# Supplementary material for: Mycn regulates intestinal development through ribosomal biogenesis in a zebrafish model of Feingold syndrome 1
Source: PubMed Central journal article supplement (PMC9624419; doi:10.1371/journal.pbio.3001856), 2022-11-01
Supplement: pbio.3001856.s008.pdf [file pbio.3001856.s008.pdf]

| NAMES              | PRIMERS                                                   |
|--------------------|-----------------------------------------------------------|
| GATA6 F            | ATGGACCTGGGTGATAACAGCTG                                   |
| GATA6 R            | TTAGGCCAAGGCCATGGGGCACC                                   |
| foxa3 F            | ATGTTGAGCTCCGTGAAGATGG                                    |
| foxa3 R            | CCTTAAAGCATTCTTTTTCTCAG                                   |
| prss1 F            | ATGAAGGCTTTCATTCTTCTG                                     |
| prss1 R            | CCATGATAACGACCTCAAAAC                                     |
| FOXA1 F            | CTCACACACACGCACGCTGTGAG                                   |
| FOXA1 R            | GGGGATCACAACGAGTATTTTAC                                   |
| lfabp F            | TCTCCAGAAAGCATGGCCTTCAG                                   |
| lfabp R            | GTCAGTCAGAGCTTTATTTAAATAG                                 |
| ifabp F            | GTCATCATCATGACCTTCAACG                                    |
| ifabp R            | CTCACAGGTGCAAATGACACG                                     |
| MYCN KI F          | GGGTCATCTCTTTACAGGGTG                                     |
| MYCN KI R          | CTGACAAAAGCAGTTCTACTGTC                                   |
| Grna1 (MYCN KI)    | TAATACGACTCACTATAGGCTCTCGGGCGTCACACCGGTTTTAGAGCTAGAAATAGC |
| Grna2 (MYCN KI)    | TAATACGACTCACTATAGGAGACTAAAGTGCCCCGTTGTTTTAGAGCTAGAAATAGC |
| Grna3 (MYCN KI)    | TAATACGACTCACTATAGGCGTGGTCCAATTATTCGCGTTTTAGAGCTAGAAATAGC |
| PUC19 F            | GACGAAAGGGCCTCGTGATACG                                    |
| PUC19 R            | GCCTGGGGTGCCCTAATGAGTGAG                                  |
| Left Arm fusion F  | TTAGGCACCCCAGGCGAGAATAAGGGCTGGCACTGGGC                    |
| Left Arm R         | CGAACCACTCCCAGCGAGTCTGGCCTGCTCAAGTC                       |
| LINKER F           | CAGGCCAGGACTCGCTCGGGAGGTGGTTCGGGTGGC                      |
| LINKER R           | AATCAGACTCACCATAGGACCAGGATTTTCTTCAAC                      |
| EGFP fusion F      | GAAAATCCTGGTCTATGGTGAGCAAGGGCGAGGAG                       |
| EGFP fusion R      | GAGCGTAAAGGGTTACTTGTACAGCTCGTCCATGCC                      |
| RIGHT ARM F        | GACAACGTCAAGTAACCCTTACGCTCATTGGCTGAATG                    |
| RIGHT Arm fusion R | CGAGGCCCTTCGTCGCTCTCTCTCTCTAGCTGTGTG                      |
| Mycn KO F          | CTCTGTCCCCGAGCCGGGCA                                      |
| Mycn KO R          | GCTGCTGCTGCTCCCGTTTC                                      |
| RPL3 F             | CGAACGTGCTTCCAGCTTTATAAG                                  |
| T7-RPL3 R          | GTAATACGACTCACTATAGGGTTAGGCCATCTTCTCCTGGCCAG              |
| RPL12 F            | GGTGAAGGTGCAACAGTTTTTCG                                   |
| T7-RPL12 R         | GTAATACGACTCACTATAGGGTTACTCAGTTGGGCACTCAACTG              |
| RPL15 F            | ATGGGAGCGTACAAGTATATGC                                    |
| T7-RPL15 R         | GTAATACGACTCACTATAGGGATGTACAGTTAAGCACACTTTG               |
| RPL19 F            | GCTTTCGCTGACCACCAGCCATG                                   |
| T7-RPL19 R         | GTAATACGACTCACTATAGGGTTATTCTTGGTCTCATCCTCTTTG             |
| RPL5 F             | GCAGCGGAGTGAAACTCCCAG                                     |
| T7-RPL5 R          | GTAATACGACTCACTATAGGGGCGGGTCGAGCTCTAGTCCCTCC              |
| RPL18 F            | GTCCAAGATGGGAGTTGACATC                                    |
| T7-RPL18 R         | GTAATACGACTCACTATAGGGCCTTAGTGTCTGCGACCACGG                |
| RPL30 F            | ACGAGGCCATCTTGGTGTGATCAG                                  |
| T7-RPL30 R         | GTAATACGACTCACTATAGGGGTGGTGGAAAAGGCTCTACTTCTC             |
| RPL24D1 F          | ATGCGCATTGAGAAGTGTATTTTC                                  |
| T7-RPL24D1 R       | GTAATACGACTCACTATAGGGGTGATCAGCTGAATGCAGAGATG              |
| RPL4 F             | ATCGAGTTAGGAGCGTGGTTCCTG                                  |
| T7-RPL4 R          | GTAATACGACTCACTATAGGGCTAAGCTTGAGCTGGAGTAGCTTC             |
| RPL32 F            | GCGGCCGCGGATCCGACGTCTC                                    |
| T7-RPL32 R         | GTAATACGACTCACTATAGGGGATTATTCGTTCTCCTCGCTGC               |
| RPL17 F            | ATGGTCCGCTACTCTCGACCC                                     |

|            |                                               |
|------------|-----------------------------------------------|
| T7-RPL17 R | GTAATACGACTCACTATAGGGTTACTCCCGAGCCATAAGCTTCTG |
| RPL6 F     | TCCACACACAATCTGCATTAATC                       |
| T7-RPL6 R  | GTAATACGACTCACTATAGGGGCATTTTAGAAAACCAGTTTGTG  |
| RPL36 F    | GGACGCCATTAGCAAAGAGCAG                        |
| T7-RPL36 R | GTAATACGACTCACTATAGGGCACAAACAGTTTTATTTTTGATG  |
| Rps9 F     | TCTCTTTAGTGTTCGAGCCTGAC                       |
| Rps9 R     | GTAATACGACTCACTATAGGGTTAATCTTCTCTTCATCATCACC  |
| Rps4x F    | ATGGCCCCGAGGACCGAAGAAGCACC                    |
| Rps4x R    | GTAATACGACTCACTATAGGGGAAACCAAGGTGTGCTAGTCCTG  |
| Rps6 F     | CTCCAAGCGAGAAAGTCCTCCATC                      |
| Rps6 R     | GTAATACGACTCACTATAGGGTCACTTCTGGCTTGACTCTGAC   |
| Rps3A F    | ATGGCAGTCGGCAAAAATAAGAGG                      |
| Rps3A R    | GTAATACGACTCACTATAGGGCAGCACACAAAGGCTCAAATTTAC |
| Rps20 F    | CACCGCTGTTCGCCTTTCAGCTG                       |
| Rps20 R    | GTAATACGACTCACTATAGGGTTAAGCATCTGCAATTGTGACC   |
| Rps8A F    | CTCTTTCTAGCCGGCGCTGAG                         |
| Rps8A R    | GTAATACGACTCACTATAGGGCTATTGCTTTCTTGGCTTTAATC  |
| Rps271 F   | ATGCCTTTGTCCAGAGATTTGATC                      |
| Rps271 R   | GTAATACGACTCACTATAGGGGTGAAGGTCATTCATTGTAATC   |
| Rps17 F    | ATGGGACCGGTGAGGACCAAGACGG                     |
| Rps17 R    | GTAATACGACTCACTATAGGGTTTTGCAGTCTTTATTGACATCTG |
| Mycn qF    | TACCAAGTCAGCGCTTGAGG                          |
| Mycn qR    | TTTGCTGCCTTGTGCTTGTG                          |
| RPL3 qF    | AAGGGACATGGATGCAAGGG                          |
| RPL3 qR    | AGGCTCCAATACAAGCCACC                          |
| RPL12 qF   | GATGACATCGCAAAGGCCAC                          |
| RPL12 qR   | CAGAGGCTGATGGCACTACC                          |
| RPL15 qF   | CTGTGCATCATGGCGTCAAC                          |
| RPL15 qR   | TAGGAGTTCAGGACCCGGAG                          |
| RPL19 qF   | TCTTGCACGAAGGAAGGGTC                          |
| RPL19 qR   | ACGTTACCCTTTGCCCTCAG                          |
| RPL5b qF   | ATTTTGCCAGAAAGCGCCTG                          |
| RPL5b qR   | CCCACACTGATGCCGTACTT                          |
| RPL18 qF   | CAACAAGGACCGCAAGGTTTC                         |
| RPL18 qR   | GGGAGCATCAGAACGACGAG                          |
| RPL30 qF   | GTTGGCAAAAACCGGTGTCC                          |
| RPL30 qR   | CTGCTGGTCTGGCATACTCC                          |
| RPL24d1 qF | CGCAACCCAAGAAAGACCAG                          |
| RPL24d1 qR | ATGATGAAGCGAGCCTGACG                          |
| RPL4 qF    | CGTATCCAGCGTAAGGGACC                          |
| RPL4 qR    | AGAGGTCATCCAGTTTGCGG                          |
| RPL32 qF   | AGGGTCAGATGTTGATGCC                           |
| RPL32 qR   | TTGAGGACACGTTGTGAGCG                          |
| RPL17 qF   | CGGCCTGAGAACATCTCTGAA                         |
| RPL17 qR   | AACACACTGGTGTCTTGACGA                         |
| RPL6 qF    | TCATCATCGCGTTATGGCTGAG                        |
| RPL6 qR    | CACCTTCGTCACTGGAGCTTT                         |
| RPL36 qF   | ACGCCATTAGCAAAGAGCAG                          |
| RPL36 qR   | TCTCTCGTAGGGTGCAGAAAC                         |
| RPs9 qF    | GCTCATTCGTCAGAGGCACA                          |
| RPs9 qR    | CCACCATATGGAGAGCGGAG                          |

|                        |                                                                                       |
|------------------------|---------------------------------------------------------------------------------------|
| RP <sub>s</sub> 4x qF  | GGACCGAAGAAGCACCTGAA                                                                  |
| RP <sub>s</sub> 4x qR  | CTCCCTCAGTTTGTGGGGAC                                                                  |
| RP <sub>s</sub> 6 qF   | TTCAGCGTCTGGTTACACCC                                                                  |
| RP <sub>s</sub> 6 qR   | TGACGTTTCTCCTTGGCCTC                                                                  |
| RP <sub>s</sub> 3A qF  | AAGAGGCTGACCAAAGGTGG                                                                  |
| RP <sub>s</sub> 3A qR  | ACTGACCTCGAACACACGTC                                                                  |
| RP <sub>s</sub> 20 qF  | AGGTGGCATTACCGTATC                                                                    |
| RP <sub>s</sub> 20 qR  | TTGGTAGGCATACGCACAGG                                                                  |
| RP <sub>s</sub> 8A qF  | CGCCGCATCCACACAATAAG                                                                  |
| RP <sub>s</sub> 8A qR  | CCAGGGTCTTGGTTCTACC                                                                   |
| RP <sub>s</sub> 271 qF | TGTTCAACAGTGCTCTGCCA                                                                  |
| RP <sub>s</sub> 271 qR | GGCATCAACAAGTCACGACAG                                                                 |
| RP <sub>s</sub> 17 qF  | CCACATTAACAAGCGGGTGTG                                                                 |
| RP <sub>s</sub> 17 qR  | TGCAGTTTGATGGAGATGCCT                                                                 |
| Hsp70 P F              | CCAAGTTTGTACAAAAAAGCAGGC                                                              |
| Hsp70 P R              | AGCAACTTTTCTATACAAAGTTG                                                               |
| Sox17 promoter F       | CTTTGTATAGAAAAGTTGCTTACACTCTCTGACAAAAGGTACAC                                          |
| Sox17 promoter R       | CTTTTTGTACAAACTTGGTCCACAGTGAAAAGTTTCAGGCAG                                            |
| ZMYCN F                | GTACAAAAAAGCAGGCTTCGGATCCATGCCAGCTAAAACCATGAGC                                        |
| ZMYCN R                | CAGAGAGAAGTTTGTAGCGGATCCGCGAGTCCTGGCCTGCTCAAGTC                                       |
| Grna1 (mycn)           | TAATACGACTCACTATAGGCTGGGGATTGCTCGCTGAGTTTTAGAGCTAGAAATAGC                             |
| Grna2 (mycn)           | TAATACGACTCACTATAGGAAGCCAGTCCAACGGGTGTTTTAGAGCTAGAAATAGC                              |
| Grna3 (mycn)           | TAATACGACTCACTATAGGAGTGTGTGGACCCTACCGTTTTAGAGCTAGAAATAGC                              |
| Constant GRNA          | AAAAGCACCGACTCGGTGCCACTTTTTCAAGTTGATAACGGACTAGCCTTATTTTAACCTTGC<br>TATTTCTAGCTCTAAAAC |
| T7 PROMOTER F          | TAATACGACTCACTATAGG                                                                   |
| Grna scaffold R        | AAAAGCACCGACTCGGTGC                                                                   |
