# Supplementary material for: Mycn regulates intestinal development through ribosomal biogenesis in a zebrafish model of Feingold syndrome 1
Source: PubMed Central journal article supplement (PMC9624419; doi:10.1371/journal.pbio.3001856), 2022-11-01
Supplement: pbio.3001856.s009.pdf [file pbio.3001856.s009.pdf]

| gene              | p_val    | avg_log2FC  | pct.1 | pct.2 | p_val_adj | cluster |
|-------------------|----------|-------------|-------|-------|-----------|---------|
| nlc1              | 3.27E-11 | 0.30805719  | 0.119 | 0.508 | 7.80E-07  | 0       |
| prdx6             | 5.79E-11 | 0.259476337 | 0.19  | 0.623 | 1.38E-06  | 0       |
| gngt2b            | 6.35E-11 | 2.168844209 | 0.69  | 0.65  | 1.51E-06  | 0       |
| si:ch211-212k18.7 | 1.45E-10 | 0.318990809 | 0.167 | 0.555 | 3.46E-06  | 0       |
| hsd12             | 1.51E-10 | 0.320937422 | 0.151 | 0.551 | 3.61E-06  | 0       |
| rbm8a             | 4.31E-10 | 0.334788642 | 0.27  | 0.713 | 1.03E-05  | 0       |
| sf3b6             | 6.23E-10 | 0.321428513 | 0.167 | 0.559 | 1.48E-05  | 0       |
| krttlc19e         | 6.62E-10 | 1.845516034 | 0.698 | 0.699 | 1.58E-05  | 0       |
| rpn1              | 6.93E-10 | 0.255528527 | 0.167 | 0.541 | 1.65E-05  | 0       |
| farsa             | 8.05E-10 | 0.33564754  | 0.095 | 0.426 | 1.92E-05  | 0       |
| wdr83os           | 9.44E-10 | 0.325985776 | 0.143 | 0.518 | 2.25E-05  | 0       |
| eif4a3            | 1.16E-09 | 0.266542649 | 0.119 | 0.475 | 2.77E-05  | 0       |
| fam32a            | 1.38E-09 | 0.256280611 | 0.198 | 0.594 | 3.29E-05  | 0       |
| pdlim2            | 1.83E-09 | 0.319247275 | 0.111 | 0.449 | 4.35E-05  | 0       |
| ssrpla            | 2.33E-09 | 0.314372127 | 0.079 | 0.377 | 5.55E-05  | 0       |
| leol              | 3.40E-09 | 0.258583353 | 0.111 | 0.428 | 8.10E-05  | 0       |
| ndufa9a           | 3.52E-09 | 0.344074883 | 0.175 | 0.543 | 8.40E-05  | 0       |
| mphosph10         | 6.77E-09 | 0.277822541 | 0.111 | 0.439 | 0.0001614 | 0       |
| ndufv2            | 7.12E-09 | 0.299265234 | 0.183 | 0.551 | 0.0001698 | 0       |
| skp1              | 8.15E-09 | 0.263842581 | 0.23  | 0.625 | 0.0001944 | 0       |
| prelid1a          | 8.45E-09 | 0.298437038 | 0.246 | 0.631 | 0.0002016 | 0       |
| cpaf6             | 1.14E-08 | 0.377883085 | 0.103 | 0.404 | 0.0002713 | 0       |
| aifm2             | 1.14E-08 | 0.297625645 | 0.103 | 0.408 | 0.0002715 | 0       |
| timm23a           | 1.15E-08 | 0.354491767 | 0.119 | 0.445 | 0.0002744 | 0       |
| cct6a             | 1.44E-08 | 0.256575131 | 0.23  | 0.631 | 0.0003435 | 0       |
| eif3ja            | 1.55E-08 | 0.252528191 | 0.246 | 0.648 | 0.0003698 | 0       |
| bcas2             | 1.64E-08 | 0.312527324 | 0.111 | 0.422 | 0.0003911 | 0       |
| psma2             | 2.14E-08 | 0.282985597 | 0.214 | 0.592 | 0.0005103 | 0       |
| si:dkey-17e16.10  | 2.23E-08 | 0.271372305 | 0.159 | 0.492 | 0.0005324 | 0       |
| srsf10b           | 2.25E-08 | 0.293336404 | 0.111 | 0.416 | 0.0005356 | 0       |
| zgc:85777         | 2.38E-08 | 0.326910274 | 0.095 | 0.402 | 0.0005674 | 0       |
| eif3d             | 2.39E-08 | 0.261558328 | 0.262 | 0.666 | 0.0005692 | 0       |
| zgc:86598         | 2.51E-08 | 0.286706352 | 0.175 | 0.531 | 0.0005975 | 0       |
| cct8              | 2.61E-08 | 0.253023674 | 0.19  | 0.549 | 0.0006212 | 0       |
| mrpl40            | 3.03E-08 | 0.254562464 | 0.143 | 0.463 | 0.0007229 | 0       |
| anp32b            | 3.11E-08 | 0.303849548 | 0.143 | 0.467 | 0.0007404 | 0       |
| myef2             | 3.26E-08 | 0.252089397 | 0.127 | 0.457 | 0.0007773 | 0       |
| cstf2             | 3.27E-08 | 0.250078726 | 0.111 | 0.42  | 0.0007794 | 0       |
| ifrd1             | 3.40E-08 | 0.3149818   | 0.222 | 0.617 | 0.00081   | 0       |
| cab39l            | 4.18E-08 | 0.519072575 | 0.119 | 0.418 | 0.0009971 | 0       |
| ubxn1             | 4.56E-08 | 0.300576962 | 0.111 | 0.412 | 0.0010884 | 0       |
| smim20            | 4.81E-08 | 0.370056679 | 0.071 | 0.346 | 0.0011477 | 0       |
| npepps            | 5.04E-08 | 0.37013343  | 0.079 | 0.344 | 0.0012011 | 0       |
| pdhb              | 5.42E-08 | 0.426748359 | 0.119 | 0.43  | 0.0012925 | 0       |
| sept7a            | 5.80E-08 | 0.302306963 | 0.111 | 0.408 | 0.0013833 | 0       |
| nutf21            | 6.64E-08 | 0.294276258 | 0.198 | 0.547 | 0.0015824 | 0       |
| spcs1             | 7.42E-08 | 0.440956639 | 0.238 | 0.621 | 0.0017686 | 0       |
| chmp4bb           | 7.53E-08 | 0.253996608 | 0.167 | 0.486 | 0.0017967 | 0       |
| calm2b            | 7.72E-08 | 0.334141131 | 0.294 | 0.711 | 0.0018405 | 0       |
| cope              | 9.41E-08 | 0.37976789  | 0.198 | 0.561 | 0.0022443 | 0       |
| epn1              | 1.12E-07 | 0.302667402 | 0.175 | 0.496 | 0.0026779 | 0       |
| cdkn2aipn1        | 1.17E-07 | 0.321340757 | 0.19  | 0.535 | 0.0027895 | 0       |
| pet100            | 1.28E-07 | 0.280330146 | 0.127 | 0.428 | 0.0030414 | 0       |

|                 |          |             |       |       |           |   |
|-----------------|----------|-------------|-------|-------|-----------|---|
| si:dkey-74k8.3  | 1.28E-07 | 0.438964283 | 0.111 | 0.404 | 0.0030468 | 0 |
| tomm22          | 1.29E-07 | 0.266712539 | 0.19  | 0.535 | 0.0030739 | 0 |
| smclal          | 1.29E-07 | 0.327821988 | 0.143 | 0.455 | 0.0030757 | 0 |
| cisd1           | 1.30E-07 | 0.266001378 | 0.111 | 0.4   | 0.003092  | 0 |
| emc2            | 1.30E-07 | 0.28728188  | 0.175 | 0.51  | 0.003105  | 0 |
| pdcd10a         | 1.46E-07 | 0.287107677 | 0.111 | 0.398 | 0.003476  | 0 |
| tomm40          | 1.74E-07 | 0.282055595 | 0.159 | 0.482 | 0.0041555 | 0 |
| CABZ01079011.1  | 1.75E-07 | 0.314469768 | 0.222 | 0.586 | 0.0041675 | 0 |
| capzala         | 1.81E-07 | 0.54663943  | 0.143 | 0.453 | 0.0043151 | 0 |
| acsbg2          | 1.82E-07 | 0.259214308 | 0.095 | 0.361 | 0.0043439 | 0 |
| higd2a          | 1.85E-07 | 0.353936103 | 0.103 | 0.383 | 0.0044174 | 0 |
| wdr82           | 2.09E-07 | 0.305270497 | 0.071 | 0.314 | 0.0049908 | 0 |
| nip7            | 2.20E-07 | 0.324463186 | 0.143 | 0.439 | 0.0052468 | 0 |
| grsfl           | 2.56E-07 | 0.290254059 | 0.071 | 0.328 | 0.0060946 | 0 |
| acadl           | 2.83E-07 | 0.313973993 | 0.103 | 0.373 | 0.0067422 | 0 |
| coa5            | 2.88E-07 | 0.302822534 | 0.111 | 0.393 | 0.0068713 | 0 |
| acadm           | 2.89E-07 | 0.390200414 | 0.175 | 0.504 | 0.0068916 | 0 |
| fabplb.1        | 3.43E-07 | 0.644399333 | 0.754 | 0.531 | 0.0081725 | 0 |
| rbb4l           | 3.88E-07 | 0.321413873 | 0.087 | 0.342 | 0.0092451 | 0 |
| ccdc47          | 4.10E-07 | 0.254174874 | 0.198 | 0.529 | 0.0097691 | 0 |
| noc2l           | 4.10E-07 | 0.269679474 | 0.119 | 0.402 | 0.0097809 | 0 |
| srm             | 4.19E-07 | 0.391321025 | 0.056 | 0.291 | 0.0099996 | 0 |
| metapl          | 4.95E-07 | 0.297281722 | 0.127 | 0.408 | 0.0117947 | 0 |
| mrpl54          | 5.21E-07 | 0.338192156 | 0.222 | 0.582 | 0.0124342 | 0 |
| hplbp3          | 5.56E-07 | 0.416601775 | 0.222 | 0.574 | 0.0132674 | 0 |
| vamp3           | 5.73E-07 | 0.300093045 | 0.151 | 0.443 | 0.0136611 | 0 |
| mif             | 5.92E-07 | 0.332389155 | 0.262 | 0.643 | 0.014121  | 0 |
| pwp2h           | 6.04E-07 | 0.379675491 | 0.087 | 0.334 | 0.0144009 | 0 |
| snrpd3l         | 6.27E-07 | 0.29020599  | 0.214 | 0.572 | 0.0149572 | 0 |
| apexl           | 6.48E-07 | 0.28751008  | 0.119 | 0.377 | 0.0154516 | 0 |
| exosc2          | 6.94E-07 | 0.276662613 | 0.079 | 0.314 | 0.0165436 | 0 |
| psmd12          | 7.33E-07 | 0.427631009 | 0.167 | 0.465 | 0.0174811 | 0 |
| ddx18           | 7.70E-07 | 0.43954668  | 0.238 | 0.605 | 0.0183506 | 0 |
| fam210b         | 8.00E-07 | 0.29547618  | 0.103 | 0.365 | 0.0190752 | 0 |
| rbbp4           | 8.12E-07 | 0.46979565  | 0.111 | 0.385 | 0.0193737 | 0 |
| adh5            | 8.42E-07 | 0.325721681 | 0.262 | 0.625 | 0.0200711 | 0 |
| etfb            | 8.97E-07 | 0.655142048 | 0.222 | 0.576 | 0.0213863 | 0 |
| vbpl            | 9.18E-07 | 0.29831409  | 0.151 | 0.432 | 0.0218921 | 0 |
| bola3           | 9.49E-07 | 0.269132419 | 0.079 | 0.322 | 0.0226218 | 0 |
| mpcl            | 9.75E-07 | 0.337343663 | 0.302 | 0.656 | 0.023245  | 0 |
| st13            | 9.90E-07 | 0.485068566 | 0.143 | 0.439 | 0.0236165 | 0 |
| pycard          | 1.04E-06 | 0.290348838 | 0.119 | 0.377 | 0.0248501 | 0 |
| dus3l           | 1.09E-06 | 0.322585282 | 0.056 | 0.275 | 0.0259963 | 0 |
| sigmar1         | 1.11E-06 | 0.282837166 | 0.175 | 0.482 | 0.0264868 | 0 |
| mrpl32          | 1.13E-06 | 0.304212956 | 0.206 | 0.539 | 0.0268892 | 0 |
| txndc17         | 1.14E-06 | 0.343716754 | 0.079 | 0.316 | 0.0272231 | 0 |
| zmat2           | 1.14E-06 | 0.363052316 | 0.151 | 0.436 | 0.0272804 | 0 |
| mrps35          | 1.17E-06 | 0.47957786  | 0.167 | 0.471 | 0.0278984 | 0 |
| znf593          | 1.25E-06 | 0.41524159  | 0.198 | 0.531 | 0.0297245 | 0 |
| psmb2           | 1.31E-06 | 0.430383116 | 0.246 | 0.617 | 0.0313384 | 0 |
| si:dkey-69o16.5 | 1.33E-06 | 0.29696337  | 0.095 | 0.34  | 0.0317825 | 0 |
| ccdc124         | 1.35E-06 | 0.27855164  | 0.167 | 0.467 | 0.0322452 | 0 |
| ranbp3b         | 1.37E-06 | 0.432000054 | 0.087 | 0.326 | 0.0327237 | 0 |
| dync11i2        | 1.40E-06 | 0.269195377 | 0.056 | 0.264 | 0.0333659 | 0 |

|             |          |             |       |       |           |   |
|-------------|----------|-------------|-------|-------|-----------|---|
| npepl1      | 1.45E-06 | 0.376129947 | 0.19  | 0.494 | 0.0345967 | 0 |
| ddx24       | 1.49E-06 | 0.380892909 | 0.183 | 0.488 | 0.0354432 | 0 |
| mrpl30      | 1.49E-06 | 0.517077324 | 0.214 | 0.559 | 0.035569  | 0 |
| chchd4a     | 1.49E-06 | 0.285143397 | 0.095 | 0.342 | 0.035591  | 0 |
| naa38       | 1.56E-06 | 0.25355228  | 0.111 | 0.367 | 0.0371649 | 0 |
| tnk1        | 1.58E-06 | 0.447550844 | 0.19  | 0.496 | 0.0375684 | 0 |
| triapl      | 1.60E-06 | 0.330741551 | 0.103 | 0.355 | 0.0381165 | 0 |
| h3f3b.1.2   | 1.60E-06 | 0.430690206 | 0.278 | 0.652 | 0.0382326 | 0 |
| blcap       | 1.61E-06 | 0.556446573 | 0.119 | 0.391 | 0.0382851 | 0 |
| park7       | 1.82E-06 | 0.457404063 | 0.111 | 0.373 | 0.043492  | 0 |
| nap114a     | 1.85E-06 | 0.410897061 | 0.079 | 0.311 | 0.0441288 | 0 |
| ciarta      | 1.89E-06 | 0.340160427 | 0.079 | 0.309 | 0.0451765 | 0 |
| dhx9        | 1.93E-06 | 0.278069938 | 0.079 | 0.303 | 0.0459958 | 0 |
| opal        | 2.01E-06 | 0.491998572 | 0.095 | 0.342 | 0.0478906 | 0 |
| nucks1b     | 2.19E-06 | 0.486029352 | 0.159 | 0.443 | 0.0522852 | 0 |
| prdx4       | 2.35E-06 | 0.406113773 | 0.206 | 0.527 | 0.056078  | 0 |
| zgc:91910   | 2.40E-06 | 0.386862279 | 0.198 | 0.504 | 0.057283  | 0 |
| nifk        | 2.49E-06 | 0.251458449 | 0.159 | 0.441 | 0.0593642 | 0 |
| aifml       | 2.61E-06 | 0.635958667 | 0.119 | 0.379 | 0.0622059 | 0 |
| ier3ip1     | 2.72E-06 | 0.47276095  | 0.127 | 0.395 | 0.0647534 | 0 |
| zgc:77486.1 | 2.89E-06 | 0.374539927 | 0.23  | 0.574 | 0.0689178 | 0 |
| mt-atp8     | 3.04E-06 | 0.284217928 | 0.27  | 0.639 | 0.0725277 | 0 |
| spcs3       | 3.05E-06 | 0.351390634 | 0.23  | 0.568 | 0.0726125 | 0 |
| mrps10      | 3.06E-06 | 0.428216414 | 0.222 | 0.545 | 0.0729845 | 0 |
| ccngl       | 3.13E-06 | 0.358003098 | 0.254 | 0.59  | 0.0746508 | 0 |
| acaal       | 3.13E-06 | 0.271427548 | 0.079 | 0.299 | 0.0747017 | 0 |
| ube2nb      | 3.15E-06 | 0.333791211 | 0.095 | 0.332 | 0.0751041 | 0 |
| arpc4       | 3.38E-06 | 0.582260111 | 0.19  | 0.496 | 0.0805764 | 0 |
| iars        | 3.66E-06 | 0.268920337 | 0.127 | 0.383 | 0.0873125 | 0 |
| psma4       | 3.75E-06 | 0.262465264 | 0.31  | 0.701 | 0.0893792 | 0 |
| ddx39ab     | 3.77E-06 | 0.262991711 | 0.31  | 0.668 | 0.0898756 | 0 |
| gtf2f2a     | 3.78E-06 | 0.393840746 | 0.127 | 0.375 | 0.0900477 | 0 |
| fahd1       | 3.80E-06 | 0.345118377 | 0.175 | 0.461 | 0.0905609 | 0 |
| lonrf11     | 3.88E-06 | 0.264086734 | 0.183 | 0.469 | 0.0925742 | 0 |
| rnaseka     | 4.00E-06 | 0.414664007 | 0.151 | 0.434 | 0.0954319 | 0 |
| ppp4cb      | 4.36E-06 | 0.346742877 | 0.103 | 0.34  | 0.1040438 | 0 |
| npm3        | 4.49E-06 | 0.500309027 | 0.19  | 0.494 | 0.1071201 | 0 |
| fabp2       | 4.55E-06 | 0.80483243  | 0.865 | 0.766 | 0.1085693 | 0 |
| thoc5       | 4.88E-06 | 0.251319841 | 0.056 | 0.254 | 0.1164177 | 0 |
| ptrhdl      | 4.91E-06 | 0.531603144 | 0.135 | 0.398 | 0.1170624 | 0 |
| lpgat1      | 4.92E-06 | 0.352231916 | 0.127 | 0.381 | 0.1172957 | 0 |
| cited4b     | 4.94E-06 | 0.365539348 | 0.135 | 0.391 | 0.1178001 | 0 |
| rbm34       | 5.02E-06 | 0.250895132 | 0.056 | 0.256 | 0.1197543 | 0 |
| timm8a      | 5.06E-06 | 0.394950964 | 0.206 | 0.496 | 0.120675  | 0 |
| polr2h      | 5.26E-06 | 0.311079674 | 0.087 | 0.314 | 0.1254729 | 0 |
| akr7a3      | 5.28E-06 | 0.306821415 | 0.079 | 0.299 | 0.125942  | 0 |
| tpilb       | 5.32E-06 | 0.455821244 | 0.333 | 0.705 | 0.1268902 | 0 |
| txndc9      | 5.37E-06 | 0.661258544 | 0.135 | 0.387 | 0.1281204 | 0 |
| glrx5       | 5.47E-06 | 0.337026416 | 0.214 | 0.525 | 0.1305264 | 0 |
| timm10      | 6.55E-06 | 0.486727862 | 0.19  | 0.471 | 0.1561316 | 0 |
| polr1d      | 6.56E-06 | 0.547070366 | 0.135 | 0.393 | 0.156456  | 0 |
| hadhaa      | 6.99E-06 | 0.342975989 | 0.079 | 0.289 | 0.1666277 | 0 |
| lig1        | 7.45E-06 | 0.295773098 | 0.079 | 0.287 | 0.17766   | 0 |
| ckba        | 8.01E-06 | 0.329553506 | 0.095 | 0.322 | 0.190982  | 0 |

|                   |          |             |       |       |           |   |
|-------------------|----------|-------------|-------|-------|-----------|---|
| zgc:112255        | 8.05E-06 | 0.421468161 | 0.111 | 0.355 | 0.1919057 | 0 |
| cdk11b            | 8.22E-06 | 0.626737675 | 0.127 | 0.379 | 0.1960935 | 0 |
| rbx1              | 8.65E-06 | 0.279828021 | 0.349 | 0.744 | 0.2062537 | 0 |
| ppifb             | 8.94E-06 | 0.443964795 | 0.167 | 0.445 | 0.2131304 | 0 |
| abcc2             | 9.11E-06 | 0.295235719 | 0.103 | 0.33  | 0.2172681 | 0 |
| sgk1              | 9.41E-06 | 0.375734009 | 0.127 | 0.371 | 0.2242921 | 0 |
| lsm7              | 9.79E-06 | 0.300562429 | 0.27  | 0.598 | 0.2333592 | 0 |
| matr311.1.1       | 1.03E-05 | 0.275647662 | 0.103 | 0.328 | 0.2445981 | 0 |
| impdh2            | 1.03E-05 | 0.299715155 | 0.151 | 0.414 | 0.2462937 | 0 |
| cox17             | 1.04E-05 | 0.329723329 | 0.317 | 0.719 | 0.2479471 | 0 |
| krt5              | 1.06E-05 | 1.882331159 | 0.563 | 0.559 | 0.2531461 | 0 |
| mrps18a           | 1.09E-05 | 0.340521907 | 0.167 | 0.451 | 0.259069  | 0 |
| gadd45gip1        | 1.13E-05 | 0.376772868 | 0.206 | 0.52  | 0.2693923 | 0 |
| trmt112           | 1.17E-05 | 0.538667466 | 0.159 | 0.418 | 0.2778746 | 0 |
| mtap              | 1.19E-05 | 0.443135169 | 0.167 | 0.436 | 0.2833832 | 0 |
| srd5a2a           | 1.20E-05 | 0.320095745 | 0.103 | 0.332 | 0.2857048 | 0 |
| hsl1b11a          | 1.21E-05 | 0.345216306 | 0.119 | 0.355 | 0.2897039 | 0 |
| si:ch211-288g17.3 | 1.23E-05 | 0.25865011  | 0.302 | 0.639 | 0.2941484 | 0 |
| sael              | 1.29E-05 | 0.359658327 | 0.079 | 0.283 | 0.3080441 | 0 |
| si:ch211-248a14.8 | 1.30E-05 | 0.316351353 | 0.119 | 0.359 | 0.3097377 | 0 |
| cherp             | 1.37E-05 | 0.340943735 | 0.063 | 0.26  | 0.3278164 | 0 |
| timmdc1           | 1.41E-05 | 0.265290002 | 0.095 | 0.303 | 0.3352429 | 0 |
| ktn1              | 1.47E-05 | 0.253594963 | 0.31  | 0.68  | 0.3499379 | 0 |
| hmgn3             | 1.48E-05 | 0.300434362 | 0.111 | 0.328 | 0.3523044 | 0 |
| emg1              | 1.61E-05 | 0.262379311 | 0.071 | 0.264 | 0.3830932 | 0 |
| smim4             | 1.71E-05 | 0.341609236 | 0.159 | 0.412 | 0.4072872 | 0 |
| ccdc58            | 1.71E-05 | 0.262066135 | 0.151 | 0.393 | 0.4074454 | 0 |
| ube2f             | 1.86E-05 | 0.343513977 | 0.071 | 0.266 | 0.4428809 | 0 |
| tusc2b            | 2.04E-05 | 0.253082174 | 0.103 | 0.314 | 0.4856458 | 0 |
| ndufv3            | 2.05E-05 | 0.322664838 | 0.238 | 0.547 | 0.4890009 | 0 |
| mrpl43            | 2.08E-05 | 0.384921352 | 0.111 | 0.332 | 0.4953296 | 0 |
| snrpd2            | 2.23E-05 | 0.428622676 | 0.333 | 0.707 | 0.5317798 | 0 |
| timml3            | 2.30E-05 | 0.341164818 | 0.198 | 0.473 | 0.5475598 | 0 |
| sdhdb             | 2.45E-05 | 0.351744193 | 0.278 | 0.598 | 0.5847383 | 0 |
| ctr9              | 2.50E-05 | 0.36841232  | 0.079 | 0.275 | 0.5956189 | 0 |
| ablim1b           | 2.58E-05 | 0.323134018 | 0.087 | 0.287 | 0.6147718 | 0 |
| lta4h             | 2.63E-05 | 0.31640275  | 0.119 | 0.34  | 0.6270928 | 0 |
| vdac1             | 2.69E-05 | 0.463155732 | 0.167 | 0.43  | 0.6413355 | 0 |
| med28             | 2.76E-05 | 0.450465593 | 0.103 | 0.316 | 0.6578296 | 0 |
| mrps25            | 3.04E-05 | 0.275205569 | 0.23  | 0.523 | 0.7256374 | 0 |
| zgc:136564        | 3.17E-05 | 0.276143292 | 0.167 | 0.408 | 0.7564976 | 0 |
| mbd3a             | 3.24E-05 | 0.400961754 | 0.071 | 0.26  | 0.771654  | 0 |
| lama3             | 3.29E-05 | 0.250578763 | 0.119 | 0.34  | 0.784787  | 0 |
| mrpl24            | 3.30E-05 | 0.598661551 | 0.206 | 0.494 | 0.7875338 | 0 |
| dnaja2            | 3.38E-05 | 0.492722601 | 0.286 | 0.623 | 0.8062528 | 0 |
| CHCHD5            | 3.55E-05 | 0.389153304 | 0.103 | 0.309 | 0.8456958 | 0 |
| mrps18c           | 3.61E-05 | 0.355358478 | 0.238 | 0.535 | 0.86124   | 0 |
| crebzf            | 3.66E-05 | 0.559809874 | 0.222 | 0.52  | 0.873252  | 0 |
| sec22ba           | 3.72E-05 | 0.282531563 | 0.095 | 0.297 | 0.8868415 | 0 |
| rrm2.1            | 3.79E-05 | 0.424940111 | 0.111 | 0.318 | 0.9037777 | 0 |
| rho               | 4.27E-05 | 1.46043159  | 0.54  | 0.498 | 1         | 0 |
| aqp8a.1           | 4.59E-05 | 0.407439405 | 0.135 | 0.371 | 1         | 0 |
| ddx42             | 4.63E-05 | 0.276234334 | 0.079 | 0.268 | 1         | 0 |
| arhgdig           | 4.73E-05 | 0.292440269 | 0.111 | 0.328 | 1         | 0 |

|                  |           |             |       |       |   |   |
|------------------|-----------|-------------|-------|-------|---|---|
| txndc12          | 4.90E-05  | 0.337129925 | 0.087 | 0.277 | 1 | 0 |
| nrlh4            | 5.21E-05  | 0.311183095 | 0.079 | 0.268 | 1 | 0 |
| nopl6            | 5.24E-05  | 0.471280377 | 0.19  | 0.455 | 1 | 0 |
| zdhhc4           | 5.57E-05  | 0.312348223 | 0.087 | 0.273 | 1 | 0 |
| cdkn1a           | 5.58E-05  | 0.291803095 | 0.119 | 0.328 | 1 | 0 |
| myo15b           | 5.60E-05  | 0.373103937 | 0.079 | 0.27  | 1 | 0 |
| hexb             | 5.64E-05  | 0.408692058 | 0.095 | 0.289 | 1 | 0 |
| snrnp40          | 5.80E-05  | 0.300034924 | 0.087 | 0.279 | 1 | 0 |
| rsl1d1           | 5.91E-05  | 0.378243681 | 0.278 | 0.607 | 1 | 0 |
| eiflaxa          | 6.08E-05  | 0.651407261 | 0.151 | 0.385 | 1 | 0 |
| acsl4a           | 6.10E-05  | 0.455266824 | 0.135 | 0.35  | 1 | 0 |
| fam120a          | 6.12E-05  | 0.388502825 | 0.087 | 0.275 | 1 | 0 |
| slirp            | 6.29E-05  | 0.300520197 | 0.325 | 0.672 | 1 | 0 |
| mpv17            | 6.61E-05  | 0.398599981 | 0.071 | 0.252 | 1 | 0 |
| bcap31           | 6.61E-05  | 0.3775084   | 0.095 | 0.293 | 1 | 0 |
| si:ch211-161h7.5 | 6.62E-05  | 0.52546813  | 0.119 | 0.326 | 1 | 0 |
| bhlhe40          | 6.81E-05  | 0.265227975 | 0.071 | 0.252 | 1 | 0 |
| tsc22d3          | 7.16E-05  | 0.324663887 | 0.167 | 0.404 | 1 | 0 |
| rnf19a           | 7.32E-05  | 0.426408447 | 0.095 | 0.285 | 1 | 0 |
| cnih1            | 7.37E-05  | 0.460683181 | 0.079 | 0.266 | 1 | 0 |
| pin4             | 7.56E-05  | 0.309657089 | 0.206 | 0.469 | 1 | 0 |
| ube2c            | 8.07E-05  | 0.282745825 | 0.111 | 0.314 | 1 | 0 |
| ifrd2            | 8.20E-05  | 0.544022914 | 0.087 | 0.275 | 1 | 0 |
| ctsba            | 8.28E-05  | 0.547427119 | 0.079 | 0.262 | 1 | 0 |
| mrpl57           | 8.66E-05  | 0.374277764 | 0.31  | 0.629 | 1 | 0 |
| lhfp12a          | 8.71E-05  | 0.294562043 | 0.111 | 0.311 | 1 | 0 |
| tufm             | 9.09E-05  | 0.68994341  | 0.238 | 0.51  | 1 | 0 |
| dhrrs1           | 9.30E-05  | 0.404271625 | 0.262 | 0.557 | 1 | 0 |
| btf3l4           | 9.32E-05  | 0.369491286 | 0.278 | 0.588 | 1 | 0 |
| aldh9a1a.1       | 9.49E-05  | 0.334147493 | 0.31  | 0.65  | 1 | 0 |
| supt4h1          | 9.85E-05  | 0.383495143 | 0.222 | 0.498 | 1 | 0 |
| chchd10          | 0.0001005 | 0.253154922 | 0.302 | 0.6   | 1 | 0 |
| mycbp            | 0.0001008 | 0.377831321 | 0.135 | 0.348 | 1 | 0 |
| id2a             | 0.0001111 | 0.770711207 | 0.31  | 0.631 | 1 | 0 |
| glulb            | 0.0001112 | 0.458867797 | 0.167 | 0.402 | 1 | 0 |
| mrpl22           | 0.0001128 | 0.319430653 | 0.119 | 0.314 | 1 | 0 |
| ndufaf4          | 0.0001177 | 0.272140555 | 0.087 | 0.266 | 1 | 0 |
| tmsb4x           | 0.0001228 | 0.366371782 | 1     | 0.992 | 1 | 0 |
| lsm12b           | 0.0001252 | 0.63409874  | 0.31  | 0.631 | 1 | 0 |
| xpolb            | 0.0001305 | 0.319669969 | 0.135 | 0.344 | 1 | 0 |
| tuba812          | 0.0001336 | 0.338103793 | 0.333 | 0.664 | 1 | 0 |
| slc39a7          | 0.0001366 | 0.462753057 | 0.087 | 0.268 | 1 | 0 |
| mrps9            | 0.0001454 | 0.49952601  | 0.151 | 0.373 | 1 | 0 |
| msmol            | 0.0001471 | 0.256434254 | 0.222 | 0.465 | 1 | 0 |
| rgcc             | 0.0001539 | 0.64495038  | 0.214 | 0.482 | 1 | 0 |
| zgc:162025       | 0.0001621 | 0.454663234 | 0.087 | 0.256 | 1 | 0 |
| gstr             | 0.0001624 | 0.279932253 | 0.357 | 0.664 | 1 | 0 |
| cox7a3           | 0.0001698 | 0.504292188 | 0.325 | 0.65  | 1 | 0 |
| pdfn4            | 0.0001802 | 0.461761199 | 0.31  | 0.639 | 1 | 0 |
| thoc7            | 0.000185  | 0.327545594 | 0.111 | 0.295 | 1 | 0 |
| eif4bb           | 0.000191  | 0.373116599 | 0.349 | 0.672 | 1 | 0 |
| lgalsl11         | 0.0002549 | 1.616998504 | 0.294 | 0.186 | 1 | 0 |
| mrpl52           | 0.000256  | 0.37145546  | 0.246 | 0.527 | 1 | 0 |
| si:ch211-68a17.7 | 0.0002692 | 0.387860292 | 0.238 | 0.498 | 1 | 0 |

|                   |           |             |       |       |   |   |
|-------------------|-----------|-------------|-------|-------|---|---|
| cicb              | 0.0002854 | 0.268035659 | 0.135 | 0.328 | 1 | 0 |
| gsta.1.1          | 0.0003242 | 0.493780899 | 0.889 | 0.828 | 1 | 0 |
| sik1              | 0.0003275 | 0.375521851 | 0.151 | 0.361 | 1 | 0 |
| rbml9             | 0.000334  | 0.564725631 | 0.135 | 0.34  | 1 | 0 |
| rtca              | 0.0003373 | 0.302264363 | 0.095 | 0.268 | 1 | 0 |
| mrpl35            | 0.0003573 | 0.562348245 | 0.214 | 0.463 | 1 | 0 |
| jdp2b             | 0.0003591 | 0.482276905 | 0.373 | 0.734 | 1 | 0 |
| angpt14           | 0.00036   | 0.445578901 | 0.357 | 0.711 | 1 | 0 |
| cct5              | 0.000369  | 0.33883792  | 0.333 | 0.656 | 1 | 0 |
| bin2a             | 0.0003762 | 0.322328742 | 0.294 | 0.559 | 1 | 0 |
| mt-nd2            | 0.0003784 | 0.276701025 | 0.532 | 0.926 | 1 | 0 |
| ndufa6            | 0.0003964 | 0.330798265 | 0.397 | 0.775 | 1 | 0 |
| nuak1b            | 0.0003973 | 0.393512127 | 0.135 | 0.32  | 1 | 0 |
| ndufb8            | 0.0004144 | 0.410427721 | 0.437 | 0.773 | 1 | 0 |
| mcm2              | 0.0004202 | 0.387060215 | 0.103 | 0.275 | 1 | 0 |
| hbae1.1           | 0.0004443 | 0.475867149 | 0.095 | 0.26  | 1 | 0 |
| NDUFAF8           | 0.0004694 | 0.277339472 | 0.111 | 0.287 | 1 | 0 |
| mgst1.2           | 0.0004758 | 0.318322505 | 0.143 | 0.328 | 1 | 0 |
| atp5mea           | 0.0004902 | 0.449480489 | 0.325 | 0.676 | 1 | 0 |
| rpl35             | 0.0004989 | 0.541325319 | 0.968 | 0.98  | 1 | 0 |
| coq10b            | 0.0005177 | 0.258142596 | 0.095 | 0.258 | 1 | 0 |
| si:ch211-156b7.4  | 0.0005306 | 0.746299588 | 0.135 | 0.328 | 1 | 0 |
| mt-nd3            | 0.0005368 | 0.284295502 | 0.437 | 0.855 | 1 | 0 |
| srp19             | 0.0005798 | 0.479639696 | 0.238 | 0.498 | 1 | 0 |
| rgn               | 0.0005981 | 0.486014722 | 0.111 | 0.287 | 1 | 0 |
| ndufall           | 0.0005995 | 0.486362385 | 0.286 | 0.6   | 1 | 0 |
| NPC1L1            | 0.0006012 | 0.312842543 | 0.095 | 0.254 | 1 | 0 |
| si:ch211-198m17.1 | 0.0006227 | 0.291180166 | 0.175 | 0.389 | 1 | 0 |
| cops5             | 0.0006247 | 0.606288155 | 0.111 | 0.287 | 1 | 0 |
| hmgn7             | 0.0006582 | 0.347955741 | 0.357 | 0.689 | 1 | 0 |
| psmb3             | 0.0006599 | 0.422491151 | 0.365 | 0.699 | 1 | 0 |
| fosab             | 0.0006758 | 0.394988135 | 0.397 | 0.738 | 1 | 0 |
| idl               | 0.0006864 | 0.403105464 | 0.175 | 0.371 | 1 | 0 |
| mesd              | 0.0006955 | 0.311988861 | 0.167 | 0.375 | 1 | 0 |
| slc35b1           | 0.0007262 | 0.348947088 | 0.159 | 0.355 | 1 | 0 |
| mrps14            | 0.0007835 | 0.427940583 | 0.238 | 0.494 | 1 | 0 |
| tgif1             | 0.0008506 | 0.285397592 | 0.119 | 0.291 | 1 | 0 |
| EIF1B             | 0.001153  | 0.496789738 | 0.333 | 0.67  | 1 | 0 |
| mrpl46            | 0.0012042 | 0.389646022 | 0.159 | 0.342 | 1 | 0 |
| lsm4              | 0.0012462 | 0.520202609 | 0.31  | 0.613 | 1 | 0 |
| gnpdal            | 0.0012622 | 0.362983425 | 0.262 | 0.512 | 1 | 0 |
| coa3a             | 0.0012934 | 0.788447941 | 0.31  | 0.609 | 1 | 0 |
| cbr11             | 0.0015107 | 0.60501805  | 0.238 | 0.463 | 1 | 0 |
| hsp70.3           | 0.0015727 | 0.696517259 | 0.183 | 0.373 | 1 | 0 |
| psmb6             | 0.0015809 | 0.446604549 | 0.381 | 0.709 | 1 | 0 |
| pptc7a            | 0.0016035 | 0.262667171 | 0.111 | 0.266 | 1 | 0 |
| si:ch211-107o10.3 | 0.0016743 | 0.630348403 | 0.23  | 0.467 | 1 | 0 |
| dhrs1311          | 0.0016889 | 0.368203565 | 0.111 | 0.266 | 1 | 0 |
| mgst3b            | 0.0017156 | 0.438037254 | 0.365 | 0.668 | 1 | 0 |
| pam16             | 0.0017515 | 0.682248188 | 0.246 | 0.488 | 1 | 0 |
| si:dkey-16p21.8   | 0.0018541 | 0.356415251 | 0.27  | 0.533 | 1 | 0 |
| cyr61             | 0.0018587 | 0.573865061 | 0.103 | 0.254 | 1 | 0 |
| prdx1             | 0.001911  | 0.769503405 | 0.294 | 0.561 | 1 | 0 |
| tomm6             | 0.0019369 | 0.259945739 | 0.373 | 0.701 | 1 | 0 |

|                   |           |             |       |       |          |   |
|-------------------|-----------|-------------|-------|-------|----------|---|
| pcna              | 0.0020387 | 0.589742516 | 0.262 | 0.5   | 1        | 0 |
| rpl29             | 0.002067  | 0.499332083 | 0.841 | 0.957 | 1        | 0 |
| ndufa3            | 0.0021342 | 0.3471055   | 0.397 | 0.709 | 1        | 0 |
| si:dkey-183i3.5   | 0.0022011 | 1.731440375 | 0.5   | 0.523 | 1        | 0 |
| tomm7             | 0.0022875 | 0.591412813 | 0.373 | 0.707 | 1        | 0 |
| hnf4a             | 0.0030069 | 0.363489486 | 0.119 | 0.27  | 1        | 0 |
| zan1              | 0.0034201 | 0.250739402 | 0.27  | 0.48  | 1        | 0 |
| mrps33            | 0.0034685 | 0.620581206 | 0.23  | 0.455 | 1        | 0 |
| mt-nd4            | 0.0037578 | 0.290581455 | 0.563 | 0.908 | 1        | 0 |
| imp3              | 0.0039276 | 0.326335098 | 0.175 | 0.359 | 1        | 0 |
| cnbbp             | 0.0039865 | 0.396722919 | 0.46  | 0.775 | 1        | 0 |
| zgc:175088        | 0.0042357 | 0.311145845 | 0.119 | 0.262 | 1        | 0 |
| pvalb2            | 0.0042568 | 0.643861266 | 0.23  | 0.445 | 1        | 0 |
| zgc:172079.2      | 0.0042945 | 0.354684604 | 0.31  | 0.541 | 1        | 0 |
| ndufb9            | 0.0044239 | 0.467129516 | 0.429 | 0.752 | 1        | 0 |
| hmgblb            | 0.0049055 | 0.604830224 | 0.143 | 0.309 | 1        | 0 |
| mb12              | 0.0049073 | 0.262318998 | 0.143 | 0.295 | 1        | 0 |
| rbp2a             | 0.0057    | 0.550435334 | 0.69  | 0.539 | 1        | 0 |
| gstm.1            | 0.0057232 | 0.653622735 | 0.23  | 0.439 | 1        | 0 |
| scp2a             | 0.0058892 | 0.34612856  | 0.31  | 0.535 | 1        | 0 |
| mt-co2            | 0.0066055 | 0.352534188 | 0.802 | 0.973 | 1        | 0 |
| mt-cyb            | 0.0067524 | 0.417711956 | 0.706 | 0.955 | 1        | 0 |
| dnajb1b           | 0.0075025 | 0.506738158 | 0.135 | 0.279 | 1        | 0 |
| rbp5              | 0.0081179 | 0.333039776 | 0.167 | 0.322 | 1        | 0 |
| hspel             | 0.0083887 | 0.669195409 | 0.706 | 0.826 | 1        | 0 |
| tuba81            | 0.0087945 | 0.296249521 | 0.444 | 0.701 | 1        | 0 |
| mt-nd1            | 0.0092948 | 0.384662862 | 0.587 | 0.918 | 1        | 0 |
| rltgr             | 2.25E-52  | 1.101401839 | 0.938 | 0.167 | 5.37E-48 | 1 |
| acsl5             | 5.19E-52  | 0.631704012 | 0.7   | 0.062 | 1.24E-47 | 1 |
| slc13a3           | 7.71E-51  | 0.780805217 | 0.825 | 0.105 | 1.84E-46 | 1 |
| pck2              | 8.28E-51  | 0.694626222 | 0.812 | 0.103 | 1.98E-46 | 1 |
| stra6             | 4.19E-50  | 0.666061886 | 0.825 | 0.103 | 9.99E-46 | 1 |
| faah2a            | 4.23E-49  | 0.530965924 | 0.8   | 0.096 | 1.01E-44 | 1 |
| cyp4v8            | 2.45E-48  | 0.539078767 | 0.788 | 0.097 | 5.84E-44 | 1 |
| ugt1b5            | 2.90E-48  | 0.622628768 | 0.9   | 0.142 | 6.92E-44 | 1 |
| gygla             | 1.46E-47  | 0.485330977 | 0.788 | 0.097 | 3.48E-43 | 1 |
| chpt1             | 2.03E-46  | 1.228636146 | 0.975 | 0.245 | 4.83E-42 | 1 |
| matla             | 6.66E-44  | 0.737277947 | 0.862 | 0.148 | 1.59E-39 | 1 |
| slc37a4a          | 1.83E-43  | 0.601046702 | 0.888 | 0.15  | 4.36E-39 | 1 |
| lta4h1            | 1.14E-42  | 1.036413892 | 0.912 | 0.202 | 2.71E-38 | 1 |
| acad11            | 1.37E-42  | 0.441127226 | 0.75  | 0.097 | 3.26E-38 | 1 |
| cyp2x9            | 1.54E-42  | 0.646522151 | 0.875 | 0.159 | 3.68E-38 | 1 |
| mogat2            | 1.18E-41  | 0.500749118 | 0.738 | 0.101 | 2.82E-37 | 1 |
| trap1             | 1.38E-41  | 0.41231872  | 0.762 | 0.105 | 3.30E-37 | 1 |
| slcold1           | 5.24E-40  | 1.128334461 | 0.938 | 0.236 | 1.25E-35 | 1 |
| si:ch211-127i16.2 | 6.19E-40  | 0.357765252 | 0.6   | 0.058 | 1.48E-35 | 1 |
| enpep             | 6.64E-40  | 0.6336689   | 0.862 | 0.155 | 1.58E-35 | 1 |
| gpt21             | 7.23E-40  | 0.72554152  | 0.875 | 0.185 | 1.72E-35 | 1 |
| mttp              | 1.36E-39  | 0.927878098 | 0.95  | 0.24  | 3.25E-35 | 1 |
| slc7a8a           | 3.06E-39  | 0.942405062 | 0.975 | 0.255 | 7.30E-35 | 1 |
| got2a             | 3.63E-39  | 0.40475649  | 0.65  | 0.077 | 8.64E-35 | 1 |
| si:ch211-161h7.8  | 6.79E-39  | 0.72859383  | 0.888 | 0.176 | 1.62E-34 | 1 |
| cyp2k19           | 8.15E-39  | 0.507628924 | 0.662 | 0.082 | 1.94E-34 | 1 |
| apobb.1           | 1.16E-38  | 0.995981711 | 0.888 | 0.2   | 2.76E-34 | 1 |

|            |          |             |       |       |          |   |
|------------|----------|-------------|-------|-------|----------|---|
| acsf2      | 2.55E-38 | 0.631434079 | 0.788 | 0.137 | 6.09E-34 | 1 |
| srd5a2a1   | 2.68E-38 | 0.638151712 | 0.912 | 0.191 | 6.38E-34 | 1 |
| slc7a7     | 2.79E-38 | 0.619859845 | 0.8   | 0.133 | 6.66E-34 | 1 |
| tbrg4      | 3.67E-38 | 0.462032808 | 0.688 | 0.096 | 8.74E-34 | 1 |
| lap3       | 4.23E-38 | 0.379295966 | 0.725 | 0.105 | 1.01E-33 | 1 |
| bco1       | 2.26E-37 | 0.535038997 | 0.588 | 0.064 | 5.39E-33 | 1 |
| nt5c2a     | 2.77E-37 | 0.311427796 | 0.812 | 0.137 | 6.61E-33 | 1 |
| zgc:152830 | 3.17E-37 | 0.768832154 | 0.862 | 0.195 | 7.56E-33 | 1 |
| mxra5a     | 4.58E-37 | 0.410967483 | 0.625 | 0.071 | 1.09E-32 | 1 |
| ilvbl      | 4.69E-37 | 0.649730176 | 0.85  | 0.184 | 1.12E-32 | 1 |
| slc5a1     | 5.68E-37 | 0.74308537  | 0.8   | 0.152 | 1.35E-32 | 1 |
| pla2g12b   | 5.86E-37 | 0.842929916 | 0.812 | 0.167 | 1.40E-32 | 1 |
| lin28a     | 5.99E-37 | 0.431960474 | 0.812 | 0.14  | 1.43E-32 | 1 |
| aifml1     | 7.67E-37 | 0.708299995 | 0.925 | 0.236 | 1.83E-32 | 1 |
| cd36       | 8.27E-37 | 0.726782019 | 0.875 | 0.189 | 1.97E-32 | 1 |
| lpcat3     | 1.60E-36 | 0.7000491   | 0.888 | 0.215 | 3.81E-32 | 1 |
| gapdh      | 3.76E-36 | 1.624916371 | 1     | 0.62  | 8.97E-32 | 1 |
| dpydb      | 4.22E-36 | 0.754386354 | 0.862 | 0.193 | 1.01E-31 | 1 |
| zgc:103681 | 4.45E-36 | 0.323149724 | 0.762 | 0.125 | 1.06E-31 | 1 |
| cpox       | 4.75E-36 | 0.466911793 | 0.75  | 0.125 | 1.13E-31 | 1 |
| heatr3     | 4.89E-36 | 0.327210039 | 0.65  | 0.082 | 1.17E-31 | 1 |
| pipox      | 5.07E-36 | 0.43474126  | 0.788 | 0.131 | 1.21E-31 | 1 |
| sccpdha    | 5.27E-36 | 0.306045838 | 0.638 | 0.081 | 1.26E-31 | 1 |
| pcxb       | 6.85E-36 | 0.950822317 | 0.975 | 0.29  | 1.63E-31 | 1 |
| gatm       | 8.69E-36 | 1.103902462 | 0.938 | 0.243 | 2.07E-31 | 1 |
| aqp8a.11   | 9.54E-36 | 0.91697002  | 0.95  | 0.228 | 2.28E-31 | 1 |
| akt2l      | 1.00E-35 | 0.408175165 | 0.888 | 0.178 | 2.39E-31 | 1 |
| mthfd1b    | 1.08E-35 | 0.572778097 | 0.762 | 0.135 | 2.57E-31 | 1 |
| pnkp       | 1.26E-35 | 0.325100697 | 0.575 | 0.062 | 3.00E-31 | 1 |
| atplala.4  | 1.49E-35 | 1.238456646 | 1     | 0.433 | 3.55E-31 | 1 |
| ada        | 1.54E-35 | 0.844596229 | 0.888 | 0.228 | 3.66E-31 | 1 |
| amt        | 1.70E-35 | 0.30130771  | 0.662 | 0.088 | 4.05E-31 | 1 |
| zgc:110843 | 3.47E-35 | 0.368349288 | 0.788 | 0.14  | 8.28E-31 | 1 |
| dgat1a     | 7.04E-35 | 0.260448774 | 0.575 | 0.064 | 1.68E-30 | 1 |
| retsat     | 1.10E-34 | 0.591744198 | 0.862 | 0.193 | 2.63E-30 | 1 |
| dnpep      | 1.46E-34 | 0.480334639 | 0.8   | 0.161 | 3.49E-30 | 1 |
| glud1b     | 1.72E-34 | 1.487743317 | 1     | 0.446 | 4.11E-30 | 1 |
| rdh1       | 1.73E-34 | 0.688711153 | 0.85  | 0.189 | 4.13E-30 | 1 |
| atp8a2     | 2.37E-34 | 0.63727295  | 0.85  | 0.193 | 5.65E-30 | 1 |
| mylk5      | 2.67E-34 | 0.477043945 | 0.7   | 0.11  | 6.38E-30 | 1 |
| ace        | 2.73E-34 | 0.812824402 | 0.938 | 0.23  | 6.51E-30 | 1 |
| zgc:153031 | 3.73E-34 | 0.301803678 | 0.488 | 0.043 | 8.89E-30 | 1 |
| adsl       | 5.35E-34 | 0.500669804 | 0.762 | 0.146 | 1.28E-29 | 1 |
| CYP2C9     | 6.63E-34 | 0.691224546 | 0.875 | 0.197 | 1.58E-29 | 1 |
| cpt2       | 6.73E-34 | 0.494790684 | 0.788 | 0.15  | 1.61E-29 | 1 |
| gstt2      | 8.51E-34 | 0.33253385  | 0.725 | 0.122 | 2.03E-29 | 1 |
| zgc:85843  | 1.10E-33 | 0.461071609 | 0.812 | 0.155 | 2.63E-29 | 1 |
| alcf       | 1.19E-33 | 0.461660953 | 0.888 | 0.185 | 2.85E-29 | 1 |
| got1       | 1.23E-33 | 0.58673009  | 0.812 | 0.17  | 2.94E-29 | 1 |
| aldh1a2    | 1.48E-33 | 0.684652074 | 0.75  | 0.14  | 3.53E-29 | 1 |
| oxall      | 1.73E-33 | 0.561764572 | 0.838 | 0.185 | 4.12E-29 | 1 |
| slc2a2     | 2.02E-33 | 0.3543662   | 0.6   | 0.079 | 4.81E-29 | 1 |
| ak3        | 2.68E-33 | 0.689834051 | 0.938 | 0.272 | 6.40E-29 | 1 |
| dhcr7      | 2.98E-33 | 0.771603956 | 0.938 | 0.268 | 7.11E-29 | 1 |



|                   |          |             |       |       |          |   |
|-------------------|----------|-------------|-------|-------|----------|---|
| st8sia7.1         | 5.40E-33 | 0.440532922 | 0.662 | 0.103 | 1.29E-28 | 1 |
| sult2st2          | 5.66E-33 | 1.28435573  | 1     | 0.41  | 1.35E-28 | 1 |
| abcb11a           | 6.15E-33 | 0.479067078 | 0.712 | 0.129 | 1.47E-28 | 1 |
| dpp3              | 6.20E-33 | 0.40212259  | 0.7   | 0.118 | 1.48E-28 | 1 |
| slc25a16          | 6.48E-33 | 0.255771087 | 0.6   | 0.079 | 1.55E-28 | 1 |
| l2hgdh            | 7.03E-33 | 0.322638061 | 0.638 | 0.09  | 1.68E-28 | 1 |
| hprt1             | 9.00E-33 | 0.348120288 | 0.75  | 0.135 | 2.15E-28 | 1 |
| ugt5b2            | 9.47E-33 | 0.483169203 | 0.75  | 0.144 | 2.26E-28 | 1 |
| cat               | 9.85E-33 | 0.874087144 | 0.962 | 0.333 | 2.35E-28 | 1 |
| si:ch211-161h7.51 | 1.55E-32 | 0.627751891 | 0.875 | 0.195 | 3.70E-28 | 1 |
| abat              | 1.56E-32 | 0.600561012 | 0.85  | 0.2   | 3.72E-28 | 1 |
| sdha              | 2.53E-32 | 0.976788059 | 0.962 | 0.369 | 6.03E-28 | 1 |
| fbp1b             | 2.98E-32 | 1.058522811 | 0.975 | 0.345 | 7.11E-28 | 1 |
| slc22a6l          | 3.49E-32 | 0.456543    | 0.688 | 0.114 | 8.33E-28 | 1 |
| slc25a44b         | 3.73E-32 | 0.416839996 | 0.688 | 0.118 | 8.90E-28 | 1 |
| msrb2             | 3.77E-32 | 0.703093531 | 0.888 | 0.232 | 8.98E-28 | 1 |
| slc16a10          | 3.96E-32 | 0.521598526 | 0.8   | 0.174 | 9.44E-28 | 1 |
| pa2g4a            | 4.70E-32 | 1.06590659  | 0.988 | 0.438 | 1.12E-27 | 1 |
| aldob             | 5.28E-32 | 1.463227374 | 1     | 0.721 | 1.26E-27 | 1 |
| fmo5              | 5.31E-32 | 0.259365427 | 0.612 | 0.082 | 1.27E-27 | 1 |
| CU856520.1        | 6.46E-32 | 0.590890319 | 0.862 | 0.208 | 1.54E-27 | 1 |
| lgals913          | 6.69E-32 | 0.295661323 | 0.712 | 0.118 | 1.59E-27 | 1 |
| zgc:112056        | 6.69E-32 | 0.360692877 | 0.65  | 0.101 | 1.60E-27 | 1 |
| mrpl37            | 7.82E-32 | 0.710828098 | 0.925 | 0.268 | 1.87E-27 | 1 |
| creb3l3a          | 8.02E-32 | 0.416728816 | 0.775 | 0.146 | 1.91E-27 | 1 |
| ehhadh            | 1.61E-31 | 0.361442649 | 0.75  | 0.144 | 3.84E-27 | 1 |
| g6pca.2           | 1.70E-31 | 0.483920869 | 0.588 | 0.079 | 4.05E-27 | 1 |
| abhd14b           | 1.74E-31 | 0.450316807 | 0.788 | 0.163 | 4.14E-27 | 1 |
| nap114a1          | 1.88E-31 | 0.402009671 | 0.812 | 0.182 | 4.47E-27 | 1 |
| msm11             | 2.06E-31 | 1.0565242   | 0.975 | 0.331 | 4.91E-27 | 1 |
| paics             | 2.13E-31 | 0.865241444 | 0.962 | 0.33  | 5.07E-27 | 1 |
| thal              | 2.84E-31 | 0.352797462 | 0.625 | 0.094 | 6.76E-27 | 1 |
| ptcd3             | 3.00E-31 | 0.527808008 | 0.8   | 0.17  | 7.16E-27 | 1 |
| npr1b             | 3.39E-31 | 0.300074647 | 0.438 | 0.037 | 8.09E-27 | 1 |
| suc1g2            | 4.29E-31 | 0.715744908 | 0.95  | 0.294 | 1.02E-26 | 1 |
| slc25a10          | 4.93E-31 | 0.484194317 | 0.738 | 0.148 | 1.18E-26 | 1 |
| aco2              | 5.56E-31 | 0.786113701 | 0.938 | 0.32  | 1.32E-26 | 1 |
| ddx10             | 6.17E-31 | 0.380432834 | 0.65  | 0.103 | 1.47E-26 | 1 |
| cyp2p6            | 1.14E-30 | 0.28088406  | 0.475 | 0.047 | 2.72E-26 | 1 |
| cyp2p9            | 1.19E-30 | 0.482622769 | 0.538 | 0.069 | 2.85E-26 | 1 |
| mrps27            | 1.22E-30 | 0.387854131 | 0.7   | 0.125 | 2.91E-26 | 1 |
| hsd11b11a1        | 1.35E-30 | 0.876511995 | 0.85  | 0.225 | 3.22E-26 | 1 |
| dpp4              | 1.61E-30 | 0.340453779 | 0.7   | 0.122 | 3.83E-26 | 1 |
| mrpl44            | 2.11E-30 | 0.535510558 | 0.85  | 0.228 | 5.02E-26 | 1 |
| baiap212a         | 2.40E-30 | 0.282470971 | 0.475 | 0.047 | 5.72E-26 | 1 |
| hsd3b7            | 2.61E-30 | 0.401942907 | 0.625 | 0.099 | 6.22E-26 | 1 |
| pdssl             | 2.62E-30 | 0.437102908 | 0.875 | 0.223 | 6.24E-26 | 1 |
| si:ch211-201h21.5 | 3.31E-30 | 0.559358905 | 0.975 | 0.268 | 7.90E-26 | 1 |
| tecrb             | 3.52E-30 | 0.655940382 | 0.912 | 0.288 | 8.40E-26 | 1 |
| IZUM01R           | 3.64E-30 | 0.469301884 | 0.775 | 0.159 | 8.67E-26 | 1 |
| dlat              | 4.72E-30 | 0.498839201 | 0.9   | 0.253 | 1.13E-25 | 1 |
| mrps2             | 4.88E-30 | 0.481625954 | 0.825 | 0.197 | 1.16E-25 | 1 |
| rgn1              | 4.99E-30 | 0.323799856 | 0.8   | 0.169 | 1.19E-25 | 1 |
| mrps22            | 6.05E-30 | 0.358575832 | 0.725 | 0.14  | 1.44E-25 | 1 |

|                   |          |             |       |       |          |   |
|-------------------|----------|-------------|-------|-------|----------|---|
| tsrl              | 6.32E-30 | 0.550602597 | 0.775 | 0.176 | 1.51E-25 | 1 |
| si:ch211-221j21.3 | 6.41E-30 | 0.471269021 | 0.738 | 0.148 | 1.53E-25 | 1 |
| si:dkey-69o16.51  | 7.72E-30 | 0.441997428 | 0.875 | 0.202 | 1.84E-25 | 1 |
| atp5fal           | 8.95E-30 | 1.164258811 | 1     | 0.745 | 2.13E-25 | 1 |
| papss2a           | 8.95E-30 | 0.798233413 | 0.912 | 0.29  | 2.13E-25 | 1 |
| pla2gl5           | 9.27E-30 | 0.257426374 | 0.575 | 0.082 | 2.21E-25 | 1 |
| zgc:56235         | 9.27E-30 | 0.270705709 | 0.512 | 0.062 | 2.21E-25 | 1 |
| cryz              | 9.29E-30 | 0.287574275 | 0.712 | 0.133 | 2.22E-25 | 1 |
| pwp2h1            | 9.83E-30 | 0.393392544 | 0.838 | 0.2   | 2.35E-25 | 1 |
| slc27a4           | 1.02E-29 | 0.557286084 | 0.8   | 0.191 | 2.42E-25 | 1 |
| acaa2             | 1.03E-29 | 0.729355955 | 0.912 | 0.3   | 2.47E-25 | 1 |
| uqcrc1            | 1.12E-29 | 0.949700616 | 1     | 0.468 | 2.68E-25 | 1 |
| tktb              | 1.18E-29 | 0.77489017  | 0.988 | 0.384 | 2.82E-25 | 1 |
| hadhab            | 1.26E-29 | 0.750691902 | 0.95  | 0.352 | 3.00E-25 | 1 |
| aldh1l1           | 1.28E-29 | 0.627280662 | 0.925 | 0.272 | 3.04E-25 | 1 |
| immt              | 1.38E-29 | 0.55273726  | 0.85  | 0.223 | 3.30E-25 | 1 |
| hmgcra            | 1.47E-29 | 0.972834556 | 0.838 | 0.238 | 3.50E-25 | 1 |
| aldh7a1           | 1.58E-29 | 0.898449807 | 0.962 | 0.343 | 3.77E-25 | 1 |
| ociad1            | 1.71E-29 | 0.435650426 | 0.838 | 0.215 | 4.08E-25 | 1 |
| them4             | 1.83E-29 | 0.268530089 | 0.538 | 0.071 | 4.37E-25 | 1 |
| atp5flc           | 1.88E-29 | 1.207639235 | 0.988 | 0.56  | 4.49E-25 | 1 |
| noc4l             | 1.93E-29 | 0.3167841   | 0.7   | 0.127 | 4.61E-25 | 1 |
| cyp8b1            | 1.97E-29 | 0.733472649 | 0.775 | 0.191 | 4.69E-25 | 1 |
| aldh9a1b          | 2.02E-29 | 0.28009499  | 0.675 | 0.114 | 4.82E-25 | 1 |
| crls1             | 2.13E-29 | 0.264294531 | 0.65  | 0.107 | 5.08E-25 | 1 |
| acss2             | 2.40E-29 | 0.291765698 | 0.738 | 0.142 | 5.71E-25 | 1 |
| ace2              | 2.65E-29 | 0.771794553 | 0.812 | 0.215 | 6.31E-25 | 1 |
| zgc:113054        | 2.85E-29 | 0.283527458 | 0.55  | 0.075 | 6.80E-25 | 1 |
| hibadhb           | 3.05E-29 | 0.464164066 | 0.825 | 0.187 | 7.28E-25 | 1 |
| sh3gl3b           | 3.15E-29 | 0.41417221  | 0.812 | 0.184 | 7.52E-25 | 1 |
| dap3              | 3.21E-29 | 0.492698168 | 0.888 | 0.266 | 7.66E-25 | 1 |
| si:ch73-269m23.5  | 3.24E-29 | 0.319394981 | 0.688 | 0.124 | 7.73E-25 | 1 |
| slc11a2           | 3.84E-29 | 0.394370819 | 0.8   | 0.178 | 9.15E-25 | 1 |
| cmc2              | 4.60E-29 | 0.373493474 | 0.8   | 0.169 | 1.10E-24 | 1 |
| ecsit             | 4.73E-29 | 0.365315577 | 0.688 | 0.135 | 1.13E-24 | 1 |
| rpia              | 5.17E-29 | 0.325069806 | 0.688 | 0.127 | 1.23E-24 | 1 |
| decr1             | 5.28E-29 | 0.293985985 | 0.75  | 0.155 | 1.26E-24 | 1 |
| oplah             | 6.01E-29 | 0.266610384 | 0.662 | 0.112 | 1.43E-24 | 1 |
| zgc:136858        | 6.25E-29 | 0.28747103  | 0.55  | 0.073 | 1.49E-24 | 1 |
| clpp              | 6.84E-29 | 0.531730362 | 0.925 | 0.266 | 1.63E-24 | 1 |
| asrgl1            | 6.95E-29 | 0.251001157 | 0.525 | 0.064 | 1.66E-24 | 1 |
| sc5d              | 7.35E-29 | 0.486627547 | 0.662 | 0.124 | 1.75E-24 | 1 |
| chs1              | 9.06E-29 | 0.481170921 | 0.638 | 0.107 | 2.16E-24 | 1 |
| atp5flb           | 9.40E-29 | 1.138436855 | 1     | 0.807 | 2.24E-24 | 1 |
| cox10             | 1.00E-28 | 0.311778466 | 0.712 | 0.142 | 2.39E-24 | 1 |
| ech1              | 1.09E-28 | 0.532720704 | 0.862 | 0.219 | 2.61E-24 | 1 |
| mmaa              | 1.15E-28 | 0.2665586   | 0.625 | 0.105 | 2.74E-24 | 1 |
| lclat1            | 1.27E-28 | 0.298255384 | 0.712 | 0.146 | 3.03E-24 | 1 |
| lipf              | 1.46E-28 | 0.539640996 | 0.838 | 0.217 | 3.48E-24 | 1 |
| mgst1.21          | 1.64E-28 | 0.597593383 | 0.838 | 0.208 | 3.91E-24 | 1 |
| hspd1             | 1.75E-28 | 1.262931471 | 1     | 0.625 | 4.18E-24 | 1 |
| hadhaa1           | 1.79E-28 | 0.283257075 | 0.775 | 0.167 | 4.28E-24 | 1 |
| agpat3            | 1.80E-28 | 0.550946302 | 0.838 | 0.221 | 4.28E-24 | 1 |
| slc25a11          | 1.95E-28 | 0.379152085 | 0.8   | 0.197 | 4.64E-24 | 1 |

|                  |          |             |       |       |          |   |
|------------------|----------|-------------|-------|-------|----------|---|
| sec1418          | 2.02E-28 | 0.312720447 | 0.8   | 0.172 | 4.81E-24 | 1 |
| ebp              | 2.14E-28 | 0.633282959 | 0.85  | 0.217 | 5.11E-24 | 1 |
| prpf19           | 2.20E-28 | 0.584605578 | 0.838 | 0.227 | 5.25E-24 | 1 |
| tomm401          | 2.31E-28 | 0.74728949  | 0.95  | 0.331 | 5.50E-24 | 1 |
| suc1a2           | 2.42E-28 | 0.279681696 | 0.712 | 0.14  | 5.78E-24 | 1 |
| faah2b           | 2.66E-28 | 0.531812371 | 0.8   | 0.187 | 6.34E-24 | 1 |
| phb              | 2.76E-28 | 0.968563275 | 1     | 0.485 | 6.57E-24 | 1 |
| dachc            | 2.80E-28 | 0.313941914 | 0.6   | 0.097 | 6.67E-24 | 1 |
| polr1a           | 3.64E-28 | 0.461843795 | 0.788 | 0.189 | 8.67E-24 | 1 |
| bc12113          | 3.79E-28 | 0.256411969 | 0.612 | 0.099 | 9.04E-24 | 1 |
| cers1            | 4.04E-28 | 0.357013774 | 0.362 | 0.026 | 9.64E-24 | 1 |
| rhoub            | 4.06E-28 | 0.397800228 | 0.725 | 0.152 | 9.68E-24 | 1 |
| samm50           | 4.11E-28 | 0.348770177 | 0.875 | 0.223 | 9.80E-24 | 1 |
| mccc2            | 4.21E-28 | 0.45021818  | 0.825 | 0.221 | 1.00E-23 | 1 |
| aldh2.2          | 4.31E-28 | 0.636488223 | 0.912 | 0.296 | 1.03E-23 | 1 |
| porb             | 5.04E-28 | 0.625393061 | 0.9   | 0.279 | 1.20E-23 | 1 |
| cyb5r2           | 5.13E-28 | 0.651197106 | 0.925 | 0.272 | 1.22E-23 | 1 |
| slc43a2b         | 5.14E-28 | 0.350172577 | 0.662 | 0.124 | 1.22E-23 | 1 |
| si:ch211-235e9.8 | 5.37E-28 | 0.866597591 | 0.988 | 0.395 | 1.28E-23 | 1 |
| mrpl39           | 5.49E-28 | 0.60127634  | 0.912 | 0.294 | 1.31E-23 | 1 |
| aldh9a1a.11      | 6.71E-28 | 1.184611984 | 0.988 | 0.519 | 1.60E-23 | 1 |
| HADHB            | 7.12E-28 | 0.799375542 | 0.975 | 0.403 | 1.70E-23 | 1 |
| slc6a19a.1       | 7.16E-28 | 0.432558576 | 0.562 | 0.084 | 1.71E-23 | 1 |
| slc3a2a          | 9.59E-28 | 0.761886654 | 0.988 | 0.388 | 2.29E-23 | 1 |
| mybbp1a          | 9.88E-28 | 0.530802692 | 0.888 | 0.242 | 2.35E-23 | 1 |
| ndufa9a1         | 1.02E-27 | 0.753043464 | 0.95  | 0.395 | 2.43E-23 | 1 |
| adka             | 1.09E-27 | 0.477692641 | 0.875 | 0.255 | 2.60E-23 | 1 |
| ppp5c            | 1.10E-27 | 0.297228581 | 0.788 | 0.184 | 2.61E-23 | 1 |
| mrps15           | 1.11E-27 | 0.445975477 | 0.888 | 0.249 | 2.64E-23 | 1 |
| rbb411           | 1.12E-27 | 0.370812666 | 0.825 | 0.21  | 2.67E-23 | 1 |
| gmps             | 1.14E-27 | 0.437254719 | 0.762 | 0.17  | 2.73E-23 | 1 |
| gstkl            | 1.25E-27 | 0.588737322 | 0.9   | 0.262 | 2.99E-23 | 1 |
| pgam1a           | 1.28E-27 | 0.827069165 | 0.95  | 0.401 | 3.05E-23 | 1 |
| eno3             | 1.31E-27 | 1.149378156 | 1     | 0.721 | 3.11E-23 | 1 |
| acad11           | 1.48E-27 | 0.442834844 | 0.862 | 0.236 | 3.53E-23 | 1 |
| dnajc11a         | 1.53E-27 | 0.428648765 | 0.8   | 0.202 | 3.64E-23 | 1 |
| zgc:1365641      | 1.63E-27 | 0.481253162 | 0.938 | 0.272 | 3.90E-23 | 1 |
| mdh1aa           | 1.84E-27 | 1.332611843 | 0.988 | 0.592 | 4.39E-23 | 1 |
| si:ch211-117n7.7 | 1.84E-27 | 0.538695623 | 0.85  | 0.223 | 4.39E-23 | 1 |
| pdhx             | 1.95E-27 | 0.426514385 | 0.812 | 0.206 | 4.65E-23 | 1 |
| abcb7            | 2.08E-27 | 0.250856753 | 0.75  | 0.161 | 4.95E-23 | 1 |
| nc1n             | 2.17E-27 | 0.370473715 | 0.838 | 0.228 | 5.18E-23 | 1 |
| pex5             | 2.45E-27 | 0.308145736 | 0.55  | 0.082 | 5.84E-23 | 1 |
| cluha            | 3.04E-27 | 0.666603534 | 0.85  | 0.257 | 7.25E-23 | 1 |
| zgc:77748        | 3.29E-27 | 0.967584878 | 1     | 0.453 | 7.83E-23 | 1 |
| aamp             | 3.41E-27 | 0.502003824 | 0.875 | 0.257 | 8.13E-23 | 1 |
| ccl25a           | 3.64E-27 | 0.359412141 | 0.8   | 0.185 | 8.68E-23 | 1 |
| adh8b            | 3.78E-27 | 1.335692387 | 0.975 | 0.476 | 9.01E-23 | 1 |
| slc25a26         | 3.86E-27 | 0.308069408 | 0.612 | 0.105 | 9.20E-23 | 1 |
| ndufa10          | 3.89E-27 | 0.753947033 | 0.962 | 0.397 | 9.28E-23 | 1 |
| h6pd             | 3.91E-27 | 0.260064079 | 0.55  | 0.084 | 9.33E-23 | 1 |
| itpkca           | 3.95E-27 | 0.369930974 | 0.738 | 0.157 | 9.41E-23 | 1 |
| tbcela           | 4.17E-27 | 0.253048298 | 0.788 | 0.18  | 9.94E-23 | 1 |
| uqcrc2b          | 6.08E-27 | 0.887406535 | 0.95  | 0.391 | 1.45E-22 | 1 |

|                    |          |             |       |       |          |   |
|--------------------|----------|-------------|-------|-------|----------|---|
| acs11b             | 6.53E-27 | 0.924738661 | 0.95  | 0.397 | 1.56E-22 | 1 |
| ca4b               | 6.74E-27 | 0.857501589 | 0.662 | 0.139 | 1.61E-22 | 1 |
| zbtb16a            | 6.91E-27 | 0.758749626 | 0.925 | 0.27  | 1.65E-22 | 1 |
| pdzk1              | 6.95E-27 | 0.524406529 | 0.912 | 0.262 | 1.66E-22 | 1 |
| ACSF3              | 7.35E-27 | 0.252358484 | 0.55  | 0.081 | 1.75E-22 | 1 |
| naprt              | 8.45E-27 | 0.506656244 | 0.9   | 0.273 | 2.01E-22 | 1 |
| mrps30             | 9.03E-27 | 0.472515589 | 0.85  | 0.234 | 2.15E-22 | 1 |
| ugt1ab             | 9.75E-27 | 1.07947381  | 1     | 0.414 | 2.32E-22 | 1 |
| si:ch211-248a14.81 | 9.92E-27 | 0.519042196 | 0.838 | 0.23  | 2.37E-22 | 1 |
| hao2               | 1.10E-26 | 0.269150226 | 0.575 | 0.088 | 2.63E-22 | 1 |
| cs                 | 1.16E-26 | 0.598616418 | 0.95  | 0.324 | 2.77E-22 | 1 |
| aldh8a1            | 1.22E-26 | 0.564692955 | 0.838 | 0.225 | 2.91E-22 | 1 |
| khk                | 1.31E-26 | 0.438409694 | 0.762 | 0.182 | 3.13E-22 | 1 |
| rpe                | 1.38E-26 | 0.383243033 | 0.825 | 0.208 | 3.28E-22 | 1 |
| ppp2r1ba           | 1.39E-26 | 0.481210052 | 0.9   | 0.272 | 3.32E-22 | 1 |
| ecil               | 1.40E-26 | 0.456963183 | 0.95  | 0.294 | 3.35E-22 | 1 |
| kyat1              | 1.49E-26 | 0.303455737 | 0.588 | 0.094 | 3.56E-22 | 1 |
| eaf2               | 1.60E-26 | 0.372518426 | 0.775 | 0.18  | 3.80E-22 | 1 |
| igf2bp3            | 1.88E-26 | 0.879604765 | 0.988 | 0.451 | 4.48E-22 | 1 |
| dlst               | 1.88E-26 | 0.826787773 | 0.975 | 0.453 | 4.48E-22 | 1 |
| cycl               | 1.93E-26 | 0.98271691  | 1     | 0.536 | 4.61E-22 | 1 |
| hnf4a1             | 2.00E-26 | 0.327929925 | 0.738 | 0.165 | 4.77E-22 | 1 |
| nedd4a             | 2.03E-26 | 0.841409962 | 0.962 | 0.369 | 4.85E-22 | 1 |
| dhrs9              | 2.14E-26 | 0.454448121 | 0.8   | 0.195 | 5.09E-22 | 1 |
| slc35d1b           | 2.27E-26 | 0.546695465 | 0.762 | 0.184 | 5.42E-22 | 1 |
| nomo               | 2.32E-26 | 0.375776008 | 0.838 | 0.21  | 5.53E-22 | 1 |
| si:ch73-21k16.5    | 2.38E-26 | 0.29346918  | 0.538 | 0.079 | 5.67E-22 | 1 |
| acot18             | 2.54E-26 | 0.321494844 | 0.65  | 0.129 | 6.05E-22 | 1 |
| acadm1             | 2.54E-26 | 0.599779705 | 0.962 | 0.358 | 6.06E-22 | 1 |
| mdh2               | 2.70E-26 | 1.031819125 | 0.975 | 0.566 | 6.43E-22 | 1 |
| anpepa             | 2.79E-26 | 0.30049532  | 0.712 | 0.146 | 6.64E-22 | 1 |
| slc25a3b           | 2.95E-26 | 1.014409674 | 1     | 0.757 | 7.04E-22 | 1 |
| polr2b             | 3.21E-26 | 0.405485656 | 0.738 | 0.167 | 7.66E-22 | 1 |
| si:ch211-121j5.4   | 3.24E-26 | 0.327342568 | 0.575 | 0.092 | 7.72E-22 | 1 |
| lrrc20             | 3.33E-26 | 0.312869395 | 0.75  | 0.17  | 7.94E-22 | 1 |
| si:ch73-308m11.1   | 3.40E-26 | 0.371809898 | 0.7   | 0.15  | 8.11E-22 | 1 |
| parml              | 3.61E-26 | 0.275049323 | 0.612 | 0.109 | 8.62E-22 | 1 |
| cptlab             | 3.73E-26 | 0.697577387 | 0.925 | 0.341 | 8.88E-22 | 1 |
| ppip5k1b           | 4.04E-26 | 0.440327887 | 0.6   | 0.114 | 9.64E-22 | 1 |
| myo15b1            | 4.49E-26 | 0.346264496 | 0.725 | 0.157 | 1.07E-21 | 1 |
| slc25a1b           | 4.59E-26 | 0.302297777 | 0.638 | 0.118 | 1.09E-21 | 1 |
| igfbp2a            | 5.35E-26 | 0.251444478 | 0.488 | 0.064 | 1.28E-21 | 1 |
| hmgcs1             | 5.81E-26 | 1.076734366 | 0.975 | 0.386 | 1.38E-21 | 1 |
| ptges1             | 5.84E-26 | 0.380753421 | 0.812 | 0.2   | 1.39E-21 | 1 |
| mrpl19             | 6.17E-26 | 0.387333221 | 0.825 | 0.212 | 1.47E-21 | 1 |
| mrpl51             | 6.22E-26 | 0.372681642 | 0.825 | 0.212 | 1.48E-21 | 1 |
| gmpr2              | 8.02E-26 | 0.265987834 | 0.75  | 0.169 | 1.91E-21 | 1 |
| map2k2a            | 9.35E-26 | 0.295726319 | 0.7   | 0.148 | 2.23E-21 | 1 |
| zgc:136472         | 9.38E-26 | 0.320086318 | 0.812 | 0.204 | 2.24E-21 | 1 |
| eif2a              | 9.41E-26 | 0.408410735 | 0.825 | 0.225 | 2.24E-21 | 1 |
| nle1               | 9.62E-26 | 0.264578823 | 0.625 | 0.114 | 2.29E-21 | 1 |
| hadh               | 1.03E-25 | 0.720044541 | 0.975 | 0.38  | 2.45E-21 | 1 |
| coq9               | 1.12E-25 | 0.417488402 | 0.712 | 0.159 | 2.68E-21 | 1 |
| mtch2              | 1.16E-25 | 0.586433057 | 0.95  | 0.335 | 2.77E-21 | 1 |

|          |          |             |       |       |          |   |
|----------|----------|-------------|-------|-------|----------|---|
| ugt2a4   | 1.32E-25 | 0.694387057 | 0.962 | 0.369 | 3.14E-21 | 1 |
| sult3st1 | 1.35E-25 | 0.330811821 | 0.612 | 0.114 | 3.21E-21 | 1 |
| ndrg2    | 1.39E-25 | 0.515207296 | 0.925 | 0.279 | 3.31E-21 | 1 |
| abcc12   | 1.49E-25 | 0.442163404 | 0.8   | 0.202 | 3.55E-21 | 1 |
| ivd      | 1.53E-25 | 0.266580062 | 0.725 | 0.159 | 3.64E-21 | 1 |
| acox1    | 1.54E-25 | 0.325811612 | 0.775 | 0.185 | 3.68E-21 | 1 |
| clic5b   | 1.79E-25 | 0.469526737 | 0.85  | 0.247 | 4.28E-21 | 1 |
| slc25a20 | 2.06E-25 | 0.725129656 | 0.962 | 0.397 | 4.92E-21 | 1 |
| fkbp8    | 2.32E-25 | 0.32437447  | 0.575 | 0.103 | 5.53E-21 | 1 |
| cracr2b  | 2.48E-25 | 0.409937785 | 0.688 | 0.146 | 5.92E-21 | 1 |
| got2b    | 2.55E-25 | 0.759831609 | 0.925 | 0.352 | 6.08E-21 | 1 |
| ahcy     | 2.55E-25 | 1.114805449 | 1     | 0.597 | 6.09E-21 | 1 |
| mrpl38   | 2.74E-25 | 0.536852607 | 0.888 | 0.29  | 6.52E-21 | 1 |
| lonrf1   | 2.83E-25 | 0.276356904 | 0.638 | 0.122 | 6.75E-21 | 1 |
| prmt1    | 2.91E-25 | 0.778721201 | 0.912 | 0.343 | 6.94E-21 | 1 |
| mrpl36   | 2.95E-25 | 0.657772066 | 0.962 | 0.363 | 7.04E-21 | 1 |
| osr2     | 3.25E-25 | 0.3171123   | 0.538 | 0.086 | 7.74E-21 | 1 |
| atic     | 3.26E-25 | 0.3344086   | 0.8   | 0.195 | 7.78E-21 | 1 |
| timm50   | 3.45E-25 | 0.266757259 | 0.662 | 0.139 | 8.22E-21 | 1 |
| chchd4a1 | 4.74E-25 | 0.334564961 | 0.825 | 0.212 | 1.13E-20 | 1 |
| dcaf13   | 4.84E-25 | 0.364253531 | 0.7   | 0.165 | 1.15E-20 | 1 |
| cyp2a1   | 5.32E-25 | 0.320123354 | 0.7   | 0.146 | 1.27E-20 | 1 |
| akap1b   | 5.34E-25 | 0.350308295 | 0.7   | 0.163 | 1.27E-20 | 1 |
| ethel    | 5.39E-25 | 0.346749479 | 0.712 | 0.163 | 1.29E-20 | 1 |
| fbx18    | 5.57E-25 | 0.382081624 | 0.612 | 0.116 | 1.33E-20 | 1 |
| dohh     | 5.62E-25 | 0.3552036   | 0.788 | 0.204 | 1.34E-20 | 1 |
| gstr1    | 5.71E-25 | 0.982594487 | 1     | 0.541 | 1.36E-20 | 1 |
| mvk      | 5.79E-25 | 0.349671388 | 0.488 | 0.071 | 1.38E-20 | 1 |
| emc8     | 5.91E-25 | 0.353231162 | 0.738 | 0.169 | 1.41E-20 | 1 |
| cdh17    | 6.09E-25 | 0.908792316 | 1     | 0.485 | 1.45E-20 | 1 |
| eci2     | 6.74E-25 | 0.548117409 | 0.925 | 0.316 | 1.61E-20 | 1 |
| atp5pb   | 7.07E-25 | 0.94317104  | 1     | 0.697 | 1.69E-20 | 1 |
| fntb     | 7.56E-25 | 0.319303691 | 0.638 | 0.125 | 1.80E-20 | 1 |
| mrps91   | 7.87E-25 | 0.346145533 | 0.85  | 0.249 | 1.88E-20 | 1 |
| sdhaf3   | 8.05E-25 | 0.282832447 | 0.7   | 0.155 | 1.92E-20 | 1 |
| sfxn4    | 8.15E-25 | 0.259590766 | 0.538 | 0.092 | 1.94E-20 | 1 |
| rrp12    | 8.45E-25 | 0.604787994 | 0.812 | 0.251 | 2.01E-20 | 1 |
| uqcrc2a  | 9.48E-25 | 0.623429686 | 0.938 | 0.404 | 2.26E-20 | 1 |
| scol     | 1.06E-24 | 0.3330125   | 0.7   | 0.165 | 2.53E-20 | 1 |
| phyhd1   | 1.08E-24 | 0.411643525 | 0.838 | 0.232 | 2.57E-20 | 1 |
| acox3    | 1.12E-24 | 0.333294201 | 0.6   | 0.112 | 2.66E-20 | 1 |
| lrpprc   | 1.12E-24 | 0.506396074 | 0.825 | 0.242 | 2.67E-20 | 1 |
| hccsb    | 1.14E-24 | 0.398796198 | 0.712 | 0.172 | 2.71E-20 | 1 |
| sf3b3    | 1.22E-24 | 0.412177173 | 0.812 | 0.217 | 2.91E-20 | 1 |
| PEPD     | 1.41E-24 | 0.437332944 | 0.788 | 0.212 | 3.35E-20 | 1 |
| tfb2m    | 1.44E-24 | 0.553889744 | 0.85  | 0.272 | 3.43E-20 | 1 |
| iars1    | 1.54E-24 | 0.323240387 | 0.875 | 0.249 | 3.67E-20 | 1 |
| ndrg3b   | 1.60E-24 | 0.257161704 | 0.612 | 0.116 | 3.81E-20 | 1 |
| tmem86b  | 1.61E-24 | 0.27487829  | 0.538 | 0.088 | 3.83E-20 | 1 |
| ugt5b3.1 | 1.63E-24 | 0.312959532 | 0.638 | 0.131 | 3.89E-20 | 1 |
| aca11    | 1.82E-24 | 0.322490758 | 0.75  | 0.18  | 4.34E-20 | 1 |
| apoa4b.1 | 1.83E-24 | 1.185490716 | 0.988 | 0.421 | 4.35E-20 | 1 |
| ndufv1   | 1.83E-24 | 0.510397338 | 0.912 | 0.313 | 4.37E-20 | 1 |
| shmt1    | 1.92E-24 | 0.328425052 | 0.75  | 0.189 | 4.58E-20 | 1 |

|                  |          |             |       |       |          |   |
|------------------|----------|-------------|-------|-------|----------|---|
| pgml             | 1.94E-24 | 0.276083555 | 0.712 | 0.163 | 4.64E-20 | 1 |
| ppargc1b         | 2.32E-24 | 0.486713628 | 0.875 | 0.255 | 5.54E-20 | 1 |
| rtn4b            | 2.35E-24 | 0.676599507 | 0.938 | 0.36  | 5.61E-20 | 1 |
| rpf2             | 2.36E-24 | 0.520860158 | 0.862 | 0.273 | 5.64E-20 | 1 |
| upb1             | 2.50E-24 | 0.403415482 | 0.638 | 0.135 | 5.97E-20 | 1 |
| myo1b            | 2.64E-24 | 0.604004018 | 0.825 | 0.247 | 6.29E-20 | 1 |
| bin2a1           | 2.75E-24 | 0.789704485 | 1     | 0.431 | 6.55E-20 | 1 |
| smfn             | 2.79E-24 | 0.341691817 | 0.65  | 0.139 | 6.64E-20 | 1 |
| tmem147          | 3.42E-24 | 0.390679927 | 0.912 | 0.298 | 8.15E-20 | 1 |
| apls3a           | 3.60E-24 | 0.385334529 | 0.675 | 0.15  | 8.59E-20 | 1 |
| fh               | 3.71E-24 | 0.525466796 | 0.9   | 0.322 | 8.85E-20 | 1 |
| scp2a1           | 3.86E-24 | 0.940622579 | 1     | 0.412 | 9.22E-20 | 1 |
| uqccl            | 3.98E-24 | 0.294132576 | 0.712 | 0.172 | 9.48E-20 | 1 |
| kmo              | 3.99E-24 | 0.254589819 | 0.638 | 0.127 | 9.51E-20 | 1 |
| idh1             | 3.99E-24 | 0.782835597 | 0.95  | 0.404 | 9.51E-20 | 1 |
| fdps             | 4.25E-24 | 0.694515227 | 0.925 | 0.348 | 1.01E-19 | 1 |
| pus7             | 4.43E-24 | 0.317096898 | 0.75  | 0.18  | 1.06E-19 | 1 |
| dldh             | 4.56E-24 | 0.725491715 | 0.912 | 0.399 | 1.09E-19 | 1 |
| gamt             | 4.70E-24 | 1.068160367 | 1     | 0.476 | 1.12E-19 | 1 |
| atp23            | 4.94E-24 | 0.289941251 | 0.562 | 0.101 | 1.18E-19 | 1 |
| wdr43            | 5.10E-24 | 0.46489339  | 0.925 | 0.303 | 1.22E-19 | 1 |
| slc13a2          | 5.22E-24 | 0.393762888 | 0.675 | 0.152 | 1.24E-19 | 1 |
| pdcd11           | 5.53E-24 | 0.523814368 | 0.9   | 0.303 | 1.32E-19 | 1 |
| idh3g            | 6.48E-24 | 0.297030984 | 0.738 | 0.172 | 1.54E-19 | 1 |
| mrpl23           | 6.79E-24 | 0.490038883 | 0.775 | 0.204 | 1.62E-19 | 1 |
| dhdh1            | 7.65E-24 | 0.731505984 | 0.988 | 0.434 | 1.82E-19 | 1 |
| cyp46a1.1        | 8.06E-24 | 0.439838927 | 0.838 | 0.243 | 1.92E-19 | 1 |
| pdhbl            | 8.28E-24 | 0.362176641 | 0.888 | 0.288 | 1.97E-19 | 1 |
| etfa             | 9.00E-24 | 0.573701544 | 0.962 | 0.375 | 2.15E-19 | 1 |
| prpf8            | 9.38E-24 | 0.473427374 | 0.875 | 0.279 | 2.24E-19 | 1 |
| mat2a1           | 1.04E-23 | 0.608419796 | 0.725 | 0.189 | 2.47E-19 | 1 |
| sult3st4         | 1.09E-23 | 0.458400882 | 0.65  | 0.14  | 2.59E-19 | 1 |
| si:zfos-943e10.1 | 1.16E-23 | 0.502885918 | 0.875 | 0.275 | 2.77E-19 | 1 |
| eftud2           | 1.18E-23 | 0.309917416 | 0.638 | 0.135 | 2.81E-19 | 1 |
| mrpl4            | 1.34E-23 | 0.417506379 | 0.888 | 0.294 | 3.19E-19 | 1 |
| mrpl12           | 1.37E-23 | 0.739069831 | 0.988 | 0.463 | 3.27E-19 | 1 |
| tufml            | 1.40E-23 | 0.586000416 | 0.938 | 0.382 | 3.33E-19 | 1 |
| aldh6a1          | 1.60E-23 | 0.615383419 | 0.938 | 0.375 | 3.82E-19 | 1 |
| zgc:56095        | 1.61E-23 | 0.376650163 | 0.875 | 0.266 | 3.85E-19 | 1 |
| ptk6b            | 1.63E-23 | 0.272651747 | 0.612 | 0.122 | 3.88E-19 | 1 |
| stt3b            | 1.92E-23 | 0.341915059 | 0.888 | 0.272 | 4.57E-19 | 1 |
| idh3b            | 1.93E-23 | 0.48788853  | 0.888 | 0.3   | 4.59E-19 | 1 |
| ndufs2           | 2.12E-23 | 0.695069904 | 0.962 | 0.427 | 5.05E-19 | 1 |
| ldha             | 2.14E-23 | 0.970146426 | 0.95  | 0.442 | 5.11E-19 | 1 |
| pter             | 2.30E-23 | 0.276439903 | 0.675 | 0.142 | 5.49E-19 | 1 |
| pdhala           | 2.33E-23 | 0.559387211 | 0.862 | 0.292 | 5.56E-19 | 1 |
| idil             | 2.34E-23 | 0.541468108 | 0.812 | 0.232 | 5.57E-19 | 1 |
| bms1             | 2.53E-23 | 0.405382166 | 0.9   | 0.273 | 6.03E-19 | 1 |
| mrpl2            | 2.77E-23 | 0.464922664 | 0.912 | 0.318 | 6.60E-19 | 1 |
| suc1g1           | 3.05E-23 | 1.015739397 | 1     | 0.601 | 7.28E-19 | 1 |
| pgm3             | 3.71E-23 | 0.255326339 | 0.575 | 0.109 | 8.85E-19 | 1 |
| vmp1             | 3.73E-23 | 0.31274474  | 0.812 | 0.221 | 8.90E-19 | 1 |
| etfdh            | 3.90E-23 | 0.348431937 | 0.788 | 0.221 | 9.29E-19 | 1 |
| cyp2k16          | 4.13E-23 | 0.754676499 | 0.975 | 0.38  | 9.85E-19 | 1 |

|                   |          |             |       |       |          |   |
|-------------------|----------|-------------|-------|-------|----------|---|
| rrp9              | 4.14E-23 | 0.253280817 | 0.7   | 0.163 | 9.88E-19 | 1 |
| stl31             | 4.20E-23 | 0.368560153 | 0.9   | 0.3   | 1.00E-18 | 1 |
| atp5mc3b          | 4.20E-23 | 0.950372789 | 1     | 0.837 | 1.00E-18 | 1 |
| decr2             | 4.24E-23 | 0.276363179 | 0.75  | 0.182 | 1.01E-18 | 1 |
| taz               | 5.29E-23 | 0.255512469 | 0.538 | 0.097 | 1.26E-18 | 1 |
| larplb            | 5.83E-23 | 0.29766024  | 0.875 | 0.255 | 1.39E-18 | 1 |
| gfml              | 6.22E-23 | 0.364625466 | 0.638 | 0.15  | 1.48E-18 | 1 |
| cad               | 7.34E-23 | 0.393945442 | 0.775 | 0.21  | 1.75E-18 | 1 |
| sf3b4             | 7.42E-23 | 0.390862967 | 0.775 | 0.206 | 1.77E-18 | 1 |
| sdhb              | 7.94E-23 | 0.800384197 | 0.962 | 0.509 | 1.89E-18 | 1 |
| wu:fb72h05        | 8.19E-23 | 0.398215033 | 0.762 | 0.197 | 1.95E-18 | 1 |
| mrps11            | 8.48E-23 | 0.469881699 | 0.912 | 0.33  | 2.02E-18 | 1 |
| stard7            | 8.75E-23 | 0.290452029 | 0.562 | 0.105 | 2.09E-18 | 1 |
| drg1              | 8.98E-23 | 0.386190627 | 0.788 | 0.217 | 2.14E-18 | 1 |
| cpsf3             | 9.31E-23 | 0.298050961 | 0.65  | 0.148 | 2.22E-18 | 1 |
| strap             | 9.91E-23 | 0.372685106 | 0.738 | 0.189 | 2.36E-18 | 1 |
| si:ch211-225b11.1 | 1.00E-22 | 0.42443931  | 0.775 | 0.204 | 2.38E-18 | 1 |
| heatr1            | 1.01E-22 | 0.255858037 | 0.575 | 0.116 | 2.42E-18 | 1 |
| ddx19             | 1.16E-22 | 0.264704677 | 0.612 | 0.124 | 2.76E-18 | 1 |
| nr2f6b            | 1.16E-22 | 0.466782333 | 0.862 | 0.27  | 2.77E-18 | 1 |
| ckmt1             | 1.17E-22 | 0.761922587 | 0.988 | 0.444 | 2.79E-18 | 1 |
| cndp2             | 1.17E-22 | 0.269387433 | 0.762 | 0.2   | 2.80E-18 | 1 |
| khsrp             | 1.26E-22 | 0.432691824 | 0.875 | 0.273 | 3.02E-18 | 1 |
| fth1a             | 1.29E-22 | 0.946704846 | 1     | 0.781 | 3.07E-18 | 1 |
| usp5              | 1.31E-22 | 0.422243756 | 0.8   | 0.238 | 3.12E-18 | 1 |
| cers3a            | 1.31E-22 | 0.399702272 | 0.8   | 0.232 | 3.12E-18 | 1 |
| gstt1a            | 1.35E-22 | 1.063281149 | 1     | 0.551 | 3.21E-18 | 1 |
| btr05             | 1.39E-22 | 0.251012325 | 0.45  | 0.066 | 3.31E-18 | 1 |
| agk               | 1.39E-22 | 0.254190387 | 0.7   | 0.167 | 3.32E-18 | 1 |
| atp5po            | 1.43E-22 | 0.923256378 | 0.988 | 0.687 | 3.40E-18 | 1 |
| pecr              | 1.46E-22 | 0.25749868  | 0.65  | 0.146 | 3.49E-18 | 1 |
| npepl11           | 1.52E-22 | 0.378202635 | 0.95  | 0.354 | 3.62E-18 | 1 |
| ube2nb1           | 1.56E-22 | 0.280036748 | 0.788 | 0.208 | 3.72E-18 | 1 |
| dnaja3a           | 1.63E-22 | 0.328658828 | 0.662 | 0.155 | 3.90E-18 | 1 |
| sod2              | 1.64E-22 | 0.625742436 | 1     | 0.39  | 3.91E-18 | 1 |
| hnflba            | 1.76E-22 | 0.298993204 | 0.688 | 0.161 | 4.19E-18 | 1 |
| acmsd             | 1.78E-22 | 0.361578624 | 0.738 | 0.189 | 4.25E-18 | 1 |
| grhprb            | 1.83E-22 | 0.354501934 | 0.662 | 0.15  | 4.36E-18 | 1 |
| utp6              | 1.93E-22 | 0.290707973 | 0.65  | 0.148 | 4.59E-18 | 1 |
| cct4              | 2.03E-22 | 0.89466295  | 0.975 | 0.532 | 4.83E-18 | 1 |
| zgc:77739         | 2.04E-22 | 0.397105906 | 0.725 | 0.184 | 4.86E-18 | 1 |
| tmx2b             | 2.15E-22 | 0.328323942 | 0.712 | 0.18  | 5.14E-18 | 1 |
| si:dkey-28n18.9   | 2.19E-22 | 0.305802904 | 0.575 | 0.109 | 5.23E-18 | 1 |
| acadvl            | 2.22E-22 | 0.63764887  | 0.962 | 0.367 | 5.30E-18 | 1 |
| csell             | 2.37E-22 | 0.282580687 | 0.688 | 0.165 | 5.66E-18 | 1 |
| pdia5             | 2.55E-22 | 0.353619605 | 0.825 | 0.247 | 6.08E-18 | 1 |
| ppifb1            | 2.58E-22 | 0.505118506 | 0.888 | 0.313 | 6.15E-18 | 1 |
| ppp4r3b           | 2.60E-22 | 0.252915505 | 0.588 | 0.12  | 6.19E-18 | 1 |
| slc9a3r1a         | 2.93E-22 | 0.507202334 | 0.95  | 0.358 | 6.98E-18 | 1 |
| txn2              | 3.00E-22 | 0.326046354 | 0.862 | 0.264 | 7.16E-18 | 1 |
| hmbsa             | 3.24E-22 | 0.331615627 | 0.612 | 0.133 | 7.73E-18 | 1 |
| ftcd              | 3.68E-22 | 0.558121    | 0.562 | 0.118 | 8.77E-18 | 1 |
| mrpl48            | 3.90E-22 | 0.51971127  | 0.962 | 0.333 | 9.31E-18 | 1 |
| mtx2              | 4.22E-22 | 0.435332394 | 0.862 | 0.281 | 1.01E-17 | 1 |

|                    |          |             |       |       |          |   |
|--------------------|----------|-------------|-------|-------|----------|---|
| pa2g4b             | 4.31E-22 | 0.759378312 | 0.962 | 0.457 | 1.03E-17 | 1 |
| nid2a              | 4.48E-22 | 0.26415411  | 0.562 | 0.11  | 1.07E-17 | 1 |
| gar1               | 4.49E-22 | 0.567182911 | 0.938 | 0.352 | 1.07E-17 | 1 |
| eef2b              | 4.51E-22 | 0.812236468 | 1     | 0.897 | 1.08E-17 | 1 |
| sgta               | 4.54E-22 | 0.387202573 | 0.962 | 0.339 | 1.08E-17 | 1 |
| nipsnap1           | 4.78E-22 | 0.260618183 | 0.562 | 0.109 | 1.14E-17 | 1 |
| mrps18b            | 4.95E-22 | 0.426772705 | 0.85  | 0.266 | 1.18E-17 | 1 |
| vars               | 4.96E-22 | 0.360845296 | 0.875 | 0.283 | 1.18E-17 | 1 |
| azin1b             | 5.00E-22 | 0.538316817 | 0.962 | 0.371 | 1.19E-17 | 1 |
| c3a.1              | 5.26E-22 | 0.308591827 | 0.675 | 0.152 | 1.25E-17 | 1 |
| mrpl431            | 5.66E-22 | 0.264003601 | 0.788 | 0.212 | 1.35E-17 | 1 |
| bud23              | 5.83E-22 | 0.33394223  | 0.688 | 0.17  | 1.39E-17 | 1 |
| aqp8a.2            | 6.49E-22 | 0.806440236 | 0.9   | 0.3   | 1.55E-17 | 1 |
| EIF3S6IP           | 6.59E-22 | 0.623985804 | 0.938 | 0.386 | 1.57E-17 | 1 |
| gpd1b              | 6.65E-22 | 0.342810838 | 0.612 | 0.137 | 1.59E-17 | 1 |
| rangap1a           | 6.65E-22 | 0.291057093 | 0.712 | 0.178 | 1.59E-17 | 1 |
| zgc:112175         | 7.08E-22 | 0.323481248 | 0.8   | 0.242 | 1.69E-17 | 1 |
| fip111b            | 7.82E-22 | 0.338517959 | 0.762 | 0.2   | 1.86E-17 | 1 |
| sec13              | 7.85E-22 | 0.37777009  | 0.9   | 0.294 | 1.87E-17 | 1 |
| bpnt1              | 8.26E-22 | 0.376671333 | 0.8   | 0.227 | 1.97E-17 | 1 |
| rpn11              | 9.09E-22 | 0.437430434 | 0.962 | 0.39  | 2.17E-17 | 1 |
| EIF3I              | 9.80E-22 | 0.646730715 | 0.988 | 0.425 | 2.34E-17 | 1 |
| grsf11             | 9.93E-22 | 0.285133273 | 0.75  | 0.204 | 2.37E-17 | 1 |
| ssfa2              | 1.01E-21 | 0.259404878 | 0.612 | 0.135 | 2.41E-17 | 1 |
| fam210b1           | 1.06E-21 | 0.356982947 | 0.788 | 0.24  | 2.52E-17 | 1 |
| actr2a             | 1.09E-21 | 0.494403089 | 0.9   | 0.33  | 2.59E-17 | 1 |
| rtn4a              | 1.17E-21 | 0.61391084  | 0.962 | 0.453 | 2.78E-17 | 1 |
| nit2               | 1.36E-21 | 0.340697326 | 0.65  | 0.15  | 3.25E-17 | 1 |
| ttl14              | 1.47E-21 | 0.268019497 | 0.538 | 0.101 | 3.50E-17 | 1 |
| myo7bb             | 1.57E-21 | 0.337832735 | 0.638 | 0.146 | 3.73E-17 | 1 |
| mrps31             | 1.67E-21 | 0.284778446 | 0.95  | 0.324 | 3.99E-17 | 1 |
| sgk2a              | 1.98E-21 | 0.290002609 | 0.675 | 0.157 | 4.71E-17 | 1 |
| ndrg1a             | 2.02E-21 | 0.827200719 | 1     | 0.537 | 4.81E-17 | 1 |
| gnpdall            | 2.06E-21 | 0.617888393 | 0.988 | 0.382 | 4.91E-17 | 1 |
| alad               | 2.08E-21 | 0.304831265 | 0.775 | 0.217 | 4.96E-17 | 1 |
| mpv1712            | 2.11E-21 | 0.377169717 | 0.775 | 0.219 | 5.03E-17 | 1 |
| mmadhc             | 2.15E-21 | 0.361962629 | 0.712 | 0.191 | 5.12E-17 | 1 |
| slc22a18           | 2.15E-21 | 0.287686854 | 0.638 | 0.15  | 5.13E-17 | 1 |
| ptgr1              | 2.19E-21 | 0.574929754 | 0.925 | 0.373 | 5.22E-17 | 1 |
| zgc:77938          | 2.21E-21 | 0.459362634 | 0.85  | 0.26  | 5.26E-17 | 1 |
| nup50              | 2.31E-21 | 0.433149724 | 0.825 | 0.255 | 5.51E-17 | 1 |
| rtraf              | 2.36E-21 | 0.280073753 | 0.7   | 0.17  | 5.64E-17 | 1 |
| metap11            | 2.43E-21 | 0.28155035  | 0.85  | 0.275 | 5.79E-17 | 1 |
| thop1              | 2.51E-21 | 0.34812719  | 0.85  | 0.268 | 5.98E-17 | 1 |
| slc25a5            | 2.57E-21 | 0.783776616 | 1     | 0.966 | 6.12E-17 | 1 |
| gapvd1             | 3.03E-21 | 0.252651728 | 0.488 | 0.084 | 7.23E-17 | 1 |
| ppid               | 3.11E-21 | 0.46097154  | 0.938 | 0.33  | 7.41E-17 | 1 |
| ddx56              | 3.11E-21 | 0.295758415 | 0.688 | 0.169 | 7.42E-17 | 1 |
| abcd3a             | 3.22E-21 | 0.438542387 | 0.85  | 0.288 | 7.67E-17 | 1 |
| selenop            | 3.28E-21 | 0.595204846 | 0.875 | 0.277 | 7.81E-17 | 1 |
| clic4              | 3.43E-21 | 0.292127593 | 0.712 | 0.182 | 8.17E-17 | 1 |
| si:ch211-107o10.31 | 3.51E-21 | 0.557170324 | 0.938 | 0.341 | 8.37E-17 | 1 |
| agpat91            | 3.72E-21 | 0.26938333  | 0.6   | 0.129 | 8.88E-17 | 1 |
| timm44             | 4.19E-21 | 0.267140782 | 0.8   | 0.227 | 1.00E-16 | 1 |



|                 |          |             |       |       |          |   |
|-----------------|----------|-------------|-------|-------|----------|---|
| ndufs8a         | 4.26E-21 | 0.568913212 | 0.912 | 0.376 | 1.02E-16 | 1 |
| tim29           | 4.30E-21 | 0.397329194 | 0.688 | 0.176 | 1.03E-16 | 1 |
| ppmlg           | 4.79E-21 | 0.378632197 | 0.8   | 0.23  | 1.14E-16 | 1 |
| copg2           | 5.19E-21 | 0.310154951 | 0.8   | 0.223 | 1.24E-16 | 1 |
| ldhba           | 5.55E-21 | 0.909370952 | 1     | 0.551 | 1.32E-16 | 1 |
| stard4          | 5.75E-21 | 0.298930691 | 0.525 | 0.103 | 1.37E-16 | 1 |
| chia.1          | 5.86E-21 | 0.493864334 | 0.425 | 0.066 | 1.40E-16 | 1 |
| cyp5l           | 5.87E-21 | 0.91634341  | 0.812 | 0.288 | 1.40E-16 | 1 |
| slc4a4a         | 6.10E-21 | 0.325054705 | 0.475 | 0.081 | 1.45E-16 | 1 |
| ccdc471         | 6.27E-21 | 0.444504205 | 0.95  | 0.388 | 1.50E-16 | 1 |
| tomm401         | 6.86E-21 | 0.261130792 | 0.925 | 0.339 | 1.63E-16 | 1 |
| hnrnpull        | 6.90E-21 | 0.389293379 | 0.85  | 0.281 | 1.64E-16 | 1 |
| pes             | 7.13E-21 | 0.471141421 | 0.95  | 0.348 | 1.70E-16 | 1 |
| zgc:158846      | 7.17E-21 | 1.012122044 | 1     | 0.743 | 1.71E-16 | 1 |
| wdr3            | 7.51E-21 | 0.305929917 | 0.662 | 0.172 | 1.79E-16 | 1 |
| selenot1b       | 7.86E-21 | 0.325585878 | 0.838 | 0.262 | 1.87E-16 | 1 |
| mrpl15          | 8.92E-21 | 0.326290284 | 0.838 | 0.27  | 2.13E-16 | 1 |
| nup93           | 9.05E-21 | 0.327859023 | 0.688 | 0.18  | 2.16E-16 | 1 |
| abcel           | 9.94E-21 | 0.729305602 | 0.912 | 0.386 | 2.37E-16 | 1 |
| gpia            | 1.02E-20 | 0.463504037 | 0.938 | 0.365 | 2.43E-16 | 1 |
| zgc:56304       | 1.04E-20 | 0.314408846 | 0.812 | 0.242 | 2.48E-16 | 1 |
| cyp26a1         | 1.09E-20 | 0.403497931 | 0.288 | 0.024 | 2.61E-16 | 1 |
| tmem97          | 1.20E-20 | 0.344319481 | 0.8   | 0.242 | 2.85E-16 | 1 |
| twflb           | 1.36E-20 | 0.271907693 | 0.712 | 0.193 | 3.25E-16 | 1 |
| hsd17b7         | 1.41E-20 | 0.565677071 | 0.825 | 0.27  | 3.36E-16 | 1 |
| AL831745.1      | 1.43E-20 | 0.348403    | 0.912 | 0.275 | 3.42E-16 | 1 |
| adssl           | 1.45E-20 | 0.331708915 | 0.788 | 0.227 | 3.45E-16 | 1 |
| esd             | 1.46E-20 | 0.474138144 | 0.838 | 0.296 | 3.49E-16 | 1 |
| acsbg21         | 1.48E-20 | 0.449632361 | 0.775 | 0.236 | 3.53E-16 | 1 |
| chia.2          | 1.51E-20 | 0.830870339 | 0.6   | 0.148 | 3.59E-16 | 1 |
| acy3.2          | 1.53E-20 | 0.298109284 | 0.7   | 0.185 | 3.66E-16 | 1 |
| micu2           | 1.56E-20 | 0.408054263 | 0.95  | 0.35  | 3.71E-16 | 1 |
| PXMP4           | 1.56E-20 | 0.260252676 | 0.525 | 0.103 | 3.71E-16 | 1 |
| pgk1            | 1.57E-20 | 0.597740445 | 0.962 | 0.446 | 3.74E-16 | 1 |
| rmdn1           | 1.66E-20 | 0.474053116 | 0.95  | 0.363 | 3.96E-16 | 1 |
| krt92           | 1.75E-20 | 0.980256019 | 1     | 0.792 | 4.18E-16 | 1 |
| cct7            | 1.89E-20 | 0.674876675 | 0.988 | 0.461 | 4.50E-16 | 1 |
| echsl           | 1.91E-20 | 0.456233207 | 0.888 | 0.326 | 4.55E-16 | 1 |
| uspl4           | 1.93E-20 | 0.254954647 | 0.688 | 0.172 | 4.59E-16 | 1 |
| si:dkey-283b1.6 | 2.00E-20 | 0.454951243 | 0.912 | 0.305 | 4.78E-16 | 1 |
| tjapl           | 2.01E-20 | 0.28139474  | 0.688 | 0.167 | 4.79E-16 | 1 |
| tmem126a        | 2.02E-20 | 0.343504961 | 0.725 | 0.21  | 4.81E-16 | 1 |
| insigl          | 2.06E-20 | 0.933168342 | 0.925 | 0.448 | 4.90E-16 | 1 |
| paklip1         | 2.59E-20 | 0.310261358 | 0.838 | 0.27  | 6.17E-16 | 1 |
| pvalb9          | 2.61E-20 | 2.098443416 | 0.638 | 0.154 | 6.21E-16 | 1 |
| dhrs11          | 2.63E-20 | 0.69353705  | 0.938 | 0.431 | 6.27E-16 | 1 |
| zgc:153968      | 2.67E-20 | 0.684290537 | 0.675 | 0.182 | 6.37E-16 | 1 |
| slc31a1         | 2.93E-20 | 0.513006998 | 0.912 | 0.354 | 7.00E-16 | 1 |
| hnrnp1          | 3.07E-20 | 0.419389057 | 0.875 | 0.279 | 7.33E-16 | 1 |
| coq5            | 3.17E-20 | 0.293586571 | 0.638 | 0.157 | 7.56E-16 | 1 |
| wdr75           | 3.17E-20 | 0.306236513 | 0.675 | 0.174 | 7.56E-16 | 1 |
| mrps351         | 3.54E-20 | 0.336698156 | 0.912 | 0.333 | 8.45E-16 | 1 |
| gpatch4         | 3.64E-20 | 0.345095945 | 0.838 | 0.247 | 8.68E-16 | 1 |
| phb2b           | 3.68E-20 | 0.642817262 | 0.975 | 0.434 | 8.77E-16 | 1 |

|                    |          |             |       |       |          |   |
|--------------------|----------|-------------|-------|-------|----------|---|
| agmat              | 3.81E-20 | 0.253599644 | 0.525 | 0.105 | 9.09E-16 | 1 |
| ndrg3a             | 4.73E-20 | 0.320263092 | 0.875 | 0.301 | 1.13E-15 | 1 |
| etfb1              | 4.74E-20 | 0.392764946 | 0.962 | 0.434 | 1.13E-15 | 1 |
| erlin1             | 5.02E-20 | 0.355088602 | 0.838 | 0.285 | 1.20E-15 | 1 |
| znf622             | 5.12E-20 | 0.283446085 | 0.8   | 0.228 | 1.22E-15 | 1 |
| rhebl1             | 5.44E-20 | 0.252440738 | 0.675 | 0.17  | 1.30E-15 | 1 |
| psmdl              | 5.47E-20 | 0.557936713 | 0.988 | 0.414 | 1.30E-15 | 1 |
| selenot1a          | 5.48E-20 | 0.57229149  | 0.988 | 0.463 | 1.31E-15 | 1 |
| kalrnb             | 5.54E-20 | 0.422886564 | 0.95  | 0.341 | 1.32E-15 | 1 |
| mrpl45             | 6.26E-20 | 0.397006012 | 0.825 | 0.268 | 1.49E-15 | 1 |
| pmpcb              | 6.99E-20 | 0.344246457 | 0.675 | 0.187 | 1.67E-15 | 1 |
| pdzklip1           | 7.90E-20 | 0.500527012 | 0.6   | 0.137 | 1.88E-15 | 1 |
| si:dkey-4e7.3      | 8.00E-20 | 0.29455414  | 0.5   | 0.097 | 1.91E-15 | 1 |
| uqcrfs1            | 8.62E-20 | 0.829520909 | 0.962 | 0.556 | 2.05E-15 | 1 |
| cebpz              | 9.75E-20 | 0.29076576  | 0.725 | 0.197 | 2.32E-15 | 1 |
| si:ch211-212k18.71 | 1.05E-19 | 0.399996501 | 0.95  | 0.404 | 2.51E-15 | 1 |
| rpl3               | 1.09E-19 | 0.712150737 | 1     | 0.931 | 2.59E-15 | 1 |
| ndufs7             | 1.11E-19 | 0.597507758 | 0.975 | 0.506 | 2.64E-15 | 1 |
| mvda               | 1.13E-19 | 0.431200103 | 0.588 | 0.137 | 2.69E-15 | 1 |
| gcshb              | 1.17E-19 | 0.774245018 | 0.988 | 0.431 | 2.79E-15 | 1 |
| elov12             | 1.21E-19 | 0.674013696 | 0.55  | 0.125 | 2.87E-15 | 1 |
| seh11              | 1.21E-19 | 0.25616185  | 0.688 | 0.182 | 2.88E-15 | 1 |
| fdx1               | 1.27E-19 | 0.738309362 | 1     | 0.453 | 3.03E-15 | 1 |
| psma5              | 1.28E-19 | 0.496404491 | 0.938 | 0.395 | 3.06E-15 | 1 |
| blmh               | 1.29E-19 | 0.406273633 | 0.875 | 0.313 | 3.07E-15 | 1 |
| eed                | 1.32E-19 | 0.263212511 | 0.662 | 0.17  | 3.14E-15 | 1 |
| lman2              | 1.42E-19 | 0.346046227 | 0.725 | 0.2   | 3.39E-15 | 1 |
| rhd12              | 1.45E-19 | 0.273782247 | 0.4   | 0.06  | 3.45E-15 | 1 |
| phb2a              | 1.46E-19 | 0.340120777 | 0.7   | 0.199 | 3.47E-15 | 1 |
| etv5b              | 1.59E-19 | 0.576885206 | 0.812 | 0.285 | 3.78E-15 | 1 |
| mpc2               | 1.59E-19 | 0.492915605 | 0.912 | 0.386 | 3.79E-15 | 1 |
| atp5f1d            | 1.74E-19 | 0.786073485 | 1     | 0.708 | 4.14E-15 | 1 |
| eef1a111           | 2.03E-19 | 0.696514279 | 1     | 0.983 | 4.83E-15 | 1 |
| gn12               | 2.03E-19 | 0.352861099 | 0.788 | 0.257 | 4.84E-15 | 1 |
| pprc1              | 2.05E-19 | 0.287163096 | 0.85  | 0.272 | 4.88E-15 | 1 |
| prdx2              | 2.09E-19 | 0.869890688 | 1     | 0.824 | 4.98E-15 | 1 |
| sypl2a             | 2.30E-19 | 0.452951679 | 0.925 | 0.38  | 5.49E-15 | 1 |
| tsfm               | 2.31E-19 | 0.258374907 | 0.5   | 0.101 | 5.50E-15 | 1 |
| anks4b             | 2.55E-19 | 0.494217774 | 0.95  | 0.354 | 6.07E-15 | 1 |
| gpr39              | 2.59E-19 | 0.280735173 | 0.662 | 0.172 | 6.16E-15 | 1 |
| pfdn2              | 2.75E-19 | 0.340493879 | 0.762 | 0.225 | 6.57E-15 | 1 |
| rnf121             | 2.82E-19 | 0.255062987 | 0.575 | 0.135 | 6.71E-15 | 1 |
| fkbp4              | 2.93E-19 | 0.360018427 | 0.725 | 0.208 | 6.99E-15 | 1 |
| qars               | 2.99E-19 | 0.28890681  | 0.775 | 0.223 | 7.14E-15 | 1 |
| adh51              | 3.16E-19 | 0.547760241 | 0.975 | 0.487 | 7.54E-15 | 1 |
| pfdn5              | 3.19E-19 | 0.49487953  | 0.85  | 0.322 | 7.60E-15 | 1 |
| fdx11              | 3.31E-19 | 0.333771958 | 0.812 | 0.249 | 7.90E-15 | 1 |
| cct81              | 3.39E-19 | 0.548475615 | 0.938 | 0.406 | 8.08E-15 | 1 |
| zgc:158258         | 3.51E-19 | 0.284154273 | 0.775 | 0.225 | 8.37E-15 | 1 |
| prelid1a1          | 3.67E-19 | 0.516043783 | 0.975 | 0.489 | 8.76E-15 | 1 |
| mrpl42             | 4.06E-19 | 0.27627501  | 0.862 | 0.273 | 9.68E-15 | 1 |
| mpc11              | 4.69E-19 | 0.597275346 | 1     | 0.521 | 1.12E-14 | 1 |
| kpnb3              | 4.74E-19 | 0.43854766  | 0.825 | 0.277 | 1.13E-14 | 1 |
| sdad1              | 4.92E-19 | 0.346794229 | 0.762 | 0.227 | 1.17E-14 | 1 |

|                 |          |             |       |       |          |   |
|-----------------|----------|-------------|-------|-------|----------|---|
| cyb5a           | 5.00E-19 | 0.528280718 | 0.95  | 0.44  | 1.19E-14 | 1 |
| mrpl34          | 5.26E-19 | 0.404042979 | 0.938 | 0.354 | 1.25E-14 | 1 |
| pblld           | 5.59E-19 | 0.354022295 | 0.838 | 0.262 | 1.33E-14 | 1 |
| krt97           | 5.64E-19 | 0.950748787 | 1     | 0.575 | 1.34E-14 | 1 |
| nipsnap3a       | 5.84E-19 | 0.298418143 | 0.85  | 0.29  | 1.39E-14 | 1 |
| prkar2aa        | 5.89E-19 | 0.450565418 | 0.912 | 0.361 | 1.41E-14 | 1 |
| coro2a          | 6.17E-19 | 0.290471934 | 0.65  | 0.167 | 1.47E-14 | 1 |
| ndufa8          | 6.32E-19 | 0.563383496 | 0.988 | 0.552 | 1.51E-14 | 1 |
| eif4ebp2        | 6.40E-19 | 0.393096877 | 0.838 | 0.301 | 1.53E-14 | 1 |
| mrpl16          | 6.44E-19 | 0.270690609 | 0.712 | 0.21  | 1.54E-14 | 1 |
| mcm4            | 6.48E-19 | 0.282055387 | 0.6   | 0.146 | 1.54E-14 | 1 |
| ndufs3          | 6.49E-19 | 0.560632578 | 0.95  | 0.414 | 1.55E-14 | 1 |
| gcsa            | 6.89E-19 | 0.347962396 | 0.925 | 0.316 | 1.64E-14 | 1 |
| nolc11          | 7.02E-19 | 0.297162174 | 0.938 | 0.352 | 1.67E-14 | 1 |
| srp72           | 7.36E-19 | 0.296709621 | 0.762 | 0.234 | 1.76E-14 | 1 |
| g3bp1           | 7.50E-19 | 0.348616723 | 0.9   | 0.324 | 1.79E-14 | 1 |
| dnajc3a         | 7.66E-19 | 0.463321112 | 0.862 | 0.294 | 1.83E-14 | 1 |
| prdx3           | 7.96E-19 | 0.554828179 | 0.925 | 0.416 | 1.90E-14 | 1 |
| hspa4b          | 8.71E-19 | 0.525036249 | 0.838 | 0.33  | 2.08E-14 | 1 |
| rars            | 9.20E-19 | 0.428040139 | 0.825 | 0.275 | 2.19E-14 | 1 |
| sdhc            | 9.23E-19 | 0.634065502 | 1     | 0.494 | 2.20E-14 | 1 |
| hsd121          | 9.77E-19 | 0.420170014 | 0.95  | 0.397 | 2.33E-14 | 1 |
| si:dkey-44g23.5 | 9.94E-19 | 0.451428536 | 0.862 | 0.298 | 2.37E-14 | 1 |
| ddx54           | 1.04E-18 | 0.267311362 | 0.762 | 0.232 | 2.49E-14 | 1 |
| vdac2           | 1.05E-18 | 0.84110055  | 1     | 0.646 | 2.51E-14 | 1 |
| ptges3a         | 1.07E-18 | 0.345289493 | 0.838 | 0.298 | 2.55E-14 | 1 |
| cldn15a         | 1.08E-18 | 0.799293753 | 0.975 | 0.438 | 2.58E-14 | 1 |
| igf2bp1         | 1.14E-18 | 0.674882679 | 0.988 | 0.481 | 2.72E-14 | 1 |
| afp4.1          | 1.29E-18 | 0.664376753 | 0.988 | 0.376 | 3.09E-14 | 1 |
| pabpc1a         | 1.30E-18 | 0.706475855 | 1     | 0.831 | 3.09E-14 | 1 |
| eif5a2          | 1.30E-18 | 0.770335391 | 1     | 0.59  | 3.10E-14 | 1 |
| CR388364.1      | 1.35E-18 | 0.250843987 | 0.562 | 0.125 | 3.22E-14 | 1 |
| timm13l         | 1.42E-18 | 0.350740795 | 0.912 | 0.343 | 3.38E-14 | 1 |
| acadsb          | 1.48E-18 | 0.353315946 | 0.725 | 0.21  | 3.54E-14 | 1 |
| pgd             | 1.51E-18 | 0.496818015 | 0.888 | 0.35  | 3.59E-14 | 1 |
| gspt11          | 1.57E-18 | 0.492420439 | 0.988 | 0.472 | 3.74E-14 | 1 |
| mphosph101      | 1.58E-18 | 0.283066449 | 0.875 | 0.296 | 3.76E-14 | 1 |
| maipl           | 1.60E-18 | 0.286480389 | 0.588 | 0.152 | 3.83E-14 | 1 |
| grpel1          | 1.77E-18 | 0.31649463  | 0.825 | 0.285 | 4.23E-14 | 1 |
| tfam            | 2.11E-18 | 0.278386581 | 0.838 | 0.281 | 5.02E-14 | 1 |
| aimp2           | 2.13E-18 | 0.338124745 | 0.85  | 0.296 | 5.07E-14 | 1 |
| tomm221         | 2.18E-18 | 0.441161092 | 0.912 | 0.397 | 5.19E-14 | 1 |
| nop58           | 2.25E-18 | 0.649220043 | 1     | 0.56  | 5.36E-14 | 1 |
| chchd4b         | 2.47E-18 | 0.261588537 | 0.45  | 0.084 | 5.90E-14 | 1 |
| zan11           | 2.48E-18 | 0.54471429  | 0.938 | 0.361 | 5.91E-14 | 1 |
| ide             | 2.69E-18 | 0.283469586 | 0.7   | 0.2   | 6.41E-14 | 1 |
| klf11b          | 2.79E-18 | 0.41424104  | 0.925 | 0.345 | 6.66E-14 | 1 |
| ezh2            | 2.83E-18 | 0.314834432 | 0.7   | 0.212 | 6.75E-14 | 1 |
| mrpl3           | 2.94E-18 | 0.323716695 | 0.725 | 0.219 | 7.00E-14 | 1 |
| gata6           | 2.96E-18 | 0.266597878 | 0.838 | 0.275 | 7.06E-14 | 1 |
| eif4ebp1        | 3.22E-18 | 0.46944419  | 0.975 | 0.419 | 7.68E-14 | 1 |
| mrpl20          | 3.23E-18 | 0.458388941 | 0.95  | 0.371 | 7.70E-14 | 1 |
| psmc1b          | 3.46E-18 | 0.346263077 | 0.8   | 0.275 | 8.24E-14 | 1 |
| adrm1           | 3.72E-18 | 0.429954962 | 0.862 | 0.324 | 8.86E-14 | 1 |

|                   |          |             |       |       |          |   |
|-------------------|----------|-------------|-------|-------|----------|---|
| nip71             | 3.79E-18 | 0.284820533 | 0.862 | 0.305 | 9.04E-14 | 1 |
| abcc21            | 3.85E-18 | 0.352921205 | 0.738 | 0.215 | 9.18E-14 | 1 |
| c23h20orf24       | 4.03E-18 | 0.598129544 | 0.962 | 0.448 | 9.62E-14 | 1 |
| mrps18a1          | 4.31E-18 | 0.296680417 | 0.925 | 0.313 | 1.03E-13 | 1 |
| hspa14            | 4.50E-18 | 0.271730188 | 0.662 | 0.187 | 1.07E-13 | 1 |
| apoalb            | 4.79E-18 | 0.966298935 | 0.962 | 0.532 | 1.14E-13 | 1 |
| bckdhh            | 5.03E-18 | 0.310034636 | 0.75  | 0.24  | 1.20E-13 | 1 |
| pllp              | 5.04E-18 | 0.256962109 | 0.812 | 0.247 | 1.20E-13 | 1 |
| nansa             | 5.33E-18 | 0.335976771 | 0.862 | 0.301 | 1.27E-13 | 1 |
| tspan13a          | 5.34E-18 | 0.430974284 | 0.95  | 0.346 | 1.27E-13 | 1 |
| dnmt1             | 5.58E-18 | 0.33293625  | 0.538 | 0.122 | 1.33E-13 | 1 |
| atpaf1            | 6.25E-18 | 0.289206438 | 0.738 | 0.23  | 1.49E-13 | 1 |
| gstm.11           | 6.47E-18 | 0.343481237 | 0.862 | 0.326 | 1.54E-13 | 1 |
| ndufa4            | 7.08E-18 | 0.685291691 | 0.988 | 0.459 | 1.69E-13 | 1 |
| hacd2             | 7.21E-18 | 0.582174268 | 0.912 | 0.393 | 1.72E-13 | 1 |
| bop1              | 9.06E-18 | 0.294883671 | 0.838 | 0.27  | 2.16E-13 | 1 |
| fads2             | 9.17E-18 | 0.255876091 | 0.325 | 0.043 | 2.19E-13 | 1 |
| atp2a2a.1         | 9.58E-18 | 0.483608663 | 0.95  | 0.419 | 2.28E-13 | 1 |
| cox16             | 1.02E-17 | 0.256556815 | 0.688 | 0.195 | 2.43E-13 | 1 |
| si:dkey-183n20.15 | 1.03E-17 | 0.363760257 | 0.688 | 0.195 | 2.45E-13 | 1 |
| mrps24            | 1.03E-17 | 0.444330303 | 0.95  | 0.397 | 2.45E-13 | 1 |
| bxdc2             | 1.04E-17 | 0.508616148 | 0.975 | 0.41  | 2.47E-13 | 1 |
| dhrs4             | 1.04E-17 | 0.329162335 | 0.862 | 0.298 | 2.49E-13 | 1 |
| tegt              | 1.08E-17 | 0.297224848 | 0.65  | 0.178 | 2.57E-13 | 1 |
| srsfla            | 1.18E-17 | 0.545319666 | 0.962 | 0.474 | 2.81E-13 | 1 |
| mrps5             | 1.22E-17 | 0.278691411 | 0.638 | 0.174 | 2.91E-13 | 1 |
| eif4a1b           | 1.25E-17 | 0.462156078 | 0.975 | 0.472 | 2.97E-13 | 1 |
| nmt1a             | 1.33E-17 | 0.335553495 | 0.825 | 0.288 | 3.17E-13 | 1 |
| gtpbp4            | 1.34E-17 | 0.470492867 | 0.95  | 0.412 | 3.19E-13 | 1 |
| apoala            | 1.49E-17 | 0.696650422 | 0.988 | 0.436 | 3.55E-13 | 1 |
| gpx4a             | 1.58E-17 | 0.862332616 | 1     | 0.541 | 3.76E-13 | 1 |
| vill              | 1.70E-17 | 0.80040717  | 0.988 | 0.541 | 4.06E-13 | 1 |
| zgc:101569        | 1.78E-17 | 0.271858046 | 0.725 | 0.213 | 4.24E-13 | 1 |
| dhx15             | 1.78E-17 | 0.344575492 | 0.825 | 0.303 | 4.25E-13 | 1 |
| slc25a36a         | 1.82E-17 | 0.264399753 | 0.8   | 0.26  | 4.33E-13 | 1 |
| idh3a             | 1.84E-17 | 0.435302262 | 0.938 | 0.431 | 4.38E-13 | 1 |
| acat1             | 1.98E-17 | 0.262143441 | 0.562 | 0.14  | 4.73E-13 | 1 |
| pk1r              | 2.06E-17 | 0.552114306 | 0.962 | 0.433 | 4.90E-13 | 1 |
| tmem11            | 2.06E-17 | 0.312717531 | 0.838 | 0.328 | 4.92E-13 | 1 |
| ddx39aa           | 2.17E-17 | 0.342172437 | 0.925 | 0.369 | 5.17E-13 | 1 |
| lonrf111          | 2.17E-17 | 0.46687708  | 0.85  | 0.345 | 5.17E-13 | 1 |
| u2af1             | 2.28E-17 | 0.383102629 | 0.988 | 0.404 | 5.44E-13 | 1 |
| si:ch211-250c4.4  | 2.43E-17 | 0.328572834 | 0.762 | 0.227 | 5.79E-13 | 1 |
| nop2              | 2.63E-17 | 0.41893697  | 0.938 | 0.39  | 6.28E-13 | 1 |
| larp4ab           | 2.70E-17 | 0.261918904 | 0.762 | 0.257 | 6.45E-13 | 1 |
| ndufv21           | 2.76E-17 | 0.35249045  | 0.938 | 0.406 | 6.58E-13 | 1 |
| tnpo2             | 3.02E-17 | 0.309865018 | 0.788 | 0.251 | 7.21E-13 | 1 |
| hspa9             | 3.22E-17 | 0.631308519 | 1     | 0.575 | 7.67E-13 | 1 |
| si:ch73-194h10.2  | 3.36E-17 | 0.301265895 | 0.925 | 0.341 | 8.01E-13 | 1 |
| hspa8             | 3.94E-17 | 0.713924238 | 1     | 0.929 | 9.39E-13 | 1 |
| itpk1a            | 4.20E-17 | 0.439929987 | 0.95  | 0.39  | 1.00E-12 | 1 |
| cd3eap            | 4.72E-17 | 0.276338495 | 0.875 | 0.311 | 1.13E-12 | 1 |
| ndufb5            | 4.96E-17 | 0.592009068 | 0.975 | 0.496 | 1.18E-12 | 1 |
| sdr16c5b          | 4.99E-17 | 0.399231039 | 0.912 | 0.363 | 1.19E-12 | 1 |

|            |          |             |       |       |          |   |
|------------|----------|-------------|-------|-------|----------|---|
| tspo       | 5.02E-17 | 0.346949365 | 0.662 | 0.206 | 1.20E-12 | 1 |
| mcee       | 5.27E-17 | 0.279078079 | 0.762 | 0.264 | 1.26E-12 | 1 |
| ckbal      | 5.39E-17 | 0.2696824   | 0.7   | 0.212 | 1.29E-12 | 1 |
| rnaseh2a   | 5.68E-17 | 0.253292914 | 0.588 | 0.154 | 1.35E-12 | 1 |
| ndufab1a   | 6.40E-17 | 0.557365192 | 0.975 | 0.483 | 1.53E-12 | 1 |
| uchl3      | 6.67E-17 | 0.282908554 | 0.788 | 0.264 | 1.59E-12 | 1 |
| uspl0      | 6.85E-17 | 0.479413803 | 0.938 | 0.395 | 1.63E-12 | 1 |
| pgrmc1     | 6.91E-17 | 0.574685718 | 0.988 | 0.522 | 1.65E-12 | 1 |
| mrps101    | 7.57E-17 | 0.376540922 | 0.925 | 0.412 | 1.81E-12 | 1 |
| cryl1      | 8.28E-17 | 0.341990091 | 0.762 | 0.249 | 1.97E-12 | 1 |
| dnttip2    | 8.40E-17 | 0.258334206 | 0.65  | 0.189 | 2.00E-12 | 1 |
| emc6       | 8.42E-17 | 0.335076141 | 0.938 | 0.365 | 2.01E-12 | 1 |
| esf1       | 8.47E-17 | 0.447513843 | 0.8   | 0.29  | 2.02E-12 | 1 |
| chchd1     | 9.79E-17 | 0.267050952 | 0.8   | 0.279 | 2.33E-12 | 1 |
| cdx1b      | 1.05E-16 | 0.525929423 | 0.988 | 0.466 | 2.50E-12 | 1 |
| cct3       | 1.05E-16 | 0.616843619 | 0.975 | 0.511 | 2.50E-12 | 1 |
| naa15a     | 1.11E-16 | 0.273769972 | 0.762 | 0.255 | 2.66E-12 | 1 |
| fam207a    | 1.16E-16 | 0.293022729 | 0.8   | 0.268 | 2.76E-12 | 1 |
| txnrd3     | 1.25E-16 | 0.317521941 | 0.812 | 0.29  | 2.98E-12 | 1 |
| cstf3      | 1.28E-16 | 0.254467353 | 0.638 | 0.18  | 3.05E-12 | 1 |
| gclc       | 1.32E-16 | 0.336757214 | 0.838 | 0.287 | 3.14E-12 | 1 |
| ddx39ab1   | 1.33E-16 | 0.546429092 | 0.988 | 0.536 | 3.16E-12 | 1 |
| sdhdb1     | 1.36E-16 | 0.49433019  | 0.938 | 0.472 | 3.24E-12 | 1 |
| jpt2       | 1.39E-16 | 0.272401546 | 0.888 | 0.322 | 3.31E-12 | 1 |
| tuba812l   | 1.45E-16 | 0.648641949 | 0.975 | 0.539 | 3.45E-12 | 1 |
| CU462878.1 | 1.59E-16 | 0.374644718 | 0.675 | 0.21  | 3.80E-12 | 1 |
| mygl       | 1.72E-16 | 0.333945577 | 0.875 | 0.346 | 4.11E-12 | 1 |
| acpl       | 1.79E-16 | 0.283960831 | 0.875 | 0.322 | 4.27E-12 | 1 |
| ngdn       | 1.81E-16 | 0.260450023 | 0.825 | 0.283 | 4.31E-12 | 1 |
| eif4h      | 1.96E-16 | 0.453966787 | 0.95  | 0.442 | 4.67E-12 | 1 |
| kars       | 2.02E-16 | 0.583765502 | 0.938 | 0.479 | 4.81E-12 | 1 |
| chchd6b    | 2.08E-16 | 0.28174287  | 0.8   | 0.279 | 4.96E-12 | 1 |
| ivnslabpa  | 2.08E-16 | 0.371936386 | 0.9   | 0.326 | 4.97E-12 | 1 |
| hnf4g      | 2.19E-16 | 0.328111797 | 0.862 | 0.326 | 5.23E-12 | 1 |
| ppalb      | 2.26E-16 | 0.354544504 | 0.95  | 0.401 | 5.39E-12 | 1 |
| mrpl17     | 2.38E-16 | 0.253022058 | 0.775 | 0.251 | 5.68E-12 | 1 |
| mcm21      | 2.80E-16 | 0.3806978   | 0.612 | 0.184 | 6.67E-12 | 1 |
| cbr111     | 3.10E-16 | 0.349404143 | 0.888 | 0.346 | 7.38E-12 | 1 |
| auh        | 3.14E-16 | 0.329783058 | 0.762 | 0.255 | 7.48E-12 | 1 |
| prdx11     | 3.57E-16 | 0.397673776 | 0.95  | 0.44  | 8.52E-12 | 1 |
| nfe2l2a    | 3.57E-16 | 0.395911255 | 0.95  | 0.38  | 8.52E-12 | 1 |
| prdx41     | 3.70E-16 | 0.347730475 | 0.912 | 0.393 | 8.83E-12 | 1 |
| herpud1    | 3.73E-16 | 0.685646779 | 0.988 | 0.543 | 8.90E-12 | 1 |
| stoml3b    | 4.09E-16 | 0.869843534 | 0.95  | 0.421 | 9.76E-12 | 1 |
| gpx1a      | 4.12E-16 | 0.682001937 | 0.988 | 0.509 | 9.82E-12 | 1 |
| raplaa     | 4.48E-16 | 0.417928455 | 0.812 | 0.313 | 1.07E-11 | 1 |
| cyp24a1    | 4.62E-16 | 0.661134486 | 0.562 | 0.154 | 1.10E-11 | 1 |
| sf3a1      | 4.75E-16 | 0.267799368 | 0.738 | 0.249 | 1.13E-11 | 1 |
| sephs2     | 4.89E-16 | 0.285814343 | 0.75  | 0.257 | 1.17E-11 | 1 |
| timm9      | 5.14E-16 | 0.268542628 | 0.912 | 0.354 | 1.23E-11 | 1 |
| tsr2       | 5.42E-16 | 0.313354753 | 0.788 | 0.277 | 1.29E-11 | 1 |
| mrpl13     | 5.48E-16 | 0.365686036 | 0.938 | 0.361 | 1.31E-11 | 1 |
| mrpl47     | 5.55E-16 | 0.253473151 | 0.862 | 0.318 | 1.32E-11 | 1 |
| p4hb       | 6.08E-16 | 0.409446515 | 0.925 | 0.429 | 1.45E-11 | 1 |

|                   |          |             |       |       |          |   |
|-------------------|----------|-------------|-------|-------|----------|---|
| farsb             | 6.13E-16 | 0.272937145 | 0.712 | 0.212 | 1.46E-11 | 1 |
| mrpl27            | 6.44E-16 | 0.282542418 | 0.862 | 0.311 | 1.54E-11 | 1 |
| tpilb1            | 6.48E-16 | 0.542904855 | 0.975 | 0.577 | 1.54E-11 | 1 |
| ldlra             | 6.89E-16 | 0.554923944 | 0.962 | 0.479 | 1.64E-11 | 1 |
| EIF2S1A           | 6.94E-16 | 0.386009297 | 0.888 | 0.354 | 1.65E-11 | 1 |
| cant1b            | 6.98E-16 | 0.272321062 | 0.738 | 0.242 | 1.66E-11 | 1 |
| esama             | 8.22E-16 | 0.25163016  | 0.45  | 0.096 | 1.96E-11 | 1 |
| thrap3b           | 8.56E-16 | 0.280703519 | 0.888 | 0.343 | 2.04E-11 | 1 |
| mrps7             | 8.58E-16 | 0.360519712 | 0.812 | 0.292 | 2.05E-11 | 1 |
| bzwlA             | 9.34E-16 | 0.349538727 | 0.925 | 0.367 | 2.23E-11 | 1 |
| dnajc15           | 1.00E-15 | 0.261402966 | 0.6   | 0.169 | 2.39E-11 | 1 |
| gdi2              | 1.08E-15 | 0.519850357 | 0.962 | 0.509 | 2.58E-11 | 1 |
| vdac3             | 1.14E-15 | 0.291063646 | 0.862 | 0.361 | 2.71E-11 | 1 |
| EIF4BBL           | 1.34E-15 | 0.469847955 | 0.975 | 0.551 | 3.21E-11 | 1 |
| EIF3C             | 1.37E-15 | 0.54863926  | 0.975 | 0.545 | 3.28E-11 | 1 |
| coll4a1a          | 1.47E-15 | 0.269410425 | 0.85  | 0.301 | 3.51E-11 | 1 |
| sub1b             | 1.57E-15 | 0.306438177 | 0.838 | 0.298 | 3.74E-11 | 1 |
| evala             | 1.61E-15 | 0.286553097 | 0.588 | 0.169 | 3.84E-11 | 1 |
| sar1b             | 1.63E-15 | 0.299212398 | 0.938 | 0.395 | 3.89E-11 | 1 |
| mrpl11            | 1.74E-15 | 0.497436344 | 0.988 | 0.476 | 4.15E-11 | 1 |
| akirin2           | 1.81E-15 | 0.287488579 | 0.8   | 0.273 | 4.31E-11 | 1 |
| EIF5A             | 1.85E-15 | 0.702651779 | 0.988 | 0.607 | 4.41E-11 | 1 |
| hnrnp12           | 2.25E-15 | 0.349758637 | 0.862 | 0.322 | 5.37E-11 | 1 |
| rpl4              | 2.40E-15 | 0.57889612  | 1     | 0.884 | 5.72E-11 | 1 |
| serpinb113        | 2.40E-15 | 0.64659496  | 0.988 | 0.601 | 5.73E-11 | 1 |
| apoc2             | 2.53E-15 | 0.559539904 | 1     | 0.455 | 6.04E-11 | 1 |
| ciapin1           | 2.73E-15 | 0.302339164 | 0.775 | 0.287 | 6.51E-11 | 1 |
| mrpl18            | 2.85E-15 | 0.3180944   | 0.975 | 0.408 | 6.79E-11 | 1 |
| mrps36            | 2.90E-15 | 0.397514924 | 0.95  | 0.498 | 6.93E-11 | 1 |
| cnbpa             | 3.15E-15 | 0.5553515   | 0.962 | 0.496 | 7.52E-11 | 1 |
| glrx51            | 3.20E-15 | 0.329111667 | 0.9   | 0.395 | 7.63E-11 | 1 |
| tuftla            | 3.24E-15 | 0.430371195 | 0.812 | 0.298 | 7.73E-11 | 1 |
| sult3st3          | 3.37E-15 | 0.416933764 | 0.912 | 0.361 | 8.04E-11 | 1 |
| tomm5             | 3.67E-15 | 0.468898319 | 1     | 0.494 | 8.74E-11 | 1 |
| stip1             | 3.79E-15 | 0.252503603 | 0.838 | 0.324 | 9.04E-11 | 1 |
| CU694197.1        | 4.22E-15 | 0.361913525 | 0.962 | 0.44  | 1.01E-10 | 1 |
| atplb1a           | 4.22E-15 | 0.582200465 | 1     | 0.816 | 1.01E-10 | 1 |
| pitpnaa           | 4.32E-15 | 0.325291317 | 0.838 | 0.315 | 1.03E-10 | 1 |
| atp5mc1           | 4.53E-15 | 0.660279163 | 1     | 0.779 | 1.08E-10 | 1 |
| si:dkey-251i10.3  | 4.60E-15 | 0.301742411 | 0.75  | 0.26  | 1.10E-10 | 1 |
| mrpl9             | 4.71E-15 | 0.298716784 | 0.725 | 0.243 | 1.12E-10 | 1 |
| ak2               | 5.17E-15 | 0.537805964 | 1     | 0.552 | 1.23E-10 | 1 |
| si:dkey-17e16.101 | 5.21E-15 | 0.251349072 | 0.9   | 0.352 | 1.24E-10 | 1 |
| kpnbl             | 5.52E-15 | 0.430939013 | 0.925 | 0.414 | 1.32E-10 | 1 |
| EIF3S10           | 6.96E-15 | 0.564798721 | 1     | 0.577 | 1.66E-10 | 1 |
| ipo7              | 7.10E-15 | 0.445861363 | 0.938 | 0.401 | 1.69E-10 | 1 |
| mrps16            | 7.16E-15 | 0.32562472  | 0.825 | 0.311 | 1.71E-10 | 1 |
| cast              | 7.37E-15 | 0.408581414 | 0.938 | 0.419 | 1.76E-10 | 1 |
| rpl711            | 7.55E-15 | 0.511309218 | 0.962 | 0.453 | 1.80E-10 | 1 |
| slc25a33          | 7.59E-15 | 0.272520098 | 0.588 | 0.169 | 1.81E-10 | 1 |
| nsdh1             | 7.63E-15 | 0.330293197 | 0.662 | 0.212 | 1.82E-10 | 1 |
| arhgdia           | 7.96E-15 | 0.453926929 | 0.95  | 0.47  | 1.90E-10 | 1 |
| ponzr1            | 8.32E-15 | 0.393459855 | 0.862 | 0.337 | 1.98E-10 | 1 |
| ftsJ3             | 8.72E-15 | 0.251717227 | 0.662 | 0.208 | 2.08E-10 | 1 |

|                  |          |             |       |       |          |   |
|------------------|----------|-------------|-------|-------|----------|---|
| gstpl            | 8.86E-15 | 0.731783754 | 1     | 0.785 | 2.11E-10 | 1 |
| rbp2a1           | 9.62E-15 | 0.810420909 | 0.988 | 0.507 | 2.29E-10 | 1 |
| prpf39           | 9.92E-15 | 0.276829115 | 0.912 | 0.367 | 2.37E-10 | 1 |
| ddost            | 1.02E-14 | 0.282686342 | 0.962 | 0.446 | 2.43E-10 | 1 |
| hars             | 1.04E-14 | 0.26347248  | 0.925 | 0.386 | 2.48E-10 | 1 |
| CCT2             | 1.20E-14 | 0.528810783 | 0.962 | 0.564 | 2.85E-10 | 1 |
| dnajc7           | 1.30E-14 | 0.320381824 | 0.912 | 0.361 | 3.10E-10 | 1 |
| zgc:77486.11     | 1.36E-14 | 0.373300591 | 0.962 | 0.434 | 3.24E-10 | 1 |
| srsf7a           | 1.38E-14 | 0.286474393 | 0.9   | 0.38  | 3.30E-10 | 1 |
| mb121            | 1.41E-14 | 0.280690786 | 0.662 | 0.204 | 3.36E-10 | 1 |
| llph             | 1.46E-14 | 0.269584776 | 0.938 | 0.373 | 3.48E-10 | 1 |
| sec61a1          | 1.51E-14 | 0.329735572 | 0.95  | 0.431 | 3.60E-10 | 1 |
| eps813b          | 1.54E-14 | 0.420049994 | 0.9   | 0.44  | 3.67E-10 | 1 |
| atp5pd           | 1.54E-14 | 0.605260084 | 1     | 0.757 | 3.68E-10 | 1 |
| nop56            | 1.55E-14 | 0.459187282 | 0.988 | 0.575 | 3.69E-10 | 1 |
| acad9            | 1.66E-14 | 0.255171555 | 0.675 | 0.221 | 3.96E-10 | 1 |
| dbi              | 1.88E-14 | 0.69259561  | 1     | 0.764 | 4.48E-10 | 1 |
| lsm12a           | 2.03E-14 | 0.251960794 | 0.738 | 0.251 | 4.84E-10 | 1 |
| usol             | 2.26E-14 | 0.262873773 | 0.75  | 0.258 | 5.38E-10 | 1 |
| tcp1             | 2.81E-14 | 0.573575484 | 0.962 | 0.537 | 6.70E-10 | 1 |
| rpl5b            | 2.85E-14 | 0.539609383 | 1     | 0.837 | 6.80E-10 | 1 |
| CU682777.2       | 2.88E-14 | 0.503286478 | 0.962 | 0.489 | 6.87E-10 | 1 |
| prkab1b          | 3.18E-14 | 0.278604979 | 0.825 | 0.326 | 7.58E-10 | 1 |
| aurkaip1         | 3.26E-14 | 0.338385411 | 0.85  | 0.35  | 7.77E-10 | 1 |
| mrpl28           | 3.46E-14 | 0.280617208 | 0.862 | 0.339 | 8.25E-10 | 1 |
| ubal             | 3.53E-14 | 0.360657236 | 0.912 | 0.399 | 8.41E-10 | 1 |
| hdlbpa           | 3.82E-14 | 0.628663655 | 1     | 0.654 | 9.10E-10 | 1 |
| ilf2             | 3.93E-14 | 0.339749219 | 0.912 | 0.436 | 9.37E-10 | 1 |
| atp5mc3a         | 4.08E-14 | 0.556107785 | 0.988 | 0.648 | 9.73E-10 | 1 |
| si:dkey-16p21.81 | 4.53E-14 | 0.723265637 | 0.9   | 0.416 | 1.08E-09 | 1 |
| timm8b           | 4.61E-14 | 0.428285765 | 0.975 | 0.449 | 1.10E-09 | 1 |
| csnk2b           | 4.79E-14 | 0.260006957 | 0.975 | 0.442 | 1.14E-09 | 1 |
| pfn21            | 5.07E-14 | 0.432842028 | 0.975 | 0.528 | 1.21E-09 | 1 |
| eif4g1a          | 5.48E-14 | 0.463595884 | 1     | 0.597 | 1.31E-09 | 1 |
| cldn151b         | 5.84E-14 | 0.594235328 | 1     | 0.549 | 1.39E-09 | 1 |
| eif3m            | 6.03E-14 | 0.617641009 | 0.95  | 0.541 | 1.44E-09 | 1 |
| rbm47            | 6.09E-14 | 0.313343724 | 0.938 | 0.438 | 1.45E-09 | 1 |
| mibp2            | 6.65E-14 | 0.62063712  | 1     | 0.678 | 1.59E-09 | 1 |
| rpsa             | 7.50E-14 | 0.540939308 | 1     | 0.944 | 1.79E-09 | 1 |
| pfn2             | 8.11E-14 | 0.563438128 | 1     | 0.667 | 1.93E-09 | 1 |
| cct51            | 9.05E-14 | 0.468779814 | 0.975 | 0.532 | 2.16E-09 | 1 |
| clqbp            | 9.46E-14 | 0.567210748 | 1     | 0.672 | 2.26E-09 | 1 |
| mcm6             | 9.84E-14 | 0.296591191 | 0.538 | 0.157 | 2.35E-09 | 1 |
| snd1             | 1.01E-13 | 0.341495874 | 0.888 | 0.41  | 2.40E-09 | 1 |
| muc13b           | 1.01E-13 | 0.360176736 | 0.988 | 0.449 | 2.40E-09 | 1 |
| degs2            | 1.04E-13 | 0.324097827 | 0.938 | 0.451 | 2.47E-09 | 1 |
| psmc3            | 1.06E-13 | 0.278609317 | 0.862 | 0.35  | 2.52E-09 | 1 |
| psmd3            | 1.14E-13 | 0.340178054 | 0.912 | 0.425 | 2.71E-09 | 1 |
| eif2s1b          | 1.19E-13 | 0.484259373 | 1     | 0.543 | 2.84E-09 | 1 |
| acot19           | 1.19E-13 | 0.37192643  | 0.688 | 0.232 | 2.84E-09 | 1 |
| mrpl301          | 1.21E-13 | 0.266302687 | 0.925 | 0.423 | 2.89E-09 | 1 |
| ccdc137          | 1.24E-13 | 0.331331773 | 0.562 | 0.17  | 2.96E-09 | 1 |
| rps2             | 1.27E-13 | 0.582807682 | 1     | 0.948 | 3.03E-09 | 1 |
| ccnbl            | 1.32E-13 | 0.391591955 | 0.35  | 0.075 | 3.15E-09 | 1 |

|                    |          |             |       |       |          |   |
|--------------------|----------|-------------|-------|-------|----------|---|
| gsta.1.11          | 1.45E-13 | 0.748164182 | 1     | 0.816 | 3.45E-09 | 1 |
| si:ch211-71m22.1   | 1.55E-13 | 0.568080699 | 0.95  | 0.468 | 3.71E-09 | 1 |
| rs11d11            | 1.93E-13 | 0.415192137 | 0.95  | 0.478 | 4.60E-09 | 1 |
| ogdha              | 1.99E-13 | 0.300349174 | 0.95  | 0.468 | 4.74E-09 | 1 |
| ndufal11           | 2.06E-13 | 0.353232245 | 0.95  | 0.474 | 4.90E-09 | 1 |
| cct6a1             | 2.10E-13 | 0.360946285 | 0.975 | 0.485 | 5.00E-09 | 1 |
| fam213b            | 2.56E-13 | 0.330230654 | 0.988 | 0.478 | 6.10E-09 | 1 |
| ptbpla             | 2.62E-13 | 0.250357706 | 0.862 | 0.358 | 6.26E-09 | 1 |
| snrpb              | 2.73E-13 | 0.613592725 | 0.988 | 0.657 | 6.51E-09 | 1 |
| psmb4              | 2.79E-13 | 0.358457693 | 0.95  | 0.464 | 6.65E-09 | 1 |
| vcp                | 2.86E-13 | 0.403926567 | 0.962 | 0.526 | 6.82E-09 | 1 |
| gstm.3             | 3.37E-13 | 0.259070667 | 0.912 | 0.427 | 8.03E-09 | 1 |
| ccng11             | 3.47E-13 | 0.422265468 | 0.912 | 0.463 | 8.28E-09 | 1 |
| olal               | 3.83E-13 | 0.369351113 | 0.938 | 0.494 | 9.13E-09 | 1 |
| hnrnpalb           | 4.24E-13 | 0.442956344 | 1     | 0.592 | 1.01E-08 | 1 |
| eef1g              | 4.56E-13 | 0.583701195 | 1     | 0.854 | 1.09E-08 | 1 |
| trpm4a             | 4.66E-13 | 0.30913806  | 0.862 | 0.35  | 1.11E-08 | 1 |
| npmla              | 5.36E-13 | 0.546831104 | 1     | 0.738 | 1.28E-08 | 1 |
| si:ch211-214j24.10 | 5.96E-13 | 0.254437856 | 0.738 | 0.266 | 1.42E-08 | 1 |
| bub3               | 6.49E-13 | 0.25277548  | 0.65  | 0.227 | 1.55E-08 | 1 |
| mphosph8           | 6.61E-13 | 0.33687615  | 0.975 | 0.498 | 1.58E-08 | 1 |
| eif3ea             | 7.16E-13 | 0.495301935 | 0.975 | 0.554 | 1.71E-08 | 1 |
| denr               | 7.51E-13 | 0.293534112 | 0.938 | 0.455 | 1.79E-08 | 1 |
| eif2s3             | 8.47E-13 | 0.433819204 | 0.988 | 0.536 | 2.02E-08 | 1 |
| eif3ha             | 9.34E-13 | 0.501147784 | 0.938 | 0.511 | 2.23E-08 | 1 |
| eif6               | 1.01E-12 | 0.355741943 | 0.938 | 0.427 | 2.41E-08 | 1 |
| fbl                | 1.10E-12 | 0.422984003 | 0.975 | 0.528 | 2.61E-08 | 1 |
| romol              | 1.15E-12 | 0.364139794 | 0.962 | 0.547 | 2.74E-08 | 1 |
| ndufabl1b          | 1.27E-12 | 0.50942768  | 0.988 | 0.573 | 3.02E-08 | 1 |
| eef2a.1            | 1.29E-12 | 0.258961806 | 0.75  | 0.305 | 3.07E-08 | 1 |
| efhd2              | 1.97E-12 | 0.256157176 | 0.925 | 0.434 | 4.70E-08 | 1 |
| psmb5              | 1.97E-12 | 0.276131148 | 0.888 | 0.395 | 4.71E-08 | 1 |
| prdx61             | 2.04E-12 | 0.323775157 | 0.912 | 0.478 | 4.86E-08 | 1 |
| rack1              | 2.25E-12 | 0.584307461 | 0.988 | 0.891 | 5.37E-08 | 1 |
| psma3              | 2.39E-12 | 0.368776057 | 0.962 | 0.536 | 5.69E-08 | 1 |
| bsg                | 2.57E-12 | 0.303394365 | 0.988 | 0.571 | 6.13E-08 | 1 |
| cox8b              | 2.62E-12 | 0.609092078 | 0.988 | 0.573 | 6.25E-08 | 1 |
| COX5B              | 3.44E-12 | 0.563657132 | 1     | 0.801 | 8.21E-08 | 1 |
| bysl               | 3.69E-12 | 0.269676331 | 0.9   | 0.418 | 8.79E-08 | 1 |
| rps6               | 3.75E-12 | 0.486592963 | 1     | 0.921 | 8.94E-08 | 1 |
| gnl3               | 3.98E-12 | 0.359163394 | 0.938 | 0.457 | 9.50E-08 | 1 |
| perp               | 4.03E-12 | 0.271665136 | 0.95  | 0.459 | 9.61E-08 | 1 |
| psmc6              | 4.06E-12 | 0.302705824 | 0.85  | 0.376 | 9.68E-08 | 1 |
| bccip              | 4.23E-12 | 0.29388877  | 0.962 | 0.429 | 1.01E-07 | 1 |
| sb:cb1058          | 4.51E-12 | 0.484073758 | 1     | 0.558 | 1.08E-07 | 1 |
| pfdn6              | 4.59E-12 | 0.286186009 | 0.925 | 0.431 | 1.09E-07 | 1 |
| chchd101           | 5.88E-12 | 0.380078173 | 0.975 | 0.474 | 1.40E-07 | 1 |
| cltca              | 6.88E-12 | 0.308343988 | 0.938 | 0.423 | 1.64E-07 | 1 |
| corolca            | 7.03E-12 | 0.314489396 | 0.875 | 0.414 | 1.68E-07 | 1 |
| gsta.2             | 7.28E-12 | 0.316389704 | 0.6   | 0.21  | 1.74E-07 | 1 |
| tuba811            | 8.18E-12 | 0.855130083 | 1     | 0.596 | 1.95E-07 | 1 |
| dkc1               | 8.41E-12 | 0.461403233 | 0.938 | 0.481 | 2.01E-07 | 1 |
| ranbp1             | 8.77E-12 | 0.295801712 | 0.962 | 0.534 | 2.09E-07 | 1 |
| hmgala             | 9.19E-12 | 0.451142396 | 1     | 0.839 | 2.19E-07 | 1 |



|                  |          |             |       |       |          |   |
|------------------|----------|-------------|-------|-------|----------|---|
| si:dkey-239h2.3  | 9.35E-12 | 0.305818233 | 0.912 | 0.41  | 2.23E-07 | 1 |
| pfnd1            | 1.08E-11 | 0.258974708 | 0.875 | 0.406 | 2.57E-07 | 1 |
| rbm4.3           | 1.11E-11 | 0.490437173 | 0.975 | 0.545 | 2.65E-07 | 1 |
| mgst3b1          | 1.18E-11 | 0.451470863 | 0.975 | 0.551 | 2.82E-07 | 1 |
| rplp0            | 1.24E-11 | 0.557552012 | 1     | 0.925 | 2.96E-07 | 1 |
| tobla            | 1.30E-11 | 0.254115643 | 1     | 0.485 | 3.10E-07 | 1 |
| EIF3ba           | 1.30E-11 | 0.397136176 | 0.938 | 0.522 | 3.11E-07 | 1 |
| actn4            | 1.33E-11 | 0.286325167 | 0.962 | 0.427 | 3.17E-07 | 1 |
| EIF4a1a          | 1.36E-11 | 0.345443323 | 0.975 | 0.577 | 3.24E-07 | 1 |
| tpt1             | 1.99E-11 | 0.578483426 | 0.988 | 0.839 | 4.75E-07 | 1 |
| eppk1            | 2.02E-11 | 0.495604688 | 1     | 0.519 | 4.82E-07 | 1 |
| zgc:92630        | 2.05E-11 | 0.252468015 | 0.862 | 0.369 | 4.89E-07 | 1 |
| psma8            | 2.06E-11 | 0.39420031  | 0.95  | 0.504 | 4.90E-07 | 1 |
| cox14            | 2.10E-11 | 0.348407448 | 0.925 | 0.423 | 5.01E-07 | 1 |
| dlgap5           | 2.19E-11 | 0.296360024 | 0.488 | 0.154 | 5.23E-07 | 1 |
| EIF3k            | 2.81E-11 | 0.401757191 | 1     | 0.552 | 6.70E-07 | 1 |
| EIF3d1           | 2.88E-11 | 0.33779931  | 0.95  | 0.528 | 6.86E-07 | 1 |
| nap111           | 3.13E-11 | 0.272708725 | 0.938 | 0.438 | 7.47E-07 | 1 |
| si:ch211-69g19.2 | 3.51E-11 | 0.44392649  | 0.362 | 0.094 | 8.38E-07 | 1 |
| EIF3g            | 3.96E-11 | 0.479933895 | 0.938 | 0.562 | 9.44E-07 | 1 |
| hsp90b1          | 4.98E-11 | 0.473780267 | 1     | 0.77  | 1.19E-06 | 1 |
| pcnal            | 5.69E-11 | 0.420333463 | 0.85  | 0.391 | 1.36E-06 | 1 |
| cox5aa           | 5.75E-11 | 0.470131151 | 0.988 | 0.734 | 1.37E-06 | 1 |
| ndufs5           | 6.13E-11 | 0.493577287 | 0.988 | 0.582 | 1.46E-06 | 1 |
| aldoaa           | 6.74E-11 | 0.258633074 | 0.988 | 0.474 | 1.61E-06 | 1 |
| naa10            | 7.16E-11 | 0.269112438 | 0.925 | 0.453 | 1.71E-06 | 1 |
| sod1             | 7.34E-11 | 0.495887654 | 0.988 | 0.684 | 1.75E-06 | 1 |
| cox6al           | 7.65E-11 | 0.490370828 | 1     | 0.824 | 1.82E-06 | 1 |
| mnt              | 7.67E-11 | 0.269260449 | 0.65  | 0.253 | 1.83E-06 | 1 |
| aurka            | 9.73E-11 | 0.280674436 | 0.325 | 0.079 | 2.32E-06 | 1 |
| rpl10            | 1.06E-10 | 0.518438843 | 1     | 0.91  | 2.53E-06 | 1 |
| gars             | 1.13E-10 | 0.302885712 | 0.888 | 0.419 | 2.69E-06 | 1 |
| banf1            | 1.14E-10 | 0.334422675 | 0.938 | 0.513 | 2.73E-06 | 1 |
| rpl8             | 1.19E-10 | 0.443341942 | 1     | 0.953 | 2.83E-06 | 1 |
| rida             | 1.43E-10 | 0.454277053 | 0.862 | 0.444 | 3.40E-06 | 1 |
| cox5ab           | 1.67E-10 | 0.47584261  | 1     | 0.695 | 3.99E-06 | 1 |
| rps3a            | 1.84E-10 | 0.520734354 | 1     | 0.933 | 4.38E-06 | 1 |
| minos1           | 1.85E-10 | 0.364773754 | 1     | 0.556 | 4.40E-06 | 1 |
| pdia3            | 2.00E-10 | 0.384926473 | 1     | 0.661 | 4.78E-06 | 1 |
| nme2b.1          | 2.03E-10 | 0.532861753 | 1     | 0.865 | 4.84E-06 | 1 |
| lxn              | 2.22E-10 | 0.270828865 | 0.912 | 0.406 | 5.29E-06 | 1 |
| cirbpa           | 2.61E-10 | 0.47691573  | 1     | 0.719 | 6.22E-06 | 1 |
| ndufa12          | 2.93E-10 | 0.3885213   | 1     | 0.584 | 6.98E-06 | 1 |
| serbpla          | 2.94E-10 | 0.411446339 | 1     | 0.873 | 7.01E-06 | 1 |
| tacc3            | 3.05E-10 | 0.414360843 | 0.325 | 0.088 | 7.28E-06 | 1 |
| khdrbs1a         | 4.27E-10 | 0.458266312 | 1     | 0.715 | 1.02E-05 | 1 |
| rpl6             | 4.32E-10 | 0.378401137 | 1     | 0.942 | 1.03E-05 | 1 |
| rps3             | 4.92E-10 | 0.481226674 | 1     | 0.91  | 1.17E-05 | 1 |
| cenpf            | 5.36E-10 | 0.377296356 | 0.388 | 0.112 | 1.28E-05 | 1 |
| pdapla           | 6.00E-10 | 0.29922591  | 0.962 | 0.526 | 1.43E-05 | 1 |
| snul3b           | 6.33E-10 | 0.386818749 | 0.975 | 0.56  | 1.51E-05 | 1 |
| btf3             | 6.55E-10 | 0.483406638 | 1     | 0.749 | 1.56E-05 | 1 |
| ezra             | 6.64E-10 | 0.43141014  | 1     | 0.699 | 1.58E-05 | 1 |
| cox7a2a          | 7.28E-10 | 0.43404867  | 1     | 0.717 | 1.74E-05 | 1 |

|                  |          |             |       |       |           |   |
|------------------|----------|-------------|-------|-------|-----------|---|
| dap              | 7.53E-10 | 0.438905916 | 1     | 0.629 | 1.80E-05  | 1 |
| ywhaba           | 8.61E-10 | 0.353589545 | 0.975 | 0.607 | 2.05E-05  | 1 |
| ndufs4           | 8.70E-10 | 0.320221848 | 0.988 | 0.541 | 2.08E-05  | 1 |
| btg2             | 9.05E-10 | 0.409206651 | 0.988 | 0.64  | 2.16E-05  | 1 |
| s100a10a         | 1.04E-09 | 0.561969931 | 1     | 0.798 | 2.47E-05  | 1 |
| ran              | 1.04E-09 | 0.454370818 | 1     | 0.745 | 2.49E-05  | 1 |
| ebna1bp2         | 1.32E-09 | 0.273596581 | 0.95  | 0.483 | 3.14E-05  | 1 |
| rps4x            | 2.08E-09 | 0.389320716 | 1     | 0.961 | 4.95E-05  | 1 |
| EIF5             | 2.20E-09 | 0.348938206 | 0.988 | 0.639 | 5.25E-05  | 1 |
| rps9             | 2.83E-09 | 0.404085358 | 1     | 0.949 | 6.75E-05  | 1 |
| serpinb1         | 2.88E-09 | 0.322637409 | 0.975 | 0.592 | 6.86E-05  | 1 |
| rpl5a            | 3.17E-09 | 0.469749226 | 1     | 0.813 | 7.56E-05  | 1 |
| anp32a           | 3.19E-09 | 0.268242875 | 0.95  | 0.519 | 7.61E-05  | 1 |
| rpl7             | 3.33E-09 | 0.454765909 | 1     | 0.921 | 7.94E-05  | 1 |
| abracl           | 3.41E-09 | 0.30945478  | 0.95  | 0.496 | 8.13E-05  | 1 |
| ftr82            | 3.52E-09 | 0.418278313 | 0.962 | 0.622 | 8.40E-05  | 1 |
| ndufb6           | 3.91E-09 | 0.250482224 | 0.962 | 0.558 | 9.32E-05  | 1 |
| ppl              | 4.87E-09 | 0.358928345 | 0.95  | 0.5   | 0.0001162 | 1 |
| rpl7a            | 4.98E-09 | 0.42220082  | 1     | 0.949 | 0.0001187 | 1 |
| psma1            | 5.03E-09 | 0.290185521 | 0.925 | 0.493 | 0.00012   | 1 |
| ndufb81          | 5.38E-09 | 0.29907497  | 1     | 0.659 | 0.0001283 | 1 |
| pdia4            | 6.37E-09 | 0.388653689 | 0.975 | 0.61  | 0.0001518 | 1 |
| zgc:92027        | 6.38E-09 | 0.250836268 | 0.938 | 0.493 | 0.0001522 | 1 |
| rpl12            | 6.49E-09 | 0.439532428 | 1     | 0.934 | 0.0001548 | 1 |
| ATP5MD           | 6.69E-09 | 0.432190231 | 1     | 0.7   | 0.0001596 | 1 |
| pdia6            | 7.31E-09 | 0.257747361 | 0.988 | 0.532 | 0.0001742 | 1 |
| spdl1            | 1.06E-08 | 0.261118218 | 0.325 | 0.096 | 0.0002539 | 1 |
| rpl10a           | 1.40E-08 | 0.47191904  | 1     | 0.921 | 0.0003336 | 1 |
| tpx2             | 2.20E-08 | 0.365990201 | 0.45  | 0.17  | 0.0005244 | 1 |
| atp5l            | 2.64E-08 | 0.417741532 | 1     | 0.82  | 0.0006301 | 1 |
| setb             | 2.94E-08 | 0.307242395 | 0.988 | 0.625 | 0.000701  | 1 |
| ociad2           | 3.23E-08 | 0.251142549 | 0.938 | 0.466 | 0.0007713 | 1 |
| tubb2b           | 4.95E-08 | 0.442122206 | 0.975 | 0.625 | 0.0011793 | 1 |
| kpna2            | 5.15E-08 | 0.886639254 | 0.425 | 0.17  | 0.0012291 | 1 |
| calr3a           | 6.03E-08 | 0.389561171 | 0.988 | 0.607 | 0.0014369 | 1 |
| cox6c            | 9.02E-08 | 0.345157557 | 1     | 0.734 | 0.0021498 | 1 |
| rpl18            | 1.08E-07 | 0.343957281 | 1     | 0.934 | 0.0025639 | 1 |
| plk1             | 1.09E-07 | 0.27988517  | 0.338 | 0.116 | 0.0025992 | 1 |
| si:dkeyp-73b11.8 | 1.15E-07 | 0.432970431 | 1     | 0.753 | 0.0027424 | 1 |
| rpl18a           | 1.49E-07 | 0.369611255 | 1     | 0.936 | 0.0035617 | 1 |
| eef1b2           | 1.59E-07 | 0.4091697   | 1     | 0.831 | 0.0037969 | 1 |
| hnrnpabb         | 1.61E-07 | 0.273521495 | 0.988 | 0.642 | 0.0038428 | 1 |
| fabp21           | 2.00E-07 | 0.341995284 | 1     | 0.755 | 0.0047571 | 1 |
| si:dkey-36i7.3   | 4.15E-07 | 0.32128358  | 0.988 | 0.605 | 0.0099028 | 1 |
| anxa2b           | 4.30E-07 | 0.458417779 | 1     | 0.742 | 0.0102485 | 1 |
| cox7b            | 4.63E-07 | 0.325714985 | 1     | 0.798 | 0.0110488 | 1 |
| uqcrq            | 5.28E-07 | 0.340737788 | 1     | 0.725 | 0.0125974 | 1 |
| mki67            | 5.62E-07 | 0.54203886  | 0.538 | 0.253 | 0.013411  | 1 |
| cirbpb           | 6.75E-07 | 0.313526398 | 1     | 0.858 | 0.0161017 | 1 |
| fa2h             | 7.48E-07 | 0.264099632 | 0.988 | 0.622 | 0.0178384 | 1 |
| nusap1           | 8.05E-07 | 0.286813375 | 0.288 | 0.092 | 0.0192002 | 1 |
| mgst3a           | 8.95E-07 | 0.280107631 | 1     | 0.676 | 0.0213366 | 1 |
| ncl              | 9.15E-07 | 0.31784098  | 1     | 0.785 | 0.0218102 | 1 |
| EIF3f            | 1.32E-06 | 0.310436225 | 0.975 | 0.64  | 0.0315229 | 1 |

|                  |           |             |       |       |           |   |
|------------------|-----------|-------------|-------|-------|-----------|---|
| hspell           | 1.53E-06  | 0.275904677 | 1     | 0.772 | 0.0364447 | 1 |
| rpl19            | 1.62E-06  | 0.365201958 | 1     | 0.949 | 0.0386825 | 1 |
| CABZ01058261.1   | 2.38E-06  | 0.256364835 | 0.388 | 0.159 | 0.0567402 | 1 |
| uqcrh            | 2.72E-06  | 0.289800625 | 0.988 | 0.749 | 0.0647441 | 1 |
| rpl13a           | 2.90E-06  | 0.30145715  | 1     | 0.938 | 0.0692631 | 1 |
| gpx4b            | 3.43E-06  | 0.341263708 | 0.988 | 0.687 | 0.0818383 | 1 |
| nupr1            | 8.57E-06  | 0.351104408 | 0.988 | 0.74  | 0.2043395 | 1 |
| cox6b2           | 9.82E-06  | 0.263988573 | 1     | 0.742 | 0.2341528 | 1 |
| rplp21           | 1.19E-05  | 0.263639679 | 1     | 0.976 | 0.2833326 | 1 |
| cldn151a         | 3.04E-05  | 0.302189927 | 1     | 0.783 | 0.7260013 | 1 |
| rps8a            | 0.0001153 | 0.277255129 | 1     | 0.972 | 1         | 1 |
| ppiaa            | 0.0003561 | 0.264162532 | 1     | 0.882 | 1         | 1 |
| rps11            | 0.0010708 | 0.25923957  | 1     | 0.919 | 1         | 1 |
| anxa4            | 4.24E-33  | 3.883420773 | 0.892 | 0.435 | 1.01E-28  | 2 |
| bsnb             | 1.55E-27  | 0.911272926 | 0.338 | 0.022 | 3.70E-23  | 2 |
| shroom4          | 2.58E-27  | 1.174379216 | 0.365 | 0.03  | 6.14E-23  | 2 |
| met              | 1.27E-24  | 1.074504176 | 0.432 | 0.057 | 3.02E-20  | 2 |
| neur11aa         | 1.78E-24  | 1.438792455 | 0.446 | 0.063 | 4.24E-20  | 2 |
| fh11b            | 6.71E-24  | 1.715448176 | 0.473 | 0.076 | 1.60E-19  | 2 |
| map4l            | 5.48E-23  | 0.80032408  | 0.324 | 0.028 | 1.31E-18  | 2 |
| hepacam2         | 7.74E-23  | 1.221242423 | 0.257 | 0.013 | 1.85E-18  | 2 |
| si:ch211-222k6.3 | 9.01E-23  | 1.011589537 | 0.311 | 0.026 | 2.15E-18  | 2 |
| arrdc3a          | 1.63E-21  | 1.295031925 | 0.608 | 0.165 | 3.88E-17  | 2 |
| krt18            | 2.39E-21  | 2.543506192 | 0.878 | 0.52  | 5.70E-17  | 2 |
| ret              | 7.13E-21  | 0.857298433 | 0.257 | 0.017 | 1.70E-16  | 2 |
| si:ch73-359m17.9 | 1.58E-20  | 2.012608727 | 0.27  | 0.02  | 3.78E-16  | 2 |
| gdil             | 4.00E-20  | 0.68192466  | 0.324 | 0.037 | 9.54E-16  | 2 |
| sogal            | 1.14E-19  | 0.948618202 | 0.365 | 0.054 | 2.71E-15  | 2 |
| FADS6            | 4.53E-19  | 0.998307731 | 0.392 | 0.065 | 1.08E-14  | 2 |
| lyg1l            | 1.34E-18  | 0.897128024 | 0.297 | 0.033 | 3.19E-14  | 2 |
| si:dkey-28b4.8   | 4.22E-18  | 0.811680711 | 0.351 | 0.054 | 1.01E-13  | 2 |
| mg1l             | 7.16E-18  | 0.875478251 | 0.257 | 0.024 | 1.71E-13  | 2 |
| b4galt6          | 1.38E-17  | 0.884725076 | 0.554 | 0.169 | 3.29E-13  | 2 |
| calmlb           | 2.26E-17  | 1.67410922  | 0.581 | 0.178 | 5.39E-13  | 2 |
| dnaja2l          | 2.55E-17  | 0.923210683 | 0.527 | 0.144 | 6.07E-13  | 2 |
| h1f0             | 4.78E-17  | 2.387178861 | 0.73  | 0.363 | 1.14E-12  | 2 |
| jpt1b            | 1.53E-16  | 1.178675081 | 0.608 | 0.207 | 3.65E-12  | 2 |
| vamp2            | 1.75E-16  | 0.750147676 | 0.311 | 0.044 | 4.18E-12  | 2 |
| zgc:113142       | 2.20E-16  | 1.665632762 | 0.257 | 0.028 | 5.26E-12  | 2 |
| ptmaa            | 2.78E-16  | 1.669799403 | 0.851 | 0.609 | 6.63E-12  | 2 |
| adgrg1           | 6.25E-16  | 1.066383872 | 0.311 | 0.048 | 1.49E-11  | 2 |
| tspan7b          | 9.59E-16  | 0.822829686 | 0.257 | 0.03  | 2.29E-11  | 2 |
| sypa             | 1.10E-15  | 1.022855012 | 0.257 | 0.03  | 2.63E-11  | 2 |
| CR383676.1       | 1.33E-15  | 0.968770205 | 1     | 0.978 | 3.18E-11  | 2 |
| sy1la            | 1.59E-15  | 1.062218488 | 0.324 | 0.054 | 3.78E-11  | 2 |
| dixd1a           | 2.04E-15  | 0.661176671 | 0.297 | 0.044 | 4.87E-11  | 2 |
| lysmd2           | 2.72E-15  | 0.620840317 | 0.311 | 0.05  | 6.49E-11  | 2 |
| tmef1b           | 5.80E-15  | 0.621996742 | 0.284 | 0.041 | 1.38E-10  | 2 |
| igfbp5b          | 7.24E-15  | 1.599459558 | 0.324 | 0.059 | 1.73E-10  | 2 |
| arrdc3b          | 9.42E-15  | 1.004422824 | 0.405 | 0.098 | 2.25E-10  | 2 |
| prkar1aa         | 1.52E-14  | 1.026850051 | 0.527 | 0.17  | 3.63E-10  | 2 |
| meislb           | 1.59E-14  | 1.342912584 | 0.486 | 0.146 | 3.80E-10  | 2 |
| tm4sf4           | 1.59E-14  | 1.823556033 | 0.892 | 0.733 | 3.80E-10  | 2 |
| foxp4            | 1.87E-14  | 1.77167054  | 0.716 | 0.376 | 4.45E-10  | 2 |

|                   |          |             |       |       |          |   |
|-------------------|----------|-------------|-------|-------|----------|---|
| slc1a4            | 2.02E-14 | 1.597561422 | 0.392 | 0.094 | 4.83E-10 | 2 |
| relb              | 2.86E-14 | 1.446880488 | 0.514 | 0.178 | 6.81E-10 | 2 |
| BX901920.1        | 3.03E-14 | 1.065463734 | 0.27  | 0.039 | 7.22E-10 | 2 |
| rtn1a             | 3.53E-14 | 1.314314045 | 0.446 | 0.122 | 8.42E-10 | 2 |
| gnaola            | 5.30E-14 | 0.601895425 | 0.257 | 0.035 | 1.26E-09 | 2 |
| frmd6             | 6.64E-14 | 0.644805699 | 0.27  | 0.041 | 1.58E-09 | 2 |
| sptlc2b           | 8.40E-14 | 1.198170983 | 0.743 | 0.43  | 2.00E-09 | 2 |
| tox               | 9.17E-14 | 0.760870925 | 0.392 | 0.087 | 2.19E-09 | 2 |
| nfkib             | 1.02E-13 | 1.413819893 | 0.568 | 0.233 | 2.42E-09 | 2 |
| h3f3b.1.21        | 1.06E-13 | 1.151263018 | 0.797 | 0.544 | 2.53E-09 | 2 |
| h3f3c             | 1.30E-13 | 1.076139337 | 0.851 | 0.637 | 3.11E-09 | 2 |
| ywhab1            | 1.39E-13 | 0.905540376 | 0.77  | 0.487 | 3.32E-09 | 2 |
| histh11           | 1.65E-13 | 2.431656442 | 0.716 | 0.431 | 3.93E-09 | 2 |
| gabarapb          | 2.05E-13 | 0.88147961  | 0.662 | 0.307 | 4.88E-09 | 2 |
| stx1b             | 2.11E-13 | 1.262478436 | 0.311 | 0.059 | 5.03E-09 | 2 |
| ptbplb            | 3.02E-13 | 1.277825455 | 0.635 | 0.304 | 7.20E-09 | 2 |
| si:ch211-147g22.5 | 3.82E-13 | 0.937301535 | 0.311 | 0.061 | 9.11E-09 | 2 |
| scg3              | 4.71E-13 | 2.060280648 | 0.297 | 0.056 | 1.12E-08 | 2 |
| irflb             | 5.36E-13 | 1.255845669 | 0.365 | 0.089 | 1.28E-08 | 2 |
| phgdh             | 6.02E-13 | 0.755983861 | 0.392 | 0.096 | 1.44E-08 | 2 |
| tenm3             | 9.33E-13 | 0.746638339 | 0.311 | 0.063 | 2.23E-08 | 2 |
| plpp5             | 1.01E-12 | 0.408219596 | 0.338 | 0.074 | 2.40E-08 | 2 |
| hsbpla            | 1.08E-12 | 0.675417759 | 0.365 | 0.087 | 2.59E-08 | 2 |
| cyfip2            | 1.22E-12 | 0.642624328 | 0.257 | 0.041 | 2.91E-08 | 2 |
| gnbla             | 1.26E-12 | 1.146592569 | 0.77  | 0.494 | 3.01E-08 | 2 |
| sat1a.2           | 1.31E-12 | 1.176700359 | 0.824 | 0.663 | 3.12E-08 | 2 |
| tox2              | 1.87E-12 | 0.582947223 | 0.27  | 0.046 | 4.46E-08 | 2 |
| atrx              | 2.78E-12 | 1.061508425 | 0.73  | 0.42  | 6.63E-08 | 2 |
| ap3s2             | 3.22E-12 | 1.02325681  | 0.392 | 0.107 | 7.67E-08 | 2 |
| atf4a             | 3.91E-12 | 1.018421068 | 0.851 | 0.652 | 9.33E-08 | 2 |
| bik               | 4.04E-12 | 1.003470361 | 0.27  | 0.05  | 9.64E-08 | 2 |
| slc7a10a          | 4.88E-12 | 0.654913344 | 0.324 | 0.07  | 1.16E-07 | 2 |
| odc1              | 6.10E-12 | 1.448130828 | 0.608 | 0.3   | 1.46E-07 | 2 |
| golgb1            | 6.72E-12 | 1.182920335 | 0.676 | 0.374 | 1.60E-07 | 2 |
| sdc4              | 7.35E-12 | 1.435451094 | 0.824 | 0.63  | 1.75E-07 | 2 |
| gsel              | 7.88E-12 | 0.887816221 | 0.581 | 0.252 | 1.88E-07 | 2 |
| elov11a           | 9.95E-12 | 0.938729905 | 0.324 | 0.078 | 2.37E-07 | 2 |
| tmsb              | 1.10E-11 | 1.076022669 | 0.419 | 0.126 | 2.63E-07 | 2 |
| myl12.1           | 1.28E-11 | 0.88475198  | 0.865 | 0.724 | 3.06E-07 | 2 |
| pbxipla           | 1.39E-11 | 1.34090013  | 0.351 | 0.089 | 3.31E-07 | 2 |
| notch2            | 2.17E-11 | 0.976043787 | 0.432 | 0.146 | 5.18E-07 | 2 |
| ptp4a1            | 2.19E-11 | 1.086573443 | 0.689 | 0.422 | 5.22E-07 | 2 |
| ankrd12           | 2.55E-11 | 1.037236948 | 0.635 | 0.33  | 6.07E-07 | 2 |
| spint2            | 3.01E-11 | 1.374377911 | 0.622 | 0.326 | 7.17E-07 | 2 |
| tsc22d1           | 3.80E-11 | 0.86916597  | 0.716 | 0.404 | 9.06E-07 | 2 |
| pard6a            | 4.23E-11 | 0.496231432 | 0.284 | 0.059 | 1.01E-06 | 2 |
| atp6v0cb          | 4.24E-11 | 1.011809451 | 0.351 | 0.093 | 1.01E-06 | 2 |
| tmem56a           | 5.17E-11 | 0.57194994  | 0.378 | 0.111 | 1.23E-06 | 2 |
| nfkib2            | 5.47E-11 | 1.161948656 | 0.446 | 0.163 | 1.30E-06 | 2 |
| ywhaz             | 5.64E-11 | 1.063406233 | 0.703 | 0.42  | 1.34E-06 | 2 |
| reep5             | 7.39E-11 | 1.025385422 | 0.703 | 0.407 | 1.76E-06 | 2 |
| rassf1            | 8.76E-11 | 0.704957818 | 0.419 | 0.137 | 2.09E-06 | 2 |
| mgea5             | 8.76E-11 | 0.631284649 | 0.419 | 0.137 | 2.09E-06 | 2 |
| celf3a            | 9.24E-11 | 0.648576447 | 0.311 | 0.076 | 2.20E-06 | 2 |

|                  |          |             |       |       |           |   |
|------------------|----------|-------------|-------|-------|-----------|---|
| baz2a            | 1.07E-10 | 0.577287293 | 0.473 | 0.178 | 2.55E-06  | 2 |
| ctsf             | 1.37E-10 | 0.713516246 | 0.419 | 0.141 | 3.27E-06  | 2 |
| jmjdlcb          | 1.58E-10 | 1.026737252 | 0.622 | 0.33  | 3.77E-06  | 2 |
| smim29           | 1.66E-10 | 0.523461655 | 0.257 | 0.052 | 3.96E-06  | 2 |
| mkrrnl           | 1.83E-10 | 0.572744761 | 0.324 | 0.085 | 4.36E-06  | 2 |
| klf7a            | 1.92E-10 | 0.538713644 | 0.257 | 0.052 | 4.59E-06  | 2 |
| smim7            | 2.06E-10 | 0.471602955 | 0.257 | 0.052 | 4.92E-06  | 2 |
| sytl3.1          | 2.26E-10 | 1.082918953 | 0.662 | 0.365 | 5.40E-06  | 2 |
| serinc1          | 2.44E-10 | 0.985104939 | 0.568 | 0.269 | 5.82E-06  | 2 |
| cebpq            | 2.49E-10 | 1.191282522 | 0.662 | 0.417 | 5.93E-06  | 2 |
| hmgb3a           | 3.50E-10 | 1.365255797 | 0.527 | 0.241 | 8.35E-06  | 2 |
| klf7b            | 3.72E-10 | 1.125489779 | 0.649 | 0.415 | 8.88E-06  | 2 |
| cnn3a            | 3.97E-10 | 1.287536685 | 0.5   | 0.23  | 9.48E-06  | 2 |
| xirp2a           | 4.01E-10 | 0.699408718 | 0.284 | 0.069 | 9.56E-06  | 2 |
| zgc:86896        | 4.20E-10 | 0.711483688 | 0.257 | 0.054 | 1.00E-05  | 2 |
| phf20a           | 4.48E-10 | 0.338235578 | 0.27  | 0.059 | 1.07E-05  | 2 |
| nkl1             | 5.00E-10 | 0.660002585 | 0.446 | 0.161 | 1.19E-05  | 2 |
| zfhx4            | 5.04E-10 | 1.453350195 | 0.338 | 0.096 | 1.20E-05  | 2 |
| tm9sf2           | 5.74E-10 | 0.793180387 | 0.595 | 0.294 | 1.37E-05  | 2 |
| h3f3d            | 5.88E-10 | 0.681009704 | 0.865 | 0.811 | 1.40E-05  | 2 |
| si:ch73-335121.4 | 6.80E-10 | 1.142418803 | 0.878 | 0.709 | 1.62E-05  | 2 |
| slc12a2          | 8.18E-10 | 0.366272624 | 0.284 | 0.067 | 1.95E-05  | 2 |
| cdkn1bb          | 8.52E-10 | 0.856996277 | 0.689 | 0.424 | 2.03E-05  | 2 |
| actb2            | 8.64E-10 | 0.916906973 | 0.959 | 0.963 | 2.06E-05  | 2 |
| cpe              | 8.77E-10 | 0.932283311 | 0.311 | 0.085 | 2.09E-05  | 2 |
| rnf10            | 9.51E-10 | 0.865262007 | 0.689 | 0.43  | 2.27E-05  | 2 |
| marcks11b        | 1.00E-09 | 1.720428506 | 0.581 | 0.296 | 2.39E-05  | 2 |
| creb3l3l         | 1.02E-09 | 0.992098642 | 0.622 | 0.369 | 2.43E-05  | 2 |
| gapdhs           | 1.07E-09 | 1.323552053 | 0.622 | 0.322 | 2.55E-05  | 2 |
| fam177a1         | 1.08E-09 | 0.576610829 | 0.446 | 0.165 | 2.59E-05  | 2 |
| txnipa           | 1.12E-09 | 1.046640301 | 0.432 | 0.157 | 2.66E-05  | 2 |
| syncr1p1         | 1.22E-09 | 0.589004906 | 0.378 | 0.124 | 2.91E-05  | 2 |
| tspan14          | 1.24E-09 | 0.311694295 | 0.257 | 0.056 | 2.95E-05  | 2 |
| gnblb            | 1.31E-09 | 0.829537153 | 0.77  | 0.556 | 3.11E-05  | 2 |
| atplb2a          | 1.58E-09 | 0.826121036 | 0.365 | 0.117 | 3.76E-05  | 2 |
| sntb2            | 1.73E-09 | 0.644525701 | 0.297 | 0.08  | 4.12E-05  | 2 |
| stard10          | 1.91E-09 | 0.690930337 | 0.365 | 0.115 | 4.56E-05  | 2 |
| asap3            | 2.03E-09 | 0.751625832 | 0.338 | 0.102 | 4.83E-05  | 2 |
| si:busml-57f23.1 | 2.66E-09 | 0.824991331 | 0.365 | 0.119 | 6.35E-05  | 2 |
| si:dkey-42i9.4   | 2.90E-09 | 0.899554696 | 0.635 | 0.383 | 6.92E-05  | 2 |
| cb1b             | 3.36E-09 | 0.405512427 | 0.27  | 0.065 | 8.02E-05  | 2 |
| erolb            | 3.50E-09 | 0.534943007 | 0.446 | 0.174 | 8.36E-05  | 2 |
| rimkla           | 3.52E-09 | 0.423027315 | 0.297 | 0.081 | 8.39E-05  | 2 |
| ppdpfb           | 3.57E-09 | 1.086880277 | 0.743 | 0.53  | 8.52E-05  | 2 |
| ash11            | 3.83E-09 | 0.757478874 | 0.541 | 0.263 | 9.14E-05  | 2 |
| slc38a10         | 3.90E-09 | 0.711628695 | 0.392 | 0.135 | 9.31E-05  | 2 |
| fam168a          | 4.16E-09 | 0.642362103 | 0.365 | 0.119 | 9.93E-05  | 2 |
| clstn1           | 4.39E-09 | 0.942501855 | 0.378 | 0.13  | 0.0001047 | 2 |
| purab            | 4.92E-09 | 0.609443654 | 0.257 | 0.063 | 0.0001174 | 2 |
| cldnh            | 4.98E-09 | 1.295958744 | 0.514 | 0.217 | 0.0001188 | 2 |
| CR762483.1       | 5.00E-09 | 2.727720585 | 0.459 | 0.196 | 0.0001193 | 2 |
| appb             | 5.32E-09 | 0.515410288 | 0.338 | 0.102 | 0.0001269 | 2 |
| mef2d            | 5.44E-09 | 0.821407586 | 0.459 | 0.193 | 0.0001297 | 2 |
| ywhaqb           | 5.81E-09 | 0.630040814 | 0.838 | 0.637 | 0.0001384 | 2 |

|                  |          |             |       |       |           |   |
|------------------|----------|-------------|-------|-------|-----------|---|
| znf395b          | 6.24E-09 | 0.367539991 | 0.257 | 0.061 | 0.0001487 | 2 |
| klf6a            | 7.18E-09 | 0.981474766 | 0.851 | 0.752 | 0.0001711 | 2 |
| cc2dlb           | 7.56E-09 | 0.419117308 | 0.365 | 0.12  | 0.0001803 | 2 |
| zgc:92606        | 8.52E-09 | 0.656951052 | 0.527 | 0.263 | 0.0002032 | 2 |
| tfe3a            | 8.53E-09 | 1.326054692 | 0.595 | 0.363 | 0.0002033 | 2 |
| rab2a            | 9.49E-09 | 0.967870542 | 0.703 | 0.537 | 0.0002264 | 2 |
| oaz1b            | 1.01E-08 | 0.761267865 | 0.73  | 0.563 | 0.0002413 | 2 |
| hs3st112         | 1.22E-08 | 0.804346595 | 0.297 | 0.089 | 0.0002916 | 2 |
| cdh1             | 1.34E-08 | 1.14637743  | 0.77  | 0.646 | 0.0003184 | 2 |
| sec63            | 1.40E-08 | 0.80165915  | 0.568 | 0.317 | 0.0003331 | 2 |
| pip4pla          | 1.57E-08 | 0.596292154 | 0.297 | 0.089 | 0.000375  | 2 |
| ddx5             | 1.61E-08 | 0.758041919 | 0.865 | 0.663 | 0.0003849 | 2 |
| rnf44            | 1.69E-08 | 0.549049954 | 0.297 | 0.087 | 0.0004031 | 2 |
| zgc:174906       | 1.70E-08 | 0.412573342 | 0.27  | 0.07  | 0.0004051 | 2 |
| gosr1            | 1.85E-08 | 0.731511927 | 0.432 | 0.178 | 0.0004417 | 2 |
| dger2            | 1.88E-08 | 0.392591268 | 0.284 | 0.08  | 0.000449  | 2 |
| clk2a            | 1.89E-08 | 0.415099966 | 0.284 | 0.078 | 0.0004511 | 2 |
| arl8a            | 1.90E-08 | 0.47568111  | 0.338 | 0.115 | 0.0004534 | 2 |
| pam              | 1.93E-08 | 1.001390301 | 0.473 | 0.231 | 0.0004592 | 2 |
| arf2a            | 2.08E-08 | 0.830956586 | 0.662 | 0.413 | 0.000497  | 2 |
| marcksb          | 2.12E-08 | 0.882106217 | 0.351 | 0.122 | 0.0005059 | 2 |
| slc38a2          | 2.25E-08 | 0.940274363 | 0.635 | 0.376 | 0.0005358 | 2 |
| rab11a           | 2.34E-08 | 0.827703082 | 0.689 | 0.448 | 0.0005572 | 2 |
| stk26            | 2.74E-08 | 0.448653673 | 0.311 | 0.096 | 0.000653  | 2 |
| arg2             | 2.76E-08 | 0.275853022 | 0.297 | 0.083 | 0.0006577 | 2 |
| hmgn31           | 3.01E-08 | 0.574054318 | 0.514 | 0.252 | 0.0007184 | 2 |
| zgc:92066        | 3.16E-08 | 0.637627513 | 0.959 | 0.87  | 0.0007534 | 2 |
| hk1              | 3.30E-08 | 0.3637909   | 0.297 | 0.085 | 0.000786  | 2 |
| map3k14a         | 3.48E-08 | 0.781066743 | 0.378 | 0.144 | 0.0008305 | 2 |
| atf6             | 3.76E-08 | 0.995331654 | 0.635 | 0.393 | 0.0008974 | 2 |
| si:dkey-28b4.7   | 3.89E-08 | 0.713823714 | 0.581 | 0.309 | 0.0009273 | 2 |
| mthfd2           | 3.91E-08 | 0.817121635 | 0.595 | 0.348 | 0.0009327 | 2 |
| myh10            | 4.05E-08 | 0.542089796 | 0.284 | 0.083 | 0.0009654 | 2 |
| kdm6bb           | 4.10E-08 | 0.799101984 | 0.541 | 0.27  | 0.000977  | 2 |
| tmem54a          | 4.13E-08 | 0.783687233 | 0.324 | 0.106 | 0.0009837 | 2 |
| ep300b           | 4.14E-08 | 0.845714084 | 0.419 | 0.17  | 0.000988  | 2 |
| kdm4b            | 4.21E-08 | 0.632594013 | 0.514 | 0.261 | 0.0010034 | 2 |
| tpp2             | 4.31E-08 | 0.49256692  | 0.419 | 0.172 | 0.0010276 | 2 |
| pkma             | 4.47E-08 | 0.596370567 | 0.554 | 0.281 | 0.0010648 | 2 |
| ranbp9           | 4.72E-08 | 0.509015946 | 0.392 | 0.159 | 0.0011254 | 2 |
| smarca4a         | 4.73E-08 | 0.793141102 | 0.649 | 0.424 | 0.001128  | 2 |
| nuak2            | 5.47E-08 | 0.443164355 | 0.338 | 0.119 | 0.0013032 | 2 |
| nfkbiaa          | 5.79E-08 | 1.284334089 | 0.635 | 0.389 | 0.0013809 | 2 |
| elov11b          | 5.99E-08 | 0.859236198 | 0.676 | 0.467 | 0.001428  | 2 |
| stag2b           | 6.01E-08 | 0.620452051 | 0.595 | 0.337 | 0.0014323 | 2 |
| sox4a.1          | 6.46E-08 | 1.054255481 | 0.378 | 0.143 | 0.0015397 | 2 |
| mbn13            | 7.20E-08 | 0.668520036 | 0.284 | 0.083 | 0.0017174 | 2 |
| actn1            | 7.58E-08 | 0.491348217 | 0.378 | 0.135 | 0.0018066 | 2 |
| cfll1            | 8.37E-08 | 1.148069345 | 0.716 | 0.481 | 0.0019969 | 2 |
| stxbp2           | 8.48E-08 | 0.589029609 | 0.378 | 0.143 | 0.0020214 | 2 |
| fst11b           | 8.63E-08 | 0.586536802 | 0.365 | 0.139 | 0.0020572 | 2 |
| si:ch211-137a8.4 | 8.98E-08 | 0.341119847 | 0.284 | 0.081 | 0.0021418 | 2 |
| ing4             | 9.12E-08 | 0.431276231 | 0.338 | 0.12  | 0.0021757 | 2 |
| clip2            | 9.26E-08 | 0.310787151 | 0.257 | 0.069 | 0.0022079 | 2 |

|                  |          |             |       |       |           |   |
|------------------|----------|-------------|-------|-------|-----------|---|
| map11c3b         | 9.40E-08 | 0.394754608 | 0.351 | 0.128 | 0.0022405 | 2 |
| zswim8           | 1.04E-07 | 0.281047895 | 0.365 | 0.133 | 0.002487  | 2 |
| cica             | 1.06E-07 | 0.672600389 | 0.392 | 0.156 | 0.0025275 | 2 |
| tubalc           | 1.17E-07 | 1.468500408 | 0.405 | 0.159 | 0.0027854 | 2 |
| chd4b            | 1.21E-07 | 0.524885688 | 0.716 | 0.489 | 0.0028765 | 2 |
| marcks11a        | 1.26E-07 | 0.837404136 | 0.581 | 0.339 | 0.0030064 | 2 |
| hmgn6            | 1.30E-07 | 0.748672923 | 0.824 | 0.685 | 0.0030903 | 2 |
| ptprfb           | 1.30E-07 | 0.880238074 | 0.622 | 0.376 | 0.0030954 | 2 |
| calmla           | 1.31E-07 | 1.040223117 | 0.797 | 0.624 | 0.0031167 | 2 |
| tcima            | 1.35E-07 | 0.792612675 | 0.5   | 0.226 | 0.0032117 | 2 |
| kdm5c            | 1.36E-07 | 0.884066878 | 0.568 | 0.311 | 0.0032414 | 2 |
| tspan3a          | 1.37E-07 | 0.508228966 | 0.338 | 0.122 | 0.0032661 | 2 |
| pdcl             | 1.38E-07 | 0.694245584 | 0.554 | 0.313 | 0.0032855 | 2 |
| cldn7b           | 1.52E-07 | 1.145510759 | 0.554 | 0.307 | 0.0036357 | 2 |
| rnasekb          | 1.74E-07 | 0.573656374 | 0.297 | 0.096 | 0.0041412 | 2 |
| ptenb            | 1.77E-07 | 0.530352909 | 0.446 | 0.204 | 0.0042122 | 2 |
| atp6ap2          | 1.82E-07 | 0.773037843 | 0.446 | 0.211 | 0.0043467 | 2 |
| sox9b            | 1.86E-07 | 0.362544096 | 0.27  | 0.08  | 0.0044326 | 2 |
| atf7ip           | 1.92E-07 | 0.673826555 | 0.595 | 0.37  | 0.0045664 | 2 |
| trim33           | 1.99E-07 | 0.484738306 | 0.405 | 0.176 | 0.0047468 | 2 |
| plekhala         | 2.08E-07 | 0.531427966 | 0.284 | 0.091 | 0.0049643 | 2 |
| fnhc3a           | 2.27E-07 | 0.379718407 | 0.284 | 0.089 | 0.0054091 | 2 |
| zgc:158564       | 2.29E-07 | 0.781074066 | 0.595 | 0.369 | 0.0054706 | 2 |
| irf2bp1          | 2.32E-07 | 0.517473309 | 0.351 | 0.133 | 0.0055324 | 2 |
| ppp3r1b          | 2.38E-07 | 0.381862806 | 0.459 | 0.217 | 0.0056736 | 2 |
| rad21a           | 2.38E-07 | 0.720076097 | 0.676 | 0.448 | 0.0056796 | 2 |
| ppp2r1bb         | 2.50E-07 | 0.48115669  | 0.459 | 0.22  | 0.0059595 | 2 |
| arglula          | 2.56E-07 | 0.633692821 | 0.432 | 0.2   | 0.0061155 | 2 |
| sgsm3            | 2.57E-07 | 0.451859964 | 0.284 | 0.091 | 0.0061253 | 2 |
| rab3ip           | 2.65E-07 | 0.357435333 | 0.257 | 0.076 | 0.0063074 | 2 |
| ifi30            | 2.69E-07 | 0.633386805 | 0.473 | 0.239 | 0.0064169 | 2 |
| arhgef1b         | 2.75E-07 | 1.006058767 | 0.459 | 0.233 | 0.0065486 | 2 |
| ginml            | 2.78E-07 | 0.538824134 | 0.419 | 0.185 | 0.0066211 | 2 |
| ppplcb           | 2.92E-07 | 0.52353509  | 0.459 | 0.23  | 0.0069523 | 2 |
| ppiab            | 2.93E-07 | 0.484696084 | 0.905 | 0.874 | 0.0069909 | 2 |
| rel              | 3.10E-07 | 0.275634756 | 0.324 | 0.111 | 0.0073934 | 2 |
| alcama           | 3.40E-07 | 0.764331223 | 0.257 | 0.076 | 0.008114  | 2 |
| tripl1           | 3.50E-07 | 0.448103185 | 0.378 | 0.152 | 0.0083565 | 2 |
| yifla            | 3.61E-07 | 0.383932876 | 0.365 | 0.139 | 0.0086151 | 2 |
| rapgef2          | 3.96E-07 | 0.426163625 | 0.257 | 0.074 | 0.0094502 | 2 |
| calr             | 4.14E-07 | 1.066032389 | 0.77  | 0.593 | 0.0098807 | 2 |
| ammecr1          | 4.15E-07 | 0.559170898 | 0.554 | 0.313 | 0.0098923 | 2 |
| homeza           | 4.20E-07 | 0.467624253 | 0.27  | 0.083 | 0.0100173 | 2 |
| krt94            | 4.22E-07 | 1.290626148 | 0.284 | 0.091 | 0.0100546 | 2 |
| atf3             | 4.28E-07 | 1.030271881 | 0.919 | 0.839 | 0.0102049 | 2 |
| schipl           | 4.32E-07 | 0.843303906 | 0.473 | 0.239 | 0.0103085 | 2 |
| rhoaa            | 4.37E-07 | 0.688491357 | 0.649 | 0.435 | 0.0104172 | 2 |
| lin7c            | 4.41E-07 | 0.602139636 | 0.392 | 0.172 | 0.0105079 | 2 |
| si:ch211-79117.1 | 4.63E-07 | 0.318393339 | 0.27  | 0.085 | 0.0110444 | 2 |
| dstyk            | 4.94E-07 | 0.542467814 | 0.297 | 0.106 | 0.011788  | 2 |
| kdm5bb           | 5.32E-07 | 0.37069221  | 0.446 | 0.206 | 0.0126819 | 2 |
| ubald1b          | 5.59E-07 | 0.25037464  | 0.365 | 0.143 | 0.0133188 | 2 |
| dcaf7            | 5.71E-07 | 0.629404039 | 0.432 | 0.206 | 0.0136237 | 2 |
| tmed2            | 5.79E-07 | 0.928312258 | 0.743 | 0.548 | 0.0137956 | 2 |

|                   |          |             |       |       |           |   |
|-------------------|----------|-------------|-------|-------|-----------|---|
| rc3h1b            | 5.86E-07 | 0.527399263 | 0.27  | 0.087 | 0.0139704 | 2 |
| mkkn2b            | 6.03E-07 | 1.007771767 | 0.743 | 0.619 | 0.0143764 | 2 |
| tmem30aa          | 6.58E-07 | 0.337468778 | 0.27  | 0.085 | 0.0156885 | 2 |
| atf1              | 6.61E-07 | 0.572490946 | 0.351 | 0.144 | 0.0157682 | 2 |
| acs13b            | 6.83E-07 | 0.587110224 | 0.324 | 0.124 | 0.0162758 | 2 |
| praf2             | 7.31E-07 | 0.502644358 | 0.284 | 0.094 | 0.0174417 | 2 |
| atgl3             | 8.60E-07 | 0.502336882 | 0.338 | 0.137 | 0.0205059 | 2 |
| birc2             | 8.94E-07 | 0.811680086 | 0.473 | 0.257 | 0.0213282 | 2 |
| srsf6b            | 8.96E-07 | 0.527421277 | 0.581 | 0.363 | 0.0213669 | 2 |
| si:ch211-160o17.4 | 9.13E-07 | 0.517101384 | 0.541 | 0.302 | 0.0217743 | 2 |
| ubc               | 9.17E-07 | 0.488815832 | 0.865 | 0.8   | 0.0218772 | 2 |
| zgc:162939        | 9.37E-07 | 0.525362007 | 0.297 | 0.107 | 0.0223409 | 2 |
| otud5a            | 9.54E-07 | 0.55709633  | 0.432 | 0.2   | 0.0227475 | 2 |
| btaf1             | 9.76E-07 | 0.738416606 | 0.284 | 0.1   | 0.0232723 | 2 |
| arfgap3           | 9.80E-07 | 0.543630313 | 0.338 | 0.137 | 0.0233703 | 2 |
| stm               | 9.91E-07 | 0.401687579 | 0.338 | 0.124 | 0.0236402 | 2 |
| tnksb             | 1.03E-06 | 0.37802623  | 0.297 | 0.106 | 0.0244436 | 2 |
| si:ch211-238n5.4  | 1.13E-06 | 0.413680872 | 0.27  | 0.087 | 0.0268817 | 2 |
| kctd5a            | 1.19E-06 | 0.639948707 | 0.554 | 0.337 | 0.0282802 | 2 |
| appa              | 1.21E-06 | 0.816063187 | 0.649 | 0.481 | 0.0287733 | 2 |
| fxyd1             | 1.21E-06 | 1.089197026 | 0.554 | 0.374 | 0.0288527 | 2 |
| gpt2              | 1.22E-06 | 0.402782319 | 0.311 | 0.111 | 0.0289743 | 2 |
| arid1aa           | 1.23E-06 | 0.530178778 | 0.378 | 0.172 | 0.0292758 | 2 |
| aldocb            | 1.27E-06 | 0.776944745 | 0.257 | 0.083 | 0.0301905 | 2 |
| zfr               | 1.28E-06 | 0.83121738  | 0.527 | 0.296 | 0.0305806 | 2 |
| baz2ba            | 1.35E-06 | 0.674441179 | 0.568 | 0.346 | 0.0322066 | 2 |
| smarcel           | 1.41E-06 | 0.783684923 | 0.568 | 0.389 | 0.0335604 | 2 |
| tnipl             | 1.46E-06 | 0.941465207 | 0.514 | 0.313 | 0.0348767 | 2 |
| arl6ipl           | 1.53E-06 | 0.647304897 | 0.486 | 0.263 | 0.0365575 | 2 |
| hipk3a            | 1.55E-06 | 0.667904252 | 0.459 | 0.235 | 0.037026  | 2 |
| sor11             | 1.58E-06 | 0.493320037 | 0.311 | 0.113 | 0.0376828 | 2 |
| cdc42             | 1.59E-06 | 0.579007707 | 0.527 | 0.304 | 0.037977  | 2 |
| ogt.1.1           | 1.62E-06 | 0.702375712 | 0.405 | 0.193 | 0.0386656 | 2 |
| pdcd6ip           | 1.67E-06 | 0.802452774 | 0.514 | 0.309 | 0.0397283 | 2 |
| ago3b             | 1.72E-06 | 0.409996423 | 0.284 | 0.1   | 0.0410994 | 2 |
| pnrc2             | 1.77E-06 | 0.542748422 | 0.905 | 0.791 | 0.0422265 | 2 |
| eif2s31           | 1.78E-06 | 0.578139725 | 0.757 | 0.572 | 0.0423972 | 2 |
| MYO9B             | 1.82E-06 | 0.383594651 | 0.338 | 0.137 | 0.0434379 | 2 |
| atf4b             | 1.99E-06 | 0.606819412 | 0.838 | 0.717 | 0.0475465 | 2 |
| rnf38             | 2.39E-06 | 0.558751015 | 0.324 | 0.13  | 0.0570381 | 2 |
| gnas              | 2.40E-06 | 0.551516604 | 0.297 | 0.109 | 0.0571785 | 2 |
| ctnnb2            | 2.40E-06 | 0.716113161 | 0.595 | 0.398 | 0.0571832 | 2 |
| map7d3            | 2.61E-06 | 0.488143561 | 0.338 | 0.139 | 0.062126  | 2 |
| golga7            | 2.63E-06 | 0.56492783  | 0.514 | 0.289 | 0.0627175 | 2 |
| rnf11b            | 2.67E-06 | 0.6805991   | 0.297 | 0.113 | 0.0637519 | 2 |
| midlip1b          | 2.80E-06 | 0.621408401 | 0.595 | 0.376 | 0.0668184 | 2 |
| chd7              | 2.85E-06 | 0.789924215 | 0.689 | 0.496 | 0.0679335 | 2 |
| rab13             | 2.90E-06 | 0.556012924 | 0.324 | 0.128 | 0.0691214 | 2 |
| TCIM (1 of many)  | 2.97E-06 | 1.04578256  | 0.419 | 0.219 | 0.0707778 | 2 |
| rablab            | 3.01E-06 | 0.626416387 | 0.703 | 0.541 | 0.0717266 | 2 |
| chd4a             | 3.04E-06 | 0.920603403 | 0.635 | 0.428 | 0.0724925 | 2 |
| btbd10a           | 3.06E-06 | 0.532292618 | 0.338 | 0.144 | 0.0729278 | 2 |
| plxna3            | 3.08E-06 | 0.379680487 | 0.257 | 0.085 | 0.0733276 | 2 |
| krt8              | 3.08E-06 | 0.855223713 | 0.73  | 0.626 | 0.0735237 | 2 |



|                   |        |          |             |       |       |           |   |
|-------------------|--------|----------|-------------|-------|-------|-----------|---|
| slc7a6os          |        | 3.09E-06 | 0.434071957 | 0.378 | 0.169 | 0.0737814 | 2 |
| tmem50a           |        | 3.10E-06 | 0.567650278 | 0.419 | 0.204 | 0.0739711 | 2 |
| hnrnpa01.1        |        | 3.22E-06 | 0.387109567 | 0.932 | 0.854 | 0.0767507 | 2 |
| atp2b2.1          |        | 3.31E-06 | 0.939636403 | 0.595 | 0.417 | 0.0788308 | 2 |
| zgc:111986        |        | 3.52E-06 | 0.650891915 | 0.649 | 0.469 | 0.0840518 | 2 |
| socs3a            |        | 3.61E-06 | 1.024680425 | 0.446 | 0.219 | 0.0861233 | 2 |
| dock7             |        | 3.62E-06 | 0.378746359 | 0.432 | 0.213 | 0.0863544 | 2 |
| tmem59            |        | 3.68E-06 | 0.544634317 | 0.311 | 0.128 | 0.0876739 | 2 |
| gadd45ba          |        | 3.73E-06 | 1.601270043 | 0.716 | 0.565 | 0.0889526 | 2 |
| kdm2ba            |        | 3.76E-06 | 0.544583679 | 0.405 | 0.193 | 0.0895426 | 2 |
| fam120c           |        | 3.79E-06 | 0.557161987 | 0.459 | 0.246 | 0.0902563 | 2 |
| ldb1a             |        | 4.05E-06 | 0.466790479 | 0.338 | 0.143 | 0.096678  | 2 |
| mycbp2            |        | 4.10E-06 | 0.586244697 | 0.662 | 0.437 | 0.0978087 | 2 |
|                   | 15-Sep | 4.10E-06 | 0.452922054 | 0.284 | 0.111 | 0.0978254 | 2 |
| ip6k2a            |        | 4.12E-06 | 0.421408487 | 0.378 | 0.178 | 0.0982318 | 2 |
| tmf1              |        | 4.14E-06 | 0.316367624 | 0.284 | 0.106 | 0.0988182 | 2 |
| gnail             |        | 4.21E-06 | 0.435735148 | 0.324 | 0.137 | 0.1004383 | 2 |
| sec61a11          |        | 4.22E-06 | 0.832404691 | 0.649 | 0.478 | 0.1007186 | 2 |
| myl12.2           |        | 4.23E-06 | 0.446205326 | 0.473 | 0.259 | 0.1008047 | 2 |
| rbpms2a           |        | 4.30E-06 | 0.57692928  | 0.27  | 0.094 | 0.1025018 | 2 |
| slc3a2b           |        | 4.42E-06 | 0.496767681 | 0.338 | 0.148 | 0.1053189 | 2 |
| b2ml              |        | 4.47E-06 | 0.531484722 | 0.581 | 0.367 | 0.1065452 | 2 |
| usp36             |        | 4.47E-06 | 0.589762224 | 0.608 | 0.407 | 0.106634  | 2 |
| mef2aa            |        | 4.54E-06 | 0.591959069 | 0.297 | 0.113 | 0.1082151 | 2 |
| ugt8              |        | 4.63E-06 | 0.921579008 | 0.581 | 0.415 | 0.1103998 | 2 |
| sinhcaf           |        | 4.67E-06 | 0.643428795 | 0.446 | 0.233 | 0.1113494 | 2 |
| canx              |        | 4.68E-06 | 0.583072393 | 0.824 | 0.643 | 0.1115669 | 2 |
| actb1             |        | 4.90E-06 | 0.530581574 | 0.959 | 0.97  | 0.1168321 | 2 |
| pim1              |        | 4.91E-06 | 0.943087212 | 0.676 | 0.483 | 0.1170952 | 2 |
| ubr3              |        | 4.97E-06 | 0.47627299  | 0.338 | 0.144 | 0.1185779 | 2 |
| ctnnd1            |        | 5.16E-06 | 0.599331701 | 0.676 | 0.504 | 0.1229415 | 2 |
| acin1a            |        | 5.16E-06 | 0.707488026 | 0.743 | 0.613 | 0.12298   | 2 |
| cdh2              |        | 5.41E-06 | 0.463096058 | 0.27  | 0.1   | 0.1289529 | 2 |
| kans11b           |        | 5.41E-06 | 0.518181653 | 0.5   | 0.294 | 0.1289849 | 2 |
| rhoab             |        | 5.64E-06 | 0.711860936 | 0.689 | 0.58  | 0.1345676 | 2 |
| cas4              |        | 5.83E-06 | 0.719209059 | 0.378 | 0.178 | 0.1389838 | 2 |
| hdac1             |        | 5.91E-06 | 0.699991497 | 0.662 | 0.454 | 0.1408371 | 2 |
| sox6              |        | 6.03E-06 | 0.543317316 | 0.297 | 0.119 | 0.1438934 | 2 |
| slc1a5            |        | 6.25E-06 | 0.705817811 | 0.554 | 0.383 | 0.1489354 | 2 |
| si:ch211-276i12.9 |        | 6.31E-06 | 0.272859388 | 0.27  | 0.098 | 0.1504066 | 2 |
| ube2e1            |        | 6.60E-06 | 0.657770782 | 0.554 | 0.367 | 0.1574918 | 2 |
| rtf1              |        | 7.05E-06 | 0.606177107 | 0.595 | 0.402 | 0.1681922 | 2 |
| sec23b            |        | 7.14E-06 | 0.451007487 | 0.541 | 0.328 | 0.1703319 | 2 |
| zmiz1a            |        | 7.31E-06 | 0.76209406  | 0.365 | 0.181 | 0.1742766 | 2 |
| csnk2a2a          |        | 7.37E-06 | 0.268794679 | 0.257 | 0.093 | 0.1758169 | 2 |
| usp9              |        | 7.80E-06 | 0.460208821 | 0.514 | 0.302 | 0.1860955 | 2 |
| tax1bp1b          |        | 8.38E-06 | 0.481491865 | 0.541 | 0.317 | 0.1999281 | 2 |
| akap12b           |        | 8.46E-06 | 0.873421477 | 0.311 | 0.128 | 0.2016389 | 2 |
| mtssl             |        | 8.48E-06 | 0.589237869 | 0.297 | 0.124 | 0.2021038 | 2 |
| med19b            |        | 8.51E-06 | 0.364466255 | 0.257 | 0.091 | 0.2028563 | 2 |
| gpm6aa            |        | 8.52E-06 | 1.606703217 | 0.27  | 0.104 | 0.2031442 | 2 |
| slc7a3a           |        | 8.63E-06 | 0.694597063 | 0.662 | 0.515 | 0.2056782 | 2 |
| synrg             |        | 8.72E-06 | 0.564420761 | 0.297 | 0.122 | 0.207939  | 2 |
| gtpbp1            |        | 8.93E-06 | 0.906179868 | 0.486 | 0.285 | 0.2129275 | 2 |

|                   |          |             |       |       |           |   |
|-------------------|----------|-------------|-------|-------|-----------|---|
| copbl             | 9.31E-06 | 0.614066325 | 0.568 | 0.357 | 0.2219942 | 2 |
| tmem184ba         | 9.33E-06 | 0.254197959 | 0.257 | 0.087 | 0.2225711 | 2 |
| plk3              | 9.44E-06 | 0.642399434 | 0.365 | 0.176 | 0.2250009 | 2 |
| pdpklb            | 9.47E-06 | 0.46250799  | 0.392 | 0.189 | 0.2258724 | 2 |
| prrc2a            | 9.52E-06 | 0.597107477 | 0.392 | 0.194 | 0.2270924 | 2 |
| atp6v0ca          | 9.67E-06 | 0.553714638 | 0.77  | 0.552 | 0.2304978 | 2 |
| brd3b             | 9.73E-06 | 0.699621834 | 0.446 | 0.248 | 0.2319867 | 2 |
| AKAP13            | 9.93E-06 | 0.887943606 | 0.432 | 0.239 | 0.2368799 | 2 |
| tanc1b            | 1.05E-05 | 0.281315856 | 0.257 | 0.093 | 0.2494307 | 2 |
| arf1              | 1.06E-05 | 0.590669754 | 0.581 | 0.394 | 0.2527958 | 2 |
| zswim5            | 1.12E-05 | 0.452494391 | 0.5   | 0.298 | 0.2668714 | 2 |
| agap1             | 1.12E-05 | 0.382116354 | 0.338 | 0.148 | 0.2670716 | 2 |
| cltcal            | 1.14E-05 | 0.540763741 | 0.662 | 0.467 | 0.2721393 | 2 |
| ptp4a2a           | 1.15E-05 | 0.336622159 | 0.365 | 0.176 | 0.2732968 | 2 |
| mbpb              | 1.17E-05 | 0.683028861 | 0.473 | 0.259 | 0.2788756 | 2 |
| kdm6ba            | 1.22E-05 | 0.816621032 | 0.581 | 0.404 | 0.2918592 | 2 |
| si:ch211-212k18.4 | 1.24E-05 | 0.569480467 | 0.527 | 0.328 | 0.2946823 | 2 |
| limala            | 1.33E-05 | 1.255419494 | 0.419 | 0.231 | 0.3181228 | 2 |
| atf5b             | 1.36E-05 | 0.762175976 | 0.541 | 0.35  | 0.3235168 | 2 |
| brd3a             | 1.39E-05 | 0.419842448 | 0.5   | 0.283 | 0.3324867 | 2 |
| scrib             | 1.41E-05 | 0.677007964 | 0.378 | 0.185 | 0.3369346 | 2 |
| tspan7            | 1.43E-05 | 0.592893331 | 0.419 | 0.217 | 0.3404422 | 2 |
| cwc25             | 1.55E-05 | 0.341356967 | 0.351 | 0.163 | 0.3693095 | 2 |
| pafah1b1b         | 1.55E-05 | 0.450436548 | 0.446 | 0.228 | 0.3694637 | 2 |
| tmed7             | 1.56E-05 | 0.645936002 | 0.635 | 0.467 | 0.3710276 | 2 |
| slc38a5a          | 1.57E-05 | 0.358496841 | 0.297 | 0.117 | 0.3744911 | 2 |
| kdm4ab            | 1.57E-05 | 0.383625315 | 0.257 | 0.093 | 0.3750602 | 2 |
| smarca5           | 1.58E-05 | 0.684996245 | 0.446 | 0.256 | 0.3760761 | 2 |
| gnallb            | 1.66E-05 | 0.401418606 | 0.351 | 0.161 | 0.3964804 | 2 |
| add3a             | 1.66E-05 | 1.161296774 | 0.527 | 0.339 | 0.3965111 | 2 |
| si:ch73-46j18.5   | 1.70E-05 | 0.923531695 | 0.527 | 0.357 | 0.404614  | 2 |
| nova2             | 1.73E-05 | 1.229953103 | 0.284 | 0.117 | 0.4113435 | 2 |
| dctn2             | 1.74E-05 | 0.481137419 | 0.419 | 0.241 | 0.4151506 | 2 |
| actrl             | 1.78E-05 | 0.380786213 | 0.473 | 0.269 | 0.4254147 | 2 |
| golga5            | 1.80E-05 | 0.54531482  | 0.297 | 0.122 | 0.4290673 | 2 |
| midn              | 1.81E-05 | 0.811953655 | 0.743 | 0.615 | 0.4310932 | 2 |
| ddx3a             | 1.82E-05 | 0.59969635  | 0.581 | 0.391 | 0.4348067 | 2 |
| ccni              | 1.85E-05 | 0.630527887 | 0.581 | 0.424 | 0.440522  | 2 |
| ptena             | 1.86E-05 | 0.572537786 | 0.473 | 0.274 | 0.4434512 | 2 |
| gdi2l             | 1.87E-05 | 0.536707176 | 0.716 | 0.548 | 0.4450598 | 2 |
| btgl              | 1.88E-05 | 0.611221267 | 0.865 | 0.791 | 0.4481748 | 2 |
| vangl2            | 1.91E-05 | 0.441199521 | 0.324 | 0.144 | 0.4559257 | 2 |
| sp4               | 1.93E-05 | 0.305796779 | 0.27  | 0.106 | 0.4590204 | 2 |
| rhoac             | 1.96E-05 | 0.399481272 | 0.581 | 0.393 | 0.4668121 | 2 |
| kmt2cb            | 1.98E-05 | 0.657112008 | 0.541 | 0.352 | 0.4719141 | 2 |
| fam210aa          | 1.99E-05 | 0.515930665 | 0.405 | 0.211 | 0.4737333 | 2 |
| ssbp4             | 2.03E-05 | 0.474399411 | 0.257 | 0.096 | 0.4838647 | 2 |
| bcam              | 2.04E-05 | 0.715501875 | 0.459 | 0.256 | 0.4867153 | 2 |
| stat3             | 2.04E-05 | 0.412359056 | 0.324 | 0.141 | 0.4873331 | 2 |
| vat1              | 2.05E-05 | 1.067873399 | 0.324 | 0.156 | 0.4892722 | 2 |
| ikbkg             | 2.09E-05 | 0.443158237 | 0.378 | 0.185 | 0.4979919 | 2 |
| zgc:165555.12     | 2.09E-05 | 0.627807424 | 0.851 | 0.717 | 0.4983072 | 2 |
| si:ch211-222l21.1 | 2.11E-05 | 0.66826896  | 0.959 | 0.856 | 0.5026905 | 2 |
| nfkbiab           | 2.12E-05 | 1.596690461 | 0.608 | 0.485 | 0.5058769 | 2 |

|                    |          |             |       |       |           |   |
|--------------------|----------|-------------|-------|-------|-----------|---|
| wipf2a             | 2.27E-05 | 0.456252861 | 0.432 | 0.244 | 0.542148  | 2 |
| arf5               | 2.31E-05 | 0.657129101 | 0.649 | 0.493 | 0.5516019 | 2 |
| irf2bp2b           | 2.33E-05 | 0.566443572 | 0.473 | 0.294 | 0.556234  | 2 |
| chmp4ba            | 2.53E-05 | 0.478556036 | 0.527 | 0.331 | 0.6038054 | 2 |
| slc35e1            | 2.56E-05 | 0.493070197 | 0.324 | 0.15  | 0.610618  | 2 |
| tnrc6c1            | 2.59E-05 | 0.685739613 | 0.378 | 0.183 | 0.617022  | 2 |
| hnrnpua            | 2.62E-05 | 0.581728646 | 0.568 | 0.383 | 0.6243707 | 2 |
| laptm4a            | 2.65E-05 | 0.476077467 | 0.419 | 0.233 | 0.6316563 | 2 |
| sh3bgr1            | 2.71E-05 | 0.467555279 | 0.405 | 0.211 | 0.6470109 | 2 |
| spry4              | 2.77E-05 | 0.842902457 | 0.486 | 0.298 | 0.6615143 | 2 |
| hlfx               | 2.78E-05 | 1.795120068 | 0.405 | 0.222 | 0.6632153 | 2 |
| tp53inp1           | 2.79E-05 | 0.505149107 | 0.365 | 0.174 | 0.6649579 | 2 |
| grinab             | 2.86E-05 | 0.510435127 | 0.405 | 0.222 | 0.6824408 | 2 |
| tiall              | 2.90E-05 | 0.391306557 | 0.378 | 0.191 | 0.6916855 | 2 |
| tmem181            | 2.91E-05 | 0.307767845 | 0.257 | 0.1   | 0.6946465 | 2 |
| abca3b             | 2.94E-05 | 0.486067451 | 0.297 | 0.122 | 0.7002004 | 2 |
| amd1               | 2.96E-05 | 0.660852549 | 0.486 | 0.306 | 0.7048468 | 2 |
| slc30a5            | 2.97E-05 | 0.318033024 | 0.27  | 0.107 | 0.70786   | 2 |
| si:dkey-276j7.1    | 2.98E-05 | 0.635356928 | 0.338 | 0.163 | 0.7116974 | 2 |
| dtmba              | 3.05E-05 | 0.346142025 | 0.27  | 0.109 | 0.7273121 | 2 |
| cd81a              | 3.10E-05 | 0.618174183 | 0.514 | 0.319 | 0.7395928 | 2 |
| ube2e3             | 3.20E-05 | 0.641910009 | 0.514 | 0.343 | 0.7636001 | 2 |
| macfla             | 3.27E-05 | 0.608119807 | 0.527 | 0.331 | 0.7793542 | 2 |
| si:ch211-137i24.10 | 3.32E-05 | 1.396503688 | 0.797 | 0.774 | 0.7911994 | 2 |
| csnk1a1            | 3.42E-05 | 0.810790289 | 0.662 | 0.502 | 0.8147581 | 2 |
| abcala             | 3.42E-05 | 0.42958764  | 0.297 | 0.13  | 0.816527  | 2 |
| ncoa3              | 3.48E-05 | 0.310938936 | 0.297 | 0.128 | 0.8289676 | 2 |
| ppp2r5eb           | 3.53E-05 | 0.540038296 | 0.419 | 0.228 | 0.8418449 | 2 |
| glipr21            | 3.61E-05 | 0.507271673 | 0.27  | 0.113 | 0.8618841 | 2 |
| cebpd              | 3.62E-05 | 0.972652436 | 0.595 | 0.469 | 0.8624089 | 2 |
| tmem184a           | 3.66E-05 | 0.729700386 | 0.392 | 0.215 | 0.8718184 | 2 |
| meaf6              | 3.66E-05 | 0.423503654 | 0.5   | 0.307 | 0.8734175 | 2 |
| ss18               | 3.69E-05 | 0.320455457 | 0.432 | 0.237 | 0.8798336 | 2 |
| dyrklab            | 3.74E-05 | 0.385075666 | 0.257 | 0.1   | 0.8918708 | 2 |
| ing3               | 3.76E-05 | 0.381059411 | 0.392 | 0.196 | 0.8974302 | 2 |
| ywhael             | 3.91E-05 | 0.408437705 | 0.689 | 0.515 | 0.93248   | 2 |
| mlf2               | 3.94E-05 | 0.493004117 | 0.378 | 0.202 | 0.9395582 | 2 |
| hmga2              | 4.08E-05 | 0.638065182 | 0.284 | 0.122 | 0.9722384 | 2 |
| trim8b             | 4.08E-05 | 0.538510731 | 0.324 | 0.152 | 0.9729595 | 2 |
| ywhag2             | 4.13E-05 | 0.840219204 | 0.257 | 0.104 | 0.9838182 | 2 |
| rtcal              | 4.15E-05 | 0.386515045 | 0.405 | 0.209 | 0.9885212 | 2 |
| hsp90ab1           | 4.17E-05 | 0.342759257 | 0.986 | 0.98  | 0.993665  | 2 |
| fundc1             | 4.22E-05 | 0.390171506 | 0.284 | 0.124 | 1         | 2 |
| hax1               | 4.35E-05 | 0.611467134 | 0.459 | 0.281 | 1         | 2 |
| ctdsp13            | 4.35E-05 | 0.5409546   | 0.257 | 0.102 | 1         | 2 |
| lsm14ab            | 4.36E-05 | 0.42708405  | 0.541 | 0.361 | 1         | 2 |
| alcamb             | 4.47E-05 | 0.707319942 | 0.351 | 0.174 | 1         | 2 |
| adgrg1.1           | 4.48E-05 | 0.32911596  | 0.392 | 0.202 | 1         | 2 |
| ubtf               | 4.54E-05 | 0.474589423 | 0.5   | 0.311 | 1         | 2 |
| ptmab              | 4.59E-05 | 0.513586544 | 0.973 | 0.894 | 1         | 2 |
| pbx4               | 4.69E-05 | 0.528605082 | 0.473 | 0.302 | 1         | 2 |
| pcf3b              | 4.70E-05 | 0.604881938 | 0.514 | 0.324 | 1         | 2 |
| daamla             | 4.70E-05 | 0.681198341 | 0.446 | 0.27  | 1         | 2 |
| rab14              | 4.77E-05 | 0.398699035 | 0.514 | 0.319 | 1         | 2 |

|                  |           |             |       |       |   |   |
|------------------|-----------|-------------|-------|-------|---|---|
| tollip           | 4.78E-05  | 0.404147056 | 0.365 | 0.178 | 1 | 2 |
| camk2g2          | 4.80E-05  | 0.437358068 | 0.311 | 0.146 | 1 | 2 |
| ywhah            | 4.85E-05  | 0.758741775 | 0.635 | 0.491 | 1 | 2 |
| dip2ba           | 5.16E-05  | 0.435221136 | 0.351 | 0.17  | 1 | 2 |
| elf3             | 5.21E-05  | 1.130212354 | 0.676 | 0.552 | 1 | 2 |
| h3f3b.1.1        | 5.27E-05  | 0.543034761 | 0.649 | 0.526 | 1 | 2 |
| leng8            | 5.28E-05  | 0.350208144 | 0.405 | 0.224 | 1 | 2 |
| fxr2             | 5.36E-05  | 0.33165763  | 0.365 | 0.181 | 1 | 2 |
| zbtb17           | 5.39E-05  | 0.254315473 | 0.284 | 0.117 | 1 | 2 |
| nrbf2b           | 5.41E-05  | 0.40502256  | 0.324 | 0.152 | 1 | 2 |
| staul            | 5.48E-05  | 0.342698038 | 0.365 | 0.185 | 1 | 2 |
| n4bpl            | 5.55E-05  | 0.652815524 | 0.284 | 0.12  | 1 | 2 |
| letm2            | 5.71E-05  | 0.561458443 | 0.527 | 0.359 | 1 | 2 |
| eif1b            | 5.77E-05  | 0.437959389 | 0.824 | 0.763 | 1 | 2 |
| sumo1            | 5.79E-05  | 0.342297169 | 0.419 | 0.241 | 1 | 2 |
| rbm25b           | 5.90E-05  | 0.590550223 | 0.595 | 0.419 | 1 | 2 |
| jund             | 5.91E-05  | 0.745631032 | 0.716 | 0.578 | 1 | 2 |
| ube2e2           | 5.96E-05  | 0.397945482 | 0.324 | 0.154 | 1 | 2 |
| kdm7ab           | 6.03E-05  | 0.285524118 | 0.338 | 0.161 | 1 | 2 |
| rbm14b           | 6.06E-05  | 0.444143252 | 0.365 | 0.193 | 1 | 2 |
| sox11a           | 6.10E-05  | 0.599749137 | 0.432 | 0.257 | 1 | 2 |
| crb3b            | 6.11E-05  | 0.554978556 | 0.257 | 0.109 | 1 | 2 |
| hyou1            | 6.14E-05  | 0.967696445 | 0.77  | 0.683 | 1 | 2 |
| si:ch73-269m14.2 | 6.22E-05  | 0.53087524  | 0.459 | 0.265 | 1 | 2 |
| znf318           | 6.36E-05  | 0.480760474 | 0.392 | 0.207 | 1 | 2 |
| cdkn1ba          | 6.52E-05  | 0.515818702 | 0.27  | 0.113 | 1 | 2 |
| arpp19a          | 6.61E-05  | 0.323153993 | 0.351 | 0.172 | 1 | 2 |
| sesn2            | 6.71E-05  | 0.441937289 | 0.432 | 0.254 | 1 | 2 |
| tmed10           | 6.88E-05  | 0.670001452 | 0.662 | 0.526 | 1 | 2 |
| hivep1           | 7.36E-05  | 0.776177737 | 0.459 | 0.28  | 1 | 2 |
| csnk1da          | 7.38E-05  | 0.395898677 | 0.514 | 0.33  | 1 | 2 |
| fbxw11b          | 7.47E-05  | 0.695169652 | 0.514 | 0.346 | 1 | 2 |
| susd6            | 7.58E-05  | 0.593693907 | 0.419 | 0.239 | 1 | 2 |
| ctnnbip1         | 7.65E-05  | 0.62072859  | 0.257 | 0.107 | 1 | 2 |
| rsrc2            | 7.65E-05  | 0.505688601 | 0.446 | 0.27  | 1 | 2 |
| golt1bb          | 7.71E-05  | 0.321682142 | 0.378 | 0.194 | 1 | 2 |
| jak1             | 7.76E-05  | 0.553947692 | 0.568 | 0.411 | 1 | 2 |
| lpin2            | 7.82E-05  | 0.534248568 | 0.297 | 0.133 | 1 | 2 |
| ets2             | 7.84E-05  | 0.792513962 | 0.703 | 0.55  | 1 | 2 |
| si:dkeyp-44a8.2  | 8.00E-05  | 0.334994769 | 0.338 | 0.17  | 1 | 2 |
| rhbdf1a          | 8.12E-05  | 0.577470416 | 0.392 | 0.222 | 1 | 2 |
| ucp2             | 8.17E-05  | 0.650815789 | 0.568 | 0.404 | 1 | 2 |
| uck2a            | 8.49E-05  | 0.272344439 | 0.284 | 0.126 | 1 | 2 |
| pfn1             | 8.51E-05  | 0.490746057 | 0.905 | 0.8   | 1 | 2 |
| kif1b            | 8.56E-05  | 0.372882933 | 0.284 | 0.12  | 1 | 2 |
| si:dkey-253i9.4  | 8.93E-05  | 0.394419814 | 0.297 | 0.135 | 1 | 2 |
| si:ch211-19617.4 | 8.98E-05  | 0.903187162 | 0.554 | 0.396 | 1 | 2 |
| stau2            | 9.18E-05  | 0.555258307 | 0.5   | 0.335 | 1 | 2 |
| syncrip          | 9.19E-05  | 0.578381838 | 0.77  | 0.646 | 1 | 2 |
| hmgblb1          | 9.57E-05  | 0.453995203 | 0.446 | 0.252 | 1 | 2 |
| calua            | 9.58E-05  | 0.451756672 | 0.378 | 0.202 | 1 | 2 |
| il6st            | 9.61E-05  | 0.607174972 | 0.446 | 0.274 | 1 | 2 |
| dnasell4.1       | 9.91E-05  | 0.948285899 | 0.257 | 0.106 | 1 | 2 |
| maccl            | 0.0001025 | 0.46933979  | 0.338 | 0.167 | 1 | 2 |

|            |           |             |       |       |   |   |
|------------|-----------|-------------|-------|-------|---|---|
| selenow1   | 0.0001065 | 0.40498301  | 0.77  | 0.656 | 1 | 2 |
| bsdc1      | 0.0001071 | 0.384983948 | 0.297 | 0.139 | 1 | 2 |
| pdzd11     | 0.0001073 | 0.436876245 | 0.297 | 0.135 | 1 | 2 |
| zgc:162698 | 0.0001097 | 0.422786834 | 0.311 | 0.148 | 1 | 2 |
| wasla      | 0.0001098 | 0.653337923 | 0.27  | 0.119 | 1 | 2 |
| nucb2b     | 0.0001116 | 1.083403901 | 0.432 | 0.276 | 1 | 2 |
| anp32e     | 0.000113  | 0.973910775 | 0.514 | 0.35  | 1 | 2 |
| SERP1      | 0.0001168 | 0.448362703 | 0.622 | 0.452 | 1 | 2 |
| bc12110    | 0.0001237 | 0.377866259 | 0.351 | 0.185 | 1 | 2 |
| crebrf     | 0.0001252 | 0.355316263 | 0.284 | 0.122 | 1 | 2 |
| hcfclb     | 0.0001298 | 0.376945868 | 0.419 | 0.248 | 1 | 2 |
| hcfcla     | 0.000132  | 0.506067317 | 0.419 | 0.244 | 1 | 2 |
| EIF3E1     | 0.0001325 | 0.394197475 | 0.716 | 0.594 | 1 | 2 |
| ubald1a    | 0.0001349 | 0.273916246 | 0.338 | 0.169 | 1 | 2 |
| gnai2a     | 0.0001354 | 0.362702147 | 0.541 | 0.367 | 1 | 2 |
| top2b      | 0.0001358 | 0.510712235 | 0.446 | 0.285 | 1 | 2 |
| pdia61     | 0.0001363 | 0.990250471 | 0.73  | 0.572 | 1 | 2 |
| rasal2     | 0.0001373 | 0.901241897 | 0.297 | 0.143 | 1 | 2 |
| trib3      | 0.0001384 | 0.400103529 | 0.676 | 0.539 | 1 | 2 |
| psmall     | 0.000147  | 0.546800658 | 0.676 | 0.531 | 1 | 2 |
| dusp2      | 0.0001486 | 1.102428102 | 0.324 | 0.17  | 1 | 2 |
| med12      | 0.0001498 | 0.572248463 | 0.351 | 0.187 | 1 | 2 |
| cep350     | 0.0001508 | 0.662348346 | 0.473 | 0.294 | 1 | 2 |
| fosl1a     | 0.0001568 | 0.705935566 | 0.703 | 0.598 | 1 | 2 |
| ap1s1      | 0.0001587 | 0.430884477 | 0.419 | 0.265 | 1 | 2 |
| tnfb       | 0.0001588 | 1.610480319 | 0.297 | 0.148 | 1 | 2 |
| snx12      | 0.0001598 | 0.255262975 | 0.459 | 0.281 | 1 | 2 |
| kmt5b      | 0.0001605 | 0.361601791 | 0.324 | 0.157 | 1 | 2 |
| dnajb11    | 0.000162  | 0.511923738 | 0.568 | 0.383 | 1 | 2 |
| per1b      | 0.0001632 | 0.568613264 | 0.27  | 0.126 | 1 | 2 |
| arpc41     | 0.0001633 | 0.368883148 | 0.73  | 0.557 | 1 | 2 |
| flna       | 0.0001648 | 0.950938676 | 0.324 | 0.174 | 1 | 2 |
| rnf25      | 0.0001683 | 0.479857623 | 0.324 | 0.159 | 1 | 2 |
| ywhaqa     | 0.0001707 | 0.802700814 | 0.716 | 0.557 | 1 | 2 |
| PPP3R1A    | 0.0001748 | 0.37196886  | 0.324 | 0.167 | 1 | 2 |
| ee1g1      | 0.0001758 | 0.369182039 | 0.878 | 0.872 | 1 | 2 |
| smurf2     | 0.00018   | 0.351208316 | 0.257 | 0.117 | 1 | 2 |
| myl6       | 0.0001811 | 0.338022028 | 0.338 | 0.176 | 1 | 2 |
| ist1       | 0.0001844 | 0.457487752 | 0.554 | 0.389 | 1 | 2 |
| aip        | 0.0001846 | 0.500376841 | 0.405 | 0.23  | 1 | 2 |
| oxsrla     | 0.0001859 | 0.312702959 | 0.446 | 0.259 | 1 | 2 |
| sumo2b     | 0.0001887 | 0.425481118 | 0.581 | 0.433 | 1 | 2 |
| fryl       | 0.0001891 | 0.261667467 | 0.311 | 0.152 | 1 | 2 |
| rnf146     | 0.0001894 | 0.450404074 | 0.338 | 0.174 | 1 | 2 |
| tubb4b     | 0.0001911 | 0.720160413 | 0.824 | 0.719 | 1 | 2 |
| vps28      | 0.0001915 | 0.370412285 | 0.446 | 0.285 | 1 | 2 |
| cirbpa1    | 0.0001933 | 0.497229204 | 0.824 | 0.746 | 1 | 2 |
| crebbpb    | 0.0001933 | 0.460432693 | 0.514 | 0.352 | 1 | 2 |
| erf        | 0.0001938 | 0.263770704 | 0.284 | 0.128 | 1 | 2 |
| bud31      | 0.0001953 | 0.342486198 | 0.716 | 0.556 | 1 | 2 |
| emc7       | 0.0001966 | 0.441329754 | 0.527 | 0.354 | 1 | 2 |
| hnrnpa0a   | 0.0002003 | 0.490397306 | 0.581 | 0.426 | 1 | 2 |
| capz1b     | 0.0002025 | 0.69514615  | 0.676 | 0.544 | 1 | 2 |
| adam10a    | 0.0002041 | 0.577271911 | 0.541 | 0.378 | 1 | 2 |

|                   |           |             |       |       |   |   |
|-------------------|-----------|-------------|-------|-------|---|---|
| gchl              | 0.0002042 | 0.668943323 | 0.257 | 0.115 | 1 | 2 |
| tcf712            | 0.0002044 | 0.924515173 | 0.473 | 0.307 | 1 | 2 |
| otubla            | 0.0002046 | 0.40268586  | 0.338 | 0.172 | 1 | 2 |
| qkia              | 0.0002069 | 0.758153652 | 0.378 | 0.224 | 1 | 2 |
| dazap2            | 0.0002071 | 0.26579578  | 0.486 | 0.307 | 1 | 2 |
| junba             | 0.0002079 | 0.637741896 | 0.784 | 0.715 | 1 | 2 |
| clint1a           | 0.0002108 | 0.666581466 | 0.568 | 0.398 | 1 | 2 |
| aridl1ab          | 0.0002123 | 0.380137694 | 0.392 | 0.222 | 1 | 2 |
| gars1             | 0.0002144 | 0.629174031 | 0.608 | 0.463 | 1 | 2 |
| edem1             | 0.0002167 | 0.50546533  | 0.432 | 0.261 | 1 | 2 |
| slc35b11          | 0.0002183 | 0.432814728 | 0.459 | 0.294 | 1 | 2 |
| si:dkeyp-27c8.2   | 0.0002243 | 0.575115223 | 0.378 | 0.209 | 1 | 2 |
| zgc:100918        | 0.0002274 | 0.306579574 | 0.459 | 0.289 | 1 | 2 |
| perp1             | 0.0002288 | 0.707667793 | 0.649 | 0.506 | 1 | 2 |
| prkar2aa1         | 0.0002293 | 0.509888123 | 0.568 | 0.415 | 1 | 2 |
| hagh              | 0.0002314 | 0.417847811 | 0.459 | 0.294 | 1 | 2 |
| hnrnpaba          | 0.000232  | 0.405631878 | 0.811 | 0.715 | 1 | 2 |
| ppp2cb            | 0.00024   | 0.31610311  | 0.662 | 0.535 | 1 | 2 |
| ctnbl             | 0.0002441 | 0.484523289 | 0.595 | 0.463 | 1 | 2 |
| rab1ba            | 0.0002451 | 0.379854049 | 0.514 | 0.354 | 1 | 2 |
| si:ch211-195b15.8 | 0.0002515 | 0.403987402 | 0.311 | 0.15  | 1 | 2 |
| acbd7             | 0.0002601 | 0.566458167 | 0.311 | 0.161 | 1 | 2 |
| spen              | 0.000261  | 0.72333797  | 0.432 | 0.27  | 1 | 2 |
| maff              | 0.000262  | 0.722446056 | 0.608 | 0.507 | 1 | 2 |
| ube2v1            | 0.0002638 | 0.334220241 | 0.662 | 0.511 | 1 | 2 |
| BX936337.1        | 0.000265  | 0.593859921 | 0.608 | 0.461 | 1 | 2 |
| znf865            | 0.0002677 | 0.651767767 | 0.378 | 0.233 | 1 | 2 |
| DYRK3             | 0.0002685 | 0.38608926  | 0.257 | 0.117 | 1 | 2 |
| hivep2a           | 0.0002698 | 0.541527921 | 0.351 | 0.196 | 1 | 2 |
| prr12b            | 0.0002711 | 0.360427077 | 0.257 | 0.109 | 1 | 2 |
| si:dkey-250d21.1  | 0.0002727 | 0.437777904 | 0.311 | 0.159 | 1 | 2 |
| kctd10            | 0.0002732 | 0.35967328  | 0.338 | 0.18  | 1 | 2 |
| gpr108            | 0.0002767 | 0.489836443 | 0.338 | 0.185 | 1 | 2 |
| cpda              | 0.0002778 | 0.363743635 | 0.27  | 0.124 | 1 | 2 |
| gabarapa          | 0.0002962 | 0.359774288 | 0.5   | 0.333 | 1 | 2 |
| kdmla             | 0.0002968 | 0.312846089 | 0.554 | 0.374 | 1 | 2 |
| si:ch211-262e15.1 | 0.0003008 | 0.566527926 | 0.432 | 0.27  | 1 | 2 |
| nap114b           | 0.0003037 | 0.534056051 | 0.311 | 0.165 | 1 | 2 |
| smc1a11           | 0.0003105 | 0.483660815 | 0.541 | 0.37  | 1 | 2 |
| vdac11            | 0.0003131 | 0.308187165 | 0.527 | 0.356 | 1 | 2 |
| prkesh            | 0.0003148 | 0.5317266   | 0.608 | 0.454 | 1 | 2 |
| tardbp            | 0.0003156 | 0.538455244 | 0.554 | 0.411 | 1 | 2 |
| eprs              | 0.0003166 | 0.532437527 | 0.486 | 0.313 | 1 | 2 |
| nfyba             | 0.0003281 | 0.421929719 | 0.297 | 0.15  | 1 | 2 |
| ptbp3             | 0.0003464 | 0.51684592  | 0.311 | 0.163 | 1 | 2 |
| pcdh1b            | 0.0003483 | 0.500582827 | 0.405 | 0.233 | 1 | 2 |
| igfbp1a           | 0.0003496 | 1.044961805 | 0.608 | 0.465 | 1 | 2 |
| zfhx3             | 0.0003528 | 0.90830698  | 0.432 | 0.254 | 1 | 2 |
| sf1               | 0.0003535 | 0.409528653 | 0.635 | 0.519 | 1 | 2 |
| fam199x           | 0.0003537 | 0.288857251 | 0.338 | 0.176 | 1 | 2 |
| fam107b           | 0.0003543 | 0.405851392 | 0.473 | 0.354 | 1 | 2 |
| cbx7a             | 0.00036   | 1.027177311 | 0.311 | 0.157 | 1 | 2 |
| kdm5ba            | 0.0003642 | 0.396806326 | 0.284 | 0.141 | 1 | 2 |
| clk4a             | 0.0003712 | 0.313988442 | 0.5   | 0.32  | 1 | 2 |

|                 |           |             |       |       |   |   |
|-----------------|-----------|-------------|-------|-------|---|---|
| ctif            | 0.0003871 | 0.361524205 | 0.27  | 0.126 | 1 | 2 |
| erlecl          | 0.0003934 | 0.806019792 | 0.378 | 0.237 | 1 | 2 |
| ythdf1          | 0.0003994 | 0.360010558 | 0.338 | 0.183 | 1 | 2 |
| zgc:153867      | 0.0004039 | 0.513418505 | 0.811 | 0.757 | 1 | 2 |
| rnf40           | 0.0004069 | 0.483902292 | 0.378 | 0.228 | 1 | 2 |
| calm2b1         | 0.0004157 | 0.524093307 | 0.757 | 0.607 | 1 | 2 |
| drapl           | 0.0004159 | 0.405021315 | 0.5   | 0.344 | 1 | 2 |
| ubl3b           | 0.000438  | 0.447884434 | 0.297 | 0.156 | 1 | 2 |
| nsd1a           | 0.0004414 | 0.336826354 | 0.338 | 0.185 | 1 | 2 |
| ctbpl           | 0.0004551 | 0.426077579 | 0.432 | 0.272 | 1 | 2 |
| lpp             | 0.000464  | 0.267470931 | 0.324 | 0.17  | 1 | 2 |
| cxcl18b         | 0.0004738 | 0.9488239   | 0.405 | 0.252 | 1 | 2 |
| uball           | 0.0004755 | 0.291481914 | 0.622 | 0.444 | 1 | 2 |
| pdgfa           | 0.0004763 | 1.013263476 | 0.365 | 0.222 | 1 | 2 |
| EPB41L2         | 0.0004764 | 0.289327681 | 0.338 | 0.183 | 1 | 2 |
| furina          | 0.0004771 | 0.518108808 | 0.365 | 0.213 | 1 | 2 |
| nfkbie          | 0.0004813 | 0.410525167 | 0.284 | 0.144 | 1 | 2 |
| dusp6           | 0.0004837 | 0.5659858   | 0.378 | 0.222 | 1 | 2 |
| tfp             | 0.0004997 | 0.317736946 | 0.581 | 0.415 | 1 | 2 |
| ap3d1           | 0.0005064 | 0.427710864 | 0.392 | 0.235 | 1 | 2 |
| tet3            | 0.0005066 | 0.485246767 | 0.5   | 0.343 | 1 | 2 |
| FAM83G          | 0.0005128 | 0.265758271 | 0.297 | 0.15  | 1 | 2 |
| rab5aa          | 0.0005172 | 0.315903128 | 0.5   | 0.356 | 1 | 2 |
| epclb           | 0.0005174 | 0.432723956 | 0.257 | 0.119 | 1 | 2 |
| nucb2a          | 0.0005208 | 0.369656852 | 0.392 | 0.228 | 1 | 2 |
| uhrflbp11       | 0.0005213 | 0.530148527 | 0.311 | 0.163 | 1 | 2 |
| rtf2            | 0.0005342 | 0.504102217 | 0.351 | 0.202 | 1 | 2 |
| tpt11           | 0.0005345 | 0.437894966 | 0.892 | 0.854 | 1 | 2 |
| si:dkey-177p2.6 | 0.0005346 | 0.569018675 | 0.473 | 0.339 | 1 | 2 |
| pkp2            | 0.0005369 | 0.406069413 | 0.311 | 0.159 | 1 | 2 |
| usol1           | 0.000541  | 0.585498798 | 0.459 | 0.304 | 1 | 2 |
| vmp11           | 0.0005457 | 0.772214294 | 0.419 | 0.281 | 1 | 2 |
| arid4a          | 0.0005501 | 0.474291462 | 0.527 | 0.359 | 1 | 2 |
| st3gal7         | 0.0005653 | 0.49316364  | 0.568 | 0.406 | 1 | 2 |
| pbrml1          | 0.000569  | 0.328586613 | 0.351 | 0.198 | 1 | 2 |
| hbegfa          | 0.0005713 | 1.051272646 | 0.784 | 0.796 | 1 | 2 |
| anx11a          | 0.0005718 | 0.360568246 | 0.554 | 0.363 | 1 | 2 |
| cap1            | 0.0005804 | 0.792288531 | 0.419 | 0.263 | 1 | 2 |
| cnot3a          | 0.0005813 | 0.35464531  | 0.338 | 0.176 | 1 | 2 |
| taok2a          | 0.0005843 | 0.483798649 | 0.27  | 0.131 | 1 | 2 |
| si:dkey-112a7.4 | 0.0005973 | 0.514783741 | 0.5   | 0.376 | 1 | 2 |
| ube2d2          | 0.0006034 | 0.309823464 | 0.662 | 0.517 | 1 | 2 |
| chac1           | 0.000604  | 0.560295482 | 0.838 | 0.783 | 1 | 2 |
| cib1            | 0.000607  | 0.809363609 | 0.527 | 0.396 | 1 | 2 |
| rps6kal         | 0.000609  | 0.304795158 | 0.338 | 0.176 | 1 | 2 |
| pde7a           | 0.0006177 | 0.470564741 | 0.284 | 0.139 | 1 | 2 |
| kif5ba          | 0.0006177 | 0.3922444   | 0.473 | 0.311 | 1 | 2 |
| cgnb            | 0.0006211 | 0.435976071 | 0.311 | 0.165 | 1 | 2 |
| at13            | 0.0006274 | 0.820242275 | 0.378 | 0.213 | 1 | 2 |
| slc43a1a        | 0.0006283 | 0.40672596  | 0.297 | 0.157 | 1 | 2 |
| rsflb.1         | 0.0006392 | 0.297871849 | 0.311 | 0.159 | 1 | 2 |
| magilb          | 0.0006631 | 0.275186264 | 0.311 | 0.161 | 1 | 2 |
| snx1a           | 0.0006693 | 0.376062134 | 0.311 | 0.163 | 1 | 2 |
| pnisr           | 0.0006743 | 0.588790052 | 0.459 | 0.304 | 1 | 2 |

|          |           |             |       |       |   |   |
|----------|-----------|-------------|-------|-------|---|---|
| fgfr2    | 0.0006859 | 0.502658457 | 0.405 | 0.25  | 1 | 2 |
| mta2     | 0.0007    | 0.302093319 | 0.392 | 0.243 | 1 | 2 |
| EIF5B    | 0.0007019 | 0.766164218 | 0.703 | 0.615 | 1 | 2 |
| MYCB     | 0.0007035 | 0.362661145 | 0.324 | 0.178 | 1 | 2 |
| SREBF2   | 0.0007152 | 0.59956077  | 0.432 | 0.294 | 1 | 2 |
| RAB5C    | 0.000717  | 0.280330025 | 0.514 | 0.361 | 1 | 2 |
| KIF2A    | 0.0007325 | 0.368328212 | 0.351 | 0.198 | 1 | 2 |
| CCT6A2   | 0.0007328 | 0.480579972 | 0.662 | 0.533 | 1 | 2 |
| PCBD1    | 0.0007405 | 0.419102906 | 0.446 | 0.306 | 1 | 2 |
| PAK2B    | 0.0007491 | 0.38115711  | 0.432 | 0.272 | 1 | 2 |
| VDAC31   | 0.000751  | 0.535243802 | 0.554 | 0.409 | 1 | 2 |
| CELSR1A  | 0.0007518 | 0.684045409 | 0.419 | 0.27  | 1 | 2 |
| SMG7     | 0.0007553 | 0.341039524 | 0.432 | 0.276 | 1 | 2 |
| DNAJC5AB | 0.0007625 | 0.379335674 | 0.324 | 0.176 | 1 | 2 |
| WASF2    | 0.0007677 | 0.496916079 | 0.432 | 0.289 | 1 | 2 |
| TET2     | 0.0008026 | 0.349136123 | 0.284 | 0.139 | 1 | 2 |
| ZFAND3   | 0.0008054 | 0.330884827 | 0.432 | 0.272 | 1 | 2 |
| RS124D1  | 0.000808  | 0.326316441 | 0.757 | 0.659 | 1 | 2 |
| EIF4G2B  | 0.0008101 | 0.584768903 | 0.581 | 0.457 | 1 | 2 |
| WDR26B   | 0.0008121 | 0.326847272 | 0.297 | 0.154 | 1 | 2 |
| NARS     | 0.0008157 | 0.504894795 | 0.622 | 0.531 | 1 | 2 |
| HGS      | 0.0008482 | 0.300854893 | 0.284 | 0.148 | 1 | 2 |
| BNIP3LB  | 0.000867  | 0.506458781 | 0.257 | 0.119 | 1 | 2 |
| SEC24B   | 0.0008708 | 0.331287098 | 0.297 | 0.157 | 1 | 2 |
| ENC1     | 0.0008785 | 0.359553055 | 0.324 | 0.189 | 1 | 2 |
| HNRNPUB  | 0.0008823 | 0.542676491 | 0.689 | 0.602 | 1 | 2 |
| PER3     | 0.000886  | 0.460941603 | 0.432 | 0.276 | 1 | 2 |
| MBN12    | 0.0009055 | 0.346917138 | 0.392 | 0.235 | 1 | 2 |
| RABGAP11 | 0.0009079 | 0.407806713 | 0.257 | 0.122 | 1 | 2 |
| PPPLR12A | 0.0009346 | 0.496123383 | 0.473 | 0.335 | 1 | 2 |
| TLN1     | 0.0009406 | 0.636854035 | 0.473 | 0.337 | 1 | 2 |
| SRPR     | 0.0009439 | 0.671365962 | 0.608 | 0.467 | 1 | 2 |
| LIMS1    | 0.0009939 | 0.318297509 | 0.432 | 0.28  | 1 | 2 |
| ARRB2B   | 0.0009963 | 0.280339089 | 0.338 | 0.193 | 1 | 2 |
| RALAB    | 0.0010016 | 0.307274304 | 0.378 | 0.228 | 1 | 2 |
| CHMP1B   | 0.0010149 | 0.443298386 | 0.554 | 0.422 | 1 | 2 |
| PRKCI    | 0.0010248 | 0.354140145 | 0.378 | 0.22  | 1 | 2 |
| CHMP5B   | 0.0010311 | 0.697184244 | 0.662 | 0.546 | 1 | 2 |
| HSPA81   | 0.0010364 | 0.319804483 | 0.986 | 0.931 | 1 | 2 |
| GADD45GA | 0.0010474 | 0.498839612 | 0.27  | 0.135 | 1 | 2 |
| SPTAN1   | 0.0010538 | 0.461182813 | 0.527 | 0.407 | 1 | 2 |
| BRDLB    | 0.0010584 | 0.398818093 | 0.432 | 0.302 | 1 | 2 |
| RBMS1A   | 0.0010627 | 0.480389716 | 0.324 | 0.183 | 1 | 2 |
| FUBP1    | 0.0010629 | 0.445969026 | 0.554 | 0.426 | 1 | 2 |
| HIP1RB   | 0.0010632 | 0.397504307 | 0.297 | 0.157 | 1 | 2 |
| SART1    | 0.0010643 | 0.490780519 | 0.527 | 0.374 | 1 | 2 |
| PLECB    | 0.0010721 | 1.19152699  | 0.581 | 0.5   | 1 | 2 |
| SRGAP3   | 0.001095  | 0.794367265 | 0.257 | 0.128 | 1 | 2 |
| SLC23A2  | 0.0011339 | 0.364535575 | 0.27  | 0.139 | 1 | 2 |
| JUPA     | 0.0011353 | 0.463251636 | 0.649 | 0.55  | 1 | 2 |
| ATP2C1   | 0.0011412 | 0.347751617 | 0.257 | 0.12  | 1 | 2 |
| CYTH1A.1 | 0.0011544 | 0.641729611 | 0.419 | 0.281 | 1 | 2 |
| CST3     | 0.0011577 | 0.459999713 | 0.432 | 0.272 | 1 | 2 |
| NFYC     | 0.0011585 | 0.608776176 | 0.419 | 0.267 | 1 | 2 |



|             |           |             |       |       |   |   |
|-------------|-----------|-------------|-------|-------|---|---|
| syvn1       | 0.001197  | 0.419717008 | 0.405 | 0.252 | 1 | 2 |
| ankrd11     | 0.0012024 | 0.531373769 | 0.622 | 0.535 | 1 | 2 |
| cnppd1      | 0.0012147 | 0.289729304 | 0.311 | 0.178 | 1 | 2 |
| hmgala1     | 0.0012183 | 0.616858746 | 0.919 | 0.852 | 1 | 2 |
| atp2a2a.11  | 0.0012238 | 0.421987198 | 0.622 | 0.47  | 1 | 2 |
| trappc3     | 0.0012469 | 0.400761913 | 0.297 | 0.165 | 1 | 2 |
| CU462878.11 | 0.0012663 | 0.295659585 | 0.405 | 0.252 | 1 | 2 |
| psat1       | 0.0012679 | 0.593866014 | 0.432 | 0.293 | 1 | 2 |
| sf3b1       | 0.0012705 | 0.480540073 | 0.5   | 0.369 | 1 | 2 |
| tpm3        | 0.0012936 | 0.569885195 | 0.811 | 0.759 | 1 | 2 |
| ppiaa1      | 0.0013041 | 0.281133303 | 0.932 | 0.893 | 1 | 2 |
| nipblb      | 0.0013055 | 0.327037322 | 0.432 | 0.289 | 1 | 2 |
| bptf        | 0.0013206 | 0.484410178 | 0.365 | 0.228 | 1 | 2 |
| prkcdb      | 0.0013302 | 0.776115849 | 0.432 | 0.309 | 1 | 2 |
| tdh         | 0.00134   | 0.443940798 | 0.486 | 0.341 | 1 | 2 |
| shc1        | 0.0013468 | 0.484008634 | 0.297 | 0.17  | 1 | 2 |
| otud5b      | 0.0013499 | 0.450644728 | 0.419 | 0.276 | 1 | 2 |
| aars        | 0.0013571 | 0.550194806 | 0.527 | 0.428 | 1 | 2 |
| syne2b      | 0.001362  | 0.387233375 | 0.27  | 0.143 | 1 | 2 |
| rhocb       | 0.0013743 | 0.323881378 | 0.473 | 0.315 | 1 | 2 |
| sptbn2      | 0.0013894 | 0.367386597 | 0.257 | 0.133 | 1 | 2 |
| yipf4       | 0.00139   | 0.48255792  | 0.378 | 0.233 | 1 | 2 |
| ppplcaa     | 0.0014135 | 0.463418853 | 0.595 | 0.476 | 1 | 2 |
| atp6v1e1b   | 0.0014337 | 0.680673559 | 0.459 | 0.328 | 1 | 2 |
| ctdsp2      | 0.0014383 | 0.284975251 | 0.419 | 0.272 | 1 | 2 |
| smarcd1     | 0.0014546 | 0.403043221 | 0.486 | 0.354 | 1 | 2 |
| zgc:136930  | 0.0014638 | 0.655116429 | 0.541 | 0.381 | 1 | 2 |
| paip2b      | 0.0014822 | 0.517307985 | 0.514 | 0.404 | 1 | 2 |
| EIF4A1B1    | 0.0015231 | 0.514377966 | 0.676 | 0.519 | 1 | 2 |
| hs6st2      | 0.0015291 | 0.333497222 | 0.27  | 0.137 | 1 | 2 |
| neckap1     | 0.0015373 | 0.573136074 | 0.446 | 0.296 | 1 | 2 |
| tgif11      | 0.0015444 | 0.459363036 | 0.378 | 0.239 | 1 | 2 |
| cldn12      | 0.0015466 | 0.36192164  | 0.257 | 0.131 | 1 | 2 |
| tm9sf1      | 0.0015499 | 0.314495887 | 0.257 | 0.133 | 1 | 2 |
| gtpbp41     | 0.0015729 | 0.425455718 | 0.595 | 0.467 | 1 | 2 |
| waplb       | 0.0015746 | 0.31933593  | 0.324 | 0.181 | 1 | 2 |
| ap2s1       | 0.0015842 | 0.366020046 | 0.432 | 0.294 | 1 | 2 |
| pdzklip11   | 0.0015843 | 0.526371661 | 0.324 | 0.18  | 1 | 2 |
| rbms2a      | 0.001591  | 0.275526761 | 0.284 | 0.15  | 1 | 2 |
| hml3        | 0.0016036 | 0.301114313 | 0.446 | 0.287 | 1 | 2 |
| rbm39a      | 0.0016738 | 0.431650046 | 0.568 | 0.463 | 1 | 2 |
| enola       | 0.0016743 | 0.331808342 | 0.392 | 0.252 | 1 | 2 |
| smarcc1a    | 0.0017167 | 0.294931233 | 0.446 | 0.317 | 1 | 2 |
| ostf1       | 0.0017176 | 0.416020181 | 0.365 | 0.222 | 1 | 2 |
| khdrbs1a1   | 0.0017236 | 0.283452011 | 0.851 | 0.739 | 1 | 2 |
| ipo71       | 0.0017269 | 0.317717694 | 0.608 | 0.452 | 1 | 2 |
| mycbp1      | 0.0017406 | 0.484965928 | 0.432 | 0.287 | 1 | 2 |
| dedd1       | 0.0017431 | 0.573878115 | 0.635 | 0.507 | 1 | 2 |
| mst1        | 0.0017496 | 0.751144096 | 0.284 | 0.161 | 1 | 2 |
| erp44       | 0.0017727 | 0.434137238 | 0.459 | 0.328 | 1 | 2 |
| baspl       | 0.0017753 | 0.454046985 | 0.446 | 0.291 | 1 | 2 |
| syngn2a     | 0.0017957 | 0.386830548 | 0.338 | 0.2   | 1 | 2 |
| cxc18a      | 0.0018145 | 0.523181722 | 0.473 | 0.317 | 1 | 2 |
| CR589944.1  | 0.0018618 | 0.343561849 | 0.27  | 0.141 | 1 | 2 |

|                  |           |             |       |       |   |   |
|------------------|-----------|-------------|-------|-------|---|---|
| stt3b1           | 0.0019232 | 0.289322993 | 0.486 | 0.333 | 1 | 2 |
| phc2a            | 0.0019465 | 0.469788545 | 0.297 | 0.169 | 1 | 2 |
| tm9sf3           | 0.0019912 | 0.384464551 | 0.486 | 0.337 | 1 | 2 |
| ddx39aa1         | 0.0019995 | 0.345681523 | 0.554 | 0.426 | 1 | 2 |
| yipf5            | 0.0020219 | 0.300588191 | 0.27  | 0.143 | 1 | 2 |
| psmd11b          | 0.0020338 | 0.294070542 | 0.419 | 0.276 | 1 | 2 |
| pcbp2            | 0.0020601 | 0.424044435 | 0.486 | 0.385 | 1 | 2 |
| cdc42l           | 0.0020648 | 0.388553681 | 0.689 | 0.578 | 1 | 2 |
| purba            | 0.0021009 | 0.474340223 | 0.392 | 0.269 | 1 | 2 |
| scfd1            | 0.0021201 | 0.322163271 | 0.338 | 0.194 | 1 | 2 |
| rnpc3            | 0.0021292 | 0.403221472 | 0.27  | 0.143 | 1 | 2 |
| ccn11a           | 0.0021413 | 0.613604761 | 0.446 | 0.333 | 1 | 2 |
| sec62            | 0.0021878 | 0.561062168 | 0.527 | 0.363 | 1 | 2 |
| uck2b            | 0.0022151 | 0.303924261 | 0.365 | 0.224 | 1 | 2 |
| maprelb          | 0.0022264 | 0.333932141 | 0.419 | 0.287 | 1 | 2 |
| snw1             | 0.0022429 | 0.362420055 | 0.419 | 0.298 | 1 | 2 |
| ckbb             | 0.0022573 | 0.734367637 | 0.419 | 0.274 | 1 | 2 |
| FP017217.1       | 0.0022915 | 0.464417724 | 0.459 | 0.304 | 1 | 2 |
| ier2a            | 0.0023028 | 0.490165502 | 0.662 | 0.572 | 1 | 2 |
| dab2ipb          | 0.0023092 | 0.455837323 | 0.351 | 0.215 | 1 | 2 |
| psip1b           | 0.0023335 | 0.379656946 | 0.459 | 0.333 | 1 | 2 |
| pdxcl            | 0.0023728 | 0.712719559 | 0.324 | 0.196 | 1 | 2 |
| ccnd1            | 0.0023914 | 0.39017815  | 0.297 | 0.167 | 1 | 2 |
| tubala           | 0.002399  | 1.312534596 | 0.27  | 0.146 | 1 | 2 |
| crylaa           | 0.0023991 | 0.312636158 | 0.338 | 0.2   | 1 | 2 |
| ppp6r3           | 0.0024015 | 0.278152933 | 0.459 | 0.319 | 1 | 2 |
| afdna            | 0.0024194 | 0.797709999 | 0.514 | 0.387 | 1 | 2 |
| copb2            | 0.0024443 | 0.361876461 | 0.527 | 0.372 | 1 | 2 |
| pcf11            | 0.0024928 | 0.340011563 | 0.608 | 0.483 | 1 | 2 |
| yars             | 0.0024988 | 0.592886324 | 0.432 | 0.32  | 1 | 2 |
| ptp4a2b          | 0.0025173 | 0.377419821 | 0.649 | 0.511 | 1 | 2 |
| optn             | 0.0025416 | 0.445870149 | 0.27  | 0.146 | 1 | 2 |
| ddost1           | 0.0025566 | 0.593316849 | 0.635 | 0.496 | 1 | 2 |
| elf1             | 0.0026154 | 0.470936431 | 0.527 | 0.419 | 1 | 2 |
| ccnt1            | 0.002618  | 0.512155499 | 0.297 | 0.169 | 1 | 2 |
| copz2            | 0.0026921 | 0.556516863 | 0.338 | 0.2   | 1 | 2 |
| EIF3ba1          | 0.0027127 | 0.367397991 | 0.703 | 0.559 | 1 | 2 |
| chmp2a           | 0.0027375 | 0.308457538 | 0.568 | 0.457 | 1 | 2 |
| si:dkey-172h23.2 | 0.0027678 | 0.267619889 | 0.351 | 0.215 | 1 | 2 |
| rack11           | 0.0027993 | 0.261880494 | 0.959 | 0.896 | 1 | 2 |
| rbm5             | 0.0028116 | 0.459870059 | 0.351 | 0.224 | 1 | 2 |
| her9             | 0.0028137 | 0.627557007 | 0.527 | 0.357 | 1 | 2 |
| llgl2            | 0.0028359 | 0.573032521 | 0.432 | 0.337 | 1 | 2 |
| srrm2            | 0.0030462 | 0.480465382 | 0.568 | 0.433 | 1 | 2 |
| gpatch8          | 0.0031    | 0.621363746 | 0.405 | 0.285 | 1 | 2 |
| EIF3ml           | 0.0031922 | 0.341806756 | 0.676 | 0.583 | 1 | 2 |
| wk1b             | 0.0031965 | 0.260071612 | 0.27  | 0.148 | 1 | 2 |
| cnot1            | 0.0032599 | 0.366724095 | 0.473 | 0.335 | 1 | 2 |
| yyla             | 0.0032627 | 0.479871435 | 0.432 | 0.307 | 1 | 2 |
| ube2d21          | 0.003286  | 0.271937022 | 0.311 | 0.187 | 1 | 2 |
| sept7a1          | 0.0033981 | 0.382986718 | 0.446 | 0.333 | 1 | 2 |
| elmsan1b         | 0.0034281 | 0.552263204 | 0.486 | 0.361 | 1 | 2 |
| pafah1b1a        | 0.0034344 | 0.303533851 | 0.419 | 0.281 | 1 | 2 |
| znf609b          | 0.0035278 | 0.635991531 | 0.392 | 0.28  | 1 | 2 |

|                    |           |             |       |       |   |   |
|--------------------|-----------|-------------|-------|-------|---|---|
| tp53               | 0.0035506 | 0.320574551 | 0.405 | 0.283 | 1 | 2 |
| ypel5              | 0.0035876 | 0.38425556  | 0.27  | 0.148 | 1 | 2 |
| zzz3               | 0.0036002 | 0.363440195 | 0.27  | 0.152 | 1 | 2 |
| kdm3b              | 0.0036437 | 0.334197796 | 0.257 | 0.141 | 1 | 2 |
| kpna4              | 0.0036473 | 0.353680429 | 0.392 | 0.263 | 1 | 2 |
| jun                | 0.0037287 | 0.279532855 | 0.878 | 0.813 | 1 | 2 |
| mark2b             | 0.0037764 | 0.391257963 | 0.5   | 0.352 | 1 | 2 |
| luc7l              | 0.0038182 | 0.393225191 | 0.514 | 0.407 | 1 | 2 |
| tmem115            | 0.0038392 | 0.310282477 | 0.405 | 0.272 | 1 | 2 |
| galnt2             | 0.0038566 | 0.601521265 | 0.27  | 0.152 | 1 | 2 |
| ppmlk              | 0.0038712 | 0.298237377 | 0.297 | 0.17  | 1 | 2 |
| clasp2             | 0.0038872 | 0.35036242  | 0.324 | 0.193 | 1 | 2 |
| fat1a              | 0.0039216 | 0.594408474 | 0.473 | 0.344 | 1 | 2 |
| cct82              | 0.0039264 | 0.255282625 | 0.581 | 0.461 | 1 | 2 |
| zgc:56525          | 0.0039637 | 0.250924673 | 0.297 | 0.176 | 1 | 2 |
| trioa              | 0.0040365 | 0.36493496  | 0.297 | 0.172 | 1 | 2 |
| hif1ab             | 0.0040461 | 0.360913143 | 0.527 | 0.394 | 1 | 2 |
| mbd2               | 0.0040526 | 0.282352853 | 0.432 | 0.309 | 1 | 2 |
| fam91a1            | 0.0040805 | 0.473546724 | 0.257 | 0.139 | 1 | 2 |
| prrc2c             | 0.0041275 | 0.340287567 | 0.405 | 0.261 | 1 | 2 |
| waca               | 0.0041354 | 0.363581447 | 0.365 | 0.235 | 1 | 2 |
| cebpb              | 0.0042045 | 0.548281019 | 0.77  | 0.757 | 1 | 2 |
| ocrl               | 0.0042278 | 0.361392198 | 0.338 | 0.207 | 1 | 2 |
| rpn12              | 0.0042504 | 0.275026207 | 0.595 | 0.446 | 1 | 2 |
| gnaia              | 0.0043271 | 0.277482936 | 0.378 | 0.252 | 1 | 2 |
| trim3b             | 0.004431  | 0.306430359 | 0.284 | 0.167 | 1 | 2 |
| foxo4              | 0.0044658 | 0.406647149 | 0.378 | 0.248 | 1 | 2 |
| mfn2               | 0.0045729 | 0.265117961 | 0.297 | 0.174 | 1 | 2 |
| si:ch1073-392o20.2 | 0.0046239 | 0.288812389 | 0.378 | 0.256 | 1 | 2 |
| chd9               | 0.0046684 | 0.793645459 | 0.459 | 0.352 | 1 | 2 |
| arpc3              | 0.004669  | 0.455489776 | 0.649 | 0.554 | 1 | 2 |
| tspan15            | 0.0046889 | 0.390571472 | 0.284 | 0.169 | 1 | 2 |
| copa               | 0.004784  | 0.399631509 | 0.473 | 0.354 | 1 | 2 |
| h2afx1             | 0.004904  | 0.455624594 | 0.676 | 0.607 | 1 | 2 |
| ralgap1            | 0.0049727 | 0.347539711 | 0.324 | 0.194 | 1 | 2 |
| papola             | 0.0050255 | 0.403065851 | 0.5   | 0.37  | 1 | 2 |
| hnrnpk             | 0.0051084 | 0.440508866 | 0.473 | 0.341 | 1 | 2 |
| csnk1g2b           | 0.0051964 | 0.512124172 | 0.473 | 0.339 | 1 | 2 |
| ccdc187            | 0.0052849 | 0.359755501 | 0.284 | 0.163 | 1 | 2 |
| gtf2a1             | 0.0053945 | 0.324322056 | 0.284 | 0.165 | 1 | 2 |
| txndc91            | 0.0055083 | 0.292813568 | 0.446 | 0.32  | 1 | 2 |
| cyp3c1             | 0.0055386 | 0.372952848 | 0.27  | 0.154 | 1 | 2 |
| atp2bla            | 0.0057435 | 0.803110132 | 0.649 | 0.528 | 1 | 2 |
| mgaa               | 0.0057528 | 0.42270359  | 0.257 | 0.143 | 1 | 2 |
| si:ch73-238c9.1    | 0.0057581 | 0.295841328 | 0.284 | 0.169 | 1 | 2 |
| si:ch211-11k18.4   | 0.0058249 | 0.286074328 | 0.27  | 0.163 | 1 | 2 |
| tpm4a              | 0.0059461 | 1.175072577 | 0.405 | 0.311 | 1 | 2 |
| si:dkey-222f8.3    | 0.0060323 | 0.292698083 | 0.27  | 0.148 | 1 | 2 |
| irf2               | 0.0060595 | 0.290870751 | 0.338 | 0.213 | 1 | 2 |
| pcyt2              | 0.0061338 | 0.367635834 | 0.473 | 0.372 | 1 | 2 |
| rab35b             | 0.0061464 | 0.259381819 | 0.419 | 0.293 | 1 | 2 |
| blocl6             | 0.0061783 | 0.264246668 | 0.297 | 0.178 | 1 | 2 |
| tp53bp2a           | 0.0061816 | 0.258053125 | 0.27  | 0.15  | 1 | 2 |
| aldoa1             | 0.0062039 | 0.369789664 | 0.608 | 0.531 | 1 | 2 |

|                    |           |             |       |       |   |   |
|--------------------|-----------|-------------|-------|-------|---|---|
| tnrc6a             | 0.0062064 | 0.599488519 | 0.473 | 0.359 | 1 | 2 |
| ccn11b             | 0.006252  | 0.262156274 | 0.514 | 0.393 | 1 | 2 |
| atp6v0a1a          | 0.0062554 | 0.442338843 | 0.324 | 0.204 | 1 | 2 |
| kmt2ba             | 0.0062747 | 0.28572425  | 0.27  | 0.161 | 1 | 2 |
| celfl              | 0.0063445 | 0.527962735 | 0.392 | 0.274 | 1 | 2 |
| ankrd54            | 0.0063656 | 0.492193122 | 0.297 | 0.185 | 1 | 2 |
| cand1              | 0.006457  | 0.309832811 | 0.338 | 0.213 | 1 | 2 |
| arcn1a             | 0.0064835 | 0.369360657 | 0.351 | 0.233 | 1 | 2 |
| zgc:110425         | 0.00651   | 0.72577203  | 0.378 | 0.257 | 1 | 2 |
| setd2              | 0.0065208 | 0.387944297 | 0.257 | 0.146 | 1 | 2 |
| tardbp1            | 0.0065701 | 0.548096191 | 0.541 | 0.461 | 1 | 2 |
| fam32a1            | 0.0066369 | 0.377942746 | 0.608 | 0.5   | 1 | 2 |
| epc2               | 0.0066505 | 0.279247873 | 0.27  | 0.159 | 1 | 2 |
| kif13ba            | 0.006663  | 0.596762919 | 0.405 | 0.289 | 1 | 2 |
| crebl1a            | 0.0066754 | 0.394785058 | 0.365 | 0.244 | 1 | 2 |
| cldnb              | 0.0068658 | 0.666469523 | 0.811 | 0.774 | 1 | 2 |
| tsc22d31           | 0.0069033 | 0.583185408 | 0.446 | 0.343 | 1 | 2 |
| sdf211             | 0.0069124 | 0.501450442 | 0.459 | 0.374 | 1 | 2 |
| si:dkey-42i9.6     | 0.0069153 | 0.283873306 | 0.27  | 0.156 | 1 | 2 |
| rock2a             | 0.007096  | 0.500047909 | 0.311 | 0.198 | 1 | 2 |
| der11              | 0.0071568 | 0.266905951 | 0.284 | 0.174 | 1 | 2 |
| flii               | 0.0071638 | 0.339348175 | 0.311 | 0.202 | 1 | 2 |
| sh3bp51a           | 0.0071807 | 0.410885206 | 0.324 | 0.217 | 1 | 2 |
| sec61b             | 0.0072072 | 0.457108452 | 0.784 | 0.698 | 1 | 2 |
| pik3r1             | 0.0072113 | 0.25097622  | 0.27  | 0.163 | 1 | 2 |
| cltcb              | 0.007243  | 0.57963194  | 0.432 | 0.32  | 1 | 2 |
| helz               | 0.0073877 | 0.387961084 | 0.338 | 0.217 | 1 | 2 |
| pdapl1b            | 0.0074166 | 0.50764066  | 0.514 | 0.413 | 1 | 2 |
| aplar              | 0.0075095 | 0.425837993 | 0.405 | 0.287 | 1 | 2 |
| taok1a             | 0.007536  | 0.396773627 | 0.27  | 0.163 | 1 | 2 |
| hspa5              | 0.0075614 | 0.647400785 | 0.932 | 0.906 | 1 | 2 |
| tmem33             | 0.0077279 | 0.395344733 | 0.351 | 0.241 | 1 | 2 |
| kmt2ca             | 0.0077505 | 0.4912031   | 0.486 | 0.376 | 1 | 2 |
| manf               | 0.0078002 | 0.361576741 | 0.703 | 0.609 | 1 | 2 |
| selenos            | 0.0078834 | 0.412540209 | 0.378 | 0.263 | 1 | 2 |
| kmt2e              | 0.0079139 | 0.46204137  | 0.311 | 0.196 | 1 | 2 |
| pdia31             | 0.0079475 | 0.460697044 | 0.77  | 0.696 | 1 | 2 |
| sec31a             | 0.0081459 | 0.556191424 | 0.351 | 0.237 | 1 | 2 |
| gigyf1b            | 0.0085304 | 0.284853438 | 0.405 | 0.287 | 1 | 2 |
| chd6               | 0.0085772 | 0.361831724 | 0.311 | 0.193 | 1 | 2 |
| cars               | 0.0086037 | 0.362475294 | 0.405 | 0.283 | 1 | 2 |
| ctgfa              | 0.0087461 | 0.292241043 | 0.284 | 0.167 | 1 | 2 |
| rab11ba            | 0.0087675 | 0.413771806 | 0.365 | 0.248 | 1 | 2 |
| si:ch211-114c12.2  | 0.0090014 | 0.379542967 | 0.365 | 0.241 | 1 | 2 |
| si:ch211-286b5.5   | 0.0090074 | 0.320270276 | 0.338 | 0.226 | 1 | 2 |
| mych               | 0.00904   | 0.579269283 | 0.554 | 0.494 | 1 | 2 |
| ganab              | 0.0091832 | 0.473817412 | 0.27  | 0.169 | 1 | 2 |
| si:ch1073-174d20.2 | 0.0091932 | 0.305288379 | 0.27  | 0.163 | 1 | 2 |
| ssr3               | 0.0093253 | 0.509076523 | 0.824 | 0.72  | 1 | 2 |
| arhgap1            | 0.0093265 | 0.305847671 | 0.324 | 0.209 | 1 | 2 |
| sf3b2              | 0.0093366 | 0.576001748 | 0.541 | 0.444 | 1 | 2 |
| zgc:162730         | 0.0094292 | 0.552281114 | 0.784 | 0.789 | 1 | 2 |
| ap2mlb             | 0.00949   | 0.392343203 | 0.595 | 0.498 | 1 | 2 |
| ubap2a             | 0.0095675 | 0.458455735 | 0.446 | 0.339 | 1 | 2 |

|                    |           |             |       |       |          |   |
|--------------------|-----------|-------------|-------|-------|----------|---|
| yipf6              | 0.0097359 | 0.270601582 | 0.311 | 0.196 | 1        | 2 |
| gadd45ab           | 0.0098259 | 0.375264821 | 0.378 | 0.269 | 1        | 2 |
| arhgap5            | 0.0099704 | 0.286766976 | 0.703 | 0.619 | 1        | 2 |
| nme2b.11           | 0.0099941 | 0.2525184   | 0.932 | 0.876 | 1        | 2 |
| aqp8a.21           | 5.78E-22  | 1.003440138 | 0.892 | 0.307 | 1.38E-17 | 3 |
| rbp2a2             | 1.11E-20  | 1.211620814 | 1     | 0.511 | 2.64E-16 | 3 |
| mat2a11            | 1.92E-20  | 0.677226935 | 0.703 | 0.198 | 4.58E-16 | 3 |
| fabp1b.11          | 5.74E-20  | 1.35129316  | 0.986 | 0.52  | 1.37E-15 | 3 |
| ugtlab1            | 9.54E-19  | 0.822051399 | 0.973 | 0.424 | 2.27E-14 | 3 |
| cyp8b11            | 9.94E-19  | 0.465452272 | 0.743 | 0.202 | 2.37E-14 | 3 |
| park71             | 1.68E-18  | 0.411252137 | 0.757 | 0.259 | 4.01E-14 | 3 |
| sod21              | 1.83E-18  | 0.789966101 | 0.905 | 0.409 | 4.35E-14 | 3 |
| apoc21             | 2.45E-18  | 0.774803402 | 0.986 | 0.463 | 5.84E-14 | 3 |
| stoml3b1           | 6.30E-18  | 1.010716445 | 0.946 | 0.428 | 1.50E-13 | 3 |
| gatml              | 9.69E-18  | 0.573273111 | 0.811 | 0.269 | 2.31E-13 | 3 |
| apoa4b.11          | 1.65E-17  | 0.968501576 | 0.959 | 0.431 | 3.93E-13 | 3 |
| ssbpl              | 1.75E-17  | 0.501266692 | 0.784 | 0.287 | 4.16E-13 | 3 |
| apoal1             | 2.13E-17  | 0.898019421 | 0.986 | 0.443 | 5.09E-13 | 3 |
| mrps241            | 3.76E-17  | 0.533783606 | 0.919 | 0.407 | 8.97E-13 | 3 |
| gcsb1              | 5.67E-17  | 0.875694625 | 0.946 | 0.443 | 1.35E-12 | 3 |
| afp4.11            | 1.48E-16  | 0.936656587 | 0.905 | 0.394 | 3.53E-12 | 3 |
| srd5a2a2           | 1.81E-16  | 0.389017692 | 0.73  | 0.224 | 4.31E-12 | 3 |
| adal               | 1.87E-16  | 0.386466747 | 0.784 | 0.25  | 4.46E-12 | 3 |
| fdx11              | 1.95E-16  | 0.884617701 | 0.946 | 0.467 | 4.65E-12 | 3 |
| pla2g12b1          | 2.70E-16  | 0.411874762 | 0.662 | 0.194 | 6.43E-12 | 3 |
| si:ch211-117n7.71  | 3.11E-16  | 0.329496234 | 0.757 | 0.243 | 7.42E-12 | 3 |
| gstt1a1            | 3.12E-16  | 0.944859402 | 0.973 | 0.559 | 7.43E-12 | 3 |
| gstk11             | 4.73E-16  | 0.513651443 | 0.784 | 0.285 | 1.13E-11 | 3 |
| ndufa41            | 5.23E-16  | 0.747919465 | 0.973 | 0.467 | 1.25E-11 | 3 |
| msrb21             | 6.44E-16  | 0.441481207 | 0.77  | 0.256 | 1.53E-11 | 3 |
| sult2st21          | 7.63E-16  | 0.727130658 | 0.986 | 0.419 | 1.82E-11 | 3 |
| si:dkey-69o16.52   | 7.66E-16  | 0.424788675 | 0.689 | 0.235 | 1.83E-11 | 3 |
| sult3st2           | 1.02E-15  | 0.338915065 | 0.622 | 0.189 | 2.43E-11 | 3 |
| COX5B1             | 1.21E-15  | 0.725362369 | 1     | 0.804 | 2.88E-11 | 3 |
| gpx4a1             | 1.49E-15  | 0.959196742 | 0.959 | 0.552 | 3.54E-11 | 3 |
| mrpl91             | 1.63E-15  | 0.362593096 | 0.73  | 0.248 | 3.88E-11 | 3 |
| ridal              | 1.88E-15  | 1.042120656 | 0.892 | 0.444 | 4.48E-11 | 3 |
| ociad21            | 2.17E-15  | 0.791980009 | 0.946 | 0.47  | 5.18E-11 | 3 |
| mb122              | 2.46E-15  | 0.512880056 | 0.662 | 0.209 | 5.87E-11 | 3 |
| prdx12             | 2.75E-15  | 0.438636025 | 0.932 | 0.448 | 6.57E-11 | 3 |
| eif4e2rs1          | 2.83E-15  | 0.29640853  | 0.554 | 0.169 | 6.75E-11 | 3 |
| cryl11             | 3.14E-15  | 0.444932383 | 0.716 | 0.261 | 7.48E-11 | 3 |
| eci21              | 3.60E-15  | 0.453493806 | 0.824 | 0.337 | 8.59E-11 | 3 |
| ndufab1a1          | 4.34E-15  | 0.635057037 | 0.946 | 0.493 | 1.04E-10 | 3 |
| cox8b1             | 4.64E-15  | 0.880729276 | 0.986 | 0.578 | 1.11E-10 | 3 |
| atp5l1             | 5.55E-15  | 0.681408538 | 1     | 0.822 | 1.32E-10 | 3 |
| si:ch211-201h21.51 | 7.14E-15  | 0.381753001 | 0.824 | 0.296 | 1.70E-10 | 3 |
| mttpl              | 7.55E-15  | 0.27796076  | 0.797 | 0.269 | 1.80E-10 | 3 |
| ldhal              | 7.68E-15  | 0.675222519 | 0.919 | 0.452 | 1.83E-10 | 3 |
| slc25a101          | 8.96E-15  | 0.279821786 | 0.595 | 0.174 | 2.14E-10 | 3 |
| cox141             | 1.03E-14  | 0.692658042 | 0.865 | 0.437 | 2.45E-10 | 3 |
| hsd11b11a2         | 1.03E-14  | 0.435401731 | 0.73  | 0.248 | 2.45E-10 | 3 |
| ndufa81            | 1.14E-14  | 0.597873062 | 0.959 | 0.561 | 2.73E-10 | 3 |
| zgc:112146         | 1.17E-14  | 0.562470239 | 0.568 | 0.17  | 2.78E-10 | 3 |

|                   |          |             |       |       |          |   |
|-------------------|----------|-------------|-------|-------|----------|---|
| chia.21           | 1.38E-14 | 0.342875335 | 0.568 | 0.157 | 3.30E-10 | 3 |
| mrpl321           | 1.56E-14 | 0.468583464 | 0.892 | 0.413 | 3.71E-10 | 3 |
| ivnslabpal        | 1.64E-14 | 0.607536103 | 0.797 | 0.346 | 3.91E-10 | 3 |
| mrpl391           | 2.02E-14 | 0.45102715  | 0.797 | 0.317 | 4.82E-10 | 3 |
| mgst3b2           | 2.13E-14 | 0.711472026 | 0.959 | 0.557 | 5.07E-10 | 3 |
| zgc:926301        | 2.70E-14 | 0.444648074 | 0.865 | 0.374 | 6.45E-10 | 3 |
| ndufb3            | 2.74E-14 | 0.678409942 | 0.973 | 0.604 | 6.54E-10 | 3 |
| zgc:56231         | 2.83E-14 | 0.252069233 | 0.297 | 0.046 | 6.76E-10 | 3 |
| mrpl181           | 2.93E-14 | 0.515630537 | 0.878 | 0.428 | 7.00E-10 | 3 |
| chchd102          | 3.05E-14 | 0.649503941 | 0.932 | 0.485 | 7.28E-10 | 3 |
| mrpl421           | 3.36E-14 | 0.45754656  | 0.716 | 0.3   | 8.01E-10 | 3 |
| timml01           | 3.49E-14 | 0.368816037 | 0.851 | 0.354 | 8.33E-10 | 3 |
| cbr112            | 4.13E-14 | 0.563746937 | 0.811 | 0.363 | 9.84E-10 | 3 |
| ca4b1             | 4.20E-14 | 0.440273368 | 0.554 | 0.159 | 1.00E-09 | 3 |
| fabp22            | 6.53E-14 | 0.990397958 | 1     | 0.757 | 1.56E-09 | 3 |
| mrpl471           | 7.20E-14 | 0.411661019 | 0.797 | 0.333 | 1.72E-09 | 3 |
| mrpl341           | 8.83E-14 | 0.431478738 | 0.838 | 0.374 | 2.11E-09 | 3 |
| AL831745.11       | 9.51E-14 | 0.257523092 | 0.797 | 0.298 | 2.27E-09 | 3 |
| gamtl             | 9.83E-14 | 0.763595868 | 0.959 | 0.487 | 2.34E-09 | 3 |
| rrp7a             | 1.06E-13 | 0.291582725 | 0.649 | 0.23  | 2.53E-09 | 3 |
| hint1             | 1.13E-13 | 0.555438977 | 0.946 | 0.541 | 2.69E-09 | 3 |
| zgc:777391        | 1.38E-13 | 0.434933661 | 0.608 | 0.206 | 3.28E-09 | 3 |
| suc1g21           | 1.58E-13 | 0.359461613 | 0.811 | 0.32  | 3.78E-09 | 3 |
| timm8a1           | 1.90E-13 | 0.442493382 | 0.824 | 0.383 | 4.54E-09 | 3 |
| ace21             | 2.08E-13 | 0.282512673 | 0.716 | 0.235 | 4.96E-09 | 3 |
| cox7a1            | 2.21E-13 | 0.423178984 | 0.649 | 0.233 | 5.26E-09 | 3 |
| mrpl14            | 2.76E-13 | 0.478717325 | 0.851 | 0.404 | 6.57E-09 | 3 |
| phb2b1            | 2.95E-13 | 0.563682473 | 0.905 | 0.45  | 7.03E-09 | 3 |
| mrpl481           | 3.21E-13 | 0.507272707 | 0.824 | 0.359 | 7.66E-09 | 3 |
| ndufa121          | 3.22E-13 | 0.659131471 | 0.959 | 0.594 | 7.67E-09 | 3 |
| cd361             | 3.34E-13 | 0.395380515 | 0.662 | 0.226 | 7.96E-09 | 3 |
| cldn15a1          | 3.51E-13 | 0.64715661  | 0.946 | 0.448 | 8.37E-09 | 3 |
| si:ch211-161h7.81 | 3.60E-13 | 0.397286162 | 0.635 | 0.219 | 8.58E-09 | 3 |
| lyrm7             | 4.04E-13 | 0.353702192 | 0.581 | 0.191 | 9.63E-09 | 3 |
| pgrmc11           | 4.27E-13 | 0.562678496 | 0.959 | 0.531 | 1.02E-08 | 3 |
| bckdhb1           | 4.62E-13 | 0.301668374 | 0.689 | 0.254 | 1.10E-08 | 3 |
| mrpl161           | 4.64E-13 | 0.321948233 | 0.608 | 0.23  | 1.11E-08 | 3 |
| ap1s3a1           | 4.75E-13 | 0.358397538 | 0.541 | 0.174 | 1.13E-08 | 3 |
| tmem242           | 4.93E-13 | 0.365550627 | 0.568 | 0.189 | 1.18E-08 | 3 |
| naa20             | 5.83E-13 | 0.45340112  | 0.649 | 0.25  | 1.39E-08 | 3 |
| cox6a11           | 6.33E-13 | 0.580415011 | 1     | 0.826 | 1.51E-08 | 3 |
| cers3a1           | 6.40E-13 | 0.402968034 | 0.689 | 0.254 | 1.53E-08 | 3 |
| nopl61            | 6.43E-13 | 0.312865399 | 0.797 | 0.346 | 1.53E-08 | 3 |
| ndufa2            | 6.47E-13 | 0.527606662 | 0.959 | 0.541 | 1.54E-08 | 3 |
| echsl1            | 6.78E-13 | 0.4194083   | 0.811 | 0.343 | 1.62E-08 | 3 |
| cox6b1            | 6.84E-13 | 0.646120222 | 0.973 | 0.73  | 1.63E-08 | 3 |
| CU682777.21       | 7.45E-13 | 0.578184814 | 0.959 | 0.494 | 1.78E-08 | 3 |
| mrpl201           | 8.03E-13 | 0.508847551 | 0.824 | 0.394 | 1.91E-08 | 3 |
| smim41            | 8.90E-13 | 0.441681071 | 0.716 | 0.311 | 2.12E-08 | 3 |
| scp2a2            | 9.44E-13 | 0.580103759 | 0.919 | 0.43  | 2.25E-08 | 3 |
| gnpda12           | 1.00E-12 | 0.540145996 | 0.878 | 0.404 | 2.40E-08 | 3 |
| NPC1L11           | 1.07E-12 | 0.251630711 | 0.541 | 0.178 | 2.55E-08 | 3 |
| aqp8a.12          | 1.12E-12 | 0.399140145 | 0.73  | 0.267 | 2.67E-08 | 3 |
| tomm51            | 1.13E-12 | 0.522888362 | 0.946 | 0.507 | 2.70E-08 | 3 |

|                    |          |             |       |       |          |   |
|--------------------|----------|-------------|-------|-------|----------|---|
| mrps34             | 1.19E-12 | 0.290308206 | 0.716 | 0.291 | 2.84E-08 | 3 |
| no17               | 1.21E-12 | 0.441834167 | 0.662 | 0.27  | 2.88E-08 | 3 |
| ccdc25             | 1.46E-12 | 0.355796757 | 0.757 | 0.317 | 3.47E-08 | 3 |
| zgc:193742         | 1.53E-12 | 0.334670188 | 0.595 | 0.207 | 3.64E-08 | 3 |
| mrpl271            | 1.63E-12 | 0.441233203 | 0.743 | 0.333 | 3.89E-08 | 3 |
| mrpl21             | 1.63E-12 | 0.379843898 | 0.757 | 0.324 | 3.89E-08 | 3 |
| zfp3612            | 1.69E-12 | 0.470083374 | 0.797 | 0.359 | 4.03E-08 | 3 |
| sdr16c5b1          | 1.81E-12 | 0.402064035 | 0.838 | 0.38  | 4.32E-08 | 3 |
| ndufa101           | 2.26E-12 | 0.461508858 | 0.892 | 0.413 | 5.40E-08 | 3 |
| prdx31             | 2.52E-12 | 0.429390671 | 0.865 | 0.43  | 6.01E-08 | 3 |
| hsd17b10           | 2.78E-12 | 0.287625719 | 0.662 | 0.248 | 6.63E-08 | 3 |
| ugt5b21            | 2.82E-12 | 0.346208727 | 0.554 | 0.178 | 6.72E-08 | 3 |
| snrnp401           | 2.85E-12 | 0.250861338 | 0.568 | 0.194 | 6.79E-08 | 3 |
| gcshal             | 3.05E-12 | 0.409879616 | 0.757 | 0.346 | 7.28E-08 | 3 |
| grsf12             | 3.49E-12 | 0.270930642 | 0.608 | 0.23  | 8.31E-08 | 3 |
| aldh7a11           | 3.56E-12 | 0.401057294 | 0.851 | 0.365 | 8.48E-08 | 3 |
| paics1             | 3.74E-12 | 0.36451124  | 0.824 | 0.356 | 8.92E-08 | 3 |
| mpc12              | 3.89E-12 | 0.518368435 | 0.946 | 0.533 | 9.27E-08 | 3 |
| si:dkey-183n20.151 | 4.40E-12 | 0.317083622 | 0.608 | 0.211 | 1.05E-07 | 3 |
| hadh1              | 4.52E-12 | 0.47021516  | 0.878 | 0.4   | 1.08E-07 | 3 |
| bin2a2             | 4.61E-12 | 0.502009802 | 0.932 | 0.446 | 1.10E-07 | 3 |
| mrps251            | 5.41E-12 | 0.362922917 | 0.851 | 0.409 | 1.29E-07 | 3 |
| suc1g11            | 5.68E-12 | 0.706915419 | 0.973 | 0.609 | 1.35E-07 | 3 |
| cmc21              | 6.18E-12 | 0.284860565 | 0.581 | 0.206 | 1.47E-07 | 3 |
| timm132            | 6.22E-12 | 0.422733974 | 0.797 | 0.365 | 1.48E-07 | 3 |
| tspan13a1          | 6.37E-12 | 0.485036109 | 0.824 | 0.37  | 1.52E-07 | 3 |
| ak31               | 6.71E-12 | 0.305423245 | 0.757 | 0.304 | 1.60E-07 | 3 |
| cyp2k161           | 6.71E-12 | 0.507448462 | 0.865 | 0.402 | 1.60E-07 | 3 |
| ndufab1b1          | 6.75E-12 | 0.628946606 | 0.973 | 0.58  | 1.61E-07 | 3 |
| zgc:172079.21      | 6.76E-12 | 0.58435525  | 0.865 | 0.443 | 1.61E-07 | 3 |
| sdhb1              | 6.96E-12 | 0.543624322 | 0.919 | 0.52  | 1.66E-07 | 3 |
| mrpl241            | 7.00E-12 | 0.251450454 | 0.824 | 0.381 | 1.67E-07 | 3 |
| zan12              | 7.05E-12 | 0.490672434 | 0.865 | 0.378 | 1.68E-07 | 3 |
| uqcrq1             | 7.15E-12 | 0.70176566  | 0.973 | 0.731 | 1.70E-07 | 3 |
| chia.11            | 7.23E-12 | 0.253364567 | 0.351 | 0.08  | 1.72E-07 | 3 |
| ndufb82            | 7.27E-12 | 0.500077453 | 0.986 | 0.665 | 1.73E-07 | 3 |
| uqcrfs11           | 7.50E-12 | 0.595603738 | 0.973 | 0.559 | 1.79E-07 | 3 |
| zgc:1365642        | 8.02E-12 | 0.336134552 | 0.73  | 0.307 | 1.91E-07 | 3 |
| adh8b1             | 8.67E-12 | 0.620600409 | 0.946 | 0.485 | 2.07E-07 | 3 |
| si:ch211-235e9.81  | 8.86E-12 | 0.527965577 | 0.878 | 0.417 | 2.11E-07 | 3 |
| mrpl41             | 9.65E-12 | 0.252645482 | 0.703 | 0.287 | 2.30E-07 | 3 |
| si:ch211-161h7.52  | 1.05E-11 | 0.410906845 | 0.635 | 0.235 | 2.50E-07 | 3 |
| llph1              | 1.07E-11 | 0.428657405 | 0.824 | 0.394 | 2.56E-07 | 3 |
| timm91             | 1.10E-11 | 0.520809966 | 0.77  | 0.38  | 2.61E-07 | 3 |
| dnph1              | 1.17E-11 | 0.292355802 | 0.554 | 0.196 | 2.78E-07 | 3 |
| rdh11              | 1.17E-11 | 0.349477662 | 0.622 | 0.228 | 2.80E-07 | 3 |
| s1c35d1b1          | 1.32E-11 | 0.329377822 | 0.581 | 0.215 | 3.16E-07 | 3 |
| sdhdb2             | 1.38E-11 | 0.403655363 | 0.932 | 0.478 | 3.29E-07 | 3 |
| krt971             | 1.44E-11 | 0.760099888 | 0.959 | 0.585 | 3.42E-07 | 3 |
| si:ch211-107o10.32 | 1.47E-11 | 0.348321845 | 0.824 | 0.363 | 3.51E-07 | 3 |
| mrps18b1           | 1.49E-11 | 0.353990695 | 0.703 | 0.293 | 3.55E-07 | 3 |
| dldh1              | 1.63E-11 | 0.364764683 | 0.865 | 0.411 | 3.88E-07 | 3 |
| mrpl541            | 1.64E-11 | 0.317555559 | 0.905 | 0.454 | 3.90E-07 | 3 |
| ckmt11             | 1.66E-11 | 0.414511734 | 0.919 | 0.459 | 3.95E-07 | 3 |

|                   |          |             |       |       |          |   |
|-------------------|----------|-------------|-------|-------|----------|---|
| mrpl281           | 1.66E-11 | 0.392202681 | 0.77  | 0.357 | 3.96E-07 | 3 |
| nipsnap3a1        | 1.74E-11 | 0.287330246 | 0.743 | 0.311 | 4.14E-07 | 3 |
| fdps1             | 1.89E-11 | 0.372733817 | 0.838 | 0.367 | 4.52E-07 | 3 |
| gapdh1            | 1.92E-11 | 0.732550441 | 0.973 | 0.628 | 4.58E-07 | 3 |
| fb11              | 2.20E-11 | 0.489543865 | 0.959 | 0.535 | 5.24E-07 | 3 |
| got2b1            | 2.24E-11 | 0.41902681  | 0.824 | 0.372 | 5.35E-07 | 3 |
| uqcr10            | 2.25E-11 | 0.627633796 | 0.986 | 0.731 | 5.37E-07 | 3 |
| mrpl33            | 2.53E-11 | 0.367324221 | 0.824 | 0.413 | 6.04E-07 | 3 |
| mrps71            | 2.71E-11 | 0.38243578  | 0.703 | 0.313 | 6.46E-07 | 3 |
| si:ch211-68a17.71 | 2.79E-11 | 0.285778124 | 0.824 | 0.393 | 6.66E-07 | 3 |
| dhrs12            | 2.83E-11 | 0.350801358 | 0.905 | 0.441 | 6.74E-07 | 3 |
| ebnalbp21         | 2.87E-11 | 0.495685267 | 0.919 | 0.493 | 6.84E-07 | 3 |
| mrps26            | 2.95E-11 | 0.310221204 | 0.797 | 0.374 | 7.04E-07 | 3 |
| ndufa5            | 3.03E-11 | 0.578771301 | 0.946 | 0.611 | 7.23E-07 | 3 |
| mrpl381           | 3.11E-11 | 0.281038245 | 0.743 | 0.317 | 7.41E-07 | 3 |
| entpd8            | 3.26E-11 | 0.282171133 | 0.514 | 0.161 | 7.78E-07 | 3 |
| gsta.1.12         | 3.34E-11 | 0.716086873 | 1     | 0.819 | 7.95E-07 | 3 |
| mrpl111           | 3.46E-11 | 0.507908815 | 0.905 | 0.493 | 8.26E-07 | 3 |
| dtd2              | 4.02E-11 | 0.264495306 | 0.446 | 0.135 | 9.58E-07 | 3 |
| ndufs31           | 4.02E-11 | 0.413391273 | 0.865 | 0.431 | 9.59E-07 | 3 |
| cyp2x91           | 4.02E-11 | 0.340965234 | 0.581 | 0.207 | 9.59E-07 | 3 |
| si:dkey-36i7.31   | 4.08E-11 | 0.608015613 | 0.986 | 0.609 | 9.74E-07 | 3 |
| bxdc21            | 4.10E-11 | 0.481805658 | 0.865 | 0.431 | 9.78E-07 | 3 |
| sult3st31         | 4.40E-11 | 0.273225726 | 0.851 | 0.376 | 1.05E-06 | 3 |
| slirp1            | 4.59E-11 | 0.472716134 | 0.946 | 0.554 | 1.09E-06 | 3 |
| CYP2C91           | 4.65E-11 | 0.335955382 | 0.649 | 0.235 | 1.11E-06 | 3 |
| mrpl231           | 4.86E-11 | 0.342606879 | 0.608 | 0.233 | 1.16E-06 | 3 |
| ndufb61           | 5.28E-11 | 0.55222566  | 0.946 | 0.565 | 1.26E-06 | 3 |
| mrpl171           | 5.41E-11 | 0.303469896 | 0.662 | 0.272 | 1.29E-06 | 3 |
| mrps361           | 5.53E-11 | 0.417485696 | 0.905 | 0.509 | 1.32E-06 | 3 |
| ccdc581           | 5.56E-11 | 0.361364804 | 0.689 | 0.296 | 1.33E-06 | 3 |
| atp5pf            | 6.03E-11 | 0.536970088 | 1     | 0.75  | 1.44E-06 | 3 |
| spink4            | 6.29E-11 | 0.512033689 | 0.797 | 0.356 | 1.50E-06 | 3 |
| pbl1              | 6.86E-11 | 0.328391874 | 0.703 | 0.287 | 1.64E-06 | 3 |
| atp231            | 7.05E-11 | 0.265828937 | 0.419 | 0.126 | 1.68E-06 | 3 |
| rtn4b1            | 7.07E-11 | 0.315211095 | 0.865 | 0.376 | 1.69E-06 | 3 |
| cox7b1            | 7.22E-11 | 0.676143881 | 1     | 0.8   | 1.72E-06 | 3 |
| uqcrc2b1          | 7.22E-11 | 0.456081701 | 0.851 | 0.411 | 1.72E-06 | 3 |
| timm8b1           | 7.89E-11 | 0.453614482 | 0.878 | 0.469 | 1.88E-06 | 3 |
| fh1               | 8.26E-11 | 0.251685688 | 0.797 | 0.343 | 1.97E-06 | 3 |
| cyp2k191          | 8.43E-11 | 0.488307472 | 0.405 | 0.124 | 2.01E-06 | 3 |
| bccip1            | 8.68E-11 | 0.453635444 | 0.878 | 0.446 | 2.07E-06 | 3 |
| idh11             | 9.50E-11 | 0.395203174 | 0.892 | 0.419 | 2.27E-06 | 3 |
| ndufa112          | 9.91E-11 | 0.424130985 | 0.878 | 0.489 | 2.36E-06 | 3 |
| aurkaip11         | 1.00E-10 | 0.354669729 | 0.784 | 0.365 | 2.39E-06 | 3 |
| psma21            | 1.07E-10 | 0.364125788 | 0.892 | 0.463 | 2.54E-06 | 3 |
| prdx62            | 1.09E-10 | 0.278978143 | 0.946 | 0.478 | 2.60E-06 | 3 |
| CU694197.11       | 1.14E-10 | 0.292589437 | 0.905 | 0.454 | 2.72E-06 | 3 |
| etfb2             | 1.16E-10 | 0.288612515 | 0.878 | 0.452 | 2.76E-06 | 3 |
| atp5flc1          | 1.17E-10 | 0.576111291 | 0.946 | 0.57  | 2.79E-06 | 3 |
| cyb5r21           | 1.19E-10 | 0.344934651 | 0.73  | 0.306 | 2.83E-06 | 3 |
| clppl             | 1.19E-10 | 0.362024157 | 0.689 | 0.306 | 2.84E-06 | 3 |
| ndufv31           | 1.40E-10 | 0.270040185 | 0.878 | 0.43  | 3.34E-06 | 3 |
| ndufs41           | 1.41E-10 | 0.573790269 | 0.878 | 0.561 | 3.36E-06 | 3 |



|                   |          |             |       |       |          |   |
|-------------------|----------|-------------|-------|-------|----------|---|
| maprela           | 1.56E-10 | 0.277876863 | 0.568 | 0.226 | 3.73E-06 | 3 |
| ecill             | 1.63E-10 | 0.397616608 | 0.743 | 0.33  | 3.88E-06 | 3 |
| hmgcs11           | 1.69E-10 | 0.274622531 | 0.865 | 0.407 | 4.02E-06 | 3 |
| si:ch211-71m22.11 | 1.87E-10 | 0.506272688 | 0.919 | 0.478 | 4.46E-06 | 3 |
| gsta.21           | 1.96E-10 | 0.47992338  | 0.568 | 0.219 | 4.68E-06 | 3 |
| ndufs6            | 2.09E-10 | 0.455996362 | 0.932 | 0.589 | 4.97E-06 | 3 |
| ndufv22           | 2.16E-10 | 0.377500385 | 0.838 | 0.426 | 5.15E-06 | 3 |
| ftcd1             | 2.18E-10 | 0.289924727 | 0.446 | 0.139 | 5.20E-06 | 3 |
| mrpl432           | 2.24E-10 | 0.308612169 | 0.595 | 0.244 | 5.35E-06 | 3 |
| tomm4011          | 2.30E-10 | 0.308434194 | 0.797 | 0.359 | 5.48E-06 | 3 |
| fahd11            | 2.32E-10 | 0.257290021 | 0.757 | 0.354 | 5.52E-06 | 3 |
| atp5p01           | 2.53E-10 | 0.587922364 | 0.973 | 0.693 | 6.03E-06 | 3 |
| sf3b5             | 2.60E-10 | 0.38969667  | 0.892 | 0.543 | 6.20E-06 | 3 |
| ndufb4            | 2.64E-10 | 0.530832432 | 0.946 | 0.622 | 6.30E-06 | 3 |
| si:dkey-44g23.51  | 2.91E-10 | 0.406825147 | 0.716 | 0.324 | 6.95E-06 | 3 |
| pbdc1             | 2.93E-10 | 0.421836228 | 0.838 | 0.443 | 6.99E-06 | 3 |
| ndrg3a1           | 3.01E-10 | 0.292674287 | 0.757 | 0.324 | 7.18E-06 | 3 |
| cnbpal            | 3.47E-10 | 0.500619437 | 0.932 | 0.506 | 8.27E-06 | 3 |
| zgc:777481        | 3.59E-10 | 0.465182065 | 0.946 | 0.467 | 8.55E-06 | 3 |
| mrpl1             | 3.90E-10 | 0.27859565  | 0.419 | 0.137 | 9.31E-06 | 3 |
| atp5mc3a1         | 3.94E-10 | 0.517647083 | 0.973 | 0.654 | 9.41E-06 | 3 |
| dbil              | 4.09E-10 | 0.661961299 | 0.986 | 0.769 | 9.76E-06 | 3 |
| ppil1             | 4.22E-10 | 0.272506962 | 0.743 | 0.357 | 1.01E-05 | 3 |
| ndufb10           | 4.52E-10 | 0.479774144 | 0.959 | 0.631 | 1.08E-05 | 3 |
| tpilb2            | 4.54E-10 | 0.399976715 | 0.959 | 0.583 | 1.08E-05 | 3 |
| chchd11           | 4.62E-10 | 0.289053549 | 0.689 | 0.3   | 1.10E-05 | 3 |
| eppk11            | 4.75E-10 | 0.643275434 | 0.959 | 0.53  | 1.13E-05 | 3 |
| mrpl571           | 4.96E-10 | 0.32643071  | 0.892 | 0.519 | 1.18E-05 | 3 |
| uqcrh1            | 5.09E-10 | 0.540900554 | 0.973 | 0.754 | 1.21E-05 | 3 |
| gstpl1            | 5.19E-10 | 0.633423382 | 0.986 | 0.789 | 1.24E-05 | 3 |
| bpnt11            | 5.58E-10 | 0.367094484 | 0.608 | 0.259 | 1.33E-05 | 3 |
| mrto4             | 5.58E-10 | 0.258052964 | 0.595 | 0.243 | 1.33E-05 | 3 |
| coa7              | 5.63E-10 | 0.298337629 | 0.608 | 0.256 | 1.34E-05 | 3 |
| ndufb51           | 5.89E-10 | 0.359988578 | 0.932 | 0.507 | 1.40E-05 | 3 |
| ponzr11           | 6.12E-10 | 0.284015332 | 0.797 | 0.352 | 1.46E-05 | 3 |
| slc31a11          | 6.13E-10 | 0.387486151 | 0.811 | 0.374 | 1.46E-05 | 3 |
| tbca              | 6.15E-10 | 0.278752843 | 0.905 | 0.494 | 1.47E-05 | 3 |
| cox7a2a1          | 6.25E-10 | 0.529622835 | 1     | 0.72  | 1.49E-05 | 3 |
| fkbp3             | 6.69E-10 | 0.350733544 | 0.824 | 0.402 | 1.60E-05 | 3 |
| zgc:92907         | 6.86E-10 | 0.267163511 | 0.297 | 0.072 | 1.64E-05 | 3 |
| sod11             | 6.90E-10 | 0.557541703 | 0.986 | 0.687 | 1.65E-05 | 3 |
| fbplb1            | 6.96E-10 | 0.400753318 | 0.811 | 0.374 | 1.66E-05 | 3 |
| ndufs71           | 7.07E-10 | 0.366476926 | 0.919 | 0.519 | 1.69E-05 | 3 |
| ssscal            | 7.11E-10 | 0.329319646 | 0.446 | 0.161 | 1.69E-05 | 3 |
| tomm71            | 7.44E-10 | 0.3145708   | 0.973 | 0.593 | 1.77E-05 | 3 |
| mrps18c1          | 7.59E-10 | 0.27077266  | 0.838 | 0.424 | 1.81E-05 | 3 |
| aimpl             | 7.81E-10 | 0.276053238 | 0.919 | 0.485 | 1.86E-05 | 3 |
| ndufs51           | 7.84E-10 | 0.659814851 | 0.932 | 0.594 | 1.87E-05 | 3 |
| hsd122            | 8.06E-10 | 0.273150732 | 0.838 | 0.419 | 1.92E-05 | 3 |
| cox4i1            | 8.25E-10 | 0.400741591 | 1     | 0.844 | 1.97E-05 | 3 |
| mgst1.22          | 8.44E-10 | 0.259884235 | 0.608 | 0.246 | 2.01E-05 | 3 |
| mrpl121           | 8.91E-10 | 0.436523557 | 0.865 | 0.485 | 2.12E-05 | 3 |
| cyb5a1            | 9.12E-10 | 0.417597979 | 0.865 | 0.457 | 2.17E-05 | 3 |
| pwpl              | 9.59E-10 | 0.340577308 | 0.824 | 0.409 | 2.29E-05 | 3 |

|                  |          |             |       |       |           |   |
|------------------|----------|-------------|-------|-------|-----------|---|
| atp5mf           | 1.02E-09 | 0.54012045  | 1     | 0.822 | 2.43E-05  | 3 |
| abcc22           | 1.07E-09 | 0.255458311 | 0.595 | 0.241 | 2.56E-05  | 3 |
| elov121          | 1.18E-09 | 0.291828117 | 0.446 | 0.144 | 2.82E-05  | 3 |
| prdx21           | 1.22E-09 | 0.601061998 | 1     | 0.826 | 2.90E-05  | 3 |
| apoa1b1          | 1.36E-09 | 0.469532983 | 0.932 | 0.541 | 3.25E-05  | 3 |
| anks4b1          | 1.41E-09 | 0.316185132 | 0.824 | 0.378 | 3.37E-05  | 3 |
| phb1             | 1.47E-09 | 0.481434232 | 0.919 | 0.502 | 3.50E-05  | 3 |
| apobb.11         | 1.52E-09 | 0.327382754 | 0.635 | 0.243 | 3.62E-05  | 3 |
| mrps18a2         | 1.54E-09 | 0.28405214  | 0.716 | 0.348 | 3.66E-05  | 3 |
| cycl1            | 1.70E-09 | 0.384417694 | 0.946 | 0.548 | 4.06E-05  | 3 |
| ola11            | 1.84E-09 | 0.376221985 | 0.892 | 0.506 | 4.40E-05  | 3 |
| papss2a1         | 1.86E-09 | 0.294488345 | 0.743 | 0.32  | 4.43E-05  | 3 |
| sdhc1            | 1.89E-09 | 0.430634412 | 0.878 | 0.517 | 4.50E-05  | 3 |
| dhdh11           | 1.94E-09 | 0.39900362  | 0.851 | 0.459 | 4.63E-05  | 3 |
| c23h20orf241     | 2.00E-09 | 0.369138968 | 0.892 | 0.463 | 4.77E-05  | 3 |
| mrps6            | 2.08E-09 | 0.339959567 | 0.838 | 0.433 | 4.96E-05  | 3 |
| tomm222          | 2.09E-09 | 0.250024369 | 0.811 | 0.417 | 4.97E-05  | 3 |
| dhrs41           | 2.17E-09 | 0.301389386 | 0.703 | 0.326 | 5.17E-05  | 3 |
| sord             | 2.20E-09 | 0.293211238 | 0.378 | 0.119 | 5.25E-05  | 3 |
| idh3b1           | 2.24E-09 | 0.295853609 | 0.73  | 0.328 | 5.34E-05  | 3 |
| aifm4            | 2.24E-09 | 0.316172958 | 0.459 | 0.167 | 5.34E-05  | 3 |
| lrplab           | 2.30E-09 | 0.313195791 | 0.541 | 0.215 | 5.49E-05  | 3 |
| fam207a1         | 2.43E-09 | 0.381321774 | 0.635 | 0.296 | 5.80E-05  | 3 |
| rpl23            | 2.48E-09 | 0.405836504 | 1     | 0.981 | 5.90E-05  | 3 |
| mrps21           | 2.49E-09 | 0.261844788 | 0.568 | 0.239 | 5.93E-05  | 3 |
| minos11          | 2.49E-09 | 0.445042296 | 0.905 | 0.574 | 5.93E-05  | 3 |
| ATP5MD1          | 2.53E-09 | 0.645888451 | 0.973 | 0.707 | 6.02E-05  | 3 |
| coq51            | 2.58E-09 | 0.275015466 | 0.486 | 0.183 | 6.15E-05  | 3 |
| rwdd1            | 2.60E-09 | 0.277742152 | 0.892 | 0.467 | 6.20E-05  | 3 |
| mrpl131          | 2.70E-09 | 0.423746024 | 0.77  | 0.391 | 6.44E-05  | 3 |
| HADHB1           | 2.80E-09 | 0.371661199 | 0.838 | 0.428 | 6.68E-05  | 3 |
| rpl7111          | 2.83E-09 | 0.405150621 | 0.865 | 0.472 | 6.76E-05  | 3 |
| mgst3a1          | 2.86E-09 | 0.461800292 | 0.986 | 0.681 | 6.82E-05  | 3 |
| aldh1111         | 3.15E-09 | 0.265643942 | 0.689 | 0.311 | 7.51E-05  | 3 |
| ptgr11           | 3.19E-09 | 0.346264425 | 0.797 | 0.396 | 7.60E-05  | 3 |
| snrpb1           | 3.28E-09 | 0.520952286 | 0.986 | 0.661 | 7.81E-05  | 3 |
| DUT              | 3.33E-09 | 0.536280732 | 0.784 | 0.411 | 7.94E-05  | 3 |
| gstr2            | 3.33E-09 | 0.42505306  | 0.986 | 0.548 | 7.95E-05  | 3 |
| acad91           | 3.34E-09 | 0.262388202 | 0.581 | 0.239 | 7.97E-05  | 3 |
| rfc3             | 3.48E-09 | 0.257612999 | 0.446 | 0.161 | 8.29E-05  | 3 |
| dap1             | 3.57E-09 | 0.501127571 | 0.959 | 0.639 | 8.52E-05  | 3 |
| mrps331          | 3.60E-09 | 0.253283334 | 0.73  | 0.365 | 8.59E-05  | 3 |
| ddt              | 3.72E-09 | 0.320086064 | 0.905 | 0.526 | 8.87E-05  | 3 |
| atp5pb1          | 3.74E-09 | 0.539534865 | 0.986 | 0.702 | 8.91E-05  | 3 |
| atp5fld1         | 3.77E-09 | 0.531113414 | 0.973 | 0.715 | 9.00E-05  | 3 |
| ech11            | 3.92E-09 | 0.258155232 | 0.622 | 0.259 | 9.35E-05  | 3 |
| mrpl361          | 4.08E-09 | 0.34246891  | 0.77  | 0.396 | 9.72E-05  | 3 |
| slcold11         | 4.15E-09 | 0.290858906 | 0.703 | 0.276 | 9.90E-05  | 3 |
| plac8.1          | 4.44E-09 | 0.428240338 | 0.959 | 0.652 | 0.0001059 | 3 |
| aldh8a11         | 4.52E-09 | 0.290407288 | 0.622 | 0.261 | 0.0001077 | 3 |
| si:dkey-88p24.11 | 4.65E-09 | 0.279521121 | 0.757 | 0.369 | 0.0001108 | 3 |
| atp5meb          | 4.76E-09 | 0.425904132 | 1     | 0.772 | 0.0001136 | 3 |
| cox6c1           | 4.79E-09 | 0.48800735  | 0.986 | 0.739 | 0.0001142 | 3 |
| cox161           | 4.93E-09 | 0.31398841  | 0.527 | 0.222 | 0.0001176 | 3 |

|                    |          |             |       |       |           |   |
|--------------------|----------|-------------|-------|-------|-----------|---|
| zgc:153911         | 4.96E-09 | 0.269322737 | 0.608 | 0.257 | 0.0001183 | 3 |
| ndufb2             | 5.06E-09 | 0.391470548 | 0.959 | 0.641 | 0.0001207 | 3 |
| si:ch211-13315.7   | 5.23E-09 | 0.288921806 | 0.757 | 0.363 | 0.0001248 | 3 |
| mrpl451            | 5.29E-09 | 0.266156625 | 0.662 | 0.296 | 0.000126  | 3 |
| si:dkey-13i19.8    | 5.35E-09 | 0.279376251 | 0.77  | 0.369 | 0.0001277 | 3 |
| lpcat4             | 5.68E-09 | 0.29702179  | 0.432 | 0.15  | 0.0001355 | 3 |
| rpl27              | 5.75E-09 | 0.371821093 | 1     | 0.957 | 0.0001372 | 3 |
| aspdh              | 6.10E-09 | 0.261449404 | 0.432 | 0.156 | 0.0001454 | 3 |
| EIF3K1             | 6.20E-09 | 0.454851418 | 0.905 | 0.57  | 0.0001477 | 3 |
| glrx3              | 6.37E-09 | 0.2572606   | 0.703 | 0.344 | 0.0001519 | 3 |
| cenpx              | 6.43E-09 | 0.271913146 | 0.635 | 0.283 | 0.0001534 | 3 |
| cat1               | 6.95E-09 | 0.373769187 | 0.77  | 0.367 | 0.0001656 | 3 |
| slc7a71            | 7.05E-09 | 0.325212963 | 0.5   | 0.181 | 0.0001682 | 3 |
| drg11              | 7.15E-09 | 0.285530518 | 0.581 | 0.252 | 0.0001704 | 3 |
| pdcd5              | 7.23E-09 | 0.311518467 | 0.649 | 0.307 | 0.0001724 | 3 |
| eno31              | 7.25E-09 | 0.514565504 | 0.986 | 0.726 | 0.0001728 | 3 |
| atp5mc11           | 7.38E-09 | 0.482780531 | 1     | 0.781 | 0.000176  | 3 |
| ndufb7             | 7.43E-09 | 0.36523136  | 0.973 | 0.646 | 0.0001771 | 3 |
| atp5mc3b1          | 7.48E-09 | 0.537954977 | 1     | 0.839 | 0.0001783 | 3 |
| EIF2S1B1           | 7.54E-09 | 0.455172391 | 0.919 | 0.559 | 0.0001799 | 3 |
| atp5if1b           | 7.59E-09 | 0.471095667 | 0.973 | 0.693 | 0.0001811 | 3 |
| zgc:77929          | 7.84E-09 | 0.297768185 | 0.392 | 0.135 | 0.0001871 | 3 |
| banf11             | 8.34E-09 | 0.279066568 | 0.946 | 0.517 | 0.000199  | 3 |
| acs11b1            | 8.84E-09 | 0.291708526 | 0.878 | 0.413 | 0.0002108 | 3 |
| tsr21              | 9.12E-09 | 0.280905482 | 0.662 | 0.3   | 0.0002174 | 3 |
| slc9a3r1a1         | 9.80E-09 | 0.326425588 | 0.797 | 0.385 | 0.0002337 | 3 |
| mtch21             | 1.02E-08 | 0.275655607 | 0.77  | 0.367 | 0.0002443 | 3 |
| sub1b1             | 1.03E-08 | 0.299610821 | 0.689 | 0.324 | 0.0002456 | 3 |
| zgc:1588461        | 1.06E-08 | 0.599275423 | 0.986 | 0.748 | 0.0002525 | 3 |
| ndufa61            | 1.08E-08 | 0.391871217 | 0.959 | 0.661 | 0.0002584 | 3 |
| ccl25a1            | 1.09E-08 | 0.34835492  | 0.554 | 0.226 | 0.0002603 | 3 |
| chchd2             | 1.12E-08 | 0.299004054 | 0.946 | 0.585 | 0.0002659 | 3 |
| snul3b1            | 1.20E-08 | 0.450395631 | 0.892 | 0.576 | 0.0002851 | 3 |
| smim8              | 1.35E-08 | 0.265148051 | 0.608 | 0.27  | 0.0003211 | 3 |
| slc25a331          | 1.35E-08 | 0.288256592 | 0.486 | 0.187 | 0.000322  | 3 |
| apoA4b.2           | 1.45E-08 | 0.289538344 | 0.554 | 0.224 | 0.0003454 | 3 |
| atp5fle            | 1.47E-08 | 0.504594772 | 1     | 0.874 | 0.0003498 | 3 |
| rbm8a1             | 1.53E-08 | 0.268258693 | 0.946 | 0.578 | 0.0003653 | 3 |
| nupr11             | 1.60E-08 | 0.621293778 | 0.986 | 0.743 | 0.000381  | 3 |
| gpx1a1             | 1.68E-08 | 0.416493554 | 0.905 | 0.526 | 0.0004005 | 3 |
| ppalb1             | 1.71E-08 | 0.305555384 | 0.824 | 0.424 | 0.0004067 | 3 |
| s100a10a1          | 1.73E-08 | 0.586594267 | 1     | 0.8   | 0.0004133 | 3 |
| cmc1               | 1.85E-08 | 0.261988064 | 0.622 | 0.283 | 0.0004403 | 3 |
| sub1a              | 1.91E-08 | 0.446301611 | 0.946 | 0.628 | 0.0004554 | 3 |
| si:dkey-16p21.82   | 1.94E-08 | 0.471393749 | 0.797 | 0.435 | 0.0004626 | 3 |
| acox31             | 2.12E-08 | 0.27546216  | 0.405 | 0.144 | 0.0005057 | 3 |
| si:ch211-225b11.11 | 2.12E-08 | 0.356987726 | 0.554 | 0.241 | 0.0005063 | 3 |
| glud1b1            | 2.30E-08 | 0.352980448 | 0.878 | 0.469 | 0.0005478 | 3 |
| mrpl521            | 2.31E-08 | 0.370989725 | 0.77  | 0.428 | 0.0005504 | 3 |
| ugt2a41            | 2.57E-08 | 0.323219364 | 0.77  | 0.402 | 0.0006124 | 3 |
| zgc:194392         | 2.58E-08 | 0.255584544 | 0.473 | 0.181 | 0.0006152 | 3 |
| mpv17121           | 2.60E-08 | 0.293425031 | 0.568 | 0.254 | 0.0006203 | 3 |
| ndufb91            | 2.73E-08 | 0.332163237 | 0.973 | 0.646 | 0.0006517 | 3 |
| gstp2              | 2.80E-08 | 0.353500367 | 0.581 | 0.241 | 0.0006676 | 3 |

|                   |          |             |       |       |           |   |
|-------------------|----------|-------------|-------|-------|-----------|---|
| si:ch211-282b22.1 | 2.82E-08 | 0.322403697 | 0.554 | 0.25  | 0.0006726 | 3 |
| vill1             | 2.85E-08 | 0.349813621 | 0.973 | 0.548 | 0.0006805 | 3 |
| oxall1            | 2.87E-08 | 0.267198246 | 0.554 | 0.231 | 0.0006851 | 3 |
| dlst1             | 2.97E-08 | 0.362224754 | 0.865 | 0.474 | 0.0007085 | 3 |
| gnl31             | 3.16E-08 | 0.340097113 | 0.851 | 0.474 | 0.0007526 | 3 |
| tmcc3             | 3.42E-08 | 0.302871738 | 0.541 | 0.233 | 0.0008148 | 3 |
| polr2k            | 3.50E-08 | 0.289400685 | 0.797 | 0.413 | 0.000834  | 3 |
| aldh1a21          | 3.55E-08 | 0.380747131 | 0.473 | 0.185 | 0.0008463 | 3 |
| nop53             | 3.62E-08 | 0.338487599 | 0.919 | 0.543 | 0.0008622 | 3 |
| mcm5              | 3.81E-08 | 0.266838983 | 0.473 | 0.185 | 0.0009087 | 3 |
| pa2g4a1           | 3.95E-08 | 0.384585879 | 0.905 | 0.456 | 0.0009414 | 3 |
| ptges3b           | 4.00E-08 | 0.369893672 | 0.919 | 0.57  | 0.0009539 | 3 |
| EIF3G1            | 4.07E-08 | 0.402688782 | 0.946 | 0.565 | 0.0009716 | 3 |
| coa6              | 4.16E-08 | 0.304589493 | 0.784 | 0.43  | 0.0009915 | 3 |
| mdh1aa1           | 4.32E-08 | 0.468429025 | 0.946 | 0.602 | 0.0010297 | 3 |
| nedd4a1           | 4.37E-08 | 0.260991776 | 0.838 | 0.393 | 0.0010409 | 3 |
| tomm61            | 4.38E-08 | 0.381499258 | 0.946 | 0.591 | 0.0010449 | 3 |
| rps5              | 4.52E-08 | 0.366719878 | 1     | 0.959 | 0.0010784 | 3 |
| ndufa7            | 4.90E-08 | 0.40834955  | 0.878 | 0.502 | 0.0011695 | 3 |
| zgc:1539681       | 4.94E-08 | 0.427160421 | 0.514 | 0.209 | 0.0011772 | 3 |
| cox5ab1           | 5.07E-08 | 0.444256519 | 0.959 | 0.704 | 0.0012083 | 3 |
| mrps141           | 5.36E-08 | 0.28979706  | 0.757 | 0.398 | 0.0012784 | 3 |
| mrpl371           | 5.59E-08 | 0.2903232   | 0.649 | 0.313 | 0.0013337 | 3 |
| EIF2S2            | 6.49E-08 | 0.404172722 | 0.973 | 0.706 | 0.0015476 | 3 |
| gsto2             | 7.10E-08 | 0.300143775 | 0.662 | 0.328 | 0.0016922 | 3 |
| nop10             | 7.36E-08 | 0.292664289 | 0.932 | 0.567 | 0.001756  | 3 |
| RPL41             | 7.47E-08 | 0.393214899 | 1     | 0.998 | 0.0017805 | 3 |
| IZUM01R1          | 7.57E-08 | 0.287329364 | 0.486 | 0.206 | 0.0018044 | 3 |
| cox7a31           | 8.00E-08 | 0.253991227 | 0.878 | 0.543 | 0.0019087 | 3 |
| hypk              | 8.27E-08 | 0.279399166 | 0.932 | 0.611 | 0.001973  | 3 |
| rs11d12           | 8.70E-08 | 0.303326569 | 0.878 | 0.493 | 0.0020737 | 3 |
| tomm20a           | 8.93E-08 | 0.270816354 | 0.851 | 0.481 | 0.0021293 | 3 |
| clqbp1            | 9.02E-08 | 0.457085462 | 0.946 | 0.683 | 0.0021516 | 3 |
| dhfr              | 9.15E-08 | 0.271454175 | 0.541 | 0.241 | 0.0021818 | 3 |
| zgc:110182        | 1.00E-07 | 0.266345549 | 0.743 | 0.367 | 0.0023927 | 3 |
| psmc61            | 1.02E-07 | 0.327869188 | 0.757 | 0.394 | 0.002428  | 3 |
| mrps28            | 1.04E-07 | 0.280871562 | 0.581 | 0.274 | 0.0024834 | 3 |
| zc3h13            | 1.12E-07 | 0.278554159 | 0.595 | 0.281 | 0.0026801 | 3 |
| cox5aa1           | 1.15E-07 | 0.427145696 | 0.986 | 0.737 | 0.0027464 | 3 |
| ahcyl             | 1.24E-07 | 0.365624459 | 0.973 | 0.606 | 0.0029573 | 3 |
| rps10             | 1.35E-07 | 0.373266607 | 1     | 0.944 | 0.0032256 | 3 |
| atp5pd1           | 1.42E-07 | 0.437509314 | 0.986 | 0.761 | 0.0033778 | 3 |
| prkab1b1          | 1.44E-07 | 0.307207952 | 0.703 | 0.348 | 0.0034337 | 3 |
| sb:cb10581        | 1.64E-07 | 0.350993285 | 0.946 | 0.57  | 0.0039084 | 3 |
| psmb1             | 1.79E-07 | 0.334084918 | 0.932 | 0.57  | 0.0042612 | 3 |
| aldob1            | 1.93E-07 | 0.450654947 | 0.986 | 0.726 | 0.0046046 | 3 |
| gpx1b             | 1.94E-07 | 0.310162057 | 0.459 | 0.193 | 0.004627  | 3 |
| nop581            | 1.94E-07 | 0.338627829 | 0.946 | 0.572 | 0.0046327 | 3 |
| smim15            | 2.22E-07 | 0.262894331 | 0.77  | 0.426 | 0.0053045 | 3 |
| idh3g1            | 2.28E-07 | 0.254279529 | 0.486 | 0.213 | 0.0054265 | 3 |
| si:ch211-121j5.41 | 2.66E-07 | 0.457710217 | 0.351 | 0.128 | 0.0063471 | 3 |
| rpl121            | 2.99E-07 | 0.440995466 | 1     | 0.935 | 0.0071221 | 3 |
| gpx4b1            | 2.99E-07 | 0.421801565 | 0.946 | 0.696 | 0.0071403 | 3 |
| etfal             | 3.01E-07 | 0.283525993 | 0.784 | 0.406 | 0.007182  | 3 |

|                   |          |             |       |       |           |   |
|-------------------|----------|-------------|-------|-------|-----------|---|
| NDUFC1            | 3.22E-07 | 0.261446151 | 0.905 | 0.58  | 0.0076666 | 3 |
| si:ch211-217k17.7 | 3.25E-07 | 0.251189264 | 0.838 | 0.469 | 0.0077444 | 3 |
| ndufc2            | 3.44E-07 | 0.330689861 | 0.959 | 0.665 | 0.0082077 | 3 |
| slc25a201         | 3.51E-07 | 0.275143627 | 0.797 | 0.426 | 0.008364  | 3 |
| decr21            | 3.52E-07 | 0.331241065 | 0.486 | 0.224 | 0.0083953 | 3 |
| cldn151b1         | 3.61E-07 | 0.334666914 | 0.959 | 0.559 | 0.0086018 | 3 |
| serpinb1131       | 4.10E-07 | 0.362941259 | 0.986 | 0.606 | 0.0097841 | 3 |
| hnrnpa1b1         | 4.13E-07 | 0.333510232 | 0.986 | 0.598 | 0.0098592 | 3 |
| slc25a3b1         | 4.29E-07 | 0.458127512 | 1     | 0.759 | 0.0102298 | 3 |
| EIF3ha1           | 4.30E-07 | 0.401367832 | 0.878 | 0.524 | 0.0102513 | 3 |
| hspel2            | 4.61E-07 | 0.418485031 | 0.973 | 0.778 | 0.0109884 | 3 |
| zgc:195170        | 4.79E-07 | 0.25352739  | 0.473 | 0.206 | 0.011418  | 3 |
| hibadhb1          | 5.50E-07 | 0.264704535 | 0.514 | 0.237 | 0.0131186 | 3 |
| snrpg             | 5.60E-07 | 0.266898338 | 0.919 | 0.594 | 0.0133469 | 3 |
| anxa2b1           | 5.74E-07 | 0.438637934 | 1     | 0.744 | 0.0136752 | 3 |
| pfdn51            | 5.88E-07 | 0.259570611 | 0.689 | 0.35  | 0.0140161 | 3 |
| mdh21             | 6.10E-07 | 0.382565601 | 0.919 | 0.578 | 0.0145358 | 3 |
| magoh             | 6.17E-07 | 0.277486779 | 0.811 | 0.485 | 0.0147073 | 3 |
| ndufa31           | 6.53E-07 | 0.337689435 | 0.919 | 0.607 | 0.0155816 | 3 |
| rtcb              | 6.59E-07 | 0.361780149 | 0.554 | 0.278 | 0.0157127 | 3 |
| ybey              | 6.82E-07 | 0.257483622 | 0.432 | 0.187 | 0.0162523 | 3 |
| zgc:193541        | 7.26E-07 | 0.416573587 | 0.973 | 0.748 | 0.0173137 | 3 |
| ssuh2rs1          | 7.50E-07 | 0.274576286 | 0.676 | 0.376 | 0.01788   | 3 |
| hikeshi           | 8.35E-07 | 0.304393711 | 0.608 | 0.302 | 0.0198993 | 3 |
| rps15             | 8.39E-07 | 0.313225933 | 1     | 0.959 | 0.0199966 | 3 |
| cycsb             | 8.94E-07 | 0.406621955 | 0.973 | 0.819 | 0.0213206 | 3 |
| pk1r1             | 9.24E-07 | 0.289801046 | 0.851 | 0.454 | 0.0220332 | 3 |
| cox7c             | 9.35E-07 | 0.436734577 | 1     | 0.809 | 0.022301  | 3 |
| creb313a1         | 9.45E-07 | 0.261201033 | 0.459 | 0.196 | 0.0225282 | 3 |
| ndn12             | 1.17E-06 | 0.278962526 | 0.5   | 0.233 | 0.027787  | 3 |
| dkc11             | 1.28E-06 | 0.270905092 | 0.865 | 0.496 | 0.0304824 | 3 |
| dtymk             | 1.36E-06 | 0.308695125 | 0.405 | 0.169 | 0.032396  | 3 |
| hnrnpm            | 1.43E-06 | 0.35564525  | 0.716 | 0.376 | 0.0340171 | 3 |
| rps23             | 1.48E-06 | 0.332069114 | 0.986 | 0.974 | 0.0353503 | 3 |
| ccz1              | 1.57E-06 | 0.265781352 | 0.392 | 0.161 | 0.037328  | 3 |
| zgc:56493         | 1.66E-06 | 0.364162802 | 0.973 | 0.826 | 0.0395192 | 3 |
| rars1             | 1.76E-06 | 0.272098882 | 0.608 | 0.311 | 0.0420796 | 3 |
| rps111            | 1.82E-06 | 0.373551719 | 1     | 0.92  | 0.0434003 | 3 |
| krt921            | 1.86E-06 | 0.405399708 | 1     | 0.794 | 0.0444654 | 3 |
| hspd11            | 1.87E-06 | 0.360798263 | 0.946 | 0.637 | 0.0445047 | 3 |
| ak21              | 1.90E-06 | 0.281734661 | 0.932 | 0.567 | 0.0454184 | 3 |
| si:dkeyp-73b11.81 | 2.04E-06 | 0.407770103 | 1     | 0.756 | 0.0485401 | 3 |
| fth1a1            | 2.04E-06 | 0.371991541 | 1     | 0.783 | 0.0485902 | 3 |
| glrx              | 2.04E-06 | 0.258470347 | 0.919 | 0.611 | 0.0487534 | 3 |
| march51           | 2.08E-06 | 0.272796478 | 0.446 | 0.211 | 0.0494925 | 3 |
| pa2g4b1           | 2.22E-06 | 0.262012965 | 0.838 | 0.48  | 0.0529719 | 3 |
| rpl2211           | 2.57E-06 | 0.368467534 | 0.986 | 0.852 | 0.061356  | 3 |
| uqcrb             | 2.80E-06 | 0.268170792 | 0.986 | 0.813 | 0.0667929 | 3 |
| uqcrc11           | 2.88E-06 | 0.253242988 | 0.824 | 0.498 | 0.0687457 | 3 |
| rpl35a            | 2.95E-06 | 0.314163148 | 1     | 0.957 | 0.0702265 | 3 |
| rps8a1            | 2.95E-06 | 0.364420586 | 0.986 | 0.974 | 0.0702569 | 3 |
| hccsb1            | 3.19E-06 | 0.258349721 | 0.459 | 0.213 | 0.0760847 | 3 |
| rpl15             | 3.52E-06 | 0.329219905 | 1     | 0.95  | 0.0838864 | 3 |
| bt3f1             | 3.61E-06 | 0.39177414  | 0.986 | 0.754 | 0.0859623 | 3 |

|                  |           |             |       |       |           |   |
|------------------|-----------|-------------|-------|-------|-----------|---|
| cyp24a11         | 3.69E-06  | 0.353496738 | 0.419 | 0.178 | 0.0880117 | 3 |
| tmem86b1         | 3.81E-06  | 0.253370323 | 0.324 | 0.122 | 0.0908553 | 3 |
| rplp211          | 4.55E-06  | 0.287052598 | 0.986 | 0.978 | 0.1085817 | 3 |
| sdhal            | 4.71E-06  | 0.262228058 | 0.73  | 0.407 | 0.1122917 | 3 |
| slbp             | 4.83E-06  | 0.262264856 | 0.432 | 0.198 | 0.1152644 | 3 |
| tmem258          | 6.34E-06  | 0.315068905 | 0.986 | 0.663 | 0.1510587 | 3 |
| porbl            | 6.82E-06  | 0.259091953 | 0.622 | 0.324 | 0.1625914 | 3 |
| snrpe            | 7.04E-06  | 0.273638867 | 0.932 | 0.646 | 0.167927  | 3 |
| timm291          | 7.44E-06  | 0.256745468 | 0.459 | 0.213 | 0.1774223 | 3 |
| atp5fa11         | 7.59E-06  | 0.358089022 | 1     | 0.748 | 0.1810861 | 3 |
| nup621           | 8.08E-06  | 0.273280138 | 0.446 | 0.206 | 0.192678  | 3 |
| rpl30            | 8.29E-06  | 0.28964036  | 1     | 0.943 | 0.1977681 | 3 |
| insig11          | 9.42E-06  | 0.31596635  | 0.824 | 0.467 | 0.2246838 | 3 |
| naca             | 9.70E-06  | 0.279686288 | 1     | 0.93  | 0.231248  | 3 |
| rps12            | 1.05E-05  | 0.344938836 | 1     | 0.957 | 0.2499587 | 3 |
| setbl            | 1.06E-05  | 0.304803134 | 0.959 | 0.633 | 0.2516509 | 3 |
| rps15a           | 1.06E-05  | 0.263972334 | 1     | 0.961 | 0.2524204 | 3 |
| hmgb2b           | 1.12E-05  | 0.290024997 | 0.973 | 0.743 | 0.2674373 | 3 |
| rps31            | 1.16E-05  | 0.354081938 | 1     | 0.911 | 0.2763243 | 3 |
| EIF3f1           | 1.21E-05  | 0.306722784 | 0.946 | 0.648 | 0.2885035 | 3 |
| cldn151a1        | 1.29E-05  | 0.306910929 | 1     | 0.785 | 0.3080305 | 3 |
| atp5f1b1         | 1.34E-05  | 0.39716943  | 0.986 | 0.811 | 0.3183814 | 3 |
| rpl39            | 1.34E-05  | 0.286780598 | 1     | 0.961 | 0.3184817 | 3 |
| rps7             | 1.36E-05  | 0.278631578 | 1     | 0.981 | 0.3252653 | 3 |
| rpl13            | 1.80E-05  | 0.265077816 | 1     | 0.978 | 0.4283978 | 3 |
| rps16            | 2.20E-05  | 0.288124045 | 1     | 0.93  | 0.5255668 | 3 |
| si:ch211-161h7.4 | 2.32E-05  | 0.335258644 | 0.311 | 0.131 | 0.5537461 | 3 |
| rpl37.1          | 2.76E-05  | 0.328787838 | 1     | 0.978 | 0.6583267 | 3 |
| rps3a1           | 3.08E-05  | 0.3516406   | 1     | 0.933 | 0.7340275 | 3 |
| tma7             | 5.05E-05  | 0.274441769 | 0.973 | 0.767 | 1         | 3 |
| ndufal           | 5.62E-05  | 0.275130157 | 0.946 | 0.737 | 1         | 3 |
| rps91            | 6.53E-05  | 0.289958394 | 0.986 | 0.952 | 1         | 3 |
| rpl36            | 6.63E-05  | 0.270177665 | 1     | 0.948 | 1         | 3 |
| rps24            | 6.93E-05  | 0.266966351 | 1     | 0.963 | 1         | 3 |
| ran1             | 6.97E-05  | 0.296940869 | 0.986 | 0.75  | 1         | 3 |
| atp5if1a         | 0.0001023 | 0.273226727 | 0.973 | 0.791 | 1         | 3 |
| rpl23a           | 0.0001062 | 0.262377333 | 0.986 | 0.956 | 1         | 3 |
| rpl17            | 0.0001418 | 0.27048257  | 1     | 0.946 | 1         | 3 |
| nme2b.12         | 0.0001582 | 0.352929848 | 1     | 0.867 | 1         | 3 |
| npmla1           | 0.0002787 | 0.26267042  | 0.959 | 0.746 | 1         | 3 |
| ndufa41          | 0.0002957 | 0.294773027 | 0.959 | 0.767 | 1         | 3 |
| rplp01           | 0.0004233 | 0.30787902  | 0.986 | 0.928 | 1         | 3 |
| htatip2          | 0.0004263 | 0.331874572 | 0.297 | 0.141 | 1         | 3 |
| rpl5a1           | 0.0014235 | 0.255004545 | 1     | 0.815 | 1         | 3 |
| rpl191           | 0.001653  | 0.251140626 | 1     | 0.95  | 1         | 3 |
| rpl71            | 0.0018994 | 0.250591333 | 1     | 0.922 | 1         | 3 |
| zgc:165555.15    | 0.0032476 | 0.398920061 | 0.473 | 0.3   | 1         | 3 |
| rps29            | 6.29E-10  | 0.481721215 | 1     | 0.998 | 1.50E-05  | 4 |
| CT027638.1       | 3.83E-09  | 2.466249404 | 0.944 | 0.954 | 9.14E-05  | 4 |
| fabp6            | 1.17E-08  | 1.330944148 | 0.292 | 0.079 | 0.0002789 | 4 |
| zgc:158463       | 1.28E-08  | 1.279291113 | 0.958 | 0.972 | 0.0003064 | 4 |
| rpl38            | 1.73E-08  | 0.739388059 | 1     | 0.98  | 0.0004124 | 4 |
| sptbn5           | 6.82E-08  | 1.431436646 | 0.347 | 0.137 | 0.0016273 | 4 |
| CR383676.11      | 1.01E-07  | 0.627223761 | 0.972 | 0.982 | 0.0024084 | 4 |

|                   |       |           |             |       |       |           |   |
|-------------------|-------|-----------|-------------|-------|-------|-----------|---|
| si:ch211-153b23.5 |       | 4.48E-07  | 1.332278818 | 0.444 | 0.212 | 0.0106887 | 4 |
| si:ch73-335121.41 |       | 1.22E-06  | 0.751862256 | 0.819 | 0.718 | 0.0292065 | 4 |
| atf3l             |       | 1.59E-06  | 0.77792711  | 0.889 | 0.843 | 0.03802   | 4 |
| cldnbl            |       | 1.67E-06  | 0.860782698 | 0.861 | 0.768 | 0.0397188 | 4 |
| si:ch211-139a5.9  |       | 2.78E-06  | 1.632439377 | 0.403 | 0.205 | 0.0662658 | 4 |
| ier2b             |       | 3.67E-06  | 0.987523141 | 0.764 | 0.71  | 0.0874466 | 4 |
| mt-col            |       | 4.12E-06  | 0.844421568 | 0.875 | 0.9   | 0.0981532 | 4 |
|                   | 1-Jun | 7.05E-06  | 0.69801305  | 0.819 | 0.821 | 0.1681469 | 4 |
| epcam             |       | 7.34E-06  | 0.600607032 | 0.958 | 0.908 | 0.1751227 | 4 |
| mt-nd21           |       | 7.35E-06  | 0.801227878 | 0.861 | 0.843 | 0.1752896 | 4 |
| psmd6             |       | 9.24E-06  | 0.337345745 | 0.125 | 0.411 | 0.2202721 | 4 |
| rps25             |       | 1.38E-05  | 0.402139489 | 0.986 | 0.969 | 0.3290665 | 4 |
| rps28             |       | 1.43E-05  | 0.435499903 | 0.986 | 0.983 | 0.3410016 | 4 |
| tnkslbp1          |       | 1.83E-05  | 1.635892308 | 0.542 | 0.435 | 0.4371881 | 4 |
| hbegfal           |       | 1.95E-05  | 0.830945292 | 0.847 | 0.788 | 0.4646441 | 4 |
| mt-cyb1           |       | 6.62E-05  | 0.576590779 | 0.917 | 0.902 | 1         | 4 |
| krt18l            |       | 6.88E-05  | 0.683995456 | 0.694 | 0.546 | 1         | 4 |
| mt-co21           |       | 7.08E-05  | 0.635966005 | 0.931 | 0.939 | 1         | 4 |
| rpl29l            |       | 7.49E-05  | 0.455323329 | 0.972 | 0.928 | 1         | 4 |
| mt-co3            |       | 0.0001017 | 0.584726314 | 0.917 | 0.937 | 1         | 4 |
| wu:fb18f06        |       | 0.0001765 | 0.997601334 | 0.542 | 0.421 | 1         | 4 |
| selenow1l         |       | 0.0002012 | 0.724916054 | 0.694 | 0.666 | 1         | 4 |
| mt-nd1l           |       | 0.0002573 | 0.624819914 | 0.833 | 0.852 | 1         | 4 |
| mt-nd5            |       | 0.0003401 | 0.653879828 | 0.778 | 0.76  | 1         | 4 |
| krttlc19e1        |       | 0.0004143 | 0.421038484 | 0.736 | 0.694 | 1         | 4 |
| mt-nd3l           |       | 0.0004722 | 0.56127752  | 0.806 | 0.764 | 1         | 4 |
| zgc:64022         |       | 0.0006474 | 1.033155061 | 0.444 | 0.308 | 1         | 4 |
| mt-nd4l           |       | 0.0008308 | 0.485053147 | 0.861 | 0.834 | 1         | 4 |
| dnmbp             |       | 0.000867  | 0.886740726 | 0.653 | 0.622 | 1         | 4 |
| mmgtl             |       | 0.0008792 | 0.39001299  | 0.167 | 0.424 | 1         | 4 |
| fosabl            |       | 0.0009856 | 0.62861685  | 0.694 | 0.664 | 1         | 4 |
| bahcc1a           |       | 0.0011046 | 0.613983923 | 0.278 | 0.149 | 1         | 4 |
| ier5              |       | 0.0012381 | 0.866145661 | 0.667 | 0.666 | 1         | 4 |
| zgc:1627301       |       | 0.0019015 | 0.785433725 | 0.75  | 0.793 | 1         | 4 |
| sec23b1           |       | 0.0023139 | 0.326341699 | 0.167 | 0.378 | 1         | 4 |
| phlda2            |       | 0.0026319 | 0.364896219 | 0.889 | 0.902 | 1         | 4 |
| fosb              |       | 0.0029285 | 0.863256116 | 0.361 | 0.247 | 1         | 4 |
| mt-atp6           |       | 0.0031062 | 0.356910011 | 0.903 | 0.915 | 1         | 4 |
| tcf3b1            |       | 0.0034444 | 0.443477887 | 0.153 | 0.373 | 1         | 4 |
| decr1l            |       | 0.0038606 | 0.250001192 | 0.083 | 0.253 | 1         | 4 |
| pnrc2l            |       | 0.0046315 | 0.45826687  | 0.833 | 0.801 | 1         | 4 |
| tagln2            |       | 0.0048288 | 0.533000002 | 0.917 | 0.847 | 1         | 4 |
| hnrnph1l          |       | 0.0060981 | 0.316349201 | 0.222 | 0.448 | 1         | 4 |
| lmo7a             |       | 0.0074819 | 0.673287742 | 0.528 | 0.485 | 1         | 4 |
| gmfb              |       | 0.0076746 | 0.468504272 | 0.111 | 0.286 | 1         | 4 |
| mcf2              |       | 0.0078458 | 0.276558105 | 0.111 | 0.282 | 1         | 4 |
| igfbpl1a1         |       | 0.0078802 | 0.495388057 | 0.569 | 0.47  | 1         | 4 |
| arhgap5l          |       | 0.0081964 | 0.906950195 | 0.611 | 0.631 | 1         | 4 |
| ccn1l1b1          |       | 0.00823   | 0.260023951 | 0.208 | 0.434 | 1         | 4 |
| foxa3             |       | 0.0082878 | 0.309208402 | 0.222 | 0.448 | 1         | 4 |
| mpp1              |       | 0.0083048 | 0.250515658 | 0.111 | 0.269 | 1         | 4 |
| stard14           |       | 0.0085994 | 0.588015654 | 0.597 | 0.585 | 1         | 4 |
| tjp2a             |       | 0.0090074 | 0.288854728 | 0.097 | 0.26  | 1         | 4 |
| fosl1a1           |       | 0.0092604 | 0.637566109 | 0.611 | 0.611 | 1         | 4 |

|                   |           |             |       |       |           |   |
|-------------------|-----------|-------------|-------|-------|-----------|---|
| tmem184a1         | 0.0093251 | 0.321091308 | 0.097 | 0.255 | 1         | 4 |
| myzap             | 0.0093901 | 0.398142873 | 0.111 | 0.277 | 1         | 4 |
| zfhx31            | 0.0094108 | 0.709335159 | 0.361 | 0.264 | 1         | 4 |
| rpl37.11          | 0.009613  | 0.318063893 | 0.986 | 0.98  | 1         | 4 |
| apoc22            | 1.97E-12  | 0.975999366 | 0.915 | 0.475 | 4.69E-08  | 5 |
| ndufb101          | 6.83E-12  | 0.82800113  | 0.944 | 0.635 | 1.63E-07  | 5 |
| fdx12             | 1.48E-11  | 0.743610666 | 0.873 | 0.479 | 3.52E-07  | 5 |
| timm8b2           | 2.24E-11  | 0.724985423 | 0.817 | 0.479 | 5.34E-07  | 5 |
| fabp1b.12         | 3.33E-11  | 1.30080086  | 0.901 | 0.534 | 7.93E-07  | 5 |
| rbp2a3            | 6.20E-11  | 0.815828885 | 0.958 | 0.519 | 1.48E-06  | 5 |
| apoa4b.12         | 1.16E-10  | 0.812834391 | 0.901 | 0.442 | 2.77E-06  | 5 |
| ndufa32           | 3.82E-10  | 0.62172228  | 0.901 | 0.611 | 9.10E-06  | 5 |
| uqcrq2            | 5.07E-10  | 0.768246712 | 0.915 | 0.74  | 1.21E-05  | 5 |
| afp4.12           | 5.33E-10  | 0.779864754 | 0.817 | 0.409 | 1.27E-05  | 5 |
| uqcrh2            | 9.22E-10  | 0.604690518 | 0.958 | 0.757 | 2.20E-05  | 5 |
| atp5pf1           | 1.10E-09  | 0.626858734 | 0.915 | 0.762 | 2.62E-05  | 5 |
| ndufb92           | 1.38E-09  | 0.500834257 | 0.901 | 0.657 | 3.28E-05  | 5 |
| atp5meb1          | 1.60E-09  | 0.594538444 | 0.958 | 0.779 | 3.81E-05  | 5 |
| cox7b2            | 3.27E-09  | 0.578679501 | 0.986 | 0.803 | 7.79E-05  | 5 |
| mgst3b3           | 3.82E-09  | 0.780866218 | 0.887 | 0.569 | 9.10E-05  | 5 |
| atp5l2            | 4.68E-09  | 0.582659304 | 0.958 | 0.829 | 0.0001115 | 5 |
| atp5fle1          | 6.36E-09  | 0.654891312 | 0.958 | 0.88  | 0.0001517 | 5 |
| aqp8a.22          | 7.58E-09  | 0.620189376 | 0.732 | 0.331 | 0.0001808 | 5 |
| tmem14ca          | 7.97E-09  | 0.668538296 | 0.69  | 0.405 | 0.00019   | 5 |
| plac8.11          | 9.00E-09  | 0.735594842 | 0.901 | 0.661 | 0.0002145 | 5 |
| apoa1a2           | 1.18E-08  | 0.600369341 | 0.887 | 0.459 | 0.0002811 | 5 |
| ociad22           | 1.22E-08  | 0.933473851 | 0.775 | 0.495 | 0.0002912 | 5 |
| ndufa13           | 1.27E-08  | 0.597233028 | 0.944 | 0.738 | 0.0003032 | 5 |
| fabp23            | 1.43E-08  | 0.716241515 | 1     | 0.759 | 0.0003408 | 5 |
| mrpl182           | 1.44E-08  | 0.542756707 | 0.746 | 0.448 | 0.0003439 | 5 |
| timm8a2           | 1.88E-08  | 0.483410391 | 0.704 | 0.401 | 0.0004484 | 5 |
| atp5if1a1         | 2.24E-08  | 0.585253464 | 0.944 | 0.796 | 0.0005331 | 5 |
| atp5if1b1         | 2.33E-08  | 0.605399933 | 0.901 | 0.703 | 0.0005566 | 5 |
| gsta.1.13         | 2.41E-08  | 0.80273597  | 0.958 | 0.825 | 0.0005736 | 5 |
| stom13b2          | 3.05E-08  | 0.690835168 | 0.789 | 0.451 | 0.0007281 | 5 |
| ndufb31           | 3.18E-08  | 0.607523567 | 0.873 | 0.619 | 0.0007593 | 5 |
| gpx4a2            | 7.46E-08  | 0.669014385 | 0.901 | 0.562 | 0.0017776 | 5 |
| tspan13a2         | 8.46E-08  | 0.632532158 | 0.676 | 0.392 | 0.002017  | 5 |
| mgst3a2           | 8.99E-08  | 0.577713397 | 0.944 | 0.689 | 0.0021447 | 5 |
| uqcrb1            | 1.01E-07  | 0.512349221 | 0.944 | 0.82  | 0.0023968 | 5 |
| ndufs52           | 1.19E-07  | 0.653647555 | 0.845 | 0.608 | 0.0028261 | 5 |
| si:ch211-13315.71 | 1.27E-07  | 0.611697511 | 0.676 | 0.376 | 0.0030174 | 5 |
| mrpl401           | 1.28E-07  | 0.53466712  | 0.634 | 0.366 | 0.0030628 | 5 |
| aurkaip12         | 1.31E-07  | 0.66840266  | 0.662 | 0.383 | 0.003131  | 5 |
| ndufb71           | 1.47E-07  | 0.604332676 | 0.859 | 0.663 | 0.0035167 | 5 |
| s100a10a2         | 1.58E-07  | 0.599475034 | 0.972 | 0.805 | 0.0037777 | 5 |
| ndufa122          | 1.67E-07  | 0.555160741 | 0.887 | 0.606 | 0.0039738 | 5 |
| pgrmc12           | 1.97E-07  | 0.572629594 | 0.859 | 0.547 | 0.0046862 | 5 |
| atp5mf1           | 2.06E-07  | 0.510341312 | 0.944 | 0.831 | 0.0049071 | 5 |
| uqcr101           | 2.30E-07  | 0.630167291 | 0.887 | 0.746 | 0.0054902 | 5 |
| cycsb1            | 2.65E-07  | 0.52392994  | 0.958 | 0.821 | 0.0063166 | 5 |
| snu13b2           | 3.29E-07  | 0.430788298 | 0.901 | 0.576 | 0.00784   | 5 |
| ndufb83           | 3.30E-07  | 0.395374885 | 0.915 | 0.676 | 0.0078657 | 5 |
| polr21            | 4.08E-07  | 0.401583301 | 0.718 | 0.457 | 0.0097189 | 5 |



|                    |          |             |       |       |           |   |
|--------------------|----------|-------------|-------|-------|-----------|---|
| si:dkey-33i11.9    | 4.39E-07 | 0.340714702 | 0.859 | 0.558 | 0.0104641 | 5 |
| ndufa71            | 5.06E-07 | 0.50067213  | 0.761 | 0.519 | 0.0120555 | 5 |
| hspel3             | 5.29E-07 | 0.548310011 | 0.972 | 0.779 | 0.0126042 | 5 |
| si:ch211-71m22.12  | 5.66E-07 | 0.622810198 | 0.789 | 0.497 | 0.0134963 | 5 |
| mrpl202            | 6.12E-07 | 0.607652371 | 0.676 | 0.416 | 0.0146025 | 5 |
| ndufab1b2          | 6.83E-07 | 0.575421356 | 0.817 | 0.602 | 0.016295  | 5 |
| sf3b51             | 6.99E-07 | 0.479493578 | 0.789 | 0.558 | 0.0166599 | 5 |
| cox6c2             | 7.04E-07 | 0.512197839 | 0.944 | 0.746 | 0.0167937 | 5 |
| chchd103           | 7.35E-07 | 0.454046479 | 0.831 | 0.501 | 0.0175288 | 5 |
| cox5ab2            | 8.38E-07 | 0.607043672 | 0.93  | 0.709 | 0.0199864 | 5 |
| ndufa21            | 9.56E-07 | 0.541336167 | 0.761 | 0.569 | 0.0227874 | 5 |
| CABZ01079011.11    | 9.81E-07 | 0.777086708 | 0.704 | 0.486 | 0.0233882 | 5 |
| zgc:1935411        | 9.87E-07 | 0.583141679 | 0.887 | 0.761 | 0.0235237 | 5 |
| uqcc2              | 1.18E-06 | 0.405074718 | 0.634 | 0.374 | 0.0282155 | 5 |
| dbi2               | 1.33E-06 | 0.556478117 | 0.93  | 0.777 | 0.0316201 | 5 |
| ugt1ab2            | 1.42E-06 | 0.613990736 | 0.803 | 0.449 | 0.0337776 | 5 |
| nupr12             | 1.49E-06 | 0.544549834 | 0.972 | 0.746 | 0.0356004 | 5 |
| cldn15a2           | 1.50E-06 | 0.49438083  | 0.831 | 0.466 | 0.0358077 | 5 |
| si:dkeyp-73b11.82  | 1.56E-06 | 0.567933319 | 0.986 | 0.759 | 0.0370978 | 5 |
| ATP5MD2            | 1.59E-06 | 0.571679159 | 0.915 | 0.716 | 0.037989  | 5 |
| si:dkey-36i7.32    | 1.84E-06 | 0.481175912 | 0.944 | 0.617 | 0.0438477 | 5 |
| cox6b11            | 1.89E-06 | 0.464553967 | 0.915 | 0.738 | 0.0450864 | 5 |
| adh8b2             | 2.10E-06 | 0.521693846 | 0.901 | 0.494 | 0.0499902 | 5 |
| gcsb2              | 2.82E-06 | 0.361117742 | 0.831 | 0.46  | 0.0671705 | 5 |
| RPL411             | 2.84E-06 | 0.390121976 | 1     | 0.998 | 0.0677965 | 5 |
| dap2               | 3.00E-06 | 0.585182657 | 0.873 | 0.652 | 0.0715346 | 5 |
| pam161             | 3.46E-06 | 0.460231007 | 0.634 | 0.413 | 0.082595  | 5 |
| ndufs61            | 3.76E-06 | 0.43456763  | 0.845 | 0.602 | 0.0895523 | 5 |
| zgc:172079.22      | 4.03E-06 | 0.760536373 | 0.732 | 0.462 | 0.0961384 | 5 |
| rpl381             | 4.45E-06 | 0.424862785 | 0.986 | 0.982 | 0.1060157 | 5 |
| ndufa51            | 5.56E-06 | 0.469656207 | 0.831 | 0.628 | 0.1325656 | 5 |
| chchd21            | 5.64E-06 | 0.558831504 | 0.845 | 0.6   | 0.1344212 | 5 |
| ndufs42            | 5.97E-06 | 0.408076459 | 0.803 | 0.573 | 0.1423296 | 5 |
| mrpl331            | 6.00E-06 | 0.445987453 | 0.69  | 0.433 | 0.1429604 | 5 |
| llph2              | 6.04E-06 | 0.401103937 | 0.648 | 0.42  | 0.1439843 | 5 |
| rps15a1            | 6.34E-06 | 0.33863012  | 1     | 0.961 | 0.1511642 | 5 |
| cyp2k162           | 6.43E-06 | 0.480341447 | 0.718 | 0.424 | 0.1533773 | 5 |
| mrpl141            | 6.66E-06 | 0.378031751 | 0.676 | 0.429 | 0.1587987 | 5 |
| sod12              | 6.72E-06 | 0.498168125 | 0.901 | 0.7   | 0.1603564 | 5 |
| cox7a2a2           | 6.82E-06 | 0.460758966 | 0.93  | 0.731 | 0.1626874 | 5 |
| si:dkey-183n20.152 | 7.39E-06 | 0.392981482 | 0.451 | 0.234 | 0.1761314 | 5 |
| mrpl112            | 7.51E-06 | 0.467517027 | 0.761 | 0.514 | 0.1791653 | 5 |
| timm92             | 8.64E-06 | 0.35714159  | 0.648 | 0.398 | 0.2059739 | 5 |
| cox6a12            | 9.46E-06 | 0.466925487 | 0.972 | 0.831 | 0.2256895 | 5 |
| sult3st32          | 9.52E-06 | 0.62254406  | 0.648 | 0.405 | 0.2269138 | 5 |
| btf3141            | 1.12E-05 | 0.324425268 | 0.746 | 0.495 | 0.2670203 | 5 |
| rplpl              | 1.14E-05 | 0.297501859 | 1     | 0.983 | 0.271416  | 5 |
| anxa2b2            | 1.29E-05 | 0.506082914 | 0.958 | 0.751 | 0.3073359 | 5 |
| ndufa62            | 1.31E-05 | 0.311804471 | 0.873 | 0.674 | 0.3125289 | 5 |
| mrpl282            | 1.39E-05 | 0.379501266 | 0.62  | 0.379 | 0.3304787 | 5 |
| ost4               | 1.46E-05 | 0.364684417 | 0.887 | 0.718 | 0.3484719 | 5 |
| ndufb21            | 1.89E-05 | 0.369871583 | 0.873 | 0.654 | 0.4499845 | 5 |
| cox171             | 1.89E-05 | 0.29744271  | 0.845 | 0.61  | 0.450472  | 5 |
| ndufb62            | 1.89E-05 | 0.308830546 | 0.845 | 0.58  | 0.4516509 | 5 |

|                   |           |             |       |       |           |   |
|-------------------|-----------|-------------|-------|-------|-----------|---|
| scp2a3            | 1.96E-05  | 0.372180176 | 0.761 | 0.453 | 0.4682334 | 5 |
| cox8b2            | 2.01E-05  | 0.507714593 | 0.845 | 0.599 | 0.4790113 | 5 |
| mt-atp81          | 2.11E-05  | 0.478540019 | 0.732 | 0.541 | 0.5033805 | 5 |
| mrps18c2          | 2.39E-05  | 0.392526599 | 0.69  | 0.446 | 0.5689249 | 5 |
| mrpl572           | 2.43E-05  | 0.379579312 | 0.746 | 0.54  | 0.5803174 | 5 |
| rps241            | 2.55E-05  | 0.324676364 | 0.986 | 0.965 | 0.6082955 | 5 |
| cox142            | 3.08E-05  | 0.465847538 | 0.662 | 0.466 | 0.7348968 | 5 |
| clqbp2            | 3.13E-05  | 0.404736995 | 0.944 | 0.685 | 0.7455803 | 5 |
| mrpl92            | 3.21E-05  | 0.286580083 | 0.507 | 0.28  | 0.7665226 | 5 |
| rida2             | 3.33E-05  | 0.515583429 | 0.732 | 0.468 | 0.7937271 | 5 |
| apoa4b.21         | 3.35E-05  | 0.402630256 | 0.451 | 0.239 | 0.7992986 | 5 |
| minos12           | 3.46E-05  | 0.391390502 | 0.817 | 0.587 | 0.824364  | 5 |
| tomm72            | 3.86E-05  | 0.294897342 | 0.817 | 0.615 | 0.9214259 | 5 |
| rpl361            | 3.91E-05  | 0.358105729 | 0.986 | 0.95  | 0.9316941 | 5 |
| mrps161           | 4.07E-05  | 0.344650775 | 0.563 | 0.354 | 0.9696441 | 5 |
| rpl37.12          | 4.41E-05  | 0.435895272 | 0.986 | 0.98  | 1         | 5 |
| lsm6              | 4.52E-05  | 0.389268453 | 0.746 | 0.565 | 1         | 5 |
| gamt2             | 4.75E-05  | 0.492937311 | 0.789 | 0.512 | 1         | 5 |
| rpl231            | 4.85E-05  | 0.304612654 | 0.986 | 0.983 | 1         | 5 |
| hsd17b101         | 4.88E-05  | 0.59387249  | 0.465 | 0.276 | 1         | 5 |
| rps231            | 5.18E-05  | 0.333012904 | 1     | 0.972 | 1         | 5 |
| mrpl322           | 5.33E-05  | 0.410704062 | 0.634 | 0.449 | 1         | 5 |
| mpc13             | 5.68E-05  | 0.3439426   | 0.775 | 0.558 | 1         | 5 |
| sub1a1            | 5.83E-05  | 0.327511573 | 0.859 | 0.641 | 1         | 5 |
| naa381            | 6.28E-05  | 0.261621506 | 0.493 | 0.291 | 1         | 5 |
| tomm52            | 6.38E-05  | 0.403984589 | 0.746 | 0.536 | 1         | 5 |
| snrpd21           | 7.02E-05  | 0.295084279 | 0.789 | 0.61  | 1         | 5 |
| COX5B2            | 7.30E-05  | 0.392729    | 0.944 | 0.812 | 1         | 5 |
| si:dkey-88p24.111 | 7.57E-05  | 0.396389238 | 0.606 | 0.39  | 1         | 5 |
| supt4h11          | 7.63E-05  | 0.264546396 | 0.62  | 0.418 | 1         | 5 |
| hint11            | 7.66E-05  | 0.350706416 | 0.775 | 0.565 | 1         | 5 |
| mrpl411           | 8.19E-05  | 0.441898642 | 0.507 | 0.315 | 1         | 5 |
| rpl36a            | 8.54E-05  | 0.305565531 | 1     | 0.982 | 1         | 5 |
| ndufb41           | 8.68E-05  | 0.333118304 | 0.845 | 0.637 | 1         | 5 |
| gadd45gip11       | 8.76E-05  | 0.274340303 | 0.648 | 0.431 | 1         | 5 |
| mrps17            | 8.95E-05  | 0.390539396 | 0.521 | 0.33  | 1         | 5 |
| NDUFC11           | 9.13E-05  | 0.294871375 | 0.789 | 0.597 | 1         | 5 |
| nacal             | 9.21E-05  | 0.297568346 | 0.972 | 0.934 | 1         | 5 |
| ndufb52           | 9.95E-05  | 0.458168559 | 0.732 | 0.536 | 1         | 5 |
| mt-nd32           | 0.0001017 | 0.472015051 | 0.831 | 0.761 | 1         | 5 |
| zgc:564931        | 0.0001022 | 0.328442556 | 0.958 | 0.829 | 1         | 5 |
| cox20             | 0.0001075 | 0.370774213 | 0.521 | 0.33  | 1         | 5 |
| tmem2581          | 0.0001106 | 0.374000889 | 0.873 | 0.68  | 1         | 5 |
| lsm3              | 0.0001124 | 0.433235749 | 0.676 | 0.49  | 1         | 5 |
| cbr113            | 0.0001177 | 0.381761845 | 0.606 | 0.392 | 1         | 5 |
| zgc:1588462       | 0.000128  | 0.435952026 | 1     | 0.748 | 1         | 5 |
| tmem971           | 0.0001376 | 0.408969283 | 0.493 | 0.291 | 1         | 5 |
| mt-nd41           | 0.0001386 | 0.34924405  | 0.662 | 0.49  | 1         | 5 |
| atp5mc12          | 0.0001388 | 0.440300933 | 0.986 | 0.785 | 1         | 5 |
| mrps242           | 0.0001405 | 0.37416804  | 0.648 | 0.446 | 1         | 5 |
| tomm70a           | 0.0001459 | 0.491131016 | 0.704 | 0.516 | 1         | 5 |
| tomm62            | 0.0001474 | 0.371031305 | 0.803 | 0.611 | 1         | 5 |
| ndufa82           | 0.0001495 | 0.266010763 | 0.831 | 0.58  | 1         | 5 |
| snrpd1            | 0.0001518 | 0.333337138 | 0.859 | 0.692 | 1         | 5 |

|                   |           |             |       |       |   |   |
|-------------------|-----------|-------------|-------|-------|---|---|
| gstp21            | 0.0001555 | 0.655389057 | 0.465 | 0.258 | 1 | 5 |
| smdtlb            | 0.0001639 | 0.405579285 | 0.761 | 0.567 | 1 | 5 |
| gsttlb            | 0.0001815 | 0.463997877 | 0.676 | 0.459 | 1 | 5 |
| gstpl2            | 0.0001818 | 0.398325568 | 0.986 | 0.79  | 1 | 5 |
| gsta.22           | 0.0001828 | 0.42701099  | 0.423 | 0.239 | 1 | 5 |
| aimpl1            | 0.0001892 | 0.428711284 | 0.69  | 0.517 | 1 | 5 |
| nopl01            | 0.0001949 | 0.318301346 | 0.775 | 0.589 | 1 | 5 |
| atp5f1d2          | 0.0002105 | 0.462640251 | 0.887 | 0.727 | 1 | 5 |
| mrpl272           | 0.0002128 | 0.359119495 | 0.549 | 0.361 | 1 | 5 |
| dhdh12            | 0.0002133 | 0.373887368 | 0.746 | 0.475 | 1 | 5 |
| prdx63            | 0.0002221 | 0.271262222 | 0.718 | 0.51  | 1 | 5 |
| tmsb1             | 0.0002352 | 0.287713688 | 0.972 | 0.783 | 1 | 5 |
| rps261            | 0.0002369 | 0.290138357 | 1     | 0.958 | 1 | 5 |
| ndufc21           | 0.0002494 | 0.417536426 | 0.831 | 0.683 | 1 | 5 |
| mt-atp61          | 0.0002512 | 0.411242553 | 0.901 | 0.915 | 1 | 5 |
| si:ch211-162e15.3 | 0.0002516 | 0.306802123 | 0.507 | 0.326 | 1 | 5 |
| mt-nd51           | 0.0002583 | 0.506705277 | 0.845 | 0.751 | 1 | 5 |
| chchd12           | 0.0002699 | 0.284308071 | 0.521 | 0.324 | 1 | 5 |
| rps27.2           | 0.000273  | 0.306827487 | 0.944 | 0.849 | 1 | 5 |
| ptges3b1          | 0.0002876 | 0.25693829  | 0.803 | 0.587 | 1 | 5 |
| uqcrfs12          | 0.0002877 | 0.365565425 | 0.789 | 0.586 | 1 | 5 |
| tfaml             | 0.0003068 | 0.522296333 | 0.493 | 0.335 | 1 | 5 |
| dnph11            | 0.0003111 | 0.50599322  | 0.38  | 0.221 | 1 | 5 |
| denr1             | 0.0003145 | 0.301812215 | 0.704 | 0.494 | 1 | 5 |
| mrps332           | 0.0003214 | 0.263868375 | 0.606 | 0.383 | 1 | 5 |
| dhrs42            | 0.0003257 | 0.385940667 | 0.535 | 0.35  | 1 | 5 |
| ckmt12            | 0.0003592 | 0.332215098 | 0.761 | 0.483 | 1 | 5 |
| timm441           | 0.0003684 | 0.367531964 | 0.465 | 0.28  | 1 | 5 |
| bxdc22            | 0.000372  | 0.323732064 | 0.676 | 0.459 | 1 | 5 |
| ppifb2            | 0.0004013 | 0.35574149  | 0.563 | 0.365 | 1 | 5 |
| aifm41            | 0.0004116 | 0.2666552   | 0.352 | 0.182 | 1 | 5 |
| prdx22            | 0.0004117 | 0.361244578 | 0.986 | 0.829 | 1 | 5 |
| slc31a12          | 0.0004207 | 0.864461315 | 0.606 | 0.403 | 1 | 5 |
| zgc:162780        | 0.0004222 | 0.373033199 | 0.352 | 0.188 | 1 | 5 |
| psma6b            | 0.0004274 | 0.300845131 | 0.62  | 0.446 | 1 | 5 |
| ndufa42           | 0.0004303 | 0.25763187  | 0.746 | 0.499 | 1 | 5 |
| mt-nd42           | 0.0004329 | 0.414711343 | 0.831 | 0.838 | 1 | 5 |
| snrpe1            | 0.0004336 | 0.27826735  | 0.845 | 0.659 | 1 | 5 |
| gpx1a2            | 0.0004382 | 0.350225068 | 0.775 | 0.545 | 1 | 5 |
| AL831745.12       | 0.000442  | 0.59461589  | 0.507 | 0.339 | 1 | 5 |
| cox7c1            | 0.0004429 | 0.323495503 | 0.93  | 0.82  | 1 | 5 |
| gstt1a2           | 0.0004546 | 0.268231198 | 0.915 | 0.569 | 1 | 5 |
| chchd7            | 0.0004811 | 0.434830366 | 0.521 | 0.344 | 1 | 5 |
| mt-cyb2           | 0.000485  | 0.356187222 | 0.901 | 0.904 | 1 | 5 |
| ndufa411          | 0.0004927 | 0.262245306 | 0.93  | 0.772 | 1 | 5 |
| mrpl522           | 0.0005018 | 0.364678992 | 0.62  | 0.449 | 1 | 5 |
| rpl14             | 0.0005089 | 0.254809719 | 0.986 | 0.967 | 1 | 5 |
| mt-co11           | 0.0005095 | 0.387614786 | 0.901 | 0.897 | 1 | 5 |
| rpl26             | 0.0005166 | 0.334418005 | 0.859 | 0.724 | 1 | 5 |
| mt-nd12           | 0.0005357 | 0.297782942 | 0.831 | 0.853 | 1 | 5 |
| mt-co31           | 0.0005566 | 0.342413215 | 0.972 | 0.93  | 1 | 5 |
| tma71             | 0.0006099 | 0.36658024  | 0.887 | 0.779 | 1 | 5 |
| fkbp1aa           | 0.0006148 | 0.306010445 | 0.93  | 0.742 | 1 | 5 |
| mt-co22           | 0.0006585 | 0.286550248 | 0.958 | 0.936 | 1 | 5 |

|                    |           |             |       |       |   |   |
|--------------------|-----------|-------------|-------|-------|---|---|
| pdzk11             | 0.0006912 | 0.528590448 | 0.521 | 0.324 | 1 | 5 |
| cldn151a2          | 0.0007072 | 0.358344347 | 1     | 0.786 | 1 | 5 |
| rps121             | 0.000721  | 0.331722656 | 0.986 | 0.959 | 1 | 5 |
| pbl2               | 0.0007679 | 0.296254943 | 0.493 | 0.317 | 1 | 5 |
| aifm21             | 0.000825  | 0.327209961 | 0.493 | 0.326 | 1 | 5 |
| rwdd11             | 0.000847  | 0.366647408 | 0.662 | 0.499 | 1 | 5 |
| triapl1            | 0.0009087 | 0.443839088 | 0.437 | 0.285 | 1 | 5 |
| pdx1               | 0.0010403 | 0.298732259 | 0.38  | 0.206 | 1 | 5 |
| EIF1B1             | 0.0011111 | 0.261272453 | 0.718 | 0.586 | 1 | 5 |
| mt-nd22            | 0.0011139 | 0.291562999 | 0.831 | 0.847 | 1 | 5 |
| selenoh            | 0.0012223 | 0.384054035 | 0.535 | 0.398 | 1 | 5 |
| pfdn61             | 0.0013442 | 0.275001802 | 0.606 | 0.481 | 1 | 5 |
| znf5931            | 0.0014048 | 0.369217844 | 0.577 | 0.448 | 1 | 5 |
| atp5pd2            | 0.0014954 | 0.312692928 | 0.915 | 0.772 | 1 | 5 |
| cox5aa2            | 0.0015194 | 0.318427155 | 0.944 | 0.744 | 1 | 5 |
| mrps252            | 0.0015261 | 0.277779425 | 0.634 | 0.44  | 1 | 5 |
| rps21              | 0.0015671 | 0.272708452 | 0.986 | 0.963 | 1 | 5 |
| si:ch211-217k17.71 | 0.0016381 | 0.327795303 | 0.662 | 0.494 | 1 | 5 |
| mrpl31             | 0.0016476 | 0.319622497 | 0.423 | 0.267 | 1 | 5 |
| mrpl53             | 0.001673  | 0.298916138 | 0.493 | 0.337 | 1 | 5 |
| CU682777.22        | 0.0017686 | 0.270068165 | 0.761 | 0.523 | 1 | 5 |
| mb123              | 0.0017921 | 0.478893236 | 0.408 | 0.245 | 1 | 5 |
| mrps211            | 0.0018815 | 0.445694425 | 0.577 | 0.409 | 1 | 5 |
| pagr1              | 0.0020044 | 0.292537218 | 0.324 | 0.192 | 1 | 5 |
| cbx3a              | 0.0020305 | 0.385262053 | 0.662 | 0.516 | 1 | 5 |
| idh3a1             | 0.0020546 | 0.384041898 | 0.648 | 0.477 | 1 | 5 |
| mrpl362            | 0.0021614 | 0.386652692 | 0.592 | 0.422 | 1 | 5 |
| mrpl461            | 0.0022202 | 0.341126288 | 0.437 | 0.287 | 1 | 5 |
| fdps2              | 0.0022234 | 0.309305374 | 0.592 | 0.401 | 1 | 5 |
| smim81             | 0.0023906 | 0.281229261 | 0.437 | 0.295 | 1 | 5 |
| eppk12             | 0.0023979 | 0.364038864 | 0.761 | 0.558 | 1 | 5 |
| DUT1               | 0.0024192 | 0.389595069 | 0.592 | 0.438 | 1 | 5 |
| anks4b2            | 0.0024437 | 0.324782486 | 0.62  | 0.407 | 1 | 5 |
| mpc21              | 0.002445  | 0.300078881 | 0.606 | 0.435 | 1 | 5 |
| magoh1             | 0.0025106 | 0.333968888 | 0.662 | 0.506 | 1 | 5 |
| rtn4b2             | 0.0026    | 0.325753443 | 0.592 | 0.414 | 1 | 5 |
| dhrrs13111         | 0.0027216 | 0.42335318  | 0.352 | 0.219 | 1 | 5 |
| spink41            | 0.0028527 | 0.43479349  | 0.535 | 0.392 | 1 | 5 |
| abcf1              | 0.0030119 | 0.300296391 | 0.845 | 0.659 | 1 | 5 |
| rps51              | 0.003063  | 0.276662031 | 0.986 | 0.961 | 1 | 5 |
| ndufs72            | 0.003121  | 0.385707677 | 0.775 | 0.54  | 1 | 5 |
| atp5flc2           | 0.0031493 | 0.304376501 | 0.831 | 0.587 | 1 | 5 |
| rsrpl              | 0.0032431 | 0.291467331 | 0.859 | 0.659 | 1 | 5 |
| mrpl49             | 0.0036529 | 0.529394608 | 0.507 | 0.354 | 1 | 5 |
| rdh12              | 0.0039407 | 0.356549733 | 0.437 | 0.254 | 1 | 5 |
| mrpl452            | 0.0040341 | 0.36703693  | 0.465 | 0.324 | 1 | 5 |
| emg11              | 0.0040385 | 0.258017627 | 0.338 | 0.21  | 1 | 5 |
| ndufs32            | 0.0041683 | 0.373955244 | 0.634 | 0.464 | 1 | 5 |
| eif3jal            | 0.0041902 | 0.313427034 | 0.718 | 0.545 | 1 | 5 |
| mrps72             | 0.0045574 | 0.275683808 | 0.493 | 0.343 | 1 | 5 |
| hirip3             | 0.0045793 | 0.378487167 | 0.338 | 0.21  | 1 | 5 |
| nop162             | 0.0053501 | 0.355650266 | 0.521 | 0.385 | 1 | 5 |
| rrs1               | 0.0054858 | 0.323411366 | 0.535 | 0.405 | 1 | 5 |
| sult1st6           | 0.005595  | 0.303223097 | 0.296 | 0.18  | 1 | 5 |

|                   |           |             |       |       |          |   |
|-------------------|-----------|-------------|-------|-------|----------|---|
| dtymk1            | 0.0060094 | 0.261280745 | 0.296 | 0.184 | 1        | 5 |
| auh1              | 0.0065777 | 0.338032741 | 0.437 | 0.306 | 1        | 5 |
| nr0b2a            | 0.0073763 | 0.304784261 | 0.324 | 0.193 | 1        | 5 |
| hccsa.1           | 0.0075006 | 0.349266614 | 0.31  | 0.199 | 1        | 5 |
| sub1b2            | 0.007682  | 0.385890919 | 0.465 | 0.355 | 1        | 5 |
| polr2k1           | 0.0079365 | 0.324342108 | 0.577 | 0.444 | 1        | 5 |
| nedd8             | 0.0083938 | 0.253357128 | 0.493 | 0.372 | 1        | 5 |
| EIF3G2            | 0.0085142 | 0.362669922 | 0.789 | 0.587 | 1        | 5 |
| cyp8b12           | 0.0086687 | 0.497012042 | 0.38  | 0.252 | 1        | 5 |
| zgc:777392        | 0.0086785 | 0.331784876 | 0.366 | 0.239 | 1        | 5 |
| zgc:1121461       | 0.0089051 | 0.287908939 | 0.324 | 0.204 | 1        | 5 |
| cdkn1a1           | 0.0091337 | 0.267113571 | 0.394 | 0.271 | 1        | 5 |
| mrps18a3          | 0.0092577 | 0.275539668 | 0.493 | 0.379 | 1        | 5 |
| ceacam1           | 7.21E-94  | 3.585484322 | 0.788 | 0.009 | 1.72E-89 | 6 |
| mx1               | 2.46E-73  | 1.893766122 | 0.558 | 0     | 5.86E-69 | 6 |
| myof              | 9.05E-72  | 1.715400854 | 0.654 | 0.011 | 2.16E-67 | 6 |
| zgc:92380         | 3.20E-68  | 3.135976864 | 0.904 | 0.069 | 7.63E-64 | 6 |
| wnt11r            | 5.32E-67  | 0.926439663 | 0.596 | 0.009 | 1.27E-62 | 6 |
| anxa5b            | 2.02E-63  | 2.34770854  | 0.846 | 0.06  | 4.81E-59 | 6 |
| cnfn              | 2.55E-59  | 3.721767609 | 0.654 | 0.027 | 6.07E-55 | 6 |
| sftpb             | 4.08E-56  | 1.901785443 | 0.481 | 0.005 | 9.74E-52 | 6 |
| ctrl              | 1.27E-55  | 3.696817072 | 0.462 | 0.004 | 3.03E-51 | 6 |
| si:cabz01007794.1 | 1.06E-53  | 1.54886133  | 0.635 | 0.032 | 2.53E-49 | 6 |
| tspan35           | 7.65E-53  | 1.20434227  | 0.673 | 0.039 | 1.83E-48 | 6 |
| zgc:162879        | 1.46E-52  | 0.898587505 | 0.538 | 0.016 | 3.47E-48 | 6 |
| gna15.1           | 7.56E-49  | 0.807119883 | 0.577 | 0.027 | 1.80E-44 | 6 |
| abca12            | 1.03E-47  | 3.05621649  | 0.558 | 0.027 | 2.46E-43 | 6 |
| s100w             | 2.97E-47  | 1.184340675 | 0.462 | 0.011 | 7.07E-43 | 6 |
| fer114            | 1.43E-46  | 1.460539724 | 0.692 | 0.053 | 3.41E-42 | 6 |
| capgb             | 1.36E-45  | 1.38551893  | 0.654 | 0.048 | 3.25E-41 | 6 |
| si:ch73-288o11.5  | 2.13E-45  | 2.374071025 | 0.385 | 0.004 | 5.08E-41 | 6 |
| BX908782.2        | 1.01E-44  | 4.443056323 | 0.462 | 0.014 | 2.41E-40 | 6 |
| anxa3a            | 5.76E-44  | 0.608815828 | 0.5   | 0.02  | 1.37E-39 | 6 |
| vwal              | 6.12E-43  | 1.754835876 | 0.692 | 0.064 | 1.46E-38 | 6 |
| glud1a            | 1.18E-41  | 1.079787315 | 0.673 | 0.062 | 2.81E-37 | 6 |
| tmem136a          | 1.23E-41  | 0.673527746 | 0.442 | 0.014 | 2.94E-37 | 6 |
| opcml             | 1.53E-41  | 0.565078009 | 0.404 | 0.009 | 3.66E-37 | 6 |
| agr1              | 2.12E-41  | 1.204133585 | 0.538 | 0.03  | 5.06E-37 | 6 |
| oclnb             | 2.63E-41  | 0.521774146 | 0.442 | 0.014 | 6.28E-37 | 6 |
| zgc:91860         | 1.80E-40  | 0.559061422 | 0.442 | 0.016 | 4.29E-36 | 6 |
| lgals3b           | 1.91E-40  | 1.970088926 | 0.904 | 0.178 | 4.57E-36 | 6 |
| atp10b            | 2.00E-40  | 0.424991394 | 0.308 | 0     | 4.77E-36 | 6 |
| zgc:158403        | 4.54E-40  | 0.905237994 | 0.615 | 0.052 | 1.08E-35 | 6 |
| myl9a             | 6.11E-40  | 1.025295139 | 0.596 | 0.046 | 1.46E-35 | 6 |
| cx35.4            | 2.14E-38  | 0.590345789 | 0.462 | 0.021 | 5.11E-34 | 6 |
| mal               | 4.71E-38  | 2.335333404 | 0.673 | 0.071 | 1.12E-33 | 6 |
| itpka             | 7.92E-38  | 0.838563722 | 0.538 | 0.037 | 1.89E-33 | 6 |
| pard3bb           | 9.64E-38  | 0.609557112 | 0.577 | 0.046 | 2.30E-33 | 6 |
| sox2              | 4.03E-37  | 0.731482649 | 0.462 | 0.023 | 9.60E-33 | 6 |
| si:dkey-30c15.2   | 4.56E-37  | 0.659492476 | 0.365 | 0.009 | 1.09E-32 | 6 |
| ahnak             | 4.93E-37  | 2.947520331 | 0.942 | 0.254 | 1.17E-32 | 6 |
| capn2b            | 1.16E-36  | 0.982067348 | 0.481 | 0.028 | 2.77E-32 | 6 |
| si:dkey-222n6.2   | 2.47E-36  | 0.850177395 | 0.346 | 0.007 | 5.88E-32 | 6 |
| si:dkey-19b23.12  | 3.42E-36  | 0.580041539 | 0.385 | 0.012 | 8.16E-32 | 6 |

|                    |          |             |       |       |          |   |
|--------------------|----------|-------------|-------|-------|----------|---|
| cavl               | 6.06E-36 | 1.896255387 | 0.654 | 0.078 | 1.45E-31 | 6 |
| cal5a              | 1.79E-35 | 0.611893037 | 0.308 | 0.004 | 4.26E-31 | 6 |
| agr2               | 1.97E-34 | 2.343181789 | 0.942 | 0.26  | 4.70E-30 | 6 |
| s100v2             | 4.26E-34 | 1.38493646  | 0.673 | 0.085 | 1.02E-29 | 6 |
| sox19a             | 6.78E-34 | 0.460606993 | 0.327 | 0.007 | 1.62E-29 | 6 |
| myh9a              | 9.03E-34 | 2.078173301 | 0.808 | 0.149 | 2.15E-29 | 6 |
| si:dkey-262k9.2    | 1.23E-33 | 2.075068633 | 0.788 | 0.157 | 2.94E-29 | 6 |
| si:ch211-264f5.6   | 2.94E-33 | 0.455300936 | 0.423 | 0.023 | 7.02E-29 | 6 |
| si:dkey-208c12.2   | 7.10E-33 | 0.475230186 | 0.269 | 0.002 | 1.69E-28 | 6 |
| cabp2b             | 1.21E-32 | 1.717474133 | 0.538 | 0.053 | 2.88E-28 | 6 |
| zgc:174164         | 2.01E-32 | 0.50524053  | 0.365 | 0.014 | 4.79E-28 | 6 |
| stox2a             | 2.85E-32 | 1.025633744 | 0.615 | 0.073 | 6.79E-28 | 6 |
| si:dkeyp-69e1.8    | 6.74E-32 | 0.531415644 | 0.5   | 0.041 | 1.61E-27 | 6 |
| ptgs2a             | 3.29E-31 | 2.167940122 | 0.712 | 0.117 | 7.84E-27 | 6 |
| kbtbd11            | 3.44E-31 | 0.368024549 | 0.288 | 0.005 | 8.21E-27 | 6 |
| clic2              | 4.62E-31 | 1.021887799 | 0.577 | 0.059 | 1.10E-26 | 6 |
| midlip1a           | 4.99E-31 | 1.196188324 | 0.558 | 0.059 | 1.19E-26 | 6 |
| rnf183             | 8.84E-31 | 0.725459976 | 0.519 | 0.05  | 2.11E-26 | 6 |
| bcaml              | 2.82E-30 | 2.356239922 | 0.865 | 0.226 | 6.73E-26 | 6 |
| enosf1             | 4.25E-30 | 0.426041182 | 0.423 | 0.027 | 1.01E-25 | 6 |
| tmem120a           | 5.36E-30 | 0.861590938 | 0.596 | 0.077 | 1.28E-25 | 6 |
| rin2               | 5.61E-30 | 0.528414343 | 0.519 | 0.052 | 1.34E-25 | 6 |
| smox               | 6.87E-29 | 0.639542634 | 0.615 | 0.087 | 1.64E-24 | 6 |
| anxa3b             | 7.11E-29 | 1.969992268 | 0.712 | 0.141 | 1.69E-24 | 6 |
| aqpla.1            | 8.04E-29 | 3.532088282 | 0.442 | 0.037 | 1.92E-24 | 6 |
| cd151              | 1.30E-28 | 0.419953869 | 0.346 | 0.016 | 3.10E-24 | 6 |
| anxa2a             | 1.61E-28 | 2.195689696 | 0.712 | 0.13  | 3.85E-24 | 6 |
| s100a10b           | 2.76E-28 | 2.526751943 | 0.962 | 0.384 | 6.58E-24 | 6 |
| rpz5               | 3.05E-28 | 1.083817712 | 0.404 | 0.028 | 7.28E-24 | 6 |
| padi2              | 3.44E-28 | 0.613950671 | 0.481 | 0.046 | 8.20E-24 | 6 |
| cav2               | 6.41E-28 | 0.703194092 | 0.442 | 0.037 | 1.53E-23 | 6 |
| cobl11b            | 8.10E-28 | 0.465423533 | 0.558 | 0.066 | 1.93E-23 | 6 |
| icn                | 9.25E-28 | 4.527781932 | 1     | 0.696 | 2.20E-23 | 6 |
| si:ch211-157p22.10 | 2.60E-27 | 0.451377488 | 0.519 | 0.057 | 6.20E-23 | 6 |
| si:dkey-19b23.8    | 6.48E-27 | 0.434602202 | 0.423 | 0.034 | 1.55E-22 | 6 |
| sox13              | 7.55E-27 | 0.450956765 | 0.269 | 0.007 | 1.80E-22 | 6 |
| wif1               | 1.58E-26 | 1.455804671 | 0.442 | 0.043 | 3.77E-22 | 6 |
| nipal4             | 1.76E-26 | 0.37137944  | 0.327 | 0.016 | 4.21E-22 | 6 |
| rhogb              | 1.79E-26 | 0.747471944 | 0.577 | 0.082 | 4.27E-22 | 6 |
| muc5.3             | 2.26E-26 | 0.743160708 | 0.288 | 0.011 | 5.38E-22 | 6 |
| zgc:92818          | 2.87E-26 | 0.802776526 | 0.635 | 0.101 | 6.83E-22 | 6 |
| zyx                | 3.86E-26 | 1.100949984 | 0.692 | 0.132 | 9.21E-22 | 6 |
| si:ch211-202f5.3   | 4.11E-26 | 0.708773171 | 0.577 | 0.08  | 9.80E-22 | 6 |
| cwc15              | 5.14E-26 | 1.089090708 | 0.769 | 0.162 | 1.23E-21 | 6 |
| palm2.1            | 5.47E-26 | 0.877209046 | 0.423 | 0.039 | 1.30E-21 | 6 |
| baspl1             | 8.94E-26 | 1.297799079 | 0.885 | 0.256 | 2.13E-21 | 6 |
| abca3b1            | 1.95E-25 | 0.942689801 | 0.615 | 0.1   | 4.65E-21 | 6 |
| zgc:174917         | 2.10E-25 | 2.389015456 | 0.346 | 0.021 | 5.02E-21 | 6 |
| hk2                | 2.40E-25 | 0.660786655 | 0.481 | 0.053 | 5.73E-21 | 6 |
| spock3             | 2.49E-25 | 2.273829123 | 0.423 | 0.041 | 5.94E-21 | 6 |
| serpinb14          | 3.44E-25 | 0.912491184 | 0.692 | 0.141 | 8.20E-21 | 6 |
| cldn7b1            | 3.98E-25 | 1.357508088 | 0.923 | 0.283 | 9.49E-21 | 6 |
| zgc:92480          | 1.16E-24 | 0.258412095 | 0.288 | 0.012 | 2.77E-20 | 6 |
| calmb1             | 1.96E-24 | 1.059249178 | 0.788 | 0.174 | 4.68E-20 | 6 |

|                  |          |             |       |       |          |   |
|------------------|----------|-------------|-------|-------|----------|---|
| rab32a           | 5.21E-24 | 1.265445785 | 0.481 | 0.062 | 1.24E-19 | 6 |
| foxp41           | 7.10E-24 | 1.677479856 | 0.942 | 0.368 | 1.69E-19 | 6 |
| frem2b           | 9.91E-24 | 0.70418418  | 0.327 | 0.021 | 2.36E-19 | 6 |
| pnp5a            | 1.06E-23 | 1.109551515 | 0.769 | 0.176 | 2.53E-19 | 6 |
| nr4a3            | 1.10E-23 | 0.568632414 | 0.596 | 0.096 | 2.62E-19 | 6 |
| cxcr3.3          | 1.32E-23 | 0.454200893 | 0.462 | 0.052 | 3.15E-19 | 6 |
| vamp8            | 1.91E-23 | 0.428894862 | 0.423 | 0.043 | 4.55E-19 | 6 |
| cavin2b          | 3.15E-23 | 1.618574611 | 0.788 | 0.24  | 7.51E-19 | 6 |
| ical1            | 4.14E-23 | 0.396404362 | 0.404 | 0.039 | 9.87E-19 | 6 |
| sytl3.11         | 4.63E-23 | 1.496546267 | 0.904 | 0.354 | 1.10E-18 | 6 |
| slc38a5a1        | 8.28E-23 | 0.672341329 | 0.577 | 0.098 | 1.97E-18 | 6 |
| col4a3bpa        | 8.80E-23 | 0.389296134 | 0.5   | 0.068 | 2.10E-18 | 6 |
| pgm211           | 9.83E-23 | 0.498383055 | 0.365 | 0.032 | 2.34E-18 | 6 |
| si:dkey-222f2.1  | 1.92E-22 | 0.351762911 | 0.269 | 0.012 | 4.57E-18 | 6 |
| qkial            | 2.85E-22 | 1.1907679   | 0.75  | 0.196 | 6.78E-18 | 6 |
| tp53bp2b         | 2.87E-22 | 0.583147018 | 0.5   | 0.069 | 6.83E-18 | 6 |
| ltb4r2a          | 2.93E-22 | 0.439791372 | 0.346 | 0.028 | 6.99E-18 | 6 |
| stx3a            | 3.33E-22 | 0.735804546 | 0.673 | 0.144 | 7.94E-18 | 6 |
| ajuba            | 5.48E-22 | 0.484453922 | 0.462 | 0.06  | 1.31E-17 | 6 |
| fam83fa          | 6.12E-22 | 0.363400484 | 0.365 | 0.032 | 1.46E-17 | 6 |
| CLDN23           | 6.41E-22 | 0.693493149 | 0.538 | 0.087 | 1.53E-17 | 6 |
| sh3d21           | 6.51E-22 | 0.757598708 | 0.635 | 0.132 | 1.55E-17 | 6 |
| abhd17b          | 6.54E-22 | 0.819415692 | 0.692 | 0.158 | 1.56E-17 | 6 |
| plxnbla          | 1.50E-21 | 0.486424304 | 0.423 | 0.05  | 3.57E-17 | 6 |
| tcnl             | 1.53E-21 | 4.546210849 | 0.577 | 0.114 | 3.65E-17 | 6 |
| grnb             | 1.58E-21 | 0.386384318 | 0.385 | 0.039 | 3.77E-17 | 6 |
| litaf            | 1.97E-21 | 0.526083535 | 0.538 | 0.084 | 4.69E-17 | 6 |
| scel             | 2.17E-21 | 0.715077341 | 0.327 | 0.025 | 5.17E-17 | 6 |
| gdpd3a           | 2.18E-21 | 0.537111564 | 0.462 | 0.062 | 5.19E-17 | 6 |
| cldnb2           | 2.31E-21 | 1.861406582 | 1     | 0.758 | 5.50E-17 | 6 |
| b4galnt3b        | 2.65E-21 | 0.424759687 | 0.442 | 0.053 | 6.31E-17 | 6 |
| syngt2a1         | 5.64E-21 | 0.93442373  | 0.692 | 0.173 | 1.34E-16 | 6 |
| tprg1            | 5.86E-21 | 1.684769063 | 0.731 | 0.217 | 1.40E-16 | 6 |
| ftr83            | 9.15E-21 | 1.651010133 | 0.673 | 0.164 | 2.18E-16 | 6 |
| tmem238a         | 9.75E-21 | 0.425887881 | 0.481 | 0.069 | 2.32E-16 | 6 |
| rbpms2a1         | 1.21E-20 | 0.37946972  | 0.519 | 0.078 | 2.89E-16 | 6 |
| zgc:194930       | 1.24E-20 | 0.533867532 | 0.577 | 0.105 | 2.95E-16 | 6 |
| FP102018.1       | 1.29E-20 | 0.868756854 | 0.288 | 0.02  | 3.07E-16 | 6 |
| mroh1            | 1.55E-20 | 0.489091746 | 0.481 | 0.069 | 3.70E-16 | 6 |
| cd99             | 1.64E-20 | 0.355570949 | 0.462 | 0.062 | 3.91E-16 | 6 |
| capn2a           | 2.03E-20 | 1.074120399 | 0.558 | 0.109 | 4.84E-16 | 6 |
| slc38a5b         | 2.45E-20 | 1.007872758 | 0.827 | 0.27  | 5.85E-16 | 6 |
| arl4cb           | 2.64E-20 | 0.634247937 | 0.423 | 0.055 | 6.30E-16 | 6 |
| rabac1           | 4.21E-20 | 0.500688832 | 0.635 | 0.133 | 1.00E-15 | 6 |
| igflrb           | 4.36E-20 | 0.424323224 | 0.481 | 0.068 | 1.04E-15 | 6 |
| si:dkey-222f8.31 | 4.68E-20 | 0.800603055 | 0.596 | 0.123 | 1.12E-15 | 6 |
| iqgap2           | 8.73E-20 | 1.04878776  | 0.75  | 0.217 | 2.08E-15 | 6 |
| sytl4            | 1.09E-19 | 0.778060641 | 0.442 | 0.064 | 2.61E-15 | 6 |
| hk11             | 1.33E-19 | 0.851808685 | 0.481 | 0.077 | 3.18E-15 | 6 |
| si:ch211-132p1.3 | 1.50E-19 | 1.000256526 | 0.346 | 0.034 | 3.57E-15 | 6 |
| sgsm31           | 1.56E-19 | 0.319101522 | 0.5   | 0.078 | 3.71E-15 | 6 |
| raraa            | 1.67E-19 | 1.321329699 | 0.692 | 0.203 | 3.99E-15 | 6 |
| ccdc125          | 2.22E-19 | 0.917008471 | 0.462 | 0.069 | 5.29E-15 | 6 |
| sh3bp4a          | 2.24E-19 | 0.550233185 | 0.442 | 0.06  | 5.34E-15 | 6 |

|                    |          |             |       |       |          |   |
|--------------------|----------|-------------|-------|-------|----------|---|
| sept9a             | 3.49E-19 | 0.678813931 | 0.615 | 0.141 | 8.32E-15 | 6 |
| cavin2a            | 4.29E-19 | 0.838709357 | 0.615 | 0.148 | 1.02E-14 | 6 |
| fn1b               | 4.70E-19 | 2.993483206 | 0.462 | 0.075 | 1.12E-14 | 6 |
| rock2b.1           | 6.31E-19 | 0.456708453 | 0.635 | 0.144 | 1.50E-14 | 6 |
| si:ch211-153b23.51 | 9.71E-19 | 2.44204505  | 0.731 | 0.194 | 2.31E-14 | 6 |
| tspan3a1           | 1.11E-18 | 0.506964342 | 0.558 | 0.11  | 2.66E-14 | 6 |
| penkb              | 1.42E-18 | 0.3524988   | 0.288 | 0.023 | 3.39E-14 | 6 |
| paqr5b             | 1.44E-18 | 0.377393978 | 0.327 | 0.032 | 3.43E-14 | 6 |
| nxn                | 1.46E-18 | 0.371392624 | 0.385 | 0.046 | 3.49E-14 | 6 |
| itm2bb             | 1.83E-18 | 0.960343731 | 0.769 | 0.269 | 4.36E-14 | 6 |
| tgfbr2b            | 1.99E-18 | 0.260524386 | 0.327 | 0.032 | 4.75E-14 | 6 |
| fgfr21             | 2.21E-18 | 1.271210175 | 0.731 | 0.226 | 5.27E-14 | 6 |
| cd9b               | 2.45E-18 | 1.579061773 | 0.942 | 0.587 | 5.83E-14 | 6 |
| col4a6             | 2.83E-18 | 1.647331531 | 0.481 | 0.087 | 6.75E-14 | 6 |
| anxala             | 2.87E-18 | 1.026300771 | 0.538 | 0.101 | 6.85E-14 | 6 |
| flot1b             | 2.92E-18 | 0.885901449 | 0.827 | 0.292 | 6.96E-14 | 6 |
| rab9a              | 4.04E-18 | 0.304841184 | 0.404 | 0.055 | 9.63E-14 | 6 |
| prr151b            | 4.77E-18 | 0.926207815 | 0.423 | 0.066 | 1.14E-13 | 6 |
| lamb21             | 4.92E-18 | 1.102938749 | 0.712 | 0.21  | 1.17E-13 | 6 |
| itgb6              | 5.26E-18 | 0.531100212 | 0.596 | 0.13  | 1.25E-13 | 6 |
| atp6v1e1a          | 6.44E-18 | 0.254045607 | 0.423 | 0.064 | 1.54E-13 | 6 |
| cgnb1              | 6.59E-18 | 0.705319401 | 0.615 | 0.142 | 1.57E-13 | 6 |
| ralab1             | 7.12E-18 | 0.727836189 | 0.731 | 0.201 | 1.70E-13 | 6 |
| actb11             | 9.74E-18 | 1.323346024 | 0.981 | 0.968 | 2.32E-13 | 6 |
| parp4              | 1.16E-17 | 0.525538561 | 0.558 | 0.125 | 2.77E-13 | 6 |
| f3a                | 1.28E-17 | 1.151290562 | 0.558 | 0.126 | 3.04E-13 | 6 |
| capns1a            | 1.28E-17 | 1.202550062 | 0.865 | 0.383 | 3.05E-13 | 6 |
| cadps2             | 1.47E-17 | 0.63817395  | 0.538 | 0.11  | 3.50E-13 | 6 |
| btbd10b            | 1.87E-17 | 0.762351973 | 0.827 | 0.31  | 4.46E-13 | 6 |
| si:ch211-266g18.6  | 2.53E-17 | 1.567900952 | 0.769 | 0.278 | 6.02E-13 | 6 |
| st5                | 3.02E-17 | 0.353631406 | 0.404 | 0.057 | 7.20E-13 | 6 |
| id11               | 3.65E-17 | 0.997974795 | 0.827 | 0.285 | 8.71E-13 | 6 |
| slc17a9b           | 3.80E-17 | 0.440768123 | 0.462 | 0.08  | 9.07E-13 | 6 |
| msna               | 4.04E-17 | 2.42184889  | 0.577 | 0.141 | 9.64E-13 | 6 |
| pkmal              | 5.07E-17 | 1.141809652 | 0.75  | 0.274 | 1.21E-12 | 6 |
| arhgap29b          | 5.08E-17 | 0.503632389 | 0.346 | 0.043 | 1.21E-12 | 6 |
| pip5klab           | 5.22E-17 | 0.290953935 | 0.462 | 0.08  | 1.25E-12 | 6 |
| zgc:77650          | 6.86E-17 | 0.716421598 | 0.692 | 0.206 | 1.64E-12 | 6 |
| krt94l             | 7.32E-17 | 1.655132012 | 0.462 | 0.082 | 1.74E-12 | 6 |
| rab27a             | 7.38E-17 | 0.356731565 | 0.327 | 0.037 | 1.76E-12 | 6 |
| npc1               | 9.94E-17 | 0.707327371 | 0.731 | 0.244 | 2.37E-12 | 6 |
| baiap211b          | 1.09E-16 | 0.623005534 | 0.538 | 0.119 | 2.59E-12 | 6 |
| slc35c2            | 1.12E-16 | 0.799512675 | 0.538 | 0.121 | 2.68E-12 | 6 |
| map3k21            | 1.19E-16 | 0.550318252 | 0.596 | 0.144 | 2.84E-12 | 6 |
| rnf381             | 1.37E-16 | 0.471471228 | 0.538 | 0.117 | 3.26E-12 | 6 |
| cx43.4             | 1.72E-16 | 0.324101058 | 0.442 | 0.071 | 4.10E-12 | 6 |
| flnal              | 1.98E-16 | 0.539809558 | 0.635 | 0.151 | 4.73E-12 | 6 |
| ptprfb1            | 2.00E-16 | 1.165260095 | 0.808 | 0.368 | 4.76E-12 | 6 |
| zdhhc13            | 2.15E-16 | 0.493238532 | 0.673 | 0.198 | 5.13E-12 | 6 |
| alox12             | 2.36E-16 | 0.722177501 | 0.558 | 0.133 | 5.62E-12 | 6 |
| itgav              | 2.60E-16 | 0.356772086 | 0.404 | 0.062 | 6.20E-12 | 6 |
| CR753886.1         | 2.72E-16 | 0.39718984  | 0.423 | 0.069 | 6.48E-12 | 6 |
| stml               | 2.85E-16 | 3.834214493 | 0.5   | 0.117 | 6.79E-12 | 6 |
| stxbp21            | 3.46E-16 | 0.451440763 | 0.577 | 0.133 | 8.26E-12 | 6 |



|                   |          |             |       |       |          |   |
|-------------------|----------|-------------|-------|-------|----------|---|
| bnip3lb1          | 3.77E-16 | 0.68240062  | 0.5   | 0.101 | 8.99E-12 | 6 |
| agn               | 4.00E-16 | 1.575187591 | 0.808 | 0.335 | 9.55E-12 | 6 |
| selenow2b         | 4.19E-16 | 0.40655856  | 0.365 | 0.052 | 1.00E-11 | 6 |
| zgc:100829        | 5.55E-16 | 0.280443622 | 0.423 | 0.068 | 1.32E-11 | 6 |
| tribl             | 6.04E-16 | 0.325337751 | 0.5   | 0.098 | 1.44E-11 | 6 |
| sgmsl             | 6.05E-16 | 0.634264269 | 0.346 | 0.048 | 1.44E-11 | 6 |
| clip2l            | 7.76E-16 | 0.420907489 | 0.404 | 0.062 | 1.85E-11 | 6 |
| tmem189           | 8.92E-16 | 0.56815864  | 0.654 | 0.192 | 2.13E-11 | 6 |
| tmem54a1          | 8.99E-16 | 0.351965876 | 0.5   | 0.098 | 2.14E-11 | 6 |
| si:ch211-153b23.4 | 9.02E-16 | 0.963040763 | 0.346 | 0.046 | 2.15E-11 | 6 |
| pkig              | 9.12E-16 | 0.357975963 | 0.385 | 0.059 | 2.18E-11 | 6 |
| ctgfal            | 9.40E-16 | 1.278628965 | 0.577 | 0.144 | 2.24E-11 | 6 |
| arl8              | 9.76E-16 | 0.311208227 | 0.385 | 0.06  | 2.33E-11 | 6 |
| ppdpfb1           | 1.01E-15 | 1.350457784 | 0.923 | 0.521 | 2.41E-11 | 6 |
| foxa2             | 1.10E-15 | 0.441902797 | 0.327 | 0.041 | 2.62E-11 | 6 |
| rrbplb            | 1.16E-15 | 0.883663572 | 0.577 | 0.157 | 2.77E-11 | 6 |
| cpdal             | 1.21E-15 | 0.657836495 | 0.5   | 0.109 | 2.88E-11 | 6 |
| slc4a10a          | 1.33E-15 | 0.355715658 | 0.308 | 0.036 | 3.16E-11 | 6 |
| alcama1           | 1.44E-15 | 1.032741126 | 0.404 | 0.069 | 3.43E-11 | 6 |
| zmp:0000001114    | 1.49E-15 | 0.3281354   | 0.404 | 0.066 | 3.55E-11 | 6 |
| slc7a10a1         | 1.63E-15 | 0.486901871 | 0.423 | 0.071 | 3.89E-11 | 6 |
| timp2b            | 1.65E-15 | 0.408685521 | 0.5   | 0.105 | 3.94E-11 | 6 |
| actb2l            | 1.70E-15 | 1.216578467 | 1     | 0.959 | 4.06E-11 | 6 |
| spint2l           | 1.76E-15 | 0.77205686  | 0.788 | 0.322 | 4.19E-11 | 6 |
| plscr3b           | 1.77E-15 | 0.483200487 | 0.5   | 0.107 | 4.22E-11 | 6 |
| hiplrbl           | 1.81E-15 | 0.542369525 | 0.558 | 0.139 | 4.32E-11 | 6 |
| zfhx32            | 1.85E-15 | 0.692709937 | 0.731 | 0.233 | 4.41E-11 | 6 |
| s100v1            | 1.97E-15 | 1.175961423 | 0.865 | 0.443 | 4.69E-11 | 6 |
| si:ch211-105c13.3 | 2.03E-15 | 0.955264586 | 0.538 | 0.123 | 4.83E-11 | 6 |
| mvp               | 2.13E-15 | 1.560104586 | 0.923 | 0.598 | 5.08E-11 | 6 |
| palm3             | 2.51E-15 | 0.347179462 | 0.5   | 0.107 | 5.98E-11 | 6 |
| fam46bb           | 2.57E-15 | 0.650278547 | 0.346 | 0.05  | 6.14E-11 | 6 |
| rbms2a1           | 3.08E-15 | 0.427844315 | 0.558 | 0.13  | 7.35E-11 | 6 |
| at13l             | 3.17E-15 | 0.497326827 | 0.654 | 0.194 | 7.56E-11 | 6 |
| serpine1          | 3.71E-15 | 1.383226315 | 0.673 | 0.215 | 8.85E-11 | 6 |
| nckap1l           | 4.46E-15 | 0.521283691 | 0.788 | 0.27  | 1.06E-10 | 6 |
| serinc5           | 4.49E-15 | 0.378807363 | 0.423 | 0.075 | 1.07E-10 | 6 |
| mxra8b            | 5.14E-15 | 0.688533363 | 0.269 | 0.028 | 1.23E-10 | 6 |
| si:dkey-229e3.2   | 5.33E-15 | 0.283660805 | 0.288 | 0.032 | 1.27E-10 | 6 |
| asap2b            | 5.39E-15 | 0.582290525 | 0.385 | 0.066 | 1.28E-10 | 6 |
| prkcil            | 6.52E-15 | 0.45908914  | 0.673 | 0.199 | 1.55E-10 | 6 |
| si:ch211-210c8.7  | 6.94E-15 | 0.254787991 | 0.365 | 0.055 | 1.66E-10 | 6 |
| TSTA3 (1 of many) | 7.19E-15 | 0.431552109 | 0.346 | 0.05  | 1.71E-10 | 6 |
| chpfa             | 7.31E-15 | 0.333035529 | 0.327 | 0.043 | 1.74E-10 | 6 |
| skia              | 8.65E-15 | 0.879548057 | 0.692 | 0.244 | 2.06E-10 | 6 |
| ahcyl2            | 1.05E-14 | 0.590877649 | 0.673 | 0.219 | 2.50E-10 | 6 |
| snx18a            | 1.10E-14 | 0.273215372 | 0.423 | 0.078 | 2.61E-10 | 6 |
| sult6b1           | 1.22E-14 | 1.27366094  | 0.788 | 0.347 | 2.91E-10 | 6 |
| hspg2             | 1.25E-14 | 0.5765169   | 0.538 | 0.137 | 2.97E-10 | 6 |
| map3k5            | 1.35E-14 | 0.519472712 | 0.327 | 0.046 | 3.22E-10 | 6 |
| si:ch211-207j7.2  | 1.39E-14 | 0.633292663 | 0.654 | 0.194 | 3.31E-10 | 6 |
| rnd3b             | 1.40E-14 | 0.329146103 | 0.288 | 0.034 | 3.35E-10 | 6 |
| tpd5212a          | 1.43E-14 | 0.619206841 | 0.404 | 0.073 | 3.41E-10 | 6 |
| rhoca             | 1.50E-14 | 0.552519471 | 0.712 | 0.249 | 3.57E-10 | 6 |

|                     |          |             |       |       |          |   |
|---------------------|----------|-------------|-------|-------|----------|---|
| tfa                 | 2.00E-14 | 4.546825118 | 0.462 | 0.112 | 4.77E-10 | 6 |
| chac11              | 2.16E-14 | 1.289266846 | 0.981 | 0.772 | 5.15E-10 | 6 |
| madd                | 2.27E-14 | 0.368911748 | 0.404 | 0.073 | 5.41E-10 | 6 |
| si:busm1-57f23.11   | 2.67E-14 | 0.426344383 | 0.519 | 0.114 | 6.37E-10 | 6 |
| cebpd1              | 2.76E-14 | 1.326826069 | 0.904 | 0.445 | 6.59E-10 | 6 |
| s100u               | 3.10E-14 | 0.775879176 | 0.769 | 0.302 | 7.38E-10 | 6 |
| ical                | 3.18E-14 | 0.270805764 | 0.269 | 0.03  | 7.59E-10 | 6 |
| chmp2a1             | 3.24E-14 | 0.808291462 | 0.885 | 0.432 | 7.73E-10 | 6 |
| si:ch73-70c5.1      | 3.40E-14 | 0.834961094 | 0.769 | 0.315 | 8.10E-10 | 6 |
| selenom             | 3.41E-14 | 0.395533519 | 0.442 | 0.089 | 8.13E-10 | 6 |
| fgfr3               | 3.67E-14 | 0.424728655 | 0.288 | 0.036 | 8.75E-10 | 6 |
| fam3c               | 3.85E-14 | 0.595757193 | 0.596 | 0.173 | 9.19E-10 | 6 |
| mxil                | 4.24E-14 | 0.393412079 | 0.385 | 0.068 | 1.01E-09 | 6 |
| rbmsl1a1            | 4.33E-14 | 0.51822465  | 0.596 | 0.164 | 1.03E-09 | 6 |
| kctd5a1             | 4.69E-14 | 0.529201593 | 0.827 | 0.32  | 1.12E-09 | 6 |
| rhocbl              | 4.89E-14 | 0.825380045 | 0.731 | 0.297 | 1.17E-09 | 6 |
| pacsin3             | 5.42E-14 | 0.379496746 | 0.423 | 0.085 | 1.29E-09 | 6 |
| si:ch1073-392o20.21 | 5.54E-14 | 0.38700428  | 0.731 | 0.228 | 1.32E-09 | 6 |
| yap1                | 5.62E-14 | 0.883296431 | 0.788 | 0.306 | 1.34E-09 | 6 |
| epcam1              | 5.95E-14 | 0.971898914 | 1     | 0.906 | 1.42E-09 | 6 |
| ptpn3               | 6.05E-14 | 0.59432497  | 0.654 | 0.21  | 1.44E-09 | 6 |
| rap1b               | 6.21E-14 | 1.000148473 | 0.827 | 0.393 | 1.48E-09 | 6 |
| taok1b              | 6.39E-14 | 0.487429848 | 0.442 | 0.093 | 1.52E-09 | 6 |
| b3gnt2b             | 6.74E-14 | 0.270425519 | 0.288 | 0.036 | 1.61E-09 | 6 |
| fundc2              | 6.80E-14 | 0.457826618 | 0.673 | 0.217 | 1.62E-09 | 6 |
| rras                | 7.31E-14 | 0.431529997 | 0.692 | 0.242 | 1.74E-09 | 6 |
| actn11              | 7.74E-14 | 0.958346144 | 0.519 | 0.132 | 1.84E-09 | 6 |
| si:ch211-202a12.4   | 7.80E-14 | 1.14709646  | 0.923 | 0.646 | 1.86E-09 | 6 |
| postna              | 8.56E-14 | 0.67279496  | 0.288 | 0.037 | 2.04E-09 | 6 |
| cyfipl              | 1.07E-13 | 0.581415692 | 0.635 | 0.206 | 2.55E-09 | 6 |
| cldnh1              | 1.08E-13 | 2.426261751 | 0.615 | 0.219 | 2.59E-09 | 6 |
| her91               | 1.14E-13 | 1.188295188 | 0.808 | 0.338 | 2.73E-09 | 6 |
| cripl               | 1.28E-13 | 1.441604808 | 0.846 | 0.454 | 3.06E-09 | 6 |
| elov11b1            | 1.45E-13 | 1.218628975 | 0.846 | 0.459 | 3.46E-09 | 6 |
| hs6st21             | 1.48E-13 | 0.464879485 | 0.5   | 0.121 | 3.53E-09 | 6 |
| chmp5b1             | 1.55E-13 | 0.798495373 | 0.923 | 0.527 | 3.70E-09 | 6 |
| sdcbp2              | 1.56E-13 | 1.009906558 | 0.846 | 0.491 | 3.73E-09 | 6 |
| spred2a             | 1.58E-13 | 0.294442853 | 0.558 | 0.144 | 3.77E-09 | 6 |
| papss2b             | 1.59E-13 | 0.66067585  | 0.558 | 0.151 | 3.79E-09 | 6 |
| chmp1b1             | 1.59E-13 | 0.724688641 | 0.846 | 0.4   | 3.80E-09 | 6 |
| hpn                 | 1.66E-13 | 0.286474825 | 0.346 | 0.055 | 3.96E-09 | 6 |
| scarb2a             | 1.90E-13 | 1.082079773 | 0.827 | 0.434 | 4.52E-09 | 6 |
| spaca41             | 2.03E-13 | 0.922354775 | 0.538 | 0.141 | 4.85E-09 | 6 |
| csrpla              | 2.06E-13 | 0.552035382 | 0.731 | 0.269 | 4.92E-09 | 6 |
| ucp21               | 2.15E-13 | 0.730386418 | 0.846 | 0.384 | 5.12E-09 | 6 |
| tmem30c             | 2.22E-13 | 0.638008119 | 0.692 | 0.249 | 5.29E-09 | 6 |
| si:dkeyp-94b4.1     | 2.50E-13 | 0.547897578 | 0.712 | 0.269 | 5.95E-09 | 6 |
| noxola              | 2.72E-13 | 1.155679167 | 0.346 | 0.055 | 6.48E-09 | 6 |
| tjplb               | 3.22E-13 | 0.467783253 | 0.596 | 0.165 | 7.67E-09 | 6 |
| map11c3a            | 3.48E-13 | 0.667763553 | 0.673 | 0.244 | 8.30E-09 | 6 |
| lrch4               | 3.58E-13 | 0.338083539 | 0.346 | 0.059 | 8.54E-09 | 6 |
| si:ch211-286b5.51   | 4.42E-13 | 0.583514818 | 0.635 | 0.203 | 1.05E-08 | 6 |
| sdc41               | 4.52E-13 | 0.939234157 | 0.923 | 0.628 | 1.08E-08 | 6 |
| fxyd11              | 4.57E-13 | 0.570224646 | 0.846 | 0.354 | 1.09E-08 | 6 |

|                   |          |             |       |       |          |   |
|-------------------|----------|-------------|-------|-------|----------|---|
| zgc:1750881       | 5.04E-13 | 0.384710216 | 0.635 | 0.196 | 1.20E-08 | 6 |
| lipia             | 5.38E-13 | 0.400089668 | 0.558 | 0.158 | 1.28E-08 | 6 |
| pacsin2           | 5.51E-13 | 0.372425628 | 0.462 | 0.107 | 1.31E-08 | 6 |
| gadd45ab1         | 5.61E-13 | 0.816893501 | 0.673 | 0.246 | 1.34E-08 | 6 |
| cnn3a1            | 7.70E-13 | 0.55593675  | 0.673 | 0.224 | 1.84E-08 | 6 |
| aqp3a             | 1.02E-12 | 0.751689746 | 0.5   | 0.13  | 2.44E-08 | 6 |
| anxal1b           | 1.10E-12 | 0.839649748 | 0.827 | 0.422 | 2.63E-08 | 6 |
| adgrg1.11         | 1.29E-12 | 0.509435491 | 0.596 | 0.19  | 3.07E-08 | 6 |
| maccl1            | 1.39E-12 | 0.477715194 | 0.558 | 0.153 | 3.31E-08 | 6 |
| tpm31             | 1.41E-12 | 0.951270903 | 0.962 | 0.747 | 3.36E-08 | 6 |
| sulf2b            | 1.44E-12 | 0.290926685 | 0.308 | 0.048 | 3.43E-08 | 6 |
| epb4115           | 1.48E-12 | 0.277008999 | 0.462 | 0.11  | 3.53E-08 | 6 |
| klh124b           | 1.51E-12 | 0.482013088 | 0.404 | 0.084 | 3.61E-08 | 6 |
| cers2a            | 1.77E-12 | 0.330177362 | 0.5   | 0.119 | 4.23E-08 | 6 |
| scamp21           | 1.85E-12 | 0.445989207 | 0.308 | 0.048 | 4.42E-08 | 6 |
| aplp2             | 1.86E-12 | 0.730798789 | 0.75  | 0.345 | 4.43E-08 | 6 |
| plekhg4           | 1.89E-12 | 0.491567079 | 0.654 | 0.224 | 4.50E-08 | 6 |
| si:cabz01102082.1 | 1.96E-12 | 0.411773823 | 0.442 | 0.101 | 4.66E-08 | 6 |
| slc12a7a          | 2.04E-12 | 0.432082465 | 0.462 | 0.114 | 4.87E-08 | 6 |
| sash1a            | 2.06E-12 | 0.318776126 | 0.308 | 0.048 | 4.91E-08 | 6 |
| si:ch211-152p11.4 | 2.20E-12 | 0.345395629 | 0.308 | 0.048 | 5.24E-08 | 6 |
| ddah2             | 2.39E-12 | 0.307366929 | 0.288 | 0.043 | 5.69E-08 | 6 |
| rap2b             | 2.43E-12 | 0.276507344 | 0.577 | 0.169 | 5.80E-08 | 6 |
| serpinh1a         | 2.44E-12 | 0.551044222 | 0.269 | 0.037 | 5.81E-08 | 6 |
| jpt1b1            | 2.80E-12 | 0.575729329 | 0.673 | 0.217 | 6.67E-08 | 6 |
| f3b               | 3.29E-12 | 0.774104127 | 0.519 | 0.142 | 7.85E-08 | 6 |
| lman21            | 3.39E-12 | 0.564318365 | 0.654 | 0.233 | 8.08E-08 | 6 |
| camk2g1           | 3.63E-12 | 0.35746345  | 0.538 | 0.16  | 8.65E-08 | 6 |
| ntan1             | 3.66E-12 | 0.485665398 | 0.462 | 0.116 | 8.72E-08 | 6 |
| dapk3             | 4.04E-12 | 0.355144151 | 0.365 | 0.069 | 9.63E-08 | 6 |
| si:dkey-240h12.3  | 4.20E-12 | 0.373741308 | 0.346 | 0.064 | 1.00E-07 | 6 |
| cldnc             | 4.44E-12 | 1.075337402 | 0.981 | 0.785 | 1.06E-07 | 6 |
| fras1             | 4.73E-12 | 0.27265301  | 0.385 | 0.077 | 1.13E-07 | 6 |
| btr02             | 5.25E-12 | 0.697918831 | 0.731 | 0.301 | 1.25E-07 | 6 |
| mgat1a            | 5.33E-12 | 0.612898827 | 0.635 | 0.233 | 1.27E-07 | 6 |
| arpc2             | 5.37E-12 | 0.733903082 | 0.904 | 0.482 | 1.28E-07 | 6 |
| col4a5            | 6.36E-12 | 1.833769028 | 0.462 | 0.128 | 1.52E-07 | 6 |
| ppfibp1b          | 6.36E-12 | 0.408684117 | 0.558 | 0.171 | 1.52E-07 | 6 |
| nrg1              | 6.47E-12 | 0.443619813 | 0.577 | 0.176 | 1.54E-07 | 6 |
| zgc:565251        | 6.55E-12 | 0.295459091 | 0.558 | 0.157 | 1.56E-07 | 6 |
| arg21             | 6.63E-12 | 0.991167924 | 0.385 | 0.084 | 1.58E-07 | 6 |
| zmynd11           | 6.69E-12 | 0.415075622 | 0.538 | 0.16  | 1.59E-07 | 6 |
| pdc6ip1           | 6.69E-12 | 0.606119706 | 0.712 | 0.299 | 1.60E-07 | 6 |
| gapdhs1           | 6.88E-12 | 1.137987378 | 0.712 | 0.326 | 1.64E-07 | 6 |
| frmd8             | 7.66E-12 | 0.282488701 | 0.346 | 0.068 | 1.83E-07 | 6 |
| zgc:92242         | 8.49E-12 | 0.335776228 | 0.635 | 0.206 | 2.02E-07 | 6 |
| arhgefla          | 8.77E-12 | 0.411756165 | 0.423 | 0.096 | 2.09E-07 | 6 |
| arf11             | 9.14E-12 | 0.509527568 | 0.827 | 0.379 | 2.18E-07 | 6 |
| sh3bgr11          | 9.77E-12 | 0.635320951 | 0.596 | 0.201 | 2.33E-07 | 6 |
| noslapa           | 9.81E-12 | 0.405669512 | 0.442 | 0.109 | 2.34E-07 | 6 |
| rest              | 1.03E-11 | 0.280924991 | 0.481 | 0.125 | 2.44E-07 | 6 |
| ctnbn11           | 1.03E-11 | 0.838232374 | 0.846 | 0.445 | 2.45E-07 | 6 |
| cygb1             | 1.04E-11 | 2.853460614 | 0.673 | 0.29  | 2.47E-07 | 6 |
| tes               | 1.04E-11 | 0.320152022 | 0.481 | 0.123 | 2.47E-07 | 6 |

|                   |          |             |       |       |          |   |
|-------------------|----------|-------------|-------|-------|----------|---|
| hopx              | 1.16E-11 | 0.467590021 | 0.385 | 0.08  | 2.76E-07 | 6 |
| tdhl              | 1.18E-11 | 0.848033786 | 0.731 | 0.324 | 2.83E-07 | 6 |
| selenow12         | 1.21E-11 | 1.473383231 | 0.981 | 0.641 | 2.88E-07 | 6 |
| rab5aa1           | 1.39E-11 | 0.54886255  | 0.769 | 0.336 | 3.30E-07 | 6 |
| cd63              | 1.39E-11 | 0.867705942 | 0.904 | 0.628 | 3.32E-07 | 6 |
| gsna              | 1.42E-11 | 0.343286946 | 0.577 | 0.183 | 3.39E-07 | 6 |
| vaspb             | 1.47E-11 | 0.65591289  | 0.808 | 0.463 | 3.51E-07 | 6 |
| mkrn11            | 1.50E-11 | 0.27331448  | 0.404 | 0.087 | 3.58E-07 | 6 |
| slc25a43          | 1.51E-11 | 0.307220324 | 0.423 | 0.101 | 3.61E-07 | 6 |
| rhpn2             | 1.61E-11 | 0.573480341 | 0.673 | 0.262 | 3.83E-07 | 6 |
| trip11            | 1.68E-11 | 0.443769991 | 0.519 | 0.148 | 4.02E-07 | 6 |
| cicb1             | 1.77E-11 | 0.377120794 | 0.692 | 0.251 | 4.21E-07 | 6 |
| tax1bp1b1         | 1.81E-11 | 0.523499108 | 0.75  | 0.306 | 4.32E-07 | 6 |
| ywhaz1            | 1.87E-11 | 0.751110669 | 0.846 | 0.418 | 4.46E-07 | 6 |
| capns1b           | 1.88E-11 | 0.764560189 | 0.75  | 0.37  | 4.49E-07 | 6 |
| shroom2a          | 2.03E-11 | 0.432311595 | 0.481 | 0.139 | 4.84E-07 | 6 |
| cmpk              | 2.04E-11 | 0.610593917 | 0.827 | 0.377 | 4.88E-07 | 6 |
| pefl              | 2.20E-11 | 0.560464155 | 0.673 | 0.254 | 5.24E-07 | 6 |
| psat11            | 2.25E-11 | 0.693452967 | 0.673 | 0.276 | 5.36E-07 | 6 |
| glb11             | 2.40E-11 | 0.374852272 | 0.288 | 0.048 | 5.73E-07 | 6 |
| ctnnb21           | 2.47E-11 | 0.554033744 | 0.788 | 0.388 | 5.88E-07 | 6 |
| lama5             | 2.68E-11 | 1.857832313 | 0.75  | 0.365 | 6.40E-07 | 6 |
| pik3c2a           | 2.71E-11 | 0.355490074 | 0.346 | 0.073 | 6.47E-07 | 6 |
| gale              | 2.77E-11 | 0.630188446 | 0.673 | 0.272 | 6.61E-07 | 6 |
| uck2b1            | 2.77E-11 | 0.574679622 | 0.596 | 0.208 | 6.61E-07 | 6 |
| nfil3             | 2.85E-11 | 0.435888051 | 0.519 | 0.151 | 6.79E-07 | 6 |
| si:ch211-250c4.41 | 3.52E-11 | 0.490072706 | 0.692 | 0.26  | 8.38E-07 | 6 |
| stau21            | 3.67E-11 | 0.498653856 | 0.75  | 0.319 | 8.75E-07 | 6 |
| BX908782.3        | 3.67E-11 | 0.387206333 | 0.288 | 0.05  | 8.76E-07 | 6 |
| scinlb            | 3.71E-11 | 0.45133579  | 0.385 | 0.091 | 8.84E-07 | 6 |
| socs3a1           | 3.74E-11 | 0.387386925 | 0.635 | 0.21  | 8.93E-07 | 6 |
| midlip1b1         | 3.78E-11 | 0.51115718  | 0.827 | 0.363 | 9.02E-07 | 6 |
| si:ch211-191a24.4 | 3.91E-11 | 0.377936804 | 0.423 | 0.105 | 9.32E-07 | 6 |
| jarid2b           | 3.94E-11 | 0.270195841 | 0.423 | 0.098 | 9.40E-07 | 6 |
| zgc:85932         | 4.01E-11 | 0.277877833 | 0.423 | 0.103 | 9.55E-07 | 6 |
| sh3rf2            | 4.11E-11 | 0.322960215 | 0.308 | 0.055 | 9.81E-07 | 6 |
| ppplcb1           | 4.22E-11 | 0.598296528 | 0.615 | 0.224 | 1.01E-06 | 6 |
| ctsla             | 4.26E-11 | 1.392338016 | 0.923 | 0.632 | 1.01E-06 | 6 |
| gsr               | 4.44E-11 | 0.400505538 | 0.577 | 0.187 | 1.06E-06 | 6 |
| creb31311         | 4.45E-11 | 0.631624904 | 0.769 | 0.365 | 1.06E-06 | 6 |
| nfkbiab1          | 4.49E-11 | 1.457881069 | 0.846 | 0.468 | 1.07E-06 | 6 |
| fasn              | 5.60E-11 | 0.296870302 | 0.288 | 0.048 | 1.33E-06 | 6 |
| sdc2              | 5.77E-11 | 0.371850399 | 0.538 | 0.173 | 1.38E-06 | 6 |
| zgc:123010        | 5.82E-11 | 0.659333892 | 0.519 | 0.169 | 1.39E-06 | 6 |
| fam199x1          | 6.38E-11 | 0.371348061 | 0.519 | 0.165 | 1.52E-06 | 6 |
| zswim51           | 6.42E-11 | 0.406640797 | 0.712 | 0.286 | 1.53E-06 | 6 |
| zgc:92140         | 6.77E-11 | 0.568013198 | 0.365 | 0.085 | 1.61E-06 | 6 |
| foxplb            | 6.98E-11 | 0.263997785 | 0.269 | 0.041 | 1.67E-06 | 6 |
| capzala1          | 7.35E-11 | 0.518545696 | 0.75  | 0.356 | 1.75E-06 | 6 |
| sh3glla           | 7.52E-11 | 0.485433864 | 0.635 | 0.221 | 1.79E-06 | 6 |
| mclla             | 7.55E-11 | 0.976676403 | 0.923 | 0.749 | 1.80E-06 | 6 |
| glsb              | 8.45E-11 | 0.484769855 | 0.654 | 0.235 | 2.02E-06 | 6 |
| chmp4bb1          | 8.77E-11 | 0.511310425 | 0.788 | 0.386 | 2.09E-06 | 6 |
| atplala.1         | 8.79E-11 | 0.842646284 | 0.923 | 0.582 | 2.10E-06 | 6 |

|             |          |             |       |       |          |   |
|-------------|----------|-------------|-------|-------|----------|---|
| shc11       | 9.98E-11 | 0.392791634 | 0.519 | 0.155 | 2.38E-06 | 6 |
| cpnel       | 1.02E-10 | 0.761271878 | 0.808 | 0.404 | 2.44E-06 | 6 |
| rnf19a1     | 1.11E-10 | 0.455174499 | 0.596 | 0.214 | 2.66E-06 | 6 |
| tagln21     | 1.13E-10 | 0.837819983 | 1     | 0.842 | 2.68E-06 | 6 |
| DYRK31      | 1.16E-10 | 0.499405514 | 0.423 | 0.107 | 2.77E-06 | 6 |
| BX936337.11 | 1.19E-10 | 0.77574761  | 0.846 | 0.445 | 2.83E-06 | 6 |
| cf11111     | 1.27E-10 | 1.027439361 | 0.846 | 0.479 | 3.02E-06 | 6 |
| uacab       | 1.30E-10 | 0.492790598 | 0.654 | 0.242 | 3.11E-06 | 6 |
| slc37a2     | 1.30E-10 | 0.500669127 | 0.692 | 0.288 | 3.11E-06 | 6 |
| CU928117.1  | 1.39E-10 | 0.329386214 | 0.596 | 0.185 | 3.31E-06 | 6 |
| myo9aa      | 1.43E-10 | 0.419967702 | 0.442 | 0.119 | 3.40E-06 | 6 |
| letm1       | 1.46E-10 | 0.287908542 | 0.519 | 0.16  | 3.48E-06 | 6 |
| tbc1d10aa   | 1.47E-10 | 0.324338621 | 0.481 | 0.139 | 3.50E-06 | 6 |
| irf2bpl     | 1.50E-10 | 0.331081774 | 0.462 | 0.13  | 3.58E-06 | 6 |
| schip11     | 1.50E-10 | 0.691630526 | 0.635 | 0.233 | 3.58E-06 | 6 |
| tead1b      | 1.52E-10 | 0.331457294 | 0.481 | 0.137 | 3.61E-06 | 6 |
| pbxipla1    | 1.55E-10 | 0.328863017 | 0.404 | 0.094 | 3.70E-06 | 6 |
| itih5       | 1.57E-10 | 0.347612284 | 0.346 | 0.077 | 3.74E-06 | 6 |
| adam17a     | 1.58E-10 | 0.250647156 | 0.404 | 0.1   | 3.77E-06 | 6 |
| tjpla       | 1.65E-10 | 0.658202884 | 0.692 | 0.304 | 3.93E-06 | 6 |
| lamc1       | 1.68E-10 | 0.600184602 | 0.558 | 0.19  | 4.00E-06 | 6 |
| btg3        | 1.77E-10 | 0.549219514 | 0.481 | 0.141 | 4.21E-06 | 6 |
| spagla      | 1.85E-10 | 0.591869883 | 0.519 | 0.18  | 4.40E-06 | 6 |
| ap3d11      | 1.85E-10 | 0.59034798  | 0.615 | 0.221 | 4.41E-06 | 6 |
| ccn1        | 1.88E-10 | 0.59716209  | 0.808 | 0.409 | 4.47E-06 | 6 |
| krt91       | 2.10E-10 | 1.670078104 | 0.865 | 0.609 | 5.02E-06 | 6 |
| gata5       | 2.14E-10 | 1.236513772 | 0.5   | 0.167 | 5.10E-06 | 6 |
| tjp2a1      | 2.20E-10 | 0.331296244 | 0.596 | 0.208 | 5.25E-06 | 6 |
| fam177a11   | 2.21E-10 | 0.368370505 | 0.538 | 0.167 | 5.27E-06 | 6 |
| smad3a      | 2.42E-10 | 0.68069074  | 0.635 | 0.254 | 5.76E-06 | 6 |
| csnk1da1    | 2.64E-10 | 0.695867858 | 0.731 | 0.317 | 6.28E-06 | 6 |
| cebpbl      | 2.72E-10 | 1.167266338 | 0.962 | 0.74  | 6.50E-06 | 6 |
| pls3        | 2.80E-10 | 0.410622041 | 0.596 | 0.21  | 6.67E-06 | 6 |
| cobl        | 2.92E-10 | 0.475110383 | 0.308 | 0.06  | 6.96E-06 | 6 |
| leng9       | 2.95E-10 | 0.402157209 | 0.596 | 0.221 | 7.03E-06 | 6 |
| cab3911     | 3.14E-10 | 0.603764841 | 0.635 | 0.247 | 7.48E-06 | 6 |
| ncoa4       | 3.17E-10 | 0.387165191 | 0.635 | 0.237 | 7.56E-06 | 6 |
| tmem79b     | 3.40E-10 | 0.348101544 | 0.442 | 0.121 | 8.11E-06 | 6 |
| tax1bp3     | 3.43E-10 | 0.47988459  | 0.827 | 0.454 | 8.19E-06 | 6 |
| itsn2a      | 4.20E-10 | 0.397533227 | 0.423 | 0.11  | 1.00E-05 | 6 |
| arl1        | 4.23E-10 | 0.413335321 | 0.75  | 0.338 | 1.01E-05 | 6 |
| cnn2        | 4.42E-10 | 0.674957216 | 0.962 | 0.669 | 1.05E-05 | 6 |
| cyb5r1      | 4.49E-10 | 0.561352117 | 0.673 | 0.263 | 1.07E-05 | 6 |
| itsn2b      | 4.65E-10 | 0.407915562 | 0.673 | 0.267 | 1.11E-05 | 6 |
| atp2c11     | 4.66E-10 | 0.260198257 | 0.423 | 0.11  | 1.11E-05 | 6 |
| pbxip1b     | 4.68E-10 | 0.383130888 | 0.577 | 0.203 | 1.12E-05 | 6 |
| CU929259.1  | 4.68E-10 | 0.57604035  | 0.769 | 0.375 | 1.12E-05 | 6 |
| pdgfba1     | 4.77E-10 | 0.410697998 | 0.596 | 0.206 | 1.14E-05 | 6 |
| limk2       | 4.80E-10 | 0.600437263 | 0.5   | 0.16  | 1.14E-05 | 6 |
| mef2aa1     | 5.03E-10 | 0.3266465   | 0.423 | 0.109 | 1.20E-05 | 6 |
| fbxo45      | 5.15E-10 | 0.318163185 | 0.346 | 0.077 | 1.23E-05 | 6 |
| zgc:153115  | 6.34E-10 | 0.26297624  | 0.615 | 0.222 | 1.51E-05 | 6 |
| ppplr9ala   | 6.45E-10 | 0.30653355  | 0.365 | 0.089 | 1.54E-05 | 6 |
| tm9sf31     | 6.53E-10 | 0.451169077 | 0.731 | 0.32  | 1.56E-05 | 6 |

|                    |        |          |             |       |       |          |   |
|--------------------|--------|----------|-------------|-------|-------|----------|---|
| wipf2a1            |        | 6.57E-10 | 0.339670255 | 0.615 | 0.235 | 1.57E-05 | 6 |
| si:dkey-172h23.21  |        | 6.58E-10 | 0.263485071 | 0.577 | 0.199 | 1.57E-05 | 6 |
| rillp12            |        | 6.80E-10 | 0.379084168 | 0.423 | 0.117 | 1.62E-05 | 6 |
| wnk1b1             |        | 7.41E-10 | 0.327421191 | 0.462 | 0.135 | 1.77E-05 | 6 |
| mpz12b             |        | 7.71E-10 | 0.499849666 | 0.596 | 0.23  | 1.84E-05 | 6 |
| uapl               |        | 8.07E-10 | 0.297969299 | 0.635 | 0.244 | 1.92E-05 | 6 |
| tlnl1              |        | 8.27E-10 | 0.778285947 | 0.692 | 0.322 | 1.97E-05 | 6 |
| rab11fip1a         |        | 8.62E-10 | 0.378672949 | 0.462 | 0.137 | 2.06E-05 | 6 |
| zgc:158343         |        | 8.84E-10 | 1.178559919 | 0.885 | 0.6   | 2.11E-05 | 6 |
| anx1a1             |        | 9.00E-10 | 0.678459713 | 0.692 | 0.358 | 2.15E-05 | 6 |
| sdf2l11            |        | 1.12E-09 | 0.612213214 | 0.731 | 0.352 | 2.67E-05 | 6 |
| fosl1a2            |        | 1.19E-09 | 0.878649566 | 0.885 | 0.585 | 2.83E-05 | 6 |
| tp53inp11          |        | 1.27E-09 | 0.622553241 | 0.519 | 0.167 | 3.02E-05 | 6 |
| fermt1             |        | 1.27E-09 | 0.477803103 | 0.673 | 0.31  | 3.04E-05 | 6 |
| baiap2a            |        | 1.33E-09 | 0.300258482 | 0.346 | 0.085 | 3.18E-05 | 6 |
|                    | 10-Sep | 1.40E-09 | 0.570046942 | 0.558 | 0.212 | 3.33E-05 | 6 |
| si:dkey-177p2.61   |        | 1.44E-09 | 0.437983014 | 0.712 | 0.322 | 3.44E-05 | 6 |
| mapk3              |        | 1.48E-09 | 0.364555078 | 0.519 | 0.176 | 3.52E-05 | 6 |
| cldn121            |        | 1.50E-09 | 0.26566351  | 0.423 | 0.121 | 3.58E-05 | 6 |
| gprc5c             |        | 1.51E-09 | 0.436446693 | 0.481 | 0.148 | 3.60E-05 | 6 |
| nfil3-5            |        | 1.61E-09 | 0.872422531 | 0.865 | 0.544 | 3.83E-05 | 6 |
| ssh2a              |        | 1.62E-09 | 0.392052461 | 0.442 | 0.126 | 3.87E-05 | 6 |
| arhgap42a          |        | 1.63E-09 | 0.279217024 | 0.5   | 0.16  | 3.90E-05 | 6 |
| lims11             |        | 1.66E-09 | 0.53805555  | 0.635 | 0.267 | 3.96E-05 | 6 |
| pcdh19             |        | 1.70E-09 | 0.54558929  | 0.288 | 0.057 | 4.06E-05 | 6 |
| si:dkeyp-110e4.6   |        | 1.70E-09 | 0.387807044 | 0.269 | 0.052 | 4.06E-05 | 6 |
| fosl2              |        | 1.73E-09 | 0.709785327 | 0.865 | 0.448 | 4.12E-05 | 6 |
| si:ch1073-165f9.2  |        | 1.78E-09 | 0.380412411 | 0.365 | 0.089 | 4.25E-05 | 6 |
| ptp4a11            |        | 1.82E-09 | 0.509066278 | 0.827 | 0.42  | 4.35E-05 | 6 |
| der111             |        | 1.85E-09 | 0.3520274   | 0.5   | 0.158 | 4.41E-05 | 6 |
| itm2ba             |        | 1.87E-09 | 0.463305665 | 0.769 | 0.381 | 4.47E-05 | 6 |
| gabpa              |        | 1.88E-09 | 0.44249665  | 0.577 | 0.212 | 4.49E-05 | 6 |
| pim3               |        | 1.90E-09 | 0.31947781  | 0.423 | 0.119 | 4.53E-05 | 6 |
| glulb1             |        | 1.93E-09 | 0.543054918 | 0.692 | 0.322 | 4.59E-05 | 6 |
| stim1a             |        | 1.98E-09 | 0.453562392 | 0.519 | 0.169 | 4.72E-05 | 6 |
| mst1ra             |        | 2.03E-09 | 0.254078788 | 0.462 | 0.135 | 4.83E-05 | 6 |
| racla              |        | 2.08E-09 | 0.582904493 | 0.692 | 0.306 | 4.95E-05 | 6 |
| rab10              |        | 2.11E-09 | 0.617053284 | 0.885 | 0.525 | 5.03E-05 | 6 |
| relb1              |        | 2.23E-09 | 0.742520868 | 0.558 | 0.187 | 5.31E-05 | 6 |
| nipal3             |        | 2.32E-09 | 0.314821033 | 0.423 | 0.123 | 5.53E-05 | 6 |
| plecb1             |        | 2.40E-09 | 0.892973603 | 0.827 | 0.48  | 5.71E-05 | 6 |
| sptlc2b1           |        | 2.43E-09 | 0.642573638 | 0.808 | 0.436 | 5.79E-05 | 6 |
| tnfb1              |        | 2.57E-09 | 0.795198951 | 0.462 | 0.139 | 6.13E-05 | 6 |
| DST                |        | 2.61E-09 | 0.47232574  | 0.442 | 0.133 | 6.22E-05 | 6 |
| cnpy1              |        | 2.62E-09 | 0.357238661 | 0.75  | 0.352 | 6.25E-05 | 6 |
| zgc:92313          |        | 2.67E-09 | 0.526679168 | 0.769 | 0.381 | 6.36E-05 | 6 |
| abracl1            |        | 2.71E-09 | 0.70217875  | 0.904 | 0.523 | 6.47E-05 | 6 |
| large2             |        | 2.79E-09 | 0.402515098 | 0.519 | 0.189 | 6.65E-05 | 6 |
| spintl1b           |        | 2.87E-09 | 0.334704438 | 0.269 | 0.052 | 6.84E-05 | 6 |
| si:ch1073-443f11.2 |        | 2.97E-09 | 0.523080113 | 0.615 | 0.253 | 7.08E-05 | 6 |
| rab2a1             |        | 3.01E-09 | 0.583424433 | 0.865 | 0.528 | 7.17E-05 | 6 |
| dlg5a              |        | 3.17E-09 | 0.417695596 | 0.385 | 0.103 | 7.56E-05 | 6 |
| srebf21            |        | 3.30E-09 | 0.479419797 | 0.635 | 0.281 | 7.87E-05 | 6 |
| gabarapb1          |        | 3.31E-09 | 0.473407219 | 0.712 | 0.317 | 7.90E-05 | 6 |

|                   |          |             |       |       |           |   |
|-------------------|----------|-------------|-------|-------|-----------|---|
| arpc31            | 3.39E-09 | 0.679670603 | 0.865 | 0.537 | 8.10E-05  | 6 |
| scfd11            | 3.52E-09 | 0.358641697 | 0.519 | 0.183 | 8.40E-05  | 6 |
| si:dkey-42i9.61   | 3.65E-09 | 0.300939051 | 0.462 | 0.142 | 8.69E-05  | 6 |
| ctnnd11           | 3.97E-09 | 0.539200779 | 0.846 | 0.495 | 9.46E-05  | 6 |
| cmtm6             | 3.97E-09 | 0.467934301 | 0.481 | 0.158 | 9.47E-05  | 6 |
| irf6              | 4.01E-09 | 0.483772895 | 0.846 | 0.422 | 9.56E-05  | 6 |
| nfkb1aa1          | 4.21E-09 | 1.548912946 | 0.731 | 0.39  | 0.0001004 | 6 |
| CABZ01005876.1    | 4.26E-09 | 0.371559376 | 0.404 | 0.112 | 0.0001016 | 6 |
| stx5a             | 4.40E-09 | 0.402239739 | 0.538 | 0.196 | 0.0001049 | 6 |
| net1              | 4.43E-09 | 0.796093084 | 0.596 | 0.276 | 0.0001057 | 6 |
| rnfl3             | 4.58E-09 | 0.352463667 | 0.327 | 0.077 | 0.0001092 | 6 |
| vapb              | 4.94E-09 | 0.688015106 | 0.788 | 0.413 | 0.0001178 | 6 |
| gak               | 4.95E-09 | 0.333130631 | 0.5   | 0.173 | 0.000118  | 6 |
| clgalt1b          | 5.05E-09 | 0.341397227 | 0.558 | 0.212 | 0.0001204 | 6 |
| arf6b             | 5.08E-09 | 0.405373106 | 0.712 | 0.31  | 0.0001212 | 6 |
| abila             | 5.26E-09 | 0.313156713 | 0.712 | 0.297 | 0.0001254 | 6 |
| iqgap1            | 5.26E-09 | 0.296295584 | 0.538 | 0.194 | 0.0001255 | 6 |
| marcks11a1        | 5.29E-09 | 1.941107896 | 0.692 | 0.338 | 0.0001262 | 6 |
| myoleb            | 5.34E-09 | 0.310593122 | 0.596 | 0.235 | 0.0001274 | 6 |
| arrdc3b1          | 5.53E-09 | 0.335469655 | 0.404 | 0.11  | 0.0001319 | 6 |
| spon1b            | 5.62E-09 | 0.534723137 | 0.269 | 0.055 | 0.0001339 | 6 |
| gdcx              | 5.97E-09 | 0.289395599 | 0.327 | 0.078 | 0.0001423 | 6 |
| pnpla8            | 6.23E-09 | 0.33797982  | 0.365 | 0.094 | 0.0001485 | 6 |
| jupal             | 6.42E-09 | 0.564439855 | 0.885 | 0.532 | 0.0001531 | 6 |
| trib31            | 6.55E-09 | 0.643973909 | 0.885 | 0.525 | 0.0001561 | 6 |
| xiap              | 6.73E-09 | 0.417344856 | 0.365 | 0.098 | 0.0001604 | 6 |
| maff1             | 6.96E-09 | 0.602449481 | 0.827 | 0.491 | 0.000166  | 6 |
| clint1a1          | 7.04E-09 | 0.62947886  | 0.75  | 0.388 | 0.0001678 | 6 |
| CT030188.1        | 7.07E-09 | 0.288806611 | 0.327 | 0.078 | 0.0001686 | 6 |
| arhgef1b1         | 7.34E-09 | 0.378684339 | 0.615 | 0.228 | 0.0001751 | 6 |
| pde7a1            | 7.86E-09 | 0.496402159 | 0.423 | 0.132 | 0.0001875 | 6 |
| ildrla            | 7.95E-09 | 0.587350642 | 0.654 | 0.283 | 0.0001895 | 6 |
| cd1511            | 8.61E-09 | 0.444637323 | 0.596 | 0.242 | 0.0002053 | 6 |
| csnkl1a11         | 8.72E-09 | 0.433821905 | 0.827 | 0.493 | 0.0002079 | 6 |
| lect21            | 9.30E-09 | 1.222069057 | 0.385 | 0.114 | 0.0002217 | 6 |
| lspl              | 9.55E-09 | 1.203792258 | 0.75  | 0.432 | 0.0002276 | 6 |
| rnfl69            | 9.57E-09 | 0.330244407 | 0.481 | 0.16  | 0.0002282 | 6 |
| slc25a55a         | 1.02E-08 | 0.603111701 | 0.885 | 0.525 | 0.0002428 | 6 |
| rca1a             | 1.04E-08 | 0.345347367 | 0.481 | 0.158 | 0.0002482 | 6 |
| arnt2             | 1.10E-08 | 0.27998135  | 0.346 | 0.089 | 0.0002614 | 6 |
| zgc:77849         | 1.10E-08 | 0.569485436 | 0.827 | 0.509 | 0.0002625 | 6 |
| ell               | 1.11E-08 | 0.400940759 | 0.5   | 0.174 | 0.0002654 | 6 |
| wasf21            | 1.22E-08 | 0.321234962 | 0.654 | 0.274 | 0.0002915 | 6 |
| ctsz              | 1.22E-08 | 0.415055385 | 0.538 | 0.208 | 0.0002916 | 6 |
| foxo41            | 1.27E-08 | 0.413037159 | 0.577 | 0.235 | 0.0003033 | 6 |
| tnipl1            | 1.31E-08 | 0.433077447 | 0.692 | 0.304 | 0.0003114 | 6 |
| ctdsp21           | 1.37E-08 | 0.461411096 | 0.635 | 0.258 | 0.0003259 | 6 |
| ywhae2            | 1.37E-08 | 0.383339968 | 0.692 | 0.319 | 0.000326  | 6 |
| si:ch211-195b11.3 | 1.38E-08 | 0.821820585 | 0.269 | 0.055 | 0.0003291 | 6 |
| kdelr2a           | 1.41E-08 | 0.528029491 | 0.769 | 0.406 | 0.0003371 | 6 |
| ppiaa2            | 1.43E-08 | 0.570602849 | 0.981 | 0.89  | 0.0003418 | 6 |
| irs2a             | 1.45E-08 | 0.263446758 | 0.365 | 0.098 | 0.0003455 | 6 |
| lpl1              | 1.47E-08 | 0.338047137 | 0.481 | 0.162 | 0.0003505 | 6 |
| llgl21            | 1.48E-08 | 0.375990362 | 0.712 | 0.315 | 0.0003518 | 6 |

|             |          |             |       |       |           |   |
|-------------|----------|-------------|-------|-------|-----------|---|
| vps281      | 1.51E-08 | 0.343611585 | 0.635 | 0.274 | 0.0003598 | 6 |
| myo9b       | 1.59E-08 | 0.269772104 | 0.365 | 0.098 | 0.000379  | 6 |
| kdm2ba1     | 1.60E-08 | 0.45123249  | 0.5   | 0.192 | 0.000381  | 6 |
| fnkc3ba     | 1.74E-08 | 0.271283542 | 0.308 | 0.071 | 0.0004159 | 6 |
| tpd5212b    | 1.81E-08 | 0.359268989 | 0.519 | 0.205 | 0.0004323 | 6 |
| golt1bb1    | 1.85E-08 | 0.315612058 | 0.538 | 0.187 | 0.0004423 | 6 |
| MY01D       | 1.87E-08 | 0.954693775 | 0.635 | 0.308 | 0.0004463 | 6 |
| mknk2b1     | 1.91E-08 | 0.982732319 | 0.865 | 0.612 | 0.0004553 | 6 |
| tubb4b1     | 2.12E-08 | 0.780495451 | 0.962 | 0.71  | 0.0005052 | 6 |
| frmd4ba     | 2.29E-08 | 0.617520954 | 0.731 | 0.356 | 0.0005472 | 6 |
| serpinb11   | 2.38E-08 | 0.8275654   | 0.923 | 0.616 | 0.0005666 | 6 |
| f11r.1      | 2.40E-08 | 0.492568084 | 0.923 | 0.617 | 0.0005726 | 6 |
| sec23b2     | 2.70E-08 | 0.384059515 | 0.673 | 0.324 | 0.0006431 | 6 |
| bzwlb       | 2.70E-08 | 0.573344542 | 0.904 | 0.562 | 0.0006445 | 6 |
| CU984600.1  | 2.74E-08 | 0.3141982   | 0.346 | 0.094 | 0.0006535 | 6 |
| egr2a       | 2.79E-08 | 1.036606622 | 0.635 | 0.285 | 0.000665  | 6 |
| cast1       | 2.91E-08 | 0.58106394  | 0.827 | 0.456 | 0.0006933 | 6 |
| jak11       | 3.03E-08 | 0.427710299 | 0.769 | 0.399 | 0.0007228 | 6 |
| pcbp21      | 3.06E-08 | 0.459506289 | 0.75  | 0.365 | 0.0007304 | 6 |
| zswim81     | 3.19E-08 | 0.355314844 | 0.423 | 0.137 | 0.0007608 | 6 |
| jmjd1cb1    | 3.26E-08 | 0.383088669 | 0.712 | 0.333 | 0.0007781 | 6 |
| lipg        | 3.27E-08 | 0.291349755 | 0.385 | 0.112 | 0.0007789 | 6 |
| rell        | 3.32E-08 | 0.294654675 | 0.404 | 0.112 | 0.0007923 | 6 |
| atp6v1e1b1  | 3.33E-08 | 0.434857126 | 0.692 | 0.311 | 0.000794  | 6 |
| kif5ba1     | 3.33E-08 | 0.514920237 | 0.635 | 0.302 | 0.0007942 | 6 |
| ccdc186     | 3.43E-08 | 0.339298474 | 0.481 | 0.162 | 0.000818  | 6 |
| pnrc22      | 3.75E-08 | 0.769933089 | 0.923 | 0.794 | 0.0008944 | 6 |
| smc6        | 3.79E-08 | 0.27179073  | 0.269 | 0.057 | 0.0009038 | 6 |
| tmsb11      | 3.82E-08 | 0.732048661 | 1     | 0.786 | 0.0009112 | 6 |
| gnai2a1     | 4.13E-08 | 0.627883491 | 0.731 | 0.356 | 0.0009842 | 6 |
| ddx3b       | 4.25E-08 | 0.486969196 | 0.788 | 0.397 | 0.0010123 | 6 |
| spartb      | 4.55E-08 | 0.270848992 | 0.288 | 0.068 | 0.001085  | 6 |
| tmf11       | 4.65E-08 | 0.324981666 | 0.365 | 0.105 | 0.0011089 | 6 |
| wu:fc21g02  | 4.72E-08 | 0.261839405 | 0.346 | 0.094 | 0.0011252 | 6 |
| vkorc111    | 4.76E-08 | 0.38956215  | 0.481 | 0.178 | 0.0011355 | 6 |
| cyth1a.11   | 4.95E-08 | 0.276036582 | 0.615 | 0.269 | 0.00118   | 6 |
| klf51       | 4.98E-08 | 0.652584685 | 0.788 | 0.52  | 0.0011872 | 6 |
| zgc:1538671 | 5.63E-08 | 0.658676145 | 0.923 | 0.749 | 0.0013433 | 6 |
| rbm14b1     | 5.64E-08 | 0.490568578 | 0.5   | 0.187 | 0.0013451 | 6 |
| rb1cc1      | 5.66E-08 | 0.255443709 | 0.462 | 0.157 | 0.0013486 | 6 |
| vsig10      | 5.70E-08 | 0.31053877  | 0.481 | 0.164 | 0.0013583 | 6 |
| b3gnt5a     | 5.92E-08 | 0.656743091 | 0.288 | 0.071 | 0.0014112 | 6 |
| palld       | 6.07E-08 | 0.499241872 | 0.462 | 0.164 | 0.0014468 | 6 |
| ist11       | 6.07E-08 | 0.490434633 | 0.712 | 0.381 | 0.001448  | 6 |
| arpc5a      | 6.67E-08 | 0.622628199 | 0.712 | 0.375 | 0.0015903 | 6 |
| chmp4ba1    | 6.68E-08 | 0.390764717 | 0.692 | 0.324 | 0.0015939 | 6 |
| zgc:92360   | 6.81E-08 | 0.260470248 | 0.442 | 0.153 | 0.0016239 | 6 |
| nrarpa      | 6.90E-08 | 0.368561222 | 0.673 | 0.294 | 0.0016443 | 6 |
| trim16      | 6.93E-08 | 0.345367875 | 0.731 | 0.37  | 0.0016527 | 6 |
| zdhhc5a     | 7.09E-08 | 0.379215962 | 0.596 | 0.251 | 0.0016902 | 6 |
| mknk1       | 7.57E-08 | 0.284807917 | 0.404 | 0.13  | 0.0018054 | 6 |
| ubb         | 7.61E-08 | 0.759867509 | 0.923 | 0.6   | 0.0018144 | 6 |
| notch21     | 7.62E-08 | 0.318409121 | 0.462 | 0.155 | 0.0018162 | 6 |
| ppplr12a1   | 7.71E-08 | 0.327296362 | 0.673 | 0.322 | 0.0018375 | 6 |



|                   |          |             |       |       |           |   |
|-------------------|----------|-------------|-------|-------|-----------|---|
| gadd45ba1         | 7.81E-08 | 1.149069042 | 0.827 | 0.56  | 0.0018622 | 6 |
| csnk1db           | 7.98E-08 | 0.402849564 | 0.712 | 0.335 | 0.0019033 | 6 |
| mob4              | 8.15E-08 | 0.317565927 | 0.635 | 0.279 | 0.0019424 | 6 |
| CR762483.11       | 8.50E-08 | 0.373150576 | 0.538 | 0.199 | 0.0020278 | 6 |
| cdca4             | 8.53E-08 | 0.308157325 | 0.423 | 0.144 | 0.0020348 | 6 |
| CU694481.1        | 8.64E-08 | 0.435395137 | 0.346 | 0.098 | 0.0020603 | 6 |
| CABZ01020840.1    | 8.74E-08 | 0.373483099 | 0.481 | 0.173 | 0.0020848 | 6 |
| afdna1            | 9.20E-08 | 0.386860375 | 0.712 | 0.374 | 0.0021945 | 6 |
| gmppb             | 9.29E-08 | 0.259163165 | 0.654 | 0.294 | 0.0022147 | 6 |
| tmed101           | 9.41E-08 | 0.476313655 | 0.846 | 0.514 | 0.0022437 | 6 |
| mapk6             | 9.58E-08 | 0.314956105 | 0.558 | 0.233 | 0.0022837 | 6 |
| mbpb1             | 9.62E-08 | 0.303026038 | 0.596 | 0.256 | 0.0022946 | 6 |
| stam2             | 9.84E-08 | 0.27889852  | 0.308 | 0.078 | 0.0023463 | 6 |
| CR383676.12       | 1.01E-07 | 0.614239825 | 1     | 0.979 | 0.0024105 | 6 |
| si:dkey-112a7.41  | 1.02E-07 | 0.523705003 | 0.692 | 0.363 | 0.0024298 | 6 |
| nedd9             | 1.02E-07 | 0.3522778   | 0.442 | 0.157 | 0.0024419 | 6 |
| adam10a1          | 1.05E-07 | 0.313223731 | 0.75  | 0.365 | 0.0024924 | 6 |
| cgn11             | 1.15E-07 | 0.48963082  | 0.538 | 0.231 | 0.0027332 | 6 |
| igf2bp2b          | 1.16E-07 | 0.268741247 | 0.481 | 0.181 | 0.0027552 | 6 |
| akap12b1          | 1.18E-07 | 1.163099358 | 0.404 | 0.126 | 0.0028081 | 6 |
| dsc21             | 1.21E-07 | 0.536686366 | 0.596 | 0.262 | 0.0028851 | 6 |
| appbp2            | 1.22E-07 | 0.277730238 | 0.308 | 0.08  | 0.0029128 | 6 |
| PPP2CA            | 1.29E-07 | 0.331271856 | 0.577 | 0.254 | 0.0030847 | 6 |
| myo18ab           | 1.31E-07 | 0.259970156 | 0.615 | 0.262 | 0.003126  | 6 |
| gipc2             | 1.31E-07 | 0.423604185 | 0.769 | 0.413 | 0.0031332 | 6 |
| tpm4a1            | 1.32E-07 | 0.373635881 | 0.673 | 0.29  | 0.0031407 | 6 |
| foxa31            | 1.33E-07 | 0.277975228 | 0.769 | 0.39  | 0.0031627 | 6 |
| ppmlbb            | 1.33E-07 | 0.307333988 | 0.423 | 0.144 | 0.0031635 | 6 |
| zmiz1a1           | 1.34E-07 | 0.268539877 | 0.481 | 0.178 | 0.0032009 | 6 |
| wls               | 1.45E-07 | 0.390347002 | 0.519 | 0.203 | 0.003462  | 6 |
| idh2              | 1.46E-07 | 1.219878095 | 0.865 | 0.571 | 0.003492  | 6 |
| eif4g2b1          | 1.57E-07 | 0.456919309 | 0.808 | 0.441 | 0.0037465 | 6 |
| phgdh1            | 1.62E-07 | 0.288650893 | 0.365 | 0.11  | 0.0038526 | 6 |
| tmem131           | 1.63E-07 | 0.367291004 | 0.635 | 0.295 | 0.003893  | 6 |
| gsell             | 1.75E-07 | 0.284836919 | 0.615 | 0.262 | 0.0041668 | 6 |
| optnl             | 1.75E-07 | 0.290317544 | 0.423 | 0.137 | 0.0041674 | 6 |
| ubcl              | 1.77E-07 | 0.537239558 | 0.981 | 0.792 | 0.0042216 | 6 |
| cntf              | 1.99E-07 | 0.441222626 | 0.327 | 0.089 | 0.0047468 | 6 |
| slc37a1           | 2.08E-07 | 0.31980861  | 0.327 | 0.096 | 0.0049528 | 6 |
| si:dkey-204f11.64 | 2.09E-07 | 0.443765657 | 0.423 | 0.149 | 0.0049867 | 6 |
| tmtc3             | 2.11E-07 | 0.286269345 | 0.269 | 0.068 | 0.0050371 | 6 |
| cdh11             | 2.12E-07 | 0.436393925 | 0.885 | 0.641 | 0.0050466 | 6 |
| psap              | 2.24E-07 | 0.529118489 | 0.635 | 0.308 | 0.0053411 | 6 |
| wip1              | 2.36E-07 | 0.264338252 | 0.269 | 0.062 | 0.0056179 | 6 |
| rnf20             | 2.44E-07 | 0.276646232 | 0.481 | 0.181 | 0.0058297 | 6 |
| rab141            | 2.50E-07 | 0.427503498 | 0.654 | 0.313 | 0.0059724 | 6 |
| wbp2n1            | 2.62E-07 | 0.530448345 | 0.519 | 0.228 | 0.0062363 | 6 |
| arl5c             | 2.84E-07 | 0.565203226 | 0.654 | 0.34  | 0.0067703 | 6 |
| ctnna1            | 2.94E-07 | 0.37780218  | 0.692 | 0.338 | 0.0070163 | 6 |
| klf7b1            | 3.05E-07 | 0.426813324 | 0.769 | 0.413 | 0.0072639 | 6 |
| mid1p11           | 3.05E-07 | 0.258747972 | 0.385 | 0.123 | 0.007281  | 6 |
| hmgn32            | 3.17E-07 | 0.320973847 | 0.577 | 0.256 | 0.0075611 | 6 |
| si:ch211-15b10.6  | 3.23E-07 | 0.650593636 | 0.769 | 0.415 | 0.0076979 | 6 |
| smad2             | 3.23E-07 | 0.291099362 | 0.538 | 0.233 | 0.0077041 | 6 |

|                   |          |             |       |       |           |   |
|-------------------|----------|-------------|-------|-------|-----------|---|
| ihha              | 3.27E-07 | 0.566811696 | 0.615 | 0.297 | 0.0077962 | 6 |
| lepr              | 3.59E-07 | 0.341033891 | 0.269 | 0.068 | 0.0085686 | 6 |
| gmds              | 3.62E-07 | 0.263456989 | 0.654 | 0.313 | 0.0086384 | 6 |
| pim2              | 3.63E-07 | 0.406005206 | 0.269 | 0.068 | 0.0086454 | 6 |
| aim1b             | 3.74E-07 | 1.154532852 | 0.404 | 0.151 | 0.0089132 | 6 |
| uggt1             | 3.75E-07 | 0.304473639 | 0.538 | 0.222 | 0.008946  | 6 |
| rac2              | 3.79E-07 | 0.339212289 | 0.615 | 0.281 | 0.0090468 | 6 |
| ivnslabpb         | 3.80E-07 | 0.284264359 | 0.404 | 0.142 | 0.0090605 | 6 |
| rrbpla            | 3.84E-07 | 0.370960622 | 0.577 | 0.242 | 0.0091657 | 6 |
| prrc1             | 4.02E-07 | 0.290479762 | 0.346 | 0.109 | 0.0095747 | 6 |
| zgc:91908         | 4.12E-07 | 0.252939973 | 0.327 | 0.098 | 0.0098295 | 6 |
| si:dkey-1612.20   | 4.16E-07 | 0.688021839 | 0.769 | 0.457 | 0.0099126 | 6 |
| tbcl1d17          | 4.18E-07 | 0.33329861  | 0.385 | 0.132 | 0.0099556 | 6 |
| si:ch211-284f22.3 | 4.19E-07 | 0.301409004 | 0.288 | 0.078 | 0.0099917 | 6 |
| tcf7121           | 4.33E-07 | 0.272778578 | 0.635 | 0.299 | 0.0103357 | 6 |
| copal             | 4.37E-07 | 0.364805796 | 0.673 | 0.34  | 0.010427  | 6 |
| kdf1a             | 4.38E-07 | 0.505955873 | 0.288 | 0.075 | 0.0104347 | 6 |
| arf51             | 4.42E-07 | 0.403773816 | 0.808 | 0.484 | 0.010543  | 6 |
| rhoaal            | 4.54E-07 | 0.423537166 | 0.75  | 0.434 | 0.0108358 | 6 |
| copg21            | 4.58E-07 | 0.577812247 | 0.596 | 0.27  | 0.0109301 | 6 |
| stat1a            | 4.66E-07 | 0.281591544 | 0.615 | 0.272 | 0.0111188 | 6 |
| her6              | 4.69E-07 | 1.178299669 | 0.769 | 0.464 | 0.0111765 | 6 |
| si:dkey-229b18.3  | 4.77E-07 | 0.304891733 | 0.346 | 0.105 | 0.0113678 | 6 |
| fosbl             | 4.78E-07 | 0.50112132  | 0.558 | 0.233 | 0.0113961 | 6 |
| golgb11           | 4.84E-07 | 0.536118524 | 0.692 | 0.384 | 0.0115513 | 6 |
| yif1a1            | 4.88E-07 | 0.293330503 | 0.404 | 0.144 | 0.0116342 | 6 |
| bri3              | 5.14E-07 | 0.317898477 | 0.423 | 0.153 | 0.0122522 | 6 |
| noslapa.1         | 5.26E-07 | 0.521329387 | 0.577 | 0.274 | 0.0125421 | 6 |
| ano9b             | 5.34E-07 | 0.741235536 | 0.635 | 0.322 | 0.0127402 | 6 |
| txn               | 5.53E-07 | 0.974667687 | 0.865 | 0.614 | 0.0131851 | 6 |
| myl12.11          | 5.59E-07 | 0.503816446 | 0.942 | 0.722 | 0.013337  | 6 |
| ppp4r2b           | 5.62E-07 | 0.278672063 | 0.462 | 0.176 | 0.0134119 | 6 |
| oaz1b1            | 5.67E-07 | 0.476213389 | 0.923 | 0.552 | 0.0135308 | 6 |
| copb11            | 5.76E-07 | 0.308361448 | 0.692 | 0.354 | 0.013728  | 6 |
| phactr4a          | 5.77E-07 | 0.452520301 | 0.808 | 0.473 | 0.0137553 | 6 |
| fat1a1            | 6.34E-07 | 0.437433858 | 0.654 | 0.333 | 0.0151172 | 6 |
| mark2b1           | 6.75E-07 | 0.250656272 | 0.692 | 0.34  | 0.0160899 | 6 |
| pfn11             | 6.81E-07 | 0.324271018 | 0.942 | 0.801 | 0.0162276 | 6 |
| atic1             | 7.24E-07 | 1.203085307 | 0.519 | 0.251 | 0.017268  | 6 |
| tcimal            | 7.25E-07 | 0.514986233 | 0.538 | 0.233 | 0.0172878 | 6 |
| nav3              | 7.39E-07 | 0.380271518 | 0.308 | 0.087 | 0.0176149 | 6 |
| hif1a1            | 7.57E-07 | 0.275190908 | 0.558 | 0.242 | 0.018061  | 6 |
| zgc:162964        | 7.78E-07 | 0.27188921  | 0.385 | 0.13  | 0.0185533 | 6 |
| st14a             | 8.04E-07 | 0.376335012 | 0.712 | 0.37  | 0.0191603 | 6 |
| rablab1           | 8.32E-07 | 0.386396139 | 0.846 | 0.534 | 0.0198411 | 6 |
| ap2s11            | 8.40E-07 | 0.35719433  | 0.615 | 0.283 | 0.0200323 | 6 |
| ilk               | 8.40E-07 | 0.322759486 | 0.519 | 0.219 | 0.0200329 | 6 |
| kctd13            | 8.54E-07 | 0.25608823  | 0.288 | 0.078 | 0.0203562 | 6 |
| si:dkey-56m19.5   | 9.78E-07 | 0.57180196  | 0.308 | 0.089 | 0.0233087 | 6 |
| arhgap23a         | 9.79E-07 | 0.309506602 | 0.442 | 0.165 | 0.0233502 | 6 |
| zfp3611a          | 9.84E-07 | 0.436710919 | 0.538 | 0.228 | 0.0234742 | 6 |
| h1fx1             | 9.92E-07 | 0.791446898 | 0.519 | 0.219 | 0.0236453 | 6 |
| spint1a           | 1.00E-06 | 0.367760579 | 0.788 | 0.512 | 0.0239234 | 6 |
| arhgdial          | 1.02E-06 | 0.565067564 | 0.808 | 0.507 | 0.0243257 | 6 |

|                  |          |             |       |       |           |   |
|------------------|----------|-------------|-------|-------|-----------|---|
| rab1ba1          | 1.03E-06 | 0.297507443 | 0.654 | 0.347 | 0.0245281 | 6 |
| ptenal           | 1.10E-06 | 0.371771576 | 0.596 | 0.27  | 0.0261791 | 6 |
| il6st1           | 1.14E-06 | 0.30280149  | 0.615 | 0.265 | 0.0270854 | 6 |
| yipf61           | 1.15E-06 | 0.328045786 | 0.462 | 0.187 | 0.0275303 | 6 |
| appal            | 1.28E-06 | 0.255866668 | 0.846 | 0.47  | 0.0304309 | 6 |
| fkbp5            | 1.30E-06 | 0.298304324 | 0.365 | 0.126 | 0.0309219 | 6 |
| si:dkey-42i9.41  | 1.32E-06 | 0.281269681 | 0.75  | 0.383 | 0.0313585 | 6 |
| ywhael1          | 1.32E-06 | 0.439018511 | 0.846 | 0.507 | 0.0314737 | 6 |
| si:dkey-79d12.5  | 1.32E-06 | 0.440227146 | 0.808 | 0.504 | 0.0315643 | 6 |
| gabapal          | 1.33E-06 | 0.30896636  | 0.635 | 0.327 | 0.0316029 | 6 |
| zgc:1009181      | 1.42E-06 | 0.266024261 | 0.596 | 0.283 | 0.0338738 | 6 |
| si:ch211-166a6.5 | 1.43E-06 | 0.283899102 | 0.615 | 0.292 | 0.0341951 | 6 |
| aldoaa2          | 1.44E-06 | 0.47591225  | 0.788 | 0.518 | 0.0343472 | 6 |
| hist2h21         | 1.50E-06 | 0.31082548  | 0.635 | 0.308 | 0.0358467 | 6 |
| snx121           | 1.54E-06 | 0.331184082 | 0.596 | 0.276 | 0.0367102 | 6 |
| mtpn             | 1.55E-06 | 0.387355877 | 0.673 | 0.354 | 0.036967  | 6 |
| si:ch73-138n13.1 | 1.56E-06 | 0.436248835 | 0.712 | 0.39  | 0.0371514 | 6 |
| ube2dlb          | 1.60E-06 | 0.424816442 | 0.846 | 0.534 | 0.0382435 | 6 |
| sri              | 1.64E-06 | 0.495972695 | 0.846 | 0.541 | 0.0391348 | 6 |
| fam107b1         | 1.74E-06 | 0.561492692 | 0.673 | 0.34  | 0.0414477 | 6 |
| h2afy2           | 1.75E-06 | 0.422889627 | 0.75  | 0.406 | 0.0418261 | 6 |
| coll8a1a         | 1.87E-06 | 1.869562428 | 0.731 | 0.441 | 0.0446632 | 6 |
| ywhabl1          | 1.88E-06 | 0.436002486 | 0.788 | 0.496 | 0.0448565 | 6 |
| cdc42ep5         | 2.07E-06 | 0.272813001 | 0.538 | 0.262 | 0.0492438 | 6 |
| crema            | 2.10E-06 | 0.553980602 | 0.615 | 0.306 | 0.050155  | 6 |
| myl9b            | 2.11E-06 | 0.748931514 | 0.596 | 0.288 | 0.0503991 | 6 |
| srpr1            | 2.21E-06 | 0.274925871 | 0.808 | 0.454 | 0.0526427 | 6 |
| bcar1            | 2.31E-06 | 0.381903914 | 0.635 | 0.319 | 0.0549797 | 6 |
| ythdc1           | 2.33E-06 | 0.389303169 | 0.596 | 0.272 | 0.0555179 | 6 |
| dock71           | 2.39E-06 | 0.295908966 | 0.519 | 0.214 | 0.0569076 | 6 |
| si:rp71-62i8.1   | 2.44E-06 | 0.274993293 | 0.481 | 0.19  | 0.0582599 | 6 |
| nfkbib1          | 2.53E-06 | 0.680674526 | 0.538 | 0.249 | 0.0603653 | 6 |
| prkcdb1          | 2.54E-06 | 0.410877525 | 0.615 | 0.297 | 0.0604646 | 6 |
| prelid3b         | 2.56E-06 | 0.414478788 | 0.885 | 0.6   | 0.0610737 | 6 |
| dpf2             | 2.60E-06 | 0.492138844 | 0.346 | 0.112 | 0.0621074 | 6 |
| laspl            | 2.62E-06 | 0.330252394 | 0.846 | 0.575 | 0.0625685 | 6 |
| itgb4            | 2.71E-06 | 0.265969037 | 0.712 | 0.384 | 0.0645175 | 6 |
| serpinh1b        | 2.73E-06 | 0.45812602  | 0.404 | 0.153 | 0.0650407 | 6 |
| trakla           | 2.75E-06 | 0.370076475 | 0.308 | 0.096 | 0.0655265 | 6 |
| nabpla           | 2.77E-06 | 0.252535251 | 0.577 | 0.269 | 0.0659394 | 6 |
| pawr             | 2.92E-06 | 0.456970313 | 0.712 | 0.372 | 0.0695193 | 6 |
| nucb2a1          | 2.93E-06 | 0.263707616 | 0.519 | 0.222 | 0.0699514 | 6 |
| cxcl8a1          | 3.00E-06 | 2.090316008 | 0.596 | 0.311 | 0.0715366 | 6 |
| oclna            | 3.04E-06 | 0.707832903 | 0.692 | 0.413 | 0.0725137 | 6 |
| pcxa             | 3.05E-06 | 0.287454787 | 0.365 | 0.126 | 0.0726757 | 6 |
| erbb3a           | 3.07E-06 | 0.344596557 | 0.423 | 0.162 | 0.0730993 | 6 |
| neola            | 3.07E-06 | 0.381979091 | 0.365 | 0.126 | 0.0731468 | 6 |
| arpcla           | 3.10E-06 | 0.355578514 | 0.846 | 0.495 | 0.0738533 | 6 |
| crylaa1          | 3.13E-06 | 0.252516095 | 0.462 | 0.194 | 0.0745631 | 6 |
| kras             | 3.14E-06 | 0.382364877 | 0.615 | 0.34  | 0.074787  | 6 |
| epha2a           | 3.14E-06 | 0.473446708 | 0.712 | 0.391 | 0.0748551 | 6 |
| cst14a.2         | 3.23E-06 | 0.54664263  | 0.904 | 0.573 | 0.0770754 | 6 |
| shha             | 3.27E-06 | 0.357043872 | 0.423 | 0.162 | 0.0779782 | 6 |
| ERC1             | 3.31E-06 | 0.281701553 | 0.442 | 0.173 | 0.0788613 | 6 |

|                    |          |             |       |       |           |   |
|--------------------|----------|-------------|-------|-------|-----------|---|
| prkd2              | 3.37E-06 | 0.295246813 | 0.404 | 0.148 | 0.080284  | 6 |
| cpeb4b             | 3.49E-06 | 0.363502158 | 0.769 | 0.445 | 0.0831708 | 6 |
| atf4b1             | 3.52E-06 | 0.401010923 | 0.942 | 0.712 | 0.0839605 | 6 |
| ylal               | 3.62E-06 | 0.293470273 | 0.615 | 0.295 | 0.0862932 | 6 |
| pof1b              | 3.67E-06 | 0.306882373 | 0.538 | 0.246 | 0.0874775 | 6 |
| efnb2a             | 3.70E-06 | 0.336271136 | 0.288 | 0.085 | 0.088111  | 6 |
| erfl3              | 3.71E-06 | 0.270782679 | 0.365 | 0.133 | 0.0883961 | 6 |
| tfgl               | 3.72E-06 | 0.414216622 | 0.692 | 0.411 | 0.0887115 | 6 |
| ahr2               | 3.86E-06 | 0.40876978  | 0.558 | 0.274 | 0.0921085 | 6 |
| ppplcaal           | 3.88E-06 | 0.308762799 | 0.769 | 0.464 | 0.0925679 | 6 |
| atf5b1             | 3.95E-06 | 0.323064465 | 0.673 | 0.345 | 0.0941736 | 6 |
| znf185             | 3.95E-06 | 0.398084903 | 0.423 | 0.167 | 0.0941833 | 6 |
| sav1               | 3.97E-06 | 0.296750813 | 0.288 | 0.089 | 0.094765  | 6 |
| aclya              | 4.11E-06 | 0.31685971  | 0.462 | 0.196 | 0.0979027 | 6 |
| gnblal             | 4.19E-06 | 0.27707517  | 0.808 | 0.502 | 0.1000092 | 6 |
| smarca4a1          | 4.24E-06 | 0.415283051 | 0.75  | 0.423 | 0.1010235 | 6 |
| wu:fjl6a03         | 4.28E-06 | 0.464070177 | 0.308 | 0.101 | 0.1020562 | 6 |
| tepl               | 4.35E-06 | 0.350314861 | 0.673 | 0.354 | 0.1036075 | 6 |
| ccdc167            | 4.43E-06 | 0.314981944 | 0.404 | 0.164 | 0.1055888 | 6 |
| si:dkey-156n14.5   | 4.44E-06 | 0.26797279  | 0.615 | 0.299 | 0.1058244 | 6 |
| si:ch73-335121.42  | 4.59E-06 | 0.923467904 | 0.904 | 0.714 | 0.1095374 | 6 |
| nme3               | 4.64E-06 | 0.460689009 | 0.365 | 0.132 | 0.1105937 | 6 |
| tnrc18             | 4.92E-06 | 0.392792297 | 0.519 | 0.23  | 0.117225  | 6 |
| mthfd21            | 5.15E-06 | 0.375642965 | 0.635 | 0.354 | 0.1227701 | 6 |
| nfkb21             | 5.15E-06 | 0.332561387 | 0.442 | 0.174 | 0.1228798 | 6 |
| si:ch211-114c12.21 | 5.18E-06 | 0.307412638 | 0.519 | 0.231 | 0.1235851 | 6 |
| sqstml             | 5.25E-06 | 0.550201643 | 0.654 | 0.359 | 0.1251966 | 6 |
| letm21             | 5.28E-06 | 0.354042166 | 0.673 | 0.352 | 0.1258363 | 6 |
| mydgm              | 5.36E-06 | 0.281896677 | 0.519 | 0.235 | 0.1277458 | 6 |
| eif3jb             | 5.42E-06 | 0.467124108 | 0.827 | 0.486 | 0.1291979 | 6 |
| naa35              | 5.55E-06 | 0.37261121  | 0.327 | 0.11  | 0.1322837 | 6 |
| atf7ip1            | 5.59E-06 | 0.292494127 | 0.712 | 0.368 | 0.133397  | 6 |
| clk4a1             | 5.67E-06 | 0.267930284 | 0.635 | 0.315 | 0.135115  | 6 |
| btg11              | 5.69E-06 | 0.652476695 | 0.962 | 0.785 | 0.1355838 | 6 |
| rhoabl             | 5.77E-06 | 0.463703391 | 0.827 | 0.571 | 0.1375903 | 6 |
| lxn1               | 5.85E-06 | 0.596777462 | 0.731 | 0.448 | 0.1394288 | 6 |
| tfpia              | 6.03E-06 | 0.500109794 | 0.577 | 0.286 | 0.1437322 | 6 |
| dapl               | 6.03E-06 | 0.402560772 | 0.712 | 0.39  | 0.1437973 | 6 |
| rab11a1            | 6.15E-06 | 0.466684172 | 0.769 | 0.45  | 0.146669  | 6 |
| WDR1               | 6.19E-06 | 0.375098831 | 0.308 | 0.098 | 0.1475875 | 6 |
| ptgs2b             | 6.48E-06 | 0.791230959 | 0.308 | 0.11  | 0.1544505 | 6 |
| cyr611             | 6.91E-06 | 0.707633545 | 0.481 | 0.199 | 0.1646812 | 6 |
| vps35              | 6.92E-06 | 0.477055982 | 0.481 | 0.21  | 0.1650476 | 6 |
| zgc:165573         | 6.94E-06 | 0.374440154 | 0.673 | 0.352 | 0.1655928 | 6 |
| clgalt1c1          | 7.08E-06 | 0.361413489 | 0.481 | 0.201 | 0.1687045 | 6 |
| alasl              | 7.12E-06 | 0.403359582 | 0.827 | 0.489 | 0.1698168 | 6 |
| gsto21             | 7.18E-06 | 0.258361888 | 0.692 | 0.338 | 0.1712126 | 6 |
| si:ch73-375g18.1   | 7.22E-06 | 0.313331106 | 0.404 | 0.162 | 0.1721175 | 6 |
| slc38a21           | 7.30E-06 | 0.280973175 | 0.692 | 0.381 | 0.1739827 | 6 |
| irf2bp2b1          | 7.94E-06 | 0.348795967 | 0.577 | 0.292 | 0.1894205 | 6 |
| purbal             | 8.57E-06 | 0.406535036 | 0.558 | 0.258 | 0.2042332 | 6 |
| cdc4211            | 8.90E-06 | 0.374095516 | 0.846 | 0.568 | 0.2122963 | 6 |
| wsb1               | 9.08E-06 | 0.343932195 | 0.635 | 0.327 | 0.2165256 | 6 |
| cnot4b             | 9.10E-06 | 0.419472739 | 0.327 | 0.121 | 0.2170639 | 6 |

|                 |          |             |       |       |           |   |
|-----------------|----------|-------------|-------|-------|-----------|---|
| h1f01           | 9.16E-06 | 0.591097063 | 0.654 | 0.384 | 0.2183469 | 6 |
| eif1b1          | 9.30E-06 | 0.456220918 | 0.981 | 0.751 | 0.2217929 | 6 |
| myh9b           | 9.58E-06 | 0.321252071 | 0.788 | 0.491 | 0.2283487 | 6 |
| lrrfip1a        | 9.72E-06 | 0.564124734 | 0.596 | 0.32  | 0.2318424 | 6 |
| elf31           | 9.88E-06 | 1.004093834 | 0.769 | 0.548 | 0.2355414 | 6 |
| pgd1            | 1.02E-05 | 0.382941146 | 0.692 | 0.395 | 0.2434752 | 6 |
| atf32           | 1.06E-05 | 0.708025697 | 0.981 | 0.836 | 0.2522831 | 6 |
| txndc92         | 1.06E-05 | 0.287133898 | 0.615 | 0.31  | 0.2522965 | 6 |
| si:dkey-244a7.1 | 1.06E-05 | 0.260446573 | 0.538 | 0.242 | 0.252558  | 6 |
| nr3c1           | 1.08E-05 | 0.268484927 | 0.481 | 0.219 | 0.2578368 | 6 |
| jund1           | 1.10E-05 | 0.444835458 | 0.846 | 0.571 | 0.2618043 | 6 |
| hectd1          | 1.12E-05 | 0.293542162 | 0.654 | 0.365 | 0.2663587 | 6 |
| chp1            | 1.12E-05 | 0.319148568 | 0.5   | 0.233 | 0.2664594 | 6 |
| foxal           | 1.13E-05 | 0.298910891 | 0.519 | 0.253 | 0.2696352 | 6 |
| prkag1          | 1.19E-05 | 0.25529614  | 0.519 | 0.256 | 0.2846504 | 6 |
| dag1            | 1.21E-05 | 0.625417139 | 0.692 | 0.425 | 0.2876536 | 6 |
| rab5ab          | 1.27E-05 | 0.408133628 | 0.615 | 0.319 | 0.303969  | 6 |
| elf11           | 1.31E-05 | 0.250901393 | 0.731 | 0.404 | 0.313452  | 6 |
| ctsf1           | 1.32E-05 | 0.402392132 | 0.385 | 0.155 | 0.3150076 | 6 |
| atp6v0cal       | 1.34E-05 | 0.36605923  | 0.846 | 0.553 | 0.3189141 | 6 |
| ppiab1          | 1.42E-05 | 0.4048696   | 0.981 | 0.868 | 0.3391531 | 6 |
| psmd4b          | 1.42E-05 | 0.298795413 | 0.577 | 0.278 | 0.3392833 | 6 |
| rab5c1          | 1.49E-05 | 0.345434095 | 0.635 | 0.356 | 0.3546912 | 6 |
| puf60b          | 1.53E-05 | 0.427536587 | 0.558 | 0.276 | 0.3649087 | 6 |
| zfang5a         | 1.55E-05 | 0.360444301 | 0.731 | 0.416 | 0.3689231 | 6 |
| lmna            | 1.56E-05 | 0.553131145 | 0.596 | 0.322 | 0.3721149 | 6 |
| nfe2l2a1        | 1.59E-05 | 0.361852799 | 0.75  | 0.427 | 0.3781904 | 6 |
| hdac4           | 1.59E-05 | 0.52621114  | 0.308 | 0.109 | 0.3799085 | 6 |
| lsm14aa         | 1.60E-05 | 0.257040136 | 0.404 | 0.16  | 0.3821919 | 6 |
| zgc:65873       | 1.75E-05 | 0.265469665 | 0.462 | 0.203 | 0.4161975 | 6 |
| smapl           | 1.79E-05 | 0.357633416 | 0.577 | 0.295 | 0.4263427 | 6 |
| pitpnaal        | 1.85E-05 | 0.389630087 | 0.654 | 0.358 | 0.4405687 | 6 |
| cltca2          | 1.86E-05 | 0.447748474 | 0.769 | 0.464 | 0.4442071 | 6 |
| ube2e31         | 1.99E-05 | 0.271418225 | 0.635 | 0.338 | 0.4744264 | 6 |
| lrba            | 2.06E-05 | 0.365970205 | 0.673 | 0.379 | 0.4905393 | 6 |
| culla           | 2.13E-05 | 0.307697748 | 0.404 | 0.167 | 0.5082896 | 6 |
| tnfrsfla        | 2.25E-05 | 0.394611123 | 0.385 | 0.16  | 0.5357633 | 6 |
| ubr5            | 2.28E-05 | 0.365236078 | 0.462 | 0.205 | 0.5437483 | 6 |
| cebpa           | 2.31E-05 | 0.56458322  | 0.75  | 0.466 | 0.5511516 | 6 |
| vdac12          | 2.44E-05 | 0.288030898 | 0.654 | 0.351 | 0.5820034 | 6 |
| eif4ebp11       | 2.61E-05 | 0.422536861 | 0.769 | 0.466 | 0.6229929 | 6 |
| pdia32          | 2.79E-05 | 0.553863938 | 0.942 | 0.683 | 0.665634  | 6 |
| CABZ01030862.1  | 2.89E-05 | 0.284018347 | 0.442 | 0.187 | 0.6881357 | 6 |
| pleca           | 3.02E-05 | 0.683912052 | 0.692 | 0.393 | 0.7200936 | 6 |
| ddx3a1          | 3.05E-05 | 0.402867084 | 0.673 | 0.39  | 0.726613  | 6 |
| ywhab1          | 3.17E-05 | 0.493290016 | 0.865 | 0.635 | 0.7566516 | 6 |
| was1b           | 3.24E-05 | 0.268175609 | 0.596 | 0.288 | 0.7735902 | 6 |
| lnx2b           | 3.41E-05 | 0.279688952 | 0.481 | 0.219 | 0.8128104 | 6 |
| rbm51           | 3.42E-05 | 0.344064911 | 0.481 | 0.217 | 0.8165134 | 6 |
| rtn3            | 3.44E-05 | 0.272877727 | 0.596 | 0.294 | 0.8202725 | 6 |
| zgc:920271      | 3.54E-05 | 0.366615526 | 0.827 | 0.525 | 0.8438695 | 6 |
| zgc:91976       | 3.60E-05 | 0.331212449 | 0.538 | 0.267 | 0.8578407 | 6 |
| psmd11          | 3.72E-05 | 0.326762326 | 0.788 | 0.461 | 0.8858556 | 6 |
| atf4a1          | 3.74E-05 | 0.408443317 | 0.923 | 0.653 | 0.8906582 | 6 |

|                 |       |           |             |       |       |           |   |
|-----------------|-------|-----------|-------------|-------|-------|-----------|---|
| degs21          |       | 3.91E-05  | 0.305262778 | 0.788 | 0.489 | 0.9316251 | 6 |
| aff4            |       | 4.24E-05  | 0.335033602 | 0.635 | 0.367 | 1         | 6 |
| bzwl1a1         |       | 4.52E-05  | 0.253166377 | 0.712 | 0.415 | 1         | 6 |
| tfe3a1          |       | 4.64E-05  | 0.450645364 | 0.654 | 0.367 | 1         | 6 |
| mboat1          |       | 4.71E-05  | 0.291236167 | 0.442 | 0.203 | 1         | 6 |
| ip6k2b          |       | 4.74E-05  | 0.331013538 | 0.596 | 0.326 | 1         | 6 |
| amd11           |       | 4.76E-05  | 0.259247196 | 0.577 | 0.304 | 1         | 6 |
| ggps1           |       | 4.88E-05  | 0.383262609 | 0.577 | 0.304 | 1         | 6 |
| syne2b1         |       | 4.96E-05  | 0.323224562 | 0.346 | 0.141 | 1         | 6 |
| arrdc3a1        |       | 5.09E-05  | 0.449576605 | 0.442 | 0.198 | 1         | 6 |
| klf3            |       | 5.55E-05  | 0.594275391 | 0.788 | 0.523 | 1         | 6 |
| lsr             |       | 5.95E-05  | 0.32550881  | 0.75  | 0.475 | 1         | 6 |
|                 | 2-Jun | 6.36E-05  | 0.514619345 | 0.981 | 0.806 | 1         | 6 |
| prrg2           |       | 6.41E-05  | 0.271928998 | 0.385 | 0.173 | 1         | 6 |
| ywhah1          |       | 6.49E-05  | 0.355464739 | 0.788 | 0.482 | 1         | 6 |
| ubfd1           |       | 6.69E-05  | 0.266096132 | 0.462 | 0.208 | 1         | 6 |
| mapkapk2a       |       | 7.15E-05  | 0.268786082 | 0.731 | 0.466 | 1         | 6 |
| pdap1b1         |       | 7.50E-05  | 0.446892045 | 0.654 | 0.404 | 1         | 6 |
| usp361          |       | 7.50E-05  | 0.373904335 | 0.673 | 0.409 | 1         | 6 |
| wu:fb18f061     |       | 7.51E-05  | 0.74630212  | 0.635 | 0.416 | 1         | 6 |
| slc13a21        |       | 7.52E-05  | 1.453609749 | 0.404 | 0.203 | 1         | 6 |
| ppl1            |       | 7.60E-05  | 0.589837522 | 0.846 | 0.532 | 1         | 6 |
| prkaal          |       | 7.85E-05  | 0.318331347 | 0.423 | 0.198 | 1         | 6 |
| krt81           |       | 8.16E-05  | 0.584751925 | 0.846 | 0.619 | 1         | 6 |
| rnf101          |       | 9.12E-05  | 0.286728899 | 0.712 | 0.438 | 1         | 6 |
| cdkn1bb1        |       | 9.39E-05  | 0.281932177 | 0.731 | 0.431 | 1         | 6 |
| scamp2          |       | 0.0001026 | 0.27501973  | 0.635 | 0.363 | 1         | 6 |
| pmp22b          |       | 0.0001036 | 1.89272686  | 0.481 | 0.295 | 1         | 6 |
| fam53b          |       | 0.0001059 | 0.346564081 | 0.5   | 0.254 | 1         | 6 |
| elmsan1b1       |       | 0.0001076 | 0.366002449 | 0.635 | 0.352 | 1         | 6 |
| sptssa          |       | 0.00011   | 0.251941493 | 0.731 | 0.48  | 1         | 6 |
| macfla1         |       | 0.0001109 | 0.282125269 | 0.615 | 0.331 | 1         | 6 |
| sec61a12        |       | 0.0001137 | 0.278327728 | 0.75  | 0.475 | 1         | 6 |
| ube2v11         |       | 0.0001143 | 0.533708173 | 0.769 | 0.507 | 1         | 6 |
| nccrpl          |       | 0.000115  | 0.481146895 | 0.692 | 0.399 | 1         | 6 |
| prdma           |       | 0.0001205 | 0.705960582 | 0.538 | 0.315 | 1         | 6 |
| irflb1          |       | 0.0001212 | 0.503348288 | 0.288 | 0.107 | 1         | 6 |
| si:dkey-87o1.2  |       | 0.0001216 | 0.267516239 | 0.481 | 0.233 | 1         | 6 |
| tmem263         |       | 0.0001287 | 0.286212365 | 0.462 | 0.221 | 1         | 6 |
| nnt1            |       | 0.0001351 | 0.334821367 | 0.538 | 0.283 | 1         | 6 |
| egr1            |       | 0.0001386 | 0.603015022 | 0.423 | 0.198 | 1         | 6 |
| pllpl           |       | 0.0001496 | 0.469198206 | 0.538 | 0.301 | 1         | 6 |
| slc1a51         |       | 0.000154  | 0.332080068 | 0.635 | 0.383 | 1         | 6 |
| si:dkey-95p16.2 |       | 0.0001613 | 0.264129224 | 0.558 | 0.313 | 1         | 6 |
| fnbp4           |       | 0.0001667 | 0.31809398  | 0.519 | 0.274 | 1         | 6 |
| ptp4a2b1        |       | 0.0001672 | 0.32634375  | 0.788 | 0.504 | 1         | 6 |
| anol0a          |       | 0.0001693 | 0.333295976 | 0.288 | 0.112 | 1         | 6 |
| tmsb4x1         |       | 0.0001753 | 0.371839136 | 1     | 0.993 | 1         | 6 |
| snx5            |       | 0.0001767 | 0.283568299 | 0.288 | 0.11  | 1         | 6 |
| calm2a.1        |       | 0.0001789 | 0.448170515 | 0.827 | 0.587 | 1         | 6 |
| ndellb          |       | 0.0001875 | 0.281490982 | 0.442 | 0.224 | 1         | 6 |
| ube2e21         |       | 0.0001888 | 0.323481659 | 0.365 | 0.157 | 1         | 6 |
| mapk14b         |       | 0.0001909 | 0.269702971 | 0.346 | 0.148 | 1         | 6 |
| vcpl            |       | 0.0002009 | 0.314780078 | 0.827 | 0.56  | 1         | 6 |

|                  |           |             |       |       |   |   |
|------------------|-----------|-------------|-------|-------|---|---|
| krt4             | 0.0002094 | 0.70615784  | 0.981 | 0.929 | 1 | 6 |
| tmem1151         | 0.0002408 | 0.442961205 | 0.481 | 0.27  | 1 | 6 |
| coll4a1a1        | 0.0002427 | 0.321721326 | 0.615 | 0.351 | 1 | 6 |
| eefla1111        | 0.0002576 | 0.382454674 | 1     | 0.984 | 1 | 6 |
| sept8a           | 0.0002634 | 0.276969779 | 0.327 | 0.144 | 1 | 6 |
| cox8a            | 0.0002771 | 0.382401156 | 0.981 | 0.74  | 1 | 6 |
| arrdc1a          | 0.0003058 | 0.513604046 | 0.635 | 0.406 | 1 | 6 |
| apls3b           | 0.0003109 | 0.281734823 | 0.731 | 0.452 | 1 | 6 |
| junb1            | 0.0003144 | 0.449596557 | 0.885 | 0.708 | 1 | 6 |
| dab2ipb1         | 0.0003184 | 0.257177244 | 0.423 | 0.214 | 1 | 6 |
| gadd45aa         | 0.0003263 | 0.342397313 | 0.519 | 0.286 | 1 | 6 |
| ddx51            | 0.0003412 | 0.331927672 | 0.904 | 0.667 | 1 | 6 |
| dnmbp1           | 0.0003415 | 0.333806475 | 0.885 | 0.601 | 1 | 6 |
| egr3             | 0.0003815 | 0.484929634 | 0.346 | 0.164 | 1 | 6 |
| rhbdf1a1         | 0.0003868 | 0.276646294 | 0.442 | 0.224 | 1 | 6 |
| gstt1b1          | 0.0003905 | 0.880051338 | 0.712 | 0.463 | 1 | 6 |
| fundc11          | 0.0004008 | 0.353107919 | 0.308 | 0.128 | 1 | 6 |
| npc2             | 0.000451  | 0.280691682 | 0.75  | 0.466 | 1 | 6 |
| pdgfab           | 0.0004687 | 0.294912178 | 0.519 | 0.285 | 1 | 6 |
| ap2b1            | 0.0004689 | 0.286851838 | 0.462 | 0.244 | 1 | 6 |
| ier2a1           | 0.0004738 | 0.768842977 | 0.788 | 0.564 | 1 | 6 |
| gnpna1           | 0.0004897 | 0.283131104 | 0.712 | 0.443 | 1 | 6 |
| pcyt21           | 0.0005166 | 0.375231646 | 0.615 | 0.363 | 1 | 6 |
| ginm11           | 0.0005494 | 0.284854911 | 0.404 | 0.196 | 1 | 6 |
| zgc:920661       | 0.0005859 | 0.433088579 | 1     | 0.87  | 1 | 6 |
| zgc:123068       | 0.0005879 | 0.828725324 | 0.288 | 0.125 | 1 | 6 |
| fkbp11           | 0.0006263 | 0.431101211 | 0.365 | 0.187 | 1 | 6 |
| slc7a6os1        | 0.0006547 | 0.262907223 | 0.365 | 0.178 | 1 | 6 |
| slc5a81          | 0.0006694 | 0.39241975  | 0.346 | 0.173 | 1 | 6 |
| pdlim1           | 0.0006783 | 0.2536707   | 0.885 | 0.635 | 1 | 6 |
| rgcc1            | 0.0007083 | 0.581860311 | 0.635 | 0.407 | 1 | 6 |
| hspa51           | 0.0007098 | 0.325618203 | 0.942 | 0.906 | 1 | 6 |
| AL935186.9       | 0.0007598 | 0.287589436 | 0.654 | 0.404 | 1 | 6 |
| gstp22           | 0.0008333 | 0.787031437 | 0.462 | 0.265 | 1 | 6 |
| actn41           | 0.0008475 | 0.285192394 | 0.692 | 0.479 | 1 | 6 |
| dnajc3b          | 0.0008505 | 0.251784986 | 0.423 | 0.219 | 1 | 6 |
| abhd16a          | 0.0009085 | 0.376592301 | 0.404 | 0.196 | 1 | 6 |
| si:ch211-207i1.2 | 0.0009664 | 0.396889991 | 0.346 | 0.169 | 1 | 6 |
| tuba814          | 0.0009901 | 0.459349158 | 0.904 | 0.678 | 1 | 6 |
| syvn11           | 0.0009989 | 0.276048992 | 0.462 | 0.253 | 1 | 6 |
| rpl192           | 0.0010024 | 0.310893664 | 1     | 0.952 | 1 | 6 |
| fkbp1aa1         | 0.00101   | 0.40338247  | 0.962 | 0.746 | 1 | 6 |
| abhd2a           | 0.0010641 | 0.362749961 | 0.288 | 0.121 | 1 | 6 |
| kin              | 0.0011209 | 0.290683682 | 0.269 | 0.117 | 1 | 6 |
| histh111         | 0.0011263 | 0.327123769 | 0.654 | 0.448 | 1 | 6 |
| rbm4.31          | 0.0011765 | 0.258496632 | 0.846 | 0.578 | 1 | 6 |
| FP017217.11      | 0.0012216 | 0.31156478  | 0.519 | 0.304 | 1 | 6 |
| si:dkey-248g15.3 | 0.0013935 | 0.830382973 | 0.269 | 0.116 | 1 | 6 |
| h3f3d1           | 0.0014171 | 0.264324585 | 0.962 | 0.804 | 1 | 6 |
| krtcap2          | 0.0014314 | 0.356383291 | 0.731 | 0.472 | 1 | 6 |
| tmem2582         | 0.001441  | 0.263086727 | 0.942 | 0.68  | 1 | 6 |
| sparc            | 0.0014926 | 0.644757174 | 0.615 | 0.415 | 1 | 6 |
| psmd4a           | 0.0015403 | 0.38037741  | 0.596 | 0.351 | 1 | 6 |
| rbmx             | 0.0015586 | 0.327632406 | 0.654 | 0.391 | 1 | 6 |

|                    |           |             |       |       |           |   |
|--------------------|-----------|-------------|-------|-------|-----------|---|
| sap301             | 0.0015754 | 0.256789714 | 0.731 | 0.48  | 1         | 6 |
| drapl1             | 0.0016792 | 0.341278132 | 0.558 | 0.345 | 1         | 6 |
| smdt1b1            | 0.0017194 | 0.266276135 | 0.846 | 0.566 | 1         | 6 |
| eef2b1             | 0.0022348 | 0.292512324 | 1     | 0.902 | 1         | 6 |
| ubqln4             | 0.0022712 | 0.25611174  | 0.731 | 0.463 | 1         | 6 |
| gspt1l1            | 0.0022734 | 0.264558086 | 0.788 | 0.516 | 1         | 6 |
| rpl101             | 0.0023245 | 0.341946231 | 0.942 | 0.92  | 1         | 6 |
| tpt12              | 0.0023345 | 0.437039198 | 0.942 | 0.851 | 1         | 6 |
| apmap              | 0.0024724 | 0.272414291 | 0.346 | 0.189 | 1         | 6 |
| coro2a1            | 0.0026176 | 0.263987945 | 0.404 | 0.214 | 1         | 6 |
| nup153             | 0.002693  | 0.421949348 | 0.423 | 0.246 | 1         | 6 |
| ywhaqb1            | 0.0028195 | 0.262443399 | 0.808 | 0.648 | 1         | 6 |
| brk1               | 0.0029805 | 0.257883677 | 0.538 | 0.342 | 1         | 6 |
| btg21              | 0.0030459 | 0.584309497 | 0.865 | 0.669 | 1         | 6 |
| glipr211           | 0.0031163 | 0.286002196 | 0.269 | 0.119 | 1         | 6 |
| tet31              | 0.0031359 | 0.297603349 | 0.538 | 0.345 | 1         | 6 |
| xbp1               | 0.0033453 | 0.276823257 | 0.962 | 0.767 | 1         | 6 |
| eef1da             | 0.0036388 | 0.274285723 | 0.942 | 0.696 | 1         | 6 |
| g3bp11             | 0.003681  | 0.312833889 | 0.596 | 0.381 | 1         | 6 |
| ppplcab            | 0.0040419 | 0.25766437  | 0.462 | 0.26  | 1         | 6 |
| gk5                | 0.0042562 | 0.273460584 | 0.385 | 0.228 | 1         | 6 |
| gstm.31            | 0.0044712 | 0.589381234 | 0.692 | 0.472 | 1         | 6 |
| ddt1               | 0.0045936 | 0.775788876 | 0.769 | 0.553 | 1         | 6 |
| hspa82             | 0.0048055 | 0.322635942 | 0.962 | 0.936 | 1         | 6 |
| nme2b.13           | 0.0050131 | 0.289131847 | 0.962 | 0.875 | 1         | 6 |
| rack12             | 0.0053302 | 0.291710499 | 0.981 | 0.897 | 1         | 6 |
| amot12b            | 0.0053426 | 0.592606299 | 0.577 | 0.393 | 1         | 6 |
| cyp3a65            | 0.0055287 | 0.364013443 | 0.423 | 0.278 | 1         | 6 |
| hnrnpub1           | 0.0063217 | 0.26968108  | 0.865 | 0.589 | 1         | 6 |
| glod5              | 0.0063218 | 0.360046577 | 0.615 | 0.404 | 1         | 6 |
| notch3             | 0.0075617 | 0.681648913 | 0.327 | 0.192 | 1         | 6 |
| rps22              | 0.007875  | 0.275718243 | 0.981 | 0.952 | 1         | 6 |
| fgd4a              | 0.0088354 | 0.298491293 | 0.327 | 0.185 | 1         | 6 |
| gpx1a3             | 0.0097431 | 0.525241944 | 0.769 | 0.553 | 1         | 6 |
| thbs1b             | 8.51E-15  | 1.769245167 | 0.659 | 0.19  | 2.03E-10  | 7 |
| si:ch211-153b23.52 | 1.67E-10  | 0.866519    | 0.659 | 0.209 | 3.99E-06  | 7 |
| anpepb             | 1.37E-09  | 1.004060542 | 0.561 | 0.178 | 3.26E-05  | 7 |
| sfrp5              | 2.42E-09  | 0.736927126 | 0.463 | 0.14  | 5.76E-05  | 7 |
| baiap211a          | 2.76E-09  | 0.979239392 | 0.829 | 0.447 | 6.57E-05  | 7 |
| muc13b1            | 3.04E-09  | 1.122242284 | 0.927 | 0.49  | 7.24E-05  | 7 |
| fabp61             | 7.28E-09  | 2.594233697 | 0.366 | 0.086 | 0.0001735 | 7 |
| anxa2b3            | 2.08E-07  | 0.868608242 | 0.951 | 0.763 | 0.004964  | 7 |
| si:ch211-153b23.41 | 4.65E-07  | 0.868361514 | 0.268 | 0.058 | 0.0110865 | 7 |
| shroom1            | 1.23E-06  | 0.557678774 | 0.439 | 0.161 | 0.0292858 | 7 |
| cdaa               | 1.38E-06  | 0.757854281 | 0.341 | 0.105 | 0.0329063 | 7 |
| si:ch211-105c13.31 | 1.86E-06  | 0.610546894 | 0.415 | 0.14  | 0.044469  | 7 |
| wu:fb59d01         | 2.53E-06  | 0.732548703 | 0.951 | 0.749 | 0.0602261 | 7 |
| zgc:640221         | 3.27E-06  | 0.850206423 | 0.585 | 0.305 | 0.0779345 | 7 |
| traf4b             | 4.05E-06  | 0.584720162 | 0.463 | 0.194 | 0.0966758 | 7 |
| abrac12            | 4.66E-06  | 0.513776995 | 0.829 | 0.536 | 0.1111682 | 7 |
| cldn151a3          | 7.07E-06  | 0.636495338 | 0.951 | 0.801 | 0.1684765 | 7 |
| si:ch73-194h10.21  | 7.21E-06  | 0.765487083 | 0.707 | 0.396 | 0.17191   | 7 |
| ponzr12            | 8.66E-06  | 0.915751033 | 0.659 | 0.387 | 0.2065226 | 7 |
| si:ch211-139a5.91  | 1.51E-05  | 1.122894309 | 0.463 | 0.211 | 0.3599153 | 7 |



|                   |           |             |       |       |           |   |
|-------------------|-----------|-------------|-------|-------|-----------|---|
| tjp3              | 1.60E-05  | 0.677351452 | 0.854 | 0.565 | 0.3822345 | 7 |
| zgc:1583431       | 1.64E-05  | 0.840877036 | 0.854 | 0.607 | 0.3903078 | 7 |
| txn1              | 2.06E-05  | 0.439787996 | 0.854 | 0.62  | 0.4905315 | 7 |
| trpm4a1           | 2.34E-05  | 0.769602555 | 0.659 | 0.4   | 0.5574615 | 7 |
| ppplr9alb         | 2.47E-05  | 0.75864205  | 0.659 | 0.435 | 0.5894729 | 7 |
| chmp4c            | 2.49E-05  | 0.466597492 | 0.488 | 0.236 | 0.5927389 | 7 |
| ddit3             | 3.59E-05  | 0.562899472 | 0.902 | 0.688 | 0.8558847 | 7 |
| cyp3c3            | 3.82E-05  | 0.830285513 | 0.683 | 0.429 | 0.9098406 | 7 |
| krt82             | 4.37E-05  | 0.51509234  | 0.902 | 0.62  | 1         | 7 |
| tmem176l.2        | 4.92E-05  | 0.805548302 | 0.805 | 0.532 | 1         | 7 |
| snrpd11           | 7.40E-05  | 0.458790194 | 0.878 | 0.7   | 1         | 7 |
| mcl1b             | 7.66E-05  | 0.501963693 | 0.707 | 0.471 | 1         | 7 |
| si:dkey-191g9.7   | 8.50E-05  | 0.681326197 | 0.439 | 0.211 | 1         | 7 |
| cldnb3            | 8.68E-05  | 0.436445257 | 0.927 | 0.768 | 1         | 7 |
| tuft1a1           | 8.80E-05  | 0.635972876 | 0.61  | 0.347 | 1         | 7 |
| amot12b1          | 9.89E-05  | 0.769244252 | 0.634 | 0.393 | 1         | 7 |
| trim161           | 0.0001071 | 0.452802545 | 0.634 | 0.384 | 1         | 7 |
| pisd              | 0.0001092 | 0.398613515 | 0.366 | 0.155 | 1         | 7 |
| cdh171            | 0.0001124 | 0.638570588 | 0.878 | 0.529 | 1         | 7 |
| ftr831            | 0.0001189 | 0.417103384 | 0.439 | 0.19  | 1         | 7 |
| cgna              | 0.0001204 | 0.70436359  | 0.61  | 0.391 | 1         | 7 |
| pdlim11           | 0.0001219 | 0.481081814 | 0.902 | 0.639 | 1         | 7 |
| si:dkey-33i11.91  | 0.0001242 | 0.266491915 | 0.878 | 0.572 | 1         | 7 |
| epcam2            | 0.0001517 | 0.593597039 | 0.976 | 0.909 | 1         | 7 |
| slc10a3           | 0.0001858 | 0.718272239 | 0.463 | 0.248 | 1         | 7 |
| s100a10a3         | 0.0001871 | 0.521835542 | 1     | 0.812 | 1         | 7 |
| hdgf12            | 0.0001909 | 0.353866925 | 0.585 | 0.351 | 1         | 7 |
| tagln22           | 0.0002019 | 0.46813095  | 0.927 | 0.85  | 1         | 7 |
| hoxc3a            | 0.0002395 | 0.300297306 | 0.341 | 0.138 | 1         | 7 |
| kars1             | 0.0002671 | 0.952882864 | 0.732 | 0.525 | 1         | 7 |
| eif1axb           | 0.0002708 | 0.275126333 | 0.854 | 0.583 | 1         | 7 |
| nav31             | 0.0002948 | 0.382763979 | 0.268 | 0.094 | 1         | 7 |
| hbegfa2           | 0.0003106 | 0.332428358 | 0.951 | 0.784 | 1         | 7 |
| ppp2r5ea          | 0.0003301 | 0.516321881 | 0.537 | 0.318 | 1         | 7 |
| arhgap52          | 0.0003307 | 0.586140935 | 0.805 | 0.616 | 1         | 7 |
| zgc:922421        | 0.0003673 | 0.382637997 | 0.463 | 0.227 | 1         | 7 |
| si:ch211-191j22.3 | 0.0004123 | 0.442538238 | 0.512 | 0.286 | 1         | 7 |
| itpk1a1           | 0.0004331 | 0.530927026 | 0.659 | 0.449 | 1         | 7 |
| wu:fb18f062       | 0.0004761 | 0.52990021  | 0.659 | 0.419 | 1         | 7 |
| coll8a1a1         | 0.000493  | 0.54969111  | 0.683 | 0.45  | 1         | 7 |
| serpinb12         | 0.0005141 | 0.580246866 | 0.805 | 0.63  | 1         | 7 |
| pllp2             | 0.0005678 | 0.590209518 | 0.512 | 0.307 | 1         | 7 |
| zgc:923131        | 0.0005836 | 0.367261403 | 0.634 | 0.398 | 1         | 7 |
| tpm32             | 0.0006399 | 0.487558345 | 0.902 | 0.756 | 1         | 7 |
| nhp2              | 0.0006434 | 0.381247032 | 0.659 | 0.442 | 1         | 7 |
| dnmbp2            | 0.0006701 | 0.479074266 | 0.829 | 0.611 | 1         | 7 |
| igf2bp31          | 0.000703  | 0.512587102 | 0.756 | 0.504 | 1         | 7 |
| glod51            | 0.0007199 | 0.380884556 | 0.61  | 0.408 | 1         | 7 |
| max               | 0.000733  | 0.328312824 | 0.732 | 0.51  | 1         | 7 |
| rab20             | 0.0007428 | 0.367511915 | 0.268 | 0.106 | 1         | 7 |
| pum1              | 0.0007792 | 0.345612903 | 0.561 | 0.354 | 1         | 7 |
| lxn2              | 0.0007829 | 0.412373049 | 0.659 | 0.459 | 1         | 7 |
| kynu              | 0.0007967 | 0.422605278 | 0.366 | 0.173 | 1         | 7 |
| pdapl1a1          | 0.0008409 | 0.463819657 | 0.78  | 0.569 | 1         | 7 |

|                  |           |             |       |       |   |   |
|------------------|-----------|-------------|-------|-------|---|---|
| si:zfos-1714f5.3 | 0.0008447 | 0.449712367 | 0.317 | 0.138 | 1 | 7 |
| si:ch73-22o12.1  | 0.0008519 | 0.460612447 | 0.732 | 0.529 | 1 | 7 |
| cldn151b2        | 0.0008575 | 0.295234458 | 0.878 | 0.588 | 1 | 7 |
| higd1a           | 0.0009466 | 0.465438363 | 0.829 | 0.64  | 1 | 7 |
| dag11            | 0.0010427 | 0.364160879 | 0.659 | 0.433 | 1 | 7 |
| ctgfa2           | 0.0010782 | 0.428181449 | 0.366 | 0.168 | 1 | 7 |
| lsp11            | 0.0011149 | 0.388874229 | 0.659 | 0.445 | 1 | 7 |
| pk1r2            | 0.0011507 | 0.482244016 | 0.707 | 0.487 | 1 | 7 |
| bcl211           | 0.001162  | 0.629390204 | 0.463 | 0.267 | 1 | 7 |
| elf32            | 0.0011857 | 0.284636619 | 0.756 | 0.553 | 1 | 7 |
| zgc:165555.9     | 0.0012215 | 0.677691173 | 0.463 | 0.25  | 1 | 7 |
| nrarpa1          | 0.0012905 | 0.418537177 | 0.537 | 0.311 | 1 | 7 |
| eps813b1         | 0.0013331 | 0.514606852 | 0.707 | 0.485 | 1 | 7 |
| si:ch73-86n18.1  | 0.0014044 | 0.356919655 | 0.512 | 0.293 | 1 | 7 |
| ctnnb12          | 0.0015002 | 0.504152634 | 0.683 | 0.464 | 1 | 7 |
| epd12            | 0.0015364 | 0.994935472 | 0.415 | 0.22  | 1 | 7 |
| rbm471           | 0.0015409 | 0.505847762 | 0.707 | 0.489 | 1 | 7 |
| ptmab1           | 0.0015428 | 0.271781524 | 1     | 0.897 | 1 | 7 |
| angpt141         | 0.0015876 | 0.539578681 | 0.902 | 0.62  | 1 | 7 |
| si:dkey-283b1.61 | 0.0016236 | 0.304880853 | 0.61  | 0.368 | 1 | 7 |
| naa101           | 0.001787  | 0.361655014 | 0.683 | 0.503 | 1 | 7 |
| anks4b3          | 0.0018474 | 0.377044701 | 0.634 | 0.417 | 1 | 7 |
| u2surp           | 0.0019302 | 0.785476313 | 0.659 | 0.473 | 1 | 7 |
| ndufa412         | 0.0019337 | 0.341561225 | 0.927 | 0.78  | 1 | 7 |
| rpl37.13         | 0.0019444 | 0.346320573 | 1     | 0.979 | 1 | 7 |
| rnf128a          | 0.0019947 | 0.351826115 | 0.634 | 0.454 | 1 | 7 |
| lmna1            | 0.0019994 | 0.513164569 | 0.512 | 0.333 | 1 | 7 |
| acsf21           | 0.002007  | 0.684612167 | 0.39  | 0.209 | 1 | 7 |
| myh9b1           | 0.0020111 | 0.343908354 | 0.683 | 0.504 | 1 | 7 |
| cx28.9           | 0.0020582 | 0.380497943 | 0.463 | 0.258 | 1 | 7 |
| dap1b1           | 0.0020642 | 0.370771955 | 0.61  | 0.403 | 1 | 7 |
| nagk             | 0.0020649 | 0.660659486 | 0.268 | 0.122 | 1 | 7 |
| s100u1           | 0.0020812 | 0.333540755 | 0.537 | 0.328 | 1 | 7 |
| tmsb4x2          | 0.0021513 | 0.257706226 | 1     | 0.993 | 1 | 7 |
| hspa91           | 0.0021535 | 0.360250484 | 0.854 | 0.614 | 1 | 7 |
| impdh21          | 0.0021902 | 0.374304048 | 0.561 | 0.346 | 1 | 7 |
| cfid             | 0.0022891 | 0.491167465 | 0.341 | 0.166 | 1 | 7 |
| zc3h11a          | 0.0022972 | 0.652622316 | 0.585 | 0.387 | 1 | 7 |
| pdzklip12        | 0.0024678 | 0.41776605  | 0.366 | 0.185 | 1 | 7 |
| taf15            | 0.0024833 | 0.321092103 | 0.756 | 0.574 | 1 | 7 |
| zbtb8os          | 0.0024963 | 0.40565716  | 0.634 | 0.469 | 1 | 7 |
| prpf81           | 0.0026323 | 0.450986162 | 0.537 | 0.344 | 1 | 7 |
| slc26a5          | 0.0026774 | 0.464402647 | 0.341 | 0.182 | 1 | 7 |
| crylba           | 0.0027319 | 0.350987271 | 0.78  | 0.555 | 1 | 7 |
| lmo7a1           | 0.0028881 | 0.283273468 | 0.659 | 0.478 | 1 | 7 |
| ncf1             | 0.0029971 | 0.683217614 | 0.341 | 0.173 | 1 | 7 |
| sptbn51          | 0.003199  | 0.40265662  | 0.317 | 0.15  | 1 | 7 |
| mt-nd52          | 0.003299  | 0.47042273  | 0.927 | 0.75  | 1 | 7 |
| serpinb1132      | 0.003495  | 0.309488551 | 0.854 | 0.637 | 1 | 7 |
| ano9b1           | 0.003553  | 0.430883867 | 0.512 | 0.337 | 1 | 7 |
| ugt81            | 0.0037034 | 0.256937772 | 0.634 | 0.421 | 1 | 7 |
| elf12            | 0.0038179 | 0.54850184  | 0.585 | 0.421 | 1 | 7 |
| srrml            | 0.0039062 | 0.260425771 | 0.659 | 0.496 | 1 | 7 |
| nop102           | 0.0039715 | 0.273575682 | 0.829 | 0.595 | 1 | 7 |

|                   |           |             |       |       |           |   |
|-------------------|-----------|-------------|-------|-------|-----------|---|
| si:ch73-138n13.11 | 0.0039919 | 0.485800075 | 0.61  | 0.403 | 1         | 7 |
| isoc2             | 0.0041692 | 0.433194731 | 0.341 | 0.188 | 1         | 7 |
| subla2            | 0.0042149 | 0.27057126  | 0.829 | 0.654 | 1         | 7 |
| pttglipb          | 0.0044436 | 0.347229973 | 0.341 | 0.182 | 1         | 7 |
| lgals2b           | 0.0046416 | 0.591362946 | 1     | 0.939 | 1         | 7 |
| rnf213a           | 0.0047154 | 0.470517069 | 0.317 | 0.161 | 1         | 7 |
| smdt1b2           | 0.0048086 | 0.462292102 | 0.78  | 0.576 | 1         | 7 |
| dspace            | 0.0048919 | 0.382912083 | 0.78  | 0.606 | 1         | 7 |
| epha2a1           | 0.0049738 | 0.322716874 | 0.585 | 0.407 | 1         | 7 |
| seta              | 0.0050701 | 0.335542831 | 0.78  | 0.551 | 1         | 7 |
| myo7bb1           | 0.0053368 | 0.570445439 | 0.366 | 0.199 | 1         | 7 |
| sptan11           | 0.0053991 | 0.358880963 | 0.561 | 0.412 | 1         | 7 |
| zgc:113314        | 0.0054165 | 0.315367597 | 0.341 | 0.176 | 1         | 7 |
| rassf7b           | 0.0055204 | 0.407488277 | 0.659 | 0.476 | 1         | 7 |
| ubl3a             | 0.005651  | 0.46925216  | 0.585 | 0.426 | 1         | 7 |
| pdk2a             | 0.0058068 | 0.386066945 | 0.415 | 0.265 | 1         | 7 |
| MY01D1            | 0.00619   | 0.278762793 | 0.512 | 0.323 | 1         | 7 |
| mt-nd411          | 0.0062331 | 0.382149719 | 0.659 | 0.499 | 1         | 7 |
| jupa2             | 0.0062399 | 0.344683864 | 0.756 | 0.548 | 1         | 7 |
| csdel             | 0.0064923 | 0.279457521 | 0.805 | 0.565 | 1         | 7 |
| smim151           | 0.0065077 | 0.324573461 | 0.61  | 0.457 | 1         | 7 |
| actn42            | 0.0065457 | 0.475818972 | 0.659 | 0.485 | 1         | 7 |
| gstt1a3           | 0.0065953 | 0.301744317 | 0.927 | 0.586 | 1         | 7 |
| CU929259.11       | 0.0066792 | 0.259931254 | 0.561 | 0.398 | 1         | 7 |
| aldh8a12          | 0.006739  | 0.538325235 | 0.488 | 0.291 | 1         | 7 |
| nsa2              | 0.0070019 | 0.316899384 | 0.78  | 0.599 | 1         | 7 |
| zgc:1584631       | 0.0070605 | 0.321707943 | 1     | 0.969 | 1         | 7 |
| chp11             | 0.0071134 | 0.343699233 | 0.39  | 0.246 | 1         | 7 |
| ezra1             | 0.0072233 | 0.373687219 | 0.878 | 0.728 | 1         | 7 |
| grn1              | 0.0072544 | 0.252463564 | 0.341 | 0.18  | 1         | 7 |
| dnajc2            | 0.0072648 | 0.332347865 | 0.366 | 0.222 | 1         | 7 |
| foxall            | 0.0073933 | 0.43160981  | 0.439 | 0.264 | 1         | 7 |
| sdcbp21           | 0.0074603 | 0.301609163 | 0.707 | 0.508 | 1         | 7 |
| gstr3             | 0.0075456 | 0.317738775 | 0.78  | 0.588 | 1         | 7 |
| safb              | 0.0075583 | 0.320258017 | 0.634 | 0.48  | 1         | 7 |
| phlda21           | 0.0076221 | 0.257864803 | 1     | 0.894 | 1         | 7 |
| ddx52             | 0.0079066 | 0.274468643 | 0.878 | 0.674 | 1         | 7 |
| si:dkey-202116.5  | 0.0079591 | 0.595217901 | 0.463 | 0.314 | 1         | 7 |
| rps122            | 0.0086597 | 0.329400513 | 1     | 0.96  | 1         | 7 |
| chd4a1            | 0.0091268 | 0.378387257 | 0.61  | 0.442 | 1         | 7 |
| nr0b2a1           | 0.0095712 | 0.531356799 | 0.341 | 0.199 | 1         | 7 |
| ush1c             | 0.0096893 | 0.309474515 | 0.537 | 0.365 | 1         | 7 |
| cnn21             | 0.0098813 | 0.325519135 | 0.805 | 0.686 | 1         | 7 |
| upf1              | 0.0099518 | 0.355406183 | 0.488 | 0.326 | 1         | 7 |
| rho1              | 2.35E-06  | 1.738331026 | 0.792 | 0.495 | 0.0560771 | 8 |
| mt-co23           | 0.0003103 | 1.483410616 | 0.958 | 0.937 | 1         | 8 |
| mt-nd43           | 0.0003407 | 1.290985086 | 0.875 | 0.836 | 1         | 8 |
| mt-co32           | 0.0006826 | 1.438994341 | 0.875 | 0.937 | 1         | 8 |
| prelid3b1         | 0.0009703 | 0.299389951 | 0.208 | 0.641 | 1         | 8 |
| copz1             | 0.000976  | 0.301236769 | 0.042 | 0.408 | 1         | 8 |
| mt-cyb3           | 0.0010058 | 1.255590172 | 0.917 | 0.903 | 1         | 8 |
| tmed102           | 0.0010628 | 0.297023033 | 0.125 | 0.559 | 1         | 8 |
| llph3             | 0.0012582 | 0.265145469 | 0.083 | 0.461 | 1         | 8 |
| stard141          | 0.0021189 | 0.521362609 | 0.167 | 0.603 | 1         | 8 |

|           |           |             |       |       |   |   |
|-----------|-----------|-------------|-------|-------|---|---|
| atp2b2.11 | 0.0023689 | 0.793198795 | 0.083 | 0.453 | 1 | 8 |
| mt-nd23   | 0.0047559 | 1.274654705 | 0.875 | 0.844 | 1 | 8 |
| sfpq      | 0.0060795 | 0.352781632 | 0.125 | 0.49  | 1 | 8 |
| ehd1b     | 0.0063867 | 0.548364897 | 0.042 | 0.325 | 1 | 8 |
| klf31     | 0.0066569 | 0.335521881 | 0.167 | 0.561 | 1 | 8 |
| mt-co12   | 0.0075267 | 1.022886629 | 0.875 | 0.898 | 1 | 8 |
| emc10     | 0.007629  | 0.327908071 | 0.125 | 0.476 | 1 | 8 |
| tmem45b   | 0.0081802 | 0.4283919   | 0.042 | 0.314 | 1 | 8 |
| mt-atp62  | 0.0089673 | 1.349976674 | 0.875 | 0.915 | 1 | 8 |
| klf7b2    | 0.0092853 | 0.473813455 | 0.125 | 0.456 | 1 | 8 |
