# Supplementary material for: Mycn regulates intestinal development through ribosomal biogenesis in a zebrafish model of Feingold syndrome 1
Source: PubMed Central journal article supplement (PMC9624419; doi:10.1371/journal.pbio.3001856), 2022-11-01
Supplement: pbio.3001856.s010.pdf [file pbio.3001856.s010.pdf]

| external_gene_name | baseMean | log2FoldChange | lfcSE    | stat     | pvalue   | padj     |
|--------------------|----------|----------------|----------|----------|----------|----------|
| slc35a5            | 118.0957 | 0.138332419    | 0.216139 | 0.640015 | 0.522163 | 0.887769 |
| ccdc80             | 204.5786 | 0.667121999    | 0.196714 | 3.391322 | 0.000696 | 0.034884 |
| nrfl               | 645.5006 | 0.179803727    | 0.116936 | 1.537621 | 0.124141 | 0.571369 |
| ube2h              | 1977.436 | -0.056246      | 0.071018 | -0.792   | 0.428363 | 0.846133 |
| slc9a3r1a          | 328.7106 | 0.044235208    | 0.163773 | 0.2701   | 0.787083 | 0.963065 |
| dap                | 1337.363 | 0.167933466    | 0.130751 | 1.28438  | 0.199009 | 0.679593 |
| itsn1              | 566.1092 | -0.094719369   | 0.148573 | -0.63753 | 0.523782 | 0.888642 |
| myh10              | 2374.121 | 0.090600692    | 0.157815 | 0.574094 | 0.565904 | 0.901726 |
| tmem267            | 73.85192 | -0.223448521   | 0.244177 | -0.91511 | 0.360135 | 0.811057 |
| thraa              | 79.31861 | -0.33157794    | 0.22693  | -1.46115 | 0.143975 | 0.603144 |
| itsn2a             | 181.5203 | 0.187071665    | 0.186403 | 1.003586 | 0.315578 | 0.77795  |
| hoxb2a             | 126.2727 | -0.186821278   | 0.218519 | -0.85494 | 0.392583 | 0.827902 |
| ptpn4b             | 320.0827 | 0.272050438    | 0.189022 | 1.439255 | 0.150078 | 0.613391 |
| sema6e             | 414.4191 | 0.068626535    | 0.170777 | 0.401848 | 0.687796 | 0.938835 |
| krt97              | 10017.04 | -0.32325501    | 0.131935 | -2.4501  | 0.014282 | 0.209217 |
| usp49              | 244.7783 | -0.161041055   | 0.17196  | -0.9365  | 0.349015 | 0.801306 |
| slc40a1            | 1322.731 | -0.121807615   | 0.204745 | -0.59492 | 0.551895 | 0.8974   |
| dcaf8              | 305.9647 | -0.10517891    | 0.17171  | -0.61254 | 0.540183 | 0.893049 |
| cfap300            | 20.81778 | 0.01514882     | 0.385248 | 0.039322 | 0.968633 | 1        |
| prkag3b            | 199.0066 | 0.244593155    | 0.211413 | 1.156947 | 0.247294 | 0.727871 |
| triob              | 466.5137 | 0.305852562    | 0.146243 | 2.091401 | 0.036492 | 0.335935 |
| pde6a              | 132.7582 | -0.474910063   | 0.308647 | -1.53868 | 0.123882 | 0.571162 |
| matr311.1          | 964.0491 | 0.087886534    | 0.104344 | 0.84228  | 0.399631 | 0.831196 |
| si:ch73-314g15.3   | 82.88596 | 0.006933536    | 0.220986 | 0.031375 | 0.97497  | 1        |
| slc39a13           | 346.1549 | 0.347299768    | 0.163181 | 2.128312 | 0.033311 | 0.323127 |
| nitr2b             | 4.536112 | 1.402299391    | 1.090216 | 1.286258 | 0.198353 | 0.679109 |
| cntn2              | 131.597  | 0.092688797    | 0.221997 | 0.417523 | 0.676296 | 0.93557  |
| tnnila             | 5.786459 | 1.055428444    | 1.777568 | 0.593748 | 0.55268  | 0.8974   |
| pms1               | 88.98435 | 0.14563694     | 0.271281 | 0.536849 | 0.591372 | 0.909437 |
| upf3b              | 605.5693 | -0.092745394   | 0.120052 | -0.77254 | 0.439792 | 0.852079 |
| stx1b              | 2744.315 | 0.28021458     | 0.194118 | 1.443529 | 0.148871 | 0.610726 |
| ankar              | 8.781245 | -0.738601733   | 0.530253 | -1.39292 | 0.163643 | 0.631915 |
| ofd1               | 128.2947 | 0.075828432    | 0.181092 | 0.418728 | 0.675415 | 0.935422 |
| asdurf             | 297.8941 | -0.081497962   | 0.143207 | -0.56909 | 0.569293 | 0.902303 |
| gtf2e1             | 251.9598 | -0.094273307   | 0.122736 | -0.7681  | 0.442428 | 0.853789 |
| slcla4             | 821.3637 | -0.195471144   | 0.136713 | -1.42979 | 0.152778 | 0.617015 |
| ttn.1              | 5496.635 | -0.016464703   | 0.262568 | -0.06271 | 0.95     | 0.99801  |
| znf281a            | 415.6062 | 0.117140376    | 0.111839 | 1.047405 | 0.294913 | 0.763708 |
| ell                | 503.7507 | -0.059260509   | 0.120175 | -0.49312 | 0.621929 | 0.918461 |
| grasp              | 113.9098 | -0.303424775   | 0.227414 | -1.33424 | 0.182126 | 0.658775 |
| dnah6              | 40.405   | 0.323344095    | 0.327526 | 0.987233 | 0.323528 | 0.783161 |
| ptpn4a             | 561.6631 | 0.034414846    | 0.12739  | 0.270153 | 0.787042 | 0.963065 |
| opnlmw4            | 0.128836 | 0              | 5.267649 | 0        | 1        | NA       |
| osgepl1            | 29.25713 | -0.065452238   | 0.367856 | -0.17793 | 0.858779 | 0.979951 |
| psmb9a             | 4.131826 | 2.293483148    | 1.513929 | 1.514921 | 0.129792 | 0.579886 |
| creg2              | 634.3608 | -0.426468675   | 0.199447 | -2.13826 | 0.032496 | 0.319445 |
| sypl2b             | 204.6097 | -0.393646479   | 0.130244 | -3.02237 | 0.002508 | 0.08071  |
| daxx               | 255.2643 | -0.123712701   | 0.144216 | -0.85783 | 0.390988 | 0.827902 |
| slc6a22.1          | 201.3817 | 0.051833218    | 0.190289 | 0.272392 | 0.785321 | 0.962605 |
| lcmt2              | 38.14294 | -0.243434905   | 0.359533 | -0.67709 | 0.498352 | 0.879132 |
| znf511             | 81.96516 | -0.748802888   | 0.227024 | -3.29834 | 0.000973 | 0.043444 |
| spilb              | 73.18201 | 0.148530427    | 0.24201  | 0.613736 | 0.53939  | 0.893049 |
| scfd1              | 683.7883 | 0.127237992    | 0.103951 | 1.224013 | 0.220947 | 0.702242 |

|                  |          |              |          |          |          |          |
|------------------|----------|--------------|----------|----------|----------|----------|
| nr4a1            | 497.5112 | -0.357396467 | 0.599656 | -0.596   | 0.551174 | 0.8974   |
| rassf6           | 173.4035 | 0.301666795  | 0.156641 | 1.925852 | 0.054123 | 0.402505 |
| telo2            | 150.1353 | 0.071266001  | 0.170902 | 0.416998 | 0.67668  | 0.935656 |
| snx9a            | 281.2678 | 0.115556174  | 0.150473 | 0.767952 | 0.442516 | 0.853789 |
| dstyk            | 1254.436 | -0.090185724 | 0.124464 | -0.72459 | 0.468702 | 0.866951 |
| mapk14a          | 517.4562 | -0.068113069 | 0.125146 | -0.54427 | 0.586258 | 0.906711 |
| scrib            | 1554.842 | 0.093783318  | 0.133826 | 0.700785 | 0.483437 | 0.872099 |
| zgc:56699        | 108.6732 | -0.336251936 | 0.213115 | -1.57779 | 0.114613 | 0.554279 |
| skap2            | 79.39406 | 0.338860117  | 0.26392  | 1.283951 | 0.199159 | 0.679605 |
| unk              | 106.3742 | 0.009571021  | 0.224451 | 0.042642 | 0.965987 | 1        |
| dzip1            | 350.9059 | 0.048373899  | 0.1575   | 0.307135 | 0.75874  | 0.957882 |
| ncor2            | 1509.007 | 0.048182865  | 0.122003 | 0.394932 | 0.692893 | 0.940444 |
| myh9b            | 2318.49  | 0.046641659  | 0.199072 | 0.234295 | 0.814756 | 0.970686 |
| znf3841          | 440.9022 | -0.107923446 | 0.165386 | -0.65255 | 0.514045 | 0.88631  |
| bysl             | 1455.774 | -0.13090452  | 0.172949 | -0.7569  | 0.449112 | 0.856796 |
| slc17a6a         | 81.66448 | 0.465811805  | 0.26007  | 1.7911   | 0.073277 | 0.460742 |
| dicer1           | 668.062  | 0.000823473  | 0.151654 | 0.00543  | 0.995668 | 1        |
| rimbp2           | 83.94345 | 0.021260874  | 0.351149 | 0.060547 | 0.95172  | 0.99801  |
| matr311.1        | 618.32   | -0.093510362 | 0.127695 | -0.73229 | 0.46399  | 0.864593 |
| hsd17b8          | 129.0817 | 0.029264277  | 0.154335 | 0.189616 | 0.84961  | 0.978209 |
| arll4ep          | 346.4709 | 0.019793201  | 0.214075 | 0.092459 | 0.926333 | 0.994815 |
| mycbp2           | 1643.958 | 0.110642258  | 0.159467 | 0.693826 | 0.487791 | 0.873291 |
| map4k2           | 158.7571 | 0.115670496  | 0.168294 | 0.687312 | 0.491886 | 0.876086 |
| puf60b           | 1618.343 | 0.037821719  | 0.094256 | 0.401267 | 0.688224 | 0.93909  |
| srrml            | 1564.129 | -0.089906221 | 0.164866 | -0.54533 | 0.585527 | 0.906655 |
| pcgfl            | 76.76687 | -0.314161947 | 0.277971 | -1.1302  | 0.258393 | 0.735636 |
| gas2a            | 31.68654 | -0.380059647 | 0.382557 | -0.99347 | 0.320479 | 0.780821 |
| psmb8a           | 4.397652 | -1.378650788 | 1.658115 | -0.83146 | 0.405716 | 0.834645 |
| g2e3             | 438.9288 | 0.270497304  | 0.234501 | 1.153503 | 0.248704 | 0.728758 |
| slc6a22.2        | 158.1514 | -0.668236035 | 0.202702 | -3.29664 | 0.000978 | 0.043444 |
| mctp2a           | 107.9434 | -0.33448633  | 0.248594 | -1.34551 | 0.178461 | 0.652712 |
| actn3b           | 8925.677 | 0.1212822    | 0.210479 | 0.576219 | 0.564467 | 0.901433 |
| slc2a1a          | 56.91533 | -0.775586592 | 0.456456 | -1.69915 | 0.089291 | 0.501424 |
| inpp1b           | 182.6042 | -0.040786814 | 0.220438 | -0.18503 | 0.853208 | 0.978839 |
| mier1b           | 233.7677 | 0.019896822  | 0.176891 | 0.11248  | 0.910442 | 0.992208 |
| adam8a           | 134.1958 | 0.079380367  | 0.231955 | 0.342223 | 0.732183 | 0.950617 |
| tdh2             | 508.9021 | 0.302044395  | 0.261786 | 1.153785 | 0.248588 | 0.728723 |
| mhclzea          | 131.2977 | 0.007991898  | 0.190438 | 0.041966 | 0.966526 | 1        |
| skap1            | 12.14574 | -1.20034116  | 0.570622 | -2.10357 | 0.035416 | 0.330833 |
| sp3a             | 105.0466 | 0.266968184  | 0.175764 | 1.518901 | 0.128787 | 0.578173 |
| tomm34           | 250.6532 | 0.585637647  | 0.188364 | 3.109079 | 0.001877 | 0.066898 |
| kifcl            | 659.3963 | 0.29341253   | 0.220307 | 1.331836 | 0.182914 | 0.659278 |
| csmd2            | 52.37148 | -0.188720783 | 0.335485 | -0.56253 | 0.573754 | 0.904296 |
| prfl.3           | 0.441618 | -0.868132876 | 3.17633  | -0.27331 | 0.784613 | NA       |
| echsl            | 1329.517 | -0.112093739 | 0.107537 | -1.04237 | 0.297239 | 0.764844 |
| nfyal            | 213.8527 | 0.094710846  | 0.164756 | 0.574856 | 0.565388 | 0.901538 |
| kirrella         | 546.8383 | 0.215769112  | 0.154565 | 1.395977 | 0.162721 | 0.630455 |
| psmb13a          | 2.086309 | -0.868149099 | 2.165098 | -0.40097 | 0.688439 | NA       |
| gpm6bb           | 552.5294 | -0.010684048 | 0.152926 | -0.06986 | 0.944302 | 0.997371 |
| ucklla           | 31.37656 | 0.251725994  | 0.427183 | 0.58927  | 0.55568  | 0.898723 |
| flotla           | 1566.41  | 0.062717748  | 0.10293  | 0.609322 | 0.542311 | 0.894395 |
| si:ch211-247n2.1 | 76.38959 | 0.236053282  | 0.346298 | 0.681648 | 0.495461 | 0.87806  |
| oc90             | 18.34908 | 0.285940656  | 0.444349 | 0.643505 | 0.519897 | 0.887148 |
| strn3            | 1219.245 | 0.163888372  | 0.0865   | 1.894666 | 0.058137 | 0.416521 |



|                  |          |              |          |          |          |          |
|------------------|----------|--------------|----------|----------|----------|----------|
| gulpla           | 415.5726 | -0.040203145 | 0.130469 | -0.30814 | 0.757973 | 0.957487 |
| fkbp8            | 432.9672 | 0.028645039  | 0.144323 | 0.198478 | 0.842671 | 0.9766   |
| noc2l            | 625.2574 | -0.007448286 | 0.16661  | -0.0447  | 0.964343 | 0.999925 |
| tnxba            | 375.85   | 0.534731355  | 0.370159 | 1.444601 | 0.14857  | 0.61024  |
| slc29a2          | 195.37   | 0.985529407  | 0.330652 | 2.980564 | 0.002877 | 0.088391 |
| ptpra            | 382.3258 | 0.110928781  | 0.158359 | 0.700491 | 0.483621 | 0.872148 |
| otolla           | 9.409358 | -0.59311211  | 0.912783 | -0.64978 | 0.515832 | 0.886634 |
| stim2b           | 46.2779  | 0.242797707  | 0.250639 | 0.968714 | 0.332688 | 0.789807 |
| nup155           | 530.3451 | 0.203169939  | 0.12152  | 1.67191  | 0.094542 | 0.513368 |
| tspan1l          | 51.56158 | -0.466227206 | 0.265138 | -1.75843 | 0.078674 | 0.474455 |
| prkacba          | 120.5776 | -0.298707465 | 0.253355 | -1.17901 | 0.238395 | 0.719474 |
| irx2a            | 282.5125 | 0.278962039  | 0.152724 | 1.82658  | 0.067763 | 0.443773 |
| atp5po           | 8457.899 | 4.57E-05     | 0.139444 | 0.000328 | 0.999738 | 1        |
| kcnh6a           | 70.65874 | -0.090379256 | 0.258562 | -0.34955 | 0.72668  | 0.949095 |
| zgc:112148       | 105.2907 | 0.847553312  | 0.233861 | 3.62417  | 0.00029  | 0.019028 |
| tnfrsf21         | 291.969  | -0.201048275 | 0.159461 | -1.2608  | 0.207382 | 0.689456 |
| zmp:0000000521   | 12.23245 | -0.995957369 | 0.506217 | -1.96745 | 0.049131 | 0.386041 |
| c3b.2            | 383.7958 | -0.539516733 | 0.49893  | -1.08135 | 0.279542 | 0.752477 |
| cfap43           | 19.07791 | -0.287068856 | 0.396871 | -0.72333 | 0.469477 | 0.867224 |
| zgc:112982       | 979.5078 | 0.031739524  | 0.141769 | 0.223881 | 0.82285  | 0.971966 |
| nalcn            | 299.0616 | 0.112658378  | 0.274532 | 0.410365 | 0.681538 | 0.937418 |
| aff4             | 292.6174 | 0.005053852  | 0.178412 | 0.028327 | 0.977401 | 1        |
| dbx1b            | 95.60424 | 0.273406789  | 0.222255 | 1.230148 | 0.218642 | 0.699445 |
| atplala.4        | 3162.927 | 0.163955084  | 0.242148 | 0.677087 | 0.498351 | 0.879132 |
| phgdh            | 1327.774 | -0.072760123 | 0.132392 | -0.54958 | 0.582606 | 0.90571  |
| nav2b            | 431.1402 | -0.029228429 | 0.141162 | -0.20706 | 0.835967 | 0.976007 |
| stx3a            | 282.9642 | 0.055197704  | 0.159785 | 0.345451 | 0.729755 | 0.950056 |
| cacnb3a          | 8.704609 | 0.354652275  | 0.753162 | 0.470884 | 0.637723 | 0.924779 |
| kbtbd12          | 945.9557 | 0.112085158  | 0.173955 | 0.644332 | 0.51936  | 0.887148 |
| ppmlba           | 175.9017 | 0.217153978  | 0.145744 | 1.489973 | 0.136231 | 0.591544 |
| tubala           | 4693.417 | 0.164257031  | 0.352194 | 0.466382 | 0.640942 | 0.925364 |
| stt3b            | 1062.604 | 0.15286006   | 0.094821 | 1.612097 | 0.106941 | 0.537    |
| sytl4b           | 64.69812 | 0.951577538  | 0.268934 | 3.538334 | 0.000403 | 0.023889 |
| man2b1           | 477.8451 | 0.050522013  | 0.154962 | 0.326029 | 0.744403 | 0.95491  |
| manea            | 161.5879 | 0.233920175  | 0.194045 | 1.205493 | 0.228013 | 0.709324 |
| si:dkey-247m21.3 | 12.98714 | -0.974535582 | 0.708759 | -1.37499 | 0.169135 | 0.640442 |
| vill             | 131.0346 | 0.237634122  | 0.180518 | 1.3164   | 0.18804  | 0.667313 |
| rorab            | 1306.542 | -0.13080753  | 0.207552 | -0.63024 | 0.528537 | 0.890002 |
| drd4-rs          | 78.49216 | -0.058550363 | 0.231598 | -0.25281 | 0.800415 | 0.967364 |
| palmda           | 185.598  | -0.007618098 | 0.248298 | -0.03068 | 0.975524 | 1        |
| pink1            | 354.5998 | 0.04322298   | 0.151084 | 0.286086 | 0.774812 | 0.960899 |
| klhl15           | 293.1312 | -0.17051177  | 0.147608 | -1.15517 | 0.248021 | 0.728489 |
| prkag2b          | 80.44624 | 0.092642324  | 0.31533  | 0.293795 | 0.768915 | 0.960395 |
| L0018422.1       | 38.24182 | -0.02269034  | 0.427582 | -0.05307 | 0.957679 | 0.999109 |
| b3gat3           | 247.2921 | -0.246008078 | 0.140029 | -1.75683 | 0.078946 | 0.475183 |
| dnajc1           | 823.0803 | 0.061756892  | 0.100791 | 0.612721 | 0.540061 | 0.893049 |
| akl              | 20964.84 | -0.017160838 | 0.131719 | -0.13028 | 0.896342 | 0.98939  |
| pfkfb3           | 747.4668 | -0.302669314 | 0.39563  | -0.76503 | 0.444252 | 0.854431 |
| dock5            | 61.96294 | 0.081447157  | 0.330467 | 0.246461 | 0.805325 | 0.969348 |
| txlng            | 288.1748 | -0.300072404 | 0.124375 | -2.41265 | 0.015837 | 0.222022 |
| cthrclb          | 26.96573 | -1.137014197 | 1.065043 | -1.06758 | 0.285712 | 0.757084 |
| hsd11b2          | 395.6046 | -0.332090582 | 0.222273 | -1.49407 | 0.135158 | 0.590536 |
| fkbp16           | 124.8048 | -0.333596248 | 0.24849  | -1.34249 | 0.179436 | 0.654677 |
| myhb             | 1278.662 | -0.351310937 | 0.310017 | -1.1332  | 0.257131 | 0.734679 |

|                   |          |              |          |          |          |          |
|-------------------|----------|--------------|----------|----------|----------|----------|
| stxbpla           | 3333.55  | 0.273432423  | 0.211955 | 1.290052 | 0.197033 | 0.677235 |
| adamts18          | 203.1237 | -0.13757466  | 0.211471 | -0.65056 | 0.515331 | 0.886401 |
| lmccl             | 246.3644 | -0.210185708 | 0.225516 | -0.93202 | 0.351326 | 0.802305 |
| rxrbb             | 413.8676 | -0.062451799 | 0.130447 | -0.47875 | 0.632114 | 0.923176 |
| grb10a            | 136.2354 | -0.620902584 | 0.222082 | -2.79582 | 0.005177 | 0.12067  |
| ppil2             | 376.8841 | -0.09714156  | 0.128099 | -0.75833 | 0.448251 | 0.856741 |
| riCTORB           | 222.6867 | 0.00744525   | 0.169823 | 0.043841 | 0.965031 | 1        |
| pygb              | 650.7976 | 0.141268904  | 0.113814 | 1.241225 | 0.214523 | 0.69658  |
| qkib              | 82.69519 | 0.367251345  | 0.218146 | 1.68351  | 0.092277 | 0.508314 |
| tox4a             | 252.0672 | 0.185116716  | 0.144823 | 1.278227 | 0.201169 | 0.681045 |
| pfkfb2b           | 86.07643 | 0.406985952  | 0.283428 | 1.435944 | 0.151018 | 0.615085 |
| brf2              | 18.70627 | -0.226366138 | 0.4273   | -0.52976 | 0.596279 | 0.911626 |
| adss              | 402.5414 | 0.179047028  | 0.160724 | 1.114001 | 0.265279 | 0.742063 |
| mnat1             | 101.3866 | 0.020839319  | 0.216874 | 0.09609  | 0.923449 | 0.994525 |
| csnk2a1           | 2031.881 | -0.089333777 | 0.075517 | -1.18296 | 0.236827 | 0.718136 |
| lamb2             | 924.9409 | 0.154493218  | 0.178225 | 0.866843 | 0.386028 | 0.826948 |
| si:dkeyp-52c3.7   | 3.180791 | -0.178447871 | 1.328468 | -0.13433 | 0.893145 | 0.988566 |
| stam              | 943.6197 | 0.090039292  | 0.098748 | 0.911809 | 0.361869 | 0.811787 |
| cwf1911           | 258.7856 | -0.023824052 | 0.125812 | -0.18936 | 0.849809 | 0.97824  |
| celf2             | 554.7982 | 0.10831608   | 0.13913  | 0.778525 | 0.436259 | 0.850864 |
| psme1             | 84.72572 | 0.065201704  | 0.345984 | 0.188453 | 0.850522 | 0.978251 |
| cacnbl            | 175.0829 | 0.100620972  | 0.185432 | 0.542631 | 0.587384 | 0.907373 |
| tra2b             | 530.6197 | 0.023528182  | 0.125658 | 0.18724  | 0.851472 | 0.978548 |
| aplra             | 246.0822 | -0.323377188 | 0.145615 | -2.22077 | 0.026367 | 0.287876 |
| itfg2             | 126.8951 | -0.17796717  | 0.207143 | -0.85915 | 0.390256 | 0.827902 |
| igbpl             | 463.9022 | -0.254057825 | 0.129742 | -1.95817 | 0.05021  | 0.390261 |
| chmp2bb           | 1147.422 | -0.258240031 | 0.154721 | -1.66907 | 0.095104 | 0.51461  |
| aspn              | 334.8077 | 0.308209489  | 0.202974 | 1.518465 | 0.128897 | 0.578173 |
| rho               | 5841.953 | -0.470414229 | 0.441166 | -1.0663  | 0.286289 | 0.757624 |
| rhd               | 102.8181 | 0.439270275  | 0.248739 | 1.765986 | 0.077398 | 0.470172 |
| bach1b            | 518.4567 | 0.154270394  | 0.170815 | 0.903144 | 0.366449 | 0.81589  |
| pygl              | 1556.32  | -0.728965228 | 0.245643 | -2.96758 | 0.003002 | 0.090435 |
| hspb11            | 353.3604 | -0.330903923 | 0.291222 | -1.13626 | 0.255848 | 0.733642 |
| stk25a            | 180.7702 | 0.698108654  | 0.173942 | 4.013465 | 5.98E-05 | 0.006302 |
| invs              | 71.35987 | 0.086918584  | 0.212676 | 0.40869  | 0.682767 | 0.938006 |
| rtca              | 487.5255 | -0.074500166 | 0.117376 | -0.63472 | 0.525614 | 0.888928 |
| tbx3a             | 394.9098 | -0.02336721  | 0.12958  | -0.18033 | 0.856893 | 0.979558 |
| scocb             | 726.4548 | 0.031098898  | 0.150457 | 0.206696 | 0.836247 | 0.976007 |
| si:dkey-103j14.5  | 21.64345 | -0.195254924 | 0.665942 | -0.2932  | 0.769368 | 0.960484 |
| zgc:103692        | 255.0908 | -0.061970831 | 0.148165 | -0.41826 | 0.675761 | 0.935422 |
| sybp              | 1610.634 | 0.319584737  | 0.185973 | 1.718444 | 0.085716 | 0.491277 |
| plpp2a            | 45.80102 | -0.602520581 | 0.291168 | -2.06932 | 0.038516 | 0.344223 |
| mmp14a            | 1284.808 | 0.043695307  | 0.123079 | 0.355018 | 0.722576 | 0.947632 |
| psmb6             | 2496.286 | 0.004064204  | 0.186057 | 0.021844 | 0.982572 | 1        |
| kcna2a            | 4.97011  | -0.397178824 | 1.042788 | -0.38088 | 0.703291 | 0.943622 |
| tbxas1            | 326.3066 | -0.453517811 | 0.21461  | -2.11322 | 0.034582 | 0.328029 |
| epb4113a          | 490.6019 | 0.089435138  | 0.156944 | 0.569853 | 0.568778 | 0.902234 |
| cal5c             | 78.36669 | 0.262743708  | 0.768454 | 0.341912 | 0.732417 | 0.950617 |
| mrpl41            | 362.9043 | 0.147933147  | 0.134346 | 1.101133 | 0.270839 | 0.746845 |
| dcaf13            | 406.6236 | 0.021612325  | 0.136809 | 0.157975 | 0.874477 | 0.984052 |
| zfang5b           | 2202.736 | 0.06123515   | 0.09501  | 0.644513 | 0.519243 | 0.887148 |
| mc0ln1a           | 333.3673 | -0.311322724 | 0.119734 | -2.60012 | 0.009319 | 0.165999 |
| si:ch211-197g15.6 | 42.71992 | 0.732253881  | 0.454404 | 1.61146  | 0.107079 | 0.537019 |
| si:dkey-21p1.3    | 9.377898 | 0.725521469  | 0.645216 | 1.124463 | 0.260817 | 0.738407 |

|                   |          |              |          |          |          |          |
|-------------------|----------|--------------|----------|----------|----------|----------|
| ankrd22           | 88.71217 | 0.085845027  | 0.361986 | 0.23715  | 0.81254  | 0.970291 |
| arsh              | 61.02675 | -0.526243622 | 0.239028 | -2.2016  | 0.027694 | 0.29556  |
| p2rx2             | 35.26727 | -1.177812487 | 0.583491 | -2.01856 | 0.043533 | 0.365455 |
| gins2             | 106.7632 | -0.157507539 | 0.344117 | -0.45771 | 0.647157 | 0.926968 |
| me3               | 1514.009 | 0.040619041  | 0.080723 | 0.503189 | 0.614831 | 0.915998 |
| fabp11b           | 94.66091 | -0.407838266 | 0.296735 | -1.37442 | 0.169311 | 0.640794 |
| lhx8a             | 92.94381 | 0.679071628  | 0.204607 | 3.318908 | 0.000904 | 0.041218 |
| frmd6             | 368.0598 | 0.009511226  | 0.140247 | 0.067817 | 0.945931 | 0.997371 |
| fam102bb          | 108.4628 | -0.855764107 | 0.205002 | -4.17442 | 2.99E-05 | 0.003783 |
| dlc               | 578.3038 | 0.103168538  | 0.147544 | 0.699237 | 0.484404 | 0.872824 |
| sgf29             | 242.4792 | -0.070361633 | 0.187472 | -0.37532 | 0.707424 | 0.944981 |
| tubb4b            | 20454.61 | -0.097693713 | 0.141558 | -0.69013 | 0.490112 | 0.875079 |
| cyp11a1           | 5.04448  | 0.026305098  | 0.755261 | 0.034829 | 0.972216 | 1        |
| tagapa            | 23.1074  | -1.258039748 | 0.548641 | -2.29301 | 0.021847 | 0.261875 |
| shpk              | 15.86331 | 0.081103171  | 0.43376  | 0.186977 | 0.851678 | 0.978548 |
| ubald1a           | 600.2824 | -0.060756371 | 0.109071 | -0.55704 | 0.577503 | 0.904842 |
| cers5             | 455.6742 | -0.214672605 | 0.131397 | -1.63378 | 0.102306 | 0.528996 |
| UBB               | 4361.995 | 0.195095677  | 0.195534 | 0.997756 | 0.318398 | 0.779923 |
| mief2             | 215.7825 | -0.025924569 | 0.20577  | -0.12599 | 0.899741 | 0.99045  |
| atm               | 178.2869 | 0.192623248  | 0.157656 | 1.221791 | 0.221787 | 0.703656 |
| tlcd1             | 114.3437 | 0.482340435  | 0.24684  | 1.954058 | 0.050694 | 0.39166  |
| ugt5d1            | 38.90915 | -0.618192568 | 0.488924 | -1.26439 | 0.206089 | 0.688448 |
| cry-dash          | 557.2135 | -0.00306869  | 0.200705 | -0.01529 | 0.987801 | 1        |
| gale              | 406.2545 | -0.02852684  | 0.154572 | -0.18455 | 0.853579 | 0.978887 |
| ercc3             | 423.2416 | 0.220984434  | 0.138197 | 1.599058 | 0.109808 | 0.543642 |
| nusap1            | 600.6257 | 0.221580173  | 0.278255 | 0.79632  | 0.425846 | 0.844714 |
| si:ch211-225b11.1 | 279.7349 | -0.122491355 | 0.208974 | -0.58616 | 0.557771 | 0.899184 |
| zmynd10           | 26.40377 | 1.260113681  | 0.3435   | 3.668449 | 0.000244 | 0.016928 |
| pde4cb            | 52.9926  | 0.122589991  | 0.319506 | 0.383686 | 0.701211 | 0.943062 |
| prdm1a            | 349.0113 | -0.010236317 | 0.191568 | -0.05343 | 0.957386 | 0.999109 |
| arhgef37          | 99.00199 | 0.292086451  | 0.260092 | 1.123013 | 0.261432 | 0.738975 |
| rdh14b            | 275.7679 | 0.145800856  | 0.136746 | 1.066215 | 0.286327 | 0.757624 |
| ercc61            | 223.0333 | 0.446500424  | 0.180814 | 2.469386 | 0.013535 | 0.202995 |
| wnt7ab            | 18.55678 | 0.090745353  | 0.447742 | 0.202673 | 0.83939  | 0.976417 |
| noc3l             | 371.5145 | 0.05039061   | 0.154397 | 0.326371 | 0.744143 | 0.95491  |
| itgb6             | 172.9777 | 0.32561134   | 0.167575 | 1.943073 | 0.052007 | 0.396487 |
| zgc:92818         | 511.1272 | 0.081270415  | 0.156093 | 0.520652 | 0.602609 | 0.914072 |
| itgal0            | 196.9689 | 0.474707366  | 0.187261 | 2.535002 | 0.011245 | 0.183909 |
| ankrd33ab         | 6.619336 | 1.985822438  | 1.504831 | 1.319632 | 0.186958 | 0.665301 |
| zgc:153911        | 27.12598 | -1.266113698 | 0.551467 | -2.2959  | 0.021682 | 0.261221 |
| dmbx1b            | 33.29555 | 0.583448838  | 0.352643 | 1.654505 | 0.098025 | 0.521071 |
| hsd12             | 1617.6   | 0.099906758  | 0.140729 | 0.709922 | 0.477752 | 0.869292 |
| adora2b           | 18.68528 | -0.439416171 | 0.505397 | -0.86945 | 0.384603 | 0.826588 |
| tm9sf4            | 646.8804 | 0.011315988  | 0.090526 | 0.125003 | 0.900521 | 0.99045  |
| smula             | 614.6052 | -0.096883508 | 0.106591 | -0.90893 | 0.363387 | 0.813662 |
| rundc3ab          | 424.3467 | 0.396562122  | 0.148697 | 2.666918 | 0.007655 | 0.147606 |
| EIF3EB            | 272.6039 | -0.599706039 | 0.168133 | -3.56686 | 0.000361 | 0.022086 |
| mapkapk2a         | 800.636  | -0.147204689 | 0.114459 | -1.2861  | 0.19841  | 0.679148 |
| syng1a            | 392.2764 | -0.181984909 | 0.153988 | -1.18181 | 0.23728  | 0.718568 |
| tmod2             | 111.7828 | -0.816553165 | 0.158998 | -5.13563 | 2.81E-07 | 0.00011  |
| cabp5a            | 34.52936 | -3.119050349 | 1.33283  | -2.34017 | 0.019275 | 0.244673 |
| tbx15             | 371.0793 | -0.102920515 | 0.168608 | -0.61041 | 0.541588 | 0.893902 |
| dpysl3            | 2257.168 | -0.030609133 | 0.118537 | -0.25822 | 0.796234 | 0.966357 |
| mylpfb            | 31222.61 | 0.187309741  | 0.144522 | 1.296067 | 0.194953 | 0.67483  |

|                 |          |              |          |          |          |          |
|-----------------|----------|--------------|----------|----------|----------|----------|
| ruvbl1          | 676.9414 | 0.303795076  | 0.124886 | 2.432574 | 0.014992 | 0.214289 |
| slc45a2         | 771.4674 | -0.329400387 | 0.16371  | -2.01209 | 0.04421  | 0.368106 |
| pabpc11         | 1.416545 | 0.339784479  | 1.570491 | 0.216356 | 0.828711 | NA       |
| pcsk1           | 41.53892 | -0.209156186 | 0.470314 | -0.44472 | 0.656525 | 0.929753 |
| irx7            | 73.01267 | -0.241274509 | 0.227314 | -1.06142 | 0.2885   | 0.759522 |
| unm_sal1614     | 98.85729 | -0.052362968 | 0.174167 | -0.30065 | 0.763682 | 0.959055 |
| rnfl45a         | 198.6577 | 0.099324436  | 0.213006 | 0.466299 | 0.641001 | 0.925364 |
| rpa3            | 325.4319 | -0.149370725 | 0.235962 | -0.63303 | 0.526714 | 0.889699 |
| anxa11b         | 2793.67  | -0.138623115 | 0.084966 | -1.63151 | 0.102782 | 0.529448 |
| b4galt1         | 124.6592 | -0.371775443 | 0.240938 | -1.54303 | 0.122823 | 0.569468 |
| zgc:85722       | 284.4956 | 0.129477899  | 0.282592 | 0.45818  | 0.646823 | 0.926728 |
| sh3g11b         | 367.4738 | 0.044503564  | 0.17579  | 0.253164 | 0.800142 | 0.967256 |
| rgs5a           | 735.1663 | 0.073711485  | 0.180617 | 0.408109 | 0.683194 | 0.938212 |
| stxbp5a         | 215.9537 | -0.235414144 | 0.298895 | -0.78762 | 0.430921 | 0.84772  |
| maprelb         | 2294.462 | 0.226996139  | 0.125859 | 1.803573 | 0.071298 | 0.455342 |
| optn            | 547.9435 | -0.382027492 | 0.137337 | -2.78167 | 0.005408 | 0.123724 |
| kcnj1b          | 27.5751  | 0.198897966  | 0.317162 | 0.627118 | 0.530582 | 0.890545 |
| ATG14           | 765.7664 | -0.148206442 | 0.169517 | -0.87429 | 0.381962 | 0.824957 |
| tbcela          | 305.6459 | -0.247529866 | 0.137144 | -1.80489 | 0.071093 | 0.455158 |
| fam113          | 0.758103 | -0.85269986  | 2.885151 | -0.29555 | 0.767575 | NA       |
| rabif           | 218.1311 | 0.177147575  | 0.188628 | 0.939137 | 0.347661 | 0.80026  |
| gnb3b           | 4011.64  | 1.181072103  | 0.484358 | 2.438427 | 0.014751 | 0.213272 |
| rasl12          | 36.16556 | -0.3613457   | 0.305932 | -1.18113 | 0.237551 | 0.718568 |
| her11           | 3.057268 | 1.676162255  | 1.353633 | 1.23827  | 0.215616 | 0.697157 |
| ncl             | 8180.211 | -0.229090874 | 0.122478 | -1.87046 | 0.06142  | 0.425187 |
| utpl5           | 394.3881 | -0.080709952 | 0.197526 | -0.4086  | 0.682831 | 0.938006 |
| ankrd2          | 0.319876 | 0.093659364  | 3.460444 | 0.027066 | 0.978407 | NA       |
| kisslra         | 2.234783 | 0            | 1.959022 | 0        | 1        | 1        |
| sdc2            | 1193.896 | -0.122153687 | 0.11617  | -1.05151 | 0.293024 | 0.762508 |
| spon2b          | 309.4512 | -0.184958966 | 0.292621 | -0.63208 | 0.527336 | 0.889948 |
| tdh             | 6705.084 | -0.285462975 | 0.217235 | -1.31407 | 0.188822 | 0.668515 |
| sema6d          | 184.4104 | -0.197386864 | 0.188049 | -1.04965 | 0.293877 | 0.763068 |
| phf20a          | 179.1573 | 0.13326754   | 0.163804 | 0.813579 | 0.415886 | 0.839284 |
| pdcd21          | 124.3066 | -0.003099829 | 0.258053 | -0.01201 | 0.990416 | 1        |
| dedd1           | 898.1648 | -0.254331102 | 0.194427 | -1.30811 | 0.190837 | 0.670774 |
| gdf5            | 50.71716 | 0.487008165  | 0.324453 | 1.501013 | 0.133352 | 0.586883 |
| miox            | 540.7889 | -0.590319445 | 0.19267  | -3.06388 | 0.002185 | 0.073902 |
| pvalb2          | 232553   | 0.163097803  | 0.13216  | 1.234097 | 0.217167 | 0.69815  |
| si:ch211-48m9.1 | 68.93091 | -2.994101113 | 1.09748  | -2.72816 | 0.006369 | 0.134763 |
| pdx1            | 48.30226 | -0.595157355 | 0.31205  | -1.90725 | 0.056488 | 0.410418 |
| t1e3a           | 888.1563 | 0.09889533   | 0.145213 | 0.681034 | 0.49585  | 0.87806  |
| ap2mla          | 4413.946 | 0.151112095  | 0.117468 | 1.286406 | 0.198302 | 0.679109 |
| atplala.1       | 4682.075 | -0.029027024 | 0.154106 | -0.18836 | 0.850596 | 0.978251 |
| arcn1a          | 919.5911 | 0.043213734  | 0.106561 | 0.405529 | 0.685089 | 0.938486 |
| meis3           | 402.469  | -0.262373573 | 0.12831  | -2.04485 | 0.04087  | 0.353604 |
| BX908804.1      | 0.342035 | 1.055411721  | 3.412846 | 0.309247 | 0.757134 | NA       |
| cog8            | 141.6059 | -0.094253869 | 0.159921 | -0.58938 | 0.555608 | 0.898723 |
| rasgrf2b        | 11.15162 | 0.832793207  | 0.720532 | 1.155803 | 0.247762 | 0.728489 |
| cep5711         | 203.3209 | 0.556839379  | 0.154468 | 3.604893 | 0.000312 | 0.020043 |
| trmt2a          | 125.3226 | -0.3042596   | 0.184106 | -1.65263 | 0.098406 | 0.521076 |
| col4a4          | 86.17774 | 0.014127511  | 0.286618 | 0.04929  | 0.960688 | 0.999243 |
| si:dkey-28b4.8  | 754.198  | 0.136028546  | 0.141408 | 0.961958 | 0.336071 | 0.792304 |
| fndc1           | 81.22225 | 0.232920202  | 0.305449 | 0.762551 | 0.445731 | 0.855403 |
| zgc:113210      | 190.3821 | -0.078592748 | 0.150672 | -0.52162 | 0.601938 | 0.914001 |

|                   |          |              |          |          |          |          |
|-------------------|----------|--------------|----------|----------|----------|----------|
| reps1             | 577.5444 | 0.079800077  | 0.140785 | 0.566823 | 0.570834 | 0.902501 |
| vps50             | 206.2058 | 0.232671451  | 0.158674 | 1.466349 | 0.142553 | 0.601741 |
| aven              | 200.4474 | -0.294160528 | 0.162041 | -1.81534 | 0.069471 | 0.45     |
| si:ch211-160o17.2 | 229.5246 | 0.334041488  | 0.239    | 1.397664 | 0.162214 | 0.629748 |
| tjp3              | 528.5198 | -0.072275453 | 0.167666 | -0.43107 | 0.666418 | 0.932664 |
| adipor1a          | 843.2996 | 0.146226334  | 0.118047 | 1.23871  | 0.215453 | 0.697157 |
| sec31b            | 223.5352 | -0.251740923 | 0.199726 | -1.26043 | 0.207514 | 0.68962  |
| gls2b             | 166.1797 | -0.831005599 | 0.611931 | -1.35801 | 0.174462 | 0.647905 |
| gbx2              | 201.9394 | -0.286271948 | 0.193052 | -1.48287 | 0.138108 | 0.594663 |
| meis1a            | 799.8332 | -0.249160477 | 0.10184  | -2.44659 | 0.014422 | 0.210484 |
| bgnb              | 158.7836 | -0.108207522 | 0.225648 | -0.47954 | 0.631554 | 0.923003 |
| abcd3b            | 139.0558 | 0.114616961  | 0.206602 | 0.554772 | 0.579051 | 0.905417 |
| ppp6c             | 1358.4   | -0.135013521 | 0.11871  | -1.13734 | 0.255395 | 0.733542 |
| smo               | 605.2573 | -0.06758563  | 0.175839 | -0.38436 | 0.700712 | 0.942918 |
| si:dkey-32n7.4    | 53.72641 | 0.089763343  | 0.269499 | 0.333074 | 0.739078 | 0.95338  |
| gpr34b            | 0.564074 | -0.868132643 | 3.005784 | -0.28882 | 0.772719 | NA       |
| pdapl1b           | 550.2837 | 0.229847658  | 0.162237 | 1.416744 | 0.156558 | 0.622452 |
| alcf              | 374.6921 | -0.196172329 | 0.206899 | -0.94816 | 0.34305  | 0.797639 |
| ss18              | 1014.039 | 0.042544244  | 0.073389 | 0.579711 | 0.562109 | 0.900715 |
| phc1              | 235.879  | 0.11009594   | 0.166607 | 0.660813 | 0.508732 | 0.883333 |
| gda               | 110.444  | 2.52850643   | 0.782313 | 3.232092 | 0.001229 | 0.050845 |
| tnnt2d            | 2964.208 | -0.059372064 | 0.134808 | -0.44042 | 0.659633 | 0.930581 |
| cep135            | 153.9401 | -0.127505257 | 0.287072 | -0.44416 | 0.656929 | 0.929939 |
| itpkca            | 391.1138 | -0.113663878 | 0.142342 | -0.79853 | 0.424564 | 0.844535 |
| prkcea            | 474.0037 | -0.039877938 | 0.138678 | -0.28756 | 0.773685 | 0.960624 |
| ube2a1            | 1015.852 | 0.033853843  | 0.152203 | 0.222426 | 0.823982 | 0.972032 |
| lrrc4.2           | 90.07559 | 0.103638252  | 0.351367 | 0.294958 | 0.768026 | 0.960296 |
| hdac8             | 217.7882 | 0.006850885  | 0.179273 | 0.038215 | 0.969516 | 1        |
| limk1b            | 159.9413 | -0.1315325   | 0.157723 | -0.83395 | 0.404312 | 0.833888 |
| scnml             | 84.56774 | -0.172057503 | 0.19474  | -0.88353 | 0.376952 | 0.822324 |
| eif4a1b           | 12087.52 | -0.277957493 | 0.115494 | -2.40669 | 0.016098 | 0.223897 |
| hspa9             | 3206.891 | 0.191707685  | 0.156536 | 1.22469  | 0.220692 | 0.701913 |
| CABZ01111496.1    | 51.82245 | -0.277007831 | 0.356422 | -0.77719 | 0.437047 | 0.851125 |
| sorbs2a           | 87.00131 | 0.35947115   | 0.213979 | 1.679933 | 0.09297  | 0.510456 |
| tacr31            | 20.43313 | 1.44518485   | 0.64319  | 2.246903 | 0.024646 | 0.278415 |
| fgfr1op           | 360.7454 | 0.057808055  | 0.123469 | 0.468198 | 0.639643 | 0.924779 |
| cd276             | 557.2463 | -0.032159644 | 0.141197 | -0.22777 | 0.819829 | 0.971785 |
| goraspla          | 546.5174 | -0.101036375 | 0.135767 | -0.74419 | 0.45676  | 0.860698 |
| btbd7             | 79.78951 | -0.044710844 | 0.302954 | -0.14758 | 0.882672 | 0.986908 |
| gpx9              | 143.9312 | 0.308458652  | 0.221065 | 1.395329 | 0.162917 | 0.630534 |
| mybphb            | 23806.54 | -0.003383559 | 0.213755 | -0.01583 | 0.987371 | 1        |
| spire2            | 43.2843  | 1.008310811  | 0.385183 | 2.617744 | 0.008851 | 0.16123  |
| stambp11          | 119.6287 | 0.281330839  | 0.23935  | 1.175396 | 0.239836 | 0.720392 |
| ubxn6             | 492.8107 | -0.384339722 | 0.137662 | -2.7919  | 0.00524  | 0.121252 |
| or103-4           |          | 0 NA         | NA       | NA       | NA       | NA       |
| oclnb             | 416.1781 | -0.07918421  | 0.138159 | -0.57314 | 0.56655  | 0.901739 |
| kdm5bb            | 2744.425 | -0.037181135 | 0.088141 | -0.42184 | 0.673143 | 0.93414  |
| rca1a             | 862.3737 | 0.131093712  | 0.093427 | 1.403169 | 0.160567 | 0.627313 |
| ada               | 1905.057 | -0.044820909 | 0.210458 | -0.21297 | 0.831352 | 0.974908 |
| zgc:123105        | 1015.884 | 0.042410171  | 0.126284 | 0.335833 | 0.736997 | 0.952276 |
| apip              | 706.7722 | 0.472693104  | 0.471393 | 1.002759 | 0.315977 | 0.778545 |
| dachc             | 207.495  | -0.031738924 | 0.17289  | -0.18358 | 0.854344 | 0.979086 |
| pxmp2             | 153.9444 | 0.236824169  | 0.31701  | 0.747055 | 0.455031 | 0.860008 |
| si:dkey-27m7.4    | 28.42293 | 0.406882069  | 0.512607 | 0.793751 | 0.42734  | 0.845774 |

|                   |          |              |          |          |          |          |
|-------------------|----------|--------------|----------|----------|----------|----------|
| skpl              | 3799.985 | 0.006664725  | 0.125167 | 0.053247 | 0.957535 | 0.999109 |
| nudt21            | 654.8711 | -0.009881495 | 0.134111 | -0.07368 | 0.941264 | 0.997371 |
| nfkbil1           | 108.5723 | -0.287022278 | 0.188947 | -1.51907 | 0.128746 | 0.578173 |
| nr2f6b            | 850.7244 | -0.252439374 | 0.103963 | -2.42816 | 0.015175 | 0.216246 |
| mlst8             | 223.6668 | -0.100203872 | 0.166138 | -0.60313 | 0.546419 | 0.896107 |
| magilb            | 1180.527 | 0.13340918   | 0.102661 | 1.299514 | 0.193768 | 0.674122 |
| stx5a1            | 605.6733 | -0.142177779 | 0.144055 | -0.98697 | 0.323659 | 0.783161 |
| sult1st4          | 207.2295 | -0.644589241 | 0.157153 | -4.10166 | 4.10E-05 | 0.004825 |
| psmd1             | 2557.582 | 0.322475144  | 0.166759 | 1.933782 | 0.05314  | 0.400175 |
| rassf7b           | 182.9394 | -0.041825115 | 0.152222 | -0.27476 | 0.783497 | 0.96245  |
| wdr21             | 61.81059 | -1.423773894 | 0.280492 | -5.07598 | 3.85E-07 | 0.000137 |
| foxm1             | 146.7308 | 0.22155381   | 0.175023 | 1.265856 | 0.205565 | 0.68784  |
| rhcga             | 582.0108 | 0.126833284  | 0.714243 | 0.177577 | 0.859055 | 0.979975 |
| ngly1             | 373.5281 | 0.040560299  | 0.156838 | 0.258613 | 0.795934 | 0.966247 |
| chchd6a           | 278.0568 | -0.101416785 | 0.26168  | -0.38756 | 0.698342 | 0.942433 |
| mterf3            | 156.5762 | -0.185922092 | 0.232767 | -0.79875 | 0.424436 | 0.844412 |
| pomk              | 196.6102 | -0.26301953  | 0.150262 | -1.7504  | 0.080049 | 0.478179 |
| ano2a             | 66.41621 | 0.156168972  | 0.390474 | 0.399948 | 0.689195 | 0.939277 |
| naal5a            | 1081.089 | -0.128232107 | 0.128154 | -1.00061 | 0.317015 | 0.778879 |
| anxa2a            | 1785.999 | -0.051271398 | 0.137834 | -0.37198 | 0.709907 | 0.945821 |
| urb2              | 211.4805 | -0.052599516 | 0.246781 | -0.21314 | 0.831216 | 0.974908 |
| bin2a             | 309.4234 | -0.755367985 | 0.17986  | -4.19976 | 2.67E-05 | 0.003515 |
| gdf9              | 0.821926 | 0            | 2.495039 | 0        | 1        | NA       |
| nup88             | 391.071  | -0.053818795 | 0.113797 | -0.47294 | 0.636259 | 0.924779 |
| gbp3              | 81.42048 | -1.394534012 | 0.330718 | -4.21669 | 2.48E-05 | 0.00332  |
| pik3cd            | 63.48738 | -0.545034329 | 0.314237 | -1.73447 | 0.082835 | 0.483014 |
| zbtb22b           | 101.3275 | -0.001066383 | 0.227612 | -0.00469 | 0.996262 | 1        |
| zgc:101559        | 157.7189 | -0.15677973  | 0.140673 | -1.1145  | 0.265066 | 0.742063 |
| loxa              | 109.0763 | -0.464059011 | 0.256423 | -1.80974 | 0.070336 | 0.452395 |
| clcn3             | 732.6587 | -0.007198808 | 0.092407 | -0.0779  | 0.937905 | 0.997305 |
| dhps              | 271.6869 | -0.250220703 | 0.175134 | -1.42874 | 0.153078 | 0.617699 |
| pik3ip1           | 942.7671 | -0.514050229 | 0.165106 | -3.11346 | 0.001849 | 0.066115 |
| wdr12             | 345.181  | -0.114451064 | 0.169433 | -0.67549 | 0.499362 | 0.879603 |
| dabl1b            | 22.07148 | 0.763752377  | 0.410533 | 1.860393 | 0.06283  | 0.428925 |
| sox9a             | 564.0924 | 0.151722434  | 0.186385 | 0.814026 | 0.41563  | 0.839167 |
| stc1              | 2.304225 | -0.799506556 | 1.506076 | -0.53085 | 0.59552  | 0.911376 |
| stx16             | 409.2113 | -0.117282975 | 0.105603 | -1.1106  | 0.26674  | 0.743188 |
| emc2              | 1354.202 | 0.080228899  | 0.11758  | 0.682334 | 0.495028 | 0.87806  |
| pank2             | 428.6177 | -0.512292811 | 0.125012 | -4.09796 | 4.17E-05 | 0.004878 |
| eps811b           | 128.1389 | -0.037155078 | 0.186365 | -0.19937 | 0.841975 | 0.97643  |
| fam91a1           | 414.6095 | 0.136705211  | 0.134131 | 1.019192 | 0.308112 | 0.773116 |
| cacng5a           | 54.79495 | 0.686759592  | 0.539787 | 1.272278 | 0.203274 | 0.684076 |
| slf2              | 158.2472 | -0.28136392  | 0.160072 | -1.75773 | 0.078793 | 0.474808 |
| trpc2b            | 10.81898 | 1.078522975  | 0.578931 | 1.862955 | 0.062469 | 0.427718 |
| commd2            | 367.8343 | -0.094097033 | 0.167807 | -0.56075 | 0.57497  | 0.904516 |
| gngl2a            | 359.9294 | -0.216217245 | 0.110091 | -1.96399 | 0.049531 | 0.387714 |
| si:dkey-275b16.2  | 0        | NA           | NA       | NA       | NA       | NA       |
| si:ch211-266g18.6 | 191.2988 | 0.035873671  | 0.175745 | 0.204124 | 0.838257 | 0.976395 |
| cwc25             | 529.6015 | -0.23566289  | 0.136117 | -1.73132 | 0.083394 | 0.484513 |
| asb8              | 454.3382 | 0.024645344  | 0.114653 | 0.214956 | 0.829802 | 0.974816 |
| col4a3            | 74.73765 | 0.190888965  | 0.349042 | 0.546893 | 0.584452 | 0.90647  |
| rbpja             | 337.9084 | -0.027600291 | 0.117536 | -0.23482 | 0.814345 | 0.970503 |
| fgf8a             | 69.29872 | -0.284683129 | 0.245048 | -1.16174 | 0.24534  | 0.726909 |
| tenm1             | 318.1697 | -0.659404676 | 0.253888 | -2.59723 | 0.009398 | 0.166683 |

|            |          |              |          |          |          |          |
|------------|----------|--------------|----------|----------|----------|----------|
| foxa2      | 138.1685 | -0.114067734 | 0.255468 | -0.4465  | 0.655233 | 0.929606 |
| caps1b     | 24.28086 | 0.683175671  | 0.399664 | 1.709373 | 0.087382 | 0.496224 |
| chrna5     | 96.72511 | -0.249526018 | 0.260688 | -0.95718 | 0.338476 | 0.795226 |
| igf2bp2a   | 137.8999 | 0.053562587  | 0.241133 | 0.222129 | 0.824214 | 0.972107 |
| hnrnpd1    | 1846.608 | 0.081582775  | 0.092147 | 0.885356 | 0.375965 | 0.822258 |
| dhrs7      | 416.1756 | 0.027915282  | 0.1714   | 0.162866 | 0.870624 | 0.983365 |
| ippk       | 155.9548 | -0.253188889 | 0.196544 | -1.2882  | 0.197675 | 0.678337 |
| pdel0a     | 47.56877 | -0.572107078 | 0.345562 | -1.65559 | 0.097806 | 0.521071 |
| fech       | 86.93404 | 0.380334483  | 0.261415 | 1.454908 | 0.145695 | 0.604973 |
| neurod4    | 720.2728 | 0.192784721  | 0.148425 | 1.298871 | 0.193988 | 0.674122 |
| sult1st5   | 45.16548 | -0.35321986  | 0.331269 | -1.06626 | 0.286304 | 0.757624 |
| ppplcaa    | 2605.082 | -0.057928391 | 0.125097 | -0.46307 | 0.643316 | 0.92593  |
| nup93      | 802.8228 | 0.258478747  | 0.115447 | 2.238941 | 0.02516  | 0.281483 |
| madd       | 854.392  | 0.017706898  | 0.122201 | 0.1449   | 0.88479  | 0.987266 |
| anks1b     | 541.9882 | 0.311536983  | 0.134679 | 2.313178 | 0.020713 | 0.255657 |
| impal      | 333.4016 | -0.046963117 | 0.184296 | -0.25482 | 0.798859 | 0.96696  |
| aprt       | 138.981  | -0.902774464 | 0.224374 | -4.02353 | 5.73E-05 | 0.006122 |
| tbc1d14    | 192.0444 | 0.205912869  | 0.174017 | 1.183295 | 0.236692 | 0.71801  |
| itln3      | 53.75981 | -1.760370295 | 1.330086 | -1.3235  | 0.185669 | 0.663476 |
| psma5      | 1712.257 | -0.089133597 | 0.19257  | -0.46286 | 0.643462 | 0.925997 |
| mak16      | 424.2813 | -0.277669512 | 0.179999 | -1.54262 | 0.122923 | 0.569468 |
| tceal      | 945.3188 | -0.011507278 | 0.095023 | -0.1211  | 0.903612 | 0.991366 |
| col8a1b    | 84.47871 | -0.301744274 | 0.32986  | -0.91477 | 0.360315 | 0.811057 |
| adarb1b    | 63.41458 | 0.318253469  | 0.279666 | 1.137975 | 0.255131 | 0.733542 |
| gnrhr2     | 1.268943 | 1.055435795  | 2.034206 | 0.518844 | 0.60387  | NA       |
| dohh       | 443.4762 | -0.048001717 | 0.150561 | -0.31882 | 0.749864 | 0.955074 |
| hsp90b1    | 3197.093 | 0.301525746  | 0.132639 | 2.273281 | 0.023009 | 0.268036 |
| dctn5      | 386.9836 | 0.138102898  | 0.13236  | 1.043387 | 0.296769 | 0.764495 |
| klh132     | 213.456  | -0.216956061 | 0.195469 | -1.10993 | 0.267031 | 0.743418 |
| pla2g7     | 444.9304 | 0.187811632  | 0.144453 | 1.300154 | 0.193548 | 0.673755 |
| surf1      | 278.62   | 0.023228983  | 0.1815   | 0.127983 | 0.898162 | 0.990171 |
| rpl3       | 63504.03 | -0.424434713 | 0.11478  | -3.69783 | 0.000217 | 0.015696 |
| nr2f6a     | 543.3084 | -0.109483304 | 0.11052  | -0.99062 | 0.321873 | 0.782075 |
| slc26a3.2  | 68.83113 | 0.67509869   | 0.948011 | 0.712121 | 0.47639  | 0.869292 |
| arih1      | 434.7855 | -0.149504028 | 0.110803 | -1.34928 | 0.177246 | 0.650801 |
| clockb     | 315.6914 | 0.131656749  | 0.191227 | 0.688484 | 0.491148 | 0.875595 |
| zgc:172270 | 54.52571 | 0.726920689  | 0.267734 | 2.715086 | 0.006626 | 0.136957 |
| mogat3b    | 144.6167 | -0.276717743 | 0.19932  | -1.38831 | 0.165043 | 0.634185 |
| tfg        | 1278.305 | 0.071284941  | 0.125126 | 0.569704 | 0.568879 | 0.902234 |
| zfyve19    | 328.4882 | 0.082535173  | 0.142197 | 0.580429 | 0.561625 | 0.900673 |
| tmem59l    | 1511.467 | 0.27518793   | 0.155659 | 1.767885 | 0.07708  | 0.469501 |
| cryl1      | 268.3928 | 0.184202657  | 0.167716 | 1.098302 | 0.272073 | 0.748056 |
| runx1t1    | 792.6405 | 0.021875427  | 0.10949  | 0.199794 | 0.841642 | 0.97643  |
| EIF5       | 3694.174 | -0.009773282 | 0.115311 | -0.08476 | 0.932455 | 0.996175 |
| obs11a     | 133.8328 | -0.003587864 | 0.189785 | -0.0189  | 0.984917 | 1        |
| hars       | 1529.819 | 0.088175344  | 0.124221 | 0.709829 | 0.47781  | 0.869292 |
| vdac3      | 9767.536 | -0.087057939 | 0.128794 | -0.67595 | 0.499073 | 0.879596 |
| slc5a8l    | 53.99399 | 0.034408156  | 0.340144 | 0.101158 | 0.919425 | 0.993892 |
| atp7a      | 367.7477 | -0.056977496 | 0.166727 | -0.34174 | 0.732546 | 0.950617 |
| cldng      | 16.98953 | -0.080510602 | 0.470097 | -0.17126 | 0.864016 | 0.981867 |
| prnprs3    | 1223.417 | 0.170527224  | 0.108209 | 1.575904 | 0.115048 | 0.554651 |
| ryr2b      | 29.03678 | -0.368303429 | 0.572081 | -0.6438  | 0.519708 | 0.887148 |
| mitfa      | 71.50847 | -0.553881325 | 0.250798 | -2.20848 | 0.027211 | 0.293137 |
| polb       | 470.5122 | 0.024710633  | 0.16462  | 0.150107 | 0.88068  | 0.986624 |

|           |          |              |           |          |          |          |
|-----------|----------|--------------|-----------|----------|----------|----------|
| pfas      | 807.5559 | -0.07439485  | 0.119948  | -0.62022 | 0.53511  | 0.891993 |
| lats1     | 296.5451 | -0.211394727 | 0.179254  | -1.1793  | 0.238278 | 0.719242 |
| tspan2a   | 634.4503 | 0.627787958  | 0.165118  | 3.80205  | 0.000144 | 0.01196  |
| cnpy1     | 299.8556 | -0.016227763 | 0.145238  | -0.11173 | 0.911036 | 0.992208 |
| tada2b    | 115.7132 | -0.285048827 | 0.207957  | -1.37071 | 0.170466 | 0.64208  |
| pip4k2aa  | 454.2579 | -0.069394549 | 0.123586  | -0.56151 | 0.57445  | 0.904516 |
| ctnnd2b   | 508.1698 | 0.383382925  | 0.140821  | 2.722494 | 0.006479 | 0.136134 |
| dennd5b   | 931.0058 | -0.035831075 | 0.150914  | -0.23743 | 0.812325 | 0.970134 |
| idh2      | 10877.66 | -0.023618123 | 0.093958  | -0.25137 | 0.80153  | 0.967776 |
| asb2a.1   | 308.7665 | -0.092926164 | 0.232866  | -0.39905 | 0.689853 | 0.939679 |
| LHX3      | 47.46458 | 0.191639132  | 0.29139   | 0.657671 | 0.510749 | 0.884139 |
| aqp3a     | 3879.032 | -0.041860554 | 0.114301  | -0.36623 | 0.714192 | 0.945821 |
| plxnb2a   | 674.526  | 0.030502847  | 0.128126  | 0.23807  | 0.811827 | 0.97012  |
| prkagl    | 495.7735 | -0.117130974 | 0.109747  | -1.06729 | 0.285843 | 0.757258 |
| nrl2a     | 1137.498 | -0.457313649 | 0.437092  | -1.04626 | 0.295439 | 0.763988 |
| ankrd16   | 80.28849 | 0.030572872  | 0.243368  | 0.125624 | 0.900029 | 0.99045  |
| snapp1b   | 145.199  | -0.677475648 | 0.16205   | -4.18065 | 2.91E-05 | 0.003705 |
| galnt2    | 546.9139 | -0.24679627  | 0.155395  | -1.58819 | 0.112243 | 0.549012 |
| stom      | 1648.425 | -0.116595741 | 0.112813  | -1.03353 | 0.301356 | 0.767552 |
| usb1      | 144.717  | 0.561480632  | 0.239198  | 2.347349 | 0.018908 | 0.242305 |
| chm       | 399.3301 | 0.070116812  | 0.13347   | 0.525337 | 0.599349 | 0.913192 |
| mrpl21    | 278.8046 | -0.07522539  | 0.184711  | -0.40726 | 0.683817 | 0.938486 |
| acs11b    | 752.5296 | -0.030940098 | 0.094009  | -0.32912 | 0.742066 | 0.954329 |
| cbx3a     | 1532.583 | 0.053451066  | 0.112674  | 0.474386 | 0.635225 | 0.924272 |
| pard6b    | 32.01021 | -0.36945765  | 0.281691  | -1.31157 | 0.189664 | 0.669289 |
| tm9sf2    | 1601.534 | 0.054919266  | 0.074752  | 0.734683 | 0.462533 | 0.863917 |
| cdk20     | 23.25722 | -0.212237176 | 0.389249  | -0.54525 | 0.585584 | 0.906655 |
| decr1     | 368.248  | -0.054374058 | 0.244924  | -0.222   | 0.824311 | 0.972171 |
| ccdc102a  | 516.0425 | 0.228026276  | 0.099125  | 2.300382 | 0.021427 | 0.25974  |
| pbrml     | 237.6497 | -0.083284234 | 0.168018  | -0.49569 | 0.620116 | 0.917678 |
| zdhhc23b  | 50.14706 | -0.157209796 | 0.275587  | -0.57045 | 0.568369 | 0.902146 |
| gpr611    | 6.729386 | 1.221744546  | 0.835509  | 1.462276 | 0.143666 | 0.602773 |
| ctsl.1    | 691.9105 | 0.015610523  | 0.263058  | 0.059343 | 0.952679 | 0.998395 |
| hapln2    | 15.82259 | 0.929276211  | 0.579944  | 1.602354 | 0.109077 | 0.541879 |
| sycp1     | 53.55793 | -0.080274653 | 0.261127  | -0.30742 | 0.758527 | 0.957865 |
| ftr01     | 20.22813 | 2.297483995  | 1.398873  | 1.642382 | 0.100511 | 0.525223 |
| med13b    | 598.0814 | 0.036104755  | 0.177583  | 0.203312 | 0.838891 | 0.976417 |
| setb      | 3852.408 | 0.028685629  | 0.082305  | 0.348529 | 0.727443 | 0.949141 |
| cx28.6    | 21.00278 | -0.427842772 | 0.41519   | -1.03047 | 0.302787 | 0.768916 |
| cldn12    | 464.0354 | 0.040795159  | 0.111489  | 0.365912 | 0.714431 | 0.945821 |
| cndp2     | 951.8227 | -0.05279344  | 0.13948   | -0.3785  | 0.705058 | 0.944016 |
| nxn12     | 114.5374 | -0.063662736 | 0.230991  | -0.27561 | 0.78285  | 0.962328 |
| rpal      | 1159.962 | 0.171219659  | 0.125865  | 1.360344 | 0.173721 | 0.646897 |
| mtfr11    | 582.6359 | 0.223463018  | 0.128554  | 1.738282 | 0.082161 | 0.482431 |
| rrsl      | 323.1664 | -0.118163928 | 0.160998  | -0.73395 | 0.46298  | 0.864191 |
| nmurlb    | 1.574059 |              | 0.2315837 |          | 0        | 1 NA     |
| pfn2      | 7963.925 | -0.044698898 | 0.116182  | -0.38473 | 0.700437 | 0.942841 |
| parp3     | 182.3054 | 0.325086533  | 0.164211  | 1.979692 | 0.047738 | 0.380493 |
| traf4a    | 468.7306 | 0.03028877   | 0.100722  | 0.300715 | 0.763632 | 0.959055 |
| tlx1      | 29.57079 | -0.119882389 | 0.416176  | -0.28806 | 0.773303 | 0.960624 |
| larp6b    | 3.156791 | -1.425161365 | 1.953448  | -0.72956 | 0.465658 | 0.864997 |
| trim35-13 | 62.60499 | 0.216400882  | 0.246523  | 0.877811 | 0.380046 | 0.823607 |
| isl2a     | 321.9822 | 0.059581905  | 0.133829  | 0.445209 | 0.656169 | 0.929684 |
| chordc1a  | 90.4627  | 0.219860928  | 0.186779  | 1.177121 | 0.239147 | 0.719781 |



|                    |          |              |          |          |          |          |  |
|--------------------|----------|--------------|----------|----------|----------|----------|--|
| spoplb             | 446.1165 | -0.138955723 | 0.145906 | -0.95237 | 0.340911 | 0.795603 |  |
| zgc:153896         | 52.80378 | 0.014033183  | 0.370733 | 0.037852 | 0.969805 | 1        |  |
| LTN1               | 315.4447 | -0.004632654 | 0.171676 | -0.02698 | 0.978472 | 1        |  |
| crhr1              | 33.65474 | 0.325137152  | 0.367843 | 0.883902 | 0.376749 | 0.822258 |  |
| fh12b              | 259.1468 | -1.102398125 | 0.243909 | -4.51971 | 6.19E-06 | 0.00127  |  |
| syt9a              | 235.7282 | 0.145779287  | 0.168735 | 0.863954 | 0.387613 | 0.827592 |  |
| phyhipla           | 50.92516 | 0.7850077    | 0.305476 | 2.569786 | 0.010176 | 0.175289 |  |
| adcyap1a           | 86.1541  | -0.186773555 | 0.33624  | -0.55548 | 0.578568 | 0.905417 |  |
| spagla             | 295.9941 | 0.176387882  | 0.136597 | 1.291301 | 0.196599 | 0.676952 |  |
| CHST13             | 73.64908 | 0.187674839  | 0.230154 | 0.815433 | 0.414824 | 0.838698 |  |
| isl1               | 781.4178 | 0.070325191  | 0.152685 | 0.46059  | 0.645093 | 0.926728 |  |
| arhgdig            | 1690.636 | 0.072756318  | 0.129366 | 0.562406 | 0.57384  | 0.904296 |  |
| cog2               | 328.576  | 0.049363884  | 0.1294   | 0.381483 | 0.702845 | 0.943622 |  |
| phf6               | 304.455  | -0.05187325  | 0.118388 | -0.43816 | 0.661268 | 0.930581 |  |
| marcksa            | 401.2216 | 0.155726082  | 0.163131 | 0.954606 | 0.339777 | 0.795226 |  |
| CR354540.1         | 21.58185 | -0.58215748  | 0.379486 | -1.53407 | 0.125013 | 0.572594 |  |
| uhrflbp11          | 277.7404 | 0.152379616  | 0.162031 | 0.940433 | 0.346996 | 0.79983  |  |
| galk2              | 57.77718 | -1.248697366 | 0.528005 | -2.36493 | 0.018033 | 0.237135 |  |
| bhlhe40            | 1976.054 | -0.050733088 | 0.268929 | -0.18865 | 0.850368 | 0.978251 |  |
| bach2b             | 219.7976 | 0.010903717  | 0.180506 | 0.060406 | 0.951832 | 0.99801  |  |
| acs14a             | 705.1702 | -0.198632291 | 0.195583 | -1.01559 | 0.309824 | 0.774621 |  |
| cx39.9             | 282.3959 | -0.140430686 | 0.241701 | -0.58101 | 0.561234 | 0.90039  |  |
| acsbg2             | 1054.082 | 0.256325036  | 0.116493 | 2.200347 | 0.027782 | 0.29637  |  |
| tiel               | 413.8308 | -0.063590493 | 0.161967 | -0.39261 | 0.694605 | 0.941093 |  |
| esr1               | 10.62673 | 0.891475177  | 0.66488  | 1.340805 | 0.179984 | 0.655675 |  |
| ttil               | 78.73449 | -0.114206792 | 0.233924 | -0.48822 | 0.625393 | 0.920625 |  |
| mgat4b             | 511.6075 | 0.074251687  | 0.147167 | 0.504541 | 0.613881 | 0.915998 |  |
| mvk                | 60.1912  | -0.271555979 | 0.280082 | -0.96956 | 0.332267 | 0.789602 |  |
| rtnn               | 69.09113 | 0.289872432  | 0.264368 | 1.096472 | 0.272872 | 0.748807 |  |
| usp19              | 801.0554 | -0.041681669 | 0.133689 | -0.31178 | 0.755206 | 0.956367 |  |
| DHRS11 (1 of many) | 289.8405 | -0.415128314 | 0.325495 | -1.27537 | 0.202177 | 0.682294 |  |
| grm2a              | 137.1699 | 0.958345307  | 0.252588 | 3.794103 | 0.000148 | 0.012175 |  |
| rab23              | 70.64192 | -0.297769307 | 0.228297 | -1.30431 | 0.192128 | 0.672283 |  |
| orailb             | 50.21748 | -0.380401302 | 0.322948 | -1.1779  | 0.238835 | 0.719781 |  |
| tmem63c            | 84.23586 | 0.635148564  | 0.249428 | 2.546423 | 0.010883 | 0.181938 |  |
| reep3b             | 618.007  | -0.193175233 | 0.111564 | -1.73152 | 0.083359 | 0.484434 |  |
| ik                 | 1086.705 | -0.121921775 | 0.0944   | -1.29154 | 0.196516 | 0.676952 |  |
| zgc:110366         | 114.0501 | -0.397539634 | 0.230026 | -1.72824 | 0.083945 | 0.486647 |  |
| stm1a              | 1682.542 | -0.173217699 | 0.211528 | -0.81889 | 0.412851 | 0.838123 |  |
| rabac1             | 771.5432 | -0.004154469 | 0.111195 | -0.03736 | 0.970196 | 1        |  |
| copa               | 2772.909 | 0.027841541  | 0.064385 | 0.432423 | 0.665434 | 0.932595 |  |
| cnot1              | 2384.098 | 0.001037103  | 0.132815 | 0.007809 | 0.99377  | 1        |  |
| ulk4               | 46.12373 | -0.007713007 | 0.303271 | -0.02543 | 0.97971  | 1        |  |
| fam169ab           | 226.9766 | -0.058199017 | 0.173847 | -0.33477 | 0.737797 | 0.95259  |  |
| nflb               | 123.3257 | 0.076560641  | 0.197406 | 0.387834 | 0.698139 | 0.942433 |  |
| zgc:122979         | 73.57118 | -0.40100426  | 0.447359 | -0.89638 | 0.370049 | 0.818446 |  |
| cbx1a              | 1206.976 | 0.098120045  | 0.129125 | 0.759883 | 0.447325 | 0.856073 |  |
| tnfsf101           | 478.7702 | 0.061077317  | 0.128725 | 0.474481 | 0.635157 | 0.924272 |  |
| spaml              | 144.3329 | -0.036571636 | 0.580979 | -0.06295 | 0.949808 | 0.99801  |  |
| efhc2              | 27.22923 | 0.068366877  | 0.365512 | 0.187044 | 0.851626 | 0.978548 |  |
| ccdc106a           | 653.3053 | -0.034874146 | 0.144528 | -0.2413  | 0.809325 | 0.969828 |  |
| rnd1b              | 255.1291 | -0.157367368 | 0.205375 | -0.76624 | 0.443531 | 0.854255 |  |
| slc6a3             | 63.97224 | 1.01877879   | 0.504844 | 2.018008 | 0.04359  | 0.365542 |  |
| pde3a              | 109.0658 | 0.010116369  | 0.22146  | 0.04568  | 0.963565 | 0.999842 |  |

|                  |          |              |          |          |          |          |
|------------------|----------|--------------|----------|----------|----------|----------|
| dlb              | 489.3287 | 0.074972189  | 0.280174 | 0.267591 | 0.789014 | 0.963602 |
| asic4b           | 9.442133 | 1.067896081  | 0.738128 | 1.446763 | 0.147963 | 0.608936 |
| slit2            | 648.1384 | 0.342419397  | 0.144696 | 2.366473 | 0.017958 | 0.2367   |
| dhfr             | 234.4508 | -0.146194486 | 0.170524 | -0.85733 | 0.391265 | 0.827902 |
| wnt11            | 44.02984 | -0.574291621 | 0.267413 | -2.14758 | 0.031747 | 0.316921 |
| cul5b            | 28.96509 | 0.144980291  | 0.448365 | 0.323353 | 0.746428 | 0.955074 |
| tmed9            | 1766.856 | 0.100944642  | 0.109516 | 0.921736 | 0.356666 | 0.807342 |
| cyp46a1.2        | 32.60075 | -0.212913732 | 0.362313 | -0.58765 | 0.556766 | 0.899063 |
| at13             | 745.4753 | -0.005528993 | 0.115303 | -0.04795 | 0.961755 | 0.999451 |
| zgc:112496       | 73.96407 | 0.294211952  | 0.266069 | 1.105772 | 0.268825 | 0.744925 |
| seh11            | 647.2762 | -0.014897837 | 0.137469 | -0.10837 | 0.9137   | 0.992796 |
| zgc:77375        | 258.8546 | -0.673536936 | 0.215106 | -3.13119 | 0.001741 | 0.064499 |
| hecw1b           | 72.20321 | 0.263863832  | 0.260863 | 1.011503 | 0.311776 | 0.776164 |
| ambp             | 2317.271 | -0.398351162 | 0.212901 | -1.87107 | 0.061336 | 0.424867 |
| irf2bp1          | 1304.829 | 0.057557896  | 0.122123 | 0.47131  | 0.637419 | 0.924779 |
| rhogb            | 235.6658 | 0.031824405  | 0.150871 | 0.210938 | 0.832936 | 0.975379 |
| slc45a1          | 105.6725 | 0.22245683   | 0.348655 | 0.638043 | 0.523446 | 0.888516 |
| vangl1           | 115.5937 | 0.074588268  | 0.201945 | 0.369349 | 0.711868 | 0.945821 |
| klhl18           | 119.9598 | 0.002896779  | 0.20871  | 0.013879 | 0.988926 | 1        |
| lypd6            | 141.534  | -0.139292135 | 0.205049 | -0.67931 | 0.49694  | 0.878572 |
| fam8a1b          | 204.7419 | -0.068489755 | 0.159759 | -0.42871 | 0.668136 | 0.933086 |
| ldlrapla         | 302.2208 | -0.087010604 | 0.174606 | -0.49833 | 0.618254 | 0.916585 |
| cbwd             | 220.8179 | -0.002964137 | 0.171841 | -0.01725 | 0.986238 | 1        |
| ush1ga           | 49.04125 | 0.252519266  | 0.35569  | 0.709943 | 0.47774  | 0.869292 |
| casp9            | 270.2221 | -0.11629677  | 0.173317 | -0.67101 | 0.502217 | 0.881277 |
| LIN28A           | 16.89683 | -0.348459098 | 0.390964 | -0.89128 | 0.372777 | 0.819953 |
| exoc4            | 276.7812 | 0.12887221   | 0.157102 | 0.820308 | 0.41204  | 0.838123 |
| nelfe            | 438.8991 | 0.046361     | 0.160552 | 0.28876  | 0.772765 | 0.960624 |
| gnb3a            | 603.8697 | -0.23658963  | 0.538715 | -0.43917 | 0.660536 | 0.930581 |
| lhfp16           | 392.8461 | 0.193837718  | 0.124309 | 1.559326 | 0.118919 | 0.562318 |
| fmnl3            | 359.8835 | -0.106678853 | 0.161197 | -0.66179 | 0.508105 | 0.883056 |
| ppplr13ba        | 629.1558 | -0.000169109 | 0.143541 | -0.00118 | 0.99906  | 1        |
| yrk              | 349.0601 | 0.0433796    | 0.128569 | 0.337402 | 0.735814 | 0.951543 |
| si:dkey-153k10.9 | 498.4    | -0.15524091  | 0.181165 | -0.8569  | 0.391498 | 0.827902 |
| hdr              | 177.433  | 0.262784295  | 0.210536 | 1.248169 | 0.211969 | 0.693592 |
| b3gnt5b          | 54.33686 | -0.081396874 | 0.303798 | -0.26793 | 0.788753 | 0.963568 |
| elov16           | 408.1048 | 0.104900697  | 0.18725  | 0.560216 | 0.575332 | 0.904739 |
| snx10a           | 76.00641 | -0.61741351  | 0.40525  | -1.52354 | 0.127624 | 0.576985 |
| spra             | 219.7409 | 0.269061163  | 0.1592   | 1.690086 | 0.091012 | 0.50549  |
| tcf712           | 1462.15  | 0.108416714  | 0.12435  | 0.871869 | 0.38328  | 0.825809 |
| dpy30            | 528.2937 | -0.329465758 | 0.170267 | -1.93499 | 0.052991 | 0.399808 |
| btk              | 54.44593 | 0.096720611  | 0.239898 | 0.403174 | 0.68682  | 0.93875  |
| fam92a1          | 133.5042 | -0.174718408 | 0.177753 | -0.98293 | 0.325643 | 0.784564 |
| grm5a            | 72.61776 | -0.072494368 | 0.462392 | -0.15678 | 0.875417 | 0.984383 |
| aplnr2           | 33.05708 | -0.053707071 | 0.461313 | -0.11642 | 0.907318 | 0.991745 |
| tnfrsfa          | 293.8863 | -0.043446696 | 0.143564 | -0.30263 | 0.762172 | 0.95835  |
| tardbp1          | 2848.323 | 0.099554842  | 0.088236 | 1.128281 | 0.259201 | 0.736127 |
| p2rx5            | 119.3471 | 0.326160078  | 0.184602 | 1.76683  | 0.077257 | 0.46958  |
| unc119.2         | 22.73711 | 0.184246147  | 0.525119 | 0.350866 | 0.725689 | 0.948653 |
| desi2            | 252.5677 | 0.085479278  | 0.168746 | 0.506555 | 0.612467 | 0.915727 |
| prkesh           | 1031.29  | 0.002382793  | 0.091249 | 0.026113 | 0.979167 | 1        |
| atat1            | 253.2767 | -0.001508101 | 0.185168 | -0.00814 | 0.993502 | 1        |
| tbx21            | 42.95063 | 0.462368516  | 0.460083 | 1.004968 | 0.314912 | 0.777649 |
| pcytlab          | 195.41   | -0.034765405 | 0.170359 | -0.20407 | 0.838298 | 0.976395 |

|            |          |              |          |          |          |          |
|------------|----------|--------------|----------|----------|----------|----------|
| tspan33a   | 307.2963 | 0.01259734   | 0.207236 | 0.060787 | 0.951529 | 0.99801  |
| xkr8.1     | 14.29258 | 0.092535558  | 0.450951 | 0.205201 | 0.837415 | 0.9761   |
| rcor3      | 70.54437 | 0.080835161  | 0.257918 | 0.313415 | 0.753966 | 0.955912 |
| ppat       | 445.1331 | -0.717251771 | 0.165759 | -4.32708 | 1.51E-05 | 0.002448 |
| zgc:63882  | 157.5429 | -0.000140187 | 0.192596 | -0.00073 | 0.999419 | 1        |
| pin4       | 304.0139 | -0.209457282 | 0.206834 | -1.01268 | 0.311211 | 0.775936 |
| zgc:173742 | 15.79968 | -0.122040964 | 0.544636 | -0.22408 | 0.822697 | 0.971966 |
| kmt2a      | 613.77   | 0.034482824  | 0.204311 | 0.168777 | 0.865972 | 0.98245  |
| ptgs2a     | 576.3543 | 0.151998316  | 0.145511 | 1.044582 | 0.296216 | 0.764246 |
| prkcg      | 7.161905 | 0.660095838  | 1.123435 | 0.587569 | 0.556822 | 0.899063 |
| gtf3c2     | 81.06669 | -0.102109055 | 0.313869 | -0.32532 | 0.744936 | 0.954956 |
| plk4       | 195.4002 | 0.357692976  | 0.192603 | 1.857156 | 0.063289 | 0.429493 |
| zgc:194665 | 147.0434 | 0.001535745  | 0.212885 | 0.007214 | 0.994244 | 1        |
| nmnat2     | 426.8391 | 0.179757872  | 0.169272 | 1.061946 | 0.28826  | 0.759235 |
| sell1      | 590.9603 | 0.085831194  | 0.102783 | 0.835075 | 0.403676 | 0.833888 |
| ntrk1      | 14.88456 | 0.663692662  | 0.734216 | 0.903947 | 0.366023 | 0.815714 |
| kat5a      | 508.7323 | -0.235062214 | 0.149155 | -1.57596 | 0.115035 | 0.554651 |
| sox4a      | 3446.009 | -0.036109746 | 0.108866 | -0.33169 | 0.740123 | 0.953709 |
| gpr22a     | 130.2592 | 0.035643015  | 0.239123 | 0.149058 | 0.881508 | 0.986908 |
| znf800a    | 184.917  | 0.006137036  | 0.13969  | 0.043933 | 0.964958 | 1        |
| lrrc4ba    | 31.75913 | 0.202898811  | 0.38351  | 0.529057 | 0.596766 | 0.911757 |
| or102-2    | 1.3164   | 1.936587051  | 2.030803 | 0.953606 | 0.340283 | NA       |
| mtmr2      | 319.7028 | -0.037894851 | 0.128432 | -0.29506 | 0.767949 | 0.960296 |
| stx2a      | 90.7598  | 0.155193626  | 0.256824 | 0.604281 | 0.545657 | 0.895515 |
| gpm6ab     | 3112.558 | -0.075578109 | 0.124714 | -0.60601 | 0.544507 | 0.895206 |
| panx3      | 35.11145 | -0.478928858 | 0.469605 | -1.01986 | 0.307797 | 0.772996 |
| egln1b     | 340.1481 | -0.148058945 | 0.189558 | -0.78108 | 0.434758 | 0.850002 |
| epn3b      | 11.51722 | 0.533434883  | 0.644277 | 0.827959 | 0.407694 | 0.835802 |
| osbp       | 247.3266 | -0.172003207 | 0.167015 | -1.02987 | 0.303072 | 0.769218 |
| epha7      | 273.3547 | 0.457262949  | 0.163608 | 2.794863 | 0.005192 | 0.120907 |
| ccdc9      | 390.8884 | 0.261412198  | 0.161697 | 1.616682 | 0.105947 | 0.534956 |
| cdhrla     | 130.2686 | 0.335276644  | 0.509579 | 0.657948 | 0.510571 | 0.884085 |
| spicel     | 96.36751 | 0.035279447  | 0.353721 | 0.099738 | 0.920552 | 0.994085 |
| kctd16a    | 5.2297   | 0.06906946   | 0.833639 | 0.082853 | 0.933968 | 0.996638 |
| zgc:101810 | 1240.176 | -0.084677062 | 0.110254 | -0.76802 | 0.442477 | 0.853789 |
| ptk2ab     | 497.3969 | -0.025230543 | 0.136689 | -0.18458 | 0.853556 | 0.978887 |
| dnajb6a    | 946.0172 | -0.031076457 | 0.105563 | -0.29439 | 0.768462 | 0.960395 |
| acaal      | 314.0824 | 0.068015096  | 0.259409 | 0.262192 | 0.793173 | 0.965312 |
| nabpla     | 259.391  | 0.100962308  | 0.151928 | 0.664541 | 0.506344 | 0.883007 |
| six4a      | 404.0857 | 0.066473186  | 0.200038 | 0.332303 | 0.739661 | 0.953588 |
| eefsec     | 165.8408 | -0.14361135  | 0.151885 | -0.94553 | 0.34439  | 0.798147 |
| rxrgb      | 216.5516 | -0.200624015 | 0.182842 | -1.09725 | 0.272531 | 0.748416 |
| irf2bp2a   | 861.6776 | 0.059554941  | 0.130261 | 0.457199 | 0.647528 | 0.927091 |
| syf2       | 914.1608 | -0.129576656 | 0.129888 | -0.9976  | 0.318473 | 0.779923 |
| tbr1b      | 225.108  | 0.37790935   | 0.240304 | 1.572629 | 0.115805 | 0.555893 |
| mad2l1     | 376.5833 | 0.125315362  | 0.27351  | 0.458175 | 0.646826 | 0.926728 |
| tcf12      | 1484.974 | -0.096960705 | 0.144241 | -0.67221 | 0.501447 | 0.880897 |
| mpp5b      | 23.08154 | 0.374353133  | 0.569226 | 0.657653 | 0.510761 | 0.884139 |
| tcea3      | 339.1796 | -0.225276856 | 0.201556 | -1.11769 | 0.263701 | 0.741708 |
| trappc11   | 666.1324 | -0.052957542 | 0.097747 | -0.54178 | 0.587969 | 0.907732 |
| hnrnpub    | 2833.219 | 0.118706692  | 0.091611 | 1.29577  | 0.195055 | 0.67483  |
| lmbrr1     | 242.6139 | -0.12052363  | 0.150298 | -0.8019  | 0.422612 | 0.843493 |
| zgc:100868 | 899.4162 | -0.057619183 | 0.155841 | -0.36973 | 0.711583 | 0.945821 |
| mylkb      | 54.40983 | -0.423040349 | 0.299492 | -1.41253 | 0.157795 | 0.623766 |

|                |          |              |          |          |          |          |
|----------------|----------|--------------|----------|----------|----------|----------|
| hspa4a         | 769.6385 | 0.293347742  | 0.225578 | 1.300427 | 0.193455 | 0.673662 |
| ybx1           | 40864.27 | -0.109096748 | 0.088433 | -1.23366 | 0.21733  | 0.69815  |
| hhl1a2a.2      | 7.558471 | -1.85806024  | 0.905949 | -2.05095 | 0.040271 | 0.350654 |
| ankrd10b       | 305.3185 | 0.044309     | 0.13777  | 0.321615 | 0.747744 | 0.955074 |
| wdr36          | 364.5249 | -0.376714293 | 0.157809 | -2.38715 | 0.01698  | 0.230743 |
| fgfr3          | 1115.162 | -0.086605947 | 0.124529 | -0.69547 | 0.48676  | 0.873245 |
| cops2          | 1089.021 | -0.126000657 | 0.119758 | -1.05213 | 0.29274  | 0.762197 |
| lrplba         | 28.7948  | -0.36593169  | 0.512502 | -0.71401 | 0.475221 | 0.869292 |
| ccdc146        | 16.41372 | 1.209932424  | 0.426592 | 2.836277 | 0.004564 | 0.111673 |
| mgrn1b         | 574.4046 | -0.023456907 | 0.144782 | -0.16202 | 0.871294 | 0.983365 |
| grwd1          | 274.3999 | -0.117737787 | 0.138003 | -0.85315 | 0.393574 | 0.828374 |
| asz1           | 4.435088 | 0.09817038   | 0.877362 | 0.111893 | 0.910909 | 0.992208 |
| flot2a         | 3407.397 | -0.064769349 | 0.10786  | -0.6005  | 0.548175 | 0.896644 |
| dnajc5ab       | 1125.704 | 0.034091509  | 0.116595 | 0.292392 | 0.769987 | 0.960484 |
| rassf1         | 463.5301 | -0.23253359  | 0.142417 | -1.63277 | 0.102518 | 0.529149 |
| foxpla         | 819.0953 | -0.140246673 | 0.130961 | -1.07091 | 0.284212 | 0.75523  |
| hinfp          | 95.02741 | -0.017119512 | 0.212611 | -0.08052 | 0.935823 | 0.996829 |
| esrrga         | 190.8754 | 0.103090357  | 0.192627 | 0.535181 | 0.592524 | 0.909996 |
| zgc:171734     | 0.139092 | 1.055370259  | 5.267649 | 0.200349 | 0.841207 | NA       |
| mindyl         | 525.5155 | -0.15584555  | 0.138907 | -1.12194 | 0.261889 | 0.739623 |
| penka          | 91.02751 | 0.182309146  | 0.437202 | 0.416991 | 0.676685 | 0.935656 |
| psen1          | 632.0794 | 0.218616689  | 0.116552 | 1.875702 | 0.060696 | 0.423211 |
| mst1rb         | 5.69334  | 0.329749578  | 0.822541 | 0.400891 | 0.6885   | 0.939118 |
| spata6l        | 26.53083 | -0.277581439 | 0.384235 | -0.72243 | 0.470032 | 0.867349 |
| tmc6b          | 645.4742 | -0.293152471 | 0.11781  | -2.48835 | 0.012834 | 0.19771  |
| rock2b         | 414.3467 | 0.129646596  | 0.16653  | 0.778516 | 0.436265 | 0.850864 |
| acsm3          | 126.5168 | -0.337132573 | 0.243223 | -1.3861  | 0.165715 | 0.635372 |
| aga            | 166.9158 | 0.023361149  | 0.23898  | 0.097754 | 0.922128 | 0.994346 |
| pex19          | 743.623  | -0.081306133 | 0.10532  | -0.77199 | 0.44012  | 0.852079 |
| zp212          | 0.732041 | -3.146754107 | 2.971264 | -1.05906 | 0.289571 | NA       |
| gys2           | 600.8784 | -0.132440075 | 0.238385 | -0.55557 | 0.578503 | 0.905417 |
| stipl          | 1220.66  | 0.073102603  | 0.108697 | 0.672538 | 0.501241 | 0.880764 |
| immp21         | 106.8273 | -0.118955594 | 0.232705 | -0.51119 | 0.609221 | 0.915204 |
| lmo7a          | 1092.393 | -0.278517336 | 0.166134 | -1.67646 | 0.093649 | 0.511703 |
| slc8a3         | 38.84587 | 0.548795082  | 0.543248 | 1.01021  | 0.312395 | 0.776164 |
| anos1b         | 288.3274 | -0.273240159 | 0.195539 | -1.39737 | 0.162303 | 0.629802 |
| skp2           | 177.3616 | 0.091451898  | 0.175138 | 0.52217  | 0.601552 | 0.913965 |
| mtdhh          | 384.5509 | 0.4353009    | 0.160215 | 2.716974 | 0.006588 | 0.136957 |
| bccip          | 1567.627 | -0.024262543 | 0.146848 | -0.16522 | 0.868769 | 0.982801 |
| rsad2          | 23.19401 | -0.620762264 | 0.938142 | -0.66169 | 0.508168 | 0.883089 |
| mxh            | 4.570826 | 0.239116332  | 1.15182  | 0.207599 | 0.835542 | 0.976007 |
| grna           | 70.23142 | -0.392540176 | 0.359467 | -1.09201 | 0.27483  | 0.750181 |
| zmat2          | 722.3791 | -0.108787249 | 0.119078 | -0.91358 | 0.360936 | 0.811253 |
| cyp4t8         | 164.8997 | 0.237793479  | 0.394211 | 0.603214 | 0.546367 | 0.896107 |
| elov15         | 134.8215 | 0.246326945  | 0.232909 | 1.057611 | 0.290233 | 0.76078  |
| ppp3ca         | 742.3557 | 0.13710407   | 0.230141 | 0.595739 | 0.55135  | 0.8974   |
| brf1b          | 121.4809 | -0.125646637 | 0.162662 | -0.77244 | 0.439854 | 0.852079 |
| slc5a12        | 69.22141 | 1.349148893  | 0.586081 | 2.301983 | 0.021336 | 0.258949 |
| si:dkeyp-2e4.8 | 50.23758 | 0.001375273  | 0.270928 | 0.005076 | 0.99595  | 1        |
| tspy           | 694.8223 | -0.065670389 | 0.108816 | -0.6035  | 0.546176 | 0.89597  |
| fkbp9          | 556.141  | -0.236435842 | 0.28124  | -0.84069 | 0.40052  | 0.831725 |
| tshz1          | 538.7325 | 0.003531151  | 0.114415 | 0.030863 | 0.975379 | 1        |
| crppa          | 289.0116 | 0.098641482  | 0.154979 | 0.636482 | 0.524462 | 0.888808 |
| rab20          | 171.9867 | -0.149425015 | 0.155819 | -0.95896 | 0.337578 | 0.794562 |

|                    |           |               |           |           |           |           |
|--------------------|-----------|---------------|-----------|-----------|-----------|-----------|
| wnt2ba             | 24. 91737 | 0. 665279442  | 0. 416863 | 1. 595919 | 0. 110507 | 0. 545461 |
| dimt11             | 212. 3089 | 0. 127389124  | 0. 293486 | 0. 434056 | 0. 664248 | 0. 93177  |
| ncapd2             | 705. 7747 | 0. 253469206  | 0. 242529 | 1. 045111 | 0. 295972 | 0. 764246 |
| eif4e3             | 871. 5869 | 0. 058340513  | 0. 142897 | 0. 408268 | 0. 683077 | 0. 938167 |
| ggctb              | 741. 4346 | 0. 047271935  | 0. 264838 | 0. 178494 | 0. 858335 | 0. 979774 |
| cep89              | 55. 99451 | 0. 479229474  | 0. 264739 | 1. 810196 | 0. 070265 | 0. 452111 |
| glcea              | 152. 8116 | 0. 298911208  | 0. 205549 | 1. 454209 | 0. 145888 | 0. 605234 |
| zgc:86764          | 279. 7885 | 0. 335643987  | 0. 205275 | 1. 635094 | 0. 102029 | 0. 528864 |
| limk2              | 622. 6652 | -0. 479285151 | 0. 120615 | -3. 97369 | 7. 08E-05 | 0. 007021 |
| oclna              | 818. 1572 | -0. 236674433 | 0. 12376  | -1. 91237 | 0. 055828 | 0. 408826 |
| cdh17              | 829. 9105 | -0. 178975648 | 0. 186983 | -0. 95717 | 0. 338479 | 0. 795226 |
| calub              | 759. 1045 | 0. 328914339  | 0. 155728 | 2. 112112 | 0. 034677 | 0. 328212 |
| atp2a2b            | 1106. 633 | 0. 19626589   | 0. 124317 | 1. 578752 | 0. 114393 | 0. 553523 |
| large1             | 57. 44411 | 0. 232376659  | 0. 326013 | 0. 712784 | 0. 475979 | 0. 869292 |
| rnaseh2b           | 239. 5628 | 0. 007408958  | 0. 131993 | 0. 056132 | 0. 955237 | 0. 998611 |
| psmd11b            | 1200. 923 | 0. 226875332  | 0. 166089 | 1. 36599  | 0. 171942 | 0. 644123 |
| hhat1b             | 824. 2248 | 0. 031011661  | 0. 133223 | 0. 23278  | 0. 815932 | 0. 971207 |
| camkvb             | 150. 1296 | -0. 796876071 | 0. 39738  | -2. 00532 | 0. 044928 | 0. 371348 |
| tbx20              | 42. 86981 | 0. 023256724  | 0. 246667 | 0. 094284 | 0. 924884 | 0. 994815 |
| aspa               | 55. 08511 | 0. 223513841  | 0. 339366 | 0. 658621 | 0. 510139 | 0. 883733 |
| cyth1a             | 203. 1093 | -0. 149092496 | 0. 186922 | -0. 79762 | 0. 425092 | 0. 844714 |
| tpm3               | 13092. 62 | 0. 129125897  | 0. 081805 | 1. 578467 | 0. 114458 | 0. 553653 |
| efr3a              | 102. 2911 | 0. 086138277  | 0. 214943 | 0. 40075  | 0. 688604 | 0. 939118 |
| dynl12b            | 287. 1695 | -0. 256884446 | 0. 187119 | -1. 37284 | 0. 169802 | 0. 641498 |
| zgc:101040         | 43. 80475 | -0. 304043513 | 0. 322683 | -0. 94224 | 0. 346071 | 0. 799369 |
| dglucy             | 360. 4585 | -1. 440864679 | 0. 246023 | -5. 85662 | 4. 72E-09 | 3. 13E-06 |
| cpn1               | 11. 99542 | -0. 342399417 | 0. 586268 | -0. 58403 | 0. 559199 | 0. 899517 |
| sp4                | 462. 5229 | 0. 108589192  | 0. 131815 | 0. 8238   | 0. 410053 | 0. 836939 |
| ahcy               | 19111. 88 | -0. 366539412 | 0. 144609 | -2. 53469 | 0. 011255 | 0. 183909 |
| coro2a             | 283. 9401 | -0. 112394197 | 0. 139228 | -0. 80727 | 0. 419511 | 0. 842383 |
| zgc:158328         | 73. 99391 | -0. 04119912  | 0. 28126  | -0. 14648 | 0. 883542 | 0. 987014 |
| wrnipl             | 66. 89706 | -0. 17154923  | 0. 241418 | -0. 71059 | 0. 477338 | 0. 869292 |
| pdc6               | 495. 3017 | -0. 039860738 | 0. 141183 | -0. 28233 | 0. 777687 | 0. 961073 |
| desmb              | 705. 316  | -0. 852992442 | 0. 380404 | -2. 24233 | 0. 02494  | 0. 279833 |
| ssr2               | 2651. 251 | 0. 02508183   | 0. 133717 | 0. 187573 | 0. 851211 | 0. 978548 |
| ccdc85ca           | 108. 3577 | 0. 146990238  | 0. 215795 | 0. 681158 | 0. 495771 | 0. 87806  |
| srcap              | 824. 4647 | 0. 15350227   | 0. 169251 | 0. 90695  | 0. 364433 | 0. 814648 |
| asb3               | 87. 92926 | 0. 278331886  | 0. 23641  | 1. 177328 | 0. 239065 | 0. 719781 |
| rpe                | 791. 0685 | 0. 028632271  | 0. 124465 | 0. 230043 | 0. 818058 | 0. 971518 |
| kdelr2a            | 1554. 63  | -0. 081052238 | 0. 119349 | -0. 67912 | 0. 497063 | 0. 878572 |
| zc3h12a            | 22. 80348 | 0. 211076567  | 0. 387302 | 0. 544993 | 0. 585759 | 0. 906655 |
| rad52              | 59. 00618 | 0. 397609741  | 0. 214073 | 1. 857355 | 0. 063261 | 0. 429493 |
| fbx115             | 57. 81314 | 0. 027469707  | 0. 262372 | 0. 104698 | 0. 916616 | 0. 993451 |
| CALHM1 (1 of many) | 3. 520198 | 0             | 1. 901218 | 0         | 1         | 1         |
| celfl              | 1050. 753 | 0. 036919192  | 0. 104283 | 0. 35403  | 0. 723317 | 0. 947898 |
| stam2              | 607. 4058 | -0. 054483506 | 0. 10351  | -0. 52636 | 0. 598638 | 0. 912889 |
| nipsnap1           | 89. 84315 | 0. 093791673  | 0. 235527 | 0. 39822  | 0. 690468 | 0. 939906 |
| ftr66              | 2. 300343 | -1. 815818051 | 1. 675863 | -1. 08351 | 0. 278581 | 0. 752152 |
| lipib              | 17. 9443  | 0. 095989312  | 0. 970026 | 0. 098955 | 0. 921174 | 0. 994085 |
| slc22a4            | 12. 93992 | 0. 678006286  | 1. 391395 | 0. 487285 | 0. 626056 | 0. 920625 |
| ccdc85a1           | 144. 3562 | 0. 564192554  | 0. 233989 | 2. 41119  | 0. 015901 | 0. 222371 |
| dip2ba             | 722. 0653 | -0. 038529169 | 0. 123409 | -0. 31221 | 0. 754882 | 0. 956283 |
| larp6a             | 675. 7026 | -0. 04258609  | 0. 133725 | -0. 31846 | 0. 750135 | 0. 955074 |
| tyro3              | 49. 54453 | 0. 086979555  | 0. 295015 | 0. 294831 | 0. 768123 | 0. 960296 |

|          |          |              |          |          |          |          |
|----------|----------|--------------|----------|----------|----------|----------|
| suc1a2   | 3977.906 | -0.080523309 | 0.093474 | -0.86145 | 0.38899  | 0.827725 |
| grin3ba  | 28.54455 | 1.388398472  | 0.367628 | 3.776642 | 0.000159 | 0.012833 |
| mcamb    | 571.864  | 0.05687452   | 0.121228 | 0.469153 | 0.638961 | 0.924779 |
| gprc6a   | 27.10585 | -0.469903097 | 0.504129 | -0.93211 | 0.351281 | 0.802305 |
| camk4    | 203.1931 | -0.119169675 | 0.253801 | -0.46954 | 0.638684 | 0.924779 |
| tubgcp4  | 293.0508 | 0.142314355  | 0.139395 | 1.020943 | 0.307281 | 0.772541 |
| prdm9    | 203.6486 | -0.29153496  | 0.147886 | -1.97135 | 0.048684 | 0.384066 |
| slc5a5   | 9.663694 | -1.880319753 | 1.288722 | -1.45906 | 0.144549 | 0.603539 |
| dnmt3aa  | 77.13677 | 0.096680348  | 0.242662 | 0.398416 | 0.690324 | 0.93988  |
| trim3b   | 705.498  | 0.078657637  | 0.125447 | 0.627018 | 0.530648 | 0.890545 |
| grapa    | 63.85896 | 0.186032301  | 0.28885  | 0.644044 | 0.519547 | 0.887148 |
| map3k5   | 488.3307 | 0.131810919  | 0.196491 | 0.670825 | 0.502332 | 0.881277 |
| pgam1a   | 1437.157 | -0.600219641 | 0.200181 | -2.99838 | 0.002714 | 0.085055 |
| wdfyl    | 128.4402 | -0.146076198 | 0.162049 | -0.90143 | 0.36736  | 0.816473 |
| mtfmt    | 113.8717 | 0.139876009  | 0.173567 | 0.805891 | 0.420306 | 0.842383 |
| gdi2     | 4066.982 | 0.000196647  | 0.089585 | 0.002195 | 0.998249 | 1        |
| foxp2    | 256.0952 | 0.357134566  | 0.173732 | 2.055659 | 0.039815 | 0.348912 |
| tacc3    | 627.3827 | 0.199613349  | 0.228967 | 0.871801 | 0.383317 | 0.825809 |
| katnbl   | 547.0209 | -0.278713518 | 0.127119 | -2.19254 | 0.028341 | 0.299296 |
| csnklg2a | 671.9297 | 0.076810646  | 0.081547 | 0.941914 | 0.346237 | 0.799463 |
| kif4     | 469.8626 | 0.410108025  | 0.231633 | 1.77051  | 0.076642 | 0.468636 |
| slc30a1a | 325.1319 | -0.213174943 | 0.127028 | -1.67817 | 0.093313 | 0.511128 |
| dnasel1l | 182.1027 | -0.49910455  | 0.178097 | -2.80243 | 0.005072 | 0.119186 |
| irf2bp1  | 600.4145 | -0.153420072 | 0.152824 | -1.0039  | 0.315428 | 0.777834 |
| nav3     | 230.3675 | -0.048537094 | 0.168642 | -0.28781 | 0.773492 | 0.960624 |
| tenm3    | 1172.628 | 0.040239668  | 0.134608 | 0.29894  | 0.764986 | 0.959622 |
| nfkb1aa  | 384.8695 | -0.303058157 | 0.328696 | -0.922   | 0.356527 | 0.807342 |
| rapgef2  | 1063.445 | -0.068813126 | 0.133236 | -0.51648 | 0.605522 | 0.915016 |
| ucmab    | 402.9476 | 0.444234103  | 0.207449 | 2.141417 | 0.03224  | 0.318747 |
| dgcr6    | 200.1671 | -0.352659744 | 0.177894 | -1.98242 | 0.047433 | 0.379101 |
| gdf6b    | 16.34529 | 0.017887899  | 0.384373 | 0.046538 | 0.962882 | 0.99973  |
| naca     | 16291.54 | -0.347082367 | 0.094067 | -3.68973 | 0.000224 | 0.015984 |
| slc5a9   | 41.29073 | 1.118086916  | 0.311327 | 3.591353 | 0.000329 | 0.0206   |
| galr1a   | 6.70121  | -0.251854916 | 0.745055 | -0.33804 | 0.735337 | 0.951543 |
| acy3.2   | 281.1548 | 0.051254319  | 0.212061 | 0.241697 | 0.809015 | 0.969828 |
| igfnl.1  | 632.5109 | 0.040337901  | 0.308032 | 0.130954 | 0.895812 | 0.98926  |
| ubr7     | 603.1055 | 0.008335579  | 0.125899 | 0.066208 | 0.947212 | 0.997371 |
| xpo7     | 807.0617 | 0.115123966  | 0.116431 | 0.988771 | 0.322775 | 0.782618 |
| wif1     | 529.4537 | -0.133003832 | 0.175973 | -0.75582 | 0.449757 | 0.856979 |
| btbd3a   | 58.68406 | -0.15539014  | 0.279343 | -0.55627 | 0.578026 | 0.90529  |
| rint1    | 201.0905 | -0.06689738  | 0.154706 | -0.43242 | 0.665439 | 0.932595 |
| znf710b  | 641.6661 | 0.063606774  | 0.096514 | 0.659039 | 0.509871 | 0.883733 |
| hnrnph1l | 1629.746 | 0.141720816  | 0.148593 | 0.95375  | 0.34021  | 0.795345 |
| pou4f1   | 206.4241 | 0.153500105  | 0.148276 | 1.035235 | 0.300559 | 0.766629 |
| ywhah    | 2804.612 | 0.209268772  | 0.116651 | 1.793972 | 0.072818 | 0.458474 |
| gfm2     | 178.5381 | -0.011290625 | 0.171527 | -0.06582 | 0.947518 | 0.997371 |
| entpd8   | 75.41467 | -0.137194119 | 0.393772 | -0.34841 | 0.727533 | 0.949205 |
| vsx2     | 216.5089 | 0.32220931   | 0.152466 | 2.113315 | 0.034574 | 0.328029 |
| mphosph8 | 1133.033 | -0.057392546 | 0.089748 | -0.63949 | 0.522507 | 0.887826 |
| ugp2a    | 394.7212 | -0.498204936 | 0.334883 | -1.4877  | 0.13683  | 0.592353 |
| zbtb20   | 7.366371 | 0.407208327  | 0.649009 | 0.627431 | 0.530377 | 0.890545 |
| mtf2     | 279.1176 | 0.220412847  | 0.126485 | 1.742603 | 0.081403 | 0.480419 |
| rxrga    | 129.8189 | -0.348009373 | 0.169807 | -2.04945 | 0.040419 | 0.351287 |
| adgb     | 39.17644 | 0.646229659  | 0.515679 | 1.253162 | 0.210147 | 0.692011 |

|                  |          |              |          |          |          |          |
|------------------|----------|--------------|----------|----------|----------|----------|
| paxipl           | 345.4773 | 0.211956943  | 0.100404 | 2.11104  | 0.034769 | 0.328533 |
| aph1b            | 588.6136 | 0.00522687   | 0.1435   | 0.036424 | 0.970944 | 1        |
| bfb              | 91.91779 | -0.528684173 | 0.347264 | -1.52243 | 0.127902 | 0.577117 |
| nek2             | 86.43755 | 0.124146221  | 0.299578 | 0.414404 | 0.678578 | 0.936026 |
| macola           | 224.3441 | -0.085721342 | 0.168758 | -0.50796 | 0.611485 | 0.915331 |
| RHOA (1 of many) | 37.58724 | -0.161271246 | 0.450857 | -0.3577  | 0.720568 | 0.947263 |
| zmp:0000000527   | 5.712151 | 0.779422262  | 0.924866 | 0.842741 | 0.399373 | 0.831196 |
| smyd2b           | 512.3435 | -0.155488009 | 0.399725 | -0.38899 | 0.697286 | 0.942027 |
| adat3            | 62.3259  | 0.18562334   | 0.252325 | 0.735651 | 0.461943 | 0.863402 |
| gcat             | 671.7521 | 0.053074749  | 0.177561 | 0.298911 | 0.765008 | 0.959622 |
| robo3            | 795.1172 | -0.07983336  | 0.09323  | -0.85631 | 0.391828 | 0.827902 |
| olfml2a          | 132.9423 | -0.151481948 | 0.2007   | -0.75477 | 0.450388 | 0.857151 |
| hrasb            | 533.3975 | -0.07115369  | 0.119585 | -0.59501 | 0.551839 | 0.8974   |
| man1a1           | 525.0251 | 0.031615029  | 0.115978 | 0.272594 | 0.785165 | 0.962605 |
| ttbk2a           | 41.91398 | -0.11798437  | 0.328772 | -0.35886 | 0.719697 | 0.94694  |
| f3b              | 128.3704 | -0.197742666 | 0.264667 | -0.74714 | 0.454981 | 0.860002 |
| sec61a11         | 426.6191 | -0.139642478 | 0.123733 | -1.12857 | 0.259077 | 0.736127 |
| trip10a          | 401.1077 | 0.070625403  | 0.128376 | 0.550144 | 0.582221 | 0.90571  |
| slc25a23a        | 311.6066 | -0.136879537 | 0.159819 | -0.85647 | 0.39174  | 0.827902 |
| ddx19            | 354.5737 | 0.116885132  | 0.110199 | 1.060677 | 0.288837 | 0.760057 |
| eps813b          | 144.502  | -0.486165679 | 0.323801 | -1.50143 | 0.133243 | 0.586706 |
| ethel            | 409.1154 | -0.223685109 | 0.203423 | -1.09961 | 0.271504 | 0.74783  |
| olfml2ba         | 83.31228 | 0.119289538  | 0.271672 | 0.439094 | 0.660593 | 0.930581 |
| rpfl             | 434.8084 | -0.161185399 | 0.188735 | -0.85403 | 0.393088 | 0.828061 |
| gpm6ba           | 549.8915 | 0.222948688  | 0.240017 | 0.928888 | 0.352947 | 0.803792 |
| cand2            | 546.6581 | -0.872861327 | 0.404215 | -2.1594  | 0.030819 | 0.312711 |
| ptprfb           | 1624.27  | -0.040850867 | 0.131872 | -0.30978 | 0.756731 | 0.95667  |
| coll4a1a         | 251.999  | -0.202214841 | 0.147403 | -1.37185 | 0.170111 | 0.641806 |
| tsr2             | 399.4448 | -0.08812631  | 0.206295 | -0.42719 | 0.669243 | 0.933115 |
| ddx3xb           | 3397.995 | 0.046325957  | 0.109255 | 0.424018 | 0.671553 | 0.933953 |
| scn8aa           | 292.6837 | 0.57022122   | 0.228242 | 2.498319 | 0.012478 | 0.194346 |
| guk1b            | 273.5026 | -0.958808822 | 0.33626  | -2.85139 | 0.004353 | 0.108751 |
| npy8br           | 10.9527  | 1.297868162  | 0.529576 | 2.450769 | 0.014255 | 0.209045 |
| ncanb            | 50.72313 | 0.377238331  | 0.310835 | 1.213628 | 0.22489  | 0.70685  |
| ppmlf            | 25.4167  | 0.810557339  | 0.345338 | 2.34714  | 0.018918 | 0.242307 |
| enppl            | 576.7241 | 0.100835806  | 0.099621 | 1.012198 | 0.311444 | 0.77613  |
| rpl28            | 21750.58 | -0.345143789 | 0.119433 | -2.88986 | 0.003854 | 0.103374 |
| smim14           | 224.2868 | -0.635667661 | 0.232436 | -2.73481 | 0.006242 | 0.133784 |
| ampd3a           | 136.9324 | 0.082464852  | 0.279895 | 0.294627 | 0.768279 | 0.960296 |
| klhl10a          | 0.715078 | -1.782789235 | 2.212689 | -0.80571 | 0.420409 | NA       |
| ncf2             | 35.83132 | 0.276979927  | 0.506953 | 0.546362 | 0.584817 | 0.906655 |
| slc39a10         | 503.7511 | -0.061246598 | 0.11259  | -0.54398 | 0.586456 | 0.906711 |
| EIF2S1A          | 659.0523 | 0.038478736  | 0.108367 | 0.355077 | 0.722532 | 0.947632 |
| faima            | 58.53188 | 0.058916263  | 0.32666  | 0.18036  | 0.85687  | 0.979558 |
| gatad2b          | 120.874  | 0.073666514  | 0.22341  | 0.329736 | 0.741599 | 0.954276 |
| got2b            | 2461.267 | -0.06676327  | 0.128658 | -0.51892 | 0.603817 | 0.914603 |
| tnni2a.2         | 306.844  | 0.510932864  | 0.267798 | 1.907901 | 0.056404 | 0.410324 |
| cd9a             | 491.8381 | -0.489717245 | 0.149414 | -3.27759 | 0.001047 | 0.045343 |
| SP5              | 5.444699 | 0.372807427  | 0.748702 | 0.497938 | 0.618528 | 0.916674 |
| slc25a6          | 82.55693 | 0.849483325  | 0.286651 | 2.963481 | 0.003042 | 0.09094  |
| ralgapa2         | 590.7983 | -0.010547919 | 0.106638 | -0.09891 | 0.921207 | 0.994085 |
| or131-1          | 0.793022 | 0.093655071  | 2.301846 | 0.040687 | 0.967545 | NA       |
| gon4l            | 428.7905 | 0.034326204  | 0.172315 | 0.199206 | 0.842101 | 0.97643  |
| mmadhc           | 689.2852 | -0.054132414 | 0.151001 | -0.35849 | 0.719977 | 0.947004 |

|            |          |              |          |          |          |          |
|------------|----------|--------------|----------|----------|----------|----------|
| rflx1a     | 174.861  | 0.511594948  | 0.181522 | 2.818362 | 0.004827 | 0.115344 |
| cyb5r3     | 588.4913 | 0.05333078   | 0.175906 | 0.303178 | 0.761755 | 0.958242 |
| slc7a9     | 34.55646 | -0.135651702 | 0.346635 | -0.39134 | 0.695547 | 0.9414   |
| dera       | 195.1343 | 0.24391322   | 0.218282 | 1.117425 | 0.263813 | 0.741813 |
| clk4b      | 455.9252 | -0.067859065 | 0.143237 | -0.47375 | 0.635675 | 0.924524 |
| tgm113     | 29.65252 | -1.126146329 | 1.103646 | -1.02039 | 0.307545 | 0.772879 |
| tcf3a      | 119.6374 | -0.072776739 | 0.286914 | -0.25365 | 0.799764 | 0.967206 |
| srpk3      | 322.6096 | 0.121829364  | 0.144725 | 0.841798 | 0.399901 | 0.831277 |
| serpina10a | 1360.264 | -0.247059986 | 0.107813 | -2.29157 | 0.021931 | 0.262532 |
| ak2        | 3104.849 | -0.547827283 | 0.137157 | -3.99417 | 6.49E-05 | 0.006631 |
| tbc1d17    | 576.7796 | -0.134278439 | 0.121859 | -1.10191 | 0.270499 | 0.746683 |
| clul1      | 934.4621 | -0.02143995  | 0.085295 | -0.25136 | 0.801533 | 0.967776 |
| v2r11      | 13.65328 | 1.368785076  | 0.683082 | 2.003838 | 0.045087 | 0.372035 |
| htra4      | 47.15841 | -0.204357699 | 0.325597 | -0.62764 | 0.53024  | 0.890545 |
| sart1      | 1103.426 | 0.164797728  | 0.081145 | 2.030894 | 0.042266 | 0.359771 |
| ankmy2a    | 157.8644 | -0.220108972 | 0.193995 | -1.13461 | 0.256539 | 0.73401  |
| ric8b      | 395.6318 | -0.285851202 | 0.141676 | -2.01764 | 0.043629 | 0.3656   |
| sfswap     | 866.184  | -0.044290509 | 0.123483 | -0.35868 | 0.719837 | 0.94694  |
| rgl1       | 719.3283 | -0.253738661 | 0.146949 | -1.72671 | 0.08422  | 0.487221 |
| prclb      | 221.2514 | 0.411913002  | 0.270581 | 1.522327 | 0.127927 | 0.577117 |
| mycla      | 290.6024 | 0.091930959  | 0.190955 | 0.481428 | 0.630212 | 0.922869 |
| dct        | 1499.049 | -0.343103777 | 0.177287 | -1.9353  | 0.052954 | 0.399666 |
| bmila      | 273.3435 | -0.310324415 | 0.159598 | -1.94441 | 0.051846 | 0.395809 |
| klhl42     | 50.35134 | -0.22381048  | 0.306043 | -0.7313  | 0.464594 | 0.8647   |
| tktb       | 2969.806 | -0.216771353 | 0.108753 | -1.99324 | 0.046235 | 0.375744 |
| tp53i11b   | 329.2917 | -0.064523924 | 0.157103 | -0.41071 | 0.681284 | 0.937331 |
| lta4h      | 664.7027 | -0.054145962 | 0.191247 | -0.28312 | 0.777085 | 0.961073 |
| abat       | 2262.322 | -0.269768424 | 0.205386 | -1.31347 | 0.189024 | 0.668516 |
| aebp2      | 390.6226 | -0.034319877 | 0.105017 | -0.3268  | 0.743817 | 0.95491  |
| cyp20a1    | 347.4484 | -0.097859034 | 0.170416 | -0.57424 | 0.565807 | 0.901634 |
| usta       | 121.8937 | -0.236825118 | 0.204682 | -1.15704 | 0.247257 | 0.727871 |
| malt2      | 60.6938  | -0.253138604 | 0.270737 | -0.935   | 0.34979  | 0.801408 |
| crybg1b    | 289.203  | -0.065244676 | 0.25127  | -0.25966 | 0.795126 | 0.965909 |
| akap1b     | 765.5783 | -0.152126847 | 0.129055 | -1.17877 | 0.238489 | 0.719595 |
| znf385b    | 80.61455 | -0.608690017 | 0.248443 | -2.45002 | 0.014285 | 0.209217 |
| uck2a      | 399.3587 | 0.053376146  | 0.121704 | 0.438572 | 0.660971 | 0.930581 |
| gpr3711a   | 44.37671 | 0.119138966  | 0.35906  | 0.331808 | 0.740035 | 0.953684 |
| rad21a     | 4757.936 | -0.026367455 | 0.083458 | -0.31594 | 0.75205  | 0.955423 |
| cdk15      | 80.37736 | -0.350858443 | 0.20359  | -1.72336 | 0.084824 | 0.488883 |
| igf2r      | 184.2938 | 0.021696841  | 0.235468 | 0.092143 | 0.926584 | 0.994815 |
| pimr185    | 2.532612 | -0.259936576 | 1.242663 | -0.20918 | 0.83431  | 0.975731 |
| chrd       | 43.45968 | 0.087030116  | 0.385627 | 0.225685 | 0.821446 | 0.971788 |
| myof       | 348.0128 | -0.31977065  | 0.179448 | -1.78197 | 0.074755 | 0.464131 |
| tbx2b      | 702.0674 | 0.099265665  | 0.125736 | 0.789477 | 0.429833 | 0.847418 |
| kdm5c      | 2189.429 | 0.010210633  | 0.09917  | 0.102961 | 0.917994 | 0.993875 |
| csnk1db    | 1807.046 | -0.097797779 | 0.115611 | -0.84592 | 0.397597 | 0.830253 |
| cepl70aa   | 690.4736 | 0.074565487  | 0.157807 | 0.47251  | 0.636562 | 0.924779 |
| star       | 151.363  | -0.108739837 | 0.268016 | -0.40572 | 0.684947 | 0.938486 |
| pdellal    | 25.78619 | 0.012123883  | 0.372485 | 0.032549 | 0.974035 | 1        |
| lrrk2      | 337.4989 | 0.241584727  | 0.200185 | 1.206806 | 0.227507 | 0.70878  |
| lrrc23     | 23.14854 | 0.287580097  | 0.371637 | 0.773819 | 0.439038 | 0.852079 |
| hif1aa     | 98.18223 | 0.302214384  | 0.266425 | 1.13433  | 0.256656 | 0.734072 |
| gatad2ab   | 461.4803 | 0.146817963  | 0.16374  | 0.896651 | 0.369905 | 0.818439 |
| savl       | 529.5004 | -0.121289152 | 0.140274 | -0.86466 | 0.387228 | 0.827592 |



|                   |          |              |          |          |          |          |
|-------------------|----------|--------------|----------|----------|----------|----------|
| eif4gla           | 2484.257 | -0.043381321 | 0.150717 | -0.28783 | 0.773475 | 0.960624 |
| erbb3a            | 405.3764 | 0.034300827  | 0.206362 | 0.166217 | 0.867986 | 0.982801 |
| pou4f3            | 45.32673 | -0.166057648 | 0.380901 | -0.43596 | 0.662866 | 0.931106 |
| gpx1b             | 314.2225 | -0.215421405 | 0.294675 | -0.73105 | 0.464751 | 0.864823 |
| akr1b1.1          | 1045.08  | -0.539230103 | 0.21969  | -2.4545  | 0.014108 | 0.208027 |
| gnl3              | 714.4212 | -0.098078411 | 0.177719 | -0.55187 | 0.581035 | 0.905618 |
| ugtlab            | 717.4505 | -0.13194497  | 0.255172 | -0.51708 | 0.605099 | 0.914985 |
| ddx39aa           | 1841.361 | 0.057427709  | 0.107601 | 0.533711 | 0.593541 | 0.910427 |
| brms1la           | 903.5467 | -0.317870538 | 0.150541 | -2.11153 | 0.034727 | 0.328285 |
| slc27a1a          | 535.0889 | 0.088569677  | 0.145936 | 0.606909 | 0.543911 | 0.895043 |
| ptp4a1            | 3304.554 | -0.051210234 | 0.128572 | -0.3983  | 0.690408 | 0.93988  |
| ell2              | 641.1851 | 0.016238738  | 0.090849 | 0.178744 | 0.858139 | 0.979774 |
| mier3a            | 341.7334 | -0.048874727 | 0.110884 | -0.44078 | 0.659376 | 0.930581 |
| vldlr             | 690.161  | 0.160180876  | 0.117236 | 1.366312 | 0.171841 | 0.643953 |
| tuba814           | 8413.713 | -0.020071947 | 0.152309 | -0.13178 | 0.895155 | 0.989187 |
| statla            | 637.3306 | -0.314999797 | 0.131854 | -2.38901 | 0.016894 | 0.230481 |
| mpp5a             | 199.2654 | -0.103501258 | 0.210438 | -0.49184 | 0.622834 | 0.918894 |
| rragd             | 54.57007 | -0.219984161 | 0.348712 | -0.63085 | 0.52814  | 0.889948 |
| was1b             | 469.9975 | 0.119907861  | 0.129755 | 0.924109 | 0.35543  | 0.806546 |
| prdm5             | 77.07328 | 0.41557954   | 0.196686 | 2.11291  | 0.034609 | 0.328035 |
| ndufs5            | 2076.897 | 0.084529044  | 0.168843 | 0.500636 | 0.616627 | 0.916365 |
| maats1            | 26.85449 | 0.632059192  | 0.427138 | 1.479753 | 0.138939 | 0.596373 |
| arhgef7a          | 507.641  | 0.232726567  | 0.13119  | 1.773971 | 0.076068 | 0.467233 |
| psmd9             | 246.9922 | 0.343022252  | 0.158689 | 2.161606 | 0.030649 | 0.312139 |
| RAPH1 (1 of many) | 453.4378 | 0.152279154  | 0.191674 | 0.794471 | 0.426922 | 0.845491 |
| shisa4            | 200.5963 | 0.239625369  | 0.20463  | 1.171019 | 0.241591 | 0.723306 |
| ptpn18            | 17.22226 | -0.010577563 | 0.446962 | -0.02367 | 0.981119 | 1        |
| itgav             | 1685.043 | 0.059116651  | 0.114484 | 0.516376 | 0.605592 | 0.915049 |
| rpl23a            | 30115.11 | -0.265756675 | 0.109416 | -2.42886 | 0.015146 | 0.215962 |
| snx14             | 623.7074 | -0.015143569 | 0.09991  | -0.15157 | 0.879525 | 0.986187 |
| tas1r3            | 1.407239 | -0.868145009 | 2.311282 | -0.37561 | 0.707205 | NA       |
| med17             | 270.4827 | -0.214804246 | 0.128468 | -1.67205 | 0.094515 | 0.513368 |
| nkx1.21a          | 8.451475 | -0.350910201 | 0.698334 | -0.5025  | 0.615318 | 0.916365 |
| itga5             | 227.759  | -0.273191756 | 0.14179  | -1.92674 | 0.054012 | 0.402269 |
| slc18a3a          | 290.6148 | -0.259455758 | 0.294134 | -0.8821  | 0.377722 | 0.822478 |
| crlf1b            | 55.67763 | 0.22356673   | 0.269509 | 0.829535 | 0.406802 | 0.835226 |
| atp6v1h           | 1686.04  | -0.003224722 | 0.116769 | -0.02762 | 0.977968 | 1        |
| ugt5c2            | 4.795863 | -2.067944967 | 1.261874 | -1.63879 | 0.101257 | 0.526828 |
| stxbp51           | 134.2732 | 0.318442675  | 0.256706 | 1.240498 | 0.214791 | 0.696864 |
| trioebp           | 438.5375 | -0.072142761 | 0.134618 | -0.53591 | 0.592022 | 0.909686 |
| smad2             | 552.7639 | 0.18507438   | 0.120317 | 1.53822  | 0.123995 | 0.57117  |
| exosc9            | 183.0661 | -0.122828634 | 0.190514 | -0.64472 | 0.519106 | 0.887148 |
| rbm25b            | 876.5028 | 0.042376396  | 0.115231 | 0.367752 | 0.713058 | 0.945821 |
| nrcama            | 99.68725 | -0.000161674 | 0.289308 | -0.00056 | 0.999554 | 1        |
| laptm4a           | 1576.365 | 0.079579886  | 0.091148 | 0.873082 | 0.382618 | 0.825435 |
| ywhae1            | 3677.577 | 0.147878898  | 0.095592 | 1.546984 | 0.121867 | 0.56863  |
| hmgb3b            | 932.2544 | -0.399350396 | 0.163907 | -2.43644 | 0.014833 | 0.213592 |
| mapk12b           | 38.27731 | 0.198182714  | 0.335251 | 0.591148 | 0.554421 | 0.898444 |
| rpl38             | 6117.221 | -0.273205268 | 0.14359  | -1.90268 | 0.057082 | 0.412539 |
| atrnl1b           | 713.9731 | 0.05826673   | 0.134263 | 0.433974 | 0.664308 | 0.93177  |
| esy3              | 164.5324 | 0.237795387  | 0.19249  | 1.235368 | 0.216694 | 0.69815  |
| fabp2             | 3625.954 | 0.03950149   | 0.219962 | 0.179583 | 0.85748  | 0.979741 |
| polr1e            | 252.9329 | -0.186397538 | 0.177719 | -1.04883 | 0.294255 | 0.763323 |
| slc19a3a          | 14.87267 | -0.678477977 | 0.693827 | -0.97788 | 0.328135 | 0.786542 |

|            |          |              |          |          |          |          |  |
|------------|----------|--------------|----------|----------|----------|----------|--|
| pdgfr1     | 466.937  | -0.077627553 | 0.225808 | -0.34378 | 0.731015 | 0.950056 |  |
| pcdh8      | 118.028  | -0.114665849 | 0.230913 | -0.49658 | 0.619488 | 0.917435 |  |
| grap2a     | 55.42816 | 0.160340379  | 0.281283 | 0.570033 | 0.568656 | 0.902234 |  |
| saxo2      | 11.62423 | 0.597838246  | 0.681091 | 0.877766 | 0.380071 | 0.823607 |  |
| ddi2       | 798.2594 | -0.234547867 | 0.134096 | -1.7491  | 0.080274 | 0.478505 |  |
| anp32a     | 6771.264 | 0.001759099  | 0.097583 | 0.018027 | 0.985618 | 1        |  |
| agpat9l    | 207.4922 | 0.17645752   | 0.194587 | 0.906832 | 0.364496 | 0.814648 |  |
| asb7       | 165.4438 | 0.161376031  | 0.210504 | 0.766618 | 0.443309 | 0.854063 |  |
| rtn1a      | 5790.372 | 0.000619519  | 0.114166 | 0.005426 | 0.99567  | 1        |  |
| cyp2x10.2  | 5.689354 | -3.203790167 | 1.038793 | -3.08415 | 0.002041 | 0.070215 |  |
| pip5k1bb   | 219.732  | 0.07286336   | 0.157326 | 0.463136 | 0.643267 | 0.92593  |  |
| her6       | 773.7849 | 0.12477803   | 0.153094 | 0.815043 | 0.415048 | 0.838732 |  |
| otop2      | 16.18949 | -0.493890592 | 1.061486 | -0.46528 | 0.641729 | 0.925586 |  |
| supt6h     | 1401.411 | 0.036481403  | 0.130065 | 0.280486 | 0.779105 | 0.961073 |  |
| fn1b       | 3596.062 | -0.274078127 | 0.220578 | -1.24254 | 0.214036 | 0.696474 |  |
| brd3a      | 779.8675 | 0.005731097  | 0.106013 | 0.05406  | 0.956887 | 0.999109 |  |
| clqtnf6b   | 61.29189 | 0.272220543  | 0.33121  | 0.821896 | 0.411136 | 0.837797 |  |
| rgpl       | 246.2166 | -0.044699264 | 0.151048 | -0.29593 | 0.767285 | 0.960296 |  |
| ak4        | 647.7623 | -0.107082343 | 0.182409 | -0.58705 | 0.557173 | 0.899165 |  |
| rras       | 579.8898 | -0.062195216 | 0.166231 | -0.37415 | 0.708294 | 0.945344 |  |
| irf4a      | 7.940095 | -1.404720514 | 0.669636 | -2.09774 | 0.035928 | 0.332937 |  |
| nlk1       | 868.2468 | 0.031657318  | 0.115385 | 0.274363 | 0.783805 | 0.96245  |  |
| dus4l      | 94.26026 | 0.394664663  | 0.238517 | 1.65466  | 0.097993 | 0.521071 |  |
| kcnmb2     | 73.62457 | 0.162109397  | 0.27715  | 0.584916 | 0.558604 | 0.899409 |  |
| nadka      | 40.28187 | -0.187752679 | 0.340287 | -0.55175 | 0.581121 | 0.905618 |  |
| clnd       | 3.313379 | -1.587871954 | 1.028108 | -1.54446 | 0.122477 | 0.569468 |  |
| phf8       | 628.7697 | 0.09428713   | 0.136788 | 0.689293 | 0.490639 | 0.875539 |  |
| DMWD       | 50.72786 | -0.009868218 | 0.265217 | -0.03721 | 0.970319 | 1        |  |
| zgc:111983 | 2652.958 | 0.982914242  | 0.285995 | 3.436823 | 0.000589 | 0.031278 |  |
| sgk2b      | 230.9487 | -0.37193452  | 0.363825 | -1.02229 | 0.306644 | 0.771918 |  |
| lsm14aa    | 566.3405 | -0.004088586 | 0.153653 | -0.02661 | 0.978771 | 1        |  |
| kaznb      | 177.5964 | 0.065175648  | 0.170249 | 0.382826 | 0.701849 | 0.943292 |  |
| chrna2a    | 18.22292 | -0.943030301 | 0.618098 | -1.5257  | 0.127085 | 0.576323 |  |
| csrpla     | 576.6249 | 0.351275849  | 0.12679  | 2.770528 | 0.005597 | 0.126154 |  |
| nectin3b   | 102.9938 | 0.140850251  | 0.19009  | 0.740967 | 0.458713 | 0.861537 |  |
| gpr27      | 171.6313 | 0.015381177  | 0.203683 | 0.075515 | 0.939805 | 0.997371 |  |
| map2k2a    | 776.7763 | 0.126213923  | 0.097127 | 1.299468 | 0.193783 | 0.674122 |  |
| hnflba     | 205.7022 | -0.426855224 | 0.183946 | -2.32055 | 0.020311 | 0.252973 |  |
| napga      | 353.1337 | 0.160060212  | 0.117252 | 1.365099 | 0.172222 | 0.644849 |  |
| pspc1      | 489.717  | 0.057182403  | 0.11745  | 0.486868 | 0.626352 | 0.920665 |  |
| ppp2r2ab   | 637.1835 | 0.222757079  | 0.120037 | 1.855744 | 0.06349  | 0.430136 |  |
| slitrk2    | 109.6508 | 0.590535257  | 0.261324 | 2.259781 | 0.023835 | 0.273663 |  |
| lnpk       | 221.487  | -0.108299084 | 0.150987 | -0.71728 | 0.473204 | 0.869064 |  |
| eomesa     | 271.8708 | 0.283189662  | 0.17339  | 1.633252 | 0.102416 | 0.529087 |  |
| drg2       | 565.9471 | 0.084151496  | 0.12706  | 0.662296 | 0.507781 | 0.883056 |  |
| bud13      | 203.9796 | 0.008666405  | 0.162862 | 0.053213 | 0.957562 | 0.999109 |  |
| fam49a     | 399.4797 | -0.211709272 | 0.148481 | -1.42583 | 0.153917 | 0.618475 |  |
| ripk1l     | 62.57617 | -0.185189973 | 0.223702 | -0.82784 | 0.407761 | 0.835802 |  |
| pth2r      | 11.77155 | -0.047619899 | 0.585405 | -0.08135 | 0.935167 | 0.996829 |  |
| arhgef6    | 360.505  | 0.036501984  | 0.116372 | 0.313666 | 0.753774 | 0.955912 |  |
| rpl12      | 29588.57 | -0.480070167 | 0.132027 | -3.63614 | 0.000277 | 0.018426 |  |
| wipf2b     | 336.9636 | 0.127840892  | 0.132714 | 0.963278 | 0.335408 | 0.792031 |  |
| specc1la   | 562.3337 | 0.218166193  | 0.127283 | 1.71402  | 0.086525 | 0.493048 |  |
| tmem178b   | 236.8231 | 0.084082687  | 0.246498 | 0.341109 | 0.733022 | 0.950736 |  |

|                    |          |              |          |          |          |          |
|--------------------|----------|--------------|----------|----------|----------|----------|
| mlt3               | 186.9279 | -0.014602101 | 0.183091 | -0.07975 | 0.936434 | 0.997044 |
| klh141b            | 3630.517 | -0.068492025 | 0.193098 | -0.3547  | 0.722814 | 0.947691 |
| fam234b            | 305.3987 | 0.254992857  | 0.158676 | 1.607002 | 0.108054 | 0.53992  |
| slc24a3            | 62.07144 | 0.305636553  | 0.277705 | 1.10058  | 0.271079 | 0.747282 |
| snd1               | 3350.775 | 0.07161952   | 0.136174 | 0.525941 | 0.598929 | 0.913109 |
| elov14a            | 127.1354 | -0.146825343 | 0.176867 | -0.83015 | 0.406457 | 0.834893 |
| cass4              | 42.64195 | -0.104720159 | 0.367234 | -0.28516 | 0.775522 | 0.961073 |
| rb1                | 310.8118 | 0.190620172  | 0.129671 | 1.470024 | 0.141555 | 0.600284 |
| copz2              | 544.3872 | 0.003541465  | 0.098784 | 0.035851 | 0.971401 | 1        |
| arntl1a            | 559.8183 | 0.062698246  | 0.218005 | 0.287601 | 0.773653 | 0.960624 |
| nt5dc1             | 74.90804 | 0.069615431  | 0.267218 | 0.260519 | 0.794464 | 0.965431 |
| sult1st6           | 137.8256 | 0.021357709  | 0.281777 | 0.075796 | 0.939581 | 0.997371 |
| wdr26b             | 1052.443 | -0.090399105 | 0.099964 | -0.90432 | 0.365826 | 0.815714 |
| gtf2f2b            | 0.21156  | 1.055363231  | 5.117974 | 0.206207 | 0.836629 | NA       |
| urod               | 294.9575 | -0.194224782 | 0.169789 | -1.14392 | 0.252657 | 0.732759 |
| galnt9             | 275.1292 | 0.317092711  | 0.234332 | 1.353176 | 0.176    | 0.649415 |
| mycn               | 1698.964 | 1.601186634  | 0.128649 | 12.44617 | 1.47E-35 | 1.70E-31 |
| eef1a2             | 23.23422 | 0.405415927  | 0.795348 | 0.509734 | 0.610238 | 0.915331 |
| gnmt               | 1509.859 | 0.009504173  | 0.151153 | 0.062878 | 0.949864 | 0.99801  |
| parp9              | 157.7745 | 0.124259572  | 0.200772 | 0.61891  | 0.535975 | 0.892102 |
| asic2              | 44.13574 | 0.563269027  | 0.434057 | 1.297685 | 0.194396 | 0.674677 |
| nkain1             | 536.4932 | -0.079526526 | 0.122253 | -0.65051 | 0.515365 | 0.886401 |
| kifap3b            | 455.0577 | -0.071397031 | 0.149859 | -0.47643 | 0.63377  | 0.923974 |
| si:ch1073-349o24.2 | 48.25298 | 0.738348143  | 0.371003 | 1.990138 | 0.046576 | 0.376263 |
| glra4a             | 212.4425 | 0.175764025  | 0.185891 | 0.945522 | 0.344392 | 0.798147 |
| trh                | 86.46793 | -0.27082842  | 0.380768 | -0.71127 | 0.476918 | 0.869292 |
| stx17              | 98.07893 | 0.083290508  | 0.194262 | 0.428753 | 0.668103 | 0.933086 |
| enpp4              | 12.62089 | -0.24400914  | 0.551307 | -0.4426  | 0.658054 | 0.930581 |
| phf21aa            | 297.6011 | 0.207455571  | 0.173738 | 1.194074 | 0.232449 | 0.713923 |
| mpped2a            | 424.908  | 0.052868038  | 0.114861 | 0.460278 | 0.645317 | 0.926728 |
| kcns3a             | 47.56164 | 0.350634729  | 0.406418 | 0.862744 | 0.388278 | 0.827592 |
| myo3b              | 70.71892 | -0.406586506 | 0.328123 | -1.23913 | 0.215297 | 0.697157 |
| oprk1              | 6.521084 | -0.252721163 | 0.970654 | -0.26036 | 0.794585 | 0.965469 |
| lhx6               | 157.8013 | -0.011398399 | 0.16219  | -0.07028 | 0.943972 | 0.997371 |
| far1               | 155.9128 | -0.15266195  | 0.196623 | -0.77642 | 0.437501 | 0.851283 |
| impdh2             | 808.9467 | -0.149430339 | 0.140524 | -1.06338 | 0.28761  | 0.758397 |
| si:ch1073-459j12.1 | 868.8361 | -0.081113343 | 0.146949 | -0.55198 | 0.580959 | 0.905618 |
| wnt8b              | 32.25386 | 0.190318592  | 0.324906 | 0.585765 | 0.558033 | 0.899301 |
| arl8ba             | 657.0122 | -0.301577082 | 0.140508 | -2.14633 | 0.031847 | 0.317164 |
| lrp5               | 853.9836 | 0.072026432  | 0.168792 | 0.426716 | 0.669586 | 0.933416 |
| cacnalab           | 51.09494 | 0.791113465  | 0.334869 | 2.36246  | 0.018154 | 0.237981 |
| fbxo38             | 305.133  | -0.208979034 | 0.155054 | -1.34778 | 0.177729 | 0.65136  |
| tbx16l             | 43.88057 | 0.687991375  | 0.25629  | 2.684426 | 0.007265 | 0.144498 |
| gdpd3b             | 19.9291  | 1.263637378  | 0.627886 | 2.012525 | 0.044165 | 0.368091 |
| csell              | 848.8597 | 0.277204863  | 0.138493 | 2.001587 | 0.045329 | 0.372707 |
| zak                | 34.7873  | 0.124256659  | 0.442787 | 0.280624 | 0.778999 | 0.961073 |
| ccdc113            | 19.49149 | -0.290928764 | 0.404746 | -0.71879 | 0.472269 | 0.868726 |
| celf3b             | 287.9959 | -0.070726997 | 0.205133 | -0.34479 | 0.730255 | 0.950056 |
| creldb             | 146.0776 | 0.063664366  | 0.205283 | 0.31013  | 0.756462 | 0.956532 |
| hoxa11b            | 168.0156 | -0.140824063 | 0.154229 | -0.91308 | 0.361199 | 0.81142  |
| ms4a17a.6          | 7.718372 | 0.994177649  | 0.767577 | 1.295215 | 0.195246 | 0.67483  |
| uox                | 1278.879 | -1.412363208 | 0.335526 | -4.2094  | 2.56E-05 | 0.00341  |
| ttc9c              | 107.216  | -0.067806259 | 0.197131 | -0.34397 | 0.730872 | 0.950056 |
| hnrpk1             | 983.5617 | -0.291858826 | 0.159184 | -1.83347 | 0.066732 | 0.441264 |

|                   |          |              |          |          |          |          |
|-------------------|----------|--------------|----------|----------|----------|----------|
| tmigd1            | 19.64088 | 0.492736739  | 0.596013 | 0.826722 | 0.408395 | 0.83628  |
| cnot4a            | 311.6939 | 0.022664916  | 0.14678  | 0.154414 | 0.877283 | 0.985341 |
| mrps18b           | 331.2951 | -0.265826653 | 0.141932 | -1.87292 | 0.061079 | 0.424477 |
| si:dkey-19a16.16  | 0 NA     | NA           | NA       | NA       | NA       | NA       |
| ankrd501          | 338.2831 | -0.116123088 | 0.150498 | -0.77159 | 0.440357 | 0.852245 |
| rhcgl1            | 402.7912 | 1.302231658  | 0.662101 | 1.966816 | 0.049204 | 0.386201 |
| pias4a            | 741.8415 | 0.115210159  | 0.096893 | 1.189041 | 0.234424 | 0.715154 |
| aqp10a            | 59.34    | -0.261817767 | 0.670566 | -0.39044 | 0.696209 | 0.941657 |
| xab2              | 362.6802 | -0.099957988 | 0.13745  | -0.72723 | 0.467084 | 0.866065 |
| her13             | 113.0583 | -0.133489002 | 0.256769 | -0.51988 | 0.603147 | 0.914226 |
| itm2ba            | 2940.28  | -0.07166326  | 0.076642 | -0.93504 | 0.349769 | 0.801408 |
| cx43.4            | 1308.171 | -0.053227233 | 0.139452 | -0.38169 | 0.702693 | 0.943622 |
| lipia             | 180.3414 | -0.248189899 | 0.148595 | -1.67025 | 0.094871 | 0.514067 |
| asb6              | 84.38049 | 0.278888526  | 0.268026 | 1.040527 | 0.298095 | 0.765416 |
| acat2             | 301.4098 | -0.076821524 | 0.241834 | -0.31766 | 0.750741 | 0.955074 |
| slc6a16a          | 132.8657 | 0.492094689  | 0.231932 | 2.121717 | 0.033862 | 0.325143 |
| mrto4             | 137.943  | 0.066938556  | 0.207538 | 0.322536 | 0.747047 | 0.955074 |
| cnot3a            | 747.5036 | 0.025899887  | 0.105052 | 0.246543 | 0.805262 | 0.969348 |
| gtf2h4            | 98.61611 | 0.158102995  | 0.255756 | 0.618178 | 0.536458 | 0.892397 |
| psmc3             | 2284.834 | 0.141950709  | 0.123125 | 1.152903 | 0.24895  | 0.728918 |
| llcama            | 186.4934 | -0.007150535 | 0.199881 | -0.03577 | 0.971463 | 1        |
| kcnk2b            | 9.494645 | 0.925068887  | 0.562032 | 1.645937 | 0.099777 | 0.524166 |
| itgblbp1          | 396.45   | 0.100021644  | 0.131294 | 0.761814 | 0.446171 | 0.855403 |
| aigl              | 90.72244 | -0.665161917 | 0.259276 | -2.56545 | 0.010304 | 0.176586 |
| plxna3            | 348.9137 | 0.228875894  | 0.164824 | 1.388606 | 0.164953 | 0.634185 |
| recql             | 205.2928 | 0.074090739  | 0.18199  | 0.407113 | 0.683925 | 0.938486 |
| sash1a            | 567.5131 | -0.050643266 | 0.114849 | -0.44096 | 0.659245 | 0.930581 |
| slc30a4           | 823.4601 | -0.039548338 | 0.151245 | -0.26149 | 0.793718 | 0.965431 |
| nadk2             | 240.8634 | 0.107318024  | 0.143511 | 0.747804 | 0.454578 | 0.85968  |
| zbtb16a           | 436.5955 | -0.059572101 | 0.165496 | -0.35996 | 0.718877 | 0.94694  |
| ppplr8a           | 46.69991 | 0.08163584   | 0.25069  | 0.325645 | 0.744693 | 0.95491  |
| grm2b             | 381.1665 | 0.293487121  | 0.151401 | 1.938481 | 0.052565 | 0.398274 |
| rael              | 596.2368 | 0.132157965  | 0.121437 | 1.088286 | 0.276469 | 0.751059 |
| mtal              | 305.0729 | 0.158141539  | 0.138888 | 1.138625 | 0.254859 | 0.733542 |
| CR846090.1        | 0.174693 | 0 5.267649   | 0        | 1 NA     |          |          |
| cnpy2             | 194.141  | -0.096613594 | 0.15197  | -0.63574 | 0.524944 | 0.888928 |
| abcel             | 2016.211 | 0.069362236  | 0.172475 | 0.402159 | 0.687567 | 0.938835 |
| wdr55             | 134.8935 | 0.141245589  | 0.194405 | 0.726553 | 0.4675   | 0.866174 |
| actn1             | 1118.84  | 0.02431916   | 0.106382 | 0.228603 | 0.819178 | 0.971785 |
| ncamlb            | 226.3789 | 0.094598737  | 0.26657  | 0.354874 | 0.722684 | 0.947632 |
| pbk               | 347.2239 | 0.231160786  | 0.278238 | 0.830802 | 0.406085 | 0.834645 |
| ryk               | 545.3897 | -0.155088347 | 0.127202 | -1.21923 | 0.222758 | 0.704616 |
| mycb              | 577.6052 | 0.043403863  | 0.293408 | 0.14793  | 0.882398 | 0.986908 |
| acp2              | 638.2256 | -0.382109627 | 0.177654 | -2.15086 | 0.031487 | 0.315416 |
| rundc3aa          | 34.2578  | 0.547062428  | 0.355664 | 1.538145 | 0.124013 | 0.57117  |
| ric8a             | 238.8079 | 0.439813525  | 0.17549  | 2.506196 | 0.012204 | 0.191703 |
| usel              | 258.9921 | 0.160513876  | 0.133155 | 1.205462 | 0.228025 | 0.709324 |
| rab5ab            | 467.7101 | 0.055665361  | 0.174113 | 0.319708 | 0.74919  | 0.955074 |
| nipsnap2          | 823.6097 | -0.03239553  | 0.115907 | -0.2795  | 0.779864 | 0.961089 |
| mynn              | 367.2306 | 0.196306274  | 0.123742 | 1.586419 | 0.112644 | 0.549814 |
| si:ch211-251b21.1 | 11860.48 | -0.237576555 | 0.145578 | -1.63196 | 0.102688 | 0.529448 |
| ela3l             | 21225.64 | 0.673370417  | 0.958923 | 0.702215 | 0.482545 | 0.871721 |
| myf5              | 114.9143 | 0.046442989  | 0.202367 | 0.229499 | 0.818481 | 0.971656 |
| ect2              | 239.6823 | 0.376133963  | 0.211936 | 1.774749 | 0.075939 | 0.46659  |

|           |          |              |          |          |          |          |
|-----------|----------|--------------|----------|----------|----------|----------|
| yipf5     | 402.6034 | -0.103352497 | 0.146128 | -0.70728 | 0.479395 | 0.86985  |
| mrpl57    | 335.0254 | 0.129517285  | 0.15519  | 0.834571 | 0.40396  | 0.833888 |
| metrnlb   | 37.80571 | 0.120512241  | 0.269216 | 0.447641 | 0.654412 | 0.929488 |
| aco2      | 5625.931 | 0.02580289   | 0.12939  | 0.199419 | 0.841935 | 0.97643  |
| sh3gl3b   | 198.3601 | -0.389735902 | 0.196558 | -1.98281 | 0.047389 | 0.379101 |
| tmpoa     | 475.356  | 0.072407605  | 0.134089 | 0.539997 | 0.589199 | 0.9083   |
| rpl7      | 45390.14 | -0.330418167 | 0.138718 | -2.38195 | 0.017221 | 0.231824 |
| chmp4bb   | 1221.887 | -0.145863283 | 0.112888 | -1.2921  | 0.196321 | 0.67688  |
| tbx16     | 4.64111  | -0.31388142  | 0.796038 | -0.3943  | 0.693356 | 0.940668 |
| tcap      | 275.7176 | 0.02091399   | 0.489185 | 0.042753 | 0.965899 | 1        |
| degs1     | 793.5978 | 0.206232885  | 0.143929 | 1.432877 | 0.151893 | 0.615406 |
| dmrt1     | 3.289139 | 0.509158551  | 1.383263 | 0.368085 | 0.71281  | 0.945821 |
| fgf20a    | 50.55994 | 0.257011353  | 0.322562 | 0.796781 | 0.425578 | 0.844714 |
| cxcr3.1   | 6.629385 | 0.874752795  | 0.855999 | 1.021908 | 0.306824 | 0.772019 |
| UBL4A     | 332.7751 | -0.044828338 | 0.155677 | -0.28796 | 0.773379 | 0.960624 |
| sft2d1    | 587.5439 | 0.036171409  | 0.11007  | 0.328621 | 0.742442 | 0.954362 |
| AMDHD1    | 60.48252 | -0.106395889 | 0.50123  | -0.21227 | 0.831897 | 0.974925 |
| tcf7l1b   | 411.7629 | -0.105161077 | 0.196144 | -0.53614 | 0.59186  | 0.909603 |
| dysf      | 482.9072 | 0.115489759  | 0.197172 | 0.585732 | 0.558055 | 0.899301 |
| slc26a3.1 | 2.816426 | -2.369116215 | 1.82846  | -1.29569 | 0.195083 | 0.67483  |
| odc1      | 1922.092 | 0.104271575  | 0.170683 | 0.610908 | 0.541261 | 0.893744 |
| ubtdla    | 116.483  | 0.730459491  | 0.285218 | 2.561055 | 0.010435 | 0.178049 |
| kcnk6     | 271.2268 | -0.366028728 | 0.192016 | -1.90624 | 0.056619 | 0.410984 |
| cct7      | 7197.275 | -0.111995766 | 0.14592  | -0.76752 | 0.442775 | 0.853929 |
| irf2a     | 357.763  | -0.284185996 | 0.152917 | -1.85843 | 0.063108 | 0.429313 |
| rnd3b     | 283.6946 | -0.101254605 | 0.145357 | -0.69659 | 0.486058 | 0.873244 |
| lrrk1     | 27.30441 | -0.516457058 | 0.460619 | -1.12122 | 0.262193 | 0.739695 |
| strap     | 981.2329 | -0.196146236 | 0.10421  | -1.88222 | 0.059807 | 0.421883 |
| phox2a    | 203.9492 | -0.273839082 | 0.16389  | -1.67087 | 0.094748 | 0.513797 |
| barx1     | 204.1423 | -0.244887837 | 0.146125 | -1.67588 | 0.093761 | 0.511703 |
| ppifa     | 190.2428 | -0.176204914 | 0.238075 | -0.74012 | 0.459226 | 0.861818 |
| slc2a1b   | 196.6908 | -0.133698135 | 0.242573 | -0.55117 | 0.581519 | 0.905618 |
| arid2     | 694.3363 | 0.181866234  | 0.174839 | 1.040194 | 0.29825  | 0.765416 |
| chmp4c    | 131.4271 | -0.112783973 | 0.196893 | -0.57282 | 0.566768 | 0.901739 |
| ftcd      | 1266.778 | -0.464761219 | 0.136962 | -3.39337 | 0.00069  | 0.034774 |
| apoll     | 203.7191 | -0.426508328 | 0.177617 | -2.40128 | 0.016338 | 0.225785 |
| ndor1     | 176.1865 | 0.083178602  | 0.152852 | 0.544177 | 0.58632  | 0.906711 |
| prdm12b   | 212.535  | 0.194382228  | 0.172897 | 1.124268 | 0.260899 | 0.738467 |
| avpr2aa   | 24.00382 | 0.701654769  | 0.423765 | 1.655763 | 0.09777  | 0.521071 |
| ube2ib    | 1742.69  | 0.007460472  | 0.12601  | 0.059205 | 0.952789 | 0.998406 |
| fbxl18    | 108.8291 | 0.04299486   | 0.212275 | 0.202544 | 0.839492 | 0.976417 |
| ift81     | 79.90874 | 0.45703553   | 0.218691 | 2.089868 | 0.03663  | 0.336389 |
| slc25a39  | 494.5867 | 0.013479952  | 0.133186 | 0.101211 | 0.919383 | 0.993892 |
| srgap1a   | 161.5014 | 0.107061826  | 0.20584  | 0.520122 | 0.602979 | 0.914226 |
| tldr1     | 31.78503 | 0.409134755  | 0.502269 | 0.814573 | 0.415317 | 0.838754 |
| ifit10    | 4.49618  | -0.487895834 | 1.116318 | -0.43706 | 0.662069 | 0.930742 |
| fbxo8     | 295.7106 | 0.263893089  | 0.188196 | 1.402224 | 0.160848 | 0.627788 |
| rpe65a    | 995.5239 | 0.060050223  | 0.24782  | 0.242314 | 0.808537 | 0.969828 |
| epc2      | 534.961  | 0.009894548  | 0.150125 | 0.065909 | 0.94745  | 0.997371 |
| adrb1     | 25.82984 | -0.179154104 | 0.437041 | -0.40993 | 0.681861 | 0.937498 |
| st3gal8   | 234.8924 | -0.511827442 | 0.226765 | -2.25709 | 0.024003 | 0.274503 |
| uf11      | 552.0971 | -0.130022792 | 0.137579 | -0.94508 | 0.344618 | 0.798147 |
| kmt2e     | 970.654  | 0.014879376  | 0.179895 | 0.082711 | 0.934081 | 0.996669 |
| ndufs2    | 3408.308 | 0.001540124  | 0.11148  | 0.013815 | 0.988977 | 1        |

|                    |          |              |          |          |          |          |
|--------------------|----------|--------------|----------|----------|----------|----------|
| zcchc9             | 259.8387 | 0.355043766  | 0.178882 | 1.984797 | 0.047167 | 0.378022 |
| itln1              | 19.12916 | -0.772433967 | 0.701172 | -1.10163 | 0.270621 | 0.746683 |
| opn4.1             | 186.8842 | -0.252690034 | 0.267065 | -0.94617 | 0.344061 | 0.798147 |
| sema3b1            | 179.7205 | 0.252944037  | 0.211677 | 1.19495  | 0.232106 | 0.71325  |
| cdh23              | 12.67762 | 0.096736328  | 0.770424 | 0.125562 | 0.900078 | 0.99045  |
| appbp2             | 567.4126 | -0.21574011  | 0.133751 | -1.613   | 0.106744 | 0.536615 |
| crybb11            | 10676.56 | 0.542680767  | 0.360863 | 1.503843 | 0.132622 | 0.585592 |
| si:ch1073-155h21.1 | 2.968294 | -1.7611445   | 1.803886 | -0.97631 | 0.328913 | 0.787203 |
| bloc1s4            | 215.1171 | -0.486200667 | 0.154635 | -3.14418 | 0.001666 | 0.062852 |
| zmynd8             | 153.8957 | 0.338993137  | 0.180817 | 1.874788 | 0.060822 | 0.423578 |
| stxbp2             | 511.4723 | -0.072211627 | 0.099882 | -0.72297 | 0.4697   | 0.867305 |
| wwox               | 98.1924  | 0.162420745  | 0.205957 | 0.788615 | 0.430337 | 0.847541 |
| gins1              | 117.9843 | 0.063797693  | 0.165351 | 0.385832 | 0.699621 | 0.942499 |
| mkrn2              | 270.8931 | 0.106882923  | 0.132964 | 0.803846 | 0.421486 | 0.842754 |
| cnot4b             | 554.6368 | -0.196169619 | 0.125253 | -1.56618 | 0.117305 | 0.558519 |
| nsfa               | 1472.33  | 0.299837064  | 0.21638  | 1.385695 | 0.16584  | 0.635405 |
| crybb113           | 46.57412 | 0.520594143  | 0.370069 | 1.406748 | 0.159502 | 0.6257   |
| ccnh               | 153.3784 | -0.201987088 | 0.157297 | -1.28411 | 0.199103 | 0.679605 |
| amph               | 950.8317 | 0.313722056  | 0.194429 | 1.613552 | 0.106625 | 0.536345 |
| ghrb               | 771.2758 | -0.0562621   | 0.238228 | -0.23617 | 0.813301 | 0.970328 |
| ttyh3b             | 1587.606 | -0.055645024 | 0.128672 | -0.43246 | 0.66541  | 0.932595 |
| ppdpfa             | 2286.591 | -0.044775739 | 0.232138 | -0.19288 | 0.84705  | 0.9773   |
| cullb              | 748.3674 | -0.274911631 | 0.137492 | -1.99948 | 0.045557 | 0.373513 |
| nfkbiab            | 1175.332 | -0.231453386 | 0.293371 | -0.78895 | 0.430144 | 0.847541 |
| fabp7a             | 5730.665 | 0.279987445  | 0.225326 | 1.242586 | 0.214021 | 0.696474 |
| nsa2               | 7956.402 | -0.375027157 | 0.15016  | -2.49752 | 0.012507 | 0.194482 |
| adamts8a           | 70.83172 | 0.355859716  | 0.278434 | 1.278076 | 0.201223 | 0.681045 |
| rab3i11            | 249.7556 | -0.025401929 | 0.147443 | -0.17228 | 0.863215 | 0.981725 |
| lgsn               | 608.0624 | 0.766325913  | 0.275345 | 2.783153 | 0.005383 | 0.123514 |
| sub1b              | 549.2419 | 0.02292307   | 0.255521 | 0.089711 | 0.928517 | 0.995052 |
| nudt8              | 237.7697 | -0.055745161 | 0.153821 | -0.3624  | 0.71705  | 0.94627  |
| efnbl              | 141.4452 | -0.00784948  | 0.178708 | -0.04392 | 0.964965 | 1        |
| rgl2               | 110.1169 | 0.01413455   | 0.204426 | 0.069143 | 0.944876 | 0.997371 |
| stn1               | 90.25551 | -0.029796242 | 0.260236 | -0.1145  | 0.908844 | 0.992033 |
| zyg11              | 580.427  | -0.279054486 | 0.174703 | -1.5973  | 0.110198 | 0.544875 |
| atplala.2          | 1788.705 | 0.052643465  | 0.219055 | 0.240321 | 0.810081 | 0.969828 |
| ill15l             | 42.19135 | -0.459227829 | 0.279241 | -1.64455 | 0.100062 | 0.524334 |
| tsr1               | 772.0928 | 0.069269275  | 0.140644 | 0.492516 | 0.622354 | 0.918644 |
| uqcrfs1            | 4049.31  | 0.016517323  | 0.105454 | 0.156631 | 0.875536 | 0.984383 |
| lmn13              | 50.94409 | 0.252658885  | 0.254333 | 0.993417 | 0.320507 | 0.780821 |
| cpne2              | 264.7036 | 0.219836228  | 0.208324 | 1.055263 | 0.291305 | 0.761454 |
| wdr61              | 339.4409 | 0.173900321  | 0.139412 | 1.247388 | 0.212255 | 0.69394  |
| spg21              | 387.2214 | -0.148277035 | 0.145256 | -1.0208  | 0.307349 | 0.772541 |
| klhdc10            | 320.4634 | -0.204307267 | 0.114666 | -1.78176 | 0.074789 | 0.464151 |
| sult5a1            | 22.70525 | -0.882784077 | 0.490067 | -1.80135 | 0.071647 | 0.4564   |
| vash2              | 469.1895 | -0.32164381  | 0.18894  | -1.70236 | 0.088688 | 0.5001   |
| blk                | 14.54875 | -0.366341664 | 0.515382 | -0.71082 | 0.477198 | 0.869292 |
| tmx2b              | 637.2486 | 0.32023669   | 0.130055 | 2.462317 | 0.013804 | 0.205712 |
| zgc:l12965         | 2.204354 | -0.723780486 | 1.4348   | -0.50445 | 0.613947 | 0.915998 |
| atp2blb            | 414.5193 | 0.498880145  | 0.21721  | 2.296767 | 0.021632 | 0.261049 |
| ppp2r1ba           | 2771.707 | 0.002768811  | 0.092669 | 0.029879 | 0.976164 | 1        |
| cst3               | 4499.03  | -0.489221061 | 0.168143 | -2.90956 | 0.003619 | 0.099519 |
| gas6               | 474.8481 | 0.020815957  | 0.15078  | 0.138055 | 0.890197 | 0.98835  |
| cyth3a             | 198.75   | -0.161130098 | 0.154458 | -1.0432  | 0.296856 | 0.764495 |

|                   |          |              |          |          |          |          |
|-------------------|----------|--------------|----------|----------|----------|----------|
| zdhhc16a          | 211.3252 | -0.053964065 | 0.198601 | -0.27172 | 0.785836 | 0.962605 |
| sp3b              | 637.6727 | 0.07116742   | 0.10345  | 0.68794  | 0.49149  | 0.87565  |
| rnpep11           | 246.9002 | -0.102429056 | 0.13661  | -0.74979 | 0.453379 | 0.858656 |
| palmlb            | 1190.812 | 0.092853952  | 0.107528 | 0.863532 | 0.387845 | 0.827592 |
| atf3              | 305.5615 | -0.08870023  | 0.290607 | -0.30522 | 0.760195 | 0.957886 |
| camtalb           | 599.9487 | 0.302025934  | 0.219568 | 1.375548 | 0.168962 | 0.640442 |
| map2k1            | 496.9415 | 0.157484889  | 0.129364 | 1.217379 | 0.22346  | 0.70531  |
| ctsla             | 12772.46 | -0.111145163 | 0.139724 | -0.79546 | 0.426345 | 0.845031 |
| MCHR2 (1 of many) | 4.606556 | -2.120760331 | 1.537749 | -1.37913 | 0.167854 | 0.639036 |
| rtn4r11a          | 10.12286 | -0.452538096 | 0.667888 | -0.67757 | 0.498047 | 0.878951 |
| tra2a             | 1439.665 | -0.042517799 | 0.104727 | -0.40599 | 0.684753 | 0.938486 |
| pimr195           | 0.217027 | 0            | 5.267649 | 0        | 1        | NA       |
| dazap2            | 1918.932 | -0.154354121 | 0.088457 | -1.74496 | 0.080992 | 0.479801 |
| ehd3              | 86.55049 | 0.564903884  | 0.229004 | 2.46679  | 0.013633 | 0.203924 |
| fanc1             | 13.02394 | -0.191719371 | 0.421818 | -0.45451 | 0.649464 | 0.927756 |
| slc35b2           | 206.2623 | 0.072218345  | 0.14449  | 0.499816 | 0.617204 | 0.916365 |
| meox1             | 352.6728 | -0.164868808 | 0.171132 | -0.9634  | 0.335346 | 0.79203  |
| pdcd2             | 37.97154 | 0.154568653  | 0.315552 | 0.489836 | 0.62425  | 0.919537 |
| crnk11            | 340.7367 | -0.342389719 | 0.130038 | -2.63299 | 0.008464 | 0.157114 |
| lrp2b             | 28.16815 | 0.908711856  | 0.918395 | 0.989456 | 0.32244  | 0.78246  |
| si:ch211-196i2.1  | 324.5857 | 0.052555871  | 0.172082 | 0.305412 | 0.760052 | 0.957886 |
| xpnpep3           | 252.8907 | -0.04713302  | 0.162269 | -0.29046 | 0.771462 | 0.960597 |
| ttc27             | 366.1707 | -0.135375833 | 0.159884 | -0.84671 | 0.397154 | 0.830253 |
| ptpn1             | 536.6465 | -0.128162979 | 0.110957 | -1.15507 | 0.248061 | 0.728489 |
| hmx4              | 335.9358 | 0.015626921  | 0.162462 | 0.096188 | 0.923371 | 0.994525 |
| gabpb2a           | 326.2521 | 0.306049151  | 0.176411 | 1.734862 | 0.082765 | 0.483014 |
| lhx1b             | 74.89986 | 0.158619837  | 0.258836 | 0.612819 | 0.539996 | 0.893049 |
| itgallb           | 47.66189 | 0.383232118  | 0.304782 | 1.257398 | 0.208609 | 0.690728 |
| iars              | 1420.642 | 0.210624686  | 0.122405 | 1.720722 | 0.085301 | 0.490552 |
| hibadhb           | 1203.257 | 0.011363735  | 0.128754 | 0.088259 | 0.929671 | 0.995576 |
| hnrnpaba          | 10488.35 | 0.216796759  | 0.087558 | 2.47605  | 0.013285 | 0.200523 |
| ckslb             | 285.5015 | 0.021735513  | 0.282189 | 0.077025 | 0.938604 | 0.997371 |
| fth1b             | 621.0976 | 0.37620646   | 0.181487 | 2.072917 | 0.03818  | 0.342672 |
| si:ch211-220f16.2 | 220.5402 | -0.266368129 | 0.16656  | -1.59923 | 0.10977  | 0.543595 |
| onecut1           | 71.6348  | 0.132532695  | 0.215373 | 0.615364 | 0.538314 | 0.892568 |
| masp2             | 176.7079 | 0.312710947  | 0.257862 | 1.212705 | 0.225243 | 0.70685  |
| nedd8             | 571.4461 | 0.090535022  | 0.168757 | 0.536483 | 0.591625 | 0.909437 |
| wtlb              | 38.88738 | -0.591510468 | 0.262536 | -2.25306 | 0.024255 | 0.275475 |
| pou2flb           | 254.3893 | 0.15082695   | 0.157682 | 0.956527 | 0.338806 | 0.795226 |
| zgc:194189        | 9.901347 | -0.121089709 | 0.621382 | -0.19487 | 0.845494 | 0.976867 |
| nudt17            | 258.199  | 0.237694547  | 0.175838 | 1.351778 | 0.176446 | 0.649859 |
| mxcg              | 1.323149 | -3.118530476 | 2.082889 | -1.49721 | 0.134338 | NA       |
| med31             | 296.298  | 0.110843961  | 0.148256 | 0.747651 | 0.454671 | 0.859767 |
| kif18a            | 146.022  | 0.31410722   | 0.210453 | 1.492527 | 0.135561 | 0.591012 |
| fam129bb          | 339.3236 | 0.007831893  | 0.173421 | 0.045161 | 0.963979 | 0.999842 |
| mepla.2           | 30.97056 | 2.278899022  | 0.691795 | 3.294185 | 0.000987 | 0.043563 |
| myl9b             | 1869.316 | -0.369157427 | 0.221452 | -1.66698 | 0.095518 | 0.516124 |
| sart3             | 644.4903 | 0.263434245  | 0.124657 | 2.113265 | 0.034578 | 0.328029 |
| skib              | 521.3197 | 0.064098678  | 0.114317 | 0.560711 | 0.574995 | 0.904516 |
| si:dkey-42i9.4    | 1739.26  | -0.29140287  | 0.187329 | -1.55556 | 0.119812 | 0.564602 |
| scara3            | 119.4553 | 0.163737623  | 0.223563 | 0.7324   | 0.463924 | 0.864593 |
| tma16             | 212.659  | 0.112655356  | 0.161237 | 0.698694 | 0.484743 | 0.872911 |
| illr4             | 3.27947  | -0.059167078 | 1.029921 | -0.05745 | 0.954188 | 0.998611 |
| olfcd1            | 1.238642 | 0.234441558  | 2.186227 | 0.107236 | 0.914602 | NA       |

|                   |          |              |          |          |          |          |
|-------------------|----------|--------------|----------|----------|----------|----------|
| srsf9             | 861.2088 | 0.013351494  | 0.111747 | 0.119479 | 0.904896 | 0.991631 |
| ifit9             | 1.984495 | 3.061626684  | 1.46004  | 2.096947 | 0.035998 | NA       |
| slc7a10a          | 285.0658 | 0.374567987  | 0.199022 | 1.882038 | 0.059831 | 0.421883 |
| mettl2a           | 262.0449 | -0.164215445 | 0.154418 | -1.06345 | 0.287578 | 0.758397 |
| src               | 130.2346 | 0.155280283  | 0.210439 | 0.737888 | 0.460583 | 0.862369 |
| si:ch211-195d17.2 | 299.9046 | -0.131951113 | 0.125546 | -1.05102 | 0.29325  | 0.762581 |
| pcdh15b           | 82.96089 | -0.345822769 | 0.288088 | -1.20041 | 0.229981 | 0.711763 |
| sox1b             | 266.9322 | 0.308158487  | 0.196095 | 1.571475 | 0.116072 | 0.556131 |
| foxl1             | 127.8324 | -0.043246453 | 0.218573 | -0.19786 | 0.843156 | 0.976791 |
| kcnabla           | 29.02733 | 0.590802052  | 0.365215 | 1.617684 | 0.105731 | 0.534827 |
| rb1l              | 246.0962 | -0.262604802 | 0.150593 | -1.74381 | 0.081193 | 0.479923 |
| stxbp3            | 596.4242 | 0.014022258  | 0.131671 | 0.106495 | 0.91519  | 0.993066 |
| serinc5           | 593.2511 | -0.006875098 | 0.090526 | -0.07595 | 0.939462 | 0.997371 |
| sms               | 643.518  | -0.015078093 | 0.14308  | -0.10538 | 0.916073 | 0.993234 |
| btr33             | 18.87259 | 0.147854388  | 0.527718 | 0.280177 | 0.779342 | 0.961073 |
| caspa             | 136.8055 | 0.146633091  | 0.168362 | 0.870939 | 0.383788 | 0.826299 |
| dbnla             | 197.504  | -0.017231974 | 0.196772 | -0.08757 | 0.930216 | 0.995707 |
| hoxbla            | 11.23353 | -0.207145755 | 0.502757 | -0.41202 | 0.680325 | 0.936798 |
| si:ch73-111e15.1  | 4.487196 | -1.48012092  | 1.042076 | -1.42036 | 0.155503 | 0.620161 |
| mia3              | 729.4284 | -0.146435904 | 0.12372  | -1.18361 | 0.236568 | 0.717725 |
| syk               | 114.7041 | -0.289612909 | 0.239873 | -1.20736 | 0.227294 | 0.708598 |
| sfl               | 1559.624 | -0.00239179  | 0.123622 | -0.01935 | 0.984564 | 1        |
| tmeffla           | 14.74217 | -0.484806482 | 0.580807 | -0.83471 | 0.40388  | 0.833888 |
| pankla            | 176.4822 | -0.088012458 | 0.157935 | -0.55727 | 0.577343 | 0.904832 |
| ugp2b             | 735.7421 | -0.067598454 | 0.131677 | -0.51337 | 0.607696 | 0.915204 |
| pax1a             | 60.54773 | 0.251785845  | 0.266383 | 0.945202 | 0.344556 | 0.798147 |
| myt11a            | 368.7052 | 0.439449965  | 0.270393 | 1.625225 | 0.104115 | 0.532183 |
| kcnk13a           | 5.317573 | -0.723884328 | 1.098592 | -0.65892 | 0.509947 | 0.883733 |
| znf410            | 1063.935 | -0.071289072 | 0.157646 | -0.45221 | 0.651119 | 0.928395 |
| crygm4            | 0.893208 | 1.771652394  | 2.100681 | 0.84337  | 0.399021 | NA       |
| vps35             | 1216.94  | 0.068569838  | 0.078292 | 0.875823 | 0.381126 | 0.824296 |
| cog5              | 248.8219 | -0.009671627 | 0.139375 | -0.06939 | 0.944677 | 0.997371 |
| sars              | 2126.775 | 0.022561497  | 0.123145 | 0.183211 | 0.854633 | 0.979161 |
| manba             | 88.12115 | -0.029095821 | 0.192006 | -0.15154 | 0.879553 | 0.986187 |
| mocs3             | 79.0621  | -0.356551145 | 0.240025 | -1.48547 | 0.137418 | 0.593264 |
| cct8              | 5173.078 | -0.126048992 | 0.109458 | -1.15157 | 0.249496 | 0.729721 |
| vezfla            | 109.0304 | 0.116695445  | 0.223274 | 0.522656 | 0.601214 | 0.913756 |
| ptchd4            | 13.90798 | 1.181013746  | 0.548917 | 2.151533 | 0.031434 | 0.315297 |
| cnot6a            | 946.4349 | 0.102800304  | 0.115012 | 0.893824 | 0.371416 | 0.818945 |
| mfsd4ab           | 93.67955 | -0.882182167 | 0.762013 | -1.1577  | 0.246987 | 0.727706 |
| klhl24b           | 1262.704 | -0.26554148  | 0.1668   | -1.59198 | 0.11139  | 0.547032 |
| rcor2             | 517.2414 | -0.060423367 | 0.141405 | -0.42731 | 0.669155 | 0.933115 |
| map2k7            | 48.9696  | 0.110511482  | 0.280395 | 0.394128 | 0.693487 | 0.940668 |
| fam114a1          | 336.9074 | 0.139515425  | 0.106889 | 1.305241 | 0.191811 | 0.672149 |
| eif2s3            | 7277.433 | -0.47410516  | 0.11034  | -4.29675 | 1.73E-05 | 0.002695 |
| hand2             | 299.1999 | -0.338271146 | 0.143196 | -2.36229 | 0.018162 | 0.237981 |
| rdh5              | 241.2217 | -0.205941067 | 0.216248 | -0.95234 | 0.340927 | 0.795603 |
| ip6k2a            | 1914.721 | -0.065881916 | 0.155234 | -0.4244  | 0.671271 | 0.933953 |
| ambrala           | 159.3863 | 0.158385052  | 0.223533 | 0.708552 | 0.478602 | 0.869292 |
| asicla            | 47.31772 | 0.183676864  | 0.337207 | 0.5447   | 0.58596  | 0.906655 |
| znf12a            | 157.56   | 0.328641572  | 0.194759 | 1.687427 | 0.091521 | 0.506944 |
| mcl1b             | 1490.885 | -0.237807806 | 0.20062  | -1.18536 | 0.235874 | 0.717225 |
| csnklda           | 2462.926 | -0.06943387  | 0.107799 | -0.6441  | 0.519509 | 0.887148 |
| spred2b           | 287.5964 | -0.144995584 | 0.133433 | -1.08666 | 0.277188 | 0.751426 |



|                    |           |               |           |           |           |           |
|--------------------|-----------|---------------|-----------|-----------|-----------|-----------|
| e pn2              | 1200. 782 | 0. 144871411  | 0. 116867 | 1. 239628 | 0. 215113 | 0. 697086 |
| brd7               | 728. 4505 | -0. 028603776 | 0. 123442 | -0. 23172 | 0. 816757 | 0. 971207 |
| arpc1a             | 2656. 648 | 0. 175040358  | 0. 110838 | 1. 579238 | 0. 114281 | 0. 553312 |
| hdac6              | 250. 6444 | 0. 267041174  | 0. 151356 | 1. 76433  | 0. 077676 | 0. 471265 |
| mmp14b             | 1310. 877 | 0. 10849077   | 0. 130885 | 0. 828904 | 0. 407159 | 0. 835299 |
| snupn              | 277. 2698 | 0. 180157553  | 0. 143184 | 1. 258222 | 0. 208311 | 0. 690398 |
| ftr24              | 114. 1927 | -0. 218497031 | 0. 191468 | -1. 14116 | 0. 253801 | 0. 732873 |
| cacnalc            | 59. 9502  | 0. 490292626  | 0. 369149 | 1. 328169 | 0. 184122 | 0. 661004 |
| phospho1           | 170. 3612 | -0. 368027555 | 0. 582865 | -0. 63141 | 0. 527772 | 0. 889948 |
| tspan7b            | 1370. 34  | 0. 068445652  | 0. 159832 | 0. 428235 | 0. 66848  | 0. 933086 |
| atp11a             | 580. 396  | -0. 146677597 | 0. 128876 | -1. 13813 | 0. 255067 | 0. 733542 |
| exoc312a           | 103. 8293 | -0. 3319257   | 0. 191344 | -1. 7347  | 0. 082793 | 0. 483014 |
| unc45b             | 380. 8973 | 0. 296163524  | 0. 235464 | 1. 257789 | 0. 208468 | 0. 69072  |
| bcl2l1             | 468. 819  | -0. 026629345 | 0. 14424  | -0. 18462 | 0. 853528 | 0. 978887 |
| atxn10             | 58. 87863 | -0. 145334216 | 0. 257039 | -0. 56542 | 0. 57179  | 0. 903234 |
| fkbp4              | 1130. 298 | 0. 059642448  | 0. 10965  | 0. 543937 | 0. 586485 | 0. 906711 |
| pcolce2a           | 51. 3206  | 0. 317477616  | 0. 256683 | 1. 236845 | 0. 216145 | 0. 69815  |
| cpeblb             | 13. 2116  | -0. 148444558 | 0. 561856 | -0. 2642  | 0. 791623 | 0. 964817 |
| faah2a             | 118. 7574 | 0. 398148542  | 0. 275686 | 1. 44421  | 0. 14868  | 0. 610476 |
| anapc5             | 180. 4777 | 0. 253823113  | 0. 159235 | 1. 594017 | 0. 110932 | 0. 54583  |
| apex2              | 105. 3621 | 0. 149389552  | 0. 208925 | 0. 715041 | 0. 474584 | 0. 869292 |
| asb14a             | 0. 18149  | -0. 868115394 | 5. 267649 | -0. 1648  | 0. 8691   | NA        |
| trmt61a            | 150. 7113 | -0. 360916217 | 0. 208072 | -1. 73457 | 0. 082816 | 0. 483014 |
| lrp3               | 74. 15044 | 0. 154795179  | 0. 217329 | 0. 712263 | 0. 476302 | 0. 869292 |
| dmd                | 917. 1727 | -0. 084934235 | 0. 220228 | -0. 38567 | 0. 699744 | 0. 942499 |
| ltvl               | 570. 5593 | -0. 189285076 | 0. 146509 | -1. 29197 | 0. 196369 | 0. 67688  |
| si:ch211-107o10. 3 | 142. 5086 | -0. 603928317 | 0. 328985 | -1. 83573 | 0. 066398 | 0. 440056 |
| myl6               | 875. 6318 | 0. 438210599  | 0. 177447 | 2. 469525 | 0. 013529 | 0. 202995 |
| pnol               | 2525. 828 | -0. 599265915 | 0. 131259 | -4. 56553 | 4. 98E-06 | 0. 001059 |
| glccila            | 99. 57664 | 0. 401494522  | 0. 177988 | 2. 255736 | 0. 024087 | 0. 27487  |
| sox21b             | 188. 0708 | 0. 111079154  | 0. 237407 | 0. 467886 | 0. 639866 | 0. 924779 |
| chia. 4            | 10. 90296 | -0. 881841184 | 1. 128898 | -0. 78115 | 0. 434713 | 0. 850002 |
| yod1               | 619. 4066 | -0. 098646621 | 0. 113087 | -0. 8723  | 0. 383043 | 0. 825809 |
| arhgap12a          | 263. 3015 | 0. 063618951  | 0. 132231 | 0. 481118 | 0. 630433 | 0. 92291  |
| pole3              | 385. 3639 | 0. 23515076   | 0. 154311 | 1. 523872 | 0. 127541 | 0. 576964 |
| zgc:136872         | 82. 53541 | -0. 043159523 | 0. 345409 | -0. 12495 | 0. 900562 | 0. 99045  |
| brap               | 214. 8341 | -0. 128521552 | 0. 139192 | -0. 92334 | 0. 355829 | 0. 806879 |
| slc25a24           | 476. 0426 | -0. 389717433 | 0. 140276 | -2. 77823 | 0. 005466 | 0. 12457  |
| fam20b             | 364. 145  | -0. 017829225 | 0. 147167 | -0. 12115 | 0. 903573 | 0. 991366 |
| lyst               | 206. 9679 | -0. 313625327 | 0. 263987 | -1. 18804 | 0. 23482  | 0. 715533 |
| mtmr8              | 230. 2483 | -0. 198345673 | 0. 203856 | -0. 97297 | 0. 330569 | 0. 788126 |
| nbas               | 143. 8293 | -0. 300095964 | 0. 184607 | -1. 62559 | 0. 104036 | 0. 532096 |
| cops3              | 757. 8817 | -0. 112026237 | 0. 125701 | -0. 89121 | 0. 372815 | 0. 819953 |
| mttp               | 463. 7181 | 0. 318548985  | 0. 194884 | 1. 634556 | 0. 102142 | 0. 528963 |
| kifap3a            | 476. 7622 | 0. 12977191   | 0. 105127 | 1. 234433 | 0. 217041 | 0. 69815  |
| coro1b             | 755. 7463 | -0. 153500244 | 0. 129995 | -1. 18082 | 0. 237675 | 0. 718568 |
| fign               | 47. 35651 | 0. 370634864  | 0. 317286 | 1. 16814  | 0. 24275  | 0. 724345 |
| snx3               | 802. 111  | 0. 049473138  | 0. 133117 | 0. 371652 | 0. 710152 | 0. 945821 |
| epasla             | 1092. 204 | -0. 316397754 | 0. 134497 | -2. 35244 | 0. 01865  | 0. 2416   |
| apeh               | 432. 6679 | -0. 008133161 | 0. 144446 | -0. 05631 | 0. 955098 | 0. 998611 |
| paip2b             | 2426. 665 | -0. 088124857 | 0. 111045 | -0. 7936  | 0. 427429 | 0. 845877 |
| lmo3               | 880. 6789 | 0. 22909791   | 0. 129612 | 1. 767568 | 0. 077133 | 0. 469501 |
| prkcba             | 305. 3236 | 0. 081702554  | 0. 136702 | 0. 597671 | 0. 55006  | 0. 8974   |
| ranbp3a            | 57. 09978 | -0. 338780697 | 0. 304676 | -1. 11194 | 0. 266165 | 0. 742912 |

|                  |          |              |          |          |          |          |
|------------------|----------|--------------|----------|----------|----------|----------|
| zgc:66479        | 749.3797 | -0.076994721 | 0.141121 | -0.54559 | 0.585346 | 0.906655 |
| atp6ap2          | 1366.992 | -0.062646368 | 0.105632 | -0.59306 | 0.553139 | 0.897809 |
| esf1             | 271.2263 | 0.127684861  | 0.210107 | 0.607713 | 0.543378 | 0.894925 |
| ube2na           | 1763.732 | 0.071477831  | 0.112466 | 0.635548 | 0.525071 | 0.888928 |
| entpd6           | 532.7945 | 0.093327297  | 0.087633 | 1.064979 | 0.286886 | 0.757915 |
| tmed5            | 430.4183 | 0.154098039  | 0.123836 | 1.244373 | 0.213362 | 0.695695 |
| tle2b            | 87.88222 | -0.385342992 | 0.246521 | -1.56312 | 0.118024 | 0.560168 |
| cacngla          | 686.0548 | 0.349016145  | 0.157615 | 2.214363 | 0.026804 | 0.290512 |
| prpf4ba          | 207.7326 | -0.138375212 | 0.187105 | -0.73956 | 0.459567 | 0.862129 |
| dldh             | 4356.992 | -0.09487143  | 0.075608 | -1.25478 | 0.209558 | 0.691743 |
| camklgb          | 300.9092 | 0.490471197  | 0.272346 | 1.800912 | 0.071717 | 0.4564   |
| actr3b           | 97.60071 | -0.511427802 | 0.356895 | -1.43299 | 0.15186  | 0.615406 |
| her5             | 2.490717 | -1.427888344 | 1.14231  | -1.25    | 0.211299 | 0.692983 |
| marcksb          | 5186.77  | 0.13844286   | 0.132208 | 1.047156 | 0.295028 | 0.763708 |
| orc3             | 208.2779 | -0.176212097 | 0.202022 | -0.87224 | 0.383077 | 0.825809 |
| bokb             | 12.9993  | -1.444632417 | 0.671798 | -2.1504  | 0.031524 | 0.315646 |
| eml2             | 839.1796 | -0.083359442 | 0.128983 | -0.64628 | 0.518098 | 0.887148 |
| cmtm3            | 152.9754 | -0.149349722 | 0.177237 | -0.84266 | 0.399421 | 0.831196 |
| gludla           | 1935.984 | -0.295243129 | 0.115121 | -2.56463 | 0.010329 | 0.176586 |
| hsf1             | 229.705  | -0.2783734   | 0.159446 | -1.74588 | 0.080831 | 0.479801 |
| chga             | 364.4445 | 0.438690079  | 0.184202 | 2.381566 | 0.017239 | 0.231824 |
| neul             | 260.9348 | 0.138876062  | 0.120613 | 1.151416 | 0.249561 | 0.729721 |
| si:dkey-46g23.5  | 2.856776 | -1.565911192 | 1.052823 | -1.48734 | 0.136924 | 0.5925   |
| hmbsa            | 295.5628 | 0.199948043  | 0.151145 | 1.322885 | 0.185874 | 0.663692 |
| ptrpq            | 16.8909  | -0.920528404 | 0.651698 | -1.41251 | 0.1578   | 0.623766 |
| elp4             | 117.4454 | 0.11073197   | 0.197396 | 0.560965 | 0.574821 | 0.904516 |
| cyp7b1           | 73.2099  | 0.232976998  | 0.293434 | 0.793968 | 0.427214 | 0.845741 |
| mylipa           | 490.5638 | -0.272969847 | 0.174233 | -1.56669 | 0.117187 | 0.558341 |
| tfap2e           | 272.5205 | -0.191827509 | 0.14581  | -1.3156  | 0.188308 | 0.667547 |
| cabp4            | 12.28234 | -1.805993548 | 1.445263 | -1.2496  | 0.211448 | 0.692983 |
| rap1b            | 1349.478 | 0.121640744  | 0.123232 | 0.987087 | 0.3236   | 0.783161 |
| usp28            | 1632.73  | 0.105409215  | 0.18278  | 0.5767   | 0.564142 | 0.901398 |
| hprt1            | 600.2007 | 0.060225584  | 0.153017 | 0.393588 | 0.693885 | 0.940854 |
| msx1b            | 535.9018 | 0.010886336  | 0.134961 | 0.080663 | 0.93571  | 0.996829 |
| ctns             | 119.0205 | -0.059401075 | 0.160849 | -0.3693  | 0.711906 | 0.945821 |
| smarca2          | 548.2926 | -0.026029425 | 0.161984 | -0.16069 | 0.872336 | 0.983447 |
| si:ch211-241e1.5 | 121.2041 | -0.164146313 | 0.21463  | -0.76479 | 0.444399 | 0.85448  |
| slc8a2a          | 28.70837 | -0.134954428 | 0.434498 | -0.3106  | 0.756106 | 0.956532 |
| mrpl53           | 175.3393 | 0.130659586  | 0.163223 | 0.800496 | 0.423424 | 0.843967 |
| renbp            | 282.5119 | -0.410368268 | 0.228589 | -1.79522 | 0.072618 | 0.457864 |
| secl1a           | 527.3868 | -0.070036987 | 0.186814 | -0.3749  | 0.707733 | 0.945194 |
| ccdc127b         | 68.83678 | -0.103667917 | 0.225652 | -0.45942 | 0.645936 | 0.926728 |
| rtfl             | 1555.243 | 0.079812585  | 0.082227 | 0.970633 | 0.331731 | 0.789531 |
| pla2g3           | 2.443856 | -1.383334241 | 1.388679 | -0.99615 | 0.319177 | 0.779923 |
| pofut1           | 213.6576 | 0.170252408  | 0.139414 | 1.221198 | 0.222011 | 0.703829 |
| tbl1xr1b         | 450.6037 | -0.100478015 | 0.14117  | -0.71175 | 0.476617 | 0.869292 |
| fgb              | 3787.575 | -0.079185915 | 0.216875 | -0.36512 | 0.71502  | 0.945821 |
| mdn1             | 476.2948 | -0.011367231 | 0.218439 | -0.05204 | 0.958498 | 0.999109 |
| golgal           | 348.8745 | -0.11017242  | 0.133307 | -0.82645 | 0.408547 | 0.836443 |
| casq2            | 2371.06  | 0.039159324  | 0.184076 | 0.212735 | 0.831534 | 0.974908 |
| sh3glb2a         | 22.07234 | -0.157219061 | 0.454061 | -0.34625 | 0.729154 | 0.949983 |
| e2f7             | 117.4898 | 0.429288869  | 0.242321 | 1.771568 | 0.076466 | 0.468417 |
| pdia6            | 1205.527 | 0.54811129   | 0.148315 | 3.695578 | 0.000219 | 0.015758 |
| coll1a1b         | 2936.579 | 0.166274374  | 0.185801 | 0.894906 | 0.370837 | 0.818484 |

|                 |          |              |          |          |          |          |
|-----------------|----------|--------------|----------|----------|----------|----------|
| rhbg            | 2608.019 | 0.258528926  | 0.156791 | 1.648879 | 0.099172 | 0.522589 |
| cnrl            | 25.25057 | 0.302605165  | 0.45146  | 0.670282 | 0.502678 | 0.881453 |
| chrnal          | 641.9811 | 0.046918801  | 0.174753 | 0.268487 | 0.788324 | 0.963471 |
| ankrd28b        | 617.5089 | 0.018042226  | 0.114995 | 0.156896 | 0.875327 | 0.984383 |
| ank2a           | 288.9563 | 0.490388179  | 0.24997  | 1.961787 | 0.049787 | 0.38821  |
| tnikb           | 525.9605 | -0.049567309 | 0.127259 | -0.3895  | 0.696906 | 0.94198  |
| si:ch73-141c7.1 | 306.5875 | -0.433489413 | 0.460847 | -0.94064 | 0.346891 | 0.799748 |
| nphpl           | 51.16157 | 0.768732768  | 0.269043 | 2.857284 | 0.004273 | 0.10808  |
| cbr4            | 71.94591 | -0.113473381 | 0.274218 | -0.41381 | 0.679015 | 0.936141 |
| BX296551.1      | 19.52515 | -0.321367391 | 0.427564 | -0.75162 | 0.452277 | 0.857994 |
| cd74a           | 32.07317 | -1.076443961 | 0.842842 | -1.27716 | 0.201546 | 0.681423 |
| gata2b          | 14.12466 | 0.599169338  | 0.625271 | 0.958256 | 0.337934 | 0.794808 |
| serinc1         | 4070.258 | 0.003433484  | 0.120441 | 0.028508 | 0.977257 | 1        |
| pigc            | 122.175  | 0.150870221  | 0.167188 | 0.902401 | 0.366844 | 0.816111 |
| sele            | 111.1151 | -0.253942532 | 0.317143 | -0.80072 | 0.423294 | 0.843894 |
| slc10a4         | 45.56489 | 0.376291217  | 0.370943 | 1.014419 | 0.310383 | 0.775121 |
| myoleb          | 452.338  | -0.047592717 | 0.128072 | -0.37161 | 0.710185 | 0.945821 |
| hlx1            | 263.3663 | -0.20075473  | 0.189109 | -1.06158 | 0.288426 | 0.759522 |
| tp53bp2a        | 1210.651 | -0.030883561 | 0.125682 | -0.24573 | 0.805893 | 0.969625 |
| ppplr13bb       | 821.7609 | -0.0248742   | 0.144761 | -0.17183 | 0.863572 | 0.981794 |
| pla2glb         | 1271.935 | 1.947156993  | 1.576879 | 1.234817 | 0.216899 | 0.69815  |
| kmo             | 151.8095 | -0.56624797  | 0.270804 | -2.09099 | 0.036529 | 0.335935 |
| ftr55           | 2.584579 | 1.072732025  | 1.579002 | 0.679373 | 0.496901 | 0.878572 |
| moblba          | 549.6625 | -0.109173227 | 0.120038 | -0.90949 | 0.363092 | 0.813385 |
| ctr9            | 896.034  | -0.06647207  | 0.099552 | -0.66771 | 0.504318 | 0.881824 |
| zfand1          | 200.6759 | -0.074932322 | 0.179147 | -0.41827 | 0.675747 | 0.935422 |
| coll6a1         | 1165.08  | 0.209419257  | 0.168132 | 1.245567 | 0.212923 | 0.695242 |
| anxa3a          | 365.311  | -0.09128582  | 0.117714 | -0.77549 | 0.438051 | 0.851454 |
| prkcd           | 326.815  | -0.037591449 | 0.131552 | -0.28575 | 0.775068 | 0.960899 |
| slc9a6a         | 227.9647 | -0.137126163 | 0.142128 | -0.9648  | 0.334643 | 0.791583 |
| ppiaa           | 31149.2  | -0.241079963 | 0.146652 | -1.64389 | 0.100198 | 0.524654 |
| mfsl3a          | 418.8222 | -0.037836209 | 0.107765 | -0.3511  | 0.725513 | 0.948653 |
| zgc:112437      | 116.6648 | 0.2652829    | 0.25335  | 1.0471   | 0.295054 | 0.763708 |
| tom112          | 131.6503 | -0.138334479 | 0.197005 | -0.70219 | 0.482562 | 0.871721 |
| mars2           | 58.76573 | 0.195318823  | 0.244358 | 0.799315 | 0.424108 | 0.844355 |
| fev             | 60.66798 | 0.03465952   | 0.278354 | 0.124516 | 0.900907 | 0.99045  |
| etfb            | 3899.431 | -0.101347384 | 0.134487 | -0.75359 | 0.451097 | 0.857606 |
| napepld         | 137.4532 | -0.49363293  | 0.228661 | -2.15879 | 0.030866 | 0.312739 |
| rtraf           | 548.0397 | -0.059778501 | 0.139065 | -0.42986 | 0.667298 | 0.933049 |
| FAR2            | 52.35927 | -0.365408871 | 0.310468 | -1.17696 | 0.23921  | 0.719781 |
| uevld           | 126.6872 | 0.192896243  | 0.176625 | 1.092122 | 0.274779 | 0.750181 |
| zgc:136439      | 0        | NA           | NA       | NA       | NA       | NA       |
| ppmla           | 497.5742 | 0.015552745  | 0.100125 | 0.155333 | 0.876559 | 0.985007 |
| smyd1a          | 6997.757 | -0.053606616 | 0.174349 | -0.30747 | 0.758488 | 0.957865 |
| dnmlb           | 211.4163 | 0.368834001  | 0.246438 | 1.49666  | 0.134482 | 0.588914 |
| rpl15           | 29034.91 | -0.377323036 | 0.124963 | -3.01947 | 0.002532 | 0.08126  |
| dusp8a          | 356.3234 | 0.172123741  | 0.164546 | 1.046054 | 0.295536 | 0.764153 |
| pvalb6          | 440.9452 | 0.221178744  | 0.288844 | 0.765737 | 0.443833 | 0.854255 |
| napsa           | 192.2656 | -0.332303383 | 0.223524 | -1.48666 | 0.137106 | 0.592785 |
| clgn            | 984.3454 | 0.242032207  | 0.084469 | 2.865333 | 0.004166 | 0.106651 |
| aif11           | 1127.202 | -0.006666642 | 0.15683  | -0.04251 | 0.966093 | 1        |
| nrap            | 844.1847 | 0.041998308  | 0.164119 | 0.255902 | 0.798027 | 0.966458 |
| txndc5          | 1571.281 | 0.123995197  | 0.125535 | 0.987733 | 0.323283 | 0.783113 |
| caprin1a        | 645.2212 | -0.039002149 | 0.116409 | -0.33504 | 0.737591 | 0.952496 |

|                   |          |              |          |          |          |          |
|-------------------|----------|--------------|----------|----------|----------|----------|
| atg3              | 688.4276 | -0.3144701   | 0.143354 | -2.19367 | 0.028259 | 0.298982 |
| fgf6a             | 161.1787 | 0.197812939  | 0.323013 | 0.612398 | 0.540274 | 0.893049 |
| diras1b           | 5.777499 | -0.201252256 | 0.686896 | -0.29299 | 0.769531 | 0.960484 |
| mpp4l             | 46.82438 | -0.893659142 | 0.652144 | -1.37034 | 0.170581 | 0.642139 |
| robo4             | 449.9186 | 0.06138745   | 0.161483 | 0.380148 | 0.703836 | 0.943735 |
| npl               | 377.227  | -0.116243565 | 0.188656 | -0.61617 | 0.537785 | 0.892498 |
| vcanb             | 1863.33  | 0.267559871  | 0.170248 | 1.571585 | 0.116047 | 0.556131 |
| si:ch211-210b2.2  | 48.1335  | -0.876554137 | 0.372873 | -2.35081 | 0.018733 | 0.241927 |
| mef2cb            | 741.9066 | 0.0034322    | 0.16813  | 0.020414 | 0.983713 | 1        |
| tmem30c           | 73.75946 | -0.325319822 | 0.271311 | -1.19907 | 0.230502 | 0.712099 |
| ubxn7             | 401.4995 | 0.107583553  | 0.161477 | 0.666248 | 0.505253 | 0.882188 |
| myog              | 199.5306 | -0.105550539 | 0.273714 | -0.38562 | 0.699776 | 0.942499 |
| zgc:92137         | 6245.375 | -1.762299637 | 1.654754 | -1.06499 | 0.28688  | 0.757915 |
| atp5mc3b          | 21670.17 | -0.103333007 | 0.154391 | -0.66929 | 0.503308 | 0.881759 |
| slc35e4           | 45.17824 | -0.286674756 | 0.419943 | -0.68265 | 0.494827 | 0.878016 |
| rgs9bp            | 30.12305 | -0.990097714 | 0.5603   | -1.76709 | 0.077214 | 0.469565 |
| hnfla             | 71.59845 | -0.450652317 | 0.226063 | -1.99348 | 0.046209 | 0.375668 |
| nid2b             | 1.77896  | -1.781178268 | 1.912814 | -0.93118 | 0.351759 | NA       |
| med19b            | 156.8605 | -0.027182034 | 0.169088 | -0.16076 | 0.872285 | 0.983447 |
| pparδ             | 498.4474 | -0.145293636 | 0.127082 | -1.1433  | 0.252912 | 0.732759 |
| prkar2ab          | 66.22129 | 0.920482807  | 0.383428 | 2.400664 | 0.016365 | 0.225867 |
| pdc1              | 1313.874 | -0.465629879 | 0.112552 | -4.13703 | 3.52E-05 | 0.004291 |
| slc38a8a          | 22.07652 | 0.395884024  | 0.391718 | 1.010635 | 0.312191 | 0.776164 |
| arfl              | 2145.179 | 0.135721679  | 0.08569  | 1.583873 | 0.113223 | 0.551017 |
| gipc2             | 290.4341 | 0.066148061  | 0.136455 | 0.484759 | 0.627847 | 0.921643 |
| MAP3K13           | 25.63885 | 0.269253844  | 0.372356 | 0.723108 | 0.469614 | 0.867224 |
| xrcc1             | 414.6295 | 0.012155455  | 0.128273 | 0.094762 | 0.924504 | 0.994815 |
| synela            | 1145.541 | 0.162391545  | 0.161275 | 1.006925 | 0.313971 | 0.777479 |
| prelid3b          | 1578.796 | 0.14429491   | 0.377329 | 0.382411 | 0.702156 | 0.943292 |
| tnfa              | 2.137033 | 0            | 2.037611 | 0        | 1        | NA       |
| rnf150b           | 212.4755 | -0.582869821 | 0.140102 | -4.16034 | 3.18E-05 | 0.00398  |
| tial1             | 1278.272 | -0.068977759 | 0.091407 | -0.75462 | 0.450477 | 0.857151 |
| wls               | 1791.372 | 0.252010144  | 0.122335 | 2.06     | 0.039399 | 0.347538 |
| cldnb             | 1315.765 | -0.08289341  | 0.262649 | -0.31561 | 0.752302 | 0.955481 |
| ubr4              | 1865.02  | -0.02852197  | 0.223954 | -0.12736 | 0.898658 | 0.990199 |
| foxi3b            | 210.5693 | -0.145204268 | 0.209671 | -0.69253 | 0.488602 | 0.873964 |
| gng3              | 1458.476 | 0.164662404  | 0.194049 | 0.84856  | 0.396126 | 0.8295   |
| wrap73            | 169.1463 | 0.012475441  | 0.165499 | 0.075381 | 0.939912 | 0.997371 |
| spegb             | 490.8696 | 0.176740516  | 0.220727 | 0.800718 | 0.423295 | 0.843894 |
| cal0b             | 53.12444 | -0.990678991 | 0.421981 | -2.34768 | 0.018891 | 0.242305 |
| papola            | 2043.677 | 0.157070413  | 0.079706 | 1.970633 | 0.048766 | 0.384322 |
| nr1d2b            | 1409.33  | -0.145089604 | 0.695697 | -0.20855 | NA       | NA       |
| ccnc              | 556.0545 | -0.088849527 | 0.125262 | -0.70931 | 0.478132 | 0.869292 |
| rgs12a            | 248.0655 | 0.220623057  | 0.151314 | 1.458052 | 0.144826 | 0.603718 |
| chia.3            | 94.73276 | -1.036054128 | 0.861674 | -1.20237 | 0.229219 | 0.711317 |
| CABZ01027646.1    | 31.62904 | -0.475103717 | 0.499571 | -0.95102 | 0.341592 | 0.796327 |
| nrbp2b            | 80.041   | -0.386083911 | 0.237269 | -1.6272  | 0.103695 | 0.531435 |
| unc119.1          | 388.2513 | -0.168558581 | 0.105225 | -1.60189 | 0.109179 | 0.542034 |
| rcvrn3            | 3546.366 | 0.192450423  | 0.159764 | 1.204592 | 0.228361 | 0.709551 |
| psmb1             | 2335.052 | 0.029441252  | 0.134897 | 0.21825  | 0.827235 | 0.973459 |
| lhfp12a           | 215.2185 | -0.334993852 | 0.208021 | -1.61039 | 0.107314 | 0.537961 |
| fgfr1op2          | 484.4306 | -0.15855447  | 0.15     | -1.05703 | 0.290499 | 0.76078  |
| si:ch211-197g15.6 | 5.644859 | -0.474811365 | 0.741544 | -0.6403  | 0.521977 | 0.88764  |
| dlg1              | 539.6414 | -0.057993435 | 0.123928 | -0.46796 | 0.639813 | 0.924779 |

|          |          |              |          |          |          |          |
|----------|----------|--------------|----------|----------|----------|----------|
| med27    | 216.3612 | 0.00112667   | 0.13047  | 0.008636 | 0.99311  | 1        |
| ppa2     | 154.678  | -0.166520235 | 0.180745 | -0.9213  | 0.356895 | 0.807545 |
| daamlb   | 782.8227 | -0.009975594 | 0.103868 | -0.09604 | 0.923488 | 0.994525 |
| llgl1    | 503.7927 | 0.203062707  | 0.144676 | 1.403569 | 0.160447 | 0.627013 |
| ascl1b   | 30.2221  | -0.251922015 | 0.516074 | -0.48815 | 0.625443 | 0.920625 |
| rpn2     | 2309.657 | 0.012174994  | 0.111543 | 0.109151 | 0.913083 | 0.99273  |
| twf2b    | 60.45436 | -0.115098316 | 0.302856 | -0.38004 | 0.703913 | 0.943735 |
| kif21b   | 65.5755  | -0.206005897 | 0.233941 | -0.88059 | 0.378539 | 0.822927 |
| gigyf2   | 822.5146 | 0.201462688  | 0.107321 | 1.877201 | 0.06049  | 0.422849 |
| cacnb4a  | 11.43734 | -0.160813164 | 0.585674 | -0.27458 | 0.78364  | 0.96245  |
| ppplr7   | 645.8312 | 0.21727861   | 0.123479 | 1.759637 | 0.078469 | 0.474337 |
| efhc1    | 48.71316 | -0.617093406 | 0.320146 | -1.92754 | 0.053913 | 0.402007 |
| fbxw2    | 437.1237 | -0.085923889 | 0.137326 | -0.62569 | 0.531518 | 0.890835 |
| dfb      | 122.7405 | -0.177472332 | 0.201677 | -0.87998 | 0.37887  | 0.823136 |
| sf3b6    | 781.5244 | -0.178060286 | 0.160821 | -1.1072  | 0.268209 | 0.744507 |
| zc3h11a  | 1044.116 | -0.099835201 | 0.13329  | -0.74901 | 0.453852 | 0.858859 |
| srekl    | 155.1527 | 0.187245345  | 0.156972 | 1.192855 | 0.232926 | 0.714492 |
| ppmel    | 1018.65  | -0.06754024  | 0.122444 | -0.5516  | 0.58122  | 0.905618 |
| mc11a    | 3712.295 | 0.05586347   | 0.181779 | 0.307316 | 0.758603 | 0.957865 |
| myh11a   | 429.0585 | 0.46130653   | 0.220342 | 2.09359  | 0.036297 | 0.335171 |
| slc49a4  | 441.7422 | 0.011912113  | 0.165695 | 0.071892 | 0.942688 | 0.997371 |
| k1c1a    | 399.7306 | 0.196704171  | 0.130392 | 1.508561 | 0.131411 | 0.583069 |
| smfn     | 139.3371 | -0.10319049  | 0.205141 | -0.50302 | 0.614948 | 0.915998 |
| her4.4   | 156.7294 | 0.347814561  | 0.29375  | 1.184049 | 0.236394 | 0.717674 |
| pou3f1   | 931.2643 | 0.150510676  | 0.114264 | 1.317222 | 0.187764 | 0.666964 |
| mmp23bb  | 162.0812 | -0.060445313 | 0.25543  | -0.23664 | 0.812935 | 0.970328 |
| hdlbpa   | 17692.18 | -0.121012588 | 0.065189 | -1.85634 | 0.063405 | 0.429783 |
| agk      | 357.3323 | -0.09583713  | 0.15006  | -0.63866 | 0.523045 | 0.88829  |
| fam117bb | 113.9037 | 0.115564885  | 0.236285 | 0.489092 | 0.624777 | 0.920109 |
| dusp23a  | 139.7146 | -0.279127113 | 0.299714 | -0.93131 | 0.351692 | 0.802513 |
| wdr41    | 402.5474 | 0.112295067  | 0.131814 | 0.851919 | 0.394259 | 0.828374 |
| dcps     | 221.4887 | -0.083826811 | 0.169592 | -0.49429 | 0.621105 | 0.918461 |
| ddx55    | 196.5365 | -0.078207031 | 0.16872  | -0.46353 | 0.642983 | 0.925854 |
| dcaf11   | 724.5279 | -0.27178851  | 0.105283 | -2.5815  | 0.009837 | 0.171403 |
| mapk8b   | 108.9201 | 0.01975945   | 0.184402 | 0.107154 | 0.914667 | 0.992972 |
| snrpc    | 664.5321 | -0.040379559 | 0.139775 | -0.28889 | 0.772665 | 0.960624 |
| cyp2k6   | 0.368977 | -3.616250748 | 5.162302 | -0.70051 | 0.483608 | NA       |
| ier5     | 1654.411 | 0.025392056  | 0.149502 | 0.169844 | 0.865133 | 0.982142 |
| sult3st1 | 12.09989 | 0.155742014  | 0.485292 | 0.320924 | 0.748268 | 0.955074 |
| rnf114   | 229.7511 | -0.268847099 | 0.14584  | -1.84344 | 0.065265 | 0.435359 |
| znf385a  | 72.54003 | 0.029502708  | 0.236802 | 0.124588 | 0.90085  | 0.99045  |
| slc38a5a | 300.9411 | -0.523533253 | 0.160229 | -3.2674  | 0.001085 | 0.046486 |
| dmbx1a   | 294.4061 | 0.478011307  | 0.177342 | 2.695414 | 0.00703  | 0.141889 |
| cadm2a   | 28.28553 | 0.261288492  | 0.37945  | 0.688598 | 0.491076 | 0.875595 |
| micu2    | 514.4928 | -0.036515803 | 0.149793 | -0.24378 | 0.807405 | 0.969736 |
| ercla    | 274.0728 | 0.311685923  | 0.192975 | 1.615164 | 0.106275 | 0.535537 |
| cdc6     | 213.09   | 0.273720845  | 0.196958 | 1.389745 | 0.164606 | 0.634007 |
| fndc4b   | 265.1267 | 0.349949673  | 0.252455 | 1.386186 | 0.16569  | 0.635372 |
| edf1     | 2424.913 | -0.125513268 | 0.124231 | -1.01032 | 0.312341 | 0.776164 |
| med14    | 534.8351 | 0.010965651  | 0.145569 | 0.075329 | 0.939953 | 0.997371 |
| cbl      | 174.7346 | 0.07828971   | 0.18253  | 0.428913 | 0.667986 | 0.933086 |
| rundc3b  | 14.18438 | -0.135564684 | 0.570712 | -0.23754 | 0.812241 | 0.970129 |
| icn      | 12173.96 | -0.096177938 | 0.224887 | -0.42767 | 0.66889  | 0.933115 |
| fam199x  | 797.992  | 0.217755403  | 0.106396 | 2.046645 | 0.040693 | 0.352601 |

|                  |          |              |          |          |          |          |
|------------------|----------|--------------|----------|----------|----------|----------|
| gnalla           | 151.106  | 0.063736469  | 0.159035 | 0.400769 | 0.68859  | 0.939118 |
| vim              | 1686.139 | -0.090761456 | 0.164707 | -0.55105 | 0.581602 | 0.905618 |
| triml3           | 366.5187 | -0.008737261 | 0.177904 | -0.04911 | 0.96083  | 0.999249 |
| qki2             | 342.2831 | 0.123727411  | 0.145544 | 0.850104 | 0.395268 | 0.829083 |
| grpel1           | 517.6971 | 0.221337458  | 0.121708 | 1.818592 | 0.068974 | 0.448201 |
| CU856539.1       | 154.8949 | 0.498964973  | 0.288682 | 1.728426 | 0.083912 | 0.486647 |
| spon1a           | 15.77457 | 0.280981221  | 0.587581 | 0.4782   | 0.632508 | 0.923396 |
| ssh1b            | 206.8907 | -0.10457146  | 0.164877 | -0.63424 | 0.525925 | 0.889076 |
| cmtm7            | 281.2787 | -0.309479859 | 0.12919  | -2.39555 | 0.016595 | 0.2282   |
| engase           | 83.22414 | -0.119197606 | 0.210874 | -0.56525 | 0.571901 | 0.90333  |
| dnmla            | 129.9223 | 0.54799486   | 0.292355 | 1.874416 | 0.060873 | 0.423588 |
| neu3.2           | 241.0417 | 0.522554515  | 0.274511 | 1.903582 | 0.056965 | 0.412306 |
| ufd11            | 1082.937 | 0.206131509  | 0.166369 | 1.239    | 0.215345 | 0.697157 |
| ndrg3b           | 972.407  | 0.148953528  | 0.123888 | 1.202329 | 0.229236 | 0.711317 |
| itpkb            | 95.80026 | 0.246849482  | 0.255436 | 0.966385 | 0.333851 | 0.790692 |
| adam9            | 280.7241 | -0.333108483 | 0.15366  | -2.16783 | 0.030172 | 0.309482 |
| CR792422.1       | 7.297995 | -0.705190968 | 0.971085 | -0.72619 | 0.467723 | 0.866174 |
| nup133           | 424.639  | 0.222375605  | 0.112974 | 1.968384 | 0.049024 | 0.385568 |
| rbfox3a          | 442.6705 | 0.165939509  | 0.146757 | 1.130709 | 0.258178 | 0.735569 |
| p4ha2            | 353.1574 | 0.030592114  | 0.219945 | 0.13909  | 0.889379 | 0.988318 |
| slc1a6           | 29.45055 | 0.943460947  | 0.415139 | 2.272637 | 0.023048 | 0.26812  |
| f9a              | 12.34456 | 0.674072143  | 0.70706  | 0.953344 | 0.340416 | 0.795496 |
| pank1b           | 455.8911 | 0.079153375  | 0.106833 | 0.740908 | 0.458749 | 0.861537 |
| bri3bp           | 148.3132 | 0.100748802  | 0.228203 | 0.441488 | 0.65886  | 0.930581 |
| ndufb8           | 3351.616 | -0.097464025 | 0.133485 | -0.73015 | 0.465299 | 0.864997 |
| smpd13b          | 126.4446 | 0.649013572  | 0.283856 | 2.286417 | 0.02223  | 0.263658 |
| dacha            | 412.1258 | -0.062021056 | 0.108155 | -0.57345 | 0.566341 | 0.901739 |
| ldbla            | 1890.631 | -0.046956922 | 0.078279 | -0.59987 | 0.548595 | 0.896847 |
| plppr3a          | 503.7154 | -0.069874282 | 0.151441 | -0.4614  | 0.644514 | 0.926639 |
| tor4aa           | 196.8623 | 0.14858393   | 0.164501 | 0.90324  | 0.366398 | 0.81589  |
| cpa2             | 32.76177 | 1.98462201   | 0.611782 | 3.244005 | 0.001179 | 0.049383 |
| atp5fa1          | 24971.97 | 0.038243392  | 0.118591 | 0.322481 | 0.747088 | 0.955074 |
| vstm4a           | 202.3441 | -0.219329598 | 0.215773 | -1.01648 | 0.309399 | 0.774075 |
| abila            | 632.0011 | 0.085685058  | 0.099201 | 0.863749 | 0.387726 | 0.827592 |
| rps15a           | 16989.26 | -0.351901276 | 0.128234 | -2.74422 | 0.006066 | 0.131345 |
| myd88            | 210.4606 | -0.306015896 | 0.178243 | -1.71685 | 0.086006 | 0.491972 |
| asap2a           | 207.8061 | 0.129266904  | 0.136863 | 0.944497 | 0.344916 | 0.79837  |
| si:ch73-265h17.1 | 10.63095 | -0.810530486 | 0.643301 | -1.25996 | 0.207685 | 0.689888 |
| myo3a            | 83.81779 | -0.21877448  | 0.253681 | -0.8624  | 0.388467 | 0.827613 |
| pax3a            | 48.59031 | -0.156791293 | 0.318751 | -0.49189 | 0.622795 | 0.918894 |
| eif4bb           | 1932.397 | 0.014069802  | 0.097632 | 0.14411  | 0.885414 | 0.987533 |
| smad3b           | 166.4469 | 0.036628012  | 0.174787 | 0.209558 | 0.834012 | 0.975618 |
| ppmlna           | 54.76904 | -0.830261244 | 0.625569 | -1.32721 | 0.184439 | 0.661629 |
| rbm22            | 445.1766 | -0.032279357 | 0.120104 | -0.26876 | 0.788113 | 0.963467 |
| rpl2211          | 4067.142 | -0.357159864 | 0.147991 | -2.41339 | 0.015805 | 0.221904 |
| prmt1            | 2468.979 | -0.180989809 | 0.137204 | -1.31913 | 0.187127 | 0.665603 |
| wdr54            | 156.7677 | 0.12251597   | 0.169513 | 0.722752 | 0.469832 | 0.867343 |
| nqol             | 917.781  | -0.992018076 | 0.370258 | -2.67926 | 0.007379 | 0.145623 |
| jak3             | 35.43653 | -0.120933742 | 0.380446 | -0.31787 | 0.750581 | 0.955074 |
| bin2b            | 100.1132 | 0.140887073  | 0.252289 | 0.558435 | 0.576548 | 0.90475  |
| igf2bp3          | 944.3413 | -0.073791106 | 0.137072 | -0.53834 | 0.590344 | 0.908901 |
| dpydb            | 763.6326 | -1.001152729 | 0.233564 | -4.28642 | 1.82E-05 | 0.002746 |
| fezf1            | 92.88106 | 0.134391134  | 0.23461  | 0.572828 | 0.566761 | 0.901739 |
| ptgs2b           | 130.0151 | 0.037098278  | 0.407548 | 0.091028 | 0.92747  | 0.994973 |

|                   |          |              |          |          |          |          |
|-------------------|----------|--------------|----------|----------|----------|----------|
| scamp2            | 531.9134 | 0.043267667  | 0.119378 | 0.362442 | 0.717022 | 0.94627  |
| claspla           | 587.4322 | -0.042978151 | 0.103635 | -0.41471 | 0.678357 | 0.936026 |
| xpo4              | 400.925  | -0.01306283  | 0.144138 | -0.09063 | 0.927789 | 0.99504  |
| fmodb             | 172.2534 | 0.216900281  | 0.188527 | 1.1505   | 0.249938 | 0.729721 |
| kcnh6b            | 8.591672 | -1.397360944 | 1.594542 | -0.87634 | 0.380845 | 0.824073 |
| traf3ip1          | 63.14024 | -0.081581613 | 0.250179 | -0.32609 | 0.744354 | 0.95491  |
| b4gal t6          | 443.8635 | 0.000831954  | 0.156783 | 0.005306 | 0.995766 | 1        |
| cp                | 713.9458 | 0.623052921  | 0.378075 | 1.647962 | 0.09936  | 0.523342 |
| qars              | 689.5999 | 0.250175764  | 0.119257 | 2.097794 | 0.035923 | 0.332937 |
| gpr183a           | 27.06505 | -0.156898801 | 0.404762 | -0.38763 | 0.698288 | 0.942433 |
| srpx              | 409.6207 | 0.09334199   | 0.15807  | 0.590511 | 0.554848 | 0.898569 |
| radx              | 31.67149 | 0.234729267  | 0.344219 | 0.681918 | 0.495291 | 0.87806  |
| zgc:56231         | 1.935869 | -0.782289405 | 1.870374 | -0.41825 | 0.675762 | NA       |
| acer1             | 53.31403 | -0.040404778 | 0.380376 | -0.10622 | 0.915405 | 0.993068 |
| clql3a            | 14.53726 | 0.210237397  | 0.52929  | 0.397206 | 0.691215 | 0.940173 |
| slc5a3a           | 0.045161 | 0            | 5.267649 | 0        | 1        | NA       |
| rnf2              | 1323.251 | -0.049847114 | 0.104696 | -0.47611 | 0.633993 | 0.924049 |
| lpar5a            | 17.09714 | -0.371404371 | 0.46115  | -0.80539 | 0.420596 | 0.842383 |
| sept4a            | 134.0574 | -0.142924411 | 0.229523 | -0.6227  | 0.533481 | 0.891181 |
| lrrfip2           | 493.2349 | 0.093501495  | 0.109264 | 0.855739 | 0.392142 | 0.827902 |
| ppp4r4            | 64.30641 | 0.618625954  | 0.409202 | 1.511787 | 0.130588 | 0.581871 |
| igsf9b            | 209.5652 | 0.037056914  | 0.174923 | 0.211847 | 0.832226 | 0.975013 |
| epnl              | 853.9205 | 0.096439189  | 0.13367  | 0.72147  | 0.470621 | 0.867752 |
| sirt4             | 106.4694 | 0.954145925  | 0.588044 | 1.622575 | 0.10468  | 0.53308  |
| ndrg1b            | 771.8504 | -0.20379138  | 0.268473 | -0.75908 | 0.447806 | 0.856379 |
| npsn              | 493.4067 | 0.04817919   | 0.199643 | 0.241327 | 0.809302 | 0.969828 |
| scara5            | 109.4323 | -0.068401071 | 0.262299 | -0.26078 | 0.794266 | 0.965431 |
| eaf2              | 418.7583 | 0.06573809   | 0.130581 | 0.503429 | 0.614663 | 0.915998 |
| clu               | 856.4905 | 1.142100419  | 0.158194 | 7.219606 | 5.21E-13 | 8.05E-10 |
| tent5c            | 147.5875 | 0.394941174  | 0.290429 | 1.359853 | 0.173876 | 0.646897 |
| rnf11a            | 491.6062 | 0.023280985  | 0.184758 | 0.126008 | 0.899726 | 0.99045  |
| trabd             | 263.315  | 0.269894883  | 0.14337  | 1.882508 | 0.059767 | 0.42181  |
| gucala            | 10.96434 | 0.906978745  | 0.713076 | 1.271924 | 0.2034   | 0.684359 |
| atpla2a           | 1070.459 | 0.263007602  | 0.245292 | 1.072224 | 0.283619 | 0.755095 |
| p2rx3a            | 19.18187 | 0.034531507  | 0.429696 | 0.080363 | 0.935949 | 0.996901 |
| hsp90aa1.1        | 1160.556 | 0.916438802  | 0.215269 | 4.257186 | 2.07E-05 | 0.002979 |
| bzwla             | 2297.519 | -0.09654072  | 0.127507 | -0.75714 | 0.448967 | 0.856796 |
| prg4a             | 23.66232 | 0.394222527  | 0.373677 | 1.054981 | 0.291434 | 0.761454 |
| sael              | 661.1614 | 0.252675877  | 0.149905 | 1.685576 | 0.091878 | 0.507669 |
| cxcr5             | 2.509465 | -1.291016595 | 1.592637 | -0.81062 | 0.417586 | 0.841149 |
| dv11a             | 65.74384 | 0.413248482  | 0.304701 | 1.356241 | 0.175022 | 0.648933 |
| rpl21             | 18579.29 | -0.176472577 | 0.115933 | -1.52219 | 0.127961 | 0.577144 |
| per3              | 812.163  | 0.234470719  | 0.637855 | 0.367592 | 0.713177 | 0.945821 |
| si:ch211-282j22.3 | 115.7262 | 0.077064097  | 0.230751 | 0.333971 | 0.738402 | 0.952912 |
| scamp4            | 619.76   | 0.112002431  | 0.094672 | 1.183053 | 0.236788 | 0.718119 |
| mmgt1             | 539.8558 | 0.184074006  | 0.147319 | 1.249496 | 0.211484 | 0.692983 |
| pdhalb            | 46.05905 | -1.261268848 | 0.63666  | -1.98107 | 0.047583 | 0.379782 |
| mmp25b            | 30.9203  | -0.468306424 | 0.335079 | -1.3976  | 0.162234 | 0.629748 |
| spopla            | 343.821  | -0.105143928 | 0.123673 | -0.85017 | 0.395228 | 0.829083 |
| aqp4              | 14.16125 | -0.218998253 | 0.642806 | -0.34069 | 0.733336 | 0.95079  |
| ezh2              | 344.271  | 0.133166097  | 0.184904 | 0.720191 | 0.471407 | 0.86809  |
| slc25a25a         | 643.7649 | -0.248562836 | 0.483997 | -0.51356 | 0.607558 | 0.915204 |
| pard3ab           | 333.6098 | 0.157028122  | 0.152855 | 1.027302 | 0.304278 | 0.769725 |
| tex9              | 67.61168 | 0.542362244  | 0.248949 | 2.178607 | 0.029361 | 0.304886 |

|                 |           |               |           |           |           |           |
|-----------------|-----------|---------------|-----------|-----------|-----------|-----------|
| foxn4           | 215. 7729 | 0. 207931505  | 0. 175354 | 1. 18578  | 0. 235709 | 0. 716905 |
| slc7a6os        | 550. 2208 | 0. 076821844  | 0. 112262 | 0. 684308 | 0. 493781 | 0. 877235 |
| mtmr10          | 223. 4612 | -0. 409101833 | 0. 198082 | -2. 06532 | 0. 038893 | 0. 345399 |
| zgc:112294      | 26. 69937 | 0. 28842995   | 0. 503331 | 0. 573042 | 0. 566616 | 0. 901739 |
| kctd9b          | 172. 7519 | -0. 045183204 | 0. 190864 | -0. 23673 | 0. 812867 | 0. 970328 |
| sarml           | 179. 6916 | 0. 273392638  | 0. 183204 | 1. 492287 | 0. 135624 | 0. 591012 |
| themis          | 12. 5089  | -2. 25861217  | 0. 683124 | -3. 3063  | 0. 000945 | 0. 042765 |
| clic2           | 260. 6331 | -0. 263527383 | 0. 162582 | -1. 62089 | 0. 105042 | 0. 533616 |
| hoxb6a          | 141. 1216 | 0. 118169812  | 0. 173169 | 0. 682394 | 0. 49499  | 0. 87806  |
| slc20a1b        | 2135. 729 | 0. 07994958   | 0. 159269 | 0. 501977 | 0. 615684 | 0. 916365 |
| arhgap42b       | 27. 13104 | -0. 137484957 | 0. 432245 | -0. 31807 | 0. 75043  | 0. 955074 |
| ppmlk           | 408. 6697 | -0. 515344831 | 0. 122987 | -4. 19023 | 2. 79E-05 | 0. 00362  |
| insigl          | 674. 2671 | -0. 184498782 | 0. 181306 | -1. 01761 | 0. 308863 | 0. 77371  |
| fbxo36a         | 10. 25466 | -0. 526417278 | 0. 614383 | -0. 85682 | 0. 391543 | 0. 827902 |
| trim16          | 189. 9237 | 0. 193709083  | 0. 148622 | 1. 30337  | 0. 192448 | 0. 672283 |
| gngt2a          | 505. 4423 | 0. 21686282   | 0. 276179 | 0. 785225 | 0. 432322 | 0. 848419 |
| tjapl           | 340. 0578 | 0. 370259441  | 0. 167861 | 2. 205755 | 0. 027401 | 0. 293857 |
| il17d           | 3. 697368 | 0. 339130193  | 0. 814907 | 0. 416158 | 0. 677294 | 0. 935952 |
| crygs4          | 0. 408343 | 1. 992516752  | 2. 940751 | 0. 677554 | 0. 498055 | NA        |
| msil            | 715. 8484 | 0. 254020426  | 0. 138661 | 1. 831947 | 0. 066959 | 0. 441882 |
| npffr113        | 9. 481469 | -0. 319040149 | 0. 659421 | -0. 48382 | 0. 628514 | 0. 921864 |
| chchd10         | 671. 9195 | 0. 105645304  | 0. 180484 | 0. 585345 | 0. 558316 | 0. 899409 |
| 6-Sep           | 1866. 606 | 0. 02009985   | 0. 094151 | 0. 213484 | 0. 830949 | 0. 974908 |
| ttyh21          | 289. 4682 | -0. 388165001 | 0. 141297 | -2. 74716 | 0. 006011 | 0. 131072 |
| scin            | 223. 7472 | 0. 126580548  | 0. 196479 | 0. 644246 | 0. 519416 | 0. 887148 |
| CABZ01073795. 1 | 8. 216573 | 0             | 1. 871067 | 0         | 1         | 1         |
| xrcc4           | 94. 49552 | -0. 476984922 | 0. 204516 | -2. 33226 | 0. 019687 | 0. 247431 |
| zgc:101716      | 61. 53856 | 0. 269391168  | 0. 254324 | 1. 059244 | 0. 289489 | 0. 760499 |
| dnaja2b         | 1277. 017 | -0. 194025325 | 0. 112961 | -1. 71763 | 0. 085865 | 0. 491473 |
| acs14b          | 274. 6999 | 0. 112868345  | 0. 152146 | 0. 741843 | 0. 458183 | 0. 861001 |
| nod2            | 62. 02668 | 0. 253908011  | 0. 236716 | 1. 072629 | 0. 283438 | 0. 755095 |
| capn12          | 427. 236  | 0. 57968535   | 0. 152581 | 3. 799203 | 0. 000145 | 0. 012055 |
| flj13639        | 162. 4294 | 1. 187086858  | 0. 482575 | 2. 4599   | 0. 013898 | 0. 206547 |
| epha41          | 161. 6123 | 0. 064021117  | 0. 161389 | 0. 396688 | 0. 691598 | 0. 940173 |
| sox19a          | 784. 6786 | 0. 075824898  | 0. 167269 | 0. 45331  | 0. 650326 | 0. 927835 |
| pnpla6          | 469. 0158 | 0. 400824931  | 0. 222443 | 1. 801923 | 0. 071558 | 0. 456244 |
| tlk2            | 481. 867  | 0. 141575516  | 0. 115527 | 1. 225475 | 0. 220396 | 0. 701707 |
| zgc:55621       | 0 NA      | NA            | NA        | NA        | NA        | NA        |
| ppplr12a        | 518. 7031 | 0. 048427655  | 0. 138878 | 0. 348707 | 0. 72731  | 0. 949095 |
| thbs1b          | 2834. 676 | -0. 041206388 | 0. 133636 | -0. 30835 | 0. 757818 | 0. 957397 |
| homer3b         | 508. 8943 | -0. 183657444 | 0. 104655 | -1. 75489 | 0. 079279 | 0. 476619 |
| dla             | 477. 3152 | 0. 191273855  | 0. 195551 | 0. 978128 | 0. 328011 | 0. 786438 |
| cdc25b          | 269. 1083 | 0. 073913357  | 0. 138872 | 0. 532242 | 0. 594558 | 0. 910865 |
| tfeb            | 164. 8256 | 0. 439522723  | 0. 193862 | 2. 267196 | 0. 023378 | 0. 270393 |
| slc7a14a        | 271. 0391 | 0. 386562429  | 0. 187656 | 2. 059947 | 0. 039404 | 0. 347538 |
| memol           | 505. 7109 | 0. 078997475  | 0. 149112 | 0. 529785 | 0. 596261 | 0. 911626 |
| churc1          | 229. 3856 | -0. 142094373 | 0. 196053 | -0. 72477 | 0. 46859  | 0. 866951 |
| fshb            | 0. 516575 | 0 4. 042926   | 0         | 1 NA      |           |           |
| kras            | 171. 0728 | 0. 090426998  | 0. 196095 | 0. 461139 | 0. 644699 | 0. 926639 |
| amt             | 312. 4704 | -0. 583858074 | 0. 166264 | -3. 51164 | 0. 000445 | 0. 025478 |
| DDX17           | 1884. 953 | -0. 555543    | 0. 181809 | -3. 05564 | 0. 002246 | 0. 075413 |
| cdkn1ca         | 678. 7527 | -0. 07923084  | 0. 128567 | -0. 61626 | 0. 537721 | 0. 892498 |
| mettl13         | 135. 8303 | 0. 129967959  | 0. 171548 | 0. 757619 | 0. 448679 | 0. 856741 |
| npr13           | 233. 5291 | 0. 244901723  | 0. 18217  | 1. 34436  | 0. 178832 | 0. 653658 |



|                   |          |              |           |          |          |          |
|-------------------|----------|--------------|-----------|----------|----------|----------|
| HTRA3             | 93.83895 | -0.23658751  | 0.270451  | -0.87479 | 0.381689 | 0.824957 |
| cacnalfa          | 16.047   | -0.110726202 | 1.038314  | -0.10664 | 0.915074 | 0.993066 |
| sytl4a            | 10.42371 | 0.603490741  | 0.597322  | 1.010328 | 0.312338 | 0.776164 |
| abcb4             | 262.6713 | -0.189971951 | 0.298807  | -0.63577 | 0.524927 | 0.888928 |
| BX957278.1        | 69.06814 | -0.882052627 | 0.318221  | -2.77182 | 0.005574 | 0.126154 |
| pomgnt2           | 56.96735 | 0.078291382  | 0.27731   | 0.282324 | 0.777695 | 0.961073 |
| rapgef6           | 296.5565 | -0.355511884 | 0.165039  | -2.1541  | 0.031232 | 0.314357 |
| cbsb              | 842.6436 | -0.077816769 | 0.275177  | -0.28279 | 0.777339 | 0.961073 |
| kif11             | 1042.426 | 0.364932134  | 0.260084  | 1.40313  | 0.160578 | 0.627313 |
| ndella            | 759.044  | 0.017519246  | 0.129523  | 0.13526  | 0.892406 | 0.988566 |
| sh3glb1b          | 713.3941 | -0.310829684 | 0.136781  | -2.27247 | 0.023058 | 0.26812  |
| mpp2b             | 372.6132 | 0.400549532  | 0.16376   | 2.445956 | 0.014447 | 0.210484 |
| glmb              | 81.49951 | 0.154572999  | 0.381997  | 0.404645 | 0.685739 | 0.938486 |
| fkbp7             | 508.6725 | 0.052670494  | 0.213645  | 0.246533 | 0.80527  | 0.969348 |
| psma8             | 2802.326 | -0.039303369 | 0.134305  | -0.29264 | 0.769795 | 0.960484 |
| rab34b            | 96.2029  | -0.103919587 | 0.169846  | -0.61185 | 0.54064  | 0.893355 |
| trmt1             | 120.6195 | 0.325820854  | 0.192919  | 1.688903 | 0.091238 | 0.505618 |
| zdhhc3a           | 135.7049 | 0.398883383  | 0.274814  | 1.451465 | 0.14665  | 0.606437 |
| gtf2a1            | 749.7141 | -0.005125848 | 0.089423  | -0.05732 | 0.954289 | 0.998611 |
| hnrnpala          | 4138.397 | 0.354858279  | 0.127065  | 2.792739 | 0.005226 | 0.121217 |
| pdlim3a           | 22.65631 | 1.420858151  | 0.914457  | 1.553773 | 0.120238 | 0.565555 |
| zgc:92907         | 139.3729 | -0.198485308 | 0.177027  | -1.12121 | 0.262197 | 0.739695 |
| fgfr1a            | 670.9575 | 0.139488199  | 0.165409  | 0.843293 | 0.399064 | 0.831196 |
| pgbd5             | 23.542   | 0.048871478  | 0.364534  | 0.134066 | 0.893351 | 0.988566 |
| slc17a9b          | 123.5313 | -0.028589691 | 0.16333   | -0.17504 | 0.861047 | 0.980388 |
| fbxo9             | 1617.603 | -0.142557159 | 0.113967  | -1.25086 | 0.210984 | 0.69272  |
| camk2b1           | 1472.666 | 0.153812856  | 0.098747  | 1.55765  | 0.119316 | 0.562753 |
| glra3             | 129.0645 | 0.185315527  | 0.367098  | 0.504812 | 0.613691 | 0.915998 |
| ddx11             | 116.8391 | 0.160312761  | 0.285756  | 0.561014 | 0.574788 | 0.904516 |
| zgc:91968         | 558.9961 | -0.313154776 | 0.200201  | -1.5642  | 0.11777  | 0.559739 |
| wdr3              | 888.4362 | -0.242802378 | 0.152752  | -1.58952 | 0.111942 | 0.548295 |
| si:dkey-42123.2   | 5.137893 | 1.073601201  | 1.07313   | 1.000439 | 0.317098 | 0.778879 |
| si:ch211-288d18.1 | 324.728  | 0.628521817  | 0.180895  | 3.474506 | 0.000512 | 0.027902 |
| drd2b             | 27.04104 | 0.584978614  | 0.44872   | 1.30366  | 0.192349 | 0.672283 |
| ccna2             | 667.5791 | 0.264328276  | 0.288012  | 0.917767 | 0.358741 | 0.80995  |
| chrna10a          | 16.31031 |              | 0.1698795 |          | 0        | 1        |
| pptc7a            | 584.5002 | -0.176300863 | 0.134904  | -1.30686 | 0.19126  | 0.671109 |
| snrpb             | 3480.547 | -0.104283312 | 0.147271  | -0.70811 | 0.47888  | 0.869292 |
| dpysl5a           | 932.9826 | 0.083748433  | 0.16978   | 0.493276 | 0.621817 | 0.918461 |
| uqcrb             | 8.310464 | 0.109563435  | 0.899619  | 0.121789 | 0.903066 | 0.991243 |
| rpp14             | 145.8007 | 0.217671902  | 0.195532  | 1.113227 | 0.265611 | 0.742247 |
| arhgef18a         | 363.4023 | -0.027136413 | 0.128836  | -0.21063 | 0.833177 | 0.975379 |
| sema3fa           | 483.7238 | -0.115193769 | 0.123823  | -0.93031 | 0.352209 | 0.802776 |
| cahz              | 2537.107 | 0.007652336  | 0.159098  | 0.048098 | 0.961638 | 0.999451 |
| ndrg2             | 2865.493 | -0.04043971  | 0.154867  | -0.26113 | 0.793995 | 0.965431 |
| si:ch211-12m10.1  | 460.4561 | 0.073024347  | 0.184071  | 0.396717 | 0.691576 | 0.940173 |
| atp6vld           | 1881.276 | -0.097869671 | 0.124743  | -0.78457 | 0.432705 | 0.84885  |
| acvr2aa           | 856.742  | 0.211036603  | 0.130552  | 1.616485 | 0.10599  | 0.534956 |
| fgfr1b            | 189.3798 | 0.037918658  | 0.235652  | 0.160909 | 0.872165 | 0.983447 |
| dnajc11a          | 866.1132 | 0.005367399  | 0.113327  | 0.047362 | 0.962225 | 0.999451 |
| rplp21            | 16546.35 | -0.277345493 | 0.139427  | -1.98918 | 0.046681 | 0.376436 |
| akt2              | 1431.651 | -0.065874444 | 0.081714  | -0.80615 | 0.420154 | 0.842383 |
| ccdc28b           | 88.13748 | 0.515744277  | 0.211946  | 2.433378 | 0.014959 | 0.214257 |
| pcytlaa           | 157.9487 | -0.570260909 | 0.166448  | -3.42606 | 0.000612 | 0.032103 |

|                  |          |              |          |          |          |          |
|------------------|----------|--------------|----------|----------|----------|----------|
| otx2b            | 624.7296 | 0.070119796  | 0.104855 | 0.668734 | 0.503665 | 0.881759 |
| ppplr14aa        | 147.6644 | -0.246293971 | 0.204032 | -1.20713 | 0.227381 | 0.708598 |
| ift46            | 324.6569 | 0.210414689  | 0.184279 | 1.141826 | 0.253526 | 0.732873 |
| esrpl            | 573.4105 | -0.23184714  | 0.130182 | -1.78095 | 0.074921 | 0.464197 |
| krri1            | 223.9377 | -0.390869333 | 0.210355 | -1.85814 | 0.063149 | 0.429313 |
| rnpc3            | 261.9167 | -0.277197285 | 0.126023 | -2.19958 | 0.027836 | 0.296561 |
| enpp2            | 174.6937 | 0.154608302  | 0.209419 | 0.738272 | 0.460349 | 0.862369 |
| trpmla           | 90.78976 | -0.485967219 | 0.30816  | -1.577   | 0.114796 | 0.554602 |
| traip            | 112.5264 | 0.116816113  | 0.250843 | 0.465694 | 0.641435 | 0.925586 |
| uqcc2            | 437.3322 | -0.008955479 | 0.144143 | -0.06213 | 0.95046  | 0.99801  |
| tlx2             | 151.6204 | 0.246199928  | 0.21774  | 1.130709 | 0.258178 | 0.735569 |
| si:dkey-110k5.10 | 7.671304 | 0.578853714  | 0.734375 | 0.788226 | 0.430565 | 0.847542 |
| atf7a            | 183.667  | 0.000209499  | 0.216036 | 0.00097  | 0.999226 | 1        |
| blzfl            | 677.4203 | 0.042882742  | 0.116823 | 0.367074 | 0.713564 | 0.945821 |
| nael             | 534.3667 | 0.09589335   | 0.141732 | 0.67658  | 0.498672 | 0.879251 |
| stk3             | 520.8766 | 0.025036571  | 0.134198 | 0.186564 | 0.852003 | 0.978558 |
| adralba          | 19.58216 | -0.072044643 | 0.391937 | -0.18382 | 0.854157 | 0.979016 |
| ankrd45          | 15.91602 | -0.032559288 | 0.432664 | -0.07525 | 0.940013 | 0.997371 |
| arhgap33         | 135.6136 | 0.292863161  | 0.271146 | 1.080094 | 0.2801   | 0.752951 |
| ncaldb           | 164.957  | 0.245756507  | 0.256787 | 0.957044 | 0.338545 | 0.795226 |
| nfatc2ip         | 262.2353 | 0.071831797  | 0.189673 | 0.378713 | 0.704901 | 0.944015 |
| fyna             | 671.5385 | 0.218919965  | 0.135456 | 1.616167 | 0.106058 | 0.534956 |
| zgc:64106        | 237.1522 | -0.387675211 | 0.167072 | -2.32041 | 0.020319 | 0.252973 |
| mknk2a           | 217.7084 | -0.393338319 | 0.247812 | -1.58724 | 0.112458 | 0.549251 |
| dnasell4.2       | 175.3901 | -0.461064857 | 0.157421 | -2.92887 | 0.003402 | 0.095894 |
| tnncla           | 102.4009 | -0.025724976 | 0.352277 | -0.07302 | 0.941786 | 0.997371 |
| fen1             | 469.2528 | -0.133739965 | 0.149377 | -0.89532 | 0.370618 | 0.818484 |
| rps9             | 41697.14 | -0.432033771 | 0.148374 | -2.9118  | 0.003594 | 0.09929  |
| col2alb          | 6578.965 | 0.036762828  | 0.167856 | 0.219014 | 0.826639 | 0.973383 |
| aadat            | 40.77186 | 0.07649681   | 0.373311 | 0.204914 | 0.837639 | 0.976213 |
| sigmar1          | 264.7948 | 0.123466074  | 0.143119 | 0.86268  | 0.388313 | 0.827592 |
| ryrla            | 699.9198 | 0.204045864  | 0.256403 | 0.795802 | 0.426147 | 0.844714 |
| ptger2a          | 55.47507 | -0.086404752 | 0.275211 | -0.31396 | 0.753552 | 0.955864 |
| elmsanla         | 217.4993 | 0.038170401  | 0.170838 | 0.223431 | 0.8232   | 0.972005 |
| fes              | 62.77696 | -0.102014548 | 0.24773  | -0.4118  | 0.680488 | 0.936945 |
| gsna             | 687.8773 | -0.051162551 | 0.138806 | -0.36859 | 0.712434 | 0.945821 |
| otubl            | 508.4254 | -0.079389762 | 0.134398 | -0.59071 | 0.554717 | 0.89855  |
| CABZ01044048.1   | 21.13878 | 0.078982159  | 0.528437 | 0.149464 | 0.881188 | 0.986892 |
| afglla           | 140.6701 | 0.1688249    | 0.18055  | 0.935059 | 0.349758 | 0.801408 |
| calcr1a          | 75.79815 | 0.007251223  | 0.225413 | 0.032169 | 0.974338 | 1        |
| gnaq             | 113.5929 | -0.297826801 | 0.283769 | -1.04954 | 0.29393  | 0.763068 |
| sirt2            | 737.4385 | -0.239418979 | 0.145475 | -1.64577 | 0.09981  | 0.524166 |
| scube3           | 57.32038 | 0.319591353  | 0.253234 | 1.262037 | 0.206935 | 0.689276 |
| dcunld3          | 253.8031 | -0.021509733 | 0.134057 | -0.16045 | 0.872525 | 0.983447 |
| ppmlbb           | 1449.898 | 0.136620876  | 0.085551 | 1.596944 | 0.110278 | 0.544923 |
| si:ch211-212o1.2 | 188.1389 | -0.00735414  | 0.138213 | -0.05321 | 0.957566 | 0.999109 |
| lpcat1           | 126.62   | 0.049976508  | 0.173334 | 0.288326 | 0.773098 | 0.960624 |
| rcc2             | 2205.561 | 0.048391803  | 0.125076 | 0.386899 | 0.698831 | 0.942456 |
| oraila           | 130.2766 | 0.01338688   | 0.17921  | 0.074699 | 0.940454 | 0.997371 |
| myl4             | 644.6286 | -0.87413545  | 0.191006 | -4.57649 | 4.73E-06 | 0.001024 |
| upbl             | 251.4401 | 0.071997305  | 0.22171  | 0.324737 | 0.74538  | 0.955013 |
| sema6dl          | 436.313  | -0.028223944 | 0.158525 | -0.17804 | 0.858691 | 0.979934 |
| ugt2a5           | 125.2485 | 0.318134658  | 0.194476 | 1.635859 | 0.101869 | 0.528631 |
| arrb2b           | 1484.986 | -0.161047155 | 0.097101 | -1.65856 | 0.097205 | 0.519839 |

|                   |           |               |           |           |           |           |
|-------------------|-----------|---------------|-----------|-----------|-----------|-----------|
| clql4a            | 14. 56169 | 1. 417864875  | 0. 666459 | 2. 127461 | 0. 033382 | 0. 323127 |
| atp5pb            | 7790. 503 | 0. 066432507  | 0. 108159 | 0. 614213 | 0. 539074 | 0. 892985 |
| spag7             | 1018. 111 | 0. 212671286  | 0. 133598 | 1. 591873 | 0. 111413 | 0. 547032 |
| sfpq              | 2886. 975 | 0. 145347508  | 0. 092677 | 1. 568316 | 0. 116807 | 0. 557831 |
| pou6f1            | 322. 7765 | -0. 110502949 | 0. 115321 | -0. 95822 | 0. 337952 | 0. 794808 |
| calcr1b           | 55. 80883 | 0. 165903693  | 0. 243759 | 0. 680606 | 0. 496121 | 0. 878093 |
| abcb11a           | 69. 7222  | -0. 768443464 | 0. 431538 | -1. 78071 | 0. 07496  | 0. 464266 |
| hoxb10a           | 159. 3807 | -0. 039398799 | 0. 185796 | -0. 21205 | 0. 832065 | 0. 975013 |
| si:dkey-23k10. 5  | 41. 99289 | -0. 214760891 | 0. 435066 | -0. 49363 | 0. 621569 | 0. 918461 |
| sox5              | 967. 2398 | -0. 015943643 | 0. 132601 | -0. 12024 | 0. 904295 | 0. 991581 |
| cry1b             | 323. 5611 | -0. 459745907 | 0. 155386 | -2. 95873 | 0. 003089 | 0. 091315 |
| smarcb1b          | 522. 4535 | 0. 035607903  | 0. 162103 | 0. 219663 | 0. 826134 | 0. 973084 |
| atxn21            | 608. 381  | 0. 059027769  | 0. 140093 | 0. 421346 | 0. 673503 | 0. 934323 |
| epha4b            | 77. 67859 | 0. 341205983  | 0. 269987 | 1. 263787 | 0. 206307 | 0. 688779 |
| si:dkeyp-117h8. 2 | 334. 5288 | -0. 085144964 | 0. 142612 | -0. 59704 | 0. 55048  | 0. 8974   |
| dennd6b           | 216. 4653 | -0. 117021731 | 0. 145296 | -0. 8054  | 0. 420588 | 0. 842383 |
| FOXK2             | 734. 3739 | -0. 119486624 | 0. 10768  | -1. 10964 | 0. 267153 | 0. 743418 |
| actr1             | 1592. 987 | 0. 102720463  | 0. 083723 | 1. 226907 | 0. 219858 | 0. 700895 |
| rbm39a            | 2229. 159 | -0. 083947616 | 0. 124558 | -0. 67397 | 0. 500333 | 0. 880145 |
| mybpc3            | 2434. 078 | -0. 098555085 | 0. 097381 | -1. 01206 | 0. 31151  | 0. 77613  |
| slc26a2           | 257       | 0. 056309659  | 0. 187703 | 0. 299993 | 0. 764183 | 0. 959228 |
| scxb              | 20. 05977 | -0. 647667761 | 0. 398512 | -1. 62521 | 0. 104117 | 0. 532183 |
| syt5b             | 967. 1186 | -0. 106782305 | 0. 393347 | -0. 27147 | 0. 786029 | 0. 962605 |
| snrpd1            | 874. 9374 | -0. 129450693 | 0. 119732 | -1. 08117 | 0. 279621 | 0. 752477 |
| ftr52p            | 44. 58458 | -0. 0630383   | 0. 298327 | -0. 21131 | 0. 832648 | 0. 975239 |
| twf1b             | 325. 8859 | 0. 207483154  | 0. 162955 | 1. 273253 | 0. 202928 | 0. 683508 |
| chuk              | 941. 7516 | -0. 161913037 | 0. 109514 | -1. 47846 | 0. 139284 | 0. 597457 |
| aldoaa            | 8864. 725 | 0. 030742966  | 0. 180849 | 0. 169992 | 0. 865016 | 0. 982136 |
| pde6b             | 113. 9827 | -0. 510136153 | 0. 448813 | -1. 13663 | 0. 255692 | 0. 733642 |
| sema3b            | 204. 6789 | 0. 299772571  | 0. 194426 | 1. 541837 | 0. 123113 | 0. 569695 |
| si:ch211-246m6. 5 | 108. 0302 | 0. 380072614  | 0. 177556 | 2. 140578 | 0. 032308 | 0. 318811 |
| prtfcd1           | 192. 6569 | -0. 3157933   | 0. 203628 | -1. 55083 | 0. 120942 | 0. 566816 |
| ttc36             | 456. 0448 | -0. 734954932 | 0. 244981 | -3. 00005 | 0. 002699 | 0. 084979 |
| esrrgb            | 11. 59066 | 0. 40035592   | 0. 542498 | 0. 737986 | 0. 460523 | 0. 862369 |
| ctsl1             | 152. 6544 | 0. 783331938  | 0. 364488 | 2. 149129 | 0. 031624 | 0. 316333 |
| clocka            | 128. 4724 | 0. 021957329  | 0. 304353 | 0. 072144 | 0. 942487 | 0. 997371 |
| zgc:56556         | 71. 69348 | 0. 218036012  | 0. 220329 | 0. 989594 | 0. 322373 | 0. 78246  |
| marveld1          | 152. 1577 | -0. 17161943  | 0. 173974 | -0. 98647 | 0. 323904 | 0. 783161 |
| b9d1              | 273. 7835 | -0. 085683192 | 0. 173713 | -0. 49325 | 0. 621839 | 0. 918461 |
| u2af2b            | 1622. 538 | 0. 038381902  | 0. 07888  | 0. 486586 | 0. 626552 | 0. 920665 |
| pigo              | 274. 965  | 0. 220254789  | 0. 160415 | 1. 373029 | 0. 169743 | 0. 641486 |
| ints13            | 284. 9402 | -0. 005319565 | 0. 158744 | -0. 03351 | 0. 973268 | 1         |
| cpm               | 338. 0869 | -0. 037492997 | 0. 147807 | -0. 25366 | 0. 799756 | 0. 967206 |
| dhrrs12           | 439. 9962 | 0. 059423044  | 0. 205443 | 0. 289243 | 0. 772396 | 0. 960624 |
| cttn              | 1026. 194 | 0. 066380317  | 0. 100285 | 0. 661917 | 0. 508024 | 0. 883056 |
| stag2a            | 698. 2878 | -0. 129741148 | 0. 13386  | -0. 96923 | 0. 332431 | 0. 789726 |
| tbx6              | 17. 9339  | 0. 840633397  | 0. 604458 | 1. 390723 | 0. 16431  | 0. 633351 |
| tent5bb           | 224. 2337 | -0. 075818328 | 0. 166093 | -0. 45648 | 0. 648043 | 0. 927245 |
| wars2             | 65. 27005 | -0. 092286667 | 0. 226138 | -0. 4081  | 0. 683201 | 0. 938212 |
| micall            | 59. 79898 | -0. 253286895 | 0. 30851  | -0. 821   | 0. 411647 | 0. 837966 |
| batf              | 2. 699619 | -1. 765174955 | 1. 84739  | -0. 9555  | 0. 339327 | 0. 795226 |
| pcnx1             | 532. 8029 | -0. 055296052 | 0. 149457 | -0. 36998 | 0. 711397 | 0. 945821 |
| plod2             | 332. 8643 | -0. 129681671 | 0. 232344 | -0. 55815 | 0. 576745 | 0. 904769 |
| pbxiplb           | 413. 526  | 0. 048382062  | 0. 163683 | 0. 295583 | 0. 767548 | 0. 960296 |

|            |          |              |          |          |          |          |
|------------|----------|--------------|----------|----------|----------|----------|
| cetn3      | 187.5072 | 0.405158824  | 0.223166 | 1.815508 | 0.069446 | 0.45     |
| zgc:100846 | 138.2953 | 0.116356962  | 0.162994 | 0.713874 | 0.475305 | 0.869292 |
| atp5l      | 4960.521 | 0.137480821  | 0.123205 | 1.115871 | 0.264477 | 0.742063 |
| chn2       | 33.56031 | -0.073077132 | 0.348221 | -0.20986 | 0.833778 | 0.975482 |
| map2k5     | 146.2216 | 0.035472784  | 0.186238 | 0.19047  | 0.848941 | 0.978021 |
| aakla      | 40.0064  | 0.402023101  | 0.278691 | 1.442538 | 0.149151 | 0.610893 |
| inaa       | 161.8782 | 0.485437969  | 0.237576 | 2.043293 | 0.041023 | 0.353808 |
| ptk7a      | 589.7106 | 0.084137913  | 0.158309 | 0.53148  | 0.595087 | 0.910894 |
| galnt8a.2  | 5.48048  | 1.096897037  | 1.095336 | 1.001425 | 0.316621 | 0.778879 |
| sp8a       | 445.7986 | 0.197848496  | 0.282162 | 0.701188 | 0.483186 | 0.871988 |
| ednraa     | 406.0865 | -0.205447659 | 0.184788 | -1.1118  | 0.266223 | 0.742912 |
| foxn1      | 19.84854 | 0.443853766  | 0.429992 | 1.032238 | 0.301961 | 0.767995 |
| MFN1       | 18.55811 | 1.939702096  | 1.618611 | 1.198375 | 0.230771 | 0.712454 |
| mrpl19     | 460.1101 | 0.097906926  | 0.127104 | 0.770287 | 0.44113  | 0.852823 |
| pdca       | 71.95176 | 2.310742674  | 0.568321 | 4.065908 | 4.78E-05 | 0.005408 |
| cry4       | 739.0691 | 0.005146787  | 0.200176 | 0.025711 | 0.979488 | 1        |
| tsg101b    | 305.0337 | 0.202093982  | 0.190618 | 1.060202 | 0.289053 | 0.76024  |
| itpr2      | 164.7559 | 0.02571415   | 0.170566 | 0.150758 | 0.880167 | 0.986408 |
| txn1l      | 1363.596 | 0.310849255  | 0.159622 | 1.947407 | 0.051486 | 0.394488 |
| spns1      | 1227.729 | -0.057270007 | 0.144268 | -0.39697 | 0.691391 | 0.940173 |
| tpgs2      | 81.73723 | 0.42114078   | 0.221555 | 1.900837 | 0.057323 | 0.413377 |
| plp1b      | 286.1212 | 0.176186673  | 0.394003 | 0.447171 | 0.654752 | 0.929527 |
| prkcbp1l   | 874.0932 | -0.039382535 | 0.106149 | -0.37101 | 0.710628 | 0.945821 |
| gyglA      | 1293.326 | -0.24929483  | 0.164666 | -1.51394 | 0.130041 | 0.580771 |
| bmpr2a     | 332.8668 | 0.171878282  | 0.159403 | 1.078263 | 0.280917 | 0.75325  |
| slc35e1    | 431.0317 | 0.108574439  | 0.119649 | 0.90744  | 0.364174 | 0.814549 |
| insra      | 773.7378 | 0.040728298  | 0.114256 | 0.356466 | 0.721492 | 0.947343 |
| dlx4a      | 177.3143 | -0.213978737 | 0.208866 | -1.02448 | 0.305609 | 0.770852 |
| ctnbn1l    | 497.3976 | 0.007999446  | 0.162751 | 0.049152 | 0.960798 | 0.999249 |
| csrp2      | 701.3364 | -0.04541841  | 0.188111 | -0.24144 | 0.809211 | 0.969828 |
| slc35d1a   | 155.2902 | 0.065326111  | 0.138692 | 0.471015 | 0.63763  | 0.924779 |
| fmnl       | 17.81518 | -0.077516129 | 0.490595 | -0.158   | 0.874453 | 0.984052 |
| zgc:136908 | 1163.422 | 0.01555602   | 0.157995 | 0.098459 | 0.921568 | 0.994085 |
| crx        | 896.6241 | -0.013615852 | 0.286169 | -0.04758 | 0.962051 | 0.999451 |
| bfsp2      | 1309.014 | 0.60503576   | 0.246654 | 2.452978 | 0.014168 | 0.208294 |
| ybey       |          | 0 NA         | NA       | NA       | NA       | NA       |
| slc38a7    | 276.0845 | 0.113015918  | 0.212176 | 0.532652 | 0.594275 | 0.910731 |
| mob2b      | 476.9225 | -0.076836538 | 0.130644 | -0.58813 | 0.556442 | 0.899063 |
| cpa6       | 118.7335 | 0.113876763  | 0.17048  | 0.667976 | 0.504149 | 0.881759 |
| hpgd       | 260.0281 | 0.044752138  | 0.173161 | 0.258443 | 0.796065 | 0.966305 |
| glral      | 291.7047 | 0.376154785  | 0.254512 | 1.477943 | 0.139423 | 0.597663 |
| kdsr       | 263.8445 | 0.041969003  | 0.12952  | 0.324035 | 0.745912 | 0.955074 |
| hs6st2     | 610.0496 | -0.06327938  | 0.094463 | -0.66988 | 0.502931 | 0.881461 |
| dnaaf1     | 14.57142 | -0.1245174   | 0.423092 | -0.2943  | 0.768526 | 0.960395 |
| zgc:100832 | 128.9949 | -0.349531365 | 0.220741 | -1.58345 | 0.11332  | 0.551138 |
| ttc26      | 154.1329 | 0.208186431  | 0.175704 | 1.184871 | 0.236068 | 0.717364 |
| rnf19a     | 792.4301 | 0.059580722  | 0.130896 | 0.455176 | 0.648983 | 0.927649 |
| polr3gla   | 99.75952 | -0.674669796 | 0.283953 | -2.37599 | 0.017502 | 0.233637 |
| mettl21a   | 41.71987 | -0.215454283 | 0.336318 | -0.64063 | 0.521766 | 0.887551 |
| mtnrlal    | 3.586654 | 0.112530897  | 1.694634 | 0.066404 | 0.947056 | 0.997371 |
| thbs3b     | 415.5538 | -0.000775646 | 0.198312 | -0.00391 | 0.996879 | 1        |
| dcn        | 2441.908 | 0.078454744  | 0.10898  | 0.719902 | 0.471585 | 0.86809  |
| angpt11a   | 244.9333 | 0.13994679   | 0.2429   | 0.576149 | 0.564514 | 0.901433 |
| dmac2l     | 212.3601 | 0.053236276  | 0.190955 | 0.278789 | 0.780407 | 0.961411 |

|             |          |              |          |          |          |          |
|-------------|----------|--------------|----------|----------|----------|----------|
| kif15       | 415.3543 | 0.084688329  | 0.208544 | 0.406094 | 0.684674 | 0.938486 |
| apoala      | 53390.78 | -0.302438743 | 0.232957 | -1.29826 | 0.194198 | 0.674395 |
| meis1b      | 2623.295 | 0.026766397  | 0.115271 | 0.232204 | 0.81638  | 0.971207 |
| cl9h1orf109 | 116.2874 | -0.486619928 | 0.247837 | -1.96347 | 0.049591 | 0.387751 |
| cngalb      | 38.79442 | -0.398038849 | 0.894497 | -0.44499 | 0.65633  | 0.929684 |
| zgc:109965  | 173.5872 | 0.054928818  | 0.371409 | 0.147893 | 0.882427 | 0.986908 |
| fbx12       | 195.9814 | -0.298204824 | 0.1682   | -1.77292 | 0.076242 | 0.467585 |
| cyp46a1.1   | 70.70013 | -0.715206233 | 0.296447 | -2.41259 | 0.01584  | 0.222022 |
| sgce        | 654.5478 | -0.008740642 | 0.122357 | -0.07144 | 0.943051 | 0.997371 |
| ccn11b      | 672.8741 | -0.135253125 | 0.144946 | -0.93313 | 0.350753 | 0.802215 |
| papolg      | 1225.515 | 0.062255508  | 0.079504 | 0.783054 | 0.433596 | 0.849735 |
| emc7        | 777.0822 | 0.029823553  | 0.097625 | 0.305491 | 0.759993 | 0.957886 |
| rab4b       | 76.98871 | 0.147931452  | 0.253566 | 0.583405 | 0.559621 | 0.899571 |
| zgc:162872  | 81.81509 | -0.099252537 | 0.203395 | -0.48798 | 0.625565 | 0.920625 |
| cant1a      | 401.2215 | -0.04999842  | 0.119865 | -0.41712 | 0.676589 | 0.935635 |
| scp2a       | 2065.927 | -0.056630147 | 0.162607 | -0.34826 | 0.727642 | 0.949241 |
| fer         | 88.38026 | 0.080578295  | 0.233856 | 0.344563 | 0.730423 | 0.950056 |
| gpt2        | 352.3205 | -0.149592929 | 0.170715 | -0.87627 | 0.380881 | 0.824073 |
| CDK18       | 66.07578 | -0.047722267 | 0.274047 | -0.17414 | 0.861756 | 0.980588 |
| umps        | 267.4186 | 0.05623718   | 0.194663 | 0.288896 | 0.772661 | 0.960624 |
| dpf2        | 215.0472 | -0.006797735 | 0.164353 | -0.04136 | 0.967008 | 1        |
| nup35       | 220.9674 | 0.013346924  | 0.129065 | 0.103413 | 0.917635 | 0.993777 |
| psme3       | 519.4908 | 0.018508622  | 0.124155 | 0.149076 | 0.881493 | 0.986908 |
| ube2e3      | 1826.547 | -0.086965258 | 0.112815 | -0.77086 | 0.440787 | 0.852579 |
| def6a       | 19.63898 | -0.337374198 | 0.456984 | -0.73826 | 0.460354 | 0.862369 |
| rgma        | 1327.684 | 0.049051121  | 0.113041 | 0.433924 | 0.664344 | 0.93177  |
| eftud2      | 869.7097 | 0.237092819  | 0.109144 | 2.172295 | 0.029833 | 0.307628 |
| clcn1b      | 56.50117 | 0.096890515  | 0.369675 | 0.262096 | 0.793247 | 0.965312 |
| tmem206     | 130.1722 | 0.174060354  | 0.198611 | 0.876388 | 0.380819 | 0.824073 |
| eif4e1c     | 726.7409 | 0.356618707  | 0.177691 | 2.006957 | 0.044754 | 0.370491 |
| katna12     | 8.145987 | 0.177464681  | 0.676263 | 0.26242  | 0.792998 | 0.965312 |
| zgc:65851   | 136.0202 | 1.057148225  | 0.284642 | 3.713958 | 0.000204 | 0.015177 |
| bcs11       | 188.9829 | 0.346615984  | 0.164765 | 2.103694 | 0.035405 | 0.330833 |
| cnga3b      | 15.38567 | 2.528223955  | 1.210871 | 2.087939 | 0.036803 | 0.336916 |
| sytl3       | 196.6824 | 0.122925273  | 0.270486 | 0.454461 | 0.649497 | 0.927756 |
| myoz2a      | 601.9614 | -0.160348111 | 0.164849 | -0.9727  | 0.330703 | 0.788149 |
| usp25       | 1043.742 | -0.230750619 | 0.151435 | -1.52376 | 0.12757  | 0.576964 |
| zgc:110269  | 175.1679 | -0.685928544 | 0.235395 | -2.91395 | 0.003569 | 0.099143 |
| ptpn11b     | 132.6917 | -0.01235089  | 0.242704 | -0.05089 | 0.959414 | 0.999164 |
| capn9       | 571.1678 | 0.15869724   | 0.133589 | 1.187949 | 0.234854 | 0.715533 |
| nacad       | 218.0082 | 0.24262878   | 0.202586 | 1.197658 | 0.23105  | 0.712561 |
| vipr2       | 49.26775 | -0.016628909 | 0.319115 | -0.05211 | 0.958441 | 0.999109 |
| galnt8a.1   | 6.094091 | 0            | 1.752786 | 0        | 1        | 1        |
| fbp2        | 721.842  | 0.008245292  | 0.296346 | 0.027823 | 0.977803 | 1        |
| trim46a     | 62.83831 | 0.300092268  | 0.311351 | 0.96384  | 0.335126 | 0.79185  |
| ttc21b      | 183.9203 | -0.204880724 | 0.166322 | -1.23183 | 0.218011 | 0.699144 |
| rdh10b      | 167.5743 | -0.068103019 | 0.172135 | -0.39564 | 0.692373 | 0.940414 |
| naa35       | 662.2197 | -0.120657679 | 0.133481 | -0.90393 | 0.366033 | 0.815714 |
| hsc70       | 4514.699 | 0.395876799  | 0.13481  | 2.936557 | 0.003319 | 0.0947   |
| pdhala      | 4246.671 | 0.090490145  | 0.084759 | 1.067611 | 0.285696 | 0.757084 |
| cox4i1l     | 129.5018 | -0.97647739  | 0.534228 | -1.82783 | 0.067575 | 0.443563 |
| adar        | 375.0712 | 0.136761047  | 0.151271 | 0.904078 | 0.365954 | 0.815714 |
| kcnk5b      | 98.11593 | -0.142737694 | 0.235049 | -0.60727 | 0.543674 | 0.894925 |
| mmp13a      | 59.49417 | -0.311660946 | 0.400836 | -0.77753 | 0.436848 | 0.851125 |

|                   |          |              |          |          |          |          |
|-------------------|----------|--------------|----------|----------|----------|----------|
| eya4              | 510.8646 | -0.032399481 | 0.127447 | -0.25422 | 0.799326 | 0.967111 |
| adssl             | 798.6349 | 0.124720409  | 0.111424 | 1.119331 | 0.262999 | 0.740604 |
| ercc612           | 113.5022 | -0.241911021 | 0.195682 | -1.23625 | 0.216366 | 0.69815  |
| coll1a1           | 37394.46 | 0.098126471  | 0.15082  | 0.650618 | 0.515293 | 0.886401 |
| mgat1a            | 260.773  | -0.209161317 | 0.136223 | -1.53544 | 0.124676 | 0.57237  |
| rnf207b           | 138.9548 | -0.207001967 | 0.187155 | -1.10604 | 0.268708 | 0.744925 |
| coll1a2           | 5100.199 | 0.328019051  | 0.231362 | 1.417774 | 0.156257 | 0.621949 |
| neflb             | 375.8563 | 0.656829139  | 0.276681 | 2.373955 | 0.017599 | 0.234077 |
| fam76b            | 672.1855 | 0.048479076  | 0.12245  | 0.395908 | 0.692173 | 0.940333 |
| spic              | 2.954327 | 0            | 1.990245 | 0        | 1        | 1        |
| zgc:113057        | 2.266465 | -1.595580454 | 1.429265 | -1.11636 | 0.264266 | 0.742063 |
| si:ch211-169p10.1 | 38.0324  | -0.198819798 | 0.360535 | -0.55146 | 0.58132  | 0.905618 |
| vmp1              | 493.3976 | 0.053137545  | 0.110684 | 0.480084 | 0.631167 | 0.923003 |
| rnls              | 259.7119 | 0.159203523  | 0.13995  | 1.137578 | 0.255297 | 0.733542 |
| zgc:77849         | 2904.287 | -0.134806994 | 0.088537 | -1.52261 | 0.127857 | 0.577117 |
| rassf4            | 54.56855 | 0.17503741   | 0.246382 | 0.710432 | 0.477436 | 0.869292 |
| spintl1b          | 408.4784 | 0.176952896  | 0.14508  | 1.219696 | 0.22258  | 0.704536 |
| aacs              | 60.79435 | -0.078322957 | 0.279502 | -0.28022 | 0.779306 | 0.961073 |
| aurka             | 283.4161 | 0.219592755  | 0.255998 | 0.857791 | 0.391008 | 0.827902 |
| mphosph10         | 320.0184 | -0.107411334 | 0.16311  | -0.65852 | 0.510205 | 0.883733 |
| GPR62 (1 of many) | 7.492189 | -1.779806101 | 1.752956 | -1.01532 | 0.309955 | 0.774671 |
| per1b             | 855.2987 | -0.366219789 | 0.776565 | -0.47159 | NA       | NA       |
| rlbpla            | 449.6661 | 0.510785066  | 0.173461 | 2.944667 | 0.003233 | 0.093414 |
| u2af2a            | 789.736  | 0.189707748  | 0.091871 | 2.064944 | 0.038928 | 0.345405 |
| rnpep             | 224.7433 | 0.430849124  | 0.212421 | 2.028278 | 0.042532 | 0.361124 |
| sdcbp2            | 1955.699 | -0.083292158 | 0.097302 | -0.85602 | 0.391987 | 0.827902 |
| hfc1b             | 1044.157 | 0.193992294  | 0.180989 | 1.071844 | 0.28379  | 0.755095 |
| slc6a6a           | 26.97763 | 0.14785996   | 0.411839 | 0.359024 | 0.719577 | 0.94694  |
| epx               | 12.11588 | -1.158288696 | 1.144913 | -1.01168 | 0.31169  | 0.776164 |
| dnase1            | 129.7173 | 0.307647462  | 0.847607 | 0.36296  | 0.716635 | 0.94627  |
| rap1aa            | 1058.843 | 0.160893496  | 0.113157 | 1.421867 | 0.155065 | 0.619776 |
| ak5               | 135.4074 | 0.808355955  | 0.315743 | 2.560173 | 0.010462 | 0.178239 |
| pdss2             | 174.9241 | 0.384782866  | 0.18184  | 2.116046 | 0.034341 | 0.327305 |
| polr3f            | 189.7608 | -0.539396947 | 0.200594 | -2.689   | 0.007167 | 0.143346 |
| slkb              | 419.8444 | 0.230694441  | 0.152155 | 1.51618  | 0.129474 | 0.579133 |
| waca              | 945.2782 | 0.134127096  | 0.10917  | 1.228613 | 0.219217 | 0.700266 |
| AL590149.1        | 127.6837 | 0.161253452  | 0.237135 | 0.680007 | 0.4965   | 0.878161 |
| fmnl2a            | 109.2439 | 0.327338602  | 0.295007 | 1.109594 | 0.267174 | 0.743418 |
| ptdss1a           | 258.8417 | -0.117759886 | 0.175135 | -0.6724  | 0.501332 | 0.880791 |
| pdcd10b           | 423.0292 | -0.193903339 | 0.140314 | -1.38192 | 0.166995 | 0.637452 |
| col5a1            | 5025.9   | 0.170875578  | 0.164679 | 1.037629 | 0.299443 | 0.766128 |
| si:dkey-97a13.6   | 36.62263 | 0.172881539  | 0.402197 | 0.429843 | 0.66731  | 0.933049 |
| EIF3JA            | 522.8614 | -0.089465935 | 0.140037 | -0.63887 | 0.522905 | 0.888222 |
| hpxa              | 49.05744 | -1.715186602 | 1.074023 | -1.59697 | 0.110271 | 0.544923 |
| saga              | 362.1608 | 0.534950992  | 0.359875 | 1.486492 | 0.137149 | 0.592789 |
| prkag2a           | 316.691  | -0.229234715 | 0.139503 | -1.64322 | 0.100338 | 0.524753 |
| cdc34b            | 710.8433 | 0.112866414  | 0.146547 | 0.770172 | 0.441198 | 0.852874 |
| zgc:92749         | 39.90691 | 0.496043274  | 0.309519 | 1.602627 | 0.109017 | 0.541807 |
| cid1b             | 78.14667 | 0.050608229  | 0.266873 | 0.189634 | 0.849596 | 0.978209 |
| si:ch211-266d19.4 | 160.2075 | -0.094620549 | 0.146734 | -0.64485 | 0.519027 | 0.887148 |
| smad4b            | 122.4355 | 0.135746254  | 0.174654 | 0.77723  | 0.437023 | 0.851125 |
| atf6              | 648.5651 | 0.496031971  | 0.10054  | 4.933689 | 8.07E-07 | 0.000253 |
| tfap2b            | 672.3012 | 0.009403928  | 0.209947 | 0.044792 | 0.964273 | 0.999925 |
| inhbaa            | 92.13136 | -0.313326262 | 0.212973 | -1.4712  | 0.141236 | 0.599899 |

|          |          |              |          |          |          |          |
|----------|----------|--------------|----------|----------|----------|----------|
| gtf2e2   | 533.8694 | 0.027308794  | 0.13261  | 0.205933 | 0.836843 | 0.976007 |
| rpud4    | 99.0762  | -0.203350509 | 0.214855 | -0.94645 | 0.343917 | 0.798147 |
| pfn2l    | 3371.108 | 0.10795616   | 0.090362 | 1.194702 | 0.232203 | 0.713454 |
| atp2bla  | 867.9536 | 0.068944087  | 0.124589 | 0.553371 | 0.58001  | 0.905618 |
| EIF1B    | 8907.004 | 0.100632284  | 0.110209 | 0.913105 | 0.361188 | 0.81142  |
| c3a.1    | 3229.306 | 0.155755044  | 0.24436  | 0.6374   | 0.523864 | 0.888642 |
| bbx      | 43.75368 | -0.225201634 | 0.345814 | -0.65122 | 0.514903 | 0.886401 |
| wee2     | 3.169467 | 0.573674361  | 1.341462 | 0.427649 | 0.668907 | 0.933115 |
| rbm14a   | 716.8231 | 0.059996829  | 0.118617 | 0.505803 | 0.612995 | 0.915998 |
| calhm5.2 | 35.83775 | -0.38700963  | 0.279462 | -1.38484 | 0.166101 | 0.635707 |
| hcls1    | 365.1904 | -0.005926117 | 0.130087 | -0.04556 | 0.963665 | 0.999842 |
| macolb   | 533.3319 | 0.145480163  | 0.113498 | 1.281786 | 0.199918 | 0.6804   |
| poclbl   | 133.3567 | 0.187192772  | 0.189925 | 0.985612 | 0.324324 | 0.783308 |
| rer1     | 779.5226 | 0.093192016  | 0.133483 | 0.698159 | 0.485078 | 0.872911 |
| arll3b   | 265.961  | -0.270761779 | 0.127814 | -2.1184  | 0.034141 | 0.326054 |
| smarca1  | 315.6997 | -0.17869114  | 0.143509 | -1.24516 | 0.213074 | 0.695467 |
| nucks1b  | 1312.832 | 0.174219434  | 0.10843  | 1.606741 | 0.108111 | 0.54009  |
| foxa3    | 217.182  | -0.334475321 | 0.143283 | -2.33436 | 0.019577 | 0.246694 |
| plek2    | 84.13485 | 0.036159957  | 0.382932 | 0.094429 | 0.924768 | 0.994815 |
| tmem161a | 383.9786 | 0.142909603  | 0.135352 | 1.055838 | 0.291042 | 0.761197 |
| hnmt     | 97.41132 | -0.750862163 | 0.243399 | -3.08491 | 0.002036 | 0.070205 |
| pfkpb    | 225.4512 | 0.424369783  | 0.207788 | 2.042318 | 0.04112  | 0.353918 |
| dipk2aa  | 88.19934 | 0.492677328  | 0.230078 | 2.141346 | 0.032246 | 0.318747 |
| csnk2a2a | 617.2878 | -0.117909475 | 0.114262 | -1.03192 | 0.302107 | 0.76803  |
| nop56    | 2525.263 | -0.267480611 | 0.133554 | -2.00279 | 0.0452   | 0.372359 |
| dlgap4b  | 42.15691 | -0.020169235 | 0.297842 | -0.06772 | 0.94601  | 0.997371 |
| itga3b   | 311.1347 | 0.279726693  | 0.159463 | 1.754178 | 0.0794   | 0.477151 |
| mettl3   | 167.7377 | 0.116091125  | 0.173246 | 0.670094 | 0.502798 | 0.881453 |
| asah2    | 85.74405 | -0.255858309 | 0.442197 | -0.57861 | 0.562854 | 0.900772 |
| foxn3    | 72.52193 | 0.259285276  | 0.247454 | 1.047812 | 0.294725 | 0.763708 |
| alg9     | 299.0122 | 0.230955014  | 0.142895 | 1.616255 | 0.106039 | 0.534956 |
| arih2    | 1368.754 | -0.054354937 | 0.171341 | -0.31723 | 0.751067 | 0.955222 |
| tmprss4b | 22.20746 | -0.510757207 | 0.482963 | -1.05755 | 0.290261 | 0.76078  |
| picalma  | 764.6193 | -0.074018804 | 0.118276 | -0.62581 | 0.531437 | 0.890835 |
| npepl1   | 1644.761 | -0.132824084 | 0.092977 | -1.42857 | 0.153129 | 0.617769 |
| snap23.1 | 905.5268 | -0.041806091 | 0.103982 | -0.40205 | 0.687646 | 0.938835 |
| slc4ala  | 3627.445 | 0.315586499  | 0.223547 | 1.411724 | 0.158031 | 0.623766 |
| znf143a  | 419.4431 | 0.045749191  | 0.120923 | 0.378332 | 0.705184 | 0.944028 |
| ammecr1  | 322.594  | -0.019257204 | 0.117281 | -0.1642  | 0.869576 | 0.983265 |
| anos1a   | 399.6266 | -0.134541165 | 0.16579  | -0.81152 | 0.417069 | 0.84067  |
| ddx49    | 190.105  | 0.08571933   | 0.18398  | 0.465916 | 0.641275 | 0.925523 |
| slc34a2a | 67.77596 | 0.085279842  | 1.491351 | 0.057183 | 0.954399 | 0.998611 |
| arhgef4  | 1146.668 | 0.122756953  | 0.103919 | 1.181271 | 0.237495 | 0.718568 |
| ech1     | 461.4014 | -0.087676885 | 0.185315 | -0.47312 | 0.636126 | 0.924779 |
| tcea2    | 197.0784 | 0.171244771  | 0.161624 | 1.059525 | 0.289361 | 0.760405 |
| EIF2D    | 206.9749 | 0.410463605  | 0.147048 | 2.791352 | 0.005249 | 0.121252 |
| mat2b    | 395.5113 | -0.074359552 | 0.16013  | -0.46437 | 0.642383 | 0.92567  |
| itgb5    | 432.1381 | 0.156154805  | 0.101253 | 1.542229 | 0.123018 | 0.569606 |
| myhz2    | 58247.93 | -0.01159401  | 0.373612 | -0.03103 | 0.975244 | 1        |
| tnfsf13b | 10.80939 | 0.593177527  | 0.525673 | 1.128414 | 0.259145 | 0.736127 |
| syap1    | 720.3605 | 0.019894591  | 0.121432 | 0.163833 | 0.869862 | 0.983365 |
| scml2    | 542.5267 | -0.10983548  | 0.130269 | -0.84314 | 0.399148 | 0.831196 |
| mob1bb   | 245.918  | -0.363744257 | 0.171123 | -2.12563 | 0.033534 | 0.323214 |
| rhoub    | 831.304  | -0.028843225 | 0.132419 | -0.21782 | 0.82757  | 0.973588 |

|                 |          |              |          |          |          |          |
|-----------------|----------|--------------|----------|----------|----------|----------|
| cfll1           | 8125.61  | -0.0286533   | 0.138982 | -0.20617 | 0.836662 | 0.976007 |
| osbp17          | 573.2386 | -0.086501159 | 0.140672 | -0.61491 | 0.538611 | 0.892777 |
| nfla            | 457.7511 | -0.090088278 | 0.125137 | -0.71992 | 0.471576 | 0.86809  |
| adal            | 27.71349 | 0.045427196  | 0.349662 | 0.129918 | 0.896632 | 0.98939  |
| gpia            | 3424.841 | -0.222089502 | 0.202699 | -1.09566 | 0.273228 | 0.749148 |
| ppfia2          | 234.634  | -0.185131559 | 0.240473 | -0.76986 | 0.441381 | 0.852874 |
| tdg.1           | 702.5065 | 0.138375625  | 0.109253 | 1.266562 | 0.205312 | 0.68744  |
| opcml           | 29.63839 | 0.487061246  | 0.54419  | 0.89502  | 0.370776 | 0.818484 |
| pibfl           | 0.179863 | 2.667699955  | 5.195716 | 0.513442 | 0.607642 | NA       |
| ubiad1          | 467.2442 | -0.108975297 | 0.149177 | -0.73051 | 0.465079 | 0.864892 |
| or101-1         | 5.453898 | 0.022218398  | 0.956388 | 0.023232 | 0.981466 | 1        |
| pole4           | 97.91044 | 0.046159414  | 0.240833 | 0.191666 | 0.848004 | 0.977829 |
| dtbbb           | 23.943   | 0.370467696  | 0.458693 | 0.807659 | 0.419287 | 0.842286 |
| si:ch211-59h6.1 | 37.3533  | -0.273760446 | 0.320453 | -0.85429 | 0.392944 | 0.827902 |
| nsun3           | 50.46745 | -0.051547712 | 0.274854 | -0.18755 | 0.851233 | 0.978548 |
| erapla          | 73.62288 | 0.063331149  | 0.278694 | 0.227243 | 0.820235 | 0.971788 |
| ints6           | 172.6932 | 0.141750983  | 0.166867 | 0.849487 | 0.39561  | 0.829389 |
| mta2            | 1867.586 | 0.070252968  | 0.109276 | 0.642893 | 0.520293 | 0.887149 |
| ndufv2          | 2229.677 | 0.205440146  | 0.123468 | 1.663917 | 0.096129 | 0.517378 |
| abcc12          | 154.2776 | -1.338709853 | 0.384152 | -3.48484 | 0.000492 | 0.027296 |
| zgc:158412      | 14.03666 | 1.078563724  | 1.298577 | 0.830574 | 0.406215 | 0.834645 |
| itpkla          | 272.4492 | -0.188847661 | 0.201232 | -0.93846 | 0.348009 | 0.800392 |
| hoxb5a          | 355.8939 | -0.22285082  | 0.126939 | -1.75558 | 0.07916  | 0.47627  |
| ascc2           | 222.6101 | -0.24504936  | 0.158779 | -1.54334 | 0.122749 | 0.569468 |
| oxctla          | 918.5822 | 0.158817122  | 0.159636 | 0.99487  | 0.3198   | 0.780475 |
| mmp15b          | 131.9502 | 0.031167095  | 0.203184 | 0.153393 | 0.878088 | 0.98573  |
| mrpl11          | 426.9408 | 0.13076323   | 0.136066 | 0.961027 | 0.336539 | 0.793245 |
| bmilb           | 321.5951 | -0.005808821 | 0.158582 | -0.03663 | 0.97078  | 1        |
| ywhaba          | 8630.655 | 0.156549719  | 0.079105 | 1.978999 | 0.047816 | 0.380801 |
| tubgcp2         | 290.9695 | -0.085445644 | 0.136862 | -0.62432 | 0.532419 | 0.890978 |
| uap111          | 305.2001 | -0.051880343 | 0.129682 | -0.40006 | 0.689114 | 0.93924  |
| ndrg3a          | 1956.71  | 0.064701769  | 0.153256 | 0.422181 | 0.672893 | 0.93414  |
| gclc            | 563.8204 | -0.129694035 | 0.162175 | -0.79971 | 0.423876 | 0.844281 |
| dmtn            | 264.5505 | 0.528280597  | 0.148158 | 3.565648 | 0.000363 | 0.022086 |
| hiatla          | 423.0673 | 0.013716799  | 0.13898  | 0.098696 | 0.921379 | 0.994085 |
| maf1            | 765.1141 | 2.47E-05     | 0.127544 | 0.000194 | 0.999845 | 1        |
| dlx1a           | 165.1993 | 0.028891749  | 0.143482 | 0.201361 | 0.840416 | 0.976417 |
| pdk1            | 166.2983 | -0.794821895 | 0.283831 | -2.80034 | 0.005105 | 0.119235 |
| prph2la         | 30.19882 | -0.114930384 | 0.448004 | -0.25654 | 0.797535 | 0.966447 |
| atplb1a         | 3871.475 | 0.097477094  | 0.122154 | 0.797983 | 0.42488  | 0.844714 |
| dhx16           | 325.0226 | -0.064503989 | 0.126968 | -0.50803 | 0.611431 | 0.915331 |
| dennd3b         | 13.10804 | -0.375174773 | 0.530777 | -0.70684 | 0.479665 | 0.869938 |
| zgc:55558       | 847.5363 | 0.047602018  | 0.105763 | 0.450084 | 0.65265  | 0.929035 |
| jag1b           | 412.5073 | -0.014984539 | 0.19235  | -0.0779  | 0.937906 | 0.997305 |
| nkf3            | 137.8832 | -0.416819636 | 0.210208 | -1.98289 | 0.04738  | 0.379101 |
| si:ch211-1f22.1 | 1.61926  | -2.812508223 | 1.551512 | -1.81275 | 0.06987  | NA       |
| zeblb           | 628.4707 | -0.108556846 | 0.100751 | -1.07748 | 0.281266 | 0.753577 |
| htr2c12         | 3.358693 | -0.217505235 | 1.404758 | -0.15483 | 0.876952 | 0.985067 |
| pde4ca          | 109.5249 | 0.178038126  | 0.286837 | 0.620694 | 0.534801 | 0.891993 |
| slc35a3a        | 169.1907 | 0.097893353  | 0.152484 | 0.641989 | 0.52088  | 0.887411 |
| phc2b           | 384.7556 | 0.237138509  | 0.121958 | 1.944424 | 0.051844 | 0.395809 |
| glulc           | 23.06374 | -0.355751414 | 0.470158 | -0.75666 | 0.449252 | 0.856862 |
| dhcr24          | 98.36573 | 0.443046053  | 0.201972 | 2.193604 | 0.028264 | 0.298982 |
| zgc:172271      | 136.0471 | -0.627365923 | 0.439948 | -1.426   | 0.153868 | 0.618475 |



|                |          |              |          |          |          |          |
|----------------|----------|--------------|----------|----------|----------|----------|
| wbp11a         | 105.6978 | 0.035273045  | 0.180683 | 0.195221 | 0.84522  | 0.976791 |
| tars           | 1107.201 | 0.222166144  | 0.099905 | 2.223774 | 0.026164 | 0.286896 |
| hsf4           | 76.11099 | 0.300808392  | 0.388193 | 0.774895 | 0.438402 | 0.851685 |
| tmc5           | 70.34356 | -0.022510876 | 0.303388 | -0.0742  | 0.940853 | 0.997371 |
| colec11        | 82.17285 | -0.877651987 | 0.419748 | -2.0909  | 0.036537 | 0.335935 |
| eif4eb         | 268.7647 | 0.296808287  | 0.12398  | 2.393999 | 0.016666 | 0.228896 |
| znf76          | 139.8091 | -0.139979957 | 0.196293 | -0.71312 | 0.475774 | 0.869292 |
| tmem179aa      | 149.131  | 0.52515317   | 0.230814 | 2.275222 | 0.022893 | 0.267028 |
| crispldlb      | 182.1796 | 0.389601907  | 0.202441 | 1.924525 | 0.054289 | 0.402961 |
| slc2a3a        | 782.3283 | -0.773914051 | 0.144596 | -5.35223 | 8.69E-08 | 4.38E-05 |
| gpx8           | 232.7288 | -0.220420486 | 0.183424 | -1.2017  | 0.22948  | 0.711596 |
| rpl19          | 28479.32 | -0.407411723 | 0.114951 | -3.54422 | 0.000394 | 0.023515 |
| map3k15        | 246.2137 | 0.058966529  | 0.192423 | 0.306442 | 0.759268 | 0.957886 |
| cadps2         | 128.5051 | 0.093776707  | 0.201474 | 0.465453 | 0.641607 | 0.925586 |
| pygmb          | 2020.455 | -0.070553007 | 0.191987 | -0.36749 | 0.713254 | 0.945821 |
| ttc5           | 252.9809 | -0.047814197 | 0.135975 | -0.35164 | 0.725109 | 0.948653 |
| ndufa10        | 2928.681 | 0.001202446  | 0.118869 | 0.010116 | 0.991929 | 1        |
| anxa6          | 1166.8   | 0.690074095  | 0.146706 | 4.703798 | 2.55E-06 | 0.00061  |
| kif26ba        | 453.7617 | 0.239500598  | 0.180657 | 1.325721 | 0.184932 | 0.662268 |
| tasorb         | 783.7742 | 0.122669526  | 0.142733 | 0.859433 | 0.390102 | 0.827902 |
| cirbpb         | 31819.57 | -0.090047809 | 0.112455 | -0.80074 | 0.423279 | 0.843894 |
| sh3gl3a        | 263.7507 | 0.368596529  | 0.13996  | 2.63359  | 0.008449 | 0.156983 |
| isoc2          | 280.1038 | -0.153308278 | 0.198401 | -0.77272 | 0.439688 | 0.852079 |
| ppp6r3         | 1350.461 | 0.04373186   | 0.114356 | 0.382419 | 0.702151 | 0.943292 |
| cwc15          | 80.74883 | 0.530071869  | 0.221685 | 2.391105 | 0.016798 | 0.230026 |
| gabra4         | 9.800422 | 0.604807261  | 0.817086 | 0.7402   | 0.459179 | 0.861818 |
| CABZ01088367.1 | 10.97346 | 1.649886454  | 0.685209 | 2.407858 | 0.016046 | 0.223838 |
| gucalb         | 26.45703 | 1.055418542  | 1.683642 | 0.626866 | 0.530747 | 0.890545 |
| bnip2          | 340.2526 | -0.048645185 | 0.135159 | -0.35991 | 0.718915 | 0.94694  |
| bmp2a          | 116.7779 | 0.037733143  | 0.165451 | 0.228062 | 0.819598 | 0.971785 |
| lin7a          | 605.1903 | -0.155803982 | 0.157561 | -0.98885 | 0.322738 | 0.782609 |
| lmna           | 392.7807 | 0.092275691  | 0.126768 | 0.727907 | 0.46667  | 0.865643 |
| slc8a1a        | 28.23022 | 0.116261219  | 0.374898 | 0.310115 | 0.756474 | 0.956532 |
| bhmt           | 68375.44 | -0.305574389 | 0.183377 | -1.66637 | 0.095639 | 0.516418 |
| hira           | 495.9396 | 0.076213628  | 0.139489 | 0.546376 | 0.584807 | 0.906655 |
| sycp3          | 3.484658 | 2.98002908   | 1.368921 | 2.176919 | 0.029487 | 0.305685 |
| hey2           | 92.08665 | 0.230595869  | 0.207705 | 1.11021  | 0.266908 | 0.743418 |
| atp6v1ba       | 2373.127 | 0.030600869  | 0.068229 | 0.448504 | 0.653789 | 0.929269 |
| tldr9          | 26.39562 | -0.46069148  | 0.419234 | -1.09889 | 0.271817 | 0.748006 |
| mtrex          | 632.7202 | 0.043320797  | 0.084641 | 0.511819 | 0.608778 | 0.915204 |
| wfikn2a        | 131.9475 | 0.142836812  | 0.216638 | 0.659333 | 0.509682 | 0.883733 |
| supt71         | 65.10795 | -0.409382006 | 0.28023  | -1.46088 | 0.144048 | 0.603144 |
| nedd1          | 289.2233 | -0.05651349  | 0.14839  | -0.38084 | 0.703319 | 0.943622 |
| cct4           | 7459.11  | -0.118040198 | 0.132675 | -0.8897  | 0.373628 | 0.820566 |
| arhgef39       | 63.49233 | -0.146213911 | 0.386222 | -0.37857 | 0.705004 | 0.944016 |
| gatala         | 48.82347 | -0.023292402 | 0.330517 | -0.07047 | 0.943817 | 0.997371 |
| rrp15          | 252.5285 | -0.147755553 | 0.175096 | -0.84385 | 0.398751 | 0.830925 |
| map3k9         | 25.23859 | 0.582056005  | 0.450557 | 1.291858 | 0.196406 | 0.67688  |
| zbtb34         | 26.09579 | -0.220140189 | 0.352604 | -0.62433 | 0.532413 | 0.890978 |
| abca2          | 239.1189 | 0.18732273   | 0.191381 | 0.978793 | 0.327682 | 0.786438 |
| ube2kb         | 773.1961 | -0.062400551 | 0.125087 | -0.49886 | 0.617881 | 0.916478 |
| pck1           | 3815.738 | -0.959026587 | 0.359541 | -2.66737 | 0.007645 | 0.147606 |
| cyp2a1         | 26.47329 | 0.606986546  | 0.335695 | 1.808151 | 0.070583 | 0.453373 |
| svepl          | 367.7897 | 0.115826729  | 0.170699 | 0.678542 | 0.497428 | 0.878744 |

|                  |          |              |          |          |          |          |
|------------------|----------|--------------|----------|----------|----------|----------|
| mcm9             | 44.7202  | 0.314772144  | 0.369977 | 0.850789 | 0.394887 | 0.828825 |
| hoxb4a           | 189.259  | -0.19877553  | 0.151883 | -1.30874 | 0.190622 | 0.670716 |
| ikzfl            | 51.63603 | 0.053460136  | 0.263184 | 0.203128 | 0.839035 | 0.976417 |
| lpgat1           | 396.349  | 0.15401256   | 0.141576 | 1.087843 | 0.276665 | 0.751239 |
| pgml             | 2710.104 | -0.133144632 | 0.114327 | -1.16459 | 0.244183 | 0.724792 |
| rxf2             | 332.0062 | 0.161158108  | 0.169598 | 0.950235 | 0.341993 | 0.79678  |
| gadd45bb         | 168.2934 | -0.457141265 | 0.300361 | -1.52197 | 0.128016 | 0.577144 |
| csnk2a2b         | 554.4462 | 0.068559914  | 0.12193  | 0.562291 | 0.573917 | 0.904296 |
| brd1a            | 329.3713 | -0.015986924 | 0.149397 | -0.10701 | 0.914782 | 0.992996 |
| tnfb             | 37.21623 | -0.226603103 | 0.525534 | -0.43119 | 0.666333 | 0.932664 |
| sema3gb          | 253.3451 | 0.135617886  | 0.139986 | 0.968795 | 0.332647 | 0.789807 |
| anxa13l          | 218.5559 | 0.390820784  | 0.140117 | 2.789244 | 0.005283 | 0.121922 |
| pbx3b            | 1268.25  | 0.178094903  | 0.157796 | 1.128639 | 0.25905  | 0.736127 |
| vdac2            | 22497.81 | -0.188069934 | 0.101222 | -1.85799 | 0.063171 | 0.429313 |
| cd164            | 1580.166 | -0.343666456 | 0.096674 | -3.55491 | 0.000378 | 0.022825 |
| cntn3a.2         | 4.613495 | 1.020955675  | 0.905007 | 1.128119 | 0.25927  | 0.736127 |
| casr             | 0.857277 | 2.577022989  | 2.3233   | 1.109208 | 0.26734  | NA       |
| adgr14           | 66.51369 | -0.219711967 | 0.218882 | -1.00379 | 0.31548  | 0.777872 |
| tpd52l2b         | 1679.779 | 0.040380844  | 0.107035 | 0.377268 | 0.705974 | 0.944512 |
| brox             | 325.9011 | -0.230795448 | 0.137134 | -1.683   | 0.092376 | 0.508314 |
| tbck             | 213.8637 | 0.161476505  | 0.170369 | 0.947807 | 0.343228 | 0.797757 |
| napba            | 227.129  | 0.437145293  | 0.211961 | 2.062382 | 0.039171 | 0.346149 |
| hyoul            | 662.2223 | 0.337387987  | 0.125742 | 2.683174 | 0.007293 | 0.144668 |
| si:dkey-42i9.6   | 1279.448 | -0.174967835 | 0.106197 | -1.64758 | 0.09944  | 0.523641 |
| vsig8b           | 42.5866  | -0.079331642 | 0.299321 | -0.26504 | 0.79098  | 0.964766 |
| cilp2            | 114.7619 | 0.35796776   | 0.279973 | 1.278582 | 0.201044 | 0.681045 |
| stimate          | 209.3492 | -0.057391905 | 0.14855  | -0.38635 | 0.69924  | 0.942499 |
| cers2a           | 69.18299 | 0.233142099  | 0.268169 | 0.869385 | 0.384636 | 0.826588 |
| ccm2             | 176.5287 | -0.667900655 | 0.148334 | -4.50267 | 6.71E-06 | 0.001322 |
| usp9             | 2303.51  | 0.083528874  | 0.142283 | 0.58706  | 0.557163 | 0.899165 |
| zgc:77486        | 293.657  | 0.294382853  | 0.201868 | 1.458291 | 0.14476  | 0.603718 |
| gtsel            | 167.8755 | 0.390039491  | 0.175376 | 2.22402  | 0.026147 | 0.286896 |
| g6pca.2          | 1785.853 | -0.088451485 | 0.239762 | -0.36891 | 0.712192 | 0.945821 |
| ap4b1            | 204.8013 | 0.033863704  | 0.164024 | 0.206456 | 0.836435 | 0.976007 |
| srsf6a           | 1384.585 | 0.030037223  | 0.103236 | 0.290956 | 0.771085 | 0.960484 |
| slc4a4a          | 987.3089 | -0.333609727 | 0.158541 | -2.10424 | 0.035357 | 0.330833 |
| vtal             | 597.7856 | -0.04414592  | 0.119591 | -0.36914 | 0.712023 | 0.945821 |
| polr3glb         | 226.848  | -0.179467008 | 0.150057 | -1.19599 | 0.231699 | 0.713202 |
| lancl1           | 325.0836 | 0.064116535  | 0.135452 | 0.473351 | 0.635963 | 0.92471  |
| slc25a55b        | 767.0385 | -0.264102101 | 0.223542 | -1.18144 | 0.237427 | 0.718568 |
| enolb            | 506.4194 | 0.675802294  | 0.215678 | 3.133388 | 0.001728 | 0.064499 |
| tnni2a.3         | 67.29855 | 0.645159416  | 0.49342  | 1.307526 | 0.191034 | 0.67094  |
| actn3a           | 25711.07 | 0.108643395  | 0.197477 | 0.550157 | 0.582211 | 0.90571  |
| rrbpla           | 747.1441 | 0.276662157  | 0.100608 | 2.749911 | 0.005961 | 0.13073  |
| ctss2.2          | 164.7182 | -0.618641094 | 0.207502 | -2.98137 | 0.00287  | 0.088299 |
| si:dkey-246g23.4 | 28.45672 | -1.58715324  | 0.450138 | -3.52593 | 0.000422 | 0.024691 |
| thopl            | 707.6768 | 0.195286299  | 0.10852  | 1.799541 | 0.071933 | 0.4564   |
| ppplr13l         | 579.137  | 0.085396309  | 0.111344 | 0.766958 | 0.443106 | 0.854063 |
| zgc:77158        | 177.2571 | -0.121697968 | 0.203452 | -0.59817 | 0.54973  | 0.897373 |
| gucylal          | 146.5586 | -0.397509835 | 0.263901 | -1.50628 | 0.131995 | 0.584317 |
| simlb            | 11.12832 | 0.096204461  | 0.686633 | 0.14011  | 0.888573 | 0.988188 |
| klf11b           | 439.0974 | -0.093894926 | 0.250661 | -0.37459 | 0.707966 | 0.945335 |
| hps4             | 127.8967 | -0.202969493 | 0.166724 | -1.2174  | 0.223453 | 0.70531  |
| snrpd3           | 0.176868 | 0            | 5.267649 | 0        | 1        | NA       |

|                   |          |              |          |          |          |          |  |
|-------------------|----------|--------------|----------|----------|----------|----------|--|
| pcid2             | 325.8824 | 0.129718097  | 0.166493 | 0.779122 | 0.435908 | 0.850596 |  |
| capns1b           | 2100.017 | 0.058101027  | 0.113928 | 0.509982 | 0.610064 | 0.915331 |  |
| fam219ab          | 167.4125 | 0.169499658  | 0.279958 | 0.605447 | 0.544882 | 0.895206 |  |
| anapc16           | 779.8393 | -0.143677843 | 0.182674 | -0.78653 | 0.431559 | 0.848419 |  |
| snx13             | 87.50935 | -0.051184981 | 0.205475 | -0.24911 | 0.803279 | 0.968443 |  |
| osbp12b           | 343.5658 | 0.102658364  | 0.138925 | 0.738949 | 0.459938 | 0.862369 |  |
| arhgef3           | 29.41926 | 0.015360016  | 0.325363 | 0.047209 | 0.962347 | 0.999461 |  |
| spoll             | 2.943551 | -0.8546605   | 1.092224 | -0.7825  | 0.433923 | 0.850002 |  |
| sulf2b            | 1345.43  | -0.126716517 | 0.120252 | -1.05376 | 0.291995 | 0.761655 |  |
| aldh3b1           | 168.6412 | -0.180704877 | 0.181762 | -0.99418 | 0.320134 | 0.780709 |  |
| abl2              | 299.6726 | -0.0797843   | 0.137136 | -0.58179 | 0.560709 | 0.899982 |  |
| tbc1d19           | 71.85352 | -0.202970529 | 0.246755 | -0.82256 | 0.410759 | 0.837567 |  |
| sept5a            | 534.3476 | 0.1895134    | 0.154442 | 1.227087 | 0.21979  | 0.700776 |  |
| ttc14             | 378.7089 | 0.321807422  | 0.236578 | 1.360258 | 0.173748 | 0.646897 |  |
| egfra             | 291.0422 | -0.147322658 | 0.182648 | -0.80659 | 0.4199   | 0.842383 |  |
| lmo4a             | 420.6685 | -0.114817081 | 0.135079 | -0.85    | 0.395325 | 0.829083 |  |
| slc12a3           | 111.9195 | 0.917986401  | 0.672969 | 1.364084 | 0.172541 | 0.645319 |  |
| amy2a             | 28514.23 | -2.23426862  | 1.142119 | -1.95625 | 0.050436 | 0.39074  |  |
| cdc14aa           | 22.96467 | 0.232653734  | 0.495846 | 0.469205 | 0.638923 | 0.924779 |  |
| ptpmt1            | 167.0181 | -0.131381446 | 0.170213 | -0.77186 | 0.440194 | 0.852079 |  |
| armc1             | 321.2393 | -0.0177303   | 0.127234 | -0.13935 | 0.889172 | 0.988253 |  |
| fam133b           | 940.0866 | 0.00104014   | 0.114554 | 0.00908  | 0.992755 | 1        |  |
| slc5a1            | 208.7493 | -2.36319945  | 0.828769 | -2.85146 | 0.004352 | 0.108751 |  |
| spata20           | 258.5271 | -0.936517682 | 0.208022 | -4.50202 | 6.73E-06 | 0.001322 |  |
| pi4k2b            | 263.2883 | -0.195116008 | 0.121455 | -1.60649 | 0.108166 | 0.54011  |  |
| sor11             | 533.84   | -0.118010161 | 0.158875 | -0.74279 | 0.457612 | 0.860993 |  |
| si:ch211-253p14.2 | 1.507818 | -0.106655893 | 1.40189  | -0.07608 | 0.939355 | NA       |  |
| frya              | 774.0436 | -0.092068625 | 0.202868 | -0.45383 | 0.649948 | 0.927756 |  |
| slc16a9a          | 211.5221 | -0.091289251 | 0.259829 | -0.35134 | 0.72533  | 0.948653 |  |
| plekhh2           | 375.7213 | 0.037763247  | 0.140537 | 0.268707 | 0.788155 | 0.963467 |  |
| eif3m             | 6538.906 | -0.356489726 | 0.143742 | -2.48007 | 0.013135 | 0.199185 |  |
| XRCC2             | 10.98196 | 0.627236473  | 0.633405 | 0.990262 | 0.322046 | 0.782237 |  |
| psmb3             | 1554.609 | 0.15740471   | 0.154603 | 1.018124 | 0.308619 | 0.773546 |  |
| ivnslabpb         | 1068.275 | -0.211097303 | 0.176124 | -1.19857 | 0.230694 | 0.712405 |  |
| pdf               | 98.11386 | -0.010723082 | 0.211981 | -0.05059 | 0.959656 | 0.999164 |  |
| slc31a1           | 475.3114 | -0.099553035 | 0.114774 | -0.86738 | 0.385731 | 0.826939 |  |
| mipb              | 1182.256 | 0.153761042  | 0.412447 | 0.372802 | 0.709296 | 0.945546 |  |
| cul2              | 587.6968 | -0.109729325 | 0.107858 | -1.01735 | 0.308986 | 0.773791 |  |
| psma6b            | 1146.406 | -0.014694881 | 0.160889 | -0.09134 | 0.927226 | 0.994973 |  |
| psap              | 6036.288 | -0.274573063 | 0.135063 | -2.03293 | 0.04206  | 0.358807 |  |
| pex3              | 162.533  | 0.551755     | 0.177003 | 3.117213 | 0.001826 | 0.065787 |  |
| anxa13            | 1425.939 | 0.166845604  | 0.10555  | 1.580726 | 0.113941 | 0.552686 |  |
| ndfipl            | 1432.807 | 0.070913335  | 0.114543 | 0.619096 | 0.535853 | 0.892102 |  |
| ube2q2            | 922.1142 | 0.064862405  | 0.100658 | 0.644382 | 0.519327 | 0.887148 |  |
| ern1              | 215.3496 | 0.136819604  | 0.253771 | 0.539145 | 0.589787 | 0.908601 |  |
| stard8            | 316.0319 | 0.08391737   | 0.110142 | 0.761899 | 0.44612  | 0.855403 |  |
| eif2b4            | 981.9909 | -0.23389638  | 0.145943 | -1.60265 | 0.109012 | 0.541807 |  |
| lrrc45            | 161.837  | 0.289105092  | 0.169723 | 1.70339  | 0.088495 | 0.499597 |  |
| cwc22             | 447.9111 | 0.052681016  | 0.107934 | 0.488085 | 0.625489 | 0.920625 |  |
| lbr               | 868.5713 | 0.219354786  | 0.128917 | 1.701514 | 0.088846 | 0.500363 |  |
| pdia7             | 838.6801 | 0.082952451  | 0.128799 | 0.644048 | 0.519545 | 0.887148 |  |
| rrml              | 1716.634 | 0.335980551  | 0.207228 | 1.621311 | 0.104951 | 0.533388 |  |
| lhx1a             | 536.4798 | -0.073006984 | 0.203168 | -0.35934 | 0.719339 | 0.94694  |  |
| ms4a17a.4         | 3.657338 | 2.508036449  | 1.599806 | 1.567713 | 0.116948 | 0.557831 |  |

|                  |          |              |          |          |          |          |
|------------------|----------|--------------|----------|----------|----------|----------|
| abcc2            | 816.2611 | 0.220176823  | 0.264423 | 0.832668 | 0.405032 | 0.834284 |
| si:dkeyp-93d12.1 | 13.56997 | -0.11788821  | 0.605559 | -0.19468 | 0.845646 | 0.976945 |
| smarcad1a        | 337.2591 | 0.268995702  | 0.323487 | 0.831549 | 0.405663 | 0.834645 |
| cldn7b           | 1660.862 | -0.094393509 | 0.14723  | -0.64113 | 0.521437 | 0.887551 |
| ngfb             | 78.65056 | 0.05012679   | 0.208282 | 0.240667 | 0.809813 | 0.969828 |
| olfmlb           | 818.0634 | 0.039602288  | 0.111946 | 0.353761 | 0.723518 | 0.947917 |
| gabrr2b          | 23.82547 | -0.438023132 | 0.412442 | -1.06202 | 0.288225 | 0.759229 |
| rab36            | 27.99913 | 0.602295822  | 0.407811 | 1.476901 | 0.139702 | 0.598033 |
| cldn5b           | 369.7551 | -0.438171082 | 0.225526 | -1.94288 | 0.052031 | 0.396487 |
| pgamlb           | 1405.572 | 0.142602727  | 0.165228 | 0.863068 | 0.3881   | 0.827592 |
| fam184a          | 224.7456 | 0.239158576  | 0.222487 | 1.074932 | 0.282405 | 0.754744 |
| wdr82            | 864.1373 | 0.314732872  | 0.126496 | 2.488095 | 0.012843 | 0.197722 |
| atp6v1e1a        | 329.7562 | -0.373209181 | 0.162138 | -2.3018  | 0.021346 | 0.258949 |
| osr1             | 250.7587 | -0.168805718 | 0.16235  | -1.03977 | 0.298448 | 0.765446 |
| pkd2             | 177.979  | 0.274436434  | 0.234088 | 1.172364 | 0.241051 | 0.722623 |
| pyroxd2          | 357.6373 | 0.27963033   | 0.122369 | 2.285144 | 0.022304 | 0.264074 |
| dkk1a            | 60.49338 | -0.09589933  | 0.239292 | -0.40076 | 0.688595 | 0.939118 |
| cfl2             | 2381.672 | 0.259900721  | 0.134843 | 1.927435 | 0.053925 | 0.402007 |
| wasla            | 503.8697 | -0.001340847 | 0.120091 | -0.01117 | 0.991092 | 1        |
| picalmb          | 897.8248 | 0.07060387   | 0.096443 | 0.732076 | 0.464122 | 0.864593 |
| acot8            | 68.74612 | -0.111205516 | 0.289584 | -0.38402 | 0.700965 | 0.942918 |
| srp72            | 1129.421 | 0.001852437  | 0.130783 | 0.014164 | 0.988699 | 1        |
| med22            | 241.2049 | -0.117894131 | 0.165454 | -0.71255 | 0.476125 | 0.869292 |
| mtdha            | 1555.831 | -0.033815186 | 0.100015 | -0.3381  | 0.735286 | 0.951543 |
| ercc4            | 164.7413 | 0.333801147  | 0.169154 | 1.973353 | 0.048455 | 0.383271 |
| ssr3             | 2272.408 | -0.208489535 | 0.141243 | -1.47611 | 0.139915 | 0.598455 |
| CABZ01041610.1   | 12.13014 | 0.604742572  | 0.593143 | 1.019557 | 0.307939 | 0.772996 |
| blocls1          | 231.6925 | -0.179665205 | 0.180838 | -0.99351 | 0.320461 | 0.780821 |
| pfkma            | 1724.558 | 0.072558449  | 0.247779 | 0.292835 | 0.769648 | 0.960484 |
| ilidr2           | 199.8714 | -0.148692432 | 0.176659 | -0.84169 | 0.39996  | 0.831277 |
| foxplb           | 264.0244 | 0.138976895  | 0.17164  | 0.809702 | 0.418112 | 0.84138  |
| sst2             | 49.83154 | -0.358702395 | 0.385239 | -0.93112 | 0.351794 | 0.802513 |
| myl1             | 34783.98 | 0.536946667  | 0.182415 | 2.943541 | 0.003245 | 0.093414 |
| otpa             | 561.795  | 0.186648573  | 0.244643 | 0.762942 | 0.445498 | 0.855403 |
| zgc:55413        | 12.76448 | -0.090122387 | 0.487164 | -0.18499 | 0.853234 | 0.978839 |
| odf3l2a          | 27.51742 | 0.03270077   | 0.402271 | 0.08129  | 0.935211 | 0.996829 |
| cdh13            | 486.6756 | 0.884756422  | 0.205164 | 4.312428 | 1.61E-05 | 0.002576 |
| mecp2            | 34.67485 | 0.449901984  | 0.400672 | 1.122869 | 0.261493 | 0.738975 |
| zgc:86598        | 1575.374 | -0.009583611 | 0.100301 | -0.09555 | 0.923879 | 0.994713 |
| dlst             | 5186.481 | 0.054549932  | 0.133761 | 0.407815 | 0.683409 | 0.938291 |
| si:dkey-121j17.5 | 26.48827 | 0.928289706  | 0.633812 | 1.464614 | 0.143026 | 0.602002 |
| sept8b           | 194.233  | -0.044135324 | 0.236245 | -0.18682 | 0.851801 | 0.978558 |
| esytlb           | 160.278  | -0.575759049 | 0.276131 | -2.0851  | 0.037061 | 0.337668 |
| rbmx             | 1559.712 | 0.007958049  | 0.084231 | 0.094479 | 0.924728 | 0.994815 |
| jag2a            | 36.209   | 0.146221237  | 0.264944 | 0.551895 | 0.581021 | 0.905618 |
| pdlim3b          | 123.1624 | -0.360302963 | 0.185269 | -1.94476 | 0.051804 | 0.395809 |
| eyal             | 749.2579 | 0.151965655  | 0.114574 | 1.326355 | 0.184722 | 0.661987 |
| camk2d2          | 662.9439 | 0.141068649  | 0.177387 | 0.795259 | 0.426463 | 0.84512  |
| rfc2             | 241.9332 | 0.111626136  | 0.171558 | 0.650663 | 0.515264 | 0.886401 |
| dlgapla          | 15.20303 | 1.29861982   | 0.604794 | 2.147211 | 0.031776 | 0.317081 |
| eno2             | 822.1619 | 0.527820412  | 0.245349 | 2.151304 | 0.031452 | 0.315339 |
| med15            | 245.863  | -0.287338365 | 0.154276 | -1.8625  | 0.062533 | 0.427724 |
| brinp2           | 67.24614 | 0.311333666  | 0.339063 | 0.918217 | 0.358506 | 0.80995  |
| vac14            | 271.0606 | 0.315968804  | 0.152794 | 2.067941 | 0.038646 | 0.344438 |

|            |           |               |           |           |           |           |
|------------|-----------|---------------|-----------|-----------|-----------|-----------|
| spaw       | 1. 92711  | 0. 670789936  | 1. 185675 | 0. 565745 | 0. 571567 | NA        |
| pgghg      | 151. 4767 | 0. 190235891  | 0. 30558  | 0. 622541 | 0. 533586 | 0. 891181 |
| atp5pf     | 2906. 137 | 0. 013461859  | 0. 125152 | 0. 107564 | 0. 914342 | 0. 992972 |
| gucy2c     | 122. 7811 | -0. 574448147 | 0. 301956 | -1. 90242 | 0. 057116 | 0. 41265  |
| enla       | 108. 8267 | -0. 00186491  | 0. 218195 | -0. 00855 | 0. 993181 | 1         |
| sh2d5      | 61. 83035 | 0. 594569607  | 0. 269586 | 2. 205488 | 0. 02742  | 0. 293857 |
| npmla      | 1972. 757 | -0. 270564459 | 0. 162745 | -1. 6625  | 0. 096412 | 0. 518297 |
| ormdl1     | 635. 2498 | -0. 36721853  | 0. 159726 | -2. 29905 | 0. 021502 | 0. 260159 |
| rab11a1    | 157. 271  | 0. 159154009  | 0. 173304 | 0. 918354 | 0. 358434 | 0. 809919 |
| stk17b     | 200. 0698 | 0. 071129473  | 0. 144242 | 0. 493127 | 0. 621923 | 0. 918461 |
| krt95      | 1. 135056 | 0             | 2. 762817 | 0         | 1         | NA        |
| amh        | 12. 38091 | 0. 88689199   | 0. 472145 | 1. 878431 | 0. 060322 | 0. 422591 |
| optc       | 25. 97377 | 0. 101963322  | 0. 358015 | 0. 284801 | 0. 775796 | 0. 961073 |
| tmbim4     | 876. 0928 | 0. 033109828  | 0. 112145 | 0. 295242 | 0. 767809 | 0. 960296 |
| luc7l3     | 779. 0108 | -0. 260367065 | 0. 145054 | -1. 79496 | 0. 07266  | 0. 457864 |
| ddx4       | 71. 40374 | 0. 529996388  | 0. 387709 | 1. 366996 | 0. 171627 | 0. 643878 |
| slc12a4    | 386. 4425 | -0. 160736156 | 0. 135436 | -1. 18681 | 0. 235304 | 0. 716329 |
| galnt6     | 252. 3084 | 0. 314290542  | 0. 176425 | 1. 781437 | 0. 074841 | 0. 464151 |
| selenoo2   | 12. 4867  | -0. 629297024 | 0. 510196 | -1. 23344 | 0. 217411 | 0. 69815  |
| smclb      | 6. 465414 | 0. 766888199  | 1. 042733 | 0. 73546  | 0. 46206  | 0. 863402 |
| elavl3     | 1256. 574 | 0. 227048535  | 0. 137324 | 1. 653379 | 0. 098254 | 0. 521076 |
| mxe        | 4. 704868 | -1. 485552216 | 1. 404547 | -1. 05767 | 0. 290204 | 0. 76078  |
| ppp2r5d    | 624. 7228 | -0. 024294884 | 0. 10777  | -0. 22543 | 0. 821642 | 0. 971794 |
| rabgef1    | 468. 2805 | 0. 12856124   | 0. 103017 | 1. 247963 | 0. 212045 | 0. 693739 |
| dgkza      | 324. 4294 | 0. 173514226  | 0. 134404 | 1. 290994 | 0. 196706 | 0. 677117 |
| rab3c      | 214. 0973 | 0. 092643052  | 0. 153901 | 0. 601964 | 0. 547198 | 0. 896121 |
| usf1l      | 572. 5397 | -0. 124568696 | 0. 133644 | -0. 93209 | 0. 351289 | 0. 802305 |
| arhgef25b  | 233. 5528 | 0. 068279039  | 0. 151175 | 0. 451657 | 0. 651516 | 0. 928562 |
| yipf1      | 248. 349  | -0. 031457685 | 0. 140398 | -0. 22406 | 0. 82271  | 0. 971966 |
| sstr3      | 6. 35842  | 0. 495688072  | 0. 968632 | 0. 51174  | 0. 608833 | 0. 915204 |
| ptfla      | 65. 35783 | -0. 088928062 | 0. 30514  | -0. 29143 | 0. 77072  | 0. 960484 |
| nr6alb     | 27. 62005 | 0. 032490656  | 0. 451691 | 0. 071931 | 0. 942657 | 0. 997371 |
| ca2        | 608. 8914 | 0. 046227113  | 0. 151154 | 0. 305827 | 0. 759736 | 0. 957886 |
| tacl       | 142. 5963 | -0. 006687087 | 0. 245346 | -0. 02726 | 0. 978256 | 1         |
| trpv6      | 314. 1473 | -0. 017811297 | 0. 202031 | -0. 08816 | 0. 929749 | 0. 995576 |
| ythdf2     | 447. 4564 | -0. 01240857  | 0. 134138 | -0. 09251 | 0. 926296 | 0. 994815 |
| nutf2l     | 535. 5963 | -0. 113730752 | 0. 131933 | -0. 86203 | 0. 38867  | 0. 827613 |
| tmem126a   | 374. 2989 | -0. 30447836  | 0. 182271 | -1. 67047 | 0. 094827 | 0. 513949 |
| usp5       | 1700. 029 | 0. 16592589   | 0. 115899 | 1. 43164  | 0. 152247 | 0. 616018 |
| cdh6       | 742. 448  | 0. 025095836  | 0. 148099 | 0. 169453 | 0. 86544  | 0. 982279 |
| pdk3a      | 61. 00967 | 0. 292149813  | 0. 256585 | 1. 138609 | 0. 254866 | 0. 733542 |
| atg4a      | 253. 9146 | -0. 294159444 | 0. 136241 | -2. 15911 | 0. 030842 | 0. 312738 |
| aida       | 185. 3175 | 0. 0928934    | 0. 175672 | 0. 52879  | 0. 596951 | 0. 91176  |
| pdfn1      | 552. 8471 | 0. 115647599  | 0. 119802 | 0. 96532  | 0. 334384 | 0. 791508 |
| golim4b    | 85. 28593 | 0. 205816556  | 0. 223136 | 0. 922381 | 0. 35633  | 0. 807306 |
| rfx3       | 123. 7267 | 0. 390097294  | 0. 206191 | 1. 891921 | 0. 058501 | 0. 418172 |
| ppplr3cb   | 673. 3223 | -0. 326636624 | 0. 294833 | -1. 10787 | 0. 267917 | 0. 74434  |
| serpinb1l3 | 919. 0361 | 0. 037459619  | 0. 225348 | 0. 16623  | 0. 867976 | 0. 982801 |
| eif4e1b    | 1. 410696 | -1. 390573248 | 1. 783159 | -0. 77984 | 0. 435487 | NA        |
| hnrnpr     | 1582. 69  | 0. 139692037  | 0. 098334 | 1. 420587 | 0. 155437 | 0. 620161 |
| ctnbl      | 7387. 907 | -0. 017100633 | 0. 084916 | -0. 20138 | 0. 840399 | 0. 976417 |
| chpt1      | 1115. 369 | 0. 054061036  | 0. 103449 | 0. 522587 | 0. 601262 | 0. 913756 |
| rhpn2      | 413. 8454 | -0. 074062182 | 0. 153121 | -0. 48368 | 0. 62861  | 0. 921946 |
| exoc3      | 577. 843  | 0. 010881215  | 0. 119562 | 0. 091009 | 0. 927486 | 0. 994973 |

|                   |          |              |          |          |          |          |
|-------------------|----------|--------------|----------|----------|----------|----------|
| slc38a5b          | 2566.586 | -0.153610515 | 0.158295 | -0.97041 | 0.331843 | 0.789531 |
| adcy2b            | 213.2279 | -0.250725129 | 0.169233 | -1.48154 | 0.138463 | 0.595018 |
| ilf2              | 2500.276 | 0.129410837  | 0.116752 | 1.108426 | 0.267678 | 0.744014 |
| dennd1a           | 95.65748 | 0.121827722  | 0.263294 | 0.462707 | 0.643575 | 0.925997 |
| slc5a6b           | 51.72556 | 0.370995444  | 0.283426 | 1.308969 | 0.190545 | 0.670655 |
| si:ch211-212d10.1 | 15.19717 | 1.083985308  | 1.305217 | 0.830502 | 0.406255 | 0.834645 |
| si:dkeyp-94g1.1   | 4.948111 | -3.175442349 | 1.377034 | -2.306   | 0.021111 | 0.25794  |
| dlx3b             | 607.4528 | -0.122889287 | 0.090718 | -1.35463 | 0.175535 | 0.649391 |
| mbtpsi            | 851.6365 | 0.036208229  | 0.101012 | 0.358454 | 0.720003 | 0.947004 |
| aoc2              | 1888.28  | -0.143740529 | 0.170537 | -0.84287 | 0.399301 | 0.831196 |
| svilb             | 72.79627 | -0.31666361  | 0.289413 | -1.09416 | 0.273886 | 0.749234 |
| ankrd13b          | 83.89304 | 0.181974439  | 0.245855 | 0.740169 | 0.459197 | 0.861818 |
| itprla            | 163.1808 | -0.112521704 | 0.163345 | -0.68886 | 0.490911 | 0.875595 |
| zgc:171731        | 3.276591 | -4.197385362 | 1.610918 | -2.60559 | 0.009172 | 0.164481 |
| colgal12          | 268.884  | 0.054470008  | 0.203484 | 0.267687 | 0.78894  | 0.963568 |
| fzd9b             | 318.2812 | 0.00387238   | 0.122521 | 0.031606 | 0.974786 | 1        |
| acsl3b            | 753.1963 | -0.044976468 | 0.116267 | -0.38684 | 0.698877 | 0.942456 |
| efna3a            | 116.4206 | 0.090167781  | 0.227101 | 0.397038 | 0.691339 | 0.940173 |
| bckdhh            | 1142.895 | -0.034191269 | 0.12151  | -0.28139 | 0.778414 | 0.961073 |
| znf710a           | 286.0994 | 0.106813389  | 0.179505 | 0.595043 | 0.551815 | 0.8974   |
| tmem26b           | 9.09188  | -0.494459956 | 1.097285 | -0.45062 | 0.652262 | 0.928768 |
| esco2             | 368.1371 | 0.236063793  | 0.228442 | 1.033364 | 0.301434 | 0.767562 |
| rps4x             | 30131.49 | -0.372196026 | 0.111132 | -3.34913 | 0.000811 | 0.038177 |
| znf622            | 590.7441 | -0.062087467 | 0.1355   | -0.45821 | 0.646802 | 0.926728 |
| pgm211            | 101.4278 | -0.191510224 | 0.20125  | -0.9516  | 0.341299 | 0.796175 |
| dync1h1           | 725.1532 | 0.111167071  | 0.26317  | 0.422416 | 0.672722 | 0.93414  |
| her1              | 0.757682 | 2.01026229   | 2.724716 | 0.737788 | 0.460643 | NA       |
| acox1             | 574.3843 | 0.251073991  | 0.153303 | 1.637761 | 0.101471 | 0.527632 |
| cacybp            | 348.6617 | -0.058326117 | 0.138192 | -0.42207 | 0.672976 | 0.93414  |
| rbfox1            | 1603.351 | 0.125303133  | 0.119888 | 1.045172 | 0.295944 | 0.764246 |
| mfsd61            | 34.42666 | -0.009729583 | 0.339215 | -0.02868 | 0.977118 | 1        |
| arf2a             | 4759.758 | 0.096737612  | 0.09559  | 1.012002 | 0.311537 | 0.77613  |
| usp4              | 990.3348 | 0.137110241  | 0.147126 | 0.931925 | 0.351376 | 0.802305 |
| zgc:113220        | 106.6634 | 0.059694296  | 0.185511 | 0.321783 | 0.747617 | 0.955074 |
| g3bp2             | 640.0707 | -0.109637815 | 0.113644 | -0.96475 | 0.334672 | 0.791583 |
| lrrc4bb           | 205.5473 | 0.071960796  | 0.238542 | 0.301669 | 0.762904 | 0.958842 |
| ehd1b             | 909.9228 | 0.228028018  | 0.154837 | 1.472699 | 0.140832 | 0.599658 |
| uqcrc2a           | 4548.32  | -0.060876491 | 0.126978 | -0.47942 | 0.631637 | 0.923003 |
| wnt11r            | 1024.226 | 0.042047462  | 0.130653 | 0.321825 | 0.747585 | 0.955074 |
| cryball2          | 175.8517 | -0.541052782 | 0.293131 | -1.84577 | 0.064925 | 0.434811 |
| cacna2d1a         | 286.2823 | -0.083423812 | 0.22155  | -0.37655 | 0.706511 | 0.944683 |
| fh15              | 78.7057  | 0.829689204  | 1.072697 | 0.773461 | 0.43925  | 0.852079 |
| hacd2             | 957.8281 | -0.248729249 | 0.161199 | -1.54299 | 0.122832 | 0.569468 |
| ranbp1            | 2190.347 | 0.038063612  | 0.119511 | 0.318495 | 0.750109 | 0.955074 |
| si:dkeyp-69b9.6   | 720.5011 | 0.05738629   | 0.104814 | 0.547504 | 0.584032 | 0.906376 |
| l3mbt11a          | 123.6957 | 0.449103211  | 0.283828 | 1.582305 | 0.11358  | 0.551824 |
| prph2b            | 1353.219 | 1.08966324   | 0.741799 | 1.468947 | 0.141847 | 0.600644 |
| pih1d2            | 11.26951 | 0.193907855  | 0.571622 | 0.339224 | 0.734441 | 0.951134 |
| reep1             | 19.96384 | -0.194899375 | 0.434612 | -0.44844 | 0.653832 | 0.929269 |
| drd21             | 2.299947 | -0.942856816 | 1.419511 | -0.66421 | 0.506554 | 0.883007 |
| hprt11            | 238.9898 | 0.051416783  | 0.176704 | 0.290977 | 0.771069 | 0.960484 |
| rpl8              | 38059.64 | -0.318236173 | 0.123453 | -2.5778  | 0.009943 | 0.172469 |
| syng3a            | 517.7726 | -0.134009531 | 0.178079 | -0.75253 | 0.451733 | 0.857676 |
| abi2b             | 784.8771 | 0.183930831  | 0.11673  | 1.575698 | 0.115095 | 0.554651 |

|            |          |              |          |          |          |          |  |
|------------|----------|--------------|----------|----------|----------|----------|--|
| robo2      | 579.436  | 0.086592767  | 0.176694 | 0.490072 | 0.624083 | 0.919497 |  |
| ncbp2      | 321.1423 | -0.007771062 | 0.141883 | -0.05477 | 0.956321 | 0.99899  |  |
| htralb     | 324.7731 | 0.221453589  | 0.231215 | 0.957781 | 0.338173 | 0.795076 |  |
| panx1b     | 115.0638 | -0.088341509 | 0.20027  | -0.44111 | 0.659132 | 0.930581 |  |
| lamp2      | 683.8213 | 0.178694185  | 0.132031 | 1.353426 | 0.17592  | 0.649415 |  |
| ndufab1b   | 1305.644 | 0.05988463   | 0.125874 | 0.475752 | 0.634251 | 0.924077 |  |
| slc10a2    | 39.55385 | -0.836706772 | 0.620372 | -1.34872 | 0.177428 | 0.651026 |  |
| uts1       | 35.01508 | -0.091277172 | 0.462986 | -0.19715 | 0.843711 | 0.976791 |  |
| p2ry11     | 11.31301 | -0.018640395 | 0.562426 | -0.03314 | 0.973561 | 1        |  |
| KCNN2      | 16.19863 | 0.27627632   | 0.50723  | 0.544676 | 0.585976 | 0.906655 |  |
| tprkb      | 52.31105 | -0.297673777 | 0.317958 | -0.9362  | 0.349168 | 0.801408 |  |
| kif23      | 527.4979 | 0.353900402  | 0.229217 | 1.543957 | 0.122599 | 0.569468 |  |
| znf598     | 561.6211 | 0.160895348  | 0.1368   | 1.176139 | 0.239539 | 0.720048 |  |
| angpt2a    | 21.79114 | 0.234437426  | 0.560602 | 0.418188 | 0.675809 | 0.935422 |  |
| svopb      | 2.391439 | -0.370137341 | 1.517351 | -0.24394 | 0.80728  | 0.969736 |  |
| cnih3      | 66.2901  | -0.280083144 | 0.36286  | -0.77188 | 0.440188 | 0.852079 |  |
| snx33      | 84.87223 | 0.195397846  | 0.237919 | 0.821279 | 0.411487 | 0.837797 |  |
| diablob    | 375.982  | -0.069897487 | 0.173167 | -0.40364 | 0.686476 | 0.938732 |  |
| ppp3cca    | 316.5806 | 0.084459778  | 0.15621  | 0.540682 | 0.588727 | 0.908018 |  |
| triapl     | 131.2762 | 0.060951727  | 0.190663 | 0.319683 | 0.749208 | 0.955074 |  |
| ccdc82     | 294.5371 | 0.01300659   | 0.155725 | 0.083523 | 0.933436 | 0.996472 |  |
| g6pcb      | 3.37831  | 0.826816025  | 1.306972 | 0.63262  | 0.526982 | 0.889861 |  |
| ankhb      | 311.1029 | 0.033315135  | 0.148724 | 0.224007 | 0.822752 | 0.971966 |  |
| ntngla     | 104.5745 | 0.323867413  | 0.384862 | 0.841516 | 0.400059 | 0.831408 |  |
| irgel      | 5.983475 | 0            | 1.831379 | 0        | 1        | 1        |  |
| lims2      | 699.1119 | 0.078529622  | 0.17364  | 0.452255 | 0.651085 | 0.928395 |  |
| acvr11     | 983.8573 | -0.006499617 | 0.087888 | -0.07395 | 0.941047 | 0.997371 |  |
| tbp        | 276.6742 | -0.043772829 | 0.131549 | -0.33275 | 0.739324 | 0.953422 |  |
| jagn1b     | 366.3792 | 0.014659579  | 0.136313 | 0.107543 | 0.914358 | 0.992972 |  |
| cdh4       | 345.2851 | 0.388973398  | 0.259917 | 1.496528 | 0.134516 | 0.588953 |  |
| arhgap4b   | 382.502  | 0.177709933  | 0.148041 | 1.200412 | 0.22998  | 0.711763 |  |
| dnm11      | 946.2759 | 0.184028934  | 0.095626 | 1.924466 | 0.054296 | 0.402961 |  |
| ccdc114    | 50.6078  | 0.309905347  | 0.30687  | 1.009893 | 0.312547 | 0.776164 |  |
| tspan18b   | 602.7269 | -0.120659845 | 0.099708 | -1.21014 | 0.226227 | 0.707597 |  |
| kif26ab    | 529.0824 | -0.034730565 | 0.17156  | -0.20244 | 0.839573 | 0.976417 |  |
| llcamb     | 128.6998 | -0.026691757 | 0.217486 | -0.12273 | 0.902322 | 0.990938 |  |
| slc23a1    | 49.9069  | -0.041368128 | 0.351372 | -0.11773 | 0.906279 | 0.991631 |  |
| calm2b     | 8306.664 | 0.058037187  | 0.142909 | 0.406112 | 0.684661 | 0.938486 |  |
| grip1      | 374.5813 | 0.125015933  | 0.139172 | 0.898284 | 0.369034 | 0.817763 |  |
| ube2d4     | 40.55627 | 0.251989384  | 0.287918 | 0.875213 | 0.381458 | 0.82463  |  |
| daam1a     | 712.1689 | -0.279125357 | 0.115665 | -2.41323 | 0.015812 | 0.221904 |  |
| esrrd      | 8.880395 | -1.077448169 | 0.657329 | -1.63913 | 0.101186 | 0.526828 |  |
| c4         | 24.25468 | -3.233624263 | 0.76505  | -4.22669 | 2.37E-05 | 0.003251 |  |
| txk        | 1.832644 | 0            | 2.605311 | 0        | 1        | NA       |  |
| pola2      | 258.0031 | -0.002282269 | 0.177391 | -0.01287 | 0.989735 | 1        |  |
| dmrt2a     | 242.7441 | 0.115559746  | 0.143743 | 0.803933 | 0.421436 | 0.842754 |  |
| gja8b      | 84.82148 | 0.033479224  | 0.364201 | 0.091925 | 0.926757 | 0.994815 |  |
| dnajb11    | 601.7387 | 0.201672903  | 0.170531 | 1.182616 | 0.236962 | 0.718451 |  |
| slc18a2    | 12.312   | -0.562164326 | 0.461013 | -1.21941 | 0.222689 | 0.704588 |  |
| ddx39ab    | 3935.201 | 0.12087662   | 0.121044 | 0.998614 | 0.317982 | 0.779809 |  |
| dnasell4.1 | 724.7296 | -0.767689354 | 0.210245 | -3.65141 | 0.000261 | 0.017773 |  |
| gorasp2    | 877.9903 | 0.157370502  | 0.127634 | 1.232987 | 0.217581 | 0.69815  |  |
| rpl27      | 19189.88 | -0.276010821 | 0.132366 | -2.0852  | 0.037051 | 0.337668 |  |
| camkk1b    | 103.4408 | 0.086553991  | 0.597844 | 0.144777 | 0.884887 | 0.987266 |  |

|           |          |              |          |          |          |          |
|-----------|----------|--------------|----------|----------|----------|----------|
| sh2d4bb   | 10.72155 | -0.204060866 | 0.634908 | -0.3214  | 0.747906 | 0.955074 |
| wasa      | 22.36213 | -0.041345592 | 0.401415 | -0.103   | 0.917963 | 0.993875 |
| wdr91     | 179.253  | 0.006666561  | 0.195251 | 0.034144 | 0.972763 | 1        |
| fb1n2     | 576.1534 | -0.218358939 | 0.145201 | -1.50383 | 0.132624 | 0.585592 |
| slc50a1   | 46.03827 | -0.221242644 | 0.270019 | -0.81936 | 0.412581 | 0.838123 |
| zgc:92664 | 300.2461 | 0.119374209  | 0.153145 | 0.779487 | 0.435693 | 0.850467 |
| mknk2b    | 4147.5   | -0.010332147 | 0.203042 | -0.05089 | 0.959416 | 0.999164 |
| atp6v0a1b | 616.7778 | 0.096402683  | 0.228353 | 0.422165 | 0.672904 | 0.93414  |
| ror1      | 174.6943 | 0.260173216  | 0.166397 | 1.563573 | 0.117918 | 0.559998 |
| mpp3a     | 260.5629 | -0.003737553 | 0.164702 | -0.02269 | 0.981895 | 1        |
| cb1b      | 280.8912 | -0.049472496 | 0.162458 | -0.30452 | 0.760728 | 0.957886 |
| pcmt      | 862.9612 | 0.031288172  | 0.106585 | 0.293552 | 0.7691   | 0.960484 |
| hnrnpua   | 1064.095 | 0.235719042  | 0.116801 | 2.018127 | 0.043578 | 0.365542 |
| rbb4l     | 927.7905 | 0.055229388  | 0.12714  | 0.434397 | 0.664    | 0.93174  |
| nsrpl     | 189.2118 | 0.015413259  | 0.167328 | 0.092114 | 0.926608 | 0.994815 |
| cb1l1     | 140.6708 | 0.064848984  | 0.175939 | 0.368587 | 0.712435 | 0.945821 |
| cd2ap     | 630.9397 | -0.052035832 | 0.120468 | -0.43195 | 0.66578  | 0.932664 |
| erola     | 37.18038 | -1.002874675 | 0.401727 | -2.49641 | 0.012546 | 0.194767 |
| pycr3     | 91.96014 | -0.040946621 | 0.319806 | -0.12804 | 0.898121 | 0.990171 |
| prpf19    | 1176.752 | 0.084738958  | 0.112947 | 0.750257 | 0.4531   | 0.858335 |
| cdk15     | 162.7526 | 0.535432058  | 0.262209 | 2.042004 | 0.041151 | 0.353924 |
| st3gal3b  | 103.2701 | -0.092007261 | 0.194601 | -0.4728  | 0.636357 | 0.924779 |
| fzrla     | 1036.046 | -0.133295432 | 0.144785 | -0.92065 | 0.357235 | 0.808077 |
| adma      | 217.9124 | -0.05243763  | 0.161421 | -0.32485 | 0.745295 | 0.954956 |
| mab2112   | 1700.59  | 0.028132372  | 0.097831 | 0.287562 | 0.773682 | 0.960624 |
| alpi.1    | 274.4383 | 0.231756637  | 0.124724 | 1.858159 | 0.063146 | 0.429313 |
| plxnc1    | 97.32418 | 0.097597925  | 0.242139 | 0.403066 | 0.6869   | 0.93875  |
| sacm1la   | 230.5147 | 0.054117338  | 0.163692 | 0.330605 | 0.740943 | 0.954103 |
| ube2g1a   | 466.632  | 0.115347024  | 0.166198 | 0.694034 | 0.487661 | 0.873291 |
| fam110a   | 65.7667  | -0.215775285 | 0.257764 | -0.8371  | 0.402534 | 0.833401 |
| pitpnbl   | 1168.887 | 0.058796691  | 0.104764 | 0.561232 | 0.57464  | 0.904516 |
| klf12a    | 251.2394 | 0.165665761  | 0.164283 | 1.008416 | 0.313255 | 0.776663 |
| zc4h2     | 1591.654 | 0.143275754  | 0.133519 | 1.073075 | 0.283238 | 0.755028 |
| psmc5     | 2857.052 | 0.052903532  | 0.145326 | 0.364033 | 0.715834 | 0.946196 |
| u2af1     | 1498.156 | -0.033671133 | 0.128581 | -0.26187 | 0.793424 | 0.965366 |
| comta     | 177.6348 | 0.481328578  | 0.181831 | 2.647126 | 0.008118 | 0.152796 |
| pgd       | 1030.582 | -0.086650049 | 0.189131 | -0.45815 | 0.646846 | 0.926728 |
| mfge8a    | 477.7927 | 0.004509561  | 0.209429 | 0.021533 | 0.982821 | 1        |
| lsg1      | 541.919  | -0.22567817  | 0.138776 | -1.6262  | 0.103907 | 0.532096 |
| fosl1a    | 279.1917 | -1.045932528 | 0.571204 | -1.8311  | 0.067085 | 0.442084 |
| fchol     | 130.3758 | -0.521921737 | 0.20794  | -2.50996 | 0.012074 | 0.190742 |
| st3gal3a  | 308.1064 | 0.308324318  | 0.129067 | 2.388863 | 0.016901 | 0.230481 |
| ndufs3    | 1697.089 | 0.019035425  | 0.103554 | 0.183821 | 0.854154 | 0.979016 |
| dhx15     | 1517.68  | -0.034374741 | 0.089544 | -0.38388 | 0.701064 | 0.942918 |
| thoc7     | 347.9495 | -0.284848471 | 0.195361 | -1.45806 | 0.144824 | 0.603718 |
| foxfl     | 197.3304 | -0.192178    | 0.169952 | -1.13078 | 0.258147 | 0.735569 |
| arl3l2    | 100.1218 | -0.75530673  | 0.454916 | -1.66032 | 0.09685  | 0.519447 |
| ppil1     | 669.7791 | -0.197363146 | 0.178241 | -1.10728 | 0.268173 | 0.744507 |
| slc24a4a  | 21.99865 | 0.136857535  | 0.378707 | 0.361381 | 0.717815 | 0.946466 |
| hdac1     | 4217.982 | 0.166820159  | 0.118309 | 1.410036 | 0.158529 | 0.623937 |
| lim2.4    | 1120.49  | 0.406024108  | 0.376282 | 1.079043 | 0.280568 | 0.753147 |
| fut8a     | 707.685  | 0.281230895  | 0.105634 | 2.662316 | 0.00776  | 0.14885  |
| racgap1   | 317.5108 | 0.25639055   | 0.249583 | 1.027274 | 0.304291 | 0.769725 |
| chd11     | 212.9921 | 0.179121805  | 0.147846 | 1.211545 | 0.225687 | 0.707068 |



|                   |          |              |          |          |          |          |
|-------------------|----------|--------------|----------|----------|----------|----------|
| gpc4              | 1253.927 | 0.251348438  | 0.104295 | 2.409966 | 0.015954 | 0.222818 |
| ppp2r5ea          | 656.1144 | 0.09659065   | 0.113782 | 0.84891  | 0.395932 | 0.829389 |
| iqch              | 25.59025 | 0.104745513  | 0.417416 | 0.250938 | 0.801862 | 0.967776 |
| zgc:113518        | 143.1634 | -0.028677743 | 0.184151 | -0.15573 | 0.876246 | 0.984895 |
| klf3              | 559.1289 | -0.311465611 | 0.202918 | -1.53493 | 0.124801 | 0.572486 |
| adam10b           | 490.2973 | 0.156146693  | 0.186673 | 0.836471 | 0.40289  | 0.833479 |
| pibfl             | 427.6254 | 0.238089366  | 0.148531 | 1.602961 | 0.108943 | 0.541793 |
| mc4r              | 10.42331 | -0.207144899 | 0.905307 | -0.22881 | 0.819015 | 0.971785 |
| prps1a            | 2651.481 | -0.158934581 | 0.152208 | -1.04419 | 0.296397 | 0.764246 |
| CU929145.1        | 1.594151 | -0.868144599 | 2.123316 | -0.40886 | 0.682641 | NA       |
| slc4a8            | 218.2408 | -0.008763622 | 0.304579 | -0.02877 | 0.977046 | 1        |
| sox6              | 654.6781 | 0.069617317  | 0.089937 | 0.77407  | 0.438889 | 0.851966 |
| gad2              | 1046.474 | 0.347014586  | 0.273497 | 1.268808 | 0.20451  | 0.68614  |
| znf207a           | 664.1183 | -0.055500665 | 0.109598 | -0.5064  | 0.612575 | 0.91573  |
| psen2             | 420.9366 | 0.008153165  | 0.170236 | 0.047893 | 0.961801 | 0.999451 |
| sl00a1            | 16.08655 | -0.584010101 | 0.544913 | -1.07175 | 0.283833 | 0.755095 |
| alpl              | 307.2333 | -0.019969051 | 0.141172 | -0.14145 | 0.887513 | 0.987974 |
| fth1a             | 15721.29 | -0.370110426 | 0.156622 | -2.36308 | 0.018124 | 0.237918 |
| phactr4a          | 456.3629 | 0.017435073  | 0.143601 | 0.121413 | 0.903364 | 0.99133  |
| zic2a             | 894.6509 | 0.123736651  | 0.115587 | 1.070505 | 0.284392 | 0.755402 |
| zgc:100829        | 687.241  | -0.105076629 | 0.161208 | -0.65181 | 0.514526 | 0.88631  |
| fst11a            | 678.4869 | -0.091027508 | 0.153272 | -0.59389 | 0.552583 | 0.8974   |
| zgc:123305        | 224.3292 | -0.171651125 | 0.191784 | -0.89502 | 0.370776 | 0.818484 |
| dnmt3ab           | 834.5114 | 0.064761058  | 0.129075 | 0.501732 | 0.615856 | 0.916365 |
| zic1              | 870.7447 | 0.139760239  | 0.119885 | 1.165787 | 0.2437   | 0.724437 |
| cyp3c1            | 857.5666 | -0.048595641 | 0.125942 | -0.38586 | 0.699603 | 0.942499 |
| itrip             | 49.29164 | -0.286617311 | 0.278503 | -1.02914 | 0.303415 | 0.769363 |
| ankrd33bb         | 6.07794  | -1.376392774 | 1.542782 | -0.89215 | 0.372313 | 0.819778 |
| c1ql2             | 1.636289 | -0.656025744 | 1.505687 | -0.4357  | 0.663055 | NA       |
| si:ch211-220f21.2 | 10.10953 | 0.628028155  | 0.695328 | 0.903211 | 0.366414 | 0.81589  |
| tubg1             | 401.4953 | 0.192871545  | 0.141138 | 1.366544 | 0.171768 | 0.643953 |
| rasl11b           | 230.7677 | -0.034565295 | 0.269828 | -0.1281  | 0.898069 | 0.990171 |
| ada2b             | 20.45225 | -0.684305317 | 0.462075 | -1.48094 | 0.138622 | 0.595394 |
| rgs6              | 55.17765 | 0.096141635  | 0.25505  | 0.376953 | 0.706209 | 0.944606 |
| psmd10            | 202.7188 | -0.157131921 | 0.225065 | -0.69816 | 0.485075 | 0.872911 |
| gemin2            | 309.4513 | -0.158081319 | 0.191012 | -0.8276  | 0.407897 | 0.835879 |
| rap2c             | 922.8794 | 0.127247201  | 0.108658 | 1.171076 | 0.241568 | 0.723306 |
| tnipl             | 1561.239 | -0.033404749 | 0.099098 | -0.33709 | 0.73605  | 0.95169  |
| cal5a             | 350.7618 | -0.825324139 | 0.215279 | -3.83374 | 0.000126 | 0.011039 |
| zgc:77112         | 55.42281 | -0.142669019 | 0.421412 | -0.33855 | 0.734949 | 0.951434 |
| pla2g12b          | 4083.831 | -0.259741515 | 0.197405 | -1.31578 | 0.188247 | 0.667434 |
| msx3              | 591.6138 | -0.102369408 | 0.147541 | -0.69384 | 0.487783 | 0.873291 |
| nmd3              | 776.9245 | -0.24825764  | 0.200007 | -1.24125 | 0.214514 | 0.69658  |
| si:dkeyp-75b4.9   | 0 NA     | NA           | NA       | NA       | NA       | NA       |
| gsk3ab            | 1329.565 | -0.004881235 | 0.085153 | -0.05732 | 0.954288 | 0.998611 |
| bmp6              | 103.6881 | -0.222850233 | 0.211325 | -1.05454 | 0.291636 | 0.761454 |
| dvl3a             | 415.5585 | 0.071552079  | 0.148456 | 0.481974 | 0.629824 | 0.92285  |
| hsd17b12a         | 544.8865 | -0.030784221 | 0.21392  | -0.14391 | 0.885575 | 0.987533 |
| kctd5a            | 357.3822 | 0.227240455  | 0.145552 | 1.561231 | 0.118469 | 0.561566 |
| ano5a             | 68.90167 | 0.037991587  | 0.274208 | 0.13855  | 0.889806 | 0.98835  |
| cax2              | 116.0416 | -0.697250551 | 0.257132 | -2.71164 | 0.006695 | 0.137643 |
| aicda             | 0.046941 | 0 5.267649   | 0        | 1 NA     |          |          |
| aarsd1            | 133.0635 | 0.268394554  | 0.208124 | 1.289591 | 0.197193 | 0.67737  |
| hps3              | 222.3965 | -0.055834652 | 0.136141 | -0.41012 | 0.681716 | 0.937427 |

|            |           |               |           |           |           |           |
|------------|-----------|---------------|-----------|-----------|-----------|-----------|
| zap70      | 9. 573242 | -1. 149816504 | 0. 704049 | -1. 63315 | 0. 102438 | 0. 529087 |
| tmem50a    | 1385. 794 | -0. 271979045 | 0. 115309 | -2. 3587  | 0. 018339 | 0. 239117 |
| tspan7     | 1640. 627 | 0. 155945147  | 0. 168971 | 0. 922908 | 0. 356055 | 0. 807063 |
| iah1       | 102. 8837 | -0. 174202389 | 0. 228804 | -0. 76136 | 0. 446441 | 0. 855403 |
| ankrd46b   | 350. 4453 | 0. 091107589  | 0. 152449 | 0. 597627 | 0. 550089 | 0. 8974   |
| atplb3a    | 1749. 338 | -0. 332498518 | 0. 113695 | -2. 92447 | 0. 00345  | 0. 096904 |
| creb311    | 225. 6849 | 0. 023130901  | 0. 163984 | 0. 141056 | 0. 887826 | 0. 988077 |
| smcr8b     | 90. 68058 | -0. 532482883 | 0. 327826 | -1. 62428 | 0. 104315 | 0. 532541 |
| cgn11      | 596. 5144 | 0. 079546379  | 0. 139186 | 0. 571512 | 0. 567652 | 0. 901809 |
| rab22a     | 316. 0913 | -0. 349693628 | 0. 111835 | -3. 12686 | 0. 001767 | 0. 064775 |
| sesn3      | 902. 982  | -0. 334827364 | 0. 207718 | -1. 61193 | 0. 106977 | 0. 537    |
| vps26b     | 505. 9144 | -0. 143851827 | 0. 14333  | -1. 00364 | 0. 315553 | 0. 77795  |
| lemd3      | 480. 4365 | 0. 112513125  | 0. 137008 | 0. 821218 | 0. 411522 | 0. 837797 |
| mov10a     | 363. 2296 | 0. 069803899  | 0. 123198 | 0. 566599 | 0. 570987 | 0. 902501 |
| EIF4E2RS1  | 363. 8261 | -0. 067435977 | 0. 109148 | -0. 61784 | 0. 53668  | 0. 892421 |
| pnn        | 1158. 384 | -0. 12578778  | 0. 115523 | -1. 08886 | 0. 276216 | 0. 750674 |
| chata      | 252. 5712 | 0. 01221946   | 0. 253266 | 0. 048248 | 0. 961519 | 0. 999434 |
| slc25a40   | 139. 3693 | -0. 010969919 | 0. 178106 | -0. 06159 | 0. 950888 | 0. 99801  |
| mtmr9      | 181. 1755 | 0. 281595794  | 0. 159254 | 1. 768216 | 0. 077025 | 0. 469486 |
| rpl5b      | 25488. 35 | -0. 444537912 | 0. 135151 | -3. 2892  | 0. 001005 | 0. 044091 |
| socs6b     | 255. 8388 | 0. 024504859  | 0. 180277 | 0. 135929 | 0. 891878 | 0. 988566 |
| apoa2      | 74025. 29 | -0. 178917062 | 0. 234108 | -0. 76425 | 0. 444719 | 0. 854903 |
| slc22a16   | 247. 0121 | -0. 247610355 | 0. 185641 | -1. 33381 | 0. 182265 | 0. 658775 |
| npas1      | 78. 44025 | -0. 06911672  | 0. 245874 | -0. 28111 | 0. 778629 | 0. 961073 |
| pax8       | 98. 15023 | -0. 222858938 | 0. 226825 | -0. 98252 | 0. 325846 | 0. 784773 |
| b2ml       | 2029. 621 | -0. 1527658   | 0. 097598 | -1. 56526 | 0. 117522 | 0. 559019 |
| zc3h15     | 693. 038  | 0. 000521499  | 0. 117135 | 0. 004452 | 0. 996448 | 1         |
| mafa       | 259. 7259 | 0. 066215995  | 0. 139568 | 0. 474437 | 0. 635188 | 0. 924272 |
| ptprea     | 220. 5178 | 0. 290168994  | 0. 132923 | 2. 182978 | 0. 029037 | 0. 303472 |
| ptbp2b     | 885. 1849 | 0. 147486534  | 0. 092903 | 1. 587531 | 0. 112393 | 0. 549251 |
| stat6      | 285. 7941 | 0. 12586514   | 0. 164727 | 0. 764083 | 0. 444818 | 0. 85495  |
| lztrl      | 614. 8849 | -0. 08389147  | 0. 135219 | -0. 62041 | 0. 534988 | 0. 891993 |
| mxtx2      | 0. 97443  | -0. 804745957 | 2. 170229 | -0. 37081 | 0. 710778 | NA        |
| dcbl1d1    | 209. 6963 | -0. 066132928 | 0. 140617 | -0. 4703  | 0. 638138 | 0. 924779 |
| slc25a36b  | 495. 833  | -0. 338803868 | 0. 147966 | -2. 28974 | 0. 022036 | 0. 262782 |
| rnft1      | 401. 6773 | -0. 181085303 | 0. 151377 | -1. 19626 | 0. 231597 | 0. 713198 |
| dlat       | 1941. 341 | -0. 048061979 | 0. 106931 | -0. 44947 | 0. 653093 | 0. 929197 |
| pwpl       | 371. 1135 | -0. 087919838 | 0. 167193 | -0. 52586 | 0. 598987 | 0. 913109 |
| stk17a1    | 207. 3011 | -0. 21870649  | 0. 197466 | -1. 10756 | 0. 26805  | 0. 744423 |
| rwddl      | 733. 6057 | 0. 189075085  | 0. 131884 | 1. 433648 | 0. 151673 | 0. 615406 |
| snap91b    | 1006. 89  | 0. 365227951  | 0. 226051 | 1. 615691 | 0. 106161 | 0. 535194 |
| kptn       | 288. 3168 | -0. 380019303 | 0. 179402 | -2. 11826 | 0. 034153 | 0. 326054 |
| slc44a1a   | 224. 0859 | -0. 141801178 | 0. 171054 | -0. 82899 | 0. 407112 | 0. 835278 |
| matn4      | 6243. 48  | 0. 220362937  | 0. 146542 | 1. 503757 | 0. 132644 | 0. 585592 |
| cldnc      | 368. 4546 | -0. 299209918 | 0. 269609 | -1. 10979 | 0. 267089 | 0. 743418 |
| ZGC:153311 | 24. 44479 | -0. 864221771 | 0. 368757 | -2. 34361 | 0. 019098 | 0. 243268 |
| yaf2       | 433. 6031 | 0. 118344249  | 0. 107107 | 1. 104914 | 0. 269197 | 0. 745285 |
| rabgef11   | 60. 29621 | -0. 210755325 | 0. 280472 | -0. 75143 | 0. 452393 | 0. 857994 |
| phip       | 155. 1827 | 0. 085051635  | 0. 184712 | 0. 460456 | 0. 645189 | 0. 926728 |
| rapgef1b   | 218. 0371 | -0. 04989588  | 0. 158427 | -0. 31494 | 0. 752804 | 0. 955756 |
| COX5B      | 6969. 017 | -0. 011968294 | 0. 117483 | -0. 10187 | 0. 918858 | 0. 993892 |
| abcc9      | 177. 2256 | -0. 13112396  | 0. 228991 | -0. 57262 | 0. 566904 | 0. 901747 |
| zdhhc16b   | 185. 2263 | 0. 299741937  | 0. 148182 | 2. 022798 | 0. 043094 | 0. 36374  |
| hcfcla     | 1079. 292 | 0. 353423186  | 0. 12372  | 2. 856648 | 0. 004281 | 0. 108179 |

|                |          |              |          |          |          |          |
|----------------|----------|--------------|----------|----------|----------|----------|
| mfstd5         | 131.3168 | -0.045784942 | 0.194856 | -0.23497 | 0.814233 | 0.970483 |
| wdhd1          | 185.4765 | 0.173558683  | 0.203741 | 0.851861 | 0.394291 | 0.828374 |
| nup107         | 788.9083 | 0.124819971  | 0.095807 | 1.302826 | 0.192634 | 0.672683 |
| gpcpd1         | 750.3615 | 0.157397043  | 0.143409 | 1.097541 | 0.272405 | 0.748416 |
| dbnlb          | 748.3135 | -0.089095454 | 0.105311 | -0.84602 | 0.397539 | 0.830253 |
| zic5           | 392.9148 | 0.124688705  | 0.122001 | 1.022028 | 0.306767 | 0.772    |
| hacd3          | 362.4023 | 0.251210772  | 0.16639  | 1.50977  | 0.131102 | 0.582816 |
| gins4          | 185.4537 | -0.060552929 | 0.257293 | -0.23535 | 0.81394  | 0.970483 |
| gpat3          | 631.1643 | 0.047419724  | 0.107309 | 0.441898 | 0.658563 | 0.930581 |
| mhc11aa        | 99.98055 | 0.120112087  | 0.215569 | 0.557186 | 0.5774   | 0.904842 |
| fibpa          | 473.3707 | -0.013856881 | 0.150751 | -0.09192 | 0.926763 | 0.994815 |
| rab5b          | 243.3281 | 0.188163435  | 0.181352 | 1.037557 | 0.299476 | 0.766128 |
| tlr3           | 12.96499 | -1.218322666 | 0.651115 | -1.87113 | 0.061327 | 0.424867 |
| cryz           | 217.4916 | -0.298464974 | 0.159182 | -1.87499 | 0.060794 | 0.423559 |
| nobl           | 438.3212 | -0.131115336 | 0.139483 | -0.94001 | 0.347211 | 0.799992 |
| cldn151a       | 376.5223 | -0.351461969 | 0.189453 | -1.85514 | 0.063577 | 0.430344 |
| spsb4a         | 279.117  | -0.113652703 | 0.128654 | -0.8834  | 0.37702  | 0.822324 |
| mbnl3          | 380.8458 | 0.194500088  | 0.14643  | 1.328276 | 0.184087 | 0.660978 |
| smurf1         | 365.6537 | 0.073447082  | 0.230913 | 0.318072 | 0.75043  | 0.955074 |
| rtn2a          | 167.7153 | -0.339875565 | 0.280157 | -1.21316 | 0.225068 | 0.70685  |
| bicral         | 171.6669 | 0.146424072  | 0.149587 | 0.978854 | 0.327652 | 0.786438 |
| qtrt2          | 97.89467 | -0.077505602 | 0.229239 | -0.3381  | 0.735288 | 0.951543 |
| htr6           | 11.8023  | -1.279120864 | 0.612377 | -2.08878 | 0.036728 | 0.33671  |
| bbs12          | 63.30777 | -0.344368789 | 0.301683 | -1.14149 | 0.253665 | 0.732873 |
| exd2           | 202.6406 | 0.118891479  | 0.157854 | 0.753176 | 0.451344 | 0.857606 |
| ptrhd1         | 125.1105 | 0.025272941  | 0.197469 | 0.127984 | 0.898162 | 0.990171 |
| ap3m2          | 502.8918 | 0.079252899  | 0.108805 | 0.728394 | 0.466373 | 0.865508 |
| keapla         | 307.0967 | -0.091028685 | 0.175154 | -0.51971 | 0.603267 | 0.914226 |
| nme6           | 67.60192 | 0.029158432  | 0.248614 | 0.117284 | 0.906635 | 0.991644 |
| mkks           | 20.66672 | 0.032743122  | 0.379827 | 0.086205 | 0.931303 | 0.995809 |
| slc6a2         | 143.1569 | -0.058791074 | 0.258473 | -0.22745 | 0.82007  | 0.971788 |
| xiap           | 407.4002 | -0.263544361 | 0.169112 | -1.5584  | 0.119138 | 0.562753 |
| dag1           | 1121.752 | 0.240258027  | 0.15492  | 1.550853 | 0.120937 | 0.566816 |
| zfp3611a       | 1709.081 | 0.084767305  | 0.134044 | 0.632386 | 0.527135 | 0.889948 |
| fam53b         | 965.3155 | -0.008611711 | 0.142513 | -0.06043 | 0.951815 | 0.99801  |
| gmpr           | 1405.695 | -0.006115573 | 0.180599 | -0.03386 | 0.972987 | 1        |
| ccdcl70        | 19.12514 | 0.644464235  | 0.407816 | 1.580283 | 0.114042 | 0.55294  |
| usp33          | 650.1203 | 0.023321964  | 0.113364 | 0.205727 | 0.837004 | 0.976007 |
| cct3           | 4744.792 | -0.059004614 | 0.109902 | -0.53689 | 0.591347 | 0.909437 |
| EIF4ENIF1      | 290.326  | -0.270158459 | 0.18997  | -1.42211 | 0.154993 | 0.619776 |
| trim33         | 591.9096 | -0.02926951  | 0.117248 | -0.24964 | 0.802868 | 0.968323 |
| SBNO2          | 326.6276 | 0.001369359  | 0.173891 | 0.007875 | 0.993717 | 1        |
| trib3          | 564.6116 | -0.188575371 | 0.188188 | -1.00206 | 0.316315 | 0.778879 |
| zgc:112408     | 12.32439 | -0.643179716 | 0.44795  | -1.43583 | 0.151051 | 0.615085 |
| nup214         | 287.7732 | 0.057272103  | 0.204411 | 0.280181 | 0.779339 | 0.961073 |
| zmp:0000001048 | 42.87014 | -1.29603384  | 0.479355 | -2.70371 | 0.006857 | 0.139692 |
| mhc11ba        | 6.626517 | 0.674540518  | 0.842874 | 0.800286 | 0.423545 | 0.843967 |
| bcap29         | 145.9989 | 0.232147627  | 0.159447 | 1.455959 | 0.145404 | 0.604523 |
| sdr16c5a       | 533.6983 | -0.662482031 | 0.126177 | -5.25044 | 1.52E-07 | 6.51E-05 |
| arl6ip5b       | 602.9854 | -0.2967709   | 0.204683 | -1.44991 | 0.147084 | 0.607283 |
| psmd13         | 1512.189 | 0.027656187  | 0.146155 | 0.189224 | 0.849917 | 0.978251 |
| ralab          | 567.3004 | -0.167242852 | 0.133454 | -1.25318 | 0.210138 | 0.692011 |
| chmp4ba        | 557.2157 | -0.357092718 | 0.132068 | -2.70386 | 0.006854 | 0.139692 |
| nudt3a         | 342.2857 | -0.162620948 | 0.153576 | -1.05889 | 0.289648 | 0.760643 |

|           |          |              |          |          |          |          |
|-----------|----------|--------------|----------|----------|----------|----------|
| fxr2      | 1602.425 | 0.146845021  | 0.211194 | 0.695309 | 0.486862 | 0.873246 |
| zdhhc5a   | 453.504  | 0.163122499  | 0.131725 | 1.238356 | 0.215584 | 0.697157 |
| eiflad    | 334.3418 | -0.399039827 | 0.182173 | -2.19044 | 0.028492 | 0.300486 |
| clcal     | 19.78857 | -0.868151365 | 1.701398 | -0.51026 | 0.609871 | 0.915331 |
| zgc:65894 | 1396.958 | 0.358601606  | 0.162092 | 2.212338 | 0.026943 | 0.291718 |
| upfl      | 1130.572 | -0.103628822 | 0.13634  | -0.76008 | 0.447209 | 0.856073 |
| tfdplb    | 344.469  | -0.137277887 | 0.14585  | -0.94123 | 0.346589 | 0.79947  |
| mrpl46    | 236.9296 | 0.046556342  | 0.148577 | 0.313348 | 0.754016 | 0.955912 |
| dock9b    | 331.4561 | 0.05412822   | 0.122404 | 0.442209 | 0.658338 | 0.930581 |
| med7      | 322.6124 | -0.3128636   | 0.122919 | -2.54528 | 0.010919 | 0.182142 |
| c9        | 2333.16  | -0.607596784 | 0.212195 | -2.86339 | 0.004191 | 0.10707  |
| tmco6     | 111.7471 | -0.588702896 | 0.208024 | -2.82997 | 0.004655 | 0.11318  |
| lctlb     | 212.0272 | 0.458745411  | 0.288896 | 1.587926 | 0.112303 | 0.549075 |
| zgc:92518 | 253.8932 | 0.217365928  | 0.250214 | 0.86872  | 0.385    | 0.826939 |
| ncoa5     | 899.8666 | -0.07004344  | 0.115143 | -0.60832 | 0.542976 | 0.894917 |
| dip2bb    | 78.13856 | 0.259250464  | 0.272513 | 0.951333 | 0.341435 | 0.796175 |
| cap1      | 274.0059 | -0.026141458 | 0.162604 | -0.16077 | 0.872277 | 0.983447 |
| fmo5      | 322.8596 | -0.649024898 | 0.157158 | -4.12975 | 3.63E-05 | 0.004382 |
| kpna1     | 666.8361 | -0.044212784 | 0.144448 | -0.30608 | 0.759543 | 0.957886 |
| her8a     | 199.2414 | 0.296368878  | 0.215109 | 1.377764 | 0.168276 | 0.639712 |
| gna15.1   | 209.4262 | 0.089702091  | 0.159936 | 0.560864 | 0.57489  | 0.904516 |
| zbtb8os   | 311.8199 | -0.379857604 | 0.139772 | -2.71769 | 0.006574 | 0.136957 |
| asns      | 252.2643 | 0.41820355   | 0.176719 | 2.36649  | 0.017958 | 0.2367   |
| calcocolb | 1103.02  | 0.175416211  | 0.39895  | 0.439694 | 0.660159 | 0.930581 |
| arf2b     | 2.079528 | 0.044120698  | 1.183305 | 0.037286 | 0.970257 | NA       |
| fam219aa  | 34.10182 | -0.281925102 | 0.302375 | -0.93237 | 0.351146 | 0.80227  |
| riok1     | 296.921  | -0.512750241 | 0.18104  | -2.83225 | 0.004622 | 0.112688 |
| ptchl     | 575.9672 | 0.072275798  | 0.235227 | 0.30726  | 0.758646 | 0.957867 |
| agt       | 712.4604 | -2.048322786 | 0.478145 | -4.2839  | 1.84E-05 | 0.002746 |
| dhtkd1    | 1377.991 | -0.04770304  | 0.147939 | -0.32245 | 0.747111 | 0.955074 |
| crygm1    | 1.182559 | 0            | 4.560512 | 0        | 1        | NA       |
| fign11    | 108.9384 | 0.274467569  | 0.181702 | 1.510534 | 0.130907 | 0.582503 |
| farp2     | 515.4167 | 0.351575534  | 0.174574 | 2.013903 | 0.04402  | 0.367392 |
| slc7a1    | 60.70397 | 0.182829507  | 0.393915 | 0.464134 | 0.642552 | 0.92567  |
| eif3c     | 7200.1   | -0.232290915 | 0.112293 | -2.06862 | 0.038582 | 0.344335 |
| ythdf1    | 690.3206 | -0.043529072 | 0.126375 | -0.34444 | 0.730512 | 0.950056 |
| vtg3      | 1.725038 | 1.130689033  | 1.451485 | 0.778988 | 0.435987 | NA       |
| esr2a     | 6.918692 | 0.306945597  | 0.772208 | 0.397491 | 0.691006 | 0.940173 |
| irf9      | 123.0716 | 0.387422188  | 0.204963 | 1.890208 | 0.05873  | 0.418427 |
| fut9a     | 184.2042 | 0.228850631  | 0.274287 | 0.834347 | 0.404086 | 0.833888 |
| trappc6b  | 206.219  | -0.225120035 | 0.214392 | -1.05004 | 0.2937   | 0.76281  |
| cdc42bpab | 257.5499 | -0.15219342  | 0.145573 | -1.04548 | 0.295803 | 0.764246 |
| anxa5b    | 1084.883 | -0.000920592 | 0.250408 | -0.00368 | 0.997067 | 1        |
| galcb     | 270.0654 | 0.111594332  | 0.143616 | 0.777032 | 0.43714  | 0.851125 |
| eif4a2    | 1114.228 | -0.39992963  | 0.12082  | -3.31013 | 0.000933 | 0.042367 |
| ugt5a1    | 10.88879 | 2.547223098  | 1.49356  | 1.705471 | 0.088107 | 0.498396 |
| slc17a7a  | 100.8384 | -0.091004881 | 0.316408 | -0.28762 | 0.773638 | 0.960624 |
| ptpn2a    | 174.5924 | -0.29884296  | 0.186641 | -1.60116 | 0.109341 | 0.542487 |
| baiap212a | 40.13671 | -0.207530921 | 0.596786 | -0.34775 | 0.72803  | 0.949325 |
| dkc1      | 928.8551 | -0.137392496 | 0.188315 | -0.72959 | 0.465641 | 0.864997 |
| rab11fip3 | 180.3986 | 0.264655774  | 0.17506  | 1.511797 | 0.130585 | 0.581871 |
| ddc       | 92.06944 | -0.262543395 | 0.337003 | -0.77905 | 0.435949 | 0.850604 |
| cdk8      | 337.0142 | 0.21422781   | 0.138902 | 1.542299 | 0.123001 | 0.569606 |
| apbblip   | 157.3819 | 0.21876671   | 0.161725 | 1.352706 | 0.17615  | 0.649415 |

|                   |          |              |          |          |          |          |
|-------------------|----------|--------------|----------|----------|----------|----------|
| setd3             | 469.663  | 0.040640633  | 0.135758 | 0.29936  | 0.764665 | 0.959403 |
| gtf2h2            | 213.2207 | 0.140791687  | 0.141147 | 0.997482 | 0.318531 | 0.779923 |
| rbm8a             | 1649.053 | -0.132270116 | 0.115366 | -1.14653 | 0.251576 | 0.731828 |
| ctdnep1a          | 199.9728 | -0.089991099 | 0.15463  | -0.58198 | 0.560581 | 0.899928 |
| gata3             | 715.9423 | -0.025364872 | 0.109614 | -0.2314  | 0.817003 | 0.971207 |
| helz2             | 9.733562 | -1.259433122 | 0.909627 | -1.38456 | 0.166187 | 0.63593  |
| wdcp              | 93.3569  | 0.271629345  | 0.227981 | 1.191456 | 0.233475 | 0.714569 |
| klhl4             | 64.912   | -0.380424224 | 0.216271 | -1.75902 | 0.078574 | 0.474455 |
| suco              | 964.6469 | -0.062844142 | 0.11926  | -0.52695 | 0.598229 | 0.912715 |
| npas2             | 67.8761  | -0.34101528  | 0.40808  | -0.83566 | 0.403347 | 0.833803 |
| zgc:55888         | 1.516671 | 0.794076749  | 1.651239 | 0.480898 | 0.630589 | NA       |
| sash3             | 31.02585 | 0.781683693  | 0.380668 | 2.053453 | 0.040029 | 0.349722 |
| mrm3a             | 52.46819 | -0.136819395 | 0.27459  | -0.49827 | 0.618296 | 0.916585 |
| zgc:154046        | 447.1859 | 0.517713929  | 0.12934  | 4.002735 | 6.26E-05 | 0.006506 |
| EIF5B             | 976.7722 | 0.070093315  | 0.135674 | 0.516629 | 0.605415 | 0.914985 |
| iqseclb           | 668.8543 | 0.215518751  | 0.129493 | 1.66433  | 0.096047 | 0.517378 |
| prlra             | 142.608  | 0.410728542  | 0.199896 | 2.054712 | 0.039907 | 0.349185 |
| mroh1             | 499.5473 | -0.340327069 | 0.129541 | -2.62718 | 0.008609 | 0.158949 |
| rgs7a             | 207.1024 | 0.179026742  | 0.229747 | 0.779236 | 0.435841 | 0.850596 |
| haus4             | 105.9693 | 0.523503278  | 0.250594 | 2.089052 | 0.036703 | 0.336694 |
| ckmt1             | 3665.403 | 0.598545608  | 0.247544 | 2.417932 | 0.015609 | 0.220659 |
| pimr110           | 0.329315 | -0.868116841 | 5.251677 | -0.1653  | 0.868706 | NA       |
| echdc2            | 189.9169 | -0.127446943 | 0.184083 | -0.69233 | 0.488728 | 0.873964 |
| scrn3             | 200.2401 | 0.157359102  | 0.235287 | 0.668797 | 0.503625 | 0.881759 |
| mcat              | 30.44791 | -0.328076276 | 0.371161 | -0.88392 | 0.376741 | 0.822258 |
| si:ch211-195b13.1 | 593.6584 | -0.373751899 | 0.212474 | -1.75905 | 0.078569 | 0.474455 |
| tprb              | 771.1711 | 0.061087119  | 0.143823 | 0.424738 | 0.671027 | 0.933953 |
| akr7a3            | 400.248  | 0.078590409  | 0.165674 | 0.474366 | 0.635239 | 0.924272 |
| znf106a           | 1106.662 | 0.114662054  | 0.188781 | 0.607382 | 0.543597 | 0.894925 |
| mgme1             | 108.6538 | -0.465908125 | 0.238832 | -1.95078 | 0.051084 | 0.393482 |
| rnf20             | 538.8641 | 0.06871361   | 0.102801 | 0.668414 | 0.503869 | 0.881759 |
| gabrb1b           | 58.47321 | 0.563014586  | 0.359241 | 1.567233 | 0.11706  | 0.557969 |
| si:ch73-166o21.1  | 4.477723 | 1.132601428  | 0.962153 | 1.177153 | 0.239135 | 0.719781 |
| gnao1a            | 1372.676 | 0.312764097  | 0.105813 | 2.955818 | 0.003118 | 0.091566 |
| acadvl            | 4039.784 | -0.024453794 | 0.11146  | -0.2194  | 0.826342 | 0.973229 |
| cd9b              | 1178.499 | -0.178830848 | 0.130047 | -1.37513 | 0.169091 | 0.640442 |
| p2rx1             | 68.72299 | -0.312046504 | 0.253244 | -1.2322  | 0.217876 | 0.698904 |
| trpala            | 220.565  | -0.434208667 | 0.151447 | -2.86706 | 0.004143 | 0.106542 |
| pblD              | 91.16873 | 0.283323383  | 0.247034 | 1.1469   | 0.251423 | 0.731717 |
| atic              | 2521.978 | 0.086042292  | 0.124439 | 0.691439 | 0.48929  | 0.874352 |
| rchyl             | 225.7424 | 0.068076973  | 0.179104 | 0.380097 | 0.703873 | 0.943735 |
| mmp11b            | 188.7981 | 0.229772397  | 0.227589 | 1.009593 | 0.31269  | 0.776189 |
| sdha              | 4905.432 | 0.019595854  | 0.143203 | 0.13684  | 0.891157 | 0.988566 |
| zgc:162339        | 115.8764 | -0.285279537 | 0.22613  | -1.26157 | 0.207103 | 0.689352 |
| gadd45gb.1        | 599.3605 | 0.146319704  | 0.156215 | 0.936655 | 0.348936 | 0.801306 |
| rfxank            | 20.52325 | -0.628240783 | 0.465553 | -1.34945 | 0.177192 | 0.65076  |
| psat1             | 977.0298 | -0.047415462 | 0.183936 | -0.25778 | 0.796574 | 0.966447 |
| lrrc4cb           | 105.0339 | 0.348925161  | 0.328154 | 1.063296 | 0.287648 | 0.758397 |
| rgs7bpb           | 124.0661 | 0.569668206  | 0.24058  | 2.3679   | 0.017889 | 0.236508 |
| angel2            | 393.4396 | 0.067271707  | 0.122503 | 0.549144 | 0.582907 | 0.90571  |
| slc35f6           | 700.8098 | -0.121961035 | 0.130762 | -0.93269 | 0.350978 | 0.802224 |
| slcolc1           | 109.4791 | -0.241863831 | 0.193229 | -1.25169 | 0.210681 | 0.692347 |
| abcc6a            | 56.26569 | 0.510406358  | 0.485913 | 1.050407 | 0.293531 | 0.76277  |
| ipo9              | 479.1461 | 0.200240456  | 0.165153 | 1.212454 | 0.225339 | 0.70685  |

|                 |          |              |          |          |          |          |
|-----------------|----------|--------------|----------|----------|----------|----------|
| tbca            | 823.5431 | -0.069758482 | 0.188032 | -0.37099 | 0.710642 | 0.945821 |
| znf292a         | 364.3082 | 0.143126365  | 0.141532 | 1.011265 | 0.311889 | 0.776164 |
| scamp3          | 453.9622 | -0.204377701 | 0.09988  | -2.04623 | 0.040734 | 0.352816 |
| sgtb            | 127.6321 | -0.035702358 | 0.201553 | -0.17714 | 0.859401 | 0.979975 |
| tfa             | 21336.46 | -0.33830269  | 0.25042  | -1.35094 | 0.176714 | 0.650047 |
| cishb           | 92.4645  | -0.427803939 | 0.349535 | -1.22392 | 0.220982 | 0.702255 |
| plekho2         | 234.6443 | -0.154656938 | 0.144628 | -1.06934 | 0.284914 | 0.755935 |
| aqr             | 477.3314 | 0.072152958  | 0.132097 | 0.54621  | 0.584921 | 0.906655 |
| huwel           | 2796.099 | 0.079756055  | 0.18258  | 0.436828 | 0.662236 | 0.930742 |
| srsf6b          | 2267.856 | 0.142294344  | 0.090639 | 1.569902 | 0.116438 | 0.557474 |
| zebla           | 96.15913 | 0.10908333   | 0.229622 | 0.475057 | 0.634747 | 0.924272 |
| zgc:152891      | 48.68142 | -0.625024074 | 0.415073 | -1.50582 | 0.132114 | 0.584623 |
| crybb1l2        | 16682.73 | 0.401872098  | 0.239553 | 1.677591 | 0.093427 | 0.511267 |
| mtmr6           | 401.4247 | 0.065056502  | 0.123816 | 0.525429 | 0.599285 | 0.913192 |
| prkacab         | 551.2252 | 0.231911693  | 0.159318 | 1.455651 | 0.145489 | 0.604661 |
| ints3           | 404.5259 | 0.083062273  | 0.105089 | 0.790397 | 0.429296 | 0.846956 |
| cascl           | 21.15681 | 0.372220761  | 0.373437 | 0.996743 | 0.318889 | 0.779923 |
| abcg2d          | 71.67625 | 0.198430031  | 0.304166 | 0.652375 | 0.51416  | 0.88631  |
| vtg6            | 0.229641 | -0.868117144 | 4.983452 | -0.1742  | 0.861708 | NA       |
| rimkla          | 3042.842 | 0.03949059   | 0.130032 | 0.303698 | 0.761358 | 0.958159 |
| tcirgla         | 256.9773 | -1.280404239 | 0.182349 | -7.02171 | 2.19E-12 | 2.99E-09 |
| glipr2l         | 89.65152 | -0.06807942  | 0.209566 | -0.32486 | 0.745288 | 0.954956 |
| neurod2         | 83.48669 | 0.164526386  | 0.294224 | 0.559187 | 0.576034 | 0.904739 |
| sf3b5           | 632.3602 | -0.100759218 | 0.15435  | -0.6528  | 0.513888 | 0.88631  |
| pon2            | 315.7257 | -0.426693177 | 0.200171 | -2.13164 | 0.033036 | 0.321751 |
| smad7           | 315.3032 | -0.052709737 | 0.116857 | -0.45106 | 0.651945 | 0.928716 |
| farsb           | 765.963  | 0.276136703  | 0.139174 | 1.984106 | 0.047244 | 0.378508 |
| fam102ab        | 135.7131 | -0.032008075 | 0.202815 | -0.15782 | 0.8746   | 0.984095 |
| rnf128a         | 664.5933 | -0.120955229 | 0.147942 | -0.81759 | 0.413594 | 0.83842  |
| rhobtb4         | 92.75761 | -0.154564773 | 0.239639 | -0.64499 | 0.518934 | 0.887148 |
| smarcel         | 3483.486 | -0.056330061 | 0.114005 | -0.4941  | 0.621235 | 0.918461 |
| gysl            | 1785.065 | 0.071194401  | 0.191512 | 0.37175  | 0.710079 | 0.945821 |
| dnajb9b         | 22.8632  | 0.644451063  | 0.370989 | 1.737119 | 0.082366 | 0.482779 |
| eif3g           | 4103.883 | -0.314057524 | 0.124261 | -2.52741 | 0.011491 | 0.186054 |
| fbxol5          | 8.253833 | -0.905843637 | 0.669164 | -1.35369 | 0.175834 | 0.649413 |
| wdr5            | 947.0228 | -0.012140474 | 0.104246 | -0.11646 | 0.907288 | 0.991745 |
| bckdk           | 1268.105 | -0.174051654 | 0.130689 | -1.3318  | 0.182925 | 0.659278 |
| zp3e            | 6.072162 | -1.37265468  | 0.951307 | -1.44291 | 0.149045 | 0.610726 |
| ace2            | 647.3582 | 0.097366618  | 1.476046 | 0.065964 | 0.947406 | 0.997371 |
| si:dkey-94f20.4 | 15.7976  | -0.352933249 | 1.213165 | -0.29092 | 0.771113 | 0.960484 |
| ttyh2           | 53.21811 | 0.257654971  | 0.23848  | 1.080407 | 0.279961 | 0.752866 |
| hmcn1           | 478.5763 | -0.064583919 | 0.173883 | -0.37142 | 0.710324 | 0.945821 |
| itgb2           | 119.1902 | -0.047239557 | 0.214144 | -0.2206  | 0.825406 | 0.972721 |
| neurog3         | 2.96068  | -0.698957686 | 1.156626 | -0.60431 | 0.545639 | 0.895515 |
| slc16a1a        | 96.74275 | -0.160824687 | 0.248564 | -0.64702 | 0.517621 | 0.887148 |
| MCUR1           | 207.0538 | 0.172994811  | 0.198256 | 0.872585 | 0.382889 | 0.825721 |
| tmem214         | 910.7449 | -0.091621365 | 0.117003 | -0.78307 | 0.433588 | 0.849735 |
| snx27b          | 169.6094 | 0.034188988  | 0.174452 | 0.19598  | 0.844626 | 0.976791 |
| pmpcb           | 487.124  | -0.035627347 | 0.178678 | -0.19939 | 0.841955 | 0.97643  |
| bcar3           | 261.6683 | -0.056926957 | 0.132337 | -0.43017 | 0.667073 | 0.933049 |
| ssrplb          | 178.5175 | 0.210311369  | 0.160729 | 1.308486 | 0.190709 | 0.670725 |
| lin28a          | 85.59518 | 0.073626595  | 0.261674 | 0.281368 | 0.778429 | 0.961073 |
| myo10           | 627.9405 | -0.053530376 | 0.200566 | -0.2669  | 0.789549 | 0.9639   |
| dennd5a         | 249.0269 | 0.154086133  | 0.138284 | 1.114273 | 0.265162 | 0.742063 |

|                 |          |              |          |          |          |          |
|-----------------|----------|--------------|----------|----------|----------|----------|
| nr4a2a          | 231.0858 | -0.103344534 | 0.242695 | -0.42582 | 0.670239 | 0.933809 |
| scamp21         | 150.2827 | 0.336963305  | 0.147537 | 2.283929 | 0.022376 | 0.264783 |
| ywhae2          | 1544.535 | -0.042604619 | 0.14503  | -0.29376 | 0.768938 | 0.960395 |
| ak7b            | 32.12194 | 0.071620655  | 0.342907 | 0.208863 | 0.834555 | 0.97576  |
| sqor            | 608.4026 | -0.184816653 | 0.220459 | -0.83833 | 0.401847 | 0.832807 |
| svilc           | 1045.782 | -0.125526148 | 0.206476 | -0.60795 | 0.543223 | 0.894925 |
| ikbkg           | 393.1806 | 0.08697109   | 0.1178   | 0.738296 | 0.460334 | 0.862369 |
| zgc:152670      | 4.629114 | -4.656565775 | 1.312558 | -3.5477  | 0.000389 | 0.023306 |
| slc27a4         | 38.3513  | 0.38438882   | 0.27901  | 1.377688 | 0.1683   | 0.639712 |
| adsl            | 2311.863 | 0.111075267  | 0.1301   | 0.853767 | 0.393234 | 0.828219 |
| zmynd12         | 8.201767 | -0.924914878 | 0.614439 | -1.5053  | 0.132247 | 0.584912 |
| large2          | 417.377  | -0.142588659 | 0.201298 | -0.70835 | 0.47873  | 0.869292 |
| chordc1b        | 332.1976 | -0.068705388 | 0.113942 | -0.60299 | 0.546518 | 0.896107 |
| mespaa          | 0.045161 | 0            | 5.267649 | 0        | 1        | NA       |
| bud31           | 873.9091 | -0.235975812 | 0.177528 | -1.32923 | 0.183771 | 0.66056  |
| asb12a          | 376.7201 | 0.013815364  | 0.141404 | 0.097701 | 0.92217  | 0.994346 |
| emc8            | 436.2534 | 0.001343067  | 0.136763 | 0.00982  | 0.992165 | 1        |
| vaspb           | 1594.979 | 0.023151322  | 0.085249 | 0.271572 | 0.785951 | 0.962605 |
| nr2e1           | 159.2713 | 0.200714485  | 0.272934 | 0.735397 | 0.462098 | 0.863402 |
| kcnalb          | 4.554494 | 1.634245078  | 1.11295  | 1.46839  | 0.141998 | 0.601041 |
| fam8a1a         | 17.00135 | -0.660213852 | 0.489834 | -1.34783 | 0.177713 | 0.65136  |
| kctd10          | 551.5251 | 0.07616651   | 0.128748 | 0.591592 | 0.554124 | 0.898275 |
| vps37a          | 552.575  | -0.119363314 | 0.144553 | -0.82574 | 0.408952 | 0.836637 |
| mafba           | 483.1079 | -0.141067154 | 0.110376 | -1.27806 | 0.201227 | 0.681045 |
| ilvbl           | 343.323  | -0.022277517 | 0.132229 | -0.16848 | 0.866208 | 0.982573 |
| pdzklipl        | 83.78017 | 0.14362803   | 0.318672 | 0.450709 | 0.6522   | 0.928768 |
| myof1           | 188.7601 | -0.167433355 | 0.163985 | -1.02103 | 0.307242 | 0.772541 |
| zgc:63587       | 707.6718 | 0.00471544   | 0.115037 | 0.040991 | 0.967303 | 1        |
| pla2g4ab        | 7.324402 | -0.168750311 | 1.052008 | -0.16041 | 0.87256  | 0.983447 |
| brd9            | 430.4595 | 0.106838578  | 0.1024   | 1.043347 | 0.296788 | 0.764495 |
| cables2b        | 32.36067 | -0.29636834  | 0.313431 | -0.94556 | 0.344372 | 0.798147 |
| wnt10a          | 21.58724 | -0.345952343 | 0.419275 | -0.82512 | 0.409303 | 0.83666  |
| kif3ca          | 88.34041 | 0.469285271  | 0.289873 | 1.618935 | 0.105461 | 0.534737 |
| sinup           | 1.667147 | -0.36617708  | 1.624003 | -0.22548 | 0.821607 | NA       |
| slc3a1          | 51.32873 | -0.008232933 | 0.339522 | -0.02425 | 0.980654 | 1        |
| nr2f1b          | 259.8428 | -0.121015374 | 0.177704 | -0.68099 | 0.495875 | 0.87806  |
| si:dkey-29p10.4 | 113.3056 | 0.094526225  | 0.18851  | 0.501438 | 0.616063 | 0.916365 |
| dlx2b           | 127.6486 | 0.206916881  | 0.201626 | 1.02624  | 0.304779 | 0.770005 |
| npc1            | 1196.9   | -0.162622168 | 0.12205  | -1.33242 | 0.182721 | 0.659278 |
| zpax2           | 1.603838 | 0.093650384  | 1.894577 | 0.049431 | 0.960576 | NA       |
| cnna            | 13.95468 | -1.087739635 | 1.238654 | -0.87816 | 0.379856 | 0.823607 |
| foxf2a          | 278.8112 | -0.21154262  | 0.140731 | -1.50317 | 0.132796 | 0.585961 |
| elp2            | 200.4549 | -0.167080532 | 0.159006 | -1.05078 | 0.29336  | 0.762713 |
| plxnb1b         | 486.7559 | 0.26488586   | 0.150035 | 1.765493 | 0.077481 | 0.470449 |
| pabpcla         | 21065.94 | -0.21797662  | 0.106064 | -2.05514 | 0.039866 | 0.348958 |
| otud7b          | 99.05864 | -0.007782712 | 0.232587 | -0.03346 | 0.973307 | 1        |
| megf10          | 144.0331 | 0.026314947  | 0.18737  | 0.140444 | 0.888309 | 0.988188 |
| fbxw11b         | 990.7537 | -0.032303431 | 0.115457 | -0.27979 | 0.77964  | 0.961073 |
| npy8ar          | 2.482412 | -0.10105541  | 1.080152 | -0.09356 | 0.925461 | 0.994815 |
| eif5a           | 15954.79 | -0.127573843 | 0.11098  | -1.14952 | 0.25034  | 0.730066 |
| traf5           | 13.77013 | -0.296294272 | 0.529983 | -0.55906 | 0.576119 | 0.904749 |
| garem           | 273.2507 | -0.198350877 | 0.140738 | -1.40936 | 0.158729 | 0.624456 |
| chd6            | 463.1098 | 0.1775465    | 0.184534 | 0.962132 | 0.335983 | 0.792177 |
| prx             | 1252.165 | -0.083108523 | 0.260027 | -0.31961 | 0.74926  | 0.955074 |

|                 |           |               |           |           |           |           |
|-----------------|-----------|---------------|-----------|-----------|-----------|-----------|
| smt1b           | 4. 562067 | 1. 22703311   | 0. 935438 | 1. 31172  | 0. 189615 | 0. 669289 |
| kcnk1b          | 15. 05577 | -0. 080964799 | 0. 594506 | -0. 13619 | 0. 891672 | 0. 988566 |
| tmed1b          | 258. 7706 | -0. 012311765 | 0. 180532 | -0. 0682  | 0. 945629 | 0. 997371 |
| gdpd1           | 565. 9578 | 0. 069859746  | 0. 195513 | 0. 357316 | 0. 720855 | 0. 947343 |
| scml4           | 26. 40981 | -0. 166911689 | 0. 398169 | -0. 4192  | 0. 675072 | 0. 935189 |
| eapp            | 155. 8946 | -0. 059995472 | 0. 176257 | -0. 34039 | 0. 733565 | 0. 950808 |
| opn1sw2         | 3526. 165 | -0. 740171296 | 0. 459225 | -1. 61178 | 0. 107009 | 0. 537    |
| gnai2b          | 468. 9983 | 0. 228929778  | 0. 131128 | 1. 745847 | 0. 080838 | 0. 479801 |
| fabp11a         | 1481. 699 | 0. 227594111  | 0. 187621 | 1. 213055 | 0. 225109 | 0. 70685  |
| gpsm2           | 367. 7359 | 0. 163715792  | 0. 194769 | 0. 840562 | 0. 400593 | 0. 831725 |
| lmbrd2b         | 452. 838  | 0. 399867396  | 0. 179747 | 2. 224611 | 0. 026107 | 0. 286686 |
| celal. 6        | 29116. 08 | 0. 424007929  | 0. 694503 | 0. 61052  | 0. 541517 | 0. 893858 |
| larp7           | 256. 1053 | 0. 008921175  | 0. 202163 | 0. 044129 | 0. 964802 | 1         |
| bag5            | 115. 7407 | -0. 118037851 | 0. 232076 | -0. 50862 | 0. 61102  | 0. 915331 |
| fl1r. 1         | 1032. 395 | -0. 151121138 | 0. 12399  | -1. 21882 | 0. 222912 | 0. 704786 |
| kdr             | 126. 4293 | -0. 09690664  | 0. 274064 | -0. 35359 | 0. 723645 | 0. 947923 |
| cdkl1           | 143. 5417 | 0. 061574765  | 0. 193292 | 0. 318559 | 0. 750061 | 0. 955074 |
| zgc:77929       | 276. 7943 | 0. 017437742  | 0. 159327 | 0. 109446 | 0. 912849 | 0. 99273  |
| kidins220b      | 2988. 65  | 0. 219503057  | 0. 129001 | 1. 701566 | 0. 088837 | 0. 500363 |
| uts2b           | 5. 620385 | 0             | 1. 775766 | 0         | 1         | 1         |
| epha2a          | 329. 7768 | 0. 137865192  | 0. 192171 | 0. 71741  | 0. 473121 | 0. 868983 |
| rsph9           | 25. 97456 | 0. 199188968  | 0. 389792 | 0. 511014 | 0. 609341 | 0. 915204 |
| mett18          | 29. 16956 | -0. 37138342  | 0. 345968 | -1. 07346 | 0. 283064 | 0. 755028 |
| slc23a2         | 31. 13088 | 0. 103127382  | 0. 323736 | 0. 318554 | 0. 750065 | 0. 955074 |
| prdm4           | 259. 4585 | -0. 216392745 | 0. 161813 | -1. 3373  | 0. 181124 | 0. 657265 |
| rhbdf1b         | 129. 3144 | 0. 264246105  | 0. 272826 | 0. 968552 | 0. 332769 | 0. 789823 |
| sema3d          | 464. 5376 | -0. 151463973 | 0. 185542 | -0. 81633 | 0. 41431  | 0. 838631 |
| b9d2            | 57. 17955 | -0. 028092229 | 0. 256217 | -0. 10964 | 0. 912693 | 0. 992635 |
| sobpb           | 250. 2603 | 0. 022323855  | 0. 212891 | 0. 10486  | 0. 916487 | 0. 99343  |
| gstt1b          | 1086. 243 | 0. 221805216  | 0. 203293 | 1. 091062 | 0. 275245 | 0. 750424 |
| unc13ba         | 28. 35715 | 0. 014681905  | 0. 482326 | 0. 03044  | 0. 975716 | 1         |
| smarcc1a        | 1642. 843 | 0. 095292792  | 0. 16093  | 0. 592139 | 0. 553758 | 0. 89821  |
| slc44a5a        | 6. 115444 | 1. 751149309  | 0. 832513 | 2. 103449 | 0. 035426 | 0. 330833 |
| klf1            | 68. 96095 | 0. 172700001  | 0. 386652 | 0. 446654 | 0. 655125 | 0. 929606 |
| apmap           | 756. 1772 | 0. 038185166  | 0. 154495 | 0. 247162 | 0. 804783 | 0. 96927  |
| pat11           | 1485. 07  | -0. 055548005 | 0. 0947   | -0. 58657 | 0. 557494 | 0. 899184 |
| crocc2          | 34. 50057 | 0. 442753233  | 0. 294084 | 1. 505535 | 0. 132186 | 0. 584831 |
| phf2011         | 347. 987  | -0. 038036911 | 0. 148553 | -0. 25605 | 0. 797913 | 0. 966447 |
| sphkap          | 219. 7847 | -0. 056963824 | 0. 24549  | -0. 23204 | 0. 816506 | 0. 971207 |
| mindy2          | 105. 7778 | -0. 069331525 | 0. 220579 | -0. 31432 | 0. 753281 | 0. 955861 |
| adcy3b          | 13. 80082 | 1. 222449851  | 0. 560586 | 2. 180665 | 0. 029208 | 0. 304273 |
| eif4ba          | 503. 1303 | 0. 046203263  | 0. 097445 | 0. 474146 | 0. 635396 | 0. 924292 |
| myl3            | 160396. 5 | 0. 115440574  | 0. 147311 | 0. 78365  | 0. 433245 | 0. 849392 |
| hal             | 469. 5088 | -1. 233925286 | 0. 354307 | -3. 48265 | 0. 000496 | 0. 027455 |
| eif3i           | 5902. 359 | -0. 235491412 | 0. 132317 | -1. 77975 | 0. 075117 | 0. 464618 |
| camk1db         | 208. 3018 | 0. 796555945  | 0. 232432 | 3. 427045 | 0. 00061  | 0. 032059 |
| nup50           | 687. 7569 | 0. 228119302  | 0. 139575 | 1. 634388 | 0. 102177 | 0. 528963 |
| ncam2           | 357. 2466 | -0. 052137681 | 0. 290612 | -0. 17941 | 0. 857618 | 0. 979756 |
| zgc:l10699      | 40. 17066 | -0. 790375945 | 0. 425047 | -1. 8595  | 0. 062956 | 0. 429313 |
| ifi45           | 103. 4908 | -2. 354787716 | 0. 543358 | -4. 33377 | 1. 47E-05 | 0. 002392 |
| cel. 1          | 9582. 765 | -0. 900328774 | 0. 954655 | -0. 94309 | 0. 345633 | 0. 798835 |
| tgfbr1a         | 39. 68073 | -0. 132542653 | 0. 334517 | -0. 39622 | 0. 691942 | 0. 940274 |
| rock2a          | 615. 958  | 0. 034780776  | 0. 168071 | 0. 206941 | 0. 836056 | 0. 976007 |
| si:ch211-1o7. 3 | 31. 71069 | -0. 734028538 | 0. 396838 | -1. 84969 | 0. 064358 | 0. 43348  |



|                   |          |              |          |          |          |          |
|-------------------|----------|--------------|----------|----------|----------|----------|
| ctdpl             | 167.531  | 0.219042964  | 0.173276 | 1.264125 | 0.206185 | 0.688671 |
| ccnt1             | 77.54491 | 0.430000816  | 0.343264 | 1.252683 | 0.210321 | 0.692011 |
| kif25             | 51.16378 | -0.298529004 | 0.376561 | -0.79278 | 0.427908 | 0.845893 |
| prkag3a           | 58.47982 | 0.214338431  | 0.229166 | 0.9353   | 0.349634 | 0.801408 |
| fgfla             | 30.70659 | 0.060907397  | 0.363843 | 0.1674   | 0.867055 | 0.982582 |
| banp              | 171.0169 | 0.144615701  | 0.148087 | 0.976562 | 0.328786 | 0.787144 |
| itk               | 4.19627  | -1.199131703 | 1.13259  | -1.05875 | 0.289713 | 0.760705 |
| reep3a            | 353.897  | -0.139238134 | 0.172189 | -0.80864 | 0.418725 | 0.84177  |
| mccc2             | 1622.792 | 0.223246479  | 0.130798 | 1.706802 | 0.087859 | 0.497853 |
| si:ch211-195b15.7 | 19.36237 | -0.484112301 | 0.649123 | -0.74579 | 0.455792 | 0.860272 |
| nit2              | 270.2602 | 0.005521206  | 0.214154 | 0.025781 | 0.979432 | 1        |
| fat1a             | 1589.143 | 0.054763155  | 0.197359 | 0.27748  | 0.781411 | 0.962024 |
| ccdc6b            | 214.9647 | 0.034323063  | 0.153096 | 0.224193 | 0.822607 | 0.971966 |
| ccng2             | 1294.148 | -0.123982874 | 0.167521 | -0.7401  | 0.459236 | 0.861818 |
| rpp40             | 78.58054 | 0.242659318  | 0.197289 | 1.229969 | 0.218709 | 0.699445 |
| sys1              | 239.0236 | -0.111670829 | 0.15898  | -0.70242 | 0.482417 | 0.871721 |
| pnpo              | 271.4938 | -0.208214257 | 0.140836 | -1.47842 | 0.139295 | 0.597457 |
| tlx3b             | 46.86261 | 0.412503963  | 0.295628 | 1.39535  | 0.16291  | 0.630534 |
| alg6              | 221.3393 | 0.134074327  | 0.161369 | 0.830853 | 0.406057 | 0.834645 |
| krt4              | 124194.1 | -0.093901664 | 0.133951 | -0.70101 | 0.483295 | 0.871988 |
| pdcb              | 790.0256 | -0.134389628 | 0.2767   | -0.48569 | 0.627189 | 0.921095 |
| rnfl67            | 176.6112 | 0.077406941  | 0.181893 | 0.425562 | 0.670427 | 0.933883 |
| cdh7b             | 4.754628 | -0.85761914  | 1.104712 | -0.77633 | 0.437555 | 0.851283 |
| rgs13             | 29.06264 | -0.072988847 | 0.670255 | -0.1089  | 0.913284 | 0.99273  |
| zgc:112163        | 37.71083 | -0.712851509 | 0.314577 | -2.26606 | 0.023448 | 0.270635 |
| gmppb             | 890.0462 | 0.041772447  | 0.146149 | 0.285821 | 0.775015 | 0.960899 |
| sephs2            | 968.7803 | 0.148346794  | 0.121917 | 1.216784 | 0.223686 | 0.705624 |
| braf              | 204.8866 | -0.016278966 | 0.161373 | -0.10088 | 0.919647 | 0.993892 |
| snrkb             | 243.4162 | -0.307298711 | 0.164376 | -1.86949 | 0.061555 | 0.425614 |
| nova2             | 2080.503 | 0.131354296  | 0.099024 | 1.326486 | 0.184679 | 0.661987 |
| utp4              | 564.5654 | -0.121414018 | 0.174398 | -0.69619 | 0.48631  | 0.873244 |
| mmp2              | 2786.439 | 0.246236232  | 0.173796 | 1.416811 | 0.156538 | 0.622452 |
| dnajc5gb          | 245.6012 | -0.10487842  | 0.150696 | -0.69596 | 0.486454 | 0.873244 |
| utp25             | 323.0812 | 0.068934714  | 0.174116 | 0.395912 | 0.69217  | 0.940333 |
| paqr3a            | 223.9077 | -0.205138323 | 0.169646 | -1.20921 | 0.226581 | 0.707798 |
| lrrc40            | 165.8542 | 0.305357288  | 0.157028 | 1.944598 | 0.051823 | 0.395809 |
| ppplr14ab         | 167.3938 | -0.039744353 | 0.226896 | -0.17517 | 0.860949 | 0.980388 |
| si:ch211-106h11.1 | 37.83033 | -0.025342728 | 0.454718 | -0.05573 | 0.955555 | 0.998611 |
| si:ch73-151m17.5  | 3.189954 | -2.138514112 | 1.65065  | -1.29556 | 0.195128 | 0.67483  |
| phb2b             | 741.9625 | 0.250011647  | 0.132399 | 1.888316 | 0.058984 | 0.418576 |
| ak5l              | 77.91101 | -0.210346764 | 0.277587 | -0.75777 | 0.448589 | 0.856741 |
| sec63             | 560.7275 | 0.056507921  | 0.107355 | 0.526363 | 0.598636 | 0.912889 |
| g3bp1             | 1500.977 | 0.071718885  | 0.131322 | 0.546128 | 0.584978 | 0.906655 |
| grm6a             | 4.917907 | -0.205025947 | 1.12319  | -0.18254 | 0.85516  | 0.979197 |
| smc2              | 758.7507 | 0.348115305  | 0.252276 | 1.379897 | 0.167619 | 0.638828 |
| arhgap29b         | 468.0781 | 0.121176538  | 0.139242 | 0.870261 | 0.384158 | 0.826565 |
| pik3cg            | 137.0154 | -0.477106982 | 0.165869 | -2.87641 | 0.004022 | 0.105636 |
| srrt              | 925.6944 | 0.213376644  | 0.148535 | 1.436542 | 0.150848 | 0.615085 |
| mdh1aa            | 8192.616 | -0.425974393 | 0.14628  | -2.91205 | 0.003591 | 0.09929  |
| slc16a12a         | 103.2125 | -0.261476971 | 0.386263 | -0.67694 | 0.498443 | 0.879132 |
| atp5mc3a          | 1930.324 | 0.231256964  | 0.129201 | 1.789907 | 0.073469 | 0.461196 |
| rorcb             | 591.5918 | -0.092052546 | 0.323809 | -0.28428 | 0.776195 | 0.961073 |
| hsl17b10          | 692.9721 | -0.016777414 | 0.160334 | -0.10464 | 0.916661 | 0.993453 |
| zgc:158689        | 90.72843 | 0.114694142  | 0.245144 | 0.467864 | 0.639882 | 0.924779 |

|                  |          |              |          |          |          |          |
|------------------|----------|--------------|----------|----------|----------|----------|
| chrnb2           | 185.7328 | 0.127214971  | 0.234563 | 0.54235  | 0.587578 | 0.907552 |
| sdr16c5b         | 629.9844 | -0.261553663 | 0.134636 | -1.94268 | 0.052055 | 0.396487 |
| bcor             | 970.0754 | 0.097231331  | 0.148519 | 0.654673 | 0.512678 | 0.885483 |
| tgml             | 91.88315 | -0.818083777 | 0.283187 | -2.88885 | 0.003867 | 0.103403 |
| gsk3ba           | 885.1758 | -0.028725119 | 0.110221 | -0.26061 | 0.79439  | 0.965431 |
| stard3           | 292.9739 | -0.309600488 | 0.144445 | -2.14338 | 0.032082 | 0.318495 |
| si:ch211-210c8.6 | 176.9996 | 0.023148125  | 0.248568 | 0.093126 | 0.925804 | 0.994815 |
| pigs             | 189.3202 | 0.188599648  | 0.155268 | 1.214672 | 0.224491 | 0.706406 |
| gata5            | 256.2149 | -0.137644357 | 0.158911 | -0.86617 | 0.386396 | 0.827278 |
| mical12b         | 90.07505 | -0.025935626 | 0.289483 | -0.08959 | 0.928611 | 0.995093 |
| brfla            | 83.3393  | 0.12361807   | 0.255737 | 0.483379 | 0.628827 | 0.922088 |
| cand1            | 1001.702 | 0.045829557  | 0.107901 | 0.424737 | 0.671029 | 0.933953 |
| syvn1            | 427.9477 | 0.229278101  | 0.110363 | 2.077484 | 0.037757 | 0.340665 |
| srsflb           | 1277.538 | -0.000446311 | 0.108672 | -0.00411 | 0.996723 | 1        |
| copz1            | 1141.21  | -0.075255097 | 0.188522 | -0.39918 | 0.689758 | 0.939657 |
| prepl            | 62.99579 | -0.224681266 | 0.327795 | -0.68543 | 0.493072 | 0.876715 |
| rgs5b            | 48.88147 | 0.18912239   | 0.420713 | 0.449528 | 0.653051 | 0.929197 |
| dnajc3b          | 343.2105 | 0.319529783  | 0.156038 | 2.047773 | 0.040582 | 0.351905 |
| kcnip3b          | 60.77659 | 0.270840754  | 0.339281 | 0.798279 | 0.424709 | 0.844714 |
| rdh1             | 297.201  | -0.096039764 | 0.309132 | -0.31068 | 0.756047 | 0.956532 |
| bgna             | 54.29769 | -1.422512262 | 0.526314 | -2.70278 | 0.006876 | 0.139692 |
| zbtb11           | 497.579  | -0.113187958 | 0.121255 | -0.93347 | 0.350576 | 0.802215 |
| tcp1             | 5806.968 | -0.089345515 | 0.106915 | -0.83567 | 0.403342 | 0.833803 |
| tlh2a            | 366.552  | -0.032092789 | 0.199097 | -0.16119 | 0.871942 | 0.983447 |
| casp3a           | 1233.905 | 0.01527487   | 0.107611 | 0.141945 | 0.887123 | 0.987739 |
| pdssl            | 451.7784 | -0.021488851 | 0.129733 | -0.16564 | 0.868441 | 0.982801 |
| her7             | 2.819159 | 0.226402029  | 1.123818 | 0.201458 | 0.840341 | 0.976417 |
| cx36.7           | 3.072483 | -0.476482892 | 1.025059 | -0.46483 | 0.64205  | 0.925586 |
| xrcc3            | 101.4798 | -0.093164841 | 0.235286 | -0.39597 | 0.692131 | 0.940333 |
| ncoa2            | 934.4681 | 0.119987886  | 0.138825 | 0.864312 | 0.387416 | 0.827592 |
| ints6l           | 120.9277 | 0.255682391  | 0.181959 | 1.405164 | 0.159972 | 0.626214 |
| ptk6a            | 51.74941 | 0.354436692  | 0.300984 | 1.177593 | 0.238959 | 0.719781 |
| tp73             | 31.84491 | 0.459591719  | 0.35091  | 1.309713 | 0.190293 | 0.670176 |
| sfxn2            | 1396.689 | -0.089255562 | 0.166328 | -0.53662 | 0.591528 | 0.909437 |
| cyp39a1          | 17.6771  | -0.129827323 | 0.635495 | -0.20429 | 0.838124 | 0.976386 |
| rsph14           | 19.7919  | 0.900814128  | 0.391901 | 2.298578 | 0.021529 | 0.260177 |
| zgc:172106       | 2.237954 | -0.391542118 | 1.281607 | -0.30551 | 0.759979 | 0.957886 |
| zgc:77739        | 110.0107 | -0.141612071 | 0.221001 | -0.64078 | 0.521668 | 0.887551 |
| vps13d           | 368.6027 | -0.10858032  | 0.172778 | -0.62844 | 0.529717 | 0.890484 |
| dse              | 473.4135 | 0.032672732  | 0.118583 | 0.275527 | 0.782912 | 0.962328 |
| tssk6            |          | 0 NA         | NA       | NA       | NA       | NA       |
| ubpl             | 182.0341 | -0.059547007 | 0.305303 | -0.19504 | 0.84536  | 0.976791 |
| ecil             | 679.4899 | -0.037623525 | 0.227803 | -0.16516 | 0.86882  | 0.982801 |
| nkx2.5           | 20.49139 | 0.061472338  | 0.420795 | 0.146086 | 0.883853 | 0.987014 |
| vrkl             | 292.0547 | -0.24724325  | 0.20874  | -1.18446 | 0.236232 | 0.717364 |
| mdh1b            | 12.38334 | 0.153083806  | 0.53169  | 0.287919 | 0.773409 | 0.960624 |
| crtap            | 697.5163 | 0.110921921  | 0.123986 | 0.894635 | 0.370982 | 0.818556 |
| msh2             | 359.0865 | 0.012825053  | 0.159861 | 0.080226 | 0.936057 | 0.996941 |
| tbx2a            | 358.091  | 0.037781671  | 0.151189 | 0.249897 | 0.802667 | 0.968181 |
| scn8ab           | 49.94981 | 0.853380014  | 0.321553 | 2.653933 | 0.007956 | 0.150851 |
| msantd4          | 25.14004 | 0.211289437  | 0.375234 | 0.563088 | 0.573375 | 0.904056 |
| brms11b          | 144.0694 | 0.417611513  | 0.207701 | 2.01064  | 0.044363 | 0.368519 |
| zgc:171704       | 9.620208 | 0.016302546  | 0.615913 | 0.026469 | 0.978883 | 1        |
| sf3b2            | 1543.669 | 0.044064316  | 0.103917 | 0.424033 | 0.671542 | 0.933953 |

|                  |           |               |           |           |           |           |
|------------------|-----------|---------------|-----------|-----------|-----------|-----------|
| pik3r2           | 618. 5163 | -0. 124331163 | 0. 104233 | -1. 19281 | 0. 232942 | 0. 714492 |
| neill            | 325. 4897 | 0. 37978601   | 0. 131557 | 2. 886866 | 0. 003891 | 0. 103477 |
| ntm              | 16. 623   | -0. 443739767 | 0. 446094 | -0. 99472 | 0. 319871 | 0. 780475 |
| ptchd1           | 62. 76137 | -0. 097924919 | 0. 31156  | -0. 31431 | 0. 753289 | 0. 955861 |
| rdh12            | 178. 5431 | -0. 269330869 | 0. 213999 | -1. 25856 | 0. 208188 | 0. 69024  |
| mrps22           | 390. 1234 | 0. 262519019  | 0. 126751 | 2. 071135 | 0. 038346 | 0. 343352 |
| rbpl. 1          | 5. 40095  | -2. 265499633 | 0. 7789   | -2. 90859 | 0. 003631 | 0. 099671 |
| scap             | 126. 6294 | 0. 049973344  | 0. 168439 | 0. 296685 | 0. 766707 | 0. 960296 |
| casqlb           | 1976. 807 | -0. 016670097 | 0. 126692 | -0. 13158 | 0. 895317 | 0. 989223 |
| eif2b3           | 329. 483  | -0. 22790813  | 0. 130026 | -1. 75279 | 0. 079639 | 0. 477652 |
| rab3da           | 86. 58756 | -0. 038865845 | 0. 240472 | -0. 16162 | 0. 871603 | 0. 983365 |
| mafga            | 5. 708759 | -0. 539708178 | 0. 81368  | -0. 66329 | 0. 507143 | 0. 883007 |
| pak4             | 429. 458  | -0. 111199572 | 0. 12609  | -0. 88191 | 0. 377828 | 0. 822615 |
| kdm7aa           | 270. 7853 | -0. 043331341 | 0. 156497 | -0. 27688 | 0. 78187  | 0. 96218  |
| CR392347. 1      | 2. 88922  | 1. 994118482  | 1. 677586 | 1. 188683 | 0. 234564 | 0. 715489 |
| cenpj            | 61. 29568 | 0. 627980569  | 0. 227764 | 2. 757151 | 0. 005831 | 0. 129157 |
| psmd3            | 2383. 837 | -0. 083366086 | 0. 149951 | -0. 55596 | 0. 578242 | 0. 905417 |
| midlip11         | 529. 0958 | 0. 104726017  | 0. 189719 | 0. 552007 | 0. 580944 | 0. 905618 |
| gpx1a            | 1220. 95  | 0. 035608679  | 0. 159178 | 0. 223703 | 0. 822988 | 0. 971966 |
| slc38a4          | 1637. 973 | -0. 150719616 | 0. 15123  | -0. 99663 | 0. 318946 | 0. 779923 |
| nt5clba          | 75. 04979 | 0. 679376162  | 0. 361205 | 1. 880862 | 0. 059991 | 0. 421883 |
| ano10b           | 163. 2279 | -0. 262667363 | 0. 206066 | -1. 27468 | 0. 202424 | 0. 682855 |
| ctnnal1          | 156. 6391 | -0. 247009747 | 0. 155482 | -1. 58867 | 0. 112136 | 0. 548603 |
| depdcla          | 174. 4346 | 0. 128154007  | 0. 213314 | 0. 600776 | 0. 547989 | 0. 896611 |
| gnai2a           | 1453. 428 | -0. 031409526 | 0. 094763 | -0. 33145 | 0. 740302 | 0. 953888 |
| pgm2             | 542. 4104 | -0. 519925429 | 0. 155437 | -3. 34493 | 0. 000823 | 0. 038681 |
| acvr11           | 416. 3437 | -0. 107087173 | 0. 152764 | -0. 701   | 0. 483305 | 0. 871988 |
| dnajc28          | 134. 2152 | -0. 130858368 | 0. 206012 | -0. 6352  | 0. 5253   | 0. 888928 |
| asnal            | 1086. 819 | -0. 085104761 | 0. 136823 | -0. 622   | 0. 533939 | 0. 891181 |
| ubr5             | 2000. 442 | 0. 009731411  | 0. 172114 | 0. 05654  | 0. 954911 | 0. 998611 |
| nck2a            | 245. 9892 | -0. 049410905 | 0. 135456 | -0. 36477 | 0. 71528  | 0. 945917 |
| htr2c11          | 87. 26363 | 0. 283351266  | 0. 267697 | 1. 058476 | 0. 289838 | 0. 760705 |
| mfap1            | 623. 8107 | 0. 066801768  | 0. 139163 | 0. 480026 | 0. 631209 | 0. 923003 |
| ncoal            | 187. 593  | -0. 102693562 | 0. 247737 | -0. 41453 | 0. 678489 | 0. 936026 |
| atpla3a          | 3215. 306 | 0. 262807857  | 0. 20681  | 1. 270769 | 0. 203811 | 0. 684589 |
| bmp7a            | 10. 01869 | -0. 343251621 | 0. 576105 | -0. 59581 | 0. 551299 | 0. 8974   |
| pdia2            | 1526. 697 | -0. 660407425 | 0. 329519 | -2. 00415 | 0. 045054 | 0. 371889 |
| trim101          | 913. 0645 | 0. 099215951  | 0. 123205 | 0. 805292 | 0. 420651 | 0. 842383 |
| methflda         | 857. 6216 | -0. 122867817 | 0. 303449 | -0. 4049  | 0. 685547 | 0. 938486 |
| olfmla           | 228. 1448 | 0. 290649595  | 0. 152969 | 1. 900056 | 0. 057426 | 0. 413602 |
| wdr33            | 1006. 02  | 0. 036811321  | 0. 095881 | 0. 383928 | 0. 701032 | 0. 942918 |
| cfap161          | 8. 647936 | 0. 305284814  | 0. 5574   | 0. 547694 | 0. 583902 | 0. 906376 |
| cyba             | 213. 2712 | 0. 430932426  | 0. 181921 | 2. 368788 | 0. 017846 | 0. 236422 |
| pdpk1b           | 1018. 315 | 0. 007002692  | 0. 094226 | 0. 074318 | 0. 940757 | 0. 997371 |
| rev1             | 237. 1883 | -0. 038972689 | 0. 149236 | -0. 26115 | 0. 793979 | 0. 965431 |
| si:ch73-186j5. 2 | 1. 305286 | 1. 042755207  | 1. 733963 | 0. 601371 | 0. 547593 | NA        |
| etv4             | 490. 0271 | 0. 085352391  | 0. 150496 | 0. 567139 | 0. 57062  | 0. 902481 |
| rell1            | 255. 8749 | 0. 113347989  | 0. 160538 | 0. 70605  | 0. 480157 | 0. 870001 |
| arglulb          | 689. 5951 | -0. 027238473 | 0. 136087 | -0. 20015 | 0. 841359 | 0. 97643  |
| lbox1a           | 66. 65062 | 0. 213756238  | 0. 30187  | 0. 708107 | 0. 478879 | 0. 869292 |
| taf5             | 341. 0465 | 0. 125290007  | 0. 107852 | 1. 161681 | 0. 245365 | 0. 726909 |
| illr3            | 0. 380278 | 0             | 5. 117832 | 0         | 1         | NA        |
| rhocb            | 1142. 394 | 0. 055297601  | 0. 098864 | 0. 559329 | 0. 575938 | 0. 904739 |
| gc2              | 11. 15104 | 0. 135567706  | 0. 649915 | 0. 208593 | 0. 834766 | 0. 975908 |

|            |          |              |          |          |          |          |   |
|------------|----------|--------------|----------|----------|----------|----------|---|
| rpl35      | 20257.35 | -0.216562835 | 0.13286  | -1.63    | 0.103101 | 0.530217 |   |
| ggt1b      | 32.09814 | 0.007658255  | 0.589959 | 0.012981 | 0.989643 |          | 1 |
| hpda       | 1836.989 | -0.894930833 | 0.231443 | -3.86674 | 0.00011  | 0.009944 |   |
| sult1st3   | 89.24409 | -0.916244405 | 0.944222 | -0.97037 | 0.331862 | 0.789531 |   |
| prkcha     | 27.67886 | 1.024397312  | 0.442899 | 2.312936 | 0.020726 | 0.255657 |   |
| frzb       | 258.215  | -0.178303928 | 0.226078 | -0.78868 | 0.430297 | 0.847541 |   |
| kank2      | 154.4176 | -0.463378472 | 0.338478 | -1.36901 | 0.170997 | 0.643066 |   |
| hpca       | 1043.463 | 0.03871022   | 0.162906 | 0.237624 | 0.812173 | 0.970129 |   |
| rps6kb1a   | 380.064  | -0.052187793 | 0.12578  | -0.41491 | 0.678206 | 0.936026 |   |
| krt18a.1   | 7729.624 | -0.264584622 | 0.138403 | -1.9117  | 0.055915 | 0.409076 |   |
| mknk1      | 309.2699 | -0.057132846 | 0.155121 | -0.36831 | 0.712641 | 0.945821 |   |
| pth1rb     | 67.83949 | -0.539098137 | 0.308942 | -1.74498 | 0.080989 | 0.479801 |   |
| sulf2a     | 503.3421 | 0.07984142   | 0.160047 | 0.498861 | 0.617877 | 0.916478 |   |
| ddx61      | 1466.843 | 0.106615574  | 0.102499 | 1.04016  | 0.298266 | 0.765416 |   |
| aldh7a1    | 2068.003 | 0.09228401   | 0.116473 | 0.79232  | 0.428174 | 0.846133 |   |
| m6pr       | 345.1838 | -0.248685963 | 0.137193 | -1.81267 | 0.069882 | 0.450896 |   |
| hegl       | 123.802  | 0.090609843  | 0.217007 | 0.417544 | 0.67628  | 0.93557  |   |
| msrb2      | 605.3794 | -0.998841342 | 0.277741 | -3.59631 | 0.000323 | 0.020489 |   |
| mbn12      | 555.1896 | -0.022107794 | 0.130611 | -0.16926 | 0.865589 | 0.982364 |   |
| zgc:56095  | 908.2945 | -0.047491101 | 0.174166 | -0.27268 | 0.785101 | 0.962605 |   |
| pak2b      | 1076.927 | 0.055788851  | 0.08186  | 0.681515 | 0.495546 | 0.87806  |   |
| agxtb      | 3395.644 | -0.368631798 | 0.30983  | -1.18979 | 0.23413  | 0.714938 |   |
| cyp2v1     | 353.1269 | -0.391714382 | 0.170756 | -2.294   | 0.02179  | 0.261665 |   |
| pdia4      | 922.5098 | 0.185272534  | 0.166305 | 1.114052 | 0.265257 | 0.742063 |   |
| znf503     | 1048.149 | -0.013439369 | 0.108562 | -0.12379 | 0.901478 | 0.990643 |   |
| smn1       | 247.2894 | -0.121733533 | 0.217982 | -0.55846 | 0.576532 | 0.90475  |   |
| ftr06      | 0.753543 | 0.88883378   | 2.418357 | 0.367536 | 0.713219 | NA       |   |
| zdhhc8b    | 223.9049 | 0.023855628  | 0.153866 | 0.155041 | 0.876789 | 0.985052 |   |
| stk38b     | 158.9942 | -0.088307439 | 0.191371 | -0.46145 | 0.644479 | 0.926639 |   |
| or115-1    | 5.870648 | -0.634955397 | 1.264973 | -0.50195 | 0.615701 | 0.916365 |   |
| midn       | 1283.089 | -0.141652507 | 0.174918 | -0.80982 | 0.418042 | 0.841312 |   |
| lipf       | 1357.225 | -0.150990906 | 0.167954 | -0.899   | 0.368651 | 0.81746  |   |
| mapkapk2b  | 20.73591 | -2.493394706 | 0.833609 | -2.99108 | 0.00278  | 0.086456 |   |
| slc6a9     | 991.4709 | 0.015521172  | 0.145668 | 0.106551 | 0.915145 | 0.993066 |   |
| hapln4     | 24.92231 | -1.029705722 | 0.631547 | -1.63045 | 0.103007 | 0.530217 |   |
| ifih1      | 13.69559 | -1.26601098  | 0.669405 | -1.89125 | 0.058591 | 0.418278 |   |
| kdm7ab     | 317.9891 | -0.023438144 | 0.133128 | -0.17606 | 0.860249 | 0.980264 |   |
| cope       | 1532.675 | -0.049437191 | 0.137297 | -0.36007 | 0.718791 | 0.94694  |   |
| flnca      | 303.4977 | -0.064137024 | 0.192526 | -0.33314 | 0.739032 | 0.95338  |   |
| tnfrsfla   | 306.7687 | -0.059778765 | 0.170314 | -0.35099 | 0.725595 | 0.948653 |   |
| sf3b4      | 388.9342 | -0.082861343 | 0.142326 | -0.58219 | 0.560436 | 0.899928 |   |
| zgc:152658 | 2.191264 | -0.868195539 | 4.968163 | -0.17475 | 0.861275 | NA       |   |
| parp16     | 366.9373 | -0.094577341 | 0.143848 | -0.65748 | 0.51087  | 0.884206 |   |
| retsat     | 390.5333 | 0.196070623  | 0.133057 | 1.473578 | 0.140595 | 0.599658 |   |
| rab5aa     | 1314.211 | -0.007439347 | 0.085956 | -0.08655 | 0.931031 | 0.995809 |   |
| lxb1b      | 43.56072 | 0.597046273  | 0.341433 | 1.748649 | 0.080352 | 0.478844 |   |
| agtr1a     | 8.611582 | -0.843066653 | 0.554826 | -1.51952 | 0.128633 | 0.578162 |   |
| cpsf6      | 1487.195 | -0.009448559 | 0.101476 | -0.09311 | 0.925815 | 0.994815 |   |
| cers4b     | 49.03873 | -0.20705477  | 0.358035 | -0.57831 | 0.563055 | 0.90078  |   |
| slc6a19a.1 | 60.61924 | -0.931913089 | 0.785469 | -1.18644 | 0.235448 | 0.716581 |   |
| rad54l     | 172.3296 | 0.209695874  | 0.201322 | 1.041593 | 0.297601 | 0.765407 |   |
| arl5a      | 292.2844 | 0.068616463  | 0.1541   | 0.445272 | 0.656123 | 0.929684 |   |
| sec61g     | 2318.351 | -0.256466052 | 0.175964 | -1.45749 | 0.14498  | 0.604004 |   |
| igf2a      | 344.26   | -0.057811176 | 0.158225 | -0.36537 | 0.714834 | 0.945821 |   |

|                   |           |               |           |           |           |           |
|-------------------|-----------|---------------|-----------|-----------|-----------|-----------|
| gtpbp3            | 37. 52112 | 0. 717266295  | 0. 292163 | 2. 455018 | 0. 014088 | 0. 208027 |
| acot7             | 169. 0319 | 0. 443068431  | 0. 197651 | 2. 24167  | 0. 024983 | 0. 280179 |
| aar2              | 244. 5523 | -0. 476329942 | 0. 188745 | -2. 52367 | 0. 011614 | 0. 187517 |
| si:ch211-262i1. 4 | 0. 574772 | 3. 33904249   | 3. 176816 | 1. 051066 | 0. 293228 | NA        |
| saall             | 127. 9497 | -0. 365514534 | 0. 269722 | -1. 35515 | 0. 175369 | 0. 649279 |
| itga2b            | 7. 248333 | 1. 226671062  | 0. 960332 | 1. 277341 | 0. 201482 | 0. 68141  |
| elk3              | 354. 9329 | -0. 06128097  | 0. 169316 | -0. 36193 | 0. 717403 | 0. 946272 |
| phf2              | 535. 0679 | 0. 12877885   | 0. 112855 | 1. 141104 | 0. 253827 | 0. 732873 |
| cdh2              | 2198. 284 | 0. 006580146  | 0. 106265 | 0. 061922 | 0. 950625 | 0. 99801  |
| carml             | 1003. 39  | 0. 198372176  | 0. 118406 | 1. 675362 | 0. 093863 | 0. 511703 |
| dgkh              | 86. 03195 | -0. 081000202 | 0. 221247 | -0. 36611 | 0. 714285 | 0. 945821 |
| npnta             | 256. 5284 | 0. 367024507  | 0. 163522 | 2. 244502 | 0. 0248   | 0. 279131 |
| slco3a1           | 73. 84176 | -0. 166175079 | 0. 254098 | -0. 65398 | 0. 513124 | 0. 886055 |
| zw10              | 453. 0245 | 0. 026412356  | 0. 108301 | 0. 243879 | 0. 807324 | 0. 969736 |
| psme4b            | 898. 6161 | 0. 128524204  | 0. 144267 | 0. 890879 | 0. 372994 | 0. 820208 |
| scamp5a           | 106. 147  | 0. 182048488  | 0. 251726 | 0. 723201 | 0. 469556 | 0. 867224 |
| prl2              | 9. 737671 | 2. 862912915  | 0. 791048 | 3. 619141 | 0. 000296 | 0. 019346 |
| npr1b             | 97. 58243 | -0. 392107761 | 0. 249807 | -1. 56965 | 0. 116498 | 0. 557474 |
| klf5l             | 250. 8174 | -0. 272795477 | 0. 158289 | -1. 7234  | 0. 084816 | 0. 488883 |
| pknox1. 1         | 379. 8097 | -0. 060122428 | 0. 123377 | -0. 48731 | 0. 626042 | 0. 920625 |
| hivep2b           | 35. 27892 | -0. 229086338 | 0. 40512  | -0. 56548 | 0. 571749 | 0. 903234 |
| kdm4aa            | 370. 5621 | 0. 086089477  | 0. 199155 | 0. 432273 | 0. 665543 | 0. 932606 |
| efnalb            | 503. 0449 | -0. 092262555 | 0. 122915 | -0. 75062 | 0. 452881 | 0. 858256 |
| st8sia2           | 17. 67498 | 0. 255811787  | 0. 599334 | 0. 426826 | 0. 669506 | 0. 93336  |
| crygmx11          | 61. 43522 | -0. 794864088 | 0. 435907 | -1. 82347 | 0. 068232 | 0. 445546 |
| abhd3             | 96. 37231 | 1. 089452898  | 0. 302693 | 3. 599203 | 0. 000319 | 0. 020374 |
| esrp2             | 604. 3683 | -0. 042001242 | 0. 141738 | -0. 29633 | 0. 766978 | 0. 960296 |
| bdnf              | 173. 3133 | 0. 519799598  | 0. 221511 | 2. 346608 | 0. 018945 | 0. 242378 |
| flnclb            | 660. 9403 | -0. 036963343 | 0. 266319 | -0. 13879 | 0. 889613 | 0. 988318 |
| tmem248           | 107. 6467 | -0. 08430344  | 0. 177005 | -0. 47628 | 0. 633877 | 0. 923974 |
| trpc4apa          | 764. 6348 | 0. 010617743  | 0. 079066 | 0. 134289 | 0. 893174 | 0. 988566 |
| dgat2             | 322. 4493 | 0. 212370356  | 0. 289711 | 0. 733042 | 0. 463533 | 0. 864593 |
| si:dkey-199f5. 8  | 609. 6864 | 0. 131741578  | 0. 116814 | 1. 127792 | 0. 259408 | 0. 736127 |
| scaf4b            | 413. 2328 | 0. 102101725  | 0. 11885  | 0. 859078 | 0. 390298 | 0. 827902 |
| dclk1a            | 280. 7589 | 0. 208310383  | 0. 230555 | 0. 903517 | 0. 366252 | 0. 81589  |
| henmt1            | 18. 9112  | -0. 491116153 | 0. 457863 | -1. 07263 | 0. 283438 | 0. 755095 |
| apobec2a          | 477. 7813 | 0. 081697839  | 0. 207233 | 0. 394232 | 0. 69341  | 0. 940668 |
| jak2b             | 682. 1233 | -0. 135123016 | 0. 109853 | -1. 23003 | 0. 218686 | 0. 699445 |
| snrpa             | 904. 5109 | -0. 131795038 | 0. 09724  | -1. 35536 | 0. 175303 | 0. 649279 |
| rnaseh2a          | 315. 1167 | -0. 015422686 | 0. 17656  | -0. 08735 | 0. 930393 | 0. 995707 |
| mmp24             | 66. 87942 | 0. 315983225  | 0. 256232 | 1. 23319  | 0. 217505 | 0. 69815  |
| zfand5a           | 1474. 841 | -0. 050435323 | 0. 146439 | -0. 34441 | 0. 730537 | 0. 950056 |
| pes               | 698. 6872 | -0. 091262607 | 0. 151651 | -0. 60179 | 0. 547313 | 0. 896137 |
| aimp2             | 2001. 12  | -0. 289705763 | 0. 149605 | -1. 93647 | 0. 05281  | 0. 399532 |
| cstf3             | 1229. 6   | -0. 10372605  | 0. 099728 | -1. 04009 | 0. 2983   | 0. 765416 |
| kat6a             | 1043. 917 | 0. 233558595  | 0. 146782 | 1. 591195 | 0. 111566 | 0. 547433 |
| hnrnpk            | 1750. 464 | -0. 07252555  | 0. 099461 | -0. 72919 | 0. 465886 | 0. 86502  |
| rad17             | 144. 3477 | 0. 038058429  | 0. 157517 | 0. 241615 | 0. 809078 | 0. 969828 |
| lratd1            | 279. 5609 | -0. 214759659 | 0. 135144 | -1. 58912 | 0. 112034 | 0. 548404 |
| fat2              | 266. 9664 | 0. 252718739  | 0. 225576 | 1. 120326 | 0. 262575 | 0. 740129 |
| zcehc17           | 201. 6623 | 0. 132769121  | 0. 127823 | 1. 038695 | 0. 298947 | 0. 765877 |
| hogal             | 366. 7811 | 0. 225855697  | 0. 161862 | 1. 395359 | 0. 162908 | 0. 630534 |
| gclm              | 375. 2698 | -0. 115225345 | 0. 15264  | -0. 75488 | 0. 450318 | 0. 857151 |
| tmem39b           | 221. 4647 | -0. 416409575 | 0. 160912 | -2. 58781 | 0. 009659 | 0. 16916  |

|                 |          |              |          |          |          |          |
|-----------------|----------|--------------|----------|----------|----------|----------|
| nrarpb          | 221.9063 | -0.037021667 | 0.187982 | -0.19694 | 0.843873 | 0.976791 |
| gtpbp4          | 7468.104 | -0.479809268 | 0.143631 | -3.34058 | 0.000836 | 0.039213 |
| cyb5r1          | 340.7898 | -0.162232155 | 0.159113 | -1.0196  | 0.307918 | 0.772996 |
| gabrr1a         | 24.47927 | 0.177871895  | 0.322873 | 0.550904 | 0.581699 | 0.905618 |
| acvrlba         | 1171.332 | -0.073286353 | 0.114919 | -0.63772 | 0.523653 | 0.888628 |
| b3gnt5a         | 610.1656 | -0.059524805 | 0.147505 | -0.40354 | 0.686548 | 0.938732 |
| clptml          | 910.2607 | 0.06980009   | 0.084642 | 0.824646 | 0.409573 | 0.836787 |
| sptlc2a         | 298.1327 | -0.237651707 | 0.160411 | -1.48151 | 0.138469 | 0.595018 |
| zgc:91890       | 126.1881 | -0.009785615 | 0.195367 | -0.05009 | 0.960052 | 0.999164 |
| eya2            | 548.729  | -0.011011734 | 0.117047 | -0.09408 | 0.925046 | 0.994815 |
| castor2         | 1422.874 | -0.173192676 | 0.143573 | -1.2063  | 0.2277   | 0.708829 |
| hspa4b          | 1894.168 | 0.044151383  | 0.099963 | 0.441678 | 0.658722 | 0.930581 |
| cplx21          | 996.0052 | 0.364461692  | 0.18617  | 1.957683 | 0.050267 | 0.390574 |
| smc3            | 1914.906 | 0.139486041  | 0.102939 | 1.355042 | 0.175404 | 0.649279 |
| ak7a            | 69.96043 | 0.23888768   | 0.24336  | 0.981622 | 0.326286 | 0.785215 |
| smarcd1         | 1413.206 | -0.051834666 | 0.099136 | -0.52286 | 0.601069 | 0.913756 |
| erp44           | 1192.196 | 0.168595969  | 0.106303 | 1.586001 | 0.112739 | 0.549875 |
| barhl1b         | 181.1312 | 0.350002375  | 0.163586 | 2.139556 | 0.032391 | 0.319256 |
| podn            | 9.421329 | 0.359561351  | 1.078143 | 0.333501 | 0.738756 | 0.953168 |
| tmem59          | 1140.235 | -0.139412947 | 0.113495 | -1.22836 | 0.219311 | 0.700266 |
| sgsm3           | 468.1321 | -0.074327259 | 0.134718 | -0.55173 | 0.581136 | 0.905618 |
| snx12           | 1515.542 | 0.027363215  | 0.087232 | 0.313682 | 0.753762 | 0.955912 |
| arpc5b          | 760.4945 | -0.058572223 | 0.127815 | -0.45826 | 0.646768 | 0.926728 |
| fat1b           | 113.4733 | -0.388197742 | 0.264151 | -1.46961 | 0.141668 | 0.600284 |
| DHDH            | 844.7556 | -0.319404957 | 0.141579 | -2.25602 | 0.024069 | 0.274857 |
| si:ch73-160i9.2 | 4.166079 | -0.893038955 | 1.133529 | -0.78784 | 0.43079  | 0.847629 |
| myl7            | 820.9849 | -0.014803947 | 0.183121 | -0.08084 | 0.935567 | 0.996829 |
| cd82a           | 1897.722 | 0.086322382  | 0.19825  | 0.435422 | 0.663256 | 0.93126  |
| kdm4ab          | 472.6599 | -0.136593606 | 0.14371  | -0.95048 | 0.341869 | 0.796651 |
| mob3a           | 462.1981 | -0.152231386 | 0.135819 | -1.12084 | 0.262358 | 0.73998  |
| ing1            | 234.3674 | 0.012921184  | 0.14347  | 0.090062 | 0.928238 | 0.995052 |
| parvb           | 853.4713 | -0.102400677 | 0.124756 | -0.82081 | 0.411757 | 0.83798  |
| he1.2           | 1764.76  | -0.989115281 | 0.452802 | -2.18443 | 0.02893  | 0.3029   |
| klhl140b        | 97.31541 | -0.047897524 | 0.33495  | -0.143   | 0.886291 | 0.987533 |
| tpm4b           | 877.6936 | -0.490493349 | 0.112696 | -4.35237 | 1.35E-05 | 0.002278 |
| plk2b           | 402.694  | -0.229886978 | 0.157772 | -1.45708 | 0.145094 | 0.604004 |
| ankefla         | 18.09942 | 0.102961995  | 0.375807 | 0.273976 | 0.784103 | 0.962605 |
| tram1           | 748.1281 | 0.111731044  | 0.120584 | 0.926583 | 0.354143 | 0.80525  |
| fam185a         | 108.9754 | -0.181136379 | 0.220541 | -0.82133 | 0.411459 | 0.837797 |
| rab4a           | 184.6028 | -0.005311593 | 0.151655 | -0.03502 | 0.97206  | 1        |
| haus5           | 111.3321 | 0.51975959   | 0.271769 | 1.912507 | 0.055811 | 0.408826 |
| sh3bp51a        | 212.3461 | 0.080777306  | 0.12748  | 0.633647 | 0.526311 | 0.88947  |
| lritla          | 112.6749 | 1.33914943   | 0.627751 | 2.133251 | 0.032904 | 0.321141 |
| rpsa            | 54981.12 | -0.263470053 | 0.123076 | -2.14071 | 0.032298 | 0.318811 |
| slainla         | 107.1167 | 0.521546781  | 0.206094 | 2.530625 | 0.011386 | 0.185262 |
| 12-Sep          | 629.6072 | 0.131544049  | 0.13167  | 0.999045 | 0.317773 | 0.779627 |
| vps9d1          | 237.1982 | 0.127579711  | 0.160529 | 0.794744 | 0.426762 | 0.845352 |
| fam120c         | 815.8741 | -0.002435745 | 0.171577 | -0.0142  | 0.988673 | 1        |
| abo             | 5.798164 | 1.709931327  | 1.13622  | 1.50493  | 0.132342 | 0.585048 |
| camsapla        | 250.2273 | 0.211105613  | 0.221018 | 0.95515  | 0.339502 | 0.795226 |
| CTBP1           | 717.203  | 0.19091314   | 0.111862 | 1.706679 | 0.087882 | 0.497853 |
| mrpl24          | 422.5661 | 0.232643325  | 0.132817 | 1.751602 | 0.079842 | 0.478112 |
| arglula         | 1500.995 | 0.049525614  | 0.159887 | 0.309754 | 0.756748 | 0.95667  |
| mogat2          | 94.64698 | -0.866914972 | 0.469686 | -1.84573 | 0.064931 | 0.434811 |

|                |          |              |          |          |          |          |
|----------------|----------|--------------|----------|----------|----------|----------|
| rpl7a          | 60163.15 | -0.352698818 | 0.129164 | -2.73064 | 0.006321 | 0.134501 |
| sptan1         | 4481.106 | 0.022067936  | 0.135217 | 0.163203 | 0.870358 | 0.983365 |
| nln            | 162.1989 | -0.276740118 | 0.22276  | -1.24233 | 0.214116 | 0.696474 |
| sema3aa        | 996.0365 | 0.232266993  | 0.118729 | 1.956275 | 0.050433 | 0.39074  |
| gsr            | 487.6955 | 0.149198403  | 0.146384 | 1.019227 | 0.308095 | 0.773116 |
| culla          | 877.0396 | -0.005265056 | 0.090195 | -0.05837 | 0.953451 | 0.998436 |
| fancf          | 46.25018 | 0.369827024  | 0.296115 | 1.248931 | 0.21169  | 0.693267 |
| rhag           | 5313.873 | -0.365726014 | 0.143238 | -2.55327 | 0.010672 | 0.179908 |
| dhrrs9         | 207.4717 | 0.215182893  | 0.235441 | 0.913958 | 0.360739 | 0.811253 |
| zbtb39         | 125.0795 | -0.329836001 | 0.223735 | -1.47423 | 0.140421 | 0.599512 |
| rasd1          | 504.8871 | -0.203925893 | 0.2057   | -0.99138 | 0.321502 | 0.781986 |
| GNB4           | 135.9644 | 0.003539123  | 0.179995 | 0.019662 | 0.984313 | 1        |
| larsb          | 558.2914 | 0.078649215  | 0.134563 | 0.584477 | 0.558899 | 0.899409 |
| tfdpla         | 655.3903 | 0.023644096  | 0.117843 | 0.200641 | 0.840979 | 0.97643  |
| cbln8          | 247.4698 | -3.084090902 | 1.39705  | -2.20757 | 0.027274 | 0.293515 |
| znf687b        | 506.8099 | -0.1415929   | 0.112164 | -1.26237 | 0.206816 | 0.689189 |
| ints7          | 191.9567 | 0.196080895  | 0.154942 | 1.265513 | 0.205688 | 0.687948 |
| midlip1b       | 1333.234 | 0.263057838  | 0.138976 | 1.892824 | 0.058381 | 0.417756 |
| phactr3b       | 249.8323 | 0.302350447  | 0.179851 | 1.681116 | 0.09274  | 0.509444 |
| dusp5          | 135.6192 | 0.068442588  | 0.287409 | 0.238137 | 0.811775 | 0.97012  |
| fbxo30b        | 82.12962 | -0.203159206 | 0.238014 | -0.85356 | 0.393349 | 0.828374 |
| rab39ba        | 130.3877 | 0.288472382  | 0.218859 | 1.318074 | 0.187479 | 0.666343 |
| fer116         | 42.06673 | 0.51562999   | 0.332787 | 1.549429 | 0.121279 | 0.567338 |
| prpsap2        | 602.9462 | -0.085490324 | 0.133632 | -0.63974 | 0.52234  | 0.887826 |
| plxna4         | 658.6098 | 0.239247077  | 0.121822 | 1.963915 | 0.04954  | 0.387714 |
| ndufb4         | 0.703826 | -0.796210895 | 2.556718 | -0.31142 | 0.755482 | NA       |
| hes6           | 461.4575 | 0.122144564  | 0.20622  | 0.592303 | 0.553648 | 0.898195 |
| adprh12        | 248.6415 | -0.006098612 | 0.220165 | -0.0277  | 0.977901 | 1        |
| uxt            | 142.5969 | -0.380429527 | 0.237074 | -1.60469 | 0.108563 | 0.541057 |
| gpcla          | 110.0657 | 0.168956979  | 0.209539 | 0.806328 | 0.420054 | 0.842383 |
| chrnd          | 330.8024 | 0.054961755  | 0.173091 | 0.317531 | 0.750841 | 0.955074 |
| mark3a         | 730.1916 | 0.138153579  | 0.11268  | 1.226069 | 0.220173 | 0.701416 |
| sparc          | 18608.24 | 0.027563753  | 0.157558 | 0.174944 | 0.861124 | 0.980406 |
| coa7           | 173.7108 | -0.203410121 | 0.196318 | -1.03613 | 0.300144 | 0.766629 |
| fabpla         |          | 0 NA         | NA       | NA       | NA       | NA       |
| sec23b         | 1131.385 | -0.047661588 | 0.248772 | -0.19159 | 0.848065 | 0.977839 |
| ptbpla         | 1095.597 | -0.04013152  | 0.115895 | -0.34627 | 0.729137 | 0.949983 |
| mbip           | 159.3937 | -0.041336389 | 0.192225 | -0.21504 | 0.829735 | 0.974816 |
| krt99          | 159.5943 | -0.514259653 | 0.218441 | -2.35422 | 0.018562 | 0.241071 |
| tgfb3          | 770.7343 | 0.028637661  | 0.137441 | 0.208363 | 0.834946 | 0.975994 |
| flt1           | 113.5947 | 0.033286737  | 0.218422 | 0.152396 | 0.878875 | 0.985841 |
| cdc42bpb       | 1273.607 | -0.015007782 | 0.132076 | -0.11363 | 0.909531 | 0.99213  |
| stat5a         | 108.5518 | 0.110928557  | 0.287342 | 0.38605  | 0.69946  | 0.942499 |
| rergla         | 98.69066 | -1.289434464 | 0.413908 | -3.11527 | 0.001838 | 0.065916 |
| psma6a         | 1184.105 | 0.137641309  | 0.153537 | 0.896471 | 0.370001 | 0.818446 |
| atp5fld        | 4347.154 | 0.062025072  | 0.111763 | 0.554969 | 0.578916 | 0.905417 |
| zgc:63470      | 363.4966 | 0.159429794  | 0.137345 | 1.160799 | 0.245724 | 0.727177 |
| gadd45ga       | 445.0377 | -0.047509799 | 0.179495 | -0.26469 | 0.791252 | 0.964766 |
| kcnj2a         | 68.42594 | 0.582377475  | 0.25467  | 2.286789 | 0.022208 | 0.263608 |
| etnk1          | 961.8611 | -0.658525815 | 0.278257 | -2.36661 | 0.017952 | 0.2367   |
| trioa          | 409.1494 | 0.086387453  | 0.203219 | 0.425096 | 0.670767 | 0.933939 |
| rnf13          | 749.3248 | -0.263491139 | 0.153607 | -1.71535 | 0.08628  | 0.493048 |
| CABZ01086041.1 | 51.4192  | 0.090616085  | 0.371957 | 0.24362  | 0.807525 | 0.969736 |
| ssr4           | 3748.321 | 0.143320624  | 0.139688 | 1.026004 | 0.30489  | 0.770035 |

|            |           |               |           |           |           |           |
|------------|-----------|---------------|-----------|-----------|-----------|-----------|
| pcsk2      | 88. 51426 | 0. 496461812  | 0. 282089 | 1. 759948 | 0. 078417 | 0. 474337 |
| tfe3b      | 61. 88525 | 0. 444433477  | 0. 343824 | 1. 292621 | 0. 196142 | 0. 676562 |
| elf2a      | 366. 251  | -0. 103656194 | 0. 145862 | -0. 71064 | 0. 477305 | 0. 869292 |
| zdhhc7     | 62. 82959 | 0. 084515329  | 0. 236086 | 0. 357986 | 0. 720354 | 0. 947199 |
| tmx1       | 214. 245  | 0. 037474137  | 0. 176827 | 0. 211925 | 0. 832166 | 0. 975013 |
| shbg       | 229. 1751 | -2. 091538599 | 0. 489482 | -4. 27297 | 1. 93E-05 | 0. 002811 |
| esd        | 1190. 678 | -0. 041191886 | 0. 140925 | -0. 2923  | 0. 770061 | 0. 960484 |
| cry5       | 399. 9955 | -0. 070655772 | 0. 292393 | -0. 24165 | 0. 809054 | 0. 969828 |
| pcnx3      | 60. 46444 | -0. 642590893 | 0. 263853 | -2. 43541 | 0. 014875 | 0. 213725 |
| zgc:103759 | 24. 09135 | 0. 369550645  | 0. 410934 | 0. 899295 | 0. 368495 | 0. 817272 |
| mcm5       | 849. 519  | -0. 061724154 | 0. 219903 | -0. 28069 | 0. 77895  | 0. 961073 |
| sp7        | 112. 9397 | 0. 316792178  | 0. 234653 | 1. 350046 | 0. 177001 | 0. 650558 |
| mpx        | 307. 2436 | 0. 035478372  | 0. 234936 | 0. 151013 | 0. 879966 | 0. 986348 |
| tbcelb     | 175. 0784 | 0. 098318533  | 0. 184151 | 0. 533903 | 0. 593409 | 0. 910427 |
| agfg1b     | 249. 302  | 0. 027523082  | 0. 152139 | 0. 180907 | 0. 85644  | 0. 979558 |
| parp1      | 773. 563  | 0. 029954867  | 0. 140822 | 0. 212715 | 0. 83155  | 0. 974908 |
| hdgf12     | 552. 4303 | 0. 100264677  | 0. 126594 | 0. 79202  | 0. 428349 | 0. 846133 |
| fads2      | 215. 4971 | 0. 919081157  | 0. 290141 | 3. 167707 | 0. 001536 | 0. 05933  |
| gpt21      | 1600. 004 | -0. 309632518 | 0. 155835 | -1. 98693 | 0. 046931 | 0. 377563 |
| cds1       | 140. 2291 | 0. 038780719  | 0. 199518 | 0. 194372 | 0. 845884 | 0. 977039 |
| clcn7      | 337. 3256 | -0. 215150527 | 0. 125564 | -1. 71348 | 0. 086625 | 0. 493145 |
| asap2b     | 531. 1498 | 0. 048205701  | 0. 120899 | 0. 398726 | 0. 690095 | 0. 939785 |
| neurod1    | 1343. 945 | 0. 033914447  | 0. 191199 | 0. 177378 | 0. 859211 | 0. 979975 |
| taf7       | 730. 0909 | -0. 100020297 | 0. 122586 | -0. 81592 | 0. 414547 | 0. 838683 |
| ldb2a      | 451. 723  | -0. 02022712  | 0. 232724 | -0. 08691 | 0. 930739 | 0. 995809 |
| usol       | 953. 1234 | -0. 219960359 | 0. 112409 | -1. 95679 | 0. 050372 | 0. 390726 |
| gstk2      | 1. 245207 | 1. 60801865   | 1. 987502 | 0. 809065 | 0. 418478 | NA        |
| chico      | 77. 89072 | -0. 095038247 | 0. 229531 | -0. 41405 | 0. 678834 | 0. 936051 |
| igl4v9     | 0 NA      | NA            | NA        | NA        | NA        | NA        |
| senp8      | 36. 49455 | -0. 60796505  | 0. 293139 | -2. 07398 | 0. 038081 | 0. 342345 |
| nrd1a      | 808. 9234 | 0. 234862389  | 0. 112907 | 2. 080142 | 0. 037512 | 0. 340049 |
| coll2a1b   | 1255. 031 | 0. 184732446  | 0. 222429 | 0. 830523 | 0. 406243 | 0. 834645 |
| ip6k2b     | 1222. 255 | -0. 034769554 | 0. 164937 | -0. 21081 | 0. 833039 | 0. 975379 |
| jade3      | 292. 1599 | -0. 069204189 | 0. 168637 | -0. 41037 | 0. 681533 | 0. 937418 |
| yif1a      | 447. 891  | -0. 12479629  | 0. 141051 | -0. 88476 | 0. 376285 | 0. 822258 |
| ldhba      | 20218. 17 | 0. 038627624  | 0. 15162  | 0. 254766 | 0. 798903 | 0. 966962 |
| twist3     | 239. 2741 | -0. 12885297  | 0. 157507 | -0. 81808 | 0. 413313 | 0. 838317 |
| zgc:162239 | 2. 045405 | -0. 281911321 | 1. 192495 | -0. 2364  | 0. 813119 | NA        |
| pou2f2a    | 120. 9215 | 0. 075641419  | 0. 17924  | 0. 422011 | 0. 673017 | 0. 93414  |
| rxfp2b     | 5. 925421 | 1. 706136246  | 1. 104976 | 1. 544048 | 0. 122577 | 0. 569468 |
| fgl2b      | 70. 60414 | -1. 801326203 | 1. 39887  | -1. 2877  | 0. 19785  | 0. 678554 |
| colq       | 102. 1962 | 0. 497626188  | 0. 232491 | 2. 140413 | 0. 032321 | 0. 318811 |
| clcn5a     | 630. 2315 | -0. 189945723 | 0. 131729 | -1. 44194 | 0. 149319 | 0. 611148 |
| aldocb     | 4406. 35  | 0. 219764842  | 0. 242975 | 0. 904477 | 0. 365743 | 0. 815695 |
| zar1       | 9. 269098 | -1. 883282874 | 0. 723631 | -2. 60255 | 0. 009253 | 0. 165407 |
| spout1     | 129. 0025 | -0. 142933448 | 0. 178414 | -0. 80113 | 0. 423055 | 0. 843894 |
| rhous      | 114. 0154 | -0. 112568387 | 0. 198537 | -0. 56699 | 0. 570721 | 0. 902481 |
| oatx       | 131. 4919 | 0. 016859926  | 0. 243675 | 0. 06919  | 0. 944838 | 0. 997371 |
| metap1d    | 120. 1789 | -0. 51788245  | 0. 203419 | -2. 54589 | 0. 0109   | 0. 181956 |
| pbx2       | 1061. 367 | 0. 000235549  | 0. 09663  | 0. 002438 | 0. 998055 | 1         |
| celsr2     | 351. 608  | 0. 250671461  | 0. 203729 | 1. 230414 | 0. 218542 | 0. 699445 |
| bmpr1aa    | 934. 8876 | 0. 130947274  | 0. 111031 | 1. 179375 | 0. 238249 | 0. 719242 |
| mtch2      | 1123. 834 | 0. 013771295  | 0. 116847 | 0. 117858 | 0. 90618  | 0. 991631 |
| ccndx      | 37. 36563 | -0. 163205397 | 0. 272638 | -0. 59862 | 0. 549429 | 0. 897192 |



|                   |          |              |          |          |          |          |
|-------------------|----------|--------------|----------|----------|----------|----------|
| tlr4ba            | 3.992041 | -0.543819133 | 0.957129 | -0.56818 | 0.569915 | 0.902322 |
| dctn1a            | 181.2854 | 0.373246646  | 0.190966 | 1.954523 | 0.050639 | 0.391589 |
| rfng              | 200.6957 | -0.303191396 | 0.190063 | -1.59521 | 0.110665 | 0.545461 |
| hsd3b2            | 12.03726 | -0.701324126 | 0.533795 | -1.31385 | 0.188898 | 0.668515 |
| romla             | 298.6521 | 0.090434315  | 0.66336  | 0.136328 | 0.891562 | 0.988566 |
| kcnn3             | 218.3835 | -0.002101064 | 0.211865 | -0.00992 | 0.992088 | 1        |
| acp5a             | 274.618  | -1.173500214 | 0.44914  | -2.61277 | 0.008981 | 0.162446 |
| zgc:158803        | 777.9843 | -0.182819116 | 0.180242 | -1.0143  | 0.310439 | 0.775146 |
| si:ch1073-280e3.1 | 55.49763 | -0.301404165 | 0.467842 | -0.64424 | 0.519417 | 0.887148 |
| zhx3              | 352.6445 | -0.238388924 | 0.181088 | -1.31643 | 0.18803  | 0.667313 |
| rps6              | 38397.33 | -0.431713055 | 0.114108 | -3.78338 | 0.000155 | 0.012534 |
| imp2a             | 30.68766 | -0.183939629 | 0.981613 | -0.18739 | 0.851359 | 0.978548 |
| prmt3             | 324.2656 | -0.068364197 | 0.194202 | -0.35203 | 0.724818 | 0.948548 |
| qrich1            | 244.8141 | 0.206402152  | 0.170635 | 1.209615 | 0.226427 | 0.707798 |
| evpla             | 636.1788 | -0.169747889 | 0.145467 | -1.16691 | 0.243245 | 0.72442  |
| nfe2l3            | 422.7119 | 0.138536122  | 0.143712 | 0.963986 | 0.335053 | 0.79185  |
| fnla              | 1106.031 | -0.080399593 | 0.217721 | -0.36928 | 0.71192  | 0.945821 |
| edrf1             | 199.7634 | 0.034424362  | 0.167241 | 0.205837 | 0.836918 | 0.976007 |
| nkx2.1            | 74.50862 | 0.557538755  | 0.26064  | 2.139115 | 0.032426 | 0.319303 |
| ugdh              | 626.7063 | 0.036622421  | 0.157398 | 0.232673 | 0.816015 | 0.971207 |
| cnot3b            | 399.0537 | 0.13735931   | 0.130155 | 1.055355 | 0.291263 | 0.761431 |
| pdlim1            | 934.5564 | -0.151396985 | 0.108319 | -1.39769 | 0.162206 | 0.629748 |
| atplalb           | 2973.22  | 0.265413157  | 0.176375 | 1.504827 | 0.132369 | 0.585048 |
| fgl2a             | 104.7322 | -0.551026539 | 0.297357 | -1.85308 | 0.063871 | 0.431455 |
| hsph1             | 41.04326 | 0.207585496  | 0.325768 | 0.637219 | 0.523982 | 0.888694 |
| rbks              | 87.64406 | -0.215307515 | 0.197769 | -1.08868 | 0.276295 | 0.750674 |
| bsg               | 8091.311 | -0.103302128 | 0.1095   | -0.9434  | 0.345478 | 0.79876  |
| gpat4             | 555.1359 | 0.082074474  | 0.127614 | 0.643145 | 0.52013  | 0.887148 |
| rcvrn2            | 2224.955 | -0.183193869 | 0.22696  | -0.80717 | 0.419571 | 0.842383 |
| dsccl             | 84.24868 | 0.186553717  | 0.263272 | 0.708596 | 0.478575 | 0.869292 |
| epb4l13b          | 2481.099 | -0.35897837  | 0.158286 | -2.26791 | 0.023335 | 0.270061 |
| lft1              | 0.653229 | 1.882458892  | 2.544082 | 0.739936 | 0.459339 | NA       |
| cmpk              | 1133.252 | 0.045576018  | 0.12097  | 0.376754 | 0.706356 | 0.944623 |
| tall              | 351.6681 | 0.007600537  | 0.117761 | 0.064542 | 0.948539 | 0.997738 |
| slc5a11           | 27.25576 | 1.079887574  | 1.305205 | 0.82737  | 0.408027 | 0.835879 |
| sgta              | 1178.699 | 0.056926898  | 0.116901 | 0.486966 | 0.626282 | 0.92063  |
| ptrprdb           | 88.83751 | 0.503154094  | 0.24738  | 2.033932 | 0.041958 | 0.35834  |
| serpinh1b         | 2037.988 | 0.442129059  | 0.530528 | 0.833376 | 0.404633 | 0.834253 |
| carf              | 220.3587 | 0.137241173  | 0.177326 | 0.773949 | 0.438961 | 0.852034 |
| sec62             | 829.1163 | -0.223419421 | 0.09002  | -2.48189 | 0.013069 | 0.198789 |
| znf513a           | 265.5749 | -0.086478927 | 0.122486 | -0.70603 | 0.480169 | 0.870001 |
| dopla             | 373.3076 | -0.059077818 | 0.137772 | -0.42881 | 0.668062 | 0.933086 |
| sfxn1             | 63.82657 | 0.261815149  | 0.254642 | 1.028169 | 0.30387  | 0.769473 |
| smarcd3b          | 526.1681 | 0.018916263  | 0.135252 | 0.139859 | 0.888771 | 0.988188 |
| stk38a            | 133.649  | 0.413903901  | 0.2073   | 1.996637 | 0.045865 | 0.374848 |
| idil              | 1154.491 | -0.219399382 | 0.144823 | -1.51494 | 0.129786 | 0.579886 |
| grhprb            | 2729.976 | -0.294632027 | 0.216466 | -1.3611  | 0.173483 | 0.64634  |
| cabpla            | 48.65807 | 0.438425662  | 0.339261 | 1.292294 | 0.196255 | 0.676773 |
| bmp4              | 455.1228 | -0.030733455 | 0.120346 | -0.25537 | 0.798434 | 0.966698 |
| slc30a7           | 457.0511 | -0.16026853  | 0.13013  | -1.2316  | 0.218098 | 0.69923  |
| sh3bp4a           | 355.7997 | 0.110729912  | 0.128106 | 0.864363 | 0.387389 | 0.827592 |
| rad23aa           | 421.8455 | -0.310647095 | 0.143814 | -2.16006 | 0.030768 | 0.312673 |
| colla2            | 12510.75 | 0.124130474  | 0.155014 | 0.800769 | 0.423265 | 0.843894 |
| vcp               | 5462.036 | 0.235029288  | 0.112056 | 2.097434 | 0.035955 | 0.332966 |

|                    |           |               |           |           |           |           |
|--------------------|-----------|---------------|-----------|-----------|-----------|-----------|
| bmp2k              | 344. 5129 | 0. 048471307  | 0. 151899 | 0. 319101 | 0. 74965  | 0. 955074 |
| mrps33             | 303. 4308 | 0. 229784206  | 0. 162012 | 1. 418314 | 0. 156099 | 0. 621751 |
| fam151b            | 86. 68512 | 0. 173494799  | 0. 252781 | 0. 686343 | 0. 492497 | 0. 876385 |
| cps1               | 65. 42921 | 0. 069698002  | 0. 354175 | 0. 19679  | 0. 843992 | 0. 976791 |
| cldn11a            | 571. 4148 | 0. 262412313  | 0. 186617 | 1. 406157 | 0. 159678 | 0. 625998 |
| vps35l             | 528. 2315 | -0. 018022809 | 0. 111209 | -0. 16206 | 0. 871257 | 0. 983365 |
| cnot8              | 494. 7199 | -0. 007557768 | 0. 116986 | -0. 0646  | 0. 948489 | 0. 997738 |
| ahrla              | 4. 213779 | 2. 022887374  | 1. 574688 | 1. 284627 | 0. 198923 | 0. 679593 |
| nkd1               | 721. 8261 | -0. 070732668 | 0. 118673 | -0. 59603 | 0. 551154 | 0. 8974   |
| aox6               | 152. 5815 | -0. 245043011 | 0. 195734 | -1. 25192 | 0. 2106   | 0. 692339 |
| bmpr2b             | 147. 9576 | 0. 028391192  | 0. 233792 | 0. 121438 | 0. 903344 | 0. 99133  |
| thbs4b             | 3381. 117 | -0. 271902405 | 0. 130423 | -2. 08478 | 0. 03709  | 0. 337668 |
| nol10              | 415. 2923 | 0. 011853302  | 0. 162106 | 0. 07312  | 0. 94171  | 0. 997371 |
| neil3              | 62. 04067 | -0. 246140077 | 0. 425436 | -0. 57856 | 0. 562886 | 0. 900772 |
| ek1                | 128. 8092 | 0. 287417179  | 0. 206256 | 1. 393494 | 0. 16347  | 0. 631479 |
| tg                 | 223. 2911 | 0. 048431369  | 0. 390031 | 0. 124173 | 0. 901178 | 0. 990512 |
| slc33a1            | 181. 012  | -0. 103899243 | 0. 167181 | -0. 62148 | 0. 534285 | 0. 891573 |
| nuak1a             | 235. 481  | -0. 089027589 | 0. 258149 | -0. 34487 | 0. 730193 | 0. 950056 |
| psmc2              | 2043. 627 | 0. 210175351  | 0. 138045 | 1. 522518 | 0. 127879 | 0. 577117 |
| kctd16b            | 21. 4814  | 1. 480766021  | 0. 621238 | 2. 383574 | 0. 017145 | 0. 231774 |
| usp2a              | 1911. 34  | 0. 022475528  | 0. 140611 | 0. 159841 | 0. 873006 | 0. 983537 |
| slc20a1a           | 243. 8535 | 0. 007535715  | 0. 194579 | 0. 038728 | 0. 969107 | 1         |
| endou2             | 213. 9412 | 0. 691097845  | 0. 240929 | 2. 868467 | 0. 004125 | 0. 106542 |
| coq8aa             | 1412. 383 | -0. 578409891 | 0. 126018 | -4. 5899  | 4. 43E-06 | 0. 000979 |
| fnbp11             | 481. 1418 | -0. 037523109 | 0. 108306 | -0. 34645 | 0. 729001 | 0. 949983 |
| jdp2b              | 119. 2256 | -0. 006191651 | 0. 583434 | -0. 01061 | 0. 991533 | 1         |
| sipal11            | 382. 9245 | -0. 065362819 | 0. 131181 | -0. 49826 | 0. 618299 | 0. 916585 |
| ptges              | 114. 7949 | -0. 431581832 | 0. 22145  | -1. 94889 | 0. 051309 | 0. 394059 |
| pah                | 2376. 736 | -0. 23354688  | 0. 176946 | -1. 31988 | 0. 186876 | 0. 665301 |
| acox1              | 27. 16341 | 0. 411024984  | 0. 342952 | 1. 198491 | 0. 230726 | 0. 71241  |
| spag6              | 51. 97965 | 0. 157196676  | 0. 267949 | 0. 586666 | 0. 557428 | 0. 899184 |
| efnb2a             | 856. 463  | 0. 33873766   | 0. 13472  | 2. 51439  | 0. 011924 | 0. 190141 |
| zbtb22a            | 100. 6992 | -0. 151482177 | 0. 243455 | -0. 62222 | 0. 533798 | 0. 891181 |
| noval              | 308. 8199 | 0. 209010251  | 0. 202591 | 1. 031686 | 0. 302219 | 0. 768145 |
| GCA                | 1082      | 0. 032915584  | 0. 160089 | 0. 205608 | 0. 837097 | 0. 976007 |
| ppefl              | 16. 1054  | -0. 321114176 | 0. 659684 | -0. 48677 | 0. 626422 | 0. 920665 |
| rpl5a              | 24772. 73 | -0. 271205363 | 0. 124774 | -2. 17358 | 0. 029737 | 0. 307042 |
| cdc73              | 504. 5195 | -0. 244694947 | 0. 115238 | -2. 12339 | 0. 033721 | 0. 324467 |
| nf2a               | 73. 48176 | -0. 074000894 | 0. 245468 | -0. 30147 | 0. 763057 | 0. 958891 |
| slc1a1             | 254. 3949 | -0. 118763794 | 0. 215395 | -0. 55138 | 0. 581375 | 0. 905618 |
| cpsf4              | 422. 7189 | -0. 031605961 | 0. 140099 | -0. 2256  | 0. 821515 | 0. 971788 |
| amfra              | 681. 9021 | -0. 070465865 | 0. 109967 | -0. 64079 | 0. 521657 | 0. 887551 |
| dld                | 271. 4778 | -0. 043468846 | 0. 166711 | -0. 26074 | 0. 79429  | 0. 965431 |
| si:ch211-225b10. 3 | 51. 06476 | -0. 433808437 | 0. 275304 | -1. 57574 | 0. 115085 | 0. 554651 |
| usf2               | 955. 4549 | 0. 004192043  | 0. 105956 | 0. 039564 | 0. 968441 | 1         |
| mapre3a            | 66. 06373 | 0. 572880443  | 0. 295738 | 1. 937123 | 0. 05273  | 0. 399138 |
| EIF6               | 974. 3704 | -0. 149143348 | 0. 176768 | -0. 84372 | 0. 398825 | 0. 831005 |
| sept9a             | 1054. 566 | -0. 078602139 | 0. 097874 | -0. 8031  | 0. 421918 | 0. 843181 |
| mclr               | 70. 25455 | -0. 405122557 | 0. 276962 | -1. 46274 | 0. 143539 | 0. 602607 |
| lpin1              | 1749. 065 | -0. 55921328  | 0. 26549  | -2. 10634 | 0. 035174 | 0. 330358 |
| icmt               | 256. 0835 | -0. 102880822 | 0. 179772 | -0. 57229 | 0. 567129 | 0. 901759 |
| fermt2             | 197. 2349 | -0. 084176123 | 0. 240986 | -0. 3493  | 0. 726865 | 0. 949095 |
| rhoj               | 79. 93434 | 0. 071867163  | 0. 275049 | 0. 261288 | 0. 79387  | 0. 965431 |
| btbd10b            | 805. 2121 | 0. 035315815  | 0. 102506 | 0. 344526 | 0. 730451 | 0. 950056 |

|                  |          |              |          |          |          |          |  |
|------------------|----------|--------------|----------|----------|----------|----------|--|
| ewsrla           | 3627.172 | 0.245809553  | 0.108199 | 2.27182  | 0.023097 | 0.26812  |  |
| rab2a            | 3844.427 | 0.093089118  | 0.102657 | 0.906796 | 0.364515 | 0.814648 |  |
| angpt16          | 124.5656 | 0.196078776  | 0.212597 | 0.922302 | 0.356371 | 0.807306 |  |
| si:dkeyp-120h9.1 | 274.6388 | 0.145184488  | 0.152646 | 0.951119 | 0.341544 | 0.796294 |  |
| efcab7           | 171.7584 | 0.182181409  | 0.171827 | 1.060261 | 0.289026 | 0.76024  |  |
| si:ch211-278j3.3 | 175.1976 | 0.397502347  | 0.181294 | 2.19259  | 0.028337 | 0.299296 |  |
| pif1             | 151.4933 | 0.202025718  | 0.261142 | 0.773625 | 0.439153 | 0.852079 |  |
| TAF3             | 120.5245 | -0.239189254 | 0.287978 | -0.83058 | 0.40621  | 0.834645 |  |
| btg2             | 1367.076 | -0.285957988 | 0.633686 | -0.45126 | 0.651801 | 0.928625 |  |
| os9              | 455.7813 | -0.164095809 | 0.113604 | -1.44446 | 0.148609 | 0.610295 |  |
| cnih1            | 871.8005 | 0.119484753  | 0.110489 | 1.081419 | 0.279511 | 0.752477 |  |
| tyk2             | 117.5363 | -0.288419486 | 0.212949 | -1.35441 | 0.175606 | 0.649413 |  |
| plekha6          | 820.8046 | -0.1730502   | 0.13349  | -1.29636 | 0.194853 | 0.67483  |  |
| nkx2.9           | 4.482112 | 0.539403979  | 0.882791 | 0.611021 | 0.541186 | 0.893683 |  |
| ptpn11a          | 699.9581 | 0.053056217  | 0.091222 | 0.581619 | 0.560823 | 0.900005 |  |
| clasp2           | 1885.066 | 0.091274968  | 0.102361 | 0.891692 | 0.372558 | 0.819953 |  |
| lmx1a            | 7.724465 | 0.796763448  | 0.705945 | 1.128648 | 0.259046 | 0.736127 |  |
| snrnp25          | 126.7959 | 0.114348825  | 0.221331 | 0.516641 | 0.605407 | 0.914985 |  |
| fbplb            | 3494.564 | -0.346674398 | 0.218613 | -1.58579 | 0.112787 | 0.549875 |  |
| g6pc3            | 72.96282 | -0.274448275 | 0.214905 | -1.27707 | 0.201579 | 0.681423 |  |
| eif4g2a          | 2664.231 | 0.131678739  | 0.091944 | 1.432159 | 0.152098 | 0.615705 |  |
| nipsnap3a        | 205.3421 | -0.417794683 | 0.193405 | -2.16021 | 0.030757 | 0.312673 |  |
| mical2b          | 369.2299 | -0.217696015 | 0.192489 | -1.13095 | 0.258075 | 0.735569 |  |
| snx15            | 172.453  | -0.119044313 | 0.164769 | -0.72249 | 0.469993 | 0.867349 |  |
| napab            | 910.5394 | -0.051976984 | 0.148928 | -0.34901 | 0.727083 | 0.949095 |  |
| emx3             | 152.9305 | 0.036665482  | 0.151894 | 0.241389 | 0.809254 | 0.969828 |  |
| nceh1a           | 1.51882  | -0.149096834 | 1.308264 | -0.11397 | 0.909265 | NA       |  |
| snx5             | 701.8195 | 0.038609917  | 0.120839 | 0.319517 | 0.749335 | 0.955074 |  |
| xkr6a            | 3.970672 | -0.542804497 | 1.204553 | -0.45063 | 0.652258 | 0.928768 |  |
| tmtc4            | 257.5143 | 0.172635369  | 0.148302 | 1.164082 | 0.244391 | 0.725223 |  |
| adil             | 430.5592 | -0.32994148  | 0.167109 | -1.97441 | 0.048335 | 0.382747 |  |
| yipf3            | 724.3256 | -0.089374107 | 0.146133 | -0.6116  | 0.540806 | 0.893438 |  |
| cacng8a          | 169.6117 | 0.275429103  | 0.25595  | 1.076107 | 0.28188  | 0.754378 |  |
| psmd8            | 2452.179 | 0.249822981  | 0.176362 | 1.416534 | 0.156619 | 0.622452 |  |
| si:ch211-171h4.3 | 23.94455 | 0.028913075  | 0.39104  | 0.073939 | 0.941059 | 0.997371 |  |
| ewsrlb           | 2367.984 | -0.002968983 | 0.097539 | -0.03044 | 0.975717 | 1        |  |
| safb             | 1402.239 | 0.112291612  | 0.150419 | 0.746525 | 0.45535  | 0.860008 |  |
| map3k7           | 569.4908 | -0.059568437 | 0.104941 | -0.56764 | 0.570282 | 0.902481 |  |
| hddc3            | 197.9962 | 0.177760226  | 0.171372 | 1.037277 | 0.299607 | 0.766128 |  |
| znrf1            | 303.6773 | 0.184472988  | 0.170385 | 1.082682 | 0.27895  | 0.752417 |  |
| nono             | 1920.991 | 0.170890876  | 0.095834 | 1.783201 | 0.074554 | 0.463807 |  |
| lta              | 1.002965 | 0.548281047  | 1.691616 | 0.324117 | 0.74585  | NA       |  |
| arhgap17a        | 128.3284 | 0.003885355  | 0.205188 | 0.018936 | 0.984892 | 1        |  |
| lgila            | 493.5894 | 0.002837178  | 0.154579 | 0.018354 | 0.985356 | 1        |  |
| znf330           | 409.2122 | -0.235927753 | 0.143553 | -1.64349 | 0.100281 | 0.524748 |  |
| rab7a            | 1933.634 | -0.13598888  | 0.11338  | -1.19941 | 0.230369 | 0.712099 |  |
| h3f3a            | 10478.49 | -0.054860883 | 0.167522 | -0.32749 | 0.743301 | 0.954856 |  |
| srd5a1           | 16.62946 | 0.413182763  | 0.503101 | 0.821272 | 0.411491 | 0.837797 |  |
| exoc6            | 346.8052 | 0.031133272  | 0.113431 | 0.274469 | 0.783724 | 0.96245  |  |
| nup621           | 892.1185 | -0.13181521  | 0.153807 | -0.85702 | 0.391436 | 0.827902 |  |
| hacl1            | 177.5954 | -0.143697802 | 0.20522  | -0.70021 | 0.483794 | 0.87219  |  |
| isml             | 558.3669 | -0.026239489 | 0.107457 | -0.24419 | 0.807088 | 0.969726 |  |
| rem1             | 171.5974 | -0.026951456 | 0.284153 | -0.09485 | 0.924435 | 0.994815 |  |
| si:dkey-77f5.10  | 0.599257 | -0.868134652 | 2.479506 | -0.35012 | 0.726246 | NA       |  |

|                   |          |              |          |          |          |          |
|-------------------|----------|--------------|----------|----------|----------|----------|
| ddx3xa            | 1873.639 | 0.004732899  | 0.116671 | 0.040566 | 0.967642 | 1        |
| atp2a1            | 146592.7 | -0.072674195 | 0.209591 | -0.34674 | 0.728785 | 0.94987  |
| otofb             | 362.3984 | 0.159941936  | 0.191435 | 0.835488 | 0.403443 | 0.833803 |
| txlnba            | 1842.437 | 0.246928134  | 0.227539 | 1.085214 | 0.277827 | 0.751752 |
| gnl3l             | 483.0291 | -0.211359781 | 0.160353 | -1.31809 | 0.187472 | 0.666343 |
| migal             | 316.7264 | 0.061218674  | 0.162181 | 0.377471 | 0.705823 | 0.944413 |
| rnf144aa          | 29.21088 | -0.125070969 | 0.378655 | -0.3303  | 0.741171 | 0.954103 |
| grk7a             | 828.0702 | 1.049681999  | 0.390738 | 2.686408 | 0.007222 | 0.144046 |
| nfe2              | 43.18525 | -0.315606194 | 0.331171 | -0.953   | 0.34059  | 0.795538 |
| emc3              | 861.0082 | 0.133524294  | 0.086126 | 1.550328 | 0.121063 | 0.566931 |
| snap25a           | 3180.905 | 0.208731627  | 0.20046  | 1.041265 | 0.297753 | 0.765407 |
| tnnt2a            | 262.6653 | 0.039687577  | 0.221723 | 0.178996 | 0.857941 | 0.979774 |
| si:ch211-160d20.3 | 94.9849  | 0.359613303  | 0.19306  | 1.862706 | 0.062504 | 0.427724 |
| gatd3a            | 326.2931 | -0.126179941 | 0.126784 | -0.99524 | 0.319622 | 0.780289 |
| apl1b1            | 866.7137 | 0.111213691  | 0.094185 | 1.180799 | 0.237683 | 0.718568 |
| baxa              | 545.759  | 0.08386377   | 0.130266 | 0.643788 | 0.519713 | 0.887148 |
| jak1              | 1144.05  | -0.193110204 | 0.097248 | -1.98575 | 0.047061 | 0.378022 |
| gtdc1             | 63.87237 | 0.014056491  | 0.225058 | 0.062457 | 0.950199 | 0.99801  |
| slc7a3a           | 1388.029 | -0.015023356 | 0.165867 | -0.09057 | 0.92783  | 0.99504  |
| trpc4apb          | 325.0556 | -0.980795572 | 0.237067 | -4.1372  | 3.52E-05 | 0.004291 |
| INSM2             | 67.53889 | 0.011299712  | 0.309725 | 0.036483 | 0.970897 | 1        |
| prkg1a            | 87.24977 | 0.309031376  | 0.209934 | 1.47204  | 0.14101  | 0.599658 |
| dpp3              | 648.2361 | -0.030004774 | 0.148897 | -0.20151 | 0.840297 | 0.976417 |
| clpp              | 712.9754 | 0.372282355  | 0.110113 | 3.380919 | 0.000722 | 0.035767 |
| sesn1             | 2746.378 | -0.126800803 | 0.176153 | -0.71983 | 0.471627 | 0.868097 |
| slc9a8            | 180.1448 | 0.156983543  | 0.149195 | 1.052206 | 0.292705 | 0.762191 |
| odf2b             | 90.51898 | 0.025251846  | 0.185316 | 0.136263 | 0.891613 | 0.988566 |
| mdkb              | 3665.383 | 0.180993865  | 0.126915 | 1.426107 | 0.153838 | 0.618475 |
| rrm2              | 719.0262 | 0.00032783   | 0.31924  | 0.001027 | 0.999181 | 1        |
| slc25a22a         | 52.26269 | 0.351231893  | 0.272616 | 1.288378 | 0.197614 | 0.678229 |
| smpd4             | 185.2857 | -0.024210702 | 0.192453 | -0.1258  | 0.89989  | 0.99045  |
| efcab6            | 26.77394 | -0.113835011 | 0.320814 | -0.35483 | 0.722716 | 0.947632 |
| zgc:153921        | 8.007864 | 0.387518373  | 0.608221 | 0.637135 | 0.524037 | 0.888694 |
| fga               | 3269.561 | 0.053042694  | 0.221307 | 0.239679 | 0.810579 | 0.969828 |
| bdkrb1            | 18.05502 | 0.577850663  | 0.556184 | 1.038956 | 0.298825 | 0.765735 |
| gfilaa            | 40.06702 | -0.428985255 | 0.354669 | -1.20954 | 0.226456 | 0.707798 |
| caprin2           | 22.65963 | 0.503010687  | 0.43336  | 1.160722 | 0.245755 | 0.727177 |
| tmem178           | 171.5788 | 0.5144944    | 0.201441 | 2.554066 | 0.010647 | 0.179908 |
| elf1              | 550.8149 | 0.026495793  | 0.12618  | 0.209984 | 0.83368  | 0.975482 |
| arrdc2            | 1989.831 | -0.17465632  | 0.20781  | -0.84046 | 0.40065  | 0.831725 |
| slmapb            | 246.1825 | 0.026355121  | 0.25296  | 0.104187 | 0.917021 | 0.993657 |
| tnr               | 79.64894 | 0.279001072  | 0.371645 | 0.75072  | 0.452821 | 0.858256 |
| cep85l            | 389.1896 | 0.128539576  | 0.145235 | 0.885043 | 0.376133 | 0.822258 |
| lama4             | 1531.323 | 0.076873319  | 0.150277 | 0.511545 | 0.60897  | 0.915204 |
| sla2              | 10.22571 | -1.482881062 | 0.83397  | -1.7781  | 0.075388 | 0.465238 |
| neurod6b          | 438.2242 | 0.193315901  | 0.192472 | 1.004383 | 0.315194 | 0.777834 |
| rac3b             | 974.7581 | 0.277028098  | 0.139702 | 1.982993 | 0.047368 | 0.379101 |
| necap1            | 516.5401 | 0.399607393  | 0.204862 | 1.950617 | 0.051103 | 0.393482 |
| efemp2b           | 158.5478 | -0.235163847 | 0.222447 | -1.05717 | 0.290436 | 0.76078  |
| si:ch73-177h5.2   | 0.755383 | -0.818428908 | 2.227156 | -0.36748 | 0.713263 | NA       |
| faimb             | 64.43913 | 0.034808585  | 0.550793 | 0.063197 | 0.949609 | 0.99801  |
| srp68             | 1084.604 | -0.07458754  | 0.097359 | -0.76611 | 0.44361  | 0.854255 |
| ift22             | 67.844   | -0.194359421 | 0.296812 | -0.65482 | 0.512581 | 0.885483 |
| si:dkey-230p4.1   | 82.97314 | 0.193782488  | 0.218154 | 0.888281 | 0.37439  | 0.820992 |

|                  |          |              |          |          |          |          |
|------------------|----------|--------------|----------|----------|----------|----------|
| mcrs1            | 554.4202 | -0.084024733 | 0.109578 | -0.7668  | 0.443198 | 0.854063 |
| rbm7             | 274.0574 | -0.265548566 | 0.135716 | -1.95666 | 0.050388 | 0.390726 |
| tnslb            | 275.7751 | 0.047633035  | 0.2373   | 0.200729 | 0.84091  | 0.97643  |
| atp6v0a1a        | 915.5267 | 0.001184851  | 0.123085 | 0.009626 | 0.992319 | 1        |
| eef1a111         | 182429.7 | -0.563956341 | 0.105496 | -5.34574 | 9.00E-08 | 4.44E-05 |
| galr2a           | 0.978379 | -0.868144414 | 2.47147  | -0.35127 | 0.725389 | NA       |
| ccdc149b         | 185.7777 | 0.120146853  | 0.203686 | 0.589862 | 0.555283 | 0.898723 |
| trim25l          | 39.06138 | -0.42134132  | 0.436995 | -0.96418 | 0.334956 | 0.79181  |
| apoa4b.2         | 4247.562 | 0.704594047  | 0.353189 | 1.994951 | 0.046048 | 0.375021 |
| ptprz1b          | 651.9763 | -0.037975963 | 0.126098 | -0.30116 | 0.76329  | 0.958924 |
| nfat5a           | 11.80741 | -0.028163056 | 0.567778 | -0.0496  | 0.960439 | 0.999164 |
| pdk2a            | 2633.923 | -0.309719288 | 0.139486 | -2.22043 | 0.02639  | 0.287876 |
| gli2b            | 172.3146 | -0.002901661 | 0.178251 | -0.01628 | 0.987012 | 1        |
| armc11           | 236.6851 | 0.122368029  | 0.17738  | 0.689862 | 0.490281 | 0.875178 |
| tmod4            | 5410.526 | 0.130694373  | 0.112867 | 1.157955 | 0.246882 | 0.727706 |
| L0018197.1       | 130.5706 | 0.073710006  | 0.2311   | 0.318952 | 0.749763 | 0.955074 |
| slc25a55a        | 2600.578 | -0.220511263 | 0.197941 | -1.11403 | 0.265268 | 0.742063 |
| bag1             | 297.7108 | 0.080561659  | 0.140406 | 0.573775 | 0.56612  | 0.901739 |
| cyb5r4           | 128.0052 | -0.141892295 | 0.171898 | -0.82545 | 0.409119 | 0.836637 |
| gabrp            | 156.8055 | 0.290922492  | 0.21406  | 1.359069 | 0.174125 | 0.647379 |
| ddx56            | 288.1027 | -0.077752951 | 0.180101 | -0.43172 | 0.665946 | 0.932664 |
| myolca           | 286.65   | -0.029804424 | 0.154261 | -0.19321 | 0.846796 | 0.977263 |
| creb3131         | 1228.674 | -0.152086555 | 0.125704 | -1.20987 | 0.226327 | 0.707597 |
| fam49ba          | 403.7585 | -0.124196487 | 0.134409 | -0.92402 | 0.355475 | 0.806546 |
| ezra             | 458.8048 | 0.391125971  | 0.143868 | 2.718651 | 0.006555 | 0.136957 |
| auts2b           | 268.2109 | 0.021728026  | 0.195328 | 0.111238 | 0.911427 | 0.992236 |
| gmcl1            | 424.6386 | -0.074887288 | 0.114212 | -0.65568 | 0.512027 | 0.885217 |
| si:ch211-214j8.1 | 56.70315 | -1.67723513  | 0.777431 | -2.15741 | 0.030974 | 0.313376 |
| dnajb6b          | 295.1238 | -0.18204508  | 0.133818 | -1.36039 | 0.173705 | 0.646897 |
| pck2             | 2131.592 | 0.551155633  | 0.133448 | 4.130107 | 3.63E-05 | 0.004382 |
| pth1ra           | 10.6983  | -0.786237116 | 0.549931 | -1.4297  | 0.152802 | 0.617015 |
| hgs              | 566.2737 | -0.214195236 | 0.149371 | -1.43398 | 0.151577 | 0.615372 |
| thap12b          | 150.5387 | 0.197814152  | 0.160003 | 1.236315 | 0.216341 | 0.69815  |
| ubald1b          | 541.8272 | -0.391731521 | 0.159438 | -2.45696 | 0.014012 | 0.207448 |
| ripor3           | 209.04   | 0.045159456  | 0.144219 | 0.313132 | 0.754181 | 0.955996 |
| slc35a3b         | 21.56468 | -0.084129787 | 0.468523 | -0.17956 | 0.857495 | 0.979741 |
| prickle2a        | 183.6937 | 0.347501906  | 0.248451 | 1.398673 | 0.161911 | 0.629443 |
| slc16a10         | 977.7216 | -0.14537554  | 0.1169   | -1.24359 | 0.213649 | 0.696139 |
| ctul             | 77.37135 | -0.016721111 | 0.275029 | -0.0608  | 0.95152  | 0.99801  |
| c5               | 599.54   | -0.165118848 | 0.244814 | -0.67447 | 0.500016 | 0.879879 |
| trim35-28        | 317.7767 | -0.148426216 | 0.179419 | -0.82726 | 0.408091 | 0.835879 |
| ift57            | 108.5893 | -0.013327176 | 0.171825 | -0.07756 | 0.938176 | 0.997364 |
| foxd3            | 299.4751 | -0.104472451 | 0.244356 | -0.42754 | 0.668985 | 0.933115 |
| herpod2          | 550.8245 | -0.001503497 | 0.129689 | -0.01159 | 0.99075  | 1        |
| rhbdd1           | 90.09884 | -0.012142126 | 0.283252 | -0.04287 | 0.965808 | 1        |
| clptm11          | 349.6982 | 0.00124063   | 0.149457 | 0.008301 | 0.993377 | 1        |
| isl11            | 2.659212 | -0.491879919 | 1.639335 | -0.30005 | 0.76414  | 0.959228 |
| alas1            | 1806.452 | -0.534918948 | 0.140359 | -3.81107 | 0.000138 | 0.01183  |
| sec31a           | 556.6871 | -0.152374156 | 0.127894 | -1.19141 | 0.233492 | 0.714569 |
| znf367           | 115.4472 | 0.254067361  | 0.256163 | 0.991819 | 0.321286 | 0.781707 |
| nelfcd           | 397.559  | -0.23227202  | 0.145118 | -1.60057 | 0.109472 | 0.542678 |
| sf3a2            | 1072.318 | -0.010040389 | 0.118313 | -0.08486 | 0.93237  | 0.996174 |
| pocl1b           | 102.598  | 0.040841158  | 0.208023 | 0.19633  | 0.844352 | 0.976791 |
| c1d              | 330.1669 | -0.226629821 | 0.198135 | -1.14381 | 0.252701 | 0.732759 |

|                |          |              |          |          |          |          |
|----------------|----------|--------------|----------|----------|----------|----------|
| ptmaa          | 8711.538 | 0.017116537  | 0.177828 | 0.096253 | 0.92332  | 0.994525 |
| spata6         | 39.01701 | -0.420246789 | 0.299772 | -1.40189 | 0.160949 | 0.627788 |
| ndc1           | 406.6521 | -0.056327897 | 0.138596 | -0.40642 | 0.684435 | 0.938486 |
| cfll1          | 9565.434 | 0.402828298  | 0.14297  | 2.817575 | 0.004839 | 0.115344 |
| dhrrs4         | 384.8679 | -0.048450646 | 0.267307 | -0.18125 | 0.856168 | 0.979558 |
| adgrv1         | 365.9787 | 0.019536582  | 0.133729 | 0.146091 | 0.88385  | 0.987014 |
| pabpc1b        | 2086.116 | 0.64174083   | 0.182969 | 3.507378 | 0.000453 | 0.025763 |
| plekhf2        | 271.9687 | -0.10943419  | 0.121244 | -0.90259 | 0.366741 | 0.816111 |
| rtn1b          | 1328.389 | 0.021212534  | 0.163533 | 0.129714 | 0.896792 | 0.98939  |
| nipal3         | 402.7537 | -0.210776095 | 0.133912 | -1.57399 | 0.115491 | 0.555747 |
| cbr11          | 636.4696 | -0.280841994 | 0.226977 | -1.23731 | 0.215971 | 0.697913 |
| valopa         | 12.38733 | 0.531424709  | 0.649852 | 0.817762 | 0.413493 | 0.838369 |
| ptpreb         | 294.9588 | 0.208762942  | 0.170914 | 1.221449 | 0.221916 | 0.703829 |
| zgc:92040      | 722.7175 | 0.098264733  | 0.165206 | 0.5948   | 0.551977 | 0.8974   |
| thrb           | 294.3822 | 0.18500327   | 0.151167 | 1.223836 | 0.221014 | 0.702262 |
| cyp2ad2        | 273.4132 | 0.084270579  | 0.619451 | 0.136041 | 0.891789 | 0.988566 |
| cept1b         | 144.1596 | 0.057223913  | 0.180479 | 0.317068 | 0.751192 | 0.955226 |
| rbfox11        | 1586.288 | 0.162704326  | 0.146659 | 1.109407 | 0.267255 | 0.743462 |
| si:dkeyp-4h4.1 | 3.985662 | 0.080587837  | 1.674292 | 0.048132 | 0.961611 | 0.999451 |
| corolcb        | 1447.813 | 0.195469522  | 0.111534 | 1.752561 | 0.079677 | 0.477652 |
| st8sia6        | 595.6232 | 0.121768671  | 0.120001 | 1.014731 | 0.310234 | 0.775062 |
| nebl           | 23.773   | -1.198930142 | 0.490443 | -2.44459 | 0.014502 | 0.210663 |
| noto           | 8.751621 | 0.104185285  | 0.583473 | 0.178561 | 0.858283 | 0.979774 |
| serpind1       | 129.5182 | -0.49961782  | 0.246138 | -2.02983 | 0.042374 | 0.360425 |
| kctd9a         | 25.25741 | 0.250380316  | 0.391581 | 0.639408 | 0.522557 | 0.887826 |
| hmgcl          | 582.6408 | -0.086868417 | 0.108475 | -0.80082 | 0.423237 | 0.843894 |
| prkci          | 1031.316 | -0.21123421  | 0.08236  | -2.56477 | 0.010324 | 0.176586 |
| nkx2.7         | 24.73685 | -0.284466028 | 0.331526 | -0.85805 | 0.390865 | 0.827902 |
| pgls           | 134.3266 | 0.469357149  | 0.204299 | 2.2974   | 0.021596 | 0.26075  |
| apaf1          | 397.8574 | 0.290403338  | 0.13183  | 2.20287  | 0.027604 | 0.295283 |
| zgc:165604     | 58.92593 | -0.393365782 | 0.37975  | -1.03585 | 0.30027  | 0.766629 |
| mvp            | 1401.462 | 0.019254897  | 0.166348 | 0.11575  | 0.90785  | 0.991745 |
| slc25a48       | 483.3031 | -0.252448778 | 0.193623 | -1.30382 | 0.192296 | 0.672283 |
| cct6a          | 5850.086 | -0.301883228 | 0.12022  | -2.51109 | 0.012036 | 0.190742 |
| arhgap22       | 28.23558 | 0.242174212  | 0.372554 | 0.650037 | 0.515668 | 0.88655  |
| eif3d          | 5866.93  | -0.330983215 | 0.118771 | -2.78673 | 0.005324 | 0.122593 |
| mybpc2b        | 2671.437 | -0.058072119 | 0.261299 | -0.22224 | 0.824124 | 0.97205  |
| rab7b          | 276.1616 | 0.088394165  | 0.153506 | 0.575835 | 0.564726 | 0.901461 |
| mier3b         | 124.3147 | 0.040218618  | 0.204318 | 0.196843 | 0.84395  | 0.976791 |
| slc30a2        | 5.871313 | -1.519492219 | 0.83252  | -1.82517 | 0.067975 | 0.44461  |
| rhoca          | 834.4139 | 0.060316834  | 0.09399  | 0.641736 | 0.521045 | 0.887466 |
| nsun4          | 54.97314 | -0.280353059 | 0.219628 | -1.27649 | 0.201781 | 0.681726 |
| pax4           | 2.934756 | 3.889488365  | 1.616013 | 2.406843 | 0.016091 | 0.223897 |
| cpa5           | 31471.09 | -0.039017116 | 0.219059 | -0.17811 | 0.858635 | 0.979931 |
| wsb1           | 2636.836 | -0.107434841 | 0.203277 | -0.52851 | 0.597143 | 0.91193  |
| prph21b        | 42.20537 | 0.297225935  | 0.515794 | 0.576249 | 0.564447 | 0.901433 |
| pdhb           | 4057.787 | 0.129563976  | 0.095961 | 1.350179 | 0.176958 | 0.650504 |
| nefma          | 623.9723 | 0.771776332  | 0.274615 | 2.810391 | 0.004948 | 0.117227 |
| griala         | 292.6068 | 0.105496574  | 0.220899 | 0.477578 | 0.632951 | 0.923885 |
| fbpla          | 816.0422 | -0.162210587 | 0.18551  | -0.8744  | 0.381899 | 0.824957 |
| mc3r           | 3.28164  | 1.550197613  | 1.088912 | 1.423621 | 0.154556 | 0.619425 |
| actr6          | 290.317  | 0.205242725  | 0.138322 | 1.483804 | 0.137861 | 0.593945 |
| tob1b          | 2833.587 | -0.173966143 | 0.167125 | -1.04093 | 0.297907 | 0.765407 |
| cab3911        | 752.9278 | -0.070321998 | 0.140325 | -0.50114 | 0.616276 | 0.916365 |

|                  |          |              |            |          |          |          |
|------------------|----------|--------------|------------|----------|----------|----------|
| phf21ab          | 135.4592 | 0.139811893  | 0.21695    | 0.644442 | 0.519289 | 0.887148 |
| ppml1db          | 171.7364 | 0.052514342  | 0.199141   | 0.263705 | 0.792007 | 0.964867 |
| naalad2          | 175.0127 | 0.100092656  | 0.139779   | 0.716079 | 0.473942 | 0.869292 |
| jag2b            | 403.3488 | 0.032217322  | 0.135367   | 0.238    | 0.811881 | 0.97012  |
| chrnb5b          | 16.44684 | 0.791542022  | 0.51665    | 1.532066 | 0.125506 | 0.57334  |
| mulla            | 279.5781 | 0.166910534  | 0.138417   | 1.20585  | 0.227875 | 0.709278 |
| yipf2            | 504.2114 | -0.153096729 | 0.140039   | -1.09325 | 0.274286 | 0.749612 |
| mcm3ap           | 454.8267 | -0.066445974 | 0.175189   | -0.37928 | 0.704479 | 0.943785 |
| zgc:110319       | 309.6451 | 0.225163989  | 0.135      | 1.667881 | 0.095339 | 0.515402 |
| chd3             | 290.1528 | 0.80425929   | 0.186547   | 4.311287 | 1.62E-05 | 0.002576 |
| poglut3          | 195.0714 | 0.075639114  | 0.160509   | 0.471245 | 0.637466 | 0.924779 |
| odf312b          | 4.548047 | -0.656049005 | 0.739897   | -0.88668 | 0.375253 | 0.822186 |
| asmt1            | 475.0163 | 0.289186294  | 0.165118   | 1.751395 | 0.079878 | 0.478112 |
| ncoa4            | 1697.825 | 0.164592915  | 0.099987   | 1.646139 | 0.099735 | 0.524166 |
| cdh11            | 1467.379 | 0.18833261   | 0.138342   | 1.361351 | 0.173403 | 0.64634  |
| zfp3611b         | 1399.672 | 0.039943192  | 0.119119   | 0.335322 | 0.737382 | 0.952375 |
| prfl.2           |          | 0 NA         | NA         | NA       | NA       | NA       |
| strbp            | 469.1674 | 0.053923588  | 0.104436   | 0.516332 | 0.605623 | 0.915049 |
| dawl             | 48.55626 | -0.297866703 | 0.274423   | -1.08543 | 0.277731 | 0.751752 |
| ireb2            | 601.6881 | -0.041104311 | 0.141748   | -0.28998 | 0.771831 | 0.960624 |
| olfml2bb         | 91.60308 | -0.142850406 | 0.262075   | -0.54507 | 0.585703 | 0.906655 |
| cdc14b           | 913.9754 | 0.081953627  | 0.126336   | 0.648695 | 0.516535 | 0.886933 |
| cyth1b           | 286.296  | -0.053488382 | 0.116973   | -0.45727 | 0.647477 | 0.927082 |
| hnf4a            | 207.979  | -0.412566343 | 0.200983   | -2.05274 | 0.040097 | 0.350191 |
| gpr132a          | 0.129399 |              | 0 5.267649 | 0        | 1 NA     |          |
| tab2             | 408.4508 | -0.016679905 | 0.121288   | -0.13752 | 0.890618 | 0.988446 |
| rgsl4a           | 14.81134 | 0.012157081  | 0.449268   | 0.02706  | 0.978412 | 1        |
| ephb2b           | 443.6029 | 0.163009683  | 0.15863    | 1.027611 | 0.304133 | 0.769716 |
| vrk2             | 42.04516 | -0.701747252 | 0.274811   | -2.55356 | 0.010663 | 0.179908 |
| rad23b           | 2828.94  | 0.07333229   | 0.118632   | 0.618147 | 0.536478 | 0.892397 |
| prkn             | 102.1101 | -0.657747345 | 0.29033    | -2.26552 | 0.023481 | 0.270809 |
| ubl3b            | 720.658  | -0.005423526 | 0.106929   | -0.05072 | 0.959548 | 0.999164 |
| wdr45b           | 1142.755 | -0.196522787 | 0.176804   | -1.11153 | 0.26634  | 0.742912 |
| OTOP1            | 93.32595 | -0.672606362 | 0.192733   | -3.48984 | 0.000483 | 0.027042 |
| gdap2            | 238.6842 | -0.086202512 | 0.16282    | -0.52943 | 0.596504 | 0.911676 |
| cgas             | 5.238192 | -1.808126405 | 0.88646    | -2.03972 | 0.041379 | 0.355014 |
| slc16a7          | 64.44668 | -1.624324308 | 0.645421   | -2.51669 | 0.011846 | 0.189426 |
| orc5             | 97.3935  | -0.470583559 | 0.207129   | -2.27194 | 0.02309  | 0.26812  |
| dynlrb1          | 258.6289 | -0.291060913 | 0.224636   | -1.2957  | 0.195078 | 0.67483  |
| cntn5            | 255.3328 | 0.048875232  | 0.229065   | 0.213368 | 0.83104  | 0.974908 |
| tmem60           | 108.7144 | -0.152819465 | 0.183606   | -0.83232 | 0.405226 | 0.834483 |
| magi2a           | 113.6234 | -0.281103164 | 0.198839   | -1.41372 | 0.157443 | 0.623263 |
| lhfp13           | 442.8519 | 0.255976944  | 0.240234   | 1.065532 | 0.286635 | 0.757624 |
| negr1            | 203.9797 | 0.4570195    | 0.208112   | 2.196029 | 0.02809  | 0.298489 |
| si:dkey-151g10.3 | 161.605  | 0.113770256  | 0.237121   | 0.479798 | 0.631371 | 0.923003 |
| sh3bgr           | 881.0199 | 0.294674104  | 0.198828   | 1.482056 | 0.138325 | 0.59495  |
| gnail            | 1144.442 | -0.017177167 | 0.11637    | -0.14761 | 0.882652 | 0.986908 |
| fzd3a            | 398.9144 | -0.015504821 | 0.146148   | -0.10609 | 0.915511 | 0.993078 |
| sec61a1          | 5322.372 | -0.465436174 | 0.132921   | -3.5016  | 0.000462 | 0.026072 |
| phf11            | 16.72325 | 1.083670628  | 0.628149   | 1.72518  | 0.084495 | 0.487852 |
| asrgl1           | 160.3503 | 0.101679298  | 0.218084   | 0.466239 | 0.641045 | 0.925364 |
| mxn              | 4.557484 | -1.556645584 | 1.08736    | -1.43158 | 0.152263 | 0.616018 |
| morn3            | 27.46086 | 0.025994185  | 0.359093   | 0.072389 | 0.942293 | 0.997371 |
| pdcd4a           | 1553.091 | -0.403204011 | 0.141809   | -2.8433  | 0.004465 | 0.110056 |

|                 |          |              |          |          |          |          |
|-----------------|----------|--------------|----------|----------|----------|----------|
| col7a1          | 394.6362 | 0.125692403  | 0.173728 | 0.723502 | 0.469371 | 0.867224 |
| cacnalba        | 64.53879 | -0.207753131 | 0.406438 | -0.51116 | 0.609242 | 0.915204 |
| klhl24a         | 300.3199 | -0.202671094 | 0.190645 | -1.06308 | 0.287744 | 0.758441 |
| ccdc25          | 522.8203 | 0.041218266  | 0.162801 | 0.253182 | 0.800127 | 0.967256 |
| abcb5           | 1141.796 | -0.183897634 | 0.237452 | -0.77446 | 0.438657 | 0.851801 |
| myoc            | 965.2429 | -0.132365945 | 0.121555 | -1.08893 | 0.276183 | 0.750674 |
| hmmr            | 326.9007 | 0.297296957  | 0.306574 | 0.969739 | 0.332176 | 0.789602 |
| t1e5            | 88.17971 | -0.020748187 | 0.287749 | -0.07211 | 0.942518 | 0.997371 |
| zfp3612         | 1317.577 | -0.109333604 | 0.154002 | -0.70995 | 0.477736 | 0.869292 |
| nmt2            | 419.8543 | -0.003193475 | 0.118114 | -0.02704 | 0.97843  | 1        |
| calmla          | 5299.82  | 0.118998961  | 0.127251 | 0.935151 | 0.34971  | 0.801408 |
| cherp           | 644.1596 | 0.029626031  | 0.130944 | 0.22625  | 0.821007 | 0.971788 |
| katnal          | 99.15047 | 0.111353951  | 0.224912 | 0.495101 | 0.620529 | 0.918076 |
| ahr2            | 1191.508 | 0.059656417  | 0.130698 | 0.456443 | 0.648071 | 0.927245 |
| rps23           | 22813.61 | -0.339251807 | 0.123458 | -2.74792 | 0.005997 | 0.131072 |
| hidla           | 40.56593 | -0.070351558 | 0.32584  | -0.21591 | 0.829059 | 0.974547 |
| si:dkey-256h2.1 | 34.65742 | -0.397838938 | 0.388994 | -1.02274 | 0.306432 | 0.771574 |
| ntpcr           | 84.40772 | -0.530722608 | 0.246566 | -2.15245 | 0.031362 | 0.314976 |
| arnt            | 152.1383 | 0.452600341  | 0.298201 | 1.517771 | 0.129072 | 0.578533 |
| erap1b          | 35.61115 | -1.079216949 | 0.554497 | -1.9463  | 0.051619 | 0.394983 |
| rplp1           | 34204.85 | -0.273554281 | 0.135452 | -2.01956 | 0.043429 | 0.365245 |
| upkla           | 5.659523 | 0.298365702  | 1.083709 | 0.275319 | 0.783071 | 0.962328 |
| rca2            | 149.831  | -0.321409168 | 0.264618 | -1.21461 | 0.224513 | 0.706406 |
| fbx13b          | 272.4033 | -0.271353469 | 0.15716  | -1.72661 | 0.084239 | 0.487221 |
| cacu11          | 4.509271 | 2.052416271  | 1.029384 | 1.993829 | 0.046171 | 0.375668 |
| gja3            | 36.96783 | 0.980453857  | 0.372274 | 2.633689 | 0.008446 | 0.156983 |
| zbtb7b          | 151.108  | -0.072859782 | 0.176779 | -0.41215 | 0.680229 | 0.936798 |
| discl           | 59.86483 | -0.066457117 | 0.261056 | -0.25457 | 0.799055 | 0.967043 |
| asap3           | 305.1577 | -0.126807196 | 0.149362 | -0.84899 | 0.395887 | 0.829389 |
| b4gal7          | 165.1456 | 0.071424413  | 0.177828 | 0.401649 | 0.687943 | 0.938937 |
| der11           | 875.6614 | -0.023658545 | 0.138005 | -0.17143 | 0.863884 | 0.981859 |
| VSTM2A          | 4.472623 | -2.052052831 | 0.962333 | -2.13237 | 0.032976 | 0.321438 |
| ak9             | 26.48236 | -0.807458415 | 0.407953 | -1.97929 | 0.047783 | 0.380722 |
| vax1            | 98.60123 | 0.701528603  | 0.221046 | 3.173683 | 0.001505 | 0.058515 |
| hsp70.3         | 436.2775 | -0.099805824 | 0.609593 | -0.16373 | 0.869947 | 0.983365 |
| smad9           | 305.5486 | -0.002834433 | 0.142208 | -0.01993 | 0.984098 | 1        |
| ddx23           | 948.9428 | -0.016908261 | 0.09364  | -0.18057 | 0.856708 | 0.979558 |
| tnc             | 1913.744 | 0.273076661  | 0.228986 | 1.192547 | 0.233047 | 0.714569 |
| zgc:101100      | 57.62481 | 0.430718879  | 0.229125 | 1.879842 | 0.06013  | 0.422294 |
| st13            | 1780.398 | -0.187375646 | 0.142964 | -1.31065 | 0.189976 | 0.66964  |
| sfr1            | 15.11682 | -0.291211617 | 0.452618 | -0.64339 | 0.519969 | 0.887148 |
| ginml           | 996.3884 | -0.439864572 | 0.119616 | -3.67731 | 0.000236 | 0.01655  |
| mical3a         | 84.60019 | 0.037692282  | 0.315095 | 0.119622 | 0.904783 | 0.991619 |
| sh3bp2          | 13.81711 | -0.461476364 | 0.466931 | -0.98832 | 0.322997 | 0.782754 |
| ndufa2          | 1011.706 | 0.028179093  | 0.157764 | 0.178616 | 0.85824  | 0.979774 |
| ercc2           | 209.0977 | -0.167475788 | 0.150696 | -1.11135 | 0.266419 | 0.742912 |
| plecb           | 2013.61  | 0.05622826   | 0.186321 | 0.301782 | 0.762818 | 0.958842 |
| erlin1          | 1528.035 | -0.048586744 | 0.125456 | -0.38728 | 0.698547 | 0.942433 |
| ppp2r2aa        | 90.96161 | 0.048648133  | 0.173078 | 0.281076 | 0.778652 | 0.961073 |
| cfap206         | 11.54669 | -0.05574858  | 0.516649 | -0.1079  | 0.914072 | 0.992969 |
| traf3           | 155.0631 | -0.402825362 | 0.229161 | -1.75783 | 0.078777 | 0.474808 |
| zgc:66426       | 10.59984 | 0.224386068  | 0.476424 | 0.47098  | 0.637655 | 0.924779 |
| focad           | 142.0984 | 0.385785866  | 0.196444 | 1.963847 | 0.049548 | 0.387714 |
| maplab          | 252.5911 | 0.169863466  | 0.291984 | 0.581756 | 0.560731 | 0.899982 |



|                   |          |              |          |          |          |          |
|-------------------|----------|--------------|----------|----------|----------|----------|
| tlr4bb            | 0.253593 | 0            | 5.267649 | 0        | 1        | NA       |
| si:dkey-34e4.1    | 92.6942  | 0.307109545  | 0.22203  | 1.38319  | 0.166607 | 0.636904 |
| opn4a             | 2.875921 | 2.612410716  | 1.59656  | 1.636274 | 0.101782 | 0.528581 |
| obscnb            | 247.1796 | 0.028767465  | 0.341926 | 0.084134 | 0.93295  | 0.996264 |
| rbm4.3            | 2703.849 | 0.102548759  | 0.094804 | 1.081688 | 0.279391 | 0.752477 |
| ocstamp           | 8.809735 | -0.575593398 | 0.57989  | -0.99259 | 0.32091  | 0.781284 |
| ttc23             | 50.68663 | -0.326799924 | 0.301734 | -1.08307 | 0.278776 | 0.752299 |
| mgst1.2           | 578.7936 | 0.142449984  | 0.168095 | 0.847437 | 0.396751 | 0.830253 |
| IGLON5            | 161.2264 | -0.134341829 | 0.27886  | -0.48175 | 0.629981 | 0.922869 |
| ddx59             | 147.8262 | 0.127959358  | 0.203037 | 0.630226 | 0.528547 | 0.890002 |
| gstol             | 89.65468 | 0.027318983  | 0.3178   | 0.085963 | 0.931496 | 0.995809 |
| usp6n1            | 284.9672 | 0.280396156  | 0.130324 | 2.151529 | 0.031434 | 0.315297 |
| gtf2ird1          | 401.9613 | 0.205178568  | 0.188009 | 1.091324 | 0.27513  | 0.750424 |
| uck2b             | 631.5658 | -0.225515355 | 0.102217 | -2.20625 | 0.027367 | 0.293836 |
| uck1              | 56.25402 | -0.2771747   | 0.323146 | -0.85774 | 0.391037 | 0.827902 |
| ppan              | 299.5174 | 0.004637343  | 0.230883 | 0.020085 | 0.983975 | 1        |
| prkcbb            | 351.0795 | 0.55746291   | 0.173545 | 3.212215 | 0.001317 | 0.053354 |
| si:ch211-57i17.1  | 282.4931 | -0.147130886 | 0.168566 | -0.87284 | 0.382751 | 0.825577 |
| pdzkl             | 487.2384 | -0.131326204 | 0.354493 | -0.37046 | 0.711039 | 0.945821 |
| trim35-34         | 2.254786 | -0.950472762 | 1.166064 | -0.81511 | 0.415008 | 0.838732 |
| brd2a             | 1323.997 | -0.046505325 | 0.144826 | -0.32111 | 0.748126 | 0.955074 |
| hnflbb            | 53.1122  | -0.684249088 | 0.373464 | -1.83217 | 0.066927 | 0.44184  |
| higdla            | 634.783  | 0.515346563  | 0.203213 | 2.535996 | 0.011213 | 0.183909 |
| dsps              | 1070.418 | -0.025421617 | 0.177181 | -0.14348 | 0.885913 | 0.987533 |
| atp6v1g1          | 2991.094 | 0.014845     | 0.13025  | 0.113973 | 0.909259 | 0.992067 |
| or115-5           | 0.127238 | 0            | 5.267649 | 0        | 1        | NA       |
| si:ch211-156i18.7 | 0.321363 | 0.042929173  | 3.863243 | 0.011112 | 0.991134 | NA       |
| ufcl              | 441.2136 | -0.141949324 | 0.196562 | -0.72216 | 0.470196 | 0.86742  |
| nek1              | 300.7439 | 0.169095264  | 0.126215 | 1.339737 | 0.180331 | 0.656129 |
| knsl              | 678.7903 | -0.241857765 | 0.247462 | -0.97735 | 0.328394 | 0.786776 |
| mtmr1b            | 102.9261 | -0.007753631 | 0.198296 | -0.0391  | 0.96881  | 1        |
| ntmt1             | 570.9969 | 0.144605791  | 0.124567 | 1.16087  | 0.245695 | 0.727177 |
| rrp12             | 1528.248 | 0.236448358  | 0.184475 | 1.281737 | 0.199935 | 0.6804   |
| ing5a             | 242.9199 | -0.043625153 | 0.178587 | -0.24428 | 0.807014 | 0.969726 |
| faf1              | 551.1103 | 0.223343024  | 0.159878 | 1.396955 | 0.162427 | 0.629825 |
| slc26a5           | 700.2433 | -0.313011795 | 0.126982 | -2.465   | 0.013701 | 0.204799 |
| ppplr8b           | 524.9442 | 0.031305404  | 0.131953 | 0.237246 | 0.812466 | 0.970252 |
| cd81b             | 239.7404 | -0.13408901  | 0.222789 | -0.60186 | 0.547264 | 0.896121 |
| cox6a1            | 4489.852 | 0.01133626   | 0.118021 | 0.096053 | 0.923478 | 0.994525 |
| enola             | 10503.42 | -0.041773291 | 0.200629 | -0.20821 | 0.835064 | 0.976007 |
| clcn5b            | 136.7926 | 0.023289748  | 0.232135 | 0.100328 | 0.920084 | 0.993955 |
| rad2111           | 2.882628 | -0.887544628 | 1.669238 | -0.53171 | 0.594929 | 0.910869 |
| pkd211            | 40.6834  | 0.147347002  | 0.376955 | 0.390887 | 0.695881 | 0.941649 |
| cox4i2            | 659.2961 | -0.143568145 | 0.162081 | -0.88578 | 0.375737 | 0.822237 |
| zgc:109913        | 9.752484 | 0.509273723  | 0.621373 | 0.819595 | 0.412447 | 0.838123 |
| pex51a            | 18.49057 | 0.357426493  | 0.498783 | 0.716597 | 0.473623 | 0.869146 |
| mchr1b            | 154.3387 | 0.88244009   | 0.373872 | 2.360276 | 0.018261 | 0.238375 |
| ntnlb             | 362.8461 | 0.592234238  | 0.149272 | 3.967471 | 7.26E-05 | 0.007162 |
| chrnb11           | 21.8629  | 0.065699203  | 0.474567 | 0.13844  | 0.889892 | 0.98835  |
| gxy1t1b           | 75.6332  | 0.149381457  | 0.28555  | 0.523136 | 0.600879 | 0.913756 |
| clcnk             | 41.87045 | -0.25312029  | 0.335209 | -0.75511 | 0.450182 | 0.857151 |
| zgc:56106         | 220.8804 | 0.125560332  | 0.157564 | 0.796886 | 0.425517 | 0.844714 |
| nkx6.1            | 142.5726 | -0.349857782 | 0.259642 | -1.34746 | 0.177831 | 0.651389 |
| nmur3             | 12.14754 | -0.50926588  | 1.39824  | -0.36422 | 0.715694 | 0.9461   |

|                   |          |              |          |          |          |          |
|-------------------|----------|--------------|----------|----------|----------|----------|
| dnpep             | 586.0173 | -0.107021567 | 0.174222 | -0.61428 | 0.539029 | 0.892985 |
| ddx43             | 36.84021 | 0.482642813  | 0.365099 | 1.32195  | 0.186185 | 0.664263 |
| si:ch211-241e1.3  | 167.816  | 0.156567049  | 0.220706 | 0.709393 | 0.478081 | 0.869292 |
| fbxo44            | 312.9453 | -0.01090808  | 0.156047 | -0.0699  | 0.944271 | 0.997371 |
| cyp2p9            | 147.78   | 0.118864794  | 0.379779 | 0.312984 | 0.754293 | 0.956018 |
| otud3             | 219.1289 | 0.00274858   | 0.210825 | 0.013037 | 0.989598 | 1        |
| cyp2ad3           | 1510.364 | -0.730604475 | 0.143117 | -5.10495 | 3.31E-07 | 0.000124 |
| psmf1             | 176.6803 | 0.078822302  | 0.168432 | 0.467976 | 0.639802 | 0.924779 |
| snx4              | 654.2642 | 0.029742458  | 0.102834 | 0.289227 | 0.772408 | 0.960624 |
| armac2            | 41.41248 | 0.782986635  | 0.310988 | 2.517739 | 0.011811 | 0.189124 |
| grapb             | 11.63328 | 0.663324236  | 1.028235 | 0.64511  | 0.518856 | 0.887148 |
| hel.3             | 1.65706  | 1.736349992  | 1.961027 | 0.885429 | 0.375925 | NA       |
| fkbp1aa           | 6965.343 | 0.06433746   | 0.134445 | 0.478542 | 0.632265 | 0.923215 |
| itgblb.2          | 549.7366 | 0.21365246   | 0.260833 | 0.819116 | 0.41272  | 0.838123 |
| chic2             | 427.8138 | 0.021332732  | 0.155335 | 0.137334 | 0.890767 | 0.988556 |
| lad1              | 152.535  | -0.199107483 | 0.265749 | -0.74923 | 0.453718 | 0.858742 |
| stat3             | 331.4017 | 0.072444667  | 0.154693 | 0.468313 | 0.639561 | 0.924779 |
| casp8ap2          | 154.484  | -0.259579812 | 0.210401 | -1.23374 | 0.2173   | 0.69815  |
| epha2b            | 251.446  | -0.042360451 | 0.222037 | -0.19078 | 0.848697 | 0.977918 |
| aasdh             | 45.90481 | -0.679953949 | 0.42396  | -1.60382 | 0.108754 | 0.541319 |
| hpcal1            | 122.2038 | -0.277713505 | 0.197439 | -1.40658 | 0.159552 | 0.6257   |
| apobb.1           | 19409.81 | 0.425595506  | 0.239637 | 1.776002 | 0.075733 | 0.46631  |
| gid8a             | 312.3074 | -0.072213757 | 0.141401 | -0.5107  | 0.60956  | 0.915204 |
| si:ch211-106a19.1 | 201.2209 | 0.003549311  | 0.164653 | 0.021556 | 0.982802 | 1        |
| cops7a            | 602.8459 | 0.008470556  | 0.132936 | 0.063719 | 0.949194 | 0.99801  |
| golt1ba           | 84.32129 | 0.028274913  | 0.228814 | 0.123571 | 0.901655 | 0.990643 |
| pitpnc1b          | 204.8634 | -0.07334048  | 0.129435 | -0.56662 | 0.570973 | 0.902501 |
| fzrlb             | 509.0661 | 0.006582659  | 0.138015 | 0.047695 | 0.961959 | 0.999451 |
| dnd1              | 4.660731 | 1.41653146   | 0.7242   | 1.955994 | 0.050466 | 0.390807 |
| pvalb3            | 544.9061 | 0.152646983  | 0.256613 | 0.594853 | 0.551942 | 0.8974   |
| bnip4             | 367.2154 | -0.575840333 | 0.238098 | -2.4185  | 0.015584 | 0.220447 |
| ptk2ba            | 22.93014 | 0.199758656  | 0.344308 | 0.580174 | 0.561797 | 0.900715 |
| lias              | 297.8211 | 0.029421844  | 0.145944 | 0.201597 | 0.840232 | 0.976417 |
| eogt              | 71.08649 | 0.095883731  | 0.335942 | 0.285417 | 0.775325 | 0.960964 |
| wnt7ba            | 11.19696 | -0.309814543 | 0.589865 | -0.52523 | 0.599424 | 0.913246 |
| zgc:175214        | 690.3579 | -0.643768977 | 0.209158 | -3.07791 | 0.002085 | 0.071344 |
| mcf2a             | 68.72836 | 0.264049082  | 0.282142 | 0.935873 | 0.349339 | 0.801408 |
| skilb             | 133.19   | -0.149288684 | 0.177205 | -0.84246 | 0.39953  | 0.831196 |
| znf1163           | 24.08813 | 0.375677765  | 0.468404 | 0.802038 | 0.422531 | 0.843493 |
| tbcc              | 193.7854 | -0.21674602  | 0.153568 | -1.4114  | 0.158128 | 0.623766 |
| taar11            | 1.234672 | 4.205882136  | 1.85357  | 2.269071 | 0.023264 | NA       |
| ino80e            | 226.5192 | -0.203904224 | 0.198859 | -1.02537 | 0.305188 | 0.770369 |
| ecd               | 170.1692 | -0.392188039 | 0.172871 | -2.26867 | 0.023288 | 0.269659 |
| pth2              | 32.43214 | 0.097118195  | 0.571879 | 0.169823 | 0.865149 | 0.982142 |
| zgc:66448         | 352.5511 | -0.07347781  | 0.123714 | -0.59393 | 0.552556 | 0.8974   |
| fxr1              | 2789.191 | -0.258598642 | 0.134337 | -1.925   | 0.05423  | 0.402725 |
| tm9sf1            | 347.3765 | 0.158188454  | 0.120193 | 1.316122 | 0.188133 | 0.667333 |
| epha6             | 160.7279 | 0.535969912  | 0.309522 | 1.731605 | 0.083344 | 0.484434 |
| wdr13             | 537.5085 | 0.097386533  | 0.125159 | 0.778105 | 0.436507 | 0.850912 |
| tmpob             | 686.4921 | 0.23371176   | 0.130164 | 1.795512 | 0.072572 | 0.457864 |
| ccdc28a           | 10.53608 | -0.761048052 | 0.562226 | -1.35363 | 0.175853 | 0.649413 |
| clic4             | 1485.469 | 0.377931823  | 0.113291 | 3.335948 | 0.00085  | 0.039393 |
| setx              | 243.2552 | -0.112568658 | 0.176282 | -0.63857 | 0.523101 | 0.888312 |
| dtl               | 76.05487 | 0.266066199  | 0.244985 | 1.086051 | 0.277456 | 0.751426 |

|                 |          |              |           |          |          |          |  |
|-----------------|----------|--------------|-----------|----------|----------|----------|--|
| ccdc12          | 166.1365 | 0.08667805   | 0.19452   | 0.445599 | 0.655887 | 0.929606 |  |
| pkp2            | 101.9608 | -0.501860644 | 0.232477  | -2.15876 | 0.030869 | 0.312739 |  |
| cdv3            | 1875.584 | 0.167858391  | 0.127124  | 1.320426 | 0.186693 | 0.665181 |  |
| hoxa2b          | 141.9596 | 0.000652267  | 0.166996  | 0.003906 | 0.996884 | 1        |  |
| si:dkey-23a23.2 | 98.81865 | -0.091367635 | 0.333021  | -0.27436 | 0.783808 | 0.96245  |  |
| zbtb1           | 161.1624 | 0.074781055  | 0.180829  | 0.413546 | 0.679207 | 0.936209 |  |
| fam129ab        | 34.24591 | 0.328229211  | 0.317655  | 1.033287 | 0.30147  | 0.767562 |  |
| foxo3a          | 1112.425 | 0.069665561  | 0.142187  | 0.489958 | 0.624164 | 0.919499 |  |
| ccn1            | 653.8815 | -0.006811855 | 0.457042  | -0.0149  | 0.988109 | 1        |  |
| krt1-19d        | 2486.904 | -0.211897948 | 0.166074  | -1.27592 | 0.201983 | 0.68211  |  |
| scaper          | 350.9113 | 0.175958362  | 0.125941  | 1.397151 | 0.162368 | 0.629825 |  |
| mapk7           | 210.1724 | 0.075213745  | 0.147432  | 0.510157 | 0.609941 | 0.915331 |  |
| plg             | 2078.653 | 0.290322719  | 0.252882  | 1.148056 | 0.250945 | 0.731279 |  |
| gopc            | 167.4944 | -0.092690422 | 0.162479  | -0.57048 | 0.568355 | 0.902146 |  |
| ucpl            | 17484.12 | -0.666479923 | 0.213047  | -3.12832 | 0.001758 | 0.064556 |  |
| wdr73           | 82.69236 | -0.11484382  | 0.236097  | -0.48643 | 0.626664 | 0.920665 |  |
| cb1n10          | 362.8735 | -0.47677131  | 0.244932  | -1.94654 | 0.05159  | 0.394954 |  |
| snrnp40         | 286.1137 | 0.063512594  | 0.1554    | 0.408703 | 0.682757 | 0.938006 |  |
| v2rx4           | 0.307083 |              | 0.4634512 |          | 0        | 1 NA     |  |
| fez1            | 1912.381 | 0.176992678  | 0.108665  | 1.628795 | 0.103356 | 0.530446 |  |
| tdo2b           | 369.7044 | -3.758883311 | 1.309182  | -2.87117 | 0.00409  | 0.106542 |  |
| pcp411          | 201.4534 | -0.196067963 | 0.251411  | -0.77987 | 0.435467 | 0.850467 |  |
| si:rp71-1g18.13 | 45.18037 | -0.392402425 | 0.287664  | -1.3641  | 0.172537 | 0.645319 |  |
| lcpl            | 406.5022 | 0.007278103  | 0.175073  | 0.041572 | 0.96684  | 1        |  |
| kpna4           | 1715.867 | 0.034087846  | 0.108729  | 0.313511 | 0.753892 | 0.955912 |  |
| mhc1lda         | 5.132798 | -0.276789783 | 1.347005  | -0.20549 | 0.837193 | 0.976007 |  |
| mob2a           | 275.9487 | 0.045393154  | 0.164381  | 0.276146 | 0.782436 | 0.962328 |  |
| crema           | 228.5176 | -0.103825613 | 0.257803  | -0.40273 | 0.687145 | 0.938835 |  |
| selenot2        | 1528.226 | 0.10259089   | 0.11435   | 0.897168 | 0.369629 | 0.818064 |  |
| vsn1la          | 1142.48  | 0.64948394   | 0.218706  | 2.969673 | 0.002981 | 0.090034 |  |
| kcnh1b          | 6.879118 | -0.083768294 | 1.064897  | -0.07866 | 0.9373   | 0.997305 |  |
| syne3           | 567.4705 | -0.069384936 | 0.112509  | -0.6167  | 0.53743  | 0.892498 |  |
| atad1a          | 106.6736 | 0.010952551  | 0.20355   | 0.053808 | 0.957088 | 0.999109 |  |
| tfap2d          | 133.8685 | 0.082050466  | 0.203234  | 0.403725 | 0.686415 | 0.938732 |  |
| psmd4b          | 1057.859 | 0.138345936  | 0.119844  | 1.15438  | 0.248345 | 0.728649 |  |
| hsl17b3         | 9.185037 | 0.364164839  | 0.610606  | 0.596399 | 0.550908 | 0.8974   |  |
| fabp3           | 6291.354 | -0.06548823  | 0.136294  | -0.48049 | 0.630877 | 0.923003 |  |
| rps27.1         | 25099.68 | -0.261199837 | 0.131208  | -1.99073 | 0.046511 | 0.376263 |  |
| snul3b          | 813.2002 | -0.20100468  | 0.174047  | -1.15489 | 0.248136 | 0.728489 |  |
| gpbar1          | 3.616249 | 0.211915703  | 0.927439  | 0.228496 | 0.819261 | 0.971785 |  |
| zgc:66427       | 547.9345 | -0.247757666 | 0.135532  | -1.82803 | 0.067545 | 0.443563 |  |
| spryd4          | 446.1295 | -0.423098128 | 0.150381  | -2.81352 | 0.0049   | 0.116571 |  |
| sim1a           | 78.10719 | 0.204274609  | 0.261293  | 0.781782 | 0.434342 | 0.850002 |  |
| fmn2a           | 188.677  | -0.627922401 | 0.180406  | -3.48061 | 0.0005   | 0.027598 |  |
| ywhaqb          | 6246.939 | -0.010085984 | 0.106052  | -0.0951  | 0.924232 | 0.994815 |  |
| anp32b          | 2646.898 | 0.018220952  | 0.125139  | 0.145605 | 0.884233 | 0.987047 |  |
| nr5alb          | 3.523011 | 1.065070906  | 1.005651  | 1.059086 | 0.289561 | 0.760499 |  |
| mxl             | 6.744447 | -0.221941392 | 0.856703  | -0.25906 | 0.795585 | 0.966077 |  |
| slc37a2         | 964.3469 | -0.224109216 | 0.088084  | -2.54426 | 0.010951 | 0.182182 |  |
| atg5            | 370.5289 | -0.18071216  | 0.116876  | -1.54618 | 0.122061 | 0.569043 |  |
| tjp2b           | 915.4651 | -0.230857221 | 0.132877  | -1.73738 | 0.08232  | 0.482739 |  |
| atp2b3b         | 593.1466 | 0.639328129  | 0.232664  | 2.747854 | 0.005999 | 0.131072 |  |
| galnt14         | 197.9138 | -0.321285171 | 0.230265  | -1.39528 | 0.16293  | 0.630534 |  |
| ctnnb2          | 3374.154 | -0.002479343 | 0.09779   | -0.02535 | 0.979773 | 1        |  |

|                   |           |               |           |           |           |           |
|-------------------|-----------|---------------|-----------|-----------|-----------|-----------|
| lrp13             | 1. 546634 | -1. 404349311 | 1. 743338 | -0. 80555 | 0. 420501 | NA        |
| rflna             | 51. 93901 | -0. 121808025 | 0. 29371  | -0. 41472 | 0. 678345 | 0. 936026 |
| ift74             | 374. 3113 | 0. 689148573  | 0. 183727 | 3. 750931 | 0. 000176 | 0. 013744 |
| gmppab            | 265. 2204 | 0. 330113035  | 0. 175266 | 1. 883492 | 0. 059634 | 0. 421125 |
| ankrd49           | 132. 2061 | 0. 154647949  | 0. 193754 | 0. 798165 | 0. 424775 | 0. 844714 |
| BX323555. 1       | 0. 323151 | 1. 854116729  | 5. 241768 | 0. 35372  | 0. 723549 | NA        |
| ggt1a             | 15. 80845 | 1. 045279319  | 0. 702654 | 1. 487616 | 0. 136852 | 0. 592353 |
| pinx1             | 705. 9409 | -0. 122184068 | 0. 192459 | -0. 63486 | 0. 525522 | 0. 888928 |
| nnt               | 8168. 6   | 0. 117538026  | 0. 133078 | 0. 883227 | 0. 377113 | 0. 822451 |
| ahr1b             | 101. 8803 | 0. 817814819  | 0. 209304 | 3. 907312 | 9. 33E-05 | 0. 008719 |
| cdh7a             | 157. 9288 | 0. 353228629  | 0. 252009 | 1. 401649 | 0. 16102  | 0. 627788 |
| kenn1b            | 20. 18739 | 0. 302078067  | 0. 487132 | 0. 620115 | 0. 535182 | 0. 891993 |
| lpp               | 385. 3112 | -0. 064315971 | 0. 106349 | -0. 60476 | 0. 545338 | 0. 895275 |
| coq9              | 825. 0915 | 0. 126589134  | 0. 120786 | 1. 048048 | 0. 294617 | 0. 763708 |
| cdc7              | 89. 00056 | 0. 301787386  | 0. 219059 | 1. 377654 | 0. 16831  | 0. 639712 |
| kenk5a            | 39. 49162 | -0. 818344006 | 0. 364419 | -2. 24561 | 0. 024729 | 0. 27868  |
| nrbf2b            | 345. 4197 | -0. 078635237 | 0. 136841 | -0. 57465 | 0. 56553  | 0. 901564 |
| sh3gl2a           | 622. 6867 | 0. 423743997  | 0. 272787 | 1. 553387 | 0. 120331 | 0. 565852 |
| AL845324. 1       | 169. 7287 | -0. 291609308 | 0. 331828 | -0. 8788  | 0. 379512 | 0. 823607 |
| ggps1             | 437. 3501 | 0. 109575905  | 0. 168325 | 0. 650977 | 0. 515061 | 0. 886401 |
| kyat1             | 303. 3085 | 0. 372853921  | 0. 218769 | 1. 70433  | 0. 08832  | 0. 499113 |
| idh3g             | 1100. 195 | -0. 181265949 | 0. 112592 | -1. 60993 | 0. 107413 | 0. 53811  |
| hel. 1            | 6924. 238 | 0. 124954803  | 0. 587467 | 0. 212701 | 0. 83156  | 0. 974908 |
| gabpb1            | 83. 82189 | 0. 255794122  | 0. 261482 | 0. 978249 | 0. 327951 | 0. 786438 |
| timm8a            | 294. 0582 | 0. 170675906  | 0. 207917 | 0. 820885 | 0. 411712 | 0. 837966 |
| ercc5             | 223. 1849 | -0. 353898158 | 0. 152569 | -2. 31959 | 0. 020363 | 0. 253253 |
| cacnalfb          | 143. 381  | -0. 083092123 | 0. 372842 | -0. 22286 | 0. 823643 | 0. 972005 |
| spon1b            | 975. 6863 | 0. 282115568  | 0. 098392 | 2. 867262 | 0. 00414  | 0. 106542 |
| kctd6b            | 225. 6895 | 0. 339064263  | 0. 178732 | 1. 897051 | 0. 057821 | 0. 415158 |
| mao               | 426. 9178 | -0. 316426001 | 0. 153717 | -2. 0585  | 0. 039542 | 0. 347625 |
| aqpla. 1          | 2248. 967 | -0. 265870301 | 0. 143304 | -1. 85529 | 0. 063555 | 0. 430337 |
| hcrtr2            | 1. 402238 | 0. 026776878  | 1. 838384 | 0. 014565 | 0. 988379 | NA        |
| cdc42se1          | 403. 2223 | 0. 006894504  | 0. 129891 | 0. 053079 | 0. 957669 | 0. 999109 |
| zgc:73226         | 155. 0751 | -1. 010214344 | 0. 420714 | -2. 40119 | 0. 016342 | 0. 225785 |
| gnsa              | 431. 4886 | 0. 038325557  | 0. 162505 | 0. 235843 | 0. 813555 | 0. 970328 |
| mfsd4aa           | 41. 99777 | -0. 365450001 | 0. 414053 | -0. 88262 | 0. 377443 | 0. 822478 |
| gabrb3            | 301. 7953 | 0. 60869365   | 0. 275494 | 2. 209461 | 0. 027143 | 0. 293072 |
| ryr1b             | 1512. 816 | -0. 037275113 | 0. 365452 | -0. 102   | 0. 918759 | 0. 993884 |
| dyrklab           | 574. 2991 | 0. 006791132  | 0. 132765 | 0. 051151 | 0. 959205 | 0. 999164 |
| uvrag             | 61. 29427 | -0. 102590409 | 0. 272907 | -0. 37592 | 0. 706979 | 0. 944895 |
| faxdc2            | 906. 3294 | -0. 357517676 | 0. 231323 | -1. 54553 | 0. 122218 | 0. 569366 |
| pfkfb2a           | 51. 30117 | 0. 227322631  | 0. 264199 | 0. 860422 | 0. 389556 | 0. 827843 |
| lsm4              | 737. 4793 | 0. 103134419  | 0. 13252  | 0. 778255 | 0. 436419 | 0. 850912 |
| ccdc174           | 290. 5385 | -0. 139178845 | 0. 213012 | -0. 65338 | 0. 513509 | 0. 88631  |
| dnase1111         | 190. 0811 | 0. 60115467   | 0. 275298 | 2. 183648 | 0. 028988 | 0. 303224 |
| si:dkey-172h23. 2 | 220. 1831 | 0. 19815447   | 0. 181445 | 1. 092092 | 0. 274793 | 0. 750181 |
| stk24b            | 665. 8503 | 0. 061837644  | 0. 112047 | 0. 55189  | 0. 581024 | 0. 905618 |
| cacna2d4b         | 128. 3281 | 0. 205275818  | 0. 594384 | 0. 345359 | 0. 729825 | 0. 950056 |
| casd1             | 272. 8682 | -0. 066729284 | 0. 147134 | -0. 45353 | 0. 65017  | 0. 927835 |
| atf2              | 19. 65124 | 0. 179211607  | 0. 426323 | 0. 420366 | 0. 674218 | 0. 934868 |
| mark4a            | 56. 22345 | 0. 362238043  | 0. 279761 | 1. 294812 | 0. 195385 | 0. 675078 |
| phactr1           | 132. 0623 | 0. 55353615   | 0. 249321 | 2. 220176 | 0. 026407 | 0. 287927 |
| llgl2             | 805. 4441 | -0. 00822325  | 0. 13453  | -0. 06113 | 0. 951259 | 0. 99801  |
| dnajc24           | 49. 54177 | -0. 36260649  | 0. 253784 | -1. 4288  | 0. 153062 | 0. 617699 |

|                  |          |              |          |          |          |          |
|------------------|----------|--------------|----------|----------|----------|----------|
| skila            | 106.6474 | -0.019849293 | 0.212375 | -0.09346 | 0.925535 | 0.994815 |
| si:ch73-362m14.4 | 82.10716 | 0.847532449  | 0.341465 | 2.482045 | 0.013063 | 0.198789 |
| znhit3           | 92.11365 | -0.845256004 | 0.287714 | -2.93783 | 0.003305 | 0.094544 |
| fam167ab         | 58.38891 | -0.008245092 | 0.247477 | -0.03332 | 0.973422 | 1        |
| rnf181           | 113.8651 | 0.008513794  | 0.186524 | 0.045645 | 0.963594 | 0.999842 |
| tpm4a            | 2679.56  | -0.056644124 | 0.158974 | -0.35631 | 0.721608 | 0.947343 |
| atp6v1c1a        | 1326.401 | -0.103016779 | 0.14509  | -0.71002 | 0.477692 | 0.869292 |
| dctn4            | 395.3588 | 0.307386757  | 0.142083 | 2.163424 | 0.030509 | 0.311199 |
| pefl             | 328.0018 | 0.031866778  | 0.136874 | 0.232818 | 0.815902 | 0.971207 |
| heatr5a          | 399.3185 | -0.062339342 | 0.128842 | -0.48384 | 0.628496 | 0.921864 |
| rprmb            | 40.33588 | -0.055287484 | 0.312334 | -0.17701 | 0.859498 | 0.979975 |
| mdga2a           | 124.8276 | 0.305491149  | 0.242039 | 1.262156 | 0.206893 | 0.689246 |
| sdf2             | 259.174  | 0.185782314  | 0.169728 | 1.094586 | 0.273698 | 0.749234 |
| angpt12a         | 133.9899 | -0.617470089 | 0.181076 | -3.41    | 0.00065  | 0.033227 |
| coch             | 445.4973 | 1.539254496  | 0.425904 | 3.614091 | 0.000301 | 0.019507 |
| tmem38a          | 5949.966 | -0.083581569 | 0.137268 | -0.60889 | 0.542595 | 0.894595 |
| dnajc4           | 366.9234 | -0.034099468 | 0.137395 | -0.24819 | 0.803991 | 0.968814 |
| lmb1             | 104.5081 | 0.281794647  | 0.200643 | 1.404459 | 0.160182 | 0.626611 |
| adrald           | 75.95899 | -0.054185889 | 0.243383 | -0.22264 | 0.823819 | 0.972005 |
| naa40            | 767.5987 | 0.023264994  | 0.105771 | 0.219957 | 0.825905 | 0.972962 |
| gmppaa           | 276.3235 | -0.30203656  | 0.175341 | -1.72256 | 0.084967 | 0.489359 |
| vamp8            | 519.099  | -0.038160074 | 0.138112 | -0.2763  | 0.78232  | 0.962328 |
| sde2             | 356.0207 | -0.01132333  | 0.134612 | -0.08412 | 0.932963 | 0.996264 |
| p2rx8            | 8.393761 | 1.402318564  | 0.67815  | 2.067859 | 0.038653 | 0.344438 |
| cav3             | 1490.763 | 0.192279673  | 0.124575 | 1.543487 | 0.122713 | 0.569468 |
| haol             | 1570.078 | -0.096370296 | 0.188912 | -0.51013 | 0.609958 | 0.915331 |
| kcnh1a           | 7.932051 | 0.312137856  | 0.613932 | 0.508424 | 0.611156 | 0.915331 |
| narf             | 513.436  | -0.302527414 | 0.14812  | -2.04244 | 0.041108 | 0.353918 |
| pnocb            | 29.80122 | -0.043949867 | 0.424543 | -0.10352 | 0.917548 | 0.993777 |
| znf395b          | 442.3682 | -0.070727089 | 0.279806 | -0.25277 | 0.800444 | 0.967364 |
| mcm3             | 652.6423 | -0.079255175 | 0.251869 | -0.31467 | 0.753014 | 0.955756 |
| opn7a            | 0.235135 | 0            | 5.267649 | 0        | 1        | NA       |
| wasf2            | 857.2854 | -0.07692589  | 0.099828 | -0.77058 | 0.440954 | 0.852687 |
| ifngl            | 0.166044 | 0            | 5.267649 | 0        | 1        | NA       |
| cdk5rap2         | 321.4219 | 0.142294568  | 0.199836 | 0.712055 | 0.476431 | 0.869292 |
| ubl7a            | 130.103  | -0.526383453 | 0.263726 | -1.99595 | 0.04594  | 0.375002 |
| pcbp4            | 693.015  | 0.016917116  | 0.101422 | 0.166799 | 0.867528 | 0.982582 |
| pigm             | 62.95988 | 0.288540533  | 0.27637  | 1.044038 | 0.296468 | 0.764344 |
| adh8b            | 1551.127 | -1.072102217 | 0.221787 | -4.83394 | 1.34E-06 | 0.000365 |
| slc11a2          | 757.1943 | 0.14625      | 0.14432  | 1.013376 | 0.310881 | 0.775776 |
| clqtnf4          | 500.5027 | 0.118676623  | 0.208863 | 0.568205 | 0.569896 | 0.902322 |
| zbed4            | 371.7601 | -0.053525052 | 0.134903 | -0.39677 | 0.691539 | 0.940173 |
| nsmce4a          | 125.2942 | 0.065243411  | 0.223576 | 0.291817 | 0.770426 | 0.960484 |
| herpud1          | 552.4116 | 0.020678378  | 0.129611 | 0.159542 | 0.873242 | 0.983537 |
| trap1            | 743.5121 | 0.327272394  | 0.157615 | 2.076398 | 0.037857 | 0.34119  |
| arhgap1          | 1227.912 | -0.055623868 | 0.104389 | -0.53285 | 0.594137 | 0.910701 |
| col4a3bpa        | 324.4466 | 0.136806806  | 0.125043 | 1.094076 | 0.273921 | 0.749234 |
| crlfla           | 178.2234 | -0.10202699  | 0.145179 | -0.70276 | 0.482202 | 0.871592 |
| mstol            | 369.8729 | -0.322153013 | 0.159118 | -2.02462 | 0.042906 | 0.362823 |
| get4             | 648.9021 | 0.030715586  | 0.113615 | 0.270349 | 0.786892 | 0.963061 |
| twistnb          | 214.4349 | -0.392123905 | 0.153837 | -2.54895 | 0.010805 | 0.181278 |
| ets1             | 78.3609  | -0.087909288 | 0.212695 | -0.41331 | 0.679378 | 0.936209 |
| pvalb4           | 17100.55 | -0.145226989 | 0.153941 | -0.94339 | 0.345479 | 0.79876  |
| gnpda2           | 1592.48  | -0.061065607 | 0.186542 | -0.32736 | 0.743398 | 0.954856 |

|                   |          |              |          |          |          |          |
|-------------------|----------|--------------|----------|----------|----------|----------|
| mrps18a           | 362.6924 | 0.087641125  | 0.167051 | 0.524636 | 0.599836 | 0.913598 |
| nsll              | 83.87229 | -0.216559592 | 0.282454 | -0.76671 | 0.443255 | 0.854063 |
| mpc2              | 2486.078 | 0.157322188  | 0.178467 | 0.88152  | 0.378037 | 0.82265  |
| pigk              | 54.56094 | -0.059875111 | 0.262149 | -0.2284  | 0.819335 | 0.971785 |
| top2a             | 1554.501 | 0.121579546  | 0.269763 | 0.45069  | 0.652213 | 0.928768 |
| col9a2            | 7684.029 | 0.39702525   | 0.182018 | 2.181238 | 0.029166 | 0.304273 |
| c6ast3            | 809.2704 | 1.055406661  | 1.691222 | 0.62405  | 0.532595 | 0.890978 |
| prfl.6            | 0.106927 | 0            | 5.267649 | 0        | 1        | NA       |
| emilin1a          | 337.876  | 0.415831966  | 0.24613  | 1.689478 | 0.091128 | 0.50549  |
| tspan36           | 1345.377 | -0.318194091 | 0.187818 | -1.69416 | 0.090235 | 0.50416  |
| pla2g4aa          | 93.08528 | -0.085290403 | 0.224527 | -0.37987 | 0.704044 | 0.943735 |
| cryba4            | 8404.305 | 0.662333197  | 0.261843 | 2.529507 | 0.011422 | 0.185332 |
| slc4a1b           | 79.3756  | -1.019402167 | 0.294747 | -3.45857 | 0.000543 | 0.029126 |
| nolc1             | 686.9183 | 0.594211719  | 0.269379 | 2.205854 | 0.027394 | 0.293857 |
| sccpdhb           | 388.0878 | -0.719288029 | 0.146948 | -4.89485 | 9.84E-07 | 0.000296 |
| kif26bb           | 40.77272 | 0.189481583  | 0.331953 | 0.570809 | 0.568129 | 0.902108 |
| gpc5b             | 92.2997  | 0.778085126  | 0.231353 | 3.363192 | 0.00077  | 0.03696  |
| homezb            | 532.7756 | 0.020199649  | 0.140698 | 0.143568 | 0.885842 | 0.987533 |
| zgc:162964        | 102.2548 | 0.193140774  | 0.211347 | 0.913854 | 0.360793 | 0.811253 |
| foxo6b            | 146.4983 | 0.174073816  | 0.203048 | 0.857305 | 0.391276 | 0.827902 |
| nlrc5             | 5.516117 | 0.128138807  | 0.78736  | 0.162745 | 0.870719 | 0.983365 |
| pip5klab          | 418.2439 | -0.055962885 | 0.103475 | -0.54083 | 0.588622 | 0.908014 |
| snrpal            | 497.4159 | 0.08804696   | 0.128872 | 0.683211 | 0.494474 | 0.877861 |
| pgm3              | 206.735  | -0.001095184 | 0.13747  | -0.00797 | 0.993644 | 1        |
| oser1             | 669.4059 | -0.046342853 | 0.146524 | -0.31628 | 0.751789 | 0.955391 |
| panel             | 128.8956 | 0.123978561  | 0.243776 | 0.508576 | 0.61105  | 0.915331 |
| polr3g            | 1.328855 | 3.279249409  | 1.903152 | 1.723062 | 0.084877 | NA       |
| lysmd3            | 101.2927 | -0.151181466 | 0.208612 | -0.7247  | 0.468636 | 0.866951 |
| myo1b             | 1044.961 | -0.146269704 | 0.134495 | -1.08755 | 0.276795 | 0.751311 |
| slc25a23b         | 23.15303 | 0.029599218  | 0.487652 | 0.060697 | 0.9516   | 0.99801  |
| selenbp1          | 386.952  | -0.182763567 | 0.165688 | -1.10306 | 0.270001 | 0.746532 |
| hdhd2             | 105.5757 | 0.398606152  | 0.210912 | 1.889921 | 0.058769 | 0.418455 |
| ngl3a             | 84.93712 | -1.604359572 | 0.870152 | -1.84377 | 0.065217 | 0.435355 |
| dpp6b             | 267.7378 | 0.624389175  | 0.233282 | 2.676543 | 0.007439 | 0.146061 |
| hsp90aa1.2        | 1099.699 | 0.368872569  | 0.427153 | 0.863561 | 0.387829 | 0.827592 |
| inhabab           | 21.76499 | 0.745649316  | 0.614829 | 1.212776 | 0.225216 | 0.70685  |
| slc24a5           | 94.34421 | -0.301097535 | 0.334759 | -0.89945 | 0.368415 | 0.817272 |
| si:ch211-129c21.1 | 338.8276 | -0.181692661 | 0.15387  | -1.18082 | 0.237674 | 0.718568 |
| ctnna2            | 612.6257 | 0.294953416  | 0.135527 | 2.176339 | 0.02953  | 0.30586  |
| mxcl              | 61.13717 | -0.066510054 | 0.396733 | -0.16764 | 0.866863 | 0.982582 |
| ogfr12            | 58.8211  | -0.055663828 | 0.342483 | -0.16253 | 0.870888 | 0.983365 |
| rillp12           | 144.9493 | 0.019211419  | 0.174243 | 0.110257 | 0.912206 | 0.992371 |
| rnf150a           | 29.47113 | -0.291266495 | 0.366005 | -0.7958  | 0.426149 | 0.844714 |
| tmem134           | 425.0556 | -0.035241453 | 0.119589 | -0.29469 | 0.768232 | 0.960296 |
| tnn               | 4986.719 | 0.088370456  | 0.176441 | 0.500849 | 0.616477 | 0.916365 |
| crhbp             | 186.4467 | -0.911187805 | 0.253584 | -3.59324 | 0.000327 | 0.020507 |
| max               | 1855.308 | -0.092864283 | 0.114881 | -0.80835 | 0.418887 | 0.841915 |
| cops8             | 647.3269 | 0.10606868   | 0.159372 | 0.665542 | 0.505704 | 0.882449 |
| col5a2b           | 98.41316 | -0.448707315 | 0.374773 | -1.19728 | 0.231198 | 0.712822 |
| dscama            | 510.9217 | 0.338482813  | 0.171536 | 1.97325  | 0.048467 | 0.383271 |
| dock4b            | 342.9562 | -0.137567759 | 0.14655  | -0.93871 | 0.347879 | 0.800274 |
| ptgr1             | 1129.324 | 0.058393568  | 0.114841 | 0.508474 | 0.611121 | 0.915331 |
| tbx5a             | 42.28794 | -0.200542286 | 0.263264 | -0.76175 | 0.446208 | 0.855403 |
| fam50a            | 565.6884 | -0.030333436 | 0.161256 | -0.18811 | 0.850792 | 0.978402 |

|                  |          |              |          |          |          |          |
|------------------|----------|--------------|----------|----------|----------|----------|
| stil             | 82.94278 | 0.406100594  | 0.300484 | 1.351489 | 0.176539 | 0.649967 |
| tmem136a         | 246.9127 | 0.071207276  | 0.137835 | 0.516612 | 0.605427 | 0.914985 |
| spast            | 276.7965 | 0.1608348    | 0.155913 | 1.031569 | 0.302274 | 0.768145 |
| rnf144b          | 303.9452 | -0.089397011 | 0.150807 | -0.59279 | 0.55332  | 0.89793  |
| tmed4            | 252.3111 | -0.039002255 | 0.233702 | -0.16689 | 0.867457 | 0.982582 |
| patj             | 235.2222 | 0.263869162  | 0.184152 | 1.432889 | 0.15189  | 0.615406 |
| MARK4            | 638.184  | -0.069471507 | 0.103319 | -0.6724  | 0.50133  | 0.880791 |
| fancg            | 63.55251 | -0.039101064 | 0.207303 | -0.18862 | 0.850392 | 0.978251 |
| synj1            | 692.4333 | 0.146115503  | 0.128229 | 1.139489 | 0.254499 | 0.733426 |
| tpila            | 201.0817 | -0.4704027   | 0.197508 | -2.38168 | 0.017234 | 0.231824 |
| gnal4a           | 9.432593 | -0.88992767  | 1.249367 | -0.7123  | 0.476277 | 0.869292 |
| prdm8            | 65.23359 | -0.154001802 | 0.24315  | -0.63336 | 0.526498 | 0.889591 |
| pnoca            | 70.2596  | -0.237158542 | 0.350726 | -0.67619 | 0.498918 | 0.879457 |
| nr3c1            | 1031.605 | -0.067271928 | 0.134392 | -0.50057 | 0.616677 | 0.916365 |
| stx5a            | 641.6274 | 0.036645041  | 0.10218  | 0.358632 | 0.719871 | 0.94694  |
| syngr3b          | 191.854  | 0.046674351  | 0.226384 | 0.206173 | 0.836655 | 0.976007 |
| trip13           | 106.1479 | 0.352033835  | 0.241143 | 1.459856 | 0.14433  | 0.603413 |
| AL935186.1       | 23.65457 | 0.691260511  | 0.662779 | 1.042973 | 0.296961 | 0.764508 |
| brd8             | 768.8669 | 0.233781736  | 0.090861 | 2.572955 | 0.010083 | 0.174093 |
| rpl18a           | 26622.84 | -0.343816199 | 0.12779  | -2.69048 | 0.007135 | 0.143006 |
| slc25a10         | 565.8901 | -0.102847166 | 0.149597 | -0.68749 | 0.491772 | 0.87595  |
| marveld2a        | 243.1538 | -0.057095416 | 0.135378 | -0.42175 | 0.67321  | 0.93414  |
| grnb             | 306.5739 | 0.205180351  | 0.164817 | 1.244897 | 0.213169 | 0.695467 |
| lox14            | 122.5322 | -0.594634639 | 0.289824 | -2.05171 | 0.040198 | 0.350542 |
| ezrb             | 1732.623 | 0.007922972  | 0.103998 | 0.076184 | 0.939273 | 0.997371 |
| edem1            | 520.4573 | 0.093795094  | 0.133494 | 0.702619 | 0.482293 | 0.871664 |
| ppp3cb           | 859.6179 | 0.221119044  | 0.218674 | 1.011182 | 0.311929 | 0.776164 |
| magixa           | 39.01416 | 0.498189951  | 0.303716 | 1.640313 | 0.10094  | 0.526541 |
| lbx2             | 222.4778 | -0.084763426 | 0.144879 | -0.58506 | 0.558505 | 0.899409 |
| cd63             | 1975.284 | -0.074593831 | 0.094404 | -0.79016 | 0.429436 | 0.846956 |
| si:dkey-181c13.1 | 0.6279   | 0            | 4.377438 | 0        | 1        | NA       |
| asic4a           | 93.6793  | -0.098560804 | 0.333264 | -0.29574 | 0.767426 | 0.960296 |
| mpp7b            | 1.384044 | -1.74909094  | 2.017058 | -0.86715 | 0.38586  | NA       |
| zgc:103482       | 16.30889 | -0.006312698 | 0.541879 | -0.01165 | 0.990705 | 1        |
| six6a            | 53.63063 | 0.150370467  | 0.317756 | 0.473226 | 0.636052 | 0.924779 |
| cpne8            | 9.716311 | 1.563786138  | 0.805525 | 1.941326 | 0.052219 | 0.396951 |
| syt2a            | 42.56157 | 0.783857941  | 0.390179 | 2.008968 | 0.044541 | 0.369365 |
| ints11           | 261.6824 | -0.021801718 | 0.148008 | -0.1473  | 0.882895 | 0.986908 |
| myo5ab           | 161.0597 | 0.041002522  | 0.198767 | 0.206285 | 0.836569 | 0.976007 |
| sppl3            | 422.9888 | -0.011661464 | 0.164203 | -0.07102 | 0.943383 | 0.997371 |
| znf668           | 107.3898 | 0.090225239  | 0.172949 | 0.521687 | 0.601888 | 0.914001 |
| lipt1            | 70.07545 | -0.039981854 | 0.225769 | -0.17709 | 0.859436 | 0.979975 |
| s100a10b         | 3571.253 | 0.198710506  | 0.13467  | 1.47554  | 0.140067 | 0.598705 |
| pdcd6ip          | 2042.548 | -0.062860038 | 0.123044 | -0.51087 | 0.60944  | 0.915204 |
| gbgt111          | 19.50997 | -0.039796245 | 0.431246 | -0.09228 | 0.926474 | 0.994815 |
| panx1a           | 528.5616 | 0.129815987  | 0.180526 | 0.719099 | 0.47208  | 0.868517 |
| tspan9a          | 18.29373 | 0.682105132  | 0.454438 | 1.500985 | 0.133359 | 0.586883 |
| gfap             | 2546.559 | 0.010749184  | 0.170588 | 0.063013 | 0.949756 | 0.99801  |
| dixd1a           | 429.4683 | 0.040016293  | 0.147529 | 0.271244 | 0.786203 | 0.962605 |
| dpf3             | 111.9839 | -0.177499696 | 0.180948 | -0.98094 | 0.32662  | 0.785469 |
| cuzd1.2          | 10.20709 | -0.868149847 | 1.759656 | -0.49336 | 0.621756 | 0.918461 |
| fynb             | 115.4719 | -0.002574526 | 0.186999 | -0.01377 | 0.989015 | 1        |
| col21a1          | 61.48695 | 0.395180645  | 0.30257  | 1.30608  | 0.191525 | 0.671557 |
| ccsapa           | 143.64   | -0.265262567 | 0.231075 | -1.14795 | 0.250989 | 0.731313 |

|                  |          |              |          |          |          |          |
|------------------|----------|--------------|----------|----------|----------|----------|
| myl12.2          | 800.8409 | -0.020760185 | 0.135802 | -0.15287 | 0.8785   | 0.985761 |
| rbm28            | 473.2022 | -0.096369988 | 0.16896  | -0.57037 | 0.568425 | 0.902146 |
| nek10            | 10.50057 | 0.450693901  | 0.60686  | 0.742666 | 0.457684 | 0.860993 |
| hagh             | 762.895  | -0.52870679  | 0.147128 | -3.59351 | 0.000326 | 0.020507 |
| tusc2b           | 658.3565 | 0.005348793  | 0.132611 | 0.040335 | 0.967826 | 1        |
| znf277           | 123.4527 | -0.640658276 | 0.198208 | -3.23225 | 0.001228 | 0.050845 |
| igfbp5b          | 912.3735 | 0.131867306  | 0.14452  | 0.912451 | 0.361532 | 0.811773 |
| prdx2            | 9423.257 | -0.097304846 | 0.167153 | -0.58213 | 0.560478 | 0.899928 |
| admp             | 0.484442 | -3.150117619 | 4.050988 | -0.77762 | 0.436795 | NA       |
| idh1             | 1816.464 | 0.140266746  | 0.158162 | 0.886856 | 0.375157 | 0.822052 |
| arl2bp           | 114.4846 | -0.059560594 | 0.218653 | -0.2724  | 0.785316 | 0.962605 |
| lsm14b           | 2.596946 | 2.776329826  | 1.531453 | 1.812873 | 0.069851 | 0.450824 |
| pfdn2            | 995.7125 | 0.273738192  | 0.125662 | 2.178371 | 0.029378 | 0.304886 |
| srsf3a           | 32.81155 | -0.017110683 | 0.328589 | -0.05207 | 0.95847  | 0.999109 |
| ftr83            | 412.4289 | 0.010517103  | 0.170291 | 0.06176  | 0.950754 | 0.99801  |
| ube2g2           | 567.6747 | 0.106458581  | 0.103226 | 1.031314 | 0.302394 | 0.768252 |
| fzd5             | 123.9917 | 0.250827491  | 0.215405 | 1.164447 | 0.244243 | 0.724876 |
| tldr3            | 371.0421 | 0.182569941  | 0.141237 | 1.29265  | 0.196132 | 0.676562 |
| socs3a           | 431.3094 | 0.034357208  | 0.724147 | 0.047445 | 0.962158 | 0.999451 |
| msrbl1a          | 734.499  | -0.252064184 | 0.262795 | -0.95917 | 0.337474 | 0.7944   |
| spon2a           | 142.512  | 0.136868982  | 0.213478 | 0.641138 | 0.521433 | 0.887551 |
| aatf             | 205.3066 | -0.04442748  | 0.167851 | -0.26468 | 0.791253 | 0.964766 |
| bnip3la          | 338.1738 | 0.22723734   | 0.12777  | 1.77849  | 0.075323 | 0.465238 |
| gipr             | 20.6594  | 0.698813635  | 0.532272 | 1.312888 | 0.189221 | 0.668738 |
| nhlh2            | 806.1545 | 0.035401084  | 0.147908 | 0.239345 | 0.810838 | 0.969828 |
| mtx1a            | 167.6613 | 0.190950162  | 0.164084 | 1.163733 | 0.244532 | 0.725549 |
| gucy2f           | 52.43495 | 0.832304673  | 0.425328 | 1.956856 | 0.050364 | 0.390726 |
| si:ch73-335d12.2 | 0.194    | 0            | 5.267649 | 0        | 1        | NA       |
| wdr24            | 243.1852 | -0.110637695 | 0.167575 | -0.66023 | 0.509107 | 0.883443 |
| dip2cb           | 434.2089 | 0.266874385  | 0.212888 | 1.253589 | 0.209991 | 0.691821 |
| zgc:101679       | 254.7999 | 0.009667344  | 0.173989 | 0.055563 | 0.95569  | 0.998707 |
| sgkl             | 1375.06  | -0.293074516 | 0.231701 | -1.26488 | 0.205913 | 0.688314 |
| clint1a          | 1002.795 | -0.057693572 | 0.107539 | -0.53649 | 0.59162  | 0.909437 |
| si:ch73-34314.6  | 0.07132  | 0            | 5.267649 | 0        | 1        | NA       |
| ndufaf1          | 802.0236 | 0.222032618  | 0.148964 | 1.49051  | 0.13609  | 0.591153 |
| wdr83os          | 630.4121 | 0.116105684  | 0.176788 | 0.65675  | 0.511341 | 0.884691 |
| ormdl3           | 39.1653  | -0.051424707 | 0.324718 | -0.15837 | 0.874167 | 0.98385  |
| pex1lg           | 76.01932 | 0.010786288  | 0.286726 | 0.037619 | 0.969992 | 1        |
| slc25a3b         | 17366.91 | -0.14807328  | 0.113029 | -1.31005 | 0.190179 | 0.669977 |
| nf2b             | 387.7046 | -0.087559526 | 0.123101 | -0.71128 | 0.476911 | 0.869292 |
| mkln1            | 371.6843 | 0.030227592  | 0.138595 | 0.2181   | 0.827351 | 0.973459 |
| zgc:66447        | 192.2499 | -0.118724654 | 0.147465 | -0.80511 | 0.420758 | 0.842383 |
| rpl10            | 33018.68 | -0.323016775 | 0.11458  | -2.81914 | 0.004815 | 0.115256 |
| plekhj1          | 189.2028 | -0.167173421 | 0.143739 | -1.16304 | 0.244815 | 0.726138 |
| agmo             | 396.2942 | -0.395121209 | 0.195941 | -2.01653 | 0.043744 | 0.3663   |
| orl02-5          | 0.194091 | 2.43638772   | 5.206324 | 0.467967 | 0.639808 | NA       |
| trim35-14        | 0.236389 | 2.079536233  | 5.22636  | 0.397894 | 0.690708 | NA       |
| nvl              | 438.1177 | -0.097012403 | 0.160136 | -0.60581 | 0.544639 | 0.895206 |
| ifnphil          | 2.154153 | -0.934726704 | 1.480419 | -0.63139 | 0.527783 | NA       |
| casp611          | 38.05507 | 0.073663216  | 0.363694 | 0.202542 | 0.839493 | 0.976417 |
| prrl51a          | 69.42806 | -0.192276956 | 0.24375  | -0.78883 | 0.430213 | 0.847541 |
| gli2a            | 461.8565 | -0.014136884 | 0.161926 | -0.0873  | 0.930429 | 0.995707 |
| orl11-2          | 5.245874 | 1.557512898  | 1.262267 | 1.233901 | 0.21724  | 0.69815  |
| adgrb2           | 42.60548 | 0.15448354   | 0.436475 | 0.353934 | 0.723388 | 0.947908 |



|                   |          |              |          |          |          |          |
|-------------------|----------|--------------|----------|----------|----------|----------|
| fstl3             | 826.1823 | 0.035802406  | 0.204261 | 0.175278 | 0.860862 | 0.980388 |
| grm6b             | 122.8051 | 0.311753438  | 0.318208 | 0.979717 | 0.327226 | 0.786088 |
| antxrla           | 92.69944 | -0.124063448 | 0.344931 | -0.35968 | 0.719089 | 0.94694  |
| comtb             | 214.0115 | 0.030943065  | 0.194875 | 0.158784 | 0.873839 | 0.98385  |
| tmem9b            | 589.7991 | 0.077359046  | 0.146998 | 0.52626  | 0.598708 | 0.912935 |
| mbdlb             | 481.3826 | 0.024335009  | 0.108983 | 0.223291 | 0.823309 | 0.972005 |
| dmgdh             | 2153.453 | 0.206800392  | 0.142891 | 1.447257 | 0.147825 | 0.608687 |
| cxxc1b            | 260.8945 | 0.229206214  | 0.126577 | 1.810806 | 0.070171 | 0.452005 |
| grin1b            | 1338.978 | 0.923108155  | 0.212062 | 4.353014 | 1.34E-05 | 0.002278 |
| ube2f             | 444.4866 | 0.084781178  | 0.151132 | 0.560976 | 0.574814 | 0.904516 |
| tspan35           | 328.2352 | -0.379284454 | 0.185068 | -2.04943 | 0.04042  | 0.351287 |
| zgc:66440         | 116.3416 | -0.362756702 | 0.231408 | -1.5676  | 0.116974 | 0.557831 |
| si:ch211-125e6.11 | 0.069091 | 0            | 5.267649 | 0        | 1        | NA       |
| chp2              | 268.4915 | -0.149095472 | 0.195999 | -0.76069 | 0.44684  | 0.855784 |
| chd4b             | 2281.218 | 0.129200472  | 0.145389 | 0.888655 | 0.374188 | 0.820862 |
| abhd2a            | 14.39622 | -0.085188624 | 0.585429 | -0.14551 | 0.884304 | 0.987047 |
| taf5l             | 109.9856 | 0.017930636  | 0.172979 | 0.103658 | 0.917441 | 0.993777 |
| chek2             | 59.0594  | 0.188921216  | 0.329736 | 0.572947 | 0.56668  | 0.901739 |
| dmtf1             | 249.8684 | 0.151237471  | 0.149769 | 1.009806 | 0.312588 | 0.776164 |
| gnal2a            | 535.4969 | 0.056452225  | 0.10963  | 0.514934 | 0.606599 | 0.915204 |
| sox12             | 731.3562 | -0.041777    | 0.107949 | -0.38701 | 0.698752 | 0.942456 |
| rps2l             | 14259.16 | -0.284039118 | 0.149023 | -1.90601 | 0.056649 | 0.411073 |
| ddx5l             | 202.0109 | -0.126688272 | 0.153328 | -0.82625 | 0.408659 | 0.836526 |
| camk2n1a          | 953.5967 | 0.003155019  | 0.160987 | 0.019598 | 0.984364 | 1        |
| zgc:56525         | 990.0015 | -0.014158814 | 0.094772 | -0.1494  | 0.881239 | 0.986892 |
| lmf2b             | 429.9186 | 0.787259391  | 0.174379 | 4.51465  | 6.34E-06 | 0.001289 |
| ankddl1b          | 20.27841 | -0.305172053 | 0.473996 | -0.64383 | 0.519686 | 0.887148 |
| kctd2             | 47.11209 | 0.010076912  | 0.271896 | 0.037062 | 0.970436 | 1        |
| usp14             | 1110.432 | 0.197342552  | 0.156413 | 1.261678 | 0.207065 | 0.689323 |
| shox              | 216.0389 | 0.027002917  | 0.145031 | 0.186187 | 0.852298 | 0.978626 |
| pnx               | 1.223402 | 0.357237681  | 1.830993 | 0.195106 | 0.84531  | NA       |
| plekhg5a          | 363.2348 | -0.203676295 | 0.163502 | -1.24571 | 0.212872 | 0.695171 |
| lgals9l1          | 78.59102 | 0.172971959  | 0.236709 | 0.730736 | 0.464941 | 0.864823 |
| tecrb             | 1779.978 | -0.039960426 | 0.120291 | -0.3322  | 0.739741 | 0.953588 |
| bssl2l            | 526.4255 | -0.400565831 | 0.206873 | -1.93628 | 0.052833 | 0.399532 |
| si:dkey-190g11.3  | 18.0542  | 0.477549728  | 0.719389 | 0.663827 | 0.506801 | 0.883007 |
| tiam1b            | 177.5727 | -0.123436887 | 0.166141 | -0.74296 | 0.457503 | 0.860993 |
| crygs3            | 0.965961 | 0            | 2.520467 | 0        | 1        | NA       |
| mlh1              | 116.6162 | -0.472237533 | 0.183904 | -2.56785 | 0.010233 | 0.176021 |
| irak1             | 59.97045 | -0.213687702 | 0.254875 | -0.8384  | 0.401806 | 0.832807 |
| rhoq              | 259.5854 | 0.281416317  | 0.175184 | 1.606404 | 0.108185 | 0.54011  |
| mctsl             | 567.5315 | 0.060690302  | 0.137569 | 0.441163 | 0.659095 | 0.930581 |
| magi3b            | 26.01579 | 0.281555238  | 0.452573 | 0.622121 | 0.533862 | 0.891181 |
| blmh              | 1070.879 | 0.086318205  | 0.164162 | 0.525812 | 0.599019 | 0.913109 |
| l3mbt13           | 36.05352 | -0.025041061 | 0.301071 | -0.08317 | 0.933714 | 0.996598 |
| xpnpep2           | 62.74268 | -0.40539882  | 0.395317 | -1.0255  | 0.305126 | 0.770296 |
| mospd2            | 309.9726 | -0.35306097  | 0.116375 | -3.03382 | 0.002415 | 0.078804 |
| ankrd44           | 83.53667 | 0.516610561  | 0.258067 | 2.001846 | 0.045301 | 0.372707 |
| ube2b             | 432.8845 | 0.182880802  | 0.146572 | 1.24772  | 0.212134 | 0.693739 |
| tscla             | 705.3055 | -0.181693535 | 0.109992 | -1.65188 | 0.098559 | 0.521133 |
| mxf               | 6.05314  | -1.392013833 | 1.643876 | -0.84679 | 0.397113 | 0.830253 |
| ccdc3a            | 71.5809  | -0.372258605 | 0.327674 | -1.13606 | 0.25593  | 0.733716 |
| hltf              | 155.6999 | 0.270440597  | 0.16206  | 1.668767 | 0.095164 | 0.514692 |
| trappc5           | 493.4924 | -0.024426143 | 0.120566 | -0.2026  | 0.839451 | 0.976417 |

|                 |          |              |          |          |          |          |
|-----------------|----------|--------------|----------|----------|----------|----------|
| cd82b           | 1062.262 | -0.036062882 | 0.146149 | -0.24675 | 0.805098 | 0.969348 |
| pcdc5           | 827.6098 | -0.11533442  | 0.176777 | -0.65243 | 0.514125 | 0.88631  |
| lhcgr           | 1.569835 | -2.111128191 | 1.696812 | -1.24417 | 0.213436 | NA       |
| si:dkey-43k4.5  | 24.71159 | 0.588496507  | 0.417666 | 1.409011 | 0.158832 | 0.624456 |
| zgc:162324      | 9.901659 | 0.305342761  | 0.656581 | 0.46505  | 0.641896 | 0.925586 |
| adprm           | 86.1445  | 0.112305034  | 0.273486 | 0.410643 | 0.681335 | 0.937331 |
| si:dkey-13a21.4 | 46.38672 | -0.771785675 | 0.461593 | -1.67201 | 0.094523 | 0.513368 |
| slc48a1b        | 407.7914 | -0.063730483 | 0.159165 | -0.40041 | 0.688858 | 0.93924  |
| sfxn5b          | 381.3207 | 0.070290727  | 0.163638 | 0.429551 | 0.667522 | 0.933086 |
| slc46a1         | 88.14862 | -0.308902603 | 0.24365  | -1.26781 | 0.204864 | 0.686735 |
| coll1a1a        | 8718.516 | 0.304685234  | 0.174377 | 1.747274 | 0.08059  | 0.479386 |
| emilin1b        | 575.8167 | 0.255189531  | 0.135319 | 1.885832 | 0.059318 | 0.419405 |
| hps1            | 155.1585 | -0.492923768 | 0.163782 | -3.00963 | 0.002616 | 0.083393 |
| ube3d           | 107.0052 | 0.040564842  | 0.18602  | 0.218067 | 0.827377 | 0.973459 |
| prpf8           | 2439.782 | 0.108800338  | 0.155718 | 0.698701 | 0.484739 | 0.872911 |
| polr2eb         | 765.6697 | 0.046544078  | 0.155747 | 0.298843 | 0.76506  | 0.959622 |
| yju2            | 345.4208 | 0.109047528  | 0.128873 | 0.846159 | 0.397464 | 0.830253 |
| enoph1          | 459.554  | 0.027019742  | 0.130407 | 0.207196 | 0.835857 | 0.976007 |
| fanci           | 102.1516 | 0.452140049  | 0.341406 | 1.324349 | 0.185387 | 0.663181 |
| nsd2            | 445.3436 | 0.311185794  | 0.18916  | 1.645096 | 0.09995  | 0.524166 |
| prnpa           | 100.0696 | -2.123125434 | 0.570594 | -3.7209  | 0.000199 | 0.014933 |
| zgc:56585       | 207.5336 | 0.059552361  | 0.194774 | 0.305751 | 0.759794 | 0.957886 |
| CR847944.1      | 1.759073 | -2.349187399 | 2.029082 | -1.15776 | 0.246962 | NA       |
| insyn1          | 137.0491 | 0.037173033  | 0.296286 | 0.125463 | 0.900157 | 0.99045  |
| slc1a7b         | 23.11555 | -2.386494143 | 1.348599 | -1.76961 | 0.076792 | 0.469341 |
| lyrml           | 40.36949 | -0.461657005 | 0.340735 | -1.35489 | 0.175454 | 0.649279 |
| erbb2           | 136.71   | 0.189441668  | 0.213838 | 0.885914 | 0.375664 | 0.822237 |
| zgc:112994      | 22.10369 | -0.39102882  | 0.503846 | -0.77609 | 0.437697 | 0.851283 |
| adgre5a         | 0.137587 | 0            | 5.267649 | 0        | 1        | NA       |
| dhrs13a.1       | 327.5115 | 0.142402893  | 0.194338 | 0.732758 | 0.463706 | 0.864593 |
| mmp11a          | 170.5486 | -0.643141356 | 0.23808  | -2.70137 | 0.006905 | 0.139981 |
| arhgap29a       | 231.5809 | 0.095737677  | 0.151651 | 0.631304 | 0.527842 | 0.889948 |
| xkr7            | 43.84981 | 0.123283691  | 0.440367 | 0.279957 | 0.779511 | 0.961073 |
| susd4           | 90.93054 | 0.368607508  | 0.298429 | 1.235162 | 0.21677  | 0.69815  |
| styxl1          | 4.713457 | -0.029395444 | 0.732427 | -0.04013 | 0.967986 | 1        |
| csad            | 278.3611 | -0.246436006 | 0.148299 | -1.66175 | 0.096563 | 0.518868 |
| wasb            | 54.75104 | -0.401245733 | 0.279506 | -1.43555 | 0.15113  | 0.615085 |
| pblid2          | 146.6225 | -0.593109068 | 0.227752 | -2.60419 | 0.009209 | 0.165025 |
| dbi             | 3618.508 | -0.132824146 | 0.188966 | -0.7029  | 0.482118 | 0.87159  |
| acol            | 158.2684 | -0.156727519 | 0.212382 | -0.73795 | 0.460544 | 0.862369 |
| si:dkey-27j5.5  | 13.58413 | 3.266678326  | 1.397095 | 2.338194 | 0.019377 | 0.245204 |
| pip4plb         | 73.13869 | -0.135953426 | 0.254751 | -0.53367 | 0.593568 | 0.910427 |
| rfx4            | 146.7212 | 0.256444498  | 0.193053 | 1.328361 | 0.184059 | 0.660978 |
| rad51d          | 36.46731 | 0.525875699  | 0.471095 | 1.116283 | 0.264301 | 0.742063 |
| heph11b         | 11.17699 | -1.17310881  | 0.639469 | -1.83451 | 0.066579 | 0.440501 |
| anxa5a          | 196.684  | 0.018356557  | 0.282439 | 0.064993 | 0.94818  | 0.997653 |
| ccr12b.2        | 3.459397 | -2.087338074 | 1.112427 | -1.87638 | 0.060603 | 0.423018 |
| apob            | 197.309  | 0.218977558  | 0.185823 | 1.178423 | 0.238628 | 0.719642 |
| med29           | 229.2752 | 0.262181502  | 0.126641 | 2.070268 | 0.038427 | 0.343768 |
| zgc:66474       | 246.2646 | -0.129890906 | 0.157382 | -0.82532 | 0.409189 | 0.836637 |
| mis12           | 145.4627 | 0.160555281  | 0.20448  | 0.785186 | 0.432344 | 0.848419 |
| six1b           | 751.0691 | 0.003943505  | 0.152333 | 0.025887 | 0.979347 | 1        |
| tiall           | 1897.282 | 0.005169444  | 0.097209 | 0.053179 | 0.95759  | 0.999109 |
| arhgap12b       | 445.2208 | 0.04929457   | 0.133248 | 0.369946 | 0.711423 | 0.945821 |

|                  |          |              |          |          |          |          |
|------------------|----------|--------------|----------|----------|----------|----------|
| rab15            | 193.268  | 0.094443537  | 0.1915   | 0.493179 | 0.621886 | 0.918461 |
| khsrp            | 1328.076 | 0.062524863  | 0.161435 | 0.387308 | 0.698528 | 0.942433 |
| ppmle            | 61.12268 | 0.0753502    | 0.277318 | 0.27171  | 0.785845 | 0.962605 |
| xkr9             | 19.6498  | -0.484284451 | 0.378078 | -1.28091 | 0.200225 | 0.680711 |
| si:ch211-285c6.3 | 0.533138 | -2.406573819 | 3.109496 | -0.77394 | 0.438964 | NA       |
| hoxb6b           | 131.4555 | 0.359070323  | 0.20933  | 1.715332 | 0.086284 | 0.493048 |
| ralgps2          | 367.8316 | 0.404504667  | 0.124887 | 3.238955 | 0.0012   | 0.049994 |
| alcama           | 871.3968 | 0.108465987  | 0.134403 | 0.807022 | 0.419654 | 0.842383 |
| ppp4r2a          | 476.7062 | -0.036777088 | 0.095368 | -0.38563 | 0.699768 | 0.942499 |
| cyp2u1           | 73.10275 | 0.109962767  | 0.459722 | 0.239194 | 0.810955 | 0.969848 |
| pimr196          | 0.087381 | 0            | 5.267649 | 0        | 1        | NA       |
| cdk2             | 379.2776 | 0.1665527    | 0.129653 | 1.284604 | 0.198931 | 0.679593 |
| iscub            | 245.2582 | 0.274199986  | 0.218289 | 1.256133 | 0.209068 | 0.691152 |
| pafahlb1b        | 1556.197 | 0.102495559  | 0.081744 | 1.253865 | 0.209891 | 0.691821 |
| en2a             | 203.4199 | -0.015872334 | 0.177803 | -0.08927 | 0.928868 | 0.995164 |
| socs3b           | 519.8421 | 0.179408142  | 0.18773  | 0.955671 | 0.339239 | 0.795226 |
| zgc:113425       | 9.041038 | 0.594292471  | 0.71397  | 0.832377 | 0.405196 | 0.834483 |
| gmds             | 622.1534 | 0.453988528  | 0.129158 | 3.514989 | 0.00044  | 0.025327 |
| mark3b           | 632.31   | -0.029075171 | 0.105432 | -0.27577 | 0.782724 | 0.962328 |
| ehmt1b           | 745.4766 | 0.022083511  | 0.104949 | 0.210421 | 0.833339 | 0.975388 |
| asb1             | 22.86653 | -0.120333787 | 0.424165 | -0.2837  | 0.776644 | 0.961073 |
| gosr1            | 293.5045 | 0.145045964  | 0.131245 | 1.105152 | 0.269094 | 0.745266 |
| tspo             | 1155.302 | 0.157191694  | 0.139176 | 1.129446 | 0.25871  | 0.73587  |
| t1r19            | 2.130795 | 1.951755946  | 1.642614 | 1.188201 | 0.234754 | NA       |
| uril             | 693.4001 | -0.087421203 | 0.109523 | -0.7982  | 0.424755 | 0.844714 |
| slc25a14         | 459.9919 | 0.25845236   | 0.126592 | 2.041614 | 0.04119  | 0.354125 |
| zgc:101583       | 139.8489 | -0.298114694 | 0.183861 | -1.62142 | 0.104928 | 0.533388 |
| gtf2h1           | 194.5306 | 0.013654114  | 0.139683 | 0.097751 | 0.92213  | 0.994346 |
| ftr72            | 2.10485  | -0.234832786 | 1.269815 | -0.18493 | 0.85328  | NA       |
| rab5c            | 1914.679 | 0.06077415   | 0.098858 | 0.614765 | 0.53871  | 0.892777 |
| syncr1p1         | 569.7702 | 0.252466837  | 0.11037  | 2.287454 | 0.022169 | 0.263608 |
| anxala           | 4789.824 | -0.414535175 | 0.122996 | -3.3703  | 0.000751 | 0.036396 |
| ill1ra           | 67.78284 | 0.52647329   | 0.268535 | 1.960539 | 0.049933 | 0.388888 |
| grik4            | 84.84726 | 0.046747075  | 0.326911 | 0.142996 | 0.886293 | 0.987533 |
| ldlr1b           | 296.9764 | 0.389094356  | 0.215711 | 1.803777 | 0.071266 | 0.455342 |
| fam126a          | 272.0492 | 0.005938464  | 0.15357  | 0.038669 | 0.969154 | 1        |
| ahsg1            | 222.8255 | -1.02955377  | 0.468896 | -2.1957  | 0.028114 | 0.29853  |
| bc12110          | 626.4846 | 0.079273879  | 0.125317 | 0.632586 | 0.527004 | 0.889861 |
| nol11            | 405.6238 | -0.092053374 | 0.14489  | -0.63533 | 0.525211 | 0.888928 |
| tmem41ab         | 174.8201 | 0.109047028  | 0.277706 | 0.39267  | 0.694563 | 0.941093 |
| robo1            | 805.6343 | 0.097434805  | 0.121861 | 0.799559 | 0.423966 | 0.844352 |
| aqp7             | 76.87107 | -0.467410526 | 0.271536 | -1.72136 | 0.085186 | 0.490251 |
| grmla            | 221.8226 | 0.2109487    | 0.348494 | 0.605314 | 0.54497  | 0.895206 |
| suv39h1a         | 4.033021 | -0.521231752 | 1.174121 | -0.44393 | 0.657091 | 0.929939 |
| stau2            | 4799.519 | 0.135695241  | 0.083303 | 1.628935 | 0.103327 | 0.530446 |
| taf8             | 148.6261 | 0.190125212  | 0.164939 | 1.152699 | 0.249034 | 0.728918 |
| ext13            | 208.8014 | 0.608651563  | 0.195153 | 3.118841 | 0.001816 | 0.06578  |
| gucy2d           | 456.1358 | 0.961248006  | 0.557893 | 1.722998 | 0.084889 | 0.489029 |
| cot11            | 5142.476 | 0.041362235  | 0.112879 | 0.366428 | 0.714045 | 0.945821 |
| cdr21            | 452.5473 | 0.020766692  | 0.150285 | 0.138182 | 0.890097 | 0.98835  |
| slc25a32b        | 139.94   | 0.140621285  | 0.171627 | 0.81934  | 0.412592 | 0.838123 |
| med21            | 249.8555 | 0.007767386  | 0.173458 | 0.04478  | 0.964283 | 0.999925 |
| arhgap23b        | 34.24114 | -0.031395104 | 0.470456 | -0.06673 | 0.946794 | 0.997371 |
| acin1b           | 1694.114 | 0.007205548  | 0.132404 | 0.054421 | 0.9566   | 0.999074 |

|                   |          |              |            |          |          |          |
|-------------------|----------|--------------|------------|----------|----------|----------|
| rhoaa             | 3192.132 | 0.099131872  | 0.098096   | 1.010563 | 0.312226 | 0.776164 |
| cacna2d4a         | 21.01009 | 0.961481782  | 0.626697   | 1.534204 | 0.124979 | 0.572594 |
| aktip             | 943.4682 | 0.056038269  | 0.102766   | 0.545301 | 0.585547 | 0.906655 |
| si:ch211-226m16.3 | 1.746272 | 1.520679867  | 1.883513   | 0.807364 | 0.419457 | NA       |
| fam107b           | 978.5571 | -0.170278797 | 0.154347   | -1.10322 | 0.269933 | 0.746532 |
| uchl1             | 318.9352 | 0.253517761  | 0.197425   | 1.284124 | 0.199098 | 0.679605 |
| fam57ba           | 247.851  | -0.080158493 | 0.171      | -0.46876 | 0.63924  | 0.924779 |
| palmla            | 367.213  | 0.215430398  | 0.177113   | 1.216345 | 0.223853 | 0.705807 |
| gpatch11          | 180.3986 | -0.090392631 | 0.149326   | -0.60534 | 0.544954 | 0.895206 |
| tor113            | 7.45819  | 0.981739212  | 1.701854   | 0.576864 | 0.564031 | 0.901345 |
| cryz11            | 212.5356 | 0.294061027  | 0.232389   | 1.265385 | 0.205733 | 0.687948 |
| cb1n13            | 59.7591  | -1.415860625 | 0.387666   | -3.65227 | 0.00026  | 0.017766 |
| slc48a1a          | 91.81402 | -0.116818901 | 0.282167   | -0.41401 | 0.678869 | 0.936051 |
| tmed2             | 2126.089 | -0.0620565   | 0.086844   | -0.71457 | 0.474873 | 0.869292 |
| nos2a             | 9.181249 | -1.34654402  | 1.190716   | -1.13087 | 0.25811  | 0.735569 |
| rom1b             | 218.0192 | -0.676485053 | 0.592764   | -1.14124 | 0.253771 | 0.732873 |
| fbx14             | 287.8728 | -0.189844282 | 0.152668   | -1.24351 | 0.213679 | 0.696139 |
| ap2s1             | 1674.354 | 0.096623342  | 0.127928   | 0.755295 | 0.450072 | 0.85711  |
| si:ch211-119o8.6  | 1.59157  | -0.645463857 | 1.351828   | -0.47747 | 0.633024 | NA       |
| krt1-c5           | 223.3033 | -0.601726351 | 0.257318   | -2.33845 | 0.019364 | 0.245171 |
| lims1             | 910.3975 | -0.005357251 | 0.183272   | -0.02923 | 0.97668  | 1        |
| rexo1             | 188.8489 | 0.036746314  | 0.161584   | 0.227413 | 0.820103 | 0.971788 |
| tbc1d22b          | 15.20766 | 0.230632579  | 0.419385   | 0.549931 | 0.582367 | 0.90571  |
| klhl6             | 19.82332 | -0.342944019 | 0.471042   | -0.72805 | 0.466581 | 0.865588 |
| zgc:85777         | 880.0179 | -0.205305189 | 0.139696   | -1.46965 | 0.141655 | 0.600284 |
| gbf1              | 567.492  | 0.145876529  | 0.133814   | 1.090144 | 0.27565  | 0.750653 |
| ppp2r5a           | 22.04756 | 0.64546321   | 0.462939   | 1.394272 | 0.163235 | 0.631199 |
| pcdh17            | 791.6387 | 0.370686241  | 0.161604   | 2.2938   | 0.021802 | 0.261665 |
| scyl3             | 481.081  | 0.05535977   | 0.140347   | 0.39445  | 0.693248 | 0.940668 |
| arpc1b            | 1011.519 | -0.028308871 | 0.128195   | -0.22083 | 0.825227 | 0.97261  |
| slc38a3a          | 769.3596 | 0.257809263  | 0.179934   | 1.432797 | 0.151916 | 0.615406 |
| acbd4             | 55.67619 | 2.127003506  | 0.490413   | 4.337166 | 1.44E-05 | 0.002389 |
| cnppd1            | 1325.809 | 0.103401766  | 0.100964   | 1.024149 | 0.305765 | 0.771068 |
| znf804a           | 72.87101 | 0.254420868  | 0.287546   | 0.884801 | 0.376264 | 0.822258 |
| hmbox1a           | 25.50112 | 0.014672831  | 0.420587   | 0.034887 | 0.97217  | 1        |
| tgfb2             | 72.566   | 0.119936154  | 0.20308    | 0.590586 | 0.554798 | 0.89855  |
| ptgdsb.1          | 9574.695 | -0.167310841 | 0.186936   | -0.89502 | 0.370778 | 0.818484 |
| psmc4             | 2707.994 | 0.113304852  | 0.148787   | 0.761523 | 0.446345 | 0.855403 |
| zfr               | 2196.844 | 0.136885586  | 0.068819   | 1.989075 | 0.046693 | 0.376436 |
| ephb4b            | 409.9542 | -0.107037344 | 0.164476   | -0.65078 | 0.515189 | 0.886401 |
| tmem218           | 33.77206 | 0.174068077  | 0.305727   | 0.569358 | 0.569113 | 0.902234 |
| tmem169a          | 68.86272 | -0.151100975 | 0.256091   | -0.59003 | 0.555171 | 0.898723 |
| nup160            | 688.5768 | 0.041129956  | 0.118775   | 0.346286 | 0.729128 | 0.949983 |
| ube213b           | 1353.616 | -0.054258076 | 0.089351   | -0.60725 | 0.543686 | 0.894925 |
| aptx              | 224.8677 | 0.414838504  | 0.174118   | 2.382507 | 0.017195 | 0.231824 |
| gabrr3a           | 23.53412 | -0.052212367 | 0.525187   | -0.09942 | 0.920807 | 0.994085 |
| tpd5212a          | 652.0985 | -0.281642053 | 0.158401   | -1.77804 | 0.075398 | 0.465238 |
| fbxo28            | 405.8348 | -0.173407982 | 0.11651    | -1.48836 | 0.136657 | 0.591964 |
| igl3v2            | 0.043308 |              | 0.5.267649 | 0        | 1        | NA       |
| kpna7             | 3.170933 | 0.279941477  | 0.965574   | 0.289922 | 0.771876 | 0.960624 |
| phactr2           | 203.2343 | -0.057965989 | 0.149504   | -0.38772 | 0.698222 | 0.942433 |
| rnf25             | 1171.575 | -0.291322626 | 0.147032   | -1.98135 | 0.047552 | 0.379659 |
| namptb            | 164.1223 | -0.097617731 | 0.179855   | -0.54276 | 0.587297 | 0.9073   |
| kat8              | 456.8872 | -0.070502455 | 0.12845    | -0.54887 | 0.583095 | 0.90582  |

|                   |          |              |          |          |          |          |
|-------------------|----------|--------------|----------|----------|----------|----------|
| hcn3              | 16.88214 | 0.083316339  | 0.593217 | 0.140448 | 0.888306 | 0.988188 |
| si:dkey-1612.17   | 58.45141 | -0.274327796 | 0.240988 | -1.13834 | 0.254977 | 0.733542 |
| smad1             | 695.592  | 0.054023465  | 0.103224 | 0.52336  | 0.600724 | 0.913756 |
| gabap12           | 916.6192 | -0.193221768 | 0.152237 | -1.26922 | 0.204362 | 0.685846 |
| adgrg1            | 176.6386 | -0.279669986 | 0.160434 | -1.74321 | 0.081297 | 0.480158 |
| ift88             | 172.3709 | 0.090729087  | 0.152563 | 0.594701 | 0.552043 | 0.8974   |
| rs1a              | 1153.92  | 0.02846639   | 0.429673 | 0.066251 | 0.947178 | 0.997371 |
| btg1              | 5647.523 | -0.212358919 | 0.089312 | -2.37773 | 0.017419 | 0.232896 |
| numb              | 275.8279 | -0.172589846 | 0.200916 | -0.85901 | 0.390333 | 0.827902 |
| kcnflb            | 53.61677 | 0.828424565  | 0.347691 | 2.382645 | 0.017189 | 0.231824 |
| nrplb             | 107.783  | 0.051511911  | 0.190554 | 0.270328 | 0.786908 | 0.963061 |
| lsp1              | 789.5661 | -0.271262194 | 0.123976 | -2.18801 | 0.028669 | 0.301471 |
| tcp1112           | 976.2213 | -0.168517892 | 0.128192 | -1.31457 | 0.188654 | 0.668367 |
| lin7c             | 1397.208 | 0.060392615  | 0.102901 | 0.5869   | 0.557271 | 0.899165 |
| mpz12b            | 536.5081 | -0.110635711 | 0.146113 | -0.75719 | 0.448934 | 0.856796 |
| zmym2             | 792.4927 | 0.002705859  | 0.137531 | 0.019675 | 0.984303 | 1        |
| slc25a4           | 17592.81 | 0.165794301  | 0.137815 | 1.203024 | 0.228967 | 0.710863 |
| cd2bp2            | 348.2835 | 0.307335347  | 0.162696 | 1.889015 | 0.05889  | 0.418455 |
| si:ch211-106h11.3 | 68.87058 | -0.214465765 | 0.37326  | -0.57458 | 0.565579 | 0.901579 |
| ccdc171           | 60.60511 | 0.343675168  | 0.25381  | 1.354064 | 0.175716 | 0.649413 |
| ccnd3             | 6.305438 | -0.45826765  | 0.813943 | -0.56302 | 0.57342  | 0.904065 |
| si:ch211-150g13.3 | 102.3287 | 0.197916807  | 0.198072 | 0.999215 | 0.317691 | 0.77959  |
| vangl2            | 833.1182 | -0.010164545 | 0.155062 | -0.06555 | 0.947735 | 0.997371 |
| zgp1              | 358.0582 | 0.088936267  | 0.130372 | 0.682173 | 0.49513  | 0.87806  |
| trappc4           | 444.8931 | -0.21834552  | 0.182637 | -1.19552 | 0.231885 | 0.713202 |
| gad1b             | 1388.931 | 0.435552284  | 0.255662 | 1.703625 | 0.088451 | 0.499597 |
| igfl1ra           | 223.4797 | -0.101906551 | 0.236398 | -0.43108 | 0.66641  | 0.932664 |
| slc25a3a          | 345.2723 | -0.056940741 | 0.422809 | -0.13467 | 0.892871 | 0.988566 |
| rpp30             | 103.4272 | -0.192983963 | 0.241935 | -0.79767 | 0.425063 | 0.844714 |
| mettl26           | 240.6462 | -0.2639243   | 0.179591 | -1.46958 | 0.141675 | 0.600284 |
| rmnd1             | 157.6454 | -0.059307335 | 0.176896 | -0.33527 | 0.737424 | 0.952375 |
| hsd17b1           | 0.656871 | 1.055416151  | 2.998276 | 0.352008 | 0.724833 | NA       |
| gphb5             | 4.353084 | -0.045731148 | 0.903854 | -0.0506  | 0.959648 | 0.999164 |
| uros              | 500.9716 | -0.056460558 | 0.140227 | -0.40264 | 0.687216 | 0.938835 |
| elov14b           | 467.3567 | 0.117757392  | 0.456781 | 0.257798 | 0.796562 | 0.966447 |
| mast1a            | 31.48125 | 0.6770357    | 0.36355  | 1.862293 | 0.062562 | 0.427724 |
| oxsrlb            | 465.6382 | -0.242347641 | 0.131095 | -1.84864 | 0.064509 | 0.433491 |
| usp20             | 274.3221 | -0.028500387 | 0.139799 | -0.20387 | 0.838458 | 0.976395 |
| trpc7a            | 9.081165 | 0.87057405   | 0.752858 | 1.15636  | 0.247534 | 0.728384 |
| hmox1a            | 564.9793 | -0.1378775   | 0.474223 | -0.29074 | 0.771247 | 0.960484 |
| noxred1           | 2.64348  | 0.365554677  | 1.139572 | 0.320783 | 0.748375 | 0.955074 |
| TPGS1             | 285.9626 | -0.134587838 | 0.199325 | -0.67522 | 0.499537 | 0.879603 |
| mapk1             | 167.1352 | 0.286125732  | 0.144646 | 1.978108 | 0.047917 | 0.380801 |
| pak6a             | 9.252965 | 0.645302307  | 0.734519 | 0.878537 | 0.379652 | 0.823607 |
| as3mt             | 171.5418 | -0.49457982  | 0.18934  | -2.61213 | 0.008998 | 0.162625 |
| angpt17           | 861.6625 | 0.293236058  | 0.135548 | 2.163334 | 0.030515 | 0.311199 |
| ttpa              | 178.0265 | 0.201878706  | 0.174744 | 1.15528  | 0.247976 | 0.728489 |
| top3b             | 188.2676 | -0.146212106 | 0.185605 | -0.78776 | 0.430839 | 0.847629 |
| htr7b             | 2.2759   | 0.077735396  | 1.294199 | 0.060064 | 0.952104 | 0.998066 |
| fzd7b             | 882.1485 | -0.117348447 | 0.127859 | -0.9178  | 0.358725 | 0.80995  |
| 2-Sep             | 1874.97  | 0.024240275  | 0.123155 | 0.196828 | 0.843962 | 0.976791 |
| selenot1b         | 515.7439 | -0.083618062 | 0.121416 | -0.68869 | 0.491017 | 0.875595 |
| fam221a           | 10.57838 | -0.369193288 | 0.670077 | -0.55097 | 0.581653 | 0.905618 |
| pdlim5b           | 612.5237 | -0.143437613 | 0.130852 | -1.09618 | 0.273001 | 0.748889 |

|                    |           |               |           |           |           |           |
|--------------------|-----------|---------------|-----------|-----------|-----------|-----------|
| lrfn1              | 24. 57608 | 0. 480224937  | 0. 471707 | 1. 018058 | 0. 30865  | 0. 773546 |
| hpn                | 53. 47312 | -0. 080238958 | 0. 325849 | -0. 24625 | 0. 805492 | 0. 969368 |
| cavin2a            | 752. 8655 | -0. 134288769 | 0. 128946 | -1. 04144 | 0. 297673 | 0. 765407 |
| gatad1             | 182. 7636 | 0. 184643315  | 0. 165277 | 1. 117172 | 0. 263921 | 0. 741937 |
| grip2b             | 11. 34534 | 0. 087506331  | 0. 649809 | 0. 134665 | 0. 892877 | 0. 988566 |
| bco2l              | 63. 28205 | -0. 700693087 | 0. 368585 | -1. 90104 | 0. 057297 | 0. 413318 |
| adralab            | 24. 3487  | -0. 136776344 | 0. 453829 | -0. 30138 | 0. 763123 | 0. 958905 |
| zgc:165539         | 1. 43367  | 0. 317341475  | 1. 411946 | 0. 224755 | 0. 82217  | NA        |
| cpsf3              | 748. 3308 | 0. 005369943  | 0. 095723 | 0. 056099 | 0. 955263 | 0. 998611 |
| crhb               | 52. 42152 | -0. 689216873 | 0. 372968 | -1. 84793 | 0. 064613 | 0. 433937 |
| irf10              | 14. 1828  | -0. 342444095 | 0. 5876   | -0. 58278 | 0. 560039 | 0. 899738 |
| si:ch211-13315. 8  | 33. 85963 | 0. 509216477  | 0. 277939 | 1. 832118 | 0. 066934 | 0. 44184  |
| tmem230a           | 78. 43783 | 0. 016250176  | 0. 25762  | 0. 063078 | 0. 949704 | 0. 99801  |
| poldl              | 478. 5509 | 0. 097535943  | 0. 150356 | 0. 648701 | 0. 516532 | 0. 886933 |
| zgc:103510         | 10. 02513 | -0. 423575393 | 0. 563378 | -0. 75185 | 0. 452141 | 0. 857994 |
| btbd16             | 3. 368211 | -1. 175163439 | 0. 947569 | -1. 24019 | 0. 214906 | 0. 697    |
| dgkb               | 7. 600851 | -0. 907661063 | 1. 350444 | -0. 67212 | 0. 501507 | 0. 880897 |
| srsf5b             | 2816. 44  | -0. 082160262 | 0. 10079  | -0. 81516 | 0. 414981 | 0. 838732 |
| si:ch211-13c6. 2   | 509. 3867 | 0. 138688838  | 0. 136742 | 1. 014238 | 0. 310469 | 0. 775146 |
| adcyap1b           | 858. 5539 | 0. 14355118   | 0. 151509 | 0. 947478 | 0. 343395 | 0. 797961 |
| gadd45ba           | 951. 96   | -0. 414601255 | 0. 239718 | -1. 72954 | 0. 083713 | 0. 485998 |
| hirip3             | 251. 6351 | 0. 170702549  | 0. 11527  | 1. 480897 | 0. 138634 | 0. 595394 |
| dpp7               | 1184. 277 | 0. 273334159  | 0. 158967 | 1. 719445 | 0. 085533 | 0. 491033 |
| tnfaip3            | 55. 2857  | 0. 253724059  | 0. 265331 | 0. 956254 | 0. 338944 | 0. 795226 |
| adcy6b             | 152. 1047 | -0. 07698439  | 0. 152031 | -0. 50637 | 0. 612594 | 0. 91573  |
| ucmaa              | 87. 2693  | 0. 94752875   | 0. 560346 | 1. 690971 | 0. 090842 | 0. 505206 |
| sbds               | 253. 3116 | -0. 104350635 | 0. 156141 | -0. 66831 | 0. 503937 | 0. 881759 |
| frk                | 118. 744  | 0. 089850868  | 0. 178169 | 0. 504301 | 0. 61405  | 0. 915998 |
| nus1               | 504. 9597 | 0. 221044661  | 0. 14981  | 1. 475505 | 0. 140077 | 0. 598705 |
| tmtops2b           | 9. 294465 | -0. 012819143 | 0. 699115 | -0. 01834 | 0. 985371 | 1         |
| top1mt             | 965. 5993 | 0. 176359588  | 0. 140134 | 1. 25851  | 0. 208207 | 0. 69024  |
| naa50              | 1227. 538 | 0. 08766488   | 0. 101751 | 0. 861565 | 0. 388927 | 0. 827725 |
| pudp               | 102. 4541 | -0. 636373486 | 0. 190745 | -3. 33624 | 0. 000849 | 0. 039393 |
| grinla             | 1510. 068 | 0. 294066104  | 0. 176461 | 1. 666464 | 0. 095621 | 0. 516418 |
| ccdc191            | 29. 05935 | 8. 73E-05     | 0. 353413 | 0. 000247 | 0. 999803 | 1         |
| paplna             | 249. 8656 | 0. 186704665  | 0. 174196 | 1. 071809 | 0. 283806 | 0. 755095 |
| zfyve21            | 464. 307  | 0. 011199439  | 0. 129869 | 0. 086236 | 0. 931279 | 0. 995809 |
| sem1               | 1664. 656 | -0. 117660983 | 0. 165415 | -0. 71131 | 0. 476894 | 0. 869292 |
| adamts13           | 34. 64379 | 0. 147540487  | 0. 332811 | 0. 443316 | 0. 657537 | 0. 93039  |
| si:ch211-216p19. 6 | 21. 29544 | -0. 123678883 | 0. 41298  | -0. 29948 | 0. 764574 | 0. 959393 |
| zc2hcla            | 378. 0373 | 0. 006514284  | 0. 127631 | 0. 05104  | 0. 959294 | 0. 999164 |
| fntb               | 785. 0926 | -0. 25791351  | 0. 153877 | -1. 6761  | 0. 093718 | 0. 511703 |
| naprt              | 596. 3301 | -0. 166211062 | 0. 139883 | -1. 18821 | 0. 234749 | 0. 715533 |
| glis1b             | 36. 03387 | -0. 318382373 | 0. 304201 | -1. 04662 | 0. 295275 | 0. 763896 |
| rad18              | 115. 6515 | 1. 13495135   | 0. 256976 | 4. 416563 | 1. 00E-05 | 0. 001874 |
| kcnfla             | 50. 8277  | -0. 449012443 | 0. 280619 | -1. 60008 | 0. 109581 | 0. 543101 |
| fgf12a             | 182. 6994 | 0. 832333881  | 0. 315092 | 2. 641562 | 0. 008252 | 0. 154575 |
| camkva             | 78. 44771 | 0. 126359319  | 0. 375278 | 0. 336709 | 0. 736336 | 0. 951919 |
| apls3b             | 236. 6496 | -0. 346828922 | 0. 166012 | -2. 08918 | 0. 036692 | 0. 336694 |
| yylb               | 1007. 146 | -0. 110386585 | 0. 097063 | -1. 13727 | 0. 255426 | 0. 733542 |
| gstz1              | 615. 2675 | -0. 075652245 | 0. 226334 | -0. 33425 | 0. 73819  | 0. 952898 |
| slc35d1b           | 200. 8142 | -0. 51982766  | 0. 194392 | -2. 67412 | 0. 007493 | 0. 146749 |
| hao2               | 499. 4036 | -0. 500923473 | 0. 17225  | -2. 90812 | 0. 003636 | 0. 099701 |
| pfkpa              | 1166. 555 | -0. 143787149 | 0. 191448 | -0. 75105 | 0. 452622 | 0. 857994 |

|                    |          |              |          |          |          |          |
|--------------------|----------|--------------|----------|----------|----------|----------|
| tpmt.2             | 15.92205 | -0.563108272 | 0.579828 | -0.97117 | 0.331466 | 0.789156 |
| tp53inp1           | 401.5384 | -0.11416804  | 0.180543 | -0.63236 | 0.527153 | 0.889948 |
| trim63a            | 4143.097 | 0.373401163  | 0.154629 | 2.414821 | 0.015743 | 0.221337 |
| rdh8a              | 446.1075 | -0.359340419 | 0.217322 | -1.65349 | 0.098231 | 0.521076 |
| bmplb              | 62.96592 | 0.211405834  | 0.273517 | 0.772917 | 0.439572 | 0.852079 |
| traf6              | 277.8863 | -0.250775167 | 0.134984 | -1.85781 | 0.063196 | 0.429313 |
| diras1a            | 893.0274 | 0.162686975  | 0.188491 | 0.863102 | 0.388082 | 0.827592 |
| bnip3lb            | 1493.969 | -0.155048404 | 0.15578  | -0.9953  | 0.319588 | 0.780289 |
| bmpla              | 907.4699 | 0.146907686  | 0.130531 | 1.125462 | 0.260393 | 0.737749 |
| mapkapk5           | 165.5261 | -0.051826961 | 0.163053 | -0.31785 | 0.750596 | 0.955074 |
| zbtb2b             | 441.5549 | -0.104804418 | 0.119875 | -0.87428 | 0.381965 | 0.824957 |
| aldh2.2            | 1655.251 | 0.019808633  | 0.13691  | 0.144684 | 0.884961 | 0.987266 |
| galk1              | 97.51422 | -0.308478105 | 0.266455 | -1.15771 | 0.246982 | 0.727706 |
| cldn23a            | 457.4143 | 0.044870806  | 0.123017 | 0.364753 | 0.715296 | 0.945917 |
| fut9d              | 785.8486 | 0.144430255  | 0.201097 | 0.71821  | 0.472628 | 0.868786 |
| sh2d3ca            | 103.2233 | 0.16990705   | 0.160323 | 1.059776 | 0.289246 | 0.760276 |
| glrx               | 452.3967 | -0.592249105 | 0.217208 | -2.72665 | 0.006398 | 0.135026 |
| dscamb             | 493.2384 | 0.323991384  | 0.208912 | 1.550854 | 0.120937 | 0.566816 |
| sumo3a             | 3020.591 | 0.146807527  | 0.123895 | 1.184934 | 0.236044 | 0.717364 |
| hccsa.1            | 237.0624 | 0.058674707  | 0.199493 | 0.294119 | 0.768667 | 0.960395 |
| pax2a              | 304.2695 | 0.112805005  | 0.148611 | 0.759062 | 0.447815 | 0.856379 |
| tead1a             | 93.68982 | -0.037964666 | 0.221361 | -0.17151 | 0.863826 | 0.981842 |
| prg4b              | 126.0799 | -0.205383783 | 0.345796 | -0.59395 | 0.552549 | 0.8974   |
| ctl14a.1           | 39.46527 | -0.898201139 | 0.363362 | -2.47192 | 0.013439 | 0.202065 |
| slc4a2a            | 274.4033 | -0.119143311 | 0.135173 | -0.88142 | 0.378092 | 0.82265  |
| cradd              | 30.62795 | -0.140669268 | 0.316791 | -0.44404 | 0.65701  | 0.929939 |
| ube2v2             | 2083.592 | -0.022825826 | 0.09561  | -0.23874 | 0.811308 | 0.97002  |
| commd8             | 287.2731 | 0.437537011  | 0.172413 | 2.53772  | 0.011158 | 0.183611 |
| ttn.2              | 5177.861 | -0.056234833 | 0.289533 | -0.19423 | 0.845999 | 0.977039 |
| itgb8              | 24.75271 | -0.399838414 | 0.379086 | -1.05474 | 0.291543 | 0.761454 |
| zbtb18             | 853.3934 | 0.055943118  | 0.142184 | 0.393457 | 0.693982 | 0.940919 |
| cyb561a3b          | 44.03279 | -0.831434744 | 0.26682  | -3.11609 | 0.001833 | 0.065916 |
| aldh3a2a           | 284.1748 | -0.030964809 | 0.157711 | -0.19634 | 0.844345 | 0.976791 |
| sult1st1           | 978.3467 | -0.149136588 | 0.123084 | -1.21166 | 0.225642 | 0.707068 |
| si:ch211-196h16.12 | 13.92997 | 2.512296006  | 1.566993 | 1.60326  | 0.108877 | 0.541698 |
| mkrn4              | 246.6524 | -0.025661872 | 0.168987 | -0.15186 | 0.879299 | 0.986147 |
| prph               | 296.2845 | 0.252464818  | 0.192839 | 1.309203 | 0.190465 | 0.670633 |
| synj2bp            | 277.1199 | 0.262112259  | 0.158584 | 1.652827 | 0.098366 | 0.521076 |
| pex14              | 318.8119 | 0.150058848  | 0.151389 | 0.991211 | 0.321583 | 0.78202  |
| gmfb               | 1873.932 | -0.100186395 | 0.155731 | -0.64333 | 0.520009 | 0.887148 |
| nitr9              | 0.446561 | -0.86812373  | 4.000989 | -0.21698 | 0.828226 | NA       |
| hmgala             | 19301.06 | 0.094866067  | 0.157781 | 0.601253 | 0.547671 | 0.896211 |
| dhdh1              | 930.2155 | 0.394658825  | 0.193684 | 2.037647 | 0.041585 | 0.356072 |
| tesca              | 256.6022 | 0.039259794  | 0.219076 | 0.179206 | 0.857776 | 0.979774 |
| pax3b              | 33.09428 | 0.164945398  | 0.290127 | 0.568529 | 0.569676 | 0.902322 |
| stxbp61            | 82.0923  | -0.014314902 | 0.412653 | -0.03469 | 0.972327 | 1        |
| sult2st3           | 142.7606 | 0.405074884  | 0.260626 | 1.554237 | 0.120128 | 0.565265 |
| trub2              | 208.9636 | 0.023443361  | 0.179441 | 0.130647 | 0.896055 | 0.98926  |
| htatip2            | 272.4722 | -0.300818354 | 0.159931 | -1.88093 | 0.059982 | 0.421883 |
| rab44              | 14.21762 | -0.06281517  | 0.493091 | -0.12739 | 0.898631 | 0.990199 |
| daam2              | 45.16453 | -0.589998936 | 0.395022 | -1.49358 | 0.135284 | 0.590585 |
| fkbp5              | 1086.779 | -0.09247987  | 0.555532 | -0.16647 | 0.867786 | 0.982728 |
| rhogc              | 453.9256 | -0.084341565 | 0.120821 | -0.69807 | 0.485132 | 0.872911 |
| adnp2b             | 494.2468 | -0.007904842 | 0.109871 | -0.07195 | 0.942645 | 0.997371 |

|                   |          |              |          |          |          |          |
|-------------------|----------|--------------|----------|----------|----------|----------|
| cplane2           | 49.34002 | 0.20641951   | 0.25402  | 0.81261  | 0.416442 | 0.839843 |
| edem2             | 224.4576 | -0.111329132 | 0.201468 | -0.55259 | 0.580544 | 0.905618 |
| rps6ka2           | 14.61941 | 0.979789292  | 0.633188 | 1.54739  | 0.121769 | 0.56863  |
| lin9              | 192.9606 | 0.210488762  | 0.156805 | 1.342363 | 0.179478 | 0.654677 |
| si:ch211-173n18.3 | 66.60795 | 1.528662549  | 0.373228 | 4.095787 | 4.21E-05 | 0.004899 |
| cabp5b            | 82.33669 | 0.171448876  | 0.528827 | 0.324206 | 0.745782 | 0.955074 |
| itgb4             | 690.4311 | 0.053820945  | 0.22226  | 0.242153 | 0.808661 | 0.969828 |
| hbpl              | 1030.899 | -0.052962718 | 0.129026 | -0.41048 | 0.681454 | 0.937418 |
| clql3b            | 24.59576 | 0.233706416  | 0.425977 | 0.548637 | 0.583255 | 0.905947 |
| inip              | 205.5047 | 0.133869692  | 0.173032 | 0.773671 | 0.439125 | 0.852079 |
| macfla            | 2278.152 | 0.097047037  | 0.185621 | 0.522825 | 0.601096 | 0.913756 |
| morc2             | 813.2144 | -0.049893715 | 0.107489 | -0.46418 | 0.642521 | 0.92567  |
| si:ch211-121a2.4  | 15.32735 | 0.095269985  | 0.420283 | 0.226681 | 0.820672 | 0.971788 |
| si:ch211-114c12.2 | 1290.373 | -0.105156533 | 0.134565 | -0.78146 | 0.434535 | 0.850002 |
| ndufs1            | 1.463341 | -2.324639292 | 2.005108 | -1.15936 | 0.24631  | NA       |
| plppr3b           | 242.1954 | -0.040293807 | 0.341709 | -0.11792 | 0.906132 | 0.991631 |
| march5l           | 544.9518 | -0.004807543 | 0.123349 | -0.03898 | 0.96891  | 1        |
| jkamp             | 221.3781 | 0.050667718  | 0.123489 | 0.410302 | 0.681584 | 0.937418 |
| si:ch211-234h8.7  | 34.97213 | 0.223565296  | 0.351986 | 0.635153 | 0.525329 | 0.888928 |
| gpr135            | 21.90033 | -0.749824469 | 0.413307 | -1.81421 | 0.069646 | 0.450502 |
| mospd1            | 782.5199 | -0.056547523 | 0.175675 | -0.32189 | 0.747538 | 0.955074 |
| krt18b            | 5236.377 | -0.135040161 | 0.17296  | -0.78076 | 0.434944 | 0.850002 |
| jph2              | 3256.989 | -0.42955528  | 0.222617 | -1.92957 | 0.05366  | 0.401106 |
| gdap11l           | 29.96207 | -0.024755658 | 0.315043 | -0.07858 | 0.937368 | 0.997305 |
| ms4a17c.2         |          | 0 NA         | NA       | NA       | NA       | NA       |
| cntfr             | 684.9539 | 0.075824961  | 0.087751 | 0.864093 | 0.387537 | 0.827592 |
| tek               | 129.8222 | 0.0703302    | 0.321654 | 0.218652 | 0.826921 | 0.973458 |
| ahsala            | 181.1903 | 0.625473987  | 0.271083 | 2.307316 | 0.021037 | 0.257628 |
| nuak1b            | 1414.087 | -0.004368454 | 0.169642 | -0.02575 | 0.979456 | 1        |
| exosc2            | 262.574  | -0.106486956 | 0.185737 | -0.57332 | 0.566427 | 0.901739 |
| crkl              | 988.4359 | 0.049631905  | 0.090147 | 0.550564 | 0.581932 | 0.90571  |
| mindy3            | 324.1775 | 0.076888657  | 0.15537  | 0.494873 | 0.62069  | 0.918151 |
| mapk14b           | 428.3484 | -0.065951933 | 0.128614 | -0.51279 | 0.608097 | 0.915204 |
| adralaa           | 6.806012 | -0.350722185 | 0.766584 | -0.45751 | 0.647303 | 0.927082 |
| stat4             | 82.26548 | -0.782987452 | 0.283144 | -2.76533 | 0.005686 | 0.127671 |
| msnb              | 21.74552 | -0.054535249 | 0.385983 | -0.14129 | 0.887641 | 0.988069 |
| tm9sf3            | 784.3681 | 0.033054899  | 0.098001 | 0.33729  | 0.735898 | 0.951589 |
| gzmk              | 1.699389 | -0.393354276 | 1.882656 | -0.20894 | 0.834498 | NA       |
| si:dkey-24p1.6    | 24.51279 | 0.214143175  | 0.451568 | 0.474222 | 0.635342 | 0.924272 |
| chst12a           | 23.11561 | 0.381371691  | 0.397556 | 0.959289 | 0.337413 | 0.794381 |
| nlk2              | 202.1239 | 0.114683096  | 0.180597 | 0.635024 | 0.525413 | 0.888928 |
| CYTH2             | 51.67467 | -0.066295595 | 0.267084 | -0.24822 | 0.803964 | 0.968814 |
| ankrd9            | 470.9275 | -0.062426704 | 0.292924 | -0.21312 | 0.831237 | 0.974908 |
| zgc:162945        | 128.7454 | 0.032943755  | 0.243918 | 0.135061 | 0.892564 | 0.988566 |
| tmed3             | 461.1727 | 0.124504858  | 0.142755 | 0.872155 | 0.383124 | 0.825809 |
| slc34a1a          | 39.83716 | 0.237496507  | 0.560681 | 0.423586 | 0.671868 | 0.933953 |
| calcr             | 33.99379 | 0.44852525   | 0.37002  | 1.212166 | 0.225449 | 0.70685  |
| lsm12a            | 437.7028 | 0.214067248  | 0.167123 | 1.280894 | 0.200231 | 0.680711 |
| btr16             | 10.34705 | -0.596993796 | 0.71681  | -0.83285 | 0.404931 | 0.834284 |
| sgsmla            | 20.50697 | 0.609515226  | 0.452704 | 1.346389 | 0.178177 | 0.65219  |
| rdh20             | 10.65509 | 0.783138133  | 0.926784 | 0.845006 | 0.398107 | 0.830737 |
| vipr1a            | 94.31154 | 0.358490369  | 0.230968 | 1.552118 | 0.120634 | 0.566496 |
| ndufb10           | 2034.764 | 0.049857748  | 0.129667 | 0.384505 | 0.700604 | 0.942918 |
| mrgbp             | 264.5195 | 0.134421183  | 0.131012 | 1.026023 | 0.304881 | 0.770035 |



|                    |           |               |           |           |           |           |
|--------------------|-----------|---------------|-----------|-----------|-----------|-----------|
| plpp2b             | 227. 2697 | 0. 038828596  | 0. 165862 | 0. 234102 | 0. 814906 | 0. 970814 |
| tekt4              | 37. 09723 | 0. 124800204  | 0. 292188 | 0. 427124 | 0. 669289 | 0. 933115 |
| odf2a              | 88. 50489 | 0. 194897375  | 0. 237003 | 0. 822341 | 0. 410883 | 0. 83771  |
| si:dkey-10h3. 2    | 2. 709589 | 1. 638418374  | 1. 262528 | 1. 297728 | 0. 194381 | 0. 674677 |
| taflb              | 117. 9645 | -0. 067846413 | 0. 217885 | -0. 31139 | 0. 755507 | 0. 956532 |
| mtss11a            | 389. 1358 | 0. 110265955  | 0. 168068 | 0. 65608  | 0. 511773 | 0. 885041 |
| ZBTB26             | 68. 34181 | -0. 050898383 | 0. 308274 | -0. 16511 | 0. 868859 | 0. 982801 |
| maff               | 813. 619  | -0. 09858171  | 0. 110275 | -0. 89396 | 0. 371343 | 0. 818945 |
| cpsf2              | 557. 951  | 0. 130671022  | 0. 119308 | 1. 09524  | 0. 273412 | 0. 749148 |
| tekt2              | 20. 65537 | 0. 372625482  | 0. 408174 | 0. 912908 | 0. 361291 | 0. 811547 |
| pus3               | 59. 77699 | -0. 100795319 | 0. 231569 | -0. 43527 | 0. 663365 | 0. 931356 |
| pcca               | 748. 7207 | -0. 070844315 | 0. 105178 | -0. 67357 | 0. 500588 | 0. 880351 |
| eif1axa            | 357. 9138 | 0. 218725181  | 0. 145004 | 1. 508404 | 0. 131451 | 0. 583069 |
| xpnpepl            | 773. 4237 | 0. 005369811  | 0. 151463 | 0. 035453 | 0. 971719 | 1         |
| cdkn1ba            | 580. 2369 | -0. 14443207  | 0. 108763 | -1. 32796 | 0. 184193 | 0. 661153 |
| epb41b             | 472. 7912 | 0. 041607878  | 0. 203596 | 0. 204365 | 0. 838069 | 0. 97637  |
| rab32a             | 202. 7986 | -0. 299088191 | 0. 208292 | -1. 43591 | 0. 151028 | 0. 615085 |
| zdhhc23a           | 16. 07647 | 0. 050261575  | 0. 461834 | 0. 10883  | 0. 913337 | 0. 99273  |
| nup12              | 170. 7718 | -0. 107677282 | 0. 206394 | -0. 52171 | 0. 601875 | 0. 914001 |
| pel12              | 284. 1133 | -0. 159076671 | 0. 148182 | -1. 07352 | 0. 283036 | 0. 755028 |
| gbela              | 24. 40114 | -0. 174545104 | 0. 539995 | -0. 32323 | 0. 746518 | 0. 955074 |
| tm6sf2             | 107. 7441 | -0. 103048185 | 0. 281266 | -0. 36637 | 0. 714087 | 0. 945821 |
| rbbp4              | 1869. 059 | 0. 222067499  | 0. 203859 | 1. 089319 | 0. 276013 | 0. 750674 |
| clpxa              | 1856. 981 | -0. 072107182 | 0. 101057 | -0. 71353 | 0. 475516 | 0. 869292 |
| uqcrq              | 2220. 251 | 0. 075050871  | 0. 187293 | 0. 400714 | 0. 688631 | 0. 939118 |
| tnni2a. 4          | 70292. 9  | 0. 021818039  | 0. 165909 | 0. 131506 | 0. 895375 | 0. 989223 |
| creld2             | 119. 6904 | 0. 369662087  | 0. 228779 | 1. 615801 | 0. 106137 | 0. 535191 |
| klf6a              | 1929. 12  | -0. 066554608 | 0. 122962 | -0. 54126 | 0. 588326 | 0. 90797  |
| pfkfb4b            | 871. 8824 | -0. 456261598 | 0. 295604 | -1. 54349 | 0. 122713 | 0. 569468 |
| guf1               | 110. 7326 | 0. 366957377  | 0. 193886 | 1. 892645 | 0. 058405 | 0. 417797 |
| chchd1             | 384. 8241 | -0. 259408061 | 0. 185075 | -1. 40163 | 0. 161024 | 0. 627788 |
| ftr51              | 110. 4624 | -0. 115085368 | 0. 405186 | -0. 28403 | 0. 776387 | 0. 961073 |
| ube2d1a            | 338. 8532 | 0. 069963378  | 0. 167884 | 0. 416738 | 0. 67687  | 0. 935664 |
| gem                | 80. 87777 | -0. 0578181   | 0. 445784 | -0. 1297  | 0. 896804 | 0. 98939  |
| si:dkey-40m6. 8    | 572. 3402 | 0. 056353186  | 0. 198121 | 0. 284438 | 0. 776075 | 0. 961073 |
| adamts15a          | 161. 9089 | -0. 271530334 | 0. 240176 | -1. 13055 | 0. 258245 | 0. 73562  |
| tubgcp3            | 486. 4883 | 0. 229650045  | 0. 10232  | 2. 244427 | 0. 024805 | 0. 279131 |
| lrplab             | 1028. 954 | 0. 130222535  | 0. 20615  | 0. 631688 | 0. 527591 | 0. 889948 |
| hsp90ab1           | 54594. 26 | -0. 361620741 | 0. 078557 | -4. 60327 | 4. 16E-06 | 0. 000936 |
| med23              | 425. 9908 | 0. 18595473   | 0. 176588 | 1. 053042 | 0. 292322 | 0. 761879 |
| ppfibp2b           | 437. 5998 | 0. 083090282  | 0. 107063 | 0. 776091 | 0. 437696 | 0. 851283 |
| si:ch211-200p22. 4 | 979. 0087 | 0. 10006143   | 0. 119781 | 0. 83537  | 0. 403509 | 0. 833867 |
| lnx2a              | 299. 6103 | 0. 12316484   | 0. 159296 | 0. 773183 | 0. 439414 | 0. 852079 |
| foxd1              | 300. 8269 | 0. 150986686  | 0. 144014 | 1. 048417 | 0. 294446 | 0. 763544 |
| tyrpla             | 1046. 676 | -0. 227749089 | 0. 197408 | -1. 1537  | 0. 248623 | 0. 728723 |
| ube2z              | 453. 5869 | 0. 015271853  | 0. 131754 | 0. 115911 | 0. 907723 | 0. 991745 |
| avpr2ab            | 13. 71769 | 0. 52418765   | 0. 454055 | 1. 154458 | 0. 248312 | 0. 728647 |
| pnp4b              | 787. 104  | 0. 289540051  | 0. 321502 | 0. 900586 | 0. 367809 | 0. 817078 |
| F0704779. 1        | 17. 33875 | 0. 346212975  | 0. 562138 | 0. 615886 | 0. 53797  | 0. 892498 |
| stxbp5b            | 113. 141  | -0. 078056499 | 0. 205869 | -0. 37916 | 0. 704572 | 0. 943785 |
| syt9b              | 224. 4148 | 0. 270301408  | 0. 215352 | 1. 255158 | 0. 209421 | 0. 691505 |
| fbxo3              | 374. 1026 | 0. 01600036   | 0. 159679 | 0. 100203 | 0. 920183 | 0. 993982 |
| fubpl              | 3748. 898 | 0. 087578599  | 0. 077751 | 1. 126394 | 0. 259999 | 0. 73712  |
| poli               | 152. 6114 | -0. 2803292   | 0. 219699 | -1. 27597 | 0. 201966 | 0. 68211  |

|                   |          |              |          |          |          |          |
|-------------------|----------|--------------|----------|----------|----------|----------|
| ssb               | 972.3107 | -0.129519238 | 0.112229 | -1.15406 | 0.248475 | 0.728723 |
| zgc:136493        | 67.03879 | -0.179560741 | 0.237617 | -0.75567 | 0.449845 | 0.857077 |
| hoxb3a            | 612.5859 | 0.057174105  | 0.108018 | 0.529301 | 0.596596 | 0.911696 |
| stx11b.1          | 329.324  | 0.162437545  | 0.262931 | 0.617796 | 0.53671  | 0.892421 |
| ipmkb             | 260.3165 | 0.10678239   | 0.150739 | 0.708393 | 0.478701 | 0.869292 |
| zgc:55943         | 571.021  | 0.144237497  | 0.134885 | 1.069334 | 0.284919 | 0.755935 |
| nexmifb           | 208.3983 | -0.31664446  | 0.205272 | -1.54256 | 0.122938 | 0.569468 |
| baiap211a         | 147.0621 | -0.27181711  | 0.204492 | -1.32923 | 0.183771 | 0.66056  |
| rmc1              | 179.6262 | 0.036606482  | 0.153935 | 0.237804 | 0.812033 | 0.97012  |
| prr151b           | 31.65481 | 0.143912993  | 0.470772 | 0.305695 | 0.759837 | 0.957886 |
| atxn713           | 185.9079 | 0.104032789  | 0.204891 | 0.507746 | 0.611632 | 0.915331 |
| serpine2          | 643.125  | -0.356328422 | 0.167494 | -2.12742 | 0.033386 | 0.323127 |
| mboat1            | 105.2231 | -0.443052197 | 0.206745 | -2.14299 | 0.032114 | 0.318495 |
| ankrd6b           | 231.9142 | 0.003578904  | 0.195774 | 0.018281 | 0.985415 | 1        |
| rasa4             | 170.1761 | -0.356799642 | 0.204216 | -1.74717 | 0.080608 | 0.479386 |
| aldh3a2b          | 64.17918 | 0.087007837  | 0.298349 | 0.291631 | 0.770568 | 0.960484 |
| si:dkey-90m5.4    | 148.1863 | -0.358802725 | 0.344067 | -1.04283 | 0.297028 | 0.764598 |
| sort1a            | 545.4593 | -0.108881365 | 0.115961 | -0.93895 | 0.347758 | 0.800274 |
| h2afx             | 371.5061 | -0.311452834 | 0.239433 | -1.30079 | 0.193329 | 0.673396 |
| mtx2              | 560.1936 | 0.186957724  | 0.133428 | 1.401185 | 0.161159 | 0.627888 |
| si:ch211-147k10.5 | 7.97966  | 0.835932603  | 0.598445 | 1.396841 | 0.162461 | 0.629825 |
| tph1a             | 33.35586 | 0.04024536   | 0.360497 | 0.111639 | 0.91111  | 0.992208 |
| atp2a2a           | 1416.372 | 0.574850573  | 0.191366 | 3.003928 | 0.002665 | 0.084161 |
| zgc:92242         | 490.9461 | -0.041485036 | 0.186598 | -0.22232 | 0.824062 | 0.97205  |
| zgc:56676         | 1744.381 | 0.011875116  | 0.151794 | 0.078232 | 0.937644 | 0.997305 |
| cacn1sa           | 296.9662 | 0.079274687  | 0.242981 | 0.326259 | 0.744228 | 0.95491  |
| cd209             | 0.094679 | 0            | 5.267649 | 0        | 1        | NA       |
| asap1a            | 792.3086 | 0.078485914  | 0.0982   | 0.799242 | 0.42415  | 0.844355 |
| afdna             | 744.1412 | -0.124183008 | 0.156333 | -0.79435 | 0.426992 | 0.845491 |
| gstm.2            | 157.232  | -0.457085561 | 0.152184 | -3.00351 | 0.002669 | 0.084161 |
| camk1b            | 452.1542 | 0.217382183  | 0.1821   | 1.19375  | 0.232576 | 0.71403  |
| ldlra             | 476.2792 | 0.507274602  | 0.307185 | 1.651366 | 0.098664 | 0.521402 |
| zgc:86609         | 289.0569 | 0.106298001  | 0.134133 | 0.792484 | 0.428079 | 0.846079 |
| specc1            | 146.4251 | -0.524481245 | 0.175315 | -2.99164 | 0.002775 | 0.086456 |
| ush2a             | 37.92647 | 0.416351883  | 0.464975 | 0.895429 | 0.370558 | 0.818484 |
| f9b               | 141.7223 | -0.72378294  | 0.279847 | -2.58635 | 0.0097   | 0.169747 |
| tfcp211           | 59.60537 | 0.736512066  | 0.32831  | 2.243342 | 0.024875 | 0.279374 |
| rpl34             | 19145.93 | -0.325464757 | 0.131802 | -2.46935 | 0.013536 | 0.202995 |
| gsk3aa            | 229.0743 | 0.006403954  | 0.139924 | 0.045767 | 0.963496 | 0.999842 |
| timml7a           | 1303.089 | 0.103084217  | 0.143873 | 0.716496 | 0.473685 | 0.869192 |
| kcns3b            | 0.650507 | 1.003195533  | 2.757676 | 0.363783 | 0.71602  | NA       |
| impdh1b           | 1681.489 | -0.673060204 | 0.165973 | -4.05525 | 5.01E-05 | 0.005606 |
| rpl18             | 24651.31 | -0.398200734 | 0.117593 | -3.38625 | 0.000709 | 0.035458 |
| id2b              | 240.2179 | 0.110407289  | 0.148496 | 0.743504 | 0.457177 | 0.860993 |
| gremla            | 14.28811 | 0.399409461  | 0.686098 | 0.582147 | 0.560468 | 0.899928 |
| kans13            | 973.0638 | 0.092293427  | 0.098618 | 0.935871 | 0.349339 | 0.801408 |
| snape1a           | 1.411257 | 0.610427116  | 1.922934 | 0.317446 | 0.750905 | NA       |
| tbcl1d7           | 314.6951 | 0.117957591  | 0.141217 | 0.835295 | 0.403552 | 0.83388  |
| msra              | 550.7932 | -0.032487985 | 0.206436 | -0.15738 | 0.874949 | 0.984191 |
| trim55a           | 289.1067 | 0.165522135  | 0.238641 | 0.693604 | 0.48793  | 0.873337 |
| wdr32             | 311.727  | 0.039556846  | 0.121353 | 0.325966 | 0.74445  | 0.95491  |
| macro1d1          | 44.49917 | 0.194516148  | 0.353752 | 0.549866 | 0.582411 | 0.90571  |
| gpkow             | 350.8538 | 0.20717768   | 0.125143 | 1.655522 | 0.097819 | 0.521071 |
| zgc:77056         | 292.7529 | -0.072632229 | 0.205287 | -0.35381 | 0.723482 | 0.947917 |

|                  |          |              |            |          |          |          |   |
|------------------|----------|--------------|------------|----------|----------|----------|---|
| sgms1            | 305.8649 | -0.109606523 | 0.14769    | -0.74214 | 0.458002 | 0.860993 |   |
| si:dkey-47k20.3  | 0.566088 | -1.379831724 | 2.806544   | -0.49165 | 0.622968 | NA       |   |
| tomm70a          | 1222.161 | 0.486379382  | 0.202624   | 2.400402 | 0.016377 | 0.225867 |   |
| commd5           | 153.4808 | -0.147659546 | 0.154621   | -0.95497 | 0.339591 | 0.795226 |   |
| rablab           | 1532.923 | -0.022928864 | 0.101698   | -0.22546 | 0.821621 | 0.971794 |   |
| crim1            | 152.4438 | -0.121835481 | 0.266693   | -0.45684 | 0.647787 | 0.927183 |   |
| xpr1b            | 605.1856 | -0.109499075 | 0.109974   | -0.99568 | 0.319404 | 0.780208 |   |
| hsp70.1          | 120.1731 | -0.721424546 | 0.426614   | -1.69105 | 0.090827 | 0.505206 |   |
| tkta             | 1738.897 | 0.433386199  | 0.147622   | 2.935781 | 0.003327 | 0.09482  |   |
| rufy3            | 519.1798 | 0.221458015  | 0.130953   | 1.691132 | 0.090812 | 0.505206 |   |
| pgp              | 342.997  | 0.227356294  | 0.137011   | 1.659407 | 0.097034 | 0.519526 |   |
| lrrc30a          | 77.76385 | 0.375616081  | 0.263896   | 1.423347 | 0.154636 | 0.619425 |   |
| p2rx3b           | 61.45469 | 0.754046668  | 0.272123   | 2.770978 | 0.005589 | 0.126154 |   |
| si:dkeyp-9d4.2   | 5.745247 | -1.716681317 | 1.435853   | -1.19558 | 0.231859 | 0.713202 |   |
| hmgb2a           | 6.411549 | -0.720483001 | 0.667197   | -1.07987 | 0.280202 | 0.752951 |   |
| pqbpl            | 259.8093 | -0.189476941 | 0.163583   | -1.1583  | 0.246743 | 0.727706 |   |
| clybl            | 375.3677 | 0.050371051  | 0.140228   | 0.359208 | 0.719439 | 0.94694  |   |
| mepla.1          | 35.04873 | 1.023131822  | 0.697455   | 1.466951 | 0.142389 | 0.601598 |   |
| wbp11b           | 176.1321 | -0.247990226 | 0.186565   | -1.32924 | 0.183768 | 0.66056  |   |
| mpp6b            | 422.0912 | 0.193928198  | 0.153144   | 1.266314 | 0.205401 | 0.687537 |   |
| mef2ca           | 992.4464 | -0.03703764  | 0.192916   | -0.19199 | 0.847751 | 0.97772  |   |
| nrli2            | 230.0002 | -0.030841587 | 0.169597   | -0.18185 | 0.855699 | 0.979524 |   |
| wap1b            | 684.11   | -0.021728682 | 0.117963   | -0.1842  | 0.853858 | 0.978905 |   |
| dedd             | 604.5351 | -0.058860919 | 0.117894   | -0.49927 | 0.61759  | 0.916398 |   |
| prxl2b           | 526.8539 | 0.085325987  | 0.204385   | 0.417478 | 0.676329 | 0.93557  |   |
| oxgr1b           | 0.260652 |              | 0.4.828052 |          | 0        | 1 NA     |   |
| srsf5a           | 4354.191 | -0.119748269 | 0.10319    | -1.16047 | 0.245859 | 0.727177 |   |
| cel.2            | 3287.775 | 0.865579282  | 0.710848   | 1.217672 | 0.223349 | 0.70531  |   |
| myf6             | 177.2605 | 0.011921051  | 0.238077   | 0.050072 | 0.960065 | 0.999164 |   |
| slc26a1          | 111.6703 | 0.085408705  | 0.210427   | 0.405882 | 0.684829 | 0.938486 |   |
| si:dkey-23a13.11 | 1.650264 | -0.493442874 | 1.58485    | -0.31135 | 0.755535 | NA       |   |
| tmprss9          | 419.2032 | -0.067116099 | 0.251253   | -0.26713 | 0.789373 | 0.963786 |   |
| zgc:161973       | 28.77056 | 0.961930243  | 0.617529   | 1.557708 | 0.119303 | 0.562753 |   |
| cnm3b            | 579.0116 | 0.224982951  | 0.155542   | 1.446445 | 0.148052 | 0.609064 |   |
| armh1            | 10.33005 | 0.244991712  | 0.642725   | 0.381177 | 0.703072 | 0.943622 |   |
| rassf2a          | 583.0912 | -0.148648432 | 0.098338   | -1.5116  | 0.130635 | 0.581957 |   |
| slc6a14          | 28.33469 | -0.024266981 | 0.566147   | -0.04286 | 0.96581  | 1        |   |
| khk              | 126.707  | 0.022827219  | 0.19401    | 0.11766  | 0.906337 | 0.991631 |   |
| kcnh2a           | 16.76941 | 0.442906919  | 0.596007   | 0.743123 | 0.457407 | 0.860993 |   |
| rab4l            | 1387.176 | 0.126034208  | 0.110699   | 1.138527 | 0.2549   | 0.733542 |   |
| si:dkeyp-86f7.4  | 5.839107 |              | 0.1.902524 |          | 0        | 1        | 1 |
| slc2a15a         | 285.4845 | -0.382170642 | 0.194389   | -1.96601 | 0.049298 | 0.386671 |   |
| cngala           | 35.15252 | 1.16189089   | 0.630488   | 1.842845 | 0.065352 | 0.435359 |   |
| phyhd1           | 665.4251 | 0.570213736  | 0.255589   | 2.230979 | 0.025682 | 0.284447 |   |
| trim54           | 21.28516 | -0.716932566 | 0.72007    | -0.99564 | 0.319424 | 0.780208 |   |
| casc3            | 693.6349 | -0.148495096 | 0.142276   | -1.04371 | 0.296618 | 0.764495 |   |
| ap3ml            | 333.1742 | 0.012171349  | 0.127208   | 0.095681 | 0.923774 | 0.994713 |   |
| SPDEF            | 14.58249 | 0.192775162  | 0.500749   | 0.384973 | 0.700257 | 0.942739 |   |
| atp13a1          | 442.2393 | 0.049875707  | 0.148589   | 0.335662 | 0.737126 | 0.952312 |   |
| grtpla           | 231.2379 | -0.4555693   | 0.198676   | -2.29303 | 0.021846 | 0.261875 |   |
| parpbp           | 142.758  | 0.056466968  | 0.223991   | 0.252094 | 0.800968 | 0.96768  |   |
| ampd2b           | 309.4501 | -0.002149271 | 0.156666   | -0.01372 | 0.989054 | 1        |   |
| glb1l            | 240.3412 | 0.075126532  | 0.167381   | 0.448835 | 0.653551 | 0.929269 |   |
| si:dkey-42123.9  | 0.184502 |              | 0.5.267649 |          | 0        | 1 NA     |   |

|                   |          |              |          |          |          |          |
|-------------------|----------|--------------|----------|----------|----------|----------|
| tnni2b.2          | 5823.328 | -0.055509169 | 0.159628 | -0.34774 | 0.728034 | 0.949325 |
| BX511121.1        | 3.019233 | 1.055425436  | 1.943378 | 0.543088 | 0.587069 | 0.907249 |
| slc6a7            | 189.4909 | -0.048023663 | 0.139843 | -0.34341 | 0.73129  | 0.950169 |
| lrrfip1a          | 509.935  | 0.036655358  | 0.133154 | 0.275286 | 0.783096 | 0.962328 |
| agfgla            | 300.4292 | 0.081975263  | 0.162234 | 0.505289 | 0.613356 | 0.915998 |
| nup188            | 803.6318 | 0.135499325  | 0.102273 | 1.324882 | 0.18521  | 0.662813 |
| pimr135           | 0.09025  | 0            | 5.267649 | 0        | 1        | NA       |
| grcc10            | 423.1182 | -0.028980064 | 0.128836 | -0.22494 | 0.822027 | 0.971966 |
| eef1db            | 3410.4   | -0.47645124  | 0.109654 | -4.34503 | 1.39E-05 | 0.002321 |
| tbx4              | 47.81637 | -0.314509097 | 0.302573 | -1.03945 | 0.298596 | 0.765656 |
| plekhala          | 554.8514 | -0.24068487  | 0.138688 | -1.73544 | 0.082663 | 0.483014 |
| glipr1b           | 103.1657 | 0.410279602  | 0.274472 | 1.494796 | 0.134968 | 0.589926 |
| nfbkib            | 1153.655 | -0.160329419 | 0.104438 | -1.53517 | 0.124742 | 0.572486 |
| tram2             | 335.7086 | -0.058264766 | 0.138081 | -0.42196 | 0.673053 | 0.93414  |
| malb              | 151.4593 | 0.415953997  | 0.244765 | 1.699402 | 0.089243 | 0.501424 |
| ccdc78            | 12.44043 | -0.271592092 | 0.496461 | -0.54706 | 0.58434  | 0.906412 |
| sdcbp             | 68.54656 | 0.995962321  | 0.343129 | 2.902586 | 0.003701 | 0.100884 |
| sh3bp4            | 118.4313 | -0.197103439 | 0.176896 | -1.11423 | 0.265179 | 0.742063 |
| stmn4             | 972.1734 | 0.119545805  | 0.215405 | 0.554981 | 0.578908 | 0.905417 |
| si:ch211-207i1.2  | 313.9276 | 0.120056598  | 0.177882 | 0.674921 | 0.499726 | 0.879636 |
| sec22ba           | 227.2095 | 0.080780943  | 0.185833 | 0.434697 | 0.663782 | 0.931603 |
| myod1             | 201.5095 | -0.159947859 | 0.253321 | -0.6314  | 0.527776 | 0.889948 |
| vps4a             | 123.3238 | -0.238598722 | 0.166161 | -1.43595 | 0.151016 | 0.615085 |
| susd6             | 955.6886 | 0.168366956  | 0.108306 | 1.554554 | 0.120052 | 0.565105 |
| sox7              | 198.8874 | 0.108210921  | 0.159664 | 0.677743 | 0.497935 | 0.878926 |
| si:ch211-87m7.2   | 45.39914 | 0.009975245  | 0.333965 | 0.029869 | 0.976171 | 1        |
| fkbp6             | 3.980489 | 0.840876658  | 0.842775 | 0.997748 | 0.318402 | 0.779923 |
| sdhdb             | 1233.234 | 0.055232923  | 0.125441 | 0.440309 | 0.659714 | 0.930581 |
| gnptab            | 514.8842 | -0.053730126 | 0.122781 | -0.43761 | 0.661669 | 0.930742 |
| pak7              | 296.2602 | 0.139904547  | 0.159688 | 0.876111 | 0.38097  | 0.824157 |
| ssbp3b            | 1074.944 | -0.197798461 | 0.134293 | -1.47288 | 0.140783 | 0.599658 |
| naglu             | 106.8972 | 0.505223874  | 0.200213 | 2.523429 | 0.011622 | 0.187517 |
| mybpc2a           | 265.0922 | -0.057972448 | 0.275939 | -0.21009 | 0.833596 | 0.975482 |
| ppplr14bb         | 566.266  | 0.032899936  | 0.174064 | 0.189011 | 0.850084 | 0.978251 |
| cdk21             | 1.604877 | -0.54429958  | 1.570995 | -0.34647 | 0.728991 | NA       |
| hyi               | 578.3336 | 0.047359439  | 0.222577 | 0.212778 | 0.8315   | 0.974908 |
| traf2a            | 92.96035 | -0.212132768 | 0.246129 | -0.86188 | 0.388756 | 0.827664 |
| zgc:92429         | 364.0873 | 0.230338262  | 0.204108 | 1.128509 | 0.259105 | 0.736127 |
| uchl3             | 498.8506 | 0.122536186  | 0.209935 | 0.583686 | 0.559431 | 0.899571 |
| sap301            | 1492.662 | -0.155958207 | 0.199767 | -0.7807  | 0.434979 | 0.850002 |
| matn1             | 6289.289 | -0.693575046 | 0.493492 | -1.40544 | 0.15989  | 0.626123 |
| ppp2ca            | 445.6982 | 0.0319717    | 0.101601 | 0.314679 | 0.753006 | 0.955756 |
| tmem30aa          | 495.9003 | 0.364280904  | 0.145753 | 2.499297 | 0.012444 | 0.194346 |
| pgrmc2            | 942.313  | -0.075479038 | 0.107084 | -0.70486 | 0.480898 | 0.870179 |
| dennd6aa          | 65.61707 | -0.179143395 | 0.199524 | -0.89785 | 0.369264 | 0.817763 |
| vbpl              | 1155.331 | -0.042674271 | 0.15101  | -0.28259 | 0.777489 | 0.961073 |
| dennd2db          | 36.60708 | -0.749771491 | 0.448708 | -1.67096 | 0.09473  | 0.513797 |
| klhl36            | 70.9694  | -0.011220135 | 0.243961 | -0.04599 | 0.963317 | 0.999842 |
| cbln9             | 17.89358 | -1.95560895  | 0.822252 | -2.37836 | 0.01739  | 0.232896 |
| si:ch211-220i18.4 | 51.96412 | 0.086060889  | 0.320921 | 0.268168 | 0.78857  | 0.963567 |
| mfsd2b            | 78.83869 | -0.349271728 | 0.351825 | -0.99274 | 0.320835 | 0.781266 |
| scdb              | 841.078  | 0.094475062  | 0.170427 | 0.554345 | 0.579343 | 0.905578 |
| gtf3aa            | 140.7813 | 0.194905517  | 0.222118 | 0.877488 | 0.380222 | 0.823648 |
| grtplb            | 34.62589 | 0.235648312  | 0.337427 | 0.698368 | 0.484947 | 0.872911 |

|                  |          |              |          |          |          |          |
|------------------|----------|--------------|----------|----------|----------|----------|
| tnnt3a           | 10612.9  | -0.060870888 | 0.178056 | -0.34186 | 0.732453 | 0.950617 |
| idh3a            | 1322.449 | 0.207667033  | 0.112152 | 1.851659 | 0.064075 | 0.432202 |
| jagla            | 150.4908 | 0.62420759   | 0.193728 | 3.222077 | 0.001273 | 0.052006 |
| sox13            | 434.3011 | 0.079251403  | 0.142194 | 0.557349 | 0.577289 | 0.904809 |
| hspal2b          | 178.5626 | 0.263967683  | 0.189644 | 1.391911 | 0.16395  | 0.632697 |
| tmc2b            | 14.54647 | 0.349592238  | 0.613183 | 0.570127 | 0.568592 | 0.902234 |
| efnala           | 420.4977 | -0.227486264 | 0.155317 | -1.46466 | 0.143015 | 0.602002 |
| zc3h10           | 226.7206 | 0.371845913  | 0.16033  | 2.319252 | 0.020381 | 0.253346 |
| gukla            | 818.0348 | -0.047940329 | 0.11654  | -0.41136 | 0.680806 | 0.937189 |
| mespba           | 0.145288 | 0            | 5.267649 | 0        | 1        | NA       |
| cryba2a          | 4932.121 | 0.506566244  | 0.262319 | 1.931106 | 0.05347  | 0.400549 |
| mnx2b            | 9.669699 | 0.725860891  | 0.699461 | 1.037743 | 0.29939  | 0.766128 |
| zgc:66313        | 16.93117 | -1.755441036 | 0.539866 | -3.25163 | 0.001147 | 0.04834  |
| angpt1           | 90.66063 | 0.236433781  | 0.3315   | 0.713224 | 0.475707 | 0.869292 |
| metrn            | 443.7573 | -0.089362209 | 0.129348 | -0.69086 | 0.489651 | 0.874629 |
| naal5b           | 715.5827 | 0.056513304  | 0.108841 | 0.51923  | 0.6036   | 0.914558 |
| grin2bb          | 247.5856 | 0.42948049   | 0.228227 | 1.881816 | 0.059861 | 0.421883 |
| prfl.1           | 0.383482 | -0.868143408 | 4.388648 | -0.19782 | 0.843189 | NA       |
| twist1a          | 459.6995 | 0.00823462   | 0.146055 | 0.05638  | 0.955039 | 0.998611 |
| rps26l           | 13123.59 | -0.263031141 | 0.136125 | -1.93227 | 0.053326 | 0.400175 |
| crygn2           | 8395.202 | 0.6837976    | 0.340907 | 2.005817 | 0.044876 | 0.371082 |
| pkd1a            | 288.7332 | 0.698182258  | 0.270109 | 2.584817 | 0.009743 | 0.170247 |
| rsrpl            | 1894.24  | -0.143315924 | 0.250374 | -0.57241 | 0.567046 | 0.901747 |
| ppalb            | 1172.814 | 0.067966539  | 0.097676 | 0.695837 | 0.486531 | 0.873244 |
| sppl2            | 482.4481 | 0.153125684  | 0.202973 | 0.754414 | 0.4506   | 0.857151 |
| crabp2b          | 783.5088 | -0.078652156 | 0.136813 | -0.57489 | 0.565368 | 0.901538 |
| tppp3            | 151.1971 | -0.159297075 | 0.213258 | -0.74697 | 0.455082 | 0.860008 |
| tmem263          | 833.7818 | 0.084707549  | 0.095666 | 0.885456 | 0.375911 | 0.822237 |
| slc16a5a         | 46.57012 | -0.131873623 | 0.278051 | -0.47428 | 0.635301 | 0.924272 |
| zgc:66484        | 152.0806 | -0.07484439  | 0.187607 | -0.39894 | 0.689936 | 0.939679 |
| hmgb1b           | 4356.396 | 0.104800911  | 0.144223 | 0.726661 | 0.467434 | 0.86616  |
| sptb             | 1013.034 | 0.313646072  | 0.215625 | 1.454592 | 0.145782 | 0.60501  |
| hvj              | 319.7547 | 0.184052913  | 0.180875 | 1.017569 | 0.308883 | 0.77371  |
| si:dkey-167k11.5 | 0        | NA           | NA       | NA       | NA       | NA       |
| tsnaxipl         | 31.6373  | 0.229121044  | 0.378967 | 0.604594 | 0.545449 | 0.8953   |
| acs11a           | 391.6251 | -0.042899301 | 0.134875 | -0.31807 | 0.750433 | 0.955074 |
| slc22a2          | 492.8838 | 0.228886488  | 0.268241 | 0.853287 | 0.3935   | 0.828374 |
| arhgef12a        | 464.0189 | -0.071280723 | 0.146266 | -0.48734 | 0.626021 | 0.920625 |
| psmcla           | 2071.582 | 0.18260973   | 0.134977 | 1.352897 | 0.176089 | 0.649415 |
| rnd1a            | 678.4565 | 0.030141408  | 0.2008   | 0.150107 | 0.88068  | 0.986624 |
| helz             | 959.3161 | 0.116136007  | 0.186154 | 0.623872 | 0.532712 | 0.890978 |
| zgc:77880        | 107.8836 | -0.096926419 | 0.219487 | -0.44161 | 0.658775 | 0.930581 |
| nudt1            | 65.12895 | 0.098898271  | 0.276824 | 0.357261 | 0.720897 | 0.947343 |
| foxk2            | 826.7226 | 0.006697683  | 0.102427 | 0.06539  | 0.947863 | 0.997411 |
| slc10a1          | 37.50131 | -2.860752802 | 0.386023 | -7.41083 | 1.26E-13 | 2.36E-10 |
| lrrc42           | 59.0282  | 0.013773455  | 0.262831 | 0.052404 | 0.958207 | 0.999109 |
| nampta           | 260.4869 | -0.098759474 | 0.165151 | -0.598   | 0.549843 | 0.897373 |
| rps19            | 23779.77 | -0.298131228 | 0.134964 | -2.20896 | 0.027177 | 0.293072 |
| phkgla           | 152.0016 | 0.314867507  | 0.28245  | 1.114774 | 0.264947 | 0.742063 |
| rhogd            | 126.7834 | 0.214128533  | 0.244049 | 0.8774   | 0.38027  | 0.823655 |
| sytle            | 2258.012 | 0.288826646  | 0.174783 | 1.652487 | 0.098435 | 0.521076 |
| nfe211a          | 392.6477 | -1.190823159 | 0.321674 | -3.70195 | 0.000214 | 0.015588 |
| th               | 54.0605  | -0.34784333  | 0.368913 | -0.94289 | 0.345738 | 0.798919 |
| lrit2            | 22.61865 | 1.984020671  | 1.423248 | 1.394009 | 0.163315 | 0.631199 |

|                  |          |              |          |          |          |          |
|------------------|----------|--------------|----------|----------|----------|----------|
| mfsd2aa          | 77.42366 | 0.397303346  | 0.261071 | 1.521822 | 0.128054 | 0.577144 |
| ccdc3b           | 216.6063 | 0.409692056  | 0.18361  | 2.23132  | 0.02566  | 0.284447 |
| plekhn3          | 161.2827 | -0.198289864 | 0.192499 | -1.03008 | 0.302972 | 0.76913  |
| pimr189          | 2.340495 | 2.656325421  | 1.325028 | 2.004732 | 0.044992 | 0.37151  |
| tex30            | 17.47541 | -0.444835692 | 0.412041 | -1.07959 | 0.280325 | 0.753146 |
| letmdl           | 106.6213 | 0.108896701  | 0.216339 | 0.503361 | 0.614711 | 0.915998 |
| gnai3            | 97.22658 | -0.075550309 | 0.178879 | -0.42235 | 0.672767 | 0.93414  |
| r3hdml           | 24.58738 | -0.485349549 | 0.561092 | -0.86501 | 0.387034 | 0.827592 |
| 3-Sep            | 641.5571 | 0.165766103  | 0.158565 | 1.045413 | 0.295832 | 0.764246 |
| CU929230.1       | 370.686  | 0.085010431  | 0.162138 | 0.524309 | 0.600064 | 0.913756 |
| phka2            | 533.283  | -0.15660953  | 0.185555 | -0.84401 | 0.398666 | 0.830925 |
| atp6vie1b        | 2562.344 | 0.009802886  | 0.133254 | 0.073565 | 0.941356 | 0.997371 |
| ctpsla           | 1081.258 | -0.137235151 | 0.188475 | -0.72814 | 0.46653  | 0.865588 |
| otx2a            | 78.35174 | 0.248105034  | 0.204784 | 1.211547 | 0.225686 | 0.707068 |
| ing4             | 1337.398 | -0.131790593 | 0.116251 | -1.13368 | 0.25693  | 0.734493 |
| xirpl            | 171.8908 | 0.220359979  | 0.204166 | 1.079318 | 0.280446 | 0.753147 |
| cldn11b          | 289.7277 | 0.157427234  | 0.136521 | 1.153135 | 0.248855 | 0.728918 |
| b3gat2           | 152.9347 | 0.144830692  | 0.204001 | 0.709953 | 0.477734 | 0.869292 |
| sptlc3           | 156.6128 | -0.1515368   | 0.196451 | -0.77137 | 0.440487 | 0.852385 |
| gabrr3b          | 28.7735  | -1.057557019 | 0.676577 | -1.5631  | 0.118029 | 0.560168 |
| prrg4            | 357.1336 | -0.106410495 | 0.158783 | -0.67016 | 0.502753 | 0.881453 |
| dnmt1            | 959.4754 | 0.124313986  | 0.179047 | 0.694309 | 0.487488 | 0.873291 |
| gucalc           | 41.44386 | -0.332421966 | 1.152885 | -0.28834 | 0.773087 | 0.960624 |
| melk             | 178.6661 | 0.095690091  | 0.209834 | 0.456027 | 0.648371 | 0.927474 |
| sytl6            | 5.424386 | 0.90627583   | 0.872852 | 1.038293 | 0.299134 | 0.766018 |
| hadh             | 1138.613 | 0.165236624  | 0.177462 | 0.93111  | 0.351797 | 0.802513 |
| sybl1            | 375.855  | 0.023821279  | 0.128576 | 0.185269 | 0.853018 | 0.978824 |
| BX323854.1       | 5.783944 | 0.508812578  | 1.33791  | 0.380304 | 0.70372  | 0.943735 |
| acads            | 688.5957 | 0.055146488  | 0.167113 | 0.329994 | 0.741404 | 0.954103 |
| exoc3l2b         | 110.8729 | 0.178748824  | 0.207353 | 0.86205  | 0.38866  | 0.827613 |
| mpi              | 102.2179 | 0.039971928  | 0.197535 | 0.202354 | 0.83964  | 0.976417 |
| ddx18            | 946.2132 | 0.032048794  | 0.192506 | 0.166482 | 0.867777 | 0.982728 |
| zgc:110006       | 37.67173 | -0.543191586 | 0.326135 | -1.66554 | 0.095805 | 0.516953 |
| fam120b          | 78.88825 | 0.059829661  | 0.245626 | 0.243581 | 0.807556 | 0.969736 |
| znhit2           | 73.3971  | -0.047596703 | 0.217638 | -0.2187  | 0.826887 | 0.973458 |
| esyt2a           | 329.5758 | 0.040868301  | 0.160448 | 0.254714 | 0.798944 | 0.966962 |
| cmtrl            | 435.9405 | -0.289032421 | 0.13217  | -2.18683 | 0.028755 | 0.301537 |
| otofa            | 193.2516 | 0.518918814  | 0.248288 | 2.089987 | 0.036619 | 0.336389 |
| tescb            | 66.62043 | -0.320328765 | 0.226819 | -1.41226 | 0.157872 | 0.623766 |
| klf11a           | 709.3005 | 0.257116623  | 0.215942 | 1.190675 | 0.233781 | 0.714749 |
| opn7c            | 18.65608 | -0.426641053 | 0.47805  | -0.89246 | 0.372146 | 0.819641 |
| siah1            | 663.3144 | -0.041878677 | 0.115319 | -0.36316 | 0.716488 | 0.94627  |
| cetp             | 277.7643 | -0.870610026 | 0.225228 | -3.86546 | 0.000111 | 0.009958 |
| baxb             | 83.0039  | 0.248377653  | 0.209096 | 1.187863 | 0.234887 | 0.715533 |
| phf23a           | 211.3383 | -0.241058643 | 0.159482 | -1.51151 | 0.130658 | 0.581957 |
| foxqla           | 340.823  | -0.271346857 | 0.281662 | -0.96338 | 0.335357 | 0.79203  |
| cited2           | 536.9279 | -0.48248364  | 0.168338 | -2.86617 | 0.004155 | 0.106606 |
| cluha            | 873.2369 | 0.076612638  | 0.162081 | 0.472681 | 0.636441 | 0.924779 |
| tmem120a         | 175.5101 | 0.056521902  | 0.165445 | 0.341635 | 0.732626 | 0.950617 |
| cpal             | 13888.08 | 0.222151458  | 0.623085 | 0.356535 | 0.72144  | 0.947343 |
| fgf10a           | 147.3801 | -0.09212363  | 0.171108 | -0.53839 | 0.590305 | 0.908901 |
| ksrlb            | 202.5144 | 0.01832456   | 0.175518 | 0.104403 | 0.91685  | 0.99353  |
| fermt3b          | 21.75686 | -1.172314518 | 0.481256 | -2.43595 | 0.014853 | 0.213725 |
| si:ch211-259g3.4 | 350.9767 | -0.059285578 | 0.155653 | -0.38088 | 0.70329  | 0.943622 |

|                 |          |              |          |          |          |          |
|-----------------|----------|--------------|----------|----------|----------|----------|
| srprb           | 802.258  | -0.112678595 | 0.172852 | -0.65188 | 0.514479 | 0.88631  |
| ftr56           | 29.83343 | -0.086427424 | 0.401023 | -0.21552 | 0.829364 | 0.974609 |
| yipf4           | 792.1176 | -0.069364111 | 0.124446 | -0.55738 | 0.577267 | 0.904809 |
| ak8             | 24.74192 | 0.233496048  | 0.364549 | 0.640506 | 0.521843 | 0.887551 |
| pde12           | 120.4988 | -0.14589396  | 0.204902 | -0.71202 | 0.476454 | 0.869292 |
| si:ch211-51a6.2 | 179.5954 | 0.019099026  | 0.171252 | 0.111526 | 0.911199 | 0.992208 |
| dnajal          | 197.4989 | 0.405565268  | 0.196017 | 2.069027 | 0.038544 | 0.344223 |
| ccdc8011        | 168.1343 | 0.190950575  | 0.185038 | 1.031954 | 0.302094 | 0.76803  |
| csrplb          | 232.9497 | -1.583130618 | 0.764817 | -2.06995 | 0.038457 | 0.343904 |
| tmem127         | 218.4799 | -0.098456257 | 0.149083 | -0.66041 | 0.508988 | 0.883442 |
| mybl1           | 120.305  | 0.27222476   | 0.217474 | 1.251757 | 0.210658 | 0.692347 |
| dtna            | 75.28055 | 0.136780212  | 0.206888 | 0.66113  | 0.508529 | 0.883333 |
| pip4k2ca        | 916.5678 | -0.074661754 | 0.100309 | -0.74432 | 0.456683 | 0.860698 |
| lipg            | 247.0638 | 0.287496934  | 0.357416 | 0.804377 | 0.421179 | 0.84265  |
| nrlh5           | 70.41413 | -1.876519507 | 0.396818 | -4.72891 | 2.26E-06 | 0.000551 |
| gspt1           | 701.0809 | 0.292213148  | 0.126748 | 2.305464 | 0.021141 | 0.25794  |
| igsf21a         | 240.3612 | -0.034367818 | 0.367446 | -0.09353 | 0.925481 | 0.994815 |
| cadmla          | 158.1801 | 0.200568426  | 0.173692 | 1.154733 | 0.2482   | 0.728489 |
| veph1           | 30.58931 | -0.226510714 | 0.404905 | -0.55942 | 0.575878 | 0.904739 |
| tim50           | 324.9707 | 0.163308779  | 0.157965 | 1.033831 | 0.301215 | 0.767371 |
| ivnslabpa       | 3287.977 | -0.154744189 | 0.157313 | -0.98367 | 0.325278 | 0.784089 |
| lrba            | 661.643  | 0.339424942  | 0.134939 | 2.515402 | 0.01189  | 0.189858 |
| dnal4a          | 44.5767  | 0.140965058  | 0.263463 | 0.535048 | 0.592617 | 0.909996 |
| baiap211b       | 86.71929 | -0.420481417 | 0.207886 | -2.02265 | 0.043109 | 0.36374  |
| notumla         | 205.5344 | 0.339556021  | 0.240648 | 1.411009 | 0.158242 | 0.623766 |
| moxdl           | 90.83347 | 0.237547856  | 0.190944 | 1.244072 | 0.213473 | 0.69586  |
| irx3b           | 76.60941 | 0.164030379  | 0.186296 | 0.88048  | 0.378599 | 0.82298  |
| gba3            | 12.44783 | 0.813570958  | 0.545449 | 1.491563 | 0.135814 | 0.591131 |
| nrl4a           | 25.2015  | 0.343580911  | 0.745226 | 0.461043 | 0.644768 | 0.926639 |
| tuba812         | 5457.105 | -0.174504599 | 0.150574 | -1.15893 | 0.246485 | 0.727706 |
| hmg20a          | 282.4177 | 0.22827218   | 0.147828 | 1.544177 | 0.122546 | 0.569468 |
| ppp2r5cb        | 828.4561 | 0.011133029  | 0.093922 | 0.118535 | 0.905644 | 0.991631 |
| alg11           | 150.2416 | -0.160120561 | 0.174641 | -0.91685 | 0.35922  | 0.810194 |
| commdl          | 189.6097 | -0.152147533 | 0.186931 | -0.81392 | 0.415689 | 0.839167 |
| arcn1b          | 1215.768 | -0.003516993 | 0.096093 | -0.0366  | 0.970804 | 1        |
| ssu72           | 725.2036 | -0.004546199 | 0.11518  | -0.03947 | 0.968515 | 1        |
| lhx2b           | 238.4919 | 0.050594744  | 0.169552 | 0.298403 | 0.765396 | 0.959831 |
| podxl           | 1154.382 | -0.180228448 | 0.130294 | -1.38324 | 0.16659  | 0.636904 |
| kidins220a      | 484.1599 | -0.140224728 | 0.44277  | -0.3167  | 0.751472 | 0.955331 |
| snai3           | 18.9468  | 0.765791338  | 0.631776 | 1.212124 | 0.225465 | 0.70685  |
| hbegfb          | 61.97676 | 0.329344071  | 0.29177  | 1.128778 | 0.258991 | 0.736127 |
| enkur           | 82.97394 | 0.016558035  | 0.208907 | 0.07926  | 0.936826 | 0.997044 |
| sap30bp         | 480.278  | 0.020250997  | 0.155586 | 0.13016  | 0.89644  | 0.98939  |
| rnf123          | 119.8729 | 0.177408267  | 0.239911 | 0.739476 | 0.459618 | 0.862156 |
| si:ch73-193i2.2 | 5.161168 | 1.055427222  | 1.805656 | 0.584512 | 0.558876 | 0.899409 |
| vamp1           | 664.0086 | 0.482130064  | 0.223179 | 2.16028  | 0.030751 | 0.312673 |
| dnajc9          | 331.2444 | 0.016986508  | 0.198162 | 0.08572  | 0.931689 | 0.995827 |
| dhrl1b          | 176.3759 | -0.201696382 | 0.179351 | -1.12459 | 0.260762 | 0.738343 |
| smap1           | 1142.959 | 0.135959078  | 0.080466 | 1.689642 | 0.091096 | 0.50549  |
| zic4            | 268.6648 | 0.144420074  | 0.158739 | 0.909795 | 0.362931 | 0.813115 |
| six6b           | 204.4337 | 0.11413208   | 0.222217 | 0.513606 | 0.607527 | 0.915204 |
| ppdpfb          | 9974.949 | -0.141222512 | 0.161615 | -0.87382 | 0.382215 | 0.825191 |
| tmedla          | 149.8472 | -0.061232291 | 0.204296 | -0.29972 | 0.764388 | 0.959254 |
| hsd20b2         | 196.5406 | 0.095478663  | 0.203622 | 0.468901 | 0.63914  | 0.924779 |

|                  |          |              |          |          |          |          |
|------------------|----------|--------------|----------|----------|----------|----------|
| hoxa10b          | 209.9324 | -0.119494557 | 0.157718 | -0.75765 | 0.448663 | 0.856741 |
| rab6bb           | 651.5636 | 0.22224734   | 0.173262 | 1.282721 | 0.19959  | 0.680373 |
| RTKN             | 84.33074 | -0.061386787 | 0.230536 | -0.26628 | 0.790025 | 0.964274 |
| rbml7            | 347.0145 | -0.1267862   | 0.111709 | -1.13497 | 0.256388 | 0.73401  |
| mc5ra            | 60.81908 | -0.43186103  | 0.311044 | -1.38842 | 0.165008 | 0.634185 |
| cmpk2            | 3.719358 | -0.868148047 | 1.862481 | -0.46612 | 0.641126 | 0.925424 |
| rtn4ipl          | 224.969  | 0.199645401  | 0.171281 | 1.165599 | 0.243777 | 0.724437 |
| efna2a           | 184.4615 | 0.182722823  | 0.176718 | 1.033978 | 0.301147 | 0.767371 |
| reep2            | 339.6186 | 0.374183232  | 0.185318 | 2.01914  | 0.043473 | 0.365455 |
| klhl38a          | 47.86105 | -0.338885187 | 0.328283 | -1.0323  | 0.301934 | 0.767995 |
| cers4a           | 120.3361 | 0.164695156  | 0.260938 | 0.631165 | 0.527933 | 0.889948 |
| dctn2            | 2041.188 | -0.069518698 | 0.126593 | -0.54915 | 0.5829   | 0.90571  |
| wtla             | 73.6349  | 0.338529586  | 0.2023   | 1.673401 | 0.094248 | 0.512734 |
| igfbp2b          | 73.65798 | -0.221010891 | 0.178444 | -1.23855 | 0.215513 | 0.697157 |
| csrnpla          | 323.9443 | -0.29682326  | 0.17564  | -1.68995 | 0.091037 | 0.50549  |
| calm2a           | 2465.842 | -0.386353297 | 0.136623 | -2.82788 | 0.004686 | 0.113564 |
| rcor1            | 555.5136 | -0.074437658 | 0.138844 | -0.53612 | 0.591874 | 0.909603 |
| TXN              | 4959.54  | -0.171801554 | 0.137435 | -1.25006 | 0.211279 | 0.692983 |
| kcnj11l          | 98.1262  | 0.168909702  | 0.311121 | 0.542907 | 0.587194 | 0.907261 |
| syt6b            | 72.2071  | 0.020908768  | 0.322216 | 0.064891 | 0.948261 | 0.997694 |
| col9a1b          | 1788.277 | 0.208229055  | 0.441917 | 0.471195 | 0.637501 | 0.924779 |
| ognb             | 5.638268 | -0.459992902 | 1.150494 | -0.39982 | 0.689288 | 0.939348 |
| prrc2a           | 2320.875 | -0.032344324 | 0.115101 | -0.28101 | 0.778705 | 0.961073 |
| seta             | 4901.381 | 0.15919559   | 0.111401 | 1.429036 | 0.152994 | 0.617573 |
| aplar            | 169.5255 | 0.354838727  | 0.199743 | 1.776478 | 0.075654 | 0.465951 |
| flvcr2b          | 140.5055 | -0.229299133 | 0.215547 | -1.0638  | 0.28742  | 0.758397 |
| psmb2            | 1710.085 | -0.061325777 | 0.138625 | -0.44239 | 0.65821  | 0.930581 |
| ap5ml            | 101.5492 | -0.608171689 | 0.276954 | -2.19593 | 0.028097 | 0.298489 |
| CU571315.1       | 52.12913 | -0.265528015 | 0.350414 | -0.75775 | 0.448598 | 0.856741 |
| tmem200a         | 35.77992 | 0.45445898   | 0.352998 | 1.287425 | 0.197946 | 0.678664 |
| ephb3a           | 657.3512 | -0.013352342 | 0.102932 | -0.12972 | 0.896788 | 0.98939  |
| srpk1b           | 332.4982 | 0.045793083  | 0.135189 | 0.338734 | 0.73481  | 0.951361 |
| tada2a           | 229.2219 | -0.286173966 | 0.144647 | -1.97843 | 0.04788  | 0.380801 |
| flvcr1           | 200.444  | 0.135176712  | 0.189759 | 0.712359 | 0.476243 | 0.869292 |
| si:dkey-239b22.1 | 306.3138 | 0.477196414  | 0.565945 | 0.843185 | 0.399125 | 0.831196 |
| calb1            | 134.9662 | 0.339410805  | 0.273958 | 1.238918 | 0.215376 | 0.697157 |
| rd3              | 78.4975  | -0.199516353 | 0.282278 | -0.70681 | 0.479686 | 0.869938 |
| g6pca.1          | 230.6545 | -0.829796888 | 0.238922 | -3.47309 | 0.000515 | 0.027984 |
| unm_sal261       | 54.03787 | -0.194773043 | 0.245676 | -0.7928  | 0.427892 | 0.845893 |
| chst10           | 210.5193 | -0.141643286 | 0.195018 | -0.72631 | 0.46765  | 0.866174 |
| pan3             | 416.6642 | 0.054358623  | 0.14042  | 0.387115 | 0.698671 | 0.942456 |
| stat2            | 246.0176 | -0.173488056 | 0.194667 | -0.89121 | 0.372819 | 0.819953 |
| cort             | 152.6955 | 0.094932396  | 0.334634 | 0.28369  | 0.776648 | 0.961073 |
| fahd1            | 124.7618 | -0.470213383 | 0.219451 | -2.14268 | 0.032139 | 0.318495 |
| si:ch211-207d6.2 | 216.7243 | -0.206084304 | 0.181474 | -1.13561 | 0.25612  | 0.73401  |
| sox21a           | 112.0435 | -0.180971446 | 0.263507 | -0.68678 | 0.492221 | 0.876345 |
| col5a2a          | 4333.223 | 0.125531271  | 0.189302 | 0.663128 | 0.507249 | 0.883007 |
| ercc1            | 232.2823 | -0.142255711 | 0.171019 | -0.83181 | 0.405515 | 0.834645 |
| atp6v0b          | 1177.653 | 0.086648969  | 0.093647 | 0.925268 | 0.354826 | 0.805933 |
| fosab            | 250.8867 | -0.427878531 | 0.95814  | -0.44657 | 0.655184 | 0.929606 |
| kif9             | 16.56271 | -0.499008894 | 0.466018 | -1.07079 | 0.284263 | 0.75523  |
| mylk2            | 34.34824 | 0.363947146  | 0.332384 | 1.094959 | 0.273535 | 0.749148 |
| prkg1b           | 569.5686 | -0.331363373 | 0.304117 | -1.08959 | 0.275893 | 0.750674 |
| ml1t1b           | 118.4824 | 0.093374151  | 0.179906 | 0.519015 | 0.60375  | 0.914603 |



|                    |           |               |           |           |           |           |
|--------------------|-----------|---------------|-----------|-----------|-----------|-----------|
| grm3               | 33. 50911 | 0. 746026463  | 0. 436824 | 1. 707842 | 0. 087666 | 0. 496994 |
| clstnl             | 2961. 036 | 0. 292919796  | 0. 146029 | 2. 005898 | 0. 044867 | 0. 371082 |
| si:ch73-27e22. 6   | 0. 477482 | 0             | 5. 267649 | 0         | 1         | NA        |
| pthlha             | 50. 9952  | 0. 424735359  | 0. 296962 | 1. 430266 | 0. 152641 | 0. 616684 |
| si:busml-266f07. 2 | 13. 15369 | 0. 087434381  | 1. 511706 | 0. 057838 | 0. 953877 | 0. 998611 |
| C3AR1              | 4. 101111 | 0. 109311981  | 1. 03338  | 0. 105781 | 0. 915756 | 0. 99311  |
| npr1a              | 99. 37137 | 0. 122039876  | 0. 172997 | 0. 705444 | 0. 480534 | 0. 870179 |
| mef2aa             | 152. 647  | 0. 364424161  | 0. 200147 | 1. 820786 | 0. 068639 | 0. 44686  |
| tmc4               | 29. 84496 | 0. 633477046  | 0. 653714 | 0. 969044 | 0. 332523 | 0. 789726 |
| dab2               | 437. 0417 | -0. 136269881 | 0. 154818 | -0. 88019 | 0. 378754 | 0. 823136 |
| smad6b             | 610. 4711 | -0. 010530126 | 0. 146844 | -0. 07171 | 0. 942833 | 0. 997371 |
| roraa              | 708. 6779 | -0. 125749841 | 0. 215667 | -0. 58307 | 0. 559843 | 0. 899668 |
| kat7b              | 495. 8577 | 0. 054792461  | 0. 119957 | 0. 456769 | 0. 647837 | 0. 927196 |
| pus7               | 356. 6296 | 0. 082366468  | 0. 193925 | 0. 424734 | 0. 671031 | 0. 933953 |
| ube2s              | 883. 548  | 0. 190448469  | 0. 107301 | 1. 774897 | 0. 075915 | 0. 46659  |
| fthl27             | 7990. 596 | 0. 235964714  | 0. 193246 | 1. 221061 | 0. 222063 | 0. 703829 |
| pparaa             | 90. 39109 | -0. 088176005 | 0. 234147 | -0. 37658 | 0. 706483 | 0. 944683 |
| crybg1a            | 905. 5821 | -0. 036369568 | 0. 150101 | -0. 2423  | 0. 808547 | 0. 969828 |
| adcy8              | 121. 0612 | 0. 152169402  | 0. 23966  | 0. 634938 | 0. 525469 | 0. 888928 |
| abcf1              | 1538. 446 | 0. 331499639  | 0. 123889 | 2. 675779 | 0. 007456 | 0. 146147 |
| ache               | 872. 9145 | -0. 013291488 | 0. 122813 | -0. 10823 | 0. 913817 | 0. 992796 |
| rbm24b             | 111. 431  | -0. 031765272 | 0. 32821  | -0. 09678 | 0. 922898 | 0. 994525 |
| dhrl3b. 1          | 113. 2293 | -0. 567741045 | 0. 188832 | -3. 00659 | 0. 002642 | 0. 083741 |
| trim2a             | 36. 04557 | 0. 173230373  | 0. 417129 | 0. 415292 | 0. 677928 | 0. 936026 |
| EIF4EBP2           | 4081. 329 | -0. 017157501 | 0. 083354 | -0. 20584 | 0. 836917 | 0. 976007 |
| vps37c             | 555. 3299 | 0. 107882777  | 0. 104901 | 1. 028428 | 0. 303748 | 0. 769473 |
| mboat2a            | 30. 4735  | -0. 799118086 | 0. 333625 | -2. 39526 | 0. 016609 | 0. 228244 |
| pparg              | 51. 75425 | 0. 099053729  | 0. 330857 | 0. 299385 | 0. 764646 | 0. 959403 |
| trpalb             | 39. 74449 | 0. 097179605  | 0. 447036 | 0. 217386 | 0. 827907 | 0. 973883 |
| pard6ga            | 2. 195878 | 1. 754747863  | 1. 633318 | 1. 074346 | 0. 282668 | NA        |
| psmb12             | 4. 104277 | 0. 119331702  | 1. 191719 | 0. 100134 | 0. 920238 | 0. 993982 |
| ift140             | 177. 5957 | 0. 15927322   | 0. 152502 | 1. 044399 | 0. 296301 | 0. 764246 |
| mapk8a             | 156. 3469 | 0. 203817946  | 0. 169664 | 1. 201304 | 0. 229633 | 0. 711596 |
| tcp1111            | 215. 1182 | 0. 242533514  | 0. 176959 | 1. 370567 | 0. 17051  | 0. 64208  |
| tbx1               | 332. 6705 | -0. 060049708 | 0. 165656 | -0. 3625  | 0. 716982 | 0. 94627  |
| lef1               | 554. 7155 | 0. 112599146  | 0. 134886 | 0. 834772 | 0. 403846 | 0. 833888 |
| ptbplb             | 1159. 69  | -0. 055030577 | 0. 120806 | -0. 45553 | 0. 648729 | 0. 927546 |
| tns3. 2            | 758. 4066 | 0. 158527216  | 0. 136553 | 1. 160919 | 0. 245675 | 0. 727177 |
| hiflan             | 648. 1436 | -0. 074652358 | 0. 19174  | -0. 38934 | 0. 697023 | 0. 94198  |
| stard14            | 283. 5967 | -0. 327015044 | 0. 23038  | -1. 41946 | 0. 155766 | 0. 620972 |
| erc1b              | 0. 131777 | 0             | 5. 267649 | 0         | 1         | NA        |
| mb                 | 812. 995  | -0. 116997802 | 0. 200694 | -0. 58297 | 0. 559915 | 0. 89967  |
| rbck1              | 172. 4039 | -0. 139637512 | 0. 209721 | -0. 66582 | 0. 505524 | 0. 8824   |
| tmem63a            | 129. 8031 | 0. 03556646   | 0. 180262 | 0. 197304 | 0. 84359  | 0. 976791 |
| cpped1             | 223. 4892 | -0. 417559971 | 0. 218785 | -1. 90854 | 0. 056321 | 0. 410107 |
| poglut2            | 163. 0415 | 0. 053471768  | 0. 174599 | 0. 306255 | 0. 75941  | 0. 957886 |
| nos2b              | 21. 57787 | -0. 228753616 | 0. 355681 | -0. 64314 | 0. 520131 | 0. 887148 |
| pcbd1              | 487. 059  | 0. 111600435  | 0. 187283 | 0. 595893 | 0. 551247 | 0. 8974   |
| six4b              | 234. 5614 | -0. 036975884 | 0. 204125 | -0. 18114 | 0. 856255 | 0. 979558 |
| ptpa               | 466. 4747 | -0. 162543668 | 0. 137136 | -1. 18527 | 0. 235911 | 0. 717225 |
| ccdc65             | 21. 79235 | 0. 630944679  | 0. 370451 | 1. 703179 | 0. 088535 | 0. 499597 |
| slc15a2            | 159. 0817 | 0. 319533808  | 0. 171707 | 1. 860925 | 0. 062755 | 0. 42872  |
| pafahlb1a          | 1233. 978 | -0. 010752868 | 0. 095391 | -0. 11272 | 0. 910249 | 0. 992208 |
| bet11              | 135. 729  | -0. 187748673 | 0. 197765 | -0. 94935 | 0. 342441 | 0. 797179 |

|             |           |               |           |           |           |           |
|-------------|-----------|---------------|-----------|-----------|-----------|-----------|
| mxdl        | 59. 57359 | 0. 035541071  | 0. 235234 | 0. 151088 | 0. 879906 | 0. 986339 |
| ftr16       | 12. 67151 | 0. 90643843   | 0. 713101 | 1. 271121 | 0. 203685 | 0. 684367 |
| enah        | 928. 32   | 0. 149118685  | 0. 132314 | 1. 127008 | 0. 259739 | 0. 736707 |
| arl6        | 276. 4122 | 0. 17092442   | 0. 147165 | 1. 161444 | 0. 245461 | 0. 726909 |
| cdk16       | 350. 6688 | 0. 03868306   | 0. 138712 | 0. 278874 | 0. 780341 | 0. 961411 |
| BX323082. 1 | 6. 330881 | -0. 744185864 | 1. 0385   | -0. 7166  | 0. 473623 | 0. 869146 |
| acsl3a      | 47. 02434 | 0. 256107623  | 0. 311166 | 0. 823057 | 0. 410476 | 0. 8372   |
| dpysl2b     | 744. 7291 | 0. 226972897  | 0. 107458 | 2. 112194 | 0. 03467  | 0. 328212 |
| sgsh        | 207. 8617 | -0. 18161818  | 0. 203717 | -0. 89152 | 0. 372649 | 0. 819953 |
| c8g         | 292. 6132 | -0. 418219838 | 0. 252841 | -1. 65408 | 0. 098111 | 0. 521071 |
| prdx3       | 1666. 22  | -0. 598891691 | 0. 157303 | -3. 80725 | 0. 000141 | 0. 011879 |
| mapk6       | 1010. 909 | -0. 597217728 | 0. 169662 | -3. 52004 | 0. 000431 | 0. 02512  |
| slain2      | 338. 051  | 0. 036673031  | 0. 14163  | 0. 258935 | 0. 795685 | 0. 966097 |
| cnot7       | 96. 16417 | -0. 200550995 | 0. 202937 | -0. 98824 | 0. 323034 | 0. 782754 |
| ddx1        | 553. 1163 | 0. 14108802   | 0. 127639 | 1. 105365 | 0. 269002 | 0. 745101 |
| scg5        | 168. 2185 | 0. 494666185  | 0. 246978 | 2. 002876 | 0. 045191 | 0. 372359 |
| gtf2f1      | 506. 7229 | -0. 065623834 | 0. 109769 | -0. 59783 | 0. 54995  | 0. 8974   |
| drd3        | 41. 81035 | -1. 265794237 | 0. 42829  | -2. 95546 | 0. 003122 | 0. 091566 |
| ppmlaa      | 349. 1642 | 0. 082640016  | 0. 169305 | 0. 488113 | 0. 62547  | 0. 920625 |
| zgc:171776  | 2. 163307 | -2. 229408547 | 1. 761276 | -1. 26579 | 0. 205588 | NA        |
| grk6        | 41. 79427 | 0. 483405685  | 0. 301114 | 1. 605392 | 0. 108408 | 0. 54085  |
| srgap2      | 610. 9196 | 0. 039802499  | 0. 116529 | 0. 341569 | 0. 732676 | 0. 950617 |
| puf60a      | 1250. 28  | -0. 00703865  | 0. 094449 | -0. 07452 | 0. 940594 | 0. 997371 |
| lrrc8aa     | 134. 1451 | -0. 430837146 | 0. 194983 | -2. 20962 | 0. 027132 | 0. 293072 |
| klf12b      | 40. 42474 | 0. 101114169  | 0. 2968   | 0. 340681 | 0. 733343 | 0. 95079  |
| gpc3        | 12. 52542 | 0. 442221265  | 0. 636505 | 0. 694765 | 0. 487203 | 0. 873291 |
| cthl        | 77. 62325 | -1. 555727649 | 0. 540909 | -2. 87614 | 0. 004026 | 0. 105636 |
| acss3       | 146. 3814 | -0. 173670959 | 0. 195397 | -0. 88881 | 0. 374104 | 0. 820835 |
| phactr4b    | 344. 8627 | -0. 012061653 | 0. 139541 | -0. 08644 | 0. 931118 | 0. 995809 |
| wnt2bb      | 43. 08335 | -0. 023520881 | 0. 243852 | -0. 09646 | 0. 923159 | 0. 994525 |
| anapc4      | 182. 6865 | 0. 306374653  | 0. 15715  | 1. 949564 | 0. 051228 | 0. 394059 |
| dnm3a       | 110. 7152 | -0. 233362765 | 0. 217186 | -1. 07449 | 0. 282605 | 0. 754808 |
| tnnt2c      | 446. 9392 | 0. 268971697  | 0. 168859 | 1. 592877 | 0. 111188 | 0. 54662  |
| tmtopsb     | 26. 58778 | 0. 22039386   | 0. 429472 | 0. 513174 | 0. 607829 | 0. 915204 |
| txndc16     | 111. 3761 | 0. 056242857  | 0. 210992 | 0. 266564 | 0. 789805 | 0. 964162 |
| rngtt       | 347. 459  | 0. 11541071   | 0. 131432 | 0. 878104 | 0. 379887 | 0. 823607 |
| zgc:110224  | 51. 26644 | 0. 063450985  | 0. 348461 | 0. 182089 | 0. 855513 | 0. 979408 |
| mybl2b      | 296. 1429 | 0. 32452648   | 0. 174559 | 1. 859124 | 0. 06301  | 0. 429313 |
| sat1b       | 172. 6025 | 0. 016209187  | 0. 214003 | 0. 075743 | 0. 939624 | 0. 997371 |
| rars2       | 88. 65513 | -0. 04780961  | 0. 232007 | -0. 20607 | 0. 836736 | 0. 976007 |
| zgc:113294  | 58. 31399 | -0. 321716356 | 0. 287035 | -1. 12082 | 0. 262362 | 0. 73998  |
| pomp        | 1339. 897 | 0. 160486962  | 0. 170819 | 0. 939517 | 0. 347465 | 0. 800037 |
| tbc1d20     | 134. 5529 | 0. 014025073  | 0. 163168 | 0. 085955 | 0. 931503 | 0. 995809 |
| tox         | 1205. 436 | 0. 074486833  | 0. 092039 | 0. 809299 | 0. 418343 | 0. 841565 |
| mfsd6a      | 94. 00113 | -0. 144575815 | 0. 204863 | -0. 70572 | 0. 480362 | 0. 870074 |
| mest        | 135. 2217 | 0. 065355774  | 0. 256272 | 0. 255025 | 0. 798704 | 0. 966823 |
| epb4115     | 508. 4006 | 0. 005050607  | 0. 111203 | 0. 045418 | 0. 963774 | 0. 999842 |
| mecr        | 173. 3672 | -0. 189275391 | 0. 246089 | -0. 76913 | 0. 441813 | 0. 853281 |
| usp36       | 864. 7824 | -0. 220569155 | 0. 156281 | -1. 41136 | 0. 158138 | 0. 623766 |
| serhl       | 177. 3225 | 0. 047117343  | 0. 163557 | 0. 288078 | 0. 773287 | 0. 960624 |
| pde4a       | 210. 6252 | 0. 437597844  | 0. 198757 | 2. 201669 | 0. 027689 | 0. 29556  |
| tipr1       | 404. 5707 | 0. 40198932   | 0. 158194 | 2. 541122 | 0. 01105  | 0. 18325  |
| btbd6b      | 645. 4364 | 0. 010953687  | 0. 093312 | 0. 117387 | 0. 906553 | 0. 991636 |
| ccdc180     | 12. 53579 | 0. 679320984  | 0. 542617 | 1. 251935 | 0. 210594 | 0. 692339 |

|                   |           |               |           |           |           |           |
|-------------------|-----------|---------------|-----------|-----------|-----------|-----------|
| rnf145b           | 684. 5316 | 0. 114545259  | 0. 109041 | 1. 050483 | 0. 293496 | 0. 76277  |
| ombp              | 52. 68268 | 0. 794967463  | 0. 323941 | 2. 454048 | 0. 014126 | 0. 208027 |
| tspan12           | 180. 1207 | -0. 014070735 | 0. 194559 | -0. 07232 | 0. 942346 | 0. 997371 |
| ckap4             | 2122. 726 | 0. 103530114  | 0. 186897 | 0. 553943 | 0. 579618 | 0. 905618 |
| coq8ab            | 77. 16936 | 0. 226243182  | 0. 278293 | 0. 812969 | 0. 416236 | 0. 839647 |
| ppp2r1bb          | 3300. 524 | 0. 140030982  | 0. 127665 | 1. 096859 | 0. 272703 | 0. 748552 |
| mpv17             | 172. 0082 | -0. 261098253 | 0. 192035 | -1. 35964 | 0. 173944 | 0. 647021 |
| itga9             | 108. 0205 | -0. 291069042 | 0. 256377 | -1. 13532 | 0. 256242 | 0. 73401  |
| mark2b            | 668. 4986 | 0. 086092986  | 0. 119982 | 0. 717548 | 0. 473036 | 0. 868965 |
| slc1a8b           | 16. 77179 | -0. 487553848 | 1. 411075 | -0. 34552 | 0. 729704 | 0. 950056 |
| ampd3b            | 1143. 518 | 0. 059543256  | 0. 152531 | 0. 390367 | 0. 696265 | 0. 941657 |
| si:dkey-40c11. 2  | 437. 183  | 0. 014811267  | 0. 153451 | 0. 096521 | 0. 923107 | 0. 994525 |
| pon1              | 246. 8524 | -0. 7374672   | 0. 238371 | -3. 09377 | 0. 001976 | 0. 068961 |
| rrp36             | 146. 445  | -0. 213899802 | 0. 221773 | -0. 9645  | 0. 334796 | 0. 791753 |
| arpp19a           | 1424. 306 | 0. 090337617  | 0. 102024 | 0. 885451 | 0. 375914 | 0. 822237 |
| praf2             | 296. 6435 | 0. 321175742  | 0. 120137 | 2. 673417 | 0. 007508 | 0. 146931 |
| 5-Mar             | 169. 0527 | -0. 145777974 | 0. 15082  | -0. 96657 | 0. 333759 | 0. 790676 |
| egln3             | 374. 1827 | 0. 026134395  | 0. 319114 | 0. 081897 | 0. 934729 | 0. 996829 |
| cacng2a           | 206. 3944 | 0. 191541951  | 0. 263088 | 0. 728053 | 0. 466581 | 0. 865588 |
| il20ra            | 94. 17388 | 0. 46169505   | 0. 338665 | 1. 36328  | 0. 172794 | 0. 645664 |
| ywhaz             | 5186. 219 | 0. 067925277  | 0. 107447 | 0. 632174 | 0. 527273 | 0. 889948 |
| clcn6             | 63. 10551 | -0. 007483744 | 0. 232648 | -0. 03217 | 0. 974338 | 1         |
| pax2b             | 16. 98599 | -0. 005671605 | 0. 534433 | -0. 01061 | 0. 991533 | 1         |
| thns12            | 33. 74942 | -0. 84744561  | 0. 523602 | -1. 61849 | 0. 105557 | 0. 534823 |
| macrod2           | 366. 7363 | 0. 221786566  | 0. 129356 | 1. 714541 | 0. 086429 | 0. 493048 |
| st71              | 133. 7438 | 0. 038737065  | 0. 219671 | 0. 176342 | 0. 860026 | 0. 980167 |
| sept8a            | 1157. 993 | -0. 04537479  | 0. 142438 | -0. 31856 | 0. 750061 | 0. 955074 |
| msi2b             | 325. 6976 | 0. 096985211  | 0. 135305 | 0. 716787 | 0. 473506 | 0. 869146 |
| fgfr11a           | 623. 5417 | -0. 140280451 | 0. 155068 | -0. 90464 | 0. 365658 | 0. 815695 |
| mgst1. 1          | 201. 9234 | 0. 051442086  | 0. 186793 | 0. 275396 | 0. 783012 | 0. 962328 |
| tob1a             | 1743. 561 | -0. 126614378 | 0. 181567 | -0. 69734 | 0. 485589 | 0. 87303  |
| rca3              | 517. 4729 | -0. 013022691 | 0. 163681 | -0. 07956 | 0. 936586 | 0. 997044 |
| SCYL2             | 323. 066  | 0. 031777959  | 0. 177424 | 0. 179108 | 0. 857853 | 0. 979774 |
| neb               | 6030. 655 | -0. 031783569 | 0. 275395 | -0. 11541 | 0. 908119 | 0. 991745 |
| ltb4r             | 33. 6524  | -0. 084184473 | 0. 308589 | -0. 2728  | 0. 785004 | 0. 962605 |
| si:dkey-261m9. 12 | 2. 766893 | 0. 407922077  | 1. 279236 | 0. 318879 | 0. 749818 | 0. 955074 |
| cd36              | 333. 494  | 0. 713740852  | 0. 321516 | 2. 219923 | 0. 026424 | 0. 287979 |
| fuk               | 150. 1153 | -0. 30602523  | 0. 227123 | -1. 3474  | 0. 177851 | 0. 651389 |
| ppplr10           | 999. 8937 | 0. 063265362  | 0. 101291 | 0. 62459  | 0. 53224  | 0. 890978 |
| sinhcaf           | 352. 514  | -0. 376773336 | 0. 146315 | -2. 57509 | 0. 010021 | 0. 173583 |
| qrsl1             | 138. 6165 | 0. 325560452  | 0. 193245 | 1. 6847   | 0. 092047 | 0. 507669 |
| foxglb            | 511. 9262 | -0. 116439007 | 0. 294135 | -0. 39587 | 0. 692202 | 0. 940333 |
| arl4cb            | 718. 6176 | -0. 097210437 | 0. 157303 | -0. 61798 | 0. 536588 | 0. 892421 |
| grialb            | 40. 96004 | -0. 067663492 | 0. 340796 | -0. 19855 | 0. 842619 | 0. 9766   |
| rps27a            | 34946. 11 | -0. 255027588 | 0. 114294 | -2. 23133 | 0. 025659 | 0. 284447 |
| gria3a            | 493. 4999 | -0. 166815308 | 0. 24706  | -0. 6752  | 0. 499548 | 0. 879603 |
| si:dkey-11p23. 7  | 1. 809831 | 2. 003633121  | 1. 920798 | 1. 043125 | 0. 29689  | NA        |
| tnfsf1013         | 44. 10037 | -0. 894065038 | 0. 298572 | -2. 99447 | 0. 002749 | 0. 085914 |
| pde4d             | 34. 50389 | 0. 353859231  | 0. 321245 | 1. 101524 | 0. 270669 | 0. 746683 |
| net1              | 1821. 951 | -0. 216853914 | 0. 09265  | -2. 34057 | 0. 019254 | 0. 244673 |
| slc38a9           | 95. 46728 | 0. 251436955  | 0. 225834 | 1. 113368 | 0. 26555  | 0. 742247 |
| pigf              | 166. 3495 | -0. 365962536 | 0. 199061 | -1. 83845 | 0. 065997 | 0. 438653 |
| tmem8a            | 77. 82847 | -0. 026689873 | 0. 24258  | -0. 11002 | 0. 91239  | 0. 992398 |
| kcnd2             | 167. 8394 | -0. 076692186 | 0. 242963 | -0. 31565 | 0. 752265 | 0. 955481 |

|                  |          |              |          |          |          |          |
|------------------|----------|--------------|----------|----------|----------|----------|
| grk5             | 45.77587 | 0.546872642  | 0.315272 | 1.734605 | 0.082811 | 0.483014 |
| ktn1             | 2210.492 | -0.06202266  | 0.082526 | -0.75155 | 0.452321 | 0.857994 |
| tldr7a           | 12.44108 | 0.895842038  | 0.518583 | 1.727479 | 0.084082 | 0.486971 |
| tm7sf2           | 106.2792 | 0.408276145  | 0.233184 | 1.750878 | 0.079967 | 0.478179 |
| rxfp2a           | 35.11905 | -1.346173052 | 0.434527 | -3.09802 | 0.001948 | 0.068449 |
| htrala           | 308.5309 | -0.015977479 | 0.201487 | -0.0793  | 0.936796 | 0.997044 |
| pvalb5           | 1092.805 | 0.758654762  | 0.19526  | 3.885348 | 0.000102 | 0.009321 |
| si:dkey-206f10.1 | 118.7366 | -0.080604555 | 0.419265 | -0.19225 | 0.847545 | 0.977676 |
| ndrgla           | 1442.834 | -0.298850608 | 0.173406 | -1.72342 | 0.084813 | 0.488883 |
| ccdc120          | 106.64   | 0.023868456  | 0.208823 | 0.1143   | 0.909    | 0.992033 |
| lratd2           | 38.65316 | -0.127015923 | 0.309061 | -0.41097 | 0.681092 | 0.937331 |
| ugt5gl           | 81.13741 | -0.202684771 | 0.240043 | -0.84437 | 0.398463 | 0.830887 |
| pacsin1a         | 330.8832 | 0.127183594  | 0.219534 | 0.579335 | 0.562363 | 0.900715 |
| erh              | 1623.957 | -0.107706012 | 0.152064 | -0.7083  | 0.478762 | 0.869292 |
| pde4ba           | 1300.659 | -0.066644851 | 0.115667 | -0.57618 | 0.564495 | 0.901433 |
| tritl            | 178.4528 | -0.231634981 | 0.184367 | -1.25638 | 0.208978 | 0.691152 |
| si:ch211-226m7.4 | 18.62661 | 0.51748088   | 0.442168 | 1.170326 | 0.24187  | 0.72348  |
| xgb              | 5.42516  | -2.461128693 | 1.101582 | -2.23418 | 0.025471 | 0.283609 |
| chchd3a          | 1069.965 | -0.070846706 | 0.12301  | -0.57594 | 0.564655 | 0.901445 |
| cryball1         | 9885.935 | 0.621871866  | 0.272045 | 2.285917 | 0.022259 | 0.263807 |
| cnksr1           | 142.3104 | -0.013957631 | 0.179599 | -0.07772 | 0.938054 | 0.997331 |
| dtx2             | 277.2347 | -0.137042094 | 0.126177 | -1.08611 | 0.277429 | 0.751426 |
| nrbp2a           | 339.4244 | 0.098240294  | 0.166146 | 0.591288 | 0.554327 | 0.898354 |
| kenc1b           | 64.79939 | 0.622226733  | 0.317104 | 1.962218 | 0.049737 | 0.388069 |
| her12            | 319.4784 | 0.139441157  | 0.206688 | 0.674644 | 0.499902 | 0.879766 |
| cox4i1           | 6775.535 | 0.018421433  | 0.107741 | 0.170979 | 0.86424  | 0.981867 |
| cm1c1            | 404.2429 | -0.091091486 | 0.207034 | -0.43998 | 0.65995  | 0.930581 |
| mrpl27           | 324.3317 | 0.122123351  | 0.190547 | 0.640911 | 0.521581 | 0.887551 |
| plxnb3           | 89.67217 | 0.027762177  | 0.23727  | 0.117007 | 0.906855 | 0.991644 |
| cc134b.3         | 1.692474 | 2.284631727  | 1.852357 | 1.233365 | 0.21744  | NA       |
| rnf185           | 690.7372 | 0.025756113  | 0.149026 | 0.172829 | 0.862786 | 0.981285 |
| h3f3c            | 12773.71 | 0.01583707   | 0.115115 | 0.137576 | 0.890576 | 0.988446 |
| pcnt             | 486.4135 | 0.010785911  | 0.185068 | 0.058281 | 0.953525 | 0.998436 |
| ppcdc            | 95.12231 | -0.408655973 | 0.234353 | -1.74376 | 0.081201 | 0.479923 |
| pkdlb            | 80.32037 | 0.776660144  | 0.331637 | 2.341899 | 0.019186 | 0.243983 |
| ptrja            | 26.4688  | 0.383803834  | 0.373345 | 1.028013 | 0.303944 | 0.76949  |
| ccni2            | 61.22955 | -0.253495219 | 0.364516 | -0.69543 | 0.486786 | 0.873245 |
| zgc:171927       | 10.48212 | 0.104223534  | 0.588333 | 0.177151 | 0.85939  | 0.979975 |
| trim35-10        | 1.942209 | 1.652281937  | 1.31666  | 1.254904 | 0.209513 | NA       |
| CR735102.1       | 136.2953 | 0.060692376  | 0.221487 | 0.274022 | 0.784068 | 0.962605 |
| kif7             | 226.4159 | 0.15564618   | 0.181685 | 0.85668  | 0.391622 | 0.827902 |
| tmc2a            | 21.22806 | -0.382632631 | 0.555986 | -0.68821 | 0.491323 | 0.875595 |
| prkrip1          | 175.4626 | -0.179771162 | 0.155132 | -1.15883 | 0.246527 | 0.727706 |
| ndufaf7          | 115.858  | -0.00229788  | 0.203906 | -0.01127 | 0.991009 | 1        |
| lyrm2            | 218.6204 | -0.063040928 | 0.178033 | -0.3541  | 0.723267 | 0.947898 |
| desila           | 466.2271 | 0.024896619  | 0.240936 | 0.103333 | 0.917699 | 0.993777 |
| psme2            | 46.71613 | 0.060031984  | 0.36244  | 0.165633 | 0.868446 | 0.982801 |
| nr1d1            | 478.045  | -0.667910266 | 0.787862 | -0.84775 | 0.396577 | 0.830053 |
| sst1.2           | 215.2409 | -0.030194662 | 0.226832 | -0.13311 | 0.894103 | 0.988762 |
| sult2st1         | 520.772  | -0.214675093 | 0.141114 | -1.52129 | 0.128187 | 0.57717  |
| trappc6b1        | 239.3061 | -0.243978109 | 0.193488 | -1.26095 | 0.207327 | 0.689456 |
| nr2f5            | 594.0824 | 0.046960725  | 0.183234 | 0.256289 | 0.797728 | 0.966447 |
| snrpe            | 830.5708 | -0.064522965 | 0.204315 | -0.3158  | 0.752153 | 0.955481 |
| tmem243b         | 151.5809 | -0.438318394 | 0.17392  | -2.52023 | 0.011728 | 0.188354 |

|                |          |              |          |          |          |          |
|----------------|----------|--------------|----------|----------|----------|----------|
| arl4ab         | 283.0561 | -0.367115169 | 0.165584 | -2.21709 | 0.026617 | 0.289132 |
| prkar2aa       | 1431.102 | -0.219172536 | 0.109826 | -1.99564 | 0.045973 | 0.375002 |
| zgc:101840     | 400.1529 | 0.249258732  | 0.205316 | 1.214024 | 0.224739 | 0.706634 |
| lect2l         | 472.284  | -1.166819418 | 0.297032 | -3.92826 | 8.56E-05 | 0.008158 |
| mcm6l          | 5.419676 | -1.579118084 | 0.938225 | -1.68309 | 0.092358 | 0.508314 |
| stmn2a         | 1911.068 | 0.366168863  | 0.187884 | 1.948914 | 0.051306 | 0.394059 |
| osbpl3a        | 130.6597 | -0.154891571 | 0.195985 | -0.79032 | 0.429338 | 0.846956 |
| dis3l2         | 206.5708 | -0.006631982 | 0.190775 | -0.03476 | 0.972268 | 1        |
| primpol        | 178.4041 | 0.520814363  | 0.258445 | 2.015181 | 0.043886 | 0.366822 |
| gsto2          | 881.2639 | 0.276649052  | 0.168617 | 1.640694 | 0.100861 | 0.526442 |
| gpr37b         | 79.14415 | 0.147588045  | 0.25039  | 0.589434 | 0.55557  | 0.898723 |
| igf2b          | 878.2989 | 0.046304201  | 0.123034 | 0.376352 | 0.706655 | 0.944735 |
| sarlab         | 812.0011 | 0.323260151  | 0.127343 | 2.53849  | 0.011133 | 0.183611 |
| unc5b          | 209.054  | -0.076699192 | 0.179465 | -0.42738 | 0.669104 | 0.933115 |
| cntln          | 65.05181 | -0.053798586 | 0.224185 | -0.23997 | 0.81035  | 0.969828 |
| zgc:101699     | 4.016435 | 0.063251808  | 1.12163  | 0.056393 | 0.955029 | 0.998611 |
| asl            | 104.8086 | -0.139253231 | 0.19059  | -0.73064 | 0.464996 | 0.864823 |
| mgst3b         | 2389.514 | -0.022530559 | 0.143008 | -0.15755 | 0.874814 | 0.984191 |
| rrm2b          | 661.1772 | 0.007166857  | 0.180777 | 0.039645 | 0.968376 | 1        |
| ppil3          | 94.45279 | -0.172219845 | 0.235988 | -0.72978 | 0.465523 | 0.864997 |
| chchd4a        | 189.1403 | -0.027464273 | 0.203698 | -0.13483 | 0.892747 | 0.988566 |
| gyg2           | 39.56675 | 1.084314781  | 0.775385 | 1.398422 | 0.161986 | 0.629618 |
| grifin         | 123.7128 | -0.257678419 | 0.363167 | -0.70953 | 0.477994 | 0.869292 |
| cabplb         | 12.34517 | 0.418765641  | 0.779863 | 0.536973 | 0.591286 | 0.909437 |
| acot18         | 198.3346 | 0.334037574  | 0.170926 | 1.954278 | 0.050668 | 0.391589 |
| gpatchl        | 380.2842 | 0.095030415  | 0.149905 | 0.633939 | 0.526121 | 0.889213 |
| mboat7         | 280.3609 | 0.102790298  | 0.125648 | 0.818081 | 0.413311 | 0.838317 |
| rps6kal        | 272.7177 | 0.101078375  | 0.138586 | 0.729354 | 0.465785 | 0.86502  |
| metapl         | 1758.662 | -0.271794659 | 0.132954 | -2.04427 | 0.040927 | 0.353808 |
| mdm2           | 714.319  | 0.155960703  | 0.117085 | 1.332035 | 0.182849 | 0.659278 |
| map4k6         | 124.6106 | -0.191322542 | 0.271035 | -0.70589 | 0.480254 | 0.870001 |
| tap2t          | 67.26031 | -0.585064644 | 0.317609 | -1.84209 | 0.065462 | 0.4356   |
| nxph1          | 367.7241 | 0.215392655  | 0.318079 | 0.677168 | 0.4983   | 0.879132 |
| nkap           | 675.2387 | -0.115237163 | 0.120241 | -0.95839 | 0.337868 | 0.794808 |
| atpsckmt       | 106.0113 | -0.024974597 | 0.202081 | -0.12359 | 0.901642 | 0.990643 |
| pimr1l1        | 0 NA     | NA           | NA       | NA       | NA       | NA       |
| tagln2         | 1791.68  | -0.0652132   | 0.132179 | -0.49337 | 0.621751 | 0.918461 |
| ube2jl         | 330.6445 | 0.029195485  | 0.148404 | 0.196729 | 0.844039 | 0.976791 |
| rorb           | 73.46961 | 0.260934636  | 0.249102 | 1.047503 | 0.294868 | 0.763708 |
| zgc:64189      | 15.34326 | 0.292516806  | 0.502935 | 0.58162  | 0.560823 | 0.900005 |
| efr3ba         | 95.01181 | 0.321223334  | 0.311163 | 1.032333 | 0.301916 | 0.767995 |
| ccdc115        | 213.3241 | -0.347649277 | 0.193381 | -1.79774 | 0.072218 | 0.456932 |
| p4hala         | 288.7585 | 0.205556006  | 0.116881 | 1.758671 | 0.078633 | 0.474455 |
| paics          | 5827.924 | -0.223285818 | 0.225528 | -0.99006 | 0.322145 | 0.782237 |
| adamts15b      | 146.167  | 0.108258657  | 0.211757 | 0.511239 | 0.609184 | 0.915204 |
| fbxw4          | 332.8727 | -0.214241474 | 0.160624 | -1.3338  | 0.182268 | 0.658775 |
| cyp17a1        | 140.4561 | 0.728544048  | 0.286353 | 2.544216 | 0.010952 | 0.182182 |
| fkbp1ab        | 118.4031 | 0.166707918  | 0.186192 | 0.895357 | 0.370596 | 0.818484 |
| mtrfl          | 72.12992 | -0.192694729 | 0.26199  | -0.73551 | 0.462032 | 0.863402 |
| CABZ01088134.1 | 28.48534 | 0.202903801  | 0.397198 | 0.510838 | 0.609465 | 0.915204 |
| idol           | 15.41194 | 0.58768642   | 0.957823 | 0.613565 | 0.539503 | 0.893049 |
| polr2c         | 491.7451 | 0.054901205  | 0.14969  | 0.366767 | 0.713793 | 0.945821 |
| api5           | 1406.975 | 0.099232511  | 0.095054 | 1.043954 | 0.296507 | 0.764359 |
| pdia8          | 205.6454 | 0.013796353  | 0.197885 | 0.069719 | 0.944417 | 0.997371 |

|                   |          |              |          |          |          |          |
|-------------------|----------|--------------|----------|----------|----------|----------|
| lrpapl            | 550.5291 | 0.030120355  | 0.140296 | 0.214692 | 0.830007 | 0.974908 |
| map1lc3a          | 948.3121 | -0.314371659 | 0.129565 | -2.42636 | 0.015251 | 0.217192 |
| morn5             | 7.946022 | -0.413308577 | 0.7281   | -0.56765 | 0.57027  | 0.902481 |
| rasgef1ba         | 586.1835 | -0.069551742 | 0.193375 | -0.35967 | 0.719092 | 0.94694  |
| selenon           | 706.0966 | 0.20828482   | 0.159903 | 1.302567 | 0.192723 | 0.67273  |
| NPFFR2            | 10.12828 | -0.654095718 | 0.854102 | -0.76583 | 0.443778 | 0.854255 |
| smarcbla          | 543.9362 | 0.00661377   | 0.114133 | 0.057948 | 0.95379  | 0.998611 |
| stmn1b            | 4682.839 | 0.105922027  | 0.20485  | 0.517072 | 0.605106 | 0.914985 |
| scd               | 10.80921 | 0.84238334   | 0.709005 | 1.18812  | 0.234786 | 0.715533 |
| pi4k2a            | 393.1838 | -0.134954692 | 0.130292 | -1.03578 | 0.300303 | 0.766629 |
| tpma              | 180965.7 | 0.042212665  | 0.18092  | 0.233322 | 0.815511 | 0.971158 |
| oxgr1a.1          | 0.88479  | -3.359420186 | 1.99976  | -1.67991 | 0.092975 | NA       |
| adora2aa          | 32.19874 | 0.295082059  | 0.292828 | 1.007697 | 0.3136   | 0.777207 |
| jadel             | 550.0655 | -0.012529385 | 0.112548 | -0.11133 | 0.911358 | 0.992208 |
| tshba             | 10.37722 | 2.184565562  | 0.694306 | 3.146404 | 0.001653 | 0.062485 |
| il12ba            | 0.613554 | -3.302237009 | 3.363149 | -0.98189 | 0.326155 | NA       |
| ncf1              | 116.4285 | -0.307135023 | 0.217399 | -1.41277 | 0.157723 | 0.623766 |
| zgc:153867        | 6505.155 | 0.041178839  | 0.110938 | 0.371186 | 0.710499 | 0.945821 |
| nt5c1bb           | 76.00878 | -0.083049123 | 0.263801 | -0.31482 | 0.7529   | 0.955756 |
| rbm48             | 289.7785 | -0.227572413 | 0.221736 | -1.02632 | 0.304739 | 0.770005 |
| ncaph2            | 235.1224 | 0.218118197  | 0.195023 | 1.118421 | 0.263387 | 0.741418 |
| pmelb             | 457.9291 | 0.069905975  | 0.172716 | 0.404745 | 0.685665 | 0.938486 |
| trappc13          | 438.9626 | -0.072589891 | 0.137471 | -0.52804 | 0.597473 | 0.911953 |
| hspbap1           | 37.17134 | -0.910714589 | 0.319965 | -2.8463  | 0.004423 | 0.109607 |
| ndufb7            | 1865.757 | 0.049776415  | 0.177301 | 0.280745 | 0.778906 | 0.961073 |
| cyp27a7           | 322.6705 | -0.468948734 | 0.19363  | -2.42187 | 0.015441 | 0.218848 |
| snx27a            | 312.1483 | 0.022704466  | 0.138039 | 0.164479 | 0.869354 | 0.983062 |
| ampd1             | 17947.56 | 0.398296583  | 0.121057 | 3.290161 | 0.001001 | 0.044023 |
| fat3a             | 124.8152 | 0.119588975  | 0.260767 | 0.458605 | 0.646518 | 0.926728 |
| igsf9ba           | 437.172  | 0.196171364  | 0.187435 | 1.04661  | 0.29528  | 0.763896 |
| mad111            | 180.1161 | 0.104018941  | 0.173666 | 0.598959 | 0.5492   | 0.897092 |
| abrab             | 206.0965 | -0.025622397 | 0.258875 | -0.09898 | 0.921157 | 0.994085 |
| cnot9             | 572.2961 | -0.040179694 | 0.114818 | -0.34994 | 0.726382 | 0.948987 |
| sepsecs           | 104.2924 | -0.027021068 | 0.213858 | -0.12635 | 0.899454 | 0.99045  |
| der13             | 291.2255 | -0.569036462 | 0.196835 | -2.89093 | 0.003841 | 0.103366 |
| spty2d1           | 422.8951 | -0.029075452 | 0.128856 | -0.22564 | 0.821479 | 0.971788 |
| ap2mlb            | 1966.421 | 0.144888199  | 0.098937 | 1.464452 | 0.14307  | 0.602002 |
| msi2a             | 272.3076 | 0.131496421  | 0.168275 | 0.781436 | 0.434546 | 0.850002 |
| si:ch211-243j20.2 | 257.0495 | 0.11284803   | 0.149583 | 0.754415 | 0.4506   | 0.857151 |
| ndfip2            | 1105.898 | 0.030404558  | 0.120711 | 0.251879 | 0.801135 | 0.967743 |
| fbxol6            | 36.46837 | -1.147165709 | 0.359648 | -3.18969 | 0.001424 | 0.056314 |
| lamb21            | 546.6231 | 0.208573833  | 0.174518 | 1.195142 | 0.232032 | 0.713202 |
| entpd2a.2         | 39.2536  | -0.230706441 | 0.363481 | -0.63471 | 0.525615 | 0.888928 |
| CABZ01088025.1    | 5.702952 | -0.432602143 | 0.750014 | -0.57679 | 0.56408  | 0.901361 |
| oxtr              | 6.63202  | -1.029826291 | 0.728368 | -1.41388 | 0.157397 | 0.623263 |
| trmt44            | 128.8523 | -0.132759829 | 0.165147 | -0.80389 | 0.421462 | 0.842754 |
| nitrli            | 0.045161 | 0            | 5.267649 | 0        | 1        | NA       |
| nup58             | 386.2858 | -0.099480674 | 0.12247  | -0.81229 | 0.416627 | 0.840071 |
| trmt2b            | 57.99903 | 0.07897183   | 0.216163 | 0.365334 | 0.714862 | 0.945821 |
| prrx1a            | 1050.696 | -0.197859254 | 0.11174  | -1.77071 | 0.07661  | 0.468597 |
| mrps23            | 250.8236 | 0.13815211   | 0.162941 | 0.847864 | 0.396514 | 0.830053 |
| nxn               | 450.1256 | 0.099373058  | 0.126466 | 0.785771 | 0.432001 | 0.848419 |
| rsrcl             | 341.7344 | 0.217114517  | 0.169406 | 1.281622 | 0.199975 | 0.6804   |
| slc19a1           | 109.6633 | 0.045388835  | 0.203155 | 0.22342  | 0.823209 | 0.972005 |

|                  |          |              |          |          |          |          |
|------------------|----------|--------------|----------|----------|----------|----------|
| cyp26a1          | 270.5693 | -0.014901311 | 0.177195 | -0.0841  | 0.93298  | 0.996264 |
| tango6           | 166.619  | -0.361785946 | 0.17439  | -2.07459 | 0.038025 | 0.342284 |
| prom1b           | 732.5238 | -0.390201994 | 0.211212 | -1.84745 | 0.064683 | 0.434279 |
| rgmd             | 1157.564 | -0.056104961 | 0.136562 | -0.41084 | 0.68119  | 0.937331 |
| dnall            | 52.49385 | -0.209429897 | 0.314245 | -0.66645 | 0.505121 | 0.882097 |
| irx5a            | 440.2526 | 0.120684055  | 0.118536 | 1.018124 | 0.308619 | 0.773546 |
| zgc:92275        | 68.55166 | 1.229271489  | 0.39397  | 3.120214 | 0.001807 | 0.065671 |
| csnk1g2b         | 523.3204 | 0.105065901  | 0.098116 | 1.070829 | 0.284247 | 0.75523  |
| elac2            | 231.8702 | 0.033130492  | 0.168781 | 0.196293 | 0.844381 | 0.976791 |
| unm_sa911        | 95.71129 | -0.862780439 | 0.357253 | -2.41504 | 0.015733 | 0.221337 |
| lrp11            | 97.74328 | 0.504251262  | 0.245493 | 2.054034 | 0.039972 | 0.349495 |
| plcd1b           | 619.2531 | 0.1468012    | 0.119346 | 1.230045 | 0.21868  | 0.699445 |
| zgc:65895        | 837.7868 | 0.145795057  | 0.215774 | 0.675685 | 0.499241 | 0.879603 |
| dclk2a           | 295.9034 | 0.010478552  | 0.158715 | 0.066021 | 0.947361 | 0.997371 |
| si:dkey-59111.10 | 1.592899 | 1.563362099  | 1.776031 | 0.880256 | 0.37872  | NA       |
| mtus1b           | 614.9966 | -0.121695081 | 0.09262  | -1.31391 | 0.188876 | 0.668515 |
| act16b           | 20.58334 | 0.157603088  | 0.496482 | 0.31744  | 0.75091  | 0.955074 |
| rarga            | 1068.332 | -0.074044765 | 0.119696 | -0.61861 | 0.536175 | 0.892277 |
| shisa2a          | 27.0979  | -0.230235252 | 0.443806 | -0.51877 | 0.603918 | 0.914603 |
| ccnk             | 200.3386 | 0.052945121  | 0.137263 | 0.385721 | 0.699703 | 0.942499 |
| slc4a1ap         | 258.7764 | 0.138281221  | 0.141473 | 0.977439 | 0.328352 | 0.786776 |
| lingola          | 28.96775 | 0.655624398  | 0.410128 | 1.598585 | 0.109913 | 0.54393  |
| serpin1          | 579.4821 | 0.05407883   | 0.210904 | 0.256414 | 0.797631 | 0.966447 |
| prkcq            | 76.4503  | -1.089147526 | 0.438617 | -2.48314 | 0.013023 | 0.198789 |
| mrrf             | 252.8509 | -0.139725514 | 0.207237 | -0.67423 | 0.500165 | 0.880007 |
| cpsf1            | 697.4344 | 0.056263188  | 0.125144 | 0.449587 | 0.653008 | 0.929197 |
| esr2b            | 37.80922 | -0.631067282 | 0.36376  | -1.73485 | 0.082768 | 0.483014 |
| calm3a           | 2119.004 | 0.29607159   | 0.149144 | 1.985136 | 0.047129 | 0.378022 |
| oxsrla           | 550.4696 | -0.070568076 | 0.118253 | -0.59675 | 0.550671 | 0.8974   |
| top2b            | 1632.991 | 0.021007649  | 0.100487 | 0.209058 | 0.834403 | 0.975731 |
| cx44.2           | 113.1649 | 0.404360147  | 0.213357 | 1.895226 | 0.058062 | 0.416246 |
| si:dkey-240h12.4 | 104.0393 | -0.21961234  | 0.21769  | -1.00883 | 0.313057 | 0.776599 |
| capn21           | 818.0099 | 0.660958754  | 0.280661 | 2.355006 | 0.018522 | 0.240697 |
| rab42a           | 137.8227 | -0.039660443 | 0.287039 | -0.13817 | 0.890105 | 0.98835  |
| hslbp3           | 61.31357 | -0.025085342 | 0.282859 | -0.08868 | 0.929332 | 0.995452 |
| si:dkey-243i1.1  | 123.1856 | 0.39115326   | 0.194381 | 2.0123   | 0.044188 | 0.368106 |
| kcnip3a          | 175.2906 | 0.541862117  | 0.303338 | 1.786334 | 0.074045 | 0.46206  |
| capzala          | 2801.797 | 0.008226377  | 0.093014 | 0.088442 | 0.929525 | 0.995576 |
| cdk10            | 159.13   | 0.102015665  | 0.165662 | 0.615804 | 0.538024 | 0.892498 |
| pld2             | 247.4974 | -0.041325982 | 0.163666 | -0.2525  | 0.800653 | 0.967515 |
| slit3            | 1023.882 | -0.002985824 | 0.144937 | -0.0206  | 0.983564 | 1        |
| ogdha            | 3242.752 | 0.154090585  | 0.103189 | 1.49328  | 0.135364 | 0.590767 |
| rpl37            | 20517.86 | -0.345990214 | 0.174599 | -1.98162 | 0.047521 | 0.379549 |
| hif1ab           | 1804.943 | -0.001859444 | 0.123747 | -0.01503 | 0.988011 | 1        |
| sema3c           | 99.87478 | -0.261828291 | 0.247671 | -1.05716 | 0.290437 | 0.76078  |
| chrne            | 431.3945 | 0.156550948  | 0.211982 | 0.73851  | 0.460205 | 0.862369 |
| cox10            | 558.2889 | 0.118190223  | 0.117546 | 1.005481 | 0.314665 | 0.777518 |
| ppp5c            | 981.3766 | 0.059696537  | 0.114168 | 0.522885 | 0.601054 | 0.913756 |
| palmdb           | 24.18931 | -0.204235702 | 0.493053 | -0.41423 | 0.678708 | 0.936026 |
| ing3             | 934.4467 | -0.185940298 | 0.122616 | -1.51644 | 0.129408 | 0.579015 |
| si:dkey-88n24.7  | 0.183528 | 2.079549577  | 5.22636  | 0.397896 | 0.690707 | NA       |
| pcdh19           | 666.194  | 0.136247983  | 0.126048 | 1.08092  | 0.279733 | 0.75269  |
| hexb             | 896.2885 | 0.290929964  | 0.127046 | 2.289962 | 0.022024 | 0.262762 |
| chst11           | 127.1134 | 0.274703939  | 0.187587 | 1.464408 | 0.143083 | 0.602002 |

|                   |          |              |          |          |          |          |
|-------------------|----------|--------------|----------|----------|----------|----------|
| mars              | 629.7044 | 0.004135129  | 0.203047 | 0.020365 | 0.983752 | 1        |
| zgc:173443        | 86.62654 | -0.448466284 | 0.44162  | -1.0155  | 0.309866 | 0.774621 |
| pik3r3b           | 938.534  | -0.241484215 | 0.129659 | -1.86246 | 0.062539 | 0.427724 |
| irx6a             | 70.38798 | -0.413627611 | 0.285194 | -1.45034 | 0.146964 | 0.60703  |
| sncga             | 719.3224 | -0.044242573 | 0.244663 | -0.18083 | 0.856501 | 0.979558 |
| atplb2b           | 340.3288 | 0.119898608  | 0.260645 | 0.460007 | 0.645511 | 0.926728 |
| jpt2              | 1392.892 | 0.119774144  | 0.099178 | 1.207672 | 0.227173 | 0.708426 |
| zgc:172121        | 49.05638 | -0.72343148  | 0.30007  | -2.41088 | 0.015914 | 0.222395 |
| igflrb            | 299.3654 | -0.1289656   | 0.140954 | -0.91495 | 0.36022  | 0.811057 |
| mpped2            | 241.1274 | 0.386064547  | 0.134156 | 2.877719 | 0.004006 | 0.105636 |
| unc119a           | 81.0738  | -0.578638726 | 0.228312 | -2.53443 | 0.011263 | 0.183909 |
| si:ch211-163121.7 | 24.90368 | -0.155478408 | 0.377283 | -0.4121  | 0.680266 | 0.936798 |
| aldoab            | 16663.73 | 0.197520089  | 0.139121 | 1.419775 | 0.155673 | 0.62071  |
| ttyh3a            | 471.1581 | -0.037042119 | 0.128541 | -0.28817 | 0.773213 | 0.960624 |
| grin2aa           | 238.9473 | 0.119087401  | 0.351366 | 0.338927 | 0.734664 | 0.951332 |
| fbxl14a           | 312.1154 | 0.024342219  | 0.166459 | 0.146235 | 0.883736 | 0.987014 |
| per2              | 1551.481 | 0.201235763  | 0.156579 | 1.285203 | 0.198722 | 0.679447 |
| lmo1              | 453.3768 | -0.031885201 | 0.195989 | -0.16269 | 0.870764 | 0.983365 |
| trdmt1            | 87.53944 | 0.261424724  | 0.215098 | 1.215374 | 0.224224 | 0.70607  |
| rab6ba            | 347.78   | 0.078583537  | 0.218865 | 0.35905  | 0.719558 | 0.94694  |
| chod1             | 74.90043 | 0.256294516  | 0.253079 | 1.012706 | 0.311201 | 0.775936 |
| atp6vlaa          | 2221.738 | 0.086665049  | 0.097125 | 0.8923   | 0.372232 | 0.819753 |
| tgfbr2b           | 664.8926 | -0.055601682 | 0.136959 | -0.40597 | 0.684763 | 0.938486 |
| pard3bb           | 159.3704 | -0.046084512 | 0.16027  | -0.28754 | 0.773697 | 0.960624 |
| srpx2             | 19.19837 | -0.216280216 | 0.350447 | -0.61715 | 0.537133 | 0.89244  |
| fitm2             | 206.0454 | -0.208115024 | 0.165308 | -1.25895 | 0.208048 | 0.690193 |
| gpr143            | 201.0191 | -0.541630498 | 0.186901 | -2.89795 | 0.003756 | 0.102148 |
| si:dkey-23o4.6    | 66.81116 | 0.36032388   | 0.676669 | 0.532496 | 0.594382 | 0.910768 |
| scn4ab            | 322.4881 | 0.449832563  | 0.226079 | 1.989711 | 0.046623 | 0.376263 |
| tmem165           | 955.8035 | -0.031463547 | 0.119118 | -0.26414 | 0.791675 | 0.964817 |
| zgc:153169        | 45.91216 | -0.404832077 | 0.350921 | -1.15363 | 0.248653 | 0.728723 |
| insb              | 3.780871 | -2.211530381 | 1.03499  | -2.13676 | 0.032617 | 0.319477 |
| mlf2              | 1270.505 | 0.015151468  | 0.086864 | 0.174428 | 0.861529 | 0.980527 |
| nuf2              | 254.0741 | 0.179740575  | 0.226982 | 0.791873 | 0.428435 | 0.846133 |
| emc9              | 304.3414 | 0.19117053   | 0.162979 | 1.172974 | 0.240806 | 0.722178 |
| fh13a             | 592.6726 | -0.389071471 | 0.138473 | -2.80972 | 0.004958 | 0.117232 |
| fabp7b            | 146.0756 | 0.430140637  | 0.278253 | 1.545863 | 0.122138 | 0.569287 |
| CABZ01090041.1    | 58.2897  | 0.89124128   | 0.472526 | 1.886122 | 0.059278 | 0.419384 |
| celf3a            | 871.3307 | 0.259761547  | 0.106753 | 2.433299 | 0.014962 | 0.214257 |
| ube2e2            | 792.758  | 0.083584244  | 0.115543 | 0.723404 | 0.469432 | 0.867224 |
| scel              | 980.3769 | -0.381186031 | 0.173433 | -2.19788 | 0.027958 | 0.297418 |
| tmem198b          | 389.1399 | -0.229410411 | 0.14423  | -1.59059 | 0.111703 | 0.547596 |
| mysml             | 225.016  | -0.156487464 | 0.152182 | -1.02829 | 0.303812 | 0.769473 |
| vegfab            | 212.2797 | 0.086988958  | 0.214305 | 0.405911 | 0.684808 | 0.938486 |
| pvalb7            | 2787.712 | -0.014298649 | 0.195285 | -0.07322 | 0.941632 | 0.997371 |
| ftr85             | 29.75654 | 0.108638925  | 0.371651 | 0.292314 | 0.770046 | 0.960484 |
| esytla            | 87.93507 | 0.146052822  | 0.290318 | 0.503079 | 0.614909 | 0.915998 |
| def6c             | 62.57493 | 0.053892265  | 0.278658 | 0.1934   | 0.846646 | 0.977214 |
| tfpia             | 702.3709 | 0.200735033  | 0.110102 | 1.823176 | 0.068277 | 0.445546 |
| med6              | 313.5118 | -0.070157774 | 0.148832 | -0.47139 | 0.637363 | 0.924779 |
| tspan3a           | 1437.231 | 0.083879583  | 0.134092 | 0.625539 | 0.531618 | 0.890835 |
| zdhhc2            | 64.77187 | 0.375112438  | 0.308719 | 1.215063 | 0.224342 | 0.706347 |
| phf3              | 466.132  | -0.037601711 | 0.161596 | -0.23269 | 0.816002 | 0.971207 |
| rab13             | 315.6699 | -0.047288858 | 0.203478 | -0.2324  | 0.816225 | 0.971207 |



|                   |           |               |           |           |           |           |
|-------------------|-----------|---------------|-----------|-----------|-----------|-----------|
| ncapd3            | 343. 9793 | 0. 3294941    | 0. 229744 | 1. 434178 | 0. 151521 | 0. 615372 |
| txn2              | 824. 2802 | -0. 009600515 | 0. 102595 | -0. 09358 | 0. 925446 | 0. 994815 |
| dachb             | 197. 3341 | -0. 204758185 | 0. 14993  | -1. 36569 | 0. 172037 | 0. 644374 |
| mylka             | 269. 7071 | -0. 122882025 | 0. 210163 | -0. 5847  | 0. 55875  | 0. 899409 |
| kcnip1b           | 335. 4987 | 0. 204078886  | 0. 185004 | 1. 103104 | 0. 269982 | 0. 746532 |
| asahlb            | 415. 9371 | -0. 328250046 | 0. 167904 | -1. 95499 | 0. 050584 | 0. 391331 |
| copg2             | 1698. 638 | -0. 023007509 | 0. 117614 | -0. 19562 | 0. 844909 | 0. 976791 |
| uspl1             | 316. 9164 | -0. 184978659 | 0. 192948 | -0. 9587  | 0. 337712 | 0. 794797 |
| si:dkey-222n6. 2  | 275. 3905 | -0. 094623726 | 0. 200379 | -0. 47222 | 0. 636767 | 0. 924779 |
| nt5c211           | 1102. 829 | -0. 048225271 | 0. 176703 | -0. 27292 | 0. 784916 | 0. 962605 |
| ccnb3             | 387. 1887 | 0. 1557673    | 0. 190197 | 0. 818978 | 0. 412799 | 0. 838123 |
| f7                | 285. 593  | -0. 133291865 | 0. 213198 | -0. 6252  | 0. 531838 | 0. 890978 |
| mid2              | 124. 7186 | 0. 175850672  | 0. 197592 | 0. 889967 | 0. 373484 | 0. 820566 |
| acbd5a            | 400. 9973 | -0. 002819544 | 0. 166974 | -0. 01689 | 0. 986527 | 1         |
| bet1              | 211. 3735 | -0. 194824205 | 0. 164361 | -1. 18534 | 0. 235882 | 0. 717225 |
| rarab             | 596. 9623 | 0. 107663892  | 0. 117327 | 0. 917636 | 0. 358809 | 0. 80995  |
| tgfb1b            | 34. 6904  | 0. 09730931   | 0. 305463 | 0. 318564 | 0. 750057 | 0. 955074 |
| ldb2b             | 496. 3306 | 0. 093311196  | 0. 1268   | 0. 735892 | 0. 461797 | 0. 863402 |
| rps10             | 27241. 5  | -0. 315623567 | 0. 128776 | -2. 45095 | 0. 014248 | 0. 209045 |
| paqr7b            | 27. 72964 | 0. 266977605  | 0. 375207 | 0. 711547 | 0. 476746 | 0. 869292 |
| si:ch211-152f2. 2 | 0. 625144 | 1. 055425623  | 2. 564796 | 0. 411505 | 0. 680702 | NA        |
| hat1              | 801. 8397 | 0. 057498068  | 0. 146649 | 0. 39208  | 0. 694999 | 0. 941197 |
| cx52. 6           | 12. 08017 | -0. 099408879 | 0. 902365 | -0. 11016 | 0. 912279 | 0. 992371 |
| chchd3b           | 239. 614  | 0. 155010692  | 0. 252961 | 0. 612785 | 0. 540019 | 0. 893049 |
| slc1a7a           | 16. 6681  | 1. 455224982  | 0. 656552 | 2. 216466 | 0. 02666  | 0. 289458 |
| si:dkey-224e22. 2 | 102. 2816 | 0. 19261687   | 0. 322013 | 0. 598165 | 0. 54973  | 0. 897373 |
| tm9sf5            | 455. 8859 | 0. 117852173  | 0. 11016  | 1. 069832 | 0. 284695 | 0. 755774 |
| myclb             | 394. 5068 | -0. 146250999 | 0. 153105 | -0. 95523 | 0. 339459 | 0. 795226 |
| hddc2             | 219. 7747 | 0. 092239549  | 0. 151912 | 0. 60719  | 0. 543725 | 0. 894925 |
| gpr157            | 74. 30452 | 0. 024799358  | 0. 283978 | 0. 087329 | 0. 93041  | 0. 995707 |
| zcchc8            | 334. 7946 | 0. 296192617  | 0. 122406 | 2. 419751 | 0. 015531 | 0. 219827 |
| asb4              | 54. 47827 | 0. 516640273  | 0. 307004 | 1. 682847 | 0. 092405 | 0. 508314 |
| retsat1           | 2. 955814 | -1. 50170185  | 1. 086686 | -1. 38191 | 0. 166999 | 0. 637452 |
| bag2              | 167. 375  | 0. 267676292  | 0. 145707 | 1. 837092 | 0. 066196 | 0. 439276 |
| trim35-27         | 53. 60788 | -0. 144405207 | 0. 28706  | -0. 50305 | 0. 61493  | 0. 915998 |
| thyl              | 696. 756  | 0. 738397914  | 0. 281457 | 2. 623483 | 0. 008704 | 0. 1602   |
| khdc4             | 651. 8121 | 0. 053363823  | 0. 122183 | 0. 436754 | 0. 66229  | 0. 930742 |
| lpcat4            | 155. 5484 | -0. 453783764 | 0. 241196 | -1. 88139 | 0. 059919 | 0. 421883 |
| pfdn5             | 1308. 994 | -0. 347507877 | 0. 156078 | -2. 2265  | 0. 025981 | 0. 285997 |
| or115-10          | 0. 190858 | 0             | 5. 267649 | 0         | 1         | NA        |
| pdc10a            | 979. 7359 | -0. 026277188 | 0. 132022 | -0. 19904 | 0. 842235 | 0. 97643  |
| fgf13a            | 535. 3841 | 0. 239247115  | 0. 136874 | 1. 747939 | 0. 080475 | 0. 479085 |
| ubtf              | 1537. 784 | -0. 132780469 | 0. 083895 | -1. 58269 | 0. 113492 | 0. 551541 |
| rtell             | 138. 9565 | 0. 109696812  | 0. 222524 | 0. 492966 | 0. 622037 | 0. 918461 |
| hsf2bp            | 2. 085062 | -3. 077531891 | 1. 810817 | -1. 69953 | 0. 08922  | NA        |
| si:ch211-254c8. 3 | 3. 110854 | -1. 386968651 | 1. 696092 | -0. 81774 | 0. 413504 | 0. 838369 |
| tdgfl             | 20. 0791  | -1. 292206524 | 0. 435182 | -2. 96935 | 0. 002984 | 0. 090034 |
| dicp2. 1          | 1. 146082 | 0             | 2. 777668 | 0         | 1         | NA        |
| glc               | 833. 9852 | -0. 096822129 | 0. 213099 | -0. 45435 | 0. 649574 | 0. 927756 |
| camsap1b          | 300. 4536 | 0. 056854463  | 0. 140361 | 0. 405058 | 0. 685435 | 0. 938486 |
| rxrab             | 23. 01232 | -0. 234492077 | 0. 380097 | -0. 61693 | 0. 537283 | 0. 892498 |
| zgc:101858        | 362. 5676 | -0. 154605987 | 0. 149275 | -1. 03571 | 0. 300336 | 0. 766629 |
| surf4l            | 170. 3876 | -0. 053156073 | 0. 174395 | -0. 3048  | 0. 760517 | 0. 957886 |
| rgs3b             | 260. 0533 | 0. 180016201  | 0. 135263 | 1. 330858 | 0. 183236 | 0. 659455 |

|                  |           |               |           |           |           |           |  |
|------------------|-----------|---------------|-----------|-----------|-----------|-----------|--|
| pho              | 82. 20988 | -0. 293773281 | 0. 317978 | -0. 92388 | 0. 355549 | 0. 806546 |  |
| selenow1         | 5650. 844 | -0. 000506455 | 0. 127184 | -0. 00398 | 0. 996823 | 1         |  |
| ehd2a            | 2. 327151 | 0. 098253273  | 1. 208225 | 0. 08132  | 0. 935187 | 0. 996829 |  |
| polr2j           | 293. 881  | 0. 051450026  | 0. 148883 | 0. 345573 | 0. 729663 | 0. 950056 |  |
| lrwd1            | 84. 73745 | -0. 183193237 | 0. 223844 | -0. 8184  | 0. 413131 | 0. 838274 |  |
| orai2            | 71. 29677 | 0. 309339461  | 0. 368109 | 0. 840347 | 0. 400714 | 0. 831725 |  |
| pex12            | 71. 45531 | -0. 533620672 | 0. 242547 | -2. 20007 | 0. 027802 | 0. 296445 |  |
| dr11. 2          | 11. 98723 | 0. 011073939  | 0. 651701 | 0. 016992 | 0. 986443 | 1         |  |
| dr11. 1          | 24. 47626 | 1. 470056549  | 0. 589208 | 2. 494972 | 0. 012597 | 0. 195228 |  |
| ap2b1            | 1498. 714 | -0. 060178795 | 0. 080854 | -0. 74429 | 0. 456701 | 0. 860698 |  |
| pkdcca           | 112. 8081 | 0. 064955545  | 0. 235973 | 0. 275267 | 0. 783111 | 0. 962328 |  |
| tmem136b         | 45. 13834 | 0. 48859113   | 0. 488272 | 1. 000653 | 0. 316995 | 0. 778879 |  |
| mrpl48           | 262. 2438 | -0. 164525747 | 0. 140798 | -1. 16852 | 0. 242596 | 0. 724345 |  |
| layna            | 9. 799415 | 0. 467176089  | 0. 565789 | 0. 825707 | 0. 40897  | 0. 836637 |  |
| btg4             | 0. 247052 | -0. 868112681 | 5. 267649 | -0. 1648  | 0. 869101 | NA        |  |
| schipl           | 1046. 19  | 0. 210981579  | 0. 10257  | 2. 05695  | 0. 039691 | 0. 348481 |  |
| gna14            | 222. 0241 | -0. 06234563  | 0. 189336 | -0. 32929 | 0. 74194  | 0. 954329 |  |
| slc25a46         | 195. 1714 | 0. 152906812  | 0. 159998 | 0. 95568  | 0. 339234 | 0. 795226 |  |
| tmem150ab        | 38. 63451 | -0. 117551663 | 0. 314915 | -0. 37328 | 0. 708939 | 0. 945546 |  |
| fzd9a            | 38. 00735 | 0. 290064499  | 0. 402776 | 0. 720163 | 0. 471425 | 0. 86809  |  |
| abl1             | 400. 0622 | -0. 05164629  | 0. 185332 | -0. 27867 | 0. 780498 | 0. 961411 |  |
| rab141           | 737. 4479 | 0. 17240376   | 0. 106125 | 1. 624531 | 0. 104263 | 0. 532541 |  |
| fam81b           | 0. 840859 | 0. 062899601  | 2. 313121 | 0. 027193 | 0. 978306 | NA        |  |
| gcnt4a           | 205. 3543 | -0. 350561955 | 0. 178876 | -1. 9598  | 0. 050019 | 0. 389217 |  |
| si:dkey-47k20. 8 | 0. 435748 | 1. 055409122  | 3. 50244  | 0. 301335 | 0. 763159 | NA        |  |
| zgc:110249       | 29. 90147 | -0. 693023321 | 0. 377277 | -1. 83691 | 0. 066223 | 0. 439276 |  |
| npr3             | 282. 0317 | 0. 083139936  | 0. 171665 | 0. 484316 | 0. 628162 | 0. 921864 |  |
| eef212           | 13868. 08 | -0. 254812764 | 0. 136762 | -1. 86318 | 0. 062436 | 0. 427718 |  |
| akrl1a           | 195. 2488 | 0. 037129605  | 0. 305761 | 0. 121433 | 0. 903348 | 0. 99133  |  |
| riok2            | 437. 337  | -0. 100528881 | 0. 198875 | -0. 50549 | 0. 613217 | 0. 915998 |  |
| tmtc2b           | 45. 03241 | 0. 008572981  | 0. 294822 | 0. 029078 | 0. 976802 | 1         |  |
| emc6             | 633. 2762 | 0. 061299163  | 0. 141235 | 0. 434022 | 0. 664272 | 0. 93177  |  |
| ncor1            | 1464. 321 | 0. 068488189  | 0. 156845 | 0. 436661 | 0. 662357 | 0. 930742 |  |
| dmrt3a           | 33. 52961 | -0. 542397106 | 0. 330936 | -1. 63898 | 0. 101218 | 0. 526828 |  |
| grb10b           | 72. 50582 | -0. 303728129 | 0. 280018 | -1. 08467 | 0. 278066 | 0. 751959 |  |
| entpd3           | 346. 2338 | 0. 246142485  | 0. 159682 | 1. 541455 | 0. 123206 | 0. 569695 |  |
| myh7bb           | 494. 9234 | 0. 000903217  | 0. 193994 | 0. 004656 | 0. 996285 | 1         |  |
| hnrnp1           | 3624. 142 | 0. 058471738  | 0. 135233 | 0. 432378 | 0. 665466 | 0. 932595 |  |
| srsf7a           | 1386. 979 | -0. 038207632 | 0. 086746 | -0. 44045 | 0. 65961  | 0. 930581 |  |
| nccrpl           | 851. 9464 | 0. 034688693  | 0. 212343 | 0. 163361 | 0. 870234 | 0. 983365 |  |
| ckma             | 175954. 9 | 0. 014172593  | 0. 186973 | 0. 0758   | 0. 939578 | 0. 997371 |  |
| capns1a          | 2435. 95  | -0. 22796693  | 0. 085159 | -2. 67697 | 0. 007429 | 0. 145999 |  |
| taf1             | 740. 7532 | 0. 013165457  | 0. 157685 | 0. 083492 | 0. 93346  | 0. 996472 |  |
| cfap298          | 141. 5871 | 0. 232938929  | 0. 180156 | 1. 292983 | 0. 196017 | 0. 676453 |  |
| mis18a           | 83. 88726 | 0. 208459234  | 0. 241473 | 0. 863281 | 0. 387983 | 0. 827592 |  |
| tppp2            | 196. 5153 | 0. 06943488   | 0. 238411 | 0. 291241 | 0. 770867 | 0. 960484 |  |
| ftr99            | 7. 117948 | -1. 526533702 | 0. 741113 | -2. 05979 | 0. 039419 | 0. 347542 |  |
| ins              | 312. 2981 | 0. 653842299  | 0. 293451 | 2. 228117 | 0. 025873 | 0. 285598 |  |
| pafah1b2         | 80. 413   | -0. 280763917 | 0. 249507 | -1. 12527 | 0. 260473 | 0. 737886 |  |
| gnb2             | 664. 3769 | 0. 009415851  | 0. 143267 | 0. 065722 | 0. 947599 | 0. 997371 |  |
| mink1            | 708. 9609 | -0. 05274609  | 0. 161492 | -0. 32662 | 0. 743957 | 0. 95491  |  |
| fgf5             | 11. 47855 | -0. 173384335 | 0. 615487 | -0. 2817  | 0. 778171 | 0. 961073 |  |
| tmem174          | 16. 50827 | -0. 798647572 | 1. 619942 | -0. 49301 | 0. 622006 | 0. 918461 |  |
| fcho2            | 520. 3866 | 0. 028793966  | 0. 126656 | 0. 22734  | 0. 820159 | 0. 971788 |  |

|                  |          |              |          |          |          |          |
|------------------|----------|--------------|----------|----------|----------|----------|
| tnp01            | 553.7852 | -0.004673295 | 0.119    | -0.03927 | 0.968674 | 1        |
| ptcd2            | 62.2896  | -0.184261959 | 0.23567  | -0.78186 | 0.434294 | 0.850002 |
| encl             | 676.1798 | 0.134289625  | 0.148764 | 0.902702 | 0.366684 | 0.816111 |
| ankra2           | 612.3593 | -0.020986388 | 0.1592   | -0.13182 | 0.895123 | 0.989187 |
| btf3             | 22500.79 | -0.508430646 | 0.191747 | -2.65156 | 0.008012 | 0.151789 |
| ttc33            | 193.7131 | -0.194643086 | 0.189042 | -1.02963 | 0.303184 | 0.769249 |
| ptger4b          | 38.07908 | -0.103804973 | 0.261577 | -0.39684 | 0.691483 | 0.940173 |
| ophn1            | 141.7442 | -0.039975566 | 0.191181 | -0.2091  | 0.834372 | 0.975731 |
| ccn111           | 47.04717 | -0.125259901 | 0.326891 | -0.38319 | 0.701582 | 0.943254 |
| surf6            | 29.63679 | -0.107022912 | 0.415808 | -0.25739 | 0.796881 | 0.966447 |
| arpc51b          | 255.0957 | -0.159902389 | 0.178052 | -0.89807 | 0.36915  | 0.817763 |
| zmat5            | 234.7024 | -0.485706231 | 0.15736  | -3.08659 | 0.002025 | 0.070121 |
| ml7              | 2.626302 | -1.480367043 | 1.538265 | -0.96236 | 0.335868 | 0.792139 |
| myhc4            | 1484.966 | 1.227231169  | 0.391679 | 3.133255 | 0.001729 | 0.064499 |
| camkk1a          | 39.06257 | -0.336669021 | 0.338618 | -0.99424 | 0.320104 | 0.780709 |
| atp2a11          | 52511.91 | 0.283919262  | 0.222953 | 1.273446 | 0.20286  | 0.683508 |
| spns3            | 70.70163 | 0.11310386   | 0.409599 | 0.276133 | 0.782446 | 0.962328 |
| slc25a25b        | 47.49523 | 0.44218215   | 0.287272 | 1.539243 | 0.123745 | 0.570837 |
| sh3glb2b         | 501.3787 | -0.094372482 | 0.143185 | -0.6591  | 0.509834 | 0.883733 |
| si:dkey-220k22.1 | 180.3607 | 0.190615177  | 0.165807 | 1.149621 | 0.2503   | 0.730041 |
| nelfb            | 304.4454 | 0.225569954  | 0.12178  | 1.85227  | 0.063987 | 0.431861 |
| entpd2a.1        | 48.32804 | 0.244348054  | 0.350672 | 0.6968   | 0.485928 | 0.873244 |
| ddx31            | 131.7287 | 0.037397776  | 0.21801  | 0.171542 | 0.863798 | 0.981842 |
| barh11a          | 181.0733 | 0.540757273  | 0.150689 | 3.588557 | 0.000333 | 0.020711 |
| adam28           | 127.2299 | 0.161529482  | 0.224113 | 0.720749 | 0.471064 | 0.868025 |
| tm2d2            | 269.9673 | -0.069834788 | 0.139313 | -0.50128 | 0.616175 | 0.916365 |
| histh11          | 13761.54 | -0.158896514 | 0.188017 | -0.84512 | 0.398046 | 0.830737 |
| sfrpla           | 331.3736 | -0.671746592 | 0.150795 | -4.45471 | 8.40E-06 | 0.001609 |
| zgc:110329       | 134.2744 | -0.066592177 | 0.16636  | -0.40029 | 0.688944 | 0.93924  |
| tacr1a           | 21.14438 | 0.515348115  | 0.494045 | 1.04312  | 0.296893 | 0.764503 |
| rasala           | 549.0493 | -0.038380371 | 0.128852 | -0.29786 | 0.765806 | 0.959951 |
| atp6v0a2a        | 234.2252 | 0.309906554  | 0.153202 | 2.022857 | 0.043088 | 0.36374  |
| brwd3            | 381.4088 | 0.085901664  | 0.145657 | 0.589754 | 0.555356 | 0.898723 |
| etnpp1           | 522.2843 | 0.388179618  | 0.281939 | 1.376821 | 0.168568 | 0.639966 |
| jmjd7            | 117.158  | -0.060295806 | 0.210824 | -0.286   | 0.774877 | 0.960899 |
| uprt             | 652.9165 | -0.232604042 | 0.136344 | -1.70601 | 0.088006 | 0.498194 |
| cfap73           | 5.083099 | 1.704730702  | 0.816431 | 2.088028 | 0.036795 | 0.336916 |
| iqcd             | 15.99613 | 0.143333589  | 0.422389 | 0.33934  | 0.734353 | 0.951134 |
| agtr2            | 222.7189 | 0.010740574  | 0.16423  | 0.0654   | 0.947856 | 0.997411 |
| cx27.5           | 26.17279 | -0.958800981 | 0.557298 | -1.72045 | 0.085351 | 0.490595 |
| gbgt113          | 58.45809 | -1.034825708 | 0.256616 | -4.03258 | 5.52E-05 | 0.006008 |
| rps6ka3a         | 652.6284 | -0.040658232 | 0.118711 | -0.3425  | 0.731977 | 0.950617 |
| gabarapa         | 1487.167 | -0.169342785 | 0.135652 | -1.24836 | 0.211898 | 0.693489 |
| gps2             | 451.0118 | 0.032757167  | 0.142003 | 0.23068  | 0.817564 | 0.971383 |
| tp53             | 765.9156 | 0.091192779  | 0.15388  | 0.592622 | 0.553434 | 0.897974 |
| capga            | 11.96255 | 0.46415317   | 0.576553 | 0.805048 | 0.420792 | 0.842383 |
| mpdula           | 219.6783 | -0.044145623 | 0.18028  | -0.24487 | 0.806555 | 0.969726 |
| znf703           | 808.185  | -0.004906624 | 0.117151 | -0.04188 | 0.966592 | 1        |
| dgcr8            | 588.5203 | -0.142056942 | 0.124463 | -1.14136 | 0.25372  | 0.732873 |
| atp6v0a2b        | 227.6093 | -0.204952938 | 0.175772 | -1.16602 | 0.243608 | 0.724437 |
| cyp1d1           | 231.5183 | 0.860274194  | 0.17632  | 4.879038 | 1.07E-06 | 0.000308 |
| zgc:101016       | 200.2785 | -0.508055306 | 0.168098 | -3.02238 | 0.002508 | 0.08071  |
| abhd17b          | 288.5703 | -0.231937507 | 0.141126 | -1.64348 | 0.100284 | 0.524748 |
| AK6              | 296.9887 | -0.627705179 | 0.236196 | -2.65757 | 0.007871 | 0.150059 |

|                   |          |              |            |          |          |          |
|-------------------|----------|--------------|------------|----------|----------|----------|
| cds2              | 808.0838 | -0.168654237 | 0.105987   | -1.59127 | 0.111548 | 0.547433 |
| hs3st112          | 112.962  | 0.294662146  | 0.180337   | 1.63395  | 0.102269 | 0.528996 |
| si:dkey-174n20.1  | 62.36163 | -0.575608014 | 0.260988   | -2.2055  | 0.027419 | 0.293857 |
| ficd              | 113.8627 | 0.106418224  | 0.223033   | 0.477142 | 0.633261 | 0.923885 |
| ISCU (1 of many)  | 1218.945 | -0.032211297 | 0.141383   | -0.22783 | 0.819778 | 0.971785 |
| corolca           | 1186.813 | 0.042693457  | 0.095651   | 0.446344 | 0.655349 | 0.929606 |
| dao.3             | 10.52018 | -0.911885123 | 0.533134   | -1.71042 | 0.087187 | 0.495407 |
| dao.1             | 890.0178 | -0.139083896 | 0.376955   | -0.36897 | 0.712153 | 0.945821 |
| dao.2             | 150.9993 | -1.185030011 | 0.293338   | -4.03981 | 5.35E-05 | 0.005902 |
| tchp              | 172.408  | 0.088882747  | 0.196718   | 0.451828 | 0.651393 | 0.928562 |
| aldh3b2           | 20.80334 | -0.660888546 | 0.456194   | -1.4487  | 0.147421 | 0.608001 |
| ankle2            | 96.89483 | -0.247067851 | 0.201138   | -1.22835 | 0.219316 | 0.700266 |
| pgam5             | 705.2975 | 0.058525893  | 0.133891   | 0.437117 | 0.662026 | 0.930742 |
| mtnrlc            | 8.717777 | 1.722480963  | 0.832727   | 2.068482 | 0.038595 | 0.344335 |
| zgc:113208        | 343.3446 | -0.004655035 | 0.212765   | -0.02188 | 0.982545 | 1        |
| coq5              | 239.3841 | 0.227978084  | 0.158764   | 1.435954 | 0.151015 | 0.615085 |
| xbp1              | 4043.405 | -0.143828887 | 0.182006   | -0.79024 | 0.429386 | 0.846956 |
| snrnp27           | 631.0761 | -0.12372245  | 0.145689   | -0.84922 | 0.395758 | 0.829389 |
| parvab            | 105.0351 | -0.045672292 | 0.220339   | -0.20728 | 0.83579  | 0.976007 |
| ypell             | 171.5642 | -0.088405453 | 0.195      | -0.45336 | 0.650288 | 0.927835 |
| sdf211            | 521.8561 | 0.244977969  | 0.192546   | 1.272309 | 0.203263 | 0.684076 |
| ccl19a.2          | 0.14762  |              | 0.5.267649 |          | 0        | 1 NA     |
| tctn2             | 69.49695 | 0.076864183  | 0.253937   | 0.30269  | 0.762126 | 0.958345 |
| rfc5              | 428.1075 | 0.010590935  | 0.153338   | 0.069069 | 0.944935 | 0.997371 |
| pimr123           | 0.04222  |              | 0.5.267649 |          | 0        | 1 NA     |
| irx4a             | 100.7072 | 0.354682571  | 0.270132   | 1.312997 | 0.189184 | 0.66871  |
| extlc             | 324.1515 | 0.256545968  | 0.162896   | 1.574908 | 0.115278 | 0.555298 |
| evla              | 572.6631 | 0.020077393  | 0.119784   | 0.167613 | 0.866887 | 0.982582 |
| sat1a.1           | 488.0374 | -0.282438374 | 0.179702   | -1.57171 | 0.116019 | 0.556131 |
| rad21b            | 375.8859 | 0.47414456   | 0.252662   | 1.876599 | 0.060573 | 0.423018 |
| BX649384.1        | 0.659156 | 2.613837829  | 2.781274   | 0.939799 | 0.347321 | NA       |
| si:ch211-193k19.1 | 210.2722 | -0.092874026 | 0.18241    | -0.50915 | 0.610646 | 0.915331 |
| zgc:103438        | 27.60938 | -1.086724945 | 0.337824   | -3.21684 | 0.001296 | 0.052702 |
| si:dkey-267n13.1  | 38.98105 | -0.082715272 | 0.343542   | -0.24077 | 0.809732 | 0.969828 |
| ptp4a2b           | 1344.649 | 0.085647789  | 0.109092   | 0.785097 | 0.432397 | 0.848419 |
| bmp8a             | 23.88989 | 0.070949425  | 0.424702   | 0.167057 | 0.867325 | 0.982582 |
| zgc:91910         | 957.2045 | 0.179534875  | 0.157097   | 1.142825 | 0.253111 | 0.732759 |
| si:rp71-45k5.4    | 1321.989 | 0.106407023  | 0.156493   | 0.679947 | 0.496538 | 0.878161 |
| zgc:113424        | 0.405877 | -0.776942606 | 2.968444   | -0.26173 | 0.793527 | NA       |
| FP102018.1        | 375.2044 | -0.001388192 | 0.183274   | -0.00757 | 0.993957 | 1        |
| mon1ba            | 24.29566 | -0.199761756 | 0.39111    | -0.51076 | 0.609522 | 0.915204 |
| rps3a             | 55038.1  | -0.420651305 | 0.138015   | -3.04787 | 0.002305 | 0.076394 |
| stm               | 1559.791 | 0.121582839  | 0.117611   | 1.033769 | 0.301244 | 0.767371 |
| scxa              | 96.03984 | -0.16045417  | 0.204382   | -0.78507 | 0.432412 | 0.848419 |
| spinb             | 48.24032 | -0.282721841 | 0.403344   | -0.70094 | 0.483338 | 0.871988 |
| srp19             | 429.8658 | -0.059571973 | 0.150824   | -0.39498 | 0.692861 | 0.940444 |
| zgc:101664        | 98.89272 | -0.000316035 | 0.172894   | -0.00183 | 0.998542 | 1        |
| dock6             | 309.0046 | -0.355475013 | 0.218671   | -1.62562 | 0.104031 | 0.532096 |
| marcks11b         | 8796.423 | 0.037327492  | 0.109335   | 0.341404 | 0.732799 | 0.950617 |
| cbln6             | 0.335261 |              | 0.4.390552 |          | 0        | 1 NA     |
| arl5c             | 193.9663 | -0.312795011 | 0.311225   | -1.00505 | 0.314875 | 0.777649 |
| arntl1b           | 310.0327 | 0.267207768  | 0.202425   | 1.320031 | 0.186825 | 0.665301 |
| gsxl              | 111.2523 | 0.116840452  | 0.201131   | 0.580917 | 0.561296 | 0.90039  |
| slc25a11          | 1976.074 | 0.170019152  | 0.109638   | 1.550738 | 0.120965 | 0.566816 |

|                    |          |              |          |          |          |          |
|--------------------|----------|--------------|----------|----------|----------|----------|
| ipo7               | 5537.163 | -0.357082977 | 0.132803 | -2.68883 | 0.00717  | 0.143346 |
| stx18              | 227.4866 | -0.235371931 | 0.137115 | -1.71661 | 0.086051 | 0.492054 |
| CU633984.1         | 7.784638 | -0.384760949 | 0.721894 | -0.53299 | 0.594042 | 0.910615 |
| si:ch1073-157b13.1 | 442.605  | -0.352301127 | 0.138885 | -2.53664 | 0.011192 | 0.183794 |
| ctdneplb           | 143.1373 | -0.060185243 | 0.163386 | -0.36836 | 0.712603 | 0.945821 |
| cdh31              | 0.710488 | 1.055430078  | 2.449813 | 0.430821 | 0.666599 | NA       |
| si:dkey-17m8.2     | 4.487501 | -6.018071578 | 5.139612 | -1.17092 | 0.241631 | 0.723333 |
| nggt1              | 871.9677 | 0.172063045  | 0.277326 | 0.620436 | 0.534971 | 0.891993 |
| clcn4              | 324.7307 | -0.062299648 | 0.176317 | -0.35334 | 0.723834 | 0.94801  |
| colla1b            | 14120.91 | 0.18949755   | 0.158339 | 1.196784 | 0.231391 | 0.712847 |
| rgcc               | 1836.883 | -0.247966725 | 0.169297 | -1.46469 | 0.143007 | 0.602002 |
| sirt3              | 168.6184 | -0.292535035 | 0.190448 | -1.53603 | 0.12453  | 0.572138 |
| drd4b              | 10.52501 | 1.106244634  | 0.863851 | 1.280597 | 0.200335 | 0.680711 |
| si:ch211-173p18.3  | 844.0212 | -0.007583389 | 0.122367 | -0.06197 | 0.950585 | 0.99801  |
| zymy4              | 320.644  | 0.065748588  | 0.123263 | 0.533399 | 0.593758 | 0.910427 |
| pyyb               | 45.30382 | -0.220517362 | 0.480795 | -0.45865 | 0.646485 | 0.926728 |
| eef2k              | 1912.054 | -0.150875911 | 0.210071 | -0.71821 | 0.472626 | 0.868786 |
| mosmob             | 153.3246 | -0.553934284 | 0.236763 | -2.33961 | 0.019304 | 0.244676 |
| cart3              | 63.73839 | 0.007298972  | 0.365901 | 0.019948 | 0.984085 | 1        |
| cdkn2aip           | 133.6393 | 0.006800599  | 0.163456 | 0.041605 | 0.966814 | 1        |
| cnn2               | 1851.478 | -0.262652056 | 0.154559 | -1.69937 | 0.08925  | 0.501424 |
| angpt14            | 1614.969 | 0.185341743  | 0.195998 | 0.945632 | 0.344336 | 0.798147 |
| rps28              | 9237.728 | -0.231677714 | 0.141852 | -1.63324 | 0.102419 | 0.529087 |
| si:rp71-39b20.4    | 40.73686 | 1.310370812  | 1.038814 | 1.261411 | 0.207161 | 0.689445 |
| insl3              | 0.641012 | -1.819808666 | 3.434447 | -0.52987 | 0.596202 | NA       |
| spirela            | 207.4934 | -0.05151028  | 0.162195 | -0.31758 | 0.750802 | 0.955074 |
| azin1b             | 5124.876 | -0.040997075 | 0.120803 | -0.33937 | 0.73433  | 0.951134 |
| laptm4b            | 546.3253 | -0.063947676 | 0.162914 | -0.39252 | 0.694671 | 0.941093 |
| rpl30              | 22531.94 | -0.443679783 | 0.131471 | -3.37473 | 0.000739 | 0.036194 |
| hsd17b12b          | 284.8522 | -0.056244106 | 0.199707 | -0.28163 | 0.778224 | 0.961073 |
| fjx1               | 52.98207 | -0.367624799 | 0.390263 | -0.94199 | 0.346197 | 0.799463 |
| tmem54b            | 6.279587 | 1.363763301  | 1.393363 | 0.978757 | 0.3277   | 0.786438 |
| fucal.2            | 219.1849 | 0.029395686  | 0.176237 | 0.166796 | 0.867531 | 0.982582 |
| atp6v1c1b          | 610.6404 | 0.054632083  | 0.118994 | 0.459115 | 0.646152 | 0.926728 |
| rida               | 1742.385 | 0.180818082  | 0.272719 | 0.663019 | 0.507318 | 0.883007 |
| nt5claa            | 60.48517 | 0.670240525  | 0.333495 | 2.009748 | 0.044458 | 0.368943 |
| zgc:91944          | 220.8834 | -0.267460413 | 0.185974 | -1.43816 | 0.150388 | 0.614113 |
| zbtb8b             | 219.3341 | -0.38976289  | 0.165777 | -2.35112 | 0.018717 | 0.241927 |
| fucal.1            | 1273.157 | -0.096695235 | 0.148564 | -0.65087 | 0.515132 | 0.886401 |
| acana              | 721.3061 | -0.081389016 | 0.22328  | -0.36452 | 0.715473 | 0.945988 |
| fnkc5b             | 62.12977 | 0.484463409  | 0.303878 | 1.594267 | 0.110876 | 0.54583  |
| lingo1b            | 179.5393 | 0.182798035  | 0.264577 | 0.690906 | 0.489624 | 0.874629 |
| crabp1b            | 252.4041 | -0.201233541 | 0.178777 | -1.12561 | 0.260331 | 0.737663 |
| slc25a44b          | 203.6572 | 0.168902808  | 0.144035 | 1.17265  | 0.240936 | 0.722465 |
| fam49a1            | 1236.348 | 0.046970143  | 0.1803   | 0.260511 | 0.79447  | 0.965431 |
| mfsd2ab            | 460.7673 | 0.030592822  | 0.228645 | 0.133801 | 0.89356  | 0.988566 |
| znf281b            | 448.9535 | 0.011225491  | 0.128793 | 0.087159 | 0.930545 | 0.995741 |
| yars               | 811.8194 | 0.221006152  | 0.158629 | 1.39323  | 0.16355  | 0.631682 |
| tmem167a           | 646.584  | -0.184995705 | 0.198859 | -0.93029 | 0.352224 | 0.802776 |
| bzw2               | 1035.007 | 0.1729319    | 0.118205 | 1.462985 | 0.143471 | 0.602607 |
| dync11i2           | 742.2026 | -0.196278099 | 0.110579 | -1.775   | 0.075899 | 0.46659  |
| hrh3               | 43.61537 | -0.05642359  | 0.297654 | -0.18956 | 0.849653 | 0.978209 |
| sync               | 40.9147  | -0.655917571 | 0.43715  | -1.50044 | 0.1335   | 0.586903 |
| tmem106bb          | 227.164  | -0.05694559  | 0.142171 | -0.40054 | 0.688757 | 0.939177 |

|                  |           |               |           |           |           |           |
|------------------|-----------|---------------|-----------|-----------|-----------|-----------|
| cdr2a            | 26. 64386 | -0. 210677479 | 0. 313991 | -0. 67097 | 0. 502242 | 0. 881277 |
| tdp2b            | 108. 01   | 0. 085241761  | 0. 228129 | 0. 373656 | 0. 70866  | 0. 94551  |
| gmn              | 113. 1319 | -0. 076155348 | 0. 203695 | -0. 37387 | 0. 708501 | 0. 94551  |
| tnni2b. 1        | 2018. 163 | 0. 216488948  | 0. 15326  | 1. 412564 | 0. 157784 | 0. 623766 |
| kcng2            | 34. 07245 | 0. 594566467  | 0. 350442 | 1. 69662  | 0. 089769 | 0. 502765 |
| ccdc96           | 31. 2158  | 0. 936102692  | 0. 374581 | 2. 499069 | 0. 012452 | 0. 194346 |
| pgr              | 4. 493481 | -0. 240826744 | 0. 88091  | -0. 27338 | 0. 784558 | 0. 962605 |
| ptprn2           | 786. 2458 | 0. 106735325  | 0. 157355 | 0. 678311 | 0. 497575 | 0. 878787 |
| ube3c            | 478. 0518 | 0. 055742915  | 0. 126751 | 0. 439784 | 0. 660094 | 0. 930581 |
| mxl              | 34. 58758 | -0. 536868573 | 0. 326158 | -1. 64604 | 0. 099756 | 0. 524166 |
| fam210aa         | 318. 8519 | 0. 125135992  | 0. 178669 | 0. 700379 | 0. 48369  | 0. 872148 |
| ptpn2b           | 421. 9638 | -0. 000296647 | 0. 10821  | -0. 00274 | 0. 997813 | 1         |
| psmg2            | 488. 7092 | -0. 361504021 | 0. 135992 | -2. 65827 | 0. 007854 | 0. 149996 |
| cited4a          | 1138. 61  | -0. 129564583 | 0. 176997 | -0. 73202 | 0. 464158 | 0. 864593 |
| sumo3b           | 1080. 031 | 0. 100702304  | 0. 168531 | 0. 597529 | 0. 550154 | 0. 8974   |
| pitpnb           | 116. 4504 | 0. 01430835   | 0. 203944 | 0. 070158 | 0. 944068 | 0. 997371 |
| caly             | 372. 3233 | 0. 408038953  | 0. 199082 | 2. 049606 | 0. 040403 | 0. 351287 |
| arrdc3b          | 2621. 497 | 0. 268149711  | 0. 222764 | 1. 203738 | 0. 228691 | 0. 710195 |
| sept5b           | 47. 96348 | 0. 282574938  | 0. 329183 | 0. 858412 | 0. 390665 | 0. 827902 |
| mdka             | 6968. 728 | 0. 147137343  | 0. 129158 | 1. 139206 | 0. 254617 | 0. 733441 |
| harbil           | 200. 1112 | -0. 207811336 | 0. 179052 | -1. 16062 | 0. 245797 | 0. 727177 |
| atg13            | 1258. 532 | -0. 067213623 | 0. 128539 | -0. 5229  | 0. 601041 | 0. 913756 |
| f2               | 1530. 325 | -0. 055544914 | 0. 217694 | -0. 25515 | 0. 798606 | 0. 966807 |
| znf408           | 38. 68735 | 0. 223417744  | 0. 317638 | 0. 703373 | 0. 481824 | 0. 871155 |
| rps20            | 32380. 8  | -0. 456946742 | 0. 128817 | -3. 54725 | 0. 000389 | 0. 023306 |
| penkb            | 78. 98115 | 0. 255942376  | 0. 261017 | 0. 980559 | 0. 32681  | 0. 785579 |
| irx4b            | 48. 24069 | -0. 250351926 | 0. 271466 | -0. 92222 | 0. 356414 | 0. 807322 |
| thapl1           | 256. 8259 | -0. 160955062 | 0. 155448 | -1. 03543 | 0. 300469 | 0. 766629 |
| vrk3             | 203. 3047 | 0. 101935607  | 0. 169932 | 0. 599863 | 0. 548598 | 0. 896847 |
| tradd            | 177. 2889 | -0. 179130433 | 0. 166606 | -1. 07518 | 0. 282296 | 0. 754679 |
| gnaolb           | 1143. 271 | 0. 511518653  | 0. 187208 | 2. 732357 | 0. 006288 | 0. 134409 |
| tmppe            | 99. 08518 | -0. 120404189 | 0. 231953 | -0. 51909 | 0. 603699 | 0. 914588 |
| exosc6           | 183. 488  | -0. 107860802 | 0. 232047 | -0. 46482 | 0. 642059 | 0. 925586 |
| ogfod1           | 159. 9379 | -0. 65504647  | 0. 19002  | -3. 44725 | 0. 000566 | 0. 030304 |
| ppplr11          | 377. 565  | -0. 091464117 | 0. 134282 | -0. 68113 | 0. 495788 | 0. 87806  |
| cnplr1           | 206. 5209 | -0. 027867052 | 0. 14783  | -0. 18851 | 0. 850479 | 0. 978251 |
| mgatl1b          | 261. 9117 | 0. 001637175  | 0. 169838 | 0. 00964  | 0. 992309 | 1         |
| si:dkey-78a14. 4 | 32. 78284 | -0. 422173414 | 0. 361042 | -1. 16932 | 0. 242275 | 0. 724106 |
| ddx39b           | 347. 0627 | 0. 169636731  | 0. 126091 | 1. 345351 | 0. 178512 | 0. 652732 |
| znrd1            | 42. 31473 | -0. 435533012 | 0. 320281 | -1. 35985 | 0. 173878 | 0. 646897 |
| gtf2h4           | 0. 288341 | 1. 055360606  | 4. 752284 | 0. 222074 | 0. 824256 | NA        |
| cebpg            | 1358. 476 | -0. 024711594 | 0. 101712 | -0. 24296 | 0. 80804  | 0. 969828 |
| cebpa            | 748. 1562 | -0. 405360568 | 0. 2436   | -1. 66404 | 0. 096104 | 0. 517378 |
| heatr3           | 344. 5233 | -0. 010271601 | 0. 176277 | -0. 05827 | 0. 953534 | 0. 998436 |
| cd81a            | 11357. 65 | 0. 128822544  | 0. 107607 | 1. 197162 | 0. 231243 | 0. 712838 |
| tph1b            | 43. 56842 | -0. 28641436  | 0. 255736 | -1. 11996 | 0. 26273  | 0. 740207 |
| itln2            | 3. 035344 | -3. 266012486 | 1. 417936 | -2. 30336 | 0. 021259 | 0. 258701 |
| itgalla          | 172. 4235 | 0. 114892021  | 0. 186522 | 0. 61597  | 0. 537914 | 0. 892498 |
| pard6gb          | 216. 1722 | 0. 239221227  | 0. 152449 | 1. 569186 | 0. 116605 | 0. 557506 |
| sdhaf3           | 171. 3664 | -0. 00887409  | 0. 171166 | -0. 05184 | 0. 958652 | 0. 999109 |
| piasla           | 154. 9912 | -0. 053175363 | 0. 170798 | -0. 31134 | 0. 755545 | 0. 956532 |
| smad3a           | 406. 5234 | -0. 043028872 | 0. 123766 | -0. 34766 | 0. 728093 | 0. 949348 |
| eya3             | 382. 6452 | -0. 094867837 | 0. 127122 | -0. 74627 | 0. 455503 | 0. 860008 |
| ctdsp2           | 2632. 673 | -0. 150219519 | 0. 105545 | -1. 42328 | 0. 154656 | 0. 619425 |

|                 |          |              |          |          |          |          |
|-----------------|----------|--------------|----------|----------|----------|----------|
| myo1g           | 8.185108 | -1.039311645 | 0.704179 | -1.47592 | 0.139965 | 0.598517 |
| si:dkeyp-92c9.2 | 12.00493 | -0.204656012 | 0.575156 | -0.35583 | 0.72197  | 0.947403 |
| rgs18           | 29.25087 | -0.001504603 | 0.427209 | -0.00352 | 0.99719  | 1        |
| txn1pa          | 8839.492 | 0.330032778  | 0.152284 | 2.167217 | 0.030218 | 0.309805 |
| mtx1b           | 132.4897 | -0.491256527 | 0.16288  | -3.01607 | 0.002561 | 0.082065 |
| EIF3hb          | 243.4704 | 0.35171387   | 0.176291 | 1.995071 | 0.046035 | 0.375021 |
| mchr2           | 15.75472 | 1.07709658   | 0.450566 | 2.39054  | 0.016824 | 0.230232 |
| nitr13          | 0.722495 | 1.055403349  | 3.296538 | 0.320155 | 0.748851 | NA       |
| bbox1           | 373.4265 | 0.453171185  | 0.256772 | 1.764876 | 0.077585 | 0.470832 |
| tipin           | 166.1976 | 0.056623804  | 0.143455 | 0.394715 | 0.693053 | 0.94055  |
| lctla           | 340.3294 | 0.609066966  | 0.301727 | 2.018603 | 0.043528 | 0.365455 |
| crybgx          | 1241.709 | -0.287497578 | 0.518272 | -0.55472 | 0.579084 | 0.905417 |
| tssc4           | 435.2922 | -0.210619934 | 0.150281 | -1.4015  | 0.161064 | 0.627834 |
| ano5b           | 357.4576 | -0.043011827 | 0.136745 | -0.31454 | 0.75311  | 0.955777 |
| gas2b           | 26.71252 | -0.025816995 | 0.452682 | -0.05703 | 0.95452  | 0.998611 |
| gla             | 43.4933  | -0.012935148 | 0.321441 | -0.04024 | 0.967901 | 1        |
| fnbpl1          | 23.07469 | 0.184772669  | 0.424044 | 0.435739 | 0.663026 | 0.931141 |
| nudcd1          | 184.5631 | -0.059406763 | 0.143215 | -0.41481 | 0.678282 | 0.936026 |
| trhrb           | 3.108427 | -2.762954711 | 1.620926 | -1.70455 | 0.088278 | 0.498998 |
| hnrnpa01        | 8006.845 | -0.026054211 | 0.111932 | -0.23277 | 0.815942 | 0.971207 |
| hnrnpa0b        | 82.15962 | -0.144910435 | 0.251759 | -0.57559 | 0.564891 | 0.901538 |
| cars            | 485.6963 | 0.045235981  | 0.117981 | 0.383416 | 0.701411 | 0.943166 |
| nfatc1          | 137.4852 | -0.117973152 | 0.26445  | -0.44611 | 0.655519 | 0.929606 |
| rnase13         | 540.6332 | 0.19478034   | 0.473447 | 0.411409 | 0.680772 | 0.937189 |
| pcdh1b          | 442.9273 | -0.102224994 | 0.128252 | -0.79706 | 0.425415 | 0.844714 |
| myolea          | 429.512  | -0.161043594 | 0.132005 | -1.21998 | 0.222471 | 0.704478 |
| ccnb2           | 90.26869 | -0.079358454 | 0.212047 | -0.37425 | 0.708218 | 0.945344 |
| mbpa            | 1022.207 | 0.830435456  | 1.062545 | 0.781554 | 0.434477 | 0.850002 |
| spata4          | 30.54816 | -0.139013206 | 0.341684 | -0.40685 | 0.684121 | 0.938486 |
| txn14a          | 541.6904 | 0.113075255  | 0.234956 | 0.481262 | 0.63033  | 0.922869 |
| pitx2           | 665.2612 | -0.022951447 | 0.137164 | -0.16733 | 0.867111 | 0.982582 |
| tbcl1d5         | 567.7903 | -0.069471865 | 0.116331 | -0.59719 | 0.550381 | 0.8974   |
| daz1            | 7.467904 | 1.020425561  | 0.737928 | 1.382826 | 0.166718 | 0.637156 |
| lcp2b           | 5.954434 | 0.134405529  | 1.076516 | 0.124852 | 0.90064  | 0.99045  |
| npy             | 51.32363 | 0.68842416   | 0.508415 | 1.354059 | 0.175718 | 0.649413 |
| npvf            | 36.89863 | 0.292740985  | 0.42376  | 0.690818 | 0.48968  | 0.874629 |
| trpm7           | 542.4508 | 0.09710052   | 0.144178 | 0.673475 | 0.500645 | 0.880385 |
| zbtb3           | 116.491  | 0.030100419  | 0.180326 | 0.166922 | 0.867431 | 0.982582 |
| slc27a2a        | 2584.572 | 0.454753423  | 0.22487  | 2.022294 | 0.043146 | 0.363921 |
| gatm            | 15762.04 | 0.008146516  | 0.166191 | 0.049019 | 0.960904 | 0.999249 |
| sb:cb649        | 71.8976  | 0.061428166  | 0.280662 | 0.218869 | 0.826752 | 0.973458 |
| tmem144b        | 1.095622 | 0            | 2.305674 | 0        | 1        | NA       |
| rras2           | 531.6609 | -0.068623552 | 0.112907 | -0.60779 | 0.543328 | 0.894925 |
| hoxa13b         | 128.9361 | -0.382651418 | 0.244424 | -1.56552 | 0.117461 | 0.558959 |
| rasal2          | 481.1602 | 0.10452336   | 0.137837 | 0.758309 | 0.448266 | 0.856741 |
| gcgrb           | 32.18414 | -1.019420006 | 0.369645 | -2.75783 | 0.005819 | 0.129012 |
| lamc1           | 2052.489 | 0.108135688  | 0.155489 | 0.695455 | 0.486771 | 0.873245 |
| CC2D1A          | 126.5897 | 0.086739511  | 0.203574 | 0.426084 | 0.670047 | 0.933809 |
| rnaset2         | 815.6962 | -0.083898365 | 0.189461 | -0.44283 | 0.657891 | 0.930581 |
| nucb2b          | 180.0556 | -0.111059467 | 0.172653 | -0.64325 | 0.520061 | 0.887148 |
| cdx4            | 5.989009 | -0.134439426 | 0.814011 | -0.16516 | 0.868821 | 0.982801 |
| gnb11           | 23.80712 | -0.04436842  | 0.396892 | -0.11179 | 0.91099  | 0.992208 |
| golga7ba        | 414.9922 | 0.240923875  | 0.264126 | 0.912157 | 0.361686 | 0.811787 |
| rps13           | 20956.08 | -0.323380785 | 0.132522 | -2.44021 | 0.014679 | 0.212568 |

|                  |          |              |          |          |          |          |
|------------------|----------|--------------|----------|----------|----------|----------|
| nucb2a           | 1676.053 | -0.303188824 | 0.127343 | -2.38089 | 0.017271 | 0.231982 |
| dnaaf3l          | 11.01673 | 0.674489234  | 0.6139   | 1.098695 | 0.271901 | 0.748035 |
| phf23b           | 277.047  | -0.08029555  | 0.130999 | -0.61295 | 0.539911 | 0.893049 |
| nod1             | 11.30793 | 0.348152509  | 0.662023 | 0.525892 | 0.598963 | 0.913109 |
| rpl39            | 15689.49 | -0.373233047 | 0.165549 | -2.25451 | 0.024164 | 0.275116 |
| ndufal           | 1162.567 | 0.039242723  | 0.160723 | 0.244163 | 0.807104 | 0.969726 |
| clgalt1c1        | 316.0176 | 0.08320228   | 0.123185 | 0.675424 | 0.499407 | 0.879603 |
| cers3b           | 40.68605 | 0.500040741  | 0.28936  | 1.728095 | 0.083971 | 0.486647 |
| vps11            | 332.8115 | -0.120539959 | 0.136116 | -0.88557 | 0.375849 | 0.822237 |
| calb2b           | 1322.972 | 0.424245103  | 0.284589 | 1.490727 | 0.136033 | 0.591131 |
| cmtr2            | 138.9257 | -0.120780029 | 0.196002 | -0.61622 | 0.537751 | 0.892498 |
| riox2            | 358.0942 | 0.180004159  | 0.20738  | 0.867993 | 0.385398 | 0.826939 |
| actala           | 9642.426 | 0.23727496   | 0.250024 | 0.94901  | 0.342616 | 0.797189 |
| cyfip2           | 1243.266 | 0.189760407  | 0.135489 | 1.400557 | 0.161347 | 0.628218 |
| cldn7a           | 451.4543 | 0.121554745  | 0.266003 | 0.456967 | 0.647695 | 0.927153 |
| ponzr6           | 94.40173 | 0.185216244  | 0.275174 | 0.673088 | 0.500891 | 0.880413 |
| slc24a6a         | 241.5569 | -0.3231738   | 0.258274 | -1.25128 | 0.210831 | 0.692523 |
| rbm4.1           | 555.725  | 0.062775472  | 0.175214 | 0.35828  | 0.720134 | 0.947004 |
| pop7             | 433.4175 | 0.037503521  | 0.16063  | 0.233478 | 0.81539  | 0.971158 |
| si:ch211-81a5.5  | 15.82019 | 0.642790597  | 0.443557 | 1.449173 | 0.147289 | 0.607673 |
| si:ch73-335121.1 | 678.2616 | 0.08052723   | 0.146064 | 0.551313 | 0.581419 | 0.905618 |
| glb1             | 165.6034 | -0.268636684 | 0.207279 | -1.29602 | 0.194969 | 0.67483  |
| si:dkey-33c9.6   | 18.82938 | 0.229156617  | 0.489916 | 0.467747 | 0.639966 | 0.924843 |
| ntn5             | 296.6534 | -0.145420217 | 0.179566 | -0.80984 | 0.418031 | 0.841312 |
| pcdh20           | 110.6087 | -0.169461701 | 0.205357 | -0.8252  | 0.409255 | 0.836637 |
| zgc:103586       | 252.3055 | 0.208182274  | 0.164729 | 1.263787 | 0.206307 | 0.688779 |
| slc3a2a          | 1882.712 | -0.178314032 | 0.172236 | -1.03529 | 0.300533 | 0.766629 |
| si:dkey-264d12.4 | 141.298  | -0.513138175 | 0.194134 | -2.64322 | 0.008212 | 0.153944 |
| sat2a            |          | 0 NA         | NA       | NA       | NA       | NA       |
| ndufv1           | 5352.949 | 0.300832564  | 0.116704 | 2.577747 | 0.009945 | 0.172469 |
| atp11c           | 165.3634 | 0.117549687  | 0.176599 | 0.665629 | 0.505648 | 0.882418 |
| serpinh2         | 167.8828 | 0.020386634  | 0.145728 | 0.139895 | 0.888743 | 0.988188 |
| PRKAR2B          | 102.4713 | -0.031031926 | 0.274377 | -0.1131  | 0.909952 | 0.992208 |
| anxa4            | 2071.396 | -0.02305374  | 0.132208 | -0.17437 | 0.861571 | 0.980527 |
| cacng6a          | 400.6534 | -0.160213687 | 0.200391 | -0.7995  | 0.423998 | 0.844352 |
| prlhr2b          | 1.986002 | -0.445613642 | 1.605475 | -0.27756 | 0.781351 | NA       |
| tmtops3a         | 6.003013 | -1.812552937 | 0.958783 | -1.89047 | 0.058695 | 0.418329 |
| rab11fip1b       | 57.40221 | 0.249660931  | 0.251981 | 0.990794 | 0.321786 | 0.782075 |
| dand5            | 1.753916 | -0.944511857 | 1.474461 | -0.64058 | 0.521795 | NA       |
| snpc2            | 108.4336 | 0.35793153   | 0.229349 | 1.560641 | 0.118608 | 0.561771 |
| si:dkeyp-80c12.4 | 10.40975 | -0.351010981 | 0.569466 | -0.61639 | 0.53764  | 0.892498 |
| tcn2             | 1070.924 | -0.066455112 | 0.184705 | -0.35979 | 0.719004 | 0.94694  |
| hexim1           | 812.754  | -0.064496636 | 0.109654 | -0.58818 | 0.556409 | 0.899063 |
| clql3b           | 23.45304 | -0.026702792 | 0.477876 | -0.05588 | 0.955439 | 0.998611 |
| zgc:l12356       | 1419.168 | 0.128703842  | 0.100472 | 1.280993 | 0.200196 | 0.680711 |
| si:ch73-174h16.4 | 210.3256 | -0.166142894 | 0.158963 | -1.04517 | 0.295946 | 0.764246 |
| gstcd            | 99.732   | 0.153997185  | 0.277536 | 0.554872 | 0.578982 | 0.905417 |
| zgc:l62171       | 21.32486 | -0.059437762 | 0.417422 | -0.14239 | 0.88677  | 0.987668 |
| fam122b          | 348.3247 | -0.216691245 | 0.169145 | -1.2811  | 0.20016  | 0.680711 |
| rab39bb          | 149.7398 | 0.268498233  | 0.211388 | 1.27017  | 0.204024 | 0.685206 |
| syt4             | 436.1098 | -0.06317534  | 0.157474 | -0.40118 | 0.688288 | 0.93909  |
| ccnt2b           | 867.8174 | 0.105082619  | 0.088973 | 1.181067 | 0.237576 | 0.718568 |
| rhbdf1a          | 511.5196 | 0.068995348  | 0.150047 | 0.459826 | 0.645641 | 0.926728 |
| pknox1.2         | 115.2248 | 0.249260048  | 0.180573 | 1.380383 | 0.167469 | 0.638828 |



|                    |           |               |           |           |           |           |
|--------------------|-----------|---------------|-----------|-----------|-----------|-----------|
| tmprss3b           | 12. 39748 | 0. 614574805  | 0. 564482 | 1. 088741 | 0. 276268 | 0. 750674 |
| pdxkb              | 39. 71231 | 0. 196590195  | 0. 355672 | 0. 552729 | 0. 580449 | 0. 905618 |
| slpr2              | 299. 4453 | 0. 130995804  | 0. 168421 | 0. 777789 | 0. 436693 | 0. 851093 |
| agpat3             | 1354. 199 | -0. 165067465 | 0. 135536 | -1. 21789 | 0. 223267 | 0. 70531  |
| coll8a1a           | 2999. 099 | 0. 205655784  | 0. 131899 | 1. 559188 | 0. 118952 | 0. 562358 |
| gpr185b            | 6. 934115 | 0. 122883351  | 0. 827835 | 0. 148439 | 0. 881996 | 0. 986908 |
| aanat1             | 24. 21277 | 1. 840110752  | 0. 514612 | 3. 575723 | 0. 000349 | 0. 021465 |
| bach2a             | 38. 83281 | -0. 066908379 | 0. 393724 | -0. 16994 | 0. 865059 | 0. 982136 |
| sema3e             | 511. 1675 | 0. 10223524   | 0. 130817 | 0. 781512 | 0. 434501 | 0. 850002 |
| si:ch73-71d17. 2   | 67. 6783  | 0. 354648296  | 0. 270916 | 1. 309073 | 0. 19051  | 0. 670633 |
| atp6v0cb           | 3095. 543 | 0. 361095407  | 0. 142777 | 2. 529091 | 0. 011436 | 0. 185422 |
| st8sia5            | 150. 1844 | 0. 183382789  | 0. 183839 | 0. 997519 | 0. 318513 | 0. 779923 |
| cbr1               | 284. 6685 | -0. 237170869 | 0. 168777 | -1. 40523 | 0. 159953 | 0. 626214 |
| mhc1zba            | 749. 7999 | 0. 203051762  | 0. 210696 | 0. 963718 | 0. 335187 | 0. 791912 |
| setd4              | 119. 2702 | -0. 155513278 | 0. 213879 | -0. 72711 | 0. 467159 | 0. 866134 |
| kdm2ba             | 936. 3024 | -0. 093080017 | 0. 092557 | -1. 00566 | 0. 314581 | 0. 777479 |
| tab1               | 623. 2537 | -0. 341929912 | 0. 163432 | -2. 09219 | 0. 036422 | 0. 335676 |
| gpr182             | 205. 1635 | -0. 128832414 | 0. 214641 | -0. 60022 | 0. 548358 | 0. 896644 |
| mgat3b             | 115. 3133 | 0. 034032064  | 0. 252358 | 0. 134857 | 0. 892725 | 0. 988566 |
| polr2f             | 510. 6913 | 0. 117370115  | 0. 168691 | 0. 695768 | 0. 486574 | 0. 873244 |
| sema6ba            | 12. 16101 | -0. 661493804 | 0. 503632 | -1. 31345 | 0. 189033 | 0. 668516 |
| cd74b              | 50. 26496 | -0. 009081112 | 0. 624123 | -0. 01455 | 0. 988391 | 1         |
| rps14              | 26142. 25 | -0. 2933197   | 0. 140476 | -2. 08805 | 0. 036794 | 0. 336916 |
| plp2               | 721. 9175 | -0. 014205286 | 0. 127577 | -0. 11135 | 0. 911342 | 0. 992208 |
| ebpl               | 27. 89254 | 0. 523774782  | 0. 423474 | 1. 236852 | 0. 216142 | 0. 69815  |
| arl11              | 104. 8398 | 0. 165577009  | 0. 203208 | 0. 814816 | 0. 415178 | 0. 838754 |
| rcbtb1             | 152. 1482 | -0. 274324318 | 0. 164807 | -1. 66452 | 0. 096009 | 0. 517378 |
| cdadcl             | 126. 5069 | -0. 169391379 | 0. 198243 | -0. 85446 | 0. 392848 | 0. 827902 |
| cab391             | 1101. 215 | -0. 052727633 | 0. 111686 | -0. 4721  | 0. 636852 | 0. 924779 |
| aplrb              | 239. 9477 | -0. 442591135 | 0. 135247 | -3. 27247 | 0. 001066 | 0. 045972 |
| tnni4b. 2          | 1214. 137 | -0. 032702507 | 0. 125664 | -0. 26024 | 0. 79468  | 0. 965534 |
| hnrnpa1b           | 3918. 549 | 0. 165383576  | 0. 112198 | 1. 474037 | 0. 140472 | 0. 599618 |
| trmt10a            | 113. 9936 | 0. 214510668  | 0. 233809 | 0. 917459 | 0. 358902 | 0. 80995  |
| ndufa7             | 896. 8249 | -0. 01288915  | 0. 159848 | -0. 08063 | 0. 935733 | 0. 996829 |
| ccnt2a             | 576. 3915 | -0. 044938313 | 0. 097373 | -0. 46151 | 0. 644434 | 0. 926639 |
| bcl9               | 1021. 059 | 0. 206082001  | 0. 136559 | 1. 509104 | 0. 131272 | 0. 583069 |
| calcocola          | 1022. 742 | -0. 273316619 | 0. 139465 | -1. 95975 | 0. 050025 | 0. 389217 |
| znf865             | 897. 9351 | 0. 032012053  | 0. 144388 | 0. 221709 | 0. 824541 | 0. 972227 |
| si:ch211-114n24. 6 | 1133. 728 | 1. 072692114  | 0. 475672 | 2. 255111 | 0. 024126 | 0. 274967 |
| tmem18             | 390. 9019 | -0. 25734954  | 0. 134649 | -1. 91126 | 0. 055971 | 0. 409108 |
| tomm401            | 390. 3512 | 0. 235341724  | 0. 126029 | 1. 867355 | 0. 061852 | 0. 426649 |
| slc9a3. 2          | 34. 83836 | -0. 590696736 | 0. 465952 | -1. 26772 | 0. 204898 | 0. 686746 |
| si:dkey-211g8. 1   | 0. 140441 | 1. 055383603  | 5. 267649 | 0. 200352 | 0. 841205 | NA        |
| nitr7a             | 0. 103749 | 0             | 5. 267649 | 0         | 1         | NA        |
| nitr8              | 0. 358284 | 1. 702985565  | 4. 36166  | 0. 390444 | 0. 696208 | NA        |
| hmgn3              | 1992. 405 | 0. 23241532   | 0. 133362 | 1. 742734 | 0. 08138  | 0. 480419 |
| prmt9              | 88. 17656 | -0. 326156449 | 0. 216138 | -1. 50902 | 0. 131294 | 0. 583069 |
| hax1               | 468. 9132 | 0. 324642932  | 0. 138119 | 2. 350459 | 0. 01875  | 0. 241927 |
| urgcp              | 77. 78914 | 0. 948515676  | 0. 633583 | 1. 497067 | 0. 134376 | 0. 588706 |
| pygo2              | 559. 7939 | 0. 077686172  | 0. 130723 | 0. 594281 | 0. 552324 | 0. 8974   |
| s100s              | 498. 988  | 0. 290490891  | 0. 218003 | 1. 33251  | 0. 182693 | 0. 659278 |
| rgs12b             | 563. 8352 | -0. 03499212  | 0. 118996 | -0. 29406 | 0. 768711 | 0. 960395 |
| dtd2               | 67. 96735 | -0. 051172144 | 0. 270985 | -0. 18884 | 0. 85022  | 0. 978251 |
| aldh8a1            | 255. 1001 | -0. 172748236 | 0. 212815 | -0. 81173 | 0. 416946 | 0. 840494 |

|                   |          |              |          |          |          |          |  |
|-------------------|----------|--------------|----------|----------|----------|----------|--|
| hbs11             | 1047.864 | 0.009479485  | 0.105676 | 0.089703 | 0.928523 | 0.995052 |  |
| si:dkey-170110.1  | 54.06209 | 0.157382056  | 0.325961 | 0.482825 | 0.62922  | 0.922431 |  |
| commd7            | 292.5531 | -0.213948897 | 0.188653 | -1.13409 | 0.256757 | 0.73427  |  |
| si:ch211-226m16.2 | 439.9881 | 0.088454087  | 0.163484 | 0.541057 | 0.588468 | 0.90797  |  |
| tap2a             | 1.083937 | -0.868144733 | 2.233633 | -0.38867 | 0.697521 | NA       |  |
| dnmt3bb.1         | 374.9193 | -0.1575592   | 0.153596 | -1.02581 | 0.304983 | 0.770102 |  |
| ttl15             | 29.52448 | 0.047647538  | 0.32389  | 0.14711  | 0.883045 | 0.986908 |  |
| si:ch211-106j24.1 | 381.7472 | 0.040027755  | 0.206902 | 0.193462 | 0.846597 | 0.977214 |  |
| ifrd2             | 661.4541 | 0.054787382  | 0.120608 | 0.454259 | 0.649643 | 0.927756 |  |
| pou2f2a           | 363.9219 | 0.085424572  | 0.128956 | 0.662434 | 0.507693 | 0.883056 |  |
| hyal3             | 15.41191 | -0.13692296  | 0.575126 | -0.23807 | 0.811823 | 0.97012  |  |
| mgll              | 769.7697 | -0.081414772 | 0.124288 | -0.65505 | 0.512435 | 0.885459 |  |
| ankrd52a          | 95.69278 | 0.240946851  | 0.314561 | 0.765979 | 0.443689 | 0.854255 |  |
| krt91             | 44703.41 | 0.038235841  | 0.1784   | 0.214326 | 0.830293 | 0.974908 |  |
| rnf41             | 484.3406 | 0.004673253  | 0.128036 | 0.036499 | 0.970884 | 1        |  |
| cytl1             | 33608.91 | 0.152398643  | 0.244157 | 0.624182 | 0.532508 | 0.890978 |  |
| upp2              | 204.6057 | 0            | 1.700425 | 0        | 1        | 1        |  |
| krt92             | 5712.646 | -0.370244611 | 0.228929 | -1.61729 | 0.105816 | 0.534827 |  |
| krt15             | 7674.189 | -0.146570412 | 0.198763 | -0.73741 | 0.460871 | 0.862482 |  |
| tsen54            | 188.2288 | -0.141846417 | 0.184857 | -0.76733 | 0.442885 | 0.853998 |  |
| anks4b            | 132.2327 | -1.326831541 | 0.312139 | -4.25076 | 2.13E-05 | 0.003005 |  |
| slc43a2a          | 1042.571 | -0.433242592 | 0.14684  | -2.95043 | 0.003173 | 0.09274  |  |
| DX0               | 46.782   | 0.162750217  | 0.271504 | 0.599439 | 0.54888  | 0.897091 |  |
| plagx             | 817.0645 | -0.021577209 | 0.116409 | -0.18536 | 0.852949 | 0.978794 |  |
| myold             | 302.3369 | 0.177797667  | 0.198046 | 0.897761 | 0.369313 | 0.817763 |  |
| slc34a2b          | 238.0441 | -0.148649375 | 0.209538 | -0.70941 | 0.478067 | 0.869292 |  |
| slc2a12           | 173.1999 | -0.179267329 | 0.184151 | -0.97348 | 0.330314 | 0.788126 |  |
| tbpl1             | 113.2116 | 0.077467844  | 0.20983  | 0.369194 | 0.711983 | 0.945821 |  |
| tcf21             | 55.20468 | -0.069291645 | 0.25754  | -0.26905 | 0.787889 | 0.963339 |  |
| arihl1            | 286.6963 | -0.140320972 | 0.139492 | -1.00595 | 0.314442 | 0.777479 |  |
| rps12             | 21477.55 | -0.286050233 | 0.121702 | -2.35041 | 0.018753 | 0.241927 |  |
| zgc:153284        | 396.8938 | 0.130149357  | 0.22272  | 0.584362 | 0.558977 | 0.899409 |  |
| sh3bgr12          | 283.4311 | -0.246137474 | 0.156991 | -1.56785 | 0.116916 | 0.557831 |  |
| zgc:153935        | 135.5983 | -0.585897278 | 0.328362 | -1.7843  | 0.074374 | 0.463115 |  |
| f13a1b            | 298.7459 | 0.416234036  | 0.200267 | 2.078397 | 0.037673 | 0.340171 |  |
| aimplb            | 1521.171 | 0.105676536  | 0.174748 | 0.604737 | 0.545354 | 0.895275 |  |
| sgms2b            | 42.37471 | -0.068887081 | 0.298842 | -0.23051 | 0.817693 | 0.971441 |  |
| irak1bp1          | 109.7144 | -0.242708992 | 0.214799 | -1.12993 | 0.258504 | 0.735636 |  |
| scamp1            | 200.1546 | 0.194743683  | 0.158635 | 1.22762  | 0.21959  | 0.700438 |  |
| edn1              | 71.86406 | -0.043365684 | 0.283854 | -0.15277 | 0.878576 | 0.985761 |  |
| st6galnac6        | 9.708924 | 0.759599178  | 0.587312 | 1.293349 | 0.19589  | 0.676219 |  |
| dolpp1            | 107.7937 | 0.230472625  | 0.214207 | 1.075934 | 0.281957 | 0.754378 |  |
| tatdn1            | 64.11336 | -0.098888778 | 0.268347 | -0.36851 | 0.712493 | 0.945821 |  |
| rnf139            | 388.4725 | -0.294558884 | 0.128134 | -2.29883 | 0.021515 | 0.260176 |  |
| tbx18             | 94.33612 | 0.155478556  | 0.239993 | 0.647847 | 0.517084 | 0.887148 |  |
| ctssl             | 20.28101 | -0.715822684 | 0.469657 | -1.52414 | 0.127474 | 0.576964 |  |
| gpd1c             | 766.0615 | -0.171407996 | 0.143215 | -1.19685 | 0.231363 | 0.712847 |  |
| golph31           | 251.3261 | -0.402475125 | 0.132755 | -3.03171 | 0.002432 | 0.07907  |  |
| ensaa             | 59.11125 | -0.138931342 | 0.34652  | -0.40093 | 0.688469 | 0.939118 |  |
| zgc:198371        | 35.62657 | 0.778668023  | 0.358753 | 2.170484 | 0.02997  | 0.30849  |  |
| asx11             | 1041.752 | -0.022406271 | 0.138537 | -0.16173 | 0.871515 | 0.983365 |  |
| rnf24             | 158.3582 | -0.251147767 | 0.231607 | -1.08437 | 0.2782   | 0.751971 |  |
| hsd3b7            | 445.1051 | -0.014761249 | 0.129859 | -0.11367 | 0.909498 | 0.99213  |  |
| smox              | 1504.827 | -0.154315333 | 0.118536 | -1.30184 | 0.19297  | 0.672855 |  |

|                   |          |              |          |          |          |          |
|-------------------|----------|--------------|----------|----------|----------|----------|
| si:ch1073-416d2.3 | 91.05765 | -0.832859295 | 0.3454   | -2.41129 | 0.015896 | 0.222371 |
| rippy3            | 7.741247 | -1.231722048 | 0.660905 | -1.86369 | 0.062365 | 0.427718 |
| plxnb2b           | 84.15607 | -0.14975714  | 0.241979 | -0.61888 | 0.535993 | 0.892102 |
| has2              | 55.09879 | 0.414589502  | 0.24107  | 1.719788 | 0.085471 | 0.490796 |
| dctd              | 111.8034 | -0.209198861 | 0.248712 | -0.84113 | 0.400275 | 0.831485 |
| erbb3b            | 154.2542 | 0.037472833  | 0.228316 | 0.164127 | 0.869631 | 0.983279 |
| tbc1d16           | 190.5369 | 0.09029201   | 0.134251 | 0.672563 | 0.501226 | 0.880764 |
| lsm6              | 589.376  | 0.057337794  | 0.229387 | 0.249961 | 0.802617 | 0.968181 |
| arf3b             | 36.47825 | 0.159315626  | 0.345838 | 0.460666 | 0.645038 | 0.926728 |
| DISP3             | 21.62807 | -0.642000785 | 0.467564 | -1.37308 | 0.169729 | 0.641486 |
| fkbp11            | 287.3697 | 0.004401726  | 0.220131 | 0.019996 | 0.984047 | 1        |
| zgc:152968        | 2.702457 | -1.189853696 | 1.517929 | -0.78387 | 0.433118 | 0.849392 |
| bsc12             | 372.3428 | 0.151491242  | 0.142284 | 1.064707 | 0.287008 | 0.757955 |
| banf1             | 1792.016 | -0.03071046  | 0.148086 | -0.20738 | 0.835711 | 0.976007 |
| slc3a2b           | 2514.907 | -0.294308625 | 0.176145 | -1.67084 | 0.094754 | 0.513797 |
| ube4b             | 1046.438 | 0.023968151  | 0.110599 | 0.216711 | 0.828433 | 0.974137 |
| gab1              | 463.2297 | 0.090569474  | 0.112557 | 0.804652 | 0.42102  | 0.842517 |
| kif1b             | 1417.574 | 0.039466564  | 0.140439 | 0.281023 | 0.778693 | 0.961073 |
| casz1             | 169.1012 | -0.030288918 | 0.229008 | -0.13226 | 0.894778 | 0.989112 |
| ptger2b           | 12.84285 | -1.466218367 | 0.717809 | -2.04263 | 0.041089 | 0.353918 |
| psmc6             | 1856.134 | 0.242542936  | 0.135769 | 1.786441 | 0.074028 | 0.46206  |
| cgrrf1            | 47.1026  | 0.259301535  | 0.265656 | 0.976081 | 0.329024 | 0.787268 |
| ddhd1b            | 140.7261 | 0.312099617  | 0.215927 | 1.445395 | 0.148347 | 0.609649 |
| rad51b            | 50.99576 | 0.476856519  | 0.291965 | 1.633268 | 0.102413 | 0.529087 |
| zte38             | 1.685868 | -0.749496067 | 1.401024 | -0.53496 | 0.592675 | NA       |
| gcdha             | 1868.369 | 0.386806811  | 0.133737 | 2.892284 | 0.003825 | 0.10304  |
| slc44a2           | 605.6993 | 0.174632192  | 0.123107 | 1.418536 | 0.156034 | 0.621616 |
| kmt2d             | 454.4237 | 0.136660739  | 0.209289 | 0.652976 | 0.513772 | 0.88631  |
| aldh9a1b          | 360.9232 | -0.126658301 | 0.193759 | -0.65369 | 0.513311 | 0.886245 |
| dhh               | 11.33934 | -0.531734097 | 0.561722 | -0.94661 | 0.343835 | 0.798147 |
| galca             | 245.2548 | -0.261969038 | 0.145011 | -1.80655 | 0.070832 | 0.454179 |
| lgals8a           | 111.6335 | 0.425666233  | 0.18953  | 2.245907 | 0.02471  | 0.27868  |
| dnajc22           | 23.19397 | 0.088779304  | 0.965481 | 0.091953 | 0.926735 | 0.994815 |
| ikzf4             | 46.23221 | -0.104017337 | 0.319355 | -0.32571 | 0.744643 | 0.95491  |
| zdhhc14           | 51.48663 | 0.449217992  | 0.301526 | 1.489814 | 0.136273 | 0.591569 |
| tmem242           | 194.073  | 0.282710405  | 0.211271 | 1.338144 | 0.18085  | 0.656785 |
| rps26             | 6029.906 | -0.166687744 | 0.122769 | -1.35773 | 0.174549 | 0.648125 |
| si:dkey-60a16.1   | 133.498  | -0.105210751 | 0.184032 | -0.5717  | 0.567526 | 0.901809 |
| cfap36            | 469.849  | 0.142601385  | 0.136392 | 1.045524 | 0.295781 | 0.764246 |
| asah1a            | 226.894  | -0.02814744  | 0.18545  | -0.15178 | 0.879361 | 0.986147 |
| slc7a2            | 330.1306 | -0.077623401 | 0.161101 | -0.48183 | 0.629927 | 0.922869 |
| irs2a             | 551.1117 | -0.204991434 | 0.185408 | -1.10562 | 0.268889 | 0.744967 |
| ankrd10a          | 145.6483 | 0.130642105  | 0.233268 | 0.560051 | 0.575445 | 0.904739 |
| mtmr7a            | 159.1068 | 0.273663763  | 0.198695 | 1.377305 | 0.168418 | 0.639712 |
| pfdn6             | 420.9754 | 0.130711063  | 0.143079 | 0.913557 | 0.36095  | 0.811253 |
| pwp2h             | 386.7527 | -0.009031033 | 0.134275 | -0.06726 | 0.946376 | 0.997371 |
| cxcl12a           | 1349.166 | -0.073089668 | 0.180996 | -0.40382 | 0.686345 | 0.938732 |
| mat2ab            | 618.2847 | -0.109698952 | 0.457011 | -0.24004 | 0.810303 | 0.969828 |
| TENM2             | 409.9061 | 0.626223838  | 0.202635 | 3.090401 | 0.001999 | 0.06954  |
| pfkfb1            | 224.1704 | -0.271653191 | 0.217895 | -1.24672 | 0.212501 | 0.694155 |
| zgc:153146        | 38.97151 | -0.400581344 | 0.286756 | -1.39694 | 0.162431 | 0.629825 |
| cpb2              | 204.7259 | -0.046575382 | 0.258761 | -0.17999 | 0.857158 | 0.979645 |
| slc8a4b           | 91.16935 | 0.147281072  | 0.320507 | 0.459525 | 0.645857 | 0.926728 |
| atp6ap1b          | 564.4023 | -0.461178363 | 0.124677 | -3.69898 | 0.000216 | 0.015696 |

|                    |          |              |            |          |          |          |
|--------------------|----------|--------------|------------|----------|----------|----------|
| hivep3b            | 206.3143 | -0.50003828  | 0.222504   | -2.24732 | 0.02462  | 0.278337 |
| si:dkey-78k11.9    | 3.992134 | 0.366357696  | 1.325241   | 0.276446 | 0.782205 | 0.962328 |
| rccl               | 234.8756 | 0.191515091  | 0.18463    | 1.037289 | 0.299601 | 0.766128 |
| oprdb              | 20.89976 | -1.564488155 | 0.730324   | -2.14218 | 0.032179 | 0.318495 |
| ddrgkl             | 105.2821 | -0.467236135 | 0.17957    | -2.60197 | 0.009269 | 0.165455 |
| nek12              | 21.39767 | 1.158641785  | 0.408607   | 2.835593 | 0.004574 | 0.111794 |
| ggh                | 107.8059 | 0.033516378  | 0.208412   | 0.160818 | 0.872237 | 0.983447 |
| zc3h13             | 914.2651 | 0.096143424  | 0.148672   | 0.646681 | 0.517838 | 0.887148 |
| zic2b              | 254.8273 | 0.274147825  | 0.155039   | 1.768247 | 0.07702  | 0.469486 |
| tpgb               | 137.4976 | -0.174399503 | 0.184372   | -0.94591 | 0.344195 | 0.798147 |
| rpa2               | 520.8568 | -0.209602661 | 0.20018    | -1.04707 | 0.295066 | 0.763708 |
| ttr                | 699.6755 | -1.492695034 | 0.979582   | -1.52381 | 0.127557 | 0.576964 |
| zgc:113364         | 37.3381  | 0.658995589  | 0.323864   | 2.034791 | 0.041872 | 0.357865 |
| tshr               | 2.840145 | 0.540370857  | 1.532861   | 0.352524 | 0.724445 | 0.948381 |
| arid5b             | 386.8909 | 0.079891149  | 0.160227   | 0.498612 | 0.618053 | 0.916507 |
| zgc:101851         | 135.1957 | 0.334556098  | 0.160616   | 2.082959 | 0.037255 | 0.338774 |
| denr               | 768.457  | 0.197719398  | 0.168217   | 1.175385 | 0.239841 | 0.720392 |
| smad5              | 585.896  | -0.027762333 | 0.138244   | -0.20082 | 0.840838 | 0.97643  |
| gpr137             | 124.3951 | -0.367472049 | 0.191672   | -1.91719 | 0.055213 | 0.406983 |
| trmo               | 34.07393 | 0.102403393  | 0.388132   | 0.263837 | 0.791906 | 0.964842 |
| pimr212            | 0.043309 |              | 0.5.267649 |          | 0        | 1 NA     |
| si:ch211-145b13.5  | 52.17265 | 0.159092748  | 0.373474   | 0.425981 | 0.670122 | 0.933809 |
| ndufb6             | 1208.779 | 0.127260249  | 0.149912   | 0.848899 | 0.395938 | 0.829389 |
| toporsa            | 108.2842 | 0.06345851   | 0.226847   | 0.279741 | 0.779676 | 0.961073 |
| mtap               | 282.6057 | -0.477235617 | 0.168861   | -2.8262  | 0.00471  | 0.113805 |
| cdkn2a/b           | 3.058274 | 0.093644522  | 1.851118   | 0.050588 | 0.959654 | 0.999164 |
| myoz2b             | 308.5783 | 0.363897985  | 0.170396   | 2.135595 | 0.032712 | 0.320079 |
| zgc:158263         | 251.1382 | -0.315319728 | 0.150291   | -2.09806 | 0.0359   | 0.332937 |
| map9               | 66.28844 | 0.174641762  | 0.218207   | 0.80035  | 0.423508 | 0.843967 |
| lrata              | 137.6865 | -0.021724067 | 0.24956    | -0.08705 | 0.930632 | 0.995786 |
| fgg                | 3453.723 | -0.176604987 | 0.218358   | -0.80879 | 0.418638 | 0.84177  |
| plrgl              | 508.5478 | -0.02942912  | 0.103365   | -0.28471 | 0.775865 | 0.961073 |
| ptges3a            | 1045.906 | 0.036190353  | 0.143912   | 0.251476 | 0.801446 | 0.967776 |
| mipa               | 975.5144 | 0.282638733  | 0.261105   | 1.082472 | 0.279043 | 0.752444 |
| si:dkey-30k22.7    | 5.198764 | -0.094118553 | 0.870522   | -0.10812 | 0.913903 | 0.992832 |
| dpf21              | 603.024  | -0.072286713 | 0.103796   | -0.69643 | 0.486157 | 0.873244 |
| chrmla             | 1.614954 | 0.09364889   | 2.034797   | 0.046024 | 0.963291 | NA       |
| gnpdal             | 512.708  | -0.00376352  | 0.206123   | -0.01826 | 0.985433 | 1        |
| gatb               | 196.1509 | -0.344768882 | 0.159152   | -2.16629 | 0.030289 | 0.310203 |
| ddost              | 1684.133 | 0.276892992  | 0.123817   | 2.236303 | 0.025332 | 0.282591 |
| fam131c            | 29.08507 | -0.271220853 | 0.314917   | -0.86125 | 0.389103 | 0.827725 |
| klhl17             | 229.0615 | 0.13110659   | 0.18022    | 0.727482 | 0.46693  | 0.865918 |
| wdr92              | 128.8172 | -0.014169565 | 0.150761   | -0.09399 | 0.92512  | 0.994815 |
| cnriplb            | 116.6368 | 0.318945274  | 0.349829   | 0.911719 | 0.361917 | 0.811787 |
| rp19               | 112.248  | -0.198059712 | 0.246893   | -0.80221 | 0.422432 | 0.843493 |
| frs2b              | 274.1425 | -0.001968707 | 0.155417   | -0.01267 | 0.989893 | 1        |
| polr3e             | 704.7678 | -0.162425159 | 0.12603    | -1.28878 | 0.197475 | 0.678053 |
| si:ch1073-272o11.3 | 7.622979 | 1.032080896  | 0.757945   | 1.361683 | 0.173298 | 0.646172 |
| kdelr2b            | 908.0912 | 0.070048453  | 0.094205   | 0.743574 | 0.457134 | 0.860993 |
| scube2             | 209.3007 | -0.083353934 | 0.202184   | -0.41227 | 0.680144 | 0.936798 |
| st5                | 564.4489 | 0.021257905  | 0.145419   | 0.146184 | 0.883777 | 0.987014 |
| ephb2a             | 48.97068 | 0.341720119  | 0.300714   | 1.136361 | 0.255806 | 0.733642 |
| qdprbl             | 175.3275 | -0.08548777  | 0.196968   | -0.43402 | 0.664275 | 0.93177  |
| pax5               | 12.17369 | -0.395693059 | 0.414336   | -0.955   | 0.339575 | 0.795226 |

|                   |          |              |          |          |          |          |
|-------------------|----------|--------------|----------|----------|----------|----------|
| gsgl1             | 59.19304 | -0.529952611 | 0.428975 | -1.23539 | 0.216684 | 0.69815  |
| med19a            | 579.9345 | -0.189835867 | 0.146963 | -1.29173 | 0.196451 | 0.67688  |
| slc43a1a          | 303.0073 | 0.004979419  | 0.226907 | 0.021945 | 0.982492 | 1        |
| ssrpla            | 765.0974 | 0.076039967  | 0.167472 | 0.454045 | 0.649797 | 0.927756 |
| zgc:113229        | 24.5487  | -0.027790318 | 0.388878 | -0.07146 | 0.943029 | 0.997371 |
| lim2.3            | 281.2991 | 0.493414509  | 0.349392 | 1.412211 | 0.157888 | 0.623766 |
| si:dkey-4p15.3    | 55.11334 | 0.688535261  | 0.319977 | 2.151827 | 0.031411 | 0.315297 |
| zgc:112083        | 102.8151 | -0.016814071 | 0.195991 | -0.08579 | 0.931633 | 0.995827 |
| wdr19             | 137.8557 | 0.002610868  | 0.205751 | 0.012689 | 0.989876 | 1        |
| tbc1d10c          | 17.85821 | -0.83624836  | 0.462945 | -1.80637 | 0.070861 | 0.454179 |
| tmem144a          | 115.989  | 0.0329629    | 0.208822 | 0.157852 | 0.874574 | 0.984095 |
| med28             | 232.3169 | 0.004879098  | 0.140869 | 0.034636 | 0.97237  | 1        |
| npylr             | 4.69355  | 1.30455653   | 1.161678 | 1.122993 | 0.26144  | 0.738975 |
| dlgap1b           | 23.4373  | 0.336608412  | 0.372584 | 0.903444 | 0.366291 | 0.81589  |
| egr1              | 546.7751 | -0.113105842 | 0.518487 | -0.21815 | 0.827315 | 0.973459 |
| smim19            | 427.8065 | -0.018592518 | 0.167412 | -0.11106 | 0.91157  | 0.992326 |
| sl00a10a          | 697.0757 | -0.416015377 | 0.253805 | -1.63911 | 0.10119  | 0.526828 |
| si:ch211-39a7.1   | 12.25863 | -1.899533076 | 0.625325 | -3.03767 | 0.002384 | 0.078183 |
| tll1              | 53.207   | 0.200827069  | 0.340724 | 0.589412 | 0.555585 | 0.898723 |
| haus7             | 132.9369 | 0.230608524  | 0.186192 | 1.238551 | 0.215512 | 0.697157 |
| fmr1              | 599.1498 | -0.204715968 | 0.122725 | -1.66809 | 0.095297 | 0.515296 |
| ugt8              | 246.1367 | -0.237666486 | 0.139665 | -1.70169 | 0.088814 | 0.500363 |
| cd79a             | 4.678934 | 0.710460341  | 1.588502 | 0.447252 | 0.654693 | 0.929527 |
| foxb2             | 12.01143 | 1.695967205  | 0.788427 | 2.151077 | 0.03147  | 0.315382 |
| sorbs3            | 315.7803 | -0.180773309 | 0.150111 | -1.20427 | 0.228487 | 0.70974  |
| tmem192           | 169.5505 | -0.141759634 | 0.167334 | -0.84716 | 0.396904 | 0.830253 |
| 1-Mar             | 20.89798 | 0.97958673   | 0.612261 | 1.599949 | 0.10961  | 0.543127 |
| canx              | 3417.834 | 0.130136353  | 0.110667 | 1.175929 | 0.239623 | 0.720113 |
| bmp15             | 2.673184 | -1.215790181 | 1.448755 | -0.8392  | 0.401359 | 0.832371 |
| rtn4r12b          | 54.5497  | 0.573008163  | 0.492995 | 1.162301 | 0.245113 | 0.726529 |
| gria4a            | 181.0834 | 0.318889519  | 0.317581 | 1.004119 | 0.315321 | 0.777834 |
| gria3b            | 245.4827 | -0.011020021 | 0.272454 | -0.04045 | 0.967737 | 1        |
| aasdhppt          | 72.56484 | -0.131743519 | 0.251934 | -0.52293 | 0.601023 | 0.913756 |
| thoc2             | 1188.133 | -0.045535526 | 0.104539 | -0.43558 | 0.663138 | 0.931207 |
| prps1b            | 328.755  | 0.137162452  | 0.136257 | 1.006642 | 0.314107 | 0.777479 |
| kctd12b           | 17.95553 | 0.582514852  | 0.58404  | 0.997388 | 0.318576 | 0.779923 |
| hdac3             | 559.6135 | -0.022274685 | 0.129418 | -0.17211 | 0.863348 | 0.981732 |
| slc35c2           | 914.3835 | 0.283198993  | 0.124225 | 2.27972  | 0.022624 | 0.265959 |
| CR749762.1        | 0.716385 | 0            | 2.643398 | 0        | 1        | NA       |
| si:rp71-17i16.5   | 3.722966 | 0            | 1.887477 | 0        | 1        | 1        |
| si:ch211-191a24.4 | 139.1068 | -0.108828407 | 0.212268 | -0.51269 | 0.608165 | 0.915204 |
| mcm31             | 8.881113 | -0.450239337 | 0.611415 | -0.73639 | 0.461494 | 0.863229 |
| mep1b             | 37.4019  | -1.763478544 | 1.597458 | -1.10393 | 0.269624 | 0.746036 |
| ccnq              | 146.4956 | 0.069113027  | 0.144912 | 0.476932 | 0.633411 | 0.923885 |
| tnnc1b            | 4378.272 | 0.175865629  | 0.123117 | 1.428443 | 0.153164 | 0.617769 |
| mtnr1aa           | 11.27342 | 0.039843698  | 0.63938  | 0.062316 | 0.950311 | 0.99801  |
| cyp21a2           | 31.47722 | -0.439192062 | 0.384453 | -1.14238 | 0.253295 | 0.732759 |
| pm20d1.1          | 85.31808 | 0.249469658  | 0.527806 | 0.472654 | 0.63646  | 0.924779 |
| illrap12          | 28.68392 | 0.224511727  | 0.698115 | 0.321597 | 0.747758 | 0.955074 |
| arhgef31          | 54.73637 | 0.248203626  | 0.256132 | 0.969047 | 0.332522 | 0.789726 |
| atoh8             | 626.0467 | 0.046726672  | 0.126171 | 0.370344 | 0.711126 | 0.945821 |
| st3gal5           | 375.845  | -0.138422902 | 0.148277 | -0.93354 | 0.350541 | 0.802215 |
| asb12b            | 51.28914 | 0.274711761  | 0.270026 | 1.017352 | 0.308986 | 0.773791 |
| ubal              | 3857.255 | 0.112824375  | 0.126023 | 0.895267 | 0.370645 | 0.818484 |

|            |          |              |          |          |          |          |
|------------|----------|--------------|----------|----------|----------|----------|
| mtml       | 215.61   | 0.062847555  | 0.141573 | 0.443924 | 0.657098 | 0.929939 |
| polr1d     | 136.0167 | -0.173021206 | 0.185899 | -0.93073 | 0.351996 | 0.802591 |
| rps6kal    | 699.5269 | -0.150048459 | 0.125814 | -1.19262 | 0.233018 | 0.714569 |
| BX530018.1 | 3.149523 | -1.089753351 | 1.038971 | -1.04888 | 0.294235 | 0.763323 |
| SYNPR      | 192.0926 | -0.437222699 | 0.303968 | -1.43838 | 0.150325 | 0.613966 |
| bhlhe23    | 219.6164 | 0.361761091  | 0.277956 | 1.301506 | 0.193085 | 0.67315  |
| gid8b      | 475.9551 | 0.172152622  | 0.128089 | 1.344008 | 0.178946 | 0.653868 |
| prickle2b  | 351.5775 | -0.089824286 | 0.18916  | -0.47486 | 0.634888 | 0.924272 |
| prfl.5     | 47.32899 | 0.020271658  | 0.347855 | 0.058276 | 0.953529 | 0.998436 |
| zgc:162144 | 17.99482 | -0.718453396 | 0.438051 | -1.64011 | 0.100982 | 0.526541 |
| no141b     | 47.24288 | 0.082134827  | 0.271737 | 0.302258 | 0.762455 | 0.958551 |
| lgals8b    | 36.1666  | -0.030999154 | 0.425581 | -0.07284 | 0.941934 | 0.997371 |
| ddit4      | 608.2349 | -0.169863827 | 0.597259 | -0.28441 | 0.7761   | 0.961073 |
| BX569798.1 | 7.781589 | 0.74554255   | 0.744755 | 1.001058 | 0.316799 | 0.778879 |
| trpt1      | 209.432  | 0.29658107   | 0.194099 | 1.527992 | 0.126514 | 0.575111 |
| lengl      | 154.637  | -0.016397708 | 0.161554 | -0.1015  | 0.919154 | 0.993892 |
| nkx3-2     | 250.9986 | 0.295563703  | 0.157932 | 1.871457 | 0.061282 | 0.424867 |
| aurkb      | 564.286  | 0.285544342  | 0.241237 | 1.18367  | 0.236544 | 0.717725 |
| zgc:173570 | 65.60863 | 0.154596305  | 0.262717 | 0.588452 | 0.556229 | 0.899002 |
| rgs11      | 100.1157 | 0.00059983   | 0.292297 | 0.002052 | 0.998363 | 1        |
| rnf175     | 383.221  | -0.022187483 | 0.16784  | -0.13219 | 0.89483  | 0.989112 |
| zgc:56409  | 100.7198 | -0.097790765 | 0.19195  | -0.50946 | 0.610431 | 0.915331 |
| pmm2       | 233.0807 | 0.026582128  | 0.150509 | 0.176615 | 0.85981  | 0.980066 |
| pls3       | 2425.946 | 0.086170281  | 0.113176 | 0.761382 | 0.446429 | 0.855403 |
| npmlb      | 325.1399 | 0.020280738  | 0.132177 | 0.153436 | 0.878054 | 0.98573  |
| fgf24      | 119.5449 | -0.216607333 | 0.224371 | -0.9654  | 0.334345 | 0.791508 |
| zgc:103678 | 317.572  | -0.411855465 | 0.199504 | -2.06439 | 0.03898  | 0.345405 |
| pcdh2ab2   | 0.274427 | 0.093651644  | 4.79789  | 0.019519 | 0.984427 | NA       |
| pcdh2aa1   | 0.251206 | -2.340119894 | 5.201853 | -0.44986 | 0.652809 | NA       |
| gss        | 67.37018 | -0.230713622 | 0.282803 | -0.81581 | 0.414609 | 0.838683 |
| exosc10    | 477.3077 | -0.138372948 | 0.115649 | -1.19649 | 0.231504 | 0.713101 |
| pcnp       | 587.4867 | -0.074911037 | 0.135937 | -0.55107 | 0.581585 | 0.905618 |
| fbx131     | 45.91801 | -0.918535844 | 0.786921 | -1.16725 | 0.243108 | 0.724396 |
| zgc:112980 | 170.603  | -0.097671175 | 0.16665  | -0.58609 | 0.557817 | 0.899184 |
| actb1      | 52277.38 | 0.074831708  | 0.126388 | 0.59208  | 0.553797 | 0.89821  |
| fscn1b     | 171.9649 | 0.407855072  | 0.281031 | 1.45128  | 0.146702 | 0.606437 |
| slc43a1b   | 231.9832 | 0.170112215  | 0.207706 | 0.819003 | 0.412785 | 0.838123 |
| tlr2       | 1.524455 | -0.205564011 | 1.579156 | -0.13017 | 0.896429 | NA       |
| uncx4.1    | 312.6505 | 0.289800888  | 0.130065 | 2.228131 | 0.025872 | 0.285598 |
| rybpa      | 434.8561 | 0.112632189  | 0.130621 | 0.862285 | 0.388531 | 0.827613 |
| stk16      | 201.9809 | -0.103729956 | 0.127343 | -0.81457 | 0.415318 | 0.838754 |
| acss2      | 715.7475 | -0.03187094  | 0.176799 | -0.18027 | 0.856943 | 0.979558 |
| sox8b      | 15.18197 | 1.127895201  | 0.534737 | 2.109254 | 0.034923 | 0.329194 |
| proza      | 1454.881 | -0.14892623  | 0.117014 | -1.27272 | 0.203117 | 0.683943 |
| pvalb1     | 225411.1 | 0.007282365  | 0.174014 | 0.041849 | 0.966619 | 1        |
| pvalb8     | 3280.171 | -0.026080801 | 0.204646 | -0.12744 | 0.898589 | 0.990199 |
| nptx2a     | 12.08404 | 1.212142866  | 0.747111 | 1.622439 | 0.104709 | 0.53308  |
| phlda3     | 158.8802 | -0.286786065 | 0.225377 | -1.27247 | 0.203206 | 0.684044 |
| lgals3bpa  | 17.12375 | -4.075494256 | 1.332494 | -3.05855 | 0.002224 | 0.074795 |
| adtrp1     | 100.6739 | -0.530276023 | 0.202768 | -2.61519 | 0.008918 | 0.161876 |
| zgc:113278 | 31.74784 | -0.044902783 | 0.385737 | -0.11641 | 0.907329 | 0.991745 |
| b4galt5    | 7.912991 | 0.322122788  | 0.68442  | 0.470651 | 0.63789  | 0.924779 |
| mitfb      | 20.89252 | 0.206505695  | 0.450138 | 0.458761 | 0.646406 | 0.926728 |
| polr3k     | 178.7728 | -0.163284255 | 0.193816 | -0.84247 | 0.399524 | 0.831196 |

|            |          |              |          |          |          |          |
|------------|----------|--------------|----------|----------|----------|----------|
| igfals     | 13.03451 | 2.52961685   | 1.54008  | 1.642523 | 0.100482 | 0.525188 |
| ogfr       | 459.6877 | -0.270457727 | 0.146485 | -1.84632 | 0.064846 | 0.434744 |
| unkl       | 651.2721 | -0.243436951 | 0.159454 | -1.52669 | 0.126838 | 0.575696 |
| col9a3     | 5835.337 | 0.401726492  | 0.185767 | 2.162524 | 0.030578 | 0.311697 |
| hml3       | 827.3506 | 0.190569233  | 0.104183 | 1.829179 | 0.067373 | 0.443222 |
| zgc:101663 | 280.2137 | 0.034218746  | 0.183389 | 0.186591 | 0.851981 | 0.978558 |
| taf11      | 456.7328 | 0.069662724  | 0.135878 | 0.512684 | 0.608172 | 0.915204 |
| il11a      | 11.83407 | 1.573682017  | 0.875291 | 1.797896 | 0.072194 | 0.456904 |
| cox6b2     | 7145.343 | 0.018545541  | 0.129803 | 0.142875 | 0.886389 | 0.987533 |
| slc2a3b    | 85.00757 | 0.600292589  | 0.263734 | 2.276126 | 0.022838 | 0.266968 |
| cln3       | 306.9376 | -0.19068747  | 0.155359 | -1.2274  | 0.219674 | 0.700598 |
| atp5mf     | 3395.675 | -0.03219825  | 0.161551 | -0.19931 | 0.842023 | 0.97643  |
| actb2      | 77937.75 | -0.127677752 | 0.134985 | -0.94586 | 0.344218 | 0.798147 |
| wipi2      | 1053.683 | -0.131799056 | 0.115504 | -1.14108 | 0.253835 | 0.732873 |
| foxk1      | 550.7769 | -0.17881523  | 0.15908  | -1.12406 | 0.260989 | 0.738533 |
| cyp3c3     | 103.3908 | 1.072494352  | 0.574826 | 1.865772 | 0.062073 | 0.42715  |
| cyp3c3     | 11.01858 | 0.905522829  | 0.851865 | 1.062989 | 0.287787 | 0.758441 |
| lfng       | 1467.864 | 0.059734396  | 0.130839 | 0.456549 | 0.647995 | 0.927245 |
| prcp       | 184.5092 | -0.501889739 | 0.22459  | -2.23469 | 0.025438 | 0.283498 |
| rab30      | 123.3727 | 0.066910618  | 0.170455 | 0.392541 | 0.694659 | 0.941093 |
| wnt9b      | 244.6241 | -0.142971039 | 0.198975 | -0.71854 | 0.472426 | 0.868786 |
| mlx        | 430.8119 | 0.020529377  | 0.122304 | 0.167855 | 0.866697 | 0.982582 |
| psmc3ip    | 50.29808 | 0.119955041  | 0.294537 | 0.407266 | 0.683812 | 0.938486 |
| ezh1       | 175.7386 | -0.559330372 | 0.238177 | -2.34838 | 0.018855 | 0.242305 |
| ramp2      | 297.5472 | 0.023491433  | 0.140515 | 0.167181 | 0.867228 | 0.982582 |
| cacnalaa   | 192.807  | 0.005486741  | 0.21456  | 0.025572 | 0.979599 | 1        |
| alkbh7     | 144.2233 | 0.029568501  | 0.184134 | 0.160581 | 0.872423 | 0.983447 |
| timm29     | 258.4224 | -0.137703732 | 0.148155 | -0.92946 | 0.352651 | 0.803513 |
| nmrk1      | 23.25255 | -0.310936279 | 0.327636 | -0.94903 | 0.342606 | 0.797189 |
| znfl1      | 1.099459 | -0.935203979 | 1.740356 | -0.53736 | 0.591016 | NA       |
| cdk5r1a    | 50.37161 | -0.515930022 | 0.386429 | -1.33512 | 0.181837 | 0.658469 |
| itga3a     | 71.56381 | -0.059713675 | 0.31642  | -0.18872 | 0.850315 | 0.978251 |
| rbbp6      | 800.3659 | -0.136404167 | 0.151949 | -0.8977  | 0.369346 | 0.817763 |
| gngl3b     | 687.35   | 0.170091177  | 0.247851 | 0.686265 | 0.492546 | 0.876385 |
| gna13b     | 242.0568 | -0.313003227 | 0.157344 | -1.98929 | 0.046669 | 0.376436 |
| rgs9a      | 84.53267 | 0.313331137  | 0.855291 | 0.366344 | 0.714108 | 0.945821 |
| ddx42      | 674.2384 | -0.038739654 | 0.097705 | -0.3965  | 0.69174  | 0.940256 |
| strada     | 256.9044 | 0.078023332  | 0.174696 | 0.446625 | 0.655146 | 0.929606 |
| rnfl13a    | 323.9856 | -0.02736627  | 0.144486 | -0.1894  | 0.849776 | 0.97824  |
| lin7b      | 508.1391 | 0.116939096  | 0.179328 | 0.652097 | 0.514338 | 0.88631  |
| aldh16a1   | 270.2867 | -0.352421514 | 0.148448 | -2.37404 | 0.017595 | 0.234077 |
| syt5a      | 261.8958 | 0.202181884  | 0.296088 | 0.682843 | 0.494706 | 0.878016 |
| cpt1cb     | 99.35862 | 0.259156912  | 0.225192 | 1.150825 | 0.249804 | 0.729721 |
| prl        | 41.16561 | 0.020544482  | 0.289278 | 0.07102  | 0.943382 | 0.997371 |
| tnnt1      | 172.2982 | 0.71561535   | 0.224566 | 3.18666  | 0.001439 | 0.05681  |
| pih1d1     | 94.68401 | -0.063528147 | 0.198132 | -0.32064 | 0.748487 | 0.955074 |
| nosip      | 435.2626 | -0.062461492 | 0.144645 | -0.43183 | 0.665867 | 0.932664 |
| lrrc17     | 889.7751 | -0.032226683 | 0.089482 | -0.36015 | 0.718738 | 0.94694  |
| rcn3       | 964.1138 | 0.216436619  | 0.152163 | 1.422399 | 0.154911 | 0.619752 |
| psmb7      | 2574.398 | 0.028207218  | 0.145043 | 0.194475 | 0.845804 | 0.977039 |
| nek6       | 181.0164 | -0.429159682 | 0.18933  | -2.26673 | 0.023407 | 0.270489 |
| lhx2a      | 7.318831 | 1.683991929  | 0.629323 | 2.67588  | 0.007453 | 0.146147 |
| srrm2      | 775.1548 | -0.029954572 | 0.131439 | -0.2279  | 0.819726 | 0.971785 |
| thoc6      | 134.2686 | -0.131627686 | 0.149392 | -0.88109 | 0.378269 | 0.822672 |

|                   |          |              |          |          |          |          |
|-------------------|----------|--------------|----------|----------|----------|----------|
| si:dkey-1612.16   | 325.4625 | -0.442744369 | 0.132881 | -3.3319  | 0.000863 | 0.039733 |
| fus               | 1609.374 | 0.078102914  | 0.151831 | 0.514407 | 0.606968 | 0.915204 |
| elob              | 3456.766 | 0.049935859  | 0.12613  | 0.395909 | 0.692172 | 0.940333 |
| gdf3              | 41.70697 | -0.150086001 | 0.450782 | -0.33295 | 0.739175 | 0.953422 |
| tubb5             | 4652.927 | 0.253529207  | 0.192257 | 1.318701 | 0.187269 | 0.66594  |
| flot1b            | 3821.655 | -0.172300219 | 0.088105 | -1.95563 | 0.050509 | 0.391012 |
| crls1             | 391.4329 | 0.027425323  | 0.150738 | 0.18194  | 0.855629 | 0.979493 |
| med25             | 364.7699 | -0.026960162 | 0.144108 | -0.18708 | 0.851596 | 0.978548 |
| osr2              | 147.9192 | -0.272406897 | 0.219606 | -1.24043 | 0.214815 | 0.696864 |
| CT573429.1        | 4.263338 | -0.483219635 | 1.504977 | -0.32108 | 0.748149 | 0.955074 |
| rac2              | 645.95   | 0.17036536   | 0.123782 | 1.376329 | 0.16872  | 0.640124 |
| cyth4a            | 21.47346 | 0.620127836  | 0.479596 | 1.29302  | 0.196004 | 0.676453 |
| fam83fa           | 55.1981  | 0.096050462  | 0.273298 | 0.351449 | 0.725251 | 0.948653 |
| prph2a            | 924.1618 | -1.491262922 | 1.192189 | -1.25086 | 0.210985 | 0.69272  |
| flr               | 230.1883 | -0.016808618 | 0.131788 | -0.12754 | 0.898511 | 0.990199 |
| cbx7a             | 487.1587 | -0.585941168 | 0.275523 | -2.12665 | 0.033449 | 0.323151 |
| nol12             | 228.8301 | -0.150653312 | 0.186919 | -0.80598 | 0.420252 | 0.842383 |
| ndufa6            | 2025.376 | 0.069030342  | 0.14656  | 0.471004 | 0.637638 | 0.924779 |
| rbx1              | 1190.313 | 0.016227116  | 0.158419 | 0.102432 | 0.918414 | 0.993884 |
| tpk1              | 132.6112 | 0.441815694  | 0.168628 | 2.620062 | 0.008791 | 0.160701 |
| si:ch211-149k23.9 | 3.968863 | 0.217050283  | 1.157325 | 0.187545 | 0.851234 | 0.978548 |
| fgfbp2b           | 748.3981 | 0.006627059  | 0.242755 | 0.027299 | 0.978221 | 1        |
| grb2b             | 910.1324 | -0.142700502 | 0.105298 | -1.3552  | 0.175353 | 0.649279 |
| chmp3             | 248.3449 | -0.123321002 | 0.15483  | -0.79649 | 0.425745 | 0.844714 |
| kpna2             | 1268.487 | 0.095100548  | 0.272113 | 0.34949  | 0.726722 | 0.949095 |
| smurf2            | 383.3474 | 0.306452116  | 0.135715 | 2.258055 | 0.023942 | 0.274217 |
| ddx5              | 7009.949 | 0.101451261  | 0.118507 | 0.856079 | 0.391954 | 0.827902 |
| mgat3a            | 23.89852 | -1.065696985 | 0.476471 | -2.23665 | 0.025309 | 0.282476 |
| ptx4              | 2.533769 | -0.47138272  | 1.286243 | -0.36648 | 0.714007 | 0.945821 |
| ergic3            | 244.4592 | 0.103470731  | 0.135225 | 0.765173 | 0.444168 | 0.854431 |
| cycl              | 4962.034 | 0.017169974  | 0.089086 | 0.192735 | 0.847166 | 0.977337 |
| romol             | 2783.887 | -0.126140096 | 0.113307 | -1.11326 | 0.265595 | 0.742247 |
| TMEM114           | 7.744159 | 0.547011314  | 0.942483 | 0.580394 | 0.561649 | 0.900673 |
| clec16a           | 461.954  | -0.157095902 | 0.127367 | -1.23341 | 0.217423 | 0.69815  |
| socsla            | 132.6684 | -0.392054572 | 0.662449 | -0.59183 | 0.553967 | 0.89821  |
| pigq              | 261.7941 | 0.144648211  | 0.139666 | 1.03567  | 0.300356 | 0.766629 |
| gskip             | 866.0562 | -0.125767665 | 0.125759 | -1.00007 | 0.317276 | 0.779151 |
| slc37a4a          | 352.6836 | 0.184282277  | 0.19313  | 0.954188 | 0.339989 | 0.795302 |
| sgcg              | 729.2147 | -0.106235449 | 0.172429 | -0.61611 | 0.537822 | 0.892498 |
| si:dkeyp-59c12.1  | 15.3517  | -0.14014151  | 0.451554 | -0.31035 | 0.756292 | 0.956532 |
| rprdlb            | 419.1244 | -0.124358016 | 0.129224 | -0.96234 | 0.335877 | 0.792139 |
| xpa               | 70.81537 | 0.164434392  | 0.202234 | 0.813091 | 0.416166 | 0.839647 |
| gnrhr4            | 2.046421 | -1.08605802  | 1.765723 | -0.61508 | 0.538503 | NA       |
| si:ch211-13k12.2  | 93.82966 | -0.201625536 | 0.204581 | -0.98555 | 0.324353 | 0.783308 |
| myl9a             | 741.5316 | 0.535700996  | 0.152846 | 3.504853 | 0.000457 | 0.025945 |
| zgc:113411        | 81.85041 | 0.1600134    | 0.202044 | 0.791972 | 0.428377 | 0.846133 |
| pdgfbp            | 84.94467 | -0.438981386 | 0.288304 | -1.52263 | 0.12785  | 0.577117 |
| atf4b             | 3384.71  | -0.026467413 | 0.138399 | -0.19124 | 0.848337 | 0.977912 |
| hbbe3             | 5315.295 | 0.247542688  | 0.458658 | 0.539711 | 0.589397 | 0.908456 |
| zgc:92360         | 657.2165 | 0.008299116  | 0.132333 | 0.062714 | 0.949994 | 0.99801  |
| lgals2b           | 3036.586 | -0.649925037 | 0.199309 | -3.26089 | 0.001111 | 0.047149 |
| isca2             | 403.2767 | -0.106468959 | 0.159421 | -0.66785 | 0.50423  | 0.881803 |
| duspl1            | 280.808  | -0.005022703 | 0.176361 | -0.02848 | 0.97728  | 1        |
| tcf7l1a           | 574.7651 | 0.011775486  | 0.136976 | 0.085968 | 0.931492 | 0.995809 |



|                 |          |              |          |          |          |          |
|-----------------|----------|--------------|----------|----------|----------|----------|
| hyal6           | 23.36014 | 2.941898542  | 1.411722 | 2.083908 | 0.037169 | 0.338153 |
| cyb561          | 15.30866 | 0.103293549  | 0.57316  | 0.180218 | 0.856982 | 0.979558 |
| gh1             | 243.5008 | 0.590336981  | 0.484374 | 1.218764 | 0.222934 | 0.704786 |
| zgc:103564      | 29.68187 | 0.269658241  | 0.343734 | 0.784497 | 0.432748 | 0.848864 |
| smt1a           | 1.577464 | -1.795861729 | 2.061369 | -0.8712  | 0.383646 | NA       |
| cdab            | 339.6548 | 0.093836712  | 1.050227 | 0.089349 | 0.928805 | 0.995163 |
| her2            | 109.3566 | 0.189560358  | 0.237823 | 0.797066 | 0.425413 | 0.844714 |
| aldh4a1         | 566.2976 | -0.262238765 | 0.138835 | -1.88885 | 0.058912 | 0.418455 |
| slc35b1         | 466.1118 | 0.06763497   | 0.128212 | 0.527524 | 0.59783  | 0.912437 |
| tyw3            | 88.20334 | -0.24361379  | 0.222325 | -1.09575 | 0.273187 | 0.749148 |
| nras            | 471.8839 | -0.039766686 | 0.161236 | -0.24664 | 0.80519  | 0.969348 |
| CABZ01074994.1  | 0.952448 | -0.54965283  | 1.924292 | -0.28564 | 0.775155 | NA       |
| selenow2a       | 3054.785 | 0.030135409  | 0.135032 | 0.223173 | 0.823401 | 0.972005 |
| pkdccb          | 95.98722 | 0.021339804  | 0.258443 | 0.082571 | 0.934193 | 0.996696 |
| tnpo2           | 1493.398 | 0.074778007  | 0.111663 | 0.669678 | 0.503063 | 0.881598 |
| zgc:113333      | 222.7812 | 0.088762516  | 0.231986 | 0.38262  | 0.702001 | 0.943292 |
| e4f1            | 248.0884 | -0.014845448 | 0.175686 | -0.0845  | 0.932659 | 0.996197 |
| ggact.2         | 397.2244 | 0.995788034  | 0.261818 | 3.803359 | 0.000143 | 0.01194  |
| proca           | 87.35098 | 0.218565332  | 0.330341 | 0.661635 | 0.508205 | 0.883089 |
| PIGG            | 79.66082 | 0.226229127  | 0.260562 | 0.868235 | 0.385266 | 0.826939 |
| zgc:113293      | 2.602003 | 0.13677272   | 1.850656 | 0.073905 | 0.941086 | 0.997371 |
| ptgir           | 19.44663 | 0.229748162  | 0.407268 | 0.564121 | 0.572672 | 0.903562 |
| natd1           | 872.725  | -0.087405518 | 0.1015   | -0.86114 | 0.389163 | 0.827725 |
| wnt6a           | 18.89081 | 0.08966975   | 0.595207 | 0.150653 | 0.880249 | 0.986408 |
| cd151           | 320.3035 | -0.19666469  | 0.200929 | -0.97878 | 0.32769  | 0.786438 |
| thoc5           | 749.2819 | 0.014609385  | 0.125193 | 0.116695 | 0.907101 | 0.991745 |
| zgc:103559      | 52.2832  | -2.813724261 | 0.662507 | -4.24709 | 2.17E-05 | 0.003005 |
| tmem86b         | 255.6098 | -1.00138015  | 0.28493  | -3.51448 | 0.000441 | 0.025327 |
| aspdh           | 41.4612  | -1.243955995 | 0.434716 | -2.86154 | 0.004216 | 0.107344 |
| rnf34a          | 135.3778 | 0.00228086   | 0.1678   | 0.013593 | 0.989155 | 1        |
| ccar2           | 287.3208 | 0.136959766  | 0.148577 | 0.921809 | 0.356628 | 0.807342 |
| vgl13           | 26.44399 | 0.100420039  | 0.395625 | 0.253826 | 0.79963  | 0.967206 |
| tsc22d1         | 1579.027 | -0.002908486 | 0.115225 | -0.02524 | 0.979862 | 1        |
| ykt6            | 298.6055 | 0.120568992  | 0.14698  | 0.82031  | 0.412039 | 0.838123 |
| dnajc15         | 348.877  | 0.207020516  | 0.191462 | 1.081262 | 0.27958  | 0.752477 |
| rcl1            | 414.734  | -0.083367613 | 0.221051 | -0.37714 | 0.706068 | 0.944549 |
| zgc:172053      | 9.936633 | -0.808552373 | 1.269575 | -0.63687 | 0.524211 | 0.888801 |
| pigh            | 309.7993 | -0.260730727 | 0.151717 | -1.71854 | 0.085699 | 0.491277 |
| slc27a1b        | 0.069091 | 0            | 5.267649 | 0        | 1        | NA       |
| enosf1          | 397.8363 | -0.50244449  | 0.173687 | -2.89282 | 0.003818 | 0.10304  |
| thg11           | 101.5719 | 0.095504513  | 0.217846 | 0.438403 | 0.661094 | 0.930581 |
| drd4a           | 39.39343 | -0.844466755 | 0.637962 | -1.32369 | 0.185605 | 0.663476 |
| sagb            | 1334.708 | -0.651278458 | 0.451406 | -1.44278 | 0.149084 | 0.610726 |
| th2             | 11.41957 | 0.95091324   | 0.829206 | 1.146776 | 0.251474 | 0.731717 |
| asc11a          | 287.5873 | 0.126758405  | 0.147165 | 0.861337 | 0.389053 | 0.827725 |
| si:dkeyp-52c3.7 | 0.900838 | -3.078020265 | 2.66545  | -1.15478 | 0.248179 | NA       |
| rpap2           | 110.5526 | -0.282266346 | 0.206308 | -1.36818 | 0.171256 | 0.643325 |
| pmml            | 15.14726 | -0.740329383 | 0.559077 | -1.3242  | 0.185437 | 0.663256 |
| zgc:153921      | 5.727248 | -0.510904406 | 0.915223 | -0.55823 | 0.576688 | 0.904769 |
| b3galt6         | 187.5423 | -0.011173341 | 0.199728 | -0.05594 | 0.955387 | 0.998611 |
| entpd4          | 226.0285 | 0.505385862  | 0.200538 | 2.520151 | 0.01173  | 0.188354 |
| c4b             | 224.0896 | -0.418290271 | 0.320811 | -1.30385 | 0.192284 | 0.672283 |
| sulf1           | 557.963  | 0.184736762  | 0.156962 | 1.176952 | 0.239215 | 0.719781 |
| csrnplb         | 340.9592 | -0.05904959  | 0.206316 | -0.28621 | 0.774717 | 0.96088  |

|                   |          |              |          |          |          |          |
|-------------------|----------|--------------|----------|----------|----------|----------|
| actr10            | 998.9577 | 0.027502975  | 0.118247 | 0.232589 | 0.81608  | 0.971207 |
| fabp10a           | 5182.642 | -1.91335881  | 0.447034 | -4.28012 | 1.87E-05 | 0.002746 |
| plcgl             | 1047.935 | 0.017283983  | 0.117274 | 0.147381 | 0.882831 | 0.986908 |
| spire1b           | 21.54733 | -0.619162082 | 0.489049 | -1.26605 | 0.205494 | 0.68775  |
| nrp2b             | 866.0406 | 0.20773637   | 0.128661 | 1.614602 | 0.106397 | 0.535773 |
| mrps35            | 656.6909 | -0.103624031 | 0.149317 | -0.69398 | 0.487692 | 0.873291 |
| stmn3             | 288.8731 | 0.388284975  | 0.242292 | 1.602547 | 0.109035 | 0.541807 |
| igsf8             | 161.3873 | 0.211222173  | 0.237773 | 0.888334 | 0.374361 | 0.820992 |
| ube2d3            | 1440.887 | 0.123291     | 0.106415 | 1.158589 | 0.246624 | 0.727706 |
| acyl              | 919.9413 | -0.47266871  | 0.202556 | -2.33352 | 0.019621 | 0.246937 |
| si:dkeyp-68b7.7   | 104.7755 | -0.061671079 | 0.192696 | -0.32004 | 0.748936 | 0.955074 |
| b3gnt7            | 150.491  | 0.095901345  | 0.250672 | 0.382578 | 0.702033 | 0.943292 |
| cep41             | 83.55557 | 0.521535536  | 0.275325 | 1.894256 | 0.058191 | 0.416652 |
| polr2h            | 220.3782 | 0.119554397  | 0.178452 | 0.669951 | 0.502889 | 0.881453 |
| chrnb3b           | 14.47429 | 0.551286482  | 0.63906  | 0.862652 | 0.388329 | 0.827592 |
| snap29            | 455.2205 | -0.062604684 | 0.118126 | -0.52998 | 0.596125 | 0.911517 |
| pik3r1            | 1906.265 | -0.09398426  | 0.151671 | -0.61966 | 0.535482 | 0.891993 |
| ggal              | 544.7321 | -0.048158306 | 0.109057 | -0.44159 | 0.658788 | 0.930581 |
| ccr12a            | 30.36512 | -0.18918191  | 0.513577 | -0.36836 | 0.712604 | 0.945821 |
| wdr48b            | 221.3156 | -0.089012393 | 0.153527 | -0.57978 | 0.562061 | 0.900715 |
| BX890608.1        | 1.173188 | 0.09365102   | 2.1842   | 0.042877 | 0.9658   | NA       |
| zgc:l12185        | 67.31665 | 0.217856339  | 0.278724 | 0.781619 | 0.434438 | 0.850002 |
| anks3             | 132.7099 | 0.363882809  | 0.226149 | 1.609042 | 0.107607 | 0.538826 |
| hlf0              | 11860.22 | -0.129929315 | 0.191022 | -0.68018 | 0.49639  | 0.878161 |
| klf6b             | 42.71511 | -0.499650494 | 0.383246 | -1.30373 | 0.192324 | 0.672283 |
| pitrm1            | 581.7721 | -0.011442414 | 0.137154 | -0.08343 | 0.933512 | 0.996474 |
| gnptg             | 264.7199 | -0.546290639 | 0.19717  | -2.77066 | 0.005594 | 0.126154 |
| tsr3              | 275.4305 | 0.066081772  | 0.185456 | 0.35632  | 0.721601 | 0.947343 |
| fzd8b             | 44.13947 | -0.124326477 | 0.272501 | -0.45624 | 0.648216 | 0.927337 |
| BX548047.1        | 1.464219 | 0            | 4.388294 | 0        | 1        | NA       |
| scg2b             | 1043.294 | 0.330558827  | 0.244923 | 1.349646 | 0.17713  | 0.650742 |
| ube2dlb           | 950.8313 | 0.059846194  | 0.14256  | 0.419797 | 0.674634 | 0.934877 |
| cox6c             | 3514.172 | 0.23156779   | 0.158676 | 1.459373 | 0.144463 | 0.603539 |
| abraa             | 584.161  | -0.221903594 | 0.28082  | -0.7902  | 0.429412 | 0.846956 |
| eif4e2            | 240.9526 | 0.09127057   | 0.220059 | 0.414754 | 0.678322 | 0.936026 |
| CU929150.1        | 4.957503 | 0.626381615  | 1.102139 | 0.568333 | 0.569809 | 0.902322 |
| rspo4             | 15.5508  | 0.373644457  | 0.478347 | 0.781116 | 0.434734 | 0.850002 |
| sdhc              | 1828.581 | -0.056187332 | 0.158859 | -0.35369 | 0.723569 | 0.947923 |
| mpz               | 159.6682 | -0.320494995 | 0.431479 | -0.74278 | 0.457613 | 0.860993 |
| pih1d3            | 21.78342 | 0.460525429  | 0.387173 | 1.189456 | 0.23426  | 0.714938 |
| pip4pla           | 242.7655 | -0.151326172 | 0.145849 | -1.03756 | 0.299476 | 0.766128 |
| cpt2              | 308.9074 | -0.056739226 | 0.196837 | -0.28825 | 0.773152 | 0.960624 |
| magoh             | 1003.881 | -0.060664575 | 0.154973 | -0.39145 | 0.695464 | 0.9414   |
| elov16l           | 246.8437 | -0.214506403 | 0.287951 | -0.74494 | 0.456307 | 0.860403 |
| alas2             | 2219.113 | -0.38054628  | 0.239374 | -1.58975 | 0.11189  | 0.548216 |
| ftr1l             | 1.051771 | 0.09364454   | 2.400524 | 0.03901  | 0.968882 | NA       |
| ajapl             | 44.48441 | -0.000258727 | 0.385672 | -0.00067 | 0.999465 | 1        |
| cavin4a           | 1454.97  | 0.183700131  | 0.169358 | 1.084686 | 0.278061 | 0.751959 |
| igfbplb           | 855.6002 | -1.569459892 | 0.557707 | -2.81413 | 0.004891 | 0.116469 |
| fggy              | 198.7597 | -0.866669535 | 0.300515 | -2.88395 | 0.003927 | 0.104111 |
| gbp1              | 89.19895 | 0.661529541  | 0.343648 | 1.925021 | 0.054227 | 0.402725 |
| gbp2              | 84.00682 | -0.725232537 | 0.33627  | -2.1567  | 0.031029 | 0.313376 |
| tcf7              | 104.7594 | -0.153072548 | 0.192911 | -0.79349 | 0.427495 | 0.845893 |
| MFAP4 (1 of many) | 6.19438  | -0.910078182 | 0.981246 | -0.92747 | 0.353682 | 0.804596 |

|                   |          |              |          |          |          |          |  |
|-------------------|----------|--------------|----------|----------|----------|----------|--|
| zgc:171687        | 6.301787 | 0.201405043  | 0.77641  | 0.259406 | 0.795322 | 0.965909 |  |
| si:zfos-2330d3.1  | 19.58457 | -0.191417299 | 0.517577 | -0.36983 | 0.711507 | 0.945821 |  |
| si:ch211-134m17.9 | 101.8137 | -0.106820717 | 0.244061 | -0.43768 | 0.661618 | 0.930742 |  |
| nfkb2             | 571.9681 | -0.06579446  | 0.148673 | -0.44255 | 0.658095 | 0.930581 |  |
| gng7              | 343.2901 | 0.017411133  | 0.152279 | 0.114337 | 0.90897  | 0.992033 |  |
| zgc:101744        | 1140.335 | -0.43108642  | 0.157258 | -2.74127 | 0.00612  | 0.131913 |  |
| elav11a           | 2286.895 | 0.000567558  | 0.084173 | 0.006743 | 0.99462  | 1        |  |
| gpr160            | 28.79797 | -0.375689783 | 0.330375 | -1.13716 | 0.255471 | 0.733544 |  |
| hkdc1             | 113.5381 | 0.192704914  | 0.243838 | 0.790298 | 0.429354 | 0.846956 |  |
| si:dkeyp-66d1.7   | 60.22671 | -0.550681869 | 0.269462 | -2.04363 | 0.04099  | 0.353808 |  |
| tepl              | 43.86889 | -0.014817059 | 0.300434 | -0.04932 | 0.960665 | 0.999243 |  |
| casqla            | 1839.749 | -0.089891398 | 0.233191 | -0.38548 | 0.699879 | 0.942583 |  |
| zp3f.1            | 2.225959 | -0.537129359 | 1.370103 | -0.39204 | 0.695032 | 0.941197 |  |
| ch25h12           | 22.63284 | -0.541431222 | 0.317859 | -1.70337 | 0.088499 | 0.499597 |  |
| s100z             | 102.6514 | 0.202598954  | 0.22244  | 0.910804 | 0.362399 | 0.812303 |  |
| slc25a36a         | 732.9815 | -0.325870863 | 0.162637 | -2.00367 | 0.045105 | 0.372051 |  |
| phf20b            | 587.2535 | 0.03536165   | 0.133405 | 0.265069 | 0.790956 | 0.964766 |  |
| rbpl.2            | 85.73134 | 0            | 1.688376 | 0        | 1        | 1        |  |
| copb2             | 3063.404 | 0.013979828  | 0.110787 | 0.126187 | 0.899584 | 0.99045  |  |
| plk3              | 749.0304 | 0.050634496  | 0.163313 | 0.310045 | 0.756527 | 0.956547 |  |
| mrpl12            | 876.3363 | 0.126771467  | 0.145842 | 0.869236 | 0.384718 | 0.826588 |  |
| zgc:103625        | 41.37768 | 0.352265171  | 0.347193 | 1.014609 | 0.310292 | 0.775062 |  |
| ubtfl             | 757.7375 | 0.013701521  | 0.123712 | 0.110754 | 0.911812 | 0.992336 |  |
| faim2a            | 111.0978 | 0.026832492  | 0.201112 | 0.13342  | 0.893861 | 0.988675 |  |
| abcf2a            | 779.2212 | 0.093884624  | 0.168085 | 0.558556 | 0.576465 | 0.90475  |  |
| smarcd3a          | 308.1284 | 0.197182638  | 0.142973 | 1.379163 | 0.167845 | 0.639036 |  |
| tmubl             | 511.9601 | -0.221464027 | 0.148551 | -1.49083 | 0.136006 | 0.591131 |  |
| dnail.2           | 42.43491 | 0.269907592  | 0.272899 | 0.989038 | 0.322645 | 0.782525 |  |
| tmem53            | 115.5424 | -0.2127786   | 0.183856 | -1.15731 | 0.247146 | 0.727871 |  |
| klf17             | 120.861  | -0.538808882 | 0.208448 | -2.58486 | 0.009742 | 0.170247 |  |
| ccdc24            | 11.53282 | 0.020977508  | 0.57727  | 0.036339 | 0.971012 | 1        |  |
| zgc:113531        | 234.2186 | 0.151123422  | 0.254941 | 0.592779 | 0.553329 | 0.89793  |  |
| klh120            | 290.388  | -0.10482266  | 0.13794  | -0.75991 | 0.447306 | 0.856073 |  |
| cenpl             | 74.32047 | 0.13603081   | 0.278953 | 0.487648 | 0.625799 | 0.920625 |  |
| pigp              | 313.1737 | 1.160147746  | 0.301658 | 3.845901 | 0.00012  | 0.010622 |  |
| e2f5              | 28.30709 | -0.02566738  | 0.282674 | -0.0908  | 0.92765  | 0.995016 |  |
| myrip             | 270.5284 | 0.088834701  | 0.252166 | 0.352286 | 0.724623 | 0.9484   |  |
| mrclb             | 150.9977 | -0.221089516 | 0.176582 | -1.25205 | 0.210552 | 0.692339 |  |
| jph1b             | 2891.13  | -0.083745206 | 0.185394 | -0.45171 | 0.651475 | 0.928562 |  |
| etfdh             | 1364.425 | -0.195967637 | 0.147607 | -1.32763 | 0.184301 | 0.661379 |  |
| ppid              | 925.5415 | -0.10451928  | 0.125352 | -0.83381 | 0.40439  | 0.833939 |  |
| ldhd              | 162.0663 | 0.16939574   | 0.211671 | 0.800278 | 0.42355  | 0.843967 |  |
| gins3             | 101.563  | 0.014617275  | 0.187363 | 0.078016 | 0.937815 | 0.997305 |  |
| chmp5a            | 72.94106 | 0.436271212  | 0.338446 | 1.289044 | 0.197383 | 0.677836 |  |
| setd7             | 691.9572 | 0.129447138  | 0.120313 | 1.07592  | 0.281963 | 0.754378 |  |
| rgs20             | 215.636  | 0.119018011  | 0.199487 | 0.59662  | 0.550761 | 0.8974   |  |
| kcnb2             | 160.0095 | -0.7844057   | 0.255163 | -3.07414 | 0.002111 | 0.072145 |  |
| babam2            | 318.2664 | -0.213203021 | 0.136243 | -1.56488 | 0.117612 | 0.559331 |  |
| acox3             | 223.7605 | 0.477071279  | 0.179728 | 2.65441  | 0.007945 | 0.150851 |  |
| trappc8           | 388.0195 | -0.043841901 | 0.128355 | -0.34157 | 0.732676 | 0.950617 |  |
| shhb              | 100.3492 | 0.186747807  | 0.303111 | 0.616104 | 0.537826 | 0.892498 |  |
| en2b              | 129.8015 | -0.009222886 | 0.218053 | -0.0423  | 0.966262 | 1        |  |
| htr5aa            | 2.997314 | -1.298079608 | 1.403493 | -0.92489 | 0.355022 | 0.80622  |  |
| slu7              | 839.524  | -0.207961486 | 0.114557 | -1.81536 | 0.069469 | 0.45     |  |

|                    |          |              |          |          |          |          |
|--------------------|----------|--------------|----------|----------|----------|----------|
| zgc:101569         | 344.2525 | -0.166264073 | 0.181866 | -0.91421 | 0.360605 | 0.811237 |
| il12a              | 1.292904 | -2.306308306 | 2.433808 | -0.94761 | 0.343326 | NA       |
| ift80              | 276.6252 | -0.063266015 | 0.135023 | -0.46856 | 0.639386 | 0.924779 |
| acaa2              | 1342.038 | -0.145853847 | 0.202603 | -0.7199  | 0.471586 | 0.86809  |
| smc4               | 694.866  | 0.240310399  | 0.241253 | 0.996091 | 0.319206 | 0.779923 |
| AL954146.1         | 58.47031 | -2.047566541 | 0.749371 | -2.73238 | 0.006288 | 0.134409 |
| tmx3a              | 198.3768 | 0.363069591  | 0.368236 | 0.985969 | 0.324148 | 0.783161 |
| zgc:113691         | 9.442673 | -1.014666227 | 0.606839 | -1.67205 | 0.094514 | 0.513368 |
| acadm              | 3298.616 | 0.146854188  | 0.154012 | 0.953522 | 0.340326 | 0.795464 |
| tmem256            | 264.2087 | 0.268715107  | 0.204728 | 1.312545 | 0.189336 | 0.668942 |
| hectd3             | 878.6617 | -0.106086145 | 0.111845 | -0.94851 | 0.34287  | 0.79738  |
| mssl2a             | 272.4785 | 0.270791216  | 0.157016 | 1.724613 | 0.084597 | 0.488321 |
| pccb               | 1167.736 | -0.003106663 | 0.137011 | -0.02267 | 0.98191  | 1        |
| rad50              | 133.2171 | 0.078732788  | 0.161143 | 0.48859  | 0.625132 | 0.920398 |
| drdlb              | 14.71283 | 0.296897757  | 0.588352 | 0.504626 | 0.613822 | 0.915998 |
| itprid2            | 305.6474 | -0.03566886  | 0.176681 | -0.20188 | 0.840008 | 0.976417 |
| ppplr1c            | 107.2062 | -0.179458828 | 0.275941 | -0.65035 | 0.515464 | 0.886401 |
| ctnbip1            | 916.0146 | 0.072190381  | 0.107702 | 0.670279 | 0.50268  | 0.881453 |
| pimr68             | 10.78418 | 0.706262346  | 0.634903 | 1.112394 | 0.265969 | 0.742773 |
| fdx1b              | 18.62269 | 0.290336036  | 0.375439 | 0.773324 | 0.439331 | 0.852079 |
| flvcr2a            | 19.36057 | 0.713939804  | 0.50353  | 1.41787  | 0.156229 | 0.621949 |
| traf4b             | 127.2684 | -0.135922357 | 0.166865 | -0.81456 | 0.415322 | 0.838754 |
| cul3a              | 1134.289 | 0.098286155  | 0.095167 | 1.032774 | 0.30171  | 0.767693 |
| ccr6b              | 5.415364 | 1.396281303  | 1.074969 | 1.298904 | 0.193977 | 0.674122 |
| zgc:113142         | 41.79173 | -0.648887782 | 0.560829 | -1.15702 | 0.247266 | 0.727871 |
| DPYSL2 (1 of many) | 99.38582 | 0.572210606  | 0.262431 | 2.180423 | 0.029226 | 0.304273 |
| pdc7               | 188.453  | -0.122211912 | 0.171169 | -0.71398 | 0.475238 | 0.869292 |
| slc25a24l          | 2.803945 | -1.357234775 | 1.286871 | -1.05468 | 0.291573 | 0.761454 |
| dnajb4             | 151.9146 | 0.401137888  | 0.215894 | 1.858033 | 0.063164 | 0.429313 |
| si:dkey-24c2.9     | 14.30018 | -0.568448369 | 0.476985 | -1.19175 | 0.233358 | 0.714569 |
| txndc12            | 677.2656 | 0.090136586  | 0.14455  | 0.623568 | 0.532911 | 0.890978 |
| zgc:153615         | 294.8684 | 0.259146699  | 0.226761 | 1.142819 | 0.253114 | 0.732759 |
| cdyl               | 140.8476 | -0.245167648 | 0.193872 | -1.26458 | 0.206021 | 0.688321 |
| si:dkey-31m5.5     | 0.04222  | 0            | 5.267649 | 0        | 1        | NA       |
| wnt3               | 47.95834 | 0.024555496  | 0.327778 | 0.074915 | 0.940282 | 0.997371 |
| nsfb               | 335.7433 | 0.03747321   | 0.115242 | 0.325169 | 0.745053 | 0.954956 |
| egln1a             | 45.04496 | 0.131287137  | 0.313982 | 0.418136 | 0.675848 | 0.935422 |
| trappc1            | 494.6138 | 0.001929906  | 0.18229  | 0.010587 | 0.991553 | 1        |
| eno3               | 19578.81 | 0.028033788  | 0.14697  | 0.190745 | 0.848725 | 0.977918 |
| zgc:85858          | 413.7645 | -0.04178043  | 0.146559 | -0.28508 | 0.775587 | 0.961073 |
| fbxo5              | 182.0054 | 0.446803055  | 0.212479 | 2.102814 | 0.035482 | 0.330833 |
| stk25b             | 950.2497 | 0.132387445  | 0.11667  | 1.13472  | 0.256493 | 0.73401  |
| marcks11a          | 5824.044 | 0.255627846  | 0.137673 | 1.856777 | 0.063343 | 0.429516 |
| sfrp5              | 248.7993 | -0.197093821 | 0.159491 | -1.23576 | 0.216546 | 0.69815  |
| hhat1a             | 5856.297 | 0.16822773   | 0.170009 | 0.989522 | 0.322408 | 0.78246  |
| klhl40a            | 121.8484 | 0.204643884  | 0.268573 | 0.761969 | 0.446079 | 0.855403 |
| morn4              | 152.6453 | 0.301721439  | 0.195055 | 1.546854 | 0.121898 | 0.56863  |
| CR847936.1         | 55.40882 | -0.441430704 | 0.277293 | -1.59193 | 0.111401 | 0.547032 |
| st3gal7            | 168.2294 | 0.039295418  | 0.21068  | 0.186517 | 0.85204  | 0.978558 |
| trpc2a             | 2.634874 | 0.168023726  | 1.020741 | 0.16461  | 0.869251 | 0.982993 |
| klhl31             | 5844.525 | 0.028038194  | 0.261359 | 0.107279 | 0.914568 | 0.992972 |
| srd5a2b            | 6.37995  | -0.913915667 | 1.370294 | -0.66695 | 0.504805 | 0.88195  |
| slx4ip             | 38.69649 | 0.457215167  | 0.280532 | 1.629814 | 0.103141 | 0.530217 |
| im:7138239         | 5.334255 | -1.317869519 | 0.805151 | -1.6368  | 0.101673 | 0.528316 |

|                |          |              |          |          |          |          |
|----------------|----------|--------------|----------|----------|----------|----------|
| tyr            | 316.4011 | -0.530328589 | 0.311075 | -1.70482 | 0.088227 | 0.498835 |
| zgc:123010     | 343.9507 | 0.057845934  | 0.131253 | 0.440722 | 0.659414 | 0.930581 |
| got1           | 3789.14  | 0.186318508  | 0.155564 | 1.197696 | 0.231035 | 0.712561 |
| nkx2.3         | 120.8051 | -0.636602557 | 0.193076 | -3.29716 | 0.000977 | 0.043444 |
| si:dkey-24p1.1 | 0.30471  | -0.868130786 | 3.977116 | -0.21828 | 0.82721  | NA       |
| ca8            | 165.5431 | -0.369768255 | 0.173826 | -2.12724 | 0.0334   | 0.323127 |
| aep1           | 3676.123 | 0.019462644  | 0.262244 | 0.074216 | 0.940839 | 0.997371 |
| jac7           | 14.04256 | 0.951569782  | 0.941204 | 1.011013 | 0.31201  | 0.776164 |
| trim35-9       | 23.99112 | 0.523684437  | 0.406644 | 1.287819 | 0.197809 | 0.678554 |
| nr5a5          | 208.2666 | -1.715078669 | 0.943472 | -1.81784 | 0.069089 | 0.448527 |
| tefa           | 2195.507 | -0.122004773 | 0.264524 | -0.46122 | 0.644638 | 0.926639 |
| trim9          | 237.1875 | 0.141285225  | 0.247255 | 0.571415 | 0.567719 | 0.901809 |
| map4k5         | 675.7582 | -0.096924306 | 0.112177 | -0.86403 | 0.38757  | 0.827592 |
| cdkn3          | 126.3258 | 0.174789384  | 0.203143 | 0.860426 | 0.389554 | 0.827843 |
| atplala.3      | 611.1055 | -0.259528657 | 0.248484 | -1.04445 | 0.296278 | 0.764246 |
| lamb4          | 268.0681 | 0.070673372  | 0.253729 | 0.278539 | 0.780599 | 0.961421 |
| cox16          | 100.5163 | 0.252902388  | 0.179529 | 1.408696 | 0.158925 | 0.62448  |
| arpc5a         | 999.892  | 0.098358439  | 0.143999 | 0.683049 | 0.494576 | 0.877975 |
| plaub          | 29.07336 | 0.645750222  | 0.421635 | 1.531539 | 0.125636 | 0.573594 |
| lgnn           | 3043.175 | -0.174052053 | 0.148998 | -1.16815 | 0.242745 | 0.724345 |
| fbxo36b        | 5.505139 | -0.51483212  | 0.783991 | -0.65668 | 0.511386 | 0.884702 |
| rhebl1         | 988.6344 | -0.020622364 | 0.102096 | -0.20199 | 0.839925 | 0.976417 |
| mhc1uma        | 3.012953 | -5.512874196 | 5.141837 | -1.07216 | 0.283648 | 0.755095 |
| ctslb          | 73.66759 | 1.349192355  | 1.27577  | 1.057552 | 0.29026  | 0.76078  |
| olfm3b         | 10.32924 | 0.356495213  | 0.816673 | 0.436522 | 0.662458 | 0.93076  |
| trpm3          | 47.85232 | 0.330017399  | 0.329539 | 1.001451 | 0.316609 | 0.778879 |
| nfyba          | 1013.597 | 0.038847787  | 0.116298 | 0.334037 | 0.738351 | 0.952912 |
| grebl1         | 136.5106 | -0.08182486  | 0.226836 | -0.36072 | 0.718307 | 0.946603 |
| zgc:110130     | 193.2593 | 0.585572575  | 0.203989 | 2.870611 | 0.004097 | 0.106542 |
| nasp           | 1101.923 | 0.09101124   | 0.106382 | 0.855513 | 0.392267 | 0.827902 |
| zgc:77439      | 1144.791 | 0.005371639  | 0.148152 | 0.036258 | 0.971077 | 1        |
| prpf38a        | 316.2998 | 0.011079566  | 0.128454 | 0.086253 | 0.931265 | 0.995809 |
| arrb2a         | 317.8996 | -0.052266391 | 0.142489 | -0.36681 | 0.713761 | 0.945821 |
| orcl           | 134.8722 | 0.065823904  | 0.191335 | 0.344025 | 0.730827 | 0.950056 |
| gpr101         | 7.352857 | -0.301085259 | 0.717034 | -0.4199  | 0.674556 | 0.934877 |
| st6galnac5a    | 4.325793 | -0.438231826 | 1.05676  | -0.41469 | 0.678366 | 0.936026 |
| mpl            | 3.689161 | -0.367736519 | 0.943911 | -0.38959 | 0.696841 | 0.94198  |
| vps13a         | 1023.407 | -0.143130855 | 0.142332 | -1.00561 | 0.314603 | 0.777479 |
| cep78          | 72.43875 | -0.071863066 | 0.241938 | -0.29703 | 0.766443 | 0.960229 |
| zgc:171579     | 4.675865 | 0.504461659  | 0.959693 | 0.525649 | 0.599132 | 0.913173 |
| cacng5b        | 5.564867 | -2.207026825 | 1.239764 | -1.7802  | 0.075043 | 0.464411 |
| zgc:152791     | 33.33056 | -1.060638697 | 1.247672 | -0.85009 | 0.395273 | 0.829083 |
| klh121         | 1002.707 | -0.007258765 | 0.112029 | -0.06479 | 0.948338 | 0.99773  |
| spega          | 137.0588 | 0.202100383  | 0.201549 | 1.002737 | 0.315988 | 0.778545 |
| zbtb48         | 80.60772 | -0.029687458 | 0.209188 | -0.14192 | 0.887145 | 0.987739 |
| igfbp5a        | 108.9471 | 0.024933652  | 0.252409 | 0.098783 | 0.921311 | 0.994085 |
| arhgap4a       | 36.37943 | 0.485691484  | 0.332537 | 1.460564 | 0.144135 | 0.603144 |
| rhm25a         | 194.8045 | 0.787793665  | 0.246852 | 3.191364 | 0.001416 | 0.056314 |
| emc4           | 163.3493 | 0.757730242  | 0.213521 | 3.548741 | 0.000387 | 0.023295 |
| arg2           | 3416.927 | -0.131261812 | 0.217875 | -0.60246 | 0.546866 | 0.896107 |
| vtilb          | 179.3284 | -0.25171065  | 0.183681 | -1.37037 | 0.170573 | 0.642139 |
| pls1           | 116.6552 | -0.195139473 | 0.324514 | -0.60133 | 0.547621 | 0.896211 |
| fbln5          | 197.7797 | -0.084536381 | 0.163497 | -0.51705 | 0.605119 | 0.914985 |
| golga5         | 723.3485 | -0.132285319 | 0.100474 | -1.31662 | 0.187967 | 0.667259 |

|                   |          |              |          |          |          |          |
|-------------------|----------|--------------|----------|----------|----------|----------|
| rdh14a            | 223.7204 | 0.103590937  | 0.214871 | 0.482108 | 0.629729 | 0.92285  |
| terfa             | 681.7642 | -0.126596468 | 0.180115 | -0.70287 | 0.48214  | 0.87159  |
| six1a             | 318.073  | 0.130957674  | 0.179529 | 0.729453 | 0.465724 | 0.864997 |
| hook2             | 62.78502 | 0.654193288  | 0.278633 | 2.347866 | 0.018881 | 0.242305 |
| parla             | 210.8379 | -0.401674311 | 0.215501 | -1.86391 | 0.062334 | 0.427718 |
| vps37b            | 308.6766 | -0.007733516 | 0.132044 | -0.05857 | 0.953296 | 0.998436 |
| pmepal            | 45.05543 | -0.332535204 | 0.340113 | -0.97772 | 0.328214 | 0.786586 |
| ccndbp1           | 332.8985 | 0.103848748  | 0.139082 | 0.746671 | 0.455262 | 0.860008 |
| st6gal2a          | 896.3436 | -0.140194125 | 0.101761 | -1.37768 | 0.168303 | 0.639712 |
| gadd45gip1        | 436.7978 | 0.093674916  | 0.108274 | 0.865169 | 0.386946 | 0.827592 |
| tmem209           | 336.277  | 0.270878999  | 0.150285 | 1.802433 | 0.071477 | 0.456109 |
| ahcy12            | 1195.422 | 0.024198176  | 0.122382 | 0.197726 | 0.843259 | 0.976791 |
| drg1              | 501.1606 | 0.022492572  | 0.150581 | 0.149372 | 0.88126  | 0.986892 |
| ndufa5            | 1503.925 | -0.116196899 | 0.156434 | -0.74278 | 0.457613 | 0.860993 |
| rps24             | 22384.09 | -0.436244303 | 0.138794 | -3.1431  | 0.001672 | 0.062877 |
| qrfpra            | 2.919455 | 0.039361113  | 1.195561 | 0.032923 | 0.973736 | 1        |
| ssbp1             | 221.4073 | 0.097778029  | 0.232938 | 0.419759 | 0.674661 | 0.934877 |
| ccl19b            | 58.56623 | -0.064229468 | 0.416413 | -0.15424 | 0.877417 | 0.985398 |
| pald1b            | 123.8807 | -0.076705302 | 0.250601 | -0.30609 | 0.75954  | 0.957886 |
| skal              | 70.8708  | -0.197117458 | 0.229661 | -0.8583  | 0.390729 | 0.827902 |
| zgc:194209        | 179.8022 | -0.500246734 | 0.206461 | -2.42296 | 0.015394 | 0.218559 |
| dnajb12a          | 446.9053 | 0.053244486  | 0.131393 | 0.40523  | 0.685309 | 0.938486 |
| cuedc2            | 172.4136 | 0.216498974  | 0.172316 | 1.25641  | 0.208967 | 0.691152 |
| epha3             | 66.94771 | 0.209404747  | 0.268592 | 0.779638 | 0.435604 | 0.850467 |
| apool             | 386.3662 | 0.194945478  | 0.163844 | 1.189824 | 0.234115 | 0.714938 |
| rcn2              | 127.3337 | 0.354017146  | 0.169087 | 2.093703 | 0.036286 | 0.335171 |
| ch25h11.1         | 234.657  | -0.085898915 | 0.270272 | -0.31782 | 0.750618 | 0.955074 |
| dlg4b             | 148.1586 | 0.178074685  | 0.261856 | 0.680047 | 0.496474 | 0.878161 |
| sdhaf4            | 234.944  | -0.050528995 | 0.179106 | -0.28212 | 0.777853 | 0.961073 |
| wnk1b             | 1171.388 | 0.102424806  | 0.177461 | 0.577168 | 0.563826 | 0.901196 |
| si:ch211-240119.5 | 1444.889 | 2.096646924  | 1.165979 | 1.798185 | 0.072148 | 0.456773 |
| nt5c2a            | 773.221  | 0.020378097  | 0.098261 | 0.207387 | 0.835708 | 0.976007 |
| polr1c            | 170.9012 | -0.012525501 | 0.211083 | -0.05934 | 0.952682 | 0.998395 |
| prom2             | 192.6899 | 0.352793561  | 0.224892 | 1.568726 | 0.116712 | 0.557685 |
| cep68             | 81.63161 | 0.099646914  | 0.208194 | 0.478625 | 0.632206 | 0.923187 |
| dmrta2            | 100.3435 | 0.262392356  | 0.162231 | 1.617402 | 0.105792 | 0.534827 |
| fuom              | 11.16763 | -0.160559047 | 0.495971 | -0.32373 | 0.746145 | 0.955074 |
| AL831745.1        | 107.4809 | 0.021683055  | 0.535803 | 0.040468 | 0.96772  | 1        |
| snrpb2            | 383.354  | -0.044737406 | 0.183132 | -0.24429 | 0.807006 | 0.969726 |
| adka              | 1397.646 | 0.131274374  | 0.123308 | 1.064605 | 0.287055 | 0.757955 |
| msl2b             | 441.3873 | -0.009537292 | 0.104761 | -0.09104 | 0.927462 | 0.994973 |
| oprml             | 10.46257 | 0.579997968  | 0.826318 | 0.701906 | 0.482737 | 0.871787 |
| rgs17             | 105.2882 | 0.219747378  | 0.193011 | 1.138524 | 0.254902 | 0.733542 |
| il13ra2           | 171.7735 | 0.377818591  | 0.211996 | 1.782194 | 0.074718 | 0.46413  |
| il22ra2           | 0.315272 | -2.340129263 | 5.201853 | -0.44986 | 0.652808 | NA       |
| zgc:110353        | 24.90418 | 0.44536794   | 0.349784 | 1.273265 | 0.202924 | 0.683508 |
| hkl               | 1500.248 | 0.242916519  | 0.131788 | 1.84324  | 0.065294 | 0.435359 |
| dhrs7ca           | 93.10129 | 0.102588549  | 0.284067 | 0.361142 | 0.717993 | 0.946533 |
| tspan15           | 203.5536 | 0.210971024  | 0.174213 | 1.210996 | 0.225897 | 0.707208 |
| acbd6             | 365.1498 | 0.070243944  | 0.156554 | 0.44869  | 0.653656 | 0.929269 |
| lhx4              | 180.9522 | -0.336625714 | 0.215162 | -1.56452 | 0.117695 | 0.559498 |
| qsox1             | 532.6109 | 0.023151975  | 0.170912 | 0.135462 | 0.892247 | 0.988566 |
| hnrnph3           | 185.0082 | -0.050087823 | 0.167963 | -0.29821 | 0.765545 | 0.959831 |
| terb2             | 4.933438 | -0.146202075 | 0.929136 | -0.15735 | 0.874967 | 0.984191 |

|                   |          |              |          |          |          |          |
|-------------------|----------|--------------|----------|----------|----------|----------|
| calhm2.1          | 82.63043 | -0.059296175 | 0.244141 | -0.24288 | 0.808101 | 0.969828 |
| si:dkey-51a16.9   | 404.0118 | -0.291917881 | 0.129575 | -2.25289 | 0.024266 | 0.275475 |
| bag3              | 200.0583 | 0.175749591  | 0.245888 | 0.714754 | 0.474761 | 0.869292 |
| git1              | 377.502  | -0.046645731 | 0.115332 | -0.40445 | 0.685884 | 0.938574 |
| pitpnaa           | 629.2566 | -0.126883896 | 0.19111  | -0.66393 | 0.506734 | 0.883007 |
| naa20             | 586.1278 | 0.0802219    | 0.116209 | 0.690324 | 0.48999  | 0.874929 |
| ccdc85a           | 52.1973  | -0.238991754 | 0.34221  | -0.69838 | 0.484941 | 0.872911 |
| soul2             | 587.2693 | -0.127047964 | 0.127568 | -0.99592 | 0.319289 | 0.780043 |
| si:cabz01090165.1 | 47.67963 | 0.602082865  | 0.415848 | 1.447843 | 0.147661 | 0.608558 |
| ugt2a6            | 56.69577 | 1.423815487  | 0.400121 | 3.558465 | 0.000373 | 0.022626 |
| eef1a1a           | 865.0734 | 0.227167683  | 0.209041 | 1.086712 | 0.277164 | 0.751426 |
| aplm3             | 128.6593 | -0.212417912 | 0.203968 | -1.04143 | 0.297676 | 0.765407 |
| zgc:153119        | 28.89174 | 0.336598453  | 0.362762 | 0.927877 | 0.353471 | 0.804432 |
| c8a               | 545.9982 | -0.138445606 | 0.181711 | -0.7619  | 0.446121 | 0.855403 |
| c8b               | 474.946  | -0.210858315 | 0.214244 | -0.9842  | 0.325019 | 0.783955 |
| ssx2ipa           | 255.1481 | 0.19808774   | 0.156547 | 1.26536  | 0.205742 | 0.687948 |
| tubb2             | 462.859  | 0.103958824  | 0.182774 | 0.568783 | 0.569504 | 0.902322 |
| rrh               | 26.58044 | -0.911572607 | 0.530402 | -1.71864 | 0.085679 | 0.491277 |
| dappl             | 23.9367  | 0.373896028  | 0.539898 | 0.692531 | 0.488604 | 0.873964 |
| mrps6             | 373.6678 | 0.151499865  | 0.148176 | 1.022433 | 0.306576 | 0.771853 |
| lox13b            | 607.0689 | 0.208496966  | 0.110502 | 1.886816 | 0.059185 | 0.419186 |
| emx1              | 49.32563 | -0.028466727 | 0.23979  | -0.11872 | 0.905501 | 0.991631 |
| fst11b            | 4474.195 | 0.198039954  | 0.136928 | 1.446308 | 0.148091 | 0.609064 |
| ptk2bb            | 402.9703 | -0.17009966  | 0.129159 | -1.31698 | 0.187846 | 0.667033 |
| pa2g4a            | 2830.165 | -0.026991568 | 0.119515 | -0.22584 | 0.821325 | 0.971788 |
| cfid              | 2203.685 | 0.570006598  | 0.179873 | 3.168938 | 0.00153  | 0.059181 |
| ier3ipl           | 503.3987 | 0.158699557  | 0.178501 | 0.889069 | 0.373966 | 0.820695 |
| atohlc            | 12.64844 | -0.116493543 | 0.603827 | -0.19293 | 0.847017 | 0.9773   |
| mat1a             | 3363.297 | 0.556984681  | 0.219429 | 2.538337 | 0.011138 | 0.183611 |
| poll              | 157.089  | 0.025652341  | 0.157105 | 0.163281 | 0.870297 | 0.983365 |
| fgf8b             | 33.60137 | 0.838525693  | 0.365576 | 2.293708 | 0.021807 | 0.261665 |
| cenpk             | 114.1467 | -0.354847755 | 0.329249 | -1.07775 | 0.281145 | 0.753557 |
| nrgna             | 441.4898 | 0.113677802  | 0.276373 | 0.41132  | 0.680838 | 0.937189 |
| slc6a1b           | 1516.256 | 0.209632477  | 0.222646 | 0.941551 | 0.346422 | 0.799463 |
| mtif3             | 143.6714 | 0.018697178  | 0.152958 | 0.122238 | 0.902711 | 0.991036 |
| itm2cb            | 280.4351 | 0.242134706  | 0.223317 | 1.084264 | 0.278248 | 0.751971 |
| si:dkey-235d18.5  | 227.1033 | 0.089273029  | 0.2138   | 0.417554 | 0.676273 | 0.93557  |
| fank1             | 7.048493 | 0.95514384   | 0.742492 | 1.286403 | 0.198302 | 0.679109 |
| slc36a4           | 266.1011 | 0.145135606  | 0.134083 | 1.082429 | 0.279062 | 0.752444 |
| tsta3             | 164.5778 | -0.027736888 | 0.165348 | -0.16775 | 0.866781 | 0.982582 |
| mrpl38            | 623.6092 | -0.01473106  | 0.116989 | -0.12592 | 0.899797 | 0.99045  |
| TSTA3 (1 of many) | 890.8417 | -0.110068316 | 0.131444 | -0.83738 | 0.40238  | 0.833317 |
| dsc21             | 408.9772 | -0.064126349 | 0.185343 | -0.34599 | 0.729352 | 0.950056 |
| samm501           | 457.0568 | 0.383092868  | 0.098179 | 3.901964 | 9.54E-05 | 0.008792 |
| si:ch211-121a2.2  | 44.14593 | -3.704391489 | 0.976715 | -3.7927  | 0.000149 | 0.012187 |
| sirt5             | 236.9602 | -0.144520758 | 0.147674 | -0.97865 | 0.327753 | 0.786438 |
| zgc:194221        | 75.42728 | 2.236611092  | 1.075709 | 2.079197 | 0.037599 | 0.340171 |
| shtn1             | 69.28109 | -0.220247979 | 0.247874 | -0.88855 | 0.374247 | 0.820913 |
| fam204a           | 239.8846 | 0.453790839  | 0.169218 | 2.681689 | 0.007325 | 0.14495  |
| emx2              | 371.858  | -0.087450437 | 0.128148 | -0.68242 | 0.494974 | 0.87806  |
| mrps26            | 560.8467 | -0.138104755 | 0.138586 | -0.99653 | 0.318994 | 0.779923 |
| OSBPL8            | 12.39651 | 0.01757054   | 0.649708 | 0.027044 | 0.978425 | 1        |
| zgc:123321        | 145.6002 | -0.045203476 | 0.247097 | -0.18294 | 0.854847 | 0.979161 |
| asapl1b           | 454.866  | -0.043891009 | 0.152868 | -0.28712 | 0.774022 | 0.960636 |

|                  |          |              |          |          |          |          |  |
|------------------|----------|--------------|----------|----------|----------|----------|--|
| zgc:112160       | 22478.16 | 2.52993036   | 1.45694  | 1.736469 | 0.082481 | 0.482825 |  |
| BX914200.1       | 4.035548 | -4.008406013 | 1.349049 | -2.97128 | 0.002966 | 0.090034 |  |
| ldlrap1b         | 44.93621 | 0.233940251  | 0.295921 | 0.790549 | 0.429207 | 0.846956 |  |
| si:ch73-308m11.1 | 101.6567 | -0.383205912 | 0.311528 | -1.23008 | 0.218666 | 0.699445 |  |
| xpc              | 326.4008 | -0.202433811 | 0.184167 | -1.09919 | 0.271686 | 0.747976 |  |
| prop1            | 1.509365 | 3.01080981   | 1.881851 | 1.599919 | 0.109616 | NA       |  |
| mcf2             | 393.5431 | 0.162673469  | 0.151557 | 1.073348 | 0.283115 | 0.755028 |  |
| dync21i1         | 42.95152 | -0.332246363 | 0.244769 | -1.35739 | 0.174658 | 0.648268 |  |
| tbxtb            | 6.518374 | 0.570676035  | 0.664093 | 0.859331 | 0.390158 | 0.827902 |  |
| meal             | 917.9189 | -0.128240881 | 0.132765 | -0.96592 | 0.334083 | 0.791078 |  |
| zgc:172182       | 7.988091 | 0.541014066  | 0.634743 | 0.852335 | 0.394028 | 0.828374 |  |
| bbs5             | 84.57325 | -0.232263517 | 0.249292 | -0.93169 | 0.351495 | 0.802378 |  |
| zp3b             | 19.47889 | -0.352018788 | 0.398841 | -0.8826  | 0.37745  | 0.822478 |  |
| gng5             | 957.2883 | 0.069626565  | 0.14187  | 0.490777 | 0.623585 | 0.919171 |  |
| gsta.2           | 186.2324 | -0.209794565 | 0.537422 | -0.39037 | 0.696262 | 0.941657 |  |
| znf800b          | 141.3668 | -0.895091136 | 0.212222 | -4.21771 | 2.47E-05 | 0.00332  |  |
| dusp22b          | 68.47282 | -0.139266607 | 0.244083 | -0.57057 | 0.568291 | 0.902146 |  |
| dhdds            | 295.0896 | 0.072146319  | 0.178997 | 0.40306  | 0.686904 | 0.93875  |  |
| ftr93            | 17.75168 | -0.375144498 | 0.512589 | -0.73186 | 0.464253 | 0.864593 |  |
| lifrb            | 79.09812 | -0.33659682  | 0.254017 | -1.3251  | 0.18514  | 0.662704 |  |
| rpz4             | 135.0427 | -0.167193386 | 0.180178 | -0.92794 | 0.35344  | 0.804432 |  |
| lamtor2          | 351.3151 | 0.034404884  | 0.154484 | 0.222708 | 0.823763 | 0.972005 |  |
| ambra1b          | 400.5108 | -0.033156571 | 0.168796 | -0.19643 | 0.844273 | 0.976791 |  |
| arpp19b          | 625.2553 | 0.264811603  | 0.156762 | 1.689261 | 0.091169 | 0.505533 |  |
| cemip            | 376.7304 | 0.031404344  | 0.13208  | 0.237767 | 0.812062 | 0.97012  |  |
| ap3s2            | 478.3654 | -0.025047472 | 0.149218 | -0.16786 | 0.866695 | 0.982582 |  |
| clqbp            | 1581.518 | -0.063972677 | 0.13315  | -0.48046 | 0.630902 | 0.923003 |  |
| CR855393.1       | 0.316692 | 0.960779704  | 4.530092 | 0.212088 | 0.832038 | NA       |  |
| BX323555.2       | 0.127474 | -0.868089684 | 5.267649 | -0.1648  | 0.869104 | NA       |  |
| gnpna1           | 166.4973 | -0.006816814 | 0.195731 | -0.03483 | 0.972217 | 1        |  |
| zbtb7a           | 18.70154 | 0.064136336  | 0.373796 | 0.171581 | 0.863767 | 0.981842 |  |
| si:ch73-168d20.1 | 5.982248 | -1.244182512 | 1.348373 | -0.92273 | 0.356149 | 0.807117 |  |
| sh3gl2b          | 11.683   | 0.270534029  | 0.528425 | 0.511963 | 0.608677 | 0.915204 |  |
| rbm42            | 256.5188 | -0.204792034 | 0.171859 | -1.19163 | 0.233406 | 0.714569 |  |
| tmem147          | 790.6294 | 0.049593109  | 0.139317 | 0.355974 | 0.72186  | 0.947403 |  |
| gapdhs           | 10063.93 | -0.033213634 | 0.160983 | -0.20632 | 0.836543 | 0.976007 |  |
| bolal            | 209.5777 | 0.204841083  | 0.143771 | 1.424769 | 0.154224 | 0.61894  |  |
| ckmt2b           | 7743.534 | 0.258398514  | 0.122719 | 2.105616 | 0.035238 | 0.330683 |  |
| slc25a33         | 832.5738 | -0.160612672 | 0.271585 | -0.59139 | 0.554259 | 0.898306 |  |
| hles             | 284.1453 | -0.055499127 | 0.175355 | -0.3165  | 0.751626 | 0.955356 |  |
| CABZ01064671.1   | 14.6597  | -0.616892366 | 0.55366  | -1.11421 | 0.26519  | 0.742063 |  |
| ccdc172          | 6.46346  | 1.233232337  | 0.71045  | 1.735847 | 0.082591 | 0.483014 |  |
| tent5ba          | 679.5455 | -0.529629522 | 0.289388 | -1.83017 | 0.067225 | 0.44275  |  |
| fibina           | 336.2055 | 0.250051673  | 0.20888  | 1.197108 | 0.231265 | 0.712838 |  |
| si:ch211-87j1.4  | 13.73332 | -0.080899974 | 0.482155 | -0.16779 | 0.86675  | 0.982582 |  |
| utpl1            | 149.9369 | -0.334675174 | 0.205489 | -1.62868 | 0.103381 | 0.530446 |  |
| gdnfa            | 41.0226  | -0.039263493 | 0.30411  | -0.12911 | 0.897271 | 0.989719 |  |
| st7              | 99.75799 | -0.045018775 | 0.241412 | -0.18648 | 0.852068 | 0.978558 |  |
| fgfbp1b          | 16.72476 | -0.654616012 | 0.548953 | -1.19248 | 0.233073 | 0.714569 |  |
| fgfbp2a          | 48.55737 | -0.343127065 | 0.332147 | -1.03306 | 0.301577 | 0.767607 |  |
| prom1a           | 346.151  | 0.104205795  | 0.165749 | 0.628695 | 0.529549 | 0.890434 |  |
| akirin1          | 728.1233 | 0.068580082  | 0.115834 | 0.592057 | 0.553812 | 0.89821  |  |
| cnr2             | 4.176556 | 0.078330752  | 1.334122 | 0.058713 | 0.95318  | 0.998436 |  |
| rail4            | 277.4682 | 0.099940189  | 0.169326 | 0.590224 | 0.55504  | 0.898692 |  |



|                   |          |              |          |          |          |          |
|-------------------|----------|--------------|----------|----------|----------|----------|
| tecr12b           | 48.0323  | -0.487597428 | 0.351512 | -1.38714 | 0.165398 | 0.634653 |
| ppt1              | 815.4044 | -0.211747654 | 0.108172 | -1.95751 | 0.050288 | 0.390605 |
| hivep2a           | 379.8484 | 0.167283597  | 0.199126 | 0.84009  | 0.400858 | 0.8318   |
| snrnp48           | 101.8318 | 0.07106853   | 0.217828 | 0.326259 | 0.744228 | 0.95491  |
| xkr8.3            | 95.49696 | -0.001787873 | 0.218661 | -0.00818 | 0.993476 | 1        |
| ptp4a3a           | 1211.807 | 0.22827092   | 0.141644 | 1.611585 | 0.107052 | 0.537    |
| slc13a5b          | 14.47345 | 0.276603282  | 0.645528 | 0.428492 | 0.668293 | 0.933086 |
| fryl              | 960.2256 | -0.258387213 | 0.16112  | -1.6037  | 0.108781 | 0.541334 |
| pnpla7b           | 560.6122 | -0.069792633 | 0.14107  | -0.49474 | 0.620785 | 0.9182   |
| si:ch211-244a23.1 | 18.29275 | 1.09474002   | 1.322066 | 0.828053 | 0.407641 | 0.83577  |
| scfd2             | 111.7743 | 0.007579893  | 0.214263 | 0.035377 | 0.971779 | 1        |
| neurod6a          | 197.7445 | 0.221865099  | 0.246694 | 0.899353 | 0.368465 | 0.817272 |
| palld             | 1723.001 | -0.083675678 | 0.138566 | -0.60387 | 0.545932 | 0.895711 |
| ebag9             | 412.5118 | -0.151167144 | 0.128261 | -1.17859 | 0.23856  | 0.719595 |
| gpd11             | 339.1073 | 0.161018794  | 0.156784 | 1.027007 | 0.304417 | 0.769848 |
| osbpl10b          | 289.8393 | -0.155016421 | 0.200102 | -0.77469 | 0.438524 | 0.851685 |
| tardbp            | 2579.812 | 0.12456065   | 0.086125 | 1.446277 | 0.1481   | 0.609064 |
| trmt11            | 109.1942 | -0.220568684 | 0.248162 | -0.88881 | 0.374105 | 0.820835 |
| tcf191            | 31.36806 | 0.735379705  | 0.339119 | 2.168502 | 0.030121 | 0.309482 |
| pttglipb          | 432.9516 | -0.124224686 | 0.173712 | -0.71512 | 0.474536 | 0.869292 |
| mcm4              | 1034.178 | 0.041576015  | 0.180811 | 0.229942 | 0.818137 | 0.971518 |
| cldn1             | 1495.004 | 0.079321327  | 0.222392 | 0.356674 | 0.721336 | 0.947343 |
| snai2             | 971.4694 | 0.028638476  | 0.148432 | 0.19294  | 0.847006 | 0.9773   |
| GALNTL6           | 232.9979 | -0.226924216 | 0.256034 | -0.8863  | 0.375453 | 0.822237 |
| gbp               | 387.7061 | -0.010467158 | 0.236271 | -0.0443  | 0.964664 | 1        |
| acp6              | 132.9447 | 0.389973403  | 0.301972 | 1.291422 | 0.196557 | 0.676952 |
| gja5a             | 14.26085 | 0.419310728  | 0.535962 | 0.782352 | 0.434008 | 0.850002 |
| coil              | 111.4693 | 0.164942388  | 0.182055 | 0.906005 | 0.364933 | 0.814972 |
| scpep1            | 436.8461 | 0.053225825  | 0.140535 | 0.378737 | 0.704883 | 0.944015 |
| pycard            | 1009.71  | -0.163572206 | 0.209512 | -0.78073 | 0.434962 | 0.850002 |
| flilb             | 134.4864 | -0.204620784 | 0.179798 | -1.13806 | 0.255095 | 0.733542 |
| zp3d.1            | 4.459777 | -0.37974016  | 0.959695 | -0.39569 | 0.692335 | 0.940414 |
| ccsapb            | 328.2154 | -0.057585952 | 0.128631 | -0.44768 | 0.654382 | 0.929488 |
| epb4114a          | 255.0303 | 0.015748708  | 0.132905 | 0.118496 | 0.905674 | 0.991631 |
| si:dkey-95h12.1   | 267.6198 | 0.350408821  | 0.24617  | 1.423442 | 0.154608 | 0.619425 |
| kif20bb           | 183.1789 | 0.157479754  | 0.2144   | 0.734515 | 0.462635 | 0.864037 |
| pi4kb             | 626.3247 | -0.042550239 | 0.096898 | -0.43912 | 0.660572 | 0.930581 |
| znf366            | 21.1984  | 0.284013086  | 0.379028 | 0.74932  | 0.453664 | 0.858742 |
| zgc:113232        | 638.6803 | 0.185127311  | 0.531468 | 0.348332 | 0.727591 | 0.949228 |
| psma2             | 1111.75  | 0.165431948  | 0.148606 | 1.113227 | 0.265611 | 0.742247 |
| zfpm2a            | 237.4606 | 0.40470554   | 0.243288 | 1.663485 | 0.096215 | 0.517722 |
| si:ch211-215k15.4 | 1.224114 | 0            | 2.138267 | 0        | 1        | NA       |
| zfyve26           | 349.8684 | -0.195529226 | 0.15734  | -1.24272 | 0.213971 | 0.696474 |
| ackr4b            | 111.5356 | -0.303942546 | 0.215704 | -1.40907 | 0.158814 | 0.624456 |
| fosaa             | 26.05401 | -0.099510344 | 0.509459 | -0.19533 | 0.845138 | 0.976791 |
| jdp2a             | 55.5001  | 0.300107717  | 0.262954 | 1.141293 | 0.253748 | 0.732873 |
| si:ch73-138e16.5  | 10.98896 | 0.60932511   | 0.65128  | 0.935581 | 0.349489 | 0.801408 |
| nek4              | 161.7559 | -0.036355605 | 0.159196 | -0.22837 | 0.819358 | 0.971785 |
| grm4              | 222.1828 | 0.465034393  | 0.194405 | 2.392094 | 0.016753 | 0.229543 |
| glt8d1            | 202.4052 | -0.176205441 | 0.158508 | -1.11165 | 0.266289 | 0.742912 |
| cdc421            | 1936.139 | 0.003278279  | 0.088048 | 0.037233 | 0.970299 | 1        |
| wnt4b             | 157.3829 | 0.158946519  | 0.280432 | 0.566792 | 0.570855 | 0.902501 |
| zgc:92287         | 418.6069 | 0.219493594  | 0.217278 | 1.010198 | 0.3124   | 0.776164 |
| zgc:165461        | 1262.853 | 0.010354431  | 0.18341  | 0.056455 | 0.954979 | 0.998611 |

|                  |          |              |            |          |          |          |
|------------------|----------|--------------|------------|----------|----------|----------|
| priml            | 305.7839 | -0.015472383 | 0.191126   | -0.08095 | 0.935479 | 0.996829 |
| rgsl6            | 187.497  | -0.358527939 | 0.281503   | -1.27362 | 0.202798 | 0.683465 |
| havcr1           | 87.48501 | -0.534449613 | 0.262017   | -2.03975 | 0.041375 | 0.355014 |
| zgc:101562       | 97.24656 | 0.24043359   | 0.441156   | 0.545008 | 0.585748 | 0.906655 |
| slc35a1          | 351.3945 | 0.176399209  | 0.131814   | 1.338244 | 0.180817 | 0.656768 |
| syncrip          | 4203.308 | 0.0199401    | 0.098852   | 0.201718 | 0.840137 | 0.976417 |
| fam210ab         | 215.243  | -0.08971845  | 0.128562   | -0.69786 | 0.485265 | 0.872911 |
| qdpra            | 902.2752 | -0.681557496 | 0.200807   | -3.3941  | 0.000689 | 0.034762 |
| nenf             | 327.8857 | 0.183148226  | 0.262917   | 0.696601 | 0.486053 | 0.873244 |
| fstl5            | 1035.951 | 0.502855365  | 0.231592   | 2.171296 | 0.029909 | 0.307994 |
| BX465228.1       | 16.76012 | 1.313373313  | 0.79285    | 1.656521 | 0.097616 | 0.521026 |
| scrt1b           | 123.6113 | -0.167166391 | 0.263279   | -0.63494 | 0.525468 | 0.888928 |
| krpc             | 374.2414 | 0.219158693  | 0.20598    | 1.063982 | 0.287337 | 0.758355 |
| si:dkey-37m8.11  | 13.48556 | -0.492738817 | 0.588976   | -0.8366  | 0.402816 | 0.833401 |
| mef2d            | 975.7509 | -0.033677381 | 0.108533   | -0.3103  | 0.756335 | 0.956532 |
| kpnb3            | 2582.165 | 0.2365372    | 0.115088   | 2.055265 | 0.039853 | 0.348958 |
| rap2ab           | 12.66037 | 0.205505046  | 0.519967   | 0.395227 | 0.692675 | 0.940444 |
| oxgr1a.3         | 0.118261 |              | 0.5.267649 | 0        | 1        | NA       |
| crata            | 761.9103 | -0.205228628 | 0.106549   | -1.92615 | 0.054086 | 0.402505 |
| tlr18            | 54.15009 | -0.27164043  | 0.213676   | -1.27127 | 0.203632 | 0.684359 |
| si:ch211-132g1.1 | 1.311624 | 1.913169792  | 2.249329   | 0.850551 | 0.395019 | NA       |
| ctsk             | 718.0851 | 0.36559433   | 0.160367   | 2.279742 | 0.022623 | 0.265959 |
| atplala.5        | 96.10767 | -0.6557422   | 0.361662   | -1.81314 | 0.069811 | 0.450824 |
| onecut1          | 218.0195 | 0.012573561  | 0.154715   | 0.081269 | 0.935228 | 0.996829 |
| hormad1          | 6.883782 | -0.486028394 | 0.659546   | -0.73691 | 0.461175 | 0.862771 |
| ephx2            | 461.3031 | 0.136072848  | 0.223729   | 0.608204 | 0.543052 | 0.894925 |
| slc38a11         | 26.44331 | -1.847453718 | 0.509274   | -3.62762 | 0.000286 | 0.018882 |
| si:ch73-340m8.2  | 36.60486 | -0.151828326 | 0.320025   | -0.47443 | 0.635196 | 0.924272 |
| runx2a           | 3.370443 | -1.431089637 | 1.095244   | -1.30664 | 0.191335 | 0.671193 |
| mpdulb           | 390.153  | 0.529966767  | 0.145067   | 3.653243 | 0.000259 | 0.017751 |
| sox19b           | 234.349  | -0.02331809  | 0.182162   | -0.12801 | 0.898143 | 0.990171 |
| scamp5b          | 389.0988 | 0.065834418  | 0.279982   | 0.235138 | 0.814101 | 0.970483 |
| fbxo32           | 1791.867 | -0.665574847 | 0.179229   | -3.71355 | 0.000204 | 0.015177 |
| klhl138b         | 821.5339 | -0.459053099 | 0.382525   | -1.20006 | 0.230116 | 0.711949 |
| zgc:110182       | 128.4083 | -0.004157438 | 0.215138   | -0.01932 | 0.984582 | 1        |
| zgc:92590        | 625.6448 | 0.103280015  | 1.571776   | 0.065709 | 0.947609 | 0.997371 |
| si:dkey-79d12.5  | 172.0381 | -0.049667569 | 0.294119   | -0.16887 | 0.8659   | 0.982416 |
| ubl7b            | 976.9574 | -0.124727763 | 0.178008   | -0.70068 | 0.4835   | 0.872099 |
| ywhab1           | 9311.756 | 0.120714523  | 0.092273   | 1.308229 | 0.190796 | 0.670774 |
| pon3.2           | 262.62   | -0.021130722 | 0.168396   | -0.12548 | 0.900142 | 0.99045  |
| cadm4            | 810.403  | 0.173829037  | 0.165101   | 1.052865 | 0.292403 | 0.761879 |
| apoeb            | 18929.43 | 0.399288786  | 0.172665   | 2.3125   | 0.02075  | 0.255734 |
| apoa4b.1         | 13763.04 | -0.093353741 | 0.211663   | -0.44105 | 0.659178 | 0.930581 |
| gtpbp10          | 178.9951 | -0.258500638 | 0.154702   | -1.67095 | 0.094731 | 0.513797 |
| osgin2           | 8.248034 | -0.350116836 | 0.620859   | -0.56392 | 0.572807 | 0.90359  |
| nbn              | 162.7269 | 0.119440606  | 0.165833   | 0.720246 | 0.471374 | 0.86809  |
| otomp            | 465.2569 | 0.20575277   | 0.145858   | 1.410634 | 0.158353 | 0.623766 |
| pxdclb           | 130.3714 | 0.361260227  | 0.200122   | 1.805197 | 0.071044 | 0.454971 |
| prpf4bb          | 545.392  | 0.039012719  | 0.115617   | 0.337432 | 0.735791 | 0.951543 |
| psph             | 1397.474 | 0.118302907  | 0.102337   | 1.15601  | 0.247677 | 0.728489 |
| CABZ01041494.1   | 9.063128 | 0.882171508  | 0.95088    | 0.927742 | 0.353541 | 0.804513 |
| rx2              | 72.23627 | 0.197831017  | 0.258758   | 0.76454  | 0.444546 | 0.85464  |
| dhx29            | 216.9369 | 0.167514389  | 0.196847   | 0.850989 | 0.394776 | 0.828825 |
| crfb2            | 43.20059 | -0.070040797 | 0.340317   | -0.20581 | 0.836939 | 0.976007 |

|                  |          |              |          |          |          |          |
|------------------|----------|--------------|----------|----------|----------|----------|
| mat2aa           | 1968.435 | 0.170302269  | 0.192588 | 0.884282 | 0.376544 | 0.822258 |
| hvcn1            | 411.1805 | -0.177698297 | 0.138761 | -1.28061 | 0.200331 | 0.680711 |
| rpp38            | 116.6264 | -0.04135156  | 0.192156 | -0.2152  | 0.829613 | 0.974753 |
| crot             | 535.8306 | -0.116378826 | 0.162347 | -0.71685 | 0.473466 | 0.869146 |
| spred3           | 302.9752 | 0.405259023  | 0.191597 | 2.115164 | 0.034416 | 0.327696 |
| ehd2b            | 434.3203 | -0.000950482 | 0.160067 | -0.00594 | 0.995262 | 1        |
| tmem182a         | 1001.046 | -0.142252795 | 0.149376 | -0.95231 | 0.340938 | 0.795603 |
| arhgef1a         | 247.2522 | -0.155680858 | 0.156125 | -0.99715 | 0.318691 | 0.779923 |
| mmd              | 194.6393 | 0.304021655  | 0.191482 | 1.587728 | 0.112348 | 0.549177 |
| bcl7bb           | 208.2146 | 0.12445882   | 0.19996  | 0.622418 | 0.533667 | 0.891181 |
| slc25a20         | 1342.156 | 0.002287471  | 0.157106 | 0.01456  | 0.988383 | 1        |
| usp22            | 283.9994 | 0.200807312  | 0.185728 | 1.081188 | 0.279614 | 0.752477 |
| acot19           | 15.97367 | -0.234462602 | 1.029417 | -0.22776 | 0.819831 | 0.971785 |
| nptxra           | 92.14747 | 0.420972114  | 0.42055  | 1.001004 | 0.316825 | 0.778879 |
| k1f2b            | 536.7563 | -0.202428867 | 0.196877 | -1.0282  | 0.303855 | 0.769473 |
| cyp2k22          | 0.271213 | 0.811792156  | 5.168395 | 0.157069 | 0.875191 | NA       |
| rsl24d1          | 6353.446 | -0.722323178 | 0.141751 | -5.09571 | 3.47E-07 | 0.000126 |
| snrpd2           | 1018.377 | -0.110838394 | 0.166041 | -0.66754 | 0.504429 | 0.881885 |
| prtgb            | 13.99017 | -0.050891007 | 0.498513 | -0.10209 | 0.918689 | 0.993884 |
| polr2i           | 353.3879 | -0.278205022 | 0.148294 | -1.87604 | 0.06065  | 0.423018 |
| si:ch211-219a4.3 | 78.26867 | 0.028334468  | 0.239952 | 0.118084 | 0.906001 | 0.991631 |
| fam214a          | 587.1033 | -0.181263736 | 0.123665 | -1.46576 | 0.142714 | 0.601981 |
| wdfy2            | 436.2473 | -0.031980243 | 0.135524 | -0.23597 | 0.813452 | 0.970328 |
| unc50            | 400.2151 | 0.023260927  | 0.167595 | 0.138793 | 0.889614 | 0.988318 |
| slc25a51b        | 515.8091 | 0.71435351   | 0.264281 | 2.703011 | 0.006871 | 0.139692 |
| irf2             | 168.6072 | -0.498986682 | 0.183288 | -2.72242 | 0.006481 | 0.136134 |
| vill             | 907.5033 | -0.952695743 | 0.34293  | -2.7781  | 0.005468 | 0.12457  |
| enpp6            | 139.0023 | 0.406185246  | 0.165104 | 2.460174 | 0.013887 | 0.206522 |
| snx10b           | 12.23302 | -0.218404915 | 0.71758  | -0.30436 | 0.760851 | 0.957937 |
| lrp2bp           | 7.783401 | 0.024744403  | 0.676617 | 0.036571 | 0.970827 | 1        |
| cga              | 32.51017 | 0.459804372  | 0.472456 | 0.973221 | 0.330443 | 0.788126 |
| osbp13b          | 99.73574 | 0.111790158  | 0.195023 | 0.573215 | 0.566499 | 0.901739 |
| gsdmeb           | 134.4907 | -0.02312135  | 0.242654 | -0.09529 | 0.924088 | 0.994802 |
| zgc:113176       | 54.45543 | -0.076561266 | 0.23158  | -0.3306  | 0.740943 | 0.954103 |
| dusp19a          | 13.06974 | -0.824244643 | 0.584878 | -1.40926 | 0.158759 | 0.624456 |
| mthfd1b          | 1172.465 | -0.361798945 | 0.106679 | -3.39149 | 0.000695 | 0.034884 |
| BX004816.1       | 3.234438 | -3.548472392 | 1.745717 | -2.03267 | 0.042086 | 0.358832 |
| sb:cb81          | 411.3666 | 0.085042318  | 0.183259 | 0.464054 | 0.642609 | 0.92567  |
| yif1b            | 213.3449 | -0.71280847  | 0.213628 | -3.33668 | 0.000848 | 0.039393 |
| cal5b            | 1.948483 | 0.346786974  | 1.327986 | 0.261138 | 0.793986 | NA       |
| zgc:92313        | 368.5953 | -0.025357158 | 0.161335 | -0.15717 | 0.87511  | 0.984191 |
| smpd2a           | 218.6279 | 0.213853747  | 0.200656 | 1.065771 | 0.286527 | 0.757624 |
| slpr5a           | 166.1402 | -0.541564177 | 0.27078  | -2.00001 | 0.045499 | 0.373513 |
| siae             | 126.9864 | 0.27334327   | 0.22419  | 1.21925  | 0.222749 | 0.704616 |
| lgals3bbp        | 122.5118 | -0.366744225 | 0.362772 | -1.01095 | 0.312041 | 0.776164 |
| epcam            | 5916.35  | 0.471426514  | 0.187978 | 2.507885 | 0.012146 | 0.191226 |
| csgalnact1a      | 142.6327 | -0.167849787 | 0.26131  | -0.64234 | 0.520652 | 0.887165 |
| ftr90            | 0.324809 | 1.055391818  | 3.949751 | 0.267205 | 0.789312 | NA       |
| spsb4b           | 188.6256 | -0.178891317 | 0.169416 | -1.05593 | 0.291    | 0.761178 |
| b3gat1a          | 45.22808 | 0.656094105  | 0.335915 | 1.953153 | 0.050801 | 0.392225 |
| tmem97           | 106.4281 | -0.215098093 | 0.194525 | -1.10576 | 0.268831 | 0.744925 |
| bckdha           | 1101.24  | 0.057251983  | 0.097684 | 0.586091 | 0.557814 | 0.899184 |
| ift20            | 209.9968 | -0.009814674 | 0.143689 | -0.06831 | 0.945543 | 0.997371 |
| exosc5           | 175.1725 | 0.021115677  | 0.149737 | 0.141019 | 0.887855 | 0.988077 |

|                   |          |              |            |          |          |          |
|-------------------|----------|--------------|------------|----------|----------|----------|
| rad1              | 111.3096 | 0.277086148  | 0.210742   | 1.314809 | 0.188574 | 0.668287 |
| hnrnpull          | 1263.205 | -0.055081207 | 0.104126   | -0.52899 | 0.596814 | 0.911757 |
| ckmb              | 150031.7 | 0.050710458  | 0.184818   | 0.27438  | 0.783792 | 0.96245  |
| phykpl            | 174.9777 | 0.007213991  | 0.196764   | 0.036663 | 0.970754 | 1        |
| pdzd3a            | 79.70212 | -0.356011771 | 0.262365   | -1.35693 | 0.174802 | 0.648577 |
| ube4a             | 326.0999 | 0.002678842  | 0.134858   | 0.019864 | 0.984152 | 1        |
| c18h3orf33        | 40.89472 | 0.102011694  | 0.345224   | 0.295494 | 0.767616 | 0.960296 |
| eeflakmt1         | 192.9194 | -0.086255539 | 0.212221   | -0.40644 | 0.684418 | 0.938486 |
| v2rh32            | 1.399586 |              | 0 2.151101 |          | 0        | 1 NA     |
| CU570684.1        |          | 0 NA         | NA         | NA       | NA       | NA       |
| tfap2c            | 771.1832 | 0.090272512  | 0.104156   | 0.866709 | 0.386102 | 0.82701  |
| rtf2              | 728.2071 | -0.318139313 | 0.162096   | -1.96266 | 0.049686 | 0.388006 |
| gcnt7             | 80.16147 | 0.715619705  | 0.341021   | 2.098461 | 0.035864 | 0.332937 |
| si:ch73-352p4.8   | 250.1158 | -0.134642716 | 0.14459    | -0.9312  | 0.351749 | 0.802513 |
| sestd1            | 820.7943 | 0.018936458  | 0.124174   | 0.1525   | 0.878793 | 0.985841 |
| ilkap             | 100.3919 | 0.074807283  | 0.226602   | 0.330127 | 0.741304 | 0.954103 |
| psmg1             | 430.2955 | -0.150739815 | 0.174786   | -0.86243 | 0.388454 | 0.827613 |
| lrrc32            | 93.3782  | 0.367910139  | 0.278322   | 1.321887 | 0.186206 | 0.664263 |
| fosl2             | 232.2936 | 0.406151501  | 0.203519   | 1.995641 | 0.045973 | 0.375002 |
| grik1b            | 66.37452 | -0.441636887 | 0.383919   | -1.15034 | 0.250004 | 0.72973  |
| zgc:110333        | 480.1407 | -0.190742402 | 0.114627   | -1.66402 | 0.096108 | 0.517378 |
| v2rx1             | 3.588207 | 0.16212713   | 1.010979   | 0.160366 | 0.872592 | 0.983447 |
| PRMT8             | 12.24717 | 0.704224213  | 0.59155    | 1.190473 | 0.233861 | 0.71479  |
| rnfl1b            | 134.6496 | -0.1285529   | 0.1702     | -0.75531 | 0.450065 | 0.85711  |
| si:ch73-44m9.3    | 0.989657 | -1.746128066 | 5.122181   | -0.3409  | 0.733182 | NA       |
| ccr10             | 1.430538 | -0.868138197 | 2.25869    | -0.38435 | 0.700716 | NA       |
| pxylp1            | 189.1106 | 0.000260999  | 0.18866    | 0.001383 | 0.998896 | 1        |
| prickle1a         | 228.8966 | 0.229402708  | 0.142046   | 1.61499  | 0.106313 | 0.53561  |
| gps1              | 947.0275 | -0.021918194 | 0.102544   | -0.21375 | 0.830746 | 0.974908 |
| wip1              | 415.4606 | -0.052592587 | 0.119605   | -0.43972 | 0.66014  | 0.930581 |
| nifk              | 390.2308 | -0.269691557 | 0.215019   | -1.25427 | 0.209745 | 0.691766 |
| lrrc51            | 7.332865 | -0.701498102 | 0.719949   | -0.97437 | 0.329872 | 0.788084 |
| ctdsp1            | 830.3939 | -0.017293462 | 0.086937   | -0.19892 | 0.842327 | 0.97643  |
| ccdc93            | 275.7401 | -0.442867456 | 0.131226   | -3.37485 | 0.000739 | 0.036194 |
| MEP1B             | 22.77885 | -0.227942575 | 0.804087   | -0.28348 | 0.776809 | 0.961073 |
| plcd4b            | 112.0892 | -0.261436685 | 0.231553   | -1.12906 | 0.258873 | 0.736046 |
| fkbp14            | 443.9665 | 0.080344815  | 0.145806   | 0.55104  | 0.581606 | 0.905618 |
| plekha8           | 202.9979 | -0.032154529 | 0.18678    | -0.17215 | 0.863318 | 0.981732 |
| nabl1b            | 17.82187 | -0.217873227 | 0.485289   | -0.44896 | 0.653464 | 0.929269 |
| si:ch211-113j13.2 | 0.995264 |              | 0 2.689558 |          | 0        | 1 NA     |
| BX936415.1        | 7.531361 | 1.358819985  | 0.93056    | 1.460217 | 0.14423  | 0.603325 |
| gl1sb             | 439.7552 | -0.019385069 | 0.165061   | -0.11744 | 0.90651  | 0.991636 |
| chchd4b           | 74.63247 | 0.162334617  | 0.317611   | 0.511111 | 0.609273 | 0.915204 |
| adprh             | 124.7994 | -0.185277806 | 0.242616   | -0.76367 | 0.445066 | 0.855219 |
| rbbp9             | 279.1463 | -0.118696437 | 0.168152   | -0.70589 | 0.480257 | 0.870001 |
| macc1             | 148.8137 | -0.25840529  | 0.183839   | -1.40561 | 0.159841 | 0.626123 |
| zgc:114130        | 234.9324 | -0.273838375 | 0.247277   | -1.10741 | 0.268115 | 0.744507 |
| tfblm             | 75.24615 | -0.007461401 | 0.264599   | -0.0282  | 0.977504 | 1        |
| wdr75             | 477.202  | -0.118400658 | 0.187948   | -0.62997 | 0.528717 | 0.890094 |
| elav12            | 9.38395  | 0.358900074  | 0.664232   | 0.540323 | 0.588974 | 0.908074 |
| crygm6            | 0.14264  |              | 0 5.267649 |          | 0        | 1 NA     |
| crygm7            | 4.728638 |              | 0 1.894199 |          | 0        | 1 1      |
| zgc:153846        | 10.05938 |              | 0 1.751229 |          | 0        | 1 1      |
| kcnabl1b          | 87.07263 | -0.293168733 | 0.306863   | -0.95537 | 0.339389 | 0.795226 |

|                  |          |              |            |          |          |          |
|------------------|----------|--------------|------------|----------|----------|----------|
| tm4sf4           | 431.1566 | -0.668382918 | 0.373564   | -1.78921 | 0.073581 | 0.461398 |
| idl              | 933.5401 | -0.05461346  | 0.138622   | -0.39398 | 0.693599 | 0.940668 |
| drd6b            | 2.888765 | 1.676123476  | 1.397076   | 1.199736 | 0.230242 | 0.712099 |
| inhbb            | 338.6903 | 0.097182368  | 0.124454   | 0.78087  | 0.434879 | 0.850002 |
| ralba            | 207.9644 | 0.27990175   | 0.177528   | 1.576662 | 0.114873 | 0.554651 |
| medl6            | 207.8874 | 0.042209272  | 0.129721   | 0.325384 | 0.74489  | 0.954956 |
| sult3st4         | 68.28426 | -0.527104126 | 0.519006   | -1.0156  | 0.309818 | 0.774621 |
| sst1.1           | 197.4946 | 0.002444208  | 0.204615   | 0.011945 | 0.990469 | 1        |
| lactb            | 219.9056 | -0.003254376 | 0.149896   | -0.02171 | 0.982679 | 1        |
| ncf4             | 30.32259 | -0.2485047   | 0.318535   | -0.78015 | 0.435303 | 0.850347 |
| tsku             | 274.6311 | 0.13352461   | 0.153203   | 0.871551 | 0.383453 | 0.825875 |
| si:dkey-27n14.1  | 30.559   | -0.219863191 | 0.392155   | -0.56065 | 0.575033 | 0.904516 |
| fundcl           | 646.304  | 0.041591257  | 0.151955   | 0.273708 | 0.784309 | 0.962605 |
| dcunld2a         | 1161.13  | -0.057711104 | 0.111592   | -0.51716 | 0.605042 | 0.914985 |
| adra2a           | 30.34832 | -0.162110668 | 0.348298   | -0.46544 | 0.641619 | 0.925586 |
| plekhh2          | 55.77344 | 0.632329194  | 0.236102   | 2.678199 | 0.007402 | 0.145771 |
| shoc2            | 301.1716 | 0.179715864  | 0.144997   | 1.239442 | 0.215182 | 0.697157 |
| tsgl01a          | 520.1333 | 0.227160682  | 0.135318   | 1.678723 | 0.093206 | 0.510759 |
| tcf25            | 400.3217 | -0.067735978 | 0.130258   | -0.52001 | 0.603055 | 0.914226 |
| si:dkey-286j15.1 | 410.1098 | -0.794210635 | 0.26661    | -2.97892 | 0.002893 | 0.088537 |
| uppl             | 13.10573 | 0.663146978  | 0.510567   | 1.298845 | 0.193997 | 0.674122 |
| add3a            | 1087.841 | 0.160431853  | 0.105004   | 1.527861 | 0.126547 | 0.575146 |
| hnrnph1          | 224.3225 | 0.178392723  | 0.131989   | 1.351577 | 0.176511 | 0.649967 |
| mxil             | 1125.568 | -0.155523374 | 0.09587    | -1.62224 | 0.104752 | 0.53308  |
| fdps             | 805.4648 | 0.656287229  | 0.126696   | 5.180035 | 2.2E-07  | 9.02E-05 |
| gpa33b           | 18.19923 | -0.749526601 | 0.931362   | -0.80476 | 0.420956 | 0.842494 |
| si:dkey-11d18.4  | 0.57542  |              | 0.2.795901 | 0        | 1        | NA       |
| si:ch73-113g13.1 | 0.164191 |              | 0.5.267649 | 0        | 1        | NA       |
| gcgb             | 97.4616  | 0.174485304  | 0.2883     | 0.605221 | 0.545032 | 0.895206 |
| ildr1b           | 145.1188 | -0.302408213 | 0.183834   | -1.645   | 0.099969 | 0.524166 |
| meox2a           | 29.87577 | -0.181286648 | 0.330054   | -0.54926 | 0.582825 | 0.90571  |
| kdelr3           | 308.4338 | -0.105093763 | 0.157632   | -0.6667  | 0.504961 | 0.88195  |
| cbfb             | 585.6625 | 0.059250411  | 0.162157   | 0.365388 | 0.714822 | 0.945821 |
| si:dkey-49n23.1  | 438.6674 | -0.11138574  | 0.128771   | -0.86499 | 0.387042 | 0.827592 |
| zmp:0000000606   | 6.387032 | -0.851854779 | 1.221558   | -0.69735 | 0.485583 | 0.87303  |
| wnt10b           | 49.58541 | -0.004402206 | 0.249378   | -0.01765 | 0.985916 | 1        |
| nr2f2            | 1499.452 | 0.001124545  | 0.10131    | 0.0111   | 0.991144 | 1        |
| depor            | 479.5532 | 0.082524152  | 0.187873   | 0.439255 | 0.660477 | 0.930581 |
| ssuh2.1          | 7.264535 | 0.338292472  | 0.584361   | 0.57891  | 0.56265  | 0.900772 |
| pnp6             | 130.0618 | 0.39570239   | 0.228265   | 1.73352  | 0.083003 | 0.483577 |
| ntd5             | 1035.71  | -0.089364453 | 0.140783   | -0.63477 | 0.52558  | 0.888928 |
| olig2            | 202.5399 | 0.08249117   | 0.192745   | 0.427982 | 0.668664 | 0.933086 |
| olig1            | 57.59282 | 0.518719965  | 0.290711   | 1.784318 | 0.074372 | 0.463115 |
| dharma           | 0.129927 |              | 0.5.267649 | 0        | 1        | NA       |
| rabl3            | 108.1604 | 0.243374023  | 0.181523   | 1.340736 | 0.180006 | 0.655675 |
| zgc:101731       | 31.34394 | 0.626725132  | 0.347316   | 1.804482 | 0.071156 | 0.455341 |
| zgc:113149       | 217.9151 | 0.309244064  | 0.149084   | 2.074294 | 0.038052 | 0.342345 |
| zgc:92606        | 1910.383 | -0.176622044 | 0.166429   | -1.06125 | 0.288577 | 0.759638 |
| fgf14            | 60.63908 | 0.775883882  | 0.332393   | 2.334236 | 0.019583 | 0.246694 |
| hspa13           | 147.962  | 0.12909556   | 0.173709   | 0.74317  | 0.457379 | 0.860993 |
| itgb11           | 563.0486 | 0.089839308  | 0.13039    | 0.689002 | 0.490822 | 0.87556  |
| tpilb            | 7489.242 | 0.053543754  | 0.138762   | 0.385868 | 0.699594 | 0.942499 |
| usp37            | 310.9775 | 0.129374992  | 0.113733   | 1.137533 | 0.255316 | 0.733542 |
| cttnbp2          | 593.8238 | 0.110907605  | 0.131628   | 0.842584 | 0.399461 | 0.831196 |

|                  |          |              |            |          |          |          |
|------------------|----------|--------------|------------|----------|----------|----------|
| or102-4          | 0.474181 | -0.868142428 | 3.638709   | -0.23859 | 0.811427 | NA       |
| or102-1          | 0.046941 |              | 0 5.267649 |          | 0        | 1 NA     |
| st3gal4          | 190.8408 | 0.051180603  | 0.154265   | 0.331772 | 0.740062 | 0.953684 |
| AL845428.1       | 0.718241 | 1.925682623  | 3.311877   | 0.581447 | 0.560939 | NA       |
| gemin7           | 167.6813 | 0.037499448  | 0.216759   | 0.173    | 0.862651 | 0.981229 |
| or111-11         | 16.77592 | 0.073705726  | 0.411499   | 0.179115 | 0.857847 | 0.979774 |
| pdcd4b           | 744.6202 | -0.180757244 | 0.139528   | -1.29549 | 0.195152 | 0.67483  |
| or111-6          | 5.063572 | 1.540070761  | 0.967442   | 1.5919   | 0.111407 | 0.547032 |
| or111-1          | 8.777284 | 0.325859646  | 0.668772   | 0.48725  | 0.626081 | 0.920625 |
| or107-1          | 3.640194 | -0.406601769 | 0.846537   | -0.48031 | 0.631005 | 0.923003 |
| or119-2          | 8.02274  | 0.425865258  | 0.764004   | 0.557412 | 0.577246 | 0.904809 |
| zgc:152857       | 4.59116  | 0.102379769  | 0.873803   | 0.117166 | 0.906729 | 0.991644 |
| piga             | 104.7353 | 0.209669246  | 0.209408   | 1.001245 | 0.316708 | 0.778879 |
| cxcr3.2          | 55.08845 | 0.098769253  | 0.322074   | 0.306666 | 0.759097 | 0.957886 |
| midlip1a         | 1084.296 | -0.077292006 | 0.245264   | -0.31514 | 0.752657 | 0.955756 |
| lgals913         | 198.3983 | -0.014615667 | 0.187462   | -0.07797 | 0.937855 | 0.997305 |
| calb2a           | 1204.788 | 0.640170251  | 0.199515   | 3.208639 | 0.001334 | 0.053834 |
| hspb1            | 531.4599 | -0.424611782 | 0.207339   | -2.04791 | 0.040568 | 0.351905 |
| got2a            | 1609.463 | 0.059046502  | 0.117206   | 0.503784 | 0.614413 | 0.915998 |
| jagnla           | 181.7271 | 0.009072874  | 0.199497   | 0.045479 | 0.963726 | 0.999842 |
| mier1a           | 338.1362 | 0.086281222  | 0.110438   | 0.781263 | 0.434648 | 0.850002 |
| si:dkey-12e7.4   | 15.26443 | -0.490350278 | 0.584341   | -0.83915 | 0.401385 | 0.832371 |
| chka             | 625.1957 | -0.577947084 | 0.204035   | -2.83259 | 0.004617 | 0.112688 |
| thap3            | 42.92458 | 0.686828831  | 0.291821   | 2.353594 | 0.018593 | 0.241343 |
| kmt5b            | 823.3293 | -0.129791451 | 0.108869   | -1.19218 | 0.233189 | 0.714569 |
| anpepa           | 59.27439 | -0.377090455 | 0.498726   | -0.75611 | 0.449585 | 0.856979 |
| arpin            | 139.8441 | 0.019631921  | 0.24305    | 0.080773 | 0.935622 | 0.996829 |
| L0018380.1       | 10.7773  | 0.861531289  | 0.608807   | 1.415113 | 0.157035 | 0.622926 |
| pgpep11          | 6.423134 | 2.239855825  | 1.06517    | 2.102816 | 0.035482 | 0.330833 |
| barx2            | 50.23706 | 0.188812082  | 0.289331   | 0.652582 | 0.514026 | 0.88631  |
| cftr             | 53.47578 | 0.009322014  | 0.364342   | 0.025586 | 0.979588 | 1        |
| ctsh             | 281.9306 | 0.011687931  | 0.153773   | 0.076008 | 0.939413 | 0.997371 |
| dnajc3a          | 300.8932 | 0.213442767  | 0.199136   | 1.071843 | 0.28379  | 0.755095 |
| wdr18            | 287.4684 | 0.238766629  | 0.126276   | 1.890837 | 0.058646 | 0.418329 |
| cnfn             | 110.1631 | -0.009511472 | 0.580606   | -0.01638 | 0.98693  | 1        |
| wnt2             | 109.1815 | -0.175712139 | 0.175458   | -1.00145 | 0.31661  | 0.778879 |
| ceacam1          | 945.2016 | -0.587519348 | 0.236175   | -2.48765 | 0.012859 | 0.197838 |
| rapsn            | 317.0251 | 0.144176771  | 0.208933   | 0.690062 | 0.490155 | 0.875082 |
| dhrrs13a.3       | 395.176  | 0.04853305   | 0.126288   | 0.384304 | 0.700753 | 0.942918 |
| ddb2             | 613.2289 | 0.00421529   | 0.258168   | 0.016328 | 0.986973 | 1        |
| crybala          | 39.19038 | 0.928831386  | 0.386215   | 2.404961 | 0.016174 | 0.224405 |
| paqr5a           | 42.71912 | 0.090749014  | 0.322451   | 0.281435 | 0.778377 | 0.961073 |
| slc17a6b         | 684.2806 | 0.339393348  | 0.195427   | 1.736679 | 0.082444 | 0.482825 |
| morf411          | 882.8354 | 0.012850323  | 0.145905   | 0.088073 | 0.929818 | 0.995605 |
| si:ch211-63p21.4 | 2.812413 | 0.133931452  | 1.814747   | 0.073802 | 0.941168 | 0.997371 |
| rab32b           | 7.215503 | -1.76644204  | 1.634655   | -1.08062 | 0.279866 | 0.752785 |
| aagab            | 255.9598 | -0.103012788 | 0.14126    | -0.72924 | 0.465855 | 0.86502  |
| crygs2           | 0.547474 | 0.704048524  | 2.70292    | 0.260477 | 0.794496 | NA       |
| adralbb          | 10.5748  | -0.370107135 | 0.675177   | -0.54816 | 0.58358  | 0.906087 |
| crygm5           | 277.6945 | -0.231322991 | 0.611851   | -0.37807 | 0.705378 | 0.944122 |
| rpl4             | 39873.38 | -0.32001741  | 0.108252   | -2.95623 | 0.003114 | 0.091566 |
| alg12            | 101.5641 | 0.091076567  | 0.212379   | 0.42884  | 0.668039 | 0.933086 |
| drapl            | 1575.559 | -0.064513033 | 0.132356   | -0.48742 | 0.625959 | 0.920625 |
| slc6a11          | 47.73647 | 0.483815437  | 0.696039   | 0.695098 | 0.486994 | 0.873291 |

|                   |          |              |          |          |          |          |
|-------------------|----------|--------------|----------|----------|----------|----------|
| cetn4             | 319.457  | -0.24386138  | 0.135809 | -1.79562 | 0.072555 | 0.457864 |
| xpo6              | 531.4217 | 0.037913349  | 0.145503 | 0.260568 | 0.794426 | 0.965431 |
| ftr53             | 21.65195 | 0.258837098  | 0.329552 | 0.785421 | 0.432207 | 0.848419 |
| zmp:0000000608    | 1.789234 | 0.965619582  | 1.865367 | 0.517657 | 0.604698 | NA       |
| fam173a           | 199.9759 | 0.205044838  | 0.166964 | 1.228078 | 0.219418 | 0.700359 |
| cdc40             | 605.2878 | -0.086237893 | 0.150691 | -0.57228 | 0.567131 | 0.901759 |
| rps29             | 9296.386 | -0.139747865 | 0.163415 | -0.85517 | 0.392457 | 0.827902 |
| med18             | 113.7365 | -0.121687029 | 0.189631 | -0.6417  | 0.521065 | 0.887466 |
| wdr20b            | 78.31209 | -0.466837741 | 0.282711 | -1.65129 | 0.098679 | 0.521402 |
| setdb1a           | 406.8345 | 0.105233453  | 0.132839 | 0.792186 | 0.428252 | 0.846133 |
| si:dkey-24117.6   | 0.555069 | 3.203868512  | 3.31976  | 0.96509  | 0.3345   | NA       |
| gemin4            | 3.960222 | 1.39932042   | 0.998108 | 1.401973 | 0.160923 | 0.627788 |
| smtnl1            | 140.5769 | 0.068714573  | 0.323584 | 0.212355 | 0.83183  | 0.974925 |
| si:ch211-231m23.4 | 1.112891 | 0.539379867  | 1.733169 | 0.31121  | 0.755641 | NA       |
| noxola            | 147.0884 | 0.247083381  | 0.262489 | 0.94131  | 0.346546 | 0.79947  |
| lim2.5            | 173.9078 | 1.169825784  | 0.302063 | 3.872784 | 0.000108 | 0.009739 |
| zgc:110796        | 87.513   | 0.117029624  | 0.257838 | 0.453889 | 0.649909 | 0.927756 |
| drc3              | 37.92444 | -0.604075169 | 0.332822 | -1.81501 | 0.069522 | 0.450071 |
| crybb3            | 3.641594 | -0.065736492 | 0.893688 | -0.07356 | 0.941363 | 0.997371 |
| trakla            | 326.6267 | 0.079939346  | 0.142061 | 0.562711 | 0.573632 | 0.904248 |
| mrps25            | 651.7813 | -0.08609505  | 0.12041  | -0.71502 | 0.474598 | 0.869292 |
| ndufb9            | 2314.88  | 0.02868323   | 0.126744 | 0.226308 | 0.820962 | 0.971788 |
| rangapla          | 788.9816 | -0.02242827  | 0.138658 | -0.16175 | 0.871501 | 0.983365 |
| csdc2a            | 430.0558 | 0.311560914  | 0.174087 | 1.789683 | 0.073505 | 0.461297 |
| tmem33            | 541.5278 | 0.110504902  | 0.123325 | 0.896049 | 0.370227 | 0.818484 |
| si:dkey-125e8.4   | 3.923142 | 0.109135074  | 1.209011 | 0.090268 | 0.928074 | 0.995052 |
| zgc:92380         | 1690.178 | -0.189759467 | 0.130287 | -1.45647 | 0.145263 | 0.604476 |
| mrp15l            | 530.488  | 0.281292274  | 0.098058 | 2.868624 | 0.004123 | 0.106542 |
| cyp19a1a          | 1.110509 | -3.534953372 | 2.123764 | -1.66448 | 0.096017 | NA       |
| ankrd39           | 110.035  | -0.39091287  | 0.238527 | -1.63886 | 0.101241 | 0.526828 |
| lgi3              | 20.49499 | 0.260066145  | 0.761207 | 0.34165  | 0.732615 | 0.950617 |
| zgc:161969        | 405.6824 | -0.099700782 | 0.122733 | -0.81234 | 0.416599 | 0.840071 |
| ttk               | 285.8896 | 0.10402268   | 0.196692 | 0.528859 | 0.596903 | 0.91176  |
| chmp7             | 470.6316 | 0.036202994  | 0.148273 | 0.244164 | 0.807104 | 0.969726 |
| dctn3             | 919.2897 | -0.123538801 | 0.161298 | -0.7659  | 0.443734 | 0.854255 |
| zgc:136564        | 179.798  | 0.310407462  | 0.240905 | 1.288505 | 0.19757  | 0.678182 |
| si:ch211-57i17.5  | 11.35018 | 0.313103875  | 0.606094 | 0.516593 | 0.60544  | 0.914985 |
| rmil              | 74.88783 | 0.20057609   | 0.268891 | 0.745938 | 0.455705 | 0.860177 |
| sh2d4a            | 60.45148 | -0.093681037 | 0.251171 | -0.37298 | 0.709166 | 0.945546 |
| si:ch211-245j22.3 | 11.62377 | 0.306281559  | 0.649832 | 0.471324 | 0.637409 | 0.924779 |
| arnt12            | 243.6852 | -0.019305398 | 0.352737 | -0.05473 | 0.956353 | 0.99899  |
| si:dkey-283b15.2  | 84.96411 | 0.393984507  | 0.506584 | 0.777728 | 0.43673  | 0.851093 |
| si:dkey-81n2.1    | 0.441166 | 0.08374504   | 2.866273 | 0.029217 | 0.976691 | NA       |
| tmed10            | 2414.022 | 0.036135485  | 0.081213 | 0.444949 | 0.656356 | 0.929684 |
| dnaj1b            | 223.3494 | -0.016493922 | 0.213119 | -0.07739 | 0.938311 | 0.997371 |
| EIF2B2            | 693.6532 | -0.015506795 | 0.154255 | -0.10053 | 0.919926 | 0.993892 |
| adgre7            | 0.060442 | 0            | 5.267649 | 0        | 1        | NA       |
| ndufa3            | 1149.783 | -0.060242472 | 0.17558  | -0.34311 | 0.731519 | 0.950365 |
| zc3h14            | 562.1467 | -0.113721977 | 0.115329 | -0.98607 | 0.324099 | 0.783161 |
| rmdn3             | 216.882  | 0.364703018  | 0.216453 | 1.684908 | 0.092006 | 0.507669 |
| rad51             | 259.2267 | 0.054205364  | 0.187929 | 0.288435 | 0.773014 | 0.960624 |
| adgrg11           | 8.73261  | -1.198980273 | 0.842321 | -1.42342 | 0.154613 | 0.619425 |
| bmf2              | 85.46745 | -0.196813919 | 0.326553 | -0.6027  | 0.546707 | 0.896107 |
| atp6ap1a          | 1108.569 | 0.412836318  | 0.177125 | 2.330763 | 0.019766 | 0.248225 |

|                  |          |              |            |          |          |          |
|------------------|----------|--------------|------------|----------|----------|----------|
| taz              | 358.2206 | -0.330545055 | 0.21594    | -1.53073 | 0.125837 | 0.573743 |
| yrdc             | 164.4507 | -0.011072707 | 0.147919   | -0.07486 | 0.940329 | 0.997371 |
| ints14           | 341.0514 | 0.058788712  | 0.159641   | 0.368256 | 0.712683 | 0.945821 |
| bmp2b            | 374.1234 | -0.091620283 | 0.143242   | -0.63962 | 0.522421 | 0.887826 |
| slc24a1          | 30.29146 | -0.098705451 | 0.532117   | -0.1855  | 0.85284  | 0.978794 |
| si:dkey-7c18.24  | 602.5865 | 0.483202541  | 0.690685   | 0.699599 | 0.484178 | 0.872553 |
| uba52            | 20476.07 | -0.300948914 | 0.139105   | -2.16347 | 0.030505 | 0.311199 |
| spred1           | 634.3193 | 0.197467405  | 0.090784   | 2.175129 | 0.02962  | 0.306524 |
| rab11a           | 2692.623 | 0.097725255  | 0.091198   | 1.071572 | 0.283912 | 0.755095 |
| taar12b          | 0.177631 |              | 0.5.267649 |          | 0        | 1 NA     |
| pimr183          | 0.621085 | 0.078601748  | 2.487875   | 0.031594 | 0.974796 | NA       |
| smg5             | 837.2561 | 0.16241286   | 0.114828   | 1.414396 | 0.157246 | 0.623263 |
| paqr6            | 346.9249 | 0.0865755    | 0.194648   | 0.444779 | 0.65648  | 0.929745 |
| afp4             | 1593.566 | -0.578003304 | 0.576225   | -1.00309 | 0.31582  | 0.778379 |
| si:ch211-196f5.2 | 40.59469 | 1.228507352  | 0.599839   | 2.04806  | 0.040554 | 0.351905 |
| ipo4             | 284.6239 | 0.077839833  | 0.234545   | 0.331876 | 0.739983 | 0.953684 |
| tgfb1a           | 372.1218 | 0.049329874  | 0.140567   | 0.350934 | 0.725638 | 0.948653 |
| med4             | 153.252  | 0.048823482  | 0.17049    | 0.286372 | 0.774593 | 0.960871 |
| itm2bb           | 3236.043 | -0.531354239 | 0.147843   | -3.59405 | 0.000326 | 0.020507 |
| pex10            | 39.11529 | 0.148658674  | 0.293557   | 0.506405 | 0.612573 | 0.91573  |
| rasal1b          | 4.001531 | 2.947578845  | 1.525607   | 1.932069 | 0.053351 | 0.400175 |
| ppih             | 295.4132 | 0.042092457  | 0.154927   | 0.271691 | 0.785859 | 0.962605 |
| ccdc130          | 134.8578 | 0.309590188  | 0.189223   | 1.636117 | 0.101815 | 0.528581 |
| mrps28           | 236.257  | 0.016779717  | 0.124442   | 0.134839 | 0.892739 | 0.988566 |
| sult1st2         | 40.19246 | 1.320125399  | 0.484743   | 2.723351 | 0.006462 | 0.135996 |
| gypc             | 216.2405 | -0.013180133 | 0.197446   | -0.06675 | 0.946778 | 0.997371 |
| pimr138          | 4.152633 | 0.876078745  | 1.041207   | 0.841407 | 0.40012  | 0.831461 |
| unc93a           | 6.106513 | 0.046085895  | 0.698352   | 0.065992 | 0.947384 | 0.997371 |
| si:dkey-102f14.5 | 137.5692 | -0.289714197 | 0.171135   | -1.6929  | 0.090474 | 0.505009 |
| tnfaip1          | 183.344  | -0.258596558 | 0.143214   | -1.80567 | 0.07097  | 0.454693 |
| ces2             | 6905.376 | -0.765137895 | 0.380423   | -2.01128 | 0.044295 | 0.368387 |
| mrpl39           | 665.5107 | 0.088007969  | 0.117259   | 0.750543 | 0.452928 | 0.858256 |
| zfpml            | 160.7841 | -0.263172548 | 0.170183   | -1.54641 | 0.122005 | 0.568897 |
| trmt10c          | 190.1732 | -0.176728755 | 0.19839    | -0.89082 | 0.373028 | 0.820208 |
| nudt18           | 141.9789 | 0.226507427  | 0.256297   | 0.883771 | 0.37682  | 0.822258 |
| znf143b          | 291.941  | 0.274606062  | 0.115092   | 2.385971 | 0.017034 | 0.231104 |
| dhx40            | 193.0792 | -0.277138021 | 0.258837   | -1.0707  | 0.284303 | 0.755251 |
| adprh11          | 49.63405 | 0.482409496  | 0.332877   | 1.44921  | 0.147279 | 0.607673 |
| dcun1d2b         | 883.2492 | 0.034226522  | 0.144115   | 0.237495 | 0.812273 | 0.970129 |
| ces3             | 1121.806 | -1.567522283 | 0.508954   | -3.07989 | 0.002071 | 0.071081 |
| zgc:91860        | 642.1165 | 0.001165391  | 0.178249   | 0.006538 | 0.994783 | 1        |
| wdr83            | 96.83835 | -0.188777872 | 0.199337   | -0.94703 | 0.343624 | 0.798147 |
| zgc:92335        | 483.4422 | -0.176246471 | 0.183526   | -0.96033 | 0.336887 | 0.793513 |
| eif4ebp31        | 2986.281 | -0.149262513 | 0.204016   | -0.73162 | 0.464399 | 0.864593 |
| adarb1a          | 232.7068 | -0.084074775 | 0.218999   | -0.38391 | 0.701049 | 0.942918 |
| b3gnt9           | 38.35705 | -0.489287505 | 0.320066   | -1.52871 | 0.126337 | 0.574665 |
| nme5             | 34.55096 | -0.078951121 | 0.322978   | -0.24445 | 0.806884 | 0.969726 |
| rack1            | 51419.37 | -0.347971576 | 0.129534   | -2.68633 | 0.007224 | 0.144046 |
| bbs2             | 304.3555 | 0.049363928  | 0.151221   | 0.326436 | 0.744095 | 0.95491  |
| mt2              | 735.5414 | -0.729345767 | 0.383199   | -1.90331 | 0.057001 | 0.412333 |
| fam192a          | 536.6966 | 0.040204499  | 0.109882   | 0.365888 | 0.714449 | 0.945821 |
| si:dkey-194e6.1  | 85.18447 | -1.320857339 | 0.37988    | -3.47704 | 0.000507 | 0.02777  |
| sb:cb37          | 720.6824 | -0.224905766 | 0.396628   | -0.56704 | 0.570684 | 0.902481 |
| opr1a            | 4.992999 | 1.414394508  | 1.073939   | 1.317016 | 0.187833 | 0.667033 |



|                   |          |              |          |          |          |          |
|-------------------|----------|--------------|----------|----------|----------|----------|
| mkrnl             | 2389.416 | -0.33761392  | 0.14375  | -2.34861 | 0.018843 | 0.242305 |
| si:dkey-105h12.2  | 305.3614 | 0.092884747  | 0.342314 | 0.271343 | 0.786127 | 0.962605 |
| usfl              | 562.3794 | -0.066137568 | 0.112379 | -0.58852 | 0.556183 | 0.899002 |
| bhlhe41           | 360.1849 | -0.606871274 | 0.218593 | -2.77626 | 0.005499 | 0.125156 |
| piwill            | 33.88871 | 0.357087222  | 0.433002 | 0.824678 | 0.409554 | 0.836787 |
| rfx6              | 1.168353 | 1.054527333  | 1.693355 | 0.622744 | 0.533452 | NA       |
| rrbplb            | 956.3271 | 0.190952439  | 0.165962 | 1.15058  | 0.249905 | 0.729721 |
| si:busml-228j01.6 | 0.965541 | -1.759343207 | 2.141448 | -0.82157 | 0.411323 | NA       |
| vgl12a            | 41.20296 | 0.015471922  | 0.372344 | 0.041553 | 0.966855 | 1        |
| kat14             | 430.4039 | -0.050545652 | 0.115049 | -0.43934 | 0.660414 | 0.930581 |
| bco2b             | 20.53745 | -0.185286085 | 0.741231 | -0.24997 | 0.80261  | 0.968181 |
| arpc51a           | 463.884  | -0.109473174 | 0.125488 | -0.87238 | 0.383001 | 0.825809 |
| TUBB4B            | 602.9235 | 0.144374725  | 0.117576 | 1.227929 | 0.219474 | 0.700391 |
| glipr2            | 121.8601 | 0.132927226  | 0.201832 | 0.658604 | 0.51015  | 0.883733 |
| man1a2            | 527.2459 | 0.263509315  | 0.120776 | 2.181796 | 0.029125 | 0.304246 |
| sntbl             | 202.4873 | 0.037851087  | 0.154572 | 0.244876 | 0.806552 | 0.969726 |
| tbc1d32           | 76.57579 | 0.248356135  | 0.306455 | 0.810416 | 0.417701 | 0.841149 |
| tmem237a          | 189.0244 | 0.635988213  | 0.403221 | 1.577268 | 0.114734 | 0.554525 |
| hsdl1             | 67.09792 | 0.068986407  | 0.245989 | 0.280445 | 0.779136 | 0.961073 |
| sspn              | 195.842  | -0.281938996 | 0.215095 | -1.31077 | 0.189937 | 0.669635 |
| ccdc92            | 246.2507 | 0.322150477  | 0.2211   | 1.457036 | 0.145106 | 0.604004 |
| ndst3             | 262.0483 | -0.113439777 | 0.124971 | -0.90773 | 0.364023 | 0.814497 |
| trdn              | 345.5574 | -0.113179857 | 0.170442 | -0.66404 | 0.506667 | 0.883007 |
| cx32.3            | 106.1789 | -0.393814964 | 0.391325 | -1.00636 | 0.314241 | 0.777479 |
| mgat4c            | 13.82183 | 0.809333706  | 0.5933   | 1.364122 | 0.172529 | 0.645319 |
| cx28.1            | 4.509102 | -0.40293984  | 0.998153 | -0.40369 | 0.686444 | 0.938732 |
| cx28.9            | 132.7176 | 1.463731484  | 0.458752 | 3.190681 | 0.001419 | 0.056314 |
| cx43              | 1625.516 | -0.163275689 | 0.128761 | -1.26805 | 0.20478  | 0.686713 |
| rnf141            | 171.8948 | -0.153820107 | 0.178891 | -0.85985 | 0.38987  | 0.827843 |
| rps25             | 18779    | -0.307689753 | 0.149347 | -2.06023 | 0.039377 | 0.347538 |
| si:dkeyp-28d2.4   | 5.480509 | -0.424724763 | 0.941018 | -0.45135 | 0.65174  | 0.928625 |
| tsn               | 302.3124 | -0.0816347   | 0.174152 | -0.46875 | 0.639245 | 0.924779 |
| ccl38a.5          | 5.971585 | -2.11565348  | 1.439066 | -1.47016 | 0.141519 | 0.600284 |
| tsc22d2           | 595.088  | -0.072927785 | 0.146823 | -0.49671 | 0.619396 | 0.917435 |
| rh50              | 17.74994 | 0.319447437  | 0.874371 | 0.365345 | 0.714854 | 0.945821 |
| rbm39b            | 1119.415 | -0.048545924 | 0.09525  | -0.50967 | 0.610284 | 0.915331 |
| ren               | 12.8676  | 0.023804585  | 0.71805  | 0.033152 | 0.973554 | 1        |
| capn3a            | 2133.534 | 0.705563148  | 0.362452 | 1.946638 | 0.051578 | 0.394954 |
| tnfrsf19          | 469.5094 | -0.083624976 | 0.138869 | -0.60219 | 0.54705  | 0.896121 |
| ift172            | 329.4015 | -0.169703687 | 0.130875 | -1.29669 | 0.194739 | 0.67483  |
| si:dkey-221h15.4  | 13.67683 | -1.373403069 | 0.576024 | -2.38428 | 0.017113 | 0.231611 |
| ube2v1            | 1661.469 | 0.004427407  | 0.117288 | 0.037748 | 0.969888 | 1        |
| rab11ba           | 1086.242 | 0.165159525  | 0.107589 | 1.535093 | 0.124761 | 0.572486 |
| sf3a1             | 1351.643 | 0.015156791  | 0.139758 | 0.10845  | 0.913639 | 0.992796 |
| cad               | 1335.583 | -0.665565048 | 0.156711 | -4.24709 | 2.17E-05 | 0.003005 |
| dnajc5ga          | 543.2727 | -0.205333928 | 0.135127 | -1.51957 | 0.12862  | 0.578162 |
| ankzf1            | 148.8112 | 0.031827659  | 0.189177 | 0.168243 | 0.866392 | 0.982582 |
| usp39             | 321.3602 | 0.00289209   | 0.122611 | 0.023587 | 0.981182 | 1        |
| znf512            | 25.73841 | -0.049574252 | 0.407263 | -0.12173 | 0.903117 | 0.991246 |
| si:ch211-245h14.1 | 18.61422 | -0.342684031 | 0.48983  | -0.6996  | 0.484179 | 0.872553 |
| stum              | 34.51544 | -0.48703554  | 0.305308 | -1.59523 | 0.110662 | 0.545461 |
| ccl38a.4          | 2.566926 | 0.943319455  | 2.01291  | 0.468635 | 0.639331 | 0.924779 |
| ccl38.1           | 17.05151 | -0.150463331 | 0.593412 | -0.25356 | 0.799838 | 0.967237 |
| hsbplb            | 1002.321 | -0.153512725 | 0.186922 | -0.82127 | 0.411494 | 0.837797 |

|                  |          |              |          |          |          |          |
|------------------|----------|--------------|----------|----------|----------|----------|
| ccl38.6          | 17.9306  | 1.000427224  | 0.703588 | 1.421893 | 0.155057 | 0.619776 |
| cryba2b          | 7489.623 | 0.375962361  | 0.237043 | 1.586051 | 0.112728 | 0.549875 |
| dlg4a            | 20.40935 | 0.94220687   | 0.791541 | 1.190345 | 0.233911 | 0.71479  |
| adat2            | 62.1665  | -0.723303903 | 0.243803 | -2.96676 | 0.00301  | 0.090442 |
| styk1b           | 304.347  | -0.15705518  | 0.129878 | -1.20925 | 0.226566 | 0.707798 |
| selenool         | 440.8969 | 0.097797991  | 0.17557  | 0.557032 | 0.577505 | 0.904842 |
| prox2            | 37.59878 | 0.543869459  | 0.45074  | 1.206614 | 0.227581 | 0.708829 |
| cxcr4b           | 137.7099 | 0.028407433  | 0.204632 | 0.138822 | 0.889591 | 0.988318 |
| si:ch211-173a9.6 | 112.9972 | -1.440390489 | 0.357571 | -4.02827 | 5.62E-05 | 0.006027 |
| brkl             | 1913.736 | 0.072720215  | 0.158303 | 0.459374 | 0.645966 | 0.926728 |
| il17a/f3         | 3.28789  | -0.024937894 | 1.011525 | -0.02465 | 0.980331 | 1        |
| calhm6           | 13.52033 | 0.338560054  | 0.534827 | 0.633027 | 0.526716 | 0.889699 |
| adamts6          | 32.75996 | 0.059255143  | 0.353852 | 0.167457 | 0.86701  | 0.982582 |
| rrp9             | 227.3009 | -0.297160598 | 0.198652 | -1.49588 | 0.134684 | 0.589356 |
| zgc:113337       | 152.6883 | -0.077890515 | 0.227065 | -0.34303 | 0.731575 | 0.950365 |
| si:ch211-63o20.7 | 79.51769 | 0.441807402  | 0.39855  | 1.108537 | 0.26763  | 0.74397  |
| nfya             | 957.6842 | 0.040680238  | 0.116196 | 0.350099 | 0.726265 | 0.948987 |
| elp3             | 239.9928 | -0.189147901 | 0.172233 | -1.09821 | 0.272112 | 0.748056 |
| pk1r             | 3384.735 | 0.466616889  | 0.188423 | 2.476429 | 0.01327  | 0.200523 |
| cyp11c1          | 50.25446 | -0.024429979 | 0.307952 | -0.07933 | 0.93677  | 0.997044 |
| fh12a            | 754.4922 | -0.179765298 | 0.144988 | -1.23987 | 0.215025 | 0.697086 |
| mapk12a          | 430.6938 | -0.090514403 | 0.119689 | -0.75625 | 0.449501 | 0.856979 |
| si:dkeyp-118h3.6 | 171.7998 | 0.024218166  | 0.162593 | 0.14895  | 0.881593 | 0.986908 |
| prrx1b           | 711.1323 | -0.055754207 | 0.119304 | -0.46733 | 0.640264 | 0.924877 |
| kpna5            | 877.7455 | -0.098483414 | 0.101478 | -0.97049 | 0.331804 | 0.789531 |
| gorab            | 120.4722 | -0.147419106 | 0.187547 | -0.78604 | 0.431844 | 0.848419 |
| pou3f3a          | 316.3353 | 0.004513546  | 0.147364 | 0.030629 | 0.975566 | 1        |
| mett11b          | 47.08942 | 0.253131939  | 0.270317 | 0.936425 | 0.349054 | 0.801306 |
| tal2             | 205.3736 | -0.00115091  | 0.165395 | -0.00696 | 0.994448 | 1        |
| hmg20b           | 611.2647 | -0.003159183 | 0.151243 | -0.02089 | 0.983335 | 1        |
| zgc:171971       | 89.91013 | 0.136250914  | 0.210244 | 0.64806  | 0.516946 | 0.887148 |
| fam129aa         | 203.9802 | -0.264373155 | 0.224708 | -1.17652 | 0.239389 | 0.719781 |
| mau2             | 727.6235 | -0.161959459 | 0.11442  | -1.41548 | 0.156929 | 0.622766 |
| trmt11           | 147.4767 | -0.394229278 | 0.205374 | -1.91957 | 0.054912 | 0.405196 |
| si:ch211-145c1.1 | 1.075195 | -0.561706611 | 2.113327 | -0.26579 | 0.790399 | NA       |
| eef2a.2          | 14.66671 | -0.922584006 | 0.565445 | -1.63161 | 0.102762 | 0.529448 |
| pebpl            | 573.5803 | -0.589239321 | 0.188857 | -3.12004 | 0.001808 | 0.065671 |
| fbx117           | 68.60808 | 0.088376373  | 0.232887 | 0.379482 | 0.70433  | 0.943785 |
| dmap1            | 442.0157 | 0.324493905  | 0.165115 | 1.965258 | 0.049384 | 0.387221 |
| si:ch73-55i23.1  | 15.76486 | -2.158695509 | 0.770777 | -2.80067 | 0.0051   | 0.119231 |
| btbd2a           | 518.9343 | 0.122435768  | 0.107759 | 1.136201 | 0.255872 | 0.733642 |
| eef2a.1          | 296.1152 | -0.337729322 | 0.241535 | -1.39827 | 0.162033 | 0.629618 |
| mx2a             | 16.46575 | -0.597287579 | 0.488238 | -1.22335 | 0.221197 | 0.702457 |
| si:dkey-44k1.5   | 78.01526 | 0.775005893  | 0.388364 | 1.995567 | 0.045981 | 0.375002 |
| diol             | 99.60299 | -0.285466594 | 0.247639 | -1.15275 | 0.249012 | 0.728918 |
| bin1a            | 30.89358 | 1.004552027  | 0.368194 | 2.72832  | 0.006366 | 0.134763 |
| tmem198a         | 88.47675 | 0.164957819  | 0.235064 | 0.701756 | 0.482832 | 0.871821 |
| trim35-40        | 168.112  | 0.121039343  | 0.152049 | 0.796056 | 0.425999 | 0.844714 |
| si:dkey-97o5.1   | 109.2101 | 0.144636695  | 0.223274 | 0.647798 | 0.517116 | 0.887148 |
| acot11b          | 228.8139 | -0.455444679 | 0.183467 | -2.48243 | 0.013049 | 0.198789 |
| nudt3b           | 47.76841 | 0.242126877  | 0.250469 | 0.966693 | 0.333698 | 0.790676 |
| si:dkey-4e7.3    | 151.0407 | 0.374628357  | 0.198058 | 1.891508 | 0.058557 | 0.418278 |
| elmo3            | 155.8094 | 0.15309635   | 0.21199  | 0.722185 | 0.470181 | 0.86742  |
| pacsin1b         | 365.5038 | 0.014032857  | 0.121547 | 0.115452 | 0.908087 | 0.991745 |

|                   |           |               |           |           |           |           |
|-------------------|-----------|---------------|-----------|-----------|-----------|-----------|
| zp3a.1            | 1. 511922 | 0. 125154036  | 1. 643736 | 0. 07614  | 0. 939308 | NA        |
| zp3a.2            | 12. 04798 | -0. 691722577 | 0. 617718 | -1. 1198  | 0. 262798 | 0. 740207 |
| si:dkey-51e6.1    | 316. 8114 | 0. 50930447   | 0. 180479 | 2. 821952 | 0. 004773 | 0. 114488 |
| selp              | 2. 757078 | -3. 922908497 | 1. 647581 | -2. 38101 | 0. 017265 | 0. 231982 |
| fpgt              | 41. 5416  | 0. 012728866  | 0. 262212 | 0. 048544 | 0. 961283 | 0. 99935  |
| myo6b             | 146. 6574 | 0. 083165426  | 0. 247888 | 0. 335496 | 0. 737251 | 0. 952312 |
| lhx8b             | 4. 650714 | 1. 239475441  | 0. 83094  | 1. 491654 | 0. 13579  | 0. 591131 |
| rbbp5             | 501. 3875 | -0. 047124565 | 0. 104196 | -0. 45227 | 0. 651075 | 0. 928395 |
| skia              | 814. 7008 | 0. 017795879  | 0. 104129 | 0. 170903 | 0. 8643   | 0. 981867 |
| ppil6             | 8. 092064 | -0. 267874184 | 0. 653329 | -0. 41001 | 0. 681796 | 0. 937464 |
| RFESD (1 of many) | 36. 52399 | 0. 583783292  | 0. 326094 | 1. 79023  | 0. 073417 | 0. 46112  |
| c7a               | 142. 3341 | 0. 539829618  | 0. 340365 | 1. 586032 | 0. 112732 | 0. 549875 |
| foxl2a            | 77. 93749 | 0. 398003651  | 0. 247875 | 1. 605666 | 0. 108347 | 0. 540687 |
| drc1              | 27. 14682 | 0. 04125486   | 0. 409393 | 0. 100771 | 0. 919732 | 0. 993892 |
| paplnb            | 8. 625405 | 0. 805779422  | 0. 818774 | 0. 984129 | 0. 325052 | 0. 783955 |
| smek1             | 1320. 584 | 0. 058066763  | 0. 093019 | 0. 624246 | 0. 532466 | 0. 890978 |
| ttc38             | 92. 56585 | -0. 171508664 | 0. 248896 | -0. 68908 | 0. 490775 | 0. 87556  |
| tspan33b          | 14. 20273 | 0. 46054715   | 0. 559382 | 0. 823315 | 0. 410329 | 0. 837066 |
| sema3ab           | 128. 3597 | 0. 340402439  | 0. 194859 | 1. 746914 | 0. 080652 | 0. 479526 |
| si:ch211-233h19.2 | 27. 57707 | 0. 83664642   | 0. 415881 | 2. 011746 | 0. 044247 | 0. 368166 |
| tmem243a          | 71. 28722 | -0. 611059297 | 0. 26565  | -2. 30024 | 0. 021435 | 0. 25974  |
| pias4b            | 5. 403788 | -1. 264301705 | 0. 861841 | -1. 46698 | 0. 142382 | 0. 601598 |
| mthfd11           | 1737. 379 | -0. 462617668 | 0. 24521  | -1. 88662 | 0. 059212 | 0. 419186 |
| stx11b.2          | 39. 97606 | -0. 201678071 | 0. 344486 | -0. 58545 | 0. 558248 | 0. 899409 |
| specc11b          | 93. 27723 | 0. 077306574  | 0. 224012 | 0. 3451   | 0. 730019 | 0. 950056 |
| fgf16             | 46. 38491 | -0. 326707497 | 0. 274007 | -1. 19233 | 0. 233131 | 0. 714569 |
| atrx              | 2335. 146 | 0. 194149846  | 0. 130843 | 1. 483841 | 0. 137851 | 0. 593945 |
| myl13             | 16935. 68 | -0. 003540319 | 0. 114995 | -0. 03079 | 0. 97544  | 1         |
| FRMD4A            | 180. 1763 | -0. 162310376 | 0. 213872 | -0. 75891 | 0. 447904 | 0. 856477 |
| eif4h             | 1677. 051 | 0. 071352347  | 0. 092762 | 0. 769196 | 0. 441777 | 0. 853281 |
| tgfbr1b           | 127. 2189 | -0. 030173639 | 0. 205141 | -0. 14709 | 0. 883063 | 0. 986908 |
| cdan1             | 82. 18105 | 0. 454185745  | 0. 270066 | 1. 681761 | 0. 092615 | 0. 509109 |
| arsa              | 99. 40485 | 0. 305182834  | 0. 205676 | 1. 483807 | 0. 13786  | 0. 593945 |
| tmem231           | 110. 4887 | 0. 006916254  | 0. 209602 | 0. 032997 | 0. 973677 | 1         |
| efnb3b            | 156. 1504 | 0. 154501279  | 0. 178923 | 0. 863506 | 0. 38786  | 0. 827592 |
| itga6a            | 143. 8772 | 0. 092301414  | 0. 21508  | 0. 429149 | 0. 667815 | 0. 933086 |
| atp8b3            | 331. 2313 | 0. 399710602  | 0. 162463 | 2. 460314 | 0. 013882 | 0. 206522 |
| dlx6a             | 88. 05148 | -0. 138586704 | 0. 228212 | -0. 60727 | 0. 54367  | 0. 894925 |
| ca4b              | 80. 79797 | 0. 313388648  | 0. 874566 | 0. 358336 | 0. 720092 | 0. 947004 |
| dlx5a             | 411. 7607 | -0. 024404993 | 0. 121241 | -0. 20129 | 0. 840469 | 0. 976417 |
| arhgef18b         | 81. 6839  | 0. 278032367  | 0. 204966 | 1. 356483 | 0. 174945 | 0. 648869 |
| cdca4             | 970. 8548 | -0. 017590549 | 0. 112567 | -0. 15627 | 0. 875822 | 0. 984562 |
| si:dkey-177p2.6   | 461. 9284 | -0. 125848881 | 0. 142205 | -0. 88498 | 0. 376167 | 0. 822258 |
| si:dkey-91m11.5   | 224. 6689 | 0. 035122057  | 0. 18389  | 0. 190995 | 0. 84853  | 0. 977912 |
| plin2             | 101. 3105 | -0. 723287649 | 0. 275785 | -2. 62265 | 0. 008725 | 0. 160441 |
| impdh1a           | 238. 3489 | 0. 62300231   | 0. 235605 | 2. 644269 | 0. 008187 | 0. 153717 |
| chracl            | 357. 8887 | -0. 174441695 | 0. 197926 | -0. 88135 | 0. 37813  | 0. 822654 |
| lpar2a            | 112. 9148 | -0. 294741711 | 0. 209683 | -1. 40565 | 0. 159827 | 0. 626123 |
| tmem251           | 247. 0898 | -0. 312256225 | 0. 136616 | -2. 28565 | 0. 022275 | 0. 263857 |
| trmt6             | 101. 4346 | 0. 106348111  | 0. 201947 | 0. 526615 | 0. 598461 | 0. 91286  |
| si:dkeyp-55f12.3  | 160. 2516 | -0. 138470647 | 0. 263459 | -0. 52559 | 0. 599175 | 0. 913173 |
| sytlb             | 8. 880662 | 0. 823904384  | 0. 945415 | 0. 871474 | 0. 383496 | 0. 825875 |
| cldnk             | 156. 46   | 0. 343439495  | 0. 303063 | 1. 13323  | 0. 257118 | 0. 734679 |
| kif26aa           | 174. 3566 | -0. 118795185 | 0. 186221 | -0. 63792 | 0. 523523 | 0. 888581 |

|                   |           |               |           |           |           |           |
|-------------------|-----------|---------------|-----------|-----------|-----------|-----------|
| ptafr             | 8. 397221 | -0. 662458454 | 0. 568328 | -1. 16563 | 0. 243766 | 0. 724437 |
| zgc:103681        | 87. 94055 | 0. 017740797  | 0. 256855 | 0. 069069 | 0. 944934 | 0. 997371 |
| zbtb25            | 36. 31639 | 0. 208120853  | 0. 324678 | 0. 641007 | 0. 521518 | 0. 887551 |
| zgc:77752         | 27. 38118 | 0. 290677811  | 0. 817166 | 0. 355714 | 0. 722054 | 0. 947403 |
| syndig11          | 25. 7072  | 0. 502199356  | 0. 49903  | 1. 006351 | 0. 314247 | 0. 777479 |
| trim35-30         | 19. 35143 | 0. 31990687   | 0. 438321 | 0. 729847 | 0. 465484 | 0. 864997 |
| der12             | 270. 3001 | 0. 04117586   | 0. 149263 | 0. 275862 | 0. 782654 | 0. 962328 |
| RALGDS            | 110. 5957 | 0. 109648736  | 0. 213018 | 0. 51474  | 0. 606735 | 0. 915204 |
| rab40b            | 279. 131  | -0. 204589108 | 0. 178082 | -1. 14885 | 0. 250619 | 0. 730604 |
| galnt17           | 88. 84991 | -0. 023277443 | 0. 293293 | -0. 07937 | 0. 936742 | 0. 997044 |
| gstt1a            | 2163. 609 | -0. 790344862 | 0. 180813 | -4. 37105 | 1. 24E-05 | 0. 002154 |
| p2rx7             | 108. 0934 | -0. 260355441 | 0. 289309 | -0. 89992 | 0. 368162 | 0. 817272 |
| p2rx4b            | 8. 316671 | -0. 396545519 | 0. 617222 | -0. 64247 | 0. 520569 | 0. 887165 |
| mad212            | 160. 0939 | -0. 188118173 | 0. 221156 | -0. 85061 | 0. 394984 | 0. 828825 |
| rfc4              | 402. 523  | -0. 049088765 | 0. 141055 | -0. 34801 | 0. 727831 | 0. 949325 |
| tlkla             | 697. 0694 | -0. 027200207 | 0. 138364 | -0. 19658 | 0. 844152 | 0. 976791 |
| ndufa12           | 1698. 979 | 0. 180019875  | 0. 140462 | 1. 28163  | 0. 199972 | 0. 6804   |
| slpr3a            | 36. 73019 | -0. 145955085 | 0. 339701 | -0. 42966 | 0. 667445 | 0. 933086 |
| nr2c2             | 407. 2088 | -0. 053895118 | 0. 162348 | -0. 33197 | 0. 73991  | 0. 953684 |
| t1e2a             | 832. 1565 | 0. 039426989  | 0. 09191  | 0. 428972 | 0. 667944 | 0. 933086 |
| foxd5             | 16. 95856 | 0. 082924665  | 0. 500175 | 0. 165791 | 0. 868321 | 0. 982801 |
| thap12a           | 308. 8152 | 0. 005708406  | 0. 156022 | 0. 036587 | 0. 970814 | 1         |
| si:dkey-250d21. 1 | 94. 8931  | -0. 141838132 | 0. 217954 | -0. 65077 | 0. 515195 | 0. 886401 |
| parp12a           | 52. 85923 | -0. 185521581 | 0. 320119 | -0. 57954 | 0. 562226 | 0. 900715 |
| ubr3              | 565. 3481 | -0. 001339561 | 0. 164707 | -0. 00813 | 0. 993511 | 1         |
| glod4             | 129. 2134 | -0. 262528165 | 0. 195058 | -1. 3459  | 0. 178335 | 0. 652458 |
| acot20            | 112. 3605 | -0. 135890313 | 0. 200387 | -0. 67814 | 0. 497683 | 0. 878845 |
| acot21            | 1. 630724 | 2. 570516871  | 1. 759939 | 1. 460572 | 0. 144133 | NA        |
| gpr176            | 46. 25427 | -0. 793740245 | 0. 318381 | -2. 49305 | 0. 012665 | 0. 196026 |
| hipk2             | 194. 9248 | 0. 366680813  | 0. 243854 | 1. 503688 | 0. 132662 | 0. 585592 |
| UTP14C            | 297. 6695 | -0. 201680549 | 0. 123959 | -1. 62699 | 0. 103738 | 0. 531539 |
| si:dkey-251i10. 1 | 70. 29014 | -0. 103978027 | 0. 231689 | -0. 44878 | 0. 653589 | 0. 929269 |
| katnbl1           | 201. 3714 | 0. 085855948  | 0. 132239 | 0. 649247 | 0. 516179 | 0. 88677  |
| ebf2              | 245. 2432 | -0. 027292326 | 0. 234533 | -0. 11637 | 0. 90736  | 0. 991745 |
| sebox             | 21. 4981  | 0. 092209579  | 1. 47307  | 0. 062597 | 0. 950088 | 0. 99801  |
| unga              | 139. 5303 | -0. 437110967 | 0. 213933 | -2. 04321 | 0. 041031 | 0. 353808 |
| gmat2             | 3532. 467 | 0. 096360284  | 0. 273013 | 0. 352952 | 0. 724125 | 0. 948273 |
| nup205            | 878. 454  | 0. 123971368  | 0. 107251 | 1. 1559   | 0. 247722 | 0. 728489 |
| gstm. 1           | 944. 785  | -0. 09345027  | 0. 168045 | -0. 5561  | 0. 578141 | 0. 905409 |
| rsrc2             | 651. 039  | 0. 019394097  | 0. 084009 | 0. 230858 | 0. 817425 | 0. 971268 |
| actc1a            | 3939. 635 | -0. 669827711 | 0. 205414 | -3. 26086 | 0. 001111 | 0. 047149 |
| si:dkey-48j7. 3   | 0. 197334 | -1. 826676282 | 5. 23046  | -0. 34924 | 0. 72691  | NA        |
| ywhaqa            | 2469. 576 | 0. 139894988  | 0. 124711 | 1. 121756 | 0. 261966 | 0. 739673 |
| degs2             | 1. 040206 | -1. 758849814 | 2. 2706   | -0. 77462 | 0. 438565 | NA        |
| sema3ga           | 81. 39339 | 0. 461926578  | 0. 243227 | 1. 899155 | 0. 057544 | 0. 4139   |
| tpd5211           | 326. 4318 | -0. 120231965 | 0. 140414 | -0. 85627 | 0. 39185  | 0. 827902 |
| mboat2b           | 213. 1976 | -0. 054923182 | 0. 199127 | -0. 27582 | 0. 782687 | 0. 962328 |
| cacnalsb          | 1060. 084 | -0. 13052813  | 0. 222962 | -0. 58543 | 0. 55826  | 0. 899409 |
| pex7              | 148. 2241 | -0. 235936684 | 0. 184945 | -1. 27571 | 0. 202057 | 0. 682257 |
| dym               | 114. 9257 | 0. 155418922  | 0. 164622 | 0. 944093 | 0. 345122 | 0. 79837  |
| rnf144ab          | 243. 795  | 0. 083836796  | 0. 142516 | 0. 588262 | 0. 556357 | 0. 899063 |
| tnnilc            | 933. 0544 | 0. 168202407  | 0. 146743 | 1. 146238 | 0. 251697 | 0. 732003 |
| lpar2b            | 257. 7976 | 0. 072873733  | 0. 156772 | 0. 464838 | 0. 642047 | 0. 925586 |
| allc              | 93. 77638 | 0. 400473304  | 0. 443011 | 0. 903981 | 0. 366006 | 0. 815714 |

|                    |          |              |            |          |          |          |
|--------------------|----------|--------------|------------|----------|----------|----------|
| mis18bp1           | 93.02402 | 0.271616415  | 0.225332   | 1.205408 | 0.228046 | 0.709324 |
| rps7               | 28122.65 | -0.341475817 | 0.119125   | -2.86654 | 0.00415  | 0.106599 |
| rnasehl            | 244.7719 | 0.137978259  | 0.182248   | 0.757092 | 0.448995 | 0.856796 |
| batf3              | 9.556686 | -0.018122912 | 0.605547   | -0.02993 | 0.976124 | 1        |
| rbml9              | 250.6143 | -0.071239566 | 0.19179    | -0.37145 | 0.710305 | 0.945821 |
| ical               | 55.71527 | 0.601883631  | 0.332179   | 1.811926 | 0.069998 | 0.451265 |
| crp3               | 267.1831 | 0.786903002  | 0.467312   | 1.683891 | 0.092203 | 0.508046 |
| sema3h             | 37.48254 | -0.004195076 | 0.363398   | -0.01154 | 0.990789 | 1        |
| gstr               | 1417.495 | -0.248873362 | 0.112669   | -2.20889 | 0.027182 | 0.293072 |
| cryaba             | 0.171522 | 1.055370259  | 5.267649   | 0.200349 | 0.841207 | NA       |
| acbd3              | 413.7667 | -0.223170683 | 0.177681   | -1.25602 | 0.20911  | 0.691152 |
| nhs11b             | 523.776  | 0.069357384  | 0.163111   | 0.425216 | 0.670679 | 0.933939 |
| hebp2              | 975.0723 | 0.155879824  | 0.240184   | 0.649002 | 0.516337 | 0.886895 |
| tert               | 117.7621 | 0.12622125   | 0.352276   | 0.358302 | 0.720117 | 0.947004 |
| cyp51              | 317.2555 | 0.658699835  | 0.239536   | 2.749898 | 0.005961 | 0.13073  |
| wtap               | 1194.858 | -0.053323331 | 0.108203   | -0.49281 | 0.622148 | 0.918461 |
| si:ch1073-440p11.2 | 0.2705   | 1.055348013  | 5.267649   | 0.200345 | 0.841211 | NA       |
| sod2               | 1227.968 | 0.053464381  | 0.168079   | 0.318091 | 0.750416 | 0.955074 |
| zgc:77784          | 244.5601 | -0.012728793 | 0.245123   | -0.05193 | 0.958586 | 0.999109 |
| rreblb             | 403.8771 | -0.049151206 | 0.171052   | -0.28735 | 0.773848 | 0.960624 |
| nrnlb              | 17.79359 | -0.972578466 | 0.635379   | -1.53071 | 0.125842 | 0.573743 |
| acad8              | 383.2477 | 0.353715616  | 0.124704   | 2.836447 | 0.004562 | 0.111673 |
| thyn1              | 96.13025 | 0.296458194  | 0.17814    | 1.664188 | 0.096075 | 0.517378 |
| fam32a             | 1595.621 | -0.270768834 | 0.189954   | -1.42545 | 0.154028 | 0.618621 |
| tsta312            | 0.17928  |              | 0.5.267649 | 0        | 1        | NA       |
| si:dkeyp-70f9.7    | 2.311166 | 0.093653673  | 1.950517   | 0.048015 | 0.961704 | 0.999451 |
| klf2a              | 765.2396 | -0.110241146 | 0.538191   | -0.20484 | 0.8377   | 0.976219 |
| eps1511a           | 468.613  | 0.105207639  | 0.142572   | 0.737928 | 0.460558 | 0.862369 |
| odr4               | 122.2927 | 0.179173055  | 0.172979   | 1.035809 | 0.300291 | 0.766629 |
| cadmlb             | 17.45338 | 0.840761955  | 0.48045    | 1.749946 | 0.080128 | 0.478357 |
| si:dkey-15j16.3    | 4.705953 | 0.566807337  | 1.031816   | 0.54933  | 0.582779 | 0.90571  |
| serpincl           | 1300.973 | -0.168742254 | 0.199632   | -0.84527 | 0.397963 | 0.830737 |
| bora               | 65.13227 | 0.255008562  | 0.253904   | 1.004348 | 0.315211 | 0.777834 |
| zbtb37             | 59.04523 | -0.357126308 | 0.243497   | -1.46666 | 0.142469 | 0.60163  |
| slpr1              | 863.3944 | 0.027730046  | 0.131511   | 0.210857 | 0.832999 | 0.975379 |
| si:dkey-15j16.6    | 9.961627 | -1.37200194  | 1.123667   | -1.221   | 0.222084 | 0.703829 |
| parp6a             | 123.046  | 0.443422185  | 0.301138   | 1.472488 | 0.140889 | 0.599658 |
| cx30.3             | 552.9073 | -0.703963272 | 0.113404   | -6.20755 | 5.38E-10 | 4.30E-07 |
| tuba8l             | 5428.159 | 0.059235076  | 0.160438   | 0.369208 | 0.711973 | 0.945821 |
| adipor1b           | 355.2909 | -0.139927139 | 0.140199   | -0.99806 | 0.31825  | 0.779923 |
| blnk               | 22.71896 | -0.829309438 | 0.449546   | -1.84477 | 0.065071 | 0.435355 |
| gfra2a             | 22.43475 | -0.073402191 | 0.417306   | -0.1759  | 0.860376 | 0.980264 |
| supt5h             | 1450.776 | -0.063411509 | 0.087979   | -0.72076 | 0.471057 | 0.868025 |
| cebpb              | 1336.484 | -0.269724736 | 0.416736   | -0.64723 | 0.517482 | 0.887148 |
| grb7               | 39.64311 | -0.477107722 | 0.294714   | -1.61888 | 0.105473 | 0.534737 |
| exo5               | 101.998  | 0.383659973  | 0.213364   | 1.79815  | 0.072153 | 0.456773 |
| plaa               | 434.1779 | 0.195554884  | 0.162619   | 1.202537 | 0.229156 | 0.711257 |
| tmem189            | 517.966  | -0.190145914 | 0.123997   | -1.53347 | 0.125161 | 0.572892 |
| slc52a3            | 26.69537 | -0.110218554 | 0.45905    | -0.2401  | 0.810252 | 0.969828 |
| stx6               | 965.1905 | 0.067796439  | 0.120839   | 0.561047 | 0.574766 | 0.904516 |
| coasy              | 254.764  | -0.143119494 | 0.15934    | -0.8982  | 0.369077 | 0.817763 |
| riok3              | 912.5759 | -0.269031958 | 0.14231    | -1.89046 | 0.058696 | 0.418329 |
| si:ch211-282j17.11 | 0.250071 | -1.826677    | 5.23046    | -0.34924 | 0.72691  | NA       |
| cts12              | 45.95309 | 0.238552938  | 0.526457   | 0.453129 | 0.650456 | 0.927861 |

|                   |          |              |          |          |          |          |
|-------------------|----------|--------------|----------|----------|----------|----------|
| cnstb             | 71.09068 | -0.828809156 | 0.242516 | -3.41754 | 0.000632 | 0.032718 |
| ndufal1           | 1228.149 | -0.038880148 | 0.171262 | -0.22702 | 0.820407 | 0.971788 |
| apoba             | 3764.82  | 0.275287011  | 0.272752 | 1.009295 | 0.312833 | 0.776304 |
| gdf7              | 29.88619 | 0.057668165  | 0.325104 | 0.177384 | 0.859207 | 0.979975 |
| git2b             | 197.078  | 0.100011917  | 0.174887 | 0.571865 | 0.567413 | 0.901809 |
| tppl              | 557.5434 | -0.402465121 | 0.142305 | -2.82819 | 0.004681 | 0.113564 |
| yyla              | 1239.84  | 0.029611365  | 0.140736 | 0.210404 | 0.833353 | 0.975388 |
| atpaf1            | 496.4086 | 0.059473538  | 0.099466 | 0.597928 | 0.549888 | 0.897373 |
| slc16a4           | 285.5366 | 0.027961232  | 0.137179 | 0.20383  | 0.838486 | 0.976395 |
| or128-10          | 7.05058  | 0.679629426  | 0.626238 | 1.085257 | 0.277808 | 0.751752 |
| fgflb             | 38.53988 | -0.296043818 | 0.3673   | -0.806   | 0.420242 | 0.842383 |
| alkal2b           | 35.10435 | -0.510909007 | 0.363099 | -1.40708 | 0.159404 | 0.6257   |
| mmp9              | 446.4059 | 1.049470565  | 0.222762 | 4.711174 | 2.46E-06 | 0.000594 |
| agps              | 139.4073 | 0.306265226  | 0.165862 | 1.846501 | 0.064819 | 0.434694 |
| spsc2             | 918.1797 | 0.075724577  | 0.136561 | 0.554512 | 0.579228 | 0.905578 |
| nfe2l2a           | 1709.649 | -0.238682564 | 0.127298 | -1.87498 | 0.060795 | 0.423559 |
| rnf169            | 283.6599 | 0.024532748  | 0.174813 | 0.140337 | 0.888393 | 0.988188 |
| egr2b             | 41.47519 | 0.713319314  | 0.520131 | 1.371422 | 0.170243 | 0.641806 |
| adoa              | 250.931  | 0.045688826  | 0.151063 | 0.30245  | 0.762309 | 0.958467 |
| si:dkey-30j22.1   | 53.56869 | -0.435928626 | 0.434844 | -1.00249 | 0.316105 | 0.778668 |
| rffl              | 171.0264 | -0.112964889 | 0.149973 | -0.75323 | 0.45131  | 0.857606 |
| tfdp2             | 551.6526 | 0.093653642  | 0.089835 | 1.042503 | 0.297178 | 0.764844 |
| atplb3b           | 2529.663 | 0.074775488  | 0.0929   | 0.804903 | 0.420876 | 0.842479 |
| dph6              | 207.6235 | -0.024475195 | 0.283576 | -0.08631 | 0.931221 | 0.995809 |
| eml1              | 544.5831 | -0.008299456 | 0.122814 | -0.06758 | 0.946122 | 0.997371 |
| oxt               | 38.4232  | 0.476181782  | 0.582947 | 0.816852 | 0.414013 | 0.838631 |
| disp2             | 157.0669 | 0.407021684  | 0.202807 | 2.006937 | 0.044756 | 0.370491 |
| pcmt1             | 220.0675 | 0.224512054  | 0.186943 | 1.200965 | 0.229765 | 0.711763 |
| nphs2             | 21.16169 | -0.485263575 | 0.456758 | -1.06241 | 0.28805  | 0.75894  |
| srp9              | 373.3222 | -0.044804796 | 0.222438 | -0.20143 | 0.840366 | 0.976417 |
| ivd               | 1706.693 | 0.073642334  | 0.207652 | 0.354643 | 0.722857 | 0.947694 |
| ephx1             | 285.1243 | 0.15865693   | 0.174588 | 0.908748 | 0.363483 | 0.81371  |
| itpka             | 263.8545 | -0.483721134 | 0.141375 | -3.42156 | 0.000623 | 0.032419 |
| si:ch211-246m6.4  | 159.4152 | 0.216782977  | 0.279833 | 0.774688 | 0.438524 | 0.851685 |
| slc5a6a           | 16.42079 | -0.412506118 | 0.456298 | -0.90403 | 0.365981 | 0.815714 |
| ltk               | 145.2682 | -0.3268062   | 0.261613 | -1.2492  | 0.211592 | 0.693044 |
| rpl7l1            | 823.5446 | -0.33569012  | 0.207971 | -1.61412 | 0.106501 | 0.536018 |
| cx35.4            | 316.5588 | 0.014431598  | 0.210032 | 0.068711 | 0.945219 | 0.997371 |
| zdhhc8a           | 63.64288 | -0.113825329 | 0.40836  | -0.27874 | 0.780446 | 0.961411 |
| slc25a27          | 24.10069 | 0.827533967  | 0.432292 | 1.914293 | 0.055583 | 0.408323 |
| phlda2            | 410.8418 | -0.17328     | 0.19994  | -0.86666 | 0.386128 | 0.82701  |
| abracl            | 1445.795 | 0.2129748    | 0.145367 | 1.465088 | 0.142897 | 0.602002 |
| heca              | 196.2741 | -0.133323375 | 0.181287 | -0.73543 | 0.46208  | 0.863402 |
| si:ch211-222f23.6 | 7.672362 | 0.467530876  | 0.706078 | 0.662152 | 0.507874 | 0.883056 |
| nthl1             | 116.5985 | -0.255465988 | 0.223426 | -1.1434  | 0.252871 | 0.732759 |
| TNPO2             | 453.6869 | 0.020802579  | 0.140579 | 0.147978 | 0.88236  | 0.986908 |
| paip1             | 639.9724 | 0.053464034  | 0.104439 | 0.511917 | 0.608709 | 0.915204 |
| tyms              | 321.5928 | 0.154388519  | 0.316495 | 0.487807 | 0.625687 | 0.920625 |
| si:ch211-163121.8 | 163.0685 | -0.389066997 | 0.244089 | -1.59395 | 0.110946 | 0.54583  |
| gtpbp1l           | 225.3064 | 0.18392993   | 0.163708 | 1.123522 | 0.261216 | 0.738737 |
| afg11b            | 59.60115 | -0.265162192 | 0.246208 | -1.07698 | 0.281487 | 0.753734 |
| foxo3b            | 1399.042 | 0.081609351  | 0.136755 | 0.596756 | 0.550671 | 0.8974   |
| rpl10a            | 37451.4  | -0.413983804 | 0.149223 | -2.77426 | 0.005533 | 0.125682 |
| hsh2d             | 19.68429 | 0.46536647   | 0.495649 | 0.938902 | 0.347781 | 0.800274 |

|                   |           |               |             |           |           |           |
|-------------------|-----------|---------------|-------------|-----------|-----------|-----------|
| sult3st3          | 96. 80119 | 0. 383724764  | 0. 586076   | 0. 654735 | 0. 512638 | 0. 885483 |
| gpr173            | 36. 11382 | 0. 390617214  | 0. 31291    | 1. 248337 | 0. 211908 | 0. 693489 |
| mfng              | 72. 98253 | 0. 058406711  | 0. 261467   | 0. 223381 | 0. 823239 | 0. 972005 |
| maprela           | 193. 0282 | -0. 159482457 | 0. 169643   | -0. 94011 | 0. 347162 | 0. 799992 |
| tmem120b          | 56. 59226 | -0. 04476012  | 0. 275072   | -0. 16272 | 0. 870738 | 0. 983365 |
| bloc1s6           | 620. 9123 | -0. 024253272 | 0. 143915   | -0. 16853 | 0. 86617  | 0. 982573 |
| ccn2a             | 1850. 139 | -0. 154450768 | 0. 186585   | -0. 82778 | 0. 407797 | 0. 835802 |
| fam228a           | 23. 70891 | 0. 37080708   | 0. 339764   | 1. 091366 | 0. 275112 | 0. 750424 |
| si:dkey-256e7. 5  | 19. 54943 | -0. 081642808 | 0. 351076   | -0. 23255 | 0. 816111 | 0. 971207 |
| nabla             | 81. 19445 | -0. 218118501 | 0. 342556   | -0. 63674 | 0. 524296 | 0. 888801 |
| hook1             | 270. 7724 | 0. 035316872  | 0. 167166   | 0. 211268 | 0. 832678 | 0. 975239 |
| mstna             | 0. 043308 |               | 0 5. 267649 |           | 0         | 1 NA      |
| dnajc5aa          | 129. 1132 | 0. 534927876  | 0. 201445   | 2. 65546  | 0. 00792  | 0. 150539 |
| cyp2n13           | 484. 349  | 0. 252504397  | 0. 354506   | 0. 71227  | 0. 476297 | 0. 869292 |
| slc17a9a          | 26. 08526 | -0. 143474065 | 0. 352367   | -0. 40717 | 0. 683881 | 0. 938486 |
| cyp2ad6           | 151. 5502 | -0. 307960799 | 0. 400885   | -0. 7682  | 0. 442367 | 0. 853782 |
| zgc:100920        | 208. 0661 | -0. 928843046 | 0. 255571   | -3. 63438 | 0. 000279 | 0. 018447 |
| dgcr2             | 152. 6867 | -0. 50027919  | 0. 323967   | -1. 54423 | 0. 122533 | 0. 569468 |
| znf1035           | 745. 6563 | 0. 012472989  | 0. 157409   | 0. 079239 | 0. 936842 | 0. 997044 |
| gng8              | 109. 4044 | 0. 020520744  | 0. 296499   | 0. 06921  | 0. 944822 | 0. 997371 |
| zgc:136605        | 1. 314151 |               | 0 2. 41718  |           | 0         | 1 NA      |
| auh               | 525. 6512 | -0. 041512831 | 0. 149807   | -0. 27711 | 0. 781696 | 0. 962077 |
| nfil3             | 745. 6901 | -0. 231514367 | 0. 19811    | -1. 16862 | 0. 242559 | 0. 724345 |
| cyp2p6            | 218. 4434 | -0. 558082298 | 0. 301675   | -1. 84995 | 0. 064321 | 0. 433359 |
| cyp2p7            | 142. 9898 | 0. 09508632   | 0. 388653   | 0. 244656 | 0. 806723 | 0. 969726 |
| cyp2p8            | 103. 8807 | -0. 422813688 | 0. 434034   | -0. 97415 | 0. 329983 | 0. 788084 |
| has1              | 1. 32616  | 1. 055430053  | 2. 147002   | 0. 491583 | 0. 623014 | NA        |
| fpr1              | 57. 0793  | 0. 131035406  | 0. 267364   | 0. 490101 | 0. 624062 | 0. 919497 |
| slc24a2           | 407. 9087 | 1. 007667818  | 0. 429151   | 2. 348049 | 0. 018872 | 0. 242305 |
| si:dkeyp-84f3. 5  | 395. 8004 | -0. 003193445 | 0. 126471   | -0. 02525 | 0. 979855 | 1         |
| cyp2p10           | 57. 75649 | 0. 33332715   | 0. 446459   | 0. 746601 | 0. 455304 | 0. 860008 |
| crygs1            | 0. 411973 | 1. 945175611  | 3. 168524   | 0. 613906 | 0. 539277 | NA        |
| prssl             | 67066. 71 | -1. 583691375 | 0. 396178   | -3. 99742 | 6. 40E-05 | 0. 006594 |
| sptlc1            | 407. 62   | -0. 160625441 | 0. 130039   | -1. 23521 | 0. 216751 | 0. 69815  |
| vmola             | 23. 43089 | 0. 817476761  | 1. 046764   | 0. 780956 | 0. 434828 | 0. 850002 |
| pcyt2             | 699. 3323 | 0. 352678259  | 0. 144222   | 2. 445387 | 0. 01447  | 0. 210484 |
| si:dkeyp-117h8. 4 | 79. 80729 | 0. 113998346  | 0. 259391   | 0. 439484 | 0. 660311 | 0. 930581 |
| gnavl             | 138. 6579 | 0. 046527288  | 0. 169223   | 0. 274946 | 0. 783358 | 0. 96245  |
| fam43a            | 789. 1756 | -0. 343404882 | 0. 149533   | -2. 29652 | 0. 021646 | 0. 261086 |
| camk2d1           | 446. 0513 | -0. 018778447 | 0. 130919   | -0. 14344 | 0. 885946 | 0. 987533 |
| chst14            | 82. 72437 | 0. 085121492  | 0. 196126   | 0. 434014 | 0. 664278 | 0. 93177  |
| napgb             | 247. 0866 | 0. 185452326  | 0. 289911   | 0. 639687 | 0. 522376 | 0. 887826 |
| exoc1             | 1052. 228 | -0. 097768277 | 0. 085547   | -1. 14286 | 0. 253099 | 0. 732759 |
| slc26a11          | 117. 1525 | 0. 006576712  | 0. 175181   | 0. 037542 | 0. 970053 | 1         |
| ttbk2b            | 264. 2689 | 0. 181877691  | 0. 166072   | 1. 09517  | 0. 273442 | 0. 749148 |
| ints10            | 184. 5412 | 0. 1247706    | 0. 146311   | 0. 852775 | 0. 393784 | 0. 828374 |
| capn3b            | 333. 5639 | 0. 214324668  | 0. 144211   | 1. 486187 | 0. 13723  | 0. 59288  |
| fbxl5             | 858. 8146 | -0. 017370346 | 0. 148465   | -0. 117   | 0. 90686  | 0. 991644 |
| hiatl1b           | 464. 5023 | -0. 070842516 | 0. 100961   | -0. 70168 | 0. 482876 | 0. 871834 |
| nog2              | 200. 9457 | 0. 117109259  | 0. 169096   | 0. 692563 | 0. 488584 | 0. 873964 |
| grp               | 96. 22911 | -0. 085188533 | 0. 242717   | -0. 35098 | 0. 725604 | 0. 948653 |
| nisch             | 428. 8641 | 0. 056783505  | 0. 123486   | 0. 459837 | 0. 645633 | 0. 926728 |
| MMP23B            | 77. 94077 | 0. 060616723  | 0. 215378   | 0. 281443 | 0. 778371 | 0. 961073 |
| ctsz              | 916. 5382 | -0. 364834391 | 0. 170295   | -2. 14236 | 0. 032164 | 0. 318495 |

|                   |          |              |           |          |          |          |
|-------------------|----------|--------------|-----------|----------|----------|----------|
| abhd17ab          | 90.49592 | 0.438820552  | 0.193658  | 2.265953 | 0.023454 | 0.270635 |
| alox5b.1          | 5.791441 | 1.137322244  | 0.767497  | 1.481858 | 0.138378 | 0.594956 |
| alox5b.2          | 1.156389 | -2.026120769 | 1.619186  | -1.25132 | 0.210818 | NA       |
| mpeg1.2           | 140.4259 | 0.626990733  | 0.379961  | 1.650145 | 0.098913 | 0.522055 |
| gnas              | 346.2674 | 0.110622173  | 0.124373  | 0.889437 | 0.373768 | 0.820644 |
| kctd6a            | 99.13818 | 0.049489084  | 0.216858  | 0.228209 | 0.819484 | 0.971785 |
| lxn               | 2285.206 | -0.419634222 | 0.188845  | -2.22211 | 0.026276 | 0.28745  |
| qtrt1             | 93.306   | -0.095384721 | 0.17162   | -0.55579 | 0.578354 | 0.905417 |
| blf               | 101.8085 | -0.302089862 | 0.294412  | -1.02608 | 0.304854 | 0.770035 |
| cldne             | 1686.828 | 0.067601926  | 0.112299  | 0.601983 | 0.547186 | 0.896121 |
| notch2            | 1061.54  | -0.003227824 | 0.193173  | -0.01671 | 0.986668 | 1        |
| BX664625.1        | 11.04576 | -1.057698223 | 0.763512  | -1.38531 | 0.165959 | 0.635475 |
| cldnf             | 242.3187 | -0.01084928  | 0.191824  | -0.05656 | 0.954897 | 0.998611 |
| cux1b             | 436.2772 | 0.063182105  | 0.119165  | 0.530207 | 0.595969 | 0.911458 |
| pomca             | 27.05157 | -0.01336915  | 0.743979  | -0.01797 | 0.985663 | 1        |
| cdca8             | 388.4373 | 0.137997957  | 0.220276  | 0.626476 | 0.531002 | 0.890545 |
| si:ch211-132f19.7 | 95.02506 | -0.620630536 | 0.550881  | -1.12661 | 0.259906 | 0.737088 |
| or108-3           | 0.688014 | 0.742998986  | 2.24612   | 0.330792 | 0.740801 | NA       |
| slc1a3b           | 385.125  | 0.450991068  | 0.129676  | 3.477825 | 0.000505 | 0.027755 |
| ucp2              | 5594.075 | 0.112826999  | 0.236911  | 0.476243 | 0.633901 | 0.923974 |
| dnajb13           | 15.05226 | 0.598032595  | 0.510678  | 1.171056 | 0.241576 | 0.723306 |
| celal.5           | 313.7186 |              | 0.1692399 |          | 0        | 1        |
| celal.4           | 885.3015 | -0.868185887 | 1.682614  | -0.51597 | 0.605872 | 0.915055 |
| celal.3           | 2155.044 |              | 0.1708455 |          | 0        | 1        |
| celal.1           | 363.8368 | -1.762177553 | 1.66742   | -1.05683 | 0.29059  | 0.76078  |
| lsml              | 137.257  | 0.081470757  | 0.210222  | 0.387547 | 0.698351 | 0.942433 |
| bag4              | 161.7326 | 0.043608544  | 0.162719  | 0.267999 | 0.7887   | 0.963568 |
| gpd1b             | 2214.761 | -0.092646566 | 0.172054  | -0.53847 | 0.590251 | 0.908901 |
| hhla2a.1          | 458.3635 | -0.137720647 | 0.159602  | -0.8629  | 0.388193 | 0.827592 |
| mllt1a            | 346.3089 | -0.009887521 | 0.139777  | -0.07074 | 0.943606 | 0.997371 |
| rnase12           | 0.480281 | -2.745953887 | 2.764868  | -0.99316 | 0.320632 | NA       |
| si:rp71-1i20.2    | 13.79734 | -1.597148088 | 0.516009  | -3.0952  | 0.001967 | 0.068839 |
| nsun5             | 106.2019 | 0.04796872   | 0.205429  | 0.233506 | 0.815369 | 0.971158 |
| nfic              | 16.77163 | -0.817534    | 0.473735  | -1.72572 | 0.084398 | 0.487532 |
| ripk4             | 181.1722 | -0.206801785 | 0.166453  | -1.2424  | 0.214088 | 0.696474 |
| adam17a           | 575.1042 | 0.017135995  | 0.129953  | 0.131863 | 0.895092 | 0.989187 |
| kcnh5a            | 5.440967 | -0.203956109 | 0.756994  | -0.26943 | 0.7876   | 0.963263 |
| nfixa             | 11.13013 | -0.65022078  | 0.584387  | -1.11265 | 0.265857 | 0.742605 |
| CT573139.1        | 3.02447  | 1.617424964  | 1.647442  | 0.98178  | 0.326208 | 0.785142 |
| ccnal             | 2.65534  | -1.107421526 | 1.395071  | -0.79381 | 0.427306 | 0.845774 |
| atg16l2           | 7.404225 | 0.363862771  | 1.062297  | 0.342525 | 0.731956 | 0.950617 |
| arrb1             | 35.56238 | 0.849202708  | 0.365545  | 2.323115 | 0.020173 | 0.251701 |
| si:dkey-222f2.1   | 761.9945 | -0.100226134 | 0.168588  | -0.5945  | 0.552175 | 0.8974   |
| prkchb            | 77.87844 | -0.134126233 | 0.286533  | -0.4681  | 0.639713 | 0.924779 |
| gtf3c3            | 206.6298 | -0.266123178 | 0.138323  | -1.92393 | 0.054363 | 0.40321  |
| irflb             | 153.953  | -0.069860297 | 0.467324  | -0.14949 | 0.881167 | 0.986892 |
| ppmlab            | 261.8349 | -0.037372852 | 0.135711  | -0.27539 | 0.78302  | 0.962328 |
| ckbb              | 12256    | 0.039333934  | 0.172893  | 0.227504 | 0.820031 | 0.971788 |
| xy1b              | 86.65879 | 0.753987677  | 0.277699  | 2.715122 | 0.006625 | 0.136957 |
| morc3b            | 10.06001 | 0.400857537  | 0.804698  | 0.498147 | 0.618381 | 0.916585 |
| mgmt              | 89.84518 | -0.50121037  | 0.240858  | -2.08094 | 0.037439 | 0.339918 |
| aqp12             | 1025.003 | 0.402711535  | 0.264261  | 1.523917 | 0.127529 | 0.576964 |
| stap2b            | 153.1904 | 0.34039968   | 0.193302  | 1.760976 | 0.078243 | 0.473959 |
| prrg1             | 260.6026 | 0.09279747   | 0.156134  | 0.594344 | 0.552282 | 0.8974   |



|                   |           |               |           |           |           |           |
|-------------------|-----------|---------------|-----------|-----------|-----------|-----------|
| zbtb21            | 20. 86943 | -0. 222530138 | 0. 419234 | -0. 5308  | 0. 595556 | 0. 911376 |
| atgl01            | 421. 7224 | -0. 085288833 | 0. 165795 | -0. 51442 | 0. 606956 | 0. 915204 |
| impact            | 245. 0308 | -0. 089739109 | 0. 174882 | -0. 51314 | 0. 607853 | 0. 915204 |
| nmu               | 19. 03461 | 1. 499636644  | 1. 04287  | 1. 43799  | 0. 150437 | 0. 614169 |
| gtf3c6            | 73. 4198  | 0. 34304475   | 0. 260619 | 1. 316269 | 0. 188084 | 0. 667333 |
| nop2              | 476. 2886 | -0. 147287132 | 0. 189853 | -0. 7758  | 0. 437869 | 0. 851283 |
| srd5a3            | 35. 33144 | -0. 19794442  | 0. 389469 | -0. 50824 | 0. 611283 | 0. 915331 |
| obsena            | 81. 40541 | -0. 905446251 | 0. 221748 | -4. 08322 | 4. 44E-05 | 0. 005146 |
| ank2b             | 1836. 623 | 0. 135588211  | 0. 165366 | 0. 819928 | 0. 412257 | 0. 838123 |
| kita              | 142. 1171 | -0. 047404259 | 0. 218994 | -0. 21646 | 0. 828626 | 0. 974137 |
| gsx2              | 58. 06566 | 0. 021053276  | 0. 218342 | 0. 096423 | 0. 923184 | 0. 994525 |
| lnx1              | 306. 5707 | 0. 138042224  | 0. 20822  | 0. 662964 | 0. 507353 | 0. 883007 |
| fip111a           | 29. 24938 | 0. 075474961  | 0. 555411 | 0. 13589  | 0. 891908 | 0. 988566 |
| prkc2             | 50. 67639 | 0. 366736651  | 0. 234552 | 1. 563559 | 0. 117921 | 0. 559998 |
| ccdc6a            | 926. 3105 | -0. 12515479  | 0. 109118 | -1. 14696 | 0. 251397 | 0. 731717 |
| abraxas1          | 71. 29784 | -0. 150997663 | 0. 250575 | -0. 6026  | 0. 546772 | 0. 896107 |
| np4r              | 2. 199406 | -1. 560794953 | 1. 614634 | -0. 96666 | 0. 333716 | NA        |
| gpx3              | 175. 3191 | -0. 161496075 | 0. 293116 | -0. 55096 | 0. 581659 | 0. 905618 |
| tbl2              | 216. 8103 | 0. 005515216  | 0. 12878  | 0. 042827 | 0. 96584  | 1         |
| rmnd5b            | 829. 5253 | 0. 058452758  | 0. 098278 | 0. 59477  | 0. 551997 | 0. 8974   |
| dph3              | 29. 29549 | 0. 297534801  | 0. 355544 | 0. 836845 | 0. 40268  | 0. 833401 |
| nck2b             | 225. 1644 | 0. 074044165  | 0. 155217 | 0. 477035 | 0. 633337 | 0. 923885 |
| mdh2              | 10402. 55 | 0. 008505345  | 0. 092389 | 0. 09206  | 0. 926651 | 0. 994815 |
| atraid            | 0 NA      | NA            | NA        | NA        | NA        | NA        |
| si:dkey-71h2. 2   | 89. 23993 | -0. 69436025  | 0. 28086  | -2. 47226 | 0. 013426 | 0. 202001 |
| crip3             | 111. 0983 | -0. 069062255 | 0. 198975 | -0. 34709 | 0. 728524 | 0. 949696 |
| fncl4a            | 31. 39584 | 0. 404912949  | 0. 696494 | 0. 581359 | 0. 560999 | 0. 900224 |
| nitr2a            | 1. 206243 | -0. 857271862 | 1. 886919 | -0. 45432 | 0. 649596 | NA        |
| zgc:171480        | 317. 4847 | 0. 211179331  | 0. 184562 | 1. 144219 | 0. 252533 | 0. 732759 |
| paox1             | 110. 8359 | 0. 245621585  | 0. 160551 | 1. 529866 | 0. 12605  | 0. 574239 |
| rpp21             | 86. 32033 | -0. 030697323 | 0. 213632 | -0. 14369 | 0. 885743 | 0. 987533 |
| slc8a1b           | 233. 9164 | 0. 541088202  | 0. 21758  | 2. 486845 | 0. 012888 | 0. 198116 |
| xkr6b             | 23. 40971 | -0. 348620249 | 0. 43401  | -0. 80325 | 0. 421828 | 0. 843078 |
| tnfaip2a          | 228. 7577 | -0. 816049305 | 0. 153058 | -5. 33162 | 9. 73E-08 | 4. 70E-05 |
| eipr1             | 470. 3837 | 0. 011883005  | 0. 196073 | 0. 060605 | 0. 951674 | 0. 99801  |
| b3gnt11           | 68. 77445 | 0. 298007227  | 0. 228605 | 1. 303588 | 0. 192374 | 0. 672283 |
| si:dkey-5n18. 1   | 207. 3622 | 0. 305670072  | 0. 225197 | 1. 357345 | 0. 174671 | 0. 648268 |
| zgc:153665        | 416. 9606 | -0. 79330689  | 0. 174679 | -4. 5415  | 5. 59E-06 | 0. 001166 |
| kcnj13            | 150. 2239 | 0. 024444494  | 0. 186462 | 0. 131096 | 0. 895699 | 0. 98926  |
| si:ch211-152f2. 3 | 1. 270904 | 2. 474449269  | 2. 602656 | 0. 95074  | 0. 341736 | NA        |
| efhd1             | 387. 5253 | -0. 085543627 | 0. 201025 | -0. 42554 | 0. 670445 | 0. 933883 |
| gpr55a            | 3. 661158 | -0. 275636997 | 0. 964508 | -0. 28578 | 0. 775047 | 0. 960899 |
| itm2ca            | 894. 9578 | 0. 099442152  | 0. 197355 | 0. 503875 | 0. 61435  | 0. 915998 |
| cab39             | 92. 81598 | 0. 163210733  | 0. 188077 | 0. 867789 | 0. 38551  | 0. 826939 |
| rps5              | 26159. 73 | -0. 34682368  | 0. 124123 | -2. 79419 | 0. 005203 | 0. 121039 |
| gapdh             | 80817. 32 | 0. 108760866  | 0. 172893 | 0. 629064 | 0. 529307 | 0. 890418 |
| wu:fj39g12        | 88. 59885 | 0. 554380939  | 0. 415361 | 1. 334696 | 0. 181976 | 0. 658775 |
| atp6v1b2          | 1338. 433 | 0. 109407153  | 0. 184084 | 0. 594332 | 0. 55229  | 0. 8974   |
| kcnk3a            | 7. 538602 | -0. 611261466 | 1. 2443   | -0. 49125 | 0. 62325  | 0. 918971 |
| ndufb11           | 1010. 619 | 0. 003117029  | 0. 140803 | 0. 022138 | 0. 982338 | 1         |
| sytl3             | 2. 776657 | -1. 77389359  | 1. 297936 | -1. 3667  | 0. 171718 | 0. 643953 |
| rsph3             | 17. 11363 | 0. 063238908  | 0. 396151 | 0. 159633 | 0. 87317  | 0. 983537 |
| atp2b3a           | 991. 8175 | 0. 352353627  | 0. 227518 | 1. 548682 | 0. 121458 | 0. 567605 |
| tagapb            | 46. 53151 | 0. 075665629  | 0. 311019 | 0. 243283 | 0. 807786 | 0. 969828 |

|                   |           |               |           |           |           |           |
|-------------------|-----------|---------------|-----------|-----------|-----------|-----------|
| opn8c             | 3. 17426  | 0. 593687643  | 1. 183647 | 0. 501575 | 0. 615967 | 0. 916365 |
| rbbp8             | 54. 59798 | -0. 100391761 | 0. 242832 | -0. 41342 | 0. 679298 | 0. 936209 |
| b3gnt3. 1         | 98. 87637 | -0. 33753064  | 0. 262937 | -1. 2837  | 0. 199249 | 0. 679739 |
| otx5              | 470. 379  | 0. 124897622  | 0. 234135 | 0. 533443 | 0. 593727 | 0. 910427 |
| ube2d2            | 1557. 395 | 0. 334732778  | 0. 150105 | 2. 229995 | 0. 025748 | 0. 28497  |
| si:ch211-22i13. 2 | 444. 7968 | -0. 011814881 | 0. 122696 | -0. 09629 | 0. 923287 | 0. 994525 |
| irfla             | 14. 08283 | -0. 405964124 | 0. 532893 | -0. 76181 | 0. 446172 | 0. 855403 |
| cltca             | 2982. 988 | 0. 108417051  | 0. 125996 | 0. 860477 | 0. 389526 | 0. 827843 |
| scrn2             | 370. 6352 | 0. 200403088  | 0. 211483 | 0. 947607 | 0. 34333  | 0. 797888 |
| ccdc124           | 1031. 325 | 0. 056712985  | 0. 142131 | 0. 39902  | 0. 689879 | 0. 939679 |
| rp111             | 29141. 56 | -0. 374107689 | 0. 1728   | -2. 16498 | 0. 030389 | 0. 310733 |
| vamp4             | 367. 9347 | 0. 139467155  | 0. 149509 | 0. 932837 | 0. 350904 | 0. 802215 |
| prdx6             | 1109. 951 | 0. 097408748  | 0. 140316 | 0. 69421  | 0. 48755  | 0. 873291 |
| si:dkey-239i20. 4 | 28. 41629 | 0. 204610852  | 0. 399435 | 0. 512251 | 0. 608475 | 0. 915204 |
| si:dkey-239i20. 2 | 38. 00252 | 0. 527712767  | 0. 449861 | 1. 173058 | 0. 240773 | 0. 722178 |
| plpp6             | 27. 0072  | -0. 151997816 | 0. 349448 | -0. 43497 | 0. 663588 | 0. 931556 |
| jun               | 1892. 011 | -0. 002620056 | 0. 127195 | -0. 0206  | 0. 983566 | 1         |
| si:dkey-86e18. 1  | 99. 99324 | -0. 075385318 | 0. 232024 | -0. 3249  | 0. 745254 | 0. 954956 |
| zpr1              | 277. 6942 | 0. 091531754  | 0. 204799 | 0. 446934 | 0. 654922 | 0. 929606 |
| atg4da            | 199. 2085 | -0. 48279291  | 0. 178316 | -2. 70751 | 0. 006779 | 0. 139038 |
| ENKD1             | 40. 52649 | 0. 126855028  | 0. 403732 | 0. 314206 | 0. 753364 | 0. 955861 |
| ches1             | 40. 26272 | -0. 316104591 | 0. 320228 | -0. 98712 | 0. 323582 | 0. 783161 |
| mrpl40            | 311. 0107 | 0. 0458606    | 0. 132421 | 0. 346325 | 0. 729099 | 0. 949983 |
| tmem30ab          | 565. 0367 | -0. 019104061 | 0. 118521 | -0. 16119 | 0. 871946 | 0. 983447 |
| kcnk13b           | 0. 205351 | 1. 055361142  | 5. 167946 | 0. 204213 | 0. 838187 | NA        |
| gle1              | 263. 4338 | 0. 25249992   | 0. 161366 | 1. 564762 | 0. 117639 | 0. 559345 |
| psmc1b            | 1697. 976 | 0. 16360073   | 0. 182084 | 0. 898493 | 0. 368923 | 0. 817763 |
| zgc:65997         | 533. 3597 | 0. 159693475  | 0. 20542  | 0. 7774   | 0. 436923 | 0. 851125 |
| nepro             | 81. 07853 | 0. 204964701  | 0. 246133 | 0. 832738 | 0. 404992 | 0. 834284 |
| dram2a            | 15. 52259 | -0. 322975174 | 0. 462288 | -0. 69864 | 0. 484774 | 0. 872911 |
| KIF2A             | 743. 239  | 0. 156270617  | 0. 095138 | 1. 642563 | 0. 100473 | 0. 525188 |
| gadd45aa          | 196. 1039 | -0. 042983468 | 0. 220192 | -0. 19521 | 0. 84523  | 0. 976791 |
| ifit15            | 11. 86501 | 0. 010579849  | 1. 235892 | 0. 00856  | NA        | NA        |
| fas               | 10. 53    | 0. 247285365  | 0. 774364 | 0. 31934  | 0. 749469 | 0. 955074 |
| srd5a2a           | 157. 3042 | -0. 058872238 | 0. 258401 | -0. 22783 | 0. 819776 | 0. 971785 |
| ca4a              | 46. 58432 | 0. 073839649  | 0. 33551  | 0. 220082 | 0. 825807 | 0. 972946 |
| rapgefla          | 61. 2852  | -0. 023379842 | 0. 276825 | -0. 08446 | 0. 932693 | 0. 996197 |
| eif4ebp1          | 1412. 438 | -0. 075517664 | 0. 137726 | -0. 54832 | 0. 583472 | 0. 906042 |
| pqlc2             | 327. 2686 | -0. 315896024 | 0. 175534 | -1. 79963 | 0. 071919 | 0. 4564   |
| tbc1d9            | 88. 70083 | -0. 110588504 | 0. 266052 | -0. 41566 | 0. 677655 | 0. 936026 |
| bcas2             | 746. 6198 | 0. 034324008  | 0. 141041 | 0. 243362 | 0. 807725 | 0. 969828 |
| cmc2              | 259. 3266 | 0. 158262885  | 0. 181551 | 0. 871726 | 0. 383358 | 0. 825809 |
| cenpn             | 110. 5966 | 0. 02726509   | 0. 221422 | 0. 123136 | 0. 901999 | 0. 990847 |
| ehbp1             | 441. 4734 | 0. 065596231  | 0. 15346  | 0. 427449 | 0. 669053 | 0. 933115 |
| vkorc111          | 170. 1629 | 0. 17817561   | 0. 205401 | 0. 867453 | 0. 385694 | 0. 826939 |
| slc6a8            | 124. 7347 | -0. 282300896 | 0. 386334 | -0. 73072 | 0. 464952 | 0. 864823 |
| pnck              | 3. 384834 | -1. 250925872 | 1. 415545 | -0. 88371 | 0. 376855 | 0. 822258 |
| cxadr             | 315. 2876 | 0. 049153083  | 0. 17358  | 0. 283173 | 0. 777044 | 0. 961073 |
| cadpsa            | 57. 61208 | 0. 578852321  | 0. 373399 | 1. 550223 | 0. 121088 | 0. 566931 |
| cnih2             | 217. 1432 | 0. 240996374  | 0. 212959 | 1. 131658 | 0. 257778 | 0. 735557 |
| faub              | 262. 8021 | -0. 123306554 | 0. 16085  | -0. 76659 | 0. 443324 | 0. 854063 |
| si:dkey-63b1. 1   | 3. 081858 | -2. 144716567 | 1. 605315 | -1. 33601 | 0. 181546 | 0. 657892 |
| glrx5             | 746. 1399 | -0. 052321228 | 0. 137838 | -0. 37959 | 0. 704253 | 0. 943757 |
| abt1              | 108. 3443 | -0. 059418359 | 0. 24656  | -0. 24099 | 0. 809563 | 0. 969828 |

|                   |          |              |          |          |          |          |
|-------------------|----------|--------------|----------|----------|----------|----------|
| zgc:100997        | 44.63283 | 0.609659917  | 0.310531 | 1.963283 | 0.049613 | 0.387751 |
| si:dkey-174m14.3  | 226.4142 | 0.614201281  | 0.257842 | 2.382087 | 0.017215 | 0.231824 |
| ylpml             | 520.5043 | -0.112213506 | 0.169151 | -0.66339 | 0.50708  | 0.883007 |
| bpntl             | 259.4998 | -0.151620412 | 0.157206 | -0.96447 | 0.334812 | 0.791753 |
| nabplb            | 0.739175 | 0.114697838  | 2.630453 | 0.043604 | 0.96522  | NA       |
| si:ch211-59d15.9  | 69.99589 | -0.218165522 | 0.229812 | -0.94932 | 0.342457 | 0.797179 |
| nefmb             | 528.3983 | 0.630422291  | 0.248182 | 2.540159 | 0.01108  | 0.18325  |
| gpdla             | 662.177  | -0.148130628 | 0.18533  | -0.79928 | 0.424127 | 0.844355 |
| mob3c             | 96.0895  | -0.29462887  | 0.196003 | -1.50318 | 0.132792 | 0.585961 |
| parvaa            | 283.619  | 0.492246004  | 0.166811 | 2.950926 | 0.003168 | 0.09274  |
| asflbb            | 345.5461 | 0.21567041   | 0.150528 | 1.432762 | 0.151926 | 0.615406 |
| cldn5a            | 200.9518 | 0.191688539  | 0.164211 | 1.167331 | 0.243077 | 0.724396 |
| c3a.6             | 374.2981 | -1.165275353 | 0.306144 | -3.8063  | 0.000141 | 0.011879 |
| cdc45             | 123.6836 | 0.236654463  | 0.292491 | 0.809099 | 0.418458 | 0.841565 |
| cpa4              | 4412.511 | -1.673813847 | 0.617067 | -2.71253 | 0.006677 | 0.137398 |
| cwc27             | 262.7463 | 0.213843817  | 0.165695 | 1.290586 | 0.196847 | 0.67714  |
| sreklip1          | 146.9759 | -0.026600394 | 0.148089 | -0.17962 | 0.857447 | 0.979741 |
| plac8.1           | 481.6594 | -1.320589158 | 0.376951 | -3.50335 | 0.000459 | 0.026028 |
| cops4             | 1073.346 | 0.150364031  | 0.126868 | 1.185201 | 0.235938 | 0.717225 |
| trmu              | 85.49813 | 0.362034781  | 0.241411 | 1.499659 | 0.133703 | 0.587056 |
| si:ch211-282j17.8 | 0.711884 | 3.582637119  | 2.3127   | 1.549115 | 0.121354 | NA       |
| efcab11           | 29.53202 | 0.130306435  | 0.335644 | 0.388228 | 0.697847 | 0.942355 |
| nrxn3a            | 536.3868 | -0.095991716 | 0.2372   | -0.40469 | 0.685708 | 0.938486 |
| ptbp3             | 105.6148 | 0.202900385  | 0.2626   | 0.772661 | 0.439723 | 0.852079 |
| si:ch211-282j17.3 | 0 NA     | NA           | NA       | NA       | NA       | NA       |
| si:ch211-282j17.2 | 0.368    | 0.5038065    | 0        | 1        | NA       | NA       |
| si:ch211-282j17.1 | 0.159496 | 0.5267649    | 0        | 1        | NA       | NA       |
| si:dkey-192d15.2  | 95.66633 | -0.530563002 | 0.301912 | -1.75734 | 0.078859 | 0.475082 |
| psmb10            | 255.9512 | 1.112991826  | 0.472047 | 2.357797 | 0.018384 | 0.239433 |
| si:rp71-7119.2    | 2.899804 | 0.762291553  | 1.23994  | 0.614781 | 0.538699 | 0.892777 |
| arhgdia           | 2518.467 | -0.02887039  | 0.087148 | -0.33128 | 0.740432 | 0.953939 |
| ms4a17a.7         | 187.0911 | -0.168149384 | 0.313294 | -0.53671 | 0.591465 | 0.909437 |
| cdc5l             | 1021.89  | 0.028845965  | 0.081486 | 0.353999 | 0.723339 | 0.947898 |
| ms4a17a.1         | 10.58629 | 1.943949499  | 0.973955 | 1.995933 | 0.045941 | 0.375002 |
| zmp:0000000619    | 27.15984 | -0.882700441 | 0.406187 | -2.17314 | 0.02977  | 0.307249 |
| ms4a17a.8         | 43.00802 | -1.207779464 | 0.566986 | -2.13018 | 0.033157 | 0.322388 |
| postna            | 585.2787 | -0.039026541 | 0.143791 | -0.27141 | 0.786075 | 0.962605 |
| st6galnac1.1      | 71.18373 | -0.142638393 | 0.228428 | -0.62443 | 0.532342 | 0.890978 |
| st6galnac1.2      | 3.205941 | -4.027165627 | 1.46663  | -2.74586 | 0.006035 | 0.131072 |
| si:ch211-119c20.2 | 75.12688 | 0.294632076  | 0.289729 | 1.016923 | 0.30919  | 0.773791 |
| nme2a             | 251.5864 | 0.581405932  | 0.421615 | 1.378996 | 0.167896 | 0.639091 |
| klf7b             | 525.5956 | 0.369123743  | 0.150936 | 2.445565 | 0.014463 | 0.210484 |
| rab3ab            | 51.4241  | 0.221996142  | 0.398736 | 0.55675  | 0.577698 | 0.905055 |
| si:ch73-111k22.2  | 776.487  | -0.089061242 | 0.113656 | -0.7836  | 0.433274 | 0.849392 |
| akap7             | 226.9191 | 0.091017007  | 0.203946 | 0.446281 | 0.655395 | 0.929606 |
| tmem244           | 28.28906 | -0.15404068  | 0.4413   | -0.34906 | 0.727044 | 0.949095 |
| sod1              | 1032.544 | -0.079088059 | 0.184776 | -0.42802 | 0.668635 | 0.933086 |
| ftr54             | 3.693175 | 0.951599613  | 1.212663 | 0.784719 | 0.432619 | 0.848753 |
| ppil4             | 256.901  | -0.096248648 | 0.153569 | -0.62675 | 0.530826 | 0.890545 |
| amd1              | 2918.02  | -0.129370978 | 0.125537 | -1.03054 | 0.302755 | 0.768916 |
| ufml              | 677.7845 | 0.237688901  | 0.128674 | 1.847224 | 0.064715 | 0.434368 |
| cdk19             | 30.45498 | -0.321138494 | 0.367698 | -0.87338 | 0.382458 | 0.825252 |
| nptnb             | 468.7416 | 0.21216603   | 0.266936 | 0.794819 | 0.426719 | 0.845352 |
| timm9             | 304.4084 | -0.114047233 | 0.158936 | -0.71757 | 0.473024 | 0.868965 |

|                   |          |              |          |          |          |          |
|-------------------|----------|--------------|----------|----------|----------|----------|
| arid4a            | 941.8772 | 0.197692197  | 0.105257 | 1.87819  | 0.060355 | 0.422591 |
| mmachc            | 49.00237 | -0.246869933 | 0.31017  | -0.79592 | 0.42608  | 0.844714 |
| nup43             | 249.6362 | 0.114875036  | 0.164069 | 0.700161 | 0.483827 | 0.87219  |
| si:ch211-214k5.3  | 0.558105 | 0            | 3.457376 | 0        | 1        | NA       |
| timml0b           | 133.4956 | -0.066324488 | 0.163609 | -0.40539 | 0.685194 | 0.938486 |
| psma6l            | 40.4444  | 0.47932374   | 0.485854 | 0.986558 | 0.323859 | 0.783161 |
| ugt5g2            | 0.46481  | 0            | 3.157007 | 0        | 1        | NA       |
| gabrr1            | 81.83712 | -0.91729122  | 1.219584 | -0.75213 | 0.45197  | 0.857994 |
| pnrc1             | 32.85935 | 0.270320981  | 0.409808 | 0.659628 | 0.509492 | 0.883733 |
| rnfl4             | 468.8243 | 0.268143325  | 0.131479 | 2.039438 | 0.041406 | 0.355065 |
| fgf11b            | 137.058  | 1.312512208  | 0.491419 | 2.670862 | 0.007566 | 0.14728  |
| mei4              | 3.092532 | 0.53926692   | 1.090779 | 0.494387 | 0.621033 | 0.918449 |
| F0904943.1        | 1.913367 | -1.44203601  | 1.369751 | -1.05277 | 0.292445 | NA       |
| sox9b             | 715.9212 | 0.081284891  | 0.175195 | 0.463968 | 0.642671 | 0.92567  |
| gpn1              | 251.9967 | -0.137029222 | 0.125011 | -1.09613 | 0.27302  | 0.748889 |
| stmn4l            | 454.7167 | 0.402981503  | 0.244905 | 1.645458 | 0.099875 | 0.524166 |
| il17a/f1          | 0.046941 | 0            | 5.267649 | 0        | 1        | NA       |
| il17a/f2          | 0.060442 | 0            | 5.267649 | 0        | 1        | NA       |
| lrrc57            | 233.92   | -0.086898162 | 0.15044  | -0.57763 | 0.563516 | 0.901075 |
| rpf2              | 499.8203 | -0.168538981 | 0.196885 | -0.85603 | 0.391983 | 0.827902 |
| fgf18b            | 36.63187 | 0.054111915  | 0.290468 | 0.186292 | 0.852215 | 0.978626 |
| si:ch211-241j12.3 | 219.9674 | -0.121104088 | 0.160929 | -0.75253 | 0.451733 | 0.857676 |
| lrpprc            | 1394.472 | 0.088672222  | 0.114096 | 0.77717  | 0.437058 | 0.851125 |
| ppp2r3c           | 377.4681 | -0.169534159 | 0.139654 | -1.21396 | 0.224763 | 0.706634 |
| znf292b           | 658.3589 | 0.175467044  | 0.170699 | 1.02793  | 0.303983 | 0.769505 |
| etflb             | 2409.694 | 0.051661897  | 0.11021  | 0.468761 | 0.639241 | 0.924779 |
| tubel             | 0.053506 | -0.86807634  | 5.267649 | -0.16479 | 0.869106 | NA       |
| setd6             | 94.4884  | -0.196873386 | 0.2449   | -0.80389 | 0.421459 | 0.842754 |
| cyp2x8            | 59.43312 | -4.857738746 | 1.288121 | -3.77118 | 0.000162 | 0.012981 |
| lgals3b           | 2175.544 | -0.03539155  | 0.090546 | -0.39087 | 0.695894 | 0.941649 |
| cyp2x7            | 195.0133 | -0.02857238  | 0.217974 | -0.13108 | 0.895711 | 0.98926  |
| lox12a            | 339.5348 | -0.037586316 | 0.308174 | -0.12196 | 0.902927 | 0.991179 |
| xkrx              | 310.7412 | 0.007516958  | 0.15117  | 0.049725 | 0.960341 | 0.999164 |
| gfra2b            | 43.0993  | -0.016995057 | 0.655546 | -0.02593 | 0.979317 | 1        |
| myo6a             | 866.0518 | -0.117180417 | 0.114866 | -1.02015 | 0.307659 | 0.772983 |
| nkl.4             | 0.632517 | 0            | 3.288974 | 0        | 1        | NA       |
| tmem86a           | 64.41526 | -0.163866321 | 0.402625 | -0.40699 | 0.684012 | 0.938486 |
| zbtb2a            | 33.11938 | -0.057757938 | 0.367365 | -0.15722 | 0.87507  | 0.984191 |
| stx11a            | 44.28504 | -0.430322317 | 0.343293 | -1.25351 | 0.210019 | 0.691821 |
| rassf2b           | 15.63538 | -0.948462343 | 0.493833 | -1.92061 | 0.05478  | 0.405097 |
| slc18b1           | 50.27422 | -0.086085219 | 0.364207 | -0.23636 | 0.81315  | 0.970328 |
| prnpb             | 41.76505 | 0.419038414  | 0.273535 | 1.531935 | 0.125538 | 0.573341 |
| vsn11b            | 617.6828 | 0.458558275  | 0.273471 | 1.67681  | 0.09358  | 0.511703 |
| ahil              | 268.1321 | -0.035465951 | 0.138141 | -0.25674 | 0.797381 | 0.966447 |
| lft2              | 3.229769 | -1.376720157 | 1.31627  | -1.04593 | 0.295595 | 0.764221 |
| adora4a           | 1.364396 | 0.275634316  | 1.446646 | 0.190533 | 0.848891 | NA       |
| ctbp2a            | 1115.083 | 0.064806779  | 0.113323 | 0.571877 | 0.567405 | 0.901809 |
| TATDN3            | 196.5823 | -0.202761238 | 0.181873 | -1.11485 | 0.264914 | 0.742063 |
| fuca2             | 1126.821 | -0.033295946 | 0.148326 | -0.22448 | 0.822385 | 0.971966 |
| lox12b            | 647.3885 | -0.184313881 | 0.224832 | -0.81979 | 0.412339 | 0.838123 |
| pelilb            | 179.8196 | -0.165035731 | 0.150349 | -1.09768 | 0.272343 | 0.748416 |
| zmpste24          | 441.8649 | 0.136660907  | 0.110929 | 1.231969 | 0.21796  | 0.699079 |
| pitpnab           | 358.6021 | 0.191136977  | 0.188627 | 1.013308 | 0.310913 | 0.775776 |
| atp5if1b          | 1721.499 | 0.139749692  | 0.137795 | 1.014182 | 0.310496 | 0.775146 |

|                   |          |              |          |          |          |          |
|-------------------|----------|--------------|----------|----------|----------|----------|
| rpl13a            | 25911.47 | -0.258897973 | 0.140877 | -1.83776 | 0.066098 | 0.439076 |
| gfpt2             | 190.4373 | -0.142696936 | 0.19843  | -0.71913 | 0.472061 | 0.868517 |
| egr2a             | 32.57978 | -0.479883664 | 0.555603 | -0.86372 | 0.387743 | 0.827592 |
| znf593            | 447.083  | -0.225744159 | 0.177773 | -1.26984 | 0.20414  | 0.685399 |
| cyb561d2          | 13.60116 | 0.312477322  | 0.438412 | 0.712748 | 0.476002 | 0.869292 |
| txn               | 1061.343 | 0.68537263   | 0.148963 | 4.60097  | 4.21E-06 | 0.000937 |
| si:ch211-214p16.1 | 15.67729 | -1.142951543 | 0.643965 | -1.77487 | 0.07592  | 0.46659  |
| ogna              | 930.9919 | 0.257912417  | 0.118264 | 2.180811 | 0.029197 | 0.304273 |
| iars2             | 469.2213 | -0.008952176 | 0.102032 | -0.08774 | 0.930084 | 0.995706 |
| cenpp             | 107.9831 | -0.133884453 | 0.192036 | -0.69719 | 0.485687 | 0.87303  |
| rab3gap2          | 461.4854 | 0.047943493  | 0.113722 | 0.421584 | 0.673329 | 0.934249 |
| acssl             | 328.4145 | -0.14364242  | 0.17054  | -0.84228 | 0.399631 | 0.831196 |
| nol8              | 143.0959 | 0.180472043  | 0.237941 | 0.758473 | 0.448168 | 0.856741 |
| wapla             | 191.8281 | 0.186137902  | 0.158931 | 1.171184 | 0.241525 | 0.723306 |
| ppplcb            | 3305.305 | -0.057493516 | 0.123127 | -0.46695 | 0.640539 | 0.925152 |
| mafaa             | 270.3615 | 0.094594442  | 0.325605 | 0.290519 | 0.771419 | 0.960594 |
| gridlb            | 45.50192 | 1.154137213  | 0.5585   | 2.066493 | 0.038782 | 0.344867 |
| padi2             | 927.4865 | 0.140430464  | 0.108425 | 1.295189 | 0.195255 | 0.67483  |
| prelidlb          | 28.45949 | 0.23947824   | 0.402074 | 0.595608 | 0.551437 | 0.8974   |
| oxtrl             | 5.39887  | -0.634580956 | 0.800275 | -0.79295 | 0.427805 | 0.845893 |
| rbms2a            | 532.7562 | -0.542839037 | 0.203399 | -2.66884 | 0.007611 | 0.147466 |
| staul             | 2515.2   | 0.097741963  | 0.093683 | 1.043326 | 0.296797 | 0.764495 |
| prkabla           | 521.1867 | 0.176802453  | 0.139617 | 1.266338 | 0.205392 | 0.687537 |
| gxylt2            | 240.119  | 0.176474269  | 0.173205 | 1.018878 | 0.308261 | 0.773155 |
| tcta              | 382.8618 | -0.071747514 | 0.162595 | -0.44127 | 0.65902  | 0.930581 |
| gnatl             | 832.5882 | 0.087856505  | 0.249502 | 0.352127 | 0.724743 | 0.948503 |
| sumf1             | 243.2599 | 0.003057514  | 0.172133 | 0.017762 | 0.985828 | 1        |
| endou             | 388.7349 | -1.773884166 | 0.975441 | -1.81855 | 0.068981 | 0.448201 |
| fto               | 113.7748 | 0.099164048  | 0.234908 | 0.42214  | 0.672923 | 0.93414  |
| si:dkey-27b3.2    | 559.2404 | -0.035307477 | 0.102723 | -0.34371 | 0.731061 | 0.950056 |
| BX005421.1        | 1.53762  | -1.404547129 | 1.748553 | -0.80326 | 0.421823 | NA       |
| dram2b            | 485.7848 | -0.03585599  | 0.148702 | -0.24113 | 0.809457 | 0.969828 |
| snx18b            | 75.12314 | -0.115233158 | 0.178579 | -0.64528 | 0.518747 | 0.887148 |
| rasgef1bb         | 375.9383 | -0.126929644 | 0.160481 | -0.79093 | 0.428984 | 0.846713 |
| paqr3b            | 111.7379 | -0.123463459 | 0.320627 | -0.38507 | 0.700186 | 0.942723 |
| anxa3b            | 800.6619 | -0.045239356 | 0.159039 | -0.28445 | 0.776062 | 0.961073 |
| rbml8             | 253.5594 | 0.052512796  | 0.150981 | 0.347811 | 0.727982 | 0.949325 |
| si:ch211-243g18.2 | 1181.714 | -0.005354603 | 0.163648 | -0.03272 | 0.973898 | 1        |
| pimr71            | 1.074523 | 3.269356263  | 1.88494  | 1.734462 | 0.082836 | NA       |
| cdc3711           | 101.8489 | -0.030163477 | 0.174481 | -0.17288 | 0.862749 | 0.981285 |
| sumol             | 1412.529 | -0.352782992 | 0.164421 | -2.14561 | 0.031904 | 0.317397 |
| spl               | 203.0052 | -0.862607877 | 0.409255 | -2.10775 | 0.035052 | 0.329872 |
| synpr             | 43.72045 | 0.912874446  | 0.319423 | 2.857889 | 0.004265 | 0.107992 |
| opnlmw3           | 1.054206 | 3.288288309  | 1.842001 | 1.785171 | 0.074234 | NA       |
| opnlmw2           | 175.1077 | -2.371078468 | 1.434198 | -1.65324 | 0.098281 | 0.521076 |
| erbin             | 753.0628 | 0.057988084  | 0.130805 | 0.443316 | 0.657537 | 0.93039  |
| smc5              | 275.2021 | 0.154525975  | 0.132591 | 1.16543  | 0.243845 | 0.724437 |
| rph3al            | 0 NA     | NA           | NA       | NA       | NA       | NA       |
| pip5klba          | 74.33371 | 0.226336724  | 0.224983 | 1.006018 | 0.314407 | 0.777479 |
| phax              | 292.8791 | 0.054217178  | 0.184488 | 0.293879 | 0.76885  | 0.960395 |
| lmnb1             | 1733.073 | 0.236493411  | 0.170686 | 1.385546 | 0.165885 | 0.635405 |
| atf1              | 760.6262 | 0.007826664  | 0.110481 | 0.070842 | 0.943524 | 0.997371 |
| prrc1             | 385.8492 | 0.159543935  | 0.124978 | 1.276573 | 0.201753 | 0.681726 |
| itgb7             | 29.18473 | 0.325164108  | 0.418529 | 0.776922 | 0.437205 | 0.851125 |

|                   |          |              |          |          |          |          |
|-------------------|----------|--------------|----------|----------|----------|----------|
| fstl4             | 57.36115 | 0.021570405  | 0.346911 | 0.062179 | 0.950421 | 0.99801  |
| zgc:193690        | 26.33947 | -0.471729509 | 0.507894 | -0.9288  | 0.352995 | 0.803822 |
| BX950188.1        | 19.66113 | -0.737119151 | 0.523962 | -1.40682 | 0.159481 | 0.6257   |
| tmem185           | 307.3003 | 0.069919612  | 0.144424 | 0.484127 | 0.628296 | 0.921864 |
| ankrd46a          | 732.1977 | 0.095191693  | 0.111004 | 0.857555 | 0.391138 | 0.827902 |
| zranb2            | 701.4928 | -0.030169386 | 0.104665 | -0.28825 | 0.773157 | 0.960624 |
| si:ch211-218m3.16 | 2.126937 | 0            | 1.959315 | 0        | 1        | NA       |
| or115-6           | 1.474002 | 0.775593229  | 1.574504 | 0.492595 | 0.622299 | NA       |
| or115-7           | 2.428128 | 0.416679469  | 1.309528 | 0.318191 | 0.75034  | 0.955074 |
| rp2               | 348.9511 | -0.266311907 | 0.165997 | -1.60431 | 0.108645 | 0.541123 |
| chst7             | 182.4404 | 0.093858986  | 0.166641 | 0.563241 | 0.57327  | 0.903952 |
| or115-13          | 0        | NA           | NA       | NA       | NA       | NA       |
| cyfipl            | 1765.1   | -0.053712926 | 0.090512 | -0.59344 | 0.55289  | 0.897594 |
| CT030712.1        | 6.660184 | -2.152589287 | 1.098092 | -1.9603  | 0.049961 | 0.388976 |
| tp63              | 522.6386 | -0.129888993 | 0.164191 | -0.79109 | 0.428894 | 0.846607 |
| tbc1d23           | 883.0877 | -0.126480236 | 0.096299 | -1.31342 | 0.189043 | 0.668516 |
| unc119b           | 519.8472 | 0.223005139  | 0.149566 | 1.491014 | 0.135958 | 0.591131 |
| angpt13           | 241.3168 | -0.056392653 | 0.200798 | -0.28084 | 0.778831 | 0.961073 |
| atg4c             | 352.9449 | -0.006499268 | 0.172662 | -0.03764 | 0.969973 | 1        |
| zgc:158291        | 421.9744 | 0.063076974  | 0.189528 | 0.332811 | 0.739277 | 0.953422 |
| rbmx2             | 100.0306 | 0.092689219  | 0.223431 | 0.414845 | 0.678255 | 0.936026 |
| siah21            | 343.6601 | 0.12153993   | 0.166671 | 0.729221 | 0.465867 | 0.86502  |
| cldn2             | 97.26615 | -0.549444253 | 0.361067 | -1.52172 | 0.128078 | 0.577144 |
| wdr78             | 20.58976 | 0.492527884  | 0.461997 | 1.066085 | 0.286385 | 0.757624 |
| nop16             | 267.3708 | -0.169662868 | 0.184642 | -0.91887 | 0.358162 | 0.809542 |
| pars2             | 63.06888 | -0.08405461  | 0.234998 | -0.35768 | 0.720581 | 0.947263 |
| ttc4              | 210.0505 | -0.103238673 | 0.184788 | -0.55869 | 0.576375 | 0.90475  |
| csmdla            | 2.478297 | 0.971665872  | 1.754411 | 0.553842 | 0.579687 | 0.905618 |
| tlr5a             | 25.6278  | -0.623338703 | 0.477197 | -1.30625 | 0.191468 | 0.671456 |
| displ             | 229.9953 | -0.012570885 | 0.152465 | -0.08245 | 0.934288 | 0.996752 |
| dnajc19           | 295.9089 | -0.746511847 | 0.220755 | -3.38163 | 0.000721 | 0.035767 |
| acvr2ba           | 73.06837 | -0.462618765 | 0.231863 | -1.99523 | 0.046018 | 0.375021 |
| ppig              | 445.5796 | 0.151356512  | 0.143577 | 1.054186 | 0.291798 | 0.761454 |
| sned1             | 90.49622 | -0.266032304 | 0.311886 | -0.85298 | 0.393671 | 0.828374 |
| rps6ka4           | 94.11452 | 0.051690171  | 0.203307 | 0.254247 | 0.799304 | 0.967111 |
| cdca5             | 205.8637 | 0.129266791  | 0.253915 | 0.509094 | 0.610686 | 0.915331 |
| si:ch73-194h10.2  | 100.6536 | 0.297517662  | 0.3216   | 0.925116 | 0.354905 | 0.806034 |
| gfilab            | 46.75149 | -0.110542718 | 0.283051 | -0.39054 | 0.696137 | 0.941657 |
| cdc23             | 194.0159 | 0.268674231  | 0.166987 | 1.608957 | 0.107626 | 0.538826 |
| sall4             | 336.635  | 0.011530127  | 0.144302 | 0.079902 | 0.936315 | 0.997032 |
| paklip1           | 370.8949 | -0.24092969  | 0.159486 | -1.51067 | 0.130874 | 0.582503 |
| tlr9              | 0.298346 | 0            | 5.267649 | 0        | 1        | NA       |
| kif20a            | 270.268  | 0.235456847  | 0.246551 | 0.955002 | 0.339577 | 0.795226 |
| ublcp1            | 208.9221 | 0.416696538  | 0.164197 | 2.537779 | 0.011156 | 0.183611 |
| viml              | 30.02396 | -1.407245971 | 0.539027 | -2.61072 | 0.009035 | 0.16317  |
| etv5b             | 781.8936 | -0.332895044 | 0.178667 | -1.86321 | 0.062432 | 0.427718 |
| ca4c              | 20.13153 | -0.474693613 | 0.488131 | -0.97247 | 0.330816 | 0.788291 |
| tpst11            | 287.3033 | 0.084819424  | 0.136832 | 0.619881 | 0.535336 | 0.891993 |
| st6gall           | 23.46805 | 0.649724104  | 0.519265 | 1.251238 | 0.210847 | 0.692523 |
| eef1b2            | 9308.534 | -0.483822017 | 0.153772 | -3.14636 | 0.001653 | 0.062485 |
| def6b             | 35.10481 | -0.301993472 | 0.441784 | -0.68358 | 0.494242 | 0.877583 |
| pparda            | 105.1549 | 0.33506409   | 0.229661 | 1.458953 | 0.144578 | 0.603539 |
| camklga           | 102.7363 | -0.251308741 | 0.521901 | -0.48153 | 0.630143 | 0.922869 |
| scl15a1b          | 163.4388 | 2.636976722  | 0.927194 | 2.84404  | 0.004455 | 0.109917 |

|               |           |               |           |           |           |           |
|---------------|-----------|---------------|-----------|-----------|-----------|-----------|
| nr4a2b        | 187. 1912 | -0. 166760051 | 0. 324777 | -0. 51346 | 0. 607629 | 0. 915204 |
| CR631122. 1   | 2. 794746 | 0. 958730969  | 1. 802109 | 0. 532005 | 0. 594722 | 0. 910869 |
| fkbp2         | 915. 633  | -0. 215383948 | 0. 192308 | -1. 12    | 0. 262715 | 0. 740207 |
| ppplr14ba     | 791. 1632 | 0. 368749905  | 0. 188414 | 1. 957123 | 0. 050333 | 0. 390692 |
| zgc:110782    | 31. 41131 | -0. 058822164 | 0. 361137 | -0. 16288 | 0. 870612 | 0. 983365 |
| zgc:77262     | 923. 7874 | 0. 146591024  | 0. 111038 | 1. 320192 | 0. 186771 | 0. 665301 |
| zgc:112416    | 6. 070629 | 0. 492920176  | 0. 789555 | 0. 624301 | 0. 53243  | 0. 890978 |
| hif1a12       | 205. 1918 | -0. 269303168 | 0. 184331 | -1. 46097 | 0. 144023 | 0. 603144 |
| atg9a         | 585. 1502 | -0. 245896736 | 0. 135237 | -1. 81827 | 0. 069023 | 0. 448349 |
| pacsla        | 239. 0319 | -0. 007178841 | 0. 185975 | -0. 0386  | 0. 969208 | 1         |
| ccr7          | 1. 960897 | -3. 767512146 | 1. 63161  | -2. 30908 | 0. 020939 | NA        |
| cycsb         | 5246. 292 | 0. 513486575  | 0. 117098 | 4. 385119 | 1. 16E-05 | 0. 00208  |
| olal          | 4018. 223 | -0. 276473533 | 0. 106488 | -2. 59628 | 0. 009424 | 0. 166808 |
| fabp6         | 1050. 195 | 1. 055395163  | 1. 69478  | 0. 622733 | 0. 53346  | 0. 891181 |
| ttcl          | 161. 9522 | 0. 087267468  | 0. 167512 | 0. 520964 | 0. 602392 | 0. 914001 |
| cldn19        | 171. 7875 | 0. 116885382  | 0. 201975 | 0. 578712 | 0. 562784 | 0. 900772 |
| cdc42         | 2806. 45  | 0. 129885412  | 0. 103054 | 1. 260357 | 0. 207541 | 0. 68962  |
| rbms3         | 116. 6603 | 0. 232040722  | 0. 254442 | 0. 91196  | 0. 36179  | 0. 811787 |
| vars          | 791. 0436 | 0. 072203285  | 0. 125637 | 0. 574695 | 0. 565497 | 0. 901564 |
| tex261        | 206. 7439 | 0. 174141755  | 0. 149076 | 1. 168144 | 0. 242749 | 0. 724345 |
| emp2          | 1882. 127 | -0. 037688103 | 0. 149248 | -0. 25252 | 0. 80064  | 0. 967515 |
| pgap2         | 88. 10695 | 0. 007300615  | 0. 184337 | 0. 039605 | 0. 968408 | 1         |
| ncbp3         | 332. 1829 | 0. 022368584  | 0. 108823 | 0. 205549 | 0. 837143 | 0. 976007 |
| plppr2b       | 16. 10207 | 0. 416285921  | 0. 659239 | 0. 631465 | 0. 527737 | 0. 889948 |
| rtn4a         | 4776. 76  | 0. 021601386  | 0. 130422 | 0. 165626 | 0. 868451 | 0. 982801 |
| stx121        | 253. 4935 | -0. 039121176 | 0. 167299 | -0. 23384 | 0. 815109 | 0. 970957 |
| clqb          | 12. 96554 | -1. 323422372 | 0. 791661 | -1. 6717  | 0. 094583 | 0. 51347  |
| clqa          | 14. 11602 | -0. 0038732   | 0. 819157 | -0. 00473 | 0. 996227 | 1         |
| zak           | 374. 5089 | -0. 047828194 | 0. 201393 | -0. 23749 | 0. 812279 | 0. 970129 |
| birc2         | 1829. 017 | -0. 000721148 | 0. 114675 | -0. 00629 | 0. 994982 | 1         |
| polq          | 53. 54952 | 0. 075637944  | 0. 249137 | 0. 3036   | 0. 761433 | 0. 958159 |
| pcf11         | 941. 6778 | 0. 004672133  | 0. 125633 | 0. 037189 | 0. 970334 | 1         |
| ccdc90b       | 180. 8266 | -0. 130727895 | 0. 24645  | -0. 53044 | 0. 595804 | 0. 911427 |
| alg8          | 107. 321  | 0. 500781588  | 0. 210882 | 2. 374698 | 0. 017563 | 0. 234077 |
| dtd1          | 194. 7623 | 0. 069600396  | 0. 157503 | 0. 4419   | 0. 658561 | 0. 930581 |
| gucald        | 5. 352452 | -0. 812469663 | 1. 678686 | -0. 48399 | 0. 628392 | 0. 921864 |
| myo7ab        | 64. 1601  | 0. 286403013  | 0. 314519 | 0. 910607 | 0. 362502 | 0. 812457 |
| sc5d          | 78. 01762 | 0. 558840701  | 0. 227294 | 2. 458666 | 0. 013945 | 0. 207125 |
| st14b         | 203. 556  | -0. 301359209 | 0. 161174 | -1. 86978 | 0. 061515 | 0. 425588 |
| hplbp3        | 4756. 084 | 0. 031516484  | 0. 098341 | 0. 320481 | 0. 748604 | 0. 955074 |
| parapinopsinb | 36. 83773 | -0. 04736572  | 0. 401651 | -0. 11793 | 0. 906125 | 0. 991631 |
| rbp41         | 154. 6088 | -0. 223704635 | 0. 329413 | -0. 6791  | 0. 497074 | 0. 878572 |
| nr0b2a        | 352. 7276 | -0. 91209397  | 0. 304155 | -2. 99878 | 0. 002711 | 0. 085055 |
| dusp4         | 202. 8427 | -0. 438229869 | 0. 261153 | -1. 67806 | 0. 093336 | 0. 51113  |
| ppplr3b       | 205. 2307 | 0. 115982385  | 0. 351485 | 0. 329978 | 0. 741416 | 0. 954103 |
| eril          | 157. 8117 | 0. 062596889  | 0. 198008 | 0. 316133 | 0. 751901 | 0. 955391 |
| fybb          | 55. 33384 | -0. 321970626 | 0. 258651 | -1. 24481 | 0. 213202 | 0. 695467 |
| ccdc8012      | 476. 1667 | 0. 058571919  | 0. 163282 | 0. 358716 | 0. 719808 | 0. 94694  |
| or137-2       | 0. 787119 | 0             | 2. 6798   | 0         | 1         | NA        |
| vav2          | 225. 0761 | -0. 12749026  | 0. 149818 | -0. 85097 | 0. 394788 | 0. 828825 |
| or115-12      | 11. 73209 | 0. 781974231  | 0. 5231   | 1. 494884 | 0. 134945 | 0. 589926 |
| ddt           | 1694. 45  | 0. 332747666  | 0. 175162 | 1. 899657 | 0. 057478 | 0. 413721 |
| p2rx4a        | 31. 12134 | -0. 203087002 | 0. 47671  | -0. 42602 | 0. 670095 | 0. 933809 |
| idh3b         | 1569. 047 | 0. 031476039  | 0. 114182 | 0. 275666 | 0. 782805 | 0. 962328 |

|                 |          |              |          |          |          |          |
|-----------------|----------|--------------|----------|----------|----------|----------|
| gnrh2           | 18.44539 | 0.233261998  | 0.526793 | 0.442796 | 0.657913 | 0.930581 |
| si:dkeyp-87d8.8 | 41.11631 | -0.296910851 | 0.310437 | -0.95643 | 0.338855 | 0.795226 |
| gnaia           | 784.1368 | 0.032044375  | 0.154466 | 0.207453 | 0.835656 | 0.976007 |
| mitd1           | 90.27899 | -0.437897265 | 0.228083 | -1.91991 | 0.05487  | 0.405196 |
| tspan10         | 65.9684  | -0.477022095 | 0.258498 | -1.84536 | 0.064985 | 0.434945 |
| kctd13          | 302.6687 | -0.221600521 | 0.144627 | -1.53222 | 0.125467 | 0.57334  |
| pou5f3          | 15.63735 | -0.910656939 | 0.51522  | -1.76751 | 0.077143 | 0.469501 |
| fut7            | 11.74076 | 0.076220394  | 0.4958   | 0.153732 | 0.877821 | 0.985613 |
| clic3           | 73.81601 | -0.072935385 | 0.252262 | -0.28913 | 0.772485 | 0.960624 |
| bace2           | 247.557  | -0.095729729 | 0.152679 | -0.627   | 0.530658 | 0.890545 |
| entpd2b         | 4.135366 | 0.529465059  | 1.251921 | 0.422922 | 0.672352 | 0.934089 |
| cd8a            | 0.289971 | -1.378335838 | 5.201853 | -0.26497 | 0.791032 | NA       |
| wdr38           | 6.095822 | -0.298900086 | 0.630895 | -0.47377 | 0.635663 | 0.924524 |
| aadacl4         | 3.447715 | -0.826987642 | 1.478771 | -0.55924 | 0.575998 | 0.904739 |
| dhrr3b          | 252.7075 | -0.135391465 | 0.120047 | -1.12782 | 0.259395 | 0.736127 |
| dck             | 87.26687 | 0.620537159  | 0.396956 | 1.563238 | 0.117997 | 0.560168 |
| slc4a4b         | 207.0943 | -0.175247513 | 0.226201 | -0.77474 | 0.438491 | 0.851685 |
| fpgs            | 373.0009 | -0.459287792 | 0.192477 | -2.3862  | 0.017024 | 0.231104 |
| cdk9            | 686.2742 | -0.241160692 | 0.088796 | -2.71591 | 0.006609 | 0.136957 |
| ttcl7           | 264.5038 | 0.017058362  | 0.164902 | 0.103445 | 0.91761  | 0.993777 |
| vps33b          | 230.9732 | -0.245864263 | 0.182226 | -1.34923 | 0.177264 | 0.650801 |
| serinc4         | 88.58724 | 0.133237482  | 0.278567 | 0.478296 | 0.632439 | 0.923353 |
| cstfl           | 373.1688 | 0.020683745  | 0.130433 | 0.158578 | 0.874002 | 0.98385  |
| wnt7aa          | 323.3319 | 0.072672851  | 0.168493 | 0.431311 | 0.666242 | 0.932664 |
| zgc:171599      | 97.97174 | -0.07367911  | 0.268222 | -0.27469 | 0.783551 | 0.96245  |
| wbp2n1          | 1160.1   | -0.088758046 | 0.131233 | -0.67634 | 0.498825 | 0.879386 |
| opn1lw2         | 6911.024 | 0.194732308  | 0.505536 | 0.3852   | 0.700089 | 0.942647 |
| opn1lw1         | 10.38699 | -0.868155027 | 1.842275 | -0.47124 | 0.637469 | 0.924779 |
| zgc:92107       | 509.3798 | -0.072872636 | 0.124701 | -0.58438 | 0.558966 | 0.899409 |
| crygm2e         | 21.95442 | 1.410912355  | 1.30468  | 1.081424 | 0.279508 | 0.752477 |
| zgc:113307      | 255.0545 | -0.009474462 | 0.201728 | -0.04697 | 0.96254  | 0.999509 |
| fmoda           | 3308.778 | -0.135550277 | 0.145164 | -0.93377 | 0.350421 | 0.802215 |
| tmem183a        | 407.3025 | -0.147499547 | 0.126267 | -1.16816 | 0.242743 | 0.724345 |
| prlhr2a         | 13.20102 | 0.930198409  | 0.477519 | 1.947981 | 0.051417 | 0.394202 |
| atp2b4          | 1828.646 | 0.024238259  | 0.12052  | 0.201113 | 0.84061  | 0.97643  |
| suclg2          | 1145.851 | 0.113429028  | 0.153593 | 0.738505 | 0.460207 | 0.862369 |
| ube2w           | 198.1709 | -0.245286223 | 0.180913 | -1.35582 | 0.175155 | 0.649231 |
| gdf11           | 19.87549 | 0.075427063  | 0.362834 | 0.207883 | 0.83532  | 0.976007 |
| cdk5rap1        | 86.59454 | -0.216516224 | 0.205337 | -1.05444 | 0.29168  | 0.761454 |
| hpdb            | 3932.138 | 0.003747359  | 0.270243 | 0.013867 | 0.988936 | 1        |
| cbx2            | 413.0082 | 0.052826364  | 0.151019 | 0.3498   | 0.726489 | 0.949072 |
| mrpl45          | 415.7206 | 0.292733939  | 0.157703 | 1.85624  | 0.063419 | 0.429783 |
| npepps          | 1561.726 | -0.06820026  | 0.115727 | -0.58932 | 0.555647 | 0.898723 |
| rnf8            | 368.6713 | -0.102393484 | 0.135056 | -0.75816 | 0.448356 | 0.856741 |
| slitla          | 418.502  | -0.095485734 | 0.230951 | -0.41345 | 0.67928  | 0.936209 |
| zgc:114123      | 1.810116 | 1.418003882  | 1.465122 | 0.96784  | 0.333124 | NA       |
| vcla            | 410.4082 | -0.024892709 | 0.199464 | -0.1248  | 0.900683 | 0.99045  |
| bcap31          | 710.5161 | -0.120204127 | 0.111603 | -1.07707 | 0.28145  | 0.753734 |
| krt98           | 11.04389 | -1.089418806 | 1.00516  | -1.08383 | 0.278442 | 0.752101 |
| krt94           | 1725.998 | 0.405438395  | 0.184703 | 2.195087 | 0.028157 | 0.298748 |
| krt93           | 7.854018 | 1.055425418  | 1.774779 | 0.59468  | 0.552057 | 0.8974   |
| kpna6           | 146.0408 | -0.22151746  | 0.236217 | -0.93777 | 0.348362 | 0.800896 |
| dhrr3a          | 178.9171 | -0.596427985 | 0.22416  | -2.66072 | 0.007797 | 0.149185 |
| plvapb          | 1079.412 | -0.126542413 | 0.120493 | -1.0502  | 0.293625 | 0.762788 |



|                  |          |              |          |          |          |          |
|------------------|----------|--------------|----------|----------|----------|----------|
| ptprga           | 55.26144 | -0.103161024 | 0.317415 | -0.325   | 0.745178 | 0.954956 |
| tapbp.2          | 27.70581 | -0.693702115 | 0.437664 | -1.58501 | 0.112964 | 0.55033  |
| tuba2            | 2751.685 | 0.155183735  | 0.168315 | 0.921982 | 0.356538 | 0.807342 |
| cyp27b1          | 43.26937 | -0.225844395 | 0.286088 | -0.78942 | 0.429865 | 0.847418 |
| npffl            | 86.05124 | 0.939193195  | 0.251253 | 3.738042 | 0.000185 | 0.014229 |
| pdrgl            | 155.1069 | 0.140325659  | 0.16824  | 0.834082 | 0.404235 | 0.833888 |
| aamp             | 2492.071 | -0.140431716 | 0.206111 | -0.68134 | 0.495657 | 0.87806  |
| lhfp15a          | 15.2805  | 0.795349635  | 0.500387 | 1.58947  | 0.111954 | 0.548295 |
| ift52            | 226.4407 | 0.071643835  | 0.178294 | 0.401829 | 0.68781  | 0.938835 |
| rab9a            | 75.14006 | 0.12109541   | 0.19309  | 0.627145 | 0.530564 | 0.890545 |
| cdc42ep4b        | 601.8836 | 0.003414755  | 0.102097 | 0.033446 | 0.973319 | 1        |
| tekt3            | 35.76692 | -0.79151552  | 0.435414 | -1.81784 | 0.069088 | 0.448527 |
| kcnj16           | 6.873371 | 0.612608744  | 0.710696 | 0.861984 | 0.388696 | 0.827613 |
| slc16a3          | 664.8361 | 0.097749545  | 0.173153 | 0.564528 | 0.572395 | 0.903461 |
| abl1mb           | 796.493  | -0.308613489 | 0.17293  | -1.78461 | 0.074324 | 0.463115 |
| vtila            | 138.6458 | -0.185579668 | 0.184492 | -1.00589 | 0.314467 | 0.777479 |
| entpd1           | 726.2704 | 0.108755094  | 0.140611 | 0.773446 | 0.439259 | 0.852079 |
| kcnk1a           | 28.12129 | -0.181126854 | 0.320998 | -0.56426 | 0.572576 | 0.903533 |
| itgb3b           | 85.34981 | 0.549364931  | 0.217697 | 2.523529 | 0.011618 | 0.187517 |
| chad             | 207.8904 | 0.132177291  | 0.3374   | 0.391752 | 0.695241 | 0.941316 |
| arl4d            | 630.1017 | -0.192620617 | 0.136741 | -1.40866 | 0.158937 | 0.62448  |
| tmem106a         | 384.5886 | -0.206795384 | 0.141418 | -1.4623  | 0.143659 | 0.602773 |
| cdk5r1b          | 289.6289 | 0.1814117    | 0.251588 | 0.721065 | 0.470869 | 0.867874 |
| si:ch211-270n8.1 | 187.6664 | -2.342981241 | 0.840558 | -2.78741 | 0.005313 | 0.122491 |
| mrpl10           | 260.9361 | 0.127032468  | 0.154856 | 0.820329 | 0.412029 | 0.838123 |
| cdk5rap3         | 311.0997 | 0.325735757  | 0.15083  | 2.159623 | 0.030802 | 0.312711 |
| si:dkey-222b8.1  | 62.21995 | -0.072808669 | 0.25356  | -0.28715 | 0.774001 | 0.960636 |
| elac1            | 274.4252 | -0.082111123 | 0.165854 | -0.49508 | 0.620544 | 0.918076 |
| foxn2b           | 346.6374 | -0.193114457 | 0.131869 | -1.46444 | 0.143073 | 0.602002 |
| oplah            | 383.9752 | -0.182808819 | 0.150133 | -1.21765 | 0.223359 | 0.70531  |
| FAM53C           | 323.6276 | -0.019987359 | 0.152349 | -0.13119 | 0.895621 | 0.98926  |
| fkbp10b          | 502.3393 | 0.116201573  | 0.147954 | 0.785388 | 0.432226 | 0.848419 |
| klhl11           | 168.8729 | -0.043534052 | 0.154197 | -0.28233 | 0.777692 | 0.961073 |
| id4              | 379.7853 | 0.074327875  | 0.186711 | 0.39809  | 0.690564 | 0.939981 |
| vdac1            | 3968.596 | 0.087596003  | 0.161806 | 0.541363 | 0.588257 | 0.907935 |
| CABZ01084564.1   | 1.819684 | -0.925234173 | 1.703873 | -0.54302 | 0.587117 | NA       |
| ca7              | 35.25653 | 0.685091211  | 0.443604 | 1.544374 | 0.122498 | 0.569468 |
| lcmt1            | 204.111  | 0.100224279  | 0.164964 | 0.607551 | 0.543485 | 0.894925 |
| aqp8a.1          | 680.3164 | -0.419549482 | 0.155045 | -2.70599 | 0.00681  | 0.139148 |
| hbae5            | 99.69583 | -0.57956753  | 0.271155 | -2.1374  | 0.032565 | 0.319477 |
| hbbe2            | 2922.457 | -0.452829088 | 0.22811  | -1.98514 | 0.047129 | 0.378022 |
| zgc:163057       | 138.4674 | 0.194902919  | 0.29394  | 0.663071 | 0.507285 | 0.883007 |
| shisa9a          | 153.7678 | -0.074463889 | 0.276211 | -0.26959 | 0.787475 | 0.963263 |
| tomm22           | 883.0041 | 0.046946198  | 0.122966 | 0.381783 | 0.702622 | 0.943591 |
| tmem184ba        | 601.889  | 0.034833085  | 0.116182 | 0.299814 | 0.764319 | 0.959228 |
| csnk1e           | 439.541  | 0.04536092   | 0.139082 | 0.326145 | 0.744315 | 0.95491  |
| slc16a8          | 11.53006 | -0.589195841 | 0.878444 | -0.67073 | 0.502395 | 0.881321 |
| phf5a            | 293.1534 | -0.187551098 | 0.213029 | -0.8804  | 0.378643 | 0.822997 |
| rgs9b            | 114.6673 | 0.401182524  | 0.354013 | 1.133243 | 0.257112 | 0.734679 |
| si:ch211-147h1.4 | 0.854649 | -0.387386303 | 2.066291 | -0.18748 | 0.851285 | NA       |
| zdhhc4           | 222.5844 | -0.168775912 | 0.157066 | -1.07456 | 0.282574 | 0.754808 |
| msrb1b           | 0        | NA           | NA       | NA       | NA       | NA       |
| nptx2b           | 7.861584 | -1.491803271 | 1.262825 | -1.18132 | 0.237475 | 0.718568 |
| bhlha15          | 16.41184 | -0.726865866 | 0.612796 | -1.18615 | 0.235564 | 0.716683 |

|                   |          |              |          |          |          |          |
|-------------------|----------|--------------|----------|----------|----------|----------|
| dlgap5            | 442.6557 | 0.322970808  | 0.244036 | 1.323458 | 0.185683 | 0.663476 |
| minpp1b           | 47.59594 | -0.049391018 | 0.299304 | -0.16502 | 0.868929 | 0.982801 |
| pofut2            | 131.8757 | 0.172736741  | 0.216962 | 0.79616  | 0.425939 | 0.844714 |
| acta2             | 2649.747 | -0.507979436 | 0.218624 | -2.32353 | 0.02015  | 0.25169  |
| ch25h             | 11.69288 | -0.491305015 | 1.018318 | -0.48247 | 0.629474 | 0.922687 |
| zgc:55262         | 430.4751 | -0.346516487 | 0.104558 | -3.31412 | 0.000919 | 0.041848 |
| dusp19b           | 98.43881 | -0.060161511 | 0.194954 | -0.30859 | 0.757631 | 0.957364 |
| dkk1b             | 171.6469 | 0.063733502  | 0.220413 | 0.289155 | 0.772463 | 0.960624 |
| glipr1a           | 38.05343 | -0.373670482 | 0.295784 | -1.26332 | 0.206473 | 0.688857 |
| stubl             | 596.6019 | -0.021644729 | 0.142549 | -0.15184 | 0.879313 | 0.986147 |
| cox6b1            | 971.2621 | -0.019326001 | 0.194694 | -0.09926 | 0.920929 | 0.994085 |
| h3f3b.1           | 9450.34  | 0.021491326  | 0.093658 | 0.229467 | 0.818506 | 0.971656 |
| nif311            | 125.5378 | 0.226175617  | 0.217682 | 1.039021 | 0.298795 | 0.765735 |
| zmp:0000000624    | 77.17071 | 0.30737417   | 0.252009 | 1.219694 | 0.222581 | 0.704536 |
| decr2             | 221.3599 | -0.006526579 | 0.161206 | -0.04049 | 0.967706 | 1        |
| gsnb              | 1366.061 | 0.366214364  | 0.177826 | 2.059396 | 0.039456 | 0.34755  |
| gsg112b           | 27.48535 | -0.546434338 | 0.501749 | -1.08906 | 0.276127 | 0.750674 |
| tectb             | 85.14758 | -0.072838324 | 0.239725 | -0.30384 | 0.761248 | 0.958159 |
| pts               | 354.61   | -0.370254119 | 0.188238 | -1.96695 | 0.049189 | 0.386201 |
| tmem204           | 288.2252 | 0.095221885  | 0.145125 | 0.656138 | 0.511735 | 0.885041 |
| klh114            | 90.27788 | 0.143360678  | 0.243631 | 0.588435 | 0.556241 | 0.899002 |
| rdh121            | 70.36128 | -0.506486789 | 0.290769 | -1.74189 | 0.081528 | 0.480662 |
| gpr137c           | 104.8298 | -0.193679465 | 0.200343 | -0.96674 | 0.333674 | 0.790676 |
| sh3glb1a          | 503.3948 | -0.025519989 | 0.16223  | -0.15731 | 0.875002 | 0.984191 |
| cops9             | 372.3293 | -0.005667719 | 0.210448 | -0.02693 | 0.978514 | 1        |
| phb2a             | 1285.142 | 0.151144808  | 0.086356 | 1.750251 | 0.080075 | 0.478179 |
| wipf2a            | 626.4427 | 0.007971862  | 0.115241 | 0.069176 | 0.94485  | 0.997371 |
| vmolb             | 341.1544 | 0.201732363  | 0.29047  | 0.694504 | 0.487366 | 0.873291 |
| st8sia3           | 5.890736 | 0.654470166  | 0.721855 | 0.90665  | 0.364592 | 0.814648 |
| smpx              | 553.5875 | -0.075535741 | 0.13974  | -0.54055 | 0.588821 | 0.908018 |
| mtfr1             | 211.5621 | -0.127037338 | 0.144702 | -0.87793 | 0.379984 | 0.823607 |
| pde7a             | 666.647  | -0.032812689 | 0.138666 | -0.23663 | 0.812942 | 0.970328 |
| slc51a            | 237.9738 | -0.677656056 | 0.302369 | -2.24115 | 0.025016 | 0.280283 |
| polal             | 426.448  | 0.202860294  | 0.21601  | 0.939127 | 0.347666 | 0.80026  |
| map7d2b           | 879.5978 | 0.359720676  | 0.175283 | 2.052224 | 0.040148 | 0.350281 |
| pkp4              | 396.9396 | 0.021522974  | 0.128962 | 0.166895 | 0.867453 | 0.982582 |
| si:ch211-140b10.6 | 174.0947 | -0.051793999 | 0.188871 | -0.27423 | 0.783908 | 0.96249  |
| usp46             | 10.06064 | 0.434277959  | 0.517769 | 0.838749 | 0.40161  | 0.832651 |
| ccdc58            | 143.3498 | 0.023382391  | 0.188597 | 0.123981 | 0.901331 | 0.990553 |
| cst14a.2          | 952.9404 | -0.26836626  | 0.184795 | -1.45224 | 0.146435 | 0.605984 |
| eloca             | 217.2019 | -0.290477818 | 0.162266 | -1.79013 | 0.073433 | 0.46112  |
| elocb             | 1427.648 | 0.004080142  | 0.192878 | 0.021154 | 0.983123 | 1        |
| flj110111         | 296.9098 | 0.081605073  | 0.127752 | 0.63878  | 0.522966 | 0.888222 |
| trappc3           | 594.7003 | 0.009098005  | 0.155043 | 0.05868  | 0.953207 | 0.998436 |
| tubalb            | 1634.378 | 0.627829099  | 0.183825 | 3.41536  | 0.000637 | 0.032797 |
| prdm14            | 10.4552  | -0.082528166 | 0.694701 | -0.1188  | 0.905436 | 0.991631 |
| ngdn              | 264.7685 | -0.393233173 | 0.234745 | -1.67515 | 0.093904 | 0.511703 |
| pabpn1            | 2827.097 | 0.017599424  | 0.08609  | 0.20443  | 0.838017 | 0.976359 |
| pil5a             | 14.13403 | 0.153722876  | 0.464887 | 0.330668 | 0.740896 | 0.954103 |
| gpr22b            | 73.68226 | -0.451771292 | 0.422752 | -1.06864 | 0.285231 | 0.756415 |
| cd226             | 22.72777 | -0.128676185 | 0.859286 | -0.14975 | 0.880964 | 0.986846 |
| mtrr              | 148.3849 | 0.333763661  | 0.176516 | 1.89084  | 0.058646 | 0.418329 |
| cct5              | 4976.94  | 0.031085015  | 0.10974  | 0.283261 | 0.776977 | 0.961073 |
| mllt10            | 1101.417 | -0.055869599 | 0.112422 | -0.49696 | 0.619216 | 0.917397 |

|                   |          |              |          |          |          |          |
|-------------------|----------|--------------|----------|----------|----------|----------|
| commd3            | 240.1488 | 0.006880683  | 0.221905 | 0.031007 | 0.975264 | 1        |
| tagln             | 1232.404 | -0.211883883 | 0.208693 | -1.01529 | 0.309969 | 0.774671 |
| acad11            | 208.0153 | 0.217542802  | 0.190268 | 1.143348 | 0.252894 | 0.732759 |
| gcm2              | 154.8201 | -0.462594872 | 0.186443 | -2.48116 | 0.013095 | 0.198965 |
| elov12            | 177.5931 | 0.61139544   | 0.273864 | 2.232477 | 0.025583 | 0.283893 |
| gnal              | 68.16796 | -0.234272011 | 0.300127 | -0.78058 | 0.435051 | 0.85007  |
| mppel             | 145.8781 | -0.091435041 | 0.153412 | -0.59601 | 0.551169 | 0.8974   |
| fam49bb           | 242.4154 | 0.01076113   | 0.154394 | 0.069699 | 0.944433 | 0.997371 |
| epdr1             | 176.8792 | -0.237645161 | 0.220605 | -1.07724 | 0.281373 | 0.753688 |
| stard3nl          | 242.4228 | -0.131023018 | 0.143551 | -0.91273 | 0.361384 | 0.811679 |
| otulina           | 101.098  | 0.172586881  | 0.274163 | 0.629504 | 0.529019 | 0.890325 |
| si:ch211-146110.8 | 0.286387 | 3.343250914  | 5.172828 | 0.64631  | 0.518079 | NA       |
| zgc:173856        | 0.053262 | 1.055396947  | 5.267649 | 0.200354 | 0.841203 | NA       |
| si:dkey-96n2.3    | 2.004351 | 1.305720357  | 1.079927 | 1.209082 | 0.226631 | NA       |
| mcee              | 215.0815 | 0.215868719  | 0.161149 | 1.339563 | 0.180387 | 0.656134 |
| slc35b3           | 163.6864 | 0.140358792  | 0.166742 | 0.841774 | 0.399914 | 0.831277 |
| cpb1              | 15040.39 | -0.111630794 | 0.305673 | -0.3652  | 0.714964 | 0.945821 |
| agtr1b            | 32.49725 | -0.477468999 | 0.297516 | -1.60485 | 0.108527 | 0.541057 |
| fzd8a             | 463.609  | 0.017801072  | 0.158244 | 0.112491 | 0.910434 | 0.992208 |
| slc35g2b          | 309.2892 | 0.022413274  | 0.234469 | 0.095592 | 0.923845 | 0.994713 |
| fl3a1a.1          | 1.633422 | 2.572456716  | 2.032609 | 1.265593 | 0.205659 | NA       |
| ralaa             | 396.8878 | 0.248958118  | 0.192235 | 1.29507  | 0.195296 | 0.674872 |
| lancl2            | 654.5701 | 0.278268334  | 0.149145 | 1.865753 | 0.062076 | 0.42715  |
| gsap              | 93.13588 | -0.451064572 | 0.19408  | -2.32412 | 0.020119 | 0.251571 |
| stk381            | 200.5358 | 0.379171198  | 0.177319 | 2.138352 | 0.032488 | 0.319445 |
| lrtn2a            | 128.4205 | 0.094666141  | 0.222579 | 0.425314 | 0.670608 | 0.933939 |
| dcplb             | 173.3657 | 0.010403073  | 0.208951 | 0.049787 | 0.960292 | 0.999164 |
| rassf8b           | 168.5538 | -0.138205588 | 0.161307 | -0.85678 | 0.391564 | 0.827902 |
| pawr              | 386.45   | -0.164575557 | 0.119443 | -1.37786 | 0.168247 | 0.639712 |
| rps16             | 17833.16 | -0.363047023 | 0.135274 | -2.68379 | 0.007279 | 0.144623 |
| ndufb2            | 1723.001 | 0.052895343  | 0.127628 | 0.414449 | 0.678545 | 0.936026 |
| slc35e3           | 141.2189 | 0.042475197  | 0.205742 | 0.206449 | 0.83644  | 0.976007 |
| gramd4b           | 363.6459 | 0.070811855  | 0.134979 | 0.524613 | 0.599852 | 0.913598 |
| tbc1d22a          | 158.0306 | -0.298391894 | 0.171025 | -1.74472 | 0.081033 | 0.479801 |
| taf3              | 565.167  | 0.003824181  | 0.151226 | 0.025288 | 0.979825 | 1        |
| atp5f1c           | 9725.858 | -0.012130954 | 0.125535 | -0.09663 | 0.923017 | 0.994525 |
| kin               | 151.9822 | -0.188749654 | 0.147081 | -1.2833  | 0.199386 | 0.679878 |
| itih2             | 1602.571 | -0.141904265 | 0.229891 | -0.61727 | 0.537059 | 0.89244  |
| itih5             | 174.8462 | -0.058763008 | 0.195037 | -0.30129 | 0.763192 | 0.958905 |
| tmem1101          | 419.422  | -0.49457039  | 0.192105 | -2.57449 | 0.010039 | 0.173583 |
| sfmbt2            | 50.62255 | -0.239560519 | 0.281077 | -0.85229 | 0.394051 | 0.828374 |
| acot15            | 610.9034 | 0.735094604  | 0.568301 | 1.293496 | 0.19584  | 0.676219 |
| lamb1b            | 616.2285 | 0.31835824   | 0.188969 | 1.684709 | 0.092045 | 0.507669 |
| tmcc3             | 610.6248 | 0.048879037  | 0.095286 | 0.512972 | 0.607971 | 0.915204 |
| nr2c1             | 386.8451 | 0.082927571  | 0.10441  | 0.794249 | 0.427051 | 0.845491 |
| fgd6              | 174.8266 | 0.261385216  | 0.211554 | 1.23555  | 0.216626 | 0.69815  |
| si:ch211-244b2.4  | 62.79213 | -0.111255512 | 0.337637 | -0.32951 | 0.741769 | 0.954329 |
| ppp6r2a           | 682.8495 | 0.041987428  | 0.115781 | 0.362645 | 0.71687  | 0.94627  |
| gcc1              | 272.9746 | -0.193726355 | 0.125949 | -1.53813 | 0.124016 | 0.57117  |
| lamtor4           | 714.2387 | 0.036895811  | 0.17707  | 0.208369 | 0.834941 | 0.975994 |
| atp6v1f           | 821.7052 | 0.067161001  | 0.129893 | 0.517047 | 0.605123 | 0.914985 |
| hgfa              | 50.86334 | 0.03328728   | 0.282313 | 0.117909 | 0.90614  | 0.991631 |
| lepb              | 13.53633 | 0            | 1.787021 | 0        | 1        | 1        |
| bik               | 98.65558 | -0.312775056 | 0.271311 | -1.15283 | 0.248981 | 0.728918 |

|                  |          |              |          |          |          |          |
|------------------|----------|--------------|----------|----------|----------|----------|
| si:dkey-202b22.6 | 5.607197 | 0.192543482  | 0.905422 | 0.212656 | 0.831595 | 0.974908 |
| hsd17b2          | 28.19615 | -0.067920521 | 0.37087  | -0.18314 | 0.854689 | 0.979161 |
| snx20            | 28.68355 | -0.824678631 | 0.442025 | -1.86568 | 0.062085 | 0.42715  |
| sco2             | 0 NA     | NA           | NA       | NA       | NA       | NA       |
| OTUD7A           | 63.79403 | 0.222795611  | 0.308065 | 0.723209 | 0.469551 | 0.867224 |
| socs2            | 121.9436 | -0.202865107 | 0.268811 | -0.75467 | 0.450444 | 0.857151 |
| mybpc1           | 497.1119 | -0.559987424 | 0.21294  | -2.62979 | 0.008544 | 0.158366 |
| dram1            | 49.42916 | -0.157480602 | 0.354207 | -0.4446  | 0.656609 | 0.929815 |
| pus1             | 125.1668 | -0.305168818 | 0.194488 | -1.56909 | 0.116627 | 0.557506 |
| washc3           | 275.0087 | -0.190396156 | 0.146707 | -1.2978  | 0.194357 | 0.674677 |
| noc4l            | 246.5838 | -0.275292712 | 0.194981 | -1.4119  | 0.15798  | 0.623766 |
| phpt1            | 202.9308 | 0.146143576  | 0.13811  | 1.05817  | 0.289978 | 0.76078  |
| bcat1            | 292.1464 | -0.228750125 | 0.242585 | -0.94297 | 0.345698 | 0.798904 |
| lrmp             | 164.652  | -0.107364657 | 0.216082 | -0.49687 | 0.619281 | 0.917397 |
| lum              | 1889.764 | 0.044279484  | 0.168295 | 0.263107 | 0.792468 | 0.965226 |
| zgc:172145       | 55.21315 | 0.035776602  | 0.234242 | 0.152734 | 0.878608 | 0.985761 |
| kcnj8            | 18.03432 | -0.64872825  | 0.466263 | -1.39134 | 0.164124 | 0.633166 |
| tnni2a.1         | 919.1254 | 0.534311475  | 0.525261 | 1.01723  | 0.309044 | 0.773791 |
| shisalla         | 62.57208 | -0.045521462 | 0.320805 | -0.1419  | 0.887161 | 0.987739 |
| si:dkey-14k9.3   | 74.05054 | -0.488755594 | 0.209762 | -2.33005 | 0.019804 | 0.24843  |
| rassf8a          | 141.5821 | -0.17615616  | 0.216    | -0.81554 | 0.414764 | 0.838698 |
| akr1b1.2         | 410.5373 | -0.502969601 | 0.217969 | -2.30753 | 0.021025 | 0.257618 |
| cax1             | 223.3007 | -0.773868865 | 0.170609 | -4.53592 | 5.74E-06 | 0.001186 |
| ticrr            | 153.5134 | 0.328046314  | 0.197143 | 1.664    | 0.096112 | 0.517378 |
| alkbh3           | 179.2278 | 0.01917796   | 0.181651 | 0.105576 | 0.915919 | 0.993113 |
| tafa5b           | 93.45696 | 0.32850359   | 0.232288 | 1.41421  | 0.1573   | 0.623263 |
| nfybb            | 336.8789 | -0.41704429  | 0.1934   | -2.15639 | 0.031054 | 0.313376 |
| lrrc10           | 12.01987 | -0.734286059 | 0.530567 | -1.38397 | 0.166369 | 0.636415 |
| clta             | 2666.358 | 0.172540817  | 0.132873 | 1.29854  | 0.194102 | 0.674365 |
| nansa            | 407.9381 | 0.212595095  | 0.127602 | 1.666079 | 0.095698 | 0.516616 |
| nek8             | 55.75697 | 0.00686425   | 0.233226 | 0.029432 | 0.97652  | 1        |
| rab34a           | 203.9128 | -0.119398725 | 0.210526 | -0.56714 | 0.570617 | 0.902481 |
| asb15a           | 193.0553 | 0.944940882  | 0.32028  | 2.950357 | 0.003174 | 0.09274  |
| lmod2a           | 3.719466 | -0.914573491 | 0.822991 | -1.11128 | 0.266448 | 0.742912 |
| rb12             | 222.2513 | 0.036015476  | 0.168751 | 0.213424 | 0.830996 | 0.974908 |
| slc13a1          | 82.89895 | -0.260774724 | 0.584173 | -0.4464  | 0.655309 | 0.929606 |
| elavl4           | 2458.112 | 0.111503145  | 0.184041 | 0.60586  | 0.544608 | 0.895206 |
| usp3             | 168.7316 | 0.16488629   | 0.162938 | 1.01196  | 0.311557 | 0.77613  |
| cal2             | 8.152053 | 0.69506241   | 1.459266 | 0.47631  | 0.633854 | 0.923974 |
| msrb3            | 761.2472 | 0.195232584  | 0.140962 | 1.384997 | 0.166053 | 0.635628 |
| hic11            | 236.733  | -0.233141343 | 0.125436 | -1.85864 | 0.063078 | 0.429313 |
| irf7             | 72.88822 | -0.17591678  | 0.291875 | -0.60271 | 0.5467   | 0.896107 |
| ANKRD50          | 218.1796 | 0.050758332  | 0.226738 | 0.223863 | 0.822864 | 0.971966 |
| si:dkey-39a18.1  | 19.01435 | -0.515489676 | 0.390611 | -1.3197  | 0.186935 | 0.665301 |
| ifnglr           | 0 NA     | NA           | NA       | NA       | NA       | NA       |
| il26             | 0.906363 | 1.982951675  | 2.315716 | 0.856302 | 0.391831 | NA       |
| il22             | 1.447194 | -1.731926611 | 2.235947 | -0.77458 | 0.438586 | NA       |
| mdml             | 39.55889 | -0.006297596 | 0.29464  | -0.02137 | 0.982947 | 1        |
| calua            | 1069.246 | 0.1235042    | 0.130208 | 0.948516 | 0.342867 | 0.79738  |
| opnlsw1          | 13480.69 | 1.413766473  | 1.220469 | 1.158379 | 0.246709 | 0.727706 |
| tnpo3            | 1043.12  | -0.034190198 | 0.136256 | -0.25093 | 0.801871 | 0.967776 |
| irf5             | 105.2424 | -0.187378391 | 0.199813 | -0.93777 | 0.348364 | 0.800896 |
| ccdc87           | 5.881925 | -0.196907413 | 0.817146 | -0.24097 | 0.809579 | 0.969828 |
| cntn1b           | 275.5322 | 0.197698549  | 0.210062 | 0.941142 | 0.346632 | 0.79947  |

|                    |          |              |          |          |          |          |
|--------------------|----------|--------------|----------|----------|----------|----------|
| pdzrn4             | 188.5325 | 0.303064876  | 0.208661 | 1.452427 | 0.146383 | 0.605984 |
| zcrbl              | 126.1147 | -0.242057494 | 0.196745 | -1.23031 | 0.218581 | 0.699445 |
| pplnl              | 540.0584 | -0.020979613 | 0.116132 | -0.18065 | 0.856639 | 0.979558 |
| prickle1b          | 740.2701 | -0.065727328 | 0.115294 | -0.57009 | 0.568619 | 0.902234 |
| myca               | 706.66   | 0.002286225  | 0.147829 | 0.015465 | 0.987661 | 1        |
| mrpl23             | 902.4096 | -0.052062706 | 0.157535 | -0.33048 | 0.741035 | 0.954103 |
| dclrelc            | 182.7666 | -0.220818276 | 0.150767 | -1.46464 | 0.14302  | 0.602002 |
| meigl              | 82.37375 | -0.00573474  | 0.216032 | -0.02655 | 0.978822 | 1        |
| tspan9b            | 292.8441 | 0.01993882   | 0.177255 | 0.112487 | 0.910437 | 0.992208 |
| adm2a              | 50.2776  | 0.231519584  | 0.314059 | 0.737186 | 0.461009 | 0.862601 |
| ciapin1            | 716.9244 | -0.017729639 | 0.205842 | -0.08613 | 0.931361 | 0.995809 |
| gucalg             | 28.56685 | -0.920523803 | 0.632586 | -1.45518 | 0.14562  | 0.604973 |
| cped1              | 379.7114 | -0.019837088 | 0.134596 | -0.14738 | 0.88283  | 0.986908 |
| stab2              | 287.9503 | 0.197130795  | 0.217068 | 0.908151 | 0.363799 | 0.814181 |
| ppfibpla           | 547.1067 | -0.250080337 | 0.118909 | -2.10313 | 0.035455 | 0.330833 |
| sytl0              | 71.46168 | 0.291779965  | 0.324135 | 0.90018  | 0.368025 | 0.817272 |
| si:ch211-161n3.4   | 1.14696  | 3.547774334  | 2.081831 | 1.704161 | 0.088351 | NA       |
| tmtc2a             | 146.6506 | 0.297248092  | 0.179909 | 1.652215 | 0.098491 | 0.521131 |
| mettl25            | 58.81148 | -0.166206921 | 0.264399 | -0.62862 | 0.529596 | 0.890434 |
| ccdc59             | 32.04114 | -0.614460969 | 0.351905 | -1.7461  | 0.080793 | 0.479801 |
| cracr2ab           | 16.99806 | -0.245806244 | 0.480766 | -0.51128 | 0.609154 | 0.915204 |
| prmt8b             | 80.04634 | 1.158087849  | 0.37732  | 3.069247 | 0.002146 | 0.073122 |
| asb13a.2           | 16.303   | -1.189538104 | 0.523823 | -2.27088 | 0.023154 | 0.268647 |
| cryla              | 1452.063 | 0.123100568  | 0.103186 | 1.192996 | 0.232871 | 0.714492 |
| PYURF              | 150.1546 | -0.177033468 | 0.193651 | -0.91419 | 0.360619 | 0.811237 |
| cnbpa              | 2564.14  | -0.016716264 | 0.112786 | -0.14821 | 0.882175 | 0.986908 |
| zgc:103499         | 98.05256 | -0.176058766 | 0.203172 | -0.86655 | 0.386189 | 0.827064 |
| avprlab            | 64.5532  | -0.039000146 | 0.296376 | -0.13159 | 0.895309 | 0.989223 |
| srgap1b            | 263.9694 | 0.473607079  | 0.246235 | 1.923397 | 0.05443  | 0.403361 |
| si:ch211-125a15.1  | 161.8586 | -0.15201645  | 0.226379 | -0.67151 | 0.501894 | 0.881148 |
| si:dkey-106n21.1   | 60.36014 | -0.278686607 | 0.319777 | -0.8715  | 0.383479 | 0.825875 |
| si:ch211-68a17.7   | 195.2445 | 0.307551834  | 0.208965 | 1.471789 | 0.141078 | 0.599658 |
| acanb              | 89.98251 | -1.082983956 | 0.364093 | -2.97447 | 0.002935 | 0.089477 |
| fbxl14b            | 494.1553 | -0.077918408 | 0.149241 | -0.5221  | 0.601603 | 0.913982 |
| hapln3             | 367.0084 | -0.07803247  | 0.178618 | -0.43687 | 0.662207 | 0.930742 |
| mfge8b             | 177.3363 | 0.189682574  | 0.274899 | 0.690007 | 0.49019  | 0.875082 |
| abhd2b             | 111.5024 | 0.689174907  | 0.279893 | 2.462276 | 0.013806 | 0.205712 |
| rlbplb             | 130.6669 | 0.052776942  | 0.334677 | 0.157695 | 0.874697 | 0.984156 |
| lrtm2b             | 30.85059 | 1.422969194  | 1.249017 | 1.139271 | 0.25459  | 0.733441 |
| samm50             | 695.172  | 0.27979559   | 0.127951 | 2.186745 | 0.028761 | 0.301537 |
| mcm10              | 68.10384 | 0.195775313  | 0.272595 | 0.718191 | 0.472639 | 0.868786 |
| tnnt2e             | 3120.16  | 0.122541261  | 0.098019 | 1.25018  | 0.211234 | 0.692983 |
| zgc:101783         | 269.1447 | -0.127452735 | 0.151    | -0.84406 | 0.398638 | 0.830925 |
| lyrm5b             | 73.43132 | -0.067307459 | 0.319718 | -0.21052 | 0.833261 | 0.975379 |
| cart2              | 46.71564 | 0.224536102  | 0.671835 | 0.334213 | 0.738219 | 0.952898 |
| si:dkey-14d8.7     | 1138.487 | 0.093618061  | 1.673369 | 0.055946 | 0.955385 | 0.998611 |
| si:dkey-14d8.6     | 8590.07  | -3.232888224 | 1.086128 | -2.97653 | 0.002915 | 0.089033 |
| mapk11             | 181.4258 | 0.045939778  | 0.163834 | 0.280404 | 0.779167 | 0.961073 |
| si:dkey-14d8.20    | 40.25374 | -0.676763995 | 0.359957 | -1.88013 | 0.060091 | 0.422231 |
| zgc:113263         | 316.677  | -0.008476975 | 0.147045 | -0.05765 | 0.954028 | 0.998611 |
| apex1              | 1234.523 | 0.11968505   | 0.139123 | 0.860285 | 0.389632 | 0.827843 |
| osgep              | 259.1374 | -0.370589188 | 0.20215  | -1.83324 | 0.066766 | 0.441363 |
| si:ch211-214j24.10 | 939.1774 | -0.163429514 | 0.11543  | -1.41583 | 0.156826 | 0.622675 |
| ccdc167            | 223.1769 | -0.310774638 | 0.166759 | -1.86361 | 0.062376 | 0.427718 |

|                  |          |              |          |          |          |          |
|------------------|----------|--------------|----------|----------|----------|----------|
| galnt8b.1        | 26.82952 | 0.403495149  | 0.421092 | 0.958211 | 0.337956 | 0.794808 |
| rad51ap1         | 78.16812 | 0.004124256  | 0.244479 | 0.01687  | 0.986541 | 1        |
| fgf23            | 22.1596  | 1.084271364  | 1.300731 | 0.833586 | 0.404514 | 0.834083 |
| fgf6b            | 12.30849 | 0.172882456  | 0.56607  | 0.305408 | 0.760055 | 0.957886 |
| cebpz            | 417.5287 | -0.153563702 | 0.146215 | -1.05026 | 0.293598 | 0.762788 |
| tigarb           | 84.54811 | 0.425977853  | 0.264118 | 1.612831 | 0.106781 | 0.536686 |
| asb15b           | 86.77466 | 0.326416636  | 1.004626 | 0.324914 | 0.745246 | 0.954956 |
| lmod2b           | 78.91686 | -0.408755965 | 0.487319 | -0.83879 | 0.401589 | 0.832651 |
| plekha5          | 695.042  | 0.003438878  | 0.123378 | 0.027873 | 0.977764 | 1        |
| frs2a            | 55.24304 | -0.200597781 | 0.273403 | -0.73371 | 0.463127 | 0.864191 |
| yeats4           | 302.6099 | 0.047273565  | 0.113236 | 0.417478 | 0.676329 | 0.93557  |
| ube2nb           | 886.8625 | 0.000616359  | 0.107114 | 0.005754 | 0.995409 | 1        |
| nudt4b           | 334.2739 | -0.327187825 | 0.151524 | -2.15932 | 0.030826 | 0.312711 |
| gas2l3           | 112.2815 | -0.106376767 | 0.197111 | -0.53968 | 0.589418 | 0.908456 |
| scaf11           | 973.5962 | -0.195167744 | 0.120467 | -1.62009 | 0.105213 | 0.534134 |
| slc38a2          | 1144.248 | 0.09204572   | 0.143416 | 0.641811 | 0.520996 | 0.887466 |
| mmp30            | 518.2905 | 0.201891567  | 0.329726 | 0.612301 | 0.540339 | 0.893049 |
| acat1            | 2369.879 | 0.060540309  | 0.09851  | 0.614558 | 0.538846 | 0.892875 |
| kctd15a          | 390.6951 | -0.04313853  | 0.155089 | -0.27815 | 0.780895 | 0.961608 |
| si:ch211-152c2.3 | 544.5574 | -0.043283749 | 0.206131 | -0.20998 | 0.833682 | 0.975482 |
| agbl5            | 308.0273 | 0.107789541  | 0.131548 | 0.819392 | 0.412563 | 0.838123 |
| nr2e3            | 146.7901 | 0.172274444  | 0.250381 | 0.68805  | 0.491422 | 0.875595 |
| dynlt1           | 47.10679 | -0.090953897 | 0.298001 | -0.30521 | 0.760204 | 0.957886 |
| tmem181          | 458.788  | 0.144145596  | 0.16381  | 0.879954 | 0.378884 | 0.823136 |
| tulp4a           | 524.8459 | 0.068129204  | 0.134369 | 0.507029 | 0.612135 | 0.915668 |
| mrps10           | 585.3149 | -0.196104063 | 0.186472 | -1.05166 | 0.292957 | 0.762505 |
| si:ch211-51e12.7 | 2249.71  | 0.342095908  | 0.127043 | 2.69275  | 0.007087 | 0.142662 |
| crabp1a          | 441.7958 | -0.397394819 | 0.203673 | -1.95115 | 0.05104  | 0.393353 |
| slc25a44a        | 57.7775  | 0.363118872  | 0.227454 | 1.596447 | 0.110389 | 0.545238 |
| psma4            | 1852.729 | 0.134486879  | 0.124941 | 1.076402 | 0.281748 | 0.754257 |
| oaz2a            | 4477.187 | -0.074679468 | 0.095519 | -0.78182 | 0.434318 | 0.850002 |
| rbpms2a          | 1029.556 | -0.170136841 | 0.101942 | -1.66896 | 0.095126 | 0.51461  |
| cpeb1a           | 17.51814 | -0.149051995 | 0.442795 | -0.33662 | 0.736406 | 0.951919 |
| immp11           | 50.43985 | 0.223997187  | 0.326368 | 0.686334 | 0.492502 | 0.876385 |
| pax6b            | 390.3076 | 0.149858602  | 0.17984  | 0.833289 | 0.404682 | 0.83428  |
| slc6ala          | 202.3387 | 0.889156078  | 0.320431 | 2.774873 | 0.005522 | 0.125566 |
| syn2a            | 985.9235 | 0.563020233  | 0.249495 | 2.256641 | 0.024031 | 0.27455  |
| sec24d           | 791.4968 | 0.075540723  | 0.120804 | 0.625318 | 0.531762 | 0.890949 |
| hrc              | 1706.011 | -0.170591055 | 0.136624 | -1.24862 | 0.211806 | 0.693489 |
| kat5b            | 305.6044 | -0.039085528 | 0.120964 | -0.32312 | 0.746606 | 0.955074 |
| prlrb            | 12.93444 | 0.259179814  | 0.451521 | 0.574015 | 0.565958 | 0.901739 |
| kcnk10b          | 8.952901 | -0.418658485 | 0.500777 | -0.83602 | 0.403145 | 0.833709 |
| gpr65            | 1.815675 | -3.936384205 | 2.073012 | -1.89887 | 0.057581 | NA       |
| egfl6            | 1592.473 | 0.072691835  | 0.103807 | 0.700257 | 0.483767 | 0.87219  |
| csf3r            | 25.80362 | 0.100644024  | 0.52708  | 0.190946 | 0.848568 | 0.977912 |
| spg11            | 416.0813 | 0.0567653    | 0.145392 | 0.390428 | 0.69622  | 0.941657 |
| sidt2            | 1049.524 | -0.362346364 | 0.17415  | -2.08066 | 0.037465 | 0.339939 |
| chchd6b          | 600.6746 | 0.138770949  | 0.155382 | 0.893097 | 0.371805 | 0.819358 |
| zgc:153704       | 1156.673 | -0.767865335 | 0.246303 | -3.11757 | 0.001824 | 0.065787 |
| si:ch73-55i23.1  | 2.861729 | -0.236680823 | 1.211768 | -0.19532 | 0.845144 | 0.976791 |
| zbtb43           | 15.15318 | -0.595337671 | 0.506096 | -1.17633 | 0.239462 | 0.719909 |
| arf4a            | 392.0303 | 0.022425149  | 0.159041 | 0.141002 | 0.887868 | 0.988077 |
| saa              | 13.00368 | 0            | 1.810401 | 0        | 1        | 1        |
| necap2           | 652.3328 | -0.128188331 | 0.144665 | -0.8861  | 0.375562 | 0.822237 |

|                    |          |              |          |          |          |          |
|--------------------|----------|--------------|----------|----------|----------|----------|
| med20              | 238.4487 | -0.120851322 | 0.160901 | -0.75109 | 0.452598 | 0.857994 |
| tmcc2              | 182.4956 | -0.059448815 | 0.212973 | -0.27914 | 0.780139 | 0.961275 |
| kdm2bb             | 564.3699 | -0.280153226 | 0.118003 | -2.37412 | 0.017591 | 0.234077 |
| slc47a1            | 96.72309 | -0.495602561 | 0.283321 | -1.74926 | 0.080245 | 0.478492 |
| rasl11a            | 259.0879 | 0.131058466  | 0.208941 | 0.62725  | 0.530495 | 0.890545 |
| kcna6a             | 84.13525 | 0.06620405   | 0.289791 | 0.228454 | 0.819293 | 0.971785 |
| snailb             | 347.5298 | -0.026988403 | 0.157195 | -0.17169 | 0.863683 | 0.981842 |
| CU914487.1         | 43.85867 | 1.945567207  | 0.512777 | 3.79418  | 0.000148 | 0.012175 |
| tmed7              | 1290.968 | 0.134848345  | 0.11283  | 1.195147 | 0.232029 | 0.713202 |
| pym1               | 211.8817 | -0.452287374 | 0.177117 | -2.5536  | 0.010662 | 0.179908 |
| zgc:110339         | 3263.361 | -0.235046706 | 0.129423 | -1.81611 | 0.069354 | 0.449618 |
| slc27a6            | 112.0041 | -0.034252479 | 0.204314 | -0.16765 | 0.866862 | 0.982582 |
| CT027815.1         | 172.4447 | -0.312762953 | 0.192559 | -1.62424 | 0.104324 | 0.532541 |
| zgc:77838          | 142.4092 | 0.056986878  | 0.199008 | 0.286355 | 0.774606 | 0.960871 |
| snx16              | 276.4393 | 0.015295072  | 0.129803 | 0.117833 | 0.9062   | 0.991631 |
| stk11              | 656.1228 | 0.185065438  | 0.114662 | 1.614009 | 0.106526 | 0.536018 |
| cacng6b            | 81.37951 | -0.13694852  | 0.326104 | -0.41995 | 0.674519 | 0.934877 |
| bloc1s2            | 222.7216 | 0.011428277  | 0.17844  | 0.064045 | 0.948934 | 0.997922 |
| brd2b              | 86.41793 | -0.014266886 | 0.258548 | -0.05518 | 0.955994 | 0.998845 |
| dhrl1a             | 55.18091 | -0.635311298 | 0.252009 | -2.52098 | 0.011703 | 0.188169 |
| si:ch211-283g2.1   | 72.6879  | 3.007524088  | 0.406232 | 7.403468 | 1.33E-13 | 2.36E-10 |
| si:ch211-283g2.3   | 0.050624 | 1.055396947  | 5.267649 | 0.200354 | 0.841203 | NA       |
| ebp                | 80.4502  | 0.500718855  | 0.25098  | 1.995052 | 0.046037 | 0.375021 |
| rab10              | 1545.098 | 0.279201957  | 0.102712 | 2.718312 | 0.006562 | 0.136957 |
| casin1             | 587.3882 | -0.149479717 | 0.134709 | -1.10965 | 0.267151 | 0.743418 |
| rab11fip1a         | 118.6224 | -0.174486986 | 0.178568 | -0.97715 | 0.328497 | 0.786794 |
| tk2                | 131.3214 | 0.022962995  | 0.186698 | 0.122995 | 0.902111 | 0.990847 |
| dynlt3             | 631.263  | 0.006201384  | 0.138014 | 0.044933 | 0.964161 | 0.999925 |
| b3galnt2           | 103.1348 | -0.034624236 | 0.236599 | -0.14634 | 0.883652 | 0.987014 |
| zgc:112038         | 11.5684  | -2.153415906 | 0.696047 | -3.09378 | 0.001976 | 0.068961 |
| zgc:162025         | 72.54416 | -0.520229089 | 0.237847 | -2.18725 | 0.028725 | 0.301537 |
| si:ch211-170d8.5   | 122.3433 | -3.08145796  | 1.364286 | -2.25866 | 0.023905 | 0.274193 |
| prkab1b            | 862.188  | -0.224054994 | 0.106103 | -2.11167 | 0.034715 | 0.328285 |
| tnfaip812b         | 163.1086 | -0.135885316 | 0.187182 | -0.72595 | 0.467868 | 0.866201 |
| b4galnt4a          | 65.20876 | 0.212691819  | 0.26779  | 0.794247 | 0.427051 | 0.845491 |
| RPS17              | 21498.87 | -0.285743071 | 0.118982 | -2.40156 | 0.016325 | 0.225785 |
| CR339041.1         | 4.030711 | 0.38242752   | 1.228723 | 0.31124  | 0.755618 | 0.956532 |
| CR339041.2         | 4.499347 | 1.397521448  | 1.430951 | 0.976638 | 0.328748 | 0.787144 |
| mhc11fa            | 8.597    | 0.414742406  | 0.995988 | 0.416413 | 0.677108 | 0.935906 |
| mhc11ga            | 5.759857 | 0.413658477  | 1.006219 | 0.411102 | 0.680998 | 0.937257 |
| si:ch211-113a14.24 | 1.704473 | 2.086293362  | 1.498375 | 1.392371 | 0.16381  | NA       |
| nfatc3b            | 183.8335 | -0.207076858 | 0.184092 | -1.12486 | 0.260649 | 0.738121 |
| slc7a10b           | 73.80597 | 0.016849032  | 0.344009 | 0.048979 | 0.960936 | 0.999249 |
| faap24             | 20.03772 | 0.281315338  | 0.465846 | 0.60388  | 0.545923 | 0.895711 |
| si:ch211-113a14.18 | 3.838685 | 3.547444685  | 1.486913 | 2.385779 | 0.017043 | 0.231104 |
| hist1h2a4          | 1.610592 | 4.852616068  | 2.216059 | 2.18975  | 0.028542 | NA       |
| zgc:173552         | 2.384778 | 0.109280119  | 1.582106 | 0.069073 | 0.944932 | 0.997371 |
| ada2a              | 428.2864 | -0.273744584 | 0.147757 | -1.85267 | 0.063929 | 0.431598 |
| ccnd2a             | 281.374  | 0.007155985  | 0.13601  | 0.052614 | 0.95804  | 0.999109 |
| tigara             | 70.97361 | 0.06418577   | 0.277198 | 0.231552 | 0.816886 | 0.971207 |
| rprip11            | 62.12762 | 0.431743892  | 0.321428 | 1.343207 | 0.179205 | 0.654489 |
| pdhx               | 1456.374 | 0.052425563  | 0.13689  | 0.382976 | 0.701738 | 0.943292 |
| igl4v10            | 0.526784 | 1.055416085  | 3.087854 | 0.341796 | 0.732504 | NA       |
| trim44             | 167.0366 | -0.074885002 | 0.154948 | -0.48329 | 0.62889  | 0.922122 |

|                   |          |              |          |          |          |          |
|-------------------|----------|--------------|----------|----------|----------|----------|
| CABZ01080568.1    | 368.018  | 0.862863067  | 0.309983 | 2.783583 | 0.005376 | 0.123514 |
| sntb2             | 363.733  | -0.042680103 | 0.133162 | -0.32051 | 0.74858  | 0.955074 |
| fhod1             | 134.8116 | 0.061145085  | 0.180494 | 0.338766 | 0.734786 | 0.951361 |
| rplp0             | 94091.24 | -0.295389834 | 0.172058 | -1.7168  | 0.086015 | 0.491972 |
| dhx33             | 69.85421 | -0.269533201 | 0.406354 | -0.6633  | 0.507141 | 0.883007 |
| zgc:113426        | 38.02623 | -0.339357454 | 0.320183 | -1.05989 | 0.289196 | 0.760276 |
| si:dkeyp-110c12.3 | 0.7892   | 1.930172717  | 2.563302 | 0.753003 | 0.451448 | NA       |
| brdlb             | 359.7333 | -0.142556781 | 0.183733 | -0.77589 | 0.437814 | 0.851283 |
| fnbp4             | 1451.938 | 0.176763699  | 0.106687 | 1.656843 | 0.097551 | 0.520966 |
| BX664721.1        | 1.672444 | -0.087389104 | 1.506043 | -0.05803 | 0.953728 | NA       |
| CU469568.1        | 79.61709 | 0.0722725    | 0.209016 | 0.345774 | 0.729512 | 0.950056 |
| btr12             | 120.0699 | -0.021226302 | 0.170598 | -0.12442 | 0.90098  | 0.99045  |
| ptrz1a            | 484.1082 | 0.116934059  | 0.14114  | 0.828497 | 0.407389 | 0.835698 |
| aass              | 527.9961 | 0.20691482   | 0.18837  | 1.098452 | 0.272007 | 0.748056 |
| swap70a           | 76.37814 | -0.011528845 | 0.24462  | -0.04713 | 0.96241  | 0.999461 |
| hyal4             | 207.9227 | 0.076716468  | 0.179387 | 0.427659 | 0.6689   | 0.933115 |
| tmeff2a           | 487.453  | 0.225672842  | 0.142945 | 1.578739 | 0.114396 | 0.553523 |
| si:dkeyp-19e1.3   | 82.02105 | -0.210941189 | 0.256523 | -0.82231 | 0.410901 | 0.83771  |
| ctu2              | 109.0538 | -0.392791018 | 0.236615 | -1.66004 | 0.096906 | 0.51949  |
| kcncla            | 254.9624 | 0.196212204  | 0.214263 | 0.915755 | 0.359795 | 0.810703 |
| galns             | 174.8186 | -0.368230239 | 0.178379 | -2.06431 | 0.038988 | 0.345405 |
| cdt1              | 124.2374 | 0.299334348  | 0.23869  | 1.254072 | 0.209816 | 0.691821 |
| tes               | 353.7773 | 0.032072256  | 0.141807 | 0.226168 | 0.821071 | 0.971788 |
| ccdc33            | 2.305012 | -1.495238843 | 1.270803 | -1.17661 | 0.239351 | 0.719781 |
| pkp3a             | 946.4297 | -0.314392031 | 0.143228 | -2.19505 | 0.02816  | 0.298748 |
| zgc:158222        | 165.7157 | -0.279212105 | 0.192111 | -1.45339 | 0.146115 | 0.605672 |
| stra6             | 406.1568 | 0.047895233  | 0.227424 | 0.210599 | 0.8332   | 0.975379 |
| islr2             | 2798.967 | -0.008509385 | 0.16022  | -0.05311 | 0.957644 | 0.999109 |
| ush1c             | 109.9187 | 0.217646204  | 0.339725 | 0.640655 | 0.521747 | 0.887551 |
| abcc8             | 277.121  | 0.100806608  | 0.182769 | 0.551552 | 0.581255 | 0.905618 |
| kcnj11            | 160.5109 | 0.263565294  | 0.219346 | 1.201598 | 0.229519 | 0.711596 |
| ankrd11           | 384.8051 | 0.045011942  | 0.18834  | 0.238993 | 0.811111 | 0.969984 |
| ist1              | 1110.79  | 0.080070809  | 0.094884 | 0.84388  | 0.398736 | 0.830925 |
| dhodh             | 311.9514 | -0.084063865 | 0.171054 | -0.49145 | 0.62311  | 0.918894 |
| hp                | 4.686291 | 0            | 2.918574 | 0        | 1        | 1        |
| rsph10b           | 21.34516 | -0.139960558 | 0.41456  | -0.33761 | 0.735656 | 0.951543 |
| kcng4b            | 18.40555 | -1.438873604 | 0.671607 | -2.14243 | 0.032159 | 0.318495 |
| fbn2a             | 115.7909 | -0.225975895 | 0.213688 | -1.0575  | 0.290282 | 0.76078  |
| exoc311           | 167.1085 | -0.042086482 | 0.171354 | -0.24561 | 0.805984 | 0.969625 |
| prmt7             | 223.3842 | 0.205932373  | 0.164286 | 1.253498 | 0.210025 | 0.691821 |
| hpxb              | 230.2248 | 0.702776772  | 0.360132 | 1.951442 | 0.051004 | 0.393269 |
| slc14a2           | 65.11493 | 0.357474687  | 0.55302  | 0.646405 | 0.518017 | 0.887148 |
| pde5ab            | 29.74275 | 0.390071486  | 0.383003 | 1.018456 | 0.308461 | 0.773474 |
| cdk7              | 295.4559 | 0.085755435  | 0.154452 | 0.555224 | 0.578742 | 0.905417 |
| nsmaf             | 205.2248 | -0.147221187 | 0.169933 | -0.86635 | 0.386299 | 0.827215 |
| slc30a5           | 523.2955 | -0.086494026 | 0.121199 | -0.71365 | 0.475443 | 0.869292 |
| ccnbl             | 650.8086 | 0.198141413  | 0.215966 | 0.917466 | 0.358898 | 0.80995  |
| cyb5r2            | 110.764  | 0.199385706  | 0.24558  | 0.811898 | 0.41685  | 0.840374 |
| plagl             | 169.7324 | -0.075011164 | 0.18516  | -0.40512 | 0.685392 | 0.938486 |
| edc3              | 385.4162 | -0.175155925 | 0.114556 | -1.529   | 0.126265 | 0.574654 |
| kxd1              | 104.6405 | 0.011364398  | 0.18298  | 0.062107 | 0.950477 | 0.99801  |
| ergic2            | 326.2019 | -0.154145372 | 0.114501 | -1.34624 | 0.178225 | 0.652262 |
| pcxb              | 1419.939 | 0.175224441  | 0.170693 | 1.026547 | 0.304634 | 0.769932 |
| ugt2a4            | 276.0657 | -0.044317914 | 0.220137 | -0.20132 | 0.840449 | 0.976417 |



|                   |          |              |          |          |          |          |
|-------------------|----------|--------------|----------|----------|----------|----------|
| ythdc1            | 753.2166 | 0.058273467  | 0.14563  | 0.400146 | 0.689049 | 0.93924  |
| brmsl             | 173.1994 | 0.133028463  | 0.174591 | 0.761942 | 0.446095 | 0.855403 |
| iscal             | 1332.432 | -0.16085927  | 0.11729  | -1.37147 | 0.170228 | 0.641806 |
| selenom           | 272.6686 | -0.047217064 | 0.20097  | -0.23495 | 0.81425  | 0.970483 |
| zpd               |          | 0 NA         | NA       | NA       | NA       | NA       |
| mmp15a            | 243.0675 | 0.068169986  | 0.250402 | 0.272242 | 0.785436 | 0.962605 |
| btr01             | 64.04852 | -0.126388409 | 0.274968 | -0.45965 | 0.645769 | 0.926728 |
| smulb             | 180.9872 | 0.225817714  | 0.230276 | 0.980641 | 0.32677  | 0.785579 |
| cd99              | 809.4692 | 0.25263513   | 0.108078 | 2.337536 | 0.019411 | 0.245214 |
| STX3              | 74.55027 | -0.076008362 | 0.26254  | -0.28951 | 0.77219  | 0.960624 |
| ndufs8a           | 3327.531 | 0.006644294  | 0.107901 | 0.061578 | 0.950899 | 0.99801  |
| tmem187           | 43.74742 | -0.537314788 | 0.305538 | -1.75859 | 0.078648 | 0.474455 |
| si:dkey-9i23.4    | 2.408564 | 2.291341441  | 1.597307 | 1.434503 | 0.151429 | 0.615372 |
| cav2              | 405.7016 | -0.443820287 | 0.168434 | -2.63498 | 0.008414 | 0.156847 |
| ciao2b            | 360.4787 | -0.499457663 | 0.152294 | -3.27956 | 0.00104  | 0.045197 |
| rrad              | 115.2538 | 0.234625448  | 0.239861 | 0.978172 | 0.327989 | 0.786438 |
| rtn4r12a          | 47.78764 | -0.345441418 | 0.604235 | -0.5717  | 0.567525 | 0.901809 |
| cabp2a            | 59.12607 | 0.986279093  | 0.376736 | 2.61796  | 0.008846 | 0.16123  |
| si:ch73-109d9.1   | 101.307  | -0.837770146 | 0.248018 | -3.37786 | 0.000731 | 0.036014 |
| cmtm4             | 69.85053 | 0.025874319  | 0.236711 | 0.109308 | 0.912958 | 0.99273  |
| pomgnt1           | 291.9042 | 0.316979973  | 0.150792 | 2.102107 | 0.035544 | 0.331075 |
| tspan1            | 25.23489 | 0.310703904  | 0.523025 | 0.594051 | 0.552478 | 0.8974   |
| akr1a1b           | 338.1337 | -0.558725217 | 0.183213 | -3.0496  | 0.002291 | 0.076134 |
| nxn11             | 41.48559 | 0.085622942  | 1.21541  | 0.070448 | 0.943837 | 0.997371 |
| trim35-1          | 36.28617 | -0.060114368 | 0.304124 | -0.19766 | 0.843308 | 0.976791 |
| caspb             | 1051.267 | -0.514501631 | 0.162278 | -3.17049 | 0.001522 | 0.059063 |
| ggt5a             | 210.4099 | 0.272997849  | 0.180863 | 1.509421 | 0.131191 | 0.583069 |
| parietopsin       | 1.360712 | -0.36765008  | 1.417345 | -0.25939 | 0.795332 | NA       |
| pcolceb           | 229.1972 | 0.093291191  | 1.45716  | 0.064023 | 0.948952 | 0.997922 |
| PAQR9             | 67.18119 | 1.025681885  | 0.985333 | 1.040949 | 0.297899 | 0.765407 |
| col4a6            | 2060.767 | 0.081166042  | 0.158308 | 0.512709 | 0.608155 | 0.915204 |
| col4a5            | 4563.436 | 0.189367649  | 0.157256 | 1.204197 | 0.228514 | 0.70974  |
| si:dkeyp-93a5.2   | 1.323681 | 0.652046966  | 2.34491  | 0.278069 | 0.780959 | NA       |
| dnajb9a           | 36.25589 | -0.083632837 | 0.299078 | -0.27964 | 0.779757 | 0.961073 |
| blcap             | 1480.934 | -0.154381602 | 0.140509 | -1.09873 | 0.271887 | 0.748035 |
| si:ch211-122f10.4 | 246.4498 | 0.593061836  | 0.154699 | 3.833655 | 0.000126 | 0.011039 |
| gabarapb          | 3544.333 | -0.287505692 | 0.139287 | -2.06412 | 0.039006 | 0.345405 |
| cxcr1             | 4.420085 | 2.939147722  | 1.5751   | 1.866007 | 0.06204  | 0.42715  |
| CCKAR             | 45.87614 | -0.41028608  | 0.423128 | -0.96965 | 0.332221 | 0.789602 |
| rbpjb             | 76.47164 | 0.147802927  | 0.274664 | 0.538124 | 0.590492 | 0.908901 |
| notch1b           | 307.0603 | 0.273129137  | 0.249418 | 1.095066 | 0.273488 | 0.749148 |
| trim35-31         | 2.853463 | 0.334680558  | 0.911763 | 0.36707  | 0.713567 | 0.945821 |
| agxta             | 728.9683 | -0.884479174 | 0.246664 | -3.58576 | 0.000336 | 0.020824 |
| dtymk             | 109.9175 | -0.370940435 | 0.2552   | -1.45353 | 0.146076 | 0.605672 |
| atg4b             | 538.4718 | -0.100511482 | 0.16786  | -0.59878 | 0.549319 | 0.897174 |
| zgc:114041        | 37.7669  | -0.519415305 | 0.421154 | -1.23331 | 0.217459 | 0.69815  |
| mboat4            | 3.709135 | -0.798950223 | 1.866219 | -0.42811 | 0.66857  | 0.933086 |
| hexa              | 306.8209 | 0.648776199  | 0.149683 | 4.334336 | 1.46E-05 | 0.002392 |
| crtc3             | 73.89778 | 0.052267947  | 0.221948 | 0.235496 | 0.813824 | 0.970423 |
| ehf               | 12.81178 | 0.937630598  | 0.770306 | 1.217219 | 0.223521 | 0.705391 |
| adamts15          | 86.01941 | -0.00051792  | 0.227214 | -0.00228 | 0.998181 | 1        |
| rag2              | 12.16572 | 0.23814657   | 0.691401 | 0.344441 | 0.730515 | 0.950056 |
| rag1              | 44.78114 | 0.525066584  | 0.393516 | 1.334295 | 0.182107 | 0.658775 |
| accs              | 182.0787 | 0.318653805  | 0.158162 | 2.014736 | 0.043932 | 0.367079 |

|                   |          |              |          |          |          |          |
|-------------------|----------|--------------|----------|----------|----------|----------|
| boka              | 218.808  | -0.236242588 | 0.151316 | -1.56125 | 0.118465 | 0.561566 |
| gli3              | 194.9362 | 0.110295712  | 0.201303 | 0.547909 | 0.583754 | 0.906298 |
| slc1a2a           | 212.1606 | 3.57110658   | 1.288885 | 2.770695 | 0.005594 | 0.126154 |
| notch3            | 1377.766 | 0.101453298  | 0.236397 | 0.429164 | 0.667804 | 0.933086 |
| acvr1bb           | 96.66129 | 0.020275522  | 0.165539 | 0.122482 | 0.902517 | 0.990964 |
| ptgs1             | 158.3961 | 0.096203614  | 0.176128 | 0.546215 | 0.584918 | 0.906655 |
| pbx4              | 1960.252 | 0.121276838  | 0.118712 | 1.021605 | 0.306968 | 0.772084 |
| lix1              | 307.173  | -0.042082104 | 0.138214 | -0.30447 | 0.760769 | 0.957886 |
| lrrc8ab           | 224.1738 | 0.205645799  | 0.15666  | 1.312692 | 0.189287 | 0.668869 |
| il12rb2           | 17.52531 | 0.190048546  | 0.444827 | 0.427242 | 0.669203 | 0.933115 |
| il23r             | 9.311946 | -1.758920299 | 1.658406 | -1.06061 | 0.288868 | 0.760057 |
| znf507            | 61.63205 | 0.031171631  | 0.261013 | 0.119426 | 0.904938 | 0.991631 |
| si:ch211-236k19.2 | 0.407697 | -3.322174862 | 3.497813 | -0.94979 | 0.342221 | NA       |
| uapl              | 341.0817 | -0.089661033 | 0.160291 | -0.55936 | 0.575913 | 0.904739 |
| zgc:171711        | 11.13991 | -0.537831641 | 0.756568 | -0.71088 | 0.477157 | 0.869292 |
| eif2s1b           | 3187.605 | 9.68E-05     | 0.132629 | 0.00073  | 0.999418 | 1        |
| rbfox2            | 1629.872 | 0.06649078   | 0.105372 | 0.631013 | 0.528032 | 0.889948 |
| znf541            | 5.350312 | -0.318064488 | 0.846465 | -0.37576 | 0.707098 | 0.944945 |
| fdx2              | 255.5409 | 0.10400277   | 0.196124 | 0.530292 | 0.59591  | 0.911428 |
| slpr5b            | 19.79021 | 0.046413843  | 0.385964 | 0.120254 | 0.904282 | 0.991581 |
| c3a.3             | 575.1208 | 0.277421514  | 0.694209 | 0.399623 | 0.689434 | 0.939493 |
| btr02             | 123.9015 | -0.340541827 | 0.172164 | -1.97801 | 0.047928 | 0.380801 |
| zgc:114118        | 10.68056 | 0.118422869  | 1.148303 | 0.103129 | 0.917861 | 0.99387  |
| rcvrna            | 395.5572 | -0.33918681  | 0.260433 | -1.3024  | 0.192781 | 0.672803 |
| aff2              | 165.254  | 0.09682543   | 0.203107 | 0.476721 | 0.633561 | 0.923924 |
| zgc:158564        | 1187.519 | 0.013140276  | 0.118353 | 0.111026 | 0.911595 | 0.992326 |
| alkbh4            | 104.4092 | -0.105403951 | 0.223091 | -0.47247 | 0.636591 | 0.924779 |
| trim35-3          | 2.392898 | -2.320832206 | 1.839062 | -1.26197 | 0.206961 | 0.689276 |
| rab1aa            | 303.1711 | 0.172231208  | 0.150998 | 1.140621 | 0.254028 | 0.733071 |
| slc22a18          | 295.2683 | -0.181377823 | 0.148527 | -1.22118 | 0.22202  | 0.703829 |
| cabp2b            | 68.56321 | 0.839482032  | 0.33055  | 2.539654 | 0.011096 | 0.18325  |
| osgn1             | 346.7905 | 0.305932011  | 0.144526 | 2.116797 | 0.034277 | 0.326832 |
| zmp:0000000634    | 41.94689 | 0.350950473  | 0.431852 | 0.812664 | 0.41641  | 0.839843 |
| rab33ba           | 203.1387 | 0.239850938  | 0.155036 | 1.547062 | 0.121848 | 0.56863  |
| pimr198           | 0 NA     | NA           | NA       | NA       | NA       | NA       |
| zgc:171489        | 23.70105 | 0.308820898  | 0.369864 | 0.834957 | 0.403742 | 0.833888 |
| uqcrc1            | 5110.369 | 0.041661989  | 0.12689  | 0.328332 | 0.742661 | 0.954484 |
| pimr196           | 0.137703 | 1.055372236  | 5.267649 | 0.20035  | 0.841207 | NA       |
| tlr5b             | 127.8744 | 0.050740906  | 0.195747 | 0.259217 | 0.795468 | 0.966036 |
| slc4a2b           | 192.3907 | 0.063582518  | 0.198045 | 0.321052 | 0.748171 | 0.955074 |
| abcf2b            | 121.1684 | 0.206329988  | 0.276938 | 0.745041 | 0.456247 | 0.860359 |
| ftr98             | 3.305038 | -0.367164021 | 1.586902 | -0.23137 | 0.817026 | 0.971207 |
| ociad1            | 797.3783 | 0.024912933  | 0.08015  | 0.310829 | 0.755931 | 0.956532 |
| ociad2            | 232.4582 | -0.325626302 | 0.182105 | -1.78812 | 0.073757 | 0.461398 |
| sgcb              | 380.705  | -0.283498925 | 0.214124 | -1.32399 | 0.185506 | 0.6634   |
| spata18           | 45.73501 | -0.013006326 | 0.35644  | -0.03649 | 0.970892 | 1        |
| tbl3              | 771.0303 | -0.085336914 | 0.198296 | -0.43035 | 0.666941 | 0.932984 |
| smarca5           | 1533.696 | 0.055923927  | 0.199183 | 0.280766 | 0.77889  | 0.961073 |
| si:dkey-156n14.3  | 484.3179 | 0.099874124  | 0.131906 | 0.757163 | 0.448952 | 0.856796 |
| cacng1b           | 2.197347 | 0 1.936902   | 0        | 1 NA     |          |          |
| il15              | 79.68507 | -0.345436462 | 0.262528 | -1.31581 | 0.188238 | 0.667434 |
| cltb              | 148.0108 | 0.041668343  | 0.195103 | 0.213571 | 0.830882 | 0.974908 |
| higd2a            | 779.7312 | -0.246105295 | 0.164537 | -1.49575 | 0.13472  | 0.5894   |
| faf2              | 718.341  | 0.030899131  | 0.131614 | 0.23477  | 0.814387 | 0.970503 |

|                   |          |              |          |          |          |          |
|-------------------|----------|--------------|----------|----------|----------|----------|
| zgc:66455         | 3.418526 | -1.387067185 | 0.822862 | -1.68566 | 0.091861 | 0.507669 |
| b3gnt2a           | 7.537324 | -1.678650537 | 0.990645 | -1.6945  | 0.09017  | 0.50413  |
| psmd12            | 1594.498 | -0.02381117  | 0.143301 | -0.16616 | 0.868029 | 0.982801 |
| ccdc22            | 443.1607 | -0.098211076 | 0.136413 | -0.71995 | 0.471555 | 0.86809  |
| cldnd1b           | 253.0758 | -0.09816437  | 0.130862 | -0.75013 | 0.453174 | 0.858337 |
| pou2f3            | 114.8436 | 0.185817492  | 0.223655 | 0.830822 | 0.406074 | 0.834645 |
| pcgf5b            | 68.82431 | -0.03936161  | 0.275111 | -0.14308 | 0.886231 | 0.987533 |
| tmed8             | 305.6304 | 0.199828861  | 0.13808  | 1.4472   | 0.147841 | 0.608687 |
| pkz               | 25.09917 | 2.166941241  | 0.793611 | 2.730482 | 0.006324 | 0.134501 |
| gpr6              | 3.202616 | 1.055420281  | 2.070051 | 0.509852 | 0.610155 | 0.915331 |
| dnmt3ba           | 822.5128 | 0.099715371  | 0.151874 | 0.656567 | 0.51146  | 0.884763 |
| pak6b             | 79.99464 | -0.685218046 | 0.318854 | -2.149   | 0.031634 | 0.316333 |
| mgat2             | 223.3087 | 0.019663909  | 0.191393 | 0.102741 | 0.918169 | 0.993884 |
| si:dkey-7111.1    | 27.62068 | 0.521671599  | 0.372649 | 1.3999   | 0.161543 | 0.628646 |
| crfb12            | 75.94658 | -0.149908087 | 0.300067 | -0.49958 | 0.61737  | 0.916365 |
| ankrd12           | 736.388  | 0.027578367  | 0.122457 | 0.225209 | 0.821816 | 0.971852 |
| ppplr12c          | 340.9725 | -0.114242178 | 0.128104 | -0.89179 | 0.372504 | 0.819953 |
| si:ch211-256e16.3 | 143.9705 | 0.224431448  | 0.208804 | 1.074842 | 0.282446 | 0.754744 |
| bicd12            | 159.4546 | -0.439265736 | 0.203692 | -2.15652 | 0.031043 | 0.313376 |
| si:dkey-43k4.3    | 22.1282  | 0.170147368  | 0.384814 | 0.442154 | 0.658377 | 0.930581 |
| syngn2a           | 541.4188 | -0.171209729 | 0.155292 | -1.1025  | 0.270244 | 0.746532 |
| inha              | 0.759844 | 3.205177372  | 3.057942 | 1.048149 | 0.29457  | NA       |
| spred2a           | 326.6872 | 0.005556035  | 0.156428 | 0.035518 | 0.971667 | 1        |
| mia               | 471.9308 | -0.432095739 | 0.326684 | -1.32267 | 0.185945 | 0.663819 |
| actr2a            | 1154.68  | 0.193739724  | 0.092547 | 2.09342  | 0.036312 | 0.335171 |
| hspb2             | 154.5731 | 0.095607851  | 0.233706 | 0.409095 | 0.68247  | 0.938006 |
| rhpn1             | 8.457277 | 0.753056721  | 0.548953 | 1.371806 | 0.170124 | 0.641806 |
| porcn1            | 130.9287 | -0.129689611 | 0.186617 | -0.69495 | 0.487085 | 0.873291 |
| pisd              | 436.9891 | 0.022453596  | 0.116887 | 0.192096 | 0.847667 | 0.97772  |
| dusp10            | 19.51633 | -0.489175893 | 0.430831 | -1.13542 | 0.256198 | 0.73401  |
| gsk3bb            | 21.79075 | 0.342705843  | 0.412346 | 0.831113 | 0.40591  | 0.834645 |
| igfbp2a           | 888.0257 | -0.030014441 | 0.161133 | -0.18627 | 0.852232 | 0.978626 |
| tafla             | 113.5499 | -0.002708793 | 0.199188 | -0.0136  | 0.98915  | 1        |
| pcddl1            | 689.6663 | -0.311567221 | 0.190904 | -1.63206 | 0.102667 | 0.529448 |
| arhgef11          | 593.4381 | -0.075694562 | 0.114329 | -0.66208 | 0.507921 | 0.883056 |
| pcdh18b           | 929.2404 | 0.128596228  | 0.170879 | 0.752556 | 0.451717 | 0.857676 |
| arhgap45a         | 48.95009 | 0.260803934  | 0.318011 | 0.82011  | 0.412154 | 0.838123 |
| zgc:110789        | 184.375  | -1.011788839 | 0.198371 | -5.10049 | 3.39E-07 | 0.000125 |
| lin28b            | 40.45866 | -0.274290982 | 0.347449 | -0.78944 | 0.429854 | 0.847418 |
| tsgal0            | 32.34449 | 0.851371184  | 0.477695 | 1.782247 | 0.074709 | 0.46413  |
| calcoco2          | 359.7776 | 0.175972876  | 0.205637 | 0.855744 | 0.392139 | 0.827902 |
| stx4              | 506.5356 | -0.084712378 | 0.168192 | -0.50367 | 0.614497 | 0.915998 |
| sgms2a            | 57.69347 | 0.019186857  | 0.313735 | 0.061156 | 0.951235 | 0.99801  |
| snx11             | 284.3574 | -0.136255928 | 0.165347 | -0.82406 | 0.409906 | 0.836939 |
| mullb             | 69.58182 | 0.101963547  | 0.222312 | 0.45865  | 0.646485 | 0.926728 |
| CR762407.1        | 13.67457 | 1.179517429  | 0.665872 | 1.771388 | 0.076496 | 0.468417 |
| ubxn10            | 6.561299 | 0.346569022  | 0.804138 | 0.430982 | 0.666481 | 0.932664 |
| tial              | 1126.385 | 0.016698349  | 0.083329 | 0.200391 | 0.841174 | 0.97643  |
| cptp              | 156.7361 | -0.065691036 | 0.206835 | -0.3176  | 0.750787 | 0.955074 |
| lig3              | 618.1028 | 0.06357911   | 0.127248 | 0.499645 | 0.617325 | 0.916365 |
| fgfr11b           | 409.1702 | -0.107700335 | 0.17096  | -0.62997 | 0.528712 | 0.890094 |
| porcn             | 74.78549 | -0.354428312 | 0.276788 | -1.28051 | 0.200367 | 0.680719 |
| cenpi             | 198.1624 | 0.152373735  | 0.211159 | 0.721607 | 0.470536 | 0.867743 |
| tmem35            | 1685.85  | 0.122591965  | 0.125156 | 0.979513 | 0.327326 | 0.786249 |

|                   |          |              |          |          |          |          |
|-------------------|----------|--------------|----------|----------|----------|----------|
| arl13a            | 121.552  | 0.070447282  | 0.608582 | 0.115756 | 0.907846 | 0.991745 |
| c6ast4            | 9177.002 | 0            | 1.713423 | 0        | 1        | 1        |
| nkiras2           | 411.4806 | -0.143841117 | 0.130524 | -1.10203 | 0.270448 | 0.746683 |
| cpeb2             | 56.66329 | 0.31222682   | 0.286683 | 1.089099 | 0.27611  | 0.750674 |
| dpp9              | 1026.639 | 0.132071523  | 0.106957 | 1.234812 | 0.2169   | 0.69815  |
| CU468164.1        | 0.872449 | 3.695529351  | 2.316655 | 1.595201 | 0.110667 | NA       |
| olig4             | 79.29441 | 0.033440966  | 0.277887 | 0.12034  | 0.904214 | 0.991581 |
| tnmd              | 721.097  | 0.211423844  | 0.191014 | 1.106847 | 0.26836  | 0.744748 |
| raver1            | 192.7554 | 0.1707599    | 0.192213 | 0.888391 | 0.374331 | 0.820992 |
| ahrrb             | 4.874225 | 1.569091095  | 1.110361 | 1.413136 | 0.157616 | 0.623766 |
| bsdc1             | 1430.159 | 0.033119984  | 0.101183 | 0.327326 | 0.743421 | 0.954856 |
| spryd7a           | 319.1495 | -0.05009374  | 0.12555  | -0.39899 | 0.689898 | 0.939679 |
| fkbp1b            | 674.9019 | 0.305831938  | 0.14877  | 2.055741 | 0.039807 | 0.348912 |
| AL954655.1        | 6.014295 | -1.789442746 | 1.514875 | -1.18125 | 0.237504 | 0.718568 |
| si:ch211-106n13.3 | 66.14176 | -0.567746474 | 0.468168 | -1.2127  | 0.225245 | 0.70685  |
| fam210b           | 551.0243 | 0.155844706  | 0.208159 | 0.74868  | 0.45405  | 0.858944 |
| kpna3             | 1042.647 | 0.157843626  | 0.105252 | 1.499676 | 0.133698 | 0.587056 |
| shisa9b           | 3.905577 | -0.220579886 | 1.186926 | -0.18584 | 0.852569 | 0.978672 |
| cal0a             | 256.0121 | 0.187775652  | 0.265094 | 0.708337 | 0.478736 | 0.869292 |
| ftr69             | 3.575352 | 0.120523933  | 1.176036 | 0.102483 | 0.918373 | 0.993884 |
| hs3st4            | 10.50761 | 0.450711802  | 0.62259  | 0.72393  | 0.469109 | 0.867181 |
| ube2ia            | 976.8403 | 0.055024058  | 0.119885 | 0.458973 | 0.646254 | 0.926728 |
| fermt1            | 398.8823 | 0.157663242  | 0.127099 | 1.240479 | 0.214798 | 0.696864 |
| thrab             | 88.26111 | 0.186930325  | 0.221301 | 0.844688 | 0.398285 | 0.830737 |
| si:ch211-193e13.5 | 10.22976 | -0.342976277 | 0.593542 | -0.57785 | 0.563368 | 0.901075 |
| pptc7b            | 103.1314 | -0.113379937 | 0.241703 | -0.46909 | 0.639007 | 0.924779 |
| sept7b            | 1358.384 | -0.007039818 | 0.094523 | -0.07448 | 0.94063  | 0.997371 |
| csnkl1a1          | 3039.818 | 0.024978519  | 0.08934  | 0.279589 | 0.779793 | 0.961073 |
| si:ch211-138g9.2  | 0.28075  | 1.889444579  | 4.729616 | 0.399492 | 0.689531 | NA       |
| si:dkey-182g1.2   | 174.6047 | 0.35778869   | 0.248581 | 1.439327 | 0.150058 | 0.613391 |
| paqr5b            | 99.88255 | -0.499491757 | 0.256281 | -1.949   | 0.051296 | 0.394059 |
| arrdc3a           | 2368.824 | -0.091303093 | 0.119131 | -0.76641 | 0.443434 | 0.854205 |
| si:dkey-172m14.1  | 284.4699 | 0.006677331  | 0.197425 | 0.033822 | 0.973019 | 1        |
| nr2fla            | 1206.595 | 0.028344482  | 0.091203 | 0.310786 | 0.755963 | 0.956532 |
| bdh2              | 0.063619 | 0            | 5.267649 | 0        | 1        | NA       |
| fam172a           | 263.4885 | -0.155875438 | 0.145701 | -1.06983 | 0.284695 | 0.755774 |
| SLC9B2            | 151.6838 | 0.256345622  | 0.327001 | 0.783929 | 0.433082 | 0.849392 |
| smpd2b            | 90.23716 | -0.346161265 | 0.227656 | -1.52055 | 0.128374 | 0.577658 |
| capn1a            | 579.4867 | -0.17450629  | 0.112675 | -1.54876 | 0.12144  | 0.567605 |
| cisd2             | 169.4482 | 0.040578046  | 0.164541 | 0.246614 | 0.805207 | 0.969348 |
| pkplb             | 238.9432 | -0.253336114 | 0.176293 | -1.43702 | 0.150713 | 0.614793 |
| tnnilb            | 226.7907 | -0.098121177 | 0.238859 | -0.41079 | 0.681226 | 0.937331 |
| suclg1            | 5310.076 | -0.056448031 | 0.115909 | -0.487   | 0.626256 | 0.92063  |
| lrrtml            | 268.0107 | 0.135772883  | 0.184003 | 0.737883 | 0.460585 | 0.862369 |
| prim2             | 334.1551 | 0.07753893   | 0.159343 | 0.486617 | 0.626529 | 0.920665 |
| sltm              | 1745.743 | 0.030093283  | 0.085978 | 0.350012 | 0.726329 | 0.948987 |
| ankrd31           | 2.058368 | -2.776046446 | 1.871102 | -1.48364 | 0.137904 | NA       |
| hmgcra            | 257.8943 | 1.336717416  | 0.2741   | 4.876753 | 1.08E-06 | 0.000308 |
| egf               | 37.34567 | 0.090217026  | 0.388608 | 0.232154 | 0.816418 | 0.971207 |
| card11            | 81.49637 | 0.545764445  | 0.22298  | 2.447592 | 0.014381 | 0.210099 |
| grinab            | 806.7989 | -0.04613948  | 0.120175 | -0.38394 | 0.701026 | 0.942918 |
| gpatch3           | 238.9946 | -0.136429014 | 0.175317 | -0.77819 | 0.436459 | 0.850912 |
| capn1b            | 179.7811 | 0.157898284  | 0.170491 | 0.92614  | 0.354373 | 0.805403 |
| pimr130           | 0.865839 | -1.746148446 | 2.187027 | -0.79841 | 0.424632 | NA       |

|                  |          |              |          |          |          |          |  |
|------------------|----------|--------------|----------|----------|----------|----------|--|
| chrnb3a          | 125.9243 | -0.091728663 | 0.257661 | -0.35601 | 0.721836 | 0.947403 |  |
| gria2b           | 402.9982 | 0.364656299  | 0.204952 | 1.779226 | 0.075203 | 0.465024 |  |
| si:ch211-239f4.1 | 28.78658 | 0.10202727   | 0.355439 | 0.287046 | 0.774077 | 0.960652 |  |
| glrbb            | 568.8851 | 0.304897005  | 0.223694 | 1.363009 | 0.17288  | 0.645664 |  |
| opn3             | 40.06444 | -1.925929517 | 0.650609 | -2.9602  | 0.003074 | 0.091315 |  |
| zgc:153932       | 59.48137 | 0            | 1.705509 | 0        | 1        | 1        |  |
| glrba            | 88.12613 | -0.434098788 | 0.493428 | -0.87976 | 0.378989 | 0.823145 |  |
| cdc42ep3         | 318.172  | 0.10373646   | 0.184475 | 0.562334 | 0.573889 | 0.904296 |  |
| zdhhc12b         | 54.08265 | 0.625933475  | 0.322189 | 1.942755 | 0.052046 | 0.396487 |  |
| azinla           | 367.3915 | 0.020826209  | 0.133057 | 0.15652  | 0.875623 | 0.984433 |  |
| shmt1            | 1498.496 | 0.073491986  | 0.161806 | 0.454197 | 0.649687 | 0.927756 |  |
| smcr8a           | 128.5002 | -0.233503876 | 0.210986 | -1.10673 | 0.268412 | 0.744804 |  |
| runx3            | 143.2783 | -0.293381702 | 0.179761 | -1.63206 | 0.102666 | 0.529448 |  |
| top3a            | 126.7379 | -0.068084974 | 0.246173 | -0.27657 | 0.782108 | 0.962319 |  |
| zfang3           | 1584.727 | -0.04947996  | 0.092203 | -0.53664 | 0.591517 | 0.909437 |  |
| ndufs4           | 1605.63  | -0.102541984 | 0.151157 | -0.67838 | 0.497529 | 0.878774 |  |
| ppifb            | 884.068  | -0.219435033 | 0.099604 | -2.20308 | 0.027589 | 0.295257 |  |
| fsta             | 653.258  | -0.074981309 | 0.168277 | -0.44558 | 0.6559   | 0.929606 |  |
| golp3            | 961.7978 | -0.16486251  | 0.08053  | -2.04722 | 0.040636 | 0.352243 |  |
| ctso             | 111.0744 | -0.612055417 | 0.218081 | -2.80656 | 0.005007 | 0.118028 |  |
| khdrbs1a         | 11098.98 | -0.02493712  | 0.095344 | -0.26155 | 0.793669 | 0.965431 |  |
| chpl             | 182.4642 | -0.268822697 | 0.156457 | -1.71819 | 0.085762 | 0.491305 |  |
| htt              | 459.4255 | 0.006206083  | 0.152795 | 0.040617 | 0.967601 | 1        |  |
| CR933791.1       | 2.703162 | -1.443859865 | 1.542729 | -0.93591 | 0.349318 | 0.801408 |  |
| CR933791.2       | 0.587937 | 0            | 3.913617 | 0        | 1        | NA       |  |
| dnajb5           | 25.79966 | -0.471395159 | 0.368171 | -1.28037 | 0.200415 | 0.680781 |  |
| rx3              | 89.21249 | -0.099525248 | 0.292332 | -0.34045 | 0.733516 | 0.950808 |  |
| znf532           | 113.4901 | 0.123275992  | 0.19363  | 0.636656 | 0.524349 | 0.888801 |  |
| htra3a           | 11.65436 | 1.540902773  | 0.627811 | 2.454407 | 0.014112 | 0.208027 |  |
| atxn2            | 279.3954 | 0.194739533  | 0.1954   | 0.996618 | 0.31895  | 0.779923 |  |
| kenk3b           | 10.04734 | 0.511059944  | 1.29206  | 0.395539 | 0.692445 | 0.940414 |  |
| CU550714.1       | 0.049519 | 0            | 5.267649 | 0        | 1        | NA       |  |
| zgc:153642       | 0.059954 | 1.055396947  | 5.267649 | 0.200354 | 0.841203 | NA       |  |
| rtnk2b           | 84.74    | -0.120158655 | 0.205448 | -0.58486 | 0.558642 | 0.899409 |  |
| zgc:165423       | 515.0255 | 1.113118753  | 0.273385 | 4.071609 | 4.67E-05 | 0.005329 |  |
| bcl7a            | 692.1391 | -0.011239119 | 0.097736 | -0.11499 | 0.90845  | 0.991812 |  |
| wnt8a            | 0.063619 | 0            | 5.267649 | 0        | 1        | NA       |  |
| si:dkey-57n24.6  | 61.27447 | 0.071510774  | 0.279089 | 0.256229 | 0.797774 | 0.966447 |  |
| si:ch211-202f3.3 | 341.8832 | -0.355887296 | 0.153149 | -2.3238  | 0.020136 | 0.251648 |  |
| adrb3b           | 0.420014 | 0            | 4.18507  | 0        | 1        | NA       |  |
| zgc:113162       | 161.8645 | -0.696549836 | 0.17492  | -3.98211 | 6.83E-05 | 0.006851 |  |
| arf6b            | 1065.536 | -0.042931757 | 0.108199 | -0.39679 | 0.691525 | 0.940173 |  |
| aspg             | 720.1589 | 0.35492647   | 0.144981 | 2.448098 | 0.014361 | 0.209937 |  |
| nppal            | 44.38629 | 0.384969119  | 0.456853 | 0.842654 | 0.399422 | 0.831196 |  |
| arhgap23a        | 819.7106 | 0.010412537  | 0.150154 | 0.069346 | 0.944714 | 0.997371 |  |
| rab25b           | 48.21511 | -0.333378428 | 0.265592 | -1.25523 | 0.209396 | 0.691505 |  |
| plcd3a           | 369.8686 | -0.000274907 | 0.202379 | -0.00136 | 0.998916 | 1        |  |
| nppb             | 36.92907 | -0.794807058 | 0.535236 | -1.48497 | 0.137553 | 0.59348  |  |
| nppa             | 279.8716 | -0.334507125 | 0.234949 | -1.42374 | 0.154521 | 0.619425 |  |
| nmt1a            | 1406.685 | 0.00169897   | 0.087699 | 0.019373 | 0.984544 | 1        |  |
| ubqln4           | 1595.39  | 0.14951455   | 0.102895 | 1.453074 | 0.146203 | 0.605672 |  |
| mbnl1            | 124.3943 | 0.530992715  | 0.225727 | 2.352366 | 0.018654 | 0.2416   |  |
| gabrr2a          | 39.08018 | -0.081273234 | 0.75856  | -0.10714 | 0.914677 | 0.992972 |  |
| xcr1b.1          | 0.466023 | 1.055376718  | 4.65548  | 0.226696 | 0.82066  | NA       |  |

|                   |          |              |          |          |          |          |
|-------------------|----------|--------------|----------|----------|----------|----------|
| slc25a28          | 1805.876 | -0.238113415 | 0.123206 | -1.93265 | 0.05328  | 0.400175 |
| sema4e            | 236.8025 | -0.001897489 | 0.231712 | -0.00819 | 0.993466 | 1        |
| slc35f1           | 118.1789 | 0.281888434  | 0.184671 | 1.526435 | 0.126902 | 0.575854 |
| cd22              | 8.307796 | 0.30770171   | 0.695834 | 0.442206 | 0.65834  | 0.930581 |
| lpcat2            | 128.8427 | 0.564252123  | 0.198363 | 2.844538 | 0.004448 | 0.109917 |
| rnft2             | 162.0883 | -0.09103774  | 0.250954 | -0.36277 | 0.716779 | 0.94627  |
| grsfl             | 312.0457 | 0.067032384  | 0.137384 | 0.48792  | 0.625606 | 0.920625 |
| kif19             | 231.1679 | 0.054196544  | 0.193468 | 0.280132 | 0.779376 | 0.961073 |
| si:dkey-33i11.1   | 3.168089 | 0.435679611  | 1.054915 | 0.413    | 0.679607 | 0.936344 |
| si:ch211-203b20.7 | 1.291379 | 0            | 2.111903 | 0        | 1        | NA       |
| eif2s2            | 3443.508 | 0.258994589  | 0.101952 | 2.54037  | 0.011074 | 0.18325  |
| rps11             | 29011.96 | -0.364620469 | 0.148076 | -2.46239 | 0.013801 | 0.205712 |
| CR628323.2        | 3.55872  | 0.534083333  | 0.848679 | 0.629311 | 0.529145 | 0.890363 |
| tubb1             | 116.2999 | 0.347134389  | 0.312327 | 1.111446 | 0.266376 | 0.742912 |
| cyp8b1            | 187.7053 | -0.457683556 | 0.364395 | -1.25601 | 0.209112 | 0.691152 |
| gosr2             | 546.0378 | -0.028752173 | 0.127595 | -0.22534 | 0.821715 | 0.971801 |
| gipc3             | 67.08354 | -0.634742426 | 0.253691 | -2.50203 | 0.012349 | 0.19319  |
| thada             | 127.7663 | -0.216699917 | 0.203184 | -1.06652 | 0.286187 | 0.757624 |
| mthfr             | 313.3187 | 0.123492118  | 0.235914 | 0.523463 | 0.600652 | 0.913756 |
| si:ch211-204c21.1 | 736.8529 | 0.150843934  | 0.134529 | 1.121272 | 0.262172 | 0.739695 |
| hsf2              | 524.2905 | -0.191885676 | 0.28988  | -0.66195 | 0.508004 | 0.883056 |
| prpf38b           | 658.34   | 0.1727478    | 0.135082 | 1.278839 | 0.200954 | 0.681045 |
| fam102ba          | 139.5949 | -0.001636899 | 0.25147  | -0.00651 | 0.994806 | 1        |
| cep44             | 70.69347 | 0.100378122  | 0.214011 | 0.469032 | 0.639046 | 0.924779 |
| pkib              | 137.1846 | 0.000293812  | 0.242406 | 0.001212 | 0.999033 | 1        |
| ly75              | 319.831  | -0.010750853 | 0.24565  | -0.04376 | 0.965092 | 1        |
| si:ch211-272h9.3  | 0.045161 | 0            | 5.267649 | 0        | 1        | NA       |
| smpd13a           | 51.17126 | 0.225752563  | 0.345885 | 0.652681 | 0.513962 | 0.88631  |
| clvs2             | 33.32096 | 0.613609605  | 0.335487 | 1.82901  | 0.067398 | 0.443262 |
| si:dkey-148a17.6  | 13.05877 | -0.543803267 | 0.543841 | -0.99993 | 0.317344 | 0.779234 |
| helb              | 110.3878 | -0.15849642  | 0.189803 | -0.83506 | 0.403686 | 0.833888 |
| carhsp1           | 636.8882 | -0.284760053 | 0.148866 | -1.91286 | 0.055766 | 0.408826 |
| pcp4a             | 578.3944 | 0.256219773  | 0.243488 | 1.052289 | 0.292667 | 0.762191 |
| irak3             | 16.71715 | -0.968022926 | 0.588058 | -1.64613 | 0.099736 | 0.524166 |
| b3gnt71           | 132.5452 | -0.009526903 | 0.228185 | -0.04175 | 0.966697 | 1        |
| taslr2.1          | 0        | NA           | NA       | NA       | NA       | NA       |
| b2m               | 75.71233 | 0.250287314  | 0.328343 | 0.762274 | 0.445897 | 0.855403 |
| lrrc47            | 323.6618 | -0.172913909 | 0.151522 | -1.14118 | 0.253796 | 0.732873 |
| pcmt1             | 842.9278 | -0.038653176 | 0.153883 | -0.25118 | 0.801671 | 0.967776 |
| alg3              | 244.9428 | 0.022146871  | 0.15164  | 0.146049 | 0.883883 | 0.987014 |
| prss56            | 6.293366 | 0.4770426    | 0.86827  | 0.549417 | 0.582719 | 0.90571  |
| zgc:110626        | 320.1359 | 0.198492085  | 0.142886 | 1.389163 | 0.164783 | 0.634185 |
| zgc:113377        | 22.43031 | 0.240395806  | 0.39375  | 0.610529 | 0.541511 | 0.893858 |
| chic1             | 128.0197 | -0.002785499 | 0.211945 | -0.01314 | 0.989514 | 1        |
| cttnbp2n1a        | 99.88056 | 0.033519289  | 0.204878 | 0.163606 | 0.870041 | 0.983365 |
| vstm4b            | 64.89187 | -0.426240576 | 0.262925 | -1.62115 | 0.104986 | 0.533448 |
| galnt16           | 136.9607 | 0.437008645  | 0.273456 | 1.598096 | 0.110022 | 0.544236 |
| pdzd11            | 376.0085 | -0.086810944 | 0.155146 | -0.55954 | 0.575791 | 0.904739 |
| mtor              | 665.8974 | 0.04309617   | 0.09511  | 0.453118 | 0.650464 | 0.927861 |
| dis3l             | 112.6952 | -0.037132804 | 0.209779 | -0.17701 | 0.859501 | 0.979975 |
| zgc:172323        | 16.8869  | 0.162012567  | 0.598506 | 0.270695 | 0.786626 | 0.962867 |
| snx22             | 65.57609 | 0.212175872  | 0.248272 | 0.85461  | 0.392767 | 0.827902 |
| ppfia4            | 93.38195 | 0.145751867  | 0.248652 | 0.586168 | 0.557763 | 0.899184 |
| smad6a            | 574.2428 | -0.064071841 | 0.131783 | -0.48619 | 0.626832 | 0.920795 |

|                   |          |              |          |          |          |          |  |
|-------------------|----------|--------------|----------|----------|----------|----------|--|
| mel               | 228.92   | -0.073633239 | 0.269332 | -0.27339 | 0.784552 | 0.962605 |  |
| cox7a2a           | 2493.614 | -0.151137737 | 0.1752   | -0.86266 | 0.388324 | 0.827592 |  |
| asb5b             | 275.8636 | 0.342565493  | 0.137815 | 2.485686 | 0.01293  | 0.198143 |  |
| itgblb.1          | 492.857  | 0.226388852  | 0.149091 | 1.518462 | 0.128898 | 0.578173 |  |
| kif6              | 15.038   | 0.71502064   | 0.508522 | 1.406077 | 0.159701 | 0.625998 |  |
| sts               | 51.42642 | 0.322597439  | 0.386508 | 0.834646 | 0.403917 | 0.833888 |  |
| depdc7b           | 0.986046 | 1.983423503  | 2.336935 | 0.848728 | 0.396032 | NA       |  |
| inab              | 272.364  | 0.502442336  | 0.21037  | 2.388377 | 0.016923 | 0.230621 |  |
| mylpfa            | 206100.3 | -0.028836882 | 0.158268 | -0.1822  | 0.855424 | 0.979354 |  |
| zgc:113090        | 58.1842  | 0.187064266  | 0.286206 | 0.6536   | 0.513369 | 0.886281 |  |
| atplb4            | 1431.41  | 0.232502735  | 0.118568 | 1.960924 | 0.049888 | 0.388669 |  |
| zgc:113372        | 109.6242 | -0.339401327 | 0.240057 | -1.41383 | 0.15741  | 0.623263 |  |
| slc2a15b          | 429.4359 | -0.675669716 | 0.128464 | -5.2596  | 1.44E-07 | 6.43E-05 |  |
| RAP1GAP           | 92.10862 | 0.089987694  | 0.253618 | 0.354816 | 0.722728 | 0.947632 |  |
| apln              | 1133.144 | -0.011516913 | 0.118037 | -0.09757 | 0.922273 | 0.994346 |  |
| pnrc2             | 7315.462 | -0.001767396 | 0.102361 | -0.01727 | 0.986224 | 1        |  |
| ftr14             | 93.82603 | -0.504238678 | 0.26068  | -1.93432 | 0.053073 | 0.400175 |  |
| nkx2.2a           | 137.442  | 0.435868272  | 0.196136 | 2.222274 | 0.026265 | 0.28745  |  |
| insmlb            | 362.1152 | 0.269346235  | 0.158972 | 1.694301 | 0.090208 | 0.50413  |  |
| tespal            | 14.60571 | 0.465757171  | 0.499828 | 0.931835 | 0.351422 | 0.802305 |  |
| tmprss3a          | 83.49914 | -1.000413579 | 0.458642 | -2.18125 | 0.029165 | 0.304273 |  |
| lrrc6             | 21.99949 | 0.195045847  | 0.37308  | 0.5228   | 0.601114 | 0.913756 |  |
| zgc:112285        | 460.4999 | 0.253637144  | 0.299921 | 0.84568  | 0.397731 | 0.830444 |  |
| gnallb            | 91.52564 | 0.142494036  | 0.216219 | 0.659026 | 0.509879 | 0.883733 |  |
| si:ch211-138g9.3  | 0.170783 | -0.868103029 | 5.267649 | -0.1648  | 0.869102 | NA       |  |
| adgrdl            | 34.29349 | -0.927911069 | 0.361784 | -2.56482 | 0.010323 | 0.176586 |  |
| si:dkey-56i24.1   | 25.02371 | 0.182130822  | 0.363649 | 0.500842 | 0.616482 | 0.916365 |  |
| baspl             | 3226.119 | 0.204216153  | 0.165217 | 1.236051 | 0.21644  | 0.69815  |  |
| cilp              | 711.6846 | 0.152630351  | 0.23363  | 0.653299 | 0.513563 | 0.88631  |  |
| pax10             | 133.2405 | 0.274514859  | 0.32212  | 0.852214 | 0.394095 | 0.828374 |  |
| rpl31             | 27821.55 | -0.305849134 | 0.143146 | -2.13662 | 0.032629 | 0.319477 |  |
| ftr12             | 5.597665 | 2.408024104  | 1.259215 | 1.912322 | 0.055835 | 0.408826 |  |
| eif3jb            | 619.6875 | -0.015400574 | 0.130419 | -0.11808 | 0.906    | 0.991631 |  |
| nptxrb            | 203.6322 | 0.390154121  | 0.186301 | 2.094209 | 0.036241 | 0.335095 |  |
| fam189a1          | 111.8816 | 0.574610687  | 0.216983 | 2.648177 | 0.008093 | 0.152599 |  |
| plppla            | 670.8884 | -0.149315581 | 0.127824 | -1.16814 | 0.242751 | 0.724345 |  |
| rprma             | 36.73562 | 0.730444523  | 0.405933 | 1.79942  | 0.071952 | 0.4564   |  |
| wdr27             | 4.441403 | -0.587925743 | 1.067136 | -0.55094 | 0.581676 | 0.905618 |  |
| CU207281.1        | 1.70295  | -3.620445623 | 5.162221 | -0.70133 | 0.483094 | NA       |  |
| jade2             | 39.2675  | -0.110089796 | 0.393979 | -0.27943 | 0.779914 | 0.961101 |  |
| cdkn2aipn1        | 418.7361 | -0.184745048 | 0.177619 | -1.04012 | 0.298284 | 0.765416 |  |
| PPP2CA            | 1534.392 | 0.001385866  | 0.088505 | 0.015659 | 0.987507 | 1        |  |
| sord              | 433.9959 | -0.360835275 | 0.282566 | -1.277   | 0.201603 | 0.681423 |  |
| myl2b             | 122.6337 | 0.253228606  | 0.39669  | 0.638354 | 0.523243 | 0.888312 |  |
| serinc21          | 43.6192  | -0.276633218 | 0.282661 | -0.97867 | 0.327741 | 0.786438 |  |
| si:ch211-257p13.3 | 162.1481 | 0.362069283  | 0.233644 | 1.54966  | 0.121223 | 0.567243 |  |
| subla             | 1602.705 | -0.046621078 | 0.203648 | -0.22893 | 0.818923 | 0.971785 |  |
| ppp4r2b           | 629.8388 | 0.088728427  | 0.093712 | 0.946824 | 0.343728 | 0.798147 |  |
| si:ch211-251f6.6  | 572.9472 | -0.849354683 | 0.22711  | -3.73983 | 0.000184 | 0.014175 |  |
| pyya              | 134.9442 | 0.290569373  | 0.301822 | 0.962716 | 0.33569  | 0.792139 |  |
| ftr06             | 2.016029 | -5.192375203 | 1.986287 | -2.61411 | 0.008946 | NA       |  |
| pop5              | 128.4144 | -0.326143694 | 0.207343 | -1.57297 | 0.115726 | 0.555893 |  |
| mpp2a             | 106.5382 | -0.012222053 | 0.212785 | -0.05744 | 0.954196 | 0.998611 |  |
| cntn3b            | 20.10438 | 0.465282718  | 0.463236 | 1.004419 | 0.315177 | 0.777834 |  |

|                  |           |               |           |           |           |           |
|------------------|-----------|---------------|-----------|-----------|-----------|-----------|
| ccdc103          | 29. 57656 | -0. 205866799 | 0. 332883 | -0. 61844 | 0. 536288 | 0. 892371 |
| GK3P             | 355. 4117 | 0. 436951284  | 0. 185866 | 2. 350894 | 0. 018728 | 0. 241927 |
| rpl23            | 25803. 17 | -0. 347026837 | 0. 151745 | -2. 2869  | 0. 022202 | 0. 263608 |
| rybpb            | 401. 2187 | 0. 150050888  | 0. 142001 | 1. 056687 | 0. 290654 | 0. 76078  |
| si:dkey-283b1. 7 | 10. 70299 | -1. 939816037 | 0. 831766 | -2. 33217 | 0. 019692 | 0. 247431 |
| c3a. 5           | 0. 966523 | -0. 868139687 | 2. 835281 | -0. 30619 | 0. 759459 | NA        |
| poglut1          | 183. 2736 | 0. 390939336  | 0. 202164 | 1. 933774 | 0. 053141 | 0. 400175 |
| timmde1          | 347. 348  | -0. 057557006 | 0. 115368 | -0. 4989  | 0. 617851 | 0. 916478 |
| gtpbp1           | 721. 4982 | 0. 054851845  | 0. 118371 | 0. 46339  | 0. 643085 | 0. 92593  |
| adam10a          | 1706. 6   | -0. 085778451 | 0. 09937  | -0. 86322 | 0. 388016 | 0. 827592 |
| tdrkh            | 194. 8494 | -0. 094705649 | 0. 153445 | -0. 6172  | 0. 537106 | 0. 89244  |
| ngb              | 213. 6278 | 0. 195626193  | 0. 280032 | 0. 698585 | 0. 484812 | 0. 872911 |
| lipca            | 27. 25085 | -1. 762556743 | 1. 621963 | -1. 08668 | 0. 277178 | 0. 751426 |
| gdf6a            | 174. 458  | -0. 044101889 | 0. 206119 | -0. 21396 | 0. 830575 | 0. 974908 |
| aqp9b            | 676. 074  | 0. 311102406  | 0. 348169 | 0. 89354  | 0. 371568 | 0. 819115 |
| entpd5a          | 79. 70861 | -0. 368373993 | 0. 303669 | -1. 21308 | 0. 225101 | 0. 70685  |
| zgc:113054       | 458. 3704 | -0. 042701653 | 0. 125038 | -0. 34151 | 0. 73272  | 0. 950617 |
| syne2b           | 494. 483  | -0. 272274422 | 0. 113175 | -2. 40578 | 0. 016138 | 0. 224038 |
| aldh6a1          | 8271. 236 | -0. 174476467 | 0. 114119 | -1. 5289  | 0. 12629  | 0. 574656 |
| osbp2            | 172. 4606 | 0. 644266322  | 0. 318074 | 2. 025524 | 0. 042814 | 0. 362408 |
| si:ch73-22a13. 3 | 5. 413245 | 0. 203626456  | 0. 751399 | 0. 270996 | 0. 786394 | 0. 962701 |
| aldh1a2          | 967. 0583 | -0. 153064552 | 0. 128079 | -1. 19508 | 0. 232054 | 0. 713202 |
| gemin8           | 267. 8742 | 0. 040286737  | 0. 150414 | 0. 267838 | 0. 788824 | 0. 963568 |
| ednrbb           | 0. 581027 | 0             | 2. 831403 | 0         | 1         | NA        |
| isl2b            | 253. 3965 | 0. 253681322  | 0. 192082 | 1. 320691 | 0. 186604 | 0. 664968 |
| cbsa             | 307. 2393 | -0. 70118267  | 0. 348491 | -2. 01206 | 0. 044214 | 0. 368106 |
| cryaa            | 363. 9713 | 0. 503611597  | 0. 300449 | 1. 676199 | 0. 093699 | 0. 511703 |
| fbxo22           | 406. 3776 | 0. 228311636  | 0. 115744 | 1. 972562 | 0. 048545 | 0. 383628 |
| kazald3          | 246. 0145 | 0. 212707372  | 0. 234666 | 0. 906426 | 0. 36471  | 0. 814648 |
| crybb2           | 7. 298954 | 0. 335628725  | 0. 74867  | 0. 4483   | 0. 653937 | 0. 929325 |
| si:dkey-1f12. 3  | 260. 7025 | -0. 438732134 | 0. 30868  | -1. 42132 | 0. 155224 | 0. 61985  |
| adhfel           | 252. 9634 | -0. 460853127 | 0. 142462 | -3. 23493 | 0. 001217 | 0. 050523 |
| L0017829. 1      | 60. 63836 | -2. 528207224 | 0. 433361 | -5. 83395 | 5. 41E-09 | 3. 39E-06 |
| enpp7. 2         | 1. 641364 | 0. 09364295   | 2. 758555 | 0. 033946 | 0. 97292  | NA        |
| enpp7. 1         | 15. 88564 | 0. 087259792  | 1. 486656 | 0. 058695 | 0. 953195 | 0. 998436 |
| snx24            | 48. 45196 | -0. 21950586  | 0. 308743 | -0. 71097 | 0. 477106 | 0. 869292 |
| nog3             | 215. 2411 | -0. 402252809 | 0. 126899 | -3. 16986 | 0. 001525 | 0. 059092 |
| cyp4f3           | 9. 990779 | 0. 425195291  | 0. 705566 | 0. 60263  | 0. 546755 | 0. 896107 |
| lmo7b            | 131. 9957 | -0. 110502298 | 0. 288395 | -0. 38316 | 0. 701599 | 0. 943254 |
| kctd12. 2        | 263. 964  | -0. 082518085 | 0. 15024  | -0. 54924 | 0. 58284  | 0. 90571  |
| hspa41           | 370. 8952 | 0. 30001632   | 0. 177879 | 1. 686632 | 0. 091674 | 0. 507427 |
| jakmip2          | 446. 514  | 0. 421909726  | 0. 169076 | 2. 495384 | 0. 012582 | 0. 195132 |
| wdr76            | 215. 4388 | 0. 279779903  | 0. 190026 | 1. 472323 | 0. 140934 | 0. 599658 |
| rtnk2a           | 103. 9267 | 0. 365386399  | 0. 243557 | 1. 500207 | 0. 133561 | 0. 586903 |
| tspan3b          | 247. 1278 | -0. 295559332 | 0. 217426 | -1. 35935 | 0. 174035 | 0. 647252 |
| ms4a17a. 12      | 7. 758101 | 2. 320314428  | 1. 461224 | 1. 587925 | 0. 112303 | 0. 549075 |
| pstpip1b         | 8. 958138 | 0. 556631517  | 0. 666204 | 0. 835528 | 0. 403421 | 0. 833803 |
| sox3             | 706. 7648 | 0. 053414438  | 0. 124931 | 0. 42755  | 0. 668979 | 0. 933115 |
| AL590151. 1      | 7. 797079 | 0. 01499195   | 0. 619642 | 0. 024195 | 0. 980697 | 1         |
| adob             | 406. 8791 | -0. 01037183  | 0. 139442 | -0. 07438 | 0. 940707 | 0. 997371 |
| fancd2           | 235. 3867 | -0. 037681718 | 0. 149876 | -0. 25142 | 0. 80149  | 0. 967776 |
| gpat2            | 15. 69205 | -0. 318319469 | 0. 62566  | -0. 50877 | 0. 610911 | 0. 915331 |
| htr1fb           | 0. 40881  | 0             | 4. 25335  | 0         | 1         | NA        |
| cers6            | 112. 4708 | 0. 136690663  | 0. 234215 | 0. 583613 | 0. 559481 | 0. 899571 |



|                   |          |              |          |          |          |          |
|-------------------|----------|--------------|----------|----------|----------|----------|
| crebla            | 751.4477 | 0.119164304  | 0.118702 | 1.003892 | 0.315431 | 0.777834 |
| gatd1             | 254.1183 | 0.201251621  | 0.18748  | 1.073459 | 0.283065 | 0.755028 |
| camk2a            | 101.1117 | -0.372793673 | 0.314706 | -1.18458 | 0.236185 | 0.717364 |
| sral              | 273.5612 | 0.112074712  | 0.159798 | 0.701352 | 0.483083 | 0.871988 |
| ebi3              | 37.77505 | -2.911796659 | 0.683771 | -4.25844 | 2.06E-05 | 0.002979 |
| csflrb            | 21.75753 | -0.605171026 | 0.424628 | -1.42518 | 0.154106 | 0.618826 |
| anxa2b            | 473.4235 | -0.70740403  | 0.312036 | -2.26706 | 0.023387 | 0.270393 |
| si:dkey-182o15.5  | 0.148387 | -1.755438701 | 5.23528  | -0.33531 | 0.737392 | NA       |
| cracr2b           | 136.2903 | -0.022502702 | 0.253423 | -0.0888  | 0.929245 | 0.995404 |
| got111            | 20.71133 | 0.871199497  | 0.430475 | 2.023811 | 0.04299  | 0.363264 |
| adrb3a            | 125.3862 | -0.213908474 | 0.1867   | -1.14573 | 0.251905 | 0.732418 |
| or135-1           | 0.806365 | 2.898070707  | 2.381004 | 1.217163 | 0.223542 | NA       |
| foxb1b            | 32.45477 | -0.482434449 | 0.403573 | -1.19541 | 0.231928 | 0.713202 |
| ndufaf6           | 132.9066 | -0.076498195 | 0.211086 | -0.3624  | 0.717051 | 0.94627  |
| lypla2            | 1125.014 | -0.305349565 | 0.121599 | -2.51113 | 0.012035 | 0.190742 |
| gabrg2            | 16.39975 | -0.081838534 | 0.458418 | -0.17852 | 0.858311 | 0.979774 |
| myb               | 285.7453 | -0.323673121 | 0.193214 | -1.67521 | 0.093894 | 0.511703 |
| stag2b            | 1486.263 | 0.166224991  | 0.132226 | 1.257126 | 0.208708 | 0.690923 |
| aldob             | 26477.85 | -0.2740264   | 0.201207 | -1.36192 | 0.173224 | 0.646158 |
| gtf2a2            | 216.383  | 0.03245693   | 0.165491 | 0.196125 | 0.844513 | 0.976791 |
| maea              | 781.958  | -0.105273036 | 0.111959 | -0.94029 | 0.347071 | 0.799924 |
| zgc:162948        | 88.2573  | -0.164618615 | 0.218243 | -0.75429 | 0.450675 | 0.857151 |
| il2rgb            | 10.95557 | -0.950487838 | 0.685054 | -1.38746 | 0.165301 | 0.634423 |
| ghrhrb            | 15.96782 | -1.081211803 | 0.514957 | -2.09961 | 0.035763 | 0.33238  |
| si:ch73-89b15.3   | 67.93567 | -0.915381954 | 0.251003 | -3.6469  | 0.000265 | 0.017992 |
| GPR68             | 2.52128  | 4.493957317  | 1.555948 | 2.888244 | 0.003874 | 0.10341  |
| ccdc88c           | 462.4619 | 0.046963545  | 0.159192 | 0.295013 | 0.767984 | 0.960296 |
| zgc:153990        | 288.3903 | 0.101172076  | 0.123676 | 0.818042 | 0.413333 | 0.838317 |
| adcyp1r1a         | 71.47963 | -0.076066786 | 0.249042 | -0.30544 | 0.760033 | 0.957886 |
| tt113             | 16.66088 | 0.659981603  | 0.466651 | 1.414295 | 0.157275 | 0.623263 |
| AL954695.1        | 2.439151 | -1.738317098 | 2.017661 | -0.86155 | 0.388935 | 0.827725 |
| dcdc2b            | 44.00151 | 0.566116617  | 0.286617 | 1.975167 | 0.048249 | 0.38233  |
| CABZ01084566.1    | 69.7301  | 0.064415666  | 0.469279 | 0.137265 | 0.890821 | 0.988566 |
| mff               | 403.6063 | -0.113058172 | 0.127975 | -0.88344 | 0.376999 | 0.822324 |
| si:dkey-187j14.4  | 105.0224 | -0.063177025 | 0.381144 | -0.16576 | 0.868349 | 0.982801 |
| apbb3             | 33.36133 | 0.05863004   | 0.308573 | 0.190004 | 0.849306 | 0.978102 |
| vgl12b            | 271.0062 | -0.26278549  | 0.205675 | -1.27768 | 0.201364 | 0.681208 |
| alpi.2            | 25.02251 | -3.274718141 | 0.675172 | -4.8502  | 1.23E-06 | 0.000346 |
| si:ch211-218m3.13 | 3.073524 | -0.305654153 | 1.47975  | -0.20656 | 0.836355 | 0.976007 |
| si:rp71-1g18.1    | 189.0783 | -0.281279082 | 0.16469  | -1.70793 | 0.087649 | 0.496994 |
| si:ch211-276c2.4  | 331.9318 | -0.119105116 | 0.134017 | -0.88873 | 0.374147 | 0.820849 |
| cb1n5             | 18.74463 | 0.20484032   | 0.634433 | 0.322872 | 0.746792 | 0.955074 |
| klh143            | 1320.789 | 0.01184361   | 0.265089 | 0.044678 | 0.964364 | 0.999925 |
| osbp12a           | 82.11724 | 0.053920162  | 0.291356 | 0.185066 | 0.853177 | 0.978839 |
| trub1             | 92.17925 | -0.126723731 | 0.18197  | -0.6964  | 0.48618  | 0.873244 |
| hnrnpc            | 1039.664 | -0.02981279  | 0.126142 | -0.23634 | 0.813166 | 0.970328 |
| or115-11          | 9.875607 | 0.920750015  | 0.708293 | 1.299956 | 0.193616 | 0.673889 |
| or115-2           | 0.060442 | 0            | 5.267649 | 0        | 1        | NA       |
| pcmt2a            | 391.2537 | -0.34541956  | 0.232623 | -1.48489 | 0.137574 | 0.59348  |
| ubxn11            | 19.74158 | 0.066488781  | 0.390967 | 0.170063 | 0.864961 | 0.982136 |
| pax9              | 237.4199 | -0.074024154 | 0.167517 | -0.44189 | 0.658569 | 0.930581 |
| vtnb              | 1239.934 | -0.152477513 | 0.195949 | -0.77815 | 0.436482 | 0.850912 |
| mntnrlba          | 1.721173 | -0.033355284 | 1.574382 | -0.02119 | 0.983097 | NA       |
| plekhh1           | 96.49809 | 0.25353409   | 0.25747  | 0.984714 | 0.324765 | 0.783588 |

|                   |          |              |          |          |          |          |
|-------------------|----------|--------------|----------|----------|----------|----------|
| si:ch211-284o19.8 | 36.27558 | -0.211264162 | 0.378684 | -0.55789 | 0.576919 | 0.904798 |
| ei24              | 302.5445 | -0.234040952 | 0.128588 | -1.82009 | 0.068745 | 0.447298 |
| cbln14            | 55.92336 | -1.245322051 | 0.330688 | -3.76586 | 0.000166 | 0.013152 |
| slc13a2           | 799.4441 | -0.165056405 | 0.293455 | -0.56246 | 0.573803 | 0.904296 |
| uts2a             | 5.130328 | 0.205634029  | 0.807927 | 0.25452  | 0.799094 | 0.967043 |
| ccdc187           | 292.0191 | -0.155564033 | 0.154633 | -1.00602 | 0.314405 | 0.777479 |
| cripl             | 1025.797 | -0.086984369 | 0.232208 | -0.3746  | 0.70796  | 0.945335 |
| ism2b             | 13.7466  | 0.269206697  | 0.492147 | 0.547005 | 0.584375 | 0.906412 |
| crygmx            | 1748.7   | 0.813292933  | 0.391251 | 2.0787   | 0.037645 | 0.340171 |
| elmsan1b          | 556.3156 | -0.050642543 | 0.225085 | -0.22499 | 0.821985 | 0.971966 |
| etv2              | 163.3658 | -0.232309566 | 0.200567 | -1.15826 | 0.246757 | 0.727706 |
| crybalb           | 7019.232 | 0.718344322  | 0.359263 | 1.999494 | 0.045555 | 0.373513 |
| klhl26            | 43.98903 | -0.20132907  | 0.271028 | -0.74283 | 0.457582 | 0.860993 |
| cpdb              | 1.216093 | -0.868143358 | 2.094032 | -0.41458 | 0.67845  | NA       |
| inpp5l            | 402.1998 | 0.028529256  | 0.126618 | 0.225318 | 0.821732 | 0.971801 |
| med13a            | 994.712  | 0.162210443  | 0.131755 | 1.23115  | 0.218267 | 0.699433 |
| tmem62            | 62.0948  | -0.190628449 | 0.223063 | -0.85459 | 0.392776 | 0.827902 |
| slc30a1b          | 46.35061 | -0.222721792 | 0.250799 | -0.88805 | 0.374514 | 0.821189 |
| angpt2b           | 45.8514  | -0.273763202 | 0.293636 | -0.93232 | 0.351171 | 0.80227  |
| si:dkey-42123.3   | 0        | NA           | NA       | NA       | NA       | NA       |
| fb1               | 1596.066 | 0.022613348  | 0.152744 | 0.148047 | 0.882306 | 0.986908 |
| alg10             | 76.68866 | 0.224624818  | 0.223726 | 1.004017 | 0.31537  | 0.777834 |
| srfa              | 57.3314  | -0.251988442 | 0.290575 | -0.86721 | 0.385828 | 0.826939 |
| si:dkey-117a8.3   | 0.502582 | 1.055411945  | 3.189057 | 0.330948 | 0.740684 | NA       |
| opn4b             | 17.28609 | 0.113682677  | 0.450548 | 0.252321 | 0.800793 | 0.967609 |
| si:dkey-42123.5   | 0.07132  | 0            | 5.267649 | 0        | 1        | NA       |
| hdhd3             | 72.95408 | 0.428438693  | 0.25507  | 1.679691 | 0.093017 | 0.510593 |
| si:ch211-137j23.8 | 2.304882 | -1.510118292 | 1.195369 | -1.26331 | 0.206479 | 0.688857 |
| tgfa              | 53.79614 | -0.714510517 | 0.35518  | -2.01169 | 0.044253 | 0.368166 |
| btr32             | 8.53356  | -2.193953247 | 1.190766 | -1.84247 | 0.065406 | 0.435359 |
| lin37             | 147.2358 | 0.419577585  | 0.190101 | 2.207135 | 0.027305 | 0.293572 |
| myadml2           | 17.41458 | 1.170337325  | 0.619573 | 1.888941 | 0.0589   | 0.418455 |
| sptbn2            | 1093.649 | -0.125089317 | 0.14002  | -0.89337 | 0.37166  | 0.819115 |
| cdc42ep2          | 48.91742 | 0.103300698  | 0.290366 | 0.35576  | 0.72202  | 0.947403 |
| slc2a11a          | 10.51279 | -2.661430363 | 1.037689 | -2.56477 | 0.010325 | 0.176586 |
| npm2b             | 9.554809 | -1.44652915  | 0.732827 | -1.9739  | 0.048393 | 0.383075 |
| cyp17a2           | 13.56463 | 0.002460019  | 0.638481 | 0.003853 | 0.996926 | 1        |
| fetub             | 21142.58 | 0.01047982   | 0.343326 | 0.030524 | 0.975649 | 1        |
| chmp2a            | 487.3249 | 0.019436922  | 0.107875 | 0.18018  | 0.857011 | 0.979558 |
| htrlb             | 24.70974 | 0.214564203  | 0.477425 | 0.44942  | 0.653129 | 0.929197 |
| hmgb2b            | 5867.352 | 0.087328347  | 0.169874 | 0.514078 | 0.607197 | 0.915204 |
| sfil              | 108.2676 | 0.265254531  | 0.19788  | 1.34048  | 0.180089 | 0.655771 |
| gpank1            | 197.1947 | 0.109528099  | 0.17792  | 0.615603 | 0.538156 | 0.892498 |
| rargb             | 26.35238 | 0.526310566  | 0.35265  | 1.492445 | 0.135583 | 0.591012 |
| ppplr2            | 276.4527 | -0.018175749 | 0.146043 | -0.12445 | 0.900955 | 0.99045  |
| scafl             | 1305.601 | 0.064364101  | 0.138658 | 0.464192 | 0.64251  | 0.92567  |
| ttl16             | 48.94129 | -0.270686586 | 0.31212  | -0.86725 | 0.385804 | 0.826939 |
| hoxb8b            | 94.09726 | -0.280076498 | 0.184205 | -1.52046 | 0.128396 | 0.577658 |
| mustn1a           | 16.67636 | -1.572041347 | 0.761312 | -2.06491 | 0.038931 | 0.345405 |
| hoxb5b            | 279.6457 | -0.11184948  | 0.153557 | -0.72839 | 0.466373 | 0.865508 |
| mx4               | 270.8637 | -0.296952693 | 0.273137 | -1.08719 | 0.276951 | 0.751311 |
| rab24             | 152.6579 | -0.285585951 | 0.17041  | -1.67588 | 0.093762 | 0.511703 |
| hoxb1b            | 143.6055 | -0.443278924 | 0.169858 | -2.6097  | 0.009062 | 0.163401 |
| rnf34b            | 8.077044 | -0.216045049 | 0.618536 | -0.34928 | 0.726876 | 0.949095 |

|                   |           |               |           |           |           |           |
|-------------------|-----------|---------------|-----------|-----------|-----------|-----------|
| plin1             | 3. 207272 | -1. 155196493 | 1. 285395 | -0. 89871 | 0. 368807 | 0. 817729 |
| vsig8a            | 107. 2107 | 0. 548867926  | 0. 251893 | 2. 178973 | 0. 029334 | 0. 304886 |
| zgc:153219        | 15. 7566  | -1. 414406455 | 0. 561415 | -2. 51936 | 0. 011757 | 0. 188516 |
| ostn              | 23. 34909 | 0. 009762853  | 0. 53659  | 0. 018194 | 0. 985484 | 1         |
| hlfx              | 3677. 983 | -0. 394432085 | 0. 17542  | -2. 2485  | 0. 024544 | 0. 277819 |
| pof1b             | 713. 3538 | -0. 225198759 | 0. 126024 | -1. 78695 | 0. 073946 | 0. 461828 |
| arpc4             | 1315. 19  | 0. 034040557  | 0. 127291 | 0. 267423 | 0. 789143 | 0. 963658 |
| tatdn3            | 25. 84652 | -0. 528595866 | 0. 351974 | -1. 50181 | 0. 133147 | 0. 586514 |
| irsl              | 255. 9139 | -0. 007702912 | 0. 176861 | -0. 04355 | 0. 96526  | 1         |
| rbm41             | 48. 45906 | 0. 004888076  | 0. 314857 | 0. 015525 | 0. 987614 | 1         |
| rippy1            | 48. 07824 | 0. 171148635  | 0. 264347 | 0. 64744  | 0. 517347 | 0. 887148 |
| tmem30b           | 350. 3097 | -0. 109474987 | 0. 110914 | -0. 98703 | 0. 32363  | 0. 783161 |
| htr1d             | 55. 3798  | -0. 211429143 | 0. 43444  | -0. 48667 | 0. 626492 | 0. 920665 |
| slc26a61          | 25. 3039  | 0. 10372047   | 0. 820885 | 0. 126352 | 0. 899453 | 0. 99045  |
| im:7136021        | 70. 15664 | -0. 542353073 | 0. 260551 | -2. 08156 | 0. 037383 | 0. 339535 |
| ccdc105           | 32. 37    | -0. 928839357 | 0. 4158   | -2. 23386 | 0. 025492 | 0. 283691 |
| adgrg6            | 484. 3043 | 0. 092734819  | 0. 145671 | 0. 636607 | 0. 524381 | 0. 888801 |
| cx23              | 208. 1021 | 0. 352363799  | 0. 30677  | 1. 148624 | 0. 250711 | 0. 730689 |
| nmbr              | 5. 105395 | 1. 95570457   | 0. 881056 | 2. 219727 | 0. 026437 | 0. 287989 |
| ftr50             | 1. 085668 | -1. 351191996 | 2. 084787 | -0. 64812 | 0. 516907 | NA        |
| bms1              | 450. 3669 | -0. 071857326 | 0. 197768 | -0. 36334 | 0. 716349 | 0. 94627  |
| pcna              | 4579. 727 | 0. 149779715  | 0. 199913 | 0. 749226 | 0. 453721 | 0. 858742 |
| zgc:113625        | 14. 58875 | 0. 158252529  | 0. 598837 | 0. 264266 | 0. 791575 | 0. 964817 |
| nfatc4            | 139. 1014 | -0. 011741881 | 0. 232067 | -0. 0506  | 0. 959647 | 0. 999164 |
| mrps17            | 232. 058  | 0. 022215646  | 0. 188831 | 0. 117648 | 0. 906347 | 0. 991631 |
| ltb4r2b           | 26. 66228 | 0. 35197046   | 0. 411726 | 0. 854865 | 0. 392626 | 0. 827902 |
| pgrmc1            | 1104. 103 | -0. 139510807 | 0. 162806 | -0. 85692 | 0. 391491 | 0. 827902 |
| adgrala           | 153. 5636 | 0. 199873621  | 0. 329386 | 0. 606807 | 0. 543979 | 0. 895043 |
| valopb            | 6. 228118 | 2. 109030805  | 1. 346659 | 1. 566121 | 0. 11732  | 0. 558519 |
| btr06             | 11. 73614 | 1. 946046451  | 1. 612968 | 1. 2065   | 0. 227625 | 0. 708829 |
| ncslb             | 52. 82041 | -0. 135971582 | 0. 33757  | -0. 4028  | 0. 687099 | 0. 938835 |
| pgkl              | 7975. 519 | -0. 289850728 | 0. 160276 | -1. 80845 | 0. 070536 | 0. 453224 |
| slc38a8b          | 17. 46787 | 0. 003582359  | 0. 432105 | 0. 00829  | 0. 993385 | 1         |
| mthfd21           | 25. 33442 | 0. 2645968    | 0. 444577 | 0. 595166 | 0. 551733 | 0. 8974   |
| rnf40             | 1084. 639 | 0. 0411997    | 0. 087854 | 0. 468956 | 0. 639101 | 0. 924779 |
| hbl4              | 81. 93033 | -0. 70746183  | 0. 273766 | -2. 58419 | 0. 009761 | 0. 170429 |
| npffr111          | 1. 283886 | 1. 53036819   | 1. 940948 | 0. 788464 | 0. 430425 | NA        |
| CU682777. 1       | 4. 7169   | 0. 516384108  | 1. 008525 | 0. 512019 | 0. 608638 | 0. 915204 |
| phkg2             | 235. 8296 | 0. 038072     | 0. 15897  | 0. 239492 | 0. 810724 | 0. 969828 |
| st8sia7. 1        | 28. 19922 | -1. 777912612 | 0. 980441 | -1. 81338 | 0. 069773 | 0. 450821 |
| hectd1            | 2894. 84  | -0. 03983003  | 0. 16152  | -0. 2466  | 0. 805222 | 0. 969348 |
| si:ch73-269m23. 5 | 63. 10873 | 0. 770750282  | 0. 313583 | 2. 457883 | 0. 013976 | 0. 207312 |
| ap4s1             | 169. 2041 | -0. 310999547 | 0. 188201 | -1. 65249 | 0. 098435 | 0. 521076 |
| fbxl8             | 44. 12663 | 0. 316605702  | 0. 270152 | 1. 171956 | 0. 241215 | 0. 722739 |
| ipoll             | 247. 7926 | 0. 166963775  | 0. 187733 | 0. 889367 | 0. 373806 | 0. 820644 |
| taar16a           | 0. 402588 | 0             | 4. 965055 | 0         | 1         | NA        |
| ghrl              | 8. 623995 | -0. 692251426 | 1. 23964  | -0. 55843 | 0. 576551 | 0. 90475  |
| crbn              | 212. 7167 | -0. 072145877 | 0. 158644 | -0. 45477 | 0. 649277 | 0. 927756 |
| pqlc3             | 119. 0036 | -0. 218671945 | 0. 188175 | -1. 16207 | 0. 245208 | 0. 726715 |
| taar18d           | 0. 120883 | 0             | 5. 267649 | 0         | 1         | NA        |
| sobpa             | 31. 9528  | 0. 062829533  | 0. 389465 | 0. 161323 | 0. 871839 | 0. 983447 |
| taar18a           | 0. 09025  | 0             | 5. 267649 | 0         | 1         | NA        |
| tctex1d2          | 83. 46845 | -0. 068558327 | 0. 336785 | -0. 20357 | 0. 838692 | 0. 976417 |
| nat10             | 460. 1855 | -0. 033917098 | 0. 149943 | -0. 2262  | 0. 821046 | 0. 971788 |

|                   |          |              |          |          |          |          |    |
|-------------------|----------|--------------|----------|----------|----------|----------|----|
| taar20c           | 0.094679 |              | 0        | 5.267649 | 0        | 1        | NA |
| cog4              | 331.034  | 0.13508863   | 0.118134 | 1.143518 | 0.252824 | 0.732759 |    |
| cdkn1bb           | 1589.391 | -0.039397594 | 0.104043 | -0.37867 | 0.704935 | 0.944015 |    |
| caprin1b          | 5790.997 | -0.538630299 | 0.117523 | -4.58319 | 4.58E-06 | 0.001001 |    |
| zgc:63972         | 56.07336 | -0.524459711 | 0.32092  | -1.63424 | 0.102209 | 0.528963 |    |
| acinla            | 2512.396 | 0.089017082  | 0.138675 | 0.641912 | 0.520931 | 0.887432 |    |
| si:ch211-14a17.11 | 322.1978 | -0.279352205 | 0.179656 | -1.55493 | 0.119963 | 0.564831 |    |
| dhrrs1            | 609.2468 | -0.114125448 | 0.157504 | -0.72459 | 0.468705 | 0.866951 |    |
| kti12             | 93.54636 | 0.079816202  | 0.228728 | 0.348956 | 0.727122 | 0.949095 |    |
| ehd4              | 138.3676 | -0.117221169 | 0.22475  | -0.52156 | 0.601975 | 0.914001 |    |
| homeza            | 307.0969 | -0.169077404 | 0.16822  | -1.0051  | 0.31485  | 0.777649 |    |
| zgc:77151         | 341.7597 | 0.001305639  | 0.153777 | 0.00849  | 0.993226 | 1        |    |
| slc38a6           | 126.7338 | -0.226789609 | 0.228619 | -0.992   | 0.321198 | 0.781574 |    |
| zp3f.2            | 1.389739 | -1.721923993 | 1.710274 | -1.00681 | 0.314025 | NA       |    |
| stk33             | 13.67645 | -0.182247974 | 0.54416  | -0.33492 | 0.737688 | 0.952532 |    |
| oxctlb            | 1045.755 | -0.000233837 | 0.22776  | -0.00103 | 0.999181 | 1        |    |
| ap2a1             | 2114.572 | 0.177708422  | 0.080488 | 2.207901 | 0.027251 | 0.293406 |    |
| ngs               | 1101.12  | -0.093661135 | 0.374786 | -0.24991 | 0.80266  | 0.968181 |    |
| pparab            | 26.93388 | -0.404002152 | 0.431346 | -0.93661 | 0.34896  | 0.801306 |    |
| rerglb            | 107.2737 | 0.054101401  | 0.225836 | 0.239561 | 0.810671 | 0.969828 |    |
| ccn4a             | 7.480611 | 0.832475264  | 0.703293 | 1.183682 | 0.236539 | 0.717725 |    |
| trim66            | 64.62099 | 0.176101994  | 0.3417   | 0.51537  | 0.606294 | 0.915204 |    |
| dctpp1            |          | 0 NA         | NA       | NA       | NA       | NA       |    |
| aplg2             | 378.2286 | -0.056388252 | 0.131333 | -0.42935 | 0.667666 | 0.933086 |    |
| slala             | 39.2384  | -0.008331797 | 0.283036 | -0.02944 | 0.976516 | 1        |    |
| slc7a8b           | 18.41611 | 0.227359608  | 0.711282 | 0.319648 | 0.749236 | 0.955074 |    |
| gabpb2b           | 93.47117 | 0.040068871  | 0.241743 | 0.16575  | 0.868354 | 0.982801 |    |
| lrre9             | 10.18298 | 0.279706989  | 0.577984 | 0.483936 | 0.628432 | 0.921864 |    |
| dcaf7             | 1978.812 | 0.144065645  | 0.08732  | 1.649857 | 0.098972 | 0.522136 |    |
| ccdc47            | 998.183  | 0.118659769  | 0.095812 | 1.23846  | 0.215545 | 0.697157 |    |
| si:zfos-464b6.2   | 87.94741 | -0.287512826 | 0.182647 | -1.57414 | 0.115455 | 0.555689 |    |
| b3gnt3.2          | 2.01085  | -2.14910981  | 1.719131 | -1.25011 | 0.211258 | NA       |    |
| alg13             | 1.983712 | 0.149743951  | 1.38798  | 0.107886 | 0.914086 | NA       |    |
| pcbp3             | 99.25774 | 0.355030562  | 0.252419 | 1.406515 | 0.159571 | 0.6257   |    |
| rhof              | 66.3022  | -0.163128567 | 0.250895 | -0.65019 | 0.515571 | 0.886459 |    |
| si:ch211-198n5.11 | 189.5408 | -0.340668576 | 0.191051 | -1.78313 | 0.074565 | 0.463807 |    |
| spata17           | 7.16938  | -0.39216909  | 0.579739 | -0.67646 | 0.49875  | 0.879321 |    |
| ssuh2.2           | 13.07008 | -0.560301994 | 0.531474 | -1.05424 | 0.291772 | 0.761454 |    |
| rpe65c            | 53.04138 | -0.436645833 | 0.256654 | -1.7013  | 0.088886 | 0.500363 |    |
| slc7a6            | 283.328  | 0.156836629  | 0.14753  | 1.063085 | 0.287744 | 0.758441 |    |
| yipf6             | 419.7172 | -0.274211351 | 0.12669  | -2.16443 | 0.030431 | 0.311024 |    |
| fzd2              | 1218.535 | -0.014693852 | 0.138517 | -0.10608 | 0.915519 | 0.993078 |    |
| cbx1b             | 671.6107 | -0.019396042 | 0.180641 | -0.10737 | 0.914493 | 0.992972 |    |
| ccdc43            | 242.5365 | 0.026237425  | 0.15837  | 0.165671 | 0.868416 | 0.982801 |    |
| slc29a1b          | 250.4503 | 0.150363611  | 0.158956 | 0.945946 | 0.344176 | 0.798147 |    |
| kif1c             | 52.27954 | -0.137317569 | 0.300274 | -0.45731 | 0.64745  | 0.927082 |    |
| lox11             | 545.3988 | 0.169884612  | 0.140134 | 1.212299 | 0.225398 | 0.70685  |    |
| epha4a            | 668.1244 | 0.100122436  | 0.148076 | 0.676157 | 0.498941 | 0.879457 |    |
| clip3             | 185.8453 | 0.388077437  | 0.25307  | 1.533481 | 0.125157 | 0.572892 |    |
| slmapa            | 610.6032 | 0.144069456  | 0.160222 | 0.899184 | 0.368555 | 0.817325 |    |
| tin2              | 79.94511 | 0.352355249  | 0.208287 | 1.691681 | 0.090707 | 0.505206 |    |
| stampa            | 333.2961 | -0.044638866 | 0.132667 | -0.33647 | 0.736515 | 0.951919 |    |
| adrb2b            | 30.75124 | -0.374308203 | 0.37443  | -0.99967 | 0.317468 | 0.779375 |    |
| rars              | 684.5746 | 0.209240891  | 0.141885 | 1.474718 | 0.140289 | 0.599409 |    |

|                   |          |              |          |          |          |          |
|-------------------|----------|--------------|----------|----------|----------|----------|
| araf              | 541.684  | -0.113056363 | 0.137632 | -0.82144 | 0.411394 | 0.837797 |
| ACOT12            | 61.37682 | -0.227979609 | 0.365786 | -0.62326 | 0.533114 | 0.890978 |
| nhs11a            | 490.692  | 0.263166727  | 0.143835 | 1.829643 | 0.067303 | 0.442891 |
| lrp10             | 537.4192 | -0.079950696 | 0.120659 | -0.66262 | 0.507576 | 0.883055 |
| imp4              | 211.7431 | -0.10419299  | 0.165076 | -0.63118 | 0.527921 | 0.889948 |
| ill2bb            | 4.301917 | 0.405798207  | 1.122947 | 0.361369 | 0.717824 | 0.946466 |
| samsn1a           | 289.0547 | -0.314254894 | 0.220088 | -1.42786 | 0.153332 | 0.617847 |
| si:ch73-285p12.4  | 0.218128 | 2.459808624  | 5.205172 | 0.47257  | 0.63652  | NA       |
| her15.2           | 149.3877 | -0.110575215 | 0.182532 | -0.60579 | 0.544657 | 0.895206 |
| her15.1           | 431.9551 | 0.321687868  | 0.141057 | 2.280546 | 0.022575 | 0.265653 |
| smg1              | 1711.041 | -0.012972191 | 0.144455 | -0.0898  | 0.928445 | 0.995052 |
| wdr95             | 19.1386  | -0.630030255 | 0.438844 | -1.43566 | 0.151099 | 0.615085 |
| znhit1            | 228.0105 | 0.098978065  | 0.196022 | 0.504934 | 0.613605 | 0.915998 |
| waif2             | 7.914459 | 0.533191661  | 0.855594 | 0.623183 | 0.533164 | 0.890978 |
| arl6ipl           | 2199.633 | 0.041767112  | 0.078209 | 0.534048 | 0.593308 | 0.910427 |
| mfsd6b            | 98.88289 | -0.220973975 | 0.210298 | -1.05077 | 0.293366 | 0.762713 |
| F0681288.1        | 63.92848 | 0.136687719  | 0.322495 | 0.423845 | 0.671679 | 0.933953 |
| cox6a2            | 125.9877 | -0.730886124 | 0.382681 | -1.90991 | 0.056145 | 0.409466 |
| cnot6l            | 798.177  | -0.274264482 | 0.127838 | -2.14541 | 0.03192  | 0.317405 |
| mrpl1             | 202.3562 | 0.040784295  | 0.148032 | 0.275509 | 0.782925 | 0.962328 |
| slco2b1           | 386.0615 | -0.19690345  | 0.151298 | -1.30143 | 0.193113 | 0.67315  |
| corola            | 296.133  | -0.273169501 | 0.209953 | -1.3011  | 0.193225 | 0.673236 |
| cldni             | 5759.827 | 0.088898073  | 0.121055 | 0.734362 | 0.462728 | 0.864104 |
| fras1             | 1096.722 | -0.014879684 | 0.209713 | -0.07095 | 0.943435 | 0.997371 |
| flila             | 523.1629 | -0.099531592 | 0.162723 | -0.61166 | 0.540762 | 0.893429 |
| tent5ab           | 203.4591 | 0.114034468  | 0.187403 | 0.6085   | 0.542856 | 0.894847 |
| si:ch211-51c14.1  | 530.5335 | -0.125874556 | 0.185861 | -0.67725 | 0.498248 | 0.879132 |
| rac11             | 1.246776 | 2.575877656  | 1.801666 | 1.42972  | 0.152798 | NA       |
| si:ch211-1f22.5   | 0.046941 | 0            | 5.267649 | 0        | 1        | NA       |
| slc34a1b          | 4.518955 | 0.087838158  | 1.312998 | 0.066899 | 0.946662 | 0.997371 |
| pgpepl            | 242.8387 | -0.384715501 | 0.186636 | -2.06131 | 0.039273 | 0.346914 |
| adra2db           | 6.300403 | -0.95431403  | 0.815359 | -1.17042 | 0.241831 | 0.72348  |
| chrna9            | 39.10407 | 0.568739625  | 0.29183  | 1.94887  | 0.051311 | 0.394059 |
| prdm8b            | 362.7741 | -0.207234309 | 0.207281 | -0.99978 | 0.317419 | 0.779336 |
| si:dkey-166k12.1  | 68.58455 | -0.544143188 | 0.266454 | -2.04217 | 0.041135 | 0.353918 |
| psmb4             | 2685.675 | 0.193712824  | 0.147401 | 1.31419  | 0.188782 | 0.668514 |
| prlh2r            | 0.515363 | 0.965224017  | 3.034998 | 0.318031 | 0.750461 | NA       |
| dhx8              | 687.8534 | -0.083240181 | 0.107776 | -0.77234 | 0.439912 | 0.852079 |
| or118-2           | 0.043308 | 0            | 5.267649 | 0        | 1        | NA       |
| or118-3           | 0 NA     | NA           | NA       | NA       | NA       | NA       |
| or118-1           | 0.053262 | 1.055396947  | 5.267649 | 0.200354 | 0.841203 | NA       |
| si:ch211-242b18.1 | 1354.365 | -0.133856544 | 0.127777 | -1.04758 | 0.294831 | 0.763708 |
| or116-1           | 2.835297 | 2.166075979  | 1.332518 | 1.625551 | 0.104045 | 0.532096 |
| prkg2             | 11.89942 | 0.251026473  | 0.613555 | 0.409134 | 0.682441 | 0.938006 |
| si:ch211-244e12.7 | 9.037015 | 2.109510078  | 0.97366  | 2.166579 | 0.030267 | 0.310167 |
| uggt1             | 215.8892 | 0.179475796  | 0.177498 | 1.011141 | 0.311949 | 0.776164 |
| cuedc1b           | 67.06615 | 0.006683722  | 0.318511 | 0.020984 | 0.983258 | 1        |
| lmo4b             | 795.1062 | -0.023865496 | 0.09961  | -0.23959 | 0.810648 | 0.969828 |
| coll0a1a          | 2222.954 | -0.028483891 | 0.271715 | -0.10483 | 0.916511 | 0.99343  |
| hs6st1a           | 69.90456 | 0.360524323  | 0.222331 | 1.621569 | 0.104896 | 0.533388 |
| alox5ap           | 19.51841 | -0.013977028 | 0.425737 | -0.03283 | 0.97381  | 1        |
| ghra              | 56.49208 | 0.079773847  | 0.313852 | 0.254177 | 0.799359 | 0.967111 |
| si:dkey-46a10.3   | 482.1176 | -0.066163823 | 0.123826 | -0.53433 | 0.593114 | 0.910427 |
| pogza             | 127.2392 | -0.079286152 | 0.174552 | -0.45423 | 0.649666 | 0.927756 |

|             |           |               |             |           |           |           |
|-------------|-----------|---------------|-------------|-----------|-----------|-----------|
| faah2b      | 34. 94706 | -1. 164931118 | 0. 717669   | -1. 62322 | 0. 104543 | 0. 53308  |
| lysmdl      | 112. 9976 | -0. 251016084 | 0. 170814   | -1. 46953 | 0. 14169  | 0. 600284 |
| emc10       | 621. 8236 | 0. 068644094  | 0. 112587   | 0. 609696 | 0. 542063 | 0. 894241 |
| plcx3       | 182. 4453 | 0. 861134915  | 0. 255405   | 3. 371643 | 0. 000747 | 0. 036381 |
| zgc:153441  | 80. 50939 | 0. 628134526  | 0. 32323    | 1. 943306 | 0. 051979 | 0. 396431 |
| rfl         | 330. 3479 | 0. 230722084  | 0. 146819   | 1. 571474 | 0. 116073 | 0. 556131 |
| anp32e      | 5348. 709 | 0. 245705233  | 0. 101346   | 2. 424413 | 0. 015333 | 0. 21791  |
| btr09       | 9. 733697 | -0. 085880526 | 0. 655906   | -0. 13093 | 0. 895827 | 0. 98926  |
| sec13       | 1173. 694 | 0. 175497369  | 0. 117818   | 1. 489563 | 0. 136339 | 0. 591569 |
| ptp4a3b     | 1387. 844 | -0. 099454415 | 0. 108979   | -0. 9126  | 0. 361453 | 0. 811711 |
| rpl32       | 22901. 78 | -0. 386268612 | 0. 13006    | -2. 96993 | 0. 002979 | 0. 090034 |
| nubpl       | 119. 9532 | -0. 059710602 | 0. 182989   | -0. 32631 | 0. 744191 | 0. 95491  |
| id3         | 1051. 679 | -0. 354235206 | 0. 149296   | -2. 3727  | 0. 017659 | 0. 234598 |
| ssuh2. 4    | 50. 66229 | -0. 105803385 | 0. 370538   | -0. 28554 | 0. 775231 | 0. 960899 |
| pik3c3      | 566. 614  | -0. 353950637 | 0. 107226   | -3. 30097 | 0. 000964 | 0. 043349 |
| nucbl       | 770. 3937 | 0. 195771283  | 0. 162485   | 1. 204859 | 0. 228258 | 0. 709397 |
| ugt5f1      | 46. 91923 | -1. 359216892 | 0. 38638    | -3. 51782 | 0. 000435 | 0. 025267 |
| zgc:136870  | 24. 99186 | -1. 150895743 | 0. 421904   | -2. 72786 | 0. 006375 | 0. 134763 |
| hsd17b14    | 198. 9919 | -0. 067376361 | 0. 147457   | -0. 45692 | 0. 647727 | 0. 927153 |
| CU657980. 1 | 13. 48088 | -3. 731682118 | 0. 915328   | -4. 07688 | 4. 56E-05 | 0. 005236 |
| xcr1a. 1    | 0. 871777 |               | 0 3. 067953 |           | 0         | 1 NA      |
| pdk4        | 500. 7474 | -0. 146551108 | 0. 169402   | -0. 86511 | 0. 38698  | 0. 827592 |
| bcat2       | 1301. 9   | 0. 102537907  | 0. 098849   | 1. 037314 | 0. 29959  | 0. 766128 |
| CSKMT       | 50. 38195 | -0. 143314698 | 0. 374629   | -0. 38255 | 0. 702053 | 0. 943292 |
| tp53bp2b    | 336. 2369 | -0. 012314475 | 0. 12271    | -0. 10035 | 0. 920063 | 0. 993955 |
| aplp2       | 2139. 35  | 0. 147873914  | 0. 15269    | 0. 968456 | 0. 332816 | 0. 789855 |
| hibch       | 376. 5205 | 0. 036678995  | 0. 124447   | 0. 294736 | 0. 768195 | 0. 960296 |
| gpsmlb      | 114. 5428 | 0. 087726323  | 0. 2013     | 0. 435799 | 0. 662982 | 0. 931141 |
| six2b       | 97. 3655  | -0. 221107367 | 0. 249485   | -0. 88626 | 0. 375479 | 0. 822237 |
| six3b       | 398. 2175 | 0. 217533552  | 0. 15897    | 1. 368389 | 0. 17119  | 0. 643325 |
| FP015808. 1 | 0. 547201 | -1. 784869867 | 2. 705538   | -0. 65971 | 0. 50944  | NA        |
| rgra        | 238. 4634 | -0. 466212517 | 0. 270043   | -1. 72644 | 0. 084269 | 0. 487271 |
| ms4a17a. 16 | 14. 80573 | -1. 226179786 | 1. 328092   | -0. 92326 | 0. 35587  | 0. 806879 |
| mta3        | 567. 9793 | 0. 027684282  | 0. 119506   | 0. 231656 | 0. 816805 | 0. 971207 |
| ier51       | 1473. 79  | 0. 086554309  | 0. 104338   | 0. 829557 | 0. 406789 | 0. 835226 |
| cox7a2l     | 1300. 06  | -0. 00671611  | 0. 131563   | -0. 05105 | 0. 959287 | 0. 999164 |
| tmsb        | 600. 584  | 0. 168010424  | 0. 262861   | 0. 639161 | 0. 522718 | 0. 887996 |
| dgat1b      | 162. 5242 | 0. 25044306   | 0. 187715   | 1. 334163 | 0. 18215  | 0. 658775 |
| eif4ebp3    | 1199. 86  | -0. 535263082 | 0. 232533   | -2. 30188 | 0. 021342 | 0. 258949 |
| zgc:110540  | 236. 757  | 0. 204605967  | 0. 248455   | 0. 823515 | 0. 410215 | 0. 837066 |
| tpal        | 223. 2063 | -0. 545912579 | 0. 154698   | -3. 52889 | 0. 000417 | 0. 02455  |
| ppp2r5b     | 294. 8136 | 0. 363142319  | 0. 171242   | 2. 120634 | 0. 033953 | 0. 325344 |
| zgc:101765  | 45. 24558 | 0. 182027532  | 0. 363428   | 0. 500863 | 0. 616468 | 0. 916365 |
| badb        | 148. 4022 | 0. 01551348   | 0. 179045   | 0. 086646 | 0. 930953 | 0. 995809 |
| ldlr4b      | 37. 97697 | -0. 265366758 | 0. 305594   | -0. 86836 | 0. 385196 | 0. 826939 |
| lgals2a     | 684. 7446 | -0. 217480536 | 0. 156017   | -1. 39396 | 0. 16333  | 0. 631199 |
| mc5rb       | 4. 929764 | 0. 439317951  | 0. 774057   | 0. 567552 | 0. 570339 | 0. 902481 |
| mc2r        | 1. 033855 | -3. 814674904 | 2. 231434   | -1. 70952 | 0. 087355 | NA        |
| eef2kmt     | 49. 26938 | -0. 219201306 | 0. 28798    | -0. 76117 | 0. 446557 | 0. 855454 |
| znf1015     | 61. 75902 | -0. 124135913 | 0. 29981    | -0. 41405 | 0. 678839 | 0. 936051 |
| alg1        | 167. 3724 | -0. 043894406 | 0. 172949   | -0. 2538  | 0. 79965  | 0. 967206 |
| cd40        | 25. 73119 | -1. 042538118 | 0. 459291   | -2. 26989 | 0. 023214 | 0. 268939 |
| itsn2b      | 848. 116  | -0. 029354267 | 0. 122188   | -0. 24024 | 0. 810145 | 0. 969828 |
| cxcr2       | 2. 303871 | -1. 760330615 | 1. 936571   | -0. 90899 | 0. 363354 | 0. 813662 |

|                  |          |              |          |          |          |          |
|------------------|----------|--------------|----------|----------|----------|----------|
| kifc3            | 956.7443 | 0.14098888   | 0.106837 | 1.319668 | 0.186946 | 0.665301 |
| ebnalbp2         | 483.8339 | 0.027092745  | 0.177669 | 0.15249  | 0.8788   | 0.985841 |
| zbtb41           | 123.1329 | -0.210167877 | 0.18169  | -1.15674 | 0.247378 | 0.728026 |
| col4a1           | 494.331  | 0.02761139   | 0.206515 | 0.133701 | 0.893639 | 0.988566 |
| si:dkey-33m11.7  | 1.607402 | 0            | 2.029349 | 0        | 1        | NA       |
| si:dkey-33m11.8  | 123.5916 | -0.078611474 | 0.321747 | -0.24433 | 0.806977 | 0.969726 |
| pds5a            | 1125.537 | 0.049862286  | 0.095701 | 0.521022 | 0.602351 | 0.914001 |
| ptch2            | 645.8939 | 0.209255702  | 0.214466 | 0.975706 | 0.32921  | 0.787409 |
| pomt2            | 274.0995 | -0.02464915  | 0.151805 | -0.16237 | 0.871012 | 0.983365 |
| itih3a           | 402.1663 | 0.382170235  | 0.250329 | 1.526675 | 0.126842 | 0.575696 |
| depdc7a          | 96.69678 | -0.078520991 | 0.206824 | -0.37965 | 0.704204 | 0.943746 |
| casp3b           | 217.3026 | 0.703338422  | 0.165704 | 4.244549 | 2.19E-05 | 0.003021 |
| ponzr5           | 477.2147 | -0.345582351 | 0.193051 | -1.79011 | 0.073437 | 0.46112  |
| map2             | 566.6338 | 0.132196196  | 0.131265 | 1.007092 | 0.313891 | 0.777479 |
| itih1            | 117.5391 | -0.277430692 | 0.758941 | -0.36555 | 0.714701 | 0.945821 |
| bcl9l            | 431.0889 | 0.077776829  | 0.126033 | 0.617115 | 0.537159 | 0.89244  |
| prdx5            | 3218.958 | 0.111608781  | 0.143951 | 0.775325 | 0.438148 | 0.851454 |
| zdhhc20a         | 34.54536 | 0.017106263  | 0.279091 | 0.061293 | 0.951126 | 0.99801  |
| borcs7           | 97.16277 | -0.333450896 | 0.276651 | -1.20531 | 0.228083 | 0.709324 |
| svila            | 1226.78  | -0.18192199  | 0.152794 | -1.19063 | 0.233797 | 0.714749 |
| nxf1             | 1206.638 | 0.077074989  | 0.128007 | 0.602114 | 0.547098 | 0.896121 |
| chac2            | 81.25619 | -0.054661662 | 0.231097 | -0.23653 | 0.813021 | 0.970328 |
| rbm4.2           | 953.2614 | 0.071330106  | 0.106361 | 0.670641 | 0.502449 | 0.881342 |
| ggnbp2           | 531.5845 | -0.153049049 | 0.120577 | -1.2693  | 0.204333 | 0.685846 |
| pora             | 960.2784 | -0.010353033 | 0.111776 | -0.09262 | 0.926203 | 0.994815 |
| cdh27            | 157.5645 | 0.226903009  | 0.311792 | 0.727738 | 0.466774 | 0.865766 |
| fam184b          | 263.2897 | 0.108185637  | 0.183168 | 0.590635 | 0.554765 | 0.89855  |
| cxcl12b          | 637.2579 | -0.333807193 | 0.173063 | -1.92882 | 0.053754 | 0.401636 |
| znf148           | 254.6866 | -0.06221933  | 0.149706 | -0.41561 | 0.677695 | 0.936026 |
| gdel             | 330.9918 | 0.204859664  | 0.233179 | 0.878551 | 0.379645 | 0.823607 |
| pom12l           | 236.2709 | 0.03488445   | 0.163321 | 0.213595 | 0.830863 | 0.974908 |
| dtnbpla          | 424.8879 | -0.180956132 | 0.146598 | -1.23437 | 0.217064 | 0.69815  |
| mylipb           | 211.1993 | -0.102793827 | 0.24371  | -0.42179 | 0.673181 | 0.93414  |
| ctsba            | 3268.567 | 0.700416208  | 0.259145 | 2.702798 | 0.006876 | 0.139692 |
| kenk2a           | 26.19233 | 0.209932373  | 0.440031 | 0.477086 | 0.633301 | 0.923885 |
| ccn1la           | 1019.762 | -0.15611521  | 0.087327 | -1.78771 | 0.073823 | 0.461665 |
| armac4           | 48.50762 | 0.782348386  | 0.271028 | 2.886594 | 0.003894 | 0.103477 |
| pim3             | 653.8282 | 0.128419859  | 0.171799 | 0.7475   | 0.454762 | 0.859845 |
| lrfn4a           | 128.0719 | -0.011775279 | 0.228168 | -0.05161 | 0.958841 | 0.999164 |
| cenpf            | 496.5532 | 0.432138459  | 0.293359 | 1.473072 | 0.140732 | 0.599658 |
| si:dkey-101k6.5  | 84.86101 | -0.309060469 | 0.201863 | -1.53104 | 0.12576  | 0.573743 |
| zgc:110410       | 39.24656 | 0.34817593   | 0.382112 | 0.911188 | 0.362196 | 0.812085 |
| smyd2a           | 658.3945 | 0.032317272  | 0.240346 | 0.134461 | 0.893038 | 0.988566 |
| slc8a4a          | 26.00673 | 0.348655733  | 0.47871  | 0.728324 | 0.466415 | 0.865517 |
| prox1a           | 293.3492 | -0.049359211 | 0.181023 | -0.27267 | 0.785108 | 0.962605 |
| cyp27a1.4        | 20.62174 | 0.297414544  | 0.451109 | 0.659296 | 0.509706 | 0.883733 |
| chadla           | 20.85357 | -1.242790791 | 0.382112 | -3.25243 | 0.001144 | 0.048292 |
| zhx2a            | 354.652  | -0.295632631 | 0.127801 | -2.31323 | 0.02071  | 0.255657 |
| epoa             | 19.17145 | -0.188833337 | 0.444039 | -0.42526 | 0.670645 | 0.933939 |
| si:ch211-256m1.8 | 657.1794 | -1.028198149 | 0.223226 | -4.60609 | 4.10E-06 | 0.000932 |
| clqtnf6a         | 33.23561 | 0.15281469   | 0.386604 | 0.395275 | 0.69264  | 0.940444 |
| pxdcl1a          | 31.31271 | 0.310932116  | 0.561364 | 0.553887 | 0.579656 | 0.905618 |
| tm4sf5           | 129.9787 | 0.5147781    | 0.804492 | 0.63988  | 0.522251 | 0.887826 |
| ccr9a            | 36.30005 | -0.186856385 | 0.533448 | -0.35028 | 0.726128 | 0.948987 |

|                    |          |              |            |          |          |          |
|--------------------|----------|--------------|------------|----------|----------|----------|
| slc17a5            | 674.5513 | 0.088530639  | 0.279591   | 0.316644 | 0.751514 | 0.955331 |
| zgc:136930         | 13575.25 | 0.34679227   | 0.212699   | 1.63044  | 0.103009 | 0.530217 |
| dtncp1b            | 71.4171  | -0.178460706 | 0.30349    | -0.58803 | 0.556513 | 0.899063 |
| tubalc             | 6587.069 | 0.668236572  | 0.167148   | 3.997868 | 6.39E-05 | 0.006594 |
| ablim2             | 357.8508 | -0.479838222 | 0.283798   | -1.69077 | 0.09088  | 0.505206 |
| dock8              | 457.4989 | -0.446458677 | 0.137671   | -3.24295 | 0.001183 | 0.049477 |
| slc7a7             | 204.6511 | -0.137882639 | 0.245166   | -0.5624  | 0.573841 | 0.904296 |
| ncsla              | 133.8668 | -0.243411756 | 0.199949   | -1.21737 | 0.223465 | 0.70531  |
| fance              | 56.21191 | 0.527348703  | 0.247243   | 2.132915 | 0.032932 | 0.321256 |
| kif17              | 13.82233 | 0.373269344  | 0.53116    | 0.702743 | 0.482216 | 0.871592 |
| xdh                | 625.6464 | -0.064553517 | 0.182565   | -0.35359 | 0.723644 | 0.947923 |
| zmp:0000000650     | 4.185174 | -1.650968101 | 1.140572   | -1.44749 | 0.147759 | 0.608687 |
| cntd2              | 3.542685 | 0.102046901  | 0.999671   | 0.10208  | 0.918693 | 0.993884 |
| snap23.2           | 115.679  | 0.419805351  | 0.334303   | 1.255765 | 0.209201 | 0.691271 |
| slc12a10.3         | 36.72809 | -0.262739887 | 0.456688   | -0.57532 | 0.565078 | 0.901538 |
| pitpnm3            | 108.9929 | -0.138053983 | 0.255203   | -0.54096 | 0.588537 | 0.908004 |
| si:chl073-358c10.1 | 83.19719 | 0.379187333  | 0.392316   | 0.966535 | 0.333776 | 0.790676 |
| nkda               | 114.2922 | 0.033608223  | 0.178089   | 0.188716 | 0.850315 | 0.978251 |
| rel                | 161.6827 | -0.036451978 | 0.257041   | -0.14181 | 0.887227 | 0.98775  |
| cfb                | 1010.653 | 0.018034914  | 0.226128   | 0.079755 | 0.936432 | 0.997044 |
| b3gat1b            | 75.38874 | -0.346807224 | 0.313501   | -1.10624 | 0.268623 | 0.744925 |
| id2a               | 2039.779 | -0.161545303 | 0.1462     | -1.10496 | 0.269178 | 0.745285 |
| afap1              | 251.6829 | 0.273365395  | 0.193037   | 1.416127 | 0.156738 | 0.622646 |
| prelid3a           | 106.3376 | -0.159321028 | 0.337924   | -0.47147 | 0.637305 | 0.924779 |
| mpegl.1            | 179.6604 | -0.149197754 | 0.204459   | -0.72972 | 0.465563 | 0.864997 |
| rab18a             | 742.8293 | -0.115218198 | 0.153214   | -0.75201 | 0.452045 | 0.857994 |
| atg9b              | 673.7688 | -0.167674502 | 0.188572   | -0.88918 | 0.373905 | 0.820695 |
| atoh1a             | 93.4512  | 0.088171703  | 0.305723   | 0.288404 | 0.773037 | 0.960624 |
| cyb561d1           | 27.13151 | -0.309829711 | 0.500374   | -0.6192  | 0.535787 | 0.892102 |
| atxn712a           | 117.1502 | -0.307883832 | 0.181036   | -1.70067 | 0.089004 | 0.500695 |
| grid2              | 106.6546 | 0.126960495  | 0.276062   | 0.459898 | 0.645589 | 0.926728 |
| ret                | 304.1701 | -0.12189136  | 0.156853   | -0.7771  | 0.437098 | 0.851125 |
| sypl2a             | 1574.716 | -0.123818986 | 0.109119   | -1.13472 | 0.256495 | 0.73401  |
| slc12a10.1         | 20.68875 | -2.109246485 | 1.27862    | -1.64963 | 0.099019 | 0.522138 |
| mcbp               | 492.3654 | -0.165736036 | 0.09132    | -1.81489 | 0.069541 | 0.450071 |
| clql4b             | 35.23443 | 0.399995816  | 0.435185   | 0.91914  | 0.358022 | 0.809315 |
| aldh9a1a.2         | 96.23435 | -1.135815108 | 0.425159   | -2.67151 | 0.007551 | 0.14728  |
| si:dkey-28d5.11    |          | 0 NA         | NA         | NA       | NA       | NA       |
| zmp:0000000652     | 2.636366 | 0.020422464  | 1.103696   | 0.018504 | 0.985237 | 1        |
| si:dkeyp-50d11.2   | 43.6859  | 0.099496729  | 0.362337   | 0.274597 | 0.783625 | 0.96245  |
| si:ch73-1a9.4      | 626.9849 | 0.19473634   | 0.127325   | 1.529443 | 0.126155 | 0.574377 |
| slc16a13           | 71.1894  | -0.485410378 | 0.33201    | -1.46203 | 0.143732 | 0.602871 |
| mipep              | 193.5067 | 0.141009948  | 0.162183   | 0.86945  | 0.384601 | 0.826588 |
| si:dkey-83f18.2    | 0.11861  |              | 0 5.267649 | 0        | 1 NA     |          |
| pknox2             | 317.7766 | 0.203562514  | 0.130689   | 1.557605 | 0.119327 | 0.562753 |
| sun1               | 847.0971 | -0.007944282 | 0.158155   | -0.05023 | 0.959938 | 0.999164 |
| leol               | 531.4189 | 0.231321496  | 0.108796   | 2.126199 | 0.033487 | 0.323151 |
| sp100.1            | 6.972377 | 1.187325078  | 0.968067   | 1.22649  | 0.220014 | 0.701105 |
| llph               | 488.3496 | 0.002756393  | 0.194972   | 0.014137 | 0.98872  | 1        |
| si:dkey-25e12.3    | 41.36945 | 0.677141335  | 0.350316   | 1.932946 | 0.053243 | 0.400175 |
| zgc:163121         | 51.34858 | 0.135108075  | 0.331998   | 0.406955 | 0.684041 | 0.938486 |
| sema3fb            | 380.2425 | -0.074197097 | 0.193075   | -0.38429 | 0.700762 | 0.942918 |
| irf4b              | 1.740526 | 1.055417118  | 2.28784    | 0.461316 | 0.644572 | NA       |
| gnb5b              | 446.6888 | 0.406637589  | 0.226602   | 1.794497 | 0.072734 | 0.458195 |



|                    |          |              |          |          |          |          |
|--------------------|----------|--------------|----------|----------|----------|----------|
| bambia             | 918.1922 | -0.159879917 | 0.100953 | -1.5837  | 0.113262 | 0.551017 |
| zgc:66160          | 583.8907 | -0.050159331 | 0.118063 | -0.42485 | 0.670946 | 0.933953 |
| vtna               | 650.7608 | -0.434242744 | 0.244918 | -1.77301 | 0.076227 | 0.467585 |
| si:dkey-67c22.2    | 744.8264 | -0.080527803 | 0.127222 | -0.63297 | 0.526754 | 0.889699 |
| foxqlb             | 235.636  | -0.162542574 | 0.22218  | -0.73158 | 0.464425 | 0.864593 |
| foxclb             | 546.3197 | 0.189801346  | 0.138945 | 1.366013 | 0.171935 | 0.644123 |
| si:dkey-56f14.7    | 298.967  | 0.258713428  | 0.223132 | 1.159461 | 0.246268 | 0.727532 |
| mylk4b             | 86.50315 | -0.098559439 | 0.383844 | -0.25677 | 0.797357 | 0.966447 |
| zp211              | 0.728756 | -3.345436825 | 2.360295 | -1.41738 | 0.156372 | NA       |
| serpinb1           | 792.8856 | -0.125792106 | 0.172549 | -0.72902 | 0.465987 | 0.865069 |
| rwdd2b             | 79.09314 | -0.277908076 | 0.20311  | -1.36827 | 0.171229 | 0.643325 |
| kat6b              | 530.673  | 0.213787673  | 0.138    | 1.549185 | 0.121337 | 0.567497 |
| BX248515.1         | 8.669541 | 0.728989921  | 0.701458 | 1.03925  | 0.298689 | 0.765669 |
| vps26b1            | 69.49521 | -0.07664192  | 0.233752 | -0.32788 | 0.743004 | 0.9547   |
| ftr97              | 59.96639 | -0.093937431 | 0.322386 | -0.29138 | 0.77076  | 0.960484 |
| METTL21C           | 16.20383 | 0.091597046  | 1.493003 | 0.061351 | 0.95108  | 0.99801  |
| adamts17           | 239.7514 | -0.168899173 | 0.208544 | -0.8099  | 0.417998 | 0.841312 |
| zcchc7             | 129.3198 | 0.199682853  | 0.191219 | 1.044263 | 0.296364 | 0.764246 |
| slc22a15           | 157.582  | 0.188466962  | 0.170125 | 1.107813 | 0.267943 | 0.74434  |
| gpm6aa             | 9908.526 | -0.002599121 | 0.123415 | -0.02106 | 0.983198 | 1        |
| dlgap3             | 62.59326 | -0.08780083  | 0.28623  | -0.30675 | 0.759034 | 0.957886 |
| lrit3a             | 88.9644  | 0.563526867  | 0.7241   | 0.778245 | 0.436425 | 0.850912 |
| si:dkeyp-3f10.14   | 7.265843 | 1.147712073  | 0.681966 | 1.682945 | 0.092386 | 0.508314 |
| cdc16              | 207.5528 | 0.131924918  | 0.145644 | 0.905802 | 0.365041 | 0.815072 |
| nubpl              | 215.1493 | 0.085038459  | 0.153129 | 0.55534  | 0.578662 | 0.905417 |
| dexi               |          | 0 NA         | NA       | NA       | NA       | NA       |
| rps27.2            | 14217.11 | -0.296002823 | 0.145365 | -2.03628 | 0.041723 | 0.356776 |
| CR352329.1         | 3.732372 | 0.119054359  | 1.25354  | 0.094975 | 0.924335 | 0.994815 |
| pelo               | 433.7442 | 0.085091504  | 0.148955 | 0.571258 | 0.567825 | 0.901872 |
| mmp20b             | 4.072297 | -2.095571017 | 1.193857 | -1.7553  | 0.079209 | 0.476322 |
| atf7b              | 559.1496 | -0.087035812 | 0.124814 | -0.69732 | 0.485601 | 0.87303  |
| galnt12            | 60.43337 | -0.072970792 | 0.241914 | -0.30164 | 0.762927 | 0.958842 |
| hic1               | 152.9481 | 0.245070166  | 0.206407 | 1.187317 | 0.235103 | 0.715906 |
| si:ch1073-184j22.1 | 59.07132 | 0.267995209  | 0.306822 | 0.873456 | 0.382414 | 0.825252 |
| cicb               | 768.4852 | 0.056856178  | 0.124322 | 0.457329 | 0.647434 | 0.927082 |
| si:ch211-212k18.7  | 1034.314 | 0.144540182  | 0.163665 | 0.883148 | 0.377156 | 0.822467 |
| si:ch211-37e10.1   | 1.587198 | 1.084429211  | 1.429178 | 0.758778 | 0.447985 | NA       |
| ypel3              | 754.0078 | -0.128047638 | 0.26259  | -0.48763 | 0.62581  | 0.920625 |
| icn2               | 4734.075 | -0.220303182 | 0.186405 | -1.18185 | 0.237263 | 0.718568 |
| pygma              | 2895.862 | 0.201287411  | 0.159078 | 1.265336 | 0.205751 | 0.687948 |
| ftr61              | 10.20257 | 4.642059535  | 1.340383 | 3.463232 | 0.000534 | 0.028826 |
| slc22a61           | 162.2832 | -0.57458594  | 0.229577 | -2.5028  | 0.012321 | 0.193027 |
| rnf7               | 1325.387 | 0.040169744  | 0.153165 | 0.262265 | 0.793117 | 0.965312 |
| lgals1b            | 21.34013 | -0.243865431 | 0.412799 | -0.59076 | 0.554681 | 0.89855  |
| cmn                | 562.9055 | 0.455144741  | 0.531397 | 0.856506 | 0.391718 | 0.827902 |
| sertad2b           | 342.8742 | 0.070414306  | 0.144578 | 0.487033 | 0.626235 | 0.92063  |
| grk7b              | 26.34845 | 0.310803916  | 0.523337 | 0.593889 | 0.552587 | 0.8974   |
| otub1a             | 607.7789 | 0.021929346  | 0.123828 | 0.177096 | 0.859433 | 0.979975 |
| av19               | 384.8508 | -0.153958086 | 0.140187 | -1.09823 | 0.272103 | 0.748056 |
| epd12              | 880.7421 | -1.49419107  | 0.705165 | -2.11892 | 0.034097 | 0.326054 |
| pfkfb4a            | 217.7649 | 0.106916105  | 0.188277 | 0.567865 | 0.570126 | 0.902481 |
| appb               | 2856.414 | 0.079083021  | 0.083652 | 0.945382 | 0.344464 | 0.798147 |
| npat               | 294.2476 | 0.169194623  | 0.145852 | 1.160042 | 0.246032 | 0.727297 |
| F0834888.1         | 14.37057 | 0.562503049  | 0.681028 | 0.825962 | 0.408826 | 0.836637 |

|                   |          |              |          |          |          |          |
|-------------------|----------|--------------|----------|----------|----------|----------|
| dv11b             | 62.09357 | -0.030266923 | 0.237582 | -0.1274  | 0.898627 | 0.990199 |
| wnt1              | 35.1623  | 0.386441796  | 0.334208 | 1.15629  | 0.247562 | 0.728384 |
| chrna6            | 115.5255 | -0.09936136  | 0.300774 | -0.33035 | 0.741134 | 0.954103 |
| p2ry8             | 2.616207 | 0.349118646  | 1.265746 | 0.27582  | 0.782686 | 0.962328 |
| clgalt1b          | 232.9348 | 0.083872487  | 0.135672 | 0.618199 | 0.536444 | 0.892397 |
| droscha           | 240.7628 | 0.21204383   | 0.175405 | 1.208878 | 0.22671  | 0.707913 |
| cacnb2b           | 54.14107 | 0.165684134  | 0.410457 | 0.403657 | 0.686465 | 0.938732 |
| mast1             | 182.6347 | 0.103824638  | 0.168708 | 0.615409 | 0.538285 | 0.892568 |
| ghdc              | 62.48057 | 0.107989798  | 0.373829 | 0.288875 | 0.772677 | 0.960624 |
| gpr61             | 51.38301 | -0.294779583 | 0.295541 | -0.99742 | 0.318559 | 0.779923 |
| FOXN2 (1 of many) | 20.01671 | 0.012719448  | 0.458414 | 0.027747 | 0.977864 | 1        |
| pcolce2b          | 180.8078 | 0.158737481  | 0.188694 | 0.841243 | 0.400212 | 0.831472 |
| clgalt1a          | 53.19906 | 0.321918904  | 0.292586 | 1.100254 | 0.271222 | 0.747344 |
| stat5b            | 168.3693 | 0.202905016  | 0.166843 | 1.216142 | 0.223931 | 0.705807 |
| s100t             | 1015.101 | -0.372537837 | 0.206899 | -1.80058 | 0.071769 | 0.4564   |
| pipox             | 97.54364 | 1.016162698  | 0.257861 | 3.940743 | 8.12E-05 | 0.007875 |
| capn2b            | 518.2701 | -0.565925938 | 0.168356 | -3.36148 | 0.000775 | 0.037036 |
| clull             | 88.55798 | -0.726783512 | 0.68176  | -1.06604 | 0.286406 | 0.757624 |
| cgna              | 135.2649 | 0.188071515  | 0.203591 | 0.923773 | 0.355605 | 0.806594 |
| exoc2             | 769.2539 | -0.023747815 | 0.099659 | -0.23829 | 0.811656 | 0.97012  |
| zgc:123238        | 137.4891 | -0.16381914  | 0.192125 | -0.85267 | 0.393842 | 0.828374 |
| actalb            | 28114.94 | -0.068520498 | 0.269854 | -0.25392 | 0.79956  | 0.967206 |
| acad9             | 211.95   | 0.178464858  | 0.258444 | 0.690536 | 0.489857 | 0.874825 |
| zgc:153345        | 9.318249 | 0.08746391   | 0.690293 | 0.126705 | 0.899174 | 0.99045  |
| dipk2ab           | 171.4149 | -0.139416262 | 0.150083 | -0.92893 | 0.352926 | 0.803792 |
| foxh1             | 5.183301 | 1.329492282  | 0.905695 | 1.467925 | 0.142125 | 0.601137 |
| smtnl             | 234.3537 | -0.016623868 | 0.229883 | -0.07231 | 0.942352 | 0.997371 |
| crk               | 1159.704 | 0.041929728  | 0.079807 | 0.525387 | 0.599314 | 0.913192 |
| ankrd33aa         | 41.2917  | -0.64269951  | 0.660426 | -0.97316 | 0.330475 | 0.788126 |
| ruvb12            | 622.4833 | 0.540725418  | 0.184393 | 2.932459 | 0.003363 | 0.095589 |
| si:ch211-217a12.1 | 304.6445 | 0.070594378  | 0.153465 | 0.460003 | 0.645514 | 0.926728 |
| prss60.2          | 93.52224 | -0.226428519 | 0.287061 | -0.78878 | 0.43024  | 0.847541 |
| ftr82             | 645.8366 | -0.190328392 | 0.149353 | -1.27435 | 0.202538 | 0.683016 |
| cpda              | 400.2555 | 0.462932953  | 0.132278 | 3.499685 | 0.000466 | 0.026196 |
| aclyb             | 94.02246 | 0.508432074  | 0.286065 | 1.777328 | 0.075514 | 0.46546  |
| nubp2             | 28.7875  | 0.237360631  | 0.38724  | 0.612955 | 0.539906 | 0.893049 |
| birc5b            | 4.545433 | 1.181363143  | 0.890751 | 1.326255 | 0.184755 | 0.661987 |
| pdzd3b            | 20.55447 | -0.411620739 | 0.570382 | -0.72166 | 0.470505 | 0.867743 |
| gpr161            | 97.60916 | -0.028977457 | 0.194722 | -0.14881 | 0.8817   | 0.986908 |
| map3k10           | 21.26429 | 0.379151051  | 0.406812 | 0.932006 | 0.351333 | 0.802305 |
| arntl             | 206.6973 | -0.292736547 | 0.17682  | -1.65556 | 0.097811 | 0.521071 |
| akap12b           | 4072.239 | 0.163833516  | 0.115152 | 1.422759 | 0.154806 | 0.619752 |
| mtol              | 209.7743 | -0.212630186 | 0.13408  | -1.58585 | 0.112773 | 0.549875 |
| pimr191           | 5.968038 | -1.508059418 | 0.881498 | -1.71079 | 0.08712  | 0.495232 |
| CU655961.1        | 37.19331 | 0.112121588  | 0.305526 | 0.366979 | 0.713635 | 0.945821 |
| pcnx2             | 287.4514 | 0.290819041  | 0.24452  | 1.189345 | 0.234304 | 0.714977 |
| f5                | 262.4789 | -0.457079704 | 0.193073 | -2.36739 | 0.017914 | 0.236638 |
| timm8b            | 498.8904 | -0.548751066 | 0.167053 | -3.28489 | 0.00102  | 0.044601 |
| sdhda             | 16.65711 | 0.456971096  | 0.488581 | 0.935302 | 0.349632 | 0.801408 |
| fmn11a            | 249.6742 | 0.073159611  | 0.19705  | 0.371275 | 0.710433 | 0.945821 |
| capn8             | 374.2735 | -0.60625083  | 0.162227 | -3.73706 | 0.000186 | 0.014237 |
| ino80c            | 313.878  | -0.091029873 | 0.139412 | -0.65296 | 0.513784 | 0.88631  |
| bco2a             | 146.4542 | -0.171801588 | 0.248195 | -0.6922  | 0.488809 | 0.873964 |
| hsp701            | 638.6327 | -0.446926956 | 0.527711 | -0.84692 | 0.397042 | 0.830253 |

|                   |          |              |          |          |          |          |
|-------------------|----------|--------------|----------|----------|----------|----------|
| trim35-29         | 6.405821 | 1.022703282  | 0.86998  | 1.175548 | 0.239776 | 0.720384 |
| si:dkeyp-69e1.8   | 88.35457 | -0.056512137 | 0.166013 | -0.34041 | 0.733549 | 0.950808 |
| ube3a             | 1172.404 | 0.021301137  | 0.127155 | 0.167521 | 0.86696  | 0.982582 |
| ribc1             | 10.27425 | -0.401819253 | 0.724782 | -0.5544  | 0.579305 | 0.905578 |
| 9-Mar             | 142.1155 | 0.331278642  | 0.225802 | 1.467119 | 0.142344 | 0.601598 |
| ankrd54           | 410.1764 | 0.211614777  | 0.114753 | 1.844083 | 0.065171 | 0.435355 |
| si:ch211-238g23.1 | 1.241212 | 0.604041338  | 1.548875 | 0.389987 | 0.696546 | NA       |
| foxp3a            | 3.463053 | -0.340106516 | 1.141729 | -0.29789 | 0.765789 | 0.959951 |
| fosb              | 27.84137 | -0.864427241 | 0.639837 | -1.35101 | 0.176692 | 0.650047 |
| npas4a            | 57.44394 | 0.243335336  | 0.937439 | 0.259575 | 0.795192 | 0.965909 |
| suv39h1b          | 259.2142 | 0.309216882  | 0.183377 | 1.686239 | 0.09175  | 0.507483 |
| smc1a             | 17.66101 | -0.397139312 | 0.690503 | -0.57514 | 0.565193 | 0.901538 |
| tmem9             | 307.7574 | 0.11713916   | 0.192405 | 0.608816 | 0.542646 | 0.894595 |
| efhd2             | 867.4154 | 0.145340903  | 0.108971 | 1.333752 | 0.182285 | 0.658775 |
| srm               | 363.161  | 0.325507735  | 0.156523 | 2.079618 | 0.037561 | 0.340171 |
| tmem115           | 538.7376 | -0.140658324 | 0.122939 | -1.14413 | 0.252568 | 0.732759 |
| dffa              | 209.8551 | -0.098715824 | 0.148454 | -0.66496 | 0.506077 | 0.882901 |
| ptger3            | 15.76894 | 0.702706074  | 0.455263 | 1.543517 | 0.122705 | 0.569468 |
| ptpn3             | 443.7658 | -0.234850782 | 0.149776 | -1.56801 | 0.116879 | 0.557831 |
| prss23            | 331.0078 | 0.130621175  | 0.151129 | 0.864305 | 0.38742  | 0.827592 |
| dzank1            | 24.41491 | 0.172711922  | 0.465798 | 0.370787 | 0.710796 | 0.945821 |
| zgc:158423        | 323.3474 | -0.31286101  | 0.221121 | -1.41488 | 0.157102 | 0.623076 |
| foxo4             | 1122.061 | -0.162916871 | 0.109601 | -1.48646 | 0.137158 | 0.592789 |
| cnpy4             | 211.0741 | 0.262433761  | 0.141955 | 1.848706 | 0.0645   | 0.433491 |
| heyl              | 31.18186 | -0.134139384 | 0.406264 | -0.33018 | 0.741265 | 0.954103 |
| vtg2              | 0.983728 | 0.099849506  | 2.083933 | 0.047914 | 0.961785 | NA       |
| si:dkey-225f5.5   | 27.11709 | 0.310148818  | 0.363935 | 0.852209 | 0.394098 | 0.828374 |
| celsr3            | 146.4606 | 0.023630514  | 0.243577 | 0.097015 | 0.922715 | 0.994525 |
| si:dkey-182g1.6   | 3.900853 | -0.916462901 | 1.391096 | -0.65881 | 0.51002  | 0.883733 |
| lectin            | 0.214395 | -1.826677    | 5.23046  | -0.34924 | 0.72691  | NA       |
| slc26a6           | 39.34593 | -0.659174103 | 0.446469 | -1.47642 | 0.139832 | 0.598212 |
| arhgef1b          | 906.9706 | -0.005784868 | 0.105897 | -0.05463 | 0.956435 | 0.99899  |
| mettl16           | 92.0106  | 0.158127198  | 0.255303 | 0.61937  | 0.535672 | 0.89207  |
| march4l           | 29.07706 | 0.866386867  | 0.517619 | 1.673791 | 0.094172 | 0.512557 |
| CABZ01046427.1    | 0.169362 | -1.710071829 | 5.238473 | -0.32644 | 0.744088 | NA       |
| cdh10a            | 77.61463 | 0.156267199  | 0.267847 | 0.583419 | 0.559611 | 0.899571 |
| mtnrlab           | 33.58108 | 0.790073054  | 0.473287 | 1.66933  | 0.095052 | 0.51461  |
| nr4a3             | 204.639  | -0.324379215 | 0.615075 | -0.52738 | 0.597928 | 0.912528 |
| kcnc3a            | 66.997   | 0.234339592  | 0.419279 | 0.558911 | 0.576222 | 0.90475  |
| tor11l1           | 0.858482 | 2.918315487  | 2.409079 | 1.211382 | 0.225749 | NA       |
| dop1b             | 628.7352 | -0.162784252 | 0.156256 | -1.04178 | 0.297515 | 0.765351 |
| rs11d1            | 2414.308 | -0.527388581 | 0.173964 | -3.03159 | 0.002433 | 0.07907  |
| cpe               | 3629.781 | 0.263592372  | 0.146146 | 1.803619 | 0.071291 | 0.455342 |
| pag1              | 560.8596 | 0.135808709  | 0.124495 | 1.090874 | 0.275328 | 0.750424 |
| msmol             | 238.4084 | 0.501471546  | 0.244348 | 2.052283 | 0.040142 | 0.350281 |
| dmcl              | 0.58321  | 1.055409124  | 3.289456 | 0.320846 | 0.748327 | NA       |
| tex10             | 630.5446 | -0.057878684 | 0.116423 | -0.49714 | 0.619088 | 0.917329 |
| zgc:153215        | 54.59867 | -0.331521479 | 0.239899 | -1.38192 | 0.166997 | 0.637452 |
| nmnat1-rbp7a      | 0.174358 | 0            | 5.267649 | 0        | 1        | NA       |
| zgc:154093        | 257.2337 | -0.195874267 | 0.206311 | -0.94941 | 0.342412 | 0.797179 |
| lzic              | 193.1278 | 0.091550851  | 0.180509 | 0.507182 | 0.612027 | 0.915649 |
| zswim5            | 1340.688 | 0.066372989  | 0.100932 | 0.657602 | 0.510794 | 0.884139 |
| steap4            | 258.433  | -0.15343681  | 0.212688 | -0.72142 | 0.470654 | 0.867752 |
| luc7l             | 1232.285 | -0.14270881  | 0.117665 | -1.21284 | 0.225192 | 0.70685  |

|                    |          |              |            |          |          |          |
|--------------------|----------|--------------|------------|----------|----------|----------|
| nipa2              | 288.1719 | -0.08859297  | 0.135236   | -0.6551  | 0.512405 | 0.885459 |
| nipal              | 49.57088 | -0.55214726  | 0.292993   | -1.88451 | 0.059497 | 0.420414 |
| si:dkey-47k20.9    | 0.063619 |              | 0 5.267649 |          | 0        | 1 NA     |
| foxi3a             | 177.4923 | -0.375512656 | 0.182704   | -2.05531 | 0.039849 | 0.348958 |
| zc3h7bb            | 759.4374 | 0.195898044  | 0.125627   | 1.559364 | 0.11891  | 0.562318 |
| si:ch1073-416j23.1 | 7.412323 | 0.860835652  | 0.655158   | 1.313937 | 0.188867 | 0.668515 |
| tspan14            | 684.7274 | 0.006807245  | 0.102847   | 0.066188 | 0.947228 | 0.997371 |
| asph               | 1718.853 | 0.195357839  | 0.110629   | 1.765885 | 0.077415 | 0.470172 |
| v2rc2              | 1.275556 | -0.94868142  | 1.673006   | -0.56705 | 0.570679 | NA       |
| lcp2a              | 28.71918 | -0.43398668  | 0.413559   | -1.04939 | 0.293997 | 0.763068 |
| k1c3               | 38.29357 | 0.386693206  | 0.300957   | 1.28488  | 0.198834 | 0.679593 |
| cflara             | 137.8317 | -0.729402657 | 0.227323   | -3.20866 | 0.001334 | 0.053834 |
| rfc3               | 239.6713 | -0.032593458 | 0.160365   | -0.20324 | 0.838944 | 0.976417 |
| zgc:136971         | 108.0126 | 0.223517379  | 0.221312   | 1.009965 | 0.312512 | 0.776164 |
| zar11              | 1.266764 | -2.753311621 | 2.09437    | -1.31463 | 0.188636 | NA       |
| tpmt.1             | 193.392  | -0.174985532 | 0.212661   | -0.82284 | 0.410599 | 0.837316 |
| pecr               | 220.9309 | 0.157513251  | 0.189172   | 0.832647 | 0.405044 | 0.834284 |
| gzm3.2             | 0.21328  |              | 0 5.267649 |          | 0        | 1 NA     |
| tmem161b           | 227.4299 | 0.019317875  | 0.150042   | 0.128749 | 0.897556 | 0.989832 |
| hmbsb              | 368.2121 | 0.616343291  | 0.186439   | 3.305863 | 0.000947 | 0.042765 |
| v2rh1              | 0.092827 |              | 0 5.267649 |          | 0        | 1 NA     |
| rps8a              | 30490.42 | -0.407936261 | 0.129298   | -3.15501 | 0.001605 | 0.061411 |
| si:ch211-59d17.3   | 89.94377 | -0.26798682  | 0.307924   | -0.8703  | 0.384136 | 0.826565 |
| v2rh7              | 0.08847  |              | 0 5.267649 |          | 0        | 1 NA     |
| fryb               | 914.6213 | -0.063955805 | 0.144855   | -0.44152 | 0.65884  | 0.930581 |
| sprn               | 197.9542 | 0.225085578  | 0.265771   | 0.846917 | 0.397042 | 0.830253 |
| dnajc18            | 573.4499 | 0.125776933  | 0.119285   | 1.054428 | 0.291687 | 0.761454 |
| si:dkey-47k20.2    | 1.954318 | -1.784330537 | 1.75736    | -1.01535 | 0.30994  | NA       |
| cyb5d1             | 13.32178 | 0.303275123  | 0.488278   | 0.621112 | 0.534526 | 0.891711 |
| atp5mc1            | 4645.955 | 0.318151535  | 0.190198   | 1.672743 | 0.094378 | 0.513319 |
| v2rh9              |          | 0 NA         |            | NA       | NA       | NA       |
| evel               | 26.0976  | 0.030254129  | 0.331673   | 0.091217 | 0.92732  | 0.994973 |
| si:dkey-47k20.7    |          | 0 NA         |            | NA       | NA       | NA       |
| hoxb13a            | 142.628  | 0.122952449  | 0.18779    | 0.654733 | 0.51264  | 0.885483 |
| itga6l             | 29.53745 | -0.316524118 | 0.470167   | -0.67322 | 0.500809 | 0.880413 |
| ttbk1a             | 239.3374 | 0.038399274  | 0.217095   | 0.176878 | 0.859604 | 0.980024 |
| sostdc1b           | 28.71253 | -0.318346723 | 0.405181   | -0.78569 | 0.432049 | 0.848419 |
| hoxb9a             | 408.6138 | -0.014897322 | 0.136879   | -0.10884 | 0.913333 | 0.99273  |
| evalc              | 10.49767 | -0.723633368 | 0.686295   | -1.0544  | 0.291698 | 0.761454 |
| tprgl              | 219.0646 | -0.089899    | 0.169429   | -0.5306  | 0.595697 | 0.911427 |
| hoxb8a             | 353.7082 | 0.099361582  | 0.124752   | 0.79647  | 0.425759 | 0.844714 |
| slc22a7a           | 740.2323 | -0.305663171 | 0.141554   | -2.15933 | 0.030824 | 0.312711 |
| cyp26c1            | 175.2162 | -0.240048022 | 0.218009   | -1.10109 | 0.270857 | 0.746845 |
| hoxb7a             | 174.2469 | -0.059426395 | 0.152113   | -0.39067 | 0.696039 | 0.941657 |
| pip4p2             | 106.9204 | -0.496442624 | 0.203817   | -2.43573 | 0.014862 | 0.213725 |
| stxbp1b            | 643.7091 | 0.315623949  | 0.177567   | 1.777489 | 0.075488 | 0.465421 |
| itih6              | 61.7348  | -0.176049735 | 0.665624   | -0.26449 | 0.791404 | 0.964817 |
| si:ch73-139e5.4    | 48.18213 | -1.478465183 | 0.363348   | -4.069   | 4.72E-05 | 0.005363 |
| noxal              | 12.41935 | 0.38975568   | 0.559936   | 0.696072 | 0.486384 | 0.873244 |
| kctd17             | 291.5839 | -0.055412143 | 0.123633   | -0.4482  | 0.65401  | 0.929373 |
| grem2a             | 16.67491 | -0.353352944 | 0.685701   | -0.51532 | 0.606332 | 0.915204 |
| rangap1b           | 292.4851 | -0.02620615  | 0.181864   | -0.1441  | 0.885424 | 0.987533 |
| adgre14            | 2.567332 | -0.641521368 | 1.455357   | -0.4408  | 0.659358 | 0.930581 |
| mov10b.2           | 4.560079 | -0.566542643 | 0.938829   | -0.60346 | 0.546205 | 0.89597  |

|                   |          |              |            |          |          |          |
|-------------------|----------|--------------|------------|----------|----------|----------|
| rca2.1            | 715.4071 | -0.166174726 | 0.193182   | -0.8602  | 0.389679 | 0.827843 |
| dcst1             | 2.188524 | -3.570774497 | 1.587518   | -2.24928 | 0.024495 | NA       |
| rftn2             | 446.8596 | -0.051778721 | 0.183542   | -0.28211 | 0.777861 | 0.961073 |
| l3mbt12           | 241.6398 | 0.429685158  | 0.173307   | 2.479325 | 0.013163 | 0.19947  |
| si:dkey-191g9.5   | 46.91215 | -0.229507846 | 0.445894   | -0.51471 | 0.606753 | 0.915204 |
| igsf21b           | 174.6325 | -0.169400894 | 0.33741    | -0.50206 | 0.615624 | 0.916365 |
| mob4              | 1633.67  | -0.067188804 | 0.12832    | -0.5236  | 0.600554 | 0.913756 |
| ecrg4a            | 345.3856 | 0.562463418  | 0.266639   | 2.109458 | 0.034905 | 0.329161 |
| nrbp1             | 624.6019 | 0.139050846  | 0.13372    | 1.039863 | 0.298403 | 0.765416 |
| capza1b           | 5397.111 | 0.000547808  | 0.115481   | 0.004744 | 0.996215 | 1        |
| cttnbp2nlb        | 167.9792 | 0.033218393  | 0.145159   | 0.228841 | 0.818992 | 0.971785 |
| si:dkey-12h9.6    | 244.0138 | 0.06662856   | 0.189568   | 0.351476 | 0.725231 | 0.948653 |
| gtf2h5            | 313.3625 | 0.244296347  | 0.177309   | 1.377797 | 0.168266 | 0.639712 |
| kcmd3             | 65.02356 | -0.010874955 | 0.328192   | -0.03314 | 0.973566 | 1        |
| uxsl              | 395.1029 | -0.049159694 | 0.109739   | -0.44797 | 0.654174 | 0.929434 |
| sytl1b            | 124.298  | 0.275110388  | 0.194598   | 1.41374  | 0.157438 | 0.623263 |
| ndufa4            | 2695.021 | 0.129705111  | 0.156195   | 0.830403 | 0.406311 | 0.834669 |
| lmod1a            | 80.65146 | 0.482740226  | 0.234649   | 2.057284 | 0.039659 | 0.348331 |
| pikfyve           | 579.5181 | -0.31420502  | 0.164721   | -1.9075  | 0.056456 | 0.410349 |
| eef1g             | 36914.94 | -0.447893339 | 0.119737   | -3.74065 | 0.000184 | 0.014175 |
| serac1            | 235.6679 | -0.099284397 | 0.179753   | -0.55234 | 0.580717 | 0.905618 |
| gdil              | 1860.857 | 0.039042202  | 0.13028    | 0.299679 | 0.764422 | 0.959254 |
| myct1a            | 29.47769 | 0.203215099  | 0.322189   | 0.630733 | 0.528215 | 0.889948 |
| polr2g1           | 1031.338 | -0.118450903 | 0.155985   | -0.75937 | 0.44763  | 0.856366 |
| fastkd1           | 212.6645 | 0.211480375  | 0.180285   | 1.173035 | 0.240782 | 0.722178 |
| neurog1           | 120.0985 | 0.137839189  | 0.193628   | 0.711876 | 0.476542 | 0.869292 |
| kitb              | 33.74072 | 0.366927566  | 0.315906   | 1.161508 | 0.245435 | 0.726909 |
| clqtnf5           | 280.3445 | 0.166881563  | 0.211148   | 0.790355 | 0.42932  | 0.846956 |
| sf3b1             | 4710.538 | -0.039890472 | 0.140388   | -0.28415 | 0.776299 | 0.961073 |
| coq10b            | 1171.396 | -0.038670452 | 0.185226   | -0.20877 | 0.834624 | 0.975792 |
| zgc:123244        | 17.00028 | -1.257211539 | 0.587268   | -2.14078 | 0.032292 | 0.318811 |
| si:dkey-159a18.1  | 25.88337 | 0.291408962  | 0.419536   | 0.694598 | 0.487307 | 0.873291 |
| rbms2b            | 407.2491 | -0.067306538 | 0.165412   | -0.4069  | 0.684079 | 0.938486 |
| tyrplb            | 3559.379 | 0.086051954  | 0.16106    | 0.534286 | 0.593144 | 0.910427 |
| fam3c             | 338.1726 | -0.134400678 | 0.135106   | -0.99478 | 0.319844 | 0.780475 |
| si:ch211-229c8.4  | 0.135409 |              | 0.5.267649 |          | 0.1NA    |          |
| npdc1b            | 433.8454 | -0.078889506 | 0.208666   | -0.37807 | 0.705382 | 0.944122 |
| hspd1             | 2291.501 | 0.234465121  | 0.195166   | 1.201365 | 0.22961  | 0.711596 |
| nr2c2ap           | 44.08759 | -0.181039674 | 0.279809   | -0.64701 | 0.517625 | 0.887148 |
| slc25a51a         | 16.4963  | 0.288206535  | 0.372588   | 0.773525 | 0.439212 | 0.852079 |
| si:ch211-215a10.4 | 198.5265 | 0.058001303  | 0.211408   | 0.274358 | 0.78381  | 0.96245  |
| jac2              | 0.844294 | -2.377293472 | 2.198662   | -1.08125 | 0.279588 | NA       |
| hsp1              | 1645.84  | -0.095650847 | 0.197134   | -0.48521 | 0.627529 | 0.921429 |
| scrt2             | 208.6547 | -0.217364712 | 0.132374   | -1.64204 | 0.100581 | 0.525351 |
| dpt               | 18.69145 | 0.628686835  | 0.699683   | 0.898531 | 0.368903 | 0.817763 |
| v2ral7            | 0.2861   | -0.868128509 | 4.675833   | -0.18566 | 0.852709 | NA       |
| ncam1a            | 436.6349 | 0.240161744  | 0.171966   | 1.396564 | 0.162545 | 0.630004 |
| dvl2              | 483.4288 | -0.089999626 | 0.145394   | -0.61901 | 0.535912 | 0.892102 |
| eif5a2            | 4850.125 | -0.006087427 | 0.089396   | -0.0681  | 0.94571  | 0.997371 |
| si:ch211-168k14.2 | 15.72159 | -0.220167925 | 0.614584   | -0.35824 | 0.720164 | 0.947004 |
| nme7              | 132.4395 | -0.388820386 | 0.180618   | -2.15272 | 0.031341 | 0.314904 |
| slc2a2            | 343.221  | 0.02789488   | 0.212131   | 0.131498 | 0.895381 | 0.989223 |
| abcb9             | 79.18098 | 0.070307833  | 0.268151   | 0.262195 | 0.793171 | 0.965312 |
| si:ch211-201h21.5 | 125.0263 | 0.796011453  | 0.241602   | 3.294727 | 0.000985 | 0.043562 |

|                   |          |              |          |          |          |          |
|-------------------|----------|--------------|----------|----------|----------|----------|
| zgc:113436        | 183.9202 | -0.097836178 | 0.187253 | -0.52248 | 0.601336 | 0.913756 |
| camk2g2           | 1617.75  | 0.111608642  | 0.08436  | 1.323001 | 0.185835 | 0.663655 |
| myoz1a            | 1821.744 | -0.019114733 | 0.188355 | -0.10148 | 0.919167 | 0.993892 |
| si:ch211-199o1.2  | 49.99089 | -0.030294308 | 0.255075 | -0.11877 | 0.90546  | 0.991631 |
| ogfod2            | 28.99845 | -0.201514014 | 0.336151 | -0.59948 | 0.548856 | 0.897091 |
| si:ch73-130a3.4   | 55.15527 | -0.012439182 | 0.241886 | -0.05143 | 0.958986 | 0.999164 |
| gnrh3             | 70.05491 | 0.564323105  | 0.381264 | 1.480138 | 0.138836 | 0.596141 |
| tnika             | 441.9498 | -0.054099624 | 0.144074 | -0.3755  | 0.707289 | 0.944981 |
| creb3l3a          | 64.78075 | -0.042883796 | 0.434761 | -0.09864 | 0.921426 | 0.994085 |
| pdl1a             | 246.1476 | -0.013229987 | 0.185554 | -0.0713  | 0.943159 | 0.997371 |
| ghsra             | 1.017922 | 0            | 2.488573 | 0        | 1        | NA       |
| zgc:110591        | 331.831  | -0.400900151 | 0.179827 | -2.22937 | 0.025789 | 0.285137 |
| smndc1            | 970.9503 | -0.073391331 | 0.116214 | -0.63152 | 0.527701 | 0.889948 |
| tmem45b           | 287.9047 | -0.149833076 | 0.150917 | -0.99282 | 0.320798 | 0.781257 |
| zgc:171740        | 28.60699 | 0.646561918  | 0.392559 | 1.647043 | 0.099549 | 0.523919 |
| zgc:162952        | 63.43202 | -0.253419207 | 0.269218 | -0.94132 | 0.346543 | 0.79947  |
| bricd5            | 87.88018 | 0.262160633  | 0.300678 | 0.871899 | 0.383263 | 0.825809 |
| si:dkey-183i3.5   | 11076.86 | 0.060022674  | 0.238938 | 0.251206 | 0.801655 | 0.967776 |
| add3b             | 105.8696 | -0.306575089 | 0.211281 | -1.45103 | 0.146772 | 0.60662  |
| sort1b            | 485.2406 | 0.174127554  | 0.144102 | 1.20836  | 0.226909 | 0.707983 |
| cdc27             | 697.3474 | 0.093496482  | 0.10658  | 0.877246 | 0.380353 | 0.823655 |
| tmem131           | 940.0304 | -0.13498806  | 0.150002 | -0.89991 | 0.368168 | 0.817272 |
| slc35g2a          | 169.1781 | 0.745567543  | 0.269465 | 2.766845 | 0.00566  | 0.127203 |
| dixdc1b           | 193.3249 | 0.10607536   | 0.170038 | 0.623833 | 0.532737 | 0.890978 |
| atxn7l2b          | 190.3002 | 0.198284346  | 0.167952 | 1.180602 | 0.237761 | 0.718607 |
| atpaf2            | 191.9336 | -0.094434174 | 0.156899 | -0.60188 | 0.547254 | 0.896121 |
| or132-5           | 13.90638 | 1.13352045   | 0.477191 | 2.375401 | 0.01753  | 0.233833 |
| ccdc157           | 20.69741 | 0.000358316  | 0.344907 | 0.001039 | 0.999171 | 1        |
| cyb561a3a         | 94.88584 | 0.105829468  | 0.236921 | 0.446687 | 0.655101 | 0.929606 |
| drd7              | 4.08516  | 2.292428889  | 1.569536 | 1.460577 | 0.144132 | 0.603144 |
| vsx1              | 698.6085 | 0.014303674  | 0.284335 | 0.050306 | 0.959879 | 0.999164 |
| si:ch211-183d21.3 | 53.27466 | 0.136029583  | 0.325822 | 0.417497 | 0.676315 | 0.93557  |
| znf706            | 1589.04  | -0.144780062 | 0.10248  | -1.41277 | 0.157724 | 0.623766 |
| a2ml              | 2315.694 | -0.243410354 | 0.356985 | -0.68185 | 0.495333 | 0.87806  |
| kans12            | 2.112541 | -0.272972696 | 1.334328 | -0.20458 | 0.837903 | NA       |
| ldb3a             | 2599.207 | 0.204875816  | 0.211876 | 0.966961 | 0.333563 | 0.790676 |
| zgc:123295        | 85.33156 | -0.627781983 | 0.256344 | -2.44899 | 0.014326 | 0.209552 |
| rhot2             | 182.9229 | 0.08775592   | 0.182651 | 0.480458 | 0.630902 | 0.923003 |
| mhc2dbb           | 16.71613 | -1.63141257  | 0.623693 | -2.61573 | 0.008904 | 0.161802 |
| ahcyll            | 771.1087 | 0.221195471  | 0.126453 | 1.74923  | 0.080251 | 0.478492 |
| mlh3              | 65.47239 | -0.205881301 | 0.202463 | -1.01688 | 0.30921  | 0.773791 |
| szrd1             | 644.6314 | -0.042876676 | 0.130717 | -0.32801 | 0.742904 | 0.954655 |
| stk31             | 6.24238  | 0.10775402   | 0.897588 | 0.120048 | 0.904445 | 0.991581 |
| acap1             | 98.59471 | -0.395058314 | 0.220832 | -1.78895 | 0.073622 | 0.461398 |
| rab3aa            | 327.7354 | -0.232992713 | 0.199249 | -1.16936 | 0.242261 | 0.724106 |
| mpv1712           | 124.4608 | 0.464403065  | 0.20293  | 2.288494 | 0.022109 | 0.263263 |
| ufsp2             | 412.8242 | 0.036641937  | 0.136624 | 0.268195 | 0.788549 | 0.963567 |
| noxolb            | 14.47642 | 0.236351954  | 0.564157 | 0.418947 | 0.675255 | 0.935297 |
| ankrd37           | 206.982  | 0.220694667  | 0.355405 | 0.620966 | 0.534622 | 0.891806 |
| ifi30             | 785.3218 | -0.038791562 | 0.222231 | -0.17455 | 0.861429 | 0.9805   |
| si:ch73-86n18.1   | 377.8103 | -0.310798197 | 0.184703 | -1.68269 | 0.092434 | 0.508357 |
| cfap97            | 104.1371 | 0.136035621  | 0.227027 | 0.599206 | 0.549036 | 0.897092 |
| TMC1              | 31.82111 | -2.041014847 | 0.821295 | -2.48512 | 0.012951 | 0.198329 |
| rnf17             | 30.3297  | 0.024298365  | 0.45331  | 0.053602 | 0.957252 | 0.999109 |

|                   |          |              |          |          |          |          |
|-------------------|----------|--------------|----------|----------|----------|----------|
| TOM1L2            | 371.6038 | 0.00015597   | 0.204487 | 0.000763 | 0.999391 | 1        |
| onecut3a          | 30.30256 | 0.374284205  | 0.285693 | 1.310092 | 0.190165 | 0.669977 |
| dusp22a           | 162.756  | -0.380703603 | 0.267207 | -1.42475 | 0.154229 | 0.61894  |
| helt              | 84.73107 | 0.009299564  | 0.185498 | 0.050133 | 0.960016 | 0.999164 |
| irf8              | 49.91557 | -0.690520139 | 0.324863 | -2.12557 | 0.033539 | 0.323214 |
| fdx1              | 649.4516 | 0.021884585  | 0.158183 | 0.13835  | 0.889964 | 0.98835  |
| uspl              | 455.3784 | 0.052507747  | 0.102843 | 0.510562 | 0.609658 | 0.915204 |
| auts2a            | 956.8481 | 0.107676124  | 0.162921 | 0.660911 | 0.50867  | 0.883333 |
| her9              | 625.4546 | 0.145525981  | 0.128551 | 1.132052 | 0.257612 | 0.735174 |
| 4-Mar             | 4.12505  | 2.277755162  | 1.567843 | 1.452795 | 0.146281 | 0.605885 |
| zgc:152753        | 0.28719  | 1.055395973  | 4.034919 | 0.261566 | 0.793656 | NA       |
| MANEAL            | 200.5849 | 0.184390051  | 0.213567 | 0.863381 | 0.387928 | 0.827592 |
| afap111b          | 115.6874 | -0.085013342 | 0.194589 | -0.43689 | 0.662194 | 0.930742 |
| lhfp15b           | 37.30736 | -0.160189589 | 0.36692  | -0.43658 | 0.662416 | 0.930757 |
| crp2              | 6.411663 | -0.867241451 | 1.030255 | -0.84177 | 0.399915 | 0.831277 |
| fitml1            | 365.2057 | 0.325430632  | 0.196139 | 1.659184 | 0.097079 | 0.519526 |
| tmub2             | 311.7469 | -0.277670158 | 0.143083 | -1.94062 | 0.052304 | 0.397339 |
| asb16             | 107.2276 | 0.463642772  | 0.21535  | 2.152975 | 0.031321 | 0.314904 |
| chaf1b            | 222.1735 | 0.21371304   | 0.228045 | 0.937153 | 0.34868  | 0.801264 |
| trnaulapb         | 984.7621 | -0.221963857 | 0.157794 | -1.40667 | 0.159525 | 0.6257   |
| ccdc125           | 136.8785 | 0.047062868  | 0.289348 | 0.162651 | 0.870793 | 0.983365 |
| si:ch211-168b3.1  | 132.7455 | -0.078188468 | 0.21979  | -0.35574 | 0.722034 | 0.947403 |
| rab1bb            | 461.457  | -0.053380045 | 0.176113 | -0.3031  | 0.761813 | 0.958263 |
| cpvl              | 604.1612 | -0.161524999 | 0.121315 | -1.33145 | 0.183041 | 0.659373 |
| vat1              | 1911.277 | 0.039586411  | 0.09468  | 0.418106 | 0.67587  | 0.935422 |
| ssbp4             | 1707.32  | 0.080637173  | 0.088838 | 0.907684 | 0.364045 | 0.814497 |
| zgc:110158        | 824.6316 | 0.12057365   | 0.134963 | 0.893384 | 0.371652 | 0.819115 |
| ikzf5             | 234.5838 | 0.207758947  | 0.133362 | 1.557855 | 0.119268 | 0.562753 |
| crp2              | 1362.209 | 3.275235856  | 1.36656  | 2.3967   | 0.016543 | 0.22762  |
| ca6               | 1299.706 | -0.402470654 | 0.106041 | -3.79544 | 0.000147 | 0.012175 |
| si:ch211-208g24.8 | 0.129927 | 0            | 5.267649 | 0        | 1        | NA       |
| si:ch73-334d15.4  | 55.47088 | -2.754310261 | 0.977528 | -2.81763 | 0.004838 | 0.115344 |
| frgl              | 292.1863 | -0.062716451 | 0.144318 | -0.43457 | 0.663874 | 0.931675 |
| si:ch73-113g13.2  | 0.198634 | 1.055359535  | 5.228811 | 0.201835 | 0.840045 | NA       |
| pdik11            | 139.2407 | -0.023487427 | 0.209013 | -0.11237 | 0.910528 | 0.992208 |
| gstkl             | 616.0085 | 0.050821741  | 0.238506 | 0.213083 | 0.831262 | 0.974908 |
| arr3a             | 4820.446 | 0.045258466  | 0.232775 | 0.19443  | 0.845839 | 0.977039 |
| spsbl             | 422.1251 | 0.159891644  | 0.161909 | 0.98754  | 0.323378 | 0.783161 |
| thoc3             | 314.3773 | 0.161434469  | 0.139374 | 1.158279 | 0.24675  | 0.727706 |
| si:dkey-280e21.3  | 249.8173 | 0.488011191  | 0.15912  | 3.066937 | 0.002163 | 0.073473 |
| bcar1             | 519.4609 | -0.08479832  | 0.127941 | -0.66279 | 0.507464 | 0.883007 |
| cpamd8            | 550.9794 | 0.069175233  | 0.125559 | 0.550939 | 0.581676 | 0.905618 |
| nutf2             | 1068.216 | 0.201898691  | 0.092953 | 2.172059 | 0.029851 | 0.307675 |
| serinc2           | 637.5124 | -0.018619829 | 0.12167  | -0.15304 | 0.87837  | 0.985761 |
| pla2g4f.1         | 97.65247 | -0.002281369 | 0.212237 | -0.01075 | 0.991424 | 1        |
| nr0bl             | 78.44822 | -0.043895117 | 0.38216  | -0.11486 | 0.908556 | 0.99186  |
| vps26a            | 775.7798 | -0.140831353 | 0.105401 | -1.33615 | 0.1815   | 0.657892 |
| tango2            | 353.1769 | 0.16563143   | 0.157475 | 1.051792 | 0.292895 | 0.762428 |
| slc22a13a         | 3.061643 | 1.372744513  | 1.51406  | 0.906664 | 0.364584 | 0.814648 |
| rap1gap           | 94.33938 | -0.350144185 | 0.259014 | -1.35184 | 0.176427 | 0.649859 |
| copbl             | 1907.554 | 0.028782687  | 0.097689 | 0.294635 | 0.768273 | 0.960296 |
| ccz1              | 391.797  | 0.015273535  | 0.115564 | 0.132165 | 0.894854 | 0.989112 |
| asb11             | 1.495565 | 0.821968941  | 1.694878 | 0.484972 | 0.627696 | NA       |
| necab1            | 74.67686 | -0.930798233 | 0.315984 | -2.94571 | 0.003222 | 0.093414 |

|                     |           |               |           |           |           |           |
|---------------------|-----------|---------------|-----------|-----------|-----------|-----------|
| nrsn11              | 70. 63341 | 0. 216005826  | 0. 454822 | 0. 474924 | 0. 634841 | 0. 924272 |
| arf2b               | 106. 2547 | 0. 099820247  | 0. 295621 | 0. 337663 | 0. 735617 | 0. 951543 |
| ndufs6              | 971. 4599 | 0. 024693737  | 0. 168762 | 0. 146323 | 0. 883667 | 0. 987014 |
| cyp2r1              | 87. 01026 | -0. 083031722 | 0. 458443 | -0. 18112 | 0. 856276 | 0. 979558 |
| calca               | 95. 92166 | 0. 488968542  | 0. 328842 | 1. 486942 | 0. 13703  | 0. 59257  |
| gucylb2             | 1. 715683 | 1. 470451669  | 1. 327301 | 1. 107851 | 0. 267926 | NA        |
| irx1b               | 202. 8681 | 0. 10533725   | 0. 15238  | 0. 69128  | 0. 489389 | 0. 874462 |
| pimr47              | 0. 049519 | 0             | 5. 267649 | 0         | 1         | NA        |
| papss2b             | 730. 8728 | 0. 034095498  | 0. 10835  | 0. 31468  | 0. 753005 | 0. 955756 |
| plekha3             | 309. 7675 | -0. 243073367 | 0. 150212 | -1. 6182  | 0. 10562  | 0. 534827 |
| mcf2b               | 6. 147105 | 0. 501805313  | 1. 273803 | 0. 393943 | 0. 693623 | 0. 940668 |
| wbp2                | 245. 5302 | 0. 118306887  | 0. 193477 | 0. 611478 | 0. 540883 | 0. 893439 |
| atad1b              | 193. 9695 | 0. 019916681  | 0. 138905 | 0. 143383 | 0. 885988 | 0. 987533 |
| cybb                | 105. 2101 | -0. 141215503 | 0. 27605  | -0. 51156 | 0. 60896  | 0. 915204 |
| pimr48              | 1. 359716 | 0. 595457543  | 1. 798474 | 0. 33109  | 0. 740576 | NA        |
| rpgra               | 12. 17113 | -1. 235862169 | 0. 583373 | -2. 11848 | 0. 034135 | 0. 326054 |
| xk                  | 59. 0966  | 0. 310502929  | 0. 339922 | 0. 913454 | 0. 361004 | 0. 811296 |
| arhgap42a           | 294. 7879 | 0. 032352771  | 0. 126062 | 0. 256642 | 0. 797455 | 0. 966447 |
| grpr                | 6. 763793 | 0. 080961916  | 0. 902381 | 0. 08972  | 0. 928509 | 0. 995052 |
| ctcf                | 1723. 092 | 0. 124064968  | 0. 132445 | 0. 936728 | 0. 348898 | 0. 801306 |
| ptenb               | 858. 9942 | 0. 100742108  | 0. 090617 | 1. 111736 | 0. 266252 | 0. 742912 |
| vegfd               | 37. 61126 | 0. 135247939  | 0. 296796 | 0. 455694 | 0. 64861  | 0. 927501 |
| trpc6a              | 52. 11823 | -0. 206917907 | 0. 282064 | -0. 73358 | 0. 463202 | 0. 864262 |
| cxcl14              | 859. 6753 | -0. 089641782 | 0. 162248 | -0. 5525  | 0. 580606 | 0. 905618 |
| tmem170a            | 168. 4506 | -0. 067145214 | 0. 16421  | -0. 4089  | 0. 682615 | 0. 938006 |
| angpt15             | 192. 0692 | -1. 190952388 | 0. 236548 | -5. 03471 | 4. 79E-07 | 0. 000161 |
| fgf13b              | 345. 1763 | 0. 16444543   | 0. 189532 | 0. 867639 | 0. 385592 | 0. 826939 |
| pir                 | 321. 023  | 0. 23307163   | 0. 218728 | 1. 065578 | 0. 286614 | 0. 757624 |
| carmil2             | 336. 8561 | 0. 310341835  | 0. 173483 | 1. 788886 | 0. 073633 | 0. 461398 |
| rpia                | 980. 5781 | -0. 086724086 | 0. 14847  | -0. 58412 | 0. 559142 | 0. 899487 |
| hdac9b              | 289. 774  | 0. 112989145  | 0. 13997  | 0. 807241 | 0. 419528 | 0. 842383 |
| slc22a7b. 1         | 39. 50259 | -0. 097821568 | 0. 514738 | -0. 19004 | 0. 849277 | 0. 978102 |
| klhl3               | 196. 5837 | 0. 390852062  | 0. 152109 | 2. 569555 | 0. 010183 | 0. 175289 |
| ext2                | 724. 5592 | -0. 059851451 | 0. 119859 | -0. 49935 | 0. 617535 | 0. 916375 |
| htatsf1             | 448. 992  | 0. 136149965  | 0. 114502 | 1. 189063 | 0. 234415 | 0. 715154 |
| zgc:113276          | 97. 99907 | 0. 535819284  | 0. 255993 | 2. 093101 | 0. 03634  | 0. 335171 |
| gfra4a              | 55. 96429 | -0. 520053459 | 0. 380612 | -1. 36636 | 0. 171826 | 0. 643953 |
| SLC22A7 (1 of many) | 15. 58002 | -0. 476129428 | 0. 577754 | -0. 8241  | 0. 409881 | 0. 836939 |
| fh11b               | 292. 0164 | -0. 282352971 | 0. 158103 | -1. 78588 | 0. 074118 | 0. 462265 |
| gna15. 3            | 9. 592043 | 0. 688161911  | 1. 420871 | 0. 484324 | 0. 628156 | 0. 921864 |
| tspan18a            | 193. 4833 | -0. 459247412 | 0. 14967  | -3. 06839 | 0. 002152 | 0. 073224 |
| ttbklb              | 119. 5896 | -0. 041678391 | 0. 187338 | -0. 22248 | 0. 823943 | 0. 972032 |
| arfip2b             | 0. 526814 | 1. 055417365  | 2. 877503 | 0. 366782 | 0. 713781 | NA        |
| nsun2               | 310. 641  | -0. 23197087  | 0. 121014 | -1. 91689 | 0. 055252 | 0. 406983 |
| sp8b                | 7. 816532 | -0. 002375738 | 0. 673782 | -0. 00353 | 0. 997187 | 1         |
| abcb8               | 283. 5416 | -0. 024177434 | 0. 152183 | -0. 15887 | 0. 873771 | 0. 983831 |
| BX530018. 2         | 51. 12284 | 0. 648978676  | 0. 28583  | 2. 270505 | 0. 023177 | 0. 268774 |
| trim47              | 321. 3177 | -0. 183890727 | 0. 134027 | -1. 37204 | 0. 170051 | 0. 641806 |
| morc3a              | 162. 3585 | 0. 134190776  | 0. 191269 | 0. 701581 | 0. 482941 | 0. 871882 |
| stc2a               | 236. 6092 | 0. 148234663  | 0. 237184 | 0. 624977 | 0. 531986 | 0. 890978 |
| cdk5                | 104. 2519 | -0. 699330083 | 0. 430145 | -1. 6258  | 0. 103992 | 0. 532096 |
| mtmrla              | 401. 1439 | 0. 115430646  | 0. 16132  | 0. 715539 | 0. 474276 | 0. 869292 |
| cpeb4a              | 331. 1576 | -0. 001323218 | 0. 161187 | -0. 00821 | 0. 99345  | 1         |
| phc2a               | 696. 9045 | -0. 191093752 | 0. 091098 | -2. 09768 | 0. 035933 | 0. 332937 |



|                   |          |              |          |          |          |          |
|-------------------|----------|--------------|----------|----------|----------|----------|
| RAMP1             | 236.8051 | -0.210948568 | 0.170393 | -1.23801 | 0.215712 | 0.697271 |
| pskh1             | 171.4543 | -0.034820577 | 0.206633 | -0.16851 | 0.866179 | 0.982573 |
| vars2             | 164.7218 | -0.049586619 | 0.196544 | -0.25229 | 0.800815 | 0.967609 |
| slc6a19b          | 126.5139 | -0.75887861  | 0.829837 | -0.91449 | 0.360459 | 0.811237 |
| utp3              | 253.0936 | -0.513416294 | 0.189496 | -2.70938 | 0.006741 | 0.138465 |
| cd9912            | 2302.413 | 0.182749621  | 0.124824 | 1.464058 | 0.143178 | 0.602183 |
| fhad1             | 18.84275 | 0.651943031  | 0.53388  | 1.221142 | 0.222032 | 0.703829 |
| hmgb3a            | 6759.972 | -0.02615218  | 0.097843 | -0.26729 | 0.789248 | 0.963735 |
| mettl7a           | 63.93557 | -0.70003774  | 0.362274 | -1.93234 | 0.053317 | 0.400175 |
| her4.2            | 188.6965 | 0.111740657  | 0.177872 | 0.628208 | 0.529867 | 0.890545 |
| her4.1            | 95.21501 | 0.155392129  | 0.225602 | 0.688787 | 0.490957 | 0.875595 |
| tas1r1            | 2.797173 | -0.921436353 | 1.480236 | -0.62249 | 0.533618 | 0.891181 |
| tmef1b            | 1572.614 | 0.09802397   | 0.12313  | 0.7961   | 0.425974 | 0.844714 |
| senp3b            | 303.2034 | 0.011895616  | 0.128476 | 0.09259  | 0.926229 | 0.994815 |
| crmp1             | 339.6361 | 0.358228525  | 0.245871 | 1.456977 | 0.145123 | 0.604004 |
| cavin4b           | 1466.943 | 0.143591469  | 0.228828 | 0.627509 | 0.530326 | 0.890545 |
| ela2              | 24261.93 | 0.91946549   | 0.359507 | 2.55757  | 0.010541 | 0.179446 |
| necab2            | 785.6316 | 0.329571075  | 0.167132 | 1.971924 | 0.048618 | 0.383778 |
| si:ch211-254p10.2 | 28.16459 | -0.126188766 | 0.42294  | -0.29836 | 0.765428 | 0.959831 |
| dctn1b            | 364.0364 | 0.220979257  | 0.202686 | 1.090255 | 0.275601 | 0.750653 |
| slc39a8           | 29.85511 | -1.134096341 | 0.631774 | -1.7951  | 0.072638 | 0.457864 |
| zgc:172079        | 4.433713 | -1.66868774  | 0.898627 | -1.85693 | 0.063321 | 0.429493 |
| hyd1n             | 51.56318 | 0.998686103  | 0.38098  | 2.621363 | 0.008758 | 0.160701 |
| ela2l             | 27435.35 | -0.339042888 | 0.296571 | -1.14321 | 0.252952 | 0.732759 |
| itgb3a            | 165.6282 | 0.151539841  | 0.207384 | 0.730722 | 0.464949 | 0.864823 |
| rprml             | 49.74461 | 0.190262205  | 0.396809 | 0.479481 | 0.631597 | 0.923003 |
| zgc:163079        | 0.285605 | 0.093652163  | 4.739054 | 0.019762 | 0.984233 | NA       |
| gpr3711b          | 51.53741 | 0.269727501  | 0.277174 | 0.973133 | 0.330487 | 0.788126 |
| ssh1a             | 20.18688 | -0.429438023 | 0.448559 | -0.95737 | 0.338379 | 0.795226 |
| zan1              | 259.9914 | -2.593462466 | 0.614054 | -4.22351 | 2.41E-05 | 0.003278 |
| raraa             | 413.8699 | -0.010969253 | 0.129487 | -0.08471 | 0.93249  | 0.996175 |
| aire              | 2.907652 | 1.490057172  | 1.318947 | 1.129733 | 0.258589 | 0.735786 |
| pde6ga            | 17.42863 | 0.288943666  | 0.860932 | 0.335617 | 0.737159 | 0.952312 |
| jazf1b            | 94.52495 | 0.264528575  | 0.245274 | 1.078501 | 0.28081  | 0.753193 |
| arl3a             | 23.24522 | -0.268629429 | 0.426727 | -0.62951 | 0.529015 | 0.890325 |
| serpine1          | 183.457  | -0.540981794 | 0.277676 | -1.94825 | 0.051385 | 0.394202 |
| ppp2r2ca          | 112.8936 | 0.16410226   | 0.332346 | 0.49377  | 0.621469 | 0.918461 |
| zgc:123297        | 2.018291 | -0.868138778 | 1.95242  | -0.44465 | 0.656574 | NA       |
| sufu              | 588.1726 | -0.030996198 | 0.124019 | -0.24993 | 0.802641 | 0.968181 |
| ap1sl             | 613.9738 | 0.255406611  | 0.160739 | 1.588952 | 0.112071 | 0.548404 |
| si:dkey-40g16.6   | 26.90963 | -0.04951842  | 0.504318 | -0.09819 | 0.921782 | 0.99426  |
| plch2b            | 25.02961 | 0.142129523  | 0.439851 | 0.323131 | 0.746596 | 0.955074 |
| pde5aa            | 18.67465 | -1.237928392 | 0.700496 | -1.76722 | 0.077192 | 0.469556 |
| hoxa9b            | 160.4475 | -0.035069711 | 0.152317 | -0.23024 | 0.817904 | 0.971518 |
| zmp:0000000662    | 201.3714 | -0.104018509 | 0.144745 | -0.71863 | 0.472366 | 0.868767 |
| si:ch211-107m4.1  | 64.01382 | 0.276223812  | 0.202891 | 1.361438 | 0.173375 | 0.64634  |
| gng2              | 820.7113 | 0.165285159  | 0.165745 | 0.997223 | 0.318656 | 0.779923 |
| exo1              | 55.6393  | -0.042158791 | 0.224988 | -0.18738 | 0.851361 | 0.978548 |
| svopa             | 23.41968 | 0.127769326  | 0.457467 | 0.279297 | 0.780017 | 0.961176 |
| laynb             | 44.91057 | -0.069876534 | 0.321516 | -0.21733 | 0.827947 | 0.973883 |
| si:ch211-125o16.4 | 1539.256 | -0.179006282 | 0.180392 | -0.99232 | 0.321041 | 0.781417 |
| pimr93            | 0.821023 | -1.212208504 | 2.11724  | -0.57254 | 0.566955 | NA       |
| otud5b            | 656.0629 | 0.081564331  | 0.100598 | 0.810797 | 0.417483 | 0.841149 |
| usp30             | 53.52562 | -0.023332574 | 0.271497 | -0.08594 | 0.931514 | 0.995809 |

|                   |          |              |          |          |          |          |
|-------------------|----------|--------------|----------|----------|----------|----------|
| si:dkey-27c15.3   | 75.58844 | -0.026371504 | 0.197314 | -0.13365 | 0.893677 | 0.988566 |
| gatc              | 223.891  | -0.063989784 | 0.150869 | -0.42414 | 0.671463 | 0.933953 |
| tax1bplb          | 2219.1   | -0.062847991 | 0.080977 | -0.77612 | 0.437679 | 0.851283 |
| spx               | 16.93493 | 0.647962673  | 0.595569 | 1.087972 | 0.276608 | 0.751172 |
| cep63             | 200.4852 | -0.059978478 | 0.185355 | -0.32359 | 0.746251 | 0.955074 |
| ap4ml             | 113.8455 | -0.276031065 | 0.233568 | -1.1818  | 0.237285 | 0.718568 |
| and3              | 3579.491 | -0.215493399 | 0.146263 | -1.47332 | 0.140664 | 0.599658 |
| lygl1             | 228.6898 | -0.169606077 | 0.17589  | -0.96427 | 0.334909 | 0.79181  |
| vamp2             | 556.8188 | 0.219911678  | 0.235637 | 0.933266 | 0.350683 | 0.802215 |
| per1a             | 141.3436 | -0.618593149 | 0.407263 | -1.5189  | 0.128786 | 0.578173 |
| tbccd1            | 120.2989 | -0.178803611 | 0.204471 | -0.87447 | 0.381863 | 0.824957 |
| dnah51            | 57.35559 | 0.276004559  | 0.370399 | 0.745155 | 0.456178 | 0.860359 |
| mpp6a             | 300.7416 | -0.169549221 | 0.15451  | -1.09734 | 0.272494 | 0.748416 |
| ttc12             | 17.94456 | 0.014514136  | 0.47558  | 0.030519 | 0.975653 | 1        |
| mrpl13            | 421.6885 | 0.044513574  | 0.136047 | 0.327193 | 0.743522 | 0.954856 |
| si:rp71-45g20.10  | 1.864329 | 1.055416891  | 2.281249 | 0.462649 | 0.643616 | NA       |
| L0018309.1        | 33.17377 | -1.380053543 | 0.547936 | -2.51864 | 0.011781 | 0.18877  |
| CU234171.1        | 9.739895 | -0.479772702 | 0.646419 | -0.7422  | 0.457966 | 0.860993 |
| or133-1           | 5.783663 | -0.023483467 | 0.831939 | -0.02823 | 0.977481 | 1        |
| pcolcea           | 1044.072 | 0.163684104  | 0.156298 | 1.047257 | 0.294981 | 0.763708 |
| emg1              | 164.7861 | 0.201625552  | 0.166321 | 1.21227  | 0.225409 | 0.70685  |
| si:ch211-23714.6  | 66.34419 | 1.120826975  | 0.320532 | 3.496773 | 0.000471 | 0.02642  |
| si:rp71-45g20.4   | 3.904656 | -0.871535285 | 1.175058 | -0.7417  | 0.458272 | 0.861001 |
| tmem88a           | 120.757  | -0.181107882 | 0.181248 | -0.99923 | 0.317685 | 0.77959  |
| ankk1             | 37.6397  | -0.037381377 | 0.319903 | -0.11685 | 0.906977 | 0.991679 |
| ltbpl             | 431.3673 | -0.216614613 | 0.149761 | -1.4464  | 0.148065 | 0.609064 |
| dbr1              | 353.2445 | -0.070277064 | 0.112702 | -0.62356 | 0.532914 | 0.890978 |
| sap130a           | 327.8625 | -0.062949031 | 0.125062 | -0.50334 | 0.614723 | 0.915998 |
| drd2a             | 12.53672 | 0.008288602  | 0.666747 | 0.012431 | 0.990081 | 1        |
| kdm6bb            | 592.2133 | 0.028197622  | 0.221626 | 0.12723  | 0.898758 | 0.990262 |
| tfip11            | 501.4893 | 0.011780269  | 0.115001 | 0.102437 | 0.91841  | 0.993884 |
| hepacama          | 268.0794 | 0.368892202  | 0.151619 | 2.433017 | 0.014974 | 0.214278 |
| kera              | 434.0923 | 0.293165015  | 0.19512  | 1.502489 | 0.132971 | 0.58639  |
| or125-8           | 6.494167 | 0.472531532  | 0.724433 | 0.652278 | 0.514222 | 0.88631  |
| htr7a             | 4.518745 | 0.634975581  | 1.209382 | 0.525041 | 0.599554 | 0.913385 |
| epyc              | 1967.854 | 0.217477661  | 0.239289 | 0.90885  | 0.363429 | 0.813669 |
| si:dkeyp-38g8.5   | 22.41783 | -0.573817153 | 0.417303 | -1.37506 | 0.169112 | 0.640442 |
| ccdc30            | 94.86622 | 0.087786742  | 0.273587 | 0.320874 | 0.748306 | 0.955074 |
| ilk               | 1035.793 | -0.166280619 | 0.110253 | -1.50817 | 0.131511 | 0.583069 |
| nek7              | 490.206  | -0.057958304 | 0.116011 | -0.49959 | 0.617363 | 0.916365 |
| ifit16            | 26.31998 | -0.572425535 | 0.478732 | -1.19571 | 0.231809 | 0.713202 |
| letml             | 129.873  | 0.099051928  | 0.173262 | 0.571688 | 0.567534 | 0.901809 |
| lhx9              | 485.5019 | 0.121267712  | 0.127446 | 0.951519 | 0.341341 | 0.796175 |
| rad9a             | 42.55454 | 0.252759334  | 0.290748 | 0.869341 | 0.38466  | 0.826588 |
| tpte              | 569.1381 | -0.279038049 | 0.165662 | -1.68438 | 0.092109 | 0.507702 |
| dact2             | 146.1486 | 0.148798764  | 0.1972   | 0.754558 | 0.450514 | 0.857151 |
| snaila            | 359.8106 | -0.003732914 | 0.149748 | -0.02493 | 0.980112 | 1        |
| kirrellb          | 211.9955 | 0.215925671  | 0.159218 | 1.356165 | 0.175047 | 0.648933 |
| camkv1            | 179.4397 | 0.146151831  | 0.273897 | 0.533601 | 0.593618 | 0.910427 |
| si:ch211-287a12.9 | 104.3225 | -0.393978529 | 0.23051  | -1.70916 | 0.087421 | 0.496224 |
| fam241a           | 222.0194 | -0.362805923 | 0.174405 | -2.08025 | 0.037503 | 0.340049 |
| ctbpl             | 2718.221 | 0.06916108   | 0.134334 | 0.514846 | 0.606661 | 0.915204 |
| si:dkey-154b15.1  | 35.13017 | 0.212493962  | 0.342561 | 0.620309 | 0.535054 | 0.891993 |
| dpml              | 318.1821 | 0.139214253  | 0.15696  | 0.886942 | 0.37511  | 0.822028 |

|                   |          |              |          |          |          |          |
|-------------------|----------|--------------|----------|----------|----------|----------|
| cadm3             | 217.3852 | 0.127701034  | 0.162372 | 0.786473 | 0.431591 | 0.848419 |
| cdc14ab           | 376.6717 | -0.193103488 | 0.118629 | -1.6278  | 0.103567 | 0.531015 |
| slc6a4b           | 7.473352 | 0.10900679   | 1.061518 | 0.10269  | 0.918209 | 0.993884 |
| vps36             | 258.1261 | -0.049045841 | 0.152602 | -0.3214  | 0.747909 | 0.955074 |
| chrna2b           | 57.38387 | 0.342010056  | 0.33384  | 1.024471 | 0.305613 | 0.770852 |
| ran               | 10273.74 | -0.091357041 | 0.113324 | -0.80615 | 0.420154 | 0.842383 |
| rtn2b             | 455.0627 | -0.142058502 | 0.17716  | -0.80186 | 0.422631 | 0.843493 |
| htr2aa            | 14.29245 | 1.864671329  | 0.654374 | 2.849548 | 0.004378 | 0.108843 |
| ppmlnb            | 316.2293 | 0.52758664   | 0.250685 | 2.104584 | 0.035328 | 0.330833 |
| stoml3b           | 243.3264 | -0.656891095 | 0.343927 | -1.90997 | 0.056136 | 0.409466 |
| kcnk12l           | 0.898066 | -2.304171659 | 2.598873 | -0.8866  | 0.375292 | NA       |
| si:ch211-191j22.8 | 9.164612 | -0.471170592 | 0.730726 | -0.6448  | 0.519058 | 0.887148 |
| tm2d1             | 139.1975 | -0.276031516 | 0.184771 | -1.49391 | 0.135199 | 0.590585 |
| kcnk18            | 31.87634 | 0.010267292  | 0.308471 | 0.033284 | 0.973448 | 1        |
| zgc:91976         | 362.864  | -0.29501758  | 0.135555 | -2.17638 | 0.029527 | 0.30586  |
| lrit3b            | 4.704249 | 2.306504972  | 0.969844 | 2.378223 | 0.017396 | 0.232896 |
| ndufs8b           | 6.007846 | -0.519956556 | 1.496246 | -0.34751 | 0.72821  | 0.949447 |
| minpp1a           | 169.4427 | -0.166068313 | 0.216074 | -0.76857 | 0.442148 | 0.853572 |
| tvp23b            | 321.1757 | 0.133373547  | 0.135799 | 0.982137 | 0.326033 | 0.784919 |
| si:dkey-157g16.6  | 289.0731 | -0.001964434 | 0.18376  | -0.01069 | 0.991471 | 1        |
| enpep             | 120.073  | -0.300996149 | 0.28374  | -1.06082 | 0.288773 | 0.759979 |
| rpgrb             | 119.2858 | 0.097396536  | 0.201224 | 0.48402  | 0.628372 | 0.921864 |
| lamtor3           | 228.5503 | 0.023547982  | 0.197554 | 0.119198 | 0.905119 | 0.991631 |
| ftsjl             | 177.4276 | -0.104465696 | 0.176337 | -0.59242 | 0.553569 | 0.89813  |
| zmp:0000001103    | 1.010942 | 0            | 2.415065 | 0        | 1        | NA       |
| kdm5ba            | 1683.946 | -0.115038431 | 0.154903 | -0.74265 | 0.457696 | 0.860993 |
| ndr1              | 1.430233 | -0.742558841 | 1.775133 | -0.41831 | 0.675719 | NA       |
| htrlab            | 19.77901 | -0.289699521 | 0.455467 | -0.63605 | 0.524745 | 0.888928 |
| papssl            | 252.6509 | 0.262042341  | 0.231427 | 1.132288 | 0.257513 | 0.735155 |
| zwilch            | 58.54307 | 0.364499569  | 0.311831 | 1.1689   | 0.242444 | 0.724345 |
| rnf180            | 95.24059 | -0.343565898 | 0.197459 | -1.73993 | 0.081871 | 0.481671 |
| nlel              | 187.7876 | -0.015391933 | 0.21132  | -0.07284 | 0.941936 | 0.997371 |
| si:ch73-383g2.1   | 14.51455 | 0.535191447  | 0.574349 | 0.931822 | 0.351428 | 0.802305 |
| serpine3          | 63.24597 | -0.475718377 | 0.30635  | -1.55286 | 0.120456 | 0.565995 |
| slc25a1a          | 255.2879 | 0.053699993  | 0.168392 | 0.318898 | 0.749804 | 0.955074 |
| gpr25             | 0.392458 | 0            | 3.772209 | 0        | 1        | NA       |
| c6                | 267.0201 | -0.254173677 | 0.231018 | -1.10023 | 0.271231 | 0.747344 |
| hpf1              | 379.7995 | -0.065856403 | 0.168045 | -0.3919  | 0.695133 | 0.94128  |
| ghsrb             | 3.109829 | 1.631411935  | 1.443771 | 1.129966 | 0.258491 | 0.735636 |
| c7b               | 106.8223 | -1.272362385 | 0.476756 | -2.66879 | 0.007612 | 0.147466 |
| pld1b             | 189.8525 | -0.162744771 | 0.171818 | -0.94719 | 0.343541 | 0.798147 |
| hadhaa            | 586.9374 | 0.010187273  | 0.239842 | 0.042475 | 0.96612  | 1        |
| zgc:174164        | 80.96959 | 0.162192214  | 0.263685 | 0.615097 | 0.53849  | 0.892732 |
| zgc:110045        | 166.0429 | 0.369675093  | 0.166484 | 2.220488 | 0.026386 | 0.287876 |
| zgc:194252        | 10.71846 | -0.616224611 | 0.820274 | -0.75124 | 0.452507 | 0.857994 |
| nradd             | 151.9405 | -0.159931493 | 0.16206  | -0.98687 | 0.323707 | 0.783161 |
| mocos             | 222.3011 | -0.485271252 | 0.165529 | -2.93164 | 0.003372 | 0.095623 |
| prep              | 185.6419 | 0.132070867  | 0.137425 | 0.961037 | 0.336534 | 0.793245 |
| ankrd29           | 154.0431 | -0.153216038 | 0.257498 | -0.59502 | 0.551831 | 0.8974   |
| lrmda             | 30.4382  | -0.195051491 | 0.295552 | -0.65996 | 0.509281 | 0.883568 |
| eif4g2b           | 4140.368 | -0.087892709 | 0.110889 | -0.79262 | 0.428001 | 0.845998 |
| abca4a            | 118.7002 | -0.83018035  | 0.341757 | -2.42916 | 0.015134 | 0.21592  |
| ifit8             | 3.00749  | -1.802049468 | 2.244567 | -0.80285 | 0.422062 | 0.843323 |
| il17c             | 0.903457 | -1.811171747 | 2.657102 | -0.68163 | 0.49547  | NA       |

|                   |          |              |          |          |          |          |
|-------------------|----------|--------------|----------|----------|----------|----------|
| zgc:55781         | 159.6656 | -0.04688255  | 0.140888 | -0.33276 | 0.739312 | 0.953422 |
| nmt1b             | 225.3222 | -0.179175452 | 0.304057 | -0.58928 | 0.555672 | 0.898723 |
| plppr5a           | 30.89954 | -0.576274365 | 0.361256 | -1.5952  | 0.110669 | 0.545461 |
| has3              | 19.54741 | -0.269962712 | 0.328633 | -0.82147 | 0.411378 | 0.837797 |
| tbc1d15           | 610.8362 | -0.292125709 | 0.149855 | -1.94938 | 0.05125  | 0.394059 |
| si:dkey-222b8.4   | 29.85255 | 0.554331404  | 0.463849 | 1.195069 | 0.23206  | 0.713202 |
| rorca             | 392.272  | 0.045427863  | 0.175906 | 0.25825  | 0.796214 | 0.966357 |
| chtopa            | 1536.696 | 0.047325343  | 0.083902 | 0.564055 | 0.572717 | 0.903571 |
| si:dkey-30k6.5    | 111.967  | 0.016147828  | 0.167907 | 0.096171 | 0.923384 | 0.994525 |
| tph2              | 59.42769 | 0.619238068  | 0.294344 | 2.103793 | 0.035397 | 0.330833 |
| tnfsf10           | 493.4661 | -0.135307434 | 0.148103 | -0.9136  | 0.360926 | 0.811253 |
| im:7138535        | 116.5981 | -0.134888384 | 0.218138 | -0.61836 | 0.536336 | 0.892371 |
| sclt1             | 177.9691 | 0.091392402  | 0.155289 | 0.58853  | 0.556177 | 0.899002 |
| zmynd11           | 1132.651 | -0.014634571 | 0.10185  | -0.14369 | 0.885747 | 0.987533 |
| pimr141           | 1.7951   | -3.932751193 | 4.785644 | -0.82178 | 0.411202 | NA       |
| emc1              | 816.5188 | 0.106841631  | 0.10439  | 1.023485 | 0.306079 | 0.771472 |
| si:dkey-91i10.3   | 115.2443 | 0.476910058  | 0.446997 | 1.066919 | 0.286008 | 0.757455 |
| zgc:173729        | 5.778933 | 0.081244265  | 0.805279 | 0.10089  | 0.919638 | 0.993892 |
| pimr52            | 0.211242 | -2.8108188   | 5.183137 | -0.5423  | 0.587611 | NA       |
| slc30a9           | 642.1088 | -0.077049281 | 0.130219 | -0.59169 | 0.554057 | 0.898275 |
| alox5a            | 42.84926 | 0.236842722  | 0.253885 | 0.932873 | 0.350885 | 0.802215 |
| iqcal             | 24.6629  | -0.101210216 | 0.375795 | -0.26932 | 0.787681 | 0.963263 |
| pimr54            | 0 NA     | NA           | NA       | NA       | NA       | NA       |
| swap70b           | 256.2377 | -0.051914067 | 0.143223 | -0.36247 | 0.717001 | 0.94627  |
| slc25a16          | 371.1163 | 0.035259674  | 0.151835 | 0.232224 | 0.816364 | 0.971207 |
| cb1n1             | 407.2318 | 0.404461086  | 0.215817 | 1.874097 | 0.060917 | 0.423604 |
| pbdc1             | 918.6683 | 0.000271697  | 0.164266 | 0.001654 | 0.99868  | 1        |
| galnt7            | 774.4247 | 0.025745598  | 0.109417 | 0.235299 | 0.813977 | 0.970483 |
| rwdd3             | 57.63543 | -0.548603048 | 0.309739 | -1.77118 | 0.076531 | 0.468485 |
| nexn              | 781.2219 | 0.163773224  | 0.227579 | 0.719632 | 0.471751 | 0.868256 |
| tut1              | 176.0989 | 0.003306358  | 0.165559 | 0.019971 | 0.984067 | 1        |
| tmem47            | 823.8024 | 0.304901894  | 0.125206 | 2.435209 | 0.014883 | 0.213725 |
| e2f8              | 222.5567 | 0.135709187  | 0.229286 | 0.591877 | 0.553933 | 0.89821  |
| cth1              | 0.234763 | -1.826688039 | 5.230459 | -0.34924 | 0.726909 | NA       |
| kenk7             | 3.25576  | 0.854068352  | 1.128167 | 0.757041 | 0.449025 | 0.856796 |
| cmasa             | 530.3503 | -0.334182462 | 0.115083 | -2.90384 | 0.003686 | 0.100716 |
| slc25a29          | 51.38626 | 0.019284247  | 0.38658  | 0.049884 | 0.960215 | 0.999164 |
| ehbp111a          | 385.9885 | -0.052220047 | 0.238962 | -0.21853 | 0.827017 | 0.973458 |
| elov18b           | 104.8134 | 1.190707852  | 0.959391 | 1.241108 | 0.214566 | 0.69658  |
| rps8b             | 83.2711  | 0.170108572  | 0.268696 | 0.633088 | 0.526676 | 0.889699 |
| sfxn3             | 151.0748 | 0.007275139  | 0.19029  | 0.038232 | 0.969503 | 1        |
| selenoula         | 1245.461 | 0.319915062  | 0.14362  | 2.227509 | 0.025913 | 0.285638 |
| lrrc31            | 36.88379 | -0.189261138 | 0.367468 | -0.51504 | 0.606524 | 0.915204 |
| rab33a            | 122.8956 | 0.114820681  | 0.213949 | 0.536674 | 0.591493 | 0.909437 |
| si:ch211-130m23.3 | 27.18498 | 0.502095017  | 0.415512 | 1.208376 | 0.226903 | 0.707983 |
| CR847953.1        | 245.8759 | 0.097713618  | 0.142247 | 0.68693  | 0.492127 | 0.87629  |
| CABZ01067232.1    | 267.0036 | 0.654130259  | 0.386439 | 1.692714 | 0.09051  | 0.505085 |
| rxfp3             | 12.71551 | 0.709412146  | 0.764977 | 0.927364 | 0.353738 | 0.804644 |
| phb               | 2534.098 | 0.156367081  | 0.10947  | 1.428403 | 0.153176 | 0.617769 |
| nudt13            | 24.15787 | -0.524294527 | 0.722132 | -0.72604 | 0.467816 | 0.866174 |
| slc44a5b          | 213.3263 | 0.084127644  | 0.171756 | 0.489808 | 0.624269 | 0.919537 |
| oard1             | 37.35929 | 0.28496564   | 0.367726 | 0.774939 | 0.438375 | 0.851685 |
| sv2ba             | 628.1271 | 0.133777889  | 0.359895 | 0.371714 | 0.710106 | 0.945821 |
| arg1              | 13.5928  | -2.390465216 | 1.37414  | -1.73961 | 0.081928 | 0.481794 |

|                    |          |              |          |          |          |          |
|--------------------|----------|--------------|----------|----------|----------|----------|
| st6galnac5b        | 72.38353 | -0.125270916 | 0.21875  | -0.57267 | 0.56687  | 0.901747 |
| amacr              | 98.25057 | 0.189276037  | 0.201979 | 0.937105 | 0.348704 | 0.801264 |
| apodb              | 861.1024 | 0.068736658  | 0.215123 | 0.319523 | 0.74933  | 0.955074 |
| phf1               | 4.311272 | 3.261528369  | 1.537173 | 2.121771 | 0.033857 | 0.325143 |
| si:dkey-228d14.5   | 46.2188  | -0.387867421 | 0.347803 | -1.11519 | 0.264767 | 0.742063 |
| ston2              | 647.287  | -0.047124518 | 0.138056 | -0.34134 | 0.732846 | 0.950624 |
| ppp3ccb            | 431.7552 | -0.096749204 | 0.12694  | -0.76216 | 0.445962 | 0.855403 |
| crygm2d13          | 8002.707 | 0.645134605  | 0.34621  | 1.86342  | 0.062403 | 0.427718 |
| gfpt1              | 390.3878 | -0.052492285 | 0.10918  | -0.48079 | 0.630668 | 0.923003 |
| kcnc2              | 38.86888 | 0.446221432  | 0.384121 | 1.16167  | 0.24537  | 0.726909 |
| lrrc28             | 50.08031 | -0.022573249 | 0.275043 | -0.08207 | 0.93459  | 0.996829 |
| hrh2b              | 2.071423 | 1.452775038  | 1.167362 | 1.244494 | 0.213318 | NA       |
| RNF157             | 288.5834 | 0.249495137  | 0.14666  | 1.701182 | 0.088909 | 0.500368 |
| srsf2a             | 2136.571 | 0.037173042  | 0.09498  | 0.391377 | 0.695518 | 0.9414   |
| n4bp1              | 221.7278 | 0.153009462  | 0.1882   | 0.813014 | 0.41621  | 0.839647 |
| stk351             | 466.728  | 0.246773847  | 0.141957 | 1.73837  | 0.082146 | 0.482431 |
| habp2              | 174.9002 | -0.65410587  | 0.307375 | -2.12804 | 0.033334 | 0.323127 |
| si:dkey-202g17.3   | 66.82565 | -0.161978111 | 0.350264 | -0.46245 | 0.643762 | 0.925997 |
| mdm4               | 859.9875 | -0.056622306 | 0.093647 | -0.60464 | 0.54542  | 0.8953   |
| pcdh1g9            | 109.8508 | 0.077867941  | 0.25801  | 0.301802 | 0.762803 | 0.958842 |
| mef2ab             | 34.07724 | 0.477010668  | 0.409582 | 1.164628 | 0.24417  | 0.724792 |
| itpa               | 195.7862 | -0.08818122  | 0.197411 | -0.44669 | 0.6551   | 0.929606 |
| pgap3              | 28.94714 | 0.408598697  | 0.378062 | 1.080772 | 0.279798 | 0.752778 |
| crygm2a            | 3.983145 | -1.747637577 | 1.795489 | -0.97335 | 0.33038  | 0.788126 |
| rpl17              | 24590.14 | -0.417925387 | 0.127491 | -3.27807 | 0.001045 | 0.045343 |
| polr3c             | 80.53959 | -0.126967169 | 0.206076 | -0.61612 | 0.537816 | 0.892498 |
| nefla              | 152.7078 | 0.860924331  | 0.332582 | 2.588607 | 0.009636 | 0.169022 |
| pgam2              | 2775.08  | 0.334660746  | 0.166031 | 2.015657 | 0.043836 | 0.366547 |
| pnp4a              | 631.3643 | -0.72808693  | 0.232582 | -3.13045 | 0.001745 | 0.064499 |
| mbtps2             | 280.4551 | -0.021591888 | 0.148173 | -0.14572 | 0.884142 | 0.987047 |
| prrc2c             | 987.5163 | 0.187465755  | 0.176595 | 1.061559 | 0.288436 | 0.759522 |
| sall3b             | 181.9981 | 0.220773212  | 0.148733 | 1.48436  | 0.137713 | 0.593771 |
| si:ch1073-396h14.1 | 260.4908 | 0.219832867  | 0.20126  | 1.092285 | 0.274708 | 0.750181 |
| s100b              | 205.2497 | -0.138979959 | 0.207552 | -0.66962 | 0.503103 | 0.881598 |
| arl4ca             | 288.3797 | -0.10189288  | 0.153725 | -0.66282 | 0.507443 | 0.883007 |
| cdkn2c             | 48.55339 | 0.393394846  | 0.250564 | 1.570039 | 0.116406 | 0.557474 |
| nitric3c           | 2.710999 | 2.910339361  | 1.244341 | 2.338861 | 0.019343 | 0.245035 |
| cops5              | 485.9098 | 0.210606381  | 0.160201 | 1.314642 | 0.18863  | 0.668367 |
| duspl4             | 98.07716 | -0.081933855 | 0.268792 | -0.30482 | 0.760501 | 0.957886 |
| josd2              | 260.037  | 0.043814026  | 0.147159 | 0.297732 | 0.765908 | 0.959974 |
| galm               | 247.5517 | -0.197567785 | 0.227143 | -0.86979 | 0.384413 | 0.826588 |
| ppplr42            | 12.82406 | 0.168605895  | 0.543573 | 0.310181 | 0.756423 | 0.956532 |
| cxcr4a             | 133.5934 | -0.144117525 | 0.184556 | -0.78089 | 0.434868 | 0.850002 |
| wdr34              | 42.01536 | -0.034135232 | 0.283187 | -0.12054 | 0.904056 | 0.991581 |
| adam8b             | 55.9253  | -0.253350599 | 0.273259 | -0.92714 | 0.353852 | 0.804826 |
| dnttip2            | 521.0513 | -0.208214294 | 0.183553 | -1.13436 | 0.256645 | 0.734072 |
| satb1a             | 92.39123 | 0.016432155  | 0.230415 | 0.071315 | 0.943147 | 0.997371 |
| dbpb               | 210.5624 | -0.624063381 | 0.293615 | -2.12545 | 0.033549 | 0.323214 |
| dhx57              | 247.4514 | 0.100311533  | 0.137402 | 0.730058 | 0.465355 | 0.864997 |
| aldoca             | 160.9006 | -0.492277508 | 0.965881 | -0.50967 | 0.610285 | 0.915331 |
| sprn2              | 104.0336 | 0.142026213  | 0.230702 | 0.615626 | 0.538141 | 0.892498 |
| epas1b             | 411.075  | -0.209074112 | 0.162105 | -1.28974 | 0.19714  | 0.677304 |
| plpp5              | 367.8643 | 0.127013651  | 0.148962 | 0.852656 | 0.39385  | 0.828374 |
| golga7             | 1354.092 | 0.026776737  | 0.117265 | 0.228344 | 0.819379 | 0.971785 |

|                     |           |               |           |           |           |           |
|---------------------|-----------|---------------|-----------|-----------|-----------|-----------|
| neu4                | 12. 35821 | 0. 549547413  | 0. 554801 | 0. 99053  | 0. 321915 | 0. 782075 |
| sfrplb              | 272. 4015 | 0. 744621175  | 0. 325161 | 2. 290005 | 0. 022021 | 0. 262762 |
| sh2b1               | 656. 9711 | -0. 02038046  | 0. 138361 | -0. 1473  | 0. 882896 | 0. 986908 |
| foxj2               | 103. 6286 | 0. 095212306  | 0. 211671 | 0. 449813 | 0. 652846 | 0. 929142 |
| si:ch211-266o15. 1  | 512. 2889 | -0. 190995312 | 0. 120183 | -1. 58921 | 0. 112013 | 0. 548404 |
| mcm6                | 782. 6914 | 0. 013151941  | 0. 152387 | 0. 086306 | 0. 931223 | 0. 995809 |
| sbk3                | 65. 72696 | 0. 183917507  | 0. 415335 | 0. 442817 | 0. 657898 | 0. 930581 |
| ical1               | 219. 4644 | -0. 244781377 | 0. 181395 | -1. 34944 | 0. 177196 | 0. 65076  |
| srsfla              | 2800. 771 | 0. 096556455  | 0. 085519 | 1. 129061 | 0. 258872 | 0. 736046 |
| ctsd                | 4035. 623 | -0. 023394883 | 0. 143584 | -0. 16294 | 0. 870569 | 0. 983365 |
| styx                | 218. 6654 | -0. 078399915 | 0. 143813 | -0. 54515 | 0. 58565  | 0. 906655 |
| si:ch211-137i24. 10 | 232. 3681 | -0. 452303762 | 0. 269569 | -1. 67788 | 0. 093371 | 0. 5112   |
| zgc:66443           | 106. 2538 | -0. 099221802 | 0. 190783 | -0. 52008 | 0. 603009 | 0. 914226 |
| zgc:175264          | 473. 5055 | -0. 041039509 | 0. 116849 | -0. 35122 | 0. 725425 | 0. 948653 |
| cmah                | 301. 71   | -0. 189160323 | 0. 162057 | -1. 16724 | 0. 243112 | 0. 724396 |
| at12                | 519. 5132 | 0. 039634599  | 0. 115127 | 0. 344268 | 0. 730645 | 0. 950056 |
| slc17a8             | 37. 68214 | 0. 324821066  | 0. 393888 | 0. 824654 | 0. 409568 | 0. 836787 |
| ephb6               | 90. 82441 | 1. 051449942  | 0. 257801 | 4. 078528 | 4. 53E-05 | 0. 005224 |
| anol0a              | 456. 732  | 0. 291449544  | 0. 109421 | 2. 663563 | 0. 007732 | 0. 148545 |
| rxraa               | 132. 321  | -0. 284807027 | 0. 184899 | -1. 54034 | 0. 123478 | 0. 570142 |
| hells               | 325. 0395 | 0. 079035584  | 0. 154351 | 0. 512051 | 0. 608615 | 0. 915204 |
| nrlh4               | 57. 46291 | -0. 508594019 | 0. 381139 | -1. 33441 | 0. 182071 | 0. 658775 |
| si:dkey-10f21. 4    | 67. 42808 | 1. 358873526  | 0. 216766 | 6. 268862 | 3. 64E-10 | 3. 12E-07 |
| zbtb47a             | 37. 09149 | 0. 006571154  | 0. 355382 | 0. 01849  | 0. 985248 | 1         |
| nudt4a              | 498. 5316 | -0. 209665215 | 0. 110394 | -1. 89924 | 0. 057533 | 0. 4139   |
| pimr55              | 2. 197791 | -0. 798877568 | 1. 87783  | -0. 42543 | 0. 670526 | NA        |
| 7-Mar               | 230. 6168 | -0. 180015107 | 0. 164576 | -1. 09381 | 0. 274037 | 0. 749284 |
| baz2ba              | 1354. 016 | 0. 122182817  | 0. 171441 | 0. 712682 | 0. 476042 | 0. 869292 |
| itgae. 2            | 18. 28041 | 0. 344160172  | 0. 471422 | 0. 730048 | 0. 465361 | 0. 864997 |
| lyz                 | 60. 02864 | -0. 150542954 | 0. 308759 | -0. 48757 | 0. 625852 | 0. 920625 |
| ankrd6a             | 48. 01675 | -1. 59113544  | 0. 437115 | -3. 64008 | 0. 000273 | 0. 018252 |
| cx52. 7             | 10. 18916 | 0. 080013999  | 1. 536123 | 0. 052088 | 0. 958458 | 0. 999109 |
| mrpl28              | 546. 4497 | -0. 055845281 | 0. 118984 | -0. 46935 | 0. 63882  | 0. 924779 |
| si:ch73-61d6. 3     | 153. 528  | -0. 152389797 | 0. 200515 | -0. 75999 | 0. 447259 | 0. 856073 |
| dnmt3bb. 2          | 150. 1681 | 0. 235011767  | 0. 167376 | 1. 404096 | 0. 16029  | 0. 626823 |
| gulplb              | 32. 80941 | 0. 40570137   | 0. 349864 | 1. 159596 | 0. 246213 | 0. 727532 |
| zgc:171470          | 8. 358171 | 4. 128230724  | 1. 408817 | 2. 930282 | 0. 003387 | 0. 095869 |
| atp6v0ca            | 3480. 069 | 0. 01107284   | 0. 079379 | 0. 139493 | 0. 889061 | 0. 988224 |
| sap18               | 0 NA      | NA            | NA        | NA        | NA        | NA        |
| mrps31              | 426. 7847 | -0. 176865933 | 0. 129299 | -1. 36789 | 0. 171347 | 0. 64335  |
| arfrpl              | 180. 2596 | 0. 130948365  | 0. 212088 | 0. 617424 | 0. 536955 | 0. 892421 |
| hoxd10a             | 166. 9043 | -0. 235611953 | 0. 188984 | -1. 24673 | 0. 212497 | 0. 694155 |
| dnmt3bb. 3          | 96. 52674 | 0. 291174707  | 0. 18981  | 1. 534033 | 0. 125022 | 0. 572594 |
| laspl               | 2439. 814 | -0. 060531641 | 0. 09283  | -0. 65207 | 0. 514357 | 0. 88631  |
| cdc4212             | 53. 80182 | -0. 351388945 | 0. 278089 | -1. 26358 | 0. 206379 | 0. 688825 |
| p3h3                | 238. 7843 | 0. 234371386  | 0. 167619 | 1. 398239 | 0. 162041 | 0. 629618 |
| si:dkey-33c12. 3    | 1121. 645 | -0. 142913574 | 0. 23564  | -0. 60649 | 0. 544189 | 0. 895206 |
| arpc3               | 1681. 884 | 0. 217397159  | 0. 143746 | 1. 512367 | 0. 13044  | 0. 581523 |
| zgc:l14174          | 48. 31174 | 0. 525225326  | 0. 34043  | 1. 542827 | 0. 122873 | 0. 569468 |
| BX901922. 1         | 1. 209983 | -1. 929686288 | 1. 717204 | -1. 12374 | 0. 261124 | NA        |
| nts                 | 15. 72899 | -0. 032583204 | 0. 719082 | -0. 04531 | 0. 963858 | 0. 999842 |
| si:dkey-33c12. 4    | 406. 2909 | 0. 08269529   | 0. 147713 | 0. 559838 | 0. 57559  | 0. 904739 |
| zgc:l14081          | 46. 58885 | 0. 549169487  | 0. 374506 | 1. 466385 | 0. 142543 | 0. 601741 |
| si:ch211-266g18. 10 | 374. 9726 | 0. 166968392  | 0. 273057 | 0. 611477 | 0. 540884 | 0. 893439 |

|                 |          |              |            |          |          |          |
|-----------------|----------|--------------|------------|----------|----------|----------|
| si:ch73-181d5.4 | 182.4905 | -0.305420097 | 0.185736   | -1.64437 | 0.100099 | 0.524371 |
| mrps34          | 593.8391 | 0.026707549  | 0.120481   | 0.221674 | 0.824568 | 0.972227 |
| zgc:86709       | 1116.375 | 0.710110486  | 0.282741   | 2.511522 | 0.012021 | 0.190742 |
| eiflaxb         | 2497.829 | -0.029138077 | 0.140175   | -0.20787 | 0.83533  | 0.976007 |
| sytl1a          | 916.9132 | 0.475309979  | 0.182647   | 2.602337 | 0.009259 | 0.165407 |
| tsc1b           | 677.5051 | -0.082381102 | 0.11809    | -0.69762 | 0.485418 | 0.873021 |
| ccdc136b        | 111.7788 | 0.597464458  | 0.208009   | 2.872297 | 0.004075 | 0.106446 |
| rps6ka3b        | 95.52946 | -0.00337193  | 0.208633   | -0.01616 | 0.987105 | 1        |
| mzt2b           | 353.0788 | -0.01938361  | 0.15536    | -0.12477 | 0.900709 | 0.99045  |
| nafl            | 124.1796 | -0.084722373 | 0.187724   | -0.45131 | 0.651764 | 0.928625 |
| lhx5            | 310.9582 | 0.133312427  | 0.241707   | 0.551545 | 0.58126  | 0.905618 |
| ythdf3          | 242.9936 | 0.088205058  | 0.187578   | 0.470231 | 0.63819  | 0.924779 |
| didol           | 998.4584 | -0.046312159 | 0.143461   | -0.32282 | 0.746831 | 0.955074 |
| glt8d2          | 37.64562 | -0.384662118 | 0.281242   | -1.36773 | 0.171398 | 0.643433 |
| slc43a3b        | 244.8341 | -0.158698348 | 0.170361   | -0.93154 | 0.351573 | 0.802399 |
| dph1            | 186.0374 | 0.366117429  | 0.166632   | 2.197168 | 0.028008 | 0.297823 |
| parp12b         | 184.3982 | -0.055329917 | 0.158098   | -0.34997 | 0.72636  | 0.948987 |
| plcd4a          | 44.81662 | -0.581244238 | 0.358264   | -1.62239 | 0.104719 | 0.53308  |
| svopl           | 326.5988 | -0.28753504  | 0.231208   | -1.24362 | 0.213639 | 0.696139 |
| eps811a         | 282.0752 | -0.251512382 | 0.159551   | -1.57638 | 0.114938 | 0.554651 |
| ints8           | 347.276  | -0.009670073 | 0.116398   | -0.08308 | 0.93379  | 0.996633 |
| uba3            | 459.9348 | 0.079314987  | 0.162706   | 0.487475 | 0.625922 | 0.920625 |
| fstb            | 415.0201 | -0.193691775 | 0.135365   | -1.43089 | 0.152462 | 0.61658  |
| arl15b          | 258.0523 | 0.047578629  | 0.140654   | 0.338267 | 0.735162 | 0.951543 |
| tmf1            | 604.8268 | -0.087335967 | 0.09855    | -0.88621 | 0.375506 | 0.822237 |
| cep350          | 583.4747 | 0.057737818  | 0.15225    | 0.37923  | 0.704517 | 0.943785 |
| wfdcl           | 408.6689 | 0.320285544  | 0.182133   | 1.758527 | 0.078658 | 0.474455 |
| six2a           | 404.2133 | 0.016726839  | 0.137762   | 0.121418 | 0.90336  | 0.99133  |
| hgd             | 3266.49  | -0.235208939 | 0.232828   | -1.01023 | 0.312387 | 0.776164 |
| six3a           | 358.3074 | 0.117973221  | 0.159807   | 0.738225 | 0.460378 | 0.862369 |
| arxa            | 186.6287 | 0.153705991  | 0.180639   | 0.850904 | 0.394823 | 0.828825 |
| ano3            | 28.08065 | 0.746402387  | 0.488264   | 1.528688 | 0.126342 | 0.574665 |
| fbxw9           | 38.34823 | 0.406177223  | 0.312348   | 1.300401 | 0.193463 | 0.673662 |
| ormdl2          | 208.3644 | -0.359516804 | 0.159387   | -2.25562 | 0.024094 | 0.27487  |
| si:dkey-11o15.7 | 19.71062 | 0.841477917  | 0.61881    | 1.359832 | 0.173883 | 0.646897 |
| hspal4          | 379.3903 | -0.079183139 | 0.158957   | -0.49814 | 0.618384 | 0.916585 |
| si:dkey-6n6.2   | 242.6043 | -0.192078428 | 0.172393   | -1.11419 | 0.265198 | 0.742063 |
| eml3            | 234.0353 | -0.728970204 | 0.213339   | -3.41696 | 0.000633 | 0.032718 |
| bhlhe22         | 437.5731 | 0.149430338  | 0.22958    | 0.650885 | 0.515121 | 0.886401 |
| ndufa8          | 1430.493 | 0.069555784  | 0.095782   | 0.726185 | 0.467725 | 0.866174 |
| kitlgb          | 19.70898 | -0.271688347 | 0.448447   | -0.60584 | 0.544619 | 0.895206 |
| rab1ba          | 3005.018 | 0.197420661  | 0.092336   | 2.138058 | 0.032512 | 0.319448 |
| tlr21           | 8.975119 | 0.394083686  | 0.682848   | 0.577118 | 0.56386  | 0.901196 |
| pafahlb3        | 599.6779 | -0.08776193  | 0.17132    | -0.51227 | 0.608462 | 0.915204 |
| ugt5e1          |          | 0 NA         | NA         | NA       | NA       | NA       |
| smyd3           | 67.59223 | 0.003023587  | 0.239392   | 0.01263  | 0.989923 | 1        |
| serping1        | 205.2054 | -0.676999492 | 0.259453   | -2.60934 | 0.009072 | 0.163447 |
| igf3            | 0.58885  | -1.806363648 | 2.245208   | -0.80454 | 0.421084 | NA       |
| magt1           | 759.5714 | -0.205877677 | 0.124568   | -1.65273 | 0.098386 | 0.521076 |
| cx3l.7          | 1.410256 |              | 0 2.055366 |          | 0        | 1 NA     |
| tnfsf1014       | 26.92287 | -0.304420127 | 0.386248   | -0.78815 | 0.430611 | 0.847542 |
| snf8            | 305.1831 | 0.194998478  | 0.185937   | 1.048732 | 0.294301 | 0.763345 |
| txndc17         | 294.3999 | 0.220899684  | 0.179068   | 1.23361  | 0.217348 | 0.69815  |
| birc7           | 106.357  | 0.565731493  | 0.243555   | 2.32281  | 0.020189 | 0.25177  |

|                   |          |              |          |          |          |          |
|-------------------|----------|--------------|----------|----------|----------|----------|
| aifml             | 1034.387 | 0.338767767  | 0.095618 | 3.542929 | 0.000396 | 0.02357  |
| rprd2a            | 352.0286 | 0.100538439  | 0.179109 | 0.561325 | 0.574576 | 0.904516 |
| cfap57            | 17.99933 | 0.881032602  | 0.540828 | 1.629044 | 0.103304 | 0.530446 |
| ciarta            | 728.4365 | -0.353558129 | 0.171705 | -2.05911 | 0.039484 | 0.34755  |
| b3gnt3.4          | 83.72485 | -0.267103051 | 0.246354 | -1.08423 | 0.278265 | 0.751971 |
| sardh             | 1349.208 | 0.135356822  | 0.147968 | 0.914774 | 0.36031  | 0.811057 |
| glra4b            | 49.49408 | 0.192016369  | 0.58871  | 0.326164 | 0.7443   | 0.95491  |
| rpl36a            | 21821.07 | -0.395084244 | 0.152528 | -2.59023 | 0.009591 | 0.168452 |
| eps812            | 160.9    | -0.312632807 | 0.161017 | -1.94162 | 0.052184 | 0.396885 |
| impad1            | 258.5013 | -0.095380442 | 0.140026 | -0.68116 | 0.49577  | 0.87806  |
| fgfr2             | 2076.319 | -0.000708589 | 0.106513 | -0.00665 | 0.994692 | 1        |
| snap25b           | 1699.146 | 0.434955281  | 0.200445 | 2.169945 | 0.030011 | 0.308772 |
| GPR83             | 2.587867 | -0.805848014 | 1.133723 | -0.7108  | 0.47721  | 0.869292 |
| hcfc2             | 95.65209 | -0.229785735 | 0.202167 | -1.13662 | 0.255699 | 0.733642 |
| msna              | 2188.02  | 0.249310215  | 0.114436 | 2.178599 | 0.029361 | 0.304886 |
| foxd2             | 343.0999 | 0.279829622  | 0.138955 | 2.013817 | 0.044029 | 0.367392 |
| ttc25             | 37.22337 | -0.326870578 | 0.329688 | -0.99146 | 0.321463 | 0.781986 |
| atp7b             | 21.74473 | -0.172338297 | 0.483535 | -0.35641 | 0.721531 | 0.947343 |
| dnajc5b           | 45.10075 | 0.142172341  | 0.41098  | 0.345935 | 0.729392 | 0.950056 |
| dnajc7            | 1527.016 | 0.080575063  | 0.084102 | 0.958065 | 0.33803  | 0.79489  |
| znf385c           | 82.06425 | 0.041221566  | 0.344342 | 0.119711 | 0.904712 | 0.991588 |
| trim55b           | 533.6736 | -0.044849988 | 0.21302  | -0.21054 | 0.833244 | 0.975379 |
| ipo8              | 293.6967 | -0.212670112 | 0.152178 | -1.39751 | 0.162261 | 0.629748 |
| tnfaip2b          | 86.44724 | -1.456966208 | 0.2509   | -5.80696 | 6.36E-09 | 3.88E-06 |
| pcytlba           | 42.64114 | 0.30437539   | 0.305869 | 0.995116 | 0.31968  | 0.78034  |
| htr2ab            | 4.90894  | -2.396066473 | 1.454817 | -1.64699 | 0.09956  | 0.523919 |
| zdhhc20b          | 102.2525 | -0.1064437   | 0.206566 | -0.5153  | 0.606342 | 0.915204 |
| ackr3b            | 867.4374 | -0.046802935 | 0.122883 | -0.38088 | 0.703296 | 0.943622 |
| exoc314           | 34.52032 | -0.366253868 | 0.351153 | -1.043   | 0.296947 | 0.764508 |
| plcx2             | 13.25631 | 2.569504201  | 1.372875 | 1.871623 | 0.061259 | 0.424867 |
| pex16             | 125.0251 | -0.247503211 | 0.181757 | -1.36173 | 0.173284 | 0.646172 |
| smclal            | 1471.002 | 0.087329528  | 0.123776 | 0.705547 | 0.48047  | 0.870179 |
| si:ch211-153b23.5 | 934.2341 | 0.111652529  | 0.189413 | 0.589467 | 0.555548 | 0.898723 |
| abi2a             | 229.3956 | -0.106247456 | 0.149712 | -0.70968 | 0.477903 | 0.869292 |
| slc25a26          | 312.1408 | -0.099540342 | 0.150763 | -0.66025 | 0.509096 | 0.883443 |
| ndnl2             | 144.6365 | -0.140128313 | 0.183626 | -0.76312 | 0.445393 | 0.855403 |
| fam151a           | 23.08967 | 0.502998353  | 0.558295 | 0.900955 | 0.367612 | 0.816956 |
| tubd1             | 70.8767  | 0.79438855   | 0.236485 | 3.359156 | 0.000782 | 0.037196 |
| tada3l            | 437.662  | 0.019510397  | 0.128509 | 0.151821 | 0.879328 | 0.986147 |
| ugcg              | 160.3705 | -0.059185751 | 0.16404  | -0.3608  | 0.718248 | 0.946598 |
| mpp4a             | 29.04451 | -0.147186867 | 0.528087 | -0.27872 | 0.780462 | 0.961411 |
| arpc4l            | 1201.311 | -0.065054    | 0.139823 | -0.46526 | 0.641745 | 0.925586 |
| ak3               | 547.2902 | -0.000265085 | 0.131211 | -0.00202 | 0.998388 | 1        |
| acot11a           | 84.37738 | -0.030552774 | 0.214735 | -0.14228 | 0.886858 | 0.987671 |
| rps6kb1b          | 946.2418 | 0.092939422  | 0.111596 | 0.832817 | 0.404948 | 0.834284 |
| nt5c2b            | 537.5168 | 0.102280801  | 0.158956 | 0.643455 | 0.519929 | 0.887148 |
| fbrs1l            | 710.1388 | 0.061699085  | 0.126089 | 0.489331 | 0.624607 | 0.919918 |
| ssbp3a            | 134.5242 | -0.161165269 | 0.184516 | -0.87345 | 0.382419 | 0.825252 |
| phactr3a          | 187.3689 | 0.37990336   | 0.229106 | 1.658196 | 0.097278 | 0.519937 |
| il17rala          | 75.00679 | -0.369209809 | 0.297747 | -1.24001 | 0.214972 | 0.697086 |
| cysltrl           | 22.11671 | -0.363398838 | 0.377609 | -0.96237 | 0.335865 | 0.792139 |
| si:dkeyp-77h1.4   | 22.7355  | -0.126895328 | 0.483399 | -0.26251 | 0.792931 | 0.965312 |
| adamts15b         | 34.50164 | 0.573942467  | 0.629269 | 0.912077 | 0.361728 | 0.811787 |
| si:ch211-213d14.1 | 5.226074 | 1.918208883  | 1.310951 | 1.463219 | 0.143408 | 0.602607 |



|                  |          |              |            |          |          |          |
|------------------|----------|--------------|------------|----------|----------|----------|
| draxin           | 195.7053 | 0.065134235  | 0.288024   | 0.226142 | 0.821091 | 0.971788 |
| slc39a1          | 137.5326 | -0.37468469  | 0.175868   | -2.13048 | 0.033132 | 0.322362 |
| celsr1b          | 365.0066 | 0.195181108  | 0.222119   | 0.878721 | 0.379552 | 0.823607 |
| cip2a            | 120.4118 | 0.34654803   | 0.204462   | 1.694922 | 0.09009  | 0.50413  |
| glmna            | 186.1181 | -0.149388954 | 0.161663   | -0.92408 | 0.355446 | 0.806546 |
| COLGALT1         | 168.2386 | 0.605342376  | 0.205583   | 2.944523 | 0.003235 | 0.093414 |
| si:dkey-208b23.5 | 7.838666 | -0.246305068 | 0.537628   | -0.45813 | 0.646857 | 0.926728 |
| CT990561.1       | 19.21667 | 0.513042595  | 0.403165   | 1.272539 | 0.203182 | 0.684044 |
| cpt1b            | 361.6883 | 0.279696092  | 0.291238   | 0.960369 | 0.33687  | 0.793513 |
| gpalpp1          | 245.1701 | 0.09970282   | 0.140841   | 0.707913 | 0.478999 | 0.869441 |
| sephs1           | 616.6087 | -0.097261118 | 0.17695    | -0.54965 | 0.582556 | 0.90571  |
| timml3           | 782.5405 | 0.198099389  | 0.118287   | 1.674731 | 0.093987 | 0.511793 |
| zgc:173737       | 6.305038 | 0.592448837  | 0.708146   | 0.83662  | 0.402806 | 0.833401 |
| sh3bgr1          | 782.729  | -0.290922791 | 0.176962   | -1.64399 | 0.100179 | 0.524654 |
| prpf18           | 407.7914 | -0.075392961 | 0.121304   | -0.62152 | 0.534258 | 0.891573 |
| clqtnf9          | 96.27261 | -0.642839369 | 0.273996   | -2.34616 | 0.018968 | 0.242406 |
| cep76            | 83.37759 | 0.221965385  | 0.271419   | 0.817797 | 0.413473 | 0.838369 |
| enc3             | 620.2359 | -0.185142363 | 0.130708   | -1.41646 | 0.156641 | 0.622452 |
| tmbim1a          | 183.5463 | -0.112490117 | 0.184471   | -0.6098  | 0.541996 | 0.894241 |
| casp8            | 166.7941 | -0.151091474 | 0.143443   | -1.05332 | 0.292195 | 0.761879 |
| neu3.3           | 39.98526 | -0.409915822 | 0.731524   | -0.56036 | 0.575235 | 0.904718 |
| lsm7             | 1104.456 | -0.027628169 | 0.205968   | -0.13414 | 0.893294 | 0.988566 |
| btr21            | 3.70771  | 0.184947725  | 1.132985   | 0.163239 | 0.87033  | 0.983365 |
| krt18a.2         | 33.14002 | -3.107670118 | 0.736683   | -4.21847 | 2.46E-05 | 0.00332  |
| slc25a22b        | 9.965636 | 0.943768948  | 0.799602   | 1.180298 | 0.237882 | 0.718607 |
| grhl2a           | 143.8103 | -0.162448717 | 0.183827   | -0.8837  | 0.376856 | 0.822258 |
| si:dkey-5i3.5    | 141.8604 | -0.173786166 | 0.210319   | -0.8263  | 0.408634 | 0.836526 |
| sass6            | 77.2083  | 0.307989724  | 0.264912   | 1.16261  | 0.244988 | 0.726435 |
| scin1b           | 652.5051 | 0.608991689  | 0.142301   | 4.279594 | 1.87E-05 | 0.002746 |
| polr21           | 426.8368 | 0.247749135  | 0.234799   | 1.055153 | 0.291356 | 0.761454 |
| tapbp1           | 269.7273 | -0.172716348 | 0.225136   | -0.76716 | 0.442984 | 0.854063 |
| acot9.1          | 244.6131 | -0.144232019 | 0.179027   | -0.80564 | 0.420448 | 0.842383 |
| selenot1a        | 961.0063 | 0.04501282   | 0.129312   | 0.348094 | 0.72777  | 0.9493   |
| ankrd33ba        | 49.58799 | -0.017791348 | 0.336468   | -0.05288 | 0.95783  | 0.999109 |
| krt8             | 26150.48 | -0.297285372 | 0.129701   | -2.29208 | 0.021901 | 0.262381 |
| hspb8            | 620.7577 | 0.321145601  | 0.110526   | 2.905598 | 0.003666 | 0.100272 |
| si:dkey-222f8.3  | 609.9028 | -0.242504581 | 0.164231   | -1.47661 | 0.13978  | 0.59821  |
| abhd14a          | 50.83105 | 0.509154393  | 0.296213   | 1.718879 | 0.085636 | 0.491277 |
| mex3b            | 1069.444 | 0.039704656  | 0.159029   | 0.24967  | 0.802843 | 0.968323 |
| ropn11           | 40.35943 | -0.113444415 | 0.356072   | -0.3186  | 0.75003  | 0.955074 |
| krt5             | 43395.29 | -0.010332354 | 0.176865   | -0.05842 | 0.953414 | 0.998436 |
| mcph1            | 31.62753 | 0.819039547  | 0.285624   | 2.867545 | 0.004137 | 0.106542 |
| otpb             | 354.6124 | 0.197100881  | 0.191652   | 1.02843  | 0.303747 | 0.769473 |
| zgc:171775       | 844.5616 | -0.096575915 | 0.112779   | -0.85633 | 0.391816 | 0.827902 |
| pimr57           | 0.18768  |              | 0.5.267649 | 0        | 1        | NA       |
| ccl19a.1         | 33.98673 | -0.270134647 | 0.432202   | -0.62502 | 0.531958 | 0.890978 |
| acot9.2          | 58.51654 | -0.081838381 | 0.294181   | -0.27819 | 0.780866 | 0.961608 |
| adcy2a           | 66.61303 | 1.034822592  | 0.348463   | 2.969675 | 0.002981 | 0.090034 |
| tagln3b          | 533.3404 | -0.13034918  | 0.110784   | -1.1766  | 0.239354 | 0.719781 |
| hce211           | 3.556619 | -0.180260037 | 1.107616   | -0.16275 | 0.870718 | 0.983365 |
| CR956623.1       | 13.82069 | -1.489347141 | 0.949142   | -1.56915 | 0.116613 | 0.557506 |
| rnaset21         | 21.30997 | -0.332155124 | 0.519288   | -0.63964 | 0.522409 | 0.887826 |
| bglap            | 0.046941 |              | 0.5.267649 | 0        | 1        | NA       |
| si:dkey-11m19.5  | 3.116127 | -0.620176676 | 1.161371   | -0.534   | 0.593339 | 0.910427 |

|                   |          |              |          |          |          |          |
|-------------------|----------|--------------|----------|----------|----------|----------|
| gcn1              | 2260.164 | 0.000152888  | 0.106311 | 0.001438 | 0.998853 | 1        |
| lgilb             | 94.54358 | 0.19381929   | 0.18848  | 1.028326 | 0.303796 | 0.769473 |
| rab35b            | 252.1432 | 0.05831763   | 0.174813 | 0.3336   | 0.738682 | 0.953124 |
| snx6              | 85.33136 | -0.026439193 | 0.268401 | -0.09851 | 0.92153  | 0.994085 |
| zgc:136472        | 72.03607 | -0.989940941 | 0.510089 | -1.94072 | 0.052292 | 0.397339 |
| zrsr2             | 103.96   | 0.111075691  | 0.220631 | 0.503444 | 0.614652 | 0.915998 |
| rpl6              | 44392.75 | -0.373019191 | 0.127697 | -2.92113 | 0.003488 | 0.097712 |
| abhd17c           | 456.984  | 0.105515851  | 0.118544 | 0.8901   | 0.373412 | 0.820558 |
| dyn111            | 3415.516 | 0.040540195  | 0.169194 | 0.239608 | 0.810634 | 0.969828 |
| plekhg2           | 306.3619 | 0.185541217  | 0.209912 | 0.883899 | 0.376751 | 0.822258 |
| cacng3a           | 1.649705 | 0.093645988  | 2.100615 | 0.04458  | 0.964442 | NA       |
| icel              | 150.6648 | 0.038113078  | 0.176028 | 0.216518 | 0.828584 | 0.974137 |
| zgc:158846        | 2162.62  | 0.564177521  | 0.284689 | 1.981734 | 0.047509 | 0.379549 |
| ndufabla          | 1377.091 | -0.002211276 | 0.133506 | -0.01656 | 0.986785 | 1        |
| rasd3             | 29.75704 | -0.373046183 | 0.331814 | -1.12426 | 0.260902 | 0.738467 |
| prpf40a           | 745.1096 | 0.124441953  | 0.103905 | 1.197654 | 0.231052 | 0.712561 |
| mapk13            | 107.7825 | -0.016561056 | 0.183898 | -0.09006 | 0.928243 | 0.995052 |
| plk1              | 742.3918 | 0.303320794  | 0.242115 | 1.252798 | 0.210279 | 0.692011 |
| st6galnac3        | 36.12544 | 0.708825408  | 0.269656 | 2.628629 | 0.008573 | 0.158655 |
| ern2              | 86.52373 | 0.17835763   | 0.256758 | 0.694652 | 0.487273 | 0.873291 |
| stc11             | 64.62062 | -0.956803091 | 0.412733 | -2.31821 | 0.020438 | 0.253747 |
| pimr72            | 0.096459 | 0            | 5.267649 | 0        | 1        | NA       |
| zgc:110425        | 13.08792 | -0.934221519 | 0.638043 | -1.4642  | 0.14314  | 0.602132 |
| chtf18            | 122.1426 | 0.28950866   | 0.199677 | 1.449888 | 0.14709  | 0.607283 |
| caps2             | 5.179477 | 0.406570728  | 0.707343 | 0.574786 | 0.565436 | 0.901538 |
| adora2ab          | 10.52793 | -0.355408614 | 0.630511 | -0.56368 | 0.57297  | 0.903718 |
| si:dkey-30c15.17  | 34.44875 | -0.823410495 | 0.402433 | -2.04608 | 0.040748 | 0.352816 |
| dnaja3a           | 1108.239 | 0.054642692  | 0.147279 | 0.371016 | 0.710626 | 0.945821 |
| slc9a3.1          | 51.47282 | -0.14185544  | 0.613302 | -0.2313  | 0.817083 | 0.971207 |
| olah              | 88.15948 | 0.198534128  | 0.367844 | 0.539724 | 0.589388 | 0.908456 |
| flt3              | 4.790464 | -0.650120123 | 1.276926 | -0.50913 | 0.610662 | 0.915331 |
| apls2             | 1198.364 | -0.004982424 | 0.134051 | -0.03717 | 0.970351 | 1        |
| cfap70            | 19.51334 | 0.918552437  | 0.548314 | 1.67523  | 0.093889 | 0.511703 |
| shq1              | 107.0183 | -0.287413997 | 0.249539 | -1.15178 | 0.249411 | 0.729721 |
| cnot10            | 271.0047 | 0.044433301  | 0.139178 | 0.319255 | 0.749533 | 0.955074 |
| pimr209           | 0.91501  | -1.941463146 | 2.149931 | -0.90304 | 0.366507 | NA       |
| pole              | 269.364  | 0.186957707  | 0.307992 | 0.607022 | 0.543836 | 0.894999 |
| si:dkey-211g8.7   | 0.046941 | 0            | 5.267649 | 0        | 1        | NA       |
| si:dkey-102c8.2   | 2.905227 | -2.991309102 | 1.711136 | -1.74814 | 0.080439 | 0.478998 |
| alcamb            | 1086.567 | -0.12667185  | 0.119115 | -1.06344 | 0.287583 | 0.758397 |
| lama5             | 1519.3   | 0.068158431  | 0.155425 | 0.438529 | 0.661003 | 0.930581 |
| si:dkey-30c15.12  | 3.384077 | -0.388282625 | 1.197312 | -0.3243  | 0.745715 | 0.955074 |
| si:ch73-160i9.3   | 2.134678 | 2.534836885  | 1.147298 | 2.209397 | 0.027147 | NA       |
| bves              | 283.0733 | 0.203352534  | 0.201612 | 1.008635 | 0.31315  | 0.776599 |
| popdc3            | 85.91318 | 0.316445201  | 0.304612 | 1.038848 | 0.298876 | 0.76578  |
| sprb              | 170.5167 | -0.477254484 | 0.239029 | -1.99664 | 0.045864 | 0.374848 |
| muc5.2            | 194.0057 | 0.297845051  | 0.336859 | 0.884183 | 0.376598 | 0.822258 |
| il11b             | 2.176398 | -0.398236304 | 1.647263 | -0.24176 | 0.808969 | NA       |
| lzts3b            | 35.22415 | 0.605987956  | 0.397723 | 1.523644 | 0.127598 | 0.576979 |
| adrm1             | 1606.848 | 0.081792494  | 0.140137 | 0.583662 | 0.559447 | 0.899571 |
| fbxo30a           | 112.5788 | -0.082713532 | 0.1892   | -0.43717 | 0.661984 | 0.930742 |
| znf991            | 104.6527 | -0.157740155 | 0.216462 | -0.72872 | 0.466172 | 0.865297 |
| ubox5             | 152.3335 | -0.010508521 | 0.244402 | -0.043   | 0.965704 | 1        |
| si:ch73-368j24.17 | 2.802274 | 2.41133426   | 1.457549 | 1.654377 | 0.098051 | 0.521071 |

|                   |          |              |          |          |          |          |
|-------------------|----------|--------------|----------|----------|----------|----------|
| socs6a            | 45.91767 | -0.1083581   | 0.345031 | -0.31405 | 0.75348  | 0.955861 |
| si:dkey-253d23.5  | 36.02573 | -0.021544822 | 0.319337 | -0.06747 | 0.94621  | 0.997371 |
| avp               | 16.81233 | 0.431308243  | 0.540007 | 0.798709 | 0.424459 | 0.844412 |
| ccl27a            | 21.80649 | -1.912925345 | 1.252997 | -1.52668 | 0.126841 | 0.575696 |
| pdp2              | 64.22286 | -0.260987946 | 0.246616 | -1.05828 | 0.28993  | 0.760779 |
| abcg2c            | 232.4376 | -0.137564709 | 0.164153 | -0.83803 | 0.402014 | 0.832956 |
| ccdc106b          | 21.63321 | -0.357625768 | 0.438764 | -0.81508 | 0.415029 | 0.838732 |
| si:ch211-274f20.2 | 15.92628 | -0.342876071 | 0.532175 | -0.64429 | 0.519386 | 0.887148 |
| chst2b            | 152.1353 | 0.234260301  | 0.203561 | 1.150809 | 0.249811 | 0.729721 |
| terbl             | 3.128868 | 1.281504166  | 1.364817 | 0.938957 | 0.347753 | 0.800274 |
| sri               | 978.608  | 0.143186455  | 0.110213 | 1.299181 | 0.193882 | 0.674122 |
| nt5c3a            | 1781.404 | -0.152247851 | 0.162563 | -0.93655 | 0.348992 | 0.801306 |
| sox18             | 157.8998 | 0.037901154  | 0.194282 | 0.195083 | 0.845328 | 0.976791 |
| gdapl             | 138.9436 | -0.218995006 | 0.27892  | -0.78515 | 0.432364 | 0.848419 |
| jph1a             | 213.4066 | 0.498343612  | 0.272759 | 1.827047 | 0.067693 | 0.443563 |
| vsig10            | 146.1678 | 0.066592273  | 0.184286 | 0.361353 | 0.717836 | 0.946466 |
| sik1              | 1164.512 | -0.513513574 | 0.439995 | -1.16709 | 0.243174 | 0.72442  |
| wsb2              | 54.5733  | 0.309364294  | 0.299965 | 1.031334 | 0.302384 | 0.768252 |
| zgc:162472        | 226.118  | 0.010897078  | 0.155546 | 0.070057 | 0.944148 | 0.997371 |
| CABZ01030107.1    | 76.92775 | 0.18386837   | 0.255691 | 0.719105 | 0.472076 | 0.868517 |
| si:ch211-71m22.1  | 186.7518 | 0.010852823  | 0.18924  | 0.057349 | 0.954267 | 0.998611 |
| dnajb2            | 168.4963 | 0.426042     | 0.220508 | 1.932092 | 0.053348 | 0.400175 |
| ptprna            | 578.5821 | 0.682740803  | 0.171835 | 3.973224 | 7.09E-05 | 0.007021 |
| hck               | 63.62676 | -0.183829667 | 0.305581 | -0.60157 | 0.547457 | 0.896211 |
| trim46b           | 114.7333 | 0.310785943  | 0.25585  | 1.214722 | 0.224472 | 0.706406 |
| dpm3              | 245.2801 | 0.093635141  | 0.175527 | 0.533451 | 0.593722 | 0.910427 |
| desma             | 6581.299 | 0.279392729  | 0.173028 | 1.614721 | 0.106371 | 0.535773 |
| si:dkey-178e17.3  | 126.8426 | 0.008840901  | 0.191725 | 0.046112 | 0.963221 | 0.999842 |
| ilf3a             | 1018.781 | 0.038069086  | 0.088228 | 0.431483 | 0.666117 | 0.932664 |
| pimr94            | 0.249435 | 2.850002157  | 5.18846  | 0.549296 | 0.582802 | NA       |
| dennd2da          | 239.6912 | -0.065503427 | 0.128265 | -0.51069 | 0.609569 | 0.915204 |
| nuggc.3           | 9.971276 | 0.305002087  | 0.828708 | 0.368045 | 0.712839 | 0.945821 |
| nkl.2             | 0.608229 | 2.062659919  | 3.246724 | 0.635305 | 0.525229 | NA       |
| aqp10b            | 10.85858 | 0.497109758  | 0.876383 | 0.567229 | 0.570558 | 0.902481 |
| zgc:114104        | 74.57458 | -0.351771313 | 0.261168 | -1.34692 | 0.178007 | 0.651772 |
| cd8b              | 0.199839 | -1.826676548 | 5.23046  | -0.34924 | 0.72691  | NA       |
| pimr204           | 0.621603 | 0            | 3.962111 | 0        | 1        | NA       |
| si:dkey-204a24.11 | 1.37578  | 1.055433978  | 2.191537 | 0.481595 | 0.630093 | NA       |
| cgnb              | 185.4597 | -0.194275595 | 0.177074 | -1.09714 | 0.27258  | 0.748416 |
| fzd3b             | 73.98977 | -0.047419672 | 0.258423 | -0.1835  | 0.854408 | 0.979088 |
| cast              | 4204.912 | -0.014479509 | 0.141987 | -0.10198 | 0.918775 | 0.993884 |
| ddr2b             | 161.0441 | 0.479901942  | 0.261442 | 1.835598 | 0.066417 | 0.440058 |
| tbl1xr1a          | 950.225  | 0.065990745  | 0.084481 | 0.781131 | 0.434726 | 0.850002 |
| tmef2b            | 253.8388 | -0.205879242 | 0.17037  | -1.20842 | 0.226885 | 0.707983 |
| si:dkey-73p2.2    | 1.681    | 0            | 2.106719 | 0        | 1        | NA       |
| noslapb           | 12.77913 | 0.200378705  | 0.628401 | 0.318871 | 0.749825 | 0.955074 |
| vax2              | 6.926931 | 0.88549978   | 0.622898 | 1.42158  | 0.155148 | 0.619776 |
| terf1             | 102.0752 | 0.049606994  | 0.235591 | 0.210564 | 0.833228 | 0.975379 |
| cept1a            | 11.96798 | 0.127234691  | 0.635163 | 0.200318 | 0.841232 | 0.97643  |
| si:dkey-119f1.1   | 110.9633 | 0.315344401  | 0.180213 | 1.74984  | 0.080146 | 0.478357 |
| or126-7           | 0.101247 | 1.854150541  | 5.241768 | 0.353726 | 0.723544 | NA       |
| rfesd             | 68.36721 | 0.113005374  | 0.35904  | 0.314743 | 0.752957 | 0.955756 |
| nudt2             | 225.5258 | 0.167981729  | 0.171913 | 0.977131 | 0.328504 | 0.786794 |
| akirin2           | 949.6512 | -0.0097103   | 0.11097  | -0.0875  | 0.930271 | 0.995707 |

|                  |          |              |          |          |          |          |
|------------------|----------|--------------|----------|----------|----------|----------|
| rdh10a           | 982.2359 | -0.295383303 | 0.155062 | -1.90494 | 0.056788 | 0.411692 |
| slc2a6           | 46.02371 | -0.528092475 | 0.323779 | -1.63103 | 0.102884 | 0.529859 |
| scgn             | 78.6864  | -0.146918344 | 0.222945 | -0.65899 | 0.509903 | 0.883733 |
| ihha             | 38.42167 | -0.481316033 | 0.333604 | -1.44278 | 0.149084 | 0.610726 |
| prdx1            | 1238.081 | -0.063512291 | 0.214316 | -0.29635 | 0.766963 | 0.960296 |
| gabra6b          | 9.436778 | 0.097574943  | 0.797829 | 0.122301 | 0.902661 | 0.991028 |
| si:ch211-117c9.2 | 17.459   | 0.133709551  | 0.598386 | 0.22345  | 0.823185 | 0.972005 |
| ube2r2           | 190.0096 | -0.122944209 | 0.171535 | -0.71673 | 0.47354  | 0.869146 |
| ubapl            | 472.991  | 0.023286754  | 0.120787 | 0.192791 | 0.847122 | 0.977335 |
| si:ch73-213k20.5 | 6.25698  | -6.887444873 | 1.361681 | -5.05805 | 4.24E-07 | 0.000149 |
| or128-3          | 1.190119 | 1.949627913  | 2.465418 | 0.79079  | 0.429066 | NA       |
| or128-2          | 0.26002  | 0            | 4.787542 | 0        | 1        | NA       |
| nav1b            | 126.5153 | 0.118479216  | 0.242384 | 0.488807 | 0.624978 | 0.920289 |
| CABZ01053221.1   | 3.77938  | -0.021181653 | 1.148299 | -0.01845 | 0.985283 | 1        |
| 2-Oct            | 45.17723 | -0.595534975 | 0.396567 | -1.50172 | 0.133168 | 0.586514 |
| slc9a2           | 65.46532 | 0.299615915  | 0.252185 | 1.188081 | 0.234802 | 0.715533 |
| si:ch73-242m19.1 | 16.22448 | 0.80701068   | 0.498435 | 1.619089 | 0.105428 | 0.534737 |
| zgc:171887       | 2.446903 | -0.625514431 | 1.376894 | -0.45429 | 0.649617 | 0.927756 |
| si:dkey-19a16.2  | 49.88538 | -0.173729435 | 0.298946 | -0.58114 | 0.561146 | 0.90039  |
| mybpha           | 340.4327 | 0.099293244  | 0.257451 | 0.385678 | 0.699735 | 0.942499 |
| rab25a           | 164.9928 | -0.004979281 | 0.165748 | -0.03004 | 0.976034 | 1        |
| rev3l            | 440.6636 | -0.038001514 | 0.183609 | -0.20697 | 0.836034 | 0.976007 |
| grk1a            | 225.3101 | 0.696849039  | 0.448002 | 1.555461 | 0.119836 | 0.564602 |
| naxe             | 284.0858 | 0.209270763  | 0.234797 | 0.891284 | 0.372777 | 0.819953 |
| ihhb             | 15.15524 | 0.004936823  | 0.628309 | 0.007857 | 0.993731 | 1        |
| rbm38            | 238.3721 | -0.198624492 | 0.135132 | -1.46985 | 0.141601 | 0.600284 |
| nogl             | 206.8275 | -0.124433127 | 0.177203 | -0.70221 | 0.48255  | 0.871721 |
| bin1b            | 294.1824 | -0.040953075 | 0.138035 | -0.29669 | 0.766706 | 0.960296 |
| sema5a           | 502.5662 | -0.02873939  | 0.148018 | -0.19416 | 0.84605  | 0.977039 |
| wnt3a            | 16.67547 | 0.391401432  | 0.470021 | 0.832731 | 0.404996 | 0.834284 |
| mrpl4            | 623.5344 | 0.139236697  | 0.157768 | 0.882539 | 0.377485 | 0.822478 |
| ccdc5l           | 168.041  | 0.060531306  | 0.19849  | 0.304959 | 0.760397 | 0.957886 |
| zgc:171424       | 2.467787 | -5.049247881 | 1.701757 | -2.96708 | 0.003006 | 0.090442 |
| zdhhc3b          | 191.9249 | -0.084890783 | 0.155763 | -0.545   | 0.585755 | 0.906655 |
| si:ch73-212j7.3  | 69.02469 | 0.058323226  | 0.301172 | 0.193654 | 0.846447 | 0.977213 |
| susd1            | 59.26414 | -0.526556497 | 0.313578 | -1.67919 | 0.093115 | 0.510759 |
| mcoln1b          | 32.76714 | -0.23700156  | 0.393322 | -0.60256 | 0.546799 | 0.896107 |
| sash1b           | 247.4929 | -0.063160314 | 0.116181 | -0.54364 | 0.586692 | 0.906788 |
| zgc:112052       | 440.5025 | 0.02825213   | 0.133502 | 0.211624 | 0.832401 | 0.975062 |
| ncln             | 570.485  | 0.204819571  | 0.143441 | 1.427897 | 0.153321 | 0.617847 |
| endog            | 162.6714 | 0.278768253  | 0.16846  | 1.654804 | 0.097964 | 0.521071 |
| apc              | 1675.099 | 0.199685985  | 0.117825 | 1.694762 | 0.090121 | 0.50413  |
| CABZ01040556.1   | 36.88683 | -0.16859604  | 0.358704 | -0.47001 | 0.638345 | 0.924779 |
| zgc:171857       | 69.10819 | 0.389194804  | 0.280879 | 1.38563  | 0.16586  | 0.635405 |
| ptpdc1b          | 83.06203 | 0.313840494  | 0.592776 | 0.529442 | 0.596499 | 0.911676 |
| zgc:113227       | 34.37226 | -0.243437961 | 0.320414 | -0.75976 | 0.447397 | 0.856073 |
| mmp16b           | 22.58466 | 0.50106962   | 0.531157 | 0.943356 | 0.345499 | 0.79876  |
| cldnj            | 49.32022 | 0.124499288  | 0.347115 | 0.358669 | 0.719843 | 0.94694  |
| ttc29            | 3.104672 | 0.919426707  | 0.937231 | 0.981004 | 0.326591 | 0.785469 |
| cepl70ab         | 49.69638 | 0.080855894  | 0.310311 | 0.260564 | 0.794429 | 0.965431 |
| nhejl            | 125.539  | 0.171045667  | 0.199378 | 0.857897 | 0.390949 | 0.827902 |
| si:ch211-237c6.4 | 232.8408 | 0.033867776  | 0.177277 | 0.191044 | 0.848491 | 0.977912 |
| si:ch211-18115.2 | 6.998923 | -0.752974326 | 0.990064 | -0.76053 | 0.446937 | 0.85583  |
| nnr              | 0.049021 | -0.86807634  | 5.267649 | -0.16479 | 0.869106 | NA       |

|                    |           |               |           |           |           |           |
|--------------------|-----------|---------------|-----------|-----------|-----------|-----------|
| pou1f1             | 3. 657827 | 1. 069141417  | 1. 070107 | 0. 999098 | 0. 317747 | 0. 779627 |
| si:busm1-52i16. 2  | 2. 573776 | -1. 510909288 | 1. 560961 | -0. 96794 | 0. 333077 | 0. 790126 |
| cldn10a            | 3. 182104 | -0. 078998791 | 1. 183808 | -0. 06673 | 0. 946794 | 0. 997371 |
| b4galnt3b          | 129. 399  | 0. 269558794  | 0. 211576 | 1. 274051 | 0. 202645 | 0. 683051 |
| si:ch211-248e11. 2 | 123. 1738 | -0. 164920801 | 0. 284216 | -0. 58027 | 0. 561736 | 0. 900715 |
| cdcpla             | 64. 75909 | -0. 724684746 | 0. 295215 | -2. 45477 | 0. 014098 | 0. 208027 |
| si:dkey-8e10. 3    | 75. 04428 | -0. 002117581 | 0. 268564 | -0. 00788 | 0. 993709 | 1         |
| acot22             | 0. 500464 | 1. 055404854  | 3. 537012 | 0. 298389 | 0. 765406 | NA        |
| CU856539. 2        | 383. 7623 | 0. 015469894  | 0. 126034 | 0. 122744 | 0. 90231  | 0. 990938 |
| spina              | 107. 0293 | 0. 068484725  | 0. 224327 | 0. 30529  | 0. 760145 | 0. 957886 |
| abcc4              | 388. 2517 | 0. 233714359  | 0. 165633 | 1. 41104  | 0. 158233 | 0. 623766 |
| trim35-7           | 17. 61656 | 0. 025073492  | 0. 483733 | 0. 051833 | 0. 958661 | 0. 999109 |
| otol1b             | 14. 35891 | -1. 105823865 | 0. 801661 | -1. 37942 | 0. 167767 | 0. 638989 |
| ngfa               | 37. 65765 | -0. 216220836 | 0. 323709 | -0. 66795 | 0. 504167 | 0. 881759 |
| txn14b             | 124. 8089 | -0. 14359118  | 0. 194357 | -0. 7388  | 0. 460027 | 0. 862369 |
| themis2            | 9. 998463 | 0. 012399653  | 0. 651318 | 0. 019038 | 0. 984811 | 1         |
| zgc:112332         | 65. 6505  | -0. 067741979 | 0. 316313 | -0. 21416 | 0. 830421 | 0. 974908 |
| haus1              | 70. 66549 | -0. 429739938 | 0. 277787 | -1. 54701 | 0. 12186  | 0. 56863  |
| cntnap2a           | 304. 3008 | -0. 011975917 | 0. 17702  | -0. 06765 | 0. 946062 | 0. 997371 |
| zgc:113423         | 124. 3999 | -0. 11728633  | 0. 277822 | -0. 42216 | 0. 672906 | 0. 93414  |
| rad23ab            | 468. 5013 | 0. 064225135  | 0. 19723  | 0. 325635 | 0. 7447   | 0. 95491  |
| KCNJ6              | 53. 29529 | 0. 24339717   | 0. 357317 | 0. 681179 | 0. 495758 | 0. 87806  |
| KCNJ15             | 55. 71883 | -0. 347330076 | 0. 310777 | -1. 11762 | 0. 263731 | 0. 741708 |
| slc35a2            | 130. 7378 | 0. 200211217  | 0. 155543 | 1. 287173 | 0. 198034 | 0. 678765 |
| cers2b             | 462. 1416 | 0. 214802644  | 0. 131015 | 1. 639529 | 0. 101103 | 0. 526828 |
| rock1              | 623. 3416 | 0. 009757764  | 0. 148122 | 0. 065876 | 0. 947476 | 0. 997371 |
| stx1a              | 8. 647984 | -0. 710200792 | 1. 03772  | -0. 68439 | 0. 493731 | 0. 877215 |
| jmjd4              | 51. 28759 | 0. 046160008  | 0. 249887 | 0. 184723 | 0. 853446 | 0. 978887 |
| jam2a              | 212. 8612 | -0. 308682134 | 0. 187803 | -1. 64364 | 0. 10025  | 0. 524748 |
| pim2               | 581. 6002 | -0. 237306789 | 0. 165464 | -1. 43419 | 0. 151518 | 0. 615372 |
| strip2             | 175. 3502 | 0. 347834835  | 0. 242331 | 1. 435369 | 0. 151182 | 0. 615188 |
| otud5a             | 695. 3412 | 0. 028897452  | 0. 112833 | 0. 256107 | 0. 797868 | 0. 966447 |
| lim2. 2            | 19. 38122 | -0. 073018507 | 0. 456239 | -0. 16004 | 0. 872846 | 0. 983537 |
| thapl              | 164. 2776 | -0. 018667424 | 0. 249179 | -0. 07492 | 0. 940282 | 0. 997371 |
| zgc:123217         | 49. 41765 | -0. 217160285 | 0. 32505  | -0. 66808 | 0. 50408  | 0. 881759 |
| srrd               | 50. 65898 | 0. 12041861   | 0. 27552  | 0. 437059 | 0. 662068 | 0. 930742 |
| mmp28              | 128. 5598 | -0. 144615482 | 0. 229904 | -0. 62903 | 0. 529332 | 0. 890418 |
| porb               | 919. 8233 | 0. 372047927  | 0. 204179 | 1. 822166 | 0. 06843  | 0. 445916 |
| F0904903. 1        | 5. 785046 | -6. 834477554 | 5. 137318 | -1. 33036 | NA        | NA        |
| ntf3               | 16. 18578 | 0. 308266068  | 0. 523117 | 0. 589287 | 0. 555669 | 0. 898723 |
| epm2a              | 44. 03459 | -0. 558527789 | 0. 440428 | -1. 26815 | 0. 204745 | 0. 686713 |
| psmd5              | 335. 0234 | 0. 075648708  | 0. 158485 | 0. 477323 | 0. 633132 | 0. 923885 |
| mpz111             | 276. 8144 | -0. 133965662 | 0. 133599 | -1. 00275 | 0. 315983 | 0. 778545 |
| zgc:174904         | 257. 3124 | -0. 449325469 | 0. 198358 | -2. 26523 | 0. 023499 | 0. 270878 |
| slc13a4            | 480. 3671 | -0. 213925814 | 0. 233669 | -0. 91551 | 0. 359925 | 0. 810891 |
| pdk2b              | 6837. 375 | -1. 324271438 | 0. 251641 | -5. 26255 | 1. 42E-07 | 6. 43E-05 |
| ft1                | 8. 967343 | -0. 778498955 | 0. 574908 | -1. 35413 | 0. 175696 | 0. 649413 |
| atpv0e2            | 760. 3995 | -0. 20912262  | 0. 207115 | -1. 00969 | 0. 312643 | 0. 776164 |
| vipr1b             | 10. 18785 | -0. 181723724 | 0. 612681 | -0. 2966  | 0. 766769 | 0. 960296 |
| emsy               | 787. 7397 | 0. 119446997  | 0. 125225 | 0. 953858 | 0. 340156 | 0. 795345 |
| lgals1a            | 76. 33259 | 0. 06438619   | 0. 228036 | 0. 282352 | 0. 777674 | 0. 961073 |
| rassf3             | 133. 4969 | -0. 197245546 | 0. 188702 | -1. 04527 | 0. 295897 | 0. 764246 |
| jupb               | 29. 2217  | 0. 860072713  | 0. 389667 | 2. 207198 | 0. 0273   | 0. 293572 |
| gars               | 2354. 025 | 0. 089617145  | 0. 117614 | 0. 761958 | 0. 446085 | 0. 855403 |

|                  |          |              |          |          |          |          |
|------------------|----------|--------------|----------|----------|----------|----------|
| gsc              | 222.2739 | -0.440250205 | 0.172651 | -2.54994 | 0.010774 | 0.181029 |
| nip7             | 257.227  | -0.045594552 | 0.228421 | -0.19961 | 0.841788 | 0.97643  |
| vps25            | 808.4992 | 0.192654737  | 0.138529 | 1.39072  | 0.16431  | 0.633351 |
| L0018513.1       | 10.21143 | 1.423430429  | 0.849498 | 1.675614 | 0.093814 | 0.511703 |
| ppp2r5ca         | 242.7795 | -0.079274194 | 0.179435 | -0.4418  | 0.658634 | 0.930581 |
| sstr2a           | 70.13062 | -0.048940852 | 0.274199 | -0.17849 | 0.858341 | 0.979774 |
| ankla            | 416.917  | 0.067869242  | 0.196744 | 0.344963 | 0.730122 | 0.950056 |
| nktr             | 587.8705 | -0.262692569 | 0.249132 | -1.05443 | 0.291686 | 0.761454 |
| si:ch73-126o18.1 | 0.416155 | -0.868122166 | 5.267649 | -0.1648  | 0.869099 | NA       |
| si:dkeyp-113d7.1 | 836.1509 | -0.139110552 | 0.127095 | -1.09454 | 0.273717 | 0.749234 |
| heatr5b          | 229.7075 | 0.166642472  | 0.195629 | 0.85183  | 0.394309 | 0.828374 |
| EFEMP1           | 12.05132 | -1.774840289 | 1.022545 | -1.73571 | 0.082615 | 0.483014 |
| plcd1a           | 499.1198 | -0.081175803 | 0.119622 | -0.6786  | 0.497391 | 0.878744 |
| prkacbb          | 899.9197 | -0.135293352 | 0.138946 | -0.97371 | 0.330201 | 0.788126 |
| uqcrh            | 2966.647 | -0.013694318 | 0.140386 | -0.09755 | 0.922291 | 0.994346 |
| gatalb           | 1.421831 | -1.330495511 | 1.547456 | -0.8598  | 0.389902 | NA       |
| spdya            | 4.508425 | -0.742805564 | 0.724675 | -1.02502 | 0.305354 | 0.770528 |
| wfikkn2b         | 5.555173 | 0.543867809  | 0.927654 | 0.586283 | 0.557686 | 0.899184 |
| tmem107          | 150.2914 | -0.291426091 | 0.158136 | -1.84288 | 0.065347 | 0.435359 |
| rbp3             | 1322.823 | 0.491953483  | 0.244641 | 2.010921 | 0.044334 | 0.368519 |
| slc22a13b        | 13.3281  | -0.603489625 | 0.713837 | -0.84542 | 0.397878 | 0.830675 |
| gdf2             | 7.190209 | -0.384394415 | 1.005635 | -0.38224 | 0.702283 | 0.943402 |
| cep19            | 76.43631 | 0.42253612   | 0.235084 | 1.797381 | 0.072275 | 0.457045 |
| tax1bp3          | 659.1283 | 0.158655792  | 0.155008 | 1.023533 | 0.306056 | 0.771472 |
| CU467633.1       | 1.839139 | -3.56404874  | 1.615674 | -2.20592 | 0.02739  | NA       |
| tspan2b          | 165.606  | 0.09754764   | 0.209744 | 0.46508  | 0.641874 | 0.925586 |
| abhd13           | 37.0638  | -0.329078259 | 0.268619 | -1.22508 | 0.220547 | 0.701837 |
| ciaol            | 412.3719 | 0.276936202  | 0.1771   | 1.56373  | 0.117881 | 0.559998 |
| zbtb8a           | 56.08008 | 0.243489361  | 0.256682 | 0.948605 | 0.342822 | 0.79738  |
| fabplb.1         | 6440.173 | 0.152262352  | 0.1885   | 0.80776  | 0.419229 | 0.842286 |
| heph1la          | 194.6894 | -0.448164531 | 0.212676 | -2.10726 | 0.035095 | 0.329877 |
| runx2b           | 20.71529 | 0.011616075  | 0.395272 | 0.029388 | 0.976556 | 1        |
| mrps27           | 491.701  | 0.238062068  | 0.14502  | 1.641586 | 0.100676 | 0.525729 |
| zgc:113274       | 64.41555 | -0.132676772 | 0.261873 | -0.50665 | 0.612403 | 0.915727 |
| ptger4a          | 11.44809 | -1.944113478 | 0.687612 | -2.82734 | 0.004694 | 0.113638 |
| arfip2a          | 399.8163 | 0.060832841  | 0.150808 | 0.40338  | 0.686669 | 0.93875  |
| hnrnpd           | 935.1953 | 0.167620356  | 0.108458 | 1.545489 | 0.122228 | 0.569366 |
| tmem54a          | 392.9922 | -0.102648511 | 0.145574 | -0.70513 | 0.48073  | 0.870179 |
| zpcx             | 2.159264 | 2.399767482  | 1.807669 | 1.327548 | 0.184327 | NA       |
| illrl            | 1.396005 | 1.888650401  | 1.675085 | 1.127495 | 0.259533 | NA       |
| evx2             | 116.9672 | 0.25144733   | 0.178014 | 1.412514 | 0.157799 | 0.623766 |
| hoxd13a          | 53.80439 | -0.162317775 | 0.206021 | -0.78787 | 0.430772 | 0.847629 |
| pabpc4           | 10285.88 | -0.066836223 | 0.145568 | -0.45914 | 0.646132 | 0.926728 |
| hoxd12a          | 84.43968 | -0.141965064 | 0.216554 | -0.65556 | 0.512105 | 0.885285 |
| hoxd11a          | 125.0779 | 0.126892685  | 0.247285 | 0.513143 | 0.607852 | 0.915204 |
| hoxd9a           | 230.2129 | -0.292656481 | 0.160506 | -1.82333 | 0.068253 | 0.445546 |
| hoxd4a           | 94.71405 | -0.005988774 | 0.200529 | -0.02986 | 0.976175 | 1        |
| tfap2a           | 1604.122 | -0.077925556 | 0.121367 | -0.64207 | 0.52083  | 0.887391 |
| hoxd3a           | 232.3088 | -0.029056293 | 0.157669 | -0.18429 | 0.853788 | 0.978905 |
| mak              | 306.0225 | 0.013440696  | 0.135159 | 0.099443 | 0.920786 | 0.994085 |
| marco            | 105.3353 | -0.282868346 | 0.286477 | -0.9874  | 0.323445 | 0.783161 |
| spcs1            | 229.531  | -0.112145707 | 0.206272 | -0.54368 | 0.586663 | 0.906788 |
| hnrnp12          | 1841.129 | 0.072130595  | 0.11626  | 0.620426 | 0.534977 | 0.891993 |
| chchd2           | 1091.967 | 0.197307436  | 0.139238 | 1.417047 | 0.156469 | 0.622452 |

|                   |          |              |          |          |          |          |
|-------------------|----------|--------------|----------|----------|----------|----------|
| tmem37            | 36.49752 | -1.59587034  | 0.958817 | -1.66442 | 0.096029 | 0.517378 |
| golt1bb           | 266.9666 | -0.061462738 | 0.195731 | -0.31402 | 0.753509 | 0.955861 |
| dpysl5b           | 1257.163 | 0.220935929  | 0.220404 | 1.002413 | 0.316144 | 0.778682 |
| ora3              | 11.36157 | 0.3791901    | 0.517211 | 0.733144 | 0.463471 | 0.864553 |
| topbpl            | 206.2668 | 0.368728639  | 0.146924 | 2.509653 | 0.012085 | 0.190742 |
| rpn1              | 1578.719 | 0.052926537  | 0.14169  | 0.373536 | 0.708749 | 0.945518 |
| gata2a            | 289.928  | -0.170593122 | 0.148379 | -1.14971 | 0.250263 | 0.730026 |
| si:ch211-285f17.1 | 471.5206 | 0.035192483  | 0.201636 | 0.174535 | 0.861445 | 0.9805   |
| tgif1             | 877.1476 | -0.093050127 | 0.123524 | -0.75329 | 0.451273 | 0.857606 |
| dlgap2a           | 19.2223  | 1.404894079  | 0.565022 | 2.486443 | 0.012903 | 0.198116 |
| avil              | 31.69409 | -0.745775456 | 0.865716 | -0.86146 | 0.388987 | 0.827725 |
| calml4b           | 1.764203 | 0            | 1.989214 | 0        | 1        | NA       |
| rxfp3.3b          | 24.44244 | -0.601803621 | 0.747996 | -0.80455 | 0.421077 | 0.842517 |
| homer2            | 578.4726 | 0.04396563   | 0.170385 | 0.258037 | 0.796378 | 0.966432 |
| hnrnpa3           | 166.313  | 0.283205089  | 0.206117 | 1.373999 | 0.169442 | 0.640975 |
| glmp              | 422.5886 | 0.017293892  | 0.128253 | 0.134842 | 0.892737 | 0.988566 |
| sarnp             | 706.4288 | -0.126883766 | 0.15658  | -0.81034 | 0.417743 | 0.841149 |
| srsf3b            | 2310.177 | -0.06209311  | 0.102766 | -0.60422 | 0.5457   | 0.895522 |
| slc39a4           | 6.864545 | -0.905723114 | 1.09238  | -0.82913 | 0.407032 | 0.835261 |
| cavin1b           | 592.8454 | 0.173301166  | 0.155296 | 1.115938 | 0.264449 | 0.742063 |
| tgfbr2a           | 49.28537 | -0.424176855 | 0.301542 | -1.40669 | 0.159518 | 0.6257   |
| nipal4            | 169.1679 | 0.111421108  | 0.187612 | 0.593891 | 0.552585 | 0.8974   |
| mfap2             | 1833.683 | -0.120993739 | 0.20287  | -0.59641 | 0.550901 | 0.8974   |
| gria4b            | 289.9214 | 1.032065428  | 0.221541 | 4.658576 | 3.18E-06 | 0.000745 |
| si:ch1073-15f12.3 | 3.204246 | -0.650453839 | 1.300807 | -0.50004 | 0.617048 | 0.916365 |
| nrld4b            | 40.73826 | -0.885063751 | 0.628375 | -1.4085  | 0.158984 | 0.624561 |
| dnajc8            | 897.3189 | 0.299728441  | 0.122516 | 2.44645  | 0.014427 | 0.210484 |
| fgf7              | 23.55078 | 0.08731615   | 0.452357 | 0.193025 | 0.84694  | 0.9773   |
| bdh1              | 186.9106 | -0.097560952 | 0.182877 | -0.53348 | 0.593702 | 0.910427 |
| gyglb             | 3078.694 | -0.20816308  | 0.142569 | -1.46008 | 0.144267 | 0.603371 |
| taslr2.2          | 0.103263 | 1.055383603  | 5.267649 | 0.200352 | 0.841205 | NA       |
| myef2             | 1339.975 | 0.167454666  | 0.104761 | 1.598449 | 0.109943 | 0.543963 |
| si:ch211-160o17.6 | 34.8078  | -0.186372798 | 0.707582 | -0.26339 | 0.792247 | 0.965108 |
| tmem167b          | 463.0741 | 0.072305786  | 0.130181 | 0.555426 | 0.578603 | 0.905417 |
| rab43             | 243.0461 | -0.134935458 | 0.131356 | -1.02725 | 0.304302 | 0.769725 |
| raf1b             | 564.2849 | -0.299613441 | 0.142984 | -2.09543 | 0.036133 | 0.334343 |
| abcd2             | 8.574027 | -0.249668399 | 0.880405 | -0.28358 | 0.77673  | 0.961073 |
| ccr12b.1          | 0.502193 | 1.05540286   | 3.52685  | 0.299248 | 0.764751 | NA       |
| impa2             | 50.59632 | 0.840855538  | 0.338471 | 2.484276 | 0.012982 | 0.198536 |
| zgc:111976        | 4.068582 | 0.083699249  | 0.930908 | 0.089911 | 0.928358 | 0.995052 |
| prune2            | 392.5907 | 0.827542667  | 0.160103 | 5.168802 | 2.36E-07 | 9.41E-05 |
| rnf215            | 41.08473 | 0.388552549  | 0.31016  | 1.25275  | 0.210297 | 0.692011 |
| fsd11             | 184.8798 | -0.147293421 | 0.153329 | -0.96064 | 0.336735 | 0.793455 |
| fktn              | 253.171  | -0.303180453 | 0.169913 | -1.78433 | 0.07437  | 0.463115 |
| galnt18b          | 147.1009 | -0.238870963 | 0.193946 | -1.23163 | 0.218086 | 0.69923  |
| smtnb             | 440.4625 | -0.148606956 | 0.141207 | -1.0524  | 0.292615 | 0.762191 |
| dqx1              | 143.5274 | -0.226748833 | 0.170556 | -1.32947 | 0.183692 | 0.66056  |
| si:ch211-283h6.4  | 81.57202 | -0.178925023 | 0.220732 | -0.8106  | 0.417596 | 0.841149 |
| sbf2              | 488.194  | -0.082392955 | 0.110582 | -0.74509 | 0.45622  | 0.860359 |
| mepce             | 407.9785 | -0.113306887 | 0.186937 | -0.60612 | 0.544434 | 0.895206 |
| wasf3a            | 55.63337 | -0.708407946 | 0.393224 | -1.80154 | 0.071618 | 0.4564   |
| arhgap31          | 173.4305 | -0.077677019 | 0.225226 | -0.34488 | 0.730181 | 0.950056 |
| kank4             | 188.5056 | 0.022181939  | 0.203381 | 0.109066 | 0.91315  | 0.99273  |
| mlxip             | 270.5087 | 0.156563458  | 0.206014 | 0.759966 | 0.447275 | 0.856073 |

|                   |          |              |          |          |          |          |
|-------------------|----------|--------------|----------|----------|----------|----------|
| camsap3           | 247.3168 | 0.038591131  | 0.15827  | 0.243832 | 0.807361 | 0.969736 |
| tead1b            | 349.887  | 0.079528786  | 0.187691 | 0.423722 | 0.671769 | 0.933953 |
| emb               | 43.15892 | 0.368825475  | 0.37592  | 0.981129 | 0.326529 | 0.785469 |
| cplx4b            | 0.392712 | -1.756251467 | 3.756677 | -0.4675  | 0.640141 | NA       |
| ar116             | 149.0895 | -0.308353959 | 0.206758 | -1.49138 | 0.135863 | 0.591131 |
| ACSF3             | 68.41714 | 0.372595793  | 0.2408   | 1.547326 | 0.121785 | 0.56863  |
| si:dkey-163m14.2  | 33.13053 | -0.356979794 | 0.393388 | -0.90745 | 0.36417  | 0.814549 |
| coq2              | 232.2321 | 0.559126576  | 0.144846 | 3.860141 | 0.000113 | 0.010099 |
| rims4             | 15.01629 | 1.13633445   | 0.71834  | 1.58189  | 0.113675 | 0.551905 |
| KIAA0895L         | 58.25241 | -0.184601908 | 0.311456 | -0.59271 | 0.553378 | 0.897946 |
| si:ch211-146m13.3 | 239.3378 | -0.117036521 | 0.226742 | -0.51617 | 0.605738 | 0.915055 |
| akap10            | 180.8513 | -0.035435315 | 0.166138 | -0.21329 | 0.831102 | 0.974908 |
| sympk             | 647.5888 | 0.08558571   | 0.112884 | 0.758172 | 0.448348 | 0.856741 |
| recq15            | 237.3326 | -0.329216079 | 0.155659 | -2.11499 | 0.034431 | 0.327696 |
| xylt2             | 35.90294 | -0.29635088  | 0.344832 | -0.85941 | 0.390116 | 0.827902 |
| tecta             | 65.54677 | 0.219533307  | 0.324396 | 0.676744 | 0.498568 | 0.879201 |
| si:ch73-281f12.4  | 132.4884 | 0.31835739   | 0.182479 | 1.744622 | 0.081051 | 0.479801 |
| fscn2a            | 33.31171 | 1.089432741  | 1.286055 | 0.847112 | 0.396933 | 0.830253 |
| uhmk1             | 78.0754  | -0.169539771 | 0.22077  | -0.76795 | 0.442518 | 0.853789 |
| mbd5              | 215.1247 | 0.118822972  | 0.195811 | 0.606824 | 0.543967 | 0.895043 |
| sowahcb           | 100.5942 | 0.244691218  | 0.261552 | 0.935534 | 0.349513 | 0.801408 |
| rccl1             | 275.4847 | -0.215838643 | 0.152317 | -1.41704 | 0.156472 | 0.622452 |
| CU928117.1        | 268.0793 | 0.175782968  | 0.165865 | 1.059797 | 0.289237 | 0.760276 |
| clip2             | 209.8383 | 0.256314915  | 0.159544 | 1.606548 | 0.108154 | 0.54011  |
| rabep1            | 508.3029 | -0.021410253 | 0.104259 | -0.20536 | 0.837293 | 0.976007 |
| maplaa            | 791.3755 | 0.422173703  | 0.185243 | 2.279027 | 0.022665 | 0.266308 |
| mtssl             | 415.9411 | -0.110854531 | 0.109253 | -1.01466 | 0.310267 | 0.775062 |
| ccdc84            | 84.66716 | 0.044848017  | 0.209755 | 0.213811 | 0.830694 | 0.974908 |
| gpr146            | 691.4739 | -0.166315483 | 0.096047 | -1.7316  | 0.083345 | 0.484434 |
| npr12             | 206.2051 | 0.110576852  | 0.175321 | 0.63071  | 0.52823  | 0.889948 |
| hs3st2            | 21.82348 | -1.218604914 | 0.442941 | -2.75117 | 0.005938 | 0.130541 |
| asphd2            | 326.5369 | -0.163645452 | 0.150947 | -1.08413 | 0.278309 | 0.752003 |
| mlec              | 162.8308 | 0.012944604  | 0.165155 | 0.078378 | 0.937527 | 0.997305 |
| thumpd3           | 253.8163 | -0.279566905 | 0.201354 | -1.38843 | 0.165005 | 0.634185 |
| si:ch211-127d4.3  | 44.65703 | 0.027884979  | 0.334014 | 0.083484 | 0.933466 | 0.996472 |
| mtmr14            | 405.3085 | -0.084922899 | 0.118805 | -0.71481 | 0.474725 | 0.869292 |
| nt5dc2            | 2267.923 | -0.266592042 | 0.16944  | -1.57337 | 0.115633 | 0.555893 |
| cidec             | 53.41993 | 0.035528485  | 0.395832 | 0.089757 | 0.928481 | 0.995052 |
| kdm2aa            | 704.3116 | 0.139736332  | 0.137067 | 1.019473 | 0.307978 | 0.772996 |
| EIF3ba            | 7974.062 | -0.328586813 | 0.11142  | -2.94908 | 0.003187 | 0.093009 |
| mks1              | 103.1785 | 0.105274416  | 0.193484 | 0.544098 | 0.586374 | 0.906711 |
| mrml              | 25.67331 | -0.302372242 | 0.39278  | -0.76983 | 0.441404 | 0.852874 |
| arhgap36          | 171.9606 | 0.112774848  | 0.177353 | 0.635878 | 0.524856 | 0.888928 |
| fscn1a            | 2480.627 | 0.090858098  | 0.137259 | 0.661947 | 0.508005 | 0.883056 |
| slc43a3a          | 123.1904 | 0.440799905  | 0.258276 | 1.706698 | 0.087878 | 0.497853 |
| mblac2            | 13.6548  | 0.309503053  | 0.567665 | 0.545221 | 0.585602 | 0.906655 |
| slc29a4           | 200.627  | 0.278418614  | 0.201788 | 1.379757 | 0.167661 | 0.638828 |
| adam19a           | 267.2169 | -0.074875405 | 0.167737 | -0.44639 | 0.655319 | 0.929606 |
| dusp28            | 12.81075 | 0.283989526  | 0.54965  | 0.516674 | 0.605384 | 0.914985 |
| dnajc16           | 31.30091 | -0.314459682 | 0.385144 | -0.81647 | 0.414229 | 0.838631 |
| agmat             | 59.62801 | -0.217471253 | 0.299276 | -0.72666 | 0.467435 | 0.86616  |
| flii              | 834.042  | 0.231384656  | 0.107679 | 2.148841 | 0.031647 | 0.316333 |
| vwa5b1            | 2.329435 | -0.495463264 | 1.62648  | -0.30462 | 0.760653 | 0.957886 |
| si:ch211-216l23.1 | 754.5468 | 0.105197739  | 0.122556 | 0.858364 | 0.390691 | 0.827902 |



|                |          |              |          |          |          |          |
|----------------|----------|--------------|----------|----------|----------|----------|
| nol6           | 347.0482 | -0.162581436 | 0.191208 | -0.85029 | 0.395165 | 0.829083 |
| slc19a2        | 19.05575 | -0.052725977 | 0.439449 | -0.11998 | 0.904497 | 0.991581 |
| arsk           | 52.87538 | -0.438816419 | 0.345096 | -1.27158 | 0.203523 | 0.684359 |
| fam169aa       | 33.16569 | -0.259072165 | 0.477844 | -0.54217 | 0.587702 | 0.907608 |
| ubac1          | 544.9375 | 0.074599489  | 0.145634 | 0.512238 | 0.608484 | 0.915204 |
| hypk           | 843.7485 | -0.021916411 | 0.148108 | -0.14798 | 0.882361 | 0.986908 |
| sec1418        | 153.535  | 0.120426521  | 0.223784 | 0.538138 | 0.590482 | 0.908901 |
| ptprsa         | 282.0366 | 0.263890041  | 0.260079 | 1.014652 | 0.310272 | 0.775062 |
| tmem98         | 72.35076 | -0.149692075 | 0.231496 | -0.64663 | 0.517872 | 0.887148 |
| plod1a         | 835.8966 | 0.187815076  | 0.177933 | 1.055537 | 0.29118  | 0.761299 |
| kcnj19a        | 21.5444  | 0.855799768  | 0.447203 | 1.913672 | 0.055662 | 0.408467 |
| abtb2a         | 80.52057 | -0.000418548 | 0.259439 | -0.00161 | 0.998713 | 1        |
| wdtc1          | 371.8969 | -0.146340345 | 0.130921 | -1.11778 | 0.263661 | 0.741708 |
| gabrd          | 137.3297 | 0.883793494  | 0.393826 | 2.24412  | 0.024825 | 0.279217 |
| gpatch8        | 1640.297 | 0.007733891  | 0.154997 | 0.049897 | 0.960204 | 0.999164 |
| cpt1aa         | 395.4969 | -0.131421528 | 0.143897 | -0.9133  | 0.361083 | 0.811396 |
| SRCIN1         | 102.7573 | 0.393901699  | 0.289387 | 1.36116  | 0.173463 | 0.64634  |
| dub            | 225.6621 | -0.582871774 | 0.244318 | -2.38571 | 0.017046 | 0.231104 |
| slc32a1        | 966.913  | 0.249542528  | 0.211411 | 1.180366 | 0.237855 | 0.718607 |
| atcayb         | 87.88563 | 0.231632006  | 0.28302  | 0.81843  | 0.413112 | 0.838274 |
| parp8          | 126.0252 | 0.197777276  | 0.168613 | 1.172967 | 0.240809 | 0.722178 |
| trpm5          | 41.51675 | -0.114351322 | 0.639792 | -0.17873 | 0.858148 | 0.979774 |
| kdm6a1         | 637.8367 | 0.006316201  | 0.140689 | 0.044895 | 0.964191 | 0.999925 |
| kcnq1.1        | 27.82288 | -0.548556527 | 0.361959 | -1.51552 | 0.129641 | 0.579651 |
| pdzd2          | 220.1076 | -0.065869378 | 0.179795 | -0.36636 | 0.714098 | 0.945821 |
| retreg3        | 415.5164 | -0.215478896 | 0.128028 | -1.68306 | 0.092364 | 0.508314 |
| slc25a38a      | 45.9674  | -0.334493377 | 0.431058 | -0.77598 | 0.43776  | 0.851283 |
| sacm11b        | 267.5989 | 0.190248102  | 0.125733 | 1.513107 | 0.130252 | 0.581464 |
| caska          | 659.938  | -0.014367935 | 0.141875 | -0.10127 | 0.919335 | 0.993892 |
| smpd5          | 164.84   | 0.086031048  | 0.204887 | 0.419895 | 0.674562 | 0.934877 |
| sin3ab         | 665.9382 | 0.072120771  | 0.105271 | 0.685099 | 0.493281 | 0.876787 |
| oaz2b          | 106.2627 | 0.890117646  | 0.401393 | 2.217571 | 0.026584 | 0.288909 |
| zgc:136864     | 0 NA     | NA           | NA       | NA       | NA       | NA       |
| mtmr12         | 189.8776 | -0.070733471 | 0.166091 | -0.42587 | 0.670202 | 0.933809 |
| kif5ab         | 55.98549 | 0.847726079  | 0.429015 | 1.975984 | 0.048157 | 0.381858 |
| soat2          | 215.6107 | -1.033234004 | 0.347142 | -2.9764  | 0.002917 | 0.089033 |
| crtac1a        | 1030.989 | 1.306811993  | 0.297963 | 4.385822 | 1.16E-05 | 0.00208  |
| adgrb3         | 416.2433 | 0.508856002  | 0.226487 | 2.246731 | 0.024657 | 0.278415 |
| zfyve27        | 246.0169 | -0.37655592  | 0.141297 | -2.66499 | 0.007699 | 0.148279 |
| ddit3          | 851.2439 | 0.064126809  | 0.183699 | 0.349087 | 0.727024 | 0.949095 |
| exosc1         | 449.5287 | -0.571090427 | 0.178994 | -3.19055 | 0.00142  | 0.056314 |
| fam135a        | 507.0207 | 0.189406358  | 0.114736 | 1.650798 | 0.09878  | 0.521469 |
| epg5           | 212.483  | -0.128262631 | 0.213627 | -0.6004  | 0.548237 | 0.896644 |
| slc35f3b       | 6.600297 | -1.815345946 | 0.849675 | -2.13652 | 0.032637 | 0.319477 |
| manba1         | 510.6517 | 0.039199606  | 0.156118 | 0.251089 | 0.801745 | 0.967776 |
| CABZ01041604.1 | 27.45575 | 0.529939033  | 0.507444 | 1.044329 | 0.296333 | 0.764246 |
| wdr66          | 18.58067 | 0.237202234  | 0.448431 | 0.52896  | 0.596833 | 0.911757 |
| alkbh2         | 51.43103 | -0.10019717  | 0.276249 | -0.36271 | 0.716825 | 0.94627  |
| blvra          | 134.0198 | -0.048752857 | 0.192719 | -0.25297 | 0.800289 | 0.967327 |
| pappab         | 23.85871 | 0.726279363  | 0.573994 | 1.265308 | 0.205761 | 0.687948 |
| cactin         | 486.261  | 0.014833357  | 0.110488 | 0.134253 | 0.893203 | 0.988566 |
| clk2b          | 268.5377 | 0.059280153  | 0.129228 | 0.458724 | 0.646432 | 0.926728 |
| shrprbck1r     | 701.1527 | -0.151319497 | 0.111822 | -1.35322 | 0.175986 | 0.649415 |
| trpv1          | 44.8681  | -0.487121519 | 0.345395 | -1.41033 | 0.158442 | 0.623806 |

|                    |           |               |           |           |           |           |
|--------------------|-----------|---------------|-----------|-----------|-----------|-----------|
| frmd3              | 20. 29874 | 0. 161493382  | 0. 373465 | 0. 432419 | 0. 665437 | 0. 932595 |
| fam222ba           | 273. 5778 | 0. 123315686  | 0. 16105  | 0. 765699 | 0. 443856 | 0. 854255 |
| erall              | 200. 6604 | 0. 058277176  | 0. 170271 | 0. 342262 | 0. 732154 | 0. 950617 |
| ago3a              | 56. 46792 | 0. 005674099  | 0. 323362 | 0. 017547 | 0. 986    | 1         |
| AL929217. 1        | 7. 130934 | 1. 431469093  | 1. 02687  | 1. 394012 | 0. 163314 | 0. 631199 |
| ntrk2a             | 147. 1963 | 0. 311767755  | 0. 206639 | 1. 508753 | 0. 131362 | 0. 583069 |
| CR847944. 2        | 1. 742431 | -0. 86814315  | 2. 021059 | -0. 42955 | 0. 667524 | NA        |
| tbc1d9             | 96. 94676 | 0. 220615565  | 0. 240572 | 0. 917045 | 0. 359119 | 0. 810124 |
| vps16              | 608. 4603 | -0. 356240065 | 0. 09225  | -3. 8617  | 0. 000113 | 0. 010073 |
| hs3st31            | 46. 14714 | 0. 055602528  | 0. 336639 | 0. 165169 | 0. 868811 | 0. 982801 |
| sdc4               | 2557. 87  | 0. 015995698  | 0. 143233 | 0. 111676 | 0. 91108  | 0. 992208 |
| si:ch211-217k17. 7 | 761. 9996 | -0. 140090906 | 0. 215737 | -0. 64936 | 0. 516106 | 0. 88677  |
| bbs7               | 175. 8812 | -0. 707213276 | 0. 181246 | -3. 90195 | 9. 54E-05 | 0. 008792 |
| sdr42e2            | 60. 83221 | -0. 809366396 | 0. 368908 | -2. 19395 | 0. 028239 | 0. 298982 |
| hyal1              | 54. 19033 | 0. 154616186  | 0. 253686 | 0. 609479 | 0. 542207 | 0. 89435  |
| ccnj               | 21. 03372 | 0. 490795839  | 0. 335527 | 1. 462759 | 0. 143533 | 0. 602607 |
| zgc:162613         | 136. 6577 | 0. 236965871  | 0. 154178 | 1. 536965 | 0. 124302 | 0. 571556 |
| slc25a47a          | 362. 4042 | 0. 338902824  | 0. 289312 | 1. 17141  | 0. 241434 | 0. 723209 |
| usp24              | 908. 5224 | 0. 201486997  | 0. 180971 | 1. 113364 | 0. 265552 | 0. 742247 |
| hyal2a             | 78. 37084 | 0. 175899798  | 0. 239586 | 0. 734183 | 0. 462837 | 0. 864104 |
| plpp3              | 1840. 575 | 0. 231324481  | 0. 106063 | 2. 181008 | 0. 029183 | 0. 304273 |
| herc4              | 140. 083  | -0. 050794567 | 0. 194382 | -0. 26131 | 0. 793851 | 0. 965431 |
| dab1a              | 35. 42119 | 0. 202726096  | 0. 271336 | 0. 74714  | 0. 454979 | 0. 860002 |
| clqtnf2            | 27. 99643 | -0. 035927125 | 0. 396065 | -0. 09071 | 0. 927723 | 0. 995016 |
| sv2a               | 1838. 901 | 0. 108570424  | 0. 243964 | 0. 445026 | 0. 656301 | 0. 929684 |
| si:dkey-121b10. 7  | 13. 69452 | 0. 382855821  | 0. 579415 | 0. 660762 | 0. 508765 | 0. 883333 |
| plxdc2             | 865. 6309 | -0. 105522194 | 0. 102281 | -1. 03169 | 0. 302219 | 0. 768145 |
| p1d6               | 5. 646735 | -1. 747378065 | 0. 968371 | -1. 80445 | 0. 071161 | 0. 455341 |
| ptk6b              | 63. 39808 | 0. 442770553  | 0. 436637 | 1. 014047 | 0. 31056  | 0. 775146 |
| plch2a             | 442. 3669 | 0. 218528975  | 0. 147436 | 1. 482199 | 0. 138287 | 0. 594938 |
| chpf2              | 260. 8685 | -0. 217096627 | 0. 133961 | -1. 6206  | 0. 105104 | 0. 533762 |
| polk               | 73. 308   | 0. 350791207  | 0. 198431 | 1. 767826 | 0. 07709  | 0. 469501 |
| camsap2b           | 161. 4294 | 0. 139873845  | 0. 208175 | 0. 671904 | 0. 501645 | 0. 881073 |
| raly               | 373. 9548 | 0. 38757682   | 0. 149204 | 2. 597632 | 0. 009387 | 0. 166663 |
| cplx4a             | 496. 3978 | 0. 089782053  | 0. 335621 | 0. 26751  | 0. 789076 | 0. 963627 |
| poc5               | 44. 3281  | 0. 280342338  | 0. 306018 | 0. 916098 | 0. 359615 | 0. 810668 |
| zufsp              | 87. 11612 | -0. 161409644 | 0. 200406 | -0. 80542 | 0. 42058  | 0. 842383 |
| dnah12             | 45. 69819 | 0. 53821628   | 0. 384159 | 1. 401025 | 0. 161207 | 0. 627968 |
| trpm4a             | 521. 2726 | -0. 228124244 | 0. 150778 | -1. 51298 | 0. 130285 | 0. 581464 |
| sv2ca              | 6. 967904 | 0. 136498971  | 0. 798455 | 0. 170954 | 0. 86426  | 0. 981867 |
| mett19             | 252. 4743 | 0. 188878779  | 0. 174325 | 1. 083489 | 0. 278592 | 0. 752152 |
| oggl               | 55. 87884 | -0. 531514679 | 0. 268708 | -1. 97804 | 0. 047924 | 0. 380801 |
| fzd7a              | 1525. 405 | -0. 014025557 | 0. 158938 | -0. 08825 | 0. 929682 | 0. 995576 |
| mtrf11             | 70. 75065 | -0. 058933948 | 0. 201959 | -0. 29181 | 0. 770431 | 0. 960484 |
| nedd41             | 493. 6105 | -0. 089352042 | 0. 115186 | -0. 77572 | 0. 437913 | 0. 851283 |
| n4bp3              | 24. 68392 | 0. 871504825  | 0. 378201 | 2. 304342 | 0. 021203 | 0. 258321 |
| hhip12             | 129. 2971 | -0. 106793234 | 0. 213167 | -0. 50098 | 0. 616382 | 0. 916365 |
| iqgap2             | 270. 7588 | -0. 088469046 | 0. 171855 | -0. 51479 | 0. 6067   | 0. 915204 |
| f2r                | 35. 68309 | 0. 052806595  | 0. 291068 | 0. 181424 | 0. 856035 | 0. 979558 |
| nsd1a              | 461. 0338 | -0. 260430885 | 0. 130103 | -2. 00173 | 0. 045314 | 0. 372707 |
| si:ch1073-44g3. 1  | 218. 6625 | 0. 39186031   | 0. 186311 | 2. 103265 | 0. 035443 | 0. 330833 |
| vcpkmt             | 117. 8752 | -0. 016067517 | 0. 166747 | -0. 09636 | 0. 923236 | 0. 994525 |
| ncapg2             | 200. 3991 | 0. 395541759  | 0. 269143 | 1. 469632 | 0. 141661 | 0. 600284 |
| nsmfa              | 10. 58982 | 0. 108514525  | 0. 902253 | 0. 120271 | 0. 904269 | 0. 991581 |

|                  |          |              |            |          |          |          |
|------------------|----------|--------------|------------|----------|----------|----------|
| noml             | 151.647  | -0.26634606  | 0.189744   | -1.40371 | 0.160404 | 0.626951 |
| fam160b2         | 338.9688 | -0.201561077 | 0.147384   | -1.36759 | 0.17144  | 0.643433 |
| setdla           | 653.8879 | 0.137544754  | 0.183638   | 0.749    | 0.453857 | 0.858859 |
| tmem151ba        | 39.49874 | 0.167586318  | 0.276695   | 0.605671 | 0.544733 | 0.895206 |
| rnf32            | 19.04214 | 0.457518934  | 0.41058    | 1.114324 | 0.26514  | 0.742063 |
| aimpla           | 1446.769 | -0.04663494  | 0.149403   | -0.31214 | 0.754933 | 0.956283 |
| lig1             | 465.5738 | 0.065855967  | 0.207338   | 0.317627 | 0.750768 | 0.955074 |
| zgc:195075       | 2.828427 | -2.616723891 | 1.461753   | -1.79013 | 0.073433 | 0.46112  |
| slc47a2.1        | 35.74213 | 0.734970824  | 0.501819   | 1.464613 | 0.143027 | 0.602002 |
| epclb            | 527.6065 | -0.410352645 | 0.126684   | -3.23918 | 0.001199 | 0.049994 |
| cylda            | 407.3658 | 0.197975498  | 0.110139   | 1.797499 | 0.072256 | 0.457045 |
| lrrc74a          | 4.651525 | -1.482055326 | 1.039245   | -1.42609 | 0.153843 | 0.618475 |
| ubap2b           | 5608.041 | -0.035096626 | 0.153109   | -0.22923 | 0.818693 | 0.971679 |
| fam98b           | 147.5455 | 0.14176331   | 0.205758   | 0.688981 | 0.490835 | 0.87556  |
| isocl            | 134.5988 | 0.16914059   | 0.177976   | 0.950357 | 0.341931 | 0.796716 |
| adcy7            | 194.6537 | -0.568594419 | 0.165096   | -3.44402 | 0.000573 | 0.030598 |
| tent4b           | 365.1581 | -0.171554711 | 0.166742   | -1.02886 | 0.303545 | 0.769406 |
| abi3a            | 85.47587 | 0.167208103  | 0.253555   | 0.659455 | 0.509603 | 0.883733 |
| crb2b            | 16.49529 | -1.769781082 | 0.617648   | -2.86535 | 0.004165 | 0.106651 |
| kcnq3            | 23.57328 | 0.674202369  | 0.367843   | 1.832852 | 0.066825 | 0.441496 |
| btaf1            | 640.0625 | 0.154858406  | 0.110807   | 1.397546 | 0.162249 | 0.629748 |
| zgc:165481       | 67.19707 | -0.27422829  | 0.292772   | -0.93666 | 0.348932 | 0.801306 |
| dapk1            | 388.1015 | 0.024827548  | 0.133926   | 0.185383 | 0.852929 | 0.978794 |
| ptgis            | 110.2571 | -0.336345134 | 0.266771   | -1.2608  | 0.207381 | 0.689456 |
| kcnb1            | 4.923083 | 3.074841779  | 1.227075   | 2.50583  | 0.012216 | 0.191771 |
| tbc1d10ab        | 38.11213 | -0.386912362 | 0.308438   | -1.25442 | 0.209688 | 0.691766 |
| trappc12         | 333.8651 | -0.080862913 | 0.152439   | -0.53046 | 0.595791 | 0.911427 |
| kankla           | 1022.861 | -0.156883267 | 0.125789   | -1.24719 | 0.212327 | 0.694078 |
| cpeb3            | 63.02133 | -0.092559191 | 0.35352    | -0.26182 | 0.793459 | 0.965366 |
| crb2a            | 52.41632 | -0.755964464 | 0.348537   | -2.16896 | 0.030085 | 0.309264 |
| aggf1            | 142.5016 | 0.009697848  | 0.18876    | 0.051377 | 0.959025 | 0.999164 |
| sybu             | 204.9862 | -0.61183059  | 0.316385   | -1.93381 | 0.053136 | 0.400175 |
| znf395a          | 1652.174 | -0.090382325 | 0.226905   | -0.39833 | 0.69039  | 0.93988  |
| lrrn1            | 944.3179 | 0.18239729   | 0.145193   | 1.256241 | 0.209029 | 0.691152 |
| camkla           | 23.8655  | 0.241174578  | 0.484154   | 0.498136 | 0.618388 | 0.916585 |
| glyctk           | 277.9914 | -0.054022186 | 0.149121   | -0.36227 | 0.717149 | 0.94627  |
| cal6b            | 312.0191 | 0.31302588   | 0.20897    | 1.497945 | 0.134148 | 0.588117 |
| timml7b          | 39.77998 | -0.937005534 | 0.341266   | -2.74567 | 0.006039 | 0.131072 |
| acypl            | 88.66193 | -0.725431966 | 0.402068   | -1.80425 | 0.071192 | 0.455342 |
| adants3          | 66.72691 | 0.095332397  | 0.242958   | 0.392382 | 0.694776 | 0.941181 |
| dusp3b           | 19.32709 | -0.995152798 | 0.740687   | -1.34355 | 0.179093 | 0.654301 |
| sh3pxd2aa        | 167.3296 | -0.415677316 | 0.24014    | -1.73098 | 0.083456 | 0.484751 |
| ablimla          | 187.9154 | 0.184473327  | 0.140756   | 1.31059  | 0.189996 | 0.66964  |
| psmd11a          | 961.6214 | 0.074442911  | 0.163353   | 0.455719 | 0.648592 | 0.927501 |
| fam155b          | 138.8971 | 0.229119952  | 0.186833   | 1.226333 | 0.220073 | 0.701196 |
| h6pd             | 313.4173 | 0.123177647  | 0.191365   | 0.64368  | 0.519783 | 0.887148 |
| dnah7            | 21.29444 | 0.081296402  | 0.522852   | 0.155486 | 0.876438 | 0.985007 |
| fam160b1         | 173.0832 | 0.099091603  | 0.192105   | 0.51582  | 0.60598  | 0.915112 |
| mns1             | 75.18177 | 0.241375117  | 0.238028   | 1.014062 | 0.310553 | 0.775146 |
| trmt10b          | 48.76627 | -0.538432872 | 0.257108   | -2.09419 | 0.036243 | 0.335095 |
| vepipl           | 115.641  | -0.332349548 | 0.234909   | -1.4148  | 0.157127 | 0.623076 |
| pkn1a            | 494.0381 | 0.009884516  | 0.113949   | 0.086745 | 0.930874 | 0.995809 |
| si:ch211-214c7.5 | 0.540527 |              | 0.3.923051 | 0        | 1        | NA       |
| rpusd1           | 58.89431 | 0.331475361  | 0.293963   | 1.127608 | 0.259485 | 0.736167 |

|                    |           |               |           |           |           |           |
|--------------------|-----------|---------------|-----------|-----------|-----------|-----------|
| lhpp               | 184. 7585 | 0. 212424039  | 0. 257405 | 0. 825252 | 0. 409228 | 0. 836637 |
| atp2c1             | 236. 5025 | 0. 141222038  | 0. 185486 | 0. 761362 | 0. 446441 | 0. 855403 |
| mrpl18             | 522. 0417 | 0. 039115653  | 0. 16011  | 0. 244305 | 0. 806994 | 0. 969726 |
| CU019662. 1        | 14. 34674 | -0. 700822567 | 0. 750159 | -0. 93423 | 0. 350184 | 0. 802152 |
| traf7              | 221. 0417 | 0. 068011348  | 0. 155371 | 0. 437736 | 0. 661578 | 0. 930742 |
| d2hgdh             | 85. 5895  | -0. 098661751 | 0. 218709 | -0. 45111 | 0. 65191  | 0. 928716 |
| ankeflb            | 1. 538626 | 0. 770880782  | 1. 44746  | 0. 532575 | 0. 594328 | NA        |
| cep85              | 240. 3774 | 0. 058031989  | 0. 172076 | 0. 337246 | 0. 735931 | 0. 951589 |
| scn1ba             | 135. 8441 | 0. 227149657  | 0. 203127 | 1. 118263 | 0. 263455 | 0. 741437 |
| mstlra             | 78. 45055 | -0. 134572699 | 0. 244875 | -0. 54956 | 0. 582623 | 0. 90571  |
| dok7               | 168. 0435 | 0. 542124704  | 0. 199694 | 2. 714773 | 0. 006632 | 0. 136957 |
| uacab              | 1241. 943 | -0. 108796904 | 0. 187633 | -0. 57984 | 0. 562023 | 0. 900715 |
| enox1              | 138. 8792 | 0. 522934289  | 0. 300303 | 1. 741358 | 0. 081621 | 0. 480965 |
| slc16a6b           | 562. 584  | -0. 081433435 | 0. 217641 | -0. 37416 | 0. 708283 | 0. 945344 |
| fgd4b              | 41. 95564 | -0. 114201646 | 0. 338166 | -0. 33771 | 0. 735583 | 0. 951543 |
| wdr44              | 820. 6907 | -0. 070812936 | 0. 108508 | -0. 65261 | 0. 51401  | 0. 88631  |
| mogs               | 333. 4888 | 0. 029337761  | 0. 12196  | 0. 240552 | 0. 809902 | 0. 969828 |
| si:ch211-216b21. 2 | 51. 80805 | -0. 317069569 | 0. 322368 | -0. 98356 | 0. 32533  | 0. 784089 |
| alkbh8             | 71. 02092 | -0. 095579178 | 0. 291068 | -0. 32837 | 0. 742629 | 0. 954484 |
| zranbla            | 971. 9955 | -0. 084380426 | 0. 113777 | -0. 74163 | 0. 458311 | 0. 861001 |
| zgc:162160         | 17. 61537 | 0. 2381516    | 0. 473063 | 0. 503425 | 0. 614666 | 0. 915998 |
| pecam1             | 363. 6883 | -0. 175071685 | 0. 154484 | -1. 13327 | 0. 257103 | 0. 734679 |
| si:dkey-37g12. 1   | 6. 602766 | -2. 758451863 | 1. 373893 | -2. 00776 | 0. 044668 | 0. 37016  |
| pde9a              | 49. 61989 | 0. 663416368  | 0. 340587 | 1. 94786  | 0. 051432 | 0. 394202 |
| rnf121             | 386. 2184 | 0. 091206027  | 0. 124297 | 0. 733775 | 0. 463086 | 0. 864191 |
| plpbp              | 686. 4827 | 0. 233009819  | 0. 166924 | 1. 395906 | 0. 162743 | 0. 630455 |
| arhgap35b          | 409. 0033 | 0. 156426438  | 0. 162457 | 0. 96288  | 0. 335608 | 0. 792139 |
| nin                | 143. 649  | 0. 311202414  | 0. 277523 | 1. 121356 | 0. 262136 | 0. 739695 |
| slc4a10b           | 31. 65393 | 0. 303248394  | 0. 487443 | 0. 622121 | 0. 533863 | 0. 891181 |
| tfcp2              | 583. 0113 | -0. 025232444 | 0. 113057 | -0. 22318 | 0. 823393 | 0. 972005 |
| urbl               | 187. 5596 | -0. 248060518 | 0. 218913 | -1. 13315 | 0. 257153 | 0. 734679 |
| srgap3             | 137. 3716 | -0. 21130288  | 0. 221363 | -0. 95455 | 0. 339804 | 0. 795226 |
| wdr62              | 252. 9076 | 0. 125417403  | 0. 230494 | 0. 544124 | 0. 586356 | 0. 906711 |
| rabgap112          | 207. 2149 | -0. 335824531 | 0. 206029 | -1. 62998 | 0. 103105 | 0. 530217 |
| cish               | 500. 1844 | -0. 474074583 | 0. 251977 | -1. 88142 | 0. 059915 | 0. 421883 |
| scn4bb             | 23. 06897 | -0. 530733884 | 0. 607655 | -0. 87341 | 0. 382438 | 0. 825252 |
| dcaf5              | 343. 0157 | -0. 032924356 | 0. 179508 | -0. 18341 | 0. 854473 | 0. 979088 |
| zgc:153654         | 7. 566008 | -0. 031677214 | 0. 671669 | -0. 04716 | 0. 962384 | 0. 999461 |
| exoc5              | 297. 9554 | -0. 066299519 | 0. 194453 | -0. 34095 | 0. 733138 | 0. 950758 |
| fam20c1            | 0. 536034 | 0             | 4. 060258 | 0         | 1         | NA        |
| map1sb             | 157. 2364 | -0. 17680602  | 0. 267312 | -0. 66142 | 0. 508342 | 0. 883261 |
| si:ch211-284e13. 4 | 59. 89955 | -0. 127459017 | 0. 303059 | -0. 42058 | 0. 674065 | 0. 934789 |
| trmt12             | 52. 25674 | -0. 484941169 | 0. 293402 | -1. 65282 | 0. 098367 | 0. 521076 |
| si:dkey-157119. 2  | 38. 22431 | 0. 071984996  | 0. 343894 | 0. 209323 | 0. 834196 | 0. 975731 |
| apoda. 1           | 686. 899  | -0. 900500316 | 0. 194523 | -4. 62926 | 3. 67E-06 | 0. 000845 |
| map3k3             | 199. 1012 | -0. 097966232 | 0. 166939 | -0. 58684 | 0. 557312 | 0. 899165 |
| wasf1              | 213. 2365 | 0. 146751063  | 0. 176622 | 0. 830879 | 0. 406042 | 0. 834645 |
| apoda. 2           | 33430. 45 | -1. 402701394 | 0. 334083 | -4. 19866 | 2. 69E-05 | 0. 003515 |
| samd7              | 130. 0886 | 0. 105967792  | 0. 297451 | 0. 356252 | 0. 721652 | 0. 947347 |
| cep104             | 68. 27404 | 0. 162641081  | 0. 223708 | 0. 727024 | 0. 467211 | 0. 86616  |
| nadkb              | 358. 9658 | -0. 180947451 | 0. 149131 | -1. 21335 | 0. 224997 | 0. 70685  |
| slc12a9            | 185. 1924 | -0. 26574242  | 0. 180501 | -1. 47225 | 0. 140953 | 0. 599658 |
| syn1               | 679. 1231 | 0. 105361536  | 0. 219791 | 0. 479371 | 0. 631674 | 0. 923003 |
| plxna2             | 94. 13897 | 0. 17517087   | 0. 197004 | 0. 889174 | 0. 373909 | 0. 820695 |

|                    |           |               |           |           |           |           |
|--------------------|-----------|---------------|-----------|-----------|-----------|-----------|
| ttl111             | 32. 51965 | -0. 275296361 | 0. 352103 | -0. 78186 | 0. 434295 | 0. 850002 |
| coq6               | 458. 3503 | 0. 207357279  | 0. 141172 | 1. 468832 | 0. 141878 | 0. 600644 |
| mmaa               | 274. 9029 | 0. 057850245  | 0. 129339 | 0. 447278 | 0. 654675 | 0. 929527 |
| stk26              | 504. 6338 | -0. 024707281 | 0. 105269 | -0. 23471 | 0. 814437 | 0. 970506 |
| ash21              | 724. 6876 | 0. 067174872  | 0. 100745 | 0. 666783 | 0. 50491  | 0. 88195  |
| fibcd1             | 32. 88914 | -0. 4756469   | 0. 463362 | -1. 02651 | 0. 30465  | 0. 769932 |
| mtfr2              | 145. 7526 | 0. 037741502  | 0. 216133 | 0. 174622 | 0. 861377 | 0. 9805   |
| si:dkey-57k2. 7    | 204. 5838 | -0. 527236776 | 0. 176935 | -2. 97983 | 0. 002884 | 0. 088391 |
| hhip               | 683. 7992 | 0. 007569181  | 0. 16746  | 0. 0452   | 0. 963948 | 0. 999842 |
| rft1               | 88. 99339 | 0. 034737414  | 0. 19714  | 0. 176207 | 0. 860131 | 0. 980191 |
| gpr185a            | 3. 498353 | 0. 206740874  | 0. 875035 | 0. 236266 | 0. 813226 | 0. 970328 |
| thbs2a             | 112. 1224 | 0. 551354323  | 0. 267181 | 2. 063602 | 0. 039055 | 0. 345519 |
| ddx28              | 149. 3125 | -0. 557456493 | 0. 167543 | -3. 32725 | 0. 000877 | 0. 040082 |
| si:ch211-157b11. 8 | 25. 59424 | -0. 229197859 | 0. 555316 | -0. 41273 | 0. 679801 | 0. 9365   |
| arhgef28a          | 285. 7447 | -0. 250246626 | 0. 154669 | -1. 61795 | 0. 105674 | 0. 534827 |
| zfyve28            | 72. 45138 | 0. 170809222  | 0. 225561 | 0. 757264 | 0. 448892 | 0. 856796 |
| map1b              | 384. 1707 | 0. 1805941    | 0. 222779 | 0. 810642 | 0. 417571 | 0. 841149 |
| bnip1              | 140. 0538 | 0. 109271085  | 0. 192673 | 0. 567133 | 0. 570624 | 0. 902481 |
| tbl1x              | 210. 301  | -0. 001289347 | 0. 196607 | -0. 00656 | 0. 994768 | 1         |
| clcn2c             | 204. 5967 | -0. 615396813 | 0. 322528 | -1. 90804 | 0. 056386 | 0. 410319 |
| tmem259            | 401. 6487 | 0. 054517534  | 0. 139293 | 0. 391386 | 0. 695512 | 0. 9414   |
| elp6               | 113. 4321 | -0. 240961595 | 0. 206276 | -1. 16815 | 0. 242746 | 0. 724345 |
| sdk2b              | 210. 7993 | -0. 023385763 | 0. 19749  | -0. 11841 | 0. 905739 | 0. 991631 |
| pmp22b             | 2363. 952 | -0. 049062069 | 0. 141597 | -0. 34649 | 0. 728973 | 0. 949983 |
| pik3r4             | 579. 619  | -0. 253254898 | 0. 156102 | -1. 62237 | 0. 104724 | 0. 53308  |
| gcnt3              | 20. 23495 | 0. 458821337  | 0. 464243 | 0. 988322 | 0. 322995 | 0. 782754 |
| vps8               | 462. 2801 | 0. 121411604  | 0. 153076 | 0. 793146 | 0. 427693 | 0. 845893 |
| ubrl               | 80. 14749 | 0. 019789377  | 0. 296414 | 0. 066763 | 0. 946771 | 0. 997371 |
| at11               | 424. 4081 | 0. 240423798  | 0. 168072 | 1. 430484 | 0. 152578 | 0. 61658  |
| mid1               | 25. 92937 | 0. 034491642  | 0. 368478 | 0. 093606 | 0. 925422 | 0. 994815 |
| selenoi            | 106. 235  | 0. 10845771   | 0. 206939 | 0. 524105 | 0. 600205 | 0. 913756 |
| mrpl32             | 615. 9093 | -0. 373051758 | 0. 191836 | -1. 94464 | 0. 051818 | 0. 395809 |
| eprs               | 3017. 961 | 0. 056014075  | 0. 144216 | 0. 388405 | 0. 697717 | 0. 9423   |
| cacnalha           | 105. 5447 | -0. 262187465 | 0. 281707 | -0. 93071 | 0. 352004 | 0. 802591 |
| tnfrsf9a           | 36. 30608 | 0. 224571975  | 0. 400359 | 0. 560927 | 0. 574847 | 0. 904516 |
| l2hgdh             | 150. 235  | -0. 020035783 | 0. 193809 | -0. 10338 | 0. 917662 | 0. 993777 |
| dpcd               | 82. 70518 | 0. 07040078   | 0. 262118 | 0. 268584 | 0. 78825  | 0. 963471 |
| pfkla              | 99. 24757 | 0. 073451446  | 0. 238211 | 0. 308346 | 0. 757819 | 0. 957397 |
| sos2               | 389. 4289 | -0. 107179527 | 0. 182471 | -0. 58738 | 0. 556951 | 0. 899145 |
| cul4b              | 1162. 447 | -0. 125806386 | 0. 095716 | -1. 31437 | 0. 188722 | 0. 668504 |
| kbtbd3             | 39. 50088 | 0. 704389118  | 0. 308621 | 2. 282379 | 0. 022467 | 0. 265534 |
| zdhhc9             | 394. 6548 | -0. 097954058 | 0. 137946 | -0. 71009 | 0. 477648 | 0. 869292 |
| psk5b              | 305. 1023 | 0. 124098038  | 0. 155182 | 0. 799692 | 0. 423889 | 0. 844281 |
| rbm27              | 138. 6953 | -0. 065691477 | 0. 219887 | -0. 29875 | 0. 76513  | 0. 959622 |
| rfk                | 53. 34902 | 0. 003733423  | 0. 290874 | 0. 012835 | 0. 989759 | 1         |
| bmp3               | 241. 7491 | 0. 022326183  | 0. 186402 | 0. 119774 | 0. 904662 | 0. 991581 |
| nkx6. 3            | 18. 28096 | -0. 363414782 | 0. 461458 | -0. 78754 | 0. 430968 | 0. 84774  |
| adam22             | 115. 1892 | 0. 066157327  | 0. 178423 | 0. 370789 | 0. 710794 | 0. 945821 |
| sgppl              | 62. 77902 | 0. 072947522  | 0. 290438 | 0. 251163 | 0. 801688 | 0. 967776 |
| atad2b             | 306. 6013 | 0. 04008042   | 0. 194342 | 0. 206236 | 0. 836606 | 0. 976007 |
| shank1             | 50. 405   | 0. 136854472  | 0. 454994 | 0. 300783 | 0. 76358  | 0. 959055 |
| lgr4               | 563. 0432 | 0. 205338534  | 0. 171429 | 1. 197805 | 0. 230993 | 0. 712561 |
| ecell              | 83. 98687 | -0. 860020461 | 0. 293586 | -2. 92937 | 0. 003397 | 0. 095894 |
| rps6ka5            | 67. 46752 | 0. 455569611  | 0. 278232 | 1. 637376 | 0. 101552 | 0. 527925 |

|                    |          |              |          |          |          |          |
|--------------------|----------|--------------|----------|----------|----------|----------|
| mut                | 1332.848 | -0.392896373 | 0.1287   | -3.0528  | 0.002267 | 0.075801 |
| dis3               | 182.1949 | 0.150330389  | 0.154327 | 0.974103 | 0.330005 | 0.788084 |
| slc25a21           | 99.72134 | -0.362089435 | 0.202597 | -1.78724 | 0.073899 | 0.461767 |
| cluhb              | 34.35769 | 0.386363824  | 0.511415 | 0.755481 | 0.449961 | 0.85711  |
| tmem229b           | 271.3903 | 0.564468427  | 0.197842 | 2.853122 | 0.004329 | 0.108751 |
| si:dkey-226m8.10   | 40.33179 | 0.403305376  | 0.47529  | 0.848547 | 0.396134 | 0.8295   |
| taspl              | 192.2777 | 0.095369018  | 0.168071 | 0.567434 | 0.570419 | 0.902481 |
| kank1b             | 15.58384 | 0.059768558  | 0.556052 | 0.107487 | 0.914402 | 0.992972 |
| ctdsp12b           | 915.3016 | 0.097778453  | 0.11354  | 0.861184 | 0.389137 | 0.827725 |
| hadhab             | 1526.132 | 0.218147904  | 0.197867 | 1.102495 | 0.270246 | 0.746532 |
| prkaal             | 481.8876 | -0.078085504 | 0.117299 | -0.6657  | 0.505604 | 0.882409 |
| zgc:158659         | 44.36175 | -0.056243066 | 0.336583 | -0.1671  | 0.867291 | 0.982582 |
| capn15             | 161.9049 | 0.207324537  | 0.208717 | 0.993326 | 0.320551 | 0.780821 |
| rgs7bpa            | 160.683  | -0.222697908 | 0.207419 | -1.07366 | 0.282975 | 0.755028 |
| cd109              | 113.5158 | 0.242558971  | 0.264444 | 0.91724  | 0.359017 | 0.810051 |
| pcdh7b             | 222.4306 | 0.235681478  | 0.143905 | 1.637755 | 0.101473 | 0.527632 |
| ipol3              | 133.1043 | 0.551327984  | 0.171445 | 3.215776 | 0.001301 | 0.052789 |
| lig4               | 105.4587 | -0.142493227 | 0.203623 | -0.69979 | 0.484058 | 0.872532 |
| si:ch73-14h1.2     | 86.23115 | -2.9775181   | 0.662584 | -4.4938  | 7.00E-06 | 0.001353 |
| dgkaa              | 677.2116 | -0.080001963 | 0.109487 | -0.7307  | 0.464964 | 0.864823 |
| hip1ra             | 40.54146 | -0.239181277 | 0.371184 | -0.64437 | 0.519333 | 0.887148 |
| GARNL3             | 136.5916 | -0.026293822 | 0.217193 | -0.12106 | 0.903642 | 0.991366 |
| uspl6              | 2.350317 | 0.66827637   | 1.534519 | 0.435496 | 0.663203 | 0.931241 |
| clstn2             | 258.2693 | -0.478104635 | 0.299814 | -1.59467 | 0.110786 | 0.545801 |
| CLSTN2 (1 of many) | 39.06006 | -0.880897358 | 0.386691 | -2.27804 | 0.022724 | 0.266612 |
| apba2b             | 640.9548 | 0.065852766  | 0.190296 | 0.346055 | 0.729302 | 0.950056 |
| prkaa2             | 48.2755  | 0.056212485  | 0.32926  | 0.170724 | 0.864441 | 0.981867 |
| sirt7              | 51.07145 | 0.077888011  | 0.31406  | 0.248003 | 0.804132 | 0.968814 |
| senp5              | 148.9686 | 0.180327605  | 0.149043 | 1.209904 | 0.226316 | 0.707597 |
| BX005421.2         | 0.773189 | -1.742413428 | 2.488658 | -0.70014 | 0.483839 | NA       |
| si:ch211-10a23.2   | 258.3537 | 0.21884784   | 0.196288 | 1.114931 | 0.26488  | 0.742063 |
| klf8               | 340.1172 | 0.027150778  | 0.135044 | 0.201052 | 0.840658 | 0.97643  |
| prf1.9             | 4.182894 | 0.066929099  | 0.980589 | 0.068254 | 0.945583 | 0.997371 |
| tm4sf18            | 139.9246 | -0.181285326 | 0.249594 | -0.72632 | 0.467642 | 0.866174 |
| lct                | 14.33582 | 0.842782553  | 1.112138 | 0.757804 | 0.448568 | 0.856741 |
| ndst2b             | 93.52606 | 0.343509259  | 0.223625 | 1.536097 | 0.124515 | 0.572138 |
| kdmla              | 2298.637 | -0.056004019 | 0.102973 | -0.54387 | 0.586529 | 0.906711 |
| si:ch73-127m5.1    | 70.14633 | 0.295449494  | 0.275757 | 1.071414 | 0.283983 | 0.755095 |
| agr1               | 1319.485 | -0.082007099 | 0.127446 | -0.64347 | 0.519922 | 0.887148 |
| lrsam1             | 171.0677 | 0.016475355  | 0.24075  | 0.068433 | 0.945441 | 0.997371 |
| chd2               | 1060.736 | -0.164394266 | 0.168068 | -0.97814 | 0.328004 | 0.786438 |
| trim69             | 74.22955 | -0.014152606 | 0.274629 | -0.05153 | 0.9589   | 0.999164 |
| znf346             | 835.7025 | 0.294913139  | 0.136947 | 2.153483 | 0.031281 | 0.314709 |
| kmt2bb             | 769.383  | 0.125720564  | 0.180671 | 0.695852 | 0.486521 | 0.873244 |
| npffr2b            | 1.225814 | 2.090186755  | 2.060152 | 1.014579 | 0.310307 | NA       |
| nsdlb              | 73.91751 | 0.463815881  | 0.268716 | 1.726042 | 0.08434  | 0.48732  |
| pex11a             | 53.03572 | 0.250624681  | 0.294011 | 0.852433 | 0.393974 | 0.828374 |
| sv2bb              | 578.4464 | 0.190445861  | 0.176549 | 1.078713 | 0.280716 | 0.753147 |
| prkx               | 157.7674 | -0.674600009 | 0.240094 | -2.80973 | 0.004958 | 0.117232 |
| stimla             | 542.5657 | 0.047014727  | 0.106521 | 0.441367 | 0.658947 | 0.930581 |
| dnajc161           | 389.1773 | -0.104436926 | 0.153476 | -0.68048 | 0.496201 | 0.878102 |
| trim8b             | 796.9673 | 0.04027989   | 0.110177 | 0.365593 | 0.714668 | 0.945821 |
| appl1              | 187.2268 | -0.084956007 | 0.176988 | -0.48001 | 0.631221 | 0.923003 |
| sytl7              | 5.566058 | 0.71423018   | 0.725732 | 0.984152 | 0.325041 | 0.783955 |

|                   |          |              |          |          |          |          |
|-------------------|----------|--------------|----------|----------|----------|----------|
| pgm5              | 25.43603 | -0.258176318 | 0.398514 | -0.64785 | 0.517083 | 0.887148 |
| tsfm              | 230.9822 | 0.502584523  | 0.162914 | 3.084974 | 0.002036 | 0.070205 |
| taok3a            | 254.344  | -0.212345748 | 0.151204 | -1.40437 | 0.160209 | 0.626611 |
| pear1             | 196.6673 | 0.062240527  | 0.189296 | 0.3288   | 0.742307 | 0.954329 |
| abhd6a            | 167.2171 | 0.50216121   | 0.230831 | 2.175453 | 0.029596 | 0.306409 |
| nphs1             | 33.82304 | -0.080246882 | 0.348691 | -0.23014 | 0.817985 | 0.971518 |
| pxnb              | 65.5392  | -0.179369769 | 0.330345 | -0.54298 | 0.587146 | 0.907261 |
| smg7              | 1428.112 | 0.007444153  | 0.127751 | 0.058271 | 0.953533 | 0.998436 |
| ankib1a           | 113.9424 | -0.192818798 | 0.218037 | -0.88434 | 0.376513 | 0.822258 |
| map7d3            | 582.7645 | -0.056298223 | 0.150927 | -0.37302 | 0.709136 | 0.945546 |
| acap2             | 259.1271 | -0.129825233 | 0.163923 | -0.79199 | 0.428366 | 0.846133 |
| pcnx4             | 290.1705 | -0.026846042 | 0.148104 | -0.18126 | 0.85616  | 0.979558 |
| lrrc14b           | 41.38546 | 0.31050038   | 0.484065 | 0.641443 | 0.521235 | 0.887473 |
| slc20a2           | 790.4478 | -0.133982577 | 0.162284 | -0.8256  | 0.409029 | 0.836637 |
| pfkmb             | 703.0545 | -0.245498908 | 0.306223 | -0.8017  | 0.422726 | 0.843493 |
| map1sa            | 281.2657 | -0.137674339 | 0.141956 | -0.96984 | 0.332127 | 0.789602 |
| mecom             | 148.0696 | 0.025627896  | 0.268363 | 0.095497 | 0.92392  | 0.994713 |
| plekha7a          | 180.8236 | -0.164876531 | 0.201942 | -0.81646 | 0.414239 | 0.838631 |
| car15             | 8.665073 | 0.684520187  | 0.847655 | 0.807545 | 0.419352 | 0.84234  |
| fam83hb           | 324.5487 | -0.165089318 | 0.14432  | -1.14391 | 0.252659 | 0.732759 |
| tecpr2            | 116.7873 | -0.077834676 | 0.208523 | -0.37327 | 0.70895  | 0.945546 |
| trpc5b            | 30.00093 | 0.387419487  | 0.569156 | 0.680692 | 0.496067 | 0.878093 |
| trim35-33         | 3.976718 | 1.883215862  | 1.085975 | 1.734125 | 0.082896 | 0.483073 |
| pik3c2a           | 618.708  | 0.072879198  | 0.121215 | 0.601237 | 0.547682 | 0.896211 |
| antxr1d           | 19.93489 | 0.211041553  | 0.3924   | 0.537823 | 0.5907   | 0.90904  |
| cabp7b            | 49.73781 | 1.580274866  | 0.609771 | 2.591588 | 0.009553 | 0.168223 |
| setd1ba           | 307.6851 | -0.097980617 | 0.167575 | -0.5847  | 0.558751 | 0.899409 |
| dlgap4a           | 308.984  | 0.269701656  | 0.159457 | 1.691377 | 0.090765 | 0.505206 |
| nckap1            | 1925.53  | 0.095901654  | 0.08602  | 1.114878 | 0.264903 | 0.742063 |
| kctd3             | 123.9029 | 0.27581016   | 0.21686  | 1.271837 | 0.203431 | 0.684359 |
| pstpipla          | 8.269284 | -0.569885814 | 0.61849  | -0.92142 | 0.356834 | 0.807485 |
| dars2             | 106.7878 | 0.313592746  | 0.216327 | 1.449623 | 0.147164 | 0.607479 |
| atxn1b            | 483.6746 | -0.026412973 | 0.113605 | -0.2325  | 0.816151 | 0.971207 |
| scai              | 18.43694 | 0.191229671  | 0.446576 | 0.428213 | 0.668496 | 0.933086 |
| mbtd1             | 249.3658 | 0.109896203  | 0.153637 | 0.715296 | 0.474426 | 0.869292 |
| mctplb            | 122.1599 | 0.428251481  | 0.169637 | 2.524516 | 0.011586 | 0.18746  |
| pdela             | 47.43634 | 0.68381552   | 0.333693 | 2.049237 | 0.040439 | 0.35132  |
| edil3b            | 9.704979 | 2.175385067  | 0.92642  | 2.348163 | 0.018866 | 0.242305 |
| slc28a1           | 39.65678 | -2.234808741 | 1.150998 | -1.94163 | 0.052182 | 0.396885 |
| nmurla            | 1.309238 | 0.107712103  | 2.129929 | 0.050571 | 0.959668 | NA       |
| znf592            | 195.7759 | -0.117201364 | 0.147137 | -0.79655 | 0.425714 | 0.844714 |
| mettl7a           |          | 0 NA         | NA       | NA       | NA       | NA       |
| col8a2            | 317.5118 | -0.112925189 | 0.179085 | -0.63057 | 0.528323 | 0.889948 |
| znf362a           | 475.624  | 0.109404413  | 0.148696 | 0.735757 | 0.461879 | 0.863402 |
| trim62.1          | 35.21728 | 0.441522946  | 0.389123 | 1.134661 | 0.256518 | 0.73401  |
| si:ch211-126i22.5 | 188.6562 | -0.114375046 | 0.136667 | -0.83689 | 0.402656 | 0.833401 |
| fbxl16            | 99.50727 | 0.186905487  | 0.237596 | 0.786651 | 0.431486 | 0.848419 |
| anln              | 555.7366 | 0.316173742  | 0.25407  | 1.244435 | 0.213339 | 0.695695 |
| pla2g6            | 450.2807 | -0.103091508 | 0.135205 | -0.76248 | 0.445771 | 0.855403 |
| ess2              | 480.1586 | -0.054571728 | 0.143322 | -0.38076 | 0.703379 | 0.943622 |
| jarid2a           | 315.4844 | 0.006744187  | 0.18069  | 0.037325 | 0.970226 | 1        |
| rnf19b            | 46.21655 | -0.254456565 | 0.305748 | -0.83224 | 0.405271 | 0.834483 |
| si:ch211-136a13.1 | 230.4676 | 0.030174298  | 0.219401 | 0.137531 | 0.890611 | 0.988446 |
| rnf220a           | 522.1274 | 0.064439271  | 0.102478 | 0.62881  | 0.529473 | 0.890434 |

|                    |          |              |            |          |          |          |  |
|--------------------|----------|--------------|------------|----------|----------|----------|--|
| baiap212b          | 21.33319 | -0.536056113 | 0.49349    | -1.08626 | 0.277366 | 0.751426 |  |
| adnp2a             | 164.2326 | 0.088601519  | 0.177256   | 0.499849 | 0.617181 | 0.916365 |  |
| ANKFN1             | 19.01521 | 0.190534107  | 0.481745   | 0.395508 | 0.692468 | 0.940414 |  |
| rnf217             | 32.79878 | 0.043994237  | 0.340756   | 0.129108 | 0.897272 | 0.989719 |  |
| pip5k11            | 65.95285 | 0.607160206  | 0.287543   | 2.111543 | 0.034726 | 0.328285 |  |
| dync1i1            | 344.5956 | 0.148467359  | 0.164141   | 0.90451  | 0.365725 | 0.815695 |  |
| polg               | 119.6653 | -0.124348296 | 0.215443   | -0.57717 | 0.563822 | 0.901196 |  |
| si:ch1073-214b20.2 | 2.88265  | -1.17436765  | 1.305278   | -0.89971 | 0.368276 | 0.817272 |  |
| tmcc1b             | 464.4794 | 0.084634463  | 0.137479   | 0.615619 | 0.538146 | 0.892498 |  |
| btr04              | 140.9842 | -0.343887671 | 0.226503   | -1.51825 | 0.128952 | 0.578173 |  |
| zgc:153018         | 768.9219 | -0.114313784 | 0.139972   | -0.81669 | 0.414105 | 0.838631 |  |
| atp2a3             | 641.3187 | 0.128706809  | 0.150956   | 0.852614 | 0.393874 | 0.828374 |  |
| atp8b1             | 311.7088 | -0.192005753 | 0.172258   | -1.11464 | 0.265005 | 0.742063 |  |
| smyd4              | 64.71265 | 0.390684739  | 0.232089   | 1.683343 | 0.092309 | 0.508314 |  |
| zgc:154077         | 201.0334 | -0.16436261  | 0.233092   | -0.70514 | 0.480722 | 0.870179 |  |
| mief1              | 290.5453 | 0.060711296  | 0.119784   | 0.506842 | 0.612266 | 0.915709 |  |
| rpud2              | 62.5959  | 0.160235446  | 0.230779   | 0.694323 | 0.48748  | 0.873291 |  |
| fbxw7              | 515.2984 | 0.26417568   | 0.116772   | 2.262312 | 0.023678 | 0.272269 |  |
| klhdc8a            | 15.54966 | -0.007017549 | 0.410648   | -0.01709 | 0.986366 | 1        |  |
| cox11              | 265.2748 | 0.005216115  | 0.147658   | 0.035326 | 0.97182  | 1        |  |
| cyb5d2             | 74.46274 | 0.314071981  | 0.275327   | 1.140721 | 0.253986 | 0.733071 |  |
| hlfb               | 75.14855 | -0.167719638 | 0.325798   | -0.5148  | 0.606695 | 0.915204 |  |
| ankfy1             | 664.2215 | 0.124314677  | 0.108704   | 1.14361  | 0.252785 | 0.732759 |  |
| kcnj5              | 7.156322 | -0.013585164 | 0.763007   | -0.0178  | 0.985795 | 1        |  |
| spns2              | 353.5308 | -0.319156752 | 0.130476   | -2.44609 | 0.014442 | 0.210484 |  |
| ccdc186            | 283.9319 | 0.215895455  | 0.153017   | 1.410925 | 0.158267 | 0.623766 |  |
| fam160a1a          | 97.19586 | 0.068380044  | 0.186991   | 0.365687 | 0.714599 | 0.945821 |  |
| si:dkey-72114.4    | 470.2645 | -0.098185124 | 0.111966   | -0.87692 | 0.380529 | 0.823655 |  |
| rabggtA            | 257.1224 | -0.711267829 | 0.234852   | -3.02858 | 0.002457 | 0.079624 |  |
| vezf1b             | 97.70505 | 0.172950212  | 0.20824    | 0.830533 | 0.406237 | 0.834645 |  |
| dner               | 36.72359 | -0.130739746 | 0.408406   | -0.32012 | 0.748876 | 0.955074 |  |
| atp10a             | 44.56914 | -0.457551324 | 0.263128   | -1.73889 | 0.082053 | 0.482272 |  |
| pum2               | 134.8111 | 0.060621709  | 0.237659   | 0.255078 | 0.798663 | 0.966823 |  |
| gabbr2             | 15.02571 | 0.30257012   | 0.562992   | 0.537432 | 0.590969 | 0.9093   |  |
| si:dkey-72114.3    | 103.3988 | -0.209408552 | 0.402998   | -0.51963 | 0.603323 | 0.914226 |  |
| abcg4a             | 17.03818 | -0.123387001 | 0.550061   | -0.22432 | 0.822512 | 0.971966 |  |
| ranbp9             | 897.5394 | -0.121481887 | 0.131608   | -0.92306 | 0.355978 | 0.807045 |  |
| rnf182             | 35.47504 | 0.812090595  | 0.613641   | 1.323397 | 0.185703 | 0.663476 |  |
| brinp3a.2          | 104.085  | -0.412459244 | 0.250605   | -1.64585 | 0.099794 | 0.524166 |  |
| nipblb             | 839.618  | 0.125681733  | 0.17604    | 0.71394  | 0.475264 | 0.869292 |  |
| cyhr1              | 626.2323 | 0.06763559   | 0.118224   | 0.572096 | 0.567257 | 0.901809 |  |
| stpg2              | 8.963868 | -0.899548422 | 0.678188   | -1.3264  | 0.184707 | 0.661987 |  |
| dpagt1             | 185.1272 | 0.10080264   | 0.168257   | 0.5991   | 0.549106 | 0.897092 |  |
| nemp2              | 158.9122 | 0.067306231  | 0.153591   | 0.438217 | 0.661229 | 0.930581 |  |
| c2cd21             | 207.7435 | 0.045093376  | 0.184547   | 0.244346 | 0.806963 | 0.969726 |  |
| chst3a             | 14.57555 | -0.139223723 | 0.423746   | -0.32855 | 0.742492 | 0.954374 |  |
| arpp21             | 301.1977 | 0.458147328  | 0.262602   | 1.744643 | 0.081047 | 0.479801 |  |
| igl4v8             | 0.301241 |              | 0.4.604814 | 0        | 1        | NA       |  |
| gtpbp6             | 73.60604 | -0.078630277 | 0.227544   | -0.34556 | 0.729673 | 0.950056 |  |
| phldb1a            | 324.5407 | -0.179842993 | 0.175134   | -1.02689 | 0.304474 | 0.769885 |  |
| stk36              | 61.66106 | 0.522263567  | 0.340027   | 1.535946 | 0.124552 | 0.572138 |  |
| dapk2a             | 342.0706 | 0.175188671  | 0.216503   | 0.809173 | 0.418416 | 0.841565 |  |
| nfasca             | 443.2379 | 0.057785244  | 0.139833   | 0.413243 | 0.679428 | 0.936209 |  |
| nars               | 995.1448 | 0.381592145  | 0.165321   | 2.308188 | 0.020989 | 0.257578 |  |



|                    |           |               |           |           |           |           |
|--------------------|-----------|---------------|-----------|-----------|-----------|-----------|
| snx19a             | 57. 10711 | -0. 118346348 | 0. 866975 | -0. 1365  | 0. 891422 | 0. 988566 |
| slc19a3b           | 6. 13389  | 1. 564710382  | 1. 605496 | 0. 974596 | 0. 329761 | 0. 788011 |
| ep300b             | 1013. 368 | 0. 065328365  | 0. 16553  | 0. 394662 | 0. 693093 | 0. 94055  |
| zbtb44             | 36. 23536 | -0. 994006919 | 0. 351338 | -2. 8292  | 0. 004666 | 0. 113335 |
| parga              | 457. 5765 | 0. 198837316  | 0. 113067 | 1. 758577 | 0. 078649 | 0. 474455 |
| slc43a2b           | 2715. 547 | -0. 494125259 | 0. 224803 | -2. 19804 | 0. 027946 | 0. 297418 |
| adgrl3. 1          | 683. 9818 | 0. 226665415  | 0. 141443 | 1. 602525 | 0. 109039 | 0. 541807 |
| srpra              | 958. 715  | 0. 044684555  | 0. 125755 | 0. 355331 | 0. 722342 | 0. 947586 |
| kif21a             | 276. 7865 | 0. 197105162  | 0. 173659 | 1. 135013 | 0. 25637  | 0. 73401  |
| senp7b             | 224. 8058 | -0. 060967743 | 0. 155023 | -0. 39328 | 0. 694112 | 0. 940996 |
| colec12            | 1073. 323 | 0. 075164568  | 0. 15497  | 0. 485026 | 0. 627658 | 0. 921538 |
| tapt1b             | 343. 2035 | 0. 124651101  | 0. 140083 | 0. 889836 | 0. 373554 | 0. 820566 |
| gfod2              | 213. 361  | -0. 083571765 | 0. 167602 | -0. 49863 | 0. 618038 | 0. 916507 |
| zfp64              | 84. 23488 | -0. 345377089 | 0. 226165 | -1. 5271  | 0. 126735 | 0. 575662 |
| nrnl1b             | 39. 32448 | -1. 112004237 | 0. 834442 | -1. 33263 | 0. 182653 | 0. 659278 |
| bicra              | 486. 4767 | -0. 005158242 | 0. 193022 | -0. 02672 | 0. 97868  | 1         |
| ube2j2             | 37. 61293 | 0. 23725672   | 0. 389678 | 0. 608853 | 0. 542622 | 0. 894595 |
| slc6a4a            | 245. 9121 | 0. 289793459  | 0. 191593 | 1. 512548 | 0. 130394 | 0. 581523 |
| dhx34              | 135. 2314 | -0. 292067119 | 0. 190527 | -1. 53295 | 0. 125289 | 0. 573026 |
| larplb             | 1202. 912 | -0. 071310718 | 0. 126877 | -0. 56204 | 0. 574085 | 0. 904376 |
| st14a              | 705. 4314 | 0. 268357141  | 0. 121427 | 2. 210031 | 0. 027103 | 0. 293036 |
| znf740b            | 294. 8196 | -0. 015580119 | 0. 134416 | -0. 11591 | 0. 907724 | 0. 991745 |
| mov10b. 1          | 105. 9691 | -0. 222305801 | 0. 240708 | -0. 92355 | 0. 35572  | 0. 806777 |
| vps45              | 366. 9707 | 0. 010909449  | 0. 133511 | 0. 081712 | 0. 934876 | 0. 996829 |
| nat15              | 277. 9073 | 0. 015647127  | 0. 126048 | 0. 124136 | 0. 901208 | 0. 990512 |
| cbx5               | 2862. 762 | 0. 128322923  | 0. 098453 | 1. 303398 | 0. 192439 | 0. 672283 |
| plekhola           | 125. 406  | 0. 638634424  | 0. 206308 | 3. 095537 | 0. 001965 | 0. 068839 |
| hectd2             | 59. 79413 | 0. 357797293  | 0. 321558 | 1. 112699 | 0. 265838 | 0. 742605 |
| cnnm2a             | 19. 96485 | 0. 833324027  | 0. 501592 | 1. 661358 | 0. 096641 | 0. 51893  |
| emilin2a           | 180. 7032 | 0. 263973973  | 0. 187793 | 1. 405663 | 0. 159824 | 0. 626123 |
| armac7             | 50. 74524 | -0. 136342454 | 0. 27173  | -0. 50176 | 0. 615838 | 0. 916365 |
| acsf2              | 945. 646  | -0. 231060623 | 0. 181072 | -1. 27607 | 0. 20193  | 0. 68211  |
| trpcl              | 94. 93568 | 0. 475709743  | 0. 390858 | 1. 217092 | 0. 223569 | 0. 705397 |
| ddx20              | 171. 2009 | -0. 06735831  | 0. 161797 | -0. 41631 | 0. 67718  | 0. 93595  |
| stagla             | 450. 2589 | 0. 246077309  | 0. 136715 | 1. 799935 | 0. 071871 | 0. 4564   |
| ttc7b              | 568. 5607 | 0. 291808709  | 0. 107577 | 2. 71256  | 0. 006677 | 0. 137398 |
| rab40c             | 571. 0358 | 0. 002908482  | 0. 107785 | 0. 026984 | 0. 978472 | 1         |
| rabep2             | 291. 1352 | -0. 052295677 | 0. 114166 | -0. 45807 | 0. 646904 | 0. 926728 |
| lpin2              | 913. 2146 | -0. 030177101 | 0. 135163 | -0. 22326 | 0. 82333  | 0. 972005 |
| fam149b1           | 313. 2093 | 0. 050985101  | 0. 174112 | 0. 29283  | 0. 769652 | 0. 960484 |
| hexdc              | 92. 60143 | -0. 208474635 | 0. 232447 | -0. 89687 | 0. 369788 | 0. 818318 |
| si:ch211-157j23. 2 | 3. 324773 | -0. 560511144 | 1. 15576  | -0. 48497 | 0. 627696 | 0. 921538 |
| uba7               | 27. 71409 | 0. 999435132  | 0. 547645 | 1. 824968 | 0. 068006 | 0. 44461  |
| ogfrl1             | 46. 68615 | 0. 12927784   | 0. 297916 | 0. 433941 | 0. 664331 | 0. 93177  |
| timp2a             | 1532. 009 | 0. 036869093  | 0. 121581 | 0. 303246 | 0. 761702 | 0. 958242 |
| pfdn4              | 646. 5923 | -0. 162228023 | 0. 151774 | -1. 06888 | 0. 285125 | 0. 756222 |
| tinagl1            | 43. 54388 | -0. 07696669  | 0. 3437   | -0. 22394 | 0. 822807 | 0. 971966 |
| abcc5              | 1586. 866 | -0. 028562358 | 0. 14965  | -0. 19086 | 0. 848635 | 0. 977912 |
| alg5               | 84. 55214 | -0. 259875564 | 0. 303165 | -0. 85721 | 0. 39133  | 0. 827902 |
| cbln4              | 34. 0183  | -0. 340409192 | 0. 38928  | -0. 87446 | 0. 381869 | 0. 824957 |
| tuftla             | 253. 6303 | -0. 261873117 | 0. 225698 | -1. 16028 | 0. 245934 | 0. 727194 |
| ubash3ba           | 40. 67181 | 0. 495285691  | 0. 294772 | 1. 680233 | 0. 092912 | 0. 510257 |
| xylt1              | 78. 43073 | 0. 070465615  | 0. 238065 | 0. 295993 | 0. 767235 | 0. 960296 |
| myomla             | 4591. 966 | -0. 041166932 | 0. 226744 | -0. 18156 | 0. 855931 | 0. 979558 |

|                  |          |              |          |          |          |          |
|------------------|----------|--------------|----------|----------|----------|----------|
| dusp3a           | 112.4045 | 0.114062504  | 0.219305 | 0.520108 | 0.602988 | 0.914226 |
| si:dkey-44g23.5  | 514.6015 | -0.196481807 | 0.173492 | -1.13251 | 0.257419 | 0.735125 |
| zgc:153240       | 242.5656 | 0.122059482  | 0.164724 | 0.740995 | 0.458697 | 0.861537 |
| sost             | 330.9739 | -0.086984039 | 0.17257  | -0.50405 | 0.614226 | 0.915998 |
| si:dkey-202e22.2 | 236.4782 | 0.356231412  | 0.173124 | 2.057668 | 0.039622 | 0.348139 |
| lmln             | 28.56771 | 0.518779284  | 0.475739 | 1.090471 | 0.275506 | 0.750643 |
| ago2             | 55.90198 | 0.341378678  | 0.249299 | 1.369352 | 0.170889 | 0.642777 |
| BX294434.1       | 1655.943 | 0.093868699  | 0.152928 | 0.613809 | 0.539341 | 0.893049 |
| lss              | 56.93397 | 0.724250022  | 0.277903 | 2.606126 | 0.009157 | 0.164349 |
| glgla            | 1421.305 | 0.060023097  | 0.101852 | 0.589316 | 0.555649 | 0.898723 |
| kcnc4            | 23.42116 | -0.444969302 | 0.437481 | -1.01712 | 0.309098 | 0.773791 |
| pil5b            | 21.26309 | 1.669963756  | 1.210141 | 1.379974 | 0.167595 | 0.638828 |
| arhgap5          | 773.3347 | -0.014726326 | 0.156535 | -0.09408 | 0.925048 | 0.994815 |
| gmpr2            | 446.5363 | 0.05498543   | 0.135834 | 0.404798 | 0.685626 | 0.938486 |
| oca2             | 99.77851 | -0.004690692 | 0.250062 | -0.01876 | 0.985034 | 1        |
| ppplr9a          | 37.44067 | 0.819407263  | 0.352533 | 2.324343 | 0.020107 | 0.251556 |
| znf438           | 97.09142 | -0.07434392  | 0.20554  | -0.3617  | 0.717576 | 0.946393 |
| ngrn             | 272.8884 | -0.362073205 | 0.177591 | -2.0388  | 0.04147  | 0.355348 |
| cdon             | 1518.68  | 0.028576059  | 0.1471   | 0.194263 | 0.84597  | 0.977039 |
| galnt1           | 539.8987 | 0.084460181  | 0.120764 | 0.69938  | 0.484315 | 0.872731 |
| ddx6             | 317.502  | -0.080533562 | 0.174146 | -0.46245 | 0.643759 | 0.925997 |
| wwp2             | 2036.749 | -0.032616961 | 0.104624 | -0.31175 | 0.755228 | 0.956367 |
| adat1            | 42.35238 | 0.173801888  | 0.342985 | 0.506733 | 0.612342 | 0.915709 |
| tfpi2            | 92.39373 | 0.010016306  | 0.25222  | 0.039713 | 0.968322 | 1        |
| bcl11aa          | 506.9755 | 0.182057788  | 0.118674 | 1.534094 | 0.125006 | 0.572594 |
| foxred2          | 331.5754 | -0.364698053 | 0.17281  | -2.1104  | 0.034824 | 0.328663 |
| aocl             | 75.47885 | 0            | 1.692202 | 0        | 1        | 1        |
| chst6            | 33.98139 | -0.863876226 | 0.429658 | -2.01061 | 0.044367 | 0.368519 |
| dipklab          | 26.94616 | -0.156117245 | 0.498198 | -0.31336 | 0.754004 | 0.955912 |
| GFOD1            | 21.93189 | 0.581903331  | 0.381731 | 1.524381 | 0.127413 | 0.576964 |
| hepacam2         | 68.19187 | 0.155112789  | 0.245865 | 0.630885 | 0.528115 | 0.889948 |
| klf13            | 79.86473 | 0.007530301  | 0.315455 | 0.023871 | 0.980955 | 1        |
| tsen34           | 156.8733 | -0.405042284 | 0.151665 | -2.67064 | 0.007571 | 0.14728  |
| cdh18a           | 166.3963 | 0.060748863  | 0.214287 | 0.283493 | 0.776799 | 0.961073 |
| cog7             | 382.033  | -0.011020438 | 0.127018 | -0.08676 | 0.93086  | 0.995809 |
| znf142           | 150.2171 | -0.099934103 | 0.159103 | -0.62811 | 0.529933 | 0.890545 |
| sgpl1            | 1081.505 | -0.124477936 | 0.187169 | -0.66506 | 0.506014 | 0.882858 |
| efcab1           | 26.23964 | 0.493034753  | 0.390405 | 1.262881 | 0.206632 | 0.688972 |
| smg8             | 363.1842 | 0.009708471  | 0.148716 | 0.065282 | 0.947949 | 0.997456 |
| cmya5            | 197.09   | 0.394142429  | 0.328076 | 1.201377 | 0.229605 | 0.711596 |
| serpinf2b        | 957.3899 | -0.446695773 | 0.21254  | -2.10171 | 0.035579 | 0.331205 |
| haus3            | 125.5109 | 0.21413373   | 0.192168 | 1.114304 | 0.265149 | 0.742063 |
| grhl1            | 296.4016 | -0.081554571 | 0.156956 | -0.5196  | 0.603342 | 0.914226 |
| trip12           | 1922.801 | -0.008961917 | 0.123738 | -0.07243 | 0.942262 | 0.997371 |
| epb4114b         | 104.6983 | -0.097244958 | 0.196754 | -0.49425 | 0.621132 | 0.918461 |
| csgalnact2       | 302.6821 | -0.233129484 | 0.119652 | -1.9484  | 0.051367 | 0.394202 |
| evala            | 111.6481 | -0.100949456 | 0.195665 | -0.51593 | 0.605903 | 0.915055 |
| bivm             | 77.65865 | 0.188404649  | 0.230348 | 0.817913 | 0.413407 | 0.838369 |
| nelfa            | 234.1999 | -0.219031292 | 0.149898 | -1.4612  | 0.14396  | 0.603144 |
| sec23ip          | 471.0454 | 0.085067994  | 0.152899 | 0.556367 | 0.57796  | 0.905248 |
| slx4             | 170.9819 | 0.179461829  | 0.217024 | 0.826923 | 0.408281 | 0.83612  |
| c2cd4a           | 63.12015 | -0.328068359 | 0.562092 | -0.58366 | 0.559452 | 0.899571 |
| nubl             | 50.80773 | 0.081670077  | 0.397272 | 0.205577 | 0.837121 | 0.976007 |
| zmat4b           | 16.41894 | 0.156545364  | 0.494244 | 0.316737 | 0.751443 | 0.955331 |

|                   |          |              |          |          |          |          |
|-------------------|----------|--------------|----------|----------|----------|----------|
| FQ311928.1        | 100.4575 | 0.099247661  | 0.339445 | 0.292382 | 0.769995 | 0.960484 |
| znf646            | 509.4019 | 0.015772146  | 0.137931 | 0.114348 | 0.908962 | 0.992033 |
| zgc:194330        | 19.05701 | -0.272599132 | 0.408771 | -0.66688 | 0.504852 | 0.88195  |
| col6a2            | 1832.912 | 0.030885459  | 0.181301 | 0.170355 | 0.864731 | 0.982052 |
| inpp5f            | 88.26786 | 0.193123177  | 0.207958 | 0.928666 | 0.353062 | 0.803896 |
| ugt5c3            | 88.76033 | -0.496865834 | 0.275844 | -1.80125 | 0.071663 | 0.4564   |
| ugt5c1            | 3.343335 | 0.084000947  | 1.040188 | 0.080756 | 0.935636 | 0.996829 |
| adcy6a            | 233.9516 | 0.043621853  | 0.169135 | 0.257911 | 0.796476 | 0.966447 |
| smap2             | 12.30891 | -0.252951554 | 0.598132 | -0.4229  | 0.672366 | 0.934089 |
| tesk2             | 333.3448 | -0.180065921 | 0.148646 | -1.21137 | 0.225753 | 0.707068 |
| n4bp2             | 266.5086 | 0.054129591  | 0.143411 | 0.377444 | 0.705844 | 0.944413 |
| nrxn2a            | 555.7423 | 0.267127688  | 0.219672 | 1.216032 | 0.223973 | 0.705807 |
| phf14             | 187.5052 | 0.259893722  | 0.13562  | 1.916333 | 0.055323 | 0.407317 |
| si:dkey-253i9.4   | 599.5995 | -0.131347321 | 0.131829 | -0.99635 | 0.319081 | 0.779923 |
| dsela             | 30.37835 | 0.323349692  | 0.360981 | 0.895752 | 0.370385 | 0.818484 |
| vwa7              | 39.36923 | 0.530299177  | 0.274358 | 1.932876 | 0.053251 | 0.400175 |
| cpne5a            | 13.98708 | 1.194372912  | 0.73782  | 1.618785 | 0.105493 | 0.534737 |
| ncaph             | 312.5646 | 0.234547569  | 0.242975 | 0.965314 | 0.334388 | 0.791508 |
| sema5ba           | 69.28186 | 0.18671228   | 0.264337 | 0.706342 | 0.479976 | 0.870001 |
| gba2              | 321.0272 | 0.080227649  | 0.118813 | 0.675243 | 0.499522 | 0.879603 |
| tbkbp1            | 135.212  | 0.40334486   | 0.346047 | 1.165579 | 0.243785 | 0.724437 |
| igf2bp1           | 3786.297 | 0.121194595  | 0.135341 | 0.895473 | 0.370534 | 0.818484 |
| thsd7aa           | 151.1021 | 0.397496472  | 0.20091  | 1.97848  | 0.047875 | 0.380801 |
| si:ch211-132b12.1 | 4.125299 | -1.723452333 | 1.39558  | -1.23494 | 0.216854 | 0.69815  |
| wu:fj05g07        | 111.2473 | 0.14822209   | 0.240691 | 0.615819 | 0.538014 | 0.892498 |
| DNAH10            | 84.72235 | -0.094570407 | 0.344737 | -0.27433 | 0.783834 | 0.96245  |
| u2surp            | 1202.802 | -0.151234127 | 0.13555  | -1.11571 | 0.264548 | 0.742063 |
| si:ch211-250e5.2  | 55.13008 | 0.002245613  | 0.265821 | 0.008448 | 0.99326  | 1        |
| thsd7bb           | 11.84669 | 1.800846294  | 0.6664   | 2.70235  | 0.006885 | 0.139692 |
| duspl3a           | 0.963788 | 2.003307096  | 2.133656 | 0.938908 | 0.347778 | NA       |
| kdm4c             | 298.9524 | -0.113878131 | 0.172447 | -0.66037 | 0.509018 | 0.883442 |
| mrps9             | 452.6778 | 0.056112313  | 0.10481  | 0.53537  | 0.592394 | 0.909996 |
| tgfbrap1          | 88.58116 | 0.028376485  | 0.205021 | 0.138408 | 0.889918 | 0.98835  |
| tbx3b             | 13.40178 | -0.295723029 | 0.51127  | -0.57841 | 0.562988 | 0.900772 |
| tmtops2a          | 60.07914 | 0.666451088  | 0.321613 | 2.072213 | 0.038246 | 0.342672 |
| lrplbb            | 149.6125 | 0.113798694  | 0.240924 | 0.472343 | 0.636682 | 0.924779 |
| b4galnt1a         | 42.11388 | -0.488444768 | 0.362974 | -1.34567 | 0.178408 | 0.652623 |
| slka              | 440.1571 | -0.050689456 | 0.145373 | -0.34869 | 0.727325 | 0.949095 |
| nxt2              | 150.9569 | -0.293527077 | 0.211504 | -1.38781 | 0.165196 | 0.634423 |
| unc5db            | 23.43121 | 0.486027429  | 0.411416 | 1.181354 | 0.237462 | 0.718568 |
| ccdc85b           | 694.4915 | -0.188940076 | 0.105736 | -1.7869  | 0.073954 | 0.461828 |
| ano6              | 102.0383 | 0.515793595  | 0.297764 | 1.732223 | 0.083234 | 0.48419  |
| zgc:153409        | 9.559503 | -0.435156085 | 0.708599 | -0.61411 | 0.539144 | 0.892985 |
| si:ch211-145o7.3  | 28.18731 | 0.074746106  | 0.381268 | 0.196046 | 0.844574 | 0.976791 |
| foxo1b            | 27.46277 | 0.279805847  | 0.328004 | 0.853056 | 0.393628 | 0.828374 |
| rap1gap2a         | 91.65924 | -0.06050614  | 0.285624 | -0.21184 | 0.832233 | 0.975013 |
| tmem246           | 193.8993 | 0.003792787  | 0.135627 | 0.027965 | 0.97769  | 1        |
| stim1b            | 74.23602 | -0.09746313  | 0.225384 | -0.43243 | 0.665427 | 0.932595 |
| tmem121aa         | 49.64737 | 0.667901365  | 0.415231 | 1.608504 | 0.107725 | 0.539089 |
| slc7a3b           | 116.9878 | -0.235613945 | 0.246126 | -0.95729 | 0.338421 | 0.795226 |
| gldn              | 20.49522 | -0.816580882 | 0.491047 | -1.66294 | 0.096325 | 0.518071 |
| myo1cb            | 955.3127 | -0.102001853 | 0.120429 | -0.84698 | 0.397004 | 0.830253 |
| kctd7             | 161.3605 | 0.300027857  | 0.23132  | 1.297024 | 0.194623 | 0.67483  |
| cyp4v7            | 113.6206 | -2.117495675 | 0.769027 | -2.75347 | 0.005897 | 0.129875 |

|                  |          |              |          |          |          |          |
|------------------|----------|--------------|----------|----------|----------|----------|
| ctdsp12a         | 595.0918 | 0.227713632  | 0.109023 | 2.088672 | 0.036737 | 0.33671  |
| cachd1           | 707.9326 | 0.054556798  | 0.1506   | 0.362263 | 0.717156 | 0.94627  |
| abcb10           | 145.3974 | 0.317706194  | 0.256288 | 1.239645 | 0.215107 | 0.697086 |
| cemip2           | 452.3922 | 0.070789887  | 0.151433 | 0.467467 | 0.640166 | 0.924877 |
| ssx2ipb          | 57.80592 | 1.022869367  | 0.347072 | 2.947141 | 0.003207 | 0.093414 |
| sorbs2b          | 608.7891 | -0.133582046 | 0.142856 | -0.93508 | 0.349748 | 0.801408 |
| ufspl            | 32.70773 | 0.055778387  | 0.427805 | 0.130383 | 0.896264 | 0.98939  |
| si:dkey-85k7.11  | 0.782488 | 0            | 4.341141 | 0        | 1        | NA       |
| them4            | 127.7313 | 0.486112399  | 0.207366 | 2.344227 | 0.019067 | 0.242999 |
| kcng3            | 11.86927 | -0.345664881 | 0.522323 | -0.66178 | 0.50811  | 0.883056 |
| ndufaf5          | 450.8176 | -0.091739378 | 0.138617 | -0.66182 | 0.508088 | 0.883056 |
| fbxolla          | 606.4739 | 0.255975917  | 0.107539 | 2.380299 | 0.017299 | 0.232084 |
| aifm4            | 259.447  | -0.204741808 | 0.1683   | -1.21653 | 0.223783 | 0.705807 |
| myo5aa           | 195.64   | -0.140326307 | 0.237826 | -0.59004 | 0.555165 | 0.898723 |
| kcnj9            | 7.640209 | 0.254470058  | 0.657648 | 0.38694  | 0.698801 | 0.942456 |
| dcakd            | 61.3137  | -0.191370843 | 0.296491 | -0.64545 | 0.518635 | 0.887148 |
| sipall2          | 1039.245 | 0.11119386   | 0.130168 | 0.854231 | 0.392977 | 0.827902 |
| ankrd34bb        | 8.282278 | 0.083061671  | 1.180678 | 0.070351 | 0.943914 | 0.997371 |
| ensab            | 92.66653 | -0.19886885  | 0.250853 | -0.79277 | 0.427912 | 0.845893 |
| nrxnla           | 1070.629 | 0.177682466  | 0.180604 | 0.983822 | 0.325203 | 0.784075 |
| marveld2b        | 136.927  | -0.120710044 | 0.184363 | -0.65474 | 0.512635 | 0.885483 |
| wwc3             | 408.4136 | -0.049090114 | 0.11493  | -0.42713 | 0.669284 | 0.933115 |
| ptpdcla          | 143.8333 | 0.230498621  | 0.171359 | 1.345122 | 0.178586 | 0.652862 |
| CABZ01055347.1   | 110.8369 | 0.161932225  | 0.279533 | 0.579296 | 0.56239  | 0.900715 |
| zgc:162707       | 123.423  | -0.156212085 | 0.177007 | -0.88252 | 0.377496 | 0.822478 |
| hcn2b            | 95.57266 | -0.012183122 | 0.256813 | -0.04744 | 0.962163 | 0.999451 |
| si:ch73-334d15.1 | 167.6585 | 0.209623839  | 0.168416 | 1.24468  | 0.21325  | 0.695523 |
| biccla           | 202.1382 | 0.149050862  | 0.168913 | 0.882414 | 0.377553 | 0.822478 |
| slc25a17         | 118.9577 | 0.279801463  | 0.176931 | 1.581414 | 0.113783 | 0.552117 |
| hcn4             | 4.550049 | 0.296915933  | 0.88568  | 0.335241 | 0.737443 | 0.952375 |
| atxnla           | 81.77021 | 0.198213511  | 0.279649 | 0.708793 | 0.478453 | 0.869292 |
| arvcfb           | 806.5686 | -0.014574694 | 0.117406 | -0.12414 | 0.901205 | 0.990512 |
| nxpe3            | 103.0567 | 0.018683476  | 0.197697 | 0.094506 | 0.924707 | 0.994815 |
| qpctla           | 174.1548 | -0.039227357 | 0.157749 | -0.24867 | 0.803617 | 0.968722 |
| yjefn3           | 172.901  | 0.076753865  | 0.204311 | 0.375672 | 0.707161 | 0.944975 |
| cal4             | 30.37697 | 0.43624105   | 0.557768 | 0.78212  | 0.434144 | 0.850002 |
| sipall3          | 151.0499 | 0.241573257  | 0.190516 | 1.267998 | 0.204799 | 0.686713 |
| map3k8           | 52.79224 | -0.365207977 | 0.34679  | -1.05311 | 0.29229  | 0.761879 |
| tpd52            | 276.3147 | -0.301832145 | 0.158237 | -1.90746 | 0.056461 | 0.410349 |
| si:dkey-45k15.1  | 20.5578  | 0.165237041  | 0.54579  | 0.302748 | 0.762082 | 0.958345 |
| cytip            | 10.21274 | -0.524368839 | 0.982577 | -0.53367 | 0.593572 | 0.910427 |
| znf704           | 31.71216 | -0.314937003 | 0.40051  | -0.78634 | 0.431669 | 0.848419 |
| washc4           | 350.5039 | -0.361007256 | 0.139383 | -2.59003 | 0.009597 | 0.168452 |
| tmem64           | 45.09362 | -0.255383988 | 0.285289 | -0.89518 | 0.370693 | 0.818484 |
| mast3a           | 249.1493 | 0.081977637  | 0.144949 | 0.565563 | 0.571691 | 0.903234 |
| acot13           | 139.6475 | 0.623490324  | 0.271598 | 2.295637 | 0.021697 | 0.261221 |
| raph1b           | 305.9418 | -0.355492159 | 0.20484  | -1.73546 | 0.082659 | 0.483014 |
| hnrnpm           | 3089.386 | 0.096004283  | 0.09701  | 0.989636 | 0.322352 | 0.78246  |
| ank3a            | 983.1457 | 0.119391284  | 0.129008 | 0.925455 | 0.354729 | 0.805792 |
| ecel             | 361.9448 | -0.107815149 | 0.170329 | -0.63298 | 0.526746 | 0.889699 |
| 2-Mar            | 72.77026 | -0.131661704 | 0.234827 | -0.56067 | 0.575019 | 0.904516 |
| itpr3            | 244.9367 | -0.039868847 | 0.175553 | -0.2271  | 0.820342 | 0.971788 |
| clasrp           | 395.042  | 9.52E-05     | 0.12229  | 0.000779 | 0.999379 | 1        |
| arhgef9a         | 209.4267 | -0.266235339 | 0.307693 | -0.86526 | 0.386895 | 0.827592 |

|                   |          |              |          |          |          |          |
|-------------------|----------|--------------|----------|----------|----------|----------|
| dipk2b            | 78.09697 | 0.154269471  | 0.323204 | 0.477313 | 0.633139 | 0.923885 |
| htr3b             | 15.67449 | 1.081239929  | 0.758795 | 1.424943 | 0.154174 | 0.61894  |
| ripor2            | 207.4271 | 0.453377898  | 0.165089 | 2.746269 | 0.006028 | 0.131072 |
| rabgap11          | 1007.011 | -0.030940033 | 0.129079 | -0.2397  | 0.810564 | 0.969828 |
| sh3pxd2ab         | 235.4886 | -0.213428986 | 0.181083 | -1.17862 | 0.238549 | 0.719595 |
| kdm6a             | 619.2985 | 0.143773741  | 0.142943 | 1.005809 | 0.314507 | 0.777479 |
| opa3              | 130.944  | 0.064319705  | 0.180283 | 0.356771 | 0.721263 | 0.947343 |
| trim108           | 80.35186 | 1.167132776  | 0.439091 | 2.658064 | 0.007859 | 0.149996 |
| spata511          | 153.6573 | -0.185548513 | 0.212418 | -0.87351 | 0.382386 | 0.825252 |
| ahnak             | 4669.768 | -0.045218284 | 0.184437 | -0.24517 | 0.806326 | 0.969726 |
| bmp10             | 2.664663 | 0.212329334  | 1.170377 | 0.18142  | 0.856038 | 0.979558 |
| abcd4             | 172.1622 | -0.182415603 | 0.182007 | -1.00224 | 0.316226 | 0.7788   |
| neur11ab          | 58.68146 | 0.332200966  | 0.272698 | 1.2182   | 0.223148 | 0.70527  |
| mbd3a             | 895.113  | -0.019777731 | 0.113454 | -0.17432 | 0.861611 | 0.980527 |
| fmn2b             | 395.3826 | 0.341348655  | 0.163562 | 2.086968 | 0.036891 | 0.337141 |
| arhgap25          | 16.84512 | -0.157307177 | 0.484521 | -0.32467 | 0.745434 | 0.955021 |
| klhl2             | 188.7209 | 0.054683146  | 0.154436 | 0.354084 | 0.723276 | 0.947898 |
| gnl1              | 406.3297 | -0.33941916  | 0.164892 | -2.05843 | 0.039549 | 0.347625 |
| nyx               | 48.02225 | -0.868163361 | 1.690674 | -0.5135  | 0.607601 | 0.915204 |
| jam3b             | 967.1776 | -0.114171549 | 0.098836 | -1.15517 | 0.248022 | 0.728489 |
| rasgrp4           | 201.1423 | -0.074803041 | 0.170577 | -0.43853 | 0.661003 | 0.930581 |
| zgc:154006        | 25.35132 | 0.126714956  | 0.414304 | 0.30585  | 0.759719 | 0.957886 |
| arhgap271         | 352.5684 | 0.096021917  | 0.158639 | 0.605286 | 0.544989 | 0.895206 |
| si:dkey-208k22.6  | 21.41657 | -1.138536666 | 0.522602 | -2.17859 | 0.029362 | 0.304886 |
| cnot2             | 854.4039 | 0.025586774  | 0.08225  | 0.311084 | 0.755737 | 0.956532 |
| si:ch211-194e15.5 | 168.2225 | 0.194209046  | 0.196918 | 0.986242 | 0.324014 | 0.783161 |
| si:dkey-13n15.2   | 40.02249 | 0.588783353  | 0.394966 | 1.49072  | 0.136035 | 0.591131 |
| mbd3b             | 1253.072 | 0.053631194  | 0.123747 | 0.433395 | 0.664728 | 0.93201  |
| kif1aa            | 777.6584 | 0.532078809  | 0.180944 | 2.940579 | 0.003276 | 0.093825 |
| meox2b            | 53.02475 | 0.299565874  | 0.251708 | 1.190131 | 0.233995 | 0.714881 |
| wscd2             | 26.37699 | -0.077032833 | 0.418422 | -0.1841  | 0.853933 | 0.978905 |
| UNC13A            | 83.70837 | 0.020966867  | 0.246499 | 0.085059 | 0.932215 | 0.996053 |
| prssl2            | 186.133  | 0.309949672  | 0.17522  | 1.768914 | 0.076908 | 0.469467 |
| sntgl             | 3.427365 | -1.2404377   | 1.225267 | -1.01238 | 0.311356 | 0.77613  |
| zpld1a            | 42.48289 | 0.772454551  | 0.402407 | 1.919586 | 0.05491  | 0.405196 |
| nfixb             | 49.71115 | 0.404016141  | 0.3202   | 1.261761 | 0.207035 | 0.689322 |
| tiparp            | 606.5673 | -0.029980169 | 0.167556 | -0.17893 | 0.857996 | 0.979774 |
| si:dkey-38p12.3   | 367.5899 | -0.087258278 | 0.110263 | -0.79137 | 0.428731 | 0.846502 |
| p1d7              | 240.6127 | -0.048833378 | 0.141719 | -0.34458 | 0.730411 | 0.950056 |
| rxfp3.2b          | 14.64047 | -0.426727257 | 0.596491 | -0.7154  | 0.474365 | 0.869292 |
| coll5a1b          | 712.2364 | 0.223563774  | 0.142202 | 1.572156 | 0.115914 | 0.556115 |
| si:dkey-19b23.13  | 78.97226 | -0.024187978 | 0.325899 | -0.07422 | 0.940836 | 0.997371 |
| olfml3a           | 137.9165 | 0.042426659  | 0.199646 | 0.21251  | 0.831709 | 0.974914 |
| lman2             | 977.4613 | 0.00248089   | 0.124952 | 0.019855 | 0.984159 | 1        |
| zgc:153968        | 291.4469 | 0            | 1.682229 | 0        | 1        | 1        |
| myo18ab           | 1161.978 | 0.451635343  | 0.15203  | 2.970707 | 0.002971 | 0.090034 |
| hdlbpb            | 446.3643 | 0.007521287  | 0.116949 | 0.064312 | 0.948721 | 0.99777  |
| ddx10             | 344.36   | -0.019119795 | 0.172816 | -0.11064 | 0.911904 | 0.992336 |
| v2rx3             | 1.292089 | -3.073696822 | 1.829121 | -1.68042 | 0.092875 | NA       |
| v2rh10            | 0        | NA           | NA       | NA       | NA       | NA       |
| satb2             | 55.71989 | -0.071158855 | 0.289592 | -0.24572 | 0.805898 | 0.969625 |
| ppcs              | 120.5135 | -0.119564131 | 0.196157 | -0.60953 | 0.542171 | 0.89435  |
| atp13a2           | 172.2664 | 0.201416763  | 0.224653 | 0.896569 | 0.369949 | 0.818446 |
| usp32             | 469.0102 | 0.311932733  | 0.163798 | 1.90438  | 0.056861 | 0.411856 |

|                 |          |              |          |          |          |          |
|-----------------|----------|--------------|----------|----------|----------|----------|
| slco2a1         | 135.2316 | 0.363820024  | 0.261951 | 1.388884 | 0.164868 | 0.634185 |
| iqub            | 18.7236  | -0.015216176 | 0.37904  | -0.04014 | 0.967978 | 1        |
| ankrd13a        | 159.9667 | 0.059500217  | 0.169386 | 0.351271 | 0.725385 | 0.948653 |
| v2ra18          | 0.922257 | -0.868141227 | 2.69032  | -0.32269 | 0.746929 | NA       |
| fhod3b          | 83.17363 | 0.246308606  | 0.211191 | 1.166281 | 0.243501 | 0.724437 |
| mfsd12a         | 147.4631 | -0.187751899 | 0.193408 | -0.97075 | 0.331671 | 0.789531 |
| si:ch73-233f7.1 | 467.6314 | -0.180636453 | 0.260199 | -0.69422 | 0.487542 | 0.873291 |
| git2a           | 177.8813 | 0.046388483  | 0.152246 | 0.304694 | 0.760599 | 0.957886 |
| tmem51b         | 96.19825 | -0.193287629 | 0.215647 | -0.89631 | 0.370085 | 0.818447 |
| cplx2           | 519.701  | -0.063674943 | 0.169789 | -0.37502 | 0.707642 | 0.945128 |
| gltpa           | 118.8002 | -0.226513643 | 0.165776 | -1.36638 | 0.171819 | 0.643953 |
| amot12a         | 1763.917 | -0.192104713 | 0.119986 | -1.60105 | 0.109365 | 0.542487 |
| fbxo10          | 40.48197 | -0.790589489 | 0.310025 | -2.55008 | 0.01077  | 0.181029 |
| htr4            | 9.882798 | -0.359443959 | 0.702066 | -0.51198 | 0.608665 | 0.915204 |
| trpv4           | 102.2716 | -0.134154284 | 0.228266 | -0.58771 | 0.556727 | 0.899063 |
| commd4          | 189.3636 | 0.137832342  | 0.176695 | 0.780059 | 0.435356 | 0.850379 |
| amot12b         | 567.9505 | -0.093724948 | 0.17526  | -0.53478 | 0.592803 | 0.910162 |
| golgb1          | 643.8406 | -0.077365082 | 0.152194 | -0.50833 | 0.611221 | 0.915331 |
| ecpas           | 787.0435 | -0.051922402 | 0.203258 | -0.25545 | 0.798375 | 0.966698 |
| sytl2a          | 75.30797 | 0.522807592  | 0.24802  | 2.107927 | 0.035037 | 0.329872 |
| ube3b           | 63.07511 | 0.33839648   | 0.275317 | 1.229116 | 0.219028 | 0.699984 |
| vrtn            | 6.126122 | 0.778742874  | 0.704006 | 1.10616  | 0.268657 | 0.744925 |
| myolha          | 10.61883 | 0.058106388  | 0.708488 | 0.082015 | 0.934635 | 0.996829 |
| lingo3a         | 73.66487 | -0.185052268 | 0.331243 | -0.55866 | 0.576394 | 0.90475  |
| grhl2b          | 174.8592 | -0.091708792 | 0.199661 | -0.45932 | 0.646003 | 0.926728 |
| sema6bb         | 41.89924 | 0.12682045   | 0.288996 | 0.43883  | 0.660784 | 0.930581 |
| ppfibp2a        | 466.8518 | 0.220759606  | 0.143841 | 1.534749 | 0.124846 | 0.572491 |
| lap3            | 338.1104 | 0.141450825  | 0.130309 | 1.085507 | 0.277697 | 0.751752 |
| rbm47           | 561.7503 | -0.020397076 | 0.13564  | -0.15038 | 0.880467 | 0.986481 |
| tbc1d2b         | 97.18128 | -0.12258068  | 0.191892 | -0.6388  | 0.522952 | 0.888222 |
| mpnd            | 283.4985 | 0.073384354  | 0.158638 | 0.46259  | 0.643658 | 0.925997 |
| kcnh4b          | 30.83533 | 0.413424551  | 0.422601 | 0.978285 | 0.327933 | 0.786438 |
| dot11           | 146.3058 | 0.071815548  | 0.271568 | 0.264448 | 0.791435 | 0.964817 |
| wdr74           | 182.3551 | -0.240138898 | 0.180325 | -1.3317  | 0.182959 | 0.659278 |
| acacb           | 1284.326 | 0.030320275  | 0.181325 | 0.167215 | 0.867201 | 0.982582 |
| abtb2b          | 157.6647 | -0.055391218 | 0.146546 | -0.37798 | 0.705446 | 0.944153 |
| adnpa           |          | 0 NA         | NA       | NA       | NA       | NA       |
| myo5b           | 835.4499 | -0.351077971 | 0.148707 | -2.36088 | 0.018232 | 0.238258 |
| hs2st1b         | 124.5538 | -0.19660778  | 0.209261 | -0.93953 | 0.347457 | 0.800037 |
| gpr18           | 2.31155  | 1.075504794  | 1.577104 | 0.681949 | 0.495271 | 0.87806  |
| vps51           | 276.2003 | 0.185024099  | 0.144154 | 1.28352  | 0.19931  | 0.679819 |
| fsd1            | 108.1423 | 0.354943477  | 0.226376 | 1.567939 | 0.116895 | 0.557831 |
| rufy2           | 693.303  | -0.033393876 | 0.109011 | -0.30634 | 0.759349 | 0.957886 |
| gsel            | 874.6194 | 0.019188195  | 0.133708 | 0.143509 | 0.885888 | 0.987533 |
| ccdc181         | 40.8014  | 0.243636208  | 0.32432  | 0.751221 | 0.452519 | 0.857994 |
| fnhc3bb         | 311.667  | -0.021007252 | 0.170121 | -0.12348 | 0.901724 | 0.990656 |
| kif1ab          | 208.8075 | 0.609929341  | 0.263804 | 2.312058 | 0.020774 | 0.255762 |
| cpox            | 304.3714 | -0.092862893 | 0.183198 | -0.5069  | 0.612225 | 0.915709 |
| gpr17           | 43.15448 | 0.125085005  | 0.387348 | 0.322927 | 0.746751 | 0.955074 |
| atp8b5a         | 105.031  | 0.364961561  | 0.24036  | 1.518393 | 0.128915 | 0.578173 |
| mthfsd          | 11.8012  | 0.104575758  | 0.591621 | 0.176761 | 0.859696 | 0.980066 |
| illrap11a       | 275.7611 | 0.86509329   | 0.268934 | 3.216753 | 0.001297 | 0.052702 |
| arhgap45b       | 77.79684 | -0.22168291  | 0.243262 | -0.91129 | 0.362141 | 0.812082 |
| casp2           | 202.4866 | -0.016499348 | 0.149101 | -0.11066 | 0.911887 | 0.992336 |

|                   |          |              |          |          |          |          |
|-------------------|----------|--------------|----------|----------|----------|----------|
| kif1bp            | 323.5776 | -0.133657256 | 0.114675 | -1.16553 | 0.243805 | 0.724437 |
| cptlab            | 1201.061 | -0.000414679 | 0.211937 | -0.00196 | 0.998439 | 1        |
| rnf38             | 287.6685 | 0.020544455  | 0.186185 | 0.110344 | 0.912136 | 0.992371 |
| elmod1            | 889.9721 | 0.307441201  | 0.21046  | 1.460806 | 0.144069 | 0.603144 |
| zgc:174945        | 3.176723 | -0.339014559 | 0.956245 | -0.35453 | 0.722944 | 0.947755 |
| slc12a7b          | 1302.626 | 0.183279387  | 0.14233  | 1.287703 | 0.197849 | 0.678554 |
| si:ch211-236114.4 | 155.9619 | 0.546747529  | 0.227175 | 2.406728 | 0.016096 | 0.223897 |
| gmebl             | 325.9675 | 0.041655938  | 0.149768 | 0.278137 | 0.780907 | 0.961608 |
| tab3              | 259.3312 | -0.010497813 | 0.145091 | -0.07235 | 0.942321 | 0.997371 |
| acsbgl            | 30.68016 | 0.413328801  | 0.654553 | 0.631467 | 0.527735 | 0.889948 |
| shc2              | 68.97312 | -0.574615306 | 0.255192 | -2.2517  | 0.024342 | 0.276029 |
| tbcl1d1           | 631.5063 | 0.072629192  | 0.112703 | 0.644431 | 0.519296 | 0.887148 |
| hipk3b            | 202.4377 | 0.093650969  | 0.208851 | 0.44841  | 0.653858 | 0.929269 |
| dph7              | 229.0726 | -0.054930947 | 0.144047 | -0.38134 | 0.70295  | 0.943622 |
| clcn1a            | 94.72817 | 0.631063747  | 0.240801 | 2.620689 | 0.008775 | 0.160701 |
| tkfc              | 206.1826 | -0.077642749 | 0.157535 | -0.49286 | 0.62211  | 0.918461 |
| kiaal5491b        | 7.459622 | -2.613130252 | 1.367709 | -1.91059 | 0.056057 | 0.409215 |
| ncehlb.1          | 39.8493  | 0.338422142  | 0.392185 | 0.862914 | 0.388185 | 0.827592 |
| uggt2             | 382.2816 | 0.376338504  | 0.147689 | 2.548182 | 0.010829 | 0.181481 |
| pm20d1.2          | 134.2614 | 0.139198734  | 0.208668 | 0.667083 | 0.504719 | 0.88195  |
| iffo2a            | 29.45772 | -0.133798552 | 0.329199 | -0.40644 | 0.684422 | 0.938486 |
| ankrd24           | 112.2189 | -0.076113355 | 0.21801  | -0.34913 | 0.726994 | 0.949095 |
| klf5b             | 26.24691 | -0.379186171 | 0.473961 | -0.80004 | 0.423689 | 0.844048 |
| iffo1b            | 45.62775 | 0.678500506  | 0.281403 | 2.411138 | 0.015903 | 0.222371 |
| shdb              | 262.0693 | -0.16932394  | 0.118761 | -1.42576 | 0.153938 | 0.618475 |
| rxfp3.3a2         | 4.261836 | 1.43550281   | 1.330258 | 1.079116 | 0.280536 | 0.753147 |
| tent4a            | 45.89454 | 0.450248475  | 0.279548 | 1.610631 | 0.10726  | 0.537809 |
| ctdsp1b           | 615.7743 | -0.010325162 | 0.129784 | -0.07956 | 0.93659  | 0.997044 |
| klhl5             | 21.61997 | 0.326603625  | 0.483289 | 0.675794 | 0.499171 | 0.879596 |
| agap1             | 793.2692 | -0.007886921 | 0.139574 | -0.05651 | 0.954938 | 0.998611 |
| mxra8b            | 803.558  | -0.131345994 | 0.146309 | -0.89773 | 0.369331 | 0.817763 |
| cyp4v8            | 310.8304 | -0.737979775 | 0.230185 | -3.20603 | 0.001346 | 0.05423  |
| kcnab2b           | 42.51861 | 0.15904691   | 0.306946 | 0.51816  | 0.604347 | 0.914971 |
| sytl5             | 18.64012 | 0.607593075  | 0.467758 | 1.298948 | 0.193962 | 0.674122 |
| stag1b            | 727.6647 | 0.170550049  | 0.117808 | 1.447699 | 0.147701 | 0.608614 |
| ranbp10           | 343.9207 | -0.065127051 | 0.170587 | -0.38178 | 0.702623 | 0.943591 |
| eif2ak3           | 415.8286 | -0.092180257 | 0.142745 | -0.64577 | 0.51843  | 0.887148 |
| stoml1            | 112.5472 | -0.10221323  | 0.19516  | -0.52374 | 0.60046  | 0.913756 |
| larp4b            | 345.3769 | 0.1873134    | 0.157427 | 1.18984  | 0.234109 | 0.714938 |
| otc               | 75.50644 | 0.662894107  | 0.377905 | 1.754129 | 0.079408 | 0.477151 |
| SENP7             | 365.6251 | 0.137284661  | 0.126814 | 1.082571 | 0.278999 | 0.752444 |
| chaf1a            | 924.0206 | 0.233100349  | 0.157778 | 1.477398 | 0.139569 | 0.597884 |
| dip2ca            | 371.4167 | 0.216354945  | 0.120045 | 1.802284 | 0.071501 | 0.456132 |
| abi3bpa           | 73.54568 | -2.028682174 | 0.978816 | -2.07259 | 0.038211 | 0.342672 |
| atrn              | 375.2468 | -0.026913522 | 0.153197 | -0.17568 | 0.860546 | 0.980264 |
| tub               | 195.8546 | 0.290088986  | 0.222506 | 1.303734 | 0.192324 | 0.672283 |
| tmem168b          | 24.47512 | 0.404173365  | 0.37514  | 1.077393 | 0.281305 | 0.753593 |
| olfml3b           | 446.0695 | 0.094214582  | 0.136344 | 0.691005 | 0.489563 | 0.874629 |
| camsap2a          | 188.5015 | 0.176257932  | 0.168565 | 1.045636 | 0.295729 | 0.764246 |
| cacnb4b           | 783.314  | 0.187506928  | 0.143955 | 1.302542 | 0.192731 | 0.67273  |
| dcbl1d2           | 200.5105 | 0.06891724   | 0.151715 | 0.454254 | 0.649646 | 0.927756 |
| ripor1            | 532.7353 | -0.041512639 | 0.113394 | -0.36609 | 0.714296 | 0.945821 |
| bmt2              | 105.9615 | -0.292482279 | 0.17004  | -1.72008 | 0.085419 | 0.490781 |
| slc22a7b.3        | 9.249189 | 2.590677937  | 1.389255 | 1.864797 | 0.06221  | 0.427589 |

|                   |          |              |          |          |          |          |
|-------------------|----------|--------------|----------|----------|----------|----------|
| kif14             | 182.3069 | 0.233006585  | 0.214501 | 1.086272 | 0.277358 | 0.751426 |
| PDE3B             | 315.4297 | -0.320272975 | 0.205273 | -1.56023 | 0.118706 | 0.561771 |
| TBC1D8B           | 327.8839 | -0.250005091 | 0.140581 | -1.77838 | 0.075342 | 0.465238 |
| fbxo31            | 117.6798 | 0.181026447  | 0.191413 | 0.94574  | 0.344281 | 0.798147 |
| pcml              | 739.0971 | 0.065884252  | 0.137487 | 0.479205 | 0.631793 | 0.923003 |
| si:dkey-217124.1  | 64.46429 | 0.164131771  | 0.230272 | 0.712773 | 0.475986 | 0.869292 |
| sigirr            | 67.64744 | 0.299586135  | 0.24892  | 1.203545 | 0.228765 | 0.710332 |
| skiv2l            | 202.463  | 0.219158777  | 0.154707 | 1.416607 | 0.156598 | 0.622452 |
| prrtl             | 73.29056 | 0.408356609  | 0.28198  | 1.448176 | 0.147568 | 0.608498 |
| mrps5             | 547.6245 | 0.075067315  | 0.118385 | 0.634097 | 0.526018 | 0.889156 |
| narfl             | 303.6427 | 0.112470575  | 0.119588 | 0.94048  | 0.346971 | 0.79983  |
| kcnj3b            | 132.1233 | 0.846042059  | 0.308439 | 2.742983 | 0.006088 | 0.131486 |
| plekha7b          | 190.693  | 1.016274772  | 0.184094 | 5.520404 | 3.38E-08 | 1.96E-05 |
| arapla            | 101.397  | 0.428521233  | 0.231298 | 1.852678 | 0.063929 | 0.431598 |
| mxra8a            | 503.7694 | -0.091162401 | 0.232947 | -0.39134 | 0.695543 | 0.9414   |
| ino80db           | 265.35   | 0.210455545  | 0.167358 | 1.25752  | 0.208565 | 0.690728 |
| adipoqa           | 3.594687 | 0.426111464  | 1.103809 | 0.386037 | 0.699469 | 0.942499 |
| znf362b           | 69.68061 | 0.117834171  | 0.291856 | 0.403741 | 0.686403 | 0.938732 |
| lrrc34            | 8.705107 | 0.025608993  | 0.69001  | 0.037114 | 0.970394 | 1        |
| nfs1              | 474.5376 | 0.156709091  | 0.144792 | 1.082305 | 0.279117 | 0.752444 |
| si:ch211-15p9.2   | 0 NA     | NA           | NA       | NA       | NA       | NA       |
| setd2             | 897.4251 | 0.072247977  | 0.158636 | 0.455432 | 0.648798 | 0.927546 |
| ptpn21            | 191.9015 | 0.066599035  | 0.253323 | 0.262902 | 0.792626 | 0.965266 |
| fbx17             | 106.7453 | -0.134599304 | 0.195529 | -0.68838 | 0.491211 | 0.875595 |
| armc8             | 332.2589 | -0.210713764 | 0.139275 | -1.51294 | 0.130296 | 0.581464 |
| ednrab            | 9.268152 | 0.300895942  | 0.620665 | 0.484796 | 0.627821 | 0.921643 |
| arhgap17b         | 289.6233 | -0.213770286 | 0.147743 | -1.4469  | 0.147924 | 0.608882 |
| edc4              | 477.6746 | 0.105055756  | 0.110248 | 0.952905 | 0.340638 | 0.795544 |
| kdm3b             | 1571.924 | -0.061833855 | 0.153703 | -0.4023  | 0.687467 | 0.938835 |
| jarid2b           | 36.85615 | 0.157297103  | 0.420001 | 0.374516 | 0.70802  | 0.945335 |
| fan1              | 158.2182 | -0.096091123 | 0.16326  | -0.58858 | 0.556144 | 0.899002 |
| slc25a15b         | 98.74779 | -0.012850363 | 0.244744 | -0.05251 | 0.958126 | 0.999109 |
| afg312            | 822.5186 | 0.04268066   | 0.10542  | 0.404864 | 0.685577 | 0.938486 |
| ppp2r2cb          | 116.6237 | 0.304483756  | 0.256214 | 1.188394 | 0.234678 | 0.715533 |
| si:dkey-202e17.1  | 27.43194 | -1.480826699 | 0.443562 | -3.33849 | 0.000842 | 0.039393 |
| hacel             | 140.307  | 0.175766548  | 0.155937 | 1.127166 | 0.259672 | 0.736607 |
| edaradd           | 27.09395 | -0.374817624 | 0.36204  | -1.03529 | 0.300532 | 0.766629 |
| qpct1b            | 12.98281 | -0.150136949 | 0.617305 | -0.24321 | 0.80784  | 0.969828 |
| soat1             | 37.88152 | -0.607347307 | 0.415164 | -1.46291 | 0.143493 | 0.602607 |
| znf652            | 216.3513 | 0.076820436  | 0.172919 | 0.444257 | 0.656857 | 0.929939 |
| pdpkla            | 262.393  | -0.027357801 | 0.215264 | -0.12709 | 0.89887  | 0.990291 |
| rims3             | 10.1302  | 0.887157582  | 0.648424 | 1.368176 | 0.171257 | 0.643325 |
| ccdc61            | 169.7069 | 0.148834985  | 0.147562 | 1.008627 | 0.313154 | 0.776599 |
| si:ch211-1f22.14  | 0.404638 | 0 4.281749   | 0        | 1 NA     |          |          |
| wdr26a            | 249.8404 | -0.044615364 | 0.189126 | -0.2359  | 0.813508 | 0.970328 |
| rasl10a           | 5.827901 | 0.049996373  | 0.714429 | 0.069981 | 0.944209 | 0.997371 |
| sik2b             | 748.6104 | -0.132722501 | 0.200007 | -0.66359 | 0.506954 | 0.883007 |
| si:dkey-103g5.3   | 353.2809 | -0.472567209 | 0.205087 | -2.30423 | 0.02121  | 0.258321 |
| adam23a           | 629.7848 | 0.32741026   | 0.205246 | 1.595208 | 0.110666 | 0.545461 |
| shank2b           | 120.4233 | -0.180708621 | 0.326226 | -0.55394 | 0.579622 | 0.905618 |
| hmgn7             | 6811.529 | 0.054155706  | 0.130836 | 0.413922 | 0.678932 | 0.936081 |
| rasgrp2           | 12.69689 | -0.872445933 | 0.575516 | -1.51594 | 0.129535 | 0.579296 |
| b4galt3           | 48.31178 | -0.082622598 | 0.294809 | -0.28026 | 0.77928  | 0.961073 |
| si:ch211-233a24.2 | 995.7147 | 0.068183501  | 0.184533 | 0.369491 | 0.711762 | 0.945821 |



|                   |           |               |           |           |           |           |
|-------------------|-----------|---------------|-----------|-----------|-----------|-----------|
| nudt14            | 89. 91787 | -0. 074763278 | 0. 212724 | -0. 35146 | 0. 725246 | 0. 948653 |
| zeb2a             | 1252. 439 | 0. 157394659  | 0. 082215 | 1. 914435 | 0. 055565 | 0. 408319 |
| wfsl1a            | 167. 4846 | 0. 363231328  | 0. 243202 | 1. 493537 | 0. 135297 | 0. 590585 |
| cacnalea          | 41. 62983 | 0. 169012004  | 0. 375921 | 0. 449594 | 0. 653003 | 0. 929197 |
| mtus2a            | 91. 16214 | 0. 348414311  | 0. 226618 | 1. 537455 | 0. 124182 | 0. 571369 |
| arhgap15          | 20. 92698 | 0. 041654879  | 0. 442243 | 0. 09419  | 0. 924958 | 0. 994815 |
| synm              | 360. 4342 | -0. 05237395  | 0. 198151 | -0. 26431 | 0. 791538 | 0. 964817 |
| sema4ab           | 278. 7312 | -0. 031516185 | 0. 142979 | -0. 22043 | 0. 825539 | 0. 972729 |
| axdnd1            | 30. 20923 | -0. 033428182 | 0. 345945 | -0. 09663 | 0. 923021 | 0. 994525 |
| tafala            | 70. 40655 | -0. 104168363 | 0. 434221 | -0. 2399  | 0. 81041  | 0. 969828 |
| scn3b             | 123. 7949 | 0. 019868954  | 0. 244062 | 0. 08141  | 0. 935116 | 0. 996829 |
| PAXBP1            | 657. 5503 | 0. 041480165  | 0. 17647  | 0. 235054 | 0. 814166 | 0. 970483 |
| tpcn1             | 166. 2547 | 0. 109697942  | 0. 177571 | 0. 617771 | 0. 536726 | 0. 892421 |
| phex              | 569. 3786 | 0. 028922454  | 0. 194543 | 0. 148669 | 0. 881815 | 0. 986908 |
| bc12l13           | 497. 8243 | 0. 256917021  | 0. 137636 | 1. 866647 | 0. 061951 | 0. 42715  |
| nrd1b             | 151. 3658 | 0. 517695712  | 0. 165671 | 3. 124851 | 0. 001779 | 0. 065013 |
| leng9             | 162. 4867 | -0. 447052338 | 0. 243221 | -1. 83805 | 0. 066055 | 0. 438914 |
| nlg3b             | 374. 8047 | 0. 063490526  | 0. 190105 | 0. 333976 | 0. 738398 | 0. 952912 |
| CRHR2             | 7. 514442 | 0. 088959944  | 0. 888072 | 0. 100172 | 0. 920208 | 0. 993982 |
| slc35a4           | 399. 1507 | 0. 065240922  | 0. 104995 | 0. 621374 | 0. 534354 | 0. 891616 |
| si:ch211-238n5. 4 | 247. 0739 | 0. 000905214  | 0. 144971 | 0. 006244 | 0. 995018 | 1         |
| snapin            | 536. 0862 | -0. 138785482 | 0. 161788 | -0. 85782 | 0. 39099  | 0. 827902 |
| flcn              | 559. 5631 | -0. 240036537 | 0. 127855 | -1. 87741 | 0. 060462 | 0. 422849 |
| cdc42ep5          | 317. 5626 | 0. 009943589  | 0. 118156 | 0. 084157 | 0. 932932 | 0. 996264 |
| anksl1a           | 101. 5621 | 0. 089161949  | 0. 200367 | 0. 444994 | 0. 656324 | 0. 929684 |
| ndst1a            | 220. 3841 | -0. 50618763  | 0. 196344 | -2. 57806 | 0. 009936 | 0. 172469 |
| znf319b           | 186. 698  | -0. 110310992 | 0. 196221 | -0. 56218 | 0. 573996 | 0. 904358 |
| frem1b            | 234. 9972 | -0. 327136158 | 0. 214564 | -1. 52465 | 0. 127346 | 0. 576964 |
| ctnnd2a           | 262. 5849 | -0. 010660255 | 0. 174448 | -0. 06111 | 0. 951273 | 0. 99801  |
| t11               | 69. 90047 | -0. 00981202  | 0. 249478 | -0. 03933 | 0. 968627 | 1         |
| nfia              | 190. 7819 | 0. 209319739  | 0. 172938 | 1. 210375 | 0. 226135 | 0. 707473 |
| pex2              | 37. 5682  | -0. 055279308 | 0. 28695  | -0. 19264 | 0. 847238 | 0. 977371 |
| zgc:153901        | 67. 36276 | -0. 319934144 | 0. 239516 | -1. 33575 | 0. 18163  | 0. 657968 |
| zgc:153521        | 148. 6236 | 0. 095975804  | 0. 188122 | 0. 510179 | 0. 609926 | 0. 915331 |
| clcn2a            | 11. 82289 | 0. 653894644  | 0. 633898 | 1. 031545 | 0. 302285 | 0. 768145 |
| trim109           | 189. 8172 | -0. 487833571 | 0. 197003 | -2. 47627 | 0. 013276 | 0. 200523 |
| gpd2              | 135. 9752 | 0. 307522836  | 0. 187989 | 1. 635853 | 0. 10187  | 0. 528631 |
| msrblb            | 3. 685461 | 2. 235205602  | 1. 366842 | 1. 635307 | 0. 101985 | 0. 528846 |
| pias1b            | 108. 6334 | 0. 137013958  | 0. 190921 | 0. 717646 | 0. 472976 | 0. 868965 |
| neur12            | 104. 4432 | 0. 225463806  | 0. 217926 | 1. 03459  | 0. 300861 | 0. 767015 |
| hecw2a            | 178. 4396 | 0. 003267692  | 0. 232601 | 0. 014048 | 0. 988791 | 1         |
| skor1b            | 127. 2764 | -0. 201024797 | 0. 213576 | -0. 94123 | 0. 346586 | 0. 79947  |
| xpr1a             | 359. 6857 | -0. 039263341 | 0. 182158 | -0. 21555 | 0. 829342 | 0. 974609 |
| rnf115            | 567. 6003 | 0. 064600329  | 0. 11604  | 0. 556709 | 0. 577727 | 0. 905055 |
| las11             | 373. 9391 | -0. 122214442 | 0. 172463 | -0. 70864 | 0. 478547 | 0. 869292 |
| sgk3              | 321. 5542 | -0. 019865481 | 0. 128081 | -0. 1551  | 0. 876741 | 0. 985052 |
| shisa7a           | 47. 88039 | 0. 595791105  | 0. 391446 | 1. 522026 | 0. 128003 | 0. 577144 |
| zc3h12b           | 41. 47779 | 0. 271625177  | 0. 2746   | 0. 989168 | 0. 322581 | 0. 782475 |
| pgap1             | 40. 83957 | 0. 204922037  | 0. 349581 | 0. 586194 | 0. 557745 | 0. 899184 |
| stra61            | 47. 79451 | -1. 057641887 | 0. 373489 | -2. 83179 | 0. 004629 | 0. 112688 |
| hipk3a            | 537. 161  | -0. 335528259 | 0. 147644 | -2. 27255 | 0. 023054 | 0. 26812  |
| tafa4b            | 36. 06078 | 0. 10461335   | 0. 400601 | 0. 261141 | 0. 793984 | 0. 965431 |
| sin3b             | 509. 5666 | 0. 19353833   | 0. 163498 | 1. 183736 | 0. 236518 | 0. 717725 |
| snpc5             | 263. 6438 | -0. 047477418 | 0. 233689 | -0. 20317 | 0. 839006 | 0. 976417 |

|                    |           |               |           |           |           |           |  |
|--------------------|-----------|---------------|-----------|-----------|-----------|-----------|--|
| kiaal5491a         | 412. 7219 | 0. 081119358  | 0. 292644 | 0. 277195 | 0. 781631 | 0. 962077 |  |
| ackr3a             | 48. 32797 | -0. 011208711 | 0. 333078 | -0. 03365 | 0. 973155 | 1         |  |
| vcamlb             | 382. 748  | 0. 150174222  | 0. 126437 | 1. 187735 | 0. 234938 | 0. 715592 |  |
| mlphb              | 160. 9457 | -0. 460168606 | 0. 167677 | -2. 74437 | 0. 006063 | 0. 131345 |  |
| lyvelb             | 119. 8329 | -0. 308259648 | 0. 206052 | -1. 49603 | 0. 134646 | 0. 589298 |  |
| dock1l             | 186. 4013 | -0. 163263838 | 0. 186055 | -0. 8775  | 0. 380214 | 0. 823648 |  |
| si:dkey-6n6. 1     | 202. 5857 | -0. 337906584 | 0. 288689 | -1. 17048 | 0. 241806 | 0. 72348  |  |
| 8-Mar              | 336. 1318 | 0. 259914385  | 0. 155732 | 1. 668984 | 0. 09512  | 0. 51461  |  |
| hhip1l             | 133. 7618 | 0. 064303207  | 0. 253328 | 0. 253834 | 0. 799624 | 0. 967206 |  |
| si:ch73-19616. 5   | 21. 43421 | 0. 14487209   | 0. 396743 | 0. 365154 | 0. 714997 | 0. 945821 |  |
| zc3h18             | 699. 4483 | -0. 00153778  | 0. 108797 | -0. 01413 | 0. 988723 | 1         |  |
| cplx3a             | 11. 9859  | 0. 433479327  | 0. 692514 | 0. 625951 | 0. 531347 | 0. 890833 |  |
| bcl11ba            | 707. 1278 | 0. 176113183  | 0. 163892 | 1. 074565 | 0. 282569 | 0. 754808 |  |
| golga3             | 350. 4679 | -0. 227874219 | 0. 173457 | -1. 31372 | 0. 18894  | 0. 668516 |  |
| tecprla            | 78. 97925 | -0. 262081341 | 0. 289507 | -0. 90527 | 0. 365324 | 0. 815339 |  |
| si:ch211-107n13. 1 | 78. 30178 | -0. 186407821 | 0. 230023 | -0. 81039 | 0. 417718 | 0. 841149 |  |
| ulk1a              | 391. 7079 | -0. 223586412 | 0. 19877  | -1. 12485 | 0. 260652 | 0. 738121 |  |
| abcc13             | 39. 93368 | -0. 320466495 | 0. 302777 | -1. 05842 | 0. 289863 | 0. 760705 |  |
| atp9b              | 62. 62309 | 0. 008681304  | 0. 236588 | 0. 036694 | 0. 970729 | 1         |  |
| ASTE1              | 48. 22043 | 0. 379313464  | 0. 299261 | 1. 267501 | 0. 204976 | 0. 686811 |  |
| mapk8ip3           | 880. 2625 | 0. 302989569  | 0. 157497 | 1. 923781 | 0. 054382 | 0. 40321  |  |
| washc2c            | 625. 8023 | -0. 307147206 | 0. 118452 | -2. 593   | 0. 009514 | 0. 167766 |  |
| si:dkey-117i10. 1  | 13. 99822 | -0. 223593222 | 0. 5984   | -0. 37365 | 0. 708663 | 0. 94551  |  |
| TMEM132C           | 44. 46114 | -0. 145002602 | 0. 487886 | -0. 29721 | 0. 766309 | 0. 960229 |  |
| acmsd              | 166. 6897 | -0. 077782554 | 0. 275119 | -0. 28272 | 0. 777389 | 0. 961073 |  |
| rc3h1a             | 119. 2504 | -0. 015813255 | 0. 25509  | -0. 06199 | 0. 95057  | 0. 99801  |  |
| lpar6a             | 457. 4794 | -0. 293732772 | 0. 118298 | -2. 48298 | 0. 013029 | 0. 198789 |  |
| bach1a             | 146. 7217 | 0. 010851409  | 0. 18958  | 0. 057239 | 0. 954355 | 0. 998611 |  |
| rspryl             | 452. 2632 | -0. 082573036 | 0. 101206 | -0. 81589 | 0. 414565 | 0. 838683 |  |
| adck1              | 108. 3074 | 0. 865047981  | 0. 218268 | 3. 963235 | 7. 39E-05 | 0. 007259 |  |
| egln2              | 127. 2111 | 0. 238645218  | 0. 382431 | 0. 624021 | 0. 532614 | 0. 890978 |  |
| kcnh4a             | 16. 83863 | -0. 849562647 | 0. 649946 | -1. 30713 | 0. 191169 | 0. 671109 |  |
| mrpl2              | 1551. 87  | 0. 095475318  | 0. 152178 | 0. 627392 | 0. 530402 | 0. 890545 |  |
| znrf3              | 169. 9958 | -0. 015308742 | 0. 201761 | -0. 07588 | 0. 939518 | 0. 997371 |  |
| si:ch211-210g13. 5 | 55. 39945 | 0. 385273361  | 0. 284845 | 1. 352572 | 0. 176192 | 0. 649415 |  |
| arhgap35a          | 565. 5632 | 0. 480118246  | 0. 129479 | 3. 708074 | 0. 000209 | 0. 015361 |  |
| kremen1            | 61. 94565 | -0. 234813479 | 0. 315774 | -0. 74361 | 0. 45711  | 0. 860993 |  |
| bratl              | 176. 9426 | 0. 032174018  | 0. 186855 | 0. 172187 | 0. 863291 | 0. 981732 |  |
| pleca              | 1938. 874 | -0. 012462505 | 0. 181685 | -0. 06859 | 0. 945313 | 0. 997371 |  |
| myl10              | 12170. 9  | 0. 052973923  | 0. 141158 | 0. 375281 | 0. 707451 | 0. 944981 |  |
| stox1              | 309. 846  | -0. 267087999 | 0. 134229 | -1. 9898  | 0. 046613 | 0. 376263 |  |
| coq7               | 277. 946  | -0. 415166683 | 0. 145021 | -2. 8628  | 0. 004199 | 0. 107151 |  |
| ltc4s              | 13. 17589 | 2. 95453671   | 0. 735422 | 4. 017473 | 5. 88E-05 | 0. 006235 |  |
| piwil2             | 22. 20713 | -0. 86830518  | 0. 644173 | -1. 34794 | 0. 177678 | 0. 65136  |  |
| si:dkey-26i13. 8   | 46. 14234 | 1. 869355328  | 0. 503691 | 3. 711316 | 0. 000206 | 0. 015263 |  |
| dhx37              | 337. 3942 | 0. 005628095  | 0. 173816 | 0. 03238  | 0. 974169 | 1         |  |
| kcnj12b            | 240. 0894 | 0. 169812984  | 0. 257037 | 0. 660656 | 0. 508833 | 0. 883385 |  |
| satb1b             | 60. 40575 | 0. 167307069  | 0. 27432  | 0. 609898 | 0. 541929 | 0. 894241 |  |
| dnah9l             | 31. 94848 | -0. 15348413  | 0. 448786 | -0. 342   | 0. 732352 | 0. 950617 |  |
| npffr112           | 8. 055064 | -1. 220649739 | 0. 579223 | -2. 10739 | 0. 035084 | 0. 329877 |  |
| duox               | 61. 35464 | -0. 378428661 | 0. 323922 | -1. 16827 | 0. 242697 | 0. 724345 |  |
| cadm2b             | 72. 88031 | 0. 108247682  | 0. 436347 | 0. 248077 | 0. 804075 | 0. 968814 |  |
| kat2b              | 66. 05304 | -0. 056974105 | 0. 36615  | -0. 1556  | 0. 876346 | 0. 984959 |  |
| fem1b              | 195. 678  | -0. 351495439 | 0. 162137 | -2. 1679  | 0. 030167 | 0. 309482 |  |

|                  |           |               |           |           |           |           |
|------------------|-----------|---------------|-----------|-----------|-----------|-----------|
| kcnh8            | 8. 302786 | -0. 173346519 | 0. 739143 | -0. 23452 | 0. 814578 | 0. 970574 |
| tet3             | 1666. 089 | 0. 190760271  | 0. 139077 | 1. 371617 | 0. 170183 | 0. 641806 |
| rif1             | 553. 8576 | -0. 02944661  | 0. 151905 | -0. 19385 | 0. 846294 | 0. 97711  |
| zc3hc1           | 366. 3074 | 0. 05126689   | 0. 135016 | 0. 37971  | 0. 704161 | 0. 943741 |
| ydjc             | 103. 6835 | -0. 346711319 | 0. 278308 | -1. 24578 | 0. 212843 | 0. 695171 |
| abca4b           | 256. 5067 | 0. 296810211  | 0. 290085 | 1. 023184 | 0. 306221 | 0. 771472 |
| lmod3            | 221. 9211 | 0. 060216188  | 0. 190747 | 0. 315687 | 0. 75224  | 0. 955481 |
| oxnad1           | 228. 6562 | 0. 420945292  | 0. 154832 | 2. 718716 | 0. 006554 | 0. 136957 |
| mpp3b            | 70. 02948 | 0. 310621083  | 0. 349088 | 0. 889808 | 0. 373569 | 0. 820566 |
| kcnj19b          | 55. 05714 | -0. 128087405 | 0. 306986 | -0. 41724 | 0. 676502 | 0. 93557  |
| btbd10a          | 733. 0615 | 0. 209616975  | 0. 09931  | 2. 110726 | 0. 034796 | 0. 328533 |
| megf11           | 90. 51246 | 0. 901246613  | 0. 337587 | 2. 669675 | 0. 007592 | 0. 147466 |
| kcnh7            | 23. 81253 | 0. 339772908  | 0. 45491  | 0. 746901 | 0. 455123 | 0. 860008 |
| gpnmb            | 1115. 6   | -1. 024979996 | 0. 163133 | -6. 2831  | 3. 32E-10 | 3. 08E-07 |
| nrxn3b           | 150. 8934 | 0. 283950643  | 0. 311403 | 0. 911843 | 0. 361851 | 0. 811787 |
| ccdc126          | 104. 8915 | 0. 017855816  | 0. 193148 | 0. 092446 | 0. 926344 | 0. 994815 |
| dgkg             | 18. 9193  | -0. 300374529 | 0. 383312 | -0. 78363 | 0. 433257 | 0. 849392 |
| nkain4           | 230. 7733 | -0. 010997164 | 0. 137966 | -0. 07971 | 0. 936468 | 0. 997044 |
| ankmy1           | 21. 88799 | -0. 030235411 | 0. 442575 | -0. 06832 | 0. 945533 | 0. 997371 |
| plat             | 63. 24422 | -0. 061168916 | 0. 32649  | -0. 18735 | 0. 851384 | 0. 978548 |
| gal3st1a         | 96. 21102 | -0. 286851324 | 0. 208768 | -1. 37402 | 0. 169436 | 0. 640975 |
| tmem264          | 20. 49465 | 1. 489738973  | 0. 643947 | 2. 313451 | 0. 020698 | 0. 255657 |
| pcdh1a           | 184. 54   | 0. 155237304  | 0. 258711 | 0. 600041 | 0. 548479 | 0. 896779 |
| dennd4a          | 246. 2308 | 0. 173310087  | 0. 176607 | 0. 981334 | 0. 326428 | 0. 785445 |
| cep290           | 303. 1299 | 0. 178835231  | 0. 194459 | 0. 919656 | 0. 357752 | 0. 80901  |
| scn11ab          | 94. 58912 | 0. 136402428  | 0. 254404 | 0. 536164 | 0. 591845 | 0. 909603 |
| socs5b           | 122. 985  | -0. 094570715 | 0. 212206 | -0. 44566 | 0. 655846 | 0. 929606 |
| pkn1b            | 54. 92529 | 0. 019204997  | 0. 26033  | 0. 073772 | 0. 941192 | 0. 997371 |
| ino80b           | 373. 6063 | 0. 051526173  | 0. 140299 | 0. 367261 | 0. 713425 | 0. 945821 |
| si:ch73-74h11. 1 | 358. 6267 | 0. 214156983  | 0. 199848 | 1. 071599 | 0. 2839   | 0. 755095 |
| mfap31           | 841. 2367 | -0. 166901697 | 0. 113938 | -1. 46485 | 0. 142961 | 0. 602002 |
| naif1            | 16. 53471 | -0. 033482159 | 0. 434241 | -0. 07711 | 0. 93854  | 0. 997371 |
| pllp             | 147. 2592 | -0. 58920655  | 0. 24884  | -2. 36781 | 0. 017894 | 0. 236508 |
| zgc:158403       | 237. 1925 | -0. 614935764 | 0. 147681 | -4. 16394 | 3. 13E-05 | 0. 003939 |
| CR352265. 1      | 22. 58861 | 0. 434871403  | 0. 476639 | 0. 912371 | 0. 361573 | 0. 811787 |
| nsd3             | 139. 2739 | -0. 164485    | 0. 20745  | -0. 79289 | 0. 427842 | 0. 845893 |
| snx21            | 37. 74273 | 0. 54428326   | 0. 265697 | 2. 048513 | 0. 04051  | 0. 351803 |
| aifm3            | 19. 89284 | 0. 080886804  | 0. 478705 | 0. 16897  | 0. 86582  | 0. 982395 |
| glsl             | 82. 04374 | -0. 002941052 | 0. 273667 | -0. 01075 | 0. 991425 | 1         |
| adpgk2           | 48. 63584 | 0. 908703123  | 0. 279243 | 3. 254163 | 0. 001137 | 0. 048173 |
| irg11            | 254. 2433 | -0. 166590101 | 0. 220352 | -0. 75602 | 0. 449639 | 0. 856979 |
| CU639469. 1      | 1200. 997 | 0. 052728154  | 0. 116263 | 0. 453524 | 0. 650171 | 0. 927835 |
| trim36           | 295. 1308 | 0. 507008376  | 0. 16744  | 3. 028001 | 0. 002462 | 0. 079664 |
| abcb7            | 619. 7597 | -0. 014363451 | 0. 104224 | -0. 13781 | 0. 890388 | 0. 988446 |
| nell2b           | 1147. 875 | 0. 228963555  | 0. 183929 | 1. 244849 | 0. 213187 | 0. 695467 |
| baiap2a          | 311. 4077 | 0. 068446847  | 0. 133684 | 0. 512006 | 0. 608647 | 0. 915204 |
| erf13            | 542. 0717 | -0. 010098359 | 0. 13314  | -0. 07585 | 0. 93954  | 0. 997371 |
| ttl19            | 18. 8054  | 0. 189829321  | 0. 427511 | 0. 444034 | 0. 657018 | 0. 929939 |
| CR786571. 1      | 13. 53434 | 0. 70489458   | 0. 455264 | 1. 548319 | 0. 121546 | 0. 567899 |
| p2ry10           | 7. 44193  | -2. 254104415 | 0. 953603 | -2. 36378 | 0. 01809  | 0. 237607 |
| glsa             | 46. 29043 | 0. 314961348  | 0. 239836 | 1. 313238 | 0. 189103 | 0. 668577 |
| crym             | 114. 3436 | 0. 406618776  | 0. 255094 | 1. 593998 | 0. 110936 | 0. 54583  |
| irgf3            | 7. 032123 | -0. 216617152 | 1. 19308  | -0. 18156 | 0. 855927 | 0. 979558 |
| slc6a15          | 70. 28899 | 0. 248187102  | 0. 296579 | 0. 836832 | 0. 402687 | 0. 833401 |

|                   |          |              |          |          |          |          |
|-------------------|----------|--------------|----------|----------|----------|----------|
| pi4kab            | 56.6924  | -0.328730912 | 0.337828 | -0.97307 | 0.330518 | 0.788126 |
| alx1              | 121.9114 | -0.376086511 | 0.200433 | -1.87637 | 0.060604 | 0.423018 |
| si:ch73-171o20.1  | 0.102175 | 1.055383603  | 5.267649 | 0.200352 | 0.841205 | NA       |
| tent5d            | 8.518437 | 0.668084665  | 0.963942 | 0.693075 | 0.488262 | 0.873728 |
| si:ch73-22o12.1   | 544.8497 | -0.072266123 | 0.136468 | -0.52955 | 0.596427 | 0.911676 |
| ecsit             | 307.4985 | 0.19786203   | 0.127313 | 1.554134 | 0.120152 | 0.565265 |
| spata13           | 938.1972 | -0.230867871 | 0.155177 | -1.48777 | 0.136811 | 0.592353 |
| tmtc3             | 553.0849 | 0.132967494  | 0.12367  | 1.075181 | 0.282294 | 0.754679 |
| kcnk10a           | 11.93983 | -0.330355118 | 0.769015 | -0.42958 | 0.6675   | 0.933086 |
| sdklb             | 54.47066 | 0.291321311  | 0.311865 | 0.934126 | 0.350239 | 0.802197 |
| plekhg7           | 132.314  | 0.385361127  | 0.250611 | 1.537685 | 0.124126 | 0.571369 |
| gk5               | 328.4021 | -0.290529075 | 0.168237 | -1.7269  | 0.084185 | 0.487221 |
| mras              | 347.9544 | 0.196351876  | 0.126313 | 1.554482 | 0.12007  | 0.565105 |
| eeal              | 138.0841 | -0.019017421 | 0.179326 | -0.10605 | 0.915543 | 0.993078 |
| mrs2              | 123.338  | 0.421819899  | 0.163821 | 2.574885 | 0.010027 | 0.173583 |
| slc2a11l          | 8.710115 | 0.55118485   | 0.954639 | 0.577375 | 0.563686 | 0.901166 |
| hcar1-3           | 10.36555 | 0.592995335  | 0.588836 | 1.007064 | 0.313904 | 0.777479 |
| cntn3a.1          | 143.5659 | 0.41126621   | 0.247539 | 1.661417 | 0.09663  | 0.51893  |
| map3k2            | 25.2918  | 0.178119095  | 0.398295 | 0.447204 | 0.654728 | 0.929527 |
| steap2            | 51.34828 | -0.017318415 | 0.426561 | -0.0406  | 0.967615 | 1        |
| foxe3             | 26.10212 | 0.039264388  | 0.324371 | 0.121048 | 0.903653 | 0.991366 |
| si:dkey-103i16.6  | 34.22344 | -0.513472088 | 0.318978 | -1.60974 | 0.107455 | 0.538203 |
| tnksb             | 984.2191 | -0.037747354 | 0.102011 | -0.37003 | 0.711359 | 0.945821 |
| si:ch211-81a5.1   | 85.8191  | 0.349264688  | 0.229338 | 1.522927 | 0.127777 | 0.577117 |
| si:dkey-220f10.4  | 58.11979 | -0.317454518 | 0.377589 | -0.84074 | 0.400493 | 0.831725 |
| idua              | 58.87635 | -1.450726103 | 0.27941  | -5.19211 | 2.08E-07 | 8.60E-05 |
| kcnv2b            | 15.86857 | 0.20959731   | 0.73764  | 0.284146 | 0.776299 | 0.961073 |
| furina            | 420.8769 | 0.016040312  | 0.14071  | 0.113996 | 0.909241 | 0.992067 |
| polr3b            | 387.2141 | 0.016615377  | 0.125819 | 0.132058 | 0.894939 | 0.989158 |
| mrpl37            | 789.7827 | 0.047087691  | 0.129822 | 0.362711 | 0.716821 | 0.94627  |
| tceanc2           | 76.11949 | 0.278108984  | 0.224909 | 1.23654  | 0.216258 | 0.69815  |
| si:ch211-243o19.4 | 7.765169 | 0.797442667  | 0.728004 | 1.095383 | 0.273349 | 0.749148 |
| FAM83G            | 343.8095 | -0.045235332 | 0.152697 | -0.29624 | 0.767045 | 0.960296 |
| cmip              | 897.3403 | 0.091686698  | 0.099458 | 0.921868 | 0.356598 | 0.807342 |
| gpr12             | 12.60127 | 0.657358344  | 0.565191 | 1.163072 | 0.2448   | 0.726138 |
| ndnf              | 943.8835 | 0.089601001  | 0.111274 | 0.805229 | 0.420688 | 0.842383 |
| kcnala            | 27.77708 | 0.915469485  | 0.375459 | 2.438269 | 0.014758 | 0.213272 |
| tacol             | 207.2094 | 0.261080197  | 0.243305 | 1.073058 | 0.283245 | 0.755028 |
| amn               | 28.43448 | 0.756805596  | 0.519101 | 1.457916 | 0.144864 | 0.603718 |
| wasf3b            | 939.0749 | 0.041154669  | 0.112638 | 0.36537  | 0.714835 | 0.945821 |
| nt5dc3            | 34.77323 | 0.041695244  | 0.35772  | 0.116558 | 0.90721  | 0.991745 |
| meak7             |          | 0 NA         | NA       | NA       | NA       | NA       |
| clk2a             | 988.5167 | 0.00458778   | 0.129053 | 0.03555  | 0.971642 | 1        |
| dipk1aa           | 146.8316 | 0.100083456  | 0.197149 | 0.507655 | 0.611695 | 0.915331 |
| dagla             | 231.5488 | 0.641877013  | 0.19493  | 3.292865 | 0.000992 | 0.043685 |
| zgc:158785        | 59.63871 | 0.493248516  | 0.402966 | 1.224045 | 0.220935 | 0.702242 |
| armc10            | 172.9139 | -0.182935234 | 0.146933 | -1.24503 | 0.213121 | 0.695467 |
| kmt2ba            | 605.7035 | 0.161722261  | 0.161925 | 0.99875  | 0.317916 | 0.77973  |
| si:dkey-246g23.2  | 23.85301 | 0.181972976  | 0.401308 | 0.45345  | 0.650225 | 0.927835 |
| fam45a            | 183.5883 | -0.173700429 | 0.182193 | -0.95339 | 0.340394 | 0.795496 |
| kcng4a            | 42.39891 | -0.128575402 | 0.330321 | -0.38924 | 0.697096 | 0.94198  |
| sbfl              | 973.9275 | 0.048105239  | 0.131407 | 0.366077 | 0.714307 | 0.945821 |
| fam129ba          | 395.6353 | 0.060337699  | 0.126665 | 0.476357 | 0.63382  | 0.923974 |
| sdhaf2            | 476.0876 | 0.313385007  | 0.1703   | 1.840189 | 0.06574  | 0.437326 |

|                  |          |              |          |          |          |          |  |
|------------------|----------|--------------|----------|----------|----------|----------|--|
| hipl             | 650.6944 | 0.17380848   | 0.122739 | 1.416088 | 0.15675  | 0.622646 |  |
| ttl17            | 238.8753 | 0.330840248  | 0.226507 | 1.460621 | 0.144119 | 0.603144 |  |
| itga2.2          | 42.89196 | 0.217360098  | 0.293448 | 0.74071  | 0.458869 | 0.861588 |  |
| iffola           | 15.78033 | 1.574451949  | 0.660703 | 2.382993 | 0.017172 | 0.231824 |  |
| samd13           | 142.8323 | 0.088500816  | 0.171667 | 0.515539 | 0.606176 | 0.915204 |  |
| ccdc151          | 32.75984 | 0.540840491  | 0.318666 | 1.697204 | 0.089658 | 0.50251  |  |
| fbxo18           | 318.0001 | 0.090502214  | 0.129641 | 0.6981   | 0.485115 | 0.872911 |  |
| pnpla7a          | 641.7212 | -0.016088076 | 0.119981 | -0.13409 | 0.893332 | 0.988566 |  |
| tywl             | 197.3892 | -0.265791497 | 0.139259 | -1.90861 | 0.056313 | 0.410107 |  |
| abilb            | 32.70999 | 0.940698874  | 0.300207 | 3.133504 | 0.001727 | 0.064499 |  |
| si:dkey-14o18.2  | 5.943092 | 1.416572785  | 1.383804 | 1.02368  | 0.305986 | 0.771459 |  |
| hyal2b           | 361.1441 | 0.061762447  | 0.148018 | 0.417263 | 0.676486 | 0.93557  |  |
| pglyrp2          | 25.75396 | 0.162679071  | 0.52009  | 0.31279  | 0.75444  | 0.956153 |  |
| atp8a1           | 19.78994 | 0.138455686  | 0.573839 | 0.24128  | 0.809338 | 0.969828 |  |
| alkbh5           | 138.3466 | 0.156347828  | 0.170907 | 0.914811 | 0.360291 | 0.811057 |  |
| anapc7           | 206.3766 | 0.334602955  | 0.193907 | 1.725588 | 0.084422 | 0.48755  |  |
| cacng7a          | 21.32384 | 0.351550848  | 0.687768 | 0.511147 | 0.609248 | 0.915204 |  |
| apc2             | 217.1032 | 0.694967205  | 0.231393 | 3.003404 | 0.00267  | 0.084161 |  |
| si:dkeyp-27e10.3 | 201.8092 | 0.355700252  | 0.223418 | 1.592087 | 0.111365 | 0.547032 |  |
| catip            | 48.93664 | 0.246198332  | 0.306503 | 0.80325  | 0.42183  | 0.843078 |  |
| antxr2b          | 41.66502 | -1.142816659 | 0.362368 | -3.15374 | 0.001612 | 0.06152  |  |
| dbpa             | 200.8846 | 0.195609121  | 0.397626 | 0.491943 | 0.62276  | 0.918894 |  |
| fam78ba          | 26.42987 | 0.112342135  | 0.347726 | 0.323077 | 0.746637 | 0.955074 |  |
| panx2            | 25.69926 | 0.07304325   | 0.60848  | 0.120042 | 0.90445  | 0.991581 |  |
| rpain            | 72.49609 | -0.135903211 | 0.24959  | -0.54451 | 0.586094 | 0.906711 |  |
| mlc1             | 113.9352 | 0.465702273  | 0.27077  | 1.719919 | 0.085447 | 0.490781 |  |
| mesd             | 345.7828 | 0.168391595  | 0.114413 | 1.471784 | 0.141079 | 0.599658 |  |
| rad5412          | 718.1367 | 0.255560354  | 0.143718 | 1.778211 | 0.075369 | 0.465238 |  |
| dok6             | 14.79434 | 0.754552201  | 0.564949 | 1.335611 | 0.181676 | 0.658034 |  |
| psd2             | 353.8577 | 0.126240616  | 0.115598 | 1.092065 | 0.274804 | 0.750181 |  |
| lipea            | 42.76359 | 0.188522857  | 0.333905 | 0.564601 | 0.572345 | 0.903461 |  |
| btbd11b          | 34.50934 | 0.738677097  | 0.345541 | 2.137742 | 0.032538 | 0.319448 |  |
| thtpa            | 83.77481 | -0.008369712 | 0.195061 | -0.04291 | 0.965775 | 1        |  |
| rc3h2            | 89.40257 | 0.014249382  | 0.270818 | 0.052616 | 0.958038 | 0.999109 |  |
| bap1             | 344.0315 | -0.099835582 | 0.123979 | -0.80526 | 0.42067  | 0.842383 |  |
| shank3b          | 131.5794 | -0.152115712 | 0.189923 | -0.80093 | 0.423171 | 0.843894 |  |
| tulp4b           | 275.3472 | 0.781981882  | 0.249926 | 3.128857 | 0.001755 | 0.064556 |  |
| abcg8            | 38.83248 | 0.548594789  | 0.451209 | 1.215832 | 0.224049 | 0.705807 |  |
| ubn2a            | 364.4717 | -0.185930145 | 0.146394 | -1.27006 | 0.204062 | 0.685236 |  |
| synelb           | 541.2273 | 0.00253327   | 0.20515  | 0.012348 | 0.990148 | 1        |  |
| gripapl          | 147.1898 | 0.006876421  | 0.185924 | 0.036985 | 0.970497 | 1        |  |
| sogal            | 255.2264 | 0.163627425  | 0.230304 | 0.710483 | 0.477405 | 0.869292 |  |
| atrip            | 157.8734 | -0.177805194 | 0.166045 | -1.07083 | 0.284248 | 0.75523  |  |
| abcg5            | 33.54922 | 0.138932024  | 0.576943 | 0.240807 | 0.809705 | 0.969828 |  |
| ago3b            | 50.68629 | 0.456963117  | 0.225738 | 2.02431  | 0.042938 | 0.362962 |  |
| si:dkey-211g8.6  | 0.772922 | 3.264329551  | 2.313173 | 1.411192 | 0.158188 | NA       |  |
| ccm21            | 65.034   | -0.382778498 | 0.268425 | -1.42601 | 0.153864 | 0.618475 |  |
| ctsf             | 2282.113 | -0.041142546 | 0.090225 | -0.456   | 0.648391 | 0.927474 |  |
| scube1           | 68.4196  | 0.068267506  | 0.234899 | 0.290625 | 0.771338 | 0.960546 |  |
| psmd14           | 1855.61  | 0.160631801  | 0.131849 | 1.218304 | 0.223108 | 0.705242 |  |
| man2a2           | 379.8349 | -0.046741607 | 0.138268 | -0.33805 | 0.735324 | 0.951543 |  |
| CABZ01059392.1   | 5.036057 | -2.111887196 | 1.203035 | -1.75547 | 0.07918  | 0.47627  |  |
| si:ch73-160i9.1  | 0.320972 | -1.826685199 | 5.230459 | -0.34924 | 0.726909 | NA       |  |
| gusb             | 251.5555 | 0.290556245  | 0.189428 | 1.533864 | 0.125063 | 0.572671 |  |

|                   |          |              |          |          |          |          |
|-------------------|----------|--------------|----------|----------|----------|----------|
| si:ch211-38m6.7   | 12.85946 | 0.060475157  | 0.548486 | 0.110258 | 0.912204 | 0.992371 |
| slc4a10a          | 1029.428 | 0.275334508  | 0.189393 | 1.453772 | 0.146009 | 0.605628 |
| exd3              | 156.5427 | -0.525947322 | 0.177871 | -2.95691 | 0.003107 | 0.091566 |
| shisa7b           | 507.202  | 0.125897993  | 0.191017 | 0.659094 | 0.509835 | 0.883733 |
| tfam              | 443.3725 | 0.065480044  | 0.177331 | 0.369252 | 0.71194  | 0.945821 |
| tmtc1             | 395.9079 | -0.143912917 | 0.128181 | -1.12273 | 0.261553 | 0.738975 |
| nrxn2b            | 356.7454 | 0.159156743  | 0.21998  | 0.723504 | 0.46937  | 0.867224 |
| bcl11ab           | 337.3243 | 0.145282919  | 0.182278 | 0.797041 | 0.425427 | 0.844714 |
| dcaf12            | 531.2374 | -0.05422963  | 0.103778 | -0.52256 | 0.601283 | 0.913756 |
| mapk8ip2          | 65.94478 | 0.374591402  | 0.307286 | 1.219033 | 0.222832 | 0.704655 |
| CABZ01081780.1    | 13.98262 | -0.194594688 | 0.599815 | -0.32442 | 0.745617 | 0.955074 |
| si:dkey-32e23.4   | 59.66302 | 0.291599438  | 0.318    | 0.916979 | 0.359154 | 0.810124 |
| ppwd1             | 267.3528 | 0.158439973  | 0.157408 | 1.006559 | 0.314147 | 0.777479 |
| cmtm8b            | 17.58358 | 0.192984026  | 0.461146 | 0.418488 | 0.675591 | 0.935422 |
| chkb              | 260.693  | 0.040518481  | 0.137016 | 0.295721 | 0.767443 | 0.960296 |
| ubn1              | 20.15514 | 0.715207956  | 0.627213 | 1.140295 | 0.254163 | 0.733279 |
| manf              | 462.3827 | 0.402831485  | 0.18958  | 2.124859 | 0.033598 | 0.323555 |
| dock3             | 51.04041 | -0.504384416 | 0.319948 | -1.57646 | 0.114921 | 0.554651 |
| rc3h1b            | 461.9022 | -0.028239299 | 0.142106 | -0.19872 | 0.842482 | 0.976552 |
| si:ch211-220f12.4 | 12.05574 | 0.215019612  | 0.704539 | 0.305192 | 0.76022  | 0.957886 |
| agpat5            | 301.3034 | -0.128675336 | 0.159617 | -0.80615 | 0.420157 | 0.842383 |
| zran1b            | 990.0496 | -0.036166513 | 0.105809 | -0.34181 | 0.732494 | 0.950617 |
| extl2             | 74.33056 | -0.658692397 | 0.27859  | -2.36438 | 0.01806  | 0.237356 |
| lin54             | 344.1383 | 0.155640682  | 0.136582 | 1.139538 | 0.254479 | 0.733426 |
| pxk               | 449.3207 | -0.390276698 | 0.107298 | -3.63731 | 0.000275 | 0.018396 |
| golga2            | 499.699  | 0.048634245  | 0.138024 | 0.35236  | 0.724568 | 0.9484   |
| erbb4a            | 8.916166 | -0.203251375 | 0.706082 | -0.28786 | 0.773455 | 0.960624 |
| exoc8             | 196.4849 | -0.036585698 | 0.169998 | -0.21521 | 0.829602 | 0.974753 |
| prmt2             | 42.84787 | -0.277883667 | 0.332363 | -0.83609 | 0.403107 | 0.833704 |
| mtif2             | 182.7146 | 0.321943216  | 0.136057 | 2.366244 | 0.01797  | 0.2367   |
| lrrc3b            | 7.677666 | -0.015153527 | 0.625459 | -0.02423 | 0.980671 | 1        |
| ppml1a            | 688.4439 | -0.16130476  | 0.107998 | -1.49359 | 0.135282 | 0.590585 |
| ubap2l            | 1470.815 | -0.068272058 | 0.15268  | -0.44716 | 0.654761 | 0.929527 |
| arll4             | 91.72096 | 0.565892491  | 0.299505 | 1.889427 | 0.058835 | 0.418455 |
| nxph2a            | 54.26554 | 0.531740878  | 0.347058 | 1.53214  | 0.125488 | 0.57334  |
| xpolb             | 2052.203 | 0.08275995   | 0.174779 | 0.473513 | 0.635847 | 0.924669 |
| bmp7b             | 154.7555 | -0.278234128 | 0.168729 | -1.649   | 0.099148 | 0.522578 |
| baz1a             | 191.3678 | -0.09905051  | 0.156045 | -0.63476 | 0.525586 | 0.888928 |
| ttc13             | 292.3278 | 0.004030506  | 0.127817 | 0.031533 | 0.974844 | 1        |
| lix1l             | 285.8772 | -0.030114638 | 0.17663  | -0.1705  | 0.864621 | 0.982015 |
| mrpl9             | 277.563  | 0.024093974  | 0.146    | 0.165028 | 0.868922 | 0.982801 |
| spata2            | 290.925  | 0.140591107  | 0.126689 | 1.109734 | 0.267114 | 0.743418 |
| prcc              | 593.7052 | 0.322509711  | 0.106796 | 3.01988  | 0.002529 | 0.08126  |
| hecw2b            | 101.706  | -0.146841405 | 0.221341 | -0.66342 | 0.507064 | 0.883007 |
| r3hdm4            | 402.9849 | -0.100654339 | 0.192477 | -0.52294 | 0.601014 | 0.913756 |
| btbd11a           | 187.865  | 0.091050675  | 0.14853  | 0.613012 | 0.539868 | 0.893049 |
| si:ch211-194e18.2 | 13.3709  | -0.462351607 | 0.574296 | -0.80508 | 0.420776 | 0.842383 |
| rfx5              | 191.2719 | -0.104464043 | 0.15302  | -0.68268 | 0.494807 | 0.878016 |
| pcdh9             | 61.46082 | 0.177087847  | 0.297572 | 0.595109 | 0.551771 | 0.8974   |
| SLC35G1           | 47.95885 | 0.84355112   | 0.279943 | 3.013293 | 0.002584 | 0.08259  |
| retreg2           | 230.0821 | 0.10182518   | 0.19229  | 0.529539 | 0.596432 | 0.911676 |
| msh3              | 70.12682 | -0.057507398 | 0.240345 | -0.23927 | 0.810896 | 0.969828 |
| abi3b             | 115.4297 | 0.059035431  | 0.23755  | 0.248518 | 0.803734 | 0.968762 |
| ube2t             | 111.7242 | -0.237975174 | 0.21508  | -1.10645 | 0.268533 | 0.744925 |

|                    |          |              |          |          |          |          |
|--------------------|----------|--------------|----------|----------|----------|----------|
| slc2a11b           | 814.4162 | -0.39894065  | 0.172665 | -2.31048 | 0.020861 | 0.256424 |
| ssuh2rs1           | 1743.924 | 0.154821513  | 0.102945 | 1.503922 | 0.132601 | 0.585592 |
| neto2b             | 11.12977 | -3.083448273 | 1.444811 | -2.13415 | 0.03283  | 0.32069  |
| myh9a              | 2810.67  | -0.013685526 | 0.126182 | -0.10846 | 0.913632 | 0.992796 |
| abcb6a             | 96.69036 | 0.730311628  | 0.234815 | 3.110164 | 0.00187  | 0.066755 |
| pcloa              | 606.0052 | 0.123184431  | 0.201479 | 0.6114   | 0.540935 | 0.89346  |
| CU655845.1         | 52.72068 | -0.328891649 | 0.340455 | -0.96603 | 0.334027 | 0.791027 |
| sgsm2              | 29.05511 | -0.202584902 | 0.37188  | -0.54476 | 0.58592  | 0.906655 |
| tjp2a              | 513.0295 | 0.081295466  | 0.116841 | 0.695778 | 0.486568 | 0.873244 |
| oxr1b              | 676.3693 | -0.358214631 | 0.197071 | -1.81769 | 0.069112 | 0.448548 |
| soga3a             | 0        | NA           | NA       | NA       | NA       | NA       |
| plbd1              | 91.79459 | -0.761436008 | 0.221525 | -3.43725 | 0.000588 | 0.031278 |
| apba2a             | 130.3688 | 0.071948343  | 0.21405  | 0.336129 | 0.736773 | 0.952147 |
| FP085394.1         | 17.85065 | -1.604343582 | 0.970851 | -1.65251 | 0.09843  | 0.521076 |
| rab12              | 151.8366 | 0.096401843  | 0.202531 | 0.475986 | 0.634084 | 0.924077 |
| mgat4a             | 447.4566 | -0.19490921  | 0.125996 | -1.54695 | 0.121875 | 0.56863  |
| shank3a            | 18.85155 | -0.011181779 | 0.512032 | -0.02184 | 0.982577 | 1        |
| nup210             | 542.647  | 0.142664616  | 0.144624 | 0.986453 | 0.323911 | 0.783161 |
| czib               | 386.2542 | 0.075101507  | 0.172168 | 0.43621  | 0.662684 | 0.930964 |
| fam162a            | 365.4654 | -0.090884313 | 0.191963 | -0.47345 | 0.635895 | 0.924669 |
| hrc                | 8.379765 | 0.03730813   | 0.646396 | 0.057717 | 0.953974 | 0.998611 |
| inpp4aa            | 521.2206 | 0.176498291  | 0.110003 | 1.60448  | 0.108608 | 0.541057 |
| abtb1              | 649.4844 | -0.378200513 | 0.1445   | -2.6173  | 0.008863 | 0.161314 |
| GPR45              | 7.572965 | 0.586679193  | 0.708346 | 0.828238 | 0.407536 | 0.83577  |
| micul              | 1012.856 | -0.14229502  | 0.118493 | -1.20087 | 0.2298   | 0.711763 |
| si:ch211-1e14.1    | 25.7332  | 0.503420401  | 0.419952 | 1.198756 | 0.230623 | 0.71228  |
| sgk2a              | 145.4101 | -0.152348776 | 0.178308 | -0.85441 | 0.392876 | 0.827902 |
| rasa3              | 272.1653 | 0.138827484  | 0.183777 | 0.755412 | 0.450002 | 0.85711  |
| zpld1b             | 15.20339 | -0.188166864 | 0.577387 | -0.32589 | 0.744505 | 0.95491  |
| pter               | 146.8739 | -0.390230754 | 0.227124 | -1.71814 | 0.085772 | 0.491305 |
| cenpe              | 698.8568 | 0.177711519  | 0.260094 | 0.683258 | 0.494444 | 0.877861 |
| sec22c             | 20.59894 | 0.151722782  | 0.364678 | 0.416046 | 0.677376 | 0.935952 |
| pvr121             | 57.58746 | -0.068859969 | 0.32496  | -0.2119  | 0.832183 | 0.975013 |
| L0018340.1         | 372.2659 | 0.292310241  | 0.194608 | 1.502046 | 0.133085 | 0.586514 |
| lrrc73             | 101.8304 | -0.422003878 | 0.307754 | -1.37124 | 0.170301 | 0.641918 |
| cers1              | 122.9005 | -0.587696451 | 0.174653 | -3.36493 | 0.000766 | 0.036804 |
| rxylt1             | 64.99454 | 0.400760003  | 0.203713 | 1.967282 | 0.049151 | 0.386041 |
| ptrk               | 643.6173 | -0.000746109 | 0.131667 | -0.00567 | 0.995479 | 1        |
| erf                | 454.5653 | 0.070014639  | 0.128422 | 0.545194 | 0.58562  | 0.906655 |
| DHX35              | 174.1878 | -0.185048107 | 0.158771 | -1.1655  | 0.243815 | 0.724437 |
| atp2b2             | 508.0647 | 0.000225389  | 0.225417 | 0.001    | 0.999202 | 1        |
| trpm4b.2           | 120.3367 | -0.151165891 | 0.220186 | -0.68654 | 0.492374 | 0.876385 |
| rph3aa             | 10.70107 | 0.102207315  | 1.012758 | 0.10092  | 0.919614 | 0.993892 |
| wnt9a              | 29.42672 | -0.035788906 | 0.313163 | -0.11428 | 0.909014 | 0.992033 |
| srebf2             | 950.7381 | 0.357473283  | 0.159579 | 2.240106 | 0.025084 | 0.280772 |
| si:dkey-32n7.7     | 1.226591 | -2.101483706 | 1.923152 | -1.09273 | 0.274513 | NA       |
| snap47             | 192.1698 | 0.202768562  | 0.243124 | 0.834012 | 0.404274 | 0.833888 |
| iba57              | 194.2613 | 0.083410173  | 0.157563 | 0.529378 | 0.596544 | 0.911676 |
| ccdc13             | 8.20764  | 0.805616991  | 0.609376 | 1.322037 | 0.186156 | 0.664263 |
| wash1              | 82.89815 | 0.378337939  | 0.214631 | 1.762734 | 0.077945 | 0.47265  |
| isyl               | 351.3213 | -0.020949402 | 0.105163 | -0.19921 | 0.842099 | 0.97643  |
| arfgef1            | 561.5179 | 0.135200826  | 0.121183 | 1.115673 | 0.264562 | 0.742063 |
| abcg1              | 60.86781 | 0.083026568  | 0.41018  | 0.202415 | 0.839592 | 0.976417 |
| si:ch211-214j24.15 | 13.58427 | -0.471576979 | 0.619381 | -0.76137 | 0.446437 | 0.855403 |

|                   |          |              |          |          |          |          |
|-------------------|----------|--------------|----------|----------|----------|----------|
| lrrc58b           | 478.2672 | -0.249507522 | 0.205114 | -1.21643 | 0.223821 | 0.705807 |
| si:ch211-15d5.11  | 176.9076 | 0.179590418  | 0.220627 | 0.813999 | 0.415646 | 0.839167 |
| zgc:153913        | 468.2543 | -0.185059579 | 0.253397 | -0.73032 | 0.465197 | 0.864989 |
| PLEKHB1           | 93.01115 | 0.088800173  | 0.705193 | 0.125923 | 0.899793 | 0.99045  |
| bbs4              | 92.96737 | 0.334685069  | 0.322548 | 1.037627 | 0.299444 | 0.766128 |
| adpgk             | 211.561  | 0.266194747  | 0.157399 | 1.69121  | 0.090797 | 0.505206 |
| elmo2             | 551.0262 | 0.149978654  | 0.178879 | 0.838436 | 0.401786 | 0.832807 |
| chd4a             | 1879.875 | 0.158758303  | 0.185711 | 0.854868 | 0.392624 | 0.827902 |
| kalrn             | 681.5762 | -0.009973224 | 0.129462 | -0.07704 | 0.938595 | 0.997371 |
| slc25a15a         | 58.09959 | 0.37591084   | 0.285072 | 1.318654 | 0.187285 | 0.66594  |
| pip4k2ab          | 24.71092 | 0.239228606  | 0.389879 | 0.613598 | 0.539481 | 0.893049 |
| rlf               | 316.0904 | 0.278731856  | 0.249788 | 1.115872 | 0.264477 | 0.742063 |
| si:ch211-166g5.4  | 93.90863 | 0.030250147  | 0.297303 | 0.101748 | 0.918956 | 0.993892 |
| pigx              | 127.235  | -0.228162869 | 0.223679 | -1.02004 | 0.307707 | 0.772996 |
| creb3l2           | 527.7417 | -0.012003062 | 0.114591 | -0.10475 | 0.916577 | 0.993451 |
| sy7a              | 17.68037 | 0.901838201  | 0.594214 | 1.5177   | 0.12909  | 0.578533 |
| dyrklaa           | 960.8614 | 0.048392809  | 0.102572 | 0.471795 | 0.637073 | 0.924779 |
| perp              | 2912.696 | -0.022154896 | 0.095585 | -0.23178 | 0.816707 | 0.971207 |
| vps4l             | 555.6247 | -0.017022039 | 0.151103 | -0.11265 | 0.910307 | 0.992208 |
| mtg2              | 195.9511 | 0.053666177  | 0.155501 | 0.345118 | 0.730006 | 0.950056 |
| klh135            | 12.61559 | -0.265828495 | 0.641792 | -0.4142  | 0.67873  | 0.936026 |
| DGKI              | 187.7685 | 0.025558665  | 0.193285 | 0.132233 | 0.8948   | 0.989112 |
| ppplr9ala         | 297.7869 | 0.142230475  | 0.145902 | 0.974839 | 0.32964  | 0.788    |
| map2k4a           | 100.7363 | -0.032445112 | 0.212377 | -0.15277 | 0.878579 | 0.985761 |
| uba5              | 289.1493 | 0.155492505  | 0.13513  | 1.150688 | 0.249861 | 0.729721 |
| hipkla            | 47.24361 | 0.195369878  | 0.31136  | 0.627473 | 0.530349 | 0.890545 |
| bud23             | 333.5007 | 0.086954784  | 0.186498 | 0.466249 | 0.641037 | 0.925364 |
| coro2bb           | 32.06589 | -0.28424201  | 0.427751 | -0.6645  | 0.506368 | 0.883007 |
| antxr1c           | 796.2337 | -0.055520365 | 0.091688 | -0.60554 | 0.544823 | 0.895206 |
| si:ch211-133n4.10 | 1.754822 | -2.156384079 | 2.057213 | -1.04821 | 0.294543 | NA       |
| skor2             | 78.76554 | 0.39391192   | 0.321969 | 1.223445 | 0.221162 | 0.702457 |
| aadac             | 72.34697 | 0.035853332  | 0.329288 | 0.108881 | 0.913297 | 0.99273  |
| gfml              | 476.8925 | 0.236829647  | 0.143174 | 1.654143 | 0.098099 | 0.521071 |
| ddx21             | 7148.091 | -0.923916442 | 0.158125 | -5.84295 | 5.13E-09 | 3.30E-06 |
| bop1              | 420.7171 | -0.14318132  | 0.162007 | -0.8838  | 0.376805 | 0.822258 |
| VIT               | 631.9094 | -0.160382129 | 0.18492  | -0.86731 | 0.385775 | 0.826939 |
| hpse              | 140.4877 | -0.469742422 | 0.198863 | -2.36214 | 0.01817  | 0.237981 |
| nrxn1b            | 131.9411 | 0.151789876  | 0.243225 | 0.624071 | 0.532581 | 0.890978 |
| galnt1l           | 694.4645 | -0.022432107 | 0.122754 | -0.18274 | 0.855002 | 0.979161 |
| lnpa              | 118.1425 | 0.083117631  | 0.232312 | 0.357785 | 0.720505 | 0.947263 |
| tead3b            | 138.3787 | -0.328762984 | 0.266962 | -1.2315  | 0.218137 | 0.699257 |
| nuak2             | 243.0912 | -0.47972035  | 0.196823 | -2.43732 | 0.014796 | 0.213551 |
| clp1              | 159.2674 | 0.023653873  | 0.178123 | 0.132795 | 0.894355 | 0.988891 |
| mat2al            | 193.7858 | 0.490023779  | 0.177581 | 2.759442 | 0.00579  | 0.128995 |
| gtf2a1l           | 14.9871  | -0.315605357 | 0.547517 | -0.57643 | 0.564324 | 0.901433 |
| zmp:0000000711    | 309.3081 | 0.020546781  | 0.184438 | 0.111402 | 0.911298 | 0.992208 |
| ccny              | 86.25611 | -0.101811501 | 0.212272 | -0.47963 | 0.631492 | 0.923003 |
| fhod3a            | 493.761  | 0.139405209  | 0.214103 | 0.651114 | 0.514973 | 0.886401 |
| ppmlh             | 191.1597 | -1.590126387 | 0.180035 | -8.83234 | 1.03E-18 | 4.75E-15 |
| atp23             | 288.7193 | 0.085427879  | 0.178987 | 0.477284 | 0.63316  | 0.923885 |
| nrm               | 157.9985 | 0.256376529  | 0.199597 | 1.284469 | 0.198978 | 0.679593 |
| rreb1a            | 381.8987 | 0.012090536  | 0.16843  | 0.071784 | 0.942774 | 0.997371 |
| pde8b             | 18.81694 | -0.604520143 | 0.441934 | -1.3679  | 0.171345 | 0.64335  |
| trim3a            | 197.5216 | 0.24201404   | 0.16376  | 1.477857 | 0.139446 | 0.597663 |



|                  |          |              |          |          |          |          |  |
|------------------|----------|--------------|----------|----------|----------|----------|--|
| syngap1a         | 140.0453 | 0.727674763  | 0.353825 | 2.056598 | 0.039725 | 0.348523 |  |
| vps72a           | 419.485  | 0.001378093  | 0.109942 | 0.012535 | 0.989999 | 1        |  |
| usp8             | 1499.814 | 0.072196327  | 0.130839 | 0.551796 | 0.581088 | 0.905618 |  |
| cdk12            | 668.6019 | -0.073343812 | 0.14792  | -0.49583 | 0.620011 | 0.91764  |  |
| osbp16           | 19.13319 | 0.608338164  | 0.363321 | 1.674383 | 0.094055 | 0.512045 |  |
| rbm45            | 7.869914 | 0.26916752   | 0.750076 | 0.358854 | 0.719705 | 0.94694  |  |
| pdella           | 14.21701 | 0.095948361  | 0.509349 | 0.188375 | 0.850583 | 0.978251 |  |
| cox19            | 129.9502 | -0.007313568 | 0.182439 | -0.04009 | 0.968023 | 1        |  |
| mt-nd1           | 21604.97 | 0.152256751  | 0.156933 | 0.970204 | 0.331945 | 0.789602 |  |
| mt-nd2           | 14876.38 | 0.155111938  | 0.130953 | 1.184485 | 0.236221 | 0.717364 |  |
| mt-co1           | 173529.8 | -0.061516925 | 0.080337 | -0.76574 | 0.443832 | 0.854255 |  |
| mt-co2           | 96788.39 | -0.304265602 | 0.162172 | -1.87619 | 0.06063  | 0.423018 |  |
| mt-atp8          | 1134.856 | 0.106237643  | 0.254549 | 0.417356 | 0.676418 | 0.93557  |  |
| mt-atp6          | 34123.93 | 0.127107487  | 0.162688 | 0.781294 | 0.43463  | 0.850002 |  |
| mt-co3           | 65725.57 | -0.090547582 | 0.105899 | -0.85504 | 0.39253  | 0.827902 |  |
| mt-nd3           | 8998.441 | 0.081343689  | 0.16547  | 0.49159  | 0.623009 | 0.918894 |  |
| mt-nd41          | 3547.563 | 0.127063445  | 0.114145 | 1.113176 | 0.265633 | 0.742247 |  |
| mt-nd4           | 14120.98 | 0.079866306  | 0.106304 | 0.751302 | 0.452471 | 0.857994 |  |
| mt-nd5           | 12021.65 | 0.110782559  | 0.095304 | 1.162412 | 0.245068 | 0.726512 |  |
| mt-nd6           | 3236.642 | 0.153960879  | 0.135789 | 1.133826 | 0.256867 | 0.734405 |  |
| mt-cyb           | 38126.9  | 0.008391099  | 0.138243 | 0.060698 | 0.9516   | 0.99801  |  |
| kctd8            | 175.7088 | -0.449439113 | 0.240433 | -1.86929 | 0.061583 | 0.425659 |  |
| slc24a4b         | 5.459317 | -1.120657187 | 1.136399 | -0.98615 | 0.324061 | 0.783161 |  |
| ccdc15           | 22.66814 | -0.405504882 | 0.474289 | -0.85497 | 0.392566 | 0.827902 |  |
| zgc:158482       | 496.1979 | 0.631394282  | 0.221498 | 2.850558 | 0.004364 | 0.108751 |  |
| fut9b            | 97.40082 | -0.111003105 | 0.235865 | -0.47062 | 0.637911 | 0.924779 |  |
| psk5a            | 85.98976 | 0.484094025  | 0.348697 | 1.388296 | 0.165047 | 0.634185 |  |
| tcf15            | 110.4724 | 0.027356088  | 0.176447 | 0.155039 | 0.876791 | 0.985052 |  |
| adam19b          | 188.1215 | -0.031458479 | 0.182932 | -0.17197 | 0.863462 | 0.981766 |  |
| si:ch211-193c2.2 | 18.8353  | -0.180973729 | 0.50067  | -0.36146 | 0.717753 | 0.946466 |  |
| adamts12         | 139.801  | 0.498670874  | 0.263834 | 1.89009  | 0.058746 | 0.418427 |  |
| gtf2h3           | 205.3055 | -0.050420102 | 0.17955  | -0.28081 | 0.778854 | 0.961073 |  |
| kisslr1b         | 3.267496 | -2.3228331   | 1.179565 | -1.96923 | 0.048927 | 0.385066 |  |
| zgc:153044       | 39.35503 | -0.863228085 | 0.354223 | -2.43696 | 0.014811 | 0.213551 |  |
| sftpb1b          | 71.375   | -0.155059293 | 0.235252 | -0.65912 | 0.509819 | 0.883733 |  |
| SLC6A13          | 47.94097 | 0.530580378  | 0.41997  | 1.263376 | 0.206454 | 0.688857 |  |
| puraa            | 132.1275 | 0.128620288  | 0.169731 | 0.757788 | 0.448578 | 0.856741 |  |
| BX901974.1       | 1.421032 | -2.37995259  | 2.102433 | -1.132   | 0.257635 | NA       |  |
| scol             | 264.123  | 0.179097675  | 0.166718 | 1.074258 | 0.282707 | 0.754993 |  |
| fancb            | 24.59304 | 0.130721187  | 0.340776 | 0.383599 | 0.701276 | 0.943094 |  |
| arfgap2          | 910.6452 | -0.027708654 | 0.121044 | -0.22891 | 0.818935 | 0.971785 |  |
| napaa            | 322.1519 | 0.038060619  | 0.157428 | 0.241766 | 0.808962 | 0.969828 |  |
| rsph4a           | 40.31113 | -0.082749423 | 0.392824 | -0.21065 | 0.833158 | 0.975379 |  |
| srebf1           | 236.793  | -0.06172744  | 0.273173 | -0.22596 | 0.821229 | 0.971788 |  |
| zswim7           | 21.59223 | 0.461872134  | 0.400962 | 1.151909 | 0.249358 | 0.729721 |  |
| dnajc25          | 104.3006 | -0.125126948 | 0.194526 | -0.64324 | 0.520069 | 0.887148 |  |
| ywhag1           | 496.3615 | 0.348842698  | 0.180754 | 1.929928 | 0.053616 | 0.400993 |  |
| zgc:154075       | 211.3464 | -0.375714735 | 0.178267 | -2.1076  | 0.035066 | 0.329872 |  |
| prpf4            | 369.561  | -0.044548152 | 0.123683 | -0.36018 | 0.718712 | 0.94694  |  |
| tmem232          | 9.839004 | 0.424728085  | 0.700861 | 0.606009 | 0.544509 | 0.895206 |  |
| kcmf1            | 403.0587 | 0.008583916  | 0.128206 | 0.066954 | 0.946618 | 0.997371 |  |
| BX470189.1       | 183.0272 | -0.161253013 | 0.169859 | -0.94933 | 0.342451 | 0.797179 |  |
| ftr80            | 0.921382 | 0.093654024  | 2.450537 | 0.038218 | 0.969514 | NA       |  |
| si:dkey-172m14.2 | 16.92261 | 0.356121693  | 0.710463 | 0.501253 | 0.616193 | 0.916365 |  |

|                    |           |               |           |           |           |           |
|--------------------|-----------|---------------|-----------|-----------|-----------|-----------|
| fam167aa           | 21. 59068 | -1. 828622908 | 0. 725072 | -2. 52199 | 0. 011669 | 0. 187763 |
| cep57              | 47. 09065 | -0. 177160381 | 0. 352062 | -0. 50321 | 0. 614818 | 0. 915998 |
| zglpl              | 1. 330176 | -0. 84491141  | 1. 527605 | -0. 5531  | 0. 580198 | NA        |
| pomt1              | 172. 5539 | -0. 232416477 | 0. 162307 | -1. 43196 | 0. 152156 | 0. 6158   |
| card9              | 26. 68829 | 0. 373781843  | 0. 411115 | 0. 909191 | 0. 363249 | 0. 813595 |
| snopc4             | 105. 433  | -0. 236529654 | 0. 261084 | -0. 90595 | 0. 364961 | 0. 814972 |
| plcl1              | 88. 63116 | 0. 238578322  | 0. 259943 | 0. 917809 | 0. 358719 | 0. 80995  |
| myoz3a             | 278. 9161 | -1. 046779544 | 0. 572789 | -1. 82751 | 0. 067622 | 0. 443563 |
| shisallb           | 63. 66378 | 0. 132209081  | 0. 250276 | 0. 528253 | 0. 597324 | 0. 911953 |
| parvg              | 68. 3501  | -0. 26781468  | 0. 284706 | -0. 94067 | 0. 346873 | 0. 799748 |
| snx18a             | 439. 815  | -0. 040130949 | 0. 133236 | -0. 3012  | 0. 763261 | 0. 958924 |
| hspb3              | 51. 08321 | -0. 149274726 | 0. 250599 | -0. 59567 | 0. 551394 | 0. 8974   |
| tomm7              | 727. 9042 | -0. 575362811 | 0. 157369 | -3. 65614 | 0. 000256 | 0. 017645 |
| si:dkey-3h3. 3     | 33. 78748 | 0. 305817766  | 0. 335901 | 0. 91044  | 0. 36259  | 0. 81253  |
| wwtr1              | 194. 5382 | -0. 015290564 | 0. 213409 | -0. 07165 | 0. 942881 | 0. 997371 |
| tank               | 70. 09588 | 0. 257801974  | 0. 255391 | 1. 009441 | 0. 312763 | 0. 776213 |
| arid3c             | 262. 233  | 0. 027063028  | 0. 15843  | 0. 17082  | 0. 864365 | 0. 981867 |
| trpc6b             | 6. 772964 | -0. 395459958 | 0. 889024 | -0. 44482 | 0. 656446 | 0. 929745 |
| itpkcb             | 497. 9213 | -0. 087480097 | 0. 162164 | -0. 53946 | 0. 589572 | 0. 908513 |
| si:rp71-68n21. 9   | 76. 92845 | -0. 27557821  | 0. 209979 | -1. 31241 | 0. 189383 | 0. 668949 |
| pigl               | 82. 43853 | -0. 11682878  | 0. 214269 | -0. 54524 | 0. 585587 | 0. 906655 |
| zgc:158640         | 52. 44242 | 0. 091300212  | 0. 223992 | 0. 407604 | 0. 683564 | 0. 938405 |
| urp2               | 18. 87356 | 1. 105766259  | 0. 56675  | 1. 951065 | 0. 051049 | 0. 393353 |
| CABZ01088428. 1    | 21. 98264 | -0. 641480196 | 0. 420959 | -1. 52385 | 0. 127545 | 0. 576964 |
| cabz01076234. 2    | 12. 01812 | -0. 588884122 | 0. 734065 | -0. 80222 | 0. 422424 | 0. 843493 |
| ifngr2             | 515. 8471 | -0. 229656412 | 0. 144826 | -1. 58574 | 0. 112799 | 0. 549875 |
| clpxb              | 762. 1294 | 0. 024312121  | 0. 130844 | 0. 185811 | 0. 852593 | 0. 978672 |
| spila              | 68. 30216 | 0. 122366235  | 0. 273564 | 0. 447303 | 0. 654656 | 0. 929527 |
| CABZ01064472. 1    | 78. 25381 | 0. 598338595  | 0. 266093 | 2. 248608 | 0. 024537 | 0. 277819 |
| ggcx               | 493. 0395 | 0. 071365921  | 0. 107404 | 0. 664464 | 0. 506393 | 0. 883007 |
| zgc:158432         | 15. 08949 | 0. 085697782  | 1. 270291 | 0. 067463 | 0. 946213 | 0. 997371 |
| si:dkeyp-27c8. 1   | 0. 150235 | 0             | 5. 267649 | 0         | 1         | NA        |
| zgc:171844         | 30. 23546 | -0. 689461329 | 0. 371827 | -1. 85425 | 0. 063703 | 0. 430571 |
| zmp:0000001127     | 0. 474251 | 0             | 4. 891932 | 0         | 1         | NA        |
| CABZ01060891. 1    | 4. 220285 | 0. 677563291  | 1. 056624 | 0. 641253 | 0. 521358 | 0. 887551 |
| CABZ01083448. 1    | 414. 2707 | -0. 050135503 | 0. 187075 | -0. 268   | 0. 788701 | 0. 963568 |
| cntnap3            | 185. 919  | 0. 417667611  | 0. 311888 | 1. 339158 | 0. 180519 | 0. 656202 |
| si:ch211-229c8. 13 | 1. 870029 | 0. 249574988  | 1. 73432  | 0. 143904 | 0. 885577 | NA        |
| ppargcla           | 87. 17482 | 0. 211888188  | 0. 304658 | 0. 695495 | 0. 486745 | 0. 873245 |
| tbata              | 35. 49868 | -0. 327515157 | 0. 295556 | -1. 10813 | 0. 267805 | 0. 744189 |
| tle2c              | 152. 9034 | 0. 016934804  | 0. 200112 | 0. 084627 | 0. 932558 | 0. 996175 |
| riox1              | 467. 9265 | -0. 027189197 | 0. 203034 | -0. 13391 | 0. 89347  | 0. 988566 |
| il21               | 2. 478481 | 0. 297227269  | 1. 217101 | 0. 244209 | 0. 807069 | 0. 969726 |
| nmrk2              | 671. 0068 | 0. 158749828  | 0. 40896  | 0. 38818  | 0. 697883 | 0. 942355 |
| jund               | 403. 4408 | -0. 499306337 | 0. 145333 | -3. 4356  | 0. 000591 | 0. 031348 |
| lcn15              | 262. 372  | -0. 217843661 | 0. 192417 | -1. 13214 | 0. 257574 | 0. 735155 |
| scospondin         | 27. 08608 | 0. 455939503  | 0. 379806 | 1. 200454 | 0. 229963 | 0. 711763 |
| CU469531. 1        | 2. 266765 | -0. 875406845 | 1. 542586 | -0. 56749 | 0. 570379 | 0. 902481 |
| gltpd2             | 49. 09526 | -0. 732632438 | 0. 337345 | -2. 17176 | 0. 029874 | 0. 307772 |
| MAN1C1             | 35. 985   | -0. 338583944 | 0. 350878 | -0. 96496 | 0. 334563 | 0. 79151  |
| ints9              | 138. 8389 | 0. 084182677  | 0. 161017 | 0. 52282  | 0. 6011   | 0. 913756 |
| lyn                | 53. 57744 | -0. 224918714 | 0. 245546 | -0. 91599 | 0. 35967  | 0. 810668 |
| elp5               | 162. 4084 | 0. 085489092  | 0. 156216 | 0. 547248 | 0. 584208 | 0. 906402 |
| rab8a              | 189. 9346 | -0. 249257995 | 0. 153913 | -1. 61947 | 0. 105346 | 0. 534575 |

|                    |           |               |           |           |           |           |
|--------------------|-----------|---------------|-----------|-----------|-----------|-----------|
| sstr1b             | 28. 82756 | -0. 045025267 | 0. 575549 | -0. 07823 | 0. 937645 | 0. 997305 |
| EVA1A              | 7. 272685 | -0. 530292821 | 0. 761361 | -0. 69651 | 0. 486111 | 0. 873244 |
| zcchc2             | 142. 8671 | 0. 080259789  | 0. 179153 | 0. 447995 | 0. 654157 | 0. 929434 |
| sh3glla            | 288. 8919 | -0. 010251989 | 0. 149768 | -0. 06845 | 0. 945425 | 0. 997371 |
| slc6a5             | 277. 5992 | -0. 197839313 | 0. 304205 | -0. 65035 | 0. 515467 | 0. 886401 |
| femla              | 632. 6449 | 0. 093311016  | 0. 168192 | 0. 554789 | 0. 579039 | 0. 905417 |
| atp5ifla           | 948. 9174 | -0. 117717329 | 0. 15906  | -0. 74008 | 0. 459252 | 0. 861818 |
| ar                 | 57. 78143 | 0. 378035684  | 0. 285586 | 1. 323718 | 0. 185597 | 0. 663476 |
| nitr7b             | 0. 043309 | 0             | 5. 267649 | 0         | 1         | NA        |
| gtf3c5             | 149. 6316 | -0. 063124355 | 0. 185717 | -0. 33989 | 0. 733936 | 0. 95093  |
| zgc:103697         | 262. 768  | -0. 154614766 | 0. 172777 | -0. 89488 | 0. 37085  | 0. 818484 |
| gas1b              | 352. 8695 | 0. 085063212  | 0. 12846  | 0. 662178 | 0. 507857 | 0. 883056 |
| ftr23              | 51. 12806 | -0. 850004556 | 0. 274822 | -3. 09293 | 0. 001982 | 0. 069053 |
| myhzl. 1           | 199088. 4 | -0. 22879475  | 0. 411056 | -0. 5566  | 0. 577799 | 0. 905057 |
| si:dkey-31e10. 1   | 7. 483442 | -0. 706841791 | 0. 70718  | -0. 99952 | 0. 317542 | 0. 779441 |
| myhzl. 2           | 65223. 91 | -0. 078967287 | 0. 419046 | -0. 18845 | 0. 850528 | 0. 978251 |
| csk                | 660. 2727 | 0. 095550289  | 0. 114814 | 0. 832221 | 0. 405284 | 0. 834483 |
| myhzl. 3           | 37427. 35 | 0. 265276735  | 0. 416935 | 0. 636254 | 0. 524611 | 0. 888928 |
| CABZ01084793. 1    | 108. 6826 | 0. 577567315  | 0. 272305 | 2. 121029 | 0. 033919 | 0. 325295 |
| gck                | 49. 87394 | -0. 647204529 | 0. 506867 | -1. 27687 | 0. 201647 | 0. 68147  |
| si:ch211-230g14. 3 | 5. 509088 | 0. 154221328  | 0. 653452 | 0. 23601  | 0. 813425 | 0. 970328 |
| ece2a              | 44. 22081 | -0. 068622017 | 0. 273815 | -0. 25061 | 0. 802112 | 0. 96794  |
| si:cabz01007802. 1 | 323. 7169 | 0. 208700875  | 0. 256163 | 0. 814719 | 0. 415233 | 0. 838754 |
| tmem119b           | 468. 0877 | -0. 300343333 | 0. 138449 | -2. 16934 | 0. 030057 | 0. 309109 |
| agbl4              | 16. 84266 | -1. 213198146 | 0. 528364 | -2. 29614 | 0. 021668 | 0. 26121  |
| sirt1              | 720. 3687 | -0. 285490853 | 0. 118369 | -2. 41187 | 0. 015871 | 0. 222329 |
| BX664721. 2        | 0. 275769 | 0             | 5. 267649 | 0         | 1         | NA        |
| wbp4               | 90. 64821 | 0. 052077567  | 0. 216965 | 0. 240027 | 0. 810309 | 0. 969828 |
| CT573494. 1        | 0. 043309 | 0             | 5. 267649 | 0         | 1         | NA        |
| psmb11b            | 0. 135482 | 0             | 5. 267649 | 0         | 1         | NA        |
| tcnba              | 687. 5083 | 0. 674038629  | 1. 337581 | 0. 503924 | 0. 614315 | 0. 915998 |
| atf5a              | 612. 6292 | 0. 458756431  | 0. 178747 | 2. 56652  | 0. 010272 | 0. 176568 |
| si:ch211-198o12. 4 | 0. 437654 | 0             | 3. 686175 | 0         | 1         | NA        |
| tafa5l             | 65. 42313 | 0. 77154208   | 0. 456098 | 1. 691615 | 0. 090719 | 0. 505206 |
| cfap45             | 48. 66851 | 0. 068557759  | 0. 319876 | 0. 214326 | 0. 830293 | 0. 974908 |
| CABZ01040999. 1    | 4. 239866 | 0. 630668405  | 0. 878066 | 0. 718247 | 0. 472605 | 0. 868786 |
| CABZ01079818. 1    | 2. 157287 | 1. 627281465  | 1. 7128   | 0. 950071 | 0. 342076 | NA        |
| f11r. 2            | 189. 0293 | 0. 236004386  | 0. 280227 | 0. 842191 | 0. 399681 | 0. 831219 |
| CFAP77             | 29. 83197 | 0. 294618079  | 0. 334331 | 0. 881216 | 0. 378201 | 0. 822672 |
| gkap1              | 820. 7768 | -0. 034099303 | 0. 133161 | -0. 25608 | 0. 797892 | 0. 966447 |
| opn7d              | 4. 675239 | -1. 550293507 | 1. 223023 | -1. 26759 | 0. 204944 | 0. 686802 |
| nful               | 526. 9476 | -0. 088524133 | 0. 113428 | -0. 78044 | 0. 435132 | 0. 850085 |
| nppc               | 30. 63742 | -0. 289515722 | 0. 450353 | -0. 64286 | 0. 520313 | 0. 887149 |
| si:ch211-194e1. 7  | 7. 736428 | 0. 025147393  | 0. 640336 | 0. 039272 | 0. 968673 | 1         |
| ppplr15b           | 69. 57967 | 0. 452115308  | 0. 260224 | 1. 737406 | 0. 082315 | 0. 482739 |
| spaca9             | 0         | NA            | NA        | NA        | NA        | NA        |
| ch25h11. 2         | 6. 713944 | 1. 632236544  | 0. 991247 | 1. 646649 | 0. 09963  | 0. 524166 |
| si:dkey-24l11. 2   | 187. 1345 | -0. 02358042  | 0. 160579 | -0. 14685 | 0. 883253 | 0. 986978 |
| tnfsf11            | 14. 48162 | 0. 564769888  | 0. 623979 | 0. 905111 | 0. 365407 | 0. 815339 |
| slc39a6            | 317. 5168 | 0. 010432542  | 0. 148036 | 0. 070473 | 0. 943817 | 0. 997371 |
| nmba               | 12. 2295  | -0. 324997929 | 0. 710478 | -0. 45744 | 0. 647358 | 0. 927082 |
| pimr180            | 0. 137189 | 0             | 5. 267649 | 0         | 1         | NA        |
| arrdcla            | 199. 7832 | 0. 034925448  | 0. 168448 | 0. 207336 | 0. 835747 | 0. 976007 |
| tprgll             | 35. 0388  | -0. 438045609 | 0. 411    | -1. 0658  | 0. 286513 | 0. 757624 |

|                   |          |              |          |          |          |          |
|-------------------|----------|--------------|----------|----------|----------|----------|
| malt3             | 55.94412 | -0.040752189 | 0.286098 | -0.14244 | 0.886731 | 0.987668 |
| chchd7            | 225.6267 | 0.273561594  | 0.192173 | 1.42352  | 0.154585 | 0.619425 |
| ehmt1a            | 321.2074 | 0.145415226  | 0.147472 | 0.986056 | 0.324106 | 0.783161 |
| si:dkey-16p6.4    | 1.059908 | -0.887194369 | 1.882771 | -0.47122 | 0.637486 | NA       |
| whrnrb            | 36.08087 | 0.878750457  | 0.485355 | 1.810532 | 0.070213 | 0.452026 |
| hes2.2            | 51.33585 | -0.216558775 | 0.280203 | -0.77287 | 0.439602 | 0.852079 |
| ing5b             | 66.79452 | 0.242185415  | 0.211967 | 1.142562 | 0.253221 | 0.732759 |
| uqccl             | 874.7565 | 0.118311238  | 0.144615 | 0.818112 | 0.413293 | 0.838317 |
| pak2a             | 1004.223 | -0.029881183 | 0.116341 | -0.25684 | 0.7973   | 0.966447 |
| trib2             | 242.0293 | 0.016032941  | 0.212978 | 0.07528  | 0.939992 | 0.997371 |
| dpepl             | 104.177  | 1.676052887  | 0.98751  | 1.697252 | 0.089649 | 0.50251  |
| crb3b             | 138.3203 | -0.388933567 | 0.229514 | -1.6946  | 0.090152 | 0.50413  |
| spg7              | 892.0329 | 0.014104664  | 0.107894 | 0.130727 | 0.895991 | 0.98926  |
| pimr188           | 0.562612 | 1.928556693  | 2.773627 | 0.69532  | 0.486855 | NA       |
| cdh15             | 129.3641 | -0.052910899 | 0.29363  | -0.1802  | 0.856999 | 0.979558 |
| taf4a             | 166.5342 | 0.03080499   | 0.167676 | 0.183717 | 0.854235 | 0.979058 |
| tmem44            | 7.158736 | 0.498451852  | 0.764321 | 0.65215  | 0.514305 | 0.88631  |
| klf9              | 842.6249 | -0.621932921 | 0.400903 | -1.55133 | 0.120823 | 0.566816 |
| pld3              | 98.9513  | 0.198162825  | 0.234607 | 0.844657 | 0.398302 | 0.830737 |
| def8              | 374.0225 | -0.209404051 | 0.140641 | -1.48893 | 0.136506 | 0.591902 |
| fzd10             | 429.9258 | 0.097920301  | 0.172038 | 0.569178 | 0.569235 | 0.902303 |
| ccni              | 5542.475 | 0.126185745  | 0.168326 | 0.749652 | 0.453464 | 0.858722 |
| stx2b             | 143.7591 | 0.217167971  | 0.191778 | 1.132395 | 0.257468 | 0.735125 |
| b3gnt21           | 167.7269 | -0.054155056 | 0.180426 | -0.30015 | 0.764062 | 0.959228 |
| mb12              | 46.85024 | -0.81180108  | 0.541713 | -1.49858 | 0.133983 | 0.58783  |
| MBL2 (1 of many)  | 28.39636 | -0.065478534 | 0.37611  | -0.17409 | 0.861791 | 0.980588 |
| tmem150aa         | 64.72595 | -0.164548021 | 0.246079 | -0.66868 | 0.5037   | 0.881759 |
| CRACR2A           | 31.21582 | -0.051681019 | 0.324325 | -0.15935 | 0.873394 | 0.983645 |
| cb1n12            | 27.75738 | -0.273555027 | 0.678996 | -0.40288 | 0.687035 | 0.938818 |
| zgc:64051         | 46.03094 | 0.178897605  | 0.367662 | 0.486581 | 0.626555 | 0.920665 |
| trim110           | 17.49529 | -0.241332727 | 0.879151 | -0.27451 | 0.783695 | 0.96245  |
| cngbla            | 72.53734 | 0.286779822  | 0.769386 | 0.372739 | 0.709343 | 0.945546 |
| plcb3             | 388.8518 | -0.222562087 | 0.162867 | -1.36653 | 0.171774 | 0.643953 |
| luzp2             | 234.4268 | 0.193251258  | 0.236538 | 0.816999 | 0.413929 | 0.838631 |
| si:ch211-151h10.2 | 10.14223 | -0.362878667 | 0.551712 | -0.65773 | 0.51071  | 0.884139 |
| nanos3            | 19.80448 | -0.078805122 | 0.489111 | -0.16112 | 0.872    | 0.983447 |
| rwdd              | 267.6168 | 0.159106647  | 0.134754 | 1.180717 | 0.237715 | 0.718572 |
| kcne4             | 43.95041 | -1.014886732 | 0.443497 | -2.28837 | 0.022116 | 0.263263 |
| lrch4             | 285.3778 | 0.097009857  | 0.133723 | 0.725456 | 0.468172 | 0.866625 |
| prosl             | 356.8857 | -0.378597895 | 0.196654 | -1.92519 | 0.054205 | 0.402725 |
| vamp5             | 560.922  | -0.169932597 | 0.156463 | -1.08609 | 0.277441 | 0.751426 |
| csflb             | 107.1715 | 0.111539485  | 0.171152 | 0.651699 | 0.514595 | 0.88631  |
| grhpra            | 100.4568 | -0.208572884 | 0.246895 | -0.84478 | 0.398232 | 0.830737 |
| tomm5             | 1214.441 | -0.160718068 | 0.202308 | -0.79442 | 0.426949 | 0.845491 |
| si:ch211-203b8.6  | 61.33931 | -0.201885871 | 0.313561 | -0.64385 | 0.519673 | 0.887148 |
| ptx3a             | 1017.701 | 0.159775639  | 0.156797 | 1.018996 | 0.308205 | 0.773155 |
| si:ch211-240b21.2 | 1.381041 | -3.341239093 | 2.360627 | -1.4154  | 0.15695  | NA       |
| GRB14             | 23.77595 | 0.118975134  | 0.394448 | 0.301624 | 0.762939 | 0.958842 |
| cyp2x10.2         | 2.111777 | -1.816622076 | 1.693149 | -1.07292 | 0.283305 | NA       |
| slc7a4            | 28.91881 | 0.191763553  | 0.316474 | 0.605938 | 0.544556 | 0.895206 |
| lamc2             | 40.04083 | 0.758435373  | 0.556007 | 1.364074 | 0.172544 | 0.645319 |
| EIF3K             | 1375.524 | -0.288517799 | 0.125942 | -2.29088 | 0.02197  | 0.262534 |
| cyp2x12           | 30.61185 | 1.352669734  | 0.438612 | 3.08398  | 0.002043 | 0.070215 |
| TMEM208           | 313.0494 | -0.114244351 | 0.145406 | -0.78569 | 0.432046 | 0.848419 |

|                     |          |              |          |          |          |          |
|---------------------|----------|--------------|----------|----------|----------|----------|
| SLC03A1 (1 of many) | 144.0033 | 0.282577216  | 0.195754 | 1.443535 | 0.14887  | 0.610726 |
| zgc:171509          | 1.997476 | 0            | 1.993373 | 0        | 1        | NA       |
| mrps14              | 360.5222 | 0.14895965   | 0.164377 | 0.90621  | 0.364825 | 0.814824 |
| astnl               | 513.563  | 0.217589413  | 0.20784  | 1.046909 | 0.295142 | 0.763815 |
| si:dkey-21n10.3     | 0        | NA           | NA       | NA       | NA       | NA       |
| mmab                | 110.6682 | 0.054637422  | 0.185751 | 0.294144 | 0.768648 | 0.960395 |
| si:ch211-132b12.3   | 0.15197  | 0.892446925  | 5.241767 | 0.170257 | 0.864808 | NA       |
| lmlbb               | 222.4062 | -0.041805835 | 0.131145 | -0.31878 | 0.749896 | 0.955074 |
| si:dkey-154p10.3    | 81.53801 | -0.173165684 | 0.208418 | -0.83086 | 0.406054 | 0.834645 |
| nfkbie              | 211.1057 | -0.086018655 | 0.18868  | -0.4559  | 0.648464 | 0.927501 |
| angpt12b            | 443.1425 | -0.276268202 | 0.1241   | -2.22617 | 0.026003 | 0.286077 |
| ralgps1             | 23.84803 | 0.104644489  | 0.589795 | 0.177425 | 0.859174 | 0.979975 |
| zgc:158427          | 0.128836 | 0            | 5.267649 | 0        | 1        | NA       |
| si:ch211-132b12.7   | 184.1143 | 0.470856913  | 0.778057 | 0.60517  | 0.545066 | 0.895206 |
| foxglc              | 20.36754 | 0.826343275  | 0.403489 | 2.047996 | 0.04056  | 0.351905 |
| pglyrp5             | 23.93525 | -0.011316262 | 0.380563 | -0.02974 | 0.976278 | 1        |
| slc6a18             | 19.65706 | 1.408863512  | 1.284004 | 1.097243 | 0.272535 | 0.748416 |
| tns2b               | 391.3678 | 0.476690646  | 0.156234 | 3.051125 | 0.00228  | 0.07594  |
| cep126              | 14.4711  | 0.499631093  | 0.660522 | 0.756418 | 0.449399 | 0.856979 |
| znf131              | 415.1108 | 0.055362186  | 0.129548 | 0.427348 | 0.669126 | 0.933115 |
| yap1                | 1552.947 | 0.021367758  | 0.095393 | 0.223998 | 0.822759 | 0.971966 |
| tbcb                | 885.8827 | 0.153294048  | 0.090733 | 1.6895   | 0.091124 | 0.50549  |
| six5                | 103.7453 | -0.235795697 | 0.271971 | -0.86699 | 0.385949 | 0.826939 |
| six9                | 9.403354 | 0.417648631  | 0.669783 | 0.623558 | 0.532918 | 0.890978 |
| vgl141              | 254.0388 | -0.164702158 | 0.196978 | -0.83614 | 0.403074 | 0.833704 |
| ptges1              | 535.8643 | 0.164641133  | 0.163018 | 1.009959 | 0.312515 | 0.776164 |
| foxl2b              | 79.31744 | -0.145582606 | 0.239623 | -0.60755 | 0.543488 | 0.894925 |
| ttc9b               | 27.59676 | 0.587456082  | 0.3462   | 1.696869 | 0.089722 | 0.502623 |
| si:ch211-153j24.3   | 12.46656 | -0.233187829 | 0.63786  | -0.36558 | 0.71468  | 0.945821 |
| si:ch211-195h23.3   | 119.3343 | -2.799452062 | 0.359712 | -7.78248 | 7.11E-15 | 1.50E-11 |
| si:dkey-56m19.5     | 2700.519 | 0.094507983  | 0.108638 | 0.869933 | 0.384337 | 0.826565 |
| h3f3b.1             | 2248.738 | 0.040310405  | 0.118997 | 0.338752 | 0.734797 | 0.951361 |
| si:ch1073-429i10.3  | 4662.603 | 0.009862915  | 0.085506 | 0.115348 | 0.90817  | 0.991745 |
| gucd1               | 289.2619 | -0.280624219 | 0.160502 | -1.74841 | 0.080393 | 0.478844 |
| CABZ01112732.1      | 6.840654 | 0.021513615  | 0.691319 | 0.03112  | 0.975174 | 1        |
| tmem91              | 8.054635 | 1.242935116  | 0.945746 | 1.314238 | 0.188766 | 0.668514 |
| tnnt3b              | 95907.71 | 0.155800725  | 0.143274 | 1.087433 | 0.276845 | 0.751311 |
| otog                | 97.09914 | 0.426144861  | 0.22806  | 1.868567 | 0.061683 | 0.42588  |
| aopep               | 163.9767 | 0.090035296  | 0.179259 | 0.502264 | 0.615482 | 0.916365 |
| zgc:136254          | 8.01399  | -0.569672922 | 0.894144 | -0.63712 | 0.524049 | 0.888694 |
| dnah3               | 12.81737 | 1.378243065  | 0.663418 | 2.077489 | 0.037756 | 0.340665 |
| si:dkey-94e7.2      | 44.47477 | -0.813816206 | 0.675802 | -1.20422 | 0.228504 | 0.70974  |
| gpx4a               | 12821.88 | -0.131929876 | 0.187147 | -0.70495 | 0.48084  | 0.870179 |
| map7d2a             | 216.6409 | 0.130045951  | 0.200197 | 0.64959  | 0.515957 | 0.886651 |
| netol               | 34.84951 | -0.899497296 | 0.763796 | -1.17767 | 0.238929 | 0.719781 |
| CABZ01100185.1      | 133.6353 | 0.133543279  | 0.18857  | 0.708189 | 0.478828 | 0.869292 |
| cyp2y3              | 48.64565 | 3.741746985  | 1.334651 | 2.803539 | 0.005055 | 0.119017 |
| gbgt114             | 407.2507 | -0.076529712 | 0.156741 | -0.48825 | 0.625369 | 0.920625 |
| crybb1              | 7969.075 | 0.648754529  | 0.364781 | 1.778475 | 0.075326 | 0.465238 |
| chs1                | 141.2278 | 0.451653572  | 0.468449 | 0.964146 | 0.334973 | 0.79181  |
| hapln1b             | 374.9835 | 0.114207042  | 0.214409 | 0.532661 | 0.594268 | 0.910731 |
| v2rh14              | 1.724132 | -0.342408553 | 1.683494 | -0.20339 | 0.838829 | NA       |
| BX530037.1          | 0.600148 | 1.055370274  | 3.992675 | 0.264327 | 0.791528 | NA       |
| si:dkey-47k20.4     | 1.315159 | -0.914071679 | 1.624244 | -0.56277 | 0.573593 | NA       |

|                   |          |              |          |          |          |          |
|-------------------|----------|--------------|----------|----------|----------|----------|
| elov18a           | 15.0603  | 0.842456969  | 0.726044 | 1.160339 | 0.245911 | 0.727194 |
| htr5ab            | 22.47103 | 0.233558221  | 0.508921 | 0.458928 | 0.646286 | 0.926728 |
| rbm33a            | 750.7568 | 0.171027471  | 0.156434 | 1.093291 | 0.274266 | 0.749612 |
| olfcq19           | 0.04222  | 0            | 5.267649 | 0        | 1        | NA       |
| shha              | 239.0955 | -0.023165618 | 0.191321 | -0.12108 | 0.903626 | 0.991366 |
| slc16a1b          | 415.7087 | -0.080627299 | 0.148663 | -0.54235 | 0.587579 | 0.907552 |
| tmem51a           | 166.9327 | -0.314000452 | 0.189478 | -1.65719 | 0.097481 | 0.520785 |
| olfcd3            | 0.918069 | 3.007987516  | 2.105657 | 1.428527 | 0.15314  | NA       |
| glisla            | 14.8069  | -0.518652289 | 0.635408 | -0.81625 | 0.414357 | 0.838631 |
| rnf44             | 75.38471 | 0.093738489  | 0.309526 | 0.302845 | 0.762008 | 0.958345 |
| CU302253.1        | 81.70466 | -1.235679711 | 1.237203 | -0.99877 | 0.317907 | 0.77973  |
| rabggtb           | 391.804  | 0.224868017  | 0.187184 | 1.201319 | 0.229627 | 0.711596 |
| vimr1             | 526.1138 | -0.33941913  | 0.463292 | -0.73262 | 0.463787 | 0.864593 |
| naa80             | 47.77054 | -0.119631176 | 0.329587 | -0.36297 | 0.716625 | 0.94627  |
| CU326366.2        | 1.599564 | -0.219832154 | 1.885375 | -0.1166  | 0.907178 | NA       |
| cnot11            | 369.922  | -0.003405143 | 0.17037  | -0.01999 | 0.984054 | 1        |
| atmin             | 39.27437 | 0.053349849  | 0.268957 | 0.198358 | 0.842765 | 0.9766   |
| dalrd3            | 547.7754 | -0.091195021 | 0.141038 | -0.6466  | 0.517892 | 0.887148 |
| si:ch211-181d7.3  | 10.78165 | -5.554451477 | 5.141623 | -1.08029 | 0.280012 | 0.752917 |
| sptbn4a           | 139.0807 | 0.141817641  | 0.386082 | 0.367325 | 0.713377 | 0.945821 |
| rab8b             | 448.6301 | 0.032291837  | 0.111287 | 0.290167 | 0.771689 | 0.960624 |
| cd1511            | 554.7335 | 0.163084019  | 0.147217 | 1.107782 | 0.267956 | 0.74434  |
| si:ch211-281124.3 | 606.4269 | 0.021652934  | 0.258731 | 0.083689 | 0.933304 | 0.996472 |
| lpar5b            | 4.934433 | 0.071315969  | 1.569149 | 0.045449 | 0.96375  | 0.999842 |
| rsf1b.1           | 510.1795 | 0.221538077  | 0.109196 | 2.028811 | 0.042478 | 0.360968 |
| taf10             | 681.9392 | -0.024434628 | 0.137841 | -0.17727 | 0.859299 | 0.979975 |
| fam214b           | 597.9843 | 0.229054204  | 0.095938 | 2.387513 | 0.016963 | 0.230743 |
| rhoga             | 6.302289 | -0.170208865 | 0.638766 | -0.26647 | 0.789881 | 0.964203 |
| dnlz              | 110.7228 | -0.054409562 | 0.194197 | -0.28018 | 0.779342 | 0.961073 |
| irgq2             | 18.63481 | 0.540036763  | 0.514037 | 1.05058  | 0.293451 | 0.76277  |
| or104-2           | 0        | NA           | NA       | NA       | NA       | NA       |
| or105-1           | 0        | NA           | NA       | NA       | NA       | NA       |
| or106-1           | 2.831993 | -0.096091078 | 1.3318   | -0.07215 | 0.942482 | 0.997371 |
| zgc:152951        | 19.14301 | -0.524631274 | 0.486439 | -1.07851 | 0.280804 | 0.753193 |
| iqcg              | 8.074674 | 0.154456411  | 0.660023 | 0.234017 | 0.814972 | 0.970843 |
| ctrl              | 14632.67 | 1.945129455  | 1.57688  | 1.233531 | 0.217378 | 0.69815  |
| crfb1             | 65.28511 | -0.260129345 | 0.270288 | -0.96242 | 0.335841 | 0.792139 |
| chmp2ba           | 19.32969 | -1.198900201 | 0.538476 | -2.22647 | 0.025983 | 0.285997 |
| kctd4             | 190.6923 | 0.140798163  | 0.189168 | 0.744301 | 0.456694 | 0.860698 |
| psenen            | 571.8403 | -0.027989755 | 0.139364 | -0.20084 | 0.840824 | 0.97643  |
| gpr85             | 310.2268 | 0.07840225   | 0.24241  | 0.323428 | 0.746371 | 0.955074 |
| lysmd4            | 189.0159 | 0.120055691  | 0.166476 | 0.721158 | 0.470812 | 0.867838 |
| or108-1           | 0.712904 | 3.512983695  | 2.688535 | 1.306653 | 0.19133  | NA       |
| tmem168a          | 220.3874 | -0.000796817 | 0.142538 | -0.00559 | 0.99554  | 1        |
| ifrd1             | 1526.118 | 0.260518103  | 0.160534 | 1.622821 | 0.104628 | 0.53308  |
| fam174b           | 208.4879 | -0.132019379 | 0.149572 | -0.88265 | 0.377427 | 0.822478 |
| nidla             | 1601.702 | 0.278589773  | 0.183498 | 1.518216 | 0.12896  | 0.578173 |
| crfb4             | 95.53371 | 0.157646612  | 0.269656 | 0.584621 | 0.558803 | 0.899409 |
| si:dkey-14o1.20   | 0.322862 | 1.05539041   | 3.952386 | 0.267026 | 0.789449 | NA       |
| ksr1a             | 34.69162 | 0.55613716   | 0.344576 | 1.613976 | 0.106533 | 0.536018 |
| cuedcla           | 270.6257 | -0.524451055 | 0.198595 | -2.6408  | 0.008271 | 0.154797 |
| gmnc              | 9.151513 | 0.328518211  | 0.489622 | 0.670963 | 0.502244 | 0.881277 |
| maspl             | 168.1264 | -0.294347071 | 0.167203 | -1.76042 | 0.078337 | 0.47433  |
| EIF2AK2           | 24.23204 | -0.604439855 | 0.395182 | -1.52952 | 0.126135 | 0.574377 |

|                    |          |              |          |          |          |          |
|--------------------|----------|--------------|----------|----------|----------|----------|
| rxfp21             | 10.10992 | -0.899449558 | 0.816457 | -1.10165 | 0.270614 | 0.746683 |
| spry4              | 721.0411 | -0.058282095 | 0.182658 | -0.31908 | 0.749667 | 0.955074 |
| cox5b2             | 247.0565 | -0.211658935 | 0.268049 | -0.78963 | 0.429745 | 0.847418 |
| CR384085.1         | 0.659255 | -1.806909736 | 2.608416 | -0.69272 | 0.488483 | NA       |
| map4l              | 736.6369 | 0.13477046   | 0.280144 | 0.481076 | 0.630463 | 0.92291  |
| si:ch211-250k18.5  | 3.774072 | -0.014525936 | 1.165418 | -0.01246 | 0.990055 | 1        |
| exosc8             | 277.5883 | -0.372195599 | 0.183773 | -2.0253  | 0.042837 | 0.362408 |
| si:ch211-244o22.2  | 360.1382 | 0.076587689  | 0.150481 | 0.508952 | 0.610786 | 0.915331 |
| tnks1bp1           | 251.931  | -0.203558479 | 0.2174   | -0.93633 | 0.349102 | 0.801336 |
| mespab             | 0.553879 | -0.595450744 | 2.862235 | -0.20804 | 0.8352   | NA       |
| plcg2              | 68.43599 | -0.575669654 | 0.317344 | -1.81402 | 0.069674 | 0.450548 |
| sparta             | 42.11763 | 0.16911553   | 0.420875 | 0.401819 | 0.687817 | 0.938835 |
| vsir               | 179.4087 | -0.329004569 | 0.179306 | -1.83488 | 0.066523 | 0.440383 |
| slc6a17            | 50.11346 | 0.529696423  | 0.357237 | 1.48276  | 0.138138 | 0.594663 |
| BX324132.1         | 0.875437 | 0.955145386  | 2.124743 | 0.449535 | 0.653046 | NA       |
| BX548044.1         | 0.429242 | 2.074396812  | 4.273253 | 0.485437 | 0.627366 | NA       |
| tlr7               | 0.981592 | -0.150908506 | 1.919367 | -0.07862 | 0.937332 | NA       |
| spata21            | 92.20789 | 0.145983778  | 0.217695 | 0.670588 | 0.502483 | 0.881342 |
| pimr149            | 0 NA     | NA           | NA       | NA       | NA       | NA       |
| BX548044.2         | 0.221663 | 0 5.267649   | 0        | 1 NA     |          |          |
| h2afva             | 1793.978 | 0.00819469   | 0.164849 | 0.04971  | 0.960353 | 0.999164 |
| purba              | 1470.633 | 0.121420706  | 0.08727  | 1.391328 | 0.164126 | 0.633166 |
| bloc1s3            | 32.27887 | 0.572079499  | 0.281475 | 2.032432 | 0.04211  | 0.358841 |
| zgc:172139         | 45.50411 | -0.029056056 | 0.284853 | -0.102   | 0.918754 | 0.993884 |
| dclrelb            | 237.5835 | 0.224996614  | 0.139948 | 1.607715 | 0.107898 | 0.539565 |
| zgc:66024          | 10.53358 | -0.162826761 | 0.646122 | -0.25201 | 0.801036 | 0.96768  |
| zgc:66024          | 2.072458 | 0.667208206  | 1.556256 | 0.428726 | 0.668122 | NA       |
| fam83ha            | 160.9343 | 0.137537956  | 0.187546 | 0.733355 | 0.463342 | 0.864408 |
| rnf183             | 337.2116 | -0.064295142 | 0.121744 | -0.52812 | 0.597419 | 0.911953 |
| si:ch211-163121.10 | 17.74563 | -0.203630188 | 0.431109 | -0.47234 | 0.636684 | 0.924779 |
| f2r11.1            | 35.34236 | 0.164260396  | 0.349257 | 0.470314 | 0.638131 | 0.924779 |
| gbp4               | 16.77619 | -0.033114633 | 0.703394 | -0.04708 | 0.962451 | 0.999461 |
| il2rga             | 14.74345 | 0.664284396  | 0.673388 | 0.986481 | 0.323897 | 0.783161 |
| si:dkey-98f17.5    | 60.29784 | 0.424442861  | 0.251939 | 1.684707 | 0.092045 | 0.507669 |
| si:dkey-61p9.7     | 8.40287  | -2.613806077 | 1.407593 | -1.85693 | 0.063321 | 0.429493 |
| nap114b            | 1075.916 | 0.037243426  | 0.129817 | 0.286893 | 0.774194 | 0.960694 |
| si:ch211-250m6.4   | 0.644893 | 0 2.826244   | 0        | 1 NA     |          |          |
| fance              | 71.64773 | 0.176970208  | 0.323747 | 0.546631 | 0.584632 | 0.906628 |
| si:ch211-250m6.7   | 3.116562 | 1.055430612  | 1.928893 | 0.547169 | 0.584263 | 0.906412 |
| zgc:153031         | 220.0963 | -0.241257363 | 0.214728 | -1.12355 | 0.261204 | 0.738737 |
| tspan13a           | 193.3903 | 0.09716685   | 0.267937 | 0.362649 | 0.716867 | 0.94627  |
| mrpl14             | 318.8921 | 0.356137923  | 0.172609 | 2.063266 | 0.039087 | 0.34567  |
| klhl41a            | 118.0828 | -0.320595645 | 0.223991 | -1.43129 | 0.152348 | 0.616255 |
| sostdcla           | 210.3942 | -0.526038893 | 0.206827 | -2.54338 | 0.010979 | 0.182478 |
| mettl5             | 274.8454 | -0.013834312 | 0.139225 | -0.09937 | 0.920847 | 0.994085 |
| nriplb             | 384.691  | 0.034774678  | 0.145266 | 0.239386 | 0.810806 | 0.969828 |
| nos1               | 125.1001 | 0.278071693  | 0.282025 | 0.985981 | 0.324143 | 0.783161 |
| zgc:153012         | 269.2219 | -0.026970939 | 0.197519 | -0.13655 | 0.891387 | 0.988566 |
| si:ch73-42k18.1    | 1.877044 | -1.501100135 | 1.332452 | -1.12657 | 0.259924 | NA       |
| ppplr35            | 26.33205 | -0.213263494 | 0.361279 | -0.5903  | 0.554988 | 0.898671 |
| map2k2b            | 148.6254 | 0.379029548  | 0.189348 | 2.001765 | 0.04531  | 0.372707 |
| rad51c             | 37.01935 | -0.280598941 | 0.342846 | -0.81844 | 0.413106 | 0.838274 |
| umod11             | 14.78391 | -0.182976737 | 0.454849 | -0.40228 | 0.687478 | 0.938835 |
| si:ch211-137a8.2   | 65.79135 | -0.283481776 | 0.247598 | -1.14493 | 0.252239 | 0.732759 |

|                   |          |              |          |          |          |          |
|-------------------|----------|--------------|----------|----------|----------|----------|
| cyp1b1            | 48.0546  | -0.241143757 | 0.383715 | -0.62844 | 0.529713 | 0.890484 |
| si:ch211-218m3.11 | 0.120883 | 0            | 5.267649 | 0        | 1        | NA       |
| xaf1              | 25.74488 | 0.020271405  | 0.621638 | 0.03261  | 0.973986 | 1        |
| atp5meb           | 3162.352 | 0.093672154  | 0.13666  | 0.685438 | 0.493067 | 0.876715 |
| zgc:113983        | 16.3971  | 0.145903805  | 0.578981 | 0.252001 | 0.80104  | 0.96768  |
| BX897692.1        | 1.043795 | -2.441912773 | 2.23664  | -1.09178 | 0.274931 | NA       |
| si:ch211-264e16.1 | 118.2273 | -0.358966675 | 0.244063 | -1.4708  | 0.141346 | 0.600146 |
| si:ch211-219a15.4 | 6.628281 | 0.784300375  | 0.974562 | 0.804773 | 0.420951 | 0.842494 |
| frmd7             | 4.811906 | -0.547800993 | 0.694274 | -0.78903 | 0.430096 | 0.847541 |
| nripla            | 309.7767 | -0.257421157 | 0.148908 | -1.72873 | 0.083858 | 0.486647 |
| si:ch211-261n11.7 | 9.129477 | -2.221789425 | 0.97095  | -2.28826 | 0.022122 | 0.263263 |
| zgc:153372        | 95.98677 | -0.230051847 | 0.21433  | -1.07335 | 0.283112 | 0.755028 |
| zgc:153759        | 8.532844 | 0.390398334  | 0.706123 | 0.552876 | 0.580348 | 0.905618 |
| pdlim4            | 254.7565 | -0.144538989 | 0.17259  | -0.83747 | 0.402328 | 0.833284 |
| lim2.1            | 311.9336 | 0.372997332  | 0.261981 | 1.423756 | 0.154517 | 0.619425 |
| bsx               | 40.38289 | 0.094209888  | 0.293521 | 0.320965 | 0.748237 | 0.955074 |
| glol              | 1638.8   | -0.096120275 | 0.123281 | -0.77968 | 0.435577 | 0.850467 |
| glceb             | 435.6416 | -0.010148349 | 0.122517 | -0.08283 | 0.933985 | 0.996638 |
| jhy               | 16.30241 | -0.26554094  | 0.45882  | -0.57875 | 0.56276  | 0.900772 |
| btbd9             | 327.0052 | 0.125546832  | 0.139403 | 0.900605 | 0.367798 | 0.817078 |
| gabral            | 68.05262 | 0.425852394  | 0.270742 | 1.572908 | 0.11574  | 0.555893 |
| zgc:158862        | 35.89328 | 1.871591052  | 1.032641 | 1.812431 | 0.06992  | 0.451012 |
| hspa8             | 56840.57 | -0.770093433 | 0.126142 | -6.10498 | 1.03E-09 | 7.76E-07 |
| zgc:153631        | 140.1711 | 0.22343628   | 0.202375 | 1.104072 | 0.269562 | 0.746029 |
| pimr129           | 0.544138 | -2.788832344 | 2.668452 | -1.04511 | 0.295971 | NA       |
| h2afx1            | 6134.644 | 0.193709093  | 0.153928 | 1.258437 | 0.208234 | 0.69024  |
| hist2h21          | 1274.113 | -0.105954428 | 0.167806 | -0.63141 | 0.527773 | 0.889948 |
| pcyox11           | 252.6501 | 0.015027272  | 0.129992 | 0.115601 | 0.907969 | 0.991745 |
| tle3b             | 862.8264 | 0.131955992  | 0.119512 | 1.10412  | 0.269541 | 0.746029 |
| si:ch211-147a11.3 | 153.7673 | -0.203418969 | 0.203078 | -1.00168 | 0.316499 | 0.778879 |
| eps8b             | 11.21169 | 1.608263958  | 0.816233 | 1.97035  | 0.048798 | 0.384446 |
| ifnphi2           | 0        | NA           | NA       | NA       | NA       | NA       |
| prdx4             | 1085.27  | 0.15892811   | 0.117838 | 1.348702 | 0.177433 | 0.651026 |
| nphp4             | 87.90402 | -0.002012276 | 0.196814 | -0.01022 | 0.991842 | 1        |
| elnb              | 206.3887 | -0.307351977 | 0.62235  | -0.49386 | 0.621407 | 0.918461 |
| cyp7a1            | 275.7736 | -0.385807754 | 0.825569 | -0.46732 | 0.640268 | 0.924877 |
| adcyla            | 9.111873 | 1.325817127  | 0.709148 | 1.869592 | 0.06154  | 0.425614 |
| admb              | 140.0184 | 0.081360882  | 0.214624 | 0.379086 | 0.704624 | 0.943785 |
| rxfp3.3a1         | 14.78053 | 0.266862535  | 0.556315 | 0.479696 | 0.631443 | 0.923003 |
| acss21            | 53.80883 | 0.886821033  | 0.492626 | 1.80019  | 0.071831 | 0.4564   |
| skor1a            | 119.4788 | 0.20834778   | 0.231099 | 0.901553 | 0.367294 | 0.816459 |
| plac811           | 58.77022 | -0.510878445 | 0.286807 | -1.78126 | 0.07487  | 0.464197 |
| pimr51            | 0.127238 | 0            | 5.267649 | 0        | 1        | NA       |
| akipl             | 31.83301 | -0.086976298 | 0.356676 | -0.24385 | 0.807345 | 0.969736 |
| si:ch211-242e8.1  | 48.83111 | 0.094803771  | 0.856636 | 0.11067  | 0.911878 | 0.992336 |
| agpat4            | 145.1098 | 0.137183796  | 0.162965 | 0.8418   | 0.3999   | 0.831277 |
| cht8              | 122.6023 | -0.15155209  | 0.196478 | -0.77134 | 0.440503 | 0.852385 |
| wu:fk65c09        | 2.313507 | -0.426560299 | 1.45836  | -0.29249 | 0.76991  | 0.960484 |
| serpinf1          | 840.5323 | 0.206674689  | 0.160185 | 1.290229 | 0.196971 | 0.677235 |
| ranbp3b           | 860.597  | 0.040662229  | 0.105535 | 0.385298 | 0.700017 | 0.942647 |
| lgals914          | 0.800048 | -0.868148328 | 2.805975 | -0.30939 | 0.757023 | NA       |
| btg3              | 463.7877 | 0.030461449  | 0.132453 | 0.229978 | 0.818108 | 0.971518 |
| nufip2            | 702.0592 | 0.211592508  | 0.14727  | 1.436765 | 0.150785 | 0.614977 |
| cry3a             | 4509.137 | 0.146211944  | 0.152539 | 0.958521 | 0.3378   | 0.794808 |



|                   |          |              |          |          |          |          |
|-------------------|----------|--------------|----------|----------|----------|----------|
| mrm3b             | 88.81971 | 0.062298928  | 0.213505 | 0.291791 | 0.770447 | 0.960484 |
| ints2             | 246.6619 | -0.020383757 | 0.137143 | -0.14863 | 0.881845 | 0.986908 |
| agrp              | 58.77899 | -0.000641405 | 0.365607 | -0.00175 | 0.9986   | 1        |
| atp6v0d1          | 1518.467 | -2.45E-05    | 0.12051  | -0.0002  | 0.999838 | 1        |
| col2ala           | 27122.57 | 0.427515449  | 0.200971 | 2.127254 | 0.033399 | 0.323127 |
| gls2a             | 215.42   | -0.045899429 | 0.300445 | -0.15277 | 0.878579 | 0.985761 |
| tmcol             | 538.2311 | 0.31201507   | 0.156507 | 1.993615 | 0.046194 | 0.375668 |
| aldh9a1a.1        | 10212.7  | -0.041542835 | 0.119012 | -0.34906 | 0.727041 | 0.949095 |
| napbb             | 87.89295 | 0.896046774  | 0.22967  | 3.901447 | 9.56E-05 | 0.008792 |
| zgc:l12962        | 216.8367 | -0.423163128 | 0.146493 | -2.88863 | 0.003869 | 0.103403 |
| si:dkeyp-82a1.4   | 0.856564 | 1.055433907  | 2.197014 | 0.480395 | 0.630947 | NA       |
| fgfr4             | 1286.826 | 0.018935022  | 0.141589 | 0.133732 | 0.893615 | 0.988566 |
| fam89b            | 150.3128 | -0.471553552 | 0.236831 | -1.9911  | 0.04647  | 0.376263 |
| znrd2             | 406.1452 | -0.039473934 | 0.143278 | -0.27551 | 0.782928 | 0.962328 |
| ikzf2             | 44.45132 | -0.236502252 | 0.2709   | -0.87302 | 0.38265  | 0.825435 |
| dbn1              | 199.6704 | -0.233867432 | 0.148691 | -1.57284 | 0.115755 | 0.555893 |
| unc93b1           | 38.91802 | 0.475982729  | 0.347044 | 1.371536 | 0.170208 | 0.641806 |
| timm10            | 359.791  | -0.039192385 | 0.145901 | -0.26862 | 0.788219 | 0.963471 |
| kcnh5b            | 18.38788 | -0.70147699  | 0.615265 | -1.14012 | 0.254235 | 0.733304 |
| ppp2r5eb          | 817.3642 | 0.218596461  | 0.089776 | 2.434912 | 0.014895 | 0.213725 |
| si:ch211-216123.2 | 443.4618 | -0.126007632 | 0.109816 | -1.14745 | 0.251198 | 0.731476 |
| fhdc3             | 141.1205 | -0.147096995 | 0.161258 | -0.91219 | 0.361671 | 0.811787 |
| mstnb             | 29.60605 | 1.722774602  | 0.511699 | 3.366771 | 0.000761 | 0.036636 |
| vwc2l             | 2.600045 | -0.484041685 | 1.186611 | -0.40792 | 0.683333 | 0.938241 |
| ppplr15a          | 1224.798 | -0.053425688 | 0.22902  | -0.23328 | 0.815544 | 0.971158 |
| grikla            | 106.2036 | -0.076033588 | 0.381545 | -0.19928 | 0.842045 | 0.97643  |
| aars              | 3302.466 | 0.042183442  | 0.110782 | 0.380779 | 0.703367 | 0.943622 |
| map3k7c1          | 39.53067 | -0.259617992 | 0.329093 | -0.78889 | 0.430177 | 0.847541 |
| pex11b            | 109.6511 | -0.185664227 | 0.215184 | -0.86282 | 0.388238 | 0.827592 |
| rit1              | 237.3121 | 0.018311889  | 0.150365 | 0.121783 | 0.903071 | 0.991243 |
| tmem135           | 323.5948 | 0.324314969  | 0.191016 | 1.697845 | 0.089537 | 0.502318 |
| tafa5a            | 112.1325 | 0.006176278  | 0.237282 | 0.026029 | 0.979234 | 1        |
| si:dkey-73n10.1   | 202.0492 | 0.091433294  | 0.164799 | 0.554817 | 0.57902  | 0.905417 |
| cerk              | 84.97674 | -0.175298777 | 0.241979 | -0.72444 | 0.468797 | 0.866951 |
| gramd4a           | 23.93087 | 0.519464846  | 0.422277 | 1.230152 | 0.21864  | 0.699445 |
| vps4b             | 1211.099 | -0.00816714  | 0.082794 | -0.09864 | 0.921421 | 0.994085 |
| ubtd2             | 384.1845 | 0.024495209  | 0.171115 | 0.143151 | 0.886171 | 0.987533 |
| celsrla           | 412.1015 | 0.052978772  | 0.141981 | 0.373139 | 0.709045 | 0.945546 |
| cyp27a1.2         | 6.639987 | -2.544143114 | 1.064343 | -2.39034 | 0.016833 | 0.230232 |
| si:dkey-242h9.3   | 39.57406 | 1.772780891  | 1.266867 | 1.399343 | 0.16171  | 0.628908 |
| zgc:l72339        | 9.71127  | -0.199539923 | 0.673849 | -0.29612 | 0.767139 | 0.960296 |
| zgc:l63030        | 491.3819 | 0.093007279  | 0.29969  | 0.310344 | 0.756299 | 0.956532 |
| mycbpap           | 14.30233 | -0.230647481 | 0.507686 | -0.45431 | 0.649605 | 0.927756 |
| ebf1b             | 52.23196 | 0.48058045   | 0.278401 | 1.726217 | 0.084308 | 0.487271 |
| zgc:l72120        | 27.15677 | 0.990868309  | 0.390135 | 2.539812 | 0.011091 | 0.18325  |
| taarl5            | 0 NA     | NA           | NA       | NA       | NA       | NA       |
| stx7l             | 99.24125 | 0.183783917  | 0.213105 | 0.86241  | 0.388462 | 0.827613 |
| taarl4i           | 0 NA     | NA           | NA       | NA       | NA       | NA       |
| taarl4l           | 0.97437  | -1.482254003 | 1.751332 | -0.84636 | 0.397353 | NA       |
| taarl0            | 0.174762 | 0 5.267649   | 0        | 1 NA     |          |          |
| c6ast1            | 5.501008 | -1.695825857 | 0.855394 | -1.98251 | 0.047422 | 0.379101 |
| zgc:l53738        | 19.05878 | -0.301867126 | 0.39729  | -0.75982 | 0.447365 | 0.856073 |
| ttc32             | 147.6458 | 0.03471555   | 0.230667 | 0.150501 | 0.88037  | 0.986419 |
| pdia5             | 484.7945 | 0.108276144  | 0.100449 | 1.077927 | 0.281066 | 0.753478 |

|                   |          |              |            |          |          |          |    |
|-------------------|----------|--------------|------------|----------|----------|----------|----|
| si:ch211-244b2.3  | 52.94094 | -0.516269523 | 0.385455   | -1.33938 | 0.180448 | 0.656148 |    |
| matn3a            | 624.0326 | -0.225754919 | 0.317231   | -0.71164 | 0.476686 | 0.869292 |    |
| rxfp3.3a3         | 6.857449 | 0.449707865  | 0.766296   | 0.586859 | 0.557298 | 0.899165 |    |
| aftpha            | 462.798  | 0.011626492  | 0.113703   | 0.102254 | 0.918555 | 0.993884 |    |
| uacaa             | 229.4566 | -0.189285506 | 0.147283   | -1.28519 | 0.198727 | 0.679447 |    |
| zpaxl             | 5.003262 | 0.361037725  | 0.822836   | 0.438773 | 0.660826 | 0.930581 |    |
| mixl1             | 8.401208 | -0.552190254 | 0.608125   | -0.90802 | 0.363867 | 0.814255 |    |
| chrn4a            | 92.50031 | -0.015545411 | 0.361332   | -0.04302 | 0.965684 |          | 1  |
| rec8b             | 2.187096 | -0.298859023 | 1.549969   | -0.19282 | 0.847103 | NA       |    |
| metap2a           | 160.0371 | 0.429234512  | 0.228371   | 1.879545 | 0.06017  | 0.422294 |    |
| erich3            | 19.49    | 0.610621502  | 0.523667   | 1.166049 | 0.243595 | 0.724437 |    |
| si:ch211-196h16.5 | 120.1162 | 0.423821075  | 0.222897   | 1.90142  | 0.057247 | 0.413213 |    |
| matn3b            | 148.2213 | 0.113436584  | 0.321587   | 0.35274  | 0.724283 | 0.948276 |    |
| esrra             | 166.7351 | 0.044475423  | 0.22227    | 0.200097 | 0.841405 | 0.97643  |    |
| wdr35             | 206.1673 | 0.035001075  | 0.172704   | 0.202665 | 0.839397 | 0.976417 |    |
| si:dkey-182i3.11  | 1.482443 | -3.939035572 | 1.965419   | -2.00417 | 0.045052 | NA       |    |
| kbtbd4            | 129.1062 | -0.009159247 | 0.182295   | -0.05024 | 0.959928 | 0.999164 |    |
| ighmbp2           | 98.47449 | 0.052233447  | 0.2314     | 0.225728 | 0.821413 | 0.971788 |    |
| pimr132           | 0.049519 |              | 0.5.267649 |          | 0        | 1        | NA |
| trmt5             | 133.2352 | -0.521514139 | 0.191009   | -2.73031 | 0.006327 | 0.134501 |    |
| elov17a           | 425.1397 | 0.19126309   | 0.139962   | 1.36654  | 0.171769 | 0.643953 |    |
| tsen15            | 137.5132 | -0.341186426 | 0.180152   | -1.89388 | 0.058241 | 0.416878 |    |
| pimr109           | 0.304838 | 2.072152707  | 3.994796   | 0.518713 | 0.603961 | NA       |    |
| bbc3              | 194.8809 | -0.006382638 | 0.211265   | -0.03021 | 0.975898 |          | 1  |
| ercc8             | 264.9656 | 0.041969285  | 0.161441   | 0.259966 | 0.79489  | 0.965688 |    |
| ndufaf2           | 204.4468 | -0.027428663 | 0.185639   | -0.14775 | 0.882538 | 0.986908 |    |
| gabpa             | 552.5567 | 0.047263     | 0.110205   | 0.428865 | 0.668021 | 0.933086 |    |
| bida              | 265.2275 | 0.139931936  | 0.189689   | 0.737691 | 0.460702 | 0.862374 |    |
| acot16            | 115.7844 | -1.664604167 | 0.359634   | -4.6286  | 3.68E-06 | 0.000845 |    |
| ahsg2             | 347.7416 |              | 0.1.693502 |          | 0        | 1        | 1  |
| insl5b            | 6.29348  | -2.503466349 | 1.311463   | -1.90891 | 0.056274 | 0.410018 |    |
| bcl6ab            | 263.7805 | -0.050222704 | 0.174921   | -0.28712 | 0.774023 | 0.960636 |    |
| moxd11            | 88.99707 | 0.593762444  | 0.305736   | 1.942076 | 0.052128 | 0.396782 |    |
| upf3a             | 317.758  | 0.167302307  | 0.181275   | 0.922922 | 0.356048 | 0.807063 |    |
| osbp19            | 626.918  | 0.064087728  | 0.093861   | 0.682794 | 0.494737 | 0.878016 |    |
| tmem177           | 299.2976 | 0.253403866  | 0.135348   | 1.872245 | 0.061173 | 0.424852 |    |
| snx9b             | 867.0013 | -0.034196319 | 0.09096    | -0.37595 | 0.706956 | 0.944895 |    |
| si:ch211-203k16.3 | 14.24709 | 0.682015733  | 0.878214   | 0.776594 | 0.437398 | 0.851283 |    |
| pomcb             | 6.173128 | 0.68926651   | 0.728507   | 0.946136 | 0.344079 | 0.798147 |    |
| ill5ra            | 2.911205 | 0.812986177  | 1.35424    | 0.600327 | 0.548289 | 0.896644 |    |
| oxall             | 533.2221 | -0.440717852 | 0.13507    | -3.26288 | 0.001103 | 0.047146 |    |
| tmem199           | 83.67689 | -0.022003602 | 0.241857   | -0.09098 | 0.92751  | 0.994973 |    |
| efr3bb            | 67.36625 | 0.191086514  | 0.21726    | 0.87953  | 0.379114 | 0.823173 |    |
| fam169b           | 10.26596 | 1.322737322  | 0.915532   | 1.444774 | 0.148521 | 0.610149 |    |
| si:ch73-122g19.1  | 2.499079 | 1.99427455   | 1.837953   | 1.085052 | 0.277899 | 0.751841 |    |
| vps53             | 312.356  | -0.043957509 | 0.173758   | -0.25298 | 0.800283 | 0.967327 |    |
| mus81             | 125.2673 | 0.346954284  | 0.234994   | 1.476439 | 0.139826 | 0.598212 |    |
| nkx3.3            | 90.58526 | -0.277903037 | 0.264579   | -1.05036 | 0.293553 | 0.76277  |    |
| si:dkey-12e7.1    | 139.0635 | -0.499052071 | 0.197234   | -2.53025 | 0.011398 | 0.185329 |    |
| drgx              | 50.85018 | -0.240881746 | 0.426301   | -0.56505 | 0.572039 | 0.903461 |    |
| trip6             | 212.9863 | -0.210617179 | 0.176717   | -1.19183 | 0.233327 | 0.714569 |    |
| tmem72            | 16.56274 | 0.345094351  | 0.578313   | 0.596726 | 0.55069  | 0.8974   |    |
| FP102052.1        | 52.94468 | 0.600320951  | 0.333324   | 1.801014 | 0.071701 | 0.4564   |    |
| zgc:114045        | 214.7455 | -0.338391681 | 0.207383   | -1.63172 | 0.102738 | 0.529448 |    |

|                  |          |              |          |          |          |          |
|------------------|----------|--------------|----------|----------|----------|----------|
| bcl6b            | 262.4598 | -0.374723485 | 0.188705 | -1.98576 | 0.04706  | 0.378022 |
| tbc1d24          | 502.9929 | -0.082307285 | 0.152258 | -0.54058 | 0.588799 | 0.908018 |
| zgc:153115       | 485.4698 | -0.001267503 | 0.247517 | -0.00512 | 0.995914 | 1        |
| adgr12a          | 629.6816 | 0.127392028  | 0.143923 | 0.885143 | 0.37608  | 0.822258 |
| ppp3r1b          | 1431.841 | 0.05318128   | 0.093122 | 0.571091 | 0.567938 | 0.901989 |
| spa17            | 223.0471 | 0.114890267  | 0.224082 | 0.512716 | 0.60815  | 0.915204 |
| CR847571.1       | 0.403336 | 1.055393839  | 3.764118 | 0.280383 | 0.779184 | NA       |
| zgc:153142       | 0 NA     | NA           | NA       | NA       | NA       | NA       |
| nrn11a           | 75.96554 | 0.147070137  | 0.297418 | 0.494491 | 0.62096  | 0.918399 |
| crep             | 115.343  | 0.034520597  | 0.206556 | 0.167124 | 0.867272 | 0.982582 |
| sh2d4ba          | 14.41973 | -0.651787823 | 0.742327 | -0.87803 | 0.379925 | 0.823607 |
| zgc:162608       | 420.5812 | -0.626761589 | 0.235417 | -2.66234 | 0.00776  | 0.14885  |
| tnfsf12          | 110.176  | 0.138879131  | 0.211061 | 0.658004 | 0.510536 | 0.884085 |
| si:dkey-242g16.2 | 144.1482 | -0.401514955 | 0.294573 | -1.36304 | 0.17287  | 0.645664 |
| pard6a           | 396.0787 | 0.159769601  | 0.124871 | 1.279474 | 0.20073  | 0.681045 |
| zgc:158868       | 29.905   | -0.073353365 | 0.398646 | -0.18401 | 0.854008 | 0.978943 |
| si:ch211-125e6.5 | 21.31128 | 0.291855664  | 0.653796 | 0.446402 | 0.655307 | 0.929606 |
| mxtx1            | 1.292426 | -1.012433727 | 1.919344 | -0.52749 | 0.597854 | NA       |
| cnga4            | 22.72602 | 0.860024535  | 0.412201 | 2.086423 | 0.03694  | 0.337141 |
| mtgl             | 131.1773 | -0.137875455 | 0.187518 | -0.73527 | 0.462178 | 0.863463 |
| tmem88b          | 73.64934 | -0.28145975  | 0.209605 | -1.34281 | 0.179334 | 0.654677 |
| itga2.1          | 9.631839 | -0.412707853 | 0.879953 | -0.46901 | 0.639061 | 0.924779 |
| zswim8           | 1101.046 | -0.054411001 | 0.108506 | -0.50146 | 0.616049 | 0.916365 |
| si:dkeyp-114g9.1 | 2.626052 | -1.864564012 | 1.063197 | -1.75373 | 0.079476 | 0.477246 |
| lrrc4.1          | 398.1514 | -0.039804949 | 0.222701 | -0.17874 | 0.858144 | 0.979774 |
| pln              | 77.58723 | 0.033847232  | 0.328395 | 0.103069 | 0.917908 | 0.993875 |
| zgc:194990       | 39.06314 | 0.464454642  | 0.356518 | 1.302751 | 0.19266  | 0.672683 |
| gkup             | 125.4934 | -0.642969206 | 0.211522 | -3.03973 | 0.002368 | 0.077821 |
| cx34.5           | 4.245582 | -0.191648933 | 0.860828 | -0.22263 | 0.823821 | 0.972005 |
| coll7a1a         | 2410.852 | 0.321112381  | 0.199219 | 1.611858 | 0.106993 | 0.537    |
| trim23           | 172.9103 | -0.035483943 | 0.173429 | -0.2046  | 0.837883 | 0.976301 |
| grpel2           | 769.6534 | 0.103682519  | 0.114157 | 0.908248 | 0.363747 | 0.814144 |
| nhp2             | 565.3395 | -0.183872317 | 0.182649 | -1.0067  | 0.31408  | 0.777479 |
| tmie             | 61.66661 | 0.319565321  | 0.33268  | 0.960578 | 0.336764 | 0.793455 |
| hsbpla           | 552.6881 | -0.055895414 | 0.186313 | -0.30001 | 0.764171 | 0.959228 |
| nkain2           | 64.44435 | 0.16619785   | 0.250172 | 0.664335 | 0.506476 | 0.883007 |
| slbp2            | 2.240359 | 0.10314964   | 1.301323 | 0.079265 | 0.936822 | 0.997044 |
| tp53illa         | 130.4363 | -0.11657614  | 0.186014 | -0.6267  | 0.530853 | 0.890545 |
| slc26a4          | 6.332179 | -0.020473257 | 0.764543 | -0.02678 | 0.978636 | 1        |
| plscr3b          | 1870.913 | -0.046462854 | 0.126645 | -0.36687 | 0.713713 | 0.945821 |
| tnk1             | 341.9235 | -0.191479926 | 0.152982 | -1.25165 | 0.210698 | 0.692347 |
| cfap58           | 18.21219 | -0.044137282 | 0.471623 | -0.09359 | 0.925438 | 0.994815 |
| neur11aa         | 54.77884 | 0.032212438  | 0.284961 | 0.113042 | 0.909998 | 0.992208 |
| ptgdsa           | 138.9537 | -0.860706663 | 0.212488 | -4.05062 | 5.11E-05 | 0.00569  |
| dachd            | 487.3361 | 0.046003733  | 0.113995 | 0.403558 | 0.686538 | 0.938732 |
| lpar6b           | 56.58069 | 0.154763441  | 0.258109 | 0.599604 | 0.54877  | 0.897065 |
| pimr128          | 1.200191 | 0.974291111  | 2.062531 | 0.472377 | 0.636658 | NA       |
| dbh              | 36.2252  | -0.447351782 | 0.386119 | -1.15858 | 0.246626 | 0.727706 |
| gja5b            | 11.25157 | 0.849791068  | 0.603835 | 1.407324 | 0.159331 | 0.625607 |
| gja8a            | 34.05372 | 0.809717449  | 0.466085 | 1.737275 | 0.082339 | 0.482739 |
| zgc:113314       | 99.99213 | -0.117661391 | 0.225944 | -0.52076 | 0.602537 | 0.914023 |
| si:dkey-6n21.13  | 18.58038 | 0.333005944  | 0.452739 | 0.735537 | 0.462013 | 0.863402 |
| rnaseka          | 602.0751 | 0.036028519  | 0.168854 | 0.213371 | 0.831037 | 0.974908 |
| alox12           | 655.9839 | -0.054378958 | 0.113772 | -0.47797 | 0.632675 | 0.923581 |

|                  |          |              |          |          |          |          |
|------------------|----------|--------------|----------|----------|----------|----------|
| cox7a1           | 197.2088 | -2.270442227 | 0.603011 | -3.76517 | 0.000166 | 0.013152 |
| igsf9bb          | 21.63474 | -1.139471372 | 0.349447 | -3.26078 | 0.001111 | 0.047149 |
| khdrbs2          | 261.3371 | 0.056286769  | 0.218647 | 0.257433 | 0.796845 | 0.966447 |
| mhclzca          | 203.7753 | -0.201456087 | 0.301539 | -0.66809 | 0.504074 | 0.881759 |
| chsy3            | 626.2611 | -0.020397076 | 0.136651 | -0.14926 | 0.881345 | 0.986908 |
| frem1a           | 713.4911 | 0.089093879  | 0.167869 | 0.530735 | 0.595603 | 0.91138  |
| spint2           | 1741.33  | -0.026164989 | 0.157075 | -0.16658 | 0.867704 | 0.982728 |
| slc13a3          | 77.22676 | -0.30519807  | 0.274731 | -1.1109  | 0.266613 | 0.743108 |
| ghrh             | 1.74923  | 0.901060037  | 1.493549 | 0.603301 | 0.546308 | NA       |
| traf1            | 17.97726 | -0.571646264 | 0.456263 | -1.25289 | 0.210246 | 0.692011 |
| dab2ipa          | 99.08004 | 0.087860165  | 0.261902 | 0.335469 | 0.737271 | 0.952312 |
| spryd7b          | 185.3931 | -0.000254556 | 0.212848 | -0.0012  | 0.999046 | 1        |
| tmem223          | 125.8165 | 0.08673908   | 0.176955 | 0.490176 | 0.624009 | 0.919497 |
| tmem179b         | 53.24774 | -0.853107979 | 0.334807 | -2.54806 | 0.010832 | 0.181481 |
| arl2             | 244.6579 | 0.232344543  | 0.202055 | 1.149906 | 0.250182 | 0.729991 |
| sumf2            | 106.9146 | 0.076277905  | 0.185652 | 0.410866 | 0.681171 | 0.937331 |
| phkg1b           | 169.9464 | 0.200340459  | 0.195118 | 1.026765 | 0.304531 | 0.769885 |
| spag1b           | 38.10173 | -0.639949282 | 0.310763 | -2.05929 | 0.039467 | 0.34755  |
| hs6st3b          | 4.003098 | 1.251850336  | 1.087865 | 1.15074  | 0.249839 | 0.729721 |
| abhd11           | 119.549  | 0.012174349  | 0.184364 | 0.066034 | 0.947351 | 0.997371 |
| cldnh            | 949.856  | 0.030330762  | 0.159192 | 0.190529 | 0.848895 | 0.978016 |
| si:dkey-88e18.2  | 2.935886 | 0.065269626  | 1.123566 | 0.058091 | 0.953676 | 0.998539 |
| zgc:136892       | 134.9455 | 0.15881237   | 0.207661 | 0.764768 | 0.44441  | 0.85448  |
| mett127          | 32.82682 | 0.309506437  | 0.31417  | 0.985157 | 0.324547 | 0.783308 |
| bbs10            | 39.07676 | 0.273916504  | 0.293675 | 0.932721 | 0.350964 | 0.802224 |
| aqp3b            | 31.66573 | -0.054688761 | 0.399    | -0.13706 | 0.89098  | 0.988566 |
| vps29            | 775.7445 | -0.060192318 | 0.120541 | -0.49935 | 0.617532 | 0.916375 |
| gpn3             | 108.5075 | -0.177180431 | 0.200459 | -0.88387 | 0.376764 | 0.822258 |
| ube2g1b          | 636.3946 | -0.018342403 | 0.126566 | -0.14492 | 0.884771 | 0.987266 |
| zgc:153981       | 192.0441 | 0.325470612  | 0.149416 | 2.17829  | 0.029384 | 0.304886 |
| si:dkey-238c7.16 | 486.7168 | 0.021154331  | 0.144589 | 0.146307 | 0.883679 | 0.987014 |
| gtf3c4           | 113.4235 | -0.126272164 | 0.222448 | -0.56765 | 0.570274 | 0.902481 |
| si:dkey-30c15.2  | 40.49251 | 0.267510142  | 0.477901 | 0.55976  | 0.575643 | 0.904739 |
| si:dkey-8e10.2   | 5.434695 | -1.69223353  | 1.417379 | -1.19392 | 0.23251  | 0.713923 |
| galt             | 167.0967 | 0.376380932  | 0.147733 | 2.547705 | 0.010843 | 0.181533 |
| atg12            | 167.7206 | 0.124406448  | 0.23209  | 0.536026 | 0.591941 | 0.909621 |
| zgc:162780       | 69.00867 | -1.743222913 | 0.335644 | -5.19366 | 2.06E-07 | 8.60E-05 |
| zgc:162396       | 271.5958 | -0.194430685 | 0.190906 | -1.01846 | 0.308458 | 0.773474 |
| atoh7            | 63.39268 | 0.394795378  | 0.258128 | 1.529457 | 0.126151 | 0.574377 |
| CR388165.1       | 1.892911 | 0.093648139  | 2.010292 | 0.046584 | 0.962845 | NA       |
| muc13a           | 73.07825 | -0.168832449 | 0.292065 | -0.57806 | 0.563221 | 0.90092  |
| kcnh3            | 20.68689 | -0.238260143 | 0.421856 | -0.56479 | 0.572217 | 0.903461 |
| zgc:153151       | 25.01065 | -0.560181223 | 0.44615  | -1.25559 | 0.209265 | 0.691286 |
| mucms1           | 19.69953 | -2.811389307 | 0.963224 | -2.91873 | 0.003515 | 0.098113 |
| zgc:114181       | 2251.45  | 0.122142125  | 0.182509 | 0.669239 | 0.503343 | 0.881759 |
| tmem222a         | 233.3383 | -0.131389799 | 0.137533 | -0.95533 | 0.339409 | 0.795226 |
| tmem150c         | 35.20223 | 0.124842136  | 0.351707 | 0.35496  | 0.722619 | 0.947632 |
| kif13a           | 230.4223 | -0.097879374 | 0.223623 | -0.4377  | 0.661605 | 0.930742 |
| si:ch211-214c7.4 | 410.3713 | -0.089970982 | 0.121513 | -0.74042 | 0.459044 | 0.861818 |
| chrn5b           | 2.112235 | 0.069408224  | 1.386618 | 0.050056 | 0.960078 | NA       |
| zgc:109889       | 558.7796 | 0.167432583  | 0.183633 | 0.911778 | 0.361886 | 0.811787 |
| snx30            | 236.8178 | 0.293641722  | 0.151653 | 1.936274 | 0.052834 | 0.399532 |
| taokla           | 629.4194 | 0.086412645  | 0.143651 | 0.601546 | 0.547477 | 0.896211 |
| zgc:162331       | 47.4838  | 0.740420999  | 0.66962  | 1.105734 | 0.268842 | 0.744925 |

|                   |          |              |          |          |          |          |
|-------------------|----------|--------------|----------|----------|----------|----------|
| palmt2            | 77.60322 | -0.4643769   | 0.374382 | -1.24038 | 0.214834 | 0.696864 |
| ckmt2a            | 1671.405 | 0.366349509  | 0.519761 | 0.704843 | 0.480908 | 0.870179 |
| atf7ip            | 1854.183 | 0.078446493  | 0.071653 | 1.094807 | 0.273601 | 0.749153 |
| mrps18c           | 336.8994 | -0.252883391 | 0.188698 | -1.34015 | 0.180197 | 0.656017 |
| si:ch211-255g12.8 | 8.860231 | 0.201734989  | 0.625068 | 0.322741 | 0.746891 | 0.955074 |
| tat               | 3937.541 | -0.676423755 | 0.253616 | -2.66712 | 0.00765  | 0.147606 |
| empl              | 58.15448 | 0.705470903  | 0.335757 | 2.101132 | 0.035629 | 0.331406 |
| vegfc             | 55.09565 | -0.708778718 | 0.258159 | -2.74551 | 0.006042 | 0.131072 |
| tmem160           | 104.5646 | 0.060460741  | 0.218187 | 0.277106 | 0.781699 | 0.962077 |
| ppp6r2b           | 69.58803 | 0.577516733  | 0.335131 | 1.723255 | 0.084842 | 0.488883 |
| chrnbl            | 324.5981 | -0.09534741  | 0.198975 | -0.47919 | 0.631801 | 0.923003 |
| si:dkey-121j17.6  | 49.92729 | 0.056727692  | 0.290898 | 0.195009 | 0.845386 | 0.976791 |
| fgf11a            | 11.08736 | -0.207467572 | 0.603623 | -0.3437  | 0.731069 | 0.950056 |
| adra2c            | 33.12179 | -0.237949482 | 0.517347 | -0.45994 | 0.645558 | 0.926728 |
| maipl             | 262.8512 | 0.212699516  | 0.138046 | 1.540785 | 0.123369 | 0.570096 |
| tyw5              | 159.2275 | -0.173206145 | 0.189963 | -0.91179 | 0.36188  | 0.811787 |
| chidl             | 198.3635 | 0.003124509  | 0.177024 | 0.01765  | 0.985918 | 1        |
| tmem230b          | 281.8624 | -0.294086377 | 0.150147 | -1.95866 | 0.050153 | 0.389949 |
| her8.2            | 97.94925 | 0.495609856  | 0.233094 | 2.126223 | 0.033485 | 0.323151 |
| nicn1             | 24.95039 | 0.81434043   | 0.364228 | 2.235796 | 0.025365 | 0.282825 |
| pcgf6             | 71.86147 | -0.11976425  | 0.22667  | -0.52837 | 0.597246 | 0.911953 |
| col7a11           | 273.8803 | -0.238066645 | 0.196901 | -1.20907 | 0.226636 | 0.707798 |
| si:ch211-261n11.5 | 270.4932 | -0.104067033 | 0.134535 | -0.77353 | 0.439207 | 0.852079 |
| lrguk             | 12.33673 | 0.16009085   | 0.471592 | 0.339469 | 0.734256 | 0.951134 |
| lgi2b             | 85.65321 | -0.176684823 | 0.255234 | -0.69225 | 0.488782 | 0.873964 |
| efhb              | 6.161705 | -0.867084173 | 0.920813 | -0.94165 | 0.346372 | 0.799463 |
| prmt6             | 136.7851 | 0.289982898  | 0.205469 | 1.41132  | 0.15815  | 0.623766 |
| si:ch211-113e8.5  | 0.10996  | 0            | 5.267649 | 0        | 1        | NA       |
| cdc34a            | 761.2353 | -0.027243258 | 0.13033  | -0.20903 | 0.834423 | 0.975731 |
| vwa10.2           | 5.78951  | 0.074198471  | 1.150122 | 0.064514 | 0.948561 | 0.997738 |
| foxi2             | 28.5314  | -0.21492628  | 0.306152 | -0.70203 | 0.482663 | 0.871787 |
| zbbx              | 6.399072 | 0.15006663   | 0.623332 | 0.240749 | 0.80975  | 0.969828 |
| glis3             | 22.50717 | -0.895364254 | 0.574026 | -1.5598  | 0.118808 | 0.562134 |
| rpz3              | 42.82324 | 0.783553964  | 0.311013 | 2.51936  | 0.011757 | 0.188516 |
| mpg               | 29.25054 | 0.016483378  | 0.391841 | 0.042067 | 0.966446 | 1        |
| mavs              | 138.9941 | 0.298502325  | 0.208189 | 1.433804 | 0.151628 | 0.615384 |
| hbba2             | 3.212835 | -0.190689721 | 0.971025 | -0.19638 | 0.844313 | 0.976791 |
| hbaa2             | 0.38778  | -3.092001853 | 4.211471 | -0.73419 | 0.462836 | NA       |
| pou4f2            | 417.263  | 0.10130855   | 0.208614 | 0.485626 | 0.627232 | 0.921095 |
| fnkc5a            | 7.772786 | -1.679482589 | 0.723127 | -2.32253 | 0.020204 | 0.251822 |
| cul5a             | 191.4702 | 0.016578798  | 0.171159 | 0.096862 | 0.922836 | 0.994525 |
| mos               | 16.61372 | -0.126481339 | 0.5758   | -0.21966 | 0.826134 | 0.973084 |
| slc35f2           | 120.0691 | -0.252672946 | 0.211989 | -1.19192 | 0.233293 | 0.714569 |
| capn5b            | 6.572877 | 1.050926402  | 0.814618 | 1.290084 | 0.197021 | 0.677235 |
| ckba              | 817.3329 | 0.031688599  | 0.156525 | 0.202451 | 0.839564 | 0.976417 |
| mtmr11            | 273.6866 | 0.084135426  | 0.142634 | 0.589871 | 0.555277 | 0.898723 |
| si:dkey-189g17.2  | 10.97967 | 1.042357303  | 0.557656 | 1.869176 | 0.061598 | 0.425659 |
| etv5a             | 617.1597 | 0.018478222  | 0.17316  | 0.106712 | 0.915018 | 0.993066 |
| syngap1b          | 192.8897 | -0.070583543 | 0.380323 | -0.18559 | 0.852767 | 0.978779 |
| caln2             | 9.862035 | 0.56296445   | 0.666865 | 0.844195 | 0.39856  | 0.830925 |
| nectin1a          | 32.63621 | -0.714515861 | 0.463814 | -1.54052 | 0.123433 | 0.570142 |
| gig2j             | 2.326594 | -2.49170059  | 1.553395 | -1.60404 | 0.108706 | 0.541209 |
| nitr1b            | 0.805442 | 0            | 2.623392 | 0        | 1        | NA       |
| flot2b            | 763.4641 | 0.063830712  | 0.110835 | 0.575908 | 0.564678 | 0.901445 |

|                  |          |              |          |          |          |          |
|------------------|----------|--------------|----------|----------|----------|----------|
| fbxo40.1         | 157.9937 | -0.306421454 | 0.259445 | -1.18106 | 0.237577 | 0.718568 |
| pus71            | 118.4822 | -0.245521141 | 0.285272 | -0.86066 | 0.389428 | 0.827843 |
| rec114           | 0.517657 | 1.055406064  | 3.187285 | 0.33113  | 0.740546 | NA       |
| tmc6a            | 6.26257  | 5.031751169  | 1.408906 | 3.571388 | 0.000355 | 0.021766 |
| dyn112a          | 786.3656 | -0.203641521 | 0.132884 | -1.53248 | 0.125405 | 0.573278 |
| crygm2d5         | 1766.656 | 0.411256494  | 0.258692 | 1.589751 | 0.111891 | 0.548216 |
| zgc:154058       | 54.43809 | 0.197914044  | 0.261131 | 0.757912 | 0.448504 | 0.856741 |
| znf1124          | 231.1758 | -0.035176356 | 0.277729 | -0.12666 | 0.899212 | 0.99045  |
| si:dkey-228114.1 | 0.120883 | 0            | 5.267649 | 0        | 1        | NA       |
| crygm2d12        | 3355.815 | 0.215340299  | 0.389781 | 0.552465 | 0.58063  | 0.905618 |
| si:ch211-198k9.6 | 16.49763 | -1.190551965 | 0.514463 | -2.31416 | 0.020659 | 0.255657 |
| sstr2b           | 4.128914 | 1.314886895  | 1.181038 | 1.113332 | 0.265566 | 0.742247 |
| zdhhc18a         | 254.1089 | -0.201126681 | 0.165553 | -1.21488 | 0.224411 | 0.706406 |
| ostml            | 282.1577 | -0.161979611 | 0.16488  | -0.98241 | 0.325899 | 0.784773 |
| dnal1l           | 32.27935 | 0.639051781  | 0.355625 | 1.79698  | 0.072339 | 0.457323 |
| crygm2d17        | 10608.11 | -0.041040408 | 0.296432 | -0.13845 | 0.889886 | 0.98835  |
| procal           | 81.18512 | 0.475513032  | 0.203725 | 2.334096 | 0.019591 | 0.246694 |
| crygm2d15        | 3359.064 | 0.418672661  | 0.359285 | 1.165295 | 0.2439   | 0.724507 |
| crygm2d11        | 4099.516 | -0.920943569 | 0.52547  | -1.75261 | 0.079669 | 0.477652 |
| si:ch211-117n7.7 | 170.5157 | 0.022783598  | 0.17857  | 0.127589 | 0.898474 | 0.990199 |
| rragca           | 563.5059 | 0.124697348  | 0.109869 | 1.134965 | 0.25639  | 0.73401  |
| sfxn4            | 185.4681 | 0.024396134  | 0.176714 | 0.138054 | 0.890198 | 0.98835  |
| rhbd12           | 228.6227 | -0.003579149 | 0.155621 | -0.023   | 0.981651 | 1        |
| pnpla4           | 17.97181 | -0.912133667 | 0.464306 | -1.96451 | 0.049471 | 0.387507 |
| CU571382.1       | 0.21379  | 2.079536253  | 5.22636  | 0.397894 | 0.690708 | NA       |
| kctd12.1         | 133.7196 | 0.214523612  | 0.302838 | 0.708377 | 0.478711 | 0.869292 |
| acod1            | 44.0462  | -0.083738705 | 0.393717 | -0.21269 | 0.831571 | 0.974908 |
| zgc:162944       | 1118.636 | -0.251712276 | 0.168936 | -1.48999 | 0.136228 | 0.591544 |
| nitrlb           | 0.649459 | 1.055420296  | 3.128929 | 0.33731  | 0.735883 | NA       |
| mrpl30           | 656.1555 | 0.031010485  | 0.190018 | 0.163197 | 0.870363 | 0.983365 |
| lipt2            | 36.42161 | -0.197054577 | 0.356957 | -0.55204 | 0.580921 | 0.905618 |
| txndc9           | 1148.871 | 0.025699558  | 0.114482 | 0.224486 | 0.822379 | 0.971966 |
| pnisr            | 1137.712 | -0.089695538 | 0.1321   | -0.679   | 0.49714  | 0.878609 |
| coq3             | 270.7057 | 0.088466549  | 0.19493  | 0.453838 | 0.649946 | 0.927756 |
| grxcrib          | 13.11631 | -0.245037346 | 0.576372 | -0.42514 | 0.670736 | 0.933939 |
| sox1a            | 278.7042 | 0.02946727   | 0.212043 | 0.138969 | 0.889475 | 0.988318 |
| zgc:113030       | 70.36195 | -0.157501661 | 0.2317   | -0.67976 | 0.496653 | 0.878298 |
| snul3a           | 393.6777 | 0.053491599  | 0.139089 | 0.384586 | 0.700544 | 0.942918 |
| cldna            | 115.9779 | 0.445314822  | 0.232663 | 1.91399  | 0.055621 | 0.408467 |
| sphk2            | 346.4439 | 0.198959261  | 0.118334 | 1.681342 | 0.092697 | 0.509435 |
| CR392036.1       | 0.940775 | 2.233632971  | 2.060156 | 1.084206 | 0.278274 | NA       |
| pimr152          | 0        | NA           | NA       | NA       | NA       | NA       |
| CABZ01071903.1   | 145.6405 | 0.132271068  | 0.205162 | 0.644714 | 0.519112 | 0.887148 |
| si:dkey-33c12.12 | 192.8915 | 0.036495299  | 0.163626 | 0.223041 | 0.823504 | 0.972005 |
| gtf2f2a          | 490.73   | 0.126721058  | 0.120943 | 1.047772 | 0.294744 | 0.763708 |
| hmga2            | 698.9226 | 0.116222549  | 0.185664 | 0.625985 | 0.531325 | 0.890833 |
| ska3             | 181.7939 | 0.385266859  | 0.21994  | 1.75169  | 0.079827 | 0.478112 |
| cox17            | 888.3111 | 0.372058796  | 0.174031 | 2.137889 | 0.032526 | 0.319448 |
| plala            | 130.2432 | 0.071792799  | 0.256761 | 0.27961  | 0.779777 | 0.961073 |
| hsd3b1           | 18.77013 | -0.381131085 | 0.569852 | -0.66882 | 0.503607 | 0.881759 |
| prkceb           | 14.30534 | 0.160089688  | 0.496038 | 0.322737 | 0.746894 | 0.955074 |
| CABZ01053976.1   | 136.236  | 0.435379457  | 0.221275 | 1.967593 | 0.049115 | 0.386041 |
| parp4            | 225.5871 | -0.110443363 | 0.202149 | -0.54635 | 0.584827 | 0.906655 |
| dnm2a            | 361.0401 | 0.211551289  | 0.193825 | 1.091454 | 0.275073 | 0.750424 |

|                   |          |              |          |          |          |          |
|-------------------|----------|--------------|----------|----------|----------|----------|
| ppap2d            | 650.7385 | -0.00692776  | 0.10405  | -0.06658 | 0.946915 | 0.997371 |
| tdp2a             | 1.622628 | 0.511045011  | 1.449585 | 0.352546 | 0.724429 | NA       |
| p2ry13            | 11.90415 | 0.599123527  | 0.676567 | 0.885534 | 0.375869 | 0.822237 |
| p2ry12            | 8.094556 | -0.326386927 | 0.562307 | -0.58044 | 0.561616 | 0.900673 |
| itga6b            | 651.8908 | 0.02661298   | 0.199015 | 0.133723 | 0.893621 | 0.988566 |
| eef1a112          | 174.3983 | 0.469356986  | 0.245294 | 1.91345  | 0.05569  | 0.408467 |
| kcnq5b            | 56.0683  | -0.174586122 | 0.320513 | -0.54471 | 0.585954 | 0.906655 |
| kcnq5a            | 27.41903 | -0.315116986 | 0.412639 | -0.76366 | 0.445068 | 0.855219 |
| pdlim2            | 580.0844 | -0.189016081 | 0.133175 | -1.41931 | 0.15581  | 0.621042 |
| zgc:162936        | 56.78421 | -0.162965581 | 0.246896 | -0.66006 | 0.509217 | 0.883523 |
| sh2b3             | 28.76456 | -0.264660588 | 0.34664  | -0.7635  | 0.445164 | 0.855332 |
| il21r.1           | 23.0721  | 0.238401097  | 0.37793  | 0.630808 | 0.528166 | 0.889948 |
| alox5b.3          | 5.310239 | 0.770414611  | 0.772275 | 0.997591 | 0.318478 | 0.779923 |
| pcsk7             | 376.3046 | 0.11379863   | 0.150215 | 0.757572 | 0.448707 | 0.856741 |
| lingo2b           | 147.8515 | 0.575116376  | 0.226699 | 2.536921 | 0.011183 | 0.183794 |
| mygl              | 945.6316 | 0.139431989  | 0.165311 | 0.84345  | 0.398977 | 0.831172 |
| cd281             | 198.1031 | -0.394668384 | 0.187542 | -2.10442 | 0.035341 | 0.330833 |
| lman1             | 401.7688 | 0.245740923  | 0.12808  | 1.918657 | 0.055028 | 0.405919 |
| cspg5a            | 1637.421 | 0.265743058  | 0.145611 | 1.825016 | 0.067999 | 0.44461  |
| nkd3              | 0.99491  | 3.196586445  | 2.026697 | 1.57724  | 0.11474  | NA       |
| arid6             | 129.5238 | -0.489278416 | 0.290489 | -1.68433 | 0.092118 | 0.507702 |
| bnc2              | 402.378  | 0.229577357  | 0.168265 | 1.364384 | 0.172447 | 0.645319 |
| dpy19111          | 81.83479 | 0.149959432  | 0.29127  | 0.514846 | 0.606661 | 0.915204 |
| dnajb14           | 132.8786 | 0.112608359  | 0.1517   | 0.742308 | 0.457901 | 0.860993 |
| si:ch211-145b13.6 | 82.31171 | -0.294200497 | 0.360309 | -0.81652 | 0.414202 | 0.838631 |
| txnipb            | 814.8612 | 0.010280204  | 0.380695 | 0.027004 | 0.978457 | 1        |
| rcn1              | 501.6071 | 0.154009669  | 0.178075 | 0.864857 | 0.387117 | 0.827592 |
| hce212            | 27.94721 | -3.478896697 | 0.478103 | -7.27646 | 3.43E-13 | 5.67E-10 |
| sesn2             | 175.0656 | -0.054970458 | 0.199594 | -0.27541 | 0.783    | 0.962328 |
| dmrt2b            | 33.4587  | -0.762998295 | 0.349915 | -2.18053 | 0.029219 | 0.304273 |
| pimr173           | 0.266154 | -0.868126796 | 4.123291 | -0.21054 | 0.833245 | NA       |
| taf15             | 2941.437 | 0.151003935  | 0.143802 | 1.050079 | 0.293682 | 0.76281  |
| cyp3c4            | 30.14447 | -0.126583165 | 0.549274 | -0.23046 | 0.817738 | 0.971441 |
| dchs1a            | 196.2431 | 0.389353959  | 0.175187 | 2.222503 | 0.026249 | 0.287427 |
| tmem41aa          | 203.4357 | -0.270228035 | 0.170065 | -1.58897 | 0.112067 | 0.548404 |
| ehhadh            | 157.1877 | -0.383525386 | 0.172059 | -2.22903 | 0.025812 | 0.285195 |
| rgs8              | 260.859  | 0.336874122  | 0.31172  | 1.080694 | 0.279833 | 0.752785 |
| rbp2a             | 2414.579 | 0.230800806  | 0.218429 | 1.056638 | 0.290677 | 0.76078  |
| AL935184.1        | 0.169362 | -1.710071829 | 5.238473 | -0.32644 | 0.744088 | NA       |
| zgc:162344        | 57.84586 | -0.301975293 | 0.268987 | -1.12264 | 0.261591 | 0.738975 |
| zgc:153920        | 8.975473 | 0.786385713  | 0.712622 | 1.103511 | 0.269805 | 0.746434 |
| dars              | 3382.59  | -0.265186688 | 0.116555 | -2.27521 | 0.022893 | 0.267028 |
| celf4             | 134.7628 | 0.45731789   | 0.290122 | 1.576297 | 0.114957 | 0.554651 |
| eny2              | 285.4509 | 0.096999881  | 0.171004 | 0.567237 | 0.570553 | 0.902481 |
| rgs4              | 1075.219 | -0.494193904 | 0.131252 | -3.76523 | 0.000166 | 0.013152 |
| zgc:173548        | 36.35208 | 0.034421282  | 0.321423 | 0.10709  | 0.914717 | 0.992972 |
| sfrp2             | 429.4153 | -0.055667877 | 0.191326 | -0.29096 | 0.771084 | 0.960484 |
| tldr6             | 18.82311 | -0.021989493 | 0.491584 | -0.04473 | 0.964321 | 0.999925 |
| foxgld            | 79.56142 | 0.384823195  | 0.318516 | 1.208176 | 0.226979 | 0.708107 |
| arfipl            | 315.5049 | 0.094333313  | 0.155783 | 0.605542 | 0.544819 | 0.895206 |
| adorala           | 1.182325 | -1.809041922 | 2.538104 | -0.71275 | 0.475998 | NA       |
| si:dkey-69o16.5   | 803.8383 | 0.602835206  | 0.279738 | 2.155001 | 0.031162 | 0.313784 |
| si:ch211-262i1.5  | 78.96781 | -0.076305959 | 0.224207 | -0.34034 | 0.733603 | 0.950808 |
| gfer              | 203.0962 | 0.328464299  | 0.20116  | 1.632852 | 0.1025   | 0.529149 |

|                   |          |              |          |          |          |          |
|-------------------|----------|--------------|----------|----------|----------|----------|
| si:ch211-163c2.2  | 2.768803 | -1.129899517 | 1.046254 | -1.07995 | 0.280165 | 0.752951 |
| pitx3             | 232.1195 | -0.224885977 | 0.160483 | -1.40131 | 0.161122 | 0.627852 |
| si:dkey-13ml.5    | 2.862964 | 2.073635721  | 1.453533 | 1.426617 | 0.15369  | 0.61823  |
| lrp8              | 439.1525 | 0.144530043  | 0.184513 | 0.783307 | 0.433447 | 0.849658 |
| actr2b            | 135.9053 | 0.159734171  | 0.194795 | 0.82001  | 0.41221  | 0.838123 |
| abcb11b           | 98.6772  | -0.637625665 | 0.664711 | -0.95925 | 0.337432 | 0.794381 |
| nbeaa             | 837.7387 | 0.275394079  | 0.131699 | 2.091084 | 0.03652  | 0.335935 |
| rspo3             | 151.8649 | 0.046770187  | 0.192736 | 0.242665 | 0.808265 | 0.969828 |
| atp5f1b           | 28650.66 | 0.060073436  | 0.102407 | 0.586616 | 0.557462 | 0.899184 |
| phf10             | 254.334  | -0.04061254  | 0.168939 | -0.2404  | 0.810021 | 0.969828 |
| mettl6            | 115.4901 | -0.124799131 | 0.194808 | -0.64063 | 0.521765 | 0.887551 |
| KCNV1             | 4.259564 | 0.436937118  | 0.866872 | 0.504039 | 0.614234 | 0.915998 |
| sytl1             | 77.43819 | 0.036376238  | 0.279804 | 0.130006 | 0.896562 | 0.98939  |
| selenos           | 1249.493 | -0.189726987 | 0.102038 | -1.85938 | 0.062974 | 0.429313 |
| lcor1             | 533.3994 | 0.394693482  | 0.126437 | 3.12165  | 0.001798 | 0.065518 |
| si:ch211-168d1.3  | 25.85885 | 0.253893024  | 0.639668 | 0.396914 | 0.691431 | 0.940173 |
| six7              | 401.378  | 0.298740993  | 0.268742 | 1.111629 | 0.266298 | 0.742912 |
| dek               | 738.3878 | 0.103599541  | 0.10846  | 0.955186 | 0.339483 | 0.795226 |
| ncapg             | 677.9288 | 0.381571819  | 0.1856   | 2.055881 | 0.039794 | 0.348912 |
| opn5              | 31.80138 | 0.519924824  | 0.331677 | 1.567563 | 0.116983 | 0.557831 |
| nit1              | 62.57324 | -0.652633489 | 0.33261  | -1.96216 | 0.049744 | 0.388069 |
| ctcl              | 295.8836 | -0.12969034  | 0.116481 | -1.1134  | 0.265535 | 0.742247 |
| rhoh              | 2.304343 | -2.803002608 | 1.81355  | -1.54559 | 0.122204 | 0.569366 |
| stkl1ip           | 370.7228 | -0.465723233 | 0.18642  | -2.49824 | 0.012481 | 0.194346 |
| ptpn23a           | 471.2921 | 0.047141453  | 0.162126 | 0.29077  | 0.771227 | 0.960484 |
| si:dkey-22111.6   | 19.56265 | 1.51314058   | 0.583034 | 2.595287 | 0.009451 | 0.167036 |
| nfx11             | 221.7517 | -0.074998693 | 0.189888 | -0.39496 | 0.69287  | 0.940444 |
| rpp251            | 78.68984 | -0.032422246 | 0.224017 | -0.14473 | 0.884923 | 0.987266 |
| astela            | 8.491215 | 1.670848866  | 1.39316  | 1.199323 | 0.230402 | 0.712099 |
| si:dkey-84o3.3    | 1.064935 | 1.98531353   | 1.865732 | 1.064094 | 0.287286 | NA       |
| RETSAT            | 21.29258 | 0.473243715  | 0.457395 | 1.03465  | 0.300832 | 0.767015 |
| si:ch211-191i18.2 | 102.1605 | 0.057120666  | 0.201583 | 0.28336  | 0.776901 | 0.961073 |
| cart4             | 41.05027 | 0.189390365  | 0.4044   | 0.468325 | 0.639552 | 0.924779 |
| magila            | 432.198  | 0.179787327  | 0.163755 | 1.097902 | 0.272247 | 0.748277 |
| cygb2             | 130.051  | 0.568140157  | 0.261495 | 2.172663 | 0.029806 | 0.307479 |
| jtb               | 388.4545 | 0.102185388  | 0.13237  | 0.771966 | 0.440135 | 0.852079 |
| nfyc              | 1217.047 | 0.072041293  | 0.116837 | 0.616598 | 0.5375   | 0.892498 |
| tuba813           | 1170.048 | 0.201077878  | 0.13429  | 1.497339 | 0.134305 | 0.588585 |
| tgm2a             | 473.0261 | 0.705900085  | 0.288938 | 2.443088 | 0.014562 | 0.211168 |
| vamp3             | 1463.211 | -0.007453886 | 0.108618 | -0.06863 | 0.945288 | 0.997371 |
| stox2a            | 652.2745 | 0.193423184  | 0.12701  | 1.522893 | 0.127786 | 0.577117 |
| ubr2              | 891.8009 | -0.039509784 | 0.116751 | -0.33841 | 0.735054 | 0.951517 |
| tnfrsflb          | 90.31561 | 0.588144825  | 0.338684 | 1.73656  | 0.082465 | 0.482825 |
| zgc:153499        | 0.327109 | -0.868131356 | 4.526148 | -0.1918  | 0.847896 | NA       |
| sod3a             | 153.9042 | 0.24857008   | 0.26009  | 0.955709 | 0.339219 | 0.795226 |
| si:ch211-225p5.8  | 108.7872 | 0.635451878  | 0.219922 | 2.889444 | 0.003859 | 0.103374 |
| gria2a            | 517.7124 | 0.093554789  | 0.170317 | 0.549297 | 0.582802 | 0.90571  |
| PLEKHH3           | 401.4195 | 0.167087965  | 0.136102 | 1.227672 | 0.21957  | 0.700438 |
| zp3d.2            | 5.086138 | -1.416936553 | 0.812139 | -1.7447  | 0.081038 | 0.479801 |
| dyrk1b            | 762.0023 | 0.156961173  | 0.175368 | 0.895036 | 0.370768 | 0.818484 |
| si:dkey-13e3.1    | 0 NA     | NA           | NA       | NA       | NA       | NA       |
| si:zfos-2070c2.1  | 0.652193 | -1.936674715 | 2.594458 | -0.74647 | 0.455386 | NA       |
| etnk2             | 17.59135 | 0.055481678  | 0.486454 | 0.114053 | 0.909196 | 0.992067 |
| slc41a1           | 44.85124 | -0.271131518 | 0.363775 | -0.74533 | 0.456074 | 0.860359 |



|                    | 0        | NA           | NA         | NA       | NA       | NA       |
|--------------------|----------|--------------|------------|----------|----------|----------|
| si:ch211-120e1.1   |          |              |            |          |          |          |
| pou3f2a            | 235.503  | 0.099271668  | 0.140963   | 0.70424  | 0.481283 | 0.87045  |
| fam43b             | 55.37121 | -0.314176446 | 0.426291   | -0.737   | 0.461122 | 0.862743 |
| nhsa               | 66.09998 | 0.156629598  | 0.21737    | 0.720566 | 0.471176 | 0.86809  |
| cdk6               | 70.30457 | 0.203651561  | 0.297317   | 0.684964 | 0.493367 | 0.876836 |
| zgc:158258         | 45.92672 | -0.612476293 | 0.612149   | -1.00053 | 0.317052 | 0.778879 |
| aldh1l2            | 289.5785 | 0.249743003  | 0.271015   | 0.921509 | 0.356785 | 0.807453 |
| polh               | 198.7494 | 0.428866987  | 0.229079   | 1.872133 | 0.061188 | 0.424852 |
| kn11               | 265.395  | 0.222433709  | 0.237478   | 0.936652 | 0.348938 | 0.801306 |
| suz12a             | 303.4789 | 0.049282345  | 0.124039   | 0.397314 | 0.691136 | 0.940173 |
| crlf3              | 603.233  | -0.304317421 | 0.110761   | -2.74751 | 0.006005 | 0.131072 |
| spock3             | 1264.921 | 0.092034825  | 0.123321   | 0.746301 | 0.455486 | 0.860008 |
| tut4               | 63.25566 | -0.013857276 | 0.225486   | -0.06146 | 0.950997 | 0.99801  |
| casp8l2            | 25.58399 | -0.631431171 | 0.417496   | -1.51243 | 0.130426 | 0.581523 |
| mettl14            | 134.0143 | 0.208554905  | 0.200853   | 1.038346 | 0.299109 | 0.766018 |
| hist1h2a3          | 14.06251 | 0.317109442  | 0.527368   | 0.601306 | 0.547636 | 0.896211 |
| sft2d3             | 279.8537 | -0.143417222 | 0.15142    | -0.94715 | 0.343564 | 0.798147 |
| si:ch211-113a14.22 | 3.984606 | -2.228960279 | 1.34933    | -1.6519  | 0.098555 | 0.521133 |
| CR354435.1         | 5.228048 | 1.227368472  | 1.067376   | 1.149893 | 0.250188 | 0.729991 |
| BX942819.1         | 3.960864 | 1.095747737  | 1.047266   | 1.046294 | 0.295425 | 0.763988 |
| cald1a             | 606.5672 | 0.009993032  | 0.137682   | 0.07258  | 0.94214  | 0.997371 |
| irge4              | 8.625113 | 0.07012425   | 1.055076   | 0.066464 | 0.947009 | 0.997371 |
| arl8bb             | 90.40266 | -0.057747682 | 0.205361   | -0.2812  | 0.778556 | 0.961073 |
| si:dkey-245p14.4   | 84.16576 | 0.240432758  | 0.215114   | 1.117701 | 0.263695 | 0.741708 |
| clrn2              | 46.73312 | 0.486731873  | 0.373126   | 1.304472 | 0.192073 | 0.672283 |
| muc5.1             | 561.5688 | 0.183469281  | 0.275488   | 0.66598  | 0.505424 | 0.882293 |
| hoxc1a             | 131.0034 | 0.083603721  | 0.226444   | 0.369203 | 0.711976 | 0.945821 |
| hoxc4a             | 162.1513 | 0.095136843  | 0.145648   | 0.653195 | 0.51363  | 0.88631  |
| hoxc3a             | 398.878  | 0.124602844  | 0.119225   | 1.045108 | 0.295973 | 0.764246 |
| hoxc5a             | 144.3795 | -0.124746571 | 0.217754   | -0.57288 | 0.566727 | 0.901739 |
| or134-1            | 2.522397 | 0.84023887   | 1.294873   | 0.648897 | 0.516405 | 0.886895 |
| hoxc6a             | 170.8832 | 0.072258198  | 0.153278   | 0.471419 | 0.637342 | 0.924779 |
| or137-3            | 3.737526 | 0.904975501  | 1.213922   | 0.745497 | 0.455971 | 0.86033  |
| hoxc8a             | 235.2792 | -0.002030558 | 0.143588   | -0.01414 | 0.988717 | 1        |
| hoxc10a            | 80.3709  | -0.148560311 | 0.218731   | -0.67919 | 0.497016 | 0.878572 |
| hoxc11a            | 123.215  | 0.220533612  | 0.296893   | 0.742806 | 0.457599 | 0.860993 |
| hoxc12a            | 179.9104 | 0.052934039  | 0.179626   | 0.29469  | 0.76823  | 0.960296 |
| hoxc13a            | 118.1015 | -0.117252062 | 0.168027   | -0.69782 | 0.485292 | 0.872911 |
| cx39.4             | 29.69795 | -0.201229996 | 0.375996   | -0.53519 | 0.592518 | 0.909996 |
| smim12             | 247.6451 | 0.121883341  | 0.153156   | 0.79581  | 0.426142 | 0.844714 |
| inkala             | 301.7101 | -0.287064096 | 0.194783   | -1.47377 | 0.140545 | 0.599658 |
| cx30.9             | 11.77697 | -0.519192599 | 0.676297   | -0.7677  | 0.442666 | 0.853879 |
| casp6l2            | 0.707961 |              | 0 2.451119 | 0        | 1 NA     |          |
| kat7a              | 269.6489 | 0.07746331   | 0.147908   | 0.523728 | 0.600468 | 0.913756 |
| ccl35.2            | 0.410346 |              | 0 4.327352 | 0        | 1 NA     |          |
| krtcap2            | 558.8851 | 0.083471563  | 0.153088   | 0.545252 | 0.58558  | 0.906655 |
| nudt7              | 53.93235 | 0.031003591  | 0.307867   | 0.100705 | 0.919785 | 0.993892 |
| foxf2b             | 67.61893 | -0.687286438 | 0.24097    | -2.85217 | 0.004342 | 0.108751 |
| fladl              | 318.4007 | -0.084264489 | 0.12284    | -0.68597 | 0.492732 | 0.876558 |
| tspan4b            | 404.6348 | -0.334583623 | 0.131146   | -2.55124 | 0.010734 | 0.180622 |
| tlr19              | 2.27755  | -0.429981783 | 1.333604   | -0.32242 | 0.747134 | 0.955074 |
| COQ10A             | 148.0198 | 0.409692502  | 0.202262   | 2.025556 | 0.04281  | 0.362408 |
| urocl              | 578.9023 | -0.135369798 | 0.285122   | -0.47478 | 0.634944 | 0.924272 |
| serpinb12          | 21.29262 | -0.243449675 | 0.443701   | -0.54868 | 0.583225 | 0.905947 |

|                   |          |              |          |          |          |          |
|-------------------|----------|--------------|----------|----------|----------|----------|
| alg2              | 149.4648 | -0.120689879 | 0.196505 | -0.61418 | 0.539094 | 0.892985 |
| mala              | 0        | NA           | NA       | NA       | NA       | NA       |
| wdyhv1            | 0        | NA           | NA       | NA       | NA       | NA       |
| inkalb            | 188.4225 | -0.367524618 | 0.157074 | -2.33982 | 0.019293 | 0.244673 |
| abitrasm          | 113.0974 | -0.343128021 | 0.235859 | -1.4548  | 0.145724 | 0.604984 |
| ccnd2b            | 79.49312 | -0.212020753 | 0.236606 | -0.89609 | 0.370203 | 0.818484 |
| mtmr7b            | 342.0234 | -0.173636791 | 0.180363 | -0.9627  | 0.335696 | 0.792139 |
| si:dkey-61f9.1    | 1.578303 | -0.868149393 | 2.337623 | -0.37138 | 0.710354 | NA       |
| zgc:162816        | 146.3184 | -0.411730597 | 0.198837 | -2.0707  | 0.038387 | 0.343542 |
| nkdl              | 0        | NA           | NA       | NA       | NA       | NA       |
| zgc:153157        | 45.98292 | 0.810833248  | 0.345724 | 2.345322 | 0.019011 | 0.242726 |
| dlla              | 207.238  | -0.072531448 | 0.167628 | -0.43269 | 0.665238 | 0.932595 |
| chac1             | 0        | NA           | NA       | NA       | NA       | NA       |
| s100v1            | 678.9396 | 0.046267005  | 0.114149 | 0.405321 | 0.685241 | 0.938486 |
| si:dkey-222b8.1   | 113.2286 | -0.118526256 | 0.217167 | -0.54578 | 0.585214 | 0.906655 |
| chtopb            | 14.57607 | -0.729746065 | 0.435529 | -1.67554 | 0.093828 | 0.511703 |
| fip111b           | 842.3504 | -0.031084362 | 0.111824 | -0.27798 | 0.781031 | 0.961659 |
| ino80             | 385.0428 | -0.227957233 | 0.218207 | -1.04468 | 0.29617  | 0.764246 |
| vps18             | 358.2527 | -0.124028509 | 0.131109 | -0.946   | 0.34415  | 0.798147 |
| rhov              | 232.3319 | -0.314989097 | 0.153161 | -2.05659 | 0.039726 | 0.348523 |
| vapb              | 804.8048 | 0.150062124  | 0.125648 | 1.194305 | 0.232359 | 0.713741 |
| rp122             | 12174.58 | -0.293955366 | 0.131146 | -2.24143 | 0.024998 | 0.280216 |
| atp6v1c2          | 17.56302 | 0.091028912  | 0.591171 | 0.153981 | 0.877625 | 0.985488 |
| zdhhc17           | 146.6761 | 0.137875859  | 0.158483 | 0.869973 | 0.384315 | 0.826565 |
| si:ch211-113g11.6 | 412.0549 | 0.096400135  | 0.296018 | 0.325656 | 0.744684 | 0.95491  |
| slc39a9           | 343.1835 | -0.036480319 | 0.162877 | -0.22397 | 0.822777 | 0.971966 |
| grk4              | 627.518  | -0.000533143 | 0.127931 | -0.00417 | 0.996675 | 1        |
| tspan5b           | 237.7914 | 0.122544332  | 0.145796 | 0.84052  | 0.400617 | 0.831725 |
| saraf             | 298.4753 | -0.002393842 | 0.147058 | -0.01628 | 0.987012 | 1        |
| gchl              | 380.2936 | -0.080502344 | 0.190458 | -0.42268 | 0.67253  | 0.93414  |
| pla2g12a          | 161.0421 | 0.387651846  | 0.23433  | 1.654299 | 0.098067 | 0.521071 |
| tmem245           | 150.653  | -0.510022684 | 0.189611 | -2.68984 | 0.007149 | 0.143159 |
| zgc:153292        | 117.7006 | -0.031474981 | 0.194518 | -0.16181 | 0.871455 | 0.983365 |
| zgc:154061        | 39.0533  | 0.089289635  | 0.276042 | 0.323464 | 0.746344 | 0.955074 |
| e2f3              | 250.2538 | 0.030418841  | 0.221006 | 0.137638 | 0.890526 | 0.988446 |
| si:dkey-13n23.3   | 10.60992 | 0.826845553  | 0.632095 | 1.308104 | 0.190838 | 0.670774 |
| lactb11b          | 65.78517 | 1.233671456  | 0.582575 | 2.11762  | 0.034207 | 0.326435 |
| sh3rf1            | 388.5833 | 0.193733905  | 0.126423 | 1.532421 | 0.125419 | 0.573278 |
| tarbp2            | 315.7735 | 0.044394467  | 0.143731 | 0.308871 | 0.75742  | 0.957364 |
| arf5              | 2128.848 | 0.020153746  | 0.125561 | 0.160509 | 0.87248  | 0.983447 |
| parp6b            | 291.184  | -0.00342199  | 0.179664 | -0.01905 | 0.984804 | 1        |
| khdrbs1b          | 3133.403 | -0.024487307 | 0.074914 | -0.32687 | 0.743765 | 0.95491  |
| dnajc2            | 212.1376 | 0.018174609  | 0.179878 | 0.101038 | 0.91952  | 0.993892 |
| amn1              | 97.9781  | -0.352473406 | 0.288112 | -1.22339 | 0.221182 | 0.702457 |
| tspan13b          | 170.9079 | -0.214630223 | 0.202617 | -1.05929 | 0.289468 | 0.760499 |
| agr2              | 1408.339 | 0.370447692  | 0.149271 | 2.481713 | 0.013075 | 0.198789 |
| zgc:195001        | 2304.418 | 0.260368517  | 0.092955 | 2.801017 | 0.005094 | 0.119231 |
| cenps             | 80.23532 | 0.184594794  | 0.229254 | 0.805197 | 0.420706 | 0.842383 |
| rbp7b             | 63.09993 | 0.008823199  | 0.333377 | 0.026466 | 0.978886 | 1        |
| zgc:110783        | 157.2312 | 0.186153092  | 0.213545 | 0.871727 | 0.383357 | 0.825809 |
| si:dkeyp-75b4.7   | 0.344739 | -0.863085617 | 4.488111 | -0.1923  | 0.847503 | NA       |
| hpcal4            | 208.5117 | 0.333570172  | 0.243004 | 1.372697 | 0.169847 | 0.641525 |
| pdgfra            | 1073.038 | 0.19171523   | 0.157457 | 1.217572 | 0.223387 | 0.70531  |
| FRMD7             | 6.843022 | -1.573093314 | 0.851859 | -1.84666 | 0.064797 | 0.434674 |

|                   |           |               |           |           |           |           |
|-------------------|-----------|---------------|-----------|-----------|-----------|-----------|
| bicclb            | 89. 83675 | -0. 236596315 | 0. 259509 | -0. 91171 | 0. 361923 | 0. 811787 |
| phyhip1b          | 106. 1305 | 0. 013068001  | 0. 203077 | 0. 06435  | 0. 948692 | 0. 99777  |
| si:dkey-31e10. 5  | 12. 09448 | 1. 007250587  | 0. 666043 | 1. 512291 | 0. 13046  | 0. 581523 |
| trpc5a            | 4. 588823 | 0. 974737018  | 1. 083075 | 0. 899972 | 0. 368135 | 0. 817272 |
| trpc4a            | 54. 61572 | 0. 333329068  | 0. 275466 | 1. 210054 | 0. 226258 | 0. 707597 |
| si:dkey-183j2. 10 | 311. 7726 | 0. 726486664  | 0. 415805 | 1. 747183 | 0. 080606 | 0. 479386 |
| cnpy3             | 203. 5575 | 0. 09636665   | 0. 146625 | 0. 657232 | 0. 511032 | 0. 884394 |
| brpf3a            | 214. 9304 | 0. 043748374  | 0. 170787 | 0. 256158 | 0. 797829 | 0. 966447 |
| cacnali           | 9. 329382 | -0. 925416398 | 0. 829665 | -1. 11541 | 0. 264675 | 0. 742063 |
| zc2hc1c           | 8. 388243 | -0. 588252804 | 0. 582586 | -1. 00973 | 0. 312627 | 0. 776164 |
| rippy2            | 0. 908689 | -0. 9087579   | 2. 002688 | -0. 45377 | 0. 649995 | NA        |
| creb5b            | 28. 46592 | -0. 585389042 | 0. 39476  | -1. 4829  | 0. 138102 | 0. 594663 |
| stmn2b            | 1361. 96  | 0. 15528116   | 0. 16922  | 0. 917627 | 0. 358814 | 0. 80995  |
| hey1              | 650. 8842 | -0. 055333001 | 0. 122536 | -0. 45156 | 0. 651583 | 0. 9286   |
| arf3a             | 186. 8059 | 0. 565554895  | 0. 211178 | 2. 6781   | 0. 007404 | 0. 145771 |
| si:dkeyp-97e7. 9  | 11. 31323 | -0. 079717308 | 0. 506136 | -0. 1575  | 0. 87485  | 0. 984191 |
| mafbb             | 476. 2377 | -0. 464206223 | 0. 182088 | -2. 54936 | 0. 010792 | 0. 181199 |
| grin2ab           | 213. 4177 | -0. 26070812  | 0. 310367 | -0. 84    | 0. 400908 | 0. 83183  |
| top1l             | 1964. 354 | 0. 467408067  | 0. 112624 | 4. 150169 | 3. 32E-05 | 0. 004139 |
| msgnl             | 1. 390194 | -0. 66123949  | 1. 494225 | -0. 44253 | 0. 658106 | NA        |
| rnmt              | 494. 7011 | 0. 038365031  | 0. 10463  | 0. 366673 | 0. 713863 | 0. 945821 |
| ldlrad4a          | 310. 9128 | -0. 094734368 | 0. 16373  | -0. 5786  | 0. 562858 | 0. 900772 |
| si:ch211-93g23. 2 | 37. 02711 | 0. 296237826  | 0. 467586 | 0. 633547 | 0. 526377 | 0. 889515 |
| nap114a           | 1926. 39  | 0. 0537741    | 0. 140392 | 0. 38303  | 0. 701698 | 0. 943292 |
| adap2             | 57. 52342 | 0. 294347486  | 0. 298028 | 0. 987651 | 0. 323324 | 0. 783129 |
| cadpsb            | 949. 1133 | 0. 053199914  | 0. 213912 | 0. 2487   | 0. 803593 | 0. 968722 |
| atad5a            | 291. 8299 | 0. 360468398  | 0. 137335 | 2. 624729 | 0. 008672 | 0. 159845 |
| ppp4ca            | 381. 2386 | -0. 088052548 | 0. 112744 | -0. 78099 | 0. 434806 | 0. 850002 |
| inavab            | 121. 0805 | -0. 303559222 | 0. 236478 | -1. 28367 | 0. 199257 | 0. 679739 |
| mapk3             | 1291. 854 | 0. 027239917  | 0. 080239 | 0. 339483 | 0. 734246 | 0. 951134 |
| fam131bb          | 31. 12472 | 0. 080072362  | 0. 366134 | 0. 218697 | 0. 826886 | 0. 973458 |
| edn2              | 29. 14294 | -0. 221332935 | 0. 294113 | -0. 75254 | 0. 451724 | 0. 857676 |
| ggact. 3          | 100. 7658 | 0. 954161705  | 0. 308015 | 3. 097777 | 0. 00195  | 0. 068449 |
| ggact. 1          | 234. 7499 | 0. 87039073   | 0. 272862 | 3. 189861 | 0. 001423 | 0. 056314 |
| itpk1b            | 194. 467  | -0. 121507564 | 0. 192761 | -0. 63035 | 0. 528463 | 0. 88999  |
| clic5b            | 357. 1396 | 0. 356908911  | 0. 193003 | 1. 849242 | 0. 064423 | 0. 433491 |
| mrpl35            | 271. 4544 | 0. 208493027  | 0. 180566 | 1. 154666 | 0. 248227 | 0. 728489 |
| nt5clab           | 18. 48829 | 0. 621512328  | 0. 582969 | 1. 066116 | 0. 286371 | 0. 757624 |
| prelp             | 256. 9352 | -0. 88784686  | 0. 260962 | -3. 40221 | 0. 000668 | 0. 034114 |
| eno4              | 20. 18958 | -0. 192625764 | 0. 401737 | -0. 47948 | 0. 631595 | 0. 923003 |
| dyrk3             | 1055. 635 | 0. 078663703  | 0. 124435 | 0. 632167 | 0. 527278 | 0. 889948 |
| RASSF5            | 216. 739  | 0. 238171649  | 0. 148484 | 1. 604023 | 0. 108709 | 0. 541209 |
| hspa12a           | 83. 26658 | 0. 315447061  | 0. 226526 | 1. 39254  | 0. 163759 | 0. 632171 |
| zgc:162509        | 18. 77161 | 0. 906201225  | 0. 518288 | 1. 748453 | 0. 080386 | 0. 478844 |
| b4galnt2. 2       | 1. 952831 | 0. 632144465  | 1. 544756 | 0. 40922  | 0. 682378 | NA        |
| ikbke             | 113. 507  | 0. 069666238  | 0. 240413 | 0. 289777 | 0. 771987 | 0. 960624 |
| mrpl36            | 583. 0186 | -0. 013349384 | 0. 132609 | -0. 10067 | 0. 919815 | 0. 993892 |
| zgc:152986        | 0. 23516  | 2. 53946606   | 4. 85586  | 0. 522969 | 0. 600996 | NA        |
| vhl               | 146. 5679 | 0. 23894762   | 0. 199268 | 1. 199125 | 0. 230479 | 0. 712099 |
| tatdn2            | 3. 53627  | 1. 216931994  | 1. 083953 | 1. 12268  | 0. 261573 | 0. 738975 |
| grin2db           | 36. 31543 | 0. 27722367   | 0. 355772 | 0. 779216 | 0. 435852 | 0. 850596 |
| FAM72B            | 226. 5885 | -0. 041624365 | 0. 132729 | -0. 3136  | 0. 753821 | 0. 955912 |
| med10             | 584. 2378 | -0. 020024485 | 0. 155245 | -0. 12899 | 0. 897368 | 0. 989719 |
| cacng7b           | 37. 15458 | 0. 608562143  | 0. 763189 | 0. 797394 | 0. 425223 | 0. 844714 |

|                   |          |              |          |          |          |          |
|-------------------|----------|--------------|----------|----------|----------|----------|
| enpp5             | 145.7965 | -0.085298451 | 0.208614 | -0.40888 | 0.682627 | 0.938006 |
| cacng8b           | 233.4619 | 0.263173034  | 0.230649 | 1.141013 | 0.253865 | 0.732873 |
| pimr60            | 0.049519 | 0            | 5.267649 | 0        | 1        | NA       |
| ttpal             | 328.2945 | -0.066731062 | 0.141485 | -0.47165 | 0.637178 | 0.924779 |
| prkcdb            | 732.5628 | -0.051903286 | 0.121901 | -0.42578 | 0.670266 | 0.933809 |
| pex5              | 360.008  | 0.000558887  | 0.141247 | 0.003957 | 0.996843 | 1        |
| si:ch211-69g19.2  | 946.4455 | 0.116036066  | 0.236042 | 0.49159  | 0.623009 | 0.918894 |
| pa2g4b            | 3117.958 | 0.048446878  | 0.148015 | 0.327312 | 0.743432 | 0.954856 |
| zbtb12.2          | 142.763  | 0.163320264  | 0.168059 | 0.971801 | 0.331149 | 0.788766 |
| si:ch211-182e10.4 | 0.200823 | -0.748301491 | 5.238472 | -0.14285 | 0.886411 | NA       |
| rhol              | 47.36161 | 2.989455533  | 1.31     | 2.282028 | 0.022488 | 0.265534 |
| cd4-1             | 3.056126 | -2.603838415 | 1.645224 | -1.58266 | 0.113498 | 0.551541 |
| cxcr3.3           | 191.8236 | -0.133248061 | 0.227976 | -0.58448 | 0.558895 | 0.899409 |
| crip2             | 614.1789 | 0.095378998  | 0.105363 | 0.905238 | 0.365339 | 0.815339 |
| slc2a9l1          | 1.389614 | -0.868143444 | 2.207362 | -0.39329 | 0.694102 | NA       |
| ptgr2             | 153.8384 | 0.048633341  | 0.21495  | 0.226254 | 0.821004 | 0.971788 |
| psmd6             | 2025.621 | 0.170358242  | 0.121638 | 1.400539 | 0.161352 | 0.628218 |
| fam3a             | 320.6619 | 0.098796737  | 0.155365 | 0.6359   | 0.524842 | 0.888928 |
| ifnphi3           | 1.551709 | 0.823058949  | 2.11194  | 0.389717 | 0.696746 | NA       |
| fezf2             | 152.464  | 0.187744513  | 0.281061 | 0.667985 | 0.504143 | 0.881759 |
| clqtnf12          | 201.7654 | -0.012514592 | 0.271071 | -0.04617 | 0.963177 | 0.999842 |
| sdf4              | 744.8272 | 0.048086951  | 0.126152 | 0.381183 | 0.703067 | 0.943622 |
| dkk3b             | 134.457  | 0.844309919  | 0.212167 | 3.979461 | 6.91E-05 | 0.006898 |
| CR759887.1        | 1.586114 | 0.077524332  | 1.667125 | 0.046502 | 0.96291  | NA       |
| cdipt             | 393.645  | 0.152585099  | 0.186414 | 0.818528 | 0.413056 | 0.838274 |
| ncalda            | 845.9581 | 0.042401872  | 0.122221 | 0.346927 | 0.728646 | 0.949787 |
| si:dkey-80c24.1   | 0.79395  | -0.673217679 | 2.180243 | -0.30878 | 0.757488 | NA       |
| nxph3             | 5.088033 | 0.104000096  | 0.807342 | 0.128818 | 0.897502 | 0.989819 |
| kbtbd8            | 165.1595 | -0.147199185 | 0.13998  | -1.05157 | 0.292995 | 0.762508 |
| s100v2            | 920.6602 | 0.060678975  | 0.132111 | 0.459302 | 0.646017 | 0.926728 |
| thap7             | 181.6787 | 0.266190081  | 0.146028 | 1.822876 | 0.068322 | 0.445546 |
| zgc:64022         | 55.54781 | -0.551594519 | 0.297405 | -1.85469 | 0.063641 | 0.430571 |
| wu:fi42e03        | 2.027868 | -1.531301395 | 1.308809 | -1.17    | 0.242003 | NA       |
| prss60.3          | 30.04779 | 3.178760196  | 0.812395 | 3.912826 | 9.12E-05 | 0.008627 |
| prss60.1          | 1.212926 | -0.231101929 | 1.563556 | -0.14781 | 0.882496 | NA       |
| zgc:173544        | 0.291188 | -0.771890306 | 4.642984 | -0.16625 | 0.867961 | NA       |
| slc25a18          | 170.456  | 0.004282328  | 0.20319  | 0.021076 | 0.983185 | 1        |
| vdrb              | 173.5913 | -0.182249507 | 0.293666 | -0.6206  | 0.534862 | 0.891993 |
| ndufa9a           | 2210.103 | 0.04054486   | 0.116457 | 0.348152 | 0.727726 | 0.949297 |
| chrna4b           | 35.31754 | -0.667086541 | 0.59356  | -1.12387 | 0.261067 | 0.738663 |
| cnga3a            | 69.20236 | 1.962205671  | 0.531868 | 3.689273 | 0.000225 | 0.015984 |
| gabra5            | 92.30588 | 0.721100165  | 0.376331 | 1.916131 | 0.055348 | 0.407377 |
| dyrk4             | 236.7649 | 0.335834382  | 0.185247 | 1.812898 | 0.069848 | 0.450824 |
| rnd2              | 239.9035 | 0.583203929  | 0.298712 | 1.952398 | 0.050891 | 0.392525 |
| pimr89            | 0        | NA           | NA       | NA       | NA       | NA       |
| tmem45a           | 232.8123 | -0.111637593 | 0.124878 | -0.89397 | 0.371337 | 0.818945 |
| sft2d2a           | 66.86116 | 0.160444188  | 0.270498 | 0.593143 | 0.553086 | 0.897809 |
| ccr11.1           | 2.617292 | -1.522292547 | 1.322506 | -1.15107 | 0.249705 | 0.729721 |
| si:ch211-155i14.1 | 1.203083 | -1.449282488 | 1.699765 | -0.85264 | 0.393861 | NA       |
| foxgla            | 260.5348 | 0.26686321   | 0.167427 | 1.593909 | 0.110956 | 0.54583  |
| her4.3            | 110.9418 | 0.685284253  | 0.235168 | 2.914016 | 0.003568 | 0.099143 |
| irgfl             | 7.462893 | -0.737115462 | 1.061476 | -0.69442 | 0.487416 | 0.873291 |
| cyp2x9            | 84.49846 | -0.802651224 | 0.557589 | -1.4395  | 0.150008 | 0.613319 |
| rln3a             | 27.04545 | 0.774326051  | 0.9118   | 0.849228 | 0.395754 | 0.829389 |

|                    |          |              |          |          |          |          |
|--------------------|----------|--------------|----------|----------|----------|----------|
| gjd2b              | 101.679  | -0.075652039 | 0.285731 | -0.26477 | 0.791189 | 0.964766 |
| znf770             | 430.6269 | 0.051957418  | 0.115684 | 0.449133 | 0.653336 | 0.929269 |
| jupa               | 2377.533 | -0.141708765 | 0.070738 | -2.00329 | 0.045146 | 0.372256 |
| lrrc15             | 98.47437 | 0.144065513  | 0.177591 | 0.811222 | 0.417238 | 0.840937 |
| grebl              | 93.06577 | -0.024647092 | 0.217881 | -0.11312 | 0.909934 | 0.992208 |
| eaf1               | 271.3696 | -0.049884486 | 0.164704 | -0.30287 | 0.761986 | 0.958345 |
| pmvk               | 38.61211 | 0.03614005   | 0.308504 | 0.117146 | 0.906744 | 0.991644 |
| zgc:109744         | 114.4514 | -0.101634304 | 0.180109 | -0.56429 | 0.572554 | 0.903533 |
| opal               | 927.8601 | 0.057453805  | 0.098594 | 0.582731 | 0.560075 | 0.899738 |
| znf516             | 484.2955 | 0.003543905  | 0.161388 | 0.021959 | 0.982481 | 1        |
| ccka               | 64.59546 | -0.755733086 | 0.397682 | -1.90034 | 0.057388 | 0.413587 |
| si:ch211-156118.6  | 0.046941 | 0            | 5.267649 | 0        | 1        | NA       |
| pax7b              | 283.0316 | -0.075787773 | 0.220309 | -0.34401 | 0.730842 | 0.950056 |
| cnp                | 1244.425 | -0.122505222 | 0.1094   | -1.11979 | 0.262803 | 0.740207 |
| ndufb5             | 1620.801 | -0.048321143 | 0.124597 | -0.38782 | 0.69815  | 0.942433 |
| bpgm               | 530.0793 | 0.144153206  | 0.132743 | 1.085957 | 0.277498 | 0.751426 |
| act16a             | 1080.635 | 0.099706794  | 0.120058 | 0.830487 | 0.406264 | 0.834645 |
| zgc:136858         | 234.4459 | -0.174570186 | 0.217751 | -0.80169 | 0.42273  | 0.843493 |
| rftn1a             | 17.65206 | 0.368887427  | 0.482783 | 0.764085 | 0.444816 | 0.85495  |
| snrka              | 563.6509 | 0.054949932  | 0.142592 | 0.385365 | 0.699967 | 0.942646 |
| lin52              | 146.5457 | -0.042917248 | 0.181881 | -0.23596 | 0.813461 | 0.970328 |
| taf13              | 635.977  | 0.427929119  | 0.172331 | 2.483175 | 0.013022 | 0.198789 |
| tnnc2              | 80343.1  | 0.020330994  | 0.136534 | 0.148908 | 0.881626 | 0.986908 |
| evi5b              | 238.8772 | -0.39887442  | 0.160973 | -2.4779  | 0.013216 | 0.200006 |
| arid3a             | 163.8357 | -0.446286349 | 0.180854 | -2.46766 | 0.0136   | 0.203563 |
| gamt               | 12596.56 | -0.539721125 | 0.189208 | -2.85253 | 0.004337 | 0.108751 |
| si:dkey-56d12.4    | 34.04557 | -1.173240651 | 0.386254 | -3.03748 | 0.002386 | 0.078183 |
| dazapl             | 139.3306 | 0.142655083  | 0.198039 | 0.720339 | 0.471316 | 0.86809  |
| trim35-20          | 14.97591 | 0.119837053  | 0.619773 | 0.193356 | 0.84668  | 0.977214 |
| rps15              | 24776.32 | -0.338473748 | 0.127372 | -2.65737 | 0.007875 | 0.150059 |
| si:ch211-282j17.10 | 0.477875 | 0            | 2.87599  | 0        | 1        | NA       |
| si:dkey-88n24.6    | 0.093881 | 0            | 5.267649 | 0        | 1        | NA       |
| zgc:195077         | 4.211317 | 0.763536038  | 1.276946 | 0.597939 | 0.549881 | 0.897373 |
| si:dkey-32e6.6     | 46.29932 | 0.134851823  | 0.36876  | 0.36569  | 0.714596 | 0.945821 |
| si:busml-105116.2  | 26.03761 | -0.741524069 | 0.412929 | -1.79577 | 0.072532 | 0.457864 |
| bcl6aa             | 174.5416 | -0.071985564 | 0.232029 | -0.31024 | 0.756376 | 0.956532 |
| tmem11             | 828.1067 | 0.042181194  | 0.106991 | 0.394248 | 0.693398 | 0.940668 |
| smx5               | 0        | NA           | NA       | NA       | NA       | NA       |
| cfap126            | 34.78479 | 0.285636655  | 0.387014 | 0.738053 | 0.460482 | 0.862369 |
| ccl25b             | 678.2949 | -0.238181817 | 0.171003 | -1.39285 | 0.163665 | 0.631915 |
| asmt2              | 124.1114 | 0.032921766  | 0.209456 | 0.157177 | 0.875105 | 0.984191 |
| AL953867.1         | 0.150467 | -2.324715954 | 5.202574 | -0.44684 | 0.654991 | NA       |
| BX510941.1         | 2.672808 | -4.378505463 | 1.502976 | -2.91322 | 0.003577 | 0.099143 |
| si:ch211-262h13.5  | 44.5234  | -0.868161036 | 1.689765 | -0.51378 | 0.607409 | 0.915204 |
| abhd6b             | 14.40548 | -0.337085192 | 0.594918 | -0.56661 | 0.570981 | 0.902501 |
| si:ch211-262h13.3  | 185.9932 | 0.049471312  | 0.169254 | 0.29229  | 0.770065 | 0.960484 |
| met                | 126.1963 | -0.106396834 | 0.231117 | -0.46036 | 0.645259 | 0.926728 |
| sox2               | 852.9197 | 0.247618172  | 0.11315  | 2.188401 | 0.02864  | 0.301362 |
| dusp6              | 2037.187 | -0.098017306 | 0.143386 | -0.68359 | 0.494235 | 0.877583 |
| dnajc27            | 190.1734 | -0.088544171 | 0.154306 | -0.57382 | 0.566088 | 0.901739 |
| kitlga             | 322.1022 | -0.131156826 | 0.119851 | -1.09433 | 0.273809 | 0.749234 |
| si:ch211-284e20.8  | 368.5282 | -0.31961169  | 0.219045 | -1.45911 | 0.144534 | 0.603539 |
| cpne5b             | 20.80035 | 0.020171998  | 0.498389 | 0.040474 | 0.967715 | 1        |
| cnbpb              | 4317.965 | 0.183927494  | 0.091728 | 2.005131 | 0.044949 | 0.371348 |

|                   |          |              |          |          |          |          |
|-------------------|----------|--------------|----------|----------|----------|----------|
| zgc:158296        | 362.539  | 0.315862072  | 0.240947 | 1.310919 | 0.189885 | 0.669635 |
| sox14             | 183.0683 | 0.12063347   | 0.238694 | 0.50539  | 0.613285 | 0.915998 |
| cart1             | 6.158166 | 2.316538802  | 1.472073 | 1.573657 | 0.115567 | 0.555766 |
| si:ch211-232m10.6 | 48.78292 | 0.393796614  | 0.60869  | 0.646958 | 0.517659 | 0.887148 |
| hcrt              | 8.116484 | 1.166372231  | 0.778091 | 1.499017 | 0.133869 | 0.58766  |
| znf740a           | 432.1284 | -0.087590661 | 0.112724 | -0.77704 | 0.437138 | 0.851125 |
| igfbp6a           | 3.92114  | 0            | 1.906578 | 0        | 1        | 1        |
| styk1a            | 71.41227 | -0.461899979 | 0.2703   | -1.70884 | 0.087481 | 0.49631  |
| hmgalb            | 947.334  | 0.238673006  | 0.192124 | 1.242286 | 0.214131 | 0.696474 |
| fam131ba          | 81.09019 | 0.618886222  | 0.216057 | 2.864452 | 0.004177 | 0.10683  |
| pla2g4f.2         | 0.714527 | 2.262191246  | 2.319502 | 0.975292 | 0.329416 | NA       |
| hmx2              | 101.6547 | 0.320009443  | 0.205787 | 1.55505  | 0.119934 | 0.564812 |
| hmx3a             | 137.0292 | 0.120271895  | 0.162982 | 0.737947 | 0.460547 | 0.862369 |
| im:7160594        | 253.6021 | -0.371153373 | 0.179529 | -2.06737 | 0.038699 | 0.344605 |
| pex6              | 96.92755 | -0.136093055 | 0.204338 | -0.66602 | 0.505398 | 0.882293 |
| si:ch211-288g17.3 | 4908.414 | 0.234341677  | 0.144607 | 1.620537 | 0.105117 | 0.533762 |
| si:ch211-288g17.4 | 91.67782 | -0.092778039 | 0.515019 | -0.18014 | 0.857039 | 0.979558 |
| lepr              | 414.3306 | 0.006115725  | 0.169974 | 0.03598  | 0.971298 | 1        |
| si:rp71-15k1.1    | 1.496158 | 0            | 2.242247 | 0        | 1        | NA       |
| insl5a            | 15.4758  | 0.860030062  | 0.588561 | 1.461241 | 0.143949 | 0.603144 |
| furinb            | 279.4803 | 0.313354818  | 0.230814 | 1.35761  | 0.174588 | 0.648164 |
| si:ch211-81a5.8   | 196.3075 | 0.172466619  | 0.295562 | 0.583521 | 0.559543 | 0.899571 |
| si:dkey-88e12.3   | 1.116909 | -1.396793765 | 1.992089 | -0.70117 | 0.483197 | NA       |
| ash11             | 1122.855 | 0.095556579  | 0.178974 | 0.533913 | 0.593402 | 0.910427 |
| mrps21            | 322.1177 | -0.17307221  | 0.244713 | -0.70724 | 0.479415 | 0.86985  |
| sergef            | 68.80316 | -0.018465226 | 0.273006 | -0.06764 | 0.946075 | 0.997371 |
| mlpha             | 322.1952 | -0.60348266  | 0.199182 | -3.02981 | 0.002447 | 0.07941  |
| inpp4ab           | 58.60918 | -0.22256276  | 0.298215 | -0.74632 | 0.455476 | 0.860008 |
| nuggc.1           | 2.599087 | -0.11743887  | 1.181962 | -0.09936 | 0.920853 | 0.994085 |
| abhd12            | 375.5623 | -0.229365774 | 0.184892 | -1.24054 | 0.214776 | 0.696864 |
| ppplr3ca          | 186.186  | -0.402196898 | 0.243063 | -1.6547  | 0.097985 | 0.521071 |
| pcgf5a            | 58.79823 | -0.30510937  | 0.387613 | -0.78715 | 0.431195 | 0.848102 |
| kif20ba           | 201.9791 | 0.309176267  | 0.238291 | 1.297475 | 0.194468 | 0.674826 |
| tuft1b            | 163.0155 | -0.138216154 | 0.242258 | -0.57053 | 0.568317 | 0.902146 |
| cdk5r2a           | 543.1431 | 0.379724106  | 0.297049 | 1.278322 | 0.201136 | 0.681045 |
| ifit14            | 9.747488 | 0.534272434  | 0.851653 | 0.627336 | 0.530439 | 0.890545 |
| arl6ip6           | 50.48735 | 0.679732009  | 0.353934 | 1.920507 | 0.054794 | 0.405097 |
| s100u             | 891.1434 | -0.120829922 | 0.122798 | -0.98397 | 0.32513  | 0.783981 |
| pbxipla           | 576.9085 | 0.331344969  | 0.154381 | 2.146283 | 0.03185  | 0.317164 |
| nt5e              | 275.6748 | -0.181860196 | 0.19403  | -0.93728 | 0.348615 | 0.801264 |
| ptena             | 1995.111 | 0.070712717  | 0.099682 | 0.709381 | 0.478088 | 0.869292 |
| si:dkey-42116.1   | 0.465482 | -1.713176346 | 4.083567 | -0.41953 | 0.674829 | NA       |
| papss2a           | 467.2505 | -0.471657817 | 0.199108 | -2.36886 | 0.017843 | 0.236422 |
| zgc:171679        | 374.0241 | -0.328237253 | 0.266066 | -1.23367 | 0.217326 | 0.69815  |
| dytn              | 12.94985 | 0.898331533  | 0.506684 | 1.772962 | 0.076235 | 0.467585 |
| mllt11            | 2895.486 | -0.006211937 | 0.208917 | -0.02973 | 0.976279 | 1        |
| si:dkey-147f3.4   | 146.1732 | 0.490764872  | 0.216531 | 2.266486 | 0.023422 | 0.270528 |
| snx1a             | 2697.538 | -0.01993494  | 0.079368 | -0.25117 | 0.801681 | 0.967776 |
| pnkd              | 193.079  | -0.201836764 | 0.180922 | -1.1156  | 0.264593 | 0.742063 |
| si:dkey-286j15.3  | 275.5913 | 0.44998214   | 0.269249 | 1.671247 | 0.094673 | 0.513797 |
| pex13             | 297.2116 | -0.148907517 | 0.117445 | -1.26789 | 0.204836 | 0.686735 |
| smim8             | 266.3746 | 0.237448042  | 0.222515 | 1.067109 | 0.285923 | 0.757383 |
| cx28.8            | 47.05158 | -0.093693134 | 0.295609 | -0.31695 | 0.751282 | 0.955285 |
| zgc:153722        | 15.05936 | 0.255817169  | 0.469673 | 0.544671 | 0.58598  | 0.906655 |

|                  |          |              |          |          |          |          |  |
|------------------|----------|--------------|----------|----------|----------|----------|--|
| bbipl            | 289.1048 | 0.058541756  | 0.176693 | 0.331318 | 0.740404 | 0.953939 |  |
| ccn6             | 180.189  | -0.028091766 | 0.33023  | -0.08507 | 0.932208 | 0.996053 |  |
| si:dkey-119m7.4  | 59.57271 | -0.033240328 | 0.277291 | -0.11988 | 0.904582 | 0.991581 |  |
| cbx6a            | 484.5101 | 0.097069655  | 0.139104 | 0.697819 | 0.485291 | 0.872911 |  |
| si:dkey-150i13.2 | 33.89707 | 0.574544239  | 0.269134 | 2.134788 | 0.032778 | 0.32041  |  |
| ZNF512B          | 18.243   | -0.552052597 | 0.496999 | -1.11077 | 0.266666 | 0.743163 |  |
| gtpbp2b          | 118.2496 | 0.097698285  | 0.207752 | 0.470265 | 0.638166 | 0.924779 |  |
| naal0            | 1185.637 | -0.12794335  | 0.136159 | -0.93966 | 0.34739  | 0.800035 |  |
| hps5             | 386.4246 | -0.21933826  | 0.144407 | -1.51889 | 0.128791 | 0.578173 |  |
| g6pd             | 499.5011 | -0.157826705 | 0.113226 | -1.39391 | 0.163344 | 0.631199 |  |
| pthlhb           | 1.513472 | 0            | 2.260325 | 0        | 1        | NA       |  |
| rccd1            | 72.99993 | -0.398636392 | 0.297505 | -1.33993 | 0.180268 | 0.656111 |  |
| ldhbb            | 347.4299 | 0.046170432  | 0.323532 | 0.142707 | 0.886521 | 0.987533 |  |
| p4halb           | 683.0299 | 0.230583755  | 0.281364 | 0.819522 | 0.412489 | 0.838123 |  |
| si:dkeyp-34c12.1 | 11.05137 | -1.391733018 | 0.985374 | -1.41239 | 0.157835 | 0.623766 |  |
| wipflb           | 366.1376 | -0.144558374 | 0.135785 | -1.06461 | 0.287051 | 0.757955 |  |
| adgrg7.2         | 0.973199 | 0            | 2.63908  | 0        | 1        | NA       |  |
| gpr155b          | 55.5022  | 0.106470905  | 0.350892 | 0.30343  | 0.761563 | 0.958237 |  |
| slc35b4          | 338.4113 | 0.096240933  | 0.110139 | 0.873811 | 0.382221 | 0.825191 |  |
| adgrg7.1         | 0.350948 | 0            | 4.440764 | 0        | 1        | NA       |  |
| actn2b           | 328.1844 | 0.519472487  | 0.204025 | 2.546116 | 0.010893 | 0.181956 |  |
| chrn3a           | 34.78008 | 0.417118114  | 0.52582  | 0.793272 | 0.427619 | 0.845893 |  |
| abi3bpb          | 973.5346 | -0.072175761 | 0.116415 | -0.61999 | 0.535267 | 0.891993 |  |
| si:ch73-367f21.4 | 126.0087 | -0.443082385 | 0.209088 | -2.11912 | 0.03408  | 0.326054 |  |
| si:dkey-222p3.1  | 35.5592  | -0.895993304 | 0.876871 | -1.02181 | 0.306872 | 0.772019 |  |
| wnt7bb           | 79.82421 | -0.006211643 | 0.215019 | -0.02889 | 0.976953 | 1        |  |
| xirp2a           | 825.4212 | 0.130404387  | 0.188109 | 0.69324  | 0.488159 | 0.873611 |  |
| eepdl            | 280.632  | 0.004275271  | 0.192958 | 0.022156 | 0.982323 | 1        |  |
| zgc:64065        | 17.91204 | 0.199708649  | 0.46547  | 0.429047 | 0.667889 | 0.933086 |  |
| si:dkey-208m12.2 | 39.48345 | 0.917767061  | 0.488691 | 1.878009 | 0.06038  | 0.422591 |  |
| cica             | 682.6235 | -0.169856538 | 0.193884 | -0.87607 | 0.38099  | 0.824157 |  |
| pickl            | 97.55674 | -0.252768433 | 0.237308 | -1.06515 | 0.286809 | 0.757911 |  |
| sft2d2b          | 89.94415 | -0.009012626 | 0.233663 | -0.03857 | 0.969232 | 1        |  |
| alkbh1           | 54.18478 | 0.039646717  | 0.254492 | 0.155788 | 0.8762   | 0.984891 |  |
| zmp:0000001138   | 1.005503 | 0            | 3.058996 | 0        | 1        | NA       |  |
| slc12a10.2       | 188.1373 | -0.360543486 | 0.358097 | -1.00683 | 0.314016 | 0.777479 |  |
| pimr73           | 0.418251 | 0            | 4.099753 | 0        | 1        | NA       |  |
| cx40.8           | 16.64199 | -0.817157928 | 0.512783 | -1.59358 | 0.111031 | 0.545965 |  |
| cavin2b          | 1606.351 | -0.209884752 | 0.101596 | -2.06588 | 0.03884  | 0.345058 |  |
| usp40            | 299.234  | 0.064218017  | 0.158521 | 0.405106 | 0.685399 | 0.938486 |  |
| fopnl            | 60.33237 | 0.052874473  | 0.29498  | 0.179247 | 0.857743 | 0.979774 |  |
| sptssa           | 297.5707 | 0.021848072  | 0.148611 | 0.147015 | 0.88312  | 0.986924 |  |
| tmem170b         | 8.092134 | 1.234704668  | 0.636923 | 1.938547 | 0.052557 | 0.398274 |  |
| wnt4a            | 88.80909 | 0.105085495  | 0.202233 | 0.519626 | 0.603324 | 0.914226 |  |
| opr11            | 99.38339 | -0.597079131 | 0.325161 | -1.83626 | 0.066319 | 0.439788 |  |
| zgc:112255       | 397.4678 | 0.193502818  | 0.21148  | 0.914994 | 0.360195 | 0.811057 |  |
| p3hl             | 359.0441 | -0.053531957 | 0.146155 | -0.36627 | 0.714165 | 0.945821 |  |
| rgl3a            | 198.4793 | -0.375513852 | 0.211773 | -1.77319 | 0.076198 | 0.467585 |  |
| palm3            | 135.2283 | -0.026498861 | 0.159817 | -0.16581 | 0.868309 | 0.982801 |  |
| si:ch211-133n4.9 | 20.79696 | 0            | 1.700607 | 0        | 1        | 1        |  |
| hs6st3a          | 8.641275 | -0.027768024 | 0.636238 | -0.04364 | 0.965188 | 1        |  |
| zgc:158445       | 17.82329 | 0.489305375  | 0.786205 | 0.622364 | 0.533703 | 0.891181 |  |
| si:ch211-133n4.4 | 1100.051 | 0.111735663  | 0.136674 | 0.817535 | 0.413623 | 0.83842  |  |
| lrfn5a           | 21.33379 | 0.415630415  | 0.573965 | 0.724139 | 0.468981 | 0.867083 |  |

|                    |          |              |          |          |          |          |
|--------------------|----------|--------------|----------|----------|----------|----------|
| zgc:158254         | 126.7341 | -0.159984516 | 0.203534 | -0.78603 | 0.431848 | 0.848419 |
| si:ch211-117c9.5   | 434.3315 | 0.103156258  | 0.173626 | 0.59413  | 0.552425 | 0.8974   |
| ftr58              | 12.8671  | -0.956542602 | 0.575833 | -1.66115 | 0.096684 | 0.519038 |
| trim35-39          | 90.98534 | 0.031465006  | 0.270789 | 0.116197 | 0.907496 | 0.991745 |
| tmem79a            | 52.55792 | -0.166228    | 0.337311 | -0.4928  | 0.622151 | 0.918461 |
| ppplr18            | 126.4166 | -0.561682745 | 0.289908 | -1.93745 | 0.05269  | 0.398963 |
| fbxo34             | 977.1691 | -0.116686997 | 0.103202 | -1.13067 | 0.258195 | 0.735569 |
| zmp:0000001139     | 8.037595 | -0.080031408 | 0.930905 | -0.08597 | 0.931489 | 0.995809 |
| si:zfos-452g4.1    | 69.44449 | 0.22248753   | 0.263013 | 0.845918 | 0.397598 | 0.830253 |
| ncoa6              | 864.2565 | 0.065347837  | 0.161446 | 0.404765 | 0.68565  | 0.938486 |
| samhd1             | 120.3651 | -0.220903134 | 0.182982 | -1.20724 | 0.227341 | 0.708598 |
| tonsl              | 102.4348 | 0.324183993  | 0.217233 | 1.492336 | 0.135611 | 0.591012 |
| chrn3b             | 0.2609   | 0            | 5.267649 | 0        | 1        | NA       |
| tbcl1d2            | 111.5808 | 0.01497781   | 0.17703  | 0.084606 | 0.932575 | 0.996175 |
| gip                | 35.04025 | -2.757120498 | 1.42597  | -1.93351 | 0.053174 | 0.400175 |
| si:dkey-7814.5     | 6.151592 | -3.241472626 | 1.397988 | -2.31867 | 0.020413 | 0.253602 |
| cbarpb             | 52.71187 | -0.025642448 | 0.362159 | -0.0708  | 0.943553 | 0.997371 |
| ryr3               | 3947.452 | 6.85E-05     | 0.359126 | 0.000191 | 0.999848 | 1        |
| si:ch211-212d10.2  | 153.6678 | -0.04192862  | 0.185652 | -0.22585 | 0.821322 | 0.971788 |
| mif                | 469.1927 | -0.056548728 | 0.191714 | -0.29496 | 0.768022 | 0.960296 |
| borcs8             | 139.2467 | -0.155469855 | 0.21878  | -0.71062 | 0.477319 | 0.869292 |
| abch1              | 99.72409 | -0.259370131 | 0.185659 | -1.39702 | 0.162407 | 0.629825 |
| mgst2              | 213.2291 | -2.561031747 | 0.194106 | -13.194  | 9.51E-40 | 2.20E-35 |
| aftphb             | 188.3044 | -0.031728921 | 0.163867 | -0.19363 | 0.846468 | 0.977213 |
| si:ch211-235e9.8   | 2327.837 | 0.34157218   | 0.13101  | 2.607231 | 0.009128 | 0.163946 |
| si:ch211-197g15.7  | 19.00201 | -0.961708646 | 0.478818 | -2.0085  | 0.04459  | 0.36964  |
| map4k3b            | 112.1891 | -0.063205027 | 0.219713 | -0.28767 | 0.773598 | 0.960624 |
| morn2              | 25.46982 | -1.029335023 | 0.388705 | -2.64811 | 0.008094 | 0.152599 |
| si:ch211-197g15.10 | 0.418872 | 0            | 4.300054 | 0        | 1        | NA       |
| lrrtm2             | 193.7482 | -0.114637025 | 0.238448 | -0.48076 | 0.630685 | 0.923003 |
| celf5a             | 27.70779 | 0.232753721  | 0.402947 | 0.577629 | 0.563514 | 0.901075 |
| hssl1b11a          | 274.7681 | 0.182654652  | 0.170539 | 1.07104  | 0.284151 | 0.75523  |
| micos13            | 856.7589 | -0.17739916  | 0.188722 | -0.94    | 0.347216 | 0.799992 |
| si:dkey-7814.11    | 0.133557 | 0            | 5.267649 | 0        | 1        | NA       |
| slc7a11            | 67.02813 | 0.454320459  | 0.301437 | 1.507181 | 0.131764 | 0.583645 |
| si:dkey-21e2.3     | 1.550425 | 0            | 2.187724 | 0        | 1        | NA       |
| si:dkey-7814.6     | 2.697509 | -1.382162306 | 1.943568 | -0.71115 | 0.476993 | 0.869292 |
| foxq2              | 24.75047 | 0.060219744  | 0.399862 | 0.150601 | 0.88029  | 0.986408 |
| camk2g1            | 2208.498 | -0.129840975 | 0.103371 | -1.25606 | 0.209093 | 0.691152 |
| tim23a             | 1150.671 | -4.63E-05    | 0.107262 | -0.00043 | 0.999656 | 1        |
| BX247870.1         | 0.463886 | 1.055420598  | 2.891469 | 0.365012 | 0.715102 | NA       |
| si:dkey-172o19.2   | 1.158471 | 0            | 2.393265 | 0        | 1        | NA       |
| oaz1a              | 5352.293 | 0.1598558    | 0.122327 | 1.306796 | 0.191282 | 0.671109 |
| tepsin             | 89.29804 | -0.742737987 | 0.26309  | -2.82313 | 0.004756 | 0.114424 |
| AL935279.1         | 0.04222  | 0            | 5.267649 | 0        | 1        | NA       |
| arl3b              | 1015.333 | -0.096738528 | 0.136976 | -0.70624 | 0.480037 | 0.870001 |
| cks2               | 100.8756 | 0.268883882  | 0.205897 | 1.305915 | 0.191581 | 0.671651 |
| mier2              | 263.5285 | -0.006664224 | 0.134134 | -0.04968 | 0.960375 | 0.999164 |
| cybc1              | 134.8666 | -0.070112734 | 0.182362 | -0.38447 | 0.700631 | 0.942918 |
| gna15.4            | 1.788488 | 0            | 2.013464 | 0        | 1        | NA       |
| gbx1               | 73.90181 | -0.148000397 | 0.240356 | -0.61576 | 0.538056 | 0.892498 |
| ap3d1              | 623.0604 | -0.278829971 | 0.125261 | -2.22599 | 0.026015 | 0.286078 |
| nat9               | 306.9193 | 0.000334114  | 0.136648 | 0.002445 | 0.998049 | 1        |
| lrrc59             | 408.285  | -0.045329582 | 0.156489 | -0.28967 | 0.772072 | 0.960624 |



|                  |          |              |          |          |          |          |
|------------------|----------|--------------|----------|----------|----------|----------|
| tdo2a            | 401.2576 | -0.00059239  | 0.413268 | -0.00143 | 0.998856 | 1        |
| ptprc            | 59.09843 | -0.152341483 | 0.282454 | -0.53935 | 0.589645 | 0.908565 |
| si:dkey-121a9.3  | 33.88144 | -0.315691258 | 0.310823 | -1.01566 | 0.309791 | 0.774621 |
| myoz1b           | 5555.558 | 0.074092505  | 0.129674 | 0.571373 | 0.567747 | 0.901809 |
| zgc:153659       | 0 NA     | NA           | NA       | NA       | NA       | NA       |
| fam234a          | 34.11492 | -0.125894799 | 0.356847 | -0.3528  | 0.72424  | 0.948273 |
| tldr5            | 6.664282 | -0.345428756 | 1.01178  | -0.34141 | 0.732797 | 0.950617 |
| crpl             | 11.26788 | 1.565513211  | 1.503634 | 1.041153 | 0.297805 | 0.765407 |
| crp7             | 2.242775 | -0.483629311 | 1.78098  | -0.27155 | 0.785966 | 0.962605 |
| crp6             | 0.644911 | 0.945525336  | 2.499597 | 0.378271 | 0.705229 | NA       |
| si:dkey-121a11.3 | 215.3885 | -0.10607041  | 0.145386 | -0.72958 | 0.46565  | 0.864997 |
| si:ch211-234p6.5 | 113.8317 | 0.465427969  | 0.285695 | 1.629109 | 0.10329  | 0.530446 |
| CU896602.1       | 0.130487 | 0            | 5.267649 | 0        | 1        | NA       |
| lama3            | 44.02247 | -0.58900005  | 0.484507 | -1.21567 | 0.224111 | 0.705812 |
| zgc:154125       | 11.46487 | -0.084674872 | 0.715531 | -0.11834 | 0.905799 | 0.991631 |
| lrrc39           | 278.0899 | 0.119144718  | 0.174244 | 0.68378  | 0.494114 | 0.877558 |
| zbtb33           | 241.4057 | 0.115802612  | 0.150062 | 0.771699 | 0.440293 | 0.852192 |
| mrpl54           | 369.331  | -0.034658141 | 0.185268 | -0.18707 | 0.851605 | 0.978548 |
| znf618           | 132.8158 | 0.129096535  | 0.167918 | 0.768806 | 0.442009 | 0.853374 |
| aox5             | 895.0284 | -0.369042441 | 0.173825 | -2.12307 | 0.033748 | 0.324589 |
| lnx2b            | 329.8547 | -0.514524755 | 0.144307 | -3.56549 | 0.000363 | 0.022086 |
| zgc:152948       | 83.88841 | 0.310599197  | 0.26069  | 1.191449 | 0.233477 | 0.714569 |
| nrros            | 64.23846 | -0.451499343 | 0.25657  | -1.75975 | 0.07845  | 0.474337 |
| fbxo45           | 263.8384 | 0.152387857  | 0.14241  | 1.070064 | 0.28459  | 0.755668 |
| olfm3a           | 101.6043 | 0.375062182  | 0.356311 | 1.052625 | 0.292513 | 0.762033 |
| fshr             | 0.175549 | -1.791424827 | 5.232816 | -0.34234 | 0.732092 | NA       |
| sult3st5         | 13.29763 | 0.648463692  | 1.460465 | 0.444012 | 0.657034 | 0.929939 |
| zic6             | 140.4557 | 0.082249475  | 0.19811  | 0.41517  | 0.678017 | 0.936026 |
| zic3             | 817.9263 | 0.199775214  | 0.104401 | 1.913531 | 0.05568  | 0.408467 |
| fh11a            | 243.5183 | -0.398567565 | 0.22367  | -1.78195 | 0.074758 | 0.464131 |
| excl32b.1        | 2.339906 | 0            | 2.044489 | 0        | 1        | 1        |
| fam207a          | 182.3312 | -0.152423743 | 0.246826 | -0.61754 | 0.536881 | 0.892421 |
| hs6st1b          | 151.4129 | 0.055786344  | 0.178773 | 0.312052 | 0.755001 | 0.956283 |
| mgat5            | 404.5475 | 0.112890858  | 0.116433 | 0.969575 | 0.332259 | 0.789602 |
| krt222           | 304.0465 | -0.098331728 | 0.189682 | -0.5184  | 0.604177 | 0.91484  |
| insrb            | 304.1512 | 0.162512284  | 0.20647  | 0.787097 | 0.431225 | 0.848102 |
| si:dkey-42i9.8   | 2.663972 | -1.495294447 | 1.097484 | -1.36247 | 0.173048 | 0.645824 |
| si:dkey-42i9.7   | 1.424733 | 0            | 2.702864 | 0        | 1        | NA       |
| josd1            | 453.5506 | -0.347797638 | 0.127163 | -2.73506 | 0.006237 | 0.133784 |
| ecm2             | 378.0378 | 0.061796206  | 0.207218 | 0.298218 | 0.765537 | 0.959831 |
| xrcc6            | 382.4775 | -0.072105112 | 0.130974 | -0.55053 | 0.581957 | 0.90571  |
| zgc:171500       | 2.458197 | 0            | 5.267649 | 0        | 1        | 1        |
| CU929149.1       | 0.45168  | -0.868130581 | 3.142372 | -0.27627 | 0.782344 | NA       |
| zgc:153675       | 420.939  | 0.00749403   | 0.163088 | 0.045951 | 0.96335  | 0.999842 |
| fb1im1           | 285.7964 | 0.146158368  | 0.190529 | 0.76712  | 0.44301  | 0.854063 |
| dlx4b            | 73.279   | -0.054226179 | 0.236443 | -0.22934 | 0.818604 | 0.971679 |
| mtus1a           | 150.7943 | -0.163123729 | 0.250612 | -0.6509  | 0.515111 | 0.886401 |
| hnf4g            | 52.90953 | -1.018275749 | 0.446099 | -2.28262 | 0.022453 | 0.265534 |
| ppplcab          | 841.5019 | 0.242164032  | 0.105684 | 2.291405 | 0.02194  | 0.262532 |
| TSTD1            | 377.6231 | -0.257538568 | 0.221791 | -1.16118 | 0.24557  | 0.727137 |
| si:dkeyp-87e7.4  | 537.8022 | 0.109124472  | 0.11774  | 0.926828 | 0.354016 | 0.80504  |
| lsm5             | 318.5423 | -0.096264374 | 0.223452 | -0.4308  | 0.66661  | 0.932664 |
| si:ch211-222k6.3 | 72.54985 | 0.181547009  | 0.427006 | 0.425163 | 0.670718 | 0.933939 |
| urad             | 80.11533 | -0.205562095 | 0.221604 | -0.92761 | 0.353611 | 0.804513 |

|                   |          |              |          |          |          |          |
|-------------------|----------|--------------|----------|----------|----------|----------|
| si:ch211-222k6.1  | 24.95587 | -0.069269677 | 0.396927 | -0.17452 | 0.861461 | 0.9805   |
| gtf3ab            | 3.642692 | -2.751531975 | 1.145182 | -2.4027  | 0.016274 | 0.22539  |
| stard15           | 121.8608 | -0.440681735 | 0.212019 | -2.07851 | 0.037663 | 0.340171 |
| tgfbi             | 4882.505 | 0.224336633  | 0.123209 | 1.820786 | 0.068639 | 0.44686  |
| BX539307.1        | 2.194691 | -1.908281462 | 2.234458 | -0.85402 | 0.393091 | NA       |
| si:dkey-253d23.2  | 71.96548 | 0.283457818  | 0.228713 | 1.23936  | 0.215212 | 0.697157 |
| si:ch211-236g6.1  | 34.74856 | 1.257311599  | 1.015334 | 1.238323 | 0.215596 | 0.697157 |
| aqp8a.2           | 120.9095 | 1.408229901  | 1.227286 | 1.147435 | 0.251202 | 0.731476 |
| TIMM21            | 124.3821 | 0.107548559  | 0.191136 | 0.56268  | 0.573653 | 0.904248 |
| netoll            | 83.11179 | 0.022587918  | 0.280319 | 0.080579 | 0.935777 | 0.996829 |
| pvalb9            | 5023.499 | 0.149899592  | 0.19646  | 0.763002 | 0.445462 | 0.855403 |
| si:ch211-156p11.1 | 15.87317 | -0.919905239 | 0.810905 | -1.13442 | 0.256619 | 0.734072 |
| si:ch211-213a13.5 | 6.154342 | -0.595296575 | 0.881751 | -0.67513 | 0.499593 | 0.879603 |
| ptgdsb.2          | 0 NA     | NA           | NA       | NA       | NA       | NA       |
| BX511034.1        | 48.17709 | -0.157991685 | 0.354109 | -0.44617 | 0.655477 | 0.929606 |
| BX511034.2        | 1.443698 | -1.766016861 | 2.028476 | -0.87061 | 0.383966 | NA       |
| drd1a             | 5.71448  | 0.446294177  | 1.133217 | 0.393829 | 0.693707 | 0.940668 |
| zgc:l71490        | 8.850645 | -6.934274774 | 1.973392 | -3.51389 | 0.000442 | 0.025327 |
| si:dkey-19a16.7   | 60.60789 | -9.591122769 | 1.43439  | -6.68655 | 2.28E-11 | 2.65E-08 |
| zgc:l13298        | 24.89231 | 0.036852252  | 0.398185 | 0.092551 | 0.926261 | 0.994815 |
| rrp8              | 116.1201 | -0.003286161 | 0.246863 | -0.01331 | 0.989379 | 1        |
| si:ch73-256j6.2   | 0.226485 | 0 5.267649   | 0        | 1 NA     |          |          |
| si:dkey-19a16.5   | 2.720982 | -1.32918691  | 1.449256 | -0.91715 | 0.359063 | 0.810078 |
| si:dkey-19a16.4   | 34.34007 | 0.417252716  | 0.601068 | 0.694186 | 0.487566 | 0.873291 |
| ywhag2            | 2146.271 | 0.422950694  | 0.159356 | 2.65412  | 0.007952 | 0.150851 |
| si:rp71-36a1.3    | 4.40473  | -1.365550052 | 1.052979 | -1.29684 | 0.194685 | 0.67483  |
| si:dkey-222f2.7   | 4.525597 | -0.613878331 | 1.00949  | -0.60811 | 0.543116 | 0.894925 |
| smyd5             | 136.0032 | 0.188884563  | 0.234256 | 0.806317 | 0.42006  | 0.842383 |
| tma7              | 1474.216 | 0.008851838  | 0.206763 | 0.042812 | 0.965852 | 1        |
| nudt22            | 181.9544 | -0.212438362 | 0.177393 | -1.19756 | 0.231089 | 0.712582 |
| ctdspla           | 890.2932 | -0.080469749 | 0.142715 | -0.56385 | 0.572857 | 0.903608 |
| atcaya            | 410.1074 | 0.222954277  | 0.173722 | 1.2834   | 0.199352 | 0.679863 |
| mydgf             | 439.8396 | 0.248269353  | 0.172683 | 1.437716 | 0.150515 | 0.6142   |
| lox15a            | 3.330523 | -1.055399479 | 1.18243  | -0.89257 | 0.372088 | 0.819592 |
| zfr2              | 682.9492 | -0.051486408 | 0.139085 | -0.37018 | 0.71125  | 0.945821 |
| rxl               | 331.9229 | 0.51716408   | 0.198244 | 2.608719 | 0.009088 | 0.163488 |
| slco5a1a          | 84.38674 | 0.237665664  | 0.230113 | 1.032821 | 0.301688 | 0.767693 |
| uqcrc2b           | 3702.546 | 0.151015291  | 0.111567 | 1.353581 | 0.17587  | 0.649413 |
| prex2             | 265.3493 | 0.048976395  | 0.156132 | 0.313686 | 0.753759 | 0.955912 |
| ndc80             | 441.6693 | 0.161710862  | 0.202064 | 0.800293 | 0.423541 | 0.843967 |
| pimr193           | 0.043309 | 0 5.267649   | 0        | 1 NA     |          |          |
| zgc:66433         | 933.8579 | 0.050776408  | 0.092578 | 0.548472 | 0.583368 | 0.905948 |
| ids               | 97.89812 | -0.130582858 | 0.23306  | -0.5603  | 0.575277 | 0.904718 |
| zgc:l62941        | 0.111311 | 0 5.267649   | 0        | 1 NA     |          |          |
| ppplr9bb          | 109.0268 | 0.174261277  | 0.238186 | 0.73162  | 0.464401 | 0.864593 |
| si:dkey-20i20.8   | 58.55733 | 0.03168516   | 0.266351 | 0.11896  | 0.905307 | 0.991631 |
| si:dkey-20i20.2   | 68.0952  | 0.033730972  | 0.249151 | 0.135383 | 0.892309 | 0.988566 |
| ankha             | 112.449  | -0.227244552 | 0.261296 | -0.86968 | 0.384473 | 0.826588 |
| znfl167           | 36.20354 | -0.233673437 | 0.276629 | -0.84472 | 0.398268 | 0.830737 |
| si:dkey-37o8.1    | 0 NA     | NA           | NA       | NA       | NA       | NA       |
| si:ch211-207i20.3 | 81.4555  | -0.211338813 | 0.262905 | -0.80386 | 0.421477 | 0.842754 |
| prlh2             | 16.54025 | -0.346772432 | 0.705633 | -0.49143 | 0.623119 | 0.918894 |
| zgc:l12977        | 26.72513 | -0.289802342 | 0.327748 | -0.88422 | 0.376576 | 0.822258 |
| pimr46            | 0.427465 | 1.921877964  | 4.938949 | 0.389127 | 0.697182 | NA       |

|                  |          |              |          |          |          |          |
|------------------|----------|--------------|----------|----------|----------|----------|
| si:ch211-253p2.2 | 37.32636 | -0.069073252 | 0.377931 | -0.18277 | 0.854981 | 0.979161 |
| eef1e1           | 395.4608 | 0.295500924  | 0.15814  | 1.868602 | 0.061678 | 0.42588  |
| znf1153          | 42.51377 | -0.051437109 | 0.271705 | -0.18931 | 0.849848 | 0.97824  |
| znf1180          | 41.03212 | -0.084546238 | 0.324959 | -0.26018 | 0.794729 | 0.965543 |
| adarb2           | 20.0754  | 0.499691341  | 0.381834 | 1.308662 | 0.190649 | 0.670716 |
| znf1162          | 31.30576 | 0.113843739  | 0.354189 | 0.32142  | 0.747892 | 0.955074 |
| si:dkey-32n7.9   | 0 NA     | NA           | NA       | NA       | NA       | NA       |
| nrn1a            | 257.9616 | 0.071557023  | 0.150372 | 0.475867 | 0.634169 | 0.924077 |
| itgbla           | 1569.25  | 0.040883403  | 0.141306 | 0.289326 | 0.772332 | 0.960624 |
| si:ch73-134f24.1 | 0 NA     | NA           | NA       | NA       | NA       | NA       |
| znf711           | 277.5974 | 0.064451124  | 0.121795 | 0.529176 | 0.596684 | 0.911709 |
| glod5            | 268.9651 | -0.306346729 | 0.234222 | -1.30793 | 0.190895 | 0.670774 |
| zdhhc15b         | 446.4232 | -0.029881917 | 0.176872 | -0.16895 | 0.865839 | 0.982395 |
| rell2            | 117.5805 | -0.158831621 | 0.223985 | -0.70912 | 0.478251 | 0.869292 |
| dhrr7cb          | 944.354  | 0.192371826  | 0.12346  | 1.55817  | 0.119193 | 0.562753 |
| trmt112          | 276.8676 | 0.016783712  | 0.226397 | 0.074134 | 0.940904 | 0.997371 |
| tgfb5            | 60.42827 | 0.319465311  | 0.329475 | 0.96962  | 0.332236 | 0.789602 |
| pimr56           | 0.04222  | 0            | 5.267649 | 0        | 1        | NA       |
| arl9             | 300.0063 | -0.208632709 | 0.170447 | -1.22403 | 0.22094  | 0.702242 |
| pcdh2ab1         | 4.474507 | -1.691707302 | 0.94914  | -1.78236 | 0.074691 | 0.46413  |
| CR847851.1       | 0.616803 | 1.432421282  | 2.53834  | 0.564314 | 0.57254  | NA       |
| sec24b           | 675.5128 | 0.020036093  | 0.145603 | 0.137608 | 0.890551 | 0.988446 |
| rasalb           | 122.3448 | -0.414789491 | 0.210165 | -1.97364 | 0.048423 | 0.383181 |
| adgra3           | 178.4612 | -0.087301831 | 0.172978 | -0.5047  | 0.61377  | 0.915998 |
| tlr8b            | 4.443001 | 0.122923554  | 0.927545 | 0.132526 | 0.894569 | 0.988985 |
| quo              | 670.8428 | 0.045794891  | 0.154537 | 0.296335 | 0.766974 | 0.960296 |
| heatr6           | 146.6573 | -0.060013558 | 0.179687 | -0.33399 | 0.738388 | 0.952912 |
| nav2a            | 531.431  | 0.222822634  | 0.12624  | 1.76507  | 0.077552 | 0.470757 |
| mamdc2b          | 63.54757 | -0.14367065  | 0.308041 | -0.4664  | 0.640928 | 0.925364 |
| frmd8            | 663.8987 | -0.249996924 | 0.081205 | -3.07858 | 0.00208  | 0.071289 |
| col9ala          | 5068.414 | 0.459375983  | 0.1851   | 2.48177  | 0.013073 | 0.198789 |
| si:dkeyp-72g9.4  | 598.2337 | 0.273049072  | 0.198367 | 1.376486 | 0.168671 | 0.640045 |
| rbfa             | 74.41068 | -0.506566255 | 0.264494 | -1.91523 | 0.055463 | 0.407706 |
| cnksr2b          | 240.0196 | -0.106257473 | 0.276676 | -0.38405 | 0.700942 | 0.942918 |
| zgc:171551       | 7.145447 | 0.291456408  | 0.722258 | 0.403535 | 0.686555 | 0.938732 |
| fam149a          | 31.92792 | -0.28221578  | 0.376932 | -0.74872 | 0.454027 | 0.858944 |
| usp7             | 1004.933 | -0.010414555 | 0.15812  | -0.06586 | 0.947486 | 0.997371 |
| mmrn2b           | 76.96573 | -0.01706188  | 0.232129 | -0.0735  | 0.941407 | 0.997371 |
| vav3b            | 96.16788 | 0.619314089  | 0.374096 | 1.655496 | 0.097824 | 0.521071 |
| cpxmla           | 431.9767 | 0.153321035  | 0.152372 | 1.006229 | 0.314305 | 0.777479 |
| si:ch73-233k15.2 | 40.82155 | 0.244254968  | 0.40152  | 0.608326 | 0.542971 | 0.894917 |
| si:dkey-250123.4 | 79.41254 | 0.847477315  | 0.366932 | 2.309631 | 0.020909 | 0.256868 |
| smarcad1b        | 292.2388 | 0.126744404  | 0.130925 | 0.96807  | 0.333009 | 0.790126 |
| zgc:194679       | 65.95299 | 0.066795346  | 0.247342 | 0.270053 | 0.78712  | 0.963065 |
| nlr1             | 257.9435 | -0.059319496 | 0.177069 | -0.33501 | 0.737619 | 0.952496 |
| zbtb32           | 2.059478 | -2.615756603 | 1.619438 | -1.61523 | 0.106262 | NA       |
| gal3st3          | 64.52404 | -0.12586503  | 0.291126 | -0.43234 | 0.665495 | 0.932595 |
| dok4             | 221.7188 | 0.08019593   | 0.154599 | 0.518735 | 0.603946 | 0.914603 |
| myh14            | 493.6226 | -0.026880508 | 0.182175 | -0.14755 | 0.882696 | 0.986908 |
| ftr95            | 1.361946 | 0            | 2.162922 | 0        | 1        | NA       |
| suds3            | 485.8341 | -0.178795739 | 0.114415 | -1.5627  | 0.118123 | 0.560498 |
| dennd2c          | 194.1892 | -0.094013862 | 0.179638 | -0.52335 | 0.60073  | 0.913756 |
| RAP1GDS1         | 22.93458 | 0.054332163  | 0.379723 | 0.143084 | 0.886224 | 0.987533 |
| prss59.2         | 91496.95 | -3.567687213 | 1.317888 | -2.70712 | 0.006787 | 0.139038 |

|                   |          |              |          |          |          |          |  |
|-------------------|----------|--------------|----------|----------|----------|----------|--|
| slc25a37          | 30.67083 | 0.028869719  | 0.336409 | 0.085817 | 0.931612 | 0.995827 |  |
| ip6kl             | 385.2116 | 0.277320332  | 0.15999  | 1.733362 | 0.083031 | 0.483619 |  |
| si:dkey-1j5.4     | 41.3387  | -0.704905493 | 0.54137  | -1.30208 | 0.19289  | 0.672855 |  |
| crygm2d18         | 5805.543 | 0.426910504  | 0.369899 | 1.154127 | 0.248448 | 0.728723 |  |
| CACNA2D1          | 12.80087 | 0.964384827  | 0.468365 | 2.059045 | 0.03949  | 0.34755  |  |
| taccl             | 220.3874 | -0.254352757 | 0.196312 | -1.29566 | 0.195093 | 0.67483  |  |
| slc12a7a          | 255.5515 | 0.05011965   | 0.168903 | 0.296737 | 0.766668 | 0.960296 |  |
| pdzrn3a           | 53.08077 | -0.391986428 | 0.231535 | -1.69299 | 0.090457 | 0.505009 |  |
| myo19             | 47.66999 | 0.314220835  | 0.231927 | 1.354827 | 0.175473 | 0.649279 |  |
| si:ch211-113j14.1 | 156.6855 | 0.22321779   | 0.250377 | 0.891527 | 0.372647 | 0.819953 |  |
| gnal3a            | 193.8065 | 0.558152196  | 0.170725 | 3.269298 | 0.001078 | 0.04626  |  |
| tnnild            | 549.4942 | 0.299909014  | 0.150486 | 1.992939 | 0.046268 | 0.375756 |  |
| magi2b            | 16.29586 | 0.318559467  | 0.539015 | 0.591003 | 0.554518 | 0.898538 |  |
| tbc1d12b          | 129.3832 | -0.038161503 | 0.159244 | -0.23964 | 0.810608 | 0.969828 |  |
| tti2              | 84.98234 | -0.148983635 | 0.246299 | -0.60489 | 0.545252 | 0.895275 |  |
| si:dkey-17e16.9   | 3.539225 | -0.286781391 | 0.983082 | -0.29172 | 0.770503 | 0.960484 |  |
| si:dkey-288i20.2  | 26.77432 | 0.399976555  | 0.455283 | 0.878523 | 0.37966  | 0.823607 |  |
| cmb1              | 518.3141 | -0.002621576 | 0.196191 | -0.01336 | 0.989339 | 1        |  |
| si:ch73-303b9.1   | 0.944785 | 2.649256149  | 2.096074 | 1.263913 | 0.206261 | NA       |  |
| zmp:0000000735    | 19.40854 | -0.695231763 | 0.452742 | -1.5356  | 0.124636 | 0.572298 |  |
| man1b1a           | 175.0659 | 0.148880286  | 0.184    | 0.809132 | 0.418439 | 0.841565 |  |
| zgc:194210        | 15.57763 | -0.11496719  | 0.497095 | -0.23128 | 0.817099 | 0.971207 |  |
| si:dkeyp-104h9.5  | 230.6939 | 0.119534319  | 0.141255 | 0.846228 | 0.397426 | 0.830253 |  |
| cntnap5l          | 126.0479 | -0.198178445 | 0.258904 | -0.76545 | 0.444002 | 0.854304 |  |
| WDR31             | 15.85602 | 0.35254599   | 0.53644  | 0.657195 | 0.511055 | 0.884394 |  |
| thbs2b            | 205.691  | 0.152440981  | 0.23597  | 0.646019 | 0.518267 | 0.887148 |  |
| or131-2           | 6.758704 | 0.534154352  | 0.864475 | 0.617894 | 0.536645 | 0.892421 |  |
| scly              | 42.44419 | -0.431130352 | 0.257134 | -1.67668 | 0.093606 | 0.511703 |  |
| pax1b             | 76.64987 | 0.523009227  | 0.226623 | 2.307836 | 0.021008 | 0.257618 |  |
| zgc:174917        | 77.08121 | 1.137513792  | 0.519073 | 2.191432 | 0.028421 | 0.299922 |  |
| znf1177           | 10.14129 | -0.239239502 | 0.670573 | -0.35677 | 0.721265 | 0.947343 |  |
| L0017700.1        | 69.97837 | -0.132510452 | 0.238828 | -0.55484 | 0.579007 | 0.905417 |  |
| RASGRF1           | 100.4181 | 0.765008625  | 0.310388 | 2.464683 | 0.013713 | 0.204799 |  |
| senp2             | 505.2662 | 0.205649849  | 0.102158 | 2.013058 | 0.044108 | 0.367756 |  |
| herc2             | 1638.478 | 0.033247939  | 0.204923 | 0.162246 | 0.871112 | 0.983365 |  |
| myo9ab            | 428.5117 | 0.003318722  | 0.125174 | 0.026513 | 0.978848 | 1        |  |
| si:dkey-85k7.10   | 3.109236 | 1.939869123  | 1.856256 | 1.045044 | 0.296003 | 0.764246 |  |
| zgc:110843        | 583.9624 | 0.267967324  | 0.159399 | 1.681107 | 0.092742 | 0.509444 |  |
| rbm15             | 387.8757 | -0.247347628 | 0.159619 | -1.54962 | 0.121234 | 0.567243 |  |
| arhgef7b          | 506.3788 | -0.005855314 | 0.133204 | -0.04396 | 0.964938 | 1        |  |
| hdac7b            | 22.05397 | 1.04427093   | 0.595552 | 1.753449 | 0.079525 | 0.477355 |  |
| klf7a             | 41.55426 | 0.080399833  | 0.239367 | 0.335885 | 0.736958 | 0.952276 |  |
| pex26             | 201.0683 | 0.022629935  | 0.154781 | 0.146206 | 0.883758 | 0.987014 |  |
| kif13bb           | 135.6687 | -0.109311431 | 0.238383 | -0.45855 | 0.646555 | 0.926728 |  |
| gas2l2            | 0.968356 | 0.107318227  | 1.607622 | 0.066756 | 0.946776 | NA       |  |
| tdpl              | 80.87717 | 0.03925628   | 0.20965  | 0.187246 | 0.851467 | 0.978548 |  |
| rex1bd            | 238.5534 | -0.166219236 | 0.184342 | -0.90169 | 0.367222 | 0.816459 |  |
| pdzrn3b           | 445.8742 | -0.130020783 | 0.136296 | -0.95396 | 0.340104 | 0.795345 |  |
| gdpd2             | 276.5598 | 0.508556084  | 0.1462   | 3.478489 | 0.000504 | 0.027752 |  |
| tpst1             | 614.6561 | -0.018910955 | 0.134888 | -0.1402  | 0.888504 | 0.988188 |  |
| crygm2d6          | 2168.978 | 0.46873371   | 0.54663  | 0.857497 | 0.39117  | 0.827902 |  |
| si:ch1073-165f9.2 | 33.80034 | 0.419374496  | 0.547025 | 0.766646 | 0.443292 | 0.854063 |  |
| slc41a2b          | 279.8834 | 0.092368166  | 0.137859 | 0.670019 | 0.502846 | 0.881453 |  |
| clstn3            | 951.2783 | 0.53370652   | 0.253901 | 2.102027 | 0.035551 | 0.331075 |  |

|                   |          |              |          |          |          |          |
|-------------------|----------|--------------|----------|----------|----------|----------|
| gdf10b            | 69.33085 | 0.40867792   | 0.277494 | 1.472743 | 0.14082  | 0.599658 |
| secisbp2          | 119.9041 | -0.156295064 | 0.19451  | -0.80353 | 0.421667 | 0.842943 |
| dnase2            | 130.0292 | -0.038429636 | 0.189159 | -0.20316 | 0.83901  | 0.976417 |
| cx47.1            | 17.68171 | -1.769087718 | 1.618502 | -1.09304 | 0.274376 | 0.74977  |
| nempl             | 72.1134  | 0.075254991  | 0.31367  | 0.239918 | 0.810394 | 0.969828 |
| inka2             | 38.16157 | -0.068200655 | 0.322169 | -0.21169 | 0.832347 | 0.975062 |
| CABZ01046997.1    | 1.91067  | 0.093642174  | 2.166477 | 0.043223 | 0.965524 | NA       |
| ptpn9b            | 248.9213 | 0.250309898  | 0.125758 | 1.990412 | 0.046546 | 0.376263 |
| zgc:92481         | 276.0021 | -0.995008137 | 0.343979 | -2.89264 | 0.00382  | 0.10304  |
| ppip5k1b          | 281.8957 | -0.200854944 | 0.162804 | -1.23372 | 0.217307 | 0.69815  |
| cinp              | 181.9819 | -0.029555016 | 0.279788 | -0.10563 | 0.915873 | 0.99311  |
| tmem255a          | 469.8283 | 0.082534577  | 0.107912 | 0.764831 | 0.444372 | 0.85448  |
| si:ch211-202h22.7 | 22.2096  | -0.013920322 | 0.505963 | -0.02751 | 0.978051 | 1        |
| pimr213           | 4.145791 | 2.650453953  | 2.877187 | 0.921196 | 0.356948 | 0.807586 |
| fam163ba          | 14.96098 | 0.084968341  | 0.542388 | 0.156656 | 0.875516 | 0.984383 |
| znf1085           | 14.40389 | -1.425179773 | 0.589621 | -2.41711 | 0.015644 | 0.220889 |
| b3glcta           | 151.3155 | 0.019205881  | 0.195089 | 0.098447 | 0.921578 | 0.994085 |
| rnf411            | 92.72134 | 0.01393572   | 0.260891 | 0.053416 | 0.957401 | 0.999109 |
| cntnap5a          | 38.43831 | 0.74533064   | 0.34066  | 2.187901 | 0.028677 | 0.301471 |
| adck2             | 127.9421 | -0.0040304   | 0.188993 | -0.02133 | 0.982986 | 1        |
| synrg             | 413.7042 | 0.114077935  | 0.138489 | 0.823731 | 0.410092 | 0.836945 |
| otulina           | 59.97478 | -0.104282961 | 0.309732 | -0.33669 | 0.736352 | 0.951919 |
| gareml            | 19.174   | -0.203794566 | 0.438461 | -0.4648  | 0.642078 | 0.925586 |
| wnt6b             | 7.22317  | 0.091134819  | 0.686605 | 0.132733 | 0.894405 | 0.988899 |
| BX511021.1        | 23.43716 | 0.510159529  | 0.434392 | 1.174421 | 0.240226 | 0.721177 |
| si:ch73-386h18.1  | 694.0066 | 0.169947059  | 0.176617 | 0.962233 | 0.335933 | 0.792139 |
| si:dkeyp-67e1.6   | 0.17956  | -0.868114638 | 5.267649 | -0.1648  | 0.8691   | NA       |
| prokl             | 6.41606  | 0.436618294  | 0.797568 | 0.547437 | 0.584078 | 0.906376 |
| cd4-2.2           | 2.179476 | 0.146764249  | 1.422239 | 0.103192 | 0.91781  | NA       |
| slc4a7            | 144.312  | 0.107598048  | 0.199888 | 0.538291 | 0.590376 | 0.908901 |
| tox3              | 313.6246 | -0.026651068 | 0.132228 | -0.20155 | 0.840266 | 0.976417 |
| pmch              | 26.36537 | -1.232459904 | 1.237126 | -0.99623 | 0.319139 | 0.779923 |
| si:ch211-160j14.2 | 50.44349 | -0.510150624 | 0.39127  | -1.30383 | 0.19229  | 0.672283 |
| ccdc32            | 369.496  | 0.044776893  | 0.137936 | 0.32462  | 0.745469 | 0.955021 |
| si:ch211-258f14.2 | 40.93638 | -0.036865735 | 0.376137 | -0.09801 | 0.921923 | 0.994346 |
| si:dkey-202b22.5  | 6.139535 | 0.639033263  | 0.724968 | 0.881464 | 0.378067 | 0.82265  |
| mctp2b            | 83.6589  | -0.141361061 | 0.265847 | -0.53174 | 0.594907 | 0.910869 |
| colgalt1          | 76.96906 | 0.444070244  | 0.284617 | 1.560239 | 0.118703 | 0.561771 |
| crabp2a           | 1101.194 | -0.059363023 | 0.136246 | -0.4357  | 0.663051 | 0.931141 |
| pctp              | 57.68182 | -0.021451383 | 0.273777 | -0.07835 | 0.937547 | 0.997305 |
| mntb              | 244.9845 | -0.19708161  | 0.138018 | -1.42794 | 0.15331  | 0.617847 |
| si:ch211-276k2.1  | 1.077223 | -0.868172732 | 5.267649 | -0.16481 | 0.869092 | NA       |
| prickle3          | 58.96264 | -0.295280521 | 0.261544 | -1.12899 | 0.258903 | 0.736046 |
| srpkla            | 466.8921 | 0.045711203  | 0.115681 | 0.395148 | 0.692734 | 0.940444 |
| si:ch211-23110.3  | 22.84965 | 0.403818909  | 0.392367 | 1.029186 | 0.303392 | 0.769363 |
| taptla            | 120.3751 | -0.071562005 | 0.216853 | -0.33    | 0.741399 | 0.954103 |
| crygmx12          | 4506.551 | 0.555187031  | 0.260709 | 2.129524 | 0.033211 | 0.32264  |
| slc6alla          | 148.464  | 0.303897802  | 0.1907   | 1.593587 | 0.111029 | 0.545965 |
| stac              | 21.34046 | 0.536401779  | 0.508813 | 1.054222 | 0.291781 | 0.761454 |
| znf1059           | 54.62117 | -0.174038616 | 0.269939 | -0.64473 | 0.5191   | 0.887148 |
| si:ch1073-159d7.7 | 7.57451  | 1.610590329  | 0.820604 | 1.962688 | 0.049682 | 0.388006 |
| zgc:194275        | 2.899168 | -1.370301807 | 1.221441 | -1.12187 | 0.261916 | 0.739623 |
| ptgfr             | 0.914385 | -1.404621054 | 2.190197 | -0.64132 | 0.521314 | NA       |
| usp31             | 108.7853 | 0.151795848  | 0.203709 | 0.745159 | 0.456176 | 0.860359 |

|                   |          |              |          |          |          |          |
|-------------------|----------|--------------|----------|----------|----------|----------|
| rbms1a            | 1077.158 | 0.084954653  | 0.097115 | 0.874786 | 0.38169  | 0.824957 |
| CT573248.1        | 17.71086 | -0.60239865  | 0.471308 | -1.27814 | 0.2012   | 0.681045 |
| myt1a             | 1044.619 | 0.141779015  | 0.147091 | 0.963886 | 0.335103 | 0.79185  |
| fastkd2           | 354.1202 | -0.047363928 | 0.134621 | -0.35183 | 0.724964 | 0.948578 |
| adamts12          | 30.48293 | -0.167721353 | 0.381691 | -0.43942 | 0.660359 | 0.930581 |
| si:dkey-91i10.2   | 113.6383 | -0.044140969 | 0.184192 | -0.23965 | 0.810604 | 0.969828 |
| ky                | 26.38002 | 0.080411098  | 0.458384 | 0.175423 | 0.860747 | 0.980388 |
| abca5             | 174.4808 | -0.082611282 | 0.198248 | -0.41671 | 0.676893 | 0.935664 |
| efnb2b            | 123.5288 | -0.083733565 | 0.261485 | -0.32022 | 0.7488   | 0.955074 |
| si:ch211-281g13.5 | 2.673233 | -5.660614794 | 1.800957 | -3.14311 | 0.001672 | 0.062877 |
| kctd1             | 113.2163 | -0.078641127 | 0.255324 | -0.30801 | 0.758078 | 0.95756  |
| calm3b            | 9428.282 | 0.2898269    | 0.113403 | 2.555724 | 0.010597 | 0.179908 |
| dlg5a             | 538.2961 | 0.021527573  | 0.150732 | 0.14282  | 0.886432 | 0.987533 |
| map3k14a          | 257.947  | 0.002423653  | 0.142906 | 0.01696  | 0.986469 | 1        |
| si:dkey-234i14.15 | 0 NA     | NA           | NA       | NA       | NA       | NA       |
| rem2              | 22.87079 | 0.836289393  | 0.433706 | 1.928239 | 0.053825 | 0.401878 |
| tas2r200.2        | 0.109463 | -0.868089684 | 5.267649 | -0.1648  | 0.869104 | NA       |
| zgc:l71452        | 7.305063 | -1.315913036 | 0.81375  | -1.6171  | 0.105857 | 0.534827 |
| irx5b             | 138.5804 | 0.125380207  | 0.233573 | 0.536792 | 0.591411 | 0.909437 |
| mrnip             | 19.06739 | 0.196783475  | 0.365408 | 0.538531 | 0.59021  | 0.908901 |
| BX511100.1        | 0.214816 | 1.055359662  | 5.267649 | 0.200347 | 0.841209 | NA       |
| map6b             | 42.30189 | 0.270828514  | 0.299947 | 0.902922 | 0.366567 | 0.816033 |
| rnf26             | 101.6435 | 0.161267082  | 0.226628 | 0.711594 | 0.476717 | 0.869292 |
| antxr1b           | 69.58696 | -0.013532656 | 0.336654 | -0.0402  | 0.967936 | 1        |
| si:dkey-3d4.3     | 73.98213 | -0.286056785 | 0.236835 | -1.20783 | 0.227112 | 0.70833  |
| dnai2b            | 9.814353 | 0.122022946  | 0.516758 | 0.236132 | 0.81333  | 0.970328 |
| gpc5c             | 19.54143 | 0.700884199  | 0.484089 | 1.447841 | 0.147661 | 0.608558 |
| stripl            | 613.5193 | 0.033530581  | 0.118628 | 0.282654 | 0.777442 | 0.961073 |
| si:ch1073-188e1.1 | 0.14264  | 0 5.267649   | 0        | 1 NA     |          |          |
| tecpr1b           | 93.02037 | 0.333745182  | 0.350101 | 0.953284 | 0.340446 | 0.795496 |
| nim1k             | 48.71455 | 0.349518261  | 0.308032 | 1.134682 | 0.256509 | 0.73401  |
| tgm2b             | 964.0139 | 0.328090588  | 0.206235 | 1.590855 | 0.111642 | 0.547577 |
| si:ch211-86h15.1  | 93.88596 | -0.201135947 | 0.192189 | -1.04656 | 0.295305 | 0.763896 |
| zgc:l63014        | 3.700903 | -0.870067777 | 1.047467 | -0.83064 | 0.406177 | 0.834645 |
| bcdin3d           | 44.746   | 0.435470553  | 0.418562 | 1.040396 | 0.298156 | 0.765416 |
| si:dkey-1h24.2    | 19.16819 | 0.182272441  | 0.404416 | 0.450705 | 0.652202 | 0.928768 |
| ftr12             | 96.80565 | 0.312570007  | 0.238453 | 1.310822 | 0.189918 | 0.669635 |
| frmpd2            | 20.76845 | 0.506041047  | 0.854845 | 0.591969 | 0.553872 | 0.89821  |
| usp2b             | 58.88068 | 0.047518338  | 0.386248 | 0.123026 | 0.902087 | 0.990847 |
| dnmbp             | 531.4388 | 0.065123516  | 0.14115  | 0.461378 | 0.644528 | 0.926639 |
| znf1161           | 52.64449 | -0.034749831 | 0.299959 | -0.11585 | 0.907773 | 0.991745 |
| ttc39a            | 85.69601 | -0.387643852 | 0.205148 | -1.88958 | 0.058814 | 0.418455 |
| edem3             | 536.0065 | 0.145145873  | 0.097372 | 1.490631 | 0.136058 | 0.591131 |
| kif5ba            | 1263.14  | -0.151056009 | 0.092688 | -1.62972 | 0.10316  | 0.530217 |
| scpp7             | 1.51681  | 2.521610991  | 2.176396 | 1.158618 | 0.246612 | NA       |
| slc47a2.2         | 7.922743 | -7.400154334 | 1.683039 | -4.3969  | 1.10E-05 | 0.002003 |
| c2cd3             | 152.3056 | -0.168188532 | 0.208524 | -0.80657 | 0.419917 | 0.842383 |
| myo1013           | 199.0958 | -0.092825068 | 0.211259 | -0.43939 | 0.660379 | 0.930581 |
| zgc:l13452        | 105.6177 | -0.249524829 | 0.218037 | -1.14441 | 0.252452 | 0.732759 |
| rbpjl             | 15.80301 | -0.494038306 | 1.380411 | -0.35789 | 0.720424 | 0.947238 |
| itpr1b            | 242.695  | 0.24292882   | 0.240297 | 1.01095  | 0.31204  | 0.776164 |
| si:ch211-226h7.5  | 8.571528 | -3.065252024 | 1.502578 | -2.04    | 0.041351 | 0.355014 |
| slitrk5b          | 8.999436 | 0.232480908  | 0.809612 | 0.287151 | 0.773997 | 0.960636 |
| sgca              | 397.8145 | 0.252694614  | 0.171706 | 1.471673 | 0.141109 | 0.599658 |

|                    |          |              |          |          |          |          |
|--------------------|----------|--------------|----------|----------|----------|----------|
| paqr4b             | 23.47178 | 0.795105527  | 0.669339 | 1.187896 | 0.234874 | 0.715533 |
| tnrc6b             | 884.4837 | 0.0117299    | 0.135032 | 0.086868 | 0.930777 | 0.995809 |
| zgc:162879         | 58.95242 | -0.182588222 | 0.24944  | -0.73199 | 0.464174 | 0.864593 |
| birc6              | 1383.988 | 0.067771362  | 0.196392 | 0.345082 | 0.730033 | 0.950056 |
| tasor2             | 530.7342 | -0.446392822 | 0.170702 | -2.61504 | 0.008922 | 0.161876 |
| gpm                | 297.6933 | -0.22705546  | 0.181122 | -1.25361 | 0.209985 | 0.691821 |
| fbxo4              | 43.6819  | -0.581030777 | 0.279262 | -2.08059 | 0.037471 | 0.339939 |
| calhm2.2           | 0.281472 | 2.436367833  | 5.206324 | 0.467963 | 0.639811 | NA       |
| prokrla            | 2.83574  | 0.860851376  | 1.318258 | 0.653022 | 0.513742 | 0.88631  |
| si:dkey-172j4.3    | 305.7582 | -0.088995056 | 0.152908 | -0.58202 | 0.560555 | 0.899928 |
| arhgap32b          | 331.5828 | 0.192447507  | 0.190232 | 1.011646 | 0.311707 | 0.776164 |
| psk9               | 21.54193 | 1.476280152  | 0.842876 | 1.751479 | 0.079863 | 0.478112 |
| zgc:172253         | 48.04238 | -0.831885779 | 0.484367 | -1.71747 | 0.085893 | 0.491515 |
| flna               | 2798.258 | 0.02511293   | 0.148495 | 0.169117 | 0.865705 | 0.982364 |
| commd6             | 78.14385 | 0.146962622  | 0.256053 | 0.573954 | 0.565999 | 0.901739 |
| si:dkey-1c7.3      | 0.319913 | -0.868124223 | 5.267649 | -0.1648  | 0.869099 | NA       |
| zgc:110286         | 11.55935 | 1.055417026  | 1.904803 | 0.554082 | 0.579523 | 0.905618 |
| SLC5A10            | 10.11045 | -0.203717387 | 0.689612 | -0.29541 | 0.767682 | 0.960296 |
| EIF3BB             | 15.30132 | 0.506068816  | 0.620573 | 0.815486 | 0.414794 | 0.838698 |
| wu:fc38h03         | 179.4917 | -0.206664574 | 0.291681 | -0.70853 | 0.478616 | 0.869292 |
| si:dkey-188i13.6   | 41.34337 | -4.13182331  | 1.034505 | -3.99401 | 6.50E-05 | 0.006631 |
| map3k22            | 59.40878 | -0.243930662 | 0.29404  | -0.82958 | 0.406774 | 0.835226 |
| zgc:172302         | 234.4348 | 0.629669763  | 0.267926 | 2.350167 | 0.018765 | 0.24195  |
| rap1gap2b          | 13.01786 | 0.173577494  | 0.607298 | 0.285819 | 0.775017 | 0.960899 |
| MDF1C              | 184.2688 | 0.246853309  | 0.167434 | 1.474333 | 0.140392 | 0.599499 |
| si:ch211-269e2.1   | 361.7828 | 0.229475851  | 0.12584  | 1.823552 | 0.06822  | 0.445546 |
| zgc:158398         | 315.279  | 0.130343413  | 0.149823 | 0.869982 | 0.38431  | 0.826565 |
| prrl2a             | 1396.112 | 0.16205909   | 0.150776 | 1.07483  | 0.282451 | 0.754744 |
| CU138547.1         | 32.68619 | -0.4477179   | 0.362037 | -1.23666 | 0.216212 | 0.69815  |
| pde4bb             | 48.51871 | 0.401152124  | 0.351058 | 1.142694 | 0.253166 | 0.732759 |
| CR376783.1         | 32.76718 | -0.545680004 | 0.380534 | -1.43398 | 0.151577 | 0.615372 |
| brpf3b             | 189.8656 | 0.071433754  | 0.178112 | 0.401062 | 0.688375 | 0.939118 |
| serbpla            | 26335.18 | -0.331995178 | 0.11763  | -2.82237 | 0.004767 | 0.114459 |
| arhgef101b         | 161.7837 | 0.406464125  | 0.174497 | 2.329349 | 0.019841 | 0.248624 |
| spen               | 695.6169 | 0.03812385   | 0.189695 | 0.200975 | 0.840718 | 0.97643  |
| rab14              | 1769.83  | -0.103773741 | 0.090745 | -1.14358 | 0.252797 | 0.732759 |
| tmem237b           | 234.2399 | -0.214106991 | 0.161155 | -1.32857 | 0.183988 | 0.66083  |
| olig3              | 69.01804 | -0.016527087 | 0.217179 | -0.0761  | 0.939341 | 0.997371 |
| abcb6b             | 30.09529 | 0.131721011  | 0.400433 | 0.328946 | 0.742196 | 0.954329 |
| micu3b             | 818.4237 | 0.115565777  | 0.145738 | 0.79297  | 0.427795 | 0.845893 |
| gramd1bb           | 40.48942 | -0.043829027 | 0.389217 | -0.11261 | 0.910341 | 0.992208 |
| nckla              | 482.6625 | -0.146002237 | 0.136213 | -1.07187 | 0.28378  | 0.755095 |
| dzip11             | 14.16742 | 1.292470971  | 0.629301 | 2.053819 | 0.039993 | 0.349544 |
| si:ch1073-314i13.4 | 189.7115 | -0.020855517 | 0.20191  | -0.10329 | 0.917732 | 0.993777 |
| si:ch211-214e3.5   | 228.1342 | -0.205854157 | 0.159478 | -1.2908  | 0.196773 | 0.67714  |
| wrb                | 318.1319 | -0.064812261 | 0.159369 | -0.40668 | 0.684242 | 0.938486 |
| POLR2E (1 of many) | 0        | NA           | NA       | NA       | NA       | NA       |
| limch1a            | 183.7739 | 0.191162853  | 0.273599 | 0.698697 | 0.484741 | 0.872911 |
| si:ch73-12o23.1    | 298.1876 | 0.08171735   | 0.173947 | 0.469783 | 0.63851  | 0.924779 |
| inpp5d             | 72.96429 | -0.231973322 | 0.30711  | -0.75534 | 0.450043 | 0.85711  |
| si:ch73-335m24.2   | 79.03257 | -0.450901311 | 0.656726 | -0.68659 | 0.492341 | 0.876385 |
| hint3              | 71.6534  | 0.36702054   | 0.243629 | 1.506475 | 0.131945 | 0.584315 |
| sptlc2b            | 531.6873 | -0.010311368 | 0.110374 | -0.09342 | 0.925568 | 0.994815 |
| tuba41             | 20.3968  | -0.800725319 | 0.474821 | -1.68637 | 0.091724 | 0.507459 |

|                   |          |              |            |          |          |          |
|-------------------|----------|--------------|------------|----------|----------|----------|
| adnpb             | 466.2787 | -0.225374933 | 0.128036   | -1.76025 | 0.078366 | 0.47433  |
| znf1015           | 224.0475 | -0.402169382 | 0.169534   | -2.37221 | 0.017682 | 0.234646 |
| cth               | 962.2022 | 0.335548332  | 0.221268   | 1.51648  | 0.129398 | 0.579015 |
| gpr183b           | 3.390461 | 0.699405935  | 0.886333   | 0.7891   | 0.430053 | 0.847541 |
| phf12a            | 360.5527 | 0.085683999  | 0.118348   | 0.724    | 0.469066 | 0.867171 |
| si:ch73-257c13.2  | 99.08354 | 0.505835374  | 0.199138   | 2.54012  | 0.011081 | 0.18325  |
| ctslb             | 153.5001 | -0.088392379 | 0.301551   | -0.29313 | 0.769426 | 0.960484 |
| rapgef5b          | 102.1235 | 0.276250933  | 0.229835   | 1.201952 | 0.229382 | 0.711579 |
| lrrc75ba          | 98.00564 | 0.695028743  | 0.282841   | 2.45731  | 0.013998 | 0.207377 |
| cnm4b             | 31.05812 | 0.146558629  | 0.383629   | 0.382032 | 0.702437 | 0.943506 |
| rbfox3b           | 7.050264 | 0.526191601  | 0.793204   | 0.663375 | 0.50709  | 0.883007 |
| mast2             | 467.1682 | 0.012802937  | 0.126973   | 0.100832 | 0.919684 | 0.993892 |
| ttc37             | 211.9562 | 0.464532477  | 0.16576    | 2.802432 | 0.005072 | 0.119186 |
| itgal             | 236.0538 | -0.187817259 | 0.187454   | -1.00194 | 0.316374 | 0.778879 |
| fam20ca           | 15.20731 | 0.268050305  | 0.480484   | 0.557876 | 0.576929 | 0.904798 |
| sall1a            | 418.8451 | 0.010300152  | 0.111938   | 0.092016 | 0.926685 | 0.994815 |
| CABZ01083937.1    | 11.96816 | 0.099152518  | 0.739233   | 0.134129 | 0.893301 | 0.988566 |
| tead3a            | 123.0053 | 0.246011331  | 0.235507   | 1.044604 | 0.296206 | 0.764246 |
| si:ch211-194m7.3  | 230.0344 | -0.797505071 | 0.256832   | -3.10516 | 0.001902 | 0.067376 |
| efcab2            | 11.09363 | -0.388493649 | 0.515984   | -0.75292 | 0.4515   | 0.857676 |
| taar12m           |          | 0 NA         | NA         | NA       | NA       | NA       |
| mcm8              | 58.28037 | 0.523667254  | 0.245417   | 2.13379  | 0.03286  | 0.320845 |
| apbalb            | 466.6574 | 0.161997101  | 0.135191   | 1.198286 | 0.230806 | 0.712466 |
| arvcfa            | 137.0856 | 0.377121559  | 0.327774   | 1.150553 | 0.249916 | 0.729721 |
| eif4g3b           | 426.8428 | 0.261453922  | 0.175192   | 1.492388 | 0.135597 | 0.591012 |
| si:ch1073-335m2.2 | 1101.985 | 0.013499504  | 0.165197   | 0.081717 | 0.934871 | 0.996829 |
| si:dkey-1c7.1     | 0.598889 | -0.821755525 | 2.535718   | -0.32407 | 0.745883 | NA       |
| boc               | 1555.161 | 0.116473134  | 0.129681   | 0.898153 | 0.369104 | 0.817763 |
| cbfa2t2           | 289.008  | -0.071175325 | 0.197144   | -0.36103 | 0.718075 | 0.946566 |
| serf2             | 2866.431 | -0.285213763 | 0.137936   | -2.06773 | 0.038666 | 0.344438 |
| hykk.2            | 50.69756 | -1.218520097 | 0.369679   | -3.29616 | 0.00098  | 0.043444 |
| si:ch211-214b16.4 | 164.2107 | 1.108655619  | 0.317773   | 3.488827 | 0.000485 | 0.027042 |
| l3mbt11b          | 148.6988 | -0.024243296 | 0.184548   | -0.13137 | 0.895486 | 0.989245 |
| fxn               | 106.1671 | 0.126945026  | 0.167665   | 0.757134 | 0.448969 | 0.856796 |
| znf11c            | 1.236545 | -0.925697916 | 1.523853   | -0.60747 | 0.543538 | NA       |
| ftr57             | 0.912935 |              | 0 2.342083 |          | 0        | 1 NA     |
| zgc:165582        | 13.78568 | -0.40827042  | 0.462729   | -0.88231 | 0.377609 | 0.822478 |
| TTC9              | 194.2148 | 0.136625266  | 0.211649   | 0.645528 | 0.518585 | 0.887148 |
| zgc:171901        | 61.95334 | 0.141602426  | 0.263133   | 0.538141 | 0.59048  | 0.908901 |
| usp12b            | 545.4673 | 0.066314281  | 0.121376   | 0.546353 | 0.584823 | 0.906655 |
| tirap             | 3.789551 | -0.462091107 | 1.102409   | -0.41916 | 0.675096 | 0.935189 |
| elfn1b            | 40.4122  | 0.735087829  | 0.451691   | 1.627413 | 0.103649 | 0.531318 |
| mdgal             | 12.93697 | 0.413065629  | 0.616919   | 0.669562 | 0.503137 | 0.881598 |
| junba             | 330.9045 | 0.038053474  | 0.283186   | 0.134376 | 0.893105 | 0.988566 |
| knstrn            | 165.064  | 0.289554185  | 0.177443   | 1.631812 | 0.102719 | 0.529448 |
| farpl             | 737.4361 | -0.162751315 | 0.156333   | -1.04106 | 0.29785  | 0.765407 |
| slc12a8           | 18.81521 | -0.051350453 | 0.464991   | -0.11043 | 0.912066 | 0.992371 |
| alkal1            | 9.187951 | -0.413837932 | 0.707164   | -0.58521 | 0.558408 | 0.899409 |
| gpr26             | 2.909954 | 0.69575822   | 1.246354   | 0.558235 | 0.576684 | 0.904769 |
| tmem1761.4        | 1075.8   | -0.015129839 | 0.139542   | -0.10842 | 0.913659 | 0.992796 |
| sh3y11            | 56.74412 | -0.248347367 | 0.257345   | -0.96504 | 0.334526 | 0.79151  |
| fscn2b            | 151.9062 | -0.031259746 | 0.218325   | -0.14318 | 0.886148 | 0.987533 |
| gnpat             | 78.18764 | 0.089998574  | 0.211593   | 0.425339 | 0.67059  | 0.933939 |
| pex51b            | 26.76772 | 0.753524228  | 0.416008   | 1.811321 | 0.070091 | 0.451617 |



|                   |          |              |          |          |          |          |
|-------------------|----------|--------------|----------|----------|----------|----------|
| bripl             | 85.92695 | 0.214772345  | 0.197099 | 1.089665 | 0.275861 | 0.750674 |
| sema4ba           | 58.60447 | 0.038981146  | 0.29724  | 0.131144 | 0.895662 | 0.98926  |
| zgc:171482        | 34.43344 | 0.090789587  | 0.409868 | 0.221509 | 0.824696 | 0.972272 |
| hcn4l             | 13.76818 | 0.405417204  | 0.774262 | 0.523618 | 0.600544 | 0.913756 |
| ibtk              | 520.4648 | 0.078107494  | 0.157379 | 0.496303 | 0.619681 | 0.91747  |
| si:busml-57f23.1  | 201.3076 | 0.019911002  | 0.192142 | 0.103626 | 0.917466 | 0.993777 |
| BX571825.1        | 0 NA     | NA           | NA       | NA       | NA       | NA       |
| hhat              | 16.94559 | 0.662352     | 0.399076 | 1.659713 | 0.096972 | 0.519502 |
| ddb1              | 1584.796 | 0.066819824  | 0.115678 | 0.577635 | 0.56351  | 0.901075 |
| ttc19             | 154.4695 | -0.079392391 | 0.211889 | -0.37469 | 0.707892 | 0.945335 |
| gplbb             | 68.28384 | 0.12536555   | 0.262706 | 0.477209 | 0.633214 | 0.923885 |
| alx4b             | 78.55065 | -0.420501558 | 0.217235 | -1.9357  | 0.052905 | 0.399547 |
| gas7a             | 62.91652 | 0.165664325  | 0.361218 | 0.458627 | 0.646502 | 0.926728 |
| dapk3             | 404.1459 | 0.022931071  | 0.134532 | 0.17045  | 0.864656 | 0.982015 |
| mmd1              | 179.7269 | -0.067207654 | 0.185049 | -0.36319 | 0.716464 | 0.94627  |
| zfx               | 561.7139 | -0.081693883 | 0.107786 | -0.75792 | 0.448496 | 0.856741 |
| setd9             | 35.53205 | 0.685420599  | 0.292067 | 2.346795 | 0.018936 | 0.242378 |
| si:dkey-96f10.1   | 22.31519 | -1.390647138 | 1.473917 | -0.9435  | 0.345423 | 0.79876  |
| vps13c            | 421.6685 | -0.140332429 | 0.140081 | -1.00179 | 0.316444 | 0.778879 |
| gdpd3a            | 224.494  | -0.107871008 | 0.146815 | -0.73474 | 0.462498 | 0.863917 |
| prdm11            | 147.44   | 0.158546796  | 0.193499 | 0.819367 | 0.412577 | 0.838123 |
| amigo3            | 70.54121 | 0.046199854  | 0.369373 | 0.125077 | 0.900463 | 0.99045  |
| vps39             | 525.0573 | -0.13919838  | 0.123232 | -1.12957 | 0.258658 | 0.73587  |
| odam              | 68.48731 | 1.583240402  | 1.485304 | 1.065937 | 0.286452 | 0.757624 |
| cnksr2a           | 21.86701 | 0.248518981  | 0.402903 | 0.616821 | 0.537352 | 0.892498 |
| ulk1b             | 187.9182 | 0.089464321  | 0.212511 | 0.420986 | 0.673765 | 0.934519 |
| ifngr11           | 103.8295 | -0.320743955 | 0.269308 | -1.19099 | 0.233657 | 0.714749 |
| cas4              | 351.5248 | 0.014302486  | 0.116643 | 0.122618 | 0.90241  | 0.99094  |
| chd9              | 1228.676 | 0.271139317  | 0.143522 | 1.889189 | 0.058867 | 0.418455 |
| tnip2             | 51.8592  | -0.112444934 | 0.429294 | -0.26193 | 0.793376 | 0.965366 |
| zmiz1a            | 1009.253 | 0.110279953  | 0.0803   | 1.373346 | 0.169645 | 0.641445 |
| mturn             | 49.79456 | 0.537806951  | 0.318889 | 1.686501 | 0.091699 | 0.507445 |
| tmem94            | 365.2316 | -0.42553298  | 0.139069 | -3.05988 | 0.002214 | 0.07471  |
| rmdn1             | 626.3542 | 0.406783469  | 0.211521 | 1.923133 | 0.054463 | 0.403426 |
| si:dkey-28e7.3    | 215.7943 | 0.120675215  | 0.177878 | 0.678415 | 0.497509 | 0.878774 |
| tacr2             | 5.248645 | 0.76578209   | 1.037999 | 0.737748 | 0.460667 | 0.862374 |
| si:busml-104n07.3 | 0.862178 | -2.768272187 | 2.304358 | -1.20132 | 0.229627 | NA       |
| BX248501.1        | 12.13289 | -1.815687432 | 0.679761 | -2.67107 | 0.007561 | 0.14728  |
| map6a             | 89.02271 | 0.612547981  | 0.261185 | 2.345262 | 0.019014 | 0.242726 |
| cntnap1           | 14.73781 | 0.099887302  | 0.625635 | 0.159658 | 0.873151 | 0.983537 |
| zbtb16b           | 157.6197 | -0.22472513  | 0.247009 | -0.90978 | 0.362936 | 0.813115 |
| chst15            | 39.14163 | 0.332966134  | 0.269342 | 1.236221 | 0.216376 | 0.69815  |
| unm_sa821         | 90.76054 | -0.970063829 | 0.285602 | -3.39656 | 0.000682 | 0.034597 |
| KCNK12            | 0.62777  | -0.782788027 | 2.298653 | -0.34054 | 0.733448 | NA       |
| spag9a            | 118.6973 | 0.209404758  | 0.255731 | 0.818848 | 0.412873 | 0.838123 |
| slc25a38b         | 330.7621 | 0.019145564  | 0.16175  | 0.118366 | 0.905778 | 0.991631 |
| lingo2a           | 162.478  | 0.299611088  | 0.241758 | 1.239299 | 0.215235 | 0.697157 |
| si:dkey-179j5.5   | 0.149833 | 1.921567426  | 5.236909 | 0.366928 | 0.713673 | NA       |
| gpr63             | 115.7301 | 0.327036537  | 0.252787 | 1.293725 | 0.19576  | 0.676072 |
| znf1007           | 171.5899 | 0.194861056  | 0.169894 | 1.146956 | 0.2514   | 0.731717 |
| si:ch211-213a13.2 | 39.97139 | -0.504932213 | 0.466539 | -1.08229 | 0.279122 | 0.752444 |
| si:ch211-240119.8 | 138.8932 | 0            | 1.734525 | 0        | 1        | 1        |
| zbtb17            | 335.3945 | 0.005045126  | 0.126262 | 0.039958 | 0.968127 | 1        |
| ndufs7            | 2615.738 | 0.059048998  | 0.148391 | 0.397927 | 0.690684 | 0.940089 |

|                   |          |              |          |          |          |          |
|-------------------|----------|--------------|----------|----------|----------|----------|
| tspan31           | 716.1497 | 0.124066663  | 0.130518 | 0.950569 | 0.341823 | 0.796624 |
| ganc              | 82.01454 | 0.378672936  | 0.274931 | 1.377338 | 0.168408 | 0.639712 |
| cntnap2b          | 162.8746 | 0.027015162  | 0.186228 | 0.145065 | 0.88466  | 0.987263 |
| CHST8             | 58.98195 | 0.072107624  | 0.281616 | 0.25605  | 0.797912 | 0.966447 |
| slc47a3           | 33.61976 | -0.907550872 | 0.623219 | -1.45623 | 0.145329 | 0.604476 |
| gpr37a            | 34.86709 | 0.635164655  | 0.30125  | 2.108428 | 0.034994 | 0.329598 |
| fam57bb           | 31.78971 | 0.255501417  | 0.360457 | 0.708827 | 0.478432 | 0.869292 |
| pusl1             | 26.10581 | -0.06694837  | 0.408698 | -0.16381 | 0.869882 | 0.983365 |
| gpaal             | 211.2671 | -0.237752205 | 0.144789 | -1.64206 | 0.100577 | 0.525351 |
| zgc:56304         | 1411.409 | -0.161075036 | 0.085809 | -1.87714 | 0.060498 | 0.422849 |
| ppplr9alb         | 329.2595 | 0.045209551  | 0.116718 | 0.387339 | 0.698505 | 0.942433 |
| add2              | 585.833  | 0.021337787  | 0.145217 | 0.146937 | 0.883182 | 0.986945 |
| gfra4b            | 64.2253  | -0.323351192 | 0.283031 | -1.14246 | 0.253263 | 0.732759 |
| gridla            | 92.68072 | 0.357593011  | 0.357473 | 1.000335 | 0.317149 | 0.77892  |
| METTL18           | 76.95057 | -0.703251986 | 0.251084 | -2.80086 | 0.005097 | 0.119231 |
| rin2              | 386.4005 | -0.156253508 | 0.126604 | -1.23419 | 0.217132 | 0.69815  |
| wdpcp             | 65.54452 | -0.181834465 | 0.230691 | -0.78822 | 0.430569 | 0.847542 |
| eda               | 20.37101 | -0.172580681 | 0.522453 | -0.33033 | 0.741152 | 0.954103 |
| lzts2a            | 154.7628 | 0.108696989  | 0.18663  | 0.58242  | 0.560284 | 0.899928 |
| frmd4ba           | 461.5795 | 0.086498515  | 0.11012  | 0.785495 | 0.432164 | 0.848419 |
| gpr78a            | 21.58221 | -0.686939352 | 0.374286 | -1.83533 | 0.066456 | 0.440066 |
| cbln2a            | 29.63644 | 0.872888568  | 0.464288 | 1.880059 | 0.0601   | 0.422231 |
| mrvil             | 16.9676  | -0.686301945 | 0.59178  | -1.15973 | 0.24616  | 0.727532 |
| phc3              | 5.547693 | 0.284707416  | 1.018381 | 0.279569 | 0.779809 | 0.961073 |
| unm_sa1506        | 0.70378  | -3.109803344 | 2.584268 | -1.20336 | 0.228837 | NA       |
| si:ch211-113e8.6  | 0.792035 | 0            | 2.354959 | 0        | 1        | NA       |
| wdr37             | 527.9386 | -0.013391885 | 0.126769 | -0.10564 | 0.915868 | 0.99311  |
| si:ch211-240119.6 | 915.5972 | -2.763117552 | 1.411789 | -1.95717 | 0.050327 | 0.390692 |
| wfs1b             | 122.2693 | -0.103872265 | 0.216911 | -0.47887 | 0.63203  | 0.923163 |
| tbcld31           | 135.9775 | -0.062299261 | 0.237584 | -0.26222 | 0.793152 | 0.965312 |
| si:ch211-198a12.6 | 2013.752 | 0.076427205  | 0.078599 | 0.972366 | 0.330868 | 0.7883   |
| pidd1             | 72.12941 | 0.094141872  | 0.258417 | 0.364302 | 0.715633 | 0.9461   |
| si:dkey-10o6.2    | 19.98633 | 0.305299231  | 0.398958 | 0.765241 | 0.444128 | 0.854431 |
| gpr35.1           | 21.60248 | 0.549843535  | 0.48683  | 1.129437 | 0.258714 | 0.73587  |
| keap1b            | 1164.137 | 0.221910061  | 0.179962 | 1.233091 | 0.217542 | 0.69815  |
| abcala            | 1287.027 | -0.689271034 | 0.18639  | -3.698   | 0.000217 | 0.015696 |
| cepl70b           | 162.1604 | 0.106547446  | 0.234664 | 0.454042 | 0.649799 | 0.927756 |
| loxhd1b           | 24.52748 | -1.555850872 | 0.614803 | -2.53065 | 0.011385 | 0.185262 |
| si:dkeyp-51b7.3   | 9.271707 | 3.443704649  | 1.324473 | 2.600056 | 0.009321 | 0.165999 |
| spock1            | 10.38317 | -0.609066157 | 0.524773 | -1.16063 | 0.245793 | 0.727177 |
| CABZ01032476.1    | 153.0999 | 0.090020915  | 0.233683 | 0.385227 | 0.700069 | 0.942647 |
| adamts16          | 23.94091 | -0.13468221  | 0.425995 | -0.31616 | 0.751882 | 0.955391 |
| smtna             | 16.3502  | -0.431374394 | 0.744357 | -0.57953 | 0.562234 | 0.900715 |
| si:ch211-233m11.1 | 0.394742 | -0.868121413 | 4.966869 | -0.17478 | 0.861251 | NA       |
| ctss2.1           | 162.9459 | -0.130025075 | 0.318204 | -0.40862 | 0.682817 | 0.938006 |
| rilp              | 71.66949 | -0.453569942 | 0.268399 | -1.68991 | 0.091045 | 0.50549  |
| gperl             | 8.129192 | -0.628012394 | 0.766408 | -0.81942 | 0.412545 | 0.838123 |
| cntf              | 26.52823 | 0.244309215  | 0.343579 | 0.711071 | 0.47704  | 0.869292 |
| SAMD8             | 178.4351 | -0.402524782 | 0.196969 | -2.0436  | 0.040994 | 0.353808 |
| cdk14             | 32.99952 | -0.115499171 | 0.403305 | -0.28638 | 0.774586 | 0.960871 |
| zgc:153760        | 13.85635 | 1.393257767  | 0.72348  | 1.925772 | 0.054133 | 0.402505 |
| akt1sl            | 3356.488 | -0.454997061 | 0.170477 | -2.66897 | 0.007608 | 0.147466 |
| cacng4b           | 13.62922 | 0.018960079  | 0.529624 | 0.035799 | 0.971443 | 1        |
| matk              | 1.740052 | -0.031182941 | 1.32764  | -0.02349 | 0.981261 | NA       |

|                   |          |              |          |          |          |          |  |
|-------------------|----------|--------------|----------|----------|----------|----------|--|
| nptx11            | 274.888  | 0.391558514  | 0.241956 | 1.618304 | 0.105597 | 0.534827 |  |
| pan2              | 326.4387 | -0.030852866 | 0.131675 | -0.23431 | 0.814744 | 0.970686 |  |
| rprd2b            | 268.0167 | 0.160864005  | 0.130772 | 1.23011  | 0.218656 | 0.699445 |  |
| frem3             | 237.8311 | 0.228209     | 0.319381 | 0.714536 | 0.474896 | 0.869292 |  |
| rims1a            | 336.6488 | 0.136921858  | 0.232268 | 0.589499 | 0.555527 | 0.898723 |  |
| mlsl              | 118.034  | -0.220128585 | 0.261769 | -0.84093 | 0.400388 | 0.831645 |  |
| oga               | 1900.296 | -0.287788164 | 0.173394 | -1.65973 | 0.096968 | 0.519502 |  |
| fbrs              | 687.5466 | 0.15004717   | 0.134928 | 1.112051 | 0.266116 | 0.742912 |  |
| ppmlj             | 38.50367 | 0.119066004  | 0.347257 | 0.342876 | 0.731692 | 0.950457 |  |
| mms221            | 150.0608 | -0.045897236 | 0.215931 | -0.21256 | 0.831674 | 0.974914 |  |
| mertka            | 168.9526 | 0.104888204  | 0.263931 | 0.397407 | 0.691067 | 0.940173 |  |
| zgc:194621        | 17.27771 | -0.092024325 | 0.512202 | -0.17966 | 0.857416 | 0.979741 |  |
| npdcl1a           | 354.0057 | -0.087526889 | 0.217737 | -0.40198 | 0.687695 | 0.938835 |  |
| sdsl              | 68.49235 | 0.156472675  | 0.363266 | 0.430738 | 0.666659 | 0.932664 |  |
| arfgef2           | 621.1928 | 0.068561397  | 0.113741 | 0.602786 | 0.546651 | 0.896107 |  |
| ccdc97            | 203.2236 | 0.340507056  | 0.177629 | 1.916959 | 0.055243 | 0.406983 |  |
| armac3            | 32.76728 | -0.576201458 | 0.337813 | -1.70568 | 0.088067 | 0.498295 |  |
| si:ch211-186e20.2 | 12.76596 | 0            | 2.262245 | 0        | 1        | 1        |  |
| stk17a            | 444.9006 | -0.080326372 | 0.128497 | -0.62512 | 0.531891 | 0.890978 |  |
| rab38c            | 55.65162 | -0.405007144 | 0.280703 | -1.44283 | 0.149069 | 0.610726 |  |
| si:ch211-51h9.7   | 101.4063 | 0.464615332  | 0.233776 | 1.98744  | 0.046874 | 0.377236 |  |
| rassf9            | 25.69664 | 0.023770468  | 0.330642 | 0.071892 | 0.942688 | 0.997371 |  |
| myo1011           | 47.23173 | 0.387141607  | 0.31308  | 1.236556 | 0.216252 | 0.69815  |  |
| nrde2             | 130.0759 | -0.237269428 | 0.177419 | -1.33734 | 0.181112 | 0.657265 |  |
| dnajc10           | 302.5559 | 0.062987996  | 0.136442 | 0.461647 | 0.644334 | 0.926639 |  |
| mfsd9             | 18.25755 | -0.715200203 | 0.388692 | -1.84002 | 0.065766 | 0.437367 |  |
| pkmyt1            | 79.44941 | -0.177549556 | 0.21507  | -0.82554 | 0.409063 | 0.836637 |  |
| BX682234.1        | 6.274947 | -0.378648277 | 0.658439 | -0.57507 | 0.565244 | 0.901538 |  |
| ms11a             | 186.7354 | -0.257384742 | 0.183485 | -1.40275 | 0.16069  | 0.627541 |  |
| slitrk3b          | 62.47544 | 0.681191299  | 0.395258 | 1.723407 | 0.084815 | 0.488883 |  |
| arhgap18          | 83.67209 | 0.009940365  | 0.377615 | 0.026324 | 0.978999 | 1        |  |
| elmod3            | 19.27128 | -0.002639308 | 0.379839 | -0.00695 | 0.994456 | 1        |  |
| zmp:0000000760    | 782.524  | 0.247802518  | 0.485352 | 0.510562 | 0.609658 | 0.915204 |  |
| kcndl             | 46.8187  | 0.996288255  | 0.403702 | 2.467881 | 0.013592 | 0.203563 |  |
| brwd1             | 431.1143 | 0.028308531  | 0.158481 | 0.178624 | 0.858233 | 0.979774 |  |
| abca12            | 745.8753 | -0.064954535 | 0.208166 | -0.31203 | 0.755016 | 0.956283 |  |
| qser1             | 295.2047 | -0.185227143 | 0.157272 | -1.17775 | 0.238897 | 0.719781 |  |
| hlfa              | 811.7078 | -0.150961392 | 0.145522 | -1.03738 | 0.29956  | 0.766128 |  |
| si:dkey-188i13.9  | 10.49156 | 0.099648562  | 1.686297 | 0.059093 | 0.952878 | 0.998425 |  |
| tfb2m             | 608.7409 | 0.044501584  | 0.14611  | 0.304577 | 0.760689 | 0.957886 |  |
| arv1              | 137.915  | 0.018119019  | 0.220403 | 0.082209 | 0.934481 | 0.99682  |  |
| csdel             | 8009.451 | 0.007630444  | 0.108107 | 0.070582 | 0.94373  | 0.997371 |  |
| ccar1             | 457.7906 | 0.029034648  | 0.14511  | 0.200086 | 0.841413 | 0.97643  |  |
| ttc7a             | 127.3157 | 0.126511898  | 0.218413 | 0.579233 | 0.562432 | 0.900715 |  |
| bicd11            | 15.92124 | -0.043171562 | 0.438089 | -0.09855 | 0.921499 | 0.994085 |  |
| BX571825.2        | 0        | NA           | NA       | NA       | NA       | NA       |  |
| mrap2a            | 33.75369 | 0.014181915  | 0.415562 | 0.034127 | 0.972776 | 1        |  |
| zgc:171426        | 14.9058  | 1.524750091  | 0.572241 | 2.664526 | 0.00771  | 0.148279 |  |
| mhclzja           | 11.55879 | -0.292996469 | 0.668484 | -0.4383  | 0.661169 | 0.930581 |  |
| zgc:113295        | 83.30394 | -0.389442667 | 0.270444 | -1.44001 | 0.149864 | 0.613056 |  |
| ifngr1            | 38.25284 | 0.051164456  | 0.314501 | 0.162685 | 0.870767 | 0.983365 |  |
| ccl44             | 170.0504 | -0.746451571 | 0.224104 | -3.33083 | 0.000866 | 0.039806 |  |
| si:dkey-110g7.8   | 52.09336 | 0.378371578  | 0.334565 | 1.130937 | 0.258081 | 0.735569 |  |
| tmem154           | 103.8434 | 0.105022946  | 0.226511 | 0.463656 | 0.642894 | 0.925784 |  |

|                    |          |              |          |          |          |          |
|--------------------|----------|--------------|----------|----------|----------|----------|
| ank1b              | 168.339  | 0.632115752  | 0.285467 | 2.214319 | 0.026807 | 0.290512 |
| alms1              | 287.832  | 0.228291613  | 0.171252 | 1.333077 | 0.182507 | 0.659083 |
| ptprt              | 30.42576 | 0.47198161   | 0.330485 | 1.428148 | 0.153249 | 0.617847 |
| adgrg3             | 13.74214 | -0.264613912 | 0.575647 | -0.45968 | 0.645745 | 0.926728 |
| rab5if             | 1007.306 | 0.219068622  | 0.174657 | 1.254278 | 0.209741 | 0.691766 |
| aldh3a1            | 102.905  | -0.339497407 | 0.216285 | -1.56968 | 0.116491 | 0.557474 |
| necab3             | 97.0909  | 0.782177997  | 0.283825 | 2.755849 | 0.005854 | 0.129451 |
| dbf4               | 117.9998 | 0.107423315  | 0.207257 | 0.518309 | 0.604243 | 0.914873 |
| cflarb             | 15.03738 | 0.01258022   | 0.588982 | 0.021359 | 0.982959 | 1        |
| atxn7              | 146.5947 | -0.031489876 | 0.197293 | -0.15961 | 0.873188 | 0.983537 |
| afap112            | 370.2276 | 0.058750274  | 0.138019 | 0.425669 | 0.670349 | 0.933861 |
| tbrg4              | 474.5129 | 0.228791817  | 0.182662 | 1.25254  | 0.210373 | 0.692083 |
| megf6b             | 337.0994 | 0.209677049  | 0.158556 | 1.322419 | 0.186029 | 0.663938 |
| zgc:194392         | 116.0695 | 0.087272074  | 0.285082 | 0.30613  | 0.759506 | 0.957886 |
| fhdc1              | 55.72119 | 0.193319264  | 0.274101 | 0.705285 | 0.480633 | 0.870179 |
| btr05              | 24.11403 | -1.313734991 | 1.039412 | -1.26392 | 0.206258 | 0.688779 |
| mxra5a             | 249.7515 | -0.084379331 | 0.222994 | -0.37839 | 0.705139 | 0.944028 |
| si:zfos-367g9.1    | 0 NA     | NA           | NA       | NA       | NA       | NA       |
| si:cabz01036022.1  | 11.55861 | 0.491230691  | 0.576911 | 0.851485 | 0.3945   | 0.828625 |
| si:dkeyp-23e4.3    | 84.61419 | 0.306484115  | 0.252562 | 1.213498 | 0.224939 | 0.70685  |
| si:dkey-253d23.9   | 37.65071 | -0.716064473 | 0.282847 | -2.53163 | 0.011353 | 0.18512  |
| si:dkey-49c17.4    | 1.10981  | 0 2.292479   | 0        | 1 NA     |          |          |
| si:ch73-184c24.1   | 19.81274 | -0.306696105 | 0.448645 | -0.6836  | 0.494225 | 0.877583 |
| rhobtb2a           | 13.38682 | 0.70408562   | 0.493894 | 1.42558  | 0.15399  | 0.618574 |
| rasipl             | 111.591  | -0.190762168 | 0.208756 | -0.9138  | 0.36082  | 0.811253 |
| setmar             | 25.73048 | -0.690908791 | 0.384004 | -1.79922 | 0.071983 | 0.4564   |
| impglb             | 57.65658 | -0.20626555  | 0.386907 | -0.53311 | 0.593955 | 0.910542 |
| snx8a              | 116.1348 | -0.361146522 | 0.160792 | -2.24605 | 0.024701 | 0.27868  |
| phldb2b            | 498.4708 | 0.055220962  | 0.140939 | 0.391807 | 0.695201 | 0.941316 |
| CABZ01061495.1     | 191.1059 | 0.517945942  | 0.167024 | 3.101018 | 0.001929 | 0.068013 |
| si:dkeyp-68b7.12   | 19.18244 | -0.032270662 | 0.41766  | -0.07727 | 0.938412 | 0.997371 |
| smim7              | 207.4033 | 0.0817613    | 0.201158 | 0.406454 | 0.684409 | 0.938486 |
| racla              | 1672.281 | 0.169943967  | 0.132753 | 1.280148 | 0.200493 | 0.68081  |
| il12rb2l           | 110.8013 | -0.317001379 | 0.261653 | -1.21154 | 0.22569  | 0.707068 |
| slpr4              | 6.735964 | -0.356739662 | 0.708443 | -0.50355 | 0.614574 | 0.915998 |
| myo15b             | 104.1383 | 0.529676485  | 0.339088 | 1.562064 | 0.118273 | 0.561094 |
| sh2dlab            | 1.024546 | -0.498770184 | 2.08072  | -0.23971 | 0.810555 | NA       |
| stard7             | 646.2988 | 0.038329077  | 0.106421 | 0.360164 | 0.718724 | 0.94694  |
| slc5a7a            | 67.52801 | 0.101247485  | 0.467631 | 0.216511 | 0.828589 | 0.974137 |
| si:dkey-112m2.1    | 100.1199 | 0.5787318    | 0.250177 | 2.313289 | 0.020707 | 0.255657 |
| frmpd3             | 176.2168 | -0.396890648 | 0.271649 | -1.46104 | 0.144004 | 0.603144 |
| ptpn5              | 243.031  | -0.126102522 | 0.254177 | -0.49612 | 0.619809 | 0.91747  |
| stim2a             | 115.7555 | 0.072266717  | 0.230803 | 0.313111 | 0.754197 | 0.955996 |
| AL929017.1         | 99.48809 | 0.106117465  | 0.256605 | 0.413544 | 0.679208 | 0.936209 |
| si:ch1073-291c23.2 | 1154.918 | -0.71810105  | 0.146519 | -4.90107 | 9.53E-07 | 0.000291 |
| pimr170            | 0.099744 | -1.732891383 | 5.236854 | -0.3309  | 0.740718 | NA       |
| abcd1              | 35.52237 | -0.05000065  | 0.389976 | -0.12821 | 0.897979 | 0.990171 |
| CT025742.1         | 97.86118 | -0.126807326 | 0.238138 | -0.5325  | 0.594383 | 0.910768 |
| pde6d              | 241.003  | -0.086228744 | 0.13549  | -0.63642 | 0.5245   | 0.888808 |
| myorg              | 743.5901 | -0.057848772 | 0.144105 | -0.40143 | 0.6881   | 0.939    |
| tysnd1             | 46.85796 | -0.290266656 | 0.252108 | -1.15136 | 0.249586 | 0.729721 |
| hes2.1             | 20.91709 | 0.250878785  | 0.408158 | 0.614661 | 0.538779 | 0.892826 |
| taok2a             | 603.1471 | -0.061703579 | 0.112412 | -0.54891 | 0.58307  | 0.90582  |
| nol14a             | 29.31136 | 0.04942659   | 0.442646 | 0.111662 | 0.911092 | 0.992208 |

|                   |          |              |          |          |          |          |
|-------------------|----------|--------------|----------|----------|----------|----------|
| itcha             | 83.11388 | 0.08303442   | 0.267671 | 0.310211 | 0.7564   | 0.956532 |
| si:ch211-253b8.5  | 125.5349 | 1.075322395  | 0.394044 | 2.728938 | 0.006354 | 0.134763 |
| camkl1da          | 35.95058 | 0.554440275  | 0.330559 | 1.677282 | 0.093487 | 0.511476 |
| znf831            | 8.725645 | -1.539353159 | 0.779512 | -1.97477 | 0.048295 | 0.38256  |
| col6al            | 2891.48  | 0.084788669  | 0.160214 | 0.52922  | 0.596653 | 0.911709 |
| dcaf17            | 38.07468 | -0.317278189 | 0.356611 | -0.8897  | 0.373624 | 0.820566 |
| crtc2             | 181.4123 | 0.003243259  | 0.185647 | 0.01747  | 0.986062 | 1        |
| CU929346.1        | 8.657237 | 0.367470656  | 0.54271  | 0.677104 | 0.49834  | 0.879132 |
| etaal             | 63.67367 | 0.234367545  | 0.235491 | 0.995227 | 0.319626 | 0.780289 |
| BFSP1             | 276.2135 | 0.479947123  | 0.29355  | 1.634973 | 0.102055 | 0.528877 |
| fam117ba          | 197.4896 | 0.378601223  | 0.185934 | 2.036212 | 0.041729 | 0.356776 |
| bub1bb            | 222.0435 | 0.13783862   | 0.219266 | 0.628636 | 0.529588 | 0.890434 |
| si:dkey-234i14.13 | 0.069091 | 0            | 5.267649 | 0        | 1        | NA       |
| si:ch1073-70f20.1 | 12.20702 | -0.006560843 | 0.500192 | -0.01312 | 0.989535 | 1        |
| polg2             | 76.15176 | -0.246977528 | 0.206197 | -1.19778 | 0.231004 | 0.712561 |
| calhm5.1          | 28.89544 | 0.289524459  | 0.355746 | 0.813852 | 0.41573  | 0.839167 |
| clqtnf7           | 4.190293 | 0.634975637  | 1.241416 | 0.511493 | 0.609006 | 0.915204 |
| zgc:194114        | 1.25087  | 2.320651873  | 1.845004 | 1.257803 | 0.208463 | NA       |
| nup98             | 1148.259 | -0.046924426 | 0.154662 | -0.3034  | 0.761585 | 0.958237 |
| or102-3           | 0.526316 | 1.055411128  | 3.121548 | 0.338105 | 0.735284 | NA       |
| zgc:162698        | 383.2536 | 0.023356321  | 0.123603 | 0.188963 | 0.850122 | 0.978251 |
| polr2m            | 106.6795 | 0.103486558  | 0.219622 | 0.471203 | 0.637496 | 0.924779 |
| larp4ab           | 361.2294 | -0.305121034 | 0.166603 | -1.83143 | 0.067036 | 0.441984 |
| jac9              | 3.450393 | 2.958348224  | 1.907738 | 1.55071  | 0.120971 | 0.566816 |
| L0017656.1        | 5.370188 | -1.465809528 | 1.013668 | -1.44605 | 0.148164 | 0.609115 |
| aurkaip1          | 518.2779 | 0.246441532  | 0.141464 | 1.742077 | 0.081495 | 0.48059  |
| sparc11           | 337.5782 | 0.446513452  | 0.249818 | 1.787355 | 0.07388  | 0.461767 |
| eif2b5            | 590.0926 | 0.388860415  | 0.124138 | 3.132481 | 0.001733 | 0.064499 |
| tbrg1             | 88.07422 | -0.215322969 | 0.250608 | -0.8592  | 0.390229 | 0.827902 |
| chst2a            | 471.5409 | 0.114171997  | 0.136446 | 0.836758 | 0.402729 | 0.833401 |
| pask              | 78.37078 | -0.089672402 | 0.2157   | -0.41573 | 0.677609 | 0.936026 |
| glra2             | 78.12756 | 0.538832712  | 0.404503 | 1.332086 | 0.182832 | 0.659278 |
| usp45             | 145.7068 | 0.070332014  | 0.177826 | 0.395511 | 0.692466 | 0.940414 |
| sqstml            | 360.6404 | -0.681125428 | 0.183588 | -3.71008 | 0.000207 | 0.015289 |
| soul5             | 3896.573 | 1.470325321  | 0.361893 | 4.062871 | 4.85E-05 | 0.005452 |
| apobb.2           | 725.8758 | -0.000982213 | 0.236316 | -0.00416 | 0.996684 | 1        |
| myzap             | 229.4538 | -0.454942344 | 0.159947 | -2.84433 | 0.00445  | 0.109917 |
| fam120a           | 694.7942 | -0.020508224 | 0.145509 | -0.14094 | 0.887916 | 0.988077 |
| si:ch211-93e11.8  | 0.772208 | 1.055420622  | 2.760339 | 0.382352 | 0.7022   | NA       |
| si:ch73-375g18.1  | 586.4465 | -0.053368405 | 0.161596 | -0.33026 | 0.741205 | 0.954103 |
| cdc123            | 398.33   | 0.030924151  | 0.17212  | 0.179666 | 0.857415 | 0.979741 |
| fgfr1bl           | 7.347879 | -7.064379511 | 2.707888 | -2.60881 | 0.009086 | 0.163488 |
| stx10             | 67.60249 | 0.284430961  | 0.225989 | 1.258605 | 0.208173 | 0.69024  |
| GTPBP8            | 56.27854 | 0.294929146  | 0.225506 | 1.307855 | 0.190923 | 0.670774 |
| raver2            | 183.8911 | 0.391597798  | 0.186019 | 2.105151 | 0.035278 | 0.330796 |
| si:ch211-225k7.6  | 0        | NA           | NA       | NA       | NA       | NA       |
| fml12b            | 602.4914 | -0.150622367 | 0.127993 | -1.1768  | 0.239273 | 0.719781 |
| si:dkeyp-123h10.2 | 220.7466 | 0.01354456   | 0.224029 | 0.060459 | 0.95179  | 0.99801  |
| cxcl18b           | 110.3723 | -0.43608648  | 0.309319 | -1.40983 | 0.158591 | 0.624074 |
| rnf151            | 7.205016 | 2.959767805  | 1.526056 | 1.939488 | 0.052442 | 0.397997 |
| lonrf1            | 1239.814 | 0.017783704  | 0.149074 | 0.119294 | 0.905042 | 0.991631 |
| sccpdha.2         | 22.27375 | 0.223917831  | 0.482622 | 0.463961 | 0.642676 | 0.92567  |
| rasgrf2a          | 46.58465 | 0.092955112  | 0.334819 | 0.277628 | 0.781298 | 0.961936 |
| ggt112.1          | 1.036345 | 0            | 2.315188 | 0        | 1        | NA       |

|                    |          |              |          |          |          |          |
|--------------------|----------|--------------|----------|----------|----------|----------|
| si:dkeyp-33b5.4    | 72.99773 | -0.006044817 | 0.216188 | -0.02796 | 0.977693 | 1        |
| gabra6a            | 71.36668 | -0.492009025 | 1.335823 | -0.36832 | 0.712635 | 0.945821 |
| aipl1              | 37.72393 | -0.468635214 | 0.444539 | -1.05421 | 0.291789 | 0.761454 |
| rpapl              | 192.896  | 0.111676176  | 0.147564 | 0.756796 | 0.449172 | 0.856796 |
| prkdc              | 175.6703 | -0.198114433 | 0.186301 | -1.06341 | 0.287595 | 0.758397 |
| CU467646.1         | 0 NA     | NA           | NA       | NA       | NA       | NA       |
| si:dkeyp-52118.4   | 90.01559 | 0.037191222  | 0.286503 | 0.129811 | 0.896716 | 0.98939  |
| wdr17              | 141.9643 | 0.002801131  | 0.227285 | 0.012324 | 0.990167 | 1        |
| neolb              | 297.7069 | 0.112891374  | 0.188047 | 0.600337 | 0.548282 | 0.896644 |
| nkx2.4a            | 44.94842 | 0.269234227  | 0.316487 | 0.850695 | 0.394939 | 0.828825 |
| tmco3              | 103.2043 | -0.002956999 | 0.180647 | -0.01637 | 0.98694  | 1        |
| dab2ipb            | 159.7931 | -0.067259578 | 0.185094 | -0.36338 | 0.716321 | 0.94627  |
| als2a              | 50.43497 | -0.533491684 | 0.298795 | -1.78548 | 0.074184 | 0.462553 |
| tacr3a             | 1.28304  | 1.055432342  | 2.020577 | 0.522342 | 0.601432 | NA       |
| nanog              | 2.474086 | 0.138361393  | 1.387905 | 0.099691 | 0.92059  | 0.994085 |
| sall2              | 148.6068 | 0.362702052  | 0.181259 | 2.001011 | 0.045391 | 0.37308  |
| hbegfa             | 482.9496 | 0.124799257  | 0.213501 | 0.584538 | 0.558858 | 0.899409 |
| trafd1             | 269.3273 | -0.061497095 | 0.1187   | -0.51809 | 0.604396 | 0.914972 |
| TMEM8B             | 146.9464 | 0.153977538  | 0.23201  | 0.663669 | 0.506902 | 0.883007 |
| or103-5            | 4.861021 | 0.837059001  | 0.928295 | 0.901717 | 0.367207 | 0.816459 |
| mrps11             | 576.7114 | -0.077393019 | 0.156907 | -0.49324 | 0.621843 | 0.918461 |
| fh                 | 3366.669 | -0.181142974 | 0.120886 | -1.49846 | 0.134015 | 0.58783  |
| adgrbla            | 494.3373 | 0.004848219  | 0.186955 | 0.025933 | 0.979311 | 1        |
| adgrf11            | 0 NA     | NA           | NA       | NA       | NA       | NA       |
| hdac5              | 101.5385 | -0.05982666  | 0.293243 | -0.20402 | 0.83834  | 0.976395 |
| SAT2               | 253.7391 | 0.212116324  | 0.191142 | 1.109729 | 0.267116 | 0.743418 |
| gprc5bb            | 23.31309 | -1.415629373 | 0.66819  | -2.1186  | 0.034124 | 0.326054 |
| nanp               | 57.20281 | 0.00847225   | 0.253546 | 0.033415 | 0.973344 | 1        |
| lrrc38a            | 51.21713 | -0.418591581 | 0.36294  | -1.15334 | 0.248773 | 0.728797 |
| nagpa              | 111.7805 | 0.123247113  | 0.217666 | 0.566222 | 0.571243 | 0.902817 |
| si:dkeyp-188i13.10 | 18.77777 | -0.250277447 | 0.677568 | -0.36938 | 0.711847 | 0.945821 |
| tbcl4              | 294.5816 | -0.281241782 | 0.156199 | -1.80054 | 0.071775 | 0.4564   |
| igdcc3             | 499.9632 | 0.081080404  | 0.12993  | 0.624033 | 0.532606 | 0.890978 |
| meltf              | 94.91428 | 0.089985188  | 0.37778  | 0.238194 | 0.81173  | 0.97012  |
| defbl1             | 947.4294 | -0.895134767 | 0.29999  | -2.98388 | 0.002846 | 0.087695 |
| cxcl20             | 81.31838 | 0.11440838   | 0.38891  | 0.294177 | 0.768623 | 0.960395 |
| mylk5              | 664.9872 | -0.276975812 | 0.098074 | -2.82414 | 0.004741 | 0.114199 |
| zc3h6              | 71.34652 | -0.821392287 | 0.256536 | -3.20186 | 0.001365 | 0.054641 |
| bbs1               | 72.44527 | 0.399785636  | 0.272586 | 1.466638 | 0.142475 | 0.60163  |
| zdhhc22            | 31.41717 | 0.480883175  | 0.503906 | 0.954311 | 0.339926 | 0.795243 |
| fbxo25             | 407.1675 | 0.115702142  | 0.2695   | 0.429321 | 0.667689 | 0.933086 |
| si:ch1073-322p19.1 | 343.9433 | 0.104653965  | 0.117405 | 0.89139  | 0.37272  | 0.819953 |
| ribc2              | 18.79944 | 0.028388276  | 0.449683 | 0.063129 | 0.949663 | 0.99801  |
| lpcat3             | 320.1218 | -0.023884813 | 0.154082 | -0.15501 | 0.876811 | 0.985052 |
| si:dkeyp-59p5.2    | 0 NA     | NA           | NA       | NA       | NA       | NA       |
| crfb16             | 58.31467 | 0.189495828  | 0.282118 | 0.671691 | 0.50178  | 0.88111  |
| rnf220b            | 78.91704 | -0.387872104 | 0.255685 | -1.51699 | 0.129268 | 0.578874 |
| adamts10           | 156.6309 | 0.068857207  | 0.244949 | 0.281108 | 0.778627 | 0.961073 |
| cntnap5b           | 234.5951 | 0.590766127  | 0.258959 | 2.281313 | 0.02253  | 0.265534 |
| oacyl              | 281.6976 | -0.185584017 | 0.163796 | -1.13302 | 0.257207 | 0.734741 |
| ymell1a            | 438.3897 | 0.164110623  | 0.232061 | 0.707189 | 0.479449 | 0.86985  |
| BX908780.1         | 0.060442 | 0            | 5.267649 | 0        | 1        | NA       |
| si:dkeyp-56e3.3    | 139.7663 | 0.347967765  | 0.177603 | 1.959243 | 0.050084 | 0.389545 |
| inpp4b             | 210.177  | -0.603337941 | 0.158366 | -3.80977 | 0.000139 | 0.011849 |

|                   |          |              |          |          |          |          |
|-------------------|----------|--------------|----------|----------|----------|----------|
| zgc:195212        | 2.128416 | 0.475378524  | 1.230202 | 0.386423 | 0.699183 | NA       |
| si:dkey-100n19.2  | 9.184785 | 0.230668453  | 0.705107 | 0.32714  | 0.743562 | 0.954856 |
| p4htm             | 114.6391 | 0.476896188  | 0.27242  | 1.75059  | 0.080017 | 0.478179 |
| chd7              | 1966.781 | 0.12499194   | 0.190748 | 0.655273 | 0.512292 | 0.885459 |
| 11-Mar            | 4.593354 | 0.081528257  | 0.966943 | 0.084315 | 0.932806 | 0.996264 |
| vezt              | 77.25757 | -0.484193329 | 0.235216 | -2.05851 | 0.039542 | 0.347625 |
| tdrd12            | 4.406453 | -0.316837402 | 0.853315 | -0.3713  | 0.710413 | 0.945821 |
| amer2             | 653.2561 | 0.077685848  | 0.155392 | 0.499936 | 0.61712  | 0.916365 |
| si:ch211-223a10.1 | 55.75122 | 0.600012827  | 0.254087 | 2.361447 | 0.018204 | 0.238026 |
| smad4a            | 461.0937 | -0.278760457 | 0.184329 | -1.5123  | 0.130458 | 0.581523 |
| slc46a2           | 16.03196 | 0.129052021  | 0.477344 | 0.270355 | 0.786887 | 0.963061 |
| tet1              | 58.64293 | 0.017806482  | 0.304838 | 0.058413 | 0.95342  | 0.998436 |
| pimr74            | 1.281417 | 1.621872657  | 1.98483  | 0.817134 | 0.413852 | NA       |
| wdr11             | 218.2025 | -0.43798752  | 0.179142 | -2.44492 | 0.014489 | 0.210602 |
| zgc:172133        | 2.720938 | -1.760782513 | 1.860293 | -0.94651 | 0.343889 | 0.798147 |
| fam171a2a         | 541.5952 | 0.035152572  | 0.126821 | 0.277182 | 0.781641 | 0.962077 |
| phrf1             | 650.4535 | -0.030828737 | 0.131177 | -0.23502 | 0.814196 | 0.970483 |
| pik3cb            | 383.2    | 0.172700395  | 0.129664 | 1.331906 | 0.182891 | 0.659278 |
| timp2b            | 376.3032 | 0.359931485  | 0.174332 | 2.064629 | 0.038958 | 0.345405 |
| ankrd1a           | 61.74818 | -0.37450995  | 0.308922 | -1.21231 | 0.225393 | 0.70685  |
| si:dkeyp-74a11.1  | 58.72996 | -0.272774569 | 0.30074  | -0.90701 | 0.3644   | 0.814648 |
| plaua             | 9.530861 | 0.698945246  | 0.855114 | 0.817371 | 0.413716 | 0.838434 |
| si:dkey-20i10.7   | 125.2282 | -0.063304546 | 0.260952 | -0.24259 | 0.808322 | 0.969828 |
| rapgef5a          | 34.43671 | 0.205676703  | 0.34315  | 0.599378 | 0.548921 | 0.897091 |
| thsdl             | 1.353603 | -1.248789184 | 1.416389 | -0.88167 | 0.377955 | NA       |
| si:dkeyp-14d3.1   | 71.23576 | -0.105555035 | 0.270684 | -0.38996 | 0.696568 | 0.941847 |
| tbc1d30           | 239.5007 | 0.119210221  | 0.236458 | 0.50415  | 0.614156 | 0.915998 |
| irs2b             | 680.8854 | -0.006484092 | 0.123582 | -0.05247 | 0.958156 | 0.999109 |
| kansl11           | 16.03086 | -1.53364325  | 0.708676 | -2.1641  | 0.030457 | 0.311151 |
| MRAS              | 19.37644 | -0.056829492 | 0.423183 | -0.13429 | 0.893173 | 0.988566 |
| nitr4a            | 0.690751 | -0.868140113 | 2.933238 | -0.29597 | 0.767256 | NA       |
| myo15aa           | 65.31275 | 0.676669937  | 0.297847 | 2.271873 | 0.023094 | 0.26812  |
| tulpl1a           | 179.9174 | -0.534677323 | 0.222562 | -2.40238 | 0.016289 | 0.225456 |
| fam83c            | 27.08285 | 0.588456321  | 0.33769  | 1.742593 | 0.081405 | 0.480419 |
| trnt1             | 274.4388 | 0.055131784  | 0.148486 | 0.371292 | 0.71042  | 0.945821 |
| prxl2c            | 101.4901 | -0.593729131 | 0.238147 | -2.49312 | 0.012663 | 0.196026 |
| gsdf              | 10.51235 | -1.917807603 | 0.998578 | -1.92054 | 0.05479  | 0.405097 |
| kcnq2a            | 24.24229 | 1.370106131  | 0.613436 | 2.233496 | 0.025516 | 0.283691 |
| zgc:174906        | 304.0481 | -0.254231331 | 0.192158 | -1.32303 | 0.185824 | 0.663655 |
| CABZ01071972.1    | 4.23691  | 0.578284125  | 0.918653 | 0.629491 | 0.529028 | 0.890325 |
| srfbp1            | 207.52   | 0.038426629  | 0.193127 | 0.198971 | 0.842286 | 0.97643  |
| mrpl16            | 999.8007 | 0.128677509  | 0.120164 | 1.070848 | 0.284238 | 0.75523  |
| dock10            | 254.2102 | 0.130724629  | 0.190588 | 0.685902 | 0.492775 | 0.876558 |
| phox2ba           | 4.727782 | -0.581829984 | 0.726513 | -0.80085 | 0.423217 | 0.843894 |
| golga4            | 422.6046 | 0.183616997  | 0.196921 | 0.932438 | 0.35111  | 0.80227  |
| si:ch211-119d14.3 | 16.07934 | 0.10413059   | 0.441343 | 0.23594  | 0.813479 | 0.970328 |
| tbc1d25           | 238.5699 | 0.07402838   | 0.140555 | 0.526687 | 0.598411 | 0.912844 |
| arhgap32a         | 201.4621 | 0.283725305  | 0.242977 | 1.167703 | 0.242926 | 0.724396 |
| lars2             | 116.2476 | -0.271653995 | 0.208355 | -1.3038  | 0.192301 | 0.672283 |
| ipp               | 106.6686 | 0.2990907    | 0.225067 | 1.328898 | 0.183882 | 0.660725 |
| med1              | 307.7532 | -0.170886447 | 0.171404 | -0.99698 | 0.318775 | 0.779923 |
| csfla             | 89.33142 | -0.575450306 | 0.207075 | -2.77895 | 0.005454 | 0.124491 |
| si:ch211-76123.7  | 16.33826 | 0.346273178  | 0.536145 | 0.645857 | 0.518372 | 0.887148 |
| tmem129           | 208.031  | -0.29149066  | 0.152869 | -1.9068  | 0.056546 | 0.410638 |

|                   |          |              |          |          |          |          |
|-------------------|----------|--------------|----------|----------|----------|----------|
| chfr              | 279.1173 | 0.293215209  | 0.16501  | 1.776952 | 0.075576 | 0.465594 |
| si:ch73-138n13.1  | 671.0294 | 0.026643081  | 0.128957 | 0.206605 | 0.836318 | 0.976007 |
| brinp3b           | 66.58494 | 0.45109142   | 0.342927 | 1.315416 | 0.18837  | 0.667666 |
| espl1             | 312.1829 | 0.340945412  | 0.176865 | 1.927715 | 0.053891 | 0.402007 |
| ftr29             | 3.515074 | -1.841991242 | 1.831762 | -1.00558 | 0.314616 | 0.777479 |
| whrna             | 67.01423 | 0.192364237  | 0.279471 | 0.688316 | 0.491254 | 0.875595 |
| mrm2              | 27.19767 | -0.076271365 | 0.376864 | -0.20238 | 0.839616 | 0.976417 |
| nck1b             | 619.076  | -0.085360121 | 0.112518 | -0.75863 | 0.448072 | 0.856727 |
| zgc:171501        | 11.55999 | 0.462850901  | 0.571363 | 0.810082 | 0.417893 | 0.841312 |
| sgsmlb            | 43.97977 | 0.268919934  | 0.462977 | 0.58085  | 0.561342 | 0.900401 |
| kril              | 256.8249 | -0.100216309 | 0.160928 | -0.62274 | 0.533454 | 0.891181 |
| slc9a6b           | 181.2835 | 0.117375398  | 0.176802 | 0.663879 | 0.506768 | 0.883007 |
| gramd1ba          | 108.7572 | 0.004818337  | 0.263635 | 0.018277 | 0.985418 | 1        |
| L0017852.1        | 257.6647 | 0.237637624  | 0.135013 | 1.760109 | 0.078389 | 0.474337 |
| si:ch211-281g13.4 | 4.52358  | -0.12817095  | 1.219146 | -0.10513 | 0.916271 | 0.993263 |
| spock2            | 886.5594 | 0.12420849   | 0.190986 | 0.650355 | 0.515463 | 0.886401 |
| dguok             | 107.2008 | -0.143970431 | 0.201787 | -0.71348 | 0.475551 | 0.869292 |
| cipca             | 75.17668 | -0.082790304 | 0.347969 | -0.23792 | 0.81194  | 0.97012  |
| fbxo33            | 201.8191 | -0.00824305  | 0.210351 | -0.03919 | 0.968741 | 1        |
| gpha2             | 2.826085 | 1.403190306  | 1.032713 | 1.358741 | 0.174229 | 0.647454 |
| adck5             | 135.1687 | 0.335235289  | 0.180693 | 1.855276 | 0.063557 | 0.430337 |
| BX571825.3        | 0 NA     | NA           | NA       | NA       | NA       | NA       |
| si:ch211-207k7.4  | 52.99312 | -0.269796065 | 0.40006  | -0.67439 | 0.500064 | 0.879896 |
| zgc:175107        | 75.09074 | 0.005518587  | 0.256048 | 0.021553 | 0.982805 | 1        |
| pttgl             | 100.4539 | 0.144484147  | 0.22156  | 0.652121 | 0.514323 | 0.88631  |
| MRPL49            | 204.8001 | -0.120668528 | 0.159781 | -0.75521 | 0.450121 | 0.85711  |
| BX547992.1        | 3.522992 | -0.321519902 | 1.076108 | -0.29878 | 0.765108 | 0.959622 |
| myom2a            | 7919.484 | 0.08803185   | 0.236985 | 0.371465 | 0.710291 | 0.945821 |
| akap11            | 416.3573 | -0.133341822 | 0.147239 | -0.90562 | 0.365138 | 0.81521  |
| syt12b            | 146.0154 | -0.209354915 | 0.182581 | -1.14664 | 0.25153  | 0.731788 |
| shc1              | 622.913  | 0.013330295  | 0.094902 | 0.140464 | 0.888293 | 0.988188 |
| vwa2              | 357.2515 | 0.138938625  | 0.141257 | 0.983591 | 0.325317 | 0.784089 |
| cgref1            | 286.8321 | 0.316216312  | 0.442332 | 0.714884 | 0.474681 | 0.869292 |
| psmb5             | 2428.351 | 0.07425292   | 0.151026 | 0.491656 | 0.622963 | 0.918894 |
| naa25             | 625.1999 | 0.045165677  | 0.121505 | 0.37172  | 0.710102 | 0.945821 |
| mkxa              | 208.5547 | 0.264496532  | 0.182181 | 1.451834 | 0.146548 | 0.606341 |
| hdc               | 27.6973  | -0.139526396 | 0.478235 | -0.29175 | 0.770476 | 0.960484 |
| soga3b            | 46.43225 | 0.286276481  | 0.317553 | 0.901508 | 0.367318 | 0.816459 |
| pik3ca            | 155.224  | -0.31421575  | 0.229059 | -1.37177 | 0.170135 | 0.641806 |
| ptpn20            | 64.76962 | -0.22846338  | 0.286528 | -0.79735 | 0.425248 | 0.844714 |
| kmt5c             | 461.1304 | 0.13427      | 0.149292 | 0.899378 | 0.368451 | 0.817272 |
| mss51             | 378.2121 | 0.312796901  | 0.188438 | 1.659947 | 0.096925 | 0.51949  |
| shisa3            | 295.5768 | 0.108530446  | 0.170856 | 0.635216 | 0.525287 | 0.888928 |
| vwal              | 474.3145 | 0.262588907  | 0.144255 | 1.820308 | 0.068712 | 0.447208 |
| znf989            | 26.40602 | -0.049263878 | 0.364865 | -0.13502 | 0.892597 | 0.988566 |
| nlrp15            | 0.521121 | 1.530653646  | 2.672842 | 0.572669 | 0.566869 | NA       |
| si:dkey-63d15.12  | 13.76691 | 0.395094191  | 0.632475 | 0.62468  | 0.532181 | 0.890978 |
| zgc:173587        | 8.899527 | 1.212516094  | 0.663441 | 1.827617 | 0.067607 | 0.443563 |
| si:ch211-267e7.3  | 234.0116 | -0.370042334 | 0.160249 | -2.30917 | 0.020934 | 0.257047 |
| si:ch211-26b3.4   | 359.5398 | 0.426833766  | 0.254837 | 1.67493  | 0.093948 | 0.511719 |
| ccdc160           | 70.36184 | 0.165372217  | 0.235066 | 0.703514 | 0.481735 | 0.871063 |
| smim1             | 54.51275 | 0.700920663  | 0.294664 | 2.378711 | 0.017373 | 0.232896 |
| cdnf              | 380.7591 | 0.654980101  | 0.156387 | 4.18819  | 2.81E-05 | 0.00362  |
| si:dkey-40c23.2   | 17.1261  | -1.245694793 | 0.952479 | -1.30784 | 0.190926 | 0.670774 |



|                   |          |              |          |          |          |          |   |
|-------------------|----------|--------------|----------|----------|----------|----------|---|
| si:ch211-132g1.7  | 13.63776 | 0.912161479  | 0.528045 | 1.727431 | 0.08409  | 0.486971 |   |
| si:dkey-108k21.10 | 5.297352 | -0.041048615 | 1.054485 | -0.03893 | 0.968948 |          | 1 |
| phf12b            | 530.467  | -0.012183365 | 0.114691 | -0.10623 | 0.915402 | 0.993068 |   |
| ccdc136b          | 155.0149 | 0.778711679  | 0.507933 | 1.5331   | 0.125251 | 0.572966 |   |
| cd37              | 19.68301 | -0.121801925 | 0.525605 | -0.23174 | 0.816743 | 0.971207 |   |
| si:ch211-120k19.1 | 56.95645 | 0.687511013  | 0.37606  | 1.828195 | 0.06752  | 0.443563 |   |
| cpz               | 111.676  | 0.251997416  | 0.296257 | 0.850605 | 0.394989 | 0.828825 |   |
| cln8              | 41.77993 | 0.381020154  | 0.25792  | 1.477279 | 0.139601 | 0.597884 |   |
| pwwp2a            | 319.402  | 0.062879086  | 0.1433   | 0.438794 | 0.660811 | 0.930581 |   |
| zgc:174154        | 52.82112 | -0.163916711 | 0.411384 | -0.39845 | 0.690297 | 0.93988  |   |
| lyrm9             | 54.11497 | 0.003383073  | 0.241722 | 0.013996 | 0.988833 |          | 1 |
| pigu              | 87.02701 | 0.016102882  | 0.210179 | 0.076615 | 0.93893  | 0.997371 |   |
| slc4a11           | 55.60802 | 0.575396506  | 0.268604 | 2.142175 | 0.032179 | 0.318495 |   |
| zbtb24            | 30.3319  | 0.255092642  | 0.338206 | 0.754252 | 0.450698 | 0.857151 |   |
| cpnel             | 1749.238 | -0.238217181 | 0.088905 | -2.67946 | 0.007374 | 0.145623 |   |
| zgc:163061        | 27.42211 | 0.016040627  | 0.328121 | 0.048886 | 0.96101  | 0.999264 |   |
| snphb             | 14.66576 | -0.746869038 | 0.633502 | -1.17895 | 0.238417 | 0.719474 |   |
| BX649498.1        | 29.74404 | -0.432324273 | 0.475511 | -0.90918 | 0.363256 | 0.813595 |   |
| si:ch73-236c18.3  | 0.895088 | 0            | 3.096    | 0        | 1        | NA       |   |
| zfhx4             | 1259.072 | -0.087758911 | 0.150593 | -0.58275 | 0.560059 | 0.899738 |   |
| chd8              | 905.758  | 0.017282796  | 0.151467 | 0.114103 | 0.909156 | 0.992067 |   |
| si:dkey-89b17.4   | 1286.22  | -0.059147812 | 0.123647 | -0.47836 | 0.632393 | 0.923343 |   |
| cdh5              | 514.6009 | 0.091482487  | 0.144993 | 0.630943 | 0.528078 | 0.889948 |   |
| aifm5             | 33.36701 | 0.292558508  | 0.434608 | 0.673155 | 0.500849 | 0.880413 |   |
| adamts17          | 36.18079 | 0.485995265  | 0.324344 | 1.498393 | 0.134031 | 0.58783  |   |
| luzpl             | 583.4847 | -0.099050789 | 0.114339 | -0.86629 | 0.386331 | 0.827215 |   |
| apcdd11           | 182.0612 | -0.11559891  | 0.179766 | -0.64305 | 0.520189 | 0.887148 |   |
| ppmlg             | 840.7105 | 0.049490007  | 0.162268 | 0.30499  | 0.760374 | 0.957886 |   |
| kmt2cb            | 616.4955 | -0.049490723 | 0.150889 | -0.32799 | 0.742917 | 0.954655 |   |
| si:dkey-76k16.5   | 15.26243 | -0.95618372  | 0.471869 | -2.02637 | 0.042726 | 0.362408 |   |
| si:ch211-119o8.4  | 1.081212 | -3.608765951 | 2.045056 | -1.76463 | 0.077626 | NA       |   |
| fam13a            | 736.7445 | -0.070545245 | 0.156169 | -0.45172 | 0.651469 | 0.928562 |   |
| lzts1             | 118.4898 | 0.331018946  | 0.20181  | 1.640248 | 0.100954 | 0.526541 |   |
| fbx120            | 61.03527 | -0.161485266 | 0.314189 | -0.51398 | 0.607269 | 0.915204 |   |
| gpbpl11           | 868.5278 | -0.027626998 | 0.101526 | -0.27212 | 0.785532 | 0.962605 |   |
| ide               | 1133.996 | 0.140656829  | 0.10792  | 1.303342 | 0.192458 | 0.672283 |   |
| bicd2             | 127.553  | 0.021348688  | 0.244946 | 0.087157 | 0.930547 | 0.995741 |   |
| lrch2             | 31.84765 | -0.223489456 | 0.451313 | -0.4952  | 0.62046  | 0.91807  |   |
| itfgl             | 161.3104 | -0.189211414 | 0.192891 | -0.98093 | 0.326629 | 0.785469 |   |
| tnfaip812a        | 52.40154 | -0.018551275 | 0.352493 | -0.05263 | 0.958028 | 0.999109 |   |
| trim71            | 611.7277 | -0.14449598  | 0.14265  | -1.01294 | 0.31109  | 0.775936 |   |
| flrtl1b           | 185.0087 | 0.834409315  | 0.23699  | 3.520862 | 0.00043  | 0.025105 |   |
| ambn              | 0.13363  | 0            | 5.267649 | 0        | 1        | NA       |   |
| cdc25d            | 25.47192 | 0.45598553   | 0.334736 | 1.362222 | 0.173128 | 0.645953 |   |
| si:dkeyp-41f9.3   | 20.89987 | 0.011406193  | 0.491211 | 0.023221 | 0.981474 |          | 1 |
| RNF5              | 171.2989 | 0.281310274  | 0.139924 | 2.010449 | 0.044384 | 0.368519 |   |
| mical2a           | 142.8535 | -0.308430857 | 0.315613 | -0.97724 | 0.328448 | 0.786794 |   |
| ercc6             | 344.2963 | 0.287006242  | 0.149847 | 1.915328 | 0.055451 | 0.407706 |   |
| apoc4             | 7.027881 | 3.750968428  | 1.527525 | 2.455586 | 0.014066 | 0.208027 |   |
| polr2k            | 174.5724 | -0.14662027  | 0.22499  | -0.65168 | 0.514611 | 0.88631  |   |
| slc36a1           | 147.4874 | -0.272319933 | 0.180675 | -1.50724 | 0.131749 | 0.583645 |   |
| cenpo             | 44.37354 | 0.357734364  | 0.327433 | 1.092543 | 0.274595 | 0.750181 |   |
| birc5a            | 331.8388 | 0.161478263  | 0.218925 | 0.737597 | 0.46076  | 0.862409 |   |
| zgc:174938        | 348.5811 | -0.165303828 | 0.253632 | -0.65175 | 0.514565 | 0.88631  |   |

|                     |           |               |           |           |           |           |
|---------------------|-----------|---------------|-----------|-----------|-----------|-----------|
| bend5               | 24. 85286 | -0. 349775721 | 0. 439524 | -0. 79581 | 0. 426145 | 0. 844714 |
| lrigl               | 485. 709  | 0. 229193826  | 0. 163166 | 1. 40467  | 0. 160119 | 0. 626578 |
| zgc:172090          | 0. 926597 | -2. 309247843 | 5. 203305 | -0. 4438  | 0. 657184 | NA        |
| si:dkey-197i20. 6   | 142. 7924 | -1. 178937891 | 0. 269108 | -4. 38091 | 1. 18E-05 | 0. 00209  |
| rad9b               | 0. 791697 | 0. 09365502   | 2. 460949 | 0. 038056 | 0. 969643 | NA        |
| si:ch211-225k7. 4   | 0. 87271  | 3. 244836075  | 2. 87273  | 1. 129531 | 0. 258674 | NA        |
| si:ch211-89o9. 6    | 170. 2543 | -0. 11620241  | 0. 164997 | -0. 70427 | 0. 481266 | 0. 87045  |
| steap3              | 41. 13352 | -0. 940463597 | 0. 315099 | -2. 98466 | 0. 002839 | 0. 087586 |
| ifi35               | 59. 78836 | 0. 236629069  | 0. 365784 | 0. 646909 | 0. 517691 | 0. 887148 |
| sema5bb             | 61. 88394 | 0. 057184272  | 0. 286529 | 0. 199576 | 0. 841813 | 0. 97643  |
| vps26c              | 512. 1446 | -0. 093513841 | 0. 133877 | -0. 6985  | 0. 484862 | 0. 872911 |
| si:ch1073-429i10. 1 | 59. 0843  | -0. 576500211 | 0. 309248 | -1. 8642  | 0. 062294 | 0. 427718 |
| tsc22d3             | 1383. 216 | 0. 039344581  | 0. 217828 | 0. 180623 | 0. 856664 | 0. 979558 |
| rereb               | 334. 7827 | -0. 032702226 | 0. 164843 | -0. 19838 | 0. 842745 | 0. 9766   |
| tlr4al              | 0. 554556 | 0             | 3. 309503 | 0         | 1         | NA        |
| pms2                | 82. 1241  | 0. 086402098  | 0. 178263 | 0. 484688 | 0. 627898 | 0. 921659 |
| arhgap21b           | 993. 5017 | 0. 036863741  | 0. 100592 | 0. 366469 | 0. 714015 | 0. 945821 |
| fncl7b              | 73. 13246 | 0. 301954507  | 0. 644248 | 0. 468693 | 0. 639289 | 0. 924779 |
| mrpl17              | 305. 2206 | 0. 070289587  | 0. 206089 | 0. 341064 | 0. 733055 | 0. 950736 |
| orc6                | 125. 4211 | -0. 177367277 | 0. 197522 | -0. 89796 | 0. 369206 | 0. 817763 |
| tlr7                | 84. 6141  | 0. 167684602  | 0. 225982 | 0. 742026 | 0. 458072 | 0. 860993 |
| anapc1              | 247. 3346 | 0. 230841606  | 0. 182033 | 1. 268128 | 0. 204752 | 0. 686713 |
| adoral1b            | 18. 03811 | 0. 892417557  | 0. 423869 | 2. 105407 | 0. 035256 | 0. 33072  |
| si:ch73-38013. 2    | 171. 7851 | -0. 036683823 | 0. 255293 | -0. 14369 | 0. 885743 | 0. 987533 |
| nkpd1               | 12. 11365 | -0. 639487046 | 1. 125327 | -0. 56827 | 0. 569853 | 0. 902322 |
| zswim2              | 7. 01752  | 0. 324190098  | 0. 760088 | 0. 426516 | 0. 669732 | 0. 933451 |
| si:ch211-106h4. 9   | 122. 6239 | -0. 156657275 | 0. 242068 | -0. 64716 | 0. 517527 | 0. 887148 |
| nid2a               | 1021. 991 | 0. 08951027   | 0. 16561  | 0. 540489 | 0. 58886  | 0. 908018 |
| ndufb3              | 1346. 744 | -0. 111022277 | 0. 117997 | -0. 94089 | 0. 346759 | 0. 799681 |
| shox2               | 176. 618  | 0. 014503663  | 0. 152926 | 0. 094841 | 0. 924441 | 0. 994815 |
| si:dkey-27p23. 3    | 24. 67762 | 0. 322212565  | 0. 420116 | 0. 766961 | 0. 443105 | 0. 854063 |
| TMEM236             | 3. 47047  | -0. 703002777 | 1. 08848  | -0. 64586 | 0. 518372 | 0. 887148 |
| rpz5                | 664. 4361 | -0. 24507041  | 0. 127558 | -1. 92125 | 0. 054701 | 0. 404924 |
| il2rb               | 12. 40587 | -0. 65388499  | 0. 51438  | -1. 27121 | 0. 203654 | 0. 684359 |
| zdhhc6              | 296. 749  | -0. 102002037 | 0. 115788 | -0. 88094 | 0. 378351 | 0. 822672 |
| si:dkey-242e21. 3   | 8. 046047 | 0. 314359025  | 0. 692645 | 0. 453853 | 0. 649934 | 0. 927756 |
| cep152              | 88. 00894 | 0. 271543754  | 0. 224542 | 1. 209324 | 0. 226538 | 0. 707798 |
| dhrs7b              | 83. 91606 | -0. 279002811 | 0. 223264 | -1. 24965 | 0. 211426 | 0. 692983 |
| map11c3c1           | 99. 2892  | -1. 159078393 | 0. 416469 | -2. 78311 | 0. 005384 | 0. 123514 |
| dnph1               | 119. 5111 | 0. 453081356  | 0. 29804  | 1. 520202 | 0. 12846  | 0. 577835 |
| zgc:174698          | 2. 159437 | 1. 612077595  | 1. 512677 | 1. 065712 | 0. 286554 | NA        |
| taf4b               | 1. 401991 | 0. 104030745  | 1. 550862 | 0. 067079 | 0. 946519 | NA        |
| zyx                 | 414. 3663 | -0. 102538211 | 0. 143661 | -0. 71375 | 0. 475381 | 0. 869292 |
| cxxc5b              | 438. 2006 | -0. 181302085 | 0. 109275 | -1. 65913 | 0. 097089 | 0. 519526 |
| zgc:165518          | 12. 88147 | -1. 782656463 | 0. 529426 | -3. 36715 | 0. 000759 | 0. 036636 |
| mrpl47              | 313. 3257 | -0. 053038274 | 0. 139604 | -0. 37992 | 0. 704006 | 0. 943735 |
| ovgpl               | 4. 294667 | 0. 072349437  | 1. 081536 | 0. 066895 | 0. 946665 | 0. 997371 |
| zfyvel6             | 194. 5397 | -0. 116043408 | 0. 191892 | -0. 60473 | 0. 545357 | 0. 895275 |
| NCKAP1L             | 138. 8238 | -0. 577340707 | 0. 1775   | -3. 25262 | 0. 001143 | 0. 048292 |
| myo18aa             | 536. 9627 | -0. 042894673 | 0. 169221 | -0. 25348 | 0. 799895 | 0. 967255 |
| mril                | 101. 5447 | 0. 175111045  | 0. 268811 | 0. 651429 | 0. 51477  | 0. 886401 |
| gig2e               | 43. 48583 | 1. 836439719  | 0. 41249  | 4. 452083 | 8. 50E-06 | 0. 001615 |
| ywhabb              | 3618. 589 | 0. 03743901   | 0. 135165 | 0. 276987 | 0. 78179  | 0. 962133 |
| samd4a              | 334. 398  | 0. 130216967  | 0. 188005 | 0. 692625 | 0. 488545 | 0. 873964 |

|                    |          |              |          |          |          |          |
|--------------------|----------|--------------|----------|----------|----------|----------|
| si:ch1073-287p18.1 | 67.02523 | -0.427696346 | 0.305491 | -1.40003 | 0.161505 | 0.628602 |
| sccpdha.1          | 139.1156 | -0.71171959  | 0.347218 | -2.04978 | 0.040386 | 0.351287 |
| sdhb               | 3368.634 | -0.049619963 | 0.11446  | -0.43351 | 0.664643 | 0.93201  |
| foxj3              | 315.3758 | -0.110621678 | 0.162982 | -0.67874 | 0.497305 | 0.878713 |
| si:ch211-57m13.5   | 0.514572 | 3.752289759  | 3.38662  | 1.107975 | 0.267873 | NA       |
| hmgxb4a            | 115.8827 | 0.603184101  | 0.220331 | 2.737624 | 0.006188 | 0.133012 |
| si:ch73-190m4.1    | 2.885731 | -3.636071055 | 3.725311 | -0.97604 | 0.329042 | 0.787268 |
| si:dkey-79f11.5    | 0.67225  | 2.576963393  | 2.277613 | 1.131432 | 0.257873 | NA       |
| prex1              | 312.0562 | 0.327197611  | 0.149693 | 2.185785 | 0.028831 | 0.302136 |
| no17               | 396.0759 | -0.176580755 | 0.190706 | -0.92593 | 0.354481 | 0.805464 |
| usp38              | 262.5153 | 0.033386116  | 0.154755 | 0.215736 | 0.829194 | 0.974606 |
| calm14a            | 114.4852 | -0.662899564 | 0.320801 | -2.06639 | 0.038792 | 0.344867 |
| grin3a             | 42.05288 | 0.074909333  | 0.39391  | 0.190169 | 0.849177 | 0.978098 |
| slc41a2a           | 221.0196 | -0.244331718 | 0.225821 | -1.08197 | 0.279266 | 0.752477 |
| si:dkey-219c3.2    | 122.7655 | 0.095383132  | 0.235647 | 0.404771 | 0.685646 | 0.938486 |
| kirrel3a           | 115.6468 | 0.100362751  | 0.266762 | 0.376225 | 0.706749 | 0.944806 |
| traj39             | 0 NA     | NA           | NA       | NA       | NA       | NA       |
| kcnt2              | 12.44832 | 0.603435417  | 0.533546 | 1.13099  | 0.258059 | 0.735569 |
| asphd1             | 96.66913 | 0.346390984  | 0.304837 | 1.136317 | 0.255824 | 0.733642 |
| slc12a5a           | 25.35478 | 0.339180147  | 0.4854   | 0.698764 | 0.4847   | 0.872911 |
| mettl24            | 111.3973 | -0.440337606 | 0.220381 | -1.99807 | 0.045709 | 0.374363 |
| dok2               | 29.40335 | 1.796743614  | 0.363255 | 4.946229 | 7.57E-07 | 0.00024  |
| arhgef2            | 294.8261 | -0.090807723 | 0.180154 | -0.50406 | 0.614222 | 0.915998 |
| CU694442.1         | 6.650405 | -0.202177214 | 1.013578 | -0.19947 | 0.841896 | 0.97643  |
| plxnb1a            | 457.7952 | 0.131668553  | 0.155634 | 0.846015 | 0.397544 | 0.830253 |
| virma              | 731.4266 | 0.034688589  | 0.123782 | 0.28024  | 0.779293 | 0.961073 |
| dlec1              | 41.86206 | -0.06410914  | 0.368774 | -0.17384 | 0.861988 | 0.980696 |
| msh4               | 6.364059 | -0.004643719 | 0.845462 | -0.00549 | 0.995618 | 1        |
| f7i                | 278.3881 | -0.994861807 | 0.339675 | -2.92886 | 0.003402 | 0.095894 |
| taarl4j            | 0 NA     | NA           | NA       | NA       | NA       | NA       |
| kiss1              | 2.716109 | 0.833010276  | 1.302481 | 0.639556 | 0.522461 | 0.887826 |
| syf3               | 111.5812 | 0.310370043  | 0.301097 | 1.030797 | 0.302636 | 0.7687   |
| slc7a8a            | 1739.705 | -0.072157814 | 0.144716 | -0.49862 | 0.61805  | 0.916507 |
| lyvela             | 126.6819 | 0.088896724  | 0.284972 | 0.311949 | 0.755079 | 0.956283 |
| si:dkey-182i3.8    | 61.59173 | -0.44088278  | 0.236355 | -1.86534 | 0.062134 | 0.427289 |
| si:dkey-1d7.3      | 48.53547 | 0.246132467  | 0.513121 | 0.479677 | 0.631457 | 0.923003 |
| pigt               | 22.22142 | 0.329256538  | 0.40084  | 0.821416 | 0.411409 | 0.837797 |
| kcnip2             | 3.354795 | -2.319638207 | 1.383863 | -1.67621 | 0.093698 | 0.511703 |
| prrl2b             | 1021.731 | 0.187741322  | 0.172225 | 1.090095 | 0.275671 | 0.750653 |
| gnal2              | 208.7646 | -0.221177723 | 0.146433 | -1.51044 | 0.130931 | 0.582503 |
| oafa               | 161.6565 | -0.096199116 | 0.173843 | -0.55337 | 0.580013 | 0.905618 |
| sh3kbp1            | 569.4235 | -0.226382201 | 0.102393 | -2.21092 | 0.027041 | 0.292604 |
| cx34.4             | 50.72178 | 0.097802255  | 0.287517 | 0.340162 | 0.733734 | 0.950924 |
| adgre10            | 7.886215 | -0.977605874 | 0.703461 | -1.38971 | 0.164617 | 0.634007 |
| pgs1               | 89.39377 | 0.005695686  | 0.235582 | 0.024177 | 0.980711 | 1        |
| fam155a            | 13.66952 | 0.706243664  | 0.618214 | 1.142394 | 0.25329  | 0.732759 |
| mcf21a             | 508.7055 | 0.033382322  | 0.109373 | 0.305215 | 0.760202 | 0.957886 |
| igsf9a             | 231.6261 | -0.00565224  | 0.284933 | -0.01984 | 0.984173 | 1        |
| cdcp2              | 23.31277 | -0.033532453 | 0.437123 | -0.07671 | 0.938853 | 0.997371 |
| mrtfaa             | 30.04    | 0.3469936    | 0.38096  | 0.910841 | 0.362379 | 0.812303 |
| triobpa            | 114.074  | 0.083671619  | 0.22765  | 0.367546 | 0.713212 | 0.945821 |
| si:ch211-39k3.2    | 174.7727 | 0.428721826  | 0.230828 | 1.857319 | 0.063266 | 0.429493 |
| bub3               | 507.9663 | 0.238313802  | 0.155665 | 1.530942 | 0.125784 | 0.573743 |
| shprh              | 124.9664 | -0.013868066 | 0.20236  | -0.06853 | 0.945362 | 0.997371 |

|                     |           |               |           |           |           |           |
|---------------------|-----------|---------------|-----------|-----------|-----------|-----------|
| vwa5b2              | 12. 37552 | 0. 639717406  | 0. 517005 | 1. 237352 | 0. 215956 | 0. 697913 |
| herc3               | 218. 6187 | 0. 020719953  | 0. 149116 | 0. 138952 | 0. 889488 | 0. 988318 |
| sall1b              | 32. 00488 | -0. 09229088  | 0. 403663 | -0. 22863 | 0. 819154 | 0. 971785 |
| bag6                | 911. 4339 | 0. 071672538  | 0. 120605 | 0. 594275 | 0. 552328 | 0. 8974   |
| spata7              | 170. 4486 | -0. 036969031 | 0. 257442 | -0. 1436  | 0. 885815 | 0. 987533 |
| si:ch1073-186i23. 1 | 137. 6108 | 0. 173849209  | 0. 182623 | 0. 951955 | 0. 34112  | 0. 795946 |
| chad1b              | 105. 0579 | 0. 678200456  | 0. 313857 | 2. 160861 | 0. 030706 | 0. 312455 |
| rfx1b               | 388. 0112 | 0. 097971246  | 0. 160668 | 0. 609774 | 0. 542011 | 0. 894241 |
| si:ch211-266g18. 9  | 29. 51943 | -0. 257971564 | 0. 377069 | -0. 68415 | 0. 493881 | 0. 877345 |
| slc35f3a            | 4. 35316  | 2. 548058237  | 1. 319598 | 1. 930935 | 0. 053491 | 0. 400578 |
| kcnj14              | 4. 690574 | 0. 83439844   | 1. 183664 | 0. 704929 | 0. 480855 | 0. 870179 |
| si:ch73-70k4. 1     | 9. 468402 | 0. 356889372  | 0. 637978 | 0. 559407 | 0. 575884 | 0. 904739 |
| zgc:66472           | 133. 7747 | -0. 099762114 | 0. 163485 | -0. 61022 | 0. 541716 | 0. 894049 |
| cacna1db            | 40. 49531 | 0. 314408263  | 0. 319515 | 0. 984018 | 0. 325107 | 0. 783981 |
| ccser1              | 24. 7344  | -0. 662710504 | 0. 38349  | -1. 72811 | 0. 083969 | 0. 486647 |
| txnr2. 2            | 27. 16822 | 0. 014158536  | 0. 431512 | 0. 032811 | 0. 973825 | 1         |
| zgc:171558          | 245. 9003 | 0. 510993194  | 0. 179264 | 2. 8505   | 0. 004365 | 0. 108751 |
| igfnl. 2            | 6. 870308 | 0. 656857317  | 1. 158179 | 0. 567147 | 0. 570615 | 0. 902481 |
| hivep3a             | 38. 80863 | 0. 012772523  | 0. 436072 | 0. 02929  | 0. 976633 | 1         |
| si:dkey-219c10. 4   | 14. 30086 | -0. 129747945 | 0. 663155 | -0. 19565 | 0. 844882 | 0. 976791 |
| adamts2             | 87. 77728 | 0. 128199627  | 0. 254124 | 0. 504478 | 0. 613926 | 0. 915998 |
| acs15               | 395. 8162 | 0. 429821292  | 0. 419064 | 1. 025669 | 0. 305047 | 0. 770181 |
| si:ch73-21112. 3    | 3. 014743 | 2. 535327958  | 1. 695217 | 1. 495577 | 0. 134764 | 0. 589481 |
| cox15               | 423. 0604 | -0. 058053176 | 0. 177535 | -0. 327   | 0. 743671 | 0. 95491  |
| sugpl               | 221. 2593 | 0. 179820651  | 0. 150094 | 1. 198051 | 0. 230897 | 0. 712561 |
| FRMD5               | 70. 95523 | -0. 005515961 | 0. 233126 | -0. 02366 | 0. 981123 | 1         |
| si:ch211-250c4. 5   | 7. 884964 | 0. 194715634  | 0. 638135 | 0. 305132 | 0. 760265 | 0. 957886 |
| slco4a1             | 18. 67412 | 0. 7160052    | 0. 559994 | 1. 278594 | 0. 20104  | 0. 681045 |
| prkd1               | 61. 51953 | 0. 36691316   | 0. 374353 | 0. 980126 | 0. 327024 | 0. 785766 |
| mbd2                | 153. 0054 | -0. 099236961 | 0. 230398 | -0. 43072 | 0. 666672 | 0. 932664 |
| serpinh1a           | 641. 7674 | 0. 071586485  | 0. 148671 | 0. 481511 | 0. 630153 | 0. 922869 |
| faxca               | 39. 53241 | 0. 063122183  | 0. 348013 | 0. 181379 | 0. 85607  | 0. 979558 |
| si:dkey-266f7. 9    | 301. 6062 | 2. 535937082  | 1. 468258 | 1. 727174 | 0. 084136 | 0. 487116 |
| cdh24a              | 20. 20373 | 0. 196306984  | 0. 519641 | 0. 377774 | 0. 705598 | 0. 944274 |
| vav3b               | 22. 60355 | -0. 429014137 | 0. 393973 | -1. 08894 | 0. 27618  | 0. 750674 |
| mhcluba             | 3. 66832  | -3. 997633836 | 1. 867686 | -2. 14042 | 0. 032321 | 0. 318811 |
| plekhg4             | 981. 9112 | 0. 109726701  | 0. 121498 | 0. 903117 | 0. 366464 | 0. 81589  |
| BX324188. 1         | 3. 781865 | 1. 764529022  | 1. 017223 | 1. 734653 | 0. 082802 | 0. 483014 |
| csrnp2              | 18. 70917 | -0. 050465715 | 0. 410751 | -0. 12286 | 0. 902216 | 0. 990915 |
| si:dkey-258f14. 3   | 29. 62325 | 0. 102898487  | 0. 380007 | 0. 27078  | 0. 78656  | 0. 962838 |
| slc45a3             | 14. 63575 | -0. 840339224 | 0. 627603 | -1. 33897 | 0. 180582 | 0. 656326 |
| prr5a               | 83. 82356 | 0. 009077252  | 0. 285908 | 0. 031749 | 0. 974672 | 1         |
| tmem125b            | 68. 03805 | -0. 142434433 | 0. 270522 | -0. 52652 | 0. 598529 | 0. 912889 |
| hsbp111             | 47. 74731 | -0. 228881142 | 0. 300631 | -0. 76134 | 0. 446456 | 0. 855403 |
| arpc2               | 3131. 917 | -0. 051505716 | 0. 120212 | -0. 42846 | 0. 668318 | 0. 933086 |
| acap3a              | 121. 3529 | 0. 139279202  | 0. 169037 | 0. 823958 | 0. 409963 | 0. 836939 |
| clic5a              | 710. 4964 | -0. 310294969 | 0. 186913 | -1. 66011 | 0. 096893 | 0. 51949  |
| znfl1b              | 0. 735729 | -0. 806220249 | 2. 830378 | -0. 28485 | 0. 775763 | NA        |
| pip5klca            | 80. 13638 | 0. 336078683  | 0. 243883 | 1. 378031 | 0. 168194 | 0. 639712 |
| osbp15              | 192. 6215 | 0. 021970995  | 0. 21797  | 0. 100798 | 0. 919711 | 0. 993892 |
| ppp2r3b             | 166. 0853 | -0. 000486193 | 0. 170436 | -0. 00285 | 0. 997724 | 1         |
| piezo2a. 2          | 371. 7836 | 0. 122706021  | 0. 163044 | 0. 752596 | 0. 451693 | 0. 857676 |
| umad1               | 103. 4791 | -0. 272408623 | 0. 216849 | -1. 25622 | 0. 209038 | 0. 691152 |
| twist1b             | 356. 1786 | -0. 155117476 | 0. 147067 | -1. 05474 | 0. 291543 | 0. 761454 |

|                   |          |              |          |          |          |          |
|-------------------|----------|--------------|----------|----------|----------|----------|
| si:ch211-149b19.3 | 719.42   | 0.043664499  | 0.195101 | 0.223804 | 0.82291  | 0.971966 |
| mab2113           | 20.25114 | 0.868115928  | 0.449692 | 1.930468 | 0.053549 | 0.400752 |
| ERC1              | 66.86568 | -0.629210415 | 0.298353 | -2.10894 | 0.034949 | 0.329312 |
| si:ch73-139e5.2   | 5.357964 | -1.246662056 | 1.013002 | -1.23066 | 0.21845  | 0.699445 |
| tmem69            | 156.8542 | -0.048311957 | 0.187648 | -0.25746 | 0.796823 | 0.966447 |
| ftr70             | 0.655223 | 1.055416827  | 2.988005 | 0.353218 | 0.723925 | NA       |
| pappa2            | 136.1099 | 0.459292124  | 0.251366 | 1.827181 | 0.067672 | 0.443563 |
| dgkzb             | 108.7944 | -0.110658972 | 0.207886 | -0.53231 | 0.594514 | 0.910857 |
| kif5c             | 113.6993 | 0.142588564  | 0.267387 | 0.533266 | 0.593849 | 0.910482 |
| cacnb3b           | 18.16364 | 0.119550754  | 0.467402 | 0.255777 | 0.798123 | 0.966524 |
| arll5a            | 31.49243 | 0.246086465  | 0.382353 | 0.64361  | 0.519828 | 0.887148 |
| wwc1              | 89.10438 | 0.035381736  | 0.246378 | 0.143608 | 0.88581  | 0.987533 |
| si:dkeyp-73d8.9   | 19.18808 | -0.679691059 | 1.460698 | -0.46532 | 0.641703 | 0.925586 |
| si:dkeyp-283j8.1  | 17.49082 | -0.145065831 | 0.578903 | -0.25059 | 0.802133 | 0.96794  |
| sez6l2            | 264.1071 | 0.163546011  | 0.348781 | 0.468908 | 0.639136 | 0.924779 |
| rpgr1p1           | 83.83979 | 0.008285322  | 0.40357  | 0.02053  | 0.983621 | 1        |
| IYD               | 39.276   | -0.467892615 | 0.536464 | -0.87218 | 0.383111 | 0.825809 |
| gba               | 254.8087 | -0.187867423 | 0.165301 | -1.13652 | 0.255739 | 0.733642 |
| diaph2            | 563.2572 | 0.002179442  | 0.148712 | 0.014655 | 0.988307 | 1        |
| 6-Mar             | 869.2677 | -0.038610149 | 0.095537 | -0.40414 | 0.68611  | 0.938732 |
| crtcla            | 31.29525 | 0.101809154  | 0.422715 | 0.240846 | 0.809675 | 0.969828 |
| dlgap2b           | 4.084447 | 1.887450953  | 1.328287 | 1.420966 | 0.155327 | 0.620076 |
| ddal              | 922.118  | -0.21345291  | 0.112582 | -1.89598 | 0.057962 | 0.415784 |
| myh7ba            | 92.7545  | 0.573689859  | 0.266939 | 2.149145 | 0.031623 | 0.316333 |
| crtclb            | 13.39723 | 0.764136033  | 0.597014 | 1.279929 | 0.20057  | 0.68081  |
| ushlgb            | 0.266429 | 0            | 4.807834 | 0        | 1        | NA       |
| CABZ01041962.1    | 220.4291 | -0.174470781 | 0.18377  | -0.9494  | 0.342419 | 0.797179 |
| jakmip1           | 127.7556 | 0.253724947  | 0.177807 | 1.426968 | 0.153589 | 0.618187 |
| slc31a2           | 102.8575 | 0.211251309  | 0.214979 | 0.982659 | 0.325775 | 0.784719 |
| ftr76             | 1.909144 | -0.87715582  | 1.746395 | -0.50227 | 0.61548  | NA       |
| klhl30            | 81.07567 | 0.814936562  | 0.329258 | 2.475068 | 0.013321 | 0.200944 |
| grid2ipa          | 32.12968 | 0.022565921  | 0.506633 | 0.044541 | 0.964473 | 0.999948 |
| sema4bb           | 253.1369 | -0.46515542  | 0.169162 | -2.74976 | 0.005964 | 0.13073  |
| ftr43             | 3.644811 | -4.363120599 | 1.64629  | -2.65027 | 0.008043 | 0.151997 |
| nwd1              | 14.58514 | 0.777011812  | 0.573387 | 1.355127 | 0.175377 | 0.649279 |
| CABZ01072254.1    | 51.58314 | -0.060136606 | 0.272087 | -0.22102 | 0.825077 | 0.97258  |
| stard5            | 5.341862 | 0.007585883  | 0.702409 | 0.0108   | 0.991383 | 1        |
| cdipl             | 234.2864 | 0.009021745  | 0.169345 | 0.053274 | 0.957513 | 0.999109 |
| emidl             | 617.8762 | -0.124902499 | 0.13328  | -0.93714 | 0.348685 | 0.801264 |
| foxp4             | 1007.102 | -0.161523909 | 0.180952 | -0.89263 | 0.372055 | 0.819592 |
| smpd1             | 331.6841 | -0.273716556 | 0.153978 | -1.77763 | 0.075464 | 0.465421 |
| si:ch211-160b11.4 | 4.62052  | 1.994291968  | 1.838111 | 1.084968 | 0.277936 | 0.751841 |
| actcla            | 1217.953 | 0.928651048  | 0.446691 | 2.078956 | 0.037621 | 0.340171 |
| gabrb1            | 49.85318 | 1.521130734  | 0.516821 | 2.943247 | 0.003248 | 0.093414 |
| prkarlaa          | 2182.863 | -0.029160955 | 0.07204  | -0.40479 | 0.685632 | 0.938486 |
| siglec15l         | 0.191229 | 2.079549577  | 5.22636  | 0.397896 | 0.690707 | NA       |
| zgc:162972        | 19.25836 | -0.044254412 | 0.425563 | -0.10399 | 0.917177 | 0.993735 |
| mmrn2a            | 225.634  | 0.194018031  | 0.176957 | 1.096411 | 0.272899 | 0.748807 |
| si:dkeyp-98f17.3  | 22.45432 | 0.005771707  | 0.372478 | 0.015495 | 0.987637 | 1        |
| si:dkeyp-71p21.13 | 9.791518 | 1.452691819  | 0.610869 | 2.378075 | 0.017403 | 0.232896 |
| clcf1             | 46.78928 | -0.04099109  | 0.302746 | -0.1354  | 0.892298 | 0.988566 |
| ppip5kla          | 271.3686 | -0.145126018 | 0.211628 | -0.68576 | 0.492865 | 0.876617 |
| icam3             | 159.7342 | -0.10131065  | 0.201745 | -0.50217 | 0.615547 | 0.916365 |
| zgc:172075        | 69.09114 | -0.298531736 | 0.304487 | -0.98044 | 0.326869 | 0.785637 |

|                   |           |               |           |           |           |           |
|-------------------|-----------|---------------|-----------|-----------|-----------|-----------|
| si:ch211-1a19. 2  | 0. 373549 | -1. 410123995 | 3. 246764 | -0. 43432 | 0. 664058 | NA        |
| lca5              | 40. 9119  | 0. 130298325  | 0. 354089 | 0. 367982 | 0. 712887 | 0. 945821 |
| mtpap             | 122. 0737 | 0. 010945791  | 0. 182399 | 0. 06001  | 0. 952148 | 0. 998066 |
| zgc:165583        | 0. 239853 | 0             | 4. 943673 | 0         | 1         | NA        |
| si:dkey-285e18. 2 | 0. 678734 | -1. 811681098 | 2. 688258 | -0. 67392 | 0. 50036  | NA        |
| coll9a1           | 162. 7059 | -0. 08424105  | 0. 253389 | -0. 33246 | 0. 739544 | 0. 953573 |
| pold3             | 368. 5031 | 0. 176321687  | 0. 225741 | 0. 78108  | 0. 434756 | 0. 850002 |
| pskln1            | 643. 6753 | 0. 185093868  | 0. 268843 | 0. 688482 | 0. 491149 | 0. 875595 |
| znf827            | 623. 9747 | -0. 085456423 | 0. 164345 | -0. 51998 | 0. 603076 | 0. 914226 |
| trim2b            | 137. 7914 | 0. 177752986  | 0. 255308 | 0. 696231 | 0. 486284 | 0. 873244 |
| ptcd1             | 178. 0304 | -0. 262237119 | 0. 164197 | -1. 59709 | 0. 110247 | 0. 544923 |
| ngef              | 167. 4823 | -0. 037655946 | 0. 173822 | -0. 21664 | 0. 828492 | 0. 974137 |
| stat1b            | 9. 262675 | -0. 494762201 | 1. 525745 | -0. 32428 | 0. 745729 | 0. 955074 |
| frrsla            | 2. 652136 | -2. 383476028 | 1. 511409 | -1. 57699 | 0. 114798 | 0. 554602 |
| lrrc3cb           | 1. 849471 | -2. 74728371  | 1. 712288 | -1. 60445 | 0. 108614 | NA        |
| ccdc88b           | 45. 1999  | -0. 057699703 | 0. 284662 | -0. 2027  | 0. 839373 | 0. 976417 |
| fbxl13            | 4. 293779 | -0. 356168862 | 1. 167913 | -0. 30496 | 0. 760395 | 0. 957886 |
| ankrd1b           | 703. 7364 | 0. 259148889  | 0. 163946 | 1. 580693 | 0. 113948 | 0. 552686 |
| si:ch211-226h7. 6 | 4. 16859  | 0             | 1. 912984 | 0         | 1         | 1         |
| zdhhc11           | 9. 274653 | 0. 413232559  | 0. 730025 | 0. 566052 | 0. 571358 | 0. 902903 |
| DOCK4 (1 of many) | 28. 91647 | 0. 114030525  | 0. 37474  | 0. 304292 | 0. 760905 | 0. 957953 |
| zgc:165514        | 0. 937349 | 0. 974203152  | 2. 045801 | 0. 476197 | 0. 633934 | NA        |
| b3galt4           | 10. 6022  | 0. 074915329  | 0. 675083 | 0. 110972 | 0. 911638 | 0. 992327 |
| fthl28            | 320. 6958 | -0. 744566349 | 0. 317321 | -2. 34641 | 0. 018955 | 0. 242378 |
| SERP1             | 2856. 448 | -0. 113671751 | 0. 171331 | -0. 66346 | 0. 507033 | 0. 883007 |
| thal              | 147. 0643 | -0. 047368518 | 0. 160109 | -0. 29585 | 0. 767343 | 0. 960296 |
| ror2              | 223. 2476 | -0. 047086106 | 0. 145442 | -0. 32375 | 0. 746131 | 0. 955074 |
| kif2c             | 271. 6732 | 0. 234995851  | 0. 243466 | 0. 96521  | 0. 33444  | 0. 79151  |
| mrtfab            | 958. 7492 | -0. 029878877 | 0. 122929 | -0. 24306 | 0. 807961 | 0. 969828 |
| atp10b            | 85. 80115 | 0. 067570286  | 0. 353976 | 0. 19089  | 0. 848612 | 0. 977912 |
| lrrc18b           | 6. 012242 | 0. 998989393  | 0. 765804 | 1. 304498 | 0. 192064 | 0. 672283 |
| gram1c            | 191. 1789 | -0. 152838073 | 0. 184797 | -0. 82706 | 0. 408203 | 0. 836036 |
| si:ch211-74f19. 2 | 479. 9197 | 0. 239175642  | 0. 192572 | 1. 242008 | 0. 214234 | 0. 696474 |
| txlnbb            | 3626. 51  | -0. 283107202 | 0. 245125 | -1. 15495 | 0. 248111 | 0. 728489 |
| prune             | 53. 88353 | -0. 338734713 | 0. 229135 | -1. 47832 | 0. 139323 | 0. 597467 |
| dlk2              | 46. 74325 | -0. 059832898 | 0. 281014 | -0. 21292 | 0. 831391 | 0. 974908 |
| ppplr3db          | 101. 6629 | 1. 071893074  | 0. 294017 | 3. 645687 | 0. 000267 | 0. 017992 |
| rasef             | 95. 7852  | -0. 613740802 | 0. 201039 | -3. 05284 | 0. 002267 | 0. 075801 |
| irf3              | 35. 31681 | 0. 364323706  | 0. 321781 | 1. 132209 | 0. 257547 | 0. 735155 |
| si:dkey-247i3. 1  | 1. 565478 | -1. 751781293 | 1. 485709 | -1. 17909 | 0. 238363 | NA        |
| znf1084           | 13. 10729 | -0. 344798211 | 0. 460027 | -0. 74952 | 0. 453546 | 0. 858722 |
| si:ch211-285c6. 1 | 12. 08538 | -1. 471542038 | 0. 66243  | -2. 22143 | 0. 026322 | 0. 287677 |
| tbr1a             | 28. 90865 | 0. 250932778  | 0. 439443 | 0. 571024 | 0. 567983 | 0. 902    |
| pou3f2b           | 641. 6586 | 0. 087325336  | 0. 161827 | 0. 539622 | 0. 589458 | 0. 908456 |
| zgc:195170        | 17. 73865 | -1. 602435795 | 0. 869087 | -1. 84382 | 0. 06521  | 0. 435355 |
| ano8a             | 51. 17368 | 0. 049136116  | 0. 307674 | 0. 159702 | 0. 873116 | 0. 983537 |
| zgc:172131        | 28. 17308 | -0. 405933833 | 0. 563694 | -0. 72013 | 0. 471444 | 0. 86809  |
| adamts13          | 79. 60493 | 0. 741016381  | 0. 383615 | 1. 931666 | 0. 053401 | 0. 400289 |
| znf1041           | 87. 43535 | -0. 28155552  | 0. 223563 | -1. 2594  | 0. 207886 | 0. 689937 |
| CR385050. 1       | 3. 149439 | -2. 651891962 | 1. 116153 | -2. 37592 | 0. 017505 | 0. 233637 |
| ppplr1b           | 314. 9254 | -0. 22384312  | 0. 122005 | -1. 83471 | 0. 066548 | 0. 440425 |
| snrpd3l           | 537. 7311 | -0. 004037136 | 0. 167797 | -0. 02406 | 0. 980805 | 1         |
| si:dkey-125e8. 1  | 0. 07132  | 0             | 5. 267649 | 0         | 1         | NA        |
| calr              | 1551. 901 | 0. 176024629  | 0. 162972 | 1. 08009  | 0. 280102 | 0. 752951 |

|                   |          |              |          |          |          |          |
|-------------------|----------|--------------|----------|----------|----------|----------|
| tns2a             | 267.0498 | -0.045488771 | 0.270727 | -0.16802 | 0.866564 | 0.982582 |
| klb               | 42.8389  | 0.007711239  | 0.368337 | 0.020935 | 0.983297 | 1        |
| triqk             | 322.9592 | 0.182420137  | 0.140511 | 1.298267 | 0.194196 | 0.674395 |
| nfatc3a           | 202.9941 | -0.333987928 | 0.168819 | -1.97838 | 0.047885 | 0.380801 |
| FQ323119.1        | 250.1016 | -0.168475416 | 0.29273  | -0.57553 | 0.564931 | 0.901538 |
| dtx4a             | 445.8447 | -0.235442359 | 0.169673 | -1.38762 | 0.165252 | 0.634423 |
| uspl1             | 135.7479 | -0.053605456 | 0.171583 | -0.31242 | 0.754724 | 0.956283 |
| lox13a            | 27.1095  | -0.32010412  | 0.814973 | -0.39278 | 0.694483 | 0.941093 |
| si:zfos-2070c2.3  | 0.04222  | 0            | 5.267649 | 0        | 1        | NA       |
| pdp1              | 235.4414 | -0.156226497 | 0.199792 | -0.78195 | 0.434246 | 0.850002 |
| mxra5b            | 104.0718 | -0.684397645 | 0.39205  | -1.74569 | 0.080865 | 0.479801 |
| si:ch73-290k24.5  | 10.92024 | -0.04775471  | 0.630089 | -0.07579 | 0.939586 | 0.997371 |
| myot              | 442.7864 | 0.132798394  | 0.159205 | 0.834133 | 0.404206 | 0.833888 |
| si:ch211-240119.7 | 35.01521 | 0            | 1.741242 | 0        | 1        | 1        |
| plod3             | 834.2579 | 0.012987138  | 0.104707 | 0.124033 | 0.901289 | 0.990553 |
| atp6vlab          | 949.1639 | 0.033449763  | 0.104521 | 0.320029 | 0.748946 | 0.955074 |
| ano9a             | 98.27384 | 0.071263514  | 0.220149 | 0.323706 | 0.74616  | 0.955074 |
| col28a2a          | 783.8227 | 0.592456088  | 0.404911 | 1.463178 | 0.143419 | 0.602607 |
| lmtk2             | 606.2735 | 0.06661492   | 0.131391 | 0.506997 | 0.612157 | 0.915668 |
| osbp111           | 48.42948 | -0.148791661 | 0.261303 | -0.56942 | 0.56907  | 0.902234 |
| duspl2            | 74.40434 | -1.004227777 | 0.260514 | -3.8548  | 0.000116 | 0.010282 |
| si:ch211-159i8.4  | 279.9671 | 0.461105816  | 0.260198 | 1.772137 | 0.076372 | 0.468131 |
| mrpl43            | 189.3347 | 0.229740253  | 0.167049 | 1.375285 | 0.169043 | 0.640442 |
| cln5              | 40.75996 | -0.193448823 | 0.348076 | -0.55577 | 0.578371 | 0.905417 |
| si:dkeyp-13d11.1  | 0        | NA           | NA       | NA       | NA       | NA       |
| taar19p           | 0.046941 | 0            | 5.267649 | 0        | 1        | NA       |
| mylk3             | 97.90704 | -0.476289364 | 0.260545 | -1.82805 | 0.067542 | 0.443563 |
| brinp3a.1         | 190.1317 | -0.208363222 | 0.301041 | -0.69214 | 0.488849 | 0.873964 |
| CABZ01102039.1    | 139.7015 | -0.59482024  | 0.23714  | -2.5083  | 0.012131 | 0.191211 |
| zmp:0000001161    | 0.492524 | 0            | 3.970805 | 0        | 1        | NA       |
| rp137             | 181.194  | -0.337920748 | 0.18744  | -1.80282 | 0.071416 | 0.455969 |
| CABZ01039859.1    | 162.3704 | -0.406718369 | 0.179801 | -2.26204 | 0.023695 | 0.272324 |
| tmem260           | 91.19231 | 0.12158958   | 0.181926 | 0.668348 | 0.503912 | 0.881759 |
| si:dkey-178k16.1  | 682.7725 | 0.242703086  | 0.166469 | 1.457951 | 0.144854 | 0.603718 |
| CABZ01080074.1    | 149.9646 | -0.82501288  | 0.223894 | -3.68483 | 0.000229 | 0.016166 |
| voppl             | 68.18653 | 0.072493313  | 0.256643 | 0.282467 | 0.777585 | 0.961073 |
| tmem175           | 56.91451 | -0.12777562  | 0.284607 | -0.44896 | 0.653464 | 0.929269 |
| nsmce2            | 95.088   | -0.370023746 | 0.225178 | -1.64325 | 0.100331 | 0.524753 |
| hnrnpa01          | 60.99989 | 0.05285447   | 0.248742 | 0.212487 | 0.831727 | 0.974914 |
| slc25a1b          | 358.1262 | 0.015799475  | 0.12543  | 0.125962 | 0.899762 | 0.99045  |
| epd11             | 849.333  | -1.758386409 | 0.28021  | -6.27524 | 3.49E-10 | 3.11E-07 |
| zgc:194686        | 1.926138 | 1.965953982  | 1.821328 | 1.079407 | 0.280406 | NA       |
| si:dkey-217f16.6  | 8.419036 | -1.647972011 | 0.785276 | -2.09859 | 0.035853 | 0.332937 |
| npm2a             | 4.61869  | -1.439231478 | 0.920179 | -1.56408 | 0.117799 | 0.559764 |
| tmem65            | 189.6383 | 0.449831315  | 0.157333 | 2.859112 | 0.004248 | 0.107812 |
| si:dkey-201121.4  | 0.117125 | -0.868089684 | 5.267649 | -0.1648  | 0.869104 | NA       |
| cacng3b           | 242.5434 | 0.116375014  | 0.276841 | 0.420368 | 0.674217 | 0.934868 |
| nat16l            | 24.18059 | -0.118678152 | 0.358384 | -0.33115 | 0.740533 | 0.953939 |
| mctpla            | 66.69562 | 0.306603011  | 0.280448 | 1.093261 | 0.274279 | 0.749612 |
| ggcta             | 6.055589 | -0.620464941 | 0.792196 | -0.78322 | 0.433497 | 0.849685 |
| cavinla           | 59.04807 | -0.129924572 | 0.272442 | -0.47689 | 0.633441 | 0.923885 |
| espn              | 28.10897 | -0.318641553 | 0.46457  | -0.68589 | 0.492785 | 0.876558 |
| shroom2a          | 565.88   | 0.096408923  | 0.106871 | 0.902109 | 0.366999 | 0.816297 |
| si:dkeyp-117b11.2 | 75.36935 | -0.130992565 | 0.304599 | -0.43005 | 0.66716  | 0.933049 |

|                     |          |              |          |          |          |          |
|---------------------|----------|--------------|----------|----------|----------|----------|
| dkk2                | 31.03893 | -0.469008656 | 0.315893 | -1.48471 | 0.137621 | 0.593574 |
| lrrc29              | 69.97    | -0.365430654 | 0.321818 | -1.13552 | 0.256158 | 0.73401  |
| ARHGAP22 (1 of many | 125.5819 | -0.056570874 | 0.231723 | -0.24413 | 0.807129 | 0.969726 |
| abhd10a             | 240.5749 | -0.222068303 | 0.156547 | -1.41854 | 0.156033 | 0.621616 |
| zgc:163143          | 45.85747 | -0.135258851 | 0.322238 | -0.41975 | 0.674669 | 0.934877 |
| ppp4cb              | 949.7118 | -0.018817468 | 0.14466  | -0.13008 | 0.896503 | 0.98939  |
| btbd6a              | 229.1554 | -0.030995324 | 0.126656 | -0.24472 | 0.806673 | 0.969726 |
| zgc:174310          | 113.3759 | 0.309605965  | 0.23051  | 1.343133 | 0.179229 | 0.654489 |
| si:dkey-183c6.8     | 176.1001 | -0.104914605 | 0.179478 | -0.58455 | 0.558848 | 0.899409 |
| serpinf2a           | 246.5909 | -1.974275866 | 0.75341  | -2.62045 | 0.008781 | 0.160701 |
| kbtbd13             | 19.13286 | 0.058373897  | 0.390333 | 0.149549 | 0.88112  | 0.986892 |
| prdm2b              | 537.5154 | 0.03415394   | 0.212227 | 0.160931 | 0.872148 | 0.983447 |
| ndnfl               | 253.4475 | -0.053029408 | 0.190412 | -0.2785  | 0.78063  | 0.961421 |
| lamtor1             | 139.1394 | 0.073319031  | 0.160272 | 0.457466 | 0.647336 | 0.927082 |
| maml1               | 267.438  | -0.127494712 | 0.17672  | -0.72145 | 0.470631 | 0.867752 |
| ovolla              | 179.3237 | -0.023125502 | 0.171044 | -0.1352  | 0.892452 | 0.988566 |
| trim37              | 239.3267 | -0.035072547 | 0.146547 | -0.23933 | 0.810852 | 0.969828 |
| org                 | 4.484211 | -0.768720477 | 0.761463 | -1.00953 | 0.31272  | 0.776189 |
| zgc:173770          | 2.975551 | 2.693682696  | 4.384996 | 0.614295 | 0.53902  | 0.892985 |
| mcf21b              | 164.9625 | 0.208419526  | 0.18405  | 1.132406 | 0.257464 | 0.735125 |
| dhrrs13b.2          | 6.471263 | -1.444308039 | 1.079136 | -1.33839 | 0.180768 | 0.656768 |
| stabl               | 257.9554 | -0.058578533 | 0.156547 | -0.37419 | 0.708261 | 0.945344 |
| acpl                | 574.3915 | -0.023720747 | 0.160235 | -0.14804 | 0.882313 | 0.986908 |
| haao                | 228.4106 | -0.099978884 | 0.282213 | -0.35427 | 0.723138 | 0.947898 |
| ankrd40             | 328.7476 | 0.164315201  | 0.132324 | 1.241766 | 0.214323 | 0.696474 |
| vcw2                | 37.79602 | 0.100306888  | 0.419136 | 0.239318 | 0.810859 | 0.969828 |
| frmd4bb             | 69.5944  | 0.178548143  | 0.257857 | 0.692431 | 0.488667 | 0.873964 |
| usp53b              | 46.90232 | 0.122979527  | 0.367463 | 0.334671 | 0.737873 | 0.952611 |
| chgb                | 157.8063 | 0.052168611  | 0.354661 | 0.147094 | 0.883058 | 0.986908 |
| asx12               | 87.66632 | -0.35445345  | 0.228568 | -1.55076 | 0.120959 | 0.566816 |
| grm8b               | 99.92794 | 1.210856886  | 0.342241 | 3.538019 | 0.000403 | 0.023889 |
| polr2d              | 652.9214 | -0.137831038 | 0.194333 | -0.70925 | 0.478168 | 0.869292 |
| fgf22               | 13.30033 | 0.318047943  | 0.519287 | 0.61247  | 0.540227 | 0.893049 |
| si:ch211-265g22.4   | 9.310888 | -0.407497071 | 0.681441 | -0.59799 | 0.549844 | 0.897373 |
| mettl1              | 168.8928 | -0.021850944 | 0.199826 | -0.10935 | 0.912925 | 0.99273  |
| mafB                | 51.99062 | 0.507132747  | 0.27355  | 1.853893 | 0.063754 | 0.430794 |
| gar1                | 921.7689 | 0.117300277  | 0.152988 | 0.766729 | 0.443243 | 0.854063 |
| mmla                | 464.932  | -0.099346225 | 0.170133 | -0.58393 | 0.559266 | 0.899562 |
| jac6                | 0.989719 | -2.310731024 | 2.182221 | -1.05889 | 0.28965  | NA       |
| si:ch211-222121.1   | 23346.78 | 0.009279088  | 0.150566 | 0.061628 | 0.950859 | 0.99801  |
| nfe211b             | 240.9002 | 0.052211109  | 0.153382 | 0.3404   | 0.733555 | 0.950808 |
| si:ch211-14a17.10   | 45.02753 | 1.801143007  | 0.80268  | 2.243913 | 0.024838 | 0.279232 |
| sc:d156             | 5.22725  | 0.403286625  | 0.809843 | 0.497981 | 0.618497 | 0.916674 |
| clcc3ba             | 39.87688 | -1.606480286 | 0.545498 | -2.94498 | 0.00323  | 0.093414 |
| pogzb               | 461.8529 | 0.280021071  | 0.169395 | 1.653068 | 0.098317 | 0.521076 |
| aldh5a1             | 281.9938 | -0.115229481 | 0.130099 | -0.88571 | 0.375774 | 0.822237 |
| trhra               | 5.887189 | 0.143114696  | 0.840754 | 0.170222 | 0.864836 | 0.982074 |
| si:ch211-221f10.2   | 334.0976 | -0.040265843 | 0.187389 | -0.21488 | 0.829862 | 0.974816 |
| si:dkey-266m15.5    | 89.16048 | -0.590112669 | 0.297299 | -1.98491 | 0.047154 | 0.378022 |
| zgc:193801          | 90.98866 | -0.067637592 | 0.233379 | -0.28982 | 0.771955 | 0.960624 |
| cdkn1a              | 82.98965 | -0.202022289 | 0.41472  | -0.48713 | 0.626167 | 0.92063  |
| bicc2               | 74.7167  | 0.243751523  | 0.238884 | 1.020375 | 0.30755  | 0.772879 |
| rblcc1              | 784.8227 | -0.106699    | 0.116004 | -0.91978 | 0.357685 | 0.808938 |
| apbb1               | 140.0448 | 0.257379475  | 0.284389 | 0.905027 | 0.365451 | 0.815359 |



|                    |           |               |           |           |           |           |
|--------------------|-----------|---------------|-----------|-----------|-----------|-----------|
| rarres31           | 80. 71801 | -0. 404724993 | 0. 292804 | -1. 38224 | 0. 166899 | 0. 637452 |
| hspg2              | 469. 9491 | 0. 111199207  | 0. 245255 | 0. 453403 | 0. 650259 | 0. 927835 |
| kank3              | 456. 1018 | -0. 076933162 | 0. 102525 | -0. 75038 | 0. 453024 | 0. 858265 |
| sec61b             | 1954. 289 | 0. 088681943  | 0. 14054  | 0. 631008 | 0. 528035 | 0. 889948 |
| ndp                | 45. 17431 | 0. 233535675  | 0. 305379 | 0. 764741 | 0. 444426 | 0. 85448  |
| sp5a               | 122. 806  | 0. 142104923  | 0. 212655 | 0. 668242 | 0. 503979 | 0. 881759 |
| crygm2d7           | 5526. 742 | 0. 781512526  | 0. 374106 | 2. 089014 | 0. 036706 | 0. 336694 |
| si:dkey-88j15. 3   | 3. 550723 | -4. 585270426 | 1. 548472 | -2. 96116 | 0. 003065 | 0. 091315 |
| si:ch73-160i9. 3   | 18. 01792 | 0. 8250299    | 0. 466344 | 1. 769143 | 0. 07687  | 0. 469467 |
| patz1              | 263. 1913 | 0. 382801307  | 0. 16062  | 2. 38328  | 0. 017159 | 0. 231824 |
| si:ch211-113e8. 11 | 406. 3507 | 0. 151259571  | 0. 144958 | 1. 043475 | 0. 296728 | 0. 764495 |
| csf2rb             | 18. 26165 | -0. 161022683 | 0. 553678 | -0. 29082 | 0. 771186 | 0. 960484 |
| atad2              | 502. 397  | 0. 181409552  | 0. 146839 | 1. 235435 | 0. 216669 | 0. 69815  |
| man1b1b            | 53. 29159 | -0. 225766012 | 0. 287267 | -0. 78591 | 0. 43192  | 0. 848419 |
| pcdh12             | 117. 265  | -0. 060748122 | 0. 246567 | -0. 24638 | 0. 805392 | 0. 969348 |
| sema4ga            | 28. 71251 | -0. 273038262 | 0. 334691 | -0. 81579 | 0. 414619 | 0. 838683 |
| prssl6             | 369. 6349 | 0. 230575841  | 0. 148462 | 1. 5531   | 0. 120399 | 0. 565852 |
| si:ch211-199g17. 9 | 53. 91561 | -0. 269371274 | 0. 243913 | -1. 10437 | 0. 269432 | 0. 745846 |
| fbxo21             | 124. 6441 | -0. 005302293 | 0. 216178 | -0. 02453 | 0. 980432 | 1         |
| ssuh2. 3           | 2. 445257 | 0. 902850847  | 0. 978339 | 0. 92284  | 0. 35609  | 0. 807064 |
| tm2d3              | 630. 6009 | 0. 051723809  | 0. 175408 | 0. 294877 | 0. 768088 | 0. 960296 |
| abhd8b             | 22. 99625 | -0. 606135845 | 0. 576611 | -1. 0512  | 0. 293165 | 0. 762581 |
| atp13a3            | 39. 53077 | -0. 021735384 | 0. 326881 | -0. 06649 | 0. 946985 | 0. 997371 |
| coll4a1b           | 598. 1278 | -0. 044239002 | 0. 199518 | -0. 22173 | 0. 824524 | 0. 972227 |
| ptprb              | 362. 5087 | -0. 062112495 | 0. 148605 | -0. 41797 | 0. 675969 | 0. 935448 |
| smg9               | 215. 6358 | 0. 252824831  | 0. 153647 | 1. 645496 | 0. 099868 | 0. 524166 |
| zdhhc12a           | 72. 03284 | -0. 456009295 | 0. 208279 | -2. 18941 | 0. 028567 | 0. 300821 |
| capn10             | 99. 56119 | -0. 149295354 | 0. 252352 | -0. 59162 | 0. 554108 | 0. 898275 |
| F0082781. 1        | 74. 39369 | 0. 147330064  | 0. 231865 | 0. 635414 | 0. 525158 | 0. 888928 |
| esamb              | 36. 03476 | 0. 219067979  | 0. 32154  | 0. 681309 | 0. 495676 | 0. 87806  |
| kcnv2a             | 24. 96028 | 1. 367052175  | 0. 544716 | 2. 509659 | 0. 012085 | 0. 190742 |
| pde9a1             | 12. 67656 | -0. 449158733 | 0. 498201 | -0. 90156 | 0. 36729  | 0. 816459 |
| zgc:193807         | 0. 222343 | -0. 868114395 | 5. 267649 | -0. 1648  | 0. 869101 | NA        |
| plagl2             | 103. 0667 | -0. 252571467 | 0. 274365 | -0. 92057 | 0. 357277 | 0. 808092 |
| cdca7b             | 325. 1315 | 0. 276992121  | 0. 167264 | 1. 656019 | 0. 097718 | 0. 521071 |
| ccngl              | 15980. 13 | 0. 121768803  | 0. 109845 | 1. 108549 | 0. 267625 | 0. 74397  |
| wu:fi04e12         | 646. 294  | -0. 030638558 | 0. 165978 | -0. 18459 | 0. 853547 | 0. 978887 |
| rail               | 201. 53   | 0. 451600998  | 0. 313909 | 1. 438638 | 0. 150253 | 0. 613889 |
| ccn4b              | 21. 76775 | 0. 25068848   | 0. 50483  | 0. 49658  | 0. 619486 | 0. 917435 |
| si:rp71-84d9. 1    | 6. 288541 | -0. 646110426 | 1. 003481 | -0. 64387 | 0. 51966  | 0. 887148 |
| gramd1a            | 642. 5511 | 0. 002042037  | 0. 130036 | 0. 015704 | 0. 987471 | 1         |
| avpr21             | 4. 173482 | -1. 302018914 | 0. 99149  | -1. 31319 | 0. 189118 | 0. 668577 |
| NAMPT (1 of many)  | 0. 22275  | 0             | 5. 267649 | 0         | 1         | NA        |
| SIP1A1             | 47. 08673 | 0. 290124724  | 0. 365906 | 0. 792893 | 0. 42784  | 0. 845893 |
| ipmka              | 18. 96537 | 0. 115725266  | 0. 510655 | 0. 226621 | 0. 820718 | 0. 971788 |
| b4galnt4b          | 82. 14795 | -0. 03761599  | 0. 280195 | -0. 13425 | 0. 893205 | 0. 988566 |
| CABZ01068356. 1    | 8. 326818 | 1. 23280836   | 0. 764138 | 1. 613331 | 0. 106673 | 0. 536372 |
| zfang4             | 163. 2095 | 0. 159727697  | 0. 185153 | 0. 86268  | 0. 388314 | 0. 827592 |
| si:dkey-42123. 7   | 46. 21032 | 0. 599849323  | 0. 537228 | 1. 116565 | 0. 26418  | 0. 742063 |
| si:dkey-265c15. 6  | 6. 613301 | 1. 190982003  | 0. 834409 | 1. 427335 | 0. 153483 | 0. 618041 |
| palb2              | 33. 05614 | -0. 245882811 | 0. 343572 | -0. 71567 | 0. 474197 | 0. 869292 |
| prkra              | 250. 7565 | 0. 388096407  | 0. 178502 | 2. 174181 | 0. 029692 | 0. 306711 |
| zgc:171686         | 12. 02752 | -0. 070751999 | 0. 669172 | -0. 10573 | 0. 915796 | 0. 99311  |
| pi4kaa             | 188. 8351 | 0. 21639933   | 0. 231183 | 0. 936054 | 0. 349246 | 0. 801408 |

|                   |          |              |          |          |          |          |
|-------------------|----------|--------------|----------|----------|----------|----------|
| si:ch211-247i17.1 | 3.795875 | -0.950180497 | 1.108141 | -0.85745 | 0.391194 | 0.827902 |
| myo9aa            | 592.766  | 0.000456077  | 0.156879 | 0.002907 | 0.99768  | 1        |
| syt6a             | 56.84075 | -0.050182973 | 0.361265 | -0.13891 | 0.889522 | 0.988318 |
| bard1             | 29.47265 | -0.18691998  | 0.372185 | -0.50222 | 0.61551  | 0.916365 |
| si:dkey-193c22.2  | 332.578  | 0.007424846  | 0.193365 | 0.038398 | 0.96937  | 1        |
| cyth1a            | 846.0324 | -0.101758277 | 0.142708 | -0.71305 | 0.475814 | 0.869292 |
| zgc:193811        | 7.139863 | -0.453925999 | 0.672824 | -0.67466 | 0.499893 | 0.879766 |
| TMCC1             | 25.4179  | -0.073282844 | 0.417935 | -0.17535 | 0.860808 | 0.980388 |
| ntn2              | 51.11408 | 0.421475407  | 0.281927 | 1.494983 | 0.134919 | 0.589926 |
| tmem67            | 172.4971 | -0.177781795 | 0.196096 | -0.90661 | 0.364615 | 0.814648 |
| slc9a7            | 349.7315 | 0.001838147  | 0.169632 | 0.010836 | 0.991354 | 1        |
| ap5s1             | 188.5572 | 0.022052071  | 0.152305 | 0.144789 | 0.884878 | 0.987266 |
| ephb1             | 13.81678 | -0.402758731 | 0.488274 | -0.82486 | 0.40945  | 0.836787 |
| sp2               | 309.249  | 0.066305123  | 0.144243 | 0.459677 | 0.645748 | 0.926728 |
| ddhd2             | 259.0065 | 0.492402438  | 0.254798 | 1.932518 | 0.053296 | 0.400175 |
| zgc:163061        | 12.69341 | -1.898725645 | 0.623144 | -3.04701 | 0.002311 | 0.076505 |
| pgfb              | 13.96829 | 0.549179473  | 0.436247 | 1.258873 | 0.208076 | 0.690193 |
| reps2             | 47.45211 | -0.415278783 | 0.33065  | -1.25595 | 0.209135 | 0.691152 |
| lrrc58a           | 81.47326 | -0.04573216  | 0.337621 | -0.13545 | 0.892253 | 0.988566 |
| gucy2g            | 10.9087  | 0.027867088  | 0.552735 | 0.050417 | 0.95979  | 0.999164 |
| si:ch73-34314.5   | 0.169904 | -0.868100281 | 5.267649 | -0.1648  | 0.869103 | NA       |
| fam13b            | 7076.83  | 0.021641272  | 0.130929 | 0.16529  | 0.868716 | 0.982801 |
| acadsb            | 811.0096 | -0.101112919 | 0.134363 | -0.75253 | 0.451729 | 0.857676 |
| trim45            | 167.4772 | -0.257964647 | 0.231647 | -1.11361 | 0.265445 | 0.742247 |
| angpt4            | 35.13166 | 0.178346668  | 0.381834 | 0.467079 | 0.640443 | 0.925072 |
| BX571825.4        | 0 NA     | NA           | NA       | NA       | NA       | NA       |
| cx32.2            | 29.11929 | 0.277212086  | 0.390409 | 0.710056 | 0.477669 | 0.869292 |
| crygm2d16         | 5449.532 | 0.051183312  | 0.528972 | 0.09676  | 0.922917 | 0.994525 |
| cdk13             | 597.4674 | -0.019822129 | 0.130823 | -0.15152 | 0.879567 | 0.986187 |
| dlg3              | 780.8406 | 0.148586757  | 0.112028 | 1.326338 | 0.184728 | 0.661987 |
| si:dkey-178o16.4  | 15.02567 | -1.038843126 | 0.580955 | -1.78816 | 0.07375  | 0.461398 |
| si:ch211-261p9.4  | 54.77909 | -0.072837845 | 0.315267 | -0.23104 | 0.817287 | 0.971207 |
| rnd3a             | 1326.325 | -0.034405666 | 0.104651 | -0.32876 | 0.742334 | 0.954329 |
| tnfrsf18          | 3.026637 | 2.534672779  | 1.612936 | 1.571465 | 0.116075 | 0.556131 |
| arap3             | 171.2097 | 0.121312702  | 0.175694 | 0.690476 | 0.489895 | 0.874826 |
| tradv30.0.1       | 0 NA     | NA           | NA       | NA       | NA       | NA       |
| ttyh1             | 291.2453 | 0.610384182  | 0.196764 | 3.102114 | 0.001921 | 0.067865 |
| leng8             | 1357.98  | -0.014596238 | 0.180644 | -0.0808  | 0.9356   | 0.996829 |
| zgc:174268        | 90.5364  | -0.030460633 | 0.189693 | -0.16058 | 0.872425 | 0.983447 |
| ganab             | 948.1278 | 0.023960555  | 0.105154 | 0.227862 | 0.819753 | 0.971785 |
| gzm3.4            | 4.536226 | 0.093368779  | 0.834724 | 0.111856 | 0.910938 | 0.992208 |
| EIF3S10           | 7883.97  | -0.215012395 | 0.103626 | -2.07488 | 0.037997 | 0.342167 |
| nLRC8             | 9.549754 | -4.051666213 | 2.587048 | -1.56613 | 0.117317 | 0.558519 |
| xkr8.2            | 42.38722 | -0.014269847 | 0.542679 | -0.0263  | 0.979022 | 1        |
| CCKBR             | 4.827432 | 0.820206782  | 1.000929 | 0.819445 | 0.412532 | 0.838123 |
| dpp6a             | 66.51243 | -0.545385565 | 0.324833 | -1.67897 | 0.093157 | 0.510759 |
| zgc:194101        | 2.142011 | 0.093647559  | 1.940681 | 0.048255 | 0.961513 | NA       |
| ankib1b           | 477.3415 | 0.045205803  | 0.144768 | 0.312265 | 0.754839 | 0.956283 |
| si:dkey-65b12.6   | 931.9498 | 0.431426385  | 0.225448 | 1.913641 | 0.055666 | 0.408467 |
| iqck              | 27.5294  | 0.434187918  | 0.40514  | 1.071697 | 0.283856 | 0.755095 |
| atplb1b           | 1777.293 | 0.000537684  | 0.134394 | 0.004001 | 0.996808 | 1        |
| LRRC75A           | 149.4995 | 0.166371174  | 0.187653 | 0.886588 | 0.375301 | 0.822213 |
| gpx4b             | 3810.64  | -0.1216337   | 0.155454 | -0.78244 | 0.433954 | 0.850002 |
| apom              | 2535.34  | -0.68159274  | 0.274154 | -2.48616 | 0.012913 | 0.198139 |

|                    |          |              |          |          |          |          |
|--------------------|----------|--------------|----------|----------|----------|----------|
| ftr86              | 132.0947 | -0.285960481 | 0.287019 | -0.99631 | 0.319098 | 0.779923 |
| si:dkey-174i8.1    | 32.52086 | 0.071207194  | 0.531259 | 0.134035 | 0.893375 | 0.988566 |
| plin6              | 202.2362 | -0.123910588 | 0.282034 | -0.43935 | 0.66041  | 0.930581 |
| nitr6a             | 0 NA     | NA           | NA       | NA       | NA       | NA       |
| tnrc6c1            | 745.7304 | 0.113788566  | 0.113696 | 1.000817 | 0.316915 | 0.778879 |
| zgc:l12492         | 107.6655 | -0.434947627 | 0.390139 | -1.11485 | 0.264913 | 0.742063 |
| si:ch211-157b11.14 | 533.3883 | 0.027573175  | 0.134013 | 0.20575  | 0.836986 | 0.976007 |
| areg               | 47.46189 | 0.401208551  | 0.325892 | 1.231108 | 0.218282 | 0.699433 |
| frem2a             | 672.6793 | -0.017567706 | 0.244562 | -0.07183 | 0.942735 | 0.997371 |
| her3               | 7.902162 | 0.687777436  | 0.60485  | 1.137105 | 0.255495 | 0.733544 |
| TCIM (1 of many)   | 72.30865 | -0.715772814 | 0.26067  | -2.7459  | 0.006035 | 0.131072 |
| tmem79b            | 236.747  | 0.063332438  | 0.197273 | 0.32104  | 0.74818  | 0.955074 |
| gaskla             | 200.911  | 0.394542768  | 0.238533 | 1.654038 | 0.09812  | 0.521071 |
| si:ch73-193c12.2   | 44.19834 | 0.146115816  | 0.287542 | 0.508154 | 0.611345 | 0.915331 |
| mrtfbb             | 159.9852 | -0.049890066 | 0.22107  | -0.22568 | 0.821454 | 0.971788 |
| piezol             | 199.5824 | -0.165171213 | 0.191041 | -0.86459 | 0.387265 | 0.827592 |
| mpp4l              | 88.36109 | -0.344551321 | 0.446239 | -0.77212 | 0.440042 | 0.852079 |
| unm_hu7912         | 93.76703 | 0.356570977  | 0.283532 | 1.257604 | 0.208535 | 0.690728 |
| zgc:l71967         | 315.3417 | 0.036898531  | 0.175797 | 0.209893 | 0.833751 | 0.975482 |
| ralgapal           | 653.675  | -0.079625621 | 0.124317 | -0.64051 | 0.521843 | 0.887551 |
| rfxap              | 46.72269 | 0.118266776  | 0.424024 | 0.278915 | 0.78031  | 0.961411 |
| flrt3              | 906.6897 | 0.083096883  | 0.148154 | 0.560883 | 0.574877 | 0.904516 |
| si:dkey-188g12.1   | 5.256165 | 0.093775463  | 0.837181 | 0.112013 | 0.910813 | 0.992208 |
| slc2a13b           | 155.0038 | -0.558071526 | 0.241538 | -2.31049 | 0.020861 | 0.256424 |
| prozb              | 100.831  | -1.771376392 | 0.457346 | -3.87316 | 0.000107 | 0.009739 |
| CR376751.1         | 0.169362 | -1.710071829 | 5.238473 | -0.32644 | 0.744088 | NA       |
| bend3              | 240.1101 | -0.143585337 | 0.142866 | -1.00503 | 0.314881 | 0.777649 |
| lox15b             | 28.29156 | -0.994222388 | 0.493534 | -2.0145  | 0.043957 | 0.367156 |
| emel               | 108.5544 | 0.082906832  | 0.225889 | 0.367025 | 0.7136   | 0.945821 |
| lacc1              | 42.35263 | 0.256578639  | 0.443584 | 0.578422 | 0.562979 | 0.900772 |
| igdcc4             | 166.94   | -0.165287384 | 0.248393 | -0.66543 | 0.505778 | 0.882512 |
| ZNF335             | 250.4423 | 0.075801927  | 0.148934 | 0.508964 | 0.610777 | 0.915331 |
| kazna              | 145.3459 | 0.038080569  | 0.164427 | 0.231595 | 0.816852 | 0.971207 |
| als2b              | 492.8098 | -0.108455704 | 0.1595   | -0.67997 | 0.496523 | 0.878161 |
| tet2               | 656.5429 | 0.077193052  | 0.124511 | 0.61997  | 0.535278 | 0.891993 |
| aldh1a3            | 126.9473 | 0.09491108   | 0.18761  | 0.505895 | 0.61293  | 0.915995 |
| wdr60              | 110.5335 | 0.486956997  | 0.218377 | 2.229896 | 0.025754 | 0.28497  |
| znf451             | 744.918  | -0.1959055   | 0.11973  | -1.63623 | 0.101792 | 0.528581 |
| lhfp14b            | 51.90561 | 0.4036323    | 0.361393 | 1.11688  | 0.264046 | 0.742018 |
| dsg2.1             | 460.913  | -0.113087536 | 0.196671 | -0.57501 | 0.565286 | 0.901538 |
| zgc:l73837         | 0.059954 | 1.055396947  | 5.267649 | 0.200354 | 0.841203 | NA       |
| kel                | 71.40244 | 0.003442121  | 0.295761 | 0.011638 | 0.990714 | 1        |
| fer114             | 52.30511 | -0.661595697 | 0.326531 | -2.02613 | 0.042751 | 0.362408 |
| jac8               | 1.925086 | 0.139666739  | 1.740723 | 0.080235 | 0.93605  | NA       |
| si:ch211-38m6.6    | 21.21702 | -1.317449571 | 0.455272 | -2.89376 | 0.003807 | 0.103034 |
| paqr4a             | 17.79092 | 0.477281525  | 0.357867 | 1.333684 | 0.182308 | 0.658775 |
| gdpd5b             | 361.3389 | -0.002777144 | 0.115129 | -0.02412 | 0.980755 | 1        |
| cables2a           | 150.8058 | 0.166228688  | 0.195182 | 0.851661 | 0.394402 | 0.828495 |
| cep70              | 80.53572 | -0.263928039 | 0.209643 | -1.25894 | 0.208052 | 0.690193 |
| pagr1              | 281.252  | 0.160606667  | 0.153326 | 1.047487 | 0.294875 | 0.763708 |
| ftr22              | 0.53932  | 1.055361864  | 4.134864 | 0.255235 | 0.798542 | NA       |
| si:ch211-165b10.3  | 30.71259 | 0.04431898   | 0.418249 | 0.105963 | 0.915612 | 0.993106 |
| plvapa             | 123.9441 | 0.06887537   | 0.235704 | 0.292211 | 0.770125 | 0.960484 |
| pdzd7a             | 7.411483 | 0.542018694  | 1.022566 | 0.530057 | 0.596072 | 0.911517 |

|                  |          |              |           |          |          |          |
|------------------|----------|--------------|-----------|----------|----------|----------|
| pmchl            | 77.3542  | 1.177092518  | 0.634681  | 1.85462  | 0.06365  | 0.430571 |
| ppplr16a         | 26.72321 | -0.028944737 | 0.350294  | -0.08263 | 0.934146 | 0.996692 |
| zgc:198329       | 45.08416 | -0.880059014 | 0.343109  | -2.56495 | 0.010319 | 0.176586 |
| rnase14          | 7.816616 |              | 0.5267649 |          | 0        | 1        |
| znf839           | 508.3032 | -0.200843708 | 0.13488   | -1.48906 | 0.136472 | 0.591902 |
| dolk             | 14.65232 | 0.209956568  | 0.474405  | 0.442568 | 0.658078 | 0.930581 |
| adgra2           | 168.6313 | 0.086879858  | 0.243587  | 0.356668 | 0.72134  | 0.947343 |
| sharpin          | 237.6828 | -0.074132204 | 0.14551   | -0.50946 | 0.610427 | 0.915331 |
| si:ch73-182a11.2 | 105.0142 | -0.364452783 | 0.256555  | -1.42056 | 0.155444 | 0.620161 |
| stxbp4           | 19.51629 | -0.245606958 | 0.693555  | -0.35413 | 0.723243 | 0.947898 |
| si:ch73-92i20.1  | 20.00665 | 0.352843187  | 0.524188  | 0.673124 | 0.500869 | 0.880413 |
| igsf3            | 164.2784 | 0.071189232  | 0.183442  | 0.388075 | 0.697961 | 0.942355 |
| aldh111          | 1688.994 | -0.262298725 | 0.211115  | -1.24244 | 0.214073 | 0.696474 |
| abcc8b           | 68.29929 | -1.491086432 | 0.776273  | -1.92083 | 0.054753 | 0.405097 |
| wdfy4            | 132.722  | -0.041973143 | 0.239524  | -0.17524 | 0.860895 | 0.980388 |
| uhrflbp1         | 52.54432 | -0.114671926 | 0.242939  | -0.47202 | 0.636913 | 0.924779 |
| eif4ea           | 301.7271 | 0.059469874  | 0.174515  | 0.340773 | 0.733275 | 0.95079  |
| znf280d          | 451.7213 | -0.029211988 | 0.12727   | -0.22953 | 0.818458 | 0.971656 |
| socs7            | 253.9556 | 0.306803084  | 0.153672  | 1.996484 | 0.045881 | 0.374848 |
| calhml           | 10.53085 | -0.809500475 | 1.643178  | -0.49264 | 0.622265 | 0.91857  |
| fam131a          | 21.83836 | 1.188974444  | 0.401057  | 2.964605 | 0.003031 | 0.090902 |
| pcdhh            | 11.133   | 0.633663082  | 0.598687  | 1.058422 | 0.289863 | 0.760705 |
| si:dkey-94e7.1   | 8.75977  | -0.581233279 | 1.003136  | -0.57942 | 0.562308 | 0.900715 |
| si:ch211-81n22.1 | 19.56468 | -1.173404983 | 0.391888  | -2.99424 | 0.002751 | 0.085914 |
| bub1             | 374.6635 | 0.297272533  | 0.247898  | 1.199171 | 0.230461 | 0.712099 |
| nmnat3           | 53.69393 | 0.045882797  | 0.267324  | 0.171637 | 0.863723 | 0.981842 |
| pimr177          | 0.338044 | 0.095044446  | 3.852933  | 0.024668 | 0.98032  | NA       |
| BX901889.1       | 0.423091 | 2.921055457  | 4.185343  | 0.697925 | 0.485224 | NA       |
| txlna            | 544.4238 | 0.025752857  | 0.114816  | 0.224296 | 0.822527 | 0.971966 |
| pbrml1           | 849.6407 | 0.063908762  | 0.15359   | 0.416099 | 0.677337 | 0.935952 |
| esama            | 108.261  | -0.037940885 | 0.221874  | -0.171   | 0.864222 | 0.981867 |
| si:ch211-85n16.4 | 54.59843 | 0.389976426  | 0.239978  | 1.625053 | 0.104151 | 0.532242 |
| arl6ip5a         | 121.2543 | 0.274795096  | 0.262068  | 1.048564 | 0.294379 | 0.763461 |
| scg5             | 12.61265 | 0.146981069  | 1.626872  | 0.090346 | 0.928012 | 0.995052 |
| ptrnrb           | 50.09865 | 0.350570814  | 0.387281  | 0.905211 | 0.365354 | 0.815339 |
| tnrc18           | 1010.917 | -0.033615338 | 0.149587  | -0.22472 | 0.822196 | 0.971966 |
| ppfia3           | 522.5695 | 0.535447578  | 0.196076  | 2.73082  | 0.006318 | 0.134501 |
| gask1b           | 108.9021 | 0.040188676  | 0.265721  | 0.151244 | 0.879783 | 0.986287 |
| escol            | 222.8755 | -0.124591395 | 0.134502  | -0.92632 | 0.354282 | 0.805403 |
| celal.5          | 146.8455 |              | 0.3564701 |          | 0        | 1        |
| rbm6             | 512.3519 | 0.110195641  | 0.114748  | 0.960324 | 0.336892 | 0.793513 |
| si:ch211-11p18.6 | 22.09988 | -0.239049997 | 0.643994  | -0.3712  | 0.710489 | 0.945821 |
| srgn             | 607.0906 | -0.137303589 | 0.150726  | -0.91095 | 0.362321 | 0.812287 |
| si:ch73-280o22.2 | 64.11468 | 0.371338208  | 0.265128  | 1.4006   | 0.161334 | 0.628218 |
| tancla           | 408.3185 | 0.025286757  | 0.156291  | 0.161793 | 0.871469 | 0.983365 |
| fastk            | 481.3821 | 0.003347298  | 0.131283  | 0.025497 | 0.979659 | 1        |
| zgc:173726       | 59.4701  | -0.120785905 | 0.249806  | -0.48352 | 0.628727 | 0.922044 |
| gprc5ba          | 342.0807 | 0.084358633  | 0.179758  | 0.46929  | 0.638862 | 0.924779 |
| slc38a10         | 492.5418 | 0.321628147  | 0.117003  | 2.748891 | 0.00598  | 0.130955 |
| agtrap           | 169.2423 | -0.380094451 | 0.182106  | -2.08721 | 0.036869 | 0.337141 |
| avprlaa          | 45.73085 | -0.295212183 | 0.28446   | -1.0378  | 0.299364 | 0.766128 |
| col28a1a         | 143.0672 | 0.081930016  | 0.329953  | 0.248308 | 0.803896 | 0.968812 |
| zgc:110821       | 94.38355 | -0.186553935 | 0.192716  | -0.96802 | 0.333032 | 0.790126 |
| ankrd34ba        | 7.764959 | 0.781140795  | 0.948993  | 0.823126 | 0.410436 | 0.8372   |

|                    |          |              |          |          |          |          |
|--------------------|----------|--------------|----------|----------|----------|----------|
| si:ch211-196g2.4   | 48.64434 | -0.442424039 | 0.37899  | -1.16738 | 0.243058 | 0.724396 |
| blm                | 118.0653 | 0.223660298  | 0.235966 | 0.94785  | 0.343206 | 0.797757 |
| si:ch211-127b11.1  | 14.70638 | -1.135195281 | 1.011001 | -1.12284 | 0.261504 | 0.738975 |
| elk4               | 43.68938 | -0.332533766 | 0.315573 | -1.05375 | 0.291999 | 0.761655 |
| scaf4a             | 890.231  | 0.129465171  | 0.110699 | 1.169522 | 0.242194 | 0.72408  |
| si:ch211-160o17.4  | 1601.19  | 0.05272219   | 0.12757  | 0.41328  | 0.679402 | 0.936209 |
| fnhc7a             | 83.41355 | 0.001696051  | 0.343666 | 0.004935 | 0.996062 | 1        |
| si:ch211-226h8.6   | 0 NA     | NA           | NA       | NA       | NA       | NA       |
| trim65             | 31.60825 | -0.252736392 | 0.298519 | -0.84663 | 0.397199 | 0.830253 |
| zbtb10             | 151.3425 | -0.200758063 | 0.192583 | -1.04245 | 0.297204 | 0.764844 |
| sema4aa            | 14.38685 | 0.596477996  | 0.548632 | 1.08721  | 0.276944 | 0.751311 |
| oafb               | 20.32439 | 0.316851653  | 0.493138 | 0.642521 | 0.520535 | 0.887165 |
| si:ch211-180f4.1   | 64.11376 | 0.640260807  | 0.331724 | 1.930098 | 0.053595 | 0.400965 |
| arhgef16           | 273.7016 | -0.205477722 | 0.142092 | -1.44609 | 0.148153 | 0.609115 |
| si:ch73-44m9.1     | 0.74877  | -3.706698546 | 4.89315  | -0.75753 | 0.448734 | NA       |
| ccnjl              | 266.4985 | -0.037185761 | 0.144763 | -0.25687 | 0.797277 | 0.966447 |
| naxd               | 634.2273 | -0.141435553 | 0.094357 | -1.49893 | 0.133891 | 0.58766  |
| arid5a             | 10.4966  | -0.040837426 | 0.669336 | -0.06101 | 0.95135  | 0.99801  |
| cyp26b1            | 539.7618 | 0.008042536  | 0.108027 | 0.074449 | 0.940653 | 0.997371 |
| si:ch211-255p10.4  | 17.57726 | 0.166547849  | 0.446391 | 0.373099 | 0.709075 | 0.945546 |
| snrnp70            | 1782.145 | -0.022577167 | 0.109841 | -0.20554 | 0.837147 | 0.976007 |
| bc110              | 148.455  | 0.354933953  | 0.196382 | 1.807367 | 0.070705 | 0.453582 |
| gpr158a            | 23.02101 | 0.517547964  | 0.537737 | 0.962455 | 0.335821 | 0.792139 |
| si:dkey-28d5.14    | 0.14762  | 0 5.267649   | 0        | 1 NA     |          |          |
| zgc:195173         | 174.4656 | -1.096382914 | 0.243466 | -4.50323 | 6.69E-06 | 0.001322 |
| col6a3             | 1500.852 | 0.244919793  | 0.228989 | 1.069572 | 0.284812 | 0.75591  |
| znf526             | 144.4241 | 0.086465986  | 0.204913 | 0.421965 | 0.67305  | 0.93414  |
| adcy3a             | 131.132  | -0.003012851 | 0.233357 | -0.01291 | 0.989699 | 1        |
| cb1n2b             | 283.8861 | 0.274082025  | 0.262129 | 1.045599 | 0.295746 | 0.764246 |
| si:ch211-157p22.10 | 57.21613 | -0.504715467 | 0.276238 | -1.8271  | 0.067684 | 0.443563 |
| synpo2b            | 164.825  | 0.163134657  | 0.321177 | 0.507927 | 0.611504 | 0.915331 |
| ccdc153            | 9.124059 | 0.126630888  | 0.680219 | 0.186162 | 0.852318 | 0.978626 |
| nwd2               | 255.3793 | -0.070061625 | 0.195086 | -0.35913 | 0.719496 | 0.94694  |
| kcnj3a             | 57.6964  | -0.025953551 | 0.321818 | -0.08065 | 0.935723 | 0.996829 |
| nmbb               | 28.67242 | -0.795946585 | 0.578467 | -1.37596 | 0.168834 | 0.640393 |
| si:ch211-153b23.4  | 231.5249 | 0.21627256   | 0.222242 | 0.973138 | 0.330485 | 0.788126 |
| qsox2              | 91.62298 | 0.293436844  | 0.275193 | 1.066294 | 0.286291 | 0.757624 |
| zgc:174888         | 145.0187 | -0.113691346 | 0.197404 | -0.57593 | 0.564661 | 0.901445 |
| map2k4b            | 1022.357 | -0.160947864 | 0.118755 | -1.3553  | 0.175322 | 0.649279 |
| zgc:152977         | 40.18071 | -0.32263613  | 0.404768 | -0.79709 | 0.425399 | 0.844714 |
| ccdc83             | 4.853412 | 0.862593328  | 0.686029 | 1.257371 | 0.208619 | 0.690728 |
| slc37a4b           | 426.904  | 0.160098557  | 0.160861 | 0.995259 | 0.31961  | 0.780289 |
| imp1a              | 75.49662 | 0.590536359  | 0.755738 | 0.781403 | 0.434565 | 0.850002 |
| atrn1a             | 40.05079 | 0.425587019  | 0.301718 | 1.410548 | 0.158378 | 0.623766 |
| nags               | 21.80451 | 1.000844388  | 0.432079 | 2.316348 | 0.020539 | 0.254489 |
| chst12b            | 7.65461  | -1.232447075 | 0.695316 | -1.7725  | 0.076312 | 0.467887 |
| myo7bb             | 84.42548 | 0.977106364  | 0.621328 | 1.57261  | 0.115809 | 0.555893 |
| mocs2              | 140.7094 | -0.027593305 | 0.181005 | -0.15244 | 0.878836 | 0.985841 |
| zgc:153116         | 29.24019 | -0.283690566 | 0.344022 | -0.82463 | 0.409582 | 0.836787 |
| lzts2b             | 40.31969 | 0.054514698  | 0.278246 | 0.195922 | 0.844671 | 0.976791 |
| or112-1            | 7.898329 | 0.460535108  | 0.690725 | 0.666742 | 0.504937 | 0.88195  |
| eif4g3a            | 609.7616 | 0.194904015  | 0.171092 | 1.139173 | 0.254631 | 0.733441 |
| zgc:162184         | 71.80022 | 0.222983385  | 0.286065 | 0.779484 | 0.435694 | 0.850467 |
| si:ch211-106h4.6   | 9.208913 | -0.74633099  | 0.65302  | -1.14289 | 0.253083 | 0.732759 |

|                   |          |              |          |          |          |          |
|-------------------|----------|--------------|----------|----------|----------|----------|
| si:ch211-208f21.3 | 5.968198 | -1.497840836 | 1.107258 | -1.35275 | 0.176136 | 0.649415 |
| ypel2a            | 52.01821 | -0.057580053 | 0.296764 | -0.19403 | 0.846155 | 0.977095 |
| smarca4a          | 3331.488 | 0.141232744  | 0.113746 | 1.241645 | 0.214367 | 0.696521 |
| fbxl6             | 123.0856 | -0.015970355 | 0.152956 | -0.10441 | 0.916843 | 0.99353  |
| ntrk3a            | 207.822  | 0.215479761  | 0.208225 | 1.034843 | 0.300742 | 0.767001 |
| ano8b             | 34.59561 | -0.656408956 | 0.322302 | -2.03663 | 0.041688 | 0.356684 |
| vwf               | 24.98684 | 0.434210601  | 0.626101 | 0.693515 | 0.487986 | 0.873369 |
| hspb6             | 196.0929 | -0.060076993 | 0.531002 | -0.11314 | 0.90992  | 0.992208 |
| rfx7a             | 317.3348 | -0.393193891 | 0.178532 | -2.20237 | 0.027639 | 0.295524 |
| si:ch211-165i18.2 | 2.996124 | 2.446695251  | 1.431215 | 1.709523 | 0.087354 | 0.496199 |
| cd2471            | 11.15384 | -1.670484515 | 0.65688  | -2.54306 | 0.010989 | 0.182514 |
| setdlbb           | 4.872356 | 1.839160862  | 1.152941 | 1.595191 | 0.11067  | 0.545461 |
| si:dkey-225n22.4  | 13.19582 | 0.471037019  | 0.632697 | 0.744491 | 0.456579 | 0.860698 |
| zgc:171459        | 66.20973 | 0.193498249  | 0.201893 | 0.958421 | 0.33785  | 0.794808 |
| gmip              | 70.59226 | -0.415994751 | 0.321074 | -1.29563 | 0.195102 | 0.67483  |
| si:rp71-36a1.5    | 33.54201 | 1.343557898  | 0.387401 | 3.468136 | 0.000524 | 0.028371 |
| alkbh6            | 145.7042 | 0.118228799  | 0.214012 | 0.552441 | 0.580646 | 0.905618 |
| nat8l             | 1282.756 | 0.021435547  | 0.151995 | 0.141028 | 0.887848 | 0.988077 |
| timd4             | 60.22641 | -0.061444575 | 0.379328 | -0.16198 | 0.87132  | 0.983365 |
| si:dkey-28d5.13   | 0.79913  | 1.550931437  | 2.464273 | 0.629367 | 0.529109 | NA       |
| lmod1b            | 19.09404 | -1.054311585 | 0.643303 | -1.6389  | 0.101234 | 0.526828 |
| si:ch73-27e22.3   | 8.35144  | 0.174020643  | 0.670789 | 0.259427 | 0.795306 | 0.965909 |
| wdr43             | 1644.09  | -0.30510973  | 0.169531 | -1.79973 | 0.071903 | 0.4564   |
| wdr89             | 85.03658 | 0.100757258  | 0.221984 | 0.453894 | 0.649905 | 0.927756 |
| zgc:174698        | 5.284947 | 0.925848997  | 0.919834 | 1.006539 | 0.314156 | 0.777479 |
| crisplda          | 53.02708 | -0.120341209 | 0.356622 | -0.33745 | 0.73578  | 0.951543 |
| gdpd5a            | 128.8232 | -0.145005447 | 0.194349 | -0.74611 | 0.455602 | 0.860124 |
| scarf1            | 76.75256 | 0.114592912  | 0.23859  | 0.480292 | 0.63102  | 0.923003 |
| si:ch211-188c16.1 | 13.03173 | -0.576611418 | 0.721611 | -0.79906 | 0.424255 | 0.844355 |
| mmp25a            | 2.28116  | 0.833524873  | 0.974592 | 0.855256 | 0.39241  | 0.827902 |
| rps2              | 119160.7 | -0.392813483 | 0.141637 | -2.77338 | 0.005548 | 0.125896 |
| synpo2la          | 777.0569 | 0.080831395  | 0.257879 | 0.313447 | 0.753941 | 0.955912 |
| akap6             | 413.7648 | 0.211267456  | 0.166506 | 1.268825 | 0.204504 | 0.68614  |
| nbr1a             | 979.8094 | -0.243358356 | 0.12334  | -1.97307 | 0.048487 | 0.3833   |
| gas1a             | 1216.365 | -0.081338942 | 0.120844 | -0.67309 | 0.500889 | 0.880413 |
| yars2             | 69.67101 | -0.052945512 | 0.238607 | -0.22189 | 0.824397 | 0.972223 |
| usp42             | 313.5924 | 0.239443297  | 0.130302 | 1.83761  | 0.06612  | 0.439094 |
| mlf1              | 1330.808 | 0.147022669  | 0.233794 | 0.628855 | 0.529444 | 0.890434 |
| erg               | 73.57147 | -0.552666378 | 0.222843 | -2.48007 | 0.013136 | 0.199185 |
| cutc              | 344.5127 | -0.021750021 | 0.161628 | -0.13457 | 0.892953 | 0.988566 |
| tmem201           | 167.7922 | -0.084088994 | 0.181252 | -0.46393 | 0.642695 | 0.92567  |
| gpr84             | 59.00327 | 1.396415349  | 0.525841 | 2.655583 | 0.007917 | 0.150539 |
| si:ch211-209f23.6 | 7.390351 | -0.836166706 | 0.5657   | -1.47811 | 0.139378 | 0.597593 |
| slc46a3           | 39.45571 | -0.049753996 | 0.321319 | -0.15484 | 0.876945 | 0.985067 |
| mblac1            | 43.4918  | -2.015396285 | 0.466156 | -4.32344 | 1.54E-05 | 0.002472 |
| MB21D2            | 18.90791 | -0.30883386  | 0.490871 | -0.62915 | 0.529248 | 0.890406 |
| snx29             | 221.563  | 0.106979887  | 0.170904 | 0.625964 | 0.531338 | 0.890833 |
| CR376737.1        | 191.4667 | -0.145475576 | 0.199156 | -0.73046 | 0.465108 | 0.864892 |
| thap4             | 184.4085 | -0.301417978 | 0.181225 | -1.66322 | 0.096268 | 0.517886 |
| slc45a4           | 318.3618 | -0.092422862 | 0.14215  | -0.65018 | 0.515577 | 0.886459 |
| anol1             | 88.49348 | 0.097780898  | 0.386245 | 0.253158 | 0.800146 | 0.967256 |
| nlg2a             | 283.7303 | 0.157948355  | 0.219266 | 0.720352 | 0.471308 | 0.86809  |
| SH3TC1            | 46.65192 | -0.132534029 | 0.331768 | -0.39948 | 0.689541 | 0.939582 |
| si:ch211-171h4.5  | 0.594001 | 0            | 2.752011 | 0        | 1        | NA       |

|                    |          |              |          |          |          |          |
|--------------------|----------|--------------|----------|----------|----------|----------|
| ptrh2              | 263.1858 | 0.248381579  | 0.217533 | 1.141809 | 0.253533 | 0.732873 |
| ppplr14c           | 1204.668 | -0.086625821 | 0.198226 | -0.43701 | 0.662108 | 0.930742 |
| sorcs3b            | 20.98714 | 0.942680464  | 0.501925 | 1.878128 | 0.060364 | 0.422591 |
| b4galnt1b          | 70.50639 | -0.347640668 | 0.249312 | -1.3944  | 0.163197 | 0.631199 |
| rerea              | 680.3525 | -0.310424843 | 0.193915 | -1.60083 | 0.109414 | 0.542505 |
| sypl1              | 126.3941 | -0.253770336 | 0.193942 | -1.30848 | 0.190709 | 0.670725 |
| lrrc61             | 19.05959 | -0.004206827 | 0.475199 | -0.00885 | 0.992937 | 1        |
| fth130             | 89.84368 | 0.441396926  | 0.328744 | 1.342679 | 0.179376 | 0.654677 |
| bptf               | 1067.832 | 0.009647086  | 0.162036 | 0.059537 | 0.952525 | 0.998371 |
| mapk9              | 80.17378 | -0.033869226 | 0.212137 | -0.15966 | 0.873151 | 0.983537 |
| ntng2a             | 104.6502 | -0.073424901 | 0.285257 | -0.2574  | 0.79687  | 0.966447 |
| slc30a6            | 221.7894 | 0.056700213  | 0.154369 | 0.367303 | 0.713393 | 0.945821 |
| kcnk15             | 26.40084 | -0.130449362 | 0.50894  | -0.25632 | 0.797707 | 0.966447 |
| tfr1b              | 443.0959 | -0.460912528 | 0.206359 | -2.23354 | 0.025513 | 0.283691 |
| si:dkey-85n7.6     | 122.2846 | 0.391671227  | 0.231238 | 1.693798 | 0.090304 | 0.50442  |
| hcn5               | 47.31138 | -0.29346616  | 0.296941 | -0.9883  | 0.323007 | 0.782754 |
| anx11a             | 1958.854 | -0.045201586 | 0.108648 | -0.41604 | 0.677384 | 0.935952 |
| dnah11             | 5.171727 | -1.236056045 | 0.886716 | -1.39397 | 0.163327 | 0.631199 |
| rgsl9              | 45.91419 | -0.226203195 | 0.257325 | -0.87906 | 0.37937  | 0.823515 |
| tctel              | 2.447264 | 0.371965144  | 0.993268 | 0.374486 | 0.708043 | 0.945335 |
| obs11b             | 304.9446 | -0.107427485 | 0.294698 | -0.36453 | 0.715459 | 0.945988 |
| tradv27.0          | 0.295069 | 1.055362043  | 5.267649 | 0.200348 | 0.841209 | NA       |
| si:dkey-81n2.2     | 0.069091 | 0            | 5.267649 | 0        | 1        | NA       |
| tlcd2              | 362.9474 | -0.332138074 | 0.166006 | -2.00076 | 0.045418 | 0.373167 |
| ubash3bb           | 66.58133 | -0.211967005 | 0.277879 | -0.7628  | 0.445581 | 0.855403 |
| rbm10              | 322.0788 | 0.094969897  | 0.182285 | 0.520996 | 0.602369 | 0.914001 |
| col8ala            | 252.5721 | 0.170188683  | 0.289631 | 0.587606 | 0.556797 | 0.899063 |
| ncoa3              | 731.4341 | -0.102629184 | 0.114957 | -0.89276 | 0.371984 | 0.819592 |
| psip1b             | 346.8185 | 0.275009371  | 0.181987 | 1.511145 | 0.130752 | 0.582151 |
| si:dkey-184p18.2   | 211.6007 | 0.433283664  | 0.285735 | 1.516383 | 0.129422 | 0.579015 |
| cbyl               | 185.3479 | -0.020979853 | 0.160313 | -0.13087 | 0.895879 | 0.98926  |
| myo9b              | 394.0834 | -0.099587346 | 0.206879 | -0.48138 | 0.630246 | 0.922869 |
| ftr08              | 0.247147 | 2.079533563  | 5.22636  | 0.397893 | 0.690709 | NA       |
| zgc:194312         | 138.4982 | -0.094053176 | 0.236778 | -0.39722 | 0.691204 | 0.940173 |
| zmp:0000001175     | 9.811241 | 0.299432501  | 0.833097 | 0.359421 | 0.71928  | 0.94694  |
| nectin4a           | 126.5789 | 0.007307223  | 0.223502 | 0.032694 | 0.973918 | 1        |
| gpr20              | 3.44696  | -1.813823045 | 1.612397 | -1.12492 | 0.260622 | 0.738121 |
| camtala            | 419.1137 | 0.387183564  | 0.207804 | 1.863217 | 0.062432 | 0.427718 |
| usf3               | 233.4083 | 0.270022691  | 0.203531 | 1.32669  | 0.184611 | 0.661987 |
| mon1bb             | 250.1977 | 0.010333324  | 0.163491 | 0.063204 | 0.949604 | 0.99801  |
| SYDE1              | 153.5073 | 0.079644562  | 0.277052 | 0.287472 | 0.773751 | 0.960624 |
| tubgcp5            | 283.5728 | 0.277756391  | 0.154414 | 1.79878  | 0.072054 | 0.456627 |
| si:dkey-234i14.14  | 0        | NA           | NA       | NA       | NA       | NA       |
| si:ch211-113a14.12 | 25.09437 | 1.340519707  | 0.626553 | 2.139514 | 0.032394 | 0.319256 |
| dhx32a             | 60.05694 | 0.086724654  | 0.269954 | 0.321257 | 0.748016 | 0.955074 |
| sorcs2             | 263.7572 | -0.322003157 | 0.159273 | -2.0217  | 0.043207 | 0.364174 |
| sox10              | 520.8902 | -0.195047603 | 0.158034 | -1.23421 | 0.217124 | 0.69815  |
| si:ch73-206p6.1    | 145.8859 | -0.166694965 | 0.257012 | -0.64859 | 0.516604 | 0.886933 |
| polr1b             | 173.0245 | -0.309202394 | 0.215269 | -1.43635 | 0.150902 | 0.615085 |
| si:dkey-193b15.8   | 24.6744  | 0.141596297  | 0.445769 | 0.317645 | 0.750754 | 0.955074 |
| hmces              | 36.02706 | -0.097058832 | 0.409994 | -0.23673 | 0.812864 | 0.970328 |
| mych               | 954.4726 | -0.205039271 | 0.475501 | -0.43121 | 0.666318 | 0.932664 |
| pla2r1             | 59.4785  | 0.371595266  | 0.397149 | 0.935658 | 0.349449 | 0.801408 |
| zgc:174353         | 0        | NA           | NA       | NA       | NA       | NA       |

|                   |          |              |          |          |          |          |
|-------------------|----------|--------------|----------|----------|----------|----------|
| msh5              | 12.41924 | -0.651900377 | 0.555165 | -1.17425 | 0.240297 | 0.721295 |
| si:dkey-76k16.6   | 31.38828 | 0.363967136  | 0.407728 | 0.892672 | 0.372033 | 0.819592 |
| spsb3b            | 214.9053 | -1.098083367 | 0.695045 | -1.57987 | 0.114136 | 0.553175 |
| si:ch73-289h5.4   | 49.90617 | 0.677546317  | 0.30606  | 2.213769 | 0.026845 | 0.290786 |
| lrfn2b            | 90.51592 | -0.08533644  | 0.309669 | -0.27557 | 0.782876 | 0.962328 |
| atp8a2            | 977.9424 | 0.035096416  | 0.11284  | 0.311027 | 0.75578  | 0.956532 |
| ptpn9a            | 138.2329 | 0.160298498  | 0.190448 | 0.841693 | 0.39996  | 0.831277 |
| igsf10            | 98.01193 | 0.023858934  | 0.376505 | 0.06337  | 0.949472 | 0.99801  |
| plekho1b          | 184.497  | -0.213742425 | 0.187245 | -1.14151 | 0.253657 | 0.732873 |
| si:ch211-103n10.5 | 70.30527 | -0.463045963 | 0.48585  | -0.95306 | 0.340558 | 0.795538 |
| tjpla             | 1681.105 | 0.186772517  | 0.115817 | 1.612654 | 0.10682  | 0.536763 |
| ppplr3da          | 83.44845 | -0.145002457 | 0.268931 | -0.53918 | 0.589762 | 0.908601 |
| letm2             | 946.5847 | 0.078544826  | 0.127747 | 0.614845 | 0.538657 | 0.892777 |
| recql4            | 72.19742 | 0.373320629  | 0.245442 | 1.521017 | 0.128256 | 0.57725  |
| si:dkey-6f10.4    | 0.292935 | 0.892420518  | 5.241767 | 0.170252 | 0.864812 | NA       |
| tdrd7b            | 106.2896 | 0.09914277   | 0.220181 | 0.450278 | 0.65251  | 0.92891  |
| babam1            | 304.2692 | 0.177957383  | 0.126913 | 1.402197 | 0.160857 | 0.627788 |
| ahctf1            | 707.3386 | 0.046736637  | 0.132446 | 0.352873 | 0.724184 | 0.948273 |
| bag6l             | 340.3418 | -0.168559267 | 0.124602 | -1.35278 | 0.176126 | 0.649415 |
| pign              | 60.95294 | 0.311589661  | 0.239892 | 1.298872 | 0.193988 | 0.674122 |
| EIF3F             | 5183.844 | -0.317661524 | 0.131561 | -2.41457 | 0.015754 | 0.221358 |
| snrnp200          | 1272.714 | 0.115480355  | 0.150935 | 0.765098 | 0.444213 | 0.854431 |
| nudt19            | 159.1238 | -0.74340897  | 0.235645 | -3.15478 | 0.001606 | 0.061411 |
| f2r11.2           | 134.4066 | 0.629226039  | 0.300218 | 2.0959   | 0.036091 | 0.334091 |
| si:dkeyp-75b4.8   | 3.660884 | 0.690018502  | 1.517805 | 0.454616 | 0.649385 | 0.927756 |
| toel              | 137.7041 | -0.259552441 | 0.169271 | -1.53335 | 0.125189 | 0.572897 |
| si:dkey-16p21.7   | 359.8036 | 0.306271481  | 0.20874  | 1.46724  | 0.142311 | 0.601598 |
| zdhhc1            | 197.4222 | 0.33203088   | 0.157836 | 2.103639 | 0.03541  | 0.330833 |
| tmlhe             | 59.5404  | -0.426372865 | 0.273238 | -1.56044 | 0.118655 | 0.561771 |
| aifm2             | 590.3204 | 0.22469416   | 0.113953 | 1.971816 | 0.048631 | 0.383778 |
| gcnt4b            | 0.380616 | 0            | 5.048128 | 0        | 1        | NA       |
| rap2aa            | 48.0402  | 0.144701262  | 0.337538 | 0.428696 | 0.668144 | 0.933086 |
| nitr5             | 2.046424 | 1.193012731  | 1.342074 | 0.888932 | 0.374039 | NA       |
| L0017815.1        | 131.0069 | -0.142247932 | 0.611912 | -0.23246 | 0.816177 | 0.971207 |
| grin2cb           | 34.14389 | -0.627599246 | 0.513285 | -1.22271 | 0.221439 | 0.702841 |
| angell            | 127.3405 | -0.21821222  | 0.306497 | -0.71195 | 0.476493 | 0.869292 |
| lrrn3a            | 130.9618 | -0.036574497 | 0.293113 | -0.12478 | 0.900698 | 0.99045  |
| cdh16             | 5.403531 | -0.044717885 | 0.794062 | -0.05632 | 0.955091 | 0.998611 |
| zgc:174862        | 8.471906 | -2.981091138 | 1.035232 | -2.87964 | 0.003981 | 0.105306 |
| si:ch211-193k19.2 | 4.545127 | 0.203845697  | 1.023463 | 0.199173 | 0.842128 | 0.97643  |
| tmprss13b         | 52.20899 | 0.349068868  | 0.335682 | 1.03988  | 0.298396 | 0.765416 |
| ntsrl             | 2.102405 | 0.29529792   | 1.318532 | 0.22396  | 0.822789 | NA       |
| tspeara           | 13.42286 | -0.665201655 | 0.580354 | -1.1462  | 0.251712 | 0.732003 |
| zzz3              | 554.612  | 0.012822737  | 0.111361 | 0.115146 | 0.908329 | 0.991812 |
| ank3b             | 184.9966 | 0.165899286  | 0.290218 | 0.571637 | 0.567568 | 0.901809 |
| b4gat1            | 159.4218 | 0.202472028  | 0.171631 | 1.179692 | 0.238123 | 0.719146 |
| cln6a             | 182.3081 | -0.011388908 | 0.171168 | -0.06654 | 0.946951 | 0.997371 |
| pdgfc             | 182.0482 | -0.073189225 | 0.154124 | -0.47487 | 0.634878 | 0.924272 |
| CR847803.1        | 0        | NA           | NA       | NA       | NA       | NA       |
| arsj              | 115.3694 | -0.229942591 | 0.208809 | -1.10121 | 0.270806 | 0.746845 |
| phf24             | 398.4623 | 0.405466132  | 0.172156 | 2.355229 | 0.018511 | 0.240697 |
| CR394546.1        | 0.430162 | 1.055427995  | 2.693338 | 0.391866 | 0.695157 | NA       |
| frrslb            | 180.1714 | 0.221417476  | 0.147176 | 1.504435 | 0.132469 | 0.5853   |
| arsia             | 36.19066 | 0.156238212  | 0.518076 | 0.301574 | 0.762977 | 0.958842 |



|                   |          |              |          |          |          |          |
|-------------------|----------|--------------|----------|----------|----------|----------|
| dus2              | 206.9496 | -0.109303184 | 0.186694 | -0.58547 | 0.558234 | 0.899409 |
| gpr137bb          | 101.2758 | -0.121098766 | 0.339724 | -0.35646 | 0.721494 | 0.947343 |
| elfn2a            | 3.628316 | -0.503339541 | 0.931109 | -0.54058 | 0.588797 | 0.908018 |
| hykk.1            | 1.48933  | -0.950746523 | 1.704307 | -0.55785 | 0.576947 | NA       |
| si:ch211-206k20.5 | 238.7779 | -0.000504176 | 0.156615 | -0.00322 | 0.997431 | 1        |
| rin3              | 366.4252 | 0.024243336  | 0.152574 | 0.158896 | 0.873751 | 0.983831 |
| cdca7a            | 452.5343 | -0.063828938 | 0.214861 | -0.29707 | 0.766413 | 0.960229 |
| si:ch211-263p13.7 | 5.969507 | 1.070067565  | 0.841424 | 1.271734 | 0.203468 | 0.684359 |
| tafa4a            | 0.646282 | 0.060657175  | 2.563679 | 0.02366  | 0.981124 | NA       |
| CU459089.1        | 22.29311 | -0.281549932 | 0.356171 | -0.79049 | 0.429242 | 0.846956 |
| magixb            | 19.77764 | 0.343198714  | 0.428988 | 0.800019 | 0.4237   | 0.844048 |
| mal2              | 55.1006  | 0.115658291  | 0.275295 | 0.420124 | 0.674395 | 0.934877 |
| zgc:171965        | 4.677511 | -0.372066462 | 0.745601 | -0.49902 | 0.617769 | 0.916478 |
| intu              | 295.7922 | -0.086746769 | 0.13259  | -0.65425 | 0.512952 | 0.885889 |
| thbs3a            | 146.5469 | 0.105849388  | 0.287376 | 0.36833  | 0.712627 | 0.945821 |
| lypd6b            | 76.6938  | -0.193519389 | 0.216914 | -0.89215 | 0.372314 | 0.819778 |
| zgc:172079        | 1.396979 | 0.113467206  | 1.644545 | 0.068996 | 0.944993 | NA       |
| gpr78b            | 1.932737 | 2.421425525  | 1.568761 | 1.543528 | 0.122703 | NA       |
| si:ch211-42i9.8   | 102.7244 | -0.183450176 | 0.277541 | -0.66098 | 0.508623 | 0.883333 |
| tnksa             | 550.4024 | -0.319526571 | 0.122891 | -2.60009 | 0.00932  | 0.165999 |
| lratb.2           | 37.72064 | 0.590739087  | 0.689758 | 0.856444 | 0.391752 | 0.827902 |
| rabl6b            | 378.0421 | -0.065823915 | 0.118063 | -0.55753 | 0.577165 | 0.904798 |
| grm8a             | 162.9513 | 0.333516668  | 0.322806 | 1.033179 | 0.30152  | 0.767562 |
| arfgef3           | 50.94596 | 0.238490175  | 0.401044 | 0.594674 | 0.552062 | 0.8974   |
| zgc:110239        | 738.7427 | -0.177634166 | 0.1226   | -1.44889 | 0.147368 | 0.607891 |
| pimr140           | 0.561789 | -1.768624254 | 3.397497 | -0.52057 | 0.602669 | NA       |
| evi5a             | 31.37002 | 0.440828401  | 0.408233 | 1.079846 | 0.280211 | 0.752951 |
| nlrpl6            | 42.33707 | -0.607113202 | 0.323881 | -1.87449 | 0.060862 | 0.423588 |
| pdgfd             | 62.07878 | 0.059861239  | 0.24868  | 0.240716 | 0.809775 | 0.969828 |
| aak1b             | 67.46603 | 0.432260527  | 0.265356 | 1.628985 | 0.103316 | 0.530446 |
| rpl               | 0.887266 | 1.93325255   | 2.264216 | 0.853829 | 0.3932   | NA       |
| cpo               | 9.927618 | 1.055421398  | 1.796688 | 0.587426 | 0.556918 | 0.899145 |
| mb21d2            | 209.9509 | 0.315011814  | 0.165418 | 1.904334 | 0.056867 | 0.411856 |
| slc13a5a          | 75.73783 | 0.370096852  | 0.282951 | 1.30799  | 0.190877 | 0.670774 |
| dtnba             | 1481.264 | -0.107336068 | 0.160406 | -0.66915 | 0.503398 | 0.881759 |
| si:dkey-30h22.11  | 72.14876 | 0.356363899  | 0.209266 | 1.702925 | 0.088582 | 0.499744 |
| si:dkey-105i14.1  | 82.73984 | 1.007712479  | 0.404297 | 2.492503 | 0.012685 | 0.196197 |
| rsad1             | 10.90336 | -0.249397985 | 0.589344 | -0.42318 | 0.672165 | 0.933953 |
| CR749163.1        | 3.514354 | 2.555095078  | 1.326308 | 1.926472 | 0.054045 | 0.402389 |
| iqsec2b           | 267.7861 | -0.085994909 | 0.179543 | -0.47897 | 0.631962 | 0.923139 |
| nlgn1             | 15.44999 | 0.326599666  | 0.573615 | 0.569371 | 0.569104 | 0.902234 |
| zgc:113886        | 1.161613 | -4.891807191 | 4.661046 | -1.04951 | 0.293944 | NA       |
| GRIK3             | 28.52163 | 0.224409296  | 0.405725 | 0.553107 | 0.58019  | 0.905618 |
| rpl29             | 8914.337 | -0.395089263 | 0.166857 | -2.36783 | 0.017893 | 0.236508 |
| knop1             | 208.4575 | -0.401767587 | 0.187417 | -2.14371 | 0.032057 | 0.318495 |
| ppp2r3a           | 595.7796 | 0.00343406   | 0.219367 | 0.015654 | 0.98751  | 1        |
| nocta             | 306.1105 | 0.074861368  | 0.297868 | 0.251324 | 0.801564 | 0.967776 |
| supv311           | 258.6049 | -0.111563983 | 0.164059 | -0.68002 | 0.49649  | 0.878161 |
| alyref            | 2638.913 | 0.046781608  | 0.101014 | 0.463119 | 0.643279 | 0.92593  |
| spsb3a            | 475.6106 | 0.036348518  | 0.192577 | 0.188748 | 0.850291 | 0.978251 |
| b3glctb           | 7.539789 | -0.244905606 | 0.762469 | -0.3212  | 0.748058 | 0.955074 |
| zgc:175135        | 0.225112 | -1.791433409 | 5.232815 | -0.34235 | 0.732091 | NA       |
| si:ch73-38013.2   | 5.944429 | -1.27732724  | 1.187774 | -1.0754  | 0.282198 | 0.754654 |
| AL935199.1        | 14.60853 | 0.182168971  | 0.522444 | 0.348686 | 0.727325 | 0.949095 |

|                  |          |              |          |          |          |          |   |
|------------------|----------|--------------|----------|----------|----------|----------|---|
| usp54b           | 43.62567 | -0.293120346 | 0.467912 | -0.62644 | 0.531025 | 0.890545 |   |
| no19             | 401.7149 | 0.007166581  | 0.120369 | 0.059538 | 0.952523 | 0.998371 |   |
| ascc1            | 139.2685 | -0.011179083 | 0.384936 | -0.02904 | 0.976832 |          | 1 |
| nlgn4xb          | 31.61485 | 0.573947099  | 0.482513 | 1.189495 | 0.234245 | 0.714938 |   |
| si:rp71-79p20.2  | 28.14518 | -0.010611264 | 0.354397 | -0.02994 | 0.976113 |          | 1 |
| faah             | 59.48123 | 0.577015104  | 0.307282 | 1.877805 | 0.060408 | 0.422599 |   |
| malt1            | 61.06111 | -0.013860703 | 0.253585 | -0.05466 | 0.95641  | 0.99899  |   |
| cited1           | 242.7294 | -0.391815429 | 0.14595  | -2.6846  | 0.007262 | 0.144498 |   |
| baalca           | 23.4074  | -0.610718228 | 0.4861   | -1.25636 | 0.208985 | 0.691152 |   |
| csnk2b           | 3392.467 | 0.096631529  | 0.083456 | 1.15787  | 0.246917 | 0.727706 |   |
| tmsb4x           | 31655.19 | -0.059904395 | 0.153858 | -0.38935 | 0.697019 | 0.94198  |   |
| adamts9          | 114.9278 | 0.225938227  | 0.236131 | 0.956834 | 0.338651 | 0.795226 |   |
| acer2            | 66.07128 | -0.031461681 | 0.309559 | -0.10163 | 0.919047 | 0.993892 |   |
| SRMS             | 55.49335 | 0.279658764  | 0.252054 | 1.109518 | 0.267207 | 0.743418 |   |
| atf5b            | 691.0428 | -0.074461938 | 0.170383 | -0.43703 | 0.662092 | 0.930742 |   |
| arhgef10         | 222.8048 | -0.038756762 | 0.156327 | -0.24792 | 0.804195 | 0.968814 |   |
| dcaf15           | 171.0795 | -0.135476749 | 0.182875 | -0.74082 | 0.458805 | 0.861537 |   |
| brsk2b           | 462.1693 | 0.281113283  | 0.181218 | 1.551244 | 0.120843 | 0.566816 |   |
| cdc42ep1b        | 37.20122 | 0.476834615  | 0.343165 | 1.389522 | 0.164674 | 0.634015 |   |
| CU468012.1       | 6.013276 | 0.07884569   | 0.843987 | 0.093421 | 0.925569 | 0.994815 |   |
| egr4             | 73.52982 | -0.376501213 | 0.547533 | -0.68763 | 0.491685 | 0.875929 |   |
| hgsnat           | 691.0638 | -0.077958414 | 0.124938 | -0.62398 | 0.532643 | 0.890978 |   |
| il13             | 3.893706 | 0            | 1.796583 | 0        | 1        | 1        | 1 |
| otud4            | 74.37086 | -0.298789616 | 0.299294 | -0.99832 | 0.318126 | 0.779916 |   |
| sox11a           | 2118.413 | 0.066672684  | 0.079452 | 0.839156 | 0.401382 | 0.832371 |   |
| slc5a3b          | 37.6037  | -0.106314717 | 0.407259 | -0.26105 | 0.794054 | 0.965431 |   |
| si:dkey-34f9.3   | 2.909612 | -1.369464393 | 1.173937 | -1.16656 | 0.243389 | 0.724437 |   |
| cdc26            | 239.1264 | -0.18277134  | 0.175348 | -1.04234 | 0.297256 | 0.764844 |   |
| cxxc4            | 143.9225 | 0.061317641  | 0.190817 | 0.321342 | 0.747951 | 0.955074 |   |
| nrg2a            | 94.01303 | 0.081150523  | 0.192204 | 0.422209 | 0.672872 | 0.93414  |   |
| si:dkey-6i22.5   | 76.80931 | 0.212759526  | 0.327692 | 0.649268 | 0.516165 | 0.88677  |   |
| hmgxb3           | 85.02041 | 0.765112413  | 0.285755 | 2.67751  | 0.007417 | 0.145888 |   |
| efcc1            | 130.6865 | 0.08287151   | 0.161646 | 0.512673 | 0.60818  | 0.915204 |   |
| slc29a3          | 274.742  | -0.418501646 | 0.178633 | -2.3428  | 0.019139 | 0.243526 |   |
| borcs5           | 74.25225 | -0.433555801 | 0.251997 | -1.72048 | 0.085345 | 0.490595 |   |
| ttc22            | 60.08659 | -0.251684502 | 0.251344 | -1.00135 | 0.316655 | 0.778879 |   |
| dhx30            | 135.5941 | 0.216542644  | 0.22737  | 0.95238  | 0.340904 | 0.795603 |   |
| meis2a           | 1313.628 | -0.157500364 | 0.13587  | -1.1592  | 0.246374 | 0.727659 |   |
| ajuba            | 537.9791 | 0.080905729  | 0.160177 | 0.505102 | 0.613487 | 0.915998 |   |
| si:ch211-67f13.7 | 8.563767 | 0.175538862  | 0.877675 | 0.200004 | 0.841477 | 0.97643  |   |
| olfm2a           | 485.1882 | -0.029897666 | 0.202775 | -0.14744 | 0.882783 | 0.986908 |   |
| lgals3a          | 1498.901 | -0.093544608 | 0.107896 | -0.86699 | 0.385949 | 0.826939 |   |
| samd11           | 506.6556 | 0.090237635  | 0.175113 | 0.515311 | 0.606336 | 0.915204 |   |
| ttl12            | 7.581771 | -0.041085943 | 0.827472 | -0.04965 | 0.960399 | 0.999164 |   |
| znrf2a           | 124.4563 | -0.195045707 | 0.291514 | -0.66908 | 0.503445 | 0.881759 |   |
| asipl            | 48.21299 | 0.267714466  | 0.494447 | 0.541442 | 0.588203 | 0.907912 |   |
| ndufaf4          | 127.0887 | 0.368406322  | 0.166021 | 2.219035 | 0.026484 | 0.288366 |   |
| ankhd1           | 1370.077 | 0.092009338  | 0.156962 | 0.58619  | 0.557748 | 0.899184 |   |
| sowahaa          | 34.36106 | 0.14265706   | 0.309873 | 0.460372 | 0.645249 | 0.926728 |   |
| si:dkey-169i5.4  | 31.747   | -6.405033687 | 1.049409 | -6.10347 | 1.04E-09 | 7.76E-07 |   |
| mettl22          | 97.83874 | 0.145027132  | 0.220238 | 0.658502 | 0.510216 | 0.883733 |   |
| rasgrp3          | 28.18951 | 0.180773156  | 0.377597 | 0.478747 | 0.632119 | 0.923176 |   |
| nostrin          | 8.542768 | -0.068221831 | 0.728161 | -0.09369 | 0.925355 | 0.994815 |   |
| taf9             | 617.3575 | -0.094077737 | 0.145236 | -0.64776 | 0.517141 | 0.887148 |   |

|                   |          |              |          |          |          |          |
|-------------------|----------|--------------|----------|----------|----------|----------|
| CR626907.1        | 346.9158 | -0.608131101 | 0.532255 | -1.14256 | 0.253223 | 0.732759 |
| vwa10.1           | 32.45213 | 0.523388474  | 0.555224 | 0.942663 | 0.345854 | 0.799025 |
| slc2a5            | 39.49233 | -0.533630894 | 0.515106 | -1.03596 | 0.300219 | 0.766629 |
| znfl1h            | 0.578453 | 3.878207498  | 3.188963 | 1.216134 | 0.223934 | NA       |
| si:dkey-192118.9  | 28.41583 | 0.386837489  | 0.458362 | 0.843955 | 0.398694 | 0.830925 |
| si:ch211-255i20.3 | 96.12227 | -0.412353506 | 0.751188 | -0.54894 | 0.58305  | 0.90582  |
| chl1a             | 220.6223 | 0.427005108  | 0.197956 | 2.157073 | 0.031    | 0.313376 |
| ccn5              | 10.12856 | 0.139671854  | 0.579401 | 0.241062 | 0.809507 | 0.969828 |
| fam83d            | 140.0366 | 0.271840036  | 0.314217 | 0.865134 | 0.386965 | 0.827592 |
| znf296            | 324.4297 | -0.240709036 | 0.129812 | -1.85429 | 0.063698 | 0.430571 |
| wu:fj20b03        | 0.652784 | 2.894477     | 2.679122 | 1.080383 | 0.279972 | NA       |
| si:dkey-28d5.11   | 0.046941 | 0            | 5.267649 | 0        | 1        | NA       |
| si:ch211-141o9.10 | 11.30396 | -0.185262475 | 0.490511 | -0.37769 | 0.705659 | 0.944274 |
| herc1             | 1145.627 | 0.114633569  | 0.198048 | 0.578818 | 0.562712 | 0.900772 |
| csmd3a            | 17.59921 | 0.311458721  | 0.555139 | 0.561046 | 0.574766 | 0.904516 |
| rnf165a           | 330.2026 | 0.199830117  | 0.169098 | 1.181741 | 0.237308 | 0.718568 |
| si:dkey-183p4.10  | 8.350086 | -0.37793233  | 1.003767 | -0.37651 | 0.706535 | 0.944683 |
| rcela             | 15.16313 | 0.31908515   | 0.413887 | 0.770948 | 0.440738 | 0.852579 |
| si:zfos-1897c11.1 | 2.429914 | 0.142872262  | 1.247777 | 0.114501 | 0.90884  | 0.992033 |
| treh              | 7.953953 | -1.230806608 | 0.945389 | -1.3019  | 0.192949 | 0.672855 |
| bcor11            | 177.9166 | -0.110198776 | 0.210644 | -0.52315 | 0.600869 | 0.913756 |
| lmx1a1            | 17.59183 | -0.290318751 | 0.451051 | -0.64365 | 0.519803 | 0.887148 |
| dnase2b           | 9.412789 | -0.855674651 | 0.778382 | -1.0993  | 0.271638 | 0.747976 |
| csmd3a            | 16.75247 | -0.122116048 | 0.564338 | -0.21639 | 0.828685 | 0.974157 |
| si:dkey-48p11.3   | 96.07371 | -0.154027956 | 0.211257 | -0.7291  | 0.465938 | 0.865047 |
| ccdc173           | 30.03834 | -0.016560035 | 0.334895 | -0.04945 | 0.960562 | 0.999243 |
| tegt              | 2862.092 | -0.279412963 | 0.125154 | -2.23255 | 0.025579 | 0.283893 |
| cd248b            | 445.6923 | 0.118197599  | 0.146676 | 0.805843 | 0.420333 | 0.842383 |
| ints5             | 137.5705 | -0.033916521 | 0.169967 | -0.19955 | 0.841835 | 0.97643  |
| smarcc2           | 608.5965 | 0.14160506   | 0.160973 | 0.879684 | 0.37903  | 0.823145 |
| usp54a            | 338.2006 | 0.240618822  | 0.160102 | 1.502905 | 0.132864 | 0.586148 |
| tor1              | 399.8217 | -0.120903447 | 0.14856  | -0.81384 | 0.415738 | 0.839167 |
| rnf6              | 256.8488 | 0.124322283  | 0.149892 | 0.829413 | 0.406871 | 0.835226 |
| CU207281.2        | 0.652988 | 0            | 2.729457 | 0        | 1        | NA       |
| si:ch211-186e20.7 | 166.6039 | 0.239850052  | 0.387078 | 0.619642 | 0.535493 | 0.891993 |
| gltpb             | 6.282655 | -0.011590805 | 0.878239 | -0.0132  | 0.98947  | 1        |
| si:ch211-140m22.7 | 1301.816 | 0.063669729  | 0.114755 | 0.554834 | 0.579008 | 0.905417 |
| si:ch73-34314.8   | 2.088087 | -0.967394673 | 1.56676  | -0.61745 | 0.536938 | NA       |
| tmem26a           | 34.50137 | -0.187705786 | 0.395953 | -0.47406 | 0.635457 | 0.924322 |
| elf3              | 526.8199 | -0.111011886 | 0.196542 | -0.56483 | 0.572192 | 0.903461 |
| GPR89B            | 49.79914 | 0.447293343  | 0.252441 | 1.771874 | 0.076415 | 0.468274 |
| kiss2             | 3.137276 | -1.246940629 | 1.420946 | -0.87754 | 0.380192 | 0.823648 |
| TMEM151A          | 81.00049 | -0.147715008 | 0.33173  | -0.44529 | 0.656112 | 0.929684 |
| zfat              | 145.3801 | -0.004754378 | 0.147205 | -0.0323  | 0.974235 | 1        |
| abcc10            | 146.4393 | 0.00403973   | 0.222188 | 0.018182 | 0.985494 | 1        |
| b4galt2           | 27.72239 | 0.208768648  | 0.338629 | 0.616512 | 0.537557 | 0.892498 |
| cdh24b            | 21.39503 | 0.302272575  | 0.509645 | 0.593104 | 0.553112 | 0.897809 |
| nitr3a            | 2.834672 | 3.484172146  | 1.32578  | 2.628017 | 0.008588 | 0.158814 |
| kbtbd7            | 33.2213  | 0.290132588  | 0.504048 | 0.575605 | 0.564882 | 0.901538 |
| si:dkey-13n15.11  | 16.03556 | -0.469001426 | 0.485194 | -0.96663 | 0.333731 | 0.790676 |
| drl               | 21.00939 | 0.395860002  | 0.394637 | 1.0031   | 0.315813 | 0.778379 |
| wscdlb            | 133.0665 | 0.342662459  | 0.213146 | 1.607644 | 0.107913 | 0.539565 |
| NAV1 (1 of many)  | 122.541  | -0.119913808 | 0.235972 | -0.50817 | 0.611334 | 0.915331 |
| zgc:162060        | 0.086618 | 0            | 5.267649 | 0        | 1        | NA       |

|                  |          |              |          |          |          |          |
|------------------|----------|--------------|----------|----------|----------|----------|
| pacsin2          | 730.8932 | 0.244196506  | 0.176842 | 1.38087  | 0.167319 | 0.638363 |
| dtx4b            | 123.0678 | -0.352316941 | 0.236913 | -1.48711 | 0.136985 | 0.5925   |
| si:dkey-79d12.4  | 39.2207  | -0.27846496  | 0.271685 | -1.02495 | 0.305385 | 0.770528 |
| fycolb           | 77.31593 | -0.001640642 | 0.210526 | -0.00779 | 0.993782 | 1        |
| zcchc24          | 741.3252 | 0.159526647  | 0.150723 | 1.058409 | 0.289869 | 0.760705 |
| zgc:l12001       | 92.33063 | 0.416581675  | 0.312884 | 1.331424 | 0.18305  | 0.659373 |
| chpfb            | 56.31193 | 0.054390488  | 0.386017 | 0.140902 | 0.887948 | 0.988077 |
| xpola            | 1219.982 | -0.035196269 | 0.178324 | -0.19737 | 0.843536 | 0.976791 |
| il10rb           | 721.1913 | -0.084529235 | 0.163445 | -0.51717 | 0.605037 | 0.914985 |
| phf19            | 85.42877 | 0.287202979  | 0.201973 | 1.421984 | 0.155031 | 0.619776 |
| emilin3a         | 171.3259 | -1.665846197 | 0.256256 | -6.5007  | 7.99E-11 | 8.05E-08 |
| acd              | 57.67168 | -0.012002372 | 0.235297 | -0.05101 | 0.959318 | 0.999164 |
| RNF208           | 139.6543 | 0.602969922  | 0.34697  | 1.737816 | 0.082243 | 0.482668 |
| snx8b            | 75.55815 | 0.106035995  | 0.612626 | 0.173084 | 0.862585 | 0.981202 |
| dip2a            | 414.0603 | -0.024567417 | 0.175059 | -0.14034 | 0.888393 | 0.988188 |
| nudcd2           | 215.5936 | -0.135687348 | 0.179504 | -0.7559  | 0.449708 | 0.856979 |
| syt7b            | 73.62198 | -0.529614988 | 0.431114 | -1.22848 | 0.219267 | 0.700266 |
| ftr05            | 15.17885 | -1.306562104 | 0.52499  | -2.48874 | 0.01282  | 0.197628 |
| elk1             | 96.13664 | -0.084784019 | 0.225041 | -0.37675 | 0.70636  | 0.944623 |
| abcg4b           | 33.87397 | -1.094083321 | 0.36838  | -2.96999 | 0.002978 | 0.090034 |
| rrm2             | 872.4596 | -0.146416575 | 0.274988 | -0.53245 | 0.594416 | 0.910768 |
| si:ch211-232i5.1 | 146.5949 | -0.173079204 | 0.224826 | -0.76984 | 0.441397 | 0.852874 |
| nudt5            | 458.2885 | -0.110630407 | 0.145376 | -0.76099 | 0.44666  | 0.855582 |
| ilrun            | 588.3099 | -0.158738508 | 0.09787  | -1.62192 | 0.10482  | 0.533188 |
| nab2             | 36.75259 | 0.039201407  | 0.351668 | 0.111473 | 0.911241 | 0.992208 |
| dph2             | 140.4792 | -0.136609366 | 0.20798  | -0.65684 | 0.511285 | 0.884659 |
| lrfn4b           | 148.0794 | 0.708508815  | 0.292755 | 2.420142 | 0.015514 | 0.219725 |
| armac5           | 151.2192 | 0.159444341  | 0.174414 | 0.91417  | 0.360627 | 0.811237 |
| CNNM1            | 26.79829 | -0.611898429 | 0.575089 | -1.06401 | 0.287325 | 0.758355 |
| si:ch211-186j3.6 | 170.0698 | 0.144650529  | 0.362308 | 0.399248 | 0.689711 | 0.939648 |
| limd2            | 182.9169 | -0.016476227 | 0.210089 | -0.07842 | 0.93749  | 0.997305 |
| zgc:l72065       | 8.753633 | -0.069022975 | 0.887783 | -0.07775 | 0.938029 | 0.997331 |
| lmf2a            | 56.72766 | -0.889208759 | 0.283939 | -3.13168 | 0.001738 | 0.064499 |
| cipcb            | 489.9385 | -0.220759312 | 0.401522 | -0.54981 | 0.582452 | 0.90571  |
| nlrc9            | 1.145507 | -0.447479623 | 1.975687 | -0.22649 | 0.820818 | NA       |
| psda             | 103.8779 | 0.235014594  | 0.191917 | 1.224564 | 0.22074  | 0.701955 |
| depdc5           | 578.2458 | -0.237400952 | 0.128709 | -1.84448 | 0.065113 | 0.435355 |
| ocr1             | 393.5481 | 0.108391561  | 0.124947 | 0.8675   | 0.385668 | 0.826939 |
| dok1a            | 57.59788 | -0.23333749  | 0.266777 | -0.87465 | 0.381762 | 0.824957 |
| uspl2a           | 368.2709 | -0.078080191 | 0.132602 | -0.58883 | 0.555974 | 0.899002 |
| ap5z1            | 133.771  | 0.00914183   | 0.178148 | 0.051316 | 0.959074 | 0.999164 |
| atp5mea          | 774.1854 | -0.182980192 | 0.184969 | -0.98925 | 0.322541 | 0.78246  |
| si:ch73-237c6.1  | 421.3818 | -0.040764751 | 0.24893  | -0.16376 | 0.86992  | 0.983365 |
| sinhcafl         | 732.7616 | 0.08131488   | 0.148569 | 0.54732  | 0.584159 | 0.906402 |
| sh3bp1           | 10.24701 | 1.101443565  | 0.571985 | 1.925651 | 0.054148 | 0.402505 |
| slitrk3a         | 99.06526 | 0.514350363  | 0.324495 | 1.585082 | 0.112948 | 0.55033  |
| ruscl            | 77.43913 | 0.514817243  | 0.292035 | 1.762859 | 0.077924 | 0.472646 |
| neur14           | 210.7263 | 0.129287361  | 0.176156 | 0.733939 | 0.462986 | 0.864191 |
| CR391986.1       | 51.21188 | 0.308482764  | 0.279444 | 1.103917 | 0.269629 | 0.746036 |
| tex2l            | 42.45313 | -0.68116306  | 0.64081  | -1.06297 | 0.287795 | 0.758441 |
| kdm2ab           | 1007.634 | 0.165672528  | 0.122645 | 1.350825 | 0.176751 | 0.650052 |
| crygm2f          | 60.21894 | 0.236679194  | 0.559331 | 0.423147 | 0.672188 | 0.933953 |
| mrc2             | 106.1057 | 0.321569571  | 0.29904  | 1.075341 | 0.282222 | 0.754654 |
| wdr47a           | 98.93997 | 0.049890881  | 0.229939 | 0.216974 | 0.828228 | 0.97403  |

|                   |          |              |           |          |          |          |  |
|-------------------|----------|--------------|-----------|----------|----------|----------|--|
| si:ch211-202h22.8 | 58.22471 | 0.103438176  | 0.301548  | 0.343024 | 0.73158  | 0.950365 |  |
| appl2             | 94.43755 | -0.013163881 | 0.179419  | -0.07337 | 0.941512 | 0.997371 |  |
| si:dkey-18j18.3   | 35.22951 | -0.174465977 | 0.334722  | -0.52123 | 0.602209 | 0.914001 |  |
| SPAG9             | 674.1926 | -0.105744066 | 0.157706  | -0.67051 | 0.50253  | 0.881359 |  |
| si:ch211-218g4.2  | 129.5229 | -0.128542739 | 0.201045  | -0.63937 | 0.522579 | 0.887826 |  |
| il10              | 2.000763 | -2.364258798 | 1.692965  | -1.39652 | 0.162558 | NA       |  |
| grin2ca           | 78.3692  | 0.039403863  | 0.41982   | 0.093859 | 0.925221 | 0.994815 |  |
| si:ch211-264f5.8  | 87.78176 | -0.301834304 | 0.374288  | -0.80642 | 0.419999 | 0.842383 |  |
| si:dkey-56i24.1   | 23.4577  | 0.517292413  | 0.422028  | 1.225729 | 0.220301 | 0.701707 |  |
| inavaa            | 169.1187 | 0.030036182  | 0.173194  | 0.173425 | 0.862318 | 0.980994 |  |
| SLC18A1           | 1.942952 | -2.119766801 | 1.711739  | -1.23837 | 0.215579 | NA       |  |
| zgc:175284        | 93.95939 | -0.136871192 | 0.292768  | -0.46751 | 0.640137 | 0.924877 |  |
| pimr208           | 2.59391  | 1.361926206  | 1.21929   | 1.116983 | 0.264001 | 0.741984 |  |
| hpse2             | 23.31335 | 0.085105309  | 0.348058  | 0.244515 | 0.806832 | 0.969726 |  |
| znf576.2          | 505.2013 | 0.063751983  | 0.111457  | 0.571985 | 0.567332 | 0.901809 |  |
| si:dkey-78p8.1    | 139.3669 | -0.06125053  | 0.210283  | -0.29128 | 0.77084  | 0.960484 |  |
| si:dkeyp-100h4.1  | 12.30211 | -0.56888923  | 0.777422  | -0.73176 | 0.464313 | 0.864593 |  |
| cacna2d2b         | 78.79283 | 0.283848047  | 0.307985  | 0.921631 | 0.356721 | 0.807388 |  |
| CU984600.1        | 346.7548 | 0.113486494  | 0.206357  | 0.549952 | 0.582352 | 0.90571  |  |
| cxcr3.1           | 0.863727 |              | 0.254136  |          | 0.1      | NA       |  |
| art4              | 3.075075 | -0.828139183 | 1.926336  | -0.4299  | 0.667266 | 0.933049 |  |
| fnDC3ba           | 384.1013 | -0.020355865 | 0.168513  | -0.1208  | 0.903852 | 0.991537 |  |
| sc:d0202          | 0.899442 | -3.353421406 | 2.089079  | -1.60522 | 0.108446 | NA       |  |
| zgc:194443        | 0.322205 | 1.055369067  | 4.550563  | 0.231921 | 0.8166   | NA       |  |
| zgc:165453        | 1.609318 | -2.536651411 | 1.665595  | -1.52297 | 0.127766 | NA       |  |
| pacS2             | 55.07521 | 0.464739181  | 0.288299  | 1.612005 | 0.106961 | 0.537    |  |
| tex2              | 318.7975 | -0.000513285 | 0.162338  | -0.00316 | 0.997477 | 1        |  |
| slc12a5b          | 74.40267 | 0.424402611  | 0.363401  | 1.167865 | 0.242861 | 0.724396 |  |
| fam160a2          | 170.0606 | -0.064361619 | 0.142002  | -0.45325 | 0.650372 | 0.927844 |  |
| crygm3            | 5.411024 | 0.093643167  | 1.745384  | 0.053652 | 0.957213 | 0.999109 |  |
| zbtb46            | 78.65368 | 0.270202906  | 0.213269  | 1.266955 | 0.205171 | 0.687166 |  |
| si:ch211-67e16.3  | 16.6359  | -0.505130524 | 0.510517  | -0.98945 | 0.322443 | 0.78246  |  |
| fhit              | 125.3121 | 0.081050232  | 0.254747  | 0.31816  | 0.750364 | 0.955074 |  |
| vcam1a            | 1.289576 | -0.86814291  | 2.186891  | -0.39698 | 0.691385 | NA       |  |
| BX072576.1        | 3.976929 | -1.089466945 | 1.20668   | -0.90286 | 0.366598 | 0.816033 |  |
| ccl34b.9          | 1.353646 |              | 0.4963249 |          | 0.1      | NA       |  |
| zgc:171506        | 1.789493 | -0.554802739 | 1.568351  | -0.35375 | 0.723527 | NA       |  |
| tulplb            | 23.79815 | -0.250157289 | 0.564396  | -0.44323 | 0.657599 | 0.930421 |  |
| espn1a            | 22.04462 | -0.282314139 | 0.51999   | -0.54292 | 0.587183 | 0.907261 |  |
| mybbp1a           | 781.7511 | -0.070668056 | 0.191769  | -0.36851 | 0.712496 | 0.945821 |  |
| rbsn              | 54.81014 | -0.827044735 | 0.270404  | -3.05856 | 0.002224 | 0.074795 |  |
| eps15             | 551.6816 | 0.132158766  | 0.10333   | 1.279002 | 0.200896 | 0.681045 |  |
| cb1c              | 94.49001 | -0.132159049 | 0.186896  | -0.70713 | 0.479488 | 0.86985  |  |
| BX323458.1        | 10.3746  | -0.144071178 | 0.526664  | -0.27355 | 0.784427 | 0.962605 |  |
| si:ch211-204d2.4  | 27.79543 | 0.270317857  | 0.387576  | 0.697457 | 0.485517 | 0.87303  |  |
| aatka             | 181.6023 | -0.066039259 | 0.178413  | -0.37015 | 0.711271 | 0.945821 |  |
| ora4              | 2.02421  | 0.922462741  | 1.641306  | 0.56203  | 0.574096 | NA       |  |
| cdh12a            | 11.88195 | 0.048523364  | 0.522698  | 0.092833 | 0.926037 | 0.994815 |  |
| cspg4             | 141.3459 | 0.100186104  | 0.203796  | 0.491601 | 0.623002 | 0.918894 |  |
| ctnnd1            | 1077.459 | 0.099268485  | 0.13949   | 0.711654 | 0.476679 | 0.869292 |  |
| nlrc7             | 6.244818 | -1.735505064 | 1.101357  | -1.57579 | 0.115075 | 0.554651 |  |
| nacclb            | 6.413785 | 0.363720927  | 0.711181  | 0.511432 | 0.609049 | 0.915204 |  |
| map7a             | 17.97635 | -0.538139189 | 0.694734  | -0.7746  | 0.438578 | 0.851718 |  |
| si:ch211-19719.2  | 96.78397 | 0.180073032  | 0.301674  | 0.596913 | 0.550566 | 0.8974   |  |

|                     |          |              |          |          |          |          |
|---------------------|----------|--------------|----------|----------|----------|----------|
| gal3st1b            | 36.94197 | -0.450868407 | 0.393687 | -1.14525 | 0.252107 | 0.732759 |
| si:ch211-114113.4   | 5.388713 | 2.968304008  | 1.452868 | 2.043065 | 0.041046 | 0.353808 |
| vip                 | 100.3552 | 0.089081294  | 0.430307 | 0.207018 | 0.835996 | 0.976007 |
| unc13d              | 32.3549  | -0.392730285 | 0.339328 | -1.15738 | 0.247118 | 0.727871 |
| zgc:194398          | 89.671   | 0.223332157  | 0.262502 | 0.850782 | 0.394891 | 0.828825 |
| TESK1               | 162.7634 | 0.409673892  | 0.202989 | 2.018208 | 0.04357  | 0.365542 |
| ftr141              | 10.71681 | -0.039909938 | 0.497926 | -0.08015 | 0.936116 | 0.996958 |
| ovollb              | 21.91503 | 0.289854576  | 0.328716 | 0.881779 | 0.377896 | 0.82265  |
| ora5                | 0.905017 | -0.472519938 | 2.012534 | -0.23479 | 0.814373 | NA       |
| CABZ01049847.1      | 61.56465 | 0.573178918  | 0.42041  | 1.36338  | 0.172763 | 0.645664 |
| bnipla              | 26.9293  | -0.288698559 | 0.372078 | -0.77591 | 0.437803 | 0.851283 |
| nphp3               | 97.69406 | 0.007185061  | 0.224882 | 0.03195  | 0.974512 | 1        |
| twist2              | 267.9109 | -0.075213805 | 0.162545 | -0.46273 | 0.64356  | 0.925997 |
| si:dkey-181m9.8     | 98.48467 | -0.139587514 | 0.200299 | -0.69689 | 0.485869 | 0.873244 |
| CU467961.1          | 88.48511 | -0.162861697 | 0.263722 | -0.61755 | 0.536871 | 0.892421 |
| si:ch211-57m13.8    | 0.11354  | 0            | 5.267649 | 0        | 1        | NA       |
| F0704871.1          | 5.352557 | 0.74182262   | 0.876954 | 0.845908 | 0.397604 | 0.830253 |
| foxp3b              | 0.788243 | -1.450840058 | 2.030366 | -0.71457 | 0.474874 | NA       |
| nkx3-1              | 31.03404 | -0.177818893 | 0.374936 | -0.47426 | 0.635311 | 0.924272 |
| zgc:173575          | 73.25836 | -0.342998564 | 0.212235 | -1.61612 | 0.106068 | 0.534956 |
| si:zfos-323e3.4     | 60.52542 | 0.036443687  | 0.241225 | 0.151077 | 0.879915 | 0.986339 |
| phkb                | 897.0515 | -0.080822281 | 0.155016 | -0.52138 | 0.602103 | 0.914001 |
| pik3ap1             | 37.51336 | -0.014244226 | 0.384267 | -0.03707 | 0.97043  | 1        |
| CABZ01046425.1      | 0.397008 | 1.597148302  | 3.183833 | 0.501643 | 0.615918 | NA       |
| ptprh               | 0.702893 | -0.868144273 | 2.615464 | -0.33193 | 0.739944 | NA       |
| si:ch211-13f8.2     | 11.48189 | 0.525428419  | 0.752704 | 0.698055 | 0.485143 | 0.872911 |
| zgc:162255          | 125.31   | -0.215924641 | 0.183214 | -1.17854 | 0.238581 | 0.719595 |
| brinpl              | 84.6288  | 0.620635652  | 0.333264 | 1.862296 | 0.062561 | 0.427724 |
| spry2               | 930.257  | -0.118430091 | 0.124874 | -0.9484  | 0.342927 | 0.797432 |
| fam83b              | 69.83605 | -0.237675762 | 0.227751 | -1.04358 | 0.296681 | 0.764495 |
| cecr2               | 342.9422 | 0.142322251  | 0.164626 | 0.864518 | 0.387303 | 0.827592 |
| dcaf6               | 570.0091 | 0.314903988  | 0.11585  | 2.718213 | 0.006564 | 0.136957 |
| pimr22              | 0.351992 | 0            | 4.374921 | 0        | 1        | NA       |
| MY09B               | 485.7824 | -0.044596239 | 0.163493 | -0.27277 | 0.785028 | 0.962605 |
| zgc:110063          | 255.0111 | 0.148850674  | 0.118493 | 1.256199 | 0.209044 | 0.691152 |
| si:dkey-175m17.7    | 26.10854 | -0.586171434 | 0.442338 | -1.32516 | 0.185116 | 0.662704 |
| tmod1               | 56.63119 | -0.482247448 | 0.261451 | -1.8445  | 0.06511  | 0.435355 |
| coll2a1a            | 4214.224 | 0.334268152  | 0.166    | 2.013663 | 0.044045 | 0.367392 |
| si:ch211-263k4.2    | 137.3664 | -0.187079227 | 0.226124 | -0.82733 | 0.40805  | 0.835879 |
| arhgap10            | 319.7373 | -0.071337663 | 0.140162 | -0.50897 | 0.610775 | 0.915331 |
| CEP170B (1 of many) | 34.00166 | 0.997177745  | 0.314173 | 3.173979 | 0.001504 | 0.058515 |
| sec22a              | 263.3445 | 0.039926582  | 0.134929 | 0.295908 | 0.7673   | 0.960296 |
| rec8a               | 0.564566 | 0            | 3.38654  | 0        | 1        | NA       |
| best1               | 4.991151 | 0.075635758  | 0.746392 | 0.101335 | 0.919284 | 0.993892 |
| tmem234             | 56.4019  | 0.252476169  | 0.280651 | 0.899609 | 0.368328 | 0.817272 |
| amot                | 336.9146 | -0.024999639 | 0.136753 | -0.18281 | 0.854948 | 0.979161 |
| tcf20               | 880.1034 | 0.129941517  | 0.146705 | 0.885731 | 0.375763 | 0.822237 |
| zmp:0000000845      | 8.218392 | -0.630863926 | 0.749456 | -0.84176 | 0.399921 | 0.831277 |
| lyrm4               | 173.0686 | -0.011018203 | 0.155308 | -0.07094 | 0.943442 | 0.997371 |
| zc3h4               | 790.6681 | 0.106493604  | 0.128695 | 0.827486 | 0.407962 | 0.835879 |
| zmp:0000000846      | 603.5304 | -0.013115506 | 0.156038 | -0.08405 | 0.933014 | 0.996264 |
| mcoln3a             | 50.03426 | 0.190535213  | 0.270189 | 0.705191 | 0.480691 | 0.870179 |
| AL954361.1          | 1.551369 | 3.237580329  | 2.148026 | 1.507235 | 0.13175  | NA       |
| robo2               | 50.21223 | 0.189242648  | 0.298282 | 0.634442 | 0.525792 | 0.888982 |

|                    |           |               |           |           |           |           |
|--------------------|-----------|---------------|-----------|-----------|-----------|-----------|
| unm_sa808          | 13. 80829 | -0. 282488191 | 0. 656581 | -0. 43024 | 0. 66702  | 0. 933039 |
| tripl1             | 647. 5525 | -0. 059176843 | 0. 127185 | -0. 46528 | 0. 64173  | 0. 925586 |
| mcripl             | 366. 2872 | 0. 09250686   | 0. 119133 | 0. 776502 | 0. 437452 | 0. 851283 |
| dyncli2a           | 1262. 333 | -0. 139338364 | 0. 109353 | -1. 27421 | 0. 20259  | 0. 683051 |
| si:dkey-92i15. 4   | 65. 08082 | 0. 016924352  | 0. 237204 | 0. 071349 | 0. 94312  | 0. 997371 |
| glis2a             | 159. 6497 | 0. 175640901  | 0. 219011 | 0. 801975 | 0. 422568 | 0. 843493 |
| ifi46              | 87. 75888 | 1. 573835311  | 0. 44944  | 3. 501768 | 0. 000462 | 0. 026072 |
| fam98a             | 252. 9868 | 0. 017184856  | 0. 174314 | 0. 098586 | 0. 921467 | 0. 994085 |
| chpfa              | 66. 97122 | -0. 419646772 | 0. 218589 | -1. 9198  | 0. 054883 | 0. 405196 |
| CABZ01059627. 1    | 1. 988457 | 1. 974194773  | 1. 363207 | 1. 448199 | 0. 147562 | NA        |
| si:ch211-163m17. 4 | 0. 092827 | 0             | 5. 267649 | 0         | 1         | NA        |
| acsl2              | 115. 2217 | -0. 276312309 | 0. 234172 | -1. 17996 | 0. 238017 | 0. 718924 |
| larp4aa            | 337. 1828 | 0. 277890955  | 0. 174291 | 1. 594411 | 0. 110844 | 0. 54583  |
| cdh26. 1           | 83. 71543 | -0. 316348411 | 0. 255164 | -1. 23979 | 0. 215054 | 0. 697086 |
| hspl15             | 105. 4503 | -1. 442910819 | 0. 386413 | -3. 73412 | 0. 000188 | 0. 014357 |
| lrrc3              | 8. 036086 | 1. 861495716  | 0. 96158  | 1. 935872 | 0. 052883 | 0. 399547 |
| zeb2b              | 427. 4525 | 0. 155038284  | 0. 148911 | 1. 041145 | 0. 297808 | 0. 765407 |
| plxdc1             | 26. 38235 | -0. 80392164  | 0. 467089 | -1. 72113 | 0. 085227 | 0. 490367 |
| filipla            | 18. 8251  | 0. 659881599  | 0. 530746 | 1. 24331  | 0. 213754 | 0. 696284 |
| zgc:194285         | 97. 50831 | 1. 123371953  | 0. 29624  | 3. 792099 | 0. 000149 | 0. 012187 |
| oat                | 251. 2147 | 0. 572761735  | 0. 465647 | 1. 230033 | 0. 218685 | 0. 699445 |
| BX901889. 2        | 0. 193546 | 0             | 5. 267649 | 0         | 1         | NA        |
| si:ch211-256e16. 4 | 9. 802429 | 1. 906602247  | 0. 818177 | 2. 330305 | 0. 01979  | 0. 248394 |
| vtg4               | 0. 194876 | 0             | 5. 267649 | 0         | 1         | NA        |
| tiamla             | 696. 3938 | -0. 010380504 | 0. 144053 | -0. 07206 | 0. 942554 | 0. 997371 |
| spc25              | 277. 101  | 0. 035205035  | 0. 269133 | 0. 130809 | 0. 895926 | 0. 98926  |
| znf692             | 25. 29658 | -0. 973976531 | 0. 464322 | -2. 09763 | 0. 035938 | 0. 332937 |
| anapc13            | 182. 0693 | -0. 058459641 | 0. 220871 | -0. 26468 | 0. 791258 | 0. 964766 |
| ccdc88aa           | 60. 75629 | -0. 102191844 | 0. 352941 | -0. 28954 | 0. 772165 | 0. 960624 |
| ppip5k2            | 432. 8555 | 0. 259023931  | 0. 110819 | 2. 337364 | 0. 01942  | 0. 245214 |
| AL954696. 1        | 228. 236  | 0. 067052298  | 0. 213499 | 0. 314064 | 0. 753473 | 0. 955861 |
| ftr07              | 0         | NA            | NA        | NA        | NA        | NA        |
| tctn1              | 82. 97312 | 0. 182398803  | 0. 230471 | 0. 791416 | 0. 428701 | 0. 846502 |
| gpr137ba           | 33. 52252 | 0. 926552271  | 0. 469    | 1. 975593 | 0. 048201 | 0. 382078 |
| gzm3               | 1. 23348  | -1. 274370805 | 2. 010852 | -0. 63375 | 0. 526246 | NA        |
| hmox2b             | 73. 29909 | 0. 190359863  | 0. 20975  | 0. 907554 | 0. 364114 | 0. 814549 |
| best4              | 6. 171644 | -3. 558182291 | 1. 462983 | -2. 43214 | 0. 01501  | 0. 214412 |
| ppplr37            | 650. 4984 | -0. 063131667 | 0. 135885 | -0. 4646  | 0. 642221 | 0. 92567  |
| cux1a              | 761. 6176 | 0. 038077192  | 0. 148726 | 0. 256022 | 0. 797934 | 0. 966447 |
| fap                | 664. 2666 | -0. 159648737 | 0. 167579 | -0. 95268 | 0. 340754 | 0. 795603 |
| nucksla            | 4612. 077 | 0. 167332465  | 0. 163774 | 1. 021731 | 0. 306908 | 0. 772019 |
| myo15ab            | 20. 3353  | 0. 384633648  | 0. 586947 | 0. 655313 | 0. 512266 | 0. 885459 |
| klh123             | 17. 87567 | 0. 98030455   | 0. 637981 | 1. 536572 | 0. 124398 | 0. 571885 |
| znf990             | 20. 09979 | 0. 434836901  | 0. 412245 | 1. 054801 | 0. 291516 | 0. 761454 |
| mocsl              | 56. 12802 | -1. 011353534 | 0. 336144 | -3. 00869 | 0. 002624 | 0. 083393 |
| zgc:195081         | 27. 27828 | 0. 122598282  | 0. 334891 | 0. 366084 | 0. 714303 | 0. 945821 |
| snpha              | 0. 684091 | 2. 999126888  | 2. 926736 | 1. 024734 | 0. 305489 | NA        |
| si:ch211-284d12. 3 | 0. 601809 | 0             | 3. 892613 | 0         | 1         | NA        |
| swi5               | 119. 7511 | -0. 03535088  | 0. 203308 | -0. 17388 | 0. 861961 | 0. 980696 |
| adamts14           | 84. 87102 | -0. 221302058 | 0. 264352 | -0. 83715 | 0. 402509 | 0. 833401 |
| timeless           | 454. 692  | 0. 032773111  | 0. 127343 | 0. 257361 | 0. 7969   | 0. 966447 |
| dap3               | 524. 1055 | 0. 020896839  | 0. 102757 | 0. 203361 | 0. 838853 | 0. 976417 |
| si:ch211-150o23. 3 | 61. 22269 | 0. 230339086  | 0. 265662 | 0. 867038 | 0. 385921 | 0. 826939 |
| si:dkey-76b14. 2   | 10. 3935  | -0. 431958977 | 0. 651653 | -0. 66287 | 0. 507416 | 0. 883007 |

|                    |          |              |          |          |          |          |
|--------------------|----------|--------------|----------|----------|----------|----------|
| si:ch73-60h1.1     | 124.5832 | 0.459359149  | 0.289886 | 1.584618 | 0.113053 | 0.550449 |
| wnt8a              | 0 NA     | NA           | NA       | NA       | NA       | NA       |
| si:dkey-266m15.6   | 273.5326 | 0.286374924  | 0.201158 | 1.423629 | 0.154554 | 0.619425 |
| socs4              | 2.899256 | 0.710195026  | 1.161848 | 0.611263 | 0.541025 | 0.893546 |
| acaca              | 577.156  | 0.237642022  | 0.210709 | 1.127822 | 0.259395 | 0.736127 |
| kazald2            | 118.4346 | -0.35999261  | 0.206861 | -1.74026 | 0.081813 | 0.481484 |
| si:ch73-256j6.4    | 0.498768 | 0 3.545969   | 0        | 1 NA     |          |          |
| ikbip              | 310.5264 | 0.134564814  | 0.238617 | 0.563937 | 0.572797 | 0.90359  |
| si:ch211-80h18.1   | 1009.101 | 0.429288242  | 0.125167 | 3.429725 | 0.000604 | 0.031889 |
| ddr1               | 484.83   | -0.029195616 | 0.158523 | -0.18417 | 0.853878 | 0.978905 |
| noctb              | 145.3042 | -0.23485612  | 0.196996 | -1.19219 | 0.233188 | 0.714569 |
| lingo4b            | 77.48415 | 0.43089771   | 0.251264 | 1.714919 | 0.08636  | 0.493048 |
| adgrblb            | 351.2712 | -0.133435871 | 0.250999 | -0.53162 | 0.59499  | 0.910869 |
| pocla              | 50.5217  | -0.103171249 | 0.314702 | -0.32784 | 0.743035 | 0.9547   |
| lrrccl             | 86.93855 | 0.107612385  | 0.188321 | 0.57143  | 0.567708 | 0.901809 |
| si:ch211-158d24.2  | 69.24593 | 0.080481136  | 0.275226 | 0.292418 | 0.769967 | 0.960484 |
| cers3a             | 57.86961 | 0.14110861   | 0.415104 | 0.339936 | 0.733905 | 0.95093  |
| inpp5ja            | 9.021688 | -0.187048516 | 0.767751 | -0.24363 | 0.807516 | 0.969736 |
| cars2              | 119.4351 | 0.456459816  | 0.187303 | 2.437014 | 0.014809 | 0.213551 |
| si:ch211-264f5.2   | 14.50412 | -0.172122807 | 0.727713 | -0.23653 | 0.813025 | 0.970328 |
| zgc:194839         | 133.709  | -0.362039827 | 0.229801 | -1.57545 | 0.115153 | 0.554815 |
| zgc:171242         | 38.85834 | -1.242793892 | 0.446792 | -2.78159 | 0.005409 | 0.123724 |
| grhl3              | 144.3876 | -0.184081969 | 0.225264 | -0.81718 | 0.413823 | 0.838564 |
| si:ch211-57n23.4   | 6.25882  | 0.509286776  | 0.6729   | 0.756853 | 0.449138 | 0.856796 |
| si:dkey-22i16.10   | 0.456571 | -0.321977337 | 4.628244 | -0.06957 | 0.944538 | NA       |
| slc9a5             | 76.69206 | 1.070567512  | 0.280599 | 3.815291 | 0.000136 | 0.011673 |
| lrig2              | 532.0497 | -0.137980094 | 0.159632 | -0.86436 | 0.387388 | 0.827592 |
| lonrf11            | 898.6169 | -0.289049357 | 0.188813 | -1.53088 | 0.1258   | 0.573743 |
| mpegl.3            | 0.371558 | 0.815308977  | 4.32522  | 0.188501 | 0.850484 | NA       |
| wdr6               | 149.1252 | -0.266718558 | 0.275033 | -0.96977 | 0.332162 | 0.789602 |
| stox2b             | 593.8606 | 0.013574989  | 0.108195 | 0.125468 | 0.900153 | 0.99045  |
| si:dkey-21c19.3    | 410.2064 | 0.030547477  | 0.1263   | 0.241864 | 0.808885 | 0.969828 |
| setd5              | 137.9011 | 0.388760349  | 0.175503 | 2.215125 | 0.026751 | 0.290183 |
| fam222bb           | 260.7795 | -0.103221436 | 0.139065 | -0.74225 | 0.457934 | 0.860993 |
| myo16              | 100.2872 | 0.352208332  | 0.274726 | 1.282033 | 0.199831 | 0.6804   |
| monla              | 104.4281 | -0.029088849 | 0.204404 | -0.14231 | 0.886834 | 0.987671 |
| nomo               | 930.2674 | 0.245492703  | 0.134023 | 1.831717 | 0.066994 | 0.441957 |
| vwa8               | 183.8264 | 0.033717861  | 0.184298 | 0.182953 | 0.854835 | 0.979161 |
| si:ch1073-184j22.2 | 118.6844 | 0.209926305  | 0.320398 | 0.655204 | 0.512336 | 0.885459 |
| micu3a             | 151.3801 | 0.422111312  | 0.216588 | 1.948918 | 0.051305 | 0.394059 |
| ldlrad3            | 360.1571 | -0.309583534 | 0.169717 | -1.82411 | 0.068135 | 0.445203 |
| ptgerlc            | 0.583777 | 0 2.762265   | 0        | 1 NA     |          |          |
| myo1hb             | 29.41183 | 0.449336036  | 0.49641  | 0.905171 | 0.365375 | 0.815339 |
| tbc1d10b           | 523.1826 | -0.020161944 | 0.129341 | -0.15588 | 0.876126 | 0.984856 |
| ptgerla            | 37.83424 | 0.151919847  | 0.329507 | 0.461052 | 0.644761 | 0.926639 |
| zgc:194224         | 51.79441 | -0.336627552 | 0.35207  | -0.95614 | 0.339003 | 0.795226 |
| CT573423.1         | 0.184528 | 0 5.267649   | 0        | 1 NA     |          |          |
| lrriq3             | 0.463007 | -0.366115313 | 3.535242 | -0.10356 | 0.917517 | NA       |
| vh11               | 32.61305 | 0.317659966  | 0.312705 | 1.015845 | 0.309703 | 0.774621 |
| CABZ01085419.1     | 114.4784 | 0.108679782  | 0.189011 | 0.574993 | 0.565296 | 0.901538 |
| inpp5kb            | 69.84301 | 0.221382236  | 0.249917 | 0.885822 | 0.375713 | 0.822237 |
| pnp5a              | 2350.953 | -0.706744246 | 0.185715 | -3.80553 | 0.000142 | 0.011879 |
| si:dkey-156m2.3    | 11.44119 | 1.212173598  | 0.803902 | 1.507862 | 0.13159  | 0.583305 |
| scpp5              | 111.5092 | -2.233800431 | 0.81106  | -2.75417 | 0.005884 | 0.129841 |



|                   |          |              |          |          |          |          |
|-------------------|----------|--------------|----------|----------|----------|----------|
| arhgef9b          | 308.7816 | -0.315955682 | 0.22028  | -1.43433 | 0.151477 | 0.615372 |
| fgf9              | 3.412919 | -2.140981054 | 1.762908 | -1.21446 | 0.224572 | 0.706495 |
| BX322577.1        | 31.75702 | -0.043165555 | 0.423104 | -0.10202 | 0.91874  | 0.993884 |
| zgc:171750        | 0 NA     | NA           | NA       | NA       | NA       | NA       |
| fam117aa          | 266.097  | -0.262570882 | 0.218922 | -1.19938 | 0.23038  | 0.712099 |
| vtcn1             | 22.49431 | 0.168470895  | 0.464989 | 0.362311 | 0.717119 | 0.94627  |
| theg              | 11.12449 | -0.49616851  | 0.497288 | -0.99775 | 0.318401 | 0.779923 |
| si:ch73-62121.1   | 37.34074 | 0.746718213  | 0.368069 | 2.028746 | 0.042484 | 0.360968 |
| samsn1b           | 70.24278 | -0.672870661 | 0.519443 | -1.29537 | 0.195192 | 0.67483  |
| il21r.2           | 1.547366 | 1.055427497  | 2.410967 | 0.437761 | 0.66156  | NA       |
| kcna4             | 25.3207  | -0.02951487  | 0.44373  | -0.06652 | 0.946967 | 0.997371 |
| zfyvel            | 161.647  | -0.129445223 | 0.15478  | -0.83632 | 0.402976 | 0.833582 |
| ralbp1            | 148.0227 | 0.052571799  | 0.186142 | 0.282428 | 0.777615 | 0.961073 |
| tpx2              | 1021.576 | 0.223194027  | 0.257257 | 0.867591 | 0.385619 | 0.826939 |
| FNDC10            | 95.04715 | 0.092663481  | 0.23966  | 0.386646 | 0.699018 | 0.942499 |
| supt20            | 136.3199 | -0.000569819 | 0.21269  | -0.00268 | 0.997862 | 1        |
| tmem176           | 889.6933 | 0.005475022  | 0.155698 | 0.035164 | 0.971949 | 1        |
| cdk5r2b           | 154.805  | 0.057324792  | 0.309259 | 0.185362 | 0.852945 | 0.978794 |
| hspb9             | 7.647438 | 0.470087295  | 0.858446 | 0.547603 | 0.583965 | 0.906376 |
| dock7             | 1002.22  | 0.087507959  | 0.156003 | 0.560936 | 0.574841 | 0.904516 |
| myrf              | 132.5576 | -0.102652494 | 0.224985 | -0.45626 | 0.6482   | 0.927337 |
| zmp:0000000524    | 183.961  | 0.354987171  | 0.243326 | 1.458895 | 0.144594 | 0.603539 |
| rufyl             | 158.3808 | 0.388241897  | 0.2081   | 1.865648 | 0.062091 | 0.42715  |
| arl8a             | 1429.94  | -0.070559453 | 0.097652 | -0.72256 | 0.469949 | 0.867349 |
| frs3              | 20.36199 | 0.011390416  | 0.449373 | 0.025347 | 0.979778 | 1        |
| gigyf1b           | 784.2824 | 0.035217833  | 0.121305 | 0.290325 | 0.771568 | 0.960624 |
| phlpp1            | 463.6758 | 0.178590529  | 0.148732 | 1.200755 | 0.229846 | 0.711763 |
| synpo21b          | 234.3629 | -0.27436965  | 0.192997 | -1.42163 | 0.155135 | 0.619776 |
| prdm13            | 166.0021 | -0.191116602 | 0.268493 | -0.71181 | 0.476581 | 0.869292 |
| unm_hu7910        | 177.1734 | -0.10466636  | 0.170701 | -0.61316 | 0.539772 | 0.893049 |
| sema7a            | 51.23218 | 0.23751987   | 0.384393 | 0.617909 | 0.536635 | 0.892421 |
| itga8             | 325.3254 | -0.087944721 | 0.18768  | -0.46859 | 0.639363 | 0.924779 |
| clip1a            | 301.6196 | -0.05673382  | 0.159165 | -0.35645 | 0.721506 | 0.947343 |
| noslapa           | 254.4468 | -0.30879266  | 0.135915 | -2.27195 | 0.02309  | 0.26812  |
| znf1068           | 9.276194 | 0.27062016   | 0.693525 | 0.39021  | 0.696381 | 0.941759 |
| ackr4a            | 25.17491 | -0.37504542  | 0.428369 | -0.87552 | 0.381291 | 0.824438 |
| si:dkey-85k7.12   | 10.78111 | 0.892101183  | 0.701624 | 1.27148  | 0.203558 | 0.684359 |
| cnm2b             | 56.43664 | 0.004721304  | 0.33752  | 0.013988 | 0.988839 | 1        |
| myolf             | 81.79941 | -0.10021878  | 0.24959  | -0.40153 | 0.688027 | 0.938955 |
| doc2a             | 21.0477  | 0.290236801  | 0.80865  | 0.358915 | 0.719658 | 0.94694  |
| si:dkey-145c18.3  | 0.624469 | 0 3.045935   | 0        | 1 NA     |          |          |
| FRMD1             | 319.2666 | -0.027632237 | 0.141657 | -0.19506 | 0.845342 | 0.976791 |
| oxgr1a.2          | 0.049519 | 0 5.267649   | 0        | 1 NA     |          |          |
| pnpla8            | 401.606  | -0.123369303 | 0.13061  | -0.94456 | 0.344884 | 0.79837  |
| si:ch211-137a8.4  | 3141.056 | 0.0770815    | 0.078997 | 0.975749 | 0.329189 | 0.787409 |
| b4galnt3a         | 12.15493 | 0.921410007  | 0.69947  | 1.317298 | 0.187739 | 0.666964 |
| tpp2              | 666.6449 | 0.113913256  | 0.1926   | 0.591449 | 0.55422  | 0.898306 |
| rubcn             | 45.28623 | 0.038317821  | 0.307745 | 0.124512 | 0.90091  | 0.99045  |
| gra               | 39.35954 | 0.418792737  | 0.268417 | 1.560232 | 0.118705 | 0.561771 |
| plppr4b           | 29.23533 | 0.283759543  | 0.476843 | 0.59508  | 0.55179  | 0.8974   |
| si:ch211-212c13.8 | 261.9938 | -0.21353822  | 0.455794 | -0.4685  | 0.639429 | 0.924779 |
| dna2              | 122.7428 | 0.115618597  | 0.234611 | 0.492811 | 0.622146 | 0.918461 |
| cacna2d3          | 170.6493 | -0.096121138 | 0.213479 | -0.45026 | 0.652522 | 0.92891  |
| rmdn2             | 40.0858  | -0.441072496 | 0.301881 | -1.46108 | 0.143994 | 0.603144 |

|                   |          |              |            |          |          |          |
|-------------------|----------|--------------|------------|----------|----------|----------|
| tmem169b          | 26.90563 | -0.032968657 | 0.37095    | -0.08888 | 0.92918  | 0.995381 |
| igl3v3            | 0 NA     |              | NA         | NA       | NA       | NA       |
| yeats2            | 124.36   | 0.026679262  | 0.19645    | 0.135807 | 0.891974 | 0.988566 |
| abhd15a           | 123.1009 | -0.074355352 | 0.21272    | -0.34955 | 0.72668  | 0.949095 |
| si:ch73-21k16.5   | 70.31519 | -0.143653927 | 0.362493   | -0.39629 | 0.691888 | 0.940274 |
| nbr1b             | 690.6962 | 0.203690123  | 0.107515   | 1.89452  | 0.058156 | 0.41653  |
| tmem70            | 121.2181 | -0.140916154 | 0.184994   | -0.76174 | 0.446218 | 0.855403 |
| RASA2             | 33.55665 | -0.205178506 | 0.287359   | -0.71401 | 0.475218 | 0.869292 |
| lrchl             | 264.4223 | 0.053691011  | 0.133817   | 0.401226 | 0.688254 | 0.93909  |
| si:ch211-161c3.6  | 275.8488 | -0.095106468 | 0.213323   | -0.44583 | 0.655717 | 0.929606 |
| mgaa              | 432.278  | -0.195626283 | 0.206636   | -0.94672 | 0.343781 | 0.798147 |
| tmem258           | 631.0226 | -0.077011906 | 0.17058    | -0.45147 | 0.651649 | 0.928625 |
| tmem184c          | 350.0611 | -0.122885319 | 0.191249   | -0.64254 | 0.520521 | 0.887165 |
| lrrc18a           | 4.07687  | 0.072453146  | 0.879837   | 0.082348 | 0.93437  | 0.996793 |
| dennd3a           | 250.1385 | -0.207141975 | 0.168591   | -1.22867 | 0.219196 | 0.700266 |
| slc26a10          | 32.38436 | -0.673369272 | 0.292519   | -2.30197 | 0.021337 | 0.258949 |
| msantdl           | 75.23113 | 0.024760321  | 0.282515   | 0.087642 | 0.930161 | 0.995707 |
| rnfl1l            | 694.6342 | -0.007493833 | 0.112744   | -0.06647 | 0.947005 | 0.997371 |
| gas21l            | 296.3497 | -0.178521083 | 0.188845   | -0.94533 | 0.34449  | 0.798147 |
| ap5bl             | 124.9447 | 0.113926042  | 0.190533   | 0.597933 | 0.549885 | 0.897373 |
| paxx              | 113.0125 | 0.191401887  | 0.269771   | 0.709497 | 0.478016 | 0.869292 |
| zgc:174320        | 0.314655 |              | 0 5.267649 |          | 0        | 1 NA     |
| si:dkey-34m19.3   | 118.7098 | -0.307228514 | 0.186071   | -1.65114 | 0.09871  | 0.521402 |
| grk5l             | 138.3514 | 0.024122322  | 0.179631   | 0.134288 | 0.893175 | 0.988566 |
| rnfl65b           | 93.25697 | -0.107151552 | 0.205029   | -0.52262 | 0.601242 | 0.913756 |
| si:ch211-225k7.5  | 0 NA     |              | NA         | NA       | NA       | NA       |
| ccdc18            | 101.2042 | 0.234445388  | 0.19917    | 1.177114 | 0.23915  | 0.719781 |
| si:ch211-66e2.3   | 41.68432 | -0.053759939 | 0.245392   | -0.21908 | 0.82659  | 0.973383 |
| bub1ba            | 161.155  | 0.117177327  | 0.218121   | 0.537211 | 0.591122 | 0.909388 |
| npb               | 103.6905 | 0.147339027  | 0.282636   | 0.521304 | 0.602155 | 0.914001 |
| ccdc149a          | 17.52777 | -1.348566574 | 0.518015   | -2.60333 | 0.009232 | 0.165181 |
| si:dkey-73p2.3    | 25.44429 | 1.077128256  | 0.752989   | 1.430471 | 0.152582 | 0.61658  |
| mrpl58            | 97.75726 | -0.014895497 | 0.255635   | -0.05827 | 0.953535 | 0.998436 |
| si:dkey-28o19.1   | 5.064015 | 0.473440971  | 0.868992   | 0.544816 | 0.58588  | 0.906655 |
| si:ch211-195b13.6 | 3.859257 | 0.073683368  | 1.310241   | 0.056237 | 0.955153 | 0.998611 |
| tnsla             | 495.0858 | 0.195401577  | 0.136954   | 1.426766 | 0.153647 | 0.61823  |
| BX571839.1        | 1.724628 | -0.080903997 | 1.390903   | -0.05817 | 0.953616 | NA       |
| si:dkey-238o13.4  | 157.1281 | -0.245907366 | 0.164869   | -1.49154 | 0.135821 | 0.591131 |
| plekhm2           | 162.1999 | -0.252531564 | 0.176887   | -1.42764 | 0.153394 | 0.617897 |
| arhgef19          | 106.3912 | -0.017787145 | 0.322204   | -0.0552  | 0.955975 | 0.998845 |
| tusc3             | 506.1977 | 0.128341561  | 0.196269   | 0.653906 | 0.513173 | 0.886073 |
| slc22a23          | 287.6023 | 0.011929686  | 0.182005   | 0.065546 | 0.947739 | 0.997371 |
| g0s2              | 31.78186 | 0.58729028   | 0.409232   | 1.435105 | 0.151257 | 0.615279 |
| lats2             | 367.4025 | 0.067650759  | 0.178452   | 0.379097 | 0.704616 | 0.943785 |
| cxxc5a            | 880.3927 | -0.056921042 | 0.146474   | -0.38861 | 0.697566 | 0.942152 |
| sdkla             | 198.5506 | -0.09568415  | 0.212478   | -0.45032 | 0.652476 | 0.92891  |
| tmem74b           | 8.301413 | 0.234209565  | 0.686277   | 0.341276 | 0.732896 | 0.950636 |
| adm2b             | 6.201035 | -0.415466315 | 0.677472   | -0.61326 | 0.539704 | 0.893049 |
| si:ch73-244f7.3   | 13.87541 | -0.533937549 | 0.669282   | -0.79778 | 0.425    | 0.844714 |
| slc22a31          | 353.0095 | -0.299324364 | 0.198253   | -1.50981 | 0.131091 | 0.582816 |
| atpl0d            | 184.7818 | -0.198421482 | 0.170115   | -1.16639 | 0.243456 | 0.724437 |
| iqgap1            | 957.1907 | -0.055349062 | 0.10479    | -0.52819 | 0.597369 | 0.911953 |
| wdfy3             | 272.0057 | 0.267508449  | 0.189003   | 1.415368 | 0.15696  | 0.622766 |
| map1l             | 270.8326 | -0.687204374 | 0.169879   | -4.04526 | 5.23E-05 | 0.005794 |

|                   |          |              |          |          |          |          |
|-------------------|----------|--------------|----------|----------|----------|----------|
| hemk1             | 213.6788 | -0.116149338 | 0.182094 | -0.63785 | 0.523569 | 0.888595 |
| pcdh7a            | 488.0782 | 0.274434091  | 0.145421 | 1.887164 | 0.059138 | 0.419032 |
| ankslab           | 31.93256 | -0.341373397 | 0.376418 | -0.9069  | 0.364459 | 0.814648 |
| rims1b            | 56.76846 | 0.701184187  | 0.309837 | 2.263076 | 0.023631 | 0.271997 |
| brd4              | 605.1697 | 0.375367345  | 0.193913 | 1.935752 | 0.052898 | 0.399547 |
| fbxo41            | 25.9212  | 0.429315153  | 0.364853 | 1.17668  | 0.239323 | 0.719781 |
| zgc:163098        | 403.9389 | 0.09664006   | 0.118069 | 0.818507 | 0.413068 | 0.838274 |
| si:ch73-24k9.2    | 32.01101 | 0.317637586  | 0.402396 | 0.789365 | 0.429899 | 0.847418 |
| mmp17a            | 23.39638 | 0.149054367  | 0.477124 | 0.312402 | 0.754735 | 0.956283 |
| chrd12            | 18.36848 | -0.539460904 | 0.556138 | -0.97001 | 0.33204  | 0.789602 |
| zgc:195245        | 23.97068 | 0.823967631  | 1.094532 | 0.752804 | 0.451568 | 0.857676 |
| comtd1            | 395.2712 | -0.615493226 | 0.406152 | -1.51543 | 0.129665 | 0.579651 |
| CR790388.1        | 3.144686 | -1.622378638 | 1.089776 | -1.48873 | 0.136559 | 0.59191  |
| tmco4             | 95.71474 | 0.053363373  | 0.231914 | 0.230099 | 0.818015 | 0.971518 |
| BX323994.1        | 0.132469 | 0            | 5.267649 | 0        | 1        | NA       |
| abhd16a           | 495.8752 | -0.060670923 | 0.139211 | -0.43582 | 0.662967 | 0.931141 |
| ttl14             | 686.2914 | 0.204145988  | 0.128208 | 1.592298 | 0.111318 | 0.547032 |
| CR936408.1        | 0        | NA           | NA       | NA       | NA       | NA       |
| ano9a             | 0        | NA           | NA       | NA       | NA       | NA       |
| enox2             | 248.8345 | 0.010160542  | 0.15327  | 0.066292 | 0.947145 | 0.997371 |
| sdccag8           | 60.28084 | -0.08169449  | 0.221037 | -0.3696  | 0.711684 | 0.945821 |
| epn3a             | 438.8216 | 0.020255498  | 0.109947 | 0.184229 | 0.853834 | 0.978905 |
| rxrba             | 461.0957 | 0.095058882  | 0.156144 | 0.608789 | 0.542664 | 0.894595 |
| tpcn3             | 184.3807 | 0.134948954  | 0.173927 | 0.775893 | 0.437812 | 0.851283 |
| duox2             | 9.944904 | -1.016737662 | 0.822423 | -1.23627 | 0.216358 | 0.69815  |
| BX901881.1        | 0.188555 | -0.86811591  | 5.267649 | -0.1648  | 0.8691   | NA       |
| esyt2b            | 179.543  | 0.408767617  | 0.174313 | 2.345027 | 0.019026 | 0.242745 |
| rbm15b            | 387.1763 | -0.046566759 | 0.140679 | -0.33101 | 0.740634 | 0.953996 |
| il7r              | 10.11894 | -0.06629532  | 0.796312 | -0.08325 | 0.93365  | 0.996576 |
| uck11b            | 277.7877 | -0.175579649 | 0.210226 | -0.83519 | 0.403608 | 0.833888 |
| COA4              | 110.0486 | 0.384442491  | 0.210561 | 1.825804 | 0.06788  | 0.444287 |
| igllc3            | 0.684591 | 0            | 3.111234 | 0        | 1        | NA       |
| arhgef40          | 93.5269  | 0.223506363  | 0.310073 | 0.720819 | 0.471021 | 0.868025 |
| faxcb             | 68.85463 | 0.350272744  | 0.254427 | 1.376711 | 0.168602 | 0.63999  |
| fam118b           | 108.5301 | 0.036895098  | 0.1862   | 0.198148 | 0.842929 | 0.97668  |
| mplkip            | 232.5643 | -0.062662889 | 0.149922 | -0.41797 | 0.675969 | 0.935448 |
| alpk3a            | 270.1936 | -0.084589089 | 0.23446  | -0.36078 | 0.718262 | 0.946598 |
| si:ch211-195e19.1 | 361.8513 | -0.061506438 | 0.116423 | -0.5283  | 0.59729  | 0.911953 |
| wnk1a             | 1129.115 | 0.153398151  | 0.155616 | 0.985747 | 0.324257 | 0.783308 |
| muc2.2            | 0.139193 | -0.868103029 | 5.267649 | -0.1648  | 0.869102 | NA       |
| tex11             | 11.15121 | 0.33396724   | 0.555998 | 0.600663 | 0.548064 | 0.896644 |
| dclk3             | 6.246418 | 0.633807591  | 0.782485 | 0.809993 | 0.417944 | 0.841312 |
| tp53bp1           | 787.2858 | -0.018117313 | 0.132363 | -0.13688 | 0.891129 | 0.988566 |
| si:dkey-7f3.9     | 196.1398 | 0.577733047  | 0.270352 | 2.136964 | 0.032601 | 0.319477 |
| abcalb            | 1430.193 | 0.083803002  | 0.215441 | 0.388984 | 0.697288 | 0.942027 |
| si:dkey-7i4.5     | 15.49298 | 0.343045157  | 0.482685 | 0.710702 | 0.477269 | 0.869292 |
| coll7a1b          | 296.1671 | -0.013878662 | 0.187705 | -0.07394 | 0.941059 | 0.997371 |
| cbfa2t3           | 90.17578 | 0.360748121  | 0.206208 | 1.749437 | 0.080215 | 0.478492 |
| dpy1913           | 425.3618 | 0.211060145  | 0.205953 | 1.024796 | 0.30546  | 0.770634 |
| brca2             | 112.8775 | 0.177202739  | 0.196721 | 0.900783 | 0.367704 | 0.817078 |
| tlncrd1           | 132.9315 | 0.115064894  | 0.187975 | 0.612129 | 0.540453 | 0.893173 |
| gcfc2             | 145.6184 | -0.116129269 | 0.181381 | -0.64025 | 0.52201  | 0.88764  |
| rps6kl1           | 57.70235 | 1.176326853  | 0.552169 | 2.130376 | 0.033141 | 0.322362 |
| chsyl             | 288.7417 | 0.132586472  | 0.150273 | 0.882306 | 0.377611 | 0.822478 |

|                   |          |              |          |          |          |          |
|-------------------|----------|--------------|----------|----------|----------|----------|
| dhx32b            | 208.9872 | 0.164983979  | 0.190311 | 0.866916 | 0.385988 | 0.826939 |
| ftr39p            | 30.67945 | 0.102454998  | 0.45788  | 0.22376  | 0.822944 | 0.971966 |
| si:ch211-22d5.2   | 27.8123  | -1.243899024 | 0.450631 | -2.76035 | 0.005774 | 0.128995 |
| zpax4             | 9.252823 | -0.997873508 | 0.583418 | -1.71039 | 0.087193 | 0.495407 |
| zgc:174573        | 17.67353 | 0.074692875  | 0.382585 | 0.195232 | 0.845211 | 0.976791 |
| znfl1k            | 1.361228 | -2.113778409 | 1.676391 | -1.26091 | 0.207341 | NA       |
| si:dkeyp-75b4.10  | 71.73812 | 1.530907248  | 0.964458 | 1.587325 | 0.112439 | 0.549251 |
| opn8b             | 51.06081 | 0.13921794   | 0.242772 | 0.573452 | 0.566339 | 0.901739 |
| rab16a            | 68.86366 | 0.437055019  | 0.209454 | 2.086639 | 0.036921 | 0.337141 |
| cercam            | 279.944  | 0.03137485   | 0.165705 | 0.189342 | 0.849825 | 0.97824  |
| adgre8            | 0.093881 | 0            | 5.267649 | 0        | 1        | NA       |
| si:dkey-85a20.4   | 100.696  | -0.065068533 | 0.239869 | -0.27127 | 0.786186 | 0.962605 |
| si:ch211-194c3.5  | 439.1023 | 0.083532803  | 0.145153 | 0.575479 | 0.564967 | 0.901538 |
| retreg1           | 182.7055 | -0.510898731 | 0.338932 | -1.50738 | 0.131714 | 0.583645 |
| samd1b            | 80.03801 | -0.113605514 | 0.241596 | -0.47023 | 0.638191 | 0.924779 |
| CABZ01079080.1    | 21.31941 | -0.108343642 | 0.496439 | -0.21824 | 0.827241 | 0.973459 |
| zgc:172215        | 55.16496 | 0.048460738  | 0.297631 | 0.162822 | 0.870659 | 0.983365 |
| mms19             | 240.1838 | -0.147371092 | 0.173642 | -0.84871 | 0.396045 | 0.8295   |
| adam12            | 21.20971 | -0.706312566 | 0.402761 | -1.75368 | 0.079486 | 0.477246 |
| jam2b             | 241.9855 | -0.413556236 | 0.250046 | -1.65392 | 0.098144 | 0.521076 |
| frmpd1a           | 10.59565 | -0.160257176 | 0.703884 | -0.22768 | 0.819898 | 0.971788 |
| si:ch211-71m22.3  | 8.776932 | -4.465747356 | 1.351597 | -3.30405 | 0.000953 | 0.042958 |
| hgfb              | 21.60593 | 0.428076396  | 0.456205 | 0.938342 | 0.348068 | 0.800392 |
| si:ch211-5k11.8   | 3.037451 | -1.231415955 | 1.063472 | -1.15792 | 0.246897 | 0.727706 |
| sult1st7          | 18.84028 | -4.971451934 | 0.927033 | -5.36275 | 8.20E-08 | 4.32E-05 |
| etfbkmt           | 42.30037 | 0.225471804  | 0.29996  | 0.751674 | 0.452247 | 0.857994 |
| fbxw8             | 211.8007 | 0.046431883  | 0.206857 | 0.224463 | 0.822397 | 0.971966 |
| rin1a             | 38.21492 | 0.330378959  | 0.311788 | 1.059629 | 0.289314 | 0.760367 |
| tanc2a            | 533.2269 | 0.127785696  | 0.147311 | 0.867453 | 0.385694 | 0.826939 |
| PRRG3             | 10.21031 | -0.144879855 | 0.600385 | -0.24131 | 0.809314 | 0.969828 |
| mfhas1            | 289.0208 | -0.118227051 | 0.191757 | -0.61655 | 0.537535 | 0.892498 |
| mhc2dab           | 17.20861 | 1.055540128  | 0.531747 | 1.985043 | 0.04714  | 0.378022 |
| clec11a           | 22.82732 | -0.143521349 | 0.444063 | -0.3232  | 0.746543 | 0.955074 |
| cluapl            | 108.0166 | -0.155556362 | 0.240811 | -0.64597 | 0.5183   | 0.887148 |
| actc1c            | 3542.861 | -0.067333824 | 0.175988 | -0.38261 | 0.702013 | 0.943292 |
| si:ch211-229d2.5  | 479.3693 | -0.334085395 | 0.196873 | -1.69696 | 0.089705 | 0.502623 |
| tmx2a             | 93.11652 | 0.502882769  | 0.220499 | 2.280661 | 0.022569 | 0.265653 |
| ikkb              | 78.10971 | -0.204773144 | 0.285726 | -0.71668 | 0.473573 | 0.869146 |
| MTERF4            | 131.2383 | -0.108481559 | 0.197765 | -0.54854 | 0.583323 | 0.905948 |
| sowahab           | 57.125   | -0.255993348 | 0.242943 | -1.05372 | 0.292012 | 0.761655 |
| znfl1i            | 0.641312 | 0.084152151  | 2.587642 | 0.032521 | 0.974057 | NA       |
| becn1             | 302.411  | -0.080926652 | 0.142932 | -0.56619 | 0.571265 | 0.902817 |
| opn4xa            | 6.6941   | 0.60368507   | 0.755467 | 0.799089 | 0.424239 | 0.844355 |
| si:dkeyp-118b1.2  | 156.0219 | -0.042298358 | 0.166763 | -0.25364 | 0.799771 | 0.967206 |
| si:dkey-10c21.1   | 11.89792 | 0.234504435  | 0.768831 | 0.305014 | 0.760355 | 0.957886 |
| si:ch73-278m9.1   | 53.22319 | 0.000305883  | 0.293856 | 0.001041 | 0.999169 | 1        |
| bc12l11           | 20.50861 | -0.3240579   | 0.428723 | -0.75587 | 0.449728 | 0.856979 |
| CABZ01077217.1    | 97.3309  | 0.544406637  | 0.263134 | 2.068933 | 0.038552 | 0.344223 |
| nckap5l           | 163.4097 | 0.350856396  | 0.260266 | 1.34807  | 0.177636 | 0.65136  |
| si:ch211-276i12.9 | 612.576  | -0.083267821 | 0.141699 | -0.58764 | 0.556775 | 0.899063 |
| si:ch211-67f13.8  | 7.525535 | 1.992066832  | 0.927414 | 2.14798  | 0.031715 | 0.31688  |
| thpo              | 3.088479 | 0.543844877  | 1.174013 | 0.463236 | 0.643195 | 0.92593  |
| srxn1             | 16.26359 | -0.31270321  | 0.386665 | -0.80872 | 0.418677 | 0.84177  |
| bsnb              | 280.6262 | 0.274595088  | 0.290798 | 0.944283 | 0.345025 | 0.79837  |

|                    |           |               |           |           |           |           |
|--------------------|-----------|---------------|-----------|-----------|-----------|-----------|
| best2              | 5. 413673 | -1. 333337649 | 1. 14437  | -1. 16513 | 0. 243967 | 0. 724522 |
| galr1b             | 16. 54809 | -0. 15662457  | 0. 466219 | -0. 33595 | 0. 736911 | 0. 952272 |
| ace                | 332. 2551 | -0. 226198179 | 0. 336686 | -0. 67184 | 0. 501687 | 0. 881077 |
| si:ch211-230g15. 5 | 250. 402  | -0. 080187826 | 0. 160265 | -0. 50034 | 0. 616833 | 0. 916365 |
| si:ch211-79k12. 1  | 355. 6906 | -0. 21743164  | 0. 179935 | -1. 20839 | 0. 226898 | 0. 707983 |
| sod3b              | 79. 76337 | 0. 496659122  | 0. 278585 | 1. 782795 | 0. 07462  | 0. 46402  |
| si:ch211-163m16. 7 | 1. 165625 | -0. 797482786 | 2. 157465 | -0. 36964 | 0. 711652 | NA        |
| tbx19              | 4. 807256 | 0. 655324674  | 1. 118025 | 0. 586145 | 0. 557778 | 0. 899184 |
| nxph2b             | 46. 372   | -0. 254297885 | 0. 491475 | -0. 51742 | 0. 604865 | 0. 914985 |
| zgc:172122         | 37. 95132 | 0. 261482902  | 0. 348466 | 0. 750382 | 0. 453025 | 0. 858265 |
| uspl3              | 749. 458  | -0. 249245369 | 0. 183908 | -1. 35527 | 0. 175331 | 0. 649279 |
| megf6a             | 77. 36584 | 0. 287569279  | 0. 275215 | 1. 044888 | 0. 296075 | 0. 764246 |
| tshz2              | 397. 2579 | 0. 037064291  | 0. 147642 | 0. 251041 | 0. 801782 | 0. 967776 |
| parp2              | 268. 3122 | -0. 082854328 | 0. 135251 | -0. 6126  | 0. 540142 | 0. 893049 |
| adam11             | 56. 54768 | 0. 797052244  | 0. 275226 | 2. 895988 | 0. 00378  | 0. 102427 |
| dpep2              | 50. 37603 | -0. 304096306 | 0. 313841 | -0. 96895 | 0. 33257  | 0. 789756 |
| bbs9               | 81. 59816 | 0. 194278988  | 0. 255879 | 0. 759261 | 0. 447697 | 0. 856366 |
| mfn1b              | 557. 2601 | 0. 125760278  | 0. 111973 | 1. 123131 | 0. 261382 | 0. 738975 |
| wdr20a             | 201. 1743 | -0. 072627191 | 0. 164725 | -0. 4409  | 0. 659285 | 0. 930581 |
| si:ch211-162k9. 6  | 4. 831913 | -0. 208097118 | 0. 773581 | -0. 269   | 0. 787926 | 0. 963339 |
| zgc:174315         | 71. 93266 | -0. 261420735 | 0. 271294 | -0. 96361 | 0. 335242 | 0. 791962 |
| plekhs1            | 21. 36475 | 0. 456792446  | 0. 713615 | 0. 640111 | 0. 522101 | 0. 887728 |
| znf414             | 2. 390027 | -0. 15103591  | 1. 349413 | -0. 11193 | 0. 910881 | 0. 992208 |
| slc7a14b           | 9. 25791  | -0. 339330087 | 0. 787171 | -0. 43108 | 0. 666414 | 0. 932664 |
| si:ch211-160f23. 5 | 130. 7714 | 0. 269682363  | 0. 197064 | 1. 368501 | 0. 171155 | 0. 643325 |
| si:ch211-285c6. 2  | 2. 099956 | -3. 754649522 | 1. 635278 | -2. 29603 | 0. 021674 | NA        |
| si:dkey-253d23. 11 | 27. 61562 | -0. 112674768 | 0. 372207 | -0. 30272 | 0. 762103 | 0. 958345 |
| trim59             | 79. 10298 | 0. 089265493  | 0. 272613 | 0. 327444 | 0. 743332 | 0. 954856 |
| wdr90              | 84. 76252 | 0. 011858954  | 0. 240552 | 0. 049299 | 0. 960681 | 0. 999243 |
| BX901889. 3        | 0 NA      | NA            | NA        | NA        | NA        | NA        |
| pigw               | 65. 55125 | 0. 254188033  | 0. 287622 | 0. 883756 | 0. 376828 | 0. 822258 |
| si:dkey-73p2. 2    | 28. 9595  | 0. 818141631  | 0. 742341 | 1. 10211  | 0. 270414 | 0. 746683 |
| mn1b               | 389. 0308 | -0. 270134418 | 0. 149316 | -1. 80915 | 0. 070428 | 0. 452779 |
| ogdhl              | 50. 85558 | -0. 185966683 | 0. 567462 | -0. 32772 | 0. 743126 | 0. 954765 |
| BX323590. 1        | 25. 98641 | -0. 379110203 | 0. 461292 | -0. 82184 | 0. 411165 | 0. 837797 |
| nlg2b              | 89. 2361  | 0. 483958646  | 0. 323451 | 1. 496236 | 0. 134592 | 0. 589174 |
| fam117ab           | 23. 93082 | 0. 306349162  | 0. 345064 | 0. 887805 | 0. 374646 | 0. 821243 |
| plchl              | 165. 1988 | 0. 294573606  | 0. 209196 | 1. 408123 | 0. 159095 | 0. 624783 |
| zgc:174935         | 144. 4213 | -0. 529350669 | 0. 199228 | -2. 657   | 0. 007884 | 0. 150098 |
| gemin5             | 177. 1429 | 0. 196793871  | 0. 1819   | 1. 08188  | 0. 279306 | 0. 752477 |
| si:dkeyp-2e4. 2    | 11. 21775 | -0. 71767053  | 0. 490602 | -1. 46284 | 0. 143512 | 0. 602607 |
| baiap3             | 29. 39159 | 0. 717624331  | 0. 45113  | 1. 590725 | 0. 111672 | 0. 547596 |
| foxel              | 39. 17955 | -0. 035654002 | 0. 379894 | -0. 09385 | 0. 925226 | 0. 994815 |
| im:7154036         | 37. 22057 | 0. 755699277  | 0. 29397  | 2. 570665 | 0. 01015  | 0. 174988 |
| CR589947. 1        | 11. 5896  | 0. 244259152  | 0. 675179 | 0. 361769 | 0. 717524 | 0. 946379 |
| dcxr               | 225. 7735 | -0. 213095261 | 0. 190243 | -1. 12012 | 0. 262661 | 0. 740207 |
| prss59. 1          | 47478. 27 | 0. 09358879   | 1. 678631 | 0. 055753 | 0. 955539 | 0. 998611 |
| ube2ql1            | 91. 4371  | 0. 084077497  | 0. 217739 | 0. 38614  | 0. 699393 | 0. 942499 |
| zgc:174877         | 150. 3405 | -0. 026108484 | 0. 157214 | -0. 16607 | 0. 868102 | 0. 982801 |
| dhrrsx             | 180. 9622 | 0. 280461981  | 0. 188814 | 1. 485385 | 0. 137442 | 0. 593264 |
| si:dkeyp-75h12. 2  | 136. 5933 | -0. 207521949 | 0. 188194 | -1. 1027  | 0. 270156 | 0. 746532 |
| si:ch211-247j9. 1  | 359. 3728 | -0. 133256751 | 0. 175722 | -0. 75834 | 0. 448248 | 0. 856741 |
| bcr                | 522. 8715 | 0. 203265721  | 0. 150529 | 1. 350342 | 0. 176906 | 0. 650415 |
| si:ch211-162k9. 5  | 5. 151253 | -1. 074336031 | 0. 795222 | -1. 35099 | 0. 176699 | 0. 650047 |

|                    |          |              |            |          |          |          |
|--------------------|----------|--------------|------------|----------|----------|----------|
| rapgef3            | 82.34535 | -0.119789819 | 0.273231   | -0.43842 | 0.661082 | 0.930581 |
| gdpd4b             | 44.29337 | -0.043943355 | 0.294779   | -0.14907 | 0.881497 | 0.986908 |
| or115-15           | 4.155302 | -0.265154771 | 1.093984   | -0.24238 | 0.808489 | 0.969828 |
| cacnalbb           | 26.66197 | 0.630965159  | 0.463894   | 1.360149 | 0.173783 | 0.646897 |
| gcga               | 94.82389 | 0.535045555  | 0.295924   | 1.808048 | 0.070599 | 0.453373 |
| and2               | 11037.98 | 0.006192201  | 0.130263   | 0.047536 | 0.962086 | 0.999451 |
| hbae3              | 47136.63 | 0.017346574  | 0.275884   | 0.062876 | 0.949865 | 0.99801  |
| rlim               | 545.6737 | 0.062829996  | 0.092718   | 0.677648 | 0.497995 | 0.878926 |
| si:dkey-205h13.1   | 79.27504 | -0.574898195 | 0.470525   | -1.22182 | 0.221775 | 0.703656 |
| tor3a              | 176.1685 | 0.340895109  | 0.195327   | 1.745257 | 0.08094  | 0.479801 |
| st3gal11           | 9.524633 | 0.256884617  | 0.709754   | 0.361935 | 0.717401 | 0.946272 |
| kmt2ca             | 571.5806 | -0.04414846  | 0.164023   | -0.26916 | 0.787806 | 0.963294 |
| pelpl              | 824.7269 | 0.086262939  | 0.105114   | 0.820661 | 0.41184  | 0.838075 |
| lpxn               | 20.89725 | -0.375044365 | 0.439936   | -0.8525  | 0.393938 | 0.828374 |
| dlc1               | 370.4977 | -0.046323736 | 0.167454   | -0.27664 | 0.78206  | 0.962311 |
| rgmb               | 711.0416 | -0.007710713 | 0.145853   | -0.05287 | 0.957838 | 0.999109 |
| ano9b              | 144.75   | 0.088255777  | 0.181615   | 0.485949 | 0.627003 | 0.920988 |
| CABZ01046432.1     | 0.07132  |              | 0.5.267649 | 0        | 1        | NA       |
| cabin1             | 76.98935 | 0.124603275  | 0.245896   | 0.506731 | 0.612343 | 0.915709 |
| hmcn2              | 661.149  | 0.12425602   | 0.198853   | 0.624864 | 0.532061 | 0.890978 |
| pgbd4              | 37.48319 | 0.101969957  | 0.276148   | 0.369258 | 0.711935 | 0.945821 |
| cop1               | 254.8443 | -0.078365935 | 0.154135   | -0.50842 | 0.611157 | 0.915331 |
| AL928650.1         | 3.99444  | -0.532954765 | 0.911447   | -0.58473 | 0.558726 | 0.899409 |
| cd40lg             | 1.450825 | 0.093647464  | 2.133879   | 0.043886 | 0.964995 | NA       |
| strc1              | 47.62543 | 0.586375795  | 0.44127    | 1.328835 | 0.183902 | 0.660725 |
| slc47a4            | 37.98549 | -1.110523697 | 0.544468   | -2.03965 | 0.041385 | 0.355014 |
| si:ch211-217k17.10 | 4.425841 | 0.875076162  | 0.957771   | 0.913659 | 0.360896 | 0.811253 |
| zgc:194659         | 193.3872 | -0.946079618 | 0.588677   | -1.60713 | 0.108026 | 0.539897 |
| GRIN2B (1 of many) | 21.67843 | 0.210623443  | 0.508191   | 0.414457 | 0.67854  | 0.936026 |
| znf654             | 421.4508 | 0.071759082  | 0.114007   | 0.629429 | 0.529068 | 0.890325 |
| sap130b            | 193.0374 | 0.160854325  | 0.159926   | 1.005804 | 0.31451  | 0.777479 |
| si:ch211-165d12.4  | 112.7819 | 0.090935046  | 0.249695   | 0.364185 | 0.71572  | 0.9461   |
| flrt2              | 151.2906 | 0.212705117  | 0.185712   | 1.145349 | 0.252065 | 0.732759 |
| abcg2b             | 21.15715 | -1.76638372  | 1.590057   | -1.11089 | 0.266614 | 0.743108 |
| CR377211.1         | 2.226042 | 0.66568286   | 1.205236   | 0.552326 | 0.580725 | 0.905618 |
| ppplr9ba           | 715.6895 | 0.256345908  | 0.15456    | 1.658549 | 0.097207 | 0.519839 |
| si:ch211-212g7.6   | 272.0712 | 0.268155186  | 0.135576   | 1.97789  | 0.047941 | 0.380801 |
| lrrc3ca            | 12.23195 | 0.514948383  | 0.522609   | 0.985341 | 0.324457 | 0.783308 |
| si:ch211-264f5.6   | 342.0604 | 0.135634194  | 0.169033   | 0.80241  | 0.422316 | 0.843493 |
| fosl1b             | 2.229073 | -0.338338781 | 1.409979   | -0.23996 | 0.810361 | 0.969828 |
| tjplb              | 739.2835 | -0.02664839  | 0.127045   | -0.20976 | 0.833858 | 0.975487 |
| zgc:174153         | 70.53486 | 0.686318876  | 0.470559   | 1.458518 | 0.144698 | 0.603718 |
| arhgef38           | 80.66603 | -0.20846993  | 0.235696   | -0.88449 | 0.376434 | 0.822258 |
| phldb1b            | 207.8    | -0.126945325 | 0.153086   | -0.82924 | 0.406969 | 0.835261 |
| hdx                | 192.9942 | -0.150897615 | 0.151872   | -0.99358 | 0.320426 | 0.780821 |
| si:ch211-235m3.5   | 34.53555 | -0.184503325 | 0.322451   | -0.57219 | 0.567193 | 0.901795 |
| si:ch211-102c2.4   | 75.12991 | 0.518320739  | 0.276602   | 1.873888 | 0.060946 | 0.423677 |
| agnr               | 1095.88  | -0.00747553  | 0.165002   | -0.04531 | 0.963864 | 0.999842 |
| mrpl42             | 482.2969 | -0.384953165 | 0.209542   | -1.83712 | 0.066192 | 0.439276 |
| tmprss15           | 7.814222 | -1.79718306  | 1.453891   | -1.23612 | 0.216414 | 0.69815  |
| lrfn5b             | 223.5807 | 0.181978686  | 0.212625   | 0.855868 | 0.392071 | 0.827902 |
| cerkl              | 33.66324 | 0.510420587  | 0.384955   | 1.325922 | 0.184865 | 0.662235 |
| F2RL3              | 51.72518 | -0.142896168 | 0.294254   | -0.48562 | 0.627235 | 0.921095 |
| si:dkey-197c15.6   | 131.6167 | 0.139464217  | 0.174615   | 0.798698 | 0.424466 | 0.844412 |

|                   |          |              |          |          |          |          |
|-------------------|----------|--------------|----------|----------|----------|----------|
| tapbp.1           | 33.60452 | -0.828324496 | 0.382103 | -2.16781 | 0.030173 | 0.309482 |
| si:dkey-204111.1  | 3.760356 | 0.449649797  | 1.126082 | 0.399305 | 0.689669 | 0.939646 |
| ftr02             | 33.3912  | -0.233445796 | 0.360491 | -0.64758 | 0.517258 | 0.887148 |
| sez6b             | 33.39086 | -0.151561458 | 0.348655 | -0.4347  | 0.663778 | 0.931603 |
| dnajc30b          | 148.6656 | -0.054444181 | 0.210239 | -0.25896 | 0.795664 | 0.966097 |
| zgc:174895        | 103.147  | 0.162204042  | 0.252815 | 0.641591 | 0.521139 | 0.887473 |
| dpp4              | 169.3567 | 0.394267219  | 0.208785 | 1.888393 | 0.058973 | 0.418576 |
| npbwr2a           | 8.681031 | 0.276761366  | 0.58227  | 0.475314 | 0.634563 | 0.924272 |
| si:dkey-12f6.5    | 0.272039 | 0            | 5.267649 | 0        | 1        | NA       |
| tmem1311          | 603.2795 | -0.171966981 | 0.12526  | -1.37288 | 0.16979  | 0.641498 |
| pkp3b             | 351.3857 | -0.170538198 | 0.136036 | -1.25363 | 0.209978 | 0.691821 |
| coro2ba           | 237.4976 | -0.278455848 | 0.182867 | -1.52272 | 0.127828 | 0.577117 |
| BX649448.1        | 3.060781 | -4.219523993 | 1.567407 | -2.69204 | 0.007102 | 0.14271  |
| vipb              | 84.59735 | -1.238356268 | 0.512528 | -2.41617 | 0.015685 | 0.221082 |
| si:dkey-238f9.1   | 100.9776 | 0.462226371  | 0.308184 | 1.499838 | 0.133656 | 0.587056 |
| rbm46             | 3.963592 | -0.260560366 | 1.050784 | -0.24797 | 0.80416  | 0.968814 |
| atp8b4            | 23.98281 | -0.417194901 | 0.360294 | -1.15793 | 0.246893 | 0.727706 |
| nlgn4xa           | 234.6571 | 0.254922682  | 0.242838 | 1.049764 | 0.293827 | 0.763054 |
| si:ch211-149a19.3 | 111.5959 | 0.711806178  | 0.222296 | 3.202068 | 0.001364 | 0.054641 |
| si:dkey-57h18.1   | 42.26902 | -0.208523566 | 0.277958 | -0.7502  | 0.453136 | 0.858335 |
| pimr126           | 0        | NA           | NA       | NA       | NA       | NA       |
| si:ch211-131k2.3  | 126.8788 | 0.231087106  | 0.252855 | 0.913912 | 0.360763 | 0.811253 |
| man2b2            | 255.8014 | 0.26371644   | 0.203898 | 1.293374 | 0.195882 | 0.676219 |
| si:ch73-15b2.5    | 194.9684 | 0.377853354  | 0.273776 | 1.380156 | 0.167539 | 0.638828 |
| rhobtb1           | 15.68059 | 0.697858179  | 0.414848 | 1.682203 | 0.092529 | 0.508758 |
| trpc7b            | 7.330894 | -0.385422682 | 0.677864 | -0.56858 | 0.569639 | 0.902322 |
| cdk17             | 232.5952 | -0.0920036   | 0.148465 | -0.6197  | 0.535455 | 0.891993 |
| si:dkey-88j15.4   | 0.716164 | 1.055423907  | 3.018678 | 0.349631 | 0.726616 | NA       |
| CABZ01071020.1    | 27.4046  | 0.018692135  | 0.446974 | 0.041819 | 0.966643 | 1        |
| map3k21           | 124.2065 | 0.095949712  | 0.191221 | 0.501774 | 0.615827 | 0.916365 |
| MSANTD2           | 59.72109 | -0.004076676 | 0.258932 | -0.01574 | 0.987438 | 1        |
| nckipsd           | 597.8419 | -0.401110895 | 0.153438 | -2.61416 | 0.008945 | 0.16209  |
| mvb12bb           | 16.86888 | 0.046478618  | 0.515111 | 0.09023  | 0.928104 | 0.995052 |
| gpr4              | 6.018076 | 1.024779465  | 0.774196 | 1.323668 | 0.185613 | 0.663476 |
| GID4              | 72.29585 | -0.005690851 | 0.190473 | -0.02988 | 0.976165 | 1        |
| CABZ01072096.1    | 31.47453 | -0.135983923 | 0.370236 | -0.36729 | 0.713403 | 0.945821 |
| kcntl             | 20.10134 | 1.195637946  | 0.738356 | 1.619324 | 0.105378 | 0.534618 |
| fam20a            | 140.0107 | -0.769711796 | 0.279308 | -2.75578 | 0.005855 | 0.129451 |
| zgc:195282        | 8.016974 | -0.453411261 | 0.621289 | -0.72979 | 0.465518 | 0.864997 |
| bicd1a            | 61.18219 | 0.115788717  | 0.235574 | 0.491516 | 0.623061 | 0.918894 |
| tcima             | 813.0968 | -0.052802626 | 0.246355 | -0.21434 | 0.830285 | 0.974908 |
| stk32a            | 0        | NA           | NA       | NA       | NA       | NA       |
| kif3cb            | 244.4991 | 0.300786048  | 0.149616 | 2.010381 | 0.044391 | 0.368519 |
| si:ch211-14911.2  | 69.91155 | 0.640070847  | 0.228492 | 2.801282 | 0.00509  | 0.119231 |
| gal3st2           | 34.27672 | 0.419752526  | 0.303759 | 1.38186  | 0.167015 | 0.637452 |
| mfn2              | 615.9684 | 0.12546397   | 0.13443  | 0.9333   | 0.350665 | 0.802215 |
| fam114a2          | 508.0204 | -0.036224839 | 0.113321 | -0.31966 | 0.749222 | 0.955074 |
| ptx3b             | 10.28195 | 0.372103141  | 0.564961 | 0.658636 | 0.51013  | 0.883733 |
| cisd1             | 749.5153 | -0.079902252 | 0.119808 | -0.66692 | 0.504826 | 0.88195  |
| nitr1f            | 0        | NA           | NA       | NA       | NA       | NA       |
| eyes              | 1.296305 | -0.719267892 | 1.800419 | -0.3995  | 0.689525 | NA       |
| si:ch211-184m13.4 | 4.553965 | 1.584436654  | 0.980267 | 1.616332 | 0.106022 | 0.534956 |
| znfl1g            | 0.61388  | 0.642657839  | 2.44125  | 0.263249 | 0.792358 | NA       |
| slc39a5           | 215.4651 | -0.120472957 | 0.251386 | -0.47923 | 0.631772 | 0.923003 |

|                    |          |              |           |          |          |          |    |
|--------------------|----------|--------------|-----------|----------|----------|----------|----|
| si:dkey-17m8.1     | 274.7811 | 0.102925627  | 0.138718  | 0.741976 | 0.458102 | 0.860993 |    |
| zgc:194242         | 34.80671 | -0.489912063 | 0.368389  | -1.32988 | 0.183559 | 0.660414 |    |
| zgc:175135         | 0.043309 |              | 0.5267649 |          | 0        | 1        | NA |
| ftr13              | 24.02676 | 0.000760448  | 0.459091  | 0.001656 | 0.998678 |          | 1  |
| stard13a           | 270.9311 | -0.005751454 | 0.125335  | -0.04589 | 0.963399 | 0.999842 |    |
| dpys               | 221.0916 | -0.239781277 | 0.289105  | -0.82939 | 0.406883 | 0.835226 |    |
| si:ch1073-464p5.5  | 1122.913 | -0.137850246 | 0.169136  | -0.81502 | 0.415058 | 0.838732 |    |
| zbtb47b            | 9.170477 | 1.165711289  | 0.691435  | 1.685929 | 0.091809 | 0.507669 |    |
| cdc42ep1a          | 79.51092 | -0.162632376 | 0.303911  | -0.53513 | 0.592559 | 0.909996 |    |
| maml3              | 268.4896 | 0.131392095  | 0.151418  | 0.867745 | 0.385534 | 0.826939 |    |
| cd83               | 23.10378 | 0.113251296  | 0.529633  | 0.21383  | 0.83068  | 0.974908 |    |
| ccdc85cb           | 119.6365 | 0.027900603  | 0.199521  | 0.139838 | 0.888788 | 0.988188 |    |
| ptprh              | 15.46874 | 0.070708384  | 0.750882  | 0.094167 | 0.924976 | 0.994815 |    |
| myh7               | 872.1281 | 0.207715973  | 0.194704  | 1.066831 | 0.286048 | 0.757455 |    |
| rspo2              | 157.5539 | 0.059824538  | 0.165263  | 0.361995 | 0.717356 | 0.946272 |    |
| mfsd4b             | 113.9881 | -0.336787726 | 0.193665  | -1.73902 | 0.082031 | 0.482272 |    |
| plcd3b             | 88.85328 | 0.339194762  | 0.226095  | 1.500229 | 0.133555 | 0.586903 |    |
| aff3               | 209.6284 | -0.16680324  | 0.243199  | -0.68587 | 0.492794 | 0.876558 |    |
| rbpms2b            | 494.5274 | -0.250136382 | 0.129206  | -1.93595 | 0.052874 | 0.399547 |    |
| nyap2a             | 32.93044 | 0.340893392  | 0.368904  | 0.924071 | 0.355449 | 0.806546 |    |
| zgc:194930         | 19.49306 | -0.202263983 | 0.402797  | -0.50215 | 0.615563 | 0.916365 |    |
| pkn3               | 139.8992 | 0.199960412  | 0.176952  | 1.130026 | 0.258465 | 0.735636 |    |
| gabrb2a            | 183.8911 | 1.076779327  | 0.393205  | 2.738469 | 0.006173 | 0.132917 |    |
| castor1            | 101.2628 | -0.287699923 | 0.216389  | -1.32955 | 0.183667 | 0.66056  |    |
| si:dkeyp-73d8.6    | 20.37546 |              | 0.1805556 |          | 0        | 1        | 1  |
| si:ch211-203d1.3   | 107.9005 | -0.37036114  | 0.31648   | -1.17025 | 0.241899 | 0.72348  |    |
| calhm3             | 14.6017  | 0.818691248  | 1.120054  | 0.730939 | 0.464816 | 0.864823 |    |
| si:ch211-256e16.6  | 20.65551 | 0.058960883  | 0.356221  | 0.165518 | 0.868536 | 0.982801 |    |
| prmt5              | 318.401  | -0.177577695 | 0.147344  | -1.20519 | 0.22813  | 0.709324 |    |
| SGPP2              | 30.95537 | 0.122735349  | 0.335611  | 0.365708 | 0.714583 | 0.945821 |    |
| akap9              | 1133.584 | -0.289559621 | 0.140289  | -2.06403 | 0.039015 | 0.345405 |    |
| sema4c             | 230.3435 | -0.192154041 | 0.140981  | -1.36298 | 0.17289  | 0.645664 |    |
| sall3a             | 101.9957 | 0.046710674  | 0.247361  | 0.188836 | 0.850221 | 0.978251 |    |
| ftr34              | 2.205951 | -1.760183476 | 1.964205  | -0.89613 | 0.370183 | 0.818484 |    |
| cramp1             | 453.0771 | -0.133218789 | 0.12877   | -1.03455 | 0.300881 | 0.767015 |    |
| sik2a              | 22.97104 | 0.001748243  | 0.537333  | 0.003254 | 0.997404 |          | 1  |
| amigo1             | 36.48921 | -0.002676759 | 0.429193  | -0.00624 | 0.995024 |          | 1  |
| frmd5              | 101.1838 | -0.179367407 | 0.189855  | -0.94476 | 0.344782 | 0.798302 |    |
| ubtd1b             | 43.10457 | 0.108222744  | 0.351932  | 0.30751  | 0.758455 | 0.957865 |    |
| amer1              | 430.9863 | 0.123661389  | 0.129607  | 0.954126 | 0.34002  | 0.795302 |    |
| atr                | 133.8141 | -0.233254423 | 0.27345   | -0.85301 | 0.393656 | 0.828374 |    |
| elf2b              | 513.0959 | 0.041855381  | 0.111846  | 0.374223 | 0.708238 | 0.945344 |    |
| si:ch211-113e8.10  | 372.4826 | 0.253998498  | 0.127016  | 1.999729 | 0.045529 | 0.373513 |    |
| si:dkey-28b4.7     | 378.7311 | -0.144123673 | 0.148377  | -0.97134 | 0.331381 | 0.789035 |    |
| filip1b            | 136.7372 | -0.034258192 | 0.231866  | -0.14775 | 0.88254  | 0.986908 |    |
| fam177a1           | 638.8743 | -0.03996108  | 0.115662  | -0.3455  | 0.729718 | 0.950056 |    |
| alpk2              | 340.6873 | -0.271336897 | 0.260089  | -1.04325 | 0.296834 | 0.764495 |    |
| PRRC2B             | 1908.898 | 0.017328263  | 0.163626  | 0.105901 | 0.915661 | 0.99311  |    |
| sc:d217            | 12.65003 | -7.264993327 | 3.142075  | -2.31216 | 0.020769 | 0.255762 |    |
| muc13b             | 156.7646 | -0.780528166 | 0.413455  | -1.88782 | 0.05905  | 0.418792 |    |
| si:ch1073-174d20.2 | 608.4633 | 0.121811728  | 0.163198  | 0.746404 | 0.455424 | 0.860008 |    |
| caapl              | 307.4621 | 0.129184069  | 0.163879  | 0.78829  | 0.430527 | 0.847542 |    |
| cyp2x6             | 3.406604 | -0.108738432 | 0.994587  | -0.10933 | 0.912941 | 0.99273  |    |
| st3gall            | 1.100106 | 0.131056273  | 1.917614  | 0.068343 | 0.945512 | NA       |    |



|                   |          |              |          |          |          |          |
|-------------------|----------|--------------|----------|----------|----------|----------|
| fam171a2b         | 53.9373  | 0.045816429  | 0.273821 | 0.167323 | 0.867116 | 0.982582 |
| si:dkey-53k12.1   | 0.375525 | 0            | 4.315831 | 0        | 1        | NA       |
| wdr53             | 191.1332 | 0.242372378  | 0.129486 | 1.871807 | 0.061233 | 0.424867 |
| CU855821.1        | 1.323972 | 1.0531366    | 2.041168 | 0.515948 | 0.605891 | NA       |
| zgc:172341        | 97.06807 | 0.920266721  | 0.335086 | 2.746356 | 0.006026 | 0.131072 |
| gpr158b           | 89.80081 | 0.869383139  | 0.390751 | 2.224901 | 0.026088 | 0.286608 |
| lrrc7             | 152.3029 | 0.358980751  | 0.26192  | 1.370576 | 0.170507 | 0.64208  |
| plppr4a           | 197.2456 | 0.084599974  | 0.259792 | 0.325645 | 0.744693 | 0.95491  |
| efl1              | 93.92215 | -0.004501596 | 0.218715 | -0.02058 | 0.983579 | 1        |
| cep112            | 91.73636 | 0.395560268  | 0.225998 | 1.750284 | 0.080069 | 0.478179 |
| CABZ01059627.2    | 0.932069 | -2.352350848 | 2.287025 | -1.02856 | 0.303685 | NA       |
| taf6l             | 250.852  | -0.01751962  | 0.183242 | -0.09561 | 0.923831 | 0.994713 |
| naa30             | 392.972  | -0.037416647 | 0.135996 | -0.27513 | 0.783216 | 0.962406 |
| rnf10             | 5571.05  | -0.296161883 | 0.07962  | -3.71969 | 0.000199 | 0.014952 |
| tnrc6a            | 1774.909 | 0.05122283   | 0.182219 | 0.281106 | 0.778629 | 0.961073 |
| zgc:194908        | 1.280857 | -0.868143195 | 2.079344 | -0.41751 | 0.676307 | NA       |
| asb13a.1          | 75.5188  | -0.270037333 | 0.295212 | -0.91472 | 0.360337 | 0.811057 |
| zgc:162612        | 122.7426 | 0.089170817  | 0.170944 | 0.521636 | 0.601923 | 0.914001 |
| b3galt1a          | 19.2811  | -0.448406988 | 0.403721 | -1.11069 | 0.266704 | 0.743178 |
| wdr81             | 323.1457 | -0.348640496 | 0.162416 | -2.14659 | 0.031826 | 0.317164 |
| si:dkey-18p12.4   | 33.09691 | 2.086200562  | 1.80197  | 1.157733 | 0.246973 | 0.727706 |
| si:ch211-152p11.4 | 68.09431 | -0.111173682 | 0.259463 | -0.42848 | 0.668304 | 0.933086 |
| gal3st4           | 489.561  | 0.448938209  | 0.129724 | 3.460707 | 0.000539 | 0.028963 |
| ccl27b            | 2.605181 | 0.486175547  | 1.280308 | 0.379733 | 0.704143 | 0.943741 |
| sin3aa            | 694.4269 | -0.016052613 | 0.143953 | -0.11151 | 0.911209 | 0.992208 |
| rbml2b            | 399.2819 | 0.013023387  | 0.119864 | 0.108651 | 0.913479 | 0.992796 |
| si:dkey-46g23.1   | 202.2416 | 0.175469313  | 0.203533 | 0.862118 | 0.388622 | 0.827613 |
| dhx9              | 934.5614 | 0.184689083  | 0.188219 | 0.981245 | 0.326472 | 0.785445 |
| selenop2          | 667.9544 | -1.328229293 | 0.275672 | -4.81815 | 1.45E-06 | 0.000386 |
| fuz               | 44.00504 | 0.421453145  | 0.349332 | 1.206455 | 0.227642 | 0.708829 |
| kif13ba           | 475.7916 | 0.051899996  | 0.201822 | 0.257157 | 0.797058 | 0.966447 |
| znf219            | 423.5137 | 0.252500177  | 0.112126 | 2.251936 | 0.024326 | 0.276024 |
| efna2b            | 42.3001  | -0.151634688 | 0.266258 | -0.5695  | 0.569016 | 0.902234 |
| CSRNP3            | 16.99215 | 0.226405537  | 0.462684 | 0.489331 | 0.624607 | 0.919918 |
| mcf212            | 56.75108 | -0.181217627 | 0.32761  | -0.55315 | 0.58016  | 0.905618 |
| si:ch211-166a6.5  | 2601.582 | -0.02114849  | 0.133473 | -0.15845 | 0.874104 | 0.98385  |
| megf8             | 613.7111 | 0.058540867  | 0.134068 | 0.43665  | 0.662365 | 0.930742 |
| col6a4a           | 1215.735 | 0.106036318  | 0.221148 | 0.479482 | 0.631596 | 0.923003 |
| kiz               | 118.2695 | -0.116806296 | 0.20057  | -0.58237 | 0.560316 | 0.899928 |
| peak1             | 152.82   | 0.072816638  | 0.292159 | 0.249236 | 0.803178 | 0.968418 |
| zgc:112998        | 26.86098 | -0.387678066 | 0.361305 | -1.07299 | 0.283274 | 0.755028 |
| si:dkey-253d23.4  | 436.3379 | 0.547067034  | 0.205321 | 2.664447 | 0.007712 | 0.148279 |
| si:ch211-112f3.4  | 40.69449 | 0.403941437  | 0.366342 | 1.102635 | 0.270186 | 0.746532 |
| tap1              | 11.40741 | 0.082362797  | 0.619365 | 0.13298  | 0.89421  | 0.988777 |
| si:ch73-296e2.3   | 0.260891 | -1.733484505 | 4.769356 | -0.36346 | 0.716259 | NA       |
| peal5             | 47.35209 | 0.128173622  | 0.273731 | 0.468247 | 0.639608 | 0.924779 |
| nox5              | 8.602262 | 0.078379971  | 1.128317 | 0.069466 | 0.944618 | 0.997371 |
| map6d1            | 44.885   | 1.60396873   | 0.504752 | 3.177734 | 0.001484 | 0.057996 |
| radil             | 51.20528 | 0.522329654  | 0.294935 | 1.771    | 0.076561 | 0.468545 |
| hnrnpull1         | 2123.428 | 0.078447608  | 0.116191 | 0.675161 | 0.499574 | 0.879603 |
| slitrk4           | 182.6982 | 0.508850552  | 0.243089 | 2.093266 | 0.036325 | 0.335171 |
| myh71             | 230.0532 | -0.505279252 | 0.343245 | -1.47207 | 0.141003 | 0.599658 |
| isg20             | 490.4857 | -0.219385325 | 0.225319 | -0.97366 | 0.330223 | 0.788126 |
| si:ch211-235o23.1 | 316.2193 | 0.143669762  | 0.15681  | 0.916206 | 0.359559 | 0.810644 |

|                     |           |               |           |           |           |           |
|---------------------|-----------|---------------|-----------|-----------|-----------|-----------|
| si:dkeyp-73a2. 2    | 0. 147936 | 0             | 5. 267649 | 0         | 1         | NA        |
| fam171a1            | 330. 8038 | 0. 041342326  | 0. 175025 | 0. 236209 | 0. 813271 | 0. 970328 |
| L0018102. 1         | 55. 3605  | 0. 31937619   | 0. 281399 | 1. 134958 | 0. 256393 | 0. 73401  |
| si:ch211-176g6. 2   | 10. 62525 | 0. 1118585    | 0. 778531 | 0. 143679 | 0. 885754 | 0. 987533 |
| CABZ01033206. 1     | 101. 1251 | -0. 291788193 | 0. 276928 | -1. 05366 | 0. 292039 | 0. 761655 |
| ldah                | 65. 28502 | 0. 006946302  | 0. 274628 | 0. 025293 | 0. 979821 | 1         |
| aanat2              | 52. 86795 | -0. 651034818 | 0. 34189  | -1. 90422 | 0. 056881 | 0. 411856 |
| tagln3a             | 15. 16396 | 0. 090334119  | 0. 515946 | 0. 175084 | 0. 861013 | 0. 980388 |
| si:ch73-208g10. 1   | 15. 92775 | 0. 074259427  | 0. 556552 | 0. 133428 | 0. 893855 | 0. 988675 |
| micall1a            | 57. 41641 | 0. 292130944  | 0. 272087 | 1. 073669 | 0. 282971 | 0. 755028 |
| lyrm7               | 168. 4705 | 0. 365675867  | 0. 183136 | 1. 996744 | 0. 045853 | 0. 374848 |
| rhbdd3              | 96. 98416 | 0. 124850835  | 0. 186886 | 0. 66806  | 0. 504096 | 0. 881759 |
| helq                | 49. 99064 | 0. 363018874  | 0. 260134 | 1. 39551  | 0. 162862 | 0. 630534 |
| mrps36              | 1055. 487 | -0. 050287696 | 0. 12092  | -0. 41588 | 0. 677501 | 0. 936026 |
| ninj2               | 21. 47352 | -1. 905432884 | 0. 748933 | -2. 5442  | 0. 010953 | 0. 182182 |
| gpr174              | 6. 131878 | 1. 157901333  | 0. 845845 | 1. 368928 | 0. 171022 | 0. 643066 |
| srbd1               | 21. 68159 | -0. 276013601 | 0. 433032 | -0. 6374  | 0. 523865 | 0. 888642 |
| ccr2                | 3. 736701 | -1. 458300121 | 1. 002294 | -1. 45496 | 0. 14568  | 0. 604973 |
| kdf1a               | 95. 15604 | -0. 414204635 | 0. 26867  | -1. 54169 | 0. 12315  | 0. 569695 |
| man2c1              | 213. 2679 | 0. 043111585  | 0. 182381 | 0. 236382 | 0. 813136 | 0. 970328 |
| arrdc1b             | 66. 22198 | 0. 003454092  | 0. 210997 | 0. 01637  | 0. 986939 | 1         |
| kcnmala             | 214. 3556 | 0. 071953213  | 0. 168071 | 0. 428113 | 0. 668569 | 0. 933086 |
| igl4v8              | 0. 203413 | 0             | 5. 165707 | 0         | 1         | NA        |
| zgc:194578          | 389. 8337 | 0. 505783111  | 0. 172795 | 2. 927072 | 0. 003422 | 0. 096214 |
| gmps                | 938. 3859 | -0. 271666684 | 0. 119266 | -2. 27782 | 0. 022737 | 0. 266612 |
| nrtn                | 6. 971879 | 0. 49507044   | 1. 206828 | 0. 410225 | 0. 681641 | 0. 937418 |
| dchs1b              | 441. 552  | 0. 130676222  | 0. 161607 | 0. 808606 | 0. 418742 | 0. 84177  |
| scyll               | 594. 3596 | 0. 052470696  | 0. 123666 | 0. 424294 | 0. 671352 | 0. 933953 |
| si:ch211-189k9. 2   | 217. 4524 | 0. 34922039   | 0. 228706 | 1. 526942 | 0. 126775 | 0. 575696 |
| tmem163a            | 37. 76528 | 0. 09930249   | 0. 339694 | 0. 29233  | 0. 770035 | 0. 960484 |
| ppplr16b            | 45. 60618 | 0. 336536941  | 0. 266622 | 1. 262226 | 0. 206868 | 0. 689246 |
| kl                  | 23. 40115 | -0. 842810386 | 0. 472802 | -1. 78259 | 0. 074653 | 0. 464106 |
| si:ch211-218o21. 4  | 23. 9256  | 0. 69109907   | 0. 464173 | 1. 488883 | 0. 136518 | 0. 591902 |
| rapgef4             | 35. 44963 | 0. 078065294  | 0. 419576 | 0. 186058 | 0. 8524   | 0. 978648 |
| SLC29A4 (1 of many) | 66. 41408 | 0. 90890081   | 0. 358621 | 2. 534429 | 0. 011263 | 0. 183909 |
| CU855878. 1         | 77. 51405 | -0. 290754603 | 0. 241022 | -1. 20634 | 0. 227686 | 0. 708829 |
| tmem151bb           | 9. 384096 | -0. 654376941 | 0. 69239  | -0. 9451  | 0. 344608 | 0. 798147 |
| tas2r200. 1         | 0. 460706 | 0             | 4. 72486  | 0         | 1         | NA        |
| tcaim               | 209. 5811 | 0. 102521154  | 0. 204955 | 0. 500212 | 0. 616926 | 0. 916365 |
| trim107             | 43. 3987  | -0. 236313259 | 0. 321072 | -0. 73601 | 0. 461723 | 0. 863402 |
| otulinb             | 148. 028  | 0. 042027012  | 0. 175423 | 0. 239575 | 0. 81066  | 0. 969828 |
| phldb2a             | 144. 2171 | -0. 251652108 | 0. 255232 | -0. 98597 | 0. 324146 | 0. 783161 |
| dnajc6              | 491. 2497 | 0. 268782814  | 0. 180954 | 1. 485366 | 0. 137447 | 0. 593264 |
| si:dkey-183c2. 4    | 13. 41304 | 0. 362292091  | 0. 75584  | 0. 479324 | 0. 631708 | 0. 923003 |
| ehbp11b             | 217. 773  | 0. 032141214  | 0. 269483 | 0. 11927  | 0. 905061 | 0. 991631 |
| si:dkey-7k24. 5     | 7. 805803 | -2. 100596119 | 1. 538338 | -1. 3655  | 0. 172097 | 0. 644494 |
| shroom4             | 367. 6849 | -0. 066342578 | 0. 141232 | -0. 46974 | 0. 63854  | 0. 924779 |
| si:ch73-15n24. 1    | 52. 15585 | -4. 218778937 | 1. 285753 | -3. 28117 | 0. 001034 | 0. 045108 |
| si:ch73-34314. 2    | 6. 646869 | -0. 814760046 | 0. 86692  | -0. 93983 | 0. 347303 | 0. 799992 |
| mark2a              | 769. 8692 | -0. 134622959 | 0. 113871 | -1. 18224 | 0. 237112 | 0. 718568 |
| ptger4c             | 4. 994973 | -1. 317236224 | 1. 14666  | -1. 14876 | 0. 250655 | 0. 730618 |
| tmem151a            | 78. 41429 | 0. 051435811  | 0. 235552 | 0. 218363 | 0. 827147 | 0. 973459 |
| rapgef11            | 77. 11282 | 0. 192694434  | 0. 262995 | 0. 732693 | 0. 463745 | 0. 864593 |
| stom13a             | 27. 98545 | 0. 357681078  | 0. 641379 | 0. 557675 | 0. 577066 | 0. 904798 |

|                     |          |              |          |          |          |          |
|---------------------|----------|--------------|----------|----------|----------|----------|
| pot1                | 56.68453 | 0.174418864  | 0.228945 | 0.761839 | 0.446156 | 0.855403 |
| rassf7a             | 150.5473 | 0.132955771  | 0.210847 | 0.63058  | 0.528315 | 0.889948 |
| klf4                | 21.7312  | -0.198209593 | 0.515126 | -0.38478 | 0.700401 | 0.942841 |
| AL954695.2          | 1.083077 | 0.759446354  | 2.034883 | 0.373214 | 0.708989 | NA       |
| syt15               | 77.02164 | -0.634538504 | 0.422886 | -1.50049 | 0.133486 | 0.586903 |
| si:dkeyp-68b7.5     | 36.95357 | -0.324801826 | 0.296495 | -1.09547 | 0.27331  | 0.749148 |
| snx19b              | 257.2126 | -0.204073791 | 0.164334 | -1.24182 | 0.214302 | 0.696474 |
| zgc:152830          | 1856.639 | 0.315000529  | 0.125195 | 2.516086 | 0.011867 | 0.18962  |
| SLC46A3 (1 of many) | 89.85137 | 0.107826152  | 0.278404 | 0.3873   | 0.698534 | 0.942433 |
| zgc:162200          | 289.2598 | 0.323008676  | 0.140534 | 2.298431 | 0.021537 | 0.260177 |
| jmjdlcb             | 1503.316 | 0.051951098  | 0.176103 | 0.295004 | 0.767991 | 0.960296 |
| pjvk                | 8.7485   | -0.708525678 | 0.646768 | -1.09549 | 0.273304 | 0.749148 |
| sqlea               | 66.86675 | 0.500846068  | 0.278974 | 1.795312 | 0.072604 | 0.457864 |
| gfilb               | 21.81314 | 0.146945052  | 0.349    | 0.421046 | 0.673721 | 0.934514 |
| supt16h             | 1406.889 | -0.083668129 | 0.148081 | -0.56502 | 0.572062 | 0.903461 |
| eloal               | 4.69333  | -0.765965121 | 0.78614  | -0.97434 | 0.329889 | 0.788084 |
| doc2d               | 85.18505 | -0.561749946 | 0.30952  | -1.8149  | 0.069539 | 0.450071 |
| dlx2a               | 253.51   | 0.060998717  | 0.12654  | 0.48205  | 0.629771 | 0.92285  |
| prkd3               | 125.8818 | -0.065460499 | 0.177868 | -0.36803 | 0.712852 | 0.945821 |
| nfatc2b             | 8.219173 | 0.986465388  | 0.704492 | 1.40025  | 0.161438 | 0.628449 |
| pus10               | 120.9382 | 0.158069509  | 0.167868 | 0.941627 | 0.346383 | 0.799463 |
| nhsb                | 243.7462 | 0.11190914   | 0.200041 | 0.559431 | 0.575868 | 0.904739 |
| samd10a             | 111.8894 | -0.063357132 | 0.239197 | -0.26487 | 0.791107 | 0.964766 |
| fam89a              | 78.33897 | -0.356049742 | 0.30682  | -1.16045 | 0.245866 | 0.727177 |
| si:ch211-202h22.9   | 9.568321 | 1.055428896  | 1.751871 | 0.602458 | 0.546869 | 0.896107 |
| agbl2               | 24.6954  | 0.080560693  | 0.446702 | 0.180345 | 0.856881 | 0.979558 |
| nrip2               | 241.6301 | 0.309289596  | 0.187182 | 1.652351 | 0.098463 | 0.521103 |
| BX927329.1          | 9.82772  | -1.983513676 | 0.790087 | -2.5105  | 0.012056 | 0.190742 |
| igl3v5              | 0 NA     | NA           | NA       | NA       | NA       | NA       |
| senp6b              | 0.402307 | -0.86813702  | 4.302287 | -0.20178 | 0.840085 | NA       |
| akap13              | 412.4819 | 0.021308793  | 0.162918 | 0.130794 | 0.895938 | 0.98926  |
| si:zfos-223e1.2     | 14.8985  | -1.021218004 | 0.447605 | -2.28151 | 0.022518 | 0.265534 |
| si:dkey-178e17.1    | 1.130718 | 1.891336941  | 2.288066 | 0.826609 | 0.408459 | NA       |
| tmem41b             | 78.50448 | -0.262426408 | 0.185905 | -1.41161 | 0.158063 | 0.623766 |
| bahcc1b             | 667.176  | 0.299018183  | 0.151626 | 1.972076 | 0.048601 | 0.383778 |
| adh5                | 2663.898 | -0.068939988 | 0.12543  | -0.54963 | 0.582574 | 0.90571  |
| lrrtm41l            | 16.16412 | 0.370413049  | 0.787789 | 0.470193 | 0.638217 | 0.924779 |
| si:cabz01032454.3   | 34.86646 | 0.776730432  | 0.382522 | 2.030551 | 0.042301 | 0.359936 |
| kif16bb             | 50.23793 | -1.414027303 | 0.385433 | -3.66867 | 0.000244 | 0.016928 |
| UBA6                | 232.2095 | -0.018624055 | 0.158062 | -0.11783 | 0.906204 | 0.991631 |
| il13ral             | 133.6092 | -0.097699931 | 0.232739 | -0.41978 | 0.674643 | 0.934877 |
| zmat3               | 7.748078 | 0.699305458  | 0.782131 | 0.894103 | 0.371267 | 0.818945 |
| RF00001             | 0.517384 | 1.055415165  | 3.061407 | 0.344748 | 0.730284 | NA       |
| dre-mir-125b-2      | 0 NA     | NA           | NA       | NA       | NA       | NA       |
| RF00001             | 0.269807 | 1.055353695  | 5.267649 | 0.200346 | 0.84121  | NA       |
| dre-let-7d-2        | 0 NA     | NA           | NA       | NA       | NA       | NA       |
| RF00001             | 0.307786 | 1.055340904  | 5.267649 | 0.200344 | 0.841212 | NA       |
| dre-mir-192         | 1.90489  | -0.868148283 | 2.313381 | -0.37527 | 0.707458 | NA       |
| RF00001             | 0 NA     | NA           | NA       | NA       | NA       | NA       |
| dre-mir-459         | 0 NA     | NA           | NA       | NA       | NA       | NA       |
| RF00001             | 0 NA     | NA           | NA       | NA       | NA       | NA       |
| dre-mir-133c        | 4.934564 | -0.425387731 | 0.968944 | -0.43902 | 0.660646 | 0.930581 |
| RF00001             | 0 NA     | NA           | NA       | NA       | NA       | NA       |
| RF00001             | 0.045161 | 0            | 5.267649 | 0        | 1        | NA       |

|                |          |              |          |          |          |          |
|----------------|----------|--------------|----------|----------|----------|----------|
| dre-mir-135c-1 | 0        | NA           | NA       | NA       | NA       | NA       |
| RF00001        | 0        | NA           | NA       | NA       | NA       | NA       |
| RF00001        | 0        | NA           | NA       | NA       | NA       | NA       |
| NC_002333.1    | 3.438334 | 0.868796272  | 0.955853 | 0.908922 | 0.363391 | 0.813662 |
| RF00026        | 0        | NA           | NA       | NA       | NA       | NA       |
| RF00001        | 19.4945  | 0.7178623    | 0.501254 | 1.432132 | 0.152106 | 0.615705 |
| NC_002333.2    | 10.94595 | -0.738448513 | 0.750893 | -0.98343 | 0.325397 | 0.784089 |
| dre-mir-29b-1  | 18.25811 | 2.564829509  | 1.569413 | 1.63426  | 0.102204 | 0.528963 |
| RF00088        | 0.261706 | 0            | 5.267649 | 0        | 1        | NA       |
| RF00093        | 0.050624 | 1.055396947  | 5.267649 | 0.200354 | 0.841203 | NA       |
| dre-mir-15a-1  | 0.046941 | 0            | 5.267649 | 0        | 1        | NA       |
| RF00001        | 0        | NA           | NA       | NA       | NA       | NA       |
| RF00440        | 0.053506 | -0.86807634  | 5.267649 | -0.16479 | 0.869106 | NA       |
| dre-mir-124-5  | 32.98597 | 0.281709153  | 0.559566 | 0.503442 | 0.614653 | 0.915998 |
| dre-mir-499    | 0        | NA           | NA       | NA       | NA       | NA       |
| RF00571        | 2.480231 | -0.638450426 | 1.185527 | -0.53854 | 0.590206 | 0.908901 |
| mir338-2       | 0        | NA           | NA       | NA       | NA       | NA       |
| RF00001        | 0.138104 | -0.86810168  | 5.267649 | -0.1648  | 0.869102 | NA       |
| RF00001        | 0        | NA           | NA       | NA       | NA       | NA       |
| RF00612        | 0        | NA           | NA       | NA       | NA       | NA       |
| RF00001        | 0.08847  | 0            | 5.267649 | 0        | 1        | NA       |
| RF00001        | 0.847031 | -2.341569717 | 2.847329 | -0.82237 | 0.410864 | NA       |
| RF00001        | 0        | NA           | NA       | NA       | NA       | NA       |
| dre-let-7c-2   | 0        | NA           | NA       | NA       | NA       | NA       |
| RF00001        | 0        | NA           | NA       | NA       | NA       | NA       |
| RF00001        | 0        | NA           | NA       | NA       | NA       | NA       |
| RF00001        | 0.237859 | -1.791188523 | 4.951468 | -0.36175 | 0.71754  | NA       |
| RF00001        | 0.546985 | -0.868142213 | 3.163063 | -0.27446 | 0.783729 | NA       |
| RF00026        | 0        | NA           | NA       | NA       | NA       | NA       |
| RF00001        | 0.086616 | 0            | 5.267649 | 0        | 1        | NA       |
| RF00001        | 0.101446 | -1.755425691 | 5.23528  | -0.33531 | 0.737394 | NA       |
| RF00001        | 0        | NA           | NA       | NA       | NA       | NA       |
| RF00001        | 0        | NA           | NA       | NA       | NA       | NA       |
| RF00001        | 0.04222  | 0            | 5.267649 | 0        | 1        | NA       |
| RF00001        | 0        | NA           | NA       | NA       | NA       | NA       |
| NC_002333.3    | 12.02514 | -0.779248293 | 0.675433 | -1.1537  | 0.248623 | 0.728723 |
| NC_002333.4    | 11048.85 | -0.115898097 | 0.230935 | -0.50186 | 0.615763 | 0.916365 |
| RF00001        | 0        | NA           | NA       | NA       | NA       | NA       |
| dre-mir-130b   | 0.847426 | 1.185918438  | 2.00651  | 0.591035 | 0.554497 | NA       |
| dre-mir-456    | 0        | NA           | NA       | NA       | NA       | NA       |
| RF00413        | 0.973869 | -2.38179113  | 1.867908 | -1.27511 | 0.20227  | NA       |
| RF00001        | 0        | NA           | NA       | NA       | NA       | NA       |
| RF00581        | 0.423469 | 3.21668106   | 3.499536 | 0.919174 | 0.358005 | NA       |
| RF00001        | 1.103177 | 0.064430824  | 1.872775 | 0.034404 | 0.972555 | NA       |
| NC_002333.5    | 0.629146 | 1.904905651  | 2.629175 | 0.724526 | 0.468743 | NA       |
| RF00026        | 0        | NA           | NA       | NA       | NA       | NA       |
| RF00001        | 0        | NA           | NA       | NA       | NA       | NA       |
| RF00548        | 0.043308 | 0            | 5.267649 | 0        | 1        | NA       |
| RF00001        | 0        | NA           | NA       | NA       | NA       | NA       |
| RF00211        | 0.087179 | 0            | 5.267649 | 0        | 1        | NA       |
| RF00001        | 0        | NA           | NA       | NA       | NA       | NA       |
| RF00604        | 0        | NA           | NA       | NA       | NA       | NA       |
| RF00001        | 0.060442 | 0            | 5.267649 | 0        | 1        | NA       |
| RF00003        | 0        | NA           | NA       | NA       | NA       | NA       |

|                 |           |               |           |           |           |           |
|-----------------|-----------|---------------|-----------|-----------|-----------|-----------|
| RF00001         | 0         | NA            | NA        | NA        | NA        | NA        |
| RF00566         | 1. 528061 | 1. 08476814   | 1. 28162  | 0. 846404 | 0. 397327 | NA        |
| mir140          | 1. 026904 | 0. 952204451  | 2. 220623 | 0. 428801 | 0. 668068 | NA        |
| RF00342         | 0. 179442 | 0             | 5. 267649 | 0         | 1         | NA        |
| dre-mir-183     | 0. 04222  | 0             | 5. 267649 | 0         | 1         | NA        |
| dre-mir-21-2    | 1. 193586 | -0. 255532298 | 1. 605339 | -0. 15918 | 0. 87353  | NA        |
| RF00001         | 0         | NA            | NA        | NA        | NA        | NA        |
| dre-mir-141     | 0. 223858 | 1. 055358154  | 5. 267649 | 0. 200347 | 0. 841209 | NA        |
| RF00377         | 0. 046941 | 0             | 5. 267649 | 0         | 1         | NA        |
| RF00396         | 2. 313002 | -0. 488063972 | 1. 24226  | -0. 39288 | 0. 694405 | 0. 941093 |
| RF00001         | 0         | NA            | NA        | NA        | NA        | NA        |
| dre-mir-125c    | 0. 204566 | 0. 117895018  | 5. 207558 | 0. 022639 | 0. 981938 | NA        |
| RF00003         | 0         | NA            | NA        | NA        | NA        | NA        |
| dre-let-7j      | 1. 189803 | 1. 978481967  | 2. 141952 | 0. 923682 | 0. 355652 | NA        |
| RF01299         | 0. 18577  | -0. 86811591  | 5. 267649 | -0. 1648  | 0. 8691   | NA        |
| RF00089         | 0. 835464 | 2. 996048059  | 2. 522951 | 1. 187517 | 0. 235024 | NA        |
| RF00056         | 0. 232063 | 0             | 5. 267649 | 0         | 1         | NA        |
| dre-mir-23a-1   | 0         | NA            | NA        | NA        | NA        | NA        |
| dre-mir-153a    | 0         | NA            | NA        | NA        | NA        | NA        |
| RF00619         | 0. 563131 | -1. 823196973 | 4. 032311 | -0. 45215 | 0. 651163 | NA        |
| dre-mir-212     | 0. 04222  | 0             | 5. 267649 | 0         | 1         | NA        |
| dre-mir-731     | 0         | NA            | NA        | NA        | NA        | NA        |
| RF00001         | 0. 147133 | 1. 055383603  | 5. 267649 | 0. 200352 | 0. 841205 | NA        |
| dre-mir-135c-2  | 0         | NA            | NA        | NA        | NA        | NA        |
| dre-mir-455-2   | 0. 089161 | 0             | 5. 267649 | 0         | 1         | NA        |
| dre-mir-26b     | 1. 473703 | 1. 011306237  | 1. 98134  | 0. 510415 | 0. 609761 | NA        |
| mir223          | 1. 038139 | -2. 172594633 | 2. 478376 | -0. 87662 | 0. 380693 | NA        |
| dre-mir-26a-1   | 0         | NA            | NA        | NA        | NA        | NA        |
| dre-mir-9-3     | 0. 160586 | 0             | 5. 267649 | 0         | 1         | NA        |
| dre-mir-24-3    | 0. 353443 | 0             | 3. 754398 | 0         | 1         | NA        |
| dre-mir-724     | 0         | NA            | NA        | NA        | NA        | NA        |
| dre-mir-9-2     | 0. 195607 | 1. 055362173  | 5. 267649 | 0. 200348 | 0. 841209 | NA        |
| NC_002333. 6    | 4. 967964 | -0. 608605289 | 0. 896156 | -0. 67913 | 0. 497056 | 0. 878572 |
| RF00096         | 0. 043308 | 0             | 5. 267649 | 0         | 1         | NA        |
| RF00093         | 0. 258045 | 1. 055368603  | 4. 829836 | 0. 21851  | 0. 827032 | NA        |
| dre-mir-10b-1   | 0         | NA            | NA        | NA        | NA        | NA        |
| RF00001         | 0         | NA            | NA        | NA        | NA        | NA        |
| RF00396         | 1. 238305 | -0. 298098158 | 2. 499846 | -0. 11925 | 0. 90508  | NA        |
| dre-mir-124-1   | 0. 61067  | 1. 055386397  | 4. 301    | 0. 245382 | 0. 806161 | NA        |
| RF00001         | 0. 167824 | 0             | 5. 267649 | 0         | 1         | NA        |
| RF00001         | 0         | NA            | NA        | NA        | NA        | NA        |
| RF00001         | 0         | NA            | NA        | NA        | NA        | NA        |
| si:dkey-71b5. 7 | 183. 0887 | 0. 830187345  | 0. 291156 | 2. 851347 | 0. 004353 | 0. 108751 |
| dre-mir-730     | 0. 046941 | 0             | 5. 267649 | 0         | 1         | NA        |
| RF00001         | 0         | NA            | NA        | NA        | NA        | NA        |
| RF00407         | 1. 405081 | 0. 117864211  | 1. 28822  | 0. 091494 | 0. 9271   | NA        |
| RF00070         | 0. 094679 | 0             | 5. 267649 | 0         | 1         | NA        |
| dre-mir-375-2   | 9. 727635 | 0. 454471887  | 0. 656677 | 0. 692078 | 0. 488888 | 0. 873964 |
| dre-mir-200c    | 0         | NA            | NA        | NA        | NA        | NA        |
| NC_002333. 7    | 0. 837286 | -0. 76171964  | 2. 689716 | -0. 2832  | 0. 777026 | NA        |
| RF00001         | 0         | NA            | NA        | NA        | NA        | NA        |
| RF00001         | 0. 439406 | 0             | 4. 174686 | 0         | 1         | NA        |
| RF00001         | 0         | NA            | NA        | NA        | NA        | NA        |
| dre-mir-17a-2   | 0. 190607 | -1. 755450757 | 5. 235279 | -0. 33531 | 0. 73739  | NA        |

|                |          |              |            |          |          |          |
|----------------|----------|--------------|------------|----------|----------|----------|
| RF00611        | 0.050624 | 1.055396947  | 5.267649   | 0.200354 | 0.841203 | NA       |
| RF00007        | 0.11354  |              | 0 5.267649 |          | 0        | 1 NA     |
| dre-mir-181a-2 | 0.090321 |              | 0 5.267649 |          | 0        | 1 NA     |
| RF00004        | 0 NA     |              | NA         | NA       | NA       | NA       |
| RF00571        | 5.374964 | 1.309865877  | 0.929715   | 1.40889  | 0.158868 | 0.624456 |
| RF01225        | 0.245644 | -1.755465446 | 5.235278   | -0.33531 | 0.737388 | NA       |
| RF00001        | 0 NA     |              | NA         | NA       | NA       | NA       |
| mir16c         | 0 NA     |              | NA         | NA       | NA       | NA       |
| RF00003        | 0 NA     |              | NA         | NA       | NA       | NA       |
| RF00001        | 0 NA     |              | NA         | NA       | NA       | NA       |
| RF00001        | 0 NA     |              | NA         | NA       | NA       | NA       |
| RF00045        | 2.482061 | -0.108987169 | 1.175381   | -0.09272 | 0.926122 | 0.994815 |
| dre-mir-27b    | 0.046941 |              | 0 5.267649 |          | 0        | 1 NA     |
| RF00001        | 0.08553  |              | 0 5.267649 |          | 0        | 1 NA     |
| dre-mir-152    | 0.043308 |              | 0 5.267649 |          | 0        | 1 NA     |
| RF00396        | 0 NA     |              | NA         | NA       | NA       | NA       |
| RF00001        | 0.102781 | 1.055383603  | 5.267649   | 0.200352 | 0.841205 | NA       |
| dre-mir-194a   | 0.353928 |              | 0 4.390747 |          | 0        | 1 NA     |
| RF00056        | 1.039583 |              | 0 2.31356  |          | 0        | 1 NA     |
| dre-mir-1788   | 0.170632 | 1.11785931   | 5.226359   | 0.213889 | 0.830634 | NA       |
| dre-let-7a-5   | 0.44549  | 0.093656397  | 2.937245   | 0.031886 | 0.974563 | NA       |
| dre-mir-722    | 0 NA     |              | NA         | NA       | NA       | NA       |
| RF01291        | 1.947181 | -0.868139122 | 1.994647   | -0.43523 | 0.663392 | NA       |
| RF00003        | 0 NA     |              | NA         | NA       | NA       | NA       |
| RF00001        | 0.136135 |              | 0 5.267649 |          | 0        | 1 NA     |
| RF00001        | 0.655036 |              | 0 2.868673 |          | 0        | 1 NA     |
| dre-mir-24-1   | 0 NA     |              | NA         | NA       | NA       | NA       |
| RF00152        | 0.137987 |              | 0 5.267649 |          | 0        | 1 NA     |
| dre-mir-18b    | 0 NA     |              | NA         | NA       | NA       | NA       |
| RF00001        | 0.04222  |              | 0 5.267649 |          | 0        | 1 NA     |
| RF00001        | 0.043309 |              | 0 5.267649 |          | 0        | 1 NA     |
| RF00049        | 0 NA     |              | NA         | NA       | NA       | NA       |
| RF00575        | 0 NA     |              | NA         | NA       | NA       | NA       |
| RF00572        | 0.059954 | 1.055396947  | 5.267649   | 0.200354 | 0.841203 | NA       |
| RF00001        | 0 NA     |              | NA         | NA       | NA       | NA       |
| dre-mir-30c    | 0 NA     |              | NA         | NA       | NA       | NA       |
| dre-mir-31     | 0.253118 | 3.171067785  | 5.177695   | 0.612448 | 0.540242 | NA       |
| RF00001        | 0.240709 | -1.769377521 | 5.234318   | -0.33803 | 0.735338 | NA       |
| RF00030        | 5.698298 | 0.666664017  | 1.526286   | 0.436788 | 0.662265 | 0.930742 |
| RF00001        | 0 NA     |              | NA         | NA       | NA       | NA       |
| RF00066        | 0.114342 | -0.868089684 | 5.267649   | -0.1648  | 0.869104 | NA       |
| RF00020        | 0.197341 |              | 0 5.236633 |          | 0        | 1 NA     |
| RF00273        | 0.086618 |              | 0 5.267649 |          | 0        | 1 NA     |
| RF00001        | 0 NA     |              | NA         | NA       | NA       | NA       |
| dre-mir-125a-2 | 0.904373 | -1.746339453 | 2.174451   | -0.80312 | 0.421907 | NA       |
| dre-mir-135a   | 2.095477 | 1.055436053  | 1.851589   | 0.570016 | 0.568667 | NA       |
| RF00001        | 0 NA     |              | NA         | NA       | NA       | NA       |
| RF00001        | 0 NA     |              | NA         | NA       | NA       | NA       |
| RF00001        | 0 NA     |              | NA         | NA       | NA       | NA       |
| RF00001        | 0.04222  |              | 0 5.267649 |          | 0        | 1 NA     |
| RF00190        | 0 NA     |              | NA         | NA       | NA       | NA       |
| dre-mir-728    | 0 NA     |              | NA         | NA       | NA       | NA       |
| dre-mir-182    | 0.131779 |              | 0 5.267649 |          | 0        | 1 NA     |
| RF00001        | 1.300478 | -0.385891604 | 1.479527   | -0.26082 | 0.794231 | NA       |

|                |          |              |          |          |          |          |    |
|----------------|----------|--------------|----------|----------|----------|----------|----|
| mir196d        | 0.127238 |              | 0        | 5.267649 | 0        | 1        | NA |
| RF01290        | 0        | NA           | NA       | NA       | NA       | NA       | NA |
| RF00001        | 0        | NA           | NA       | NA       | NA       | NA       | NA |
| dre-mir-204-1  | 0        | NA           | NA       | NA       | NA       | NA       | NA |
| RF00001        | 0.131779 |              | 0        | 5.267649 | 0        | 1        | NA |
| dre-mir-7b     | 2.268099 | 3.056819205  | 1.673075 | 1.827066 | 0.06769  | 0.443563 |    |
| RF00001        | 0.049519 |              | 0        | 5.267649 | 0        | 1        | NA |
| RF01296        | 0.983514 |              | 0        | 2.90126  | 0        | 1        | NA |
| dre-mir-181b-1 | 3.348307 | -0.802493034 | 1.703912 | -0.47097 | 0.637662 | 0.924779 |    |
| RF00001        | 0        | NA           | NA       | NA       | NA       | NA       | NA |
| RF00001        | 0        | NA           | NA       | NA       | NA       | NA       | NA |
| dre-mir-153c   | 0.091739 |              | 0        | 5.267649 | 0        | 1        | NA |
| RF00001        | 0        | NA           | NA       | NA       | NA       | NA       | NA |
| dre-mir-15b    | 0        | NA           | NA       | NA       | NA       | NA       | NA |
| dre-mir-132-1  | 0.344401 | -1.71401976  | 3.879152 | -0.44185 | 0.658595 | NA       |    |
| RF00020        | 0        | NA           | NA       | NA       | NA       | NA       | NA |
| RF00001        | 0        | NA           | NA       | NA       | NA       | NA       | NA |
| RF00001        | 0.04222  |              | 0        | 5.267649 | 0        | 1        | NA |
| RF00001        | 0        | NA           | NA       | NA       | NA       | NA       | NA |
| RF00002        | 6.989299 | 0.640721483  | 1.682463 | 0.380824 | 0.703334 | 0.943622 |    |
| dre-mir-34a    | 0        | NA           | NA       | NA       | NA       | NA       | NA |
| dre-mir-26a-3  | 0        | NA           | NA       | NA       | NA       | NA       | NA |
| dre-mir-454b   | 0.73406  | 0.013260851  | 2.250295 | 0.005893 | 0.995298 | NA       |    |
| RF00001        | 0        | NA           | NA       | NA       | NA       | NA       | NA |
| RF00001        | 0        | NA           | NA       | NA       | NA       | NA       | NA |
| dre-mir-16b    | 16.96057 | 0.003972791  | 0.421745 | 0.00942  | 0.992484 |          | 1  |
| RF00001        | 0        | NA           | NA       | NA       | NA       | NA       | NA |
| rn7sk          | 133.1326 | 0.22708224   | 0.313927 | 0.723359 | 0.469459 | 0.867224 |    |
| NC_002333.8    | 20.97122 | 0.212408353  | 0.436054 | 0.487115 | 0.626177 | 0.92063  |    |
| dre-mir-29b-2  | 0.256263 |              | 0        | 5.267649 | 0        | 1        | NA |
| RF00001        | 0        | NA           | NA       | NA       | NA       | NA       | NA |
| BX936308.1     | 39.2182  | -0.078544287 | 0.346776 | -0.2265  | 0.820813 | 0.971788 |    |
| mir363         | 8.933826 | -0.361096777 | 0.608958 | -0.59297 | 0.553198 | 0.897843 |    |
| dre-mir-124-2  | 11.79612 | -0.1339178   | 0.552719 | -0.24229 | 0.808556 | 0.969828 |    |
| dre-mir-9-7    | 0        | NA           | NA       | NA       | NA       | NA       | NA |
| mir99-2        | 0.045161 |              | 0        | 5.267649 | 0        | 1        | NA |
| RF00001        | 0        | NA           | NA       | NA       | NA       | NA       | NA |
| dre-mir-138-1  | 0        | NA           | NA       | NA       | NA       | NA       | NA |
| RF00001        | 0.049519 |              | 0        | 5.267649 | 0        | 1        | NA |
| RF00001        | 0        | NA           | NA       | NA       | NA       | NA       | NA |
| mir196b        | 0        | NA           | NA       | NA       | NA       | NA       | NA |
| dre-mir-101b   | 0        | NA           | NA       | NA       | NA       | NA       | NA |
| dre-mir-125b-1 | 0.096814 | -0.868089684 | 5.267649 | -0.1648  | 0.869104 | NA       |    |
| RF00001        | 0        | NA           | NA       | NA       | NA       | NA       | NA |
| dre-mir-9-5    | 0.15117  | -1.791424827 | 5.232816 | -0.34234 | 0.732092 | NA       |    |
| dre-mir-15c    | 0        | NA           | NA       | NA       | NA       | NA       | NA |
| NC_002333.9    | 7.121488 | 1.447500948  | 0.919218 | 1.574709 | 0.115324 | 0.555404 |    |
| dre-mir-457b   | 1.308162 | 2.94724688   | 1.747114 | 1.686923 | 0.091618 | NA       |    |
| RF00096        | 0.084441 |              | 0        | 5.267649 | 0        | 1        | NA |
| dre-mir-200a   | 0        | NA           | NA       | NA       | NA       | NA       | NA |
| RF00001        | 0        | NA           | NA       | NA       | NA       | NA       | NA |
| RF00001        | 0        | NA           | NA       | NA       | NA       | NA       | NA |
| dre-mir-124-3  | 2.451422 | -1.055440154 | 1.154294 | -0.91436 | 0.360528 | 0.811237 |    |
| RF00004        | 0        | NA           | NA       | NA       | NA       | NA       | NA |

|                |          |                       |          |          |         |
|----------------|----------|-----------------------|----------|----------|---------|
| dre-mir-429a   | 0 NA     | NA                    | NA       | NA       | NA      |
| RF00072        | 0 NA     | NA                    | NA       | NA       | NA      |
| dre-let-7c-1   | 0.094679 | 0 5.267649            | 0        | 1 NA     |         |
| NC_002333.10   | 0.243448 | 0 5.267649            | 0        | 1 NA     |         |
| RF00020        | 0 NA     | NA                    | NA       | NA       | NA      |
| RF00581        | 0.21807  | 0 5.267649            | 0        | 1 NA     |         |
| mir100-2       | 0 NA     | NA                    | NA       | NA       | NA      |
| RF00001        | 0.152088 | 0 5.267649            | 0        | 1 NA     |         |
| CR847953.2     | 0 NA     | NA                    | NA       | NA       | NA      |
| NC_002333.11   | 0.611346 | 0.057013627 2.344336  | 0.02432  | 0.980598 | NA      |
| dre-mir-126a   | 0 NA     | NA                    | NA       | NA       | NA      |
| dre-mir-23a-2  | 0 NA     | NA                    | NA       | NA       | NA      |
| RF00001        | 0 NA     | NA                    | NA       | NA       | NA      |
| dre-mir-301c   | 0 NA     | NA                    | NA       | NA       | NA      |
| RF00001        | 0 NA     | NA                    | NA       | NA       | NA      |
| dre-mir-375-1  | 1.102339 | 1.176705477 1.923281  | 0.611822 | 0.540656 | NA      |
| dre-mir-100-1  | 0 NA     | NA                    | NA       | NA       | NA      |
| RF00001        | 0 NA     | NA                    | NA       | NA       | NA      |
| dre-mir-204-2  | 0.092101 | 0 5.267649            | 0        | 1 NA     |         |
| dre-mir-23b    | 0 NA     | NA                    | NA       | NA       | NA      |
| RF00001        | 0.073968 | 0 5.267649            | 0        | 1 NA     |         |
| dre-mir-30d    | 0 NA     | NA                    | NA       | NA       | NA      |
| dre-mir-181b-2 | 0.861895 | -0.71537127 1.721412  | -0.41557 | 0.677723 | NA      |
| RF00001        | 0.043309 | 0 5.267649            | 0        | 1 NA     |         |
| RF00133        | 0 NA     | NA                    | NA       | NA       | NA      |
| RF00003        | 0.174358 | 0 5.267649            | 0        | 1 NA     |         |
| RF00608        | 0 NA     | NA                    | NA       | NA       | NA      |
| dre-mir-103    | 0 NA     | NA                    | NA       | NA       | NA      |
| RF00001        | 0 NA     | NA                    | NA       | NA       | NA      |
| dre-mir-144    | 0 NA     | NA                    | NA       | NA       | NA      |
| mir150         | 0 NA     | NA                    | NA       | NA       | NA      |
| dre-mir-734    | 0 NA     | NA                    | NA       | NA       | NA      |
| dre-mir-216a   | 0 NA     | NA                    | NA       | NA       | NA      |
| RF00001        | 0 NA     | NA                    | NA       | NA       | NA      |
| RF00577        | 0 NA     | NA                    | NA       | NA       | NA      |
| RF00377        | 0 NA     | NA                    | NA       | NA       | NA      |
| dre-mir-7a-3   | 0.206287 | -0.868115716 5.164683 | -0.16809 | 0.866515 | NA      |
| dre-mir-190a   | 0.128837 | 0 5.267649            | 0        | 1 NA     |         |
| dre-mir-10c    | 0.232924 | 0 5.267649            | 0        | 1 NA     |         |
| RF00001        | 0.4517   | 1.481414034 3.598071  | 0.411725 | 0.680541 | NA      |
| dre-mir-205    | 1.497681 | -0.578867485 1.332777 | -0.43433 | 0.664048 | NA      |
| RF00410        | 0.246408 | 0 5.267649            | 0        | 1 NA     |         |
| RF00186        | 2.355967 | -2.625737823 1.275254 | -2.05899 | 0.039495 | 0.34755 |
| mir206-2       | 0 NA     | NA                    | NA       | NA       | NA      |
| dre-mir-133a-2 | 0 NA     | NA                    | NA       | NA       | NA      |
| RF00092        | 1.657103 | -2.361761456 1.954752 | -1.20822 | 0.226964 | NA      |
| dre-mir-107b   | 0.142903 | -0.868103008 5.267649 | -0.1648  | 0.869102 | NA      |
| RF00001        | 0 NA     | NA                    | NA       | NA       | NA      |
| RF00001        | 0 NA     | NA                    | NA       | NA       | NA      |
| dre-mir-218a-1 | 0.043308 | 0 5.267649            | 0        | 1 NA     |         |
| RF00001        | 0 NA     | NA                    | NA       | NA       | NA      |
| NC_002333.12   | 13.25648 | 0.552759527 0.573221  | 0.964304 | 0.334894 | 0.79181 |
| dre-mir-184-1  | 0.288485 | -0.749604582 4.644132 | -0.16141 | 0.871771 | NA      |
| mir24-4        | 0.04222  | 0 5.267649            | 0        | 1 NA     |         |



|                 |           |               |             |           |           |           |   |
|-----------------|-----------|---------------|-------------|-----------|-----------|-----------|---|
| dre-mir-203a    | 2. 527007 | -0. 58183001  | 1. 107021   | -0. 52558 | 0. 599179 | 0. 913173 |   |
| dre-mir-155     | 0 NA      |               | NA          | NA        | NA        | NA        |   |
| dre-let-7a-2    | 0 NA      |               | NA          | NA        | NA        | NA        |   |
| RF00288         | 0. 508535 | -1. 820603885 | 3. 550568   | -0. 51276 | 0. 608116 | NA        |   |
| CU929237. 1     | 4. 734592 | -0. 99713525  | 0. 871537   | -1. 14411 | 0. 252578 | 0. 732759 |   |
| RF00581         | 0. 575965 | 3. 472677838  | 3. 312142   | 1. 048469 | 0. 294423 | NA        |   |
| dre-let-7b      | 1. 420609 | 0. 039495456  | 1. 494452   | 0. 026428 | 0. 978916 | NA        |   |
| dre-let-7h      | 0 NA      |               | NA          | NA        | NA        | NA        |   |
| RF00001         | 0. 073968 |               | 0 5. 267649 |           | 0         | 1 NA      |   |
| dre-mir-15a-2   | 0 NA      |               | NA          | NA        | NA        | NA        |   |
| RF00001         | 0 NA      |               | NA          | NA        | NA        | NA        |   |
| mir29a-1        | 0. 447142 | 2. 439683462  | 4. 196018   | 0. 581428 | 0. 560952 | NA        |   |
| RF00001         | 0 NA      |               | NA          | NA        | NA        | NA        |   |
| RF00151         | 0. 310787 | -1. 039034368 | 5. 157212   | -0. 20147 | 0. 840329 | NA        |   |
| RF00425         | 0 NA      |               | NA          | NA        | NA        | NA        |   |
| RF00001         | 0. 094679 |               | 0 5. 267649 |           | 0         | 1 NA      |   |
| dre-mir-200b    | 0 NA      |               | NA          | NA        | NA        | NA        |   |
| dre-mir-199-3   | 8. 122642 | 0. 016633845  | 0. 933463   | 0. 01782  | 0. 985783 |           | 1 |
| RF00609         | 0 NA      |               | NA          | NA        | NA        | NA        |   |
| RF00001         | 0. 109473 | 1. 055383603  | 5. 267649   | 0. 200352 | 0. 841205 | NA        |   |
| CABZ01078244. 1 | 0. 087179 |               | 0 5. 267649 |           | 0         | 1 NA      |   |
| dre-mir-338-3   | 0 NA      |               | NA          | NA        | NA        | NA        |   |
| RF00411         | 0. 140685 | -0. 868089684 | 5. 267649   | -0. 1648  | 0. 869104 | NA        |   |
| dre-mir-128-1   | 0. 04222  |               | 0 5. 267649 |           | 0         | 1 NA      |   |
| dre-mir-1306    | 0 NA      |               | NA          | NA        | NA        | NA        |   |
| CR847548. 1     | 0 NA      |               | NA          | NA        | NA        | NA        |   |
| RF00133         | 1. 366528 | 0. 93112971   | 1. 765146   | 0. 527508 | 0. 597841 | NA        |   |
| RF00190         | 0 NA      |               | NA          | NA        | NA        | NA        |   |
| RF00421         | 8. 085896 | -0. 363722458 | 0. 713092   | -0. 51006 | 0. 610007 | 0. 915331 |   |
| NC_002333. 13   | 1761. 535 | -0. 401823168 | 0. 231834   | -1. 73324 | 0. 083054 | 0. 483628 |   |
| RF00091         | 0. 053506 | -0. 86807634  | 5. 267649   | -0. 16479 | 0. 869106 | NA        |   |
| RF00581         | 0 NA      |               | NA          | NA        | NA        | NA        |   |
| RF00001         | 0 NA      |               | NA          | NA        | NA        | NA        |   |
| RF00613         | 0. 160274 | -0. 864880641 | 5. 230461   | -0. 16535 | 0. 868665 | NA        |   |
| RF00001         | 0 NA      |               | NA          | NA        | NA        | NA        |   |
| RF00001         | 0 NA      |               | NA          | NA        | NA        | NA        |   |
| RF00288         | 0. 113703 | 1. 055383603  | 5. 267649   | 0. 200352 | 0. 841205 | NA        |   |
| dre-let-7e      | 0. 049519 |               | 0 5. 267649 |           | 0         | 1 NA      |   |
| RF00001         | 0. 04222  |               | 0 5. 267649 |           | 0         | 1 NA      |   |
| dre-mir-729     | 3. 276927 |               | 0 1. 900555 |           | 0         | 1         | 1 |
| dre-mir-457a    | 0 NA      |               | NA          | NA        | NA        | NA        |   |
| RF00001         | 0 NA      |               | NA          | NA        | NA        | NA        |   |
| RF00001         | 0 NA      |               | NA          | NA        | NA        | NA        |   |
| RF00001         | 0 NA      |               | NA          | NA        | NA        | NA        |   |
| RF00001         | 0. 564265 | 1. 875125866  | 2. 838247   | 0. 660663 | 0. 508828 | NA        |   |
| RF00026         | 0. 468123 | 1. 859598885  | 4. 104984   | 0. 45301  | 0. 650542 | NA        |   |
| RF00016         | 0. 350871 |               | 0 4. 454105 |           | 0         | 1 NA      |   |
| dre-mir-9-1     | 0 NA      |               | NA          | NA        | NA        | NA        |   |
| RF00265         | 0 NA      |               | NA          | NA        | NA        | NA        |   |
| RF00001         | 0. 049519 |               | 0 5. 267649 |           | 0         | 1 NA      |   |
| RF00001         | 0 NA      |               | NA          | NA        | NA        | NA        |   |
| RF00001         | 0 NA      |               | NA          | NA        | NA        | NA        |   |
| NC_002333. 14   | 3. 350224 | -3. 255207646 | 1. 492981   | -2. 18034 | 0. 029232 | 0. 304273 |   |
| RF00089         | 3. 17417  | -0. 094647069 | 0. 878102   | -0. 10779 | 0. 914166 | 0. 992972 |   |

|                |           |               |           |           |                     |
|----------------|-----------|---------------|-----------|-----------|---------------------|
| RF00001        | 0 NA      | NA            | NA        | NA        | NA                  |
| RF00001        | 0. 249675 | 0 4. 878677   | 0         | 1 NA      |                     |
| RF00001        | 0 NA      | NA            | NA        | NA        | NA                  |
| NC_002333. 15  | 8. 377183 | 0. 426162882  | 0. 559282 | 0. 761982 | 0. 446071 0. 855403 |
| RF00001        | 0. 131777 | 0 5. 267649   | 0         | 1 NA      |                     |
| RF00066        | 0. 263478 | 0 5. 267649   | 0         | 1 NA      |                     |
| dre-mir-101a   | 0 NA      | NA            | NA        | NA        | NA                  |
| dre-mir-92a-2  | 4. 155377 | -2. 304023215 | 0. 935874 | -2. 4619  | 0. 013821 0. 205798 |
| RF00001        | 0 NA      | NA            | NA        | NA        | NA                  |
| RF00001        | 0 NA      | NA            | NA        | NA        | NA                  |
| RF00001        | 0 NA      | NA            | NA        | NA        | NA                  |
| dre-mir-142a   | 0. 264461 | 0. 093661915  | 4. 127007 | 0. 022695 | 0. 981894 NA        |
| CU442763. 1    | 0. 131761 | 0 5. 267649   | 0         | 1 NA      |                     |
| dre-mir-301b   | 0. 452197 | -1. 821041661 | 3. 620252 | -0. 50302 | 0. 614954 NA        |
| dre-let-7a-6   | 2. 470391 | -0. 562310133 | 1. 504642 | -0. 37372 | 0. 708615 0. 94551  |
| dre-mir-20b    | 0. 100142 | 1. 055383603  | 5. 267649 | 0. 200352 | 0. 841205 NA        |
| dre-mir-21-1   | 38. 54237 | 0. 763170579  | 0. 474614 | 1. 607981 | 0. 107839 0. 539429 |
| dre-mir-181c   | 0. 565764 | -0. 114554677 | 2. 829034 | -0. 04049 | 0. 9677 NA          |
| dre-mir-99-1   | 0 NA      | NA            | NA        | NA        | NA                  |
| RF00211        | 0. 249239 | -1. 331752152 | 5. 204055 | -0. 25591 | 0. 798023 NA        |
| RF00001        | 0 NA      | NA            | NA        | NA        | NA                  |
| RF00001        | 0. 04222  | 0 5. 267649   | 0         | 1 NA      |                     |
| dre-mir-137-1  | 6. 17732  | -0. 635391881 | 0. 780747 | -0. 81383 | 0. 415745 0. 839167 |
| RF00045        | 12. 75752 | 0. 301007152  | 0. 483483 | 0. 622581 | 0. 53356 0. 891181  |
| RF00001        | 0. 103263 | 1. 055383603  | 5. 267649 | 0. 200352 | 0. 841205 NA        |
| dre-mir-1388   | 0 NA      | NA            | NA        | NA        | NA                  |
| RF00001        | 0 NA      | NA            | NA        | NA        | NA                  |
| RF00003        | 0. 073968 | 0 5. 267649   | 0         | 1 NA      |                     |
| dre-mir-219-1  | 1. 945222 | 0. 055045975  | 1. 83193  | 0. 030048 | 0. 976029 NA        |
| dre-mir-454a   | 1. 557156 | -0. 481152119 | 1. 681995 | -0. 28606 | 0. 774832 NA        |
| RF00003        | 0 NA      | NA            | NA        | NA        | NA                  |
| dre-let-7a-3   | 0. 234085 | 0 5. 267649   | 0         | 1 NA      |                     |
| RF01229        | 0. 050624 | 1. 055396947  | 5. 267649 | 0. 200354 | 0. 841203 NA        |
| RF00001        | 0 NA      | NA            | NA        | NA        | NA                  |
| RF00001        | 0 NA      | NA            | NA        | NA        | NA                  |
| dre-mir-10a    | 0. 119909 | 2. 079562922  | 5. 22636  | 0. 397899 | 0. 690705 NA        |
| RF00001        | 0 NA      | NA            | NA        | NA        | NA                  |
| RF00004        | 1. 90881  | 1. 055433186  | 2. 011774 | 0. 524628 | 0. 599842 NA        |
| RF00001        | 0 NA      | NA            | NA        | NA        | NA                  |
| dre-mir-34b    | 0 NA      | NA            | NA        | NA        | NA                  |
| dre-mir-462    | 0 NA      | NA            | NA        | NA        | NA                  |
| RF00026        | 0 NA      | NA            | NA        | NA        | NA                  |
| RF00001        | 0. 063619 | 0 5. 267649   | 0         | 1 NA      |                     |
| RF00066        | 0. 621722 | 2. 005156301  | 2. 397906 | 0. 836212 | 0. 403036 NA        |
| RF00001        | 0 NA      | NA            | NA        | NA        | NA                  |
| dre-mir-130c-1 | 0. 53343  | 0. 013582049  | 3. 58106  | 0. 003793 | 0. 996974 NA        |
| RF00001        | 0 NA      | NA            | NA        | NA        | NA                  |
| dre-mir-206-1  | 5. 967495 | -0. 65829765  | 0. 911822 | -0. 72196 | 0. 47032 0. 867552  |
| CR354430. 1    | 0. 960561 | -0. 549069874 | 2. 06779  | -0. 26553 | 0. 790598 NA        |
| RF00001        | 0. 084441 | 0 5. 267649   | 0         | 1 NA      |                     |
| RF00001        | 0. 172145 | 0 5. 267649   | 0         | 1 NA      |                     |
| RF00409        | 4. 172465 | 0. 498730669  | 0. 856555 | 0. 582252 | 0. 560397 0. 899928 |
| dre-mir-19c    | 0. 762442 | -0. 550081441 | 2. 238843 | -0. 2457  | 0. 805915 NA        |
| dre-mir-740    | 0. 342372 | 0. 00403594   | 4. 462997 | 0. 000904 | 0. 999278 NA        |

|               |           |               |           |           |                     |
|---------------|-----------|---------------|-----------|-----------|---------------------|
| RF00001       | 0 NA      | NA            | NA        | NA        | NA                  |
| RF00089       | 0 NA      | NA            | NA        | NA        | NA                  |
| mir199-3a     | 0. 452729 | -2. 386665428 | 3. 570312 | -0. 66848 | 0. 50383 NA         |
| dre-mir-27a   | 0. 453739 | 1. 527103969  | 3. 122241 | 0. 489105 | 0. 624767 NA        |
| dre-mir-129-4 | 0. 04222  | 0             | 5. 267649 | 0         | 1 NA                |
| dre-mir-27d   | 0. 073968 | 0             | 5. 267649 | 0         | 1 NA                |
| dre-mir-142b  | 0 NA      | NA            | NA        | NA        | NA                  |
| RF00026       | 0 NA      | NA            | NA        | NA        | NA                  |
| RF00001       | 0. 679768 | 2. 5564091    | 2. 570827 | 0. 994392 | 0. 320032 NA        |
| RF00001       | 0. 060442 | 0             | 5. 267649 | 0         | 1 NA                |
| RF00191       | 0. 045161 | 0             | 5. 267649 | 0         | 1 NA                |
| dre-mir-726   | 0 NA      | NA            | NA        | NA        | NA                  |
| RF00001       | 0. 098043 | -1. 71005882  | 5. 238474 | -0. 32644 | 0. 74409 NA         |
| RF00093       | 0. 819698 | 0. 093656276  | 2. 223767 | 0. 042116 | 0. 966406 NA        |
| dre-mir-143   | 0. 51142  | -1. 823253975 | 4. 048125 | -0. 45039 | 0. 652426 NA        |
| RF00001       | 0 NA      | NA            | NA        | NA        | NA                  |
| RF00001       | 0. 049519 | 0             | 5. 267649 | 0         | 1 NA                |
| RF00001       | 0 NA      | NA            | NA        | NA        | NA                  |
| RF00001       | 0. 086618 | 0             | 5. 267649 | 0         | 1 NA                |
| RF00001       | 0 NA      | NA            | NA        | NA        | NA                  |
| RF00001       | 0 NA      | NA            | NA        | NA        | NA                  |
| dre-mir-135b  | 2. 052024 | 2. 572568874  | 1. 714352 | 1. 500607 | 0. 133457 NA        |
| dre-mir-460   | 0 NA      | NA            | NA        | NA        | NA                  |
| RF00001       | 0 NA      | NA            | NA        | NA        | NA                  |
| RF00068       | 0. 151871 | 2. 436401064  | 5. 206324 | 0. 46797  | 0. 639806 NA        |
| RF00319       | 0. 567336 | 3. 038865297  | 3. 297004 | 0. 921705 | 0. 356682 NA        |
| RF00001       | 0 NA      | NA            | NA        | NA        | NA                  |
| RF00001       | 0. 126661 | 0             | 5. 267649 | 0         | 1 NA                |
| dre-mir-34c   | 0 NA      | NA            | NA        | NA        | NA                  |
| RF00003       | 0. 04222  | 0             | 5. 267649 | 0         | 1 NA                |
| RF01299       | 1. 212646 | -0. 864149892 | 1. 849592 | -0. 46721 | 0. 640349 NA        |
| RF00003       | 0 NA      | NA            | NA        | NA        | NA                  |
| RF00270       | 0. 185688 | 1. 85412583   | 5. 241768 | 0. 353721 | 0. 723548 NA        |
| RF00001       | 0 NA      | NA            | NA        | NA        | NA                  |
| RF00001       | 0. 096459 | 0             | 5. 267649 | 0         | 1 NA                |
| RF00001       | 0 NA      | NA            | NA        | NA        | NA                  |
| RF00001       | 0. 56419  | 1. 897761748  | 3. 030372 | 0. 626247 | 0. 531153 NA        |
| dre-mir-187   | 0. 106524 | 1. 92158077   | 5. 236909 | 0. 36693  | 0. 713671 NA        |
| NC_002333. 16 | 14. 89251 | 0. 175176449  | 0. 567753 | 0. 308543 | 0. 757669 0. 957364 |
| RF00001       | 0. 08553  | 0             | 5. 267649 | 0         | 1 NA                |
| RF00004       | 0 NA      | NA            | NA        | NA        | NA                  |
| dre-let-7i    | 0. 981138 | -0. 868148976 | 2. 523328 | -0. 34405 | 0. 730809 NA        |
| RF00049       | 0 NA      | NA            | NA        | NA        | NA                  |
| RF00001       | 0 NA      | NA            | NA        | NA        | NA                  |
| NC_002333. 17 | 6372. 558 | -0. 828594712 | 0. 364082 | -2. 27585 | 0. 022855 0. 266968 |
| dre-let-7a-4  | 0 NA      | NA            | NA        | NA        | NA                  |
| dre-mir-9-6   | 0 NA      | NA            | NA        | NA        | NA                  |
| RF00001       | 0 NA      | NA            | NA        | NA        | NA                  |
| dre-mir-18c   | 0. 04222  | 0             | 5. 267649 | 0         | 1 NA                |
| RF00001       | 0 NA      | NA            | NA        | NA        | NA                  |
| NC_002333. 18 | 2790. 918 | -0. 585928961 | 0. 240999 | -2. 43125 | 0. 015047 0. 21481  |
| RF00003       | 0 NA      | NA            | NA        | NA        | NA                  |
| dre-mir-458   | 0 NA      | NA            | NA        | NA        | NA                  |
| RF00151       | 0. 084441 | 0             | 5. 267649 | 0         | 1 NA                |

|                |          |              |          |          |                   |
|----------------|----------|--------------|----------|----------|-------------------|
| RF00001        | 0 NA     | NA           | NA       | NA       | NA                |
| RF00001        | 0 NA     | NA           | NA       | NA       | NA                |
| dre-mir-129-1  | 0.050723 | -0.86807634  | 5.267649 | -0.16479 | 0.869106 NA       |
| dre-let-7d-1   | 0 NA     | NA           | NA       | NA       | NA                |
| RF00273        | 0 NA     | NA           | NA       | NA       | NA                |
| RF00020        | 0 NA     | NA           | NA       | NA       | NA                |
| RF00096        | 0.367783 | 1.055397308  | 3.81253  | 0.276823 | 0.781916 NA       |
| RF00001        | 0 NA     | NA           | NA       | NA       | NA                |
| RF00001        | 0 NA     | NA           | NA       | NA       | NA                |
| RF00015        | 0 NA     | NA           | NA       | NA       | NA                |
| RF00001        | 0.045161 | 0            | 5.267649 | 0        | 1 NA              |
| RF00150        | 0 NA     | NA           | NA       | NA       | NA                |
| RF00001        | 0.04222  | 0            | 5.267649 | 0        | 1 NA              |
| dre-mir-451    | 0 NA     | NA           | NA       | NA       | NA                |
| RF00001        | 0 NA     | NA           | NA       | NA       | NA                |
| RF00001        | 0 NA     | NA           | NA       | NA       | NA                |
| CR847944.3     | 0.049519 | 0            | 5.267649 | 0        | 1 NA              |
| RF00093        | 1.66954  | -2.110626997 | 1.727887 | -1.22151 | 0.221894 NA       |
| dre-mir-10b-2  | 1.595265 | 0.868190238  | 1.809451 | 0.479809 | 0.631363 NA       |
| dre-mir-27e    | 0.220576 | 0            | 5.267649 | 0        | 1 NA              |
| RF00090        | 0.10878  | 0            | 5.267649 | 0        | 1 NA              |
| dre-mir-130a   | 0.043309 | 0            | 5.267649 | 0        | 1 NA              |
| dre-let-7f     | 0 NA     | NA           | NA       | NA       | NA                |
| RF00068        | 1.623314 | 0.675909695  | 1.651882 | 0.409176 | 0.682411 NA       |
| dre-mir-429b   | 7.000675 | 0.058890821  | 0.669257 | 0.087994 | 0.929881 0.995626 |
| RF00001        | 0.136102 | 0            | 5.267649 | 0        | 1 NA              |
| RF00001        | 0 NA     | NA           | NA       | NA       | NA                |
| RF00001        | 0.129927 | 0            | 5.267649 | 0        | 1 NA              |
| RF00001        | 0.049519 | 0            | 5.267649 | 0        | 1 NA              |
| RF00001        | 0.184661 | -1.710083148 | 5.238472 | -0.32645 | 0.744086 NA       |
| dre-mir-218a-2 | 0.1434   | 0            | 5.267649 | 0        | 1 NA              |
| dre-mir-732    | 0 NA     | NA           | NA       | NA       | NA                |
| mir214a        | 0.050723 | -0.86807634  | 5.267649 | -0.16479 | 0.869106 NA       |
| NC_002333.19   | 23.7254  | 0.146962238  | 0.380999 | 0.385728 | 0.699698 0.942499 |
| dre-mir-10d    | 4.706884 | 0.59801586   | 0.892593 | 0.669976 | 0.502873 0.881453 |
| RF00001        | 5.439159 | -0.466577903 | 1.040094 | -0.44859 | 0.653726 0.929269 |
| RF01299        | 0 NA     | NA           | NA       | NA       | NA                |
| RF00619        | 0 NA     | NA           | NA       | NA       | NA                |
| RF00001        | 0 NA     | NA           | NA       | NA       | NA                |
| RF00003        | 0.049519 | 0            | 5.267649 | 0        | 1 NA              |
| dre-mir-129-2  | 0.087179 | 0            | 5.267649 | 0        | 1 NA              |
| RF00001        | 0.099037 | 0            | 5.267649 | 0        | 1 NA              |
| RF00340        | 0.08553  | 0            | 5.267649 | 0        | 1 NA              |
| dre-mir-145    | 8.367164 | -0.140538619 | 0.927317 | -0.15155 | 0.879539 0.986187 |
| RF00045        | 6.495241 | 0.28558637   | 0.694385 | 0.411279 | 0.680868 0.937189 |
| NC_002333.20   | 4.940971 | 0.73323993   | 0.909745 | 0.805984 | 0.420252 0.842383 |
| dre-mir-190b   | 0 NA     | NA           | NA       | NA       | NA                |
| dre-mir-125a-1 | 0.257725 | 0            | 5.267649 | 0        | 1 NA              |
| mir96          | 0.364308 | -2.410040694 | 3.783361 | -0.63701 | 0.524118 NA       |
| dre-mir-7a-2   | 0.225897 | 0.093667548  | 5.010069 | 0.018696 | 0.985084 NA       |
| RF00137        | 0 NA     | NA           | NA       | NA       | NA                |
| RF01277        | 0.727987 | -0.820020644 | 2.358053 | -0.34775 | 0.728026 NA       |
| RF00001        | 0 NA     | NA           | NA       | NA       | NA                |
| RF00270        | 0.570469 | -1.379512748 | 3.05452  | -0.45163 | 0.651536 NA       |

|                |          |              |          |          |          |          |
|----------------|----------|--------------|----------|----------|----------|----------|
| dre-mir-199-2  | 0.146408 | 1.854137197  | 5.241768 | 0.353724 | 0.723546 | NA       |
| dre-mir-27c    | 0.700234 | -1.416817577 | 2.291149 | -0.61839 | 0.53632  | NA       |
| arhgap19       | 184.5324 | 0.275868717  | 0.191291 | 1.442144 | 0.149262 | 0.611024 |
| dre-mir-16a    | 0 NA     | NA           | NA       | NA       | NA       | NA       |
| RF00001        | 0 NA     | NA           | NA       | NA       | NA       | NA       |
| dre-mir-130c-2 | 0 NA     | NA           | NA       | NA       | NA       | NA       |
| RF00001        | 1.140236 | 0.710965082  | 2.04239  | 0.348104 | 0.727762 | NA       |
| RF00001        | 0 NA     | NA           | NA       | NA       | NA       | NA       |
| dre-mir-727    | 0 NA     | NA           | NA       | NA       | NA       | NA       |
| RF00152        | 0 NA     | NA           | NA       | NA       | NA       | NA       |
| RF00613        | 0.091242 | -0.868089684 | 5.267649 | -0.1648  | 0.869104 | NA       |
| RF00581        | 2.477889 | 0.757186694  | 1.280235 | 0.591443 | 0.554223 | 0.898306 |
| RF00611        | 0 NA     | NA           | NA       | NA       | NA       | NA       |
| dre-mir-218b   | 0.137587 | 0            | 5.267649 | 0        | 1        | NA       |
| CR354430.2     | 0.13069  | 0            | 5.267649 | 0        | 1        | NA       |
| dre-mir-217    | 1.501613 | -1.516571386 | 1.583782 | -0.95756 | 0.338283 | NA       |
| dre-let-7g-1   | 2.050609 | 1.055434009  | 1.86063  | 0.567245 | 0.570547 | NA       |
| RF00001        | 0.36136  | 2.962433098  | 3.720933 | 0.796153 | 0.425943 | NA       |
| dre-mir-489    | 0.133922 | 1.055383603  | 5.267649 | 0.200352 | 0.841205 | NA       |
| mir196a-1      | 0 NA     | NA           | NA       | NA       | NA       | NA       |
| dre-mir-146a   | 1.125868 | 0            | 2.400962 | 0        | 1        | NA       |
| NC_002333.21   | 2.892187 | -0.374900833 | 1.289402 | -0.29076 | 0.771238 | 0.960484 |
| RF00001        | 0.621447 | -1.785485327 | 2.797255 | -0.6383  | 0.523279 | NA       |
| RF00001        | 0.043309 | 0            | 5.267649 | 0        | 1        | NA       |
| RF01296        | 0.849746 | 0.711918008  | 1.995099 | 0.356833 | 0.721217 | NA       |
| RF00001        | 0 NA     | NA           | NA       | NA       | NA       | NA       |
| RF00001        | 0 NA     | NA           | NA       | NA       | NA       | NA       |
| dre-mir-210    | 3.170684 | 1.05628998   | 1.000668 | 1.055585 | 0.291158 | 0.761299 |
| RF00001        | 0.163222 | 1.055370259  | 5.267649 | 0.200349 | 0.841207 | NA       |
| RF00001        | 0.310657 | 1.631374499  | 4.526054 | 0.360441 | 0.718518 | NA       |
| dre-mir-203b   | 2.89357  | -1.11351179  | 1.450601 | -0.76762 | 0.442712 | 0.853879 |
| dre-mir-216b   | 0.050624 | 1.055396947  | 5.267649 | 0.200354 | 0.841203 | NA       |
| dre-mir-146b   | 0 NA     | NA           | NA       | NA       | NA       | NA       |
| dre-mir-148    | 0 NA     | NA           | NA       | NA       | NA       | NA       |
| RF00001        | 0 NA     | NA           | NA       | NA       | NA       | NA       |
| RF00001        | 0 NA     | NA           | NA       | NA       | NA       | NA       |
| RF00092        | 0.291087 | -2.364631889 | 4.601776 | -0.51385 | 0.607355 | NA       |
| RF00020        | 0 NA     | NA           | NA       | NA       | NA       | NA       |
| RF00001        | 0.092828 | 0            | 5.267649 | 0        | 1        | NA       |
| RF00191        | 4.612408 | -0.520533765 | 0.947353 | -0.54946 | 0.582689 | 0.90571  |
| RF00001        | 0 NA     | NA           | NA       | NA       | NA       | NA       |
| dre-mir-153b   | 0.864487 | -1.66792265  | 2.000942 | -0.83357 | 0.404524 | NA       |
| RF00045        | 8.758605 | -0.164492089 | 0.729302 | -0.22555 | 0.821553 | 0.971788 |
| RF00001        | 11.6286  | 0.863094702  | 0.636249 | 1.356536 | 0.174929 | 0.648869 |
| RF00001        | 0 NA     | NA           | NA       | NA       | NA       | NA       |
| RF00548        | 0.171618 | -1.769364778 | 5.234319 | -0.33803 | 0.735339 | NA       |
| dre-mir-301a   | 0 NA     | NA           | NA       | NA       | NA       | NA       |
| RF00001        | 0.045161 | 0            | 5.267649 | 0        | 1        | NA       |
| dre-mir-107a   | 0 NA     | NA           | NA       | NA       | NA       | NA       |
| RF01234        | 12.14049 | 0.563531191  | 0.657052 | 0.857666 | 0.391077 | 0.827902 |
| dre-let-7g-2   | 0 NA     | NA           | NA       | NA       | NA       | NA       |
| RF00001        | 0.093881 | 0            | 5.267649 | 0        | 1        | NA       |
| RF00001        | 0.30631  | 0            | 5.267649 | 0        | 1        | NA       |
| RF00015        | 0 NA     | NA           | NA       | NA       | NA       | NA       |

|                |          |              |          |          |                   |
|----------------|----------|--------------|----------|----------|-------------------|
| dre-mir-22b    | 0 NA     | NA           | NA       | NA       | NA                |
| RF00377        | 0 NA     | NA           | NA       | NA       | NA                |
| RF00284        | 0 NA     | NA           | NA       | NA       | NA                |
| NC_002333.22   | 0.17618  | 0            | 5.267649 | 0        | 1 NA              |
| NC_002333.23   | 2.286011 | 0.131013548  | 1.465501 | 0.089398 | 0.928765 0.995163 |
| RF00001        | 0 NA     | NA           | NA       | NA       | NA                |
| dre-mir-128-2  | 0.099037 | 0            | 5.267649 | 0        | 1 NA              |
| dre-mir-9-4    | 0.133629 | 0            | 5.267649 | 0        | 1 NA              |
| dre-mir-184-2  | 0 NA     | NA           | NA       | NA       | NA                |
| dre-mir-30e-2  | 0 NA     | NA           | NA       | NA       | NA                |
| RF00001        | 0 NA     | NA           | NA       | NA       | NA                |
| NC_002333.24   | 6.565567 | 1.133105871  | 0.832477 | 1.361126 | 0.173474 0.64634  |
| RF00026        | 0.091739 | 0            | 5.267649 | 0        | 1 NA              |
| dre-mir-23a-3  | 0 NA     | NA           | NA       | NA       | NA                |
| dre-mir-30b    | 0 NA     | NA           | NA       | NA       | NA                |
| RF00001        | 0 NA     | NA           | NA       | NA       | NA                |
| dre-mir-133b   | 0 NA     | NA           | NA       | NA       | NA                |
| RF00001        | 0 NA     | NA           | NA       | NA       | NA                |
| dre-mir-125b-3 | 1.974005 | 2.988673009  | 1.694746 | 1.763493 | 0.077817 NA       |
| RF00001        | 0 NA     | NA           | NA       | NA       | NA                |
| RF00001        | 0 NA     | NA           | NA       | NA       | NA                |
| RF00001        | 0 NA     | NA           | NA       | NA       | NA                |
| RF00396        | 0.043308 | 0            | 5.267649 | 0        | 1 NA              |
| RF00001        | 0 NA     | NA           | NA       | NA       | NA                |
| RF00072        | 0.219649 | 0            | 5.060338 | 0        | 1 NA              |
| RF00001        | 0.046941 | 0            | 5.267649 | 0        | 1 NA              |
| RF00001        | 0 NA     | NA           | NA       | NA       | NA                |
| dre-mir-181b-3 | 21.40046 | -0.175001042 | 0.381581 | -0.45862 | 0.646506 0.926728 |
| RF00430        | 3.561808 | 0.494687029  | 0.862306 | 0.573679 | 0.566185 0.901739 |
| dre-mir-22a    | 6.78159  | -0.217515367 | 1.136377 | -0.19141 | 0.848203 0.977912 |
| RF00001        | 0 NA     | NA           | NA       | NA       | NA                |
| dre-mir-124-6  | 11.66856 | -0.34815325  | 0.525717 | -0.66225 | 0.507814 0.883056 |
| dre-mir-736    | 0 NA     | NA           | NA       | NA       | NA                |
| dre-mir-430a-1 | 0 NA     | NA           | NA       | NA       | NA                |
| dre-mir-122    | 0.199578 | 0            | 5.267649 | 0        | 1 NA              |
| RF00066        | 1.982494 | -0.286234831 | 1.498781 | -0.19098 | 0.848543 NA       |
| RF00001        | 0 NA     | NA           | NA       | NA       | NA                |
| RF00001        | 0 NA     | NA           | NA       | NA       | NA                |
| RF00001        | 0 NA     | NA           | NA       | NA       | NA                |
| RF00100        | 0 NA     | NA           | NA       | NA       | NA                |
| RF00001        | 0.043308 | 0            | 5.267649 | 0        | 1 NA              |
| RF00001        | 0.949829 | 0            | 2.635992 | 0        | 1 NA              |
| RF00001        | 0 NA     | NA           | NA       | NA       | NA                |
| RF00001        | 0 NA     | NA           | NA       | NA       | NA                |
| RF01241        | 0.471686 | 1.055417662  | 3.102218 | 0.340214 | 0.733695 NA       |
| dre-mir-2193   | 0 NA     | NA           | NA       | NA       | NA                |
| RF00001        | 0 NA     | NA           | NA       | NA       | NA                |
| RF00001        | 0 NA     | NA           | NA       | NA       | NA                |
| RF00001        | 0 NA     | NA           | NA       | NA       | NA                |
| RF00231        | 13.53867 | 0.09109853   | 0.518298 | 0.175765 | 0.860479 0.980264 |
| RF00001        | 0.16893  | 1.11785931   | 5.226359 | 0.213889 | 0.830634 NA       |
| RF00478        | 0.523189 | 1.898709793  | 3.090424 | 0.614385 | 0.538961 NA       |
| dre-mir-2198   | 0.11056  | 0            | 5.267649 | 0        | 1 NA              |
| RF00001        | 0.107013 | -1.826650979 | 5.230461 | -0.34923 | 0.726914 NA       |

|              |          |              |          |          |          |    |    |
|--------------|----------|--------------|----------|----------|----------|----|----|
| RF00001      | 0.1369   |              | 0        | 5.267649 | 0        | 1  | NA |
| RF00099      | 0        | NA           | NA       | NA       | NA       | NA | NA |
| RF00001      | 0        | NA           | NA       | NA       | NA       | NA | NA |
| RF00001      | 0.409549 | -0.868133433 | 3.271284 | -0.26538 | 0.790717 | NA | NA |
| RF00001      | 0.175088 |              | 0        | 5.267649 | 0        | 1  | NA |
| RF00001      | 0        | NA           | NA       | NA       | NA       | NA | NA |
| RF00001      | 0.153953 | -1.826663989 | 5.230461 | -0.34924 | 0.726912 | NA | NA |
| RF00417      | 0.861967 | 2.524004608  | 2.821213 | 0.894652 | 0.370973 | NA | NA |
| RF00001      | 0.091739 |              | 0        | 5.267649 | 0        | 1  | NA |
| RF00429      | 0.585198 | -0.868140258 | 2.815585 | -0.30833 | 0.757828 | NA | NA |
| RF00001      | 0        | NA           | NA       | NA       | NA       | NA | NA |
| RF00001      | 0        | NA           | NA       | NA       | NA       | NA | NA |
| RF00001      | 0        | NA           | NA       | NA       | NA       | NA | NA |
| RF00001      | 0        | NA           | NA       | NA       | NA       | NA | NA |
| dre-mir-2187 | 0        | NA           | NA       | NA       | NA       | NA | NA |
| dre-mir-2192 | 0        | NA           | NA       | NA       | NA       | NA | NA |
| RF01225      | 0        | NA           | NA       | NA       | NA       | NA | NA |
| dre-mir-2196 | 0        | NA           | NA       | NA       | NA       | NA | NA |
| RF00001      | 0        | NA           | NA       | NA       | NA       | NA | NA |
| RF00302      | 0.893987 | 1.202789721  | 1.909394 | 0.629933 | 0.528739 | NA | NA |
| RF00001      | 0.133559 |              | 0        | 5.267649 | 0        | 1  | NA |
| RF00001      | 0.049021 | -0.86807634  | 5.267649 | -0.16479 | 0.869106 | NA | NA |
| RF00001      | 0        | NA           | NA       | NA       | NA       | NA | NA |
| RF00001      | 0        | NA           | NA       | NA       | NA       | NA | NA |
| RF00302      | 1.326152 | -0.446879314 | 1.730322 | -0.25826 | 0.796203 | NA | NA |
| RF00001      | 0.301084 | 1.055373291  | 4.602166 | 0.229321 | 0.818619 | NA | NA |
| RF00593      | 0.584178 | -2.090997952 | 2.639606 | -0.79216 | 0.428266 | NA | NA |
| RF00001      | 0        | NA           | NA       | NA       | NA       | NA | NA |
| RF00001      | 0        | NA           | NA       | NA       | NA       | NA | NA |
| RF00001      | 0        | NA           | NA       | NA       | NA       | NA | NA |
| RF00001      | 0.588853 | 1.055380887  | 3.900034 | 0.270608 | 0.786692 | NA | NA |
| RF00001      | 0        | NA           | NA       | NA       | NA       | NA | NA |
| RF00001      | 0        | NA           | NA       | NA       | NA       | NA | NA |
| RF00026      | 0        | NA           | NA       | NA       | NA       | NA | NA |
| RF01241      | 0.448444 | -1.484220665 | 4.016379 | -0.36954 | 0.711724 | NA | NA |
| RF00001      | 0.138182 |              | 0        | 5.267649 | 0        | 1  | NA |
| RF00001      | 0        | NA           | NA       | NA       | NA       | NA | NA |
| RF00001      | 0        | NA           | NA       | NA       | NA       | NA | NA |
| RF00001      | 0        | NA           | NA       | NA       | NA       | NA | NA |
| RF00001      | 0        | NA           | NA       | NA       | NA       | NA | NA |
| RF00428      | 0.092827 |              | 0        | 5.267649 | 0        | 1  | NA |
| RF00001      | 0        | NA           | NA       | NA       | NA       | NA | NA |
| RF00001      | 0        | NA           | NA       | NA       | NA       | NA | NA |
| RF00001      | 0.086616 |              | 0        | 5.267649 | 0        | 1  | NA |
| RF00001      | 0        | NA           | NA       | NA       | NA       | NA | NA |
| RF00001      | 0.128836 |              | 0        | 5.267649 | 0        | 1  | NA |
| RF00431      | 0        | NA           | NA       | NA       | NA       | NA | NA |
| RF00001      | 0.049021 | -0.86807634  | 5.267649 | -0.16479 | 0.869106 | NA | NA |
| RF00001      | 0.1775   |              | 0        | 5.267649 | 0        | 1  | NA |
| RF00001      | 0.149233 | -1.826663989 | 5.230461 | -0.34924 | 0.726912 | NA | NA |
| RF00001      | 0        | NA           | NA       | NA       | NA       | NA | NA |
| RF00001      | 0.17872  |              | 0        | 5.267649 | 0        | 1  | NA |
| RF00001      | 0        | NA           | NA       | NA       | NA       | NA | NA |
| RF00003      | 0        | NA           | NA       | NA       | NA       | NA | NA |

|              |           |               |             |           |           |      |
|--------------|-----------|---------------|-------------|-----------|-----------|------|
| RF00001      | 0         | NA            | NA          | NA        | NA        | NA   |
| RF00001      | 0         | NA            | NA          | NA        | NA        | NA   |
| RF00001      | 0         | NA            | NA          | NA        | NA        | NA   |
| RF00006      | 1. 510834 | -3. 090046848 | 1. 809771   | -1. 70742 | 0. 087743 | NA   |
| RF00001      | 0         | NA            | NA          | NA        | NA        | NA   |
| RF00001      | 0         | NA            | NA          | NA        | NA        | NA   |
| RF00001      | 0. 04222  |               | 0 5. 267649 |           | 0         | 1 NA |
| RF00001      | 0         | NA            | NA          | NA        | NA        | NA   |
| RF00001      | 0         | NA            | NA          | NA        | NA        | NA   |
| RF00001      | 0. 882818 |               | 0 2. 427409 |           | 0         | 1 NA |
| RF00001      | 0. 043309 |               | 0 5. 267649 |           | 0         | 1 NA |
| RF00001      | 0         | NA            | NA          | NA        | NA        | NA   |
| RF00154      | 0         | NA            | NA          | NA        | NA        | NA   |
| RF00001      | 0. 045161 |               | 0 5. 267649 |           | 0         | 1 NA |
| RF00001      | 0         | NA            | NA          | NA        | NA        | NA   |
| RF00001      | 0         | NA            | NA          | NA        | NA        | NA   |
| RF00001      | 0. 087179 |               | 0 5. 267649 |           | 0         | 1 NA |
| RF00001      | 0         | NA            | NA          | NA        | NA        | NA   |
| RF00001      | 0         | NA            | NA          | NA        | NA        | NA   |
| RF00411      | 0. 89751  | -0. 167037341 | 1. 702046   | -0. 09814 | 0. 921822 | NA   |
| RF00001      | 0         | NA            | NA          | NA        | NA        | NA   |
| RF00001      | 0         | NA            | NA          | NA        | NA        | NA   |
| dre-mir-2191 | 0         | NA            | NA          | NA        | NA        | NA   |
| RF00001      | 0         | NA            | NA          | NA        | NA        | NA   |
| RF00001      | 0         | NA            | NA          | NA        | NA        | NA   |
| RF00001      | 0         | NA            | NA          | NA        | NA        | NA   |
| RF00001      | 0         | NA            | NA          | NA        | NA        | NA   |
| RF00001      | 0. 089161 |               | 0 5. 267649 |           | 0         | 1 NA |
| RF00001      | 0         | NA            | NA          | NA        | NA        | NA   |
| RF00001      | 0         | NA            | NA          | NA        | NA        | NA   |
| RF00001      | 0         | NA            | NA          | NA        | NA        | NA   |
| RF00001      | 1. 012028 | 1. 055434849  | 2. 193106   | 0. 481251 | 0. 630338 | NA   |
| RF00001      | 0. 049519 |               | 0 5. 267649 |           | 0         | 1 NA |
| RF00001      | 0         | NA            | NA          | NA        | NA        | NA   |
| RF00001      | 0         | NA            | NA          | NA        | NA        | NA   |
| RF00001      | 0. 069091 |               | 0 5. 267649 |           | 0         | 1 NA |
| RF00001      | 0         | NA            | NA          | NA        | NA        | NA   |
| RF00001      | 0         | NA            | NA          | NA        | NA        | NA   |
| RF00001      | 0. 049519 |               | 0 5. 267649 |           | 0         | 1 NA |
| RF00001      | 0. 252278 | 1. 055368498  | 4. 854545   | 0. 217398 | 0. 827898 | NA   |
| RF00001      | 0. 450593 | -1. 756791033 | 3. 231153   | -0. 5437  | 0. 586645 | NA   |
| RF00572      | 0         | NA            | NA          | NA        | NA        | NA   |
| RF00001      | 0         | NA            | NA          | NA        | NA        | NA   |
| RF00001      | 0. 185949 |               | 0 5. 267649 |           | 0         | 1 NA |
| RF00001      | 0. 152169 | -2. 340093811 | 5. 201855   | -0. 44986 | 0. 652813 | NA   |
| RF00026      | 0         | NA            | NA          | NA        | NA        | NA   |
| RF00001      | 0         | NA            | NA          | NA        | NA        | NA   |
| RF00001      | 0. 700445 | 1. 035294295  | 2. 17828    | 0. 475281 | 0. 634587 | NA   |
| RF00429      | 0. 908281 | 2. 994961112  | 1. 869042   | 1. 602405 | 0. 109066 | NA   |
| RF00001      | 0         | NA            | NA          | NA        | NA        | NA   |
| RF00001      | 0. 098043 | -1. 71005882  | 5. 238474   | -0. 32644 | 0. 74409  | NA   |
| RF00001      | 0. 090321 |               | 0 5. 267649 |           | 0         | 1 NA |
| RF00001      | 0         | NA            | NA          | NA        | NA        | NA   |
| RF00001      | 0. 171507 | 1. 055373006  | 5. 267649   | 0. 20035  | 0. 841207 | NA   |



|         |          |              |            |          |          |          |
|---------|----------|--------------|------------|----------|----------|----------|
| RF00001 | 0        | NA           | NA         | NA       | NA       | NA       |
| RF00001 | 0        | NA           | NA         | NA       | NA       | NA       |
| RF00001 | 0.059954 | 1.055396947  | 5.267649   | 0.200354 | 0.841203 | NA       |
| RF00001 | 0        | NA           | NA         | NA       | NA       | NA       |
| RF00001 | 0        | NA           | NA         | NA       | NA       | NA       |
| RF00322 | 0.582661 | 1.055411275  | 3.058005   | 0.345131 | 0.729996 | NA       |
| RF00001 | 0        | NA           | NA         | NA       | NA       | NA       |
| RF00001 | 0        | NA           | NA         | NA       | NA       | NA       |
| RF01233 | 0.805282 | -2.166369918 | 2.258046   | -0.9594  | 0.337357 | NA       |
| RF00001 | 0.186616 | 1.055364149  | 5.267649   | 0.200348 | 0.841208 | NA       |
| RF01233 | 0.178945 | -0.868109386 | 5.267649   | -0.1648  | 0.869101 | NA       |
| RF00001 | 0.059954 | 1.055396947  | 5.267649   | 0.200354 | 0.841203 | NA       |
| RF00001 | 0        | NA           | NA         | NA       | NA       | NA       |
| RF00001 | 0.154861 | -0.868103029 | 5.267649   | -0.1648  | 0.869102 | NA       |
| RF00001 | 0        | NA           | NA         | NA       | NA       | NA       |
| RF00001 | 0        | NA           | NA         | NA       | NA       | NA       |
| RF00443 | 1.325309 | -0.379632923 | 1.5346     | -0.24738 | 0.804612 | NA       |
| RF00001 | 0        | NA           | NA         | NA       | NA       | NA       |
| RF00001 | 0        | NA           | NA         | NA       | NA       | NA       |
| RF00001 | 0        | NA           | NA         | NA       | NA       | NA       |
| RF00009 | 1.015123 | 2.576517861  | 2.024014   | 1.272974 | 0.203027 | NA       |
| RF00001 | 0.160584 | 1.055370259  | 5.267649   | 0.200349 | 0.841207 | NA       |
| RF00431 | 0.053262 | 1.055396947  | 5.267649   | 0.200354 | 0.841203 | NA       |
| RF00001 | 0        | NA           | NA         | NA       | NA       | NA       |
| RF00001 | 4.445792 | -1.993372478 | 0.813768   | -2.44956 | 0.014303 | 0.209352 |
| RF00001 | 0        | NA           | NA         | NA       | NA       | NA       |
| RF00001 | 0        | NA           | NA         | NA       | NA       | NA       |
| RF00001 | 0        | NA           | NA         | NA       | NA       | NA       |
| RF00001 | 0        | NA           | NA         | NA       | NA       | NA       |
| RF00001 | 0        | NA           | NA         | NA       | NA       | NA       |
| RF00001 | 0        | NA           | NA         | NA       | NA       | NA       |
| RF00001 | 0.129927 |              | 0 5.267649 | 0        | 1        | NA       |
| RF00001 | 0        | NA           | NA         | NA       | NA       | NA       |
| RF00001 | 0.043308 |              | 0 5.267649 | 0        | 1        | NA       |
| RF00001 | 0        | NA           | NA         | NA       | NA       | NA       |
| RF00001 | 14.47691 | -0.266541953 | 0.526494   | -0.50626 | 0.612675 | 0.915754 |
| RF00001 | 0        | NA           | NA         | NA       | NA       | NA       |
| RF00001 | 0.472562 | 3.371044602  | 3.426524   | 0.983809 | 0.325209 | NA       |
| RF00001 | 0        | NA           | NA         | NA       | NA       | NA       |
| RF00001 | 0        | NA           | NA         | NA       | NA       | NA       |
| RF00001 | 0.091739 |              | 0 5.267649 | 0        | 1        | NA       |
| RF00001 | 0.043309 |              | 0 5.267649 | 0        | 1        | NA       |
| RF00001 | 0        | NA           | NA         | NA       | NA       | NA       |
| RF00001 | 0.191864 |              | 0 5.267649 | 0        | 1        | NA       |
| RF00263 | 0.514706 | -1.379915675 | 2.747894   | -0.50217 | 0.615546 | NA       |
| RF00001 | 0        | NA           | NA         | NA       | NA       | NA       |
| RF00001 | 0        | NA           | NA         | NA       | NA       | NA       |
| RF00001 | 0        | NA           | NA         | NA       | NA       | NA       |
| RF00001 | 0        | NA           | NA         | NA       | NA       | NA       |
| RF00001 | 0.043308 |              | 0 5.267649 | 0        | 1        | NA       |
| RF00001 | 0        | NA           | NA         | NA       | NA       | NA       |
| RF00001 | 0        | NA           | NA         | NA       | NA       | NA       |
| RF00618 | 0        | NA           | NA         | NA       | NA       | NA       |
| RF00001 | 0        | NA           | NA         | NA       | NA       | NA       |

|         |          |                       |                   |      |    |
|---------|----------|-----------------------|-------------------|------|----|
| RF00001 | 0 NA     | NA                    | NA                | NA   | NA |
| RF00001 | 0 NA     | NA                    | NA                | NA   | NA |
| RF00001 | 0 NA     | NA                    | NA                | NA   | NA |
| RF00001 | 0 NA     | NA                    | NA                | NA   | NA |
| RF00001 | 0 NA     | NA                    | NA                | NA   | NA |
| RF00001 | 0.043308 | 0 5.267649            | 0                 | 1 NA |    |
| RF00001 | 0.318349 | 3.49922331 5.121877   | 0.683192 0.494486 | NA   |    |
| RF00001 | 0.166965 | 1.921567426 5.236909  | 0.366928 0.713673 | NA   |    |
| RF00001 | 0.049519 | 0 5.267649            | 0                 | 1 NA |    |
| RF00001 | 0 NA     | NA                    | NA                | NA   | NA |
| RF00001 | 0 NA     | NA                    | NA                | NA   | NA |
| RF00001 | 0.04222  | 0 5.267649            | 0                 | 1 NA |    |
| RF00001 | 0.093881 | 0 5.267649            | 0                 | 1 NA |    |
| RF00091 | 0.573891 | 1.117970416 2.750553  | 0.406453 0.68441  | NA   |    |
| RF00408 | 1.371992 | -2.77219443 1.606924  | -1.72516 0.084499 | NA   |    |
| RF00001 | 0 NA     | NA                    | NA                | NA   | NA |
| RF00001 | 0 NA     | NA                    | NA                | NA   | NA |
| RF00001 | 0 NA     | NA                    | NA                | NA   | NA |
| RF00001 | 0.18065  | -0.868109387 5.267649 | -0.1648 0.869101  | NA   |    |
| RF00001 | 0 NA     | NA                    | NA                | NA   | NA |
| RF00001 | 0.059954 | 1.055396947 5.267649  | 0.200354 0.841203 | NA   |    |
| RF00001 | 0.223698 | 0 5.267649            | 0                 | 1 NA |    |
| RF00001 | 0 NA     | NA                    | NA                | NA   | NA |
| RF00001 | 0 NA     | NA                    | NA                | NA   | NA |
| RF00001 | 0 NA     | NA                    | NA                | NA   | NA |
| RF00001 | 0 NA     | NA                    | NA                | NA   | NA |
| RF00001 | 0 NA     | NA                    | NA                | NA   | NA |
| RF00001 | 0 NA     | NA                    | NA                | NA   | NA |
| RF00001 | 0 NA     | NA                    | NA                | NA   | NA |
| RF00026 | 0.564747 | 2.921417033 3.897244  | 0.749611 0.453489 | NA   |    |
| RF00001 | 0 NA     | NA                    | NA                | NA   | NA |
| RF00001 | 0 NA     | NA                    | NA                | NA   | NA |
| RF00001 | 0.090249 | 0 5.267649            | 0                 | 1 NA |    |
| RF00001 | 0.069091 | 0 5.267649            | 0                 | 1 NA |    |
| RF00001 | 0.141258 | 0 5.267649            | 0                 | 1 NA |    |
| RF00001 | 0 NA     | NA                    | NA                | NA   | NA |
| RF00020 | 0 NA     | NA                    | NA                | NA   | NA |
| RF00001 | 0 NA     | NA                    | NA                | NA   | NA |
| RF00004 | 0 NA     | NA                    | NA                | NA   | NA |
| RF00001 | 0.069091 | 0 5.267649            | 0                 | 1 NA |    |
| RF00001 | 0 NA     | NA                    | NA                | NA   | NA |
| RF00001 | 0 NA     | NA                    | NA                | NA   | NA |
| RF00001 | 0 NA     | NA                    | NA                | NA   | NA |
| RF00001 | 0 NA     | NA                    | NA                | NA   | NA |
| RF00001 | 1.094327 | -3.359917295 2.11689  | -1.58719 0.112469 | NA   |    |
| RF00582 | 0 NA     | NA                    | NA                | NA   | NA |
| RF00001 | 0.174358 | 0 5.267649            | 0                 | 1 NA |    |
| RF00001 | 0 NA     | NA                    | NA                | NA   | NA |
| RF00001 | 0.177268 | 0 5.267649            | 0                 | 1 NA |    |
| RF00001 | 0.092827 | 0 5.267649            | 0                 | 1 NA |    |
| RF01192 | 0.045161 | 0 5.267649            | 0                 | 1 NA |    |
| RF00001 | 0.049519 | 0 5.267649            | 0                 | 1 NA |    |
| RF00001 | 0 NA     | NA                    | NA                | NA   | NA |
| RF00322 | 0 NA     | NA                    | NA                | NA   | NA |
| RF00001 | 0 NA     | NA                    | NA                | NA   | NA |

|              |          |             |          |          |          |          |    |
|--------------|----------|-------------|----------|----------|----------|----------|----|
| RF00001      | 0.043309 |             | 0        | 5.267649 | 0        | 1        | NA |
| RF00001      |          | 0 NA        |          | NA       | NA       | NA       | NA |
| RF00020      | 0.097564 | 1.055383603 | 5.267649 | 0.200352 | 0.841205 |          | NA |
| RF00001      |          | 0 NA        |          | NA       | NA       | NA       | NA |
| RF00001      |          | 0 NA        |          | NA       | NA       | NA       | NA |
| RF00001      |          | 0 NA        |          | NA       | NA       | NA       | NA |
| RF00218      |          | 0 NA        |          | NA       | NA       | NA       | NA |
| RF00001      |          | 0 NA        |          | NA       | NA       | NA       | NA |
| RF00001      | 0.043308 |             | 0        | 5.267649 | 0        | 1        | NA |
| RF00001      |          | 0 NA        |          | NA       | NA       | NA       | NA |
| RF00001      | 0.060442 |             | 0        | 5.267649 | 0        | 1        | NA |
| RF00001      |          | 0 NA        |          | NA       | NA       | NA       | NA |
| RF00001      | 0.119909 | 2.079562922 | 5.22636  | 0.397899 | 0.690705 |          | NA |
| RF00001      | 0.046941 |             | 0        | 5.267649 | 0        | 1        | NA |
| RF00020      | 0.04222  |             | 0        | 5.267649 | 0        | 1        | NA |
| RF00026      |          | 0 NA        |          | NA       | NA       | NA       | NA |
| RF00001      | 0.131274 | 1.055383603 | 5.267649 | 0.200352 | 0.841205 |          | NA |
| RF00001      |          | 0 NA        |          | NA       | NA       | NA       | NA |
| RF00001      |          | 0 NA        |          | NA       | NA       | NA       | NA |
| RF00001      |          | 0 NA        |          | NA       | NA       | NA       | NA |
| RF00001      | 3.70598  | 1.553729181 | 1.031806 | 1.505834 | 0.13211  | 0.584623 |    |
| RF00001      |          | 0 NA        |          | NA       | NA       | NA       | NA |
| RF00001      |          | 0 NA        |          | NA       | NA       | NA       | NA |
| RF00001      |          | 0 NA        |          | NA       | NA       | NA       | NA |
| RF00001      | 0.101247 | 1.854150541 | 5.241768 | 0.353726 | 0.723544 |          | NA |
| RF00001      |          | 0 NA        |          | NA       | NA       | NA       | NA |
| RF00001      |          | 0 NA        |          | NA       | NA       | NA       | NA |
| RF00001      |          | 0 NA        |          | NA       | NA       | NA       | NA |
| RF00568      | 7.88184  | 0.369041138 | 0.628758 | 0.586936 | 0.557247 | 0.899165 |    |
| RF00009      | 2.41544  | 0.091114364 | 1.38739  | 0.065673 | 0.947638 | 0.997371 |    |
| RF00001      |          | 0 NA        |          | NA       | NA       | NA       | NA |
| RF00001      |          | 0 NA        |          | NA       | NA       | NA       | NA |
| RF00001      |          | 0 NA        |          | NA       | NA       | NA       | NA |
| RF00001      | 0.049519 |             | 0        | 5.267649 | 0        | 1        | NA |
| dre-mir-2195 |          | 0 NA        |          | NA       | NA       | NA       | NA |
| RF00001      | 2.39956  | 0.487446714 | 1.211413 | 0.402379 | 0.687405 | 0.938835 |    |
| RF00001      | 0.086618 |             | 0        | 5.267649 | 0        | 1        | NA |
| RF01192      | 0.129927 |             | 0        | 5.267649 | 0        | 1        | NA |
| RF00001      | 9.801681 | 1.221261454 | 0.591047 | 2.066269 | 0.038803 | 0.344867 |    |
| RF00001      | 0.493502 |             | 0        | 3.184213 | 0        | 1        | NA |
| RF00001      | 0.043308 |             | 0        | 5.267649 | 0        | 1        | NA |
| RF00001      |          | 0 NA        |          | NA       | NA       | NA       | NA |
| RF00001      |          | 0 NA        |          | NA       | NA       | NA       | NA |
| RF00440      |          | 0 NA        |          | NA       | NA       | NA       | NA |
| RF00001      |          | 0 NA        |          | NA       | NA       | NA       | NA |
| RF00001      | 0.07132  |             | 0        | 5.267649 | 0        | 1        | NA |
| RF00001      |          | 0 NA        |          | NA       | NA       | NA       | NA |
| RF00001      |          | 0 NA        |          | NA       | NA       | NA       | NA |
| RF00001      | 0.050723 | -0.86807634 | 5.267649 | -0.16479 | 0.869106 |          | NA |
| RF00001      |          | 0 NA        |          | NA       | NA       | NA       | NA |
| RF00001      | 0.059954 | 1.055396947 | 5.267649 | 0.200354 | 0.841203 |          | NA |
| RF00001      | 0.595543 |             | 0        | 2.985052 | 0        | 1        | NA |
| RF00001      |          | 0 NA        |          | NA       | NA       | NA       | NA |
| RF00001      |          | 0 NA        |          | NA       | NA       | NA       | NA |

|                   |          |              |          |          |          |          |    |
|-------------------|----------|--------------|----------|----------|----------|----------|----|
| RF00270           | 0.04222  |              | 0        | 5.267649 | 0        | 1        | NA |
| RF00001           |          | 0 NA         |          | NA       | NA       | NA       | NA |
| RF00302           |          | 0 NA         |          | NA       | NA       | NA       | NA |
| RF00001           | 0.153868 |              | 0        | 5.267649 | 0        | 1        | NA |
| RF00001           |          | 0 NA         |          | NA       | NA       | NA       | NA |
| RF00001           |          | 0 NA         |          | NA       | NA       | NA       | NA |
| RF00001           |          | 0 NA         |          | NA       | NA       | NA       | NA |
| dre-mir-2197      |          | 0 NA         |          | NA       | NA       | NA       | NA |
| RF00001           |          | 0 NA         |          | NA       | NA       | NA       | NA |
| RF00001           |          | 0 NA         |          | NA       | NA       | NA       | NA |
| RF00001           |          | 0 NA         |          | NA       | NA       | NA       | NA |
| RF00001           |          | 0 NA         |          | NA       | NA       | NA       | NA |
| RF00001           |          | 0 NA         |          | NA       | NA       | NA       | NA |
| RF00613           | 1.656476 | 0.967187287  | 1.834427 | 0.527242 | 0.598025 | NA       | NA |
| RF00553           | 0.273815 | 0.930265321  | 4.043812 | 0.230047 | 0.818056 | NA       | NA |
| RF00001           |          | 0 NA         |          | NA       | NA       | NA       | NA |
| RF00001           |          | 0 NA         |          | NA       | NA       | NA       | NA |
| RF00001           | 0.049021 | -0.86807634  | 5.267649 | -0.16479 | 0.869106 | NA       | NA |
| RF00001           |          | 0 NA         |          | NA       | NA       | NA       | NA |
| dre-mir-2184      | 0.897198 |              | 0        | 2.429092 | 0        | 1        | NA |
| RF00564           | 0.090321 |              | 0        | 5.267649 | 0        | 1        | NA |
| RF00191           | 0.55407  | -1.774169865 | 2.684164 | -0.66098 | 0.508627 | NA       | NA |
| RF00001           | 0.043309 |              | 0        | 5.267649 | 0        | 1        | NA |
| RF00001           | 0.097664 | -0.868089684 | 5.267649 | -0.1648  | 0.869104 | NA       | NA |
| RF00001           | 0.046941 |              | 0        | 5.267649 | 0        | 1        | NA |
| RF00001           |          | 0 NA         |          | NA       | NA       | NA       | NA |
| RF00001           | 0.281084 | -0.868129415 | 5.267649 | -0.1648  | 0.869098 | NA       | NA |
| RF00001           |          | 0 NA         |          | NA       | NA       | NA       | NA |
| dre-mir-735       |          | 0 NA         |          | NA       | NA       | NA       | NA |
| RF00001           |          | 0 NA         |          | NA       | NA       | NA       | NA |
| RF00001           |          | 0 NA         |          | NA       | NA       | NA       | NA |
| RF00001           |          | 0 NA         |          | NA       | NA       | NA       | NA |
| RF00001           |          | 0 NA         |          | NA       | NA       | NA       | NA |
| RF00001           |          | 0 NA         |          | NA       | NA       | NA       | NA |
| RF00001           | 0.073968 |              | 0        | 5.267649 | 0        | 1        | NA |
| RF00001           |          | 0 NA         |          | NA       | NA       | NA       | NA |
| RF00001           | 0.043308 |              | 0        | 5.267649 | 0        | 1        | NA |
| RF00001           |          | 0 NA         |          | NA       | NA       | NA       | NA |
| RF00001           |          | 0 NA         |          | NA       | NA       | NA       | NA |
| RF00001           | 0.043309 |              | 0        | 5.267649 | 0        | 1        | NA |
| RF00001           | 2.184425 |              | 0        | 2.019014 | 0        | 1        | NA |
| RF00599           | 0.207516 | -0.748301491 | 5.238472 | -0.14285 | 0.886411 | NA       | NA |
| RF00001           |          | 0 NA         |          | NA       | NA       | NA       | NA |
| BX537109.1        | 10.14076 | 1.282318861  | 0.792894 | 1.617263 | 0.105821 | 0.534827 |    |
| zgc:153681        | 4.417778 | 0.32699958   | 1.034359 | 0.316137 | 0.751898 | 0.955391 |    |
| si:dkey-238d18.7  |          | 0 NA         |          | NA       | NA       | NA       | NA |
| si:ch211-168d23.3 | 23.04983 | 0.03354472   | 0.49545  | 0.067706 | 0.94602  | 0.997371 |    |
| igfn1.4           | 0.76912  | 1.066637458  | 2.196328 | 0.485646 | 0.627218 | NA       |    |
| tspan5a           | 212.0574 | 0.053785221  | 0.184175 | 0.292033 | 0.770262 | 0.960484 |    |
| nectin1b          | 214.1842 | 0.109465119  | 0.190828 | 0.573634 | 0.566216 | 0.901739 |    |
| si:ch211-229i14.2 | 5.042147 | -0.80249562  | 1.704167 | -0.4709  | 0.637711 | 0.924779 |    |
| si:ch211-106k21.5 | 19.06771 | -0.366486698 | 0.512965 | -0.71445 | 0.47495  | 0.869292 |    |
| si:dkey-7e14.3    | 2.735614 | -1.817008259 | 1.54034  | -1.17962 | 0.238153 | 0.719146 |    |
| plekhg6           | 62.93228 | -0.291968774 | 0.271381 | -1.07586 | 0.281988 | 0.754378 |    |

|                   |          |              |          |          |          |          |
|-------------------|----------|--------------|----------|----------|----------|----------|
| plxnd1            | 87.19394 | -0.37173658  | 0.25623  | -1.45079 | 0.146837 | 0.606781 |
| hmcn2             | 4.686224 | 0.130352729  | 0.958165 | 0.136044 | 0.891786 | 0.988566 |
| fgf20b            | 44.77046 | 0.297267689  | 0.310867 | 0.956254 | 0.338944 | 0.795226 |
| ttc3              | 680.0331 | -0.211875958 | 0.153434 | -1.38089 | 0.167312 | 0.638363 |
| kcnn4             | 27.33259 | -0.284423776 | 0.423654 | -0.67136 | 0.501992 | 0.881211 |
| RF00001           | 0 NA     | NA           | NA       | NA       | NA       | NA       |
| BX539307.2        | 1.120285 | 0.679245904  | 1.91445  | 0.3548   | 0.72274  | NA       |
| cd302             | 184.1953 | -0.262021602 | 0.166423 | -1.57443 | 0.115388 | 0.555596 |
| slc37a1           | 130.0608 | -0.170981922 | 0.184639 | -0.92603 | 0.354429 | 0.805425 |
| slco5a1a          | 635.1933 | 0.142785189  | 0.144892 | 0.985461 | 0.324398 | 0.783308 |
| RF00006           | 0 NA     | NA           | NA       | NA       | NA       | NA       |
| MTERF1            | 199.4241 | 0.006633479  | 0.161184 | 0.041155 | 0.967172 | 1        |
| si:ch211-266i6.3  | 310.9518 | 0.22210543   | 0.329855 | 0.673343 | 0.500729 | 0.880413 |
| CR792417.1        | 20.40003 | 0.134021448  | 0.507808 | 0.263921 | 0.791841 | 0.964835 |
| umod              | 0.158299 | 0            | 5.267649 | 0        | 1        | NA       |
| trim331           | 84.1916  | 0.164058405  | 0.214265 | 0.765682 | 0.443866 | 0.854255 |
| RF00017           | 0 NA     | NA           | NA       | NA       | NA       | NA       |
| si:ch211-42i6.2   | 6.659515 | 1.338355675  | 0.788403 | 1.697552 | 0.089592 | 0.502507 |
| si:ch73-267c23.10 | 4.807998 | -0.329169093 | 1.262619 | -0.2607  | 0.794321 | 0.965431 |
| wrap53            | 168.5342 | 0.054871235  | 0.153844 | 0.356667 | 0.721341 | 0.947343 |
| ccbcl             | 61.02981 | 0.121181982  | 0.286173 | 0.423456 | 0.671962 | 0.933953 |
| si:ch73-206d17.1  | 31.6203  | -0.645192718 | 0.783949 | -0.823   | 0.410506 | 0.8372   |
| znf385d           | 49.65606 | 0.068336157  | 0.286938 | 0.238157 | 0.811759 | 0.97012  |
| si:ch211-286b5.9  | 5.578516 | -0.785110754 | 0.727799 | -1.07875 | 0.280701 | 0.753147 |
| rskrb             | 38.02675 | 0.260333594  | 0.428782 | 0.607147 | 0.543753 | 0.894925 |
| ACVR1C            | 6.477254 | 1.580606063  | 1.526457 | 1.035474 | 0.300448 | 0.766629 |
| relb              | 308.4817 | -0.203768855 | 0.182808 | -1.11466 | 0.264995 | 0.742063 |
| si:dkey-3h2.4     | 2.543983 | -2.097254656 | 1.688147 | -1.24234 | 0.214111 | 0.696474 |
| vkorc1            | 75.75831 | 0.172903556  | 0.239114 | 0.7231   | 0.469618 | 0.867224 |
| FBX048            | 414.5363 | -0.031535112 | 0.206185 | -0.15295 | 0.878441 | 0.985761 |
| opn8a             | 0.614771 | 0            | 3.359454 | 0        | 1        | NA       |
| mgp               | 3.924449 | 0.119423499  | 1.13453  | 0.105263 | 0.916167 | 0.993244 |
| gsg112a           | 12.25951 | 2.950461832  | 1.443853 | 2.043464 | 0.041007 | 0.353808 |
| grin2da           | 129.0221 | 0.943136674  | 0.296088 | 3.185329 | 0.001446 | 0.056975 |
| ntrk3b            | 150.0722 | 0.829686582  | 0.266383 | 3.114643 | 0.001842 | 0.065953 |
| gpr156            | 32.20353 | -0.346689101 | 0.383604 | -0.90377 | 0.366118 | 0.815747 |
| prr13             | 419.2121 | -0.113145389 | 0.174878 | -0.647   | 0.517635 | 0.887148 |
| nkd3              | 0.173005 | 0            | 5.267649 | 0        | 1        | NA       |
| si:ch211-226h8.4  | 1.911901 | 0.971512125  | 1.66228  | 0.584445 | 0.558921 | NA       |
| nat16             | 596.3863 | -0.121920887 | 0.197496 | -0.61733 | 0.537015 | 0.89244  |
| si:ch73-144d13.4  | 45.44442 | -0.046865191 | 0.339117 | -0.1382  | 0.890084 | 0.98835  |
| si:dkey-120c6.5   | 31.62092 | -0.821035747 | 0.440048 | -1.86579 | 0.062071 | 0.42715  |
| F2R (1 of many)   | 19.30441 | 0.01685276   | 0.444739 | 0.037894 | 0.969773 | 1        |
| si:dkeyp-121d2.7  | 46.54079 | 0.050469614  | 0.279105 | 0.180826 | 0.856504 | 0.979558 |
| zgc:171781        | 0.460877 | 0.563522553  | 2.949773 | 0.191039 | 0.848495 | NA       |
| kcnpjla.3         | 85.81741 | -0.856266964 | 0.489197 | -1.75035 | 0.080058 | 0.478179 |
| hh1a2b.2          | 289.298  | -0.151511118 | 0.23735  | -0.63834 | 0.523249 | 0.888312 |
| si:rp71-1c10.10   | 4.422996 | -1.290997027 | 0.753157 | -1.71411 | 0.086508 | 0.493048 |
| si:ch211-236p5.2  | 50.24733 | -0.053894588 | 0.316519 | -0.17027 | 0.864796 | 0.982074 |
| CU469420.1        | 14.83871 | 0.630278297  | 0.691658 | 0.911258 | 0.36216  | 0.812082 |
| fhdc4             | 144.533  | -0.175884333 | 0.221    | -0.79586 | 0.426115 | 0.844714 |
| F2R (1 of many)   | 0.151871 | 2.436401064  | 5.206324 | 0.46797  | 0.639806 | NA       |
| bsnd              | 12.89677 | -1.712830788 | 0.619481 | -2.76494 | 0.005693 | 0.127699 |
| CR925773.1        | 9.481931 | -1.588527952 | 0.707392 | -2.24561 | 0.024729 | 0.27868  |

|                    |          |              |          |          |          |          |
|--------------------|----------|--------------|----------|----------|----------|----------|
| taarl2i            | 0.309689 | 0.093656381  | 3.97855  | 0.02354  | 0.981219 | NA       |
| ndst2a             | 538.659  | 0.190528251  | 0.123647 | 1.540904 | 0.12334  | 0.570077 |
| acyp2              | 1.594923 | 1.662489947  | 1.521989 | 1.092314 | 0.274695 | NA       |
| si:dkey-4p15.5     | 535.8666 | -0.237478181 | 0.239733 | -0.9906  | 0.321883 | 0.782075 |
| si:ch211-282j17.5  | 0 NA     | NA           | NA       | NA       | NA       | NA       |
| cnsta              | 106.1754 | 0.129724633  | 0.230304 | 0.563275 | 0.573247 | 0.903952 |
| scg3               | 1099.506 | -0.020376916 | 0.174046 | -0.11708 | 0.906799 | 0.991644 |
| znf1137            | 7.518668 | -3.101761011 | 0.704991 | -4.39972 | 1.08E-05 | 0.001993 |
| FAM107A            | 75.30783 | -0.035555857 | 0.254827 | -0.13953 | 0.889032 | 0.988224 |
| si:dkey-27j5.6     | 0.221298 | 0            | 5.267649 | 0        | 1        | NA       |
| proser1            | 515.6611 | 0.115863931  | 0.143916 | 0.80508  | 0.420774 | 0.842383 |
| si:ch211-63b16.4   | 32.27928 | 0.016938246  | 0.418185 | 0.040504 | 0.967691 | 1        |
| erlecl             | 524.6508 | 0.237578863  | 0.10971  | 2.165513 | 0.030348 | 0.310589 |
| cabocol            | 12.7431  | -0.021816317 | 0.59935  | -0.0364  | 0.970963 | 1        |
| CU633991.1         | 9.590747 | 0.283506466  | 0.571387 | 0.496172 | 0.619773 | 0.91747  |
| si:ch211-67e16.4   | 295.0638 | 0.078779686  | 0.145781 | 0.540397 | 0.588924 | 0.908056 |
| si:dkey-274m17.3   | 42.95926 | -0.064148171 | 0.321802 | -0.19934 | 0.841996 | 0.97643  |
| CABZ01071939.1     | 88.43536 | -0.389486858 | 0.252862 | -1.54032 | 0.123483 | 0.570142 |
| srrm4              | 292.169  | 0.484102505  | 0.153125 | 3.161482 | 0.00157  | 0.060215 |
| bri3               | 1346.065 | -0.205260595 | 0.125788 | -1.6318  | 0.102721 | 0.529448 |
| si:ch211-157b11.12 | 248.432  | -0.260117328 | 0.19955  | -1.30352 | 0.192397 | 0.672283 |
| si:dkey-102g19.3   | 27.82897 | 0.648975232  | 0.451367 | 1.437799 | 0.150491 | 0.6142   |
| zgc:101566         | 734.4208 | -0.08487354  | 0.118561 | -0.71587 | 0.474074 | 0.869292 |
| cux2b              | 22.91414 | 0.526698681  | 0.491349 | 1.071945 | 0.283745 | 0.755095 |
| zp2.1              | 0.734663 | -2.599065727 | 2.536691 | -1.02459 | 0.305557 | NA       |
| si:dkey-83f18.9    | 0 NA     | NA           | NA       | NA       | NA       | NA       |
| pou6f2             | 20.80119 | 0.461101465  | 0.42772  | 1.078044 | 0.281014 | 0.753425 |
| si:ch211-167j9.5   | 7.162189 | 0.180356111  | 0.70933  | 0.254263 | 0.799293 | 0.967111 |
| isgl5              | 65.73273 | -0.074463886 | 0.617758 | -0.12054 | 0.904056 | 0.991581 |
| or111-8            | 0.069091 | 0            | 5.267649 | 0        | 1        | NA       |
| RF00026            | 0.043308 | 0            | 5.267649 | 0        | 1        | NA       |
| si:dkey-246e3.4    | 0.808873 | 0.913316212  | 2.402959 | 0.38008  | 0.703886 | NA       |
| cald1b             | 42.03845 | -0.693081104 | 0.44404  | -1.56085 | 0.118558 | 0.561771 |
| dbx1a              | 148.9767 | 0.25977028   | 0.186749 | 1.391017 | 0.16422  | 0.63332  |
| mterf2             | 111.2597 | -0.022246037 | 0.224503 | -0.09909 | 0.921067 | 0.994085 |
| BX950205.1         | 0 NA     | NA           | NA       | NA       | NA       | NA       |
| srsf10b            | 596.6419 | -0.126184391 | 0.154047 | -0.81913 | 0.412714 | 0.838123 |
| taarl2c            | 0.692989 | 2.967613073  | 2.533744 | 1.171236 | 0.241504 | NA       |
| med11              | 234.5843 | -0.186936648 | 0.170828 | -1.0943  | 0.273824 | 0.749234 |
| si:ch211-236p5.3   | 2.57537  | -0.382737915 | 1.735838 | -0.22049 | 0.825488 | 0.972729 |
| si:ch211-282j17.13 | 13.24069 | 1.760419308  | 0.864371 | 2.036647 | 0.041685 | 0.356684 |
| CABZ01046949.1     | 0 NA     | NA           | NA       | NA       | NA       | NA       |
| si:ch211-212k18.8  | 392.7817 | 0.1793477    | 0.156918 | 1.142942 | 0.253063 | 0.732759 |
| prpf3              | 341.0294 | -0.126622338 | 0.123142 | -1.02826 | 0.303827 | 0.769473 |
| adgrf7             | 19.16472 | -1.38327332  | 1.481996 | -0.93339 | 0.350621 | 0.802215 |
| znf1055            | 13.07103 | -1.342531069 | 0.510925 | -2.62765 | 0.008598 | 0.15886  |
| tdg.2              | 258.2788 | 0.02031872   | 0.138102 | 0.147128 | 0.883031 | 0.986908 |
| dthd1              | 5.773221 | 0.243768523  | 0.867361 | 0.281046 | 0.778675 | 0.961073 |
| cx52.9             | 19.33316 | -0.532488117 | 0.62935  | -0.84609 | 0.397501 | 0.830253 |
| tnfaip811          | 164.452  | -0.043224657 | 0.220226 | -0.19627 | 0.844396 | 0.976791 |
| hdac10             | 130.0332 | 0.52517763   | 0.184358 | 2.848678 | 0.00439  | 0.109024 |
| si:ch211-165g14.1  | 164.9512 | -0.375787131 | 0.164956 | -2.27811 | 0.02272  | 0.266612 |
| si:dkey-83f18.10   | 0 NA     | NA           | NA       | NA       | NA       | NA       |
| klhl13             | 10.03135 | 2.415330519  | 1.033324 | 2.337437 | 0.019416 | 0.245214 |

|                    |          |              |            |          |          |          |    |
|--------------------|----------|--------------|------------|----------|----------|----------|----|
| pkig               | 318.1764 | 0.053917074  | 0.163538   | 0.329691 | 0.741633 | 0.954276 |    |
| mogat3a            | 220.0634 | -0.215216811 | 0.26996    | -0.79722 | 0.425324 | 0.844714 |    |
| si:ch211-132p1.4   | 7.539253 | 0.545147733  | 0.791009   | 0.68918  | 0.49071  | 0.875539 |    |
| fbxw10             | 4.752015 | -0.08973048  | 0.779863   | -0.11506 | 0.908398 | 0.991812 |    |
| CU179643.1         | 2.909596 | -0.361459205 | 1.132886   | -0.31906 | 0.749681 | 0.955074 |    |
| si:dkey-92f12.2    | 173.9045 | 0.478558136  | 0.166842   | 2.868324 | 0.004127 | 0.106542 |    |
| mtnr1bb            | 6.279933 | 2.537203621  | 1.517171   | 1.672325 | 0.09446  | 0.513368 |    |
| znf970             | 12.63117 | -0.022863948 | 0.478082   | -0.04782 | 0.961856 | 0.999451 |    |
| BX546500.1         | 0.24537  |              | 0 4.236004 |          | 0        | 1 NA     |    |
| si:ch211-116o3.3   |          | 0 NA         |            | NA       | NA       | NA       | NA |
| BX323559.1         | 0.190341 |              | 0 5.267649 |          | 0        | 1 NA     |    |
| mast3b             | 122.891  | 0.426465226  | 0.20033    | 2.128818 | 0.033269 | 0.323073 |    |
| ptprjb.2           | 0.069091 |              | 0 5.267649 |          | 0        | 1 NA     |    |
| prodhb             | 316.2054 | 0.103426461  | 0.285758   | 0.361937 | 0.717399 | 0.946272 |    |
| si:ch211-155o21.3  | 11.7978  | -0.8917666   | 0.69761    | -1.27832 | 0.201137 | 0.681045 |    |
| RF00001            |          | 0 NA         |            | NA       | NA       | NA       | NA |
| zp2.5              | 2.917519 | -0.385128395 | 1.284287   | -0.29988 | 0.764271 | 0.959228 |    |
| ch25h13            | 199.0721 | -0.46185018  | 0.218435   | -2.11436 | 0.034484 | 0.327793 |    |
| si:dkey-90123.2    | 3.068054 | -0.201527524 | 1.143532   | -0.17623 | 0.860111 | 0.980191 |    |
| CABZ01115881.1     | 138.2574 | -0.091734548 | 0.181771   | -0.50467 | 0.613789 | 0.915998 |    |
| dbf4b              | 67.1121  | 0.229573442  | 0.268688   | 0.854425 | 0.392869 | 0.827902 |    |
| irs4a              | 114.3498 | 0.275104627  | 0.227106   | 1.21135  | 0.225761 | 0.707068 |    |
| hist1h2a11         | 1.630117 | -0.443100614 | 1.74586    | -0.2538  | 0.799649 | NA       |    |
| n1rc311            | 341.5704 | -0.095079384 | 0.129166   | -0.7361  | 0.46167  | 0.863402 |    |
| si:dkey-201121.2   |          | 0 NA         |            | NA       | NA       | NA       | NA |
| zgc:172051         | 362.0644 | -0.859763004 | 0.273121   | -3.14792 | 0.001644 | 0.06246  |    |
| kcna7              | 86.13838 | -0.005852388 | 0.30941    | -0.01891 | 0.984909 | 1        |    |
| omega              | 3.522244 | 0.820166141  | 1.422895   | 0.576407 | 0.56434  | 0.901433 |    |
| si:cabz01069012.2  | 23.4331  | 0.571258412  | 0.452377   | 1.262794 | 0.206663 | 0.688976 |    |
| CABZ01077217.2     | 1.74756  | -1.210011483 | 1.522778   | -0.79461 | 0.426842 | NA       |    |
| nrg2b              | 183.7586 | 0.908281669  | 0.232728   | 3.902753 | 9.51E-05 | 0.008792 |    |
| si:ch211-113a14.11 | 11.25139 | 1.003856514  | 0.649649   | 1.54523  | 0.122291 | 0.569468 |    |
| dre-mir-26a-2      | 0.958404 | -2.796193989 | 1.973599   | -1.4168  | 0.156542 | NA       |    |
| zgc:136963         | 20.02457 | 2.268309987  | 0.687885   | 3.297513 | 0.000975 | 0.043444 |    |
| si:ch73-269m14.4   |          | 0 NA         |            | NA       | NA       | NA       | NA |
| si:dkey-266f7.10   | 3.845102 | 0.093645018  | 1.83745    | 0.050965 | 0.959354 | 0.999164 |    |
| CR846087.1         | 10.15147 | -0.535780029 | 0.610854   | -0.8771  | 0.380432 | 0.823655 |    |
| cabz01093075.1     | 1.84884  | -2.32932003  | 1.817967   | -1.28128 | 0.200096 | NA       |    |
| psma3              | 1929.057 | 0.134976819  | 0.131296   | 1.028038 | 0.303932 | 0.76949  |    |
| gckr               | 2.739486 |              | 0 1.895404 |          | 0        | 1 1      |    |
| vav3a              | 28.15373 | 0.337084889  | 0.34215    | 0.985198 | 0.324527 | 0.783308 |    |
| im:7147486         | 333.093  | 0.010728581  | 0.182966   | 0.058637 | 0.953241 | 0.998436 |    |
| stk19              | 53.70318 | 0.023770798  | 0.260021   | 0.091419 | 0.92716  | 0.994973 |    |
| rnh1               | 13.96602 | 0.353734823  | 0.412995   | 0.856511 | 0.391715 | 0.827902 |    |
| or111-3            | 13.14703 | 0.656822363  | 0.536118   | 1.225146 | 0.22052  | 0.701837 |    |
| RF00017            |          | 0 NA         |            | NA       | NA       | NA       | NA |
| hs3st3b1b          | 676.5338 | -0.098488882 | 0.132677   | -0.74232 | 0.457894 | 0.860993 |    |
| chrng              | 101.1221 | 0.405964799  | 0.253572   | 1.600984 | 0.10938  | 0.542487 |    |
| ttc41              | 4.908908 | 0.205664557  | 0.754027   | 0.272755 | 0.785042 | 0.962605 |    |
| cb1n11             | 259.9654 | 0.794348927  | 0.535166   | 1.484303 | 0.137728 | 0.593771 |    |
| mkrn2os.1          | 22.81529 | -0.485290365 | 0.41575    | -1.16726 | 0.243103 | 0.724396 |    |
| crygm2d21          | 11315.26 | 0.189392379  | 0.361333   | 0.524149 | 0.600175 | 0.913756 |    |
| si:ch211-125m10.6  | 11.22871 | -1.059629818 | 0.705489   | -1.50198 | 0.133102 | 0.586514 |    |
| si:dkey-175g6.2    | 102.1897 | 0.130073196  | 0.417847   | 0.311294 | 0.755577 | 0.956532 |    |

|                    |          |              |          |          |          |          |
|--------------------|----------|--------------|----------|----------|----------|----------|
| edn3b              | 12.39891 | 0.331490285  | 0.584679 | 0.566962 | 0.57074  | 0.902481 |
| ice2               | 105.8783 | -0.170587799 | 0.196035 | -0.87019 | 0.384196 | 0.826565 |
| ascc3              | 316.05   | 0.559298091  | 0.195042 | 2.867582 | 0.004136 | 0.106542 |
| si:ch211-19719.5   | 5.114463 | -1.332351783 | 1.132392 | -1.17658 | 0.239363 | 0.719781 |
| trim63b            | 1137.475 | -0.065098107 | 0.215272 | -0.3024  | 0.762347 | 0.958467 |
| dnajc12            | 71.60368 | -0.125996252 | 0.232457 | -0.54202 | 0.587805 | 0.907608 |
| taarl4a            | 0.452216 | 0            | 4.748743 | 0        | 1        | NA       |
| smim15             | 622.6719 | 0.033455235  | 0.168009 | 0.199127 | 0.842163 | 0.97643  |
| si:dkey-126g1.7    | 19.52023 | -0.34967254  | 0.561084 | -0.62321 | 0.533148 | 0.890978 |
| probl              | 69.46022 | 0.463111359  | 0.311159 | 1.488344 | 0.13666  | 0.591964 |
| BMERB1             | 100.2247 | 0.819888097  | 0.287491 | 2.851875 | 0.004346 | 0.108751 |
| CR847543.1         | 56.65119 | -0.174129988 | 0.311436 | -0.55912 | 0.57608  | 0.904749 |
| si:dkeyp-97b10.3   | 102.8559 | -0.28330772  | 0.198104 | -1.4301  | 0.152689 | 0.61677  |
| CU075735.1         | 0.214417 | 0            | 5.267649 | 0        | 1        | NA       |
| znf1023            | 1.492244 | -1.257458779 | 1.557975 | -0.80711 | 0.419602 | NA       |
| im:7151449         | 83.45545 | -0.01100359  | 0.242831 | -0.04531 | 0.963857 | 0.999842 |
| si:ch211-238p8.24  | 0.561375 | 0.695554886  | 3.148552 | 0.220913 | 0.82516  | NA       |
| RF00274            | 0.197578 | -0.86811193  | 5.267649 | -0.1648  | 0.869101 | NA       |
| SAMD4B             | 570.4615 | 0.103504941  | 0.150812 | 0.686319 | 0.492512 | 0.876385 |
| tmem68             | 168.6552 | -0.009970519 | 0.182474 | -0.05464 | 0.956425 | 0.99899  |
| si:ch1073-513e17.1 | 68.61451 | -0.353920146 | 0.340568 | -1.0392  | 0.29871  | 0.765669 |
| phyh               | 869.4617 | 0.049718234  | 0.156189 | 0.31832  | 0.750242 | 0.955074 |
| znf1152            | 76.05989 | -0.01380141  | 0.364963 | -0.03782 | 0.969834 | 1        |
| prodha             | 341.2448 | -0.636095443 | 0.44464  | -1.43058 | 0.152549 | 0.61658  |
| L0018205.1         | 10.62224 | 0.580341804  | 0.706974 | 0.820882 | 0.411714 | 0.837966 |
| gb:bc139872        | 186.7219 | 0.184514231  | 0.172389 | 1.070336 | 0.284468 | 0.75547  |
| RGS9BP             | 75.58344 | -0.067782389 | 0.366424 | -0.18498 | 0.853242 | 0.978839 |
| gsdmea             | 44.92947 | -0.156879174 | 0.383855 | -0.40869 | 0.682764 | 0.938006 |
| mdc1               | 213.5292 | 0.172514583  | 0.149098 | 1.157052 | 0.247251 | 0.727871 |
| topl               | 27.66742 | 0.524176835  | 0.336467 | 1.557884 | 0.119261 | 0.562753 |
| pdgfba             | 70.84578 | -0.235384505 | 0.270406 | -0.87049 | 0.384035 | 0.826565 |
| mfsd10             | 131.6184 | 0.166049829  | 0.197388 | 0.841237 | 0.400215 | 0.831472 |
| bahd1              | 273.6723 | -0.168001653 | 0.169585 | -0.99067 | 0.321849 | 0.782075 |
| gucylb1            | 156.1142 | -0.689483946 | 0.27238  | -2.53133 | 0.011363 | 0.185148 |
| itprid1            | 54.76138 | 0.003119777  | 0.286919 | 0.010873 | 0.991324 | 1        |
| ddhdla             | 173.1057 | 0.096416811  | 0.188676 | 0.511017 | 0.609339 | 0.915204 |
| MYADM              | 337.7391 | -0.230722658 | 0.186303 | -1.23842 | 0.215559 | 0.697157 |
| scn11aa            | 10.39063 | 0.375061548  | 0.532719 | 0.704052 | 0.4814   | 0.870594 |
| znf521             | 22.50115 | -0.052140218 | 0.41797  | -0.12475 | 0.900724 | 0.99045  |
| sult6b1            | 1286.823 | -0.01910586  | 0.149069 | -0.12817 | 0.898016 | 0.990171 |
| zmp:0000001228     | 49.8407  | -0.200673161 | 0.315125 | -0.63681 | 0.524252 | 0.888801 |
| itga2.3            | 20.47988 | -2.013714005 | 0.877232 | -2.29553 | 0.021703 | 0.261221 |
| si:ch211-266k8.4   | 43.8656  | -0.076552017 | 0.384058 | -0.19932 | 0.842009 | 0.97643  |
| dapl1b             | 2004.482 | -0.081332124 | 0.184764 | -0.44019 | 0.659796 | 0.930581 |
| irgql              | 16.26189 | -0.309966324 | 0.742666 | -0.41737 | 0.676408 | 0.93557  |
| atad3              | 261.6391 | 0.049318458  | 0.201929 | 0.244236 | 0.807048 | 0.969726 |
| si:dkey-187k19.2   | 0.421212 | -1.824031643 | 4.242233 | -0.42997 | 0.667218 | NA       |
| si:dkey-264d12.5   | 93.86075 | -0.312312015 | 0.26042  | -1.19926 | 0.230426 | 0.712099 |
| dpyda.3            | 37.03031 | -1.069101713 | 0.324325 | -3.29639 | 0.000979 | 0.043444 |
| stk35              | 144.5637 | 0.118002713  | 0.229941 | 0.513188 | 0.60782  | 0.915204 |
| qdprb2             | 0.470533 | 0.086913969  | 2.555827 | 0.034006 | 0.972872 | NA       |
| si:ch211-232i5.3   | 105.1095 | -0.187229978 | 0.19656  | -0.95253 | 0.340826 | 0.795603 |
| mhclzda            | 183.1461 | -1.026910742 | 0.290507 | -3.5349  | 0.000408 | 0.024112 |
| lins1              | 40.16967 | 0.001845805  | 0.291836 | 0.006325 | 0.994954 | 1        |



|                   |          |              |          |          |          |          |
|-------------------|----------|--------------|----------|----------|----------|----------|
| AL831726.1        | 2.148814 | 1.99525532   | 1.846045 | 1.080827 | 0.279774 | NA       |
| ier2b             | 368.0899 | -0.078997599 | 0.542261 | -0.14568 | 0.884172 | 0.987047 |
| RF00426           | 0 NA     | NA           | NA       | NA       | NA       | NA       |
| erfl1             | 84.23121 | 0.089134757  | 0.238861 | 0.373166 | 0.709025 | 0.945546 |
| fubp3             | 695.5868 | 0.106387256  | 0.158776 | 0.670045 | 0.502829 | 0.881453 |
| si:dkey-7i4.1     | 9.038409 | 0.474781359  | 0.798337 | 0.594713 | 0.552035 | 0.8974   |
| gig2o             | 28.6471  | -0.264143184 | 0.430832 | -0.6131  | 0.53981  | 0.893049 |
| stambpb           | 201.1456 | -0.318831809 | 0.188175 | -1.69434 | 0.090201 | 0.50413  |
| si:dkey-100n23.5  | 262.5077 | -0.029144571 | 0.181302 | -0.16075 | 0.872289 | 0.983447 |
| crygm2d2          | 12176.29 | 0.04712265   | 0.418726 | 0.112538 | 0.910397 | 0.992208 |
| CR381646.1        | 0.050723 | -0.86807634  | 5.267649 | -0.16479 | 0.869106 | NA       |
| pik3c2b           | 577.0273 | -0.103004742 | 0.127527 | -0.80771 | 0.419258 | 0.842286 |
| CABZ01029822.1    | 8.973092 | 0.377844825  | 0.576227 | 0.655722 | 0.512003 | 0.885217 |
| tnni3k            | 18.38094 | -0.291777771 | 0.403486 | -0.72314 | 0.469592 | 0.867224 |
| pimr14            | 0 NA     | NA           | NA       | NA       | NA       | NA       |
| TCF24             | 34.91191 | 0.301450405  | 0.298304 | 1.010549 | 0.312232 | 0.776164 |
| si:ch211-269k10.2 | 206.227  | 0.30048641   | 0.184368 | 1.629819 | 0.10314  | 0.530217 |
| si:dkey-24117.3   | 0.050723 | -0.86807634  | 5.267649 | -0.16479 | 0.869106 | NA       |
| si:dkeyp-118a3.2  | 48.77671 | -0.763704137 | 0.361919 | -2.11015 | 0.034845 | 0.32873  |
| BX649442.1        | 1.076466 | -2.606736662 | 2.374519 | -1.0978  | 0.272294 | NA       |
| FP102309.1        | 8.498204 | -0.499200329 | 0.643348 | -0.77594 | 0.437784 | 0.851283 |
| atxn11            | 18.88816 | -0.459996611 | 0.481025 | -0.95628 | 0.338929 | 0.795226 |
| mbd6              | 180.3071 | -0.099329463 | 0.211883 | -0.46879 | 0.639217 | 0.924779 |
| k1c4              | 482.0783 | 0.210333836  | 0.190639 | 1.103307 | 0.269894 | 0.746532 |
| carmil3           | 167.5986 | 0.386212696  | 0.205336 | 1.880878 | 0.059989 | 0.421883 |
| si:ch73-234b20.5  | 280.1133 | 0.083103238  | 0.163147 | 0.509376 | 0.610489 | 0.915331 |
| zgc:64002         | 55.37584 | -0.268761572 | 0.47031  | -0.57146 | 0.56769  | 0.901809 |
| BX004816.2        | 0 NA     | NA           | NA       | NA       | NA       | NA       |
| cubn              | 99.95318 | -0.896430167 | 0.420894 | -2.12982 | 0.033186 | 0.322535 |
| RF00017           | 0 NA     | NA           | NA       | NA       | NA       | NA       |
| micall1b.2        | 26.38407 | -0.826018252 | 0.615253 | -1.34257 | 0.179412 | 0.654677 |
| si:dkey-11k2.7    | 65.04409 | -0.091063026 | 0.60423  | -0.15071 | 0.880205 | 0.986408 |
| F0704748.1        | 15.33621 | -0.27469543  | 0.467475 | -0.58762 | 0.556791 | 0.899063 |
| si:ch73-334d15.2  | 26.49815 | -0.493621695 | 0.388419 | -1.27085 | 0.203783 | 0.684589 |
| RF00281           | 0 NA     | NA           | NA       | NA       | NA       | NA       |
| rbbp81            | 94.54593 | -0.407181654 | 0.220894 | -1.84333 | 0.065281 | 0.435359 |
| rhd11             | 16.91663 | 0.3940674    | 0.490344 | 0.803655 | 0.421596 | 0.842901 |
| si:ch211-222k6.2  | 69.19357 | -0.101743884 | 0.291763 | -0.34872 | 0.727299 | 0.949095 |
| si:dkey-165n16.1  | 144.5983 | 0.034172475  | 0.221758 | 0.154098 | 0.877533 | 0.985433 |
| ggt112.2          | 0 NA     | NA           | NA       | NA       | NA       | NA       |
| ftr36             | 2.113615 | 1.219981704  | 1.36015  | 0.896947 | 0.369747 | NA       |
| selenoulb         | 31.1751  | 0.609378847  | 0.51573  | 1.181584 | 0.237371 | 0.718568 |
| RF00017           | 0.043308 | 0 5.267649   | 0        | 1 NA     |          |          |
| si:ch211-71k14.1  | 1.403802 | -2.121825063 | 1.965267 | -1.07966 | 0.280293 | NA       |
| znf977            | 1.742562 | 0.409279472  | 1.875479 | 0.218227 | 0.827253 | NA       |
| chrna4a           | 1.794396 | 1.958135903  | 2.025006 | 0.966978 | 0.333555 | NA       |
| znf574            | 119.4322 | 0.273997874  | 0.157082 | 1.744294 | 0.081108 | 0.479923 |
| RF00001           | 0 NA     | NA           | NA       | NA       | NA       | NA       |
| hear1-4           | 17.8407  | -0.259374938 | 0.45261  | -0.57307 | 0.5666   | 0.901739 |
| col28a1b          | 17.64653 | 0.405021991  | 0.686002 | 0.590409 | 0.554916 | 0.898617 |
| si:ch211-274p24.4 | 7.6001   | -0.931564569 | 0.795919 | -1.17043 | 0.241829 | 0.72348  |
| si:ch211-157c3.4  | 616.7986 | -0.157145531 | 0.131615 | -1.19398 | 0.232487 | 0.713923 |
| foxa              | 33.21874 | -0.044358458 | 0.383812 | -0.11557 | 0.907991 | 0.991745 |
| si:ch73-106k19.5  | 0.727025 | 0 3.049743   | 0        | 1 NA     |          |          |

|                    |          |              |          |          |          |          |  |
|--------------------|----------|--------------|----------|----------|----------|----------|--|
| ntng2b             | 62.89393 | 0.088129684  | 0.343909 | 0.256258 | 0.797751 | 0.966447 |  |
| si:ch1073-164k15.3 | 15.83438 | -2.907437969 | 0.933277 | -3.1153  | 0.001838 | 0.065916 |  |
| si:ch73-222h13.1   | 14.1434  | 0.41884717   | 0.438788 | 0.954555 | 0.339803 | 0.795226 |  |
| akna               | 104.2737 | 0.057190015  | 0.233046 | 0.245402 | 0.806145 | 0.969726 |  |
| RF00001            | 0 NA     | NA           | NA       | NA       | NA       | NA       |  |
| slc5a8             | 25.71903 | -0.275283983 | 0.506127 | -0.5439  | 0.586508 | 0.906711 |  |
| ifnlr1             | 24.75262 | 0.833347326  | 0.48507  | 1.717995 | 0.085798 | 0.491332 |  |
| RF00001            | 0 NA     | NA           | NA       | NA       | NA       | NA       |  |
| serpina7           | 52.2364  | 0            | 1.740839 | 0        | 1        | 1        |  |
| fam183a            | 11.06916 | -0.200373173 | 0.521515 | -0.38421 | 0.70082  | 0.942918 |  |
| si:ch1073-296d18.1 | 16.80321 | -0.019974104 | 0.460793 | -0.04335 | 0.965425 | 1        |  |
| CR788255.1         | 0.393939 | 0            | 4.992835 | 0        | 1        | NA       |  |
| sowahd             | 33.86725 | 0.194076588  | 0.39277  | 0.494123 | 0.621219 | 0.918461 |  |
| tmem102            | 139.233  | 0.193196954  | 0.216104 | 0.894001 | 0.371321 | 0.818945 |  |
| crygm2d4           | 6754.751 | 0.396514893  | 0.346521 | 1.144275 | 0.252509 | 0.732759 |  |
| si:dkeyp-69c1.7    | 83.57943 | 0.058226869  | 0.44553  | 0.130691 | 0.89602  | 0.98926  |  |
| figla              | 0.476256 | -0.795521116 | 2.882002 | -0.27603 | 0.782524 | NA       |  |
| si:ch211-162i8.4   | 4.102589 | 1.721364778  | 0.880807 | 1.954304 | 0.050665 | 0.391589 |  |
| rskra              | 40.19054 | -0.418334734 | 0.386046 | -1.08364 | 0.278525 | 0.752148 |  |
| scpp9              | 28.71763 | -2.753532876 | 1.457274 | -1.88951 | 0.058824 | 0.418455 |  |
| ubxn2a             | 106.7494 | 0.359345162  | 0.295127 | 1.217595 | 0.223378 | 0.70531  |  |
| cbx7b              | 29.84405 | -0.608588143 | 0.618863 | -0.9834  | 0.325412 | 0.784089 |  |
| si:ch211-232b12.5  | 111.18   | -0.379137881 | 0.240573 | -1.57598 | 0.115031 | 0.554651 |  |
| grip2a             | 75.92115 | 0.024526306  | 0.302117 | 0.081181 | 0.935298 | 0.996829 |  |
| nfil3-6            | 128.129  | -0.864759779 | 0.295132 | -2.93008 | 0.003389 | 0.095869 |  |
| si:ch73-105b23.6   | 21.28508 | -0.288739212 | 0.577666 | -0.49984 | 0.617189 | 0.916365 |  |
| wdr93              | 19.61213 | 0.899585953  | 0.53896  | 1.669116 | 0.095094 | 0.51461  |  |
| prrg2              | 210.7823 | -0.052452277 | 0.197568 | -0.26549 | 0.790632 | 0.964764 |  |
| rorc               | 9.560816 | -0.334037845 | 0.663747 | -0.50326 | 0.614781 | 0.915998 |  |
| fibinb             | 373.9109 | -0.253980764 | 0.145407 | -1.74669 | 0.080692 | 0.479638 |  |
| rosl               | 30.65386 | -1.115237101 | 0.617006 | -1.8075  | 0.070685 | 0.453582 |  |
| cthrcla            | 428.8045 | 0.363014731  | 0.151957 | 2.388932 | 0.016897 | 0.230481 |  |
| stk39              | 9.778271 | 0.432369762  | 0.621312 | 0.695897 | 0.486493 | 0.873244 |  |
| akt3b              | 183.5678 | 0.127723255  | 0.150862 | 0.846623 | 0.397205 | 0.830253 |  |
| cct2               | 1328.355 | -0.26567992  | 0.196854 | -1.34963 | 0.177135 | 0.650742 |  |
| vwa3a              | 8.847763 | 0.751313039  | 0.646022 | 1.162984 | 0.244836 | 0.726138 |  |
| si:ch73-380n15.2   | 60.35956 | 0.540650489  | 0.612818 | 0.882237 | 0.377649 | 0.822478 |  |
| si:ch73-361p23.3   | 2.390112 | 1.030223242  | 1.407701 | 0.731848 | 0.464261 | 0.864593 |  |
| kbtbd2             | 358.4409 | 0.01756495   | 0.110755 | 0.158594 | 0.873989 | 0.98385  |  |
| oit3               | 34.21287 | 0.599133697  | 0.461197 | 1.299084 | 0.193915 | 0.674122 |  |
| exoc7              | 752.9835 | 0.008820838  | 0.14877  | 0.059292 | 0.95272  | 0.998395 |  |
| si:ch211-161h7.4   | 340.5002 | 0.160564934  | 0.143739 | 1.117055 | 0.263971 | 0.741984 |  |
| ucn3l              | 10.81959 | -1.490348426 | 0.8647   | -1.72354 | 0.08479  | 0.488883 |  |
| zgc:100918         | 858.8135 | -0.211893167 | 0.113469 | -1.8674  | 0.061845 | 0.426649 |  |
| CR847844.1         | 4.496379 | 0            | 1.863517 | 0        | 1        | 1        |  |
| kcnab2a            | 27.16955 | 0.60213328   | 0.409129 | 1.471745 | 0.14109  | 0.599658 |  |
| znf101l            | 21.00381 | -0.508845305 | 0.377669 | -1.34733 | 0.177874 | 0.651389 |  |
| si:ch73-50f9.4     | 51.47428 | 0.134163854  | 0.3179   | 0.422032 | 0.673002 | 0.93414  |  |
| si:dkeyp-3f10.17   | 4.537228 | 0.181393802  | 0.929369 | 0.19518  | 0.845252 | 0.976791 |  |
| ypel2b             | 13.07484 | -0.423217477 | 0.563308 | -0.75131 | 0.452468 | 0.857994 |  |
| mtssl1b            | 57.45822 | 0.185533751  | 0.36395  | 0.509778 | 0.610207 | 0.915331 |  |
| zgc:63568          | 74.39771 | 0.598202259  | 0.400927 | 1.492048 | 0.135687 | 0.591131 |  |
| BX942819.2         | 0 NA     | NA           | NA       | NA       | NA       | NA       |  |
| selenoj            | 1273.4   | -0.167453107 | 0.154125 | -1.08648 | 0.277268 | 0.751426 |  |

|                     |           |               |           |           |           |           |
|---------------------|-----------|---------------|-----------|-----------|-----------|-----------|
| tmem182b            | 12. 38187 | 0. 443531129  | 0. 479828 | 0. 924354 | 0. 355302 | 0. 806546 |
| zgc:66473           | 6. 147475 | 0. 720007091  | 0. 822601 | 0. 875281 | 0. 381421 | 0. 824626 |
| si:ch211-202h22. 10 | 22. 66358 | 0. 080055205  | 0. 432991 | 0. 184889 | 0. 853316 | 0. 978876 |
| si:dkey-84h14. 1    | 0. 77145  | 0             | 2. 549587 | 0         | 1         | NA        |
| si:dkey-152b24. 8   | 2. 492202 | 1. 851878931  | 1. 423118 | 1. 301283 | 0. 193162 | 0. 673175 |
| armac9              | 144. 6637 | -0. 384790301 | 0. 236609 | -1. 62627 | 0. 103893 | 0. 532096 |
| crygm2d14           | 4020. 537 | 0. 262635756  | 0. 379518 | 0. 692025 | 0. 488922 | 0. 873964 |
| cebpd               | 3903. 02  | -0. 270686416 | 0. 244129 | -1. 10878 | 0. 267524 | 0. 743943 |
| CABZ01038521. 1     | 30. 08666 | -0. 424153153 | 0. 440792 | -0. 96225 | 0. 335922 | 0. 792139 |
| lgals915            | 1. 179104 | 0. 76469372   | 2. 277092 | 0. 33582  | 0. 737006 | NA        |
| jac10               | 27. 64294 | -1. 605262044 | 0. 48233  | -3. 32814 | 0. 000874 | 0. 040034 |
| tmem121b            | 12. 21563 | -0. 168271224 | 0. 485088 | -0. 34689 | 0. 728675 | 0. 949787 |
| crygm2d1            | 13630. 56 | 0. 085659185  | 0. 346326 | 0. 247337 | 0. 804647 | 0. 969208 |
| cbx8a               | 160. 6264 | -0. 134507247 | 0. 181204 | -0. 7423  | 0. 457907 | 0. 860993 |
| maza                | 202. 2317 | 0. 474178864  | 0. 183879 | 2. 578756 | 0. 009916 | 0. 172469 |
| si:dkey-77f5. 3     | 148. 323  | -0. 228897161 | 0. 170042 | -1. 34612 | 0. 178264 | 0. 652303 |
| scoca               | 367. 485  | -0. 055517644 | 0. 119703 | -0. 4638  | 0. 642793 | 0. 925707 |
| unc5c               | 129. 9762 | -0. 205407591 | 0. 168402 | -1. 21975 | 0. 222561 | 0. 704536 |
| raplab              | 367. 5685 | 0. 176881452  | 0. 185437 | 0. 953862 | 0. 340154 | 0. 795345 |
| reep6               | 36. 57163 | -0. 401645939 | 0. 547402 | -0. 73373 | 0. 463112 | 0. 864191 |
| dnah2               | 61. 6792  | 0. 001342852  | 0. 301254 | 0. 004458 | 0. 996443 | 1         |
| c3a. 2              | 83. 15561 | 0. 111986677  | 0. 483767 | 0. 231489 | 0. 816935 | 0. 971207 |
| si:dkeyp-46h3. 6    | 0. 565466 | 1. 199557893  | 2. 623539 | 0. 457229 | 0. 647507 | NA        |
| cep162              | 67. 34907 | -0. 052085868 | 0. 252767 | -0. 20606 | 0. 836742 | 0. 976007 |
| dnah5               | 61. 89849 | -0. 073212763 | 0. 286097 | -0. 2559  | 0. 798026 | 0. 966458 |
| zgc:66473           | 11. 13795 | 0. 148811514  | 0. 522421 | 0. 28485  | 0. 775759 | 0. 961073 |
| tcf23               | 0. 767917 | 0             | 3. 104234 | 0         | 1         | NA        |
| si:dkey-29b11. 3    | 4. 144263 | 1. 891341093  | 1. 340965 | 1. 410432 | 0. 158412 | 0. 623794 |
| hbbe1. 3            | 15524. 74 | -0. 175055427 | 0. 34528  | -0. 507   | 0. 612158 | 0. 915668 |
| si:ch73-160p18. 3   | 0. 140973 | -0. 868103029 | 5. 267649 | -0. 1648  | 0. 869102 | NA        |
| prr11               | 82. 17301 | 0. 336673746  | 0. 29541  | 1. 139683 | 0. 254418 | 0. 733426 |
| tshz3a              | 231. 9105 | -0. 21897421  | 0. 135717 | -1. 61346 | 0. 106644 | 0. 536345 |
| slc25a34            | 498. 3743 | 0. 278006496  | 0. 292224 | 0. 951347 | 0. 341428 | 0. 796175 |
| tpml                | 4612. 971 | 0. 056103221  | 0. 149439 | 0. 375425 | 0. 707345 | 0. 944981 |
| si:ch211-214p13. 3  | 75. 89426 | 0. 71919259   | 0. 341416 | 2. 106497 | 0. 035161 | 0. 330358 |
| si:ch73-304f21. 1   | 11. 96588 | -1. 015836271 | 0. 657821 | -1. 54425 | 0. 122529 | 0. 569468 |
| bean1               | 112. 2586 | 0. 419758531  | 0. 288277 | 1. 456095 | 0. 145366 | 0. 604476 |
| CR790388. 2         | 1. 266153 | 0. 625374822  | 1. 850644 | 0. 337923 | 0. 735421 | NA        |
| zdhhc5b             | 171. 9339 | 0. 041095814  | 0. 179016 | 0. 229564 | 0. 81843  | 0. 971656 |
| taar12g             | 0         | NA            | NA        | NA        | NA        | NA        |
| serbp1b             | 2400. 357 | 0. 06687725   | 0. 098241 | 0. 680745 | 0. 496033 | 0. 878093 |
| si:dkey-187j14. 6   | 7. 726535 | -1. 698633618 | 0. 950652 | -1. 78681 | 0. 073968 | 0. 461828 |
| si:ch211-151p13. 8  | 285. 1334 | 0. 241528161  | 0. 270948 | 0. 89142  | 0. 372704 | 0. 819953 |
| RF00017             | 0         | NA            | NA        | NA        | NA        | NA        |
| spi2                | 13. 47042 | -0. 714279216 | 0. 465411 | -1. 53473 | 0. 124851 | 0. 572491 |
| ponzr4              | 299. 8609 | 0. 303677608  | 0. 232951 | 1. 303614 | 0. 192365 | 0. 672283 |
| ptp4a2a             | 774. 5164 | 0. 164907775  | 0. 135759 | 1. 214706 | 0. 224478 | 0. 706406 |
| BX664625. 2         | 0. 190066 | -1. 73291671  | 5. 236853 | -0. 33091 | 0. 740714 | NA        |
| mmd2a               | 26. 17438 | 0. 213702867  | 0. 35335  | 0. 604791 | 0. 545318 | 0. 895275 |
| pel13               | 494. 1331 | 0. 018018082  | 0. 186522 | 0. 0966   | 0. 923044 | 0. 994525 |
| si:ch73-57f22. 2    | 26. 8885  | -0. 804119096 | 0. 476033 | -1. 68921 | 0. 091179 | 0. 505533 |
| NDUFB1              | 784. 2063 | 0. 037430147  | 0. 142541 | 0. 262592 | 0. 792865 | 0. 965312 |
| ecscr               | 50. 60484 | -0. 799926371 | 0. 237297 | -3. 37099 | 0. 000749 | 0. 036381 |
| si:dkey-21c1. 4     | 34. 96298 | -0. 599860132 | 0. 311244 | -1. 9273  | 0. 053942 | 0. 402007 |

|                   |          |              |          |          |          |          |
|-------------------|----------|--------------|----------|----------|----------|----------|
| RF00001           | 0 NA     | NA           | NA       | NA       | NA       |          |
| F2R (1 of many)   | 0 NA     | NA           | NA       | NA       | NA       |          |
| dnajb12b          | 223.0577 | 0.201120997  | 0.187016 | 1.07542  | 0.282187 | 0.754654 |
| ccr6a             | 9.177049 | 0.814515093  | 0.682479 | 1.193465 | 0.232687 | 0.714183 |
| cbln20            | 171.8479 | -0.670249151 | 0.353468 | -1.89621 | 0.057932 | 0.415699 |
| si:dkey-226110.6  | 163.164  | -0.084869969 | 0.150311 | -0.56463 | 0.572326 | 0.903461 |
| fam124b           | 41.63205 | 0.112736584  | 0.296717 | 0.379947 | 0.703985 | 0.943735 |
| F0704810.1        | 97.88237 | 0.208701297  | 0.258576 | 0.807118 | 0.419599 | 0.842383 |
| tradv30.0.6       | 0 NA     | NA           | NA       | NA       | NA       |          |
| si:ch73-322b17.4  | 0.368432 | 1.055353197  | 5.126048 | 0.20588  | 0.836884 | NA       |
| CU693494.1        | 10.90582 | -0.868156864 | 1.753966 | -0.49497 | 0.620623 | 0.918135 |
| btbd3b            | 96.88661 | -0.135988135 | 0.310474 | -0.438   | 0.661385 | 0.930607 |
| si:dkey-261p22.1  | 7.896608 | -0.904257657 | 0.907739 | -0.99617 | 0.31917  | 0.779923 |
| CU693446.1        | 7.08558  | 0.058738176  | 0.727169 | 0.080777 | 0.93562  | 0.996829 |
| CABZ01045212.1    | 34.14902 | -0.703173083 | 0.299076 | -2.35115 | 0.018716 | 0.241927 |
| snipl             | 276.3731 | -0.218820755 | 0.172658 | -1.26737 | 0.205024 | 0.686873 |
| zgc:85936         | 194.3065 | 0.517992122  | 0.15454  | 3.351824 | 0.000803 | 0.037962 |
| wu:fe05a04        | 142.4897 | 0.058148641  | 0.197598 | 0.294278 | 0.768546 | 0.960395 |
| si:ch211-278p9.1  | 11.68238 | 1.190035341  | 0.807919 | 1.472965 | 0.140761 | 0.599658 |
| znf407            | 109.0259 | -0.049680084 | 0.205731 | -0.24148 | 0.809183 | 0.969828 |
| kif3a             | 686.6157 | 0.162092785  | 0.139058 | 1.165649 | 0.243756 | 0.724437 |
| BX510934.1        | 15.66773 | 0.050101553  | 0.470431 | 0.106501 | 0.915185 | 0.993066 |
| fbxo42            | 203.7726 | -0.073593751 | 0.158317 | -0.46485 | 0.642038 | 0.925586 |
| cdkl              | 807.3997 | 0.108856669  | 0.296386 | 0.36728  | 0.71341  | 0.945821 |
| si:ch73-308114.2  | 215.6009 | -0.092562969 | 0.167061 | -0.55407 | 0.579533 | 0.905618 |
| pacrg             | 29.14658 | 0.257395178  | 0.302096 | 0.852031 | 0.394197 | 0.828374 |
| si:ch73-105b23.1  | 11.44021 | -1.224795497 | 0.724147 | -1.69136 | 0.090768 | 0.505206 |
| nek11             | 4.869387 | -0.537861127 | 1.075096 | -0.50029 | 0.61687  | 0.916365 |
| hdac11            | 20.44285 | 0.106932348  | 0.441876 | 0.241996 | 0.808783 | 0.969828 |
| nox1              | 82.43815 | 0.000990368  | 0.336527 | 0.002943 | 0.997652 | 1        |
| zmp:0000000912    | 2.691155 | 1.864525821  | 1.694632 | 1.100254 | 0.271221 | 0.747344 |
| zgc:171717        | 0.343647 | -3.291895274 | 5.169337 | -0.63681 | 0.524247 | NA       |
| si:dkeyp-98a7.9   | 0.704776 | 1.684213415  | 2.322861 | 0.72506  | 0.468415 | NA       |
| si:ch211-242f23.8 | 10.85056 | -0.036842149 | 0.620299 | -0.05939 | 0.952638 | 0.998395 |
| BX469925.1        | 1.241357 | -0.648372699 | 1.524267 | -0.42537 | 0.670569 | NA       |
| si:ch73-95115.5   | 457.3528 | -0.284785047 | 0.149851 | -1.90045 | 0.057374 | 0.413587 |
| si:dkey-51d8.3    | 1.732346 | -2.387471022 | 1.967136 | -1.21368 | 0.22487  | NA       |
| TENM3             | 155.6188 | 0.046691194  | 0.19416  | 0.240478 | 0.80996  | 0.969828 |
| gpr153            | 58.00671 | 1.081244717  | 0.411327 | 2.628676 | 0.008572 | 0.158655 |
| FP085398.1        | 45.29293 | -0.275987929 | 0.306788 | -0.8996  | 0.368331 | 0.817272 |
| RF00001           | 0 NA     | NA           | NA       | NA       | NA       |          |
| maptb             | 717.2687 | -0.090807148 | 0.153701 | -0.59081 | 0.554651 | 0.89855  |
| BX649485.1        | 9.215098 | 1.406368977  | 0.671919 | 2.093064 | 0.036343 | 0.335171 |
| si:ch211-173a9.6  | 49.07934 | -1.57445341  | 0.435614 | -3.61433 | 0.000301 | 0.019507 |
| nitrlm            | 4.85185  | -5.253979714 | 1.254374 | -4.18853 | 2.81E-05 | 0.00362  |
| si:dkey-11o18.5   | 13.03744 | 2.260102368  | 0.870341 | 2.5968   | 0.00941  | 0.166683 |
| or128-5           | 12.02312 | 0.482405394  | 0.557112 | 0.865903 | 0.386543 | 0.827433 |
| hmgn6             | 4588.109 | 0.046428497  | 0.142509 | 0.325794 | 0.74458  | 0.95491  |
| si:dkey-33o22.1   | 0 NA     | NA           | NA       | NA       | NA       |          |
| nsf11c            | 1412.926 | 0.261210938  | 0.145757 | 1.792095 | 0.073118 | 0.460113 |
| cdh26.2           | 115.1714 | 0.071856561  | 0.226328 | 0.317489 | 0.750873 | 0.955074 |
| znf1064           | 11.77435 | 1.112044739  | 0.574616 | 1.935285 | 0.052955 | 0.399666 |
| runx1             | 20.60859 | -0.062948053 | 0.427935 | -0.1471  | 0.883055 | 0.986908 |
| sept7a            | 1675.86  | -0.109115601 | 0.099798 | -1.09337 | 0.274232 | 0.749612 |

|                    |          |              |          |          |          |          |
|--------------------|----------|--------------|----------|----------|----------|----------|
| ctslb              | 0.050723 | -0.86807634  | 5.267649 | -0.16479 | 0.869106 | NA       |
| fasn               | 654.0692 | 0.4588736    | 0.194207 | 2.362811 | 0.018137 | 0.237957 |
| si:ch211-219a15.3  | 36.28332 | 0.052289339  | 0.41905  | 0.124781 | 0.900697 | 0.99045  |
| si:ch211-248117.3  | 32.19099 | 0.966905114  | 0.540603 | 1.788567 | 0.073685 | 0.461398 |
| RF00001            | 0 NA     | NA           | NA       | NA       | NA       | NA       |
| fibpb              | 31.29308 | 0.639836205  | 0.352631 | 1.814461 | 0.069607 | 0.450374 |
| si:ch1073-127d16.1 | 20.70613 | -0.457809257 | 0.536439 | -0.85342 | 0.393425 | 0.828374 |
| BX005012.1         | 4.422138 | 2.516772057  | 1.573222 | 1.599757 | 0.109653 | 0.543222 |
| si:dkey-1c11.1     | 84.44289 | 0.256830131  | 0.263681 | 0.97402  | 0.330047 | 0.788084 |
| klh129             | 174.1205 | 0.072432     | 0.15086  | 0.480128 | 0.631136 | 0.923003 |
| atox1              | 841.3672 | 0.067710116  | 0.183697 | 0.368597 | 0.712428 | 0.945821 |
| lpl                | 2100.494 | 0.007417875  | 0.250588 | 0.029602 | 0.976385 | 1        |
| si:dkey-256i11.3   | 0.094679 | 0            | 5.267649 | 0        | 1        | NA       |
| gfra3              | 74.54118 | 0.36279437   | 0.271475 | 1.336382 | 0.181424 | 0.657873 |
| dicp3.3            | 12.83144 | 0.270627321  | 0.573731 | 0.471697 | 0.637143 | 0.924779 |
| FQ311930.1         | 24.24947 | 1.429414939  | 0.904547 | 1.580255 | 0.114048 | 0.55294  |
| si:ch211-226o13.1  | 15.10761 | -1.209492867 | 0.705831 | -1.71357 | 0.086607 | 0.493145 |
| tmprss5            | 62.39643 | -0.41462234  | 0.273335 | -1.5169  | 0.129291 | 0.578874 |
| RF00017            | 140.5502 | 0.050961086  | 0.375427 | 0.135742 | 0.892026 | 0.988566 |
| si:dkey-118k5.3    | 51.48212 | -0.278722151 | 0.294937 | -0.94502 | 0.344647 | 0.798147 |
| BX664618.1         | 27.26218 | -1.945393391 | 0.539561 | -3.60551 | 0.000312 | 0.020043 |
| asb14b             | 142.3862 | 0.233814208  | 0.343527 | 0.680629 | 0.496106 | 0.878093 |
| map4k3a            | 197.2477 | 0.150403604  | 0.177407 | 0.847791 | 0.396555 | 0.830053 |
| si:dkey-156k2.8    | 0.419162 | 0.093654781  | 2.980464 | 0.031423 | 0.974932 | NA       |
| lrrc38b            | 37.43804 | -0.364953221 | 0.371072 | -0.98351 | 0.325356 | 0.784089 |
| ccser2a            | 341.152  | 0.065602826  | 0.127529 | 0.514415 | 0.606962 | 0.915204 |
| CR382337.1         | 3.364438 | -1.822352686 | 1.626535 | -1.12039 | 0.262548 | 0.740129 |
| rfwd3              | 103.5217 | -0.053612908 | 0.188232 | -0.28482 | 0.775779 | 0.961073 |
| CR388166.1         | 5.096889 | 1.696639171  | 1.196757 | 1.417697 | 0.156279 | 0.621949 |
| RF00001            | 0 NA     | NA           | NA       | NA       | NA       | NA       |
| si:ch211-173d10.4  | 4.716721 | -0.600345183 | 1.17529  | -0.51081 | 0.609487 | 0.915204 |
| pimr190            | 3.209859 | 0.388111587  | 1.001617 | 0.387485 | 0.698397 | 0.942433 |
| cnih4              | 53.64553 | 0.124162113  | 0.217586 | 0.570635 | 0.568247 | 0.902146 |
| or122-1            | 0 NA     | NA           | NA       | NA       | NA       | NA       |
| rab27b             | 50.14974 | -0.425604338 | 0.319165 | -1.33349 | 0.18237  | 0.658899 |
| ponzr10            | 9.322296 | 0            | 1.820697 | 0        | 1        | 1        |
| crygm2d10          | 15462.33 | 0.239949531  | 0.33704  | 0.711931 | 0.476507 | 0.869292 |
| CABZ01074298.1     | 10.30006 | -0.514983441 | 0.649396 | -0.79302 | 0.427767 | 0.845893 |
| RF00017            | 0 NA     | NA           | NA       | NA       | NA       | NA       |
| pum3               | 505.3477 | 0.087623673  | 0.171155 | 0.511955 | 0.608682 | 0.915204 |
| tiam2a             | 399.5172 | 0.045838318  | 0.157921 | 0.290261 | 0.771616 | 0.960624 |
| rnf152             | 62.49069 | 0.759280255  | 0.310793 | 2.443045 | 0.014564 | 0.211168 |
| si:dkeyp-110a12.4  | 128.7754 | 0.362957368  | 0.233001 | 1.55775  | 0.119293 | 0.562753 |
| si:ch211-22k7.9    | 12.94008 | 0.253001562  | 0.665508 | 0.380163 | 0.703825 | 0.943735 |
| si:dkey-54n8.2     | 215.3492 | 0.083882275  | 0.131793 | 0.636471 | 0.524469 | 0.888808 |
| pdyn               | 24.08357 | 0.602265695  | 0.63486  | 0.94866  | 0.342794 | 0.79738  |
| tnfrsf11a          | 164.249  | -0.588817242 | 0.232756 | -2.52977 | 0.011414 | 0.185332 |
| FP236735.1         | 28.38533 | -0.423958978 | 0.381345 | -1.11175 | 0.266247 | 0.742912 |
| mfrp               | 7.391655 | -0.069151515 | 0.6507   | -0.10627 | 0.915366 | 0.993068 |
| si:dkey-30g5.1     | 0 NA     | NA           | NA       | NA       | NA       | NA       |
| agap3              | 77.20738 | 0.174317524  | 0.293646 | 0.593631 | 0.552759 | 0.897444 |
| si:dkey-211g8.9    | 0.116481 | 0            | 5.267649 | 0        | 1        | NA       |
| bc13               | 25.56806 | 0.877023146  | 0.462796 | 1.895054 | 0.058085 | 0.416281 |
| si:ch211-113p18.3  | 145.6563 | -0.178796839 | 0.209013 | -0.85543 | 0.39231  | 0.827902 |

|                     |          |              |          |          |          |          |
|---------------------|----------|--------------|----------|----------|----------|----------|
| si:dkey-33c14.6     | 20.06283 | -0.332205091 | 0.491835 | -0.67544 | 0.499396 | 0.879603 |
| cntn1a              | 332.8434 | 0.026516839  | 0.146759 | 0.180683 | 0.856616 | 0.979558 |
| plekhn1             | 99.74003 | -0.520548888 | 0.267432 | -1.94647 | 0.051598 | 0.394954 |
| si:ch211-180a12.2   | 178.7537 | -2.026016911 | 0.939862 | -2.15565 | 0.031111 | 0.313664 |
| cd44a               | 32.45455 | -0.607364226 | 0.484066 | -1.25471 | 0.209583 | 0.691743 |
| SLC2A13 (1 of many) | 11.59909 | 0.4876559    | 0.656617 | 0.74268  | 0.457676 | 0.860993 |
| si:ch211-11k18.4    | 499.3842 | 0.314618078  | 0.17192  | 1.830027 | 0.067246 | 0.442764 |
| adgrf3a             | 3.17262  | 1.403011875  | 1.480217 | 0.947842 | 0.34321  | 0.797757 |
| eevs                | 245.7671 | 0.911810962  | 0.344793 | 2.644518 | 0.008181 | 0.153717 |
| rnf216              | 385.3553 | -0.318877429 | 0.138267 | -2.30625 | 0.021097 | 0.25794  |
| h2afy2              | 3281.776 | 0.172659336  | 0.100882 | 1.711494 | 0.08699  | 0.494706 |
| CU896691.1          | 1.145049 | 1.094763633  | 1.520251 | 0.720121 | 0.471451 | NA       |
| ndufa412b           | 3.146516 | 0.511453581  | 1.371528 | 0.372908 | 0.709217 | 0.945546 |
| RF00001             | 0 NA     | NA           | NA       | NA       | NA       | NA       |
| il4                 | 3.545264 | -1.251817667 | 1.328053 | -0.9426  | 0.345888 | 0.799025 |
| dact3a              | 162.3479 | -0.304890939 | 0.214345 | -1.42243 | 0.154902 | 0.619752 |
| psme4a              | 2121.493 | 0.135615314  | 0.205314 | 0.660526 | 0.508917 | 0.883442 |
| tmem240a            | 34.99812 | -0.358751035 | 0.387272 | -0.92635 | 0.354262 | 0.805403 |
| nitr10a             | 0 NA     | NA           | NA       | NA       | NA       | NA       |
| plcel               | 209.3312 | -0.113779891 | 0.217421 | -0.52332 | 0.600754 | 0.913756 |
| nudt9               | 276.2496 | 0.074561631  | 0.135498 | 0.550277 | 0.582129 | 0.90571  |
| RF00001             | 0 NA     | NA           | NA       | NA       | NA       | NA       |
| zgc:174972          | 22.49635 | -0.157588621 | 0.432976 | -0.36397 | 0.715884 | 0.946208 |
| cdk4                | 324.2752 | -0.412269313 | 0.177185 | -2.32677 | 0.019977 | 0.250067 |
| CR933559.1          | 20.63421 | -0.023586269 | 0.44528  | -0.05297 | 0.957756 | 0.999109 |
| pde8a               | 192.0845 | -0.029641637 | 0.150557 | -0.19688 | 0.843921 | 0.976791 |
| RF00017             | 0 NA     | NA           | NA       | NA       | NA       | NA       |
| CABZ01044053.1      | 1293.888 | -0.059079865 | 0.078337 | -0.75418 | 0.450741 | 0.857162 |
| rac1b               | 346.2419 | -0.084301272 | 0.198669 | -0.42433 | 0.671325 | 0.933953 |
| she                 | 104.5819 | -0.082105381 | 0.196262 | -0.41835 | 0.675694 | 0.935422 |
| avd                 | 4.290389 | -0.646926938 | 0.833915 | -0.77577 | 0.437885 | 0.851283 |
| rpap3               | 484.7148 | -0.118010574 | 0.111695 | -1.05655 | 0.290718 | 0.76078  |
| or122-2             | 0.43915  | 0.095639674  | 3.499665 | 0.027328 | 0.978198 | NA       |
| CU657980.2          | 0.344432 | -1.71201628  | 4.422325 | -0.38713 | 0.69866  | NA       |
| CT573433.1          | 86.05618 | 0.055548773  | 0.260453 | 0.213278 | 0.831111 | 0.974908 |
| slc6a11b            | 206.5896 | 0.14715866   | 0.263843 | 0.557751 | 0.577014 | 0.904798 |
| igsf5a              | 40.93489 | -0.001168259 | 0.4846   | -0.00241 | 0.998076 | 1        |
| znf365              | 6.024792 | 0.092632828  | 0.768885 | 0.120477 | 0.904105 | 0.991581 |
| bada                | 219.465  | -0.471186775 | 0.213284 | -2.2092  | 0.027161 | 0.293072 |
| si:ch211-114c17.1   | 35.99296 | 0.250265129  | 0.342031 | 0.731703 | 0.46435  | 0.864593 |
| pabpn11             | 3.390765 | -0.666796746 | 0.967212 | -0.6894  | 0.490571 | 0.875539 |
| BX664625.3          | 13.27298 | -0.147083979 | 0.772861 | -0.19031 | 0.849065 | 0.978067 |
| znf1057             | 18.94554 | 1.396505565  | 0.402401 | 3.470437 | 0.00052  | 0.028195 |
| wu:fc23c09          | 1.564909 | 0.028568832  | 1.641251 | 0.017407 | 0.986112 | NA       |
| CYP27A1 (1 of many) | 36.22266 | -3.740588578 | 0.550815 | -6.79101 | 1.11E-11 | 1.36E-08 |
| si:ch211-114113.12  | 3.571721 | 1.303861805  | 1.177952 | 1.106888 | 0.268342 | 0.744748 |
| mhc1zfa             | 27.29825 | 1.594529026  | 0.663557 | 2.403004 | 0.016261 | 0.225339 |
| si:dkey-26c10.5     | 43.97096 | 0.527660166  | 0.402778 | 1.310051 | 0.190179 | 0.669977 |
| si:ch73-125k17.2    | 0.720416 | 2.537678861  | 2.269874 | 1.117982 | 0.263574 | NA       |
| rp135a              | 21681.33 | -0.304850233 | 0.135948 | -2.2424  | 0.024935 | 0.279833 |
| si:dkey-106g10.7    | 150.8282 | -0.050706599 | 0.188826 | -0.26854 | 0.788286 | 0.963471 |
| CU929391.1          | 17.78903 | 0.430897381  | 0.61047  | 0.705846 | 0.480284 | 0.870001 |
| si:dkeyp-27c8.2     | 60.17752 | -0.246385359 | 0.296217 | -0.83177 | 0.405537 | 0.834645 |
| si:ch73-139j3.4     | 12.26385 | -3.866299453 | 1.131083 | -3.41823 | 0.00063  | 0.032718 |

|                     |           |               |           |           |           |           |
|---------------------|-----------|---------------|-----------|-----------|-----------|-----------|
| fgf18a              | 68. 57485 | 0. 496702047  | 0. 244793 | 2. 029074 | 0. 042451 | 0. 360949 |
| AL935044. 1         | 3. 57878  | 0. 769970304  | 0. 890953 | 0. 86421  | 0. 387473 | 0. 827592 |
| pimr70              | 3. 033703 | 1. 935448117  | 1. 142793 | 1. 693613 | 0. 090339 | 0. 504496 |
| pimr187             | 3. 269315 | 0. 871319356  | 1. 402027 | 0. 621471 | 0. 53429  | 0. 891573 |
| CR759879. 1         | 67. 10656 | 0. 848831714  | 0. 326993 | 2. 595868 | 0. 009435 | 0. 166881 |
| usp43b              | 30. 55353 | -0. 007151992 | 0. 404413 | -0. 01768 | 0. 98589  | 1         |
| fam110b             | 350. 8853 | 0. 167047167  | 0. 144267 | 1. 1579   | 0. 246905 | 0. 727706 |
| uspl8               | 8. 15873  | -0. 542485602 | 0. 969261 | -0. 55969 | 0. 575691 | 0. 904739 |
| tmed6               | 118. 7917 | -2. 608311839 | 1. 311749 | -1. 98842 | 0. 046765 | 0. 376754 |
| si:ch211-214c20. 1  | 5. 964036 | 0. 103119571  | 1. 087754 | 0. 0948   | 0. 924473 | 0. 994815 |
| sik3                | 1198. 289 | -0. 033278339 | 0. 128738 | -0. 2585  | 0. 796023 | 0. 966305 |
| si:dkey-66i24. 8    | 22. 29951 | -0. 055324761 | 0. 443486 | -0. 12475 | 0. 900722 | 0. 99045  |
| kdm6ba              | 1594. 309 | -0. 063732326 | 0. 105256 | -0. 6055  | 0. 544848 | 0. 895206 |
| pfn1                | 22791. 45 | -0. 038540655 | 0. 178815 | -0. 21553 | 0. 829351 | 0. 974609 |
| KCNIP4              | 26. 48236 | 0. 634969176  | 0. 409252 | 1. 551538 | 0. 120773 | 0. 566816 |
| gstm. 3             | 573. 5404 | 0. 010889661  | 0. 180851 | 0. 060213 | 0. 951986 | 0. 998032 |
| fut8b               | 23. 73589 | 0. 524014873  | 0. 5886   | 0. 890274 | 0. 373319 | 0. 820558 |
| pkd112b             | 0 NA      | NA            | NA        | NA        | NA        | NA        |
| znf217              | 436. 2584 | 0. 1209511    | 0. 129347 | 0. 935092 | 0. 349741 | 0. 801408 |
| adrb2a              | 102. 0097 | -0. 124089357 | 0. 195537 | -0. 63461 | 0. 525684 | 0. 888928 |
| si:dkey-30c15. 10   | 234. 721  | 0. 165798092  | 0. 456096 | 0. 363516 | 0. 716219 | 0. 94627  |
| pcdh2aa15           | 1. 563488 | -0. 536535771 | 1. 839292 | -0. 29171 | 0. 77051  | NA        |
| adgrg2a             | 87. 95753 | 0. 315427329  | 0. 302058 | 1. 044262 | 0. 296364 | 0. 764246 |
| hsd17b7             | 192. 2726 | -0. 011174709 | 0. 198925 | -0. 05618 | 0. 955202 | 0. 998611 |
| sema4gb             | 10. 0457  | 0. 257396209  | 0. 720126 | 0. 357432 | 0. 720768 | 0. 947343 |
| atg4db              | 20. 10764 | 0. 367863417  | 0. 441039 | 0. 834084 | 0. 404233 | 0. 833888 |
| smoc2               | 182. 6368 | -0. 037654129 | 0. 207131 | -0. 18179 | 0. 855749 | 0. 979532 |
| CABZ01056629. 1     | 28. 60326 | -0. 530938478 | 0. 38986  | -1. 36187 | 0. 173239 | 0. 646158 |
| BX470188. 1         | 6. 356683 | 1. 588525206  | 0. 816381 | 1. 945814 | 0. 051677 | 0. 395168 |
| si:ch211-112g6. 4   | 6. 163128 | -0. 266025362 | 0. 868564 | -0. 30628 | 0. 75939  | 0. 957886 |
| ablim3              | 382. 371  | -0. 230106379 | 0. 145652 | -1. 57984 | 0. 114144 | 0. 553175 |
| ciartb              | 111. 8469 | 0. 270691529  | 0. 224236 | 1. 207173 | 0. 227366 | 0. 708598 |
| tp53inp2            | 524. 9298 | 0. 205223286  | 0. 156415 | 1. 312045 | 0. 189505 | 0. 669129 |
| mpped1              | 148. 7395 | 0. 232015069  | 0. 251126 | 0. 923899 | 0. 355539 | 0. 806546 |
| CR381544. 1         | 145. 2914 | -0. 05061234  | 0. 158157 | -0. 32001 | 0. 748958 | 0. 955074 |
| si:ch211-135n15. 3  | 0. 749217 | -1. 437528546 | 2. 44396  | -0. 5882  | 0. 556401 | NA        |
| v2rh13              | 0. 049519 | 0             | 5. 267649 | 0         | 1         | NA        |
| si:ch211-168f7. 5   | 314. 3403 | -0. 022138781 | 0. 144386 | -0. 15333 | 0. 878138 | 0. 98573  |
| CABZ01077220. 1     | 0. 277731 | 0             | 4. 708733 | 0         | 1         | NA        |
| RF00001             | 0 NA      | NA            | NA        | NA        | NA        | NA        |
| sh3d19              | 207. 3239 | -0. 02568981  | 0. 187792 | -0. 1368  | 0. 891189 | 0. 988566 |
| shisa8b             | 28. 53846 | -0. 271030876 | 0. 780052 | -0. 34745 | 0. 728251 | 0. 949448 |
| rcelb               | 3. 16172  | -0. 449216112 | 1. 524331 | -0. 2947  | 0. 768225 | 0. 960296 |
| si:dkey-23a23. 3    | 60. 2092  | -0. 361186394 | 0. 290101 | -1. 24503 | 0. 213119 | 0. 695467 |
| zmp:0000000924      | 4. 704821 | 0. 910836727  | 0. 931494 | 0. 977823 | 0. 328162 | 0. 786542 |
| fam78ab             | 57. 32508 | 0. 038869473  | 0. 240059 | 0. 161916 | 0. 871372 | 0. 983365 |
| F0082877. 1         | 172. 884  | 0. 299272147  | 0. 158174 | 1. 89204  | 0. 058486 | 0. 418172 |
| tmem163b            | 53. 12784 | 0. 503935224  | 0. 330166 | 1. 526309 | 0. 126933 | 0. 575884 |
| shisa2b             | 77. 61633 | 0. 110773571  | 0. 237542 | 0. 466333 | 0. 640977 | 0. 925364 |
| si:ch211-217k17. 12 | 2. 739453 | -0. 86814215  | 1. 920503 | -0. 45204 | 0. 651241 | 0. 928512 |
| kans11b             | 745. 4414 | 0. 10936785   | 0. 123377 | 0. 886456 | 0. 375372 | 0. 822237 |
| si:dkey-16p6. 1     | 5. 465882 | -1. 117808865 | 1. 154852 | -0. 96792 | 0. 333082 | 0. 790126 |
| thoc1               | 645. 5092 | 0. 007299571  | 0. 118228 | 0. 061742 | 0. 950769 | 0. 99801  |
| si:ch1073-303k11. 2 | 222. 4621 | 0. 502282164  | 0. 137779 | 3. 645563 | 0. 000267 | 0. 017992 |

|                   |          |              |          |          |          |          |
|-------------------|----------|--------------|----------|----------|----------|----------|
| lgals17           | 16.8582  | -0.47271319  | 2.060931 | -0.22937 | NA       | NA       |
| si:dkey-83f18.7   | 0        | NA           | NA       | NA       | NA       | NA       |
| RF00017           | 0.101446 | -1.755425691 | 5.23528  | -0.33531 | 0.737394 | NA       |
| smocl             | 18.775   | -0.30744943  | 0.531575 | -0.57837 | 0.563011 | 0.900772 |
| CABZ01038494.1    | 58.58991 | -0.100690282 | 0.245191 | -0.41066 | 0.681321 | 0.937331 |
| gig2p             | 10.38798 | -0.738695319 | 0.738017 | -1.00092 | 0.316866 | 0.778879 |
| zgc:174356        | 24.86024 | -1.230434199 | 0.547537 | -2.24722 | 0.024626 | 0.278337 |
| si:ch211-181d7.1  | 0.129927 | 0            | 5.267649 | 0        | 1        | NA       |
| si:ch211-190p8.2  | 2.335292 | 1.548024765  | 1.331137 | 1.162934 | 0.244856 | 0.726138 |
| susd5             | 18.41976 | 0.193377823  | 0.427545 | 0.452298 | 0.651054 | 0.928395 |
| si:ch73-248e21.5  | 16.77068 | 0.050124273  | 0.549996 | 0.091136 | 0.927385 | 0.994973 |
| dre-mir-194b      | 1.404407 | 0            | 2.182305 | 0        | 1        | NA       |
| foxj1b            | 44.44434 | 0.464443514  | 0.324203 | 1.432569 | 0.151981 | 0.615522 |
| doc2b             | 134.3278 | 0.263998497  | 0.265392 | 0.99475  | 0.319858 | 0.780475 |
| si:ch211-235i11.4 | 109.6707 | 0.015271061  | 0.213909 | 0.071391 | 0.943087 | 0.997371 |
| si:dkey-254e13.6  | 12.34208 | 0.674097921  | 0.604244 | 1.115606 | 0.264591 | 0.742063 |
| mrtfba            | 66.20478 | 0.00245182   | 0.307822 | 0.007965 | 0.993645 | 1        |
| notchl            | 93.8849  | -0.021937926 | 0.246621 | -0.08895 | 0.929119 | 0.995361 |
| si:ch211-103f14.3 | 152.6953 | -0.118501937 | 0.206345 | -0.57429 | 0.565771 | 0.901634 |
| si:ch73-302o18.2  | 6.628152 | -0.04747282  | 0.765995 | -0.06198 | 0.950582 | 0.99801  |
| ubap2a            | 1951.395 | 0.044299174  | 0.100864 | 0.439198 | 0.660518 | 0.930581 |
| mir1-1            | 0.501603 | 0            | 3.471837 | 0        | 1        | NA       |
| si:ch211-132e22.4 | 0.137587 | 0            | 5.267649 | 0        | 1        | NA       |
| hbael.3           | 353.4708 | -0.13042334  | 0.491431 | -0.26539 | 0.790705 | 0.964766 |
| znf1028           | 28.24552 | -0.617918622 | 0.481813 | -1.28249 | 0.199672 | 0.6804   |
| alx4a             | 465.205  | -0.22917334  | 0.171059 | -1.33973 | 0.180332 | 0.656129 |
| tmem145           | 63.85771 | -0.279018915 | 0.447282 | -0.62381 | 0.532753 | 0.890978 |
| prrt4             | 17.02952 | -0.537546205 | 0.629599 | -0.85379 | 0.39322  | 0.828219 |
| miip              | 86.61726 | -0.578124499 | 0.231478 | -2.49754 | 0.012506 | 0.194482 |
| spl               | 215.1479 | -0.325214662 | 0.185121 | -1.75676 | 0.078958 | 0.475183 |
| RF00001           | 0        | NA           | NA       | NA       | NA       | NA       |
| tmem117           | 21.46675 | -0.257758843 | 0.5014   | -0.51408 | 0.607198 | 0.915204 |
| acad1             | 917.1366 | -0.135752878 | 0.146441 | -0.92701 | 0.35392  | 0.8049   |
| CR925817.1        | 6.763076 | 0.303811209  | 0.755162 | 0.402313 | 0.687454 | 0.938835 |
| zgc:77938         | 348.2769 | 0.353536871  | 0.192622 | 1.835393 | 0.066447 | 0.440066 |
| si:cabz01069013.3 | 11.0462  | 0.234970492  | 0.803323 | 0.292498 | 0.769906 | 0.960484 |
| RF00001           | 0.30721  | 1.0553616    | 4.651421 | 0.22689  | 0.820509 | NA       |
| rp111b            | 15.02781 | 1.954194468  | 1.635033 | 1.195202 | 0.232008 | 0.713202 |
| znf1000           | 2.17507  | 1.695897849  | 1.31062  | 1.293966 | 0.195677 | NA       |
| cox5aa            | 4721.282 | 0.015773882  | 0.138661 | 0.113759 | 0.909429 | 0.99213  |
| nme4              | 158.7782 | -1.186423202 | 0.245839 | -4.82601 | 1.39E-06 | 0.000375 |
| tmem1071          | 54.81553 | -0.275958852 | 0.285984 | -0.96494 | 0.334572 | 0.79151  |
| rubcn1            | 16.35909 | 0.067373364  | 0.408088 | 0.165095 | 0.868869 | 0.982801 |
| si:ch211-171h4.7  | 0        | NA           | NA       | NA       | NA       | NA       |
| notum2            | 272.3585 | -0.144666684 | 0.164215 | -0.88096 | 0.37834  | 0.822672 |
| si:ch211-66k16.28 | 20.36695 | 0.378835611  | 0.49897  | 0.759235 | 0.447712 | 0.856366 |
| si:ch211-189a15.5 | 42.58254 | -0.42180623  | 0.316544 | -1.33253 | 0.182685 | 0.659278 |
| gm2a              | 329.3386 | -0.349799865 | 0.158346 | -2.20908 | 0.027169 | 0.293072 |
| ssh2a             | 585.1197 | 0.062954304  | 0.173287 | 0.363294 | 0.716385 | 0.94627  |
| si:dkey-190j3.3   | 0        | NA           | NA       | NA       | NA       | NA       |
| selenol           | 32.6693  | -4.06964018  | 1.286287 | -3.16387 | 0.001557 | 0.059822 |
| si:dkey-24i24.3   | 8.115718 | 0.806483093  | 0.60652  | 1.329688 | 0.183621 | 0.660534 |
| or111-7           | 3.150198 | 1.41080249   | 1.046922 | 1.347572 | 0.177796 | 0.651389 |
| taar12j           | 1.80264  | 0.849678237  | 1.262327 | 0.673105 | 0.500881 | NA       |



|                    |          |              |          |          |          |          |
|--------------------|----------|--------------|----------|----------|----------|----------|
| CLPB               | 29.27157 | 0.132328801  | 0.462293 | 0.286244 | 0.774691 | 0.96088  |
| tmx3b              | 139.1989 | -0.145436295 | 0.218005 | -0.66712 | 0.504693 | 0.88195  |
| pcdhlgb9           | 13.953   | -0.365834588 | 0.551906 | -0.66286 | 0.507423 | 0.883007 |
| kenjla.6           | 92.13166 | -0.748760528 | 0.378839 | -1.97646 | 0.048103 | 0.38156  |
| CR385078.1         | 3.074076 | -0.755756836 | 0.904273 | -0.83576 | 0.403289 | 0.833803 |
| cntrl              | 146.6701 | -0.139192115 | 0.230486 | -0.60391 | 0.545906 | 0.895711 |
| si:ch211-149k12.3  | 1.884553 | 0.759525821  | 1.417488 | 0.535825 | 0.592079 | NA       |
| BX571757.1         | 14.07113 | 0.53008318   | 0.532122 | 0.996168 | 0.319169 | 0.779923 |
| pimr137            | 0.308392 | 0            | 5.267649 | 0        | 1        | NA       |
| fam217b            | 34.60922 | 0.038967089  | 0.338932 | 0.11497  | 0.908469 | 0.991812 |
| znf982             | 30.94688 | -0.25245594  | 0.35127  | -0.71869 | 0.472329 | 0.868767 |
| and1               | 7515.249 | 0.140213192  | 0.135624 | 1.033838 | 0.301212 | 0.767371 |
| st6gal2b           | 55.66503 | 0.015615861  | 0.322286 | 0.048453 | 0.961355 | 0.999354 |
| acot17             | 250.8399 | -0.144012351 | 0.280796 | -0.51287 | 0.608041 | 0.915204 |
| ponzr2             | 63.85801 | 0.024520236  | 0.279144 | 0.087841 | 0.930003 | 0.995689 |
| myct1b             | 21.05332 | -0.238837754 | 0.447699 | -0.53348 | 0.593702 | 0.910427 |
| si:ch1073-390k14.1 | 114.5105 | 0.238432955  | 0.335602 | 0.710463 | 0.477417 | 0.869292 |
| si:dkey-23f9.13    | 0        | NA           | NA       | NA       | NA       | NA       |
| si:dkey-1c7.2      | 0.411857 | -1.826141375 | 4.964773 | -0.36782 | 0.713008 | NA       |
| tmem104            | 130.8957 | 0.257158964  | 0.187053 | 1.374791 | 0.169196 | 0.640541 |
| vps72b             | 38.37806 | 0.602307677  | 0.399313 | 1.508359 | 0.131463 | 0.583069 |
| si:ch211-151o1.4   | 23.79068 | -0.16715975  | 0.445351 | -0.37534 | 0.707405 | 0.944981 |
| f10                | 688.7147 | -0.994573101 | 0.232288 | -4.28163 | 1.86E-05 | 0.002746 |
| si:ch73-352p18.4   | 77.69503 | -2.07007604  | 0.519016 | -3.98846 | 6.65E-05 | 0.006729 |
| ponzr3             | 496.4882 | 0.322344728  | 0.56386  | 0.571675 | 0.567542 | 0.901809 |
| pxna               | 842.0316 | -0.028461088 | 0.123879 | -0.22975 | 0.818286 | 0.971594 |
| CR759791.1         | 0.71309  | 1.093467541  | 2.896623 | 0.377497 | 0.705804 | NA       |
| chst1              | 149.9743 | 0.162982039  | 0.197923 | 0.823462 | 0.410245 | 0.837066 |
| crispld2           | 104.6095 | -0.169701514 | 0.279735 | -0.60665 | 0.544083 | 0.89515  |
| si:dkey-175m17.6   | 16.6232  | 0.440977923  | 0.518042 | 0.851239 | 0.394636 | 0.828825 |
| si:ch211-153b23.7  | 19.8055  | -0.327646    | 0.551844 | -0.59373 | 0.552693 | 0.8974   |
| ltb4r2a            | 20.14765 | -0.092796158 | 0.477979 | -0.19414 | 0.846064 | 0.977039 |
| si:ch211-152l115.2 | 7.888337 | 1.773587597  | 0.728499 | 2.434579 | 0.014909 | 0.213765 |
| rexo4              | 173.6319 | -0.282675742 | 0.202177 | -1.39816 | 0.162065 | 0.629618 |
| si:ch211-142d6.2   | 11.59386 | 0            | 4.483752 | 0        | 1        | 1        |
| arhgef101a         | 185.097  | 0.425676159  | 0.235971 | 1.803936 | 0.071241 | 0.455342 |
| BX000363.1         | 5.280139 | 0.06345389   | 0.916129 | 0.069263 | 0.94478  | 0.997371 |
| adcylb             | 18.56812 | -0.000848799 | 0.714161 | -0.00119 | 0.999052 | 1        |
| BX927260.1         | 18.80773 | -0.905059005 | 1.290647 | -0.70124 | 0.483151 | 0.871988 |
| cdca9              | 2.10684  | 1.086175915  | 1.240397 | 0.875668 | 0.381211 | NA       |
| znf1115            | 4.123529 | 0.182243197  | 0.781095 | 0.233318 | 0.815515 | 0.971158 |
| grn2               | 19.09473 | 1.05543391   | 1.73315  | 0.608969 | 0.542545 | 0.894595 |
| CU855711.1         | 0        | NA           | NA       | NA       | NA       | NA       |
| si:ch211-208k15.1  | 73.29902 | -0.421246019 | 0.316309 | -1.33175 | 0.182941 | 0.659278 |
| si:ch211-212k18.6  | 15.21861 | -0.630552696 | 0.718917 | -0.87709 | 0.380439 | 0.823655 |
| si:ch211-209f22.3  | 0        | NA           | NA       | NA       | NA       | NA       |
| lman21b            | 376.3308 | 0.351605344  | 0.151347 | 2.323178 | 0.02017  | 0.251701 |
| RF00001            | 0        | NA           | NA       | NA       | NA       | NA       |
| zmp:0000000936     | 32.82611 | -0.525466808 | 0.299774 | -1.75287 | 0.079624 | 0.477652 |
| hh1a2b.1           | 32.68736 | 0.412425082  | 0.436231 | 0.945427 | 0.344441 | 0.798147 |
| si:dkey-192d15.3   | 0        | NA           | NA       | NA       | NA       | NA       |
| hist1h2a11         | 1.998915 | -1.340508902 | 1.701379 | -0.7879  | 0.430758 | NA       |
| si:ch211-201o1.1   | 27.46642 | -0.54742013  | 0.642467 | -0.85206 | 0.394181 | 0.828374 |
| ddias              | 36.19501 | -0.279258548 | 0.303974 | -0.91869 | 0.358256 | 0.809596 |

|                    |           |               |           |           |           |           |
|--------------------|-----------|---------------|-----------|-----------|-----------|-----------|
| dcst2              | 2. 227611 | -1. 226953709 | 1. 21484  | -1. 00997 | 0. 312509 | 0. 776164 |
| pdzd8              | 173. 937  | -0. 136282556 | 0. 186733 | -0. 72983 | 0. 465496 | 0. 864997 |
| tlr20. 2           | 0. 299226 | -2. 340130225 | 5. 201853 | -0. 44986 | 0. 652808 | NA        |
| ngfra              | 297. 5016 | 0. 151004714  | 0. 189412 | 0. 797229 | 0. 425318 | 0. 844714 |
| tnfaip813          | 129. 0848 | -0. 243857137 | 0. 171549 | -1. 4215  | 0. 155171 | 0. 619776 |
| lgalsl11           | 1806. 151 | 0. 41710707   | 0. 363007 | 1. 149034 | 0. 250542 | 0. 730471 |
| si:ch211-226h8. 14 | 2. 627331 | -0. 479873442 | 1. 313483 | -0. 36534 | 0. 714854 | 0. 945821 |
| ecrg4b             | 275. 1816 | -0. 498902328 | 0. 504994 | -0. 98794 | 0. 323183 | 0. 783034 |
| zmp:0000000937     | 1. 214525 | 2. 577902485  | 1. 872399 | 1. 376791 | 0. 168577 | NA        |
| si:ch211-250n8. 1  | 2. 527405 | 0             | 1. 910067 | 0         | 1         | 1         |
| CR382327. 1        | 10. 9813  | 0. 384373802  | 0. 67505  | 0. 569401 | 0. 569084 | 0. 902234 |
| hmgcl11            | 4. 115718 | 0. 964336854  | 1. 741405 | 0. 553769 | 0. 579737 | 0. 905618 |
| BX322530. 1        | 246. 497  | -2. 284340358 | 0. 71594  | -3. 19068 | 0. 001419 | 0. 056314 |
| zgc:174193         | 0. 261032 | 3. 213945857  | 5. 176429 | 0. 620881 | 0. 534678 | NA        |
| MFAP4 (1 of many)  | 99. 2053  | 0. 837250364  | 0. 654117 | 1. 27997  | 0. 200556 | 0. 68081  |
| otogl              | 44. 36315 | 0. 709772819  | 0. 413044 | 1. 718396 | 0. 085724 | 0. 491277 |
| cfap299            | 13. 44089 | -0. 229475354 | 0. 521139 | -0. 44033 | 0. 659695 | 0. 930581 |
| si:ch211-224110. 4 | 4. 197952 | -2. 816023477 | 1. 173098 | -2. 4005  | 0. 016373 | 0. 225867 |
| lyplal1            | 70. 15358 | -0. 059926453 | 0. 227888 | -0. 26296 | 0. 792578 | 0. 965266 |
| CABZ01059406. 1    | 0. 62888  | -2. 349276392 | 2. 143367 | -1. 09607 | 0. 273049 | NA        |
| RF00017            | 0         | NA            | NA        | NA        | NA        | NA        |
| mast1b             | 239. 4322 | 0. 012242036  | 0. 166615 | 0. 073475 | 0. 941428 | 0. 997371 |
| RF00001            | 0         | NA            | NA        | NA        | NA        | NA        |
| si:ch73-180n10. 1  | 9. 474541 | -0. 868151849 | 1. 769731 | -0. 49056 | 0. 623741 | 0. 919343 |
| plxcd1             | 51. 89982 | -0. 04150128  | 0. 345957 | -0. 11996 | 0. 904514 | 0. 991581 |
| xxylt1             | 35. 55755 | -0. 050949582 | 0. 368979 | -0. 13808 | 0. 890175 | 0. 98835  |
| fgd5a              | 287. 8077 | -0. 17826276  | 0. 184719 | -0. 96505 | 0. 334521 | 0. 79151  |
| nes                | 170. 7836 | 0. 168906757  | 0. 179349 | 0. 941774 | 0. 346308 | 0. 799463 |
| klh122             | 140. 8055 | 0. 028060568  | 0. 274835 | 0. 1021   | 0. 918678 | 0. 993884 |
| prox3              | 172. 1272 | 0. 083513024  | 0. 205914 | 0. 405573 | 0. 685057 | 0. 938486 |
| ppplr3ab           | 175. 8575 | -0. 163144775 | 0. 29257  | -0. 55763 | 0. 577099 | 0. 904798 |
| trabd2b            | 201. 0542 | -0. 002655939 | 0. 17427  | -0. 01524 | 0. 98784  | 1         |
| wdr59              | 185. 4563 | 0. 120205479  | 0. 177646 | 0. 676658 | 0. 498623 | 0. 87923  |
| CR318646. 1        | 0         | NA            | NA        | NA        | NA        | NA        |
| zgc:174288         | 90. 05816 | -0. 496307873 | 0. 325581 | -1. 52438 | 0. 127415 | 0. 576964 |
| crygm2d3           | 12004. 9  | 0. 571201847  | 0. 272051 | 2. 099616 | 0. 035763 | 0. 33238  |
| citb               | 19. 25217 | 0. 271415036  | 0. 843463 | 0. 321787 | 0. 747614 | 0. 955074 |
| paqr8              | 21. 16267 | -0. 220553689 | 0. 4009   | -0. 55015 | 0. 582219 | 0. 90571  |
| si:dkey-81j8. 6    | 2. 455456 | -2. 107916507 | 1. 613627 | -1. 30632 | 0. 191443 | 0. 671456 |
| si:ch211-237i5. 4  | 21. 28598 | 0. 859156265  | 0. 485188 | 1. 770768 | 0. 076599 | 0. 468597 |
| efs                | 394. 8954 | 0. 05761856   | 0. 187958 | 0. 30655  | 0. 759186 | 0. 957886 |
| si:ch211-76m11. 5  | 17. 55747 | -0. 30345264  | 0. 636461 | -0. 47678 | 0. 633518 | 0. 923924 |
| BX571952. 1        | 41. 65508 | 0. 104767681  | 0. 399688 | 0. 262124 | 0. 793226 | 0. 965312 |
| dnal4b             | 83. 47884 | 0. 138484022  | 0. 214609 | 0. 645286 | 0. 518742 | 0. 887148 |
| KCNB2              | 5. 620465 | 2. 782101676  | 1. 417104 | 1. 96323  | 0. 049619 | 0. 387751 |
| deaf1              | 99. 44834 | 0. 043930772  | 0. 18681  | 0. 235163 | 0. 814082 | 0. 970483 |
| or111-4            | 5. 016128 | 0. 77471729   | 0. 712428 | 1. 087432 | 0. 276846 | 0. 751311 |
| znf1089            | 2. 850537 | -1. 041243222 | 1. 030432 | -1. 01049 | 0. 31226  | 0. 776164 |
| taarl4f            | 0. 092828 | 0             | 5. 267649 | 0         | 1         | NA        |
| znf1021            | 15. 84122 | -0. 849518401 | 0. 503617 | -1. 68683 | 0. 091635 | 0. 507334 |
| stxbp6             | 578. 5398 | 0. 005852889  | 0. 156501 | 0. 037398 | 0. 970167 | 1         |
| si:ch211-135n15. 1 | 0. 073968 | 0             | 5. 267649 | 0         | 1         | NA        |
| si:ch211-22k7. 9   | 9. 827576 | 0. 212382371  | 0. 696829 | 0. 304784 | 0. 760531 | 0. 957886 |
| si:busm1-228j01. 4 | 1. 189762 | 1. 068617089  | 2. 260872 | 0. 472657 | 0. 636458 | NA        |

|                    |          |              |          |          |          |          |
|--------------------|----------|--------------|----------|----------|----------|----------|
| smarcd2            | 250.3187 | -0.134389793 | 0.200918 | -0.66888 | 0.503573 | 0.881759 |
| clqtnfl            | 87.51194 | -0.083391766 | 0.247793 | -0.33654 | 0.736465 | 0.951919 |
| si:dkeyp-69b9.3    | 407.3988 | 0.424039179  | 0.277416 | 1.528532 | 0.126381 | 0.574727 |
| si:ch211-149b19.2  | 37.41196 | 1.419197601  | 0.580367 | 2.445346 | 0.014471 | 0.210484 |
| si:ch1073-340i21.3 | 606.8032 | 0.569707029  | 0.224291 | 2.540033 | 0.011084 | 0.18325  |
| slc23a3            | 41.89481 | 0.339276331  | 0.336517 | 1.008198 | 0.313359 | 0.776777 |
| si:dkey-238d18.3   | 1.063577 | 1.521176842  | 1.982305 | 0.767378 | 0.442857 | NA       |
| si:dkeyp-98a7.7    | 0.361489 | -1.8266867   | 5.230459 | -0.34924 | 0.726909 | NA       |
| caln1              | 13.46605 | 0.346048117  | 0.499482 | 0.692814 | 0.488426 | 0.873955 |
| ralgapb            | 421.3108 | 0.097094746  | 0.159741 | 0.607828 | 0.543302 | 0.894925 |
| si:dkey-21o19.2    | 62.2831  | -0.525957714 | 0.270764 | -1.94249 | 0.052077 | 0.396527 |
| CABZ01059403.1     | 10.38454 | -1.567287724 | 0.630475 | -2.48588 | 0.012923 | 0.198143 |
| CU570691.1         | 15.52447 | -1.218521907 | 0.780838 | -1.56053 | 0.118634 | 0.561771 |
| cbln17             | 27.15389 | -0.412322695 | 0.580979 | -0.7097  | 0.477888 | 0.869292 |
| si:ch211-241n15.3  | 16.43382 | -0.108782835 | 0.441653 | -0.24631 | 0.805444 | 0.96936  |
| RF00001            | 0 NA     | NA           | NA       | NA       | NA       | NA       |
| si:ch211-12h2.8    | 1.069853 | -0.73203175  | 1.702785 | -0.4299  | 0.667266 | NA       |
| si:dkey-185e18.7   | 91.70972 | 0.599700318  | 0.253938 | 2.361602 | 0.018196 | 0.238026 |
| CR450793.1         | 9.41372  | 0.93084731   | 0.920343 | 1.011414 | 0.311818 | 0.776164 |
| ypel5              | 474.0796 | 0.022528799  | 0.15463  | 0.145695 | 0.884162 | 0.987047 |
| golt1a             | 32.8039  | 0.00787697   | 0.466581 | 0.016882 | 0.98653  | 1        |
| si:dkey-259j3.5    | 29.34354 | -0.959725023 | 0.408821 | -2.34755 | 0.018898 | 0.242305 |
| RF00001            | 0.049519 | 0 5.267649   | 0        | 1 NA     |          |          |
| sycp2              | 1.875796 | -4.439540444 | 1.947279 | -2.27987 | 0.022615 | NA       |
| pdxka              | 251.8015 | -0.147125153 | 0.141397 | -1.04051 | 0.298103 | 0.765416 |
| si:dkey-16p19.5    | 4.856176 | 0.972241648  | 1.014202 | 0.958627 | 0.337747 | 0.794799 |
| wnk4b              | 270.9409 | -0.54590919  | 0.188739 | -2.89241 | 0.003823 | 0.10304  |
| si:dkey-238d18.4   | 65.64635 | -0.439736087 | 0.286088 | -1.53707 | 0.124277 | 0.571556 |
| si:ch211-14k19.8   | 341.0591 | -0.424652437 | 0.200759 | -2.11523 | 0.03441  | 0.327696 |
| tmem220            | 40.48615 | -0.292657732 | 0.339887 | -0.86105 | 0.389213 | 0.827725 |
| cep131             | 372.21   | 0.246647788  | 0.139459 | 1.768607 | 0.076959 | 0.469467 |
| si:ch1073-228j22.2 | 2.967704 | -1.386816004 | 1.618284 | -0.85697 | 0.391463 | 0.827902 |
| si:dkey-24117.5    | 0.64352  | 1.552144561  | 2.566967 | 0.604661 | 0.545404 | NA       |
| mett14             | 63.06017 | 0.306548231  | 0.224742 | 1.363999 | 0.172568 | 0.645319 |
| taarl1b            | 0.112399 | 0 5.267649   | 0        | 1 NA     |          |          |
| si:ch211-207e14.4  | 96.96026 | 0.104679311  | 0.261473 | 0.400345 | 0.688903 | 0.93924  |
| AL772298.1         | 0.043309 | 0 5.267649   | 0        | 1 NA     |          |          |
| frmpd1b            | 385.0944 | -0.227034618 | 0.173425 | -1.30913 | 0.190492 | 0.670633 |
| si:ch211-175m2.5   | 207.5246 | -0.331504135 | 0.225781 | -1.46826 | 0.142034 | 0.601083 |
| si:dkey-7f16.3     | 0.916123 | -1.758083437 | 2.527257 | -0.69565 | 0.486649 | NA       |
| si:dkey-183k8.2    | 2.277426 | -0.140567791 | 1.251441 | -0.11232 | 0.910566 | 0.992208 |
| si:ch211-154o6.2   | 230.2009 | -0.032042226 | 0.118875 | -0.26955 | 0.787509 | 0.963263 |
| rrnad1             | 43.91606 | -0.143049748 | 0.297259 | -0.48123 | 0.630354 | 0.922869 |
| zgc:173585         | 3.687249 | -0.409301851 | 1.016762 | -0.40255 | 0.687276 | 0.938835 |
| foxbla             | 139.7916 | 0.426696117  | 0.217429 | 1.962462 | 0.049709 | 0.388057 |
| ptpn6              | 126.5856 | -0.042481376 | 0.188873 | -0.22492 | 0.822041 | 0.971966 |
| cuzd1.1            | 17.5293  | 0 1.705853   | 0        | 1        | 1        | 1        |
| RF00001            | 0 NA     | NA           | NA       | NA       | NA       | NA       |
| ube2ka             | 358.5709 | -0.195157374 | 0.188167 | -1.03715 | 0.299665 | 0.766192 |
| kcnj1a.5           | 118.5612 | -0.765181889 | 0.303329 | -2.52261 | 0.011649 | 0.187683 |
| lactb11a           | 96.02316 | 0.689632614  | 0.478993 | 1.439754 | 0.149937 | 0.613246 |
| nhs12              | 339.2394 | -0.396821775 | 0.166994 | -2.37626 | 0.017489 | 0.233637 |
| si:dkey-83f18.5    | 0 NA     | NA           | NA       | NA       | NA       | NA       |
| ushbpl             | 160.7429 | -0.294635242 | 0.187219 | -1.57375 | 0.115546 | 0.555766 |

|                     |           |               |           |           |           |           |
|---------------------|-----------|---------------|-----------|-----------|-----------|-----------|
| si:ch73-173p19. 1   | 323. 0042 | 0. 001452516  | 0. 113871 | 0. 012756 | 0. 989823 | 1         |
| gphna               | 534. 7602 | -0. 161859549 | 0. 123419 | -1. 31146 | 0. 189702 | 0. 669289 |
| rgsl                | 29. 49143 | -1. 760864471 | 1. 609788 | -1. 09385 | 0. 274021 | 0. 749284 |
| si:ch211-160j14. 3  | 115. 0634 | 0. 149586932  | 0. 180347 | 0. 829441 | 0. 406855 | 0. 835226 |
| si:ch211-214b16. 3  | 3. 380853 | -1. 126344956 | 1. 275481 | -0. 88307 | 0. 377196 | 0. 822476 |
| mustnlb             | 136. 0351 | 0. 355639912  | 0. 2236   | 1. 590522 | 0. 111717 | 0. 547596 |
| hbba1               | 0. 669912 | -4. 477510958 | 3. 886416 | -1. 15209 | 0. 249283 | NA        |
| BX510940. 1         | 14. 68644 | -0. 21873593  | 0. 526739 | -0. 41526 | 0. 677949 | 0. 936026 |
| mmd2b               | 5. 118424 | 0. 150962269  | 0. 76799  | 0. 196568 | 0. 844166 | 0. 976791 |
| si:cabz01054394. 5  | 17. 28615 | 0. 923023171  | 0. 521905 | 1. 768567 | 0. 076966 | 0. 469467 |
| si:dkey-160o24. 3   | 31. 31386 | 0. 267027002  | 0. 321144 | 0. 831488 | 0. 405698 | 0. 834645 |
| plrdgb              | 49. 18393 | -0. 375395612 | 0. 57634  | -0. 65134 | 0. 514824 | 0. 886401 |
| mlxipl              | 21. 89379 | -0. 889624582 | 0. 462697 | -1. 92269 | 0. 054519 | 0. 403705 |
| bcl2b               | 147. 7875 | 0. 724604088  | 0. 310312 | 2. 335081 | 0. 019539 | 0. 246447 |
| si:ch211-198b3. 4   | 4. 682191 | 0. 626029745  | 0. 827225 | 0. 756782 | 0. 44918  | 0. 856796 |
| zmp:0000000951      | 13. 77046 | -0. 088502947 | 0. 597898 | -0. 14802 | 0. 882324 | 0. 986908 |
| BX663516. 1         | 0. 951092 | 1. 055410693  | 2. 768628 | 0. 381204 | 0. 703052 | NA        |
| negaly6             | 113. 3023 | -0. 187940398 | 0. 25611  | -0. 73383 | 0. 463054 | 0. 864191 |
| hbael. 3            | 3259. 451 | -0. 506865513 | 0. 365569 | -1. 38651 | 0. 165591 | 0. 635141 |
| RF00001             | 0 NA      | NA            | NA        | NA        | NA        | NA        |
| baxa                | 10. 6185  | -0. 13294074  | 0. 953719 | -0. 13939 | 0. 88914  | 0. 988253 |
| il17rel             | 9. 237574 | 1. 358983527  | 0. 890774 | 1. 525621 | 0. 127104 | 0. 576323 |
| si:ch1073-440b2. 1  | 453. 6748 | 0. 060380683  | 0. 124767 | 0. 483947 | 0. 628424 | 0. 921864 |
| im:7145024          | 48. 51622 | 0. 143762371  | 0. 276305 | 0. 520303 | 0. 602853 | 0. 914226 |
| zgc:113119          | 54. 79173 | -0. 016542619 | 0. 339504 | -0. 04873 | 0. 961138 | 0. 99935  |
| gpx2                | 54. 93999 | -0. 624468202 | 0. 342061 | -1. 8256  | 0. 06791  | 0. 44436  |
| egr3                | 69. 18206 | 0. 010098271  | 0. 384713 | 0. 026249 | 0. 979059 | 1         |
| si:dkeyp-104f11. 6  | 9. 751854 | -0. 900802625 | 0. 543701 | -1. 6568  | 0. 09756  | 0. 520966 |
| acot14              | 213. 4444 | 0. 046254478  | 0. 242256 | 0. 190933 | 0. 848578 | 0. 977912 |
| afapl11a            | 306. 7637 | 0. 041986733  | 0. 127128 | 0. 330272 | 0. 741195 | 0. 954103 |
| RF00325             | 0. 182502 | -0. 868114638 | 5. 267649 | -0. 1648  | 0. 8691   | NA        |
| si:ch1073-391i24. 1 | 33. 79465 | -0. 549060508 | 0. 397922 | -1. 37982 | 0. 167642 | 0. 638828 |
| cyp46a1. 3          | 89. 05008 | 0. 37730088   | 0. 277266 | 1. 360792 | 0. 173579 | 0. 646597 |
| si:dkey-16p6. 1     | 26. 70726 | 0. 638251597  | 0. 55964  | 1. 140468 | 0. 254092 | 0. 733163 |
| adad1               | 11. 3579  | 0. 437018295  | 0. 726085 | 0. 601883 | 0. 547252 | 0. 896121 |
| ppplr32             | 1. 76106  | 2. 91703993   | 1. 715689 | 1. 700215 | 0. 089091 | NA        |
| si:ch73-264i18. 2   | 1. 113223 | 1. 024126874  | 2. 273134 | 0. 450535 | 0. 652325 | NA        |
| wfdc2               | 227. 1123 | -0. 002028655 | 0. 195413 | -0. 01038 | 0. 991717 | 1         |
| tanc1b              | 183. 865  | 0. 287893857  | 0. 169081 | 1. 702695 | 0. 088625 | 0. 499864 |
| zmp:0000001267      | 4. 791603 | 0. 834918956  | 1. 332821 | 0. 62643  | 0. 531033 | 0. 890545 |
| CR384099. 1         | 12. 02084 | -1. 291902826 | 0. 864177 | -1. 49495 | 0. 134927 | 0. 589926 |
| dre-mir-92b         | 0 NA      | NA            | NA        | NA        | NA        | NA        |
| si:dkey-103g5. 4    | 21. 93414 | 0. 793117293  | 0. 400482 | 1. 980408 | 0. 047658 | 0. 380113 |
| RF00017             | 0. 838412 | 1. 055413342  | 2. 893185 | 0. 364793 | 0. 715266 | NA        |
| nkl. 3              | 1. 217249 | 0 4. 636399   | 0         | 1 NA      |           |           |
| smim13              | 846. 9885 | 0. 003796597  | 0. 131759 | 0. 028815 | 0. 977012 | 1         |
| si:dkey-73n8. 3     | 94. 33627 | 0. 456331234  | 0. 382987 | 1. 191506 | 0. 233455 | 0. 714569 |
| ankrd27             | 283. 4825 | -0. 033196701 | 0. 141492 | -0. 23462 | 0. 814504 | 0. 970536 |
| htr3a               | 65. 802   | 0. 381732578  | 0. 240865 | 1. 584838 | 0. 113003 | 0. 550406 |
| adam15              | 53. 47353 | 0. 012718328  | 0. 253437 | 0. 050183 | 0. 959976 | 0. 999164 |
| zmp:0000001268      | 0. 781187 | -2. 768897272 | 2. 803812 | -0. 98755 | 0. 323374 | NA        |
| ubapl1a             | 15. 48089 | 0. 247037957  | 0. 632444 | 0. 390609 | 0. 696087 | 0. 941657 |
| si:ch211-195o20. 7  | 178. 7264 | -0. 101564179 | 0. 184545 | -0. 55035 | 0. 582081 | 0. 90571  |
| ngfrb               | 76. 16881 | 0. 042594638  | 0. 203852 | 0. 208949 | 0. 834488 | 0. 975731 |

|                    |           |               |           |           |           |           |
|--------------------|-----------|---------------|-----------|-----------|-----------|-----------|
| ro60               | 223. 2147 | 0. 200902592  | 0. 149916 | 1. 340098 | 0. 180213 | 0. 656017 |
| si:ch211-91p5. 3   | 55. 6904  | -0. 317791634 | 0. 252651 | -1. 25783 | 0. 208453 | 0. 69072  |
| si:ch211-253b8. 2  | 204. 0002 | -0. 30226022  | 0. 145411 | -2. 07865 | 0. 037649 | 0. 340171 |
| prrl4              | 423. 9198 | -0. 028473379 | 0. 116226 | -0. 24498 | 0. 80647  | 0. 969726 |
| csgalnact1b        | 27. 98382 | -2. 138529922 | 0. 713224 | -2. 9984  | 0. 002714 | 0. 085055 |
| tspearb            | 103. 4075 | -0. 362742946 | 0. 241797 | -1. 50019 | 0. 133564 | 0. 586903 |
| mettl15            | 41. 42367 | -0. 118046659 | 0. 321221 | -0. 36749 | 0. 713251 | 0. 945821 |
| vsigl01            | 21. 52807 | 0. 577362241  | 0. 575015 | 1. 004083 | 0. 315339 | 0. 777834 |
| r3hcc11            | 363. 0622 | 0. 095255272  | 0. 124088 | 0. 767644 | 0. 442698 | 0. 853879 |
| dusp23b            | 216. 752  | 0. 333083816  | 0. 212471 | 1. 567665 | 0. 116959 | 0. 557831 |
| FP885542. 1        | 0. 634658 | 2. 998917251  | 2. 890585 | 1. 037478 | 0. 299513 | NA        |
| kcnj111            | 296. 0722 | 0. 017174918  | 0. 261799 | 0. 065604 | 0. 947693 | 0. 997371 |
| dus11              | 104. 2789 | 0. 134736073  | 0. 244297 | 0. 551526 | 0. 581273 | 0. 905618 |
| pbx3a              | 17. 28936 | 0. 112060816  | 0. 447783 | 0. 250257 | 0. 802389 | 0. 968181 |
| nexmifa            | 554. 1276 | 0. 076822112  | 0. 157619 | 0. 487391 | 0. 625981 | 0. 920625 |
| tmem235b           | 7. 224999 | 1. 062861639  | 0. 78262  | 1. 358081 | 0. 174438 | 0. 647905 |
| cenpx              | 117. 4863 | -0. 542049108 | 0. 23016  | -2. 3551  | 0. 018518 | 0. 240697 |
| adgr11a            | 48. 50259 | -0. 594101916 | 0. 396552 | -1. 49817 | 0. 134089 | 0. 587972 |
| si:dkey-240n22. 6  | 101. 9542 | 0. 052388706  | 0. 452467 | 0. 115785 | 0. 907823 | 0. 991745 |
| si:dkeyp-115d7. 2  | 1. 854597 | -0. 332102146 | 1. 323212 | -0. 25098 | 0. 801828 | NA        |
| hnrnpa0a           | 2869. 789 | 0. 134241272  | 0. 131111 | 1. 023877 | 0. 305893 | 0. 771308 |
| BX572619. 1        | 155. 8696 | 0. 086687262  | 0. 167531 | 0. 51744  | 0. 604849 | 0. 914985 |
| si:dkeyp-4f2. 1    | 24. 88381 | 0. 93592946   | 0. 405804 | 2. 306357 | 0. 021091 | 0. 25794  |
| pmaipl             | 202. 7673 | 0. 156862258  | 0. 220646 | 0. 710922 | 0. 477133 | 0. 869292 |
| gc                 | 980. 167  | -2. 646598715 | 0. 526669 | -5. 02516 | 5. 03E-07 | 0. 000166 |
| si:ch73-106115. 4  | 57. 235   | 2. 520096699  | 1. 513897 | 1. 664642 | 0. 095984 | 0. 517378 |
| mapta              | 604. 2072 | 0. 282799803  | 0. 184665 | 1. 531418 | 0. 125666 | 0. 573618 |
| BX088538. 1        | 16. 64304 | -1. 238177967 | 0. 519387 | -2. 38392 | 0. 017129 | 0. 231689 |
| ccdc175            | 4. 432572 | 0. 126361981  | 0. 84556  | 0. 149442 | 0. 881205 | 0. 986892 |
| arhgap20           | 48. 48381 | -0. 378279181 | 0. 387747 | -0. 97558 | 0. 329271 | 0. 787409 |
| BX120005. 1        | 1. 045894 | 2. 914554323  | 2. 199561 | 1. 325062 | 0. 185151 | NA        |
| urahb              | 4. 915328 | -2. 395772773 | 1. 426624 | -1. 67933 | 0. 093088 | 0. 510737 |
| si:ch211-198c19. 1 | 0. 750094 | 0             | 2. 537751 | 0         | 1         | NA        |
| ednrba             | 105. 3086 | -0. 525115922 | 0. 214067 | -2. 45304 | 0. 014165 | 0. 208294 |
| si:ch211-110e21. 3 | 269. 691  | -0. 233610908 | 0. 203031 | -1. 15062 | 0. 249891 | 0. 729721 |
| rhobtb2b           | 55. 24767 | 0. 969817894  | 0. 429473 | 2. 258158 | 0. 023936 | 0. 274217 |
| si:ch73-109d9. 4   | 8. 768227 | -0. 606169923 | 0. 618895 | -0. 97944 | 0. 327363 | 0. 786256 |
| tspan4a            | 287. 3781 | -0. 07690902  | 0. 149606 | -0. 51408 | 0. 607199 | 0. 915204 |
| si:dkeyp-121d4. 3  | 298. 3977 | -0. 1665146   | 0. 171791 | -0. 96928 | 0. 332404 | 0. 789726 |
| miga2              | 40. 37848 | 0. 889751641  | 0. 328642 | 2. 70736  | 0. 006782 | 0. 139038 |
| wu:fb59d01         | 266. 9781 | -1. 345821444 | 0. 313937 | -4. 28692 | 1. 81E-05 | 0. 002746 |
| grn1               | 22. 55514 | -0. 274016647 | 0. 838657 | -0. 32673 | 0. 74387  | 0. 95491  |
| hopx               | 759. 3901 | -0. 109992374 | 0. 172636 | -0. 63714 | 0. 524036 | 0. 888694 |
| fdxr               | 112. 0747 | -0. 181076154 | 0. 184991 | -0. 97884 | 0. 327659 | 0. 786438 |
| si:dkey-238d18. 10 | 0         | NA            | NA        | NA        | NA        | NA        |
| clk4a              | 2170. 567 | 0. 013510633  | 0. 117161 | 0. 115317 | 0. 908194 | 0. 991745 |
| si:ch211-232p21. 6 | 0. 585017 | -1. 76756262  | 2. 569553 | -0. 68789 | 0. 491524 | NA        |
| zgc:158463         | 3217. 96  | -0. 136272553 | 0. 239051 | -0. 57006 | 0. 568639 | 0. 902234 |
| illfma             | 9. 071889 | -1. 454798308 | 0. 950845 | -1. 53001 | 0. 126015 | 0. 574193 |
| RF00001            | 0. 223379 | -0. 868105092 | 5. 267649 | -0. 1648  | 0. 869102 | NA        |
| ftr35              | 2. 263876 | 0. 973463552  | 2. 116287 | 0. 459987 | 0. 645526 | 0. 926728 |
| pnpla2             | 123. 989  | -0. 172895231 | 0. 335067 | -0. 516   | 0. 605853 | 0. 915055 |
| tmem1761. 2        | 157. 779  | -0. 454123383 | 0. 423217 | -1. 07303 | 0. 283258 | 0. 755028 |
| si:ch73-281i18. 3  | 7. 660418 | -1. 698239894 | 0. 933447 | -1. 81932 | 0. 068863 | 0. 447809 |

|                    |          |              |          |          |          |          |
|--------------------|----------|--------------|----------|----------|----------|----------|
| si:dkey-24p1.7     | 14.04553 | -0.556300158 | 0.450472 | -1.23493 | 0.216857 | 0.69815  |
| mbpb               | 1499.458 | 0.097959604  | 0.122434 | 0.800102 | 0.423652 | 0.844048 |
| si:dkey-164f24.2   | 905.0618 | -0.028997027 | 0.161188 | -0.1799  | 0.857235 | 0.979685 |
| rab12              | 291.4478 | -0.225825771 | 0.169635 | -1.33125 | 0.183108 | 0.659373 |
| si:dkey-205h13.2   | 3140.231 | -0.050469818 | 0.223236 | -0.22608 | 0.821137 | 0.971788 |
| si:ch211-212k18.15 | 7.421421 | -0.867871533 | 0.901269 | -0.96294 | 0.335575 | 0.792139 |
| etv7               | 7.474819 | 2.251561067  | 1.241595 | 1.813442 | 0.069764 | 0.450821 |
| macf1b             | 19.81354 | 0.575412904  | 0.367126 | 1.567343 | 0.117035 | 0.557961 |
| si:ch211-105c13.3  | 992.7376 | 0.371699171  | 0.101175 | 3.673839 | 0.000239 | 0.016725 |
| omgb               | 25.39206 | -0.692708669 | 0.694384 | -0.99759 | 0.318479 | 0.779923 |
| men1               | 254.5622 | 0.175794982  | 0.135511 | 1.297279 | 0.194535 | 0.67483  |
| rp111a             | 60.5395  | 0.373607164  | 0.44939  | 0.831365 | 0.405768 | 0.834645 |
| ciz1b              | 53.67929 | -0.284141333 | 0.290252 | -0.97895 | 0.327607 | 0.786438 |
| dhx58              | 17.56879 | -1.252618832 | 0.860659 | -1.45542 | 0.145554 | 0.60482  |
| fam161b            | 24.63295 | -0.175570874 | 0.365983 | -0.47972 | 0.631424 | 0.923003 |
| CR936459.1         | 1.316058 | -1.78269767  | 2.441897 | -0.73005 | 0.465362 | NA       |
| hbael.1            | 329.2344 | -1.278785884 | 0.68511  | -1.86654 | 0.061966 | 0.42715  |
| si:ch211-132g1.3   | 155.9094 | 0.028648128  | 0.180914 | 0.158352 | 0.874179 | 0.98385  |
| si:dkey-24117.4    | 0.199489 | -2.731538732 | 5.185882 | -0.52673 | 0.598384 | NA       |
| si:dkey-12j5.1     | 324.4075 | 0.134835269  | 0.155402 | 0.867655 | 0.385583 | 0.826939 |
| tecr12a            | 15.13015 | 0.133731057  | 0.485763 | 0.275301 | 0.783085 | 0.962328 |
| cplx3b             | 88.52383 | 0.910978087  | 0.337322 | 2.700616 | 0.006921 | 0.140177 |
| fam83e             | 174.3029 | 0.026094389  | 0.173121 | 0.150729 | 0.880189 | 0.986408 |
| kcnq4              | 6.364812 | 0.713096763  | 0.721908 | 0.987794 | 0.323254 | 0.783113 |
| pimr23             | 0.069091 | 0            | 5.267649 | 0        | 1        | NA       |
| si:ch73-367f21.5   | 22.333   | 0.035056574  | 0.43124  | 0.081292 | 0.935209 | 0.996829 |
| bod111             | 451.3959 | 0.212920912  | 0.156044 | 1.364493 | 0.172412 | 0.645319 |
| ugt1b5             | 219.0285 | 0.142356905  | 0.136931 | 1.039628 | 0.298513 | 0.765528 |
| si:ch73-78o10.1    | 89.98553 | -0.146089888 | 0.231758 | -0.63036 | 0.528462 | 0.88999  |
| si:ch211-198e20.10 | 3.73327  | -2.321949971 | 1.174452 | -1.97705 | 0.048036 | 0.381163 |
| si:dkeyp-46h3.5    | 0        | NA           | NA       | NA       | NA       | NA       |
| zgc:92594          | 110.1774 | 0.383604567  | 0.256242 | 1.497038 | 0.134383 | 0.588706 |
| fb1n7              | 122.9287 | 0.116160151  | 0.192786 | 0.602536 | 0.546818 | 0.896107 |
| si:dkeyp-98a7.4    | 0        | NA           | NA       | NA       | NA       | NA       |
| desilb             | 212.0531 | 0.16958797   | 0.22312  | 0.760077 | 0.447209 | 0.856073 |
| erbb4b             | 14.81548 | -0.640247373 | 0.515484 | -1.24203 | 0.214225 | 0.696474 |
| rnf166             | 22.19505 | 0.437153501  | 0.391499 | 1.116616 | 0.264159 | 0.742063 |
| BX571825.5         | 0        | NA           | NA       | NA       | NA       | NA       |
| baalcb             | 76.25021 | 0.222162877  | 0.314295 | 0.706861 | 0.479653 | 0.869938 |
| si:ch211-93n23.7   | 4.425531 | -0.513737513 | 1.463343 | -0.35107 | 0.725535 | 0.948653 |
| si:dkey-22114.11   | 2.692809 | 0.083926971  | 1.542258 | 0.054418 | 0.956602 | 0.999074 |
| si:dkey-63j12.4    | 12.16036 | -0.503792029 | 0.708876 | -0.71069 | 0.477276 | 0.869292 |
| BX957322.1         | 15.88155 | 0.486386871  | 0.496004 | 0.980611 | 0.326785 | 0.785579 |
| sfrp21             | 7.640598 | -0.130630865 | 0.739498 | -0.17665 | 0.859785 | 0.980066 |
| MDFI               | 255.1226 | 0.373717104  | 0.192216 | 1.944255 | 0.051865 | 0.395819 |
| pat12              | 2.030009 | 0.97791445   | 1.864029 | 0.524624 | 0.599845 | NA       |
| pstpip2            | 14.05521 | -1.618837825 | 0.623055 | -2.59823 | 0.009371 | 0.166502 |
| ccdc169            | 5.291062 | -0.971987487 | 0.760046 | -1.27885 | 0.200949 | 0.681045 |
| tfpt               | 289.5764 | -0.157940366 | 0.123188 | -1.28211 | 0.199806 | 0.6804   |
| xrral              | 12.52209 | -0.003375185 | 0.560055 | -0.00603 | 0.995192 | 1        |
| nhlrc2             | 220.7298 | 0.18785916   | 0.144887 | 1.296591 | 0.194772 | 0.67483  |
| si:dkey-265e15.2   | 27.59067 | -1.963120993 | 0.502152 | -3.90942 | 9.25E-05 | 0.008679 |
| ncam3              | 25.5301  | -0.669928473 | 0.507747 | -1.31941 | 0.187031 | 0.665362 |
| pcdh2ab11          | 0        | NA           | NA       | NA       | NA       | NA       |

|                     |          |              |          |          |          |          |
|---------------------|----------|--------------|----------|----------|----------|----------|
| si: cabz01054396.2  | 82.76447 | 0.194143134  | 0.229145 | 0.847249 | 0.396856 | 0.830253 |
| si: dkey-217f16.1   | 2.481754 | -2.259377829 | 1.750576 | -1.29065 | 0.196826 | 0.67714  |
| CU929037.1          | 0.04222  | 0            | 5.267649 | 0        | 1        | NA       |
| coro7               | 81.19551 | 0.45530806   | 0.295715 | 1.539685 | 0.123637 | 0.570652 |
| RF00009             | 9.433886 | 0.444593798  | 0.687822 | 0.646379 | 0.518034 | 0.887148 |
| fgd5b               | 14.12435 | -0.0321523   | 0.51704  | -0.06219 | 0.950415 | 0.99801  |
| ptges3b             | 1040.138 | -0.041886927 | 0.136506 | -0.30685 | 0.758957 | 0.957886 |
| si: ch211-160d20.5  | 0.429725 | -3.079608879 | 3.489987 | -0.88241 | 0.377554 | NA       |
| dre-mir-2188        | 0.092101 | 0            | 5.267649 | 0        | 1        | NA       |
| BX322587.1          | 2.162361 | -0.892741825 | 1.315595 | -0.67858 | 0.497401 | NA       |
| rnaseh2c            | 221.4425 | 0.196801106  | 0.181495 | 1.084335 | 0.278216 | 0.751971 |
| si: dkey-117n7.5    | 21.20936 | -0.151701746 | 0.457103 | -0.33188 | 0.739982 | 0.953684 |
| ppml1b              | 33.69843 | -0.140587679 | 0.331711 | -0.42383 | 0.671693 | 0.933953 |
| mcama               | 605.4664 | 0.06313112   | 0.11341  | 0.556661 | 0.577759 | 0.905055 |
| si: ch1073-406110.2 | 287.8322 | -1.090546733 | 0.193156 | -5.64593 | 1.64E-08 | 9.76E-06 |
| ctdsp13             | 329.8075 | 0.037116697  | 0.128907 | 0.287935 | 0.773397 | 0.960624 |
| BX927136.1          | 0        | NA           | NA       | NA       | NA       | NA       |
| F0704622.1          | 7.160589 | -0.837252569 | 0.9059   | -0.92422 | 0.355371 | 0.806546 |
| lsm3                | 511.9541 | -0.214511727 | 0.226733 | -0.9461  | 0.344099 | 0.798147 |
| MFAP4 (1 of many)   | 34.0803  | -1.298562175 | 0.339389 | -3.82618 | 0.00013  | 0.011294 |
| btf314              | 815.4357 | 0.045518772  | 0.160352 | 0.283868 | 0.776512 | 0.961073 |
| tex26               | 4.546714 | -0.650179427 | 0.897652 | -0.72431 | 0.468875 | 0.867025 |
| ism2a               | 57.60919 | -0.04898409  | 0.30926  | -0.15839 | 0.874148 | 0.98385  |
| nfe212b             | 97.29084 | -0.135085886 | 0.291107 | -0.46404 | 0.642617 | 0.92567  |
| atf7ip2             | 147.9923 | 0.038557834  | 0.190898 | 0.201982 | 0.839931 | 0.976417 |
| trabd2a             | 125.5179 | 0.191504237  | 0.205823 | 0.93043  | 0.352149 | 0.802776 |
| abcf3               | 236.8328 | 0.146081493  | 0.196621 | 0.742959 | 0.457506 | 0.860993 |
| si: ch211-276a23.5  | 67.24236 | 0.20362177   | 0.2561   | 0.795086 | 0.426563 | 0.845247 |
| gfral               | 48.22427 | -0.076329934 | 0.277805 | -0.27476 | 0.7835   | 0.96245  |
| BX004785.1          | 2.628041 | -0.890940401 | 1.46633  | -0.6076  | 0.543454 | 0.894925 |
| si: cabz01054394.7  | 13.52997 | 1.217759762  | 0.541803 | 2.247604 | 0.024601 | 0.278328 |
| qpct                | 206.4337 | -0.286907767 | 0.152744 | -1.87835 | 0.060333 | 0.422591 |
| CABZ01077218.1      | 43.44154 | 0.449816213  | 0.278038 | 1.617825 | 0.1057   | 0.534827 |
| cyldb               | 56.26351 | 0.470785729  | 0.628194 | 0.749428 | 0.453599 | 0.858722 |
| fam161a             | 69.75024 | -0.682469541 | 0.273151 | -2.4985  | 0.012472 | 0.194346 |
| si: zfos-754c12.2   | 0.133559 | 0            | 5.267649 | 0        | 1        | NA       |
| aqp8b               | 109.558  | -0.399110821 | 0.252304 | -1.58187 | 0.11368  | 0.551905 |
| si: dkey-26g8.5     | 115.8732 | -0.355134597 | 0.46379  | -0.76572 | 0.443842 | 0.854255 |
| si: dkey-11o15.7    | 0.379948 | 0            | 5.267649 | 0        | 1        | NA       |
| si: ch211-286b5.4   | 0        | NA           | NA       | NA       | NA       | NA       |
| nrg3b               | 172.2592 | 0.550514749  | 0.215576 | 2.553692 | 0.010659 | 0.179908 |
| rnf130              | 439.9168 | -0.008687257 | 0.141075 | -0.06158 | 0.950898 | 0.99801  |
| hapln1a             | 2658.943 | 0.036080483  | 0.214414 | 0.168275 | 0.866367 | 0.982582 |
| si: dkey-288a3.2    | 9.668244 | 0.215980031  | 0.699393 | 0.308811 | 0.757466 | 0.957364 |
| cizla               | 85.92298 | -0.859403215 | 0.214662 | -4.00351 | 6.24E-05 | 0.006506 |
| crebzf              | 522.0146 | -0.068208702 | 0.130747 | -0.52169 | 0.601889 | 0.914001 |
| efna5a              | 416.9033 | 0.165294067  | 0.125357 | 1.318584 | 0.187308 | 0.66594  |
| slc25a32a           | 564.4394 | -0.139424018 | 0.15424  | -0.90394 | 0.366025 | 0.815714 |
| si: dkeyp-101e12.1  | 0.157736 | -2.389175838 | 5.199609 | -0.45949 | 0.645881 | NA       |
| sertad4             | 193.6158 | 0.019559677  | 0.15949  | 0.122639 | 0.902393 | 0.99094  |
| si: ch73-41e3.7     | 3.51244  | 0.085087354  | 1.148834 | 0.074064 | 0.940959 | 0.997371 |
| prp7                | 19.6389  | -0.226474818 | 0.539887 | -0.41949 | 0.674861 | 0.935024 |
| akap1a              | 10.0131  | -0.273856348 | 0.718839 | -0.38097 | 0.703225 | 0.943622 |
| pcdh18a             | 425.1381 | -0.220807315 | 0.151338 | -1.45904 | 0.144555 | 0.603539 |

|                   |          |              |          |          |          |          |
|-------------------|----------|--------------|----------|----------|----------|----------|
| si:dkey-239j18.3  | 536.9522 | -0.296934179 | 0.41746  | -0.71129 | 0.476906 | 0.869292 |
| znf1042           | 20.97442 | -0.658117503 | 0.436658 | -1.50717 | 0.131767 | 0.583645 |
| si:dkey-9k7.3     | 33.63758 | -0.055498835 | 0.401016 | -0.1384  | 0.889928 | 0.98835  |
| lpar4             | 4.377772 | -0.610004453 | 0.984657 | -0.61951 | 0.535581 | 0.891993 |
| si:rp71-19m20.1   | 285.0429 | 0.083041387  | 0.137135 | 0.605544 | 0.544817 | 0.895206 |
| si:ch211-189a21.1 | 5.303062 | -0.172019656 | 1.007516 | -0.17074 | 0.864431 | 0.981867 |
| si:dkey-207m2.4   | 6.655517 | 0.539474705  | 1.106884 | 0.487382 | 0.625988 | 0.920625 |
| asb13b            | 60.22843 | -0.240687857 | 0.282225 | -0.85282 | 0.393758 | 0.828374 |
| MRPS12            | 536.7631 | 0.095257076  | 0.136624 | 0.697222 | 0.485664 | 0.87303  |
| slc35d2           | 30.83619 | 0.495141001  | 0.479792 | 1.031992 | 0.302076 | 0.76803  |
| si:dkey-262k9.4   | 68.55666 | -0.671281154 | 0.301939 | -2.22324 | 0.0262   | 0.287022 |
| BX296541.1        | 1.371429 | -2.432688787 | 2.216822 | -1.09738 | 0.272477 | NA       |
| scarb2c           | 354.5268 | -0.069307345 | 0.216669 | -0.31988 | 0.749062 | 0.955074 |
| RF00017           | 0 NA     | NA           | NA       | NA       | NA       | NA       |
| RF00017           | 0 NA     | NA           | NA       | NA       | NA       | NA       |
| si:dkey-51d8.1    | 3.478767 | -0.642365855 | 1.300089 | -0.49409 | 0.62124  | 0.918461 |
| si:dkey-22n8.3    | 74.27462 | -3.102715286 | 0.606537 | -5.11546 | 3.13E-07 | 0.000119 |
| cita              | 317.946  | 0.242056858  | 0.166107 | 1.457233 | 0.145052 | 0.604004 |
| cobl11a           | 71.80499 | -0.287921946 | 0.42001  | -0.68551 | 0.493021 | 0.876715 |
| atxn711           | 30.25802 | 0.050261025  | 0.406798 | 0.123553 | 0.901669 | 0.990643 |
| usp44             | 493.0437 | -0.298333778 | 0.158154 | -1.88635 | 0.059248 | 0.419296 |
| si:dkey-16j16.4   | 29.70376 | 0.48880379   | 0.320627 | 1.524526 | 0.127377 | 0.576964 |
| si:ch211-112c15.8 | 2.362733 | -1.387228101 | 1.864414 | -0.74406 | 0.456843 | 0.860783 |
| zgc:172218        | 0.086618 | 0 5.267649   | 0        | 1 NA     |          |          |
| jcada             | 559.527  | 0.068627701  | 0.132998 | 0.516006 | 0.60585  | 0.915055 |
| socs1b            | 1.196638 | 0.087688588  | 2.069499 | 0.042372 | 0.966202 | NA       |
| pcdh2ab8          | 5.156311 | 0.808004134  | 0.834217 | 0.968578 | 0.332756 | 0.789823 |
| zgc:173705        | 5.84032  | -2.260819638 | 0.847214 | -2.66853 | 0.007618 | 0.147466 |
| si:dkeyp-75h12.5  | 720.1356 | 0.093845472  | 0.149529 | 0.627607 | 0.530261 | 0.890545 |
| nedd9             | 327.0139 | 0.126433958  | 0.16396  | 0.771127 | 0.440632 | 0.852523 |
| soul51            | 3.682777 | 0.103289275  | 1.505957 | 0.068587 | 0.945318 | 0.997371 |
| si:dkey-210j14.3  | 44.63615 | -0.327575966 | 0.24866  | -1.31736 | 0.187717 | 0.666964 |
| slc16a12b         | 740.3266 | 0.039952646  | 0.177087 | 0.225611 | 0.821504 | 0.971788 |
| si:dkey-19e4.5    | 1142.129 | -0.054907722 | 0.13244  | -0.41459 | 0.678445 | 0.936026 |
| mmp20a            | 7.298505 | 0.077901636  | 0.698123 | 0.111587 | 0.911151 | 0.992208 |
| dag1b             | 397.7272 | 0.007737357  | 0.135688 | 0.057023 | 0.954527 | 0.998611 |
| rpz6              | 17.36869 | -0.085012553 | 0.475322 | -0.17885 | 0.858053 | 0.979774 |
| RF00001           | 0.144555 | 1.854137197  | 5.241768 | 0.353724 | 0.723546 | NA       |
| cd44b             | 11.34855 | 0.723380913  | 0.670579 | 1.078741 | 0.280703 | 0.753147 |
| tasora            | 368.0906 | -0.063750234 | 0.146179 | -0.43611 | 0.662757 | 0.93101  |
| zmp:0000001289    | 0.872733 | 1.055430918  | 2.495012 | 0.423016 | 0.672283 | NA       |
| si:ch211-261n11.8 | 0 NA     | NA           | NA       | NA       | NA       | NA       |
| CABZ01039863.1    | 47.98757 | 0.936033609  | 0.278379 | 3.362442 | 0.000773 | 0.036984 |
| adgre5b.3         | 69.03879 | -0.044642182 | 0.277898 | -0.16064 | 0.872375 | 0.983447 |
| si:ch211-265o23.1 | 96.63569 | 0.370410981  | 0.230437 | 1.607431 | 0.10796  | 0.539683 |
| cacnalg           | 185.3528 | -0.02382832  | 0.19001  | -0.12541 | 0.900202 | 0.99045  |
| clint1b           | 212.8201 | 0.050613302  | 0.162616 | 0.311244 | 0.755615 | 0.956532 |
| sh3tc2            | 607.3929 | -0.026856274 | 0.140576 | -0.19105 | 0.84849  | 0.977912 |
| si:ch211-161h7.8  | 124.4976 | 0.365166206  | 0.246411 | 1.48194  | 0.138356 | 0.594956 |
| mlip              | 599.5147 | 0.03315871   | 0.255709 | 0.129674 | 0.896824 | 0.98939  |
| smim4             | 237.9691 | 0.049008334  | 0.183084 | 0.267682 | 0.788944 | 0.963568 |
| dsn1              | 190.9417 | 0.513012309  | 0.181656 | 2.824093 | 0.004741 | 0.114199 |
| aldh2.1           | 736.0328 | -0.620022606 | 0.172118 | -3.60231 | 0.000315 | 0.020188 |
| iqce              | 128.4571 | -0.109114324 | 0.170115 | -0.64141 | 0.521254 | 0.887473 |



|                    |          |              |          |          |          |          |
|--------------------|----------|--------------|----------|----------|----------|----------|
| rasal3             | 38.71416 | -0.217899587 | 0.341826 | -0.63746 | 0.523826 | 0.888642 |
| si:ch211-64i20.3   | 5.88265  | -1.101603232 | 1.035653 | -1.06368 | 0.287474 | 0.758397 |
| selenow2b          | 1005.888 | 0.222597089  | 0.196994 | 1.129971 | 0.258488 | 0.735636 |
| znf1008            | 52.20952 | -0.321601505 | 0.359428 | -0.89476 | 0.370915 | 0.818486 |
| npy2r1             | 9.865234 | 0.534822081  | 0.513998 | 1.040513 | 0.298101 | 0.765416 |
| BX005085.1         | 113.496  | -0.061847276 | 0.195696 | -0.31604 | 0.751975 | 0.955417 |
| si:dkey-210j14.5   | 33.14363 | -0.14966627  | 0.344989 | -0.43383 | 0.664413 | 0.931811 |
| si:ch211-147k9.8   | 7.195287 | 0.917512929  | 0.773509 | 1.18617  | 0.235555 | 0.716683 |
| si:ch73-367f21.6   | 16.37456 | 0.087693713  | 0.466678 | 0.187911 | 0.850947 | 0.978532 |
| si:ch211-189e2.3   | 0.806491 | 1.560675295  | 2.047162 | 0.76236  | 0.445845 | NA       |
| si:dkey-88n24.10   | 0.124061 | 0            | 5.267649 | 0        | 1        | NA       |
| CR388164.1         | 0.483837 | -0.868138064 | 3.213043 | -0.27019 | 0.787013 | NA       |
| si:cabz01007807.1  | 45.5592  | -0.699711285 | 0.363363 | -1.92565 | 0.054148 | 0.402505 |
| si:zfos-1505d6.3   | 0.195968 | -1.791427895 | 5.221084 | -0.34311 | 0.731513 | NA       |
| si:ch211-59o9.10   | 138.6424 | 0.15685486   | 0.179518 | 0.873755 | 0.382252 | 0.825191 |
| SLC15A5            | 1.682442 | -2.382745862 | 1.617882 | -1.47276 | 0.140817 | NA       |
| spsc3              | 782.0329 | 0.019896423  | 0.154166 | 0.129058 | 0.897312 | 0.989719 |
| rnf146             | 522.4915 | -0.511665722 | 0.106723 | -4.79433 | 1.63E-06 | 0.00042  |
| si:ch73-109i22.2   | 10.08874 | -0.506786557 | 0.564083 | -0.89842 | 0.368959 | 0.817763 |
| or116-2            | 3.569876 | 0.686633668  | 1.176504 | 0.583622 | 0.559475 | 0.899571 |
| BX511080.1         | 0.566492 | 0            | 3.286668 | 0        | 1        | NA       |
| cln6b              | 1.630947 | -0.868146615 | 2.061493 | -0.42113 | 0.673664 | NA       |
| ccdc9b             | 29.56591 | -0.225316949 | 0.392    | -0.57479 | 0.565435 | 0.901538 |
| CR388047.1         | 4.777092 | -4.737255819 | 1.545853 | -3.06449 | 0.00218  | 0.073859 |
| BX682550.1         | 35.72815 | 0.063334961  | 0.304743 | 0.207831 | 0.835361 | 0.976007 |
| si:dkey-16p6.1     | 10.66728 | 2.289078547  | 0.777772 | 2.943122 | 0.003249 | 0.093414 |
| rtn4r              | 138.9345 | 0.533952132  | 0.249593 | 2.139289 | 0.032412 | 0.319299 |
| si:dkey-6b12.5     | 141.1534 | 0.205374242  | 0.203088 | 1.011256 | 0.311894 | 0.776164 |
| BX248410.1         | 1.897368 | -1.785402158 | 1.715494 | -1.04075 | 0.297991 | NA       |
| reck               | 1473.486 | 0.292336482  | 0.188329 | 1.552261 | 0.1206   | 0.56645  |
| F2R (1 of many)    | 3.243716 | -1.18764564  | 1.120173 | -1.06023 | 0.289038 | 0.76024  |
| si:dkey-165a24.9   | 39.32853 | -0.759848749 | 0.30232  | -2.51339 | 0.011958 | 0.190417 |
| znf318             | 699.8571 | -0.098172955 | 0.145316 | -0.67558 | 0.499305 | 0.879603 |
| CR394546.2         | 2.902282 | 1.965018558  | 1.803739 | 1.089414 | 0.275971 | 0.750674 |
| rac3a              | 318.5526 | -0.264714624 | 0.178562 | -1.48248 | 0.138213 | 0.594797 |
| fa2h               | 444.6873 | 0.011240189  | 0.143922 | 0.078099 | 0.937749 | 0.997305 |
| CABZ01084273.1     | 58.53449 | 0.238594168  | 0.384918 | 0.619858 | 0.535351 | 0.891993 |
| rxfp1              | 45.79068 | 0.58655909   | 0.426674 | 1.374725 | 0.169217 | 0.640541 |
| CU462878.1         | 197.1959 | -0.631170817 | 0.167965 | -3.75775 | 0.000171 | 0.013466 |
| si:dkey-1m11.5     | 3.588521 | -0.575713845 | 1.220363 | -0.47176 | 0.637101 | 0.924779 |
| rab11bb            | 246.7923 | -0.274726547 | 0.144437 | -1.90205 | 0.057164 | 0.412874 |
| CR626886.1         | 6.950281 | 0.400549564  | 0.861302 | 0.465051 | 0.641895 | 0.925586 |
| dre-mir-30a        | 0        | NA           | NA       | NA       | NA       | NA       |
| si:dkeyp-67a8.4    | 5.437553 | 1.479155688  | 0.913823 | 1.618645 | 0.105524 | 0.534773 |
| slc17a7b           | 48.54939 | 0.08144165   | 0.801721 | 0.101584 | 0.919087 | 0.993892 |
| zmp:0000000984     | 4.689852 | 0.187530198  | 0.797159 | 0.235248 | 0.814016 | 0.970483 |
| si:ch1073-174d20.1 | 53.41052 | -0.330378126 | 0.402961 | -0.81988 | 0.412287 | 0.838123 |
| znf1136            | 42.87793 | 0.043539076  | 0.283183 | 0.153749 | 0.877808 | 0.985613 |
| qdprb2             | 0.495157 | 0.642059814  | 2.49177  | 0.257672 | 0.79666  | NA       |
| si:dkey-248g21.1   | 82.1987  | 0.095498222  | 0.273074 | 0.349716 | 0.726552 | 0.949095 |
| si:ch211-105f12.2  | 11.0239  | -0.269323941 | 0.658356 | -0.40909 | 0.682477 | 0.938006 |
| tmem196b           | 14.04653 | 0.448984016  | 0.627971 | 0.714975 | 0.474624 | 0.869292 |
| si:dkey-94l16.4    | 145.9006 | -0.195170005 | 0.198798 | -0.98175 | 0.326222 | 0.785142 |
| tmem240b           | 64.92107 | 0.352548673  | 0.362777 | 0.971804 | 0.331148 | 0.788766 |

|                     |          |              |          |          |          |          |
|---------------------|----------|--------------|----------|----------|----------|----------|
| anapc10             | 123.2075 | -0.149449436 | 0.208026 | -0.71842 | 0.472501 | 0.868786 |
| cyldl               | 56.66508 | 0.053583756  | 0.282386 | 0.189753 | 0.849502 | 0.978182 |
| pttglipa            | 266.3213 | -0.455867925 | 0.189183 | -2.40967 | 0.015967 | 0.222864 |
| BX005105.1          | 14.70746 | 0.497715019  | 1.248241 | 0.398733 | 0.69009  | 0.939785 |
| zgc:173709          | 67.08461 | 0.214277969  | 0.277499 | 0.772174 | 0.440011 | 0.852079 |
| si:ch73-362m14.2    | 14.24712 | 0.741143755  | 0.872622 | 0.849329 | 0.395698 | 0.829389 |
| F0904898.1          | 0 NA     | NA           | NA       | NA       | NA       | NA       |
| rab11fip4a          | 201.4509 | 0.213891775  | 0.243995 | 0.876625 | 0.380691 | 0.823893 |
| BX323556.1          | 9.339511 | 1.613961377  | 0.926263 | 1.742445 | 0.081431 | 0.480419 |
| BX548044.3          | 0 NA     | NA           | NA       | NA       | NA       | NA       |
| si:ch211-117c9.1    | 4.876952 | -0.548301539 | 0.933971 | -0.58706 | 0.55716  | 0.899165 |
| BX072576.2          | 42.95687 | -0.379980374 | 0.293255 | -1.29574 | 0.195067 | 0.67483  |
| gapvd1              | 396.4793 | -0.024792991 | 0.177163 | -0.13994 | 0.888704 | 0.988188 |
| si:dkeyp-73b11.8    | 586.2999 | -0.669516111 | 0.258201 | -2.593   | 0.009514 | 0.167766 |
| bcam                | 426.3621 | 0.095861684  | 0.148013 | 0.647658 | 0.517206 | 0.887148 |
| si:dkey-16p6.1      | 3.659494 | 0.050533573  | 1.047304 | 0.048251 | 0.961516 | 0.999434 |
| si:ch73-286h23.4    | 2.258507 | -4.890919333 | 3.409579 | -1.43446 | 0.15144  | 0.615372 |
| lamtor5             | 290.0013 | -0.161602986 | 0.148615 | -1.0874  | 0.276862 | 0.751311 |
| mtx3                | 101.8771 | 0.081106324  | 0.228076 | 0.355612 | 0.722131 | 0.94744  |
| RF00001             | 0 NA     | NA           | NA       | NA       | NA       | NA       |
| rbm11               | 2.482439 | -2.363894137 | 1.329062 | -1.77862 | 0.075302 | 0.465238 |
| rheb                | 215.9991 | 0.030679337  | 0.179497 | 0.170919 | 0.864288 | 0.981867 |
| RF00001             | 0 NA     | NA           | NA       | NA       | NA       | NA       |
| wdr45               | 663.5151 | -0.105303509 | 0.145274 | -0.72486 | 0.468538 | 0.866951 |
| mssl1b              | 527.6266 | -0.030073205 | 0.102466 | -0.29349 | 0.769145 | 0.960484 |
| gsta.1              | 2683.491 | 0.257505537  | 0.187829 | 1.370961 | 0.170387 | 0.642035 |
| tmem108             | 194.0016 | 0.174469643  | 0.161777 | 1.078456 | 0.28083  | 0.753193 |
| clpb                | 113.6014 | -0.279851576 | 0.265115 | -1.05559 | 0.291157 | 0.761299 |
| zp2.3               | 0.268168 | -0.456832401 | 4.668313 | -0.09786 | 0.922045 | NA       |
| zgc:113223          | 61.17477 | 0.047605007  | 0.246145 | 0.193402 | 0.846644 | 0.977214 |
| phlpp2              | 17.15852 | -0.211083336 | 0.48917  | -0.43151 | 0.666095 | 0.932664 |
| CU062628.1          | 1.578633 | 2.250330014  | 1.892751 | 1.18892  | 0.234471 | NA       |
| krttlc19e           | 35108.77 | -0.06901173  | 0.256261 | -0.2693  | 0.787697 | 0.963263 |
| BX248410.2          | 4.902284 | -0.074986067 | 0.778134 | -0.09637 | 0.92323  | 0.994525 |
| serpinal            | 5028.803 | -0.467020943 | 0.254978 | -1.83161 | 0.067009 | 0.441957 |
| ralyl               | 38.06833 | -0.560645711 | 0.429781 | -1.30449 | 0.192066 | 0.672283 |
| ldlrad2             | 69.9243  | 0.359074962  | 0.222293 | 1.615322 | 0.106241 | 0.53548  |
| usp48               | 383.0643 | 0.019559095  | 0.131736 | 0.148472 | 0.88197  | 0.986908 |
| CU929391.2          | 45.0902  | 0.033805846  | 0.334089 | 0.101188 | 0.919401 | 0.993892 |
| ubxn1               | 468.007  | 0.142963421  | 0.124583 | 1.147538 | 0.251159 | 0.731476 |
| CABZ01065328.1      | 0.213959 | 0            | 5.267649 | 0        | 1        | NA       |
| rnf212              | 3.321684 | 1.04349395   | 1.264238 | 0.825394 | 0.409148 | 0.836637 |
| MAPK8IP1 (1 of many | 71.43626 | -0.124211096 | 0.418095 | -0.29709 | 0.766399 | 0.960229 |
| pprc1               | 228.5305 | -0.236919569 | 0.276754 | -0.85607 | 0.391961 | 0.827902 |
| fam20cb             | 99.99606 | -0.200323117 | 0.228116 | -0.87816 | 0.379854 | 0.823607 |
| si:dkey-27o4.1      | 29.97492 | -0.662939493 | 0.429696 | -1.54281 | 0.122877 | 0.569468 |
| il191               | 0.583753 | 0            | 4.028913 | 0        | 1        | NA       |
| RF00001             | 0 NA     | NA           | NA       | NA       | NA       | NA       |
| zmp:0000000991      | 113.7885 | 0.010437878  | 0.278922 | 0.037422 | 0.970148 | 1        |
| dre-mir-222a        | 0 NA     | NA           | NA       | NA       | NA       | NA       |
| pcdh2ab5            | 1.877628 | 0.294364493  | 1.153679 | 0.255153 | 0.798605 | NA       |
| CR855311.1          | 551.8519 | -0.051351621 | 0.309446 | -0.16595 | 0.868199 | 0.982801 |
| pimr168             | 0 NA     | NA           | NA       | NA       | NA       | NA       |
| znf1065             | 35.18981 | 0.571890138  | 0.412296 | 1.387087 | 0.165415 | 0.634653 |

|                    |          |              |          |          |          |          |
|--------------------|----------|--------------|----------|----------|----------|----------|
| RF00001            | 0.043308 | 0            | 5.267649 | 0        | 1        | NA       |
| dre-mir-132-2      | 1.928194 | 0            | 2.117253 | 0        | 1        | NA       |
| zgc:86896          | 4040.623 | -0.158769475 | 0.139399 | -1.13896 | 0.254719 | 0.733542 |
| si:dkey-46i9.6     | 257.6768 | 0.153938436  | 0.23431  | 0.656985 | 0.511191 | 0.884562 |
| taarl4e            | 0.09025  | 0            | 5.267649 | 0        | 1        | NA       |
| gzma               | 0.733979 | -0.868137438 | 2.265393 | -0.38322 | 0.701559 | NA       |
| CABZ01072157.1     | 6.513012 | -0.419288275 | 0.953706 | -0.43964 | 0.660197 | 0.930581 |
| cd3eap             | 201.398  | -0.390554188 | 0.177207 | -2.20394 | 0.027529 | 0.29475  |
| onecut2            | 20.35842 | 0.028035149  | 0.382845 | 0.073228 | 0.941624 | 0.997371 |
| ndufv3             | 812.732  | -0.27235367  | 0.183384 | -1.48515 | 0.137503 | 0.593397 |
| si:dkey-7114.2     | 10.37318 | -1.682815038 | 0.825272 | -2.0391  | 0.04144  | 0.355219 |
| si:cabz01074946.1  | 19.17166 | -0.399624398 | 0.46351  | -0.86217 | 0.388594 | 0.827613 |
| CABZ01067973.1     | 2.211782 | -1.403783986 | 1.728871 | -0.81197 | 0.416811 | 0.840369 |
| CABZ01020840.1     | 45.02151 | -0.093775762 | 0.32234  | -0.29092 | 0.771111 | 0.960484 |
| ERBB4 (1 of many)  | 15.37068 | 0.608884903  | 0.543482 | 1.12034  | 0.262569 | 0.740129 |
| scpp1              | 37.44586 | -0.263357226 | 0.783042 | -0.33633 | 0.736625 | 0.952008 |
| wdsub1             | 228.1189 | -0.132941567 | 0.18621  | -0.71393 | 0.475268 | 0.869292 |
| SH2B2              | 41.00783 | -0.07604639  | 0.27065  | -0.28098 | 0.778728 | 0.961073 |
| si:dkey-246i14.3   | 34.67149 | -0.069247658 | 0.334648 | -0.20693 | 0.836067 | 0.976007 |
| ctrbl              | 48399.69 | -1.321654586 | 1.003787 | -1.31667 | 0.18795  | 0.667259 |
| si:dkeyp-7a3.1     | 6.005163 | 0.507742004  | 0.598598 | 0.848218 | 0.396316 | 0.829808 |
| ponzr1             | 260.7887 | -0.295700403 | 0.190713 | -1.5505  | 0.121022 | 0.566931 |
| mtbp               | 69.1784  | 0.135845782  | 0.249942 | 0.543509 | 0.586779 | 0.906862 |
| sp100.3            | 1.095176 | 0.093653363  | 2.124539 | 0.044082 | 0.964839 | NA       |
| gnbla              | 2758.183 | 0.160152761  | 0.104638 | 1.530545 | 0.125882 | 0.573811 |
| RF00001            | 12.92331 | 0.367226675  | 0.457858 | 0.802054 | 0.422521 | 0.843493 |
| si:ch211-197f20.1  | 2.010177 | -3.359545809 | 1.708968 | -1.96583 | 0.049318 | NA       |
| mrpl20             | 497.235  | -0.061844334 | 0.191615 | -0.32275 | 0.746882 | 0.955074 |
| taarl4h            | 2.374006 | 1.159020099  | 1.369716 | 0.846176 | 0.397455 | 0.830253 |
| ppplr3aa           | 87.79828 | -0.317355292 | 0.325539 | -0.97486 | 0.329629 | 0.788    |
| sycn.1             | 66.7767  | 0            | 1.723233 | 0        | 1        | 1        |
| BX530037.2         | 0.049021 | -0.86807634  | 5.267649 | -0.16479 | 0.869106 | NA       |
| ttl110             | 34.68854 | 0.163023179  | 0.404004 | 0.403519 | 0.686567 | 0.938732 |
| si:ch211-269k10.5  | 19.45709 | -0.286283235 | 0.481319 | -0.59479 | 0.551985 | 0.8974   |
| ccdc17             | 2.888572 | 1.043929597  | 1.45432  | 0.717813 | 0.472873 | 0.868965 |
| trargla            | 221.0717 | 0.29628355   | 0.224271 | 1.321096 | 0.186469 | 0.664968 |
| lipcb              | 94.95726 | 0.549600833  | 0.238653 | 2.302929 | 0.021283 | 0.258857 |
| ANKRD66            | 1.253884 | 3.983667136  | 2.163165 | 1.841592 | 0.065535 | NA       |
| thsd7ab            | 15.79229 | -0.993175424 | 0.636119 | -1.56131 | 0.118452 | 0.561566 |
| tmem121ab          | 13.14619 | 0.808264074  | 0.714539 | 1.131168 | 0.257984 | 0.735569 |
| zmp:0000000997     | 0        | NA           | NA       | NA       | NA       | NA       |
| omal               | 43.73097 | 0.306408048  | 0.243828 | 1.256656 | 0.208878 | 0.691152 |
| trim8a             | 269.033  | -0.081264805 | 0.139103 | -0.5842  | 0.559082 | 0.899454 |
| f2rl2              | 36.77378 | -0.094374991 | 0.281285 | -0.33551 | 0.737237 | 0.952312 |
| zgc:158404         | 73.57823 | -0.07363862  | 0.421268 | -0.1748  | 0.861235 | 0.980484 |
| ifit11             | 20.76404 | 0.867094331  | 0.448764 | 1.932184 | 0.053337 | 0.400175 |
| tmem138            | 67.51402 | -0.086106959 | 0.390609 | -0.22044 | 0.825526 | 0.972729 |
| CABZ01085658.1     | 155.5929 | 0.056869198  | 0.195175 | 0.291376 | 0.770764 | 0.960484 |
| RF00001            | 0.086617 | 0            | 5.267649 | 0        | 1        | NA       |
| CR753886.1         | 198.0013 | -0.104780867 | 0.158011 | -0.66312 | 0.507251 | 0.883007 |
| FP102786.1         | 0.597455 | 0            | 3.334683 | 0        | 1        | NA       |
| si:dkey-7j14.6     | 1118.569 | 0.196238346  | 0.133977 | 1.464717 | 0.142998 | 0.602002 |
| si:ch1073-110a20.7 | 73.43982 | -1.377298153 | 0.46518  | -2.96079 | 0.003069 | 0.091315 |
| mfap5              | 64.1984  | -0.35467958  | 0.410771 | -0.86345 | 0.387891 | 0.827592 |

|                    |          |              |          |          |          |          |
|--------------------|----------|--------------|----------|----------|----------|----------|
| PDZD4              | 149.7096 | 0.178321465  | 0.190644 | 0.935364 | 0.349601 | 0.801408 |
| mrp152             | 141.4425 | 0.071955037  | 0.188144 | 0.382446 | 0.70213  | 0.943292 |
| naa40              | 2.357018 | -0.344765109 | 1.421773 | -0.24249 | 0.808401 | 0.969828 |
| si:dkey-63j12.4    | 1.719141 | 0.084878711  | 1.391843 | 0.060983 | 0.951373 | NA       |
| rassf11            | 0.946721 | 3.67426604   | 2.584548 | 1.421628 | 0.155134 | NA       |
| wdr4               | 155.5883 | 0.004165111  | 0.188489 | 0.022097 | 0.98237  | 1        |
| gpc1b              | 183.5662 | 0.211904739  | 0.13885  | 1.52614  | 0.126975 | 0.575962 |
| taar10b            | 0.699798 | 0            | 3.246322 | 0        | 1        | NA       |
| pkpla              | 12.9013  | 0.637870059  | 0.521953 | 1.222082 | 0.221676 | 0.703499 |
| si:ch211-213a13.1  | 234.9285 | 0.382798041  | 0.28884  | 1.325293 | 0.185074 | 0.662675 |
| F0904898.2         | 0.197941 | 0            | 5.212249 | 0        | 1        | NA       |
| pimr105            | 0        | NA           | NA       | NA       | NA       | NA       |
| si:dkeyp-117b11.1  | 7.482975 | 0.102952939  | 0.855412 | 0.120355 | 0.904202 | 0.991581 |
| F0904898.3         | 0.649041 | -2.762547314 | 2.922077 | -0.94541 | 0.344452 | NA       |
| cd59               | 293.258  | -0.285218592 | 0.364949 | -0.78153 | 0.434491 | 0.850002 |
| ctif               | 37.95822 | 0.296904504  | 0.331433 | 0.895821 | 0.370348 | 0.818484 |
| malrd1             | 38.59505 | -0.947073642 | 0.380507 | -2.48898 | 0.012811 | 0.197626 |
| si:dkeyp-106c3.1   | 303.0453 | 0.293390622  | 0.157723 | 1.860167 | 0.062862 | 0.429016 |
| ADGRL3             | 256.5357 | -0.034047371 | 0.1561   | -0.21811 | 0.827342 | 0.973459 |
| si:ch73-248e21.1   | 76.37684 | 0.003923238  | 0.240623 | 0.016305 | 0.986991 | 1        |
| si:dkey-197j19.6   | 1.503472 | -0.868144537 | 2.075451 | -0.41829 | 0.675734 | NA       |
| tmtops3b           | 4.034186 | 0.529240719  | 1.179008 | 0.448887 | 0.653513 | 0.929269 |
| si:dkey-32n7.8     | 0.205377 | 1.474697114  | 5.206324 | 0.283251 | 0.776984 | NA       |
| BX601644.1         | 0.464852 | -0.868140828 | 3.264922 | -0.2659  | 0.790317 | NA       |
| smim29             | 369.4527 | -0.672389935 | 0.187301 | -3.5899  | 0.000331 | 0.02066  |
| kcnj1a.4           | 81.03433 | 0.211925172  | 0.381231 | 0.555897 | 0.578282 | 0.905417 |
| myh6               | 62.95074 | -0.207029308 | 0.280335 | -0.73851 | 0.460206 | 0.862369 |
| gp9                | 41.51535 | 0.084095107  | 0.249092 | 0.337607 | 0.73566  | 0.951543 |
| si:dkey-54n8.4     | 29.84832 | 0.767827691  | 0.363355 | 2.113164 | 0.034587 | 0.328029 |
| tnk2a              | 51.34368 | -0.000390589 | 0.309685 | -0.00126 | 0.998994 | 1        |
| ly86               | 1.444178 | 1.055424914  | 2.182777 | 0.483524 | 0.628724 | NA       |
| gak                | 817.7635 | 0.232722392  | 0.134377 | 1.731859 | 0.083299 | 0.484434 |
| tomm20a            | 62.89534 | -0.311493546 | 0.279304 | -1.11525 | 0.264743 | 0.742063 |
| moto               | 2.001658 | -0.664632771 | 1.530267 | -0.43432 | 0.664053 | NA       |
| si:dkey-201i6.8    | 0.537694 | 2.894255816  | 2.701466 | 1.071365 | 0.284005 | NA       |
| si:ch1073-104i17.1 | 53.33427 | 0.076794275  | 0.222693 | 0.344844 | 0.730212 | 0.950056 |
| si:ch73-40i7.5     | 217.763  | 0.168661032  | 0.136974 | 1.231333 | 0.218198 | 0.699358 |
| si:ch211-166i24.1  | 0        | NA           | NA       | NA       | NA       | NA       |
| si:ch211-79k12.2   | 182.7949 | -0.160591087 | 0.183099 | -0.87707 | 0.380446 | 0.823655 |
| tmem241            | 65.8156  | -0.108867918 | 0.228782 | -0.47586 | 0.634176 | 0.924077 |
| slc35f21           | 7.984362 | -0.0024107   | 0.596135 | -0.00404 | 0.996773 | 1        |
| rcbtb2             | 146.2182 | 0.030033592  | 0.164404 | 0.182682 | 0.855048 | 0.979166 |
| nell2a             | 564.603  | 0.570316657  | 0.168584 | 3.382992 | 0.000717 | 0.035767 |
| BX005329.1         | 1.098428 | -2.564036306 | 2.542265 | -1.00856 | 0.313184 | NA       |
| si:dkey-15b23.3    | 4.608788 | 0.492372751  | 0.973131 | 0.505967 | 0.61288  | 0.915979 |
| EIF3EA             | 7808.727 | -0.373396685 | 0.111916 | -3.33641 | 0.000849 | 0.039393 |
| si:dkey-52j6.3     | 3.38583  | 1.499407352  | 1.105019 | 1.356907 | 0.174811 | 0.648577 |
| nLrb5              | 7.293201 | 0.977915805  | 0.913682 | 1.070302 | 0.284483 | 0.75547  |
| si:dkey-28g23.6    | 45.30197 | 1.139853142  | 0.355774 | 3.203867 | 0.001356 | 0.054449 |
| gaa                | 14.6037  | 0.507107349  | 0.41255  | 1.229201 | 0.218997 | 0.699984 |
| cltcb              | 2369.266 | 0.174885729  | 0.119    | 1.469629 | 0.141662 | 0.600284 |
| gremla             | 0        | NA           | NA       | NA       | NA       | NA       |
| prdm2a             | 130.4365 | 0.313502072  | 0.276478 | 1.133912 | 0.256832 | 0.734393 |
| leg1.1             | 2757.757 | -0.911176616 | 0.228442 | -3.98865 | 6.65E-05 | 0.006729 |

|                   |          |              |           |          |          |          |  |
|-------------------|----------|--------------|-----------|----------|----------|----------|--|
| scn12aa           | 32.34819 | -0.466073497 | 0.451261  | -1.03282 | 0.301686 | 0.767693 |  |
| celf5b            | 8.724427 | 0.378086369  | 0.706614  | 0.535068 | 0.592603 | 0.909996 |  |
| tnfrsf9b          | 2.163604 | -1.368439662 | 1.28098   | -1.06828 | 0.285396 | NA       |  |
| cfbl              | 65.36959 | 0.167492787  | 0.283603  | 0.590589 | 0.554796 | 0.89855  |  |
| si:dkey-16p6.1    | 4.381166 | 2.088576102  | 1.133479  | 1.842625 | 0.065384 | 0.435359 |  |
| zmp:0000001003    | 34.4911  | -0.135821988 | 0.300908  | -0.45137 | 0.65172  | 0.928625 |  |
| tor112            | 6.485147 | 0.00746251   | 0.914861  | 0.008157 | 0.993492 | 1        |  |
| si:ch73-269m14.2  | 289.7816 | -0.002126011 | 0.158742  | -0.01339 | 0.989314 | 1        |  |
| zc3h3             | 119.5187 | -0.007655303 | 0.222712  | -0.03437 | 0.97258  | 1        |  |
| plk2a             | 245.5289 | 0.092264091  | 0.143142  | 0.644563 | 0.51921  | 0.887148 |  |
| si:dkey-13p1.3    | 6.540229 | -0.823728321 | 0.866312  | -0.95084 | 0.341683 | 0.796379 |  |
| bcas3             | 283.9245 | -0.027772669 | 0.132265  | -0.20998 | 0.833686 | 0.975482 |  |
| si:ch211-136m16.8 | 57.36703 | -0.123181281 | 0.274691  | -0.44844 | 0.653838 | 0.929269 |  |
| zgc:173556        | 10.00913 | -1.599119912 | 0.554277  | -2.88505 | 0.003913 | 0.103866 |  |
| si:dkey-51d8.6    | 3.471219 | 1.188827722  | 1.044446  | 1.138237 | 0.255021 | 0.733542 |  |
| F0834800.1        | 136.2354 | -0.191640419 | 0.189742  | -1.01001 | 0.312493 | 0.776164 |  |
| ttl11             | 161.7411 | 0.33023014   | 0.293768  | 1.124117 | 0.260963 | 0.738533 |  |
| mfap4             | 85.95303 | -0.519084267 | 0.282722  | -1.83602 | 0.066354 | 0.439894 |  |
| diaph3            | 81.28473 | 0.164335557  | 0.291289  | 0.564166 | 0.572641 | 0.903562 |  |
| klhdc8b           | 6.743118 | 0.087180081  | 0.753233  | 0.115741 | 0.907858 | 0.991745 |  |
| cstf2             | 960.3187 | 0.080028516  | 0.098734  | 0.810546 | 0.417627 | 0.841149 |  |
| RF00001           | 0.281702 | -1.82550716  | 4.709956  | -0.38758 | 0.698323 | NA       |  |
| si:ch211-207j7.2  | 94.0995  | -0.14963492  | 0.258845  | -0.57809 | 0.563205 | 0.90092  |  |
| fam222a           | 139.3537 | 0.119055557  | 0.186192  | 0.639424 | 0.522547 | 0.887826 |  |
| gpr155a           | 429.161  | 0.008167946  | 0.150799  | 0.054164 | 0.956804 | 0.999109 |  |
| taar14g           | 0.166794 |              | 0.5267649 | 0        | 1        | NA       |  |
| si:dkey-18a10.3   | 45.6203  | -0.13618672  | 0.460362  | -0.29583 | 0.767363 | 0.960296 |  |
| kcnj10a           | 13.03892 | 2.45241675   | 0.74949   | 3.272114 | 0.001067 | 0.045972 |  |
| si:dkey-85k15.11  | 0.299905 | 0.093660982  | 4.601732  | 0.020353 | 0.983761 | NA       |  |
| CACFD1            | 63.61194 | 0.18254588   | 0.210568  | 0.86692  | 0.385986 | 0.826939 |  |
| slc2a10           | 103.3016 | 0.388925055  | 0.226812  | 1.714744 | 0.086392 | 0.493048 |  |
| zgc:171517        | 0.454209 | 1.015477127  | 4.68076   | 0.216947 | 0.82825  | NA       |  |
| si:dkey-51d8.3    | 0.968278 | 1.925327285  | 1.884463  | 1.021685 | 0.30693  | NA       |  |
| tmem132e          | 590.4619 | 0.225385283  | 0.120459  | 1.871048 | 0.061338 | 0.424867 |  |
| igfbp6b           | 107.2226 | 0.365750884  | 0.3271    | 1.118164 | 0.263497 | 0.741465 |  |
| epor              | 79.22324 | -0.557696816 | 0.318747  | -1.74965 | 0.080178 | 0.478425 |  |
| si:ch211-191d2.2  | 128.0993 | -0.139301741 | 0.18278   | -0.76213 | 0.445983 | 0.855403 |  |
| zmp:0000001006    | 3.921265 | 1.397723092  | 0.994521  | 1.405424 | 0.159895 | 0.626123 |  |
| CABZ01054965.1    | 36.75617 | -1.963754487 | 0.473363  | -4.14852 | 3.35E-05 | 0.004143 |  |
| si:ch211-209l18.4 | 261.0626 | 0.834182668  | 0.175611  | 4.75017  | 2.03E-06 | 0.000506 |  |
| serpina11         | 5504.115 | 0.273552039  | 0.245039  | 1.116359 | 0.264269 | 0.742063 |  |
| ciita             | 5.380522 | 0.581816903  | 0.831479  | 0.699737 | 0.484091 | 0.872532 |  |
| lsm11             | 39.14457 | 0.065373532  | 0.274837  | 0.237863 | 0.811988 | 0.97012  |  |
| CABZ01087514.1    | 39.96655 | -0.07201876  | 0.323472  | -0.22264 | 0.823813 | 0.972005 |  |
| CR847545.1        | 0.70459  |              | 0.2470394 | 0        | 1        | NA       |  |
| kcnj1a.2          | 86.40708 | 0.000530916  | 0.227022  | 0.002339 | 0.998134 | 1        |  |
| F0904898.4        | 0.808513 | -3.636528817 | 4.065836  | -0.89441 | 0.371102 | NA       |  |
| si:ch1073-263o8.2 | 1.595689 | 1.280537151  | 1.420876  | 0.901231 | 0.367466 | NA       |  |
| si:dkey-210j14.4  | 217.5085 | 0.128539483  | 0.172318  | 0.745943 | 0.455702 | 0.860177 |  |
| si:dkey-276j7.1   | 1828.178 | 0.199570781  | 0.123951  | 1.610078 | 0.107381 | 0.538065 |  |
| ccl34a.4          | 28.51713 | -0.247616889 | 0.509829  | -0.48569 | 0.62719  | 0.921095 |  |
| si:dkey-217f16.5  | 10.80581 | -1.014525386 | 0.785622  | -1.29137 | 0.196577 | 0.676952 |  |
| si:rp71-36a1.5    | 7.560733 | 1.302328304  | 1.137196  | 1.14521  | 0.252122 | 0.732759 |  |
| gabrac3           | 7.568446 | 0.61236746   | 0.858936  | 0.712937 | 0.475885 | 0.869292 |  |

|                    |          |              |          |          |          |          |
|--------------------|----------|--------------|----------|----------|----------|----------|
| zmp:0000001301     | 23.07315 | 0.330731217  | 0.54241  | 0.609744 | 0.542031 | 0.894241 |
| si:ch211-132p1.3   | 30.95852 | 0.23264599   | 0.716154 | 0.324855 | 0.745291 | 0.954956 |
| cmklr1             | 39.54966 | -0.512869197 | 0.395415 | -1.29704 | 0.194618 | 0.67483  |
| or117-1            | 1.314071 | 0.773303904  | 1.877431 | 0.411895 | 0.680417 | NA       |
| kans11a            | 881.7659 | -0.040520886 | 0.091063 | -0.44498 | 0.656336 | 0.929684 |
| syncn.3            | 58.46066 | 0            | 1.682981 | 0        | 1        | 1        |
| apn1               | 4.496611 | -0.954450988 | 1.521927 | -0.62713 | 0.530572 | 0.890545 |
| si:ch211-256e16.11 | 11.83805 | 0.246999237  | 0.739928 | 0.333815 | 0.738519 | 0.952968 |
| creb313b           | 87.42149 | -0.530338241 | 0.356247 | -1.48868 | 0.136571 | 0.59191  |
| RNF219             | 22.32818 | -0.079420889 | 0.407765 | -0.19477 | 0.845572 | 0.976909 |
| si:ch211-152f22.4  | 0.672987 | 2.07105313   | 3.881527 | 0.533567 | 0.593641 | NA       |
| npc2               | 2714.158 | -0.262562764 | 0.146536 | -1.7918  | 0.073165 | 0.460285 |
| si:ch211-117k10.3  | 580.2801 | -0.423364739 | 0.236469 | -1.79036 | 0.073396 | 0.46112  |
| CR559930.1         | 0.259948 | 0            | 5.267649 | 0        | 1        | NA       |
| si:dkeyp-98a7.3    | 0        | NA           | NA       | NA       | NA       | NA       |
| si:ch211-120g10.1  | 146.1358 | -1.03019414  | 0.340401 | -3.02641 | 0.002475 | 0.079972 |
| or128-4            | 0.600723 | -0.868130891 | 3.292387 | -0.26368 | 0.792028 | NA       |
| usp16              | 20.35249 | 0.063944359  | 0.418683 | 0.152727 | 0.878613 | 0.985761 |
| CABZ01054394.1     | 72.32482 | 0.37038764   | 0.303449 | 1.220592 | 0.222241 | 0.703972 |
| CABZ01033205.1     | 68.62319 | -0.57962814  | 0.863212 | -0.67148 | 0.501916 | 0.881148 |
| si:ch211-170d8.8   | 13.88611 | -1.984221889 | 0.948772 | -2.09136 | 0.036496 | 0.335935 |
| si:zfos-364h11.2   | 10.355   | -5.55297206  | 1.543166 | -3.59843 | 0.00032  | 0.020379 |
| si:dkey-29j8.1     | 4.213211 | 1.079165675  | 1.514492 | 0.71256  | 0.476118 | 0.869292 |
| si:ch73-29c22.1    | 42.30423 | 0.5556428    | 0.90383  | 0.614765 | 0.53871  | 0.892777 |
| dlg5b.1            | 507.2365 | -0.044113788 | 0.17449  | -0.25282 | 0.800411 | 0.967364 |
| igsf5b             | 24.58555 | -0.427794086 | 0.50049  | -0.85475 | 0.392689 | 0.827902 |
| CU469420.2         | 13.78525 | 0.03075051   | 0.568109 | 0.054128 | 0.956833 | 0.999109 |
| atp6ap11b          | 213.1467 | 0.150442484  | 0.236708 | 0.635561 | 0.525063 | 0.888928 |
| ripk3              | 25.73695 | -0.567063037 | 0.399937 | -1.41788 | 0.156225 | 0.621949 |
| cb1n18             | 122.1281 | -0.322835402 | 0.66538  | -0.48519 | 0.627542 | 0.921429 |
| cc2d2a             | 188.3344 | 0.303370716  | 0.194716 | 1.55802  | 0.119228 | 0.562753 |
| si:dkey-264d12.1   | 66.61425 | -0.297310298 | 0.278992 | -1.06566 | 0.286578 | 0.757624 |
| si:dkey-62k3.5     | 76.28938 | 2.391122626  | 1.182668 | 2.021804 | 0.043197 | 0.364174 |
| NABP2              | 137.0325 | -0.258776396 | 0.174207 | -1.48545 | 0.137424 | 0.593264 |
| ifit12             | 4.773296 | -0.672854883 | 0.912298 | -0.73754 | 0.460795 | 0.862409 |
| apof               | 477.7433 | 0.271404247  | 0.195311 | 1.389601 | 0.16465  | 0.634015 |
| si:ch211-191o15.6  | 7.176976 | 0.954083504  | 0.862676 | 1.105959 | 0.268744 | 0.744925 |
| slc44a1b           | 327.9916 | 0.153399232  | 0.158677 | 0.966742 | 0.333673 | 0.790676 |
| si:dkeyp-115e12.6  | 316.213  | 0.014144209  | 0.155647 | 0.090874 | 0.927593 | 0.995015 |
| larsa              | 147.1728 | 0.215294359  | 0.234506 | 0.918075 | 0.35858  | 0.80995  |
| rnf4               | 211.0134 | -0.268774357 | 0.136614 | -1.96739 | 0.049138 | 0.386041 |
| vegfa              | 52.70769 | -0.7919143   | 0.37942  | -2.08717 | 0.036873 | 0.337141 |
| si:cabz01071911.3  | 139.962  | -0.012956065 | 0.159155 | -0.08141 | 0.93512  | 0.996829 |
| mycbp              | 177.0772 | 0.563693685  | 0.177461 | 3.176442 | 0.001491 | 0.058157 |
| il34               | 83.69335 | -0.123097126 | 0.280933 | -0.43817 | 0.661261 | 0.930581 |
| cobl               | 473.5749 | 0.013544004  | 0.131007 | 0.103384 | 0.917658 | 0.993777 |
| si:ch211-28p3.4    | 242.2875 | 0.024123721  | 0.221353 | 0.108983 | 0.913216 | 0.99273  |
| si:dkey-84h14.2    | 13.29013 | 0.721153663  | 0.539878 | 1.335771 | 0.181624 | 0.657968 |
| CR381544.2         | 6.303022 | 0.150428754  | 0.737997 | 0.203834 | 0.838483 | 0.976395 |
| znf1124            | 2.707649 | -2.444439409 | 1.334038 | -1.83236 | 0.066898 | 0.44184  |
| si:ch211-218h8.1   | 4.921282 | -1.131596603 | 1.156748 | -0.97826 | 0.327947 | 0.786438 |
| aqpla.2            | 1.336563 | -0.102907321 | 2.062324 | -0.0499  | 0.960203 | NA       |
| phox2bb            | 225.5486 | -0.145075754 | 0.142104 | -1.02091 | 0.307297 | 0.772541 |
| sacs               | 111.1448 | 0.276867909  | 0.26092  | 1.061121 | 0.288635 | 0.759703 |

|                     |           |               |           |           |           |           |
|---------------------|-----------|---------------|-----------|-----------|-----------|-----------|
| pcdh2ab6            | 4. 919266 | -1. 107399391 | 0. 73743  | -1. 5017  | 0. 133174 | 0. 586514 |
| tmem173             | 18. 84601 | -1. 737463688 | 0. 629927 | -2. 7582  | 0. 005812 | 0. 129012 |
| onecut3b            | 2. 900319 | 0. 544246313  | 1. 159832 | 0. 469246 | 0. 638894 | 0. 924779 |
| slc38a3b            | 337. 0964 | 0. 087383429  | 0. 220467 | 0. 396357 | 0. 691842 | 0. 940274 |
| si:dkey-199k11. 6   | 0. 55406  | 0             | 3. 396163 | 0         | 1         | NA        |
| cib3                | 9. 716041 | -0. 121455641 | 0. 550007 | -0. 22083 | 0. 825228 | 0. 97261  |
| alkal2a             | 13. 46545 | -0. 054413424 | 0. 529817 | -0. 1027  | 0. 918199 | 0. 993884 |
| si:zfos-1192g2. 3   | 539. 3857 | -0. 07136358  | 0. 155235 | -0. 45971 | 0. 645721 | 0. 926728 |
| si:ch211-195j11. 27 | 0. 087381 | 0             | 5. 267649 | 0         | 1         | NA        |
| lepa                | 4. 732393 | -0. 873762407 | 1. 045676 | -0. 8356  | 0. 403382 | 0. 833803 |
| xirp2b              | 337. 9383 | -0. 095962317 | 0. 351131 | -0. 2733  | 0. 784626 | 0. 962605 |
| zcchc10             | 186. 5813 | -0. 112547345 | 0. 148876 | -0. 75598 | 0. 449661 | 0. 856979 |
| si:dkey-88n24. 8    | 0         | NA            | NA        | NA        | NA        | NA        |
| fabp10b             | 56. 84949 | 0. 187410136  | 0. 226752 | 0. 8265   | 0. 408521 | 0. 836443 |
| si:ch211-15b10. 6   | 884. 1501 | -0. 093037815 | 0. 171081 | -0. 54382 | 0. 586564 | 0. 906711 |
| pkhd111             | 322. 12   | -0. 636235182 | 0. 275335 | -2. 31076 | 0. 020846 | 0. 256424 |
| fbxo40. 2           | 132. 844  | 0. 279359226  | 0. 315458 | 0. 885567 | 0. 375851 | 0. 822237 |
| rps19bp1            | 423. 8089 | -0. 302172069 | 0. 17628  | -1. 71416 | 0. 0865   | 0. 493048 |
| rnf207a             | 30. 2519  | -2. 124651803 | 1. 403283 | -1. 51406 | 0. 130011 | 0. 580752 |
| klf15               | 448. 1611 | -0. 144053865 | 0. 23218  | -0. 62044 | 0. 534968 | 0. 891993 |
| lrrc75bb            | 19. 54269 | 0. 809646934  | 0. 547039 | 1. 480052 | 0. 138859 | 0. 596141 |
| kcnq2b              | 28. 79604 | -0. 074636161 | 0. 386724 | -0. 193   | 0. 846962 | 0. 9773   |
| cry3b               | 1418. 362 | 0. 363457381  | 0. 364884 | 0. 99609  | 0. 319206 | 0. 779923 |
| si:ch211-253p18. 5  | 9. 614439 | 2. 301274579  | 1. 407319 | 1. 635219 | 0. 102003 | 0. 528846 |
| zgc:174259          | 35. 82567 | -3. 541414813 | 1. 188339 | -2. 98014 | 0. 002881 | 0. 088391 |
| actr3               | 2507. 577 | -0. 248962495 | 0. 13631  | -1. 82645 | 0. 067783 | 0. 443779 |
| pik3r6b             | 3. 134799 | -0. 914117586 | 1. 503323 | -0. 60806 | 0. 543145 | 0. 894925 |
| or106-10            | 9. 897901 | 1. 351086485  | 0. 742747 | 1. 819039 | 0. 068906 | 0. 447963 |
| CR749162. 1         | 0. 060442 | 0             | 5. 267649 | 0         | 1         | NA        |
| crygm2d20           | 6540. 215 | 0. 587772937  | 0. 23849  | 2. 464562 | 0. 013718 | 0. 204799 |
| mki67               | 1753. 316 | 0. 37703585   | 0. 298386 | 1. 263582 | 0. 20638  | 0. 688825 |
| rpz                 | 278. 16   | 0. 267464699  | 0. 137126 | 1. 950496 | 0. 051117 | 0. 393482 |
| tor4ab              | 3. 385516 | 0. 680036388  | 1. 6183   | 0. 420217 | 0. 674327 | 0. 934877 |
| or110-2             | 7. 457082 | 0. 930419464  | 0. 693439 | 1. 341746 | 0. 179678 | 0. 655282 |
| si:dkey-30k22. 5    | 0. 045161 | 0             | 5. 267649 | 0         | 1         | NA        |
| FP017295. 1         | 8. 169674 | 1. 098016538  | 0. 90304  | 1. 215912 | 0. 224019 | 0. 705807 |
| BX649250. 1         | 235. 006  | 0. 186087448  | 0. 158443 | 1. 174474 | 0. 240205 | 0. 721177 |
| urml                | 239. 7664 | -0. 132612826 | 0. 164714 | -0. 80511 | 0. 420756 | 0. 842383 |
| or110-1             | 0         | NA            | NA        | NA        | NA        | NA        |
| BX511123. 1         | 0. 166655 | 1. 055370259  | 5. 267649 | 0. 200349 | 0. 841207 | NA        |
| mlnr                | 1. 50766  | -0. 41368651  | 1. 775935 | -0. 23294 | 0. 815808 | NA        |
| ucp3                | 1018. 136 | -0. 834635657 | 0. 266738 | -3. 12905 | 0. 001754 | 0. 064556 |
| adh8a               | 38. 73431 | 0. 386810361  | 0. 74228  | 0. 521111 | 0. 602289 | 0. 914001 |
| si:dkey-192p21. 6   | 5. 784902 | -0. 741139574 | 0. 979013 | -0. 75703 | 0. 449033 | 0. 856796 |
| rpz2                | 230. 3173 | -0. 037856818 | 0. 191959 | -0. 19721 | 0. 843661 | 0. 976791 |
| or111-10            | 0. 090321 | 0             | 5. 267649 | 0         | 1         | NA        |
| ttc34               | 9. 838869 | 0. 806682093  | 0. 555715 | 1. 451611 | 0. 14661  | 0. 606437 |
| si:dkey-19018. 2    | 57. 27411 | 0. 002326283  | 0. 3039   | 0. 007655 | 0. 993892 | 1         |
| CR450686. 1         | 6. 528155 | 0. 417672507  | 0. 893444 | 0. 467486 | 0. 640152 | 0. 924877 |
| kcnj1a. 1           | 45. 62347 | -0. 605644565 | 0. 508207 | -1. 19173 | 0. 233368 | 0. 714569 |
| FP236356. 1         | 2. 276371 | 2. 481356457  | 1. 900734 | 1. 305473 | 0. 191732 | 0. 672077 |
| si:ch73-335121. 4   | 255. 2362 | -0. 116788205 | 0. 378652 | -0. 30843 | 0. 757754 | 0. 957397 |
| CABZ01015525. 1     | 12. 47664 | -4. 525471959 | 1. 325987 | -3. 41291 | 0. 000643 | 0. 032986 |
| glt1d1              | 14. 89844 | -1. 072440492 | 0. 468186 | -2. 29063 | 0. 021985 | 0. 262571 |

|                    |           |               |           |           |           |           |
|--------------------|-----------|---------------|-----------|-----------|-----------|-----------|
| znf975             | 4. 935199 | 0. 417133619  | 0. 817912 | 0. 509998 | 0. 610053 | 0. 915331 |
| fars2              | 82. 34906 | -0. 057121273 | 0. 197035 | -0. 2899  | 0. 771889 | 0. 960624 |
| CR381686. 1        | 8. 962699 | -1. 279736695 | 0. 738505 | -1. 73288 | 0. 083118 | 0. 483758 |
| slc22a7b. 2        | 11. 04323 | -1. 918606435 | 1. 080762 | -1. 77523 | 0. 075859 | 0. 46659  |
| smyd1b             | 799. 1237 | 0. 357707083  | 0. 201726 | 1. 773232 | 0. 07619  | 0. 467585 |
| si:ch73-59p9. 2    | 0. 782338 | 0             | 3. 98605  | 0         | 1         | NA        |
| mylk4a             | 264. 7572 | 0. 184607017  | 0. 350388 | 0. 526865 | 0. 598288 | 0. 912715 |
| si:ch211-71m22. 5  | 4. 89608  | -0. 314687676 | 0. 894965 | -0. 35162 | 0. 725123 | 0. 948653 |
| si:ch211-225g23. 1 | 134. 6547 | 0. 379179506  | 0. 22602  | 1. 677637 | 0. 093418 | 0. 511267 |
| dre-mir-221        | 0. 108976 | 0. 093693664  | 5. 267649 | 0. 017787 | 0. 985809 | NA        |
| adra2da            | 71. 70364 | 0. 323478883  | 0. 22215  | 1. 456131 | 0. 145356 | 0. 604476 |
| si:ch211-66k16. 27 | 53. 93287 | -1. 936806232 | 0. 575144 | -3. 36751 | 0. 000758 | 0. 036636 |
| ebf3b              | 10. 44365 | -0. 199624178 | 0. 570041 | -0. 35019 | 0. 726194 | 0. 948987 |
| dmx12              | 909. 4049 | 0. 059194414  | 0. 165845 | 0. 356927 | 0. 721147 | 0. 947343 |
| pmela              | 3075. 722 | -0. 116619382 | 0. 172545 | -0. 67588 | 0. 499118 | 0. 879596 |
| card19             | 277. 3592 | -0. 164668498 | 0. 11331  | -1. 45326 | 0. 146151 | 0. 605672 |
| kcnn1a             | 365. 0967 | 0. 135754207  | 0. 17635  | 0. 7698   | 0. 441418 | 0. 852874 |
| hunk               | 577. 1388 | -0. 074475558 | 0. 19836  | -0. 37546 | 0. 707322 | 0. 944981 |
| RF00001            | 0. 4741   | 0             | 3. 659205 | 0         | 1         | NA        |
| nlr6               | 83. 78058 | 1. 018149674  | 0. 408782 | 2. 490691 | 0. 01275  | 0. 196806 |
| CABZ01088229. 1    | 13. 18056 | 0. 492631399  | 0. 495644 | 0. 993922 | 0. 320261 | 0. 780807 |
| cep120             | 229. 6272 | 0. 153801076  | 0. 175997 | 0. 873885 | 0. 382181 | 0. 825191 |
| si:ch73-134f24. 1  | 0         | NA            | NA        | NA        | NA        | NA        |
| RF00017            | 0. 259704 | -2. 707766391 | 5. 186735 | -0. 52206 | 0. 601631 | NA        |
| adcy5              | 77. 87717 | -0. 221473881 | 0. 220438 | -1. 0047  | 0. 315042 | 0. 777786 |
| rtn3               | 2173. 291 | -0. 040243628 | 0. 117116 | -0. 34362 | 0. 731131 | 0. 950056 |
| plekhd1            | 40. 16447 | 0. 888546749  | 0. 379651 | 2. 340429 | 0. 019262 | 0. 244673 |
| CAMSAP3            | 255. 9396 | 0. 273838847  | 0. 242282 | 1. 130249 | 0. 258372 | 0. 735636 |
| si:dkey-84k17. 2   | 21. 45656 | 0. 29473895   | 0. 440222 | 0. 669524 | 0. 503161 | 0. 881598 |
| prpf6              | 1088. 591 | 0. 158656647  | 0. 095831 | 1. 655585 | 0. 097806 | 0. 521071 |
| AL954327. 1        | 10. 40775 | -0. 105774639 | 0. 568814 | -0. 18596 | 0. 852479 | 0. 978672 |
| galn               | 72. 2728  | 0. 094191718  | 0. 300209 | 0. 313754 | 0. 753708 | 0. 955912 |
| si:ch211-214c20. 1 | 5. 935879 | -0. 270203135 | 0. 834279 | -0. 32388 | 0. 746032 | 0. 955074 |
| zgc:165409         | 145. 8959 | -0. 107577989 | 0. 188961 | -0. 56931 | 0. 569143 | 0. 902234 |
| si:ch73-38013. 5   | 0. 348715 | 0             | 5. 267649 | 0         | 1         | NA        |
| RF00001            | 0         | NA            | NA        | NA        | NA        | NA        |
| si:ch211-161m3. 6  | 54. 03915 | -0. 614716706 | 0. 358659 | -1. 71393 | 0. 086542 | 0. 493048 |
| eif2b1             | 371. 2576 | -0. 001114355 | 0. 149621 | -0. 00745 | 0. 994058 | 1         |
| mtcl1              | 24. 2085  | 0. 086475503  | 0. 362561 | 0. 238513 | 0. 811483 | 0. 97012  |
| zp2. 6             | 0. 092844 | 1. 055383603  | 5. 267649 | 0. 200352 | 0. 841205 | NA        |
| si:ch211-214p13. 9 | 11. 66416 | 1. 751751187  | 0. 879783 | 1. 991117 | 0. 046468 | 0. 376263 |
| TIMM22             | 173. 1883 | 0. 029587531  | 0. 200849 | 0. 147312 | 0. 882886 | 0. 986908 |
| RF00001            | 0. 043308 | 0             | 5. 267649 | 0         | 1         | NA        |
| snx17              | 352. 9024 | 0. 014595716  | 0. 130156 | 0. 112141 | 0. 910712 | 0. 992208 |
| nrarpa             | 1074. 906 | -0. 093948968 | 0. 106174 | -0. 88486 | 0. 376232 | 0. 822258 |
| BX511100. 2        | 0. 633789 | 0             | 4. 474334 | 0         | 1         | NA        |
| si:ch211-176g13. 8 | 34. 59571 | -0. 422844793 | 0. 427874 | -0. 98825 | 0. 323033 | 0. 782754 |
| abhd17aa           | 135. 8067 | 0. 062152843  | 0. 171527 | 0. 36235  | 0. 717091 | 0. 94627  |
| pimr27             | 0         | NA            | NA        | NA        | NA        | NA        |
| gabra2a            | 19. 6861  | 0. 319484373  | 0. 676633 | 0. 472168 | 0. 636807 | 0. 924779 |
| si:dkey-66a8. 7    | 214. 5658 | -0. 164037703 | 0. 210387 | -0. 77969 | 0. 435571 | 0. 850467 |
| RF00001            | 0         | NA            | NA        | NA        | NA        | NA        |
| ccdc28a            | 15. 68828 | -0. 186615379 | 0. 408714 | -0. 45659 | 0. 647965 | 0. 927245 |
| znf1066            | 11. 85778 | 0. 874651688  | 0. 488889 | 1. 789058 | 0. 073605 | 0. 461398 |



|                   |          |              |          |          |          |          |
|-------------------|----------|--------------|----------|----------|----------|----------|
| foxcla            | 590.5543 | 0.106773282  | 0.17891  | 0.5968   | 0.550641 | 0.8974   |
| RF00003           | 0 NA     | NA           | NA       | NA       | NA       | NA       |
| cnbd1             | 6.292507 | -0.610206501 | 0.766447 | -0.79615 | 0.425945 | 0.844714 |
| si:dkey-83f18.11  | 0.049519 | 0            | 5.267649 | 0        | 1        | NA       |
| zmp:0000001020    | 16.6199  | -0.296481389 | 0.54078  | -0.54825 | 0.583522 | 0.906058 |
| CABZ01073954.1    | 110.1362 | 0.610399099  | 0.268091 | 2.276839 | 0.022796 | 0.266874 |
| atp6ap1la         | 40.21699 | 0.314897789  | 0.363689 | 0.865844 | 0.386576 | 0.827433 |
| gpx7              | 272.6391 | 0.043670103  | 0.194657 | 0.224344 | 0.822489 | 0.971966 |
| nfrkb             | 284.7051 | -0.20272271  | 0.149578 | -1.3553  | 0.175322 | 0.649279 |
| si:dkey-22o12.2   | 386.1292 | 0.228726937  | 0.111559 | 2.050286 | 0.040337 | 0.351088 |
| CT737190.1        | 36.22923 | 0.116830476  | 0.37937  | 0.307959 | 0.758113 | 0.95756  |
| BX511084.1        | 2.148974 | -0.649806246 | 1.351198 | -0.48091 | 0.63058  | NA       |
| MAP3K11           | 56.683   | 0.091945464  | 0.252192 | 0.364585 | 0.715421 | 0.945988 |
| carml1            | 36.99754 | -0.892933145 | 0.328772 | -2.71597 | 0.006608 | 0.136957 |
| ccser2b           | 13.75094 | -0.00082153  | 0.534271 | -0.00154 | 0.998773 | 1        |
| zranb3            | 63.04541 | -0.150742199 | 0.244042 | -0.61769 | 0.536779 | 0.892421 |
| ptprjb.1          | 8.407797 | 0.390251062  | 1.087613 | 0.358814 | 0.719734 | 0.94694  |
| stard9            | 232.263  | -0.034920868 | 0.204526 | -0.17074 | 0.864428 | 0.981867 |
| RF00003           | 0 NA     | NA           | NA       | NA       | NA       | NA       |
| ostf1             | 476.3644 | -0.052968081 | 0.105593 | -0.50162 | 0.615933 | 0.916365 |
| tnfsf13           | 0 NA     | NA           | NA       | NA       | NA       | NA       |
| mmp19             | 0.344485 | 1.055412578  | 3.372428 | 0.312953 | 0.754316 | NA       |
| si:ch211-251f6.7  | 24.61831 | -0.715425073 | 0.469447 | -1.52397 | 0.127515 | 0.576964 |
| slc6a19a.2        | 185.2602 | 3.400918188  | 1.111501 | 3.059754 | 0.002215 | 0.07471  |
| si:dkey-156k2.4   | 19.52919 | 0.506601293  | 0.490338 | 1.033167 | 0.301526 | 0.767562 |
| snwl              | 1058.376 | -0.050623643 | 0.091584 | -0.55276 | 0.580431 | 0.905618 |
| si:ch1073-90m23.1 | 10.44747 | -2.814056548 | 1.169408 | -2.40639 | 0.016111 | 0.223897 |
| suox              | 293.973  | -0.193047184 | 0.145421 | -1.32751 | 0.184341 | 0.661379 |
| TMEM216           | 52.12923 | 0.0606034    | 0.300686 | 0.201551 | 0.840268 | 0.976417 |
| si:ch211-66e2.5   | 196.9139 | 0.501387677  | 0.198775 | 2.522382 | 0.011656 | 0.187683 |
| si:ch73-217n20.1  | 145.1066 | -1.350645252 | 0.308956 | -4.37164 | 1.23E-05 | 0.002154 |
| kif28             | 9.661024 | -1.112857427 | 0.728689 | -1.52721 | 0.12671  | 0.57566  |
| si:ch211-170p16.1 | 0 NA     | NA           | NA       | NA       | NA       | NA       |
| pelila            | 37.41071 | -0.170746476 | 0.293872 | -0.58102 | 0.561224 | 0.90039  |
| L0018154.1        | 145.9679 | 0.016131419  | 0.146881 | 0.109826 | 0.912547 | 0.992523 |
| si:ch73-91k6.2    | 99.66791 | -0.339800733 | 0.194876 | -1.74367 | 0.081216 | 0.479923 |
| si:dkey-163f14.6  | 67.79733 | -0.34179313  | 0.292482 | -1.16859 | 0.242567 | 0.724345 |
| RF00026           | 0 NA     | NA           | NA       | NA       | NA       | NA       |
| arhgef28b         | 13.19528 | -0.200658158 | 0.660404 | -0.30384 | 0.761249 | 0.958159 |
| spink4            | 385.4729 | -0.673212527 | 0.368544 | -1.82668 | 0.067748 | 0.443773 |
| si:dkey-62k3.6    | 6.577203 | 0.889851013  | 0.839374 | 1.060136 | 0.289083 | 0.76024  |
| prok2             | 1.420421 | -3.083726519 | 1.866342 | -1.65228 | 0.098477 | NA       |
| cltcl1            | 185.3741 | 0.483426416  | 0.245465 | 1.96943  | 0.048904 | 0.385015 |
| mvl12ba           | 67.86885 | -0.075005597 | 0.244935 | -0.30623 | 0.759432 | 0.957886 |
| ugt2a7            | 49.21791 | -3.113521737 | 0.449387 | -6.92837 | 4.26E-12 | 5.48E-09 |
| si:dkeyp-67f1.2   | 72.09858 | -0.336384098 | 0.252671 | -1.33131 | 0.183085 | 0.659373 |
| si:dkey-271j15.3  | 45.13071 | 0.142244627  | 0.451242 | 0.315229 | 0.752588 | 0.955756 |
| cspp1b            | 148.2619 | 0.001163897  | 0.176864 | 0.006581 | 0.994749 | 1        |
| si:ch211-197h24.6 | 476.5501 | 0.154417122  | 0.132936 | 1.161589 | 0.245403 | 0.726909 |
| si:dkey-177p2.18  | 35.22916 | 0.464058116  | 0.345966 | 1.34134  | 0.17981  | 0.655282 |
| pip4k2cb          | 9.164555 | -0.57804725  | 0.988992 | -0.58448 | 0.558897 | 0.899409 |
| CABZ01072989.1    | 1.529427 | 0.367071795  | 1.362208 | 0.269468 | 0.787569 | NA       |
| si:ch73-352p4.5   | 73.35225 | -0.432884149 | 0.222154 | -1.94858 | 0.051346 | 0.394196 |
| igflr1            | 73.59209 | -2.939215504 | 0.533744 | -5.50679 | 3.65E-08 | 2.07E-05 |

|                   |          |              |          |          |          |          |
|-------------------|----------|--------------|----------|----------|----------|----------|
| xrn1              | 617.7425 | 0.068458627  | 0.189074 | 0.362073 | 0.717297 | 0.946272 |
| gcsha             | 445.5076 | 0.048968291  | 0.144264 | 0.339435 | 0.734282 | 0.951134 |
| lsm8              | 328.3635 | 0.117636848  | 0.176504 | 0.666481 | 0.505103 | 0.882097 |
| CT573256.1        | 13.1512  | 0.954893727  | 0.465499 | 2.051335 | 0.040234 | 0.350648 |
| sptssb            | 123.3413 | 0.390735687  | 0.249184 | 1.568059 | 0.116867 | 0.557831 |
| fgfbplb           | 132.9738 | 0.192597099  | 0.224395 | 0.858294 | 0.39073  | 0.827902 |
| si:dkey-234i14.3  | 9.721993 | -0.080827514 | 0.578762 | -0.13966 | 0.888932 | 0.988188 |
| bicd12l           | 238.8013 | -0.584275358 | 0.657342 | -0.88885 | NA       | NA       |
| ints12            | 211.8117 | -0.035643021 | 0.16409  | -0.21722 | 0.828039 | 0.973905 |
| F0704858.1        | 1.271065 | 0.077801642  | 1.909696 | 0.04074  | 0.967503 | NA       |
| cnripla           | 491.5908 | 0.451506985  | 0.151891 | 2.972581 | 0.002953 | 0.089911 |
| havcr2            | 18.745   | -0.509119272 | 0.539122 | -0.94435 | 0.344991 | 0.79837  |
| RF00017           | 0 NA     | NA           | NA       | NA       | NA       | NA       |
| capn2a            | 1507.625 | -0.167059053 | 0.109578 | -1.52456 | 0.127368 | 0.576964 |
| csnk2a4           | 18.91863 | 1.401002003  | 0.529485 | 2.645971 | 0.008146 | 0.153194 |
| taarl4d           | 0 NA     | NA           | NA       | NA       | NA       | NA       |
| si:dkey-238d18.5  | 3.835891 | 0.676742773  | 1.544711 | 0.438103 | 0.661312 | 0.930581 |
| BX649490.1        | 0.955202 | 1.917134636  | 2.118365 | 0.905007 | 0.365462 | NA       |
| si:ch211-202f3.4  | 20.65775 | 0.115593689  | 0.876466 | 0.131886 | 0.895074 | 0.989187 |
| aebpl             | 540.2452 | 0.048553075  | 0.143524 | 0.338292 | 0.735143 | 0.951543 |
| CABZ01061592.1    | 28.66745 | 0.590478751  | 0.487598 | 1.210995 | 0.225897 | 0.707208 |
| zgc:l14046        | 92.14547 | 0.419744195  | 0.241662 | 1.736909 | 0.082403 | 0.482825 |
| gig2l             | 1.380556 | 0            | 5.267649 | 0        | 1        | NA       |
| taarl4b           | 0 NA     | NA           | NA       | NA       | NA       | NA       |
| traf3ip2l         | 148.43   | -0.279938796 | 0.223833 | -1.25066 | 0.211058 | 0.692821 |
| si:dkey-16p6.1    | 3.697546 | -2.116388277 | 1.137136 | -1.86116 | 0.062722 | 0.428693 |
| tbx22             | 28.96721 | -0.183012395 | 0.308178 | -0.59385 | 0.55261  | 0.8974   |
| RF00001           | 0 NA     | NA           | NA       | NA       | NA       | NA       |
| CT573476.1        | 34.66673 | -0.234401804 | 0.418508 | -0.56009 | 0.575418 | 0.904739 |
| insmla            | 685.805  | 0.035948093  | 0.165949 | 0.216622 | 0.828503 | 0.974137 |
| adgrf6            | 127.8557 | -0.400132116 | 0.310222 | -1.28982 | 0.197112 | 0.677304 |
| cwf1912           | 212.9611 | 0.326386848  | 0.134765 | 2.421895 | 0.01544  | 0.218848 |
| zbtb40            | 123.7715 | 0.24799015   | 0.21922  | 1.131239 | 0.257954 | 0.735569 |
| dclrela           | 111.4096 | 0.228983059  | 0.255592 | 0.895894 | 0.370309 | 0.818484 |
| lysmd2            | 379.8949 | 0.322672522  | 0.146254 | 2.20624  | 0.027367 | 0.293836 |
| CR524827.1        | 0.576274 | 0            | 4.506452 | 0        | 1        | NA       |
| mapkap1           | 88.31314 | 0.213014718  | 0.279454 | 0.762253 | 0.445909 | 0.855403 |
| BX890608.2        | 0.325339 | 0.181757575  | 5.131276 | 0.035422 | 0.971744 | NA       |
| si:dkeyp-71f10.5  | 20.56161 | 0.416540356  | 0.57989  | 0.71831  | 0.472566 | 0.868786 |
| si:ch211-203b20.4 | 0.043309 | 0            | 5.267649 | 0        | 1        | NA       |
| or111-5           | 4.209684 | -0.426203708 | 1.118553 | -0.38103 | 0.70318  | 0.943622 |
| akap12a           | 207.3094 | -0.671277895 | 0.233839 | -2.87068 | 0.004096 | 0.106542 |
| taarl8c           | 0 NA     | NA           | NA       | NA       | NA       | NA       |
| si:ch211-266k22.6 | 43.83858 | 0.021802401  | 0.342385 | 0.063678 | 0.949227 | 0.99801  |
| zgc:l74260        | 57.24853 | -4.100279244 | 1.301563 | -3.15027 | 0.001631 | 0.06206  |
| serpinb14         | 480.8806 | 0.208739278  | 0.398641 | 0.523627 | 0.600538 | 0.913756 |
| si:dkey-21a6.5    | 352.7275 | -0.271098263 | 0.159348 | -1.7013  | 0.088886 | 0.500363 |
| CR391998.1        | 28.18443 | 0.474151691  | 0.442335 | 1.071928 | 0.283752 | 0.755095 |
| smc6              | 33.73078 | 0.440164274  | 0.364739 | 1.206793 | 0.227512 | 0.70878  |
| ddx27             | 490.4107 | -0.076900601 | 0.169139 | -0.45466 | 0.649355 | 0.927756 |
| MDFIC2            | 3.598716 | 0.777122573  | 0.987988 | 0.786571 | 0.431533 | 0.848419 |
| sv2               | 180.9557 | -0.330892725 | 0.232913 | -1.42067 | 0.155412 | 0.620161 |
| si:ch211-198m17.1 | 161.5911 | 0.078505993  | 0.19536  | 0.401853 | 0.687792 | 0.938835 |
| si:ch73-264p11.1  | 23.53212 | 0.579531461  | 0.378172 | 1.532456 | 0.12541  | 0.573278 |

|                   |          |              |            |          |          |          |
|-------------------|----------|--------------|------------|----------|----------|----------|
| casp7             | 400.7483 | 0.295494836  | 0.150374   | 1.965067 | 0.049406 | 0.387262 |
| si:cabz01071909.2 | 19.61499 | 0.434953725  | 0.591728   | 0.735056 | 0.462305 | 0.863631 |
| pimr21            | 0.208907 |              | 0.5.267649 |          | 0        | 1 NA     |
| si:ch211-181d7.1  | 16.80034 | -6.378100384 | 3.827323   | -1.66647 | 0.095621 | 0.516418 |
| tsen2             | 49.61549 | -0.149386651 | 0.292276   | -0.51111 | 0.609271 | 0.915204 |
| si:ch73-233m11.2  | 9.720536 | 0.634913836  | 0.639173   | 0.993336 | 0.320546 | 0.780821 |
| zgc:194007        | 22.71905 | -0.073213468 | 0.526867   | -0.13896 | 0.889482 | 0.988318 |
| BX942825.1        | 0.059954 | 1.055396947  | 5.267649   | 0.200354 | 0.841203 | NA       |
| zgc:158701        | 4.603588 | 0.263580284  | 0.9946     | 0.265011 | 0.791001 | 0.964766 |
| BX950194.1        |          | 0 NA         | NA         | NA       | NA       | NA       |
| CR936300.1        | 4.868255 | 0.116094475  | 0.93085    | 0.124719 | 0.900746 | 0.99045  |
| zgc:162958        | 86.97662 | -0.06572062  | 0.234941   | -0.27973 | 0.779683 | 0.961073 |
| CU469539.1        | 0.236338 | 1.05539181   | 4.243249   | 0.248723 | 0.803575 | NA       |
| si:ch211-102c2.7  | 128.7623 | -0.027050361 | 0.185407   | -0.1459  | 0.884002 | 0.987036 |
| CR354402.1        | 0.168647 |              | 0.5.267649 |          | 0        | 1 NA     |
| or137-7           | 0.707363 |              | 0.2.992628 |          | 0        | 1 NA     |
| si:dkey-29d8.3    | 72.53808 | -0.316790166 | 0.267446   | -1.1845  | 0.236215 | 0.717364 |
| grnas             | 0.849449 |              | 0.2.372316 |          | 0        | 1 NA     |
| BX005355.1        | 0.043308 |              | 0.5.267649 |          | 0        | 1 NA     |
| si:dkeyp-69c1.9   | 28.33422 | -0.215842559 | 0.344515   | -0.62651 | 0.53098  | 0.890545 |
| CR812481.1        | 9.407172 | -1.946040545 | 0.688489   | -2.82654 | 0.004705 | 0.113804 |
| si:dkeyp-67e1.3   | 0.102662 |              | 0.5.267649 |          | 0        | 1 NA     |
| AL953893.1        | 0.262872 | -0.868116091 | 5.267649   | -0.1648  | 0.8691   | NA       |
| znf1172           | 17.37557 | 0.35997697   | 0.431534   | 0.834179 | 0.40418  | 0.833888 |
| BX323884.1        | 66.25614 | 1.362510173  | 0.31736    | 4.293261 | 1.76E-05 | 0.00272  |
| si:ch73-54n14.2   |          | 0 NA         | NA         | NA       | NA       | NA       |
| CR388209.1        | 0.454697 | 1.055394109  | 3.665504   | 0.287926 | 0.773403 | NA       |
| b3gnt2b           | 406.8324 | -0.495214454 | 0.168257   | -2.9432  | 0.003248 | 0.093414 |
| si:dkeyp-51f12.3  | 5.5213   | -1.288173078 | 0.819396   | -1.5721  | 0.115927 | 0.556115 |
| si:dkey-108k21.21 | 13.84288 | 0.815237852  | 0.501341   | 1.626114 | 0.103925 | 0.532096 |
| rbp7a             | 0.08553  |              | 0.5.267649 |          | 0        | 1 NA     |
| si:ch73-59c19.1   | 10.7985  | -1.428352103 | 0.522056   | -2.73601 | 0.006219 | 0.133542 |
| CR974461.1        |          | 0 NA         | NA         | NA       | NA       | NA       |
| si:ch211-15j1.5   | 6.343414 | 0.709644501  | 1.544451   | 0.45948  | 0.64589  | 0.926728 |
| BX530075.1        |          | 0 NA         | NA         | NA       | NA       | NA       |
| ugt5b4            | 269.8995 | -0.086727206 | 0.272774   | -0.31794 | 0.750527 | 0.955074 |
| CU571079.1        | 22.98231 | -0.041263828 | 0.362997   | -0.11368 | 0.909495 | 0.99213  |
| BX548073.1        | 7.68621  | 1.506649871  | 0.794316   | 1.896789 | 0.057856 | 0.415278 |
| BX284679.1        | 0.210955 | 1.055364264  | 5.123777   | 0.205974 | 0.836811 | NA       |
| si:dkey-103e21.5  | 15.14662 | -0.691089123 | 0.576437   | -1.1989  | 0.230568 | 0.712206 |
| or126-1           | 5.200218 | -0.102480707 | 1.076269   | -0.09522 | 0.924141 | 0.994813 |
| si:ch211-12e13.1  | 10.23899 | 0.293095408  | 0.750664   | 0.390448 | 0.696205 | 0.941657 |
| gpatch4           | 193.1742 | 0.072947311  | 0.246541   | 0.295882 | 0.76732  | 0.960296 |
| si:ch73-25f10.6   | 461.7084 | -0.231448673 | 0.115357   | -2.00637 | 0.044817 | 0.370861 |
| BX649388.1        | 12.00626 | -0.589622164 | 0.575119   | -1.02522 | 0.30526  | 0.770382 |
| BX005429.1        |          | 0 NA         | NA         | NA       | NA       | NA       |
| CU633804.1        | 0.316633 |              | 0.4.549245 |          | 0        | 1 NA     |
| GBGT1 (1 of many) | 3.596171 | 0.115071456  | 1.225063   | 0.093931 | 0.925164 | 0.994815 |
| BX927308.1        | 132.1577 | -0.134186731 | 0.257189   | -0.52174 | 0.601849 | 0.914001 |
| BX890576.1        | 5.483039 | -0.493726473 | 0.743897   | -0.6637  | 0.50688  | 0.883007 |
| CR847971.1        | 1.038802 | -2.309028232 | 2.268042   | -1.01807 | 0.308644 | NA       |
| BX005313.1        | 0.495842 | 2.068161195  | 3.619801   | 0.571347 | 0.567765 | NA       |
| GBGT1 (1 of many) | 1.817678 | -0.868136768 | 1.988061   | -0.43668 | 0.662347 | NA       |
| CR391940.1        | 24.64403 | -0.535366523 | 0.412145   | -1.29898 | 0.193953 | 0.674122 |

|                     |           |               |             |           |           |           |
|---------------------|-----------|---------------|-------------|-----------|-----------|-----------|
| znf106b             | 33. 51208 | -0. 498129857 | 0. 295578   | -1. 68528 | 0. 091935 | 0. 507669 |
| CU694486. 1         | 0 NA      |               | NA          | NA        | NA        | NA        |
| si:dkeyp-4c7. 3     | 0. 574205 | 0. 939435634  | 2. 876751   | 0. 326561 | 0. 744    | NA        |
| nuggc. 2            | 8. 317383 | 0. 179817839  | 0. 696703   | 0. 258098 | 0. 796331 | 0. 966425 |
| si:dkeyp-122a9. 1   | 0. 83963  | -2. 074204515 | 2. 611096   | -0. 79438 | 0. 426974 | NA        |
| tmem184bb           | 30. 92652 | 1. 082975588  | 0. 480553   | 2. 253604 | 0. 024221 | 0. 275306 |
| si:dkey-172o10. 8   | 0 NA      |               | NA          | NA        | NA        | NA        |
| BX677668. 1         | 1. 21917  | 2. 502601507  | 2. 042051   | 1. 225533 | 0. 220374 | NA        |
| pth1b               | 42. 25434 | -1. 468022629 | 0. 469622   | -3. 12596 | 0. 001772 | 0. 06487  |
| RUNDC1              | 70. 40868 | 0. 200092941  | 0. 244872   | 0. 817132 | 0. 413853 | 0. 838564 |
| CR925863. 1         | 0. 282371 | 1. 05536736   | 4. 731485   | 0. 223052 | 0. 823495 | NA        |
| ttf1                | 54. 73668 | -0. 152350773 | 0. 287266   | -0. 53035 | 0. 595871 | 0. 911428 |
| gbgt113             | 2. 582965 | -0. 922396254 | 1. 297794   | -0. 71074 | 0. 477244 | 0. 869292 |
| ms4a17a. 3          | 11. 49049 | -1. 491911103 | 0. 837895   | -1. 78055 | 0. 074987 | 0. 464308 |
| si:dkey-58f10. 7    | 47. 47512 | -0. 549689107 | 0. 315227   | -1. 74379 | 0. 081196 | 0. 479923 |
| CR356233. 1         | 19. 7687  | 0. 982174583  | 0. 423707   | 2. 318051 | 0. 020447 | 0. 253747 |
| AL929229. 1         | 0. 927048 | 4. 065046016  | 2. 21317    | 1. 836753 | 0. 066246 | NA        |
| CR848717. 1         | 0. 097564 | 1. 055383603  | 5. 267649   | 0. 200352 | 0. 841205 | NA        |
| BX470189. 2         | 4. 607871 | 2. 579449523  | 1. 163161   | 2. 217621 | 0. 026581 | 0. 288909 |
| CR450716. 1         | 0. 119814 | -0. 868089684 | 5. 267649   | -0. 1648  | 0. 869104 | NA        |
| BX085193. 1         | 0. 36806  | 1. 921543831  | 5. 236909   | 0. 366923 | 0. 713676 | NA        |
| BX005012. 2         | 0. 259886 |               | 0 5. 267649 | 0         | 1         | NA        |
| BX469885. 1         | 4. 941185 | -5. 713747554 | 1. 597194   | -3. 57737 | 0. 000347 | 0. 021388 |
| BX511112. 1         | 0. 997337 | -3. 101904659 | 2. 710491   | -1. 14441 | 0. 252455 | NA        |
| v2ra16              | 0. 583805 | 0 2. 760401   |             | 0         | 1         | NA        |
| mrp                 | 0 NA      |               | NA          | NA        | NA        | NA        |
| dicp1. 1            | 10. 07178 | 2. 997279762  | 1. 40235    | 2. 137327 | 0. 032571 | 0. 319477 |
| znf1048             | 7. 222487 | -0. 515534303 | 0. 711347   | -0. 72473 | 0. 468618 | 0. 866951 |
| tcnbb               | 4076. 988 | 0. 557838074  | 0. 417314   | 1. 336736 | 0. 181309 | 0. 657731 |
| si:ch211-284e13. 11 | 0. 060442 | 0 5. 267649   |             | 0         | 1         | NA        |
| znf1020             | 9. 366282 | -1. 203666301 | 0. 629779   | -1. 91125 | 0. 055972 | 0. 409108 |
| CR735121. 1         | 0. 245107 | -3. 029187758 | 5. 176306   | -0. 5852  | 0. 558411 | NA        |
| ccs                 | 50. 24241 | 0. 84674771   | 0. 481942   | 1. 756948 | 0. 078927 | 0. 475183 |
| CR396590. 1         | 0 NA      |               | NA          | NA        | NA        | NA        |
| CT027611. 1         | 0. 742148 | 4. 392704439  | 2. 813184   | 1. 561471 | 0. 118413 | NA        |
| CR381686. 2         | 1. 609494 | -0. 742697281 | 2. 563699   | -0. 2897  | 0. 772048 | NA        |
| BX530407. 1         | 0 NA      |               | NA          | NA        | NA        | NA        |
| BX294129. 1         | 0. 258471 | -0. 868123757 | 5. 267649   | -0. 1648  | 0. 869099 | NA        |
| si:ch211-139a5. 1   | 35. 83254 | 0. 055788749  | 0. 272178   | 0. 204972 | 0. 837594 | 0. 97621  |
| CR855277. 1         | 1. 662263 | -2. 387454763 | 1. 703284   | -1. 40168 | 0. 161012 | NA        |
| CR513782. 1         | 0. 23529  | -0. 868124374 | 4. 979613   | -0. 17434 | 0. 861602 | NA        |
| si:dkey-256e7. 8    | 3. 682504 | 1. 8893193    | 1. 030255   | 1. 833836 | 0. 066678 | 0. 441033 |
| ftr10               | 0. 229766 | -1. 769373768 | 5. 234318   | -0. 33803 | 0. 735338 | NA        |
| nlerc8              | 1. 885106 | -5. 229656611 | 3. 999943   | -1. 30743 | 0. 191066 | NA        |
| zgc:173545          | 0. 129927 | 0 5. 267649   |             | 0         | 1         | NA        |
| si:dkey-20i20. 9    | 7. 826377 | 0. 972738453  | 0. 613101   | 1. 586588 | 0. 112606 | 0. 549758 |
| si:dkey-4c23. 3     | 1. 431344 | -0. 519278244 | 1. 824168   | -0. 28467 | 0. 7759   | NA        |
| si:dkey-239h2. 3    | 668. 7399 | -0. 372374616 | 0. 308578   | -1. 20674 | 0. 227531 | 0. 70878  |
| BX649633. 1         | 0 NA      |               | NA          | NA        | NA        | NA        |
| si:ch211-156j16. 1  | 1371. 554 | 0. 038529977  | 0. 148968   | 0. 258647 | 0. 795908 | 0. 966247 |
| CR925731. 1         | 12. 34681 | -1. 163754425 | 0. 649626   | -1. 79142 | 0. 073225 | 0. 460541 |
| si:dkey-70p6. 1     | 154. 1074 | 0. 306454467  | 0. 236554   | 1. 295496 | 0. 195149 | 0. 67483  |
| CR391910. 1         | 0. 358818 | 0 4. 446814   |             | 0         | 1         | NA        |
| AL935153. 1         | 11. 50132 | -3. 624718362 | 2. 205965   | -1. 64314 | 0. 100353 | 0. 524753 |

|                   |          |              |          |          |          |          |
|-------------------|----------|--------------|----------|----------|----------|----------|
| si:dkey-22f5.9    | 25.27464 | -0.321044135 | 0.796446 | -0.4031  | 0.686878 | 0.93875  |
| si:dkey-225k4.1   | 30.26746 | -0.134277728 | 0.390699 | -0.34369 | 0.731083 | 0.950056 |
| gstk4             | 3.048865 | -1.877321888 | 1.495143 | -1.25561 | 0.209256 | 0.691286 |
| BX649502.1        | 0 NA     | NA           | NA       | NA       | NA       | NA       |
| BX927365.1        | 0.475406 | -0.868146279 | 4.183999 | -0.20749 | 0.835626 | NA       |
| si:dkey-90123.1   | 6.810408 | -0.081196705 | 0.724173 | -0.11212 | 0.910726 | 0.992208 |
| tbx5b             | 8.731983 | 0.445654533  | 0.590258 | 0.755016 | 0.450239 | 0.857151 |
| si:dkey-112g5.13  | 0.046941 | 0            | 5.267649 | 0        | 1        | NA       |
| BX511123.2        | 2.047469 | -0.448562164 | 1.387041 | -0.3234  | 0.746396 | NA       |
| si:dkey-117n7.4   | 19.68851 | -0.338052642 | 0.452289 | -0.74743 | 0.454806 | 0.859845 |
| BX005174.1        | 1.434578 | 0.516140283  | 1.530124 | 0.337319 | 0.735876 | NA       |
| CT583708.1        | 4.736109 | -2.330295019 | 1.145329 | -2.03461 | 0.04189  | 0.35789  |
| atn1              | 530.014  | 0.123160955  | 0.13528  | 0.910412 | 0.362605 | 0.81253  |
| si:ch211-15j1.3   | 2.39582  | 0            | 2.225662 | 0        | 1        | 1        |
| si:ch211-117n7.6  | 52.68736 | -0.289246017 | 0.376139 | -0.76899 | 0.441901 | 0.853308 |
| CT997819.1        | 0.623252 | 2.00003102   | 2.975284 | 0.672215 | 0.501447 | NA       |
| znf1165           | 35.19885 | -0.126206633 | 0.368622 | -0.34237 | 0.732069 | 0.950617 |
| hcest             | 9.797237 | -1.137612355 | 0.651013 | -1.74745 | 0.08056  | 0.479386 |
| pimr49            | 0.14264  | 0            | 5.267649 | 0        | 1        | NA       |
| si:dkey-147f3.4   | 87.38102 | 0.680151677  | 0.255043 | 2.666813 | 0.007657 | 0.147606 |
| AL954134.1        | 1.190803 | -0.868145468 | 2.217455 | -0.39151 | 0.695424 | NA       |
| znf1044           | 5.968625 | 0.239722075  | 0.812733 | 0.294958 | 0.768026 | 0.960296 |
| BX649639.1        | 16.31144 | -1.765293163 | 1.606451 | -1.09888 | 0.271821 | 0.748006 |
| BX899181.1        | 4.963485 | 0.617808456  | 0.762316 | 0.810437 | 0.417689 | 0.841149 |
| CR392002.1        | 4.583935 | -0.510789889 | 1.14528  | -0.446   | 0.6556   | 0.929606 |
| BX294006.1        | 0.282251 | -0.868127258 | 4.045521 | -0.21459 | 0.830087 | NA       |
| CR318650.1        | 0 NA     | NA           | NA       | NA       | NA       | NA       |
| si:dkey-4c15.8    | 10.9325  | 0.101562132  | 0.543077 | 0.187012 | 0.851651 | 0.978548 |
| BX927234.1        | 0.137262 | 0            | 5.267649 | 0        | 1        | NA       |
| si:ch211-125e6.12 | 1.09666  | -0.25873759  | 5.037776 | -0.05136 | 0.959039 | NA       |
| cyp2x12           | 39.3956  | 1.428879266  | 1.306298 | 1.093839 | 0.274026 | 0.749284 |
| si:dkey-112g5.11  | 0.867377 | -2.310711983 | 2.183146 | -1.05843 | 0.289858 | NA       |
| CR788254.1        | 0.04222  | 0            | 5.267649 | 0        | 1        | NA       |
| BX294661.1        | 0.175683 | -0.868109138 | 5.267649 | -0.1648  | 0.869101 | NA       |
| CR749763.1        | 0 NA     | NA           | NA       | NA       | NA       | NA       |
| si:ch211-133n4.6  | 354.938  | 0.641630373  | 0.366523 | 1.750585 | 0.080017 | 0.478179 |
| BX571955.1        | 0 NA     | NA           | NA       | NA       | NA       | NA       |
| si:ch211-214p13.8 | 1.002815 | 1.055430458  | 2.253052 | 0.468445 | 0.639467 | NA       |
| CU633823.1        | 0.137802 | 1.055383603  | 5.267649 | 0.200352 | 0.841205 | NA       |
| BX511093.1        | 0 NA     | NA           | NA       | NA       | NA       | NA       |
| CU639436.1        | 0 NA     | NA           | NA       | NA       | NA       | NA       |
| tomm40            | 985.3261 | 0.074139898  | 0.147029 | 0.504254 | 0.614083 | 0.915998 |
| EIF4ala           | 6329.946 | 0.709009596  | 0.189544 | 3.740597 | 0.000184 | 0.014175 |
| BX571701.1        | 0.087179 | 0            | 5.267649 | 0        | 1        | NA       |
| si:ch211-235f12.2 | 0 NA     | NA           | NA       | NA       | NA       | NA       |
| BX470185.1        | 34.34079 | -0.490298704 | 0.30903  | -1.58657 | 0.112609 | 0.549758 |
| si:ch211-229n2.6  | 0.045161 | 0            | 5.267649 | 0        | 1        | NA       |
| si:dkey-20d21.12  | 134.9664 | 0.176952324  | 0.193795 | 0.913091 | 0.361195 | 0.81142  |
| cox14             | 369.8875 | 0.203825624  | 0.183703 | 1.109541 | 0.267197 | 0.743418 |
| CU468041.1        | 0 NA     | NA           | NA       | NA       | NA       | NA       |
| vtg5              | 0.409253 | 0            | 4.275376 | 0        | 1        | NA       |
| CR925709.1        | 13.79093 | 0.080288412  | 0.486612 | 0.164995 | 0.868948 | 0.982801 |
| AL954694.1        | 2.223755 | -0.332919055 | 1.249698 | -0.2664  | 0.789931 | 0.964214 |
| si:dkey-84o3.7    | 0.40223  | 1.055396228  | 3.738238 | 0.282324 | 0.777695 | NA       |

|                    |          |              |            |          |          |          |
|--------------------|----------|--------------|------------|----------|----------|----------|
| rad54b             | 67.08791 | 0.039868318  | 0.27929    | 0.142749 | 0.886488 | 0.987533 |
| BX649502.2         | 0.073968 |              | 0 5.267649 |          | 0        | 1 NA     |
| cenpw              | 51.40417 | 0.141442554  | 0.306767   | 0.461075 | 0.644745 | 0.926639 |
| si:dkey-4i23.5     | 22.13172 | -0.315766219 | 1.388393   | -0.22743 | 0.820087 | 0.971788 |
| si:dkey-247i3.6    | 6.707233 | -0.14562755  | 0.834235   | -0.17456 | 0.861422 | 0.9805   |
| si:ch211-231i17.3  | 0 NA     |              | NA         | NA       | NA       | NA       |
| si:dkeyp-100a1.6   | 29.77227 | -0.273322432 | 0.32123    | -0.85086 | 0.394847 | 0.828825 |
| BX663503.1         | 102.4609 | -0.320968346 | 0.337219   | -0.95181 | 0.341193 | 0.796037 |
| ank1a              | 770.1198 | 0.285263595  | 0.160394   | 1.778513 | 0.07532  | 0.465238 |
| CR847899.1         | 0 NA     |              | NA         | NA       | NA       | NA       |
| FP085398.2         | 23.72221 | -0.980410329 | 0.390598   | -2.51002 | 0.012072 | 0.190742 |
| BX649522.1         | 11.25733 | -0.297635648 | 0.549655   | -0.5415  | 0.588166 | 0.907912 |
| si:dkey-4c15.9     | 7.630831 | -0.28050891  | 0.612385   | -0.45806 | 0.646909 | 0.926728 |
| tex264a            | 297.8325 | 0.18566583   | 0.163245   | 1.137346 | 0.255394 | 0.733542 |
| apoc2              | 8761.025 | -0.028247605 | 0.223409   | -0.12644 | 0.899384 | 0.99045  |
| cbx3b              | 692.9572 | 0.000220161  | 0.13786    | 0.001597 | 0.998726 | 1        |
| CR788249.1         | 1.33189  | -3.821025121 | 5.158606   | -0.74071 | 0.45887  | NA       |
| ferd3l             | 0.354213 | 0.148986837  | 3.687855   | 0.040399 | 0.967775 | NA       |
| si:dkey-261e22.4   | 16.57857 | 0.825724513  | 0.568251   | 1.453098 | 0.146197 | 0.605672 |
| mhclzaa            | 1.901861 | -1.730102803 | 2.314081   | -0.74764 | 0.454676 | NA       |
| si:dkey-147f3.8    | 102.1487 | -0.309331455 | 0.207457   | -1.49106 | 0.135946 | 0.591131 |
| si:ch211-272h9.5   | 2.422131 | -0.346283708 | 1.502486   | -0.23047 | 0.817724 | 0.971441 |
| si:dkey-250k15.4   | 7.730411 | -0.214088762 | 0.660221   | -0.32427 | 0.745735 | 0.955074 |
| apoc1              | 23012.59 | -0.162494698 | 0.263137   | -0.61753 | 0.536886 | 0.892421 |
| si:dkey-96n2.1     | 0 NA     |              | NA         | NA       | NA       | NA       |
| si:ch211-59d15.4   | 8.598003 | 0.159129907  | 0.764494   | 0.208151 | 0.835111 | 0.976007 |
| BX321875.1         | 0.850522 | -0.797673173 | 2.112677   | -0.37757 | 0.705754 | NA       |
| BX908388.1         | 0 NA     |              | NA         | NA       | NA       | NA       |
| BX511187.1         | 0.660532 | 2.446295201  | 3.237946   | 0.755508 | 0.449944 | NA       |
| si:dkey-40m6.11    | 0 NA     |              | NA         | NA       | NA       | NA       |
| im:7140055         | 159.6227 | 0.045844819  | 0.159828   | 0.286838 | 0.774236 | 0.960695 |
| BX957292.1         | 0.274719 | 1.055346338  | 5.267649   | 0.200345 | 0.841211 | NA       |
| CR318588.1         | 100.4579 | 0.637513154  | 0.63932    | 0.997175 | 0.31868  | 0.779923 |
| L0018289.1         | 1.067582 |              | 0 2.627934 |          | 0        | 1 NA     |
| si:ch211-250c4.4   | 287.5118 | 0.173504418  | 0.124493   | 1.393692 | 0.163411 | 0.631353 |
| CHST12 (1 of many) | 5.516315 | -2.32191891  | 1.812973   | -1.28072 | 0.20029  | 0.680711 |
| si:dkey-112g5.16   | 1.599496 | 1.332031738  | 1.442016   | 0.923729 | 0.355628 | NA       |
| ms4a17a.5          | 30.60607 | 0.386753022  | 0.539673   | 0.716644 | 0.473594 | 0.869146 |
| BX511089.1         | 0 NA     |              | NA         | NA       | NA       | NA       |
| CR932978.1         | 0.095482 | 1.055383603  | 5.267649   | 0.200352 | 0.841205 | NA       |
| AL929092.1         | 1.027072 | 2.667596542  | 5.195716   | 0.513422 | 0.607656 | NA       |
| or103-3            | 0 NA     |              | NA         | NA       | NA       | NA       |
| si:ch211-271e10.3  | 0.662005 | 0.637898046  | 2.585106   | 0.246759 | 0.805095 | NA       |
| si:dkeyp-13a3.10   | 121.0538 | -0.679186189 | 0.234463   | -2.89677 | 0.00377  | 0.102406 |
| CT573163.1         | 0.046941 |              | 0 5.267649 |          | 0        | 1 NA     |
| si:dkey-27p18.3    | 28.0903  | 0.222671277  | 0.404145   | 0.550968 | 0.581655 | 0.905618 |
| F0904898.5         | 0.324815 | -0.86813434  | 4.571789   | -0.18989 | 0.849396 | NA       |
| BX571825.6         | 0.050723 | -0.86807634  | 5.267649   | -0.16479 | 0.869106 | NA       |
| vtgl               | 4.738558 | 0.975748205  | 0.880968   | 1.107587 | 0.26804  | 0.744423 |
| or111-9            | 0 NA     |              | NA         | NA       | NA       | NA       |
| si:ch211-243a20.3  | 245.0999 | -0.889081656 | 0.204081   | -4.3565  | 1.32E-05 | 0.002278 |
| znf1009            | 30.69118 | -0.003509721 | 0.389471   | -0.00901 | 0.99281  | 1        |
| si:dkey-26i13.7    | 0.227407 | 1.921556829  | 5.236909   | 0.366926 | 0.713674 | NA       |
| BX005065.1         | 48.25666 | -1.818944372 | 0.451104   | -4.03221 | 5.53E-05 | 0.006008 |

|                   |          |              |          |          |          |          |
|-------------------|----------|--------------|----------|----------|----------|----------|
| BX000447.1        | 60.22029 | 0.244562502  | 0.314034 | 0.778777 | 0.436111 | 0.850763 |
| si:dkey-20i20.3   | 9.619877 | 0.209434179  | 0.587464 | 0.356506 | 0.721462 | 0.947343 |
| BX548061.1        | 0.106927 | 0            | 5.267649 | 0        | 1        | NA       |
| irgf2             | 0.332701 | -0.868129238 | 3.402075 | -0.25518 | 0.798587 | NA       |
| si:dkey-103k4.1   | 4.556054 | 0.99940055   | 1.736869 | 0.575404 | 0.565018 | 0.901538 |
| CR769769.1        | 7.553476 | -1.334265936 | 0.803979 | -1.65958 | 0.096999 | 0.519526 |
| si:dkey-102f14.7  | 1.266142 | 0            | 2.757032 | 0        | 1        | NA       |
| BX510992.1        | 11.02655 | -0.060768457 | 0.582132 | -0.10439 | 0.91686  | 0.99353  |
| si:dkey-211g8.5   | 0.207254 | -2.389188515 | 5.199609 | -0.45949 | 0.64588  | NA       |
| si:ch73-290k24.6  | 40.56832 | -0.318990677 | 0.328805 | -0.97015 | 0.331971 | 0.789602 |
| si:ch211-220m6.4  | 0.356385 | 0            | 5.1926   | 0        | 1        | NA       |
| CR382296.1        | 1.374722 | 1.574316962  | 1.821508 | 0.864293 | 0.387427 | NA       |
| si:ch73-27e22.2   | 0.315207 | 1.854115399  | 5.241768 | 0.353719 | 0.723549 | NA       |
| CR788230.1        | 0.124582 | 1.055383603  | 5.267649 | 0.200352 | 0.841205 | NA       |
| si:dkeyp-41f9.4   | 76.27478 | -0.230875313 | 0.336398 | -0.68632 | 0.492513 | 0.876385 |
| BX511161.1        | 44.31978 | 0.174628489  | 0.442453 | 0.394682 | 0.693077 | 0.94055  |
| si:dkey-3k20.1    | 4.875211 | -0.636938245 | 1.00251  | -0.63534 | 0.525204 | 0.888928 |
| si:dkey-234d14.2  | 0.328627 | -2.707785434 | 5.186734 | -0.52206 | 0.601629 | NA       |
| BX663611.1        | 1.082632 | 1.952511727  | 2.21814  | 0.880247 | 0.378725 | NA       |
| BX548015.1        | 0        | NA           | NA       | NA       | NA       | NA       |
| AL929266.1        | 2.274997 | 0.542003077  | 1.365312 | 0.396981 | 0.691381 | 0.940173 |
| flnb              | 305.2468 | -0.12553349  | 0.221906 | -0.56571 | 0.571593 | 0.903152 |
| BX000991.1        | 0.04222  | 0            | 5.267649 | 0        | 1        | NA       |
| cx134b.11         | 234.3922 | -0.098683161 | 0.336996 | -0.29283 | 0.769651 | 0.960484 |
| cenpv             | 64.44459 | 0.227967109  | 0.354744 | 0.642625 | 0.520468 | 0.887165 |
| CU861651.1        | 0.408873 | -1.717626595 | 3.261805 | -0.52659 | 0.59848  | NA       |
| CR392026.1        | 0.452045 | -1.335348704 | 3.633693 | -0.36749 | 0.713253 | NA       |
| AL954142.1        | 5.78179  | 0.083515533  | 1.349186 | 0.061901 | 0.950642 | 0.99801  |
| si:dkeyp-26a9.2   | 157.5156 | 0.797438343  | 0.186276 | 4.280958 | 1.86E-05 | 0.002746 |
| si:dkey-222h21.6  | 0.586059 | 1.05542239   | 2.791347 | 0.378105 | 0.705353 | NA       |
| BX537166.1        | 6.006481 | -1.487047579 | 1.318726 | -1.12764 | 0.259472 | 0.736167 |
| CT027772.1        | 0.61031  | 0            | 2.68068  | 0        | 1        | NA       |
| CT574549.1        | 0.137988 | 0            | 5.267649 | 0        | 1        | NA       |
| si:dkey-11o15.8   | 1.78831  | 0            | 4.994699 | 0        | 1        | NA       |
| si:dkey-59l11.7   | 0        | NA           | NA       | NA       | NA       | NA       |
| poldip2           | 890.1126 | -0.009964334 | 0.124639 | -0.07995 | 0.93628  | 0.997032 |
| CR456642.1        | 4.240344 | 1.742646055  | 1.449089 | 1.202581 | 0.229139 | 0.711257 |
| si:dkey-65l23.2   | 0        | NA           | NA       | NA       | NA       | NA       |
| BX927288.1        | 3.554547 | 0.131422569  | 1.234819 | 0.106431 | 0.915241 | 0.993068 |
| si:ch211-199g17.2 | 44.81318 | -0.884848613 | 0.274346 | -3.22531 | 0.001258 | 0.051788 |
| si:dkey-65b12.10  | 0.973367 | 1.634639115  | 2.377855 | 0.687443 | 0.491804 | NA       |
| BX004981.1        | 8.900126 | -0.082008544 | 0.577781 | -0.14194 | 0.88713  | 0.987739 |
| pimr152           | 0        | NA           | NA       | NA       | NA       | NA       |
| BX323074.1        | 3.380418 | 1.231192496  | 1.178638 | 1.044589 | 0.296213 | 0.764246 |
| CT583646.1        | 0        | NA           | NA       | NA       | NA       | NA       |
| si:ch211-152f2.1  | 0        | NA           | NA       | NA       | NA       | NA       |
| CR383669.1        | 0.188219 | 0            | 5.267649 | 0        | 1        | NA       |
| si:dkeyp-2e4.3    | 24.93863 | -0.450845278 | 0.36573  | -1.23273 | 0.217678 | 0.698365 |
| pimr136           | 1.482074 | -3.729708813 | 1.789429 | -2.0843  | 0.037133 | NA       |
| CR383672.1        | 0.279436 | -0.868125659 | 4.061755 | -0.21373 | 0.830756 | NA       |
| BX649499.1        | 0.534552 | -0.868144478 | 3.189021 | -0.27223 | 0.785446 | NA       |
| CU207311.1        | 0        | NA           | NA       | NA       | NA       | NA       |
| CU467861.1        | 236.6671 | -0.896711552 | 0.278148 | -3.22386 | 0.001265 | 0.051937 |
| pimr61            | 0        | NA           | NA       | NA       | NA       | NA       |

|                   |          |              |            |          |          |          |
|-------------------|----------|--------------|------------|----------|----------|----------|
| AL590150.1        | 18.53543 | -0.269308479 | 0.415274   | -0.64851 | 0.516656 | 0.886933 |
| si:dkey-57a22.13  | 0.165707 |              | 0 5.267649 | 0        | 1 NA     |          |
| nfil3-4           | 0.384755 | 1.858590153  | 4.260742   | 0.436213 | 0.662682 | NA       |
| si:dkey-161j23.6  | 111.5875 | -0.762697889 | 0.243302   | -3.13478 | 0.00172  | 0.064499 |
| CT027702.1        | 7.08261  | 1.122397511  | 0.62162    | 1.8056   | 0.070981 | 0.454693 |
| si:dkey-222h21.12 | 0.147936 |              | 0 5.267649 | 0        | 1 NA     |          |
| BX649478.1        | 17.32031 | -4.337619285 | 1.553848   | -2.79153 | 0.005246 | 0.121252 |
| jac4              | 0.383595 | 1.055380736  | 4.28659    | 0.246205 | 0.805523 | NA       |
| si:ch211-284e13.6 | 545.6739 | -0.419559725 | 0.29409    | -1.42664 | 0.153684 | 0.61823  |
| BX469930.1        | 49.24409 | -3.118413541 | 1.362108   | -2.2894  | NA       | NA       |
| si:dkeyp-113d7.10 | 78.47373 | 0.142300612  | 0.245511   | 0.57961  | 0.562177 | 0.900715 |
| si:ch211-51h9.6   | 138.0029 | 0.047397131  | 0.180622   | 0.262411 | 0.793005 | 0.965312 |
| si:dkey-79f11.7   | 11.14733 | -2.97527645  | 1.037562   | -2.86756 | 0.004136 | 0.106542 |
| hsp70.2           | 287.1792 | -0.027431725 | 0.529174   | -0.05184 | 0.958657 | 0.999109 |
| si:ch211-218c6.8  | 244.5188 | 0.162707552  | 0.190346   | 0.854798 | 0.392663 | 0.827902 |
| si:dkeyp-77c8.3   | 8.436658 | 0.36970494   | 0.659364   | 0.560699 | 0.575003 | 0.904516 |
| BX511023.1        | 24.95758 | -0.327244107 | 0.459775   | -0.71175 | 0.476621 | 0.869292 |
| BX005340.1        |          | 0 NA         | NA         | NA       | NA       | NA       |
| dlgap2b           | 3.782453 | 0.66173593   | 1.244729   | 0.531631 | 0.594982 | 0.910869 |
| BX571809.1        | 4.839328 | -0.162889121 | 1.007947   | -0.1616  | 0.871617 | 0.983365 |
| si:dkeyp-51b9.3   | 9.722687 | -5.387114731 | 1.944462   | -2.77049 | 0.005597 | 0.126154 |
| si:dkey-33c12.14  | 0.092844 | 1.055383603  | 5.267649   | 0.200352 | 0.841205 | NA       |
| zgc:153759        | 1.070236 | -0.841577088 | 2.291485   | -0.36726 | 0.713423 | NA       |
| snorc             | 194.7494 | -0.261515535 | 0.336469   | -0.77723 | 0.43702  | 0.851125 |
| si:dkey-28d5.3    | 0.063619 |              | 0 5.267649 | 0        | 1 NA     |          |
| zgc:193742        | 166.7907 | 0.143309846  | 0.199816   | 0.717208 | 0.473246 | 0.869064 |
| CU207217.1        | 0.683999 | -2.303256474 | 2.681699   | -0.85888 | 0.390407 | NA       |
| si:dkey-6f10.4    |          | 0 NA         | NA         | NA       | NA       | NA       |
| dcun1d4           | 487.0756 | 0.005948242  | 0.130108   | 0.045718 | 0.963535 | 0.999842 |
| BX120005.2        | 0.093881 |              | 0 5.267649 | 0        | 1 NA     |          |
| BX936320.1        | 22.94765 | -0.135573721 | 0.462781   | -0.29295 | 0.769557 | 0.960484 |
| taar20d1          |          | 0 NA         | NA         | NA       | NA       | NA       |
| BX901930.1        | 0.053506 | -0.86807634  | 5.267649   | -0.16479 | 0.869106 | NA       |
| CR396590.2        | 0.04222  |              | 0 5.267649 | 0        | 1 NA     |          |
| BX569787.1        | 71.57311 | -0.122783039 | 0.235662   | -0.52101 | 0.602358 | 0.914001 |
| si:dkey-79p17.3   | 6.415734 | 0.215646189  | 0.681758   | 0.316309 | 0.751768 | 0.955391 |
| or115-8           | 0.094031 | -0.868089684 | 5.267649   | -0.1648  | 0.869104 | NA       |
| zmp:0000001316    | 88.06745 | -0.467722001 | 0.276631   | -1.69078 | 0.090879 | 0.505206 |
| CU467861.2        | 3.690649 | -0.755411245 | 1.044638   | -0.72313 | 0.469599 | 0.867224 |
| CR762493.1        | 0.100142 | 1.055383603  | 5.267649   | 0.200352 | 0.841205 | NA       |
| FP103004.1        | 30.41318 | -0.46698261  | 0.415561   | -1.12374 | 0.261123 | 0.738733 |
| vtg7              | 5.987363 | -4.372070252 | 1.642568   | -2.66173 | 0.007774 | 0.148987 |
| si:ch1073-394i4.1 | 0.189841 |              | 0 5.267649 | 0        | 1 NA     |          |
| CR854838.1        | 0.65176  | -0.926326792 | 2.420502   | -0.3827  | 0.701942 | NA       |
| cxc111.5          | 0.662214 | -1.786032032 | 2.88988    | -0.61803 | 0.536556 | NA       |
| BX677668.2        | 4.626338 | 1.742476822  | 1.037863   | 1.678908 | 0.09317  | 0.510759 |
| si:dkey-24c2.7    | 3.152719 | -0.853248953 | 1.583124   | -0.53897 | 0.589911 | 0.908732 |
| BX649599.1        |          | 0 NA         | NA         | NA       | NA       | NA       |
| CU041345.1        |          | 0 NA         | NA         | NA       | NA       | NA       |
| BX537137.1        | 1.668413 | -0.652077922 | 1.65101    | -0.39496 | 0.692875 | NA       |
| BX649502.3        |          | 0 NA         | NA         | NA       | NA       | NA       |
| BX005364.1        |          | 0 NA         | NA         | NA       | NA       | NA       |
| BX548032.1        | 1.454745 | 1.538019245  | 1.791891   | 0.858322 | 0.390715 | NA       |
| BX088710.1        |          | 0 NA         | NA         | NA       | NA       | NA       |



|                    |          |              |          |          |          |          |
|--------------------|----------|--------------|----------|----------|----------|----------|
| zgc:153352         | 38.32965 | 0.187020225  | 0.329023 | 0.568411 | 0.569756 | 0.902322 |
| BX571825.7         | 0 NA     | NA           | NA       | NA       | NA       | NA       |
| CR762431.1         | 36.00618 | -0.070432539 | 0.373985 | -0.18833 | 0.850618 | 0.978251 |
| si:dkey-95p16.1    | 12.50827 | 0.630954362  | 0.662088 | 0.952977 | 0.340602 | 0.795538 |
| BX469925.2         | 0.053262 | 1.055396947  | 5.267649 | 0.200354 | 0.841203 | NA       |
| si:ch211-246e12.3  | 10.44989 | 0.272372491  | 0.555845 | 0.490015 | 0.624123 | 0.919498 |
| BX284635.1         | 27.57142 | 0.480667326  | 0.351356 | 1.368034 | 0.171301 | 0.64335  |
| BX548073.2         | 0.145978 | 0            | 5.267649 | 0        | 1        | NA       |
| si:dkey-282h22.5   | 3.359083 | 1.055430727  | 1.82123  | 0.579515 | 0.562241 | 0.900715 |
| si:dkey-9i23.5     | 0.531455 | 0            | 3.118622 | 0        | 1        | NA       |
| kifl               | 7.690609 | -1.423731241 | 0.827378 | -1.72077 | 0.085292 | 0.490552 |
| rhbdd2             | 62.67863 | -0.111870159 | 0.235848 | -0.47433 | 0.635264 | 0.924272 |
| si:dkeyp-20g2.1    | 40.13441 | 0.042445517  | 0.289928 | 0.1464   | 0.883606 | 0.987014 |
| si:ch73-46j18.5    | 4408.003 | 0.30207574   | 0.132774 | 2.275105 | 0.0229   | 0.267028 |
| fnrc7rs1           | 25.11196 | 0.090226993  | 0.567338 | 0.159036 | 0.873641 | 0.983828 |
| thbd               | 44.8438  | 0.54570057   | 0.330029 | 1.653491 | 0.098231 | 0.521076 |
| si:dkey-7j22.1     | 9.663296 | 1.024527966  | 0.60064  | 1.705727 | 0.088059 | 0.498295 |
| AL953896.1         | 2.844991 | 0.093650907  | 1.866575 | 0.050173 | 0.959985 | 0.999164 |
| apopt1             | 198.9604 | -0.205965851 | 0.182557 | -1.12823 | 0.259223 | 0.736127 |
| si:rp71-1f1.4      | 3.26069  | 0.761056277  | 1.078891 | 0.705406 | 0.480558 | 0.870179 |
| BX284666.1         | 10.73645 | 0.02964103   | 0.586946 | 0.0505   | 0.959724 | 0.999164 |
| sdhaf1             | 225.562  | 0.158263352  | 0.225348 | 0.702305 | 0.482489 | 0.871721 |
| vegfb              | 3.12944  | -1.112731084 | 0.976732 | -1.13924 | 0.254603 | 0.733441 |
| si:ch211-207c7.2   | 0.32794  | 0            | 4.545699 | 0        | 1        | NA       |
| si:dkeyp-110g5.4   | 77.51169 | -0.154482518 | 0.228191 | -0.67699 | 0.498413 | 0.879132 |
| iqcc               | 53.28519 | -0.448806543 | 0.336285 | -1.3346  | 0.182007 | 0.658775 |
| si:ch211-215m21.22 | 0 NA     | NA           | NA       | NA       | NA       | NA       |
| khyn               | 212.2987 | -0.327718059 | 0.206816 | -1.58459 | 0.113059 | 0.550449 |
| si:ch73-103b9.2    | 16.81421 | -0.091166791 | 0.465546 | -0.19583 | 0.844745 | 0.976791 |
| BX323457.1         | 0.481162 | 1.897515574  | 3.211011 | 0.59094  | 0.554561 | NA       |
| si:dkey-149i17.8   | 0 NA     | NA           | NA       | NA       | NA       | NA       |
| si:dkeyp-44a8.2    | 1387.197 | 0.37880853   | 0.12687  | 2.985795 | 0.002828 | 0.087379 |
| BX927275.1         | 0.046941 | 0            | 5.267649 | 0        | 1        | NA       |
| si:dkeyp-46h3.2    | 2.191153 | -0.772811841 | 1.277853 | -0.60477 | 0.545329 | NA       |
| si:ch211-183d21.1  | 176.4824 | 0.343952437  | 0.262145 | 1.312069 | 0.189497 | 0.669129 |
| si:dkey-222h21.1   | 1.382345 | -0.258506096 | 2.167766 | -0.11925 | 0.905077 | NA       |
| si:dkey-80c24.5    | 0.337093 | -0.826435836 | 3.389613 | -0.24381 | 0.807375 | NA       |
| si:ch73-34314.3    | 0 NA     | NA           | NA       | NA       | NA       | NA       |
| arid1b             | 500.139  | 0.04156501   | 0.131355 | 0.316432 | 0.751675 | 0.955365 |
| znf1013            | 63.30847 | -0.212094201 | 0.250383 | -0.84708 | 0.396952 | 0.830253 |
| si:ch73-376124.2   | 106.6948 | -0.013684095 | 0.227094 | -0.06026 | 0.951951 | 0.998032 |
| CR405715.1         | 3.373383 | -0.94092127  | 1.014316 | -0.92764 | 0.353594 | 0.804513 |
| CR376835.1         | 0.313985 | 1.055366024  | 4.598443 | 0.229505 | 0.818476 | NA       |
| si:dkey-9311.6     | 0.729411 | 0            | 2.764842 | 0        | 1        | NA       |
| pku300             | 0.277579 | 0            | 5.267649 | 0        | 1        | NA       |
| gpsmla             | 388.8887 | 0.208546675  | 0.173803 | 1.199902 | 0.230178 | 0.712045 |
| si:dkey-21e2.11    | 0 NA     | NA           | NA       | NA       | NA       | NA       |
| si:dkey-250k15.10  | 8.971901 | -0.586351065 | 1.359792 | -0.43121 | 0.666318 | 0.932664 |
| jac1               | 47.85598 | -0.462788589 | 0.887144 | -0.52166 | 0.601906 | 0.914001 |
| nmt2               | 72.86709 | 0.088958858  | 0.329217 | 0.270214 | 0.786996 | 0.963065 |
| si:dkey-47k20.1    | 0.467824 | 1.868581693  | 3.212815 | 0.581603 | 0.560834 | NA       |
| si:dkey-88116.4    | 0 NA     | NA           | NA       | NA       | NA       | NA       |
| BX663522.1         | 0 NA     | NA           | NA       | NA       | NA       | NA       |
| BX005153.1         | 0.605498 | 2.557252711  | 2.732073 | 0.936012 | 0.349267 | NA       |

|                    |          |              |            |          |          |          |
|--------------------|----------|--------------|------------|----------|----------|----------|
| si:dkey-21e2.8     | 136.0374 | -0.896226823 | 1.075966   | -0.83295 | 0.404872 | 0.834284 |
| si:ch211-13315.4   | 10.12288 | -1.785633354 | 1.57671    | -1.13251 | 0.257422 | 0.735125 |
| si:dkey-242h9.5    | 0.497904 |              | 0 4.614194 | 0        | 1        | NA       |
| BX571825.8         | 0 NA     |              | NA         | NA       | NA       | NA       |
| BX927394.1         | 0.469428 | -0.868134558 | 3.151305   | -0.27548 | 0.782944 | NA       |
| CR855328.1         | 0 NA     |              | NA         | NA       | NA       | NA       |
| BX649502.4         | 0 NA     |              | NA         | NA       | NA       | NA       |
| BX005068.1         | 0.404943 | -2.363386471 | 3.201586   | -0.73819 | 0.460397 | NA       |
| pdapla             | 1608.38  | -0.100253092 | 0.122519   | -0.81827 | 0.413205 | 0.838317 |
| si:dkey-85a20.4    | 0.603877 |              | 0 3.080998 | 0        | 1        | NA       |
| si:dkey-56e3.2     | 10.43962 | -1.517988164 | 0.762429   | -1.99099 | 0.046482 | 0.376263 |
| fnrc7rs2           | 8.937525 | -1.777463323 | 0.987857   | -1.79931 | 0.071969 | 0.4564   |
| slc25a5            | 83808.85 | -0.225155495 | 0.1198     | -1.87943 | 0.060186 | 0.422294 |
| si:ch211-214j8.12  | 41.91958 | 0.106112014  | 0.320984   | 0.330584 | 0.740959 | 0.954103 |
| AL929315.1         | 0.677147 | 1.055424451  | 2.547493   | 0.414299 | 0.678655 | NA       |
| or123-1            | 0.957238 | 2.199115853  | 1.996418   | 1.101531 | 0.270666 | NA       |
| pimr201            | 0.862876 | 0.20849952   | 2.126209   | 0.098062 | 0.921883 | NA       |
| BX927385.1         | 0.824749 | -2.339723529 | 2.192451   | -1.06717 | 0.285894 | NA       |
| si:dkey-6111.4     | 80.04913 | -0.234182033 | 0.37016    | -0.63265 | 0.526961 | 0.889861 |
| BX571681.1         | 0.101446 | -1.755425691 | 5.23528    | -0.33531 | 0.737394 | NA       |
| CU394254.1         | 0 NA     |              | NA         | NA       | NA       | NA       |
| BX323586.1         | 0.43494  | 1.055345477  | 4.942951   | 0.213505 | 0.830933 | NA       |
| si:ch211-198d23.1  | 12.2312  | 0.330154945  | 0.844235   | 0.39107  | 0.695745 | 0.941558 |
| BX927388.1         | 0.873188 |              | 0 2.548011 | 0        | 1        | NA       |
| or125-6            | 0 NA     |              | NA         | NA       | NA       | NA       |
| si:ch211-222e20.4  | 71.23326 | 0.511461953  | 0.35161    | 1.454627 | 0.145772 | 0.60501  |
| si:ch211-95j8.3    | 0.467481 |              | 0 4.909862 | 0        | 1        | NA       |
| si:dkey-16p19.5    | 19.76124 | -0.205386965 | 0.477816   | -0.42985 | 0.667308 | 0.933049 |
| si:ch1073-385f13.3 | 19.0341  | -0.200406548 | 0.446855   | -0.44848 | 0.653805 | 0.929269 |
| BX957274.1         | 0.184352 | -0.868115637 | 5.267649   | -0.1648  | 0.8691   | NA       |
| CU861651.2         | 0.41891  |              | 0 4.25238  | 0        | 1        | NA       |
| pimr150            | 0 NA     |              | NA         | NA       | NA       | NA       |
| BX322660.1         | 0.184282 | -0.868114638 | 5.267649   | -0.1648  | 0.8691   | NA       |
| CR925763.1         | 0.618271 | -0.74994631  | 3.345044   | -0.2242  | 0.822605 | NA       |
| si:dkey-174k12.3   | 0.050723 | -0.86807634  | 5.267649   | -0.16479 | 0.869106 | NA       |
| si:dkeyp-44d3.1    | 3.016836 | -0.527019329 | 0.954291   | -0.55226 | 0.580768 | 0.905618 |
| BX005058.1         | 0.416155 | -0.868122166 | 5.267649   | -0.1648  | 0.869099 | NA       |
| si:dkey-256e7.5    | 15.49632 | 0.333705922  | 0.416227   | 0.80174  | 0.422703 | 0.843493 |
| BX546499.1         | 10.93425 | 0.481392168  | 0.543805   | 0.88523  | 0.376033 | 0.822258 |
| si:ch211-15j1.4    | 12.36797 | 1.625329227  | 0.812538   | 2.000312 | 0.045467 | 0.373435 |
| znf1003            | 22.66142 | -0.585811178 | 0.38257    | -1.53125 | 0.125707 | 0.573691 |
| CU855900.1         | 0 NA     |              | NA         | NA       | NA       | NA       |
| BX936298.1         | 0.043308 |              | 0 5.267649 | 0        | 1        | NA       |
| si:dkey-262g12.12  | 52.91291 | 0.474686852  | 0.282763   | 1.678745 | 0.093202 | 0.510759 |
| aupl               | 978.9266 | 0.121320137  | 0.138222   | 0.877723 | 0.380094 | 0.823607 |
| lamp1b             | 566.3426 | -0.264362373 | 0.112498   | -2.34992 | 0.018777 | 0.241964 |
| CR848741.1         | 0.632413 | -0.584708349 | 2.752289   | -0.21244 | 0.83176  | NA       |
| si:dkey-204f11.3   | 0.060442 |              | 0 5.267649 | 0        | 1        | NA       |
| BX322665.1         | 6.143505 | -0.680022354 | 0.935013   | -0.72729 | 0.46705  | 0.866065 |
| sptbn4b            | 39.98135 | -0.212273986 | 0.359835   | -0.58992 | 0.555244 | 0.898723 |
| zgc:174193         | 1.240812 | 2.22942841   | 1.706758   | 1.306236 | 0.191472 | NA       |
| zgc:174931         | 14.97049 | -0.466700293 | 0.514634   | -0.90686 | 0.364481 | 0.814648 |
| pimr29             | 0.069091 |              | 0 5.267649 | 0        | 1        | NA       |
| CR954294.1         | 0.14264  |              | 0 5.267649 | 0        | 1        | NA       |

|                   |          |              |            |          |          |          |   |
|-------------------|----------|--------------|------------|----------|----------|----------|---|
| CR812470.1        | 22.29133 | 2.233590851  | 0.82248    | 2.715678 | 0.006614 | 0.136957 |   |
| CR753844.1        | 0.178356 |              | 0 5.267649 |          | 0        | 1 NA     |   |
| EBF1 (1 of many)  | 0 NA     |              | NA         | NA       | NA       | NA       |   |
| AL935295.1        | 6.41619  | -0.673318249 | 0.679139   | -0.99143 | 0.321476 | 0.781986 |   |
| ptprua            | 347.2944 | 0.169704563  | 0.201162   | 0.843622 | 0.398881 | 0.831047 |   |
| BX649641.1        | 0 NA     |              | NA         | NA       | NA       | NA       |   |
| BX571701.2        | 0 NA     |              | NA         | NA       | NA       | NA       |   |
| BX323080.1        | 1.197882 | -2.78090866  | 1.993566   | -1.39494 | 0.163033 | NA       |   |
| ago1              | 64.49851 | 0.093309818  | 0.329385   | 0.283285 | 0.776959 | 0.961073 |   |
| CR381531.1        | 0.31275  |              | 0 4.562366 |          | 0        | 1 NA     |   |
| si:ch211-223p8.8  | 0.247453 | -0.864893651 | 5.23046    | -0.16536 | 0.868663 | NA       |   |
| si:dkey-57a22.11  | 80.76989 | 0.29356527   | 0.341417   | 0.859843 | 0.389876 | 0.827843 |   |
| qrfpr4            | 22.61159 | -0.445620498 | 0.430776   | -1.03446 | 0.300921 | 0.767035 |   |
| si:dkey-1h24.6    | 15.49204 | -0.562556253 | 0.648808   | -0.86706 | 0.385908 | 0.826939 |   |
| CR457445.1        | 14.62729 | -0.60515368  | 0.511521   | -1.18305 | 0.23679  | 0.718119 |   |
| ppp3rla           | 325.6867 | 0.365785944  | 0.127253   | 2.874475 | 0.004047 | 0.106027 |   |
| cyp27c1           | 107.4525 | 0.060471092  | 0.170696   | 0.354262 | 0.723143 | 0.947898 |   |
| dnaaf3            | 5.994115 | 1.728699809  | 0.925156   | 1.86855  | 0.061685 | 0.42588  |   |
| si:dkey-93m18.3   | 5.223612 | -0.183870284 | 0.929907   | -0.19773 | 0.843257 | 0.976791 |   |
| BX005156.1        | 0 NA     |              | NA         | NA       | NA       | NA       |   |
| si:ch211-271e10.2 | 2.343008 | -1.061056663 | 1.170031   | -0.90686 | 0.36448  | 0.814648 |   |
| tlr20.3           | 0.446466 | -0.868138808 | 3.245513   | -0.26749 | 0.789093 | NA       |   |
| pard3ba           | 110.7648 | 0.633280614  | 0.197574   | 3.205277 | 0.001349 | 0.054277 |   |
| BX248497.1        | 236.0339 | 0.526349159  | 0.142112   | 3.703751 | 0.000212 | 0.015576 |   |
| coa6              | 65.92199 | 0.463216875  | 0.304433   | 1.521574 | 0.128116 | 0.57717  |   |
| AL954134.2        | 0 NA     |              | NA         | NA       | NA       | NA       |   |
| si:dkey-58f10.12  | 19.69694 | -0.345508287 | 0.48936    | -0.70604 | 0.480162 | 0.870001 |   |
| AL845369.1        | 0.595712 | -0.609683177 | 3.071567   | -0.19849 | 0.84266  | NA       |   |
| BX649292.1        | 0 NA     |              | NA         | NA       | NA       | NA       |   |
| si:ch211-130h14.6 | 0.266973 | -0.307582766 | 5.162256   | -0.05958 | 0.952488 | NA       |   |
| CU682811.1        | 0.325523 | -2.31014535  | 4.43305    | -0.52112 | 0.602284 | NA       |   |
| pimr133           | 0.129045 | 1.055383603  | 5.267649   | 0.200352 | 0.841205 | NA       |   |
| tpt1              | 42835.32 | -0.477477263 | 0.139405   | -3.42512 | 0.000615 | 0.032141 |   |
| CT025775.1        | 0 NA     |              | NA         | NA       | NA       | NA       |   |
| cyp11a2           | 14.31736 | -0.021387283 | 0.579051   | -0.03694 | 0.970537 |          | 1 |
| pimr200           | 0.139879 | 1.055371994  | 5.267649   | 0.20035  | 0.841207 | NA       |   |
| si:dkeyp-20e4.8   | 0.70614  | -2.449589095 | 4.176418   | -0.58653 | 0.55752  | NA       |   |
| BX649384.2        | 2.000895 | -0.905338432 | 1.559031   | -0.58071 | 0.561439 | NA       |   |
| or124-1           | 0.829704 | -0.868137704 | 2.547655   | -0.34076 | 0.733285 | NA       |   |
| BX537280.1        | 0.413789 | -0.868129363 | 4.936118   | -0.17587 | 0.860394 | NA       |   |
| CU463109.1        | 0.22096  | -2.413182047 | 5.198538   | -0.4642  | 0.642502 | NA       |   |
| BX571681.2        | 0.043308 |              | 0 5.267649 |          | 0        | 1 NA     |   |
| si:dkey-31b16.7   | 0.151871 | 2.436401064  | 5.206324   | 0.46797  | 0.639806 | NA       |   |
| si:ch211-266a5.12 | 6.639372 | -1.019518451 | 1.112717   | -0.91624 | 0.35954  | 0.810644 |   |
| CR847503.1        | 24.73719 | 0.450247136  | 0.313956   | 1.43411  | 0.151541 | 0.615372 |   |
| VASH1             | 66.09781 | -0.21025165  | 0.262055   | -0.80232 | 0.422368 | 0.843493 |   |
| BX569790.1        | 2.448602 | -2.593118704 | 1.78123    | -1.4558  | 0.145447 | 0.604596 |   |
| gbgt112           | 11.11112 | 0.080864587  | 0.781361   | 0.103492 | 0.917573 | 0.993777 |   |
| AL954655.2        | 25.82377 | 0.830206912  | 1.104865   | 0.751411 | 0.452406 | 0.857994 |   |
| si:ch211-67f24.7  | 15.95291 | 0.664046984  | 0.52657    | 1.261079 | 0.20728  | 0.689456 |   |
| unc5da            | 155.395  | 0.388617326  | 0.304704   | 1.275391 | 0.202171 | 0.682294 |   |
| si:ch73-381f5.2   | 0 NA     |              | NA         | NA       | NA       | NA       |   |
| si:dkey-188i13.8  | 17.28622 | 0.98225561   | 0.605834   | 1.621328 | 0.104947 | 0.533388 |   |
| si:dkey-184p9.7   | 321.7907 | -0.05989768  | 0.228766   | -0.26183 | 0.793453 | 0.965366 |   |

|                    |          |              |            |          |          |          |   |
|--------------------|----------|--------------|------------|----------|----------|----------|---|
| si:dkey-266f7.4    | 0.891438 | -2.336797338 | 2.670581   | -0.87501 | 0.381566 | NA       |   |
| enam               | 266.8323 | -0.809376553 | 0.379062   | -2.13521 | 0.032744 | 0.320251 |   |
| mhcluka            | 1.257555 | -2.312224218 | 2.116121   | -1.09267 | 0.274538 | NA       |   |
| si:ch73-256j6.5    | 3.320245 | 1.524341776  | 1.830053   | 0.832949 | 0.404873 | 0.834284 |   |
| si:ch211-263k4.2   | 12.71114 | -0.003787444 | 0.452962   | -0.00836 | 0.993329 |          | 1 |
| BX510917.1         | 0.974758 | -1.490082465 | 1.814575   | -0.82117 | 0.411547 | NA       |   |
| si:ch211-57m13.7   | 0.092943 | -0.868089684 | 5.267649   | -0.1648  | 0.869104 | NA       |   |
| BX571825.9         |          | 0 NA         | NA         | NA       | NA       | NA       |   |
| ftr37              | 3.61458  | -0.425565333 | 0.930919   | -0.45715 | 0.647566 | 0.927091 |   |
| si:ch211-150o23.2  | 219.6142 | -0.659331574 | 0.181889   | -3.62491 | 0.000289 | 0.019027 |   |
| si:ch211-133n4.12  |          | 0 NA         | NA         | NA       | NA       | NA       |   |
| CR396590.3         |          | 0 NA         | NA         | NA       | NA       | NA       |   |
| BX248399.1         | 0.651172 |              | 0 3.3344   |          | 0        | 1 NA     |   |
| caiap              | 1.658795 | -0.12548959  | 1.551757   | -0.08087 | 0.935546 | NA       |   |
| si:dkey-61p9.9     | 67.9452  | 0.648639175  | 0.245385   | 2.64335  | 0.008209 | 0.153944 |   |
| si:dkey-5i3.1      |          | 0 NA         | NA         | NA       | NA       | NA       |   |
| si:dkey-57a22.14   | 0.060442 |              | 0 5.267649 |          | 0        | 1 NA     |   |
| znf1151            | 26.01483 | -0.005012047 | 0.336965   | -0.01487 | 0.988133 |          | 1 |
| si:dkeyp-68b7.7    | 32.34563 | 0.261916585  | 0.381308   | 0.68689  | 0.492152 | 0.87629  |   |
| si:ch211-253p18.2  | 25.85895 | -2.144176259 | 0.408268   | -5.25189 | 1.51E-07 | 6.51E-05 |   |
| BX530064.1         |          | 0 NA         | NA         | NA       | NA       | NA       |   |
| CR769772.1         | 0.217647 |              | 0 5.267649 |          | 0        | 1 NA     |   |
| tarsl2             | 456.9015 | 0.444697067  | 0.131519   | 3.381237 | 0.000722 | 0.035767 |   |
| BX640547.1         | 1.744176 | -4.552308855 | 1.818558   | -2.50325 | 0.012306 | NA       |   |
| si:ch73-338o16.4   | 1.289923 | 1.055432578  | 2.12446    | 0.496801 | 0.61933  | NA       |   |
| si:rp71-23d18.4    |          | 0 NA         | NA         | NA       | NA       | NA       |   |
| si:ch1073-170o4.1  | 30.77813 | -0.155503894 | 0.409873   | -0.3794  | 0.704394 | 0.943785 |   |
| BX323550.1         | 0.087179 |              | 0 5.267649 |          | 0        | 1 NA     |   |
| znf1109            | 15.6039  | 1.152301193  | 0.603061   | 1.910753 | 0.056036 | 0.409191 |   |
| si:dkey-88p24.11   | 319.1102 | 0.139739956  | 0.208231   | 0.671082 | 0.502169 | 0.881277 |   |
| si:dkey-21e2.15    | 379.5747 |              | 0 1.685968 |          | 0        | 1        | 1 |
| BX323038.1         | 0.709895 | 1.055423089  | 2.650454   | 0.398205 | 0.690479 | NA       |   |
| rprm3              | 38.00832 | 0.316860426  | 0.362906   | 0.873121 | 0.382597 | 0.825435 |   |
| BX470224.1         | 0.727633 | 1.927566651  | 2.929639   | 0.657954 | 0.510568 | NA       |   |
| ppib               | 6126.198 | 0.023177479  | 0.127143   | 0.182295 | 0.855352 | 0.97932  |   |
| camta2             | 29.95635 | 0.245703477  | 0.335735   | 0.731838 | 0.464268 | 0.864593 |   |
| CU075735.2         | 0.189278 |              | 0 5.267649 |          | 0        | 1 NA     |   |
| CR855277.2         | 7.392385 | 0.960208641  | 1.00978    | 0.950909 | 0.341651 | 0.796379 |   |
| BX957328.1         | 0.141258 |              | 0 5.267649 |          | 0        | 1 NA     |   |
| si:ch1073-110a20.2 | 19.05184 | 0.947474075  | 0.789026   | 1.200815 | 0.229823 | 0.711763 |   |
| si:dkey-151g10.6   | 40014.07 | -0.390055555 | 0.152775   | -2.55315 | 0.010675 | 0.179908 |   |
| CU466285.1         | 1.049406 |              | 0 2.459065 |          | 0        | 1 NA     |   |
| hoxc9a             | 193.7538 | -0.05786057  | 0.154063   | -0.37557 | 0.70724  | 0.944981 |   |
| stap2a             | 240.6926 | 0.221185566  | 0.154254   | 1.433907 | 0.151599 | 0.615372 |   |
| fndc7rs4           | 125.5286 | 0.28783359   | 0.313158   | 0.919132 | 0.358027 | 0.809315 |   |
| si:dkey-21e2.3     | 0.372981 |              | 0 5.085146 |          | 0        | 1 NA     |   |
| si:dkey-93n13.2    | 82.67628 | 0.072208161  | 0.246105   | 0.293403 | 0.769214 | 0.960484 |   |
| CR388168.1         | 0.310373 |              | 0 5.267649 |          | 0        | 1 NA     |   |
| si:dkeyp-67a8.4    | 12.31073 | 0.718766094  | 0.594021   | 1.210001 | 0.226279 | 0.707597 |   |
| si:dkey-42p14.3    | 8.655876 | 0.279597022  | 0.627189   | 0.445794 | 0.655746 | 0.929606 |   |
| BX248511.1         | 9.864471 | -0.801107035 | 0.622214   | -1.28751 | 0.197917 | 0.678663 |   |
| CR589943.1         | 7.943268 | 0.452236082  | 0.752221   | 0.601201 | 0.547706 | 0.896211 |   |
| BX548075.1         |          | 0 NA         | NA         | NA       | NA       | NA       |   |
| CR318588.2         | 10.29191 | -18.81516661 | 5.1472     | -3.65542 | NA       | NA       |   |

|                   |          |              |          |          |          |          |
|-------------------|----------|--------------|----------|----------|----------|----------|
| si:ch211-191d15.2 | 1.444966 | 1.537619902  | 2.184333 | 0.703931 | 0.481476 | NA       |
| si:ch211-93g21.2  | 2.659942 | -1.736063885 | 1.451125 | -1.19636 | 0.231557 | 0.71317  |
| si:dkey-66g10.2   | 3.115348 | -1.320631987 | 1.170881 | -1.1279  | 0.259364 | 0.736127 |
| zgc:162611        | 44.87549 | 0.076066807  | 0.312103 | 0.243723 | 0.807445 | 0.969736 |
| AL845320.1        | 1.792831 | -0.338893895 | 1.837635 | -0.18442 | 0.853685 | NA       |
| si:ch73-92e7.4    | 72.92796 | 0.054710996  | 0.240084 | 0.227883 | 0.819737 | 0.971785 |
| CR788322.1        | 0 NA     | NA           | NA       | NA       | NA       | NA       |
| BX510324.1        | 0.087381 | 0 5.267649   | 0        | 1 NA     |          |          |
| SRBD1             | 81.38694 | 0.174831426  | 0.212114 | 0.824232 | 0.409808 | 0.836939 |
| si:ch211-210c8.7  | 281.3762 | 0.080705596  | 0.157781 | 0.511502 | 0.608999 | 0.915204 |
| si:ch1073-126c3.2 | 50.1876  | -0.85525667  | 0.548462 | -1.55937 | 0.118908 | 0.562318 |
| si:ch211-260p9.3  | 9.416407 | 0.633601057  | 0.62261  | 1.017654 | 0.308843 | 0.77371  |
| CU138515.1        | 1.060383 | -0.830148546 | 1.968832 | -0.42165 | 0.673284 | NA       |
| BX936337.1        | 2104.145 | 0.159005287  | 0.264038 | 0.602205 | 0.547037 | 0.896121 |
| upk3b             | 8.428229 | -0.561358121 | 0.725942 | -0.77328 | 0.439355 | 0.852079 |
| zgc:193541        | 3269.131 | 0.079639827  | 0.152783 | 0.521261 | 0.602185 | 0.914001 |
| BX537288.1        | 0.37155  | 1.055396887  | 3.80277  | 0.277534 | 0.78137  | NA       |
| si:dkeyp-85e10.3  | 5.74314  | -0.856556943 | 1.052655 | -0.81371 | 0.415811 | 0.839227 |
| CU074419.1        | 0.550004 | -0.774813818 | 2.966261 | -0.26121 | 0.793931 | NA       |
| BX649294.1        | 192.0581 | -0.145295544 | 0.232626 | -0.62459 | 0.532242 | 0.890978 |
| si:dkey-161j23.7  | 117.5148 | -0.418361468 | 0.219299 | -1.90772 | 0.056427 | 0.410349 |
| si:dkey-193b15.5  | 2.248252 | 1.584805273  | 1.775359 | 0.892667 | 0.372035 | 0.819592 |
| zgc:171977        | 0.55364  | -1.551678655 | 3.729423 | -0.41606 | 0.677363 | NA       |
| si:dkeyp-46h3.3   | 0.784597 | 3.345065004  | 2.16959  | 1.541796 | 0.123123 | NA       |
| zgc:194246        | 171.0796 | 1.146487085  | 0.337148 | 3.400543 | 0.000673 | 0.034247 |
| si:ch73-44m9.5    | 63.70136 | 0 5.267649   | 0        | 1        | 1        |          |
| si:dkey-23c22.5   | 6.586279 | -1.73373368  | 0.916741 | -1.89119 | 0.058599 | 0.418278 |
| CT027589.1        | 0.239892 | -2.29353506  | 5.204055 | -0.44072 | 0.659415 | NA       |
| si:ch211-114113.9 | 4.395053 | 0.080197678  | 1.685162 | 0.04759  | 0.962043 | 0.999451 |
| si:dkey-188i13.11 | 283.2293 | -0.859542769 | 0.207244 | -4.14748 | 3.36E-05 | 0.004143 |
| si:ch211-67f24.7  | 8.676767 | 0.54975757   | 0.694223 | 0.791903 | 0.428417 | 0.846133 |
| si:ch211-157j23.3 | 25.77714 | -0.3379536   | 0.478786 | -0.70585 | 0.480279 | 0.870001 |
| BX927258.1        | 5.0213   | 0.409216916  | 0.739926 | 0.553051 | 0.580228 | 0.905618 |
| zgc:153317        | 14.0359  | -0.03155192  | 0.564635 | -0.05588 | 0.955437 | 0.998611 |
| AL954320.1        | 0.185122 | 0 5.267649   | 0        | 1 NA     |          |          |
| si:dkey-201121.2  | 0.120883 | 0 5.267649   | 0        | 1 NA     |          |          |
| BX323586.2        | 0.102662 | 0 5.267649   | 0        | 1 NA     |          |          |
| BX547930.1        | 0 NA     | NA           | NA       | NA       | NA       | NA       |
| BX323812.1        | 0.14351  | 1.055370259  | 5.267649 | 0.200349 | 0.841207 | NA       |
| mlnl              | 52.66577 | 0.206081076  | 0.437183 | 0.471384 | 0.637367 | 0.924779 |
| crhr2             | 11.57472 | 2.590029224  | 0.776997 | 3.333382 | 0.000858 | 0.0396   |
| zp3c              | 0.289653 | -2.751193222 | 3.886168 | -0.70795 | 0.478979 | NA       |
| si:ch211-106h4.12 | 356.5539 | -0.342143682 | 0.344676 | -0.99265 | 0.320879 | 0.781284 |
| si:dkey-95h12.2   | 0 NA     | NA           | NA       | NA       | NA       | NA       |
| zgc:171474        | 0.256199 | -0.604297191 | 5.174495 | -0.11678 | 0.907031 | NA       |
| BX649641.2        | 0.04222  | 0 5.267649   | 0        | 1 NA     |          |          |
| si:dkey-66k12.3   | 0 NA     | NA           | NA       | NA       | NA       | NA       |
| si:dkey-44g23.2   | 0 NA     | NA           | NA       | NA       | NA       | NA       |
| si:ch211-132b12.4 | 0 NA     | NA           | NA       | NA       | NA       | NA       |
| si:ch211-114c12.5 | 1.150383 | -1.806596954 | 2.421333 | -0.74612 | 0.455597 | NA       |
| si:dkey-32e6.3    | 53.69022 | 0.25310457   | 0.293977 | 0.860967 | 0.389256 | 0.827741 |
| znf1047           | 7.092643 | 1.749296646  | 0.82799  | 2.112704 | 0.034626 | 0.328035 |
| BX537338.1        | 0.049519 | 0 5.267649   | 0        | 1 NA     |          |          |
| BX000981.1        | 0.196204 | -1.732939949 | 5.215678 | -0.33226 | 0.739696 | NA       |

|                    |           |               |             |           |           |           |
|--------------------|-----------|---------------|-------------|-----------|-----------|-----------|
| si:dkey-222h21. 3  | 0. 647492 | 2. 997568758  | 2. 6953     | 1. 112147 | 0. 266075 | NA        |
| BX001050. 1        | 0. 092844 | 1. 055383603  | 5. 267649   | 0. 200352 | 0. 841205 | NA        |
| si:dkey-117n7. 3   | 24. 5496  | -0. 449123922 | 0. 438881   | -1. 02334 | 0. 306148 | 0. 771472 |
| si:ch211-250g4. 3  | 10. 12115 | -0. 425660459 | 0. 696979   | -0. 61072 | 0. 541384 | 0. 893819 |
| CU681845. 1        | 0. 262826 |               | 0 5. 267649 |           | 0         | 1 NA      |
| cytl               | 67279. 92 | -0. 267435206 | 0. 207239   | -1. 29047 | 0. 196888 | 0. 67714  |
| gna15. 3           | 14. 659   | 0. 625693197  | 0. 498761   | 1. 254496 | 0. 209662 | 0. 691766 |
| si:ch73-366i20. 1  | 4. 470484 | -2. 344906042 | 1. 348585   | -1. 73879 | 0. 082072 | 0. 482272 |
| BX294379. 1        | 9. 03481  | -3. 606415614 | 1. 355198   | -2. 66117 | 0. 007787 | 0. 149109 |
| BX548044. 4        |           | 0 NA          | NA          | NA        | NA        | NA        |
| mrpl34             | 590. 0222 | 0. 014424924  | 0. 161344   | 0. 089405 | 0. 92876  | 0. 995163 |
| BX649388. 2        | 0. 060442 |               | 0 5. 267649 |           | 0         | 1 NA      |
| si:dkeyp-27c8. 1   | 0. 195752 |               | 0 5. 267649 |           | 0         | 1 NA      |
| ftr26              | 2. 652298 | 3. 939471306  | 1. 569658   | 2. 509765 | 0. 012081 | 0. 190742 |
| BX004981. 2        | 1. 96751  | 2. 522657207  | 1. 618719   | 1. 558428 | 0. 119132 | NA        |
| BX321877. 1        | 13. 97375 | 0. 172496683  | 0. 451335   | 0. 382192 | 0. 702319 | 0. 943402 |
| CU207275. 1        | 3. 834773 | 0. 325613273  | 0. 927787   | 0. 350957 | 0. 725621 | 0. 948653 |
| si:dkey-93m18. 4   | 8. 328013 | -4. 685481658 | 1. 169567   | -4. 00617 | 6. 17E-05 | 0. 00647  |
| znf1128            | 7. 545273 | -0. 90362039  | 0. 737701   | -1. 22491 | 0. 220608 | 0. 701837 |
| tmsb2              | 572. 3943 | 0. 064127836  | 0. 291155   | 0. 220253 | 0. 825674 | 0. 972839 |
| si:dkeyp-82a1. 3   | 0. 48927  |               | 0 3. 091692 |           | 0         | 1 NA      |
| AL935198. 1        | 1. 39423  | -2. 63778469  | 1. 784752   | -1. 47796 | 0. 13942  | NA        |
| si:ch211-127i16. 2 | 121. 082  | 0. 103242212  | 0. 218851   | 0. 471748 | 0. 637107 | 0. 924779 |
| pias2              | 461. 0122 | -0. 139984588 | 0. 121183   | -1. 15515 | 0. 24803  | 0. 728489 |
| AL929058. 1        | 141. 0592 | -0. 301215608 | 0. 214903   | -1. 40163 | 0. 161025 | 0. 627788 |
| si:dkey-222h21. 11 | 0. 814898 | -0. 868140994 | 2. 575063   | -0. 33713 | 0. 736016 | NA        |
| CU499330. 1        | 71. 90043 | -0. 080161291 | 0. 364403   | -0. 21998 | 0. 825887 | 0. 972962 |
| zmat4a             | 37. 72189 | 0. 760854254  | 0. 459638   | 1. 655333 | 0. 097857 | 0. 521071 |
| si:ch211-161n3. 3  | 1. 988265 | -2. 355278992 | 1. 723705   | -1. 36641 | 0. 171812 | NA        |
| BX294113. 1        |           | 0 NA          | NA          | NA        | NA        | NA        |
| BX005329. 2        | 6. 70332  | -2. 693463316 | 1. 122504   | -2. 39951 | 0. 016417 | 0. 226114 |
| si:ch211-202f5. 3  | 257. 4313 | 0. 028753683  | 0. 145558   | 0. 197541 | 0. 843404 | 0. 976791 |
| tnni4b. 1          | 9. 624224 | -0. 233042259 | 0. 522616   | -0. 44592 | 0. 655658 | 0. 929606 |
| si:dkeyp-77c8. 2   | 21. 00211 | -0. 258940002 | 0. 509631   | -0. 50809 | 0. 611388 | 0. 915331 |
| BX323543. 1        | 0. 050723 | -0. 86807634  | 5. 267649   | -0. 16479 | 0. 869106 | NA        |
| acy3. 1            | 50. 76586 | 0. 11984418   | 0. 361928   | 0. 331127 | 0. 740548 | 0. 953939 |
| si:dkey-33c12. 11  | 10. 554   | 0. 783566265  | 0. 590217   | 1. 32759  | 0. 184313 | 0. 661379 |
| rarres3            | 16. 46068 | 0. 016469432  | 0. 673651   | 0. 024448 | 0. 980495 | 1         |
| mphosph6           | 226. 413  | -0. 055126832 | 0. 171808   | -0. 32086 | 0. 748315 | 0. 955074 |
| adgrf3b            | 36. 67859 | -0. 156860655 | 0. 491279   | -0. 31929 | 0. 749506 | 0. 955074 |
| BX511259. 1        | 0. 267102 | 2. 987673653  | 4. 637639   | 0. 644223 | 0. 519431 | NA        |
| BX890551. 1        |           | 0 NA          | NA          | NA        | NA        | NA        |
| BX294181. 1        |           | 0 NA          | NA          | NA        | NA        | NA        |
| CR383662. 1        | 3. 262819 | 0. 491778712  | 1. 326683   | 0. 370683 | 0. 710874 | 0. 945821 |
| si:ch211-174j14. 2 | 0. 467431 | 1. 509718951  | 2. 816171   | 0. 536089 | 0. 591897 | NA        |
| CR847870. 1        |           | 0 NA          | NA          | NA        | NA        | NA        |
| si:dkey-83k24. 5   | 70. 36159 | -0. 134023881 | 0. 306865   | -0. 43675 | 0. 662292 | 0. 930742 |
| CR356233. 2        |           | 0 NA          | NA          | NA        | NA        | NA        |
| FAM163A            | 11. 37391 | 0. 961692877  | 0. 805037   | 1. 194594 | 0. 232246 | 0. 713489 |
| selenoh            | 912. 9111 | -0. 294893482 | 0. 182407   | -1. 61667 | 0. 105949 | 0. 534956 |
| CT737131. 1        | 0. 155545 | 0. 959877153  | 5. 236908   | 0. 183291 | 0. 85457  | NA        |
| si:ch211-213a13. 2 | 14. 51191 | 0. 30038214   | 0. 460904   | 0. 651723 | 0. 51458  | 0. 88631  |
| si:dkeyp-77c8. 4   | 6. 428917 | -0. 913213986 | 0. 769411   | -1. 1869  | 0. 235267 | 0. 716312 |
| si:ch211-222n4. 2  | 1. 002407 | 1. 967252439  | 2. 087865   | 0. 942232 | 0. 346074 | NA        |

|                   |          |              |            |          |          |          |
|-------------------|----------|--------------|------------|----------|----------|----------|
| BX950184.1        | 1.483906 | -1.036174979 | 1.51537    | -0.68378 | 0.494116 | NA       |
| BX640520.1        | 1.24086  | 1.383290222  | 1.75336    | 0.788937 | 0.430149 | NA       |
| CR513782.2        | 0.217342 |              | 0 5.267649 |          | 0        | 1 NA     |
| AL935144.1        |          | 0 NA         | NA         | NA       | NA       | NA       |
| si:ch211-234c11.2 | 3.553295 | -0.379762968 | 0.940648   | -0.40373 | 0.686415 | 0.938732 |
| si:dkey-104n9.1   | 48.85289 | 0.306298495  | 0.469422   | 0.652502 | 0.514077 | 0.88631  |
| ugt2a7            | 101.8766 | -1.326172251 | 0.423088   | -3.13451 | 0.001721 | 0.064499 |
| si:ch211-161h7.5  | 143.6559 | -0.355736477 | 0.713466   | -0.4986  | 0.618059 | 0.916507 |
| BX465186.1        | 0.07132  |              | 0 5.267649 |          | 0        | 1 NA     |
| si:ch211-158d24.4 | 58.47764 | -0.250297364 | 0.306175   | -0.8175  | 0.413644 | 0.83842  |
| c6                | 20.60567 | 0.42346635   | 0.637829   | 0.663919 | 0.506742 | 0.883007 |
| vap               | 0.535148 | -0.868131075 | 3.878691   | -0.22382 | 0.822897 | NA       |
| BX548073.3        | 26.20894 | -0.725686906 | 0.507314   | -1.43045 | 0.152588 | 0.61658  |
| STMP1             | 790.6939 | 0.091420783  | 0.140832   | 0.649147 | 0.516244 | 0.886815 |
| lgals916          | 0.12723  | 1.055383603  | 5.267649   | 0.200352 | 0.841205 | NA       |
| BX682548.1        | 1.979288 | 0.877300708  | 1.759446   | 0.498623 | 0.618045 | NA       |
| CR847870.2        | 0.346683 |              | 0 4.441013 |          | 0        | 1 NA     |
| FP016056.1        | 10.38299 | -0.943462181 | 0.699999   | -1.3478  | 0.177721 | 0.65136  |
| SMIM18            | 63.0083  | -0.104417864 | 0.347074   | -0.30085 | 0.763527 | 0.959055 |
| ubac2             | 122.9461 | 0.118673996  | 0.16381    | 0.724462 | 0.468782 | 0.866951 |
| c3b.1             | 476.1381 | -1.13312572  | 0.408719   | -2.77239 | 0.005565 | 0.126154 |
| thumpd2           | 58.85527 | -0.074444391 | 0.297599   | -0.25015 | 0.802472 | 0.968181 |
| CR925713.1        | 7.218027 | -0.068240005 | 0.684577   | -0.09968 | 0.920597 | 0.994085 |
| si:ch211-139g16.8 | 13.65795 | -0.428467618 | 0.555658   | -0.7711  | 0.440648 | 0.852523 |
| BX897740.1        | 0.238366 | -0.86811668  | 5.267649   | -0.1648  | 0.8691   | NA       |
| plscr3a           | 64.8495  | 0.44949387   | 0.411639   | 1.091961 | 0.27485  | 0.750181 |
| proca             | 59.78139 | 0.402652684  | 0.413759   | 0.973158 | 0.330475 | 0.788126 |
| si:dkey-163f12.10 | 0.709881 | -2.326545301 | 3.524216   | -0.66016 | 0.509151 | NA       |
| si:ch73-92i20.1   | 9.995378 | -0.025929576 | 0.661392   | -0.0392  | 0.968727 | 1        |
| L0018605.1        | 3.599766 | 0.427639056  | 1.035358   | 0.413035 | 0.679581 | 0.936344 |
| CT573467.1        |          | 0 NA         | NA         | NA       | NA       | NA       |
| BX323543.2        | 0.779381 | -3.958256042 | 3.450905   | -1.14702 | 0.251373 | NA       |
| BX649502.5        |          | 0 NA         | NA         | NA       | NA       | NA       |
| BX649388.3        | 4.162536 | -0.849901773 | 1.271357   | -0.6685  | 0.503815 | 0.881759 |
| BX511310.1        | 17.34165 | 0.313466678  | 1.009081   | 0.310646 | 0.75607  | 0.956532 |
| tac3a             | 60.59896 | -0.497307659 | 0.424288   | -1.1721  | 0.241157 | 0.72266  |
| iqsec3b           | 27.37768 | 1.150262407  | 0.402093   | 2.860691 | 0.004227 | 0.107395 |
| adam17b           | 85.70744 | 0.000103945  | 0.275432   | 0.000377 | 0.999699 | 1        |
| cc134b.8          | 0.317989 |              | 0 4.541757 |          | 0        | 1 NA     |
| BX005313.2        | 3.095045 | 1.055433326  | 1.843786   | 0.572427 | 0.567033 | 0.901747 |
| tmprss12          | 0.07132  |              | 0 5.267649 |          | 0        | 1 NA     |
| si:ch211-132g1.6  |          | 0 NA         | NA         | NA       | NA       | NA       |
| BX000444.1        | 0.053262 | 1.055396947  | 5.267649   | 0.200354 | 0.841203 | NA       |
| BX004774.1        | 3.791202 | -0.868154129 | 1.971012   | -0.44046 | 0.659603 | 0.930581 |
| CT573344.1        | 39.84557 | -0.009323989 | 0.310029   | -0.03007 | 0.976008 | 1        |
| si:ch211-209118.2 | 40.11194 | 0.878165237  | 0.407439   | 2.155327 | 0.031136 | 0.313664 |
| espn1b            | 23.23858 | -0.486954661 | 0.401748   | -1.21209 | 0.225478 | 0.70685  |
| BX511265.1        | 1.888135 | -1.587708267 | 1.592269   | -0.99714 | 0.318699 | NA       |
| si:dkeyp-122a9.2  | 0.253619 |              | 0 4.817845 |          | 0        | 1 NA     |
| si:dkey-266m15.7  | 23.11812 | 0.079329372  | 0.383794   | 0.206698 | 0.836246 | 0.976007 |
| CR847509.1        | 0.268678 |              | 0 4.115396 |          | 0        | 1 NA     |
| gstk4             | 1.849953 | 2.524235838  | 1.850362   | 1.364185 | 0.172509 | NA       |
| si:dkey-117m1.4   | 206.3517 | 0.176383558  | 0.221592   | 0.795985 | 0.426041 | 0.844714 |
| scpp8             | 28.86536 | -0.511348441 | 0.490847   | -1.04177 | 0.297519 | 0.765351 |

|                    |          |              |          |          |          |          |  |
|--------------------|----------|--------------|----------|----------|----------|----------|--|
| RANBP2             | 944.6157 | 0.291929637  | 0.15651  | 1.86524  | 0.062148 | 0.427289 |  |
| si:ch73-11216.1    | 285.5984 | 0.02251667   | 0.16026  | 0.1405   | 0.888265 | 0.988188 |  |
| si:rp71-45k5.2     | 0.18478  | 0.09368032   | 5.267649 | 0.017784 | 0.985811 | NA       |  |
| CR788254.2         | 1.409313 | 0.012680196  | 1.720651 | 0.007369 | 0.99412  | NA       |  |
| si:ch211-57f7.7    | 4.510269 | -4.098637322 | 1.429252 | -2.86768 | 0.004135 | 0.106542 |  |
| si:dkey-117n7.2    | 45.74106 | -0.909544162 | 0.320596 | -2.83705 | 0.004553 | 0.111673 |  |
| BX936323.1         | 0 NA     | NA           | NA       | NA       | NA       | NA       |  |
| BX294189.1         | 3.331134 | -2.377189679 | 1.148981 | -2.06895 | 0.03855  | 0.344223 |  |
| BX004800.1         | 0 NA     | NA           | NA       | NA       | NA       | NA       |  |
| znf1010            | 85.85119 | -0.100400068 | 0.242798 | -0.41351 | 0.679231 | 0.936209 |  |
| CR932983.1         | 0.148188 | 1.854137197  | 5.241768 | 0.353724 | 0.723546 | NA       |  |
| fnf7rs3            | 20.27386 | -2.605013771 | 1.155984 | -2.2535  | 0.024227 | 0.275306 |  |
| CU137717.1         | 1.267229 | -4.076597362 | 5.154668 | -0.79086 | 0.429028 | NA       |  |
| pimr83             | 0.049021 | -0.86807634  | 5.267649 | -0.16479 | 0.869106 | NA       |  |
| si:ch73-21g5.7     | 376.836  | 0.193593773  | 0.261312 | 0.740853 | 0.458783 | 0.861537 |  |
| si:ch73-236c18.8   | 180.5334 | -0.192507219 | 0.144334 | -1.33376 | 0.182281 | 0.658775 |  |
| si:dkeyp-106c3.3   | 18.51203 | 0.529975506  | 0.353212 | 1.500448 | 0.133499 | 0.586903 |  |
| CR853291.1         | 0.084441 | 0            | 5.267649 | 0        | 1        | NA       |  |
| si:rp71-23d18.8    | 1.850942 | 1.055427329  | 2.048379 | 0.51525  | 0.606378 | NA       |  |
| si:dkey-16p6.2     | 3.154542 | -0.021635108 | 0.954362 | -0.02267 | 0.981914 | 1        |  |
| BX510336.1         | 0 NA     | NA           | NA       | NA       | NA       | NA       |  |
| CR749763.2         | 0.502735 | -0.868138973 | 3.585408 | -0.24213 | 0.808679 | NA       |  |
| mef2b              | 25.57795 | 0.99796918   | 0.61276  | 1.628647 | 0.103388 | 0.530446 |  |
| CR759927.1         | 2.328531 | 0.410645105  | 1.254957 | 0.327218 | 0.743503 | 0.954856 |  |
| si:dkey-93m18.6    | 23.45721 | -8.274093882 | 1.238856 | -6.67882 | 2.41E-11 | 2.66E-08 |  |
| zgc:77118          | 1.771643 | 0.485824069  | 1.376257 | 0.353004 | 0.724086 | NA       |  |
| si:ch211-15j1.1    | 7.286159 | 0.660396974  | 0.853069 | 0.774143 | 0.438847 | 0.851954 |  |
| si:dkey-79c1.1     | 1.063273 | 0.704695428  | 1.772078 | 0.397666 | 0.690876 | NA       |  |
| CR354547.1         | 1.846375 | -1.900015045 | 1.705089 | -1.11432 | 0.265142 | NA       |  |
| CT027756.1         | 0.160481 | 0            | 5.267649 | 0        | 1        | NA       |  |
| EIF2AK1            | 325.8845 | -0.097939689 | 0.166874 | -0.58691 | 0.557265 | 0.899165 |  |
| OR125-7            | 2.896685 | 0.107412359  | 1.068473 | 0.100529 | 0.919925 | 0.993892 |  |
| GUCY1A2            | 31.60165 | 0.148211723  | 0.385923 | 0.384044 | 0.700946 | 0.942918 |  |
| si:dkey-30j10.5    | 2.370242 | 0            | 2.354481 | 0        | 1        | 1        |  |
| si:dkey-75a21.2    | 139.2813 | 0.436176955  | 0.170648 | 2.55601  | 0.010588 | 0.179908 |  |
| BX571724.1         | 4.00162  | 0.347754231  | 0.821447 | 0.423344 | 0.672045 | 0.933953 |  |
| si:ch211-198m1.1   | 0.09854  | -0.868089684 | 5.267649 | -0.1648  | 0.869104 | NA       |  |
| chia.6             | 125.9785 | -0.509111131 | 0.257065 | -1.98047 | 0.04765  | 0.380113 |  |
| CR788285.1         | 0.242938 | -1.769300839 | 4.877572 | -0.36274 | 0.716798 | NA       |  |
| c3a.4              | 42.54614 | -0.747989665 | 0.789998 | -0.94682 | 0.343728 | 0.798147 |  |
| si:ch211-212c13.10 | 137.6646 | 0.27955604   | 0.187812 | 1.488489 | 0.136622 | 0.591964 |  |
| si:dkey-112e17.1   | 59.23893 | 0.046334082  | 0.394385 | 0.117484 | 0.906476 | 0.991636 |  |
| ftr32              | 0.046941 | 0            | 5.267649 | 0        | 1        | NA       |  |
| AL845362.1         | 4.611478 | -0.887507531 | 1.007457 | -0.88094 | 0.378351 | 0.822672 |  |
| CR786562.1         | 45.65112 | 0.18953784   | 0.281643 | 0.672971 | 0.500965 | 0.880413 |  |
| CT573148.1         | 8.731291 | 1.272596539  | 0.628285 | 2.02551  | 0.042815 | 0.362408 |  |
| si:ch211-284e13.9  | 1.209921 | -0.868139942 | 2.060165 | -0.42139 | 0.673468 | NA       |  |
| si:ch211-146110.7  | 0.100242 | -0.868089684 | 5.267649 | -0.1648  | 0.869104 | NA       |  |
| BX936308.2         | 10.74912 | 0.208694549  | 0.695136 | 0.300221 | 0.764008 | 0.959228 |  |
| znf1127            | 1.90821  | -0.063084084 | 1.128306 | -0.05591 | 0.955413 | NA       |  |
| CR749762.2         | 1.627106 | -2.106874651 | 1.648428 | -1.27811 | 0.20121  | NA       |  |
| CR456628.1         | 3.744383 | -0.327849856 | 1.10003  | -0.29804 | 0.765675 | 0.959942 |  |
| AL928845.1         | 1.111406 | 2.483779009  | 2.173039 | 1.142998 | 0.25304  | NA       |  |
| si:ch211-139n6.3   | 33.93472 | -0.408367177 | 0.370279 | -1.10286 | 0.270086 | 0.746532 |  |



|                   |          |              |          |          |          |          |
|-------------------|----------|--------------|----------|----------|----------|----------|
| CR847566.1        | 0.55589  | 0.112766428  | 2.754869 | 0.040933 | 0.967349 | NA       |
| si:ch211-215d8.2  | 85.78374 | 0.187964823  | 0.232703 | 0.807747 | 0.419236 | 0.842286 |
| si:dkey-65l23.2   | 0 NA     | NA           | NA       | NA       | NA       | NA       |
| TST               | 399.5115 | -0.113567426 | 0.169054 | -0.67178 | 0.501723 | 0.881077 |
| si:ch211-89o9.4   | 165.4061 | -0.029683695 | 0.285451 | -0.10399 | 0.917178 | 0.993735 |
| BX649641.3        | 0.41982  | -2.769475485 | 4.142824 | -0.6685  | 0.503815 | NA       |
| GMEB2             | 183.8511 | -0.109801125 | 0.152051 | -0.72214 | 0.470211 | 0.86742  |
| BX530024.1        | 0.235174 | 0            | 5.267649 | 0        | 1        | NA       |
| CU681836.1        | 673.7436 | -0.068852693 | 0.162633 | -0.42336 | 0.672031 | 0.933953 |
| BX537358.1        | 7.826052 | -0.696300778 | 0.682772 | -1.01982 | 0.307816 | 0.772996 |
| si:dkey-238m4.4   | 5.751332 | -1.511225439 | 0.954246 | -1.58369 | 0.113265 | 0.551017 |
| si:ch211-226h8.11 | 0 NA     | NA           | NA       | NA       | NA       | NA       |
| BX936438.1        | 0.181111 | 1.055370259  | 5.267649 | 0.200349 | 0.841207 | NA       |
| CR753837.1        | 0.801898 | -1.779889031 | 2.202407 | -0.80816 | 0.419001 | NA       |
| MFSD3             | 38.22719 | 0.322238999  | 0.322054 | 1.000574 | 0.317033 | 0.778879 |
| znf5691           | 31.26564 | -0.180749521 | 0.315499 | -0.5729  | 0.566713 | 0.901739 |
| si:dkey-229d11.3  | 0.490686 | -3.896728841 | 3.82244  | -1.01943 | 0.307997 | NA       |
| BX901930.2        | 0 NA     | NA           | NA       | NA       | NA       | NA       |
| taar19o           | 0.259925 | 0            | 5.267649 | 0        | 1        | NA       |
| cnkg              | 2.054206 | 1.166003834  | 1.53121  | 0.761492 | 0.446363 | NA       |
| si:ch73-62b13.1   | 8.069684 | 1.778699884  | 0.858354 | 2.072222 | 0.038245 | 0.342672 |
| AL954694.2        | 0.495787 | -1.825198689 | 4.599947 | -0.39679 | 0.691525 | NA       |
| igicls1           | 0.551887 | -2.340335995 | 4.590905 | -0.50978 | 0.610208 | NA       |
| or137-6           | 0.376131 | 0            | 4.305707 | 0        | 1        | NA       |
| si:dkey-204f11.51 | 0 NA     | NA           | NA       | NA       | NA       | NA       |
| BX530037.3        | 0 NA     | NA           | NA       | NA       | NA       | NA       |
| si:dkey-11o1.3    | 3.528846 | -1.751634674 | 1.722512 | -1.01691 | 0.309198 | 0.773791 |
| CR786582.1        | 0.520155 | 0.038049622  | 3.412377 | 0.01115  | 0.991103 | NA       |
| si:ch211-173m16.2 | 0.768323 | -3.325984033 | 2.870231 | -1.15879 | 0.246543 | NA       |
| CABZ01039782.1    | 7.069365 | -2.974167492 | 1.386392 | -2.14526 | 0.031932 | 0.317405 |
| BX510924.1        | 0.218858 | -1.791258993 | 5.034195 | -0.35582 | 0.721977 | NA       |
| CR513782.3        | 0 NA     | NA           | NA       | NA       | NA       | NA       |
| si:dkey-9i23.14   | 9.03128  | 3.097727791  | 0.711687 | 4.352656 | 1.34E-05 | 0.002278 |
| CU570889.1        | 1.397927 | 0.0456103    | 1.293195 | 0.035269 | 0.971865 | NA       |
| ifitml            | 690.9839 | 0.1612887    | 0.322434 | 0.500222 | 0.616919 | 0.916365 |
| si:dkey-221j11.3  | 217.0164 | -0.455944684 | 0.301716 | -1.51117 | 0.130744 | 0.582151 |
| BX957257.1        | 0.163217 | 2.079549577  | 5.22636  | 0.397896 | 0.690707 | NA       |
| CT025585.1        | 0.924449 | 1.982341133  | 2.288818 | 0.866098 | 0.386436 | NA       |
| BX890559.1        | 5.359177 | -1.364479136 | 0.853223 | -1.59921 | 0.109775 | 0.543595 |
| si:dkey-83f18.4   | 0 NA     | NA           | NA       | NA       | NA       | NA       |
| ubb               | 3759.589 | 0.045887312  | 0.143202 | 0.320438 | 0.748637 | 0.955074 |
| adgrf8            | 31.88899 | 0.159225665  | 0.558366 | 0.285164 | 0.775519 | 0.961073 |
| si:ch211-209j10.6 | 93.71762 | 0.627422485  | 0.950058 | 0.660404 | 0.508994 | 0.883442 |
| si:dkey-57a22.15  | 927.0661 | -0.4449527   | 0.533375 | -0.83422 | 0.404156 | 0.833888 |
| BX323028.1        | 0.193511 | 1.05535865   | 5.267649 | 0.200347 | 0.841209 | NA       |
| si:dkeyp-87a6.2   | 0.17634  | 0            | 5.267649 | 0        | 1        | NA       |
| si:ch211-114l13.1 | 38.81899 | 0.245374312  | 0.696382 | 0.352356 | 0.724571 | 0.9484   |
| BX640512.1        | 0 NA     | NA           | NA       | NA       | NA       | NA       |
| si:rp71-1h3.1     | 7.288254 | 0.538955037  | 0.904217 | 0.596046 | 0.551144 | 0.8974   |
| CR524821.1        | 0.298573 | 0            | 3.956496 | 0        | 1        | NA       |
| si:dkey-38n4.2    | 0.602108 | -2.408247991 | 3.379625 | -0.71258 | 0.476107 | NA       |
| si:ch73-249k16.4  | 4.994683 | 1.134766567  | 0.907368 | 1.250613 | 0.211076 | 0.692821 |
| si:ch211-195h23.4 | 1.128815 | 0            | 2.274317 | 0        | 1        | NA       |
| BX088709.1        | 3.144066 | -4.93501676  | 1.787306 | -2.76115 | 0.00576  | 0.128818 |

|                    |          |              |            |          |          |          |    |
|--------------------|----------|--------------|------------|----------|----------|----------|----|
| si:ch211-13f8.1    | 51.63702 | 0.320229413  | 0.85136    | 0.376139 | 0.706814 | 0.944838 |    |
| si:ch73-27e22.7    | 0.871682 | -1.710118194 | 5.23847    | -0.32645 | 0.744081 | NA       |    |
| si:ch211-239f4.6   | 0.445522 |              | 0.3.612915 |          | 0        | 1        | NA |
| CR396590.4         | 0.084441 |              | 0.5.267649 |          | 0        | 1        | NA |
| si:ch211-141e20.2  | 22.70892 | 1.220240196  | 0.508527   | 2.399558 | 0.016415 | 0.226114 |    |
| si:dkey-58f10.7    | 1.086404 | -1.401569064 | 1.948133   | -0.71944 | 0.471868 | NA       |    |
| si:ch211-263m18.4  | 0.479522 | -3.800058476 | 4.544742   | -0.83614 | 0.403074 | NA       |    |
| si:ch211-57i17.2   | 32.14065 | -1.061227428 | 0.439148   | -2.41656 | 0.015668 | 0.221082 |    |
| CU633785.1         |          | 0 NA         |            | NA       | NA       | NA       | NA |
| nyap2b             | 103.1749 | -0.185686212 | 0.27366    | -0.67853 | 0.497436 | 0.878744 |    |
| BX284697.1         | 0.355296 |              | 0.3.80152  |          | 0        | 1        | NA |
| inpp5jb            | 10.60237 | 0.113562023  | 0.58723    | 0.193386 | 0.846657 | 0.977214 |    |
| CU469531.2         | 2.269741 | 1.322789568  | 1.444145   | 0.915967 | 0.359684 | 0.810668 |    |
| mtmr3              |          | 0 NA         |            | NA       | NA       | NA       | NA |
| acer3              | 31.73562 | -0.636605874 | 0.421906   | -1.50888 | 0.13133  | 0.583069 |    |
| si:ch1073-272j17.3 | 0.987524 | 3.028941223  | 2.43149    | 1.245714 | 0.212869 | NA       |    |
| BX842702.1         |          | 0 NA         |            | NA       | NA       | NA       | NA |
| lrrc66             | 2.012376 | -2.435030121 | 1.831588   | -1.32946 | 0.183695 | NA       |    |
| BX649476.1         | 0.049021 | -0.86807634  | 5.267649   | -0.16479 | 0.869106 | NA       |    |
| EPB41L2            | 1638.436 | 0.048384717  | 0.098573   | 0.490851 | 0.623532 | 0.919171 |    |
| si:ch211-28e16.5   |          | 0 NA         |            | NA       | NA       | NA       | NA |
| si:ch211-235i11.5  | 41.86535 | -0.014879296 | 0.261172   | -0.05697 | 0.954568 | 0.998611 |    |
| tgm21              | 88.21334 | 0.226229974  | 0.369353   | 0.612504 | 0.540204 | 0.893049 |    |
| uqcc3              | 347.8341 | -0.116506504 | 0.16695    | -0.69785 | 0.48527  | 0.872911 |    |
| BX640539.1         | 1.179191 | -3.565265696 | 2.021026   | -1.76409 | 0.077717 | NA       |    |
| si:ch211-150d5.3   | 1.882818 |              | 0.2.169996 |          | 0        | 1        | NA |
| CU469314.1         | 0.495227 | -0.856002561 | 3.189581   | -0.26837 | 0.788411 | NA       |    |
| si:dkeyp-82a1.1    | 5.503728 | 0.083357676  | 0.921594   | 0.090449 | 0.92793  | 0.995052 |    |
| si:dkeyp-20g2.3    |          | 0 NA         |            | NA       | NA       | NA       | NA |
| CR392330.1         | 0.235041 | 1.055363809  | 4.965841   | 0.212525 | 0.831698 | NA       |    |
| CT583651.1         |          | 0 NA         |            | NA       | NA       | NA       | NA |
| AL953894.1         | 6.772707 | 1.107213725  | 0.896426   | 1.235142 | 0.216778 | 0.69815  |    |
| BX511184.1         |          | 0 NA         |            | NA       | NA       | NA       | NA |
| crha               | 3.091693 |              | 0.1.869838 |          | 0        | 1        | 1  |
| si:dkey-286j17.4   | 47.62372 | 0.512427009  | 0.977981   | 0.523964 | 0.600304 | 0.913756 |    |
| si:ch73-376124.4   | 0.555981 | -0.850318996 | 2.715914   | -0.31309 | 0.754214 | NA       |    |
| BX323822.1         |          | 0 NA         |            | NA       | NA       | NA       | NA |
| casp6              | 66.47322 | 0.113249012  | 0.279774   | 0.404788 | 0.685634 | 0.938486 |    |
| zgc:111986         | 2860.624 | 0.297895047  | 0.134075   | 2.221854 | 0.026293 | 0.2875   |    |
| BX530075.2         |          | 0 NA         |            | NA       | NA       | NA       | NA |
| pimr49             | 0.241766 |              | 0.5.267649 |          | 0        | 1        | NA |
| BX936421.1         | 0.273594 | -1.75547092  | 5.235277   | -0.33532 | 0.737387 | NA       |    |
| gad1a              | 14.96861 | -0.159625485 | 0.519692   | -0.30715 | 0.758726 | 0.957882 |    |
| sertad2a           | 120.6517 | -0.290188961 | 0.208803   | -1.38977 | 0.164597 | 0.634007 |    |
| edil3a             | 547.0637 | -0.056601642 | 0.151394   | -0.37387 | 0.708501 | 0.94551  |    |
| si:dkey-21e2.12    | 4.740767 |              | 0.1.832825 |          | 0        | 1        | 1  |
| BX470229.1         | 7.288277 | -0.01452329  | 0.817375   | -0.01777 | 0.985824 |          | 1  |
| si:dkey-216e24.9   | 3.927324 | 1.706474257  | 1.163103   | 1.467174 | 0.142329 | 0.601598 |    |
| CR933734.1         | 0.188916 | -0.868115997 | 5.267649   | -0.1648  | 0.8691   | NA       |    |
| creblb             | 289.7784 | 0.206564021  | 0.161966   | 1.27535  | 0.202185 | 0.682294 |    |
| si:ch211-229b6.1   | 1.292849 | -2.82534334  | 1.657329   | -1.70476 | 0.08824  | NA       |    |
| swsap1             | 12.19135 | -0.232205947 | 0.472027   | -0.49193 | 0.622766 | 0.918894 |    |
| znf1135            | 8.818609 | 0.278263482  | 0.617419   | 0.450688 | 0.652214 | 0.928768 |    |
| BX539332.1         | 0.043309 |              | 0.5.267649 |          | 0        | 1        | NA |

|                   |          |              |          |          |          |          |    |
|-------------------|----------|--------------|----------|----------|----------|----------|----|
| si:dkey-69c1.1    | 0.046941 |              | 0        | 5.267649 | 0        | 1        | NA |
| BX465862.1        | 19.14501 | 0.089794091  | 0.479176 | 0.187393 | 0.851353 | 0.978548 |    |
| CT027825.1        | 0.354596 | -0.868133336 | 3.835254 | -0.22636 | 0.820924 | NA       |    |
| si:dkeyp-34f6.4   | 0.049519 |              | 0        | 5.267649 | 0        | 1        | NA |
| iqcbl             | 5.100637 | 1.0569857    | 1.193105 | 0.885912 | 0.375665 | 0.822237 |    |
| si:ch211-9n13.3   | 0        | NA           | NA       | NA       | NA       | NA       |    |
| CU467110.1        | 198.1027 | 0.211328195  | 0.246451 | 0.857484 | 0.391177 | 0.827902 |    |
| tnfaip6           | 112.2556 | -0.206807426 | 0.216236 | -0.95639 | 0.338873 | 0.795226 |    |
| BX927377.1        | 0        | NA           | NA       | NA       | NA       | NA       |    |
| BX323559.2        | 1.733279 | -4.883251874 | 1.712212 | -2.85201 | 0.004344 | NA       |    |
| si:dkey-10613.7   | 82.25967 | -0.200215083 | 0.262394 | -0.76303 | 0.445444 | 0.855403 |    |
| BX649502.6        | 7.201581 | 1.752033034  | 0.732094 | 2.393181 | 0.016703 | 0.229135 |    |
| mpc1              | 1572.765 | -0.034326341 | 0.147534 | -0.23267 | 0.81602  | 0.971207 |    |
| CR388143.1        | 15.02626 | 0.16305285   | 0.462772 | 0.35234  | 0.724584 | 0.9484   |    |
| si:dkey-7814.10   | 0        | NA           | NA       | NA       | NA       | NA       |    |
| BX511129.1        | 52.34165 | -0.601163827 | 0.268597 | -2.23816 | 0.025211 | 0.281915 |    |
| ahdc1             | 268.4554 | 0.497066653  | 0.156262 | 3.180984 | 0.001468 | 0.057739 |    |
| oip5-as1          | 2462.449 | 0.107784421  | 0.116602 | 0.924381 | 0.355288 | 0.806546 |    |
| si:ch211-14a11.2  | 0.245733 | 0.929637512  | 4.186256 | 0.222069 | 0.82426  | NA       |    |
| si:dkey-76d14.2   | 4.252862 | 0.482827323  | 0.787741 | 0.612926 | 0.539925 | 0.893049 |    |
| gpr52             | 25.60587 | 0.706150371  | 0.458257 | 1.540949 | 0.123329 | 0.570077 |    |
| si:dkey-56m15.6   | 1.387854 | -0.184006284 | 1.397592 | -0.13166 | 0.895254 | NA       |    |
| CR384062.1        | 0.176938 |              | 0        | 5.267649 | 0        | 1        | NA |
| CU693484.1        | 45.56337 | -0.398044094 | 0.298454 | -1.33369 | 0.182306 | 0.658775 |    |
| si:ch73-7i4.3     | 1.745872 | -2.402732877 | 1.870986 | -1.28421 | 0.19907  | NA       |    |
| znf653            | 86.53584 | 0.116473162  | 0.269736 | 0.431804 | 0.665884 | 0.932664 |    |
| CT009596.1        | 0.11861  |              | 0        | 5.267649 | 0        | 1        | NA |
| CR361551.1        | 36.0113  | 0.65110487   | 0.611408 | 1.064928 | 0.286909 | 0.757915 |    |
| CU466287.1        | 0.288391 | 0.093661709  | 4.019962 | 0.023299 | 0.981412 | NA       |    |
| si:dkey-175d9.2   | 9.430091 | 0.661018896  | 0.972991 | 0.679368 | 0.496905 | 0.878572 |    |
| CYP46A1           | 11.01215 | -2.839125791 | 0.858607 | -3.30667 | 0.000944 | 0.042765 |    |
| si:ch211-197e7.3  | 2.698328 | 0.537370225  | 1.264873 | 0.424841 | 0.670953 | 0.933953 |    |
| BX571825.10       | 0        | NA           | NA       | NA       | NA       | NA       |    |
| pamr1             | 207.2305 | -0.38050724  | 0.25749  | -1.47776 | 0.139473 | 0.597667 |    |
| BX530034.1        | 4.890824 | 0.951867875  | 0.908965 | 1.047199 | 0.295008 | 0.763708 |    |
| si:dkey-95p16.2   | 69.57396 | -0.355827417 | 0.256844 | -1.38538 | 0.165936 | 0.635475 |    |
| BX571701.3        | 0.060442 |              | 0        | 5.267649 | 0        | 1        | NA |
| BX664716.1        | 1.339614 | -2.588920812 | 1.730598 | -1.49597 | 0.134662 | NA       |    |
| BX004785.2        | 1.126128 | 2.773351204  | 2.374629 | 1.167909 | 0.242843 | NA       |    |
| CR450740.1        | 0.484046 | 1.055386708  | 4.049432 | 0.260626 | 0.794381 | NA       |    |
| si:dkey-7814.8    | 0.405907 | 1.055395059  | 3.76203  | 0.280539 | 0.779064 | NA       |    |
| CR677617.1        | 4.59272  | 1.971049558  | 1.571558 | 1.254201 | 0.209769 | 0.691766 |    |
| urpl              | 25.23045 | -1.011432966 | 0.396157 | -2.55311 | 0.010676 | 0.179908 |    |
| si:ch211-217k17.9 | 122.3469 | -0.389589268 | 0.340444 | -1.14436 | 0.252476 | 0.732759 |    |
| CU651633.1        | 0        | NA           | NA       | NA       | NA       | NA       |    |
| si:zfos-905g2.1   | 114.2519 | -0.253364134 | 0.204118 | -1.24126 | 0.214508 | 0.69658  |    |
| zgc:194281        | 30.06395 | 0.183855113  | 0.3503   | 0.52485  | 0.599687 | 0.913468 |    |
| BX649448.2        | 3.962604 | -0.327486722 | 1.103523 | -0.29676 | 0.766646 | 0.960296 |    |
| rsflb.1           | 0.107013 | -1.826650979 | 5.230461 | -0.34923 | 0.726914 | NA       |    |
| zgc:77614         | 0        | NA           | NA       | NA       | NA       | NA       |    |
| si:ch211-135f11.6 | 0.093881 |              | 0        | 5.267649 | 0        | 1        | NA |
| si:dkey-238j22.1  | 0        | NA           | NA       | NA       | NA       | NA       |    |
| BX324218.1        | 2.934346 | 0.473372739  | 1.131059 | 0.418522 | 0.675566 | 0.935422 |    |
| BX323812.2        | 0.129399 |              | 0        | 5.267649 | 0        | 1        | NA |

|                   |          |              |          |          |          |          |
|-------------------|----------|--------------|----------|----------|----------|----------|
| CT573204.1        | 11.34009 | -0.140397816 | 0.607649 | -0.23105 | 0.817275 | 0.971207 |
| b3gnt3.3          | 39.59895 | -0.363628513 | 0.42459  | -0.85642 | 0.391764 | 0.827902 |
| BX548044.5        | 0.196845 | 1.921554817  | 5.236909 | 0.366925 | 0.713675 | NA       |
| slc37a4b          | 10.57338 | -0.001387469 | 0.603259 | -0.0023  | 0.998165 | 1        |
| si:dkey-230i18.2  | 1.391482 | 0.660173528  | 1.88985  | 0.349326 | 0.726845 | NA       |
| BX005309.1        | 267.1059 | 0.225205326  | 0.147871 | 1.522986 | 0.127762 | 0.577117 |
| BX539321.1        | 0.44617  | 1.055388429  | 3.731094 | 0.282863 | 0.777282 | NA       |
| CR450686.2        | 3.926239 | -0.610650194 | 1.127064 | -0.54181 | 0.587952 | 0.907732 |
| BX294165.1        | 5.844675 | -1.09294631  | 1.01427  | -1.07757 | 0.281226 | 0.753557 |
| si:ch73-56d11.5   | 33.01994 | 0.124705463  | 0.529255 | 0.235625 | 0.813724 | 0.970397 |
| si:dkey-111e8.4   | 0.894672 | -3.248062192 | 2.14834  | -1.51189 | 0.130561 | NA       |
| BX649641.4        | 0.312679 | 0            | 3.933089 | 0        | 1        | NA       |
| selenop           | 34720.04 | 0.209119044  | 0.208911 | 1.000997 | 0.316828 | 0.778879 |
| BX005438.1        | 59.92561 | -0.264504727 | 0.327595 | -0.80741 | 0.419428 | 0.842347 |
| BX842699.1        | 3.200657 | 1.383890253  | 0.975783 | 1.418235 | 0.156122 | 0.621751 |
| BX324007.1        | 0.046941 | 0            | 5.267649 | 0        | 1        | NA       |
| BX571854.1        | 5.914254 | -0.089002278 | 0.958805 | -0.09283 | 0.926042 | 0.994815 |
| si:dkey-20i20.7   | 17.14985 | 0.335184699  | 0.453154 | 0.739671 | 0.4595   | 0.862103 |
| si:ch211-225b11.4 | 79.72008 | 0.020453858  | 0.183475 | 0.11148  | 0.911235 | 0.992208 |
| BX294388.1        | 0.461427 | 0            | 3.664946 | 0        | 1        | NA       |
| bckdhb1           | 399.761  | -0.394831146 | 0.20649  | -1.9121  | 0.055863 | 0.408826 |
| si:dkey-25o1.7    | 13.58004 | -1.072856897 | 1.733317 | -0.61896 | 0.535942 | 0.892102 |
| lamc3             | 797.364  | -0.102911165 | 0.175409 | -0.58669 | 0.55741  | 0.899184 |
| si:ch73-256j6.4   | 0.751934 | 0.120635228  | 2.112627 | 0.057102 | 0.954464 | NA       |
| AL929493.1        | 0.04222  | 0            | 5.267649 | 0        | 1        | NA       |
| BX000981.2        | 13.91943 | -0.581653323 | 0.606071 | -0.95971 | 0.3372   | 0.794158 |
| CT025897.1        | 10.50507 | 0.340012069  | 0.561005 | 0.606076 | 0.544464 | 0.895206 |
| si:dkey-80c24.4   | 0.049519 | 0            | 5.267649 | 0        | 1        | NA       |
| FP236157.1        | 3.682851 | -0.974579185 | 0.941137 | -1.03553 | 0.30042  | 0.766629 |
| zgc:193505        | 1188.731 | -0.148821965 | 0.152978 | -0.97283 | 0.330636 | 0.788126 |
| CU207343.1        | 0        | NA           | NA       | NA       | NA       | NA       |
| si:dkey-234i24.8  | 5.056048 | 0.674622117  | 0.858971 | 0.785384 | 0.432228 | 0.848419 |
| si:ch211-282k23.2 | 7.747788 | -0.918532654 | 1.072236 | -0.85665 | 0.391638 | 0.827902 |
| CR391910.2        | 4.24982  | -1.186044275 | 1.068764 | -1.10973 | 0.267114 | 0.743418 |
| CR536604.1        | 10.63843 | 0.223527733  | 0.586453 | 0.381152 | 0.703091 | 0.943622 |
| si:dkey-88n24.10  | 0.140822 | 0            | 5.267649 | 0        | 1        | NA       |
| oip5              | 67.75214 | -0.224914537 | 0.245592 | -0.9158  | 0.35977  | 0.810703 |
| BX470224.2        | 0.613233 | 0.090405095  | 2.176001 | 0.041546 | 0.96686  | NA       |
| omd               | 53.46592 | -0.608170109 | 0.366538 | -1.65923 | 0.09707  | 0.519526 |
| si:ch211-93g21.1  | 15.35403 | 1.51539685   | 0.587774 | 2.578198 | 0.009932 | 0.172469 |
| or124-3           | 0.053262 | 1.055396947  | 5.267649 | 0.200354 | 0.841203 | NA       |
| BX255912.1        | 1.058809 | 1.922704314  | 1.968845 | 0.976565 | 0.328785 | NA       |
| si:dkey-159f12.2  | 74.40665 | 0.381109716  | 0.478441 | 0.796565 | 0.425704 | 0.844714 |
| ccl34b.1          | 229.3901 | 0.038770071  | 0.330121 | 0.117442 | 0.90651  | 0.991636 |
| BX664750.1        | 0        | NA           | NA       | NA       | NA       | NA       |
| si:dkey-92i17.2   | 80.81769 | 0.453628041  | 0.226635 | 2.001583 | 0.04533  | 0.372707 |
| CT025909.1        | 1.122505 | -1.396015449 | 1.913318 | -0.72963 | 0.465616 | NA       |
| si:ch211-234c11.3 | 5.083466 | 1.13501404   | 0.909593 | 1.247826 | 0.212095 | 0.693739 |
| BX005419.1        | 0.264416 | 0            | 5.267649 | 0        | 1        | NA       |
| si:dkey-45h7.1    | 10.21111 | -0.416312763 | 0.577229 | -0.72123 | 0.47077  | 0.86783  |
| sult3st2          | 129.0097 | 0.341427625  | 0.328314 | 1.039941 | 0.298367 | 0.765416 |
| si:dkey-27b3.4    | 5.036453 | -1.502221953 | 1.355027 | -1.10863 | 0.26759  | 0.74397  |
| spc24             | 221.3681 | 0.367704359  | 0.242677 | 1.5152   | 0.129722 | 0.579795 |
| CR392341.1        | 6.730816 | -1.059094074 | 1.045693 | -1.01282 | 0.311148 | 0.775936 |

|                   |          |              |            |          |          |          |
|-------------------|----------|--------------|------------|----------|----------|----------|
| BX537143.1        |          | 0 NA         | NA         | NA       | NA       | NA       |
| sl00a11           | 1080.101 | 0.463233554  | 0.242208   | 1.912545 | 0.055806 | 0.408826 |
| si:ch211-106h4.4  | 12.65534 | -0.630833547 | 0.609186   | -1.03554 | 0.300419 | 0.766629 |
| si:ch211-249h16.8 | 2.564495 | -0.847676755 | 1.526085   | -0.55546 | 0.578581 | 0.905417 |
| BX000981.3        | 0.687458 | 1.427059234  | 2.146649   | 0.664785 | 0.506188 | NA       |
| si:dkey-26i13.5   | 0.337453 |              | 0 4.477553 |          | 0        | 1 NA     |
| BX537282.1        | 1.468689 | -0.272791445 | 1.675988   | -0.16276 | 0.870704 | NA       |
| ugt5a2            | 5.681834 | -0.799322258 | 1.809059   | -0.44184 | 0.658602 | 0.930581 |
| AL954868.1        | 0.507111 | -0.868138091 | 3.113926   | -0.27879 | 0.780404 | NA       |
| BX511034.3        | 7.95092  | 1.249636268  | 0.587376   | 2.12749  | 0.033379 | 0.323127 |
| BX294113.2        | 0.132542 |              | 0 5.267649 |          | 0        | 1 NA     |
| AL954359.1        | 9.069406 | -0.010328056 | 0.686164   | -0.01505 | 0.987991 | 1        |
| CR513785.1        | 0.046941 |              | 0 5.267649 |          | 0        | 1 NA     |
| si:ch211-287n14.3 | 0.837076 | 0.873762748  | 2.081226   | 0.419831 | 0.674609 | NA       |
| ftr25             | 5.190022 | -0.406355226 | 0.812803   | -0.49994 | 0.617115 | 0.916365 |
| si:dkeyp-2e4.6    | 2.87623  | -2.450848552 | 1.142227   | -2.14568 | 0.031899 | 0.317397 |
| tm7sf3            | 563.7836 | -0.067209468 | 0.123255   | -0.54529 | 0.585555 | 0.906655 |
| entpd5b           | 530.3408 | 0.172417687  | 0.14126    | 1.220567 | 0.22225  | 0.703972 |
| si:dkey-6f10.3    | 0.722748 | 1.055434089  | 2.370686   | 0.445202 | 0.656174 | NA       |
| CR318646.2        | 0.216219 |              | 0 5.100278 |          | 0        | 1 NA     |
| CT573186.1        | 0.063619 |              | 0 5.267649 |          | 0        | 1 NA     |
| si:dkey-285e18.5  | 2.410741 | -1.166259661 | 1.218889   | -0.95682 | 0.338657 | 0.795226 |
| BX005283.1        | 1.735212 | 0.595427102  | 1.280036   | 0.465164 | 0.641814 | NA       |
| ankmy2b           | 1.615047 | 1.958180311  | 2.028292   | 0.965433 | 0.334328 | NA       |
| BX001030.1        | 327.5689 | -0.128101405 | 0.225419   | -0.56828 | 0.569844 | 0.902322 |
| zgc:171435        | 5.44839  | -1.819601118 | 0.899311   | -2.02333 | 0.043039 | 0.363552 |
| si:dkey-28d5.4    | 0.365801 | 1.055347551  | 5.147862   | 0.205007 | 0.837567 | NA       |
| si:ch211-56a11.2  | 41.43047 | 0.133388701  | 0.327478   | 0.407321 | 0.683772 | 0.938486 |
| AL845312.1        | 0.04222  |              | 0 5.267649 |          | 0        | 1 NA     |
| si:dkey-218h11.6  | 0.105115 | 1.055383603  | 5.267649   | 0.200352 | 0.841205 | NA       |
| tmem238a          | 312.6302 | -0.169499394 | 0.173648   | -0.97611 | 0.329009 | 0.787268 |
| CU467633.2        | 0.378152 |              | 0 4.997252 |          | 0        | 1 NA     |
| si:rp71-36a1.2    | 89.5447  | 0.562432953  | 0.327963   | 1.714929 | 0.086358 | 0.493048 |
| si:dkey-193c22.1  | 80.43242 | -0.008729685 | 0.260984   | -0.03345 | 0.973316 | 1        |
| CU074419.2        | 1.811694 | -1.916789758 | 1.514013   | -1.26603 | 0.205502 | NA       |
| FP016018.1        |          | 0 NA         | NA         | NA       | NA       | NA       |
| BX005301.1        | 0.363303 | 1.055410559  | 3.351162   | 0.314939 | 0.752808 | NA       |
| BX649502.7        |          | 0 NA         | NA         | NA       | NA       | NA       |
| BX537166.2        | 0.931521 |              | 0 2.21625  |          | 0        | 1 NA     |
| BX255917.1        | 0.312203 | 2.667673267  | 5.195716   | 0.513437 | 0.607646 | NA       |
| si:dkey-217m5.8   | 0.226028 | -0.793668545 | 5.235279   | -0.1516  | 0.879502 | NA       |
| si:ch73-27e22.4   | 29.53957 | 0.075302581  | 0.456694   | 0.164886 | 0.869034 | 0.982843 |
| si:dkey-126g1.9   | 528.9199 | -0.361559896 | 0.26332    | -1.37308 | 0.169727 | 0.641486 |
| si:ch211-122114.4 | 0.063619 |              | 0 5.267649 |          | 0        | 1 NA     |
| si:dkeyp-46h3.8   | 0.144198 |              | 0 5.267649 |          | 0        | 1 NA     |
| CR356222.1        | 1.856552 | 2.522447157  | 2.046336   | 1.232665 | 0.217701 | NA       |
| CR385053.1        | 0.147064 | -2.293512936 | 5.204056   | -0.44072 | 0.659418 | NA       |
| arhgap20b         | 12.39168 | -0.007146273 | 0.652677   | -0.01095 | 0.991264 | 1        |
| si:dkeyp-7a3.1    | 2.524149 | 0.5299908    | 1.131671   | 0.468326 | 0.639551 | 0.924779 |
| CR854927.1        | 0.536304 |              | 0 3.51923  |          | 0        | 1 NA     |
| si:dkey-256i11.2  | 4.905761 | -0.228726489 | 0.80345    | -0.28468 | 0.775889 | 0.961073 |
| artnb             | 13.08877 | -0.612496585 | 0.478919   | -1.27891 | 0.200927 | 0.681045 |
| BX901930.3        | 0.063619 |              | 0 5.267649 |          | 0        | 1 NA     |
| BX470224.3        | 0.159412 |              | 0 5.267649 |          | 0        | 1 NA     |

|                    |          |              |            |          |          |          |
|--------------------|----------|--------------|------------|----------|----------|----------|
| rnf212b            | 1.021881 | -3.316248662 | 2.064325   | -1.60646 | 0.108174 | NA       |
| si:dkey-54g2.2     | 0.270892 |              | 0 5.267649 |          | 0        | 1 NA     |
| BX276096.1         |          | 0 NA         | NA         | NA       | NA       | NA       |
| CR931802.1         | 2.583118 | 2.933095558  | 1.604426   | 1.828128 | 0.06753  | 0.443563 |
| BX539307.3         | 19.50098 | -1.37038912  | 0.441192   | -3.10611 | 0.001896 | 0.067264 |
| CR396583.1         | 7.807992 | 0.271262098  | 0.732804   | 0.37017  | 0.711256 | 0.945821 |
| si:ch211-209a2.2   | 2.013499 | 1.220258893  | 1.405864   | 0.867978 | 0.385406 | NA       |
| pth1a              | 5.916046 | -1.0725014   | 0.793906   | -1.35092 | 0.176722 | 0.650047 |
| si:dkey-83m22.7    | 10.09493 | 0.587751565  | 0.550336   | 1.067986 | 0.285527 | 0.756853 |
| BX276103.1         | 0.314664 | 0.093655399  | 3.965699   | 0.023616 | 0.981159 | NA       |
| CU207257.1         |          | 0 NA         | NA         | NA       | NA       | NA       |
| htr1aa             | 59.59395 | 0.315644464  | 0.383074   | 0.823977 | 0.409953 | 0.836939 |
| si:dkey-122c11.1   |          | 0 NA         | NA         | NA       | NA       | NA       |
| si:ch211-217k17.11 | 1.851117 | 0.093653786  | 2.145882   | 0.043643 | 0.965189 | NA       |
| FP102171.1         | 0.166911 | -0.868103029 | 5.267649   | -0.1648  | 0.869102 | NA       |
| cd180              | 7.284699 | -2.143511537 | 1.462902   | -1.46525 | 0.142854 | 0.602002 |
| rimbp2             |          | 0 NA         | NA         | NA       | NA       | NA       |
| BX004774.2         | 85.94788 | 0.079941818  | 0.451416   | 0.177091 | 0.859437 | 0.979975 |
| FP101875.1         | 0.396016 | 1.055337996  | 5.084507   | 0.20756  | 0.835573 | NA       |
| si:ch211-197h24.9  | 256.5519 | -0.239380656 | 0.14103    | -1.69738 | 0.089626 | 0.50251  |
| si:ch211-250k18.7  | 11.26465 | 0.555925874  | 0.722919   | 0.769002 | 0.441892 | 0.853308 |
| si:ch211-271e10.6  | 0.060442 |              | 0 5.267649 |          | 0        | 1 NA     |
| si:dkey-145c18.5   | 6.391587 | 0.350445691  | 0.66363    | 0.528074 | 0.597448 | 0.911953 |
| prr18              | 701.9284 | -0.008036428 | 0.199583   | -0.04027 | 0.967881 | 1        |
| si:ch1073-296i8.2  | 53.17973 | 0.405409138  | 0.331984   | 1.22117  | 0.222022 | 0.703829 |
| rbp2b              | 673.4663 | -0.534770074 | 0.299417   | -1.78604 | 0.074093 | 0.462232 |
| si:ch211-272h9.6   |          | 0 NA         | NA         | NA       | NA       | NA       |
| BX547993.1         |          | 0 NA         | NA         | NA       | NA       | NA       |
| BX663499.1         |          | 0 NA         | NA         | NA       | NA       | NA       |
| cxcl11.7           | 0.688746 | -0.868133489 | 3.633176   | -0.23895 | 0.811147 | NA       |
| BX548078.1         | 25.7275  | 0.827753937  | 0.836024   | 0.990107 | 0.322122 | 0.782237 |
| lrr1ql             | 13.2637  | -0.233321002 | 0.540287   | -0.43185 | 0.665853 | 0.932664 |
| si:dkey-70b23.2    | 38.49918 | -0.027036632 | 0.302965   | -0.08924 | 0.928891 | 0.995164 |
| taar17a            |          | 0 NA         | NA         | NA       | NA       | NA       |
| BX255915.1         | 0.221787 | -2.32472863  | 5.202573   | -0.44684 | 0.654989 | NA       |
| CR450686.3         | 9.881798 | 1.653880907  | 0.568023   | 2.911642 | 0.003595 | 0.09929  |
| CT583625.1         | 0.120341 | -0.868089684 | 5.267649   | -0.1648  | 0.869104 | NA       |
| si:rp71-79p20.2    |          | 0 NA         | NA         | NA       | NA       | NA       |
| itln2              | 0.207272 |              | 0 5.267649 |          | 0        | 1 NA     |
| si:dkey-81p22.11   | 4.537354 | -0.477874528 | 0.759501   | -0.6292  | 0.529221 | 0.890406 |
| slx4               | 2.802922 | -1.010883949 | 0.987977   | -1.02319 | 0.30622  | 0.771472 |
| setbpl             | 115.9099 | -0.216751652 | 0.219936   | -0.98552 | 0.324367 | 0.783308 |
| si:dkey-196n19.2   | 8.40293  | 0.680531355  | 0.754191   | 0.902332 | 0.36688  | 0.816111 |
| sst6               | 31.91067 | 0.356203784  | 0.3615     | 0.98535  | 0.324452 | 0.783308 |
| ccdc73             | 0.519153 | 2.559365536  | 3.367174   | 0.760093 | 0.447199 | NA       |
| pimr113            | 1.466776 |              | 0 2.480518 |          | 0        | 1 NA     |
| si:dkeyp-2c8.3     | 0.894078 |              | 0 2.219031 |          | 0        | 1 NA     |
| CR762470.1         | 0.137239 | 1.055371994  | 5.267649   | 0.20035  | 0.841207 | NA       |
| si:ch211-142c4.1   | 0.294451 |              | 0 5.267649 |          | 0        | 1 NA     |
| ch25h13            | 3.036265 | -0.228851664 | 1.026268   | -0.22299 | 0.82354  | 0.972005 |
| CT027772.2         | 0.326589 | 1.055365306  | 4.56713    | 0.231078 | 0.817254 | NA       |
| si:ch211-110p13.9  | 94.44661 | 0.150092127  | 0.263747   | 0.569077 | 0.569304 | 0.902303 |
| si:dkey-259j3.5    | 5.059998 | -1.214472103 | 0.984111   | -1.23408 | 0.217173 | 0.69815  |
| si:ch211-102c2.8   | 20.89003 | -0.337569332 | 0.436944   | -0.77257 | 0.439778 | 0.852079 |

|                   |          |              |          |          |          |          |
|-------------------|----------|--------------|----------|----------|----------|----------|
| BX085193.2        | 2.092421 | -1.258707717 | 1.456886 | -0.86397 | 0.387604 | NA       |
| znf1121           | 12.80318 | -0.099682614 | 0.510348 | -0.19532 | 0.84514  | 0.976791 |
| si:ch73-382f3.1   | 69.76036 | -0.158635738 | 0.21165  | -0.74952 | 0.453544 | 0.858722 |
| CR628410.1        | 3.211733 | 0.698609699  | 1.568056 | 0.445526 | 0.65594  | 0.929606 |
| si:ch211-165f21.4 | 1.065563 | -3.087773908 | 1.984636 | -1.55584 | 0.119746 | NA       |
| si:dkey-83f18.14  | 0.874113 | -0.868140618 | 2.534873 | -0.34248 | 0.731991 | NA       |
| BX571825.11       | 0 NA     | NA           | NA       | NA       | NA       | NA       |
| zgc:152936        | 3.905903 | -3.118566558 | 1.211227 | -2.57472 | 0.010032 | 0.173583 |
| zgc:136461        | 14214.18 | -3.084018947 | 1.398666 | -2.20497 | 0.027456 | 0.294109 |
| si:ch211-1f22.12  | 0.87383  | -1.808798589 | 2.525686 | -0.71616 | 0.473892 | NA       |
| si:dkey-57c22.1   | 2.585603 | -0.855435526 | 1.374888 | -0.62219 | 0.53382  | 0.891181 |
| BX649457.1        | 0.087179 | 0            | 5.267649 | 0        | 1        | NA       |
| CU639468.1        | 40.97708 | 1.47563407   | 0.431898 | 3.416628 | 0.000634 | 0.032718 |
| si:dkey-19a16.1   | 0.131761 | 0            | 5.267649 | 0        | 1        | NA       |
| BX248512.1        | 0 NA     | NA           | NA       | NA       | NA       | NA       |
| igl3v2            | 0 NA     | NA           | NA       | NA       | NA       | NA       |
| or125-1           | 1.173314 | 0.085038781  | 1.971922 | 0.043125 | 0.965602 | NA       |
| si:dkey-79f11.10  | 5.141189 | 2.140949523  | 2.294721 | 0.932989 | 0.350826 | 0.802215 |
| BX957345.1        | 0 NA     | NA           | NA       | NA       | NA       | NA       |
| si:ch211-274k16.2 | 3.021412 | -1.668378726 | 1.10836  | -1.50527 | 0.132255 | 0.584912 |
| si:dkey-248f6.3   | 1.160971 | 1.05542546   | 2.40247  | 0.439308 | 0.660438 | NA       |
| weel              | 314.98   | 0.051733865  | 0.192179 | 0.269196 | 0.787779 | 0.963294 |
| CR356223.1        | 1.311245 | 0.062134485  | 1.92891  | 0.032212 | 0.974303 | NA       |
| BX004840.1        | 0 NA     | NA           | NA       | NA       | NA       | NA       |
| BX901878.1        | 0.073968 | 0            | 5.267649 | 0        | 1        | NA       |
| CU137716.1        | 1.502049 | -0.275302013 | 1.582095 | -0.17401 | 0.861857 | NA       |
| BX324213.1        | 5.066084 | -1.653480169 | 0.919343 | -1.79854 | 0.072091 | 0.456627 |
| si:dkey-196j8.2   | 51.00823 | -0.548141528 | 0.275354 | -1.99068 | 0.046516 | 0.376263 |
| zgc:174224        | 27.74127 | -0.187870782 | 0.323859 | -0.5801  | 0.561847 | 0.900715 |
| si:dkey-28d5.10   | 0.920911 | -0.868144833 | 2.373957 | -0.3657  | 0.714593 | NA       |
| si:zfos-2330d3.7  | 128.1207 | -0.194199772 | 0.403811 | -0.48092 | 0.630575 | 0.923003 |
| pimr69            | 0.517689 | -0.85568782  | 3.156124 | -0.27112 | 0.786299 | NA       |
| CT027791.1        | 0.230869 | 0            | 4.974856 | 0        | 1        | NA       |
| BX908800.1        | 0.337263 | -0.868130865 | 3.870918 | -0.22427 | 0.822547 | NA       |
| tmsb5             | 6.311031 | 0.265421652  | 0.902309 | 0.294158 | 0.768637 | 0.960395 |
| CR677513.1        | 1.700024 | 1.964468739  | 1.711633 | 1.147716 | 0.251086 | NA       |
| CT027756.2        | 0.053506 | -0.86807634  | 5.267649 | -0.16479 | 0.869106 | NA       |
| CR376740.1        | 0.043308 | 0            | 5.267649 | 0        | 1        | NA       |
| BX530037.4        | 0 NA     | NA           | NA       | NA       | NA       | NA       |
| BX510657.1        | 222.5258 | -0.191632908 | 0.186054 | -1.02999 | 0.303016 | 0.769158 |
| trhr2             | 3.971099 | -0.188650985 | 1.214376 | -0.15535 | 0.876547 | 0.985007 |
| CU694380.1        | 0.353276 | 0            | 5.193539 | 0        | 1        | NA       |
| CT030031.1        | 0.98422  | 0.093649672  | 2.42547  | 0.038611 | 0.969201 | NA       |
| BX323559.3        | 27.28015 | 0.952820883  | 0.865399 | 1.101019 | 0.270888 | 0.746845 |
| CR456628.2        | 0 NA     | NA           | NA       | NA       | NA       | NA       |
| BX284666.2        | 0 NA     | NA           | NA       | NA       | NA       | NA       |
| BX324137.1        | 0.085528 | 0            | 5.267649 | 0        | 1        | NA       |
| BX276103.2        | 4.174324 | 0.074748748  | 0.979641 | 0.076302 | 0.939179 | 0.997371 |
| CR354542.1        | 0 NA     | NA           | NA       | NA       | NA       | NA       |
| BX890562.1        | 1.799832 | 1.43869419   | 1.24852  | 1.152319 | 0.24919  | NA       |
| CR855277.3        | 13.12099 | 0.857332257  | 0.752225 | 1.139729 | 0.254399 | 0.733426 |
| BX005032.1        | 0 NA     | NA           | NA       | NA       | NA       | NA       |
| CR392341.2        | 0 NA     | NA           | NA       | NA       | NA       | NA       |
| rflnb             | 285.2153 | 0.442537188  | 0.199483 | 2.218424 | 0.026526 | 0.288683 |

|                    |           |               |             |           |           |           |
|--------------------|-----------|---------------|-------------|-----------|-----------|-----------|
| ftr04              | 1. 002445 | 0. 100892857  | 2. 255225   | 0. 044737 | 0. 964317 | NA        |
| si:dkeyp-1h4. 6    | 639. 0335 | -0. 283735043 | 0. 396158   | -0. 71622 | 0. 473858 | 0. 869292 |
| BX004770. 1        | 3. 893005 | -3. 082511716 | 1. 54312    | -1. 99758 | 0. 045762 | 0. 374664 |
| si:dkeyp-77c8. 1   | 33. 23651 | -0. 301146512 | 0. 446938   | -0. 6738  | 0. 500439 | 0. 880222 |
| BX294181. 2        | 1. 167347 | 3. 514230267  | 2. 299868   | 1. 528014 | 0. 126509 | NA        |
| vma21              | 1026. 435 | -0. 256983875 | 0. 158252   | -1. 62389 | 0. 1044   | 0. 53263  |
| BX546499. 2        | 2. 942208 | 0. 09069404   | 1. 072144   | 0. 084591 | 0. 932586 | 0. 996175 |
| BX530407. 2        | 0. 049519 |               | 0 5. 267649 | 0         | 1         | NA        |
| AL929321. 1        | 0 NA      | NA            | NA          | NA        | NA        | NA        |
| si:dkey-9i23. 16   | 263. 9042 | -0. 207228396 | 0. 158201   | -1. 30991 | 0. 190227 | 0. 670045 |
| si:dkey-251i10. 2  | 4172. 1   | -0. 44246216  | 0. 188054   | -2. 35285 | 0. 01863  | 0. 241555 |
| BX530064. 2        | 1. 202566 | 0. 795233747  | 1. 905277   | 0. 417385 | 0. 676397 | NA        |
| si:dkey-111e8. 5   | 25. 89735 | -0. 136256179 | 0. 4661     | -0. 29233 | 0. 770032 | 0. 960484 |
| CR396590. 5        | 0 NA      | NA            | NA          | NA        | NA        | NA        |
| si:ch211-250k18. 6 | 14. 07632 | -0. 200041517 | 0. 645577   | -0. 30986 | 0. 756664 | 0. 956668 |
| BX571825. 12       | 0. 147064 | -2. 293512936 | 5. 204056   | -0. 44072 | 0. 659418 | NA        |
| BX548247. 1        | 0. 376026 | -2. 295240395 | 4. 248933   | -0. 54019 | 0. 589065 | NA        |
| ftr79              | 8. 273341 | 0. 282638061  | 0. 643911   | 0. 43894  | 0. 660705 | 0. 930581 |
| BX950224. 1        | 2. 551721 | -0. 314961122 | 1. 322504   | -0. 23816 | 0. 811761 | 0. 97012  |
| CR933734. 2        | 6. 662885 | -4. 53724342  | 1. 350428   | -3. 35985 | 0. 00078  | 0. 037179 |
| si:dkey-222h21. 9  | 1. 927194 | -0. 664206933 | 1. 434409   | -0. 46305 | 0. 643327 | NA        |
| CR925803. 1        | 1. 417523 | -1. 203873655 | 1. 959752   | -0. 6143  | 0. 539018 | NA        |
| si:ch211-220f16. 1 | 9. 154606 | 1. 788840063  | 0. 579151   | 3. 088729 | 0. 00201  | 0. 069723 |
| zgc:77486          | 302. 3671 | 0. 113323703  | 0. 157876   | 0. 717801 | 0. 47288  | 0. 868965 |
| CR749763. 3        | 4. 777728 | -0. 315640554 | 1. 266557   | -0. 24921 | 0. 803197 | 0. 968418 |
| si:dkeyp-72a4. 1   | 0. 69325  | -2. 401374178 | 2. 581918   | -0. 93007 | 0. 352333 | NA        |
| si:ch211-165f21. 7 | 0. 732247 | 3. 561678507  | 2. 124165   | 1. 676743 | 0. 093593 | NA        |
| BX323543. 3        | 0. 184281 | -0. 868114638 | 5. 267649   | -0. 1648  | 0. 8691   | NA        |
| gzm3. 3            | 3. 264253 | 1. 099819071  | 1. 400442   | 0. 785337 | 0. 432256 | 0. 848419 |
| si:ch211-279g13. 1 | 23. 98519 | -1. 795992717 | 1. 432751   | -1. 25353 | 0. 210014 | 0. 691821 |
| BX465838. 1        | 0 NA      | NA            | NA          | NA        | NA        | NA        |
| znf1058            | 1. 238214 | 1. 539842397  | 2. 08232    | 0. 739484 | 0. 459613 | NA        |
| si:dkey-9i23. 15   | 167. 1486 | -0. 541235851 | 0. 19254    | -2. 81103 | 0. 004938 | 0. 117227 |
| si:ch73-7i4. 2     | 5. 403991 | -0. 848430656 | 0. 763568   | -1. 11114 | 0. 266508 | 0. 74299  |
| si:ch73-376124. 6  | 39. 23993 | 0. 455068049  | 0. 308652   | 1. 47437  | 0. 140382 | 0. 599499 |
| si:dkey-6a5. 3     | 0. 727197 | -0. 850823175 | 2. 748502   | -0. 30956 | 0. 756896 | NA        |
| cc134b. 4          | 23. 95861 | 1. 845846464  | 1. 060621   | 1. 740345 | 0. 081798 | 0. 481484 |
| serp2              | 73. 31187 | 0. 092282426  | 0. 283417   | 0. 325606 | 0. 744722 | 0. 95491  |
| FP102120. 1        | 70. 62197 | 0. 323469897  | 0. 251694   | 1. 285173 | 0. 198732 | 0. 679447 |
| si:dkey-98j1. 5    | 1. 944592 | -0. 245268189 | 1. 298709   | -0. 18886 | 0. 850206 | NA        |
| CU467633. 3        | 0. 616109 | 0. 093655884  | 2. 719452   | 0. 034439 | 0. 972527 | NA        |
| CR388373. 1        | 0. 291326 | -0. 793909104 | 4. 652539   | -0. 17064 | 0. 864507 | NA        |
| swt1               | 153. 8676 | 0. 151256583  | 0. 182818   | 0. 827362 | 0. 408032 | 0. 835879 |
| si:dkey-192g7. 3   | 55. 66129 | 0. 045064641  | 0. 265483   | 0. 169746 | 0. 86521  | 0. 982162 |
| si:ch211-130h14. 4 | 6. 044144 | 0. 42811677   | 0. 638183   | 0. 670837 | 0. 502324 | 0. 881277 |
| znf1137            | 6. 553832 | -3. 522225088 | 0. 829333   | -4. 24706 | 2. 17E-05 | 0. 003005 |
| si:dkey-111e8. 1   | 170. 6286 | 0. 505971786  | 0. 187102   | 2. 704254 | 0. 006846 | 0. 139692 |
| BX649641. 5        | 0. 647075 | 0. 026201197  | 2. 670959   | 0. 00981  | 0. 992173 | NA        |
| AL831745. 2        | 3. 071751 | 0. 095368409  | 1. 017777   | 0. 093703 | 0. 925345 | 0. 994815 |
| AL935183. 1        | 65. 7916  | 0. 012407633  | 0. 238822   | 0. 051953 | 0. 958566 | 0. 999109 |
| CR387989. 1        | 0 NA      | NA            | NA          | NA        | NA        | NA        |
| si:dkey-237j10. 2  | 14. 04908 | -0. 216192725 | 0. 474903   | -0. 45524 | 0. 64894  | 0. 927649 |
| BX890544. 1        | 0 NA      | NA            | NA          | NA        | NA        | NA        |
| si:dkeyp-3f10. 16  | 0 NA      | NA            | NA          | NA        | NA        | NA        |



|                    |           |               |           |           |           |           |
|--------------------|-----------|---------------|-----------|-----------|-----------|-----------|
| znf1045            | 2. 615022 | -0. 021318171 | 1. 777162 | -0. 012   | 0. 990429 | 1         |
| si:dkey-76p14. 2   | 4. 514491 | 0. 778964486  | 1. 152662 | 0. 675796 | 0. 49917  | 0. 879596 |
| si:ch211-226f6. 1  | 0 NA      | NA            | NA        | NA        | NA        | NA        |
| krt17              | 15183. 76 | 0. 658437003  | 0. 180628 | 3. 645264 | 0. 000267 | 0. 017992 |
| si:ch73-376124. 3  | 176. 9741 | -0. 057692969 | 0. 145272 | -0. 39714 | 0. 691267 | 0. 940173 |
| si:dkeyp-73d8. 8   | 127. 61   | -0. 339401679 | 0. 525471 | -0. 6459  | 0. 518344 | 0. 887148 |
| si:dkeyp-26a9. 7   | 0. 227845 | 2. 001906196  | 4. 969659 | 0. 402826 | 0. 687076 | NA        |
| CR759830. 1        | 0. 712634 | 0. 093656858  | 2. 26075  | 0. 041427 | 0. 966955 | NA        |
| BX004962. 1        | 0. 181295 | 0             | 5. 267649 | 0         | 1         | NA        |
| taok3b             | 87. 41397 | 0. 775886475  | 0. 282866 | 2. 742945 | 0. 006089 | 0. 131486 |
| BX248332. 1        | 0 NA      | NA            | NA        | NA        | NA        | NA        |
| si:dkey-88116. 3   | 5. 448795 | -2. 358651222 | 1. 254941 | -1. 87949 | 0. 060177 | 0. 422294 |
| cyp2j20            | 23. 72284 | -1. 319071966 | 0. 561911 | -2. 34748 | 0. 018901 | 0. 242305 |
| si:ch211-191j22. 7 | 4. 843167 | 2. 310404809  | 1. 140403 | 2. 025955 | 0. 042769 | 0. 362408 |
| CR749774. 1        | 0 NA      | NA            | NA        | NA        | NA        | NA        |
| CU570972. 1        | 0 NA      | NA            | NA        | NA        | NA        | NA        |
| CR788236. 1        | 0. 246404 | 2. 505641223  | 5. 20297  | 0. 481579 | 0. 630105 | NA        |
| si:dkey-121n8. 7   | 1. 970527 | -3. 514144778 | 5. 129048 | -0. 68515 | 0. 493252 | NA        |
| AL954149. 1        | 0 NA      | NA            | NA        | NA        | NA        | NA        |
| si:dkey-81h8. 1    | 7. 814399 | 0. 845476687  | 0. 832596 | 1. 01547  | 0. 309882 | 0. 774621 |
| BX936317. 1        | 0. 869907 | 1. 10587883   | 1. 888936 | 0. 585451 | 0. 558245 | NA        |
| si:dkey-21e2. 16   | 317. 7564 | 1. 055410093  | 1. 690044 | 0. 624487 | 0. 532308 | 0. 890978 |
| CR626882. 1        | 0. 049519 | 0             | 5. 267649 | 0         | 1         | NA        |
| or103-1            | 0. 3577   | 0             | 3. 757432 | 0         | 1         | NA        |
| BX323880. 1        | 0 NA      | NA            | NA        | NA        | NA        | NA        |
| si:dkey-223d7. 6   | 0 NA      | NA            | NA        | NA        | NA        | NA        |
| CR759846. 1        | 1. 826081 | -0. 613955326 | 1. 544278 | -0. 39757 | 0. 690949 | NA        |
| CR548634. 1        | 3. 94191  | 1. 080685662  | 0. 933805 | 1. 157292 | 0. 247153 | 0. 727871 |
| si:ch211-229n2. 7  | 88. 38407 | -0. 021379408 | 0. 258202 | -0. 0828  | 0. 93401  | 0. 996638 |
| sult3st3           | 0. 471628 | 0             | 3. 581016 | 0         | 1         | NA        |
| BX248089. 1        | 0. 688461 | -1. 380310389 | 2. 529591 | -0. 54567 | 0. 585296 | NA        |
| CR450817. 1        | 12. 37876 | -1. 007979511 | 0. 602288 | -1. 67358 | 0. 094213 | 0. 51266  |
| CR936321. 1        | 209. 7937 | -0. 419971273 | 0. 262127 | -1. 60217 | 0. 109118 | 0. 541965 |
| si:ch211-278p9. 3  | 3. 021068 | -0. 249498404 | 1. 274138 | -0. 19582 | 0. 844753 | 0. 976791 |
| BX323559. 4        | 4. 410139 | -0. 393019663 | 1. 167394 | -0. 33666 | 0. 73637  | 0. 951919 |
| BX248118. 1        | 5. 867955 | 1. 686445634  | 0. 757289 | 2. 226951 | 0. 025951 | 0. 285912 |
| BX469925. 3        | 4. 929672 | 0. 998656022  | 0. 824828 | 1. 210745 | 0. 225993 | 0. 707411 |
| AL929237. 1        | 178. 4957 | 0. 325251029  | 1. 337922 | 0. 243102 | 0. 807927 | 0. 969828 |
| BX005064. 1        | 5. 420781 | 0. 927075707  | 0. 808857 | 1. 146156 | 0. 251731 | 0. 732003 |
| si:ch73-37h15. 2   | 106. 4935 | -0. 052504886 | 0. 192084 | -0. 27334 | 0. 784589 | 0. 962605 |
| BX571827. 1        | 0 NA      | NA            | NA        | NA        | NA        | NA        |
| znf1168            | 24. 67667 | -0. 062992647 | 0. 358232 | -0. 17584 | 0. 860417 | 0. 980264 |
| AL954145. 1        | 148. 5456 | -0. 075345027 | 0. 239882 | -0. 31409 | 0. 753451 | 0. 955861 |
| s1c22a21           | 56. 18604 | 0. 161339414  | 0. 529265 | 0. 304837 | 0. 760491 | 0. 957886 |
| BX571945. 1        | 0. 098043 | -1. 71005882  | 5. 238474 | -0. 32644 | 0. 74409  | NA        |
| BX914211. 1        | 15. 65808 | 0. 425255951  | 0. 480599 | 0. 884845 | 0. 37624  | 0. 822258 |
| si:dkey-21o22. 2   | 21. 04951 | 0. 52484238   | 0. 649834 | 0. 807655 | 0. 419289 | 0. 842286 |
| CR846087. 2        | 2. 985375 | 0. 970953168  | 1. 245127 | 0. 779803 | 0. 435507 | 0. 850467 |
| CR318674. 1        | 0. 049519 | 0             | 5. 267649 | 0         | 1         | NA        |
| CR589874. 1        | 15. 88548 | 0. 654579997  | 0. 76359  | 0. 85724  | 0. 391312 | 0. 827902 |
| or103-2            | 0. 163218 | 2. 079549577  | 5. 22636  | 0. 397896 | 0. 690707 | NA        |
| si:ch211-202c21. 7 | 2. 12954  | 1. 844792763  | 1. 573272 | 1. 172583 | 0. 240963 | NA        |
| AL954695. 3        | 1. 334031 | -0. 460525374 | 1. 496412 | -0. 30775 | 0. 75827  | NA        |
| CR751602. 1        | 88. 53029 | -0. 358547863 | 0. 214373 | -1. 67255 | 0. 094417 | 0. 513368 |

|                   |          |              |          |          |          |          |
|-------------------|----------|--------------|----------|----------|----------|----------|
| ftr19             | 17.39203 | -1.418860095 | 0.512489 | -2.76857 | 0.00563  | 0.126656 |
| igfl              | 18.87854 | -0.313051095 | 0.48431  | -0.64639 | 0.518029 | 0.887148 |
| wu:fc21g02        | 1469.758 | 0.179079097  | 0.11071  | 1.617557 | 0.105758 | 0.534827 |
| BX936305.1        | 0.381577 | -2.326223789 | 3.709917 | -0.62703 | 0.53064  | NA       |
| CT027756.3        | 5.433319 | 0.484343768  | 0.804044 | 0.602384 | 0.546918 | 0.896121 |
| BX511265.2        | 3.071348 | 4.110564747  | 1.489501 | 2.759693 | 0.005786 | 0.128995 |
| BX936391.1        | 3.509395 | -1.008376796 | 1.359055 | -0.74197 | 0.458106 | 0.860993 |
| CR391990.1        | 1.162904 | 0.102842445  | 1.908981 | 0.053873 | 0.957036 | NA       |
| pimr143           | 0 NA     | NA           | NA       | NA       | NA       | NA       |
| pimr134           | 0.501428 | -1.715383025 | 3.607883 | -0.47545 | 0.634463 | NA       |
| BX465864.1        | 0.512606 | -1.334105194 | 4.005105 | -0.3331  | 0.739058 | NA       |
| BX323875.1        | 0.236521 | 0            | 5.267649 | 0        | 1        | NA       |
| CR812469.1        | 4.060654 | -1.213847896 | 0.945398 | -1.28395 | 0.199158 | 0.679605 |
| hist2h3c          | 26.87711 | 0.572239297  | 0.457711 | 1.25022  | 0.211219 | 0.692983 |
| si:ch73-256j6.2   | 1.513192 | -0.868140445 | 2.004999 | -0.43299 | 0.665023 | NA       |
| si:dkey-27j5.10   | 0.073968 | 0            | 5.267649 | 0        | 1        | NA       |
| BX072561.1        | 6.015058 | 0.030437787  | 0.683351 | 0.044542 | 0.964472 | 0.999948 |
| si:ch73-160h15.3  | 71.13454 | -0.118322426 | 0.254504 | -0.46491 | 0.641994 | 0.925586 |
| si:dkeyp-19e1.4   | 0.086617 | 0            | 5.267649 | 0        | 1        | NA       |
| BX649434.1        | 1.231226 | 1.985452117  | 1.753131 | 1.132518 | 0.257417 | NA       |
| AL807389.1        | 0 NA     | NA           | NA       | NA       | NA       | NA       |
| lrplba            | 39.57187 | -0.929223164 | 0.465056 | -1.99809 | 0.045707 | 0.374363 |
| si:ch73-263f13.1  | 0 NA     | NA           | NA       | NA       | NA       | NA       |
| BX927282.1        | 1.673472 | 3.275530401  | 2.042493 | 1.603692 | 0.108782 | NA       |
| znf1027           | 2.246344 | -0.210806487 | 1.030186 | -0.20463 | 0.837862 | 0.976301 |
| cdkn2d            | 47.62759 | 0.167444333  | 0.290557 | 0.576288 | 0.564421 | 0.901433 |
| si:ch211-208f21.2 | 5.285297 | -0.223257998 | 0.966349 | -0.23103 | 0.81729  | 0.971207 |
| shroom1           | 62.24975 | -0.115512392 | 0.289198 | -0.39942 | 0.689581 | 0.939582 |
| si:ch211-125e6.14 | 0 NA     | NA           | NA       | NA       | NA       | NA       |
| AL954149.2        | 18.91652 | -0.530944564 | 0.424844 | -1.24974 | 0.211395 | 0.692983 |
| BX322661.1        | 0.66794  | -2.55695519  | 2.677194 | -0.95509 | 0.339533 | NA       |
| CU207281.3        | 0.601215 | 1.989945227  | 2.719641 | 0.731694 | 0.464355 | NA       |
| nup37             | 182.1389 | -0.094014654 | 0.145378 | -0.64669 | 0.517832 | 0.887148 |
| si:dkeyp-82a1.2   | 0.453566 | -0.868133531 | 2.829495 | -0.30682 | 0.758984 | NA       |
| BX649484.1        | 4.476038 | 1.022576312  | 1.036961 | 0.986128 | 0.32407  | 0.783161 |
| CR936371.1        | 1.412996 | -1.523417338 | 1.41805  | -1.0743  | 0.282686 | NA       |
| si:dkey-27d5.10   | 0.136698 | 0            | 5.267649 | 0        | 1        | NA       |
| znf111            | 1.956551 | -2.464365436 | 1.799244 | -1.36967 | 0.170791 | NA       |
| CR354556.1        | 203.4202 | -0.221288258 | 0.237199 | -0.93292 | 0.35086  | 0.802215 |
| si:ch211-226h8.8  | 0 NA     | NA           | NA       | NA       | NA       | NA       |
| CT583646.2        | 24.3272  | 0.305179048  | 0.383979 | 0.79478  | 0.426741 | 0.845352 |
| elpl              | 286.5486 | -0.121840034 | 0.156303 | -0.77951 | 0.435677 | 0.850467 |
| si:ch73-191k20.3  | 11.13534 | -1.239366872 | 0.887775 | -1.39604 | 0.162703 | 0.630455 |
| fth131            | 359.0234 | -0.341161371 | 0.248096 | -1.37512 | 0.169095 | 0.640442 |
| CR545465.1        | 0 NA     | NA           | NA       | NA       | NA       | NA       |
| si:dkey-179k24.1  | 0.531004 | -0.50530645  | 3.473106 | -0.14549 | 0.884323 | NA       |
| BX601644.2        | 0.135482 | 0            | 5.267649 | 0        | 1        | NA       |
| si:dkeyp-117b8.4  | 241.6832 | 0.005495094  | 0.150349 | 0.036549 | 0.970845 | 1        |
| BX005417.1        | 27.97316 | -1.907670452 | 0.693195 | -2.752   | 0.005923 | 0.130335 |
| si:ch1073-186o8.3 | 12.77684 | -0.600771647 | 0.50844  | -1.1816  | 0.237365 | 0.718568 |
| si:dkey-17e16.15  | 91.22081 | -0.992310736 | 0.367201 | -2.70237 | 0.006885 | 0.139692 |
| CR854965.1        | 0 NA     | NA           | NA       | NA       | NA       | NA       |
| si:dkey-219e20.2  | 0.179483 | 0            | 5.267649 | 0        | 1        | NA       |
| si:dkey-28d5.8    | 0.836572 | 1.055426899  | 2.447032 | 0.431309 | 0.666244 | NA       |

|                    |           |               |           |           |           |           |
|--------------------|-----------|---------------|-----------|-----------|-----------|-----------|
| pimr125            | 1. 261069 | -0. 868141506 | 2. 126508 | -0. 40825 | 0. 683092 | NA        |
| si:dkey-211g8. 4   | 2. 488859 | 1. 055430666  | 1. 88538  | 0. 559797 | 0. 575618 | 0. 904739 |
| BX908395. 1        | 1. 27941  | -2. 082390375 | 1. 767025 | -1. 17847 | 0. 238608 | NA        |
| or115-14           | 0. 227575 | -1. 710083394 | 5. 238472 | -0. 32645 | 0. 744086 | NA        |
| si:dkey-112g5. 15  | 0 NA      | NA            | NA        | NA        | NA        | NA        |
| taarl2h            | 0. 262068 | 0. 09365822   | 4. 82001  | 0. 019431 | 0. 984497 | NA        |
| CR450777. 1        | 2. 132377 | 1. 622015174  | 1. 29514  | 1. 252386 | 0. 210429 | NA        |
| BX649502. 8        | 0. 049021 | -0. 86807634  | 5. 267649 | -0. 16479 | 0. 869106 | NA        |
| znf1171            | 51. 96908 | 0. 262206687  | 0. 23397  | 1. 120683 | 0. 262423 | 0. 74006  |
| shda               | 39. 70544 | -0. 287349558 | 0. 370207 | -0. 77619 | 0. 43764  | 0. 851283 |
| BX085193. 3        | 0 NA      | NA            | NA        | NA        | NA        | NA        |
| si:dkey-222h21. 10 | 3. 12423  | 4. 267628509  | 1. 495239 | 2. 854145 | 0. 004315 | 0. 108751 |
| CU693368. 1        | 0. 606644 | 2. 48957171   | 3. 012296 | 0. 82647  | 0. 408538 | NA        |
| wu:fc17b08         | 61. 24979 | -0. 274940056 | 0. 249598 | -1. 10153 | 0. 270665 | 0. 746683 |
| si:ch211-119d14. 2 | 17. 18708 | 0. 017182829  | 0. 437815 | 0. 039247 | 0. 968694 | 1         |
| BX649448. 3        | 7. 969627 | 0. 102316017  | 0. 82112  | 0. 124605 | 0. 900836 | 0. 99045  |
| B3GNT10            | 5. 19787  | 0. 669424299  | 1. 119408 | 0. 598016 | 0. 549829 | 0. 897373 |
| BX324164. 1        | 1. 312911 | -0. 868136239 | 2. 140188 | -0. 40564 | 0. 68501  | NA        |
| commd9             | 162. 2458 | 0. 011232335  | 0. 18357  | 0. 061188 | 0. 951209 | 0. 99801  |
| CR388077. 1        | 4. 06867  | -1. 633159075 | 0. 944848 | -1. 72849 | 0. 083901 | 0. 486647 |
| taar19g            | 0. 04222  | 0             | 5. 267649 | 0         | 1         | NA        |
| BX544876. 1        | 0. 270925 | -0. 868110153 | 5. 267649 | -0. 1648  | 0. 869101 | NA        |
| CU539058. 1        | 170. 9405 | -0. 021589216 | 0. 20309  | -0. 1063  | 0. 915342 | 0. 993068 |
| si:dkey-183n20. 15 | 81. 55812 | -0. 027776214 | 0. 231879 | -0. 11979 | 0. 904652 | 0. 991581 |
| si:ch73-337115. 2  | 23. 53149 | 0. 018173473  | 0. 373398 | 0. 048671 | 0. 961182 | 0. 99935  |
| CR855393. 2        | 0. 39929  | 2. 074056514  | 4. 225058 | 0. 490894 | 0. 623501 | NA        |
| si:ch73-222f22. 2  | 0 NA      | NA            | NA        | NA        | NA        | NA        |
| map3k19            | 13. 91653 | 0. 785834792  | 0. 532459 | 1. 475861 | 0. 139981 | 0. 598517 |
| peak3              | 3. 391053 | 1. 086822941  | 0. 985684 | 1. 102607 | 0. 270198 | 0. 746532 |
| BX005156. 2        | 0. 768598 | 2. 881324153  | 2. 526912 | 1. 140255 | 0. 25418  | NA        |
| mrpl44             | 558. 8896 | -0. 167523186 | 0. 16164  | -1. 0364  | 0. 300017 | 0. 766629 |
| si:dkeyp-20g2. 3   | 0. 10996  | 0             | 5. 267649 | 0         | 1         | NA        |
| usp21              | 88. 35688 | -0. 750728881 | 1. 034007 | -0. 72604 | 0. 467815 | 0. 866174 |
| si:ch73-196i15. 3  | 29. 81837 | 0. 277441315  | 0. 492467 | 0. 56337  | 0. 573183 | 0. 903937 |
| dnah11             | 37. 80915 | 0. 170040778  | 0. 426856 | 0. 398356 | 0. 690368 | 0. 93988  |
| si:dkey-58f10. 10  | 0. 52116  | -2. 797660983 | 3. 454099 | -0. 80995 | 0. 417967 | NA        |
| si:ch211-117m20. 4 | 7. 712229 | -2. 337329274 | 1. 553084 | -1. 50496 | 0. 132334 | 0. 585048 |
| CT997819. 2        | 2. 043151 | 1. 134193922  | 1. 319679 | 0. 859447 | 0. 390094 | NA        |
| si:rp71-45g20. 11  | 1. 544824 | -0. 777158106 | 1. 999434 | -0. 38869 | 0. 697506 | NA        |
| CR318599. 1        | 0. 266722 | 0             | 4. 809193 | 0         | 1         | NA        |
| CR855337. 1        | 20. 16081 | 0. 087317223  | 0. 360954 | 0. 241907 | 0. 808853 | 0. 969828 |
| si:dkey-222h21. 2  | 36. 46582 | 0. 756943551  | 0. 40942  | 1. 848821 | 0. 064484 | 0. 433491 |
| CT573178. 1        | 1. 055443 | -0. 868142922 | 2. 464566 | -0. 35225 | 0. 724651 | NA        |
| BX649350. 1        | 0. 352216 | -0. 86813429  | 3. 875469 | -0. 22401 | 0. 822751 | NA        |
| nuprla             | 1954. 787 | -0. 656096355 | 0. 221724 | -2. 95906 | 0. 003086 | 0. 091315 |
| BX537274. 1        | 5. 238671 | -0. 211669586 | 0. 716939 | -0. 29524 | 0. 76781  | 0. 960296 |
| BX296552. 1        | 0. 60259  | 1. 596351935  | 2. 939026 | 0. 543157 | 0. 587022 | NA        |
| si:dkey-237j11. 3  | 0. 82582  | 0. 14793365   | 2. 915885 | 0. 050734 | 0. 959538 | NA        |
| BX000981. 4        | 1. 011552 | -1. 377243869 | 2. 097748 | -0. 65653 | 0. 51148  | NA        |
| si:ch211-226o13. 3 | 0 NA      | NA            | NA        | NA        | NA        | NA        |
| si:dkey-247i3. 6   | 3. 214205 | -2. 403352811 | 1. 013005 | -2. 3725  | 0. 017668 | 0. 234598 |
| si:ch73-92e7. 6    | 21. 60239 | -0. 06861179  | 0. 338787 | -0. 20252 | 0. 839509 | 0. 976417 |
| si:ch211-255g12. 6 | 3369. 907 | 0. 629395529  | 0. 360734 | 1. 744765 | 0. 081026 | 0. 479801 |
| ndufa9b            | 82. 17288 | 0. 027834293  | 0. 356324 | 0. 078115 | 0. 937737 | 0. 997305 |

|                    |          |              |          |          |          |          |    |
|--------------------|----------|--------------|----------|----------|----------|----------|----|
| CR753837.2         | 0.130689 |              | 0        | 5.267649 | 0        | 1        | NA |
| CR788285.2         | 0.183441 | 1.055370259  | 5.267649 | 0.200349 | 0.841207 | NA       |    |
| si:rp71-80o10.4    | 43.25078 | 0.62216784   | 0.402329 | 1.546416 | 0.122004 | 0.568897 |    |
| CU326349.1         | 0.322307 | -1.848372801 | 4.434248 | -0.41684 | 0.676795 | NA       |    |
| BX322647.1         | 0.68081  | 0.935052981  | 2.164957 | 0.431904 | 0.665811 | NA       |    |
| CR788303.1         | 2.414676 | -1.574182423 | 1.068674 | -1.47302 | 0.140745 | 0.599658 |    |
| BX294389.1         | 0.298613 | -3.313063164 | 5.168828 | -0.64097 | 0.521542 | NA       |    |
| efemp2a            | 442.095  | 0.378306086  | 0.174847 | 2.163644 | 0.030492 | 0.311199 |    |
| or124-2            | 0.137189 |              | 0        | 5.267649 | 0        | 1        | NA |
| SPATA1             | 11.28433 | 0.55054533   | 0.54515  | 1.009898 | 0.312544 | 0.776164 |    |
| si:dkey-93n13.1    | 25.71999 | -0.592698058 | 0.455821 | -1.30029 | 0.193503 | 0.673698 |    |
| si:dkey-9p24.5     | 0.367428 |              | 0        | 3.832074 | 0        | 1        | NA |
| BX901918.1         | 7.012078 | -2.597448238 | 1.006302 | -2.58118 | 0.009846 | 0.171403 |    |
| vgl14a             | 119.401  | -0.387794888 | 0.203628 | -1.90443 | 0.056854 | 0.411856 |    |
| si:dkey-23f9.12    | 0        | NA           | NA       | NA       | NA       | NA       |    |
| si:dkeyp-82a1.6    | 127.8818 | -0.230030145 | 0.175386 | -1.31156 | 0.189667 | 0.669289 |    |
| pimr88             | 0.374881 | -0.511261258 | 4.301068 | -0.11887 | 0.90538  | NA       |    |
| CR545466.1         | 0.043309 |              | 0        | 5.267649 | 0        | 1        | NA |
| si:dkey-20i20.8    | 13.74277 | -0.190266759 | 0.550322 | -0.34574 | 0.72954  | 0.950056 |    |
| si:dkey-222h21.8   | 0.915509 |              | 0        | 5.267649 | 0        | 1        | NA |
| si:dkey-26117.2    | 53.80312 | 0.12923027   | 0.335008 | 0.385753 | 0.69968  | 0.942499 |    |
| si:ch211-114113.13 | 2.255256 | 1.975471662  | 1.568249 | 1.259667 | 0.20779  | 0.689888 |    |
| CR388079.1         | 0.050723 | -0.86807634  | 5.267649 | -0.16479 | 0.869106 | NA       |    |
| si:ch211-187g4.1   | 0.649262 | 2.607981229  | 3.223256 | 0.809114 | 0.41845  | NA       |    |
| si:ch73-34314.1    | 0        | NA           | NA       | NA       | NA       | NA       |    |
| CR762497.1         | 2.932539 | -0.779038384 | 1.178911 | -0.66081 | 0.508733 | 0.883333 |    |
| si:dkey-260g12.1   | 15.4217  | 0.60811335   | 0.747494 | 0.813536 | 0.415911 | 0.839284 |    |
| AL935300.1         | 0.562267 |              | 0        | 2.967166 | 0        | 1        | NA |
| CR759893.1         | 0.043309 |              | 0        | 5.267649 | 0        | 1        | NA |
| si:ch211-125e6.13  | 0.865278 | -3.798417576 | 3.039313 | -1.24976 | 0.211386 | NA       |    |
| si:ch211-165f21.2  | 18.26548 | 0.586359576  | 0.693737 | 0.845219 | 0.397989 | 0.830737 |    |
| samd10b            | 14.61433 | 0.481188045  | 0.50959  | 0.944265 | 0.345034 | 0.79837  |    |
| BX927413.1         | 2.539107 | -2.367826058 | 1.779784 | -1.3304  | 0.183386 | 0.659894 |    |
| zzef1              | 434.6465 | -0.241752333 | 0.197301 | -1.2253  | 0.220463 | 0.701764 |    |
| BX649266.1         | 2.034013 | -0.714336549 | 1.471729 | -0.48537 | 0.627412 | NA       |    |
| si:dkey-85k15.6    | 1.759092 | 1.588716423  | 1.565604 | 1.014763 | 0.310219 | NA       |    |
| adgrg4b            | 10.71148 | -1.598747794 | 0.915851 | -1.74564 | 0.080873 | 0.479801 |    |
| si:dkeyp-30e7.2    | 0.478053 | -1.768362316 | 3.121428 | -0.56652 | 0.571038 | NA       |    |
| celsr2             | 43.82208 | 0.139553182  | 0.274848 | 0.507747 | 0.611631 | 0.915331 |    |
| si:dkey-201k7.1    | 0.084441 |              | 0        | 5.267649 | 0        | 1        | NA |
| si:dkey-229d11.5   | 0.369443 | 2.308187444  | 4.212147 | 0.547984 | 0.583703 | NA       |    |
| CR848841.1         | 15.01514 | 0.413817999  | 0.477837 | 0.866024 | 0.386477 | 0.827374 |    |
| si:dkey-78k11.4    | 1.018036 | -0.433015152 | 2.329291 | -0.1859  | 0.852523 | NA       |    |
| si:dkey-199f5.6    | 4.668891 | -0.631750607 | 0.926171 | -0.68211 | 0.495169 | 0.87806  |    |
| BX545856.1         | 0.563724 | 0.09364933   | 2.891807 | 0.032384 | 0.974166 | NA       |    |
| si:dkey-33c12.10   | 0.874931 | 4.137611272  | 2.17739  | 1.900262 | 0.057399 | NA       |    |
| CU633933.1         | 0        | NA           | NA       | NA       | NA       | NA       |    |
| BX548075.2         | 0        | NA           | NA       | NA       | NA       | NA       |    |
| MFAP4 (1 of many)  | 45.29399 | -0.488796834 | 0.419641 | -1.1648  | 0.244101 | 0.724735 |    |
| CU463033.1         | 0.22127  | -0.868112681 | 5.267649 | -0.1648  | 0.869101 | NA       |    |
| si:dkey-4c15.14    | 89.58104 | 0.136479135  | 0.213754 | 0.638488 | 0.523156 | 0.888312 |    |
| aknad1             | 14.11612 | 0.337244824  | 0.652865 | 0.516562 | 0.605462 | 0.914985 |    |
| si:ch211-264e16.2  | 4.881565 | -0.042097962 | 0.775229 | -0.0543  | 0.956693 | 0.999109 |    |
| si:dkey-13n15.2    | 26.32519 | -0.251203218 | 0.541636 | -0.46379 | 0.642801 | 0.925707 |    |

|                    |          |              |            |          |          |          |      |
|--------------------|----------|--------------|------------|----------|----------|----------|------|
| si:dkey-27p18.7    | 1.435471 | -3.582684943 | 2.305157   | -1.5542  | 0.120136 | NA       |      |
| BX640465.1         | 0.389158 | -2.411692805 | 4.336748   | -0.55611 | 0.578138 | NA       |      |
| si:dkey-12112.1    | 320.1886 | 0.275966755  | 0.215273   | 1.28194  | 0.199864 | 0.6804   |      |
| AL954359.2         | 6.946607 | -0.763998893 | 0.915185   | -0.8348  | 0.403829 | 0.833888 |      |
| si:ch211-222m18.4  | 0 NA     |              | NA         | NA       | NA       | NA       |      |
| her4.2             | 345.6014 | -0.004421172 | 0.169327   | -0.02611 | 0.979169 |          | 1    |
| si:dkey-253d23.8   | 13.86124 | 0.919952771  | 0.515655   | 1.784047 | 0.074416 | 0.463251 |      |
| si:dkey-31f5.8     | 52.25837 | -0.168044441 | 0.326882   | -0.51408 | 0.607194 | 0.915204 |      |
| caspb1             | 31.03822 | 0.726763224  | 0.576495   | 1.260659 | 0.207432 | 0.689456 |      |
| CR848723.1         | 3.623731 | -1.348086584 | 1.152154   | -1.17006 | 0.241978 | 0.723529 |      |
| BX571803.1         | 2.198351 | 0.769924111  | 1.215111   | 0.633625 | 0.526326 | NA       |      |
| plac8.2            | 1.12519  |              | 0 5.242183 |          | 0        |          | 1 NA |
| si:dkey-161j23.5   | 105.5134 | 0.443161399  | 0.202645   | 2.186886 | 0.028751 | 0.301537 |      |
| si:dkeyp-73g8.5    | 0 NA     |              | NA         | NA       | NA       | NA       |      |
| znf1036            | 2.443608 | 1.090511032  | 1.170941   | 0.931311 | 0.351693 | 0.802513 |      |
| CR354556.2         | 0.515096 | 1.870006064  | 3.118395   | 0.599669 | 0.548727 | NA       |      |
| AL929520.1         | 0.41597  |              | 0 4.284894 |          | 0        |          | 1 NA |
| BX511231.1         | 0.148744 | 1.921567426  | 5.236909   | 0.366928 | 0.713673 | NA       |      |
| BX571945.2         | 0 NA     |              | NA         | NA       | NA       | NA       |      |
| cfp                | 281.8983 | 0.239756257  | 0.19947    | 1.201969 | 0.229376 | 0.711579 |      |
| cdh23              | 2.770751 | 2.053162586  | 1.197895   | 1.713975 | 0.086533 | 0.493048 |      |
| CR293531.1         | 2.194904 | 1.252489067  | 1.244809   | 1.00617  | 0.314334 | NA       |      |
| AL928824.1         | 0.854822 | -0.820333541 | 1.939579   | -0.42294 | 0.672336 | NA       |      |
| BX005210.1         | 0.590936 | -1.785294955 | 2.43511    | -0.73315 | 0.463468 | NA       |      |
| si:dkey-65b12.12   | 4.881492 | 0.51278037   | 0.799467   | 0.641403 | 0.521261 | 0.887473 |      |
| CR354556.3         | 366.1219 | -0.166838491 | 0.243046   | -0.68645 | 0.49243  | 0.876385 |      |
| BX465186.2         | 5.187213 | 0.660097553  | 0.852551   | 0.774262 | 0.438776 | 0.85189  |      |
| or128-8            | 0.87906  | 1.671076635  | 2.002669   | 0.834425 | 0.404042 | NA       |      |
| si:dkeyp-80c12.8   | 1.272184 | -0.603913628 | 1.555796   | -0.38817 | 0.69789  | NA       |      |
| si:ch73-199e17.1   | 124.9683 | -0.471223157 | 0.239677   | -1.96607 | 0.04929  | 0.386671 |      |
| BX957308.1         | 0 NA     |              | NA         | NA       | NA       | NA       |      |
| wu:fc63a07         | 100.0032 | -0.140133045 | 0.198874   | -0.70463 | 0.481038 | 0.870339 |      |
| txnrd2.1           | 0 NA     |              | NA         | NA       | NA       | NA       |      |
| CU137648.1         | 0.681989 | -3.75430689  | 4.16927    | -0.90047 | 0.36787  | NA       |      |
| BX927218.1         | 7.840433 | -0.330796538 | 0.574327   | -0.57597 | 0.564634 | 0.901445 |      |
| si:dkey-163f12.6   | 9.232045 | 0.456904054  | 0.720261   | 0.634359 | 0.525847 | 0.889009 |      |
| BX569801.1         | 67.3028  | -0.186047054 | 0.253395   | -0.73422 | 0.462816 | 0.864104 |      |
| si:ch1073-75o15.4  | 0 NA     |              | NA         | NA       | NA       | NA       |      |
| BX927121.1         | 0.147936 |              | 0 5.267649 |          | 0        |          | 1 NA |
| si:ch211-162i8.4   | 1.160318 | -1.307475276 | 2.045212   | -0.63929 | 0.522637 | NA       |      |
| si:dkey-27h10.2    | 24.36149 | -0.426095925 | 0.380532   | -1.11974 | 0.262826 | 0.740207 |      |
| si:ch1073-412h12.3 | 0.653983 | 2.962133074  | 3.304826   | 0.896305 | 0.37009  | NA       |      |
| BX510923.1         | 249.4987 | -0.132993399 | 0.207308   | -0.64152 | 0.521182 | 0.887473 |      |
| si:dkey-58f10.6    | 10.69035 | 0.64742597   | 0.681927   | 0.949406 | 0.342414 | 0.797179 |      |
| taar19k            | 0.098043 | -1.71005882  | 5.238474   | -0.32644 | 0.74409  | NA       |      |
| si:ch211-202m22.1  | 2.545959 | 1.055432371  | 1.920763   | 0.549486 | 0.582672 | 0.90571  |      |
| si:ch211-284e13.12 | 0.332856 | 1.055395646  | 3.893185   | 0.271088 | 0.786323 | NA       |      |
| CR933017.1         | 0.894727 | 0.098195554  | 1.737512   | 0.056515 | 0.954932 | NA       |      |
| BX548075.3         | 0.297677 | -1.402438903 | 3.937686   | -0.35616 | 0.721722 | NA       |      |
| CR376762.1         | 2.103243 | 0.996789747  | 1.194412   | 0.834545 | 0.403974 | NA       |      |
| BX927101.1         | 1.804727 | -1.185869938 | 1.695526   | -0.69941 | 0.484295 | NA       |      |
| si:ch211-238e22.4  | 0.846547 | -0.436556702 | 2.366755   | -0.18445 | 0.853658 | NA       |      |
| BX323457.2         | 3.322921 | -0.185179181 | 1.289714   | -0.14358 | 0.885831 | 0.987533 |      |
| CR376748.1         | 0.060442 |              | 0 5.267649 |          | 0        |          | 1 NA |

|                    |          |              |          |          |          |          |
|--------------------|----------|--------------|----------|----------|----------|----------|
| AL954767.1         | 24.57178 | 1.090498789  | 0.778016 | 1.401641 | 0.161023 | 0.627788 |
| plekha1b           | 80.86665 | 0.00407654   | 0.228899 | 0.017809 | 0.985791 | 1        |
| si:ch211-218m3.9   | 3.697069 | 0.966932918  | 1.71554  | 0.563632 | 0.573005 | 0.903718 |
| CR925709.2         | 1.884106 | 1.465658848  | 1.694782 | 0.864807 | 0.387145 | NA       |
| CR354538.1         | 0.728332 | 0            | 2.792538 | 0        | 1        | NA       |
| cc120b             | 15.07562 | 2.31177721   | 1.391023 | 1.661926 | 0.096528 | 0.518799 |
| gabrz              | 19.21155 | -1.011301911 | 0.786264 | -1.28621 | 0.198369 | 0.679109 |
| si:dkey-716.3      | 93.12003 | -0.161833694 | 0.236387 | -0.68461 | 0.493588 | 0.877027 |
| or132-2            | 3.785865 | 2.640430367  | 1.182375 | 2.233158 | 0.025539 | 0.28373  |
| es1                | 1.553009 | 3.52549646   | 1.911841 | 1.844032 | 0.065178 | NA       |
| si:ch211-125e6.8   | 48.16938 | 0.837889299  | 0.530487 | 1.579471 | 0.114228 | 0.553295 |
| si:ch211-152p23.2  | 2.545104 | 1.44759716   | 1.016971 | 1.42344  | 0.154609 | 0.619425 |
| si:ch73-194h10.3   | 0.431522 | 1.005256549  | 3.207015 | 0.313456 | 0.753935 | NA       |
| si:ch211-14c7.2    | 181.3039 | 0.460138525  | 0.184329 | 2.496285 | 0.01255  | 0.194767 |
| BX511089.2         | 4.319049 | -3.321148334 | 1.310122 | -2.53499 | 0.011245 | 0.183909 |
| si:ch211-1f22.11   | 0.247052 | -0.868112681 | 5.267649 | -0.1648  | 0.869101 | NA       |
| ksr2               | 135.0565 | 0.366261872  | 0.31246  | 1.172188 | 0.241122 | 0.722648 |
| BX927181.1         | 0        | NA           | NA       | NA       | NA       | NA       |
| BX548157.1         | 2.865924 | 0.62664933   | 1.123907 | 0.557563 | 0.577143 | 0.904798 |
| CR388168.2         | 5.876069 | -4.002592155 | 1.517094 | -2.63833 | 0.008332 | 0.155679 |
| si:dkey-246e1.3    | 18.37647 | -0.638495007 | 0.829206 | -0.77001 | 0.441295 | 0.852874 |
| CR786571.2         | 5.091029 | -0.525443261 | 0.687898 | -0.76384 | 0.444963 | 0.855159 |
| BX957326.1         | 2.093655 | 0.104543438  | 1.359932 | 0.076874 | 0.938724 | NA       |
| si:ch211-137i24.12 | 28.6583  | 1.588856076  | 0.407981 | 3.894441 | 9.84E-05 | 0.009014 |
| CT027623.1         | 1.164139 | -3.512424734 | 1.935961 | -1.81431 | 0.069631 | NA       |
| si:dkey-96117.6    | 3.99023  | -2.577549267 | 1.554322 | -1.65831 | 0.097255 | 0.519934 |
| si:dkey-121h17.7   | 4.057618 | -1.900221089 | 0.960989 | -1.97736 | 0.048001 | 0.381054 |
| BX649349.1         | 0.363403 | -0.868136285 | 3.409689 | -0.25461 | 0.799025 | NA       |
| si:ch211-132b12.6  | 0.060442 | 0            | 5.267649 | 0        | 1        | NA       |
| CU462914.1         | 0        | NA           | NA       | NA       | NA       | NA       |
| taar12a            | 0        | NA           | NA       | NA       | NA       | NA       |
| BX649490.2         | 15.27002 | -6.053683993 | 1.290926 | -4.68941 | 2.74E-06 | 0.000648 |
| BX855614.1         | 49.4536  | 0.106501382  | 0.271481 | 0.392298 | 0.694838 | 0.941197 |
| si:ch73-7i4.1      | 1.448634 | -1.826961951 | 1.806645 | -1.01125 | 0.311899 | NA       |
| BX470218.1         | 0.08847  | 0            | 5.267649 | 0        | 1        | NA       |
| si:dkey-24h22.5    | 0.391435 | -2.340746098 | 3.702992 | -0.63212 | 0.527307 | NA       |
| nuprlb             | 2612.959 | -0.18350728  | 0.182616 | -1.00488 | 0.314953 | 0.777649 |
| si:dkeyp-53e4.1    | 4.829663 | -1.557214717 | 0.919084 | -1.69431 | 0.090206 | 0.50413  |
| zgc:174855         | 611.7337 | 0.480681349  | 0.353742 | 1.358846 | 0.174195 | 0.647434 |
| BX005254.1         | 17.54344 | -0.179026825 | 0.933179 | -0.19185 | 0.847863 | 0.977782 |
| si:ch211-139a5.9   | 371.3215 | -0.041838079 | 0.180593 | -0.23167 | 0.816794 | 0.971207 |
| znf1144            | 50.0042  | -0.510151174 | 0.246848 | -2.06666 | 0.038766 | 0.344867 |
| AL953841.1         | 0.645581 | 1.055418909  | 2.748377 | 0.384015 | 0.700967 | NA       |
| AL928920.1         | 0        | NA           | NA       | NA       | NA       | NA       |
| CU652528.1         | 0.260124 | -0.868119338 | 5.267649 | -0.1648  | 0.8691   | NA       |
| CT025748.1         | 5.293028 | -0.260264316 | 0.911365 | -0.28558 | 0.775203 | 0.960899 |
| cdc42se2           | 42.71382 | -0.209024288 | 0.360159 | -0.58037 | 0.561667 | 0.900673 |
| epstil             | 7.112653 | 0.101231495  | 0.839825 | 0.120539 | 0.904056 | 0.991581 |
| b4galnt2.1         | 4.048145 | 0.412571517  | 1.276393 | 0.323232 | 0.746519 | 0.955074 |
| si:ch211-92117.1   | 0.744985 | 0.188316628  | 2.382407 | 0.079045 | 0.936997 | NA       |
| CT573357.1         | 4.02319  | -0.235342615 | 1.136452 | -0.20709 | 0.835943 | 0.976007 |
| si:dkey-35m8.1     | 40.10719 | 0.403783496  | 0.373934 | 1.079825 | 0.28022  | 0.752951 |
| c2cd5              | 517.26   | 0.056254896  | 0.112859 | 0.498451 | 0.618166 | 0.916585 |
| BX571803.2         | 1.71007  | 0.303125204  | 1.3074   | 0.231853 | 0.816652 | NA       |

|                    |          |              |           |          |          |          |
|--------------------|----------|--------------|-----------|----------|----------|----------|
| BX890572.1         | 0.416437 |              | 0.3648901 | 0        | 1        | NA       |
| BX649502.9         | 0        | NA           | NA        | NA       | NA       | NA       |
| CR383662.2         | 0.609675 | -2.126496636 | 2.557934  | -0.83133 | 0.405785 | NA       |
| BX957257.2         | 0        | NA           | NA        | NA       | NA       | NA       |
| si:ch73-113g13.3   | 0.304414 | 2.438158698  | 4.582478  | 0.532061 | 0.594684 | NA       |
| si:dkey-7n6.2      | 77.11878 | -0.073582076 | 0.371219  | -0.19822 | 0.842875 | 0.976666 |
| si:dkey-21h14.12   | 0.142347 |              | 0.5267649 | 0        | 1        | NA       |
| si:ch73-256j6.3    | 0.262248 |              | 0.4777449 | 0        | 1        | NA       |
| si:ch211-154e10.1  | 15.92591 | -1.131207948 | 1.148417  | -0.98501 | 0.324617 | 0.783313 |
| si:zfos-364h11.2   | 1.041795 | 2.02903552   | 2.238202  | 0.906547 | 0.364646 | NA       |
| si:dkey-222h21.10  | 1.919555 | -1.759478615 | 2.112218  | -0.833   | 0.404844 | NA       |
| si:ch73-68b22.2    | 3.137184 | 0.559590654  | 1.073203  | 0.521421 | 0.602073 | 0.914001 |
| CR392012.1         | 0        | NA           | NA        | NA       | NA       | NA       |
| si:dkey-262g12.3   | 26.6471  | 0.05302098   | 0.36779   | 0.144161 | 0.885373 | 0.987533 |
| BX323458.2         | 91.19987 | 0.659823224  | 0.354927  | 1.859038 | 0.063022 | 0.429313 |
| si:dkey-9p20.18    | 5.512354 | 0.088607946  | 0.863214  | 0.102649 | 0.918242 | 0.993884 |
| zgc:113984         | 0.343149 | -3.514029006 | 5.164352  | -0.68044 | 0.496226 | NA       |
| CR318624.1         | 0.558916 | 3.269633526  | 2.397055  | 1.364021 | 0.172561 | NA       |
| BX323543.4         | 0        | NA           | NA        | NA       | NA       | NA       |
| AL935198.2         | 2.599179 | 0.077864894  | 1.028202  | 0.075729 | 0.939635 | 0.997371 |
| si:dkey-84j12.1    | 0        | NA           | NA        | NA       | NA       | NA       |
| taarl6b            | 0.198623 |              | 0.5267649 | 0        | 1        | NA       |
| si:dkey-148f10.4   | 16.74519 | 0.273040058  | 0.464526  | 0.587782 | 0.556678 | 0.899063 |
| BX323854.2         | 0        | NA           | NA        | NA       | NA       | NA       |
| CR626935.1         | 0.375516 | -1.826371407 | 5.071071  | -0.36015 | 0.718731 | NA       |
| si:ch211-120e1.7   | 14.79337 | -0.097956873 | 0.499849  | -0.19597 | 0.844631 | 0.976791 |
| CR391921.1         | 4.09051  | 0.76963881   | 1.072795  | 0.717414 | 0.473118 | 0.868983 |
| ms4a17c.1          | 2.861937 | -2.754129819 | 1.669482  | -1.64969 | 0.099006 | 0.522138 |
| si:dkey-68l7.2     | 0.591969 | 1.690995343  | 3.007412  | 0.562276 | 0.573928 | NA       |
| dyrk2              | 697.4262 | -0.187194775 | 0.118916  | -1.57418 | 0.115447 | 0.555689 |
| BX465844.1         | 0.783405 | 0.956387827  | 2.088027  | 0.458034 | 0.646928 | NA       |
| si:ch211-194g2.4   | 15.37915 | 0.191370351  | 0.504851  | 0.379063 | 0.704641 | 0.943785 |
| si:dkey-149m13.5   | 26.86492 | -0.382665234 | 0.390989  | -0.97871 | 0.327723 | 0.786438 |
| AL928977.1         | 1.016614 | -1.141061065 | 1.76113   | -0.64791 | 0.51704  | NA       |
| CU570781.1         | 0        | NA           | NA        | NA       | NA       | NA       |
| BX571681.3         | 1.153668 | 1.650952324  | 1.604902  | 1.028694 | 0.303624 | NA       |
| BX510324.2         | 0.529107 | 1.055418406  | 2.874749  | 0.367134 | 0.713519 | NA       |
| si:ch211-218d20.15 | 38.2579  | -0.493436123 | 0.414122  | -1.19152 | 0.233448 | 0.714569 |
| si:dkey-21e2.8     | 0.060442 |              | 0.5267649 | 0        | 1        | NA       |
| BX842684.1         | 0.04222  |              | 0.5267649 | 0        | 1        | NA       |
| si:dkey-24f15.2    | 0.086616 |              | 0.5267649 | 0        | 1        | NA       |
| CU571324.1         | 1.295562 | -4.179231536 | 4.60231   | -0.90807 | 0.36384  | NA       |
| BX470247.1         | 0        | NA           | NA        | NA       | NA       | NA       |
| si:ch211-51a19.5   | 2.294572 | -3.087039601 | 1.661259  | -1.85825 | 0.063133 | 0.429313 |
| BX510337.1         | 0.265626 | 0.093657469  | 4.808949  | 0.019476 | 0.984462 | NA       |
| rhoab              | 1526.109 | 0.047310537  | 0.158472  | 0.298542 | 0.76529  | 0.959771 |
| si:dkeyp-98a7.8    | 0.257148 | 2.594206969  | 5.198905  | 0.498991 | 0.617786 | NA       |
| trarglb            | 53.05571 | 0.23144276   | 0.240113  | 0.963892 | 0.3351   | 0.79185  |
| CR769772.2         | 0.046941 |              | 0.5267649 | 0        | 1        | NA       |
| si:dkey-92j12.5    | 51.67128 | -0.728479675 | 0.456353  | -1.59631 | 0.11042  | 0.545275 |
| si:dkey-9i23.6     | 20.03798 | 0.445392697  | 0.459591  | 0.969107 | 0.332492 | 0.789726 |
| hb12               | 14.31284 | -0.904569273 | 0.608198  | -1.48729 | 0.136937 | 0.5925   |
| CR392012.2         | 1.435695 | 0.161289847  | 1.510245  | 0.106797 | 0.91495  | NA       |
| si:dkey-149i17.7   | 0.053506 | -0.86807634  | 5.267649  | -0.16479 | 0.869106 | NA       |

|                   |          |              |          |          |          |          |    |
|-------------------|----------|--------------|----------|----------|----------|----------|----|
| si:dkey-267j14.7  | 0.20156  |              | 0        | 5.203891 | 0        | 1        | NA |
| BX005414.1        | 0.65426  | -3.033897945 | 2.952644 | -1.02752 | 0.304176 | NA       |    |
| CR384089.1        | 0.302502 | 1.999112478  | 3.967811 | 0.503833 | 0.614379 | NA       |    |
| si:dkey-220k22.3  | 5.742628 | -0.335000892 | 0.79763  | -0.42    | 0.674489 | 0.934877 |    |
| BX005329.3        | 0.101247 | 1.854150541  | 5.241768 | 0.353726 | 0.723544 | NA       |    |
| si:dkey-204f11.64 | 591.1608 | -0.130987864 | 0.128193 | -1.0218  | 0.306876 | 0.772019 |    |
| si:dkey-201c13.2  | 208.4339 | -0.653803854 | 0.451707 | -1.44741 | 0.147783 | 0.608687 |    |
| BX510928.1        | 0.144555 | 1.854137197  | 5.241768 | 0.353724 | 0.723546 | NA       |    |
| bc12a             | 59.93183 | 0.09924543   | 0.333982 | 0.297158 | 0.766346 | 0.960229 |    |
| cxcl11.6          | 0.376087 | 2.486304095  | 3.656608 | 0.679948 | 0.496537 | NA       |    |
| sfttpba           | 64.132   | -0.491650818 | 0.634107 | -0.77534 | 0.438136 | 0.851454 |    |
| ar18              | 757.2434 | -0.552402402 | 0.102476 | -5.39056 | 7.02E-08 | 3.78E-05 |    |
| si:dkey-79i2.4    | 7.445087 | 1.038173685  | 0.72284  | 1.436243 | 0.150933 | 0.615085 |    |
| BX294165.2        | 0 NA     | NA           | NA       | NA       | NA       | NA       |    |
| BX548044.6        | 0.271634 | 1.499226878  | 4.669906 | 0.32104  | 0.74818  | NA       |    |
| or125-2           | 0.630791 | 0            | 3.080905 | 0        | 1        | NA       |    |
| si:dkey-83f18.6   | 1.164987 | -2.730085853 | 2.209751 | -1.23547 | 0.216655 | NA       |    |
| zgc:77614         | 0 NA     | NA           | NA       | NA       | NA       | NA       |    |
| CR318588.3        | 393.6646 | -1.039482063 | 0.307878 | -3.37628 | 0.000735 | 0.036144 |    |
| si:ch211-284e13.5 | 63.67963 | -0.218405916 | 0.233935 | -0.93362 | 0.350501 | 0.802215 |    |
| apela             | 31.23877 | -0.910668513 | 0.353835 | -2.57371 | 0.010062 | 0.173845 |    |
| acbd7             | 521.197  | 0.182693374  | 0.160533 | 1.13804  | 0.255104 | 0.733542 |    |
| mical3b           | 283.3127 | -0.353043176 | 0.190714 | -1.85117 | 0.064146 | 0.432457 |    |
| CR392363.1        | 5.069393 | -0.310772356 | 0.936554 | -0.33183 | 0.740021 | 0.953684 |    |
| v2rc1             | 0.785616 | 0            | 3.536331 | 0        | 1        | NA       |    |
| znf1157           | 29.88595 | -0.076081764 | 0.381076 | -0.19965 | 0.841754 | 0.97643  |    |
| si:ch211-12e13.12 | 11.25387 | 0.570365252  | 0.509765 | 1.118879 | 0.263192 | 0.740967 |    |
| loxhd1a           | 4.994561 | -0.252396469 | 0.960911 | -0.26266 | 0.79281  | 0.965312 |    |
| BX530079.1        | 0.175069 | 0            | 5.267649 | 0        | 1        | NA       |    |
| zgc:173425        | 0.494418 | 2.061957577  | 3.207825 | 0.64279  | 0.52036  | NA       |    |
| si:ch211-197g15.6 | 4.159943 | -0.16571258  | 1.183145 | -0.14006 | 0.888612 | 0.988188 |    |
| BX927218.2        | 0 NA     | NA           | NA       | NA       | NA       | NA       |    |
| si:dkey-84o3.2    | 1.198022 | -3.102044291 | 2.018193 | -1.53704 | 0.124283 | NA       |    |
| rpe65b            | 404.7124 | -0.223223699 | 0.157717 | -1.41534 | 0.156968 | 0.622766 |    |
| si:dkey-71d15.2   | 61.66689 | 0.064319151  | 0.284935 | 0.225733 | 0.821409 | 0.971788 |    |
| BX640536.1        | 0 NA     | NA           | NA       | NA       | NA       | NA       |    |
| CR788311.1        | 0 NA     | NA           | NA       | NA       | NA       | NA       |    |
| si:dkey-125i10.3  | 222.1419 | -0.01268974  | 0.200358 | -0.06334 | 0.9495   | 0.99801  |    |
| npy2r             | 4.744881 | 1.001487201  | 0.908182 | 1.102739 | 0.270141 | 0.746532 |    |
| fyba              | 1.571842 | 0.045787888  | 1.793501 | 0.02553  | 0.979632 | NA       |    |
| CT583625.2        | 2.9164   | -0.916005339 | 1.513696 | -0.60514 | 0.545083 | 0.895206 |    |
| si:dkey-280e8.1   | 7.959131 | -0.187301399 | 0.687794 | -0.27232 | 0.785374 | 0.962605 |    |
| BX248385.1        | 0 NA     | NA           | NA       | NA       | NA       | NA       |    |
| BX571803.3        | 0.707437 | 0.208696817  | 2.378885 | 0.087729 | 0.930092 | NA       |    |
| CR626923.1        | 0.043309 | 0            | 5.267649 | 0        | 1        | NA       |    |
| si:dkey-192d15.1  | 2.215074 | 1.055433786  | 1.946779 | 0.542144 | 0.58772  | 0.907608 |    |
| CU914617.1        | 0.157559 | 0            | 5.267649 | 0        | 1        | NA       |    |
| si:ch211-196h16.4 | 19.04886 | 1.332918269  | 0.542997 | 2.454744 | 0.014098 | 0.208027 |    |
| si:dkey-193n17.9  | 28.51018 | -0.376935049 | 0.759781 | -0.49611 | 0.619817 | 0.91747  |    |
| twf2a             | 687.2835 | 0.373861937  | 0.153135 | 2.441389 | 0.014631 | 0.212006 |    |
| ovch2             | 2.618448 | 0.656303214  | 0.990702 | 0.662463 | 0.507675 | 0.883056 |    |
| si:ch211-171b20.3 | 1.10608  | 0.827712901  | 1.879644 | 0.440356 | 0.659679 | NA       |    |
| si:ch211-133n4.11 | 0 NA     | NA           | NA       | NA       | NA       | NA       |    |
| si:dkey-181m19.11 | 0 NA     | NA           | NA       | NA       | NA       | NA       |    |



|                   |          |              |          |          |          |          |    |
|-------------------|----------|--------------|----------|----------|----------|----------|----|
| BX294387.1        | 0.07132  |              | 0        | 5.267649 | 0        | 1        | NA |
| plxnb2a           | 19.67425 | 0.493833904  | 0.454564 | 1.086389 | 0.277307 | 0.751426 |    |
| l3mbt11           | 51.38336 | 0.47634024   | 0.403    | 1.181987 | 0.237211 | 0.718568 |    |
| CR392026.2        | 0.101446 | -1.755425691 | 5.23528  | -0.33531 | 0.737394 | NA       |    |
| si:ch211-208g1.1  | 0.586398 | -1.716268233 | 3.459477 | -0.49611 | 0.619819 | NA       |    |
| ms4a17a.11        | 629.3029 | 0.393870139  | 0.195199 | 2.017788 | 0.043613 | 0.3656   |    |
| si:dkey-111i23.1  | 0.590186 | 2.065775445  | 3.4418   | 0.600202 | 0.548372 | NA       |    |
| CU179758.1        | 11.00559 | 0.134929369  | 0.481903 | 0.279993 | 0.779483 | 0.961073 |    |
| or133-10          | 0        | NA           | NA       | NA       | NA       | NA       |    |
| si:dkey-58f10.4   | 2.342835 | -1.734939988 | 1.630436 | -1.0641  | 0.287285 | 0.758355 |    |
| si:ch73-44m9.2    | 4.502027 | -2.280175387 | 1.009751 | -2.25816 | 0.023936 | 0.274217 |    |
| AL953907.1        | 0.424991 | 1.055359511  | 4.901986 | 0.215292 | 0.829539 | NA       |    |
| si:dkey-23a23.1   | 0.61668  | -3.150708296 | 4.431873 | -0.71092 | 0.477134 | NA       |    |
| F13A1 (1 of many) | 0.52642  | 0            | 3.118302 | 0        | 1        | NA       |    |
| coa5              | 242.3278 | 0.198666548  | 0.194879 | 1.019433 | 0.307997 | 0.772996 |    |
| si:ch211-195b15.8 | 622.1695 | 0.35395782   | 0.173474 | 2.040408 | 0.04131  | 0.354893 |    |
| BX663515.1        | 0.522138 | 0.010001289  | 3.563527 | 0.002807 | 0.997761 | NA       |    |
| CR749748.1        | 11.64352 | -0.148225366 | 0.496888 | -0.29831 | 0.765468 | 0.959831 |    |
| si:dkey-21e2.13   | 151.0722 | 0            | 1.693338 | 0        | 1        | 1        |    |
| BX927394.2        | 0        | NA           | NA       | NA       | NA       | NA       |    |
| BX323457.3        | 4.928245 | 2.188307179  | 1.05212  | 2.079902 | 0.037534 | 0.340115 |    |
| zmp:0000001323    | 11.80927 | 0            | 1.876128 | 0        | 1        | 1        |    |
| BX936461.1        | 4.378658 | 2.091864582  | 1.346849 | 1.553155 | 0.120386 | 0.565852 |    |
| BX640520.2        | 0        | NA           | NA       | NA       | NA       | NA       |    |
| si:dkey-88l16.5   | 3.798583 | 0.089111691  | 0.87867  | 0.101417 | 0.91922  | 0.993892 |    |
| BX119902.1        | 0.050624 | 1.055396947  | 5.267649 | 0.200354 | 0.841203 | NA       |    |
| si:ch211-147m20.3 | 0.116481 | 0            | 5.267649 | 0        | 1        | NA       |    |
| ms4a17a.9         | 445.6769 | 0.398985955  | 0.198989 | 2.005066 | 0.044956 | 0.371348 |    |
| BX511089.3        | 0        | NA           | NA       | NA       | NA       | NA       |    |
| dio2              | 20.38176 | -0.676555164 | 0.5261   | -1.28598 | 0.19845  | 0.679184 |    |
| si:dkey-11o15.10  | 0.347232 | 0            | 4.408206 | 0        | 1        | NA       |    |
| gpr186            | 38.14749 | -1.130823176 | 0.553726 | -2.04221 | 0.041131 | 0.353918 |    |
| si:dkey-163f12.11 | 1.613231 | 0.939533936  | 1.193946 | 0.786915 | 0.431332 | NA       |    |
| v2ra20            | 0.165352 | -0.868103029 | 5.267649 | -0.1648  | 0.869102 | NA       |    |
| CR407561.1        | 0.25048  | -0.066140403 | 5.204391 | -0.01271 | 0.98986  | NA       |    |
| pimr152           | 0        | NA           | NA       | NA       | NA       | NA       |    |
| si:ch73-313122.2  | 0        | NA           | NA       | NA       | NA       | NA       |    |
| CR396590.6        | 0        | NA           | NA       | NA       | NA       | NA       |    |
| BX649434.2        | 0.922433 | 0.067491398  | 2.173786 | 0.031048 | 0.975231 | NA       |    |
| si:dkey-258f14.2  | 23.87696 | -0.318876709 | 0.333572 | -0.95595 | 0.339099 | 0.795226 |    |
| si:dkey-84o3.6    | 1.198871 | 0.60515862   | 1.713153 | 0.353243 | 0.723907 | NA       |    |
| si:dkey-277m11.2  | 14.33731 | -0.307694843 | 0.651551 | -0.47225 | 0.636748 | 0.924779 |    |
| si:ch211-197h24.8 | 36.34481 | -0.159455256 | 0.347183 | -0.45928 | 0.646031 | 0.926728 |    |
| illr2             | 0        | NA           | NA       | NA       | NA       | NA       |    |
| BX470185.2        | 0.103025 | -0.868089684 | 5.267649 | -0.1648  | 0.869104 | NA       |    |
| pimr178           | 0.24655  | 2.436374376  | 5.206324 | 0.467964 | 0.63981  | NA       |    |
| si:dkey-266f7.5   | 4.638403 | -1.589553493 | 0.892556 | -1.7809  | 0.074929 | 0.464197 |    |
| si:ch211-170d8.2  | 18.32095 | 0.240485867  | 0.41312  | 0.582121 | 0.560485 | 0.899928 |    |
| znf1061           | 0.640021 | -0.791259046 | 2.420142 | -0.32695 | 0.743708 | NA       |    |
| cplx4c            | 108.6993 | 0.157065434  | 0.27344  | 0.574406 | 0.565693 | 0.901634 |    |
| si:ch211-163b2.4  | 0.867138 | -4.000317502 | 5.155772 | -0.77589 | 0.437813 | NA       |    |
| cenph             | 49.43807 | 0.065917005  | 0.249889 | 0.263786 | 0.791945 | 0.964842 |    |
| tyrobp            | 4.452141 | -1.812694665 | 0.883795 | -2.05104 | 0.040263 | 0.350654 |    |
| rbm33b            | 9.50118  | 1.234984828  | 0.579325 | 2.131766 | 0.033026 | 0.321751 |    |

|                    |          |              |          |          |          |          |  |
|--------------------|----------|--------------|----------|----------|----------|----------|--|
| si:ch1073-143110.2 | 43.5752  | -0.037507753 | 0.376544 | -0.09961 | 0.920654 | 0.994085 |  |
| abcc6b.2           | 46.88779 | -0.191464226 | 0.369339 | -0.5184  | 0.604181 | 0.91484  |  |
| si:ch211-231i17.4  | 0.73786  | 1.000603034  | 2.394239 | 0.417921 | 0.676005 | NA       |  |
| lingo4a            | 5.906893 | -1.111560148 | 1.082171 | -1.02716 | 0.304346 | 0.769752 |  |
| si:dkey-22i16.7    | 8.920483 | 0            | 1.790196 | 0        | 1        | 1        |  |
| CR749775.1         | 0.456584 | 1.055379606  | 4.142258 | 0.254784 | 0.79889  | NA       |  |
| or133-2            | 7.946613 | 1.293714013  | 0.608439 | 2.126285 | 0.03348  | 0.323151 |  |
| si:ch73-196i15.5   | 2.61289  | 0.9725953    | 1.739167 | 0.55923  | 0.576004 | 0.904739 |  |
| CR936403.1         | 0.508661 | 2.875448212  | 3.056118 | 0.940883 | 0.346765 | NA       |  |
| ungb               | 4.677415 | 0.208863178  | 0.979478 | 0.213239 | 0.83114  | 0.974908 |  |
| CU469568.2         | 1.720664 | 0            | 2.199157 | 0        | 1        | NA       |  |
| CR735104.1         | 0.248325 | 0            | 5.267649 | 0        | 1        | NA       |  |
| BX248322.1         | 0.709603 | -0.86814605  | 2.853738 | -0.30421 | 0.760965 | NA       |  |
| si:dkey-9311.4     | 0.099037 | 0            | 5.267649 | 0        | 1        | NA       |  |
| si:ch211-53m15.2   | 0.092101 | 0            | 5.267649 | 0        | 1        | NA       |  |
| apoa4b.2           | 871.6515 | 0.586668614  | 0.454366 | 1.29118  | 0.196641 | 0.676996 |  |
| si:dkey-58f10.11   | 3.695602 | 2.544734822  | 1.707158 | 1.490627 | 0.13606  | 0.591131 |  |
| CR450833.1         | 8.28144  | -0.255751363 | 0.746721 | -0.3425  | 0.731975 | 0.950617 |  |
| F0834814.1         | 7.688252 | 0.369190339  | 0.79185  | 0.466238 | 0.641045 | 0.925364 |  |
| CR855257.1         | 0.049519 | 0            | 5.267649 | 0        | 1        | NA       |  |
| BX005153.2         | 0.16003  | 0.959877153  | 5.236908 | 0.183291 | 0.85457  | NA       |  |
| AL929210.1         | 0.347478 | -1.807578344 | 3.727823 | -0.48489 | 0.627755 | NA       |  |
| si:ch211-132b12.2  | 18.90649 | 0.123421444  | 0.399656 | 0.308819 | 0.757459 | 0.957364 |  |
| BX511265.3         | 0.318543 | 2.665446361  | 4.529697 | 0.588438 | 0.556238 | NA       |  |
| si:ch211-74m13.1   | 138.9855 | 0.108110113  | 0.197114 | 0.548465 | 0.583373 | 0.905948 |  |
| BX284697.2         | 0        | NA           | NA       | NA       | NA       | NA       |  |
| CR392341.3         | 2.889017 | -0.652138157 | 1.325063 | -0.49216 | 0.622609 | 0.918894 |  |
| si:ch73-379f5.5    | 26.77955 | 0            | 1.717684 | 0        | 1        | 1        |  |
| AL929032.1         | 0.102175 | 1.055383603  | 5.267649 | 0.200352 | 0.841205 | NA       |  |
| BX530407.3         | 0        | NA           | NA       | NA       | NA       | NA       |  |
| CR377211.2         | 0.608305 | -0.575770725 | 3.235925 | -0.17793 | 0.858777 | NA       |  |
| nf1l3-5            | 1551.13  | -0.300641672 | 0.558438 | -0.53836 | 0.590327 | 0.908901 |  |
| BX255915.2         | 0.128839 | 0            | 5.267649 | 0        | 1        | NA       |  |
| wnt16              | 46.30901 | -0.427770273 | 0.283972 | -1.50638 | 0.131969 | 0.584315 |  |
| BX530068.1         | 84.36775 | -1.358163179 | 0.26972  | -5.03546 | 4.77E-07 | 0.000161 |  |
| si:ch211-214p16.2  | 0        | NA           | NA       | NA       | NA       | NA       |  |
| si:ch211-156j22.4  | 196.1452 | 0.2012793    | 0.291251 | 0.691085 | 0.489512 | 0.874615 |  |
| si:ch73-18b11.2    | 58.28599 | -0.191012352 | 0.256622 | -0.74433 | 0.456674 | 0.860698 |  |
| CR792454.1         | 0.544298 | 0            | 2.86717  | 0        | 1        | NA       |  |
| chst12b            | 3.08114  | 0            | 2.02341  | 0        | 1        | 1        |  |
| cc134a.3           | 0.753966 | 1.055427804  | 2.475174 | 0.426405 | 0.669812 | NA       |  |
| si:ch211-197g15.8  | 3.928695 | 0.821602309  | 1.245767 | 0.659515 | 0.509565 | 0.883733 |  |
| CR377211.3         | 1.094575 | -1.339614516 | 1.667981 | -0.80314 | 0.421897 | NA       |  |
| si:dkey-91f15.1    | 39.29375 | -0.025692092 | 0.679012 | -0.03784 | 0.969817 | 1        |  |
| otxl               | 239.4079 | 0.327551855  | 0.134433 | 2.436552 | 0.014828 | 0.213592 |  |
| si:dkey-106c17.2   | 3.369742 | -2.48067787  | 1.075724 | -2.30606 | 0.021108 | 0.25794  |  |
| si:dkey-84o3.4     | 3.778121 | -3.350863987 | 1.571132 | -2.13277 | 0.032944 | 0.321256 |  |
| sult1st9           | 5.68152  | -3.308110877 | 1.374813 | -2.40623 | 0.016118 | 0.223897 |  |
| taar18b            | 0.319903 | 2.517922993  | 3.840332 | 0.655652 | 0.512048 | NA       |  |
| FP015823.1         | 0.381753 | 0            | 3.307398 | 0        | 1        | NA       |  |
| pimr98             | 1.426463 | 2.275189368  | 1.74078  | 1.306995 | 0.191215 | NA       |  |
| si:dkey-194e6.2    | 0.161641 | 0            | 5.267649 | 0        | 1        | NA       |  |
| si:rp71-17i16.4    | 302.3866 | 0.454461537  | 0.372337 | 1.220564 | 0.222251 | 0.703972 |  |
| si:dkey-21e2.10    | 63.16602 | 0            | 2.165945 | 0        | 1        | 1        |  |

|                   |          |              |            |          |          |          |
|-------------------|----------|--------------|------------|----------|----------|----------|
| CR388079.2        | 1.001648 | -2.101082676 | 1.953474   | -1.07556 | 0.282123 | NA       |
| sinhcafl          | 574.1495 | 0.01711956   | 0.11558    | 0.148118 | 0.882249 | 0.986908 |
| si:ch211-67n3.9   | 26.73067 | -0.30087142  | 0.543688   | -0.55339 | 0.579997 | 0.905618 |
| AL953903.1        | 0 NA     |              | NA         | NA       | NA       | NA       |
| si:dkey-240n22.3  | 8.807943 | 0.772537784  | 0.79522    | 0.971477 | 0.331311 | 0.788949 |
| BX571955.2        | 7.301899 | 0.113943958  | 1.058127   | 0.107685 | 0.914246 | 0.992972 |
| CR932983.2        | 2.084766 | 0.689963046  | 1.621346   | 0.425549 | 0.670436 | NA       |
| BX927275.2        | 1.737319 | 1.382192672  | 1.209888   | 1.142413 | 0.253282 | NA       |
| lmo2              | 223.1546 | -0.177469743 | 0.18865    | -0.94074 | 0.34684  | 0.799748 |
| thsd7ba           | 134.2975 | 0.425144469  | 0.362351   | 1.173295 | 0.240678 | 0.722178 |
| si:dkeyp-68b7.10  | 31.50214 | -0.360291501 | 0.377202   | -0.95517 | 0.339492 | 0.795226 |
| CR388166.2        | 29.55069 | -0.453858271 | 0.386405   | -1.17457 | 0.240169 | 0.721177 |
| si:dkey-58f10.14  | 4.333636 | 2.501317738  | 1.183314   | 2.113825 | 0.03453  | 0.328029 |
| si:ch73-120g24.4  | 71.8737  | 0.42233532   | 0.283091   | 1.491872 | 0.135733 | 0.591131 |
| ftr33             | 1.780472 | 0.064775992  | 2.009046   | 0.032242 | 0.974279 | NA       |
| FP067425.1        | 0.209102 | 1.055362417  | 5.137509   | 0.205423 | 0.837242 | NA       |
| zgc:162928        | 68.19469 | 0.093518587  | 0.396576   | 0.235815 | 0.813576 | 0.970328 |
| taar20t           | 0.197454 |              | 0 5.267649 |          | 0        | 1 NA     |
| CR318668.1        | 0 NA     |              | NA         | NA       | NA       | NA       |
| CR388189.1        | 0.063619 |              | 0 5.267649 |          | 0        | 1 NA     |
| cb1n7             | 0.09025  |              | 0 5.267649 |          | 0        | 1 NA     |
| BX322661.2        | 81.7727  | 0.0419344    | 0.295563   | 0.14188  | 0.887175 | 0.987739 |
| CU468826.1        | 0.320553 | 2.461492708  | 4.460611   | 0.551829 | 0.581066 | NA       |
| pold2             | 152.486  | 0.040509287  | 0.189584   | 0.213675 | 0.830801 | 0.974908 |
| si:dkey-85k15.4   | 6.524022 | -1.339788716 | 0.63135    | -2.1221  | 0.033829 | 0.325104 |
| si:dkey-250k15.7  | 28.05376 | 0.006881764  | 0.608599   | 0.011308 | 0.990978 | 1        |
| si:dkey-7f3.14    | 0.40487  |              | 0 5.267649 |          | 0        | 1 NA     |
| si:ch211-236l14.1 | 0 NA     |              | NA         | NA       | NA       | NA       |
| pimr148           | 0 NA     |              | NA         | NA       | NA       | NA       |
| CT573133.1        | 1.835178 | -0.917045424 | 1.625822   | -0.56405 | 0.57272  | NA       |
| si:dkey-103d23.3  | 0.75172  | -1.753759352 | 2.662265   | -0.65875 | 0.510058 | NA       |
| CT025776.1        | 0.043309 |              | 0 5.267649 |          | 0        | 1 NA     |
| si:ch211-106h4.5  | 15.29389 | 0.953776659  | 0.829008   | 1.150503 | 0.249937 | 0.729721 |
| or127-1           | 2.714458 | 0.457980299  | 1.168181   | 0.392046 | 0.695024 | 0.941197 |
| CU394254.2        | 0.376674 | -3.354576721 | 4.904049   | -0.68404 | 0.493948 | NA       |
| si:dkey-238m4.3   | 0 NA     |              | NA         | NA       | NA       | NA       |
| BX005445.1        | 2.081394 | -1.713039563 | 1.201555   | -1.42569 | 0.153959 | NA       |
| si:ch211-113e8.9  | 12.07546 | 0.188199147  | 0.578992   | 0.325046 | 0.745146 | 0.954956 |
| BX088713.1        | 0.23603  | -1.71064224  | 4.961755   | -0.34477 | 0.730271 | NA       |
| TC2N              | 20.7283  | 0.400395989  | 0.456071   | 0.877925 | 0.379985 | 0.823607 |
| si:dkey-10h3.3    | 0.937555 | 3.946499895  | 2.150111   | 1.835487 | 0.066434 | NA       |
| BX908726.1        | 3.99614  | 1.681108789  | 0.981375   | 1.713013 | 0.08671  | 0.493509 |
| cd28              | 18.60328 | 0.146628446  | 0.539491   | 0.271791 | 0.785783 | 0.962605 |
| ctslb             | 0.157736 | -2.389175838 | 5.199609   | -0.45949 | 0.645881 | NA       |
| si:dkey-73p2.3    | 3.303607 | 0.041501669  | 1.557411   | 0.026648 | 0.978741 | 1        |
| BX548073.4        | 0.050723 | -0.86807634  | 5.267649   | -0.16479 | 0.869106 | NA       |
| CR545476.1        | 0 NA     |              | NA         | NA       | NA       | NA       |
| CR450782.1        | 6.714486 | 2.749473526  | 0.849918   | 3.234988 | 0.001216 | 0.050523 |
| CU657976.1        | 0.389481 |              | 0 5.007512 |          | 0        | 1 NA     |
| ITLN1 (1 of many) | 144.5786 | -2.408522161 | 0.612751   | -3.93067 | 8.47E-05 | 0.008144 |
| ftr10             | 0 NA     |              | NA         | NA       | NA       | NA       |
| cfdbl             | 217.1767 | 0.047594566  | 0.161969   | 0.29385  | 0.768873 | 0.960395 |
| CU928069.1        | 0 NA     |              | NA         | NA       | NA       | NA       |
| BX649508.1        | 0 NA     |              | NA         | NA       | NA       | NA       |

|                   |          |              |            |          |          |          |
|-------------------|----------|--------------|------------|----------|----------|----------|
| tspan37           | 118.1778 | -0.298581078 | 0.266485   | -1.12044 | 0.262525 | 0.740129 |
| si:ch211-232m8.3  | 22.64444 | 1.092992966  | 0.571976   | 1.910908 | 0.056016 | 0.409174 |
| pimr50            | 0.301596 |              | 0 5.267649 | 0        | 1 NA     |          |
| pimr127           | 0.08847  |              | 0 5.267649 | 0        | 1 NA     |          |
| BX649516.1        | 0.22126  | -2.340106499 | 5.201854   | -0.44986 | 0.652811 | NA       |
| si:ch211-229g14.3 | 0.106927 |              | 0 5.267649 | 0        | 1 NA     |          |
| si:ch211-132g1.4  | 1.917183 | -5.013962568 | 1.868738   | -2.68307 | 0.007295 | NA       |
| CR749763.4        | 0.060442 |              | 0 5.267649 | 0        | 1 NA     |          |
| CR847899.2        |          | 0 NA         | NA         | NA       | NA       | NA       |
| si:dkey-28k24.2   | 3.100805 | -4.658362078 | 1.487942   | -3.13074 | 0.001744 | 0.064499 |
| AL953855.1        |          | 0 NA         | NA         | NA       | NA       | NA       |
| si:dkey-192k22.2  | 2.473022 | -0.717608894 | 1.388737   | -0.51673 | 0.605341 | 0.914985 |
| BX640512.2        |          | 0 NA         | NA         | NA       | NA       | NA       |
| btr04             | 0.806468 |              | 0 3.061762 | 0        | 1 NA     |          |
| BX005024.1        |          | 0 NA         | NA         | NA       | NA       | NA       |
| CU207311.2        | 0.559468 | 1.055381168  | 4.47416    | 0.235884 | 0.813523 | NA       |
| CU694808.1        | 0.99726  | -0.29471275  | 1.692274   | -0.17415 | 0.861746 | NA       |
| ftr97             | 37.67554 | -0.726031116 | 0.384363   | -1.88892 | 0.058903 | 0.418455 |
| si:dkey-82i20.2   | 87.46289 | 0.265941191  | 0.402826   | 0.660188 | 0.509133 | 0.883443 |
| si:ch73-34314.6   |          | 0 NA         | NA         | NA       | NA       | NA       |
| CT583652.1        | 0.223518 |              | 0 5.055639 | 0        | 1 NA     |          |
| si:ch211-227e10.6 | 4.725202 | 0.072427302  | 0.995612   | 0.072747 | 0.942008 | 0.997371 |
| si:ch211-165f21.2 | 3.012694 | 0.092965978  | 1.110595   | 0.083708 | 0.933288 | 0.996472 |
| si:dkey-250k15.9  | 0.820115 | 1.055419243  | 2.697383   | 0.391275 | 0.695594 | NA       |
| si:ch73-266f23.1  | 63.55809 | -0.348197433 | 0.287147   | -1.21261 | 0.225278 | 0.70685  |
| si:ch211-130m23.2 | 34.07607 | -0.097182094 | 0.304815   | -0.31882 | 0.749861 | 0.955074 |
| si:dkey-88116.2   |          | 0 NA         | NA         | NA       | NA       | NA       |
| CR388373.2        | 20.16795 | 0.15658023   | 0.344955   | 0.453915 | 0.64989  | 0.927756 |
| BX004962.2        | 0.049519 |              | 0 5.267649 | 0        | 1 NA     |          |
| si:ch211-208h16.4 | 206.8947 | 0.220111492  | 0.258329   | 0.852058 | 0.394182 | 0.828374 |
| AL954816.1        | 1.771506 | -0.461883891 | 1.694014   | -0.27266 | 0.785117 | NA       |
| BX571724.2        | 0.179442 |              | 0 5.267649 | 0        | 1 NA     |          |
| krt96             | 105.4267 | -0.316849916 | 0.224427   | -1.41181 | 0.158004 | 0.623766 |
| CT583625.3        | 0.615056 | -0.868138675 | 2.728519   | -0.31817 | 0.750354 | NA       |
| znf1062           | 0.786746 | -1.045013107 | 2.877481   | -0.36317 | 0.716478 | NA       |
| si:dkey-114c15.5  | 13.21692 | 0.549061793  | 0.518754   | 1.058425 | 0.289862 | 0.760705 |
| AL953903.2        |          | 0 NA         | NA         | NA       | NA       | NA       |
| si:ch211-255i3.4  | 88.91942 | -0.10926504  | 0.303995   | -0.35943 | 0.719273 | 0.94694  |
| CR388363.1        | 0.413109 |              | 0 4.30197  | 0        | 1 NA     |          |
| taar20w           | 0.043308 |              | 0 5.267649 | 0        | 1 NA     |          |
| zgc:163080        | 187.351  | -0.101683258 | 0.187603   | -0.54201 | 0.58781  | 0.907608 |
| CT025913.1        | 0.277549 | -2.792433852 | 5.183761   | -0.53869 | 0.590102 | NA       |
| BX649500.1        | 4.987845 | -1.211987463 | 0.945341   | -1.28206 | 0.19982  | 0.6804   |
| AL590134.1        | 4.602353 | 0.592034541  | 0.79402    | 0.745616 | 0.455899 | 0.860324 |
| CR847563.1        | 5.591664 | 2.260505884  | 0.857628   | 2.635766 | 0.008395 | 0.156734 |
| CU469530.1        | 2.767935 | 0.068935123  | 1.248542   | 0.055212 | 0.955969 | 0.998845 |
| CR450836.1        | 48.97557 | 0.695297135  | 0.25393    | 2.738148 | 0.006179 | 0.132924 |
| lrrfip1b          | 100.0287 | 0.05694773   | 0.239297   | 0.23798  | 0.811897 | 0.97012  |
| CU695074.1        |          | 0 NA         | NA         | NA       | NA       | NA       |
| si:dkey-7814.12   |          | 0 NA         | NA         | NA       | NA       | NA       |
| BX640478.1        | 2.231912 | 0.105183263  | 1.400135   | 0.075124 | 0.940116 | 0.997371 |
| si:ch211-235f1.3  | 1.270024 | 1.055456057  | 2.069454   | 0.510017 | 0.61004  | NA       |
| abr               | 231.6619 | 0.132602976  | 0.136051   | 0.974657 | 0.32973  | 0.788011 |
| si:ch73-52p7.1    | 18.9882  | 0.447119935  | 0.602378   | 0.742258 | 0.457931 | 0.860993 |

|                    |           |               |             |           |           |           |
|--------------------|-----------|---------------|-------------|-----------|-----------|-----------|
| si:ch211-274p24. 2 | 19. 91231 | 0. 307434922  | 0. 41134    | 0. 747398 | 0. 454823 | 0. 859845 |
| BX324164. 2        | 5. 513731 | -1. 504323064 | 1. 236037   | -1. 21705 | 0. 223584 | 0. 705397 |
| si:dkey-189h5. 6   | 50. 28503 | -0. 500985224 | 0. 459245   | -1. 09089 | 0. 275322 | 0. 750424 |
| si:ch211-127n13. 2 | 0. 241766 |               | 0 5. 267649 | 0         | 1 NA      |           |
| BX901918. 2        | 0. 40922  | -1. 826692069 | 5. 230459   | -0. 34924 | 0. 726908 | NA        |
| si:dkey-57k2. 7    | 91. 23668 | -0. 552519924 | 0. 231353   | -2. 38821 | 0. 016931 | 0. 230621 |
| BX957317. 1        | 143. 1614 | -0. 42888034  | 0. 333336   | -1. 28663 | 0. 198223 | 0. 679109 |
| si:dkey-23c22. 7   | 4. 406677 | -2. 496214054 | 1. 165685   | -2. 14141 | 0. 032241 | 0. 318747 |
| si:dkey-19a16. 11  | 0 NA      |               | NA          | NA        | NA        | NA        |
| CR854927. 2        | 0. 262548 | 2. 079535926  | 5. 22636    | 0. 397894 | 0. 690708 | NA        |
| znf1132            | 0. 546974 | -0. 199744923 | 2. 938455   | -0. 06798 | 0. 945805 | NA        |
| AL732515. 1        | 0. 094032 | -0. 868089684 | 5. 267649   | -0. 1648  | 0. 869104 | NA        |
| si:ch211-197e7. 1  | 51. 14028 | 1. 159516291  | 0. 984363   | 1. 177935 | 0. 238822 | 0. 719781 |
| AL935117. 1        | 2. 014148 | 0. 050279608  | 1. 246952   | 0. 040322 | 0. 967836 | NA        |
| BX649502. 10       | 0 NA      |               | NA          | NA        | NA        | NA        |
| BX649610. 1        | 0 NA      |               | NA          | NA        | NA        | NA        |
| AL845306. 1        | 0. 267184 | 0 5. 267649   |             | 0         | 1 NA      |           |
| si:ch211-210b2. 4  | 11. 06951 | -0. 268250254 | 0. 546277   | -0. 49105 | 0. 62339  | 0. 919118 |
| CU469584. 1        | 9. 094539 | -0. 098093982 | 0. 694595   | -0. 14122 | 0. 887692 | 0. 988077 |
| zgc:66156          | 34. 22124 |               | 0 1. 703057 | 0         | 1         | 1         |
| CT030044. 1        | 3. 453402 | 0. 898431494  | 1. 076864   | 0. 834304 | 0. 40411  | 0. 833888 |
| or128-7            | 0. 046941 |               | 0 5. 267649 | 0         | 1 NA      |           |
| si:ch211-242f23. 3 | 0. 597135 | -2. 773597679 | 3. 882806   | -0. 71433 | 0. 475024 | NA        |
| camkmt             | 95. 27695 | 0. 298969301  | 0. 21288    | 1. 404402 | 0. 160199 | 0. 626611 |
| CR769772. 3        | 0. 351146 | -0. 868132897 | 4. 416119   | -0. 19658 | 0. 844154 | NA        |
| CR759970. 1        | 0 NA      |               | NA          | NA        | NA        | NA        |
| CT990618. 1        | 171. 9289 | 0. 010764119  | 0. 156846   | 0. 068628 | 0. 945285 | 0. 997371 |
| CR759887. 2        | 0. 050624 | 1. 055396947  | 5. 267649   | 0. 200354 | 0. 841203 | NA        |
| mybl2a             | 138. 3737 | -0. 188696274 | 0. 209809   | -0. 89937 | 0. 368454 | 0. 817272 |
| si:ch211-157j23. 2 | 2. 127395 | -1. 646534664 | 1. 36137    | -1. 20947 | 0. 226483 | NA        |
| CU468920. 1        | 2. 122384 | -0. 691937419 | 1. 276627   | -0. 542   | 0. 587816 | NA        |
| si:ch211-225k7. 3  | 0. 586432 | 1. 490324766  | 2. 793945   | 0. 533412 | 0. 593748 | NA        |
| si:dkey-40h20. 1   | 6. 273136 | 1. 226927857  | 0. 694395   | 1. 766903 | 0. 077244 | 0. 46958  |
| si:dkey-239j18. 2  | 8. 913191 | 0. 133702597  | 0. 692063   | 0. 193194 | 0. 846807 | 0. 977263 |
| tmem119a           | 22. 75749 | 0. 171961875  | 0. 561696   | 0. 306148 | 0. 759492 | 0. 957886 |
| CU694757. 1        | 0 NA      |               | NA          | NA        | NA        | NA        |
| si:dkey-145c18. 4  | 0 NA      |               | NA          | NA        | NA        | NA        |
| CR396590. 7        | 0. 837533 | 4. 20932268   | 2. 216604   | 1. 898996 | 0. 057565 | NA        |
| AL928866. 1        | 0. 400469 | -0. 868137916 | 3. 324672   | -0. 26112 | 0. 794    | NA        |
| BX927385. 2        | 1. 753027 | 2. 520620622  | 1. 836172   | 1. 372759 | 0. 169827 | NA        |
| si:dkey-261h17. 1  | 1068. 511 | -0. 257536805 | 0. 170663   | -1. 50903 | 0. 13129  | 0. 583069 |
| htr7c              | 5. 107027 | -0. 657665309 | 1. 233368   | -0. 53323 | 0. 593876 | 0. 910482 |
| cox8a              | 4418. 685 | 0. 125974389  | 0. 110675   | 1. 138242 | 0. 255019 | 0. 733542 |
| si:ch211-278p9. 2  | 2. 88547  | -1. 80771757  | 1. 64547    | -1. 0986  | 0. 271941 | 0. 748056 |
| si:dkey-269p2. 1   | 5. 433065 | -0. 244724987 | 1. 105305   | -0. 22141 | 0. 824774 | 0. 972272 |
| BX936318. 1        | 0. 609232 | -2. 77879581  | 2. 658682   | -1. 04518 | 0. 295941 | NA        |
| AL954142. 2        | 1. 305681 | -1. 02114651  | 1. 664558   | -0. 61346 | 0. 53957  | NA        |
| CU682811. 2        | 10. 19479 | -1. 282910165 | 0. 708138   | -1. 81167 | 0. 070038 | 0. 451397 |
| zgc:152652         | 0. 153006 | -0. 771121057 | 5. 236853   | -0. 14725 | 0. 882936 | NA        |
| BX950187. 1        | 5. 813574 | -0. 382713981 | 0. 949785   | -0. 40295 | 0. 686987 | 0. 938807 |
| si:dkeyp-2e4. 3    | 27. 64434 | -1. 553118193 | 0. 420302   | -3. 69525 | 0. 00022  | 0. 015758 |
| rusc2              | 1044. 877 | 0. 112375171  | 0. 168406   | 0. 667287 | 0. 504589 | 0. 88195  |
| CU595864. 1        | 0. 18486  |               | 0 5. 267649 | 0         | 1 NA      |           |
| CR394546. 3        | 19. 26578 | 1. 277460936  | 0. 621775   | 2. 054538 | 0. 039924 | 0. 3492   |

|                   |          |              |          |          |          |          |
|-------------------|----------|--------------|----------|----------|----------|----------|
| si:dkey-265e7.1   | 3.261543 | -1.472602756 | 1.310714 | -1.12351 | 0.26122  | 0.738737 |
| si:dkey-20015.4   | 61.99612 | -0.646578874 | 0.817257 | -0.79116 | 0.428852 | 0.846597 |
| si:rp71-36a1.1    | 112.3227 | -0.004350984 | 0.267517 | -0.01626 | 0.987024 | 1        |
| si:ch73-274k23.1  | 7.384781 | -0.354066846 | 0.604347 | -0.58587 | 0.557965 | 0.899301 |
| adgre17           | 0.491655 | 2.922009193  | 3.546198 | 0.823984 | 0.409949 | NA       |
| ftr73             | 1.154307 | -3.521284481 | 2.310384 | -1.52411 | 0.127481 | NA       |
| mxra7             | 114.1251 | 0.050907548  | 0.214802 | 0.236997 | 0.812659 | 0.970328 |
| BX247868.1        | 4.940595 | -0.562288056 | 0.825248 | -0.68136 | 0.495646 | 0.87806  |
| BX957322.2        | 13.54155 | 0.138796602  | 0.538198 | 0.257891 | 0.796491 | 0.966447 |
| CR926469.1        | 0 NA     | NA           | NA       | NA       | NA       | NA       |
| si:ch211-207c6.2  | 37.81648 | -0.058195795 | 0.332514 | -0.17502 | 0.861066 | 0.980388 |
| si:dkey-22p6.2    | 0 NA     | NA           | NA       | NA       | NA       | NA       |
| si:ch211-215c18.3 | 22.52586 | 0.873452114  | 0.574783 | 1.519619 | 0.128607 | 0.578162 |
| si:dkey-79f11.9   | 0.060442 | 0            | 5.267649 | 0        | 1        | NA       |
| sc:d0202          | 36.22022 | -0.22784988  | 0.400154 | -0.56941 | 0.569081 | 0.902234 |
| si:dkey-19p15.4   | 0.273395 | 1.85410415   | 5.241768 | 0.353717 | 0.723551 | NA       |
| CR626907.2        | 18.37017 | 0.318312143  | 0.362652 | 0.877735 | 0.380087 | 0.823607 |
| CR769777.1        | 3.305798 | -2.638960732 | 1.264016 | -2.08776 | 0.03682  | 0.336931 |
| BX004840.2        | 0 NA     | NA           | NA       | NA       | NA       | NA       |
| fkbp1             | 75.91831 | 0.183094946  | 0.202884 | 0.902462 | 0.366812 | 0.816111 |
| galnt8b.2         | 13.33431 | 0.128013104  | 0.484549 | 0.26419  | 0.791633 | 0.964817 |
| si:dkey-49n23.3   | 0.140685 | -0.868089684 | 5.267649 | -0.1648  | 0.869104 | NA       |
| si:dkey-88n24.3   | 0.087381 | 0            | 5.267649 | 0        | 1        | NA       |
| si:ch211-191i18.4 | 8.376127 | -0.652784841 | 0.771412 | -0.84622 | 0.39743  | 0.830253 |
| si:dkey-14d8.1    | 26.38808 | 0.244189781  | 0.455708 | 0.535847 | 0.592064 | 0.90969  |
| si:ch211-157j23.3 | 3.071204 | 0.69320396   | 1.164313 | 0.595376 | 0.551592 | 0.8974   |
| CR318646.3        | 0.152169 | -2.340093811 | 5.201855 | -0.44986 | 0.652813 | NA       |
| si:dkeyp-44a8.4   | 274.257  | 0.107479022  | 0.180866 | 0.594246 | 0.552347 | 0.8974   |
| BX248512.2        | 1.347173 | 1.703205165  | 1.439753 | 1.182985 | 0.236815 | NA       |
| ftr09             | 0.208377 | 0            | 5.267649 | 0        | 1        | NA       |
| si:dkeyp-72h1.1   | 94.39404 | -0.637160449 | 0.4675   | -1.36291 | 0.172911 | 0.645664 |
| sh2d1aa           | 1.62049  | -0.711332106 | 1.546198 | -0.46005 | 0.645479 | NA       |
| si:dkey-4c15.12   | 5.70848  | -0.702269018 | 0.765563 | -0.91732 | 0.358973 | 0.810031 |
| CU914776.1        | 403.5881 | 1.703963693  | 0.203961 | 8.354365 | 6.58E-17 | 1.91E-13 |
| CR936240.1        | 0.130689 | 0            | 5.267649 | 0        | 1        | NA       |
| si:dkey-7814.7    | 0.138182 | 0            | 5.267649 | 0        | 1        | NA       |
| si:ch211-213b8.4  | 3.356202 | 0            | 1.862921 | 0        | 1        | 1        |
| si:ch211-77g15.32 | 189.0097 | -0.868161223 | 1.676596 | -0.51781 | 0.60459  | 0.914985 |
| BX640520.3        | 0.099037 | 0            | 5.267649 | 0        | 1        | NA       |
| BX323065.1        | 1.500335 | 0.64593194   | 1.843755 | 0.350335 | 0.726087 | NA       |
| AL590146.1        | 0.453942 | 1.05542085   | 3.1273   | 0.337486 | 0.73575  | NA       |
| zgc:112966        | 11.73442 | -0.277467747 | 0.53613  | -0.51754 | 0.604781 | 0.914985 |
| FP016012.1        | 0 NA     | NA           | NA       | NA       | NA       | NA       |
| CR388207.1        | 18.203   | 0.989323333  | 0.500337 | 1.977316 | 0.048006 | 0.381054 |
| gdf10a            | 313.2605 | 0.368189101  | 0.195076 | 1.887416 | 0.059104 | 0.419032 |
| BX294163.1        | 0.046941 | 0            | 5.267649 | 0        | 1        | NA       |
| si:dkey-7814.2    | 5.406209 | 0            | 1.850347 | 0        | 1        | 1        |
| BX640481.1        | 5.760791 | -0.811359055 | 0.960296 | -0.84491 | 0.398164 | 0.830737 |
| pimr179           | 1.976873 | -2.389650645 | 1.724683 | -1.38556 | 0.165881 | NA       |
| BX323590.2        | 126.7221 | 0.173198189  | 0.202019 | 0.857337 | 0.391259 | 0.827902 |
| BX901878.2        | 2.339628 | -0.868145949 | 1.907343 | -0.45516 | 0.648994 | 0.927649 |
| BX537288.2        | 43.15799 | 0.608504429  | 0.439878 | 1.383349 | 0.166558 | 0.636904 |
| BX664750.2        | 0.050624 | 1.055396947  | 5.267649 | 0.200354 | 0.841203 | NA       |
| CR376741.1        | 5.251752 | -0.353043635 | 0.735432 | -0.48005 | 0.631192 | 0.923003 |

|                    |          |              |          |          |          |          |  |
|--------------------|----------|--------------|----------|----------|----------|----------|--|
| si:ch1073-75f15.2  | 0.331578 | -2.413216571 | 5.198537 | -0.46421 | 0.642497 | NA       |  |
| CU468730.1         | 6.862631 | -2.212222297 | 1.020414 | -2.16797 | 0.030161 | 0.309482 |  |
| znf1170            | 22.87365 | 0.190344144  | 0.340762 | 0.558583 | 0.576446 | 0.90475  |  |
| si:ch73-256j6.6    | 0.878478 | -0.58229253  | 2.18129  | -0.26695 | 0.789509 | NA       |  |
| si:ch73-52f15.5    | 212.1147 | -0.213430933 | 0.177724 | -1.20092 | 0.229784 | 0.711763 |  |
| si:rp71-1i20.1     | 2.97298  | 0.364607572  | 0.99268  | 0.367296 | 0.713398 | 0.945821 |  |
| BX897741.1         | 3.394089 | 1.055428615  | 1.869856 | 0.564444 | 0.572452 | 0.903461 |  |
| si:dkey-9i23.8     | 0.315682 | 0            | 5.267649 | 0        | 1        | NA       |  |
| AL935184.2         | 0.318586 | -1.332881143 | 4.510018 | -0.29554 | 0.767583 | NA       |  |
| si:ch211-226h7.8   | 8.099764 | 0.982113385  | 1.687898 | 0.581856 | 0.560664 | 0.899982 |  |
| si:ch211-285c6.4   | 1.227785 | -0.868142441 | 2.137322 | -0.40618 | 0.684609 | NA       |  |
| CR847543.2         | 14.85794 | -0.19534196  | 0.444614 | -0.43935 | 0.660407 | 0.930581 |  |
| RNF224             | 16.90999 | -0.031348478 | 0.444337 | -0.07055 | 0.943755 | 0.997371 |  |
| or125-4            | 16.95032 | 0.400139095  | 0.419524 | 0.953792 | 0.340189 | 0.795345 |  |
| CR388363.2         | 0.045161 | 0            | 5.267649 | 0        | 1        | NA       |  |
| si:ch211-14a11.1   | 0.350216 | -2.335655781 | 3.312055 | -0.7052  | 0.480687 | NA       |  |
| BX324123.2         | 253.6959 | -0.081216844 | 0.350014 | -0.23204 | 0.816508 | 0.971207 |  |
| si:ch211-133n4.7   | 6.43763  | -0.327927765 | 0.869732 | -0.37704 | 0.70614  | 0.944592 |  |
| AL929520.2         | 0.696393 | 0.093654412  | 2.956628 | 0.031676 | 0.97473  | NA       |  |
| FP101887.1         | 175.3055 | -0.653760228 | 0.226463 | -2.88683 | 0.003891 | 0.103477 |  |
| BX323074.2         | 102.5187 | 0.500352584  | 0.216339 | 2.312815 | 0.020733 | 0.255657 |  |
| si:ch211-217k17.8  | 53.30669 | -0.06509283  | 0.354447 | -0.18365 | 0.854291 | 0.979073 |  |
| si:dkeyp-117b11.3  | 24.66405 | -0.189359125 | 0.393887 | -0.48075 | 0.630698 | 0.923003 |  |
| si:dkey-7814.4     | 0        | NA           | NA       | NA       | NA       | NA       |  |
| BX649490.3         | 0.233191 | 1.055358154  | 5.267649 | 0.200347 | 0.841209 | NA       |  |
| si:dkeyp-53e4.2    | 1.866771 | -2.559015258 | 1.802212 | -1.41993 | 0.155628 | NA       |  |
| BX927216.1         | 0        | NA           | NA       | NA       | NA       | NA       |  |
| si:dkey-191c17.2   | 0.980665 | -0.367988649 | 2.09135  | -0.17596 | 0.860327 | NA       |  |
| CR383662.3         | 14.75435 | -0.295640418 | 0.610961 | -0.48389 | 0.628461 | 0.921864 |  |
| ftr30              | 2.967181 | 2.031178988  | 1.302905 | 1.558962 | 0.119005 | 0.562496 |  |
| AL929017.2         | 6.663959 | 0.794556364  | 0.735328 | 1.080547 | 0.279899 | 0.752787 |  |
| AL929237.2         | 0.043309 | 0            | 5.267649 | 0        | 1        | NA       |  |
| si:ch211-19617.4   | 823.09   | -0.004103114 | 0.155431 | -0.0264  | 0.97894  | 1        |  |
| si:rp71-17i16.6    | 28.17164 | 0.264645216  | 0.304222 | 0.869908 | 0.384351 | 0.826565 |  |
| si:dkey-19a16.13   | 12.88131 | -0.348563612 | 0.585531 | -0.5953  | 0.551646 | 0.8974   |  |
| si:dkey-20i20.10   | 8.478319 | 0.978168454  | 0.663343 | 1.474604 | 0.140319 | 0.599409 |  |
| si:ch211-147d7.5   | 22.43993 | 0.084415169  | 0.349017 | 0.241865 | 0.808885 | 0.969828 |  |
| si:dkey-240h12.3   | 12.71953 | -0.237884572 | 0.536285 | -0.44358 | 0.657347 | 0.930235 |  |
| si:ch211-191j22.3  | 553.2532 | -0.046877728 | 0.132612 | -0.35349 | 0.723717 | 0.947964 |  |
| BX000705.1         | 0        | NA           | NA       | NA       | NA       | NA       |  |
| pimr171            | 6.334335 | 0            | 1.909239 | 0        | 1        | 1        |  |
| celal.2            | 629.7341 | 0            | 1.698113 | 0        | 1        | 1        |  |
| si:ch73-90k17.1    | 0.398206 | -0.868147553 | 4.363994 | -0.19893 | 0.842314 | NA       |  |
| gstt2              | 114.8021 | -1.734973723 | 0.32901  | -5.27331 | 1.34E-07 | 6.21E-05 |  |
| BX649377.1         | 3.601204 | 0.964006908  | 1.744808 | 0.5525   | 0.580606 | 0.905618 |  |
| BX470183.1         | 0.352911 | -0.868128313 | 4.428365 | -0.19604 | 0.84458  | NA       |  |
| CU657977.1         | 2.26661  | 2.083354873  | 1.464727 | 1.42235  | 0.154925 | 0.619752 |  |
| CR392001.1         | 0.049519 | 0            | 5.267649 | 0        | 1        | NA       |  |
| CR933734.3         | 17.91259 | -5.281760865 | 1.556177 | -3.39406 | 0.000689 | 0.034762 |  |
| si:ch211-282j17.10 | 0.093881 | 0            | 5.267649 | 0        | 1        | NA       |  |
| CHST12 (1 of many) | 0.871622 | 1.055426087  | 2.533782 | 0.416542 | 0.677014 | NA       |  |
| AL929457.1         | 4.337838 | -0.535069304 | 0.941695 | -0.5682  | 0.569901 | 0.902322 |  |
| CU467646.2         | 3.042934 | 1.488988483  | 1.099727 | 1.353962 | 0.175749 | 0.649413 |  |
| CU570881.1         | 0.234799 | 0            | 5.267649 | 0        | 1        | NA       |  |

|                   |          |              |          |          |          |          |    |
|-------------------|----------|--------------|----------|----------|----------|----------|----|
| adgre6            | 0.13412  |              | 0        | 5.267649 | 0        | 1        | NA |
| CU459065.1        | 0 NA     |              | NA       | NA       | NA       | NA       | NA |
| si:dkeyp-2e4.5    | 23.69156 | -0.184125867 | 0.376572 | -0.48895 | 0.624875 | 0.920195 |    |
| si:dkey-286h21.1  | 0.200022 | -0.868115203 | 5.213564 | -0.16651 | 0.867755 | NA       |    |
| si:ch211-167j6.3  | 0.257995 | -0.868110878 | 5.267649 | -0.1648  | 0.869101 | NA       |    |
| CU986305.1        | 1.721615 | 3.298961352  | 1.756152 | 1.878517 | 0.06031  | NA       |    |
| BX649622.1        | 7.623314 | -0.061200172 | 0.665194 | -0.092   | 0.926695 | 0.994815 |    |
| CR759885.1        | 20.29581 | -1.893018809 | 0.703392 | -2.69127 | 0.007118 | 0.142826 |    |
| si:ch211-10d23.5  | 40.97442 | -0.836592236 | 0.322464 | -2.59437 | 0.009476 | 0.167353 |    |
| rca2.2            | 24.64879 | -0.85961218  | 0.636891 | -1.3497  | 0.177112 | 0.650742 |    |
| CR396590.8        | 0 NA     |              | NA       | NA       | NA       | NA       |    |
| si:dkeyp-77c8.5   | 4.837453 | 0.246197428  | 0.80836  | 0.304564 | 0.760698 | 0.957886 |    |
| entr1             | 181.9642 | -0.307557806 | 0.202544 | -1.51848 | 0.128894 | 0.578173 |    |
| si:dkey-204f11.13 | 0 NA     |              | NA       | NA       | NA       | NA       |    |
| BX323839.1        | 6.859296 | 0.433935527  | 0.868225 | 0.499796 | 0.617218 | 0.916365 |    |
| BX950188.2        | 0 NA     |              | NA       | NA       | NA       | NA       |    |
| znf1090           | 6.277927 | -0.782967552 | 0.722302 | -1.08399 | 0.27837  | 0.752078 |    |
| si:dkey-71b5.3    | 24.9105  | 0.709144252  | 1.183951 | 0.598964 | 0.549197 | 0.897092 |    |
| AL845369.2        | 0.504104 | -0.868144804 | 3.638534 | -0.2386  | 0.811418 | NA       |    |
| CR392363.2        | 2.310829 | -0.096807324 | 1.27602  | -0.07587 | 0.939525 | 0.997371 |    |
| CR854897.1        | 3.040068 | -2.483320191 | 1.85126  | -1.34142 | 0.179784 | 0.655282 |    |
| BX322661.3        | 0.40762  | 0.585858489  | 4.985846 | 0.117504 | 0.90646  | NA       |    |
| si:dkey-58f10.13  | 2.857376 | -1.708074673 | 1.390582 | -1.22832 | 0.219328 | 0.700266 |    |
| si:ch211-198c19.3 | 39.52732 | 0.484012407  | 0.451291 | 1.072507 | 0.283492 | 0.755095 |    |
| BX005462.1        | 0 NA     |              | NA       | NA       | NA       | NA       |    |
| trim62.2          | 4.225575 | -0.321766962 | 0.946596 | -0.33992 | 0.733917 | 0.95093  |    |
| senp3a            | 162.6386 | 0.051132832  | 0.164472 | 0.310891 | 0.755884 | 0.956532 |    |
| si:dkeyp-82a1.8   | 0.873491 | 1.554166618  | 2.131862 | 0.729018 | 0.46599  | NA       |    |
| sid1              | 0.605483 | 1.98394108   | 2.360779 | 0.840375 | 0.400698 | NA       |    |
| si:dkey-33c12.12  | 0.964868 | 3.504428765  | 2.205755 | 1.588766 | 0.112113 | NA       |    |
| CR931802.2        | 0.274667 | -1.402866893 | 4.6602   | -0.30103 | 0.763391 | NA       |    |
| BX247877.1        | 1.768539 | 1.327297491  | 1.400675 | 0.947612 | 0.343327 | NA       |    |
| si:dkeyp-106c3.2  | 0.145303 | 1.055370259  | 5.267649 | 0.200349 | 0.841207 | NA       |    |
| lenep             | 54.8835  | -0.162301226 | 0.6694   | -0.24246 | 0.808425 | 0.969828 |    |
| si:ch211-163g19.2 | 0.04222  |              | 0        | 5.267649 | 0        | 1        | NA |
| CR318588.4        | 1637.467 | 0.356551284  | 0.231618 | 1.539392 | 0.123709 | 0.570837 |    |
| BX664610.1        | 113.0193 | -0.261053777 | 0.250906 | -1.04044 | 0.298134 | 0.765416 |    |
| si:dkey-246j7.1   | 27.23532 | -0.036353045 | 0.46952  | -0.07743 | 0.938285 | 0.997371 |    |
| si:ch73-138i16.1  | 4.61572  | 0.211815519  | 1.018263 | 0.208017 | 0.835216 | 0.976007 |    |
| CABZ0118770.1     | 3.999401 | 0.585032485  | 0.969143 | 0.60366  | 0.54607  | 0.895875 |    |
| si:dkey-65b13.1   | 1.003543 | 3.239747371  | 2.000405 | 1.619545 | 0.10533  | NA       |    |
| AL929576.1        | 1.95703  | 2.13142378   | 1.526924 | 1.395893 | 0.162747 | NA       |    |
| BX537162.1        | 0 NA     |              | NA       | NA       | NA       | NA       |    |
| si:dkey-21e2.14   | 3.401186 |              | 0        | 1.949698 | 0        | 1        | 1  |
| si:ch211-122114.7 | 0.053506 | -0.86807634  | 5.267649 | -0.16479 | 0.869106 | NA       |    |
| cybrd1            | 215.8255 | 0.286197143  | 0.20362  | 1.405544 | 0.15986  | 0.626123 |    |
| si:dkey-222h21.7  | 0.318445 | 1.05534377   | 5.267649 | 0.200344 | 0.841211 | NA       |    |
| si:ch211-67e16.11 | 207.8725 | 0.259716187  | 0.210095 | 1.236182 | 0.216391 | 0.69815  |    |
| BX663525.1        | 3.976423 | 0.670987828  | 1.194879 | 0.561553 | 0.574421 | 0.904516 |    |
| CR925798.1        | 75.34705 | -0.577355664 | 0.286725 | -2.01362 | 0.044049 | 0.367392 |    |
| CT583727.1        | 3.458694 | -1.689790274 | 1.197075 | -1.4116  | 0.158068 | 0.623766 |    |
| si:dkey-11e23.9   | 0.51688  | 1.05542101   | 2.820606 | 0.374182 | 0.708269 | NA       |    |
| BX548073.5        | 0 NA     |              | NA       | NA       | NA       | NA       |    |
| pimr100           | 0.301123 | -0.868131582 | 4.003593 | -0.21684 | 0.828334 | NA       |    |



|                    |           |               |           |           |           |           |
|--------------------|-----------|---------------|-----------|-----------|-----------|-----------|
| spp2               | 3. 11301  | 0. 792762266  | 1. 548468 | 0. 511965 | 0. 608675 | 0. 915204 |
| si:dkey-11o15. 5   | 30. 9787  | 1. 891074719  | 0. 821458 | 2. 302095 | 0. 02133  | 0. 258949 |
| si:ch211-134c9. 2  | 11. 52841 | 0. 102408412  | 0. 522839 | 0. 19587  | 0. 844712 | 0. 976791 |
| si:dkey-184a18. 5  | 53. 51622 | 0. 135692416  | 0. 252494 | 0. 537408 | 0. 590986 | 0. 9093   |
| BX322575. 1        | 16. 88264 | 1. 856051748  | 0. 55615  | 3. 337321 | 0. 000846 | 0. 039393 |
| si:dkeyp-4f2. 6    | 0. 225296 | 0             | 5. 046189 | 0         | 1         | NA        |
| AL627088. 1        | 0. 683332 | -0. 868147046 | 3. 041094 | -0. 28547 | 0. 775283 | NA        |
| BX465206. 1        | 0. 827436 | -2. 63772688  | 2. 320307 | -1. 1368  | 0. 255622 | NA        |
| grid2ipb           | 87. 42883 | -0. 597547071 | 0. 260792 | -2. 29127 | 0. 021948 | 0. 262532 |
| CR846087. 3        | 3. 073219 | 0. 317738998  | 0. 85121  | 0. 373279 | 0. 708941 | 0. 945546 |
| si:dkeyp-51f12. 2  | 15. 72028 | 0. 746548971  | 0. 496937 | 1. 5023   | 0. 13302  | 0. 58639  |
| si:ch211-209f23. 3 | 0. 205064 | 0. 959863809  | 5. 236908 | 0. 183288 | 0. 854572 | NA        |
| si:dkey-57k2. 6    | 36. 18123 | 0. 236656786  | 0. 37359  | 0. 633467 | 0. 526429 | 0. 889539 |
| ftr60              | 2. 692924 | 1. 172212042  | 1. 587052 | 0. 73861  | 0. 460144 | 0. 862369 |
| BX248510. 2        | 0. 589497 | 2. 490157423  | 2. 931198 | 0. 849536 | 0. 395583 | NA        |
| caonaleb           | 16. 87544 | 0. 541024927  | 0. 439615 | 1. 230679 | 0. 218443 | 0. 699445 |
| si:dkeyp-86h10. 3  | 343. 4857 | -0. 160236821 | 0. 217897 | -0. 73538 | 0. 462109 | 0. 863402 |
| znf1157            | 14. 36305 | -0. 632115257 | 0. 483476 | -1. 30744 | 0. 191064 | 0. 67094  |
| BX927243. 1        | 0         | NA            | NA        | NA        | NA        | NA        |
| taar19b            | 0. 487683 | 0             | 3. 602716 | 0         | 1         | NA        |
| dpm2               | 338. 2766 | -0. 30810691  | 0. 182919 | -1. 68439 | 0. 092106 | 0. 507702 |
| clqc               | 23. 73676 | 0. 899978749  | 0. 547051 | 1. 645146 | 0. 09994  | 0. 524166 |
| CR927456. 1        | 0. 053506 | -0. 86807634  | 5. 267649 | -0. 16479 | 0. 869106 | NA        |
| si:ch211-13315. 7  | 172. 0971 | -2. 762572261 | 1. 392731 | -1. 98357 | 0. 047304 | 0. 378859 |
| si:ch211-66k16. 2  | 0. 69093  | 2. 50830567   | 3. 403205 | 0. 737042 | 0. 461097 | NA        |
| dr11. 3            | 3. 159807 | -0. 307722738 | 1. 180433 | -0. 26069 | 0. 794334 | 0. 965431 |
| cycsa              | 0         | NA            | NA        | NA        | NA        | NA        |
| si:dkey-284p5. 3   | 17. 95908 | -0. 76703174  | 0. 487398 | -1. 57373 | 0. 11555  | 0. 555766 |
| BX248515. 2        | 0         | NA            | NA        | NA        | NA        | NA        |
| si:ch1073-15f19. 2 | 1. 223948 | 0             | 2. 407185 | 0         | 1         | NA        |
| CT025588. 1        | 0. 83433  | 0             | 2. 457052 | 0         | 1         | NA        |
| si:dkey-253d23. 3  | 59. 61493 | 0. 802644646  | 0. 278929 | 2. 87759  | 0. 004007 | 0. 105636 |
| CU207238. 1        | 0. 099037 | 0             | 5. 267649 | 0         | 1         | NA        |
| BX545856. 2        | 0         | NA            | NA        | NA        | NA        | NA        |
| si:dkey-97a13. 12  | 11. 09946 | 0. 667725327  | 1. 436389 | 0. 464864 | 0. 642029 | 0. 925586 |
| hmx1               | 130. 7861 | 0. 201317051  | 0. 208312 | 0. 966423 | 0. 333833 | 0. 790692 |
| CU681836. 2        | 0         | NA            | NA        | NA        | NA        | NA        |
| tns3. 1            | 16. 92582 | -0. 019293816 | 0. 394088 | -0. 04896 | 0. 960953 | 0. 999249 |
| BX005024. 2        | 0         | NA            | NA        | NA        | NA        | NA        |
| FP016213. 1        | 1. 117065 | -0. 543185089 | 1. 810511 | -0. 30002 | 0. 764164 | NA        |
| si:ch211-191a16. 2 | 48. 2393  | -0. 748276842 | 0. 411734 | -1. 81738 | 0. 069159 | 0. 448617 |
| znf1175            | 31. 50632 | -0. 325535731 | 0. 4075   | -0. 79886 | 0. 424372 | 0. 844412 |
| BX855614. 2        | 0         | NA            | NA        | NA        | NA        | NA        |
| si:ch211-221n20. 2 | 0. 223809 | 0             | 5. 267649 | 0         | 1         | NA        |
| FP016142. 1        | 50. 85008 | 0. 203368544  | 0. 316611 | 0. 64233  | 0. 520659 | 0. 887165 |
| si:dkey-79f11. 8   | 0. 809553 | 0             | 2. 773404 | 0         | 1         | NA        |
| tmem123            | 118. 1203 | 0. 047182388  | 0. 248532 | 0. 189844 | 0. 849431 | 0. 978148 |
| ccdc141            | 141. 1179 | -0. 0098228   | 0. 228416 | -0. 043   | 0. 965698 | 1         |
| ftr38              | 7. 994978 | -0. 481480874 | 0. 975557 | -0. 49354 | 0. 621628 | 0. 918461 |
| AL845324. 2        | 0. 165201 | 0             | 5. 267649 | 0         | 1         | NA        |
| BX537103. 1        | 0. 580518 | 2. 489819673  | 2. 977168 | 0. 836305 | 0. 402984 | NA        |
| BX296526. 2        | 1. 541253 | 0. 690516944  | 2. 113258 | 0. 326755 | 0. 743853 | NA        |
| BX571694. 1        | 3. 814796 | -1. 106486728 | 0. 909911 | -1. 21604 | 0. 22397  | 0. 705807 |
| si:dkey-84o3. 3    | 4. 320153 | 3. 14717491   | 1. 177818 | 2. 672039 | 0. 007539 | 0. 14728  |

|                    |          |              |          |          |          |          |
|--------------------|----------|--------------|----------|----------|----------|----------|
| zgc:162509         | 0.878559 | 0.392573684  | 2.187015 | 0.179502 | 0.857544 | NA       |
| AL953867.2         | 0 NA     | NA           | NA       | NA       | NA       | NA       |
| BX927401.1         | 0.365242 | 0            | 3.830778 | 0        | 1        | NA       |
| CT573231.1         | 1.203191 | 0            | 2.522284 | 0        | 1        | NA       |
| ms4a17a.10         | 15.4935  | 0.580482252  | 0.582188 | 0.997069 | 0.318731 | 0.779923 |
| trpm2              | 59.19645 | 0.06178726   | 0.315708 | 0.19571  | 0.844837 | 0.976791 |
| CR774194.1         | 2.213848 | -2.43699216  | 1.680343 | -1.45029 | 0.146976 | 0.60703  |
| si:dkey-228a15.1   | 83.89625 | -0.646873255 | 0.28265  | -2.2886  | 0.022102 | 0.263263 |
| CR792453.1         | 0.466337 | 0            | 5.267649 | 0        | 1        | NA       |
| si:dkey-4c15.13    | 73.72741 | 0.013265357  | 0.211371 | 0.062759 | 0.949959 | 0.99801  |
| CDPF1              | 172.7357 | -0.326920973 | 0.211767 | -1.54378 | 0.122642 | 0.569468 |
| BX322665.2         | 16.20998 | -2.985802628 | 0.714239 | -4.1804  | 2.91E-05 | 0.003705 |
| si:dkey-7i4.9      | 81.46738 | 0.039864447  | 0.29609  | 0.134636 | 0.892899 | 0.988566 |
| BX284666.3         | 0.28788  | 0            | 5.267649 | 0        | 1        | NA       |
| BX465834.1         | 404.0374 | 0.14215804   | 0.169494 | 0.838718 | 0.401628 | 0.832651 |
| si:dkey-172k15.6   | 17.18563 | 0.197621745  | 0.71576  | 0.276101 | 0.782471 | 0.962328 |
| si:dkey-222h21.2   | 0.206413 | 0            | 5.267649 | 0        | 1        | NA       |
| CR931763.1         | 1.107058 | 0.071898557  | 1.8492   | 0.038881 | 0.968985 | NA       |
| BX005108.1         | 0.391234 | 1.002787289  | 2.687391 | 0.373145 | 0.70904  | NA       |
| CR925709.3         | 0 NA     | NA           | NA       | NA       | NA       | NA       |
| si:ch211-196c10.15 | 19.55355 | -2.32571326  | 0.816123 | -2.84971 | 0.004376 | 0.108843 |
| CU657925.1         | 0.04222  | 0            | 5.267649 | 0        | 1        | NA       |
| BX957357.1         | 0 NA     | NA           | NA       | NA       | NA       | NA       |
| si:dkey-21e2.12    | 0 NA     | NA           | NA       | NA       | NA       | NA       |
| si:ch211-234p6.9   | 0.472678 | -0.868140854 | 3.231737 | -0.26863 | 0.788215 | NA       |
| BX890591.1         | 2.345947 | 0.788715548  | 1.197506 | 0.658632 | 0.510132 | 0.883733 |
| znf423             | 0.21916  | 0            | 5.267649 | 0        | 1        | NA       |
| CT573344.2         | 0 NA     | NA           | NA       | NA       | NA       | NA       |
| pimr186            | 2.467996 | 0.044767884  | 1.164146 | 0.038456 | 0.969324 | 1        |
| si:ch211-271e10.1  | 0.732804 | -0.868143901 | 2.623149 | -0.33095 | 0.740679 | NA       |
| AL953903.3         | 0.136698 | 0            | 5.267649 | 0        | 1        | NA       |
| si:dkey-73p2.1     | 3.616588 | -0.466025308 | 1.305905 | -0.35686 | 0.721196 | 0.947343 |
| si:ch1073-75o15.3  | 0.229727 | 0            | 5.018867 | 0        | 1        | NA       |
| sox11b             | 934.1082 | 0.039775709  | 0.15146  | 0.262616 | 0.792847 | 0.965312 |
| si:dkey-269i1.4    | 146.951  | -0.606338547 | 0.310552 | -1.95246 | 0.050884 | 0.392525 |
| si:ch73-138e16.3   | 33.71539 | -0.228159933 | 0.284743 | -0.80128 | 0.422967 | 0.843821 |
| si:zfos-2330d3.7   | 1.7578   | 0.039619257  | 1.863036 | 0.021266 | 0.983033 | NA       |
| cxcl11.8           | 0.152173 | -1.826663989 | 5.230461 | -0.34924 | 0.726912 | NA       |
| taar18j            | 0.043308 | 0            | 5.267649 | 0        | 1        | NA       |
| fdxacb1            | 44.98305 | 0.244205452  | 0.31398  | 0.777773 | 0.436703 | 0.851093 |
| leg1.2             | 180.1029 | -1.125199205 | 0.407102 | -2.76393 | 0.005711 | 0.127973 |
| CR377211.4         | 1.20416  | 0.030194598  | 1.693189 | 0.017833 | 0.985772 | NA       |
| si:dkey-234h16.7   | 142.5885 | 0.08850192   | 0.188392 | 0.469775 | 0.638516 | 0.924779 |
| BX465864.2         | 0 NA     | NA           | NA       | NA       | NA       | NA       |
| si:ch211-190k17.19 | 0 NA     | NA           | NA       | NA       | NA       | NA       |
| si:dkey-28d5.1     | 0.043309 | 0            | 5.267649 | 0        | 1        | NA       |
| si:ch73-222f22.2   | 0 NA     | NA           | NA       | NA       | NA       | NA       |
| dio3b              | 160.512  | -0.407296945 | 0.253766 | -1.60501 | 0.108492 | 0.541057 |
| si:dkey-11o1.2     | 1.048048 | -1.758618003 | 2.34069  | -0.75132 | 0.452457 | NA       |
| zgc:194906         | 1.725014 | -0.868148624 | 2.318993 | -0.37436 | 0.708133 | NA       |
| emd                | 348.0622 | 0.024680761  | 0.133853 | 0.184387 | 0.85371  | 0.978905 |
| si:ch211-122114.6  | 0 NA     | NA           | NA       | NA       | NA       | NA       |
| hccsa.2            | 1.454434 | 3.935783609  | 2.031907 | 1.93699  | 0.052747 | NA       |
| si:ch211-218h8.3   | 2.504629 | -0.521354908 | 1.689699 | -0.30855 | 0.757665 | 0.957364 |

|                    |          |              |            |          |          |          |
|--------------------|----------|--------------|------------|----------|----------|----------|
| AL928725.1         |          | 0 NA         | NA         | NA       | NA       | NA       |
| CR769777.2         | 0.144882 |              | 0 5.267649 |          | 0        | 1 NA     |
| CR854897.2         | 0.297961 | 1.05539711   | 3.996504   | 0.26408  | 0.791718 | NA       |
| BX908740.1         | 0.094679 |              | 0 5.267649 |          | 0        | 1 NA     |
| CR352226.1         | 0.713355 | -0.868137432 | 2.878562   | -0.30159 | 0.762967 | NA       |
| si:dkey-249d8.1    | 22.65303 | 0.040747436  | 0.412214   | 0.09885  | 0.921257 | 0.994085 |
| BX511100.3         | 0.318485 |              | 0 5.267649 |          | 0        | 1 NA     |
| AL928685.1         | 0.060442 |              | 0 5.267649 |          | 0        | 1 NA     |
| BX936406.1         | 0.045161 |              | 0 5.267649 |          | 0        | 1 NA     |
| ghrhr1             | 1.612664 | 2.58067748   | 1.923478   | 1.341672 | 0.179702 | NA       |
| ccr8.1             | 6.002385 | 0.998751151  | 0.728481   | 1.371005 | 0.170374 | 0.642035 |
| FP067424.1         | 24.06197 | 0.127680489  | 0.388203   | 0.328902 | 0.74223  | 0.954329 |
| si:dkey-85n7.8     | 12.72692 | -0.562171196 | 0.678863   | -0.82811 | 0.40761  | 0.83577  |
| FP103048.1         |          | 0 NA         | NA         | NA       | NA       | NA       |
| si:dkey-87o1.2     | 460.0812 | -0.14818578  | 0.196364   | -0.75465 | 0.450461 | 0.857151 |
| BX666064.1         | 4.23748  | -1.35725836  | 1.885331   | -0.7199  | 0.471584 | 0.86809  |
| CU633916.1         | 11.85607 | -0.519557135 | 0.631059   | -0.82331 | 0.410332 | 0.837066 |
| si:ch211-105n15.1  | 0.69507  |              | 0 3.129301 |          | 0        | 1 NA     |
| BX649485.2         | 22.80818 | -0.947387545 | 0.572295   | -1.65542 | 0.09784  | 0.521071 |
| si:ch1073-155h21.2 | 182.1414 | 0.878180826  | 0.387712   | 2.265035 | 0.023511 | 0.270879 |
| BX649485.3         | 0.536453 |              | 0 3.503913 |          | 0        | 1 NA     |
| CT027631.1         | 0.142363 | 1.055370259  | 5.267649   | 0.200349 | 0.841207 | NA       |
| si:dkey-16n15.6    | 8.069225 | 0.986888252  | 0.766635   | 1.287299 | 0.19799  | 0.678714 |
| si:ch73-362i18.1   | 0.302374 |              | 0 5.267649 |          | 0        | 1 NA     |
| hp                 | 1098.427 | -0.40638859  | 0.223694   | -1.81672 | 0.06926  | 0.449134 |
| BX470242.1         | 2.664815 | 0.364075132  | 1.320231   | 0.275766 | 0.782728 | 0.962328 |
| dlg4b              | 6.616737 | 1.934001357  | 1.66655    | 1.160482 | 0.245853 | 0.727177 |
| BX005108.2         | 211.0097 | 0.218090464  | 0.2288     | 0.953191 | 0.340494 | 0.795526 |
| BX649481.1         |          | 0 NA         | NA         | NA       | NA       | NA       |
| znhit6             | 185.4957 | -0.329359642 | 0.168468   | -1.95503 | 0.050579 | 0.391331 |
| CU855786.1         |          | 0 NA         | NA         | NA       | NA       | NA       |
| si:dkey-231j24.3   | 11.6038  | 1.118300062  | 0.750722   | 1.489632 | 0.136321 | 0.591569 |
| BX649485.4         | 25.28048 | -0.314247924 | 0.53871    | -0.58333 | 0.559668 | 0.899585 |
| si:dkey-122a22.2   | 73.13072 | 0.314580159  | 0.228662   | 1.375743 | 0.168901 | 0.640393 |
| BX324132.2         | 13.19537 | 1.025541688  | 0.699504   | 1.466098 | 0.142622 | 0.601892 |
| BX649295.1         |          | 0 NA         | NA         | NA       | NA       | NA       |
| ftr92              | 3.1515   | 0.013596781  | 1.17292    | 0.011592 | 0.990751 | 1        |
| smdtla             | 180.4025 | 0.018852887  | 0.213833   | 0.088166 | 0.929745 | 0.995576 |
| otulina            |          | 0 NA         | NA         | NA       | NA       | NA       |
| serpinb111         | 59.09696 | -0.383931445 | 0.326856   | -1.17462 | 0.240147 | 0.721177 |
| si:ch211-175f12.2  | 61.25399 | 0.507185335  | 0.680257   | 0.745579 | 0.455922 | 0.860324 |
| CU682777.2         | 197.1033 | -0.529970235 | 0.23538    | -2.25155 | 0.024351 | 0.276029 |
| alk                | 84.36782 | -0.757376049 | 0.400337   | -1.89185 | 0.058512 | 0.418172 |
| AL954317.1         | 0.049519 |              | 0 5.267649 |          | 0        | 1 NA     |
| CR354611.1         | 0.304068 | -2.810267428 | 4.5283     | -0.6206  | 0.534862 | NA       |
| si:dkey-185p13.1   | 2.527972 | 0.349655302  | 1.30581    | 0.267769 | 0.788877 | 0.963568 |
| CR626882.2         | 0.141351 | -1.710071829 | 5.238473   | -0.32644 | 0.744088 | NA       |
| CU929426.1         | 1.121161 | -0.994055669 | 2.061868   | -0.48211 | 0.629725 | NA       |
| BX511173.1         | 0.871586 | -0.682805381 | 1.976474   | -0.34547 | 0.729744 | NA       |
| col24a1            | 158.5116 | -0.1876268   | 0.222566   | -0.84302 | 0.399219 | 0.831196 |
| FP102167.1         | 53.30764 | 0.587477649  | 0.27779    | 2.114828 | 0.034445 | 0.327696 |
| BX511100.4         | 0.180296 | 0.09368032   | 5.267649   | 0.017784 | 0.985811 | NA       |
| si:dkey-239n17.6   | 4.87593  | 0.076375586  | 0.896858   | 0.085159 | 0.932135 | 0.996053 |
| CU672266.1         | 0.043308 |              | 0 5.267649 |          | 0        | 1 NA     |

|                    |          |              |            |          |          |          |
|--------------------|----------|--------------|------------|----------|----------|----------|
| CR352226.2         | 0.95918  | 1.055428652  | 2.379397   | 0.44357  | 0.657354 | NA       |
| CT574585.1         | 0.531359 | 0.130129317  | 2.81448    | 0.046236 | 0.963122 | NA       |
| si:ch211-57m13.3   | 0.046941 |              | 0 5.267649 | 0        | 1        | NA       |
| si:dkey-42i9.16    | 3.280359 | -0.130277324 | 1.216212   | -0.10712 | 0.914696 | 0.992972 |
| si:ch211-163l21.11 | 3.588715 | 1.055429305  | 1.829394   | 0.576928 | 0.563988 | 0.901338 |
| CR407550.1         | 0.043308 |              | 0 5.267649 | 0        | 1        | NA       |
| CU683879.1         | 1.538641 | -0.481302774 | 1.659882   | -0.28996 | 0.771845 | NA       |
| ptchl              | 0 NA     |              | NA         | NA       | NA       | NA       |
| BX465849.1         | 0.043308 |              | 0 5.267649 | 0        | 1        | NA       |
| si:ch1073-441p17.1 | 2.551789 | 0.409963573  | 1.446019   | 0.283512 | 0.776785 | 0.961073 |
| afp4               | 9181.283 | -0.055301946 | 0.256502   | -0.2156  | 0.8293   | 0.974609 |
| ftr59              | 2.264869 | 1.698365573  | 1.346894   | 1.26095  | 0.207327 | 0.689456 |
| oxrla              | 703.6422 | -0.010013976 | 0.122686   | -0.08162 | 0.934947 | 0.996829 |
| si:ch73-132k15.2   | 0.329184 | -2.325990657 | 3.864576   | -0.60187 | 0.547258 | NA       |
| AL844185.1         | 0 NA     |              | NA         | NA       | NA       | NA       |
| AL845419.1         | 2.240509 | 0.701807338  | 1.349738   | 0.519958 | 0.603093 | 0.914226 |
| FP067424.2         | 0 NA     |              | NA         | NA       | NA       | NA       |
| CR352226.3         | 0.825242 | -2.815325584 | 2.248323   | -1.25219 | 0.210501 | NA       |
| CU993818.1         | 9.87245  | -0.168830866 | 0.561661   | -0.30059 | 0.763726 | 0.959055 |
| wdr46              | 672.6345 | -0.026384448 | 0.126077   | -0.20927 | 0.834235 | 0.975731 |
| FP325358.1         | 0 NA     |              | NA         | NA       | NA       | NA       |
| BX001026.1         | 0.559687 | -1.376215052 | 2.30037    | -0.59826 | 0.549668 | NA       |
| si:ch211-57m13.9   | 0.52508  | -2.828385393 | 4.625947   | -0.61142 | 0.540923 | NA       |
| si:ch211-158m24.12 | 0 NA     |              | NA         | NA       | NA       | NA       |
| BX248517.1         | 0.282968 | 2.077021334  | 4.683647   | 0.443462 | 0.657431 | NA       |
| znf236             | 220.407  | 0.07763559   | 0.14637    | 0.530407 | 0.59583  | 0.911427 |
| si:ch73-3019.1     | 5.858664 | 0.219567674  | 0.763986   | 0.287397 | 0.773808 | 0.960624 |
| CR339054.1         | 0.087179 |              | 0 5.267649 | 0        | 1        | NA       |
| si:dkey-85n7.7     | 2.124895 | -2.00182572  | 1.268697   | -1.57786 | 0.114598 | NA       |
| BX511250.1         | 1.337988 |              | 2.51379282 | 2.334105 | 1.076984 | 0.281488 |
| BX571828.1         | 0.085528 |              | 0 5.267649 | 0        | 1        | NA       |
| pou3f3b            | 912.4331 | 0.167217657  | 0.087283   | 1.915802 | 0.05539  | 0.407556 |
| atp5fle            | 2515.829 | -0.028792355 | 0.194392   | -0.14812 | 0.882252 | 0.986908 |
| BX664742.1         | 0.47721  | 1.923541921  | 4.000208   | 0.480861 | 0.630616 | NA       |
| BX088696.2         | 0.624505 |              | 0 2.852833 | 0        | 1        | NA       |
| col18a1b           | 169.9953 | 0.022536826  | 0.204697   | 0.110098 | 0.912331 | 0.992381 |
| si:ch211-57m13.10  | 0.676598 |              | 0 3.150887 | 0        | 1        | NA       |
| prpf31             | 560.5006 | 0.07439489   | 0.127559   | 0.583221 | 0.559744 | 0.899644 |
| BX927181.2         | 0.396107 | 0.093645742  | 3.82345    | 0.024492 | 0.98046  | NA       |
| CR848047.1         | 817.5831 | 0.216441229  | 0.10372    | 2.086775 | 0.036908 | 0.337141 |
| AL928685.2         | 43.83412 | 0.05056124   | 0.266266   | 0.18989  | 0.849395 | 0.978148 |
| sat1a.2            | 1272.669 | -0.221898836 | 0.196732   | -1.12793 | 0.259351 | 0.736127 |
| BX539325.1         | 3.587483 | 0.47566083   | 1.497622   | 0.317611 | 0.75078  | 0.955074 |
| si:ch211-149b19.4  | 13.64589 | -1.760935525 | 1.607839   | -1.09522 | 0.273421 | 0.749148 |
| si:dkey-229b18.3   | 234.7312 | 0.228367244  | 0.163492   | 1.396808 | 0.162471 | 0.629825 |
| si:ch1073-324l1.1  | 14.28906 | 0.418244351  | 0.475796   | 0.879042 | 0.379378 | 0.823515 |
| si:dkey-209n16.2   | 9.589096 | 3.16142579   | 0.834527   | 3.788287 | 0.000152 | 0.012332 |
| col6a3             | 31.92289 | 0.206386071  | 0.356369   | 0.579136 | 0.562497 | 0.900758 |
| CR450738.1         | 0.086618 |              | 0 5.267649 | 0        | 1        | NA       |
| si:ch211-274k16.9  | 0.533582 | -3.106564955 | 3.809798   | -0.81541 | 0.414835 | NA       |
| si:ch73-236e11.2   | 15.18299 | -0.144102043 | 0.550678   | -0.26168 | 0.793567 | 0.965431 |
| AL929171.1         | 1.179122 | 0.871751937  | 1.840126   | 0.473746 | 0.635681 | NA       |
| si:ch1073-325m22.2 | 3286.932 | 0.143199948  | 0.128133   | 1.117587 | 0.263743 | 0.741708 |
| CR855300.1         | 92.10398 | 0.295939292  | 0.227942   | 1.298309 | 0.194181 | 0.674395 |

|                    |          |              |          |          |          |          |    |
|--------------------|----------|--------------|----------|----------|----------|----------|----|
| si:dkey-258f14.7   | 0.04222  |              | 0        | 5.267649 | 0        | 1        | NA |
| si:ch211-57m13.1   | 0.195927 | 1.854123853  | 5.241768 | 0.353721 | 0.723548 | NA       |    |
| BX664742.2         | 0.433479 | 1.055407094  | 3.313963 | 0.318473 | 0.750126 | NA       |    |
| myha               | 280.1773 | 0.3743452    | 0.304448 | 1.229588 | 0.218852 | 0.699709 |    |
| CU856621.1         | 0.175851 |              | 0        | 5.267649 | 0        | 1        | NA |
| si:dkey-151m22.8   | 0.561692 | -0.94203747  | 3.379706 | -0.27873 | 0.780449 | NA       |    |
| tmem265            | 50.88432 | 0.450511371  | 0.312218 | 1.44294  | 0.149037 | 0.610726 |    |
| si:ch73-226113.2   | 20.44069 |              | 0        | 1.697092 | 0        | 1        | 1  |
| si:dkey-19a16.12   | 1.575172 | 1.055432142  | 2.004185 | 0.526614 | 0.598462 | NA       |    |
| CT573247.1         | 2.118967 | 0.54962172   | 1.346339 | 0.408234 | 0.683102 | NA       |    |
| BX324207.1         | 4.987079 | -0.996719191 | 0.777196 | -1.28246 | 0.199683 | 0.6804   |    |
| si:ch73-103b2.1    | 4.397208 | 0.550780422  | 0.9713   | 0.567055 | 0.570677 | 0.902481 |    |
| CR936359.1         |          | 0 NA         | NA       | NA       | NA       | NA       |    |
| si:ch73-341k19.1   | 37.16423 | 0.075444066  | 0.325356 | 0.231881 | 0.81663  | 0.971207 |    |
| adkb               | 552.912  | 0.30571659   | 0.167191 | 1.828547 | 0.067467 | 0.443563 |    |
| BX511100.5         | 0.803005 | 2.031833615  | 2.285813 | 0.888889 | 0.374063 | NA       |    |
| si:dkey-22i16.9    | 37.93432 | -5.78150601  | 0.727237 | -7.94996 | 1.87E-15 | 4.80E-12 |    |
| BX465868.1         | 0.060442 |              | 0        | 5.267649 | 0        | 1        | NA |
| BX890562.2         | 0.531174 | 1.869553699  | 3.147267 | 0.594025 | 0.552496 | NA       |    |
| CR352226.4         |          | 0 NA         | NA       | NA       | NA       | NA       |    |
| si:ch211-57m13.6   | 0.310497 | -0.933440633 | 4.421172 | -0.21113 | 0.832786 | NA       |    |
| BX571828.2         | 0.045161 |              | 0        | 5.267649 | 0        | 1        | NA |
| BX927257.1         | 0.049519 |              | 0        | 5.267649 | 0        | 1        | NA |
| CU467655.1         | 11.47567 | -1.762593636 | 1.617388 | -1.08978 | 0.275811 | 0.750674 |    |
| fhdc5              | 9.733997 | -0.772015658 | 0.545957 | -1.41406 | 0.157345 | 0.623263 |    |
| si:ch73-361h17.1   | 178.9615 | -1.269322791 | 0.668464 | -1.89887 | 0.057582 | 0.413955 |    |
| BX005108.3         | 4.623345 | 1.082092095  | 1.487203 | 0.727602 | 0.466857 | 0.865851 |    |
| zgc:171699         | 0.45629  | -1.715264651 | 3.628388 | -0.47273 | 0.636402 | NA       |    |
| AL590145.1         |          | 0 NA         | NA       | NA       | NA       | NA       |    |
| erlin2             | 0.059954 | 1.055396947  | 5.267649 | 0.200354 | 0.841203 | NA       |    |
| si:ch73-106g13.1   | 4.345898 | -1.249236621 | 1.431546 | -0.87265 | 0.382855 | 0.825721 |    |
| CU856621.2         | 1.677683 |              | 0        | 2.233115 | 0        | 1        | NA |
| BX511100.6         | 0.237432 | -0.868128673 | 4.998236 | -0.17369 | 0.862111 | NA       |    |
| si:ch73-211113.2   | 275.7246 | -0.273153739 | 0.167044 | -1.63522 | 0.102003 | 0.528846 |    |
| si:ch73-261i21.2   | 2.627418 | 0.473643924  | 1.387276 | 0.34142  | 0.732787 | 0.950617 |    |
| CU469420.3         | 2.140698 | -0.435049939 | 1.328783 | -0.3274  | 0.743362 | NA       |    |
| si:ch211-161n3.5   | 2.281543 |              | 0        | 2.058893 | 0        | 1        | 1  |
| CR391978.1         |          | 0 NA         | NA       | NA       | NA       | NA       |    |
| AL807749.1         |          | 0 NA         | NA       | NA       | NA       | NA       |    |
| si:ch211-64i20.5_2 |          | 0 NA         | NA       | NA       | NA       | NA       |    |
| AL935166.1         | 57.04397 | -0.253003689 | 0.288067 | -0.87828 | 0.379791 | 0.823607 |    |
| BX469910.1         |          | 0 NA         | NA       | NA       | NA       | NA       |    |
| znf1073            | 9.030149 | -4.285088331 | 0.950212 | -4.50961 | 6.49E-06 | 0.001309 |    |
| CR383662.4         | 2.451637 | 0.169292265  | 1.427365 | 0.118605 | 0.905588 | 0.991631 |    |
| BX323801.1         | 0.516557 |              | 0        | 3.973174 | 0        | 1        | NA |
| znf1112            | 20.07755 | -0.420500887 | 0.391596 | -1.07381 | 0.282907 | 0.755028 |    |
| CR388052.1         | 16.54476 | 1.098592511  | 0.4936   | 2.225673 | 0.026036 | 0.286174 |    |
| si:dkey-29j8.2     | 13.3026  | 0.861583541  | 0.658987 | 1.307437 | 0.191064 | 0.67094  |    |
| si:dkey-240n22.8   | 11.12233 | -0.061467593 | 0.517561 | -0.11876 | 0.905462 | 0.991631 |    |
| atp5md             | 1510.371 | -0.079480448 | 0.182758 | -0.43489 | 0.663639 | 0.931571 |    |
| CT027801.1         | 0.890696 |              | 0        | 2.515107 | 0        | 1        | NA |
| BX901962.1         | 0.15627  |              | 0        | 5.267649 | 0        | 1        | NA |
| si:dkey-21h14.15   |          | 0 NA         | NA       | NA       | NA       | NA       |    |
| si:dkeyp-4f2.3     | 22.02793 | 0.584839111  | 0.422072 | 1.385639 | 0.165857 | 0.635405 |    |

|                    |          |              |            |          |          |          |   |
|--------------------|----------|--------------|------------|----------|----------|----------|---|
| znf1115            | 10.31926 | -0.981104249 | 0.824249   | -1.1903  | 0.233928 | 0.71479  |   |
| znf1146            | 0.792175 | -1.742683259 | 2.462924   | -0.70757 | 0.479214 | NA       |   |
| BX649337.1         | 1.453781 | 0.359899246  | 1.725682   | 0.208555 | 0.834796 | NA       |   |
| BX005012.3         | 2.834232 |              | 0 2.092065 |          | 0        | 1        | 1 |
| si:ch211-178j18.4  | 0 NA     |              | NA         | NA       | NA       | NA       |   |
| si:dkey-4e4.1      | 12.04784 | 0.96401803   | 0.554567   | 1.738325 | 0.082153 | 0.482431 |   |
| si:dkey-262g12.7   | 16.04539 | 0.776891463  | 0.649709   | 1.195752 | 0.231793 | 0.713202 |   |
| si:ch73-6k14.2     | 65.54366 | 1.400760496  | 0.743766   | 1.883336 | 0.059655 | 0.421147 |   |
| si:ch73-289h5.5    | 0.147936 |              | 0 5.267649 |          | 0        | 1 NA     |   |
| si:ch211-214j24.14 | 455.5257 | 0.117378214  | 0.164788   | 0.7123   | 0.476279 | 0.869292 |   |
| BX784029.1         | 0 NA     |              | NA         | NA       | NA       | NA       |   |
| si:ch211-162i8.2   | 2.909167 | -1.142203373 | 1.089524   | -1.04835 | 0.294477 | 0.763544 |   |
| BX548032.2         | 0.207516 | -0.748301491 | 5.238472   | -0.14285 | 0.886411 | NA       |   |
| si:ch73-263o4.4    | 118.9113 | 0.312637357  | 0.212519   | 1.471106 | 0.141262 | 0.599899 |   |
| BX649307.1         | 61.22213 | 0.510990469  | 0.728136   | 0.701779 | 0.482817 | 0.871821 |   |
| si:dkey-21h14.3    | 0.136136 |              | 0 5.267649 |          | 0        | 1 NA     |   |
| CR788248.1         | 0.049021 | -0.86807634  | 5.267649   | -0.16479 | 0.869106 | NA       |   |
| ccl39a.10          | 0.050624 | 1.055396947  | 5.267649   | 0.200354 | 0.841203 | NA       |   |
| si:dkey-191j3.1    | 2.332707 | 0.274004633  | 1.260267   | 0.217418 | 0.827883 | 0.973883 |   |
| si:dkeyp-100h4.4   | 0.137262 |              | 0 5.267649 |          | 0        | 1 NA     |   |
| si:dkey-156k2.7    | 0.377645 | 1.055386755  | 4.298731   | 0.245511 | 0.806061 | NA       |   |
| BX957333.1         | 0.221904 |              | 0 5.267649 |          | 0        | 1 NA     |   |
| si:dkeyp-100h4.7   | 0 NA     |              | NA         | NA       | NA       | NA       |   |
| taar20i            | 0.471389 |              | 0 3.677211 |          | 0        | 1 NA     |   |
| BX927253.1         | 0.308813 | -1.826689736 | 5.230459   | -0.34924 | 0.726909 | NA       |   |
| coll19a1           | 33.12268 | 1.231582714  | 0.453465   | 2.715936 | 0.006609 | 0.136957 |   |
| BX649516.2         | 0.045161 |              | 0 5.267649 |          | 0        | 1 NA     |   |
| BX649516.3         | 0.265949 | -1.769045486 | 4.094714   | -0.43203 | 0.665719 | NA       |   |
| CR381686.3         | 0.545889 | -1.865340283 | 3.954916   | -0.47165 | 0.637176 | NA       |   |
| LRRC56             | 9.294773 | 0.710605585  | 0.609873   | 1.16517  | 0.24395  | 0.724522 |   |
| si:dkey-21h14.8    | 29.92633 | 0.946784994  | 0.380035   | 2.491307 | 0.012727 | 0.196596 |   |
| si:dkey-256i11.6   | 0.421608 | -2.340217508 | 4.955678   | -0.47223 | 0.636763 | NA       |   |
| si:ch211-208g1.1   | 0.529233 | 1.055408041  | 3.458948   | 0.305124 | 0.760272 | NA       |   |
| taar20j            | 0.174358 |              | 0 5.267649 |          | 0        | 1 NA     |   |
| taar20a            | 0.158701 |              | 0 5.267649 |          | 0        | 1 NA     |   |
| BX927253.2         | 42.79113 | -1.395090316 | 0.60279    | -2.31439 | 0.020646 | 0.255657 |   |
| BX548032.3         | 30.96384 | 0.980221086  | 0.370158   | 2.648115 | 0.008094 | 0.152599 |   |
| buc                | 1.444447 | -1.785496341 | 1.712012   | -1.04292 | 0.296984 | NA       |   |
| si:dkeyp-98a7.4    | 0.18396  | -0.868103029 | 5.267649   | -0.1648  | 0.869102 | NA       |   |
| BX649399.1         | 0 NA     |              | NA         | NA       | NA       | NA       |   |
| BX465862.2         | 4.95631  | -0.538523261 | 1.03409    | -0.52077 | 0.602527 | 0.914023 |   |
| BX000981.5         | 0.1434   |              | 0 5.267649 |          | 0        | 1 NA     |   |
| BX957333.2         | 0 NA     |              | NA         | NA       | NA       | NA       |   |
| CU326364.1         | 3.317765 | 1.994230847  | 1.837613   | 1.085229 | 0.27782  | 0.751752 |   |
| BX942819.3         | 1.107407 | -0.203729587 | 2.100694   | -0.09698 | 0.922741 | NA       |   |
| BX649516.4         | 6.637839 | -0.147888196 | 0.676836   | -0.2185  | 0.82704  | 0.973458 |   |
| si:dkeyp-100h4.2   | 0 NA     |              | NA         | NA       | NA       | NA       |   |
| zgc:123278         | 34.91952 | -1.486616622 | 0.736436   | -2.01866 | 0.043522 | 0.365455 |   |
| CU570689.1         | 0 NA     |              | NA         | NA       | NA       | NA       |   |
| BX784029.2         | 0 NA     |              | NA         | NA       | NA       | NA       |   |
| ost4               | 348.7411 | 0.18112268   | 0.229467   | 0.789318 | 0.429926 | 0.847418 |   |
| CR392001.2         | 0.04222  |              | 0 5.267649 |          | 0        | 1 NA     |   |
| si:ch73-266f23.3   | 107.1263 | -0.240605037 | 0.206165   | -1.16705 | 0.24319  | 0.72442  |   |
| CR381686.4         | 7.020356 | -0.115624934 | 0.778504   | -0.14852 | 0.881931 | 0.986908 |   |

|                   |          |              |          |          |          |          |
|-------------------|----------|--------------|----------|----------|----------|----------|
| BX469910.2        | 0.09233  | -0.868089684 | 5.267649 | -0.1648  | 0.869104 | NA       |
| BX649349.2        | 0.149233 | -1.826663989 | 5.230461 | -0.34924 | 0.726912 | NA       |
| BX119963.1        | 26.25086 | 0.873253131  | 0.598985 | 1.457888 | 0.144872 | 0.603718 |
| CR388190.1        | 0 NA     | NA           | NA       | NA       | NA       | NA       |
| zgc:173624        | 36.11857 | 0.132746599  | 0.41152  | 0.322577 | 0.747016 | 0.955074 |
| CR388378.1        | 1.390914 | -0.548650691 | 1.289449 | -0.42549 | 0.670478 | NA       |
| CR388052.2        | 0.618333 | 1.559601936  | 2.933611 | 0.531632 | 0.594981 | NA       |
| BX465862.3        | 4.38131  | -1.243228797 | 1.333193 | -0.93252 | 0.351068 | 0.80227  |
| CU469420.4        | 5.313049 | -1.063078005 | 0.920666 | -1.15468 | 0.24822  | 0.728489 |
| si:dkey-21h14.9   | 1.191724 | 0            | 2.254207 | 0        | 1        | NA       |
| CU695141.1        | 0.073968 | 0            | 5.267649 | 0        | 1        | NA       |
| si:dkey-21h14.12  | 0.353276 | 0            | 5.193539 | 0        | 1        | NA       |
| BX469918.1        | 0.094182 | -0.868089684 | 5.267649 | -0.1648  | 0.869104 | NA       |
| BX927135.1        | 0.099037 | 0            | 5.267649 | 0        | 1        | NA       |
| BX664605.1        | 0.155545 | 0.959877153  | 5.236908 | 0.183291 | 0.85457  | NA       |
| taar20g           | 0 NA     | NA           | NA       | NA       | NA       | NA       |
| taar20b           | 0 NA     | NA           | NA       | NA       | NA       | NA       |
| FP015809.1        | 0 NA     | NA           | NA       | NA       | NA       | NA       |
| znf1113           | 11.05019 | -1.059776672 | 0.739251 | -1.43358 | 0.151692 | 0.615406 |
| CU469524.1        | 0 NA     | NA           | NA       | NA       | NA       | NA       |
| si:dkey-21h14.12  | 0.394539 | 2.904065046  | 4.261813 | 0.681415 | 0.495609 | NA       |
| si:dkey-247i3.5   | 5.544449 | -0.468196733 | 0.9297   | -0.5036  | 0.614543 | 0.915998 |
| si:dkey-21h14.10  | 0 NA     | NA           | NA       | NA       | NA       | NA       |
| CT027801.2        | 1.808955 | -0.074522636 | 1.347675 | -0.0553  | 0.955902 | NA       |
| si:dkey-54j5.2    | 6.817213 | -4.421046607 | 1.075766 | -4.10967 | 3.96E-05 | 0.004708 |
| CR381664.1        | 0 NA     | NA           | NA       | NA       | NA       | NA       |
| si:ch211-112b1.2  | 2.823689 | 1.47402341   | 1.326406 | 1.111292 | 0.266443 | 0.742912 |
| CR381664.2        | 0 NA     | NA           | NA       | NA       | NA       | NA       |
| BX649518.1        | 0 NA     | NA           | NA       | NA       | NA       | NA       |
| si:ch73-263o4.3   | 0.145246 | -0.868103029 | 5.267649 | -0.1648  | 0.869102 | NA       |
| si:dkeyp-100h4.8  | 0 NA     | NA           | NA       | NA       | NA       | NA       |
| znf1050           | 11.96415 | -0.109922305 | 0.607671 | -0.18089 | 0.856453 | 0.979558 |
| si:ch211-197k17.3 | 233.9266 | -0.033512278 | 0.1656   | -0.20237 | 0.839629 | 0.976417 |
| CR293502.1        | 2.221215 | 0.796514805  | 1.058493 | 0.752499 | 0.451751 | 0.857676 |
| si:dkey-51d8.9    | 11.78297 | 0.582954499  | 0.545253 | 1.069146 | 0.285004 | 0.756073 |
| BX784029.3        | 0.209607 | -0.868114638 | 5.267649 | -0.1648  | 0.8691   | NA       |
| si:ch211-245n8.4  | 46.07251 | -0.16743223  | 0.403974 | -0.41446 | 0.678535 | 0.936026 |
| nr6ala            | 0 NA     | NA           | NA       | NA       | NA       | NA       |
| znf1072           | 2.906838 | -2.21435053  | 1.30092  | -1.70214 | 0.088729 | 0.500206 |
| si:dkey-260c8.8   | 18.96559 | 0.50990078   | 0.436964 | 1.166917 | 0.243244 | 0.72442  |
| BX548046.1        | 0.842814 | -3.359513753 | 2.020385 | -1.66281 | 0.096351 | NA       |
| si:dkey-260c8.6   | 4.344136 | -0.960294029 | 0.82875  | -1.15873 | 0.246568 | 0.727706 |
| tac4              | 0.229121 | 0.959863809  | 5.236908 | 0.183288 | 0.854572 | NA       |
| BX936397.1        | 1.250273 | 2.957736553  | 1.833334 | 1.61331  | 0.106677 | NA       |
| pimr206           | 0 NA     | NA           | NA       | NA       | NA       | NA       |
| si:dkey-3d18.5    | 1.936365 | -2.298253771 | 1.779779 | -1.29131 | 0.196595 | NA       |
| FP017151.1        | 7.08944  | -1.637364614 | 0.719478 | -2.27577 | 0.02286  | 0.266968 |
| ighv7-1           | 0 NA     | NA           | NA       | NA       | NA       | NA       |
| si:ch211-76123.4  | 303.5717 | 0.338101538  | 0.267673 | 1.263112 | 0.206549 | 0.688892 |
| ighv1-3           | 0 NA     | NA           | NA       | NA       | NA       | NA       |
| ighv4-3           | 0.050723 | -0.86807634  | 5.267649 | -0.16479 | 0.869106 | NA       |
| CU633478.1        | 0.266101 | 0            | 4.777809 | 0        | 1        | NA       |
| ighd              | 0.143059 | 0            | 5.267649 | 0        | 1        | NA       |
| aplml             | 994.6634 | 0.420843663  | 0.149897 | 2.807556 | 0.004992 | 0.117782 |

|                    |           |               |             |           |           |           |
|--------------------|-----------|---------------|-------------|-----------|-----------|-----------|
| CT573429. 2        | 3. 707085 | -0. 349414236 | 0. 961153   | -0. 36354 | 0. 716204 | 0. 94627  |
| artna              | 3. 330325 | 1. 026529285  | 1. 230543   | 0. 834208 | 0. 404164 | 0. 833888 |
| ighv8-1            | 0. 174358 |               | 0 5. 267649 |           | 0         | 1 NA      |
| BX548060. 1        | 1. 750341 | 0. 024056653  | 1. 612301   | 0. 014921 | 0. 988095 | NA        |
| si:ch73-367p23. 2  | 19655. 77 | 0. 150925273  | 0. 206282   | 0. 731644 | 0. 464386 | 0. 864593 |
| si:dkey-15f23. 1   | 0. 40189  | -1. 067630608 | 4. 961748   | -0. 21517 | 0. 829633 | NA        |
| ighv4-1            | 0 NA      |               | NA          | NA        | NA        | NA        |
| BX908803. 1        | 0. 04222  |               | 0 5. 267649 |           | 0         | 1 NA      |
| CU862078. 1        | 0. 21985  |               | 0 5. 032833 |           | 0         | 1 NA      |
| or124-4            | 0. 123574 | 1. 055383603  | 5. 267649   | 0. 200352 | 0. 841205 | NA        |
| BX247899. 1        | 0 NA      |               | NA          | NA        | NA        | NA        |
| BX510989. 1        | 4. 737769 | 1. 930467513  | 0. 994297   | 1. 941539 | 0. 052193 | 0. 396885 |
| ighv5-2            | 0 NA      |               | NA          | NA        | NA        | NA        |
| ighv4-7            | 0 NA      |               | NA          | NA        | NA        | NA        |
| CR388364. 1        | 6. 387286 | 1. 49770202   | 1. 117976   | 1. 339654 | 0. 180358 | 0. 656129 |
| BX548046. 2        | 61. 7859  | -0. 434485902 | 0. 300487   | -1. 44594 | 0. 148194 | 0. 609127 |
| 7-Mar              | 63. 78067 | 0. 14104483   | 0. 236824   | 0. 595568 | 0. 551464 | 0. 8974   |
| si:dkey-3n22. 9    | 8. 287589 | 0. 380543343  | 0. 818616   | 0. 464862 | 0. 64203  | 0. 925586 |
| si:ch211-251g8. 5  | 0. 069091 |               | 0 5. 267649 |           | 0         | 1 NA      |
| ighv4-2            | 0 NA      |               | NA          | NA        | NA        | NA        |
| ighv6-1            | 0. 188426 | 1. 854137197  | 5. 241768   | 0. 353724 | 0. 723546 | NA        |
| CR786578. 1        | 0 NA      |               | NA          | NA        | NA        | NA        |
| nkd3               | 0. 746712 | 0. 831972576  | 3. 222305   | 0. 258192 | 0. 796259 | NA        |
| ighz               | 0. 411789 |               | 0 3. 664566 |           | 0         | 1 NA      |
| CU695199. 1        | 0. 205443 | 1. 055361174  | 5. 167193   | 0. 204243 | 0. 838164 | NA        |
| BX005368. 1        | 0. 791263 | 1. 05541335   | 2. 735644   | 0. 385801 | 0. 699644 | NA        |
| BX510989. 2        | 0. 060442 |               | 0 5. 267649 |           | 0         | 1 NA      |
| BX323555. 3        | 0. 284867 | -1. 733628439 | 4. 675395   | -0. 3708  | 0. 710788 | NA        |
| ighv4-8            | 0 NA      |               | NA          | NA        | NA        | NA        |
| AL929243. 1        | 39. 54369 | -0. 209627815 | 0. 307331   | -0. 68209 | 0. 495182 | 0. 87806  |
| ighj1-2            | 0 NA      |               | NA          | NA        | NA        | NA        |
| BX649612. 1        | 0. 760521 | 1. 055406598  | 3. 050842   | 0. 345939 | 0. 729388 | NA        |
| CR936968. 1        | 0. 485788 |               | 0 2. 891063 |           | 0         | 1 NA      |
| CR954285. 1        | 0. 249408 | 0. 093666669  | 5. 267649   | 0. 017781 | 0. 985813 | NA        |
| CR786578. 2        | 0. 648776 | 1. 16265387   | 2. 786033   | 0. 417315 | 0. 676448 | NA        |
| CR847785. 1        | 4. 553306 | -1. 42997944  | 0. 839431   | -1. 70351 | 0. 088472 | 0. 499597 |
| ighv1-4            | 0 NA      |               | NA          | NA        | NA        | NA        |
| ighv6-2            | 0 NA      |               | NA          | NA        | NA        | NA        |
| btr31              | 13. 57839 | 0. 23782696   | 0. 588719   | 0. 403974 | 0. 686232 | 0. 938732 |
| si:ch73-269m14. 3  | 0 NA      |               | NA          | NA        | NA        | NA        |
| si:ch1073-342h5. 2 | 87. 55526 | -0. 077269268 | 0. 220641   | -0. 3502  | 0. 726186 | 0. 948987 |
| si:ch73-379f7. 5   | 8. 652125 | 0. 615569214  | 0. 647024   | 0. 951386 | 0. 341408 | 0. 796175 |
| ighv5-4            | 0 NA      |               | NA          | NA        | NA        | NA        |
| AL627258. 1        | 0 NA      |               | NA          | NA        | NA        | NA        |
| wu:fj64h06         | 65. 12165 | 0. 117201771  | 0. 306908   | 0. 381879 | 0. 702551 | 0. 943591 |
| si:dkey-211g8. 8   | 0. 617624 | 2. 602160247  | 2. 688897   | 0. 967743 | 0. 333173 | NA        |
| BX957317. 2        | 16. 66744 | -0. 593711964 | 0. 393648   | -1. 50823 | 0. 131495 | 0. 583069 |
| FP236454. 1        | 0. 817014 | -3. 111539303 | 2. 004824   | -1. 55203 | 0. 120656 | NA        |
| ighv10-1           | 0 NA      |               | NA          | NA        | NA        | NA        |
| CU571254. 1        | 2. 182699 | 0. 013847968  | 1. 603721   | 0. 008635 | 0. 99311  | NA        |
| ighv5-8            | 0 NA      |               | NA          | NA        | NA        | NA        |
| si:ch211-239j9. 1  | 379. 7267 | 0. 077429301  | 0. 214391   | 0. 361159 | 0. 717981 | 0. 946533 |
| CR352253. 1        | 0. 101247 | 1. 854150541  | 5. 241768   | 0. 353726 | 0. 723544 | NA        |
| ighj2-1            | 0 NA      |               | NA          | NA        | NA        | NA        |



|                   |          |              |          |          |          |          |
|-------------------|----------|--------------|----------|----------|----------|----------|
| si:ch73-379f7.4   | 2.797648 | -0.51647736  | 1.05349  | -0.49025 | 0.623954 | 0.919482 |
| BX571681.4        | 0.699119 | 3.549621534  | 2.737656 | 1.296592 | 0.194772 | NA       |
| CU695077.1        | 0 NA     | NA           | NA       | NA       | NA       | NA       |
| ighv4-9           | 0 NA     | NA           | NA       | NA       | NA       | NA       |
| cd16412           | 79.13752 | 0.061364566  | 0.319921 | 0.191812 | 0.84789  | 0.977782 |
| ighj2-5           | 0 NA     | NA           | NA       | NA       | NA       | NA       |
| si:ch73-248e21.7  | 55.69189 | 0.073012234  | 0.268856 | 0.271567 | 0.785955 | 0.962605 |
| ighv4-6           | 0 NA     | NA           | NA       | NA       | NA       | NA       |
| BX323079.1        | 0.043309 | 0 5.267649   | 0        | 1 NA     |          |          |
| ighv5-1           | 0 NA     | NA           | NA       | NA       | NA       | NA       |
| CR792438.1        | 4.327245 | -1.31999857  | 1.258411 | -1.04894 | 0.294205 | 0.763323 |
| ighv8-2           | 0 NA     | NA           | NA       | NA       | NA       | NA       |
| ighv5-5           | 0 NA     | NA           | NA       | NA       | NA       | NA       |
| ighv4-5           | 0 NA     | NA           | NA       | NA       | NA       | NA       |
| si:ch211-85n16.3  | 141.0849 | 0.1877986    | 0.177852 | 1.055926 | 0.291002 | 0.761178 |
| CR792426.1        | 0.202006 | 2.505652832  | 5.20297  | 0.481581 | 0.630103 | NA       |
| ighv1-2           | 0 NA     | NA           | NA       | NA       | NA       | NA       |
| ighj1-1           | 0 NA     | NA           | NA       | NA       | NA       | NA       |
| BX957260.1        | 0.090321 | 0 5.267649   | 0        | 1 NA     |          |          |
| ighv1-4           | 2.4657   | -2.038310864 | 1.405234 | -1.45051 | 0.146915 | 0.606995 |
| FP236809.1        | 0 NA     | NA           | NA       | NA       | NA       | NA       |
| ighv3-2           | 0 NA     | NA           | NA       | NA       | NA       | NA       |
| BX957344.1        | 0.192986 | 1.854123853  | 5.241768 | 0.353721 | 0.723548 | NA       |
| eppk1             | 177.3619 | -0.358527413 | 0.311936 | -1.14936 | 0.250406 | 0.730168 |
| si:ch211-229c8.14 | 0.049021 | -0.86807634  | 5.267649 | -0.16479 | 0.869106 | NA       |
| BX927298.1        | 1.927143 | 0.700005387  | 1.662649 | 0.421018 | 0.673742 | NA       |
| si:ch211-195m9.3  | 53.01146 | -0.754363051 | 0.327399 | -2.30411 | 0.021216 | 0.258321 |
| ighj2-3           | 0 NA     | NA           | NA       | NA       | NA       | NA       |
| fnbp1b            | 3.603513 | -1.117382472 | 1.006647 | -1.11    | 0.266997 | 0.743418 |
| neu3.5            | 11.51539 | 0.439375298  | 0.833344 | 0.527243 | 0.598025 | 0.912615 |
| CT573133.2        | 0 NA     | NA           | NA       | NA       | NA       | NA       |
| ighv13-2          | 0 NA     | NA           | NA       | NA       | NA       | NA       |
| BX936397.2        | 11.15377 | 0.199373595  | 0.584922 | 0.340855 | 0.733213 | 0.95078  |
| 7-Mar             | 113.9769 | 0.14496556   | 0.233971 | 0.619587 | 0.53553  | 0.891993 |
| ighv2-3           | 0.049519 | 0 5.267649   | 0        | 1 NA     |          |          |
| BX890590.1        | 0.043308 | 0 5.267649   | 0        | 1 NA     |          |          |
| defb12            | 4.665613 | 1.946204408  | 1.526234 | 1.275168 | 0.20225  | 0.682413 |
| neu3.4            | 5.333752 | 1.055436107  | 1.772987 | 0.595287 | 0.551652 | 0.8974   |
| neu3.1            | 51.06126 | -0.554510886 | 0.271212 | -2.04457 | 0.040898 | 0.353713 |
| BX572622.1        | 0 NA     | NA           | NA       | NA       | NA       | NA       |
| si:ch211-162i14.1 | 0.240643 | 1.921554081  | 5.236909 | 0.366925 | 0.713675 | NA       |
| ighv9-3           | 0 NA     | NA           | NA       | NA       | NA       | NA       |
| ighv1-1           | 0 NA     | NA           | NA       | NA       | NA       | NA       |
| ighv5-3           | 0 NA     | NA           | NA       | NA       | NA       | NA       |
| sox4a             | 0 NA     | NA           | NA       | NA       | NA       | NA       |
| ighv4-3           | 0 NA     | NA           | NA       | NA       | NA       | NA       |
| ighv11-1          | 0 NA     | NA           | NA       | NA       | NA       | NA       |
| BX511272.1        | 1.250609 | 0.516753579  | 1.730646 | 0.29859  | 0.765253 | NA       |
| si:ch211-276a17.5 | 38.08558 | -2.490385461 | 0.705941 | -3.52776 | 0.000419 | 0.024584 |
| AL935145.1        | 0.243482 | 2.667686611  | 5.195716 | 0.51344  | 0.607644 | NA       |
| CU570787.1        | 0.622842 | 0 3.284356   | 0        | 1 NA     |          |          |
| CT027638.1        | 0.043309 | 0 5.267649   | 0        | 1 NA     |          |          |
| ighv2-1           | 0 NA     | NA           | NA       | NA       | NA       | NA       |
| ighv11-2          | 0 NA     | NA           | NA       | NA       | NA       | NA       |

|                   |          |              |            |          |          |          |
|-------------------|----------|--------------|------------|----------|----------|----------|
| CR792438.2        | 1.096736 | -1.442745291 | 1.691743   | -0.85282 | 0.393761 | NA       |
| si:dkey-261j15.2  | 167.4964 | -0.233470668 | 0.161244   | -1.44793 | 0.147637 | 0.608558 |
| si:ch211-15j1.7   | 5.66686  | 0.933093231  | 0.846369   | 1.102466 | 0.270259 | 0.746532 |
| CU074421.1        | 0 NA     |              | NA         | NA       | NA       | NA       |
| rafla             | 148.4489 | -0.334061305 | 0.175564   | -1.90279 | 0.057068 | 0.412539 |
| BX470238.1        | 6.375115 | -0.489087831 | 0.745095   | -0.65641 | 0.51156  | 0.884872 |
| ighv14-1          | 0 NA     |              | NA         | NA       | NA       | NA       |
| CU659670.1        | 238.2291 | 0.022529432  | 0.150408   | 0.149788 | 0.880932 | 0.986846 |
| CR936968.2        | 32.64474 | -0.142552171 | 0.65219    | -0.21857 | 0.826981 | 0.973458 |
| BX324146.1        | 109.7947 | -0.194892476 | 0.289304   | -0.67366 | 0.500527 | 0.880311 |
| pimr205           | 0.15032  | -1.826663989 | 5.230461   | -0.34924 | 0.726912 | NA       |
| ighv2-2           | 0 NA     |              | NA         | NA       | NA       | NA       |
| si:dkey-217d24.6  | 220.4991 | -0.44046639  | 0.176262   | -2.49893 | 0.012457 | 0.194346 |
| BX663606.1        | 2.044705 | -0.205380333 | 1.418864   | -0.14475 | 0.884908 | NA       |
| ighv9-1           | 0.335504 |              | 0 5.267649 |          | 0        | 1 NA     |
| rock2b            | 42.42083 | 1.259936301  | 0.292565   | 4.306513 | 1.66E-05 | 0.002614 |
| BX901907.1        | 0.267064 |              | 0 5.267649 |          | 0        | 1 NA     |
| AL845295.1        | 0.046941 |              | 0 5.267649 |          | 0        | 1 NA     |
| BX005275.1        | 0 NA     |              | NA         | NA       | NA       | NA       |
| si:dkey-26h11.1   | 0 NA     |              | NA         | NA       | NA       | NA       |
| si:ch211-214p16.3 | 99.1942  | -0.573882006 | 0.492146   | -1.16608 | 0.243582 | 0.724437 |
| AL929009.1        | 0 NA     |              | NA         | NA       | NA       | NA       |
| BX005461.1        | 1.215117 | -2.732171448 | 1.989883   | -1.37303 | 0.169743 | NA       |
| si:ch211-194e1.7  | 4.902434 | -3.082714208 | 1.487569   | -2.07232 | 0.038236 | 0.342672 |
| CR391935.1        | 0.203741 | -0.868114637 | 5.267649   | -0.1648  | 0.8691   | NA       |
| si:ch211-196f5.9  | 31.63254 | 0.128159022  | 0.356771   | 0.359219 | 0.719431 | 0.94694  |
| CR383672.2        | 1.092936 | -2.748373088 | 2.189292   | -1.25537 | 0.209344 | NA       |
| apl2              | 182.7332 | 0.205581382  | 0.239067   | 0.859931 | 0.389827 | 0.827843 |
| BX005275.2        | 1.557197 | -0.508172274 | 1.58308    | -0.321   | 0.748209 | NA       |
| si:dkey-118j18.2  | 470.333  | -0.176135597 | 0.108546   | -1.62269 | 0.104656 | 0.53308  |
| si:dkey-26h11.2   | 0 NA     |              | NA         | NA       | NA       | NA       |
| CR450696.1        | 0 NA     |              | NA         | NA       | NA       | NA       |
| CR382294.1        | 0.745369 | -1.133810501 | 1.945312   | -0.58284 | 0.559999 | NA       |
| BX571664.1        | 0 NA     |              | NA         | NA       | NA       | NA       |
| si:dkeyp-82h4.1   | 0.743924 | 2.477575949  | 2.428188   | 1.020339 | 0.307568 | NA       |
| FP103106.1        | 1.106688 |              | 0 2.132309 |          | 0        | 1 NA     |
| si:ch211-246n15.2 | 0 NA     |              | NA         | NA       | NA       | NA       |
| BX571825.13       | 0 NA     |              | NA         | NA       | NA       | NA       |
| AL845295.2        | 0 NA     |              | NA         | NA       | NA       | NA       |
| mcat              | 0 NA     |              | NA         | NA       | NA       | NA       |
| BX571825.14       | 0 NA     |              | NA         | NA       | NA       | NA       |
| BX901907.2        | 0.996098 | 0.928067734  | 2.063746   | 0.4497   | 0.652926 | NA       |
| CU914550.1        | 1.546309 | 3.89505644   | 1.835498   | 2.12207  | 0.033832 | NA       |
| si:dkey-16p19.8   | 0.509713 | -2.293556462 | 5.204054   | -0.44072 | 0.659412 | NA       |
| BX571825.15       | 0 NA     |              | NA         | NA       | NA       | NA       |
| si:ch211-181p13.2 | 1.51433  | -0.537465344 | 1.93498    | -0.27776 | 0.781194 | NA       |
| BX901907.3        | 0 NA     |              | NA         | NA       | NA       | NA       |
| BX248324.1        | 82.69917 | 0.028607889  | 0.232329   | 0.123135 | 0.902    | 0.990847 |
| si:ch211-73m21.1  | 0.439923 | 1.055404357  | 3.598262   | 0.293309 | 0.769286 | NA       |
| BX901907.4        | 0.088469 |              | 0 5.267649 |          | 0        | 1 NA     |
| BX571825.16       | 0 NA     |              | NA         | NA       | NA       | NA       |
| BX571705.1        | 7.448158 | -0.248946009 | 0.671492   | -0.37074 | 0.710834 | 0.945821 |
| si:dkey-22h13.3   | 4.107246 | 0.354271132  | 1.102603   | 0.321304 | 0.74798  | 0.955074 |
| BX324003.1        | 0.640068 | 1.400786846  | 2.24735    | 0.623306 | 0.533083 | NA       |

|                   |          |              |            |          |          |          |  |
|-------------------|----------|--------------|------------|----------|----------|----------|--|
| BX088688.1        | 55.36799 | -0.657237653 | 0.502849   | -1.30703 | 0.191203 | 0.671109 |  |
| BX927068.1        | 0 NA     |              | NA         | NA       | NA       | NA       |  |
| BX890559.2        | 0 NA     |              | NA         | NA       | NA       | NA       |  |
| si:ch73-10311.2   | 33.19599 | -1.37614066  | 0.427078   | -3.22222 | 0.001272 | 0.052006 |  |
| si:dkey-58j15.11  | 2.800878 | 0.717362153  | 1.050345   | 0.682978 | 0.494621 | 0.877987 |  |
| si:ch211-1f22.8   | 5.95174  |              | 0 1.815775 | 0        | 1        | 1        |  |
| BX322618.1        | 931.3803 | -0.391371651 | 0.261851   | -1.49463 | 0.13501  | 0.59     |  |
| si:dkey-27j5.9    | 0.617628 |              | 0 2.821866 | 0        | 1 NA     |          |  |
| BX842692.1        | 0.307223 | 1.942013074  | 4.494807   | 0.432057 | 0.6657   | NA       |  |
| BX547930.2        | 0.043308 |              | 0 5.267649 | 0        | 1 NA     |          |  |
| si:ch211-286b5.2  | 3.804076 | -0.987098217 | 1.293668   | -0.76302 | 0.44545  | 0.855403 |  |
| si:dkey-58j15.10  | 0.769607 | 1.05542199   | 2.522313   | 0.418434 | 0.67563  | NA       |  |
| CT033796.1        | 4.641218 | -2.982991687 | 1.429747   | -2.08638 | 0.036944 | 0.337141 |  |
| irbpl             | 7.289103 | 0.087203109  | 1.138597   | 0.076588 | 0.938951 | 0.997371 |  |
| AL929349.1        | 0 NA     |              | NA         | NA       | NA       | NA       |  |
| CR626889.1        | 1.506505 |              | 0 2.352113 | 0        | 1 NA     |          |  |
| si:ch211-176g6.1  | 0.126661 |              | 0 5.267649 | 0        | 1 NA     |          |  |
| si:ch73-94k4.5    | 0.279694 | 3.310194291  | 5.173718   | 0.63981  | 0.522296 | NA       |  |
| AL928650.2        | 0.742333 | 0.722526553  | 2.529771   | 0.285609 | 0.775177 | NA       |  |
| BX548015.2        | 7.661026 | -0.029956418 | 2.342259   | -0.01279 | 0.989796 | 1        |  |
| si:ch73-236c18.9  | 76.36588 | -0.050121484 | 0.246002   | -0.20374 | 0.838553 | 0.976395 |  |
| AL929396.1        | 1.213068 | -0.96188675  | 1.60847    | -0.59801 | 0.549831 | NA       |  |
| si:dkey-202c14.3  | 3.067512 | 0.530783192  | 1.026721   | 0.516969 | 0.605178 | 0.914985 |  |
| rltgr             | 294.4098 | -0.179474982 | 0.22138    | -0.81071 | 0.417533 | 0.841149 |  |
| si:dkey-27j5.10   | 0.272039 |              | 0 5.267649 | 0        | 1 NA     |          |  |
| CR854964.1        | 0 NA     |              | NA         | NA       | NA       | NA       |  |
| CU469541.1        | 0.089161 |              | 0 5.267649 | 0        | 1 NA     |          |  |
| BX088688.2        | 4.992502 | 0.616223611  | 0.86669    | 0.711008 | 0.477079 | 0.869292 |  |
| BX901898.1        | 0.088469 |              | 0 5.267649 | 0        | 1 NA     |          |  |
| BX901942.1        | 0.346254 | -1.714183198 | 3.842555   | -0.44611 | 0.655521 | NA       |  |
| BX649533.1        | 0.23509  |              | 0 4.959557 | 0        | 1 NA     |          |  |
| si:ch211-1f22.7   | 0 NA     |              | NA         | NA       | NA       | NA       |  |
| CR774189.1        | 2.449516 | 2.360650482  | 1.367537   | 1.726206 | 0.08431  | 0.487271 |  |
| si:ch211-191a16.5 | 14.34961 | -1.744257498 | 0.793005   | -2.19955 | 0.027839 | 0.296561 |  |
| nrp2a             | 831.9437 | 0.108628357  | 0.11348    | 0.95725  | 0.338441 | 0.795226 |  |
| CR925879.1        | 1.46783  | -0.878976719 | 1.561255   | -0.56299 | 0.573439 | NA       |  |
| rac11             | 1.724243 |              | 0 2.107664 | 0        | 1 NA     |          |  |
| CR774192.1        | 0.150865 | 0.09368032   | 5.267649   | 0.017784 | 0.985811 | NA       |  |
| BX681416.1        | 0 NA     |              | NA         | NA       | NA       | NA       |  |
| BX248126.1        | 0 NA     |              | NA         | NA       | NA       | NA       |  |
| si:dkey-25o16.4   | 332.7387 | 0.270914589  | 0.251074   | 1.079021 | 0.280578 | 0.753147 |  |
| CT573186.2        | 0.188905 | -0.868102747 | 5.267649   | -0.1648  | 0.869102 | NA       |  |
| si:dkey-19f4.2    | 1.940126 | -4.847072152 | 1.863301   | -2.60134 | 0.009286 | NA       |  |
| CR556696.1        | 7.26145  | 0.221104991  | 0.884322   | 0.250028 | 0.802566 | 0.968181 |  |
| CU986306.1        | 0 NA     |              | NA         | NA       | NA       | NA       |  |
| BX649231.1        | 1.728306 | 0.12240984   | 1.485019   | 0.08243  | 0.934305 | NA       |  |
| wu:fj29h11        | 198.6582 | 0.129389758  | 0.301793   | 0.428737 | 0.668115 | 0.933086 |  |
| BX322603.1        | 11.28126 | 1.838084797  | 3.182417   | 0.577575 | 0.563551 | 0.901075 |  |
| CU915827.1        | 6.226793 | 0.12926397   | 0.883265   | 0.146348 | 0.883647 | 0.987014 |  |
| CR392024.1        | 1.066491 | 1.371955454  | 1.922708   | 0.713554 | 0.475503 | NA       |  |
| zgc:165656        | 30.4578  | 0.467909044  | 0.292094   | 1.601911 | 0.109175 | 0.542034 |  |
| si:ch211-155o21.4 | 3.645493 | -1.366796445 | 1.099134   | -1.24352 | 0.213676 | 0.696139 |  |
| BX470128.1        | 0.127749 |              | 0 5.267649 | 0        | 1 NA     |          |  |
| BX248418.1        | 58.14703 | -0.135241334 | 0.254742   | -0.5309  | 0.595491 | 0.911376 |  |

|                    |          |              |            |          |          |          |
|--------------------|----------|--------------|------------|----------|----------|----------|
| si:dkey-27j5.7     | 0.294079 | 2.614137966  | 4.562882   | 0.572914 | 0.566703 | NA       |
| CR382370.1         | 0 NA     |              | NA         | NA       | NA       | NA       |
| FP067451.1         | 0.449944 | -0.868144008 | 3.71787    | -0.23351 | 0.815369 | NA       |
| si:ch211-152f2.4   | 0.337756 | -0.8681335   | 3.90303    | -0.22243 | 0.823983 | NA       |
| si:dkey-182i3.9    | 16.39515 | -0.65389319  | 0.511598   | -1.27814 | 0.2012   | 0.681045 |
| si:ch211-286b5.6   | 1.348465 | -0.974337773 | 1.671079   | -0.58306 | 0.559853 | NA       |
| adgre9             | 1.249704 | 0.074985839  | 2.047917   | 0.036616 | 0.970791 | NA       |
| cul4a              | 782.8302 | -0.000885026 | 0.118106   | -0.00749 | 0.994021 | 1        |
| si:dkey-9c18.3     | 0.202494 | 2.850015501  | 5.18846    | 0.549299 | 0.5828   | NA       |
| BX323590.3         | 0.486913 | -2.32655697  | 3.520269   | -0.6609  | 0.508674 | NA       |
| AL928835.1         | 0.507831 | 2.538433637  | 2.715037   | 0.934954 | 0.349812 | NA       |
| BX004779.1         | 0.292408 | -0.8072091   | 3.987657   | -0.20243 | 0.839583 | NA       |
| si:ch211-1f22.9    | 0.134939 |              | 0 5.267649 | 0        | 1 NA     |          |
| MFAP4 (1 of many)  | 10.00276 | 2.523477233  | 1.554024   | 1.623834 | 0.104411 | 0.53263  |
| itgam              | 2.868382 | 0.923600205  | 1.61762    | 0.570963 | 0.568025 | 0.902004 |
| adgre15            | 0.995486 | -1.734653529 | 2.133652   | -0.813   | 0.41622  | NA       |
| BX088594.1         | 0 NA     |              | NA         | NA       | NA       | NA       |
| BX908780.2         | 0.045161 |              | 0 5.267649 | 0        | 1 NA     |          |
| CR478288.1         | 0 NA     |              | NA         | NA       | NA       | NA       |
| lratb.1            | 80.73985 | -0.137624954 | 0.262474   | -0.52434 | 0.600044 | 0.913756 |
| BX296516.1         | 0 NA     |              | NA         | NA       | NA       | NA       |
| si:ch1073-228b5.2  | 85.40489 | -0.195328495 | 0.17991    | -1.0857  | 0.277611 | 0.751607 |
| BX322618.2         | 0.059954 | 1.055396947  | 5.267649   | 0.200354 | 0.841203 | NA       |
| AL928650.3         | 8.379573 | -3.22012094  | 1.076449   | -2.99143 | 0.002777 | 0.086456 |
| si:ch1073-357b18.4 | 119.4853 | -0.158123237 | 0.219097   | -0.7217  | 0.470477 | 0.867743 |
| bmb                | 30.91976 | 0.520960143  | 0.607824   | 0.857091 | 0.391395 | 0.827902 |
| si:ch73-94k4.4     | 0 NA     |              | NA         | NA       | NA       | NA       |
| CR626902.1         | 1.069528 | 2.775322139  | 1.988441   | 1.395728 | 0.162796 | NA       |
| BX649499.2         | 0 NA     |              | NA         | NA       | NA       | NA       |
| BX465225.1         | 0.049021 | -0.86807634  | 5.267649   | -0.16479 | 0.869106 | NA       |
| CU929161.1         | 0 NA     |              | NA         | NA       | NA       | NA       |
| si:ch73-212j7.3    | 11.85506 | -0.160228048 | 0.637334   | -0.2514  | 0.801502 | 0.967776 |
| si:dkey-182i3.10   | 70.35052 | 0.198631865  | 0.297357   | 0.667991 | 0.50414  | 0.881759 |
| BX469930.2         | 0 NA     |              | NA         | NA       | NA       | NA       |
| si:ch211-255p10.3  | 2226.913 | -0.195598407 | 0.198663   | -0.98457 | 0.324834 | 0.783673 |
| BX469908.1         | 2.207125 | 0.036993982  | 1.243676   | 0.029746 | 0.97627  | 1        |
| BX000534.1         | 1.031451 | -1.419523693 | 2.537108   | -0.5595  | 0.575817 | NA       |
| si:ch211-1f22.10   | 0.238995 | -0.868109223 | 5.267649   | -0.1648  | 0.869101 | NA       |
| tubel              | 0.50067  | 0.093651319  | 2.924105   | 0.032027 | 0.97445  | NA       |
| si:dkey-27j5.6     | 0.08553  |              | 0 5.267649 | 0        | 1 NA     |          |
| adgre16            | 1.165748 | 0.093647777  | 2.266904   | 0.041311 | 0.967048 | NA       |
| si:ch211-1f22.13   | 0.307608 | 2.506241582  | 4.563305   | 0.549216 | 0.582857 | NA       |
| si:dkey-187i8.2    | 0.918266 | 1.055408269  | 2.773997   | 0.380465 | 0.7036   | NA       |
| si:ch211-286b5.8   | 3.21795  | -0.090368993 | 1.213712   | -0.07446 | 0.940647 | 0.997371 |
| CU914144.1         | 11.35745 | -2.744421172 | 1.092729   | -2.51153 | 0.012021 | 0.190742 |
| BX908780.3         | 0 NA     |              | NA         | NA       | NA       | NA       |
| buc21              | 1.074914 | 1.055430091  | 2.137113   | 0.493858 | 0.621407 | NA       |
| BX908756.1         | 0 NA     |              | NA         | NA       | NA       | NA       |
| MED9               | 208.4492 | -0.096269713 | 0.181136   | -0.53148 | 0.595089 | 0.910894 |
| CR382370.2         | 457.8953 | -0.002298055 | 0.125934   | -0.01825 | 0.985441 | 1        |
| si:ch73-94k4.1     | 0 NA     |              | NA         | NA       | NA       | NA       |
| si:ch211-122h15.4  | 1.780395 | -2.389645675 | 1.724025   | -1.38609 | 0.165721 | NA       |
| si:dkey-11c5.11    | 56.45903 | 0.208395828  | 0.284774   | 0.731793 | 0.464295 | 0.864593 |
| BX510992.2         | 2.417534 | 0.354906048  | 1.078463   | 0.329085 | 0.742091 | 0.954329 |

|                   |          |              |            |          |          |          |   |
|-------------------|----------|--------------|------------|----------|----------|----------|---|
| BX276101.1        | 34.89739 | -0.010555358 | 0.346418   | -0.03047 | 0.975692 |          | 1 |
| BX649471.1        | 0 NA     |              | NA         | NA       | NA       | NA       |   |
| AL954187.1        | 0.101247 | 1.854150541  | 5.241768   | 0.353726 | 0.723544 | NA       |   |
| BX908780.4        | 0.426838 | 1.055406637  | 3.570826   | 0.295564 | 0.767563 | NA       |   |
| adgre18           | 0.312476 |              | 0 3.464643 |          | 0        | 1 NA     |   |
| si:ch211-131k2.2  | 10.95508 | -0.668104415 | 0.712974   | -0.93707 | 0.348724 | 0.801264 |   |
| BX296520.1        | 0.063619 |              | 0 5.267649 |          | 0        | 1 NA     |   |
| BX908780.5        | 0 NA     |              | NA         | NA       | NA       | NA       |   |
| adgre19           | 0.384226 | -0.868135737 | 3.317312   | -0.2617  | 0.793554 | NA       |   |
| si:dkey-27j5.11   | 0 NA     |              | NA         | NA       | NA       | NA       |   |
| gpr108            | 701.2731 | -0.088305952 | 0.103647   | -0.85199 | 0.394219 | 0.828374 |   |
| si:dkey-119m7.8   | 96.61533 | 0.175941602  | 0.223111   | 0.788585 | 0.430355 | 0.847541 |   |
| BX901920.1        | 547.7793 | 0.762565632  | 0.206789   | 3.687646 | 0.000226 | 0.016037 |   |
| si:ch211-1f22.6   | 0.111164 | -0.868089684 | 5.267649   | -0.1648  | 0.869104 | NA       |   |
| BX547930.3        | 0.045161 |              | 0 5.267649 |          | 0        | 1 NA     |   |
| si:dkey-4p15.4    | 0.098667 | -0.868089684 | 5.267649   | -0.1648  | 0.869104 | NA       |   |
| si:ch211-286b5.5  | 487.725  | -0.312838549 | 0.139445   | -2.24345 | 0.024868 | 0.279374 |   |
| abcc3             | 406.6006 | -0.010709232 | 0.1836     | -0.05833 | 0.953486 | 0.998436 |   |
| si:dkey-249p7.4   | 1.677911 | 1.427149816  | 1.545828   | 0.923227 | 0.355889 | NA       |   |
| cx134c            | 0.191244 |              | 0 5.267649 |          | 0        | 1 NA     |   |
| si:ch211-202n12.2 | 2.212458 | 0.06555025   | 1.367323   | 0.047941 | 0.961764 | 0.999451 |   |
| si:ch211-1f22.2   | 1.025863 | -2.771940152 | 2.294604   | -1.20803 | 0.227037 | NA       |   |
| hemgn             | 608.1885 | 0.157008124  | 0.314162   | 0.499768 | 0.617239 | 0.916365 |   |
| MZT1              | 363.6653 | -0.014473642 | 0.207648   | -0.0697  | 0.94443  | 0.997371 |   |
| si:ch73-301j1.1   | 2.91182  | 0.244614309  | 1.209491   | 0.202246 | 0.839725 | 0.976417 |   |
| si:ch211-1f22.16  | 0.601082 | 1.928305839  | 2.810498   | 0.686108 | 0.492645 | NA       |   |
| si:dkey-27j5.10   | 0 NA     |              | NA         | NA       | NA       | NA       |   |
| BX296562.1        | 0.120883 |              | 0 5.267649 |          | 0        | 1 NA     |   |
| AL845365.1        | 0 NA     |              | NA         | NA       | NA       | NA       |   |
| CR450698.1        | 0.086617 |              | 0 5.267649 |          | 0        | 1 NA     |   |
| BX004780.1        | 2.913439 | -1.740957217 | 1.945541   | -0.89484 | 0.37087  | 0.818484 |   |
| AL929237.3        | 2.177696 | 0.820680966  | 1.38516    | 0.592481 | 0.553529 | NA       |   |
| BX927123.1        | 0.426853 | -0.859650083 | 3.68709    | -0.23315 | 0.815644 | NA       |   |
| si:dkey-1f1.3     | 17.12971 | -0.057342142 | 0.544442   | -0.10532 | 0.91612  | 0.993238 |   |
| BX928755.1        | 0.043309 |              | 0 5.267649 |          | 0        | 1 NA     |   |
| CR385078.2        | 0 NA     |              | NA         | NA       | NA       | NA       |   |
| BX927300.1        | 6.295644 | 0.610603072  | 0.945503   | 0.645797 | 0.518411 | 0.887148 |   |
| CU565528.1        | 0.050723 | -0.86807634  | 5.267649   | -0.16479 | 0.869106 | NA       |   |
| CR382372.1        | 32.71905 | -0.191560196 | 0.412481   | -0.46441 | 0.642354 | 0.92567  |   |
| CT573003.1        | 16.17159 | -0.485285416 | 1.365852   | -0.3553  | 0.722366 | 0.947586 |   |
| rgs7b             | 28.77119 | 0.114428216  | 0.40901    | 0.279769 | 0.779655 | 0.961073 |   |
| CU660013.1        | 3.540718 | 1.498989407  | 0.946844   | 1.583142 | 0.113389 | 0.551243 |   |
| si:dkey-66i24.9   | 76.55362 | 0.401927736  | 0.238471   | 1.685437 | 0.091904 | 0.507669 |   |
| CR376838.1        | 0.073968 |              | 0 5.267649 |          | 0        | 1 NA     |   |
| CU929359.1        | 0.086616 |              | 0 5.267649 |          | 0        | 1 NA     |   |
| CR388157.1        | 0.653528 | -0.868145332 | 3.437627   | -0.25254 | 0.800622 | NA       |   |
| CU914156.1        | 0.240446 | 2.56148978   | 5.200379   | 0.492558 | 0.622325 | NA       |   |
| AL928716.1        | 0 NA     |              | NA         | NA       | NA       | NA       |   |
| CR932360.1        | 0 NA     |              | NA         | NA       | NA       | NA       |   |
| BX072570.1        | 0.186781 |              | 0 5.267649 |          | 0        | 1 NA     |   |
| BX119915.1        | 0.101446 | -1.755425691 | 5.23528    | -0.33531 | 0.737394 | NA       |   |
| AL928920.2        | 0.219256 |              | 0 5.267649 |          | 0        | 1 NA     |   |
| FP565451.1        | 2.603151 | -0.235026582 | 1.223855   | -0.19204 | 0.847712 | 0.97772  |   |
| si:dkey-21e13.3   | 69.97724 | -1.070116637 | 0.391715   | -2.73188 | 0.006297 | 0.134482 |   |

|                    |          |              |          |          |          |          |    |
|--------------------|----------|--------------|----------|----------|----------|----------|----|
| CU550702.1         | 0.449774 |              | 0        | 2.925764 | 0        | 1        | NA |
| si:dkey-1h6.8      | 12.09874 | 0.308106316  | 0.603494 | 0.510537 | 0.609675 | 0.915204 |    |
| BX001014.1         | 0.907788 | -0.739988641 | 1.923509 | -0.38471 | 0.700454 | NA       |    |
| CR847530.1         | 0.276258 | -0.749440561 | 4.708684 | -0.15916 | 0.873542 | NA       |    |
| CR388421.1         | 0.272563 |              | 0        | 5.267649 | 0        | 1        | NA |
| BX469896.1         | 10.26544 | -0.432366557 | 0.59853  | -0.72238 | 0.470061 | 0.867349 |    |
| si:dkeyp-104f11.8  | 3.142294 | -0.794405842 | 1.071214 | -0.74159 | 0.458333 | 0.861001 |    |
| BX255913.1         | 0.119909 | 2.079562922  | 5.22636  | 0.397899 | 0.690705 | NA       |    |
| BX470246.1         | 0.302632 |              | 0        | 4.608093 | 0        | 1        | NA |
| si:ch211-194k22.8  | 588.3268 | -0.12148491  | 0.110475 | -1.09966 | 0.271481 | 0.74783  |    |
| si:dkey-193p11.2   | 618.9376 | -0.910367846 | 0.199393 | -4.56571 | 4.98E-06 | 0.001059 |    |
| CR388040.1         | 24.72558 | -0.050265496 | 0.63992  | -0.07855 | 0.937391 | 0.997305 |    |
| si:dkey-66i24.7    | 88.55571 | 0.076459003  | 0.192379 | 0.39744  | 0.691043 | 0.940173 |    |
| si:dkeyp-104f11.9  | 0.312002 | -1.710093081 | 5.238471 | -0.32645 | 0.744085 | NA       |    |
| hmx3b              | 5.089303 | -0.668279631 | 1.155353 | -0.57842 | 0.56298  | 0.900772 |    |
| AL732488.1         | 201.6418 | 0.202128805  | 0.192316 | 1.051023 | 0.293248 | 0.762581 |    |
| BX323889.1         | 13.8126  | -0.383058009 | 0.517894 | -0.73965 | 0.459515 | 0.862103 |    |
| CR352342.1         | 0.063619 |              | 0        | 5.267649 | 0        | 1        | NA |
| si:rp71-1c10.11    | 648.8068 | -0.176316401 | 0.216183 | -0.81559 | 0.414736 | 0.838698 |    |
| si:dkey-16i5.8     | 15.77355 | 0.100499462  | 1.101917 | 0.091204 | 0.92733  | 0.994973 |    |
| CU660013.2         | 1.081873 | 2.461394167  | 2.367617 | 1.039608 | 0.298522 | NA       |    |
| BX248238.1         | 0.24034  | 2.436374376  | 5.206324 | 0.467964 | 0.63981  | NA       |    |
| si:dkey-21c1.1     | 323.7805 | -0.154496801 | 0.135502 | -1.14018 | 0.254212 | 0.733304 |    |
| si:ch211-250m6.2   | 0.156447 |              | 0        | 5.267649 | 0        | 1        | NA |
| CT737227.1         | 3.779178 | 3.287147761  | 1.511709 | 2.174459 | 0.029671 | 0.306672 |    |
| cpn1               |          | 0 NA         | NA       | NA       | NA       | NA       |    |
| CR385078.3         |          | 0 NA         | NA       | NA       | NA       | NA       |    |
| BX569783.1         | 0.990448 | -1.79575856  | 2.058899 | -0.87219 | 0.383103 | NA       |    |
| CR847530.2         | 0.045161 |              | 0        | 5.267649 | 0        | 1        | NA |
| BX255897.1         |          | 0 NA         | NA       | NA       | NA       | NA       |    |
| BX855623.1         | 1.370666 | 1.055419222  | 2.432682 | 0.43385  | 0.664397 | NA       |    |
| BX255963.1         | 0.677079 | 2.76544505   | 2.199751 | 1.257163 | 0.208695 | NA       |    |
| BX248390.1         | 2.319933 | 1.968032009  | 1.863283 | 1.056217 | 0.290869 | 0.761002 |    |
| CR749163.2         | 2.524312 | -0.634210905 | 1.416558 | -0.44771 | 0.654361 | 0.929488 |    |
| si:zfos-911d5.4    | 1.43247  | -0.868142501 | 2.05371  | -0.42272 | 0.6725   | NA       |    |
| si:dkey-219e21.2   | 61.02843 | -0.920889704 | 0.717858 | -1.28283 | 0.199552 | 0.680344 |    |
| CR405682.1         | 0.198989 | 0.093667081  | 5.22139  | 0.017939 | 0.985687 | NA       |    |
| BX088644.1         | 0.093931 | 1.055383603  | 5.267649 | 0.200352 | 0.841205 | NA       |    |
| CU469493.1         |          | 0 NA         | NA       | NA       | NA       | NA       |    |
| si:dkey-2211.1     |          | 0 NA         | NA       | NA       | NA       | NA       |    |
| AL928824.2         |          | 0 NA         | NA       | NA       | NA       | NA       |    |
| CR385078.4         |          | 0 NA         | NA       | NA       | NA       | NA       |    |
| CR381684.1         |          | 0 NA         | NA       | NA       | NA       | NA       |    |
| BX296562.2         |          | 0 NA         | NA       | NA       | NA       | NA       |    |
| asb2a.1            | 2.993733 | 2.796127502  | 1.490394 | 1.876099 | 0.060642 | 0.423018 |    |
| NDUF8              | 87.35758 | 0.00500586   | 0.277117 | 0.018064 | 0.985588 | 1        |    |
| BX001014.2         | 25.62047 | 0.323464942  | 0.33715  | 0.95941  | 0.337352 | 0.794355 |    |
| BX842669.1         | 1.170433 | 0.39813646   | 1.4277   | 0.278866 | 0.780348 | NA       |    |
| CU459210.1         | 0.087179 |              | 0        | 5.267649 | 0        | 1        | NA |
| AL928824.3         | 0.084441 |              | 0        | 5.267649 | 0        | 1        | NA |
| CU570682.1         | 0.043309 |              | 0        | 5.267649 | 0        | 1        | NA |
| si:ch211-202p1.5   | 5.747954 | -0.704155148 | 0.917644 | -0.76735 | 0.442873 | 0.853998 |    |
| si:ch211-196c10.13 | 24.71395 | 0.899840721  | 0.740083 | 1.215864 | 0.224037 | 0.705807 |    |
| si:ch73-205h11.1   | 2.229629 | -1.652437983 | 1.316443 | -1.25523 | 0.209395 | 0.691505 |    |

|                   |          |              |          |          |                   |
|-------------------|----------|--------------|----------|----------|-------------------|
| BX901952.1        | 0 NA     | NA           | NA       | NA       | NA                |
| BX255913.2        | 0.284691 | 0            | 5.267649 | 0        | 1 NA              |
| si:rp71-1c10.8    | 1.334577 | 2.307608539  | 1.94183  | 1.188368 | 0.234688 NA       |
| CT573006.1        | 1.076119 | 1.92416512   | 1.934727 | 0.994541 | 0.31996 NA        |
| si:dkey-61p9.11   | 19.39065 | 1.776858813  | 0.665198 | 2.671172 | 0.007559 0.14728  |
| CU694525.1        | 0 NA     | NA           | NA       | NA       | NA                |
| BX510919.1        | 0.084441 | 0            | 5.267649 | 0        | 1 NA              |
| pimr124           | 0.175084 | 0            | 5.267649 | 0        | 1 NA              |
| BX510920.1        | 0.060442 | 0            | 5.267649 | 0        | 1 NA              |
| BX255897.2        | 0.341812 | 2.079522788  | 5.22636  | 0.397891 | 0.69071 NA        |
| CR932077.1        | 6.134229 | -0.677678525 | 0.786569 | -0.86156 | 0.388928 0.827725 |
| CU571074.1        | 347.8871 | 0.232886726  | 0.161895 | 1.438507 | 0.15029 0.613933  |
| BX510319.1        | 4.395569 | -1.479189169 | 1.101912 | -1.34238 | 0.179471 0.654677 |
| pimr128           | 0.773165 | -3.312697549 | 2.512414 | -1.31853 | 0.187326 NA       |
| BX088686.1        | 2.929713 | -2.137204119 | 1.070444 | -1.99656 | 0.045873 0.374848 |
| BX119992.1        | 0.326167 | -2.340632107 | 3.894584 | -0.601   | 0.547842 NA       |
| CCDC189           | 3.323645 | -0.159167303 | 0.814265 | -0.19547 | 0.845022 0.976791 |
| AL928920.3        | 0.837832 | 2.891982939  | 2.874946 | 1.005926 | 0.314451 NA       |
| BX294177.1        | 0.170532 | 2.594231922  | 5.198905 | 0.498996 | 0.617782 NA       |
| CR932360.2        | 0.176993 | -0.868103029 | 5.267649 | -0.1648  | 0.869102 NA       |
| CR932362.1        | 0.630144 | -3.349637719 | 2.383876 | -1.40512 | 0.159985 NA       |
| si:dkey-148d16.5  | 0.104229 | -1.791411807 | 5.232816 | -0.34234 | 0.732094 NA       |
| CU929359.2        | 4.866016 | -0.788334952 | 1.748862 | -0.45077 | 0.652155 0.928768 |
| CU660013.3        | 0.090249 | 0            | 5.267649 | 0        | 1 NA              |
| si:ch211-28p3.3   | 42.42525 | -0.545337426 | 0.295436 | -1.84587 | 0.06491 0.434811  |
| selp              | 0.084441 | 0            | 5.267649 | 0        | 1 NA              |
| CR352243.1        | 0 NA     | NA           | NA       | NA       | NA                |
| BX248238.2        | 0.152284 | 0.09368032   | 5.267649 | 0.017784 | 0.985811 NA       |
| BX569801.2        | 0.333187 | 2.076152944  | 4.536068 | 0.457699 | 0.647169 NA       |
| si:ch73-344o19.1  | 61.1829  | 0.415413464  | 0.30739  | 1.351423 | 0.17656 0.649967  |
| BX004999.1        | 21.92483 | 0.152145021  | 0.513418 | 0.296337 | 0.766972 0.960296 |
| BX842240.1        | 0.321822 | 0.007697392  | 4.497805 | 0.001711 | 0.998635 NA       |
| BX119915.2        | 1.529219 | 0.996981786  | 2.069027 | 0.48186  | 0.629905 NA       |
| CR848736.1        | 7.655783 | -1.195105787 | 0.840437 | -1.42201 | 0.155025 0.619776 |
| CR751608.1        | 0.08847  | 0            | 5.267649 | 0        | 1 NA              |
| si:ch73-127m5.2   | 239.1044 | -0.058274362 | 0.138297 | -0.42137 | 0.673485 0.934323 |
| BX322665.3        | 0.04222  | 0            | 5.267649 | 0        | 1 NA              |
| BX004803.1        | 0 NA     | NA           | NA       | NA       | NA                |
| si:ch211-277e21.1 | 2.775979 | 0.318301651  | 1.228615 | 0.259074 | 0.795578 0.966077 |
| si:dkeyp-13d11.1  | 0 NA     | NA           | NA       | NA       | NA                |
| CU660013.4        | 148.1307 | -0.022140653 | 0.19053  | -0.11621 | 0.90749 0.991745  |
| si:dkey-219e21.4  | 60.87886 | -0.703516433 | 0.376025 | -1.87093 | 0.061355 0.424867 |
| BX119915.3        | 0.264541 | 0            | 4.783328 | 0        | 1 NA              |
| BX957286.1        | 0 NA     | NA           | NA       | NA       | NA                |
| si:dkey-287g12.6  | 97.60832 | -0.223535404 | 0.256834 | -0.87035 | 0.38411 0.826565  |
| si:ch211-168b3.2  | 54.82245 | 0.049121589  | 0.388403 | 0.126471 | 0.899359 0.99045  |
| BX279523.1        | 15.14951 | -3.181452124 | 0.772749 | -4.11706 | 3.84E-05 0.004607 |
| AL833789.1        | 0.336111 | 0            | 5.19772  | 0        | 1 NA              |
| AL928920.4        | 0.049519 | 0            | 5.267649 | 0        | 1 NA              |
| BX901968.1        | 0 NA     | NA           | NA       | NA       | NA                |
| si:dkeyp-106c3.2  | 1.704093 | -0.070381366 | 1.388043 | -0.05071 | 0.95956 NA        |
| CR854832.1        | 0.136102 | 0            | 5.267649 | 0        | 1 NA              |
| zgc:136683        | 0.575064 | -2.413213343 | 5.198537 | -0.46421 | 0.642497 NA       |
| CR396584.1        | 2.158765 | -1.760512733 | 1.905118 | -0.9241  | 0.355436 NA       |

|                   |          |              |            |          |          |          |    |   |
|-------------------|----------|--------------|------------|----------|----------|----------|----|---|
| si:ch211-256e16.7 | 0.84372  | 3.467620215  | 2.414848   | 1.435958 | 0.151014 | NA       |    |   |
| CR847898.1        | 5.025185 | -1.324226569 | 0.779937   | -1.69786 | 0.089534 | 0.502318 |    |   |
| BX571796.1        | 0.086618 |              | 0.5.267649 |          | 0        | 1        | NA |   |
| CU914157.1        | 11.42637 | -4.046979481 | 1.151144   | -3.51561 | 0.000439 | 0.025327 |    |   |
| BX323575.1        | 0.050723 | -0.86807634  | 5.267649   | -0.16479 | 0.869106 | NA       |    |   |
| BX279523.2        |          | 0 NA         | NA         | NA       | NA       | NA       |    |   |
| si:ch73-144d13.7  | 13.93284 | 0.399653173  | 0.484093   | 0.825571 | 0.409048 | 0.836637 |    |   |
| blvrb             | 751.8636 | 0.16830821   | 0.180661   | 0.931623 | 0.351531 | 0.802382 |    |   |
| mhc1l1ja          | 9.513196 | 0.186359383  | 1.060586   | 0.175714 | 0.860519 | 0.980264 |    |   |
| CR774195.1        |          | 0 NA         | NA         | NA       | NA       | NA       |    |   |
| BX569793.1        | 17.89385 | 1.1661906    | 0.52806    | 2.208441 | 0.027214 | 0.293137 |    |   |
| CR391963.1        | 28.69696 | 0.025041091  | 0.444622   | 0.05632  | 0.955087 | 0.998611 |    |   |
| si:ch211-155k24.9 | 64.34833 | -0.119576528 | 0.27238    | -0.43901 | 0.660658 | 0.930581 |    |   |
| CR450814.1        | 0.14609  | 1.055370722  | 5.267649   | 0.200349 | 0.841207 | NA       |    |   |
| AL807792.1        | 3.118644 | 0.926609179  | 1.266509   | 0.731624 | 0.464398 | 0.864593 |    |   |
| CU013548.1        | 1.100862 | -1.800316565 | 2.187737   | -0.82291 | 0.410558 | NA       |    |   |
| CR848791.1        |          | 0 NA         | NA         | NA       | NA       | NA       |    |   |
| CU929322.1        | 0.451585 | -2.708159125 | 4.877299   | -0.55526 | 0.578718 | NA       |    |   |
| CU929206.1        | 1.276791 | 0.645215853  | 1.947584   | 0.33129  | 0.740425 | NA       |    |   |
| CT573157.1        | 0.098043 | -1.71005882  | 5.238474   | -0.32644 | 0.74409  | NA       |    |   |
| zgc:193593        | 75.71712 |              | 0.1.678109 |          | 0        | 1        |    | 1 |
| BX927351.1        |          | 0 NA         | NA         | NA       | NA       | NA       |    |   |
| BX649487.1        |          | 0 NA         | NA         | NA       | NA       | NA       |    |   |
| CU855854.1        | 0.132469 |              | 0.5.267649 |          | 0        | 1        | NA |   |
| CR855311.2        | 0.793479 | -1.801967316 | 2.241986   | -0.80374 | 0.421549 | NA       |    |   |
| si:dkey-16p21.8   | 4395.783 | 0.005252158  | 0.11224    | 0.046794 | 0.962677 | 0.999607 |    |   |
| BX957346.1        | 367.5073 | -0.056444404 | 0.18613    | -0.30325 | 0.761697 | 0.958242 |    |   |
| znf1143           | 96.10214 | -0.581711097 | 0.288164   | -2.01868 | 0.043521 | 0.365455 |    |   |
| BX572077.1        | 11.28908 | -0.818314596 | 0.602355   | -1.35853 | 0.174297 | 0.647604 |    |   |
| si:ch73-1f23.1    | 0.86837  |              | 0.2.541178 |          | 0        | 1        | NA |   |
| BX649324.1        | 6.035656 | 0.106861803  | 0.890151   | 0.120049 | 0.904444 | 0.991581 |    |   |
| znf1012           | 8.622096 | -0.577000639 | 0.636489   | -0.90654 | 0.364652 | 0.814648 |    |   |
| CU469362.1        | 74.95145 | -0.403028832 | 0.231871   | -1.73816 | 0.082183 | 0.482436 |    |   |
| BX927361.1        | 0.579344 | -2.808183135 | 3.391649   | -0.82797 | 0.407688 | NA       |    |   |
| si:ch211-286b4.4  | 13.44647 | -0.7501005   | 0.746319   | -1.00507 | 0.314865 | 0.777649 |    |   |
| CU207301.1        |          | 0 NA         | NA         | NA       | NA       | NA       |    |   |
| CR936975.1        | 3.307789 | -1.409604068 | 1.261618   | -1.1173  | 0.263867 | 0.741875 |    |   |
| si:ch73-38013.4   | 3.952906 | -0.490462867 | 1.543825   | -0.31769 | 0.750718 | 0.955074 |    |   |
| CR790362.1        | 1.170813 | -0.317274516 | 1.934698   | -0.16399 | 0.869738 | NA       |    |   |
| CR457444.1        |          | 0 NA         | NA         | NA       | NA       | NA       |    |   |
| CR931780.1        | 1.14243  | -0.868137038 | 2.210571   | -0.39272 | 0.694526 | NA       |    |   |
| c1mn              | 66.44014 | 0.299857694  | 0.266236   | 1.126287 | 0.260044 | 0.73712  |    |   |
| CR385026.1        | 0.045161 |              | 0.5.267649 |          | 0        | 1        | NA |   |
| CT583650.1        | 0.135482 |              | 0.5.267649 |          | 0        | 1        | NA |   |
| si:dkey-33c3.1    | 1.454244 | 1.05542438   | 2.192591   | 0.48136  | 0.630261 | NA       |    |   |
| BX511245.1        |          | 0 NA         | NA         | NA       | NA       | NA       |    |   |
| CU467963.1        | 0.459699 | -0.794534619 | 3.680099   | -0.2159  | 0.829065 | NA       |    |   |
| CR626887.1        | 1.952089 | 1.95410045   | 1.737969   | 1.124359 | 0.260861 | NA       |    |   |
| tmem1761.3b       | 350.7661 | -0.467409466 | 0.220359   | -2.12113 | 0.033911 | 0.325295 |    |   |
| BX294110.1        | 0.315506 | 2.506272461  | 4.536194   | 0.552506 | 0.580602 | NA       |    |   |
| CR847984.1        | 20.42608 | 0.289956838  | 0.329603   | 0.879716 | 0.379013 | 0.823145 |    |   |
| CR759918.1        | 127.4927 | -0.169097855 | 0.190029   | -0.88985 | 0.373546 | 0.820566 |    |   |
| BX323807.1        |          | 0 NA         | NA         | NA       | NA       | NA       |    |   |
| CU462980.1        | 19.9113  | 0.417972847  | 0.518445   | 0.806205 | 0.420125 | 0.842383 |    |   |



|                   |          |              |           |          |          |          |    |
|-------------------|----------|--------------|-----------|----------|----------|----------|----|
| pimr28            | 0.229326 |              | 0.4977387 | 0        |          | 1        | NA |
| BX322538.1        | 0.201699 |              | 0.5267649 | 0        |          | 1        | NA |
| CU638693.1        | 0.557252 | 1.984271485  | 2.376588  | 0.834925 | 0.40376  |          | NA |
| AL953866.1        | 1.29571  | 1.905215335  | 2.011231  | 0.947288 | 0.343492 |          | NA |
| CR388164.2        | 7.992064 | 0.103830988  | 0.91027   | 0.114066 | 0.909185 | 0.992067 |    |
| CR381618.1        | 361.1116 | 0.14215659   | 0.234937  | 0.605084 | 0.545123 | 0.895209 |    |
| serpinb114        | 8.901476 | -3.070896789 | 1.44416   | -2.12642 | 0.033468 | 0.323151 |    |
| CT033825.1        | 71.82344 | 0.92717851   | 0.397459  | 2.332768 | 0.01966  | 0.247302 |    |
| FP102794.1        | 0        | NA           | NA        | NA       | NA       | NA       |    |
| CR774184.1        | 0        | NA           | NA        | NA       | NA       | NA       |    |
| CR450848.1        | 6.822573 | 1.535126291  | 1.701262  | 0.902345 | 0.366873 | 0.816111 |    |
| CU628002.1        | 0        | NA           | NA        | NA       | NA       | NA       |    |
| BX004991.1        | 35.4771  | -0.465895859 | 0.34823   | -1.3379  | 0.18093  | 0.656975 |    |
| si:dkey-90a13.10  | 2.071878 | -3.438397535 | 1.677677  | -2.0495  | 0.040413 |          | NA |
| CR925728.1        | 6.088142 | 0.093649273  | 1.79237   | 0.052249 | 0.95833  | 0.999109 |    |
| CU929451.1        | 24.72727 | -1.648464843 | 0.442355  | -3.72656 | 0.000194 | 0.014684 |    |
| CT961047.1        | 0        | NA           | NA        | NA       | NA       | NA       |    |
| si:dkey-7i4.10    | 22.52524 | -0.56485013  | 0.441549  | -1.27925 | 0.200811 | 0.681045 |    |
| si:ch211-180n24.3 | 1.445713 | 1.055428922  | 2.099828  | 0.502626 | 0.615227 |          | NA |
| CU062633.1        | 4.876025 | 0.338626985  | 1.084702  | 0.312184 | 0.7549   | 0.956283 |    |
| si:dkeyp-100a5.4  | 6.875966 | -1.290454189 | 0.816921  | -1.57966 | 0.114186 | 0.553258 |    |
| si:ch73-23124.1   | 421.8506 | -0.075138039 | 0.216     | -0.34786 | 0.727944 | 0.949325 |    |
| si:dkey-7i4.24    | 3.064852 | 2.371867328  | 1.362421  | 1.740922 | 0.081697 | 0.481171 |    |
| si:ch73-185c24.2  | 55.5737  | -1.1064791   | 0.428568  | -2.58181 | 0.009828 | 0.171403 |    |
| BX005128.1        | 0.620096 | -0.54615362  | 2.075403  | -0.26316 | 0.792431 |          | NA |
| CR759878.1        | 0.67843  | 1.962582357  | 2.417656  | 0.811771 | 0.416923 |          | NA |
| vps50             | 0.043309 |              | 0.5267649 | 0        |          | 1        | NA |
| BX005129.1        | 14.34209 | -0.035520504 | 0.48844   | -0.07272 | 0.942027 | 0.997371 |    |
| CR391963.2        | 0.043308 |              | 0.5267649 | 0        |          | 1        | NA |
| si:ch211-107e6.6  | 0.214816 | 1.055359662  | 5.267649  | 0.200347 | 0.841209 |          | NA |
| si:ch211-227m13.1 | 117.1038 | -0.244171285 | 0.229115  | -1.06571 | 0.286553 | 0.757624 |    |
| AL954322.1        | 0.870782 | -0.739033681 | 1.593101  | -0.4639  | 0.642722 |          | NA |
| CR790366.1        | 0        | NA           | NA        | NA       | NA       | NA       |    |
| si:zfos-375h5.1   | 14.88898 | -1.176802218 | 0.611853  | -1.92334 | 0.054437 | 0.403361 |    |
| CR790377.1        | 0        | NA           | NA        | NA       | NA       | NA       |    |
| si:ch211-147k10.6 | 50.53897 | -0.270752768 | 0.533089  | -0.50789 | 0.611528 | 0.915331 |    |
| CU638693.2        | 0.346147 |              | 0.5267649 | 0        |          | 1        | NA |
| BX927282.2        | 0.599358 | 0.093650399  | 2.643818  | 0.035422 | 0.971743 |          | NA |
| BX005392.1        | 16.2128  | -1.476452583 | 0.510799  | -2.89047 | 0.003847 | 0.103374 |    |
| si:ch211-210b2.3  | 1.913927 | 1.072336429  | 1.590953  | 0.674021 | 0.500298 |          | NA |
| CR388163.1        | 0.383837 | -0.19183096  | 4.145447  | -0.04628 | 0.963091 |          | NA |
| CU639412.1        | 0.314142 | 1.65007198   | 3.868722  | 0.426516 | 0.669732 |          | NA |
| CR385086.1        | 0        | NA           | NA        | NA       | NA       | NA       |    |
| si:ch211-37e10.2  | 143.4725 | -0.103983882 | 0.233259  | -0.44579 | 0.655751 | 0.929606 |    |
| si:ch211-135n15.2 | 20.95406 | -0.254828387 | 0.372561  | -0.68399 | 0.49398  | 0.877455 |    |
| CR589875.1        | 0.086617 |              | 0.5267649 | 0        |          | 1        | NA |
| BX005461.2        | 2.575106 | -0.196751213 | 1.503897  | -0.13083 | 0.895912 | 0.98926  |    |
| BX323035.1        | 0        | NA           | NA        | NA       | NA       | NA       |    |
| CU207354.1        | 0.562537 | 0.093655929  | 2.590056  | 0.03616  | 0.971155 |          | NA |
| si:dkey-52p2.5    | 0.043309 |              | 0.5267649 | 0        |          | 1        | NA |
| si:dkey-77f5.8    | 75.24933 | -0.105483224 | 0.244806  | -0.43089 | 0.666552 | 0.932664 |    |
| BX957258.1        | 8.966684 | 0.285737383  | 0.710319  | 0.402266 | 0.687488 | 0.938835 |    |
| CR759863.1        | 0        | NA           | NA        | NA       | NA       | NA       |    |
| BX897682.1        | 3.480842 | 2.31339078   | 1.539841  | 1.502357 | 0.133005 | 0.58639  |    |

|                    |          |              |            |          |          |          |
|--------------------|----------|--------------|------------|----------|----------|----------|
| CR545469.1         |          | 0 NA         | NA         | NA       | NA       | NA       |
| im:7143333         | 36.61608 | -0.42942533  | 0.346863   | -1.23802 | 0.215707 | 0.697271 |
| si:dkey-197j19.5   | 10.65989 | 0.798873211  | 0.684328   | 1.167384 | 0.243055 | 0.724396 |
| BX927244.1         | 12.87756 | -1.874795127 | 0.711442   | -2.6352  | 0.008409 | 0.156847 |
| CR848812.1         | 17.45003 | -0.064336567 | 0.397326   | -0.16192 | 0.871366 | 0.983365 |
| si:dkeyp-67f1.1    | 81.77747 | -0.177069219 | 0.273914   | -0.64644 | 0.517994 | 0.887148 |
| CR848791.2         | 0.349803 | 1.055407845  | 3.421792   | 0.308437 | 0.75775  | NA       |
| BX005254.2         | 7.276727 | -0.648450937 | 0.707491   | -0.91655 | 0.359378 | 0.810472 |
| BX005351.1         |          | 0 NA         | NA         | NA       | NA       | NA       |
| si:dkey-29h14.10   | 7.905358 | -0.820386028 | 0.775696   | -1.05761 | 0.290232 | 0.76078  |
| CLIP4              | 54.19051 | 0.05360545   | 0.281851   | 0.19019  | 0.84916  | 0.978098 |
| CT025690.1         | 90.4449  | -0.48037699  | 0.191665   | -2.50634 | 0.012199 | 0.191703 |
| CU179699.1         |          | 0 NA         | NA         | NA       | NA       | NA       |
| AL844141.1         | 1.15026  | 0.527685378  | 2.471437   | 0.213514 | 0.830926 | NA       |
| si:dkey-238d18.13  |          | 0 NA         | NA         | NA       | NA       | NA       |
| CR383662.5         | 3.038943 | -2.987444766 | 1.423656   | -2.09843 | 0.035867 | 0.332937 |
| BX004812.1         | 8.386311 | 0.919592473  | 0.737381   | 1.247106 | 0.212359 | 0.694082 |
| CR759863.2         | 0.045161 |              | 0 5.267649 |          | 0        | 1 NA     |
| BX119902.2         | 2.612091 | 1.103993035  | 1.282507   | 0.860809 | 0.389343 | 0.827843 |
| si:dkey-206p8.1    | 29.5636  | -0.278649052 | 0.354807   | -0.78535 | 0.432246 | 0.848419 |
| CU633991.2         | 50.82456 | -0.212311942 | 0.257675   | -0.82395 | 0.409967 | 0.836939 |
| CR926463.1         | 9.850717 | 1.583786002  | 0.74324    | 2.130922 | 0.033096 | 0.322195 |
| BX248113.1         | 3.565485 | 0.71377708   | 1.23881    | 0.576179 | 0.564494 | 0.901433 |
| si:dkeyp-93a5.3    | 3.99994  |              | 0 1.973842 |          | 0        | 1 1      |
| mhc111a            | 0.161568 |              | 0 5.267649 |          | 0        | 1 NA     |
| CU972512.1         | 26.9407  | -1.987999499 | 0.97823    | -2.03224 | 0.042129 | 0.358873 |
| NPC2 (1 of many)   | 39.60916 | -4.350299212 | 0.889746   | -4.88937 | 1.01E-06 | 0.0003   |
| CR626962.1         |          | 0 NA         | NA         | NA       | NA       | NA       |
| BX957326.2         | 0.389886 |              | 0 4.336758 |          | 0        | 1 NA     |
| si:dkeyp-19h3.8    |          | 0 NA         | NA         | NA       | NA       | NA       |
| si:dkey-14d8.22    | 27.22212 | 0.030514147  | 0.384155   | 0.079432 | 0.936689 | 0.997044 |
| CU915818.1         | 0.686588 |              | 0 2.77366  |          | 0        | 1 NA     |
| CR589944.1         | 96.18687 | 0.379613494  | 0.28434    | 1.33507  | 0.181853 | 0.658469 |
| fam110c            | 91.54391 | -0.017295241 | 0.222718   | -0.07766 | 0.938102 | 0.997331 |
| si:ch1073-340i21.2 | 168.6201 | 0.218420902  | 0.231685   | 0.942751 | 0.345808 | 0.799001 |
| CR847968.1         | 132.4268 | 0.615987844  | 0.214711   | 2.868915 | 0.004119 | 0.106542 |
| zgc:153405         | 3.15206  | 1.687844644  | 0.921649   | 1.831331 | 0.067051 | 0.441984 |
| CR847923.1         |          | 0 NA         | NA         | NA       | NA       | NA       |
| AL929222.1         | 2.239156 | -2.060439895 | 1.418701   | -1.45234 | 0.146406 | 0.605984 |
| fbx122             | 79.35577 | 0.19528785   | 0.30966    | 0.630652 | 0.528268 | 0.889948 |
| BX005392.2         | 12.897   | -0.506181309 | 0.604083   | -0.83793 | 0.402068 | 0.832968 |
| CR589876.1         | 41.47076 | -0.284842318 | 0.366406   | -0.77739 | 0.436926 | 0.851125 |
| CT737162.1         | 0.507601 | -3.110011307 | 2.644136   | -1.17619 | 0.239518 | NA       |
| BX537308.1         | 11.43036 | 0.279644562  | 0.719558   | 0.388634 | 0.697547 | 0.942152 |
| BX890558.1         | 50.93103 | 1.478660594  | 0.547602   | 2.700249 | 0.006929 | 0.140209 |
| FP245462.1         | 21.71027 | 0.001786044  | 0.482264   | 0.003703 | 0.997045 | 1        |
| CR855375.1         | 1.326711 | 1.068283349  | 2.065658   | 0.517164 | 0.605042 | NA       |
| CR854839.1         | 312.9654 | -0.016066558 | 0.169053   | -0.09504 | 0.924284 | 0.994815 |
| CU694256.1         | 0.04222  |              | 0 5.267649 |          | 0        | 1 NA     |
| opn1mw1            | 3921.788 | 0.081142983  | 1.027962   | 0.078936 | 0.937084 | 0.997163 |
| FP102888.1         | 0.323665 | -2.769503347 | 4.396809   | -0.62989 | 0.528767 | NA       |
| hbaa1              | 7.909825 | -2.471903173 | 0.90562    | -2.72951 | 0.006343 | 0.134704 |
| BX649300.1         |          | 0 NA         | NA         | NA       | NA       | NA       |
| CU694202.1         |          | 0 NA         | NA         | NA       | NA       | NA       |

|                   |          |              |           |          |          |          |
|-------------------|----------|--------------|-----------|----------|----------|----------|
| FP016018.2        | 2.183285 | -2.390600888 | 1.738375  | -1.37519 | 0.169072 | NA       |
| BX004972.1        | 0.351685 | 2.464049193  | 3.774873  | 0.65275  | 0.513917 | NA       |
| mical3a           | 203.8154 | 0.029309199  | 0.240211  | 0.122015 | 0.902887 | 0.991179 |
| CR628341.1        | 9.606233 | 6.384595959  | 1.277729  | 4.996831 | 5.83E-07 | 0.000188 |
| dhrrs13b.1        | 7.272172 | -1.305874555 | 0.931578  | -1.40179 | 0.160979 | 0.627788 |
| CU682780.1        | 0.099037 |              | 0.5267649 |          | 0        | 1 NA     |
| CU655829.1        | 0.149833 | 1.921567426  | 5.236909  | 0.366928 | 0.713673 | NA       |
| CR786571.3        | 1.15791  | -2.100288017 | 2.021146  | -1.03916 | 0.298732 | NA       |
| ugt1b4            | 1.91462  | -0.662954503 | 1.312051  | -0.50528 | 0.613361 | NA       |
| CR354383.1        | 3.158246 | -0.214977309 | 1.03666   | -0.20737 | 0.835717 | 0.976007 |
| si:dkey-16m19.1   | 28.95143 | -0.242722481 | 0.382813  | -0.63405 | 0.526049 | 0.889156 |
| CR352292.1        | 1.885428 | 0.849102338  | 1.477139  | 0.574829 | 0.565407 | NA       |
| AL845435.1        | 0.29106  | 2.962897837  | 5.184402  | 0.571502 | 0.567659 | NA       |
| si:ch73-38013.3   | 2.118998 | -1.786697826 | 1.864574  | -0.95823 | 0.337945 | NA       |
| si:ch211-256a21.4 | 25.80787 | 0.073664213  | 0.398755  | 0.184735 | 0.853437 | 0.978887 |
| CU466278.1        | 13.19334 | -0.448075389 | 0.626564  | -0.71513 | 0.474528 | 0.869292 |
| CR450813.1        | 0.553364 | -0.754299688 | 3.486953  | -0.21632 | 0.828738 | NA       |
| pimr42            | 0.045161 |              | 0.5267649 |          | 0        | 1 NA     |
| CR759845.1        | 4.842645 | -1.169692648 | 0.967325  | -1.2092  | 0.226585 | 0.707798 |
| CT025745.1        | 11.6414  | 0.074472677  | 0.751413  | 0.09911  | 0.921051 | 0.994085 |
| BX927349.1        | 0.613606 | -0.868130521 | 3.279592  | -0.26471 | 0.791235 | NA       |
| CR759845.2        | 1.724268 | 0.052384063  | 1.497087  | 0.034991 | 0.972087 | NA       |
| CU468915.1        | 56.89801 | -1.077175498 | 0.306521  | -3.5142  | 0.000441 | 0.025327 |
| AL935145.2        | 1.592866 | -0.402497502 | 1.489356  | -0.27025 | 0.786968 | NA       |
| CR936518.1        | 3.208639 | 0.040883685  | 0.933     | 0.04382  | 0.965048 | 1        |
| BX629346.1        | 21.08726 | -0.158730288 | 0.535197  | -0.29658 | 0.766785 | 0.960296 |
| CU571318.1        | 290.9425 | -0.093207339 | 0.187724  | -0.49651 | 0.619532 | 0.917435 |
| CR759845.3        | 0.881782 | -0.850560102 | 2.730851  | -0.31146 | 0.755448 | NA       |
| CR855375.2        | 2.38183  | 1.418053691  | 1.456978  | 0.973284 | 0.330412 | 0.788126 |
| BX897714.1        | 0.045161 |              | 0.5267649 |          | 0        | 1 NA     |
| FP236594.1        |          | 0 NA         |           | NA       | NA       | NA       |
| CU927934.1        | 5.64044  | 1.237174121  | 0.973173  | 1.271278 | 0.20363  | 0.684359 |
| si:ch211-284f22.3 | 411.9352 | 0.182121331  | 0.146555  | 1.242682 | 0.213985 | 0.696474 |
| fxyd6l            | 2675.265 | -0.123650729 | 0.133834  | -0.92391 | 0.355532 | 0.806546 |
| CU929339.1        | 5.708231 | -0.5614818   | 0.697844  | -0.80459 | 0.421054 | 0.842517 |
| si:dkey-159n16.4  |          | 0 NA         |           | NA       | NA       | NA       |
| CR388369.1        | 4.372551 | -0.152713927 | 0.820442  | -0.18614 | 0.852338 | 0.978626 |
| BX547934.1        | 1.019805 |              | 0.2312653 |          | 0        | 1 NA     |
| sparc12           | 31.11192 | 0.540045064  | 0.414169  | 1.303925 | 0.192259 | 0.672283 |
| CR759845.4        | 0.450486 | 1.481373992  | 3.603823  | 0.411056 | 0.681031 | NA       |
| si:ch73-223p23.2  | 0.632471 |              | 0.319276  |          | 0        | 1 NA     |
| BX322555.1        | 0.28951  | -2.754991261 | 5.185055  | -0.53133 | 0.595188 | NA       |
| CR626887.2        |          | 0 NA         |           | NA       | NA       | NA       |
| si:ch211-66i15.4  | 7.703866 | 0.476818204  | 0.631363  | 0.75522  | 0.450117 | 0.85711  |
| AL954322.2        | 95.38576 | -0.274114902 | 0.208288  | -1.31604 | 0.188161 | 0.667333 |
| CU928073.1        | 0.750624 | 0.14778532   | 2.902538  | 0.050916 | 0.959393 | NA       |
| BX322555.2        | 0.101247 | 1.854150541  | 5.241768  | 0.353726 | 0.723544 | NA       |
| CU855801.1        | 0.649612 | 0.524963053  | 2.521956  | 0.208157 | 0.835106 | NA       |
| CR318607.1        | 2.210701 | -1.517381914 | 1.555309  | -0.97561 | 0.329256 | 0.787409 |
| CR848665.1        | 1.036232 | 0.0936551    | 2.167812  | 0.043203 | 0.96554  | NA       |
| si:ch73-181m17.1  | 5.809358 | 0.733223246  | 0.919842  | 0.797118 | 0.425382 | 0.844714 |
| si:dkey-149i17.11 |          | 0 NA         |           | NA       | NA       | NA       |
| im:7152348        | 144.3967 | 0.293494321  | 0.247446  | 1.186092 | 0.235586 | 0.716683 |
| BX005462.2        | 0.191497 | 1.854123853  | 5.241768  | 0.353721 | 0.723548 | NA       |

|                   |          |              |            |          |          |          |
|-------------------|----------|--------------|------------|----------|----------|----------|
| si:zfos-1714f5.4  | 1.022489 |              | 0.2.487893 | 0        | 1        | NA       |
| si:ch211-261a10.5 | 6.838142 | 0.119911497  | 0.73788    | 0.162508 | 0.870906 | 0.983365 |
| si:dkey-172k15.4  | 50.83282 | 0.307247921  | 0.290741   | 1.056776 | 0.290614 | 0.76078  |
| CR812472.1        | 0.698474 |              | 0.2.541282 | 0        | 1        | NA       |
| si:dkey-60d5.3    | 19.43197 | 0.05575441   | 0.465456   | 0.119785 | 0.904654 | 0.991581 |
| BX120006.1        | 0.087179 |              | 0.5.267649 | 0        | 1        | NA       |
| si:dkey-7j22.2    | 2.617451 | -3.606526557 | 1.411341   | -2.55539 | 0.010607 | 0.179908 |
| si:ch211-273k1.5  | 0.27882  |              | 0.4.700212 | 0        | 1        | NA       |
| CR293508.1        | 0.401666 | 0.104170968  | 2.890476   | 0.036039 | 0.971251 | NA       |
| CU927934.2        |          | 0 NA         | NA         | NA       | NA       | NA       |
| AL954669.1        | 0.736687 | 2.660403691  | 2.412025   | 1.102975 | 0.270038 | NA       |
| CR394545.1        | 8.883301 | -2.210380672 | 0.74574    | -2.96401 | 0.003037 | 0.090902 |
| znf1004           | 0.617996 |              | 0.2.832449 | 0        | 1        | NA       |
| si:ch211-108d22.1 | 1.179126 | -3.584021836 | 2.292514   | -1.56336 | 0.117968 | NA       |
| BX511075.1        | 0.294625 | -3.029200167 | 5.176305   | -0.58521 | 0.55841  | NA       |
| si:ch73-281n10.2  | 9908.317 | 0.041003671  | 0.154017   | 0.266228 | 0.790064 | 0.964274 |
| si:dkey-52d15.2   | 0.502068 |              | 0.4.715286 | 0        | 1        | NA       |
| CR790366.2        | 2.963162 | -0.168099142 | 1.12933    | -0.14885 | 0.881673 | 0.986908 |
| AL928927.1        | 0.181988 |              | 0.5.267649 | 0        | 1        | NA       |
| BX649442.2        | 5.658603 | -0.327724408 | 0.916333   | -0.35765 | 0.720607 | 0.947263 |
| si:dkey-56f14.4   | 181.7403 | 0.260942441  | 0.255318   | 1.022029 | 0.306767 | 0.772    |
| CR762407.2        | 0.841352 | -0.868144777 | 2.503569   | -0.34676 | 0.72877  | NA       |
| BX571737.1        |          | 0 NA         | NA         | NA       | NA       | NA       |
| si:dkey-27115.1   | 0.147561 | -1.710071829 | 5.238473   | -0.32644 | 0.744088 | NA       |
| si:dkey-33c14.3   | 764.7173 | -0.94517608  | 0.546276   | -1.73022 | 0.083591 | 0.485416 |
| AL928657.1        | 27.13464 | -0.65946093  | 0.367593   | -1.794   | 0.072814 | 0.458474 |
| AL935115.1        |          | 0 NA         | NA         | NA       | NA       | NA       |
| FP102921.1        | 0.073968 |              | 0.5.267649 | 0        | 1        | NA       |
| AL772382.1        | 11.03122 | 0.371875805  | 0.543181   | 0.684626 | 0.49358  | 0.877027 |
| FP102170.1        | 18.30858 | 0.06939278   | 0.437361   | 0.158663 | 0.873935 | 0.98385  |
| FP015862.1        | 0.060442 |              | 0.5.267649 | 0        | 1        | NA       |
| si:dkey-7i4.23    |          | 0 NA         | NA         | NA       | NA       | NA       |
| CR854927.3        |          | 0 NA         | NA         | NA       | NA       | NA       |
| BX957346.2        |          | 0 NA         | NA         | NA       | NA       | NA       |
| BX005242.1        | 0.189359 |              | 0.5.267649 | 0        | 1        | NA       |
| CU695222.1        | 0.087381 |              | 0.5.267649 | 0        | 1        | NA       |
| CR318658.1        |          | 0 NA         | NA         | NA       | NA       | NA       |
| si:dkey-77f5.11   | 50.36291 | 0.162825283  | 0.3432     | 0.474433 | 0.635191 | 0.924272 |
| CR848683.1        | 1.240727 | 1.282374251  | 1.54724    | 0.828814 | 0.40721  | NA       |
| CR545465.2        |          | 0 NA         | NA         | NA       | NA       | NA       |
| CR753876.1        | 107.4864 | -0.301321361 | 0.350254   | -0.86029 | 0.389628 | 0.827843 |
| si:ch211-191c10.3 | 1.576563 | 3.298973906  | 1.903948   | 1.732702 | 0.083149 | NA       |
| BX465205.1        | 0.163218 | 2.079549577  | 5.22636    | 0.397896 | 0.690707 | NA       |
| BX664705.1        | 0.049519 |              | 0.5.267649 | 0        | 1        | NA       |
| CR848742.1        | 0.08847  |              | 0.5.267649 | 0        | 1        | NA       |
| FP565432.1        | 4.329298 | 0.430290147  | 1.106492   | 0.388878 | 0.697366 | 0.942046 |
| CU459174.1        | 2.365597 | -2.065676496 | 1.44117    | -1.43333 | 0.151763 | 0.615406 |
| BX005254.3        | 10.14506 | 0.329334563  | 0.612897   | 0.537341 | 0.591032 | 0.909311 |
| BX324227.1        | 0.092101 |              | 0.5.267649 | 0        | 1        | NA       |
| si:dkey-7i4.11    | 5.56084  | 0.388825801  | 0.763346   | 0.50937  | 0.610493 | 0.915331 |
| CR954963.1        | 2.376942 | 1.825488252  | 1.427936   | 1.27841  | 0.201105 | 0.681045 |
| GDPGP1            | 30.76115 | 0.521097801  | 0.318481   | 1.636197 | 0.101798 | 0.528581 |
| CR944667.1        |          | 0 NA         | NA         | NA       | NA       | NA       |
| si:ch211-207n23.2 | 331.1097 | -0.483392344 | 0.254543   | -1.89906 | 0.057557 | 0.4139   |

|                   |          |              |            |          |          |          |
|-------------------|----------|--------------|------------|----------|----------|----------|
| BX294100.1        | 40.86574 | 0.899044483  | 0.278906   | 3.223467 | 0.001266 | 0.051937 |
| BX664738.1        | 0.403614 | -1.807681634 | 4.147845   | -0.43581 | 0.662973 | NA       |
| si:ch211-121j5.4  | 64.38356 | -0.533634635 | 0.592914   | -0.90002 | 0.368109 | 0.817272 |
| CU861891.1        | 4.686767 | 0.726301357  | 0.844297   | 0.860244 | 0.389655 | 0.827843 |
| CR385035.1        | 9.814607 | 0.089669264  | 0.533009   | 0.168232 | 0.866401 | 0.982582 |
| CR848746.1        | 9.628171 | -0.540073233 | 0.67329    | -0.80214 | 0.422471 | 0.843493 |
| BX936386.1        | 0.485256 | 0.746822993  | 3.068274   | 0.243402 | 0.807694 | NA       |
| BX005484.1        | 0.845057 |              | 0 2.485449 |          | 0        | 1 NA     |
| CR749752.1        | 0.176435 | 1.055370259  | 5.267649   | 0.200349 | 0.841207 | NA       |
| si:ch73-330k17.3  | 8.849768 | -0.340274148 | 0.88927    | -0.38264 | 0.701984 | 0.943292 |
| pcdh1a4           | 13.89489 | -0.091681891 | 0.548833   | -0.16705 | 0.867332 | 0.982582 |
| CR381579.1        |          | 0 NA         | NA         | NA       | NA       | NA       |
| CR388129.1        | 0.28898  |              | 0 5.267649 |          | 0        | 1 NA     |
| BX546459.1        | 0.104229 | -1.791411807 | 5.232816   | -0.34234 | 0.732094 | NA       |
| CR383662.6        | 9.664719 | -0.221840574 | 0.621649   | -0.35686 | 0.721198 | 0.947343 |
| BX927308.2        | 21.7965  | -0.351060465 | 0.494256   | -0.71028 | 0.47753  | 0.869292 |
| CR538726.1        | 10.62752 | 0.538182341  | 0.526084   | 1.022996 | 0.30631  | 0.771472 |
| si:dkey-7i4.21    |          | 0 NA         | NA         | NA       | NA       | NA       |
| defb13            | 5.355908 | -0.492766045 | 0.973388   | -0.50624 | 0.61269  | 0.915754 |
| CR848757.1        | 69.16111 | 0.09746001   | 0.457327   | 0.213108 | 0.831243 | 0.974908 |
| CU570976.1        | 1.530644 | 1.055423957  | 2.166519   | 0.487152 | 0.626151 | NA       |
| CU695073.1        | 0.633652 | -2.745348195 | 4.351576   | -0.63089 | 0.528115 | NA       |
| CR847799.1        |          | 0 NA         | NA         | NA       | NA       | NA       |
| si:ch211-15316.6  | 65.06083 | -0.249019438 | 0.481293   | -0.5174  | 0.604879 | 0.914985 |
| CU929037.2        | 0.46016  |              | 0 4.800285 |          | 0        | 1 NA     |
| FP101861.1        | 24.86818 | -0.098828119 | 0.318349   | -0.31044 | 0.756227 | 0.956532 |
| BX640398.1        | 0.401312 | 1.646145155  | 3.212441   | 0.512428 | 0.608351 | NA       |
| CU861453.1        | 48.51357 | 0.347625983  | 0.302231   | 1.150199 | 0.250062 | 0.729807 |
| si:dkey-28n18.9   | 134.2707 | -0.020491784 | 0.188037   | -0.10898 | 0.91322  | 0.99273  |
| FP236850.1        |          | 0 NA         | NA         | NA       | NA       | NA       |
| BX649398.1        | 0.980844 | -1.814720939 | 2.90238    | -0.62525 | 0.531805 | NA       |
| CR847531.1        | 531.9314 | 0.276962702  | 0.247339   | 1.119771 | 0.262811 | 0.740207 |
| CR392042.1        | 1.90582  | -3.242504587 | 1.928556   | -1.68131 | 0.092702 | NA       |
| BX120006.2        | 0.120883 |              | 0 5.267649 |          | 0        | 1 NA     |
| si:ch211-176124.4 | 40.78229 | 0.172601609  | 0.313703   | 0.550206 | 0.582178 | 0.90571  |
| BX000524.1        | 0.060442 |              | 0 5.267649 |          | 0        | 1 NA     |
| ulk2              | 956.5674 | -0.212764713 | 0.222673   | -0.9555  | 0.339324 | 0.795226 |
| BX324206.1        | 4.340446 | -1.301147985 | 1.290316   | -1.0084  | 0.313265 | 0.776663 |
| CR759882.1        | 0.191882 | 1.05535617   | 5.267649   | 0.200347 | 0.841209 | NA       |
| alkbh3            | 578.7569 | -0.087875011 | 0.263837   | -0.33307 | 0.739085 | 0.95338  |
| cox8b             | 302.7203 | -0.638433092 | 0.211771   | -3.01474 | 0.002572 | 0.082312 |
| CR381647.1        | 77.32151 | 0.311736962  | 0.362456   | 0.860068 | 0.389752 | 0.827843 |
| si:dkey-24p1.6    |          | 0 NA         | NA         | NA       | NA       | NA       |
| AL808121.1        | 0.053262 | 1.055396947  | 5.267649   | 0.200354 | 0.841203 | NA       |
| CR388029.1        | 1.003593 | -1.699911558 | 2.295016   | -0.7407  | 0.458877 | NA       |
| si:dkey-172k15.3  | 62.4526  | -0.307969343 | 0.241615   | -1.27463 | 0.20244  | 0.682855 |
| BX957355.1        | 0.502953 | -0.868141633 | 3.186701   | -0.27243 | 0.785294 | NA       |
| si:dkey-229e3.2   | 28.78448 | 0.240877322  | 0.320934   | 0.750552 | 0.452923 | 0.858256 |
| CT027582.1        | 0.283522 | -0.868134432 | 4.745832   | -0.18293 | 0.854856 | NA       |
| BX005079.1        | 0.043309 |              | 0 5.267649 |          | 0        | 1 NA     |
| AL954387.1        | 0.375372 | 1.858244586  | 4.3164     | 0.430508 | 0.666826 | NA       |
| CR854827.1        |          | 0 NA         | NA         | NA       | NA       | NA       |
| CR925728.2        | 0.209501 |              | 0 5.267649 |          | 0        | 1 NA     |
| prrr33            | 1959.88  | 0.016849546  | 0.23302    | 0.072309 | 0.942356 | 0.997371 |

|                   |          |              |          |          |          |          |
|-------------------|----------|--------------|----------|----------|----------|----------|
| si:dkey-79d12.6   | 2.478835 | 0.079158331  | 1.250605 | 0.063296 | 0.949531 | 0.99801  |
| CR847887.1        | 6.284057 | 1.179295967  | 0.758174 | 1.555442 | 0.119841 | 0.564602 |
| CR854827.2        | 0 NA     | NA           | NA       | NA       | NA       | NA       |
| si:dkey-234i14.12 | 0.132542 | 0            | 5.267649 | 0        | 1        | NA       |
| si:ch211-226h8.15 | 0.908488 | -2.353169444 | 2.188824 | -1.07508 | 0.282337 | NA       |
| ugt1b2            | 20.22687 | 1.275848563  | 0.931717 | 1.369352 | 0.170889 | 0.642777 |
| AL929435.1        | 0.060442 | 0            | 5.267649 | 0        | 1        | NA       |
| CT737162.2        | 58.74943 | -0.942387167 | 0.319908 | -2.94581 | 0.003221 | 0.093414 |
| si:ch73-147o17.1  | 329.3467 | -0.180658217 | 0.164177 | -1.10039 | 0.271163 | 0.747344 |
| BX005012.4        | 0.505127 | 0            | 3.631139 | 0        | 1        | NA       |
| hbba1             | 4.073387 | -2.87444738  | 1.443168 | -1.99176 | 0.046397 | 0.376263 |
| si:ch73-31d8.2    | 72.94542 | 0.05473115   | 0.342676 | 0.159717 | 0.873104 | 0.983537 |
| BX323076.1        | 3.262901 | -1.680687967 | 1.152384 | -1.45844 | 0.144718 | 0.603718 |
| BX120016.1        | 0.621035 | 3.076457663  | 3.34451  | 0.919853 | 0.35765  | NA       |
| CR457447.1        | 0.588718 | 2.07621036   | 4.547321 | 0.456579 | 0.647974 | NA       |
| zgc:174263        | 311.4798 | -0.085202563 | 0.124343 | -0.68522 | 0.493203 | 0.876787 |
| soga3a            | 0 NA     | NA           | NA       | NA       | NA       | NA       |
| BX322555.3        | 154.9856 | -0.0083724   | 0.23956  | -0.03495 | 0.97212  | 1        |
| si:dkey-117a8.2   | 0 NA     | NA           | NA       | NA       | NA       | NA       |
| BX537104.1        | 0.801334 | 1.055432194  | 2.309693 | 0.456958 | 0.647701 | NA       |
| si:dkey-42123.9   | 2.992693 | 0.223378595  | 1.041949 | 0.214385 | 0.830247 | 0.974908 |
| CR354429.1        | 0.154952 | -2.364821159 | 5.200714 | -0.45471 | 0.649317 | NA       |
| yeats2            | 52.30052 | 0.413264369  | 0.297258 | 1.390257 | 0.164451 | 0.633787 |
| si:dkey-77f5.13   | 40.75907 | -0.256444346 | 0.33736  | -0.76015 | 0.447165 | 0.856073 |
| si:ch211-270g19.5 | 97.55929 | -0.589678225 | 0.24772  | -2.38042 | 0.017293 | 0.232084 |
| BX908753.1        | 7.230185 | 1.227805338  | 0.642692 | 1.91041  | 0.05608  | 0.409255 |
| si:dkey-4c15.16   | 45.67448 | -0.216673673 | 0.34767  | -0.62322 | 0.533142 | 0.890978 |
| AL808129.1        | 98.21401 | -0.306562439 | 0.353501 | -0.86722 | 0.385823 | 0.826939 |
| CR925802.1        | 0 NA     | NA           | NA       | NA       | NA       | NA       |
| si:ch211-40k21.5  | 198.5311 | -0.167235592 | 0.155895 | -1.07275 | 0.283384 | 0.755095 |
| CR847898.2        | 17.75629 | -1.005453217 | 0.456581 | -2.20213 | 0.027656 | 0.29556  |
| AL954322.3        | 13.09537 | -2.456379588 | 0.775559 | -3.16724 | 0.001539 | 0.05933  |
| si:ch211-266k8.6  | 2.774895 | -0.568386836 | 1.133243 | -0.50156 | 0.615978 | 0.916365 |
| CU929145.2        | 44.70794 | 0.267865127  | 0.374014 | 0.716191 | 0.473874 | 0.869292 |
| si:ch211-222n22.1 | 7.97431  | 0.137898213  | 0.64846  | 0.212655 | 0.831596 | 0.974908 |
| CR405687.1        | 0.431263 | 0            | 3.177544 | 0        | 1        | NA       |
| CU571382.2        | 0 NA     | NA           | NA       | NA       | NA       | NA       |
| CR848759.1        | 0.507354 | 0            | 4.096455 | 0        | 1        | NA       |
| CU929145.3        | 0.183188 | 1.055363901  | 5.267649 | 0.200348 | 0.841208 | NA       |
| si:ch211-147g22.4 | 48.54524 | -0.09027339  | 1.36541  | -0.06611 | 0.947287 | 0.997371 |
| CR381689.1        | 1.51614  | 0.096235     | 1.560615 | 0.061665 | 0.95083  | NA       |
| CR352232.1        | 0.046941 | 0            | 5.267649 | 0        | 1        | NA       |
| CU856222.1        | 248.699  | 0.029070486  | 0.223497 | 0.130071 | 0.89651  | 0.98939  |
| zgc:174574        | 93.2451  | 0.018723178  | 0.201744 | 0.092806 | 0.926057 | 0.994815 |
| BX119902.3        | 0.44142  | 3.26325136   | 3.505953 | 0.930774 | 0.35197  | NA       |
| si:ch211-261d7.3  | 426.1121 | -0.034525533 | 0.115991 | -0.29766 | 0.765964 | 0.959993 |
| ANPEP             | 241.7533 | -0.968663946 | 0.227779 | -4.25265 | 2.11E-05 | 0.003003 |
| FP102892.1        | 0 NA     | NA           | NA       | NA       | NA       | NA       |
| BX323076.2        | 12.19091 | 0.736099785  | 0.618158 | 1.190795 | 0.233734 | 0.714749 |
| BX629344.1        | 151.3946 | -0.153710023 | 0.236524 | -0.64987 | 0.515776 | 0.886634 |
| CU855917.1        | 0.184203 | 0            | 5.267649 | 0        | 1        | NA       |
| s1c26a6           | 14.121   | 0.40530482   | 0.619653 | 0.654084 | 0.513058 | 0.886007 |
| CU855758.1        | 0.551168 | -0.380661876 | 2.747893 | -0.13853 | 0.889823 | NA       |
| BX571762.1        | 1.886753 | 1.575894524  | 1.4819   | 1.063428 | 0.287588 | NA       |

|                   |          |              |          |          |          |          |
|-------------------|----------|--------------|----------|----------|----------|----------|
| FP016018.3        | 0        | NA           | NA       | NA       | NA       | NA       |
| CR792422.2        | 3.114232 | -0.69290884  | 0.971377 | -0.71333 | 0.475644 | 0.869292 |
| flrt2             | 104.0709 | 0.382698362  | 0.242415 | 1.578688 | 0.114408 | 0.553523 |
| BX530017.1        | 0        | NA           | NA       | NA       | NA       | NA       |
| CR925755.1        | 0        | NA           | NA       | NA       | NA       | NA       |
| tbp12             | 0.694043 | -0.871329861 | 2.116333 | -0.41172 | 0.680547 | NA       |
| BX000358.1        | 0        | NA           | NA       | NA       | NA       | NA       |
| si:dkey-238d18.10 | 0.68315  | 0            | 2.898718 | 0        | 1        | NA       |
| BX901883.1        | 0        | NA           | NA       | NA       | NA       | NA       |
| zgc:193812        | 47.82499 | -0.411902826 | 0.334945 | -1.22976 | 0.218786 | 0.699596 |
| CT573316.1        | 0        | NA           | NA       | NA       | NA       | NA       |
| CR812470.2        | 0.789218 | 1.558175431  | 2.57086  | 0.606091 | 0.544454 | NA       |
| si:zfos-1714f5.3  | 2.246859 | -0.912527225 | 1.339422 | -0.68128 | 0.495691 | 0.87806  |
| BX927078.1        | 0        | NA           | NA       | NA       | NA       | NA       |
| CT027805.1        | 0.609359 | 0.110490628  | 2.33819  | 0.047255 | 0.96231  | NA       |
| si:dkey-276j7.3   | 6.598594 | -1.31264857  | 1.135543 | -1.15597 | 0.247695 | 0.728489 |
| BX649242.1        | 0.675517 | 2.911803424  | 2.425079 | 1.200704 | 0.229866 | NA       |
| CR848791.3        | 0.238803 | -2.293535501 | 5.204055 | -0.44072 | 0.659415 | NA       |
| BX005183.1        | 0        | NA           | NA       | NA       | NA       | NA       |
| si:dkey-81117.6   | 139.013  | 0.517625175  | 0.264606 | 1.956211 | 0.05044  | 0.39074  |
| si:ch211-14i3.2   | 5.854531 | 0            | 1.766246 | 0        | 1        | 1        |
| BX546473.1        | 0        | NA           | NA       | NA       | NA       | NA       |
| BX957270.1        | 0.147561 | -1.710071829 | 5.238473 | -0.32644 | 0.744088 | NA       |
| BX005060.1        | 0.063619 | 0            | 5.267649 | 0        | 1        | NA       |
| CR759826.1        | 0        | NA           | NA       | NA       | NA       | NA       |
| si:dkey-170g13.2  | 0.81717  | 1.055419063  | 2.836974 | 0.372023 | 0.709876 | NA       |
| CU571161.1        | 0        | NA           | NA       | NA       | NA       | NA       |
| CT573342.1        | 10.64436 | -0.405709093 | 0.532451 | -0.76197 | 0.44608  | 0.855403 |
| CT573316.2        | 3.084529 | -4.275416285 | 1.910603 | -2.23773 | 0.025239 | 0.282092 |
| CR759841.1        | 1.156841 | 0.194276116  | 2.060016 | 0.094308 | 0.924864 | NA       |
| CT583687.1        | 2.71408  | -5.074762908 | 1.692647 | -2.99812 | 0.002716 | 0.085055 |
| BX000434.1        | 0.050723 | -0.86807634  | 5.267649 | -0.16479 | 0.869106 | NA       |
| slc9a1b           | 87.12049 | -0.603262496 | 0.326912 | -1.84534 | 0.064988 | 0.434945 |
| si:ch211-33e4.2   | 11.28706 | 0.126604864  | 0.607693 | 0.208337 | 0.834966 | 0.975994 |
| CR847994.1        | 33.33939 | 0.134149307  | 0.313238 | 0.428266 | 0.668457 | 0.933086 |
| AL845550.1        | 0.232264 | 0            | 5.267649 | 0        | 1        | NA       |
| AL772300.1        | 7.662712 | 0.23323485   | 0.7779   | 0.299826 | 0.76431  | 0.959228 |
| CR387932.1        | 0.327635 | 2.505626164  | 5.20297  | 0.481576 | 0.630107 | NA       |
| AL935186.2        | 0.321502 | -0.794332909 | 3.91497  | -0.2029  | 0.839216 | NA       |
| ten1              | 78.72057 | 0.36139968   | 0.359861 | 1.004275 | 0.315246 | 0.777834 |
| CR854965.2        | 0.09854  | -0.868089684 | 5.267649 | -0.1648  | 0.869104 | NA       |
| BX649628.1        | 0.396775 | 0.635061758  | 4.207024 | 0.150953 | 0.880013 | NA       |
| si:ch211-147g22.7 | 6.938305 | 0.91568637   | 0.7693   | 1.190286 | 0.233934 | 0.71479  |
| BX324164.3        | 50.26301 | 0.258785031  | 0.356071 | 0.726779 | 0.467361 | 0.86616  |
| CT027551.1        | 0.101247 | 1.854150541  | 5.241768 | 0.353726 | 0.723544 | NA       |
| BX901883.2        | 41.12111 | 0.326420921  | 0.527893 | 0.618346 | 0.536347 | 0.892371 |
| CU638693.3        | 0.046941 | 0            | 5.267649 | 0        | 1        | NA       |
| BX279523.3        | 1.876378 | 1.025199575  | 1.356859 | 0.755568 | 0.449908 | NA       |
| CR790363.1        | 0.401923 | 0            | 3.713601 | 0        | 1        | NA       |
| CU655820.1        | 2.17914  | -3.078585214 | 1.682258 | -1.83003 | 0.067245 | NA       |
| CU896541.1        | 16.68316 | -0.214360846 | 0.508247 | -0.42176 | 0.673197 | 0.93414  |
| si:dkey-244a7.1   | 56.42802 | -0.08405821  | 0.255447 | -0.32906 | 0.742108 | 0.954329 |
| FP017274.1        | 55.6009  | 0.294161958  | 0.354822 | 0.829041 | 0.407081 | 0.835278 |
| mcf2b             | 19.82645 | -0.59735669  | 0.409317 | -1.4594  | 0.144456 | 0.603539 |

|                   |          |              |            |          |          |          |
|-------------------|----------|--------------|------------|----------|----------|----------|
| si:ch211-139d20.3 | 31.98432 | -1.056891108 | 0.387815   | -2.72525 | 0.006425 | 0.135464 |
| ftr90             | 14.05303 | 0.848525085  | 0.605114   | 1.402256 | 0.160839 | 0.627788 |
| si:dkey-108k21.7  | 24.67676 | -0.154553799 | 0.482379   | -0.3204  | 0.748666 | 0.955074 |
| BX248418.2        | 0.13271  |              | 0 5.267649 | 0        | 1 NA     |          |
| CR790366.3        | 0.342138 | 1.631053342  | 4.379444   | 0.372434 | 0.70957  | NA       |
| CR387933.1        | 0.510368 | -1.774014312 | 2.717375   | -0.65284 | 0.513859 | NA       |
| CR936416.1        | 0.501458 | -0.868136423 | 2.848739   | -0.30474 | 0.760561 | NA       |
| CR812472.2        | 0 NA     |              | NA         | NA       | NA       | NA       |
| CR382363.1        | 5.080899 | -1.427024364 | 1.313861   | -1.08613 | 0.277421 | 0.751426 |
| BX005183.2        | 0.141849 | -0.868102566 | 5.267649   | -0.1648  | 0.869102 | NA       |
| BX465853.1        | 0 NA     |              | NA         | NA       | NA       | NA       |
| AL929182.1        | 0.151871 | 2.436401064  | 5.206324   | 0.46797  | 0.639806 | NA       |
| si:ch211-15d5.12  | 94.20731 | -0.076207139 | 0.218417   | -0.34891 | 0.72716  | 0.949095 |
| CR854907.1        | 1.532813 | -0.31320319  | 1.528059   | -0.20497 | 0.837597 | NA       |
| FP101990.1        | 0 NA     |              | NA         | NA       | NA       | NA       |
| BX571853.1        | 2.533746 | -2.271614508 | 1.397478   | -1.62551 | 0.104054 | 0.532096 |
| BX530407.4        | 3.949071 | -0.597926072 | 1.06539    | -0.56123 | 0.574642 | 0.904516 |
| si:dkey-33c14.7   | 7.259917 | 0.019721354  | 0.627709   | 0.031418 | 0.974936 | 1        |
| BX465208.1        | 0 NA     |              | NA         | NA       | NA       | NA       |
| BX897720.1        | 0 NA     |              | NA         | NA       | NA       | NA       |
| si:dkey-77f5.6    | 51.66611 | -0.328165704 | 0.284382   | -1.15396 | 0.248517 | 0.728723 |
| BX005459.1        | 0 NA     |              | NA         | NA       | NA       | NA       |
| BX539313.1        | 1.412233 |              | 0 2.177035 | 0        | 1 NA     |          |
| ugt5a4            | 2.980594 | -0.475085678 | 1.324239   | -0.35876 | 0.719774 | 0.94694  |
| si:ch73-288o11.4  | 1.362008 | 2.083154999  | 1.600405   | 1.301643 | 0.193039 | NA       |
| FP340271.1        | 0.189354 | 1.055370259  | 5.267649   | 0.200349 | 0.841207 | NA       |
| BX470254.1        | 0.04222  |              | 0 5.267649 | 0        | 1 NA     |          |
| BX511308.1        | 1.671171 | 0.612350715  | 1.390144   | 0.440495 | 0.659579 | NA       |
| si:dkey-273g18.1  | 2.045657 | 2.026363748  | 1.687818   | 1.200582 | 0.229913 | NA       |
| si:dkey-81e3.2    | 18.49781 | -0.267594618 | 0.505173   | -0.52971 | 0.596314 | 0.911626 |
| BX547992.2        | 0 NA     |              | NA         | NA       | NA       | NA       |
| BX548045.1        | 0.069091 |              | 0 5.267649 | 0        | 1 NA     |          |
| CU571319.1        | 2.32828  | 1.100912734  | 1.329974   | 0.82777  | 0.407801 | 0.835802 |
| AL928870.1        | 0.143468 | 1.854137197  | 5.241768   | 0.353724 | 0.723546 | NA       |
| si:ch211-106e7.2  | 70.61456 | -0.235706705 | 0.27235    | -0.86546 | 0.386788 | 0.827592 |
| lrrc53            | 3.471578 | 2.900991204  | 1.357807   | 2.136527 | 0.032636 | 0.319477 |
| si:ch73-306e8.2   | 97.0504  | -1.502458621 | 0.555236   | -2.70598 | 0.00681  | 0.139148 |
| CR847793.1        | 0.927219 | 4.117133064  | 2.089141   | 1.97073  | 0.048755 | NA       |
| si:ch211-63b16.3  | 10.65025 | -0.890796501 | 0.780927   | -1.14069 | 0.253999 | 0.733071 |
| CR786571.4        | 0.623697 | 0.093646477  | 3.456595   | 0.027092 | 0.978386 | NA       |
| si:ch73-250a16.5  | 41.3245  | -0.201847457 | 0.336202   | -0.60038 | 0.548256 | 0.896644 |
| si:dkeyp-50b9.1   | 5.250774 | -0.512797077 | 0.819644   | -0.62563 | 0.531555 | 0.890835 |
| CU929360.1        | 3.399792 | -0.502357694 | 1.511414   | -0.33238 | 0.739605 | 0.953573 |
| CU638870.1        | 50.61734 | -1.289635856 | 0.326671   | -3.94781 | 7.89E-05 | 0.00771  |
| BX569790.2        | 0 NA     |              | NA         | NA       | NA       | NA       |
| BX470242.2        | 0 NA     |              | NA         | NA       | NA       | NA       |
| BX005461.3        | 6.942551 | -0.105638882 | 0.598014   | -0.17665 | 0.859784 | 0.980066 |
| CR392003.1        | 4.837282 | -0.764147539 | 0.772656   | -0.98899 | 0.322669 | 0.782525 |
| CT027718.1        | 1.116242 | -0.262392876 | 1.920271   | -0.13664 | 0.891312 | NA       |
| BX649398.2        | 8.048636 | 1.025229926  | 0.730263   | 1.403919 | 0.160343 | 0.626923 |
| CU928222.1        | 0.060442 |              | 0 5.267649 | 0        | 1 NA     |          |
| AL928908.1        | 0 NA     |              | NA         | NA       | NA       | NA       |
| BX510360.1        | 0 NA     |              | NA         | NA       | NA       | NA       |
| CR788230.2        | 0.084441 |              | 0 5.267649 | 0        | 1 NA     |          |



|                   |          |              |            |          |          |          |   |
|-------------------|----------|--------------|------------|----------|----------|----------|---|
| CU855930.1        | 19.25999 | -0.141338147 | 0.434883   | -0.325   | 0.745179 | 0.954956 |   |
| si:dkey-77f5.15   | 8.338203 | -0.179167504 | 0.554983   | -0.32283 | 0.746821 | 0.955074 |   |
| si:dkey-195m11.8  | 495.2247 | -0.018647294 | 0.223055   | -0.0836  | 0.933375 | 0.996472 |   |
| si:ch211-66i15.5  | 0.844374 | -0.355947494 | 2.557797   | -0.13916 | 0.889322 | NA       |   |
| BX890600.1        | 0.561775 | 3.502063332  | 2.782439   | 1.258631 | 0.208164 | NA       |   |
| CR925728.3        | 0.719739 | -3.091452451 | 2.54531    | -1.21457 | 0.224531 | NA       |   |
| CR381647.2        | 0.194106 |              | 0 5.267649 |          | 0        | 1 NA     |   |
| chmp6a            | 4.552366 | -0.552436043 | 1.200184   | -0.46029 | 0.645306 | 0.926728 |   |
| CU929070.1        | 175.9634 | -0.232020464 | 0.183703   | -1.26302 | 0.206583 | 0.688906 |   |
| si:ch211-225b7.5  | 49.85116 | 0.119433703  | 0.323652   | 0.369018 | 0.712114 | 0.945821 |   |
| BX539313.2        | 3.270075 | -0.568184404 | 0.974534   | -0.58303 | 0.559872 | 0.899668 |   |
| CR931782.1        | 0.657451 |              | 0 3.748456 |          | 0        | 1 NA     |   |
| coa3b             | 71.61037 | -1.360611587 | 0.299003   | -4.55049 | 5.35E-06 | 0.001127 |   |
| BX119963.2        | 6.33216  | 0.651291456  | 0.84646    | 0.769429 | 0.441638 | 0.853157 |   |
| si:dkey-208m12.3  |          | 0 NA         | NA         | NA       | NA       | NA       |   |
| si:dkey-125e8.3   | 9.830665 |              | 0 1.968384 |          | 0        | 1        | 1 |
| CU929339.2        |          | 0 NA         | NA         | NA       | NA       | NA       |   |
| BX957326.3        | 3.685156 | 2.77564849   | 1.173434   | 2.365408 | 0.01801  | 0.236966 |   |
| CR788249.2        | 0.084441 |              | 0 5.267649 |          | 0        | 1 NA     |   |
| trmt61b           | 145.1375 | -0.214511136 | 0.237165   | -0.90448 | 0.365741 | 0.815695 |   |
| CU207343.2        | 0.501884 | -1.787388385 | 3.165841   | -0.56459 | 0.572356 | NA       |   |
| CU693502.1        | 132.3348 | -0.005193094 | 0.176585   | -0.02941 | 0.976539 |          | 1 |
| si:ch73-1f23.1    | 2.033164 | 0.537728818  | 1.481108   | 0.363058 | 0.716561 | NA       |   |
| BX927362.1        | 0.753691 | -1.729949368 | 2.320458   | -0.74552 | 0.455957 | NA       |   |
| FP015862.2        | 5.619181 | -2.09824648  | 1.365871   | -1.5362  | 0.12449  | 0.572138 |   |
| BX004999.2        |          | 0 NA         | NA         | NA       | NA       | NA       |   |
| zgc:113340        | 82.36076 | 0.046897608  | 0.219053   | 0.214092 | 0.830475 | 0.974908 |   |
| CR396585.1        | 0.188628 | 1.854125201  | 5.241768   | 0.353721 | 0.723548 | NA       |   |
| si:dkey-4c2.11    | 4.544119 | 1.66018416   | 1.128509   | 1.47113  | 0.141256 | 0.599899 |   |
| qkia              | 2477.865 | -0.009040641 | 0.12845    | -0.07038 | 0.943889 | 0.997371 |   |
| si:dkey-263j23.1  | 9.054338 | -1.886742862 | 0.817583   | -2.30771 | 0.021015 | 0.257618 |   |
| si:dkey-77f5.11   | 34.02694 | 0.617485466  | 0.324111   | 1.905168 | 0.056758 | 0.411608 |   |
| si:ch211-213d14.2 | 125.9647 | 0.043273464  | 0.161523   | 0.267909 | 0.78877  | 0.963568 |   |
| cfap99            | 17.517   | 0.465490399  | 0.492973   | 0.94425  | 0.345042 | 0.79837  |   |
| si:ch211-175f11.5 | 2.24631  | -0.828106776 | 1.599173   | -0.51783 | 0.604574 | 0.914985 |   |
| si:ch73-390p7.2   | 132.1372 | 0.097328588  | 0.182343   | 0.533766 | 0.593503 | 0.910427 |   |
| AL928908.2        |          | 0 NA         | NA         | NA       | NA       | NA       |   |
| ugtlbl            | 295.6109 | -0.086753295 | 0.15926    | -0.54473 | 0.585942 | 0.906655 |   |
| AL772314.1        | 153.967  | 0.564781443  | 0.347721   | 1.624239 | 0.104325 | 0.532541 |   |
| si:dkey-148h10.5  | 23.43865 | -0.84901373  | 0.416552   | -2.0382  | 0.04153  | 0.355733 |   |
| CR382327.2        | 21.76507 | 0.164144654  | 0.446885   | 0.367308 | 0.713389 | 0.945821 |   |
| CU467639.1        | 0.543156 | -1.276037138 | 3.383132   | -0.37718 | 0.706043 | NA       |   |
| si:dkey-6e2.2     | 298.3169 | -0.086845304 | 0.138362   | -0.62767 | 0.530222 | 0.890545 |   |
| BX511253.1        | 0.356852 | -0.85733973  | 3.347209   | -0.25614 | 0.797846 | NA       |   |
| CR450813.2        |          | 0 NA         | NA         | NA       | NA       | NA       |   |
| BX511311.1        |          | 0 NA         | NA         | NA       | NA       | NA       |   |
| si:dkey-111k8.3   | 134.8224 | -0.206485022 | 0.289974   | -0.71208 | 0.476414 | 0.869292 |   |
| CU694807.1        | 0.073968 |              | 0 5.267649 |          | 0        | 1 NA     |   |
| si:ch73-288o11.5  | 211.748  | -0.32476631  | 0.653646   | -0.49685 | 0.619293 | 0.917397 |   |
| CR626907.3        | 299.235  | 0.931311316  | 0.294201   | 3.165558 | 0.001548 | 0.059575 |   |
| DNAL1 (1 of many) |          | 0 NA         | NA         | NA       | NA       | NA       |   |
| BX571780.1        | 0.353459 | 1.05539299   | 3.833035   | 0.275341 | 0.783054 | NA       |   |
| BX324164.4        | 74.12602 | -0.28977736  | 0.291461   | -0.99422 | 0.320114 | 0.780709 |   |
| CR848836.1        | 0.059954 | 1.055396947  | 5.267649   | 0.200354 | 0.841203 | NA       |   |

|                    |          |              |          |          |          |          |
|--------------------|----------|--------------|----------|----------|----------|----------|
| si:dkey-245f22.3   | 10.33616 | 0.429564687  | 0.690521 | 0.622088 | 0.533884 | 0.891181 |
| BX890629.1         | 1.578445 | 0.904628344  | 1.564244 | 0.578317 | 0.56305  | NA       |
| BX649529.1         | 43.06652 | 0.042266253  | 0.287225 | 0.147154 | 0.883011 | 0.986908 |
| CT573383.1         | 35.35946 | -1.35098698  | 0.530923 | -2.5446  | 0.01094  | 0.182182 |
| CR854989.1         | 1.842822 | -0.103130507 | 1.27243  | -0.08105 | 0.935402 | NA       |
| CR751227.1         | 1.146042 | -2.116301646 | 1.736904 | -1.21843 | 0.223059 | NA       |
| BX323016.1         | 2.035913 | 0.281849316  | 1.161648 | 0.242629 | 0.808293 | NA       |
| BX537110.1         | 17.88643 | 1.82709071   | 0.625581 | 2.92063  | 0.003493 | 0.097752 |
| AL935300.2         | 0.2617   | 0            | 5.267649 | 0        | 1        | NA       |
| si:dkey-111k8.5    | 44.53989 | -0.272306686 | 0.279343 | -0.97481 | 0.329654 | 0.788    |
| si:ch73-364h19.1   | 31.27661 | 0.112036991  | 0.449323 | 0.249346 | 0.803093 | 0.968418 |
| BX005129.2         | 4.175851 | 1.661230734  | 0.957291 | 1.735345 | 0.08268  | 0.483014 |
| AL928724.1         | 0.738387 | -0.8681478   | 3.377995 | -0.257   | 0.797178 | NA       |
| CU466287.2         | 33.88641 | 0.25541129   | 0.343317 | 0.743951 | 0.456906 | 0.860832 |
| ms4a17a.5          | 3.230178 | -1.764580106 | 1.746797 | -1.01018 | 0.312409 | 0.776164 |
| si:dkey-7j14.5     | 585.7456 | 0.20849502   | 0.236903 | 0.880087 | 0.378812 | 0.823136 |
| CR847983.1         | 0        | NA           | NA       | NA       | NA       | NA       |
| xkr5b              | 59.61047 | 0.059726808  | 0.272587 | 0.219111 | 0.826564 | 0.973383 |
| pimr26             | 0        | NA           | NA       | NA       | NA       | NA       |
| si:ch73-93k15.5    | 0.274222 | -1.451411383 | 5.198538 | -0.2792  | 0.780094 | NA       |
| BX571880.1         | 294.3826 | 0.222414707  | 0.246166 | 0.903514 | 0.366253 | 0.81589  |
| si:ch211-252f13.5  | 53.46609 | -1.347500373 | 0.276188 | -4.87893 | 1.07E-06 | 0.000308 |
| CR848844.1         | 13.76228 | 0.089850903  | 0.551508 | 0.162919 | 0.870582 | 0.983365 |
| wwpl               | 1397.859 | 0.057034772  | 0.088062 | 0.647666 | 0.517201 | 0.887148 |
| CR627496.1         | 0.645149 | 1.932482802  | 2.329852 | 0.829444 | 0.406853 | NA       |
| si:ch211-39f2.3    | 4.41986  | 0.503007567  | 1.291597 | 0.389446 | 0.696946 | 0.94198  |
| pimr62             | 0        | NA           | NA       | NA       | NA       | NA       |
| CU137680.1         | 0.511897 | -3.729962545 | 3.281832 | -1.13655 | 0.255727 | NA       |
| CU633855.1         | 0        | NA           | NA       | NA       | NA       | NA       |
| cbx6b              | 43.03651 | -0.156496087 | 0.310757 | -0.5036  | 0.614545 | 0.915998 |
| si:ch211-40k21.9   | 103.9756 | -0.212816791 | 0.226484 | -0.93965 | 0.347395 | 0.800035 |
| AL954861.1         | 0.638645 | -1.522574232 | 3.284924 | -0.4635  | 0.643003 | NA       |
| CR450727.1         | 37.15662 | -0.249882577 | 0.38593  | -0.64748 | 0.517321 | 0.887148 |
| CT573103.1         | 0.107013 | -1.826650979 | 5.230461 | -0.34923 | 0.726914 | NA       |
| si:dkey-7i4.15     | 41.79307 | -0.117339153 | 0.321419 | -0.36507 | 0.715062 | 0.945823 |
| AL772362.1         | 0.291846 | 0            | 5.267649 | 0        | 1        | NA       |
| BX908750.1         | 38.29452 | 0.791032169  | 0.4791   | 1.65108  | 0.098722 | 0.521402 |
| cyp8b2             | 5.448531 | -0.50322252  | 1.092828 | -0.46048 | 0.645174 | 0.926728 |
| BX511311.2         | 0.04222  | 0            | 5.267649 | 0        | 1        | NA       |
| cyp8b3             | 7.875548 | 0.498664988  | 0.771721 | 0.646173 | 0.518167 | 0.887148 |
| BX511311.3         | 45.52545 | 0.31138591   | 0.485925 | 0.640811 | 0.521645 | 0.887551 |
| CR847503.2         | 0        | NA           | NA       | NA       | NA       | NA       |
| BX005083.1         | 0.160481 | 0            | 5.267649 | 0        | 1        | NA       |
| si:ch211-151m7.6   | 0.997239 | -0.922006588 | 1.772938 | -0.52004 | 0.603033 | NA       |
| si:ch73-190f9.4    | 0.092101 | 0            | 5.267649 | 0        | 1        | NA       |
| BX072576.3         | 0        | NA           | NA       | NA       | NA       | NA       |
| si:ch211-256e16.10 | 0        | NA           | NA       | NA       | NA       | NA       |
| si:dkey-208c12.2   | 10.82059 | 0.391494881  | 0.635742 | 0.615808 | 0.538022 | 0.892498 |
| CR391977.1         | 0.270512 | 1.055379111  | 4.73504  | 0.222887 | 0.823623 | NA       |
| FP102921.2         | 0.410996 | -1.821717162 | 3.735268 | -0.48771 | 0.625757 | NA       |
| si:dkey-114124.2   | 5.113301 | -2.799809934 | 1.460647 | -1.91683 | 0.05526  | 0.406983 |
| ptprt              | 8.626894 | 1.662132176  | 1.019816 | 1.629835 | 0.103136 | 0.530217 |
| si:ch211-107e6.5   | 12.16699 | 0.321597156  | 0.803573 | 0.400209 | 0.689003 | 0.93924  |
| CR847898.3         | 4.295284 | 0.402195375  | 0.897771 | 0.447993 | 0.654158 | 0.929434 |

|                   |          |              |            |          |          |          |   |
|-------------------|----------|--------------|------------|----------|----------|----------|---|
| CU914602.1        | 21.46517 | 0.224034534  | 0.374019   | 0.598993 | 0.549178 | 0.897092 |   |
| zgc:92912         | 55.37635 | 1.061288929  | 0.404929   | 2.620927 | 0.008769 | 0.160701 |   |
| BX294100.2        | 0.129925 |              | 0 5.267649 |          | 0        | 1 NA     |   |
| CT573048.1        | 1.65315  | -3.59256157  | 1.68245    | -2.13532 | 0.032735 | NA       |   |
| BX663519.1        | 6.286967 | 0.340192643  | 0.753202   | 0.451662 | 0.651512 | 0.928562 |   |
| CR376740.2        | 0.440994 |              | 0 4.202794 |          | 0        | 1 NA     |   |
| arfgap3           | 321.516  | -0.116905128 | 0.189711   | -0.61623 | 0.537744 | 0.892498 |   |
| si:dkey-238d18.6  | 0 NA     |              | NA         | NA       | NA       | NA       |   |
| CR548634.2        | 2.457531 | 0.567184462  | 1.464422   | 0.38731  | 0.698527 | 0.942433 |   |
| BX664750.3        | 0 NA     |              | NA         | NA       | NA       | NA       |   |
| si:dkey-175d9.1   | 0.046941 |              | 0 5.267649 |          | 0        | 1 NA     |   |
| proser3           | 76.50094 | -0.013811319 | 0.189994   | -0.07269 | 0.94205  | 0.997371 |   |
| si:dkey-40c23.1   | 10.81472 | -0.93935543  | 0.765015   | -1.22789 | 0.219488 | 0.700391 |   |
| BX548024.1        | 0.589917 | 3.694571166  | 3.277129   | 1.127381 | 0.259582 | NA       |   |
| FP236741.1        | 5.366805 | -0.131077983 | 0.780801   | -0.16788 | 0.866681 | 0.982582 |   |
| BX682556.1        | 3.794673 | -0.185544702 | 0.928346   | -0.19987 | 0.841586 | 0.97643  |   |
| tac3b             | 26.45354 | -0.145227864 | 0.549595   | -0.26425 | 0.791591 | 0.964817 |   |
| BX088688.3        | 1.068007 |              | 0 2.609806 |          | 0        | 1 NA     |   |
| CR925804.1        | 1.143609 | -1.797625366 | 2.108387   | -0.85261 | 0.393877 | NA       |   |
| si:ch211-66h3.4   | 0.981764 | 0.714365058  | 1.98083    | 0.360639 | 0.718369 | NA       |   |
| CT868708.1        | 0.636317 | 0.065054852  | 2.334079   | 0.027872 | 0.977764 | NA       |   |
| BX072559.1        | 0.639715 | -0.909301596 | 2.368625   | -0.38389 | 0.701057 | NA       |   |
| CU571382.3        | 0 NA     |              | NA         | NA       | NA       | NA       |   |
| BX465205.2        | 0.36806  | 1.921543831  | 5.236909   | 0.366923 | 0.713676 | NA       |   |
| CU137681.1        | 23.98147 | -1.755022259 | 0.677211   | -2.59154 | 0.009555 | 0.168223 |   |
| tmem82            | 127.1477 | -0.371918256 | 0.224946   | -1.65337 | 0.098257 | 0.521076 |   |
| BX324166.1        | 0 NA     |              | NA         | NA       | NA       | NA       |   |
| CU929312.1        | 6.41316  | -0.975402871 | 0.989984   | -0.98527 | 0.324491 | 0.783308 |   |
| BX005183.3        | 104.648  | 0.757407994  | 0.482537   | 1.569638 | 0.116499 | 0.557474 |   |
| CU896691.2        | 3.754679 | 1.188438948  | 1.018531   | 1.166817 | 0.243284 | 0.724437 |   |
| si:dkey-24111.2   | 0 NA     |              | NA         | NA       | NA       | NA       |   |
| igfn1.3           | 2451.407 | 0.485608735  | 0.180146   | 2.695639 | 0.007025 | 0.141889 |   |
| si:ch211-108d22.2 | 217.7538 | 1.817054706  | 0.283429   | 6.410972 | 1.45E-10 | 1.40E-07 |   |
| BX908796.1        | 0.707918 | -2.327536014 | 3.094285   | -0.7522  | 0.451928 | NA       |   |
| si:ch211-178n15.1 | 148.6694 | 0.006114462  | 0.196762   | 0.031075 | 0.975209 |          | 1 |
| FP102073.1        | 0.270999 | 2.436374376  | 5.206324   | 0.467964 | 0.63981  | NA       |   |
| BX571794.1        | 0.106895 | 1.055383603  | 5.267649   | 0.200352 | 0.841205 | NA       |   |
| si:ch211-210b2.1  | 152.4658 | 0.021680861  | 0.236353   | 0.091731 | 0.926912 | 0.994883 |   |
| BX936342.1        | 0.347674 | 2.070609412  | 3.834877   | 0.539942 | 0.589237 | NA       |   |
| si:dkey-42p14.6   | 0 NA     |              | NA         | NA       | NA       | NA       |   |
| CU137681.2        | 0 NA     |              | NA         | NA       | NA       | NA       |   |
| BX323450.1        | 0 NA     |              | NA         | NA       | NA       | NA       |   |
| CR762400.1        | 0.36899  |              | 0 4.411156 |          | 0        | 1 NA     |   |
| si:dkey-7i4.14    | 8.541687 | 0.285199023  | 0.739217   | 0.385812 | 0.699636 | 0.942499 |   |
| FP102794.2        | 0.049519 |              | 0 5.267649 |          | 0        | 1 NA     |   |
| si:ch211-282b22.1 | 396.6014 | -0.438846984 | 0.244394   | -1.79566 | 0.072549 | 0.457864 |   |
| BX005101.1        | 0 NA     |              | NA         | NA       | NA       | NA       |   |
| CU306817.1        | 3.46316  | 1.466243311  | 1.014539   | 1.445231 | 0.148393 | 0.60973  |   |
| wu:fb18f06        | 1154.55  | -0.224874797 | 0.236122   | -0.95237 | 0.34091  | 0.795603 |   |
| AL928908.3        | 5.319608 | 0.829325025  | 1.204764   | 0.688371 | 0.491219 | 0.875595 |   |
| si:ch211-246i5.5  | 174.4834 | 0.126355071  | 0.177612   | 0.71141  | 0.47683  | 0.869292 |   |
| CR848661.1        | 0.094182 | -0.868089684 | 5.267649   | -0.1648  | 0.869104 | NA       |   |
| si:ch73-265h17.4  | 6.112625 | -0.472409798 | 0.881198   | -0.5361  | 0.59189  | 0.909603 |   |
| BX120006.3        | 0.262372 | 0.093661053  | 4.135387   | 0.022649 | 0.981931 | NA       |   |

|                   |          |              |          |          |          |          |    |
|-------------------|----------|--------------|----------|----------|----------|----------|----|
| CR589941.1        | 0.043308 |              | 0        | 5.267649 | 0        | 1        | NA |
| CU469568.3        | 0.114252 |              | 0        | 5.267649 | 0        | 1        | NA |
| CU138509.1        | 1.989001 | -0.104087844 | 1.436518 | -0.07246 | 0.942237 | NA       |    |
| CU571091.1        | 0.087179 |              | 0        | 5.267649 | 0        | 1        | NA |
| BX936393.1        | 0.753303 |              | 0        | 2.866228 | 0        | 1        | NA |
| BX511021.2        | 11.72609 | -0.779504576 | 0.541485 | -1.43957 | 0.149989 | 0.613319 |    |
| si:dkey-35i13.1   | 459.6809 | 0.291589671  | 0.233395 | 1.249338 | 0.211542 | 0.693044 |    |
| FP243382.1        | 0.172567 | 1.854137197  | 5.241768 | 0.353724 | 0.723546 | NA       |    |
| atg2b             | 27.90328 | 0.641999135  | 0.409738 | 1.566852 | 0.117149 | 0.558278 |    |
| tgm8              | 0.717438 | -0.778337603 | 2.755301 | -0.28249 | 0.77757  | NA       |    |
| si:dkey-234i14.2  | 61.16441 | -0.172347936 | 0.412088 | -0.41823 | 0.675778 | 0.935422 |    |
| si:dkey-23k10.3   | 31.42471 | -0.415505198 | 0.411788 | -1.00903 | 0.312962 | 0.776457 |    |
| CR556709.1        | 0.21483  | 1.055364289  | 5.092479 | 0.20724  | 0.835823 | NA       |    |
| CR381579.2        | 0.084441 |              | 0        | 5.267649 | 0        | 1        | NA |
| si:dkey-7i4.16    | 10.21538 | -0.501035079 | 0.757587 | -0.66136 | 0.508384 | 0.883268 |    |
| BX001030.2        |          | 0 NA         | NA       | NA       | NA       | NA       |    |
| BX936406.2        | 0.262472 | 0.960394109  | 4.787858 | 0.20059  | 0.84102  | NA       |    |
| trappc2           | 501.1275 | -0.018744126 | 0.146612 | -0.12785 | 0.898269 | 0.990199 |    |
| BX511124.1        |          | 0 NA         | NA       | NA       | NA       | NA       |    |
| tesmin            | 1.508377 | 0.450046128  | 1.779416 | 0.252918 | 0.800332 | NA       |    |
| BX324206.2        | 166.1374 | 0.128471468  | 0.264108 | 0.486436 | 0.626658 | 0.920665 |    |
| si:ch211-235m3.10 | 48.01838 | -0.118049391 | 0.392123 | -0.30105 | 0.763375 | 0.958926 |    |
| CU076099.1        | 14.26507 | 0.552035947  | 0.459887 | 1.200373 | 0.229994 | 0.711763 |    |
| BX569785.1        | 5.403746 | -0.488501899 | 0.703691 | -0.6942  | 0.487557 | 0.873291 |    |
| si:ch211-13912.1  | 0.340457 | -1.789608901 | 3.894807 | -0.45949 | 0.645885 | NA       |    |
| BX005048.1        | 5.615151 | -0.99601514  | 1.240786 | -0.80273 | 0.422131 | 0.843389 |    |
| CR381579.3        |          | 0 NA         | NA       | NA       | NA       | NA       |    |
| FP016235.1        | 6.325724 | 0.217854352  | 0.822321 | 0.264926 | 0.791066 | 0.964766 |    |
| CU633978.1        | 0.132469 |              | 0        | 5.267649 | 0        | 1        | NA |
| CU207301.2        | 0.129927 |              | 0        | 5.267649 | 0        | 1        | NA |
| CR450824.1        | 0.701204 | -2.332503037 | 2.155762 | -1.08199 | 0.279259 | NA       |    |
| ftr90             | 2.644316 | 0.526481653  | 1.451938 | 0.362606 | 0.716899 | 0.94627  |    |
| si:ch211-241f5.3  | 16.14028 | -0.430810345 | 0.598728 | -0.71954 | 0.471807 | 0.868289 |    |
| si:ch211-244k5.1  | 0.183043 |              | 0        | 5.267649 | 0        | 1        | NA |
| CR383683.1        |          | 0 NA         | NA       | NA       | NA       | NA       |    |
| sptbn5            | 118.551  | 0.672893542  | 0.26322  | 2.55639  | 0.010576 | 0.179908 |    |
| si:ch211-235i11.3 | 54.09866 | 0.061458171  | 0.243763 | 0.252123 | 0.800946 | 0.96768  |    |
| FP325112.1        | 0.329126 |              | 0        | 4.539679 | 0        | 1        | NA |
| CT573316.3        |          | 0 NA         | NA       | NA       | NA       | NA       |    |
| si:ch73-265h17.5  | 0.61786  | -0.868139815 | 3.051938 | -0.28446 | 0.776062 | NA       |    |
| CT867948.1        | 0.181296 |              | 0        | 5.267649 | 0        | 1        | NA |
| BX629346.2        |          | 0 NA         | NA       | NA       | NA       | NA       |    |
| pclaf             | 148.0866 | -0.058256208 | 0.211256 | -0.27576 | 0.782732 | 0.962328 |    |
| si:ch211-116o3.5  | 230.7096 | 0.036382925  | 0.147406 | 0.246822 | 0.805046 | 0.969348 |    |
| si:ch211-248a14.8 | 246.3701 | -1.787754494 | 0.301107 | -5.93728 | 2.90E-09 | 2.10E-06 |    |
| CU137681.3        | 0.200285 | 1.854123109  | 5.241768 | 0.353721 | 0.723548 | NA       |    |
| si:ch73-71c20.5   | 219.1184 | -0.05963728  | 0.165145 | -0.36112 | 0.718008 | 0.946533 |    |
| si:dkey-117a8.4   | 2.629725 | 0.096244608  | 1.27572  | 0.075443 | 0.939862 | 0.997371 |    |
| si:dkey-23k10.2   | 13.95423 | 0.229772062  | 0.779483 | 0.294775 | 0.768166 | 0.960296 |    |
| AL954831.1        | 6.892907 | -1.810685157 | 0.979456 | -1.84866 | 0.064506 | 0.433491 |    |
| si:ch1073-66123.1 | 0.334658 | -2.38723419  | 3.795184 | -0.62902 | 0.529338 | NA       |    |
| ccdc36            | 0.619886 | 0.093658216  | 2.3847   | 0.039275 | 0.968671 | NA       |    |
| birc6-as2         | 112.5655 | 0.28128234   | 0.242633 | 1.159294 | 0.246337 | 0.727641 |    |
| BX323807.2        | 0.049519 |              | 0        | 5.267649 | 0        | 1        | NA |

|                   |          |              |          |          |          |          |    |
|-------------------|----------|--------------|----------|----------|----------|----------|----|
| CR786576.1        | 0.045161 |              | 0        | 5.267649 | 0        | 1        | NA |
| BX957311.1        | 0.178355 |              | 0        | 5.267649 | 0        | 1        | NA |
| CR848667.1        | 69.2982  | -0.190859829 | 0.277331 | -0.6882  | 0.491325 | 0.875595 |    |
| BX927318.1        | 0        | NA           | NA       | NA       | NA       | NA       |    |
| FP017215.1        | 109.1826 | 0.259640781  | 0.368109 | 0.705338 | 0.4806   | 0.870179 |    |
| BX571794.2        | 0        | NA           | NA       | NA       | NA       | NA       |    |
| stard10           | 284.8374 | 0.002819632  | 0.187409 | 0.015045 | 0.987996 |          | 1  |
| CU469514.1        | 3.608318 | -2.752692314 | 1.62825  | -1.69058 | 0.090916 | 0.505285 |    |
| BX005129.3        | 2.694821 | -0.388153716 | 1.216918 | -0.31896 | 0.749753 | 0.955074 |    |
| CU207301.3        | 39.05469 | 0.587885987  | 0.37122  | 1.58366  | 0.113271 | 0.551017 |    |
| BX927282.3        | 0.35503  |              | 0        | 3.828502 | 0        | 1        | NA |
| BX936342.2        | 6.355686 | -0.895146439 | 0.822729 | -1.08802 | 0.276586 | 0.751172 |    |
| si:dkey-96g2.1    | 74.12779 | 0.313518418  | 0.84894  | 0.369306 | 0.7119   | 0.945821 |    |
| si:ch211-149e23.4 | 6.409187 | -0.907910359 | 1.140038 | -0.79639 | 0.425808 | 0.844714 |    |
| CR388132.1        | 3.053245 | -3.394508468 | 1.60337  | -2.11711 | 0.034251 | 0.326714 |    |
| CR352243.2        | 0.527625 | 1.03103158   | 2.967467 | 0.347445 | 0.728257 | NA       |    |
| CR936482.1        | 27.61782 | 0.005115056  | 0.422356 | 0.012111 | 0.990337 |          | 1  |
| CR932000.1        | 2.396205 | -1.088439622 | 1.146667 | -0.94922 | 0.342508 | 0.797179 |    |
| BX957346.3        | 0.293749 | 1.055364293  | 4.698171 | 0.224633 | 0.822265 | NA       |    |
| CR628365.1        | 5.412131 | 0.855647692  | 0.838686 | 1.020224 | 0.307622 | 0.772975 |    |
| si:dkey-188h10.3  | 67.06628 | 0.164515445  | 0.401927 | 0.409317 | 0.682307 | 0.937945 |    |
| AL929222.2        | 110.0357 | 0.393820595  | 0.279121 | 1.41093  | 0.158265 | 0.623766 |    |
| si:dkey-238d18.9  | 0        | NA           | NA       | NA       | NA       | NA       |    |
| e1ob              | 88.29706 | -0.268094733 | 0.218562 | -1.22663 | 0.219962 | 0.701105 |    |
| CT954240.1        | 6.849191 | -0.087361111 | 0.922503 | -0.0947  | 0.924553 | 0.994815 |    |
| si:dkey-276j7.2   | 2.880358 | 2.550396112  | 1.432585 | 1.780276 | 0.075031 | 0.464411 |    |
| CU861501.1        | 0.496398 | -1.756061451 | 4.009128 | -0.43802 | 0.661375 | NA       |    |
| BX323987.1        | 0        | NA           | NA       | NA       | NA       | NA       |    |
| si:rp71-7711.1    | 288.1601 | -0.474538251 | 0.174887 | -2.7134  | 0.00666  | 0.137282 |    |
| CU464118.1        | 19.01221 | -0.093628383 | 0.389517 | -0.24037 | 0.810043 | 0.969828 |    |
| CR381621.1        | 0.240728 | 0.093657633  | 4.949328 | 0.018923 | 0.984902 | NA       |    |
| BX511195.1        | 0.04222  |              | 0        | 5.267649 | 0        | 1        | NA |
| CR854827.3        | 2.86776  | 0.453861711  | 1.23606  | 0.367184 | 0.713482 | 0.945821 |    |
| si:rp71-7711.2    | 4.37842  | -0.893212568 | 1.065876 | -0.83801 | 0.402026 | 0.832956 |    |
| slirp             | 484.5378 | 0.177804055  | 0.168848 | 1.053039 | 0.292323 | 0.761879 |    |
| CR749763.5        | 0        | NA           | NA       | NA       | NA       | NA       |    |
| CR626882.3        | 0.628948 |              | 0        | 3.246811 | 0        | 1        | NA |
| BX511010.1        | 0.043308 |              | 0        | 5.267649 | 0        | 1        | NA |
| CU929206.2        | 1.476993 | -2.679591587 | 1.807301 | -1.48265 | 0.138168 | NA       |    |
| CR628327.1        | 1.302449 | -1.258647422 | 1.738249 | -0.72409 | 0.469011 | NA       |    |
| BX005234.1        | 17.97016 | 0.913263905  | 0.411252 | 2.22069  | 0.026372 | 0.287876 |    |
| CU693494.2        | 64.61291 | -0.055761901 | 0.471443 | -0.11828 | 0.905846 | 0.991631 |    |
| CT573392.1        | 29.9639  | -0.677192825 | 0.360431 | -1.87884 | 0.060266 | 0.422591 |    |
| BX936364.1        | 0.496077 |              | 0        | 3.925157 | 0        | 1        | NA |
| BX537342.1        | 80.32268 | -0.041841893 | 0.205316 | -0.20379 | 0.838515 | 0.976395 |    |
| mhc11ia           | 18.63516 | 0.003161488  | 0.658995 | 0.004797 | 0.996172 |          | 1  |
| BX000438.1        | 10.70481 | 1.573882052  | 1.489358 | 1.056752 | 0.290625 | 0.76078  |    |
| BX649397.1        | 0.091739 |              | 0        | 5.267649 | 0        | 1        | NA |
| si:ch211-167j9.4  | 104.3725 | 1.042941058  | 0.298955 | 3.488624 | 0.000486 | 0.027042 |    |
| BX571786.1        | 0.233091 | -1.710599731 | 4.981801 | -0.34337 | 0.73132  | NA       |    |
| si:ch211-185a18.2 | 77.98065 | 0.437890591  | 0.240319 | 1.822121 | 0.068437 | 0.445916 |    |
| CR391910.3        | 21.34394 | -0.086740511 | 0.479143 | -0.18103 | 0.856342 | 0.979558 |    |
| CR387996.1        | 7.857447 | 2.048228977  | 0.602912 | 3.397226 | 0.000681 | 0.034589 |    |
| BX465205.3        | 0        | NA           | NA       | NA       | NA       | NA       |    |

|                   |          |              |            |          |          |          |   |
|-------------------|----------|--------------|------------|----------|----------|----------|---|
| si:ch1073-80i24.3 | 4.301849 | 0.141014139  | 0.854694   | 0.164988 | 0.868953 | 0.982801 |   |
| BX005183.4        |          | 0 NA         | NA         | NA       | NA       | NA       |   |
| CR385053.2        | 0.111164 | -0.868089684 | 5.267649   | -0.1648  | 0.869104 | NA       |   |
| BX649559.1        | 3.05307  | -0.643078474 | 1.078847   | -0.59608 | 0.551122 | 0.8974   |   |
| CU683879.2        | 0.995285 | -0.796517858 | 2.442836   | -0.32606 | 0.744377 | NA       |   |
| si:dkey-42123.4   | 4.737493 | -0.396425163 | 0.948109   | -0.41812 | 0.675858 | 0.935422 |   |
| ccdc162           | 0.937948 | -0.374057828 | 2.124836   | -0.17604 | 0.860262 | NA       |   |
| CU467862.1        | 0.043308 |              | 0 5.267649 |          | 0        | 1 NA     |   |
| BX572077.2        | 0.208087 |              | 0 5.267649 |          | 0        | 1 NA     |   |
| pon3.2            | 182.6845 | -0.284652079 | 0.181109   | -1.57172 | 0.116016 | 0.556131 |   |
| si:dkey-234i14.6  | 41.71532 | 0.698452318  | 0.378695   | 1.844369 | 0.065129 | 0.435355 |   |
| FP325112.2        | 2.079999 | -0.489247382 | 1.378223   | -0.35498 | 0.722601 | NA       |   |
| si:ch211-33e4.3   | 1.887136 | -3.704790401 | 1.718586   | -2.15572 | 0.031106 | NA       |   |
| CR626944.1        | 52.6911  | 0.073574188  | 0.320046   | 0.229886 | 0.81818  | 0.971518 |   |
| zgc:162952        | 109.4475 | -1.655461723 | 0.330157   | -5.01416 | 5.33E-07 | 0.000174 |   |
| AL845357.1        | 0.087179 |              | 0 5.267649 |          | 0        | 1 NA     |   |
| tomm6             | 493.7774 | -0.249438453 | 0.133038   | -1.87494 | 0.060801 | 0.423559 |   |
| CU929037.3        | 1.811476 |              | 0 1.982418 |          | 0        | 1 NA     |   |
| zgc:194207        | 27.00026 | -0.930390453 | 0.582376   | -1.59758 | 0.110137 | 0.544691 |   |
| CR788235.1        | 10.94489 | -0.445116869 | 0.570337   | -0.78044 | 0.435129 | 0.850085 |   |
| BX470154.1        | 0.438963 | 1.055395012  | 3.686554   | 0.286282 | 0.774662 | NA       |   |
| si:dkey-238d18.12 | 0.858824 |              | 0 2.78436  |          | 0        | 1 NA     |   |
| si:ch211-275j6.5  | 153.2448 | 0.001358402  | 0.171116   | 0.007938 | 0.993666 |          | 1 |
| lypc              | 427.0083 | -0.444918423 | 0.252655   | -1.76097 | 0.078243 | 0.473959 |   |
| CR376747.1        | 0.656783 | 1.871738599  | 3.014365   | 0.62094  | 0.534639 | NA       |   |
| BX530017.2        | 1.765465 | 0.481578049  | 1.278811   | 0.376583 | 0.706484 | NA       |   |
| si:dkey-77f5.4    | 61.64139 | -0.017068409 | 0.251945   | -0.06775 | 0.945987 | 0.997371 |   |
| si:ch211-256e16.8 | 0.337919 | 0.895605158  | 4.480211   | 0.199902 | 0.841557 | NA       |   |
| CR925777.1        | 0.899516 | -0.97528653  | 1.948704   | -0.50048 | 0.616737 | NA       |   |
| BX324126.1        | 0.448341 | 1.863533462  | 3.632489   | 0.513018 | 0.607939 | NA       |   |
| si:ch73-144d13.5  | 28.20869 | 0.250277007  | 0.344843   | 0.725771 | 0.467979 | 0.866337 |   |
| BX927323.1        | 0.995963 |              | 0 2.374524 |          | 0        | 1 NA     |   |
| CU928129.1        | 45.42437 | -0.924515509 | 0.332258   | -2.78252 | 0.005394 | 0.123615 |   |
| si:dkey-117a8.1   | 15.07923 | 0.608946961  | 0.476654   | 1.277544 | 0.20141  | 0.681266 |   |
| CT027582.2        |          | 0 NA         | NA         | NA       | NA       | NA       |   |
| znf576.1          | 300.8628 | 0.038240251  | 0.137563   | 0.277984 | 0.781025 | 0.961659 |   |
| BX005129.4        | 2.941793 | -1.754958612 | 1.608178   | -1.09127 | 0.275153 | 0.750424 |   |
| CR933839.1        |          | 0 NA         | NA         | NA       | NA       | NA       |   |
| CU464125.1        |          | 0 NA         | NA         | NA       | NA       | NA       |   |
| smco4             | 280.1967 | 0.219676363  | 0.16361    | 1.342681 | 0.179375 | 0.654677 |   |
| BX465227.1        | 155.4833 | -0.258673943 | 0.189766   | -1.36312 | 0.172845 | 0.645664 |   |
| si:dkey-239b22.2  | 320.4826 | -0.435666218 | 0.202035   | -2.15639 | 0.031053 | 0.313376 |   |
| lrplaa            | 1279.465 | 0.117144184  | 0.177786   | 0.658904 | 0.509957 | 0.883733 |   |
| CR848825.1        | 0.175305 | 0.09368032   | 5.267649   | 0.017784 | 0.985811 | NA       |   |
| CU463231.1        | 1.458042 | 0.852947867  | 1.517862   | 0.56194  | 0.574157 | NA       |   |
| CR382327.3        | 41.68365 | 0.168761116  | 0.3505     | 0.481487 | 0.630171 | 0.922869 |   |
| BX571712.1        | 0.667534 | -1.784102088 | 2.60179    | -0.68572 | 0.492889 | NA       |   |
| CR388050.1        | 0.046941 |              | 0 5.267649 |          | 0        | 1 NA     |   |
| pimr40            |          | 0 NA         | NA         | NA       | NA       | NA       |   |
| si:dkey-42123.1   | 2.204192 |              | 0 1.93627  |          | 0        | 1        | 1 |
| si:ch211-235i11.6 | 31.25195 | -0.755326021 | 0.331095   | -2.2813  | 0.022531 | 0.265534 |   |
| si:dkey-42123.6   | 0.740102 | -3.101945121 | 2.728507   | -1.13687 | 0.255595 | NA       |   |
| CR933730.1        | 3.275633 | -0.509962359 | 1.027155   | -0.49648 | 0.619556 | 0.917435 |   |
| znf1134           | 90.02683 | -0.145955219 | 0.247938   | -0.58868 | 0.556078 | 0.899002 |   |

|                   |          |              |            |          |          |          |
|-------------------|----------|--------------|------------|----------|----------|----------|
| BX088540.1        | 2.291329 | 0.430031462  | 1.496331   | 0.287391 | 0.773813 | 0.960624 |
| si:ch211-105j21.9 | 151.9468 | -0.059512911 | 0.199746   | -0.29794 | 0.765747 | 0.959951 |
| si:dkey-74h17.3   | 1.326393 |              | 0 2.324627 |          | 0        | 1 NA     |
| si:ch211-269k10.4 | 14.16616 | -0.147822061 | 0.540083   | -0.2737  | 0.784313 | 0.962605 |
| BX927395.1        | 0.049021 | -0.86807634  | 5.267649   | -0.16479 | 0.869106 | NA       |
| CT583687.2        | 0.471899 | 0.093652264  | 3.620339   | 0.025868 | 0.979362 | NA       |
| CR792439.1        | 0.741928 |              | 0 2.929882 |          | 0        | 1 NA     |
| BX323586.3        | 102.9065 | -0.16506674  | 0.230041   | -0.71755 | 0.473033 | 0.868965 |
| CR377210.1        | 2.654492 | 2.207114938  | 1.414226   | 1.560652 | 0.118606 | 0.561771 |
| BX255963.2        | 0.913746 | -0.868145771 | 2.503502   | -0.34677 | 0.728762 | NA       |
| CT025854.1        | 0.04222  |              | 0 5.267649 |          | 0        | 1 NA     |
| BX324134.1        | 0.170537 | -1.755438701 | 5.23528    | -0.33531 | 0.737392 | NA       |
| CR376776.1        | 0.224621 | 1.05535601   | 5.063182   | 0.208437 | 0.834888 | NA       |
| CU041346.1        |          | 0 NA         | NA         | NA       | NA       | NA       |
| si:dkeyp-84f3.9   | 267.4089 | -0.007961082 | 0.121273   | -0.06565 | 0.94766  | 0.997371 |
| CR847983.2        | 0.188905 | -0.868102747 | 5.267649   | -0.1648  | 0.869102 | NA       |
| CR381579.4        | 0.160585 |              | 0 5.267649 |          | 0        | 1 NA     |
| BX294160.1        | 14.11696 | -0.090884996 | 0.59518    | -0.1527  | 0.878633 | 0.985761 |
| si:dkey-1m11.6    | 8.191084 | 0.404291438  | 0.831042   | 0.486488 | 0.626621 | 0.920665 |
| pimr13            | 0.050624 | 1.055396947  | 5.267649   | 0.200354 | 0.841203 | NA       |
| si:ch1073-145m9.1 | 28.83612 | -0.492056052 | 0.341017   | -1.44291 | 0.149046 | 0.610726 |
| si:ch211-137j23.6 | 1.0096   | -1.766146594 | 2.060667   | -0.85708 | 0.391403 | NA       |
| BX530721.1        | 0.736391 | -2.726906014 | 2.516842   | -1.08346 | 0.278603 | NA       |
| BX548170.1        |          | 0 NA         | NA         | NA       | NA       | NA       |
| CR786577.1        | 33.65951 | 0.633812563  | 0.57359    | 1.104991 | 0.269163 | 0.745285 |
| si:dkey-40g16.5   | 5.516447 | -0.79876772  | 0.702015   | -1.13782 | 0.255195 | 0.733542 |
| si:ch211-167b20.8 | 251.7388 | 0.040355041  | 0.143423   | 0.281371 | 0.778426 | 0.961073 |
| CU694532.1        | 15.29691 | 0.487785625  | 0.713348   | 0.683798 | 0.494103 | 0.877558 |
| BX323824.1        | 13.03452 | 0.26533901   | 0.477953   | 0.555158 | 0.578787 | 0.905417 |
| CR936518.2        | 0.566522 | -0.86813813  | 2.804695   | -0.30953 | 0.756918 | NA       |
| CR759927.2        | 8.677043 | 0.864692263  | 0.520688   | 1.660673 | 0.096779 | 0.519309 |
| CU928013.1        | 117.4827 | -0.07342351  | 0.167102   | -0.43939 | 0.660376 | 0.930581 |
| CU104777.1        | 39.65723 | -0.237537477 | 0.378812   | -0.62706 | 0.530621 | 0.890545 |
| BX293559.1        |          | 0 NA         | NA         | NA       | NA       | NA       |
| si:ch73-265h17.2  | 2.5492   | -2.106044832 | 1.592346   | -1.32261 | 0.185967 | 0.663819 |
| si:ch1073-100f3.2 | 45.32126 | 0.431700385  | 0.444858   | 0.970423 | 0.331836 | 0.789531 |
| CR751227.2        | 7.268584 | -0.760463277 | 0.697877   | -1.08968 | 0.275854 | 0.750674 |
| BX470264.1        | 84.57215 | 0.272048902  | 0.30995    | 0.877719 | 0.380096 | 0.823607 |
| CR352228.1        | 1.368205 | 0.274717639  | 1.511079   | 0.181802 | 0.855738 | NA       |
| BX000451.1        | 1.480046 | -1.079167303 | 1.567417   | -0.6885  | 0.491138 | NA       |
| sgipla            | 462.9327 | -0.326074286 | 0.211538   | -1.54144 | 0.123209 | 0.569695 |
| BX649266.2        |          | 0 NA         | NA         | NA       | NA       | NA       |
| si:ch73-90p23.1   | 3.657579 | 0.790372469  | 1.08725    | 0.726946 | 0.467259 | 0.86616  |
| si:ch73-204p21.2  | 322.5416 | 0.104168299  | 0.147339   | 0.706996 | 0.479569 | 0.869929 |
| BX927184.1        | 105.1499 | 0.358223236  | 0.246668   | 1.452248 | 0.146433 | 0.605984 |
| CR387921.1        | 0.476589 |              | 0 3.192576 |          | 0        | 1 NA     |
| CU928083.1        | 8.837575 | -2.370245009 | 1.307327   | -1.81305 | 0.069825 | 0.450824 |
| BX322555.4        | 3.18987  | 0.089535624  | 1.0248     | 0.087369 | 0.930378 | 0.995707 |
| si:dkey-195m11.11 | 17.32244 | 0.744246685  | 0.617735   | 1.204799 | 0.228281 | 0.709397 |
| BX293567.1        | 1.878708 | 1.633813956  | 1.763168   | 0.926636 | 0.354116 | NA       |
| CU179756.1        | 0.511304 | -0.868141097 | 3.522064   | -0.24649 | 0.805306 | NA       |
| BX649356.1        |          | 0 NA         | NA         | NA       | NA       | NA       |
| CT574587.1        | 0.885011 | 2.533983064  | 2.135877   | 1.18639  | 0.235468 | NA       |
| AL929309.1        | 0.400277 | 0.935346867  | 3.25707    | 0.287174 | 0.773979 | NA       |

|                    |          |              |            |          |          |          |
|--------------------|----------|--------------|------------|----------|----------|----------|
| si:ch211-137j23.7  | 0.053506 | -0.86807634  | 5.267649   | -0.16479 | 0.869106 | NA       |
| AL954666.1         | 2.791319 | -0.316010276 | 1.464094   | -0.21584 | 0.829112 | 0.97456  |
| tex36              | 1.798833 | -0.127741437 | 1.29362    | -0.09875 | 0.921339 | NA       |
| BX465857.1         | 0.254466 |              | 0 4.878514 |          | 0        | 1 NA     |
| CR385026.2         |          | 0 NA         | NA         | NA       | NA       | NA       |
| BX663528.1         |          | 0 NA         | NA         | NA       | NA       | NA       |
| CU464134.1         | 7.58918  | -0.868144469 | 1.824608   | -0.4758  | 0.634219 | 0.924077 |
| si:ch73-40a17.4    | 16.0769  | -0.36778934  | 0.599329   | -0.61367 | 0.539435 | 0.893049 |
| BX005392.3         | 4.306244 | -0.730868295 | 0.966745   | -0.75601 | 0.449643 | 0.856979 |
| BX323557.1         | 15.6822  | -2.73460811  | 0.696723   | -3.92496 | 8.67E-05 | 0.008237 |
| BX510649.1         | 4.414415 | -0.66932221  | 0.770466   | -0.86872 | 0.384998 | 0.826939 |
| CR762392.1         | 0.053262 | 1.055396947  | 5.267649   | 0.200354 | 0.841203 | NA       |
| si:dkey-22114.10   | 20.60115 | -0.898434635 | 0.453719   | -1.98016 | 0.047686 | 0.380207 |
| FP102895.1         |          | 0 NA         | NA         | NA       | NA       | NA       |
| CT955996.1         |          | 0 NA         | NA         | NA       | NA       | NA       |
| asb5a              | 438.0162 | 0.116254421  | 0.222184   | 0.523235 | 0.600811 | 0.913756 |
| CU467879.1         |          | 0 NA         | NA         | NA       | NA       | NA       |
| pimr175            | 0.415615 | 0.020830635  | 2.860336   | 0.007283 | 0.994189 | NA       |
| si:ch211-207d10.2  | 0.390582 | 1.055357499  | 5.030621   | 0.209787 | 0.833834 | NA       |
| CR926464.1         | 0.819228 | -2.3828817   | 2.731943   | -0.87223 | 0.383083 | NA       |
| BX664614.1         | 13.47248 | 0.077434416  | 0.583682   | 0.132665 | 0.894458 | 0.98891  |
| CU137681.4         |          | 0 NA         | NA         | NA       | NA       | NA       |
| CR354430.3         | 1.178976 | -0.472149471 | 1.889238   | -0.24992 | 0.802653 | NA       |
| mespbb             | 0.342502 |              | 0 4.433361 |          | 0        | 1 NA     |
| BX901883.3         | 0.214368 |              | 0 5.267649 |          | 0        | 1 NA     |
| BX663520.1         | 1.795559 | 0.116867865  | 1.385018   | 0.08438  | 0.932754 | NA       |
| CU469568.4         | 1.648337 | -0.072849139 | 1.166047   | -0.06248 | 0.950184 | NA       |
| si:ch211-284e13.14 | 17.64209 | -0.034164137 | 0.46008    | -0.07426 | 0.940806 | 0.997371 |
| BX469902.1         | 62.56321 | 0.260063626  | 0.271996   | 0.956131 | 0.339006 | 0.795226 |
| CT956066.1         | 1.358297 | -0.89614026  | 1.562831   | -0.57341 | 0.566368 | NA       |
| CR391915.1         | 0.103263 | 1.055383603  | 5.267649   | 0.200352 | 0.841205 | NA       |
| CU137680.2         | 0.049021 | -0.86807634  | 5.267649   | -0.16479 | 0.869106 | NA       |
| si:dkey-248g15.3   | 1565.667 | 0.007915041  | 0.285745   | 0.0277   | 0.977902 | 1        |
| BX511132.1         | 1.580047 | 1.84971349   | 1.41303    | 1.30904  | 0.190521 | NA       |
| BX571762.2         | 73.56802 | 0.092028153  | 0.288231   | 0.319286 | 0.74951  | 0.955074 |
| CR589875.2         | 8.934951 | 2.230998599  | 0.78527    | 2.841058 | 0.004496 | 0.110596 |
| arhgef33           | 88.50955 | -0.796934686 | 0.227214   | -3.50743 | 0.000452 | 0.025763 |
| BX936420.1         | 1.20785  | 0.80522972   | 1.592309   | 0.505699 | 0.613068 | NA       |
| BX950217.1         | 0.418883 | 1.05541144   | 3.261385   | 0.323608 | 0.746235 | NA       |
| BX942813.1         | 8.140392 | -0.954202304 | 0.583899   | -1.63419 | 0.102219 | 0.528963 |
| FP089511.1         | 2.351383 | 0.578552649  | 1.146927   | 0.504437 | 0.613954 | 0.915998 |
| BX004769.1         | 1.80385  | 0.043253409  | 1.667678   | 0.025936 | 0.979308 | NA       |
| BX957251.1         | 0.139769 |              | 0 5.267649 |          | 0        | 1 NA     |
| CT033842.1         | 0.537975 | 2.559520614  | 3.439466   | 0.744162 | 0.456778 | NA       |
| si:ch1073-190k2.1  | 267.9589 | 0.515152819  | 0.300542   | 1.71408  | 0.086514 | 0.493048 |
| CU855685.1         | 10.01547 | 1.732335414  | 0.755134   | 2.294078 | 0.021786 | 0.261665 |
| CR812464.1         | 0.453472 | -2.7551039   | 4.815364   | -0.57215 | 0.567221 | NA       |
| BX000364.1         |          | 0 NA         | NA         | NA       | NA       | NA       |
| CR387984.1         |          | 0 NA         | NA         | NA       | NA       | NA       |
| ugt1b3             | 2.082418 | 0.093648129  | 1.946403   | 0.048113 | 0.961626 | NA       |
| BX005375.1         | 9.036816 | -0.686570214 | 0.85916    | -0.79912 | 0.424222 | 0.844355 |
| BX957228.1         |          | 0 NA         | NA         | NA       | NA       | NA       |
| BX323067.1         | 3.960351 | -0.22454116  | 0.774681   | -0.28985 | 0.771931 | 0.960624 |
| BX571712.2         | 7.299415 | 3.057306429  | 1.053301   | 2.902594 | 0.003701 | 0.100884 |



|                   |          |      |              |          |          |          |          |
|-------------------|----------|------|--------------|----------|----------|----------|----------|
| EIF3J (1 of many) | 0.090321 |      | 0            | 5.267649 | 0        | 1        | NA       |
| CR293498.1        |          | 0 NA |              | NA       | NA       | NA       | NA       |
| BX005450.1        | 4.129956 |      | 0.51879994   | 0.943703 | 0.549749 | 0.582492 | 0.90571  |
| si:ch211-191c10.1 | 5.342257 |      | 0.739581875  | 0.825662 | 0.895744 | 0.370389 | 0.818484 |
| FP102071.1        | 0.201801 |      | 0            | 5.267649 | 0        | 1        | NA       |
| BX571774.1        | 0.425495 |      | 2.559849746  | 3.606515 | 0.709785 | 0.477838 | NA       |
| CR848784.1        | 0.336436 |      | 0            | 3.892515 | 0        | 1        | NA       |
| si:ch211-272b8.7  | 1.557384 |      | -1.284357598 | 1.641473 | -0.78244 | 0.433955 | NA       |
| CR376785.1        |          | 0 NA |              | NA       | NA       | NA       | NA       |
| BX640549.1        | 0.637474 |      | 2.302492566  | 2.352704 | 0.978658 | 0.327749 | NA       |
| ftr91             | 4.878447 |      | -0.215947173 | 0.872318 | -0.24756 | 0.804478 | 0.969054 |
| BX004996.1        | 0.415768 |      | 1.473771565  | 3.448138 | 0.427411 | 0.66908  | NA       |
| AL929523.1        | 0.517884 |      | 0            | 3.327515 | 0        | 1        | NA       |
| CU633486.1        | 1.07977  |      | 0.969193268  | 2.474881 | 0.391612 | 0.695345 | NA       |
| BX000438.2        | 880.0932 |      | -0.214548053 | 0.238229 | -0.9006  | 0.367804 | 0.817078 |
| itgae.1           | 42.01833 |      | -2.369308157 | 0.402826 | -5.88171 | 4.06E-09 | 2.77E-06 |
| si:ch211-130m23.5 | 196.0071 |      | -0.11783444  | 0.161082 | -0.73152 | 0.464463 | 0.864594 |
| CU571179.1        |          | 0 NA |              | NA       | NA       | NA       | NA       |
| CT573139.2        | 0.573447 |      | -0.868140729 | 2.831786 | -0.30657 | 0.759171 | NA       |
| BX539313.3        | 2.508795 |      | 1.145753728  | 1.298911 | 0.882088 | 0.377729 | 0.822478 |
| pet100            | 186.481  |      | -0.106807549 | 0.251289 | -0.42504 | 0.670808 | 0.93394  |
| BX005129.5        | 2.741643 |      | -1.480170792 | 1.428596 | -1.0361  | 0.300155 | 0.766629 |
| si:dkey-111k8.2   | 44.43968 |      | -0.809557693 | 0.269052 | -3.00893 | 0.002622 | 0.083393 |
| CR936378.1        | 19.67725 |      | -0.054350625 | 0.574343 | -0.09463 | 0.924608 | 0.994815 |
| AL928707.1        | 0.043309 |      | 0            | 5.267649 | 0        | 1        | NA       |
| si:dkey-262k9.2   | 787.0626 |      | -0.014825682 | 0.13796  | -0.10746 | 0.914421 | 0.992972 |
| CR548622.1        | 1.996156 |      | -1.76410009  | 1.591111 | -1.10872 | 0.26755  | NA       |
| si:dkey-238d18.8  |          | 0 NA |              | NA       | NA       | NA       | NA       |
| si:dkey-77f5.14   | 57.5702  |      | -0.127280968 | 0.294581 | -0.43207 | 0.665687 | 0.932664 |
| BX890602.1        | 1.081905 |      | -2.373900405 | 2.011817 | -1.17998 | 0.238009 | NA       |
| si:ch211-129o18.4 | 5.013801 |      | -0.820847865 | 0.914805 | -0.89729 | 0.369563 | 0.817994 |
| BX571794.3        | 1.552758 |      | 0.152543299  | 2.165224 | 0.070452 | 0.943834 | NA       |
| si:ch73-144d13.8  | 22.38523 |      | 0.026352843  | 0.372129 | 0.070816 | 0.943544 | 0.997371 |
| si:dkey-7i4.8     | 54.03538 |      | 0.019699767  | 0.291421 | 0.067599 | 0.946105 | 0.997371 |
| CR848840.1        | 1.451619 |      | -0.144572637 | 1.267601 | -0.11405 | 0.909196 | NA       |
| si:ch211-69110.4  | 22.24042 |      | -0.660455906 | 0.627079 | -1.05323 | 0.292237 | 0.761879 |
| CU927934.3        | 14.0411  |      | 0.70748089   | 0.849524 | 0.832797 | 0.404959 | 0.834284 |
| FP015862.3        | 1.075848 |      | 0.093653055  | 2.519167 | 0.037176 | 0.970345 | NA       |
| AL928707.2        | 0.043309 |      | 0            | 5.267649 | 0        | 1        | NA       |
| CR391995.1        | 0.129924 |      | 0            | 5.267649 | 0        | 1        | NA       |
| BX005332.1        |          | 0 NA |              | NA       | NA       | NA       | NA       |
| BX663503.2        | 60.81612 |      | -0.378447117 | 0.549037 | -0.68929 | 0.490639 | 0.875539 |
| CR751602.2        | 77.92894 |      | -0.208262032 | 0.270372 | -0.77028 | 0.441135 | 0.852823 |
| FP017161.1        | 20.79806 |      | 1.139713408  | 0.597034 | 1.90896  | 0.056267 | 0.410018 |
| CU855758.2        |          | 0 NA |              | NA       | NA       | NA       | NA       |
| CT025912.1        | 0.045161 |      | 0            | 5.267649 | 0        | 1        | NA       |
| BX248121.1        | 212.4761 |      | -0.059208936 | 0.261241 | -0.22664 | 0.8207   | 0.971788 |
| BX571712.3        | 1.042903 |      | -4.348357639 | 2.150483 | -2.02204 | 0.043173 | NA       |
| opn6b             | 61.20985 |      | 0.414845837  | 0.622643 | 0.666266 | 0.505241 | 0.882188 |
| BX548024.2        | 3.393866 |      | 0.984889457  | 0.844171 | 1.166694 | 0.243334 | 0.724437 |
| CT009746.1        |          | 0 NA |              | NA       | NA       | NA       | NA       |
| dscaml1           | 97.32316 |      | 0.433151194  | 0.270919 | 1.598821 | 0.10986  | 0.543786 |
| fkbp3             | 554.1738 |      | -0.027614351 | 0.15657  | -0.17637 | 0.860003 | 0.980167 |
| alp3              | 56.11315 |      | 2.058725396  | 0.8223   | 2.503619 | 0.012293 | 0.192713 |

|                    |          |              |          |          |          |          |  |    |    |
|--------------------|----------|--------------|----------|----------|----------|----------|--|----|----|
| si:ch1073-205c8.5  | 0.444056 |              | 0        | 4.17434  |          | 0        |  | 1  | NA |
| dre-mir-365-1      | 0.046941 |              | 0        | 5.267649 |          | 0        |  | 1  | NA |
| CU302323.1         | 1.200453 | -0.803414405 | 1.855174 | -0.43307 | 0.664966 | NA       |  |    |    |
| AL929457.2         | 0.930148 | -1.811213798 | 2.659664 | -0.68099 | 0.495876 | NA       |  |    |    |
| CU207354.2         |          | 0 NA         |          | NA       |          | NA       |  | NA | NA |
| CABZ01085140.1     | 30.74918 | -0.574273225 | 0.374118 | -1.53501 | 0.124782 | 0.572486 |  |    |    |
| znf1049            | 1.596592 | -1.02849449  | 1.516925 | -0.67801 | 0.497763 | NA       |  |    |    |
| trip4              | 127.7073 | 0.199836698  | 0.215035 | 0.929322 | 0.352722 | 0.803517 |  |    |    |
| sh3bgrl3           | 1193.067 | 0.117037666  | 0.120299 | 0.972888 | 0.330609 | 0.788126 |  |    |    |
| kcnql.2            | 7.649441 | 1.615901265  | 0.740058 | 2.183478 | 0.029001 | 0.303224 |  |    |    |
| si:dkey-238o14.3   | 3.567012 | 4.113214007  | 1.44603  | 2.844488 | 0.004448 | 0.109917 |  |    |    |
| dre-mir-18a        |          | 0 NA         |          | NA       |          | NA       |  | NA | NA |
| rab3gap1           | 571.3818 | 0.005525044  | 0.153167 | 0.036072 | 0.971225 |          |  | 1  |    |
| gnl2               | 948.0836 | -0.246600845 | 0.151935 | -1.62307 | 0.104575 | 0.53308  |  |    |    |
| GABRR1 (1 of many) | 61.83057 | -1.390072001 | 0.470187 | -2.95642 | 0.003112 | 0.091566 |  |    |    |
| CU459093.1         | 29.70346 | -0.028357193 | 0.389195 | -0.07286 | 0.941917 | 0.997371 |  |    |    |
| RF00001            | 0.594252 | -2.356782597 | 2.876273 | -0.81939 | 0.412565 | NA       |  |    |    |
| si:dkey-30f3.2     | 9.795167 | -0.832464637 | 0.757409 | -1.09909 | 0.271727 | 0.747999 |  |    |    |
| CU929178.1         | 0.046941 |              | 0        | 5.267649 |          | 0        |  | 1  | NA |
| BX000463.1         | 0.230035 | 1.05536091   | 5.010242 | 0.210641 | 0.833168 | NA       |  |    |    |
| si:dkey-146c18.5   | 4.188386 | 0.099506242  | 0.801203 | 0.124196 | 0.90116  | 0.990512 |  |    |    |
| CT027696.1         | 4.017905 | -3.934633721 | 1.335736 | -2.94567 | 0.003223 | 0.093414 |  |    |    |
| slc12a1            | 30.74928 | 1.241089586  | 0.548313 | 2.26347  | 0.023607 | 0.271853 |  |    |    |
| jac3               | 0.551851 | 0.041568842  | 2.80419  | 0.014824 | 0.988173 | NA       |  |    |    |
| RF00001            | 0.159785 | 2.50566729   | 5.20297  | 0.481584 | 0.630101 | NA       |  |    |    |
| zgc:64065          | 29.02961 | -0.770144338 | 0.524149 | -1.46932 | 0.141745 | 0.600409 |  |    |    |
| BX248243.1         | 0.333426 | -3.0388486   | 5.176027 | -0.5871  | 0.557136 | NA       |  |    |    |
| tefb               | 548.2812 | -0.087593823 | 0.222944 | -0.3929  | 0.694397 | 0.941093 |  |    |    |
| tmem106c           | 249.1275 | -0.400096583 | 0.167445 | -2.38942 | 0.016875 | 0.230481 |  |    |    |
| si:ch211-215e19.8  | 0.099037 |              | 0        | 5.267649 |          | 0        |  | 1  | NA |
| dusp2              | 131.4143 | -0.348691532 | 0.387498 | -0.89985 | 0.368198 | 0.817272 |  |    |    |
| CABZ01079550.1     | 0.13396  |              | 0        | 5.267649 |          | 0        |  | 1  | NA |
| btc                | 131.9617 | -0.045352292 | 0.190888 | -0.23759 | 0.812203 | 0.970129 |  |    |    |
| WSCD1              | 34.23873 | 0.325921971  | 0.422256 | 0.771859 | 0.440198 | 0.852079 |  |    |    |
| ctsa               | 674.7447 | 0.2873782    | 0.143908 | 1.996961 | 0.045829 | 0.374848 |  |    |    |
| si:dkey-178j11.5   | 33.22947 | 0.710595697  | 0.470514 | 1.510254 | 0.130979 | 0.582602 |  |    |    |
| trappc10           | 686.9788 | 0.069866151  | 0.11054  | 0.632042 | 0.52736  | 0.889948 |  |    |    |
| CABZ01012959.1     | 0.633443 | 2.282723939  | 2.996058 | 0.761909 | 0.446114 | NA       |  |    |    |
| RF00001            | 0.317945 | 1.03462284   | 3.418329 | 0.302669 | 0.762142 | NA       |  |    |    |
| FP101882.1         | 160.5042 | -0.601242628 | 0.246054 | -2.44354 | 0.014544 | 0.211145 |  |    |    |
| BX005085.2         | 35.79603 | -0.567109711 | 0.351813 | -1.61197 | 0.10697  | 0.537    |  |    |    |
| si:dkey-44g17.6    | 20.21461 | -0.47792231  | 0.508523 | -0.93982 | 0.347308 | 0.799992 |  |    |    |
| BX324212.1         | 0.458848 | -0.868124148 | 4.016319 | -0.21615 | 0.828871 | NA       |  |    |    |
| si:dkeyp-97a10.2   | 84.63651 | -0.162954172 | 0.198919 | -0.8192  | 0.412674 | 0.838123 |  |    |    |
| bola3              | 135.0283 | 0.036280682  | 0.203822 | 0.178001 | 0.858722 | 0.979934 |  |    |    |
| BX511136.1         | 2.631837 | 1.691070227  | 0.965861 | 1.750842 | 0.079973 | 0.478179 |  |    |    |
| si:ch211-281k19.2  | 0.66612  | 1.05539008   | 3.817793 | 0.27644  | 0.78221  | NA       |  |    |    |
| stk40              | 260.8016 | 0.057031518  | 0.189999 | 0.300167 | 0.76405  | 0.959228 |  |    |    |
| ankrd13d           | 168.6662 | -0.294339309 | 0.279997 | -1.05122 | 0.293155 | 0.762581 |  |    |    |
| supt3h             | 292.2985 | -0.496817163 | 0.189755 | -2.61821 | 0.008839 | 0.16123  |  |    |    |
| CR391944.1         | 15.37794 | 0.760716473  | 0.410975 | 1.851006 | 0.064169 | 0.432457 |  |    |    |
| si:dkey-57l19.1    | 1.362938 | -4.291084018 | 5.129881 | -0.83649 | 0.40288  | NA       |  |    |    |
| si:dkey-285e18.6   | 0.212123 | -1.378323151 | 5.201854 | -0.26497 | 0.791034 | NA       |  |    |    |
| BX572628.1         | 0.802255 | -0.999413956 | 2.38456  | -0.41912 | 0.675129 | NA       |  |    |    |

|                   |          |              |          |          |          |          |
|-------------------|----------|--------------|----------|----------|----------|----------|
| uts2d             | 13.4821  | 0.037938705  | 0.551276 | 0.06882  | 0.945133 | 0.997371 |
| BX255896.1        | 3.99156  | 0.577978389  | 1.088893 | 0.530795 | 0.595561 | 0.911376 |
| CR925797.1        | 0.569099 | 0.08400201   | 2.725441 | 0.030821 | 0.975412 | NA       |
| lhfp12b           | 282.6608 | 0.261568856  | 0.175275 | 1.49233  | 0.135613 | 0.591012 |
| CT583728.1        | 0.119909 | 2.079562922  | 5.22636  | 0.397899 | 0.690705 | NA       |
| CR792416.1        | 0.493054 | -1.713183691 | 4.083937 | -0.41949 | 0.674856 | NA       |
| cpxmlb            | 138.4982 | -0.439261066 | 0.259549 | -1.6924  | 0.09057  | 0.505206 |
| cntn4             | 63.16228 | 0.999387349  | 0.295523 | 3.381753 | 0.00072  | 0.035767 |
| zgc:77748         | 254.1883 | -0.576462205 | 0.432426 | -1.33309 | 0.182503 | 0.659083 |
| traj56            | 0 NA     | NA           | NA       | NA       | NA       | NA       |
| aipl2             | 21.85573 | 0.38411911   | 0.608202 | 0.631565 | 0.527671 | 0.889948 |
| si:dkey-176f19.4  | 3.035763 | 0.324451963  | 1.240977 | 0.261449 | 0.793746 | 0.965431 |
| zgc:162193        | 402.2642 | 0.381523433  | 0.210826 | 1.809659 | 0.070349 | 0.452395 |
| tradv19.0         | 0 NA     | NA           | NA       | NA       | NA       | NA       |
| BX537115.1        | 0.090249 | 0            | 5.267649 | 0        | 1        | NA       |
| dgkab             | 27.55519 | 0.627875113  | 0.597375 | 1.051056 | 0.293233 | 0.762581 |
| si:rp71-1h20.5    | 85.30838 | -0.218205356 | 0.222164 | -0.98218 | 0.326011 | 0.784919 |
| si:dkey-28i19.3   | 4.420811 | -0.487963779 | 0.784478 | -0.62202 | 0.533927 | 0.891181 |
| or109-4           | 0 NA     | NA           | NA       | NA       | NA       | NA       |
| si:dkeyp-86c4.1   | 1.268676 | 0.772885075  | 1.87281  | 0.412687 | 0.679836 | NA       |
| zgc:113184        | 221.0224 | -0.047421657 | 0.190924 | -0.24838 | 0.803841 | 0.968812 |
| si:dkey-27n6.1    | 0.719738 | 1.027106654  | 2.642545 | 0.388681 | 0.697512 | NA       |
| BX663612.1        | 1.252987 | -1.093559012 | 1.867919 | -0.58544 | 0.55825  | NA       |
| si:dkey-16p6.1    | 10.71549 | 0.939200432  | 0.704928 | 1.332336 | 0.18275  | 0.659278 |
| si:dkey-16l2.20   | 302.7317 | -0.169063193 | 0.118954 | -1.42125 | 0.155243 | 0.61985  |
| znf998            | 1.307524 | -0.891804986 | 1.527172 | -0.58396 | 0.559248 | NA       |
| SLC39A11          | 73.16664 | 0.284084877  | 0.218151 | 1.302241 | 0.192834 | 0.672855 |
| znf1077           | 35.28937 | 0.476279234  | 0.437867 | 1.087726 | 0.276716 | 0.75129  |
| CU633999.1        | 0.76192  | 0.081628114  | 2.331521 | 0.035011 | 0.972071 | NA       |
| RF00001           | 0.617367 | 0            | 3.106827 | 0        | 1        | NA       |
| BX928743.1        | 0.111311 | 0            | 5.267649 | 0        | 1        | NA       |
| mtmr3             | 201.3458 | -0.316833157 | 0.163277 | -1.94047 | 0.052323 | 0.397352 |
| AL954698.1        | 0 NA     | NA           | NA       | NA       | NA       | NA       |
| APCDD1            | 6.741032 | 0.012373822  | 0.771166 | 0.016046 | 0.987198 | 1        |
| CU984600.2        | 13.43627 | -0.676313725 | 0.804955 | -0.84019 | 0.400803 | 0.8318   |
| ptrhl             | 65.99904 | 0.229448479  | 0.227685 | 1.007743 | 0.313578 | 0.777207 |
| fn3krp            | 22.90567 | -0.502130954 | 0.433423 | -1.15853 | 0.24665  | 0.727706 |
| si:ch211-199b20.3 | 67.34289 | -0.394328857 | 0.274017 | -1.43907 | 0.150131 | 0.613498 |
| wrn               | 79.51578 | 0.026141972  | 0.20761  | 0.125919 | 0.899796 | 0.99045  |
| BX465836.1        | 1.296837 | 0.516154057  | 1.53097  | 0.337142 | 0.73601  | NA       |
| BICD2             | 216.9332 | 0.169455701  | 0.224758 | 0.753947 | 0.450881 | 0.857288 |
| si:ch211-215e19.3 | 0.129532 | 0            | 5.267649 | 0        | 1        | NA       |
| si:dkey-261j11.1  | 4.350008 | -1.325419803 | 1.282583 | -1.0334  | 0.301417 | 0.767562 |
| si:ch211-209j12.6 | 3.010382 | -0.532810295 | 1.212888 | -0.43929 | 0.660451 | 0.930581 |
| st8sial           | 352.7505 | 0.111034887  | 0.152912 | 0.726137 | 0.467755 | 0.866174 |
| AL773558.1        | 18.12249 | -2.623922187 | 0.700737 | -3.74452 | 0.000181 | 0.014053 |
| tmem56b           | 536.5249 | 0.086386259  | 0.127972 | 0.675043 | 0.499649 | 0.879634 |
| olfcg7            | 1.04696  | 0.76103096   | 2.307274 | 0.32984  | 0.741521 | NA       |
| smpd3             | 40.97911 | 0.975541613  | 0.298194 | 3.271501 | 0.00107  | 0.045987 |
| BX649608.1        | 0 NA     | NA           | NA       | NA       | NA       | NA       |
| thrap3b           | 1541.831 | -0.028065717 | 0.089831 | -0.31243 | 0.754715 | 0.956283 |
| BX649416.1        | 43.8627  | -0.115156538 | 0.271968 | -0.42342 | 0.67199  | 0.933953 |
| hhex              | 48.35289 | -0.091783703 | 0.235791 | -0.38926 | 0.697084 | 0.94198  |
| tiam2b            | 61.6511  | 0.026451651  | 0.210607 | 0.125597 | 0.900051 | 0.99045  |

|                   |          |              |          |          |          |          |
|-------------------|----------|--------------|----------|----------|----------|----------|
| actr5             | 161.6991 | -0.122149836 | 0.156271 | -0.78166 | 0.434417 | 0.850002 |
| zgc:174698        | 1.690647 | 0.517144603  | 1.37272  | 0.37673  | 0.706374 | NA       |
| fbn2b             | 985.0686 | 0.238093554  | 0.288382 | 0.825617 | 0.409021 | 0.836637 |
| CR626866.1        | 0.337991 | 0.038445182  | 4.413528 | 0.008711 | 0.99305  | NA       |
| zgc:85932         | 439.5902 | 0.128473164  | 0.147811 | 0.86917  | 0.384754 | 0.826588 |
| meis2a            | 2185.176 | 0.266331633  | 0.102477 | 2.598935 | 0.009351 | 0.166286 |
| brcc3             | 351.4394 | 0.186059824  | 0.137431 | 1.353839 | 0.175788 | 0.649413 |
| CR762475.1        | 0.155358 | 0            | 5.267649 | 0        | 1        | NA       |
| CR388206.1        | 0.111311 | 0            | 5.267649 | 0        | 1        | NA       |
| cidea             | 6.030433 | -1.481043977 | 1.297239 | -1.14169 | 0.253583 | 0.732873 |
| CU928222.2        | 0        | NA           | NA       | NA       | NA       | NA       |
| det1              | 71.10409 | 0.223775654  | 0.204367 | 1.09497  | 0.27353  | 0.749148 |
| asmt              | 51.06566 | 0.939466046  | 0.340132 | 2.762061 | 0.005744 | 0.128583 |
| cpne9             | 8.416797 | -1.294137619 | 1.136764 | -1.13844 | 0.254937 | 0.733542 |
| si:ch73-329n5.6   | 65.8976  | -0.945943572 | 0.601488 | -1.57267 | 0.115795 | 0.555893 |
| pcdh15a           | 67.94277 | 0.77603302   | 0.288833 | 2.68679  | 0.007214 | 0.144046 |
| RF00001           | 0        | NA           | NA       | NA       | NA       | NA       |
| si:dkeyp-85h7.1   | 0.090321 | 0            | 5.267649 | 0        | 1        | NA       |
| CU929294.1        | 46.53415 | 0.104364228  | 0.546633 | 0.190922 | 0.848587 | 0.977912 |
| RF00001           | 0.046941 | 0            | 5.267649 | 0        | 1        | NA       |
| znf1053           | 15.37617 | -0.687042543 | 0.428571 | -1.6031  | 0.108912 | 0.541756 |
| nipbla            | 766.7706 | 0.068733661  | 0.154002 | 0.446315 | 0.65537  | 0.929606 |
| zbtb14            | 348.372  | -0.038521493 | 0.145337 | -0.26505 | 0.790971 | 0.964766 |
| si:dkeyp-13d12.16 | 0.046941 | 0            | 5.267649 | 0        | 1        | NA       |
| CR550307.1        | 0.225485 | -0.868115537 | 5.267649 | -0.1648  | 0.8691   | NA       |
| si:zfos-451d2.2   | 3.857583 | -0.054553506 | 1.010159 | -0.054   | 0.956931 | 0.999109 |
| rbm5              | 1809.685 | -0.220888104 | 0.160427 | -1.37688 | 0.168551 | 0.639966 |
| si:dkey-237m9.1   | 4.571617 | -1.662180388 | 0.870717 | -1.90898 | 0.056265 | 0.410018 |
| ctxn1             | 4.613483 | 1.198480066  | 0.855235 | 1.401346 | 0.161111 | 0.627852 |
| CU695232.1        | 178.2064 | 0.152747642  | 0.219928 | 0.694534 | 0.487347 | 0.873291 |
| tax1bp1a          | 242.3002 | -0.07325162  | 0.177781 | -0.41203 | 0.680315 | 0.936798 |
| vstm2l            | 24.82765 | 0.017576612  | 0.488158 | 0.036006 | 0.971278 | 1        |
| unc80             | 48.75547 | 0.197231684  | 0.457145 | 0.431443 | 0.666147 | 0.932664 |
| trpc3             | 8.214444 | -0.66172785  | 0.764319 | -0.86577 | 0.386614 | 0.827438 |
| si:dkey-27i16.2   | 94.1137  | -0.097758697 | 0.205819 | -0.47497 | 0.634806 | 0.924272 |
| col5a3a           | 40.0848  | -0.168363373 | 0.326705 | -0.51534 | 0.606317 | 0.915204 |
| efna3b            | 61.84626 | 0.235673627  | 0.246368 | 0.956591 | 0.338774 | 0.795226 |
| gnsb              | 181.7717 | -0.034645238 | 0.151536 | -0.22863 | 0.819158 | 0.971785 |
| CU928205.1        | 0.07132  | 0            | 5.267649 | 0        | 1        | NA       |
| taok1b            | 992.2552 | -0.130525275 | 0.123236 | -1.05915 | 0.289532 | 0.760499 |
| si:ch211-76m11.8  | 1.471345 | -0.906973625 | 1.462113 | -0.62032 | 0.535049 | NA       |
| CR936540.1        | 48.92767 | 0.101799063  | 0.411762 | 0.247228 | 0.804732 | 0.969259 |
| si:zfos-932h1.3   | 335.0069 | 0.415249197  | 0.154894 | 2.680869 | 0.007343 | 0.145171 |
| scarb2a           | 1268.735 | 0.332189483  | 0.098333 | 3.3782   | 0.00073  | 0.036014 |
| nadka             | 63.73652 | -0.228145249 | 0.242215 | -0.94191 | 0.346237 | 0.799463 |
| cypla             | 753.5664 | -0.332955973 | 0.23442  | -1.42034 | 0.155509 | 0.620161 |
| BX908386.1        | 1.537465 | 0.433311312  | 1.609084 | 0.269291 | 0.787706 | NA       |
| dync11l1          | 1091.949 | 0.018174294  | 0.111882 | 0.162442 | 0.870958 | 0.983365 |
| BX005396.1        | 0        | NA           | NA       | NA       | NA       | NA       |
| dre-mir-193a-1    | 0        | NA           | NA       | NA       | NA       | NA       |
| grmlb             | 4.138489 | 0.098198969  | 1.635006 | 0.06006  | 0.952108 | 0.998066 |
| si:cabz01054394.6 | 43.85192 | 0.546786436  | 0.284786 | 1.919991 | 0.054859 | 0.405196 |
| CU280645.1        | 4.445874 | -6.137495173 | 1.492122 | -4.11327 | 3.90E-05 | 0.004659 |
| RF00001           | 0.049519 | 0            | 5.267649 | 0        | 1        | NA       |

|                    |          |              |          |          |          |          |
|--------------------|----------|--------------|----------|----------|----------|----------|
| spef2              | 34.01528 | 0.149452923  | 0.454234 | 0.329022 | 0.742139 | 0.954329 |
| exosc3             | 412.0308 | -0.339546594 | 0.237855 | -1.42754 | 0.153426 | 0.617916 |
| BX537137.2         | 0.450028 | -3.594525293 | 3.952524 | -0.90943 | 0.363126 | NA       |
| CR381673.1         | 0.361251 | 1.05539986   | 3.793065 | 0.278245 | 0.780825 | NA       |
| si:ch73-340n8.4    | 109.0717 | -0.319353105 | 0.218473 | -1.46175 | 0.14381  | 0.603089 |
| RF00001            | 0        | NA           | NA       | NA       | NA       | NA       |
| RF00003            | 0        | NA           | NA       | NA       | NA       | NA       |
| CABZ01065679.1     | 22.81639 | 1.276270865  | 0.44721  | 2.85385  | 0.004319 | 0.108751 |
| rab18b             | 1041.235 | -0.000404579 | 0.15575  | -0.0026  | 0.997927 | 1        |
| mamdc2a            | 88.8186  | 0.100309304  | 0.31693  | 0.316503 | 0.751621 | 0.955356 |
| si:ch1073-181h11.4 | 0.14264  | 0            | 5.267649 | 0        | 1        | NA       |
| znf326             | 44.45711 | -0.532825914 | 0.361335 | -1.4746  | 0.140319 | 0.599409 |
| hdac4              | 100.2995 | 0.200839905  | 0.28515  | 0.704331 | 0.481227 | 0.87045  |
| mxd3               | 523.554  | 0.012855725  | 0.237172 | 0.054204 | 0.956772 | 0.999109 |
| si:ch211-66c13.1   | 2.457685 | -1.385897389 | 1.49335  | -0.92805 | 0.353384 | 0.804432 |
| BX322574.1         | 8.898978 | 0.166605094  | 0.538825 | 0.309201 | 0.757169 | 0.95715  |
| atp5pd             | 4775.004 | 0.009624214  | 0.123898 | 0.077678 | 0.938084 | 0.997331 |
| si:ch211-229110.4  | 6.559756 | -0.087187106 | 0.684092 | -0.12745 | 0.898585 | 0.990199 |
| il17rd             | 317.9936 | 0.046731438  | 0.160673 | 0.290847 | 0.771168 | 0.960484 |
| cyp19a1b           | 10.18445 | 0.708102357  | 0.727911 | 0.972787 | 0.330659 | 0.788126 |
| nudcd3             | 1171.389 | -0.076283903 | 0.136923 | -0.55713 | 0.57744  | 0.904842 |
| BX901957.1         | 111.4177 | -0.399123995 | 0.200253 | -1.9931  | 0.04625  | 0.375744 |
| lrrc74b            | 24.26888 | 0.432803103  | 0.352685 | 1.227167 | 0.21976  | 0.700776 |
| srp54              | 1322.877 | -0.024063114 | 0.086837 | -0.27711 | 0.781698 | 0.962077 |
| aplp1              | 2057.679 | 0.183932959  | 0.174805 | 1.05222  | 0.292699 | 0.762191 |
| si:dkey-165o8.1    | 7.517308 | -5.291544711 | 1.418404 | -3.73063 | 0.000191 | 0.01451  |
| BX276102.1         | 17.38537 | 7.397015535  | 1.255997 | 5.889355 | 3.88E-09 | 2.72E-06 |
| FLNB               | 491.9406 | 0.174944629  | 0.174089 | 1.004916 | 0.314937 | 0.777649 |
| polr1a             | 477.9528 | -0.306943557 | 0.178957 | -1.71518 | 0.086313 | 0.493048 |
| si:ch211-207114.1  | 126.6539 | -0.842792551 | 0.537152 | -1.569   | 0.116648 | 0.557506 |
| tnfrsf11b          | 63.42994 | 0.025768661  | 0.263081 | 0.097949 | 0.921972 | 0.994346 |
| CU694197.1         | 339.5705 | -0.071912083 | 0.160917 | -0.44689 | 0.654954 | 0.929606 |
| si:dkey-38122.2    | 42.80739 | 0.32470111   | 0.36598  | 0.887209 | 0.374966 | 0.82179  |
| si:dkey-14o6.1     | 4.302575 | -0.706120472 | 0.975055 | -0.72419 | 0.468952 | 0.867083 |
| ctps1b             | 613.9802 | -0.264540687 | 0.269853 | -0.98031 | 0.326932 | 0.785707 |
| tmem1761.3a        | 247.2868 | -1.950468804 | 0.186666 | -10.449  | 1.48E-25 | 1.14E-21 |
| znf1015            | 42.06438 | 0.011974802  | 0.298871 | 0.040067 | 0.96804  | 1        |
| si:ch211-76m11.8   | 28.24627 | -3.443456285 | 1.082833 | -3.18004 | 0.001473 | 0.057828 |
| psmg3              | 406.1401 | -0.01831359  | 0.137588 | -0.1331  | 0.894111 | 0.988762 |
| ly6pge             | 487.5253 | 0.074268179  | 0.231575 | 0.32071  | 0.748431 | 0.955074 |
| tradv24.0.2        | 0        | NA           | NA       | NA       | NA       | NA       |
| CU929451.2         | 99.85054 | -0.031481108 | 0.188014 | -0.16744 | 0.867024 | 0.982582 |
| FP016106.1         | 4.130951 | 0            | 1.803735 | 0        | 1        | 1        |
| CABZ01079480.1     | 132.0259 | -0.49212304  | 0.235309 | -2.09139 | 0.036493 | 0.335935 |
| fam136a            | 234.8651 | 0.06859317   | 0.175816 | 0.390142 | 0.696432 | 0.941772 |
| L0017877.1         | 2.867132 | -1.8532139   | 1.404154 | -1.31981 | 0.186899 | 0.665301 |
| CR925723.1         | 15.38669 | 0.739975514  | 0.452825 | 1.634132 | 0.102231 | 0.528963 |
| map3k1             | 203.0803 | 0.167381092  | 0.187982 | 0.890412 | 0.373245 | 0.820501 |
| si:dkey-22a18.2    | 15.36707 | -0.229392943 | 0.679011 | -0.33783 | 0.735489 | 0.951543 |
| BX936393.2         | 0.411425 | 1.055369942  | 4.324761 | 0.24403  | 0.807208 | NA       |
| stbd1              | 131.7991 | -0.234585197 | 0.228086 | -1.0285  | 0.303717 | 0.769473 |
| BX005376.1         | 19.77697 | -0.13818757  | 0.537353 | -0.25716 | 0.797053 | 0.966447 |
| si:dkey-19b23.10   | 4.545131 | 1.551030055  | 1.143535 | 1.356346 | 0.174989 | 0.648927 |
| ninl               | 154.9528 | 0.554079026  | 0.214088 | 2.588088 | 0.009651 | 0.169148 |

|                   |          |              |            |          |          |          |
|-------------------|----------|--------------|------------|----------|----------|----------|
| CT956093.1        | 15.23753 | -6.223428752 | 1.283344   | -4.84938 | 1.24E-06 | 0.000346 |
| RF00067           | 0 NA     |              | NA         | NA       | NA       | NA       |
| SNTA1             | 65.98786 | 0.329564083  | 0.295217   | 1.116343 | 0.264275 | 0.742063 |
| trgv2             | 0.639831 |              | 0 3.758021 |          | 0        | 1 NA     |
| CABZ01079241.1    | 204.4251 | -0.007195321 | 0.168905   | -0.0426  | 0.96602  | 1        |
| si:dkey-56m15.8   | 2.471099 | -2.665334191 | 1.28442    | -2.07513 | 0.037975 | 0.342098 |
| RF00003           | 0 NA     |              | NA         | NA       | NA       | NA       |
| asiclc            | 6.099287 | -0.688281505 | 0.773247   | -0.89012 | 0.373402 | 0.820558 |
| RF00026           | 0 NA     |              | NA         | NA       | NA       | NA       |
| znf1078           | 5.113064 | 0.938520838  | 0.710167   | 1.32155  | 0.186318 | 0.664561 |
| comp              | 401.4013 | 0.183030982  | 0.203922   | 0.897555 | 0.369423 | 0.817841 |
| paf1              | 321.8545 | -0.135363586 | 0.16229    | -0.83408 | 0.404234 | 0.833888 |
| utp6              | 427.1872 | -0.10360595  | 0.16111    | -0.64308 | 0.520175 | 0.887148 |
| BX005003.1        | 237.8265 | 0.004926206  | 0.232791   | 0.021162 | 0.983117 | 1        |
| BX537156.1        | 0.657398 | -2.301184519 | 2.909033   | -0.79105 | 0.428916 | NA       |
| si:ch211-9d9.8    | 0.640984 |              | 0 3.329819 |          | 0        | 1 NA     |
| slc6a6b           | 149.6766 | -0.186354735 | 0.297901   | -0.62556 | 0.531604 | 0.890835 |
| nr1h3             | 488.562  | -0.106939483 | 0.131872   | -0.81093 | 0.417404 | 0.841149 |
| si:ch211-62a1.4   | 10.97117 | 0.425156442  | 0.585291   | 0.726401 | 0.467593 | 0.866174 |
| nars2             | 54.36223 | 0.190887388  | 0.318855   | 0.598665 | 0.549396 | 0.897192 |
| zfang6            | 532.824  | -0.036493777 | 0.128543   | -0.2839  | 0.776484 | 0.961073 |
| si:dkey-3h2.4     | 5.367607 | -0.243746906 | 1.060187   | -0.22991 | 0.818162 | 0.971518 |
| si:ch211-1o7.2    | 5.914977 | 0.630214386  | 0.820951   | 0.767664 | 0.442687 | 0.853879 |
| tmem56a           | 202.1248 | 0.090951202  | 0.215779   | 0.421502 | 0.673389 | 0.934276 |
| si:dkey-151g22.1  | 1.657483 | 0.775295669  | 1.572082   | 0.493165 | 0.621896 | NA       |
| pank4             | 419.9356 | 0.039183826  | 0.134333   | 0.291691 | 0.770523 | 0.960484 |
| BX957236.1        | 0 NA     |              | NA         | NA       | NA       | NA       |
| cc139.5           | 0.305906 | 1.05535837   | 5.267649   | 0.200347 | 0.841209 | NA       |
| si:dkey-11f4.14   | 20.37525 | -0.453823592 | 0.489057   | -0.92796 | 0.35343  | 0.804432 |
| CU570782.1        | 0.793111 | 1.916359627  | 2.142197   | 0.894577 | 0.371013 | NA       |
| gig2g             | 0.905191 | 1.104609955  | 2.041959   | 0.540956 | 0.588538 | NA       |
| si:ch73-36611.5   | 2263.545 | 0.065062917  | 0.162641   | 0.40004  | 0.689127 | 0.93924  |
| ube2a             | 1149.733 | 0.062854803  | 0.113109   | 0.555703 | 0.578414 | 0.905417 |
| RF00001           | 0 NA     |              | NA         | NA       | NA       | NA       |
| arr3b             | 1248.778 | 0.177557327  | 0.285821   | 0.621219 | 0.534455 | 0.891711 |
| tec               | 23.74742 | -0.60167829  | 0.411484   | -1.46222 | 0.143682 | 0.602773 |
| F0704758.1        | 44.59037 | 0.767269906  | 0.624592   | 1.228433 | 0.219284 | 0.700266 |
| anxald            | 340.729  | 0.153955466  | 0.140425   | 1.096351 | 0.272925 | 0.748807 |
| CR792424.1        | 1.055229 | 0.027250167  | 1.717987   | 0.015862 | 0.987345 | NA       |
| RF00017           | 0.043308 |              | 0 5.267649 |          | 0        | 1 NA     |
| CU929365.1        | 0 NA     |              | NA         | NA       | NA       | NA       |
| tollip            | 450.1235 | -0.086799864 | 0.119116   | -0.7287  | 0.466185 | 0.865297 |
| traj32            | 0 NA     |              | NA         | NA       | NA       | NA       |
| BX682557.1        | 14.67228 | -0.32302011  | 1.19546    | -0.27021 | 0.787002 | 0.963065 |
| olfcd2            | 0.161192 |              | 0 5.267649 |          | 0        | 1 NA     |
| si:ch211-145h19.3 | 0.227619 | 1.055368195  | 5.267649   | 0.200349 | 0.841208 | NA       |
| tradv25.0.1       | 0.060442 |              | 0 5.267649 |          | 0        | 1 NA     |
| hrasa             | 259.0822 | -0.161004041 | 0.138082   | -1.16601 | 0.243612 | 0.724437 |
| si:dkey-161111.79 | 0 NA     |              | NA         | NA       | NA       | NA       |
| CT583728.2        | 0.21483  | 1.055364289  | 5.092479   | 0.20724  | 0.835823 | NA       |
| lyar              | 280.5947 | 0.212799477  | 0.144379   | 1.473894 | 0.14051  | 0.599658 |
| BX005286.1        | 4.687152 | 1.366657002  | 0.970491   | 1.408211 | 0.159068 | 0.624783 |
| zgc:174650        | 2.072204 | 0.06498004   | 1.403585   | 0.046296 | 0.963075 | NA       |
| ntrk2b            | 22.37668 | 0.36794506   | 0.444216   | 0.828302 | 0.4075   | 0.83577  |

|                    |          |              |          |          |          |          |
|--------------------|----------|--------------|----------|----------|----------|----------|
| si:ch73-215f7.1    | 52.17347 | -0.379184669 | 0.31591  | -1.20029 | 0.230026 | 0.711766 |
| CU855694.1         | 0.173415 | 1.11785931   | 5.226359 | 0.213889 | 0.830634 | NA       |
| si:ch211-59d8.3    | 10.8447  | 1.222564342  | 0.63403  | 1.928243 | 0.053825 | 0.401878 |
| si:dkey-16p6.1     | 22.48734 | 0.642540326  | 0.794097 | 0.809146 | 0.418431 | 0.841565 |
| RF00001            | 0.135047 | 0            | 5.267649 | 0        | 1        | NA       |
| BX321870.1         | 0 NA     | NA           | NA       | NA       | NA       | NA       |
| BX649431.1         | 0.124591 | 1.055383603  | 5.267649 | 0.200352 | 0.841205 | NA       |
| CU856358.1         | 0.240682 | -1.710085139 | 5.238472 | -0.32645 | 0.744086 | NA       |
| gpr75              | 153.0752 | 0.136792518  | 0.225193 | 0.607447 | 0.543555 | 0.894925 |
| rtn4r11b           | 70.06067 | -0.173653223 | 0.419191 | -0.41426 | 0.678685 | 0.936026 |
| ccne2              | 206.1992 | -0.007525961 | 0.194663 | -0.03866 | 0.96916  | 1        |
| si:dkey-106c17.2   | 0.183431 | -0.868109386 | 5.267649 | -0.1648  | 0.869101 | NA       |
| RF00067            | 2.141784 | 0.40324367   | 1.276479 | 0.315903 | 0.752076 | NA       |
| BX004823.1         | 26.00891 | 1.563762051  | 0.474332 | 3.29677  | 0.000978 | 0.043444 |
| si:dkey-25i10.1    | 0.788805 | -3.343111305 | 2.101193 | -1.59105 | 0.111597 | NA       |
| spata22            | 146.6386 | 0.18177182   | 0.192531 | 0.944118 | 0.345109 | 0.79837  |
| zc3h7ba            | 154.8168 | 0.251524663  | 0.260124 | 0.96694  | 0.333574 | 0.790676 |
| CR388378.2         | 0.452822 | 1.642388564  | 2.836408 | 0.579038 | 0.562563 | NA       |
| ncdn               | 358.1462 | -0.12043831  | 0.169678 | -0.7098  | 0.477826 | 0.869292 |
| olfcg6             | 1.425117 | 1.660291598  | 1.792719 | 0.92613  | 0.354378 | NA       |
| CABZ01085700.1     | 21.75761 | -0.238622629 | 0.390105 | -0.61169 | 0.540744 | 0.893429 |
| BX323564.1         | 6.734812 | 0.186911668  | 0.727881 | 0.256789 | 0.797342 | 0.966447 |
| BX005082.1         | 0.107013 | -1.826650979 | 5.230461 | -0.34923 | 0.726914 | NA       |
| zgc:194202         | 1.543703 | -1.653866696 | 1.710982 | -0.96662 | 0.333735 | NA       |
| CR381534.1         | 0.645816 | 1.055420946  | 2.729357 | 0.386692 | 0.698984 | NA       |
| RF00001            | 0 NA     | NA           | NA       | NA       | NA       | NA       |
| si:ch73-233f7.4    | 5.769171 | 0.334023241  | 0.719729 | 0.464096 | 0.642579 | 0.92567  |
| si:ch1073-286c18.5 | 0 NA     | NA           | NA       | NA       | NA       | NA       |
| BX927336.1         | 24.82277 | 0.489806364  | 0.376188 | 1.302024 | 0.192908 | 0.672855 |
| si:ch211-8c17.2    | 12.84317 | -0.54312078  | 0.538472 | -1.00863 | 0.31315  | 0.776599 |
| FP016142.2         | 0 NA     | NA           | NA       | NA       | NA       | NA       |
| sgcd               | 384.4953 | 0.251387063  | 0.175223 | 1.434672 | 0.151381 | 0.615372 |
| srsf11             | 2009.932 | -0.020584272 | 0.118184 | -0.17417 | 0.861731 | 0.980588 |
| BX511079.1         | 0.049021 | -0.86807634  | 5.267649 | -0.16479 | 0.869106 | NA       |
| CU914631.1         | 0 NA     | NA           | NA       | NA       | NA       | NA       |
| BX908763.1         | 0.761109 | 0.771195822  | 2.762959 | 0.279119 | 0.780153 | NA       |
| pdgfab             | 152.8926 | 0.385945832  | 0.273924 | 1.40895  | 0.15885  | 0.624456 |
| CR457444.2         | 37.47206 | 0            | 2.746345 | 0        | 1        | 1        |
| wbp1               | 645.4689 | -0.190193943 | 0.11005  | -1.72824 | 0.083945 | 0.486647 |
| si:ch211-237a4.2   | 0.2875   | 1.05537143   | 4.681433 | 0.225438 | 0.821639 | NA       |
| zgc:194887         | 39.75641 | 0.077129496  | 0.530201 | 0.145472 | 0.884338 | 0.987047 |
| CR318595.1         | 0.145978 | 0            | 5.267649 | 0        | 1        | NA       |
| gchfr              | 252.5285 | -0.376705185 | 0.235178 | -1.60179 | 0.109202 | 0.542034 |
| cyb5a              | 1180.708 | -0.118479423 | 0.140322 | -0.84434 | 0.398481 | 0.830887 |
| tubb2b             | 0 NA     | NA           | NA       | NA       | NA       | NA       |
| zgc:92140          | 645.2326 | -0.134113359 | 0.143606 | -0.9339  | 0.350357 | 0.802215 |
| FP102843.1         | 0 NA     | NA           | NA       | NA       | NA       | NA       |
| hist1h2a11         | 1.101656 | -0.262299901 | 1.714165 | -0.15302 | 0.878383 | NA       |
| CU570791.1         | 17.75582 | -0.276793249 | 0.391835 | -0.7064  | 0.479937 | 0.870001 |
| RF00001            | 0.238328 | 1.970286354  | 4.936483 | 0.399128 | 0.689799 | NA       |
| pithd1             | 44.32025 | -0.370527417 | 0.299203 | -1.23838 | 0.215575 | 0.697157 |
| oral               | 1.826672 | 0.07901004   | 1.243179 | 0.063555 | 0.949325 | NA       |
| BX914220.1         | 0.989592 | 1.047714158  | 2.658393 | 0.394116 | 0.693496 | NA       |
| si:dkey-14o6.4     | 3.055933 | -1.596402767 | 1.21196  | -1.31721 | 0.187769 | 0.666964 |

|                   |          |              |          |          |          |          |
|-------------------|----------|--------------|----------|----------|----------|----------|
| slx1b             | 79.56846 | 0.038821523  | 0.231632 | 0.1676   | 0.866898 | 0.982582 |
| AL840638.1        | 110.325  | -0.510229403 | 0.288196 | -1.77042 | 0.076656 | 0.468636 |
| si:dkey-4c15.8    | 8.734991 | 0.124187246  | 0.572402 | 0.216958 | 0.828241 | 0.97403  |
| si:ch211-207e19.2 | 5.380448 | -0.77799692  | 1.019792 | -0.7629  | 0.445524 | 0.855403 |
| RF00001           | 0 NA     | NA           | NA       | NA       | NA       | NA       |
| chrn2a            | 10.26864 | 0.464987162  | 0.718689 | 0.646993 | 0.517636 | 0.887148 |
| si:dkey-15h8.16   | 41.75922 | 0.393535244  | 0.326528 | 1.205212 | 0.228122 | 0.709324 |
| BX901954.1        | 0 NA     | NA           | NA       | NA       | NA       | NA       |
| ly6m4             | 1.609409 | 0            | 2.323126 | 0        | 1        | NA       |
| erap2             | 41.37875 | -0.55183376  | 0.411408 | -1.34133 | 0.179814 | 0.655282 |
| si:ch211-188p14.2 | 20.8867  | 0.657888682  | 0.577904 | 1.138406 | 0.254951 | 0.733542 |
| CR759843.1        | 12.73773 | -0.839434642 | 0.549594 | -1.52737 | 0.126669 | 0.575586 |
| ccnel             | 85.14597 | 0.287612579  | 0.249477 | 1.15286  | 0.248968 | 0.728918 |
| si:dkey-23f9.4    | 68.20854 | 0.190115157  | 0.206821 | 0.919226 | 0.357977 | 0.809315 |
| traj54            | 0 NA     | NA           | NA       | NA       | NA       | NA       |
| efna5b            | 15.42464 | 0.268920899  | 0.431025 | 0.62391  | 0.532687 | 0.890978 |
| nitrl2            | 0.237798 | 2.56148978   | 5.200379 | 0.492558 | 0.622325 | NA       |
| gspt11            | 3645.67  | -0.118872647 | 0.10659  | -1.11524 | 0.264749 | 0.742063 |
| BX914214.1        | 0.376424 | -0.857089456 | 3.31597  | -0.25847 | 0.796042 | NA       |
| tradv6.0.1        | 0 NA     | NA           | NA       | NA       | NA       | NA       |
| RF00001           | 0.17618  | 0            | 5.267649 | 0        | 1        | NA       |
| CABZ01044277.1    | 110.9168 | 0.385023645  | 0.33644  | 1.144404 | 0.252456 | 0.732759 |
| AL929586.1        | 0.319504 | 0            | 5.267649 | 0        | 1        | NA       |
| irf2bp2b          | 1027.152 | -0.032625131 | 0.111693 | -0.2921  | 0.770212 | 0.960484 |
| pycrlb            | 930.4386 | 0.343556429  | 0.148302 | 2.316601 | 0.020525 | 0.254454 |
| CU984600.3        | 23.51053 | -0.327680203 | 0.424217 | -0.77244 | 0.439856 | 0.852079 |
| nbeal2            | 63.55114 | -0.37466338  | 0.238202 | -1.57288 | 0.115746 | 0.555893 |
| si:ch211-126j24.1 | 758.8807 | 0.135434533  | 0.142896 | 0.947786 | 0.343239 | 0.797757 |
| rgn               | 515.1577 | 0.136447184  | 0.178946 | 0.762506 | 0.445758 | 0.855403 |
| mthfd2            | 730.7688 | -0.04039031  | 0.18892  | -0.2138  | 0.830706 | 0.974908 |
| ankddl1a          | 53.6571  | 0.406739104  | 0.315265 | 1.290149 | 0.196999 | 0.677235 |
| iqgap3            | 332.7068 | 0.327018086  | 0.318336 | 1.027274 | 0.304292 | 0.769725 |
| si:dkey-21e2.7    | 2.313962 | 0.80465369   | 1.674695 | 0.480478 | 0.630888 | 0.923003 |
| pcdh11            | 164.3662 | 0.527063138  | 0.24869  | 2.119355 | 0.034061 | 0.326054 |
| BX957252.1        | 0.633926 | -0.823668307 | 2.793356 | -0.29487 | 0.768096 | NA       |
| FQ976914.1        | 5.572362 | 0.590250283  | 0.74902  | 0.78803  | 0.430679 | 0.847603 |
| KIF1C             | 70.0369  | -0.034177425 | 0.309271 | -0.11051 | 0.912005 | 0.992371 |
| CR788237.1        | 0 NA     | NA           | NA       | NA       | NA       | NA       |
| CU469526.1        | 190.4753 | -0.087979339 | 0.255927 | -0.34377 | 0.731021 | 0.950056 |
| AL935300.3        | 29.2005  | -0.681191997 | 0.42123  | -1.61715 | 0.105846 | 0.534827 |
| si:ch73-359m17.9  | 71.8252  | -0.061387223 | 0.309472 | -0.19836 | 0.842763 | 0.9766   |
| fgf19             | 17.415   | 0.822087136  | 0.8567   | 0.959597 | 0.337258 | 0.794213 |
| si:dkeyp-53d3.3   | 17.55234 | -0.119924263 | 0.466833 | -0.25689 | 0.797265 | 0.966447 |
| CT583690.1        | 0.772893 | 0.144595801  | 2.666703 | 0.054223 | 0.956758 | NA       |
| si:dkey-93h22.8   | 158.2416 | -0.066363476 | 0.245918 | -0.26986 | 0.787268 | 0.963145 |
| grin3bb           | 30.23744 | -1.372784513 | 0.612759 | -2.24033 | 0.025069 | 0.280742 |
| BX323031.1        | 2.254385 | 1.603517325  | 1.397575 | 1.147357 | 0.251234 | 0.731477 |
| exd1              | 8.604016 | 0.921735134  | 0.668548 | 1.378711 | 0.167984 | 0.639267 |
| map4k4            | 1596.581 | 0.046588028  | 0.13628  | 0.341856 | 0.73246  | 0.950617 |
| prelid1a          | 1202.563 | -0.139283058 | 0.115064 | -1.21048 | 0.226095 | 0.707444 |
| BX001023.1        | 31.81354 | 0.359417486  | 0.362804 | 0.990665 | 0.321849 | 0.782075 |
| ppfial            | 276.5742 | 0.139234094  | 0.16168  | 0.861172 | 0.389143 | 0.827725 |
| traj55            | 0 NA     | NA           | NA       | NA       | NA       | NA       |
| CU467043.1        | 0 NA     | NA           | NA       | NA       | NA       | NA       |



|                   |          |              |          |          |          |          |
|-------------------|----------|--------------|----------|----------|----------|----------|
| zgc:174180        | 0.659767 | 0.908935957  | 3.07539  | 0.295551 | 0.767573 | NA       |
| nup85             | 218.0053 | 0.16341124   | 0.174101 | 0.938601 | 0.347935 | 0.800324 |
| si:zfos-2326c3.2  | 496.331  | 0.175260291  | 0.131903 | 1.328704 | 0.183946 | 0.660778 |
| CU207221.1        | 314.556  | -0.140922167 | 0.135407 | -1.04073 | 0.298002 | 0.765416 |
| RF00017           | 0 NA     | NA           | NA       | NA       | NA       | NA       |
| zmiz2             | 224.0346 | 0.071351173  | 0.193045 | 0.36961  | 0.711673 | 0.945821 |
| CU855895.1        | 0.315222 | 3.276401662  | 5.174649 | 0.633164 | 0.526627 | NA       |
| tmprss2           | 115.4796 | -0.310851253 | 0.287439 | -1.08145 | 0.279497 | 0.752477 |
| pygol             | 9.278817 | -0.067482321 | 0.573787 | -0.11761 | 0.906378 | 0.991631 |
| CABZ01101739.1    | 0 NA     | NA           | NA       | NA       | NA       | NA       |
| ptpn23b           | 260.1584 | -0.222684699 | 0.171046 | -1.3019  | 0.192951 | 0.672855 |
| CT583672.1        | 169.4973 | 0.066970985  | 0.164143 | 0.408003 | 0.683271 | 0.938212 |
| FQ311908.1        | 20.96361 | -0.074435414 | 0.4019   | -0.18521 | 0.853065 | 0.978831 |
| vclb              | 294.9259 | 0.120910474  | 0.218655 | 0.552975 | 0.580281 | 0.905618 |
| rela              | 117.651  | -0.304856491 | 0.178982 | -1.70328 | 0.088516 | 0.499597 |
| si:ch211-11c3.9   | 4.059659 | -3.399356713 | 1.759589 | -1.9319  | 0.053371 | 0.400199 |
| illb              | 89.65792 | 0.515986529  | 0.693342 | 0.744202 | 0.456754 | 0.860698 |
| zgc:165603        | 4.319256 | 1.071034492  | 1.138    | 0.941155 | 0.346626 | 0.79947  |
| si:ch73-236c18.7  | 7.17688  | -0.713560504 | 0.924327 | -0.77198 | 0.440127 | 0.852079 |
| dre-mir-365-2     | 0.875346 | 0            | 2.415912 | 0        | 1        | NA       |
| CR388231.1        | 0.497202 | -1.756080566 | 3.982524 | -0.44095 | 0.659252 | NA       |
| CABZ01078350.1    | 4.832091 | 1.055440421  | 1.782362 | 0.592158 | 0.553745 | 0.89821  |
| CR925761.1        | 12.86899 | 0.119552191  | 0.546691 | 0.218683 | 0.826897 | 0.973458 |
| parp1l            | 2.259408 | -0.14371749  | 1.245408 | -0.1154  | 0.90813  | 0.991745 |
| CU655844.1        | 0.44703  | 1.055392172  | 3.691833 | 0.285872 | 0.774976 | NA       |
| FP245456.1        | 22.7314  | -0.145192772 | 0.47735  | -0.30416 | 0.761003 | 0.958019 |
| BX649331.1        | 2.496229 | -4.333823835 | 1.596214 | -2.71507 | 0.006626 | 0.136957 |
| si:ch73-170d6.3   | 5.226412 | 0.843225523  | 0.829604 | 1.016419 | 0.30943  | 0.774075 |
| rgrb              | 508.4072 | -0.436668868 | 0.237003 | -1.84246 | 0.065407 | 0.435359 |
| rptor             | 286.1069 | 0.261097429  | 0.144095 | 1.811978 | 0.06999  | 0.451265 |
| BX511018.1        | 0.160481 | 0            | 5.267649 | 0        | 1        | NA       |
| si:dkey-108k24.2  | 0 NA     | NA           | NA       | NA       | NA       | NA       |
| en1b              | 251.7019 | 0.056987201  | 0.123473 | 0.461534 | 0.644415 | 0.926639 |
| CU929403.1        | 1.626068 | 1.055430535  | 2.02425  | 0.521393 | 0.602093 | NA       |
| pxdn              | 172.1007 | -0.174982955 | 0.239633 | -0.73021 | 0.465261 | 0.864997 |
| ccdc14            | 36.27178 | 0.614396271  | 0.28255  | 2.174466 | 0.02967  | 0.306672 |
| si:dkey-201i2.4   | 4.079416 | 0.059903441  | 1.652962 | 0.03624  | 0.971091 | 1        |
| scn4aa            | 7.416677 | -0.127116476 | 1.129739 | -0.11252 | 0.910412 | 0.992208 |
| CABZ01046427.2    | 0.815481 | 0.093634378  | 5.267649 | 0.017775 | 0.985818 | NA       |
| CT737182.1        | 1.998594 | 0.4097673    | 1.087117 | 0.37693  | 0.706226 | NA       |
| lrtml             | 11.49547 | 0.990828734  | 1.614819 | 0.613585 | 0.53949  | 0.893049 |
| BX548018.1        | 0 NA     | NA           | NA       | NA       | NA       | NA       |
| tfec              | 79.92424 | -1.059201146 | 0.215698 | -4.91058 | 9.08E-07 | 0.000281 |
| dhrrs131l         | 350.3545 | 0.003338813  | 0.249787 | 0.013367 | 0.989335 | 1        |
| MYH6 (1 of many)  | 83.46783 | -0.126889973 | 0.353733 | -0.35872 | 0.719807 | 0.94694  |
| tbcd              | 172.8682 | 0.245294828  | 0.160513 | 1.52819  | 0.126465 | 0.575001 |
| lzts3a            | 35.00067 | 0.415196563  | 0.355541 | 1.167789 | 0.242892 | 0.724396 |
| csf3b             | 14.71839 | -2.808118851 | 1.159509 | -2.42182 | 0.015443 | 0.218848 |
| elmol             | 1367.305 | 0.057327691  | 0.122465 | 0.468114 | 0.639703 | 0.924779 |
| si:ch211-156p11.1 | 3.362504 | -1.543207835 | 1.344645 | -1.14767 | 0.251105 | 0.731476 |
| znf1125           | 0.336691 | 0.09365499   | 3.905184 | 0.023982 | 0.980867 | NA       |
| rgs2              | 76.6383  | -0.534097643 | 0.370336 | -1.4422  | 0.149246 | 0.611024 |
| musk              | 97.19385 | 0.117312313  | 0.259244 | 0.452517 | 0.650897 | 0.928364 |
| BX544876.2        | 0.069091 | 0            | 5.267649 | 0        | 1        | NA       |

|                  |          |              |            |          |          |          |  |
|------------------|----------|--------------|------------|----------|----------|----------|--|
| pcxa             | 983.5372 | -0.150275578 | 0.098783   | -1.52127 | 0.128191 | 0.57717  |  |
| CABZ01007829.1   | 0.043309 |              | 0 5.267649 |          | 0        | 1 NA     |  |
| BX005124.1       | 0.423726 | 0.644861176  | 3.593096   | 0.179472 | 0.857567 | NA       |  |
| slitrk6          | 335.7234 | -0.156248146 | 0.119721   | -1.3051  | 0.191858 | 0.672212 |  |
| cbx8b            | 145.959  | 0.060697043  | 0.21083    | 0.287896 | 0.773426 | 0.960624 |  |
| gig2d            | 2.386421 | -0.22659944  | 1.483724   | -0.15272 | 0.878616 | 0.985761 |  |
| si:zfos-741a10.3 | 16.06073 | -0.355957985 | 0.582485   | -0.6111  | 0.541132 | 0.893658 |  |
| RF00003          |          | 0 NA         | NA         | NA       | NA       | NA       |  |
| BX640547.2       | 8.316043 | 0.836206272  | 0.764062   | 1.094422 | 0.27377  | 0.749234 |  |
| CU693379.1       | 520.0185 | -0.041369818 | 0.160699   | -0.25744 | 0.796841 | 0.966447 |  |
| BX547930.4       | 1.240149 | 1.512311477  | 2.031277   | 0.744513 | 0.456566 | NA       |  |
| nsmcel           | 52.83952 | -0.127712166 | 0.267801   | -0.47689 | 0.633439 | 0.923885 |  |
| cratb            | 213.8902 | -0.127650317 | 0.151998   | -0.83982 | 0.401011 | 0.831893 |  |
| polr2b           | 1199.264 | -0.216580214 | 0.089685   | -2.41489 | 0.01574  | 0.221337 |  |
| glrx3            | 812.8271 | 0.127938615  | 0.091973   | 1.391045 | 0.164212 | 0.63332  |  |
| rangrf           | 104.5671 | 0.018768381  | 0.192919   | 0.097286 | 0.922499 | 0.994477 |  |
| cd7a1            | 43.96413 | -0.726429035 | 0.339688   | -2.13852 | 0.032475 | 0.319445 |  |
| pcdh2g28         | 1988.468 | 0.061994033  | 0.13453    | 0.460821 | 0.644927 | 0.926728 |  |
| sowahca          | 9.524835 | 0.316624444  | 0.689862   | 0.458968 | 0.646257 | 0.926728 |  |
| cdhr5b           | 25.82106 | 1.055417614  | 1.704585   | 0.619164 | 0.535808 | 0.892102 |  |
| znrf2b           | 75.02337 | -0.054428082 | 0.255909   | -0.21268 | 0.831573 | 0.974908 |  |
| CABZ01078120.1   | 0.59696  |              | 0 3.493893 |          | 0        | 1 NA     |  |
| traj7            |          | 0 NA         | NA         | NA       | NA       | NA       |  |
| CR382300.1       | 120.0703 | 0.01551529   | 0.202988   | 0.076435 | 0.939073 | 0.997371 |  |
| si:ch211-194m7.5 | 4.094324 | 1.055438349  | 1.810274   | 0.583027 | 0.559875 | 0.899668 |  |
| znf1156          | 112.5474 | -2.570190603 | 0.291917   | -8.80454 | 1.31E-18 | 5.07E-15 |  |
| sbno2a           | 72.3204  | 0.110761919  | 0.2974     | 0.372434 | 0.70957  | 0.945793 |  |
| map7d1a          | 382.9927 | 0.079092337  | 0.152988   | 0.516984 | 0.605167 | 0.914985 |  |
| cyp2aa4          | 146.1191 | -0.679239527 | 0.542875   | -1.25119 | 0.210865 | 0.692523 |  |
| vwall            | 29.93379 | 0.85008739   | 0.790081   | 1.075949 | 0.28195  | 0.754378 |  |
| RF00001          |          | 0 NA         | NA         | NA       | NA       | NA       |  |
| snap91a          | 654.0048 | 0.142979116  | 0.20245    | 0.706245 | 0.480036 | 0.870001 |  |
| VSTM2B           | 115.1386 | 0.04128472   | 0.318219   | 0.129737 | 0.896775 | 0.98939  |  |
| LO018021.1       | 56.10341 | -0.362954642 | 0.241782   | -1.50117 | 0.133312 | 0.586883 |  |
| RF00001          |          | 0 NA         | NA         | NA       | NA       | NA       |  |
| stx12            | 668.6421 | -0.044820234 | 0.11909    | -0.37636 | 0.706652 | 0.944735 |  |
| CU571064.1       | 0.349601 | -2.388311782 | 4.377897   | -0.54554 | 0.585383 | NA       |  |
| kcnc3b           | 10.89632 | 1.40870271   | 0.728769   | 1.932989 | 0.053238 | 0.400175 |  |
| CABZ01055522.1   | 180.5202 | -0.225311903 | 0.170681   | -1.32008 | 0.186808 | 0.665301 |  |
| si:dkey-58i8.5   | 0.601206 | -0.851862417 | 2.821387   | -0.30193 | 0.762705 | NA       |  |
| ftr67            | 395.1338 | -0.2800885   | 0.147304   | -1.90143 | 0.057245 | 0.413213 |  |
| sec1411          | 535.2599 | -0.324276707 | 0.136924   | -2.3683  | 0.01787  | 0.236508 |  |
| tcergla          | 680.2942 | 0.117327318  | 0.116553   | 1.006641 | 0.314107 | 0.777479 |  |
| CT583651.2       | 91.464   | 0.375411963  | 0.252585   | 1.486281 | 0.137205 | 0.59288  |  |
| cdh22            | 5.492841 | 0.074973854  | 0.947315   | 0.079143 | 0.936918 | 0.997079 |  |
| farsa            | 1153.787 | 0.112276796  | 0.16568    | 0.677674 | 0.497978 | 0.878926 |  |
| plc12            | 73.38759 | -0.108148213 | 0.29493    | -0.36669 | 0.71385  | 0.945821 |  |
| CT573793.1       |          | 0 NA         | NA         | NA       | NA       | NA       |  |
| gcdhb            | 446.8825 | 0.098935494  | 0.238601   | 0.414648 | 0.678399 | 0.936026 |  |
| fam168a          | 150.7551 | 0.820531605  | 0.2036     | 4.030125 | 5.57E-05 | 0.006008 |  |
| sox4b            | 1531.212 | 0.259673396  | 0.192051   | 1.352104 | 0.176342 | 0.649785 |  |
| BX664606.1       |          | 0 NA         | NA         | NA       | NA       | NA       |  |
| tgm51            | 25.97906 | 0.830092925  | 0.488105   | 1.700643 | 0.08901  | 0.500695 |  |
| sdr42e1          | 28.4594  | 0.015976249  | 0.362389   | 0.044086 | 0.964836 | 1        |  |

|                   |          |              |          |          |          |          |    |
|-------------------|----------|--------------|----------|----------|----------|----------|----|
| CABZ01044108.1    | 0.212191 |              | 0        | 5.267649 | 0        | 1        | NA |
| BX005073.1        | 0.101247 | 1.854150541  | 5.241768 | 0.353726 | 0.723544 | NA       |    |
| FQ311879.1        | 3.889067 |              | 0        | 2.023609 | 0        | 1        | 1  |
| lrp12             | 512.4997 | 0.028570867  | 0.12562  | 0.227438 | 0.820083 | 0.971788 |    |
| SLC25A29          | 35.06036 | 0.467211108  | 0.316354 | 1.476861 | 0.139713 | 0.598033 |    |
| si:dkey-11d20.1   | 0.098043 | -1.71005882  | 5.238474 | -0.32644 | 0.74409  | NA       |    |
| smdt1b            | 2237.82  | -0.139374655 | 0.194344 | -0.71716 | 0.473278 | 0.869064 |    |
| ehd1a             | 615.0665 | -0.283829113 | 0.14127  | -2.00912 | 0.044524 | 0.369362 |    |
| RF00001           | 0        | NA           | NA       | NA       | NA       | NA       |    |
| oxsm              | 208.206  | -0.471644408 | 0.175255 | -2.69119 | 0.00712  | 0.142826 |    |
| RYR2 (1 of many)  | 260.7357 | 0.886166727  | 0.274549 | 3.227718 | 0.001248 | 0.051445 |    |
| lifra             | 90.97242 | 0.302570727  | 0.321911 | 0.93992  | 0.347258 | 0.799992 |    |
| nop14             | 623.2284 | -0.117695691 | 0.172922 | -0.68063 | 0.496106 | 0.878093 |    |
| fam57a            | 72.39421 | 0.135494639  | 0.274726 | 0.4932   | 0.621872 | 0.918461 |    |
| plpp4             | 2.16944  | -0.833881055 | 1.352497 | -0.61655 | 0.537532 | NA       |    |
| RF00001           | 0        | NA           | NA       | NA       | NA       | NA       |    |
| BX548044.7        | 3.336192 | 1.266458295  | 1.259206 | 1.00576  | 0.314531 | 0.777479 |    |
| PRDM15            | 58.0677  | 0.272566188  | 0.212841 | 1.280609 | 0.200331 | 0.680711 |    |
| XPO5              | 109.6848 | 0.021800773  | 0.185941 | 0.117246 | 0.906665 | 0.991644 |    |
| gga3b             | 54.53303 | 0.36242465   | 0.247564 | 1.463965 | 0.143204 | 0.602183 |    |
| exoc6b            | 438.49   | -0.238155145 | 0.112261 | -2.12144 | 0.033885 | 0.325235 |    |
| si:dkey-199m13.5  | 7.496402 | 0.421767025  | 0.65546  | 0.643467 | 0.519921 | 0.887148 |    |
| BX927164.1        | 0.043308 |              | 0        | 5.267649 | 0        | 1        | NA |
| si:dkey-4j21.2    | 4.755354 | -2.487455948 | 1.197628 | -2.07699 | 0.037803 | 0.340947 |    |
| pclob             | 440.509  | 0.44044682   | 0.42522  | 1.035809 | 0.300291 | 0.766629 |    |
| si:dkey-238i5.3   | 2.781211 | -2.649420153 | 1.132257 | -2.33995 | 0.019287 | 0.244673 |    |
| stac3             | 1182.154 | 0.01221663   | 0.189904 | 0.064331 | 0.948707 | 0.99777  |    |
| BX649355.1        | 0.877524 | -3.114819891 | 5.154668 | -0.60427 | 0.545663 | NA       |    |
| dre-mir-735       | 0        | NA           | NA       | NA       | NA       | NA       |    |
| CU861459.1        | 0        | NA           | NA       | NA       | NA       | NA       |    |
| si:zfos-128g4.2   | 94.43504 | 0.103331263  | 0.33661  | 0.306977 | 0.758861 | 0.957886 |    |
| cyp2aa9           | 96.70155 | -0.992643882 | 0.406872 | -2.4397  | 0.0147   | 0.212735 |    |
| si:ch211-223a21.1 | 14.25758 | -0.133852342 | 0.463349 | -0.28888 | 0.772673 | 0.960624 |    |
| BX324119.1        | 0.2075   |              | 0        | 5.267649 | 0        | 1        | NA |
| RF00001           | 0        | NA           | NA       | NA       | NA       | NA       |    |
| BX323544.1        | 0.389977 |              | 0        | 4.279676 | 0        | 1        | NA |
| pds5b             | 1311.888 | 0.170694632  | 0.111429 | 1.531864 | 0.125556 | 0.573341 |    |
| si:ch211-255f4.2  | 42.71726 | -1.144498469 | 0.360075 | -3.1785  | 0.00148  | 0.057996 |    |
| zmp:0000001082    | 141.887  | 0.217354572  | 0.20965  | 1.036751 | 0.299852 | 0.766586 |    |
| ubxn8             | 108.5595 | 0.381976945  | 0.256199 | 1.490941 | 0.135977 | 0.591131 |    |
| tfe3a             | 57.90815 | -0.125450912 | 0.315428 | -0.39772 | 0.690839 | 0.940147 |    |
| pex1              | 132.2387 | 0.112783658  | 0.182108 | 0.619323 | 0.535704 | 0.89207  |    |
| herc7             | 35.68959 | 0.042078826  | 0.388852 | 0.108213 | 0.913827 | 0.992796 |    |
| abraxas2          | 159.5245 | 0.234284253  | 0.162988 | 1.437435 | 0.150595 | 0.614417 |    |
| CU062501.1        | 28.30914 | -0.258615342 | 0.373966 | -0.69155 | 0.489221 | 0.874296 |    |
| SHC3              | 28.85498 | 0.688096552  | 0.501294 | 1.37264  | 0.169864 | 0.641525 |    |
| zgc:153293        | 185.7048 | -0.532790456 | 0.225935 | -2.35815 | 0.018366 | 0.239337 |    |
| CU633999.2        | 14.94661 | 0.68536265   | 0.506209 | 1.353913 | 0.175764 | 0.649413 |    |
| faslg             | 1.330844 |              | 0        | 2.412297 | 0        | 1        | NA |
| si:ch211-216p19.5 | 4.106464 | -1.708316367 | 1.335062 | -1.27958 | 0.200694 | 0.68103  |    |
| krit1             | 290.9995 | -0.065941674 | 0.128523 | -0.51307 | 0.607902 | 0.915204 |    |
| mcoln2            | 14.47066 | -0.545789868 | 0.609938 | -0.89483 | 0.370879 | 0.818484 |    |
| smarcc1b          | 298.4899 | 0.151062854  | 0.130791 | 1.154991 | 0.248094 | 0.728489 |    |
| zgc:173577        | 12.28044 | -0.46474098  | 0.495071 | -0.93874 | 0.347866 | 0.800274 |    |

|                   |          |              |            |          |          |          |
|-------------------|----------|--------------|------------|----------|----------|----------|
| suz12b            | 598.8079 | -0.006820453 | 0.119787   | -0.05694 | 0.954594 | 0.998611 |
| prdm1b            | 110.634  | 0.05239047   | 0.270203   | 0.193893 | 0.84626  | 0.97711  |
| si:ch211-196h24.1 | 2.164237 | -1.754979978 | 1.339932   | -1.30975 | 0.190279 | NA       |
| tex15             | 4.681861 | 0.146885724  | 0.906104   | 0.162107 | 0.871222 | 0.983365 |
| gigyfla           | 197.2279 | -0.10535783  | 0.173395   | -0.60762 | 0.543442 | 0.894925 |
| rrp7a             | 309.6637 | -0.130769726 | 0.217462   | -0.60135 | 0.54761  | 0.896211 |
| bxdc2             | 442.0058 | -0.08133668  | 0.134185   | -0.60615 | 0.544413 | 0.895206 |
| kif5aa            | 1852.07  | 0.228260387  | 0.201054   | 1.135319 | 0.256242 | 0.73401  |
| si:ch73-315f9.2   | 26.39305 | 0.256104548  | 0.438348   | 0.58425  | 0.559052 | 0.899454 |
| trdjl             | 0.283508 |              | 0.5.267649 |          | 0        | 1 NA     |
| BX323855.1        | 0.128839 |              | 0.5.267649 |          | 0        | 1 NA     |
| CU856520.1        | 311.4528 | -0.380420929 | 0.167227   | -2.27487 | 0.022914 | 0.267056 |
| rp9               | 283.4184 | -0.013974061 | 0.194042   | -0.07202 | 0.942589 | 0.997371 |
| dre-mir-7148      | 0 NA     |              | NA         | NA       | NA       | NA       |
| nme8              | 19.5152  | -0.408683563 | 0.374095   | -1.09246 | 0.274631 | 0.750181 |
| CT583726.1        | 0 NA     |              | NA         | NA       | NA       | NA       |
| pald1a            | 637.5998 | -0.093663752 | 0.11494    | -0.81489 | 0.415134 | 0.838738 |
| mslna             | 88.58661 | -0.312063772 | 0.388652   | -0.80294 | 0.42201  | 0.843292 |
| si:dkeyp-92c9.4   | 14.84365 | -0.797392684 | 1.608459   | -0.49575 | 0.620071 | 0.917671 |
| BX957297.1        | 2.739333 | 0.897596925  | 1.48007    | 0.606456 | 0.544212 | 0.895206 |
| gata4             | 50.43692 | -0.157272038 | 0.411043   | -0.38262 | 0.702004 | 0.943292 |
| stardl3b          | 475.6836 | -0.072772237 | 0.110659   | -0.65763 | 0.510777 | 0.884139 |
| ssh2b             | 312.2947 | -0.00527166  | 0.179893   | -0.0293  | 0.976622 | 1        |
| znf1100           | 1.662715 | -1.240269571 | 1.822286   | -0.68061 | 0.496117 | NA       |
| RF00003           | 0 NA     |              | NA         | NA       | NA       | NA       |
| pcdhlg13          | 24.60824 | 0.784091442  | 0.488679   | 1.604514 | 0.108601 | 0.541057 |
| si:ch211-9d9.7    | 4.749035 | 4.053417928  | 1.392336   | 2.911236 | 0.0036   | 0.099301 |
| CABZ01064972.1    | 5.153006 | -1.510018803 | 1.319911   | -1.14403 | 0.252611 | 0.732759 |
| rabgap1           | 555.5152 | -0.043309237 | 0.119549   | -0.36227 | 0.71715  | 0.94627  |
| RSBN1             | 161.9249 | 0.013223131  | 0.209785   | 0.063032 | 0.949741 | 0.99801  |
| CU459186.1        | 3.1638   | -1.468230123 | 1.442788   | -1.01763 | 0.308852 | 0.77371  |
| FP003590.1        | 1.61908  | -3.099076741 | 2.001963   | -1.54802 | 0.121618 | NA       |
| mrps16            | 374.7976 | 0.171720453  | 0.148608   | 1.155529 | 0.247874 | 0.728489 |
| CR759816.1        | 3.173697 | -1.214633331 | 1.127799   | -1.07699 | 0.281483 | 0.753734 |
| si:ch211-76m11.15 | 0.059954 | 1.055396947  | 5.267649   | 0.200354 | 0.841203 | NA       |
| si:ch211-153f2.3  | 47.21138 | -0.036663319 | 0.239042   | -0.15338 | 0.878102 | 0.98573  |
| dre-mir-126b      | 0 NA     |              | NA         | NA       | NA       | NA       |
| CABZ01112656.1    | 520.1412 | 0.00667166   | 0.128457   | 0.051937 | 0.958579 | 0.999109 |
| pid1              | 117.4958 | -0.093552911 | 0.171013   | -0.54705 | 0.584343 | 0.906412 |
| BX649431.2        | 0.119909 | 2.079562922  | 5.22636    | 0.397899 | 0.690705 | NA       |
| znf1040           | 24.83028 | -0.449285287 | 0.512361   | -0.87689 | 0.380545 | 0.823655 |
| znf1071           | 0.821862 | 3.070586319  | 2.834423   | 1.08332  | 0.278666 | NA       |
| si:ch211-193i15.1 | 2.98845  | 0.585010795  | 1.227585   | 0.476554 | 0.63368  | 0.923974 |
| CU459012.1        | 43.85931 | -0.44853524  | 0.26172    | -1.7138  | 0.086565 | 0.493048 |
| zgc:162858        | 196.6588 | 0.479350179  | 0.191964   | 2.497088 | 0.012522 | 0.194587 |
| znf1095           | 5.266899 | -1.390533515 | 0.754185   | -1.84376 | 0.065219 | 0.435355 |
| zgc:114119        | 224.1831 | 0.152315924  | 0.166709   | 0.913666 | 0.360893 | 0.811253 |
| CR352263.1        | 7.104985 | -0.217791199 | 0.873237   | -0.24941 | 0.803046 | 0.968418 |
| cyp2k6            | 20.31042 | 0.822153149  | 1.108525   | 0.741664 | 0.458291 | 0.861001 |
| RF01190           | 0 NA     |              | NA         | NA       | NA       | NA       |
| si:ch73-311h14.2  | 275.4739 | -0.207860332 | 0.131288   | -1.58324 | 0.113367 | 0.551243 |
| RF00001           | 0.046941 |              | 0.5.267649 |          | 0        | 1 NA     |
| CR847947.1        | 0.940056 |              | 0.2.703509 |          | 0        | 1 NA     |
| creb5a            | 28.00116 | -0.225527716 | 0.399481   | -0.56455 | 0.572378 | 0.903461 |

|                   |          |              |            |          |          |          |
|-------------------|----------|--------------|------------|----------|----------|----------|
| cyp2aa1           | 137.6034 | -0.810377612 | 0.27377    | -2.96006 | 0.003076 | 0.091315 |
| palm2             | 24.72939 | -0.353176976 | 0.454587   | -0.77692 | 0.437207 | 0.851125 |
| EGFLAM            | 18.35343 | 0.103179091  | 0.524377   | 0.196765 | 0.844011 | 0.976791 |
| si:dkey-50i6.6    | 55.84189 | -0.479394562 | 0.238863   | -2.00699 | 0.044751 | 0.370491 |
| fxyd1             | 1318.426 | -0.047264058 | 0.146253   | -0.32317 | 0.746569 | 0.955074 |
| wacb              | 72.10122 | -0.011184599 | 0.204679   | -0.05464 | 0.956422 | 0.99899  |
| CR749168.1        | 0.507339 | -1.74783001  | 3.995116   | -0.43749 | 0.661755 | NA       |
| RF00001           | 0.04222  |              | 0 5.267649 |          | 0        | 1 NA     |
| setdbl1b          | 725.1263 | 0.057437197  | 0.166874   | 0.344195 | 0.7307   | 0.950056 |
| faua              | 18777.11 | -0.369625837 | 0.13393    | -2.75985 | 0.005783 | 0.128995 |
| CABZ01034698.1    | 3.307168 | -6.120539461 | 2.831698   | -2.16144 | 0.030662 | 0.312139 |
| si:ch211-188p14.5 |          | 0 NA         | NA         | NA       | NA       | NA       |
| CU915778.1        | 9.318042 | -0.576530132 | 0.599986   | -0.96091 | 0.3366   | 0.793309 |
| si:dkey-185m8.2   | 17.52672 | 0.174673218  | 0.425792   | 0.410232 | 0.681636 | 0.937418 |
| tradv25.0.2       |          | 0 NA         | NA         | NA       | NA       | NA       |
| trdj2             | 0.211204 |              | 0 5.267649 |          | 0        | 1 NA     |
| scn4ba            | 59.5936  | 0.833625104  | 0.346432   | 2.406315 | 0.016114 | 0.223897 |
| F0818704.1        | 1.387034 | 1.561531118  | 1.941268   | 0.804387 | 0.421173 | NA       |
| unc5a             | 9.162565 | 0.528150757  | 0.642592   | 0.821907 | 0.41113  | 0.837797 |
| pcdh1g33          | 124.1067 | 0.168671169  | 0.277488   | 0.60785  | 0.543287 | 0.894925 |
| CU138542.1        | 0.126661 |              | 0 5.267649 |          | 0        | 1 NA     |
| kcngl             | 23.27833 | -0.496269019 | 0.605033   | -0.82023 | 0.412083 | 0.838123 |
| pcbp2             | 3548.909 | -0.039871815 | 0.091661   | -0.43499 | 0.66357  | 0.931556 |
| cfap157           | 8.435338 | 0.71600476   | 0.652004   | 1.09816  | 0.272135 | 0.748056 |
| BX548000.1        | 1.61833  | -0.53949911  | 1.514234   | -0.35629 | 0.721627 | NA       |
| cacnb2a           | 152.6471 | -0.007862841 | 0.179975   | -0.04369 | 0.965153 | 1        |
| si:ch211-227p7.5  | 9.010628 | -0.986857204 | 0.782727   | -1.26079 | 0.207383 | 0.689456 |
| BX323797.1        | 0.045161 |              | 0 5.267649 |          | 0        | 1 NA     |
| znf1070           | 5.106489 | 0.440647762  | 0.843793   | 0.522222 | 0.601516 | 0.913965 |
| rragcb            | 80.32987 | -0.209337246 | 0.205064   | -1.02084 | 0.307331 | 0.772541 |
| tradv2.0.3        | 0.248325 |              | 0 5.267649 |          | 0        | 1 NA     |
| BX088596.1        | 20.25031 | 0.832057896  | 0.477546   | 1.742362 | 0.081445 | 0.480419 |
| CR790365.1        |          | 0 NA         | NA         | NA       | NA       | NA       |
| CU929262.1        | 0.141258 |              | 0 5.267649 |          | 0        | 1 NA     |
| zgc:111868        | 6.393964 | -0.498172725 | 0.721183   | -0.69077 | 0.489709 | 0.874629 |
| znf1154           | 9.774388 | -0.50848816  | 0.59461    | -0.85516 | 0.392461 | 0.827902 |
| tradv6.0.2        |          | 0 NA         | NA         | NA       | NA       | NA       |
| BX323051.1        | 0.816753 | 0.477157219  | 2.141354   | 0.22283  | 0.823668 | NA       |
| si:dkey-161111.67 |          | 0 NA         | NA         | NA       | NA       | NA       |
| si:ch211-147m6.3  |          | 0 NA         | NA         | NA       | NA       | NA       |
| bsk146            | 132.5585 | 0.388232944  | 0.215199   | 1.804064 | 0.071221 | 0.455342 |
| FP074867.1        | 7.932083 | 1.483125486  | 0.584928   | 2.535568 | 0.011227 | 0.183909 |
| si:zfos-741a10.4  | 4.157381 | 0.111840674  | 0.999488   | 0.111898 | 0.910904 | 0.992208 |
| si:ch211-106g8.54 |          | 0 NA         | NA         | NA       | NA       | NA       |
| CABZ01032982.1    | 0.17763  |              | 0 5.267649 |          | 0        | 1 NA     |
| CU467646.3        | 2.162107 | 2.403906208  | 3.279746   | 0.732955 | 0.463586 | NA       |
| F0905040.1        | 29.57299 | -0.225072226 | 0.330683   | -0.68063 | 0.496107 | 0.878093 |
| aclya             | 1548.283 | 0.118977014  | 0.091771   | 1.296456 | 0.194818 | 0.67483  |
| sbno1             | 1108.053 | 0.21936067   | 0.122299   | 1.793638 | 0.072871 | 0.458685 |
| CR376766.1        |          | 0 NA         | NA         | NA       | NA       | NA       |
| BX572078.1        | 1.178184 | -2.32396134  | 2.039063   | -1.13972 | 0.254403 | NA       |
| pcif1             | 141.9769 | -0.137363804 | 0.158003   | -0.86938 | 0.384642 | 0.826588 |
| RF00001           |          | 0 NA         | NA         | NA       | NA       | NA       |
| BX511142.1        | 3.079537 | -0.81290109  | 0.923704   | -0.88005 | 0.378835 | 0.823136 |

|                    |           |               |             |           |           |           |   |
|--------------------|-----------|---------------|-------------|-----------|-----------|-----------|---|
| edar               | 27. 93708 | -0. 084375143 | 0. 41949    | -0. 20114 | 0. 840591 | 0. 97643  |   |
| znf1087            | 7. 738996 | -0. 165101169 | 0. 723193   | -0. 22829 | 0. 819417 | 0. 971785 |   |
| CU929418. 1        | 2. 000242 | -4. 224810506 | 1. 831726   | -2. 30646 | 0. 021085 | NA        |   |
| RASGRP2            | 13. 81943 | 0. 10698103   | 0. 572749   | 0. 186785 | 0. 851829 | 0. 978558 |   |
| dock1              | 560. 7138 | 0. 042489658  | 0. 141338   | 0. 300624 | 0. 763701 | 0. 959055 |   |
| CR974475. 1        | 0. 14264  |               | 0 5. 267649 |           | 0         | 1 NA      |   |
| gabrb4             | 16. 38253 | 0. 639739226  | 0. 542392   | 1. 179477 | 0. 238208 | 0. 719219 |   |
| L0017849. 1        | 0. 389018 | -0. 868141166 | 3. 818391   | -0. 22736 | 0. 820145 | NA        |   |
| CABZ01015815. 1    | 66. 98391 | 0. 339580951  | 0. 34225    | 0. 992202 | 0. 321099 | 0. 781417 |   |
| gch2               | 7945. 569 | -0. 418830791 | 0. 27567    | -1. 51932 | 0. 128682 | 0. 578173 |   |
| dre-mir-19a        | 0. 053262 | 1. 055396947  | 5. 267649   | 0. 200354 | 0. 841203 | NA        |   |
| rpl24              | 25283. 54 | -0. 396794771 | 0. 138123   | -2. 87277 | 0. 004069 | 0. 106406 |   |
| afmid              | 66. 47968 | -0. 068871054 | 0. 32567    | -0. 21147 | 0. 832517 | 0. 975149 |   |
| FP016019. 1        | 0. 31506  |               | 0 3. 954076 |           | 0         | 1 NA      |   |
| clic6              | 62. 40963 | 0. 008126267  | 0. 328202   | 0. 02476  | 0. 980246 |           | 1 |
| CU929444. 1        | 384. 1497 | -0. 299289849 | 0. 178484   | -1. 67684 | 0. 093574 | 0. 511703 |   |
| zgc:175280         | 69. 23013 | -0. 056763255 | 0. 520585   | -0. 10904 | 0. 913173 | 0. 99273  |   |
| si:dkey-7114. 3    | 9. 885154 | 1. 421434301  | 0. 855812   | 1. 660919 | 0. 09673  | 0. 519163 |   |
| UNC13B             | 98. 36332 | -0. 057628146 | 0. 210657   | -0. 27356 | 0. 78442  | 0. 962605 |   |
| FP017279. 1        | 0. 26542  |               | 0 5. 267649 |           | 0         | 1 NA      |   |
| nagk               | 318. 7594 | -0. 047318018 | 0. 163122   | -0. 29008 | 0. 771757 | 0. 960624 |   |
| si:dkey-33i11. 4   | 1047. 898 | 0. 024470248  | 0. 183733   | 0. 133183 | 0. 894048 | 0. 988762 |   |
| si:dkey-218f9. 10  | 120. 3173 | 0. 229602846  | 0. 203819   | 1. 126502 | 0. 259953 | 0. 73712  |   |
| si:dkey-6d5. 1     | 0. 539865 | 1. 004308421  | 2. 983668   | 0. 336602 | 0. 736417 | NA        |   |
| naa38              | 303. 1474 | 0. 146173195  | 0. 197755   | 0. 739162 | 0. 459808 | 0. 862369 |   |
| CU459186. 2        | 3. 173183 | -0. 807753801 | 0. 975418   | -0. 82811 | 0. 407608 | 0. 83577  |   |
| f3a                | 133. 0298 | 0. 068527537  | 0. 23819    | 0. 287701 | 0. 773575 | 0. 960624 |   |
| RF01848            |           | 0 NA          | NA          | NA        | NA        | NA        |   |
| CABZ01055168. 1    |           | 0 NA          | NA          | NA        | NA        | NA        |   |
| phlda1             | 62. 20605 | 0. 003173655  | 0. 230435   | 0. 013772 | 0. 989012 |           | 1 |
| si:ch73-72b7. 1    | 19. 79141 | 0. 185360781  | 0. 557912   | 0. 33224  | 0. 739708 | 0. 953588 |   |
| zgc:195356         | 20. 67001 | 0. 238923363  | 0. 399698   | 0. 59776  | 0. 55     | 0. 8974   |   |
| BX663503. 3        | 614. 978  | 0. 144190535  | 0. 151044   | 0. 954624 | 0. 339768 | 0. 795226 |   |
| btr29              | 3. 683384 | 0. 591763125  | 1. 071826   | 0. 552108 | 0. 580875 | 0. 905618 |   |
| fbxw5              | 515. 5785 | -0. 042614224 | 0. 100086   | -0. 42578 | 0. 670271 | 0. 933809 |   |
| tradv25. 0. 3      |           | 0 NA          | NA          | NA        | NA        | NA        |   |
| CR762408. 1        |           | 0 NA          | NA          | NA        | NA        | NA        |   |
| fnta               | 439. 7731 | -0. 06594802  | 0. 113515   | -0. 58096 | 0. 561265 | 0. 90039  |   |
| igfbp3             | 423. 6024 | 0. 006654371  | 0. 136924   | 0. 048599 | 0. 961239 | 0. 99935  |   |
| BX511066. 1        |           | 0 NA          | NA          | NA        | NA        | NA        |   |
| bzwlb              | 2086. 297 | -0. 274359162 | 0. 192572   | -1. 42471 | 0. 154241 | 0. 61894  |   |
| hs3st3bla          | 36. 19348 | -0. 169650258 | 0. 32864    | -0. 51622 | 0. 605702 | 0. 915055 |   |
| si:dkey-190j3. 2   | 3. 927616 | 0. 774000073  | 1. 110093   | 0. 697239 | 0. 485653 | 0. 87303  |   |
| tpst2              | 53. 37149 | -0. 601887026 | 0. 286413   | -2. 10147 | 0. 0356   | 0. 331266 |   |
| katnall            | 195. 4303 | 0. 190132988  | 0. 143957   | 1. 320761 | 0. 186581 | 0. 664968 |   |
| CR450748. 1        | 0. 120909 |               | 0 5. 267649 |           | 0         | 1 NA      |   |
| si:ch211-186j3. 3  | 1. 988825 | -0. 409086309 | 1. 192699   | -0. 34299 | 0. 731604 | NA        |   |
| CR749168. 2        | 2. 376464 | 0. 975172244  | 1. 302443   | 0. 748726 | 0. 454023 | 0. 858944 |   |
| dnaaf4             | 27. 94431 | -0. 166894587 | 0. 398318   | -0. 419   | 0. 675217 | 0. 935297 |   |
| RF00017            | 0. 049519 |               | 0 5. 267649 |           | 0         | 1 NA      |   |
| naccla             | 67. 39524 | 0. 320723521  | 0. 227945   | 1. 407023 | 0. 15942  | 0. 6257   |   |
| RF00001            |           | 0 NA          | NA          | NA        | NA        | NA        |   |
| cxc18b. 3          | 58. 31105 | -0. 966064192 | 0. 581047   | -1. 66263 | 0. 096387 | 0. 518287 |   |
| si:dkey-161111. 78 |           | 0 NA          | NA          | NA        | NA        | NA        |   |

|                  |          |              |          |          |          |          |
|------------------|----------|--------------|----------|----------|----------|----------|
| BX000701.1       | 26.65584 | 0.22318689   | 0.339127 | 0.658122 | 0.51046  | 0.884024 |
| BX530097.1       | 45.5192  | -0.023094814 | 0.280875 | -0.08222 | 0.934468 | 0.99682  |
| BX666065.1       | 0.310936 | 1.055365242  | 4.611357 | 0.228862 | 0.818976 | NA       |
| hmgbl1a          | 7003.103 | 0.071946734  | 0.151332 | 0.475422 | 0.634486 | 0.924245 |
| dok1b            | 119.8625 | -0.024826978 | 0.185584 | -0.13378 | 0.893578 | 0.988566 |
| CR927050.1       | 0.996131 | -3.335260647 | 2.746162 | -1.21452 | 0.22455  | NA       |
| L0018568.1       | 5.47174  | 1.965659214  | 0.920824 | 2.134673 | 0.032788 | 0.32041  |
| ankrd55          | 65.40953 | 0.128425525  | 0.311062 | 0.412861 | 0.679708 | 0.936428 |
| fkbp10a          | 115.9286 | 0.326110384  | 0.218317 | 1.493745 | 0.135242 | 0.590585 |
| map2k6           | 771.703  | 0.153548951  | 0.107835 | 1.423926 | 0.154468 | 0.619425 |
| chia.2           | 2330.757 | -0.369052309 | 0.706322 | -0.5225  | 0.601323 | 0.913756 |
| slcla5           | 1512.031 | 0.081580758  | 0.160652 | 0.507811 | 0.611586 | 0.915331 |
| purg             | 44.00145 | 0.293374332  | 0.357593 | 0.820415 | 0.41198  | 0.838123 |
| CU856516.1       | 29.38583 | 0.442230695  | 0.370634 | 1.193173 | 0.232802 | 0.714439 |
| CABZ01058261.1   | 640.0265 | 0.278312152  | 0.393555 | 0.707175 | 0.479457 | 0.86985  |
| ier2a            | 518.7268 | -0.203694581 | 0.505154 | -0.40323 | 0.686777 | 0.93875  |
| actclb           | 400397.6 | -0.064155373 | 0.192463 | -0.33334 | 0.738879 | 0.953273 |
| BX927287.1       | 4.04997  | -1.293533272 | 1.087428 | -1.18953 | 0.23423  | 0.714938 |
| itchb            | 98.38478 | -0.024432214 | 0.243085 | -0.10051 | 0.91994  | 0.993892 |
| zgc:123103       | 6570.548 | -0.486994585 | 0.244881 | -1.9887  | 0.046734 | 0.376639 |
| BX908731.1       | 2.165094 | 0.649176652  | 1.322439 | 0.490894 | 0.623502 | NA       |
| atplb2a          | 2219.347 | 0.1885731    | 0.171958 | 1.096623 | 0.272806 | 0.748747 |
| CU466285.2       | 0 NA     | NA           | NA       | NA       | NA       | NA       |
| CR855379.1       | 0.102175 | 1.055383603  | 5.267649 | 0.200352 | 0.841205 | NA       |
| si:dkey-11f4.7   | 2.658694 | -1.362533238 | 1.759786 | -0.77426 | 0.438777 | 0.85189  |
| BX681417.1       | 0 NA     | NA           | NA       | NA       | NA       | NA       |
| si:dkey-220o5.5  | 2.103405 | 0 1.998242   | 0        | 1 NA     |          |          |
| glyr1            | 980.1502 | 0.140220886  | 0.089403 | 1.568418 | 0.116784 | 0.557831 |
| CR318603.1       | 0.222721 | 1.055360606  | 5.267649 | 0.200348 | 0.841209 | NA       |
| atp8b2           | 2.752687 | 0.927538045  | 1.257136 | 0.737819 | 0.460625 | 0.862369 |
| zgc:109982       | 15.58848 | 0.305087344  | 0.681394 | 0.44774  | 0.654341 | 0.929488 |
| ghrhr2           | 1.121274 | 1.055422086  | 2.455593 | 0.429803 | 0.667339 | NA       |
| BX571942.1       | 41.18375 | -0.131846776 | 0.257766 | -0.5115  | 0.609002 | 0.915204 |
| ppp2r2bb         | 139.5372 | -0.004012558 | 0.195413 | -0.02053 | 0.983618 | 1        |
| prpsap1          | 106.4344 | -0.102195657 | 0.222465 | -0.45938 | 0.645962 | 0.926728 |
| CABZ01076667.1   | 825.1258 | -0.035116361 | 0.129251 | -0.27169 | 0.78586  | 0.962605 |
| galnt13          | 132.6939 | 0.830058308  | 0.242542 | 3.422328 | 0.000621 | 0.0324   |
| RF00001          | 0.059954 | 1.055396947  | 5.267649 | 0.200354 | 0.841203 | NA       |
| CU929119.1       | 7.09261  | -0.535612425 | 0.69708  | -0.76837 | 0.44227  | 0.853736 |
| si:zfos-2372e4.1 | 7.949645 | 0.453661436  | 0.986039 | 0.460085 | 0.645455 | 0.926728 |
| hook2            | 165.2959 | 0.083266247  | 0.245442 | 0.339251 | 0.734421 | 0.951134 |
| 10-Sep           | 1453.722 | 0.00026294   | 0.094777 | 0.002774 | 0.997786 | 1        |
| rasd4            | 267.7424 | 0.196775016  | 0.255707 | 0.769533 | 0.441577 | 0.853109 |
| traj47           | 0 NA     | NA           | NA       | NA       | NA       | NA       |
| acap3b           | 85.09037 | -0.076915819 | 0.196187 | -0.39205 | 0.695019 | 0.941197 |
| ppp2cb           | 2255.285 | -0.009507649 | 0.084979 | -0.11188 | 0.910916 | 0.992208 |
| si:dkey-68o6.5   | 20.00181 | 0.668244672  | 0.413135 | 1.617499 | 0.105771 | 0.534827 |
| CR450749.1       | 0 NA     | NA           | NA       | NA       | NA       | NA       |
| CT030005.1       | 0 NA     | NA           | NA       | NA       | NA       | NA       |
| ipcef1           | 90.49986 | -0.32489575  | 0.178773 | -1.81737 | 0.069161 | 0.448617 |
| CU861469.1       | 0.81363  | -1.922790693 | 2.417907 | -0.79523 | 0.42648  | NA       |
| BX465836.2       | 0.20403  | 0 5.267649   | 0        | 1 NA     |          |          |
| puml             | 2038.51  | 0.051695096  | 0.067568 | 0.765079 | 0.444225 | 0.854431 |
| si:ch73-119p20.1 | 613.0368 | 0.589189577  | 0.238072 | 2.474834 | 0.01333  | 0.200944 |

|                   |          |              |          |          |          |          |
|-------------------|----------|--------------|----------|----------|----------|----------|
| vps52             | 354.5461 | 0.004694795  | 0.129807 | 0.036167 | 0.971149 | 1        |
| tradv15.0         | 1.190781 | -1.721342413 | 2.863482 | -0.60114 | 0.547749 | NA       |
| PITPNC1           | 23.65825 | -0.371177791 | 0.441543 | -0.84064 | 0.400551 | 0.831725 |
| si:dkey-16p6.1    | 32.65564 | 0.155273874  | 0.454265 | 0.341814 | 0.732491 | 0.950617 |
| slc7a5            | 151.5797 | 0.065676577  | 0.268296 | 0.244792 | 0.806618 | 0.969726 |
| vasna             | 432.3176 | -0.114590987 | 0.170699 | -0.6713  | 0.502028 | 0.881211 |
| si:dkeyp-13d12.11 | 0 NA     | NA           | NA       | NA       | NA       | NA       |
| si:dkeyp-115e12.7 | 133.2281 | 0.07803842   | 0.221751 | 0.351918 | 0.724899 | 0.948578 |
| zgc:103508        | 231.9884 | 0.07893272   | 0.164599 | 0.479547 | 0.63155  | 0.923003 |
| atxn3             | 186.5014 | -0.173481059 | 0.183896 | -0.94337 | 0.345493 | 0.79876  |
| ugt5b3            | 99.47271 | -0.690621185 | 0.426427 | -1.61955 | 0.105329 | 0.534575 |
| znf1039           | 0.295227 | -2.780498223 | 3.862701 | -0.71983 | 0.471628 | NA       |
| utp20             | 279.6388 | 0.054918253  | 0.180367 | 0.304481 | 0.760761 | 0.957886 |
| si:dkey-112e7.2   | 869.9636 | -0.327465156 | 0.149516 | -2.19017 | 0.028512 | 0.300554 |
| si:ch73-359m17.6  | 8.575632 | 1.099573169  | 0.997169 | 1.102694 | 0.27016  | 0.746532 |
| epb41a            | 286.109  | -0.071091841 | 0.17566  | -0.40471 | 0.685688 | 0.938486 |
| si:dkey-228b2.6   | 0 NA     | NA           | NA       | NA       | NA       | NA       |
| st3gal113         | 1.848727 | 0            | 2.428945 | 0        | 1        | NA       |
| RF00001           | 0 NA     | NA           | NA       | NA       | NA       | NA       |
| lsr               | 334.1026 | 0.00339908   | 0.169823 | 0.020015 | 0.984031 | 1        |
| CR847534.1        | 3.967058 | 2.301750792  | 0.898885 | 2.560672 | 0.010447 | 0.178114 |
| BX914214.2        | 4.782738 | 0.307290105  | 0.854466 | 0.359628 | 0.719125 | 0.94694  |
| si:ch73-199g24.2  | 378.0716 | -0.132749829 | 0.121772 | -1.09015 | 0.275646 | 0.750653 |
| BX511034.4        | 1.022687 | 0            | 2.927951 | 0        | 1        | NA       |
| xrcc5             | 429.0664 | -0.108906567 | 0.2098   | -0.5191  | 0.603693 | 0.914588 |
| cdc37             | 1029.774 | 0.145757688  | 0.123102 | 1.184044 | 0.236396 | 0.717674 |
| AL954741.1        | 42.63507 | -0.642384235 | 0.293997 | -2.185   | 0.028889 | 0.302602 |
| RF00001           | 0.092101 | 0            | 5.267649 | 0        | 1        | NA       |
| si:ch211-51f19.1  | 14.95453 | 0.225601863  | 0.508138 | 0.443977 | 0.657059 | 0.929939 |
| RF00001           | 0.20119  | -2.743296963 | 5.185466 | -0.52904 | 0.596781 | NA       |
| zgc:175088        | 1690.042 | 0.073796547  | 0.161148 | 0.457941 | 0.646995 | 0.926792 |
| si:dkey-10p5.10   | 131.3785 | 0.467934481  | 0.17437  | 2.683565 | 0.007284 | 0.144623 |
| si:zfos-169g10.3  | 122.9718 | -0.391445446 | 0.196678 | -1.99029 | 0.04656  | 0.376263 |
| jpt1b             | 1616.663 | 0.128443507  | 0.161171 | 0.796941 | 0.425486 | 0.844714 |
| naga              | 365.9603 | -0.293143159 | 0.156193 | -1.8768  | 0.060546 | 0.423018 |
| nsdhl             | 98.81455 | 0.244111429  | 0.204097 | 1.196056 | 0.231675 | 0.713202 |
| si:ch211-255f4.9  | 1.820537 | -2.597122552 | 1.516497 | -1.71258 | 0.08679  | NA       |
| CU651657.1        | 0.158409 | 0            | 5.267649 | 0        | 1        | NA       |
| CU138553.1        | 0 NA     | NA           | NA       | NA       | NA       | NA       |
| btbd17a           | 102.6314 | 0.46517209   | 0.344118 | 1.351781 | 0.176445 | 0.649859 |
| dlg2              | 79.82342 | -0.365182836 | 0.275959 | -1.32332 | 0.185727 | 0.663476 |
| gig2i             | 0.625745 | -0.868140758 | 3.04588  | -0.28502 | 0.775628 | NA       |
| zgc:174944        | 7.328918 | -2.130359296 | 1.080827 | -1.97105 | 0.048719 | 0.384211 |
| BX927130.1        | 6.873026 | 0.571413904  | 0.95404  | 0.598941 | 0.549212 | 0.897092 |
| h2afy             | 261.5938 | -0.42174601  | 0.183817 | -2.29438 | 0.021768 | 0.261665 |
| si:ch211-246b8.5  | 0 NA     | NA           | NA       | NA       | NA       | NA       |
| CABZ01064859.1    | 132.6005 | -0.02131285  | 0.234825 | -0.09076 | 0.927683 | 0.995016 |
| ly6m5             | 19.0997  | 0.05945281   | 0.363386 | 0.163608 | 0.87004  | 0.983365 |
| mvda              | 99.69299 | 0.479795409  | 0.185873 | 2.58131  | 0.009843 | 0.171403 |
| si:ch211-209j12.2 | 5.877356 | 0.224648887  | 1.106589 | 0.20301  | 0.839127 | 0.976417 |
| pacsin3           | 799.2182 | -0.204078256 | 0.125781 | -1.62249 | 0.104697 | 0.53308  |
| RF00003           | 0 NA     | NA           | NA       | NA       | NA       | NA       |
| crfb15            | 6.102264 | -1.647964186 | 1.070757 | -1.53906 | 0.123788 | 0.570895 |
| zgc:92162         | 12.41548 | -1.185811376 | 0.67147  | -1.76599 | 0.077397 | 0.470172 |



|                   |          |              |          |          |          |          |
|-------------------|----------|--------------|----------|----------|----------|----------|
| si:rp71-1d10.8    | 66.29538 | 0.353150401  | 0.229609 | 1.538053 | 0.124036 | 0.57117  |
| znf1079           | 7.007638 | 0.239917121  | 0.768305 | 0.312268 | 0.754837 | 0.956283 |
| si:dkey-220o21.4  | 0 NA     | NA           | NA       | NA       | NA       | NA       |
| CU469503.1        | 0 NA     | NA           | NA       | NA       | NA       | NA       |
| igfbpla           | 1211.141 | -0.314922437 | 0.207007 | -1.52131 | 0.128181 | 0.57717  |
| si:rp71-62i8.1    | 46.15783 | -0.299847012 | 0.355935 | -0.84242 | 0.399553 | 0.831196 |
| slc25a13          | 4.280526 | 2.197864322  | 1.166651 | 1.883909 | 0.059577 | 0.420855 |
| BX890548.1        | 401.1536 | 0.208736842  | 0.1819   | 1.147535 | 0.25116  | 0.731476 |
| hccsb             | 505.2767 | 0.070147948  | 0.205951 | 0.340605 | 0.733401 | 0.950808 |
| CR855320.1        | 0.704215 | -2.341864618 | 2.655564 | -0.88187 | 0.377847 | NA       |
| si:dkey-30e9.6    | 12.57178 | 0.031963617  | 0.485916 | 0.06578  | 0.947553 | 0.997371 |
| CABZ01088346.1    | 189.4692 | 0.160470316  | 0.246379 | 0.651316 | 0.514843 | 0.886401 |
| lhb               | 1.517088 | -0.508938554 | 1.952979 | -0.2606  | 0.794404 | NA       |
| BX511034.5        | 28.81132 | 0.178971405  | 0.416681 | 0.429516 | 0.667548 | 0.933086 |
| evx1              | 0 NA     | NA           | NA       | NA       | NA       | NA       |
| slc25a42          | 162.2796 | -0.073724936 | 0.246464 | -0.29913 | 0.76484  | 0.959571 |
| AL954861.2        | 11.28163 | -3.078427957 | 1.527266 | -2.01565 | 0.043837 | 0.366547 |
| cygb1             | 1417.012 | 0.174768988  | 0.100093 | 1.746064 | 0.0808   | 0.479801 |
| CT583728.3        | 0 NA     | NA           | NA       | NA       | NA       | NA       |
| zgc:158320        | 42.84601 | -0.485097449 | 0.330239 | -1.46893 | 0.141853 | 0.600644 |
| sp9               | 345.6725 | -0.044227696 | 0.153548 | -0.28804 | 0.773318 | 0.960624 |
| poldip3           | 497.7858 | -0.102606463 | 0.120074 | -0.85453 | 0.392814 | 0.827902 |
| CABZ01050249.1    | 158.3689 | 0.106094281  | 0.19957  | 0.531613 | 0.594994 | 0.910869 |
| si:cabz01030277.1 | 2.832755 | 0.679263862  | 1.71917  | 0.395111 | 0.692761 | 0.940444 |
| ppp4r11           | 74.87594 | -0.122473642 | 0.195691 | -0.62585 | 0.531412 | 0.890835 |
| rp113             | 28340.19 | -0.301051913 | 0.121941 | -2.46883 | 0.013556 | 0.20316  |
| si:dkey-27n6.1    | 4.948979 | -1.169183659 | 1.232481 | -0.94864 | 0.342803 | 0.79738  |
| si:ch211-209n20.1 | 6.22745  | -0.030003832 | 1.04244  | -0.02878 | 0.977038 | 1        |
| dnajbla           | 148.5522 | 0.374383484  | 0.209446 | 1.787493 | 0.073858 | 0.461761 |
| si:dkey-238k10.1  | 12.99952 | -1.739754727 | 1.142614 | -1.52261 | 0.127857 | 0.577117 |
| si:ch211-22312.4  | 523.1124 | -0.159703517 | 0.124152 | -1.28635 | 0.19832  | 0.679109 |
| lrrtm412          | 8.016542 | -1.019489523 | 0.810646 | -1.25763 | 0.208527 | 0.690728 |
| jptla             | 125.328  | 0.204421327  | 0.242571 | 0.842728 | 0.399381 | 0.831196 |
| BX957256.1        | 0.354455 | -0.868133593 | 4.450344 | -0.19507 | 0.845337 | NA       |
| lama2             | 183.1938 | 0.099772111  | 0.528134 | 0.188915 | 0.85016  | 0.978251 |
| si:dkey-161111.76 | 0 NA     | NA           | NA       | NA       | NA       | NA       |
| cables1           | 39.9327  | -0.425707527 | 0.316892 | -1.34338 | 0.179148 | 0.654401 |
| rbpms             | 17.73426 | -0.06315425  | 0.442404 | -0.14275 | 0.886486 | 0.987533 |
| cfap410           | 77.06976 | -0.777666671 | 0.270271 | -2.87736 | 0.00401  | 0.105636 |
| ccl33.3           | 53.53153 | 0            | 1.701299 | 0        | 1        | 1        |
| CR753902.1        | 0.184567 | 0            | 5.267649 | 0        | 1        | NA       |
| CU694952.1        | 1.482062 | 0.506851715  | 1.593709 | 0.318033 | 0.75046  | NA       |
| lritlb            | 189.8269 | 0.270230177  | 0.327445 | 0.825269 | 0.409219 | 0.836637 |
| FP085432.1        | 0.377278 | -1.768541645 | 3.301313 | -0.53571 | 0.59216  | NA       |
| BX640537.1        | 12.35942 | 0.10983414   | 0.548744 | 0.200156 | 0.841359 | 0.97643  |
| zgc:162182        | 14.36316 | -0.367492141 | 0.811486 | -0.45286 | 0.650647 | 0.928065 |
| si:dkeyp-79b7.3   | 1.248751 | 1.559390663  | 2.029025 | 0.768542 | 0.442165 | NA       |
| zgc:158343        | 412.8107 | -0.137814698 | 0.190587 | -0.72311 | 0.469615 | 0.867224 |
| bean              | 224.2788 | 0.274821759  | 0.259882 | 1.057485 | 0.29029  | 0.76078  |
| BX914205.1        | 0.687345 | -2.427541662 | 2.37881  | -1.02049 | 0.307498 | NA       |
| CR759907.1        | 0.460658 | -0.868135665 | 4.075402 | -0.21302 | 0.831313 | NA       |
| ly6m3             | 6.828777 | -4.335075171 | 1.511652 | -2.86777 | 0.004134 | 0.106542 |
| nme2b.2           | 43310.9  | -0.058359186 | 0.157822 | -0.36978 | 0.711547 | 0.945821 |
| si:ch73-236c18.9  | 0.591957 | 0            | 3.728853 | 0        | 1        | NA       |

|                    |          |              |            |          |          |          |
|--------------------|----------|--------------|------------|----------|----------|----------|
| CR391930.1         | 0.462384 | -0.868136105 | 3.577307   | -0.24268 | 0.808254 | NA       |
| lcat               | 182.089  | -0.784511048 | 0.284446   | -2.75803 | 0.005815 | 0.129012 |
| CABZ01073265.1     | 728.2103 | -0.50717437  | 0.23463    | -2.1616  | 0.030649 | 0.312139 |
| CU179702.1         | 0.060442 |              | 0 5.267649 | 0        | 1        | NA       |
| nkx1.21b           | 99.5444  | 0.075810386  | 0.299139   | 0.253429 | 0.799937 | 0.967255 |
| si:dkey-15h8.17    | 8.36085  | -6.915059123 | 3.316352   | -2.08514 | 0.037057 | 0.337668 |
| atgl611            | 554.2585 | -0.026446311 | 0.124595   | -0.21226 | 0.831905 | 0.974925 |
| med24              | 391.8629 | 0.099434889  | 0.1339     | 0.742607 | 0.457719 | 0.860993 |
| si:ch211-246b8.1   | 1.209821 | 1.893951403  | 2.226707   | 0.850562 | 0.395013 | NA       |
| BX927335.1         | 0.050624 | 1.055396947  | 5.267649   | 0.200354 | 0.841203 | NA       |
| tradv23.1.1        | 0 NA     |              | NA         | NA       | NA       | NA       |
| AL844563.1         | 0 NA     |              | NA         | NA       | NA       | NA       |
| si:ch1073-268j14.1 | 26.21706 | -0.249950627 | 0.44       | -0.56807 | 0.569988 | 0.902338 |
| CABZ01073736.1     | 11.52075 | -0.08916721  | 0.491623   | -0.18137 | 0.856075 | 0.979558 |
| serp1              | 1148.699 | 0.155495742  | 0.111248   | 1.397739 | 0.162192 | 0.629748 |
| CR936249.1         | 2.700896 | -1.37080718  | 1.263964   | -1.08453 | 0.27813  | 0.751971 |
| cbx4               | 235.1521 | -0.021922448 | 0.161014   | -0.13615 | 0.891701 | 0.988566 |
| znf1122            | 1.31475  | -3.746258017 | 1.786744   | -2.0967  | 0.036021 | NA       |
| cc2dlb             | 325.6236 | 0.095863563  | 0.223935   | 0.428086 | 0.668589 | 0.933086 |
| slit1b             | 296.3549 | 0.135937316  | 0.205678   | 0.660923 | 0.508662 | 0.883333 |
| pcdh1g18           | 30.87666 | -0.194961078 | 0.456959   | -0.42665 | 0.669635 | 0.933428 |
| sh3d21             | 671.6298 | 0.136875419  | 0.135232   | 1.012149 | 0.311467 | 0.77613  |
| atrx1              | 655.7182 | 0.094932615  | 0.116373   | 0.815763 | 0.414636 | 0.838683 |
| dre-mir-455-1      | 0.04222  |              | 0 5.267649 | 0        | 1        | NA       |
| elof1              | 2215.781 | -0.116674385 | 0.154893   | -0.75326 | 0.451295 | 0.857606 |
| tradv14.0          | 3.184858 | -1.844325153 | 1.425149   | -1.29413 | 0.195621 | 0.675764 |
| ogt.1              | 874.1721 | 0.04836642   | 0.168753   | 0.286611 | 0.77441  | 0.960818 |
| BX293991.1         | 2.218893 |              | 0 1.948201 | 0        | 1        | 1        |
| ddx46              | 1062.282 | -0.086320793 | 0.117988   | -0.73161 | 0.46441  | 0.864593 |
| asb10              | 310.8858 | 0.116814599  | 0.22872    | 0.510733 | 0.609538 | 0.915204 |
| prlh               | 11.74766 | -0.424183113 | 0.548512   | -0.77333 | 0.439325 | 0.852079 |
| rnf213a            | 191.554  | -0.557537836 | 0.293429   | -1.90008 | 0.057423 | 0.413602 |
| si:dkey-190j3.2    | 1.164489 | 0.531771887  | 1.624191   | 0.327407 | 0.74336  | NA       |
| RF00026            | 0 NA     |              | NA         | NA       | NA       | NA       |
| pcdh2ab2           | 0 NA     |              | NA         | NA       | NA       | NA       |
| BX000985.1         | 0 NA     |              | NA         | NA       | NA       | NA       |
| muc5.3             | 82.66451 | 1.662873219  | 0.875974   | 1.898313 | 0.057655 | 0.41428  |
| CT476811.1         | 7.455178 | 0.171100011  | 0.707283   | 0.241912 | 0.808849 | 0.969828 |
| FQ312013.1         | 0.879967 | -0.940571629 | 2.469878   | -0.38082 | 0.703339 | NA       |
| CR855306.1         | 0.167824 |              | 0 5.267649 | 0        | 1        | NA       |
| zgc:174863         | 312.3798 | 0.298024748  | 0.159548   | 1.867929 | 0.061772 | 0.42635  |
| hs2st1a            | 199.1116 | -0.058823931 | 0.187017   | -0.31454 | 0.753112 | 0.955777 |
| SYDE2              | 203.6596 | -0.031274231 | 0.176366   | -0.17733 | 0.859252 | 0.979975 |
| vdra               | 27.80752 | -0.639164229 | 0.447663   | -1.42778 | 0.153355 | 0.617847 |
| mlap               | 0.447731 | 0.907016445  | 3.199822   | 0.283458 | 0.776825 | NA       |
| si:ch73-233f7.7    | 6.477609 | 0.711719718  | 0.766936   | 0.928004 | 0.353406 | 0.804432 |
| tmem1761.1         | 509.7611 | -0.246564284 | 0.162477   | -1.51753 | 0.129132 | 0.578579 |
| CR847906.1         | 2.208859 | -0.111700207 | 1.371046   | -0.08147 | 0.935068 | 0.996829 |
| si:ch73-309g22.1   | 1.424413 |              | 0 2.34477  | 0        | 1        | NA       |
| FP016247.1         | 0.26896  | 1.922155056  | 4.750613   | 0.404612 | 0.685763 | NA       |
| ndufa41            | 5724.887 | -0.081755956 | 0.120775   | -0.67693 | 0.498453 | 0.879132 |
| clec3bb            | 24.5721  | 0.621772572  | 0.515836   | 1.205368 | 0.228061 | 0.709324 |
| FQ311879.2         | 0.045161 |              | 0 5.267649 | 0        | 1        | NA       |
| traj5              | 0 NA     |              | NA         | NA       | NA       | NA       |

|                   |          |              |            |          |          |          |
|-------------------|----------|--------------|------------|----------|----------|----------|
| CABZ01049362.1    |          | 0 NA         | NA         | NA       | NA       | NA       |
| btr23             | 17.98047 | 0.159343339  | 0.524692   | 0.303689 | 0.761365 | 0.958159 |
| cnm3a             | 1384.156 | -0.117887014 | 0.134251   | -0.87811 | 0.379884 | 0.823607 |
| CABZ01034698.2    | 11.70987 | -1.547579079 | 0.679729   | -2.27676 | 0.022801 | 0.266874 |
| zgc:112234        | 5.12813  | -2.223635922 | 1.268665   | -1.75274 | 0.079647 | 0.477652 |
| ephx4             | 102.4945 | 0.819047349  | 0.333931   | 2.452747 | 0.014177 | 0.208295 |
| mettl23           | 93.96741 | -0.195747585 | 0.197277   | -0.99225 | 0.321077 | 0.781417 |
| adssl1            | 3456.237 | -0.167723382 | 0.194784   | -0.86107 | 0.389197 | 0.827725 |
| si:ch211-119e14.1 | 48.28587 | -0.302531995 | 0.295634   | -1.02333 | 0.30615  | 0.771472 |
| zgc:66475         | 511.6249 | -0.056009562 | 0.153467   | -0.36496 | 0.715141 | 0.945873 |
| CU571163.1        | 0.580382 | 0.069106523  | 2.484379   | 0.027816 | 0.977809 | NA       |
| si:ch73-252p3.1   | 87.68091 | 0.236255365  | 0.225635   | 1.04707  | 0.295067 | 0.763708 |
| gbelb             | 161.5994 | -0.009854372 | 0.21598    | -0.04563 | 0.963608 | 0.999842 |
| si:ch1073-13h15.3 | 88.83789 | -0.957827509 | 0.710193   | -1.34869 | 0.177438 | 0.651026 |
| tradv4.0.2        |          | 0 NA         | NA         | NA       | NA       | NA       |
| nkiras1           | 176.6545 | 0.258239273  | 0.145418   | 1.775836 | 0.07576  | 0.466355 |
| dus3l             | 293.8862 | -0.326270088 | 0.177993   | -1.83305 | 0.066795 | 0.441428 |
| BX957252.2        | 0.725038 | 2.457968723  | 2.498829   | 0.983648 | 0.325289 | NA       |
| pimr58            |          | 0 NA         | NA         | NA       | NA       | NA       |
| ubl3a             | 900.8234 | 0.037038863  | 0.123489   | 0.299937 | 0.764225 | 0.959228 |
| zgc:113279        | 76.85189 | -0.617599893 | 0.363379   | -1.6996  | 0.089206 | 0.501424 |
| CABZ01066926.1    | 145.3536 | -0.643609841 | 0.53243    | -1.20882 | 0.226734 | 0.707913 |
| si:ch73-379j16.2  | 1.280205 | -0.271382716 | 2.266532   | -0.11973 | 0.904693 | NA       |
| si:ch211-188p14.3 | 6.733944 | 0.603565733  | 0.714457   | 0.844789 | 0.398229 | 0.830737 |
| dicp2.2           | 0.089161 |              | 0 5.267649 |          | 0        | 1 NA     |
| FQ311924.1        | 6.186176 | 0.47003179   | 0.719524   | 0.653254 | 0.513592 | 0.88631  |
| CR388156.1        |          | 0 NA         | NA         | NA       | NA       | NA       |
| si:dkey-165b20.3  | 3.385159 | 1.779374345  | 1.053151   | 1.689571 | 0.09111  | 0.50549  |
| snx25             | 419.9777 | 0.139901796  | 0.173665   | 0.805582 | 0.420484 | 0.842383 |
| kynu              | 268.7765 | 0.463005863  | 0.246172   | 1.880824 | 0.059996 | 0.421883 |
| nbeall            | 230.8831 | -0.196487465 | 0.177306   | -1.10819 | 0.267782 | 0.744189 |
| sec16b            | 136.8078 | 0.060007654  | 0.185567   | 0.323374 | 0.746412 | 0.955074 |
| foxola            | 493.2408 | 0.072346073  | 0.147537   | 0.490359 | 0.62388  | 0.919431 |
| CU929079.1        | 0.060442 |              | 0 5.267649 |          | 0        | 1 NA     |
| CT027744.1        | 6.266514 | -0.695029103 | 0.845658   | -0.82188 | 0.411145 | 0.837797 |
| NPC1L1            | 49.94508 | -1.23718478  | 0.752024   | -1.64514 | 0.099941 | 0.524166 |
| mir196a-2         | 0.254477 |              | 0 5.267649 |          | 0        | 1 NA     |
| lyrm5a            | 215.8593 | -0.075568602 | 0.162758   | -0.4643  | 0.642432 | 0.92567  |
| BX088603.1        | 2.418701 | -0.79473427  | 1.551608   | -0.5122  | 0.608511 | 0.915204 |
| lygl2             | 1.603726 | -1.488502527 | 1.487562   | -1.00063 | 0.317004 | NA       |
| inpp5ka           | 271.5666 | -0.151234986 | 0.167561   | -0.90257 | 0.366756 | 0.816111 |
| lmbird2a          | 498.2233 | 0.140899792  | 0.147213   | 0.957116 | 0.338509 | 0.795226 |
| CU856423.1        | 14.77296 | -0.081381679 | 0.469436   | -0.17336 | 0.862368 | 0.981003 |
| RF00001           | 0.809372 | -1.811037223 | 2.648876   | -0.6837  | 0.494165 | NA       |
| CU468012.2        | 0.192158 |              | 0 5.267649 |          | 0        | 1 NA     |
| hmgn2             | 22602.41 | 0.007106402  | 0.183277   | 0.038774 | 0.96907  | 1        |
| CR759927.3        | 37.22776 | -0.414192358 | 0.38544    | -1.0746  | 0.282556 | 0.754808 |
| CU929203.1        |          | 0 NA         | NA         | NA       | NA       | NA       |
| RF00001           |          | 0 NA         | NA         | NA       | NA       | NA       |
| si:dkey-182g1.10  | 50.02857 | -0.268163721 | 0.322526   | -0.83145 | 0.405721 | 0.834645 |
| BX005124.2        | 0.193702 | 1.921567426  | 5.236909   | 0.366928 | 0.713673 | NA       |
| aldh18a1          | 672.1429 | 0.002846836  | 0.103773   | 0.027433 | 0.978114 | 1        |
| CR762480.1        | 0.129926 |              | 0 5.267649 |          | 0        | 1 NA     |
| CR382383.2        | 4.528428 | -1.471988747 | 1.048587   | -1.40378 | 0.160383 | 0.626951 |

|                  |          |              |          |          |          |          |
|------------------|----------|--------------|----------|----------|----------|----------|
| tradv23.3.8      | 0.147083 | 1.055370259  | 5.267649 | 0.200349 | 0.841207 | NA       |
| BX914205.2       | 0.124582 | 1.055383603  | 5.267649 | 0.200352 | 0.841205 | NA       |
| r3hcc1           | 108.4575 | -0.250583751 | 0.196787 | -1.27337 | 0.202885 | 0.683508 |
| CU468012.3       | 4.727429 | -0.499742069 | 1.527647 | -0.32713 | 0.743568 | 0.954856 |
| BX088603.2       | 0.406437 | -1.791190913 | 4.953241 | -0.36162 | 0.717636 | NA       |
| btd              | 75.27155 | -1.058414668 | 0.281157 | -3.7645  | 0.000167 | 0.013152 |
| si:dkey-211i20.5 | 4.443607 | 4.416888453  | 1.446795 | 3.052878 | 0.002267 | 0.075801 |
| CABZ01067558.1   | 12.6511  | 0.318676103  | 0.632367 | 0.503942 | 0.614302 | 0.915998 |
| pigr12.3         | 1.775759 | 0.993565878  | 1.859639 | 0.534279 | 0.593149 | NA       |
| si:dkey-93h22.7  | 95.21286 | 0.093187774  | 0.279975 | 0.332843 | 0.739253 | 0.953422 |
| BX842700.1       | 2.908768 | 2.572271785  | 1.784243 | 1.44166  | 0.149398 | 0.611366 |
| clca5.1          | 0.202892 | -2.754967866 | 5.185055 | -0.53133 | 0.595191 | NA       |
| si:ch73-160p18.4 | 0.539167 | -2.18695978  | 3.468689 | -0.63049 | 0.528377 | NA       |
| tpbga            | 116.6221 | 0.203392132  | 0.263354 | 0.772314 | 0.439928 | 0.852079 |
| RF00001          | 0.984196 | -1.803293754 | 2.288855 | -0.78786 | 0.43078  | NA       |
| zgc:66483        | 4.299513 | -0.131557035 | 0.830706 | -0.15837 | 0.874167 | 0.98385  |
| purab            | 248.2937 | -0.275306191 | 0.162392 | -1.69531 | 0.090016 | 0.504028 |
| RF00001          | 0 NA     | NA           | NA       | NA       | NA       | NA       |
| FP236734.1       | 60.81737 | 0.380576512  | 0.281684 | 1.351074 | 0.176672 | 0.650047 |
| sdr39u1          | 293.534  | 0.287246419  | 0.115975 | 2.476798 | 0.013257 | 0.200494 |
| si:dkey-1b17.6   | 28.55305 | 0.502688303  | 0.392649 | 1.280249 | 0.200457 | 0.68081  |
| CABZ01083166.1   | 116.4446 | 0.319092918  | 0.195404 | 1.632992 | 0.102471 | 0.529139 |
| si:ch211-69b22.5 | 113.2066 | 0.243730595  | 0.213368 | 1.142303 | 0.253328 | 0.732759 |
| chmplb           | 1276.79  | -0.079536151 | 0.12244  | -0.64959 | 0.515956 | 0.886651 |
| BX908721.1       | 4.360953 | 0.080357494  | 1.328721 | 0.060477 | 0.951775 | 0.99801  |
| CR855307.1       | 21.62959 | 0.043500918  | 0.351644 | 0.123707 | 0.901547 | 0.990643 |
| BX510915.1       | 10.9109  | 1.010599159  | 0.779327 | 1.296759 | 0.194714 | 0.67483  |
| cmtm6            | 382.691  | -0.178400536 | 0.128269 | -1.39083 | 0.164278 | 0.633351 |
| sec1417          | 288.3096 | -0.987226495 | 0.3782   | -2.61033 | 0.009046 | 0.163229 |
| akap8l           | 2364.96  | 0.107080739  | 0.079664 | 1.344163 | 0.178896 | 0.653788 |
| si:ch211-11c3.11 | 0.238114 | 0 4.934757   | 0        | 0        | 1 NA     | NA       |
| szl              | 0.467871 | 0 3.596789   | 0        | 0        | 1 NA     | NA       |
| tradv8.0         | 0 NA     | NA           | NA       | NA       | NA       | NA       |
| trim35-19        | 0.676424 | 0.093650571  | 2.595594 | 0.036081 | 0.971218 | NA       |
| eed              | 466.9341 | 0.079429577  | 0.168449 | 0.471536 | 0.637258 | 0.924779 |
| dcunld1          | 267.403  | 0.080991005  | 0.119889 | 0.675549 | 0.499327 | 0.879603 |
| si:ch211-76m11.9 | 0.203895 | 0 5.267649   | 0        | 0        | 1 NA     | NA       |
| zgc:153184       | 166.7658 | -0.104035678 | 0.191145 | -0.54428 | 0.586251 | 0.906711 |
| pcdhlg3          | 20.41795 | 0.119149263  | 0.418832 | 0.28448  | 0.776043 | 0.961073 |
| L0018363.1       | 71.03429 | 0.696878849  | 0.269061 | 2.590044 | 0.009596 | 0.168452 |
| CABZ01079663.1   | 98.7043  | 0.403351518  | 0.214626 | 1.879325 | 0.0602   | 0.422294 |
| bin3             | 373.8404 | -0.08596357  | 0.123712 | -0.69487 | 0.487138 | 0.873291 |
| xpot             | 848.8962 | 0.153057448  | 0.095926 | 1.595579 | 0.110583 | 0.545461 |
| marveld3         | 52.16752 | -0.315439073 | 0.267008 | -1.18139 | 0.23745  | 0.718568 |
| pimr207          | 0.178247 | 0 5.267649   | 0        | 0        | 1 NA     | NA       |
| CR381657.1       | 0.842746 | -2.384171899 | 2.93964  | -0.81104 | 0.417342 | NA       |
| akt1             | 58.63593 | 0.27584225   | 0.226892 | 1.215742 | 0.224083 | 0.705812 |
| CU915256.1       | 3.314874 | -1.79809065  | 1.654475 | -1.0868  | 0.277123 | 0.751426 |
| cox5ab           | 3103.284 | -0.030514798 | 0.144611 | -0.21101 | 0.832877 | 0.975379 |
| selenof          | 1829.982 | -0.035951576 | 0.20517  | -0.17523 | 0.8609   | 0.980388 |
| snrpg            | 1192.581 | -0.089848865 | 0.206898 | -0.43427 | 0.664095 | 0.93177  |
| CR927050.2       | 0.849807 | -1.757179066 | 2.958581 | -0.59393 | 0.552561 | NA       |
| znf1074          | 7.763242 | 1.152771251  | 0.738231 | 1.561533 | 0.118398 | 0.561566 |
| capgb            | 1213.508 | -0.205904118 | 0.105437 | -1.95287 | 0.050835 | 0.392352 |

|                  |          |              |          |          |          |          |    |    |
|------------------|----------|--------------|----------|----------|----------|----------|----|----|
| si:dkey-203a12.5 | 5.550164 |              | 0        | 2.62272  |          | 0        | 1  | 1  |
| dicp3.1          | 17.40672 | -0.13110901  | 0.513522 | -0.25531 | 0.798481 | 0.966705 |    |    |
| kdm4b            | 1571.113 | -0.212709084 | 0.101631 | -2.09296 | 0.036352 | 0.335171 |    |    |
| BX927335.2       | 0.889749 | -0.426487287 | 2.566005 | -0.16621 | 0.867994 | NA       |    |    |
| bambib           | 258.184  | -0.002386085 | 0.202542 | -0.01178 | 0.990601 |          | 1  |    |
| BX569789.1       | 31.97967 | 0.152513036  | 0.348138 | 0.438082 | 0.661327 | 0.930581 |    |    |
| tent2            | 293.5132 | 0.037149123  | 0.187632 | 0.197989 | 0.843054 | 0.976775 |    |    |
| BX004980.1       |          | 0 NA         |          | NA       | NA       | NA       | NA | NA |
| trim35-24        | 4.111232 | 0.955285548  | 1.078873 | 0.885448 | 0.375915 | 0.822237 |    |    |
| gnb5a            | 226.8293 | -0.115503136 | 0.222179 | -0.51986 | 0.603158 | 0.914226 |    |    |
| CT009597.1       | 0.240305 | 2.667686611  | 5.195716 | 0.51344  | 0.607644 | NA       |    |    |
| FP016142.3       |          | 0 NA         |          | NA       | NA       | NA       | NA | NA |
| spink2.3         | 19.78036 |              | 0        | 2.065996 |          | 0        | 1  | 1  |
| vaspa            | 27.95678 | 0.421765224  | 0.391387 | 1.077618 | 0.281204 | 0.753557 |    |    |
| CR550302.1       | 0.049519 |              | 0        | 5.267649 |          | 0        | 1  | NA |
| ccny11           | 198.4033 | 0.023072065  | 0.134937 | 0.170984 | 0.864236 | 0.981867 |    |    |
| AL935065.1       | 1.535533 |              | 0        | 1.99684  |          | 0        | 1  | NA |
| neur11b          | 306.1807 | -0.005750842 | 0.216987 | -0.0265  | 0.978856 |          | 1  |    |
| si:dkey-61n16.5  | 137.1831 | -1.514569015 | 0.549061 | -2.75847 | 0.005807 | 0.129012 |    |    |
| BX548059.1       | 6.975378 | 0.063822488  | 0.928095 | 0.068767 | 0.945175 | 0.997371 |    |    |
| BX649620.1       | 4.986599 | -0.01863852  | 1.037802 | -0.01796 | 0.985671 |          | 1  |    |
| ahrra            | 77.40677 | 0.010150906  | 0.561451 | 0.01808  | 0.985575 |          | 1  |    |
| foxred1          | 68.39467 | 0.280118258  | 0.205571 | 1.362635 | 0.172997 | 0.645798 |    |    |
| CR385021.1       | 0.148556 |              | 0        | 5.267649 |          | 0        | 1  | NA |
| cacnalhb         | 11.80789 | 1.091872739  | 0.592426 | 1.843054 | 0.065321 | 0.435359 |    |    |
| BX284696.1       |          | 0 NA         |          | NA       | NA       | NA       | NA | NA |
| si:dkey-29j8.1   | 7.49552  | 0.258575136  | 0.979714 | 0.263929 | 0.791835 | 0.964835 |    |    |
| zgc:163073       | 157.489  | 3.264155215  | 1.085208 | 3.007861 | 0.002631 | 0.083505 |    |    |
| si:dkey-152b24.7 | 15.69849 | -1.384207106 | 0.603312 | -2.29435 | 0.021771 | 0.261665 |    |    |
| si:rp71-1h20.9   | 24.43611 | -0.316815141 | 0.452164 | -0.70066 | 0.483512 | 0.872099 |    |    |
| CU929391.3       | 2.119532 | 0.882686604  | 1.12669  | 0.783434 | 0.433372 | NA       |    |    |
| evlb             | 525.1694 | 0.245423274  | 0.190322 | 1.289519 | 0.197218 | 0.67737  |    |    |
| zgc:153993       | 310.5365 | 0.003296283  | 0.136923 | 0.024074 | 0.980794 |          | 1  |    |
| re1t             | 147.646  | 0.250158189  | 0.158602 | 1.577266 | 0.114734 | 0.554525 |    |    |
| FP236161.1       | 0.457097 | 1.055416406  | 3.174469 | 0.33247  | 0.739534 | NA       |    |    |
| ssbp2            | 162.6393 | 0.174975787  | 0.179031 | 0.977352 | 0.328395 | 0.786776 |    |    |
| zgc:56622        | 70.67723 | -0.266283221 | 0.315522 | -0.84395 | 0.398699 | 0.830925 |    |    |
| pcdh10a          | 855.9985 | -0.309697535 | 0.102455 | -3.02276 | 0.002505 | 0.08071  |    |    |
| pkma             | 3283.407 | 0.073348072  | 0.182505 | 0.401897 | 0.68776  | 0.938835 |    |    |
| gfrala           | 154.4485 | 0.141347219  | 0.193136 | 0.731855 | 0.464257 | 0.864593 |    |    |
| CIR1             | 206.5702 | -0.160441208 | 0.146497 | -1.09519 | 0.273435 | 0.749148 |    |    |
| gig2f            | 0.049021 | -0.86807634  | 5.267649 | -0.16479 | 0.869106 | NA       |    |    |
| ccr9b            | 16.77722 | -3.089411438 | 1.411075 | -2.1894  | 0.028568 | 0.300821 |    |    |
| mvl12a           | 187.5405 | 0.045149422  | 0.189794 | 0.237886 | 0.811969 | 0.97012  |    |    |
| heatr1           | 441.1954 | -0.099548305 | 0.198657 | -0.50111 | 0.616297 | 0.916365 |    |    |
| zgc:113019       | 164.3385 | -0.268643793 | 0.167415 | -1.60465 | 0.10857  | 0.541057 |    |    |
| gap43            | 944.3993 | 0.271135675  | 0.205268 | 1.320885 | 0.18654  | 0.664968 |    |    |
| baz1a            | 220.7631 | -0.206306147 | 0.190546 | -1.08271 | 0.278937 | 0.752417 |    |    |
| rgs3a            | 261.3361 | -0.261632627 | 0.150232 | -1.74152 | 0.081592 | 0.480918 |    |    |
| CABZ01111953.1   | 123.3594 | -0.1341488   | 0.233992 | -0.5733  | 0.566438 | 0.901739 |    |    |
| si:ch73-46n24.1  | 0.086616 |              | 0        | 5.267649 |          | 0        | 1  | NA |
| ube2d21          | 399.3812 | 0.232800626  | 0.111806 | 2.082185 | 0.037326 | 0.339151 |    |    |
| BX682557.2       | 11.626   | -0.155378469 | 0.881049 | -0.17636 | 0.860014 | 0.980167 |    |    |
| si:dkey-250k10.4 | 1.828943 | -0.848322182 | 1.805507 | -0.46985 | 0.63846  | NA       |    |    |

|                   |          |              |          |          |          |          |
|-------------------|----------|--------------|----------|----------|----------|----------|
| si:dkey-19b23.7   | 70.11326 | 0.322198147  | 0.259755 | 1.240392 | 0.21483  | 0.696864 |
| zgc:63863         | 167.8919 | 0.142703115  | 0.209803 | 0.680176 | 0.496393 | 0.878161 |
| pfklb             | 470.8433 | -0.381050212 | 0.232338 | -1.64007 | 0.10099  | 0.526541 |
| wdr47b            | 70.19865 | 0.569114938  | 0.331304 | 1.7178   | 0.085833 | 0.491414 |
| igf2bp2b          | 447.4418 | -0.09309168  | 0.130024 | -0.71596 | 0.474018 | 0.869292 |
| BX510342.1        | 0.091242 | -0.868089684 | 5.267649 | -0.1648  | 0.869104 | NA       |
| vox               | 14.65975 | 0.097330423  | 0.439457 | 0.221479 | 0.82472  | 0.972272 |
| CR855389.1        | 57.79273 | 0.255908523  | 0.310556 | 0.824033 | 0.409921 | 0.836939 |
| BX323861.1        | 0.553226 | -2.294792793 | 4.453114 | -0.51532 | 0.606327 | NA       |
| myl12.1           | 7132.552 | 0.021298036  | 0.103357 | 0.206062 | 0.836742 | 0.976007 |
| fhdc2             | 77.59054 | -0.120964867 | 0.216822 | -0.5579  | 0.576913 | 0.904798 |
| si:ch211-272n13.3 | 238.6898 | 0.15386858   | 0.170599 | 0.90193  | 0.367094 | 0.81643  |
| tradvl8.0         | 0.251885 | 1.055363221  | 5.267649 | 0.200348 | 0.841208 | NA       |
| CU104782.1        | 1.07815  | -3.402572195 | 5.166758 | -0.65855 | 0.510184 | NA       |
| gne               | 273.5694 | 0.0712807    | 0.132485 | 0.538028 | 0.590557 | 0.908942 |
| CU928046.1        | 46.31393 | -1.511461852 | 0.685008 | -2.20649 | 0.02735  | 0.293836 |
| olfcg4            | 2.801767 | -1.380080374 | 1.606849 | -0.85887 | 0.39041  | 0.827902 |
| cyb5b             | 357.7153 | 0.263371345  | 0.174139 | 1.512418 | 0.130428 | 0.581523 |
| glula             | 5254.396 | -0.191162163 | 0.224946 | -0.84982 | 0.395428 | 0.829221 |
| si:ch211-11n16.2  | 326.5532 | 0.035661674  | 0.13296  | 0.268214 | 0.788535 | 0.963567 |
| CT737196.1        | 0 NA     | NA           | NA       | NA       | NA       | NA       |
| CR383669.2        | 0.451866 | 0 3.270151   | 0        | 1 NA     |          |          |
| pcdh2ac           | 0 NA     | NA           | NA       | NA       | NA       | NA       |
| si:dkey-146m20.13 | 0.063619 | 0 5.267649   | 0        | 1 NA     |          |          |
| actn4             | 4227.121 | 0.013825688  | 0.089249 | 0.154911 | 0.876892 | 0.985067 |
| echdc3            | 35.14836 | 0.459739323  | 0.376982 | 1.219525 | 0.222645 | 0.704573 |
| si:ch211-76m11.7  | 0.14264  | 0 5.267649   | 0        | 1 NA     |          |          |
| pdk3b             | 11.10838 | 0.152084208  | 0.661146 | 0.230031 | 0.818068 | 0.971518 |
| BX908776.1        | 0.682922 | -1.800841234 | 2.441731 | -0.73753 | 0.460802 | NA       |
| cspg5b            | 398.2825 | 0.387354945  | 0.173891 | 2.227578 | 0.025909 | 0.285638 |
| si:dkey-285b23.3  | 1.246405 | -0.929007139 | 1.538463 | -0.60385 | 0.545941 | NA       |
| RF00001           | 0 NA     | NA           | NA       | NA       | NA       | NA       |
| mon2              | 848.4295 | 0.05723343   | 0.101987 | 0.561185 | 0.574672 | 0.904516 |
| si:dkey-11f4.16   | 48.10192 | 0.168816006  | 0.332651 | 0.507487 | 0.611813 | 0.915448 |
| topaz1            | 22.12227 | 0.765044448  | 0.622398 | 1.229189 | 0.219001 | 0.699984 |
| pnp5b             | 84.10034 | -0.224560263 | 0.338293 | -0.6638  | 0.506816 | 0.883007 |
| pik3c2g           | 78.27225 | 0.447779405  | 0.223925 | 1.999685 | 0.045534 | 0.373513 |
| CABZ01059119.1    | 78.52649 | -0.042760788 | 0.216955 | -0.1971  | 0.843753 | 0.976791 |
| dre-mir-202       | 0 NA     | NA           | NA       | NA       | NA       | NA       |
| BX572620.1        | 17.94547 | 0.55326121   | 0.403147 | 1.372356 | 0.169952 | 0.641753 |
| si:dkey-203a12.7  | 6.950362 | 0 1.948858   | 0        | 1        | 1        | 1        |
| si:dkey-31f5.11   | 186.4961 | 0.030769698  | 0.198011 | 0.155394 | 0.876511 | 0.985007 |
| FBX046            | 409.7404 | -0.107646209 | 0.112759 | -0.95466 | 0.339749 | 0.795226 |
| tusc2a            | 146.4087 | -0.077423791 | 0.19654  | -0.39393 | 0.693629 | 0.940668 |
| RF00001           | 0 NA     | NA           | NA       | NA       | NA       | NA       |
| sb:cb1058         | 420.0543 | -0.060826201 | 0.275446 | -0.22083 | 0.825226 | 0.97261  |
| tymp              | 41.67486 | -2.763898774 | 1.397234 | -1.97812 | 0.047915 | 0.380801 |
| nots              | 11.23082 | -0.892453095 | 0.642825 | -1.38833 | 0.165037 | 0.634185 |
| zgc:174944        | 12.53611 | 0.659342945  | 0.627668 | 1.050464 | 0.293505 | 0.76277  |
| BX927336.2        | 7.46172  | 0.294161743  | 0.72371  | 0.406464 | 0.684402 | 0.938486 |
| BX005396.2        | 7.007286 | 0.030358715  | 0.730234 | 0.041574 | 0.966838 | 1        |
| BX255908.1        | 0.209715 | 0.093666232  | 5.267649 | 0.017781 | 0.985813 | NA       |
| fbxo7             | 291.786  | -0.07308842  | 0.137893 | -0.53004 | 0.596087 | 0.911517 |
| si:dkey-199m13.7  | 16.23811 | 0.057053672  | 0.427874 | 0.133342 | 0.893923 | 0.988696 |

|                   |          |              |          |          |          |          |
|-------------------|----------|--------------|----------|----------|----------|----------|
| si:ch211-9d9.1    | 43.83999 | -1.266315118 | 0.337291 | -3.75437 | 0.000174 | 0.013603 |
| lpar1             | 145.4362 | 0.085340356  | 0.195357 | 0.436842 | 0.662226 | 0.930742 |
| prkcab            | 13.40796 | -0.624221058 | 0.53347  | -1.17011 | 0.241955 | 0.723529 |
| CU138533.1        | 53.86919 | -0.369728096 | 0.392662 | -0.94159 | 0.346401 | 0.799463 |
| nedd4a            | 492.3435 | 0.103278176  | 0.194137 | 0.531986 | 0.594736 | 0.910869 |
| GNAZ              | 87.99588 | 0.20784392   | 0.292145 | 0.711441 | 0.476811 | 0.869292 |
| zgc:174275        | 11.41271 | -2.637286262 | 0.707811 | -3.72597 | 0.000195 | 0.014684 |
| si:ch211-154o6.3  | 170.6912 | -0.034269477 | 0.170061 | -0.20151 | 0.840298 | 0.976417 |
| ebf3a             | 168.014  | 0.360000492  | 0.157134 | 2.291036 | 0.021961 | 0.262534 |
| iqsec3a           | 290.4768 | 0.142029116  | 0.238036 | 0.596671 | 0.550727 | 0.8974   |
| GPR180            | 36.14617 | 0.208623405  | 0.269066 | 0.775361 | 0.438126 | 0.851454 |
| FP103005.1        | 1.494917 | 1.055430447  | 2.132385 | 0.494953 | 0.620633 | NA       |
| HTR7              | 3.49191  | 0.794990876  | 1.416994 | 0.56104  | 0.57477  | 0.904516 |
| BX677667.1        | 0 NA     | NA           | NA       | NA       | NA       | NA       |
| RF01684           | 1.058855 | -1.437459537 | 2.439372 | -0.58927 | 0.555677 | NA       |
| pkmb              | 8480.284 | 0.183449644  | 0.13463  | 1.362619 | 0.173003 | 0.645798 |
| RF00001           | 0 NA     | NA           | NA       | NA       | NA       | NA       |
| si:ch73-170d6.2   | 13.60607 | 0.418342296  | 1.155482 | 0.36205  | 0.717315 | 0.946272 |
| hnrnpabb          | 4583.472 | 0.098053979  | 0.105504 | 0.92939  | 0.352687 | 0.803516 |
| si:ch73-103b2.1   | 97.57609 | 0.409266542  | 0.373126 | 1.096859 | 0.272703 | 0.748552 |
| traj4             | 0 NA     | NA           | NA       | NA       | NA       | NA       |
| tnni4a            | 88.09421 | -0.710764711 | 0.441966 | -1.60819 | 0.107794 | 0.539319 |
| myo7aa            | 156.2722 | -0.319522597 | 0.232304 | -1.37545 | 0.168992 | 0.640442 |
| zgc:163083        | 30.56368 | 0.423494774  | 0.516554 | 0.819847 | 0.412303 | 0.838123 |
| agap2             | 274.3633 | 0.167509806  | 0.179924 | 0.931001 | 0.351853 | 0.802563 |
| CT956056.1        | 0 NA     | NA           | NA       | NA       | NA       | NA       |
| BX908401.1        | 20.30989 | -0.140335767 | 0.417961 | -0.33576 | 0.73705  | 0.952291 |
| si:dkeyp-72e1.6   | 78.4866  | -0.279962586 | 0.281722 | -0.99375 | 0.320343 | 0.780807 |
| sp6               | 101.0834 | 0.012759309  | 0.205779 | 0.062005 | 0.950559 | 0.99801  |
| CU302200.1        | 1.332757 | 0.454690976  | 1.554468 | 0.292506 | 0.7699   | NA       |
| trim105           | 175.6678 | -0.124395691 | 0.14769  | -0.84228 | 0.399634 | 0.831196 |
| si:ch211-25d12.7  | 1.203021 | -1.36949421  | 2.298151 | -0.59591 | 0.551234 | NA       |
| snn               | 51.26104 | 0.295049852  | 0.321589 | 0.917475 | 0.358894 | 0.80995  |
| CU207221.2        | 16.49782 | -0.068855638 | 0.498741 | -0.13806 | 0.890194 | 0.98835  |
| si:ch211-57n23.1  | 51.02759 | -0.123965343 | 0.318283 | -0.38948 | 0.69692  | 0.94198  |
| CU571336.1        | 2.150337 | -0.635318851 | 1.418231 | -0.44797 | 0.654178 | NA       |
| BX640537.2        | 32.41892 | 0.083351703  | 0.348957 | 0.23886  | 0.811214 | 0.97002  |
| CR388184.1        | 4.905601 | 0.034026466  | 0.75351  | 0.045157 | 0.963982 | 0.999842 |
| si:ch211-27e6.1   | 5.218912 | 1.576967967  | 0.83619  | 1.885896 | 0.059309 | 0.419405 |
| si:dkeyp-51g9.4   | 1.987338 | -1.375732089 | 1.788114 | -0.76938 | 0.44167  | NA       |
| twnk              | 158.578  | -0.169572263 | 0.152093 | -1.11493 | 0.264882 | 0.742063 |
| il17rc            | 308.5326 | 0.204655393  | 0.156925 | 1.304158 | 0.19218  | 0.672283 |
| si:ch211-19312.10 | 32.40811 | 0.137515657  | 0.337386 | 0.407591 | 0.683574 | 0.938405 |
| MTFP1             | 472.6698 | 0.15060654   | 0.176486 | 0.853363 | 0.393458 | 0.828374 |
| RF00001           | 0.295196 | 0            | 5.267649 | 0        | 1        | NA       |
| si:ch211-208f21.3 | 0.085528 | 0            | 5.267649 | 0        | 1        | NA       |
| lrrc8c            | 195.5274 | -0.008369283 | 0.180672 | -0.04632 | 0.963053 | 0.999842 |
| snrnp35           | 103.1651 | 0.018104032  | 0.201711 | 0.089752 | 0.928484 | 0.995052 |
| BX323064.1        | 0 NA     | NA           | NA       | NA       | NA       | NA       |
| p2ry2.1           | 7.460173 | -1.222495128 | 0.761534 | -1.60531 | 0.108427 | 0.54085  |
| BX649345.1        | 3.693914 | 3.800122149  | 1.631826 | 2.328754 | 0.019872 | 0.248885 |
| znf1005           | 68.60702 | 0.343550844  | 0.235075 | 1.461454 | 0.143891 | 0.603144 |
| arl4aa            | 230.8894 | 0.003211999  | 0.180264 | 0.017818 | 0.985784 | 1        |
| CR407584.1        | 2.754197 | 0.140152544  | 1.744773 | 0.080327 | 0.935977 | 0.996901 |

|                   |          |              |          |          |          |          |
|-------------------|----------|--------------|----------|----------|----------|----------|
| zgc:163040        | 2.772095 | 0.126185004  | 1.401376 | 0.090044 | 0.928253 | 0.995052 |
| tbce              | 164.052  | 0.057670994  | 0.207019 | 0.278578 | 0.780569 | 0.961421 |
| mir222b           | 0 NA     | NA           | NA       | NA       | NA       | NA       |
| zgc:154054        | 460.637  | -0.091044288 | 0.170585 | -0.53372 | 0.593536 | 0.910427 |
| BX072564.1        | 0.234379 | 0            | 5.267649 | 0        | 1        | NA       |
| si:dkey-26m3.1    | 0 NA     | NA           | NA       | NA       | NA       | NA       |
| dpf1              | 90.69565 | -0.067928447 | 0.292203 | -0.23247 | 0.816173 | 0.971207 |
| chrn5a            | 3.279893 | -0.316014787 | 1.311216 | -0.24101 | 0.809548 | 0.969828 |
| col27a1b          | 102.7794 | 0.220819127  | 0.265625 | 0.831319 | 0.405793 | 0.834645 |
| pcdh1g26          | 30.50325 | 0.030012427  | 0.425803 | 0.070484 | 0.943808 | 0.997371 |
| BX005245.1        | 0.696502 | -1.767952766 | 2.799244 | -0.63158 | 0.52766  | NA       |
| ppala             | 68.8867  | -0.771031475 | 0.599755 | -1.28558 | 0.198591 | 0.679281 |
| CU862015.1        | 0.279584 | 0            | 4.699872 | 0        | 1        | NA       |
| nlrc3l            | 91.29656 | 0.159090099  | 0.240285 | 0.662089 | 0.507914 | 0.883056 |
| CABZ01112864.1    | 3.155969 | 1.128589831  | 1.343402 | 0.840098 | 0.400853 | 0.8318   |
| pigr13.5          | 0.39738  | -0.868138352 | 5.041156 | -0.17221 | 0.863272 | NA       |
| mapre2            | 914.4258 | -0.110860678 | 0.08871  | -1.2497  | 0.211408 | 0.692983 |
| RF00001           | 0 NA     | NA           | NA       | NA       | NA       | NA       |
| CU467646.4        | 33.47168 | 0.701002653  | 0.339019 | 2.067739 | 0.038665 | 0.344438 |
| fam189a2          | 122.1879 | 0.202354239  | 0.186893 | 1.082728 | 0.278929 | 0.752417 |
| si:ch211-209f23.7 | 0.049021 | -0.86807634  | 5.267649 | -0.16479 | 0.869106 | NA       |
| FP236551.1        | 0.690414 | 1.05542605   | 2.48092  | 0.425417 | 0.670533 | NA       |
| cldn17            | 8.301894 | -0.414704261 | 0.827778 | -0.50098 | 0.616382 | 0.916365 |
| PRLHR             | 9.744966 | -0.421134566 | 0.815956 | -0.51612 | 0.605768 | 0.915055 |
| plekhm1           | 431.8851 | 0.041860614  | 0.189063 | 0.221411 | 0.824772 | 0.972272 |
| CT955967.1        | 0.250074 | 0.960281311  | 4.872023 | 0.197101 | 0.843748 | NA       |
| BX957318.1        | 6.272386 | 1.371370353  | 0.707079 | 1.939486 | 0.052442 | 0.397997 |
| smyhc1            | 14424.62 | -0.055781507 | 0.14787  | -0.37723 | 0.705999 | 0.944512 |
| elov11a           | 161.5491 | -0.458020123 | 0.263781 | -1.73637 | 0.082499 | 0.482825 |
| bnip3             | 291.1182 | 0.278929549  | 0.208281 | 1.339196 | 0.180507 | 0.656202 |
| si:dkey-27n6.1    | 6.518296 | -0.629933477 | 0.966567 | -0.65172 | 0.51458  | 0.88631  |
| BX005073.2        | 0.107013 | -1.826650979 | 5.230461 | -0.34923 | 0.726914 | NA       |
| FP085428.1        | 9.821788 | -1.67941903  | 0.692522 | -2.42508 | 0.015305 | 0.217692 |
| polr2a            | 1625.02  | 0.202340016  | 0.186857 | 1.082858 | 0.278872 | 0.752417 |
| CU929143.1        | 0.39745  | -0.402180623 | 3.529312 | -0.11395 | 0.909274 | NA       |
| zgc:152863        | 49.58383 | 0.634191024  | 0.340804 | 1.860867 | 0.062763 | 0.42872  |
| CR383676.1        | 13221.28 | 0.128975416  | 0.146638 | 0.879547 | 0.379105 | 0.823173 |
| nup153            | 762.4144 | 0.131163271  | 0.173956 | 0.754001 | 0.450849 | 0.857288 |
| mia2              | 610.1205 | 0.115564713  | 0.125486 | 0.920941 | 0.357081 | 0.807809 |
| ldb3b             | 7613.39  | 0.250540067  | 0.149556 | 1.675223 | 0.09389  | 0.511703 |
| tgfbr3            | 59.83696 | -0.329910512 | 0.370895 | -0.8895  | 0.373736 | 0.820644 |
| bpifc1            | 23.218   | -0.603361979 | 0.449802 | -1.34139 | 0.179792 | 0.655282 |
| si:ch1073-228h2.2 | 29.19882 | 0.355787786  | 0.343681 | 1.035226 | 0.300564 | 0.766629 |
| ccl39.7           | 13.41942 | -0.19373478  | 0.58811  | -0.32942 | 0.741839 | 0.954329 |
| CABZ01023255.1    | 47.61066 | 0.080145526  | 0.382668 | 0.209439 | 0.834106 | 0.975678 |
| ccn112            | 136.5454 | 0.0515021    | 0.180307 | 0.285636 | 0.775157 | 0.960899 |
| si:ch211-207i20.2 | 31.35647 | 0.026671699  | 0.311718 | 0.085564 | 0.931813 | 0.995854 |
| FP236356.2        | 0.234145 | -1.710092121 | 5.238472 | -0.32645 | 0.744085 | NA       |
| RF00001           | 0 NA     | NA           | NA       | NA       | NA       | NA       |
| creld1a           | 138.3204 | 0.305390749  | 0.273732 | 1.115657 | 0.264569 | 0.742063 |
| RF00001           | 0 NA     | NA           | NA       | NA       | NA       | NA       |
| apbb2b            | 250.949  | -0.033204724 | 0.145528 | -0.22817 | 0.819517 | 0.971785 |
| rhotla            | 611.7424 | 0.215452453  | 0.164866 | 1.306834 | 0.191269 | 0.671109 |
| cox20             | 252.3089 | 0.18580249   | 0.167518 | 1.109148 | 0.267366 | 0.743683 |



|                    |          |              |          |          |          |          |
|--------------------|----------|--------------|----------|----------|----------|----------|
| tcf3b              | 1268.341 | 0.01869049   | 0.151874 | 0.123066 | 0.902055 | 0.990847 |
| CR352226.5         | 22.09784 | -8.039956043 | 1.286398 | -6.24998 | 4.11E-10 | 3.40E-07 |
| znf1096            | 9.07896  | -1.934898598 | 0.678642 | -2.85113 | 0.004356 | 0.108751 |
| ctbs               | 153.1769 | 0.361253384  | 0.514499 | 0.702146 | 0.482588 | 0.871721 |
| glulb              | 8066.164 | -0.232148164 | 0.106115 | -2.1877  | 0.028691 | 0.301484 |
| si:ch211-76m11.5   | 11.59387 | -0.303084705 | 0.729091 | -0.4157  | 0.677628 | 0.936026 |
| arhgap39           | 74.03695 | 0.543035126  | 0.214677 | 2.529542 | 0.011421 | 0.185332 |
| RF00001            | 0 NA     | NA           | NA       | NA       | NA       | NA       |
| strn               | 315.0059 | 0.032366122  | 0.144587 | 0.223853 | 0.822872 | 0.971966 |
| CR855860.1         | 127.4298 | -0.255085211 | 0.339584 | -0.75117 | 0.45255  | 0.857994 |
| dhx38              | 282.3761 | -0.080168466 | 0.157759 | -0.50817 | 0.611334 | 0.915331 |
| tradv13.0          | 0 NA     | NA           | NA       | NA       | NA       | NA       |
| arhgap11a          | 204.5024 | 0.32872838   | 0.187605 | 1.752233 | 0.079734 | 0.477867 |
| piml               | 1537.403 | 0.09022699   | 0.177877 | 0.507244 | 0.611984 | 0.915644 |
| plaat1             | 109.9093 | 0.841352674  | 0.359047 | 2.343291 | 0.019114 | 0.243342 |
| hist1h2a6          | 2.127575 | 1.073126083  | 1.494065 | 0.718259 | 0.472597 | NA       |
| si:ch211-231f6.6   | 161.0436 | 0.235978568  | 0.206159 | 1.144645 | 0.252356 | 0.732759 |
| olfchl             | 0 NA     | NA           | NA       | NA       | NA       | NA       |
| si:dkeyp-13d12.21  | 0.049519 | 0 5.267649   | 0        | 1 NA     |          |          |
| pole2              | 103.7268 | 0.35871674   | 0.19309  | 1.857769 | 0.063202 | 0.429313 |
| TADA1              | 103.7922 | -0.198235659 | 0.208836 | -0.94924 | 0.342498 | 0.797179 |
| GABRB2 (1 of many) | 5.946493 | 0.052182622  | 0.994661 | 0.052463 | 0.95816  | 0.999109 |
| CU929317.1         | 0 NA     | NA           | NA       | NA       | NA       | NA       |
| BX901923.1         | 8.436044 | -0.248583379 | 0.602792 | -0.41239 | 0.680056 | 0.93674  |
| CU571069.1         | 67.75087 | -1.531725316 | 0.585984 | -2.61394 | 0.008951 | 0.16209  |
| CABZ01111454.1     | 59.98038 | 0.165364895  | 0.292909 | 0.564561 | 0.572372 | 0.903461 |
| prtga              | 1.106224 | -0.825171955 | 1.90089  | -0.4341  | 0.664218 | NA       |
| pimr184            | 0.379085 | -0.752516851 | 3.817574 | -0.19712 | 0.843734 | NA       |
| si:dkey-206d17.15  | 0 NA     | NA           | NA       | NA       | NA       | NA       |
| ergic1             | 229.758  | 0.373614143  | 0.148572 | 2.514692 | 0.011914 | 0.190109 |
| tradv25.0.4        | 0 NA     | NA           | NA       | NA       | NA       | NA       |
| BX571954.1         | 0 NA     | NA           | NA       | NA       | NA       | NA       |
| spink2.4           | 18.73348 | 0 2.291669   | 0        | 1        | 1        |          |
| CABZ01044099.1     | 71.91578 | -0.094538527 | 0.256837 | -0.36809 | 0.712808 | 0.945821 |
| tox2               | 195.5821 | -0.12221344  | 0.157427 | -0.77632 | 0.437562 | 0.851283 |
| CABZ01088109.1     | 845.1919 | 0.15164293   | 0.114342 | 1.326217 | 0.184768 | 0.661987 |
| ppfibp1b           | 498.9331 | 0.042599692  | 0.123554 | 0.344786 | 0.730256 | 0.950056 |
| RF00001            | 0.045161 | 0 5.267649   | 0        | 1 NA     |          |          |
| exosc7             | 194.1122 | -0.001942748 | 0.162775 | -0.01194 | 0.990477 | 1        |
| si:dkey-16p6.1     | 3.895736 | -2.49771525  | 1.173846 | -2.1278  | 0.033353 | 0.323127 |
| CU467837.1         | 6.557401 | -0.577643993 | 0.873976 | -0.66094 | 0.508652 | 0.883333 |
| RF00001            | 0.043308 | 0 5.267649   | 0        | 1 NA     |          |          |
| dre-mir-137-2      | 0 NA     | NA           | NA       | NA       | NA       | NA       |
| mgrn1a             | 482.8983 | -0.409075793 | 0.174095 | -2.34973 | 0.018787 | 0.241964 |
| BX908757.1         | 0 NA     | NA           | NA       | NA       | NA       | NA       |
| abcg2a             | 1455.122 | -0.241507841 | 0.205184 | -1.17703 | 0.239184 | 0.719781 |
| CU929568.1         | 0.188326 | 1.888174718  | 5.239287 | 0.360388 | 0.718557 | NA       |
| RF00026            | 0 NA     | NA           | NA       | NA       | NA       | NA       |
| dnail.1            | 1.084513 | 1.634010181  | 2.35124  | 0.694957 | 0.487082 | NA       |
| ap3bla             | 274.5708 | -0.176534544 | 0.142388 | -1.23982 | 0.215043 | 0.697086 |
| sugt1              | 467.759  | 0.078647053  | 0.138429 | 0.568142 | 0.569939 | 0.902322 |
| CABZ01084603.1     | 220.2099 | 0.206007369  | 0.185131 | 1.112767 | 0.265809 | 0.742605 |
| AL929114.1         | 0.570739 | -0.805386326 | 2.395534 | -0.3362  | 0.736718 | NA       |
| adipoqb            | 16.01333 | -1.489205311 | 1.053935 | -1.41299 | 0.157657 | 0.623766 |

|                   |          |              |          |          |          |          |
|-------------------|----------|--------------|----------|----------|----------|----------|
| evx1              | 22.59221 | -0.021660293 | 0.320667 | -0.06755 | 0.946146 | 0.997371 |
| zmp:0000001114    | 408.9177 | 0.037678811  | 0.134534 | 0.280069 | 0.779424 | 0.961073 |
| camk2b2           | 18.85684 | -0.227823296 | 0.553483 | -0.41162 | 0.68062  | 0.937071 |
| si:dkey-11d20.1   | 0.09233  | -0.868089684 | 5.267649 | -0.1648  | 0.869104 | NA       |
| ppp2r2ca          | 487.037  | 0.151859051  | 0.19182  | 0.791675 | 0.42855  | 0.846289 |
| anxalb            | 1620.409 | -0.784506318 | 0.199496 | -3.93243 | 8.41E-05 | 0.008118 |
| CU855936.1        | 0.193998 | 0            | 5.267649 | 0        | 1        | NA       |
| mafgb             | 34.75163 | -0.197880535 | 0.317478 | -0.62329 | 0.533095 | 0.890978 |
| CR382281.1        | 1.816759 | -2.34425431  | 1.885901 | -1.24304 | 0.213852 | NA       |
| si:dkey-238o14.1  | 3.125885 | -1.648987696 | 1.375135 | -1.19915 | 0.230471 | 0.712099 |
| RF00001           | 0        | NA           | NA       | NA       | NA       | NA       |
| RF00001           | 0.053506 | -0.86807634  | 5.267649 | -0.16479 | 0.869106 | NA       |
| zgc:101785        | 25.31727 | -0.433807754 | 0.434034 | -0.99948 | 0.317563 | 0.779441 |
| imp2b             | 4.79989  | -0.633618873 | 1.308697 | -0.48416 | 0.628272 | 0.921864 |
| CR385054.1        | 33.73708 | 2.805789881  | 1.407181 | 1.993908 | 0.046162 | 0.375668 |
| cul3b             | 704.2086 | -0.006413128 | 0.106391 | -0.06028 | 0.951934 | 0.998032 |
| si:ch211-237a4.2  | 14.44826 | 0.089254273  | 1.042815 | 0.08559  | 0.931793 | 0.995854 |
| znf1118           | 9.794575 | -2.560429773 | 0.780718 | -3.27958 | 0.00104  | 0.045197 |
| AL935044.2        | 3.526631 | -3.101797549 | 1.558873 | -1.98977 | 0.046616 | 0.376263 |
| sf3a3             | 961.1614 | 0.00864282   | 0.110945 | 0.077902 | 0.937906 | 0.997305 |
| dnah1             | 47.16427 | 0.582960618  | 0.322447 | 1.807925 | 0.070618 | 0.453373 |
| mrps24            | 495.7844 | 0.111368371  | 0.198621 | 0.560708 | 0.574997 | 0.904516 |
| CR925761.2        | 2.294286 | -0.357832521 | 1.406222 | -0.25446 | 0.799137 | 0.967045 |
| caskb             | 474.3028 | 0.126137778  | 0.140715 | 0.896409 | 0.370034 | 0.818446 |
| si:dkey-21c1.8    | 47.31211 | 0.453967746  | 0.258085 | 1.758984 | 0.07858  | 0.474455 |
| znf1178           | 15.43142 | 0.275201048  | 0.475425 | 0.578853 | 0.562688 | 0.900772 |
| CU861477.1        | 95.11263 | 0.341009015  | 0.245704 | 1.387886 | 0.165172 | 0.634423 |
| brd3b             | 1200.089 | 0.084644198  | 0.119389 | 0.708979 | 0.478337 | 0.869292 |
| cdh29             | 12.56625 | -2.604793562 | 1.387043 | -1.87795 | 0.060388 | 0.422591 |
| CU929402.1        | 2.307649 | 0.232782928  | 1.369386 | 0.169991 | 0.865017 | 0.982136 |
| cnmd              | 1989.753 | 0.398807941  | 0.16252  | 2.453895 | 0.014132 | 0.208027 |
| dre-mir-7146      | 0.045161 | 0            | 5.267649 | 0        | 1        | NA       |
| dcpla             | 174.2972 | 0.0036785    | 0.239507 | 0.015359 | 0.987746 | 1        |
| il17ra2           | 0        | NA           | NA       | NA       | NA       | NA       |
| CR749168.3        | 0        | NA           | NA       | NA       | NA       | NA       |
| si:ch211-113d22.2 | 196.5468 | -1.127038045 | 0.589596 | -1.91154 | 0.055935 | 0.409094 |
| CR626874.1        | 2.249899 | 0.077244189  | 1.196619 | 0.064552 | 0.948531 | 0.997738 |
| znf1083           | 28.96248 | -0.401033919 | 0.350603 | -1.14384 | 0.25269  | 0.732759 |
| lrp6              | 413.4289 | -0.06351542  | 0.133566 | -0.47554 | 0.634405 | 0.924185 |
| CR936977.1        | 0        | NA           | NA       | NA       | NA       | NA       |
| CABZ01092282.1    | 407.0498 | 0.421732807  | 0.254929 | 1.654312 | 0.098064 | 0.521071 |
| RF00026           | 0        | NA           | NA       | NA       | NA       | NA       |
| znf1150           | 0.086618 | 0            | 5.267649 | 0        | 1        | NA       |
| axin2             | 995.7234 | 0.075563952  | 0.114784 | 0.658312 | 0.510338 | 0.883879 |
| FQ377903.1        | 32.62224 | -0.285583018 | 0.400293 | -0.71343 | 0.475577 | 0.869292 |
| appl2             | 588.119  | 0.102066973  | 0.103    | 0.990943 | 0.321713 | 0.782075 |
| C12orf75          | 55.96975 | -0.509813065 | 0.27426  | -1.85887 | 0.063046 | 0.429313 |
| FP067440.1        | 0        | NA           | NA       | NA       | NA       | NA       |
| si:ch211-217i17.1 | 5.349162 | -2.851567788 | 1.264477 | -2.25514 | 0.024125 | 0.274967 |
| tamm41            | 199.0151 | 0.118283707  | 0.18203  | 0.649805 | 0.515818 | 0.886634 |
| tradv6.0.4        | 0.087179 | 0            | 5.267649 | 0        | 1        | NA       |
| angpt11b          | 27.01911 | -0.901421106 | 0.713987 | -1.26252 | 0.206763 | 0.689109 |
| si:dkey-205i10.2  | 1.087204 | -2.116623259 | 2.393964 | -0.88415 | 0.376615 | NA       |
| CR382337.2        | 1.718928 | 2.256515612  | 1.764831 | 1.278602 | 0.201037 | NA       |

|                    |          |              |          |          |          |          |
|--------------------|----------|--------------|----------|----------|----------|----------|
| CABZ01059120.1     | 72.90787 | 0.146968605  | 0.227782 | 0.645217 | 0.518786 | 0.887148 |
| tox4b              | 54.13473 | -0.178421081 | 0.331091 | -0.53889 | 0.589964 | 0.908753 |
| si:dkey-16p6.1     | 8.054691 | -0.838183465 | 0.758012 | -1.10577 | 0.268828 | 0.744925 |
| CR749167.1         | 0 NA     | NA           | NA       | NA       | NA       | NA       |
| si:dkeyp-9d4.3     | 593.4466 | 0.120114668  | 0.227394 | 0.528222 | 0.597345 | 0.911953 |
| CSDC2 (1 of many)  | 18.85645 | -0.78541628  | 0.513248 | -1.53028 | 0.125946 | 0.573992 |
| pam                | 1264.352 | 0.074135408  | 0.106528 | 0.695923 | 0.486477 | 0.873244 |
| CU638702.1         | 0 NA     | NA           | NA       | NA       | NA       | NA       |
| CT573484.1         | 3.666482 | 1.308858011  | 1.221422 | 1.071585 | 0.283906 | 0.755095 |
| gb:ai877918        | 70.55001 | -0.269765854 | 0.222303 | -1.2135  | 0.224937 | 0.70685  |
| lamp1a             | 507.0477 | -0.192346529 | 0.157725 | -1.2195  | 0.222654 | 0.704573 |
| BX908782.1         | 79.57199 | 0.093628031  | 1.688906 | 0.055437 | 0.95579  | 0.998767 |
| CU655842.1         | 132.1441 | 0.091267283  | 0.19498  | 0.468086 | 0.639723 | 0.924779 |
| si:ch211-188p14.4  | 60.77983 | 0.739946147  | 0.358417 | 2.064486 | 0.038972 | 0.345405 |
| trgv6              | 0.628731 | 0            | 2.847174 | 0        | 1        | NA       |
| znf1155            | 51.36827 | 0.173604301  | 0.324337 | 0.535259 | 0.59247  | 0.909996 |
| AL953858.1         | 0 NA     | NA           | NA       | NA       | NA       | NA       |
| znf1160            | 25.98561 | -1.3878994   | 0.414    | -3.35241 | 0.000801 | 0.037962 |
| zgc:171929         | 1.352052 | 0.093648013  | 2.071644 | 0.045205 | 0.963944 | NA       |
| sncaip             | 142.1159 | -0.086202156 | 0.191801 | -0.44943 | 0.653118 | 0.929197 |
| si:ch1073-185p12.2 | 3.750905 | -2.371915045 | 1.265586 | -1.87416 | 0.060908 | 0.423604 |
| BX537249.1         | 0.181263 | 0            | 5.267649 | 0        | 1        | NA       |
| CABZ01056637.1     | 5.798532 | -1.159483497 | 0.815158 | -1.4224  | 0.154909 | 0.619752 |
| RF00001            | 0.045161 | 0            | 5.267649 | 0        | 1        | NA       |
| klhdc4             | 266.7139 | 0.037376384  | 0.165669 | 0.225608 | 0.821506 | 0.971788 |
| prpf39             | 1580.795 | -0.038438939 | 0.104254 | -0.3687  | 0.712348 | 0.945821 |
| RF00001            | 0.257269 | 0            | 5.267649 | 0        | 1        | NA       |
| si:dkey-247i3.6    | 2.889322 | -0.98438888  | 1.058351 | -0.93012 | 0.352311 | 0.802897 |
| si:ch211-117117.7  | 0.56469  | 0            | 5.267649 | 0        | 1        | NA       |
| AL935294.1         | 0 NA     | NA           | NA       | NA       | NA       | NA       |
| si:dkey-264f17.1   | 28.83652 | 0.53432903   | 0.346642 | 1.541445 | 0.123208 | 0.569695 |
| BX511018.2         | 2.933378 | -0.145691008 | 0.908139 | -0.16043 | 0.872544 | 0.983447 |
| utrnl              | 1304.271 | -0.200564816 | 0.160417 | -1.25027 | 0.2112   | 0.692983 |
| gpa33a             | 611.0346 | -0.642273405 | 0.194863 | -3.29603 | 0.000981 | 0.043444 |
| kif16ba            | 152.4423 | -0.006540459 | 0.164617 | -0.03973 | 0.968307 | 1        |
| SLC7A1 (1 of many) | 342.6456 | 0.117419262  | 0.195074 | 0.601921 | 0.547227 | 0.896121 |
| si:ch211-238e22.5  | 2.24889  | 1.296310513  | 1.264363 | 1.025268 | 0.305237 | 0.770382 |
| ccdc135            | 75.77821 | -0.694329403 | 0.336417 | -2.0639  | 0.039028 | 0.345405 |
| glis2b             | 82.49638 | -0.268656843 | 0.247323 | -1.08626 | 0.277365 | 0.751426 |
| CU633762.1         | 0 NA     | NA           | NA       | NA       | NA       | NA       |
| BX511246.1         | 13.34206 | 0.881269799  | 0.624956 | 1.410131 | 0.158501 | 0.623932 |
| CU929203.2         | 0 NA     | NA           | NA       | NA       | NA       | NA       |
| csppla             | 45.50476 | 0.39482983   | 0.2658   | 1.485437 | 0.137428 | 0.593264 |
| tradv23.1.2        | 0 NA     | NA           | NA       | NA       | NA       | NA       |
| CT737123.1         | 7.945405 | 0.999662672  | 0.868965 | 1.150406 | 0.249977 | 0.72973  |
| dph5               | 201.4921 | -0.102007756 | 0.169117 | -0.60318 | 0.546391 | 0.896107 |
| ebf3a              | 1576.623 | 0.243684937  | 0.084334 | 2.889536 | 0.003858 | 0.103374 |
| FP016234.1         | 140.7035 | 0.155998463  | 0.227505 | 0.685693 | 0.492906 | 0.876623 |
| CU929199.1         | 6.202156 | -0.446293721 | 0.77924  | -0.57273 | 0.566828 | 0.901747 |
| c1r                | 5.044364 | -1.267735805 | 0.913126 | -1.38835 | 0.165031 | 0.634185 |
| si:ch211-266k2.1   | 29.36217 | -0.38729473  | 0.378562 | -1.02307 | 0.306275 | 0.771472 |
| si:ch211-152c8.2   | 3.154976 | -0.569361356 | 0.913968 | -0.62296 | 0.533314 | 0.891164 |
| capzb              | 5235.803 | -0.127690787 | 0.117353 | -1.08809 | 0.276553 | 0.751172 |
| CU571169.1         | 0 NA     | NA           | NA       | NA       | NA       | NA       |

|                    |          |              |          |          |          |          |
|--------------------|----------|--------------|----------|----------|----------|----------|
| si:ch73-29119.1    | 80.23145 | 0.372367728  | 0.435296 | 0.855436 | 0.39231  | 0.827902 |
| si:dkey-88e18.8    | 44.69906 | 0.394250992  | 0.332772 | 1.184748 | 0.236117 | 0.717364 |
| zgc:174314         | 5.585452 | -1.996384955 | 0.814304 | -2.45164 | 0.01422  | 0.208802 |
| si:dkeyp-104b3.2   | 0.11056  | 0            | 5.267649 | 0        | 1        | NA       |
| zgc:171759         | 7.883862 | -0.281839994 | 0.781131 | -0.36081 | 0.718241 | 0.946598 |
| them6              | 221.6722 | 0.444528653  | 0.217565 | 2.043203 | 0.041032 | 0.353808 |
| si:ch1073-266p11.2 | 45.05775 | 0.585852896  | 0.359548 | 1.629414 | 0.103225 | 0.530435 |
| BX936382.1         | 12.20586 | -0.441453265 | 0.496359 | -0.88938 | 0.373797 | 0.820644 |
| si:ch211-161c3.5   | 51.56061 | 0.103929861  | 0.275867 | 0.376739 | 0.706367 | 0.944623 |
| thumpd1            | 243.6464 | -0.032827323 | 0.171286 | -0.19165 | 0.848015 | 0.977829 |
| rhcgb              | 210.9882 | 0.264135918  | 0.723369 | 0.365147 | 0.715002 | 0.945821 |
| GRM7               | 137.8943 | 0.394495291  | 0.285892 | 1.379877 | 0.167624 | 0.638828 |
| or109-7            | 0        | NA           | NA       | NA       | NA       | NA       |
| FP085414.1         | 450.086  | 0.012141908  | 0.177299 | 0.068482 | 0.945402 | 0.997371 |
| or109-3            | 0        | NA           | NA       | NA       | NA       | NA       |
| dre-mir-19b        | 0.053262 | 1.055396947  | 5.267649 | 0.200354 | 0.841203 | NA       |
| WDR7               | 260.3582 | 0.100271919  | 0.194617 | 0.515227 | 0.606394 | 0.915204 |
| CU457819.1         | 1.401365 | 0.883707753  | 1.691983 | 0.522291 | 0.601468 | NA       |
| znfx1              | 17.48475 | -0.484150798 | 0.582308 | -0.83143 | 0.405728 | 0.834645 |
| si:dkeyp-6a3.1     | 0.343654 | 1.055364631  | 4.512522 | 0.233875 | 0.815082 | NA       |
| BX571843.1         | 0.314559 | 1.055381606  | 4.527408 | 0.233109 | 0.815676 | NA       |
| dnai2a             | 3.735162 | -2.094305698 | 1.386882 | -1.51008 | 0.131023 | 0.582686 |
| SLA (1 of many)    | 3.799106 | 0.215471826  | 0.912448 | 0.236147 | 0.813319 | 0.970328 |
| imp2b              | 20.74508 | -2.343860462 | 1.481653 | -1.58192 | 0.113667 | 0.551905 |
| fam166b            | 22.78038 | 0.002383425  | 0.563239 | 0.004232 | 0.996624 | 1        |
| arhgef15           | 8.283199 | 0.487603523  | 0.98323  | 0.49592  | 0.619951 | 0.91761  |
| zgc:113209         | 144.2867 | -0.057378646 | 0.232871 | -0.2464  | 0.805375 | 0.969348 |
| ccl39.3            | 12.89463 | 0.157723342  | 0.973968 | 0.161939 | 0.871354 | 0.983365 |
| pja2               | 302.6263 | 0.057740402  | 0.130023 | 0.444078 | 0.656986 | 0.929939 |
| CABZ01065328.2     | 0.191661 | -0.868103335 | 5.267649 | -0.1648  | 0.869102 | NA       |
| si:dkey-237g15.2   | 19.74625 | 0.097582061  | 0.414069 | 0.235666 | 0.813692 | 0.970397 |
| CU638714.1         | 0.060442 | 0            | 5.267649 | 0        | 1        | NA       |
| chdh               | 179.2578 | -0.148120613 | 0.203806 | -0.72677 | 0.467364 | 0.86616  |
| adamts5            | 62.26085 | -0.079645914 | 0.291201 | -0.27351 | 0.784462 | 0.962605 |
| SEMA4F             | 69.92684 | 0.171431745  | 0.261388 | 0.655852 | 0.511919 | 0.885162 |
| si:dkey-165e24.1   | 23.48356 | -3.176433599 | 1.407488 | -2.25681 | 0.02402  | 0.27455  |
| hoxa13a            | 79.40603 | 0.023373186  | 0.202188 | 0.115601 | 0.907969 | 0.991745 |
| pip5k1cb           | 273.3253 | -0.158179427 | 0.28341  | -0.55813 | 0.576756 | 0.904769 |
| slc15a1a           | 54.82058 | -1.261496309 | 0.673892 | -1.87196 | 0.061213 | 0.424867 |
| ahsalb             | 405.3883 | 0.050784856  | 0.133702 | 0.379836 | 0.704067 | 0.943735 |
| RF00324            | 4.586725 | -0.670930946 | 0.846287 | -0.79279 | 0.427898 | 0.845893 |
| BX248331.1         | 0.15979  | 0            | 5.267649 | 0        | 1        | NA       |
| fut10              | 26.71561 | -0.14761577  | 0.379315 | -0.38916 | 0.697154 | 0.94198  |
| AL627305.1         | 28.77534 | 0.414545747  | 0.399504 | 1.037651 | 0.299433 | 0.766128 |
| FQ377896.1         | 1.94204  | 2.145436449  | 1.445711 | 1.484001 | 0.137809 | NA       |
| CR354444.1         | 0.442906 | -1.756781023 | 3.239487 | -0.5423  | 0.58761  | NA       |
| znf1056            | 11.97203 | -0.308849496 | 0.528421 | -0.58448 | 0.5589   | 0.899409 |
| SMIM10             | 173.1166 | -0.074603282 | 0.169386 | -0.44043 | 0.659623 | 0.930581 |
| lat                | 7.238081 | -1.38663841  | 1.546172 | -0.89682 | 0.369815 | 0.818318 |
| znf1104            | 2.783585 | 0.805114743  | 0.960312 | 0.838388 | 0.401813 | 0.832807 |
| pik3r6a            | 115.3069 | 0.518161462  | 0.198022 | 2.61669  | 0.008879 | 0.161475 |
| RF00001            | 0.957365 | 0            | 2.469437 | 0        | 1        | NA       |
| BX936384.1         | 3.004521 | 3.947206589  | 1.506756 | 2.619672 | 0.008801 | 0.160701 |
| arf4b              | 25.86994 | 0.97838741   | 0.729479 | 1.341213 | 0.179851 | 0.655316 |

|                    |          |              |            |          |          |          |
|--------------------|----------|--------------|------------|----------|----------|----------|
| si:ch211-196h24.2  | 2.852882 | -2.803147288 | 1.556933   | -1.80043 | 0.071793 | 0.4564   |
| zgc:158464         | 133.9362 | -0.103852303 | 0.209093   | -0.49668 | 0.619415 | 0.917435 |
| tradv24.0.3        | 0.073968 |              | 0 5.267649 | 0        | 1 NA     |          |
| si:dkey-7114.1     | 4.780252 | 0.090827583  | 1.195452   | 0.075978 | 0.939437 | 0.997371 |
| prkacaa            | 356.0869 | -0.110138678 | 0.15512    | -0.71002 | 0.477691 | 0.869292 |
| aglb               | 693.4988 | 0.53785151   | 0.220895   | 2.434872 | 0.014897 | 0.213725 |
| si:ch1073-398f15.1 | 205.0109 | -0.455155497 | 0.317616   | -1.43304 | 0.151847 | 0.615406 |
| AL844192.1         | 5.124045 | -0.220624833 | 0.932228   | -0.23666 | 0.812917 | 0.970328 |
| si:ch73-44m9.3     | 235.4337 | 0.228428883  | 0.284033   | 0.804234 | 0.421262 | 0.842742 |
| CR382300.2         | 0 NA     | NA           | NA         | NA       | NA       | NA       |
| AREL1              | 342.1146 | 0.034841956  | 0.12278    | 0.283777 | 0.776582 | 0.961073 |
| si:ch211-125c23.3  | 3.974753 | -2.824665128 | 1.569667   | -1.79953 | 0.071935 | 0.4564   |
| znf1174            | 23.66454 | -0.332733722 | 0.352764   | -0.94322 | 0.345569 | 0.798766 |
| dcunld5            | 494.3002 | 0.020480774  | 0.130675   | 0.156731 | 0.875457 | 0.984383 |
| F0907110.1         | 2.949555 | 1.380056868  | 1.161753   | 1.187909 | 0.234869 | 0.715533 |
| si:dkey-102m7.3    | 195.0485 | -0.425818455 | 0.226457   | -1.88035 | 0.06006  | 0.422205 |
| BX276088.1         | 0.215663 | 1.055358649  | 5.267649   | 0.200347 | 0.841209 | NA       |
| CT955963.1         | 5.321294 | -1.145507264 | 0.940593   | -1.21786 | 0.223278 | 0.70531  |
| eef2b              | 77110.32 | -0.43493351  | 0.140978   | -3.08511 | 0.002035 | 0.070205 |
| alad               | 414.104  | 0.10988194   | 0.198049   | 0.554823 | 0.579016 | 0.905417 |
| si:ch211-175l6.1   | 1.277582 | 0.943479355  | 2.6086     | 0.36168  | 0.717591 | NA       |
| txnrd3             | 2028.06  | 0.181865588  | 0.1175     | 1.547787 | 0.121674 | 0.568382 |
| timm23b            | 46.61549 | 0.03648408   | 0.315909   | 0.115489 | 0.908057 | 0.991745 |
| amdhd2             | 535.0047 | -0.137237521 | 0.133374   | -1.02897 | 0.303495 | 0.769363 |
| CABZ01012885.1     | 0 NA     | NA           | NA         | NA       | NA       | NA       |
| si:dkey-83h2.3     | 1.316061 | -0.009386635 | 1.854861   | -0.00506 | 0.995962 | NA       |
| si:dkey-34d22.2    | 1.756071 | -1.806124751 | 2.132382   | -0.847   | 0.396996 | NA       |
| rock2bl            | 5.129971 | -0.51066737  | 0.734001   | -0.69573 | 0.486597 | 0.873244 |
| il10ra             | 12.08998 | 0.378062515  | 0.566414   | 0.667467 | 0.504474 | 0.881897 |
| CT990567.1         | 0.04222  |              | 0 5.267649 | 0        | 1 NA     |          |
| slc25a19           | 82.83091 | 0.277059582  | 0.242556   | 1.142249 | 0.253351 | 0.732759 |
| si:dkey-61p9.9     | 1.587926 | -0.812211419 | 1.880088   | -0.43201 | 0.665736 | NA       |
| si:dkey-78o7.3     | 0 NA     | NA           | NA         | NA       | NA       | NA       |
| abhd5b             | 1.244696 |              | 0 2.16554  | 0        | 1 NA     |          |
| nitr1la            | 0.120883 |              | 0 5.267649 | 0        | 1 NA     |          |
| rps18              | 19606.77 | -0.287205482 | 0.112996   | -2.54173 | 0.011031 | 0.183078 |
| lnpep              | 312.5698 | -0.091539875 | 0.127145   | -0.71996 | 0.471547 | 0.86809  |
| RF00001            | 0 NA     | NA           | NA         | NA       | NA       | NA       |
| pip5klaa           | 192.431  | -0.030014907 | 0.177509   | -0.16909 | 0.865726 | 0.982364 |
| pde6c              | 1735.627 | -0.26832034  | 0.399528   | -0.67159 | 0.501843 | 0.881148 |
| pax7a              | 100.1392 | -0.087487699 | 0.22021    | -0.39729 | 0.691152 | 0.940173 |
| F0704610.1         | 250.4416 | 0.283489618  | 0.179516   | 1.579191 | 0.114292 | 0.553312 |
| fgd1               | 101.9757 | 0.203758135  | 0.228069   | 0.893406 | 0.37164  | 0.819115 |
| CT027704.1         | 0.147823 |              | 0 5.267649 | 0        | 1 NA     |          |
| BX957252.3         | 5.026085 | -3.967945857 | 1.447431   | -2.74137 | 0.006118 | 0.131913 |
| zgc:112265         | 2123.102 | -0.184300071 | 0.38193    | -0.48255 | 0.629416 | 0.92266  |
| si:ch211-166e11.5  | 252.4874 | -0.069780142 | 0.144917   | -0.48152 | 0.630148 | 0.922869 |
| camlg              | 504.7926 | -0.509215489 | 0.180404   | -2.82264 | 0.004763 | 0.114459 |
| or106-5            | 0 NA     | NA           | NA         | NA       | NA       | NA       |
| si:ch73-106n3.1    | 1.689873 | -0.612623541 | 1.502758   | -0.40767 | 0.683519 | NA       |
| si:ch211-171117.14 | 4.387005 | 0.644794646  | 0.945961   | 0.681629 | 0.495474 | 0.87806  |
| BX323861.2         | 0 NA     | NA           | NA         | NA       | NA       | NA       |
| si:ch211-227e10.2  | 0.069091 |              | 0 5.267649 | 0        | 1 NA     |          |
| ints1              | 659.8933 | -0.200789903 | 0.165377   | -1.21413 | 0.224697 | 0.706634 |

|                   |          |              |            |          |          |          |
|-------------------|----------|--------------|------------|----------|----------|----------|
| tpcn2             | 136.451  | -0.220221753 | 0.223167   | -0.9868  | 0.323739 | 0.783161 |
| znf1129           | 12.35669 | 0.161834187  | 0.657757   | 0.246039 | 0.805652 | 0.96946  |
| ptpro             | 458.3541 | 0.038071975  | 0.119393   | 0.318879 | 0.749818 | 0.955074 |
| BX323994.2        | 0.043308 |              | 0.5.267649 | 0        | 1        | NA       |
| si:ch73-233f7.8   | 5.48839  | -0.391693147 | 0.840848   | -0.46583 | 0.641336 | 0.925554 |
| fam167b           | 101.6583 | -0.184196743 | 0.196693   | -0.93647 | 0.349032 | 0.801306 |
| BX547934.2        | 97.66107 | 0.141600697  | 0.255684   | 0.553811 | 0.579708 | 0.905618 |
| irgf4             | 1.405054 | 0.054926614  | 1.564578   | 0.035106 | 0.971995 | NA       |
| CU634008.1        | 92.03813 | 0.086835129  | 0.237074   | 0.366279 | 0.714157 | 0.945821 |
| CR376738.1        | 1.906454 | 1.055430738  | 1.952571   | 0.540534 | 0.588829 | NA       |
| znf1091           | 3.586723 | 0.060976399  | 1.082684   | 0.05632  | 0.955087 | 0.998611 |
| sec22bb           | 657.5741 | -0.049715749 | 0.128543   | -0.38676 | 0.698931 | 0.942456 |
| cnga2b            | 21.61365 | 0.822487623  | 0.429045   | 1.91702  | 0.055235 | 0.406983 |
| zgc:153383        | 104.795  | 0.591979527  | 0.443074   | 1.336075 | 0.181525 | 0.657892 |
| fastkd3           | 171.5771 | -0.118288542 | 0.141515   | -0.83588 | 0.403225 | 0.833799 |
| cfh               | 1051.075 | -0.365215168 | 0.231486   | -1.5777  | 0.114635 | 0.554279 |
| CR376766.2        | 245.4713 | -0.19865003  | 0.27842    | -0.71349 | 0.475542 | 0.869292 |
| si:dkeyp-13d12.17 |          | 0 NA         | NA         | NA       | NA       | NA       |
| si:ch211-286o17.1 | 978.2032 | -0.109374811 | 0.19195    | -0.56981 | 0.568808 | 0.902234 |
| BX322631.1        | 10.74269 | -0.868155033 | 1.722677   | -0.50396 | 0.614292 | 0.915998 |
| btr21             | 5.897501 | -3.73249539  | 2.615547   | -1.42704 | 0.153568 | 0.618187 |
| olfcs2            | 3.136495 | -0.521081153 | 1.311345   | -0.39736 | 0.691099 | 0.940173 |
| nop53             | 3902.155 | -0.738212438 | 0.155339   | -4.75228 | 2.01E-06 | 0.000506 |
| BX649313.1        | 0.444703 | 0.093653772  | 3.657799   | 0.025604 | 0.979573 | NA       |
| pnkp              | 171.7538 | -0.00210792  | 0.168356   | -0.01252 | 0.99001  | 1        |
| ptk2aa            | 334.2387 | 0.033933229  | 0.165208   | 0.205397 | 0.837262 | 0.976007 |
| si:dkey-217g21.3  | 3.672131 | -0.057702964 | 1.07728    | -0.05356 | 0.957283 | 0.999109 |
| CABZ01078737.1    | 69.19594 | 0.18953029   | 0.278618   | 0.680251 | 0.496345 | 0.878161 |
| paqr7a            | 12.94399 | 0.523126653  | 0.50388    | 1.038198 | 0.299178 | 0.766047 |
| BX908799.1        | 0.101247 | 1.854150541  | 5.241768   | 0.353726 | 0.723544 | NA       |
| si:dkey-193i10.1  | 7.14103  | -1.840412293 | 0.864684   | -2.12842 | 0.033302 | 0.323127 |
| clrn3             | 25.79614 | 0.980980476  | 1.618367   | 0.606155 | 0.544412 | 0.895206 |
| nrl               | 19.7859  | -0.256466222 | 0.504561   | -0.5083  | 0.611246 | 0.915331 |
| fkrp              | 93.77544 | 0.091560524  | 0.235403   | 0.388952 | 0.697311 | 0.942027 |
| znf1182           | 17.98887 | -0.367702504 | 0.438948   | -0.83769 | 0.402204 | 0.833156 |
| BX004768.1        | 0.174583 | 1.055370259  | 5.267649   | 0.200349 | 0.841207 | NA       |
| L0017721.1        | 7.127109 | 1.997168872  | 0.758123   | 2.63436  | 0.00843  | 0.156879 |
| fgf10b            | 20.32636 | 0.195920165  | 0.437613   | 0.447702 | 0.654368 | 0.929488 |
| si:dkeyp-110c7.4  | 202.6831 | 0.171876465  | 0.497756   | 0.345303 | 0.729867 | 0.950056 |
| si:dkey-43f9.4    | 33.05522 | -0.507741515 | 0.36744    | -1.38184 | 0.167022 | 0.637452 |
| smg6              | 444.6248 | 0.041945033  | 0.135911   | 0.308621 | 0.75761  | 0.957364 |
| pmt               | 211.3226 | 0.36915173   | 0.251845   | 1.465791 | 0.142705 | 0.601981 |
| vent              | 2.335403 | 0.522061378  | 1.338524   | 0.390028 | 0.696516 | 0.941831 |
| CR450808.1        | 14.34308 | 0.936371765  | 0.677633   | 1.381826 | 0.167025 | 0.637452 |
| foxo6a            | 15.2225  | -0.149381496 | 0.505492   | -0.29552 | 0.767599 | 0.960296 |
| nploc4            | 692.8818 | 0.069013677  | 0.138315   | 0.498958 | 0.617809 | 0.916478 |
| RF00001           |          | 0 NA         | NA         | NA       | NA       | NA       |
| BX511111.1        | 3.917622 | -2.232808414 | 0.998136   | -2.23698 | 0.025288 | 0.282476 |
| CT025669.1        | 1.561709 | -4.680128108 | 2.130883   | -2.19633 | 0.028068 | NA       |
| pbx1a             | 594.4978 | -0.041603834 | 0.12104    | -0.34372 | 0.731056 | 0.950056 |
| hic2              | 198.1511 | -0.424948227 | 0.240392   | -1.76773 | 0.077106 | 0.469501 |
| CABZ01079251.1    | 38.59355 | -1.450617455 | 0.379313   | -3.82433 | 0.000131 | 0.011295 |
| cpeb4b            | 721.5832 | 0.113260165  | 0.125317   | 0.903791 | 0.366106 | 0.815747 |
| CR848025.1        | 4.491064 | -1.574354137 | 0.846197   | -1.8605  | 0.062814 | 0.428925 |

|                   |          |              |          |          |          |          |
|-------------------|----------|--------------|----------|----------|----------|----------|
| sosl              | 656.1271 | -0.138536537 | 0.13418  | -1.03246 | 0.301854 | 0.767977 |
| ppplr27b          | 406.8769 | -0.267125494 | 0.763103 | -0.35005 | 0.7263   | 0.948987 |
| ddx52             | 278.9527 | -0.224235127 | 0.233408 | -0.9607  | 0.336703 | 0.793455 |
| crbl              | 65.35678 | 0.009165658  | 0.243977 | 0.037568 | 0.970032 | 1        |
| RF00001           | 0 NA     | NA           | NA       | NA       | NA       | NA       |
| ubn2b             | 291.1195 | 0.009846834  | 0.139666 | 0.070503 | 0.943794 | 0.997371 |
| si:dkey-82i20.2   | 0.635309 | 0.719246233  | 2.433651 | 0.295542 | 0.76758  | NA       |
| CR855379.2        | 1.000215 | 0            | 2.677596 | 0        | 1        | NA       |
| rps27l            | 868.5797 | -0.593584864 | 0.198678 | -2.98767 | 0.002811 | 0.087078 |
| cfap20            | 289.5275 | 0.072233654  | 0.14199  | 0.508724 | 0.610945 | 0.915331 |
| duspl             | 1188.782 | -0.125476634 | 0.459415 | -0.27312 | 0.784759 | 0.962605 |
| tradv5.0.1        | 0 NA     | NA           | NA       | NA       | NA       | NA       |
| CR387919.1        | 60.45567 | -0.056225173 | 0.293762 | -0.1914  | 0.848215 | 0.977912 |
| spop              | 603.3674 | 0.142332641  | 0.127182 | 1.119122 | 0.263088 | 0.740765 |
| si:dkey-25o1.7    | 3.26759  | -0.618441906 | 1.391211 | -0.44453 | 0.656656 | 0.929824 |
| abca3b            | 1378.666 | 0.018024598  | 0.210314 | 0.085703 | 0.931702 | 0.995827 |
| map11c3c          | 20.79181 | 0.520179217  | 0.477798 | 1.088702 | 0.276285 | 0.750674 |
| sh3bp5a           | 667.373  | 0.002645639  | 0.1101   | 0.024029 | 0.980829 | 1        |
| abhd14b           | 258.8562 | 0.503882435  | 0.19207  | 2.623433 | 0.008705 | 0.1602   |
| CU639471.1        | 0.144395 | 1.055372236  | 5.267649 | 0.20035  | 0.841207 | NA       |
| si:ch1073-178p5.3 | 0.371572 | 1.556794327  | 3.248997 | 0.479161 | 0.631824 | NA       |
| irak4             | 150.9771 | -0.723019122 | 0.258433 | -2.79771 | 0.005147 | 0.12009  |
| ecmla             | 0.530794 | 0.093647308  | 3.578571 | 0.026169 | 0.979123 | NA       |
| nkrf              | 438.7183 | 0.029854219  | 0.147006 | 0.203081 | 0.839071 | 0.976417 |
| CR388413.1        | 0 NA     | NA           | NA       | NA       | NA       | NA       |
| si:dkeyp-88h4.2   | 0 NA     | NA           | NA       | NA       | NA       | NA       |
| btr22             | 2.629998 | 0.948560498  | 1.291838 | 0.734272 | 0.462783 | 0.864104 |
| si:ch211-106g8.62 | 0 NA     | NA           | NA       | NA       | NA       | NA       |
| zgc:173486        | 13.89503 | -1.560319447 | 0.474681 | -3.28709 | 0.001012 | 0.044337 |
| or108-2           | 0.325628 | -1.332943469 | 4.479007 | -0.2976  | 0.76601  | NA       |
| CR383680.1        | 1.087612 | 0.093651096  | 2.205331 | 0.042466 | 0.966127 | NA       |
| tefm              | 104.7163 | -0.155012696 | 0.189811 | -0.81667 | 0.414118 | 0.838631 |
| CABZ01079427.1    | 158.5542 | -0.430728249 | 0.225738 | -1.90809 | 0.056379 | 0.410319 |
| si:dkey-112a7.5   | 3.920655 | -0.875944604 | 1.428784 | -0.61307 | 0.53983  | 0.893049 |
| lsm14ab           | 1454.689 | -0.042870274 | 0.086381 | -0.49629 | 0.619688 | 0.91747  |
| trgv1             | 0.103751 | 0            | 5.267649 | 0        | 1        | NA       |
| aqp11             | 420.8871 | 0.112096385  | 0.173146 | 0.64741  | 0.517367 | 0.887148 |
| si:dkeyp-5g9.1    | 4.044738 | -0.519776635 | 1.464447 | -0.35493 | 0.722642 | 0.947632 |
| slbp              | 473.6442 | 0.071675237  | 0.168782 | 0.42466  | 0.671084 | 0.933953 |
| tor2a             | 144.5656 | 0.193976587  | 0.182183 | 1.064737 | 0.286995 | 0.757955 |
| zfp2b             | 159.9449 | 0.2787061    | 0.238134 | 1.170375 | 0.24185  | 0.72348  |
| BX323453.1        | 8.253948 | -0.269375188 | 0.707752 | -0.38061 | 0.703495 | 0.943668 |
| sill              | 201.9711 | 0.366382404  | 0.155313 | 2.358989 | 0.018325 | 0.239068 |
| CR556708.1        | 0.11354  | 0            | 5.267649 | 0        | 1        | NA       |
| CR318647.1        | 0.306793 | 0            | 5.267649 | 0        | 1        | NA       |
| si:ch211-209j12.3 | 14.12987 | 0.160361045  | 0.4462   | 0.359393 | 0.719301 | 0.94694  |
| BX927122.1        | 0.668139 | 0.908375134  | 3.109858 | 0.292095 | 0.770214 | NA       |
| FP085400.1        | 0.427313 | -2.409491936 | 3.643416 | -0.66133 | 0.508402 | NA       |
| ckap21            | 208.8318 | 0.236961814  | 0.228184 | 1.03847  | 0.299051 | 0.765976 |
| CT573787.1        | 0.680029 | 2.577506146  | 2.27791  | 1.131522 | 0.257835 | NA       |
| CU694481.1        | 70.9045  | 0.32483107   | 0.252676 | 1.285564 | 0.198595 | 0.679281 |
| si:dkeyp-90h9.1   | 5.277554 | -1.029609744 | 1.03275  | -0.99696 | 0.318784 | 0.779923 |
| RF00001           | 0 NA     | NA           | NA       | NA       | NA       | NA       |
| si:ch211-195b11.3 | 5049.884 | -0.568833831 | 0.163708 | -3.47469 | 0.000511 | 0.027902 |

|                    |          |              |          |          |          |          |
|--------------------|----------|--------------|----------|----------|----------|----------|
| hid1b              | 69.04318 | 0.566147057  | 0.24752  | 2.287277 | 0.02218  | 0.263608 |
| ccdc40             | 66.49272 | 0.637439452  | 0.334883 | 1.903472 | 0.056979 | 0.412306 |
| coa3a              | 430.0402 | 0.146254865  | 0.136984 | 1.067681 | 0.285664 | 0.757084 |
| BX324007.2         | 0.193221 | 0            | 5.267649 | 0        | 1        | NA       |
| zgc:113886         | 28.54189 | 0.025080689  | 0.353126 | 0.071025 | 0.943378 | 0.997371 |
| rpl36              | 18227.78 | -0.62476351  | 0.170909 | -3.65553 | 0.000257 | 0.017645 |
| BX649421.1         | 8.370499 | 1.520301025  | 0.760581 | 1.998868 | 0.045623 | 0.373922 |
| sox32              | 0.6273   | 0.638751241  | 2.210284 | 0.288991 | 0.772589 | NA       |
| slc8a2b            | 22.74248 | 0.586026948  | 0.543092 | 1.079056 | 0.280563 | 0.753147 |
| gnrhr1             | 2.614017 | -0.410788309 | 1.112486 | -0.36925 | 0.71194  | 0.945821 |
| sez6l              | 177.4112 | -0.095717846 | 0.278563 | -0.34361 | 0.731137 | 0.950056 |
| CR626884.1         | 0        | NA           | NA       | NA       | NA       | NA       |
| si:ch73-43g23.1    | 481.9242 | 0.12038085   | 0.242643 | 0.496123 | 0.619808 | 0.91747  |
| ubxn4              | 0        | NA           | NA       | NA       | NA       | NA       |
| CABZ01109081.1     | 62.253   | -0.426986669 | 0.271953 | -1.57008 | 0.116397 | 0.557474 |
| cls                | 7.09859  | -1.725372323 | 0.773338 | -2.23107 | 0.025676 | 0.284447 |
| RF00001            | 0        | NA           | NA       | NA       | NA       | NA       |
| CU019562.1         | 0.046941 | 0            | 5.267649 | 0        | 1        | NA       |
| olfcw1             | 0.274316 | 0            | 5.267649 | 0        | 1        | NA       |
| FP016142.4         | 0.324825 | -2.324743267 | 5.202572 | -0.44684 | 0.654987 | NA       |
| BX539336.1         | 174.0451 | -0.144824646 | 0.200183 | -0.72346 | 0.469396 | 0.867224 |
| zbtb38             | 40.43295 | -0.035952791 | 0.455344 | -0.07896 | 0.937067 | 0.997163 |
| CR812468.1         | 0.409476 | 1.055393469  | 3.746124 | 0.281729 | 0.778151 | NA       |
| si:ch211-163c2.1   | 2.274027 | -1.712254915 | 4.357447 | -0.39295 | 0.694357 | 0.941093 |
| CABZ01089777.1     | 50.31824 | -0.908482343 | 1.038895 | -0.87447 | 0.381863 | 0.824957 |
| CU019663.1         | 0.092827 | 0            | 5.267649 | 0        | 1        | NA       |
| si:ch1073-209h18.1 | 0.698851 | 0.919735906  | 2.576891 | 0.356917 | 0.721154 | NA       |
| taok2b             | 75.73628 | 0.176354702  | 0.207662 | 0.849241 | 0.395747 | 0.829389 |
| CABZ01080550.1     | 2.84197  | 0            | 1.865312 | 0        | 1        | 1        |
| trrap              | 762.2584 | 0.10460207   | 0.122279 | 0.855441 | 0.392307 | 0.827902 |
| CABZ01066312.1     | 257.4588 | -0.157334891 | 0.192739 | -0.81631 | 0.414324 | 0.838631 |
| si:ch73-197b13.1   | 138.0564 | 0.285110394  | 0.250773 | 1.136924 | 0.25557  | 0.733544 |
| CR354537.1         | 0.448562 | -0.868132127 | 3.505918 | -0.24762 | 0.804429 | NA       |
| klhl12             | 101.356  | 0.235460031  | 0.226215 | 1.040867 | 0.297937 | 0.765407 |
| BX649328.1         | 1.698087 | -0.22552544  | 1.836578 | -0.1228  | 0.902268 | NA       |
| zgc:114200         | 436.017  | -0.044881549 | 0.119919 | -0.37426 | 0.708208 | 0.945344 |
| chia.1             | 424.0747 | -0.400381105 | 0.653813 | -0.61238 | 0.540287 | 0.893049 |
| rbml2              | 367.9562 | 0.174946053  | 0.135191 | 1.294068 | 0.195642 | 0.675764 |
| tradv26.0          | 0.319441 | 0            | 5.267649 | 0        | 1        | NA       |
| CR847939.1         | 3.483568 | -0.335665683 | 1.055793 | -0.31793 | 0.75054  | 0.955074 |
| BX321870.2         | 0.122043 | -0.868089684 | 5.267649 | -0.1648  | 0.869104 | NA       |
| plppr1             | 145.5976 | -0.006750705 | 0.210619 | -0.03205 | 0.974431 | 1        |
| BX005454.1         | 19.60984 | 0.302594153  | 0.426673 | 0.709195 | 0.478204 | 0.869292 |
| si:dkey-211i20.4   | 0.07132  | 0            | 5.267649 | 0        | 1        | NA       |
| t1r1               | 2.356722 | -1.941211762 | 1.401427 | -1.38517 | 0.166001 | 0.635533 |
| znf1147            | 0.662786 | -2.300576942 | 2.98942  | -0.76957 | 0.441553 | NA       |
| si:dkeyp-82b4.6    | 0        | NA           | NA       | NA       | NA       | NA       |
| si:dkey-207m2.4    | 8.852527 | -0.256547945 | 0.832244 | -0.30826 | 0.757884 | 0.957427 |
| CR356223.2         | 2.968421 | 2.298642771  | 1.396057 | 1.646525 | 0.099656 | 0.524166 |
| egf17              | 178.9411 | -0.397495957 | 0.196248 | -2.02547 | 0.042819 | 0.362408 |
| si:ch211-51h4.2    | 6.386391 | -0.983315346 | 0.861579 | -1.14129 | 0.253747 | 0.732873 |
| si:ch73-252i11.1   | 62.99277 | 0.182699397  | 0.335076 | 0.545248 | 0.585583 | 0.906655 |
| cxcl11.1           | 0.323644 | 0            | 5.267649 | 0        | 1        | NA       |
| or120-1            | 4.256763 | 0.002470814  | 0.994429 | 0.002485 | 0.998018 | 1        |



|                    |          |              |            |          |          |          |
|--------------------|----------|--------------|------------|----------|----------|----------|
| ep300a             | 447.0303 | 0.204904891  | 0.151349   | 1.353853 | 0.175783 | 0.649413 |
| RF00001            | 0.053506 | -0.86807634  | 5.267649   | -0.16479 | 0.869106 | NA       |
| si:dkey-61p9.9     | 10.9652  | -0.562490859 | 0.794068   | -0.70837 | 0.478718 | 0.869292 |
| pcdh1g31           | 47.67872 | -0.194292853 | 0.304348   | -0.63839 | 0.52322  | 0.888312 |
| CR790382.1         | 0.527071 | -2.71109143  | 3.472043   | -0.78083 | 0.4349   | NA       |
| FQ311920.1         | 0.045161 |              | 0 5.267649 | 0        | 1        | NA       |
| znf974             | 1.528777 | 0.812403377  | 1.476216   | 0.550328 | 0.582094 | NA       |
| UBE20              | 204.1244 | 0.277445222  | 0.170806   | 1.624331 | 0.104305 | 0.532541 |
| tmem205            | 222.7618 | 0.277023249  | 0.12931    | 2.14232  | 0.032168 | 0.318495 |
| ifnphi4            | 1.513692 | -1.503273047 | 1.571675   | -0.95648 | 0.338831 | NA       |
| lrch3              | 80.61691 | -0.019898278 | 0.278908   | -0.07134 | 0.943124 | 0.997371 |
| si:ch211-241b2.4   | 20.70559 | 0.471233813  | 0.469352   | 1.00401  | 0.315374 | 0.777834 |
| CU929154.1         | 0.07132  |              | 0 5.267649 | 0        | 1        | NA       |
| CR450749.2         |          | 0 NA         | NA         | NA       | NA       | NA       |
| si:ch211-256e16.11 | 42.52695 | 0.701817092  | 0.35326    | 1.986685 | 0.046957 | 0.377647 |
| prss35             | 1014.564 | 0.1113186    | 0.137594   | 0.809036 | 0.418494 | 0.841565 |
| ddr2a              | 191.321  | 0.0140116    | 0.206085   | 0.067989 | 0.945794 | 0.997371 |
| tnnt2b             | 78.71913 | 1.901385152  | 1.169333   | 1.626043 | 0.103941 | 0.532096 |
| CR407585.1         |          | 0 NA         | NA         | NA       | NA       | NA       |
| FQ323156.1         | 2315.252 | -0.01878007  | 0.246939   | -0.07605 | 0.939378 | 0.997371 |
| evalbb             | 139.8923 | -0.215877744 | 0.146828   | -1.47028 | 0.141487 | 0.600284 |
| BX950868.1         | 0.263036 | 1.055362802  | 5.267649   | 0.200348 | 0.841208 | NA       |
| CABZ01066725.1     | 21.32436 | -0.509138373 | 0.353287   | -1.44115 | 0.149543 | 0.611852 |
| si:ch211-285j22.3  | 4.829277 | -1.769010677 | 1.704762   | -1.03769 | 0.299415 | 0.766128 |
| traj26             |          | 0 NA         | NA         | NA       | NA       | NA       |
| si:dkey-48g21.7    | 6.680381 | -3.156297143 | 1.079714   | -2.92327 | 0.003464 | 0.097161 |
| jakmip3            | 116.0128 | 0.358171661  | 0.3256     | 1.100036 | 0.271316 | 0.747491 |
| agxt2              | 492.0857 | 0.704061421  | 0.206313   | 3.41259  | 0.000643 | 0.032986 |
| CR855206.1         | 0.04222  |              | 0 5.267649 | 0        | 1        | NA       |
| si:dkey-19b23.12   | 508.9011 | -0.017506056 | 0.122651   | -0.14273 | 0.886503 | 0.987533 |
| RF00001            |          | 0 NA         | NA         | NA       | NA       | NA       |
| tlklb              | 892.694  | -0.082138412 | 0.10057    | -0.81673 | 0.414084 | 0.838631 |
| si:dkey-285b23.4   | 6.923281 | -1.228542967 | 0.741123   | -1.65768 | 0.097383 | 0.520377 |
| socs5a             | 250.1759 | -0.094652379 | 0.120552   | -0.78516 | 0.432362 | 0.848419 |
| me2                | 897.9963 | -0.039144888 | 0.207084   | -0.18903 | 0.85007  | 0.978251 |
| uraha              | 684.5779 | 0.016794546  | 0.190255   | 0.088274 | 0.929659 | 0.995576 |
| si:ch211-17516.2   | 1.832487 | 1.055429654  | 2.132816   | 0.494853 | 0.620704 | NA       |
| si:ch211-160f23.7  | 193.506  | 0.294973947  | 0.288399   | 1.0228   | 0.306403 | 0.771574 |
| znf1097            | 4.010963 | -1.15379594  | 0.855307   | -1.34898 | 0.177342 | 0.650985 |
| ephb4a             | 455.9252 | -0.02610596  | 0.166855   | -0.15646 | 0.875671 | 0.98444  |
| mkrn2os.2          | 26.14881 | 1.398973785  | 0.428962   | 3.261303 | 0.001109 | 0.047149 |
| tlnl               | 1630.159 | 0.062619174  | 0.139148   | 0.45002  | 0.652696 | 0.929043 |
| zgc:101540         | 101.3555 | -0.502098535 | 0.232835   | -2.15645 | 0.031048 | 0.313376 |
| si:dkeyp-93h6.1    | 2.761862 | -2.053102557 | 1.21388    | -1.69135 | 0.090769 | 0.505206 |
| epob               | 10.98722 | 0.503717782  | 0.526884   | 0.956031 | 0.339057 | 0.795226 |
| osmr               | 3.656293 | -0.261101098 | 1.358718   | -0.19217 | 0.847611 | 0.977705 |
| CABZ01052573.1     | 122.5026 | -0.277255941 | 0.26763    | -1.03597 | 0.300217 | 0.766629 |
| CU179702.2         | 3.18158  | 0.544115781  | 0.949654   | 0.572962 | 0.566671 | 0.901739 |
| cdc20              | 706.6399 | 0.349967135  | 0.268115   | 1.30529  | 0.191794 | 0.672149 |
| reep5              | 1822.056 | -0.050245022 | 0.114679   | -0.43813 | 0.661289 | 0.930581 |
| si:dkey-190j3.4    | 11.50266 | -0.481841366 | 0.634673   | -0.7592  | 0.447735 | 0.856366 |
| RF00415            |          | 0 NA         | NA         | NA       | NA       | NA       |
| si:ch211-103a14.5  | 20.20554 | -1.062200162 | 0.691694   | -1.53565 | 0.124624 | 0.572298 |
| rab21              | 714.1711 | 0.010683754  | 0.149316   | 0.071552 | 0.942959 | 0.997371 |

|                    |          |              |          |          |          |          |
|--------------------|----------|--------------|----------|----------|----------|----------|
| CR450764.1         | 0        | NA           | NA       | NA       | NA       | NA       |
| CU074330.1         | 21.93679 | -0.521899798 | 0.451858 | -1.15501 | 0.248086 | 0.728489 |
| RF00003            | 0        | NA           | NA       | NA       | NA       | NA       |
| RF00001            | 0        | NA           | NA       | NA       | NA       | NA       |
| BX293993.1         | 0.129045 | 1.055383603  | 5.267649 | 0.200352 | 0.841205 | NA       |
| zfyve9b            | 21.425   | 0.680727129  | 0.545273 | 1.248415 | 0.211879 | 0.693489 |
| traj37             | 0        | NA           | NA       | NA       | NA       | NA       |
| ube2ql             | 807.2819 | -0.096917312 | 0.1423   | -0.68108 | 0.495824 | 0.87806  |
| BX248131.1         | 0        | NA           | NA       | NA       | NA       | NA       |
| si:ch211-160d14.15 | 0.163104 | 0            | 5.267649 | 0        | 1        | NA       |
| si:ch211-154c21.1  | 27.84231 | -0.099891681 | 0.3173   | -0.31482 | 0.7529   | 0.955756 |
| zmynd19            | 232.6235 | -0.007804149 | 0.183189 | -0.0426  | 0.966019 | 1        |
| cmc4               | 44.3437  | 0.095365931  | 0.319195 | 0.29877  | 0.765115 | 0.959622 |
| si:ch211-238e22.7  | 1.166663 | 2.044428732  | 1.805808 | 1.132141 | 0.257575 | NA       |
| slcole1            | 5.508629 | -2.106205904 | 1.472357 | -1.4305  | 0.152574 | 0.61658  |
| col28a2b           | 72.24625 | 0.879503699  | 0.436306 | 2.015798 | 0.043821 | 0.366547 |
| f71                | 78.24537 | 0.331274002  | 0.286291 | 1.157124 | 0.247222 | 0.727871 |
| PLCB4              | 3.985818 | -0.735090684 | 1.021795 | -0.71941 | 0.471888 | 0.868369 |
| CR855274.1         | 0.043309 | 0            | 5.267649 | 0        | 1        | NA       |
| trip10b            | 79.74601 | -0.205556848 | 0.236699 | -0.86843 | 0.385158 | 0.826939 |
| plgrkt             | 372.8725 | 0.40079982   | 0.120392 | 3.329115 | 0.000871 | 0.039973 |
| tril               | 147.1825 | 0.083763218  | 0.197624 | 0.423851 | 0.671675 | 0.933953 |
| zgc:154142         | 45.78079 | 0.208260868  | 0.391667 | 0.53173  | 0.594913 | 0.910869 |
| CR450785.1         | 7.57587  | -0.30433601  | 0.956501 | -0.31818 | 0.750351 | 0.955074 |
| mmp13b             | 3.09836  | -0.524964307 | 1.34397  | -0.39061 | 0.696088 | 0.941657 |
| timp4.3            | 595.2271 | 0.984162171  | 1.579176 | 0.623212 | 0.533145 | 0.890978 |
| CABZ01076996.1     | 54.65171 | 0.044372886  | 0.289734 | 0.15315  | 0.87828  | 0.985761 |
| CR381540.1         | 1.124852 | 0            | 2.197036 | 0        | 1        | NA       |
| si:ch211-106g8.20  | 0        | NA           | NA       | NA       | NA       | NA       |
| zgc:173517         | 24.31899 | -0.528696106 | 0.407056 | -1.29883 | 0.194003 | 0.674122 |
| st6galnac4         | 10.86271 | 0.700622804  | 0.564179 | 1.241845 | 0.214294 | 0.696474 |
| si:ch1073-209e23.1 | 46.81946 | -0.203015988 | 0.351437 | -0.57767 | 0.563484 | 0.901075 |
| si:ch211-213c4.5   | 0.795927 | -2.784636344 | 2.364173 | -1.17785 | 0.238857 | NA       |
| znf1183            | 14.04124 | -2.789142301 | 0.739291 | -3.77272 | 0.000161 | 0.012946 |
| g6fl               | 2.82808  | -0.987397125 | 1.235443 | -0.79923 | 0.42416  | 0.844355 |
| BX927130.2         | 0        | NA           | NA       | NA       | NA       | NA       |
| nudt12             | 361.3709 | -0.190124292 | 0.142182 | -1.33719 | 0.18116  | 0.657295 |
| srsf3a             | 1.236948 | 0            | 2.120449 | 0        | 1        | NA       |
| CT990625.1         | 0.635304 | 0            | 3.259268 | 0        | 1        | NA       |
| si:ch73-97h19.2    | 28.78762 | -0.920795911 | 1.317316 | -0.69899 | 0.484556 | 0.872911 |
| BX548164.1         | 0.321756 | 0            | 3.910283 | 0        | 1        | NA       |
| RF00003            | 0        | NA           | NA       | NA       | NA       | NA       |
| scrtla             | 223.6157 | 0.256183065  | 0.142344 | 1.799741 | 0.071902 | 0.4564   |
| mapk15             | 7.141875 | 1.189372659  | 0.723235 | 1.644518 | 0.100069 | 0.524334 |
| selenok            | 617.3507 | 0.293280967  | 0.121967 | 2.40459  | 0.016191 | 0.224498 |
| calm3a             | 1625.674 | 0.206057347  | 0.170647 | 1.207507 | 0.227237 | 0.708529 |
| hif1al             | 4748.236 | 0.013312086  | 0.123829 | 0.107504 | 0.914389 | 0.992972 |
| CU929150.2         | 3.932342 | 0.772528784  | 1.021259 | 0.756447 | 0.449381 | 0.856979 |
| pcdhlg32           | 25.29585 | 0.19376122   | 0.352312 | 0.549971 | 0.582339 | 0.90571  |
| RF00001            | 0.354718 | -0.868126271 | 5.166465 | -0.16803 | 0.866559 | NA       |
| si:dkey-269i1.4    | 374.9215 | 0.453544555  | 0.375234 | 1.208698 | 0.226779 | 0.707959 |
| FP016208.1         | 0.086618 | 0            | 5.267649 | 0        | 1        | NA       |
| RGS13 (1 of many)  | 4.404376 | 0.238700072  | 0.90783  | 0.262935 | 0.792601 | 0.965266 |
| CR790380.1         | 59.48321 | 0.060268241  | 0.250941 | 0.240169 | 0.8102   | 0.969828 |

|                   |          |              |            |          |          |          |
|-------------------|----------|--------------|------------|----------|----------|----------|
| BX649384.3        | 10.04585 | -0.131784252 | 0.570318   | -0.23107 | 0.817259 | 0.971207 |
| RF00003           | 0 NA     |              | NA         | NA       | NA       | NA       |
| si:ch211-223a21.4 | 8.476647 | 0.24413193   | 0.583221   | 0.418593 | 0.675514 | 0.935422 |
| cldn151b          | 140.0605 | -1.152930491 | 0.341893   | -3.37219 | 0.000746 | 0.036381 |
| esrrb             | 65.15118 | 0.081670938  | 0.233289   | 0.350085 | 0.726275 | 0.948987 |
| RF00001           | 0 NA     |              | NA         | NA       | NA       | NA       |
| rnf103            | 409.2209 | -0.165059267 | 0.158922   | -1.03862 | 0.298982 | 0.765883 |
| gphnb             | 288.4901 | 0.180366738  | 0.209069   | 0.862714 | 0.388295 | 0.827592 |
| ago4              | 685.3627 | -0.351010234 | 0.143968   | -2.43811 | 0.014764 | 0.213272 |
| BX640584.1        | 0.819583 | 3.732169232  | 5.163742   | 0.722764 | 0.469825 | NA       |
| FP101914.1        | 180.8607 | -0.48073488  | 0.242146   | -1.98531 | 0.04711  | 0.378022 |
| zgc:171695        | 0.053262 | 1.055396947  | 5.267649   | 0.200354 | 0.841203 | NA       |
| BX465868.2        | 0.053262 | 1.055396947  | 5.267649   | 0.200354 | 0.841203 | NA       |
| gprc5c            | 56.50052 | -0.118953911 | 0.294467   | -0.40396 | 0.686239 | 0.938732 |
| BX004873.1        | 2.585468 | -0.828138951 | 1.188638   | -0.69671 | 0.485983 | 0.873244 |
| si:dkey-269o24.1  | 5.143277 | -4.050709433 | 1.590647   | -2.54658 | 0.010878 | 0.181938 |
| rictora           | 244.3213 | -0.083870459 | 0.199429   | -0.42055 | 0.674081 | 0.934789 |
| adc9              | 125.0399 | -0.266517989 | 0.160016   | -1.66557 | 0.095798 | 0.516953 |
| RF00001           | 0 NA     |              | NA         | NA       | NA       | NA       |
| otud1             | 61.1306  | 0.155751916  | 0.353801   | 0.440224 | 0.659775 | 0.930581 |
| RF00001           | 0 NA     |              | NA         | NA       | NA       | NA       |
| GAN               | 53.06665 | -0.119056792 | 0.268956   | -0.44266 | 0.65801  | 0.930581 |
| sez6a             | 70.38961 | -0.272420865 | 0.364018   | -0.74837 | 0.454236 | 0.859224 |
| dre-mir-19d       | 0 NA     |              | NA         | NA       | NA       | NA       |
| znf1154           | 23.417   | -0.135295814 | 0.423095   | -0.31978 | 0.749138 | 0.955074 |
| CU896630.1        | 33.34228 | -0.177687549 | 0.282045   | -0.63    | 0.528696 | 0.890094 |
| si:ch211-285j22.5 | 0 NA     |              | NA         | NA       | NA       | NA       |
| si:dkeyp-97a10.1  | 19.30679 | -1.038196019 | 0.777098   | -1.33599 | 0.181552 | 0.657892 |
| si:dkey-11f4.20   | 5.013038 | 0.476015153  | 1.060229   | 0.448974 | 0.653451 | 0.929269 |
| RF00001           | 0.053506 | -0.86807634  | 5.267649   | -0.16479 | 0.869106 | NA       |
| galnt18a          | 35.35477 | -0.287645593 | 0.366379   | -0.7851  | 0.432393 | 0.848419 |
| si:zfos-1069f5.1  | 3.973254 | 0.877763615  | 1.114246   | 0.787764 | 0.430835 | 0.847629 |
| CR589944.2        | 0.36894  | -2.311622452 | 3.697499   | -0.62519 | 0.531849 | NA       |
| cfap53            | 20.00677 | 0.454377751  | 0.420104   | 1.081584 | 0.279437 | 0.752477 |
| znf973            | 16.69442 | 0.942370679  | 0.540325   | 1.74408  | 0.081145 | 0.479923 |
| pdgfrb            | 340.1897 | -0.243067032 | 0.147748   | -1.64514 | 0.099941 | 0.524166 |
| RF00001           | 0 NA     |              | NA         | NA       | NA       | NA       |
| si:ch211-241b2.5  | 11.07899 | -0.537736553 | 0.540729   | -0.99447 | 0.319996 | 0.780618 |
| si:ch211-183d5.2  | 6.086431 | 0.286209575  | 1.235426   | 0.231669 | 0.816795 | 0.971207 |
| FP085399.1        | 0.890183 | -1.437003214 | 2.412692   | -0.5956  | 0.551441 | NA       |
| hist1h2a11        | 0.740533 | -0.936916535 | 3.004787   | -0.31181 | 0.755186 | NA       |
| lcor              | 34.89009 | 0.143743194  | 0.325348   | 0.441813 | 0.658625 | 0.930581 |
| zgc:173581        | 16.51714 | 0.261079808  | 0.632776   | 0.412594 | 0.679904 | 0.936586 |
| si:ch211-195p4.4  | 0.191369 |              | 0 5.267649 | 0        | 1 NA     |          |
| BX294383.1        | 0.326478 | 1.055367829  | 4.549706   | 0.231964 | 0.816566 | NA       |
| zgc:162297        | 26.85727 | 0.796491412  | 0.478362   | 1.665041 | 0.095905 | 0.517372 |
| arhgef12b         | 580.1301 | 0.137260991  | 0.126728   | 1.083113 | 0.278758 | 0.752299 |
| si:ch211-255f4.7  | 144.6626 | -0.5017707   | 0.174447   | -2.87635 | 0.004023 | 0.105636 |
| uvssa             | 125.7129 | -0.02404532  | 0.167775   | -0.14332 | 0.886039 | 0.987533 |
| slc30a8           | 260.7734 | -0.012823088 | 0.16044    | -0.07992 | 0.936297 | 0.997032 |
| prcla             | 306.0747 | 0.320740518  | 0.266171   | 1.205019 | 0.228196 | 0.709324 |
| slc5a2            | 25.19864 | -0.91487567  | 0.931228   | -0.98244 | 0.325883 | 0.784773 |
| AL831768.1        | 0.375092 | -1.712377852 | 4.306778   | -0.3976  | 0.690925 | NA       |
| CU104709.1        | 0.102528 | -1.76935176  | 5.23432    | -0.33803 | 0.735341 | NA       |

|                   |          |              |            |          |          |          |
|-------------------|----------|--------------|------------|----------|----------|----------|
| nfatc2a           | 16.33517 | -0.165166871 | 0.503446   | -0.32807 | 0.742857 | 0.954655 |
| RF00001           | 0 NA     |              | NA         | NA       | NA       | NA       |
| BX088583.1        | 0.060442 |              | 0 5.267649 |          | 0        | 1 NA     |
| RF00003           | 0 NA     |              | NA         | NA       | NA       | NA       |
| RF00026           | 0 NA     |              | NA         | NA       | NA       | NA       |
| CR790368.1        | 0.583789 | 1.055421384  | 2.746155   | 0.384327 | 0.700736 | NA       |
| hint2             | 208.2796 | -0.544133097 | 0.203182   | -2.67806 | 0.007405 | 0.145771 |
| CABZ01117603.1    | 0.643236 | 0.132180244  | 2.339284   | 0.056505 | 0.95494  | NA       |
| nr5a2             | 99.89592 | 0.154417497  | 0.210335   | 0.734151 | 0.462857 | 0.864104 |
| clcal             | 9.274329 |              | 0 2.57801  |          | 0        | 1 1      |
| zgc:194655        | 2.965966 | -3.923190804 | 1.56348    | -2.50927 | 0.012098 | 0.19082  |
| RF00001           | 1.960507 | -1.765100141 | 1.834326   | -0.96226 | 0.335919 | NA       |
| glrx2             | 161.2294 | -0.10378934  | 0.206063   | -0.50368 | 0.614488 | 0.915998 |
| RF00001           | 0 NA     |              | NA         | NA       | NA       | NA       |
| si:ch211-212k18.9 | 206.3612 | -0.375655371 | 0.176829   | -2.1244  | 0.033636 | 0.323787 |
| mafk              | 58.88589 | -0.58511027  | 0.338871   | -1.72664 | 0.084232 | 0.487221 |
| si:ch73-47f2.1    | 1.114329 | 1.989635611  | 2.697605   | 0.737556 | 0.460784 | NA       |
| vap               | 0 NA     |              | NA         | NA       | NA       | NA       |
| CU468012.4        | 0.043308 |              | 0 5.267649 |          | 0        | 1 NA     |
| tradv22.0         | 0 NA     |              | NA         | NA       | NA       | NA       |
| wu:fj16a03        | 1252.387 | -0.311099078 | 0.201948   | -1.54049 | 0.123441 | 0.570142 |
| si:dkeyp-93a5.2   | 3.926246 |              | 0 3.290583 |          | 0        | 1 1      |
| wars              | 169.2392 | 0.158974968  | 0.197082   | 0.806645 | 0.419871 | 0.842383 |
| stk24a            | 24.61546 | -3.938475304 | 1.316993   | -2.99051 | 0.002785 | 0.086504 |
| si:ch211-276i12.4 | 65.2629  | 1.020078238  | 0.660991   | 1.543255 | 0.122769 | 0.569468 |
| si:ch211-188f17.1 | 71.89825 | 0.25996965   | 0.267204   | 0.972927 | 0.33059  | 0.788126 |
| si:dkey-3p4.7     | 0.744376 | 3.72933281   | 2.79555    | 1.334025 | 0.182196 | NA       |
| si:ch211-155m12.5 | 8.546172 | 0.121039106  | 0.619384   | 0.195419 | 0.845065 | 0.976791 |
| zgc:174653        | 2.959424 | -1.324970328 | 0.974321   | -1.35989 | 0.173865 | 0.646897 |
| ttc39b            | 79.39048 | -0.098107104 | 0.283629   | -0.3459  | 0.729418 | 0.950056 |
| CU468826.2        | 0 NA     |              | NA         | NA       | NA       | NA       |
| si:ch211-57b15.2  | 1.023332 | -2.755026148 | 5.185053   | -0.53134 | 0.595183 | NA       |
| ep400             | 772.3778 | -0.041117954 | 0.205393   | -0.20019 | 0.841331 | 0.97643  |
| BX569788.1        | 8.041658 | 0.584164052  | 0.581763   | 1.004128 | 0.315317 | 0.777834 |
| si:ch211-1a19.3   | 97.74882 | -0.013072832 | 0.301814   | -0.04331 | 0.965451 | 1        |
| tmprss13a         | 116.8118 | -0.84951744  | 0.297247   | -2.85795 | 0.004264 | 0.107992 |
| pimr197           | 0.194921 | -0.868117117 | 5.267649   | -0.1648  | 0.8691   | NA       |
| fxyd6             | 116.5175 | -0.045826618 | 0.320359   | -0.14305 | 0.886252 | 0.987533 |
| myh11b            | 29.31221 | -0.95729243  | 0.513712   | -1.86348 | 0.062395 | 0.427718 |
| arhgap24          | 176.6291 | 0.115887264  | 0.154634   | 0.749427 | 0.4536   | 0.858722 |
| CCDC39            | 158.0956 | 1.002824633  | 0.208926   | 4.799902 | 1.59E-06 | 0.000413 |
| dre-mir-93        | 0 NA     |              | NA         | NA       | NA       | NA       |
| zbtb7c            | 7.161797 | -0.493656827 | 0.828999   | -0.59549 | 0.551519 | 0.8974   |
| INHBC             | 16.15123 | 0.083329287  | 0.655245   | 0.127173 | 0.898804 | 0.990265 |
| CR388413.2        | 0.046941 |              | 0 5.267649 |          | 0        | 1 NA     |
| RF00001           | 0.173236 |              | 0 5.267649 |          | 0        | 1 NA     |
| nme3              | 612.3468 | -0.454428304 | 0.192045   | -2.36626 | 0.017969 | 0.2367   |
| chrna3            | 45.68106 | -0.238170989 | 0.373481   | -0.63771 | 0.523665 | 0.888628 |
| dre-mir-725       | 2.656732 | -1.545180265 | 1.393578   | -1.10879 | 0.267522 | 0.743943 |
| si:dkey-16b10.1   | 3.896728 | -0.789183871 | 0.892963   | -0.88378 | 0.376814 | 0.822258 |
| BX901898.2        | 1.135669 | 1.413422068  | 2.079488   | 0.679697 | 0.496696 | NA       |
| traj11            | 0 NA     |              | NA         | NA       | NA       | NA       |
| RF00026           | 0 NA     |              | NA         | NA       | NA       | NA       |
| soul4             | 401.9464 | 0.024047958  | 0.202165   | 0.118952 | 0.905313 | 0.991631 |

|                   |          |              |            |          |          |          |
|-------------------|----------|--------------|------------|----------|----------|----------|
| cited4b           | 995.9082 | -0.041021004 | 0.117575   | -0.34889 | 0.727171 | 0.949095 |
| hpd1              | 34.44524 | 0.337034032  | 0.320123   | 1.052826 | 0.292421 | 0.761879 |
| RF00001           | 0.050624 | 1.055396947  | 5.267649   | 0.200354 | 0.841203 | NA       |
| slcolf4           | 0.660251 |              | 0 3.819063 |          | 0        | 1 NA     |
| CT583642.1        | 8.036971 | -0.974865735 | 0.688252   | -1.41644 | 0.156647 | 0.622452 |
| ptdss2            | 382.9841 | 0.239742605  | 0.146896   | 1.632055 | 0.102668 | 0.529448 |
| ext1b             | 62.31113 | -0.117137734 | 0.242107   | -0.48383 | 0.628509 | 0.921864 |
| slc22a5           | 20.305   | 0.389192232  | 0.485446   | 0.801721 | 0.422714 | 0.843493 |
| msx2b             | 271.9603 | -0.007486263 | 0.14646    | -0.05111 | 0.959234 | 0.999164 |
| nufip1            | 119.6307 | -0.712756785 | 0.241069   | -2.95665 | 0.00311  | 0.091566 |
| fnbp1b            | 65.08989 | 0.115698843  | 0.217201   | 0.532681 | 0.594255 | 0.910731 |
| si:ch73-347e22.4  | 179.2742 | 0.126080759  | 0.226141   | 0.557531 | 0.577165 | 0.904798 |
| si:ch73-158p21.3  | 22.47982 | 0.135205246  | 0.542376   | 0.249283 | 0.803142 | 0.968418 |
| iqcbl             | 83.85207 | -0.09134617  | 0.220493   | -0.41428 | 0.678668 | 0.936026 |
| tradv4.0.3        |          | 0 NA         | NA         | NA       | NA       | NA       |
| si:dkey-206d17.12 | 49.38446 | -0.310694889 | 0.260945   | -1.19065 | 0.23379  | 0.714749 |
| CU655870.1        | 0.320865 | -2.387349099 | 3.845563   | -0.62081 | 0.534727 | NA       |
| traf2b            | 99.11308 | -0.195102988 | 0.231933   | -0.8412  | 0.400234 | 0.831472 |
| asf1ba            | 259.0274 | 0.140620017  | 0.184897   | 0.760531 | 0.446937 | 0.85583  |
| zdhhc15a          | 21.33614 | -0.332016332 | 0.410154   | -0.80949 | 0.418232 | 0.84155  |
| ccl20a.3          | 10.23133 | -2.063505236 | 1.272156   | -1.62205 | 0.104792 | 0.533164 |
| ccl39.1           |          | 0 NA         | NA         | NA       | NA       | NA       |
| ppl               | 2582.751 | -0.078919449 | 0.14101    | -0.55967 | 0.575702 | 0.904739 |
| si:ch73-138e16.6  | 227.4116 | -0.061601915 | 0.139971   | -0.44011 | 0.659861 | 0.930581 |
| si:dkeyp-107f9.1  | 0.326089 | -1.755783668 | 4.463829   | -0.39334 | 0.694071 | NA       |
| rtcb              | 298.5722 | 0.212223403  | 0.128658   | 1.649516 | 0.099042 | 0.522139 |
| FQ790208.1        | 12.21192 | 0.582420419  | 0.597976   | 0.973987 | 0.330063 | 0.788084 |
| CABZ01075274.1    | 32.99905 | 0.022531108  | 0.60541    | 0.037216 | 0.970313 | 1        |
| tmc8              | 23.61056 | -1.03290383  | 0.532799   | -1.93864 | 0.052546 | 0.398274 |
| ctsbb             | 86.5431  | 1.055414869  | 1.705991   | 0.618652 | 0.536146 | 0.892277 |
| RF02041           | 0.151    |              | 0 5.267649 |          | 0        | 1 NA     |
| syn2b             | 321.6414 | 0.225953108  | 0.231789   | 0.974823 | 0.329648 | 0.788    |
| trim35-25         | 2.084029 | -1.760221606 | 1.957452   | -0.89924 | 0.368524 | NA       |
| BX890539.1        | 20.06875 | -0.122249516 | 0.397741   | -0.30736 | 0.758569 | 0.957865 |
| srsf7b            | 158.4614 | -0.694926568 | 0.263954   | -2.63276 | 0.008469 | 0.157114 |
| traj3             |          | 0 NA         | NA         | NA       | NA       | NA       |
| dhx36             | 291.7612 | 0.203205622  | 0.140881   | 1.442387 | 0.149193 | 0.610959 |
| gcna              | 71.87917 | 0.370343059  | 0.272515   | 1.358981 | 0.174153 | 0.647379 |
| EIF2A             | 697.7522 | 0.062205877  | 0.11292    | 0.550882 | 0.581714 | 0.905618 |
| fdft1             | 138.7182 | 0.287136145  | 0.229419   | 1.251582 | 0.210722 | 0.692347 |
| CABZ01058650.1    | 467.7879 | -0.117236908 | 0.170528   | -0.68749 | 0.491772 | 0.87595  |
| BX511223.1        | 1.961867 | 2.551631508  | 1.635623   | 1.560036 | 0.118751 | NA       |
| CR812471.1        |          | 0 NA         | NA         | NA       | NA       | NA       |
| shoc1             | 1.809037 | 1.360070632  | 1.635397   | 0.831646 | 0.405609 | NA       |
| CU651669.1        | 7.830417 | 0.099948053  | 1.058729   | 0.094404 | 0.924788 | 0.994815 |
| si:dkeyp-80d11.14 | 12.4172  | 0.797859257  | 0.643963   | 1.238983 | 0.215352 | 0.697157 |
| cnot6b            | 153.3403 | -0.172578165 | 0.211668   | -0.81533 | 0.414886 | 0.838732 |
| si:zfos-1011f11.2 | 55.158   | -0.140508071 | 0.338509   | -0.41508 | 0.678084 | 0.936026 |
| glud1b            | 11636.74 | 0.085511034  | 0.138979   | 0.61528  | 0.53837  | 0.892596 |
| irx3a             | 772.393  | -0.02326542  | 0.111948   | -0.20782 | 0.835367 | 0.976007 |
| sctr              | 9.149038 | -1.377824301 | 1.567719   | -0.87887 | 0.379471 | 0.823607 |
| HECTD4            | 262.7332 | 0.149275299  | 0.23799    | 0.627235 | 0.530505 | 0.890545 |
| pwpp2b            | 710.1446 | 0.155409957  | 0.111932   | 1.388437 | 0.165004 | 0.634185 |
| ptprub            | 224.6468 | 0.033129677  | 0.18173    | 0.182302 | 0.855346 | 0.97932  |

|                   |          |              |            |          |          |          |
|-------------------|----------|--------------|------------|----------|----------|----------|
| eif3s6ip          | 3866.341 | -0.270856577 | 0.119837   | -2.26021 | 0.023808 | 0.273495 |
| olfcg2            | 0.508637 | 0.756252135  | 3.02672    | 0.249859 | 0.802697 | NA       |
| ss1812            | 263.7953 | 0.391894325  | 0.232544   | 1.68525  | 0.09194  | 0.507669 |
| si:dkeyp-80d11.1  | 6.043551 | -1.863396537 | 0.816498   | -2.28218 | 0.022479 | 0.265534 |
| si:ch73-359m17.5  | 22.00316 | -0.601635091 | 0.491218   | -1.22478 | 0.220657 | 0.701898 |
| gart              | 829.2092 | 0.086922159  | 0.128441   | 0.676746 | 0.498567 | 0.879201 |
| pappaa            | 27.41697 | 0.286061124  | 0.480237   | 0.595667 | 0.551398 | 0.8974   |
| RF00001           | 0.043308 |              | 0 5.267649 |          | 0        | 1 NA     |
| zgc:162971        | 44.77051 | -0.491338779 | 0.256534   | -1.9153  | 0.055455 | 0.407706 |
| ATP11B            | 384.9546 | 0.04416909   | 0.166218   | 0.26573  | 0.790447 | 0.964589 |
| cpne4a            | 206.225  | -0.169025727 | 0.243335   | -0.69462 | 0.487293 | 0.873291 |
| cebpl             | 9.588024 | 0.211434112  | 0.655656   | 0.322477 | 0.747091 | 0.955074 |
| RF00017           |          | 0 NA         |            | NA       | NA       | NA       |
| tprn              | 56.80261 | 0.092637358  | 0.246964   | 0.375104 | 0.707583 | 0.945103 |
| FP102192.1        | 4.810584 | -0.87408566  | 0.915567   | -0.95469 | 0.339733 | 0.795226 |
| si:ch73-109d9.3   | 91.34878 | -0.72352418  | 0.232808   | -3.10782 | 0.001885 | 0.067081 |
| cldn15b           | 113.8934 | 0.28740923   | 0.237404   | 1.210631 | 0.226037 | 0.707444 |
| si:ch211-152c8.4  | 37.38183 | -0.141034274 | 0.315354   | -0.44723 | 0.654712 | 0.929527 |
| F0704777.1        | 29.52716 | -0.095745901 | 0.458153   | -0.20898 | 0.834462 | 0.975731 |
| med30             | 301.0601 | -0.425792631 | 0.180642   | -2.35711 | 0.018418 | 0.239743 |
| vps33a            | 376.5939 | 0.130941678  | 0.135369   | 0.967292 | 0.333398 | 0.790506 |
| CABZ01066813.1    | 88.70764 | 0.123878309  | 0.227527   | 0.544457 | 0.586127 | 0.906711 |
| kif3b             | 194.741  | 0.15454471   | 0.15136    | 1.021044 | 0.307234 | 0.772541 |
| si:dkey-161111.62 |          | 0 NA         |            | NA       | NA       | NA       |
| BX649345.2        | 0.050723 | -0.86807634  | 5.267649   | -0.16479 | 0.869106 | NA       |
| CR854945.1        | 30.00119 | -0.767948291 | 0.644662   | -1.19124 | 0.233559 | 0.71468  |
| atad5b            | 74.33855 | 0.220708554  | 0.214943   | 1.026822 | 0.304504 | 0.769885 |
| map11c3b          | 2658.468 | -0.176724898 | 0.116061   | -1.52269 | 0.127837 | 0.577117 |
| si:dkey-211f22.5  | 687.6313 | 0.358620532  | 0.148428   | 2.416127 | 0.015687 | 0.221082 |
| si:dkeyp-104b3.18 | 0.48597  |              | 0 3.546047 |          | 0        | 1 NA     |
| coq8b             | 194.7435 | 0.119792746  | 0.188097   | 0.636867 | 0.524211 | 0.888801 |
| pbx1b             | 50.78455 | -0.349810636 | 0.262781   | -1.33119 | 0.183127 | 0.659373 |
| BX510960.1        | 6.792182 | 0.354519955  | 0.781875   | 0.453423 | 0.650244 | 0.927835 |
| CABZ01064859.2    | 47.65209 | -0.092792727 | 0.274087   | -0.33855 | 0.734947 | 0.951434 |
| si:dkey-85k7.7    | 1207.222 | -0.211960791 | 0.480719   | -0.44092 | 0.659268 | 0.930581 |
| BX927317.1        |          | 0 NA         |            | NA       | NA       | NA       |
| znf999            | 19.39494 | 0.419408891  | 0.413264   | 1.01487  | 0.310168 | 0.775062 |
| BX323596.1        |          | 0 NA         |            | NA       | NA       | NA       |
| agpat2            | 396.5739 | 0.464835765  | 0.165964   | 2.800817 | 0.005097 | 0.119231 |
| zgc:114173        | 81.92489 | 0.154651047  | 0.210293   | 0.735409 | 0.462091 | 0.863402 |
| zdhhc13           | 372.688  | 0.326042684  | 0.118412   | 2.753465 | 0.005897 | 0.129875 |
| lipeb             | 75.36574 | -0.143486029 | 0.27447    | -0.52278 | 0.60113  | 0.913756 |
| CR293511.1        | 114.2755 | -0.189991328 | 0.227869   | -0.83377 | 0.404408 | 0.833939 |
| RAB19             | 19.66467 | 0.309085776  | 0.435536   | 0.709668 | 0.47791  | 0.869292 |
| si:dkeyp-110c7.8  |          | 0 NA         |            | NA       | NA       | NA       |
| slcolf2           | 0.043309 |              | 0 5.267649 |          | 0        | 1 NA     |
| si:ch73-338a16.3  | 12.12726 | -1.51800795  | 0.88322    | -1.71872 | 0.085665 | 0.491277 |
| apoa4a            | 801.3943 | -0.852853146 | 0.244662   | -3.48584 | 0.000491 | 0.027259 |
| orc4              | 232.6286 | -0.151599817 | 0.153568   | -0.98719 | 0.323552 | 0.783161 |
| BX001023.2        | 16.65029 | -0.271653402 | 0.464188   | -0.58522 | 0.558398 | 0.899409 |
| nansb             | 177.3367 | 0.136479122  | 0.238425   | 0.57242  | 0.567037 | 0.901747 |
| si:dkey-157e10.8  | 0.204491 | 1.055360845  | 5.175029   | 0.203933 | 0.838406 | NA       |
| BX005396.3        | 1.474007 | -3.763842201 | 2.322916   | -1.62031 | 0.105166 | NA       |
| RF00001           |          | 0 NA         |            | NA       | NA       | NA       |

|                    |          |              |            |          |          |          |
|--------------------|----------|--------------|------------|----------|----------|----------|
| grap2b             | 73.64376 | -0.469134879 | 0.303908   | -1.54367 | 0.122667 | 0.569468 |
| rab42b             | 82.614   | -0.088058204 | 0.264873   | -0.33245 | 0.739546 | 0.953573 |
| FO704786.1         | 58.76689 | 0.02237408   | 0.345624   | 0.064735 | 0.948385 | 0.997733 |
| TMEM200C           | 18.08746 | -0.383402691 | 0.480736   | -0.79753 | 0.425142 | 0.844714 |
| RF00001            | 0.307339 | 1.055380564  | 4.558399   | 0.231524 | 0.816907 | NA       |
| BX649556.1         | 0.203992 | -0.868116142 | 5.188233   | -0.16732 | 0.867115 | NA       |
| mcu                | 95.46647 | -1.094387511 | 0.23002    | -4.7578  | 1.96E-06 | 0.000498 |
| ugt1b7             | 40.29116 | -0.071210176 | 0.274444   | -0.25947 | 0.795272 | 0.965909 |
| sh3rf2             | 98.34905 | -0.441781176 | 0.228836   | -1.93056 | 0.053538 | 0.400752 |
| mcm7               | 1341.134 | 0.027185284  | 0.113856   | 0.238768 | 0.811285 | 0.97002  |
| s100w              | 312.062  | -0.078097475 | 0.151968   | -0.51391 | 0.607316 | 0.915204 |
| CR855860.2         | 0.229405 | 2.001884741  | 4.958565   | 0.403723 | 0.686417 | NA       |
| BX510922.1         | 23.10826 | -0.023269989 | 0.385251   | -0.0604  | 0.951835 | 0.99801  |
| CABZ01095001.1     | 24.16892 | -0.291382426 | 0.416923   | -0.69889 | 0.484622 | 0.872911 |
| CABZ01087566.1     | 9.103429 | -0.351465659 | 0.830281   | -0.42331 | 0.672069 | 0.933953 |
| CABZ01048053.1     | 58.11223 | 0.539206611  | 0.290792   | 1.854266 | 0.063701 | 0.430571 |
| CR589947.2         | 14.62779 | -0.981309061 | 0.58744    | -1.67048 | 0.094824 | 0.513949 |
| cyp2k8             | 50.965   | -0.132215141 | 0.285889   | -0.46247 | 0.643745 | 0.925997 |
| si:ch211-255f4.13  | 4.564428 | -0.336690057 | 0.877958   | -0.38349 | 0.701355 | 0.943145 |
| BX855614.3         | 22.4004  | -0.316082269 | 0.455169   | -0.69443 | 0.487413 | 0.873291 |
| si:dkey-238d18.15  | 0.07132  |              | 0.5.267649 | 0        | 1        | NA       |
| BX927181.3         | 0.546858 | 1.903689986  | 2.703366   | 0.704192 | 0.481313 | NA       |
| rbp4               | 25433.4  | 0.077154517  | 0.208599   | 0.36987  | 0.711479 | 0.945821 |
| zgc:112964         | 450.5543 | -0.202814872 | 0.232604   | -0.87193 | 0.383245 | 0.825809 |
| si:dkey-207b20.2   | 3.449151 | -2.475188493 | 1.347422   | -1.83698 | 0.066213 | 0.439276 |
| CU302413.1         | 1.229736 | 1.715463575  | 1.928903   | 0.889347 | 0.373817 | NA       |
| znf513b            | 31.66153 | -0.392986856 | 0.332893   | -1.18052 | 0.237794 | 0.718607 |
| mbd1a              | 331.7738 | 0.0184114    | 0.1163     | 0.15831  | 0.874213 | 0.98385  |
| zgc:113363         | 44.71718 | 0.023487212  | 0.268378   | 0.087516 | 0.930262 | 0.995707 |
| lambla             | 1464.857 | 0.095995457  | 0.156399   | 0.613787 | 0.539356 | 0.893049 |
| glglb              | 64.5066  | 0.591442925  | 0.251502   | 2.351646 | 0.018691 | 0.241927 |
| BX537130.1         | 0.439966 |              | 0.4.235619 | 0        | 1        | NA       |
| CU681841.1         | 116.5411 | -0.325004717 | 0.278163   | -1.16839 | 0.242648 | 0.724345 |
| CU278559.1         | 4.026296 | -1.210316931 | 0.947103   | -1.27791 | 0.20128  | 0.681123 |
| pkd112b            | 7.800048 | -0.915871485 | 0.854813   | -1.07143 | 0.283976 | 0.755095 |
| sgiplb             | 138.6521 | 0.413042316  | 0.269249   | 1.534052 | 0.125017 | 0.572594 |
| meaf6              | 811.4464 | 0.021539296  | 0.147164   | 0.146362 | 0.883635 | 0.987014 |
| fam78aa            | 22.9918  | -0.23152991  | 0.373623   | -0.61969 | 0.535463 | 0.891993 |
| si:ch73-345f18.3   | 16.38552 | -0.972422808 | 0.635961   | -1.52906 | 0.12625  | 0.574654 |
| BX511128.1         | 0.451024 | 0.961480393  | 4.145116   | 0.231955 | 0.816573 | NA       |
| polrmt             | 160.1254 | -0.199687169 | 0.167067   | -1.19525 | 0.231989 | 0.713202 |
| tradv3.0.3         |          | 0 NA         | NA         | NA       | NA       | NA       |
| osepla             | 0.652533 | -0.868143844 | 2.853471   | -0.30424 | 0.760944 | NA       |
| si:ch211-229110.11 | 0.392639 | -1.807339498 | 3.152685   | -0.57327 | 0.566462 | NA       |
| cngb3.1            | 32.89167 | -0.944745625 | 0.47936    | -1.97085 | 0.048741 | 0.384258 |
| CR790382.2         |          | 0 NA         | NA         | NA       | NA       | NA       |
| pedh1g2            | 21.18262 | -0.114665411 | 0.409954   | -0.2797  | 0.779705 | 0.961073 |
| nsmfb              | 238.8974 | 0.093996162  | 0.229536   | 0.409506 | 0.682168 | 0.93781  |
| ccdc166            | 1.521583 | 0.686748797  | 1.455464   | 0.471842 | 0.63704  | NA       |
| cep83              | 151.6708 | 0.115154543  | 0.215813   | 0.533585 | 0.593628 | 0.910427 |
| hsd17b4            | 707.0796 | 0.005967284  | 0.171738   | 0.034746 | 0.972282 | 1        |
| CU651662.1         | 27.95741 | -0.606560312 | 0.459262   | -1.32073 | 0.186592 | 0.664968 |
| zcchc14            | 90.27232 | -0.308565218 | 0.199823   | -1.5442  | 0.122541 | 0.569468 |
| CABZ01049825.1     | 0.607193 |              | 0.3.319777 | 0        | 1        | NA       |

|                   |          |              |          |          |          |          |
|-------------------|----------|--------------|----------|----------|----------|----------|
| gli1              | 291.1697 | 0.008316756  | 0.197803 | 0.042046 | 0.966462 | 1        |
| znf1063           | 8.582099 | 0.475938093  | 0.729446 | 0.652466 | 0.514101 | 0.88631  |
| hist1h41          | 0.87416  | 0.093653905  | 2.309887 | 0.040545 | 0.967659 | NA       |
| ldha              | 4080.961 | 0.083540528  | 0.195149 | 0.428085 | 0.668589 | 0.933086 |
| si:dkey-238n5.3   | 0 NA     | NA           | NA       | NA       | NA       | NA       |
| RF00001           | 0 NA     | NA           | NA       | NA       | NA       | NA       |
| BX649411.1        | 24.69893 | -0.496918841 | 0.322838 | -1.53922 | 0.123751 | 0.570837 |
| hgh1              | 116.1801 | -0.002861319 | 0.239308 | -0.01196 | 0.99046  | 1        |
| GPATCH2           | 446.0588 | -0.149071968 | 0.136616 | -1.09117 | 0.275196 | 0.750424 |
| BX927317.2        | 2.139327 | 0            | 2.080073 | 0        | 1        | NA       |
| trim35-12         | 64.3486  | -0.214504965 | 0.246214 | -0.87121 | 0.383638 | 0.826106 |
| RF00001           | 0 NA     | NA           | NA       | NA       | NA       | NA       |
| klh18             | 238.194  | 0.040910612  | 0.15076  | 0.271363 | 0.786112 | 0.962605 |
| si:ch211-227n13.3 | 49.5396  | -0.370679501 | 0.492258 | -0.75302 | 0.451439 | 0.857676 |
| si:dkey-29j8.1    | 8.456145 | 1.601162853  | 0.931548 | 1.71882  | 0.085647 | 0.491277 |
| dre-mir-365-3     | 0 NA     | NA           | NA       | NA       | NA       | NA       |
| si:dkey-16p6.4    | 0.219506 | -0.868116949 | 5.056954 | -0.17167 | 0.863699 | NA       |
| BX936433.1        | 4.552432 | 0.819690538  | 0.893314 | 0.917584 | 0.358837 | 0.80995  |
| znf207b           | 763.8602 | 0.054680242  | 0.09986  | 0.547572 | 0.583986 | 0.906376 |
| ndr2              | 3.193677 | 0.225679072  | 1.184053 | 0.190599 | 0.84884  | 0.978002 |
| vat11             | 14.53313 | 0.666787039  | 0.487639 | 1.367377 | 0.171507 | 0.643534 |
| corin             | 83.91671 | 0.490701175  | 0.220115 | 2.229299 | 0.025794 | 0.285137 |
| zswim6            | 228.759  | 0.146642746  | 0.163282 | 0.898093 | 0.369136 | 0.817763 |
| CT737129.1        | 2.479894 | -1.78083465  | 1.676552 | -1.0622  | 0.288145 | 0.759103 |
| anapc15           | 222.3014 | -0.035623324 | 0.165798 | -0.21486 | 0.829877 | 0.974816 |
| RF00001           | 1.744532 | 1.055436196  | 2.094324 | 0.503951 | 0.614296 | NA       |
| slc29a1a          | 1820.074 | 0.081742541  | 0.082629 | 0.989277 | 0.322527 | 0.78246  |
| spink2.5          | 22.36381 | 0            | 2.232861 | 0        | 1        | 1        |
| txndc11           | 217.896  | 0.260869943  | 0.143372 | 1.819534 | 0.06883  | 0.447723 |
| si:dkey-201g16.1  | 3.439442 | 0.205416056  | 1.132927 | 0.181314 | 0.856121 | 0.979558 |
| PKN2 (1 of many)  | 337.3588 | 0.043996493  | 0.123688 | 0.355704 | 0.722062 | 0.947403 |
| psmd4a            | 479.8246 | 0.104356567  | 0.192879 | 0.541046 | 0.588476 | 0.90797  |
| si:ch211-170p16.1 | 0.829128 | 3.226605003  | 2.668039 | 1.209354 | 0.226527 | NA       |
| tmem266           | 123.1318 | 0.144460147  | 0.277705 | 0.520193 | 0.602929 | 0.914226 |
| CABZ01064248.1    | 0.163129 | 0            | 5.267649 | 0        | 1        | NA       |
| ssnal             | 68.52911 | 0.420877864  | 0.237936 | 1.768873 | 0.076915 | 0.469467 |
| si:dkey-261o4.1   | 0.323805 | -1.756127425 | 3.906568 | -0.44953 | 0.653048 | NA       |
| CR388172.1        | 0.049519 | 0            | 5.267649 | 0        | 1        | NA       |
| mrpl15            | 606.6668 | 0.030992099  | 0.115497 | 0.268336 | 0.788441 | 0.963562 |
| pcdh1gb2          | 19.67275 | 0.478780693  | 0.496998 | 0.963346 | 0.335374 | 0.79203  |
| smug1             | 124.4117 | -0.305523648 | 0.177421 | -1.72203 | 0.085064 | 0.489675 |
| si:ch73-100122.3  | 310.0719 | -0.023344293 | 0.144946 | -0.16106 | 0.87205  | 0.983447 |
| RF00001           | 0 NA     | NA           | NA       | NA       | NA       | NA       |
| si:dkey-31n13.4   | 21.74411 | -1.371595265 | 0.428449 | -3.20131 | 0.001368 | 0.054652 |
| ppp4r1            | 553.3292 | 0.071094318  | 0.122615 | 0.579817 | 0.562038 | 0.900715 |
| grinaa            | 150.2371 | 0.063819603  | 0.238394 | 0.267706 | 0.788926 | 0.963568 |
| pcdh2ab9          | 8.053063 | -1.049114804 | 0.591049 | -1.77501 | 0.075897 | 0.46659  |
| si:ch73-299h12.6  | 81.70772 | -0.36111813  | 0.228298 | -1.58178 | 0.113699 | 0.551905 |
| si:dkey-50i6.5    | 58.58584 | 0.074109447  | 0.333116 | 0.222473 | 0.823945 | 0.972032 |
| CR376800.1        | 0.212312 | 2.43638772   | 5.206324 | 0.467967 | 0.639808 | NA       |
| tfr1a             | 229.9608 | -0.289611372 | 0.297276 | -0.97422 | 0.32995  | 0.788084 |
| trnaulapa         | 214.2114 | -0.412503391 | 0.141714 | -2.91081 | 0.003605 | 0.099319 |
| apoalb            | 86214    | -0.134128589 | 0.181322 | -0.73973 | 0.459466 | 0.862103 |
| znf1076           | 7.361499 | 0.757856659  | 0.743815 | 1.018878 | 0.308261 | 0.773155 |



|                    |          |              |          |          |          |          |
|--------------------|----------|--------------|----------|----------|----------|----------|
| CR382300.3         | 5.328918 | 0.851841327  | 0.743942 | 1.145038 | 0.252194 | 0.732759 |
| tektl              | 25.69656 | 0.220349598  | 0.41311  | 0.533393 | 0.593762 | 0.910427 |
| uba2               | 1118.214 | 0.079411428  | 0.094803 | 0.837644 | 0.40223  | 0.833156 |
| AL928808.1         | 0.784186 | 0.09365198   | 2.377325 | 0.039394 | 0.968576 | NA       |
| ctsc               | 569.4077 | 0.149967369  | 0.141506 | 1.059795 | 0.289238 | 0.760276 |
| BX088728.1         | 0.35123  | 1.95911441   | 4.395797 | 0.445679 | 0.655829 | NA       |
| CR450808.2         | 2.199898 | -1.531989632 | 1.37729  | -1.11232 | 0.266    | NA       |
| BX005294.1         | 3.365056 | -0.701979062 | 1.178385 | -0.59571 | 0.551367 | 0.8974   |
| CR589882.1         | 0.915642 | 1.964911738  | 2.748911 | 0.714796 | 0.474735 | NA       |
| si:ch211-262i1.6   | 377.2955 | -0.164239523 | 0.216192 | -0.75969 | 0.447438 | 0.856081 |
| CR293511.2         | 1.941945 | -2.308027539 | 2.325028 | -0.99269 | 0.320862 | NA       |
| CU468723.1         | 3.585167 | 1.449416489  | 1.035573 | 1.399627 | 0.161625 | 0.628859 |
| plppr5b            | 21.01396 | 0.422049781  | 0.631711 | 0.668106 | 0.504066 | 0.881759 |
| arhgap28           | 112.4615 | 0.462940661  | 0.158888 | 2.913624 | 0.003573 | 0.099143 |
| si:dkey-16p6.1     | 6.392203 | 0.501113093  | 0.846721 | 0.591828 | 0.553966 | 0.89821  |
| si:dkey-34d22.3    | 0.853461 | -0.245577676 | 2.543632 | -0.09655 | 0.923087 | NA       |
| f13b               | 9.391188 | 2.779587883  | 1.542478 | 1.802028 | 0.071541 | 0.456244 |
| CABZ01044156.1     | 4.364092 | -0.988821171 | 0.855876 | -1.15533 | 0.247955 | 0.728489 |
| pard3aa            | 16.05919 | -0.304494154 | 0.490234 | -0.62112 | 0.53452  | 0.891711 |
| si:ch211-215e19.6  | 0.131778 | 0            | 5.267649 | 0        | 1        | NA       |
| znf644a            | 269.8583 | -0.130517407 | 0.141357 | -0.92332 | 0.355841 | 0.806879 |
| mibp               | 840.3395 | -0.076066743 | 0.164295 | -0.46299 | 0.643372 | 0.925953 |
| ano2b              | 134.4672 | 0.117021732  | 0.252663 | 0.463154 | 0.643254 | 0.92593  |
| wfikkn1            | 5.003753 | 0.807905693  | 0.787023 | 1.026534 | 0.30464  | 0.769932 |
| si:cabz01021430.2  | 71.75412 | 0.374642074  | 0.219198 | 1.709152 | 0.087423 | 0.496224 |
| gpr1               | 156.7435 | 0.299007955  | 0.227839 | 1.312368 | 0.189396 | 0.668949 |
| si:ch73-193i22.1   | 78.27016 | -0.465489635 | 0.37505  | -1.24114 | 0.214554 | 0.69658  |
| cngb3.2            | 122.6072 | -0.060865594 | 0.501701 | -0.12132 | 0.903439 | 0.991365 |
| BX321912.1         | 0.073968 | 0            | 5.267649 | 0        | 1        | NA       |
| si:dkey-11n14.1    | 40.69081 | 0.933129616  | 0.526041 | 1.773873 | 0.076084 | 0.467233 |
| ccdc142            | 173.1349 | 0.066034792  | 0.162369 | 0.406696 | 0.684231 | 0.938486 |
| nadsyn1            | 78.81709 | 0.185958169  | 0.292307 | 0.636174 | 0.524663 | 0.888928 |
| mfsd1              | 79.95235 | -0.62637666  | 0.221201 | -2.8317  | 0.00463  | 0.112688 |
| cryabb             | 18.65186 | -0.068588338 | 0.500468 | -0.13705 | 0.890993 | 0.988566 |
| CU019562.2         | 0 NA     | NA           | NA       | NA       | NA       | NA       |
| CR388148.1         | 0.50552  | 1.984971856  | 2.274228 | 0.872811 | 0.382766 | NA       |
| BX088524.1         | 0.069091 | 0            | 5.267649 | 0        | 1        | NA       |
| f8                 | 55.56686 | -0.14618217  | 0.27739  | -0.52699 | 0.5982   | 0.912715 |
| CAMK2N1            | 240.0568 | 0.458191796  | 0.363748 | 1.259642 | 0.207799 | 0.689888 |
| si:ch211-171117.14 | 16.22848 | 0.453601242  | 0.828251 | 0.547662 | 0.583924 | 0.906376 |
| zgc:174180         | 2.990542 | -4.216563716 | 1.546445 | -2.72662 | 0.006399 | 0.135026 |
| pimr168            | 0 NA     | NA           | NA       | NA       | NA       | NA       |
| si:dkey-31g6.6     | 2216.03  | -0.126359302 | 0.279599 | -0.45193 | 0.651319 | 0.928562 |
| CR788226.1         | 22.88148 | 1.974711925  | 0.538248 | 3.66878  | 0.000244 | 0.016928 |
| BX908401.2         | 0 NA     | NA           | NA       | NA       | NA       | NA       |
| RF00003            | 0.235552 | 1.055386653  | 4.289141 | 0.24606  | 0.805636 | NA       |
| CR376730.1         | 1.037233 | -2.290827494 | 1.861637 | -1.23054 | 0.218493 | NA       |
| CABZ01065131.1     | 268.569  | -0.132834325 | 0.154652 | -0.85892 | 0.390383 | 0.827902 |
| rplp2              | 11082.03 | -0.13603565  | 0.142668 | -0.95351 | 0.340329 | 0.795464 |
| tgm114             | 59.25676 | -0.30053715  | 0.263282 | -1.1415  | 0.253661 | 0.732873 |
| CABZ01012957.1     | 0.48614  | 2.999685455  | 3.02688  | 0.991016 | 0.321678 | NA       |
| wbp11              | 346.6501 | 0.031487559  | 0.139346 | 0.225966 | 0.821228 | 0.971788 |
| FP102969.1         | 0 NA     | NA           | NA       | NA       | NA       | NA       |
| dusp7              | 508.2686 | -0.134524361 | 0.10473  | -1.28449 | 0.198972 | 0.679593 |

|                    |          |              |          |          |          |          |
|--------------------|----------|--------------|----------|----------|----------|----------|
| drp2               | 6.239027 | 1.445301793  | 1.223899 | 1.180899 | 0.237643 | 0.718568 |
| si:dkeyp-80d11.10  | 5.230041 | -1.623456322 | 1.020433 | -1.59095 | 0.111621 | 0.547577 |
| hdac12             | 36.32436 | -1.031242658 | 0.378551 | -2.72419 | 0.006446 | 0.135777 |
| cyp2y3             | 1001.292 | 0.061462733  | 0.13553  | 0.4535   | 0.650189 | 0.927835 |
| BX901974.2         | 0 NA     | NA           | NA       | NA       | NA       | NA       |
| si:dkey-1b17.5     | 11.3817  | 0.284791814  | 0.570243 | 0.499422 | 0.617482 | 0.916375 |
| si:ch73-208h1.1    | 0.972087 | 0            | 2.925418 | 0        | 1        | NA       |
| gas8               | 128.525  | 0.093494343  | 0.196513 | 0.475766 | 0.634241 | 0.924077 |
| rab11fip2          | 47.98192 | 0.321496566  | 0.282533 | 1.137908 | 0.255159 | 0.733542 |
| AL831745.3         | 0.292935 | 0.892420518  | 5.241767 | 0.170252 | 0.864812 | NA       |
| fsbp               | 16.0603  | 0.298951286  | 0.535142 | 0.558639 | 0.576408 | 0.90475  |
| lonp2              | 476.8199 | -0.242945837 | 0.119525 | -2.03259 | 0.042093 | 0.358832 |
| limala             | 861.3141 | 0.046600146  | 0.118209 | 0.39422  | 0.693419 | 0.940668 |
| relch              | 271.3306 | -0.100410722 | 0.142094 | -0.70665 | 0.479784 | 0.870001 |
| CU856523.1         | 0 NA     | NA           | NA       | NA       | NA       | NA       |
| klhl7              | 172.5664 | 0.093040095  | 0.155391 | 0.59875  | 0.54934  | 0.897174 |
| si:dkey-46i9.1     | 2184.096 | 0.20993825   | 0.116688 | 1.799145 | 0.071996 | 0.4564   |
| BX511066.2         | 0.277673 | 0            | 4.734464 | 0        | 1        | NA       |
| grik5              | 138.8919 | -0.073437481 | 0.260287 | -0.28214 | 0.777836 | 0.961073 |
| si:ch211-215p11.3  | 4.942362 | -0.249980825 | 0.888145 | -0.28146 | 0.778354 | 0.961073 |
| SUSD2              | 34.54999 | -0.14737242  | 0.274657 | -0.53657 | 0.591566 | 0.909437 |
| si:ch211-284k5.2   | 19.56174 | -0.596930285 | 0.548199 | -1.08889 | 0.276201 | 0.750674 |
| acp5b              | 25.66266 | 0.048476535  | 0.467984 | 0.103586 | 0.917498 | 0.993777 |
| cdc42ep4a          | 178.7599 | 0.048725082  | 0.160497 | 0.30359  | 0.761441 | 0.958159 |
| r3hdml             | 1118.631 | 0.165361127  | 0.135767 | 1.217975 | 0.223234 | 0.70531  |
| si:dkey-279j5.1    | 5.549066 | 0.247173381  | 0.912147 | 0.27098  | 0.786407 | 0.962701 |
| emp3b              | 25.02763 | -0.168847612 | 0.381868 | -0.44216 | 0.658371 | 0.930581 |
| si:dkey-176f19.1   | 1.401917 | -0.899044852 | 1.635972 | -0.54955 | 0.582629 | NA       |
| orc2               | 93.20148 | -0.038769083 | 0.210197 | -0.18444 | 0.853667 | 0.978905 |
| si:dkey-56m15.2    | 8.880974 | -0.217066393 | 0.991113 | -0.21901 | 0.82664  | 0.973383 |
| CR749168.4         | 0.053506 | -0.86807634  | 5.267649 | -0.16479 | 0.869106 | NA       |
| fgd4a              | 187.0918 | 0.178669509  | 0.14927  | 1.196957 | 0.231323 | 0.712847 |
| pop4               | 147.4184 | -0.207432692 | 0.241175 | -0.86009 | 0.389739 | 0.827843 |
| snpc3              | 184.1986 | -0.153481715 | 0.16447  | -0.93319 | 0.350722 | 0.802215 |
| BX649328.2         | 0.329704 | 0            | 4.570482 | 0        | 1        | NA       |
| si:dkey-65j4.2     | 5.440814 | 1.291996458  | 0.750245 | 1.722099 | 0.085052 | 0.489675 |
| plppr2a            | 39.40642 | 0.581524932  | 0.31781  | 1.829788 | 0.067282 | 0.442874 |
| BX908782.2         | 57.35242 | -1.805260398 | 1.41234  | -1.27821 | 0.201177 | 0.681045 |
| rbp5               | 882.394  | -0.073420634 | 0.135745 | -0.54087 | 0.588596 | 0.908014 |
| hk2                | 226.8125 | 0.1759312    | 0.205317 | 0.856878 | 0.391512 | 0.827902 |
| CT027586.1         | 0 NA     | NA           | NA       | NA       | NA       | NA       |
| si:dkey-264f17.2   | 54.93657 | 0.66318079   | 0.477472 | 1.388942 | 0.16485  | 0.634185 |
| si:ch1073-469d17.2 | 128.1208 | 0.330643074  | 0.689725 | 0.479384 | 0.631666 | 0.923003 |
| RF00003            | 0 NA     | NA           | NA       | NA       | NA       | NA       |
| si:ch73-281i18.6   | 16.5454  | -0.126652617 | 0.466014 | -0.27178 | 0.785792 | 0.962605 |
| RF00001            | 0 NA     | NA           | NA       | NA       | NA       | NA       |
| BX511128.2         | 1.972785 | -0.325217574 | 1.301673 | -0.24985 | 0.802707 | NA       |
| RF00001            | 0.101446 | -1.755425691 | 5.23528  | -0.33531 | 0.737394 | NA       |
| ugt5b2             | 171.4744 | 0.067739411  | 0.204514 | 0.331221 | 0.740477 | 0.953939 |
| znf1047            | 1.96443  | -0.512804012 | 1.402463 | -0.36565 | 0.71463  | NA       |
| si:ch73-305o9.3    | 50.75485 | -0.391250532 | 0.63153  | -0.61953 | 0.535569 | 0.891993 |
| ATG2A              | 489.8365 | -0.010383643 | 0.207895 | -0.04995 | 0.960165 | 0.999164 |
| nr6ala             | 6.706231 | -0.153592648 | 0.740438 | -0.20743 | 0.83567  | 0.976007 |
| cetn2              | 178.9548 | -0.052467301 | 0.187441 | -0.27991 | 0.779544 | 0.961073 |

|                    |          |              |          |          |          |          |
|--------------------|----------|--------------|----------|----------|----------|----------|
| CU972516.1         | 0.230978 | -1.755450266 | 5.235279 | -0.33531 | 0.73739  | NA       |
| tmx4               | 52.21897 | 0.62407032   | 0.261238 | 2.388893 | 0.016899 | 0.230481 |
| ftr64              | 13.56181 | 0.883723781  | 0.600057 | 1.472732 | 0.140823 | 0.599658 |
| CT583728.4         | 13.32855 | -1.029651988 | 0.527096 | -1.95344 | 0.050767 | 0.392092 |
| CR854829.1         | 0.142345 | 0            | 5.267649 | 0        | 1        | NA       |
| CR786582.2         | 0.21173  | 0            | 5.267649 | 0        | 1        | NA       |
| UBE2M              | 1382.154 | 0.079059823  | 0.100884 | 0.78367  | 0.433234 | 0.849392 |
| FO907089.1         | 16.86356 | 1.171193512  | 0.754993 | 1.551264 | 0.120838 | 0.566816 |
| arxb               | 19.56307 | 0.203965673  | 0.519363 | 0.392722 | 0.694524 | 0.941093 |
| znf1080            | 3.807732 | -0.317932128 | 1.255607 | -0.25321 | 0.800106 | 0.967256 |
| si:dkey-82o10.4    | 59.74047 | 0.585411527  | 0.353801 | 1.654637 | 0.097998 | 0.521071 |
| CU855885.1         | 1.862564 | 0            | 1.991588 | 0        | 1        | NA       |
| si:ch211-194h1.2   | 2.05504  | -1.737978842 | 2.027392 | -0.85725 | 0.391308 | NA       |
| prrl6              | 10.40382 | 0.98460769   | 0.640467 | 1.537328 | 0.124213 | 0.571374 |
| si:ch211-1f22.3    | 0.043309 | 0            | 5.267649 | 0        | 1        | NA       |
| rab3db             | 59.97158 | -1.002309147 | 0.265621 | -3.77345 | 0.000161 | 0.012946 |
| col10a1b           | 11.07295 | 1.675906596  | 1.039853 | 1.611676 | 0.107032 | 0.537    |
| rpp25a             | 21.824   | -0.234403761 | 0.602324 | -0.38917 | 0.697154 | 0.94198  |
| fgf3               | 110.7842 | 0.153854389  | 0.26527  | 0.579993 | 0.56192  | 0.900715 |
| si:dkeyp-53d3.5    | 66.23701 | -0.188478421 | 0.228917 | -0.82335 | 0.410311 | 0.837066 |
| washc5             | 355.2279 | -0.056740475 | 0.121531 | -0.46688 | 0.640586 | 0.925162 |
| CR354395.1         | 0.838144 | 0.093656336  | 2.309555 | 0.040552 | 0.967653 | NA       |
| nkx2.2b            | 21.38509 | -0.25286915  | 0.398221 | -0.635   | 0.52543  | 0.888928 |
| si:dkey-261j11.2   | 8.040904 | 0.132106698  | 1.035076 | 0.12763  | 0.898442 | 0.990199 |
| CABZ01111555.1     | 0.140122 | -0.868101293 | 5.267649 | -0.1648  | 0.869102 | NA       |
| or106-8            | 8.11694  | -0.548101281 | 0.749915 | -0.73089 | 0.464849 | 0.864823 |
| BX088583.2         | 7.149405 | -1.695723756 | 0.908674 | -1.86615 | 0.06202  | 0.42715  |
| si:ch1073-475a24.1 | 8.552013 | -2.027397503 | 1.060898 | -1.91102 | 0.056002 | 0.409174 |
| scarb1             | 404.5429 | -0.119496039 | 0.15858  | -0.75354 | 0.451127 | 0.857606 |
| dre-mir-7149       | 0.47539  | -0.373414692 | 2.564643 | -0.1456  | 0.884236 | NA       |
| zhx2b              | 18.45224 | 1.050439348  | 0.529822 | 1.982625 | 0.047409 | 0.379101 |
| psmal              | 2498.418 | -0.044111468 | 0.15228  | -0.28967 | 0.772067 | 0.960624 |
| dbt                | 857.6142 | 0.042560725  | 0.110112 | 0.386521 | 0.699111 | 0.942499 |
| znf1014            | 183.5283 | 0.02604072   | 0.168922 | 0.154158 | 0.877485 | 0.985427 |
| CR354430.4         | 3.743711 | 1.068925498  | 1.045672 | 1.022238 | 0.306668 | 0.771918 |
| si:dkey-226n24.1   | 0.254477 | 0            | 5.267649 | 0        | 1        | NA       |
| CU468917.1         | 27.34095 | -0.559334839 | 0.480113 | -1.16501 | 0.244017 | 0.724576 |
| CR769772.4         | 2.151022 | 2.823536147  | 1.69808  | 1.662781 | 0.096356 | NA       |
| gucale             | 18.944   | 1.09787684   | 0.971535 | 1.130044 | 0.258458 | 0.735636 |
| CR352338.1         | 3.511506 | -1.566774231 | 1.069733 | -1.46464 | 0.143019 | 0.602002 |
| ppargc1b           | 599.0062 | 0.028964214  | 0.16343  | 0.177227 | 0.85933  | 0.979975 |
| si:ch211-106j21.4  | 4.519073 | -0.722712    | 1.009836 | -0.71567 | 0.474193 | 0.869292 |
| CU928046.2         | 0        | NA           | NA       | NA       | NA       | NA       |
| tbxta              | 63.96254 | -0.086545633 | 0.336283 | -0.25736 | 0.796901 | 0.966447 |
| si:ch211-17218.4   | 79.78001 | 0.045293187  | 0.306837 | 0.147613 | 0.882648 | 0.986908 |
| e2f4               | 366.3458 | 0.084473737  | 0.175186 | 0.482195 | 0.629667 | 0.92285  |
| epcla              | 418.7056 | 0.080521352  | 0.135026 | 0.596341 | 0.550947 | 0.8974   |
| RF00001            | 0        | NA           | NA       | NA       | NA       | NA       |
| CU927920.1         | 0.099037 | 0            | 5.267649 | 0        | 1        | NA       |
| CU467822.1         | 906.1362 | 0.079114215  | 0.135584 | 0.583509 | 0.559551 | 0.899571 |
| tecrea             | 67.24059 | 0.877126752  | 0.328313 | 2.671618 | 0.007549 | 0.14728  |
| si:ch73-389b16.1   | 120.0162 | -0.508566665 | 0.251695 | -2.02057 | 0.043325 | 0.364898 |
| or109-13           | 0.514441 | 1.10472165   | 3.454367 | 0.319804 | 0.749117 | NA       |
| cacnaldb           | 15.41884 | 0.301997032  | 0.890171 | 0.339257 | 0.734416 | 0.951134 |

|                   |          |              |          |          |          |          |    |
|-------------------|----------|--------------|----------|----------|----------|----------|----|
| CU695215.1        | 0.295871 |              | 0        | 5.267649 | 0        | 1        | NA |
| zgc:163077        | 107.5749 | -0.406684728 | 0.223095 | -1.82292 | 0.068316 | 0.445546 |    |
| tgm112            | 126.6288 | 0.123612258  | 0.20143  | 0.613673 | 0.539431 | 0.893049 |    |
| RF00001           |          | 0 NA         | NA       | NA       | NA       | NA       |    |
| si:dkeyp-57d7.4   | 97.91028 | 1.603335183  | 0.744782 | 2.152757 | 0.031338 | 0.314904 |    |
| si:ch211-215p11.1 | 4.465851 | 0.556906765  | 1.08734  | 0.512173 | 0.60853  | 0.915204 |    |
| BX640576.1        | 2.751624 | -0.749486464 | 1.318697 | -0.56835 | 0.569795 | 0.902322 |    |
| preb              | 447.407  | -0.166856315 | 0.110464 | -1.51051 | 0.130913 | 0.582503 |    |
| rims2a            | 253.1873 | -0.093307012 | 0.267685 | -0.34857 | 0.727412 | 0.949141 |    |
| si:dkey-109a10.2  | 3.84079  | 1.335888305  | 1.247504 | 1.070849 | 0.284237 | 0.75523  |    |
| zgc:112966        | 2.168786 | 0.669702448  | 1.601139 | 0.418266 | 0.675752 | NA       |    |
| si:dkey-238i5.2   | 100.7811 | 0.069220676  | 0.296773 | 0.233244 | 0.815572 | 0.971158 |    |
| BX469901.1        |          | 0 NA         | NA       | NA       | NA       | NA       |    |
| arfgap1           | 735.1088 | -0.297166045 | 0.165088 | -1.80005 | 0.071853 | 0.4564   |    |
| BX530032.1        | 8.105513 | 2.238850777  | 0.689527 | 3.246936 | 0.001167 | 0.048965 |    |
| ube2c             | 152.8322 | -0.184773861 | 0.14877  | -1.24201 | 0.214233 | 0.696474 |    |
| micos10           | 876.1831 | 0.118921279  | 0.16     | 0.74326  | 0.457324 | 0.860993 |    |
| RF00001           | 0.271185 |              | 0        | 5.267649 | 0        | 1        | NA |
| mrps7             | 449.7767 | 0.211015441  | 0.135451 | 1.557876 | 0.119263 | 0.562753 |    |
| znf1109           | 5.345253 | -1.735171816 | 0.994192 | -1.74531 | 0.080931 | 0.479801 |    |
| lmbb2             | 1590.422 | 0.516867452  | 0.143157 | 3.610493 | 0.000306 | 0.019725 |    |
| si:ch73-208h1.2   | 0.325862 |              | 0        | 5.263602 | 0        | 1        | NA |
| arf6a             | 555.8966 | 0.169241884  | 0.135673 | 1.247423 | 0.212242 | 0.69394  |    |
| ssr1              | 1826.101 | 0.142865976  | 0.145034 | 0.985048 | 0.3246   | 0.783313 |    |
| ascl1b            | 296.2019 | 0.008131977  | 0.165823 | 0.04904  | 0.960887 | 0.999249 |    |
| CABZ01079192.1    | 231.785  | -1.763738115 | 0.66535  | -2.65084 | 0.008029 | 0.151864 |    |
| si:dkey-8113.5    | 16.6846  | -1.136825309 | 0.422059 | -2.69352 | 0.00707  | 0.142573 |    |
| etfa              | 3284.671 | -0.164011356 | 0.204368 | -0.80253 | 0.422247 | 0.843493 |    |
| cyp2k20           | 1.778942 | 1.055436724  | 2.041605 | 0.516964 | 0.605181 | NA       |    |
| L0017682.1        | 6.925843 | -0.8018923   | 0.958048 | -0.83701 | 0.402589 | 0.833401 |    |
| si:ch211-209j12.1 | 7.506397 | -1.47263726  | 0.74079  | -1.98793 | 0.04682  | 0.376932 |    |
| dact1             | 343.3203 | -0.04382519  | 0.1887   | -0.23225 | 0.816345 | 0.971207 |    |
| zgc:64201         | 45.89218 | 0.944615785  | 0.292395 | 3.23062  | 0.001235 | 0.051016 |    |
| ccnd1             | 2308.727 | 0.055736028  | 0.122727 | 0.454147 | 0.649723 | 0.927756 |    |
| trpm2             | 30.63017 | -0.666940542 | 0.392341 | -1.6999  | 0.08915  | 0.501359 |    |
| si:ch211-155m12.1 | 8.74776  | -3.847444533 | 1.056195 | -3.64274 | 0.00027  | 0.018116 |    |
| ARHGEF17          | 276.1709 | 0.203097837  | 0.13637  | 1.489318 | 0.136404 | 0.591738 |    |
| myrfl             | 90.75146 | -4.589433868 | 0.701817 | -6.53936 | 6.18E-11 | 6.51E-08 |    |
| si:ch73-359m17.8  | 0.197783 | -0.868114638 | 5.267649 | -0.1648  | 0.8691   | NA       |    |
| RF00003           |          | 0 NA         | NA       | NA       | NA       | NA       |    |
| CU929240.1        | 39.48362 | -0.220196048 | 0.310066 | -0.71016 | 0.477605 | 0.869292 |    |
| si:zfos-1056e6.1  | 19.43617 | -0.223435592 | 0.422646 | -0.52866 | 0.597042 | 0.911837 |    |
| haus6             | 210.0738 | 0.241342418  | 0.242639 | 0.994656 | 0.319904 | 0.780475 |    |
| zgc:110171        | 5.284222 | -0.016632348 | 0.961115 | -0.01731 | 0.986193 | 1        |    |
| si:ch211-188c18.1 | 5.478347 | 1.337973112  | 1.213704 | 1.102388 | 0.270293 | 0.746536 |    |
| sstr5             | 90.59281 | 0.29396672   | 0.233427 | 1.25935  | 0.207904 | 0.689937 |    |
| BX323882.1        | 0.063619 |              | 0        | 5.267649 | 0        | 1        | NA |
| BX005396.4        | 0.086616 |              | 0        | 5.267649 | 0        | 1        | NA |
| RF00560           | 0.52487  | 2.489258021  | 3.05908  | 0.813728 | 0.415801 | NA       |    |
| sntg2             | 47.84972 | 0.563010084  | 0.385502 | 1.46046  | 0.144164 | 0.603155 |    |
| ulk3              | 85.52267 | -0.438347454 | 0.226953 | -1.93145 | 0.053427 | 0.40036  |    |
| CABZ01078663.1    | 0.414655 |              | 0        | 3.651284 | 0        | 1        | NA |
| BX957361.1        | 0.295271 | 2.436361052  | 5.206324 | 0.467962 | 0.639812 | NA       |    |
| pcdh1g11          | 3.973941 | -2.232683974 | 1.446198 | -1.54383 | 0.122629 | 0.569468 |    |

|                    |          |              |           |          |          |          |
|--------------------|----------|--------------|-----------|----------|----------|----------|
| si:ch73-233f7.6    | 2.728359 | 0.471427464  | 1.204413  | 0.391417 | 0.695489 | 0.9414   |
| BX681417.2         | 2.996337 | 3.199630215  | 1.949311  | 1.641416 | 0.100711 | 0.525794 |
| elmod2             | 538.3356 | -0.150707101 | 0.145738  | -1.0341  | 0.30109  | 0.767371 |
| kntc1              | 305.4914 | 0.404206751  | 0.209652  | 1.927986 | 0.053857 | 0.401889 |
| zgc:158417         | 21.13011 | -0.285952616 | 0.615497  | -0.46459 | 0.642226 | 0.92567  |
| trgv7              | 0.376839 | -2.744373636 | 3.660061  | -0.74982 | 0.453365 | NA       |
| RF00001            | 0.086616 |              | 0.5267649 |          | 0        | 1 NA     |
| RF00001            |          | 0 NA         | NA        | NA       | NA       | NA       |
| zgc:123107         | 5.657857 | -1.090016928 | 1.141942  | -0.95453 | 0.339816 | 0.795226 |
| KLHL28             | 144.7642 | -0.230938555 | 0.188444  | -1.2255  | 0.220386 | 0.701707 |
| chrnb4             | 30.37263 | -0.160589596 | 0.400816  | -0.40066 | 0.688673 | 0.939118 |
| cfap52             | 32.31243 | 0.03904096   | 0.313125  | 0.124682 | 0.900776 | 0.99045  |
| arll               | 590.3702 | 0.176099658  | 0.105983  | 1.661583 | 0.096597 | 0.518929 |
| tradv7.0           |          | 0 NA         | NA        | NA       | NA       | NA       |
| CT990567.2         | 2.200291 | -0.003732147 | 1.195743  | -0.00312 | 0.99751  | 1        |
| FP340292.1         |          | 0 NA         | NA        | NA       | NA       | NA       |
| tradv16.0          |          | 0 NA         | NA        | NA       | NA       | NA       |
| si:ch73-171o20.2   | 0.073968 |              | 0.5267649 |          | 0        | 1 NA     |
| CU929259.1         | 132.7915 | 0.439148299  | 0.250871  | 1.750495 | 0.080033 | 0.478179 |
| si:dkey-207124.2   | 21.01235 | 0.235844318  | 0.580942  | 0.405969 | 0.684765 | 0.938486 |
| si:dkey-16p6.1     | 3.282464 | -3.101745771 | 1.55778   | -1.99113 | 0.046466 | 0.376263 |
| si:ch73-158p21.2   | 41.40269 | 0.532343542  | 0.355209  | 1.498677 | 0.133958 | 0.58783  |
| znf1184            | 31.04263 | 0.232696265  | 0.339844  | 0.684716 | 0.493523 | 0.877027 |
| si:dkey-26m3.3     | 19.36662 | 1.167933306  | 0.57583   | 2.028259 | 0.042534 | 0.361124 |
| zgc:158316         | 193.9367 | -0.06822782  | 0.249768  | -0.27317 | 0.784726 | 0.962605 |
| si:dkey-30e9.7     | 94.34445 | -0.114059643 | 0.258389  | -0.44143 | 0.658905 | 0.930581 |
| si:ch1073-181h11.1 | 0.11861  |              | 0.5267649 |          | 0        | 1 NA     |
| bmp5               | 319.713  | 0.045553426  | 0.166431  | 0.273708 | 0.784309 | 0.962605 |
| chrna7             | 9.935497 | -0.160625595 | 0.82824   | -0.19394 | 0.846226 | 0.97711  |
| zgc:158260         | 6.648396 | 0.553276925  | 0.755893  | 0.731952 | 0.464198 | 0.864593 |
| lrrc24             | 15.68297 | -0.157533024 | 0.540146  | -0.29165 | 0.770555 | 0.960484 |
| csrp3              | 30.93527 | 0.429863902  | 0.348577  | 1.233196 | 0.217503 | 0.69815  |
| si:ch211-156b7.4   | 286.0787 | 0.316802949  | 0.22163   | 1.42942  | 0.152883 | 0.617235 |
| si:ch211-106g8.56  |          | 0 NA         | NA        | NA       | NA       | NA       |
| aridlaa            | 1370.247 | 0.104424296  | 0.136954  | 0.76248  | 0.445774 | 0.855403 |
| scn2b              | 49.7846  | 0.549329147  | 0.335852  | 1.635627 | 0.101918 | 0.528757 |
| RF00026            |          | 0 NA         | NA        | NA       | NA       | NA       |
| arsg               | 32.45822 | -0.366535876 | 0.373937  | -0.98021 | 0.326983 | 0.785751 |
| bacel              | 118.5745 | 0.48492957   | 0.195017  | 2.486608 | 0.012897 | 0.198116 |
| sox17              | 3.24521  | -1.456110175 | 1.166964  | -1.24778 | 0.212113 | 0.693739 |
| CR394556.1         | 0.324891 |              | 0.4589924 |          | 0        | 1 NA     |
| pargl              | 85.96065 | -0.345748745 | 0.31379   | -1.10185 | 0.270528 | 0.746683 |
| CU459186.3         | 6.366349 | -0.007612575 | 0.700467  | -0.01087 | 0.991329 | 1        |
| L0018584.1         | 2.594785 | 0.716328387  | 1.662192  | 0.430954 | 0.666502 | 0.932664 |
| larpl              | 734.0144 | -0.128907089 | 0.162283  | -0.79433 | 0.427002 | 0.845491 |
| parietopsin        | 166.9652 | -0.355828222 | 0.198059  | -1.79658 | 0.072403 | 0.457602 |
| si:ch211-93f2.1    | 524.0093 | 0.318126692  | 0.298185  | 1.066876 | 0.286028 | 0.757455 |
| CU467822.2         | 3.566621 | -0.891506903 | 1.01372   | -0.87944 | 0.379162 | 0.8232   |
| si:dkeyp-80d11.12  | 2.982979 | -1.255389353 | 1.442945  | -0.87002 | 0.38429  | 0.826565 |
| BX649341.1         | 0.37335  | -0.868139708 | 3.830603  | -0.22663 | 0.820709 | NA       |
| fam168b            | 750.2631 | 0.037661112  | 0.111601  | 0.337463 | 0.735768 | 0.951543 |
| chn1               | 596.1391 | -0.014290705 | 0.148755  | -0.09607 | 0.923466 | 0.994525 |
| BX842687.1         | 0.643704 | -1.957467507 | 3.058124  | -0.64009 | 0.522116 | NA       |
| tradv24.0.5        | 0.25058  |              | 0.5267649 |          | 0        | 1 NA     |

|                   |          |              |          |          |          |          |
|-------------------|----------|--------------|----------|----------|----------|----------|
| gb:eh456644       | 11.00462 | -0.024701259 | 0.571019 | -0.04326 | 0.965496 | 1        |
| elavl1b           | 978.5747 | -0.168505184 | 0.11518  | -1.46298 | 0.143474 | 0.602607 |
| AL953886.1        | 18.88242 | 0.83073181   | 0.502857 | 1.652025 | 0.098529 | 0.521133 |
| si:ch211-24o8.4   | 1.344944 | -0.285607833 | 1.657608 | -0.1723  | 0.863201 | NA       |
| zgc:92161         | 167.233  | 1.57173278   | 0.324956 | 4.836759 | 1.32E-06 | 0.000364 |
| si:ch211-196p9.1  | 174.0552 | 0.052612934  | 0.147565 | 0.356541 | 0.721436 | 0.947343 |
| plekhg5b          | 93.77054 | -0.130692313 | 0.27888  | -0.46863 | 0.639332 | 0.924779 |
| CABZ01085195.1    | 14.69457 | -0.391690181 | 0.447236 | -0.8758  | 0.381138 | 0.824296 |
| prkarlab          | 116.8438 | -0.190000829 | 0.215017 | -0.88365 | 0.376883 | 0.822258 |
| im:7141269        | 61.65114 | 0.915233176  | 0.322587 | 2.837165 | 0.004552 | 0.111673 |
| si:dkey-27n6.4    | 49.93646 | 0.374974982  | 1.128104 | 0.332394 | 0.739592 | 0.953573 |
| traj41            | 0 NA     | NA           | NA       | NA       | NA       | NA       |
| homer1b           | 552.9312 | -0.074452097 | 0.120574 | -0.61748 | 0.536918 | 0.892421 |
| znf1016           | 2.063599 | -0.015571057 | 1.218747 | -0.01278 | 0.989806 | NA       |
| RF00001           | 0 NA     | NA           | NA       | NA       | NA       | NA       |
| fah               | 455.7611 | 0.050252169  | 0.248598 | 0.202142 | 0.839806 | 0.976417 |
| CU467646.5        | 1.599077 | 2.429223862  | 1.813669 | 1.339398 | 0.180441 | NA       |
| ptmab             | 17712.16 | 0.066272878  | 0.158986 | 0.416848 | 0.676789 | 0.935664 |
| si:dkey-183i3.6   | 5.786478 | 1.049540627  | 0.898628 | 1.167936 | 0.242832 | 0.724396 |
| trgv3             | 0 NA     | NA           | NA       | NA       | NA       | NA       |
| cysltr3           | 5.609877 | -0.295687755 | 0.909209 | -0.32521 | 0.745019 | 0.954956 |
| CT956002.1        | 0.251029 | 2.482881251  | 5.204054 | 0.477105 | 0.633287 | NA       |
| si:ch211-241j8.2  | 0.398533 | 1.055402733  | 3.682096 | 0.286631 | 0.774395 | NA       |
| zgc:172014        | 20.17734 | -0.096767338 | 0.482377 | -0.20061 | 0.841007 | 0.97643  |
| syt12             | 223.6606 | 0.118344024  | 0.278807 | 0.424466 | 0.671226 | 0.933953 |
| pdlim5a           | 100.6838 | 0.157359863  | 0.233815 | 0.673011 | 0.50094  | 0.880413 |
| ca5a              | 556.7662 | -0.234501074 | 0.160621 | -1.45997 | 0.144299 | 0.603393 |
| pimr181           | 0.126661 | 0            | 5.267649 | 0        | 1        | NA       |
| RF00001           | 0 NA     | NA           | NA       | NA       | NA       | NA       |
| laptm5            | 115.4648 | -0.018011352 | 0.296999 | -0.06064 | 0.951642 | 0.99801  |
| si:ch211-134a4.6  | 1.153509 | -3.383354884 | 2.322724 | -1.45663 | 0.145218 | NA       |
| zgc:162592        | 0.485081 | 0            | 4.777108 | 0        | 1        | NA       |
| BX784032.1        | 0.060442 | 0            | 5.267649 | 0        | 1        | NA       |
| cyplc2            | 77.64428 | 0.208018695  | 0.2871   | 0.72455  | 0.468728 | 0.866951 |
| si:ch73-299h12.3  | 37.65565 | -0.225992012 | 0.300855 | -0.75117 | 0.452553 | 0.857994 |
| kyat3             | 400.3797 | 0.165182242  | 0.153854 | 1.073631 | 0.282988 | 0.755028 |
| si:dkey-237i9.1   | 195.1956 | -0.02936077  | 0.183962 | -0.1596  | 0.873194 | 0.983537 |
| atp6v0e1          | 552.9451 | 0.518192312  | 0.199359 | 2.599296 | 0.009342 | 0.166239 |
| CABZ01033394.1    | 0 NA     | NA           | NA       | NA       | NA       | NA       |
| RF00001           | 0.144983 | -1.710071829 | 5.238473 | -0.32644 | 0.744088 | NA       |
| or130-1           | 3.760758 | 1.11901485   | 1.285142 | 0.870732 | 0.3839   | 0.82644  |
| si:ch1073-82119.1 | 40.03218 | -0.136465528 | 0.347266 | -0.39297 | 0.694341 | 0.941093 |
| L0018493.1        | 1.870446 | 0            | 2.104674 | 0        | 1        | NA       |
| tradv36.2.12      | 0.073968 | 0            | 5.267649 | 0        | 1        | NA       |
| or104-1           | 0.13984  | 0            | 5.267649 | 0        | 1        | NA       |
| si:ch211-120c15.3 | 30.28406 | 0.911992183  | 0.522606 | 1.745087 | 0.08097  | 0.479801 |
| si:ch211-271b14.1 | 689.9394 | -0.048534448 | 0.115067 | -0.42179 | 0.673177 | 0.93414  |
| zgc:114120        | 9.032161 | 0.160365311  | 0.74931  | 0.214017 | 0.830534 | 0.974908 |
| nap111            | 3489.985 | 0.00437291   | 0.08476  | 0.051592 | 0.958854 | 0.999164 |
| lpar3             | 65.03211 | -0.334500735 | 0.308788 | -1.08327 | 0.278688 | 0.752299 |
| col5a3b           | 1500.924 | 0.316608315  | 0.177709 | 1.781611 | 0.074813 | 0.464151 |
| si:dkey-5i16.5    | 12.44794 | 0.845692029  | 0.575376 | 1.469806 | 0.141614 | 0.600284 |
| BX294178.1        | 9.719168 | 1.19933489   | 0.643764 | 1.863004 | 0.062462 | 0.427718 |
| CU984583.1        | 0.191496 | 1.854123853  | 5.241768 | 0.353721 | 0.723548 | NA       |

|                   |          |              |            |          |          |          |
|-------------------|----------|--------------|------------|----------|----------|----------|
| traj51            |          | 0 NA         | NA         | NA       | NA       | NA       |
| si:ch211-243p7.3  | 32.88838 | -0.031506984 | 0.343186   | -0.09181 | 0.926851 | 0.994864 |
| AL929114.2        | 2.121371 | -0.776761058 | 1.680133   | -0.46232 | 0.643851 | NA       |
| zwi               | 333.1377 | 0.200127919  | 0.254768   | 0.785529 | 0.432144 | 0.848419 |
| pimr59            | 0.049519 |              | 0 5.267649 | 0        | 1 NA     |          |
| si:dkey-16p6.1    | 26.92974 | -1.161063979 | 0.51708    | -2.24543 | 0.024741 | 0.27868  |
| si:dkey-16b10.2   | 4.564279 | -2.240338034 | 0.966709   | -2.31749 | 0.020477 | 0.25399  |
| si:dkeyp-13d12.22 | 0.308101 |              | 0 3.950428 | 0        | 1 NA     |          |
| irx1a             | 364.576  | 0.212068244  | 0.128196   | 1.654247 | 0.098077 | 0.521071 |
| AL627305.2        | 3.343076 | -2.732690577 | 1.275219   | -2.14292 | 0.03212  | 0.318495 |
| RF00003           | 0.043309 |              | 0 5.267649 | 0        | 1 NA     |          |
| CR788237.2        | 0.14162  |              | 0 5.267649 | 0        | 1 NA     |          |
| znf1085           | 12.31446 | 0.574148821  | 0.504749   | 1.137493 | 0.255332 | 0.733542 |
| znf1106           | 4.068457 | -0.753171955 | 1.048822   | -0.71811 | 0.472688 | 0.868807 |
| mibp2             | 12763.21 | -0.411733947 | 0.180744   | -2.278   | 0.022727 | 0.266612 |
| FP016142.5        | 0.869139 | 1.4039812    | 2.442389   | 0.574839 | 0.5654   | NA       |
| BX088718.1        | 0.382489 | -0.794422626 | 3.810237   | -0.2085  | 0.834841 | NA       |
| dydc2             | 19.80347 | -0.328726002 | 0.376139   | -0.87395 | 0.382146 | 0.825191 |
| adipor2           | 2301.991 | -0.052556285 | 0.110488   | -0.47567 | 0.634308 | 0.924102 |
| RF00001           | 0.069091 |              | 0 5.267649 | 0        | 1 NA     |          |
| FQ311894.1        | 1209.233 | 0.135238939  | 0.182681   | 0.7403   | 0.459118 | 0.861818 |
| mnta              | 371.9597 | -0.103375751 | 0.126715   | -0.81581 | 0.414609 | 0.838683 |
| cyp2k19           | 109.7727 | 1.065292881  | 0.621931   | 1.71288  | 0.086735 | 0.493527 |
| CR382337.3        | 3.571543 | 0.685400356  | 1.602655   | 0.427666 | 0.668895 | 0.933115 |
| pcdh1g30          | 106.094  | -0.014241527 | 0.249914   | -0.05699 | 0.954556 | 0.998611 |
| asic1b            | 84.2439  | -0.273978095 | 0.289528   | -0.94629 | 0.343999 | 0.798147 |
| si:ch1073-416d2.4 | 93.14061 | 0.062749914  | 0.190848   | 0.328795 | 0.742311 | 0.954329 |
| dennd1b           | 21.74402 | 0.300378125  | 0.369545   | 0.812832 | 0.416315 | 0.839732 |
| magi3a            | 318.9772 | -0.213864103 | 0.165458   | -1.29256 | 0.196165 | 0.676562 |
| CR854963.1        |          | 0 NA         | NA         | NA       | NA       | NA       |
| BX842701.1        | 7.500969 | -0.303771231 | 0.881584   | -0.34457 | 0.730414 | 0.950056 |
| dtwd2             | 34.66361 | -1.138078834 | 0.481019   | -2.36597 | 0.017983 | 0.236739 |
| rbm34             | 268.8211 | 0.028023854  | 0.191533   | 0.146313 | 0.883674 | 0.987014 |
| kdf1b             | 34.74254 | 0.192206233  | 0.33182    | 0.579248 | 0.562422 | 0.900715 |
| traj58            |          | 0 NA         | NA         | NA       | NA       | NA       |
| zgc:172128        | 56.93466 | 0.171219615  | 0.361634   | 0.473461 | 0.635884 | 0.924669 |
| si:dkey-20i20.11  | 6.522026 | 1.605726547  | 0.641708   | 2.502269 | 0.01234  | 0.193188 |
| pdxcl             | 325.3713 | -0.011702669 | 0.132568   | -0.08828 | 0.929657 | 0.995576 |
| OSCP1 (1 of many) | 123.0471 | 0.064280999  | 0.224978   | 0.285722 | 0.775091 | 0.960899 |
| dre-mir-25        | 0.515928 | 0.645074711  | 3.536687   | 0.182395 | 0.855273 | NA       |
| pigr              | 153.3697 | 0.000626738  | 0.209861   | 0.002986 | 0.997617 | 1        |
| aridlab           | 1408.095 | 0.144207229  | 0.12964    | 1.112365 | 0.265981 | 0.742773 |
| ino80e            | 232.2982 | 0.228010624  | 0.172105   | 1.324831 | 0.185227 | 0.662813 |
| CR388178.1        | 12.73343 | 2.424463259  | 0.895894   | 2.706193 | 0.006806 | 0.139148 |
| stk10             | 194.1901 | -0.216775831 | 0.16264    | -1.33286 | 0.182578 | 0.659237 |
| kncn              | 11.69909 | 0.508307885  | 0.632623   | 0.803493 | 0.42169  | 0.842943 |
| xrn2              | 885.0065 | 0.148481457  | 0.11016    | 1.347874 | 0.177699 | 0.65136  |
| zgc:193711        | 76.3806  | 0.123090239  | 0.225362   | 0.546188 | 0.584936 | 0.906655 |
| CR376730.2        | 0.86503  | -0.333485079 | 2.115585   | -0.15763 | 0.874746 | NA       |
| zfyve9a           | 365.2299 | 0.113867859  | 0.120255   | 0.946887 | 0.343696 | 0.798147 |
| RF00001           |          | 0 NA         | NA         | NA       | NA       | NA       |
| zgc:113442        | 30.58204 | -0.087357339 | 0.4459     | -0.19591 | 0.844679 | 0.976791 |
| CR848667.2        |          | 0 NA         | NA         | NA       | NA       | NA       |
| rab3ip            | 707.1066 | 0.139501633  | 0.140588   | 0.99227  | 0.321066 | 0.781417 |

|                    |          |              |          |          |          |          |
|--------------------|----------|--------------|----------|----------|----------|----------|
| pcdh20             | 134.2546 | 0.188902565  | 0.26707  | 0.707315 | 0.479371 | 0.86985  |
| si:dkeyp-86d6.2    | 10.33851 | -0.536577757 | 0.576709 | -0.93041 | 0.352157 | 0.802776 |
| si:dkey-65l23.2    | 0.053262 | 1.055396947  | 5.267649 | 0.200354 | 0.841203 | NA       |
| metrnla            | 937.24   | -0.06386262  | 0.160337 | -0.3983  | 0.690407 | 0.93988  |
| pinl               | 872.4995 | 0.021078888  | 0.132135 | 0.159526 | 0.873255 | 0.983537 |
| si:dkeyp-44d3.5    | 20.90442 | 0.318814037  | 0.489318 | 0.651548 | 0.514693 | 0.886385 |
| pmfbpl             | 20.72955 | 0.157628997  | 0.456539 | 0.345269 | 0.729892 | 0.950056 |
| si:ch211-111e20.1  | 3.471941 | 0.090505298  | 1.118019 | 0.080951 | 0.935481 | 0.996829 |
| foxjla             | 105.4801 | -0.050833177 | 0.247434 | -0.20544 | 0.837227 | 0.976007 |
| RF00001            | 0.053506 | -0.86807634  | 5.267649 | -0.16479 | 0.869106 | NA       |
| si:dkey-65b13.13   | 56.62824 | 1.302029592  | 0.760512 | 1.712043 | 0.086889 | 0.494282 |
| si:ch1073-204b8.1  | 1.164394 | -2.307761583 | 2.340074 | -0.98619 | 0.324039 | NA       |
| zgc:101130         | 72.54772 | -0.209244311 | 0.227649 | -0.91915 | 0.358015 | 0.809315 |
| FQ377605.1         | 9.690876 | -0.294836184 | 0.531396 | -0.55483 | 0.579008 | 0.905417 |
| gorasp1b           | 7.334884 | 1.071230812  | 0.759262 | 1.410885 | 0.158278 | 0.623766 |
| CU914622.1         | 19.28791 | 1.923856753  | 0.782872 | 2.457434 | 0.013993 | 0.207377 |
| si:dkey-205h23.2   | 4.935647 | 0.777569263  | 0.833411 | 0.932996 | 0.350822 | 0.802215 |
| si:ch73-358j7.2    | 0.113138 | 0            | 5.267649 | 0        | 1        | NA       |
| BX088707.1         | 1.592651 | -1.730852481 | 1.731593 | -0.99957 | 0.317518 | NA       |
| tmem106ba          | 925.1819 | -0.021737899 | 0.115891 | -0.18757 | 0.851212 | 0.978548 |
| RF02209            | 0        | NA           | NA       | NA       | NA       | NA       |
| BX324216.1         | 0.36202  | 0            | 5.175955 | 0        | 1        | NA       |
| si:dkey-260j18.2   | 473.0243 | -0.084223068 | 0.119537 | -0.70458 | 0.481072 | 0.870339 |
| BX511111.2         | 9.613391 | 0.261258915  | 0.617262 | 0.423255 | 0.672109 | 0.933953 |
| si:dkey-92j16.2    | 4.81703  | 0.173363741  | 0.813941 | 0.212993 | 0.831332 | 0.974908 |
| ptbp2a             | 260.7589 | 0.070741019  | 0.130067 | 0.54388  | 0.586524 | 0.906711 |
| si:ch211-223g7.6   | 3.248184 | 0.44707554   | 1.227385 | 0.36425  | 0.715671 | 0.9461   |
| numbl              | 60.23024 | 0.21085914   | 0.23915  | 0.881703 | 0.377937 | 0.82265  |
| pigv               | 50.60062 | -0.138945485 | 0.290104 | -0.47895 | 0.631973 | 0.923139 |
| hoxc6b             | 73.79913 | 0.059512381  | 0.251872 | 0.23628  | 0.813215 | 0.970328 |
| znf1159            | 21.74109 | 0.388946207  | 0.429075 | 0.906476 | 0.364684 | 0.814648 |
| CU571315.2         | 16.97897 | 1.891006238  | 2.295275 | 0.823869 | 0.410014 | 0.836939 |
| etvl               | 144.4096 | 0.125135568  | 0.182662 | 0.685068 | 0.493301 | 0.876787 |
| si:dkeyp-44d3.3    | 14.25493 | 0.419499224  | 0.4454   | 0.941848 | 0.34627  | 0.799463 |
| abhd18             | 235.9022 | 0.246142126  | 0.150367 | 1.636939 | 0.101643 | 0.52828  |
| tmem141            | 100.9407 | -0.332746308 | 0.233372 | -1.42582 | 0.15392  | 0.618475 |
| zgc:171592         | 0.693153 | 0            | 3.032878 | 0        | 1        | NA       |
| BX664606.2         | 0        | NA           | NA       | NA       | NA       | NA       |
| sult4a1            | 479.7209 | 0.239155593  | 0.225057 | 1.062643 | 0.287944 | 0.758746 |
| si:ch211-227p7.1   | 0        | NA           | NA       | NA       | NA       | NA       |
| CABZ01084347.1     | 3.561841 | 0.89603492   | 1.348272 | 0.66458  | 0.506319 | 0.883007 |
| RF00026            | 0        | NA           | NA       | NA       | NA       | NA       |
| si:dkey-225f5.4    | 195.1112 | 0.321534513  | 0.214357 | 1.499998 | 0.133615 | 0.587004 |
| si:ch211-209n20.59 | 2.315622 | 3.472261276  | 1.552422 | 2.236674 | 0.025308 | 0.282476 |
| eps8l3a            | 213.2526 | -0.356974115 | 0.266896 | -1.3375  | 0.181058 | 0.657233 |
| bmpcr              | 341.6663 | 0.066415538  | 0.163647 | 0.405848 | 0.684855 | 0.938486 |
| spryd3             | 128.931  | -0.41053204  | 0.209097 | -1.96336 | 0.049605 | 0.387751 |
| pkn2               | 179.7972 | -0.167991917 | 0.155025 | -1.08364 | 0.278523 | 0.752148 |
| pde6gb             | 497.9402 | 0.265812088  | 0.19714  | 1.34834  | 0.177549 | 0.651332 |
| socs9              | 84.65719 | -0.005167351 | 0.228037 | -0.02266 | 0.981921 | 1        |
| irf6               | 166.538  | -0.375163034 | 0.215542 | -1.74056 | 0.081761 | 0.481425 |
| CU633987.1         | 0        | NA           | NA       | NA       | NA       | NA       |
| thrap3a            | 179.3836 | 0.036993382  | 0.199117 | 0.185787 | 0.852611 | 0.978672 |
| CU571315.3         | 16.99593 | -2.404449276 | 1.489265 | -1.61452 | 0.106415 | 0.535773 |



|                   |          |              |          |          |          |          |
|-------------------|----------|--------------|----------|----------|----------|----------|
| si:dkey-238k10.3  | 24.85701 | -1.449421205 | 0.852979 | -1.69925 | 0.089273 | 0.501424 |
| CR354398.1        | 0 NA     | NA           | NA       | NA       | NA       | NA       |
| gabrgl            | 8.443523 | 1.396291343  | 0.720425 | 1.938148 | 0.052605 | 0.398451 |
| cxcla             | 341.4876 | -0.061616023 | 0.135189 | -0.45578 | 0.64855  | 0.927501 |
| si:dkey-191j3.2   | 16.7239  | -0.532794357 | 0.670378 | -0.79477 | 0.426749 | 0.845352 |
| si:dkey-1b17.2    | 9.042472 | -0.974681422 | 0.71272  | -1.36755 | 0.171453 | 0.643433 |
| cog3              | 412.0397 | 0.145974243  | 0.156157 | 0.93479  | 0.349897 | 0.801572 |
| si:dkeyp-13d12.24 | 0.159785 | 2.50566729   | 5.20297  | 0.481584 | 0.630101 | NA       |
| CU695215.2        | 4.567322 | 0.003052291  | 0.769519 | 0.003966 | 0.996835 | 1        |
| apoea             | 7522.156 | -0.704898523 | 0.248068 | -2.84156 | 0.004489 | 0.11054  |
| RF00001           | 0.046941 | 0            | 5.267649 | 0        | 1        | NA       |
| si:dkey-72117.6   | 16.84861 | -0.124136062 | 0.625862 | -0.19834 | 0.842776 | 0.9766   |
| ppp2r2d           | 357.0037 | 0.17229933   | 0.120234 | 1.433039 | 0.151847 | 0.615406 |
| ppplcbl           | 2694.669 | -0.090501764 | 0.111957 | -0.80836 | 0.418883 | 0.841915 |
| FP009765.1        | 0.27541  | -0.868110153 | 5.267649 | -0.1648  | 0.869101 | NA       |
| CABZ01037298.1    | 141.1999 | 0.02404859   | 0.188763 | 0.127401 | 0.898623 | 0.990199 |
| trpc4b            | 18.14742 | 0.215415489  | 0.460127 | 0.468166 | 0.639666 | 0.924779 |
| btr25             | 13.97715 | -0.845695058 | 0.6708   | -1.26073 | 0.207408 | 0.689456 |
| AL627305.3        | 14.53575 | -0.834549891 | 0.573041 | -1.45635 | 0.145295 | 0.604476 |
| pnpla3            | 501.2171 | -0.674537697 | 0.216325 | -3.11817 | 0.00182  | 0.06578  |
| C14orf28          | 65.45859 | -0.287252813 | 0.271679 | -1.05732 | 0.290364 | 0.76078  |
| phf13             | 163.1516 | -0.023699425 | 0.169715 | -0.13964 | 0.888942 | 0.988188 |
| chmp6b            | 1037.826 | -0.168321399 | 0.096551 | -1.74334 | 0.081274 | 0.480142 |
| znf644b           | 128.2957 | -0.05053417  | 0.20467  | -0.24691 | 0.804982 | 0.969348 |
| gpsm21            | 101.6351 | -0.198845663 | 0.183351 | -1.08451 | 0.27814  | 0.751971 |
| si:dkey-172k15.11 | 81.91429 | 0.261988263  | 0.224062 | 1.169267 | 0.242296 | 0.724106 |
| si:dkey-183c6.7   | 13.77813 | 0.036996764  | 0.611697 | 0.060482 | 0.951772 | 0.99801  |
| BX950220.1        | 0 NA     | NA           | NA       | NA       | NA       | NA       |
| zgc:193790        | 36.74632 | -0.106434586 | 0.286878 | -0.37101 | 0.71063  | 0.945821 |
| si:ch211-214k5.3  | 1.69946  | 0.814405349  | 1.590648 | 0.511996 | 0.608654 | NA       |
| slc52a2           | 87.0698  | -0.58358733  | 0.199851 | -2.92011 | 0.003499 | 0.097796 |
| RF00001           | 0 NA     | NA           | NA       | NA       | NA       | NA       |
| CR356236.1        | 33.51425 | 0.070170306  | 0.377744 | 0.185762 | 0.852632 | 0.978672 |
| FP326652.1        | 0.173005 | 0            | 5.267649 | 0        | 1        | NA       |
| mab2111           | 1787.057 | 0.060449536  | 0.109898 | 0.55005  | 0.582285 | 0.90571  |
| slc25a43          | 473.1451 | -0.087440511 | 0.239691 | -0.36481 | 0.715256 | 0.945917 |
| CU550719.1        | 0 NA     | NA           | NA       | NA       | NA       | NA       |
| MCOLN3            | 170.9301 | -0.237063944 | 0.268688 | -0.8823  | 0.377614 | 0.822478 |
| mtbl              | 281.3012 | 0.075086594  | 0.244257 | 0.307408 | 0.758533 | 0.957865 |
| tradv28.0         | 0.138182 | 0            | 5.267649 | 0        | 1        | NA       |
| znf1164           | 38.71388 | -0.276459082 | 0.331502 | -0.83396 | 0.404305 | 0.833888 |
| CR848705.1        | 0.227876 | 0            | 5.267649 | 0        | 1        | NA       |
| hadhb             | 2239.699 | 0.182647995  | 0.141842 | 1.287686 | 0.197855 | 0.678554 |
| svild             | 693.8401 | -0.042263826 | 0.108413 | -0.38984 | 0.696654 | 0.941908 |
| si:dkeyp-11e3.1   | 168.723  | 0.047342759  | 0.173818 | 0.27237  | 0.785338 | 0.962605 |
| RGS13 (1 of many) | 49.52663 | -0.551699061 | 0.451184 | -1.22278 | 0.221412 | 0.702841 |
| zgc:92873         | 168.9922 | 0.121373262  | 0.21104  | 0.575121 | 0.56521  | 0.901538 |
| b3galt2           | 785.025  | 0.027058496  | 0.147963 | 0.182874 | 0.854897 | 0.979161 |
| si:dkeyp-82h4.3   | 11.63389 | -2.378722089 | 0.542639 | -4.38362 | 1.17E-05 | 0.00208  |
| kcna2b            | 17.21864 | 0.509655247  | 0.503437 | 1.012352 | 0.31137  | 0.77613  |
| ntn4              | 57.31062 | -0.579672968 | 0.286925 | -2.0203  | 0.043353 | 0.365001 |
| grm5b             | 6.211379 | 0.118308392  | 0.965907 | 0.122484 | 0.902515 | 0.990964 |
| shcbp1            | 172.8572 | 0.100871126  | 0.160202 | 0.629649 | 0.528924 | 0.890325 |
| neolb             | 0 NA     | NA           | NA       | NA       | NA       | NA       |

|                   |          |              |          |          |          |          |  |
|-------------------|----------|--------------|----------|----------|----------|----------|--|
| tbcl1d10aa        | 273.8207 | -0.136743267 | 0.17647  | -0.77488 | 0.438409 | 0.851685 |  |
| slc25a47b         | 52.65975 | 0.621109101  | 0.319155 | 1.946103 | 0.051642 | 0.395032 |  |
| RNF122            | 68.01477 | 0.400833191  | 0.276548 | 1.449414 | 0.147222 | 0.607612 |  |
| spink2.1          | 219.1767 | -0.713761462 | 0.391273 | -1.8242  | 0.068121 | 0.445203 |  |
| CABZ01072548.1    | 73.66493 | 0.051603324  | 0.200208 | 0.257748 | 0.796601 | 0.966447 |  |
| mif4gda           | 86.6519  | -0.023044178 | 0.215083 | -0.10714 | 0.914677 | 0.992972 |  |
| mprip             | 905.5465 | 0.029496027  | 0.11208  | 0.26317  | 0.792419 | 0.965217 |  |
| nr3c2             | 41.8076  | 0.032062078  | 0.344773 | 0.092995 | 0.925908 | 0.994815 |  |
| CT573793.2        | 0.103025 | -0.868089684 | 5.267649 | -0.1648  | 0.869104 | NA       |  |
| pop1              | 50.72692 | -0.391274822 | 0.285152 | -1.37216 | 0.170013 | 0.641773 |  |
| CABZ01052576.1    | 131.5089 | 0.375136686  | 0.157136 | 2.387345 | 0.016971 | 0.230743 |  |
| RF00001           | 0 NA     | NA           | NA       | NA       | NA       | NA       |  |
| wu:fd46c06        | 0.643795 | 1.867132574  | 3.318083 | 0.562714 | 0.573629 | NA       |  |
| si:ch73-233f7.5   | 4.588308 | -0.403014933 | 0.709224 | -0.56825 | 0.569867 | 0.902322 |  |
| adra2b            | 39.01891 | -0.226029107 | 0.324908 | -0.69567 | 0.486635 | 0.873244 |  |
| nfbkiz            | 171.9145 | 0.109416166  | 0.179663 | 0.609007 | 0.54252  | 0.894595 |  |
| CR954226.1        | 0.170783 | -0.868103029 | 5.267649 | -0.1648  | 0.869102 | NA       |  |
| si:ch211-255f4.11 | 33.77039 | 0.265389279  | 0.336723 | 0.788152 | 0.430608 | 0.847542 |  |
| mrcla             | 467.2657 | 0.20806722   | 0.205461 | 1.012683 | 0.311212 | 0.775936 |  |
| si:ch73-174h16.5  | 37.67008 | 0.950528761  | 0.605822 | 1.56899  | 0.11665  | 0.557506 |  |
| CU855889.1        | 0 NA     | NA           | NA       | NA       | NA       | NA       |  |
| dad1              | 1616.896 | 0.535867748  | 0.205449 | 2.608282 | 0.0091   | 0.16357  |  |
| tgm111            | 732.6884 | -0.004394932 | 0.156533 | -0.02808 | 0.977601 | 1        |  |
| tradv2.0.4        | 0 NA     | NA           | NA       | NA       | NA       | NA       |  |
| zbtb49            | 123.3097 | 0.087275391  | 0.203957 | 0.427912 | 0.668715 | 0.933101 |  |
| ptdss1b           | 7.672882 | -0.433051901 | 0.788003 | -0.54956 | 0.582624 | 0.90571  |  |
| ndufc2            | 1276.416 | 0.207357419  | 0.149848 | 1.38378  | 0.166426 | 0.636527 |  |
| s1f1              | 79.82987 | 0.348278288  | 0.234896 | 1.482693 | 0.138156 | 0.594663 |  |
| si:ch73-359m17.2  | 96.81096 | 0.042244212  | 0.381029 | 0.110869 | 0.91172  | 0.992336 |  |
| RF00090           | 0 NA     | NA           | NA       | NA       | NA       | NA       |  |
| phtf2             | 180.5923 | -0.044142584 | 0.218755 | -0.20179 | 0.840081 | 0.976417 |  |
| BX000696.1        | 0.390199 | 3.222190182  | 4.215984 | 0.764279 | 0.444701 | NA       |  |
| iqsec2a           | 109.6528 | 0.402458812  | 0.321346 | 1.252417 | 0.210418 | 0.692133 |  |
| RF00001           | 0 NA     | NA           | NA       | NA       | NA       | NA       |  |
| NHLRC3            | 300.9456 | 0.413233504  | 0.180699 | 2.286856 | 0.022204 | 0.263608 |  |
| eps8a             | 294.658  | -0.30571634  | 0.172978 | -1.76738 | 0.077165 | 0.469517 |  |
| crygn1            | 37.49037 | -0.526484918 | 0.574817 | -0.91592 | 0.35971  | 0.810668 |  |
| BX666065.2        | 0.156168 | -0.868103029 | 5.267649 | -0.1648  | 0.869102 | NA       |  |
| AL954698.2        | 0.545585 | 1.055395577  | 3.506877 | 0.30095  | 0.763452 | NA       |  |
| foxal             | 149.7199 | 0.2051559    | 0.232734 | 0.881503 | 0.378045 | 0.82265  |  |
| ptpn12            | 232.6705 | 0.171986999  | 0.169319 | 1.015756 | 0.309746 | 0.774621 |  |
| ece2b             | 85.48904 | 0.203883976  | 0.243672 | 0.836715 | 0.402753 | 0.833401 |  |
| btr24             | 5.354103 | -0.908045022 | 0.953174 | -0.95265 | 0.340766 | 0.795603 |  |
| eef1akmt2         | 100.4712 | 0.071780076  | 0.288185 | 0.249076 | 0.803302 | 0.968443 |  |
| ccdc77            | 131.6751 | 0.020290133  | 0.207864 | 0.097612 | 0.92224  | 0.994346 |  |
| si:ch211-69b7.6   | 99.39431 | -0.036309405 | 0.264043 | -0.13751 | 0.890625 | 0.988446 |  |
| femlc             | 374.2034 | -0.099320318 | 0.124753 | -0.79613 | 0.425954 | 0.844714 |  |
| si:ch211-249o11.5 | 0.745742 | -0.714912542 | 2.213315 | -0.32301 | 0.746691 | NA       |  |
| nrpla             | 647.179  | -0.102841643 | 0.103124 | -0.99726 | 0.318639 | 0.779923 |  |
| si:dkey-262g12.10 | 111.953  | -0.270398701 | 0.186183 | -1.45233 | 0.146411 | 0.605984 |  |
| si:dkey-264f17.4  | 11.00031 | 1.143881191  | 0.601141 | 1.90285  | 0.05706  | 0.412539 |  |
| si:ch211-117i20.2 | 0.579097 | 1.881690254  | 2.570663 | 0.731986 | 0.464177 | NA       |  |
| ly6m6             | 0.266177 | -2.334611233 | 4.705852 | -0.49611 | 0.619818 | NA       |  |
| si:dkeyp-61b2.1   | 15.13457 | 0.624784833  | 0.616632 | 1.013221 | 0.310955 | 0.775796 |  |

|                   |          |              |          |          |          |          |
|-------------------|----------|--------------|----------|----------|----------|----------|
| SDK2 (1 of many)  | 34.9881  | 0.269425161  | 0.343039 | 0.785407 | 0.432215 | 0.848419 |
| BX005043.1        | 5.629356 | 1.33729517   | 0.741864 | 1.802614 | 0.071449 | 0.456052 |
| RF00001           | 0.207272 | 0            | 5.267649 | 0        | 1        | NA       |
| ppox              | 146.1833 | 0.107249576  | 0.250154 | 0.428734 | 0.668117 | 0.933086 |
| fnipl             | 548.5406 | -0.186576591 | 0.187223 | -0.99655 | 0.318984 | 0.779923 |
| CABZ01065425.1    | 0.167133 | -1.710071829 | 5.238473 | -0.32644 | 0.744088 | NA       |
| CR381700.1        | 1.806795 | -2.94212339  | 1.675906 | -1.75554 | 0.079167 | NA       |
| hamp              | 344.8577 | 0.233123036  | 0.468537 | 0.497555 | 0.618797 | 0.917015 |
| plala             | 62.29114 | -1.202125485 | 0.332493 | -3.61549 | 0.0003   | 0.019507 |
| emilin2b          | 535.1648 | 0.011305925  | 0.122225 | 0.092501 | 0.9263   | 0.994815 |
| shroom3           | 105.4716 | 0.708950508  | 0.233442 | 3.036946 | 0.00239  | 0.078211 |
| mibl              | 810.3032 | 0.107790365  | 0.120387 | 0.895364 | 0.370593 | 0.818484 |
| PCDH8             | 106.6732 | 0.333474651  | 0.284149 | 1.17359  | 0.240559 | 0.72199  |
| CU694264.1        | 0.65229  | 0            | 3.256751 | 0        | 1        | NA       |
| tradv20.0         | 0        | NA           | NA       | NA       | NA       | NA       |
| CPNE8             | 350.9841 | -0.296102783 | 0.18833  | -1.57226 | 0.115891 | 0.556115 |
| zc3h7a            | 453.6723 | -0.056957947 | 0.099385 | -0.5731  | 0.566574 | 0.901739 |
| si:ch73-233f7.3   | 3.432833 | 2.90016178   | 0.998096 | 2.905693 | 0.003664 | 0.100272 |
| SIKE1             | 334.011  | -0.173071657 | 0.172805 | -1.00154 | 0.316564 | 0.778879 |
| man2a1            | 25.40086 | -0.043790428 | 0.397409 | -0.11019 | 0.912259 | 0.992371 |
| phospho2          | 198.0279 | -0.186351826 | 0.175063 | -1.06448 | 0.287111 | 0.758016 |
| jph3              | 222.2606 | 0.318407316  | 0.180081 | 1.768133 | 0.077039 | 0.469486 |
| stc2b             | 40.42793 | -0.277726527 | 0.536105 | -0.51805 | 0.604427 | 0.914972 |
| L0018612.1        | 0        | NA           | NA       | NA       | NA       | NA       |
| csf3a             | 15.61659 | -0.244579625 | 0.64889  | -0.37692 | 0.706233 | 0.944606 |
| si:dkey-16p6.1    | 11.02379 | 1.080924594  | 0.789001 | 1.369991 | 0.17069  | 0.642339 |
| si:ch211-227e10.6 | 5.300211 | -0.101428868 | 0.9922   | -0.10223 | 0.918577 | 0.993884 |
| d1g11             | 740.0154 | 0.09110988   | 0.145598 | 0.625764 | 0.53147  | 0.890835 |
| RF00026           | 0        | NA           | NA       | NA       | NA       | NA       |
| si:dkey-31g6.4    | 1.766686 | -0.150620205 | 1.416306 | -0.10635 | 0.915307 | NA       |
| si:ch211-12p12.2  | 1.631354 | -0.5475836   | 2.201618 | -0.24872 | 0.803578 | NA       |
| RF00026           | 0        | NA           | NA       | NA       | NA       | NA       |
| HACD4             | 68.22014 | -0.067739767 | 0.267365 | -0.25336 | 0.79999  | 0.967256 |
| BX511079.2        | 0        | NA           | NA       | NA       | NA       | NA       |
| si:ch211-205a14.7 | 7.543259 | 0.802684949  | 1.041628 | 0.770606 | 0.44094  | 0.852687 |
| gpr19             | 97.72154 | 0.039329581  | 0.231823 | 0.169653 | 0.865283 | 0.982197 |
| CR450749.3        | 0        | NA           | NA       | NA       | NA       | NA       |
| si:dkey-171c9.3   | 19.17364 | 0.595974497  | 0.385989 | 1.54402  | 0.122584 | 0.569468 |
| mapk8ipla         | 319.0356 | 0.238420834  | 0.221254 | 1.077591 | 0.281216 | 0.753557 |
| si:ch211-8c17.3   | 1.229998 | 0.081959005  | 1.92316  | 0.042617 | 0.966007 | NA       |
| si:ch211-71n6.4   | 115.9545 | 0.122441934  | 0.217522 | 0.562895 | 0.573507 | 0.90414  |
| RF00001           | 0        | NA           | NA       | NA       | NA       | NA       |
| CR559945.1        | 0.045161 | 0            | 5.267649 | 0        | 1        | NA       |
| CU695223.1        | 56.08292 | 0.020350699  | 0.222856 | 0.091318 | 0.92724  | 0.994973 |
| zgc:136410        | 1312.634 | -0.116425358 | 0.212749 | -0.54724 | 0.584213 | 0.906402 |
| si:ch211-180m24.3 | 12.39458 | 0.38845752   | 0.57636  | 0.673984 | 0.500322 | 0.880145 |
| tkl               | 308.2877 | 0.199783367  | 0.216032 | 0.924786 | 0.355077 | 0.806266 |
| traj42            | 0        | NA           | NA       | NA       | NA       | NA       |
| CU463038.2        | 4.682998 | 0.966651806  | 0.999291 | 0.967337 | 0.333375 | 0.790506 |
| pepd              | 757.6999 | 0.059383247  | 0.164216 | 0.361617 | 0.717638 | 0.946421 |
| traj44            | 0        | NA           | NA       | NA       | NA       | NA       |
| pdzph1            | 3.641835 | -0.673833416 | 1.395366 | -0.48291 | 0.629161 | 0.922403 |
| USP34             | 294.9131 | -0.278669775 | 0.211745 | -1.31606 | 0.188154 | 0.667333 |
| pycrla            | 124.5981 | -0.883557978 | 0.301818 | -2.92746 | 0.003417 | 0.096212 |

|                   |          |              |          |          |          |          |
|-------------------|----------|--------------|----------|----------|----------|----------|
| si:dkey-157e10.6  | 2.3823   | 0.12385935   | 1.160101 | 0.106766 | 0.914975 | 0.993066 |
| soul3             | 651.6265 | -0.204858983 | 0.149091 | -1.37406 | 0.169424 | 0.640975 |
| si:dkey-1b17.1    | 24.78071 | -0.018371484 | 0.345287 | -0.05321 | 0.957567 | 0.999109 |
| tradv40.0         | 0 NA     | NA           | NA       | NA       | NA       | NA       |
| RSPH1             | 74.40119 | -0.04019339  | 0.197715 | -0.20329 | 0.838909 | 0.976417 |
| si:dkey-179k24.5  | 4.811468 | -1.288426398 | 1.037847 | -1.24144 | 0.214443 | 0.69658  |
| trim35-22         | 0.223191 | 2.43638772   | 5.206324 | 0.467967 | 0.639808 | NA       |
| smarcall          | 60.76697 | 0.188775717  | 0.319632 | 0.590603 | 0.554786 | 0.89855  |
| isg2012           | 117.5199 | -0.182475893 | 0.19553  | -0.93324 | 0.350697 | 0.802215 |
| znf750            | 51.60586 | -0.215396104 | 0.338984 | -0.63542 | 0.525157 | 0.888928 |
| si:dkey-203a12.2  | 13.67056 | 0            | 1.763    | 0        | 1        | 1        |
| coro6             | 118.3135 | 0.606004664  | 0.195601 | 3.098161 | 0.001947 | 0.068449 |
| si:ch211-229110.9 | 0.977142 | 1.507659843  | 2.13444  | 0.706349 | 0.479971 | NA       |
| aaas              | 305.3289 | -0.043111347 | 0.150423 | -0.2866  | 0.774418 | 0.960818 |
| lamal             | 167.9993 | 0.299670373  | 0.255591 | 1.172461 | 0.241012 | 0.722599 |
| CR388413.3        | 0 NA     | NA           | NA       | NA       | NA       | NA       |
| zmiz1b            | 71.31728 | -0.462362691 | 0.228159 | -2.0265  | 0.042714 | 0.362408 |
| CR391937.1        | 0.440438 | 0            | 4.176919 | 0        | 1        | NA       |
| slcolf1           | 0 NA     | NA           | NA       | NA       | NA       | NA       |
| CABZ01056321.1    | 86.35744 | 0.683517141  | 0.599573 | 1.140006 | 0.254284 | 0.733353 |
| eef1da            | 9755.306 | -0.378637604 | 0.117609 | -3.21946 | 0.001284 | 0.052391 |
| CU013526.1        | 0.094679 | 0            | 5.267649 | 0        | 1        | NA       |
| fbxolla           | 730.389  | 0.094972206  | 0.122858 | 0.773024 | 0.439508 | 0.852079 |
| dnaja3b           | 160.3492 | 0.022708151  | 0.159867 | 0.142044 | 0.887045 | 0.987739 |
| zgc:175177        | 4.618451 | 0.380224167  | 0.906239 | 0.419563 | 0.674805 | 0.93501  |
| CU929307.1        | 0.07132  | 0            | 5.267649 | 0        | 1        | NA       |
| excl8b.1          | 26.23257 | -1.695261545 | 0.750927 | -2.25756 | 0.023973 | 0.274302 |
| ca9               | 23.10266 | -0.166294191 | 0.419533 | -0.39638 | 0.691825 | 0.940274 |
| CR855379.3        | 1.176787 | 0            | 4.744846 | 0        | 1        | NA       |
| trim35-21         | 1.536191 | 0.607716274  | 1.749648 | 0.347336 | 0.728339 | NA       |
| svbp              | 215.3806 | -0.142452177 | 0.202225 | -0.70443 | 0.481168 | 0.870445 |
| taf2              | 415.08   | -0.000973058 | 0.112647 | -0.00864 | 0.993108 | 1        |
| ttc39c            | 346.1766 | 0.374599806  | 0.149589 | 2.504198 | 0.012273 | 0.192528 |
| si:ch211-156118.8 | 12.01866 | 0.613586372  | 0.634463 | 0.967095 | 0.333496 | 0.790659 |
| scn5lab           | 13.12441 | 1.464916943  | 0.545559 | 2.685166 | 0.007249 | 0.144427 |
| si:dkey-237m9.2   | 0.767505 | -2.985691181 | 2.534754 | -1.1779  | 0.238836 | NA       |
| rpl26             | 4.293385 | -5.034131219 | 1.614265 | -3.11853 | 0.001818 | 0.06578  |
| il6               | 3.172813 | -1.761135299 | 1.8051   | -0.97564 | 0.329241 | 0.787409 |
| si:dkey-196h17.9  | 1.834766 | -0.880183414 | 1.595614 | -0.55163 | 0.581204 | NA       |
| mobla             | 641.8113 | 0.016198359  | 0.119471 | 0.135584 | 0.89215  | 0.988566 |
| si:ch73-299h12.1  | 51.3855  | -0.005293677 | 0.348948 | -0.01517 | 0.987896 | 1        |
| ehmt2             | 257.3303 | -0.020255367 | 0.139196 | -0.14552 | 0.884303 | 0.987047 |
| rafla             | 0 NA     | NA           | NA       | NA       | NA       | NA       |
| or106-11          | 5.240533 | -0.446610344 | 0.904368 | -0.49384 | 0.621421 | 0.918461 |
| spintla           | 1209.31  | 0.14730196   | 0.125286 | 1.175729 | 0.239703 | 0.72026  |
| fcfl              | 402.1558 | -0.030146781 | 0.154344 | -0.19532 | 0.845141 | 0.976791 |
| SH3RF3            | 18.15725 | -0.173100367 | 0.477121 | -0.3628  | 0.716753 | 0.94627  |
| anol              | 135.3831 | -0.211642449 | 0.188692 | -1.12163 | 0.262021 | 0.739695 |
| SLC5A7            | 8.136633 | 1.678517834  | 0.925361 | 1.813907 | 0.069692 | 0.450548 |
| ptarl             | 152.911  | -0.067185219 | 0.169447 | -0.3965  | 0.691738 | 0.940256 |
| si:dkey-5n7.2     | 4.551682 | 1.162485339  | 0.877672 | 1.32451  | 0.185334 | 0.663092 |
| ptn               | 644.0695 | 0.26532785   | 0.158308 | 1.676025 | 0.093733 | 0.511703 |
| sugct             | 21.27751 | 0.582316711  | 0.4721   | 1.233461 | 0.217404 | 0.69815  |
| CR925800.1        | 0 NA     | NA           | NA       | NA       | NA       | NA       |

|                   |          |              |          |          |          |          |
|-------------------|----------|--------------|----------|----------|----------|----------|
| si:dkey-243k1.3   | 4.202483 | -0.241797067 | 1.20939  | -0.19993 | 0.841533 | 0.97643  |
| cep551            | 149.6571 | 0.523185196  | 0.279125 | 1.874379 | 0.060878 | 0.423588 |
| ddx47             | 525.198  | -0.001593508 | 0.199644 | -0.00798 | 0.993632 | 1        |
| scp2b             | 565.7741 | 0.411198314  | 0.15834  | 2.596932 | 0.009406 | 0.166683 |
| CR854899.1        | 0 NA     | NA           | NA       | NA       | NA       | NA       |
| si:dkey-261o4.9   | 0.323087 | -2.792020934 | 4.401559 | -0.63433 | 0.525868 | NA       |
| si:ch211-11p18.6  | 0.358742 | 2.611181782  | 3.732765 | 0.69953  | 0.484221 | NA       |
| slc25a12          | 1447.844 | 0.139513849  | 0.12336  | 1.130951 | 0.258076 | 0.735569 |
| si:ch73-138e16.4  | 35.91569 | 0.074321952  | 0.32922  | 0.225752 | 0.821395 | 0.971788 |
| si:dkey-202122.6  | 394.4339 | -0.599064632 | 0.513743 | -1.16608 | 0.243583 | 0.724437 |
| eloa              | 981.8214 | -0.059988653 | 0.129848 | -0.46199 | 0.644088 | 0.926408 |
| micall2a          | 99.31562 | -0.093776695 | 0.246886 | -0.37984 | 0.704066 | 0.943735 |
| ndfip11           | 496.5296 | 0.056398862  | 0.107839 | 0.522993 | 0.600979 | 0.913756 |
| trim35-23         | 4.150324 | -0.932405754 | 1.520295 | -0.61331 | 0.539674 | 0.893049 |
| znf1094           | 7.82596  | -0.150633811 | 0.679294 | -0.22175 | 0.824508 | 0.972227 |
| CU570769.1        | 69.34573 | -0.2515213   | 0.244433 | -1.029   | 0.303481 | 0.769363 |
| col4a3bpb         | 440.3257 | -0.157292153 | 0.132008 | -1.19154 | 0.233443 | 0.714569 |
| si:dkeyp-13d12.20 | 0.207272 | 0            | 5.267649 | 0        | 1        | NA       |
| si:ch211-204c21.1 | 4.766362 | 0.950162875  | 0.880747 | 1.078814 | 0.280671 | 0.753147 |
| slc6a16b          | 79.42684 | -0.255120931 | 0.201341 | -1.26711 | 0.205117 | 0.687085 |
| si:zfos-80g12.1   | 420.8221 | 0.165819795  | 0.161113 | 1.029217 | 0.303378 | 0.769363 |
| cnm4a             | 7.643626 | 0.133345353  | 0.83171  | 0.160327 | 0.872624 | 0.983447 |
| slc44a4           | 70.88345 | -0.179723216 | 0.256377 | -0.70101 | 0.483296 | 0.871988 |
| CR774179.2        | 3.185925 | 0.870632958  | 1.351056 | 0.644409 | 0.51931  | 0.887148 |
| slc39a14          | 19.93456 | 0.316090953  | 0.420799 | 0.751169 | 0.452551 | 0.857994 |
| ved               | 50.07773 | -0.327940127 | 0.323251 | -1.01451 | 0.310342 | 0.775101 |
| RF00003           | 0 NA     | NA           | NA       | NA       | NA       | NA       |
| CU062645.1        | 1.526934 | -0.868139367 | 2.157044 | -0.40247 | 0.68734  | NA       |
| ap1g1             | 552.4486 | 0.13674519   | 0.128582 | 1.063486 | 0.287561 | 0.758397 |
| CU658285.1        | 0 NA     | NA           | NA       | NA       | NA       | NA       |
| cnm1b             | 35.5192  | -0.224845322 | 0.581844 | -0.38644 | 0.699174 | 0.942499 |
| znf1001           | 2.046513 | 1.611581063  | 1.425475 | 1.130557 | 0.258241 | NA       |
| fut11             | 90.24493 | 0.200620998  | 0.228024 | 0.879826 | 0.378954 | 0.823145 |
| cry2              | 411.2715 | -0.312872037 | 0.202617 | -1.54415 | 0.122552 | 0.569468 |
| si:ch211-165e15.1 | 80.69774 | 0.19881173   | 0.307425 | 0.6467   | 0.517826 | 0.887148 |
| cep97             | 228.5151 | 0.079660217  | 0.18337  | 0.434424 | 0.663981 | 0.93174  |
| traj46            | 0 NA     | NA           | NA       | NA       | NA       | NA       |
| CR381540.2        | 0 NA     | NA           | NA       | NA       | NA       | NA       |
| CR847850.1        | 2.718982 | -1.458798618 | 1.679622 | -0.86853 | 0.385105 | 0.826939 |
| eci2              | 849.8861 | 0.25678848   | 0.190876 | 1.345318 | 0.178522 | 0.652732 |
| myhz1.1           | 1975.046 | -0.497777001 | 0.307909 | -1.61664 | 0.105957 | 0.534956 |
| scinla            | 3444.967 | 0.164424367  | 0.159684 | 1.029683 | 0.303159 | 0.769249 |
| psmd7             | 737.482  | 0.064892786  | 0.1421   | 0.45667  | 0.647908 | 0.927241 |
| enc2              | 137.0509 | -0.114678125 | 0.244179 | -0.46965 | 0.638607 | 0.924779 |
| azi2              | 98.46153 | -0.623448584 | 0.27109  | -2.29978 | 0.021461 | 0.259793 |
| RF00001           | 0 NA     | NA           | NA       | NA       | NA       | NA       |
| si:ch211-114m9.1  | 14.23119 | 0.250558609  | 0.47091  | 0.532073 | 0.594675 | 0.910869 |
| zgc:165519        | 2.557306 | -1.231818007 | 1.239352 | -0.99392 | 0.320261 | 0.780807 |
| BX088544.1        | 24.45245 | -0.138872832 | 0.442043 | -0.31416 | 0.753399 | 0.955861 |
| opn6a             | 104.219  | -0.462932497 | 0.352464 | -1.31342 | 0.189043 | 0.668516 |
| CT027744.2        | 15.75812 | 0.588621569  | 0.589518 | 0.998479 | 0.318047 | 0.779872 |
| si:dkey-261j11.3  | 1.168517 | -0.552663745 | 1.743372 | -0.31701 | 0.751237 | NA       |
| syt14             | 110.6926 | -0.079217236 | 0.215974 | -0.36679 | 0.713776 | 0.945821 |
| si:dkey-13m1.2    | 1.159549 | 0.093653455  | 2.021622 | 0.046326 | 0.963051 | NA       |

|                   |          |              |          |          |          |          |
|-------------------|----------|--------------|----------|----------|----------|----------|
| plekhf1           | 300.1139 | 0.840925615  | 0.281623 | 2.986002 | 0.002827 | 0.087379 |
| si:ch211-194b1.1  | 43.26518 | 0.737884628  | 0.32406  | 2.277    | 0.022786 | 0.266874 |
| CABZ01080434.1    | 3.825458 | 2.209128665  | 1.007007 | 2.193756 | 0.028253 | 0.298982 |
| ctnnal            | 1590.959 | 0.120597849  | 0.121792 | 0.990197 | 0.322078 | 0.782237 |
| folr              | 64.37218 | -1.357514966 | 0.623248 | -2.17813 | 0.029396 | 0.304886 |
| shank2a           | 92.46994 | -0.230762325 | 0.527808 | -0.43721 | 0.66196  | 0.930742 |
| si:dkey-22o22.2   | 163.5502 | 0.349684793  | 0.223346 | 1.565662 | 0.117428 | 0.558915 |
| BX511025.1        | 0.14264  | 0            | 5.267649 | 0        | 1        | NA       |
| gdpd4a            | 33.94387 | -0.504983644 | 0.344677 | -1.46509 | 0.142895 | 0.602002 |
| BX322657.1        | 3.264055 | 2.073055171  | 1.27194  | 1.629837 | 0.103136 | 0.530217 |
| CU571328.1        | 2.329196 | 0.049934204  | 2.024637 | 0.024663 | 0.980324 | 1        |
| EIF3ha            | 3076.71  | -0.253978029 | 0.138732 | -1.83071 | 0.067144 | 0.442345 |
| slcla2b           | 4969.019 | 0.186808056  | 0.148232 | 1.260245 | 0.207581 | 0.689655 |
| FP016142.6        | 0.323174 | -0.868131879 | 4.562233 | -0.19029 | 0.849085 | NA       |
| znf1133           | 6.266956 | -0.551879441 | 0.654413 | -0.84332 | 0.39905  | 0.831196 |
| cfhl4             | 3089.322 | -0.415849012 | 0.215091 | -1.93337 | 0.053191 | 0.400175 |
| hip1rb            | 236.8097 | 0.180106479  | 0.157049 | 1.14682  | 0.251456 | 0.731717 |
| olfcg5            | 0.116481 | 0            | 5.267649 | 0        | 1        | NA       |
| si:ch73-170d6.4   | 1.024549 | -0.868142488 | 2.105992 | -0.41223 | 0.680174 | NA       |
| CR354372.1        | 46.61417 | 0.429976568  | 0.357799 | 1.201726 | 0.22947  | 0.711596 |
| BX088535.1        | 0        | NA           | NA       | NA       | NA       | NA       |
| cox18             | 178.1228 | 0.413324232  | 0.189716 | 2.178652 | 0.029357 | 0.304886 |
| wnt5b             | 315.3288 | -0.037884356 | 0.151039 | -0.25082 | 0.80195  | 0.96782  |
| tradv24.0.1       | 0.138182 | 0            | 5.267649 | 0        | 1        | NA       |
| si:dkey-7114.5    | 6.689804 | 0.313398648  | 0.878462 | 0.356758 | 0.721273 | 0.947343 |
| mpp7a             | 292.4088 | -0.094310205 | 0.115981 | -0.81315 | 0.416131 | 0.839647 |
| trak2             | 154.1278 | 0.222635319  | 0.202851 | 1.097534 | 0.272408 | 0.748416 |
| btbd17b           | 55.57407 | 0.416273768  | 0.447202 | 0.930841 | 0.351936 | 0.802591 |
| zgc:171673        | 98.36608 | -0.762143663 | 0.455035 | -1.67491 | 0.093951 | 0.511719 |
| dusp16            | 647.8831 | 0.001115273  | 0.169741 | 0.00657  | 0.994758 | 1        |
| si:dkey-3p4.1     | 6.761101 | -0.173653585 | 1.086326 | -0.15985 | 0.872996 | 0.983537 |
| stard4            | 138.4718 | 0.846121     | 0.566732 | 1.492983 | 0.135442 | 0.590943 |
| ADAMTS7           | 47.96719 | 0.775102998  | 0.285109 | 2.718619 | 0.006556 | 0.136957 |
| BX005417.2        | 4.192209 | -0.25217527  | 0.994019 | -0.25369 | 0.799733 | 0.967206 |
| zgc:165573        | 479.7905 | -0.09032826  | 0.135469 | -0.66678 | 0.50491  | 0.88195  |
| numal             | 376.7973 | 0.202012199  | 0.298026 | 0.677835 | 0.497876 | 0.878926 |
| si:ch73-359m17.11 | 0.730431 | -3.103841716 | 2.324928 | -1.33503 | 0.181867 | NA       |
| F0704745.1        | 0.425587 | 0            | 4.226899 | 0        | 1        | NA       |
| asb2b             | 1067.801 | 0.339746033  | 0.231129 | 1.46994  | 0.141578 | 0.600284 |
| gpr142            | 6.177878 | -0.054839233 | 0.810342 | -0.06767 | 0.946045 | 0.997371 |
| ticam1            | 114.7093 | -0.348751672 | 0.206177 | -1.69152 | 0.090738 | 0.505206 |
| CR847898.4        | 4.491511 | -0.141554939 | 0.823164 | -0.17196 | 0.863466 | 0.981766 |
| BX511227.1        | 1.616057 | -0.780472476 | 1.226993 | -0.63609 | 0.524721 | NA       |
| hoxa5a            | 70.06912 | 0.479616528  | 0.222513 | 2.15545  | 0.031127 | 0.313664 |
| lrp2a             | 449.1108 | 0.101046521  | 0.186391 | 0.542121 | 0.587735 | 0.907608 |
| cript             | 600.7284 | -0.184622879 | 0.152692 | -1.20912 | 0.226616 | 0.707798 |
| kdm8              | 51.58185 | -0.178249178 | 0.261921 | -0.68054 | 0.49616  | 0.878095 |
| F0704822.1        | 11.68183 | 0.926782982  | 0.51373  | 1.804029 | 0.071227 | 0.455342 |
| BX323596.2        | 4.82067  | 0            | 1.917592 | 0        | 1        | 1        |
| CR847504.1        | 0.332581 | 0.093659852  | 5.267649 | 0.01778  | 0.985814 | NA       |
| crtac1b           | 14.478   | -0.313304815 | 0.5906   | -0.53049 | 0.595775 | 0.911427 |
| CR855206.2        | 0.049519 | 0            | 5.267649 | 0        | 1        | NA       |
| cc133.2           | 0.103751 | 0            | 5.267649 | 0        | 1        | NA       |
| si:dkey-225f23.4  | 7.879146 | 0.553235867  | 0.639808 | 0.86469  | 0.387209 | 0.827592 |

|                    |          |              |          |          |          |          |
|--------------------|----------|--------------|----------|----------|----------|----------|
| si:dkey-161111.74  | 0        | NA           | NA       | NA       | NA       | NA       |
| lck                | 6.710293 | -1.412344228 | 0.858663 | -1.64482 | 0.100008 | 0.524248 |
| AL935126.1         | 3.099491 | -2.168112574 | 1.817565 | -1.19287 | 0.232922 | 0.714492 |
| pimr182            | 2.022914 | 0.662347051  | 1.719991 | 0.385088 | 0.700173 | NA       |
| anapc11            | 336.6242 | -0.16541532  | 0.226764 | -0.72946 | 0.465721 | 0.864997 |
| homer3a            | 6.035566 | 1.304382013  | 0.781467 | 1.669146 | 0.095088 | 0.51461  |
| si:ch73-281i18.4   | 26.04221 | 0.342316221  | 0.371242 | 0.922083 | 0.356485 | 0.807342 |
| si:cabz01007816.2  | 2.497021 | -4.895563789 | 1.663409 | -2.94309 | 0.00325  | 0.093414 |
| mccc1              | 903.992  | 0.065241602  | 0.098452 | 0.662672 | 0.507541 | 0.883055 |
| CR450832.1         | 5.395482 | 0.346642905  | 0.782745 | 0.442855 | 0.65787  | 0.930581 |
| si:ch211-268b14.2  | 14.82379 | -0.672363769 | 0.535808 | -1.25486 | 0.20953  | 0.691743 |
| CR762475.2         | 0        | NA           | NA       | NA       | NA       | NA       |
| AL928951.1         | 0.364217 | 2.888615941  | 3.673224 | 0.786398 | 0.431634 | NA       |
| cdk11b             | 806.8123 | 0.156930287  | 0.107522 | 1.459512 | 0.144424 | 0.603539 |
| jazfla             | 34.48723 | 0.146053304  | 0.315374 | 0.463112 | 0.643284 | 0.92593  |
| traj6              | 0        | NA           | NA       | NA       | NA       | NA       |
| zgc:112433         | 25.67271 | 0.709695336  | 0.385127 | 1.842758 | 0.065364 | 0.435359 |
| si:dkey-33i11.9    | 304.8721 | 0.203831069  | 0.263068 | 0.774822 | 0.438445 | 0.851685 |
| nfat5b             | 49.88545 | -0.50244013  | 0.360119 | -1.39521 | 0.162954 | 0.630534 |
| ftr87              | 15.2601  | 0.619115846  | 0.545464 | 1.135027 | 0.256364 | 0.73401  |
| pde6ha             | 2870.125 | 0.480382831  | 0.31657  | 1.517462 | 0.12915  | 0.578579 |
| si:dkey-16p19.5    | 6.020006 | 0.820687226  | 0.951225 | 0.862769 | 0.388265 | 0.827592 |
| AL645691.1         | 1.380863 | -0.642504848 | 1.624033 | -0.39562 | 0.692383 | NA       |
| RF00001            | 0        | NA           | NA       | NA       | NA       | NA       |
| gfal1b             | 43.291   | -0.077787758 | 0.356901 | -0.21795 | 0.827465 | 0.973513 |
| vasnb              | 368.6217 | 0.020108014  | 0.132818 | 0.151395 | 0.879664 | 0.986201 |
| fam102aa           | 49.12734 | -0.208281064 | 0.270369 | -0.77036 | 0.441087 | 0.852823 |
| si:ch73-106k19.2   | 3.236246 | 0.053754058  | 1.333757 | 0.040303 | 0.967852 | 1        |
| polr3a             | 173.1709 | -0.140996913 | 0.19932  | -0.70739 | 0.479325 | 0.86985  |
| CR678435.1         | 0        | NA           | NA       | NA       | NA       | NA       |
| metap2b            | 2643.051 | -0.19637668  | 0.155267 | -1.26477 | 0.205954 | 0.688314 |
| si:ch211-260e23.9  | 1660.402 | -0.143164091 | 0.12051  | -1.18799 | 0.234837 | 0.715533 |
| si:ch73-21d24.1    | 1.814622 | 1.941867647  | 1.49251  | 1.301075 | 0.193233 | NA       |
| si:ch211-106j21.2  | 5.163435 | -1.906651913 | 1.335126 | -1.42807 | 0.153272 | 0.617847 |
| mif4gdb            | 108.8051 | -0.289323534 | 0.320344 | -0.90316 | 0.366439 | 0.81589  |
| BX323855.2         | 0.298807 | 0            | 5.267649 | 0        | 1        | NA       |
| CU571310.1         | 21.83742 | -0.154786115 | 0.482476 | -0.32082 | 0.74835  | 0.955074 |
| si:dkeyp-44b5.5    | 9.085811 | 0.776506808  | 0.560052 | 1.386491 | 0.165597 | 0.635141 |
| il4r.1             | 116.9372 | -0.067974148 | 0.223838 | -0.30368 | 0.761375 | 0.958159 |
| cpne7              | 23.66322 | 0.434105439  | 0.58415  | 0.743141 | 0.457397 | 0.860993 |
| fam160a1b          | 42.08346 | -0.107763696 | 0.283108 | -0.38065 | 0.703466 | 0.943668 |
| zgc:152938         | 87.90343 | -0.623709502 | 0.229257 | -2.72057 | 0.006517 | 0.136774 |
| mios               | 288.3559 | -0.018809013 | 0.128904 | -0.14592 | 0.883988 | 0.987036 |
| sp100.2            | 1.907733 | 0.051033865  | 1.568673 | 0.032533 | 0.974047 | NA       |
| polr3h             | 267.3397 | -0.325041642 | 0.199601 | -1.62845 | 0.103429 | 0.530538 |
| btr30              | 32.27979 | -0.319070923 | 0.483839 | -0.65946 | 0.509602 | 0.883733 |
| tradv17.0          | 0.145288 | 0            | 5.267649 | 0        | 1        | NA       |
| si:ch211-214b16.2  | 70.49546 | 1.07630064   | 0.338661 | 3.178105 | 0.001482 | 0.057996 |
| zgc:194627         | 111.5325 | 0.360613269  | 0.307633 | 1.172217 | 0.24111  | 0.722648 |
| si:dkey-250k10.1   | 11.95676 | -0.34575272  | 0.649846 | -0.53205 | 0.594689 | 0.910869 |
| si:ch1073-392o20.2 | 599.8037 | -0.032930042 | 0.124385 | -0.26474 | 0.791207 | 0.964766 |
| si:dkey-15h8.15    | 72.63166 | 0.265934758  | 0.205047 | 1.296945 | 0.19465  | 0.67483  |
| si:ch211-220m17.4  | 3.643613 | 0            | 1.986331 | 0        | 1        | 1        |
| BX323837.1         | 0.04222  | 0            | 5.267649 | 0        | 1        | NA       |

|                   |           |               |           |           |           |           |
|-------------------|-----------|---------------|-----------|-----------|-----------|-----------|
| CU929054. 1       | 2. 649004 | -0. 913067546 | 1. 239507 | -0. 73664 | 0. 461343 | 0. 863016 |
| znf1158           | 61. 80642 | 0. 363709367  | 0. 257675 | 1. 411506 | 0. 158095 | 0. 623766 |
| pmpca             | 553. 7351 | 0. 155679401  | 0. 152185 | 1. 022965 | 0. 306325 | 0. 771472 |
| zgc:109986        | 106. 4695 | -0. 26102132  | 0. 191517 | -1. 36292 | 0. 172908 | 0. 645664 |
| r3hdm2            | 52. 14279 | -0. 092467345 | 0. 37779  | -0. 24476 | 0. 806643 | 0. 969726 |
| stmdn1            | 2. 370969 | 0. 68722519   | 1. 142779 | 0. 601363 | 0. 547598 | 0. 896211 |
| slc15a4           | 80. 23881 | -0. 157321121 | 0. 281556 | -0. 55876 | 0. 576329 | 0. 90475  |
| or106-4           | 0. 341576 | 0. 093658844  | 3. 85475  | 0. 024297 | 0. 980616 | NA        |
| fra10ac1          | 100. 3585 | -0. 310360329 | 0. 242164 | -1. 28161 | 0. 199979 | 0. 6804   |
| si:dkey-3h2. 3    | 4. 322234 | -0. 715327725 | 1. 084911 | -0. 65934 | 0. 509676 | 0. 883733 |
| timp4. 2          | 19. 74657 | -2. 338310899 | 1. 541331 | -1. 51707 | 0. 129248 | 0. 578874 |
| utpl8             | 53. 29161 | 0. 097919947  | 0. 266837 | 0. 366965 | 0. 713645 | 0. 945821 |
| kif22             | 544. 3176 | 0. 242453692  | 0. 224681 | 1. 079101 | 0. 280543 | 0. 753147 |
| tradv21. 0        | 0 NA      | NA            | NA        | NA        | NA        | NA        |
| frem2b            | 460. 5403 | 0. 324478588  | 0. 19102  | 1. 69866  | 0. 089383 | 0. 501698 |
| hoxc11b           | 86. 58236 | -0. 049166465 | 0. 258673 | -0. 19007 | 0. 849253 | 0. 978102 |
| ubc               | 19642. 97 | 0. 043737694  | 0. 165128 | 0. 264872 | 0. 791108 | 0. 964766 |
| parn              | 711. 3874 | 0. 031851883  | 0. 120085 | 0. 265245 | 0. 790821 | 0. 964766 |
| znf1037           | 2. 574255 | -0. 774775928 | 1. 005054 | -0. 77088 | 0. 440778 | 0. 852579 |
| trmt9b            | 60. 95259 | 0. 082895706  | 0. 292625 | 0. 283283 | 0. 77696  | 0. 961073 |
| RF00001           | 0. 129924 | 0 5. 267649   | 0         | 1 NA      |           |           |
| si:rp71-7119. 2   | 3. 835495 | -0. 57420102  | 1. 068019 | -0. 53763 | 0. 590831 | 0. 909183 |
| si:dkey-29d5. 2   | 0. 455768 | -0. 868139604 | 3. 603039 | -0. 24095 | 0. 809597 | NA        |
| pdia3             | 2887. 103 | 0. 005027919  | 0. 189946 | 0. 02647  | 0. 978882 | 1         |
| CR925761. 3       | 23. 20072 | -0. 104101323 | 0. 458598 | -0. 227   | 0. 820424 | 0. 971788 |
| chmp1a            | 886. 6221 | 0. 083696515  | 0. 142809 | 0. 586071 | 0. 557828 | 0. 899184 |
| BX927193. 1       | 0. 156531 | -1. 826663989 | 5. 230461 | -0. 34924 | 0. 726912 | NA        |
| usp47             | 763. 2399 | -0. 031707069 | 0. 094952 | -0. 33393 | 0. 738435 | 0. 952912 |
| BX248331. 2       | 157. 5622 | 0. 682037543  | 0. 271645 | 2. 510764 | 0. 012047 | 0. 190742 |
| lman21a           | 206. 3384 | 0. 471257784  | 0. 219573 | 2. 146246 | 0. 031853 | 0. 317164 |
| zgc:174624        | 55. 80777 | -0. 822357258 | 0. 356826 | -2. 30464 | 0. 021187 | 0. 258321 |
| si:dkeyp-107f9. 2 | 0. 338736 | 0. 960862071  | 4. 474749 | 0. 21473  | 0. 829978 | NA        |
| BX511077. 1       | 0. 59135  | 0. 370166833  | 3. 3839   | 0. 109391 | 0. 912893 | NA        |
| or106-12          | 0. 04222  | 0 5. 267649   | 0         | 1 NA      |           |           |
| slc16a5b          | 10. 23877 | 1. 94070059   | 0. 876095 | 2. 215172 | 0. 026748 | 0. 290183 |
| or129-1           | 5. 746603 | 1. 395758949  | 1. 005967 | 1. 38748  | 0. 165295 | 0. 634423 |
| dpyda. 1          | 15. 55781 | -0. 294494093 | 0. 526892 | -0. 55893 | 0. 576212 | 0. 90475  |
| si:dkey-26i24. 1  | 14. 20462 | -0. 642009839 | 0. 434173 | -1. 4787  | 0. 139222 | 0. 597365 |
| ckap5             | 1838. 199 | 0. 350661998  | 0. 121067 | 2. 896419 | 0. 003774 | 0. 102406 |
| F0818743. 1       | 6. 325861 | -0. 762698045 | 0. 657756 | -1. 15955 | 0. 246234 | 0. 727532 |
| RF00001           | 0 NA      | NA            | NA        | NA        | NA        | NA        |
| znf1181           | 38. 19661 | -1. 551579978 | 0. 357045 | -4. 34561 | 1. 39E-05 | 0. 002321 |
| FP074874. 1       | 54. 51973 | 0. 051773335  | 0. 306097 | 0. 169141 | 0. 865686 | 0. 982364 |
| CR847844. 2       | 1. 938546 | 1. 046754498  | 1. 969842 | 0. 53139  | 0. 595149 | NA        |
| CR626941. 1       | 0. 890466 | 1. 055422248  | 2. 476864 | 0. 426112 | 0. 670026 | NA        |
| lrrc1             | 283. 5728 | -0. 218645727 | 0. 142602 | -1. 53326 | 0. 125211 | 0. 572897 |
| CABZ01085139. 1   | 113. 8849 | 0. 062364865  | 0. 222752 | 0. 279974 | 0. 779497 | 0. 961073 |
| BX663516. 2       | 11. 0309  | -2. 76146145  | 1. 495875 | -1. 84605 | 0. 064885 | 0. 434811 |
| rims2b            | 283. 2152 | -0. 066200362 | 0. 211293 | -0. 31331 | 0. 754045 | 0. 955912 |
| BX005336. 1       | 1. 74669  | -0. 482730308 | 1. 578272 | -0. 30586 | 0. 759711 | NA        |
| CU570769. 2       | 5. 100376 | -1. 103495756 | 0. 711946 | -1. 54997 | 0. 121148 | 0. 567072 |
| dnajc11b          | 170. 2719 | 0. 142877445  | 0. 199118 | 0. 717552 | 0. 473034 | 0. 868965 |
| BX005124. 3       | 0 NA      | NA            | NA        | NA        | NA        | NA        |
| evalba            | 186. 817  | 0. 238509001  | 0. 137523 | 1. 734317 | 0. 082862 | 0. 483014 |



|                    |          |              |          |          |          |          |
|--------------------|----------|--------------|----------|----------|----------|----------|
| lrrn3b             | 325.6433 | 0.231031703  | 0.200063 | 1.154794 | 0.248175 | 0.728489 |
| CR848025.2         | 1.638492 | -2.974081748 | 1.637755 | -1.81595 | 0.069378 | NA       |
| si:ch1073-376c22.1 | 62.10258 | 1.97532264   | 1.460491 | 1.352505 | 0.176214 | 0.649415 |
| otud6b             | 230.9225 | 0.040902112  | 0.153065 | 0.26722  | 0.7893   | 0.963748 |
| BX511128.3         | 47.75475 | -0.496198487 | 0.585947 | -0.84683 | 0.397089 | 0.830253 |
| CR848032.1         | 7.243897 | -2.783497213 | 1.526933 | -1.82293 | 0.068314 | 0.445546 |
| CU138533.2         | 14.22376 | 0.049310401  | 0.494692 | 0.099679 | 0.920599 | 0.994085 |
| CR376766.3         | 0 NA     | NA           | NA       | NA       | NA       | NA       |
| si:ch211-205a14.1  | 75.83355 | 1.028095715  | 0.770525 | 1.33428  | 0.182112 | 0.658775 |
| si:dkey-13n23.3    | 0.043309 | 0            | 5.267649 | 0        | 1        | NA       |
| CU469532.1         | 6.763591 | 2.782246412  | 1.377272 | 2.020114 | 0.043372 | 0.365027 |
| AL645691.2         | 10.62134 | 0.741212797  | 0.652222 | 1.136442 | 0.255772 | 0.733642 |
| tmem42a            | 70.10695 | -0.225212411 | 0.213719 | -1.05378 | 0.291985 | 0.761655 |
| pcdh2ab3           | 0 NA     | NA           | NA       | NA       | NA       | NA       |
| zgc:123284         | 19.07279 | -0.558607318 | 0.757083 | -0.73784 | 0.460611 | 0.862369 |
| itih3b             | 301.6442 | -0.288909074 | 0.407606 | -0.7088  | 0.478451 | 0.869292 |
| zgc:153039         | 95.12402 | 0.078853561  | 0.230752 | 0.341724 | 0.732559 | 0.950617 |
| CT737184.1         | 0.65984  | 0            | 3.018058 | 0        | 1        | NA       |
| si:ch73-182e20.4   | 1.003775 | 0            | 5.267649 | 0        | 1        | NA       |
| CR762480.2         | 2.180971 | 0.695794844  | 1.123675 | 0.619214 | 0.535776 | NA       |
| SAMD9              | 0.842521 | 0.063327414  | 2.458599 | 0.025758 | 0.979451 | NA       |
| mapk10             | 98.62779 | 0.389965112  | 0.209887 | 1.857976 | 0.063172 | 0.429313 |
| si:ch73-299h12.2   | 14.44743 | -0.93142403  | 0.467486 | -1.99241 | 0.046326 | 0.376018 |
| dre-mir-7147       | 0.271837 | -1.710096158 | 5.238471 | -0.32645 | 0.744084 | NA       |
| wdr48a             | 88.2062  | -0.146754283 | 0.234238 | -0.62652 | 0.530976 | 0.890545 |
| sars2              | 127.6426 | 0.225454532  | 0.183954 | 1.225604 | 0.220348 | 0.701707 |
| sumo2b             | 1626.374 | -0.146868206 | 0.124666 | -1.17809 | 0.23876  | 0.719781 |
| bmpr1bb            | 143.5961 | 0.027086433  | 0.236514 | 0.114524 | 0.908823 | 0.992033 |
| mgst3a             | 1122.082 | -0.134189821 | 0.223893 | -0.59935 | 0.548941 | 0.897091 |
| tmem39a            | 408.3176 | -0.072188585 | 0.137365 | -0.52552 | 0.599219 | 0.913175 |
| cdh1               | 1131.06  | -0.000793063 | 0.134614 | -0.00589 | 0.995299 | 1        |
| BX663521.1         | 0 NA     | NA           | NA       | NA       | NA       | NA       |
| si:dkey-10914.3    | 102.9259 | 0.239508601  | 0.27191  | 0.880836 | 0.378406 | 0.822715 |
| EML6               | 227.7173 | 0.232290791  | 0.194074 | 1.196919 | 0.231338 | 0.712847 |
| nr0b2b             | 0.959412 | 0            | 5.267649 | 0        | 1        | NA       |
| tradvl             | 0 NA     | NA           | NA       | NA       | NA       | NA       |
| F0704661.1         | 55.19444 | 0.511192982  | 0.343752 | 1.487099 | 0.136989 | 0.5925   |
| TMEM132D           | 68.14606 | 0.153466539  | 0.365886 | 0.419438 | 0.674896 | 0.935024 |
| zbtb42             | 11.46427 | -0.093974154 | 0.527162 | -0.17826 | 0.858516 | 0.979892 |
| pik3r5             | 31.85937 | -0.008626235 | 0.298224 | -0.02893 | 0.976924 | 1        |
| lonpl              | 435.2998 | -0.025764185 | 0.146686 | -0.17564 | 0.860576 | 0.980264 |
| dennd4c            | 554.5969 | -0.097444408 | 0.175783 | -0.55435 | 0.579342 | 0.905578 |
| L0017726.1         | 102.3136 | 0.097061493  | 0.359881 | 0.269704 | 0.787388 | 0.96324  |
| klhdc3             | 376.6488 | -0.526955316 | 0.173311 | -3.04051 | 0.002362 | 0.07773  |
| cacnalda           | 46.63832 | 0.141145353  | 0.357244 | 0.395095 | 0.692773 | 0.940444 |
| znf687a            | 156.2149 | 0.051754563  | 0.190365 | 0.27187  | 0.785722 | 0.962605 |
| cxcl19             | 18.46441 | -2.21021845  | 0.838928 | -2.63458 | 0.008424 | 0.156879 |
| thbs4a             | 147.9976 | 0.434928593  | 0.250982 | 1.732909 | 0.083112 | 0.483758 |
| fgf17              | 14.51739 | -0.385049305 | 0.41366  | -0.93084 | 0.351938 | 0.802591 |
| RF00026            | 0 NA     | NA           | NA       | NA       | NA       | NA       |
| s1c25a35           | 15.38544 | -0.357150461 | 0.433516 | -0.82385 | 0.410027 | 0.836939 |
| RF00001            | 0 NA     | NA           | NA       | NA       | NA       | NA       |
| BX000696.2         | 0 NA     | NA           | NA       | NA       | NA       | NA       |
| fam193a            | 334.9719 | 0.08025906   | 0.193363 | 0.41507  | 0.678091 | 0.936026 |

|                    |          |              |          |          |          |          |
|--------------------|----------|--------------|----------|----------|----------|----------|
| si:zfos-128g4.1    | 27.88414 | -0.122448801 | 0.35197  | -0.3479  | 0.727918 | 0.949325 |
| zgc:174704         | 13.20334 | -0.135553396 | 0.565248 | -0.23981 | 0.810476 | 0.969828 |
| si:ch211-106f21.1  | 4.95478  | 0.934940767  | 0.69804  | 1.33938  | 0.180447 | 0.656148 |
| CU681842.1         | 53.57947 | 0.099644427  | 0.31647  | 0.314862 | 0.752866 | 0.955756 |
| si:ch1073-83b15.1  | 0 NA     | NA           | NA       | NA       | NA       | NA       |
| CABZ01075509.1     | 97.7274  | 0.14187607   | 0.192444 | 0.737235 | 0.46098  | 0.862601 |
| mcm2               | 856.6429 | 0.066580517  | 0.186985 | 0.356074 | 0.721785 | 0.947403 |
| brdt               | 459.3539 | -0.073552511 | 0.161451 | -0.45557 | 0.648698 | 0.927546 |
| CABZ01087091.1     | 0 NA     | NA           | NA       | NA       | NA       | NA       |
| cyp2aa12           | 114.0421 | -0.466719164 | 0.605519 | -0.77078 | 0.44084  | 0.852609 |
| zgc:112234         | 1.167507 | -3.11349107  | 2.027784 | -1.53542 | 0.124682 | NA       |
| si:dkey-151p11.2   | 2.995676 | -2.970993964 | 1.536876 | -1.93314 | 0.053219 | 0.400175 |
| calr3b             | 1252.349 | 0.2601892    | 0.173438 | 1.500184 | 0.133567 | 0.586903 |
| tradv29.0          | 0.069091 | 0            | 5.267649 | 0        | 1        | NA       |
| samd1a             | 183.1678 | 0.206857287  | 0.134026 | 1.543412 | 0.122731 | 0.569468 |
| CABZ01069436.1     | 2.691148 | -1.476429189 | 1.151609 | -1.28206 | 0.199822 | 0.6804   |
| cib2               | 167.6244 | -0.213758826 | 0.291825 | -0.73249 | 0.463869 | 0.864593 |
| pam16              | 324.6413 | 0.079161246  | 0.169706 | 0.466462 | 0.640885 | 0.925364 |
| CR759887.3         | 6.503867 | 0.533765855  | 0.671099 | 0.795361 | 0.426403 | 0.845075 |
| pcdh10b            | 701.7984 | -0.137161779 | 0.115647 | -1.18604 | 0.235605 | 0.716683 |
| olfm2b             | 39.04469 | 0.038887282  | 0.397817 | 0.097752 | 0.92213  | 0.994346 |
| ubfd1              | 454.0814 | -0.08532109  | 0.169365 | -0.50377 | 0.614422 | 0.915998 |
| mfsd11             | 24.73939 | 0.007534937  | 0.397014 | 0.018979 | 0.984858 | 1        |
| cob111b            | 575.4842 | -0.280735336 | 0.178142 | -1.5759  | 0.115048 | 0.554651 |
| fam193b            | 437.2717 | 0.272037223  | 0.109736 | 2.479009 | 0.013175 | 0.199516 |
| baz1b              | 551.4812 | 0.254521251  | 0.217236 | 1.171636 | 0.241343 | 0.723031 |
| CU207241.1         | 0.669311 | 3.24436145   | 3.039712 | 1.067325 | 0.285825 | NA       |
| si:ch211-195j11.30 | 9.972046 | 1.969592052  | 0.84899  | 2.319923 | 0.020345 | 0.253166 |
| CABZ01021435.1     | 15.32162 | 0.468232118  | 0.630924 | 0.742137 | 0.458004 | 0.860993 |
| CU062479.1         | 0.043308 | 0            | 5.267649 | 0        | 1        | NA       |
| znf1145            | 0.636055 | -0.188941382 | 3.156866 | -0.05985 | 0.952274 | NA       |
| si:ch211-211k8.4   | 0.090321 | 0            | 5.267649 | 0        | 1        | NA       |
| CT978957.1         | 28.52677 | 0.004735081  | 0.304448 | 0.015553 | 0.987591 | 1        |
| BX088596.2         | 0.233802 | -0.807527422 | 4.924999 | -0.16396 | 0.869759 | NA       |
| dclk2b             | 31.90661 | 0.642382845  | 0.340157 | 1.888492 | 0.05896  | 0.418576 |
| trmt13             | 55.30046 | 0.087584379  | 0.255756 | 0.342453 | 0.73201  | 0.950617 |
| BX927336.3         | 3.275033 | 2.357498857  | 1.807341 | 1.304402 | 0.192097 | 0.672283 |
| CU469577.1         | 82.02227 | 0.204330253  | 0.227618 | 0.897688 | 0.369352 | 0.817763 |
| si:rp71-7119.2     | 0.324383 | 0            | 5.260448 | 0        | 1        | NA       |
| traj21             | 0 NA     | NA           | NA       | NA       | NA       | NA       |
| neola              | 826.8456 | 0.054698376  | 0.149312 | 0.366335 | 0.714115 | 0.945821 |
| si:ch73-59f11.3    | 18.24987 | 2.420340436  | 0.589422 | 4.106298 | 4.02E-05 | 0.004753 |
| sc:d189            | 78.97972 | 0.346454916  | 0.362515 | 0.955699 | 0.339224 | 0.795226 |
| lmf1               | 119.4257 | 0.206676892  | 0.184063 | 1.122858 | 0.261498 | 0.738975 |
| carnmt1            | 46.69887 | -0.012702512 | 0.269468 | -0.04714 | 0.962402 | 0.999461 |
| CR391991.1         | 2.468682 | -1.793924246 | 2.013853 | -0.89079 | 0.373041 | 0.820208 |
| srfb               | 113.4951 | 0.033994686  | 0.247075 | 0.137589 | 0.890565 | 0.988446 |
| si:dkey-203a12.4   | 25.57389 | 0            | 2.090593 | 0        | 1        | 1        |
| RF00001            | 0 NA     | NA           | NA       | NA       | NA       | NA       |
| FP236157.2         | 1.514398 | -0.191526539 | 1.71466  | -0.1117  | 0.911062 | NA       |
| CT956002.2         | 1.003546 | 2.516731236  | 2.071189 | 1.215114 | 0.224322 | NA       |
| immt               | 2506.842 | 0.0715938    | 0.111064 | 0.644615 | 0.519177 | 0.887148 |
| CABZ01081830.2     | 0.045161 | 0            | 5.267649 | 0        | 1        | NA       |
| mapre3b            | 337.0284 | -0.059966944 | 0.192822 | -0.311   | 0.755804 | 0.956532 |

|                   |          |              |            |          |          |          |   |
|-------------------|----------|--------------|------------|----------|----------|----------|---|
| mytlb             | 223.1311 | 0.049504622  | 0.219233   | 0.225808 | 0.82135  | 0.971788 |   |
| traj60            | 0 NA     |              | NA         | NA       | NA       | NA       |   |
| sptbn1            | 2109.778 | 0.011784713  | 0.136451   | 0.086366 | 0.931176 | 0.995809 |   |
| si:ch211-145h19.5 | 12.97317 | 0.155374251  | 0.739368   | 0.210145 | 0.833555 | 0.975482 |   |
| rsul              | 196.201  | -0.191554408 | 0.173891   | -1.10158 | 0.270645 | 0.746683 |   |
| abhd4             | 840.7756 | 0.144767564  | 0.169238   | 0.85541  | 0.392324 | 0.827902 |   |
| gpr39             | 227.3004 | -0.074941156 | 0.30981    | -0.24189 | 0.808862 | 0.969828 |   |
| 15-Sep            | 1616.674 | -0.010861898 | 0.14791    | -0.07344 | 0.941459 | 0.997371 |   |
| clrn1             | 8.51741  | 0.735327216  | 0.770521   | 0.954324 | 0.339919 | 0.795243 |   |
| ppplr26           | 144.7347 | 0.024338247  | 0.181991   | 0.133734 | 0.893613 | 0.988566 |   |
| hlm               | 2.053687 | -1.097196871 | 1.764576   | -0.62179 | 0.53408  | NA       |   |
| atg7              | 295.9841 | 0.040270816  | 0.147907   | 0.272272 | 0.785413 | 0.962605 |   |
| CABZ01057159.1    | 9.469997 | -1.276173357 | 1.239425   | -1.02965 | 0.303174 | 0.769249 |   |
| si:dkey-31i7.1    | 1.646995 | 0.093646236  | 2.212766   | 0.042321 | 0.966243 | NA       |   |
| jmjd6             | 285.2913 | 0.189706     | 0.212985   | 0.890702 | 0.373089 | 0.820237 |   |
| mtfl              | 28.01712 | -0.115780458 | 0.306522   | -0.37772 | 0.705637 | 0.944274 |   |
| cremb             | 21.30933 | -2.152788724 | 0.601002   | -3.582   | 0.000341 | 0.021068 |   |
| tacrlb            | 24.93289 | 0.632929178  | 0.387409   | 1.633748 | 0.102312 | 0.528996 |   |
| strn4             | 309.878  | 0.020197592  | 0.1501     | 0.134561 | 0.892959 | 0.988566 |   |
| si:ch211-246b8.2  | 10.43151 | -0.454847388 | 0.576242   | -0.78933 | 0.429917 | 0.847418 |   |
| dre-mir-219-3     | 0.195355 | -1.769377334 | 5.234267   | -0.33804 | 0.735335 | NA       |   |
| hibadha           | 364.4308 | -0.235619257 | 0.137881   | -1.70886 | 0.087477 | 0.49631  |   |
| il16              | 256.7826 | -0.016145363 | 0.149733   | -0.10783 | 0.914132 | 0.992972 |   |
| RF00324           | 3.233445 | -0.962157765 | 1.113408   | -0.86416 | 0.387502 | 0.827592 |   |
| iffo2b            | 21.96939 | 0.497093782  | 0.445278   | 1.116367 | 0.264265 | 0.742063 |   |
| gpr184            | 2.635658 | -0.901302725 | 1.585148   | -0.56859 | 0.569633 | 0.902322 |   |
| si:dkey-206d17.16 | 0 NA     |              | NA         | NA       | NA       | NA       |   |
| dennd4b           | 519.4024 | 0.012815788  | 0.129581   | 0.098901 | 0.921217 | 0.994085 |   |
| CR388095.1        | 20.4861  | 0.309405488  | 0.481634   | 0.642408 | 0.520608 | 0.887165 |   |
| RF00001           | 0 NA     |              | NA         | NA       | NA       | NA       |   |
| or106-7           | 4.572718 | 1.118778181  | 1.498384   | 0.746656 | 0.455271 | 0.860008 |   |
| senp6a            | 271.5381 | 0.147855273  | 0.127199   | 1.162392 | 0.245076 | 0.726512 |   |
| zgc:112334        | 34.27266 | -0.474832165 | 0.437032   | -1.08649 | 0.277261 | 0.751426 |   |
| si:dkey-223p19.2  | 0.369584 | 1.505522583  | 3.247832   | 0.463547 | 0.642972 | NA       |   |
| si:dkey-156k2.4   | 2.910294 | -4.22659135  | 1.43665    | -2.94198 | 0.003261 | 0.093518 |   |
| zgc:101715        | 44.35547 | -0.989188714 | 0.403051   | -2.45425 | 0.014118 | 0.208027 |   |
| CR388046.1        | 0.093881 |              | 0.5.267649 |          | 0        | 1 NA     |   |
| si:ch211-212k5.3  | 0.319615 |              | 0.5.267649 |          | 0        | 1 NA     |   |
| or106-9           | 1.059837 | -2.400400221 | 2.513252   | -0.9551  | 0.339529 | NA       |   |
| noal              | 105.5254 | 0.173482223  | 0.177027   | 0.979978 | 0.327097 | 0.78586  |   |
| hspbpl            | 160.6479 | -0.286630344 | 0.199664   | -1.43556 | 0.151127 | 0.615085 |   |
| si:ch211-249c2.1  | 0 NA     |              | NA         | NA       | NA       | NA       |   |
| ccl39.2           | 3.414098 | 0.47868746   | 1.578667   | 0.303222 | 0.76172  | 0.958242 |   |
| si:ch73-167f10.1  | 32.04922 | -1.49211809  | 0.33816    | -4.41246 | 1.02E-05 | 0.001894 |   |
| crb3a             | 70.71926 | 0.808261802  | 0.223555   | 3.615492 | 0.0003   | 0.019507 |   |
| CU184832.1        | 0 NA     |              | NA         | NA       | NA       | NA       |   |
| zgc:110688        | 194.1809 | -0.143237317 | 0.161912   | -0.88466 | 0.376339 | 0.822258 |   |
| ints4             | 222.2851 | -0.06308552  | 0.163106   | -0.38678 | 0.698922 | 0.942456 |   |
| si:ch211-11c3.12  | 0.349714 | -2.294851216 | 4.424457   | -0.51867 | 0.603988 | NA       |   |
| mmp17b            | 84.31055 | -0.005923042 | 0.287245   | -0.02062 | 0.983549 |          | 1 |
| AL732567.1        | 1.375347 | -0.868144031 | 2.049174   | -0.42366 | 0.671817 | NA       |   |
| zgc:171220        | 44.08665 | 0.500488117  | 0.314447   | 1.591648 | 0.111464 | 0.547165 |   |
| vps54             | 259.9576 | 0.162668576  | 0.172315   | 0.94402  | 0.345159 | 0.798377 |   |
| sirt6             | 138.6131 | -0.16820511  | 0.168127   | -1.00047 | 0.317085 | 0.778879 |   |

|                    |          |              |          |          |          |          |
|--------------------|----------|--------------|----------|----------|----------|----------|
| axin1              | 953.986  | -0.09605513  | 0.111272 | -0.86325 | 0.388    | 0.827592 |
| CABZ01087948.1     | 101.5862 | -0.264934001 | 0.200553 | -1.32102 | 0.186496 | 0.664968 |
| CT573282.1         | 71.53247 | 0.677968773  | 0.96783  | 0.700504 | 0.483612 | 0.872148 |
| cnga2a             | 0.451817 | -0.495721602 | 3.154399 | -0.15715 | 0.875125 | NA       |
| pimr119            | 0 NA     | NA           | NA       | NA       | NA       | NA       |
| CABZ01075125.1     | 32.83628 | -0.018144447 | 0.321287 | -0.05647 | 0.954964 | 0.998611 |
| cmtm8a             | 20.06417 | -0.099842876 | 0.482738 | -0.20683 | 0.836145 | 0.976007 |
| baz2a              | 1138.027 | -0.052506372 | 0.144676 | -0.36292 | 0.716662 | 0.94627  |
| nsg2               | 1430.528 | 0.056495764  | 0.18467  | 0.305928 | 0.75966  | 0.957886 |
| uncx               | 208.1784 | 0.313518198  | 0.185976 | 1.685803 | 0.091834 | 0.507669 |
| cant1b             | 501.3945 | 0.026774473  | 0.126306 | 0.211981 | 0.832121 | 0.975013 |
| eif4a3             | 1832.545 | 0.001131552  | 0.109499 | 0.010334 | 0.991755 | 1        |
| cyp2k16            | 366.5875 | 0.014507526  | 0.27407  | 0.052934 | 0.957785 | 0.999109 |
| zgc:195050         | 58.68633 | 0.03651163   | 0.427723 | 0.085363 | 0.931973 | 0.995979 |
| BX537303.1         | 2.239352 | 0.413064666  | 1.424917 | 0.289887 | 0.771903 | 0.960624 |
| csflra             | 360.2031 | -0.522364937 | 0.212518 | -2.45799 | 0.013972 | 0.207312 |
| capn7              | 189.9455 | -0.09895028  | 0.306562 | -0.32277 | 0.746866 | 0.955074 |
| CU394253.1         | 0.04222  | 0            | 5.267649 | 0        | 1        | NA       |
| or109-5            | 0.099037 | 0            | 5.267649 | 0        | 1        | NA       |
| btr20              | 4.100176 | -0.875189063 | 1.259547 | -0.69484 | 0.487153 | 0.873291 |
| znf1034            | 1.863207 | -1.596487727 | 1.236717 | -1.29091 | 0.196736 | NA       |
| rbm24a             | 723.664  | 0.177872983  | 0.118753 | 1.497834 | 0.134176 | 0.588132 |
| rrn3               | 341.3351 | -0.001177934 | 0.157899 | -0.00746 | 0.994048 | 1        |
| taf6               | 574.495  | 0.408203961  | 0.141364 | 2.887607 | 0.003882 | 0.103477 |
| si:dkey-246j6.1    | 12.92456 | 0.578891084  | 0.473378 | 1.222893 | 0.22137  | 0.702841 |
| si:ch211-107p11.3  | 84.89233 | 0.064057512  | 0.215349 | 0.29746  | 0.766116 | 0.960113 |
| si:ch73-215d9.1    | 141.1477 | 0.800158861  | 0.265885 | 3.009419 | 0.002617 | 0.083393 |
| nptna              | 990.8672 | 0.269138275  | 0.187918 | 1.432209 | 0.152084 | 0.615705 |
| si:dkey-211i20.2   | 19.45124 | 0.57355844   | 0.600744 | 0.954748 | 0.339705 | 0.795226 |
| tpra               | 608.7386 | 0.204593853  | 0.144494 | 1.415937 | 0.156794 | 0.622675 |
| si:ch1073-303d10.1 | 38.09365 | 2.672280179  | 1.13567  | 2.353044 | 0.01862  | 0.241555 |
| rps3               | 40744.81 | -0.373115692 | 0.132711 | -2.81149 | 0.004931 | 0.117186 |
| tradv10.0.5        | 0.073968 | 0            | 5.267649 | 0        | 1        | NA       |
| CABZ01090373.1     | 481.2242 | 0.063546968  | 0.158818 | 0.400124 | 0.689066 | 0.93924  |
| pcdh1g22           | 65.99125 | -0.994797156 | 0.504362 | -1.97239 | 0.048566 | 0.383656 |
| hist1h2a2          | 1.431815 | -1.923619569 | 1.636344 | -1.17556 | 0.239771 | NA       |
| xkr5a              | 12.07131 | 0.617381955  | 0.576128 | 1.071606 | 0.283897 | 0.755095 |
| gstp2              | 280.504  | 0.668207671  | 0.316045 | 2.114283 | 0.034491 | 0.327793 |
| si:dkey-237i9.8    | 36.56978 | -0.159704304 | 0.317183 | -0.50351 | 0.614607 | 0.915998 |
| fadd               | 136.3226 | 0.151876799  | 0.180219 | 0.842736 | 0.399376 | 0.831196 |
| zgc:175136         | 1.423022 | 0.976272102  | 1.582158 | 0.617051 | 0.537201 | NA       |
| hmgcs1             | 460.9553 | 0.148084758  | 0.147954 | 1.000882 | 0.316884 | 0.778879 |
| p3h2               | 209.8767 | -0.204884376 | 0.162196 | -1.26319 | 0.20652  | 0.688892 |
| clns1a             | 395.5089 | -0.121441773 | 0.158652 | -0.76546 | 0.443998 | 0.854304 |
| znf1029            | 4.862239 | 3.822292662  | 1.490033 | 2.56524  | 0.01031  | 0.176586 |
| rap2b              | 583.753  | -0.240312915 | 0.128446 | -1.87093 | 0.061355 | 0.424867 |
| CABZ01068499.1     | 256.8994 | -1.479938458 | 0.876212 | -1.68902 | 0.091216 | 0.505615 |
| CR848788.1         | 4.542208 | 0.861797186  | 0.86944  | 0.991209 | 0.321584 | 0.78202  |
| pik3r3a            | 559.6224 | -0.212608908 | 0.249825 | -0.85103 | 0.394752 | 0.828825 |
| CABZ01012962.1     | 0.155761 | 0            | 5.267649 | 0        | 1        | NA       |
| ddahl              | 193.9488 | -0.135871685 | 0.140191 | -0.96919 | 0.332452 | 0.789726 |
| BX548067.1         | 0.749198 | 2.600636898  | 2.592379 | 1.003185 | 0.315771 | NA       |
| rest               | 418.7031 | -0.316638334 | 0.179716 | -1.76188 | 0.078089 | 0.473395 |
| FP015866.1         | 0 NA     | NA           | NA       | NA       | NA       | NA       |

|                    |           |               |           |           |           |           |
|--------------------|-----------|---------------|-----------|-----------|-----------|-----------|
| CR392341. 4        | 0. 813642 | 1. 055397447  | 3. 311511 | 0. 318706 | 0. 74995  | NA        |
| mrap2b             | 3. 479441 | -0. 466792038 | 1. 596784 | -0. 29233 | 0. 770032 | 0. 960484 |
| pcyox1             | 81. 01388 | -0. 315786542 | 0. 237029 | -1. 33227 | 0. 182772 | 0. 659278 |
| CR383680. 2        | 8. 255811 | -0. 072603858 | 0. 638651 | -0. 11368 | 0. 909489 | 0. 99213  |
| dnm2b              | 264. 9121 | 0. 123650994  | 0. 23555  | 0. 524946 | 0. 599621 | 0. 913427 |
| itga4              | 85. 16998 | 0. 123835494  | 0. 292579 | 0. 423255 | 0. 672109 | 0. 933953 |
| zfhx3              | 1467. 967 | 0. 041526422  | 0. 188102 | 0. 220765 | 0. 825275 | 0. 972616 |
| zgc:172091         | 0         | NA            | NA        | NA        | NA        | NA        |
| FP016142. 7        | 0         | NA            | NA        | NA        | NA        | NA        |
| ly6m7              | 0. 614812 | 0             | 4. 445706 | 0         | 1         | NA        |
| LSM2 (1 of many)   | 31. 81868 | 0. 667592847  | 0. 50907  | 1. 311398 | 0. 189723 | 0. 669289 |
| adgrd2             | 58. 68    | 0. 200428596  | 0. 282953 | 0. 708345 | 0. 478731 | 0. 869292 |
| CABZ01099795. 1    | 53. 63124 | 0. 495402788  | 0. 365661 | 1. 354816 | 0. 175476 | 0. 649279 |
| si:ch211-244c8. 4  | 426. 3059 | 0. 080638519  | 0. 16899  | 0. 477179 | 0. 633235 | 0. 923885 |
| CR385065. 1        | 1. 06593  | 0             | 2. 896528 | 0         | 1         | NA        |
| si:rp71-81e14. 2   | 8. 699887 | -2. 006055822 | 0. 829788 | -2. 41755 | 0. 015625 | 0. 220755 |
| zgc:174222         | 10. 72565 | -0. 244352077 | 0. 575914 | -0. 42429 | 0. 671357 | 0. 933953 |
| si:dkey-220o21. 3  | 0. 455146 | -0. 86814125  | 3. 668713 | -0. 23663 | 0. 812941 | NA        |
| cldn18             | 0         | NA            | NA        | NA        | NA        | NA        |
| si:dkey-19h16. 8   | 0         | NA            | NA        | NA        | NA        | NA        |
| grem2b             | 61. 22824 | 0. 187582116  | 0. 212514 | 0. 88268  | 0. 377409 | 0. 822478 |
| alg14              | 64. 81178 | 0. 278550849  | 0. 344216 | 0. 809234 | 0. 418381 | 0. 841565 |
| tbk1               | 814. 7843 | -0. 003386488 | 0. 108393 | -0. 03124 | 0. 975076 | 1         |
| tradv31. 0         | 0         | NA            | NA        | NA        | NA        | NA        |
| si:ch211-280a23. 2 | 0. 919239 | -0. 249650245 | 1. 856788 | -0. 13445 | 0. 893045 | NA        |
| EARS2              | 190. 1109 | -0. 100831529 | 0. 175225 | -0. 57544 | 0. 564993 | 0. 901538 |
| BX950220. 2        | 0. 049519 | 0             | 5. 267649 | 0         | 1         | NA        |
| si:ch211-235e9. 6  | 656. 8291 | 0. 146125916  | 0. 169915 | 0. 859996 | 0. 389791 | 0. 827843 |
| FAM180A            | 78. 86297 | -0. 340555454 | 0. 275694 | -1. 23527 | 0. 216731 | 0. 69815  |
| BX957361. 2        | 3. 13474  | 1. 074151194  | 1. 306659 | 0. 822059 | 0. 411043 | 0. 837797 |
| tradv23. 1. 3      | 0         | NA            | NA        | NA        | NA        | NA        |
| BX936303. 1        | 2. 79836  | -2. 961381957 | 1. 3169   | -2. 24875 | 0. 024528 | 0. 277819 |
| trappc9            | 90. 97312 | 0. 080683386  | 0. 239107 | 0. 337437 | 0. 735788 | 0. 951543 |
| acvr2bb            | 136. 9052 | -0. 272339384 | 0. 280057 | -0. 97244 | 0. 33083  | 0. 788291 |
| chl1b              | 397. 5124 | 0. 122851329  | 0. 1454   | 0. 844919 | 0. 398156 | 0. 830737 |
| FP089536. 1        | 0. 129927 | 0             | 5. 267649 | 0         | 1         | NA        |
| BX950225. 1        | 0. 043309 | 0             | 5. 267649 | 0         | 1         | NA        |
| ndufa412a          | 63. 3502  | -0. 185483254 | 0. 232193 | -0. 79883 | 0. 424387 | 0. 844412 |
| tmprss4a           | 269. 5741 | -0. 16183667  | 0. 162996 | -0. 99289 | 0. 320765 | 0. 781257 |
| cibl               | 318. 4717 | -0. 415338231 | 0. 174927 | -2. 37436 | 0. 01758  | 0. 234077 |
| si:dkeyp-33c10. 7  | 7. 231919 | 0. 89318362   | 0. 762932 | 1. 170725 | 0. 241709 | 0. 723473 |
| RF01684            | 0         | NA            | NA        | NA        | NA        | NA        |
| AL953841. 2        | 1. 495797 | 0. 102685924  | 1. 814623 | 0. 056588 | 0. 954873 | NA        |
| olfcg8             | 0. 043308 | 0             | 5. 267649 | 0         | 1         | NA        |
| CR854980. 1        | 29. 29894 | -0. 328153038 | 0. 380101 | -0. 86333 | 0. 387955 | 0. 827592 |
| slc35f4            | 40. 87124 | -0. 281334489 | 0. 445438 | -0. 63159 | 0. 527654 | 0. 889948 |
| tsc2               | 722. 3704 | -0. 079899219 | 0. 158628 | -0. 50369 | 0. 614479 | 0. 915998 |
| gpn2               | 305. 3521 | -0. 382693828 | 0. 180629 | -2. 11867 | 0. 034118 | 0. 326054 |
| nid1b              | 1349. 671 | 0. 129077038  | 0. 134828 | 0. 957346 | 0. 338393 | 0. 795226 |
| BX571960. 1        | 17. 78889 | 0. 036154204  | 0. 503839 | 0. 071757 | 0. 942795 | 0. 997371 |
| dnaaf2             | 25. 02095 | 0. 35253508   | 0. 471437 | 0. 747789 | 0. 454588 | 0. 85968  |
| hoxc12b            | 47. 39208 | -0. 113378737 | 0. 346941 | -0. 3268  | 0. 743822 | 0. 95491  |
| zgc:65873          | 761. 2284 | 0. 014076315  | 0. 118369 | 0. 118919 | 0. 90534  | 0. 991631 |
| stom12             | 276. 074  | 0. 11178235   | 0. 139031 | 0. 804008 | 0. 421392 | 0. 842754 |

|                   |          |              |            |          |          |          |   |
|-------------------|----------|--------------|------------|----------|----------|----------|---|
| rmi2              | 43.90556 | -0.081920032 | 0.301878   | -0.27137 | 0.786108 | 0.962605 |   |
| L0017843.1        | 9.273541 | 3.45474012   | 1.315743   | 2.625696 | 0.008647 | 0.159519 |   |
| BX004771.1        | 0 NA     |              | NA         | NA       | NA       | NA       |   |
| si:dkey-19c16.12  | 8.3578   | 1.209701188  | 0.873865   | 1.384311 | 0.166263 | 0.636117 |   |
| ppplr21           | 595.8152 | -0.019011965 | 0.165142   | -0.11512 | 0.908346 | 0.991812 |   |
| cdk2ap2           | 512.7749 | 0.029135031  | 0.118632   | 0.245592 | 0.805998 | 0.969625 |   |
| nllrc3            | 5.71823  | -0.762044605 | 0.885708   | -0.86038 | 0.38958  | 0.827843 |   |
| nectin4b          | 39.70033 | -0.330565087 | 0.37956    | -0.87092 | 0.383799 | 0.826299 |   |
| cog6              | 288.2809 | 0.063035556  | 0.122499   | 0.514581 | 0.606846 | 0.915204 |   |
| tradv2.0.2        | 0.060442 |              | 0 5.267649 |          | 0        | 1 NA     |   |
| si:ch73-14413.1   | 12.03485 | -0.311972963 | 0.60037    | -0.51963 | 0.603318 | 0.914226 |   |
| extla             | 137.8312 | 0.112101885  | 0.255821   | 0.438204 | 0.661238 | 0.930581 |   |
| gpc6a             | 12.84374 | -0.670375778 | 0.632373   | -1.0601  | 0.289101 | 0.76024  |   |
| ldb1b             | 326.871  | 0.183290347  | 0.17353    | 1.056243 | 0.290857 | 0.761002 |   |
| CR388178.2        | 16.90455 | -0.063859658 | 0.507825   | -0.12575 | 0.899929 | 0.99045  |   |
| tomm20a           | 588.5391 | 0.038873378  | 0.166997   | 0.232779 | 0.815933 | 0.971207 |   |
| zgc:194948        | 1.020424 |              | 0 2.213718 |          | 0        | 1 NA     |   |
| AL929057.1        | 1.420378 | -4.354595847 | 2.030322   | -2.14478 | 0.03197  | NA       |   |
| FP245458.1        | 1.35918  | 1.57496365   | 1.962249   | 0.802632 | 0.422188 | NA       |   |
| si:dkey-245n4.2   | 30.63112 | -0.079326699 | 0.442206   | -0.17939 | 0.857633 | 0.979756 |   |
| BX914205.3        | 0.386257 | 0.093654508  | 3.339797   | 0.028042 | 0.977629 | NA       |   |
| stx8              | 118.7217 | -0.17859173  | 0.217357   | -0.82165 | 0.411275 | 0.837797 |   |
| nr5ala            | 6.630817 | -0.300618788 | 0.871411   | -0.34498 | 0.73011  | 0.950056 |   |
| CR457444.3        | 0.18188  |              | 0 5.267649 |          | 0        | 1 NA     |   |
| CU639397.1        | 1.867571 | 1.055428158  | 2.192764   | 0.481323 | 0.630287 | NA       |   |
| CU467880.1        | 0 NA     |              | NA         | NA       | NA       | NA       |   |
| si:dkey-34d22.1   | 147.7386 | -0.004307613 | 0.189801   | -0.0227  | 0.981893 |          | 1 |
| CABZ01034691.1    | 0.407267 | 1.965890532  | 2.934843   | 0.669845 | 0.502957 | NA       |   |
| PAMR1 (1 of many) | 113.2073 | -0.392853942 | 0.208873   | -1.88083 | 0.059995 | 0.421883 |   |
| si:ch73-389k6.1   | 44.88437 | -1.293711743 | 0.452176   | -2.86108 | 0.004222 | 0.107381 |   |
| syce2             | 30.85364 | 0.51618865   | 0.519375   | 0.993866 | 0.320288 | 0.780807 |   |
| or106-6           | 0 NA     |              | NA         | NA       | NA       | NA       |   |
| CR394535.1        | 27.1187  | 0.104556437  | 0.39976    | 0.261548 | 0.79367  | 0.965431 |   |
| BX936433.2        | 6.474035 | 0.692776451  | 0.681284   | 1.016869 | 0.309216 | 0.773791 |   |
| dync1i2b          | 201.616  | 0.135477326  | 0.197717   | 0.685208 | 0.493213 | 0.876787 |   |
| zgc:113343        | 32.34047 | 0.404532237  | 0.325669   | 1.242159 | 0.214178 | 0.696474 |   |
| si:ch211-227e10.1 | 3.320591 | -0.264528657 | 1.260772   | -0.20981 | 0.833812 | 0.975482 |   |
| mrps2             | 485.278  | -0.308451719 | 0.146468   | -2.10593 | 0.03521  | 0.330558 |   |
| si:dkey-247k7.2   | 718.6393 | -0.742438756 | 0.299046   | -2.48269 | 0.013039 | 0.198789 |   |
| gpr107            | 422.6299 | 0.046599738  | 0.114679   | 0.406348 | 0.684487 | 0.938486 |   |
| CT583728.5        | 0 NA     |              | NA         | NA       | NA       | NA       |   |
| CR383668.1        | 0.471978 | 1.966801641  | 3.150887   | 0.624206 | 0.532493 | NA       |   |
| vps28             | 1493.482 | -0.059184301 | 0.151908   | -0.38961 | 0.696828 | 0.94198  |   |
| si:ch211-161f7.2  | 2.167439 | -1.003413547 | 1.5253     | -0.65785 | 0.510637 | NA       |   |
| rab11fip4b        | 66.1734  | 0.117137352  | 0.270303   | 0.433356 | 0.664756 | 0.93201  |   |
| il17ralb          | 6.279709 | -0.115996316 | 0.833074   | -0.13924 | 0.889261 | 0.988305 |   |
| si:dkey-19b23.8   | 267.5127 | -0.307882757 | 0.1802     | -1.70856 | 0.087533 | 0.496485 |   |
| RF00001           | 0 NA     |              | NA         | NA       | NA       | NA       |   |
| pimr169           | 0.126661 |              | 0 5.267649 |          | 0        | 1 NA     |   |
| BX681417.3        | 0 NA     |              | NA         | NA       | NA       | NA       |   |
| BX927130.3        | 9.870498 | -0.574153941 | 0.991193   | -0.57926 | 0.562417 | 0.900715 |   |
| slc10a3           | 341.6934 | -0.219204531 | 0.165258   | -1.32644 | 0.184694 | 0.661987 |   |
| BX908386.2        | 0.85634  | 2.48140697   | 2.259586   | 1.098169 | 0.272131 | NA       |   |
| si:ch73-350k19.1  | 0.073968 |              | 0 5.267649 |          | 0        | 1 NA     |   |

|                   |          |              |            |          |          |          |
|-------------------|----------|--------------|------------|----------|----------|----------|
| dhcr7             | 259.2448 | -0.24634348  | 0.19815    | -1.24322 | 0.213789 | 0.6963   |
| si:ch211-149o24.4 | 0 NA     |              | NA         | NA       | NA       | NA       |
| RF00001           | 0.04222  |              | 0 5.267649 | 0        | 1 NA     |          |
| si:dkey-265e15.5  | 5.673819 | 0.239597616  | 0.781223   | 0.306695 | 0.759075 | 0.957886 |
| si:ch211-199i15.5 | 397.4456 | 0.362056307  | 0.221622   | 1.633667 | 0.102329 | 0.528996 |
| ppie              | 161.6727 | -0.012055953 | 0.183245   | -0.06579 | 0.947544 | 0.997371 |
| mfsd8             | 913.6374 | -0.127059243 | 0.184276   | -0.6895  | 0.490506 | 0.875513 |
| si:ch73-299h12.8  | 20.83977 | 0.549509605  | 0.365661   | 1.502784 | 0.132895 | 0.586174 |
| si:dkey-14o6.8    | 1.869224 | -1.751800951 | 1.892948   | -0.92544 | 0.354739 | NA       |
| CR381673.2        | 1.023683 | -1.398115707 | 2.162741   | -0.64646 | 0.517985 | NA       |
| CR550302.2        | 0 NA     |              | NA         | NA       | NA       | NA       |
| BX324224.1        | 1.060432 | -1.407981596 | 1.849985   | -0.76108 | 0.446611 | NA       |
| znf993            | 3.766017 | 1.651651444  | 0.913858   | 1.807339 | 0.07071  | 0.453582 |
| sh3pxd2b          | 531.4881 | 0.111438105  | 0.17788    | 0.626481 | 0.531    | 0.890545 |
| si:busml-169i8.11 | 0 NA     |              | NA         | NA       | NA       | NA       |
| zgc:112023        | 131.4025 | -0.796997103 | 0.215254   | -3.70259 | 0.000213 | 0.015588 |
| si:dkeyp-80d11.4  | 1.152865 | -4.385693243 | 2.111938   | -2.07662 | 0.037837 | NA       |
| BX927210.1        | 1.076279 |              | 0 2.391202 | 0        | 1 NA     |          |
| opn4xb            | 51.36464 | 0.288414329  | 0.249009   | 1.15825  | 0.246762 | 0.727706 |
| si:ch211-57b15.1  | 1.904489 | -4.557886947 | 1.754871   | -2.59728 | 0.009397 | NA       |
| RF00001           | 0.093881 |              | 0 5.267649 | 0        | 1 NA     |          |
| dre-mir-733       | 0 NA     |              | NA         | NA       | NA       | NA       |
| si:dkey-25g12.4   | 6.361693 | 2.285863523  | 1.103705   | 2.071082 | 0.038351 | 0.343352 |
| si:ch211-223g7.2  | 4.378423 | 0.415939203  | 0.964637   | 0.431187 | 0.666332 | 0.932664 |
| ogal              | 51.03885 | -0.31072738  | 0.355368   | -0.87438 | 0.38191  | 0.824957 |
| BX088524.2        | 0 NA     |              | NA         | NA       | NA       | NA       |
| CR513789.1        | 9.550508 | 0.540781537  | 0.537352   | 1.006382 | 0.314232 | 0.777479 |
| pla2g15           | 2876.443 | -0.118005882 | 0.192585   | -0.61275 | 0.540044 | 0.893049 |
| AL645792.1        | 0.15462  |              | 0 5.267649 | 0        | 1 NA     |          |
| fcrlg             | 19.14649 | -0.228126767 | 0.431415   | -0.52879 | 0.596953 | 0.91176  |
| cyp24a1           | 2275.99  | -0.830693457 | 0.283028   | -2.93502 | 0.003335 | 0.094935 |
| CR812832.1        | 64.54473 | -0.147715641 | 0.23275    | -0.63465 | 0.525654 | 0.888928 |
| si:dkey-56m15.9   | 1.686192 | 1.011404854  | 1.983985   | 0.509784 | 0.610202 | NA       |
| si:dkey-238o14.7  | 1.551686 | -3.72773272  | 1.904811   | -1.95701 | 0.050346 | NA       |
| CABZ01110881.1    | 176.1097 | -0.123712594 | 0.170234   | -0.72672 | 0.467398 | 0.86616  |
| kcnk4a            | 21.56424 | -2.020400052 | 0.605836   | -3.3349  | 0.000853 | 0.039464 |
| PDPR              | 767.8849 | -0.070039166 | 0.101741   | -0.68841 | 0.491197 | 0.875595 |
| L0018568.2        | 22.10503 | 0.619386388  | 0.552298   | 1.12147  | 0.262088 | 0.739695 |
| CR931813.1        | 1.366124 | 2.736097613  | 2.141127   | 1.277877 | 0.201293 | NA       |
| si:ch211-221j21.3 | 193.9508 | 0.14415508   | 0.157966   | 0.912569 | 0.361469 | 0.811711 |
| cyp3a65           | 3108.328 | -0.027012155 | 0.439182   | -0.06151 | 0.950957 | 0.99801  |
| nup54             | 651.9481 | 0.155326646  | 0.120424   | 1.289833 | 0.197108 | 0.677304 |
| ephx5             | 123.1714 | 0.045857584  | 0.266746   | 0.171915 | 0.863505 | 0.981766 |
| tradv23.1.4       | 0 NA     |              | NA         | NA       | NA       | NA       |
| P2RY14            | 3.253986 | -1.227391674 | 0.983214   | -1.24835 | 0.211904 | 0.693489 |
| BX927130.4        | 10.82555 | -2.824554087 | 0.787721   | -3.58573 | 0.000336 | 0.020824 |
| mst1              | 512.4277 | -0.273689459 | 0.171505   | -1.59581 | 0.110532 | 0.545461 |
| BX664625.4        | 9.726388 | -1.217443767 | 0.67826    | -1.79495 | 0.072661 | 0.457864 |
| znf1053           | 3.911359 | -4.745356151 | 1.555368   | -3.05095 | 0.002281 | 0.07594  |
| fb1n1             | 415.3308 | -0.444997511 | 0.175516   | -2.53536 | 0.011233 | 0.183909 |
| C1orf232          | 24.10369 | -0.139574268 | 0.490881   | -0.28433 | 0.776154 | 0.961073 |
| rhot1b            | 66.50026 | 0.026829505  | 0.28998    | 0.092522 | 0.926283 | 0.994815 |
| si:dkey-84h14.1   | 1.193464 | 4.052479017  | 2.09239    | 1.936771 | 0.052773 | NA       |
| CU464124.1        | 111.1674 | 0.374558096  | 0.202233   | 1.852112 | 0.06401  | 0.431888 |

|                   |          |              |          |          |          |          |
|-------------------|----------|--------------|----------|----------|----------|----------|
| si:ch211-212k18.5 | 377.6168 | 0.242762649  | 0.197926 | 1.226534 | 0.219998 | 0.701105 |
| capn5a            | 341.9274 | -0.272494714 | 0.183905 | -1.48172 | 0.138416 | 0.595008 |
| mrpl3             | 573.4354 | -0.091531867 | 0.14019  | -0.65291 | 0.513811 | 0.88631  |
| si:ch73-359m17.7  | 5.560301 | -4.465564628 | 1.427441 | -3.12837 | 0.001758 | 0.064556 |
| lclatl            | 489.808  | 0.171472096  | 0.129947 | 1.319551 | 0.186985 | 0.665301 |
| RF00001           | 0 NA     | NA           | NA       | NA       | NA       | NA       |
| si:ch73-347e22.8  | 307.3316 | -0.107180626 | 0.200614 | -0.53426 | 0.59316  | 0.910427 |
| AL929220.1        | 0.438971 | 0.593146773  | 3.55953  | 0.166636 | 0.867656 | NA       |
| si:ch211-127b6.2  | 11.84967 | 0.638291826  | 0.759955 | 0.839907 | 0.40096  | 0.831864 |
| si:ch73-236c18.5  | 2.101153 | -4.222602632 | 1.716043 | -2.46066 | 0.013868 | NA       |
| baiap2b           | 43.54474 | 0.172465902  | 0.534995 | 0.322369 | 0.747173 | 0.955074 |
| dre-mir-338-1     | 0.149831 | 1.921567426  | 5.236909 | 0.366928 | 0.713673 | NA       |
| si:dkey-77g12.4   | 4.270513 | 0            | 1.865781 | 0        | 1        | 1        |
| rrpl              | 694.5555 | -0.14869546  | 0.182146 | -0.81635 | 0.414299 | 0.838631 |
| clicl             | 368.2934 | 0.074169352  | 0.113974 | 0.650757 | 0.515203 | 0.886401 |
| si:ch211-110e21.4 | 30.25011 | 0.508599511  | 0.377633 | 1.346811 | 0.178041 | 0.651796 |
| si:dkey-51d8.1    | 2.965881 | -1.007814019 | 1.222888 | -0.82413 | 0.409868 | 0.836939 |
| CABZ01003476.1    | 0.45698  | 0            | 3.656986 | 0        | 1        | NA       |
| si:dkeyp-85d8.5   | 16.83654 | -1.417305071 | 0.487141 | -2.90944 | 0.003621 | 0.099519 |
| cyp2aa3           | 116.5129 | -0.165373026 | 0.31632  | -0.5228  | 0.601111 | 0.913756 |
| si:dkey-176f19.7  | 2.546834 | 0.327800321  | 1.172389 | 0.2796   | 0.779784 | 0.961073 |
| trim24            | 373.6244 | 0.00500927   | 0.142436 | 0.035168 | 0.971945 | 1        |
| FP102192.2        | 12.78504 | 2.516628474  | 0.68325  | 3.68332  | 0.00023  | 0.016213 |
| dre-mir-1-2       | 1.458137 | -1.849842672 | 2.073574 | -0.8921  | 0.372337 | NA       |
| RF01684           | 0 NA     | NA           | NA       | NA       | NA       | NA       |
| CU467856.1        | 79.58301 | -0.023988422 | 0.259982 | -0.09227 | 0.926484 | 0.994815 |
| slitrk5a          | 158.5421 | 0.380541485  | 0.309986 | 1.22761  | 0.219593 | 0.700438 |
| BX927407.1        | 0.184658 | -1.710083148 | 5.238472 | -0.32645 | 0.744086 | NA       |
| tshz3b            | 523.834  | -0.022573946 | 0.1558   | -0.14489 | 0.884798 | 0.987266 |
| zgc:158376        | 180.0439 | 0.173876664  | 0.159919 | 1.087276 | 0.276915 | 0.751311 |
| cs                | 5231.059 | 0.310592358  | 0.065546 | 4.738539 | 2.15E-06 | 0.000531 |
| pimr214           | 0.120883 | 0            | 5.267649 | 0        | 1        | NA       |
| si:ch211-127m7.2  | 82.55147 | -0.05794536  | 0.225468 | -0.257   | 0.797178 | 0.966447 |
| taldol            | 1391.851 | -0.165902167 | 0.121706 | -1.36314 | 0.172838 | 0.645664 |
| lrrc8da           | 169.9925 | 0.074073901  | 0.215715 | 0.343388 | 0.731306 | 0.950169 |
| si:dkey-190j3.6   | 3.228552 | -0.175081835 | 1.252807 | -0.13975 | 0.888856 | 0.988188 |
| si:ch211-161m3.4  | 51.40233 | 0.058631716  | 0.249749 | 0.234762 | 0.814393 | 0.970503 |
| pax6a             | 690.8952 | 0.249886263  | 0.132128 | 1.891244 | 0.058592 | 0.418278 |
| si:ch73-21k16.1   | 59.08126 | 0.151983536  | 0.343675 | 0.44223  | 0.658322 | 0.930581 |
| si:ch211-196f19.1 | 14.11085 | 0.593339957  | 0.62901  | 0.943291 | 0.345532 | 0.79876  |
| BX005398.1        | 0 NA     | NA           | NA       | NA       | NA       | NA       |
| dnah9             | 10.75221 | 0.38254606   | 0.629353 | 0.607841 | 0.543293 | 0.894925 |
| RF00568           | 0 NA     | NA           | NA       | NA       | NA       | NA       |
| CR407701.1        | 1.530489 | 1.828797433  | 1.758047 | 1.040244 | 0.298227 | NA       |
| znf609a           | 292.0214 | 0.19018588   | 0.145308 | 1.308846 | 0.190586 | 0.6707   |
| cacna2d2a         | 11.33872 | 0.70291737   | 0.710486 | 0.989347 | 0.322494 | 0.78246  |
| rab9b             | 44.44981 | 0.199698039  | 0.28286  | 0.705996 | 0.480191 | 0.870001 |
| kif5ba            | 147.724  | 0.126197373  | 0.19021  | 0.663464 | 0.507033 | 0.883007 |
| si:ch73-281i18.7  | 8.654465 | 0.466721242  | 0.718688 | 0.649407 | 0.516075 | 0.88677  |
| znf804b           | 7.472783 | 2.528212151  | 1.2024   | 2.102638 | 0.035497 | 0.330843 |
| fabp1b.2          | 10.5784  | -0.231394094 | 0.566457 | -0.40849 | 0.682911 | 0.938006 |
| si:ch211-161m3.1  | 5.389829 | -0.267271933 | 0.631315 | -0.42336 | 0.672034 | 0.933953 |
| sar1b             | 1269.914 | 0.30706139   | 0.112529 | 2.728724 | 0.006358 | 0.134763 |
| uchl5             | 522.9231 | 0.381381211  | 0.167546 | 2.276277 | 0.022829 | 0.266968 |



|                  |          |              |          |          |          |          |
|------------------|----------|--------------|----------|----------|----------|----------|
| znf1102          | 13.04764 | 1.161352257  | 0.527435 | 2.201888 | 0.027673 | 0.29556  |
| uhrfl            | 780.1129 | 0.135473131  | 0.173356 | 0.781472 | 0.434525 | 0.850002 |
| RF00001          | 0 NA     | NA           | NA       | NA       | NA       | NA       |
| CT583728.6       | 0 NA     | NA           | NA       | NA       | NA       | NA       |
| RF00001          | 0 NA     | NA           | NA       | NA       | NA       | NA       |
| zgc:109949       | 90.87174 | 0.079169811  | 0.270551 | 0.292625 | 0.769809 | 0.960484 |
| ppp4r3b          | 687.7039 | 0.026998849  | 0.11057  | 0.244179 | 0.807092 | 0.969726 |
| si:dkey-269o24.6 | 9.431564 | 0.048575092  | 0.490545 | 0.099023 | 0.92112  | 0.994085 |
| or106-3          | 2.293068 | 0.364249033  | 1.246769 | 0.292154 | 0.770169 | 0.960484 |
| si:dkey-56m15.5  | 4.17518  | -0.61448868  | 0.896911 | -0.68512 | 0.49327  | 0.876787 |
| usp10            | 1259.308 | -0.018153033 | 0.124997 | -0.14523 | 0.884531 | 0.987168 |
| si:dkey-13m3.2   | 5.45637  | 0.862579538  | 0.887639 | 0.971768 | 0.331166 | 0.788766 |
| CR457444.4       | 0.349421 | 0            | 4.394359 | 0        | 1        | NA       |
| ogdhh            | 532.1652 | 0.064605157  | 0.166959 | 0.386952 | 0.698792 | 0.942456 |
| CR854926.1       | 3.356203 | 1.729464392  | 1.568944 | 1.102311 | 0.270327 | 0.74654  |
| RF00003          | 0 NA     | NA           | NA       | NA       | NA       | NA       |
| exosc4           | 298.9604 | -0.289331496 | 0.167019 | -1.73232 | 0.083216 | 0.48419  |
| rpl14            | 22319.99 | -0.246292871 | 0.104294 | -2.36152 | 0.0182   | 0.238026 |
| FP074902.1       | 0.499765 | 0            | 4.703282 | 0        | 1        | NA       |
| sorbs1           | 1306.54  | 0.071316065  | 0.125199 | 0.56962  | 0.568935 | 0.902234 |
| BX548028.1       | 0.049519 | 0            | 5.267649 | 0        | 1        | NA       |
| tradv3.0.1       | 0 NA     | NA           | NA       | NA       | NA       | NA       |
| si:dkey-248e17.5 | 10.78041 | 1.147943567  | 0.576569 | 1.99099  | 0.046482 | 0.376263 |
| znf1060          | 12.84491 | -0.932017478 | 0.536435 | -1.73743 | 0.082312 | 0.482739 |
| vwde             | 887.2789 | -0.081317764 | 0.195884 | -0.41513 | 0.678044 | 0.936026 |
| gig2h            | 5.387235 | -0.266465203 | 0.85116  | -0.31306 | 0.754234 | 0.955996 |
| CR376738.2       | 0.487692 | 0            | 3.217014 | 0        | 1        | NA       |
| gig2k            | 0 NA     | NA           | NA       | NA       | NA       | NA       |
| BX005085.3       | 47.50495 | 0.106452057  | 0.283268 | 0.3758   | 0.707065 | 0.944945 |
| zfp11            | 320.6246 | -0.22654498  | 0.147297 | -1.53801 | 0.124045 | 0.57117  |
| trpm6            | 163.3011 | 0.026214331  | 0.174083 | 0.150585 | 0.880303 | 0.986408 |
| cyp2aa11         | 12.85557 | 0.107424892  | 0.713468 | 0.150567 | 0.880317 | 0.986408 |
| spartb           | 269.8087 | -0.072033378 | 0.143106 | -0.50336 | 0.614713 | 0.915998 |
| znf1126          | 0.430074 | 1.557581681  | 2.800053 | 0.556269 | 0.578027 | NA       |
| dv13b            | 64.4779  | -0.212689334 | 0.236428 | -0.8996  | 0.368336 | 0.817272 |
| pggt1b           | 613.6442 | -0.051398702 | 0.143066 | -0.35927 | 0.719396 | 0.94694  |
| RF00001          | 0 NA     | NA           | NA       | NA       | NA       | NA       |
| cc135.1          | 15.01794 | -0.178635148 | 0.79481  | -0.22475 | 0.822172 | 0.971966 |
| limkla           | 76.24435 | 0.406534638  | 0.24314  | 1.672021 | 0.09452  | 0.513368 |
| CR450787.1       | 0.087179 | 0            | 5.267649 | 0        | 1        | NA       |
| polm             | 24.56949 | 0.089312432  | 0.445876 | 0.200308 | 0.84124  | 0.97643  |
| si:dkey-199m13.4 | 40.75913 | -0.011382934 | 0.249665 | -0.04559 | 0.963635 | 0.999842 |
| nedd81           | 0 NA     | NA           | NA       | NA       | NA       | NA       |
| BX537137.3       | 5.061048 | -1.346845321 | 1.030199 | -1.30736 | 0.191089 | 0.67094  |
| RF00478          | 0.329071 | 1.055390475  | 3.939488 | 0.2679   | 0.788776 | NA       |
| trpmlb           | 460.703  | -0.360217068 | 0.136531 | -2.63836 | 0.008331 | 0.155679 |
| si:ch211-255f4.5 | 23.72497 | -0.01774397  | 0.470396 | -0.03772 | 0.96991  | 1        |
| nsun6            | 30.63381 | 0.395815225  | 0.329738 | 1.200392 | 0.229987 | 0.711763 |
| ptprfa           | 482.569  | -0.161332284 | 0.147413 | -1.09442 | 0.27377  | 0.749234 |
| BX640512.3       | 12.74223 | -1.633671666 | 0.567298 | -2.87974 | 0.00398  | 0.105306 |
| litaf            | 177.1078 | -0.042943715 | 0.168008 | -0.25561 | 0.798256 | 0.966635 |
| pkdc             | 29.96604 | 0.00105446   | 0.305734 | 0.003449 | 0.997248 | 1        |
| card14           | 51.51781 | -0.107588744 | 0.306687 | -0.35081 | 0.725731 | 0.948653 |
| CT573799.1       | 2.416728 | -2.15066969  | 1.970196 | -1.0916  | 0.275008 | 0.750424 |

|                   |          |              |          |          |          |          |
|-------------------|----------|--------------|----------|----------|----------|----------|
| BX936431.1        | 1.497667 | 0.148817489  | 1.682981 | 0.088425 | 0.929539 | NA       |
| CR356246.1        | 1.751955 | 0.09365058   | 2.02512  | 0.046244 | 0.963115 | NA       |
| dpysl4            | 396.7699 | -0.101053482 | 0.165631 | -0.61011 | 0.541787 | 0.894102 |
| si:ch73-111k22.3  | 5.328541 | 0.718218223  | 0.675425 | 1.063357 | 0.28762  | 0.758397 |
| usp43a            | 20.46954 | 0.9234151    | 0.474064 | 1.947871 | 0.05143  | 0.394202 |
| zgc:173714        | 20.81512 | 1.124856822  | 0.617496 | 1.821642 | 0.068509 | 0.446264 |
| si:dkey-246j6.3   | 5.418192 | 1.340135999  | 0.906161 | 1.478916 | 0.139163 | 0.597222 |
| epd               | 3241.188 | -0.050140719 | 0.272291 | -0.18414 | 0.853901 | 0.978905 |
| RF02041           | 0        | NA           | NA       | NA       | NA       | NA       |
| RF00286           | 2.013196 | -0.052426986 | 1.324811 | -0.03957 | 0.968433 | NA       |
| RF00001           | 0.069091 | 0            | 5.267649 | 0        | 1        | NA       |
| dgatla            | 184.6962 | -0.017000481 | 0.240261 | -0.07076 | 0.94359  | 0.997371 |
| CR855311.4        | 2.210957 | 1.544932487  | 1.688708 | 0.914861 | 0.360265 | 0.811057 |
| fbxl3a            | 239.5216 | 0.266873769  | 0.214288 | 1.2454   | 0.212985 | 0.695345 |
| tradv5.0.2        | 0        | NA           | NA       | NA       | NA       | NA       |
| n4bp212           | 97.50391 | -0.074726329 | 0.1865   | -0.40068 | 0.688657 | 0.939118 |
| AL953910.1        | 0.053506 | -0.86807634  | 5.267649 | -0.16479 | 0.869106 | NA       |
| si:ch73-106n3.2   | 0.188805 | 1.05537054   | 5.267649 | 0.200349 | 0.841207 | NA       |
| CR391991.2        | 0.073968 | 0            | 5.267649 | 0        | 1        | NA       |
| zfang2a           | 541.6481 | -0.028132691 | 0.164242 | -0.17129 | 0.863997 | 0.981867 |
| vcana             | 17.96703 | -0.392129726 | 0.372448 | -1.05284 | 0.292412 | 0.761879 |
| sec24c            | 782.4049 | 0.052869194  | 0.102772 | 0.514429 | 0.606952 | 0.915204 |
| CR759810.1        | 0.268847 | 0            | 4.76527  | 0        | 1        | NA       |
| abhd8a            | 10.51927 | 0.436119121  | 0.59684  | 0.730714 | 0.464954 | 0.864823 |
| adamts1           | 275.8086 | -0.034130131 | 0.2954   | -0.11554 | 0.908018 | 0.991745 |
| si:dkey-148a17.5  | 2.180695 | 2.250531009  | 1.568788 | 1.434567 | 0.151411 | NA       |
| capsla            | 84.54702 | 0.210984867  | 0.227799 | 0.92619  | 0.354347 | 0.805403 |
| si:zfos-943e10.1  | 473.8192 | -0.114867697 | 0.121326 | -0.94677 | 0.343756 | 0.798147 |
| nudt6             | 106.5717 | 0.081083998  | 0.264353 | 0.306726 | 0.759052 | 0.957886 |
| YTHDC2            | 33.31242 | 1.068821504  | 0.407977 | 2.619807 | 0.008798 | 0.160701 |
| si:dkeyp-35e5.9   | 10.59537 | 0.797298513  | 0.594327 | 1.341515 | 0.179753 | 0.655282 |
| FP243383.1        | 59.5059  | -0.275243439 | 0.231157 | -1.19072 | 0.233763 | 0.714749 |
| zgc:113102        | 52.54053 | -0.131117571 | 0.307386 | -0.42656 | 0.669702 | 0.933451 |
| clec14a           | 241.7938 | -0.237292321 | 0.189954 | -1.24921 | 0.211588 | 0.693044 |
| si:ch211-117117.4 | 1.075778 | -3.78245953  | 2.189442 | -1.72759 | 0.084062 | NA       |
| F0818719.1        | 23.01426 | -0.342413736 | 0.621182 | -0.55123 | 0.581476 | 0.905618 |
| BX546503.1        | 0.13396  | 0            | 5.267649 | 0        | 1        | NA       |
| tt1112            | 111.4967 | -0.257771898 | 0.228462 | -1.12829 | 0.259196 | 0.736127 |
| BX571954.2        | 0.04222  | 0            | 5.267649 | 0        | 1        | NA       |
| gpr132b           | 5.278268 | 0.593028612  | 0.873451 | 0.678949 | 0.49717  | 0.878609 |
| vegfaa            | 226.9988 | 0.036143955  | 0.159398 | 0.226753 | 0.820616 | 0.971788 |
| nggt2b            | 3399.068 | 0.829824595  | 0.378351 | 2.193264 | 0.028288 | 0.299015 |
| trgv5             | 0        | NA           | NA       | NA       | NA       | NA       |
| tctex1d1          | 25.26348 | 0.892985951  | 0.34822  | 2.564431 | 0.010335 | 0.176586 |
| purbb             | 284.577  | 0.033187013  | 0.213816 | 0.155213 | 0.876653 | 0.985052 |
| CR925723.2        | 0        | NA           | NA       | NA       | NA       | NA       |
| CR354444.2        | 0.049519 | 0            | 5.267649 | 0        | 1        | NA       |
| RF00001           | 0.147561 | -1.710071829 | 5.238473 | -0.32644 | 0.744088 | NA       |
| rnf213b           | 8.267087 | -1.754981933 | 0.855183 | -2.05217 | 0.040153 | 0.350281 |
| tradv10.0.1       | 0        | NA           | NA       | NA       | NA       | NA       |
| sf3b3             | 1387.258 | 0.045988781  | 0.087993 | 0.52264  | 0.601225 | 0.913756 |
| notch1a           | 676.9642 | 0.503742768  | 0.219013 | 2.300055 | 0.021445 | 0.25974  |
| si:ch211-8c17.4   | 3.183504 | -0.458648127 | 1.153238 | -0.3977  | 0.690848 | 0.940147 |
| si:ch211-218g23.6 | 16.49743 | -0.648047277 | 0.664857 | -0.97472 | 0.329701 | 0.788011 |

|                   |          |              |          |          |          |          |
|-------------------|----------|--------------|----------|----------|----------|----------|
| CU462878.2        | 0.154753 | 0.892446925  | 5.241767 | 0.170257 | 0.864808 | NA       |
| si:dkeyp-30d6.2   | 0.76004  | 0.09365339   | 2.351062 | 0.039835 | 0.968225 | NA       |
| tomm20b           | 1915.678 | -0.325053257 | 0.14099  | -2.30551 | 0.021138 | 0.25794  |
| FP103005.2        | 0.470221 | 1.055403884  | 3.294421 | 0.320361 | 0.748695 | NA       |
| si:ch211-255f4.8  | 7.471188 | 0.427014069  | 0.679308 | 0.628601 | 0.52961  | 0.890434 |
| si:dkey-201i24.3  | 1.903622 | 1.920993428  | 2.010987 | 0.955249 | 0.339452 | NA       |
| si:dkeyp-104b3.1  | 0.417814 | 0            | 4.872827 | 0        | 1        | NA       |
| EPHB3             | 49.93771 | 0.028677601  | 0.391517 | 0.073247 | 0.941609 | 0.997371 |
| gtf2b             | 555.8639 | 0.054839562  | 0.095557 | 0.573896 | 0.566038 | 0.901739 |
| znf1166           | 14.94188 | 0.057590079  | 0.406414 | 0.141703 | 0.887315 | 0.9878   |
| si:ch211-106g8.17 | 0        | NA           | NA       | NA       | NA       | NA       |
| si:dkey-65j6.2    | 252.4796 | -0.070500994 | 0.283932 | -0.2483  | 0.8039   | 0.968812 |
| prrt2             | 123.3626 | 0.332871883  | 0.258887 | 1.28578  | 0.19852  | 0.679281 |
| gata6             | 284.7483 | 0.111330021  | 0.167612 | 0.664214 | 0.506553 | 0.883007 |
| cyp2aa6           | 209.6356 | -0.369512429 | 0.149586 | -2.47024 | 0.013502 | 0.202885 |
| dkk3a             | 146.8369 | 0.305674939  | 0.281749 | 1.08492  | 0.277957 | 0.751841 |
| npm3              | 711.8663 | -0.278646229 | 0.145724 | -1.91215 | 0.055857 | 0.408826 |
| sfxn5a            | 11.49564 | -0.326498619 | 0.635832 | -0.5135  | 0.607603 | 0.915204 |
| si:dkey-40j3.3    | 0.34205  | -0.774949856 | 3.387617 | -0.22876 | 0.819056 | NA       |
| st8sia4           | 69.44105 | -0.499715919 | 0.213163 | -2.34429 | 0.019063 | 0.242999 |
| pcdh1a3           | 5.306642 | -0.488144613 | 0.874223 | -0.55838 | 0.576588 | 0.90475  |
| CABZ01068244.1    | 0.32122  | -0.868116031 | 5.267649 | -0.1648  | 0.8691   | NA       |
| ndst1b            | 453.5792 | 0.14306098   | 0.141554 | 1.010643 | 0.312187 | 0.776164 |
| wtip              | 75.27587 | 0.064810505  | 0.222494 | 0.291291 | 0.770828 | 0.960484 |
| zgc:153431        | 7.831913 | 0.020178597  | 0.554127 | 0.036415 | 0.970951 | 1        |
| mib2              | 60.0947  | -0.337165848 | 0.243261 | -1.38602 | 0.16574  | 0.635372 |
| actr8             | 228.2675 | -0.029129524 | 0.162386 | -0.17938 | 0.857636 | 0.979756 |
| akt2l             | 1302.601 | -0.369575828 | 0.128475 | -2.87663 | 0.004019 | 0.105636 |
| pent              | 89.68941 | 0.07360326   | 0.369271 | 0.19932  | 0.842012 | 0.97643  |
| si:dkey-31j3.11   | 9.342419 | 0.681725996  | 0.541208 | 1.259637 | 0.2078   | 0.689888 |
| CU468002.1        | 0.101446 | -1.755425691 | 5.23528  | -0.33531 | 0.737394 | NA       |
| btr18             | 10.47823 | -0.462590329 | 0.503933 | -0.91796 | 0.35864  | 0.80995  |
| si:ch73-238c9.1   | 268.9032 | -0.250080752 | 0.182586 | -1.36966 | 0.170794 | 0.642627 |
| RF00001           | 0        | NA           | NA       | NA       | NA       | NA       |
| npy7r             | 0.83625  | 0.093649358  | 2.685769 | 0.034869 | 0.972184 | NA       |
| CT573408.1        | 0        | NA           | NA       | NA       | NA       | NA       |
| traj43            | 0        | NA           | NA       | NA       | NA       | NA       |
| CU914622.2        | 64.00538 | -0.967660373 | 0.601492 | -1.60877 | 0.107668 | 0.538919 |
| CT583728.7        | 0        | NA           | NA       | NA       | NA       | NA       |
| zgc:174703        | 14.73024 | -0.69365868  | 0.447828 | -1.54894 | 0.121396 | 0.567605 |
| CR936977.2        | 13.96498 | 0.269597431  | 0.528982 | 0.509653 | 0.610295 | 0.915331 |
| si:dkey-36i7.3    | 359.5468 | -0.260996735 | 0.214999 | -1.21394 | 0.224769 | 0.706634 |
| pglyrp6           | 38.25248 | 1.05542303   | 1.72781  | 0.610845 | 0.541302 | 0.893749 |
| unc45a            | 191.7325 | 0.156926895  | 0.167816 | 0.935111 | 0.349731 | 0.801408 |
| BX088524.3        | 19.12324 | 0.465472887  | 0.662921 | 0.702154 | 0.482583 | 0.871721 |
| gpc5a             | 62.84027 | -0.00362293  | 0.235583 | -0.01538 | 0.98773  | 1        |
| znf536            | 573.0475 | 0.248656381  | 0.140041 | 1.775603 | 0.075798 | 0.466467 |
| si:ch73-329n5.1   | 8.175681 | 0.379316464  | 0.878655 | 0.431701 | 0.665959 | 0.932664 |
| map3k12           | 55.62413 | -0.024318789 | 0.32021  | -0.07595 | 0.939462 | 0.997371 |
| CU179757.1        | 0.045161 | 0            | 5.267649 | 0        | 1        | NA       |
| hivepl            | 306.8986 | 0.198263297  | 0.236921 | 0.836834 | 0.402686 | 0.833401 |
| bcol1             | 67.75575 | -0.627666918 | 0.444949 | -1.41065 | 0.158348 | 0.623766 |
| RF00001           | 0        | NA           | NA       | NA       | NA       | NA       |
| si:zfos-169g10.2  | 3.247096 | 0.939309543  | 1.133875 | 0.828407 | 0.40744  | 0.835729 |

|                    |          |              |            |          |          |          |
|--------------------|----------|--------------|------------|----------|----------|----------|
| NINJ1              | 42.3143  | -0.080084613 | 0.358027   | -0.22368 | 0.823004 | 0.971966 |
| brpf1              | 312.0399 | 0.113229093  | 0.11979    | 0.945227 | 0.344543 | 0.798147 |
| dapk2b             | 56.70218 | -0.038817884 | 0.309741   | -0.12532 | 0.900267 | 0.99045  |
| gga3a              | 312.3745 | 0.174520486  | 0.128096   | 1.36242  | 0.173065 | 0.645824 |
| CU570782.2         | 0.114252 |              | 0 5.267649 |          | 0        | 1 NA     |
| cmc1               | 495.8874 | 0.200958154  | 0.149903   | 1.340588 | 0.180054 | 0.655746 |
| cirbpa             | 17333.28 | 0.05286958   | 0.130552   | 0.40497  | 0.685499 | 0.938486 |
| CABZ01063651.1     | 1.588785 | 0.707293261  | 1.582291   | 0.447006 | 0.654871 | NA       |
| CR854948.1         |          | 0 NA         | NA         | NA       | NA       | NA       |
| si:dkey-9018.3     | 28.90011 | -0.183150774 | 0.353781   | -0.5177  | 0.604671 | 0.914985 |
| CABZ01008730.1     | 3.36653  | -1.772916941 | 1.72208    | -1.02952 | 0.303235 | 0.769293 |
| si:ch211-215e19.4  |          | 0 NA         | NA         | NA       | NA       | NA       |
| bmp16              | 169.0919 | -0.172601272 | 0.218139   | -0.79124 | 0.428802 | 0.84657  |
| CU041363.1         | 0.459598 | 0.897569461  | 4.149006   | 0.216334 | 0.828728 | NA       |
| si:dkey-23i12.5    | 382.822  | -0.288655521 | 0.202923   | -1.42249 | 0.154884 | 0.619752 |
| inpp5b             | 450.3439 | -0.04857763  | 0.108877   | -0.44617 | 0.655475 | 0.929606 |
| ap4e1              | 225.1595 | 0.210825003  | 0.20702    | 1.01838  | 0.308498 | 0.773474 |
| or106-2            | 5.253642 | 1.105475367  | 0.882927   | 1.252057 | 0.210549 | 0.692339 |
| RF00001            |          | 0 NA         | NA         | NA       | NA       | NA       |
| syncn.2            | 3342.297 | 0.093607982  | 1.678642   | 0.055764 | 0.95553  | 0.998611 |
| znf1148            | 6.032349 | -0.212341855 | 0.723687   | -0.29342 | 0.769204 | 0.960484 |
| vipas39            | 176.1089 | 0.146150682  | 0.161607   | 0.904359 | 0.365805 | 0.815714 |
| rfx7b              | 517.3703 | 0.008553251  | 0.148831   | 0.05747  | 0.954171 | 0.998611 |
| p4ha3              | 20.85117 | 0.803375782  | 0.475316   | 1.690193 | 0.090991 | 0.50549  |
| RF00001            |          | 0 NA         | NA         | NA       | NA       | NA       |
| CABZ01064968.1     | 15.13637 | 0.146184     | 0.586356   | 0.249309 | 0.803122 | 0.968418 |
| arnt2              | 835.5123 | -0.111563441 | 0.143226   | -0.77893 | 0.436019 | 0.85067  |
| ptpn13             | 881.5911 | -0.080684401 | 0.141606   | -0.56978 | 0.568827 | 0.902234 |
| si:ch211-239d6.2   |          | 0 NA         | NA         | NA       | NA       | NA       |
| si:busml-194e12.8  |          | 0 NA         | NA         | NA       | NA       | NA       |
| cldn23b            | 25.05932 | 0.590433726  | 0.411652   | 1.434302 | 0.151486 | 0.615372 |
| crhr2              | 2.196075 | 3.732032819  | 1.760653   | 2.119686 | 0.034032 | NA       |
| traj59             |          | 0 NA         | NA         | NA       | NA       | NA       |
| CU694378.1         | 0.254465 | 1.055361426  | 4.881108   | 0.216214 | 0.828821 | NA       |
| plpp7a             | 401.0893 | 0.157731128  | 0.182435   | 0.864587 | 0.387266 | 0.827592 |
| cd248a             | 705.8386 | 0.056681229  | 0.123517   | 0.458893 | 0.646311 | 0.926728 |
| rab6a              | 1050.137 | -0.044139701 | 0.118107   | -0.37373 | 0.708607 | 0.94551  |
| BX510949.1         | 1.043375 | 2.224944782  | 2.402716   | 0.926012 | 0.35444  | NA       |
| si:busml-194e12.11 | 1.352808 | 2.962800989  | 5.16079    | 0.574098 | 0.565901 | NA       |
| CT978957.2         | 7.230679 | -0.517573016 | 1.044948   | -0.49531 | 0.620381 | 0.918012 |
| chmp5b             | 980.1147 | 0.058069275  | 0.120555   | 0.481681 | 0.630032 | 0.922869 |
| AL772298.2         | 0.043308 |              | 0 5.267649 |          | 0        | 1 NA     |
| zgc:162730         | 2119.396 | -0.129129946 | 0.229747   | -0.56205 | 0.574079 | 0.904376 |
| si:dkey-122c11.7   | 1.356317 | -3.097157126 | 1.819976   | -1.70176 | 0.088801 | NA       |
| znf341             | 51.6065  | -0.119336808 | 0.261077   | -0.45709 | 0.647603 | 0.927091 |
| tfr2               | 67.88177 | -0.149279697 | 0.300377   | -0.49698 | 0.619206 | 0.917397 |
| RF00012            |          | 0 NA         | NA         | NA       | NA       | NA       |
| vgl14b             | 1077.142 | 0.212703958  | 0.125708   | 1.692042 | 0.090638 | 0.505206 |
| plpla              | 421.3163 | -0.065706859 | 0.180587   | -0.36385 | 0.715969 | 0.946266 |
| FP085414.2         | 0.129925 |              | 0 5.267649 |          | 0        | 1 NA     |
| elov11b            | 748.6163 | -0.059338669 | 0.125561   | -0.47259 | 0.636506 | 0.924779 |
| gramd2aa           | 127.745  | -0.397636622 | 0.199999   | -1.98819 | 0.046791 | 0.376829 |
| si:ch211-230g14.6  | 6.481629 | -0.946513362 | 0.670316   | -1.41204 | 0.157938 | 0.623766 |
| FP085399.2         | 2.127053 | 1.055437954  | 2.047231   | 0.515544 | 0.606173 | NA       |

|                   |          |              |          |          |          |          |
|-------------------|----------|--------------|----------|----------|----------|----------|
| bahcc1a           | 154.7555 | 0.331236999  | 0.173846 | 1.905346 | 0.056735 | 0.41157  |
| fundc2            | 773.165  | 0.039389149  | 0.153703 | 0.256267 | 0.797744 | 0.966447 |
| si:dkeyp-72e1.9   | 95.08691 | -0.669416173 | 0.277125 | -2.41557 | 0.015711 | 0.221285 |
| hacd1             | 1443.307 | 0.244827477  | 0.116332 | 2.104567 | 0.035329 | 0.330833 |
| BX005286.3        | 0.513693 | 1.055421455  | 2.820523 | 0.374193 | 0.70826  | NA       |
| mapkbp1           | 172.6738 | 0.147885605  | 0.209758 | 0.70503  | 0.480791 | 0.870179 |
| cav1              | 1538.592 | -0.095632344 | 0.129368 | -0.73923 | 0.45977  | 0.862369 |
| ovca2             | 55.07935 | -0.261131759 | 0.263505 | -0.99099 | 0.321689 | 0.782075 |
| RF00026           | 0 NA     | NA           | NA       | NA       | NA       | NA       |
| si:ch211-246m6.5  | 329.7932 | 0.10231087   | 0.169771 | 0.602641 | 0.546748 | 0.896107 |
| si:dkey-262g12.14 | 101.966  | -0.156123293 | 0.213456 | -0.73141 | 0.464531 | 0.864651 |
| DUSP26            | 27.08274 | 0.230942252  | 0.548211 | 0.421266 | 0.673561 | 0.934348 |
| RF00026           | 0 NA     | NA           | NA       | NA       | NA       | NA       |
| aspm              | 581.8787 | 0.333544097  | 0.446948 | 0.746271 | 0.455504 | 0.860008 |
| si:dkeyp-4c4.1    | 9.59939  | -7.413405872 | 1.448592 | -5.11766 | 3.09E-07 | 0.000119 |
| CR388184.2        | 0 NA     | NA           | NA       | NA       | NA       | NA       |
| fahd2a            | 1031.525 | -0.45180036  | 0.202322 | -2.23307 | 0.025544 | 0.28373  |
| cfh12             | 102.0579 | -1.273890608 | 0.299451 | -4.25408 | 2.10E-05 | 0.003002 |
| ugt1b6p           | 1.096631 | -1.670140883 | 2.075311 | -0.80477 | 0.420954 | NA       |
| rln1              | 12.49571 | 1.158420025  | 0.558525 | 2.074069 | 0.038073 | 0.342345 |
| l3hypdh           | 56.06852 | -0.462852691 | 0.322974 | -1.43309 | 0.151831 | 0.615406 |
| gdnfb             | 3.097109 | -0.133782723 | 1.251889 | -0.10686 | 0.914896 | 0.993066 |
| stpg1             | 1.362973 | 0.261113371  | 1.455304 | 0.179422 | 0.857606 | NA       |
| cyp2aa7           | 77.31565 | -0.041962405 | 0.300385 | -0.1397  | 0.888901 | 0.988188 |
| CR855320.2        | 0 NA     | NA           | NA       | NA       | NA       | NA       |
| si:ch211-147m6.2  | 0.049021 | -0.86807634  | 5.267649 | -0.16479 | 0.869106 | NA       |
| ARMC6             | 59.95982 | -0.056238207 | 0.214273 | -0.26246 | 0.792966 | 0.965312 |
| cep128            | 18.80218 | 0.205625021  | 0.394758 | 0.520889 | 0.602444 | 0.914001 |
| tradv24.0.4       | 0.147936 | 0            | 5.267649 | 0        | 1        | NA       |
| CR457444.5        | 5.722973 | 0            | 1.785453 | 0        | 1        | 1        |
| limch1b           | 520.3527 | -0.24695686  | 0.144095 | -1.71385 | 0.086557 | 0.493048 |
| CR354610.1        | 16.13511 | 0.804986043  | 0.536388 | 1.500754 | 0.133419 | 0.586903 |
| znf1001           | 61.81109 | -0.049132613 | 0.248577 | -0.19766 | 0.843315 | 0.976791 |
| RF00001           | 0 NA     | NA           | NA       | NA       | NA       | NA       |
| cyrr1             | 574.8322 | 0.04637311   | 0.143503 | 0.32315  | 0.746581 | 0.955074 |
| RF00003           | 0 NA     | NA           | NA       | NA       | NA       | NA       |
| sult2st2          | 514.9975 | 0.027975379  | 0.214722 | 0.130286 | 0.89634  | 0.98939  |
| klhl13            | 27.49045 | -0.029274862 | 0.361455 | -0.08099 | 0.935449 | 0.996829 |
| chd1              | 562.4333 | 0.187723612  | 0.156695 | 1.198023 | 0.230908 | 0.712561 |
| AL645792.2        | 0.616602 | 1.898335302  | 3.126039 | 0.607265 | 0.543675 | NA       |
| tmem130           | 318.1685 | -0.576691367 | 0.189341 | -3.04578 | 0.002321 | 0.076635 |
| nme2b.1           | 19036.03 | -0.406212209 | 0.149655 | -2.71432 | 0.006641 | 0.137024 |
| CABZ01076737.1    | 10.29347 | 0.003988597  | 0.601457 | 0.006632 | 0.994709 | 1        |
| zgc:113348        | 205.7566 | 0.123353335  | 0.163433 | 0.754762 | 0.450392 | 0.857151 |
| kars              | 3535.862 | 0.155546434  | 0.13603  | 1.14347  | 0.252843 | 0.732759 |
| prkar1b           | 218.2005 | -0.119484878 | 0.209486 | -0.57037 | 0.568426 | 0.902146 |
| si:ch73-389b16.2  | 514.5516 | 0.12363142   | 0.135236 | 0.91419  | 0.360617 | 0.811237 |
| BX004785.3        | 12.46416 | 1.278219768  | 0.899845 | 1.420489 | 0.155465 | 0.620161 |
| CR376821.1        | 0 NA     | NA           | NA       | NA       | NA       | NA       |
| CT990567.3        | 0.063619 | 0            | 5.267649 | 0        | 1        | NA       |
| cacna2d4a         | 17.04691 | -2.80377456  | 1.332056 | -2.10485 | 0.035305 | 0.330833 |
| agla              | 1258.923 | -0.150453646 | 0.168259 | -0.89418 | 0.371226 | 0.818945 |
| ATE1              | 140.5934 | 0.230501537  | 0.178446 | 1.291713 | 0.196457 | 0.67688  |
| CR450808.3        | 12.35006 | -1.36815721  | 0.503529 | -2.71713 | 0.006585 | 0.136957 |

|                    |          |              |          |          |          |          |
|--------------------|----------|--------------|----------|----------|----------|----------|
| BX950855.1         | 5.548599 | 0.61241546   | 0.782781 | 0.782358 | 0.434004 | 0.850002 |
| tmem42b            | 25.68424 | -0.072272221 | 0.361424 | -0.19997 | 0.841508 | 0.97643  |
| CU896644.1         | 0 NA     | NA           | NA       | NA       | NA       | NA       |
| CU459186.4         | 1.570194 | -0.573445709 | 1.681984 | -0.34093 | 0.733153 | NA       |
| rbms1b             | 25.09534 | 0.123482364  | 0.389455 | 0.317065 | 0.751194 | 0.955226 |
| hint1              | 939.6857 | 0.000195772  | 0.152483 | 0.001284 | 0.998976 | 1        |
| galnt10            | 198.0868 | -0.109774926 | 0.218578 | -0.50222 | 0.615511 | 0.916365 |
| gpib               | 1557.193 | -0.129025534 | 0.21646  | -0.59607 | 0.551127 | 0.8974   |
| znf1144            | 54.1047  | 0.008160567  | 0.25725  | 0.031722 | 0.974694 | 1        |
| si:ch73-236c18.2   | 1.065999 | 1.616679828  | 2.326236 | 0.694977 | 0.48707  | NA       |
| ddr2l              | 170.712  | 0.041364658  | 0.271659 | 0.152267 | 0.878976 | 0.985907 |
| ankrd13c           | 896.6577 | 0.118432947  | 0.087497 | 1.35356  | 0.175877 | 0.649413 |
| spink2.2           | 4.476153 | 1.055439027  | 1.869824 | 0.564459 | 0.572442 | 0.903461 |
| rbml4b             | 615.1305 | 0.526373075  | 0.160665 | 3.276211 | 0.001052 | 0.04548  |
| CU633479.2         | 87.14892 | -0.78332185  | 0.386777 | -2.02525 | 0.042841 | 0.362408 |
| lrrc8db            | 229.2088 | -0.274774094 | 0.233201 | -1.17827 | 0.238688 | 0.719728 |
| CU024870.1         | 0.46225  | -1.75563288  | 4.8344   | -0.36315 | 0.71649  | NA       |
| spag8              | 12.6076  | 0.408312346  | 0.470285 | 0.868223 | 0.385272 | 0.826939 |
| si:ch211-266c8.1   | 17.46813 | -2.057531476 | 0.762315 | -2.69906 | 0.006954 | 0.14059  |
| zgc:55733          | 1048.583 | 0.045687571  | 0.109637 | 0.416715 | 0.676887 | 0.935664 |
| hspa5              | 2974.822 | 0.141813057  | 0.17378  | 0.816049 | 0.414472 | 0.838683 |
| CR339059.1         | 1.990344 | 0.365657592  | 1.759278 | 0.207845 | 0.83535  | NA       |
| apbala             | 166.8741 | 0.192390401  | 0.163402 | 1.177407 | 0.239033 | 0.719781 |
| mdhlab             | 1535.994 | -0.389355777 | 0.172714 | -2.25434 | 0.024175 | 0.275116 |
| si:cabz01021426.2  | 111.2305 | -0.290443719 | 0.185085 | -1.56924 | 0.116591 | 0.557506 |
| tnrc6c2            | 467.4934 | -0.072518965 | 0.141764 | -0.51155 | 0.608967 | 0.915204 |
| pigr14.2           | 1.58618  | 1.055425998  | 2.209329 | 0.477713 | 0.632854 | NA       |
| znf1183            | 16.15861 | 0.325580375  | 0.406794 | 0.800357 | 0.423504 | 0.843967 |
| pdlim7             | 2127.7   | 0.023030773  | 0.16978  | 0.135651 | 0.892097 | 0.988566 |
| ptcd3              | 479.9267 | -0.007086758 | 0.121263 | -0.05844 | 0.953397 | 0.998436 |
| RF00001            | 0 NA     | NA           | NA       | NA       | NA       | NA       |
| arf4a              | 5.899697 | -0.912526006 | 0.714207 | -1.27768 | 0.201364 | 0.681208 |
| wu:fu71h07         | 25.22184 | 0.207083176  | 0.407874 | 0.507713 | 0.611654 | 0.915331 |
| RF00001            | 0.045161 | 0 5.267649   | 0        | 1 NA     |          |          |
| hoxa4a             | 480.3606 | -0.191082801 | 0.107998 | -1.76932 | 0.076841 | 0.469467 |
| wu:fc30c06         | 58.64526 | 0.06803885   | 0.245539 | 0.2771   | 0.781703 | 0.962077 |
| nitr3r.11          | 0.244922 | 0 5.267649   | 0        | 1 NA     |          |          |
| BX005054.1         | 0.14264  | 0 5.267649   | 0        | 1 NA     |          |          |
| e2f1               | 33.07411 | -0.23846545  | 0.319285 | -0.74687 | 0.455141 | 0.860008 |
| CU855889.2         | 22.03453 | -0.132469387 | 0.376483 | -0.35186 | 0.724943 | 0.948578 |
| si:ch73-109d9.2    | 214.8464 | -0.148093877 | 0.170648 | -0.86783 | 0.385485 | 0.826939 |
| si:dkey-84h14.4    | 0 NA     | NA           | NA       | NA       | NA       | NA       |
| BX927082.1         | 0 NA     | NA           | NA       | NA       | NA       | NA       |
| tradv23.0.1        | 0 NA     | NA           | NA       | NA       | NA       | NA       |
| anpepb             | 287.3473 | -3.929999104 | 1.296375 | -3.03153 | 0.002433 | 0.07907  |
| si:ch1073-181h11.2 | 0.530337 | 0 3.565166   | 0        | 1 NA     |          |          |
| si:dkey-161111.75  | 0 NA     | NA           | NA       | NA       | NA       | NA       |
| carmill            | 48.88093 | -0.503164849 | 0.289707 | -1.7368  | 0.082422 | 0.482825 |
| RF00001            | 0 NA     | NA           | NA       | NA       | NA       | NA       |
| mettl17            | 168.7251 | -0.085604918 | 0.15305  | -0.55933 | 0.575938 | 0.904739 |
| si:dkeyp-13d12.18  | 0.215518 | 0 5.267649   | 0        | 1 NA     |          |          |
| CABZ01074203.1     | 16.52256 | -0.438480427 | 0.38029  | -1.15302 | 0.248904 | 0.728918 |
| srsf2b             | 534.8648 | 0.10675459   | 0.105966 | 1.007441 | 0.313723 | 0.777429 |
| traj2              | 0.060442 | 0 5.267649   | 0        | 1 NA     |          |          |

|                   |          |              |          |          |          |          |
|-------------------|----------|--------------|----------|----------|----------|----------|
| CT737210.1        | 1.316351 | -0.804220377 | 2.026221 | -0.39691 | 0.691436 | NA       |
| sept9b            | 367.0076 | -0.083625825 | 0.180789 | -0.46256 | 0.643679 | 0.925997 |
| ndel              | 189.8333 | 0.091082361  | 0.127953 | 0.71184  | 0.476564 | 0.869292 |
| L0017650.1        | 69.18588 | -0.175737989 | 0.253947 | -0.69203 | 0.48892  | 0.873964 |
| pcdh2ab10         | 3.348054 | -1.508326091 | 0.968018 | -1.55816 | 0.119196 | 0.562753 |
| sgol              | 190.5461 | 0.299836617  | 0.306977 | 0.976738 | 0.328699 | 0.787144 |
| pimr202           | 0 NA     | NA           | NA       | NA       | NA       | NA       |
| THEM6             | 62.67741 | 0.424156337  | 0.281032 | 1.509284 | 0.131226 | 0.583069 |
| erolb             | 282.5376 | 0.051232751  | 0.178546 | 0.286944 | 0.774155 | 0.960694 |
| RF00001           | 0.105115 | 1.055383603  | 5.267649 | 0.200352 | 0.841205 | NA       |
| znf185            | 607.1318 | 0.053621806  | 0.143845 | 0.372775 | 0.709316 | 0.945546 |
| si:ch73-1a9.3     | 15127.32 | -0.02546244  | 0.143408 | -0.17755 | 0.859074 | 0.979975 |
| CR847936.2        | 0 NA     | NA           | NA       | NA       | NA       | NA       |
| bod1              | 323.6925 | 0.010164503  | 0.129855 | 0.078276 | 0.937609 | 0.997305 |
| tfap4             | 151.2918 | -0.36700749  | 0.176523 | -2.07909 | 0.037609 | 0.340171 |
| zgc:154055        | 80.46902 | -0.606054639 | 0.292349 | -2.07305 | 0.038167 | 0.342672 |
| RF00001           | 0 NA     | NA           | NA       | NA       | NA       | NA       |
| inpp5e            | 217.5386 | 0.172723251  | 0.146121 | 1.182057 | 0.237183 | 0.718568 |
| CR450824.2        | 3.783357 | 1.938920752  | 1.178363 | 1.645436 | 0.09988  | 0.524166 |
| RF00001           | 0 NA     | NA           | NA       | NA       | NA       | NA       |
| ildrla            | 337.4101 | -0.123428119 | 0.144257 | -0.85561 | 0.392213 | 0.827902 |
| fancm             | 25.30323 | -0.247246023 | 0.420574 | -0.58788 | 0.556615 | 0.899063 |
| mef8              | 29.26769 | 0.623176212  | 0.376163 | 1.656666 | 0.097587 | 0.520989 |
| rab27a            | 237.3267 | -0.300726858 | 0.17702  | -1.69883 | 0.089352 | 0.501643 |
| zgc:173486        | 0 NA     | NA           | NA       | NA       | NA       | NA       |
| ndrg4             | 1921.594 | 0.079107657  | 0.16605  | 0.47641  | 0.633783 | 0.923974 |
| frrs11            | 35.32571 | 0.037587989  | 0.346927 | 0.108345 | 0.913722 | 0.992796 |
| FP085399.3        | 0 NA     | NA           | NA       | NA       | NA       | NA       |
| si:dkey-124113.1  | 4.149703 | 0.155649741  | 1.404294 | 0.110838 | 0.911744 | 0.992336 |
| zgc:113295        | 117.3322 | 0.046209841  | 0.207898 | 0.222272 | 0.824102 | 0.97205  |
| RF00001           | 0 NA     | NA           | NA       | NA       | NA       | NA       |
| zbtb12.1          | 18.15174 | -1.216474958 | 0.480123 | -2.53367 | 0.011287 | 0.184175 |
| pcdh1gc6          | 84.05884 | -0.324445325 | 0.281811 | -1.15129 | 0.249614 | 0.729721 |
| tspan34           | 22.61113 | -0.484905931 | 1.363894 | -0.35553 | 0.722192 | 0.947466 |
| CABZ01054391.1    | 20.24473 | 0.241309485  | 0.491544 | 0.490922 | 0.623482 | 0.919171 |
| med12             | 1174.178 | 0.050973824  | 0.116007 | 0.439402 | 0.660371 | 0.930581 |
| znf1152           | 50.86285 | 0.002675494  | 0.244298 | 0.010952 | 0.991262 | 1        |
| si:dkey-29j8.1    | 0.178355 | 0            | 5.267649 | 0        | 1        | NA       |
| si:dkey-17o15.2   | 342.382  | 0.098646517  | 0.142628 | 0.691634 | 0.489167 | 0.874267 |
| aamdc             | 205.1029 | 0.099339183  | 0.201739 | 0.492415 | 0.622426 | 0.918691 |
| pak1              | 356.5888 | 0.157141401  | 0.14567  | 1.078747 | 0.280701 | 0.753147 |
| CU019624.1        | 11.16895 | -4.400945556 | 2.092288 | -2.10341 | NA       | NA       |
| poln              | 9.955184 | -0.529407519 | 0.559895 | -0.94555 | 0.34438  | 0.798147 |
| add1              | 582.3124 | -0.162939164 | 0.181428 | -0.89809 | 0.369135 | 0.817763 |
| si:dkeyp-104b3.21 | 3.646914 | 0.814183714  | 1.299666 | 0.626456 | 0.531016 | 0.890545 |
| si:ch211-156b7.5  | 2.490817 | -0.33896751  | 1.366518 | -0.24805 | 0.804094 | 0.968814 |
| CU062501.2        | 1.02094  | 0.693045842  | 2.374326 | 0.291892 | 0.770369 | NA       |
| RF00026           | 0 NA     | NA           | NA       | NA       | NA       | NA       |
| smyhc2            | 2174.454 | 0.327466187  | 0.16351  | 2.002723 | 0.045207 | 0.372359 |
| si:ch73-173p19.2  | 4.616395 | -2.60725546  | 1.457224 | -1.78919 | 0.073584 | 0.461398 |
| CR352209.1        | 0.094031 | -0.868089684 | 5.267649 | -0.1648  | 0.869104 | NA       |
| RF00001           | 0.158701 | 0            | 5.267649 | 0        | 1        | NA       |
| BX544877.1        | 0.772297 | -2.777516243 | 2.506386 | -1.10818 | 0.267786 | NA       |
| terf2ip           | 192.2073 | -0.09244446  | 0.145606 | -0.63489 | 0.525498 | 0.888928 |

|                   |          |              |          |          |          |          |
|-------------------|----------|--------------|----------|----------|----------|----------|
| sh3bp5b           | 418.0521 | 0.111621747  | 0.12824  | 0.870415 | 0.384074 | 0.826565 |
| calr3a            | 1937.294 | 0.260521565  | 0.12825  | 2.031359 | 0.042219 | 0.359502 |
| ets2              | 618.5604 | -0.361389473 | 0.263148 | -1.37333 | 0.169649 | 0.641445 |
| bhlha9            | 281.028  | -0.227011585 | 0.163321 | -1.38997 | 0.164539 | 0.634007 |
| slc30a10          | 104.3029 | 0.291142701  | 0.257391 | 1.13113  | 0.258    | 0.735569 |
| cyth4b            | 31.3131  | -0.031193141 | 0.306709 | -0.1017  | 0.918993 | 0.993892 |
| spryl             | 110.4358 | 0.090241023  | 0.262047 | 0.34437  | 0.730568 | 0.950056 |
| mymk              | 97.68655 | 0.028426065  | 0.251046 | 0.11323  | 0.909848 | 0.992208 |
| si:ch211-237a4.2  | 1.512405 | 1.91107041   | 1.922277 | 0.99417  | 0.32014  | NA       |
| ppiab             | 8223.809 | -0.060820522 | 0.123698 | -0.49168 | 0.622943 | 0.918894 |
| spd11             | 183.9576 | 0.166645288  | 0.229822 | 0.725106 | 0.468387 | 0.866951 |
| BX548173.1        | 1.102415 | -0.943357002 | 1.876593 | -0.5027  | 0.615178 | NA       |
| RF00017           | 0        | NA           | NA       | NA       | NA       | NA       |
| ccl39.4           | 1.000355 | 0.54624787   | 2.212978 | 0.246838 | 0.805033 | NA       |
| si:dkey-146c18.2  | 0.239301 | -1.710098575 | 5.238471 | -0.32645 | 0.744084 | NA       |
| slc4a3            | 16.92752 | 0.357364473  | 0.570394 | 0.626522 | 0.530973 | 0.890545 |
| znf1082           | 16.70091 | -0.871534686 | 0.496899 | -1.75395 | 0.079439 | 0.477213 |
| pcdhlgl           | 18.38605 | -0.448792697 | 0.520488 | -0.86225 | 0.388548 | 0.827613 |
| si:ch211-232d10.3 | 4.506372 | -1.002367893 | 1.406421 | -0.71271 | 0.476026 | 0.869292 |
| si:dkey-264f17.3  | 0.632612 | 1.055421238  | 2.643242 | 0.39929  | 0.689679 | NA       |
| rps17             | 10124.52 | -0.325613369 | 0.104823 | -3.10633 | 0.001894 | 0.067264 |
| BX323041.1        | 4.161567 | 1.0796252    | 1.090011 | 0.990472 | 0.321944 | 0.782075 |
| mark1             | 49.34308 | 0.001563704  | 0.277496 | 0.005635 | 0.995504 | 1        |
| fgfr1bl           | 52.11654 | -10.02526936 | 1.263297 | -7.9358  | 2.09E-15 | 4.85E-12 |
| si:dkey-151j17.4  | 7.011037 | 0.534500519  | 0.770225 | 0.693953 | 0.487711 | 0.873291 |
| mtpn              | 2312.631 | -0.153235257 | 0.100822 | -1.51986 | 0.128546 | 0.578106 |
| RF00001           | 0.060442 | 0            | 5.267649 | 0        | 1        | NA       |
| CR450827.1        | 0        | NA           | NA       | NA       | NA       | NA       |
| gcgra             | 140.3674 | -0.169229337 | 0.190586 | -0.88794 | 0.374572 | 0.821236 |
| mag               | 164.4743 | 0.44684242   | 0.425795 | 1.049432 | 0.293979 | 0.763068 |
| ccdc137           | 222.8539 | -0.211971988 | 0.193607 | -1.09486 | 0.27358  | 0.749153 |
| si:dkeyp-35e5.5   | 13.72204 | -0.625566535 | 0.652988 | -0.95801 | 0.33806  | 0.79489  |
| si:ch211-207b24.4 | 0.157519 | 1.970562653  | 5.233515 | 0.376528 | 0.706525 | NA       |
| si:dkey-74k8.3    | 652.455  | 0.286495342  | 0.148587 | 1.928136 | 0.053838 | 0.401878 |
| BX677667.2        | 0.331121 | -1.710102001 | 5.238471 | -0.32645 | 0.744083 | NA       |
| taf12             | 1284.387 | -0.029576778 | 0.129    | -0.22928 | 0.818654 | 0.971679 |
| mrpl33            | 315.0837 | 0.1764516    | 0.185805 | 0.94966  | 0.342285 | 0.797179 |
| arid3b            | 895.6891 | -0.13386376  | 0.143998 | -0.92962 | 0.352568 | 0.803403 |
| ttcl6             | 2.915303 | 1.467056491  | 1.058689 | 1.385729 | 0.16583  | 0.635405 |
| si:dkey-74k8.4    | 29.60976 | 0.061309709  | 0.456261 | 0.134374 | 0.893107 | 0.988566 |
| znf1023           | 1.842836 | 0.494801301  | 1.209949 | 0.408944 | 0.682581 | NA       |
| errfila           | 374.3645 | -0.086689126 | 0.186013 | -0.46604 | 0.641189 | 0.925456 |
| CR388132.2        | 75.32129 | -0.070985299 | 0.273496 | -0.25955 | 0.795212 | 0.965909 |
| b4galt4           | 266.6909 | -0.072456763 | 0.154514 | -0.46893 | 0.639117 | 0.924779 |
| ngl10             | 55.398   | -0.736761657 | 0.348736 | -2.11266 | 0.03463  | 0.328035 |
| t1r22             | 18.96914 | -0.31457827  | 0.497542 | -0.63226 | 0.527214 | 0.889948 |
| tradv23.0.2       | 0        | NA           | NA       | NA       | NA       | NA       |
| si:ch211-262i1.3  | 159.5303 | 0.42591359   | 0.17969  | 2.370263 | 0.017775 | 0.235751 |
| crebl2            | 516.9705 | 0.016388009  | 0.151098 | 0.108459 | 0.913631 | 0.992796 |
| CR388413.4        | 0.228236 | 0            | 5.030786 | 0        | 1        | NA       |
| BX324181.1        | 0        | NA           | NA       | NA       | NA       | NA       |
| mlxipl            | 8.355475 | 0.178661186  | 0.549707 | 0.325011 | 0.745172 | 0.954956 |
| pcdhlgl4          | 17.74994 | 0.028376379  | 0.450119 | 0.063042 | 0.949733 | 0.99801  |
| si:dkey-31c13.1   | 86.98857 | 0.197394665  | 0.261491 | 0.754882 | 0.45032  | 0.857151 |



|                     |           |               |           |           |           |           |
|---------------------|-----------|---------------|-----------|-----------|-----------|-----------|
| si:ch211-127b6. 2   | 17. 55941 | -1. 648779052 | 0. 431123 | -3. 82438 | 0. 000131 | 0. 011295 |
| znf1154             | 50. 28114 | -1. 314555873 | 0. 240644 | -5. 46266 | 4. 69E-08 | 2. 59E-05 |
| dnaja2a             | 2708. 145 | -0. 065376375 | 0. 098877 | -0. 66119 | 0. 508493 | 0. 883333 |
| gstpl               | 5581. 077 | -0. 233007339 | 0. 147786 | -1. 57665 | 0. 114875 | 0. 554651 |
| rnf170              | 1040. 572 | -0. 112183661 | 0. 164712 | -0. 68109 | 0. 495815 | 0. 87806  |
| BX323876. 1         | 0. 487293 | -1. 784242189 | 2. 735976 | -0. 65214 | 0. 51431  | NA        |
| hikeshi             | 332. 2558 | -0. 216519891 | 0. 168899 | -1. 28195 | 0. 199861 | 0. 6804   |
| si:ch211-215j19. 12 | 0. 399824 | 0             | 3. 771442 | 0         | 1         | NA        |
| FQ790367. 1         | 0. 635574 | -3. 104874547 | 2. 622437 | -1. 18397 | 0. 236427 | NA        |
| znf1052             | 3. 841295 | 1. 46097638   | 1. 00527  | 1. 453318 | 0. 146136 | 0. 605672 |
| rnf126              | 152. 4694 | -0. 16221869  | 0. 244482 | -0. 66352 | 0. 506997 | 0. 883007 |
| fcer1gl             | 217. 4134 | -0. 245916646 | 0. 191467 | -1. 28438 | 0. 199009 | 0. 679593 |
| zgc:113336          | 49. 06728 | -0. 063461977 | 0. 355631 | -0. 17845 | 0. 85837  | 0. 979774 |
| CT009487. 1         | 0. 272335 | -0. 868123631 | 4. 74584  | -0. 18292 | 0. 854858 | NA        |
| pcdh2ab12           | 3. 924713 | 0. 228292453  | 1. 045498 | 0. 218358 | 0. 82715  | 0. 973459 |
| trps1               | 94. 35955 | 0. 256559667  | 0. 265786 | 0. 965287 | 0. 334401 | 0. 791508 |
| adgre5b. 2          | 16. 70306 | -0. 124765086 | 0. 518761 | -0. 24051 | 0. 809938 | 0. 969828 |
| si:dkey-191g9. 7    | 236. 4692 | 0. 003179879  | 0. 167597 | 0. 018973 | 0. 984862 | 1         |
| abcd3a              | 717. 6026 | 0. 023817644  | 0. 116297 | 0. 2048   | 0. 837728 | 0. 976219 |
| si:dkey-14o6. 2     | 3. 492655 | 1. 037693375  | 1. 481591 | 0. 700391 | 0. 483683 | 0. 872148 |
| p3h4                | 173. 1002 | -0. 062979933 | 0. 15682  | -0. 40161 | 0. 687973 | 0. 938937 |
| june                | 128. 2291 | -0. 324918461 | 0. 200862 | -1. 61762 | 0. 105745 | 0. 534827 |
| mchr1a              | 0. 231105 | 2. 505652832  | 5. 20297  | 0. 481581 | 0. 630103 | NA        |
| grk3                | 284. 3613 | 0. 143670498  | 0. 171138 | 0. 839503 | 0. 401187 | 0. 832185 |
| si:dkey-29d5. 1     | 0. 108976 | 0. 093693664  | 5. 267649 | 0. 017787 | 0. 985809 | NA        |
| tmem222b            | 47. 39434 | 0. 384728335  | 0. 24818  | 1. 5502   | 0. 121094 | 0. 566931 |
| FP236513. 1         | 41. 11513 | 0. 200705892  | 0. 386857 | 0. 518812 | 0. 603892 | 0. 914603 |
| bmpr1ba             | 212. 041  | -0. 243176462 | 0. 182701 | -1. 33101 | 0. 183186 | 0. 65938  |
| RIMBP2              | 122. 4462 | 0. 161453798  | 0. 247546 | 0. 652218 | 0. 51426  | 0. 88631  |
| rps6kc1             | 567. 4949 | -0. 222388702 | 0. 112918 | -1. 96947 | 0. 048899 | 0. 385015 |
| RF00324             | 1. 865716 | 2. 467310053  | 1. 746547 | 1. 412679 | 0. 15775  | NA        |
| ttf2                | 126. 608  | 0. 415387962  | 0. 292013 | 1. 422497 | 0. 154882 | 0. 619752 |
| CABZ01087953. 1     | 15. 06521 | 0. 634592107  | 0. 594136 | 1. 068092 | 0. 285479 | 0. 756814 |
| nkx2. 4b            | 24. 74262 | 0. 374316366  | 0. 367095 | 1. 019673 | 0. 307884 | 0. 772996 |
| slcold1             | 781. 3516 | 0. 190958504  | 0. 190757 | 1. 001058 | 0. 316799 | 0. 778879 |
| col4a2              | 541. 5596 | 0. 11181354   | 0. 234566 | 0. 476684 | 0. 633587 | 0. 923924 |
| mrps30              | 450. 0987 | -0. 029283779 | 0. 135066 | -0. 21681 | 0. 828356 | 0. 974116 |
| CR383680. 3         | 0. 710712 | 0             | 2. 786252 | 0         | 1         | NA        |
| zgc:136767          | 0. 849073 | 2. 512765715  | 2. 456324 | 1. 022978 | 0. 306318 | NA        |
| kmt5ab              | 216. 6924 | 0. 331722247  | 0. 232472 | 1. 426932 | 0. 1536   | 0. 618187 |
| RF00002             | 1. 700128 | 0             | 2. 294022 | 0         | 1         | NA        |
| antxr2a             | 229. 8572 | 0. 334521934  | 0. 152655 | 2. 191357 | 0. 028426 | 0. 299922 |
| kalrna              | 307. 067  | 0. 036119719  | 0. 151238 | 0. 238826 | 0. 81124  | 0. 97002  |
| L0018260. 1         | 14. 88415 | 1. 499500909  | 1. 033218 | 1. 451291 | 0. 146699 | 0. 606437 |
| znf1069             | 9. 320192 | 0. 028135137  | 0. 589855 | 0. 047698 | 0. 961957 | 0. 999451 |
| ttc6                | 20. 96522 | 0. 58820958   | 0. 455377 | 1. 291698 | 0. 196462 | 0. 67688  |
| ccpg1               | 36. 11956 | -0. 049953812 | 0. 357222 | -0. 13984 | 0. 888787 | 0. 988188 |
| snx2                | 375. 0868 | -0. 055036665 | 0. 181697 | -0. 3029  | 0. 761963 | 0. 958345 |
| si:dkey-23n7. 10    | 86. 59453 | 0. 463311312  | 0. 320849 | 1. 444015 | 0. 148735 | 0. 610593 |
| rbm26               | 404. 6145 | 0. 111568698  | 0. 099097 | 1. 125859 | 0. 260225 | 0. 737543 |
| CU652893. 1         | 0         | NA            | NA        | NA        | NA        | NA        |
| traj28              | 0         | NA            | NA        | NA        | NA        | NA        |
| RF00001             | 0         | NA            | NA        | NA        | NA        | NA        |
| BX323793. 1         | 7. 723153 | -4. 099957946 | 1. 426442 | -2. 87426 | 0. 00405  | 0. 106027 |

|                   |          |              |          |          |          |          |
|-------------------|----------|--------------|----------|----------|----------|----------|
| RF02250           | 0.352754 | 1.081132585  | 4.280498 | 0.252572 | 0.800599 | NA       |
| igfbp7            | 303.1569 | -0.542208019 | 0.19505  | -2.77984 | 0.005439 | 0.124273 |
| atpla3b           | 1735.633 | 0.267138966  | 0.244587 | 1.092205 | 0.274743 | 0.750181 |
| si:dkey-262j3.7   | 0 NA     | NA           | NA       | NA       | NA       | NA       |
| si:dkey-15h8.10   | 4.184775 | -0.147047043 | 0.899551 | -0.16347 | 0.870151 | 0.983365 |
| si:dkey-68o6.8    | 1.330793 | 0.097891329  | 2.250108 | 0.043505 | 0.965299 | NA       |
| CR381676.1        | 0.274599 | -0.868118436 | 5.267649 | -0.1648  | 0.8691   | NA       |
| rraga             | 389.6417 | 0.03478175   | 0.106696 | 0.32599  | 0.744432 | 0.95491  |
| prkd4             | 3.386643 | -1.692411555 | 1.194811 | -1.41647 | 0.156638 | 0.622452 |
| CU464180.1        | 2.406302 | 0.604190205  | 1.286236 | 0.469735 | 0.638544 | 0.924779 |
| dre-mir-17a-1     | 0 NA     | NA           | NA       | NA       | NA       | NA       |
| hoxalla           | 22.11035 | 0.416201554  | 0.429249 | 0.969603 | 0.332244 | 0.789602 |
| si:cabz01071912.2 | 57.11511 | 0.31109886   | 0.278176 | 1.118353 | 0.263416 | 0.741418 |
| si:ch211-232d10.1 | 11.40297 | -2.011550269 | 0.747191 | -2.69215 | 0.007099 | 0.14271  |
| CR388378.3        | 0.099037 | 0            | 5.267649 | 0        | 1        | NA       |
| si:ch211-212k18.4 | 1713.728 | -0.063006891 | 0.162763 | -0.38711 | 0.698676 | 0.942456 |
| si:dkey-208k4.2   | 1.46416  | 1.005760905  | 1.853102 | 0.542744 | 0.587306 | NA       |
| diabloa           | 1133.801 | -0.370946102 | 0.228436 | -1.62385 | 0.104408 | 0.53263  |
| tufm              | 1518.506 | 0.082243752  | 0.139712 | 0.588667 | 0.556085 | 0.899002 |
| BX511034.6        | 0.060442 | 0            | 5.267649 | 0        | 1        | NA       |
| cpne3             | 736.0771 | 0.239674918  | 0.134014 | 1.788433 | 0.073706 | 0.461398 |
| trir              | 519.0957 | 0.073409351  | 0.160168 | 0.458326 | 0.646718 | 0.926728 |
| rab11fip5a        | 31.71791 | 0.400448945  | 0.360211 | 1.111706 | 0.266265 | 0.742912 |
| tmsbl             | 6701.394 | 0.149793767  | 0.219408 | 0.682718 | 0.494785 | 0.878016 |
| BX247946.1        | 0.444924 | 2.858020327  | 3.193629 | 0.894913 | 0.370834 | NA       |
| AL831726.2        | 1.893275 | 0            | 2.018867 | 0        | 1        | NA       |
| fbxo43            | 8.053355 | 0.651748084  | 0.571752 | 1.139914 | 0.254322 | 0.733371 |
| fam83fb           | 36.3567  | -0.031033337 | 0.405999 | -0.07644 | 0.939071 | 0.997371 |
| BX927261.1        | 0.050624 | 1.055396947  | 5.267649 | 0.200354 | 0.841203 | NA       |
| CABZ01019904.1    | 40.1333  | 1.405670109  | 1.547168 | 0.908544 | 0.363591 | 0.813873 |
| traj45            | 0 NA     | NA           | NA       | NA       | NA       | NA       |
| pimr203           | 0.459285 | 0            | 4.212787 | 0        | 1        | NA       |
| ptpn22            | 76.23321 | 0.061699905  | 0.227089 | 0.271699 | 0.785853 | 0.962605 |
| si:dkey-43p13.5   | 72.33092 | -0.052919134 | 0.258025 | -0.20509 | 0.837499 | 0.976149 |
| BX901923.2        | 447.3052 | 0.560751898  | 0.184765 | 3.034948 | 0.002406 | 0.07862  |
| ugt5b5            | 6.412576 | 3.729880455  | 1.432468 | 2.603814 | 0.009219 | 0.165078 |
| slcla8a           | 106.601  | -0.545111907 | 0.552635 | -0.98639 | 0.323944 | 0.783161 |
| cfhl3             | 19.62686 | 0.338402043  | 0.703162 | 0.481258 | 0.630333 | 0.922869 |
| pcytlbb           | 140.457  | 0.363500832  | 0.267636 | 1.358192 | 0.174403 | 0.647894 |
| zgc:172128        | 0 NA     | NA           | NA       | NA       | NA       | NA       |
| si:ch73-173h19.3  | 219.9364 | 0.183076723  | 0.161033 | 1.136888 | 0.255585 | 0.733544 |
| BX548173.2        | 0.120341 | -0.868089684 | 5.267649 | -0.1648  | 0.869104 | NA       |
| RF00001           | 0 NA     | NA           | NA       | NA       | NA       | NA       |
| si:dkey-283b1.6   | 94.05095 | 0.120606325  | 0.521973 | 0.231058 | 0.817269 | 0.971207 |
| CR381540.3        | 15.14789 | 0.068746954  | 0.505333 | 0.136043 | 0.891787 | 0.988566 |
| gpc2              | 64.87748 | 0.150488454  | 0.309497 | 0.486236 | 0.6268   | 0.920795 |
| gpc6b             | 5.918686 | 0.604890699  | 0.856269 | 0.706426 | 0.479923 | 0.870001 |
| CU694197.2        | 3.419758 | -1.720547596 | 1.252642 | -1.37354 | 0.169586 | 0.641415 |
| sat2b             | 196.5565 | -0.127565963 | 0.237141 | -0.53793 | 0.590623 | 0.908982 |
| inpp1a            | 748.3319 | -0.157860699 | 0.144701 | -1.09094 | 0.275299 | 0.750424 |
| lmbird1           | 348.8595 | 0.026095438  | 0.142651 | 0.182932 | 0.854851 | 0.979161 |
| RF00001           | 0 NA     | NA           | NA       | NA       | NA       | NA       |
| ndellb            | 672.5381 | 0.461269032  | 0.194355 | 2.373337 | 0.017628 | 0.234334 |
| RF00026           | 0 NA     | NA           | NA       | NA       | NA       | NA       |

|                    |          |              |          |          |          |          |
|--------------------|----------|--------------|----------|----------|----------|----------|
| nop10              | 363.0619 | -0.072200797 | 0.193333 | -0.37345 | 0.708812 | 0.945545 |
| lyplal             | 61.6474  | -0.373465253 | 0.226363 | -1.64985 | 0.098974 | 0.522136 |
| sec23a             | 1079.013 | 0.046856927  | 0.140049 | 0.334576 | 0.737945 | 0.952651 |
| opn9               | 81.19998 | 1.582914948  | 0.721643 | 2.193486 | 0.028272 | 0.298982 |
| dynlrbl            | 0 NA     | NA           | NA       | NA       | NA       | NA       |
| myo5c              | 69.9647  | 0.250166723  | 0.218536 | 1.144741 | 0.252316 | 0.732759 |
| CR383668.2         | 0.388852 | 0 5.267649   | 0        | 1 NA     |          |          |
| olfcs1             | 1.23477  | 0.465019066  | 1.680563 | 0.276704 | 0.782007 | NA       |
| dcp2               | 927.1256 | 0.024295811  | 0.120459 | 0.201694 | 0.840156 | 0.976417 |
| eomesb             | 5.529867 | -1.192975887 | 1.405089 | -0.84904 | 0.395859 | 0.829389 |
| twsgla             | 792.4374 | -0.240662132 | 0.152153 | -1.58171 | 0.113716 | 0.551905 |
| si:ch211-165a10.11 | 0 NA     | NA           | NA       | NA       | NA       | NA       |
| prdm10             | 255.7374 | -0.064913647 | 0.125603 | -0.51681 | 0.605285 | 0.914985 |
| cpne4b             | 8.511842 | -1.315602921 | 0.748778 | -1.757   | 0.078918 | 0.475183 |
| arhgap27           | 194.6459 | 0.214668304  | 0.164973 | 1.301234 | 0.193178 | 0.673175 |
| bcol               | 534.5614 | -0.397355944 | 0.223612 | -1.77699 | 0.07557  | 0.465594 |
| F0681314.1         | 0 NA     | NA           | NA       | NA       | NA       | NA       |
| CABZ01072885.1     | 28.00049 | 0.350448175  | 0.424783 | 0.825005 | 0.409369 | 0.836721 |
| si:ch211-117c19.1  | 14.41125 | 0.417583352  | 1.081833 | 0.385996 | 0.6995   | 0.942499 |
| si:dkey-56m15.3    | 1.320296 | -1.509271456 | 1.683828 | -0.89633 | 0.370075 | NA       |
| CABZ01055365.1     | 8.569981 | 0.857845499  | 1.187415 | 0.722448 | 0.470019 | 0.867349 |
| zgc:123035         | 139.6968 | 0.219740777  | 0.192823 | 1.1396   | 0.254453 | 0.733426 |
| si:dkey-29m1.2     | 6.553366 | -0.507179759 | 0.963452 | -0.52642 | 0.598597 | 0.912889 |
| postnb             | 10566.58 | 0.102538477  | 0.147367 | 0.695804 | 0.486552 | 0.873244 |
| si:ch211-271d10.2  | 6.601002 | 0.170161427  | 0.701133 | 0.242695 | 0.808242 | 0.969828 |
| si:dkey-56m15.7    | 0 NA     | NA           | NA       | NA       | NA       | NA       |
| BX664721.3         | 2.83515  | 2.312459253  | 1.646189 | 1.404735 | 0.1601   | 0.626578 |
| tmem200b           | 103.7906 | -0.361543595 | 0.205609 | -1.75841 | 0.078679 | 0.474455 |
| dicpl.17           | 1.377388 | -0.868134992 | 2.383245 | -0.36427 | 0.715659 | NA       |
| BX942846.1         | 9.623391 | 1.86378274   | 0.603302 | 3.089302 | 0.002006 | 0.069693 |
| slc2a8             | 77.28699 | 0.051549112  | 0.205305 | 0.251086 | 0.801748 | 0.967776 |
| appa               | 2628.429 | 0.055465032  | 0.140385 | 0.395091 | 0.692776 | 0.940444 |
| bniplb             | 234.8729 | 0.413508895  | 0.161409 | 2.561878 | 0.010411 | 0.177758 |
| dcc                | 26.65004 | -0.114138981 | 0.323773 | -0.35253 | 0.724442 | 0.948381 |
| cdc42bpa           | 114.3826 | -0.332215185 | 0.326734 | -1.01678 | 0.30926  | 0.773818 |
| CABZ01049361.1     | 3.402847 | 1.695875988  | 1.114457 | 1.521706 | 0.128083 | 0.577144 |
| armh3              | 391.4714 | -0.099856101 | 0.138158 | -0.72277 | 0.469824 | 0.867343 |
| CU019562.3         | 0 NA     | NA           | NA       | NA       | NA       | NA       |
| lto1               | 97.94621 | 0.35700329   | 0.212557 | 1.679562 | 0.093043 | 0.510611 |
| hfml               | 15.443   | 1.041314762  | 0.524524 | 1.985257 | 0.047116 | 0.378022 |
| ripk2              | 31.561   | 0.002195684  | 0.330596 | 0.006642 | 0.994701 | 1        |
| GPR151             | 35.62225 | -1.40598904  | 0.460711 | -3.05178 | 0.002275 | 0.07594  |
| ccn2b              | 116.9402 | -0.519289053 | 0.260483 | -1.99356 | 0.0462   | 0.375668 |
| arhgap21a          | 285.7988 | -0.043714403 | 0.251505 | -0.17381 | 0.862014 | 0.980696 |
| zgc:165508         | 10.46756 | 1.236344878  | 0.657226 | 1.881156 | 0.059951 | 0.421883 |
| si:ch73-380110.2   | 38.80907 | 0.257250941  | 0.26412  | 0.973992 | 0.33006  | 0.788084 |
| AL953886.2         | 0.515113 | -1.747760285 | 4.029816 | -0.43371 | 0.664501 | NA       |
| wipfla             | 26.21649 | -0.121297915 | 0.362356 | -0.33475 | 0.737815 | 0.95259  |
| zgc:193726         | 66.21281 | -0.223148219 | 0.431518 | -0.51712 | 0.60507  | 0.914985 |
| CR391991.3         | 2.163749 | 0.502944886  | 1.280148 | 0.39288  | 0.694408 | NA       |
| FP085399.4         | 1.033922 | 0 2.244675   | 0        | 1 NA     |          |          |
| L0018474.1         | 265.3522 | -0.245419027 | 0.242632 | -1.01149 | 0.311784 | 0.776164 |
| hoxala             | 37.83013 | 0.143957915  | 0.32072  | 0.448859 | 0.653533 | 0.929269 |
| CT573245.1         | 0.094182 | -0.868089684 | 5.267649 | -0.1648  | 0.869104 | NA       |

|                   |          |              |          |          |          |          |
|-------------------|----------|--------------|----------|----------|----------|----------|
| scmh1             | 372.8448 | 0.081012213  | 0.139181 | 0.582066 | 0.560522 | 0.899928 |
| CT573342.2        | 1.316249 | -1.138417568 | 1.697692 | -0.67057 | 0.502496 | NA       |
| nrg1              | 97.50891 | 0.159700968  | 0.243782 | 0.655098 | 0.512405 | 0.885459 |
| fh13b             | 84.46202 | -0.382011953 | 0.21726  | -1.75832 | 0.078694 | 0.474455 |
| si:ch211-182p11.1 | 8.104178 | 0            | 1.747105 | 0        | 1        | 1        |
| plek              | 50.61253 | 0.021832178  | 0.356781 | 0.061192 | 0.951206 | 0.99801  |
| si:dkey-183i3.9   | 87.1974  | 0.478709439  | 0.301996 | 1.585152 | 0.112932 | 0.55033  |
| si:ch73-281k2.5   | 148.7072 | -0.127164331 | 0.528163 | -0.24077 | 0.809736 | 0.969828 |
| cdh28             | 5.108193 | -2.747889955 | 1.568473 | -1.75195 | 0.079782 | 0.478031 |
| si:ch211-212k5.4  | 3.961694 | -1.005049057 | 1.076404 | -0.93371 | 0.350454 | 0.802215 |
| SMARCA4           | 194.4159 | 0.199954666  | 0.306399 | 0.652596 | 0.514017 | 0.88631  |
| rspol             | 48.37385 | -0.222637926 | 0.312283 | -0.71294 | 0.475886 | 0.869292 |
| si:ch211-76m11.8  | 3.459992 | -0.21831415  | 1.209964 | -0.18043 | 0.856815 | 0.979558 |
| csnklg1           | 432.7911 | 0.213845846  | 0.130422 | 1.639649 | 0.101078 | 0.526828 |
| ccdc127a          | 32.1814  | -1.927463465 | 0.490498 | -3.9296  | 8.51E-05 | 0.008146 |
| rtn4b             | 4413.11  | 0.219514993  | 0.098722 | 2.223572 | 0.026177 | 0.28691  |
| fgf2              | 49.52673 | -0.253621921 | 0.379265 | -0.66872 | 0.503675 | 0.881759 |
| si:dkey-68o6.6    | 0.998384 | 2.604655921  | 2.87867  | 0.904812 | 0.365565 | NA       |
| CR318589.1        | 0.13271  | 0            | 5.267649 | 0        | 1        | NA       |
| nop58             | 1195.98  | -0.37718984  | 0.187123 | -2.01574 | 0.043828 | 0.366547 |
| FP016005.1        | 19.1546  | -0.523742277 | 0.441392 | -1.18657 | 0.235397 | 0.71652  |
| anxalc            | 2581.743 | 0.268970829  | 0.182628 | 1.472781 | 0.14081  | 0.599658 |
| barh12            | 413.3208 | 0.185783741  | 0.148984 | 1.247006 | 0.212395 | 0.694104 |
| FP236354.1        | 0.505412 | 1.90567613   | 2.585165 | 0.737158 | 0.461026 | NA       |
| BX470229.2        | 5.063558 | 0.679364101  | 1.10944  | 0.612349 | 0.540307 | 0.893049 |
| CR339044.1        | 0        | NA           | NA       | NA       | NA       | NA       |
| BX323064.2        | 6.431208 | -0.868151144 | 1.804034 | -0.48123 | 0.630355 | 0.922869 |
| AL732629.1        | 0.197249 | 0            | 5.267649 | 0        | 1        | NA       |
| zgc:194469        | 270.6333 | 0.126022469  | 0.225064 | 0.55994  | 0.575521 | 0.904739 |
| esml              | 76.20251 | -0.155331319 | 0.231549 | -0.67084 | 0.502325 | 0.881277 |
| gnb1b             | 2559.902 | 0.220137183  | 0.082491 | 2.668614 | 0.007616 | 0.147466 |
| smchd1            | 320.1802 | 0.247245614  | 0.179212 | 1.379623 | 0.167703 | 0.63888  |
| sec24a            | 1647.578 | 0.255275426  | 0.13739  | 1.858035 | 0.063164 | 0.429313 |
| BX927192.1        | 0.151871 | 2.436401064  | 5.206324 | 0.46797  | 0.639806 | NA       |
| si:dkey-238k10.2  | 58.50772 | -2.383830973 | 0.591417 | -4.03071 | 5.56E-05 | 0.006008 |
| RF00001           | 0.043308 | 0            | 5.267649 | 0        | 1        | NA       |
| AGBL1             | 95.73628 | 0.083126758  | 0.305816 | 0.27182  | 0.785761 | 0.962605 |
| CU019647.1        | 0.332352 | 3.213986605  | 5.116915 | 0.62811  | 0.529932 | NA       |
| si:ch211-48m9.1   | 83.57498 | -1.073117793 | 0.392926 | -2.7311  | 0.006312 | 0.134501 |
| stag3             | 6.312788 | 0.297112107  | 0.746945 | 0.39777  | 0.6908   | 0.940147 |
| kcnj2b            | 3.225119 | -0.48921774  | 1.203826 | -0.40639 | 0.684459 | 0.938486 |
| sumo2a            | 2.911609 | -1.020325341 | 1.471002 | -0.69363 | 0.487917 | 0.873337 |
| eri2              | 29.94629 | 0.327011618  | 0.342615 | 0.954457 | 0.339853 | 0.795232 |
| npr2              | 274.8771 | 0.075845732  | 0.180285 | 0.4207   | 0.673974 | 0.934753 |
| BX324177.1        | 0        | NA           | NA       | NA       | NA       | NA       |
| RF00001           | 0.492073 | -0.539959152 | 3.494139 | -0.15453 | 0.87719  | NA       |
| trim25            | 168.0793 | 0.501487841  | 0.268206 | 1.869787 | 0.061513 | 0.425588 |
| si:ch73-343g19.4  | 2.052352 | 0            | 2.093787 | 0        | 1        | NA       |
| tppp              | 169.8453 | 1.151636843  | 0.509874 | 2.25867  | 0.023904 | 0.274193 |
| ymell1b           | 555.5855 | 0.308515094  | 0.148403 | 2.078906 | 0.037626 | 0.340171 |
| osepla            | 18.49823 | -0.868158115 | 1.710134 | -0.50765 | 0.611695 | 0.915331 |
| b4galt11          | 436.1033 | 0.310076543  | 0.11832  | 2.620667 | 0.008776 | 0.160701 |
| BX649453.1        | 6.233111 | -5.001580369 | 1.239203 | -4.03613 | 5.43E-05 | 0.005967 |
| zgc:152774        | 18.92961 | -0.688415883 | 0.490689 | -1.40296 | 0.16063  | 0.62741  |

|                   |          |              |          |          |          |          |
|-------------------|----------|--------------|----------|----------|----------|----------|
| tnk2b             | 258.945  | -0.063468634 | 0.153527 | -0.4134  | 0.67931  | 0.936209 |
| si:dkey-72117.5   | 4.355648 | -2.692607756 | 1.25414  | -2.14697 | 0.031795 | 0.317131 |
| rogdi             | 919.9343 | -0.289811561 | 0.15903  | -1.82238 | 0.068398 | 0.445915 |
| shmt2             | 856.161  | -0.189484478 | 0.18082  | -1.04792 | 0.294676 | 0.763708 |
| si:ch73-236c18.6  | 1.161817 | 2.505600065  | 5.20297  | 0.481571 | 0.630111 | NA       |
| si:dkey-16p6.1    | 5.333547 | -0.662332535 | 0.977144 | -0.67782 | 0.497883 | 0.878926 |
| CT573006.2        | 0.379534 | -0.806765825 | 3.31758  | -0.24318 | 0.807867 | NA       |
| BX248318.1        | 168.7568 | -1.000016622 | 0.339861 | -2.94242 | 0.003257 | 0.093499 |
| RF00600           | 2.369344 | 0.949528715  | 1.91886  | 0.49484  | 0.620713 | 0.918151 |
| si:ch73-34h11.1   | 0 NA     | NA           | NA       | NA       | NA       | NA       |
| BX950868.2        | 0.323324 | -0.868137273 | 4.573336 | -0.18983 | 0.849446 | NA       |
| p2ry2.3           | 1.70801  | 0.637493602  | 1.625772 | 0.392117 | 0.694971 | NA       |
| AL935044.3        | 1.78994  | 1.530989786  | 1.52538  | 1.003678 | 0.315534 | NA       |
| olfcjl            | 4.47769  | 1.144793889  | 0.975796 | 1.17319  | 0.24072  | 0.722178 |
| slcla3a           | 736.8421 | 0.194563714  | 0.154562 | 1.258805 | 0.208101 | 0.690193 |
| RF00001           | 0 NA     | NA           | NA       | NA       | NA       | NA       |
| si:ch73-217b7.1   | 207.8618 | -0.231669856 | 0.189125 | -1.22495 | 0.220593 | 0.701837 |
| zgc:153426        | 2084.249 | 0.658814667  | 0.191962 | 3.432005 | 0.000599 | 0.031694 |
| aip               | 1210.99  | 0.023791863  | 0.104173 | 0.228389 | 0.819344 | 0.971785 |
| clnd1a            | 276.4568 | -0.12671236  | 0.181416 | -0.69846 | 0.484887 | 0.872911 |
| cdh30             | 5.285453 | 0.549296271  | 0.773545 | 0.710102 | 0.477641 | 0.869292 |
| hspb7             | 122.7423 | -0.266462023 | 0.211051 | -1.26255 | 0.206751 | 0.689109 |
| aatkb             | 264.0181 | 0.20762742   | 0.139176 | 1.491835 | 0.135742 | 0.591131 |
| CT573793.3        | 0.04222  | 0            | 5.267649 | 0        | 1        | NA       |
| si:ch211-203c5.3  | 1.302159 | 0.082725526  | 1.977544 | 0.041832 | 0.966632 | NA       |
| zgc:77287         | 113.0204 | 0.199508907  | 0.259482 | 0.768873 | 0.441969 | 0.853368 |
| CU210919.1        | 0.283774 | 0.093657716  | 4.7145   | 0.019866 | 0.98415  | NA       |
| CR855996.2        | 222.3623 | -0.399030128 | 0.315521 | -1.26467 | 0.205989 | 0.688314 |
| slc39a7           | 694.0319 | 0.128550217  | 0.122288 | 1.051207 | 0.293164 | 0.762581 |
| flt4              | 257.6227 | -0.336160741 | 0.199188 | -1.68766 | 0.091477 | 0.506821 |
| CR936974.1        | 0.458975 | 0            | 4.907313 | 0        | 1        | NA       |
| MPV17L            | 87.94608 | 0.09397876   | 0.296809 | 0.31663  | 0.751524 | 0.955331 |
| rnasekb           | 614.4127 | 0.299188263  | 0.196681 | 1.521187 | 0.128213 | 0.57717  |
| CT573799.2        | 0.556752 | 0            | 3.976074 | 0        | 1        | NA       |
| si:dkeyp-107f9.4  | 0.214395 | -1.826677    | 5.23046  | -0.34924 | 0.72691  | NA       |
| syng2b            | 1025.023 | -0.17752058  | 0.167887 | -1.05738 | 0.290337 | 0.76078  |
| si:ch211-39i2.2   | 192.2836 | -0.460787122 | 0.189405 | -2.43282 | 0.014982 | 0.214278 |
| il6r              | 116.7958 | -0.268895118 | 0.233054 | -1.15379 | 0.248586 | 0.728723 |
| si:dkey-41c6.3    | 2.696956 | -0.146640464 | 1.394805 | -0.10513 | 0.91627  | 0.993263 |
| cap2              | 673.7387 | 0.186139265  | 0.197003 | 0.944856 | 0.344732 | 0.798266 |
| BX649416.2        | 48.78071 | 0.093910054  | 0.272927 | 0.344085 | 0.730782 | 0.950056 |
| hcn1              | 20.36584 | 0.286265946  | 0.58735  | 0.487386 | 0.625985 | 0.920625 |
| tradv2.0.1        | 0 NA     | NA           | NA       | NA       | NA       | NA       |
| gipcl             | 62.57167 | -0.155364086 | 0.22133  | -0.70196 | 0.482706 | 0.871787 |
| itgblb            | 366.4374 | -0.183957456 | 0.156433 | -1.17595 | 0.239614 | 0.720113 |
| si:ch1073-224n8.1 | 155.1734 | 0.102083479  | 0.156266 | 0.653266 | 0.513585 | 0.88631  |
| CR812836.1        | 0 NA     | NA           | NA       | NA       | NA       | NA       |
| mthfs             | 202.3206 | 0.068321965  | 0.250307 | 0.272952 | 0.78489  | 0.962605 |
| si:ch73-299h12.9  | 40.31379 | -0.344464101 | 0.279203 | -1.23374 | 0.2173   | 0.69815  |
| CR855389.2        | 20.21684 | 0.268534539  | 0.53197  | 0.504793 | 0.613704 | 0.915998 |
| CT009570.1        | 0 NA     | NA           | NA       | NA       | NA       | NA       |
| ampd2a            | 208.2704 | -0.625275544 | 0.223841 | -2.7934  | 0.005216 | 0.121092 |
| L0018176.1        | 104.9619 | 0.013059218  | 0.243615 | 0.053606 | 0.957249 | 0.999109 |
| pltp              | 206.8456 | -1.222670593 | 0.231803 | -5.27461 | 1.33E-07 | 6.21E-05 |

|                  |          |              |          |          |          |          |
|------------------|----------|--------------|----------|----------|----------|----------|
| pcdh1g29         | 69.66113 | -0.202349349 | 0.297081 | -0.68112 | 0.495793 | 0.87806  |
| fycola           | 203.4217 | 0.123183726  | 0.2181   | 0.564803 | 0.572208 | 0.903461 |
| FP236812.1       | 40.42548 | 0.370154207  | 0.344003 | 1.076021 | 0.281918 | 0.754378 |
| si:ch211-266c8.1 | 69.4525  | 0.555648895  | 0.33392  | 1.664018 | 0.096109 | 0.517378 |
| dre-mir-219-2    | 0 NA     | NA           | NA       | NA       | NA       | NA       |
| slc10a7          | 150.5393 | -0.216960678 | 0.157703 | -1.37576 | 0.168897 | 0.640393 |
| RF01268          | 0 NA     | NA           | NA       | NA       | NA       | NA       |
| BX936284.1       | 0 NA     | NA           | NA       | NA       | NA       | NA       |
| CU861667.1       | 0.724045 | 2.604428192  | 2.859604 | 0.910765 | 0.362419 | NA       |
| uqcr10           | 2120.344 | -0.04775196  | 0.17691  | -0.26992 | 0.78722  | 0.963137 |
| tcrg             | 2.847405 | -0.113693146 | 1.127563 | -0.10083 | 0.919685 | 0.993892 |
| CABZ01075611.1   | 20.43889 | 2.69040643   | 1.410994 | 1.906745 | 0.056554 | 0.410638 |
| BX908386.3       | 1.099672 | 0.034504485  | 2.117867 | 0.016292 | 0.987001 | NA       |
| CU138542.2       | 7.542833 | 0.868983071  | 0.764285 | 1.136988 | 0.255543 | 0.733544 |
| CR391991.4       | 1.6065   | -4.412128165 | 2.476177 | -1.78183 | 0.074777 | NA       |
| cldn10b          | 24.51452 | -1.257748091 | 0.473071 | -2.65869 | 0.007845 | 0.149965 |
| cyp2k17          | 16.35711 | 0.604670841  | 0.525928 | 1.149721 | 0.250259 | 0.730026 |
| znf609b          | 872.8182 | 0.099989162  | 0.112466 | 0.88906  | 0.373971 | 0.820695 |
| zcchc4           | 94.17829 | -0.264186127 | 0.249437 | -1.05913 | 0.289542 | 0.760499 |
| RF00001          | 0 NA     | NA           | NA       | NA       | NA       | NA       |
| BX072554.1       | 0 NA     | NA           | NA       | NA       | NA       | NA       |
| cox7c            | 3008.81  | -0.062621749 | 0.169142 | -0.37023 | 0.71121  | 0.945821 |
| tmem184a         | 209.0519 | -0.130322986 | 0.203506 | -0.64039 | 0.521919 | 0.887615 |
| cyp2aa8          | 184.6541 | -1.427694934 | 1.178565 | -1.21138 | 0.225748 | 0.707068 |
| msh6             | 457.7229 | 0.063005562  | 0.119583 | 0.526877 | 0.598279 | 0.912715 |
| ppt2             | 348.819  | -0.038106575 | 0.101349 | -0.37599 | 0.706923 | 0.944895 |
| CR456627.1       | 0.88146  | 1.074903881  | 2.377272 | 0.452159 | 0.651155 | NA       |
| RF00001          | 0.050624 | 1.055396947  | 5.267649 | 0.200354 | 0.841203 | NA       |
| BX005367.1       | 1.365792 | 0.767279796  | 1.645166 | 0.466384 | 0.64094  | NA       |
| dre-mir-133a-1   | 1.803694 | -1.125768666 | 1.277008 | -0.88157 | 0.378011 | NA       |
| arhgap44         | 76.09541 | 0.216346106  | 0.297172 | 0.728017 | 0.466603 | 0.865588 |
| olfcgl           | 0.600682 | 0 4.509146   | 0        | 1 NA     |          |          |
| CU929150.3       | 0.110677 | 0.093693664  | 5.267649 | 0.017787 | 0.985809 | NA       |
| sh2d3cb          | 105.3517 | -0.106862394 | 0.397431 | -0.26888 | 0.78802  | 0.963403 |
| RF00001          | 0 NA     | NA           | NA       | NA       | NA       | NA       |
| CR318653.1       | 0.335568 | 0 3.41637    | 0        | 1 NA     |          |          |
| BX511115.1       | 0 NA     | NA           | NA       | NA       | NA       | NA       |
| tmem63ba         | 180.4477 | -0.167913601 | 0.164998 | -1.01767 | 0.308833 | 0.77371  |
| CT990561.2       | 2.29621  | 0.642087091  | 1.458386 | 0.440273 | 0.65974  | 0.930581 |
| znf1081          | 43.07783 | -0.260224328 | 0.344144 | -0.75615 | 0.44956  | 0.856979 |
| CR847984.2       | 1.899678 | -3.096245912 | 1.721849 | -1.79821 | 0.072144 | NA       |
| kcnk9            | 7.878846 | -0.877401338 | 0.818843 | -1.07151 | 0.283939 | 0.755095 |
| RF00026          | 0 NA     | NA           | NA       | NA       | NA       | NA       |
| foxil            | 28.54174 | 0.389861845  | 0.360526 | 1.08137  | 0.279532 | 0.752477 |
| BX571715.1       | 217.2128 | -0.272141186 | 0.14718  | -1.84904 | 0.064452 | 0.433491 |
| CABZ01088484.1   | 53.03584 | 0.09362522   | 1.713832 | 0.054629 | 0.956434 | 0.99899  |
| gadd45ab         | 372.353  | -0.071751558 | 0.473884 | -0.15141 | 0.879651 | 0.986201 |
| si:dkey-35h6.1   | 567.9351 | -0.210851369 | 0.511778 | -0.412   | 0.680341 | 0.936798 |
| slc12a2          | 1059.892 | 0.02852654   | 0.109443 | 0.260652 | 0.794361 | 0.965431 |
| psck6            | 71.20877 | -0.240886773 | 0.244216 | -0.98637 | 0.323953 | 0.783161 |
| si:ch211-152c8.5 | 161.6324 | -0.663887737 | 0.279206 | -2.37777 | 0.017418 | 0.232896 |
| BX323876.2       | 0.232063 | 0 5.267649   | 0        | 1 NA     |          |          |
| toml             | 312.2572 | 0.115720516  | 0.122563 | 0.944173 | 0.345081 | 0.79837  |
| si:dkeyp-4f2.3   | 9.167335 | -0.4309975   | 0.59358  | -0.7261  | 0.467778 | 0.866174 |

|                     |          |              |            |          |          |          |
|---------------------|----------|--------------|------------|----------|----------|----------|
| RF00001             |          | 0 NA         | NA         | NA       | NA       | NA       |
| srl                 | 3721.959 | 0.032838213  | 0.159112   | 0.206384 | 0.836491 | 0.976007 |
| zgc:112234          | 11.28115 | 0.267667776  | 0.655203   | 0.408526 | 0.682887 | 0.938006 |
| si:dkey-99n20.6     | 0.117277 |              | 0 5.267649 | 0        | 1 NA     |          |
| CT737123.2          |          | 0 NA         | NA         | NA       | NA       | NA       |
| tradv4.0.1          |          | 0 NA         | NA         | NA       | NA       | NA       |
| zgc:171601          | 5.572903 | -2.265729368 | 1.059597   | -2.13829 | 0.032493 | 0.319445 |
| cyp2k18             | 65.44049 | 1.943882913  | 1.586293   | 1.225425 | 0.220415 | 0.701707 |
| gtf2a11             | 343.1886 | -0.14393755  | 0.224721   | -0.64052 | 0.521837 | 0.887551 |
| BX005398.2          |          | 0 NA         | NA         | NA       | NA       | NA       |
| zgc:123181          | 8.11895  | 0.935223051  | 0.735441   | 1.271649 | 0.203498 | 0.684359 |
| CABZ01070527.1      | 19.84979 | -0.389900256 | 0.685999   | -0.56837 | 0.569785 | 0.902322 |
| RF00001             |          | 0 NA         | NA         | NA       | NA       | NA       |
| CR847514.1          |          | 0 NA         | NA         | NA       | NA       | NA       |
| si:ch73-299h12.4    | 29.44979 | -0.242045845 | 0.318091   | -0.76093 | 0.446698 | 0.855583 |
| crebbpa             | 718.9704 | 0.050383187  | 0.171374   | 0.293995 | 0.768761 | 0.960395 |
| znf1179             | 69.08427 | -2.575192793 | 0.838473   | -3.07129 | 0.002131 | 0.07273  |
| RF00003             |          | 0 NA         | NA         | NA       | NA       | NA       |
| grem1b              | 55.19971 | -0.325207865 | 0.38423    | -0.84639 | 0.397336 | 0.830253 |
| si:ch211-171117.4   | 4.646282 | 1.606579993  | 0.953577   | 1.684792 | 0.092029 | 0.507669 |
| CU462913.1          | 2.720296 | 2.55148069   | 1.640602   | 1.55521  | 0.119896 | 0.564747 |
| pimr168             | 1.208524 |              | 0 5.267649 | 0        | 1 NA     |          |
| si:ch73-236c18.8    | 0.134409 |              | 0 5.267649 | 0        | 1 NA     |          |
| SLC16A6 (1 of many) | 9.221157 | 0.156556071  | 0.556507   | 0.281319 | 0.778465 | 0.961073 |
| CABZ01061592.2      | 11.95905 | 0.069040997  | 0.70034    | 0.098582 | 0.92147  | 0.994085 |
| RERG                | 77.85702 | 0.103474949  | 0.273548   | 0.37827  | 0.70523  | 0.944028 |
| BX957336.1          | 0.043308 |              | 0 5.267649 | 0        | 1 NA     |          |
| mhc2b               | 1.04371  | -2.391685411 | 2.121396   | -1.12741 | 0.259569 | NA       |
| si:dkey-112a7.4     | 456.0444 | 0.001016294  | 0.151475   | 0.006709 | 0.994647 | 1        |
| fam219b             | 178.8951 | -0.708946499 | 0.165475   | -4.28431 | 1.83E-05 | 0.002746 |
| CCNB1IP1            | 0.524818 | -0.861406934 | 4.033869   | -0.21354 | 0.830903 | NA       |
| BX511034.7          | 27.74738 | 0.145204551  | 0.374613   | 0.387612 | 0.698303 | 0.942433 |
| si:ch211-261d7.6    | 150.8323 | -0.252395397 | 0.208411   | -1.21105 | 0.225878 | 0.707208 |
| si:dkey-31i7.2      | 130.3092 | 0.907443504  | 0.446282   | 2.03334  | 0.042018 | 0.358718 |
| tuba71              | 30.55964 | -0.162191838 | 0.425603   | -0.38109 | 0.703138 | 0.943622 |
| surf4               | 1014.84  | 0.182978116  | 0.166174   | 1.101123 | 0.270843 | 0.746845 |
| CR626884.3          | 0.275174 |              | 0 5.267649 | 0        | 1 NA     |          |
| si:dkey-40c23.2     | 10.83154 | 0.606005385  | 0.679802   | 0.891444 | 0.372691 | 0.819953 |
| BX936384.2          |          | 0 NA         | NA         | NA       | NA       | NA       |
| msx2a               | 46.13771 | -0.041756401 | 0.266509   | -0.15668 | 0.875498 | 0.984383 |
| btbd2b              | 183.5694 | -0.101734249 | 0.217405   | -0.46795 | 0.639822 | 0.924779 |
| leap2               | 231.4742 | -0.921118281 | 0.554777   | -1.66034 | 0.096846 | 0.519447 |
| si:dkeyp-97a10.3    | 46.36952 | -0.23776185  | 0.302412   | -0.78622 | 0.431739 | 0.848419 |
| CU915762.1          | 0.791814 | -2.818664395 | 2.470316   | -1.14101 | 0.253864 | NA       |
| si:ch73-132f6.5     | 158.5236 | 0.191789461  | 0.187234   | 1.024332 | 0.305679 | 0.770934 |
| RF00415             | 0.130689 |              | 0 5.267649 | 0        | 1 NA     |          |
| zgc:103755          | 13.39926 | -0.659358458 | 0.558586   | -1.18041 | 0.237838 | 0.718607 |
| dclkb               | 605.8405 | -0.132670332 | 0.138805   | -0.9558  | 0.339173 | 0.795226 |
| kirrel31            | 615.8535 | 0.142953061  | 0.138526   | 1.031962 | 0.30209  | 0.76803  |
| slc35c1             | 127.7997 | 0.43122353   | 0.206934   | 2.08387  | 0.037172 | 0.338153 |
| cct2                | 3376.993 | -0.394285467 | 0.217759   | -1.81065 | 0.070195 | 0.452026 |
| prkd2               | 325.2857 | -0.014097356 | 0.162627   | -0.08669 | 0.930922 | 0.995809 |
| AL935044.4          |          | 0 NA         | NA         | NA       | NA       | NA       |
| CU467646.6          | 114.3107 | 1.212144485  | 0.353558   | 3.428417 | 0.000607 | 0.03197  |

|                   |          |              |            |          |          |          |
|-------------------|----------|--------------|------------|----------|----------|----------|
| CU469104.1        | 0.401531 | 0.095384128  | 2.724073   | 0.035015 | 0.972068 | NA       |
| si:dkeyp-87d1.1   | 0.924128 | 1.055426998  | 2.476813   | 0.426123 | 0.670018 | NA       |
| tpm2              | 9692.243 | 0.261889773  | 0.098927   | 2.647292 | 0.008114 | 0.152796 |
| BX640408.1        | 0.272599 |              | 0.5.267649 |          | 0        | 1 NA     |
| trdc              | 3.115656 |              | 0.1.899046 |          | 0        | 1 1      |
| grklb             | 262.2287 | 2.611685167  | 0.803608   | 3.249947 | 0.001154 | 0.048538 |
| hsf5              | 4.375426 | -2.326899988 | 1.079592   | -2.15535 | 0.031134 | 0.313664 |
| slc16a9b          | 581.8727 | -0.19168899  | 0.196335   | -0.97634 | 0.328897 | 0.787203 |
| cd79b             | 1.04429  | -3.128960599 | 2.331024   | -1.34231 | 0.179495 | NA       |
| CR848705.2        | 8.30114  | -0.32621796  | 0.628873   | -0.51873 | 0.603946 | 0.914603 |
| il6st             | 676.7242 | 0.182615698  | 0.137199   | 1.331025 | 0.183181 | 0.65938  |
| BX088587.1        | 1.831129 | 2.570639873  | 1.484179   | 1.732028 | 0.083269 | NA       |
| apooa             | 374.9208 | 0.219188792  | 0.149305   | 1.468063 | 0.142087 | 0.601137 |
| si:dkey-57k17.1   | 32.09225 | 0.252310236  | 0.329397   | 0.765977 | 0.44369  | 0.854255 |
| CR925761.4        | 12.38878 | -1.130741952 | 0.651391   | -1.73589 | 0.082583 | 0.483014 |
| acvr2ab           | 98.83597 | -0.02041067  | 0.250687   | -0.08142 | 0.935109 | 0.996829 |
| map7dlb           | 840.364  | 0.043166797  | 0.152351   | 0.283338 | 0.776918 | 0.961073 |
| cat               | 1624.477 | 0.151744017  | 0.161548   | 0.93931  | 0.347572 | 0.800202 |
| si:ch211-271g18.1 | 7.561139 | -1.578192036 | 0.782603   | -2.01659 | 0.043738 | 0.3663   |
| CU550719.2        | 0.129532 |              | 0.5.267649 |          | 0        | 1 NA     |
| ddx24             | 541.1947 | -0.05082841  | 0.162615   | -0.31257 | 0.754608 | 0.956283 |
| sprtn             | 164.9458 | -0.024881771 | 0.174629   | -0.14248 | 0.886698 | 0.987668 |
| psipla            | 115.9486 | -0.281303143 | 0.225114   | -1.2496  | 0.211444 | 0.692983 |
| RF00001           |          | 0 NA         |            | NA       | NA       | NA       |
| zgc:165653        | 183.6069 | 0.137779537  | 0.21005    | 0.655936 | 0.511866 | 0.885135 |
| zgc:91849         | 121.0296 | 0.055227326  | 0.196475   | 0.281091 | 0.778641 | 0.961073 |
| tbxa2r            | 10.66113 | -0.229876569 | 0.681102   | -0.33751 | 0.735735 | 0.951543 |
| CU570769.3        | 1.13876  | -2.370334545 | 2.775981   | -0.85387 | 0.393176 | NA       |
| abcc1             | 508.5619 | 0.171665326  | 0.191276   | 0.897475 | 0.369465 | 0.817857 |
| RF00001           | 0.247225 | 1.854109764  | 5.241768   | 0.353718 | 0.72355  | NA       |
| si:dkey-203a12.9  | 135.0461 |              | 0.1.680322 |          | 0        | 1 1      |
| myl2a             | 255.4283 | 0.50066364   | 0.227759   | 2.198214 | 0.027934 | 0.297418 |
| CABZ01087502.1    | 0.805126 |              | 0.3.041517 |          | 0        | 1 NA     |
| si:ch211-162e15.3 | 297.9919 | 0.110627539  | 0.146853   | 0.753321 | 0.451257 | 0.857606 |
| ino80da           | 23.04392 | 0.694423809  | 0.431276   | 1.610161 | 0.107363 | 0.538065 |
| BX950205.2        | 0.174358 |              | 0.5.267649 |          | 0        | 1 NA     |
| si:dkey-33b17.3   | 4.597983 | 2.454843375  | 1.10684    | 2.217885 | 0.026563 | 0.288909 |
| mlycd             | 99.45436 | 0.164033905  | 0.304776   | 0.538212 | 0.590431 | 0.908901 |
| coq4              | 146.3582 | 0.381673405  | 0.166937   | 2.286327 | 0.022235 | 0.263658 |
| kat2a             | 130.5462 | 0.194782425  | 0.208694   | 0.933339 | 0.350645 | 0.802215 |
| nkx6.2            | 226.068  | 0.208627764  | 0.171853   | 1.213993 | 0.22475  | 0.706634 |
| si:ch211-223a21.3 | 0.891711 | -0.967172052 | 2.529574   | -0.38235 | 0.702205 | NA       |
| AL935294.2        | 10.12656 |              | 0.1.716915 |          | 0        | 1 1      |
| hnf4b             | 132.5239 | -0.091057008 | 0.191685   | -0.47503 | 0.634763 | 0.924272 |
| or130-1           | 3.035479 | 1.756056935  | 1.376832   | 1.275433 | 0.202156 | 0.682294 |
| COLEC10           | 75.81408 | -0.570039916 | 0.300701   | -1.8957  | 0.057999 | 0.415921 |
| CR555298.1        | 0.135482 |              | 0.5.267649 |          | 0        | 1 NA     |
| CABZ01112650.1    | 80.34765 | 0.328246178  | 0.379713   | 0.864459 | 0.387336 | 0.827592 |
| zgc:194981        | 65.73013 | -0.310881101 | 0.321338   | -0.96746 | 0.333315 | 0.790471 |
| si:ch211-165a10.9 |          | 0 NA         |            | NA       | NA       | NA       |
| si:ch211-1i11.3   | 148.4732 | 0.107610738  | 0.171795   | 0.626389 | 0.53106  | 0.890545 |
| chek1             | 103.5364 | 0.057492526  | 0.285586   | 0.201314 | 0.840453 | 0.976417 |
| CR381531.2        | 8.058679 | -0.327785556 | 0.832304   | -0.39383 | 0.693707 | 0.940668 |
| akap17a           | 268.1596 | -0.002168625 | 0.178355   | -0.01216 | 0.990299 | 1        |



|                   |          |              |          |          |          |          |  |
|-------------------|----------|--------------|----------|----------|----------|----------|--|
| tim44             | 419.5338 | 0.07198657   | 0.116159 | 0.619725 | 0.535439 | 0.891993 |  |
| junbb             | 986.1873 | 0.108337873  | 0.415983 | 0.260438 | 0.794526 | 0.965448 |  |
| ly6m2             | 103.7212 | -0.326347573 | 0.802135 | -0.40685 | 0.684119 | 0.938486 |  |
| RF00001           | 0.050723 | -0.86807634  | 5.267649 | -0.16479 | 0.869106 | NA       |  |
| oaz1b             | 4033.193 | 0.376824146  | 0.149975 | 2.512574 | 0.011985 | 0.190729 |  |
| si:ch73-221f6.4   | 53.10245 | -0.015817643 | 0.281294 | -0.05623 | 0.955157 | 0.998611 |  |
| CR847998.1        | 0.308247 | 0            | 4.583051 | 0        | 1        | NA       |  |
| nlg3a             | 241.6547 | 0.314304501  | 0.264654 | 1.187606 | 0.234989 | 0.715653 |  |
| si:dkey-28k24.2   | 4.362499 | -0.796153112 | 1.260985 | -0.63137 | 0.527796 | 0.889948 |  |
| dele1             | 481.1361 | 0.093750473  | 0.123165 | 0.76118  | 0.44655  | 0.855454 |  |
| CABZ01077956.1    | 5.457005 | -0.326585443 | 0.810141 | -0.40312 | 0.686859 | 0.93875  |  |
| dntt              | 0.569958 | 0.965159086  | 3.047182 | 0.316738 | 0.751442 | NA       |  |
| dgke              | 48.50904 | 0.31503583   | 0.303971 | 1.036401 | 0.300015 | 0.766629 |  |
| cxcl8a            | 91.93721 | 0.375638461  | 0.357106 | 1.051896 | 0.292847 | 0.76239  |  |
| BX510922.2        | 43.19301 | -0.351271237 | 0.328602 | -1.06899 | 0.285076 | 0.756178 |  |
| si:ch211-175m2.4  | 13.27984 | -1.059519124 | 0.52458  | -2.01975 | 0.04341  | 0.365214 |  |
| tubb6             | 178.8568 | 0.255494759  | 0.178013 | 1.435261 | 0.151213 | 0.615206 |  |
| CR555295.1        | 0.045161 | 0            | 5.267649 | 0        | 1        | NA       |  |
| si:ch211-238e22.8 | 4.402449 | -1.245107851 | 1.036276 | -1.20152 | 0.229549 | 0.711596 |  |
| dre-mir-92a-1     | 3.464097 | 0.039219098  | 1.025117 | 0.038258 | 0.969482 | 1        |  |
| fbxw11a           | 526.2792 | 0.002373168  | 0.120953 | 0.019621 | 0.984346 | 1        |  |
| si:ch73-221f6.3   | 54.70077 | -0.323427184 | 0.234807 | -1.37742 | 0.168383 | 0.639712 |  |
| jak2a             | 625.6442 | -0.034779404 | 0.113532 | -0.30634 | 0.759346 | 0.957886 |  |
| top1mt            | 94.18693 | -0.277170774 | 0.263191 | -1.05312 | 0.292287 | 0.761879 |  |
| akt3a             | 33.05899 | 0.057288933  | 0.341414 | 0.167799 | 0.866742 | 0.982582 |  |
| cyp2aa2           | 37.03913 | 0.925483247  | 0.370422 | 2.498457 | 0.012474 | 0.194346 |  |
| BX511024.1        | 6.203967 | 0.096371753  | 1.298172 | 0.074236 | 0.940822 | 0.997371 |  |
| lmlba             | 108.2949 | 0.212990796  | 0.196518 | 1.083823 | 0.278443 | 0.752101 |  |
| pyroxd1           | 193.6873 | -0.422498222 | 0.167416 | -2.52364 | 0.011615 | 0.187517 |  |
| si:ch211-93f2.1   | 285.6494 | -0.372538323 | 0.308403 | -1.20796 | 0.227063 | 0.708273 |  |
| CR790382.3        | 0.566067 | 0            | 3.853995 | 0        | 1        | NA       |  |
| psd3l             | 680.1794 | 0.151202515  | 0.098168 | 1.540239 | 0.123502 | 0.570142 |  |
| znf1131           | 6.772678 | 0.023927733  | 0.787258 | 0.030394 | 0.975753 | 1        |  |
| znf648            | 248.5772 | -0.128136576 | 0.363175 | -0.35282 | 0.724221 | 0.948273 |  |
| CU929073.1        | 28.07037 | -0.312760762 | 0.459115 | -0.68123 | 0.495728 | 0.87806  |  |
| trim35-7          | 35.14424 | -0.006879418 | 0.372886 | -0.01845 | 0.985281 | 1        |  |
| pcdh1gc5          | 85.12895 | 0.504055111  | 0.244571 | 2.060978 | 0.039305 | 0.347066 |  |
| zgc:112146        | 56.52709 | 0.933962755  | 0.480591 | 1.943362 | 0.051972 | 0.396431 |  |
| cep192            | 109.2312 | 0.158943309  | 0.245036 | 0.648653 | 0.516563 | 0.886933 |  |
| CU914164.1        | 1.481777 | -4.914798072 | 1.962143 | -2.50481 | 0.012252 | NA       |  |
| CU693471.1        | 7.017976 | 0.061711938  | 0.848826 | 0.072703 | 0.942043 | 0.997371 |  |
| si:dkey-83h2.5    | 34.94958 | -0.275683169 | 0.324618 | -0.84925 | 0.39574  | 0.829389 |  |
| map3k4            | 684.4298 | 0.096037882  | 0.128253 | 0.748816 | 0.453968 | 0.858944 |  |
| myom1b            | 1752.102 | 0.008578123  | 0.284292 | 0.030174 | 0.975929 | 1        |  |
| nudc              | 656.9324 | 0.135217155  | 0.147565 | 0.91632  | 0.359499 | 0.810644 |  |
| tradv3.0.4        | 0.073968 | 0            | 5.267649 | 0        | 1        | NA       |  |
| manscl            | 254.2131 | 0.273466828  | 0.223929 | 1.221221 | 0.222002 | 0.703829 |  |
| si:dkey-28a3.2    | 110.1722 | -0.54653628  | 0.184724 | -2.95866 | 0.00309  | 0.091315 |  |
| JMJD8             | 21.83878 | 0.623731122  | 0.52364  | 1.191145 | 0.233597 | 0.714702 |  |
| mipoll            | 120.8705 | -0.023945647 | 0.233982 | -0.10234 | 0.918487 | 0.993884 |  |
| atg10             | 98.78028 | -0.293967219 | 0.25486  | -1.15345 | 0.248728 | 0.728758 |  |
| ptger1b           | 19.03714 | 0.247975034  | 0.462929 | 0.535666 | 0.59219  | 0.909823 |  |
| cdkall            | 168.9357 | -0.087872135 | 0.230646 | -0.38098 | 0.703216 | 0.943622 |  |
| si:dkey-3h23.3    | 0        | NA           | NA       | NA       | NA       | NA       |  |

|                    |          |              |            |          |          |          |   |
|--------------------|----------|--------------|------------|----------|----------|----------|---|
| si:ch211-215p11.1  | 9.736046 | -0.311542398 | 0.74748    | -0.41679 | 0.676832 | 0.935664 |   |
| si:ch211-142b24.8  | 2.887876 | -0.09472716  | 1.024401   | -0.09247 | 0.926324 | 0.994815 |   |
| illrap11b          | 34.08302 | -0.150551886 | 0.426544   | -0.35296 | 0.724121 | 0.948273 |   |
| olfcg3             | 0.294822 |              | 0 4.657209 |          | 0        | 1 NA     |   |
| si:ch211-260e23.7  | 9.981212 | 1.796785208  | 0.849651   | 2.114733 | 0.034453 | 0.327696 |   |
| znf740a            | 6.417352 | -0.387244389 | 0.816572   | -0.47423 | 0.635335 | 0.924272 |   |
| si:dkey-1c7.2      | 2.072725 | -1.373558969 | 1.912567   | -0.71818 | 0.472649 | NA       |   |
| si:ch211-128m15.3  | 78.87744 | 0.063642572  | 0.261713   | 0.243177 | 0.807869 | 0.969828 |   |
| rprdl1a            | 185.5724 | -0.425394061 | 0.143759   | -2.95909 | 0.003086 | 0.091315 |   |
| klhdc2             | 300.1079 | 0.190713479  | 0.258123   | 0.738848 | 0.46     | 0.862369 |   |
| si:dkey-34d22.5    | 3.498068 | -1.09783358  | 1.124113   | -0.97662 | 0.328756 | 0.787144 |   |
| tradv6.0.3         |          | 0 NA         | NA         | NA       | NA       | NA       |   |
| si:dkey-21e5.1     | 38.86763 | 0.487323112  | 0.487883   | 0.998853 | 0.317866 | 0.77973  |   |
| CABZ01085878.1     | 107.8354 | -0.255299624 | 0.307831   | -0.82935 | 0.406907 | 0.835226 |   |
| FP016239.1         | 2.945553 | -3.634470761 | 1.626769   | -2.23417 | 0.025472 | 0.283609 |   |
| CU929568.2         | 0.140822 |              | 0 5.267649 |          | 0        | 1 NA     |   |
| fzd6               | 416.1389 | 0.023927893  | 0.135196   | 0.176987 | 0.859519 | 0.979975 |   |
| bspry              | 28.41033 | 0.6371273    | 0.320198   | 1.989789 | 0.046614 | 0.376263 |   |
| v2ral              | 0.263492 | 2.615452334  | 5.197966   | 0.503168 | 0.614846 | NA       |   |
| FP085399.5         | 0.667517 |              | 0 3.710018 |          | 0        | 1 NA     |   |
| PCMTD2 (1 of many) | 71.78458 | -0.237167621 | 0.276391   | -0.85809 | 0.390844 | 0.827902 |   |
| BX510934.2         | 0.087381 |              | 0 5.267649 |          | 0        | 1 NA     |   |
| znf1105            | 9.823963 | -0.004106993 | 0.675433   | -0.00608 | 0.995148 |          | 1 |
| si:dkey-28i19.1    | 1.375206 | 0.535016863  | 1.352036   | 0.395712 | 0.692318 | NA       |   |
| kpnbl              | 3036.53  | -0.059281722 | 0.095068   | -0.62357 | 0.53291  | 0.890978 |   |
| si:ch211-76m11.3   | 74.89426 | 0.99486007   | 0.952625   | 1.044335 | 0.29633  | 0.764246 |   |
| si:dkey-109j17.5   | 57.65385 | -0.402728161 | 0.300885   | -1.33848 | 0.18074  | 0.656768 |   |
| znf1108            | 0.045161 |              | 0 5.267649 |          | 0        | 1 NA     |   |
| si:ch211-207e19.2  | 4.763728 | -0.680225864 | 1.271218   | -0.5351  | 0.592582 | 0.909996 |   |
| si:ch73-138e16.2   | 64.61389 | -0.743182516 | 0.344587   | -2.15674 | 0.031026 | 0.313376 |   |
| BX004857.1         | 117.0807 | 1.752464952  | 1.336756   | 1.310983 | 0.189863 | 0.669635 |   |
| si:dkey-16p6.1     | 9.148779 | 0.620063063  | 0.759134   | 0.816803 | 0.414041 | 0.838631 |   |
| CR931813.2         | 68.82099 | -0.267712934 | 0.32694    | -0.81884 | 0.412876 | 0.838123 |   |
| RF00001            | 0.084441 |              | 0 5.267649 |          | 0        | 1 NA     |   |
| ostc               | 887.003  | 0.134646188  | 0.162224   | 0.830002 | 0.406538 | 0.834986 |   |
| cdknlcb            | 24.74597 | -0.156433214 | 0.36081    | -0.43356 | 0.664607 | 0.93201  |   |
| si:ch73-221f6.1    | 32.97838 | 0.116669135  | 0.333895   | 0.349418 | 0.726775 | 0.949095 |   |
| mtr                | 274.2312 | 0.006775573  | 0.196753   | 0.034437 | 0.972529 |          | 1 |
| ing2               | 346.6826 | -0.089869079 | 0.134613   | -0.66761 | 0.504381 | 0.881868 |   |
| dre-mir-20a        |          | 0 NA         | NA         | NA       | NA       | NA       |   |
| CU074310.1         | 0.880271 | 0.09365185   | 2.174148   | 0.043075 | 0.965642 | NA       |   |
| muc5f              | 26.16368 | -0.323437205 | 0.848362   | -0.38125 | 0.703018 | 0.943622 |   |
| si:dkey-7114.4     | 9.150492 | -0.663878716 | 1.046369   | -0.63446 | 0.525781 | 0.888982 |   |
| si:ch211-153b23.3  | 136.7254 | -0.283582956 | 0.409836   | -0.69194 | 0.488973 | 0.873989 |   |
| sstr1a             | 42.19689 | -0.512574797 | 0.35241    | -1.45448 | 0.145812 | 0.605026 |   |
| BX072577.1         | 53.69144 | 0.744939246  | 0.384156   | 1.939158 | 0.052482 | 0.39817  |   |
| si:dkey-26m3.2     | 8.820448 | -0.134794774 | 0.73833    | -0.18257 | 0.855138 | 0.979197 |   |
| p2ry2.2            |          | 0 NA         | NA         | NA       | NA       | NA       |   |
| CT030005.2         |          | 0 NA         | NA         | NA       | NA       | NA       |   |
| si:ch211-153f2.7   | 96.10474 | 0.4891029    | 0.238439   | 2.051271 | 0.040241 | 0.350648 |   |
| TMEM275            | 77.38319 | -0.422454221 | 0.426913   | -0.98956 | 0.322391 | 0.78246  |   |
| RF00001            | 0.150322 | -1.826663989 | 5.230461   | -0.34924 | 0.726912 | NA       |   |
| si:ch211-261d9.1   | 0.043309 |              | 0 5.267649 |          | 0        | 1 NA     |   |
| si:ch211-225h24.2  | 75.7632  | -0.062864886 | 0.243405   | -0.25827 | 0.796197 | 0.966357 |   |

|                     |          |              |          |          |          |          |
|---------------------|----------|--------------|----------|----------|----------|----------|
| fts3                | 485.0038 | 0.221223409  | 0.180665 | 1.224494 | 0.220766 | 0.701955 |
| ciao2a              | 219.9116 | -0.032258822 | 0.155065 | -0.20803 | 0.835203 | 0.976007 |
| mad211bp            | 88.70538 | 0.020627843  | 0.256139 | 0.080534 | 0.935813 | 0.996829 |
| sncb                | 1520.338 | 0.253154545  | 0.207044 | 1.222712 | 0.221439 | 0.702841 |
| si:ch211-194m7.8    | 8.881059 | 0.093643837  | 1.842068 | 0.050836 | 0.959456 | 0.999164 |
| slc27a1b            | 161.6245 | -0.358574033 | 0.218563 | -1.6406  | 0.100881 | 0.526442 |
| CU855694.2          | 0 NA     | NA           | NA       | NA       | NA       | NA       |
| stt3a               | 1807.147 | 0.138906143  | 0.10269  | 1.352673 | 0.17616  | 0.649415 |
| BX294178.2          | 1.355151 | -0.705341534 | 1.613148 | -0.43725 | 0.661933 | NA       |
| si:dkey-165o8.2     | 20.23076 | -1.745590428 | 0.71961  | -2.42575 | 0.015277 | 0.217425 |
| CR478208.1          | 0 NA     | NA           | NA       | NA       | NA       | NA       |
| kbtbd11             | 76.8305  | -0.341980368 | 0.232142 | -1.47315 | 0.140711 | 0.599658 |
| dnajc17             | 69.12643 | 0.301228709  | 0.188156 | 1.600954 | 0.109387 | 0.542487 |
| si:ch211-11n16.3    | 1.012079 | -4.196710517 | 4.955745 | -0.84684 | 0.397086 | NA       |
| ghrhra              | 4.989845 | -2.059622797 | 1.34235  | -1.53434 | 0.124946 | 0.572594 |
| L0018493.2          | 2.05118  | 0.428826863  | 1.4108   | 0.30396  | 0.761158 | NA       |
| BX511166.1          | 3.670604 | 0.792649583  | 0.97263  | 0.814954 | 0.415098 | 0.838738 |
| kcnj12a             | 3.193982 | 2.986226591  | 1.586864 | 1.881842 | 0.059857 | 0.421883 |
| si:dkey-238k10.3    | 7.721671 | 1.678705788  | 0.962425 | 1.744246 | 0.081116 | 0.479923 |
| si:ch211-227e10.1   | 12.69486 | 0.928685003  | 0.736001 | 1.261798 | 0.207021 | 0.689322 |
| pimr199             | 0.426405 | 0.96252427   | 3.720643 | 0.258698 | 0.795868 | NA       |
| wnt5a               | 39.28995 | -0.31067272  | 0.296211 | -1.04882 | 0.29426  | 0.763323 |
| slain1b             | 18.18969 | -0.459221793 | 0.431072 | -1.0653  | 0.286739 | 0.757813 |
| si:ch1073-67j19.2   | 0.120839 | 0.5.267649   | 0        | 0        | 1 NA     | NA       |
| CR388055.1          | 0.148556 | 0.5.267649   | 0        | 0        | 1 NA     | NA       |
| CU695117.1          | 63.88707 | -0.902601527 | 0.382387 | -2.36044 | 0.018253 | 0.238375 |
| SLC45A4 (1 of many) | 18.37612 | 0.051457839  | 0.454369 | 0.113251 | 0.909831 | 0.992208 |
| dre-mir-193b        | 0.129927 | 0.5.267649   | 0        | 0        | 1 NA     | NA       |
| zgc:110249          | 36.62839 | 0.192423083  | 0.296712 | 0.648519 | 0.51665  | 0.886933 |
| si:ch211-211k8.12   | 0.301011 | 1.055410984  | 3.494725 | 0.302001 | 0.762651 | NA       |
| RF00001             | 0 NA     | NA           | NA       | NA       | NA       | NA       |
| wnk2                | 59.54025 | 1.08660391   | 0.369932 | 2.937304 | 0.003311 | 0.094588 |
| epgn                | 231.11   | 0.228430672  | 0.221902 | 1.029423 | 0.303281 | 0.769325 |
| si:ch211-63i20.3    | 0.433968 | -0.868135145 | 3.625082 | -0.23948 | 0.810733 | NA       |
| ugt5b1              | 61.87909 | 0.388180193  | 0.337268 | 1.150956 | 0.24975  | 0.729721 |
| tmem203             | 282.6561 | 0.046228675  | 0.207583 | 0.2227   | 0.823769 | 0.972005 |
| CT027980.1          | 20.3471  | 1.095303341  | 0.485806 | 2.254608 | 0.024158 | 0.275116 |
| c2cd2               | 128.651  | -0.003061726 | 0.212961 | -0.01438 | 0.988529 | 1        |
| zgc:91999           | 1357.437 | -0.088160705 | 0.121624 | -0.72486 | 0.468535 | 0.866951 |
| scn1bb              | 296.5626 | 0.266157875  | 0.293966 | 0.905403 | 0.365252 | 0.815339 |
| CU896640.1          | 0 NA     | NA           | NA       | NA       | NA       | NA       |
| tmem132a            | 0 NA     | NA           | NA       | NA       | NA       | NA       |
| CT573446.1          | 1.280597 | 3.783156808  | 1.866637 | 2.026723 | 0.042691 | NA       |
| gpr171              | 1.252346 | 0.2.311205   | 0        | 0        | 1 NA     | NA       |
| ddah2               | 707.2664 | -0.071752638 | 0.165052 | -0.43473 | 0.66376  | 0.931603 |
| lztfl1              | 444.4341 | -0.024803257 | 0.145153 | -0.17088 | 0.864321 | 0.981867 |
| pigb                | 137.8956 | 0.117617867  | 0.159873 | 0.735697 | 0.461915 | 0.863402 |
| utp23               | 207.431  | -0.207178927 | 0.201342 | -1.02899 | 0.303485 | 0.769363 |
| hoxa9a              | 57.43366 | -0.211678795 | 0.246283 | -0.85949 | 0.390068 | 0.827902 |
| mrella              | 101.0225 | 0.097099666  | 0.197641 | 0.491294 | 0.623219 | 0.918971 |
| CU459147.1          | 6.050148 | 0.1.799314   | 0        | 0        | 1        | 1        |
| lrrc20              | 841.2273 | 0.402587828  | 0.162306 | 2.480429 | 0.013122 | 0.199185 |
| F0704813.1          | 7.210478 | 0.435868809  | 0.989998 | 0.440272 | 0.65974  | 0.930581 |
| selplg              | 23.48954 | -0.179698631 | 0.38092  | -0.47175 | 0.637106 | 0.924779 |

|                   |          |              |          |          |          |          |
|-------------------|----------|--------------|----------|----------|----------|----------|
| TPPP              | 28.70737 | 0.538872246  | 0.531716 | 1.013458 | 0.310841 | 0.775764 |
| RF01951           | 0 NA     | NA           | NA       | NA       | NA       | NA       |
| BX897691.1        | 2.195164 | 0.21302274   | 1.790971 | 0.118943 | 0.905321 | NA       |
| zdhhc18b          | 79.61529 | 0.06907986   | 0.194654 | 0.354886 | 0.722675 | 0.947632 |
| anapc2            | 205.4318 | 0.336409187  | 0.131722 | 2.553929 | 0.010651 | 0.179908 |
| arl6ip4           | 246.8876 | 0.196601229  | 0.186031 | 1.056817 | 0.290595 | 0.76078  |
| snrpf             | 715.9175 | -0.116876277 | 0.20626  | -0.56665 | 0.570955 | 0.902501 |
| CABZ01038376.1    | 7.96128  | 0.595235818  | 0.715823 | 0.83154  | 0.405669 | 0.834645 |
| phkalb            | 71.34319 | 0.070212637  | 0.376379 | 0.186548 | 0.852015 | 0.978558 |
| dipk1c            | 313.974  | -0.192406364 | 0.139686 | -1.37742 | 0.168381 | 0.639712 |
| CABZ01024659.1    | 0.135482 | 0            | 5.267649 | 0        | 1        | NA       |
| cldn1012          | 5.18119  | -1.460109153 | 1.354082 | -1.0783  | 0.280899 | 0.75325  |
| si:dkey-152b24.6  | 2.873231 | -3.55714932  | 1.624799 | -2.18929 | 0.028576 | 0.300821 |
| si:ch211-51i16.3  | 5.674308 | 1.22913362   | 1.06801  | 1.150864 | 0.249788 | 0.729721 |
| bmprlab           | 391.0937 | 0.122244933  | 0.166858 | 0.73263  | 0.463784 | 0.864593 |
| ccnf              | 335.3453 | 0.420530451  | 0.282294 | 1.489691 | 0.136305 | 0.591569 |
| BX927369.1        | 0.049519 | 0            | 5.267649 | 0        | 1        | NA       |
| LO018231.1        | 5.706571 | -0.241781072 | 1.101907 | -0.21942 | 0.826322 | 0.973229 |
| SHKBP1            | 197.6068 | -0.091802129 | 0.131564 | -0.69777 | 0.485319 | 0.872911 |
| RF00001           | 0 NA     | NA           | NA       | NA       | NA       | NA       |
| cfh15             | 90.62259 | 0.513868448  | 0.440069 | 1.167701 | 0.242927 | 0.724396 |
| znf451            | 46.99784 | -0.226699951 | 0.265176 | -0.8549  | 0.392604 | 0.827902 |
| CR762475.3        | 0.04222  | 0            | 5.267649 | 0        | 1        | NA       |
| CT027609.1        | 1.325519 | 0.036285838  | 1.642601 | 0.02209  | 0.982376 | NA       |
| zgc:172282        | 81.66255 | -0.14386909  | 0.288032 | -0.49949 | 0.617435 | 0.916375 |
| rdh8b             | 75.46026 | 0.112665422  | 0.284899 | 0.395457 | 0.692505 | 0.940414 |
| si:ch73-261i21.5  | 98.60807 | 0.742737017  | 0.671865 | 1.105486 | 0.268949 | 0.745044 |
| si:ch211-64i20.3  | 7.012676 | 0.17911141   | 0.701222 | 0.255427 | 0.798393 | 0.966698 |
| znf1043           | 10.94839 | 0.792510079  | 0.62662  | 1.264738 | 0.205965 | 0.688314 |
| SMIM22            | 201.1783 | 0.604802027  | 0.201278 | 3.004809 | 0.002657 | 0.084117 |
| CR925723.3        | 1.448482 | 0.03188422   | 1.784282 | 0.01787  | 0.985743 | NA       |
| nos1apa           | 101.8464 | 0.088827536  | 0.177116 | 0.501522 | 0.616004 | 0.916365 |
| CU655961.2        | 70.6099  | 0.030145015  | 0.312721 | 0.096396 | 0.923206 | 0.994525 |
| BX000701.2        | 25.50407 | -0.092060393 | 0.327954 | -0.28071 | 0.778932 | 0.961073 |
| BX324216.2        | 42.72683 | -0.60206742  | 0.396457 | -1.51862 | 0.128858 | 0.578173 |
| hdhd5             | 61.63983 | 0.237530129  | 0.376661 | 0.63062  | 0.528289 | 0.889948 |
| BX649411.2        | 139.1185 | -0.479236194 | 0.320184 | -1.49675 | 0.134458 | 0.588914 |
| CABZ01057891.1    | 158.5335 | 0.191280581  | 0.306863 | 0.623342 | 0.53306  | 0.890978 |
| BX548246.1        | 0.069091 | 0            | 5.267649 | 0        | 1        | NA       |
| chd5              | 108.8746 | 0.553880174  | 0.295757 | 1.872755 | 0.061102 | 0.424509 |
| BX649622.2        | 0.589739 | -2.326757105 | 3.421294 | -0.68008 | 0.496453 | NA       |
| tenm4             | 431.4206 | 0.652379874  | 0.135599 | 4.811107 | 1.50E-06 | 0.000395 |
| cc139.6           | 4.119421 | 1.655235136  | 0.925474 | 1.788528 | 0.073691 | 0.461398 |
| zgc:174944        | 19.80828 | 0.666237166  | 0.557487 | 1.195071 | 0.232059 | 0.713202 |
| FP236157.3        | 8.962129 | -0.928341585 | 0.713576 | -1.30097 | 0.193268 | 0.673287 |
| WDR63             | 19.09255 | 0.174347194  | 0.427303 | 0.408018 | 0.68326  | 0.938212 |
| si:ch1073-67j19.1 | 0 NA     | NA           | NA       | NA       | NA       | NA       |
| RF00017           | 0.053506 | -0.86807634  | 5.267649 | -0.16479 | 0.869106 | NA       |
| dr1               | 598.9366 | 0.128403597  | 0.117356 | 1.094137 | 0.273895 | 0.749234 |
| golga7bb          | 4.871204 | 1.396838111  | 1.358453 | 1.028256 | 0.303829 | 0.769473 |
| crsp7             | 155.1161 | -0.065798139 | 0.232577 | -0.28291 | 0.777246 | 0.961073 |
| F0704866.1        | 0 NA     | NA           | NA       | NA       | NA       | NA       |
| si:dkey-223p19.1  | 11.50072 | 1.097202721  | 0.99214  | 1.105895 | 0.268772 | 0.744925 |
| si:ch211-165a10.8 | 0 NA     | NA           | NA       | NA       | NA       | NA       |

|                    |          |              |          |          |          |          |
|--------------------|----------|--------------|----------|----------|----------|----------|
| FP102783.1         | 94.6998  | 0.215633355  | 0.310104 | 0.695359 | 0.48683  | 0.873246 |
| BX927122.2         | 0.053506 | -0.86807634  | 5.267649 | -0.16479 | 0.869106 | NA       |
| ntnla              | 259.7145 | -0.122481279 | 0.154277 | -0.7939  | 0.427251 | 0.845742 |
| galr2b             | 48.59585 | 0.66768888   | 0.410052 | 1.628302 | 0.103461 | 0.530587 |
| crebrf             | 76.9332  | -0.072896684 | 0.343349 | -0.21231 | 0.831865 | 0.974925 |
| si:dkey-57c15.1    | 11.81077 | 0.092917611  | 0.832696 | 0.111587 | 0.911151 | 0.992208 |
| p4hb               | 2755.607 | 0.47889575   | 0.094738 | 5.054927 | 4.31E-07 | 0.000149 |
| sdad1              | 1371.132 | -0.210513519 | 0.160484 | -1.31174 | 0.189607 | 0.669289 |
| zgc:171566         | 425.3376 | 0.363235414  | 0.165495 | 2.194837 | 0.028175 | 0.298774 |
| si:ch211-258f1.3   | 28.7517  | 0.021049694  | 0.517549 | 0.040672 | 0.967557 | 1        |
| gab2               | 43.01152 | 0.007578796  | 0.279323 | 0.027133 | 0.978354 | 1        |
| BX323031.2         | 20.4193  | 0.22816322   | 0.487953 | 0.467593 | 0.640076 | 0.924877 |
| zer1               | 526.4498 | 0.053788928  | 0.18085  | 0.297423 | 0.766143 | 0.960113 |
| si:ch73-321d9.2    | 1.620845 | -1.35242592  | 2.037915 | -0.66363 | 0.506926 | NA       |
| si:ch211-155e24.3  | 369.1483 | -0.100429878 | 0.134773 | -0.74518 | 0.456163 | 0.860359 |
| dre-mir-193a-2     | 0 NA     | NA           | NA       | NA       | NA       | NA       |
| cogl               | 245.2303 | -0.188369797 | 0.136843 | -1.37654 | 0.168656 | 0.640045 |
| dre-mir-7a-1       | 5.075979 | 0.111186541  | 1.218258 | 0.091267 | 0.927281 | 0.994973 |
| zdhhc24            | 106.1532 | -0.048831981 | 0.199685 | -0.24454 | 0.806809 | 0.969726 |
| ccdc50             | 118.3013 | 0.179424786  | 0.273935 | 0.654991 | 0.512474 | 0.88546  |
| zgc:173705         | 8.017986 | -0.810623974 | 0.625871 | -1.29519 | 0.195254 | 0.67483  |
| F0704635.1         | 74.74645 | -0.185456899 | 0.27344  | -0.67824 | 0.497621 | 0.878802 |
| tcirglb            | 506.4425 | -0.070215017 | 0.165428 | -0.42444 | 0.671242 | 0.933953 |
| BX005367.2         | 0.178718 | 0 5.267649   | 0        | 1 NA     |          |          |
| znf1130            | 15.04252 | 0.669186406  | 0.764122 | 0.875758 | 0.381161 | 0.824296 |
| si:ch211-282j17.12 | 2.679284 | 3.779161007  | 1.659949 | 2.276673 | 0.022806 | 0.266874 |
| osbplla            | 304.0301 | -0.050468067 | 0.147806 | -0.34145 | 0.732767 | 0.950617 |
| CR774179.3         | 1.2889   | 0.063555971  | 1.9932   | 0.031886 | 0.974563 | NA       |
| tradv10.0.4        | 0 NA     | NA           | NA       | NA       | NA       | NA       |
| cyp2k21            | 12.23528 | -0.345448547 | 1.270358 | -0.27193 | 0.785676 | 0.962605 |
| ifitm5             | 58.21977 | -0.335868484 | 0.267707 | -1.25461 | 0.20962  | 0.691766 |
| egl1nb             | 0 NA     | NA           | NA       | NA       | NA       | NA       |
| BX649434.3         | 0.225297 | 0 4.308399   | 0        | 1 NA     |          |          |
| hdac8              | 513.3401 | 0.129348481  | 0.173491 | 0.745564 | 0.455931 | 0.860324 |
| si:ch211-238e22.8  | 3.175565 | -3.245406101 | 1.531686 | -2.11885 | 0.034104 | 0.326054 |
| CR293509.1         | 41.46637 | -0.291059755 | 0.349557 | -0.83265 | 0.405041 | 0.834284 |
| RF00582            | 0.059954 | 1.055396947  | 5.267649 | 0.200354 | 0.841203 | NA       |
| AL935303.1         | 0 NA     | NA           | NA       | NA       | NA       | NA       |
| si:ch211-142b24.2  | 1.408306 | 1.958430841  | 2.044634 | 0.957839 | 0.338144 | NA       |
| CR547131.1         | 0 NA     | NA           | NA       | NA       | NA       | NA       |
| zgc:174890         | 25.68938 | -0.361442004 | 0.344406 | -1.04946 | 0.293965 | 0.763068 |
| ilf3b              | 2517.313 | 0.091027247  | 0.073987 | 1.230313 | 0.21858  | 0.699445 |
| erc2               | 33.41222 | 0.067933452  | 0.356945 | 0.190319 | 0.849059 | 0.978067 |
| hdac7a             | 157.7473 | -0.120190017 | 0.170129 | -0.70646 | 0.4799   | 0.870001 |
| L0018597.1         | 0.053506 | -0.86807634  | 5.267649 | -0.16479 | 0.869106 | NA       |
| ntan1              | 159.9733 | -0.233076575 | 0.169282 | -1.37686 | 0.168557 | 0.639966 |
| CT009487.2         | 40.59555 | -0.915248735 | 0.540867 | -1.69219 | 0.09061  | 0.505206 |
| nbeab              | 42.84274 | 0.09717405   | 0.341053 | 0.284924 | 0.775703 | 0.961073 |
| snx7               | 496.7642 | 0.018405691  | 0.156188 | 0.117843 | 0.906192 | 0.991631 |
| gcshb              | 250.2946 | 0.080739936  | 0.159988 | 0.504664 | 0.613795 | 0.915998 |
| vimr2              | 190.8922 | 0.073711777  | 0.35455  | 0.207902 | 0.835305 | 0.976007 |
| olfcg9             | 1.091345 | 0 2.615697   | 0        | 1 NA     |          |          |
| rhbd13             | 172.2974 | -0.048592533 | 0.187846 | -0.25868 | 0.79588  | 0.966247 |
| BX927404.1         | 4.621089 | -1.002337706 | 0.969611 | -1.03375 | 0.301252 | 0.767371 |

|                   |          |              |          |          |          |          |    |
|-------------------|----------|--------------|----------|----------|----------|----------|----|
| AL929105.1        | 0.341682 |              | 0        | 5.179119 | 0        | 1        | NA |
| dnajc21           | 142.8499 | 0.294601098  | 0.214116 | 1.375897 | 0.168853 | 0.640393 |    |
| CR318620.1        | 0        | NA           | NA       | NA       | NA       | NA       |    |
| si:dkeyp-13d12.19 | 0.213959 |              | 0        | 5.267649 | 0        | 1        | NA |
| adcyap1r1a        | 471.7657 | -0.021732903 | 0.233495 | -0.09308 | 0.925843 | 0.994815 |    |
| RF00001           | 0        | NA           | NA       | NA       | NA       | NA       |    |
| hmgcrb            | 542.4097 | 0.029272599  | 0.12675  | 0.230948 | 0.817355 | 0.971235 |    |
| zgc:85843         | 113.1426 | 0.043316608  | 0.183874 | 0.235578 | 0.81376  | 0.970397 |    |
| MPRIP             | 895.2556 | 0.099182114  | 0.136829 | 0.724861 | 0.468537 | 0.866951 |    |
| etfla             | 49.32922 | 0.286589296  | 0.325268 | 0.881087 | 0.378271 | 0.822672 |    |
| cfh11             | 39.02611 | -0.512178422 | 0.46863  | -1.09293 | 0.274426 | 0.749817 |    |
| agtpbp1           | 168.211  | 0.20052968   | 0.162636 | 1.232994 | 0.217578 | 0.69815  |    |
| kdrl              | 510.7683 | 0.05851619   | 0.153847 | 0.380352 | 0.703684 | 0.943735 |    |
| ompa              | 133.6478 | 0.380522348  | 0.449237 | 0.847041 | 0.396972 | 0.830253 |    |
| znf988            | 3.716927 | -1.229547055 | 1.080864 | -1.13756 | 0.255305 | 0.733542 |    |
| CT573285.1        | 0        | NA           | NA       | NA       | NA       | NA       |    |
| pmp22a            | 2449.498 | -0.043149564 | 0.119815 | -0.36014 | 0.718745 | 0.94694  |    |
| tradv41.0         | 0        | NA           | NA       | NA       | NA       | NA       |    |
| fgf4              | 79.7625  | 0.113770448  | 0.230355 | 0.493893 | 0.621382 | 0.918461 |    |
| kmt5aa            | 1071.525 | 0.078260053  | 0.136271 | 0.574296 | 0.565768 | 0.901634 |    |
| si:ch211-260e23.8 | 1.72579  | 4.836567311  | 1.723023 | 2.807024 | 0.005    | NA       |    |
| BX255920.1        | 1.736254 | 1.851852192  | 1.359135 | 1.362523 | 0.173033 | NA       |    |
| mcc               | 251.8589 | -0.304394866 | 0.200447 | -1.51858 | 0.128868 | 0.578173 |    |
| ecmlb             | 370.532  | 0.090743247  | 0.152369 | 0.595549 | 0.551477 | 0.8974   |    |
| btr26             | 12.8597  | -0.248022337 | 0.694185 | -0.35729 | 0.720878 | 0.947343 |    |
| BX088547.1        | 0.156848 |              | 0        | 5.267649 | 0        | 1        | NA |
| ogt.1             | 2313.808 | -0.057250191 | 0.164901 | -0.34718 | 0.728457 | 0.949663 |    |
| BX649431.3        | 0.440641 |              | 0        | 4.173456 | 0        | 1        | NA |
| CR388413.5        | 0.150237 |              | 0        | 5.267649 | 0        | 1        | NA |
| CT025695.1        | 0        | NA           | NA       | NA       | NA       | NA       |    |
| CR391991.5        | 0        | NA           | NA       | NA       | NA       | NA       |    |
| FP016247.2        | 7.999699 |              | 0        | 1.739206 | 0        | 1        | 1  |
| si:dkey-65b13.9   | 2.238685 | -1.636300586 | 1.325811 | -1.23419 | 0.217133 | 0.69815  |    |
| zbtb4             | 439.2069 | -0.069957388 | 0.225164 | -0.3107  | 0.756032 | 0.956532 |    |
| cep72             | 71.22692 | 0.033808763  | 0.267224 | 0.126518 | 0.899322 | 0.99045  |    |
| CR457444.6        | 0        | NA           | NA       | NA       | NA       | NA       |    |
| nfkb1             | 103.4532 | 0.05316232   | 0.251175 | 0.211655 | 0.832376 | 0.975062 |    |
| RF00003           | 0.045161 |              | 0        | 5.267649 | 0        | 1        | NA |
| cc136.1           | 12.95303 | -0.63643942  | 1.168179 | -0.54481 | 0.585882 | 0.906655 |    |
| AL929304.1        | 0.049021 | -0.86807634  | 5.267649 | -0.16479 | 0.869106 | NA       |    |
| zgc:171534        | 23.6539  | -7.569618895 | 3.122435 | -2.42427 | 0.015339 | 0.21791  |    |
| si:dkey-16p6.1    | 3.863943 | 0.229923641  | 0.894515 | 0.257037 | 0.79715  | 0.966447 |    |
| RF00001           | 0        | NA           | NA       | NA       | NA       | NA       |    |
| si:ch73-338d8.5   | 0.114629 |              | 0        | 5.267649 | 0        | 1        | NA |
| 4-Sep             | 146.1107 | -0.157316497 | 0.221014 | -0.71179 | 0.476593 | 0.869292 |    |
| FP074902.2        | 282.8595 | -1.052243688 | 0.374406 | -2.81043 | 0.004947 | 0.117227 |    |
| grb2a             | 135.834  | 0.269538226  | 0.18378  | 1.466637 | 0.142475 | 0.60163  |    |
| cnksr3            | 128.3021 | -0.033982692 | 0.193249 | -0.17585 | 0.860412 | 0.980264 |    |
| wu:fa19b12        | 91.62306 | -0.5655295   | 0.184533 | -3.06465 | 0.002179 | 0.073859 |    |
| si:ch211-108c17.2 | 117.6568 | 0.314059003  | 0.207058 | 1.516766 | 0.129326 | 0.578917 |    |
| p2ry1             | 205.5648 | 0.09285263   | 0.181463 | 0.511689 | 0.608869 | 0.915204 |    |
| RF00003           | 0.267253 | -0.828184774 | 4.078653 | -0.20305 | 0.839093 | NA       |    |
| btr24             | 0.934637 | 0.093650996  | 2.587037 | 0.0362   | 0.971123 | NA       |    |
| FAT4              | 614.0135 | 0.046302383  | 0.246987 | 0.187469 | 0.851293 | 0.978548 |    |

|                    |          |              |            |          |          |          |  |
|--------------------|----------|--------------|------------|----------|----------|----------|--|
| ddx54              | 622.2307 | 0.022787446  | 0.171326   | 0.133007 | 0.894188 | 0.988777 |  |
| mpp1               | 1155.817 | -0.137273316 | 0.157921   | -0.86925 | 0.384708 | 0.826588 |  |
| si:ch211-79117.1   | 502.6781 | 0.022310085  | 0.138258   | 0.161366 | 0.871805 | 0.983447 |  |
| CT573239.1         | 44.45367 | 0.119683238  | 0.374152   | 0.319879 | 0.74906  | 0.955074 |  |
| srsf4              | 1613.554 | 0.046517087  | 0.092535   | 0.502698 | 0.615177 | 0.916279 |  |
| L0017784.1         | 150.1252 | -0.25671061  | 0.201011   | -1.27709 | 0.201569 | 0.681423 |  |
| AP3B2              | 313.3794 | 0.175093294  | 0.187663   | 0.933018 | 0.350811 | 0.802215 |  |
| RF00001            | 2.740932 | 3.50015412   | 1.731965   | 2.020915 | 0.043289 | 0.364726 |  |
| BX927081.1         | 3.337747 | 0.666788965  | 0.970449   | 0.687093 | 0.492024 | 0.876264 |  |
| sox8a              | 16.09052 | -1.521872087 | 0.532928   | -2.85568 | 0.004294 | 0.10839  |  |
| CR762475.4         | 0.57465  | -0.868140177 | 3.05368    | -0.28429 | 0.776186 | NA       |  |
| si:dkeyp-79b7.12   | 19.80758 | -0.194448331 | 0.411629   | -0.47239 | 0.636651 | 0.924779 |  |
| si:dkeyp-44b5.5    | 10.51625 | -0.826053419 | 0.557329   | -1.48216 | 0.138297 | 0.594938 |  |
| CR626886.2         | 3.685557 | -2.268803554 | 1.22711    | -1.8489  | 0.064472 | 0.433491 |  |
| F0704756.1         | 2.729461 | -1.465080427 | 1.333969   | -1.09829 | 0.272079 | 0.748056 |  |
| BX927327.1         | 0.172399 |              | 0 5.267649 | 0        | 1        | NA       |  |
| CU914760.1         | 1.206289 |              | 0 2.399087 | 0        | 1        | NA       |  |
| CU459186.5         | 2.074231 | -1.351827858 | 1.380911   | -0.97894 | 0.32761  | NA       |  |
| si:dkey-187j14.7   | 0.043309 |              | 0 5.267649 | 0        | 1        | NA       |  |
| si:ch1073-365p7.2  | 15.26898 | 0.807208367  | 0.685273   | 1.177936 | 0.238822 | 0.719781 |  |
| zgc:165555         | 2.762992 | 0.092199888  | 1.346065   | 0.068496 | 0.945391 | 0.997371 |  |
| BX601648.1         | 0.050624 | 1.055396947  | 5.267649   | 0.200354 | 0.841203 | NA       |  |
| AL590151.2         | 0.907011 | -2.383851665 | 2.105706   | -1.13209 | 0.257596 | NA       |  |
| aspscr1            | 632.1757 | 0.160744761  | 0.147393   | 1.090586 | 0.275455 | 0.750643 |  |
| klhdc7a            | 20.61148 | 0.020726642  | 0.467516   | 0.044334 | 0.964639 | 1        |  |
| si:dkey-11o1.7     | 2.936449 | -2.340421942 | 1.658996   | -1.41075 | 0.158319 | 0.623766 |  |
| CABZ01044764.1     | 55.71448 | -0.008911977 | 0.265549   | -0.03356 | 0.973228 | 1        |  |
| CABZ01069324.1     | 0.137262 |              | 0 5.267649 | 0        | 1        | NA       |  |
| CU062454.1         |          | 0 NA         | NA         | NA       | NA       | NA       |  |
| si:dkey-23a13.17   | 7.503178 | -0.333222038 | 0.67891    | -0.49082 | 0.623554 | 0.919171 |  |
| CABZ01066384.1     | 0.145363 | 1.055370634  | 5.267649   | 0.200349 | 0.841207 | NA       |  |
| CU210845.1         |          | 0 NA         | NA         | NA       | NA       | NA       |  |
| BX569779.1         | 0.468624 | -1.715602734 | 3.568039   | -0.48083 | 0.630641 | NA       |  |
| CU929328.1         |          | 0 NA         | NA         | NA       | NA       | NA       |  |
| si:dkey-28d5.14    |          | 0 NA         | NA         | NA       | NA       | NA       |  |
| si:dkey-24117.2    | 0.098422 | 1.055383603  | 5.267649   | 0.200352 | 0.841205 | NA       |  |
| pafahlb3           |          | 0 NA         | NA         | NA       | NA       | NA       |  |
| BX247870.2         | 1.027337 | -1.413031269 | 2.056614   | -0.68707 | 0.492041 | NA       |  |
| CR931782.2         | 1.188817 | -1.515576075 | 1.829639   | -0.82835 | 0.407474 | NA       |  |
| BX248521.1         | 0.68761  | -0.868143269 | 2.790476   | -0.31111 | 0.755718 | NA       |  |
| zgc:112234         | 0.453529 | -0.868136551 | 3.552668   | -0.24436 | 0.806951 | NA       |  |
| si:dkey-9120.3     | 1178.047 | -0.379802456 | 0.259668   | -1.46265 | 0.143565 | 0.602607 |  |
| si:dkey-23a13.12   |          | 0 NA         | NA         | NA       | NA       | NA       |  |
| klhl33             | 0.528195 |              | 0 3.050718 | 0        | 1        | NA       |  |
| pkd112a            | 45.21929 | 0.054631906  | 0.303018   | 0.180293 | 0.856923 | 0.979558 |  |
| zgc:173552         | 0.810494 | 1.92748965   | 2.941515   | 0.655271 | 0.512293 | NA       |  |
| zp2.2              | 5.501672 | -0.704523077 | 0.75132    | -0.93771 | 0.348392 | 0.800896 |  |
| si:ch211-277c7.7   | 4.982471 | 0.559201779  | 1.118816   | 0.499816 | 0.617205 | 0.916365 |  |
| si:cabz01069582.1  |          | 0 NA         | NA         | NA       | NA       | NA       |  |
| si:ch1073-153i20.4 | 10.0327  | -0.425168091 | 0.849388   | -0.50056 | 0.616682 | 0.916365 |  |
| si:ch211-113d11.6  | 34.44849 | 0.980349755  | 1.626463   | 0.60275  | 0.546675 | 0.896107 |  |
| zgc:165555         | 12.3438  | 1.385452359  | 0.83902    | 1.651275 | 0.098683 | 0.521402 |  |
| zgc:165555         | 1.946011 | 2.016220887  | 1.718387   | 1.173322 | 0.240667 | NA       |  |
| CABZ01044764.2     | 0.747035 | -1.800902995 | 2.184346   | -0.82446 | 0.409679 | NA       |  |

|                    |          |              |          |          |          |          |  |
|--------------------|----------|--------------|----------|----------|----------|----------|--|
| zgc:154164         | 79.10801 | 0.790114884  | 0.309303 | 2.554498 | 0.010634 | 0.179908 |  |
| FP325124.1         | 0 NA     | NA           | NA       | NA       | NA       | NA       |  |
| si:dkeyp-32g11.8   | 0.20321  | 0.648625     | 1.245111 | 0.520938 | 0.60241  | 0.914001 |  |
| FP325123.1         | 3.766869 | 0.913228868  | 0.85376  | 1.069656 | 0.284774 | 0.755897 |  |
| BX571940.1         | 0 NA     | NA           | NA       | NA       | NA       | NA       |  |
| faim2b             | 33.02601 | -0.029658716 | 0.532069 | -0.05574 | 0.955547 | 0.998611 |  |
| ccr2               | 0.677716 | 0            | 3.23635  | 0        | 1        | NA       |  |
| si:ch73-223f5.1    | 3.698973 | 0.648625     | 1.245111 | 0.520938 | 0.60241  | 0.914001 |  |
| hist1h2a10         | 3.063347 | 1.402218565  | 1.002077 | 1.399313 | 0.161719 | 0.628908 |  |
| si:dkey-88n24.11   | 9.716138 | -0.119327628 | 0.952234 | -0.12531 | 0.900275 | 0.99045  |  |
| CR383676.2         | 0 NA     | NA           | NA       | NA       | NA       | NA       |  |
| si:ch73-122k23.1   | 0 NA     | NA           | NA       | NA       | NA       | NA       |  |
| CR382283.1         | 29.53677 | 0            | 1.911781 | 0        | 1        | 1        |  |
| si:ch211-220f21.1  | 8.540064 | 2.620680572  | 0.688357 | 3.807155 | 0.000141 | 0.011879 |  |
| CABZ01058277.1     | 0.507842 | -1.724610628 | 2.61313  | -0.65998 | 0.509267 | NA       |  |
| CU457819.2         | 1.194349 | 1.910034289  | 2.286289 | 0.83543  | 0.403476 | NA       |  |
| si:ch211-285c6.5   | 2.933039 | 0.494547242  | 1.123371 | 0.440235 | 0.659767 | 0.930581 |  |
| zgc:165555         | 2.081502 | 3.297100792  | 1.813085 | 1.818503 | 0.068987 | NA       |  |
| si:ch211-277c7.6   | 0.824721 | 1.055411725  | 2.975947 | 0.354647 | 0.722854 | NA       |  |
| si:ch211-42c5.5    | 0 NA     | NA           | NA       | NA       | NA       | NA       |  |
| si:ch211-220f21.3  | 1.701911 | 2.230358903  | 1.537635 | 1.450513 | 0.146916 | NA       |  |
| fgl1               | 156.6228 | -0.402490631 | 0.303596 | -1.32574 | 0.184925 | 0.662268 |  |
| CR555293.1         | 0.140945 | 1.055370995  | 5.267649 | 0.20035  | 0.841207 | NA       |  |
| zgc:165555         | 4.720381 | 1.074447387  | 1.191599 | 0.901685 | 0.367224 | 0.816459 |  |
| si:zfos-405g10.4   | 0.194389 | -2.340106499 | 5.201854 | -0.44986 | 0.652811 | NA       |  |
| si:dkey-23a13.22   | 7.631283 | -0.374469457 | 0.627032 | -0.59721 | 0.550368 | 0.8974   |  |
| BX005156.3         | 0 NA     | NA           | NA       | NA       | NA       | NA       |  |
| si:ch211-160o17.3  | 0.07132  | 0            | 5.267649 | 0        | 1        | NA       |  |
| mmell              | 34.13353 | 0.549225603  | 0.322154 | 1.704856 | 0.088221 | 0.498835 |  |
| strc               | 27.22264 | -0.516501861 | 0.546101 | -0.9458  | 0.344251 | 0.798147 |  |
| si:ch73-22o18.1    | 8.25251  | 0.321390613  | 0.972384 | 0.330518 | 0.741008 | 0.954103 |  |
| zgc:112234         | 5.480693 | -0.415581063 | 1.001322 | -0.41503 | 0.678118 | 0.936026 |  |
| gemin6             | 112.2695 | 0.130912294  | 0.29251  | 0.447548 | 0.65448  | 0.929526 |  |
| BX649385.1         | 0.128836 | 0            | 5.267649 | 0        | 1        | NA       |  |
| si:ch211-113a14.22 | 1.908077 | 0.082818361  | 1.70531  | 0.048565 | 0.961266 | NA       |  |
| dnajc14            | 68.0285  | -0.083557481 | 0.217064 | -0.38494 | 0.700279 | 0.942739 |  |
| CU457819.3         | 3.494093 | 0.101271661  | 1.221287 | 0.082922 | 0.933913 | 0.996638 |  |
| FP236327.1         | 0.839471 | -1.183953772 | 2.387942 | -0.49581 | 0.620032 | NA       |  |
| abcc6b.1           | 26.98002 | -1.495297162 | 0.721287 | -2.0731  | 0.038163 | 0.342672 |  |
| loc564481          | 2.73523  | -3.046810399 | 1.878099 | -1.62228 | 0.104743 | 0.53308  |  |
| FP236789.1         | 0.460232 | 0            | 3.587229 | 0        | 1        | NA       |  |
| CU459186.6         | 1.877582 | -5.12135639  | 2.064567 | -2.4806  | 0.013116 | NA       |  |
| BX248082.1         | 59.02228 | 0.780491799  | 0.405685 | 1.923887 | 0.054369 | 0.40321  |  |
| zgc:165555         | 1.724377 | -0.137825751 | 1.336196 | -0.10315 | 0.917846 | NA       |  |
| BX324230.1         | 0 NA     | NA           | NA       | NA       | NA       | NA       |  |
| si:ch211-113d11.5  | 519.1824 | -3.976194941 | 0.455948 | -8.72071 | 2.76E-18 | 9.15E-15 |  |
| si:ch211-276i12.11 | 240.8372 | -0.082142169 | 0.207324 | -0.3962  | 0.691955 | 0.940274 |  |
| si:dkey-83f18.8    | 0 NA     | NA           | NA       | NA       | NA       | NA       |  |
| zgc:112234         | 4.278976 | -0.277828307 | 0.977584 | -0.2842  | 0.776258 | 0.961073 |  |
| si:ch211-163c2.1   | 0.267714 | 0            | 5.267649 | 0        | 1        | NA       |  |
| adgrg4a            | 36.52896 | 0.990659107  | 1.579772 | 0.62709  | 0.5306   | 0.890545 |  |
| CU695207.1         | 0 NA     | NA           | NA       | NA       | NA       | NA       |  |
| CU457819.4         | 6.386856 | 0.598968457  | 0.734485 | 0.815494 | 0.414789 | 0.838698 |  |
| CR318599.2         | 0 NA     | NA           | NA       | NA       | NA       | NA       |  |



|                    |          |              |            |          |          |          |  |
|--------------------|----------|--------------|------------|----------|----------|----------|--|
| CR361564.1         | 26.40914 | -0.351522077 | 0.445659   | -0.78877 | 0.430247 | 0.847541 |  |
| BX324006.1         | 0 NA     |              | NA         | NA       | NA       | NA       |  |
| si:dkey-1k23.3     | 9.503406 |              | 0 1.763818 | 0        | 1        | 1        |  |
| cd27               | 0.059954 | 1.055396947  | 5.267649   | 0.200354 | 0.841203 | NA       |  |
| si:rp71-46j2.7     | 228.5519 | 0.053102347  | 0.215816   | 0.246054 | 0.805641 | 0.96946  |  |
| si:dkey-187j14.8   | 0 NA     |              | NA         | NA       | NA       | NA       |  |
| si:zfos-1837d3.1   | 0 NA     |              | NA         | NA       | NA       | NA       |  |
| si:ch73-368j24.11  | 8.428491 | 0.471335898  | 0.710217   | 0.66365  | 0.506914 | 0.883007 |  |
| si:dkey-23a13.9    | 10.71183 | -0.133865402 | 0.600277   | -0.22301 | 0.823531 | 0.972005 |  |
| MINAR1             | 8.502086 | -0.278695805 | 0.768806   | -0.3625  | 0.716975 | 0.94627  |  |
| zgc:172143         | 5.525193 | 1.018866628  | 0.88557    | 1.150521 | 0.249929 | 0.729721 |  |
| grxcrla            | 41.90458 | -0.803179917 | 0.425416   | -1.88799 | 0.059028 | 0.41876  |  |
| camtal             | 4.530069 | 0.111411008  | 1.574452   | 0.070762 | 0.943587 | 0.997371 |  |
| FQ976909.1         | 0.647152 |              | 0 2.604575 | 0        | 1        | NA       |  |
| BX601648.2         | 29.23764 | -0.825540949 | 0.43952    | -1.87828 | 0.060343 | 0.422591 |  |
| si:ch1073-220m6.1  | 1.716957 | -0.868138264 | 2.015696   | -0.43069 | 0.666694 | NA       |  |
| si:dkey-273g18.1   | 8.388581 | -2.154224801 | 0.771147   | -2.79353 | 0.005214 | 0.121092 |  |
| zgc:193807         | 0 NA     |              | NA         | NA       | NA       | NA       |  |
| pcdh11             | 158.0142 | -0.331684961 | 0.284516   | -1.16578 | 0.243702 | 0.724437 |  |
| si:cabz01100188.1  | 130.5369 | 0.403507645  | 0.289874   | 1.392008 | 0.16392  | 0.632688 |  |
| si:ch211-63p21.8   | 38.74057 | 1.380747785  | 0.55847    | 2.472376 | 0.013422 | 0.202001 |  |
| hist1h2a11         | 1.828412 | -0.583492885 | 1.281431   | -0.45534 | 0.648861 | NA       |  |
| CR769769.2         | 274.4356 | -0.079087963 | 0.165667   | -0.47739 | 0.633084 | 0.923885 |  |
| si:ch211-129p13.1  | 20.07667 | -0.173416927 | 0.532222   | -0.32584 | 0.744548 | 0.95491  |  |
| CR548622.2         | 49.28474 | -0.00720683  | 0.340667   | -0.02116 | 0.983122 | 1        |  |
| si:ch211-63p21.1   | 194.6797 | 0.071962706  | 0.308484   | 0.233278 | 0.815545 | 0.971158 |  |
| plxnala            | 138.4698 | 0.245814592  | 0.197587   | 1.244083 | 0.213469 | 0.69586  |  |
| kcnk17             | 9.301463 | -1.089649883 | 0.993146   | -1.09717 | 0.272567 | 0.748416 |  |
| AL928854.1         | 43.86732 | 0.189188269  | 0.310488   | 0.609326 | 0.542308 | 0.894395 |  |
| si:dkey-10h3.7     | 0.849232 | 2.858891897  | 3.094611   | 0.923829 | 0.355575 | NA       |  |
| F0834831.1         | 3.45236  | -0.556202075 | 0.903794   | -0.61541 | 0.538285 | 0.892568 |  |
| si:cabz01021066.1  | 0.069091 |              | 0 5.267649 | 0        | 1        | NA       |  |
| si:dkeyp-81f3.4    | 7.443742 | -0.197486248 | 0.748335   | -0.2639  | 0.791856 | 0.964835 |  |
| CU457819.5         | 4.134122 | 1.319644446  | 1.022561   | 1.290529 | 0.196867 | 0.67714  |  |
| si:ch73-54f23.4    | 23.59479 | 0.153227915  | 0.399801   | 0.383261 | 0.701526 | 0.943254 |  |
| si:dkey-11o1.6     | 3.759628 | -0.878533219 | 1.466095   | -0.59923 | 0.549017 | 0.897092 |  |
| si:dkey-82k12.13   | 1.637074 | 1.055438078  | 2.018757   | 0.522816 | 0.601103 | NA       |  |
| CR352285.1         | 57.48223 | -0.083331084 | 0.413719   | -0.20142 | 0.84037  | 0.976417 |  |
| si:ch211-285c6.6   | 1.665199 | -3.076839506 | 1.930556   | -1.59376 | 0.11099  | NA       |  |
| BX005228.1         | 309.1235 | -0.098724289 | 0.189377   | -0.52131 | 0.60215  | 0.914001 |  |
| si:dkey-125e8.5    | 5.137705 |              | 0 3.185388 | 0        | 1        | 1        |  |
| si:cabz01093077.1  | 0.138182 |              | 0 5.267649 | 0        | 1        | NA       |  |
| zgc:112234         | 4.622591 | 2.656932423  | 1.050856   | 2.528351 | 0.01146  | 0.185684 |  |
| CU695207.2         | 0 NA     |              | NA         | NA       | NA       | NA       |  |
| si:dkey-23a13.2    | 3.827024 | -0.401627967 | 0.853232   | -0.47071 | 0.637845 | 0.924779 |  |
| si:ch73-368j24.1   | 0.099037 |              | 0 5.267649 | 0        | 1        | NA       |  |
| si:cabz01036006.1  | 76.66391 | 2.035615356  | 0.776803   | 2.620504 | 0.00878  | 0.160701 |  |
| si:dkey-9a6.4      | 0.607536 |              | 0 3.006619 | 0        | 1        | NA       |  |
| BX005456.1         | 0.07132  |              | 0 5.267649 | 0        | 1        | NA       |  |
| si:dkey-88n24.12   | 23.60188 | -0.173156554 | 0.502689   | -0.34446 | 0.7305   | 0.950056 |  |
| si:ch1073-153i20.5 | 0.6886   | 1.631889742  | 2.267743   | 0.71961  | 0.471765 | NA       |  |
| si:ch211-126c2.4   | 114.5768 | 0.265637498  | 0.203844   | 1.303144 | 0.192526 | 0.672418 |  |
| F0681390.1         | 1.919857 | 0.267219193  | 1.189635   | 0.224623 | 0.822273 | NA       |  |
| si:ch211-243a20.4  | 9.073322 | 1.10183441   | 0.748731   | 1.471603 | 0.141128 | 0.599658 |  |

|                     |           |               |           |           |           |           |
|---------------------|-----------|---------------|-----------|-----------|-----------|-----------|
| zgc:165555          | 1. 482282 | 2. 549705344  | 1. 922326 | 1. 326364 | 0. 184719 | NA        |
| zgc:112234          | 7. 288686 | 0. 465264059  | 0. 93544  | 0. 497375 | 0. 618925 | 0. 917146 |
| FP325123. 2         | 3. 021567 | 1. 15815933   | 1. 393366 | 0. 831195 | 0. 405863 | 0. 834645 |
| si:cabz01090193. 1  | 40. 24004 | -0. 351093211 | 0. 322003 | -1. 09034 | 0. 275562 | 0. 750653 |
| si:cabz01040626. 2  | 3. 36623  | -6. 553206484 | 1. 662295 | -3. 94226 | 8. 07E-05 | 0. 007858 |
| CABZ01061349. 1     | 3. 533028 | 1. 670315786  | 1. 379875 | 1. 210484 | 0. 226093 | 0. 707444 |
| CABZ01083815. 1     | 0. 347999 | 0             | 5. 242936 | 0         | 1         | NA        |
| loc564660           | 0. 243853 | 0             | 5. 267649 | 0         | 1         | NA        |
| rph3ab              | 31. 50576 | 0. 271083053  | 0. 311712 | 0. 869658 | 0. 384487 | 0. 826588 |
| si:dkey-97120. 6    | 25. 93618 | 0. 925767143  | 0. 423874 | 2. 184063 | 0. 028958 | 0. 303048 |
| si:ch73-223f5. 2    | 1. 664351 | 0. 853920598  | 1. 466239 | 0. 582388 | 0. 560305 | NA        |
| si:ch211-113d11. 8  | 5. 641167 | -1. 059029353 | 0. 83664  | -1. 26581 | 0. 20558  | 0. 68784  |
| si:dkey-31g16. 2    | 1. 469504 | 1. 055428017  | 2. 120571 | 0. 497709 | 0. 618689 | NA        |
| CU457819. 6         | 0 NA      | NA            | NA        | NA        | NA        | NA        |
| CABZ01078080. 1     | 0. 78729  | -3. 377364353 | 2. 208224 | -1. 52945 | 0. 126153 | NA        |
| si:ch211-220e11. 3  | 1. 535351 | -1. 716083432 | 1. 751472 | -0. 9798  | 0. 327187 | NA        |
| zgc:175135          | 0. 439053 | -2. 808594676 | 3. 542003 | -0. 79294 | 0. 427813 | NA        |
| BX000524. 2         | 0. 069091 | 0             | 5. 267649 | 0         | 1         | NA        |
| CABZ01044765. 1     | 0. 043308 | 0             | 5. 267649 | 0         | 1         | NA        |
| si:ch73-368j24. 12  | 6. 124998 | 2. 008955917  | 0. 972196 | 2. 06641  | 0. 03879  | 0. 344867 |
| fn3a                | 691. 5015 | -0. 070350343 | 0. 12556  | -0. 56029 | 0. 575279 | 0. 904718 |
| dre-let-7a-1        | 0. 043308 | 0             | 5. 267649 | 0         | 1         | NA        |
| CT574585. 2         | 0. 221904 | 0             | 5. 267649 | 0         | 1         | NA        |
| CR769769. 3         | 0. 839391 | -3. 830286089 | 5. 155415 | -0. 74296 | 0. 457504 | NA        |
| zgc:112234          | 6. 228927 | -1. 056059602 | 1. 027517 | -1. 02778 | 0. 304054 | 0. 769602 |
| si:dkey-23a13. 21   | 2. 474609 | 0. 384800432  | 1. 170811 | 0. 328661 | 0. 742412 | 0. 954362 |
| CU466278. 2         | 0. 962037 | -0. 868143673 | 2. 493211 | -0. 3482  | 0. 727688 | NA        |
| BX248521. 2         | 29. 73178 | -0. 562039895 | 0. 500983 | -1. 12187 | 0. 261916 | 0. 739623 |
| BX908792. 1         | 0. 47177  | 1. 558275695  | 2. 54166  | 0. 613094 | 0. 539814 | NA        |
| AL935053. 1         | 0 NA      | NA            | NA        | NA        | NA        | NA        |
| zgc:171424          | 0 NA      | NA            | NA        | NA        | NA        | NA        |
| FP015866. 2         | 0 NA      | NA            | NA        | NA        | NA        | NA        |
| CR388046. 2         | 0 NA      | NA            | NA        | NA        | NA        | NA        |
| CU041319. 1         | 0 NA      | NA            | NA        | NA        | NA        | NA        |
| si:ch73-40a2. 1     | 5. 2337   | -0. 964224929 | 0. 91257  | -1. 0566  | 0. 290693 | 0. 76078  |
| si:ch211-196f2. 3   | 92. 61142 | 0. 063057733  | 0. 324704 | 0. 194201 | 0. 846019 | 0. 977039 |
| AL954129. 1         | 7. 18455  | 0. 283120297  | 0. 893859 | 0. 316739 | 0. 751441 | 0. 955331 |
| BX571680. 1         | 143. 7635 | 0. 049111006  | 0. 232858 | 0. 210905 | 0. 832961 | 0. 975379 |
| CR318601. 1         | 14. 88943 | -0. 967286919 | 0. 670065 | -1. 44357 | 0. 148859 | 0. 610726 |
| si:ch73-256g18. 2   | 54. 82523 | 0. 413415631  | 0. 482519 | 0. 856787 | 0. 391563 | 0. 827902 |
| si:dkey-86l18. 10   | 76. 14029 | -2. 328787172 | 0. 798613 | -2. 91604 | 0. 003545 | 0. 098844 |
| vgf                 | 148. 9408 | -0. 432487656 | 0. 351413 | -1. 23071 | 0. 218432 | 0. 699445 |
| si:dkey-19b23. 14   | 18. 91594 | -0. 289030175 | 0. 567993 | -0. 50886 | 0. 610849 | 0. 915331 |
| znf16l              | 318. 572  | -0. 146852363 | 0. 114298 | -1. 28482 | 0. 198854 | 0. 679593 |
| FP015866. 3         | 0 NA      | NA            | NA        | NA        | NA        | NA        |
| CR318603. 2         | 0. 101446 | -1. 755425691 | 5. 23528  | -0. 33531 | 0. 737394 | NA        |
| CR388046. 3         | 0. 043309 | 0             | 5. 267649 | 0         | 1         | NA        |
| BX914219. 1         | 0 NA      | NA            | NA        | NA        | NA        | NA        |
| BX914219. 2         | 0 NA      | NA            | NA        | NA        | NA        | NA        |
| CR382325. 1         | 7. 507248 | -1. 245148256 | 0. 72222  | -1. 72406 | 0. 084698 | 0. 488778 |
| si:ch73-335121. 3   | 1. 199578 | 3. 465462702  | 2. 006913 | 1. 726763 | 0. 08421  | NA        |
| AL929307. 1         | 0. 098043 | -1. 71005882  | 5. 238474 | -0. 32644 | 0. 74409  | NA        |
| BX323797. 2         | 0 NA      | NA            | NA        | NA        | NA        | NA        |
| si:ch1073-363c19. 3 | 61. 0713  | -0. 030151125 | 0. 239675 | -0. 1258  | 0. 89989  | 0. 99045  |

|                    |          |              |            |          |          |          |  |
|--------------------|----------|--------------|------------|----------|----------|----------|--|
| si:dkey-165a24.10  | 7.283815 | -3.183983975 | 1.172682   | -2.71513 | 0.006625 | 0.136957 |  |
| CR388046.4         | 0 NA     |              | NA         | NA       | NA       | NA       |  |
| CR388231.2         | 1.695676 | 0.754697156  | 1.550463   | 0.486756 | 0.626431 | NA       |  |
| si:dkey-1h4.4      | 7.517415 | -0.17818976  | 0.678669   | -0.26256 | 0.792891 | 0.965312 |  |
| si:ch211-235p24.2  | 50.42905 | -0.177917994 | 0.572993   | -0.31051 | 0.756176 | 0.956532 |  |
| BX908792.2         | 0 NA     |              | NA         | NA       | NA       | NA       |  |
| si:cabz01101003.1  | 73.31229 | 0.057113915  | 0.252324   | 0.226351 | 0.820928 | 0.971788 |  |
| CU972454.1         | 6.065317 |              | 0 1.819426 | 0        | 1        | 1        |  |
| CU041319.2         | 3.271131 | 0.426833357  | 1.12376    | 0.379826 | 0.704075 | 0.943735 |  |
| CR450827.2         | 1.275026 | 0.093868553  | 1.523243   | 0.061624 | 0.950862 | NA       |  |
| BX663605.1         | 0.411256 | -2.335814693 | 3.193214   | -0.73149 | 0.464478 | NA       |  |
| BX511061.1         | 12.60515 | -0.280175066 | 0.669325   | -0.41859 | 0.675513 | 0.935422 |  |
| btr07              | 27.38101 | -3.284508747 | 1.406388   | -2.33542 | 0.019521 | 0.246357 |  |
| BX072554.2         | 2.895387 | -1.423305181 | 1.104621   | -1.2885  | 0.197571 | 0.678182 |  |
| si:dkey-23i12.7    | 31.08942 | 0.23581941   | 0.827395   | 0.285014 | 0.775633 | 0.961073 |  |
| CR450827.3         | 0 NA     |              | NA         | NA       | NA       | NA       |  |
| si:ch73-367j5.3    | 1.340433 | 1.937890003  | 1.956288   | 0.990596 | 0.321883 | NA       |  |
| BX005056.1         | 1.937857 | -0.158904552 | 1.444481   | -0.11001 | 0.912403 | NA       |  |
| CR388046.5         | 0 NA     |              | NA         | NA       | NA       | NA       |  |
| si:ch211-194p6.10  | 47.45717 | -2.227828069 | 0.502248   | -4.43572 | 9.18E-06 | 0.001729 |  |
| crestin            | 14.45455 | -0.726836905 | 0.519357   | -1.39949 | 0.161665 | 0.628907 |  |
| CU929416.1         | 0.543719 | -3.074915795 | 2.584562   | -1.18972 | 0.234155 | NA       |  |
| si:ch211-22614.6   | 3.205026 | -0.700182324 | 0.833144   | -0.84041 | 0.400679 | 0.831725 |  |
| si:cabz01009626.1  | 3.776603 | -0.411591228 | 1.060246   | -0.3882  | 0.697865 | 0.942355 |  |
| si:dkey-6n21.12    | 278.1196 | 0.168086363  | 0.120542   | 1.394426 | 0.163189 | 0.631199 |  |
| BX323060.1         | 0.236047 | -0.748874496 | 4.953448   | -0.15118 | 0.879832 | NA       |  |
| amfrb              | 81.04601 | 0.085106057  | 0.797289   | 0.106744 | 0.914992 | 0.993066 |  |
| BX323060.2         | 0.04222  |              | 0 5.267649 | 0        | 1 NA     |          |  |
| si:ch211-69e13.6   | 0 NA     |              | NA         | NA       | NA       | NA       |  |
| CT027807.1         | 0.069091 |              | 0 5.267649 | 0        | 1 NA     |          |  |
| si:dkeyp-75h12.7   | 5.046334 | -0.265224668 | 0.978653   | -0.27101 | 0.786383 | 0.962701 |  |
| slc8bl             | 135.4616 | 0.022198811  | 0.189953   | 0.116865 | 0.906967 | 0.991679 |  |
| si:dkey-33c9.8     | 6.001049 | -1.028171168 | 0.705535   | -1.45729 | 0.145036 | 0.604004 |  |
| BX255967.1         | 7.168708 | 0.70875222   | 0.711906   | 0.99557  | 0.319459 | 0.780212 |  |
| CU464087.1         | 2.99177  | 2.996332698  | 1.409697   | 2.125515 | 0.033544 | 0.323214 |  |
| CT030144.1         | 12.88574 | -0.786576195 | 0.526867   | -1.49293 | 0.135455 | 0.590943 |  |
| si:cabz01007794.1  | 666.0547 | 0.436511292  | 0.20075    | 2.174408 | 0.029675 | 0.306672 |  |
| CR936442.1         | 164.5271 | -1.367951735 | 0.472022   | -2.89807 | 0.003755 | 0.102148 |  |
| MAJIN              | 0.907772 | -1.359746406 | 2.179548   | -0.62387 | 0.532715 | NA       |  |
| ITLN1 (1 of many)  | 0 NA     |              | NA         | NA       | NA       | NA       |  |
| CR354377.1         | 0.086616 |              | 0 5.267649 | 0        | 1 NA     |          |  |
| CR388231.3         | 2.312173 | 0.338080925  | 1.479361   | 0.228532 | 0.819233 | 0.971785 |  |
| BX322601.1         | 0.318501 | 0.093651575  | 3.974965   | 0.02356  | 0.981203 | NA       |  |
| BX957276.1         | 2.033665 | -1.393429999 | 1.720454   | -0.80992 | 0.417986 | NA       |  |
| BX511109.1         | 0.049519 |              | 0 5.267649 | 0        | 1 NA     |          |  |
| CR388046.6         | 0 NA     |              | NA         | NA       | NA       | NA       |  |
| si:dkey-183c6.9    | 10.10196 | 1.048655917  | 0.870227   | 1.205038 | 0.228189 | 0.709324 |  |
| BX957297.2         | 2.713842 | -1.897224753 | 1.384786   | -1.37005 | 0.170672 | 0.642339 |  |
| CT030012.1         | 0.435474 |              | 0 3.644507 | 0        | 1 NA     |          |  |
| si:dkey-23i12.9    | 0.043308 |              | 0 5.267649 | 0        | 1 NA     |          |  |
| BX914219.3         | 0 NA     |              | NA         | NA       | NA       | NA       |  |
| si:ch211-212k18.13 | 0.916496 | -2.382222839 | 2.643885   | -0.90103 | 0.367572 | NA       |  |
| si:ch211-196f2.6   | 2.238978 | 0.093648631  | 2.056738   | 0.045533 | 0.963683 | 0.999842 |  |
| CU972454.2         | 1.033328 |              | 0 2.95817  | 0        | 1 NA     |          |  |

|                    |           |               |           |           |           |           |
|--------------------|-----------|---------------|-----------|-----------|-----------|-----------|
| si:ch73-335121. 2  | 5. 627916 | 0. 958853374  | 0. 880699 | 1. 088741 | 0. 276268 | 0. 750674 |
| CT030153. 1        | 0. 536909 | -2. 297520593 | 3. 540288 | -0. 64896 | 0. 516361 | NA        |
| BX571811. 1        | 10. 06224 | -5. 472240332 | 1. 272268 | -4. 30117 | 1. 70E-05 | 0. 00266  |
| CU329666. 1        | 0. 049519 | 0             | 5. 267649 | 0         | 1         | NA        |
| si:cabz01007812. 1 | 34. 25077 | -0. 455354803 | 0. 312282 | -1. 45815 | 0. 144799 | 0. 603718 |
| adad2              | 9. 994764 | -0. 124070865 | 0. 608727 | -0. 20382 | 0. 838494 | 0. 976395 |
| AL954672. 1        | 0. 286064 | -1. 825372799 | 4. 663117 | -0. 39145 | 0. 695465 | NA        |
| BX927082. 2        | 0         | NA            | NA        | NA        | NA        | NA        |
| BX470211. 1        | 72. 32763 | -0. 254257351 | 0. 240402 | -1. 05763 | 0. 290223 | 0. 76078  |
| alpk3b             | 24. 37621 | 0. 14808542   | 0. 497338 | 0. 297756 | 0. 76589  | 0. 959974 |
| CABP4              | 39. 58628 | -0. 868164037 | 1. 686927 | -0. 51464 | 0. 606803 | 0. 915204 |
| BX957325. 1        | 0. 465671 | 0. 720191205  | 2. 492075 | 0. 288993 | 0. 772587 | NA        |
| BX323797. 3        | 26. 83904 | -2. 11718203  | 1. 389306 | -1. 52391 | 0. 12753  | 0. 576964 |
| CT027989. 1        | 0. 720053 | 1. 295976827  | 2. 04719  | 0. 633052 | 0. 5267   | NA        |
| si:ch211-98n17. 5  | 319. 478  | -0. 234299571 | 0. 159819 | -1. 46603 | 0. 142641 | 0. 601892 |
| CU972454. 3        | 0. 218384 | -2. 293525612 | 5. 204056 | -0. 44072 | 0. 659417 | NA        |
| adgrgl             | 79. 29815 | -0. 434323518 | 0. 36508  | -1. 18967 | 0. 234177 | 0. 714938 |
| zgc:172079         | 22. 11739 | -2. 022839835 | 1. 043414 | -1. 93867 | 0. 052541 | 0. 398274 |
| si:cabz01102082. 1 | 269. 8432 | -0. 303754307 | 0. 185361 | -1. 63871 | 0. 101273 | 0. 526828 |
| BX323060. 3        | 374. 6928 | 1. 071242361  | 0. 238397 | 4. 493529 | 7. 01E-06 | 0. 001353 |
| BX957297. 3        | 0. 808167 | 0. 093653527  | 2. 396421 | 0. 039081 | 0. 968826 | NA        |
| BX323797. 4        | 10. 30926 | 0. 136107953  | 0. 498138 | 0. 273234 | 0. 784674 | 0. 962605 |
| BX571811. 2        | 14. 54843 | -5. 843694071 | 1. 09176  | -5. 35254 | 8. 67E-08 | 4. 38E-05 |
| si:cabz01080528. 1 | 47. 61386 | -1. 156132717 | 0. 379603 | -3. 04564 | 0. 002322 | 0. 076635 |
| CR394555. 1        | 0. 993033 | 2. 964673163  | 2. 087394 | 1. 420275 | 0. 155528 | NA        |
| FP015866. 4        | 0         | NA            | NA        | NA        | NA        | NA        |
| FO704741. 1        | 28. 36256 | 0. 533773915  | 0. 314069 | 1. 699542 | 0. 089217 | 0. 501424 |
| CR450827. 4        | 0         | NA            | NA        | NA        | NA        | NA        |
| CU972454. 4        | 19. 77409 | -0. 941271511 | 0. 534703 | -1. 76036 | 0. 078346 | 0. 47433  |
| NFX1               | 883. 2242 | -0. 003214719 | 0. 140637 | -0. 02286 | 0. 981763 | 1         |
| CT030129. 1        | 5. 718838 | 1. 989862705  | 1. 081834 | 1. 839343 | 0. 065865 | 0. 437902 |
| or113-1            | 0         | NA            | NA        | NA        | NA        | NA        |
| CABZ01015815. 2    | 0         | NA            | NA        | NA        | NA        | NA        |
| ms4a17a. 2         | 15. 0196  | 2. 083247074  | 0. 737499 | 2. 824746 | 0. 004732 | 0. 114199 |
| BX005417. 3        | 2. 117254 | 1. 411508051  | 1. 444458 | 0. 977188 | 0. 328476 | NA        |
| CABZ01018874. 1    | 0         | NA            | NA        | NA        | NA        | NA        |
| or137-9            | 0. 325551 | 2. 071058347  | 3. 878975 | 0. 533919 | 0. 593398 | NA        |
| BX957362. 1        | 10. 77344 | 0. 648227088  | 0. 599308 | 1. 081626 | 0. 279419 | 0. 752477 |
| si:ch1073-22e3. 1  | 0         | NA            | NA        | NA        | NA        | NA        |
| CABZ01070258. 1    | 0. 373459 | 2. 209578212  | 5. 029714 | 0. 439305 | 0. 660441 | NA        |
| BX324153. 1        | 0. 632622 | 0             | 3. 17783  | 0         | 1         | NA        |
| znf1009            | 105. 8629 | 0. 094369163  | 0. 26264  | 0. 35931  | 0. 719363 | 0. 94694  |
| zgc:194186         | 6. 608717 | -0. 711019532 | 0. 848398 | -0. 83807 | 0. 40199  | 0. 832956 |
| slcolf3            | 0. 49441  | 0             | 3. 099634 | 0         | 1         | NA        |
| CABZ01069022. 1    | 34. 51649 | -0. 022933383 | 0. 331206 | -0. 06924 | 0. 944797 | 0. 997371 |
| CR354588. 1        | 1097. 773 | -0. 139621921 | 0. 140102 | -0. 99657 | 0. 318973 | 0. 779923 |
| CABZ01015815. 3    | 4. 441239 | -0. 315325987 | 0. 830094 | -0. 37987 | 0. 704044 | 0. 943735 |
| CABZ01021433. 1    | 56. 54215 | 0. 180300707  | 0. 227581 | 0. 792249 | 0. 428216 | 0. 846133 |
| CT737190. 2        | 1. 347248 | -1. 025844144 | 2. 283084 | -0. 44932 | 0. 653198 | NA        |
| BX649282. 1        | 0         | NA            | NA        | NA        | NA        | NA        |
| or137-8            | 3. 962425 | 1. 217333249  | 0. 860948 | 1. 413945 | 0. 157378 | 0. 623263 |
| or125-3            | 3. 259792 | 0. 63492079   | 1. 009591 | 0. 628889 | 0. 529421 | 0. 890434 |
| or121-1            | 0. 096459 | 0             | 5. 267649 | 0         | 1         | NA        |
| or109-11           | 14. 55113 | 1. 181192242  | 0. 612925 | 1. 92714  | 0. 053962 | 0. 402027 |

|                  |          |              |          |          |          |          |
|------------------|----------|--------------|----------|----------|----------|----------|
| or113-2          | 0 NA     | NA           | NA       | NA       | NA       | NA       |
| CU467646.7       | 2.920926 | 0.772393837  | 0.95887  | 0.805525 | 0.420517 | 0.842383 |
| CU570689.2       | 68.0773  | -0.02857048  | 0.25881  | -0.11039 | 0.912099 | 0.992371 |
| CABZ01083442.1   | 35.39932 | 1.318874734  | 0.770638 | 1.711407 | 0.087006 | 0.494706 |
| AL772146.1       | 0 NA     | NA           | NA       | NA       | NA       | NA       |
| CR450833.2       | 0.18343  | -0.868109386 | 5.267649 | -0.1648  | 0.869101 | NA       |
| BX957362.2       | 0 NA     | NA           | NA       | NA       | NA       | NA       |
| CABZ01068273.1   | 2.073915 | -0.149901411 | 1.18847  | -0.12613 | 0.899629 | NA       |
| or132-4          | 0.050624 | 1.055396947  | 5.267649 | 0.200354 | 0.841203 | NA       |
| or128-6          | 0 NA     | NA           | NA       | NA       | NA       | NA       |
| or126-2          | 0 NA     | NA           | NA       | NA       | NA       | NA       |
| FP074874.2       | 0 NA     | NA           | NA       | NA       | NA       | NA       |
| CABZ01069022.2   | 6.015502 | 0.152348448  | 0.670173 | 0.227327 | 0.820169 | 0.971788 |
| si:ch73-266f23.1 | 40.12744 | 0.408781714  | 0.289143 | 1.41377  | 0.157429 | 0.623263 |
| or125-5          | 9.513101 | 0.186527153  | 0.651447 | 0.286327 | 0.774627 | 0.960871 |
| or128-1          | 4.762037 | -0.255511849 | 0.911235 | -0.2804  | 0.779169 | 0.961073 |
| CR788316.1       | 2.33072  | -0.868158905 | 5.267649 | -0.16481 | 0.869094 | 0.982863 |
| or133-7          | 1.336151 | 1.974844628  | 2.02898  | 0.973319 | 0.330395 | NA       |
| or137-4          | 0.486281 | -0.924669435 | 3.513458 | -0.26318 | 0.792412 | NA       |
| BX005319.1       | 0 NA     | NA           | NA       | NA       | NA       | NA       |
| L0018260.2       | 6.196287 | -0.680793091 | 0.998701 | -0.68168 | 0.495442 | 0.87806  |
| CU640433.1       | 4.79082  | 0.273414113  | 0.94659  | 0.288841 | 0.772703 | 0.960624 |
| or133-6          | 0.241677 | 0            | 5.267649 | 0        | 1        | NA       |
| CABZ01015815.4   | 5.940164 | 0.332503369  | 0.784308 | 0.423945 | 0.671606 | 0.933953 |
| ptpr             | 135.7261 | 0.421409502  | 0.293067 | 1.437929 | 0.150454 | 0.614169 |
| L0018124.1       | 8.741374 | 0.772220927  | 0.722121 | 1.069379 | 0.284899 | 0.755935 |
| nmnat1           | 28.9115  | 0.318636776  | 0.343004 | 0.928959 | 0.352911 | 0.803792 |
| CR788316.2       | 1.174544 | 0            | 5.267649 | 0        | 1        | NA       |
| AL929321.2       | 0.046941 | 0            | 5.267649 | 0        | 1        | NA       |
| or133-9          | 1.977524 | 0.349330899  | 1.119261 | 0.312109 | 0.754958 | NA       |
| BX510938.1       | 0.189143 | -1.769375676 | 5.234318 | -0.33803 | 0.735338 | NA       |
| BX957362.3       | 0 NA     | NA           | NA       | NA       | NA       | NA       |
| CR788316.3       | 5.150726 | -2.710906717 | 1.382417 | -1.96099 | 0.04988  | 0.388669 |
| or133-5          | 7.449599 | -0.420222121 | 0.95823  | -0.43854 | 0.660995 | 0.930581 |
| AL845428.2       | 0.049519 | 0            | 5.267649 | 0        | 1        | NA       |
| BX510938.2       | 0.04222  | 0            | 5.267649 | 0        | 1        | NA       |
| CABZ01072523.1   | 26.54518 | -0.189421984 | 0.702904 | -0.26948 | 0.787557 | 0.963263 |
| or121-1          | 0 NA     | NA           | NA       | NA       | NA       | NA       |
| or132-2          | 0.958578 | 0.53655651   | 1.824096 | 0.294149 | 0.768644 | NA       |
| CR354581.1       | 0 NA     | NA           | NA       | NA       | NA       | NA       |
| AL928851.1       | 0 NA     | NA           | NA       | NA       | NA       | NA       |
| AL845428.3       | 0 NA     | NA           | NA       | NA       | NA       | NA       |
| or133-4          | 1.530881 | 0.093649027  | 2.031398 | 0.046101 | 0.96323  | NA       |
| BX957362.4       | 0.155739 | 1.970562653  | 5.233515 | 0.376528 | 0.706525 | NA       |
| AL929321.3       | 0.120883 | 0            | 5.267649 | 0        | 1        | NA       |
| or109-6          | 0.14264  | 0            | 5.267649 | 0        | 1        | NA       |
| BX510938.3       | 0 NA     | NA           | NA       | NA       | NA       | NA       |
| BX322787.1       | 13.72373 | 2.682686688  | 1.213452 | 2.21079  | 0.02705  | 0.292604 |
| CR318600.2       | 0.093881 | 0            | 5.267649 | 0        | 1        | NA       |
| zgc:171727       | 0.579006 | 2.214484636  | 3.41123  | 0.649175 | 0.516225 | NA       |
| CABZ01081777.1   | 40.31127 | -0.213122311 | 0.371081 | -0.57433 | 0.565745 | 0.901634 |
| L0018029.1       | 116.1648 | 0.227066393  | 0.178219 | 1.274089 | 0.202632 | 0.683051 |
| si:dkeyp-3f10.11 | 0.242102 | -0.868117365 | 4.899064 | -0.1772  | 0.859351 | NA       |
| AL929208.1       | 6.685843 | -0.802592826 | 1.717405 | -0.46733 | 0.640265 | 0.924877 |

|                    |          |              |          |          |                   |
|--------------------|----------|--------------|----------|----------|-------------------|
| or137-1            | 0 NA     | NA           | NA       | NA       | NA                |
| si:dkeyp-3f10.12   | 0.073968 | 0 5.267649   | 0        | 1 NA     |                   |
| or115-9            | 0.330135 | 0 3.824396   | 0        | 1 NA     |                   |
| or126-4            | 0.391105 | 3.172892679  | 4.265036 | 0.743931 | 0.456918 NA       |
| or109-1            | 1.129744 | 0.548868899  | 2.586147 | 0.212234 | 0.831924 NA       |
| si:ch1073-166e24.4 | 0.690461 | -0.500919949 | 1.978104 | -0.25323 | 0.800089 NA       |
| or133-3            | 0 NA     | NA           | NA       | NA       | NA                |
| si:ch211-218m3.18  | 1.187896 | -0.772886465 | 2.132862 | -0.36237 | 0.717075 NA       |
| CABZ01015815.5     | 15.72895 | -0.327814213 | 0.458336 | -0.71523 | 0.474469 0.869292 |
| BX510938.4         | 0 NA     | NA           | NA       | NA       | NA                |
| or136-1            | 2.612336 | 1.040999795  | 1.570657 | 0.66278  | 0.507472 0.883007 |
| CABZ01069020.1     | 38.23842 | -0.257667643 | 0.397069 | -0.64892 | 0.516387 0.886895 |
| CU672227.1         | 0 NA     | NA           | NA       | NA       | NA                |
| or128-9            | 0 NA     | NA           | NA       | NA       | NA                |
| CR376774.1         | 1.565425 | 0 2.125057   | 0        | 1 NA     |                   |
| FP074874.3         | 0.094679 | 0 5.267649   | 0        | 1 NA     |                   |
| BX510938.5         | 0 NA     | NA           | NA       | NA       | NA                |
| BX649282.2         | 0 NA     | NA           | NA       | NA       | NA                |
| BX855614.4         | 68.23292 | 0.465319169  | 0.24613  | 1.890544 | 0.058685 0.418329 |
| CR391925.1         | 1.343857 | -1.734399591 | 2.142459 | -0.80954 | 0.418206 NA       |
| or132-1            | 1.513013 | 0 2.064881   | 0        | 1 NA     |                   |
| AL929321.4         | 0 NA     | NA           | NA       | NA       | NA                |
| CABZ01117780.1     | 57.64051 | -0.428815794 | 0.660122 | -0.6496  | 0.51595 0.886651  |
| AL772146.2         | 2.605283 | -0.4743767   | 0.917484 | -0.51704 | 0.605128 0.914985 |
| or126-5            | 0.059954 | 1.055396947  | 5.267649 | 0.200354 | 0.841203 NA       |
| or109-2            | 0.043309 | 0 5.267649   | 0        | 1 NA     |                   |
| CR788316.4         | 1.522155 | 0 5.192814   | 0        | 1 NA     |                   |
| CU915534.1         | 0.045161 | 0 5.267649   | 0        | 1 NA     |                   |
| znf1009            | 72.27781 | -0.119814583 | 0.218855 | -0.54746 | 0.584062 0.906376 |
| or126-3            | 0.863818 | 1.886193999  | 2.426078 | 0.777466 | 0.436884 NA       |
| znf971             | 62.21071 | -0.326512328 | 0.305646 | -1.06827 | 0.285398 0.756686 |
| or132-3            | 0.284883 | -1.825391669 | 4.669491 | -0.39092 | 0.695857 NA       |
| BX649282.3         | 0.050624 | 1.055396947  | 5.267649 | 0.200354 | 0.841203 NA       |
| RF00001            | 0 NA     | NA           | NA       | NA       | NA                |
| RF00001            | 0.14264  | 0 5.267649   | 0        | 1 NA     |                   |
| RF00001            | 0.133629 | 0 5.267649   | 0        | 1 NA     |                   |
| RF00001            | 0 NA     | NA           | NA       | NA       | NA                |
| RF00001            | 0.315513 | 0 5.267649   | 0        | 1 NA     |                   |
| RF00001            | 0.334842 | 0 5.267649   | 0        | 1 NA     |                   |
| FO904970.1         | 61.91139 | -0.966273219 | 0.388892 | -2.48468 | 0.012967 0.198441 |
| RF00001            | 0.169428 | 2.079549577  | 5.22636  | 0.397896 | 0.690707 NA       |
| RF00001            | 0.093881 | 0 5.267649   | 0        | 1 NA     |                   |
| RF00001            | 0.092827 | 0 5.267649   | 0        | 1 NA     |                   |
| RF00001            | 0 NA     | NA           | NA       | NA       | NA                |
| CABZ01041495.1     | 101.0582 | 0.090456862  | 1.206323 | 0.074986 | 0.940226 0.997371 |
| RF00001            | 0.136102 | 0 5.267649   | 0        | 1 NA     |                   |
| RF00001            | 0 NA     | NA           | NA       | NA       | NA                |
| RF00001            | 0.043309 | 0 5.267649   | 0        | 1 NA     |                   |
| RF00001            | 0 NA     | NA           | NA       | NA       | NA                |
| RF00001            | 0.246248 | 2.460572345  | 4.822854 | 0.51019  | 0.609918 NA       |
| CABZ01075572.1     | 14.53808 | 1.22943293   | 0.579709 | 2.120776 | 0.033941 0.325344 |
| RF00001            | 0 NA     | NA           | NA       | NA       | NA                |
| RF00001            | 0 NA     | NA           | NA       | NA       | NA                |
| RF00001            | 0 NA     | NA           | NA       | NA       | NA                |

|                     |          |              |          |          |          |          |
|---------------------|----------|--------------|----------|----------|----------|----------|
| RF00001             | 0        | NA           | NA       | NA       | NA       | NA       |
| RF00001             | 0.202713 | 1.055360222  | 5.189824 | 0.203352 | 0.83886  | NA       |
| RF00001             | 0        | NA           | NA       | NA       | NA       | NA       |
| CABZ01050944.1      | 2.061389 | 0.955407502  | 1.841571 | 0.5188   | 0.6039   | NA       |
| CR847870.3          | 0.159101 | 1.055370259  | 5.267649 | 0.200349 | 0.841207 | NA       |
| L0017820.1          | 5.227157 | -0.868152258 | 1.795643 | -0.48348 | 0.628757 | 0.922044 |
| RF00001             | 0        | NA           | NA       | NA       | NA       | NA       |
| RF00001             | 0        | NA           | NA       | NA       | NA       | NA       |
| RF00001             | 0.129925 | 0            | 5.267649 | 0        | 1        | NA       |
| RF00001             | 0        | NA           | NA       | NA       | NA       | NA       |
| RF00001             | 0        | NA           | NA       | NA       | NA       | NA       |
| RF00001             | 0        | NA           | NA       | NA       | NA       | NA       |
| RF00001             | 0.22749  | 1.055361563  | 5.018252 | 0.210305 | 0.83343  | NA       |
| CACNA2D3 (1 of many | 26.29152 | 1.387458472  | 0.492395 | 2.817774 | 0.004836 | 0.115344 |
| RF00001             | 0.156447 | 0            | 5.267649 | 0        | 1        | NA       |
| AL928881.1          | 0        | NA           | NA       | NA       | NA       | NA       |
| RF00001             | 0        | NA           | NA       | NA       | NA       | NA       |
| RF00001             | 0.046941 | 0            | 5.267649 | 0        | 1        | NA       |
| RF00001             | 0.093881 | 0            | 5.267649 | 0        | 1        | NA       |
| RF00001             | 0.049519 | 0            | 5.267649 | 0        | 1        | NA       |
| RF00001             | 0        | NA           | NA       | NA       | NA       | NA       |
| RF00001             | 0.192244 | 1.05535729   | 5.267649 | 0.200347 | 0.841209 | NA       |
| fzd1                | 151.5625 | -0.135366707 | 0.219646 | -0.61629 | 0.5377   | 0.892498 |
| RF00001             | 0        | NA           | NA       | NA       | NA       | NA       |
| RF00001             | 0        | NA           | NA       | NA       | NA       | NA       |
| RF00001             | 0        | NA           | NA       | NA       | NA       | NA       |
| RF00001             | 0.063619 | 0            | 5.267649 | 0        | 1        | NA       |
| RF00001             | 0        | NA           | NA       | NA       | NA       | NA       |
| RF00001             | 0        | NA           | NA       | NA       | NA       | NA       |
| RF00001             | 0        | NA           | NA       | NA       | NA       | NA       |
| BX005256.1          | 6.629929 | 0            | 1.778855 | 0        | 1        | 1        |
| RF00001             | 0.043308 | 0            | 5.267649 | 0        | 1        | NA       |
| RF00001             | 0.049021 | -0.86807634  | 5.267649 | -0.16479 | 0.869106 | NA       |
| RF00001             | 0        | NA           | NA       | NA       | NA       | NA       |
| RF00001             | 0.770249 | 1.055414411  | 2.921857 | 0.361214 | 0.71794  | NA       |
| RF00001             | 0        | NA           | NA       | NA       | NA       | NA       |
| RF00001             | 1.296408 | 3.411016443  | 1.711388 | 1.993129 | 0.046247 | NA       |
| RF00001             | 0.092101 | 0            | 5.267649 | 0        | 1        | NA       |
| BX855618.1          | 66.52888 | -0.707524834 | 0.443586 | -1.59501 | 0.11071  | 0.545542 |
| RF00001             | 0.224571 | 0            | 5.00251  | 0        | 1        | NA       |
| BX664705.2          | 0        | NA           | NA       | NA       | NA       | NA       |
| RF00001             | 0        | NA           | NA       | NA       | NA       | NA       |
| TP53I3              | 13.67454 | 0.510428293  | 0.662953 | 0.769931 | 0.441341 | 0.852874 |
| RF00001             | 0        | NA           | NA       | NA       | NA       | NA       |
| RF00001             | 0.604506 | 0            | 3.925226 | 0        | 1        | NA       |
| RF00001             | 0        | NA           | NA       | NA       | NA       | NA       |
| RF00001             | 0        | NA           | NA       | NA       | NA       | NA       |
| RF00001             | 0.156404 | -0.868103029 | 5.267649 | -0.1648  | 0.869102 | NA       |
| RF00001             | 0        | NA           | NA       | NA       | NA       | NA       |
| RF00001             | 0        | NA           | NA       | NA       | NA       | NA       |
| RF00001             | 0        | NA           | NA       | NA       | NA       | NA       |
| RF00001             | 0        | NA           | NA       | NA       | NA       | NA       |
| L0017965.1          | 9.818903 | -1.069007752 | 0.579754 | -1.8439  | 0.065198 | 0.435355 |
| RF00001             | 0        | NA           | NA       | NA       | NA       | NA       |

|            |          |              |          |          |          |          |    |
|------------|----------|--------------|----------|----------|----------|----------|----|
| RF00001    | 0.093881 |              | 0        | 5.267649 | 0        | 1        | NA |
| RF00001    |          | 0 NA         |          | NA       | NA       | NA       | NA |
| RF00001    |          | 0 NA         |          | NA       | NA       | NA       | NA |
| RF00001    |          | 0 NA         |          | NA       | NA       | NA       | NA |
| RF00001    | 0.086618 |              | 0        | 5.267649 | 0        | 1        | NA |
| RF00001    | 0.045161 |              | 0        | 5.267649 | 0        | 1        | NA |
| BX321905.1 |          | 0 NA         |          | NA       | NA       | NA       | NA |
| RF00001    |          | 0 NA         |          | NA       | NA       | NA       | NA |
| CR931802.3 | 3.379292 | 0.483203419  | 1.276597 | 0.378509 | 0.705053 | 0.944016 |    |
| BX548062.1 | 73.49899 | 0.094410031  | 0.347213 | 0.271908 | 0.785693 | 0.962605 |    |
| RF00001    |          | 0 NA         |          | NA       | NA       | NA       | NA |
| SGCZ       | 4.650966 | -0.912133434 | 1.418964 | -0.64282 | 0.520343 | 0.887149 |    |
| RF00001    |          | 0 NA         |          | NA       | NA       | NA       | NA |
| CR388042.1 | 6.541057 | -0.637746326 | 1.015766 | -0.62785 | 0.530104 | 0.890545 |    |
| RF00001    |          | 0 NA         |          | NA       | NA       | NA       | NA |
| RF00001    | 0.30607  | 1.055366919  | 4.639218 | 0.227488 | 0.820044 | NA       |    |
| RF00001    |          | 0 NA         |          | NA       | NA       | NA       | NA |
| RF00001    | 0.059954 | 1.055396947  | 5.267649 | 0.200354 | 0.841203 | NA       |    |
| RF00212    |          | 0 NA         |          | NA       | NA       | NA       | NA |
| CR751224.1 | 8.20511  | -0.561517855 | 0.742506 | -0.75625 | 0.449501 | 0.856979 |    |
| RF00001    |          | 0 NA         |          | NA       | NA       | NA       | NA |
| RF00001    |          | 0 NA         |          | NA       | NA       | NA       | NA |
| RF00001    | 0.351969 | 2.886818669  | 4.343166 | 0.664681 | 0.506255 | NA       |    |
| RF00001    | 0.143468 | 1.854137197  | 5.241768 | 0.353724 | 0.723546 | NA       |    |
| RF00001    |          | 0 NA         |          | NA       | NA       | NA       | NA |
| RF00001    | 0.043308 |              | 0        | 5.267649 | 0        | 1        | NA |
| RF00001    | 0.136137 |              | 0        | 5.267649 | 0        | 1        | NA |
| RF00001    | 0.213959 |              | 0        | 5.267649 | 0        | 1        | NA |
| RF00001    | 0.915153 | 0.110628247  | 2.425806 | 0.045605 | 0.963625 | NA       |    |
| RF00001    | 0.155707 |              | 0        | 5.267649 | 0        | 1        | NA |
| LO018254.1 |          | 0 NA         |          | NA       | NA       | NA       | NA |
| RF00001    |          | 0 NA         |          | NA       | NA       | NA       | NA |
| RF00001    |          | 0 NA         |          | NA       | NA       | NA       | NA |
| RF00001    |          | 0 NA         |          | NA       | NA       | NA       | NA |
| CR936408.2 |          | 0 NA         |          | NA       | NA       | NA       | NA |
| RF00001    |          | 0 NA         |          | NA       | NA       | NA       | NA |
| RF00001    |          | 0 NA         |          | NA       | NA       | NA       | NA |
| RF00001    |          | 0 NA         |          | NA       | NA       | NA       | NA |
| RF00001    |          | 0 NA         |          | NA       | NA       | NA       | NA |
| RF00001    | 0.155708 |              | 0        | 5.267649 | 0        | 1        | NA |
| RF00001    | 0.099645 | 0.093693664  | 5.267649 | 0.017787 | 0.985809 | NA       |    |
| RF00001    |          | 0 NA         |          | NA       | NA       | NA       | NA |
| RF00001    |          | 0 NA         |          | NA       | NA       | NA       | NA |
| RF00001    | 1.881777 |              | 0        | 2.116899 | 0        | 1        | NA |
| RF00001    |          | 0 NA         |          | NA       | NA       | NA       | NA |
| RF00001    |          | 0 NA         |          | NA       | NA       | NA       | NA |
| RF00001    |          | 0 NA         |          | NA       | NA       | NA       | NA |
| RF00001    | 0.147936 |              | 0        | 5.267649 | 0        | 1        | NA |
| RF00001    |          | 0 NA         |          | NA       | NA       | NA       | NA |
| RF00001    | 0.045161 |              | 0        | 5.267649 | 0        | 1        | NA |
| RF00001    |          | 0 NA         |          | NA       | NA       | NA       | NA |
| RF00001    | 0.043309 |              | 0        | 5.267649 | 0        | 1        | NA |
| RF00001    |          | 0 NA         |          | NA       | NA       | NA       | NA |
| RF00001    |          | 0 NA         |          | NA       | NA       | NA       | NA |



|                 |          |              |          |          |          |          |    |
|-----------------|----------|--------------|----------|----------|----------|----------|----|
| RF00001         | 0.043308 |              | 0        | 5.267649 | 0        | 1        | NA |
| CABZ01076968.1  | 12.06787 | -0.063653012 | 0.551632 | -0.11539 | 0.908136 | 0.991745 |    |
| RF00001         | 0        | NA           | NA       | NA       | NA       | NA       |    |
| RF00001         | 0        | NA           | NA       | NA       | NA       | NA       |    |
| RF00001         | 0        | NA           | NA       | NA       | NA       | NA       |    |
| CR559945.2      | 0.390032 |              | 0        | 5.070537 | 0        | 1        | NA |
| RF00001         | 0        | NA           | NA       | NA       | NA       | NA       |    |
| RF00001         | 0.391609 | 1.236863201  | 4.180435 | 0.295869 | 0.76733  | NA       |    |
| RF00001         | 0.713627 | -1.7946298   | 2.651573 | -0.67682 | 0.498522 | NA       |    |
| RF00001         | 0        | NA           | NA       | NA       | NA       | NA       |    |
| RF00001         | 0.133557 |              | 0        | 5.267649 | 0        | 1        | NA |
| si:dkey-199f5.3 | 0.087179 |              | 0        | 5.267649 | 0        | 1        | NA |
| RF00001         | 0        | NA           | NA       | NA       | NA       | NA       |    |
| LRRTM4          | 2.242294 | 0.093643242  | 2.005085 | 0.046703 | 0.96275  | 0.999638 |    |
| RF00001         | 0        | NA           | NA       | NA       | NA       | NA       |    |
| dut             | 1003.771 | 0.021237068  | 0.158158 | 0.134277 | 0.893183 | 0.988566 |    |
| RF00001         | 0.18106  |              | 0        | 5.267649 | 0        | 1        | NA |
| RF00001         | 0        | NA           | NA       | NA       | NA       | NA       |    |
| RF00001         | 0.100242 | -0.868089684 | 5.267649 | -0.1648  | 0.869104 | NA       |    |
| MCMDC2          | 120.7318 | -0.410964951 | 0.281643 | -1.45917 | 0.144519 | 0.603539 |    |
| CT027676.1      | 1.652128 | 2.811024507  | 1.951721 | 1.44028  | 0.149788 | NA       |    |
| RF00001         | 0        | NA           | NA       | NA       | NA       | NA       |    |
| CABZ01060030.1  | 6.351087 | 0.100456301  | 0.745412 | 0.134766 | 0.892797 | 0.988566 |    |
| RF00001         | 0        | NA           | NA       | NA       | NA       | NA       |    |
| CT027674.1      | 19.38872 | -0.014474456 | 0.652913 | -0.02217 | 0.982313 | 1        |    |
| RF00001         | 0        | NA           | NA       | NA       | NA       | NA       |    |
| RF00001         | 0.053506 | -0.86807634  | 5.267649 | -0.16479 | 0.869106 | NA       |    |
| L0018627.1      | 139.6673 | 0.434948078  | 0.303309 | 1.43401  | 0.151569 | 0.615372 |    |
| tmem63bb        | 16.12704 | 0.172829302  | 0.548572 | 0.315053 | 0.752722 | 0.955756 |    |
| RF00001         | 0.045161 |              | 0        | 5.267649 | 0        | 1        | NA |
| RF00001         | 0        | NA           | NA       | NA       | NA       | NA       |    |
| RF00001         | 0        | NA           | NA       | NA       | NA       | NA       |    |
| znf977          | 1.672107 | 2.727001226  | 1.480279 | 1.842221 | 0.065443 | NA       |    |
| CABZ01068358.1  | 175.3445 | -0.310248949 | 0.209028 | -1.48425 | 0.137744 | 0.593771 |    |
| RF00001         | 0.17723  | 1.055370259  | 5.267649 | 0.200349 | 0.841207 | NA       |    |
| RF00001         | 16.31758 | -0.395330209 | 0.488097 | -0.80994 | 0.417974 | 0.841312 |    |
| AL929192.1      | 0.221156 | 2.971570005  | 5.184103 | 0.573208 | 0.566504 | NA       |    |
| RF00001         | 0        | NA           | NA       | NA       | NA       | NA       |    |
| RF00001         | 0        | NA           | NA       | NA       | NA       | NA       |    |
| RF00001         | 0        | NA           | NA       | NA       | NA       | NA       |    |
| CU655961.3      | 2.331922 | -0.778102601 | 1.13075  | -0.68813 | 0.491371 | 0.875595 |    |
| RF00001         | 0        | NA           | NA       | NA       | NA       | NA       |    |
| RF00001         | 0        | NA           | NA       | NA       | NA       | NA       |    |
| F0904901.1      | 42.35236 | -0.718267131 | 0.696703 | -1.03095 | 0.302563 | 0.768599 |    |
| RF00001         | 0        | NA           | NA       | NA       | NA       | NA       |    |
| si:dkey-7i4.13  | 0.479197 |              | 0        | 3.203595 | 0        | 1        | NA |
| RF00001         | 0        | NA           | NA       | NA       | NA       | NA       |    |
| RF00001         | 0.142423 | 1.055371237  | 5.267649 | 0.20035  | 0.841207 | NA       |    |
| RF00001         | 0        | NA           | NA       | NA       | NA       | NA       |    |
| RF00001         | 0        | NA           | NA       | NA       | NA       | NA       |    |
| AL953848.1      | 0        | NA           | NA       | NA       | NA       | NA       |    |
| RF00001         | 0        | NA           | NA       | NA       | NA       | NA       |    |
| RF00001         | 0        | NA           | NA       | NA       | NA       | NA       |    |
| RF00001         | 0.098043 | -1.71005882  | 5.238474 | -0.32644 | 0.74409  | NA       |    |

|                    |           |               |             |           |           |           |
|--------------------|-----------|---------------|-------------|-----------|-----------|-----------|
| RF00001            | 0. 58968  | 1. 055421059  | 2. 762172   | 0. 382098 | 0. 702388 | NA        |
| RF00001            | 0 NA      |               | NA          | NA        | NA        | NA        |
| RF00001            | 0. 049519 |               | 0 5. 267649 |           | 0         | 1 NA      |
| BX470232. 1        | 0. 312454 | 2. 436362767  | 5. 206324   | 0. 467962 | 0. 639812 | NA        |
| CU856622. 1        | 38. 10146 | 0. 215028926  | 0. 285394   | 0. 753447 | 0. 451181 | 0. 857606 |
| RF00001            | 0. 045161 |               | 0 5. 267649 |           | 0         | 1 NA      |
| RF00001            | 0 NA      |               | NA          | NA        | NA        | NA        |
| RF00001            | 0 NA      |               | NA          | NA        | NA        | NA        |
| RF00001            | 0 NA      |               | NA          | NA        | NA        | NA        |
| RF00001            | 0. 07132  |               | 0 5. 267649 |           | 0         | 1 NA      |
| mir196c            | 0. 069091 |               | 0 5. 267649 |           | 0         | 1 NA      |
| RF00001            | 0 NA      |               | NA          | NA        | NA        | NA        |
| si:dkey-58b18. 9   | 0. 156531 | -1. 826663989 | 5. 230461   | -0. 34924 | 0. 726912 | NA        |
| RF00001            | 0 NA      |               | NA          | NA        | NA        | NA        |
| FP565451. 2        | 0 NA      |               | NA          | NA        | NA        | NA        |
| RF00001            | 0 NA      |               | NA          | NA        | NA        | NA        |
| RF00001            | 0. 046941 |               | 0 5. 267649 |           | 0         | 1 NA      |
| RF00001            | 0. 043308 |               | 0 5. 267649 |           | 0         | 1 NA      |
| RF00001            | 0 NA      |               | NA          | NA        | NA        | NA        |
| RF00001            | 0 NA      |               | NA          | NA        | NA        | NA        |
| L0018188. 1        | 110. 14   | 0. 390010542  | 0. 281008   | 1. 3879   | 0. 165168 | 0. 634423 |
| RF00001            | 0. 16555  |               | 0 5. 267649 |           | 0         | 1 NA      |
| RF00001            | 0. 270129 | 0. 093661253  | 4. 100534   | 0. 022841 | 0. 981777 | NA        |
| pth4               | 7. 478844 | 0. 405655628  | 0. 64859    | 0. 625442 | 0. 531681 | 0. 890877 |
| RF00001            | 0. 203952 | 1. 055360657  | 5. 179497   | 0. 203757 | 0. 838543 | NA        |
| RF00001            | 0 NA      |               | NA          | NA        | NA        | NA        |
| CR847936. 3        | 0. 349422 | 2. 041670112  | 4. 292879   | 0. 475595 | 0. 634363 | NA        |
| RF00001            | 0. 107013 | -1. 826650979 | 5. 230461   | -0. 34923 | 0. 726914 | NA        |
| si:ch211-218m3. 19 | 3. 772013 | 0. 197141383  | 1. 076406   | 0. 183148 | 0. 854682 | 0. 979161 |
| RF00001            | 0 NA      |               | NA          | NA        | NA        | NA        |
| RF00001            | 0. 07132  |               | 0 5. 267649 |           | 0         | 1 NA      |
| RF00001            | 0 NA      |               | NA          | NA        | NA        | NA        |
| RF00001            | 0. 090321 |               | 0 5. 267649 |           | 0         | 1 NA      |
| RF00001            | 0. 069091 |               | 0 5. 267649 |           | 0         | 1 NA      |
| RF00001            | 0 NA      |               | NA          | NA        | NA        | NA        |
| ZNF821             | 19. 36092 | 0. 036757658  | 0. 409805   | 0. 089695 | 0. 928529 | 0. 995052 |
| CR388373. 3        | 1. 572723 | 3. 044905786  | 1. 996543   | 1. 525089 | 0. 127237 | NA        |
| RF00001            | 0. 043308 |               | 0 5. 267649 |           | 0         | 1 NA      |
| RF00001            | 0 NA      |               | NA          | NA        | NA        | NA        |
| si:dkey-240n22. 6  | 4. 991283 | 0. 562960479  | 0. 971244   | 0. 579628 | 0. 562165 | 0. 900715 |
| RF00001            | 0 NA      |               | NA          | NA        | NA        | NA        |
| RF00001            | 0. 090321 |               | 0 5. 267649 |           | 0         | 1 NA      |
| RF00001            | 0 NA      |               | NA          | NA        | NA        | NA        |
| RF00001            | 0 NA      |               | NA          | NA        | NA        | NA        |
| RF00001            | 0. 091739 |               | 0 5. 267649 |           | 0         | 1 NA      |
| RF00001            | 0 NA      |               | NA          | NA        | NA        | NA        |
| BX530018. 3        | 0 NA      |               | NA          | NA        | NA        | NA        |
| RF00001            | 0. 10996  |               | 0 5. 267649 |           | 0         | 1 NA      |
| RF00001            | 0 NA      |               | NA          | NA        | NA        | NA        |
| RF00001            | 0 NA      |               | NA          | NA        | NA        | NA        |
| RF00158            | 0 NA      |               | NA          | NA        | NA        | NA        |
| RF00001            | 0 NA      |               | NA          | NA        | NA        | NA        |
| CR848788. 2        | 15. 52845 | 0. 367572774  | 0. 400071   | 0. 918768 | 0. 358217 | 0. 809587 |
| RF00001            | 0 NA      |               | NA          | NA        | NA        | NA        |

|                     |           |               |           |           |           |           |
|---------------------|-----------|---------------|-----------|-----------|-----------|-----------|
| RF00001             | 0 NA      | NA            | NA        | NA        | NA        | NA        |
| RF00001             | 0. 049021 | -0. 86807634  | 5. 267649 | -0. 16479 | 0. 869106 | NA        |
| PEBP4               | 6. 331906 | 1. 202639139  | 0. 665743 | 1. 806462 | 0. 070846 | 0. 454179 |
| RF00001             | 0. 043308 | 0             | 5. 267649 | 0         | 1         | NA        |
| RF00001             | 0. 043308 | 0             | 5. 267649 | 0         | 1         | NA        |
| BX571884. 1         | 6. 336174 | 0. 561216088  | 0. 80058  | 0. 701012 | 0. 483295 | 0. 871988 |
| PIEZO2 (1 of many)  | 4. 36444  | 0. 454020447  | 0. 822136 | 0. 552245 | 0. 58078  | 0. 905618 |
| RF00001             | 0. 260976 | 0             | 5. 267649 | 0         | 1         | NA        |
| castor1             | 0 NA      | NA            | NA        | NA        | NA        | NA        |
| RF00001             | 0 NA      | NA            | NA        | NA        | NA        | NA        |
| CU927890. 1         | 47. 55087 | 0. 154268771  | 0. 329052 | 0. 468828 | 0. 639193 | 0. 924779 |
| RF00001             | 0. 16685  | 2. 079549577  | 5. 22636  | 0. 397896 | 0. 690707 | NA        |
| RF00001             | 0. 173234 | 0             | 5. 267649 | 0         | 1         | NA        |
| RF00001             | 0. 311251 | 0             | 5. 267649 | 0         | 1         | NA        |
| RF00001             | 0. 099037 | 0             | 5. 267649 | 0         | 1         | NA        |
| RF00001             | 0 NA      | NA            | NA        | NA        | NA        | NA        |
| RF00001             | 0 NA      | NA            | NA        | NA        | NA        | NA        |
| RF00001             | 0 NA      | NA            | NA        | NA        | NA        | NA        |
| RF00001             | 0 NA      | NA            | NA        | NA        | NA        | NA        |
| RF00001             | 0 NA      | NA            | NA        | NA        | NA        | NA        |
| RF00001             | 0 NA      | NA            | NA        | NA        | NA        | NA        |
| znf1108             | 1. 298539 | 1. 113788808  | 1. 687294 | 0. 660103 | 0. 509187 | NA        |
| RF00001             | 0. 129927 | 0             | 5. 267649 | 0         | 1         | NA        |
| RF00001             | 0 NA      | NA            | NA        | NA        | NA        | NA        |
| RF00001             | 0. 776388 | 0. 208411542  | 2. 472746 | 0. 084283 | 0. 932831 | NA        |
| RF00001             | 0. 569293 | 1. 05542528   | 2. 725796 | 0. 387199 | 0. 698609 | NA        |
| RF00001             | 1. 605863 | 1. 562774638  | 1. 822153 | 0. 857653 | 0. 391084 | NA        |
| RF00001             | 0 NA      | NA            | NA        | NA        | NA        | NA        |
| RF00001             | 0 NA      | NA            | NA        | NA        | NA        | NA        |
| RF00001             | 0 NA      | NA            | NA        | NA        | NA        | NA        |
| si:dkeyp-98a7. 3    | 0. 195278 | 0. 89243358   | 5. 241767 | 0. 170254 | 0. 86481  | NA        |
| RF00001             | 0 NA      | NA            | NA        | NA        | NA        | NA        |
| RF00001             | 0. 046941 | 0             | 5. 267649 | 0         | 1         | NA        |
| RF00001             | 0 NA      | NA            | NA        | NA        | NA        | NA        |
| RF00001             | 0 NA      | NA            | NA        | NA        | NA        | NA        |
| RF00001             | 0 NA      | NA            | NA        | NA        | NA        | NA        |
| RF00001             | 0 NA      | NA            | NA        | NA        | NA        | NA        |
| RF00001             | 0. 455557 | -2. 121277522 | 3. 04     | -0. 69779 | 0. 485309 | NA        |
| RF00001             | 0 NA      | NA            | NA        | NA        | NA        | NA        |
| RF00001             | 0 NA      | NA            | NA        | NA        | NA        | NA        |
| RF00001             | 0. 613734 | 1. 055422316  | 2. 726814 | 0. 387053 | 0. 698717 | NA        |
| FO744833. 1         | 5. 307326 | -0. 48088935  | 1. 528099 | -0. 3147  | 0. 752991 | 0. 955756 |
| RF00001             | 0 NA      | NA            | NA        | NA        | NA        | NA        |
| BX571813. 1         | 2. 220041 | 0             | 2. 026505 | 0         | 1         | 1         |
| RF00001             | 0 NA      | NA            | NA        | NA        | NA        | NA        |
| RF00001             | 0 NA      | NA            | NA        | NA        | NA        | NA        |
| RF00001             | 0 NA      | NA            | NA        | NA        | NA        | NA        |
| INSYN2A (1 of many) | 5. 526689 | -0. 850860209 | 0. 848724 | -1. 00252 | 0. 316094 | 0. 778668 |
| RF00001             | 0 NA      | NA            | NA        | NA        | NA        | NA        |
| RF00001             | 0 NA      | NA            | NA        | NA        | NA        | NA        |
| RF00001             | 0. 17663  | 0             | 5. 267649 | 0         | 1         | NA        |
| RF00001             | 0. 410502 | -2. 708125033 | 4. 884641 | -0. 55442 | 0. 579294 | NA        |
| RF00001             | 0 NA      | NA            | NA        | NA        | NA        | NA        |
| RF00001             | 0. 045161 | 0             | 5. 267649 | 0         | 1         | NA        |

|                     |          |              |          |          |          |          |
|---------------------|----------|--------------|----------|----------|----------|----------|
| RF00001             | 0        | NA           | NA       | NA       | NA       | NA       |
| RF00001             | 0        | NA           | NA       | NA       | NA       | NA       |
| RF00001             | 0.119909 | 2.079562922  | 5.22636  | 0.397899 | 0.690705 | NA       |
| FP085394.2          | 0.859443 | -0.868139299 | 2.428437 | -0.35749 | 0.720726 | NA       |
| RF00001             | 0.043308 | 0            | 5.267649 | 0        | 1        | NA       |
| BX957322.3          | 83.42806 | 0.214066424  | 0.244102 | 0.876953 | 0.380512 | 0.823655 |
| RF00001             | 0        | NA           | NA       | NA       | NA       | NA       |
| RF00001             | 0        | NA           | NA       | NA       | NA       | NA       |
| RF00001             | 0        | NA           | NA       | NA       | NA       | NA       |
| RF00001             | 0.661942 | -2.450412674 | 3.331988 | -0.73542 | 0.462083 | NA       |
| aars2               | 91.89873 | -0.040790465 | 0.256703 | -0.1589  | 0.873746 | 0.983831 |
| RF00001             | 0.049519 | 0            | 5.267649 | 0        | 1        | NA       |
| RF00001             | 0.33931  | -2.413214435 | 5.198537 | -0.46421 | 0.642497 | NA       |
| RF00001             | 0.043309 | 0            | 5.267649 | 0        | 1        | NA       |
| TCF4                | 59.8045  | -0.059308977 | 0.222185 | -0.26693 | 0.78952  | 0.9639   |
| RF00001             | 0        | NA           | NA       | NA       | NA       | NA       |
| RF00001             | 0.063619 | 0            | 5.267649 | 0        | 1        | NA       |
| RF00001             | 0        | NA           | NA       | NA       | NA       | NA       |
| si:dkeyp-35e5.10    | 7.849415 | -1.792706386 | 0.691932 | -2.59087 | 0.009573 | 0.168425 |
| L0018208.1          | 3.627669 | -0.529093526 | 1.048806 | -0.50447 | 0.613929 | 0.915998 |
| RF00001             | 0.089161 | 0            | 5.267649 | 0        | 1        | NA       |
| TANC2               | 294.5932 | 0.150051396  | 0.185832 | 0.807455 | 0.419404 | 0.842347 |
| SLC35D3             | 19.23599 | -0.050073795 | 0.473183 | -0.10582 | 0.915722 | 0.99311  |
| hrh2a               | 4.2898   | 1.405465474  | 1.373686 | 1.023134 | 0.306244 | 0.771472 |
| RF00001             | 0        | NA           | NA       | NA       | NA       | NA       |
| RF00001             | 0        | NA           | NA       | NA       | NA       | NA       |
| RF00001             | 0        | NA           | NA       | NA       | NA       | NA       |
| RF00001             | 0        | NA           | NA       | NA       | NA       | NA       |
| RF00001             | 0        | NA           | NA       | NA       | NA       | NA       |
| RF00001             | 0.043308 | 0            | 5.267649 | 0        | 1        | NA       |
| RF00001             | 0        | NA           | NA       | NA       | NA       | NA       |
| RF00001             | 0.053506 | -0.86807634  | 5.267649 | -0.16479 | 0.869106 | NA       |
| CR855320.3          | 3.026255 | -0.862697843 | 1.552114 | -0.55582 | 0.578333 | 0.905417 |
| RF00001             | 0        | NA           | NA       | NA       | NA       | NA       |
| RF00001             | 0        | NA           | NA       | NA       | NA       | NA       |
| RF00001             | 0.151684 | 1.921567426  | 5.236909 | 0.366928 | 0.713673 | NA       |
| CR356227.1          | 0.043309 | 0            | 5.267649 | 0        | 1        | NA       |
| RF00001             | 0        | NA           | NA       | NA       | NA       | NA       |
| lyn                 | 158.8053 | 0.055061013  | 0.187799 | 0.293191 | 0.769376 | 0.960484 |
| RF00001             | 0        | NA           | NA       | NA       | NA       | NA       |
| RF00001             | 0        | NA           | NA       | NA       | NA       | NA       |
| RF00001             | 0        | NA           | NA       | NA       | NA       | NA       |
| smkr1               | 33.82187 | -0.112839996 | 0.276241 | -0.40848 | 0.682919 | 0.938006 |
| slc18a3b            | 13.8085  | -0.544827801 | 0.534611 | -1.01911 | 0.308151 | 0.77313  |
| erich2              | 50.5298  | -0.185871919 | 0.238563 | -0.77913 | 0.435903 | 0.850596 |
| RF00001             | 0.119909 | 2.079562922  | 5.22636  | 0.397899 | 0.690705 | NA       |
| RF00001             | 0.050624 | 1.055396947  | 5.267649 | 0.200354 | 0.841203 | NA       |
| INSYN2A (1 of many) | 20.65461 | 0.359696164  | 0.521895 | 0.689212 | 0.49069  | 0.875539 |
| RF00001             | 0        | NA           | NA       | NA       | NA       | NA       |
| RF00001             | 0.059954 | 1.055396947  | 5.267649 | 0.200354 | 0.841203 | NA       |
| RF00001             | 0        | NA           | NA       | NA       | NA       | NA       |
| RF00001             | 0        | NA           | NA       | NA       | NA       | NA       |
| RF00001             | 0.091739 | 0            | 5.267649 | 0        | 1        | NA       |
| RF00001             | 0        | NA           | NA       | NA       | NA       | NA       |

|                 |           |               |           |           |                     |
|-----------------|-----------|---------------|-----------|-----------|---------------------|
| RF00001         | 0 NA      | NA            | NA        | NA        | NA                  |
| RF00001         | 0. 046941 | 0 5. 267649   | 0         | 1 NA      |                     |
| RF00001         | 0 NA      | NA            | NA        | NA        | NA                  |
| RF00001         | 0 NA      | NA            | NA        | NA        | NA                  |
| RF00001         | 0 NA      | NA            | NA        | NA        | NA                  |
| RF00001         | 0 NA      | NA            | NA        | NA        | NA                  |
| RF00001         | 0 NA      | NA            | NA        | NA        | NA                  |
| RF00001         | 0. 090249 | 0 5. 267649   | 0         | 1 NA      |                     |
| RF00001         | 0 NA      | NA            | NA        | NA        | NA                  |
| RF00001         | 0 NA      | NA            | NA        | NA        | NA                  |
| RF00001         | 0 NA      | NA            | NA        | NA        | NA                  |
| RF00001         | 0. 059954 | 1. 055396947  | 5. 267649 | 0. 200354 | 0. 841203 NA        |
| RF00001         | 0 NA      | NA            | NA        | NA        | NA                  |
| RF00001         | 0 NA      | NA            | NA        | NA        | NA                  |
| RF00001         | 0. 046941 | 0 5. 267649   | 0         | 1 NA      |                     |
| RF00001         | 0 NA      | NA            | NA        | NA        | NA                  |
| RF00001         | 0 NA      | NA            | NA        | NA        | NA                  |
| RF00001         | 0 NA      | NA            | NA        | NA        | NA                  |
| RF00001         | 0 NA      | NA            | NA        | NA        | NA                  |
| RF00001         | 0 NA      | NA            | NA        | NA        | NA                  |
| RF00001         | 1. 526649 | -0. 43617166  | 1. 853117 | -0. 23537 | 0. 81392 NA         |
| RF00001         | 0 NA      | NA            | NA        | NA        | NA                  |
| BX897670. 1     | 0 NA      | NA            | NA        | NA        | NA                  |
| RF00001         | 0 NA      | NA            | NA        | NA        | NA                  |
| RF00001         | 0 NA      | NA            | NA        | NA        | NA                  |
| RF00001         | 0 NA      | NA            | NA        | NA        | NA                  |
| RF00001         | 0. 060442 | 0 5. 267649   | 0         | 1 NA      |                     |
| RF00001         | 0 NA      | NA            | NA        | NA        | NA                  |
| RF00001         | 0. 045161 | 0 5. 267649   | 0         | 1 NA      |                     |
| RF00001         | 0. 253515 | -1. 793197028 | 5. 185055 | -0. 34584 | 0. 729463 NA        |
| RF00001         | 0 NA      | NA            | NA        | NA        | NA                  |
| RF00001         | 0 NA      | NA            | NA        | NA        | NA                  |
| RF00001         | 0. 049519 | 0 5. 267649   | 0         | 1 NA      |                     |
| RF00001         | 0 NA      | NA            | NA        | NA        | NA                  |
| RF00001         | 0 NA      | NA            | NA        | NA        | NA                  |
| RF00001         | 0. 060442 | 0 5. 267649   | 0         | 1 NA      |                     |
| RF00001         | 0 NA      | NA            | NA        | NA        | NA                  |
| RF00001         | 0 NA      | NA            | NA        | NA        | NA                  |
| RF00001         | 0 NA      | NA            | NA        | NA        | NA                  |
| RF00001         | 0. 30761  | 1. 110177522  | 3. 968475 | 0. 279749 | 0. 77967 NA         |
| RF00001         | 0. 734039 | 1. 66602357   | 2. 162353 | 0. 770468 | 0. 441022 NA        |
| RF00001         | 0. 046941 | 0 5. 267649   | 0         | 1 NA      |                     |
| RF00001         | 0. 043308 | 0 5. 267649   | 0         | 1 NA      |                     |
| CABZ01073424. 1 | 44. 18947 | 0. 348566946  | 0. 346303 | 1. 006538 | 0. 314157 0. 777479 |
| RF00001         | 0 NA      | NA            | NA        | NA        | NA                  |
| RF00001         | 0 NA      | NA            | NA        | NA        | NA                  |
| RF00001         | 0 NA      | NA            | NA        | NA        | NA                  |
| RF00001         | 0. 103025 | -0. 868089684 | 5. 267649 | -0. 1648  | 0. 869104 NA        |
| RF00001         | 0. 721369 | -0. 132925123 | 2. 489408 | -0. 0534  | 0. 957416 NA        |
| FIG4            | 154. 9343 | -0. 104534221 | 0. 156913 | -0. 66619 | 0. 505288 0. 882188 |
| RF00001         | 0. 049519 | 0 5. 267649   | 0         | 1 NA      |                     |
| RF00001         | 0 NA      | NA            | NA        | NA        | NA                  |
| RF00001         | 0. 043309 | 0 5. 267649   | 0         | 1 NA      |                     |
| RF00001         | 0 NA      | NA            | NA        | NA        | NA                  |

|                     |          |              |          |          |          |          |    |
|---------------------|----------|--------------|----------|----------|----------|----------|----|
| dre-mir-124-4       | 0.371901 |              | 0        | 3.697523 | 0        | 1        | NA |
| RF00001             | 0        | NA           | NA       | NA       | NA       | NA       | NA |
| RF00001             | 0        | NA           | NA       | NA       | NA       | NA       | NA |
| RF00001             | 0.04222  |              | 0        | 5.267649 | 0        | 1        | NA |
| RF00001             | 0        | NA           | NA       | NA       | NA       | NA       | NA |
| RF00001             | 0        | NA           | NA       | NA       | NA       | NA       | NA |
| CR382334.1          | 0.324929 | 1.05539948   | 3.872504 | 0.272537 | 0.785209 | NA       | NA |
| RF00001             | 0        | NA           | NA       | NA       | NA       | NA       | NA |
| RF00001             | 0        | NA           | NA       | NA       | NA       | NA       | NA |
| RF00001             | 0.093881 |              | 0        | 5.267649 | 0        | 1        | NA |
| RF00001             | 0        | NA           | NA       | NA       | NA       | NA       | NA |
| RF00001             | 0        | NA           | NA       | NA       | NA       | NA       | NA |
| RF00001             | 0.131777 |              | 0        | 5.267649 | 0        | 1        | NA |
| RF00001             | 0        | NA           | NA       | NA       | NA       | NA       | NA |
| FAM163B (1 of many) | 12.75516 | 0.08063011   | 0.613711 | 0.131381 | 0.895474 | 0.989245 | NA |
| RF00001             | 4.924276 | 1.567089606  | 1.569566 | 0.998422 | 0.318075 | 0.779872 | NA |
| CU693481.1          | 47.86896 | -0.67890903  | 0.436155 | -1.55658 | 0.119571 | 0.563675 | NA |
| RF00001             | 0        | NA           | NA       | NA       | NA       | NA       | NA |
| RF00001             | 0.043309 |              | 0        | 5.267649 | 0        | 1        | NA |
| RF00001             | 0        | NA           | NA       | NA       | NA       | NA       | NA |
| RF00001             | 0        | NA           | NA       | NA       | NA       | NA       | NA |
| RF00001             | 0.204709 | -0.793668545 | 5.235279 | -0.1516  | 0.879502 | NA       | NA |
| RF00001             | 0        | NA           | NA       | NA       | NA       | NA       | NA |
| RF00001             | 0.043308 |              | 0        | 5.267649 | 0        | 1        | NA |
| CABZ01109481.1      | 23.60869 | -0.377809343 | 0.367751 | -1.02735 | 0.304256 | 0.769725 | NA |
| RF00001             | 0        | NA           | NA       | NA       | NA       | NA       | NA |
| CZQB01137059.1      | 0        | NA           | NA       | NA       | NA       | NA       | NA |
| RF00001             | 0        | NA           | NA       | NA       | NA       | NA       | NA |
| RF00001             | 0.049519 |              | 0        | 5.267649 | 0        | 1        | NA |
| RF00001             | 1.715172 | -0.256719697 | 1.680195 | -0.15279 | 0.878563 | NA       | NA |
| LO017771.1          | 120.792  | 0.595652787  | 0.258355 | 2.305562 | 0.021135 | 0.25794  | NA |
| RF00001             | 0        | NA           | NA       | NA       | NA       | NA       | NA |
| RF00001             | 0        | NA           | NA       | NA       | NA       | NA       | NA |
| CT573476.2          | 0        | NA           | NA       | NA       | NA       | NA       | NA |
| RF00001             | 0.092827 |              | 0        | 5.267649 | 0        | 1        | NA |
| RF00001             | 0        | NA           | NA       | NA       | NA       | NA       | NA |
| RF00001             | 1.329421 | -0.30922525  | 1.607889 | -0.19232 | 0.847493 | NA       | NA |
| RF00001             | 6.899482 | 0.970936413  | 0.608908 | 1.594554 | 0.110812 | 0.545815 | NA |
| RF00001             | 0.043308 |              | 0        | 5.267649 | 0        | 1        | NA |
| RF00001             | 0        | NA           | NA       | NA       | NA       | NA       | NA |
| RF00001             | 0        | NA           | NA       | NA       | NA       | NA       | NA |
| CR847523.1          | 2.693568 | 0.084610376  | 1.629495 | 0.051924 | 0.958589 | 0.999109 | NA |
| RF00001             | 0        | NA           | NA       | NA       | NA       | NA       | NA |
| RF00001             | 1.171462 | -1.774871335 | 1.856993 | -0.95578 | 0.339185 | NA       | NA |
| RF00001             | 0        | NA           | NA       | NA       | NA       | NA       | NA |
| RF00001             | 0        | NA           | NA       | NA       | NA       | NA       | NA |
| RF00001             | 0        | NA           | NA       | NA       | NA       | NA       | NA |
| CABZ01084774.1      | 0        | NA           | NA       | NA       | NA       | NA       | NA |
| BX571760.1          | 0        | NA           | NA       | NA       | NA       | NA       | NA |
| RF00001             | 0        | NA           | NA       | NA       | NA       | NA       | NA |
| RF00001             | 0.050723 | -0.86807634  | 5.267649 | -0.16479 | 0.869106 | NA       | NA |
| RF00001             | 0.224244 | 1.05535765   | 5.267649 | 0.200347 | 0.841209 | NA       | NA |
| RF00001             | 0        | NA           | NA       | NA       | NA       | NA       | NA |
| RF00001             | 0.129927 |              | 0        | 5.267649 | 0        | 1        | NA |

|                    |           |               |           |           |           |           |
|--------------------|-----------|---------------|-----------|-----------|-----------|-----------|
| RF00001            | 0 NA      | NA            | NA        | NA        | NA        |           |
| RF00001            | 0 NA      | NA            | NA        | NA        | NA        |           |
| RF00001            | 0. 488329 | 0. 116629203  | 3. 165718 | 0. 036841 | 0. 970612 | NA        |
| RF00001            | 0 NA      | NA            | NA        | NA        | NA        |           |
| RF00001            | 0. 043309 | 0 5. 267649   |           | 0         | 1 NA      |           |
| RF00001            | 0 NA      | NA            | NA        | NA        | NA        |           |
| RF00001            | 0 NA      | NA            | NA        | NA        | NA        |           |
| RF00001            | 0 NA      | NA            | NA        | NA        | NA        |           |
| RF00001            | 0 NA      | NA            | NA        | NA        | NA        |           |
| RF00001            | 0 NA      | NA            | NA        | NA        | NA        |           |
| RF00001            | 0 NA      | NA            | NA        | NA        | NA        |           |
| RF00001            | 0. 927992 | -2. 731734339 | 2. 096499 | -1. 303   | 0. 192575 | NA        |
| RF00001            | 0 NA      | NA            | NA        | NA        | NA        |           |
| RF00001            | 0. 04222  | 0 5. 267649   |           | 0         | 1 NA      |           |
| RF00001            | 0 NA      | NA            | NA        | NA        | NA        |           |
| RF00001            | 0 NA      | NA            | NA        | NA        | NA        |           |
| RF00001            | 0. 227029 | 0 5. 267649   |           | 0         | 1 NA      |           |
| RF00001            | 0. 101247 | 1. 854150541  | 5. 241768 | 0. 353726 | 0. 723544 | NA        |
| RF00001            | 0 NA      | NA            | NA        | NA        | NA        |           |
| RF00001            | 0 NA      | NA            | NA        | NA        | NA        |           |
| RF00001            | 0 NA      | NA            | NA        | NA        | NA        |           |
| RF00001            | 0. 336982 | 0. 899832604  | 3. 847305 | 0. 233886 | 0. 815073 | NA        |
| RF00001            | 0. 046941 | 0 5. 267649   |           | 0         | 1 NA      |           |
| RF00001            | 0 NA      | NA            | NA        | NA        | NA        |           |
| RF00001            | 0 NA      | NA            | NA        | NA        | NA        |           |
| RF00001            | 0. 114628 | 0 5. 267649   |           | 0         | 1 NA      |           |
| RF00001            | 0 NA      | NA            | NA        | NA        | NA        |           |
| RF00001            | 0. 045161 | 0 5. 267649   |           | 0         | 1 NA      |           |
| RF00001            | 0. 069091 | 0 5. 267649   |           | 0         | 1 NA      |           |
| RF00001            | 0 NA      | NA            | NA        | NA        | NA        |           |
| RF00001            | 0 NA      | NA            | NA        | NA        | NA        |           |
| LT631684. 1        | 320. 4272 | -0. 222274389 | 0. 253351 | -0. 87734 | 0. 380303 | 0. 823655 |
| RF00001            | 0. 043308 | 0 5. 267649   |           | 0         | 1 NA      |           |
| RF00001            | 0. 073968 | 0 5. 267649   |           | 0         | 1 NA      |           |
| FO393424. 1        | 4. 989093 | 0. 980604748  | 1. 033213 | 0. 949082 | 0. 342579 | 0. 797189 |
| RF00001            | 0. 217667 | 0 5. 267649   |           | 0         | 1 NA      |           |
| si :ch211-283g2. 2 | 15. 423   | -0. 479815268 | 0. 490379 | -0. 97846 | 0. 327848 | 0. 786438 |
| RF00001            | 0 NA      | NA            | NA        | NA        | NA        |           |
| RF00001            | 0. 046941 | 0 5. 267649   |           | 0         | 1 NA      |           |
| RF00001            | 0 NA      | NA            | NA        | NA        | NA        |           |
| RF00001            | 0. 726907 | 1. 05541277   | 3. 156217 | 0. 334392 | 0. 738084 | NA        |
| LO017648. 1        | 83. 13264 | 0. 33538123   | 0. 32691  | 1. 025913 | 0. 304933 | 0. 770059 |
| RF00001            | 0 NA      | NA            | NA        | NA        | NA        |           |
| RF00001            | 0 NA      | NA            | NA        | NA        | NA        |           |
| BX322587. 2        | 2. 697142 | -0. 823072836 | 1. 085598 | -0. 75817 | 0. 448347 | 0. 856741 |
| LO018336. 1        | 15. 98675 | 0. 541734188  | 0. 426771 | 1. 269378 | 0. 204306 | 0. 685846 |
| RF00001            | 0. 090321 | 0 5. 267649   |           | 0         | 1 NA      |           |
| RF000026           | 0 NA      | NA            | NA        | NA        | NA        |           |
| RF00001            | 0. 043309 | 0 5. 267649   |           | 0         | 1 NA      |           |
| RF00001            | 0 NA      | NA            | NA        | NA        | NA        |           |
| RF00001            | 0 NA      | NA            | NA        | NA        | NA        |           |
| CR385077. 1        | 5. 062968 | -0. 414905787 | 1. 14992  | -0. 36081 | 0. 718239 | 0. 946598 |
| BX537277. 1        | 0 NA      | NA            | NA        | NA        | NA        |           |
| CU570894. 1        | 52. 37183 | 0. 441211611  | 0. 298656 | 1. 477326 | 0. 139588 | 0. 597884 |

|                   |           |               |           |           |           |           |
|-------------------|-----------|---------------|-----------|-----------|-----------|-----------|
| RF00001           | 0 NA      | NA            | NA        | NA        | NA        | NA        |
| RF00001           | 4. 033863 | 0. 143904263  | 1. 109045 | 0. 129755 | 0. 89676  | 0. 98939  |
| RF00001           | 0 NA      | NA            | NA        | NA        | NA        | NA        |
| AL845330. 1       | 2. 158102 | 0             | 1. 971855 | 0         | 1         | NA        |
| otos              | 608. 3862 | 0. 166235624  | 0. 263682 | 0. 63044  | 0. 528407 | 0. 88999  |
| RF00001           | 0. 086618 | 0             | 5. 267649 | 0         | 1         | NA        |
| RF00001           | 0 NA      | NA            | NA        | NA        | NA        | NA        |
| RF00001           | 0 NA      | NA            | NA        | NA        | NA        | NA        |
| RF00001           | 0 NA      | NA            | NA        | NA        | NA        | NA        |
| RF00001           | 0 NA      | NA            | NA        | NA        | NA        | NA        |
| RF00001           | 0. 361149 | -0. 86813977  | 4. 446576 | -0. 19524 | 0. 845207 | NA        |
| RF00001           | 0 NA      | NA            | NA        | NA        | NA        | NA        |
| CR749167. 2       | 0. 099744 | -1. 732891383 | 5. 236854 | -0. 3309  | 0. 740718 | NA        |
| RF00001           | 0 NA      | NA            | NA        | NA        | NA        | NA        |
| psmb11a           | 0. 087179 | 0             | 5. 267649 | 0         | 1         | NA        |
| CABZ01072077. 1   | 168. 3407 | 0. 132582185  | 0. 26852  | 0. 493752 | 0. 621481 | 0. 918461 |
| RF00001           | 0 NA      | NA            | NA        | NA        | NA        | NA        |
| RF00001           | 0 NA      | NA            | NA        | NA        | NA        | NA        |
| RF00001           | 0 NA      | NA            | NA        | NA        | NA        | NA        |
| RF00001           | 0 NA      | NA            | NA        | NA        | NA        | NA        |
| RF00001           | 0. 216545 | 0             | 5. 267649 | 0         | 1         | NA        |
| RF00001           | 0 NA      | NA            | NA        | NA        | NA        | NA        |
| RF00001           | 0 NA      | NA            | NA        | NA        | NA        | NA        |
| RF00001           | 0. 223879 | 0             | 5. 052924 | 0         | 1         | NA        |
| RF00001           | 1. 247894 | 0. 093635357  | 2. 612078 | 0. 035847 | 0. 971404 | NA        |
| RF00001           | 1. 492737 | -0. 505019957 | 1. 800429 | -0. 2805  | 0. 779094 | NA        |
| RF00001           | 0. 100203 | 1. 055383603  | 5. 267649 | 0. 200352 | 0. 841205 | NA        |
| RF00001           | 0. 060442 | 0             | 5. 267649 | 0         | 1         | NA        |
| RF00001           | 0 NA      | NA            | NA        | NA        | NA        | NA        |
| RF00001           | 0 NA      | NA            | NA        | NA        | NA        | NA        |
| RF00001           | 0 NA      | NA            | NA        | NA        | NA        | NA        |
| RF00001           | 0 NA      | NA            | NA        | NA        | NA        | NA        |
| CABZ01084774. 2   | 0 NA      | NA            | NA        | NA        | NA        | NA        |
| RF00001           | 0. 046941 | 0             | 5. 267649 | 0         | 1         | NA        |
| RF00001           | 0 NA      | NA            | NA        | NA        | NA        | NA        |
| RF00001           | 0. 050723 | -0. 86807634  | 5. 267649 | -0. 16479 | 0. 869106 | NA        |
| BX572621. 1       | 0 NA      | NA            | NA        | NA        | NA        | NA        |
| GALNT3            | 16. 30013 | -0. 000128825 | 0. 381316 | -0. 00034 | 0. 99973  | 1         |
| RF00001           | 0 NA      | NA            | NA        | NA        | NA        | NA        |
| RF00001           | 0. 099037 | 0             | 5. 267649 | 0         | 1         | NA        |
| RF00001           | 0. 043308 | 0             | 5. 267649 | 0         | 1         | NA        |
| RF00001           | 0 NA      | NA            | NA        | NA        | NA        | NA        |
| RF00001           | 0 NA      | NA            | NA        | NA        | NA        | NA        |
| FITM1 (1 of many) | 7. 237323 | -0. 561303359 | 0. 557321 | -1. 00715 | 0. 313865 | 0. 777479 |
| RF00001           | 0 NA      | NA            | NA        | NA        | NA        | NA        |
| RF00001           | 0 NA      | NA            | NA        | NA        | NA        | NA        |
| RF00001           | 0. 195129 | 1. 854123873  | 5. 241768 | 0. 353721 | 0. 723548 | NA        |
| RF00001           | 0 NA      | NA            | NA        | NA        | NA        | NA        |
| RF00001           | 0 NA      | NA            | NA        | NA        | NA        | NA        |
| RF00001           | 0. 043309 | 0             | 5. 267649 | 0         | 1         | NA        |
| RF00001           | 0 NA      | NA            | NA        | NA        | NA        | NA        |
| RF00001           | 0 NA      | NA            | NA        | NA        | NA        | NA        |
| RF00001           | 0. 137703 | 1. 055372236  | 5. 267649 | 0. 20035  | 0. 841207 | NA        |
| RF00001           | 0 NA      | NA            | NA        | NA        | NA        | NA        |



|                   |           |               |           |           |           |           |
|-------------------|-----------|---------------|-----------|-----------|-----------|-----------|
| RF00001           | 0 NA      | NA            | NA        | NA        | NA        | NA        |
| CU929317. 2       | 0 NA      | NA            | NA        | NA        | NA        | NA        |
| RF00001           | 0 NA      | NA            | NA        | NA        | NA        | NA        |
| RF00001           | 0. 086618 | 0 5. 267649   | 0         | 1 NA      |           |           |
| RF00001           | 0 NA      | NA            | NA        | NA        | NA        | NA        |
| RF00001           | 0. 363736 | 2. 064603394  | 3. 363605 | 0. 613807 | 0. 539343 | NA        |
| RF00001           | 0. 17872  | 0 5. 267649   | 0         | 1 NA      |           |           |
| RF00001           | 0 NA      | NA            | NA        | NA        | NA        | NA        |
| RF00001           | 0. 150076 | 0. 09368032   | 5. 267649 | 0. 017784 | 0. 985811 | NA        |
| C14orf132         | 32. 57597 | 2. 005040255  | 0. 866773 | 2. 313223 | 0. 02071  | 0. 255657 |
| TRIM67            | 8. 308034 | 0. 419726051  | 0. 600433 | 0. 699039 | 0. 484528 | 0. 872911 |
| ARSB              | 83. 26149 | -0. 082094414 | 0. 241423 | -0. 34004 | 0. 733824 | 0. 95093  |
| RF00001           | 0 NA      | NA            | NA        | NA        | NA        | NA        |
| RF00001           | 0. 138182 | 0 5. 267649   | 0         | 1 NA      |           |           |
| zgc:113886        | 3. 501655 | -0. 711075946 | 1. 155012 | -0. 61564 | 0. 53813  | 0. 892498 |
| RF00001           | 0 NA      | NA            | NA        | NA        | NA        | NA        |
| RF00001           | 0 NA      | NA            | NA        | NA        | NA        | NA        |
| RF00001           | 0 NA      | NA            | NA        | NA        | NA        | NA        |
| RF00001           | 0 NA      | NA            | NA        | NA        | NA        | NA        |
| RF00001           | 0 NA      | NA            | NA        | NA        | NA        | NA        |
| RF00001           | 0 NA      | NA            | NA        | NA        | NA        | NA        |
| RF00001           | 0 NA      | NA            | NA        | NA        | NA        | NA        |
| RF00001           | 0. 045161 | 0 5. 267649   | 0         | 1 NA      |           |           |
| RF00001           | 0 NA      | NA            | NA        | NA        | NA        | NA        |
| RF00001           | 0. 117276 | 0 5. 267649   | 0         | 1 NA      |           |           |
| FO704750. 1       | 149. 393  | -0. 004263235 | 0. 203674 | -0. 02093 | 0. 9833   | 1         |
| FQ378016. 1       | 16. 82595 | -2. 956181174 | 1. 347129 | -2. 19443 | 0. 028204 | 0. 298947 |
| RF00001           | 0. 261766 | -0. 652645425 | 5. 172309 | -0. 12618 | 0. 899589 | NA        |
| si:ch211-283g2. 2 | 10. 7272  | -0. 266994528 | 0. 630444 | -0. 4235  | 0. 671929 | 0. 933953 |
| RF00001           | 0. 183043 | 0 5. 267649   | 0         | 1 NA      |           |           |
| RF00001           | 0 NA      | NA            | NA        | NA        | NA        | NA        |
| RF00001           | 0 NA      | NA            | NA        | NA        | NA        | NA        |
| RF00001           | 0 NA      | NA            | NA        | NA        | NA        | NA        |
| RF00001           | 0. 045161 | 0 5. 267649   | 0         | 1 NA      |           |           |
| si:dkey-7i4. 19   | 1. 519757 | -1. 206613585 | 1. 560437 | -0. 77325 | 0. 439372 | NA        |
| RF00001           | 0 NA      | NA            | NA        | NA        | NA        | NA        |
| RF00001           | 0. 161662 | -1. 710071829 | 5. 238473 | -0. 32644 | 0. 744088 | NA        |
| RF00001           | 0 NA      | NA            | NA        | NA        | NA        | NA        |
| RF00001           | 0 NA      | NA            | NA        | NA        | NA        | NA        |
| RF00001           | 0 NA      | NA            | NA        | NA        | NA        | NA        |
| RF00001           | 0 NA      | NA            | NA        | NA        | NA        | NA        |
| WDR70             | 169. 5349 | -0. 156816721 | 0. 1945   | -0. 80626 | 0. 420095 | 0. 842383 |
| RF00001           | 0 NA      | NA            | NA        | NA        | NA        | NA        |
| RF00001           | 0 NA      | NA            | NA        | NA        | NA        | NA        |
| RF00001           | 0. 087381 | 0 5. 267649   | 0         | 1 NA      |           |           |
| RF00001           | 1. 683145 | -1. 420607709 | 1. 847217 | -0. 76905 | 0. 441862 | NA        |
| RF00001           | 0 NA      | NA            | NA        | NA        | NA        | NA        |
| RF00001           | 0. 711456 | -1. 106449803 | 1. 915127 | -0. 57774 | 0. 563438 | NA        |
| ftr81             | 0. 542468 | 2. 662159409  | 3. 908844 | 0. 681061 | 0. 495833 | NA        |
| RF00001           | 0 NA      | NA            | NA        | NA        | NA        | NA        |
| RF00001           | 0 NA      | NA            | NA        | NA        | NA        | NA        |
| RF00001           | 0. 364995 | 0. 960953832  | 4. 418202 | 0. 217499 | 0. 82782  | NA        |
| RF00001           | 0 NA      | NA            | NA        | NA        | NA        | NA        |
| RF00001           | 0 NA      | NA            | NA        | NA        | NA        | NA        |

|                   |          |              |          |          |          |          |    |
|-------------------|----------|--------------|----------|----------|----------|----------|----|
| RF00001           | 0.129924 |              | 0        | 5.267649 | 0        | 1        | NA |
| RF00001           | 0.481824 | 1.556936514  | 3.143429 | 0.495299 | 0.620389 |          | NA |
| RF00001           | 0.087179 |              | 0        | 5.267649 | 0        | 1        | NA |
| F0393424.2        | 11.59689 | 0.690473926  | 0.633656 | 1.089668 | 0.27586  | 0.750674 |    |
| RF00001           | 0.043308 |              | 0        | 5.267649 | 0        | 1        | NA |
| RF00001           | 0        | NA           | NA       | NA       | NA       |          | NA |
| RF00001           | 0        | NA           | NA       | NA       | NA       |          | NA |
| RF00001           | 0.15627  |              | 0        | 5.267649 | 0        | 1        | NA |
| RF00001           | 0        | NA           | NA       | NA       | NA       |          | NA |
| RF00001           | 0        | NA           | NA       | NA       | NA       |          | NA |
| RF00001           | 0        | NA           | NA       | NA       | NA       |          | NA |
| RF00001           | 0        | NA           | NA       | NA       | NA       |          | NA |
| RF00001           | 0        | NA           | NA       | NA       | NA       |          | NA |
| RF00001           | 0        | NA           | NA       | NA       | NA       |          | NA |
| RF00001           | 0        | NA           | NA       | NA       | NA       |          | NA |
| RF00001           | 0        | NA           | NA       | NA       | NA       |          | NA |
| RF00001           | 0.113216 | 2.002397883  | 5.231371 | 0.382767 | 0.701892 |          | NA |
| RF00001           | 0        | NA           | NA       | NA       | NA       |          | NA |
| RF00001           | 7.579224 | -0.804110571 | 0.703475 | -1.14306 | 0.253016 | 0.732759 |    |
| RF00001           | 0.237384 | 1.854116614  | 5.241768 | 0.35372  | 0.723549 |          | NA |
| RF00001           | 0.043308 |              | 0        | 5.267649 | 0        | 1        | NA |
| BX324216.3        | 47.89739 | 0.016641937  | 0.268154 | 0.062061 | 0.950514 | 0.99801  |    |
| RF00001           | 0        | NA           | NA       | NA       | NA       |          | NA |
| BX649416.3        | 12.46338 | -0.168164227 | 0.49477  | -0.33988 | 0.733944 | 0.95093  |    |
| znf979            | 1.352415 | -2.127261404 | 1.560468 | -1.36322 | 0.172813 |          | NA |
| RF00026           | 0        | NA           | NA       | NA       | NA       |          | NA |
| ighv8-4           | 0        | NA           | NA       | NA       | NA       |          | NA |
| FQ377603.1        | 6.505257 | -0.217606186 | 0.697539 | -0.31196 | 0.755069 | 0.956283 |    |
| RF00001           | 0.345487 |              | 0        | 3.828117 | 0        | 1        | NA |
| RF00001           | 0        | NA           | NA       | NA       | NA       |          | NA |
| RF00026           | 0        | NA           | NA       | NA       | NA       |          | NA |
| CABZ01042417.1    | 0.049519 |              | 0        | 5.267649 | 0        | 1        | NA |
| F0680692.1        | 0        | NA           | NA       | NA       | NA       |          | NA |
| traj10            | 0        | NA           | NA       | NA       | NA       |          | NA |
| bmp101            | 3.283829 | -1.167629038 | 1.08179  | -1.07935 | 0.280432 | 0.753147 |    |
| BX294375.1        | 0.059954 | 1.055396947  | 5.267649 | 0.200354 | 0.841203 |          | NA |
| RF00001           | 0        | NA           | NA       | NA       | NA       |          | NA |
| RF00026           | 0        | NA           | NA       | NA       | NA       |          | NA |
| CT573356.1        | 0        | NA           | NA       | NA       | NA       |          | NA |
| RF00001           | 0.592459 | -0.868143486 | 2.885665 | -0.30085 | 0.763531 |          | NA |
| si:dkey-4e4.1     | 7.833687 | -0.585225667 | 0.581246 | -1.00685 | 0.314009 | 0.777479 |    |
| RF00026           | 0        | NA           | NA       | NA       | NA       |          | NA |
| si:ch211-234c11.2 | 5.466381 | -0.541325781 | 0.864144 | -0.62643 | 0.531033 | 0.890545 |    |
| CU855906.1        | 0.146334 | -0.868102566 | 5.267649 | -0.1648  | 0.869102 |          | NA |
| CABZ01088982.1    | 1.574067 |              | 0        | 4.256808 | 0        | 1        | NA |
| RF00001           | 0        | NA           | NA       | NA       | NA       |          | NA |
| CU928131.1        | 28.53647 | -0.004417179 | 0.617194 | -0.00716 | 0.99429  |          | 1  |
| BX640537.3        | 44.70855 | 0.123992177  | 0.339008 | 0.36575  | 0.714552 | 0.945821 |    |
| RF00069           | 0.805832 |              | 0        | 2.829965 | 0        | 1        | NA |
| RF00001           | 0.119909 | 2.079562922  | 5.22636  | 0.397899 | 0.690705 |          | NA |
| RF00001           | 18.80819 | 0.054081272  | 0.484339 | 0.11166  | 0.911093 | 0.992208 |    |
| RF00001           | 0        | NA           | NA       | NA       | NA       |          | NA |
| RF00012           | 0        | NA           | NA       | NA       | NA       |          | NA |
| BX005305.1        | 0        | NA           | NA       | NA       | NA       |          | NA |

|                    |          |              |            |          |          |          |   |
|--------------------|----------|--------------|------------|----------|----------|----------|---|
| CABZ01068367.1     | 110.7569 | -1.35076715  | 0.371624   | -3.63477 | 0.000278 | 0.018447 |   |
| CU570800.2         | 0.935744 | -1.18429384  | 1.928838   | -0.61399 | 0.53922  | NA       |   |
| RF00001            | 0 NA     |              | NA         | NA       | NA       | NA       |   |
| RF00020            | 0.043308 |              | 0 5.267649 |          | 0        | 1 NA     |   |
| CU570800.3         | 0 NA     |              | NA         | NA       | NA       | NA       |   |
| CABZ01078261.1     | 27.97087 | -0.32864057  | 0.402033   | -0.81745 | 0.413674 | 0.83842  |   |
| RF00001            | 0 NA     |              | NA         | NA       | NA       | NA       |   |
| mrps15             | 443.5197 | -0.153393786 | 0.154352   | -0.99379 | 0.320325 | 0.780807 |   |
| pimr152            | 0 NA     |              | NA         | NA       | NA       | NA       |   |
| CT583728.8         | 0 NA     |              | NA         | NA       | NA       | NA       |   |
| nitr6b             | 0.073968 |              | 0 5.267649 |          | 0        | 1 NA     |   |
| RF00001            | 0.060442 |              | 0 5.267649 |          | 0        | 1 NA     |   |
| CT583728.9         | 0 NA     |              | NA         | NA       | NA       | NA       |   |
| RF00026            | 0 NA     |              | NA         | NA       | NA       | NA       |   |
| im:7150988         | 2029.89  | -0.354350686 | 0.216832   | -1.63422 | 0.102213 | 0.528963 |   |
| znf1030            | 17.66689 | 1.091044248  | 0.457507   | 2.384759 | 0.01709  | 0.231569 |   |
| RF00001            | 0 NA     |              | NA         | NA       | NA       | NA       |   |
| RF00003            | 0 NA     |              | NA         | NA       | NA       | NA       |   |
| RF00003            | 0 NA     |              | NA         | NA       | NA       | NA       |   |
| RF00001            | 0.717293 | -0.696455028 | 2.012353   | -0.34609 | 0.729275 | NA       |   |
| znf1140            | 17.42137 | -0.104676621 | 0.426066   | -0.24568 | 0.805929 | 0.969625 |   |
| RF00003            | 0 NA     |              | NA         | NA       | NA       | NA       |   |
| CU104716.1         | 0 NA     |              | NA         | NA       | NA       | NA       |   |
| nanos1             | 1327.362 | -0.015271979 | 0.094499   | -0.16161 | 0.871613 | 0.983365 |   |
| CR388042.2         | 1.11754  | -1.084765088 | 2.481574   | -0.43713 | 0.662019 | NA       |   |
| CR762395.1         | 0.419609 | 1.055398845  | 3.670073   | 0.287569 | 0.773677 | NA       |   |
| RF00001            | 0 NA     |              | NA         | NA       | NA       | NA       |   |
| RF00001            | 0 NA     |              | NA         | NA       | NA       | NA       |   |
| RF00001            | 0.129927 |              | 0 5.267649 |          | 0        | 1 NA     |   |
| trhde.2            | 46.17288 | 0.578572712  | 0.326625   | 1.77137  | 0.076499 | 0.468417 |   |
| FO704848.1         | 108.6262 | -0.39106953  | 0.196286   | -1.99235 | 0.046333 | 0.376018 |   |
| BX005294.2         | 0.427374 | 1.030443772  | 2.911022   | 0.35398  | 0.723354 | NA       |   |
| RF00001            | 0.134409 |              | 0 5.267649 |          | 0        | 1 NA     |   |
| zgc:173720         | 2.550534 | 0.312574931  | 1.160595   | 0.269323 | 0.787681 | 0.963263 |   |
| RF00026            | 0 NA     |              | NA         | NA       | NA       | NA       |   |
| si:dkey-182g1.2    | 4.434373 | -5.759774786 | 1.498262   | -3.8443  | 0.000121 | 0.010651 |   |
| histlh2ba          | 3.152064 | -1.20840445  | 1.551767   | -0.77873 | 0.43614  | 0.850763 |   |
| pdgfaa             | 27.82058 | -0.842981373 | 0.649855   | -1.29718 | 0.194568 | 0.67483  |   |
| tmbim1b            | 426.3554 | -0.352098911 | 0.132816   | -2.65104 | 0.008025 | 0.151864 |   |
| RF01848            | 0 NA     |              | NA         | NA       | NA       | NA       |   |
| RF00001            | 0 NA     |              | NA         | NA       | NA       | NA       |   |
| RF00001            | 0.043309 |              | 0 5.267649 |          | 0        | 1 NA     |   |
| RF00017            | 0 NA     |              | NA         | NA       | NA       | NA       |   |
| dre-mir-430b-6     | 0 NA     |              | NA         | NA       | NA       | NA       |   |
| taarl8e            | 0.137987 |              | 0 5.267649 |          | 0        | 1 NA     |   |
| atgl612            | 4.288667 | -1.157010656 | 1.002671   | -1.15393 | 0.248529 | 0.728723 |   |
| RF00003            | 0 NA     |              | NA         | NA       | NA       | NA       |   |
| si:ch211-66i15.5   | 0.52395  | 0.093652883  | 3.141233   | 0.029814 | 0.976215 | NA       |   |
| FO681393.1         | 4.10873  |              | 0 1.939252 |          | 0        | 1        | 1 |
| RF00001            | 0 NA     |              | NA         | NA       | NA       | NA       |   |
| si:ch1073-110a20.7 | 0.161147 |              | 0 5.267649 |          | 0        | 1 NA     |   |
| RF00017            | 0 NA     |              | NA         | NA       | NA       | NA       |   |
| si:dkey-234124.1   | 0.70975  | 4.243540938  | 2.590963   | 1.637824 | 0.101458 | NA       |   |
| RF00001            | 0.087179 |              | 0 5.267649 |          | 0        | 1 NA     |   |

|                   |          |              |          |          |          |          |
|-------------------|----------|--------------|----------|----------|----------|----------|
| RF00003           | 0 NA     | NA           | NA       | NA       | NA       |          |
| prfl.7            | 0.060442 | 0            | 5.267649 | 0        | 1        | NA       |
| RF00001           | 0.043308 | 0            | 5.267649 | 0        | 1        | NA       |
| RF00003           | 0 NA     | NA           | NA       | NA       | NA       |          |
| RF00003           | 0.060442 | 0            | 5.267649 | 0        | 1        | NA       |
| RASL10B           | 2.188896 | -0.124433207 | 1.219906 | -0.102   | 0.918755 | NA       |
| RF00563           | 0.133559 | 0            | 5.267649 | 0        | 1        | NA       |
| AL953865.1        | 2.702826 | 0            | 1.920352 | 0        | 1        | 1        |
| RF00001           | 0 NA     | NA           | NA       | NA       | NA       |          |
| hrc               | 23.21295 | -0.410437029 | 0.394202 | -1.04118 | 0.29779  | 0.765407 |
| EML4              | 501.5844 | -0.093080385 | 0.129849 | -0.71683 | 0.473477 | 0.869146 |
| RF00026           | 0 NA     | NA           | NA       | NA       | NA       |          |
| RF00026           | 0 NA     | NA           | NA       | NA       | NA       |          |
| histlh2a1         | 2.148022 | 1.36543691   | 1.31727  | 1.036566 | 0.299938 | NA       |
| si:dkeyp-77c4.5   | 2.658733 | -1.988201533 | 1.437813 | -1.3828  | 0.166728 | 0.637156 |
| CR352340.1        | 0.091739 | 0            | 5.267649 | 0        | 1        | NA       |
| RF00017           | 0.107013 | -1.826650979 | 5.230461 | -0.34923 | 0.726914 | NA       |
| RF00001           | 0 NA     | NA           | NA       | NA       | NA       |          |
| CABZ01092745.1    | 99.64653 | 0.025129713  | 0.246886 | 0.101787 | 0.918926 | 0.993892 |
| RF00001           | 0 NA     | NA           | NA       | NA       | NA       |          |
| RF00015           | 0 NA     | NA           | NA       | NA       | NA       |          |
| RF00017           | 0.043309 | 0            | 5.267649 | 0        | 1        | NA       |
| RF00001           | 0.045161 | 0            | 5.267649 | 0        | 1        | NA       |
| PHF21B            | 29.31631 | -0.015727074 | 0.487594 | -0.03225 | 0.974269 | 1        |
| RF00001           | 0 NA     | NA           | NA       | NA       | NA       |          |
| BX323459.1        | 0.380187 | -1.755851127 | 4.356501 | -0.40304 | 0.686918 | NA       |
| lsm12b            | 1438.598 | -0.046574365 | 0.091945 | -0.50655 | 0.612474 | 0.915727 |
| RF00001           | 0 NA     | NA           | NA       | NA       | NA       |          |
| CR339054.2        | 28.7017  | 0.181520027  | 0.415184 | 0.437204 | 0.661964 | 0.930742 |
| RF00096           | 0 NA     | NA           | NA       | NA       | NA       |          |
| RF00026           | 0 NA     | NA           | NA       | NA       | NA       |          |
| RF00017           | 0.927125 | -2.369769797 | 2.656243 | -0.89215 | 0.372312 | NA       |
| senp7a            | 0 NA     | NA           | NA       | NA       | NA       |          |
| BX279525.1        | 3.191941 | -1.121828614 | 1.04371  | -1.07485 | 0.282443 | 0.754744 |
| BX000363.2        | 0.579776 | 0.949224457  | 2.332781 | 0.406907 | 0.684076 | NA       |
| RF00001           | 0 NA     | NA           | NA       | NA       | NA       |          |
| RF00003           | 0 NA     | NA           | NA       | NA       | NA       |          |
| RF00012           | 0 NA     | NA           | NA       | NA       | NA       |          |
| CT583625.4        | 0.138182 | 0            | 5.267649 | 0        | 1        | NA       |
| dre-mir-430b-6    | 0 NA     | NA           | NA       | NA       | NA       |          |
| RF00309           | 0 NA     | NA           | NA       | NA       | NA       |          |
| BX571954.3        | 0 NA     | NA           | NA       | NA       | NA       |          |
| CABZ01027551.1    | 3.149493 | 0.664304279  | 1.231363 | 0.539487 | 0.589551 | 0.908513 |
| zgc:77614         | 0 NA     | NA           | NA       | NA       | NA       |          |
| ft2               | 3.561354 | 0            | 1.785684 | 0        | 1        | 1        |
| PLPP7 (1 of many) | 13.77059 | 0.304080788  | 0.448582 | 0.67787  | 0.497854 | 0.878926 |
| BX649337.2        | 1.273238 | -0.868135325 | 2.153051 | -0.40321 | 0.686792 | NA       |
| RF00001           | 0 NA     | NA           | NA       | NA       | NA       |          |
| si:ch211-165a10.1 | 0.060442 | 0            | 5.267649 | 0        | 1        | NA       |
| RF00001           | 0 NA     | NA           | NA       | NA       | NA       |          |
| CR925744.1        | 1.318535 | -0.242587213 | 1.736415 | -0.13971 | 0.888892 | NA       |
| taar19n           | 0.259611 | -1.710997634 | 4.803211 | -0.35622 | 0.721676 | NA       |
| CT573366.1        | 0.990237 | 1.12491242   | 1.870226 | 0.601485 | 0.547517 | NA       |
| CU104741.1        | 11.91976 | -0.000764089 | 0.408666 | -0.00187 | 0.998508 | 1        |

|                   |          |              |            |          |          |          |
|-------------------|----------|--------------|------------|----------|----------|----------|
| RF00001           |          | 0 NA         | NA         | NA       | NA       | NA       |
| zgc:77614         |          | 0 NA         | NA         | NA       | NA       | NA       |
| RF00001           |          | 0 NA         | NA         | NA       | NA       | NA       |
| CR855375.3        | 10.68754 | -0.225470761 | 0.495075   | -0.45543 | 0.648802 | 0.927546 |
| CR847936.4        |          | 0 NA         | NA         | NA       | NA       | NA       |
| RF00001           | 0.060442 |              | 0 5.267649 |          | 0        | 1 NA     |
| RF00001           |          | 0 NA         | NA         | NA       | NA       | NA       |
| si:dkey-275b16.2  |          | 0 NA         | NA         | NA       | NA       | NA       |
| si:dkey-194g4.1   | 64.82082 | -0.254234582 | 0.340651   | -0.74632 | 0.455474 | 0.860008 |
| CU302316.1        | 0.152169 | -2.340093811 | 5.201855   | -0.44986 | 0.652813 | NA       |
| BX323574.1        | 0.57297  | -0.630467    | 3.033683   | -0.20782 | 0.835368 | NA       |
| znf1026           | 4.281354 | -0.285553189 | 1.113261   | -0.2565  | 0.797564 | 0.966447 |
| FP236810.1        | 5.993679 | -2.769514083 | 1.591816   | -1.73985 | 0.081886 | 0.481671 |
| RF00001           | 0.136135 |              | 0 5.267649 |          | 0        | 1 NA     |
| si:ch73-129a22.11 | 0.069091 |              | 0 5.267649 |          | 0        | 1 NA     |
| CABZ01066611.1    |          | 0 NA         | NA         | NA       | NA       | NA       |
| si:ch211-226h7.3  | 25.64277 | -1.888814066 | 1.08479    | -1.74118 | 0.081652 | 0.481027 |
| CR944667.2        | 0.060442 |              | 0 5.267649 |          | 0        | 1 NA     |
| CU896691.3        | 5.739268 | 0.279079818  | 0.879996   | 0.317138 | 0.751139 | 0.955226 |
| L0018548.1        | 4.529849 | -1.23604456  | 1.455269   | -0.84936 | 0.395682 | 0.829389 |
| si:ch211-153a8.4  | 141.9051 | 0.085985269  | 0.221547   | 0.388113 | 0.697933 | 0.942355 |
| si:ch211-147m6.1  | 163.0805 | -0.957230519 | 0.261401   | -3.66193 | 0.00025  | 0.017313 |
| BX571720.1        | 0.711684 | -3.568453849 | 2.751856   | -1.29674 | 0.194719 | NA       |
| RF00271           | 13.16027 | 0.536982219  | 0.591906   | 0.907209 | 0.364296 | 0.814648 |
| cmklr12           | 4.473749 | 1.102547531  | 1.081154   | 1.019788 | 0.307829 | 0.772996 |
| BX470083.1        |          | 0 NA         | NA         | NA       | NA       | NA       |
| CR792453.2        | 0.756553 | 1.986647921  | 2.501475   | 0.794191 | 0.427084 | NA       |
| BX005442.1        | 0.073968 |              | 0 5.267649 |          | 0        | 1 NA     |
| L0016987.2        | 65.39318 | -0.134809745 | 0.256286   | -0.52601 | 0.59888  | 0.913109 |
| RF00003           |          | 0 NA         | NA         | NA       | NA       | NA       |
| RF00001           |          | 0 NA         | NA         | NA       | NA       | NA       |
| CR550302.3        | 0.049021 | -0.86807634  | 5.267649   | -0.16479 | 0.869106 | NA       |
| dapl1b            | 194.5592 | -10.79844337 | 1.218085   | -8.8651  | 7.64E-19 | 4.43E-15 |
| RF00001           |          | 0 NA         | NA         | NA       | NA       | NA       |
| zgc:77614         |          | 0 NA         | NA         | NA       | NA       | NA       |
| F0904885.1        |          | 0 NA         | NA         | NA       | NA       | NA       |
| si:ch211-59p23.1  | 7.321629 | 1.197425396  | 0.827427   | 1.447167 | 0.14785  | 0.608687 |
| CU459012.3        | 0.251311 | -1.7108596   | 4.862875   | -0.35182 | 0.724973 | NA       |
| RF00001           | 0.050624 | 1.055396947  | 5.267649   | 0.200354 | 0.841203 | NA       |
| pimr152           |          | 0 NA         | NA         | NA       | NA       | NA       |
| znf1025           | 20.06373 | 0.60673686   | 0.478985   | 1.266713 | 0.205258 | 0.687357 |
| RF00001           |          | 0 NA         | NA         | NA       | NA       | NA       |
| F0834825.1        | 0.17626  | -0.868099337 | 5.267649   | -0.1648  | 0.869103 | NA       |
| BX510309.1        |          | 0 NA         | NA         | NA       | NA       | NA       |
| RF00001           |          | 0 NA         | NA         | NA       | NA       | NA       |
| RF00017           |          | 0 NA         | NA         | NA       | NA       | NA       |
| dre-mir-430b-10   |          | 0 NA         | NA         | NA       | NA       | NA       |
| tradv10.0.2       | 0.782627 | -1.473229283 | 2.643785   | -0.55724 | 0.577362 | NA       |
| sncgb             | 1236.823 | 0.491320724  | 0.231068   | 2.126308 | 0.033478 | 0.323151 |
| SLC35E2A          | 113.3061 | -0.075812973 | 0.206946   | -0.36634 | 0.71411  | 0.945821 |
| RF00001           | 0.043309 |              | 0 5.267649 |          | 0        | 1 NA     |
| PLCB1             | 17.72097 | 0.551757439  | 0.475624   | 1.160071 | 0.24602  | 0.727297 |
| RF00001           | 0.180491 | 1.921567426  | 5.236909   | 0.366928 | 0.713673 | NA       |
| RF00003           | 0.043308 |              | 0 5.267649 |          | 0        | 1 NA     |

|                   |           |               |           |           |           |           |
|-------------------|-----------|---------------|-----------|-----------|-----------|-----------|
| RF00001           | 0 NA      | NA            | NA        | NA        | NA        | NA        |
| zgc:171759        | 4. 28221  | 1. 248863179  | 0. 980015 | 1. 27433  | 0. 202546 | 0. 683016 |
| si:dkeyp-44b5. 4  | 0 NA      | NA            | NA        | NA        | NA        | NA        |
| GPR139            | 23. 16537 | 1. 512081347  | 0. 546001 | 2. 769373 | 0. 005616 | 0. 126465 |
| BX324227. 2       | 0. 098043 | -1. 71005882  | 5. 238474 | -0. 32644 | 0. 74409  | NA        |
| CR847936. 5       | 0 NA      | NA            | NA        | NA        | NA        | NA        |
| si:ch211-162i8. 7 | 5. 208833 | -1. 720602891 | 1. 049693 | -1. 63915 | 0. 101182 | 0. 526828 |
| RF00012           | 0 NA      | NA            | NA        | NA        | NA        | NA        |
| CU570800. 4       | 0 NA      | NA            | NA        | NA        | NA        | NA        |
| histlh2a3         | 2. 049435 | -1. 792511741 | 1. 660581 | -1. 07945 | 0. 280388 | NA        |
| RF00001           | 0 NA      | NA            | NA        | NA        | NA        | NA        |
| RF00001           | 0 NA      | NA            | NA        | NA        | NA        | NA        |
| CR376779. 1       | 6. 584989 | 0. 728332314  | 0. 70089  | 1. 039154 | 0. 298733 | 0. 765669 |
| RF01848           | 0 NA      | NA            | NA        | NA        | NA        | NA        |
| RF00001           | 0 NA      | NA            | NA        | NA        | NA        | NA        |
| RF00001           | 0 NA      | NA            | NA        | NA        | NA        | NA        |
| RF00017           | 0. 099037 | 0             | 5. 267649 | 0         | 1         | NA        |
| BX322614. 1       | 0. 548388 | 0. 024352587  | 2. 763591 | 0. 008812 | 0. 992969 | NA        |
| L0017835. 1       | 187. 4434 | -0. 016254496 | 0. 195897 | -0. 08297 | 0. 933872 | 0. 996638 |
| CABZ01117348. 1   | 175. 7381 | -0. 294097546 | 0. 16352  | -1. 79855 | 0. 07209  | 0. 456627 |
| BX530407. 5       | 0 NA      | NA            | NA        | NA        | NA        | NA        |
| RF00003           | 0 NA      | NA            | NA        | NA        | NA        | NA        |
| RF00026           | 0 NA      | NA            | NA        | NA        | NA        | NA        |
| igsf11            | 10. 26563 | -0. 767194694 | 0. 681512 | -1. 12572 | 0. 260282 | 0. 737615 |
| RF00001           | 0 NA      | NA            | NA        | NA        | NA        | NA        |
| BX324003. 2       | 2. 392723 | -0. 322298406 | 1. 072751 | -0. 30044 | 0. 763841 | 0. 959148 |
| CR936457. 1       | 0. 537612 | -1. 714006107 | 3. 881527 | -0. 44158 | 0. 658793 | NA        |
| FP101875. 2       | 0. 297925 | -0. 868127364 | 4. 604199 | -0. 18855 | 0. 850445 | NA        |
| BX323083. 1       | 0 NA      | NA            | NA        | NA        | NA        | NA        |
| RF00001           | 0 NA      | NA            | NA        | NA        | NA        | NA        |
| RF00001           | 0 NA      | NA            | NA        | NA        | NA        | NA        |
| RF00001           | 0 NA      | NA            | NA        | NA        | NA        | NA        |
| RF00001           | 0. 07132  | 0             | 5. 267649 | 0         | 1         | NA        |
| SPATA48           | 3. 255746 | -1. 47650881  | 0. 959948 | -1. 53811 | 0. 124021 | 0. 57117  |
| NPAS3             | 466. 4645 | 0. 003735467  | 0. 181749 | 0. 020553 | 0. 983602 | 1         |
| si:dkey-156j15. 1 | 5. 051431 | 2. 805687742  | 0. 92271  | 3. 040702 | 0. 00236  | 0. 07773  |
| RF00003           | 0 NA      | NA            | NA        | NA        | NA        | NA        |
| pdxp              | 91. 09458 | 0. 120745311  | 0. 223934 | 0. 5392   | 0. 589749 | 0. 908601 |
| RF00001           | 0 NA      | NA            | NA        | NA        | NA        | NA        |
| BX649559. 2       | 1. 139321 | 1. 882842077  | 2. 531102 | 0. 743882 | 0. 456948 | NA        |
| taar19h           | 1. 18423  | -1. 924409222 | 1. 81711  | -1. 05905 | 0. 289577 | NA        |
| SFMBT1            | 302. 3844 | -0. 25933993  | 0. 171922 | -1. 50848 | 0. 131433 | 0. 583069 |
| znf993            | 1. 42504  | 1. 325418828  | 1. 431091 | 0. 92616  | 0. 354363 | NA        |
| BX664742. 3       | 0. 761354 | 0. 019971349  | 2. 12476  | 0. 009399 | 0. 992501 | NA        |
| BX901962. 2       | 54. 86518 | -0. 672352122 | 0. 37142  | -1. 81022 | 0. 070262 | 0. 452111 |
| RF00020           | 0 NA      | NA            | NA        | NA        | NA        | NA        |
| F0681286. 1       | 5. 419769 | -0. 031378225 | 0. 811532 | -0. 03867 | 0. 969157 | 1         |
| RF00001           | 0 NA      | NA            | NA        | NA        | NA        | NA        |
| CABZ01072242. 1   | 311. 441  | 0. 676941114  | 0. 249055 | 2. 718041 | 0. 006567 | 0. 136957 |
| RF00026           | 0 NA      | NA            | NA        | NA        | NA        | NA        |
| crygm2d17         | 12691. 22 | 0. 163592569  | 0. 367535 | 0. 445108 | 0. 656242 | 0. 929684 |
| htrlfa            | 9. 379929 | -0. 80939218  | 0. 752565 | -1. 07551 | 0. 282146 | 0. 754654 |
| CU896602. 2       | 0 NA      | NA            | NA        | NA        | NA        | NA        |
| znf995            | 1. 697636 | -2. 586188967 | 1. 655162 | -1. 5625  | 0. 11817  | NA        |

|                     |           |               |           |           |           |           |
|---------------------|-----------|---------------|-----------|-----------|-----------|-----------|
| pimr58              | 0 NA      | NA            | NA        | NA        | NA        | NA        |
| zgc:174719          | 5. 500574 | -1. 023684091 | 0. 742517 | -1. 37867 | 0. 167997 | 0. 639267 |
| RF00001             | 0 NA      | NA            | NA        | NA        | NA        | NA        |
| RF00003             | 0 NA      | NA            | NA        | NA        | NA        | NA        |
| RF00001             | 0. 049519 | 0             | 5. 267649 | 0         | 1         | NA        |
| RF00001             | 0 NA      | NA            | NA        | NA        | NA        | NA        |
| CR388047. 2         | 0 NA      | NA            | NA        | NA        | NA        | NA        |
| dre-mir-430a-2      | 0 NA      | NA            | NA        | NA        | NA        | NA        |
| pimr145             | 0 NA      | NA            | NA        | NA        | NA        | NA        |
| CR848715. 1         | 0 NA      | NA            | NA        | NA        | NA        | NA        |
| RF00003             | 0 NA      | NA            | NA        | NA        | NA        | NA        |
| RF00003             | 0 NA      | NA            | NA        | NA        | NA        | NA        |
| RF00611             | 0 NA      | NA            | NA        | NA        | NA        | NA        |
| RF00001             | 0 NA      | NA            | NA        | NA        | NA        | NA        |
| tmem254             | 258. 476  | -0. 063424158 | 0. 172892 | -0. 36684 | 0. 713736 | 0. 945821 |
| BX649502. 11        | 0 NA      | NA            | NA        | NA        | NA        | NA        |
| CU138548. 1         | 0 NA      | NA            | NA        | NA        | NA        | NA        |
| si:dkey-58b18. 10   | 0 NA      | NA            | NA        | NA        | NA        | NA        |
| CU570781. 2         | 0 NA      | NA            | NA        | NA        | NA        | NA        |
| RF00001             | 0. 092827 | 0             | 5. 267649 | 0         | 1         | NA        |
| RF00026             | 0 NA      | NA            | NA        | NA        | NA        | NA        |
| RF00001             | 0 NA      | NA            | NA        | NA        | NA        | NA        |
| pimr156             | 0. 087179 | 0             | 5. 267649 | 0         | 1         | NA        |
| RF00001             | 0 NA      | NA            | NA        | NA        | NA        | NA        |
| si:ch211-113a14. 19 | 8. 795528 | 0. 777384108  | 0. 708568 | 1. 09712  | 0. 272589 | 0. 748416 |
| RF00001             | 0. 046941 | 0             | 5. 267649 | 0         | 1         | NA        |
| RF00012             | 0 NA      | NA            | NA        | NA        | NA        | NA        |
| CABZ01058721. 1     | 153. 4763 | -0. 192133556 | 0. 171353 | -1. 12127 | 0. 262171 | 0. 739695 |
| BX681417. 4         | 0 NA      | NA            | NA        | NA        | NA        | NA        |
| CR356242. 1         | 0. 744344 | 1. 930692881  | 2. 504774 | 0. 770805 | 0. 440822 | NA        |
| RF00012             | 0 NA      | NA            | NA        | NA        | NA        | NA        |
| RF00012             | 0 NA      | NA            | NA        | NA        | NA        | NA        |
| BX004816. 3         | 0 NA      | NA            | NA        | NA        | NA        | NA        |
| dre-mir-430b-10     | 0 NA      | NA            | NA        | NA        | NA        | NA        |
| RF00001             | 0 NA      | NA            | NA        | NA        | NA        | NA        |
| BX005027. 2         | 0 NA      | NA            | NA        | NA        | NA        | NA        |
| RF00026             | 0 NA      | NA            | NA        | NA        | NA        | NA        |
| RF00001             | 0. 050723 | -0. 86807634  | 5. 267649 | -0. 16479 | 0. 869106 | NA        |
| RF00001             | 0 NA      | NA            | NA        | NA        | NA        | NA        |
| mrp122              | 254. 2053 | -0. 126065183 | 0. 1309   | -0. 96307 | 0. 335513 | 0. 792139 |
| pimr167             | 0 NA      | NA            | NA        | NA        | NA        | NA        |
| TCERG1L             | 122. 6839 | -0. 04682737  | 0. 348664 | -0. 13431 | 0. 893161 | 0. 988566 |
| dre-mir-430b-10     | 0 NA      | NA            | NA        | NA        | NA        | NA        |
| BX537120. 1         | 0. 053262 | 1. 055396947  | 5. 267649 | 0. 200354 | 0. 841203 | NA        |
| tmem186             | 0 NA      | NA            | NA        | NA        | NA        | NA        |
| taar20o             | 0. 198623 | 0             | 5. 267649 | 0         | 1         | NA        |
| RF00001             | 0. 050624 | 1. 055396947  | 5. 267649 | 0. 200354 | 0. 841203 | NA        |
| RF00003             | 0 NA      | NA            | NA        | NA        | NA        | NA        |
| RF00001             | 0. 043309 | 0             | 5. 267649 | 0         | 1         | NA        |
| RF00026             | 0 NA      | NA            | NA        | NA        | NA        | NA        |
| RF00001             | 0 NA      | NA            | NA        | NA        | NA        | NA        |
| v2rh12              | 0 NA      | NA            | NA        | NA        | NA        | NA        |
| pimr120             | 0 NA      | NA            | NA        | NA        | NA        | NA        |
| RF00001             | 0. 196772 | 1. 921554081  | 5. 236909 | 0. 366925 | 0. 713675 | NA        |

|                   |          |              |          |          |          |          |
|-------------------|----------|--------------|----------|----------|----------|----------|
| CABZ01101996.1    | 244.3749 | -2.228690571 | 0.66542  | -3.3493  | 0.00081  | 0.038177 |
| RF00001           | 0.118261 | 0            | 5.267649 | 0        | 1        | NA       |
| RF00001           | 0.07132  | 0            | 5.267649 | 0        | 1        | NA       |
| BX005085.4        | 89.3923  | -0.072052595 | 0.235568 | -0.30587 | 0.759706 | 0.957886 |
| CR855257.2        | 0.314571 | 1.055362335  | 4.624273 | 0.228222 | 0.819473 | NA       |
| dre-mir-430c-1    | 0        | NA           | NA       | NA       | NA       | NA       |
| znf1004           | 2.250387 | 0.186047479  | 1.14886  | 0.161941 | 0.871352 | 0.983365 |
| RF00001           | 0.046941 | 0            | 5.267649 | 0        | 1        | NA       |
| msc               | 32.03826 | 0.01028508   | 0.417467 | 0.024637 | 0.980345 | 1        |
| CABZ01079267.1    | 88.66834 | 0.205055118  | 0.451831 | 0.453832 | 0.64995  | 0.927756 |
| zgc:56628         | 41.16039 | -0.519024749 | 0.331385 | -1.56623 | 0.117295 | 0.558519 |
| RF00001           | 0        | NA           | NA       | NA       | NA       | NA       |
| FQ377903.3        | 93.93373 | 0.051690763  | 0.211811 | 0.244042 | 0.807198 | 0.969736 |
| RF00001           | 0.148556 | 0            | 5.267649 | 0        | 1        | NA       |
| BX548011.1        | 0.190406 | -0.868115024 | 5.267649 | -0.1648  | 0.8691   | NA       |
| BX649328.3        | 0.049519 | 0            | 5.267649 | 0        | 1        | NA       |
| SAMD5             | 19.42185 | 0.273754062  | 0.441747 | 0.619708 | 0.53545  | 0.891993 |
| zgc:165555        | 2.034282 | 0.959717706  | 1.99837  | 0.48025  | 0.631049 | NA       |
| RF00001           | 0        | NA           | NA       | NA       | NA       | NA       |
| RF00001           | 0        | NA           | NA       | NA       | NA       | NA       |
| CABZ01092781.1    | 292.1926 | 0.129479535  | 0.305471 | 0.423869 | 0.671661 | 0.933953 |
| RF00001           | 0        | NA           | NA       | NA       | NA       | NA       |
| igl3v1            | 0.224981 | 1.055368195  | 5.267649 | 0.200349 | 0.841208 | NA       |
| RF00003           | 0        | NA           | NA       | NA       | NA       | NA       |
| dre-mir-430a-4    | 0        | NA           | NA       | NA       | NA       | NA       |
| CR854927.4        | 0.297856 | 0            | 3.987111 | 0        | 1        | NA       |
| CU929160.1        | 83.13059 | 0.263923931  | 0.216181 | 1.22085  | 0.222143 | 0.703919 |
| RF00001           | 0.129927 | 0            | 5.267649 | 0        | 1        | NA       |
| RF00003           | 0        | NA           | NA       | NA       | NA       | NA       |
| RF00001           | 0.221632 | 0            | 5.267649 | 0        | 1        | NA       |
| pdgfaa            | 71.45577 | 0.300442891  | 0.3245   | 0.925863 | 0.354517 | 0.805468 |
| si:ch211-139n6.10 | 0.087179 | 0            | 5.267649 | 0        | 1        | NA       |
| CU929402.2        | 1.330559 | 0.13036899   | 1.771179 | 0.073606 | 0.941324 | NA       |
| RF00026           | 0        | NA           | NA       | NA       | NA       | NA       |
| RF00001           | 0        | NA           | NA       | NA       | NA       | NA       |
| RF00001           | 0        | NA           | NA       | NA       | NA       | NA       |
| CT573264.1        | 1.366851 | 1.060129535  | 2.130887 | 0.497506 | 0.618832 | NA       |
| RF00001           | 0        | NA           | NA       | NA       | NA       | NA       |
| CR854942.1        | 0.964614 | -2.155086621 | 1.974175 | -1.09164 | 0.274992 | NA       |
| RF00001           | 0.07132  | 0            | 5.267649 | 0        | 1        | NA       |
| RF00001           | 0        | NA           | NA       | NA       | NA       | NA       |
| si:ch73-92e7.4    | 33.27492 | 0.264957995  | 0.271344 | 0.976465 | 0.328834 | 0.787177 |
| RF00026           | 0        | NA           | NA       | NA       | NA       | NA       |
| traj31            | 0        | NA           | NA       | NA       | NA       | NA       |
| F0834799.1        | 107.9605 | 0.039671134  | 0.199301 | 0.199052 | 0.842222 | 0.97643  |
| CABZ01044235.1    | 53.49682 | -0.514852771 | 0.296865 | -1.7343  | 0.082865 | 0.483014 |
| si:dkey-20i20.4   | 22.94902 | -0.269986356 | 0.373549 | -0.72276 | 0.469827 | 0.867343 |
| RF00026           | 0        | NA           | NA       | NA       | NA       | NA       |
| CU929146.1        | 2.1651   | -2.348720578 | 1.672038 | -1.4047  | 0.160109 | NA       |
| F0704648.1        | 0.608578 | -0.868136212 | 2.489552 | -0.34871 | 0.727306 | NA       |
| CU929414.1        | 0.702023 | 0.741149077  | 2.240401 | 0.330811 | 0.740787 | NA       |
| dre-mir-430c-1    | 0        | NA           | NA       | NA       | NA       | NA       |
| RF00017           | 0        | NA           | NA       | NA       | NA       | NA       |
| si:dkey-31m5.3    | 0        | NA           | NA       | NA       | NA       | NA       |



|                   |           |               |           |           |                     |
|-------------------|-----------|---------------|-----------|-----------|---------------------|
| RF00026           | 0 NA      | NA            | NA        | NA        | NA                  |
| RF00001           | 0 NA      | NA            | NA        | NA        | NA                  |
| pimr79            | 0. 278731 | -0. 793687329 | 5. 235277 | -0. 1516  | 0. 8795 NA          |
| RF00026           | 0 NA      | NA            | NA        | NA        | NA                  |
| RF00001           | 0. 113948 | -0. 868089684 | 5. 267649 | -0. 1648  | 0. 869104 NA        |
| RF00002           | 0 NA      | NA            | NA        | NA        | NA                  |
| RF00001           | 1. 071577 | 1. 055426116  | 2. 313295 | 0. 456244 | 0. 648215 NA        |
| si:dkey-240e12. 6 | 2. 420317 | -0. 148183605 | 1. 00463  | -0. 1475  | 0. 882737 0. 986908 |
| RF00026           | 0 NA      | NA            | NA        | NA        | NA                  |
| RF00001           | 0 NA      | NA            | NA        | NA        | NA                  |
| CU633838. 1       | 88. 14534 | -0. 616308044 | 0. 245757 | -2. 5078  | 0. 012149 0. 191226 |
| CABZ01113818. 1   | 17. 82383 | 0. 509175528  | 0. 614071 | 0. 82918  | 0. 407003 0. 835261 |
| BX324164. 5       | 26. 95412 | -0. 381139506 | 0. 920123 | -0. 41423 | 0. 678708 0. 936026 |
| RF00026           | 0 NA      | NA            | NA        | NA        | NA                  |
| RF00001           | 0 NA      | NA            | NA        | NA        | NA                  |
| zgc:85789         | 264. 9862 | -0. 556563591 | 0. 223364 | -2. 49173 | 0. 012712 0. 196492 |
| ank3b             | 217. 2329 | -0. 235692561 | 0. 183191 | -1. 2866  | 0. 198235 0. 679109 |
| zgc:165555        | 2. 576572 | -0. 627165913 | 1. 336256 | -0. 46935 | 0. 638823 0. 924779 |
| CR450812. 1       | 3. 042317 | -0. 819362853 | 0. 968331 | -0. 84616 | 0. 397463 0. 830253 |
| SBSPON            | 59. 8938  | -0. 294287329 | 0. 41964  | -0. 70129 | 0. 483125 0. 871988 |
| RF00026           | 0 NA      | NA            | NA        | NA        | NA                  |
| CU459155. 1       | 0. 272567 | 0 5. 267649   | 0         | 1 NA      |                     |
| RF00001           | 0 NA      | NA            | NA        | NA        | NA                  |
| CABZ01041996. 1   | 0. 043308 | 0 5. 267649   | 0         | 1 NA      |                     |
| RF00001           | 0. 272273 | 0 5. 267649   | 0         | 1 NA      |                     |
| BX323861. 3       | 2. 748925 | -2. 878297806 | 1. 609696 | -1. 7881  | 0. 07376 0. 461398  |
| CABZ01066694. 1   | 23. 79699 | 0. 185692688  | 0. 424899 | 0. 437028 | 0. 662091 0. 930742 |
| AL929305. 1       | 24. 60174 | -0. 389086924 | 0. 381655 | -1. 01947 | 0. 307979 0. 772996 |
| CABZ01070631. 1   | 42. 894   | -0. 073741992 | 0. 279426 | -0. 26391 | 0. 791853 0. 964835 |
| LO018535. 1       | 231. 9337 | -0. 140608926 | 0. 183025 | -0. 76825 | 0. 44234 0. 853782  |
| RF00026           | 0 NA      | NA            | NA        | NA        | NA                  |
| RF00334           | 1. 558191 | -1. 169624014 | 1. 619514 | -0. 72221 | 0. 470167 NA        |
| RF00026           | 0 NA      | NA            | NA        | NA        | NA                  |
| RF00003           | 0 NA      | NA            | NA        | NA        | NA                  |
| BX510309. 2       | 0 NA      | NA            | NA        | NA        | NA                  |
| RF00001           | 0 NA      | NA            | NA        | NA        | NA                  |
| RF00012           | 0 NA      | NA            | NA        | NA        | NA                  |
| taar18f           | 0. 043308 | 0 5. 267649   | 0         | 1 NA      |                     |
| CABZ01085887. 1   | 32. 09285 | -0. 426704315 | 0. 552046 | -0. 77295 | 0. 439552 0. 852079 |
| RF00001           | 0. 184658 | -1. 710083148 | 5. 238472 | -0. 32645 | 0. 744086 NA        |
| RF00017           | 0 NA      | NA            | NA        | NA        | NA                  |
| RF00026           | 0 NA      | NA            | NA        | NA        | NA                  |
| pimr168           | 0 NA      | NA            | NA        | NA        | NA                  |
| BX511056. 1       | 0 NA      | NA            | NA        | NA        | NA                  |
| zgc:173702        | 3. 132117 | -0. 797442149 | 1. 181451 | -0. 67497 | 0. 499696 0. 879636 |
| zgc:91850         | 0 NA      | NA            | NA        | NA        | NA                  |
| RF00001           | 0 NA      | NA            | NA        | NA        | NA                  |
| RF00001           | 0. 043308 | 0 5. 267649   | 0         | 1 NA      |                     |
| kctd14            | 21. 6584  | 0. 410166398  | 0. 439802 | 0. 932616 | 0. 351019 0. 802239 |
| BX323083. 2       | 0 NA      | NA            | NA        | NA        | NA                  |
| RF00001           | 0. 043309 | 0 5. 267649   | 0         | 1 NA      |                     |
| RF00026           | 0 NA      | NA            | NA        | NA        | NA                  |
| BX784025. 1       | 1. 143299 | 0 2. 146941   | 0         | 1 NA      |                     |
| BX548067. 2       | 0 NA      | NA            | NA        | NA        | NA                  |

|                   |          |              |          |          |          |          |    |
|-------------------|----------|--------------|----------|----------|----------|----------|----|
| RF00017           | 0.180208 |              | 0        | 5.267649 | 0        | 1        | NA |
| AL929237.4        | 0        | NA           | NA       | NA       | NA       | NA       | NA |
| si:ch211-200p22.4 | 157.1498 | 0.439149837  | 0.284768 | 1.542131 | 0.123042 | 0.569606 |    |
| tmem107           | 66.31863 | -0.064549289 | 0.316694 | -0.20382 | 0.838492 | 0.976395 |    |
| RF00003           | 0        | NA           | NA       | NA       | NA       | NA       | NA |
| RF00001           | 0.140822 |              | 0        | 5.267649 | 0        | 1        | NA |
| traj35            | 0        | NA           | NA       | NA       | NA       | NA       | NA |
| si:rp71-1f1.6     | 0.544798 | -1.715862431 | 3.524555 | -0.48683 | 0.626378 | NA       |    |
| BX296549.1        | 0.212294 | -1.710084839 | 5.238472 | -0.32645 | 0.744086 | NA       |    |
| CT583625.5        | 2.434966 | -0.868147591 | 2.067597 | -0.41988 | 0.674571 | 0.934877 |    |
| BX005380.1        | 9.21875  | -0.802432018 | 0.909616 | -0.88217 | 0.377687 | 0.822478 |    |
| CABZ01044731.1    | 143.3238 | 0.123162022  | 0.209212 | 0.588694 | 0.556066 | 0.899002 |    |
| mbd4              | 184.813  | -0.137896837 | 0.185724 | -0.74248 | 0.457794 | 0.860993 |    |
| BX571681.5        | 0.043309 |              | 0        | 5.267649 | 0        | 1        | NA |
| RF00001           | 0        | NA           | NA       | NA       | NA       | NA       | NA |
| CT583728.10       | 1.518713 | -0.879279084 | 1.170342 | -0.7513  | 0.452472 | NA       |    |
| si:dkey-13p1.4    | 12.92469 | -0.116285837 | 0.535381 | -0.2172  | 0.828051 | 0.973905 |    |
| BX640512.4        | 0.339126 | -0.868131959 | 4.486147 | -0.19351 | 0.846556 | NA       |    |
| RF00001           | 0        | NA           | NA       | NA       | NA       | NA       | NA |
| znf986            | 7.383331 | -1.110904718 | 0.830103 | -1.33827 | 0.180807 | 0.656768 |    |
| zgc:153733        | 79.13426 | 0.808159035  | 0.227344 | 3.554789 | 0.000378 | 0.022825 |    |
| CABZ01040626.1    | 0        | NA           | NA       | NA       | NA       | NA       | NA |
| CR792453.3        | 3.374853 | 2.526177794  | 1.705709 | 1.481014 | 0.138603 | 0.595394 |    |
| RF00001           | 0.131274 | 1.055383603  | 5.267649 | 0.200352 | 0.841205 | NA       |    |
| RF00001           | 0        | NA           | NA       | NA       | NA       | NA       | NA |
| RF00001           | 0.127238 |              | 0        | 5.267649 | 0        | 1        | NA |
| RF00001           | 0        | NA           | NA       | NA       | NA       | NA       | NA |
| hsd11b11b         | 60.95824 | -0.806042137 | 0.29934  | -2.69273 | 0.007087 | 0.142662 |    |
| L0018557.1        | 427.4351 | -0.317036866 | 0.146357 | -2.16618 | 0.030297 | 0.310203 |    |
| RF00001           | 0        | NA           | NA       | NA       | NA       | NA       | NA |
| BX897685.1        | 0        | NA           | NA       | NA       | NA       | NA       | NA |
| CR847571.2        | 0.099037 |              | 0        | 5.267649 | 0        | 1        | NA |
| txndc15           | 333.3819 | -0.670303338 | 0.237758 | -2.81927 | 0.004813 | 0.115256 |    |
| FQ976913.1        | 219.4161 | 0.098496256  | 0.172043 | 0.572509 | 0.566977 | 0.901747 |    |
| cmklr12           | 1.026753 | 1.876788004  | 2.762264 | 0.679438 | 0.49686  | NA       |    |
| RF00001           | 0.557304 | -0.820492715 | 2.402507 | -0.34152 | 0.732716 | NA       |    |
| zgc:77614         | 0        | NA           | NA       | NA       | NA       | NA       | NA |
| F0904880.1        | 49.25446 | -0.664172646 | 0.390346 | -1.7015  | 0.08885  | 0.500363 |    |
| CABZ01086293.1    | 20.29324 | 0.246509782  | 0.41972  | 0.58732  | 0.556989 | 0.899145 |    |
| BX324212.2        | 0.904086 | -0.654669632 | 1.623513 | -0.40324 | 0.68677  | NA       |    |
| RF00026           | 0        | NA           | NA       | NA       | NA       | NA       | NA |
| RF00001           | 0        | NA           | NA       | NA       | NA       | NA       | NA |
| RF00001           | 0        | NA           | NA       | NA       | NA       | NA       | NA |
| CR788249.3        | 0        | NA           | NA       | NA       | NA       | NA       | NA |
| RF00026           | 0        | NA           | NA       | NA       | NA       | NA       | NA |
| RF00001           | 0        | NA           | NA       | NA       | NA       | NA       | NA |
| RF00001           | 0        | NA           | NA       | NA       | NA       | NA       | NA |
| nitrlk            | 0.404968 | -0.868148978 | 4.362875 | -0.19899 | 0.842274 | NA       |    |
| CR394532.1        | 3.427332 | 0.52496898   | 1.305226 | 0.402205 | 0.687533 | 0.938835 |    |
| RF00004           | 0        | NA           | NA       | NA       | NA       | NA       | NA |
| CR388363.3        | 0        | NA           | NA       | NA       | NA       | NA       | NA |
| AL954848.1        | 0.778615 | 2.485338696  | 2.12233  | 1.171043 | 0.241582 | NA       |    |
| RF00001           | 0.093881 |              | 0        | 5.267649 | 0        | 1        | NA |
| RF00001           | 0.063619 |              | 0        | 5.267649 | 0        | 1        | NA |

|                   |          |              |          |          |          |          |
|-------------------|----------|--------------|----------|----------|----------|----------|
| BX537296.1        | 0.049021 | -0.86807634  | 5.267649 | -0.16479 | 0.869106 | NA       |
| BX901962.3        | 43.43868 | 0.183931848  | 0.447409 | 0.411105 | 0.680996 | 0.937257 |
| CABZ01057488.1    | 31.05455 | -0.494492613 | 0.359602 | -1.37511 | 0.169097 | 0.640442 |
| taar20a1          | 0.280165 | -1.755659013 | 4.743918 | -0.37009 | 0.711318 | NA       |
| BX548073.6        | 0 NA     | NA           | NA       | NA       | NA       | NA       |
| znf997            | 2.337197 | -1.339420197 | 1.369386 | -0.97812 | 0.328016 | 0.786438 |
| apls3a            | 69.32224 | -0.126844483 | 0.322967 | -0.39275 | 0.694506 | 0.941093 |
| BX571853.2        | 0.973097 | 2.917657562  | 2.059099 | 1.416958 | 0.156495 | NA       |
| RF00001           | 0 NA     | NA           | NA       | NA       | NA       | NA       |
| dre-mir-430c-1    | 0 NA     | NA           | NA       | NA       | NA       | NA       |
| RF00026           | 0 NA     | NA           | NA       | NA       | NA       | NA       |
| CABZ01086877.1    | 0 NA     | NA           | NA       | NA       | NA       | NA       |
| RF00001           | 0.906318 | -0.63699491  | 2.239299 | -0.28446 | 0.776057 | NA       |
| BX005380.2        | 12.40922 | 0.734125189  | 0.475875 | 1.542685 | 0.122907 | 0.569468 |
| RF00001           | 0 NA     | NA           | NA       | NA       | NA       | NA       |
| si:ch211-156118.4 | 1.039535 | -0.868141436 | 2.15288  | -0.40325 | 0.686767 | NA       |
| ptpro             | 325.0321 | -0.053076582 | 0.135698 | -0.39114 | 0.695696 | 0.941547 |
| RF00001           | 0 NA     | NA           | NA       | NA       | NA       | NA       |
| RF00026           | 0 NA     | NA           | NA       | NA       | NA       | NA       |
| RF00001           | 0 NA     | NA           | NA       | NA       | NA       | NA       |
| si:ch73-42p12.2   | 371.0945 | -0.146049481 | 0.206206 | -0.70827 | 0.478778 | 0.869292 |
| si:dkey-199f5.4   | 0 NA     | NA           | NA       | NA       | NA       | NA       |
| FP236318.1        | 49.92474 | 0.39713128   | 0.374148 | 1.061427 | 0.288496 | 0.759522 |
| RF00001           | 0 NA     | NA           | NA       | NA       | NA       | NA       |
| RF00001           | 0 NA     | NA           | NA       | NA       | NA       | NA       |
| BX510941.2        | 0.238189 | -1.7911715   | 4.937741 | -0.36275 | 0.716791 | NA       |
| zgc:162989        | 116.3028 | 0.178602678  | 0.257402 | 0.693867 | 0.487766 | 0.873291 |
| F0744840.1        | 0.08847  | 0            | 5.267649 | 0        | 1        | NA       |
| BX510960.2        | 2.33453  | 3.329727897  | 1.598995 | 2.082388 | 0.037307 | 0.339115 |
| RF00001           | 0.380728 | 0            | 3.773041 | 0        | 1        | NA       |
| taar20q           | 0.197217 | 1.055362627  | 5.267649 | 0.200348 | 0.841208 | NA       |
| CU459094.1        | 2.968608 | 0.729899981  | 1.323076 | 0.551669 | 0.581175 | 0.905618 |
| RF00001           | 0 NA     | NA           | NA       | NA       | NA       | NA       |
| RF00001           | 0 NA     | NA           | NA       | NA       | NA       | NA       |
| BX088713.2        | 0 NA     | NA           | NA       | NA       | NA       | NA       |
| sypa              | 3481.569 | 0.346111762  | 0.155364 | 2.227742 | 0.025898 | 0.285638 |
| si:dkey-31m5.7    | 0 NA     | NA           | NA       | NA       | NA       | NA       |
| RF00001           | 0 NA     | NA           | NA       | NA       | NA       | NA       |
| RF00026           | 0 NA     | NA           | NA       | NA       | NA       | NA       |
| CU571382.4        | 0.069091 | 0            | 5.267649 | 0        | 1        | NA       |
| BX119963.3        | 0.376689 | 0.09365317   | 3.796443 | 0.024669 | 0.980319 | NA       |
| CABZ01113373.1    | 97.15143 | -0.004489864 | 0.261482 | -0.01717 | 0.9863   | 1        |
| zgc:77614         | 0 NA     | NA           | NA       | NA       | NA       | NA       |
| RF00137           | 0 NA     | NA           | NA       | NA       | NA       | NA       |
| BX470083.2        | 0.073968 | 0            | 5.267649 | 0        | 1        | NA       |
| si:dkey-23f9.7    | 0 NA     | NA           | NA       | NA       | NA       | NA       |
| RF00026           | 0 NA     | NA           | NA       | NA       | NA       | NA       |
| BX004779.2        | 5.197151 | 0.327333017  | 1.054841 | 0.310315 | 0.756322 | 0.956532 |
| CABZ01090785.1    | 74.17218 | 0.269161535  | 0.221363 | 1.215928 | 0.224013 | 0.705807 |
| CABZ01080042.1    | 10.004   | -0.361258032 | 0.608412 | -0.59377 | 0.552665 | 0.8974   |
| mapk4             | 225.0143 | -0.094946998 | 0.122024 | -0.7781  | 0.43651  | 0.850912 |
| RF00001           | 0 NA     | NA           | NA       | NA       | NA       | NA       |
| si:dkey-27d5.6    | 0 NA     | NA           | NA       | NA       | NA       | NA       |
| RF00003           | 0.084441 | 0            | 5.267649 | 0        | 1        | NA       |

|                    |          |              |            |          |          |          |
|--------------------|----------|--------------|------------|----------|----------|----------|
| CABZ01079179.1     | 130.072  | -2.143540098 | 0.681059   | -3.14737 | 0.001647 | 0.062475 |
| pimr152            | 0.095784 | 1.055383603  | 5.267649   | 0.200352 | 0.841205 | NA       |
| CABZ01030278.1     | 0.903582 | 2.647482772  | 2.730179   | 0.96971  | 0.332191 | NA       |
| RF00001            | 0 NA     |              | NA         | NA       | NA       | NA       |
| RF01848            | 0 NA     |              | NA         | NA       | NA       | NA       |
| dre-mir-430b-1     | 0 NA     |              | NA         | NA       | NA       | NA       |
| pimr97             | 0 NA     |              | NA         | NA       | NA       | NA       |
| CABZ01115113.1     | 200.4264 | 0.084161938  | 0.195331   | 0.430867 | 0.666565 | 0.932664 |
| BX950868.3         | 0 NA     |              | NA         | NA       | NA       | NA       |
| CU681855.1         | 5.497223 | 1.366649118  | 0.800967   | 1.706248 | 0.087962 | 0.498063 |
| ugt2a7             | 5.006556 |              | 0 1.866538 |          | 0 1      | 1        |
| RF00001            | 0 NA     |              | NA         | NA       | NA       | NA       |
| CABZ01068209.1     | 6.135686 | -0.240476538 | 0.779334   | -0.30857 | 0.757651 | 0.957364 |
| RF00138            | 0 NA     |              | NA         | NA       | NA       | NA       |
| FO905027.1         | 0.473024 |              | 0 4.541701 |          | 0 1      | NA       |
| zgc:171310         | 0 NA     |              | NA         | NA       | NA       | NA       |
| pimr8              | 0 NA     |              | NA         | NA       | NA       | NA       |
| RF00001            | 0 NA     |              | NA         | NA       | NA       | NA       |
| CABZ01061508.1     | 10.92699 | 0.647043712  | 0.617332   | 1.048129 | 0.294579 | 0.763708 |
| BX321875.2         | 1.412079 | -0.868147779 | 2.214117   | -0.3921  | 0.694987 | NA       |
| si:ch211-212k5.1   | 13.87231 | 1.297907214  | 0.462251   | 2.807799 | 0.004988 | 0.117782 |
| RF00026            | 0 NA     |              | NA         | NA       | NA       | NA       |
| cacna1db           | 5.779979 | 0.103741999  | 1.060532   | 0.097821 | 0.922075 | 0.994346 |
| taar13d            | 0.187763 |              | 0 5.267649 |          | 0 1      | NA       |
| RF00001            | 0 NA     |              | NA         | NA       | NA       | NA       |
| CABZ01088049.1     | 14.56881 | -0.239165199 | 0.607106   | -0.39394 | 0.693623 | 0.940668 |
| wdr21              | 545.8927 | 0.130470211  | 0.120147   | 1.085926 | 0.277512 | 0.751426 |
| CT025875.1         | 13.3243  | -0.196423436 | 0.549385   | -0.35753 | 0.720692 | 0.947322 |
| zgc:174696         | 30.7763  | 1.095359559  | 1.036096   | 1.057199 | 0.290421 | 0.76078  |
| AL954137.1         | 0.063619 |              | 0 5.267649 |          | 0 1      | NA       |
| BX510335.1         | 0 NA     |              | NA         | NA       | NA       | NA       |
| RF00003            | 0 NA     |              | NA         | NA       | NA       | NA       |
| znf1092            | 4.940102 | -0.861840216 | 0.720541   | -1.1961  | 0.231657 | 0.713202 |
| CT573103.2         | 1.857738 | 2.069982777  | 1.464563   | 1.413379 | 0.157544 | NA       |
| BX537296.2         | 0 NA     |              | NA         | NA       | NA       | NA       |
| RF00001            | 0 NA     |              | NA         | NA       | NA       | NA       |
| RF00026            | 0 NA     |              | NA         | NA       | NA       | NA       |
| RF00026            | 0 NA     |              | NA         | NA       | NA       | NA       |
| AL590152.1         | 0.07132  |              | 0 5.267649 |          | 0 1      | NA       |
| BX284640.1         | 0.458092 | -1.59876397  | 3.946707   | -0.40509 | 0.685413 | NA       |
| CABZ01061524.1     | 6386.919 | 0.006808118  | 0.220233   | 0.030913 | 0.975339 | 1        |
| COX7A2 (1 of many) | 515.2317 | -0.173122422 | 0.143665   | -1.20504 | 0.228188 | 0.709324 |
| zgc:162154         | 0.841107 |              | 0 2.914503 |          | 0 1      | NA       |
| zdhhc21            | 130.8799 | 0.015642562  | 0.169646   | 0.092207 | 0.926533 | 0.994815 |
| CU210890.1         | 18.60814 | 1.194166762  | 0.664864   | 1.796107 | 0.072478 | 0.457864 |
| RF00001            | 0 NA     |              | NA         | NA       | NA       | NA       |
| BX247865.1         | 0.184567 |              | 0 5.267649 |          | 0 1      | NA       |
| BX470214.1         | 0.315106 | 1.922458861  | 4.549688   | 0.422547 | 0.672626 | NA       |
| CABZ01092907.1     | 11.65792 | -0.34243056  | 0.710003   | -0.48229 | 0.629597 | 0.922808 |
| AL935195.1         | 5.549848 | -0.016697073 | 0.644155   | -0.02592 | 0.97932  | 1        |
| PCP4               | 613.9018 | 0.74197235   | 0.270454   | 2.743438 | 0.00608  | 0.131486 |
| RF00001            | 0.088469 |              | 0 5.267649 |          | 0 1      | NA       |
| RF00001            | 0.186781 |              | 0 5.267649 |          | 0 1      | NA       |
| CU499311.1         | 0.086618 |              | 0 5.267649 |          | 0 1      | NA       |

|                   |          |              |            |          |          |          |
|-------------------|----------|--------------|------------|----------|----------|----------|
| RF00001           | 0.093931 | 1.055383603  | 5.267649   | 0.200352 | 0.841205 | NA       |
| CR388207.2        | 1.990159 | -0.918895586 | 1.215681   | -0.75587 | 0.449728 | NA       |
| CABZ01086797.1    | 87.80499 | 0.044928897  | 0.363244   | 0.123688 | 0.901562 | 0.990643 |
| znf994            | 2.773863 | 1.198960912  | 1.08363    | 1.10643  | 0.26854  | 0.744925 |
| CABZ01056052.1    | 0.956428 |              | 0 2.606314 | 0        | 1        | NA       |
| nitr6b            | 0 NA     |              | NA         | NA       | NA       | NA       |
| CLEC3A            | 170.4365 | -0.764354249 | 0.45184    | -1.69165 | 0.090713 | 0.505206 |
| RF00001           | 0.043308 |              | 0 5.267649 | 0        | 1        | NA       |
| RF00138           | 0 NA     |              | NA         | NA       | NA       | NA       |
| RF00003           | 0 NA     |              | NA         | NA       | NA       | NA       |
| RF00001           | 0 NA     |              | NA         | NA       | NA       | NA       |
| znf1098           | 7.977111 | -0.232238169 | 0.568405   | -0.40858 | 0.682849 | 0.938006 |
| CU137648.2        | 0.892187 | 0.604587689  | 2.639532   | 0.229051 | 0.818829 | NA       |
| taar20b1          | 0 NA     |              | NA         | NA       | NA       | NA       |
| RF00001           | 0 NA     |              | NA         | NA       | NA       | NA       |
| prf1.7            | 1.144077 | -1.759637068 | 2.074924   | -0.84805 | 0.396411 | NA       |
| RF00001           | 0.092827 |              | 0 5.267649 | 0        | 1        | NA       |
| BX681417.5        | 0 NA     |              | NA         | NA       | NA       | NA       |
| RF00026           | 0 NA     |              | NA         | NA       | NA       | NA       |
| znf1102           | 11.52023 | -0.284386015 | 0.494673   | -0.5749  | 0.565361 | 0.901538 |
| AL772241.1        | 0 NA     |              | NA         | NA       | NA       | NA       |
| RF00001           | 0.069091 |              | 0 5.267649 | 0        | 1        | NA       |
| pimr16            | 0 NA     |              | NA         | NA       | NA       | NA       |
| RF00001           | 0 NA     |              | NA         | NA       | NA       | NA       |
| RF00026           | 0 NA     |              | NA         | NA       | NA       | NA       |
| znf1149           | 0.091739 |              | 0 5.267649 | 0        | 1        | NA       |
| PARD3 (1 of many) | 20.0869  | -0.211874907 | 0.422827   | -0.50109 | 0.616307 | 0.916365 |
| RF00001           | 0 NA     |              | NA         | NA       | NA       | NA       |
| si:ch211-221n20.1 | 0.523183 | -0.570737301 | 3.516149   | -0.16232 | 0.871055 | NA       |
| F0203514.1        | 2.750402 | -0.617977331 | 1.366297   | -0.4523  | 0.651052 | 0.928395 |
| hist1h2a3         | 1.286479 | -1.164406871 | 2.051604   | -0.56756 | 0.570334 | NA       |
| si:dkey-3h2.2     | 9.804189 | -0.634221664 | 0.730277   | -0.86847 | 0.385139 | 0.826939 |
| zgc:165555        | 1.383267 | 0.129726005  | 2.043793   | 0.063473 | 0.94939  | NA       |
| RF00026           | 0 NA     |              | NA         | NA       | NA       | NA       |
| BX548073.7        | 0 NA     |              | NA         | NA       | NA       | NA       |
| RF00026           | 0 NA     |              | NA         | NA       | NA       | NA       |
| RF00026           | 0 NA     |              | NA         | NA       | NA       | NA       |
| RF00001           | 0 NA     |              | NA         | NA       | NA       | NA       |
| RF00015           | 0 NA     |              | NA         | NA       | NA       | NA       |
| pimr12            | 0.049021 | -0.86807634  | 5.267649   | -0.16479 | 0.869106 | NA       |
| pimr153           | 0 NA     |              | NA         | NA       | NA       | NA       |
| tmem14ca          | 426.8847 | 0.175269222  | 0.162017   | 1.081793 | 0.279345 | 0.752477 |
| agbl4             | 14.08098 | 0.691850654  | 0.548517   | 1.261311 | 0.207197 | 0.689456 |
| si:dkey-108k21.14 | 6.139809 | -0.776603852 | 0.716948   | -1.08321 | 0.278716 | 0.752299 |
| RF00001           | 0 NA     |              | NA         | NA       | NA       | NA       |
| pimr107           | 0.179863 | 2.667699955  | 5.195716   | 0.513442 | 0.607642 | NA       |
| RF00026           | 0 NA     |              | NA         | NA       | NA       | NA       |
| RF00026           | 0 NA     |              | NA         | NA       | NA       | NA       |
| RF00017           | 0.853249 | 0.028042274  | 1.889766   | 0.014839 | 0.988161 | NA       |
| znf1111           | 8.882138 | 0.029786391  | 0.628785   | 0.047371 | 0.962217 | 0.999451 |
| CABZ01020455.1    | 0.805098 | 3.570694189  | 2.093018   | 1.706003 | 0.088008 | NA       |
| RF00003           | 0.046941 |              | 0 5.267649 | 0        | 1        | NA       |
| si:dkey-9i5.2     | 5.085686 | 0.182493752  | 0.795869   | 0.229301 | 0.818635 | 0.971679 |
| RF00026           | 0 NA     |              | NA         | NA       | NA       | NA       |

|                   |          |              |            |          |          |          |
|-------------------|----------|--------------|------------|----------|----------|----------|
| BX629348.1        | 0.245604 | -2.707766391 | 5.186735   | -0.52206 | 0.601631 | NA       |
| RF00001           | 0 NA     |              | NA         | NA       | NA       | NA       |
| RF00001           | 0 NA     |              | NA         | NA       | NA       | NA       |
| CR847537.1        | 4.726552 | -0.639720397 | 1.24357    | -0.51442 | 0.606957 | 0.915204 |
| F0834855.1        | 4.395635 | 1.939590952  | 1.088748   | 1.781488 | 0.074833 | 0.464151 |
| si:dkey-28k24.2   | 8.398461 | -0.203280439 | 0.823027   | -0.24699 | 0.804915 | 0.969348 |
| BX908804.2        | 0.977534 | -2.321131999 | 2.206641   | -1.05188 | 0.292852 | NA       |
| BX276128.1        | 6.706244 | 1.242905209  | 0.901079   | 1.379352 | 0.167786 | 0.638989 |
| RF00003           | 0 NA     |              | NA         | NA       | NA       | NA       |
| FP103007.1        | 0.213311 | -0.868115637 | 5.267649   | -0.1648  | 0.8691   | NA       |
| RF01848           | 0 NA     |              | NA         | NA       | NA       | NA       |
| RF00001           | 0 NA     |              | NA         | NA       | NA       | NA       |
| RF00001           | 0 NA     |              | NA         | NA       | NA       | NA       |
| RF00001           | 0 NA     |              | NA         | NA       | NA       | NA       |
| zgc:173552        | 3.416303 | 1.22343329   | 0.842998   | 1.451289 | 0.146699 | 0.606437 |
| BX649312.1        | 0 NA     |              | NA         | NA       | NA       | NA       |
| pimr101           | 0 NA     |              | NA         | NA       | NA       | NA       |
| RF00026           | 0 NA     |              | NA         | NA       | NA       | NA       |
| si:ch211-223a21.6 | 2.063494 | -2.342609963 | 1.338301   | -1.75044 | 0.080043 | NA       |
| RF00001           | 0 NA     |              | NA         | NA       | NA       | NA       |
| CR847936.6        | 195.8053 | -0.040865497 | 0.264736   | -0.15436 | 0.877324 | 0.985341 |
| RF00001           | 0.093881 |              | 0 5.267649 | 0        | 1        | NA       |
| RF00001           | 0 NA     |              | NA         | NA       | NA       | NA       |
| RF00001           | 0 NA     |              | NA         | NA       | NA       | NA       |
| RF00012           | 0 NA     |              | NA         | NA       | NA       | NA       |
| CU137681.5        | 0 NA     |              | NA         | NA       | NA       | NA       |
| si:dkey-27d5.14   | 0.04222  |              | 0 5.267649 | 0        | 1        | NA       |
| ptprsa            | 409.9127 | 0.350218588  | 0.155113   | 2.257827 | 0.023956 | 0.274245 |
| RF00001           | 0.059954 | 1.055396947  | 5.267649   | 0.200354 | 0.841203 | NA       |
| znf1110           | 5.146309 | 0.74781227   | 0.787745   | 0.949307 | 0.342464 | 0.797179 |
| RF00001           | 0 NA     |              | NA         | NA       | NA       | NA       |
| RF00001           | 0.049519 |              | 0 5.267649 | 0        | 1        | NA       |
| BX324227.3        | 0.102781 | 1.055383603  | 5.267649   | 0.200352 | 0.841205 | NA       |
| CU929544.1        | 80.75867 | -0.113277399 | 0.293372   | -0.38612 | 0.699407 | 0.942499 |
| CABZ01043952.1    | 56.35803 | 0.281761616  | 0.223717   | 1.259457 | 0.207865 | 0.689937 |
| RF00001           | 0 NA     |              | NA         | NA       | NA       | NA       |
| RF00026           | 0 NA     |              | NA         | NA       | NA       | NA       |
| dre-mir-430b-10   | 0 NA     |              | NA         | NA       | NA       | NA       |
| BX769173.1        | 0.569202 | -1.38773119  | 2.66614    | -0.5205  | 0.602714 | NA       |
| zgc:110045        | 76.45046 | 0.262770826  | 0.258041   | 1.018329 | 0.308522 | 0.773474 |
| trib1             | 240.1243 | -0.285513229 | 0.320084   | -0.89199 | 0.372396 | 0.81988  |
| RF00001           | 5.653076 | -2.336200828 | 1.567134   | -1.49075 | 0.136028 | 0.591131 |
| BX950205.3        | 0 NA     |              | NA         | NA       | NA       | NA       |
| FP102169.1        | 2.822425 | 1.773329389  | 1.282601   | 1.382604 | 0.166786 | 0.637276 |
| RF00001           | 0.098043 | -1.71005882  | 5.238474   | -0.32644 | 0.74409  | NA       |
| si:dkey-58b18.3   | 0 NA     |              | NA         | NA       | NA       | NA       |
| RF00001           | 0.084441 |              | 0 5.267649 | 0        | 1        | NA       |
| tln2b             | 103.2945 | 0.071357459  | 0.236816   | 0.30132  | 0.76317  | 0.958905 |
| RF00003           | 0 NA     |              | NA         | NA       | NA       | NA       |
| ftr32             | 3.10216  | 0.765035662  | 1.058644   | 0.722656 | 0.469891 | 0.867349 |
| RF00015           | 0 NA     |              | NA         | NA       | NA       | NA       |
| RF00001           | 2.836976 | 0.06776217   | 1.105403   | 0.061301 | 0.95112  | 0.99801  |
| pimr163           | 0 NA     |              | NA         | NA       | NA       | NA       |
| RF00003           | 0 NA     |              | NA         | NA       | NA       | NA       |

|                    |          |              |            |          |          |          |
|--------------------|----------|--------------|------------|----------|----------|----------|
| BX908796.2         | 0.598854 | -1.419012099 | 2.483796   | -0.57131 | 0.567791 | NA       |
| ZNF276             | 909.4421 | -0.258969951 | 0.155305   | -1.66749 | 0.095417 | 0.515699 |
| VMAC               | 0 NA     |              | NA         | NA       | NA       | NA       |
| taar20z            | 0.111311 |              | 0 5.267649 |          | 0        | 1 NA     |
| RF00001            | 0 NA     |              | NA         | NA       | NA       | NA       |
| CU694317.1         | 1.214213 | 0.668957699  | 1.644071   | 0.406891 | 0.684088 | NA       |
| CT583728.11        | 0 NA     |              | NA         | NA       | NA       | NA       |
| dicpl.1            | 0.421733 | -1.379010531 | 3.619358   | -0.38101 | 0.703196 | NA       |
| L0018430.1         | 48.18921 | -0.073951457 | 0.22438    | -0.32958 | 0.741717 | 0.954329 |
| RF00001            | 0.49136  |              | 0 3.399117 |          | 0        | 1 NA     |
| si:dkey-112g5.3    | 0 NA     |              | NA         | NA       | NA       | NA       |
| FP016018.4         | 0.429794 | 1.055352914  | 5.267649   | 0.200346 | 0.84121  | NA       |
| BX511056.2         | 0 NA     |              | NA         | NA       | NA       | NA       |
| BX000981.6         | 0 NA     |              | NA         | NA       | NA       | NA       |
| BX927193.2         | 10.72144 | 0.363408832  | 0.642116   | 0.565955 | 0.571424 | 0.902946 |
| si:ch211-165a10.10 | 0 NA     |              | NA         | NA       | NA       | NA       |
| RF00026            | 0 NA     |              | NA         | NA       | NA       | NA       |
| RF00026            | 0 NA     |              | NA         | NA       | NA       | NA       |
| RF00001            | 0 NA     |              | NA         | NA       | NA       | NA       |
| L0018128.1         | 5.944887 | -0.796088535 | 1.686567   | -0.47202 | 0.636915 | 0.924779 |
| RF00001            | 0.179863 | 2.667699955  | 5.195716   | 0.513442 | 0.607642 | NA       |
| F0681288.3         | 18.26239 | 0.068474548  | 0.404961   | 0.169089 | 0.865727 | 0.982364 |
| RF00017            | 0.050723 | -0.86807634  | 5.267649   | -0.16479 | 0.869106 | NA       |
| RF00001            | 0 NA     |              | NA         | NA       | NA       | NA       |
| znf1116            | 5.878634 | -1.088091397 | 0.627065   | -1.73521 | 0.082703 | 0.483014 |
| si:ch211-165a10.5  | 0 NA     |              | NA         | NA       | NA       | NA       |
| RF00001            | 0 NA     |              | NA         | NA       | NA       | NA       |
| si:dkey-58b18.2    | 0.043309 |              | 0 5.267649 |          | 0        | 1 NA     |
| RF00003            | 0 NA     |              | NA         | NA       | NA       | NA       |
| RF00001            | 0 NA     |              | NA         | NA       | NA       | NA       |
| RF00017            | 0.375343 |              | 0 5.11288  |          | 0        | 1 NA     |
| lgi2a              | 49.65989 | 0.533026558  | 0.364417   | 1.462684 | 0.143554 | 0.602607 |
| pimr44             | 0 NA     |              | NA         | NA       | NA       | NA       |
| RF00017            | 0.337378 | -1.350919767 | 3.344385   | -0.40394 | 0.686259 | NA       |
| RF00001            | 0 NA     |              | NA         | NA       | NA       | NA       |
| RF00001            | 0.51205  | 0.273835101  | 3.981153   | 0.068783 | 0.945162 | NA       |
| F0082779.1         | 182.3027 | -0.137441715 | 0.133921   | -1.02629 | 0.304756 | 0.770005 |
| RF00017            | 0.271617 |              | 0 5.267649 |          | 0        | 1 NA     |
| CR354547.2         | 0 NA     |              | NA         | NA       | NA       | NA       |
| si:ch73-106115.2   | 0.446384 | 1.924586388  | 3.617088   | 0.532082 | 0.594669 | NA       |
| pimr155            | 0.14264  |              | 0 5.267649 |          | 0        | 1 NA     |
| camk2n2            | 360.9848 | 0.196715948  | 0.231431   | 0.849998 | 0.395326 | 0.829083 |
| RF00001            | 0 NA     |              | NA         | NA       | NA       | NA       |
| arl311             | 256.0086 | -0.570813395 | 0.32274    | -1.76865 | 0.076952 | 0.469467 |
| CT009620.1         | 0 NA     |              | NA         | NA       | NA       | NA       |
| taar10d            | 0.431305 | 3.2031352    | 3.503649   | 0.914228 | 0.360597 | NA       |
| CABZ01086611.1     | 55.45807 | 0.301575426  | 0.405078   | 0.744488 | 0.456581 | 0.860698 |
| RF00003            | 0 NA     |              | NA         | NA       | NA       | NA       |
| RF00001            | 0 NA     |              | NA         | NA       | NA       | NA       |
| BX005470.1         | 0.106895 | 1.055383603  | 5.267649   | 0.200352 | 0.841205 | NA       |
| RF00001            | 0.043308 |              | 0 5.267649 |          | 0        | 1 NA     |
| BX537263.1         | 0.435634 | 1.625999064  | 3.130845   | 0.519348 | 0.603518 | NA       |
| RF00001            | 0 NA     |              | NA         | NA       | NA       | NA       |
| FP102888.2         | 0.419262 |              | 0 4.225084 |          | 0        | 1 NA     |

|                   |           |               |           |           |           |           |
|-------------------|-----------|---------------|-----------|-----------|-----------|-----------|
| CR931980. 1       | 0. 086618 | 0             | 5. 267649 | 0         | 1         | NA        |
| acyl              | 91. 77237 | 0. 22893161   | 0. 267051 | 0. 857259 | 0. 391302 | 0. 827902 |
| RF00001           | 0         | NA            | NA        | NA        | NA        | NA        |
| RF00026           | 0         | NA            | NA        | NA        | NA        | NA        |
| RF00001           | 0. 171507 | 1. 055373006  | 5. 267649 | 0. 20035  | 0. 841207 | NA        |
| RF00026           | 0         | NA            | NA        | NA        | NA        | NA        |
| RF00001           | 0         | NA            | NA        | NA        | NA        | NA        |
| CR848784. 2       | 0         | NA            | NA        | NA        | NA        | NA        |
| RF00017           | 0. 04222  | 0             | 5. 267649 | 0         | 1         | NA        |
| zgc:165555        | 3. 380322 | -0. 517921436 | 1. 314669 | -0. 39396 | 0. 693614 | 0. 940668 |
| CU138548. 2       | 0         | NA            | NA        | NA        | NA        | NA        |
| si:dkeyp-67e1. 2  | 0. 144504 | 0. 09368032   | 5. 267649 | 0. 017784 | 0. 985811 | NA        |
| RF00026           | 0         | NA            | NA        | NA        | NA        | NA        |
| RF00003           | 0         | NA            | NA        | NA        | NA        | NA        |
| RF00001           | 0. 049519 | 0             | 5. 267649 | 0         | 1         | NA        |
| RF00026           | 0         | NA            | NA        | NA        | NA        | NA        |
| RF00026           | 0         | NA            | NA        | NA        | NA        | NA        |
| cdaa              | 63. 00364 | -0. 530028397 | 0. 300899 | -1. 76148 | 0. 078157 | 0. 473682 |
| CR450686. 4       | 0. 591189 | -2. 808982878 | 3. 706862 | -0. 75778 | 0. 448583 | NA        |
| RF00003           | 0         | NA            | NA        | NA        | NA        | NA        |
| BX640461. 1       | 0. 58714  | -3. 104134711 | 2. 396653 | -1. 2952  | 0. 195253 | NA        |
| RF00001           | 0         | NA            | NA        | NA        | NA        | NA        |
| BX537296. 3       | 0         | NA            | NA        | NA        | NA        | NA        |
| AL844518. 1       | 5. 538185 | -0. 908026255 | 0. 925805 | -0. 9808  | 0. 326693 | 0. 785542 |
| prokr1b           | 3. 23125  | 0. 713096378  | 1. 522395 | 0. 468404 | 0. 639495 | 0. 924779 |
| RF00003           | 0         | NA            | NA        | NA        | NA        | NA        |
| si:ch211-14p21. 3 | 0. 716779 | 1. 055431701  | 2. 327554 | 0. 453451 | 0. 650224 | NA        |
| RF00026           | 0         | NA            | NA        | NA        | NA        | NA        |
| BX323588. 1       | 0         | NA            | NA        | NA        | NA        | NA        |
| pimr152           | 0         | NA            | NA        | NA        | NA        | NA        |
| nrsn1             | 890. 3942 | 0. 425109284  | 0. 238234 | 1. 78442  | 0. 074355 | 0. 463115 |
| RF00001           | 0         | NA            | NA        | NA        | NA        | NA        |
| CT583728. 12      | 17. 20639 | 0. 327488199  | 0. 654443 | 0. 500407 | 0. 616788 | 0. 916365 |
| RF00001           | 0         | NA            | NA        | NA        | NA        | NA        |
| dhrrs13a. 2       | 442. 849  | 0. 015346964  | 0. 526675 | 0. 029139 | 0. 976753 | 1         |
| RF00001           | 0         | NA            | NA        | NA        | NA        | NA        |
| RF00001           | 0         | NA            | NA        | NA        | NA        | NA        |
| si:dkey-27d5. 3   | 0         | NA            | NA        | NA        | NA        | NA        |
| BX324132. 3       | 50. 44449 | 0. 259716282  | 0. 257348 | 1. 009204 | 0. 312877 | 0. 776329 |
| zgc:165555        | 2. 230141 | -0. 798800671 | 1. 889994 | -0. 42265 | 0. 672553 | 0. 93414  |
| RF00003           | 0         | NA            | NA        | NA        | NA        | NA        |
| CR394528. 1       | 36. 70866 | 0. 098937472  | 0. 327855 | 0. 301772 | 0. 762826 | 0. 958842 |
| RF00001           | 0. 046941 | 0             | 5. 267649 | 0         | 1         | NA        |
| RF00012           | 0         | NA            | NA        | NA        | NA        | NA        |
| RF00003           | 0         | NA            | NA        | NA        | NA        | NA        |
| BX927243. 2       | 0         | NA            | NA        | NA        | NA        | NA        |
| GNG4              | 10. 17871 | -0. 050937799 | 0. 533893 | -0. 09541 | 0. 923991 | 0. 994743 |
| F0834850. 1       | 95. 7352  | 0. 297819694  | 0. 209496 | 1. 4216   | 0. 155142 | 0. 619776 |
| RF00001           | 0         | NA            | NA        | NA        | NA        | NA        |
| CABZ01087224. 1   | 0. 549123 | 0             | 3. 175424 | 0         | 1         | NA        |
| CR847936. 7       | 0. 12723  | 1. 055383603  | 5. 267649 | 0. 200352 | 0. 841205 | NA        |
| RF00026           | 0         | NA            | NA        | NA        | NA        | NA        |
| RF00001           | 0         | NA            | NA        | NA        | NA        | NA        |
| BX510996. 1       | 24. 51421 | -0. 124505952 | 0. 390172 | -0. 31911 | 0. 749646 | 0. 955074 |



|                   |          |              |            |          |          |          |
|-------------------|----------|--------------|------------|----------|----------|----------|
| RF00001           | 0.050723 | -0.86807634  | 5.267649   | -0.16479 | 0.869106 | NA       |
| RF00001           | 0.04222  |              | 0 5.267649 |          | 0        | 1 NA     |
| ERG28             | 29.92626 | 0.822351429  | 0.306657   | 2.681663 | 0.007326 | 0.14495  |
| RF00001           |          | 0 NA         | NA         | NA       | NA       | NA       |
| pimr24            |          | 0 NA         | NA         | NA       | NA       | NA       |
| pimr4             | 0.045161 |              | 0 5.267649 |          | 0        | 1 NA     |
| AL935126.2        | 0.789141 | -1.841736882 | 2.494258   | -0.73839 | 0.460277 | NA       |
| CT583642.2        | 7.982502 | -1.266265776 | 0.679138   | -1.86452 | 0.062249 | 0.427696 |
| pimr11            |          | 0 NA         | NA         | NA       | NA       | NA       |
| RF00001           |          | 0 NA         | NA         | NA       | NA       | NA       |
| CR759968.2        | 3.221493 | 1.074969302  | 0.978253   | 1.098867 | 0.271826 | 0.748006 |
| RF00026           |          | 0 NA         | NA         | NA       | NA       | NA       |
| si:ch211-51i16.1  | 7.877608 | 1.135498901  | 0.892027   | 1.272942 | 0.203039 | 0.68378  |
| RF00026           |          | 0 NA         | NA         | NA       | NA       | NA       |
| dre-mir-430c-1    |          | 0 NA         | NA         | NA       | NA       | NA       |
| BX323820.1        | 34.57211 | -0.393764132 | 0.913881   | -0.43087 | 0.666563 | 0.932664 |
| RF00026           |          | 0 NA         | NA         | NA       | NA       | NA       |
| pimr90            |          | 0 NA         | NA         | NA       | NA       | NA       |
| traj18            |          | 0 NA         | NA         | NA       | NA       | NA       |
| BX936418.1        | 0.219359 | 0.89243358   | 5.241767   | 0.170254 | 0.86481  | NA       |
| dre-mir-430b-10   |          | 0 NA         | NA         | NA       | NA       | NA       |
| LO018238.1        | 0.468371 | -0.995214476 | 3.537796   | -0.28131 | 0.778473 | NA       |
| RF00001           |          | 0 NA         | NA         | NA       | NA       | NA       |
| RF00017           | 1.345874 |              | 0 2.389527 |          | 0        | 1 NA     |
| RF00001           |          | 0 NA         | NA         | NA       | NA       | NA       |
| tnfsf14           | 4.77842  | -0.325803564 | 1.082199   | -0.30106 | 0.763371 | 0.958926 |
| CABZ01050062.1    | 93.02264 | -0.181164537 | 0.227366   | -0.7968  | 0.425568 | 0.844714 |
| si:ch211-221n20.4 | 0.122597 | -0.868089684 | 5.267649   | -0.1648  | 0.869104 | NA       |
| RF00001           | 0.04222  |              | 0 5.267649 |          | 0        | 1 NA     |
| BX005305.2        | 0.221523 | 1.05536637   | 5.041951   | 0.209317 | 0.834201 | NA       |
| CR383662.7        | 2.628506 | 1.676365041  | 1.22809    | 1.365018 | 0.172247 | 0.644849 |
| BX088713.3        |          | 0 NA         | NA         | NA       | NA       | NA       |
| CABZ01079178.1    | 6.441841 |              | 0 1.82555  |          | 0        | 1 1      |
| CABZ01068469.1    | 234.5544 | 0.391654405  | 0.15432    | 2.537936 | 0.011151 | 0.183611 |
| RF00001           | 0.043309 |              | 0 5.267649 |          | 0        | 1 NA     |
| zgc:173552        | 11.56211 | 0.320391458  | 0.867553   | 0.369305 | 0.7119   | 0.945821 |
| CR589947.3        | 2.582233 | 0.45575549   | 1.574491   | 0.289462 | 0.772228 | 0.960624 |
| CR848784.3        |          | 0 NA         | NA         | NA       | NA       | NA       |
| dre-mir-430a-4    |          | 0 NA         | NA         | NA       | NA       | NA       |
| RF00001           | 0.085528 |              | 0 5.267649 |          | 0        | 1 NA     |
| CU856623.1        | 0.844363 |              | 0 3.262503 |          | 0        | 1 NA     |
| RF00001           |          | 0 NA         | NA         | NA       | NA       | NA       |
| RF00001           | 12.48637 | -0.119444877 | 0.493874   | -0.24185 | 0.808894 | 0.969828 |
| RF00001           | 0.733262 | 2.923706418  | 2.906915   | 1.005776 | 0.314523 | NA       |
| RF00026           |          | 0 NA         | NA         | NA       | NA       | NA       |
| CT033803.1        |          | 0 NA         | NA         | NA       | NA       | NA       |
| si:ch73-27e22.1   | 2.988144 | -4.779042979 | 1.85886    | -2.57095 | 0.010142 | 0.174972 |
| RF00001           |          | 0 NA         | NA         | NA       | NA       | NA       |
| nitr6b            |          | 0 NA         | NA         | NA       | NA       | NA       |
| CR933528.1        | 2.061592 | 1.511224344  | 1.211403   | 1.2475   | 0.212214 | NA       |
| pimr194           | 0.921317 | -3.088118949 | 2.244368   | -1.37594 | 0.16884  | NA       |
| zgc:100951        | 0.479034 | 0.789929589  | 3.31087    | 0.238587 | 0.811426 | NA       |
| RF00001           | 0.046941 |              | 0 5.267649 |          | 0        | 1 NA     |
| RF00003           |          | 0 NA         | NA         | NA       | NA       | NA       |

|                    |          |              |          |          |          |          |
|--------------------|----------|--------------|----------|----------|----------|----------|
| CR792437.1         | 0        | NA           | NA       | NA       | NA       | NA       |
| wu:fi09b08         | 0.24452  | 1.055364308  | 4.918881 | 0.214554 | 0.830115 | NA       |
| BX548011.2         | 0        | NA           | NA       | NA       | NA       | NA       |
| zgc:77614          | 0.095784 | 1.055383603  | 5.267649 | 0.200352 | 0.841205 | NA       |
| znf1104            | 7.593219 | -3.309581721 | 0.987373 | -3.3519  | 0.000803 | 0.037962 |
| RF00001            | 0.099037 | 0            | 5.267649 | 0        | 1        | NA       |
| cfap100            | 27.11768 | 0.279140049  | 0.326743 | 0.854312 | 0.392932 | 0.827902 |
| RF00001            | 0        | NA           | NA       | NA       | NA       | NA       |
| RF00001            | 0        | NA           | NA       | NA       | NA       | NA       |
| RF00001            | 0.179712 | -0.868115024 | 5.267649 | -0.1648  | 0.8691   | NA       |
| CABZ01084501.1     | 3.865483 | -1.083848147 | 1.18131  | -0.9175  | 0.358882 | 0.80995  |
| zgc:165555         | 1.113661 | 1.958017642  | 2.016823 | 0.970843 | 0.331627 | NA       |
| AL929334.1         | 30.58571 | 0.325795508  | 0.533644 | 0.610511 | 0.541523 | 0.893858 |
| RF00012            | 0        | NA           | NA       | NA       | NA       | NA       |
| zgc:165555         | 0        | NA           | NA       | NA       | NA       | NA       |
| BX539332.2         | 0.045161 | 0            | 5.267649 | 0        | 1        | NA       |
| RF00015            | 0        | NA           | NA       | NA       | NA       | NA       |
| BX470259.1         | 62.1571  | -0.179691181 | 0.299361 | -0.60025 | 0.54834  | 0.896644 |
| RF00001            | 0        | NA           | NA       | NA       | NA       | NA       |
| dtwd1              | 112.0072 | -0.124871526 | 0.253239 | -0.4931  | 0.621944 | 0.918461 |
| RF00001            | 0        | NA           | NA       | NA       | NA       | NA       |
| CABZ01061498.1     | 13.16963 | -0.006813297 | 0.659607 | -0.01033 | 0.991759 | 1        |
| si:dkey-16p6.1     | 4.898654 | 1.882821901  | 1.31136  | 1.435778 | 0.151066 | 0.615085 |
| traj15             | 0        | NA           | NA       | NA       | NA       | NA       |
| RF00026            | 0        | NA           | NA       | NA       | NA       | NA       |
| CABZ01084081.1     | 0.68618  | -0.868145828 | 2.828844 | -0.30689 | 0.758927 | NA       |
| RF00001            | 0        | NA           | NA       | NA       | NA       | NA       |
| RF00001            | 0        | NA           | NA       | NA       | NA       | NA       |
| RF00001            | 0        | NA           | NA       | NA       | NA       | NA       |
| RF00003            | 0        | NA           | NA       | NA       | NA       | NA       |
| si:ch211-113a14.19 | 4.355963 | -1.489147128 | 1.011611 | -1.47206 | 0.141006 | 0.599658 |
| dre-mir-430a-2     | 0        | NA           | NA       | NA       | NA       | NA       |
| CABZ01002702.1     | 0.315386 | -0.354176328 | 5.160036 | -0.06864 | 0.945277 | NA       |
| F0904980.1         | 6.464785 | -0.343813402 | 0.754407 | -0.45574 | 0.648577 | 0.927501 |
| RF00067            | 0.332397 | 0            | 4.562993 | 0        | 1        | NA       |
| RF00001            | 0.107013 | -1.826650979 | 5.230461 | -0.34923 | 0.726914 | NA       |
| RF00003            | 0        | NA           | NA       | NA       | NA       | NA       |
| RF00001            | 0.397521 | 0            | 5.041064 | 0        | 1        | NA       |
| RF00001            | 0        | NA           | NA       | NA       | NA       | NA       |
| RF00026            | 0        | NA           | NA       | NA       | NA       | NA       |
| RF00003            | 0        | NA           | NA       | NA       | NA       | NA       |
| RF00026            | 0        | NA           | NA       | NA       | NA       | NA       |
| RF00026            | 0        | NA           | NA       | NA       | NA       | NA       |
| L0018550.2         | 6.146938 | -3.752529469 | 1.398935 | -2.68242 | 0.007309 | 0.144871 |
| CABZ01048666.1     | 40.71241 | -0.052545907 | 0.299155 | -0.17565 | 0.860571 | 0.980264 |
| RF00276            | 1.024474 | 0.72927505   | 1.967586 | 0.370645 | 0.710902 | NA       |
| CABZ01103860.1     | 35.18919 | 0.405134768  | 0.408907 | 0.990776 | 0.321795 | 0.782075 |
| zgc:162898         | 36.17406 | -0.281150933 | 0.340676 | -0.82527 | 0.409216 | 0.836637 |
| RF00026            | 0        | NA           | NA       | NA       | NA       | NA       |
| RF00001            | 0        | NA           | NA       | NA       | NA       | NA       |
| RF00001            | 0        | NA           | NA       | NA       | NA       | NA       |
| RF00001            | 0        | NA           | NA       | NA       | NA       | NA       |
| BX470197.1         | 0.118261 | 0            | 5.267649 | 0        | 1        | NA       |
| CABZ01043826.1     | 0.67389  | 0            | 2.341859 | 0        | 1        | NA       |

|                   |          |              |          |          |          |          |
|-------------------|----------|--------------|----------|----------|----------|----------|
| mapkapk3          | 142.1024 | 0.086078874  | 0.178582 | 0.482013 | 0.629797 | 0.92285  |
| znf1183           | 43.2063  | -0.464388979 | 0.281796 | -1.64796 | 0.09936  | 0.523342 |
| BX908757.2        | 0 NA     | NA           | NA       | NA       | NA       | NA       |
| zgc:165555        | 6.097549 | -0.130212856 | 0.732156 | -0.17785 | 0.858842 | 0.979975 |
| CU915775.1        | 0.086618 | 0            | 5.267649 | 0        | 1        | NA       |
| RF00012           | 0 NA     | NA           | NA       | NA       | NA       | NA       |
| taar20i           | 0.310592 | 0            | 5.267649 | 0        | 1        | NA       |
| wu:fc75a09        | 70.31266 | 0.421736374  | 0.203112 | 2.076375 | 0.037859 | 0.34119  |
| RF00026           | 0 NA     | NA           | NA       | NA       | NA       | NA       |
| RF00001           | 0 NA     | NA           | NA       | NA       | NA       | NA       |
| RF00001           | 0 NA     | NA           | NA       | NA       | NA       | NA       |
| si:dkey-19p15.4   | 3.709771 | 0.113551335  | 1.014634 | 0.111914 | 0.910892 | 0.992208 |
| FQ377660.1        | 0.331278 | 0.093659445  | 3.088555 | 0.030325 | 0.975808 | NA       |
| CABZ01040998.1    | 38.04823 | -0.001467433 | 0.292974 | -0.00501 | 0.996004 | 1        |
| RF00001           | 0.04222  | 0            | 5.267649 | 0        | 1        | NA       |
| RF00001           | 0 NA     | NA           | NA       | NA       | NA       | NA       |
| CR925720.1        | 0 NA     | NA           | NA       | NA       | NA       | NA       |
| CABZ01085137.1    | 3.396815 | 2.090278122  | 1.175956 | 1.777514 | 0.075484 | 0.465421 |
| hist1h2a3         | 3.317194 | 0.103123527  | 1.148335 | 0.089803 | 0.928444 | 0.995052 |
| CR956623.2        | 0.464906 | 0.093649413  | 3.293271 | 0.028437 | 0.977314 | NA       |
| RF00001           | 0.682129 | 0            | 3.353061 | 0        | 1        | NA       |
| CABZ01081490.1    | 0.118261 | 0            | 5.267649 | 0        | 1        | NA       |
| RF00001           | 0 NA     | NA           | NA       | NA       | NA       | NA       |
| BX322657.2        | 73.41109 | 0.055604599  | 0.239631 | 0.232042 | 0.816505 | 0.971207 |
| RF00001           | 0 NA     | NA           | NA       | NA       | NA       | NA       |
| BX324230.2        | 0.249115 | 0.093660845  | 4.889833 | 0.019154 | 0.984718 | NA       |
| RF00026           | 0 NA     | NA           | NA       | NA       | NA       | NA       |
| RF00001           | 0 NA     | NA           | NA       | NA       | NA       | NA       |
| RF00001           | 0.091739 | 0            | 5.267649 | 0        | 1        | NA       |
| RF00001           | 0 NA     | NA           | NA       | NA       | NA       | NA       |
| si:ch73-267c23.10 | 6.560908 | -2.086943905 | 1.249786 | -1.66984 | 0.094951 | 0.514382 |
| taar20x           | 0.049519 | 0            | 5.267649 | 0        | 1        | NA       |
| RF00026           | 0 NA     | NA           | NA       | NA       | NA       | NA       |
| RF00026           | 0 NA     | NA           | NA       | NA       | NA       | NA       |
| BX000981.7        | 0 NA     | NA           | NA       | NA       | NA       | NA       |
| BX322608.1        | 0 NA     | NA           | NA       | NA       | NA       | NA       |
| pimr117           | 0 NA     | NA           | NA       | NA       | NA       | NA       |
| CABZ01002690.1    | 43.13889 | -0.044027211 | 0.313694 | -0.14035 | 0.888383 | 0.988188 |
| RF00003           | 0 NA     | NA           | NA       | NA       | NA       | NA       |
| tnfsf18           | 1.061127 | 1.055426861  | 2.368125 | 0.44568  | 0.655828 | NA       |
| CZQB01146713.1    | 0.551077 | 1.625896948  | 3.117977 | 0.521459 | 0.602047 | NA       |
| lbh               | 77.33592 | -0.319907403 | 0.334692 | -0.95583 | 0.33916  | 0.795226 |
| RF00026           | 0 NA     | NA           | NA       | NA       | NA       | NA       |
| CABZ01096573.1    | 14.81583 | -0.559798836 | 0.614118 | -0.91155 | 0.362006 | 0.811895 |
| RF00001           | 0 NA     | NA           | NA       | NA       | NA       | NA       |
| CU972454.5        | 1.793208 | 0.070438594  | 1.647759 | 0.042748 | 0.965902 | NA       |
| RF00004           | 0 NA     | NA           | NA       | NA       | NA       | NA       |
| CU138548.3        | 0 NA     | NA           | NA       | NA       | NA       | NA       |
| adgr12b.1         | 6.995062 | 0.884691042  | 0.661411 | 1.337582 | 0.181033 | 0.657233 |
| BOLA2             | 200.9008 | 0.074327524  | 0.199382 | 0.37279  | 0.709305 | 0.945546 |
| si:ch211-162i8.5  | 9.232194 | 0.938910051  | 0.696674 | 1.347704 | 0.177754 | 0.65136  |
| ftr36             | 139.15   | 0.05438876   | 0.216582 | 0.251123 | 0.801719 | 0.967776 |
| CU138548.4        | 0 NA     | NA           | NA       | NA       | NA       | NA       |
| RF00026           | 0 NA     | NA           | NA       | NA       | NA       | NA       |

|                   |           |               |             |           |           |           |
|-------------------|-----------|---------------|-------------|-----------|-----------|-----------|
| znf972            | 1. 50297  | -0. 302409262 | 1. 759018   | -0. 17192 | 0. 863501 | NA        |
| RF00001           | 0 NA      |               | NA          | NA        | NA        | NA        |
| CABZ01059626. 1   | 0. 050723 | -0. 86807634  | 5. 267649   | -0. 16479 | 0. 869106 | NA        |
| RF00001           | 0. 043308 |               | 0 5. 267649 | 0         | 1 NA      |           |
| LT631676. 1       | 4. 444267 | 0. 86685857   | 0. 963822   | 0. 899397 | 0. 368441 | 0. 817272 |
| bloc1s5           | 148. 7584 | -0. 16265373  | 0. 184362   | -0. 88225 | 0. 37764  | 0. 822478 |
| dre-mir-430a-4    | 0 NA      |               | NA          | NA        | NA        | NA        |
| RF00026           | 0 NA      |               | NA          | NA        | NA        | NA        |
| CR318614. 1       | 0. 360007 | -0. 755162099 | 3. 354143   | -0. 22514 | 0. 821868 | NA        |
| RF00026           | 0 NA      |               | NA          | NA        | NA        | NA        |
| zgc:165555        | 12. 17101 | 0. 080658852  | 1. 127063   | 0. 071566 | 0. 942948 | 0. 997371 |
| CT030017. 1       | 0. 128839 |               | 0 5. 267649 | 0         | 1 NA      |           |
| BX530407. 6       | 1. 414112 | 0. 873499758  | 1. 747424   | 0. 499878 | 0. 617161 | NA        |
| ccdc62            | 51. 95397 | 0. 261670741  | 0. 252495   | 1. 036339 | 0. 300044 | 0. 766629 |
| igl3v4            | 0. 173236 |               | 0 5. 267649 | 0         | 1 NA      |           |
| RF00003           | 0 NA      |               | NA          | NA        | NA        | NA        |
| RF00001           | 0 NA      |               | NA          | NA        | NA        | NA        |
| pimr152           | 0. 050624 | 1. 055396947  | 5. 267649   | 0. 200354 | 0. 841203 | NA        |
| RF00001           | 0. 157561 |               | 0 5. 267649 | 0         | 1 NA      |           |
| BX681417. 6       | 0 NA      |               | NA          | NA        | NA        | NA        |
| RF00001           | 0 NA      |               | NA          | NA        | NA        | NA        |
| RF00026           | 0 NA      |               | NA          | NA        | NA        | NA        |
| CR388195. 1       | 0. 657091 |               | 0 3. 802127 | 0         | 1 NA      |           |
| F0393424. 3       | 0. 241766 |               | 0 5. 267649 | 0         | 1 NA      |           |
| trappc21          | 222. 5128 | -0. 12413152  | 0. 261744   | -0. 47425 | 0. 635324 | 0. 924272 |
| BX511067. 1       | 0 NA      |               | NA          | NA        | NA        | NA        |
| BX571665. 1       | 0 NA      |               | NA          | NA        | NA        | NA        |
| zgc:194418        | 0. 060442 |               | 0 5. 267649 | 0         | 1 NA      |           |
| BX323461. 1       | 0. 362924 |               | 0 5. 115817 | 0         | 1 NA      |           |
| RF00137           | 0. 045161 |               | 0 5. 267649 | 0         | 1 NA      |           |
| CR855311. 5       | 3. 647907 | 1. 055430548  | 1. 827627   | 0. 577487 | 0. 563611 | 0. 901108 |
| CABZ01050238. 1   | 0. 744544 | -0. 558618865 | 2. 233856   | -0. 25007 | 0. 802534 | NA        |
| znf1011           | 0. 901117 | -0. 283841274 | 1. 790669   | -0. 15851 | 0. 874054 | NA        |
| CABZ01080599. 1   | 2. 911754 | 1. 159210943  | 1. 257611   | 0. 921756 | 0. 356656 | 0. 807342 |
| RF00001           | 0 NA      |               | NA          | NA        | NA        | NA        |
| timp4. 1          | 28. 09279 | -0. 121520809 | 0. 411215   | -0. 29552 | 0. 767599 | 0. 960296 |
| pimr176           | 0. 226881 | -1. 710096158 | 5. 238471   | -0. 32645 | 0. 744084 | NA        |
| RF00001           | 0. 043309 |               | 0 5. 267649 | 0         | 1 NA      |           |
| dre-mir-2185-1    | 0 NA      |               | NA          | NA        | NA        | NA        |
| lhfp14a           | 19. 74055 | -0. 164460773 | 0. 484872   | -0. 33918 | 0. 734471 | 0. 951134 |
| RF01848           | 0 NA      |               | NA          | NA        | NA        | NA        |
| RF00020           | 0 NA      |               | NA          | NA        | NA        | NA        |
| CABZ01053748. 1   | 0. 303633 | 1. 055402541  | 3. 93986    | 0. 267878 | 0. 788793 | NA        |
| RF00001           | 0. 086618 |               | 0 5. 267649 | 0         | 1 NA      |           |
| pimr98            | 0 NA      |               | NA          | NA        | NA        | NA        |
| si:dkey-199m13. 7 | 3. 865669 | -0. 858886557 | 0. 931169   | -0. 92237 | 0. 356333 | 0. 807306 |
| zgc:174354        | 0. 04222  |               | 0 5. 267649 | 0         | 1 NA      |           |
| rcvrnb            | 81. 74616 | 0. 665441548  | 0. 254589   | 2. 613787 | 0. 008954 | 0. 16209  |
| RF00026           | 0 NA      |               | NA          | NA        | NA        | NA        |
| CR407594. 1       | 0. 784207 | 2. 90454883   | 2. 05105    | 1. 416127 | 0. 156738 | NA        |
| CABZ01046996. 1   | 1. 852767 | 1. 954771632  | 1. 830132   | 1. 068104 | 0. 285474 | NA        |
| BX511311. 4       | 0 NA      |               | NA          | NA        | NA        | NA        |
| RF00001           | 0 NA      |               | NA          | NA        | NA        | NA        |
| trhde. 2          | 53. 59149 | 0. 800372865  | 0. 421637   | 1. 898251 | 0. 057663 | 0. 41428  |

|                  |          |              |            |          |          |          |
|------------------|----------|--------------|------------|----------|----------|----------|
| cxcl18a.1        | 37.93321 | -0.834089389 | 0.365669   | -2.28099 | 0.022549 | 0.26561  |
| BX511056.3       | 0        | NA           | NA         | NA       | NA       | NA       |
| RF00001          | 19.28225 | -0.02519326  | 0.399499   | -0.06306 | 0.949717 | 0.99801  |
| si:ch211-225k7.2 | 0.171507 | 1.055373006  | 5.267649   | 0.20035  | 0.841207 | NA       |
| RF00001          | 0.233078 |              | 0 5.267649 |          | 0        | 1 NA     |
| RF00003          | 0        | NA           | NA         | NA       | NA       | NA       |
| BX571738.1       | 1.43634  | 0.093649403  | 1.985855   | 0.047158 | 0.962387 | NA       |
| BX649490.4       | 4.874556 | -5.091151916 | 1.51026    | -3.37104 | 0.000749 | 0.036381 |
| RF00003          | 0        | NA           | NA         | NA       | NA       | NA       |
| taar20n          | 0        | NA           | NA         | NA       | NA       | NA       |
| exorh            | 86.6669  | 0.384608148  | 0.26132    | 1.47179  | 0.141078 | 0.599658 |
| BX927341.1       | 0        | NA           | NA         | NA       | NA       | NA       |
| CR450785.2       | 0.192186 | -0.868115394 | 5.267649   | -0.1648  | 0.8691   | NA       |
| bc17ba           | 170.8989 | 0.099292526  | 0.16624    | 0.597283 | 0.550318 | 0.8974   |
| si:ch211-194m7.4 | 8.124463 | 0.750173348  | 0.864205   | 0.86805  | 0.385367 | 0.826939 |
| RF00001          | 0.045161 |              | 0 5.267649 |          | 0        | 1 NA     |
| RF00003          | 0        | NA           | NA         | NA       | NA       | NA       |
| CR450827.5       | 0        | NA           | NA         | NA       | NA       | NA       |
| pimr106          | 0        | NA           | NA         | NA       | NA       | NA       |
| BX649471.2       | 0        | NA           | NA         | NA       | NA       | NA       |
| zgc:171435       | 60.90503 | 0.147734032  | 0.331352   | 0.445853 | 0.655704 | 0.929606 |
| taar20c1         | 0.046941 |              | 0 5.267649 |          | 0        | 1 NA     |
| RF00002          | 26.2329  | -0.726987447 | 0.568457   | -1.27888 | 0.20094  | 0.681045 |
| RF00020          | 0        | NA           | NA         | NA       | NA       | NA       |
| RF00001          | 0.181988 |              | 0 5.267649 |          | 0        | 1 NA     |
| CR932017.1       | 0        | NA           | NA         | NA       | NA       | NA       |
| cplx2            | 585.3065 | 0.333668248  | 0.185305   | 1.800648 | 0.071758 | 0.4564   |
| RF00001          | 0.148387 | -1.755438701 | 5.23528    | -0.33531 | 0.737392 | NA       |
| RF00026          | 0        | NA           | NA         | NA       | NA       | NA       |
| CU694445.1       | 1.405869 | -1.365075589 | 1.907234   | -0.71574 | 0.474155 | NA       |
| zgc:112234       | 20.73009 | -0.072958984 | 0.475302   | -0.1535  | 0.878004 | 0.98573  |
| BX769173.2       | 9.179056 | -0.02308935  | 0.578468   | -0.03991 | 0.968161 | 1        |
| RF00001          | 0        | NA           | NA         | NA       | NA       | NA       |
| RF00003          | 0        | NA           | NA         | NA       | NA       | NA       |
| atf4a            | 5647.002 | -0.023837029 | 0.111998   | -0.21283 | 0.831456 | 0.974908 |
| sptbn4b          | 41.8042  | 0.430903884  | 0.355505   | 1.212091 | 0.225478 | 0.70685  |
| dre-mir-430a-11  | 0        | NA           | NA         | NA       | NA       | NA       |
| CU928071.1       | 0.312282 | 1.055379422  | 4.553185   | 0.231789 | 0.816702 | NA       |
| CABZ01069040.1   | 48.86524 | -0.274986547 | 0.323889   | -0.84901 | 0.395873 | 0.829389 |
| BX649315.1       | 0.202062 | -0.86811193  | 5.267649   | -0.1648  | 0.869101 | NA       |
| BX005442.2       | 0.069091 |              | 0 5.267649 |          | 0        | 1 NA     |
| CT027583.1       | 1.201167 | -0.594879504 | 2.097711   | -0.28359 | 0.776728 | NA       |
| AL929435.2       | 1.855873 | -0.955935007 | 1.302884   | -0.73371 | 0.463127 | NA       |
| RF00026          | 0        | NA           | NA         | NA       | NA       | NA       |
| RF00001          | 0        | NA           | NA         | NA       | NA       | NA       |
| si:dkeyp-44b5.4  | 0.232889 |              | 0 5.267649 |          | 0        | 1 NA     |
| zgc:171759       | 11.35338 | 1.411953032  | 0.79151    | 1.783873 | 0.074444 | 0.463302 |
| RF00003          | 0        | NA           | NA         | NA       | NA       | NA       |
| RF00001          | 0        | NA           | NA         | NA       | NA       | NA       |
| FQ377628.1       | 6.048775 | -0.964354468 | 0.753414   | -1.27998 | 0.200552 | 0.68081  |
| RF00001          | 0        | NA           | NA         | NA       | NA       | NA       |
| RF00003          | 0        | NA           | NA         | NA       | NA       | NA       |
| dre-mir-430a-2   | 0        | NA           | NA         | NA       | NA       | NA       |
| RF00001          | 0        | NA           | NA         | NA       | NA       | NA       |

|                   |          |              |            |          |          |          |
|-------------------|----------|--------------|------------|----------|----------|----------|
| gjdla             | 184.4695 | 0.484414188  | 0.267805   | 1.808831 | 0.070477 | 0.45297  |
| CR394552.1        | 8.05283  | -0.333757166 | 0.803304   | -0.41548 | 0.67779  | 0.936026 |
| L0018585.1        | 10.82377 | -0.509944583 | 0.857896   | -0.59441 | 0.552236 | 0.8974   |
| sb:cb470          | 0.181263 |              | 0 5.267649 |          | 0        | 1 NA     |
| taarl6g           | 1.220241 | 0.09365662   | 2.359335   | 0.039696 | 0.968335 | NA       |
| npffr1            | 15.41017 | 0.110250608  | 0.673423   | 0.163717 | 0.869954 | 0.983365 |
| znf1099           | 4.312739 | -1.468724132 | 0.870516   | -1.68719 | 0.091567 | 0.507077 |
| NUP85 (1 of many) | 114.3111 | 0.166991845  | 0.181059   | 0.922304 | 0.35637  | 0.807306 |
| RF00001           |          | 0 NA         | NA         | NA       | NA       | NA       |
| RF00001           |          | 0 NA         | NA         | NA       | NA       | NA       |
| RF00003           |          | 0 NA         | NA         | NA       | NA       | NA       |
| si:dkey-181m19.17 | 0.469256 | 1.86831375   | 3.231323   | 0.578188 | 0.563137 | NA       |
| CR387935.1        | 0.581356 |              | 0 2.861979 |          | 0        | 1 NA     |
| CR381686.5        | 27.54445 | -0.258229444 | 0.438938   | -0.58831 | 0.556327 | 0.899063 |
| taarl3b           | 4.302766 | -0.825454991 | 0.848076   | -0.97333 | 0.330391 | 0.788126 |
| CABZ01065423.1    | 35.79023 | -0.032749992 | 0.458336   | -0.07145 | 0.943036 | 0.997371 |
| si:dkey-4c23.4    | 1.501533 | -2.821333955 | 1.693696   | -1.66579 | 0.095756 | NA       |
| L0017821.1        | 0.138182 |              | 0 5.267649 |          | 0        | 1 NA     |
| si:ch211-76m11.3  | 5.811147 | 1.294482656  | 0.758538   | 1.706549 | 0.087906 | 0.497868 |
| RF00001           |          | 0 NA         | NA         | NA       | NA       | NA       |
| CU929418.2        | 16.20744 | 0.663282013  | 0.986769   | 0.672176 | 0.501472 | 0.880897 |
| RF00001           |          | 0 NA         | NA         | NA       | NA       | NA       |
| L0017711.1        | 17.6217  | -0.181021824 | 0.610703   | -0.29642 | 0.766913 | 0.960296 |
| CABZ01062996.1    | 2.804267 | 1.896617435  | 1.461023   | 1.298143 | 0.194238 | 0.674434 |
| CR774179.5        | 3.349908 | -0.310409053 | 1.166932   | -0.266   | 0.790236 | 0.964428 |
| RF00012           |          | 0 NA         | NA         | NA       | NA       | NA       |
| znf1091           | 2.554972 | -1.670258211 | 1.252732   | -1.33329 | 0.182436 | 0.659033 |
| AXL               | 307.1129 | -0.045038548 | 0.179419   | -0.25102 | 0.801795 | 0.967776 |
| CT583728.13       |          | 0 NA         | NA         | NA       | NA       | NA       |
| RF00026           | 10.17304 | -1.052882932 | 0.867685   | -1.21344 | 0.224962 | 0.70685  |
| c1dn15a           | 180.2688 | -0.746171402 | 0.249679   | -2.98852 | 0.002803 | 0.086952 |
| F0907124.1        | 0.773019 | -0.443203711 | 2.104359   | -0.21061 | 0.83319  | NA       |
| CABZ01066921.1    | 17.1158  | -0.016238661 | 0.440519   | -0.03686 | 0.970595 | 1        |
| RF00015           |          | 0 NA         | NA         | NA       | NA       | NA       |
| CT737127.1        | 11.98873 | -0.127671278 | 0.563177   | -0.2267  | 0.820658 | 0.971788 |
| CU179759.1        | 0.167999 | -0.868103029 | 5.267649   | -0.1648  | 0.869102 | NA       |
| RF00001           |          | 0 NA         | NA         | NA       | NA       | NA       |
| CR361551.2        | 5.311619 | -0.36123697  | 0.855085   | -0.42246 | 0.672691 | 0.93414  |
| BX510335.2        |          | 0 NA         | NA         | NA       | NA       | NA       |
| CABZ01046407.1    | 0.163104 |              | 0 5.267649 |          | 0        | 1 NA     |
| znf1121           | 6.175491 | -0.098452571 | 0.615604   | -0.15993 | 0.872937 | 0.983537 |
| RF00001           | 9.028372 | -0.820470217 | 0.590875   | -1.38857 | 0.164964 | 0.634185 |
| CABZ01043953.1    | 76.67488 | 0.146194473  | 0.225858   | 0.647284 | 0.517448 | 0.887148 |
| RF00001           |          | 0 NA         | NA         | NA       | NA       | NA       |
| si:dkey-59p5.1    |          | 0 NA         | NA         | NA       | NA       | NA       |
| ube213a           | 1058.309 | 0.284570523  | 0.113046   | 2.517292 | 0.011826 | 0.189234 |
| AL935174.2        | 106.2067 | 0.078136069  | 0.193697   | 0.403394 | 0.686659 | 0.93875  |
| neto2b            | 54.44528 | 0.426412916  | 0.319062   | 1.336459 | 0.181399 | 0.657873 |
| RF00001           | 4.554159 | -2.349907516 | 1.335383   | -1.75973 | 0.078454 | 0.474337 |
| si:dkey-16p19.1   | 1.860205 | -1.768424328 | 1.258284   | -1.40543 | 0.159895 | NA       |
| RF00001           |          | 0 NA         | NA         | NA       | NA       | NA       |
| pimr166           | 0.098043 | -1.71005882  | 5.238474   | -0.32644 | 0.74409  | NA       |
| si:dkey-58b18.5   |          | 0 NA         | NA         | NA       | NA       | NA       |
| RF00001           | 0.094031 | -0.868089684 | 5.267649   | -0.1648  | 0.869104 | NA       |

|                  |          |              |          |          |          |          |
|------------------|----------|--------------|----------|----------|----------|----------|
| FP236331.1       | 0        | NA           | NA       | NA       | NA       | NA       |
| zfn995           | 1.419093 | 0.888298894  | 1.48758  | 0.597144 | 0.550411 | NA       |
| RF00001          | 0.483412 | 0            | 3.472112 | 0        | 1        | NA       |
| zgc:173552       | 4.56202  | 0.78038562   | 0.93878  | 0.831276 | 0.405818 | 0.834645 |
| BX470182.1       | 1.794341 | -4.810097045 | 2.386009 | -2.01596 | 0.043804 | NA       |
| CABZ01079748.1   | 11.60355 | 0.671127301  | 0.564151 | 1.189624 | 0.234194 | 0.714938 |
| zfn1169          | 22.56147 | -0.107578666 | 0.377591 | -0.28491 | 0.775715 | 0.961073 |
| zfn1174          | 74.04467 | -0.124637513 | 0.287574 | -0.43341 | 0.664717 | 0.93201  |
| RF00001          | 0        | NA           | NA       | NA       | NA       | NA       |
| RF00001          | 0        | NA           | NA       | NA       | NA       | NA       |
| RF00001          | 0        | NA           | NA       | NA       | NA       | NA       |
| CR522881.1       | 0.768094 | 0            | 3.223072 | 0        | 1        | NA       |
| RF00026          | 0        | NA           | NA       | NA       | NA       | NA       |
| CU914811.1       | 0.240768 | 1.055363264  | 4.943177 | 0.213499 | 0.830938 | NA       |
| BX537291.1       | 0.653684 | 0            | 2.646487 | 0        | 1        | NA       |
| rabepk           | 83.38557 | 0.061380582  | 0.308586 | 0.198909 | 0.842334 | 0.97643  |
| RF00003          | 0        | NA           | NA       | NA       | NA       | NA       |
| RF00001          | 0.196085 | -2.707753881 | 5.186735 | -0.52205 | 0.601633 | NA       |
| klh110b.2        | 0.979714 | 2.94690978   | 2.054194 | 1.434582 | 0.151406 | NA       |
| si:dkey-149i17.9 | 0.093881 | 0            | 5.267649 | 0        | 1        | NA       |
| zgc:173552       | 7.319011 | 2.181823213  | 0.703232 | 3.102565 | 0.001919 | 0.067865 |
| BX537120.2       | 0.39209  | 1.055407852  | 3.354292 | 0.314644 | 0.753032 | NA       |
| RF00003          | 0        | NA           | NA       | NA       | NA       | NA       |
| pimr154          | 0        | NA           | NA       | NA       | NA       | NA       |
| RF00001          | 0.145978 | 0            | 5.267649 | 0        | 1        | NA       |
| RF00001          | 0.098043 | -1.71005882  | 5.238474 | -0.32644 | 0.74409  | NA       |
| RF00001          | 0.380365 | 0            | 3.304689 | 0        | 1        | NA       |
| RF00001          | 0        | NA           | NA       | NA       | NA       | NA       |
| si:dkey-31m5.2   | 0        | NA           | NA       | NA       | NA       | NA       |
| RF00026          | 0        | NA           | NA       | NA       | NA       | NA       |
| pimr147          | 0        | NA           | NA       | NA       | NA       | NA       |
| RF00334          | 0        | NA           | NA       | NA       | NA       | NA       |
| BX323801.2       | 0        | NA           | NA       | NA       | NA       | NA       |
| RF00017          | 0.053506 | -0.86807634  | 5.267649 | -0.16479 | 0.869106 | NA       |
| RF00001          | 0.094679 | 0            | 5.267649 | 0        | 1        | NA       |
| BX005321.1       | 0.114252 | 0            | 5.267649 | 0        | 1        | NA       |
| RF00001          | 0        | NA           | NA       | NA       | NA       | NA       |
| SHISAL2A         | 0.901074 | 1.544540775  | 1.911724 | 0.807931 | 0.41913  | NA       |
| RF01848          | 0        | NA           | NA       | NA       | NA       | NA       |
| RF00001          | 0.092828 | 0            | 5.267649 | 0        | 1        | NA       |
| RF00017          | 2.527609 | -0.42928504  | 1.04755  | -0.4098  | 0.681953 | 0.937569 |
| RF00001          | 0.353978 | 1.055400863  | 3.811895 | 0.27687  | 0.78188  | NA       |
| RF00001          | 0        | NA           | NA       | NA       | NA       | NA       |
| endouc           | 703.2121 | 0.149700012  | 0.142686 | 1.049156 | 0.294107 | 0.763267 |
| RF00001          | 0.045161 | 0            | 5.267649 | 0        | 1        | NA       |
| RF00001          | 0        | NA           | NA       | NA       | NA       | NA       |
| CT573817.1       | 0.273654 | -0.868121691 | 5.267649 | -0.1648  | 0.869099 | NA       |
| BX248136.1       | 1.876201 | -3.366070799 | 1.591866 | -2.11454 | 0.034469 | NA       |
| rpp25b           | 84.83693 | 0.13397413   | 0.245893 | 0.544848 | 0.585858 | 0.906655 |
| CABZ01067002.1   | 0.360706 | 0            | 3.308902 | 0        | 1        | NA       |
| RF00001          | 0        | NA           | NA       | NA       | NA       | NA       |
| CABZ01022569.1   | 0        | NA           | NA       | NA       | NA       | NA       |
| RF00001          | 0        | NA           | NA       | NA       | NA       | NA       |
| AL935186.6       | 4.71338  | -0.078405134 | 0.811416 | -0.09663 | 0.923022 | 0.994525 |

|                  |          |              |          |          |          |          |
|------------------|----------|--------------|----------|----------|----------|----------|
| RF00001          | 0 NA     | NA           | NA       | NA       | NA       | NA       |
| zgc:66156        | 511.2285 | -0.800236512 | 1.572081 | -0.50903 | 0.610731 | 0.915331 |
| RF00001          | 0 NA     | NA           | NA       | NA       | NA       | NA       |
| thsd1            | 0 NA     | NA           | NA       | NA       | NA       | NA       |
| CT583728.14      | 0 NA     | NA           | NA       | NA       | NA       | NA       |
| dre-mir-430b-10  | 0 NA     | NA           | NA       | NA       | NA       | NA       |
| CU570881.2       | 58.12878 | 0.881146117  | 0.297584 | 2.961001 | 0.003066 | 0.091315 |
| RF00001          | 0 NA     | NA           | NA       | NA       | NA       | NA       |
| RF00001          | 0 NA     | NA           | NA       | NA       | NA       | NA       |
| BX537263.2       | 0.602089 | 0            | 2.914794 | 0        | 1        | NA       |
| CABZ01084617.1   | 8.809909 | 0.993688394  | 0.797    | 1.246785 | 0.212476 | 0.694155 |
| RF00001          | 0 NA     | NA           | NA       | NA       | NA       | NA       |
| RF00017          | 0 NA     | NA           | NA       | NA       | NA       | NA       |
| RF00006          | 0 NA     | NA           | NA       | NA       | NA       | NA       |
| RF00001          | 0 NA     | NA           | NA       | NA       | NA       | NA       |
| CU179759.2       | 0.094679 | 0            | 5.267649 | 0        | 1        | NA       |
| RF00026          | 0 NA     | NA           | NA       | NA       | NA       | NA       |
| RF00001          | 0.049519 | 0            | 5.267649 | 0        | 1        | NA       |
| RF00001          | 2.263249 | -0.652318929 | 1.307162 | -0.49903 | 0.617755 | 0.916478 |
| mindy4b          | 41.23634 | -0.243979821 | 0.382641 | -0.63762 | 0.52372  | 0.888642 |
| RF00001          | 0.092844 | 1.055383603  | 5.267649 | 0.200352 | 0.841205 | NA       |
| CABZ01046980.1   | 16.78581 | 0.179264275  | 0.417457 | 0.429419 | 0.667618 | 0.933086 |
| LO018437.1       | 2.967342 | 0.775423393  | 1.215027 | 0.638195 | 0.523347 | 0.888413 |
| RF00003          | 0 NA     | NA           | NA       | NA       | NA       | NA       |
| CABZ01015105.1   | 15.53054 | 1.31233771   | 0.78179  | 1.678631 | 0.093224 | 0.510759 |
| RF00026          | 0 NA     | NA           | NA       | NA       | NA       | NA       |
| BX649641.6       | 0 NA     | NA           | NA       | NA       | NA       | NA       |
| si:dkey-102c8.2  | 4.781127 | 0.316962657  | 0.976888 | 0.324462 | 0.745589 | 0.955074 |
| zgc:174353       | 0 NA     | NA           | NA       | NA       | NA       | NA       |
| si:dkey-179k24.2 | 0.291943 | 0.894591761  | 4.684749 | 0.190958 | 0.848558 | NA       |
| FQ377918.1       | 4.42472  | 1.444408095  | 0.873223 | 1.654112 | 0.098105 | 0.521071 |
| taar20o          | 0 NA     | NA           | NA       | NA       | NA       | NA       |
| RF00017          | 0.529772 | -0.868139578 | 3.124825 | -0.27782 | 0.78115  | NA       |
| CR762436.1       | 2.637062 | 0.493629346  | 1.115102 | 0.442676 | 0.658    | 0.930581 |
| BX324194.2       | 0.316964 | -0.8681333   | 5.267649 | -0.1648  | 0.869098 | NA       |
| RF00001          | 0 NA     | NA           | NA       | NA       | NA       | NA       |
| RF00001          | 0 NA     | NA           | NA       | NA       | NA       | NA       |
| RF00001          | 0 NA     | NA           | NA       | NA       | NA       | NA       |
| RF00001          | 0.046941 | 0            | 5.267649 | 0        | 1        | NA       |
| si:ch73-236c18.2 | 0.185122 | 0            | 5.267649 | 0        | 1        | NA       |
| RF00001          | 0 NA     | NA           | NA       | NA       | NA       | NA       |
| RF00017          | 0.326653 | 0            | 4.560526 | 0        | 1        | NA       |
| BX664705.3       | 0 NA     | NA           | NA       | NA       | NA       | NA       |
| taar19c          | 0.181325 | 0            | 5.267649 | 0        | 1        | NA       |
| BX511013.1       | 2.050333 | -0.90068262  | 1.491242 | -0.60398 | 0.545856 | NA       |
| zgc:77614        | 0 NA     | NA           | NA       | NA       | NA       | NA       |
| CT583728.15      | 0 NA     | NA           | NA       | NA       | NA       | NA       |
| RF00003          | 0 NA     | NA           | NA       | NA       | NA       | NA       |
| FP003590.2       | 2.693927 | 0.642574018  | 1.030872 | 0.623331 | 0.533067 | 0.890978 |
| RF00017          | 0.050723 | -0.86807634  | 5.267649 | -0.16479 | 0.869106 | NA       |
| RF00001          | 0 NA     | NA           | NA       | NA       | NA       | NA       |
| si:ch211-62a1.3  | 395.7715 | 0.594836139  | 0.288417 | 2.062414 | 0.039168 | 0.346149 |
| RF00026          | 0 NA     | NA           | NA       | NA       | NA       | NA       |
| BX908757.3       | 0 NA     | NA           | NA       | NA       | NA       | NA       |



|                   |          |              |          |          |          |          |    |
|-------------------|----------|--------------|----------|----------|----------|----------|----|
| AL808129.2        | 0.045161 |              | 0        | 5.267649 | 0        | 1        | NA |
| RF00003           | 0.086618 |              | 0        | 5.267649 | 0        | 1        | NA |
| LO018598.1        | 28.05428 | 0.34915541   | 0.381398 | 0.915463 | 0.359949 | 0.810891 |    |
| F0818699.1        | 3.575922 | 3.780757066  | 1.481936 | 2.551228 | 0.010734 | 0.180622 |    |
| CR769778.1        | 182.2999 | -0.042720664 | 0.23977  | -0.17817 | 0.858587 | 0.979925 |    |
| CABZ01092982.1    | 21.92391 | 0.039765901  | 0.382775 | 0.103889 | 0.917258 | 0.993775 |    |
| RF00001           | 0.049021 | -0.86807634  | 5.267649 | -0.16479 | 0.869106 | NA       |    |
| RF00001           | 0        | NA           | NA       | NA       | NA       | NA       |    |
| zgc:174354        | 0.084441 |              | 0        | 5.267649 | 0        | 1        | NA |
| BX248122.1        | 51.63626 | -0.203519579 | 0.310132 | -0.65624 | 0.511673 | 0.885    |    |
| si:ch211-238e22.2 | 2.419978 | 0.568914696  | 1.446097 | 0.393414 | 0.694014 | 0.940919 |    |
| F0834823.1        | 21.96927 | -0.241128003 | 0.450836 | -0.53485 | 0.592756 | 0.91015  |    |
| crebbpb           | 1092.546 | 0.078902968  | 0.148395 | 0.53171  | 0.594927 | 0.910869 |    |
| F0818722.1        | 3.935468 | 0.092705923  | 0.952899 | 0.097288 | 0.922497 | 0.994477 |    |
| F0744833.2        | 45.36946 | -0.340041976 | 0.398646 | -0.85299 | 0.393664 | 0.828374 |    |
| RF00001           | 0        | NA           | NA       | NA       | NA       | NA       |    |
| RF00026           | 0        | NA           | NA       | NA       | NA       | NA       |    |
| CR848049.1        | 0.091739 |              | 0        | 5.267649 | 0        | 1        | NA |
| RF00001           | 0        | NA           | NA       | NA       | NA       | NA       |    |
| RF00001           | 0        | NA           | NA       | NA       | NA       | NA       |    |
| RF00026           | 0        | NA           | NA       | NA       | NA       | NA       |    |
| BX572103.1        | 4.438167 | -1.740620273 | 0.834888 | -2.08486 | 0.037082 | 0.337668 |    |
| CU927887.1        | 0        | NA           | NA       | NA       | NA       | NA       |    |
| surf2             | 205.7369 | -0.395640794 | 0.212206 | -1.86442 | 0.062262 | 0.427696 |    |
| RF00001           | 0        | NA           | NA       | NA       | NA       | NA       |    |
| rnf168            | 323.2691 | 0.188079926  | 0.180984 | 1.039208 | 0.298708 | 0.765669 |    |
| CR450780.1        | 7.612092 | -0.057422975 | 1.002242 | -0.05729 | 0.954311 | 0.998611 |    |
| RF00001           | 0.045161 |              | 0        | 5.267649 | 0        | 1        | NA |
| CU855936.2        | 33.74735 | 0.065263925  | 0.495343 | 0.131755 | 0.895178 | 0.989187 |    |
| zgc:165555        | 2.179611 | 4.723374549  | 1.619213 | 2.91708  | 0.003533 | NA       |    |
| BX088712.1        | 3.960342 | 0.69204041   | 1.274998 | 0.542778 | 0.587283 | 0.9073   |    |
| mmp21             | 5.654586 | -0.701194996 | 0.6701   | -1.0464  | 0.295375 | 0.763988 |    |
| RF00001           | 0        | NA           | NA       | NA       | NA       | NA       |    |
| dre-mir-430a-2    | 0        | NA           | NA       | NA       | NA       | NA       |    |
| RF00026           | 0        | NA           | NA       | NA       | NA       | NA       |    |
| RF00001           | 0        | NA           | NA       | NA       | NA       | NA       |    |
| CABZ01087629.1    | 55.63389 | 0.138570067  | 0.258002 | 0.53709  | 0.591205 | 0.909437 |    |
| CABZ01114581.1    | 3.994742 | -0.445399162 | 0.965538 | -0.4613  | 0.644586 | 0.926639 |    |
| FP325130.1        | 147.0046 | -0.147695874 | 0.195816 | -0.75426 | 0.450694 | 0.857151 |    |
| zgc:165555        | 2.622924 | -0.196084112 | 1.436531 | -0.1365  | 0.891427 | 0.988566 |    |
| RF00001           | 37.34606 | 0.378410447  | 0.403266 | 0.938364 | 0.348057 | 0.800392 |    |
| RF00392           | 0.794712 | -1.787893484 | 2.347674 | -0.76156 | 0.446323 | NA       |    |
| RF00026           | 0        | NA           | NA       | NA       | NA       | NA       |    |
| RF00001           | 0        | NA           | NA       | NA       | NA       | NA       |    |
| RF00001           | 0.049519 |              | 0        | 5.267649 | 0        | 1        | NA |
| cst14b.2          | 61.24882 | -0.928487207 | 0.502795 | -1.84665 | 0.064798 | 0.434674 |    |
| znf1093           | 8.175066 | -0.866280916 | 0.830157 | -1.04351 | 0.29671  | 0.764495 |    |
| ftr50             | 0.779005 | 1.055426768  | 2.625532 | 0.401986 | 0.687694 | NA       |    |
| RF00001           | 0        | NA           | NA       | NA       | NA       | NA       |    |
| CR352223.1        | 0.263252 | -2.293535501 | 5.204055 | -0.44072 | 0.659415 | NA       |    |
| RF01848           | 0        | NA           | NA       | NA       | NA       | NA       |    |
| RF00001           | 0        | NA           | NA       | NA       | NA       | NA       |    |
| si:dkey-108k21.11 | 0.782896 | 1.055415514  | 2.890376 | 0.365148 | 0.715001 | NA       |    |
| RF00001           | 0        | NA           | NA       | NA       | NA       | NA       |    |

|                    |           |               |             |           |           |           |
|--------------------|-----------|---------------|-------------|-----------|-----------|-----------|
| v2ra18             | 1. 479597 | 0. 676507199  | 2. 038719   | 0. 33183  | 0. 740018 | NA        |
| RF00026            | 0 NA      |               | NA          | NA        | NA        | NA        |
| RF00001            | 0 NA      |               | NA          | NA        | NA        | NA        |
| BX321875. 3        | 4. 460094 | -1. 060668286 | 1. 312381   | -0. 8082  | 0. 418975 | 0. 842019 |
| CR293507. 1        | 98. 77162 | -0. 027702081 | 0. 203792   | -0. 13593 | 0. 891874 | 0. 988566 |
| CU467905. 1        | 41. 16479 | -1. 716454018 | 0. 680366   | -2. 52284 | 0. 011641 | 0. 187683 |
| RF00003            | 0 NA      |               | NA          | NA        | NA        | NA        |
| cmssl              | 110. 7309 | -0. 04981681  | 0. 203764   | -0. 24448 | 0. 806856 | 0. 969726 |
| RF00591            | 0 NA      |               | NA          | NA        | NA        | NA        |
| TMEM87B            | 20. 44813 | 0. 279561389  | 0. 372      | 0. 751508 | 0. 452347 | 0. 857994 |
| RF00001            | 3. 353973 | 3. 504760875  | 1. 618673   | 2. 165207 | 0. 030372 | 0. 310691 |
| si:ch211-283116. 1 | 0. 528466 | -0. 042931226 | 3. 153562   | -0. 01361 | 0. 989138 | NA        |
| si:ch211-199m3. 1  | 0. 168882 |               | 0 5. 267649 |           | 0         | 1 NA      |
| histlh2a3          | 3. 508859 | -0. 362696942 | 1. 101028   | -0. 32942 | 0. 741841 | 0. 954329 |
| BX511311. 5        | 0 NA      |               | NA          | NA        | NA        | NA        |
| BX510335. 3        | 0 NA      |               | NA          | NA        | NA        | NA        |
| BX000981. 8        | 0 NA      |               | NA          | NA        | NA        | NA        |
| FO704673. 1        | 0. 584423 | -0. 868139515 | 3. 041378   | -0. 28544 | 0. 775305 | NA        |
| pimr15             | 0 NA      |               | NA          | NA        | NA        | NA        |
| RF00003            | 0 NA      |               | NA          | NA        | NA        | NA        |
| RF00001            | 0 NA      |               | NA          | NA        | NA        | NA        |
| RF00001            | 0. 053506 | -0. 86807634  | 5. 267649   | -0. 16479 | 0. 869106 | NA        |
| RF00001            | 0. 098667 | -0. 868089684 | 5. 267649   | -0. 1648  | 0. 869104 | NA        |
| RF00001            | 0 NA      |               | NA          | NA        | NA        | NA        |
| RF00001            | 0 NA      |               | NA          | NA        | NA        | NA        |
| si:ch211-238p8. 35 | 0 NA      |               | NA          | NA        | NA        | NA        |
| RF00001            | 0. 263483 |               | 0 5. 267649 |           | 0         | 1 NA      |
| si:ch211-106j21. 6 | 8. 241327 | -2. 128187799 | 0. 973091   | -2. 18704 | 0. 02874  | 0. 301537 |
| BX681416. 2        | 0. 66605  | 0. 076111635  | 3. 026949   | 0. 025145 | 0. 97994  | NA        |
| RF00001            | 0 NA      |               | NA          | NA        | NA        | NA        |
| RF00001            | 0 NA      |               | NA          | NA        | NA        | NA        |
| FO744854. 1        | 65. 46928 | 0. 552730193  | 0. 216388   | 2. 554342 | 0. 010639 | 0. 179908 |
| RF00026            | 0 NA      |               | NA          | NA        | NA        | NA        |
| BX649423. 1        | 0. 215689 | -0. 793668545 | 5. 235279   | -0. 1516  | 0. 879502 | NA        |
| CU459056. 1        | 445. 4339 | -0. 058645406 | 0. 108361   | -0. 54121 | 0. 588366 | 0. 90797  |
| si:dkey-108k21. 24 | 11. 64543 | 0. 994363497  | 0. 689189   | 1. 442803 | 0. 149076 | 0. 610726 |
| si:dkeyp-82b4. 2   | 7. 517679 | -4. 356707068 | 1. 114414   | -3. 90942 | 9. 25E-05 | 0. 008679 |
| RF00020            | 0 NA      |               | NA          | NA        | NA        | NA        |
| si:dkey-23f9. 8    | 0 NA      |               | NA          | NA        | NA        | NA        |
| RF00001            | 0 NA      |               | NA          | NA        | NA        | NA        |
| RF00001            | 0 NA      |               | NA          | NA        | NA        | NA        |
| tp53rk             | 214. 3491 | -0. 314561132 | 0. 209045   | -1. 50476 | 0. 132387 | 0. 585048 |
| RF00001            | 0 NA      |               | NA          | NA        | NA        | NA        |
| taar19m            | 0 NA      |               | NA          | NA        | NA        | NA        |
| smim20             | 230. 2206 | -0. 201166916 | 0. 219836   | -0. 91508 | 0. 360152 | 0. 811057 |
| RF00001            | 0. 043308 |               | 0 5. 267649 |           | 0         | 1 NA      |
| AL954682. 1        | 539. 6185 | 0. 174160432  | 0. 20415    | 0. 853102 | 0. 393603 | 0. 828374 |
| CABZ01068208. 1    | 9. 753482 | -1. 32742371  | 0. 65024    | -2. 04144 | 0. 041207 | 0. 354145 |
| CT033790. 1        | 0. 102781 | 1. 055383603  | 5. 267649   | 0. 200352 | 0. 841205 | NA        |
| BX649279. 1        | 0. 049519 |               | 0 5. 267649 |           | 0         | 1 NA      |
| RF00001            | 0 NA      |               | NA          | NA        | NA        | NA        |
| RF00001            | 0 NA      |               | NA          | NA        | NA        | NA        |
| RF00001            | 0. 053506 | -0. 86807634  | 5. 267649   | -0. 16479 | 0. 869106 | NA        |
| CR931802. 4        | 62. 80124 | 0. 375519878  | 0. 260216   | 1. 443106 | 0. 148991 | 0. 610726 |

|                   |          |              |            |          |          |          |
|-------------------|----------|--------------|------------|----------|----------|----------|
| st7               | 140.9005 | -0.187166376 | 0.221626   | -0.84451 | 0.398382 | 0.830829 |
| RF00001           | 0.043308 |              | 0 5.267649 |          | 0        | 1 NA     |
| CR556713.1        | 0 NA     |              | NA         | NA       | NA       | NA       |
| RF00003           | 0 NA     |              | NA         | NA       | NA       | NA       |
| RF00026           | 0 NA     |              | NA         | NA       | NA       | NA       |
| RF00001           | 0 NA     |              | NA         | NA       | NA       | NA       |
| taarl8g           | 0.060442 |              | 0 5.267649 |          | 0        | 1 NA     |
| BX537263.3        | 9.095552 | -0.209158848 | 0.878185   | -0.23817 | 0.811748 | 0.97012  |
| CU013534.1        | 0.644143 | 0.967024855  | 2.739837   | 0.35295  | 0.724126 | NA       |
| CR450827.6        | 0 NA     |              | NA         | NA       | NA       | NA       |
| pimr152           | 0.127238 |              | 0 5.267649 |          | 0        | 1 NA     |
| RF00001           | 0 NA     |              | NA         | NA       | NA       | NA       |
| RF00001           | 0 NA     |              | NA         | NA       | NA       | NA       |
| zgc:77614         | 0.07132  |              | 0 5.267649 |          | 0        | 1 NA     |
| RF00001           | 0 NA     |              | NA         | NA       | NA       | NA       |
| si:dkey-58b18.5   | 0 NA     |              | NA         | NA       | NA       | NA       |
| RF00017           | 0.318254 | -3.402516154 | 5.166759   | -0.65854 | 0.510191 | NA       |
| RF00001           | 0.045161 |              | 0 5.267649 |          | 0        | 1 NA     |
| si:dkey-4j21.2    | 4.949798 | -5.801395389 | 4.693378   | -1.23608 | 0.216428 | 0.69815  |
| L0018508.1        | 5.970103 | -0.279219912 | 0.805379   | -0.34669 | 0.728821 | 0.94987  |
| si:dkey-22h13.2   | 10.6404  | -0.489474718 | 0.629393   | -0.77769 | 0.43675  | 0.851093 |
| KLHL12            | 142.2439 | 0.041830134  | 0.212974   | 0.196409 | 0.84429  | 0.976791 |
| RF00001           | 0 NA     |              | NA         | NA       | NA       | NA       |
| RF00001           | 0 NA     |              | NA         | NA       | NA       | NA       |
| CR847970.1        | 18.16109 | 0.242902304  | 0.51812    | 0.468814 | 0.639202 | 0.924779 |
| RF00026           | 0 NA     |              | NA         | NA       | NA       | NA       |
| si:dkey-58b18.6   | 0.185656 |              | 0 5.267649 |          | 0        | 1 NA     |
| FP015810.1        | 42.86743 | -0.169312439 | 0.303563   | -0.55775 | 0.577015 | 0.904798 |
| si:ch211-165a10.5 | 0 NA     |              | NA         | NA       | NA       | NA       |
| BX511129.2        | 57.02376 | -0.875899932 | 0.307706   | -2.84655 | 0.00442  | 0.109607 |
| RF00001           | 0 NA     |              | NA         | NA       | NA       | NA       |
| BX681417.7        | 0 NA     |              | NA         | NA       | NA       | NA       |
| CR394546.4        | 2.411587 | 1.478332502  | 1.743112   | 0.848099 | 0.396383 | 0.829871 |
| CU468896.1        | 0.524427 | 0.093654412  | 2.667818   | 0.035105 | 0.971996 | NA       |
| RF00026           | 0 NA     |              | NA         | NA       | NA       | NA       |
| si:ch211-122124.6 | 0.290362 |              | 0 4.648768 |          | 0        | 1 NA     |
| L0017951.1        | 87.42817 | 0.737955978  | 0.270003   | 2.733139 | 0.006273 | 0.134338 |
| CR381647.3        | 138.642  | -0.526088441 | 0.27899    | -1.88569 | 0.059337 | 0.419411 |
| BX664750.4        | 0 NA     |              | NA         | NA       | NA       | NA       |
| RF00001           | 0 NA     |              | NA         | NA       | NA       | NA       |
| RF00001           | 0 NA     |              | NA         | NA       | NA       | NA       |
| pimr95            | 0 NA     |              | NA         | NA       | NA       | NA       |
| pimr152           | 0.063619 |              | 0 5.267649 |          | 0        | 1 NA     |
| CT583728.16       | 0 NA     |              | NA         | NA       | NA       | NA       |
| taarl3c           | 0 NA     |              | NA         | NA       | NA       | NA       |
| CU695011.1        | 0 NA     |              | NA         | NA       | NA       | NA       |
| dre-mir-430b-18   | 0 NA     |              | NA         | NA       | NA       | NA       |
| RF00012           | 0 NA     |              | NA         | NA       | NA       | NA       |
| RF00001           | 0 NA     |              | NA         | NA       | NA       | NA       |
| RF00001           | 0.129925 |              | 0 5.267649 |          | 0        | 1 NA     |
| AL928875.1        | 0.894898 | -0.868139144 | 2.196359   | -0.39526 | 0.692649 | NA       |
| CZQB01141835.1    | 390.7757 | -0.035146836 | 0.113069   | -0.31084 | 0.755919 | 0.956532 |
| RF00026           | 0 NA     |              | NA         | NA       | NA       | NA       |
| RF00026           | 0 NA     |              | NA         | NA       | NA       | NA       |

|                 |          |              |          |          |          |          |    |
|-----------------|----------|--------------|----------|----------|----------|----------|----|
| RF00001         | 0.084441 |              | 0        | 5.267649 | 0        | 1        | NA |
| RF00001         | 0.043308 |              | 0        | 5.267649 | 0        | 1        | NA |
| RF00026         | 0        | NA           | NA       | NA       | NA       | NA       | NA |
| CABZ01058107.1  | 0.460371 |              | 0        | 3.205351 | 0        | 1        | NA |
| RF00001         | 0        | NA           | NA       | NA       | NA       | NA       | NA |
| znf1116         | 11.88292 | -0.554502482 | 0.524331 | -1.05754 | 0.290264 | 0.76078  |    |
| RF00020         | 0        | NA           | NA       | NA       | NA       | NA       | NA |
| RF00001         | 0        | NA           | NA       | NA       | NA       | NA       | NA |
| RF00017         | 0        | NA           | NA       | NA       | NA       | NA       | NA |
| BX005424.1      | 0        | NA           | NA       | NA       | NA       | NA       | NA |
| RF00001         | 0        | NA           | NA       | NA       | NA       | NA       | NA |
| histlh2a10      | 4.497404 | 0.463810366  | 1.075031 | 0.431439 | 0.666149 | 0.932664 |    |
| si:dkey-61f9.1  | 0.507616 | 1.055422374  | 3.025864 | 0.3488   | 0.727239 | NA       |    |
| BX908796.3      | 0.42208  | -1.337319407 | 3.215217 | -0.41593 | 0.677458 | NA       |    |
| si:dkey-65b13.8 | 0        | NA           | NA       | NA       | NA       | NA       | NA |
| RF00001         | 0        | NA           | NA       | NA       | NA       | NA       | NA |
| RF00001         | 0        | NA           | NA       | NA       | NA       | NA       | NA |
| RF00001         | 0        | NA           | NA       | NA       | NA       | NA       | NA |
| BX323083.3      | 0        | NA           | NA       | NA       | NA       | NA       | NA |
| CT033790.2      | 0.119909 | 2.079562922  | 5.22636  | 0.397899 | 0.690705 | NA       |    |
| RF00001         | 0        | NA           | NA       | NA       | NA       | NA       | NA |
| RF00015         | 0.452797 | -0.86814278  | 3.681945 | -0.23578 | 0.813601 | NA       |    |
| RASSF10         | 126.6762 | -0.232555893 | 0.158501 | -1.46722 | 0.142316 | 0.601598 |    |
| RF00026         | 0        | NA           | NA       | NA       | NA       | NA       | NA |
| RASSF4          | 0        | NA           | NA       | NA       | NA       | NA       | NA |
| RF00001         | 0        | NA           | NA       | NA       | NA       | NA       | NA |
| RF00001         | 0.238159 |              | 0        | 5.267649 | 0        | 1        | NA |
| BX681417.8      | 0        | NA           | NA       | NA       | NA       | NA       | NA |
| CABZ01073424.2  | 38.26636 | -0.176120161 | 0.319503 | -0.55123 | 0.581475 | 0.905618 |    |
| CABZ01021599.1  | 12.48058 | -0.094051367 | 0.554695 | -0.16955 | 0.86536  | 0.982237 |    |
| RF00003         | 0        | NA           | NA       | NA       | NA       | NA       | NA |
| si:dkey-23f9.11 | 0        | NA           | NA       | NA       | NA       | NA       | NA |
| znf1067         | 37.52829 | -0.002077311 | 0.329439 | -0.00631 | 0.994969 |          | 1  |
| RF00001         | 0        | NA           | NA       | NA       | NA       | NA       | NA |
| znf1101         | 8.754854 | 0.082160752  | 0.586237 | 0.140149 | 0.888542 | 0.988188 |    |
| CT030005.3      | 0        | NA           | NA       | NA       | NA       | NA       | NA |
| RF00001         | 0        | NA           | NA       | NA       | NA       | NA       | NA |
| rab38b          | 18.64067 | -0.872828683 | 0.417511 | -2.09055 | 0.036568 | 0.33609  |    |
| CT027598.1      | 2.21282  |              | 0        | 2.302476 | 0        | 1        | 1  |
| F0834857.1      | 16.22104 | 0.465203094  | 0.426599 | 1.090492 | 0.275496 | 0.750643 |    |
| BX000981.9      | 0        | NA           | NA       | NA       | NA       | NA       | NA |
| st3ga12         | 61.14441 | 0.335870595  | 0.261549 | 1.284161 | 0.199086 | 0.679605 |    |
| RF00001         | 0.148387 | -1.755438701 | 5.23528  | -0.33531 | 0.737392 | NA       |    |
| RF00026         | 0        | NA           | NA       | NA       | NA       | NA       | NA |
| RF00001         | 0.053262 | 1.055396947  | 5.267649 | 0.200354 | 0.841203 | NA       |    |
| RF00026         | 0        | NA           | NA       | NA       | NA       | NA       | NA |
| RF00001         | 0        | NA           | NA       | NA       | NA       | NA       | NA |
| RF00017         | 0        | NA           | NA       | NA       | NA       | NA       | NA |
| ZNF462          | 156.3245 | -0.082780406 | 0.221614 | -0.37353 | 0.708751 | 0.945518 |    |
| RF00001         | 0.046941 |              | 0        | 5.267649 | 0        | 1        | NA |
| RF00001         | 0        | NA           | NA       | NA       | NA       | NA       | NA |
| BX927362.2      | 0.88611  | 1.055432112  | 2.323638 | 0.454215 | 0.649674 | NA       |    |
| PQLC1           | 22.98214 | -0.077875844 | 0.36233  | -0.21493 | 0.829821 | 0.974816 |    |
| CABZ01088036.1  | 25.48798 | -0.662736262 | 0.459262 | -1.44305 | 0.149008 | 0.610726 |    |

|                    |          |              |            |          |          |          |
|--------------------|----------|--------------|------------|----------|----------|----------|
| CR450780.2         | 10.45304 | -0.183498816 | 0.538227   | -0.34093 | 0.733155 | 0.950758 |
| CT737184.2         | 10.67775 | -0.241520974 | 0.688539   | -0.35077 | 0.725758 | 0.948653 |
| ndufaf3            | 1249.036 | 0.482740922  | 0.15309    | 3.153304 | 0.001614 | 0.06152  |
| taar20b1           | 0.280318 |              | 0 5.267649 |          | 0        | 1 NA     |
| RF00026            | 0 NA     |              | NA         | NA       | NA       | NA       |
| CT573263.1         | 3.563168 | -3.338428418 | 1.198073   | -2.7865  | 0.005328 | 0.122593 |
| pimr174            | 0.584587 | 1.640526638  | 2.697903   | 0.608075 | 0.543138 | NA       |
| BX908770.1         | 12.42886 | 0.014281045  | 0.474403   | 0.030103 | 0.975985 | 1        |
| adgre5b.3          | 108.1011 | 0.062837748  | 0.191079   | 0.328858 | 0.742263 | 0.954329 |
| L0018564.1         | 23.91317 | 0.350881499  | 0.498729   | 0.703551 | 0.481713 | 0.871063 |
| BX294110.2         | 0.312225 |              | 0 5.267649 |          | 0        | 1 NA     |
| RF00026            | 0 NA     |              | NA         | NA       | NA       | NA       |
| zgc:165555         | 6.057972 | 0.11313912   | 0.951662   | 0.118886 | 0.905366 | 0.991631 |
| RF00001            | 0 NA     |              | NA         | NA       | NA       | NA       |
| CT009745.1         | 0 NA     |              | NA         | NA       | NA       | NA       |
| F0704758.2         | 76.65217 | -1.648671701 | 0.581233   | -2.83651 | 0.004561 | 0.111673 |
| CABZ01072309.1     | 867.2385 | 0.122257745  | 0.18012    | 0.678757 | 0.497292 | 0.878713 |
| si:dkey-7i4.7      | 65.55781 | 0.035143549  | 0.281041   | 0.125048 | 0.900486 | 0.99045  |
| L0017848.1         | 24.94431 | -0.329571716 | 0.518779   | -0.63528 | 0.525244 | 0.888928 |
| CR762436.2         | 2.104429 | 1.428413779  | 1.532063   | 0.932347 | 0.351157 | NA       |
| RF00001            | 0 NA     |              | NA         | NA       | NA       | NA       |
| BX571719.1         | 37.37315 | -0.846915515 | 0.374293   | -2.26271 | 0.023654 | 0.272124 |
| RF00026            | 0 NA     |              | NA         | NA       | NA       | NA       |
| RF00001            | 0 NA     |              | NA         | NA       | NA       | NA       |
| CABZ01061591.1     | 94.22896 | -0.4568507   | 0.232883   | -1.96172 | 0.049795 | 0.38821  |
| RF00001            | 0 NA     |              | NA         | NA       | NA       | NA       |
| RF00001            | 0 NA     |              | NA         | NA       | NA       | NA       |
| RF00003            | 0.046941 |              | 0 5.267649 |          | 0        | 1 NA     |
| RF00325            | 0.090321 |              | 0 5.267649 |          | 0        | 1 NA     |
| RF00003            | 0 NA     |              | NA         | NA       | NA       | NA       |
| BX897729.1         | 2.955584 | 0.880121808  | 1.359072   | 0.64759  | 0.51725  | 0.887148 |
| RF00001            | 0 NA     |              | NA         | NA       | NA       | NA       |
| efnb3a             | 88.42382 | 0.152051477  | 0.204967   | 0.741833 | 0.458188 | 0.861001 |
| RF00001            | 0 NA     |              | NA         | NA       | NA       | NA       |
| RF00001            | 0 NA     |              | NA         | NA       | NA       | NA       |
| RF00001            | 0 NA     |              | NA         | NA       | NA       | NA       |
| RF00001            | 0.171522 | 1.055370259  | 5.267649   | 0.200349 | 0.841207 | NA       |
| si:dkey-47k16.4    | 2.121176 | 0.446162901  | 1.373074   | 0.324937 | 0.745229 | NA       |
| dre-mir-738        | 0 NA     |              | NA         | NA       | NA       | NA       |
| si:dkey-58b18.10   | 0 NA     |              | NA         | NA       | NA       | NA       |
| F0704721.1         | 43.44377 | -0.365753375 | 0.300012   | -1.21913 | 0.222795 | 0.704635 |
| RF00026            | 0 NA     |              | NA         | NA       | NA       | NA       |
| zgc:113102         | 45.9021  | -0.505885878 | 0.254845   | -1.98507 | 0.047137 | 0.378022 |
| CU207245.1         | 8.761217 | -0.722640859 | 0.635385   | -1.13733 | 0.255401 | 0.733542 |
| RF00003            | 0 NA     |              | NA         | NA       | NA       | NA       |
| RF00001            | 0 NA     |              | NA         | NA       | NA       | NA       |
| si:ch211-207e19.15 | 1.643269 | -3.810488898 | 1.681869   | -2.26563 | 0.023474 | NA       |
| RF00001            | 0 NA     |              | NA         | NA       | NA       | NA       |
| RF00001            | 0 NA     |              | NA         | NA       | NA       | NA       |
| BX005073.3         | 5.202171 | -0.431239985 | 1.18661    | -0.36342 | 0.71629  | 0.94627  |
| si:dkey-58b18.8    | 1.353169 | 1.559490814  | 2.237631   | 0.696938 | 0.485841 | NA       |
| RF00001            | 0 NA     |              | NA         | NA       | NA       | NA       |
| tradv10.0.3        | 0 NA     |              | NA         | NA       | NA       | NA       |
| BX681417.9         | 0 NA     |              | NA         | NA       | NA       | NA       |

|                   |          |              |          |          |          |          |    |
|-------------------|----------|--------------|----------|----------|----------|----------|----|
| RF00001           | 0        | NA           | NA       | NA       | NA       | NA       |    |
| BX000981.10       | 0        | NA           | NA       | NA       | NA       | NA       |    |
| RF00001           | 0.04222  |              | 0        | 5.267649 | 0        | 1        | NA |
| RF00001           | 0.149291 | 0.09368032   | 5.267649 | 0.017784 | 0.985811 | NA       | NA |
| pimr58            | 0        | NA           | NA       | NA       | NA       | NA       | NA |
| CABZ01063543.1    | 9.931564 | -0.335951326 | 1.197205 | -0.28061 | 0.779007 | 0.961073 | NA |
| RF00001           | 0.375295 | -0.752583246 | 3.802734 | -0.19791 | 0.843119 | NA       | NA |
| RF00026           | 0        | NA           | NA       | NA       | NA       | NA       | NA |
| RF00001           | 0        | NA           | NA       | NA       | NA       | NA       | NA |
| RF00016           | 0.364824 | 1.055394171  | 3.83848  | 0.274951 | 0.783354 | NA       | NA |
| F0834800.2        | 0.669392 |              | 0        | 3.346729 | 0        | 1        | NA |
| RF00026           | 0        | NA           | NA       | NA       | NA       | NA       | NA |
| ighv9-4           | 0        | NA           | NA       | NA       | NA       | NA       | NA |
| CR392045.1        | 7.198549 | 0.77276541   | 0.83495  | 0.925523 | 0.354694 | 0.805791 | NA |
| AL929276.1        | 2.519731 | 0.32521346   | 1.156195 | 0.281279 | 0.778496 | 0.961073 | NA |
| RF00001           | 0.043308 |              | 0        | 5.267649 | 0        | 1        | NA |
| dre-mir-430b-6    | 0        | NA           | NA       | NA       | NA       | NA       | NA |
| CU468723.2        | 0.195608 | 1.055362173  | 5.267649 | 0.200348 | 0.841209 | NA       | NA |
| si:ch211-182p11.1 | 30.04921 | 1.308553967  | 1.044345 | 1.25299  | 0.210209 | 0.692011 | NA |
| zgc:91850         | 0        | NA           | NA       | NA       | NA       | NA       | NA |
| RF00001           | 0        | NA           | NA       | NA       | NA       | NA       | NA |
| CU138512.1        | 0.28137  | -1.826678969 | 5.23046  | -0.34924 | 0.72691  | NA       | NA |
| RF00001           | 0        | NA           | NA       | NA       | NA       | NA       | NA |
| RF00001           | 1.022309 |              | 0        | 2.427151 | 0        | 1        | NA |
| RF00026           | 0        | NA           | NA       | NA       | NA       | NA       | NA |
| BX569796.1        | 0        | NA           | NA       | NA       | NA       | NA       | NA |
| dre-mir-430b-10   | 0        | NA           | NA       | NA       | NA       | NA       | NA |
| RF00001           | 0.043308 |              | 0        | 5.267649 | 0        | 1        | NA |
| si:ch211-1n9.6    | 0.333805 | 1.629353468  | 3.796798 | 0.429139 | 0.667822 | NA       | NA |
| RF00001           | 0        | NA           | NA       | NA       | NA       | NA       | NA |
| BX530077.1        | 110.3973 | 0.098386961  | 0.189217 | 0.519969 | 0.603085 | 0.914226 | NA |
| BX649468.1        | 2.322121 | 1.932447782  | 1.771387 | 1.090924 | 0.275307 | 0.750424 | NA |
| CABZ01085275.1    | 12.11331 | 1.150984738  | 0.728741 | 1.579414 | 0.114241 | 0.553295 | NA |
| BX681417.10       | 0        | NA           | NA       | NA       | NA       | NA       | NA |
| DGKD              | 47.37763 | -0.073923796 | 0.378099 | -0.19551 | 0.84499  | 0.976791 | NA |
| NRXN2             | 106.5271 | 0.245461249  | 0.313159 | 0.783824 | 0.433143 | 0.849392 | NA |
| AL929345.1        | 0.426654 | -0.753421073 | 3.637001 | -0.20715 | 0.835889 | NA       | NA |
| CR848784.4        | 0.140822 |              | 0        | 5.267649 | 0        | 1        | NA |
| RF00003           | 0.134322 |              | 0        | 5.267649 | 0        | 1        | NA |
| CABZ01061501.1    | 1.091761 |              | 0        | 4.678269 | 0        | 1        | NA |
| RF00017           | 0.101446 | -1.755425691 | 5.23528  | -0.33531 | 0.737394 | NA       | NA |
| BX548073.8        | 0        | NA           | NA       | NA       | NA       | NA       | NA |
| BX276107.1        | 28.70888 | -0.123585529 | 0.420495 | -0.29391 | 0.76883  | 0.960395 | NA |
| CR855318.1        | 1.825715 | 0.762237222  | 1.459803 | 0.522151 | 0.601565 | NA       | NA |
| znf1018           | 3.099861 | -1.052479582 | 1.0215   | -1.03033 | 0.302856 | 0.769006 | NA |
| AL929009.2        | 0.47989  | -0.86814616  | 4.172952 | -0.20804 | 0.835197 | NA       | NA |
| RF00012           | 0        | NA           | NA       | NA       | NA       | NA       | NA |
| fth131            | 13.78787 | -0.119300985 | 0.583442 | -0.20448 | 0.83798  | 0.976359 | NA |
| RF00001           | 0        | NA           | NA       | NA       | NA       | NA       | NA |
| RF00001           | 0        | NA           | NA       | NA       | NA       | NA       | NA |
| RF00001           | 0        | NA           | NA       | NA       | NA       | NA       | NA |
| RF00001           | 0        | NA           | NA       | NA       | NA       | NA       | NA |
| CU464134.2        | 0.75014  | -1.3799274   | 2.746604 | -0.50241 | 0.615378 | NA       | NA |
| RF00001           | 0        | NA           | NA       | NA       | NA       | NA       | NA |

|                  |           |               |           |           |                     |
|------------------|-----------|---------------|-----------|-----------|---------------------|
| RF00003          | 0 NA      | NA            | NA        | NA        | NA                  |
| RF00017          | 0. 148556 | 0 5. 267649   | 0         | 1 NA      |                     |
| RF00001          | 0 NA      | NA            | NA        | NA        | NA                  |
| CABZ01078858. 1  | 118. 5866 | 0. 030759839  | 0. 251461 | 0. 122325 | 0. 902642 0. 991028 |
| RF00001          | 0. 099037 | 0 5. 267649   | 0         | 1 NA      |                     |
| BX957362. 5      | 0 NA      | NA            | NA        | NA        | NA                  |
| pigr13. 5        | 0. 259065 | 0 5. 267649   | 0         | 1 NA      |                     |
| si:dkey-29p23. 2 | 1. 25031  | -0. 213125852 | 1. 980536 | -0. 10761 | 0. 914305 NA        |
| RF00003          | 0 NA      | NA            | NA        | NA        | NA                  |
| CR352226. 6      | 0. 2085   | -0. 868117117 | 5. 267649 | -0. 1648  | 0. 8691 NA          |
| RF00001          | 0 NA      | NA            | NA        | NA        | NA                  |
| BX511311. 6      | 0 NA      | NA            | NA        | NA        | NA                  |
| zgc:163040       | 3. 833869 | -1. 500691633 | 1. 166055 | -1. 28698 | 0. 198101 0. 678893 |
| pimr85           | 0. 254831 | -2. 340119187 | 5. 201853 | -0. 44986 | 0. 65281 NA         |
| RF00001          | 0 NA      | NA            | NA        | NA        | NA                  |
| FP236810. 2      | 22. 58755 | -0. 493473288 | 0. 806244 | -0. 61206 | 0. 540495 0. 89318  |
| taar19u          | 0 NA      | NA            | NA        | NA        | NA                  |
| RF00001          | 0. 08847  | 0 5. 267649   | 0         | 1 NA      |                     |
| RF00012          | 0 NA      | NA            | NA        | NA        | NA                  |
| CR450764. 3      | 2. 381639 | -1. 165866277 | 1. 09379  | -1. 0659  | 0. 286471 0. 757624 |
| CR384055. 1      | 4. 439876 | -0. 933389018 | 1. 066113 | -0. 87551 | 0. 381298 0. 824438 |
| RF00001          | 0 NA      | NA            | NA        | NA        | NA                  |
| RF00415          | 0 NA      | NA            | NA        | NA        | NA                  |
| RF00001          | 0. 043308 | 0 5. 267649   | 0         | 1 NA      |                     |
| BX957281. 1      | 2. 470294 | 0. 065312016  | 1. 297387 | 0. 050341 | 0. 95985 0. 999164  |
| RF00001          | 0 NA      | NA            | NA        | NA        | NA                  |
| BX511224. 1      | 1. 240109 | -1. 758361901 | 2. 423861 | -0. 72544 | 0. 468183 NA        |
| CABZ01028298. 1  | 0 NA      | NA            | NA        | NA        | NA                  |
| BX572627. 1      | 0. 664847 | 0 2. 885208   | 0         | 1 NA      |                     |
| RF00001          | 0 NA      | NA            | NA        | NA        | NA                  |
| zgc:77058        | 430. 6422 | 0. 353285479  | 0. 151115 | 2. 337865 | 0. 019394 0. 245214 |
| CABZ01070469. 1  | 62. 79156 | 0. 763110649  | 0. 318796 | 2. 393724 | 0. 016678 0. 228931 |
| F0704821. 1      | 91. 33167 | 0. 18025925   | 0. 219975 | 0. 819452 | 0. 412528 0. 838123 |
| BX546453. 1      | 1. 299471 | -0. 287522561 | 1. 727146 | -0. 16647 | 0. 867785 NA        |
| RF00001          | 0 NA      | NA            | NA        | NA        | NA                  |
| BX005397. 1      | 3. 767113 | 2. 134695704  | 0. 989416 | 2. 15753  | 0. 030964 0. 313376 |
| ctxn1            | 3. 119248 | -0. 663278418 | 1. 104957 | -0. 60028 | 0. 548323 0. 896644 |
| RF00494          | 81. 70173 | 0. 019875157  | 0. 315519 | 0. 062992 | 0. 949773 0. 99801  |
| RF00020          | 0 NA      | NA            | NA        | NA        | NA                  |
| AL929536. 3      | 95. 89224 | -0. 991460967 | 0. 478396 | -2. 07247 | 0. 038222 0. 342672 |
| dre-mir-430c-1   | 0 NA      | NA            | NA        | NA        | NA                  |
| RF00026          | 0 NA      | NA            | NA        | NA        | NA                  |
| BX510335. 4      | 0 NA      | NA            | NA        | NA        | NA                  |
| RF00026          | 0 NA      | NA            | NA        | NA        | NA                  |
| RF00001          | 0 NA      | NA            | NA        | NA        | NA                  |
| znf1146          | 6. 559161 | 0. 08798763   | 0. 615697 | 0. 142907 | 0. 886363 0. 987533 |
| L0017802. 1      | 9. 983507 | -0. 648284866 | 0. 575583 | -1. 12631 | 0. 260034 0. 73712  |
| L0017722. 1      | 136. 452  | 0. 12033998   | 0. 204768 | 0. 587689 | 0. 556741 0. 899063 |
| RF00026          | 0 NA      | NA            | NA        | NA        | NA                  |
| CR382326. 1      | 0 NA      | NA            | NA        | NA        | NA                  |
| L0018260. 3      | 1. 440604 | 3. 146806664  | 1. 730906 | 1. 818011 | 0. 069062 NA        |
| CT583662. 1      | 0. 489802 | 0 4. 762926   | 0         | 1 NA      |                     |
| CR925756. 1      | 0. 073968 | 0 5. 267649   | 0         | 1 NA      |                     |
| RF00001          | 0 NA      | NA            | NA        | NA        | NA                  |

|                  |          |              |          |          |                   |
|------------------|----------|--------------|----------|----------|-------------------|
| ighv9-2          | 0 NA     | NA           | NA       | NA       | NA                |
| CR394532.2       | 1.074976 | -1.781808143 | 2.357316 | -0.75586 | 0.449731 NA       |
| zgc:153932       | 47.30271 | 0.797533152  | 0.725566 | 1.099188 | 0.271686 0.747976 |
| si:dkey-88n24.5  | 8.053089 | 1.717667027  | 0.643871 | 2.667721 | 0.007637 0.147606 |
| RF00001          | 0.486944 | -3.637091156 | 4.651757 | -0.78187 | 0.434288 NA       |
| RF00017          | 0.049519 | 0            | 5.267649 | 0        | 1 NA              |
| CR388148.2       | 1.051614 | 0            | 4.835044 | 0        | 1 NA              |
| CU571081.1       | 32.21218 | 0.237119888  | 0.301885 | 0.785464 | 0.432181 0.848419 |
| CABZ01084501.2   | 136.6485 | 0.453112169  | 0.236018 | 1.919822 | 0.05488 0.405196  |
| RF00001          | 0 NA     | NA           | NA       | NA       | NA                |
| RF00003          | 0 NA     | NA           | NA       | NA       | NA                |
| RF00026          | 0 NA     | NA           | NA       | NA       | NA                |
| RF00026          | 0 NA     | NA           | NA       | NA       | NA                |
| CR749763.6       | 0.050723 | -0.86807634  | 5.267649 | -0.16479 | 0.869106 NA       |
| RF00001          | 0 NA     | NA           | NA       | NA       | NA                |
| RF01848          | 0 NA     | NA           | NA       | NA       | NA                |
| zgc:153659       | 0.108976 | 0.093693664  | 5.267649 | 0.017787 | 0.985809 NA       |
| F0904868.1       | 0.134939 | 0            | 5.267649 | 0        | 1 NA              |
| RF00001          | 0.043309 | 0            | 5.267649 | 0        | 1 NA              |
| RF00001          | 0 NA     | NA           | NA       | NA       | NA                |
| RF00001          | 0 NA     | NA           | NA       | NA       | NA                |
| RF00026          | 0 NA     | NA           | NA       | NA       | NA                |
| dre-mir-430c-1   | 0 NA     | NA           | NA       | NA       | NA                |
| CU571384.1       | 0.898195 | 1.99710134   | 1.981172 | 1.008041 | 0.313435 NA       |
| BX322657.3       | 25.89229 | -0.183168793 | 0.406709 | -0.45037 | 0.652445 0.92891  |
| insig2           | 83.89117 | -0.283150777 | 0.206348 | -1.3722  | 0.170002 0.641773 |
| dre-mir-430c-1   | 0 NA     | NA           | NA       | NA       | NA                |
| CABZ01086139.1   | 4.776868 | 0.102601866  | 0.732431 | 0.140084 | 0.888594 0.988188 |
| BX248501.2       | 21.00272 | -0.910160779 | 0.787762 | -1.15537 | 0.247937 0.728489 |
| RF00001          | 0.04222  | 0            | 5.267649 | 0        | 1 NA              |
| BX510922.3       | 17.09335 | -0.210374166 | 0.505608 | -0.41608 | 0.67735 0.935952  |
| RF00001          | 0 NA     | NA           | NA       | NA       | NA                |
| CU138548.5       | 0.116481 | 0            | 5.267649 | 0        | 1 NA              |
| si:dkey-83f18.15 | 0.191245 | 0            | 5.267649 | 0        | 1 NA              |
| RF00003          | 0 NA     | NA           | NA       | NA       | NA                |
| L0018432.1       | 2.243239 | -0.182114178 | 1.25387  | -0.14524 | 0.88452 0.987168  |
| si:dkey-265e15.2 | 4.437556 | 0.17221044   | 0.773576 | 0.222616 | 0.823834 0.972005 |
| golim4a          | 253.7896 | 0.158541482  | 0.145279 | 1.091293 | 0.275144 0.750424 |
| BX548045.2       | 0.046941 | 0            | 5.267649 | 0        | 1 NA              |
| RF00001          | 0 NA     | NA           | NA       | NA       | NA                |
| FP236630.1       | 2.792622 | 1.666971707  | 1.3967   | 1.193507 | 0.232671 0.714183 |
| RF00026          | 0 NA     | NA           | NA       | NA       | NA                |
| RF00001          | 0.100203 | 1.055383603  | 5.267649 | 0.200352 | 0.841205 NA       |
| lrrc4ca          | 52.12316 | 0.333873329  | 0.373547 | 0.893793 | 0.371433 0.818945 |
| RF00003          | 0 NA     | NA           | NA       | NA       | NA                |
| RF00001          | 0 NA     | NA           | NA       | NA       | NA                |
| zgc:173545       | 0 NA     | NA           | NA       | NA       | NA                |
| RF00001          | 0.139042 | 0            | 5.267649 | 0        | 1 NA              |
| RF00001          | 0.282552 | -1.790859047 | 4.659198 | -0.38437 | 0.700704 NA       |
| si:ch211-276i6.1 | 1.192539 | -1.264307541 | 2.105534 | -0.60047 | 0.548194 NA       |
| RF00026          | 0 NA     | NA           | NA       | NA       | NA                |
| RF00026          | 0 NA     | NA           | NA       | NA       | NA                |
| CR318624.2       | 15.9501  | -1.607038032 | 0.542165 | -2.96411 | 0.003036 0.090902 |
| RF00003          | 0.090249 | 0            | 5.267649 | 0        | 1 NA              |



|                    |          |              |          |          |          |          |
|--------------------|----------|--------------|----------|----------|----------|----------|
| taar18i            | 0 NA     | NA           | NA       | NA       | NA       | NA       |
| CT583626.1         | 0.137262 | 0            | 5.267649 | 0        | 1        | NA       |
| CABZ01068600.1     | 87.7687  | -0.192141997 | 0.20747  | -0.92612 | 0.354384 | 0.805403 |
| CABZ01058333.1     | 5.044441 | -0.87838596  | 0.822086 | -1.06848 | 0.285302 | 0.756517 |
| RF00001            | 0 NA     | NA           | NA       | NA       | NA       | NA       |
| RF00334            | 0 NA     | NA           | NA       | NA       | NA       | NA       |
| dre-mir-430a-4     | 0 NA     | NA           | NA       | NA       | NA       | NA       |
| CABZ01067151.1     | 35.97557 | -0.046241477 | 0.368151 | -0.1256  | 0.900045 | 0.99045  |
| RF00026            | 0 NA     | NA           | NA       | NA       | NA       | NA       |
| CU856539.3         | 3.073321 | 0.103887721  | 1.283203 | 0.08096  | 0.935474 | 0.996829 |
| si:ch211-113a14.19 | 1.814662 | 1.944817119  | 1.423805 | 1.365929 | 0.171961 | NA       |
| RF00026            | 0 NA     | NA           | NA       | NA       | NA       | NA       |
| si:dkey-27d5.5     | 0.099037 | 0            | 5.267649 | 0        | 1        | NA       |
| RF00001            | 0.063619 | 0            | 5.267649 | 0        | 1        | NA       |
| RF00001            | 0.120883 | 0            | 5.267649 | 0        | 1        | NA       |
| RF00001            | 0 NA     | NA           | NA       | NA       | NA       | NA       |
| CR786566.1         | 0.383913 | -3.055702316 | 3.629948 | -0.8418  | 0.399898 | NA       |
| RF00001            | 1.92113  | 1.055436094  | 1.928706 | 0.547225 | 0.584224 | NA       |
| RF00001            | 0 NA     | NA           | NA       | NA       | NA       | NA       |
| si:ch211-14p21.4   | 0.217291 | 0            | 5.07631  | 0        | 1        | NA       |
| pimr45             | 0.086616 | 0            | 5.267649 | 0        | 1        | NA       |
| CU459094.2         | 23.68662 | -0.052025811 | 0.437678 | -0.11887 | 0.90538  | 0.991631 |
| RF00017            | 0.707403 | -0.795729914 | 2.773588 | -0.2869  | 0.774192 | NA       |
| RF00001            | 0 NA     | NA           | NA       | NA       | NA       | NA       |
| si:ch211-59d8.2    | 3.529489 | -2.165870122 | 1.383586 | -1.5654  | 0.117488 | 0.558974 |
| si:dkeyp-67e1.6    | 0.043309 | 0            | 5.267649 | 0        | 1        | NA       |
| BX088712.2         | 0.134322 | 0            | 5.267649 | 0        | 1        | NA       |
| RF00001            | 0 NA     | NA           | NA       | NA       | NA       | NA       |
| RF00026            | 0 NA     | NA           | NA       | NA       | NA       | NA       |
| RF00001            | 0 NA     | NA           | NA       | NA       | NA       | NA       |
| fgf12b             | 92.64614 | 0.442708659  | 0.277241 | 1.596835 | 0.110302 | 0.544927 |
| BX548011.3         | 0.403378 | 3.215238303  | 4.127414 | 0.778996 | 0.435982 | NA       |
| si:ch211-209n20.3  | 1.483541 | 2.83245106   | 1.642973 | 1.723979 | 0.084712 | NA       |
| CABZ01074363.1     | 48.92339 | -0.469093395 | 0.248557 | -1.88727 | 0.059124 | 0.419032 |
| RF00001            | 0 NA     | NA           | NA       | NA       | NA       | NA       |
| RF00001            | 0.562478 | -0.95962814  | 2.602769 | -0.3687  | 0.712355 | NA       |
| RF00017            | 0.049519 | 0            | 5.267649 | 0        | 1        | NA       |
| RF00001            | 0 NA     | NA           | NA       | NA       | NA       | NA       |
| L0017656.2         | 0.090249 | 0            | 5.267649 | 0        | 1        | NA       |
| CU633775.1         | 39.61428 | -0.461756414 | 0.32551  | -1.41856 | 0.156027 | 0.621616 |
| CU571382.5         | 0.455595 | -2.71067835  | 3.596058 | -0.75379 | 0.450974 | NA       |
| L0018202.1         | 0.245499 | 0            | 5.267649 | 0        | 1        | NA       |
| si:dkeyp-82b4.4    | 2.111025 | 2.10200428   | 1.499264 | 1.402024 | 0.160908 | NA       |
| RF00001            | 0 NA     | NA           | NA       | NA       | NA       | NA       |
| fam78bb            | 10.57521 | -1.067477806 | 0.687468 | -1.55277 | 0.120479 | 0.565995 |
| traj23             | 0 NA     | NA           | NA       | NA       | NA       | NA       |
| si:ch211-221n20.7  | 0.488536 | -1.718573923 | 3.144053 | -0.54661 | 0.584646 | NA       |
| RF00001            | 0 NA     | NA           | NA       | NA       | NA       | NA       |
| znf1107            | 5.929912 | -3.382763958 | 0.977149 | -3.46187 | 0.000536 | 0.028905 |
| RF00001            | 0 NA     | NA           | NA       | NA       | NA       | NA       |
| BX927341.2         | 0 NA     | NA           | NA       | NA       | NA       | NA       |
| CR352226.7         | 0.149116 | 1.055371237  | 5.267649 | 0.20035  | 0.841207 | NA       |
| RF00091            | 0.137491 | -0.868103029 | 5.267649 | -0.1648  | 0.869102 | NA       |
| si:dkey-102c8.3    | 564.9143 | 0.542988794  | 0.240908 | 2.25393  | 0.024201 | 0.275271 |

|                   |          |              |            |          |          |          |
|-------------------|----------|--------------|------------|----------|----------|----------|
| CU462871.1        | 0.76791  | 1.055429862  | 2.348808   | 0.449347 | 0.653181 | NA       |
| CR936363.1        | 0.148556 |              | 0 5.267649 |          | 0        | 1 NA     |
| CT955984.1        | 0.612381 | 1.028979629  | 2.783017   | 0.369735 | 0.71158  | NA       |
| RF00001           | 0 NA     |              | NA         | NA       | NA       | NA       |
| RF00003           | 0 NA     |              | NA         | NA       | NA       | NA       |
| znf993            | 17.94491 | 0.684430545  | 0.683525   | 1.001324 | 0.31667  | 0.778879 |
| pimr30            | 0.147936 |              | 0 5.267649 |          | 0        | 1 NA     |
| RF00001           | 0 NA     |              | NA         | NA       | NA       | NA       |
| RF00001           | 0.053506 | -0.86807634  | 5.267649   | -0.16479 | 0.869106 | NA       |
| RF00001           | 0 NA     |              | NA         | NA       | NA       | NA       |
| RF00001           | 0 NA     |              | NA         | NA       | NA       | NA       |
| hbbe1.1           | 21267.39 | -1.97106027  | 0.275761   | -7.14771 | 8.82E-13 | 1.28E-09 |
| BX511311.7        | 0 NA     |              | NA         | NA       | NA       | NA       |
| BEND4             | 2.815108 | -0.363180639 | 1.150438   | -0.31569 | 0.752238 | 0.955481 |
| RF00026           | 0 NA     |              | NA         | NA       | NA       | NA       |
| TMEM164           | 31.34243 | 0.274904496  | 0.348717   | 0.78833  | 0.430504 | 0.847542 |
| RF00003           | 0 NA     |              | NA         | NA       | NA       | NA       |
| RF00001           | 0 NA     |              | NA         | NA       | NA       | NA       |
| dre-mir-430a-16   | 0 NA     |              | NA         | NA       | NA       | NA       |
| RF00001           | 0 NA     |              | NA         | NA       | NA       | NA       |
| RF00001           | 0.106524 | 1.92158077   | 5.236909   | 0.36693  | 0.713671 | NA       |
| RF00026           | 0 NA     |              | NA         | NA       | NA       | NA       |
| znf976            | 7.932282 | -0.732111757 | 0.665984   | -1.09929 | 0.27164  | 0.747976 |
| RF00001           | 0.045161 |              | 0 5.267649 |          | 0        | 1 NA     |
| RF00392           | 0 NA     |              | NA         | NA       | NA       | NA       |
| pimr64            | 0.26763  | 1.05533919   | 5.267649   | 0.200344 | 0.841212 | NA       |
| BX571674.1        | 0.046941 |              | 0 5.267649 |          | 0        | 1 NA     |
| BX470083.3        | 0 NA     |              | NA         | NA       | NA       | NA       |
| RF00001           | 0 NA     |              | NA         | NA       | NA       | NA       |
| ralbb             | 284.6522 | 0.296843063  | 0.160366   | 1.85104  | 0.064164 | 0.432457 |
| RF00026           | 0.517996 | -2.340313459 | 4.63966    | -0.50441 | 0.61397  | NA       |
| RF00026           | 0 NA     |              | NA         | NA       | NA       | NA       |
| CU861574.1        | 0 NA     |              | NA         | NA       | NA       | NA       |
| RF00001           | 0 NA     |              | NA         | NA       | NA       | NA       |
| LO018363.2        | 104.3811 | 0.29858338   | 0.21781    | 1.370843 | 0.170424 | 0.642069 |
| CU928063.1        | 0.203167 | 0.093666232  | 5.267649   | 0.017781 | 0.985813 | NA       |
| si:ch211-196f19.1 | 17.22063 | -0.792271913 | 0.419947   | -1.8866  | 0.059214 | 0.419186 |
| BX649423.2        | 0 NA     |              | NA         | NA       | NA       | NA       |
| BX901883.4        | 1.228183 | -1.485516437 | 1.624066   | -0.91469 | 0.360354 | NA       |
| RF00026           | 0 NA     |              | NA         | NA       | NA       | NA       |
| znf1173           | 40.15119 | 0.451894054  | 0.376686   | 1.199657 | 0.230272 | 0.712099 |
| RF00001           | 0 NA     |              | NA         | NA       | NA       | NA       |
| AL935186.8        | 22.04589 | 0.520831925  | 0.914047   | 0.569808 | 0.568808 | 0.902234 |
| RF00026           | 0.288831 | 2.962897837  | 5.184402   | 0.571502 | 0.567659 | NA       |
| CABZ01058222.1    | 242.0813 | -0.556947329 | 0.22512    | -2.474   | 0.013361 | 0.201282 |
| BX511082.1        | 0.084441 |              | 0 5.267649 |          | 0        | 1 NA     |
| RF00003           | 0 NA     |              | NA         | NA       | NA       | NA       |
| RF00026           | 0 NA     |              | NA         | NA       | NA       | NA       |
| RF00001           | 0 NA     |              | NA         | NA       | NA       | NA       |
| RF00001           | 0.787699 | 2.053785138  | 2.841749   | 0.722719 | 0.469853 | NA       |
| RF00001           | 0.172399 |              | 0 5.267649 |          | 0        | 1 NA     |
| si:ch211-223g7.6  | 9.160741 | -0.470055782 | 0.727432   | -0.64619 | 0.518159 | 0.887148 |
| RF00001           | 0 NA     |              | NA         | NA       | NA       | NA       |
| RF00003           | 0 NA     |              | NA         | NA       | NA       | NA       |

|                     |           |               |             |           |           |           |
|---------------------|-----------|---------------|-------------|-----------|-----------|-----------|
| RF00015             | 1. 526846 | 0. 03538167   | 1. 470782   | 0. 024056 | 0. 980808 | NA        |
| RF00001             | 0 NA      |               | NA          | NA        | NA        | NA        |
| CR925804. 2         | 110. 2084 | -0. 068769134 | 0. 308679   | -0. 22279 | 0. 823703 | 0. 972005 |
| RF00001             | 0. 135482 |               | 0 5. 267649 | 0         | 1 NA      |           |
| BX511265. 5         | 0. 207088 | 2. 079549577  | 5. 22636    | 0. 397896 | 0. 690707 | NA        |
| CR925723. 4         | 0 NA      |               | NA          | NA        | NA        | NA        |
| si:ch211-113a14. 19 | 6. 130516 | -1. 864222411 | 0. 781886   | -2. 38426 | 0. 017113 | 0. 231611 |
| RF00001             | 0 NA      |               | NA          | NA        | NA        | NA        |
| RF00026             | 0 NA      |               | NA          | NA        | NA        | NA        |
| si:dkey-31m5. 5     | 0 NA      |               | NA          | NA        | NA        | NA        |
| znf1103             | 2. 892718 | 1. 134537532  | 1. 025895   | 1. 105901 | 0. 268769 | 0. 744925 |
| RF00001             | 0. 370188 |               | 0 4. 375507 | 0         | 1 NA      |           |
| baiap2b             | 7. 529395 | -0. 103656366 | 0. 880182   | -0. 11777 | 0. 906252 | 0. 991631 |
| RF00001             | 0 NA      |               | NA          | NA        | NA        | NA        |
| RF00015             | 0 NA      |               | NA          | NA        | NA        | NA        |
| RF01848             | 0 NA      |               | NA          | NA        | NA        | NA        |
| RF00017             | 0 NA      |               | NA          | NA        | NA        | NA        |
| RF00001             | 0. 161147 |               | 0 5. 267649 | 0         | 1 NA      |           |
| GABRA2              | 17. 98408 | 0. 28740259   | 0. 430781   | 0. 667167 | 0. 504665 | 0. 88195  |
| si:dkey-234124. 7   | 0. 994552 | 1. 333858495  | 1. 97523    | 0. 675293 | 0. 49949  | NA        |
| RF00001             | 0. 087179 |               | 0 5. 267649 | 0         | 1 NA      |           |
| RF00012             | 0 NA      |               | NA          | NA        | NA        | NA        |
| RF00001             | 0 NA      |               | NA          | NA        | NA        | NA        |
| RF00001             | 0 NA      |               | NA          | NA        | NA        | NA        |
| RF00001             | 0 NA      |               | NA          | NA        | NA        | NA        |
| DYNC2H1             | 205. 4898 | 0. 071017173  | 0. 233521   | 0. 304115 | 0. 76104  | 0. 958019 |
| FP340257. 1         | 0 NA      |               | NA          | NA        | NA        | NA        |
| CU462915. 1         | 3. 917739 | 0. 077667274  | 1. 181829   | 0. 065718 | 0. 947602 | 0. 997371 |
| znf1139             | 4. 479443 | 1. 502823391  | 0. 955623   | 1. 572612 | 0. 115809 | 0. 555893 |
| GRIK2               | 133. 6791 | -0. 371710532 | 0. 378215   | -0. 9828  | 0. 325705 | 0. 784632 |
| BX908388. 2         | 2. 423156 | -2. 373724345 | 1. 524915   | -1. 55663 | 0. 119559 | 0. 563675 |
| RF00001             | 0 NA      |               | NA          | NA        | NA        | NA        |
| RF00001             | 0 NA      |               | NA          | NA        | NA        | NA        |
| zgc:173615          | 15. 4335  | -0. 485309886 | 0. 479568   | -1. 01197 | 0. 311551 | 0. 77613  |
| RF00001             | 0. 147936 |               | 0 5. 267649 | 0         | 1 NA      |           |
| si:dkeyp-67e1. 6    | 1. 580337 | 1. 925552031  | 1. 88634    | 1. 020787 | 0. 307355 | NA        |
| CU896602. 3         | 0 NA      |               | NA          | NA        | NA        | NA        |
| BX901942. 2         | 0. 086616 |               | 0 5. 267649 | 0         | 1 NA      |           |
| taar13a             | 0 NA      |               | NA          | NA        | NA        | NA        |
| RF00001             | 0 NA      |               | NA          | NA        | NA        | NA        |
| si:dkey-108k21. 19  | 3. 708968 | 0. 173597613  | 0. 949189   | 0. 18289  | 0. 854884 | 0. 979161 |
| LO017872. 1         | 210. 1462 | -0. 003321043 | 0. 15889    | -0. 0209  | 0. 983324 | 1         |
| si:dkey-205i10. 1   | 2. 929838 | 1. 565810668  | 1. 627256   | 0. 96224  | 0. 335929 | 0. 792139 |
| CR788322. 3         | 0 NA      |               | NA          | NA        | NA        | NA        |
| si:dkeyp-82b4. 6    | 1. 585975 | -1. 000249762 | 1. 48525    | -0. 67346 | 0. 500658 | NA        |
| RF00001             | 0 NA      |               | NA          | NA        | NA        | NA        |
| BX681417. 11        | 0 NA      |               | NA          | NA        | NA        | NA        |
| RF00015             | 0 NA      |               | NA          | NA        | NA        | NA        |
| BX681417. 12        | 0 NA      |               | NA          | NA        | NA        | NA        |
| cyp46a1. 4          | 11. 97666 | -0. 715434049 | 0. 820579   | -0. 87186 | 0. 383282 | 0. 825809 |
| RF00001             | 0 NA      |               | NA          | NA        | NA        | NA        |
| pimr158             | 0 NA      |               | NA          | NA        | NA        | NA        |
| si:ch211-223k15. 1  | 10. 32974 | 0. 235302329  | 0. 638286   | 0. 368647 | 0. 712391 | 0. 945821 |
| RF00017             | 0. 049519 |               | 0 5. 267649 | 0         | 1 NA      |           |

|                  |           |               |           |           |                     |
|------------------|-----------|---------------|-----------|-----------|---------------------|
| ighj2-2          | 0 NA      | NA            | NA        | NA        | NA                  |
| RF00026          | 0 NA      | NA            | NA        | NA        | NA                  |
| CABZ01112461. 1  | 10. 16793 | 0. 163099698  | 0. 626051 | 0. 260521 | 0. 794462 0. 965431 |
| BX537305. 1      | 1. 685227 | -0. 974457365 | 1. 878238 | -0. 51881 | 0. 60389 NA         |
| L0018029. 2      | 37. 30298 | 0. 168330507  | 0. 343251 | 0. 4904   | 0. 623851 0. 919431 |
| RF00001          | 0 NA      | NA            | NA        | NA        | NA                  |
| RF00001          | 0 NA      | NA            | NA        | NA        | NA                  |
| RF00012          | 0 NA      | NA            | NA        | NA        | NA                  |
| AL844172. 1      | 0 NA      | NA            | NA        | NA        | NA                  |
| RF00003          | 0 NA      | NA            | NA        | NA        | NA                  |
| RF00001          | 0 NA      | NA            | NA        | NA        | NA                  |
| L0018629. 1      | 29. 55505 | 0. 051489239  | 0. 377151 | 0. 136522 | 0. 891409 0. 988566 |
| RF00012          | 0 NA      | NA            | NA        | NA        | NA                  |
| BX649502. 12     | 0 NA      | NA            | NA        | NA        | NA                  |
| RF00001          | 0. 181491 | 0 5. 267649   | 0         | 1         | NA                  |
| RF00001          | 0 NA      | NA            | NA        | NA        | NA                  |
| AL928650. 4      | 5. 270015 | 1. 252471914  | 1. 023719 | 1. 223452 | 0. 221159 0. 702457 |
| RF00001          | 0 NA      | NA            | NA        | NA        | NA                  |
| RF00026          | 0 NA      | NA            | NA        | NA        | NA                  |
| RF00001          | 0. 049519 | 0 5. 267649   | 0         | 1         | NA                  |
| RF00017          | 0 NA      | NA            | NA        | NA        | NA                  |
| RF00001          | 0 NA      | NA            | NA        | NA        | NA                  |
| RF00001          | 0 NA      | NA            | NA        | NA        | NA                  |
| RF00026          | 0 NA      | NA            | NA        | NA        | NA                  |
| RF00017          | 0 NA      | NA            | NA        | NA        | NA                  |
| hoxc13b          | 62. 93675 | 0. 169669686  | 0. 223809 | 0. 758102 | 0. 44839 0. 856741  |
| RF00067          | 0. 408355 | 0. 114788269  | 3. 249147 | 0. 035329 | 0. 971818 NA        |
| RF00026          | 0 NA      | NA            | NA        | NA        | NA                  |
| zgc:174355       | 0 NA      | NA            | NA        | NA        | NA                  |
| RF00001          | 0 NA      | NA            | NA        | NA        | NA                  |
| RF00017          | 0 NA      | NA            | NA        | NA        | NA                  |
| si:dkey-30g5. 1  | 0 NA      | NA            | NA        | NA        | NA                  |
| si:dkey-29p23. 1 | 11. 71359 | -4. 093742945 | 1. 138749 | -3. 59495 | 0. 000324 0. 020507 |
| CT955962. 1      | 0. 298513 | 0 3. 99662    | 0         | 1         | NA                  |
| zgc:77650        | 560. 7694 | 0. 388523296  | 0. 141052 | 2. 754477 | 0. 005879 0. 129841 |
| RF00001          | 0 NA      | NA            | NA        | NA        | NA                  |
| RF01848          | 0 NA      | NA            | NA        | NA        | NA                  |
| RF00026          | 0 NA      | NA            | NA        | NA        | NA                  |
| F0904860. 1      | 1. 705097 | -1. 471895916 | 1. 64742  | -0. 89346 | 0. 371613 NA        |
| RF00026          | 0 NA      | NA            | NA        | NA        | NA                  |
| RF00001          | 0 NA      | NA            | NA        | NA        | NA                  |
| BX530407. 7      | 1. 475476 | 1. 488771358  | 1. 444734 | 1. 030482 | 0. 302784 NA        |
| B3GAT1           | 29. 07993 | -0. 347568242 | 0. 360906 | -0. 96304 | 0. 335525 0. 792139 |
| RF00026          | 0 NA      | NA            | NA        | NA        | NA                  |
| L0018011. 1      | 0. 271333 | 1. 055367968  | 4. 746356 | 0. 222353 | 0. 824039 NA        |
| pard3ba          | 5. 823928 | 0. 748498651  | 0. 726576 | 1. 030172 | 0. 302929 0. 769107 |
| RF00026          | 0 NA      | NA            | NA        | NA        | NA                  |
| BX649628. 2      | 0 NA      | NA            | NA        | NA        | NA                  |
| BX005462. 3      | 0 NA      | NA            | NA        | NA        | NA                  |
| igl3v2           | 0. 705372 | 0 3. 336794   | 0         | 1         | NA                  |
| pimr19           | 0. 063619 | 0 5. 267649   | 0         | 1         | NA                  |
| RF00026          | 0 NA      | NA            | NA        | NA        | NA                  |
| BX248331. 4      | 0 NA      | NA            | NA        | NA        | NA                  |
| RF00026          | 0 NA      | NA            | NA        | NA        | NA                  |

|                   |          |              |            |          |          |          |
|-------------------|----------|--------------|------------|----------|----------|----------|
| AL953907.2        | 6.787388 | -1.365749246 | 1.306446   | -1.04539 | 0.295842 | 0.764246 |
| nudt15            | 80.3697  | 0.541234004  | 0.215329   | 2.513519 | 0.011953 | 0.190417 |
| traj17            | 0 NA     |              | NA         | NA       | NA       | NA       |
| L0018597.2        | 0.613229 |              | 0 3.038923 | 0        | 1 NA     |          |
| supt4h1           | 547.377  | 0.036240725  | 0.125503   | 0.288764 | 0.772762 | 0.960624 |
| L0018181.1        | 5.295261 | 5.18948945   | 1.406191   | 3.690457 | 0.000224 | 0.015984 |
| RF00004           | 0 NA     |              | NA         | NA       | NA       | NA       |
| RF00003           | 0 NA     |              | NA         | NA       | NA       | NA       |
| RF00001           | 0 NA     |              | NA         | NA       | NA       | NA       |
| pimr162           | 0 NA     |              | NA         | NA       | NA       | NA       |
| fth129            | 87.48838 | 0.383659546  | 0.296815   | 1.29259  | 0.196153 | 0.676562 |
| RF00001           | 0.308494 | -2.754992887 | 5.185055   | -0.53133 | 0.595188 | NA       |
| RF00003           | 0 NA     |              | NA         | NA       | NA       | NA       |
| RF00001           | 0 NA     |              | NA         | NA       | NA       | NA       |
| RF00026           | 0.060442 |              | 0 5.267649 | 0        | 1 NA     |          |
| RF00003           | 0 NA     |              | NA         | NA       | NA       | NA       |
| BX324156.1        | 0.390131 | 2.518545188  | 3.248947   | 0.775188 | 0.438228 | NA       |
| apobec2b          | 9.741784 | 0.952379417  | 0.596893   | 1.595561 | 0.110587 | 0.545461 |
| zgc:174354        | 0 NA     |              | NA         | NA       | NA       | NA       |
| RF00026           | 0 NA     |              | NA         | NA       | NA       | NA       |
| RF00001           | 0 NA     |              | NA         | NA       | NA       | NA       |
| RF00003           | 0 NA     |              | NA         | NA       | NA       | NA       |
| CU062431.1        | 0.905527 | -1.85923619  | 2.689927   | -0.69118 | 0.489449 | NA       |
| CABZ01088149.1    | 75.77098 | 0.25420481   | 0.315474   | 0.805787 | 0.420366 | 0.842383 |
| WDR1              | 2685.939 | 0.057762329  | 0.098602   | 0.585811 | 0.558003 | 0.899301 |
| CU914780.1        | 1.31081  | 0.026725326  | 1.838842   | 0.014534 | 0.988404 | NA       |
| CABZ01099833.1    | 17.79811 | 0.14700486   | 0.53108    | 0.276803 | 0.781931 | 0.962204 |
| RF00026           | 0 NA     |              | NA         | NA       | NA       | NA       |
| CR759843.2        | 0.581451 | -1.741759403 | 2.55671    | -0.68125 | 0.495713 | NA       |
| smyhc3            | 104.8307 | 0.354003234  | 0.337955   | 1.047486 | 0.294875 | 0.763708 |
| RF00026           | 0 NA     |              | NA         | NA       | NA       | NA       |
| BX248510.5        | 24.36065 | 0.656526436  | 0.531673   | 1.234832 | 0.216893 | 0.69815  |
| ska2              | 469.9984 | -0.306416345 | 0.127708   | -2.39935 | 0.016424 | 0.226114 |
| RF00001           | 0.050723 | -0.86807634  | 5.267649   | -0.16479 | 0.869106 | NA       |
| RF00001           | 0.094031 | -0.868089684 | 5.267649   | -0.1648  | 0.869104 | NA       |
| CU571061.1        | 0.744315 | 1.965898399  | 2.683683   | 0.732538 | 0.46384  | NA       |
| CR626887.3        | 1.699353 | -4.325714902 | 2.127706   | -2.03304 | 0.042048 | NA       |
| CABZ01018956.1    | 0.053262 | 1.055396947  | 5.267649   | 0.200354 | 0.841203 | NA       |
| RF00001           | 0.043309 |              | 0 5.267649 | 0        | 1 NA     |          |
| t1r20.3           | 0.443064 | -0.794169992 | 4.168084   | -0.19054 | 0.848889 | NA       |
| RF00026           | 0 NA     |              | NA         | NA       | NA       | NA       |
| parml             | 69.26672 | 0.614896048  | 0.318677   | 1.929527 | 0.053665 | 0.401106 |
| RF00001           | 0.10584  |              | 0 5.267649 | 0        | 1 NA     |          |
| tspan17           | 130.9633 | 0.092148928  | 0.180139   | 0.511542 | 0.608971 | 0.915204 |
| RF00003           | 0 NA     |              | NA         | NA       | NA       | NA       |
| BX927341.3        | 0 NA     |              | NA         | NA       | NA       | NA       |
| stx10             | 1.573867 | -1.089016951 | 1.376076   | -0.79139 | 0.428715 | NA       |
| RF00017           | 1.225365 | -0.383843055 | 1.729669   | -0.22192 | 0.824378 | NA       |
| DOCK9 (1 of many) | 435.3746 | -0.173913896 | 0.179533   | -0.9687  | 0.332694 | 0.789807 |
| RF00001           | 0 NA     |              | NA         | NA       | NA       | NA       |
| RF00001           | 0 NA     |              | NA         | NA       | NA       | NA       |
| trim35-30         | 4.016726 | 2.095660429  | 1.304834   | 1.606074 | 0.108258 | 0.540355 |
| CT583728.17       | 0 NA     |              | NA         | NA       | NA       | NA       |
| RF00003           | 0.049519 |              | 0 5.267649 | 0        | 1 NA     |          |

|                   |          |              |          |          |          |          |    |
|-------------------|----------|--------------|----------|----------|----------|----------|----|
| RF00001           | 0.04222  |              | 0        | 5.267649 | 0        | 1        | NA |
| zgc:174355        | 0        | NA           | NA       | NA       | NA       | NA       | NA |
| RF00001           | 0.043308 |              | 0        | 5.267649 | 0        | 1        | NA |
| BX005085.5        | 68.2208  | 0.090443336  | 0.230662 | 0.392103 | 0.694982 | 0.941197 |    |
| RF00001           | 0.043308 |              | 0        | 5.267649 | 0        | 1        | NA |
| si:dkey-3p4.8     | 2.304232 | -3.751499555 | 1.575058 | -2.38182 | 0.017227 | 0.231824 |    |
| si:dkey-261m9.19  | 3.864807 | 0.505962075  | 1.286903 | 0.393163 | 0.694199 | 0.94106  |    |
| histlh2a5         | 1.757164 | 1.575125541  | 2.003935 | 0.786016 | 0.431858 | NA       |    |
| pimr86            | 0        | NA           | NA       | NA       | NA       | NA       |    |
| si:dkeyp-4f2.1    | 81.12292 | 1.150198523  | 0.724586 | 1.587386 | 0.112425 | 0.549251 |    |
| RF00001           | 0.174358 |              | 0        | 5.267649 | 0        | 1        | NA |
| AL929023.1        | 0.04222  |              | 0        | 5.267649 | 0        | 1        | NA |
| RF00001           | 0        | NA           | NA       | NA       | NA       | NA       |    |
| CR385053.3        | 0.090321 |              | 0        | 5.267649 | 0        | 1        | NA |
| F0904989.1        | 21.78561 | -0.415003037 | 0.332119 | -1.24956 | 0.211459 | 0.692983 |    |
| RF00001           | 0.049519 |              | 0        | 5.267649 | 0        | 1        | NA |
| CR354435.2        | 2.509619 | 0.074841373  | 1.264853 | 0.05917  | 0.952817 | 0.998406 |    |
| RF00001           | 0.994946 | -0.256984612 | 2.216589 | -0.11594 | 0.907702 | NA       |    |
| znf996            | 2.028466 | -1.343038608 | 1.352916 | -0.9927  | 0.320856 | NA       |    |
| FP236812.2        | 7.333124 | 0.093345925  | 0.688871 | 0.135506 | 0.892212 | 0.988566 |    |
| zgc:77614         | 0        | NA           | NA       | NA       | NA       | NA       |    |
| mkxb              | 47.06569 | 0.628569893  | 0.307551 | 2.043794 | 0.040974 | 0.353808 |    |
| dre-mir-430c-1    | 0        | NA           | NA       | NA       | NA       | NA       |    |
| si:busml-105116.2 | 5.83944  | -0.428595628 | 0.96194  | -0.44555 | 0.65592  | 0.929606 |    |
| RF00003           | 0        | NA           | NA       | NA       | NA       | NA       |    |
| BX927212.1        | 0.527621 | 1.92652892   | 3.123561 | 0.616773 | 0.537384 | NA       |    |
| L0018333.1        | 5.512893 | 0.565219813  | 0.687951 | 0.821599 | 0.411305 | 0.837797 |    |
| BX548011.4        | 0.246429 | -2.731551242 | 5.185882 | -0.52673 | 0.598382 | NA       |    |
| BX005305.3        | 0        | NA           | NA       | NA       | NA       | NA       |    |
| zgc:171759        | 2.280831 | 1.042711511  | 1.929083 | 0.540522 | 0.588837 | 0.908018 |    |
| CR847936.8        | 0        | NA           | NA       | NA       | NA       | NA       |    |
| RF00001           | 0        | NA           | NA       | NA       | NA       | NA       |    |
| F0834825.2        | 0.277067 | 1.055337233  | 5.267649 | 0.200343 | 0.841212 | NA       |    |
| dre-mir-430b-9    | 0        | NA           | NA       | NA       | NA       | NA       |    |
| CR788322.4        | 0        | NA           | NA       | NA       | NA       | NA       |    |
| taar19n           | 0.07132  |              | 0        | 5.267649 | 0        | 1        | NA |
| BX005022.1        | 1.476817 | -0.358829931 | 1.617493 | -0.22184 | 0.824436 | NA       |    |
| BX548073.9        | 0        | NA           | NA       | NA       | NA       | NA       |    |
| RF00026           | 0        | NA           | NA       | NA       | NA       | NA       |    |
| CABZ01102109.1    | 150.2279 | 0.508757837  | 0.275248 | 1.84836  | 0.06455  | 0.433642 |    |
| CABZ01075242.1    | 64.26931 | 0.053138203  | 0.257058 | 0.206717 | 0.836231 | 0.976007 |    |
| RF00026           | 0        | NA           | NA       | NA       | NA       | NA       |    |
| si:ch211-221n20.7 | 0.54065  | 3.308290995  | 3.338463 | 0.990962 | 0.321704 | NA       |    |
| znf974            | 6.536583 | 0.48539375   | 0.605648 | 0.801446 | 0.422874 | 0.843708 |    |
| bc12116           | 114.2274 | 0.281097497  | 0.202581 | 1.387579 | 0.165265 | 0.634423 |    |
| RF00001           | 0        | NA           | NA       | NA       | NA       | NA       |    |
| RF00001           | 0        | NA           | NA       | NA       | NA       | NA       |    |
| RF00026           | 0        | NA           | NA       | NA       | NA       | NA       |    |
| PLBD2             | 1185.985 | 0.5448972    | 0.217346 | 2.507053 | 0.012174 | 0.191498 |    |
| RF00017           | 0        | NA           | NA       | NA       | NA       | NA       |    |
| zgc:91850         | 0        | NA           | NA       | NA       | NA       | NA       |    |
| dre-mir-430b-1    | 0        | NA           | NA       | NA       | NA       | NA       |    |
| si:dkey-30c15.13  | 62.95842 | -0.156054455 | 0.311238 | -0.5014  | 0.616091 | 0.916365 |    |
| RF00001           | 0.264971 |              | 0        | 5.267649 | 0        | 1        | NA |

|                   |          |              |            |          |          |          |
|-------------------|----------|--------------|------------|----------|----------|----------|
| RF00001           | 0        | NA           | NA         | NA       | NA       | NA       |
| CU138548.6        | 0        | NA           | NA         | NA       | NA       | NA       |
| RF00003           | 0        | NA           | NA         | NA       | NA       | NA       |
| RF00026           | 0        | NA           | NA         | NA       | NA       | NA       |
| BX901889.4        | 0.174358 |              | 0 5.267649 | 0        | 1        | NA       |
| RF00001           | 0.049519 |              | 0 5.267649 | 0        | 1        | NA       |
| RF00003           | 0        | NA           | NA         | NA       | NA       | NA       |
| BX324132.4        | 0.256355 | 2.920228759  | 5.185899   | 0.563109 | 0.57336  | NA       |
| RF00001           | 0        | NA           | NA         | NA       | NA       | NA       |
| CU571398.1        | 17.95356 | -0.644412891 | 0.547496   | -1.17702 | 0.239188 | 0.719781 |
| taar19q           | 0.063619 |              | 0 5.267649 | 0        | 1        | NA       |
| znf980            | 2.524146 | -0.127386483 | 0.946248   | -0.13462 | 0.89291  | 0.988566 |
| RF00001           | 0        | NA           | NA         | NA       | NA       | NA       |
| zgc:77614         | 0        | NA           | NA         | NA       | NA       | NA       |
| BX530407.8        | 0        | NA           | NA         | NA       | NA       | NA       |
| BX511120.1        | 11.74176 | 0.664968691  | 1.032836   | 0.643828 | 0.519687 | 0.887148 |
| BX248108.1        | 19.23086 | -0.150251402 | 0.533475   | -0.28165 | 0.778214 | 0.961073 |
| CR354612.1        | 0        | NA           | NA         | NA       | NA       | NA       |
| RF00001           | 0        | NA           | NA         | NA       | NA       | NA       |
| BX005421.3        | 2.811594 | -2.403653077 | 1.615107   | -1.48823 | 0.13669  | 0.591982 |
| RF00001           | 0        | NA           | NA         | NA       | NA       | NA       |
| dre-mir-430b-9    | 0        | NA           | NA         | NA       | NA       | NA       |
| RF00001           | 0        | NA           | NA         | NA       | NA       | NA       |
| CR376861.1        | 0.434519 |              | 0 3.238751 | 0        | 1        | NA       |
| CR407598.1        | 0        | NA           | NA         | NA       | NA       | NA       |
| BX927253.3        | 0.720167 | -2.78989399  | 2.974025   | -0.93809 | 0.3482   | NA       |
| RF00001           | 0        | NA           | NA         | NA       | NA       | NA       |
| HOOK3             | 387.9118 | 0.047964675  | 0.118369   | 0.405215 | 0.68532  | 0.938486 |
| CT573234.1        | 1.648882 | 0.093648507  | 2.316211   | 0.040432 | 0.967749 | NA       |
| zgc:173552        | 3.812731 | 0.066010891  | 1.360722   | 0.048512 | 0.961308 | 0.99935  |
| si:rp71-1f1.5     | 3.569376 | -1.170547072 | 0.988166   | -1.18456 | 0.23619  | 0.717364 |
| RF00001           | 0        | NA           | NA         | NA       | NA       | NA       |
| tpbgl             | 11.20723 | -0.797313688 | 0.73688    | -1.08201 | 0.279247 | 0.752477 |
| RF00001           | 0.095727 | -0.868089684 | 5.267649   | -0.1648  | 0.869104 | NA       |
| RF00001           | 0.113948 | -0.868089684 | 5.267649   | -0.1648  | 0.869104 | NA       |
| si:dkey-28d5.5    | 1.060669 | -2.722771152 | 2.111706   | -1.28937 | 0.197269 | NA       |
| dre-mir-430a-2    | 0        | NA           | NA         | NA       | NA       | NA       |
| si:dkey-20i20.15  | 11.22251 | -0.035526878 | 0.583786   | -0.06086 | 0.951474 | 0.99801  |
| AL840638.2        | 1.06033  | -4.734335747 | 2.300087   | -2.05833 | 0.039559 | NA       |
| AL844186.1        | 1.288907 | -3.017490986 | 1.795154   | -1.68091 | 0.092781 | NA       |
| RF00017           | 0.361109 |              | 0 3.794321 | 0        | 1        | NA       |
| trajl2            | 0        | NA           | NA         | NA       | NA       | NA       |
| RF00002           | 2.296911 | -0.868146761 | 2.156235   | -0.40262 | 0.687227 | 0.938835 |
| si:ch211-238p8.31 | 0        | NA           | NA         | NA       | NA       | NA       |
| RF00001           | 0        | NA           | NA         | NA       | NA       | NA       |
| RF00001           | 0        | NA           | NA         | NA       | NA       | NA       |
| RF00012           | 0        | NA           | NA         | NA       | NA       | NA       |
| RF00026           | 0        | NA           | NA         | NA       | NA       | NA       |
| zgc:77614         | 0        | NA           | NA         | NA       | NA       | NA       |
| znf985            | 4.767875 | 0.959867242  | 0.74658    | 1.285686 | 0.198553 | 0.679281 |
| FQ312024.1        | 2.885498 | -2.410130219 | 1.597448   | -1.50874 | 0.131366 | 0.583069 |
| RF00026           | 0        | NA           | NA         | NA       | NA       | NA       |
| RF00001           | 0        | NA           | NA         | NA       | NA       | NA       |
| RF00026           | 0        | NA           | NA         | NA       | NA       | NA       |

|                |          |              |          |          |          |          |
|----------------|----------|--------------|----------|----------|----------|----------|
| F0904885.2     | 0 NA     | NA           | NA       | NA       | NA       | NA       |
| pimr99         | 0 NA     | NA           | NA       | NA       | NA       | NA       |
| RF00325        | 0.269016 | 1.05534481   | 5.267649 | 0.200345 | 0.841211 | NA       |
| BX005305.4     | 0 NA     | NA           | NA       | NA       | NA       | NA       |
| CABZ01063034.1 | 1.179043 | 0.093650947  | 2.047559 | 0.045738 | 0.963519 | NA       |
| CU499336.2     | 0 NA     | NA           | NA       | NA       | NA       | NA       |
| zgc:77614      | 0 NA     | NA           | NA       | NA       | NA       | NA       |
| RF00001        | 0 NA     | NA           | NA       | NA       | NA       | NA       |
| CR407590.2     | 0 NA     | NA           | NA       | NA       | NA       | NA       |
| CU929458.1     | 0 NA     | NA           | NA       | NA       | NA       | NA       |
| znf1017        | 7.152123 | -0.133826335 | 0.681036 | -0.1965  | 0.844216 | 0.976791 |
| BX276117.1     | 0 NA     | NA           | NA       | NA       | NA       | NA       |
| zgc:194989     | 4.11564  | -0.157082634 | 1.211744 | -0.12963 | 0.896856 | 0.98939  |
| zgc:77614      | 0.07132  | 0            | 5.267649 | 0        | 1        | NA       |
| AL954137.2     | 7.326914 | 0.492243931  | 0.73041  | 0.673929 | 0.500357 | 0.880145 |
| CR450686.5     | 3.17461  | 0.23265066   | 1.247471 | 0.186498 | 0.852054 | 0.978558 |
| BX511178.1     | 2.294515 | 2.405858095  | 1.557673 | 1.54452  | 0.122462 | 0.569468 |
| RF00026        | 0 NA     | NA           | NA       | NA       | NA       | NA       |
| CT009714.1     | 0.392957 | 1.055368739  | 4.397297 | 0.240004 | 0.810327 | NA       |
| RF00001        | 0.043309 | 0            | 5.267649 | 0        | 1        | NA       |
| med8           | 413.7549 | -0.044115605 | 0.178138 | -0.24765 | 0.804407 | 0.969019 |
| CT583728.18    | 0 NA     | NA           | NA       | NA       | NA       | NA       |
| RF00001        | 0 NA     | NA           | NA       | NA       | NA       | NA       |
| pimr5          | 0.087179 | 0            | 5.267649 | 0        | 1        | NA       |
| zgc:173705     | 16.2326  | 0.468767568  | 0.477322 | 0.982078 | 0.326061 | 0.784919 |
| RF00001        | 0 NA     | NA           | NA       | NA       | NA       | NA       |
| CABZ01079081.1 | 11.03958 | -0.289977436 | 0.492457 | -0.58884 | 0.55597  | 0.899002 |
| RF00001        | 0 NA     | NA           | NA       | NA       | NA       | NA       |
| mmp13a         | 240.8332 | 0.074322393  | 0.301254 | 0.24671  | 0.805133 | 0.969348 |
| RF00415        | 0 NA     | NA           | NA       | NA       | NA       | NA       |
| CR762483.1     | 24.5463  | -0.323167438 | 0.677132 | -0.47726 | 0.633178 | 0.923885 |
| pimr164        | 0 NA     | NA           | NA       | NA       | NA       | NA       |
| CU694999.1     | 0.191688 | -0.868102747 | 5.267649 | -0.1648  | 0.869102 | NA       |
| RF00001        | 0.069091 | 0            | 5.267649 | 0        | 1        | NA       |
| CABZ01056051.1 | 0.573687 | 1.099800534  | 2.63748  | 0.416989 | 0.676686 | NA       |
| RF00001        | 0 NA     | NA           | NA       | NA       | NA       | NA       |
| ctxn3          | 18.14824 | 0.401160537  | 0.601435 | 0.667005 | 0.504769 | 0.88195  |
| RF00001        | 0 NA     | NA           | NA       | NA       | NA       | NA       |
| CT027583.2     | 1.542461 | 0.664996619  | 1.276246 | 0.521057 | 0.602327 | NA       |
| dre-mir-430c-1 | 0 NA     | NA           | NA       | NA       | NA       | NA       |
| RF00001        | 0 NA     | NA           | NA       | NA       | NA       | NA       |
| pimr142        | 0.364259 | -2.363504901 | 3.278867 | -0.72083 | 0.471014 | NA       |
| RF00003        | 0.480779 | 1.921975698  | 4.854622 | 0.395906 | 0.692174 | NA       |
| ATP8A1         | 33.76035 | 0.470801588  | 0.414779 | 1.135065 | 0.256348 | 0.73401  |
| RF00001        | 0 NA     | NA           | NA       | NA       | NA       | NA       |
| CU302436.1     | 2.477129 | 0.666738778  | 1.1523   | 0.578616 | 0.562849 | 0.900772 |
| CR388079.3     | 0.206525 | 2.079531647  | 5.22636  | 0.397893 | 0.690709 | NA       |
| phtf2          | 402.6295 | -0.102282622 | 0.159223 | -0.64238 | 0.520623 | 0.887165 |
| RF00026        | 0 NA     | NA           | NA       | NA       | NA       | NA       |
| tmem101        | 316.1726 | 0.205083609  | 0.295635 | 0.693706 | 0.487866 | 0.873337 |
| CR385040.1     | 1.398423 | -0.925627752 | 1.493332 | -0.61984 | 0.535363 | NA       |
| CABZ01021592.1 | 6786.178 | -0.43711608  | 0.172322 | -2.53663 | 0.011193 | 0.183794 |
| RF00026        | 0 NA     | NA           | NA       | NA       | NA       | NA       |
| BX511056.4     | 0 NA     | NA           | NA       | NA       | NA       | NA       |



|                  |          |              |          |          |          |          |    |
|------------------|----------|--------------|----------|----------|----------|----------|----|
| CR354547.3       | 0.185983 |              | 0        | 5.267649 | 0        | 1        | NA |
| CR388165.2       | 0.651843 | -0.465300944 | 2.075514 | -0.22419 | 0.822613 |          | NA |
| RF00001          | 0        | NA           | NA       | NA       | NA       |          | NA |
| RF00001          | 0.046941 |              | 0        | 5.267649 | 0        | 1        | NA |
| RF00001          | 0        | NA           | NA       | NA       | NA       |          | NA |
| pimr97           | 0        | NA           | NA       | NA       | NA       |          | NA |
| zgc:165555       | 1.780778 | 2.809702141  | 1.785102 | 1.573973 | 0.115494 |          | NA |
| si:dkey-149m13.4 | 7.587361 | 0.91196388   | 0.660815 | 1.380059 | 0.167568 | 0.638828 |    |
| taar19e          | 0        | NA           | NA       | NA       | NA       |          | NA |
| RF00001          | 0        | NA           | NA       | NA       | NA       |          | NA |
| nfr              | 5.837496 | -2.036707492 | 0.853121 | -2.38736 | 0.01697  | 0.230743 |    |
| RF00026          | 0        | NA           | NA       | NA       | NA       |          | NA |
| RF00026          | 0        | NA           | NA       | NA       | NA       |          | NA |
| fisl             | 474.6334 | -0.091554272 | 0.144941 | -0.63167 | 0.527605 | 0.889948 |    |
| sival            | 179.8235 | -0.145819766 | 0.198252 | -0.73553 | 0.462019 | 0.863402 |    |
| cdx1a            | 69.73318 | -0.229938319 | 0.49697  | -0.46268 | 0.643594 | 0.925997 |    |
| RF00003          | 0        | NA           | NA       | NA       | NA       |          | NA |
| si:dkey-233e3.3  | 6.045906 | 0.003707434  | 0.651222 | 0.005693 | 0.995458 |          | 1  |
| RF00001          | 0.04222  |              | 0        | 5.267649 | 0        | 1        | NA |
| RF00026          | 0        | NA           | NA       | NA       | NA       |          | NA |
| RF00001          | 0        | NA           | NA       | NA       | NA       |          | NA |
| BX323555.4       | 0        | NA           | NA       | NA       | NA       |          | NA |
| RF00001          | 0.538354 |              | 0        | 2.819887 | 0        | 1        | NA |
| RF00003          | 0        | NA           | NA       | NA       | NA       |          | NA |
| asb18            | 120.1052 | 0.571411307  | 0.446505 | 1.279742 | 0.200636 | 0.680933 |    |
| RF00001          | 0        | NA           | NA       | NA       | NA       |          | NA |
| CT025887.1       | 0        | NA           | NA       | NA       | NA       |          | NA |
| RF00026          | 0        | NA           | NA       | NA       | NA       |          | NA |
| si:dkey-159n16.2 | 142.9107 | 1.079813103  | 0.766445 | 1.40886  | 0.158877 | 0.624456 |    |
| BX681417.13      | 0        | NA           | NA       | NA       | NA       |          | NA |
| BX890543.1       | 0        | NA           | NA       | NA       | NA       |          | NA |
| RF00026          | 0        | NA           | NA       | NA       | NA       |          | NA |
| pimr82           | 0.707064 | 0.088076025  | 2.127102 | 0.041407 | 0.966972 |          | NA |
| AL627164.1       | 0        | NA           | NA       | NA       | NA       |          | NA |
| jam3a            | 242.7555 | -0.008667007 | 0.198988 | -0.04356 | 0.965259 |          | 1  |
| RF00026          | 0        | NA           | NA       | NA       | NA       |          | NA |
| dre-mir-430c-1   | 0        | NA           | NA       | NA       | NA       |          | NA |
| CU914776.2       | 9.906495 | 0.170902718  | 0.646875 | 0.264197 | 0.791628 | 0.964817 |    |
| zgc:77614        | 0        | NA           | NA       | NA       | NA       |          | NA |
| RF00001          | 0        | NA           | NA       | NA       | NA       |          | NA |
| BX470182.2       | 0.240446 | 2.56148978   | 5.200379 | 0.492558 | 0.622325 |          | NA |
| FP085421.1       | 0.214043 |              | 0        | 5.267649 | 0        | 1        | NA |
| RF00001          | 0        | NA           | NA       | NA       | NA       |          | NA |
| RF00017          | 0.050723 | -0.86807634  | 5.267649 | -0.16479 | 0.869106 |          | NA |
| RF00001          | 0        | NA           | NA       | NA       | NA       |          | NA |
| RF00001          | 0.069091 |              | 0        | 5.267649 | 0        | 1        | NA |
| RF00001          | 0        | NA           | NA       | NA       | NA       |          | NA |
| RF00001          | 0        | NA           | NA       | NA       | NA       |          | NA |
| BX942815.1       | 4.023658 | -0.52717416  | 0.85842  | -0.61412 | 0.539135 | 0.892985 |    |
| znf1021          | 12.6925  | 0.060937805  | 0.536951 | 0.113489 | 0.909643 | 0.992206 |    |
| RF00001          | 0        | NA           | NA       | NA       | NA       |          | NA |
| L0018106.1       | 5.148002 | 0.390580082  | 0.815943 | 0.478686 | 0.632162 | 0.923182 |    |
| BX510335.5       | 0        | NA           | NA       | NA       | NA       |          | NA |
| RF00001          | 0        | NA           | NA       | NA       | NA       |          | NA |

|                    |           |               |             |           |           |           |
|--------------------|-----------|---------------|-------------|-----------|-----------|-----------|
| BX942837. 1        | 0. 090321 |               | 0 5. 267649 | 0         | 1 NA      |           |
| BX321875. 4        | 0. 372338 | -1. 712222989 | 4. 358099   | -0. 39288 | 0. 694406 | NA        |
| RF00001            | 0 NA      |               | NA          | NA        | NA        | NA        |
| RF00001            | 0. 049519 |               | 0 5. 267649 | 0         | 1 NA      |           |
| ube2c              | 489. 9225 | 0. 233611495  | 0. 306844   | 0. 761336 | 0. 446456 | 0. 855403 |
| BX324233. 1        | 0. 238789 | -1. 826688276 | 5. 230459   | -0. 34924 | 0. 726909 | NA        |
| BX908797. 1        | 50. 58439 | -0. 294261978 | 0. 329234   | -0. 89378 | 0. 371441 | 0. 818945 |
| RF00001            | 0. 520224 | -0. 868138505 | 2. 861923   | -0. 30334 | 0. 76163  | NA        |
| BX248410. 3        | 5. 033491 | 2. 310103763  | 1. 038789   | 2. 223844 | 0. 026159 | 0. 286896 |
| BX908796. 4        | 0 NA      |               | NA          | NA        | NA        | NA        |
| RF00001            | 0. 059954 | 1. 055396947  | 5. 267649   | 0. 200354 | 0. 841203 | NA        |
| RF01848            | 0 NA      |               | NA          | NA        | NA        | NA        |
| pimr58             | 0 NA      |               | NA          | NA        | NA        | NA        |
| RF00026            | 0 NA      |               | NA          | NA        | NA        | NA        |
| hmox2a             | 985. 6315 | -0. 016740941 | 0. 144369   | -0. 11596 | 0. 907685 | 0. 991745 |
| BX537118. 1        | 0. 129926 |               | 0 5. 267649 | 0         | 1 NA      |           |
| CABZ01067557. 1    | 9. 904362 | -0. 007533353 | 0. 826118   | -0. 00912 | 0. 992724 | 1         |
| FP074902. 3        | 0 NA      |               | NA          | NA        | NA        | NA        |
| FP016205. 1        | 53. 37066 | -0. 370162809 | 0. 344651   | -1. 07402 | 0. 282813 | 0. 755028 |
| taar19i            | 0 NA      |               | NA          | NA        | NA        | NA        |
| BX324142. 1        | 9. 027733 | -0. 444327072 | 0. 638693   | -0. 69568 | 0. 486628 | 0. 873244 |
| RF00026            | 0 NA      |               | NA          | NA        | NA        | NA        |
| CU570893. 1        | 0. 828059 | 0. 106467915  | 2. 042549   | 0. 052125 | 0. 958429 | NA        |
| znf1117            | 41. 48258 | 0. 538637169  | 0. 347802   | 1. 548688 | 0. 121457 | 0. 567605 |
| taar20p            | 0. 29294  | -2. 364242249 | 3. 955897   | -0. 59765 | 0. 550073 | NA        |
| CABZ01068246. 1    | 14. 84192 | -0. 387057944 | 0. 524193   | -0. 73839 | 0. 460278 | 0. 862369 |
| CT573356. 2        | 0. 106524 | 1. 92158077   | 5. 236909   | 0. 36693  | 0. 713671 | NA        |
| RF00001            | 0. 836679 | 1. 055432006  | 2. 387811   | 0. 442008 | 0. 658483 | NA        |
| RF00017            | 9. 11969  | 0. 009472781  | 0. 703844   | 0. 013459 | 0. 989262 | 1         |
| zgc:77614          | 0 NA      |               | NA          | NA        | NA        | NA        |
| RF00026            | 0 NA      |               | NA          | NA        | NA        | NA        |
| CABZ01008739. 1    | 1. 451396 | -2. 409396527 | 1. 730534   | -1. 39229 | 0. 163836 | NA        |
| CABZ01072083. 2    | 58. 25576 | 0. 07143623   | 0. 331875   | 0. 21525  | 0. 829572 | 0. 974753 |
| si:dkey-11d20. 1   | 2. 705631 | -0. 387101494 | 1. 052433   | -0. 36782 | 0. 713011 | 0. 945821 |
| pimr92             | 0 NA      |               | NA          | NA        | NA        | NA        |
| BX957231. 1        | 1. 014831 | 1. 055424132  | 2. 409408   | 0. 438043 | 0. 661355 | NA        |
| RF00001            | 0. 135482 |               | 0 5. 267649 | 0         | 1 NA      |           |
| BX510309. 3        | 0 NA      |               | NA          | NA        | NA        | NA        |
| RF00001            | 0 NA      |               | NA          | NA        | NA        | NA        |
| BX957279. 1        | 16. 95919 | 0. 011082764  | 0. 451183   | 0. 024564 | 0. 980403 | 1         |
| asip2b             | 588. 2241 | -0. 28368392  | 0. 149215   | -1. 90118 | 0. 057279 | 0. 413312 |
| RF00026            | 0. 099037 |               | 0 5. 267649 | 0         | 1 NA      |           |
| CABZ01084131. 1    | 163. 4436 | -0. 162234645 | 0. 183431   | -0. 88445 | 0. 376456 | 0. 822258 |
| RF00001            | 0. 129602 |               | 0 5. 267649 | 0         | 1 NA      |           |
| CU928847. 1        | 0. 693201 | 0. 968684425  | 2. 531103   | 0. 382712 | 0. 701933 | NA        |
| RF00001            | 0 NA      |               | NA          | NA        | NA        | NA        |
| RF00020            | 0. 043308 |               | 0 5. 267649 | 0         | 1 NA      |           |
| si:ch211-238p8. 35 | 0 NA      |               | NA          | NA        | NA        | NA        |
| RF00026            | 0 NA      |               | NA          | NA        | NA        | NA        |
| RF00001            | 0. 04222  |               | 0 5. 267649 | 0         | 1 NA      |           |
| RF00001            | 0. 234166 |               | 0 5. 267649 | 0         | 1 NA      |           |
| RF00026            | 0 NA      |               | NA          | NA        | NA        | NA        |
| CT583728. 19       | 0 NA      |               | NA          | NA        | NA        | NA        |
| ighj2-4            | 0 NA      |               | NA          | NA        | NA        | NA        |

|                    |          |              |            |          |          |          |
|--------------------|----------|--------------|------------|----------|----------|----------|
| RF00392            | 0        | NA           | NA         | NA       | NA       | NA       |
| znf985             | 2.599594 | -2.341444354 | 1.211326   | -1.93296 | 0.053241 | 0.400175 |
| JMY                | 160.1505 | -0.051419717 | 0.187095   | -0.27483 | 0.783446 | 0.96245  |
| rab3b              | 541.8233 | 0.289312788  | 0.244381   | 1.183861 | 0.236468 | 0.717725 |
| CABZ01032906.1     | 0.04222  |              | 0 5.267649 |          | 0        | 1 NA     |
| taar19a            | 0        | NA           | NA         | NA       | NA       | NA       |
| CT867973.1         | 0        | NA           | NA         | NA       | NA       | NA       |
| RF00026            | 0        | NA           | NA         | NA       | NA       | NA       |
| L0018106.2         | 4.679499 | -0.337170929 | 0.831015   | -0.40573 | 0.684938 | 0.938486 |
| CU469530.2         | 2.536187 | 0.563927626  | 1.311551   | 0.42997  | 0.667218 | 0.933049 |
| RF00012            | 0        | NA           | NA         | NA       | NA       | NA       |
| RF00001            | 0.04222  |              | 0 5.267649 |          | 0        | 1 NA     |
| BX294661.2         | 0.063619 |              | 0 5.267649 |          | 0        | 1 NA     |
| dicpl.1            | 1.02475  | -0.77093288  | 2.20425    | -0.34975 | 0.726528 | NA       |
| RF00001            | 0        | NA           | NA         | NA       | NA       | NA       |
| CR407598.2         | 0        | NA           | NA         | NA       | NA       | NA       |
| CU633479.5         | 46.2372  | -0.554509791 | 0.741511   | -0.74781 | 0.454574 | 0.85968  |
| ighv8-3            | 0        | NA           | NA         | NA       | NA       | NA       |
| RF00026            | 0        | NA           | NA         | NA       | NA       | NA       |
| L0018148.1         | 229.946  | -0.18268455  | 0.176562   | -1.03468 | 0.300819 | 0.767015 |
| SCARF2             | 134.2255 | 0.157119382  | 0.264017   | 0.595111 | 0.551769 | 0.8974   |
| CR749777.1         | 0.395856 | -1.748590142 | 3.694213   | -0.47333 | 0.635976 | NA       |
| RF00001            | 0.090321 |              | 0 5.267649 |          | 0        | 1 NA     |
| dre-mir-430c-1     | 0        | NA           | NA         | NA       | NA       | NA       |
| RF00017            | 0.341523 | -1.378597334 | 4.415888   | -0.31219 | 0.754896 | NA       |
| CR450805.1         | 0.433398 | -0.868136723 | 3.257738   | -0.26648 | 0.789866 | NA       |
| CR974456.1         | 54.43869 | 0.34278257   | 0.4171     | 0.821824 | 0.411177 | 0.837797 |
| RF00003            | 0        | NA           | NA         | NA       | NA       | NA       |
| si:dkey-31m5.5     | 0.090321 |              | 0 5.267649 |          | 0        | 1 NA     |
| zgc:77614          | 0        | NA           | NA         | NA       | NA       | NA       |
| CABZ01078594.1     | 3361.293 | -0.067299378 | 0.190451   | -0.35337 | 0.723813 | 0.94801  |
| BX681417.14        | 0        | NA           | NA         | NA       | NA       | NA       |
| FP236318.2         | 122.3042 | -0.002296555 | 0.219055   | -0.01048 | 0.991635 | 1        |
| RF00026            | 0        | NA           | NA         | NA       | NA       | NA       |
| CU467856.3         | 20.59067 | 1.219962368  | 0.506843   | 2.406985 | 0.016085 | 0.223897 |
| CU655961.4         | 4.61095  | 0.307436698  | 0.810877   | 0.379141 | 0.704583 | 0.943785 |
| PXMP4              | 105.3794 | -0.453417488 | 0.245222   | -1.84901 | 0.064457 | 0.433491 |
| CU076099.2         | 0        | NA           | NA         | NA       | NA       | NA       |
| BX571681.6         | 0        | NA           | NA         | NA       | NA       | NA       |
| znf1038            | 3.740686 | -0.921500809 | 1.078671   | -0.85429 | 0.392943 | 0.827902 |
| znf1026            | 21.73386 | 0.665319436  | 0.429002   | 1.550853 | 0.120937 | 0.566816 |
| si:ch211-113a14.22 | 13.28718 | 0.739879947  | 0.865258   | 0.855097 | 0.392497 | 0.827902 |
| RF00026            | 0        | NA           | NA         | NA       | NA       | NA       |
| FP236318.3         | 42.57058 | 0.245595031  | 0.354849   | 0.692112 | 0.488867 | 0.873964 |
| RF00026            | 0        | NA           | NA         | NA       | NA       | NA       |
| taar20r            | 0.462588 | 2.587599632  | 3.108872   | 0.832327 | 0.405224 | NA       |
| tradv11.0.3        | 0.07132  |              | 0 5.267649 |          | 0        | 1 NA     |
| znf1089            | 1.840682 | -2.239905419 | 1.271297   | -1.76191 | 0.078085 | NA       |
| F0704772.1         | 17.7211  | -0.740725569 | 0.647469   | -1.14403 | 0.25261  | 0.732759 |
| CT027677.1         | 0.368231 | -0.868133092 | 4.346231   | -0.19974 | 0.841681 | NA       |
| RF00026            | 0        | NA           | NA         | NA       | NA       | NA       |
| RF00001            | 0        | NA           | NA         | NA       | NA       | NA       |
| BX649508.2         | 1.005291 | -1.396116886 | 1.923122   | -0.72596 | 0.467861 | NA       |
| TTC28              | 522.4277 | 0.130282999  | 0.146738   | 0.88786  | 0.374616 | 0.821243 |

|                   |          |              |          |          |          |          |    |
|-------------------|----------|--------------|----------|----------|----------|----------|----|
| RF00001           | 0.046941 |              | 0        | 5.267649 | 0        | 1        | NA |
| CU855895.2        | 77.93715 | -0.063333404 | 0.238135 | -0.26596 | 0.790273 | 0.964428 |    |
| CT583728.20       | 0        | NA           | NA       | NA       | NA       | NA       |    |
| RF00026           | 0        | NA           | NA       | NA       | NA       | NA       |    |
| BX470137.1        | 0.32262  | 2.591232155  | 3.835965 | 0.67551  | 0.499352 | NA       |    |
| RF00001           | 0.891175 | -0.408861016 | 2.134232 | -0.19157 | 0.848077 | NA       |    |
| BX927341.4        | 0.059954 | 1.055396947  | 5.267649 | 0.200354 | 0.841203 | NA       |    |
| si:dkeyp-53e4.4   | 1.620668 | 1.674833224  | 1.581354 | 1.059113 | 0.289548 | NA       |    |
| CABZ01073033.1    | 33.89945 | 0.28171205   | 0.287103 | 0.981222 | 0.326484 | 0.785445 |    |
| CT025695.2        | 0        | NA           | NA       | NA       | NA       | NA       |    |
| BX511034.8        | 0.181325 |              | 0        | 5.267649 | 0        | 1        | NA |
| RF00001           | 0        | NA           | NA       | NA       | NA       | NA       |    |
| zgc:194551        | 58.6846  | 0.0045058    | 0.311086 | 0.014484 | 0.988444 |          | 1  |
| zgc:77614         | 0        | NA           | NA       | NA       | NA       | NA       |    |
| BX005022.2        | 1.174318 | -3.540377807 | 2.173063 | -1.62921 | 0.103268 | NA       |    |
| RF00001           | 0        | NA           | NA       | NA       | NA       | NA       |    |
| RF00001           | 0        | NA           | NA       | NA       | NA       | NA       |    |
| dre-mir-430b-10   | 0        | NA           | NA       | NA       | NA       | NA       |    |
| zp3               | 3.005359 | -0.342997384 | 1.085442 | -0.316   | 0.752004 | 0.955417 |    |
| CABZ01084340.1    | 0.298628 | 2.07686583   | 4.658187 | 0.445853 | 0.655704 | NA       |    |
| BX901962.4        | 56.52401 | -0.407663437 | 0.301285 | -1.35308 | 0.176029 | 0.649415 |    |
| pimr80            | 2.143486 | -1.572379746 | 1.359459 | -1.15662 | 0.247427 | NA       |    |
| pimr166           | 0.087179 |              | 0        | 5.267649 | 0        | 1        | NA |
| RF00001           | 0.242418 | -2.340119187 | 5.201853 | -0.44986 | 0.65281  | NA       |    |
| RF00003           | 0        | NA           | NA       | NA       | NA       | NA       |    |
| RF00001           | 0        | NA           | NA       | NA       | NA       | NA       |    |
| CABZ01065416.1    | 13.2588  | -0.770336447 | 0.695733 | -1.10723 | 0.268194 | 0.744507 |    |
| AL845320.2        | 0.270062 |              | 0        | 5.267649 | 0        | 1        | NA |
| si:dkey-234i14.13 | 0        | NA           | NA       | NA       | NA       | NA       |    |
| RF00001           | 0.045161 |              | 0        | 5.267649 | 0        | 1        | NA |
| tmem14cb          | 79.46319 | 0.184722932  | 0.333409 | 0.554043 | 0.579549 | 0.905618 |    |
| BX769173.3        | 0.267714 |              | 0        | 5.267649 | 0        | 1        | NA |
| RF00001           | 0        | NA           | NA       | NA       | NA       | NA       |    |
| RF00026           | 0        | NA           | NA       | NA       | NA       | NA       |    |
| CABZ01075628.1    | 10.91751 | -0.320051774 | 0.591479 | -0.5411  | 0.588436 | 0.90797  |    |
| CU862020.1        | 8.164231 | -1.474956054 | 0.958619 | -1.53863 | 0.123896 | 0.571162 |    |
| RF00026           | 0        | NA           | NA       | NA       | NA       | NA       |    |
| RF00026           | 0        | NA           | NA       | NA       | NA       | NA       |    |
| L0017845.1        | 12.44803 | -0.512053031 | 0.467506 | -1.09529 | 0.273391 | 0.749148 |    |
| RF00001           | 0.043309 |              | 0        | 5.267649 | 0        | 1        | NA |
| F0704624.1        | 78.5271  | -0.317071634 | 0.280509 | -1.13034 | 0.258331 | 0.735636 |    |
| znf1033           | 8.584304 | 0.355596374  | 0.628928 | 0.565401 | 0.571801 | 0.903234 |    |
| CT583728.21       | 0.13868  |              | 0        | 5.267649 | 0        | 1        | NA |
| RF00017           | 0.043308 |              | 0        | 5.267649 | 0        | 1        | NA |
| CR932978.2        | 0        | NA           | NA       | NA       | NA       | NA       |    |
| RF00001           | 0.101247 | 1.854150541  | 5.241768 | 0.353726 | 0.723544 | NA       |    |
| RF00026           | 0        | NA           | NA       | NA       | NA       | NA       |    |
| si:dkeyp-123a12.2 | 8.717136 | 0.635850836  | 0.657235 | 0.967464 | 0.333312 | 0.790471 |    |
| BX000981.11       | 0        | NA           | NA       | NA       | NA       | NA       |    |
| RF00001           | 0        | NA           | NA       | NA       | NA       | NA       |    |
| dre-mir-430a-2    | 0        | NA           | NA       | NA       | NA       | NA       |    |
| RF00017           | 0.367789 | 2.869604686  | 4.308638 | 0.666012 | 0.505403 | NA       |    |
| RF00001           | 0        | NA           | NA       | NA       | NA       | NA       |    |
| si:dkey-4c23.5    | 4.823747 | 0.069713526  | 0.969242 | 0.071926 | 0.942661 | 0.997371 |    |

|                   |           |               |             |           |           |           |
|-------------------|-----------|---------------|-------------|-----------|-----------|-----------|
| ftr50             | 4. 447974 | 2. 799247321  | 1. 475105   | 1. 89766  | 0. 057741 | 0. 414711 |
| CU138548. 7       | 0 NA      |               | NA          | NA        | NA        | NA        |
| RF00026           | 0 NA      |               | NA          | NA        | NA        | NA        |
| RF00001           | 0 NA      |               | NA          | NA        | NA        | NA        |
| RF00016           | 0. 748784 | -0. 868139858 | 2. 834147   | -0. 30631 | 0. 759365 | NA        |
| BX324157. 1       | 0. 161662 | -1. 710071829 | 5. 238473   | -0. 32644 | 0. 744088 | NA        |
| RF00001           | 0 NA      |               | NA          | NA        | NA        | NA        |
| RF00001           | 0 NA      |               | NA          | NA        | NA        | NA        |
| AL935292. 1       | 2. 152462 | -1. 450399542 | 1. 351705   | -1. 07301 | 0. 283265 | NA        |
| zgc:165555        | 3. 079663 | 0. 299373189  | 1. 095049   | 0. 273388 | 0. 784555 | 0. 962605 |
| pimr192           | 0. 04222  |               | 0 5. 267649 | 0         | 1         | NA        |
| BX470083. 4       | 0 NA      |               | NA          | NA        | NA        | NA        |
| si:dkey-65b13. 8  | 0 NA      |               | NA          | NA        | NA        | NA        |
| RF00003           | 0. 069091 |               | 0 5. 267649 | 0         | 1         | NA        |
| si:dkeyp-74b6. 2  | 0. 932285 | -0. 868143935 | 2. 849755   | -0. 30464 | 0. 760642 | NA        |
| RF00001           | 0. 045161 |               | 0 5. 267649 | 0         | 1         | NA        |
| zgc:174353        | 0 NA      |               | NA          | NA        | NA        | NA        |
| RF00001           | 0 NA      |               | NA          | NA        | NA        | NA        |
| taar19d           | 0. 293486 |               | 0 5. 267649 | 0         | 1         | NA        |
| CABZ01057928. 1   | 47. 18325 | 0. 286100927  | 0. 262766   | 1. 088805 | 0. 27624  | 0. 750674 |
| v2rh11            | 0 NA      |               | NA          | NA        | NA        | NA        |
| RF00001           | 0 NA      |               | NA          | NA        | NA        | NA        |
| CABZ01087415. 1   | 16. 1505  | -0. 52971184  | 0. 535779   | -0. 98868 | 0. 322822 | 0. 78265  |
| F0704836. 1       | 0. 505484 | -2. 623776703 | 3. 856136   | -0. 68042 | 0. 496241 | NA        |
| LHFPL6            | 20. 91295 | 0. 146798661  | 0. 362944   | 0. 404467 | 0. 68587  | 0. 938574 |
| RF00271           | 6. 334488 | -0. 659010605 | 0. 678307   | -0. 97155 | 0. 331274 | 0. 788942 |
| RF00001           | 0 NA      |               | NA          | NA        | NA        | NA        |
| si:dkey-33c12. 12 | 0. 280362 |               | 0 5. 267649 | 0         | 1         | NA        |
| RF00026           | 0 NA      |               | NA          | NA        | NA        | NA        |
| si:dkeyp-46h3. 1  | 2. 359389 | 0. 110779936  | 1. 261559   | 0. 087812 | 0. 930026 | 0. 995689 |
| RF00003           | 0 NA      |               | NA          | NA        | NA        | NA        |
| BX511056. 5       | 0 NA      |               | NA          | NA        | NA        | NA        |
| si:dkey-112g5. 12 | 0. 622936 | -2. 07171273  | 3. 036592   | -0. 68225 | 0. 495081 | NA        |
| RF00001           | 0. 043308 |               | 0 5. 267649 | 0         | 1         | NA        |
| CU466281. 1       | 0 NA      |               | NA          | NA        | NA        | NA        |
| si:dkey-199f5. 7  | 0. 27755  | -0. 863711847 | 4. 708396   | -0. 18344 | 0. 854452 | NA        |
| AL935174. 3       | 17. 61981 | -0. 245713847 | 0. 449417   | -0. 54674 | 0. 584558 | 0. 906574 |
| RF00001           | 0. 043309 |               | 0 5. 267649 | 0         | 1         | NA        |
| RF00026           | 0 NA      |               | NA          | NA        | NA        | NA        |
| senp7a            | 0. 046941 |               | 0 5. 267649 | 0         | 1         | NA        |
| RF00001           | 0 NA      |               | NA          | NA        | NA        | NA        |
| RF00001           | 0 NA      |               | NA          | NA        | NA        | NA        |
| BX681417. 15      | 0 NA      |               | NA          | NA        | NA        | NA        |
| nitr1b            | 1. 118029 | 1. 055419195  | 2. 552641   | 0. 413462 | 0. 679268 | NA        |
| BX901889. 5       | 0 NA      |               | NA          | NA        | NA        | NA        |
| LO018020. 2       | 0 NA      |               | NA          | NA        | NA        | NA        |
| RF00276           | 0 NA      |               | NA          | NA        | NA        | NA        |
| RF00001           | 0. 043308 |               | 0 5. 267649 | 0         | 1         | NA        |
| RF00001           | 0. 045161 |               | 0 5. 267649 | 0         | 1         | NA        |
| CABZ01059407. 1   | 0 NA      |               | NA          | NA        | NA        | NA        |
| RF00001           | 0 NA      |               | NA          | NA        | NA        | NA        |
| RF00001           | 0 NA      |               | NA          | NA        | NA        | NA        |
| RF00001           | 0 NA      |               | NA          | NA        | NA        | NA        |
| BX000364. 3       | 0 NA      |               | NA          | NA        | NA        | NA        |

|                   |          |              |            |          |          |          |   |
|-------------------|----------|--------------|------------|----------|----------|----------|---|
| im:6904045        | 82.27867 | 0.075529381  | 0.326534   | 0.231306 | 0.817077 | 0.971207 |   |
| RF00001           | 0 NA     |              | NA         | NA       | NA       | NA       |   |
| si:dkey-15b23.3   | 0.747432 | -2.762691752 | 2.194816   | -1.25874 | 0.208126 | NA       |   |
| CR450764.6        | 0 NA     |              | NA         | NA       | NA       | NA       |   |
| RF00004           | 0 NA     |              | NA         | NA       | NA       | NA       |   |
| L0017791.1        | 6.767461 | 2.423990024  | 1.23389    | 1.96451  | 0.049471 | 0.387507 |   |
| RF00001           | 0.423235 | 1.965556474  | 2.865904   | 0.685842 | 0.492813 | NA       |   |
| CU929379.1        | 0.358493 | 1.055413771  | 3.337007   | 0.316276 | 0.751793 | NA       |   |
| F0203432.1        | 3.400282 | 0.904324539  | 1.21326    | 0.745367 | 0.45605  | 0.860359 |   |
| dicpl.3-4         | 1.965185 | -1.393703018 | 1.737093   | -0.80232 | 0.422368 | NA       |   |
| RF00001           | 0 NA     |              | NA         | NA       | NA       | NA       |   |
| BX323062.1        | 1.183227 | 3.797137609  | 2.054469   | 1.848233 | 0.064569 | NA       |   |
| RF00004           | 0.505702 |              | 0 3.469034 |          | 0        | 1 NA     |   |
| zgc:171445        | 4.11841  | -0.988093635 | 0.771553   | -1.28065 | 0.200315 | 0.680711 |   |
| L0018680.1        | 0.252931 |              | 0 4.160025 |          | 0        | 1 NA     |   |
| RF00001           | 0 NA     |              | NA         | NA       | NA       | NA       |   |
| RF00026           | 0 NA     |              | NA         | NA       | NA       | NA       |   |
| RF00001           | 0 NA     |              | NA         | NA       | NA       | NA       |   |
| RF00015           | 0 NA     |              | NA         | NA       | NA       | NA       |   |
| RF00001           | 0.223545 |              | 0 5.267649 |          | 0        | 1 NA     |   |
| BX005085.6        | 68.12363 | 0.003252518  | 0.223653   | 0.014543 | 0.988397 |          | 1 |
| MARF1             | 539.8852 | -0.003801182 | 0.120408   | -0.03157 | 0.974816 |          | 1 |
| RF00026           | 0 NA     |              | NA         | NA       | NA       | NA       |   |
| BX681417.16       | 0 NA     |              | NA         | NA       | NA       | NA       |   |
| crygm2b           | 12.91583 | -1.757101017 | 1.637318   | -1.07316 | 0.2832   | 0.755028 |   |
| CR450720.1        | 0.13868  |              | 0 5.267649 |          | 0        | 1 NA     |   |
| BX681417.17       | 0 NA     |              | NA         | NA       | NA       | NA       |   |
| RF00001           | 0.154619 |              | 0 5.267649 |          | 0        | 1 NA     |   |
| BX927234.2        | 0.092329 | -0.868089684 | 5.267649   | -0.1648  | 0.869104 | NA       |   |
| CDK2AP1           | 161.6171 | 0.020560826  | 0.241432   | 0.085162 | 0.932133 | 0.996053 |   |
| RF00001           | 0.275902 |              | 0 5.267649 |          | 0        | 1 NA     |   |
| dre-mir-430a-2    | 0 NA     |              | NA         | NA       | NA       | NA       |   |
| CR376730.3        | 0 NA     |              | NA         | NA       | NA       | NA       |   |
| si:ch73-338o16.4  | 0.090249 |              | 0 5.267649 |          | 0        | 1 NA     |   |
| RF00026           | 0 NA     |              | NA         | NA       | NA       | NA       |   |
| RF00026           | 0 NA     |              | NA         | NA       | NA       | NA       |   |
| RF00092           | 0.334886 | 0.093656226  | 3.452092   | 0.02713  | 0.978356 | NA       |   |
| si:ch211-238p8.18 | 0.087179 |              | 0 5.267649 |          | 0        | 1 NA     |   |
| BX649300.2        | 33.76208 | -0.315249376 | 0.411783   | -0.76557 | 0.443931 | 0.854304 |   |
| imp3              | 212.918  | 0.146466324  | 0.183698   | 0.797322 | 0.425264 | 0.844714 |   |
| RF00001           | 0.147064 | -2.293512936 | 5.204056   | -0.44072 | 0.659418 | NA       |   |
| CR394572.1        | 0.751938 | 2.914377556  | 3.286266   | 0.886836 | 0.375167 | NA       |   |
| RPL37A            | 18956.31 | -0.205294827 | 0.146725   | -1.39918 | 0.161758 | 0.628955 |   |
| taar13e           | 0 NA     |              | NA         | NA       | NA       | NA       |   |
| RF00003           | 0 NA     |              | NA         | NA       | NA       | NA       |   |
| zgc:165555        | 8.331159 | 0.370390668  | 0.733893   | 0.504693 | 0.613774 | 0.915998 |   |
| tsnax             | 183.3064 | -0.052320125 | 0.200504   | -0.26094 | 0.794136 | 0.965431 |   |
| si:ch211-238p8.10 | 3.208192 | -0.130863561 | 1.014403   | -0.12901 | 0.897353 | 0.989719 |   |
| RF00001           | 0 NA     |              | NA         | NA       | NA       | NA       |   |
| RF00001           | 0 NA     |              | NA         | NA       | NA       | NA       |   |
| RF00271           | 0.268332 | 2.667673267  | 5.195716   | 0.513437 | 0.607646 | NA       |   |
| RF00017           | 0.093881 |              | 0 5.267649 |          | 0        | 1 NA     |   |
| BX510352.1        | 0.046941 |              | 0 5.267649 |          | 0        | 1 NA     |   |
| RF00001           | 0.04222  |              | 0 5.267649 |          | 0        | 1 NA     |   |

|                   |          |              |          |          |          |          |
|-------------------|----------|--------------|----------|----------|----------|----------|
| zgc:174354        | 0.049519 | 0            | 5.267649 | 0        | 1        | NA       |
| si:ch211-227e10.3 | 2.746413 | 2.352904053  | 1.586739 | 1.482855 | 0.138113 | 0.594663 |
| lurapl            | 220.7984 | -0.100453007 | 0.16786  | -0.59843 | 0.54955  | 0.897328 |
| pimr146           | 0        | NA           | NA       | NA       | NA       | NA       |
| CU693440.1        | 0        | NA           | NA       | NA       | NA       | NA       |
| pimr159           | 0        | NA           | NA       | NA       | NA       | NA       |
| RF00003           | 0        | NA           | NA       | NA       | NA       | NA       |
| CU633857.1        | 2.034592 | 0.35846875   | 1.332471 | 0.269026 | 0.78791  | NA       |
| RF00001           | 0.207272 | 0            | 5.267649 | 0        | 1        | NA       |
| dre-mir-430b-18   | 0        | NA           | NA       | NA       | NA       | NA       |
| RF00003           | 0        | NA           | NA       | NA       | NA       | NA       |
| znf1002           | 5.195719 | -1.068059806 | 0.790828 | -1.35056 | 0.176837 | 0.650262 |
| RF00026           | 0        | NA           | NA       | NA       | NA       | NA       |
| BX681417.18       | 0        | NA           | NA       | NA       | NA       | NA       |
| ubald2            | 218.5323 | 0.035780601  | 0.190984 | 0.187348 | 0.851388 | 0.978548 |
| RF00001           | 0        | NA           | NA       | NA       | NA       | NA       |
| RF00001           | 0.150235 | 0            | 5.267649 | 0        | 1        | NA       |
| BX908796.5        | 0        | NA           | NA       | NA       | NA       | NA       |
| RF00001           | 0.049519 | 0            | 5.267649 | 0        | 1        | NA       |
| nat14             | 72.30051 | 0.061277861  | 0.214567 | 0.285588 | 0.775194 | 0.960899 |
| RF00001           | 0.043308 | 0            | 5.267649 | 0        | 1        | NA       |
| RF00001           | 0        | NA           | NA       | NA       | NA       | NA       |
| CABZ01077555.1    | 4.296908 | 0.093643111  | 1.79511  | 0.052166 | 0.958397 | 0.999109 |
| CR753816.1        | 0.243482 | 2.667686611  | 5.195716 | 0.51344  | 0.607644 | NA       |
| RF00026           | 0        | NA           | NA       | NA       | NA       | NA       |
| RF00001           | 0        | NA           | NA       | NA       | NA       | NA       |
| AL928685.3        | 0.621252 | -3.584928925 | 2.830081 | -1.26672 | 0.205254 | NA       |
| pimr77            | 0.098043 | -1.71005882  | 5.238474 | -0.32644 | 0.74409  | NA       |
| RF00026           | 0        | NA           | NA       | NA       | NA       | NA       |
| LO018532.1        | 0.097564 | 1.055383603  | 5.267649 | 0.200352 | 0.841205 | NA       |
| RF00026           | 0        | NA           | NA       | NA       | NA       | NA       |
| gnb4b             | 359.7273 | 0.041769574  | 0.124134 | 0.336488 | 0.736503 | 0.951919 |
| CABZ01022564.1    | 0.087179 | 0            | 5.267649 | 0        | 1        | NA       |
| RF00001           | 0        | NA           | NA       | NA       | NA       | NA       |
| RF00003           | 0        | NA           | NA       | NA       | NA       | NA       |
| RF00026           | 0        | NA           | NA       | NA       | NA       | NA       |
| BX890572.2        | 0.233307 | 0            | 4.957971 | 0        | 1        | NA       |
| RF00026           | 0        | NA           | NA       | NA       | NA       | NA       |
| RF00001           | 0        | NA           | NA       | NA       | NA       | NA       |
| RF00001           | 0.094679 | 0            | 5.267649 | 0        | 1        | NA       |
| hbbe1.2           | 18865.23 | 0.208498716  | 0.402912 | 0.517479 | 0.604822 | 0.914985 |
| pimr58            | 0.941989 | -0.868140405 | 2.505218 | -0.34653 | 0.728942 | NA       |
| BX664750.5        | 0        | NA           | NA       | NA       | NA       | NA       |
| RF00001           | 0        | NA           | NA       | NA       | NA       | NA       |
| BX649556.2        | 0.5289   | 1.9249022    | 3.520859 | 0.546714 | 0.584575 | NA       |
| RF00001           | 0        | NA           | NA       | NA       | NA       | NA       |
| RF00001           | 0.203827 | -2.413182047 | 5.198538 | -0.4642  | 0.642502 | NA       |
| n6amt1            | 249.8088 | -0.00063755  | 0.162204 | -0.00393 | 0.996864 | 1        |
| CABZ01083778.1    | 6.961968 | -0.658884434 | 0.835986 | -0.78815 | 0.430608 | 0.847542 |
| CABZ01038524.1    | 24.31044 | -0.07183748  | 0.464153 | -0.15477 | 0.877002 | 0.985075 |
| CR925768.1        | 1.37974  | -1.939940276 | 1.783126 | -1.08794 | 0.27662  | NA       |
| CABZ01101813.1    | 133.6612 | -0.783697288 | 0.196577 | -3.98672 | 6.70E-05 | 0.006749 |
| RF00392           | 0.150268 | 0.892446925  | 5.241767 | 0.170257 | 0.864808 | NA       |
| RF00026           | 0        | NA           | NA       | NA       | NA       | NA       |

|                   |           |               |             |           |           |           |
|-------------------|-----------|---------------|-------------|-----------|-----------|-----------|
| pimr198           | 1. 191554 | 0. 376158029  | 2. 072856   | 0. 181468 | 0. 856    | NA        |
| RF00001           | 0. 4945   | 2. 558460269  | 3. 037364   | 0. 842329 | 0. 399604 | NA        |
| BX547993. 2       | 1. 40752  | 0. 958160955  | 2. 038596   | 0. 47001  | 0. 638348 | NA        |
| RF00003           | 0. 04222  |               | 0 5. 267649 |           | 0         | 1 NA      |
| RF00001           | 0 NA      |               | NA          | NA        | NA        | NA        |
| RF00003           | 0. 131779 |               | 0 5. 267649 |           | 0         | 1 NA      |
| RF00001           | 0. 181325 |               | 0 5. 267649 |           | 0         | 1 NA      |
| RF00001           | 0 NA      |               | NA          | NA        | NA        | NA        |
| RF00001           | 0 NA      |               | NA          | NA        | NA        | NA        |
| RF00001           | 29. 87901 | 1. 082472886  | 0. 62647    | 1. 727893 | 0. 084007 | 0. 486734 |
| zgc:173575        | 23. 0723  | 0. 132707214  | 0. 37505    | 0. 353839 | 0. 723459 | 0. 947917 |
| zp3. 2            | 3. 153998 | -0. 477042707 | 0. 976261   | -0. 48864 | 0. 625095 | 0. 920398 |
| RF00001           | 0. 099037 |               | 0 5. 267649 |           | 0         | 1 NA      |
| tomt              | 2. 846563 | -3. 627472589 | 1. 516065   | -2. 39269 | 0. 016725 | 0. 229306 |
| CR854981. 1       | 0. 07132  |               | 0 5. 267649 |           | 0         | 1 NA      |
| dre-mir-430c-1    | 0 NA      |               | NA          | NA        | NA        | NA        |
| RF00001           | 0. 199754 |               | 0 5. 267649 |           | 0         | 1 NA      |
| pimr160           | 0 NA      |               | NA          | NA        | NA        | NA        |
| RF00017           | 0 NA      |               | NA          | NA        | NA        | NA        |
| BX322622. 1       | 0. 398894 |               | 0 4. 268703 |           | 0         | 1 NA      |
| klh110b. 1        | 0. 740318 | -1. 758263076 | 2. 45825    | -0. 71525 | 0. 474455 | NA        |
| BX511028. 1       | 2. 042804 | 0. 35604995   | 1. 203495   | 0. 295847 | 0. 767347 | NA        |
| RF00211           | 0. 504112 | -0. 665120421 | 3. 33714    | -0. 19931 | 0. 842021 | NA        |
| RF00012           | 0 NA      |               | NA          | NA        | NA        | NA        |
| BX548073. 10      | 0 NA      |               | NA          | NA        | NA        | NA        |
| shisa6            | 34. 15476 | 0. 68160575   | 0. 412859   | 1. 650942 | 0. 09875  | 0. 521433 |
| BX004976. 1       | 0. 266321 |               | 0 4. 775512 |           | 0         | 1 NA      |
| CABZ01080056. 1   | 41. 40909 | 0. 245802629  | 0. 318426   | 0. 771931 | 0. 440155 | 0. 852079 |
| MGAT5B            | 2. 81459  | 1. 655792923  | 1. 542462   | 1. 073474 | 0. 283058 | 0. 755028 |
| si:dkey-122c11. 8 | 1. 027721 | 2. 598194299  | 1. 966043   | 1. 321535 | 0. 186323 | NA        |
| RF00001           | 0. 050723 | -0. 86807634  | 5. 267649   | -0. 16479 | 0. 869106 | NA        |
| RF00003           | 0 NA      |               | NA          | NA        | NA        | NA        |
| CU468041. 2       | 43. 3271  | 0. 233644536  | 0. 311313   | 0. 750513 | 0. 452946 | 0. 858256 |
| RF00003           | 0 NA      |               | NA          | NA        | NA        | NA        |
| CR847973. 1       | 0 NA      |               | NA          | NA        | NA        | NA        |
| CR293501. 2       | 3. 08766  | -0. 254003268 | 1. 330392   | -0. 19092 | 0. 848585 | 0. 977912 |
| pimr6             | 0. 453175 | -0. 868135188 | 3. 189081   | -0. 27222 | 0. 785452 | NA        |
| znf1118           | 7. 700325 | 0. 450657567  | 0. 673915   | 0. 668716 | 0. 503677 | 0. 881759 |
| AL929520. 3       | 0. 710231 | 2. 069514342  | 3. 734534   | 0. 554156 | 0. 579472 | NA        |
| RF00001           | 0. 092827 |               | 0 5. 267649 |           | 0         | 1 NA      |
| F0082780. 1       | 34. 11295 | -0. 376350913 | 0. 77933    | -0. 48292 | 0. 629155 | 0. 922403 |
| RF00618           | 0. 094679 |               | 0 5. 267649 |           | 0         | 1 NA      |
| dre-mir-430c-1    | 0 NA      |               | NA          | NA        | NA        | NA        |
| cacng4a           | 16. 28927 | -0. 100280344 | 0. 546704   | -0. 18343 | 0. 854463 | 0. 979088 |
| CT030048. 1       | 0. 49913  | -2. 769267222 | 3. 423818   | -0. 80882 | 0. 418616 | NA        |
| clec19a           | 98. 68406 | -0. 141220171 | 0. 260712   | -0. 54167 | 0. 588045 | 0. 907789 |
| CABZ01026681. 1   | 125. 3429 | -0. 288016237 | 0. 287583   | -1. 00151 | 0. 316581 | 0. 778879 |
| NCEH1             | 34. 47218 | 0. 036751289  | 0. 389683   | 0. 094311 | 0. 924862 | 0. 994815 |
| FP015862. 4       | 5. 555819 | 1. 673267834  | 1. 371529   | 1. 220002 | 0. 222464 | 0. 704478 |
| RF00026           | 0 NA      |               | NA          | NA        | NA        | NA        |
| CABZ01117752. 1   | 4. 171399 | -0. 111170653 | 1. 125074   | -0. 09881 | 0. 921288 | 0. 994085 |
| BX323459. 2       | 0. 742591 | -2. 798540456 | 2. 092883   | -1. 33717 | 0. 181167 | NA        |
| cox7b             | 3252. 466 | -0. 051582888 | 0. 146944   | -0. 35104 | 0. 72556  | 0. 948653 |
| traj22            | 0 NA      |               | NA          | NA        | NA        | NA        |



|                   |          |              |            |          |          |          |   |
|-------------------|----------|--------------|------------|----------|----------|----------|---|
| si:ch211-271g18.4 | 2.271044 | -2.409679835 | 1.362544   | -1.76852 | 0.076975 | 0.469467 |   |
| RF00012           | 0 NA     |              | NA         | NA       | NA       | NA       |   |
| si:dkey-235d18.6  | 1.248511 | 1.049558072  | 2.000069   | 0.524761 | 0.599749 | NA       |   |
| CR759836.1        | 223.2459 | 0.14342218   | 0.187036   | 0.766818 | 0.44319  | 0.854063 |   |
| RF00001           | 0 NA     |              | NA         | NA       | NA       | NA       |   |
| BX681417.19       | 0 NA     |              | NA         | NA       | NA       | NA       |   |
| AL928685.4        | 16.6553  | 0.48237271   | 0.427184   | 1.129193 | 0.258816 | 0.736046 |   |
| BX681417.20       | 0 NA     |              | NA         | NA       | NA       | NA       |   |
| si:dkeyp-82b4.3   | 1.720443 | -0.754260886 | 1.375014   | -0.54855 | 0.583316 | NA       |   |
| RF00026           | 0 NA     |              | NA         | NA       | NA       | NA       |   |
| RF00001           | 0 NA     |              | NA         | NA       | NA       | NA       |   |
| CR847895.1        | 4.860742 | 0.322003618  | 0.738183   | 0.436211 | 0.662684 | 0.930964 |   |
| pimr160           | 0.050723 | -0.86807634  | 5.267649   | -0.16479 | 0.869106 | NA       |   |
| RF00001           | 0.04222  |              | 0 5.267649 |          | 0        | 1 NA     |   |
| RF00001           | 0 NA     |              | NA         | NA       | NA       | NA       |   |
| cacna1db          | 6.914012 | 0.55941962   | 0.970402   | 0.576482 | 0.564289 | 0.901433 |   |
| BX649608.2        | 0.664484 | -0.058196109 | 2.919678   | -0.01993 | 0.984097 | NA       |   |
| cc125a            | 85.57373 | 0.227271813  | 0.364969   | 0.622716 | 0.533471 | 0.891181 |   |
| CU468826.3        | 0 NA     |              | NA         | NA       | NA       | NA       |   |
| taar19t           | 0 NA     |              | NA         | NA       | NA       | NA       |   |
| RF00001           | 0 NA     |              | NA         | NA       | NA       | NA       |   |
| CR392335.1        | 0.099037 |              | 0 5.267649 |          | 0        | 1 NA     |   |
| RF00001           | 0 NA     |              | NA         | NA       | NA       | NA       |   |
| RF00001           | 0 NA     |              | NA         | NA       | NA       | NA       |   |
| RF00017           | 0.049519 |              | 0 5.267649 |          | 0        | 1 NA     |   |
| BX324110.1        | 0.423115 | 2.47153057   | 2.812675   | 0.878712 | 0.379558 | NA       |   |
| CR293532.1        | 0 NA     |              | NA         | NA       | NA       | NA       |   |
| si:dkey-83f18.3   | 0.098043 | -1.71005882  | 5.238474   | -0.32644 | 0.74409  | NA       |   |
| CT030160.1        | 0.675117 | 1.877442016  | 2.734277   | 0.686632 | 0.492315 | NA       |   |
| RF00001           | 0 NA     |              | NA         | NA       | NA       | NA       |   |
| BX511259.2        | 0.587964 | -1.788629005 | 3.511128   | -0.50942 | 0.61046  | NA       |   |
| zgc:173552        | 7.09342  | -0.132329052 | 0.799884   | -0.16544 | 0.868601 | 0.982801 |   |
| RF00017           | 0.160519 | -2.413169363 | 5.198539   | -0.4642  | 0.642503 | NA       |   |
| CR846082.1        | 90.23644 | 0.003106958  | 0.279831   | 0.011103 | 0.991141 |          | 1 |
| RF00001           | 0.063619 |              | 0 5.267649 |          | 0        | 1 NA     |   |
| L0017917.1        | 88.79223 | 0.596316302  | 0.168986   | 3.528789 | 0.000417 | 0.02455  |   |
| dre-mir-430a-16   | 0 NA     |              | NA         | NA       | NA       | NA       |   |
| znf1078           | 12.99793 | 0.800060244  | 0.482397   | 1.65851  | 0.097215 | 0.519839 |   |
| RF00001           | 0.049519 |              | 0 5.267649 |          | 0        | 1 NA     |   |
| prkaa             | 556.7152 | -0.062015015 | 0.113948   | -0.54424 | 0.586275 | 0.906711 |   |
| RF00001           | 0 NA     |              | NA         | NA       | NA       | NA       |   |
| RF00001           | 0.093931 | 1.055383603  | 5.267649   | 0.200352 | 0.841205 | NA       |   |
| SAMD12            | 6.146551 | 0.271799494  | 0.777936   | 0.349385 | 0.7268   | 0.949095 |   |
| RF00003           | 0 NA     |              | NA         | NA       | NA       | NA       |   |
| RF00096           | 0.04222  |              | 0 5.267649 |          | 0        | 1 NA     |   |
| pimr89            | 0 NA     |              | NA         | NA       | NA       | NA       |   |
| CU694255.2        | 0 NA     |              | NA         | NA       | NA       | NA       |   |
| RF00001           | 0 NA     |              | NA         | NA       | NA       | NA       |   |
| RF00001           | 0 NA     |              | NA         | NA       | NA       | NA       |   |
| RF00001           | 0.086616 |              | 0 5.267649 |          | 0        | 1 NA     |   |
| si:dkey-27d5.4    | 0 NA     |              | NA         | NA       | NA       | NA       |   |
| pimr18            | 0.069091 |              | 0 5.267649 |          | 0        | 1 NA     |   |
| RF00026           | 0 NA     |              | NA         | NA       | NA       | NA       |   |
| zgc:101806        | 0.060442 |              | 0 5.267649 |          | 0        | 1 NA     |   |

|                 |          |              |            |          |          |          |
|-----------------|----------|--------------|------------|----------|----------|----------|
| RF00001         | 0        | NA           | NA         | NA       | NA       | NA       |
| crygm2d9        | 3903.782 | 0.482735703  | 0.383232   | 1.259643 | 0.207798 | 0.689888 |
| BX664750.6      | 0        | NA           | NA         | NA       | NA       | NA       |
| RF00001         | 0.08847  |              | 0 5.267649 |          | 0        | 1 NA     |
| RF00012         | 0        | NA           | NA         | NA       | NA       | NA       |
| pimr76          | 0.102175 | 1.055383603  | 5.267649   | 0.200352 | 0.841205 | NA       |
| RF00001         | 0        | NA           | NA         | NA       | NA       | NA       |
| twfla           | 530.9931 | -0.072012356 | 0.09362    | -0.7692  | 0.441775 | 0.853281 |
| CT583728.22     | 0        | NA           | NA         | NA       | NA       | NA       |
| pigbos1         | 239.0467 | -0.043592214 | 0.165618   | -0.26321 | 0.79239  | 0.965217 |
| FO904836.1      | 0        | NA           | NA         | NA       | NA       | NA       |
| RF00003         | 0        | NA           | NA         | NA       | NA       | NA       |
| pimr84          | 0.090321 |              | 0 5.267649 |          | 0        | 1 NA     |
| RF00026         | 0        | NA           | NA         | NA       | NA       | NA       |
| RF00001         | 0        | NA           | NA         | NA       | NA       | NA       |
| CT033803.2      | 0        | NA           | NA         | NA       | NA       | NA       |
| CT583625.6      | 0.887263 | 2.877282327  | 2.850892   | 1.009257 | 0.312851 | NA       |
| RF00026         | 0        | NA           | NA         | NA       | NA       | NA       |
| BX511311.8      | 0        | NA           | NA         | NA       | NA       | NA       |
| AL954741.2      | 150.1082 | -0.206664858 | 0.145999   | -1.41553 | 0.156914 | 0.622766 |
| RF00001         | 0        | NA           | NA         | NA       | NA       | NA       |
| L0017974.1      | 2.659924 | -0.412451691 | 1.125128   | -0.36658 | 0.713931 | 0.945821 |
| CR932978.3      | 0        | NA           | NA         | NA       | NA       | NA       |
| RF00001         | 0        | NA           | NA         | NA       | NA       | NA       |
| zgc:77614       | 0.278882 |              | 0 5.267649 |          | 0        | 1 NA     |
| RF00001         | 0.466955 | -1.748876438 | 3.601078   | -0.48565 | 0.627213 | NA       |
| si:dkey-30g5.1  | 0.356599 |              | 0 5.267649 |          | 0        | 1 NA     |
| AL929536.5      | 148.494  | 0.384471009  | 0.210405   | 1.82729  | 0.067656 | 0.443563 |
| si:dkey-47k20.5 | 0.23452  |              | 0 5.267649 |          | 0        | 1 NA     |
| RF00026         | 0        | NA           | NA         | NA       | NA       | NA       |
| si:ch73-36p18.1 | 2.881821 | 0.593398814  | 1.186372   | 0.50018  | 0.616949 | 0.916365 |
| RF00001         | 0        | NA           | NA         | NA       | NA       | NA       |
| RF00001         | 0.046941 |              | 0 5.267649 |          | 0        | 1 NA     |
| RF00017         | 0        | NA           | NA         | NA       | NA       | NA       |
| RF00001         | 0        | NA           | NA         | NA       | NA       | NA       |
| BX681417.21     | 0        | NA           | NA         | NA       | NA       | NA       |
| chrnb5a         | 31.91501 | -0.785652115 | 0.608605   | -1.29091 | 0.196736 | 0.677121 |
| CR339041.3      | 5.525682 | 0.277246275  | 1.261504   | 0.219774 | 0.826047 | 0.97308  |
| CR558302.1      | 0        | NA           | NA         | NA       | NA       | NA       |
| RF00001         | 0.099037 |              | 0 5.267649 |          | 0        | 1 NA     |
| BX470083.5      | 0.087179 |              | 0 5.267649 |          | 0        | 1 NA     |
| RF00003         | 0        | NA           | NA         | NA       | NA       | NA       |
| zgc:165555      | 2.79575  | -0.915732609 | 1.832755   | -0.49965 | 0.617323 | 0.916365 |
| RF00003         | 0        | NA           | NA         | NA       | NA       | NA       |
| GGT7            | 153.5011 | -0.148069259 | 0.235253   | -0.6294  | 0.529084 | 0.890325 |
| CABZ01043506.1  | 18.23239 | 0.576316034  | 0.424021   | 1.359169 | 0.174093 | 0.647365 |
| RF00003         | 0        | NA           | NA         | NA       | NA       | NA       |
| CR376797.1      | 1.26829  | -3.077144869 | 1.873279   | -1.64265 | 0.100455 | NA       |
| RF00001         | 0        | NA           | NA         | NA       | NA       | NA       |
| RF00026         | 0        | NA           | NA         | NA       | NA       | NA       |
| si:dkey-46g23.2 | 6.977108 | 0.905618708  | 0.800909   | 1.130739 | 0.258165 | 0.735569 |
| znf1099         | 0.680297 | 1.389655276  | 2.133619   | 0.651314 | 0.514844 | NA       |
| CT583728.23     | 0.086616 |              | 0 5.267649 |          | 0        | 1 NA     |
| RF00003         | 0        | NA           | NA         | NA       | NA       | NA       |

|                    |          |              |          |          |          |          |
|--------------------|----------|--------------|----------|----------|----------|----------|
| RF00026            | 0 NA     | NA           | NA       | NA       | NA       | NA       |
| BX465228.2         | 18.70811 | 1.954770367  | 0.670961 | 2.913388 | 0.003575 | 0.099143 |
| L0018490.1         | 27.76694 | -0.884619317 | 0.419074 | -2.11089 | 0.034782 | 0.328533 |
| RF00026            | 0 NA     | NA           | NA       | NA       | NA       | NA       |
| RF00001            | 0 NA     | NA           | NA       | NA       | NA       | NA       |
| si:rp71-1k13.6     | 100.1798 | 0.076633894  | 0.180758 | 0.423958 | 0.671596 | 0.933953 |
| RF00002            | 0 NA     | NA           | NA       | NA       | NA       | NA       |
| RF00020            | 0.04222  | 0            | 5.267649 | 0        | 1        | NA       |
| RF00563            | 0.546048 | -2.385802169 | 3.305635 | -0.72174 | 0.470456 | NA       |
| RF00001            | 0 NA     | NA           | NA       | NA       | NA       | NA       |
| BX276105.1         | 48.65377 | -0.364435466 | 0.296729 | -1.22818 | 0.21938  | 0.700336 |
| znf1001            | 12.02985 | 0.32610883   | 0.474744 | 0.686914 | 0.492137 | 0.87629  |
| vapal              | 817.4628 | 0.035096946  | 0.121538 | 0.288773 | 0.772755 | 0.960624 |
| RF00001            | 0.263486 | 0            | 5.267649 | 0        | 1        | NA       |
| sp5l               | 37.87201 | 0.418558942  | 0.389854 | 1.073629 | 0.282989 | 0.755028 |
| ATP9A              | 17.84382 | 0.855023258  | 0.418013 | 2.045447 | 0.040811 | 0.353226 |
| CABZ01117706.1     | 7.98847  | -0.764813019 | 0.755082 | -1.01289 | 0.311114 | 0.775936 |
| dre-mir-430b-4     | 0 NA     | NA           | NA       | NA       | NA       | NA       |
| CU855552.1         | 14.22377 | 0.052892334  | 0.517043 | 0.102298 | 0.91852  | 0.993884 |
| RF00003            | 0 NA     | NA           | NA       | NA       | NA       | NA       |
| si:ch211-113a14.19 | 9.662876 | 0.294424855  | 0.637397 | 0.461918 | 0.64414  | 0.926426 |
| RF00001            | 0 NA     | NA           | NA       | NA       | NA       | NA       |
| RF00003            | 0 NA     | NA           | NA       | NA       | NA       | NA       |
| CT573264.2         | 0.861556 | 1.960173443  | 2.057656 | 0.952624 | 0.34078  | NA       |
| pimr205            | 0.311448 | 1.968942554  | 3.940357 | 0.499686 | 0.617296 | NA       |
| CABZ01021532.1     | 0.243466 | 0            | 4.910067 | 0        | 1        | NA       |
| BX681417.22        | 0 NA     | NA           | NA       | NA       | NA       | NA       |
| si:dkey-1b17.9     | 1.840321 | -1.497736422 | 1.278199 | -1.17176 | 0.241295 | NA       |
| CR533578.1         | 0 NA     | NA           | NA       | NA       | NA       | NA       |
| zgc:194906         | 1.25153  | -2.343107301 | 2.151534 | -1.08904 | 0.276136 | NA       |
| BX323083.5         | 0 NA     | NA           | NA       | NA       | NA       | NA       |
| pimr165            | 0 NA     | NA           | NA       | NA       | NA       | NA       |
| CR405710.2         | 1.483126 | 0.310077632  | 1.706761 | 0.181676 | 0.855837 | NA       |
| dre-mir-430c-1     | 0 NA     | NA           | NA       | NA       | NA       | NA       |
| Inpa               | 114.9668 | 0.102208382  | 0.25117  | 0.406929 | 0.68406  | 0.938486 |
| KIRREL3            | 17.73374 | 0.300909529  | 0.437319 | 0.688077 | 0.491404 | 0.875595 |
| RF00001            | 0 NA     | NA           | NA       | NA       | NA       | NA       |
| FP016005.2         | 5.511244 | 1.593704358  | 0.838922 | 1.899705 | 0.057472 | 0.413721 |
| RF00001            | 0.148424 | 1.055370259  | 5.267649 | 0.200349 | 0.841207 | NA       |
| RF00026            | 0 NA     | NA           | NA       | NA       | NA       | NA       |
| RF00001            | 0 NA     | NA           | NA       | NA       | NA       | NA       |
| RF00017            | 0.101247 | 1.854150541  | 5.241768 | 0.353726 | 0.723544 | NA       |
| t1r20.1            | 0.04222  | 0            | 5.267649 | 0        | 1        | NA       |
| htr2b              | 15.03568 | 0.196451617  | 0.519272 | 0.378321 | 0.705192 | 0.944028 |
| CU137681.6         | 0 NA     | NA           | NA       | NA       | NA       | NA       |
| zgc:171759         | 2.228202 | -1.382711929 | 1.840413 | -0.75131 | 0.452469 | 0.857994 |
| F0681393.2         | 0.045161 | 0            | 5.267649 | 0        | 1        | NA       |
| galnt8a.1          | 0.116032 | 0            | 5.267649 | 0        | 1        | NA       |
| L0018551.1         | 0.331579 | 2.613781368  | 4.432472 | 0.589689 | 0.555399 | NA       |
| RF00003            | 0 NA     | NA           | NA       | NA       | NA       | NA       |
| RF00001            | 0 NA     | NA           | NA       | NA       | NA       | NA       |
| AL929453.1         | 0.326752 | 1.042632645  | 5.146609 | 0.202586 | 0.839458 | NA       |
| RF00001            | 0 NA     | NA           | NA       | NA       | NA       | NA       |
| CABZ01044281.1     | 592.4916 | 0.432276868  | 0.280375 | 1.541782 | 0.123126 | 0.569695 |

|                    |          |              |          |          |          |          |      |
|--------------------|----------|--------------|----------|----------|----------|----------|------|
| L0017799.1         | 14.56984 | 1.306590406  | 0.52057  | 2.509922 | 0.012076 | 0.190742 |      |
| RF00001            | 0.043308 |              | 0        | 5.267649 |          | 0        | 1 NA |
| RF00137            | 0.152169 | -2.340093811 | 5.201855 | -0.44986 | 0.652813 | NA       |      |
| CU856344.1         | 12.64925 | 0.861606812  | 0.64831  | 1.329004 | 0.183847 | 0.660725 |      |
| RF00017            | 0 NA     |              | NA       | NA       | NA       | NA       |      |
| AL935186.9         | 4272.436 | -0.332498199 | 0.24881  | -1.33635 | 0.181433 | 0.657873 |      |
| RF00001            | 0 NA     |              | NA       | NA       | NA       | NA       |      |
| srp14              | 341.2219 | -0.086645624 | 0.136094 | -0.63666 | 0.524348 | 0.888801 |      |
| AL935186.10        | 817.9925 | -0.377745679 | 0.243215 | -1.55314 | 0.120391 | 0.565852 |      |
| BX323887.1         | 4.145279 | 0.277076165  | 0.820584 | 0.337657 | 0.735621 | 0.951543 |      |
| CR382385.1         | 0 NA     |              | NA       | NA       | NA       | NA       |      |
| RF00001            | 0 NA     |              | NA       | NA       | NA       | NA       |      |
| si:dkey-23f9.6     | 0 NA     |              | NA       | NA       | NA       | NA       |      |
| BX649295.2         | 0.233078 |              | 0        | 5.267649 |          | 0        | 1 NA |
| RF00001            | 0 NA     |              | NA       | NA       | NA       | NA       |      |
| zgc:171446         | 3.615    | -1.210964821 | 1.360434 | -0.89013 | 0.373395 | 0.820558 |      |
| CABZ01016118.1     | 17.41662 | 0.513212128  | 0.699835 | 0.733333 | 0.463356 | 0.864408 |      |
| RF00026            | 0 NA     |              | NA       | NA       | NA       | NA       |      |
| RF00020            | 0 NA     |              | NA       | NA       | NA       | NA       |      |
| RF00001            | 0.045161 |              | 0        | 5.267649 |          | 0        | 1 NA |
| pimr78             | 0 NA     |              | NA       | NA       | NA       | NA       |      |
| RF00001            | 0 NA     |              | NA       | NA       | NA       | NA       |      |
| CR318589.2         | 1.152984 | -3.815115946 | 2.062255 | -1.84997 | 0.064317 | NA       |      |
| dre-mir-430c-1     | 0 NA     |              | NA       | NA       | NA       | NA       |      |
| RF00026            | 0 NA     |              | NA       | NA       | NA       | NA       |      |
| RF00001            | 0 NA     |              | NA       | NA       | NA       | NA       |      |
| RF00026            | 0 NA     |              | NA       | NA       | NA       | NA       |      |
| RF00003            | 0 NA     |              | NA       | NA       | NA       | NA       |      |
| RF00001            | 0 NA     |              | NA       | NA       | NA       | NA       |      |
| CR456635.1         | 1.760967 | -2.308760865 | 2.28323  | -1.01118 | 0.311929 | NA       |      |
| chst3b             | 18.12847 | -0.087623059 | 0.417496 | -0.20988 | 0.833763 | 0.975482 |      |
| CU459094.3         | 0.434805 |              | 0        | 3.686456 |          | 0        | 1 NA |
| RF00001            | 0 NA     |              | NA       | NA       | NA       | NA       |      |
| RF00001            | 0 NA     |              | NA       | NA       | NA       | NA       |      |
| il4r.2             | 51.84637 | 0.007334789  | 0.272411 | 0.026925 | 0.978519 |          | 1    |
| pimr58             | 0 NA     |              | NA       | NA       | NA       | NA       |      |
| RF00001            | 0 NA     |              | NA       | NA       | NA       | NA       |      |
| rhoac              | 1409.343 | -0.097140848 | 0.107942 | -0.89994 | 0.368154 | 0.817272 |      |
| CT998556.1         | 29.06295 | -1.397893276 | 0.500621 | -2.79232 | 0.005233 | 0.121252 |      |
| RF00026            | 0 NA     |              | NA       | NA       | NA       | NA       |      |
| ADAM12 (1 of many) | 18.31654 | 0.434107694  | 0.448511 | 0.967887 | 0.333101 | 0.790126 |      |
| RF00026            | 0 NA     |              | NA       | NA       | NA       | NA       |      |
| CR848040.3         | 0 NA     |              | NA       | NA       | NA       | NA       |      |
| CABZ01084501.3     | 2.507443 | -1.079397068 | 1.061477 | -1.01688 | 0.309209 | 0.773791 |      |
| CU539054.1         | 0.849562 | -3.042884825 | 2.92142  | -1.04158 | 0.297608 | NA       |      |
| FO704772.2         | 1017.062 | -0.331922297 | 0.286266 | -1.15949 | 0.246257 | 0.727532 |      |
| RF00001            | 0.095884 | -0.868089684 | 5.267649 | -0.1648  | 0.869104 | NA       |      |
| RF00001            | 0.099037 |              | 0        | 5.267649 |          | 0        | 1 NA |
| si:dkey-193i10.4   | 6.169793 | 0.220725575  | 0.88792  | 0.248587 | 0.80368  | 0.968748 |      |
| RF00003            | 0 NA     |              | NA       | NA       | NA       | NA       |      |
| pimr17             | 0.04222  |              | 0        | 5.267649 |          | 0        | 1 NA |
| CR932364.1         | 0.114342 | -0.868089684 | 5.267649 | -0.1648  | 0.869104 | NA       |      |
| pimr87             | 0 NA     |              | NA       | NA       | NA       | NA       |      |
| RF00276            | 0 NA     |              | NA       | NA       | NA       | NA       |      |

|                   |           |               |             |           |           |           |
|-------------------|-----------|---------------|-------------|-----------|-----------|-----------|
| BX908795. 1       | 1. 842218 | -0. 167046067 | 1. 528614   | -0. 10928 | 0. 912981 | NA        |
| CABZ01100304. 1   | 24. 96901 | 0. 240838143  | 0. 478279   | 0. 503552 | 0. 614576 | 0. 915998 |
| RF00001           | 0 NA      |               | NA          | NA        | NA        | NA        |
| RF00001           | 0. 08553  |               | 0 5. 267649 |           | 0         | 1 NA      |
| RF00001           | 21. 78945 | -1. 718005149 | 0. 756738   | -2. 27028 | 0. 023191 | 0. 268799 |
| RF00003           | 0 NA      |               | NA          | NA        | NA        | NA        |
| RF00001           | 0 NA      |               | NA          | NA        | NA        | NA        |
| si:dkey-40n15. 1  | 2. 383868 | -2. 522793698 | 1. 240882   | -2. 03307 | 0. 042046 | 0. 358807 |
| msx1a             | 82. 9836  | 0. 111098174  | 0. 336442   | 0. 330215 | 0. 741237 | 0. 954103 |
| CABZ01097761. 1   | 227. 0534 | -0. 000514064 | 0. 154206   | -0. 00333 | 0. 99734  | 1         |
| RF00026           | 0 NA      |               | NA          | NA        | NA        | NA        |
| CABZ01067150. 1   | 53. 05952 | -0. 362556078 | 0. 346389   | -1. 04667 | 0. 295251 | 0. 763896 |
| CR626884. 4       | 0. 043308 |               | 0 5. 267649 |           | 0         | 1 NA      |
| BX664625. 5       | 3. 649198 | 0. 070804556  | 1. 022374   | 0. 069255 | 0. 944787 | 0. 997371 |
| RF00001           | 0 NA      |               | NA          | NA        | NA        | NA        |
| RF00017           | 1. 36509  | -0. 835902405 | 1. 743701   | -0. 47938 | 0. 631665 | NA        |
| RF00026           | 0 NA      |               | NA          | NA        | NA        | NA        |
| cdx1b             | 149. 6667 | -1. 217242714 | 0. 327308   | -3. 71896 | 0. 0002   | 0. 014952 |
| RF00003           | 0 NA      |               | NA          | NA        | NA        | NA        |
| CU137645. 1       | 3. 821427 | -0. 110942125 | 1. 160984   | -0. 09556 | 0. 923871 | 0. 994713 |
| CU633479. 6       | 2. 413885 | 0. 821986233  | 1. 639015   | 0. 501512 | 0. 61601  | 0. 916365 |
| RF00012           | 0 NA      |               | NA          | NA        | NA        | NA        |
| BX005407. 1       | 2. 046393 | 0. 142211974  | 1. 649834   | 0. 086198 | 0. 931309 | NA        |
| RF01684           | 0 NA      |               | NA          | NA        | NA        | NA        |
| RF00020           | 0. 093933 | 1. 055383603  | 5. 267649   | 0. 200352 | 0. 841205 | NA        |
| RF01848           | 0 NA      |               | NA          | NA        | NA        | NA        |
| RF00001           | 0. 07132  |               | 0 5. 267649 |           | 0         | 1 NA      |
| BX322657. 4       | 53. 85687 | 0. 010768515  | 0. 243944   | 0. 044143 | 0. 96479  | 1         |
| crygm2d8          | 17413. 78 | 0. 130841121  | 0. 336576   | 0. 388741 | 0. 697468 | 0. 942128 |
| RF00026           | 0 NA      |               | NA          | NA        | NA        | NA        |
| CU138548. 8       | 0 NA      |               | NA          | NA        | NA        | NA        |
| RF00276           | 0. 043308 |               | 0 5. 267649 |           | 0         | 1 NA      |
| znf1127           | 11. 91317 | 0. 298612427  | 0. 541898   | 0. 551049 | 0. 5816   | 0. 905618 |
| RF00001           | 0 NA      |               | NA          | NA        | NA        | NA        |
| CT583728. 24      | 0 NA      |               | NA          | NA        | NA        | NA        |
| znf1119           | 37. 31754 | -0. 007345235 | 0. 277832   | -0. 02644 | 0. 978908 | 1         |
| RF00001           | 0. 04222  |               | 0 5. 267649 |           | 0         | 1 NA      |
| RF00001           | 0 NA      |               | NA          | NA        | NA        | NA        |
| BX005305. 5       | 0. 198667 |               | 0 5. 233177 |           | 0         | 1 NA      |
| RF00026           | 0 NA      |               | NA          | NA        | NA        | NA        |
| RF00001           | 0 NA      |               | NA          | NA        | NA        | NA        |
| L0018315. 6       | 0. 337447 | -2. 779919456 | 3. 260755   | -0. 85254 | 0. 393915 | NA        |
| si:dkeyp-4c4. 2   | 12. 41318 | 0. 569857787  | 0. 688839   | 0. 827273 | 0. 408082 | 0. 835879 |
| BX005372. 1       | 0. 48227  | -1. 807290419 | 3. 061213   | -0. 59038 | 0. 554933 | NA        |
| RF00001           | 0 NA      |               | NA          | NA        | NA        | NA        |
| si:dkey-19a16. 11 | 0. 800142 | -1. 806558573 | 2. 419978   | -0. 74652 | 0. 455354 | NA        |
| CABZ01102038. 1   | 20. 68595 | 0. 059811997  | 0. 375808   | 0. 159156 | 0. 873546 | 0. 983769 |
| si:dkey-5i16. 5   | 5. 234391 | 1. 399514841  | 0. 849696   | 1. 647078 | 0. 099542 | 0. 523919 |
| znf1046           | 4. 091063 | -1. 684817739 | 1. 157942   | -1. 45501 | 0. 145666 | 0. 604973 |
| RF00001           | 2. 999756 | -0. 82056154  | 1. 210769   | -0. 67772 | 0. 49795  | 0. 878926 |
| L0018205. 2       | 6. 633736 | -0. 630003614 | 0. 873428   | -0. 7213  | 0. 470725 | 0. 867814 |
| BX901973. 1       | 23. 04466 | 0. 215515461  | 0. 503024   | 0. 42844  | 0. 668331 | 0. 933086 |
| CABZ01030282. 1   | 0. 112399 |               | 0 5. 267649 |           | 0         | 1 NA      |
| CT583728. 25      | 0 NA      |               | NA          | NA        | NA        | NA        |

|                   |          |              |          |          |          |          |    |
|-------------------|----------|--------------|----------|----------|----------|----------|----|
| CR848784.5        | 0        | NA           | NA       | NA       | NA       | NA       |    |
| RF00001           | 0        | NA           | NA       | NA       | NA       | NA       |    |
| RF00026           | 0        | NA           | NA       | NA       | NA       | NA       |    |
| RF00003           | 0        | NA           | NA       | NA       | NA       | NA       |    |
| BX323448.1        | 0.221027 |              | 0        | 5.267649 | 0        | 1        | NA |
| ccs               | 10.43114 | -1.113025418 | 0.64928  | -1.71424 | 0.086484 | 0.493048 |    |
| RF00003           | 0        | NA           | NA       | NA       | NA       | NA       |    |
| RF00069           | 0        | NA           | NA       | NA       | NA       | NA       |    |
| BX681417.23       | 0        | NA           | NA       | NA       | NA       | NA       |    |
| pimr104           | 0        | NA           | NA       | NA       | NA       | NA       |    |
| dre-mir-2185-1    | 0        | NA           | NA       | NA       | NA       | NA       |    |
| chia.6            | 19.28454 | -2.231413372 | 0.978122 | -2.28132 | 0.022529 | 0.265534 |    |
| dre-mir-430b-10   | 0        | NA           | NA       | NA       | NA       | NA       |    |
| CU138548.9        | 0        | NA           | NA       | NA       | NA       | NA       |    |
| BX537277.2        | 0.120883 |              | 0        | 5.267649 | 0        | 1        | NA |
| traj57            | 0        | NA           | NA       | NA       | NA       | NA       |    |
| BX470259.2        | 283.5175 | -0.15442859  | 0.209203 | -0.73818 | 0.460407 | 0.862369 |    |
| taar16f           | 1.500352 | -2.379785248 | 2.172682 | -1.09532 | 0.273376 | NA       |    |
| RF00001           | 0        | NA           | NA       | NA       | NA       | NA       |    |
| BX649628.3        | 0        | NA           | NA       | NA       | NA       | NA       |    |
| CU138548.10       | 0        | NA           | NA       | NA       | NA       | NA       |    |
| RF00026           | 0        | NA           | NA       | NA       | NA       | NA       |    |
| CABZ01023247.1    | 1.73245  | 1.939873114  | 1.855861 | 1.045268 | 0.295899 | NA       |    |
| taar191           | 0        | NA           | NA       | NA       | NA       | NA       |    |
| CU024870.2        | 0.193096 |              | 0        | 5.267649 | 0        | 1        | NA |
| RF00001           | 0.053506 | -0.86807634  | 5.267649 | -0.16479 | 0.869106 | NA       |    |
| si:ch211-250e5.16 | 0.479671 | 0.038767208  | 3.332003 | 0.011635 | 0.990717 | NA       |    |
| RF00015           | 0        | NA           | NA       | NA       | NA       | NA       |    |
| RF00001           | 0        | NA           | NA       | NA       | NA       | NA       |    |
| FP016239.2        | 0.046941 |              | 0        | 5.267649 | 0        | 1        | NA |
| CR628395.1        | 0.184458 |              | 0        | 5.267649 | 0        | 1        | NA |
| zgc:165515        | 65.24675 | 0.204817569  | 0.218869 | 0.935798 | 0.349377 | 0.801408 |    |
| CABZ01039096.1    | 26.6874  | 0.661714982  | 0.390427 | 1.694851 | 0.090104 | 0.50413  |    |
| CU137681.7        | 0        | NA           | NA       | NA       | NA       | NA       |    |
| RF00001           | 0        | NA           | NA       | NA       | NA       | NA       |    |
| CT867973.2        | 0        | NA           | NA       | NA       | NA       | NA       |    |
| CR847936.9        | 0        | NA           | NA       | NA       | NA       | NA       |    |
| CABZ01053619.1    | 0        | NA           | NA       | NA       | NA       | NA       |    |
| RF00001           | 0.297282 |              | 0        | 3.985391 | 0        | 1        | NA |
| CU855758.3        | 0.521069 | -3.149961063 | 3.967047 | -0.79403 | 0.427177 | NA       |    |
| BX927341.5        | 0        | NA           | NA       | NA       | NA       | NA       |    |
| RF00017           | 0.08553  |              | 0        | 5.267649 | 0        | 1        | NA |
| RF00026           | 0        | NA           | NA       | NA       | NA       | NA       |    |
| tmem17            | 48.51799 | -0.740876944 | 0.318028 | -2.3296  | 0.019827 | 0.248594 |    |
| RF00003           | 0        | NA           | NA       | NA       | NA       | NA       |    |
| RF00026           | 0        | NA           | NA       | NA       | NA       | NA       |    |
| BX510922.4        | 24.86273 | -0.201599338 | 0.409882 | -0.49185 | 0.622828 | 0.918894 |    |
| FP103009.1        | 58.33981 | 0.229189727  | 0.293156 | 0.781801 | 0.434331 | 0.850002 |    |
| RF00026           | 0        | NA           | NA       | NA       | NA       | NA       |    |
| CABZ01063556.1    | 168.3965 | -0.02093738  | 0.164338 | -0.1274  | 0.89862  | 0.990199 |    |
| BX511311.9        | 0        | NA           | NA       | NA       | NA       | NA       |    |
| CU682604.1        | 0.631776 | -2.400115475 | 2.494331 | -0.96223 | 0.335935 | NA       |    |
| RF00001           | 0        | NA           | NA       | NA       | NA       | NA       |    |
| LRP4              | 73.16529 | -0.139071198 | 0.292996 | -0.47465 | 0.635035 | 0.924272 |    |

|                    |           |               |             |           |           |           |
|--------------------|-----------|---------------|-------------|-----------|-----------|-----------|
| CT955962. 2        | 0. 107013 | -1. 826650979 | 5. 230461   | -0. 34923 | 0. 726914 | NA        |
| CU607104. 1        | 0. 177268 |               | 0 5. 267649 |           | 0         | 1 NA      |
| RF00001            | 0 NA      |               | NA          | NA        | NA        | NA        |
| RF00003            | 0 NA      |               | NA          | NA        | NA        | NA        |
| RF00026            | 0 NA      |               | NA          | NA        | NA        | NA        |
| RF00001            | 0. 045161 |               | 0 5. 267649 |           | 0         | 1 NA      |
| CU929304. 1        | 2. 114709 | -0. 936340199 | 1. 286753   | -0. 72768 | 0. 466812 | NA        |
| RF00001            | 0 NA      |               | NA          | NA        | NA        | NA        |
| si:dkey-51d8. 1    | 3. 478726 | 0. 749444321  | 1. 165619   | 0. 642958 | 0. 520251 | 0. 887149 |
| BX537120. 3        | 0. 095482 | 1. 055383603  | 5. 267649   | 0. 200352 | 0. 841205 | NA        |
| chrn2b             | 4. 9446   | -0. 029263957 | 0. 927598   | -0. 03155 | 0. 974832 | 1         |
| RF00001            | 0. 046941 |               | 0 5. 267649 |           | 0         | 1 NA      |
| ms4a17a. 17        | 13. 76935 | 0. 859824209  | 0. 770518   | 1. 115904 | 0. 264463 | 0. 742063 |
| RF00001            | 0 NA      |               | NA          | NA        | NA        | NA        |
| RF00017            | 0 NA      |               | NA          | NA        | NA        | NA        |
| BX546453. 2        | 2. 509681 | 0. 134601388  | 1. 474111   | 0. 09131  | 0. 927246 | 0. 994973 |
| CR450764. 8        | 0 NA      |               | NA          | NA        | NA        | NA        |
| RF00003            | 0 NA      |               | NA          | NA        | NA        | NA        |
| CABZ01067581. 1    | 16. 6597  | 0. 250867693  | 0. 655151   | 0. 382916 | 0. 701782 | 0. 943292 |
| BX548044. 8        | 0. 81181  | -0. 221264231 | 2. 494714   | -0. 08869 | 0. 929326 | NA        |
| RF00026            | 0 NA      |               | NA          | NA        | NA        | NA        |
| CR388008. 1        | 14. 93629 | 5. 393992551  | 1. 28246    | 4. 205973 | 2. 60E-05 | 0. 003442 |
| CR925755. 2        | 0. 392464 |               | 0 4. 327392 |           | 0         | 1 NA      |
| dre-mir-430b-1     | 0 NA      |               | NA          | NA        | NA        | NA        |
| CABZ01086574. 1    | 4. 348897 | -0. 67469862  | 1. 010417   | -0. 66774 | 0. 504298 | 0. 881824 |
| RF00001            | 0 NA      |               | NA          | NA        | NA        | NA        |
| RF01848            | 0 NA      |               | NA          | NA        | NA        | NA        |
| RF00017            | 0. 365896 | -0. 486227003 | 5. 120182   | -0. 09496 | 0. 924344 | NA        |
| RF00012            | 0 NA      |               | NA          | NA        | NA        | NA        |
| RF00001            | 0 NA      |               | NA          | NA        | NA        | NA        |
| RF00026            | 0 NA      |               | NA          | NA        | NA        | NA        |
| olfcgl             | 0 NA      |               | NA          | NA        | NA        | NA        |
| taar20h            | 0. 175614 | 1. 921567426  | 5. 236909   | 0. 366928 | 0. 713673 | NA        |
| si:ch73-329n5. 2   | 10. 27563 | 0. 501480262  | 0. 882397   | 0. 568316 | 0. 56982  | 0. 902322 |
| LO017877. 2        | 7. 41129  | -0. 830290064 | 0. 823403   | -1. 00836 | 0. 31328  | 0. 776663 |
| CABZ01029422. 1    | 34. 94581 | -0. 145242645 | 0. 323494   | -0. 44898 | 0. 653446 | 0. 929269 |
| TENT5A             | 22. 94153 | 0. 167076763  | 0. 379245   | 0. 440551 | 0. 659538 | 0. 930581 |
| BX510986. 1        | 0. 591396 | -2. 788639201 | 2. 624207   | -1. 06266 | 0. 287936 | NA        |
| CABZ01046954. 1    | 70. 75643 | -0. 383283421 | 0. 270721   | -1. 41579 | 0. 156838 | 0. 622675 |
| RF00017            | 0. 284595 | -1. 755666026 | 4. 72917    | -0. 37124 | 0. 710457 | NA        |
| si:ch211-156118. 4 | 0 NA      |               | NA          | NA        | NA        | NA        |
| zmp:0000001088     | 35. 70955 | 0. 868407277  | 0. 485541   | 1. 788534 | 0. 07369  | 0. 461398 |
| si:ch211-139n6. 11 | 0 NA      |               | NA          | NA        | NA        | NA        |
| BX681417. 24       | 0. 42421  |               | 0 4. 195398 |           | 0         | 1 NA      |
| BX276101. 2        | 1. 086539 | 2. 902994099  | 2. 114645   | 1. 372804 | 0. 169813 | NA        |
| RF00026            | 0 NA      |               | NA          | NA        | NA        | NA        |
| RF00026            | 0 NA      |               | NA          | NA        | NA        | NA        |
| dre-mir-430a-2     | 0 NA      |               | NA          | NA        | NA        | NA        |
| dre-mir-430a-4     | 0 NA      |               | NA          | NA        | NA        | NA        |
| RF00001            | 0 NA      |               | NA          | NA        | NA        | NA        |
| RF00026            | 0 NA      |               | NA          | NA        | NA        | NA        |
| RF00001            | 1. 809779 | -0. 523832372 | 1. 177877   | -0. 44473 | 0. 656518 | NA        |
| dre-mir-430c-1     | 0 NA      |               | NA          | NA        | NA        | NA        |
| FP102122. 1        | 3. 822144 | -4. 579602716 | 1. 462672   | -3. 13098 | 0. 001742 | 0. 064499 |

|                 |          |              |          |          |          |          |
|-----------------|----------|--------------|----------|----------|----------|----------|
| BX465198.1      | 1.417758 | -1.51402413  | 1.668788 | -0.90726 | 0.36427  | NA       |
| CABZ01039304.1  | 25.27593 | 0.045331354  | 0.383845 | 0.118098 | 0.90599  | 0.991631 |
| pimr157         | 0        | NA           | NA       | NA       | NA       | NA       |
| h2afvb          | 9516.39  | 0.121766129  | 0.157707 | 0.772102 | 0.440054 | 0.852079 |
| RF00026         | 0        | NA           | NA       | NA       | NA       | NA       |
| GAA             | 15.42749 | 0.661026326  | 0.454879 | 1.453191 | 0.146171 | 0.605672 |
| BX510654.1      | 0        | NA           | NA       | NA       | NA       | NA       |
| phyhip          | 35.5873  | -0.990101381 | 0.654213 | -1.51342 | 0.130172 | 0.581245 |
| BX005361.1      | 0        | NA           | NA       | NA       | NA       | NA       |
| FQ378040.1      | 0        | NA           | NA       | NA       | NA       | NA       |
| RF00012         | 0        | NA           | NA       | NA       | NA       | NA       |
| BX681417.25     | 0        | NA           | NA       | NA       | NA       | NA       |
| BX539310.1      | 0.049519 | 0            | 5.267649 | 0        | 1        | NA       |
| npas4l          | 11.24738 | 0.395420542  | 0.5531   | 0.714917 | 0.47466  | 0.869292 |
| CR792441.1      | 0.293521 | -3.057937135 | 5.17548  | -0.59085 | 0.55462  | NA       |
| RF00001         | 0        | NA           | NA       | NA       | NA       | NA       |
| RF00001         | 0.043309 | 0            | 5.267649 | 0        | 1        | NA       |
| BX649628.4      | 0        | NA           | NA       | NA       | NA       | NA       |
| si:dkey-23f9.9  | 0        | NA           | NA       | NA       | NA       | NA       |
| zgc:103700      | 7.145429 | -0.14113356  | 1.304203 | -0.10821 | 0.913826 | 0.992796 |
| taar19j         | 0        | NA           | NA       | NA       | NA       | NA       |
| CT573303.1      | 0.191716 | 1.055371429  | 5.267649 | 0.20035  | 0.841207 | NA       |
| RF00001         | 0        | NA           | NA       | NA       | NA       | NA       |
| RF00001         | 0        | NA           | NA       | NA       | NA       | NA       |
| RF00006         | 0        | NA           | NA       | NA       | NA       | NA       |
| RF00001         | 0        | NA           | NA       | NA       | NA       | NA       |
| znf987          | 0.373487 | -2.734096583 | 3.211849 | -0.85125 | 0.394629 | NA       |
| RF00001         | 0        | NA           | NA       | NA       | NA       | NA       |
| RF00026         | 0        | NA           | NA       | NA       | NA       | NA       |
| im:7142702      | 130.9235 | 0.097391302  | 0.233362 | 0.41734  | 0.67643  | 0.93557  |
| pimr81          | 0        | NA           | NA       | NA       | NA       | NA       |
| RF00026         | 0        | NA           | NA       | NA       | NA       | NA       |
| CT583723.2      | 0.331519 | 1.05536894   | 4.550717 | 0.231913 | 0.816606 | NA       |
| pimr3           | 0        | NA           | NA       | NA       | NA       | NA       |
| F0834825.3      | 0.543173 | -3.03327953  | 3.087251 | -0.98252 | 0.325845 | NA       |
| RF00026         | 0        | NA           | NA       | NA       | NA       | NA       |
| RF00001         | 0        | NA           | NA       | NA       | NA       | NA       |
| si:dkey-28k24.2 | 0.997137 | -0.772623355 | 2.141843 | -0.36073 | 0.718303 | NA       |
| CR352265.3      | 27.4672  | 0.652820525  | 0.448025 | 1.457107 | 0.145087 | 0.604004 |
| si:dkey-27d5.9  | 0        | NA           | NA       | NA       | NA       | NA       |
| RF00001         | 0.332493 | 2.506374376  | 4.45165  | 0.563021 | 0.57342  | NA       |
| RF00026         | 0        | NA           | NA       | NA       | NA       | NA       |
| RF00001         | 0.511954 | 1.055403087  | 3.485259 | 0.302819 | 0.762028 | NA       |
| opn7b           | 2.410726 | 0.379369119  | 1.185655 | 0.319966 | 0.748994 | 0.955074 |
| fth127          | 108.8925 | -0.923032153 | 0.2411   | -3.82842 | 0.000129 | 0.011234 |
| znf980          | 4.287285 | -1.701539618 | 0.955322 | -1.78112 | 0.074893 | 0.464197 |
| BX601646.1      | 1.762446 | -2.598453552 | 1.739683 | -1.49364 | 0.135271 | NA       |
| dre-mir-430c-1  | 0        | NA           | NA       | NA       | NA       | NA       |
| BX323022.1      | 2.259186 | 0.285761793  | 1.274038 | 0.224296 | 0.822527 | 0.971966 |
| RF00026         | 0        | NA           | NA       | NA       | NA       | NA       |
| BX681417.26     | 0        | NA           | NA       | NA       | NA       | NA       |
| RF00001         | 0        | NA           | NA       | NA       | NA       | NA       |
| pitxl           | 338.677  | -0.140561029 | 0.143738 | -0.9779  | 0.328124 | 0.786542 |
| RF00001         | 0.050624 | 1.055396947  | 5.267649 | 0.200354 | 0.841203 | NA       |



|                   |          |              |            |          |          |          |
|-------------------|----------|--------------|------------|----------|----------|----------|
| BX571678.1        | 2.486995 | -0.165986894 | 1.137966   | -0.14586 | 0.88403  | 0.987036 |
| RF00003           | 0 NA     |              | NA         | NA       | NA       | NA       |
| spaca41           | 3483.523 | 0.099179211  | 0.148985   | 0.665697 | 0.505605 | 0.882409 |
| si:ch73-27e22.8   | 22.89781 | 0.16693499   | 0.507065   | 0.329218 | 0.741991 | 0.954329 |
| RF00003           | 0 NA     |              | NA         | NA       | NA       | NA       |
| RF00412           | 0.628398 | -2.320066953 | 2.284387   | -1.01562 | 0.309811 | NA       |
| ftr50             | 0.451791 | 0.093656398  | 3.209124   | 0.029184 | 0.976718 | NA       |
| znf1141           | 47.18117 | -0.591394454 | 0.297182   | -1.99001 | 0.04659  | 0.376263 |
| RF00026           | 0 NA     |              | NA         | NA       | NA       | NA       |
| pimr160           | 0 NA     |              | NA         | NA       | NA       | NA       |
| BX908782.3        | 678.1486 | 0.123686037  | 0.424561   | 0.291327 | 0.770801 | 0.960484 |
| RF00001           | 0.744857 | 0.093650812  | 2.539778   | 0.036874 | 0.970586 | NA       |
| RF00001           | 0 NA     |              | NA         | NA       | NA       | NA       |
| RF00001           | 1.878838 | -0.758780689 | 1.55355    | -0.48842 | 0.625254 | NA       |
| RF00001           | 0.04222  |              | 0 5.267649 | 0        | 1 NA     |          |
| RF00001           | 0.173235 |              | 0 5.267649 | 0        | 1 NA     |          |
| CR749763.7        | 0.049519 |              | 0 5.267649 | 0        | 1 NA     |          |
| taar20f           | 0.063619 |              | 0 5.267649 | 0        | 1 NA     |          |
| RF00001           | 0.21173  |              | 0 5.267649 | 0        | 1 NA     |          |
| ube2e1            | 1097.826 | -0.139646242 | 0.148757   | -0.93875 | 0.347858 | 0.800274 |
| RF00026           | 0 NA     |              | NA         | NA       | NA       | NA       |
| RF00026           | 0 NA     |              | NA         | NA       | NA       | NA       |
| si:dkey-261m9.6   | 2.990109 | -1.30929377  | 1.045079   | -1.25282 | 0.210272 | 0.692011 |
| RF00001           | 0 NA     |              | NA         | NA       | NA       | NA       |
| taar18h           | 1.145922 | -0.777938647 | 1.977842   | -0.39333 | 0.694078 | NA       |
| pigr12.3          | 2.079444 | -1.495266215 | 1.448618   | -1.0322  | 0.301978 | NA       |
| si:ch211-165a10.3 | 0 NA     |              | NA         | NA       | NA       | NA       |
| CABZ01078320.1    | 56.44378 | -0.025638597 | 0.365762   | -0.0701  | 0.944117 | 0.997371 |
| taar10a           | 0.400299 | 1.055376334  | 4.305295   | 0.245134 | 0.806352 | NA       |
| CR354435.3        | 0.357195 | 2.436495186  | 5.147287   | 0.473355 | 0.63596  | NA       |
| RF00001           | 0 NA     |              | NA         | NA       | NA       | NA       |
| pimr25            | 0 NA     |              | NA         | NA       | NA       | NA       |
| RF00003           | 0 NA     |              | NA         | NA       | NA       | NA       |
| zgc:56235         | 667.8095 | 0.149740123  | 0.140299   | 1.067289 | 0.285841 | 0.757258 |
| RF00026           | 0 NA     |              | NA         | NA       | NA       | NA       |
| RF00001           | 0 NA     |              | NA         | NA       | NA       | NA       |
| BX470211.2        | 0.418915 | 1.997894368  | 3.692611   | 0.541052 | 0.588472 | NA       |
| RF00001           | 0 NA     |              | NA         | NA       | NA       | NA       |
| BX936298.2        | 1.021879 | -2.359127576 | 2.055553   | -1.14768 | 0.251099 | NA       |
| RF00001           | 0.043308 |              | 0 5.267649 | 0        | 1 NA     |          |
| si:ch211-79g12.1  | 6.125149 | -0.431037159 | 0.817796   | -0.52707 | 0.598144 | 0.912715 |
| BX511132.2        | 0 NA     |              | NA         | NA       | NA       | NA       |
| RF00001           | 0 NA     |              | NA         | NA       | NA       | NA       |
| BX537296.4        | 0 NA     |              | NA         | NA       | NA       | NA       |
| RF00020           | 0.136135 |              | 0 5.267649 | 0        | 1 NA     |          |
| CABZ01061894.1    | 176.7666 | 0.15464006   | 0.237624   | 0.650777 | 0.515191 | 0.886401 |
| si:ch73-265d7.2   | 52.91274 | 0.661784645  | 0.319105   | 2.073875 | 0.038091 | 0.342345 |
| RF00001           | 0 NA     |              | NA         | NA       | NA       | NA       |
| BX664750.7        | 0 NA     |              | NA         | NA       | NA       | NA       |
| si:dkey-82i20.5   | 1.720521 | -2.506214511 | 1.426412   | -1.75701 | 0.078917 | NA       |
| RF00001           | 0 NA     |              | NA         | NA       | NA       | NA       |
| BX470259.3        | 21.07734 | -0.011688438 | 0.574316   | -0.02035 | 0.983763 | 1        |
| CABZ01114053.1    | 70.13329 | -0.153677236 | 0.470688   | -0.32649 | 0.74405  | 0.95491  |
| RF00001           | 0.13396  |              | 0 5.267649 | 0        | 1 NA     |          |

|                    |          |              |            |          |          |          |
|--------------------|----------|--------------|------------|----------|----------|----------|
| CABZ01081294.1     | 9.109603 | 0.529838019  | 0.641428   | 0.826028 | 0.408788 | 0.836637 |
| CABZ01031870.1     | 17.666   | -0.508512184 | 0.488457   | -1.04106 | 0.297849 | 0.765407 |
| RF00001            | 0.046941 |              | 0.5.267649 |          | 0        | 1 NA     |
| RF00001            | 0 NA     |              | NA         | NA       | NA       | NA       |
| rnps1              | 644.8684 | 0.008466088  | 0.118684   | 0.071333 | 0.943133 | 0.997371 |
| RF00091            | 1.550953 | 0.70271064   | 1.264536   | 0.555706 | 0.578412 | NA       |
| RF00026            | 0 NA     |              | NA         | NA       | NA       | NA       |
| RF00012            | 0 NA     |              | NA         | NA       | NA       | NA       |
| dre-mir-430c-1     | 0 NA     |              | NA         | NA       | NA       | NA       |
| BX537263.4         | 12.2106  | -0.426322454 | 0.738557   | -0.57724 | 0.563779 | 0.901196 |
| CR936300.2         | 1.107759 | -0.499437502 | 1.743453   | -0.28646 | 0.774522 | NA       |
| RF00001            | 0 NA     |              | NA         | NA       | NA       | NA       |
| RF00003            | 0 NA     |              | NA         | NA       | NA       | NA       |
| c16h2orf66         | 19.47027 | 0.706874998  | 0.478536   | 1.47716  | 0.139633 | 0.59791  |
| CABZ01053323.1     | 0 NA     |              | NA         | NA       | NA       | NA       |
| pimr205            | 0.043308 |              | 0.5.267649 |          | 0        | 1 NA     |
| BX649516.5         | 0 NA     |              | NA         | NA       | NA       | NA       |
| zgc:162962         | 71.26619 | -0.091358912 | 0.222769   | -0.41011 | 0.681729 | 0.937427 |
| ZNF521 (1 of many) | 96.87296 | 0.038615344  | 0.206675   | 0.186841 | 0.851785 | 0.978558 |
| CR450827.7         | 0.043308 |              | 0.5.267649 |          | 0        | 1 NA     |
| RF00001            | 0 NA     |              | NA         | NA       | NA       | NA       |
| RF00001            | 0.13984  |              | 0.5.267649 |          | 0        | 1 NA     |
| BX511311.10        | 0 NA     |              | NA         | NA       | NA       | NA       |
| zgc:165555         | 1.485226 | 1.111482462  | 1.492496   | 0.744714 | 0.456445 | NA       |
| RF00001            | 0.087179 |              | 0.5.267649 |          | 0        | 1 NA     |
| CR352310.1         | 7.981421 | -0.45869788  | 0.842018   | -0.54476 | 0.585918 | 0.906655 |
| CABZ01065417.1     | 14.35736 | -1.328970615 | 0.772646   | -1.72002 | 0.085428 | 0.490781 |
| RF00001            | 0.087381 |              | 0.5.267649 |          | 0        | 1 NA     |
| nanos2             | 1.431232 | -0.663250711 | 1.871099   | -0.35447 | 0.722986 | NA       |
| CABZ01037174.1     | 39.01166 | -0.432353609 | 0.319658   | -1.35255 | 0.176199 | 0.649415 |
| CU693479.1         | 1262.284 | -0.206124519 | 0.242906   | -0.84858 | 0.396117 | 0.8295   |
| AL935299.1         | 0.118261 |              | 0.5.267649 |          | 0        | 1 NA     |
| CU570894.2         | 118.5198 | 0.756530313  | 0.188331   | 4.017028 | 5.89E-05 | 0.006235 |
| znf1024            | 86.40048 | 0.187007928  | 0.260155   | 0.718834 | 0.472243 | 0.868726 |
| RF00003            | 0 NA     |              | NA         | NA       | NA       | NA       |
| zgc:174356         | 0.409609 | 1.055395546  | 3.700884   | 0.285174 | 0.775511 | NA       |
| BX511056.6         | 0 NA     |              | NA         | NA       | NA       | NA       |
| RF00001            | 0 NA     |              | NA         | NA       | NA       | NA       |
| RF00001            | 0 NA     |              | NA         | NA       | NA       | NA       |
| RF00003            | 0 NA     |              | NA         | NA       | NA       | NA       |
| RF00591            | 0 NA     |              | NA         | NA       | NA       | NA       |
| pimr41             | 0 NA     |              | NA         | NA       | NA       | NA       |
| CR749164.1         | 7.627409 | -2.347063768 | 1.526611   | -1.53743 | 0.124187 | 0.571369 |
| CABZ01077220.2     | 32.24648 | 0.345113416  | 0.3556     | 0.97051  | 0.331792 | 0.789531 |
| park7              | 640.5942 | -0.002031868 | 0.164243   | -0.01237 | 0.99013  | 1        |
| taar19s            | 0.217666 |              | 0.5.267649 |          | 0        | 1 NA     |
| RF00001            | 0 NA     |              | NA         | NA       | NA       | NA       |
| BX324216.4         | 4.02598  | -0.049365668 | 1.255866   | -0.03931 | 0.968645 | 1        |
| izumol             | 0.585617 | -2.30051561  | 2.997639   | -0.76744 | 0.442819 | NA       |
| RF00001            | 0 NA     |              | NA         | NA       | NA       | NA       |
| RF00015            | 0 NA     |              | NA         | NA       | NA       | NA       |
| CR383662.8         | 12.17459 | -2.25366099  | 0.739068   | -3.04933 | 0.002294 | 0.076134 |
| tradv11.0.1        | 0 NA     |              | NA         | NA       | NA       | NA       |
| CR933812.1         | 6.203455 | -1.417017212 | 0.679343   | -2.08587 | 0.036991 | 0.337432 |

|                   |          |              |            |          |          |          |
|-------------------|----------|--------------|------------|----------|----------|----------|
| pimr64            | 7.852773 | -0.272074871 | 0.994445   | -0.27359 | 0.784396 | 0.962605 |
| CU984579.1        | 67.36691 | 0.271014671  | 0.213164   | 1.271391 | 0.20359  | 0.684359 |
| RF00001           | 0.060442 |              | 0 5.267649 |          | 0        | 1 NA     |
| si:dkey-58b18.10  | 0 NA     |              | NA         | NA       | NA       | NA       |
| pimr151           | 0.098422 | 1.055383603  | 5.267649   | 0.200352 | 0.841205 | NA       |
| BX284638.1        | 960.0174 | 0.378002676  | 0.121054   | 3.1226   | 0.001793 | 0.065409 |
| RF00026           | 0 NA     |              | NA         | NA       | NA       | NA       |
| RF00001           | 0 NA     |              | NA         | NA       | NA       | NA       |
| RF00001           | 0 NA     |              | NA         | NA       | NA       | NA       |
| CR352220.1        | 4.071806 | 1.519139578  | 0.853416   | 1.78007  | 0.075065 | 0.464418 |
| RF00003           | 0 NA     |              | NA         | NA       | NA       | NA       |
| BX005442.3        | 0 NA     |              | NA         | NA       | NA       | NA       |
| GJD4              | 10.9396  | -0.064686023 | 0.546556   | -0.11835 | 0.905789 | 0.991631 |
| BX005328.1        | 2.999819 | 0.084876513  | 1.620667   | 0.052371 | 0.958233 | 0.999109 |
| rln3b             | 3.71053  | -0.868151819 | 1.929789   | -0.44987 | 0.652805 | 0.929142 |
| RF00001           | 0 NA     |              | NA         | NA       | NA       | NA       |
| RF00003           | 0 NA     |              | NA         | NA       | NA       | NA       |
| RF00003           | 0 NA     |              | NA         | NA       | NA       | NA       |
| AL928657.2        | 1.081049 | 2.504848307  | 1.959616   | 1.278234 | 0.201167 | NA       |
| si:ch211-133h13.1 | 8.196545 | 2.281105552  | 1.074749   | 2.122454 | 0.0338   | 0.324953 |
| RF00026           | 0 NA     |              | NA         | NA       | NA       | NA       |
| RF00001           | 0 NA     |              | NA         | NA       | NA       | NA       |
| RF00001           | 0 NA     |              | NA         | NA       | NA       | NA       |
| BX927243.3        | 0 NA     |              | NA         | NA       | NA       | NA       |
| CABZ01059408.1    | 35.94623 | 0.593895116  | 0.425603   | 1.39542  | 0.162889 | 0.630534 |
| RF00001           | 0 NA     |              | NA         | NA       | NA       | NA       |
| BX927333.1        | 160.3639 | 0.039033899  | 0.239898   | 0.162711 | 0.870746 | 0.983365 |
| RF00001           | 0.043308 |              | 0 5.267649 |          | 0        | 1 NA     |
| CR759875.1        | 0.645635 | -1.541592462 | 2.722858   | -0.56617 | 0.57128  | NA       |
| RF00001           | 0.043308 |              | 0 5.267649 |          | 0        | 1 NA     |
| nfil3-3           | 5.101664 | 0.708710943  | 0.681472   | 1.039971 | 0.298353 | 0.765416 |
| RF00001           | 0.053262 | 1.055396947  | 5.267649   | 0.200354 | 0.841203 | NA       |
| BX324134.2        | 0 NA     |              | NA         | NA       | NA       | NA       |
| RF00001           | 0 NA     |              | NA         | NA       | NA       | NA       |
| RF00017           | 0.272271 |              | 0 5.267649 |          | 0        | 1 NA     |
| RF00001           | 0.278837 |              | 0 4.727799 |          | 0        | 1 NA     |
| RF00001           | 0 NA     |              | NA         | NA       | NA       | NA       |
| RF00001           | 0.099037 |              | 0 5.267649 |          | 0        | 1 NA     |
| RF00026           | 0 NA     |              | NA         | NA       | NA       | NA       |
| RF00012           | 0.129927 |              | 0 5.267649 |          | 0        | 1 NA     |
| CR762392.2        | 0 NA     |              | NA         | NA       | NA       | NA       |
| FO704771.1        | 0.759698 | -0.868141714 | 2.361233   | -0.36766 | 0.713123 | NA       |
| RF00026           | 0 NA     |              | NA         | NA       | NA       | NA       |
| RF00001           | 0 NA     |              | NA         | NA       | NA       | NA       |
| RF00001           | 0.197981 |              | 0 5.267649 |          | 0        | 1 NA     |
| pimr75            | 0.050723 | -0.86807634  | 5.267649   | -0.16479 | 0.869106 | NA       |
| RF00001           | 28.83856 | 0.094406176  | 0.599484   | 0.157479 | 0.874867 | 0.984191 |
| parapinopsina     | 3.502686 | -0.564817949 | 1.099026   | -0.51393 | 0.607304 | 0.915204 |
| RF00026           | 0 NA     |              | NA         | NA       | NA       | NA       |
| BX571768.1        | 1.658405 | -1.823030965 | 1.725977   | -1.05623 | 0.290863 | NA       |
| FO904997.1        | 7.831129 | -0.564333341 | 0.640238   | -0.88144 | 0.378078 | 0.82265  |
| AL929276.2        | 0.14762  |              | 0 5.267649 |          | 0        | 1 NA     |
| zgc:172315        | 33.72429 | 0.505961127  | 1.125936   | 0.449369 | 0.653165 | 0.929197 |
| FP236542.1        | 16.36665 | -0.663022243 | 0.615834   | -1.07663 | 0.281648 | 0.754076 |

|                |          |              |          |          |          |          |
|----------------|----------|--------------|----------|----------|----------|----------|
| taar12f        | 0.693781 | -0.875752177 | 2.179768 | -0.40176 | 0.687858 | NA       |
| znf1051        | 10.53082 | 0.574135578  | 0.724166 | 0.792823 | 0.427881 | 0.845893 |
| CABZ01109480.1 | 5.912447 | -0.474001165 | 0.73707  | -0.64309 | 0.520167 | 0.887148 |
| taar19o        | 0.140124 | -0.868101294 | 5.267649 | -0.1648  | 0.869102 | NA       |
| AL929536.6     | 101.6048 | 0.202102778  | 0.212452 | 0.951287 | 0.341459 | 0.796175 |
| CABZ01086812.1 | 293.3737 | -1.031638118 | 0.351839 | -2.93213 | 0.003366 | 0.095589 |
| BX324142.2     | 0 NA     | NA           | NA       | NA       | NA       | NA       |
| RF00026        | 0 NA     | NA           | NA       | NA       | NA       | NA       |
| CABZ01102201.1 | 0.04222  | 0            | 5.267649 | 0        | 1        | NA       |
| ewsrlb         | 12.18447 | -2.27432657  | 1.058932 | -2.14776 | 0.031733 | 0.316921 |
| RF00211        | 0.795771 | -0.956418136 | 2.496133 | -0.38316 | 0.701601 | NA       |
| RF00001        | 0 NA     | NA           | NA       | NA       | NA       | NA       |
| RF00003        | 0 NA     | NA           | NA       | NA       | NA       | NA       |
| CR388047.3     | 0.769397 | -2.335894752 | 3.138373 | -0.7443  | 0.456694 | NA       |
| CU896602.4     | 0 NA     | NA           | NA       | NA       | NA       | NA       |
| RF00001        | 0 NA     | NA           | NA       | NA       | NA       | NA       |
| RF00397        | 0.981416 | -0.990782467 | 2.153033 | -0.46018 | 0.645387 | NA       |
| RF00004        | 0.092101 | 0            | 5.267649 | 0        | 1        | NA       |
| RF00026        | 0 NA     | NA           | NA       | NA       | NA       | NA       |
| RF00001        | 0.243386 | 0.093662229  | 4.910588 | 0.019074 | 0.984782 | NA       |
| RF00026        | 0 NA     | NA           | NA       | NA       | NA       | NA       |
| RF00003        | 0 NA     | NA           | NA       | NA       | NA       | NA       |
| RF00001        | 0 NA     | NA           | NA       | NA       | NA       | NA       |
| RF00001        | 0 NA     | NA           | NA       | NA       | NA       | NA       |
| RF00026        | 0 NA     | NA           | NA       | NA       | NA       | NA       |
| RF00017        | 0 NA     | NA           | NA       | NA       | NA       | NA       |
| RF00003        | 0 NA     | NA           | NA       | NA       | NA       | NA       |
| dre-mir-2185-1 | 0 NA     | NA           | NA       | NA       | NA       | NA       |
| BX649300.3     | 12.26555 | -0.456347309 | 0.514264 | -0.88738 | 0.374874 | 0.821666 |
| CABZ01060373.1 | 61.73205 | -0.139726457 | 0.344917 | -0.4051  | 0.685403 | 0.938486 |
| RF00001        | 0 NA     | NA           | NA       | NA       | NA       | NA       |
| arsib          | 19.50796 | -0.332334321 | 0.416395 | -0.79812 | 0.4248   | 0.844714 |
| BX005085.7     | 114.8606 | -0.362699862 | 0.202065 | -1.79497 | 0.072659 | 0.457864 |
| BX321886.1     | 3.319963 | -0.640178852 | 1.185289 | -0.5401  | 0.589126 | 0.908247 |
| RF00003        | 0 NA     | NA           | NA       | NA       | NA       | NA       |
| RF00001        | 0 NA     | NA           | NA       | NA       | NA       | NA       |
| RF00156        | 0.985469 | -0.797460846 | 2.164701 | -0.36839 | 0.71258  | NA       |
| CKS2           | 155.7289 | 0.388656381  | 0.299893 | 1.295983 | 0.194981 | 0.67483  |
| dipklb         | 40.13369 | 0.108587365  | 0.380202 | 0.285605 | 0.775181 | 0.960899 |
| znf1138        | 1.547224 | -2.103787534 | 1.322605 | -1.59064 | 0.111691 | NA       |
| crygm2c        | 34.5184  | -0.48984167  | 1.375819 | -0.35604 | 0.721813 | 0.947403 |
| RF00001        | 0.07132  | 0            | 5.267649 | 0        | 1        | NA       |
| CR388102.1     | 0.896927 | -0.516324912 | 2.363328 | -0.21847 | 0.82706  | NA       |
| CR749775.2     | 38.87861 | 0.195611369  | 0.391318 | 0.499878 | 0.617161 | 0.916365 |
| RF00001        | 0 NA     | NA           | NA       | NA       | NA       | NA       |
| CABZ01058647.1 | 85.68828 | 0.11162165   | 0.551869 | 0.202261 | 0.839713 | 0.976417 |
| CR626884.5     | 33.05282 | -0.661016485 | 0.979827 | -0.67463 | 0.499913 | 0.879766 |
| zgc:173607     | 2.5047   | -0.751335038 | 1.187451 | -0.63273 | 0.52691  | 0.889861 |
| CR352209.2     | 0.087179 | 0            | 5.267649 | 0        | 1        | NA       |
| taar12e        | 0.095727 | -0.868089684 | 5.267649 | -0.1648  | 0.869104 | NA       |
| RF00001        | 0 NA     | NA           | NA       | NA       | NA       | NA       |
| BX908804.3     | 1.142369 | 2.008560853  | 1.767108 | 1.136637 | 0.25569  | NA       |
| CU672228.1     | 0.461095 | 0            | 4.892876 | 0        | 1        | NA       |
| BX664603.1     | 3.358228 | 0.687440269  | 1.122325 | 0.612515 | 0.540197 | 0.893049 |

|                   |          |              |            |          |          |          |
|-------------------|----------|--------------|------------|----------|----------|----------|
| BX510301.1        | 0.161662 | -1.710071829 | 5.238473   | -0.32644 | 0.744088 | NA       |
| RF00001           | 0 NA     |              | NA         | NA       | NA       | NA       |
| RF01848           | 0.190858 |              | 0 5.267649 | 0        | 1        | NA       |
| BX936439.1        | 73.1448  | -0.180098701 | 0.251941   | -0.71484 | 0.474705 | 0.869292 |
| BX663613.1        | 17.70056 | 1.571106498  | 0.569584   | 2.758339 | 0.00581  | 0.129012 |
| cst14b.1          | 1028.102 | -0.175170359 | 0.152162   | -1.15121 | 0.249646 | 0.729721 |
| si:dkey-7814.13   | 0.049519 |              | 0 5.267649 | 0        | 1        | NA       |
| RF00026           | 0 NA     |              | NA         | NA       | NA       | NA       |
| RF00001           | 0 NA     |              | NA         | NA       | NA       | NA       |
| CT573337.1        | 6.214957 | 0.698718417  | 1.113751   | 0.627356 | 0.530426 | 0.890545 |
| notum1b           | 519.002  | -0.208654944 | 0.142139   | -1.46796 | 0.142114 | 0.601137 |
| RF00001           | 0 NA     |              | NA         | NA       | NA       | NA       |
| RF00026           | 0 NA     |              | NA         | NA       | NA       | NA       |
| BX323087.1        | 33.27945 | 0.473764295  | 0.434678   | 1.089919 | 0.275749 | 0.750674 |
| si:dkey-7j22.4    | 4.67984  | -2.358559175 | 0.824001   | -2.86232 | 0.004205 | 0.107195 |
| CR392001.3        | 0.045161 |              | 0 5.267649 | 0        | 1        | NA       |
| znf1114           | 37.05691 | 0.386330606  | 0.282269   | 1.368662 | 0.171105 | 0.643274 |
| RF00003           | 0 NA     |              | NA         | NA       | NA       | NA       |
| BX649431.4        | 0 NA     |              | NA         | NA       | NA       | NA       |
| RF00001           | 0 NA     |              | NA         | NA       | NA       | NA       |
| pimr118           | 0 NA     |              | NA         | NA       | NA       | NA       |
| taar10c           | 0.279529 | 1.921539993  | 5.236909   | 0.366923 | 0.713677 | NA       |
| CT583728.26       | 0.311253 | 1.055352636  | 5.267649   | 0.200346 | 0.84121  | NA       |
| FP326649.1        | 6.211443 | 0.097505997  | 1.327812   | 0.073434 | 0.941461 | 0.997371 |
| RF00026           | 0 NA     |              | NA         | NA       | NA       | NA       |
| RF00003           | 0 NA     |              | NA         | NA       | NA       | NA       |
| si:ch211-255f4.11 | 13.21643 | -1.239087254 | 0.629366   | -1.96879 | 0.048977 | 0.385334 |
| RF00001           | 0 NA     |              | NA         | NA       | NA       | NA       |
| CR318625.1        | 0.470404 | -2.709396758 | 4.098799   | -0.66102 | 0.508598 | NA       |
| FO704607.1        | 14.84864 | -0.173363199 | 0.653543   | -0.26527 | 0.790804 | 0.964766 |
| RF00017           | 0.193511 | 1.05535865   | 5.267649   | 0.200347 | 0.841209 | NA       |
| RF00017           | 0 NA     |              | NA         | NA       | NA       | NA       |
| BX119314.1        | 0.251277 | 0.07251512   | 5.204345   | 0.013934 | 0.988883 | NA       |
| pimr144           | 0 NA     |              | NA         | NA       | NA       | NA       |
| RF00424           | 1.524243 | 0.673041159  | 1.544234   | 0.435841 | 0.662952 | NA       |
| L0017725.1        | 1.22891  | 2.93072209   | 1.955743   | 1.498521 | 0.133998 | NA       |
| RF00003           | 0 NA     |              | NA         | NA       | NA       | NA       |
| RF00026           | 0 NA     |              | NA         | NA       | NA       | NA       |
