# Supplementary material for: Mycn regulates intestinal development through ribosomal biogenesis in a zebrafish model of Feingold syndrome 1
Source: PubMed Central journal article supplement (PMC9624419; doi:10.1371/journal.pbio.3001856), 2022-11-01
Supplement: pbio.3001856.s011.pdf [file pbio.3001856.s011.pdf]

| external_gene_name | baseMean    | log2FoldChange | lfcSE     | stat      | pvalue   | padj     |
|--------------------|-------------|----------------|-----------|-----------|----------|----------|
| slc35a5            | 110.7843772 | -0.089832458   | 0.1935898 | -0.464035 | 0.642623 | 0.959994 |
| ccdc80             | 238.4015724 | -0.099075092   | 0.1637249 | -0.605131 | 0.545092 | 0.945463 |
| nrf1               | 1098.943144 | 0.024786055    | 0.0906902 | 0.2733047 | 0.784619 | 0.97627  |
| ube2h              | 2872.066754 | 0.036277141    | 0.0694333 | 0.5224745 | 0.60134  | 0.956045 |
| slc9a3r1a          | 578.595402  | -0.284462678   | 0.1065059 | -2.670864 | 0.007566 | 0.138393 |
| dap                | 1360.164668 | -0.293162476   | 0.0823357 | -3.560574 | 0.00037  | 0.013938 |
| itsn1              | 774.8533231 | -0.095268376   | 0.1074052 | -0.887    | 0.375079 | 0.894316 |
| myh10              | 3307.760608 | 0.068453167    | 0.0781422 | 0.8760074 | 0.381026 | 0.895192 |
| tmem267            | 81.46602461 | 0.131059734    | 0.2149771 | 0.609645  | 0.542097 | 0.944974 |
| thraa              | 88.48352469 | 0.140161917    | 0.2225947 | 0.6296731 | 0.528908 | 0.942109 |
| itsn2a             | 366.4213905 | 0.397075794    | 0.1190188 | 3.3362436 | 0.000849 | 0.027171 |
| hoxb2a             | 140.2560912 | -0.049079599   | 0.1803371 | -0.272155 | 0.785503 | 0.97627  |
| ptpn4b             | 802.4027832 | 0.106561404    | 0.095044  | 1.1211801 | 0.262211 | 0.830166 |
| sema6e             | 739.9901406 | 0.100717075    | 0.092404  | 1.0899644 | 0.275729 | 0.839541 |
| krt97              | 2059.823256 | -0.676745372   | 0.0924589 | -7.319415 | 2.49E-13 | 9.66E-11 |
| usp49              | 401.5704819 | -0.029108567   | 0.1175779 | -0.247568 | 0.804468 | 0.979705 |
| slc40a1            | 1183.376349 | 0.128762988    | 0.0818194 | 1.5737467 | 0.115546 | 0.637206 |
| dcaf8              | 401.6524669 | 0.057448599    | 0.118443  | 0.4850316 | 0.627654 | 0.957354 |
| cfap300            | 7.784043597 | -0.218924592   | 0.7252682 | -0.301853 | 0.762764 | NA       |
| prkag3b            | 96.12103045 | 0.526670851    | 0.2249433 | 2.3413495 | 0.019214 | 0.259523 |
| triob              | 864.0831659 | -0.019338327   | 0.1038091 | -0.186287 | 0.852219 | 0.985174 |
| pde6a              | 353.3519912 | 0.278874884    | 0.1547859 | 1.801681  | 0.071596 | 0.523122 |
| matr311.1          | 1376.713683 | -0.084307277   | 0.0841554 | -1.001805 | 0.316438 | 0.867129 |
| si:ch73-314g15.3   | 93.7200388  | -0.132475597   | 0.2153881 | -0.615055 | 0.538518 | 0.943336 |
| slc39a13           | 328.5883075 | 0.003580145    | 0.1194459 | 0.0299729 | 0.976089 | 0.996762 |
| nitr2b             | 1.006818213 | 1.048314579    | 1.9690503 | 0.532396  | 0.594452 | NA       |
| cntn2              | 296.1828382 | -0.188920677   | 0.1313701 | -1.43808  | 0.150411 | 0.698669 |
| tnnila             | 4.397434008 | 0.02757987     | 0.9176952 | 0.0300534 | 0.976024 | NA       |
| pms1               | 104.97284   | -0.108703159   | 0.1977083 | -0.549816 | 0.582446 | 0.952117 |
| upf3b              | 465.065988  | -0.043735922   | 0.1140997 | -0.383313 | 0.701487 | 0.968134 |
| stx1b              | 8003.781798 | 0.064561879    | 0.074053  | 0.8718337 | 0.383299 | 0.895192 |
| ankar              | 12.86079713 | 0.219441444    | 0.5263733 | 0.4168932 | 0.676757 | 0.965257 |
| ofd1               | 174.4339804 | 0.013153708    | 0.1532147 | 0.0858515 | 0.931584 | 0.992702 |
| asdurf             | 300.490504  | 0.115808834    | 0.1326246 | 0.8732077 | 0.38255  | 0.895192 |
| gtf2el             | 376.6806551 | 0.056242916    | 0.1150516 | 0.4888495 | 0.624948 | 0.957354 |
| slcla4             | 1746.627161 | -0.09240065    | 0.0770089 | -1.19987  | 0.23019  | 0.797857 |
| ttn.1              | 13346.33684 | 0.304783266    | 0.0762461 | 3.9973647 | 6.41E-05 | 0.003387 |
| znf281a            | 746.6925073 | -0.068077337   | 0.0922662 | -0.737836 | 0.460614 | 0.921978 |
| ell                | 598.5937215 | 0.100333733    | 0.0966998 | 1.0375795 | 0.299466 | 0.855609 |
| grasp              | 107.0856978 | 0.021736325    | 0.1909394 | 0.1138389 | 0.909366 | 0.990702 |
| dnah6              | 78.07753066 | 0.057905481    | 0.2589872 | 0.2235844 | 0.823081 | 0.982189 |
| ptpn4a             | 913.5432219 | 0.031042228    | 0.0889276 | 0.3490731 | 0.727034 | 0.970402 |
| opnlmw4            | 0.474778155 | 0.852397662    | 2.898154  | 0.2941175 | 0.768668 | NA       |
| osgepl1            | 22.65022457 | -0.608842854   | 0.4360455 | -1.396283 | 0.162629 | 0.7175   |
| psmb9a             | 5.887001654 | 0.632335053    | 0.7932828 | 0.7971117 | 0.425386 | NA       |
| creg2              | 481.9932817 | -0.024179885   | 0.1126938 | -0.214563 | 0.830108 | 0.982908 |
| sypl2b             | 175.092547  | 0.218191829    | 0.1614916 | 1.351103  | 0.176662 | 0.737285 |
| daxx               | 319.5469013 | 0.135330847    | 0.122562  | 1.1041824 | 0.269514 | 0.834705 |
| slc6a22.1          | 266.5483062 | 0.022588176    | 0.1311058 | 0.1722896 | 0.86321  | 0.985841 |
| lcmt2              | 43.40201887 | -0.063908538   | 0.2872047 | -0.222519 | 0.82391  | 0.982196 |
| znf511             | 41.61059353 | -0.001113897   | 0.3007513 | -0.003704 | 0.997045 | 0.99906  |
| spilb              | 29.56747846 | 0.372973101    | 0.3584987 | 1.040375  | 0.298166 | 0.85401  |
| scfd1              | 936.7749391 | 0.089621814    | 0.0921628 | 0.9724296 | 0.330837 | 0.87417  |

|                  |             |              |           |           |          |          |
|------------------|-------------|--------------|-----------|-----------|----------|----------|
| nr4a1            | 401.3114029 | 0.372618462  | 0.1230352 | 3.0285509 | 0.002457 | 0.062216 |
| rassf6           | 128.4309205 | -0.345900203 | 0.1789822 | -1.932596 | 0.053286 | 0.452416 |
| telo2            | 232.5201317 | 0.041032495  | 0.1438114 | 0.2853215 | 0.775398 | 0.975687 |
| snx9a            | 270.3385627 | 0.092605209  | 0.1398326 | 0.6622577 | 0.507806 | 0.935734 |
| dstyk            | 852.8509651 | 0.006084669  | 0.0985729 | 0.0617276 | 0.95078  | 0.99381  |
| mapk14a          | 749.986437  | 0.073814286  | 0.0969076 | 0.7616973 | 0.446241 | 0.917154 |
| scrib            | 2573.037459 | 0.043702037  | 0.0767198 | 0.5696317 | 0.568928 | 0.948983 |
| zgc:56699        | 72.93390087 | -0.230119246 | 0.2300728 | -1.000202 | 0.317213 | 0.867335 |
| skap2            | 42.43366628 | 0.057118343  | 0.3152409 | 0.1811895 | 0.856219 | 0.985384 |
| unk              | 114.8647547 | -0.060953196 | 0.1875968 | -0.324916 | 0.745245 | 0.974094 |
| dzip1            | 370.3432914 | -0.236951074 | 0.1286091 | -1.842412 | 0.065415 | 0.500198 |
| ncor2            | 2700.208108 | -0.052613342 | 0.0716074 | -0.734747 | 0.462494 | 0.922698 |
| myh9b            | 3039.369443 | -0.101014677 | 0.1083356 | -0.932423 | 0.351118 | 0.880473 |
| znf3841          | 555.6286181 | 0.005529337  | 0.1024366 | 0.0539781 | 0.956953 | 0.994543 |
| bysl             | 562.3259108 | -0.050627637 | 0.1054751 | -0.479996 | 0.63123  | 0.957356 |
| slc17a6a         | 44.3201432  | 0.572425611  | 0.2986549 | 1.9166794 | 0.055279 | 0.46072  |
| dicer1           | 1075.463057 | 0.07079635   | 0.0994577 | 0.7118236 | 0.476574 | 0.926716 |
| rimbp2           | 157.1394167 | 0.191772474  | 0.1770207 | 1.0833336 | 0.27866  | 0.842672 |
| matr311.1        | 694.6645765 | 0.00265084   | 0.1109899 | 0.0238836 | 0.980945 | 0.996944 |
| hsd17b8          | 124.4266191 | -0.123737808 | 0.1810732 | -0.683358 | 0.494381 | 0.931926 |
| arll4ep          | 391.9395496 | -0.124131401 | 0.1150469 | -1.078963 | 0.280604 | 0.84355  |
| mycbp2           | 3230.525754 | 0.051198056  | 0.0747081 | 0.6853081 | 0.49315  | 0.931926 |
| map4k2           | 210.3395507 | 0.2078427    | 0.1466596 | 1.4171777 | 0.156431 | 0.706639 |
| puf60b           | 2228.094294 | -0.01130198  | 0.0725392 | -0.155805 | 0.876187 | 0.987881 |
| srrml            | 3340.460728 | -0.078067371 | 0.0942018 | -0.828725 | 0.40726  | 0.901305 |
| pcgfl            | 66.98506237 | -0.182920997 | 0.2507305 | -0.729552 | 0.465664 | 0.923865 |
| gas2a            | 29.25283633 | 0.484811658  | 0.3797375 | 1.2767022 | 0.201707 | 0.767736 |
| psmb8a           | 1.138501641 | -0.373253155 | 1.7712222 | -0.210732 | 0.833096 | NA       |
| g2e3             | 318.9474736 | -0.043687197 | 0.1345315 | -0.324736 | 0.745381 | 0.974094 |
| slc6a22.2        | 97.74071568 | 0.528032817  | 0.2203896 | 2.3959065 | 0.016579 | 0.237453 |
| mctp2a           | 102.4931772 | -0.000720927 | 0.2074903 | -0.003475 | 0.997228 | 0.999097 |
| actn3b           | 6620.348673 | 0.26517875   | 0.0906117 | 2.9265402 | 0.003428 | 0.078354 |
| slc2a1a          | 111.8786856 | 0.858882861  | 0.1969089 | 4.3618276 | 1.29E-05 | 0.000886 |
| inpp1b           | 100.2505867 | -0.014328779 | 0.2035146 | -0.070407 | 0.94387  | 0.993364 |
| mier1b           | 281.3105896 | 0.043000165  | 0.1430582 | 0.3005782 | 0.763736 | 0.975374 |
| adam8a           | 131.5394087 | -0.077055193 | 0.1830362 | -0.420983 | 0.673767 | 0.965257 |
| tdh2             | 1318.217197 | 0.007618699  | 0.0813355 | 0.09367   | 0.925371 | 0.992676 |
| mhclzea          | 166.8526748 | 0.032496824  | 0.1771458 | 0.1834468 | 0.854447 | 0.985174 |
| skap1            | 13.92563701 | 1.165861264  | 0.5225563 | 2.2310732 | 0.025676 | 0.310555 |
| sp3a             | 138.4706356 | 0.070632835  | 0.1748377 | 0.4039908 | 0.686219 | 0.966376 |
| tomm34           | 313.2013299 | 0.196752836  | 0.1285525 | 1.5305257 | 0.125887 | 0.654803 |
| kifcl            | 897.5802833 | -0.110729979 | 0.0930311 | -1.190247 | 0.233949 | 0.802633 |
| csmd2            | 64.30211894 | 0.292496897  | 0.2597656 | 1.1260032 | 0.260164 | 0.828288 |
| prfl.3           | 0.481032184 | -2.398473301 | 2.80721   | -0.854398 | 0.392885 | NA       |
| echsl            | 1062.157946 | -0.044472418 | 0.0837103 | -0.531265 | 0.595235 | 0.954434 |
| nfyal            | 230.7591545 | -0.251967145 | 0.156409  | -1.61095  | 0.107191 | 0.617056 |
| kirrella         | 840.4616487 | 0.089798797  | 0.0907743 | 0.9892536 | 0.322539 | 0.870226 |
| psmb13a          | 1.178070337 | 0.530310831  | 1.9330889 | 0.2743334 | 0.783828 | NA       |
| gpm6bb           | 702.7035254 | 0.077508857  | 0.1022011 | 0.7583957 | 0.448214 | 0.917683 |
| ucklla           | 75.72106679 | 0.39071551   | 0.2345785 | 1.6656068 | 0.095792 | 0.589171 |
| flotla           | 3112.543381 | 0.012694734  | 0.0694421 | 0.1828104 | 0.854947 | 0.985174 |
| si:ch211-247n2.1 | 45.5287406  | 0.168263293  | 0.3035107 | 0.5543899 | 0.579312 | 0.951257 |
| oc90             | 12.87319814 | -0.006099792 | 0.541003  | -0.011275 | 0.991004 | 0.997679 |
| strn3            | 1639.417939 | 0.064096901  | 0.0743046 | 0.8626237 | 0.388344 | 0.896271 |



|                  |             |              |           |           |          |          |
|------------------|-------------|--------------|-----------|-----------|----------|----------|
| gulpla           | 322.5623346 | 0.057499911  | 0.1270261 | 0.4526622 | 0.650792 | 0.960708 |
| fkbp8            | 593.8735953 | 0.033605942  | 0.1001333 | 0.3356121 | 0.737163 | 0.972535 |
| noc2l            | 701.9320025 | -0.031924336 | 0.0990223 | -0.322395 | 0.747153 | 0.97419  |
| tnxba            | 1208.657835 | 0.112284508  | 0.0946382 | 1.1864606 | 0.23544  | 0.804771 |
| slc29a2          | 429.1365493 | -0.193175891 | 0.1143131 | -1.689885 | 0.09105  | 0.578171 |
| ptpra            | 309.578729  | -0.133863824 | 0.1317783 | -1.015826 | 0.309712 | 0.86172  |
| otolla           | 19.94280981 | 0.332589742  | 0.427698  | 0.7776276 | 0.436789 | 0.914408 |
| stim2b           | 53.43132692 | 0.223681436  | 0.271798  | 0.8229694 | 0.410525 | 0.903084 |
| nup155           | 660.2582362 | -0.087951272 | 0.1158794 | -0.75899  | 0.447859 | 0.917154 |
| tspan1l          | 81.80578632 | 0.034733467  | 0.2212723 | 0.1569716 | 0.875267 | 0.987881 |
| prkacba          | 75.4426244  | 0.058756927  | 0.260303  | 0.2257252 | 0.821415 | 0.981845 |
| irx2a            | 456.9776852 | -0.084886437 | 0.1054259 | -0.805177 | 0.420718 | 0.90651  |
| atp5po           | 6711.565159 | 0.043561318  | 0.1009107 | 0.4316818 | 0.665973 | 0.964736 |
| kcnh6a           | 157.0960653 | -0.035822677 | 0.1637748 | -0.218731 | 0.826859 | 0.982473 |
| zgc:112148       | 117.1952421 | -0.600638039 | 0.1923566 | -3.122524 | 0.001793 | 0.049451 |
| tnfrsf2l         | 603.0250382 | 0.110467637  | 0.1120818 | 0.9855983 | 0.32433  | 0.870928 |
| zmp:0000000521   | 7.880354907 | 0.446028997  | 0.6840558 | 0.652036  | 0.514378 | NA       |
| c3b.2            | 535.5350531 | 0.426381207  | 0.1269911 | 3.3575677 | 0.000786 | 0.025573 |
| cfap43           | 23.10187312 | 0.081256691  | 0.4054669 | 0.2004028 | 0.841166 | 0.985174 |
| zgc:112982       | 1009.947658 | 0.000181499  | 0.1046737 | 0.0017339 | 0.998617 | 0.999375 |
| nalcn            | 871.2356201 | 0.029413267  | 0.0959383 | 0.3065854 | 0.759159 | 0.975374 |
| aff4             | 194.8252949 | 0.170056088  | 0.1545107 | 1.1006104 | 0.271066 | 0.835943 |
| dbx1b            | 125.3027712 | -0.266110243 | 0.1957281 | -1.359591 | 0.173959 | 0.733946 |
| atplala.4        | 6658.899427 | -0.490698912 | 0.0719285 | -6.822042 | 8.98E-12 | 2.57E-09 |
| phgdh            | 1272.428888 | -0.154074796 | 0.0801818 | -1.921568 | 0.05466  | 0.457793 |
| nav2b            | 702.5894408 | -0.253753208 | 0.0964969 | -2.629652 | 0.008547 | 0.151445 |
| stx3a            | 436.9570086 | 0.0311626    | 0.1138416 | 0.2737365 | 0.784287 | 0.97627  |
| cacnb3a          | 9.499928775 | 0.154693372  | 0.6081313 | 0.2543749 | 0.799206 | NA       |
| kbtbd12          | 414.6719128 | 0.149594339  | 0.1164038 | 1.285133  | 0.198746 | 0.763848 |
| ppmlba           | 235.6937074 | 0.131959229  | 0.1352246 | 0.975852  | 0.329138 | 0.873436 |
| tubala           | 8391.637863 | -0.046282812 | 0.0849219 | -0.545005 | 0.58575  | 0.952847 |
| stt3b            | 2093.974105 | 0.081464951  | 0.0784557 | 1.0383564 | 0.299104 | 0.855189 |
| sytl4b           | 73.77316123 | 0.417221299  | 0.2298062 | 1.8155357 | 0.069442 | 0.514708 |
| man2b1           | 634.1833849 | -0.096394051 | 0.1055204 | -0.913511 | 0.360974 | 0.885686 |
| manea            | 169.2225577 | 0.150434685  | 0.1668129 | 0.9018167 | 0.367154 | 0.887458 |
| si:dkey-247m2l.3 | 17.01402108 | 0.209429984  | 0.4682502 | 0.4472608 | 0.654687 | 0.961305 |
| vill             | 221.2488874 | -0.148748579 | 0.1429153 | -1.040816 | 0.297961 | 0.85401  |
| rorab            | 2521.960065 | 0.029034909  | 0.0800176 | 0.3628567 | 0.716712 | 0.96909  |
| drd4-rs          | 151.4235636 | -0.103245251 | 0.1673606 | -0.616903 | 0.537299 | 0.943336 |
| palmda           | 249.661805  | 0.239988861  | 0.1368216 | 1.754027  | 0.079426 | 0.547489 |
| pinkl            | 304.1548956 | 0.030298401  | 0.1307498 | 0.2317281 | 0.816749 | 0.981594 |
| klhl15           | 494.3340476 | -0.02742287  | 0.1035045 | -0.264944 | 0.791053 | 0.977461 |
| prkag2b          | 73.70025362 | 0.072237787  | 0.2366857 | 0.3052055 | 0.76021  | 0.975374 |
| L0018422.1       | 68.61364514 | 0.311377706  | 0.2607254 | 1.1942747 | 0.232371 | 0.800644 |
| b3gat3           | 387.2573296 | 0.139940178  | 0.1128497 | 1.2400579 | 0.214954 | 0.782493 |
| dnajc1           | 673.6495071 | 0.048365918  | 0.0980931 | 0.4930614 | 0.621969 | 0.957354 |
| akl              | 5244.840595 | 0.101522408  | 0.0959135 | 1.0584784 | 0.289837 | 0.846246 |
| pfkfb3           | 1285.663133 | -0.109564169 | 0.1102522 | -0.99376  | 0.32034  | 0.868202 |
| dock5            | 20.02823285 | -0.2723532   | 0.4401023 | -0.618841 | 0.536021 | 0.943336 |
| txlmg            | 351.3955109 | -0.164980654 | 0.1243535 | -1.326707 | 0.184605 | 0.747376 |
| cthrclb          | 65.34068245 | 0.264514301  | 0.2487136 | 1.0635296 | 0.287542 | 0.845979 |
| hsd11b2          | 604.6605456 | -0.03497882  | 0.1049863 | -0.333175 | 0.739002 | 0.972722 |
| fkbp16           | 265.7850726 | 0.060745051  | 0.1354927 | 0.4483272 | 0.653917 | 0.961214 |
| myhb             | 3476.077612 | 0.017573703  | 0.0793651 | 0.2214285 | 0.824759 | 0.982196 |

|                   |             |              |           |           |          |          |
|-------------------|-------------|--------------|-----------|-----------|----------|----------|
| stxbpla           | 9751.213735 | 0.059911238  | 0.0726769 | 0.8243505 | 0.40974  | 0.902351 |
| adamts18          | 393.700987  | 0.010424844  | 0.1180589 | 0.0883021 | 0.929637 | 0.992702 |
| lmc1              | 58.6058179  | 0.28975283   | 0.2630477 | 1.101522  | 0.27067  | 0.835351 |
| rxrbb             | 505.8873758 | 0.058813212  | 0.1216342 | 0.4835253 | 0.628723 | 0.957354 |
| grb10a            | 119.6711323 | 0.083731998  | 0.194154  | 0.4312658 | 0.666275 | 0.964736 |
| ppil2             | 392.9230751 | -0.069148022 | 0.1164876 | -0.593609 | 0.552774 | 0.947265 |
| riCTORb           | 402.5313488 | -0.034990059 | 0.113506  | -0.308266 | 0.75788  | 0.975374 |
| pygb              | 739.0591287 | -0.04235201  | 0.0919165 | -0.460766 | 0.644966 | 0.96029  |
| qkib              | 31.5323724  | 0.089733113  | 0.34574   | 0.2595393 | 0.795219 | 0.978466 |
| tox4a             | 413.536087  | 0.144023341  | 0.1098621 | 1.3109462 | 0.189876 | 0.754269 |
| pfkfb2b           | 168.3001269 | 0.118425923  | 0.1646392 | 0.7193059 | 0.471952 | 0.924838 |
| brf2              | 22.59060022 | 0.687222807  | 0.4071399 | 1.687928  | 0.091425 | 0.57849  |
| adss              | 227.4476459 | 0.497757166  | 0.1421352 | 3.5019974 | 0.000462 | 0.016755 |
| mnat1             | 117.4331271 | 0.109721498  | 0.2016929 | 0.5440027 | 0.58644  | 0.953319 |
| csnk2a1           | 2699.372842 | -0.04060286  | 0.0705964 | -0.575141 | 0.565196 | 0.948739 |
| lamb2             | 1779.841567 | 0.232368213  | 0.0874378 | 2.6575245 | 0.007872 | 0.142411 |
| si:dkeyp-52c3.7   | 1.675486141 | 2.010499125  | 1.6659854 | 1.2067928 | 0.227512 | NA       |
| stam              | 1421.810152 | 0.11794035   | 0.0793892 | 1.4855962 | 0.137386 | 0.674358 |
| cwf1911           | 354.0023131 | -0.116694557 | 0.1193731 | -0.977561 | 0.328291 | 0.872883 |
| celf2             | 175.9815985 | -0.169360301 | 0.1598208 | -1.059689 | 0.289286 | 0.845979 |
| psme1             | 80.87599158 | -0.258307887 | 0.2211363 | -1.168094 | 0.242769 | 0.811583 |
| cacnb1            | 214.4521868 | 0.246846956  | 0.1492957 | 1.6534097 | 0.098248 | 0.597502 |
| tra2b             | 790.0884397 | -0.017341314 | 0.09383   | -0.184816 | 0.853373 | 0.985174 |
| aplra             | 203.934979  | -0.15324565  | 0.1466719 | -1.044819 | 0.296107 | 0.853273 |
| itfg2             | 134.2786044 | -0.286720732 | 0.1749659 | -1.638724 | 0.101271 | 0.604628 |
| igbpl             | 531.9667527 | -0.143400604 | 0.1120476 | -1.279819 | 0.200609 | 0.766801 |
| chmp2bb           | 1082.678112 | -0.037782849 | 0.0968949 | -0.389936 | 0.696584 | 0.96736  |
| aspn              | 490.8816744 | 0.395264233  | 0.1133169 | 3.4881307 | 0.000486 | 0.01747  |
| rho               | 14675.76992 | 0.336027253  | 0.2025155 | 1.6592667 | 0.097062 | 0.593844 |
| rhd               | 23.845769   | 0.447160754  | 0.3893198 | 1.1485692 | 0.250734 | 0.820469 |
| bach1b            | 626.2581394 | 0.056490147  | 0.1059024 | 0.5334171 | 0.593745 | 0.954434 |
| pygl              | 1557.845007 | 0.379684415  | 0.0788617 | 4.8145634 | 1.48E-06 | 0.000139 |
| hspb11            | 150.1213509 | -0.351011432 | 0.1766199 | -1.987383 | 0.04688  | 0.425112 |
| stk25a            | 324.3293996 | -0.157247744 | 0.1298146 | -1.211326 | 0.22577  | 0.793245 |
| invs              | 58.47573931 | -0.057765724 | 0.2674147 | -0.216016 | 0.828976 | 0.982721 |
| rtca              | 487.4794605 | -0.072171739 | 0.1086332 | -0.664361 | 0.506459 | 0.935724 |
| tbx3a             | 633.3176694 | -0.071106603 | 0.1014614 | -0.700824 | 0.483413 | 0.929461 |
| scocb             | 1339.808851 | 0.046090598  | 0.0817283 | 0.5639492 | 0.572789 | 0.949717 |
| si:dkey-103j14.5  | 37.81463232 | -1.066487374 | 0.3282915 | -3.248599 | 0.00116  | 0.034642 |
| zgc:103692        | 232.8413972 | 0.007645912  | 0.1466374 | 0.0521416 | 0.958416 | 0.994893 |
| syb               | 4911.215393 | 0.102810473  | 0.08131   | 1.2644259 | 0.206077 | 0.773826 |
| plpp2a            | 18.72329438 | 0.076417033  | 0.4542098 | 0.1682417 | 0.866393 | 0.986673 |
| mmp14a            | 1333.127059 | 0.13684144   | 0.0841642 | 1.6258865 | 0.103974 | 0.610807 |
| psmb6             | 1122.008042 | -0.163428044 | 0.106559  | -1.533686 | 0.125107 | 0.654648 |
| kcna2a            | 8.309041893 | 0.239449177  | 0.6544951 | 0.3658533 | 0.714475 | NA       |
| tbxas1            | 246.2379656 | -0.134852069 | 0.1482079 | -0.909885 | 0.362883 | 0.885944 |
| epb4113a          | 1375.359136 | 0.078582266  | 0.0925788 | 0.8488152 | 0.395984 | 0.899505 |
| cal5c             | 22.04917881 | 1.301128248  | 0.4605642 | 2.8250744 | 0.004727 | 0.099016 |
| mrpl41            | 369.5774427 | 0.168863883  | 0.1247829 | 1.3532609 | 0.175972 | 0.736505 |
| dcaf13            | 566.2713902 | -0.036776475 | 0.0980409 | -0.375114 | 0.707576 | 0.968664 |
| zfang5b           | 1729.01347  | -0.09155009  | 0.093864  | -0.975348 | 0.329388 | 0.873436 |
| mcnl1a            | 418.5047083 | -0.064049927 | 0.110742  | -0.578371 | 0.563014 | 0.948728 |
| si:ch211-197g15.6 | 33.48565203 | 0.52517006   | 0.3670214 | 1.4308975 | 0.15246  | 0.70162  |
| si:dkey-21p1.3    | 20.99644497 | 0.486381365  | 0.4313679 | 1.1275325 | 0.259517 | 0.827693 |

|                   |             |              |           |           |          |          |
|-------------------|-------------|--------------|-----------|-----------|----------|----------|
| ankrd22           | 82.18190749 | 0.410916848  | 0.2562719 | 1.6034412 | 0.108837 | 0.621829 |
| arsh              | 59.37291573 | 0.394324264  | 0.2649485 | 1.4883052 | 0.13667  | 0.673303 |
| p2rx2             | 72.10378835 | -0.343210636 | 0.2294253 | -1.495958 | 0.134664 | 0.670689 |
| gins2             | 118.3259788 | 0.110825399  | 0.2002915 | 0.5533204 | 0.580044 | 0.951257 |
| me3               | 1927.457073 | 0.096426386  | 0.0790379 | 1.2200015 | 0.222464 | 0.788748 |
| fabp11b           | 161.5706302 | -0.779254154 | 0.1698882 | -4.586864 | 4.50E-06 | 0.000369 |
| lhx8a             | 115.1059038 | 0.041975945  | 0.1914187 | 0.2192887 | 0.826425 | 0.982196 |
| frmd6             | 373.1063361 | -0.022707706 | 0.1167502 | -0.194498 | 0.845786 | 0.985174 |
| fam102bb          | 140.1249383 | -0.207042871 | 0.1731005 | -1.196085 | 0.231663 | 0.799752 |
| dlc               | 859.9822345 | -0.054326405 | 0.0912774 | -0.595179 | 0.551724 | 0.947156 |
| sgf29             | 239.8234937 | -0.212340086 | 0.1485159 | -1.429747 | 0.15279  | 0.701776 |
| tubb4b            | 19425.59572 | -0.019210827 | 0.1075057 | -0.178696 | 0.858177 | 0.985773 |
| cypl1a1           | 5.562617533 | -0.233442977 | 0.8435458 | -0.27674  | 0.78198  | NA       |
| tagapa            | 38.43241389 | 0.066445869  | 0.3255899 | 0.2040784 | 0.838292 | 0.984797 |
| shpk              | 20.49459969 | -0.333108854 | 0.4230367 | -0.787423 | 0.431034 | 0.91234  |
| ubald1a           | 758.2223526 | -0.068008729 | 0.0932818 | -0.729068 | 0.46596  | 0.923865 |
| cers5             | 602.0443148 | -0.375873039 | 0.1088547 | -3.45298  | 0.000554 | 0.019228 |
| UBB               | 2964.169296 | 0.144897558  | 0.0770756 | 1.8799404 | 0.060116 | 0.478687 |
| mief2             | 313.7822661 | 0.029187709  | 0.1257489 | 0.2321111 | 0.816452 | 0.981594 |
| atm               | 257.6160605 | -0.128380925 | 0.1357313 | -0.945846 | 0.344227 | 0.878434 |
| tlcd1             | 137.2218255 | -0.053429018 | 0.1748785 | -0.305521 | 0.75997  | 0.975374 |
| ugt5d1            | 94.7968435  | -0.418032956 | 0.2044797 | -2.044374 | 0.040917 | 0.394957 |
| cry-dash          | 865.022848  | 0.16191616   | 0.0968732 | 1.6714243 | 0.094638 | 0.585169 |
| gale              | 454.1667052 | -0.185245529 | 0.1067882 | -1.7347   | 0.082794 | 0.554784 |
| ercc3             | 440.8344852 | -0.058638635 | 0.1121712 | -0.52276  | 0.601141 | 0.956045 |
| nusap1            | 664.3622683 | -0.06179984  | 0.100275  | -0.616304 | 0.537694 | 0.943336 |
| si:ch211-225b11.1 | 474.6080237 | 0.033431302  | 0.1403776 | 0.2381528 | 0.811763 | 0.981081 |
| zmynd10           | 27.97061365 | 0.106170334  | 0.3851015 | 0.2756944 | 0.782783 | 0.97627  |
| pde4cb            | 45.3205063  | -0.196580309 | 0.2916169 | -0.674105 | 0.500245 | 0.934224 |
| prdmla            | 328.657408  | -0.266817807 | 0.1231235 | -2.167075 | 0.030229 | 0.336193 |
| arhgef37          | 124.4772892 | 0.104977587  | 0.2142141 | 0.4900592 | 0.624092 | 0.957354 |
| rdh14b            | 300.1577982 | 0.011113456  | 0.1273867 | 0.0872419 | 0.930479 | 0.992702 |
| ercc61            | 270.3157055 | -0.094632922 | 0.132556  | -0.713909 | 0.475283 | 0.925754 |
| wnt7ab            | 3.000751058 | 1.03490228   | 1.1903426 | 0.8694155 | 0.38462  | NA       |
| noc3l             | 444.3874664 | 0.056910013  | 0.1128844 | 0.5041443 | 0.61416  | 0.95688  |
| itgb6             | 315.2464051 | -0.110945833 | 0.1273723 | -0.871036 | 0.383735 | 0.895192 |
| zgc:92818         | 492.6289311 | 0.038144265  | 0.1138746 | 0.3349672 | 0.73765  | 0.972535 |
| itgal0            | 401.1101831 | -0.075175727 | 0.1199624 | -0.626661 | 0.530882 | 0.942209 |
| ankrd33ab         | 10.83254859 | 0.50741217   | 0.5955521 | 0.852003  | 0.394212 | NA       |
| zgc:153911        | 38.25335488 | -0.155663195 | 0.3926668 | -0.396426 | 0.691791 | 0.967305 |
| dmbx1b            | 45.48537184 | -0.116447934 | 0.2831828 | -0.411211 | 0.680918 | 0.965476 |
| hsl12             | 1934.177222 | -0.026571638 | 0.0791912 | -0.335538 | 0.737219 | 0.972535 |
| adora2b           | 12.80861116 | 0.196006934  | 0.5253285 | 0.3731131 | 0.709064 | 0.968664 |
| tm9sf4            | 1130.78324  | 0.042604726  | 0.0834269 | 0.5106834 | 0.609573 | 0.956718 |
| smula             | 941.5954464 | -0.071307352 | 0.085839  | -0.83071  | 0.406138 | 0.901305 |
| rundc3ab          | 1171.922262 | -0.073866278 | 0.0814094 | -0.907344 | 0.364225 | 0.886494 |
| eif3eb            | 252.023594  | -0.000276353 | 0.1447635 | -0.001909 | 0.998477 | 0.999364 |
| mapkapk2a         | 878.3955815 | 0.054553918  | 0.0996104 | 0.5476727 | 0.583917 | 0.952214 |
| syng1a            | 575.6177334 | 0.065085143  | 0.1021078 | 0.6374162 | 0.523854 | 0.939336 |
| tmod2             | 43.80321449 | 0.250330994  | 0.2933289 | 0.853414  | 0.39343  | 0.898076 |
| cabp5a            | 101.3826759 | 0.483775033  | 0.2040469 | 2.3709015 | 0.017745 | 0.246928 |
| tbx15             | 304.2748962 | 0.126338077  | 0.1338716 | 0.9437255 | 0.34531  | 0.878434 |
| dpysl3            | 5245.135785 | 0.03983175   | 0.0671757 | 0.5929486 | 0.553216 | 0.947265 |
| mylplib           | 15592.24733 | 0.29530827   | 0.0846403 | 3.4889808 | 0.000485 | 0.017464 |

|                 |             |              |           |           |          |          |
|-----------------|-------------|--------------|-----------|-----------|----------|----------|
| ruvbl1          | 1043.362705 | -0.068041975 | 0.0875747 | -0.776959 | 0.437183 | 0.914408 |
| slc45a2         | 353.6672933 | -0.377432194 | 0.145228  | -2.598895 | 0.009352 | 0.162082 |
| pabpc11         | 0.341366344 | 1.891903201  | 3.2128156 | 0.5888614 | 0.555954 | NA       |
| pskl            | 26.28032607 | 0.228676326  | 0.3853649 | 0.5934021 | 0.552912 | 0.947265 |
| irx7            | 155.7978676 | -0.238464846 | 0.171785  | -1.388159 | 0.165089 | 0.721223 |
| unm_sal1614     | 126.319167  | -0.033394282 | 0.1751148 | -0.190699 | 0.848761 | 0.985174 |
| rnfl145a        | 328.1550519 | 0.193539499  | 0.1278439 | 1.5138733 | 0.130058 | 0.662656 |
| rpa3            | 230.7344448 | -0.074376092 | 0.1541814 | -0.482394 | 0.629526 | 0.957354 |
| anx11b          | 2180.879495 | -0.018344884 | 0.0718095 | -0.255466 | 0.798363 | 0.978884 |
| b4galt1         | 161.9859719 | 0.050479762  | 0.1677444 | 0.3009327 | 0.763466 | 0.975374 |
| zgc:85722       | 798.9130635 | 0.119085435  | 0.0887871 | 1.3412471 | 0.17984  | 0.741062 |
| sh3gl1b         | 404.3696953 | 0.105812648  | 0.1204536 | 0.8784516 | 0.379699 | 0.895192 |
| rgs5a           | 731.4905637 | 0.064648478  | 0.0952336 | 0.6788408 | 0.497239 | 0.93322  |
| stxbp5a         | 573.8192484 | -0.012146297 | 0.1066924 | -0.113844 | 0.909361 | 0.990702 |
| maprelb         | 3578.592917 | 0.096270789  | 0.0807221 | 1.1926194 | 0.233018 | 0.80134  |
| optn            | 432.0882869 | -0.035390907 | 0.1158894 | -0.305385 | 0.760073 | 0.975374 |
| kcnj1b          | 48.26354606 | 0.0714043    | 0.2778685 | 0.2569716 | 0.797201 | 0.978577 |
| ATG14           | 505.380216  | -0.089485911 | 0.1049451 | -0.852692 | 0.39383  | 0.898496 |
| tbcela          | 439.0499009 | -0.251839583 | 0.1119249 | -2.250076 | 0.024444 | 0.3019   |
| fam113          |             | 0 NA         | NA        | NA        | NA       | NA       |
| rabif           | 266.6735537 | 0.029535892  | 0.1372892 | 0.2151363 | 0.829661 | 0.982805 |
| gnb3b           | 12793.44419 | 0.272394714  | 0.0821818 | 3.3145366 | 0.000918 | 0.029089 |
| rasl12          | 30.12937291 | 0.411317221  | 0.3468732 | 1.1857857 | 0.235707 | 0.804824 |
| her11           | 7.079546724 | 0.164783122  | 0.7547281 | 0.2183344 | 0.827169 | NA       |
| ncl             | 11731.72513 | -0.112961986 | 0.0682945 | -1.654042 | 0.098119 | 0.59749  |
| utpl5           | 371.1609399 | -0.007385852 | 0.1222376 | -0.060422 | 0.951819 | 0.993864 |
| ankrd2          | 0.325573202 | 0.005883621  | 3.3172783 | 0.0017736 | 0.998585 | NA       |
| kisslra         | 4.707980623 | 0.850762253  | 0.9189779 | 0.92577   | 0.354565 | NA       |
| sdc2            | 1212.677141 | 0.090929631  | 0.0862459 | 1.0543061 | 0.291743 | 0.847498 |
| spon2b          | 282.4570924 | 0.049015299  | 0.142721  | 0.3434343 | 0.731272 | 0.971557 |
| tdh             | 3940.034196 | 0.192075544  | 0.0768412 | 2.4996438 | 0.012432 | 0.197293 |
| sema6d          | 385.2735759 | -0.310217589 | 0.114393  | -2.711858 | 0.006691 | 0.126122 |
| phf20a          | 250.398233  | 0.003489467  | 0.1370565 | 0.0254601 | 0.979688 | 0.99687  |
| pcdc21          | 58.90419741 | -0.127654406 | 0.2602922 | -0.490427 | 0.623832 | 0.957354 |
| dedd1           | 1192.352643 | -0.028228501 | 0.0842531 | -0.335044 | 0.737592 | 0.972535 |
| gdf5            | 59.96744433 | -0.047846277 | 0.2542517 | -0.188185 | 0.850732 | 0.985174 |
| miox            | 202.9140373 | 0.135286239  | 0.1627616 | 0.8311928 | 0.405865 | 0.901305 |
| pvalb2          | 72004.53101 | 0.180503075  | 0.0992211 | 1.8192011 | 0.068881 | 0.513259 |
| si:ch211-48m9.1 | 226.1946382 | 0.158327356  | 0.1541027 | 1.0274146 | 0.304225 | 0.858657 |
| pdx1            | 92.72568519 | -0.712465084 | 0.2081225 | -3.423296 | 0.000619 | 0.020853 |
| t1e3a           | 1543.328091 | -0.017323537 | 0.0918215 | -0.188665 | 0.850355 | 0.985174 |
| ap2mla          | 6193.741383 | -0.028193764 | 0.080226  | -0.351429 | 0.725266 | 0.970402 |
| atplala.1       | 9372.332129 | 0.042079895  | 0.0702513 | 0.5989906 | 0.549179 | 0.946312 |
| arcn1a          | 1340.166032 | 0.016049609  | 0.0853012 | 0.1881523 | 0.850757 | 0.985174 |
| meis3           | 599.3057547 | -0.034147564 | 0.0969125 | -0.352355 | 0.724572 | 0.970402 |
| BX908804.1      | 0.323844819 | -1.825095364 | 3.274639  | -0.557342 | 0.577293 | NA       |
| cog8            | 155.2118954 | -0.132681604 | 0.1680626 | -0.789477 | 0.429833 | 0.911615 |
| rasgrf2b        | 12.75425079 | 1.325274695  | 0.55017   | 2.4088459 | 0.016003 | 0.233194 |
| cep57l1         | 170.9396726 | 0.866815006  | 0.1691414 | 5.1247935 | 2.98E-07 | 3.57E-05 |
| trmt2a          | 178.7941446 | -0.016107197 | 0.1611439 | -0.099955 | 0.92038  | 0.992049 |
| col4a4          | 134.6111826 | 0.034550377  | 0.1756024 | 0.1967535 | 0.84402  | 0.985174 |
| si:dkey-28b4.8  | 2024.461674 | 0.119736729  | 0.0870935 | 1.3748063 | 0.169191 | 0.726198 |
| fndc1           | 91.71523874 | 0.299874087  | 0.2113402 | 1.4189167 | 0.155923 | 0.705963 |
| zgc:113210      | 197.5781653 | -0.115389532 | 0.1508601 | -0.764878 | 0.444344 | 0.916726 |

|                   |             |              |           |           |          |          |
|-------------------|-------------|--------------|-----------|-----------|----------|----------|
| reps1             | 764.6306361 | -0.086729188 | 0.0975409 | -0.889157 | 0.373919 | 0.893677 |
| vps50             | 395.9307799 | 0.002435222  | 0.1244074 | 0.0195746 | 0.984383 | 0.996944 |
| aven              | 198.0586592 | 0.010720326  | 0.1525752 | 0.0702626 | 0.943985 | 0.993364 |
| si:ch211-160o17.2 | 393.8124136 | 0.295234264  | 0.1252089 | 2.3579329 | 0.018377 | 0.25227  |
| tjp3              | 505.0544869 | -0.299719003 | 0.1319462 | -2.271524 | 0.023115 | 0.291648 |
| adipor1a          | 1460.879893 | 0.103237539  | 0.084287  | 1.2248333 | 0.220638 | 0.787641 |
| sec31b            | 117.1117    | -0.195765321 | 0.1984869 | -0.986288 | 0.323992 | 0.870928 |
| gls2b             | 59.71353971 | 0.150586332  | 0.2853218 | 0.5277772 | 0.597654 | 0.95534  |
| gbx2              | 442.893434  | -0.108159894 | 0.1077696 | -1.003622 | 0.315561 | 0.866773 |
| meisla            | 596.850293  | -0.145829214 | 0.0961656 | -1.516438 | 0.129409 | 0.661221 |
| bgnb              | 268.6157037 | 0.223360824  | 0.1513908 | 1.4753924 | 0.140107 | 0.679809 |
| abcd3b            | 213.3866056 | 0.11298964   | 0.1426437 | 0.7921109 | 0.428296 | 0.911082 |
| ppp6c             | 1759.358966 | -0.079199111 | 0.0798824 | -0.991447 | 0.321467 | 0.869201 |
| smo               | 522.7446843 | 0.020762788  | 0.1028836 | 0.2018085 | 0.840066 | 0.985029 |
| si:dkey-32n7.4    | 18.91687221 | 0.583680407  | 0.4510785 | 1.2939665 | 0.195677 | 0.761077 |
| gpr34b            | 0.158915748 | 0.967652056  | 4.0804729 | 0.2371421 | 0.812547 | NA       |
| pdap1b            | 376.7657982 | 0.042854661  | 0.1235649 | 0.3468191 | 0.728727 | 0.970631 |
| alcf              | 337.7298275 | -0.570885846 | 0.1300183 | -4.390812 | 1.13E-05 | 0.000809 |
| ss18              | 1416.182799 | -0.102564865 | 0.0771194 | -1.329949 | 0.183535 | 0.747284 |
| phc1              | 295.8510509 | -0.114880728 | 0.1293011 | -0.888474 | 0.374286 | 0.893914 |
| gda               | 77.07080119 | 0.011302934  | 0.2262775 | 0.0499516 | 0.960161 | 0.995388 |
| tnnt2d            | 730.3799624 | 0.311124734  | 0.1051187 | 2.959748  | 0.003079 | 0.073439 |
| cep135            | 221.1679905 | -0.298974828 | 0.1425346 | -2.09756  | 0.035944 | 0.369801 |
| itpkca            | 715.5833411 | -0.080116309 | 0.0945771 | -0.8471   | 0.396939 | 0.899672 |
| prkcea            | 996.8822163 | 0.058996837  | 0.0891735 | 0.6615964 | 0.50823  | 0.935735 |
| ube2a1            | 950.2916722 | 0.135423386  | 0.0867717 | 1.5606868 | 0.118598 | 0.642318 |
| lrrc4.2           | 264.4487876 | 0.166540464  | 0.1312568 | 1.2688136 | 0.204508 | 0.772352 |
| hdac8             | 260.7731905 | -0.07106329  | 0.1313016 | -0.541222 | 0.588355 | 0.953319 |
| limk1b            | 125.3806642 | -0.08325514  | 0.1846087 | -0.450982 | 0.652003 | 0.960708 |
| scnml             | 82.69278278 | -0.332246041 | 0.2214482 | -1.500333 | 0.133528 | 0.667982 |
| EIF4A1B           | 9020.002017 | -0.126946642 | 0.0793407 | -1.60002  | 0.109594 | 0.623766 |
| hspa9             | 5375.623417 | -0.005043985 | 0.0632412 | -0.079758 | 0.93643  | 0.992702 |
| CABZ01111496.1    | 6.43614444  | 0.085850899  | 0.7365922 | 0.1165515 | 0.907216 | NA       |
| sorbs2a           | 131.0434294 | -0.10265721  | 0.1732129 | -0.592665 | 0.553405 | 0.947265 |
| tacr31            | 33.23832108 | -0.33364283  | 0.3386957 | -0.985081 | 0.324584 | 0.871063 |
| fgfrlop           | 439.1485072 | 0.055402509  | 0.1101311 | 0.5030597 | 0.614922 | 0.95688  |
| cd276             | 449.647135  | 0.122872433  | 0.108611  | 1.1313072 | 0.257926 | 0.825413 |
| goraspla          | 826.6773227 | 0.030577858  | 0.0931459 | 0.3282791 | 0.742701 | 0.973303 |
| btbd7             | 39.3244835  | 0.32593308   | 0.3398383 | 0.9590828 | 0.337517 | 0.876395 |
| gpx9              | 282.4055221 | 0.118391159  | 0.1343107 | 0.8814723 | 0.378062 | 0.895192 |
| mybphb            | 7352.719449 | 0.35616089   | 0.2047694 | 1.7393266 | 0.081977 | 0.552725 |
| spire2            | 117.0321659 | 0.359928339  | 0.1844926 | 1.9509097 | 0.051068 | 0.443485 |
| stambp11          | 233.4761521 | 0.185369941  | 0.1441361 | 1.2860755 | 0.198417 | 0.763597 |
| ubxn6             | 418.908505  | 0.105237669  | 0.1246762 | 0.8440877 | 0.39862  | 0.900359 |
| or103-4           |             | 0 NA         | NA        | NA        | NA       | NA       |
| oclnb             | 421.2812558 | -0.061789879 | 0.1206565 | -0.512114 | 0.608571 | 0.956718 |
| kdm5bb            | 4824.123038 | -0.159775278 | 0.0660846 | -2.417739 | 0.015617 | 0.229092 |
| rca1a             | 1036.769444 | 0.138664719  | 0.0893238 | 1.5523827 | 0.120571 | 0.645578 |
| ada               | 1019.546673 | -0.335195827 | 0.089559  | -3.742736 | 0.000182 | 0.007911 |
| zgc:123105        | 1775.14999  | -0.005839294 | 0.075772  | -0.077064 | 0.938573 | 0.992849 |
| apip              | 522.1147793 | -0.111610557 | 0.1211583 | -0.921196 | 0.356948 | 0.883467 |
| dachc             | 387.6248971 | -0.138933013 | 0.1160383 | -1.197304 | 0.231188 | 0.799444 |
| pxmp2             | 86.69983432 | 0.165778188  | 0.2224158 | 0.7453525 | 0.456059 | 0.921215 |
| si:dkey-27m7.4    | 34.68774013 | 0.223936359  | 0.3379831 | 0.6625668 | 0.507608 | 0.935734 |

|                   |             |              |           |           |          |          |
|-------------------|-------------|--------------|-----------|-----------|----------|----------|
| skpl              | 4767.322085 | -0.039000104 | 0.0821499 | -0.474743 | 0.63497  | 0.957881 |
| nudt21            | 797.0040948 | -0.042092737 | 0.0913397 | -0.460837 | 0.644915 | 0.96029  |
| nfkbil1           | 158.4170041 | -0.015858702 | 0.1621029 | -0.097831 | 0.922066 | 0.992269 |
| nr2f6b            | 694.9655613 | -0.039055911 | 0.0957642 | -0.407834 | 0.683396 | 0.965476 |
| mlst8             | 267.5256762 | 0.087937648  | 0.1439939 | 0.6107041 | 0.541395 | 0.944954 |
| magilb            | 2487.567975 | -0.038502688 | 0.0760994 | -0.505953 | 0.61289  | 0.95688  |
| stx5a1            | 403.4819898 | -0.101113515 | 0.1173894 | -0.861352 | 0.389044 | 0.896303 |
| sult1st4          | 105.2791378 | -0.526601197 | 0.2017992 | -2.609531 | 0.009067 | 0.159222 |
| psmd1             | 2847.542995 | -0.106813702 | 0.1034734 | -1.032282 | 0.30194  | 0.856944 |
| rassf7b           | 180.8551406 | 0.076160218  | 0.153067  | 0.4975612 | 0.618793 | 0.957354 |
| wdr21             | 40.44436524 | -0.857534039 | 0.3154826 | -2.718166 | 0.006564 | 0.124228 |
| foxml             | 196.7198251 | -0.045266204 | 0.1500787 | -0.301616 | 0.762944 | 0.975374 |
| rhcga             | 851.0714139 | 0.781913195  | 0.1354148 | 5.7742098 | 7.73E-09 | 1.34E-06 |
| ngly1             | 436.6868466 | 0.140333265  | 0.1177314 | 1.1919787 | 0.23327  | 0.801695 |
| chchd6a           | 346.4200813 | -0.291095131 | 0.1200727 | -2.424324 | 0.015337 | 0.22717  |
| mterf3            | 143.7723433 | 0.148727249  | 0.1795052 | 0.8285402 | 0.407365 | 0.901305 |
| pomk              | 212.1916368 | -0.083518115 | 0.1469589 | -0.568309 | 0.569825 | 0.948983 |
| ano2a             | 182.2701751 | 0.001604712  | 0.1545018 | 0.0103864 | 0.991713 | 0.997679 |
| naal5a            | 1451.044306 | -0.002182001 | 0.0851299 | -0.025631 | 0.979551 | 0.996866 |
| anxa2a            | 992.3531469 | -0.023623445 | 0.0960064 | -0.246061 | 0.805635 | 0.979893 |
| urb2              | 269.2606644 | 0.19190363   | 0.1335915 | 1.4364956 | 0.150861 | 0.698912 |
| bin2a             | 735.456157  | -0.581592418 | 0.09661   | -6.020002 | 1.74E-09 | 3.38E-07 |
| gdf9              | 2.29457288  | -3.568136068 | 1.6189121 | -2.204033 | 0.027522 | NA       |
| nup88             | 621.8757339 | -0.028392968 | 0.0976582 | -0.290738 | 0.771252 | 0.975687 |
| gbp3              | 61.25560459 | 0.103274559  | 0.2652826 | 0.3893001 | 0.697054 | 0.96736  |
| pik3cd            | 121.7699962 | 0.448490682  | 0.1882332 | 2.3826331 | 0.017189 | 0.242176 |
| zbtb22b           | 44.39068615 | -0.233969689 | 0.3055886 | -0.765636 | 0.443893 | 0.916631 |
| zgc:101559        | 173.6270324 | 0.200813609  | 0.1552529 | 1.2934609 | 0.195852 | 0.76113  |
| loxa              | 90.89855377 | 0.185962103  | 0.2039892 | 0.911627  | 0.361965 | 0.885944 |
| clcn3             | 1442.617062 | 0.094634957  | 0.0775328 | 1.2205802 | 0.222245 | 0.788551 |
| dhps              | 354.5750985 | -0.063292467 | 0.1220299 | -0.518664 | 0.603995 | 0.956467 |
| pik3ip1           | 1094.162703 | -0.13656601  | 0.0884626 | -1.543771 | 0.122644 | 0.650831 |
| wdr12             | 355.2019886 | -0.209630361 | 0.1234558 | -1.698019 | 0.089504 | 0.572876 |
| dabl1b            | 31.76303633 | -0.193063433 | 0.3599816 | -0.536315 | 0.591741 | 0.954434 |
| sox9a             | 758.9273123 | -0.188252618 | 0.1060336 | -1.775406 | 0.075831 | 0.536487 |
| stc1              | 0.679983498 | -1.527277543 | 2.5551009 | -0.597737 | 0.550016 | NA       |
| stx16             | 631.09439   | 0.059944278  | 0.0980132 | 0.6115939 | 0.540806 | 0.944633 |
| emc2              | 1782.805289 | -0.041189175 | 0.0748606 | -0.550212 | 0.582174 | 0.952028 |
| pank2             | 502.9679591 | -0.05352427  | 0.1117046 | -0.479159 | 0.631826 | 0.957356 |
| eps811b           | 156.130968  | -0.38115098  | 0.1723299 | -2.211752 | 0.026984 | 0.316663 |
| fam91a1           | 876.7532029 | 0.039935315  | 0.0937399 | 0.4260225 | 0.670091 | 0.965223 |
| cacng5a           | 98.82808754 | -0.172034488 | 0.2104336 | -0.817524 | 0.413629 | 0.905864 |
| slf2              | 183.1291635 | -0.180958272 | 0.1591622 | -1.136942 | 0.255562 | 0.824118 |
| trpc2b            | 17.80182988 | 0.0510655    | 0.44696   | 0.1142507 | 0.909039 | 0.990702 |
| commd2            | 301.057066  | -0.186924691 | 0.1295746 | -1.442603 | 0.149132 | 0.696454 |
| gngl2a            | 360.3828042 | -0.123683765 | 0.1207568 | -1.024238 | 0.305723 | 0.860027 |
| si:dkey-275b16.2  |             | 0 NA         | NA        | NA        | NA       | NA       |
| si:ch211-266g18.6 | 178.677939  | -0.219080504 | 0.1578217 | -1.388152 | 0.165091 | 0.721223 |
| cwc25             | 676.4257433 | -0.111857414 | 0.1008229 | -1.109444 | 0.267239 | 0.833191 |
| asb8              | 626.2416343 | -0.089969467 | 0.0998761 | -0.90081  | 0.367689 | 0.887476 |
| col4a3            | 111.5988247 | -0.064611177 | 0.1931192 | -0.334566 | 0.737952 | 0.972535 |
| rbpja             | 398.811914  | 0.180219581  | 0.1133769 | 1.5895623 | 0.111934 | 0.627242 |
| fgf8a             | 32.27970706 | -0.463642706 | 0.3345761 | -1.385762 | 0.16582  | 0.721626 |
| tenm1             | 875.8314272 | 0.100077652  | 0.088748  | 1.127661  | 0.259463 | 0.827693 |

|            |             |              |           |           |          |          |
|------------|-------------|--------------|-----------|-----------|----------|----------|
| foxa2      | 257.0897724 | -0.379002613 | 0.1526953 | -2.482084 | 0.013062 | 0.204336 |
| caps1b     | 23.05668006 | 0.083596019  | 0.4532036 | 0.1844558 | 0.853656 | 0.985174 |
| chrna5     | 236.3863704 | -0.22640691  | 0.1432149 | -1.580889 | 0.113903 | 0.632675 |
| igf2bp2a   | 75.31671283 | -0.141627121 | 0.2354093 | -0.601621 | 0.547427 | 0.945526 |
| hnrnpd1    | 3571.923157 | 0.024354925  | 0.076462  | 0.3185231 | 0.750088 | 0.97419  |
| dhrs7      | 334.1224798 | 0.020340098  | 0.137116  | 0.1483422 | 0.882073 | 0.988344 |
| ippk       | 178.4154112 | -0.086187449 | 0.1598712 | -0.539106 | 0.589814 | 0.953762 |
| pdel0a     | 14.32886898 | 0.695605744  | 0.5048907 | 1.3777354 | 0.168285 | 0.725919 |
| fech       | 29.78021582 | 0.144582712  | 0.3515173 | 0.4113104 | 0.680845 | 0.965476 |
| neurod4    | 1386.048097 | -0.134456385 | 0.0871354 | -1.543074 | 0.122813 | 0.650905 |
| sult1st5   | 29.31961538 | -0.288461707 | 0.3542772 | -0.814226 | 0.415516 | 0.906237 |
| ppplcaa    | 3792.610793 | -0.040152332 | 0.083044  | -0.483507 | 0.628736 | 0.957354 |
| nup93      | 1467.345071 | -0.128676831 | 0.0858685 | -1.498533 | 0.133995 | 0.669349 |
| madd       | 2202.768517 | 0.006955167  | 0.0767589 | 0.0906106 | 0.927802 | 0.992702 |
| anks1b     | 1275.537614 | 0.01203728   | 0.0882143 | 0.136455  | 0.891462 | 0.989291 |
| impal      | 568.9086527 | -0.039319689 | 0.0988358 | -0.397829 | 0.690757 | 0.967157 |
| aprt       | 168.0033455 | -0.23402367  | 0.1687415 | -1.386877 | 0.165479 | 0.721223 |
| tbc1d14    | 199.8640059 | 0.169894931  | 0.1484172 | 1.1447117 | 0.252329 | 0.821887 |
| itln3      | 149.5151109 | -0.10839333  | 0.165568  | -0.654676 | 0.512677 | 0.936253 |
| psma5      | 1526.33432  | -0.055207995 | 0.0871705 | -0.633333 | 0.526516 | 0.940506 |
| mak16      | 457.1193043 | -0.003251359 | 0.1110851 | -0.029269 | 0.97665  | 0.996762 |
| tceal      | 1581.128999 | -0.100619061 | 0.0783895 | -1.283578 | 0.19929  | 0.764601 |
| col8a1b    | 162.3748196 | 0.560641815  | 0.1796248 | 3.1211825 | 0.001801 | 0.049493 |
| adarb1b    | 37.59156002 | 0.001069187  | 0.3423966 | 0.0031227 | 0.997508 | 0.999174 |
| gnrhr2     | 3.338151239 | 0.885070687  | 1.0490776 | 0.8436656 | 0.398856 | NA       |
| dohh       | 387.2005281 | 0.034243774  | 0.1274126 | 0.2687629 | 0.788112 | 0.976703 |
| hsp90b1    | 5716.14638  | 0.016859847  | 0.0742985 | 0.2269205 | 0.820486 | 0.981594 |
| dctn5      | 490.0082511 | -0.103674119 | 0.1068717 | -0.970081 | 0.332006 | 0.874653 |
| klhl32     | 397.9488295 | -0.060280983 | 0.1175472 | -0.512824 | 0.608075 | 0.956718 |
| pla2g7     | 451.0106916 | -0.003177545 | 0.1097129 | -0.028962 | 0.976895 | 0.996762 |
| surf1      | 285.0394478 | -0.068797301 | 0.1399849 | -0.491462 | 0.623099 | 0.957354 |
| rpl3       | 29544.10675 | -0.34635411  | 0.0770028 | -4.497941 | 6.86E-06 | 0.000521 |
| nr2f6a     | 617.0552819 | -0.255114342 | 0.0978725 | -2.606599 | 0.009145 | 0.160082 |
| slc26a3.2  | 132.7485266 | -0.443071468 | 0.1777774 | -2.492282 | 0.012693 | 0.200185 |
| arih1      | 474.9110182 | 0.057766006  | 0.1107599 | 0.5215427 | 0.601989 | 0.956045 |
| clockb     | 335.1318207 | -0.056944514 | 0.1241878 | -0.458535 | 0.646568 | 0.960362 |
| zgc:172270 | 45.78354241 | 0.154750292  | 0.3019596 | 0.5124867 | 0.60831  | 0.956718 |
| mogat3b    | 173.3600591 | -0.177625592 | 0.1586466 | -1.119631 | 0.262871 | 0.830166 |
| tfg        | 1368.563629 | -0.011265972 | 0.098104  | -0.114837 | 0.908574 | 0.990702 |
| zfyve19    | 322.3689247 | -0.072864703 | 0.1313503 | -0.554736 | 0.579075 | 0.951052 |
| tmem591    | 3630.327357 | 0.082688126  | 0.0701636 | 1.1785053 | 0.238595 | 0.807659 |
| cryll      | 244.8510629 | -0.049601405 | 0.1397819 | -0.354848 | 0.722703 | 0.970375 |
| runx1t1    | 1821.412994 | -0.066054861 | 0.0749982 | -0.880752 | 0.378452 | 0.895192 |
| EIF5       | 4234.329953 | 0.039719066  | 0.0657937 | 0.6036907 | 0.546049 | 0.945526 |
| obs11a     | 136.7568419 | 0.319323654  | 0.1844502 | 1.7312193 | 0.083413 | 0.556666 |
| hars       | 1628.649391 | -0.053563178 | 0.0822487 | -0.651234 | 0.514895 | 0.937646 |
| vdac3      | 7515.519019 | 0.039460929  | 0.0794351 | 0.4967693 | 0.619352 | 0.957354 |
| slc5a81    | 94.62494592 | -0.419330304 | 0.2068337 | -2.027379 | 0.042624 | 0.405993 |
| atp7a      | 474.1274441 | -0.07933576  | 0.1085904 | -0.730597 | 0.465026 | 0.923671 |
| cldng      | 1.794681846 | -3.19748812  | 1.7151324 | -1.864281 | 0.062282 | NA       |
| prnprs3    | 2605.75927  | 0.055056811  | 0.071389  | 0.7712228 | 0.440575 | 0.916336 |
| ryr2b      | 48.13979216 | -0.24647379  | 0.2791031 | -0.883092 | 0.377186 | 0.895192 |
| mitfa      | 13.47214527 | -0.094935005 | 0.5136947 | -0.184808 | 0.853379 | 0.985174 |
| polb       | 459.226659  | 0.156937775  | 0.1087667 | 1.4428842 | 0.149053 | 0.696454 |

|           |             |              |           |           |          |          |
|-----------|-------------|--------------|-----------|-----------|----------|----------|
| pfas      | 464.8998547 | 0.168013482  | 0.1081328 | 1.5537697 | 0.120239 | 0.645215 |
| lats1     | 390.7801279 | 0.128276658  | 0.1149201 | 1.1162248 | 0.264326 | 0.830245 |
| tspan2a   | 1076.4509   | -0.088715561 | 0.084329  | -1.052018 | 0.292791 | 0.848607 |
| cnpy1     | 263.436096  | 0.103074423  | 0.1334248 | 0.7725281 | 0.439802 | 0.916082 |
| tada2b    | 150.6916191 | 0.110696859  | 0.1736647 | 0.6374171 | 0.523853 | 0.939336 |
| pip4k2aa  | 839.7617389 | -0.068124171 | 0.0968984 | -0.703047 | 0.482026 | 0.928561 |
| ctnnd2b   | 1189.994921 | 0.00217148   | 0.0876407 | 0.0247771 | 0.980233 | 0.996879 |
| dennd5b   | 1677.629846 | -0.005508683 | 0.0798218 | -0.069012 | 0.94498  | 0.993409 |
| idh2      | 6788.287005 | 0.067784183  | 0.0708459 | 0.9567833 | 0.338677 | 0.877373 |
| asb2a.1   | 155.5952107 | 0.212732177  | 0.1763272 | 1.2064624 | 0.227639 | 0.794934 |
| LHX3      | 85.44805583 | -0.098772564 | 0.2114633 | -0.467091 | 0.640435 | 0.959994 |
| aqp3a     | 2251.28309  | 0.329018893  | 0.0793515 | 4.1463461 | 3.38E-05 | 0.001942 |
| plxnb2a   | 1187.533757 | -0.039479021 | 0.0827783 | -0.476925 | 0.633416 | 0.957581 |
| prkagl    | 485.1712627 | 0.154868716  | 0.1097474 | 1.4111379 | 0.158204 | 0.709224 |
| nrl2a     | 2252.956948 | -0.041128616 | 0.086152  | -0.477396 | 0.63308  | 0.957356 |
| ankrd16   | 55.77492741 | -0.282709021 | 0.2574926 | -1.097931 | 0.272235 | 0.837242 |
| snapp1b   | 141.4325632 | -0.243586249 | 0.1725785 | -1.411452 | 0.158111 | 0.709224 |
| galnt2    | 1177.637809 | 0.110278516  | 0.0830371 | 1.3280626 | 0.184157 | 0.747376 |
| stom      | 1590.533564 | -0.035823962 | 0.081089  | -0.441786 | 0.658644 | 0.962545 |
| usb1      | 129.4548951 | -0.151277242 | 0.1789836 | -0.845202 | 0.397998 | 0.899672 |
| chm       | 557.1783353 | 0.16389509   | 0.1104958 | 1.4832695 | 0.138003 | 0.67563  |
| mrpl21    | 344.1547218 | 0.127296298  | 0.1218355 | 1.044821  | 0.296106 | 0.853273 |
| acs11b    | 957.4133227 | -0.222145009 | 0.0915101 | -2.427547 | 0.015201 | 0.225685 |
| cbx3a     | 1875.120693 | -0.100842285 | 0.0810089 | -1.24483  | 0.213194 | 0.781631 |
| pard6b    | 30.64551475 | -0.650296309 | 0.350586  | -1.854884 | 0.063613 | 0.4929   |
| tm9sf2    | 3045.544542 | 0.069420151  | 0.0694891 | 0.9990073 | 0.317791 | 0.867607 |
| cdk20     | 39.5859712  | -0.0640295   | 0.3052734 | -0.209745 | 0.833867 | 0.983583 |
| decr1     | 403.5756329 | -0.091762392 | 0.1141039 | -0.8042   | 0.421281 | 0.90651  |
| ccdc102a  | 849.8799882 | -0.07907248  | 0.0906843 | -0.871953 | 0.383234 | 0.895192 |
| pbrml     | 582.0860791 | 0.113407828  | 0.1007862 | 1.1252314 | 0.260491 | 0.828546 |
| zdhhc23b  | 46.97095576 | -0.154187937 | 0.3084502 | -0.499879 | 0.61716  | 0.95723  |
| gpr611    | 12.71835886 | 0.276367923  | 0.5307465 | 0.5207155 | 0.602565 | 0.956045 |
| ctsl.1    | 147.0070148 | -0.815992796 | 0.1943901 | -4.197707 | 2.70E-05 | 0.001621 |
| hapln2    | 16.66069699 | -0.117543822 | 0.4672361 | -0.251573 | 0.801371 | 0.979377 |
| sycp1     | 22.5981051  | -0.032048179 | 0.4058832 | -0.078959 | 0.937065 | 0.99279  |
| ftr01     | 27.14163818 | -1.998273133 | 0.4105467 | -4.867347 | 1.13E-06 | 0.000111 |
| med13b    | 926.1199856 | 0.044779564  | 0.1136536 | 0.3940004 | 0.693581 | 0.96736  |
| setb      | 5222.878983 | -0.046670552 | 0.0681663 | -0.684657 | 0.493561 | 0.931926 |
| cx28.6    | 14.4409229  | -0.260033306 | 0.5233145 | -0.496897 | 0.619262 | 0.957354 |
| cldn12    | 707.999907  | 0.098196774  | 0.0944039 | 1.0401772 | 0.298258 | 0.85401  |
| cndp2     | 799.0309579 | -0.202831568 | 0.0949611 | -2.135943 | 0.032684 | 0.352204 |
| nxn12     | 203.0169374 | -0.068570273 | 0.158682  | -0.432124 | 0.665651 | 0.964736 |
| rpal      | 1747.194181 | -0.088609366 | 0.0782427 | -1.132494 | 0.257427 | 0.825314 |
| mtfr11    | 1086.124155 | 0.016549767  | 0.0879408 | 0.1881922 | 0.850726 | 0.985174 |
| rrsl      | 351.1416707 | 0.180659699  | 0.1231446 | 1.4670534 | 0.142362 | 0.684315 |
| nmurlb    | 1.829494234 | -2.205461113 | 1.6346402 | -1.349203 | 0.177272 | NA       |
| pfn2      | 7566.991758 | -0.094008398 | 0.0718325 | -1.308716 | 0.19063  | 0.755212 |
| parp3     | 231.4518728 | -0.052848977 | 0.1364381 | -0.387348 | 0.698499 | 0.967998 |
| traf4a    | 818.4015525 | -0.084873258 | 0.0889745 | -0.953905 | 0.340132 | 0.87805  |
| tlx1      | 26.35919222 | -0.64469705  | 0.3992295 | -1.614853 | 0.106343 | 0.615567 |
| larp6b    | 1.020882972 | 1.110886363  | 2.0729323 | 0.5359009 | 0.592027 | NA       |
| trim35-13 | 51.88051056 | 0.468236494  | 0.2720825 | 1.7209357 | 0.085262 | 0.560519 |
| isl2a     | 550.3607766 | -0.133586852 | 0.1034123 | -1.291789 | 0.19643  | 0.761835 |
| chordc1a  | 69.78830645 | 0.035647994  | 0.2356063 | 0.1513032 | 0.879737 | 0.987881 |



|                    |             |              |           |           |          |          |
|--------------------|-------------|--------------|-----------|-----------|----------|----------|
| spoplb             | 546.1527812 | -0.028063123 | 0.109093  | -0.25724  | 0.796993 | 0.978569 |
| zgc:153896         | 30.59114883 | -0.507921591 | 0.3621106 | -1.40267  | 0.160715 | 0.713833 |
| LTN1               | 509.4672755 | 0.051094454  | 0.1150963 | 0.4439279 | 0.657095 | 0.962166 |
| crhrl              | 30.00626531 | -0.071744735 | 0.3462623 | -0.207198 | 0.835856 | 0.984089 |
| fh12b              | 157.5681575 | 0.026651692  | 0.1706476 | 0.1561797 | 0.875891 | 0.987881 |
| syt9a              | 633.66861   | 0.019969596  | 0.1029839 | 0.1939099 | 0.846246 | 0.985174 |
| phyhipla           | 95.11603897 | 0.048308908  | 0.213071  | 0.2267269 | 0.820636 | 0.981594 |
| adcyap1a           | 160.8728251 | -0.505805271 | 0.1647792 | -3.069593 | 0.002144 | 0.056364 |
| spagla             | 540.7372903 | 0.184248153  | 0.1071709 | 1.7191998 | 0.085578 | 0.561521 |
| CHST13             | 104.6971566 | 0.073574789  | 0.2019689 | 0.3642877 | 0.715643 | 0.96909  |
| isl1               | 1841.709547 | -0.118762936 | 0.0742639 | -1.599202 | 0.109776 | 0.623766 |
| arhgdig            | 2008.153742 | 0.09894005   | 0.077402  | 1.2782626 | 0.201157 | 0.766855 |
| cog2               | 505.4568383 | 0.084581524  | 0.108424  | 0.7800997 | 0.435332 | 0.914408 |
| phf6               | 355.9273595 | 0.003302574  | 0.1175898 | 0.0280856 | 0.977594 | 0.996762 |
| marcksa            | 620.2639177 | 0.056825962  | 0.1058152 | 0.5370305 | 0.591247 | 0.954193 |
| CR354540.1         | 21.3074331  | -0.22428427  | 0.4094664 | -0.547748 | 0.583865 | 0.952214 |
| uhrflbp11          | 602.7528912 | -0.221619269 | 0.1046252 | -2.11822  | 0.034156 | 0.359261 |
| galk2              | 50.92832141 | -0.33327025  | 0.2757433 | -1.208625 | 0.226807 | 0.794528 |
| bhlhe40            | 2792.744124 | 0.120181443  | 0.0755845 | 1.5900279 | 0.111829 | 0.627242 |
| bach2b             | 314.2817904 | -0.10367726  | 0.1223612 | -0.847305 | 0.396825 | 0.899672 |
| acsl4a             | 1149.387134 | -0.107606157 | 0.0843876 | -1.275142 | 0.202259 | 0.768575 |
| cx39.9             | 87.14113296 | 0.254811723  | 0.2217054 | 1.149326  | 0.250422 | 0.820164 |
| acsbg2             | 2055.553312 | -0.048611743 | 0.0830481 | -0.585345 | 0.558316 | 0.948478 |
| tiel               | 281.2059593 | -0.135859277 | 0.1480535 | -0.917636 | 0.358809 | 0.884602 |
| esrl               | 10.43939753 | 0.413505945  | 0.6039094 | 0.6847152 | 0.493524 | NA       |
| ttil               | 147.8584733 | -0.330151413 | 0.1850741 | -1.783887 | 0.074442 | 0.531413 |
| mgat4b             | 616.1782856 | 0.061463753  | 0.0997316 | 0.6162916 | 0.537702 | 0.943336 |
| mvk                | 103.1685091 | 0.055715047  | 0.1947415 | 0.2860974 | 0.774804 | 0.975687 |
| rtnn               | 96.00281198 | -0.19706443  | 0.2038397 | -0.966762 | 0.333663 | 0.874933 |
| usp19              | 1098.63681  | 0.017821205  | 0.0915659 | 0.194627  | 0.845685 | 0.985174 |
| DHRS11 (1 of many) | 256.4823707 | -0.448973251 | 0.1393004 | -3.223058 | 0.001268 | 0.037265 |
| grm2a              | 392.1936946 | 0.112879937  | 0.1189681 | 0.9488254 | 0.342709 | 0.878434 |
| rab23              | 44.76519049 | -0.012821108 | 0.29727   | -0.043129 | 0.965598 | 0.996315 |
| orailb             | 38.24750342 | 0.294852927  | 0.3240534 | 0.90989   | 0.362881 | 0.885944 |
| tmem63c            | 181.9534804 | -0.199530977 | 0.1654572 | -1.205937 | 0.227842 | 0.794963 |
| reep3b             | 784.5190528 | 0.008954117  | 0.0900703 | 0.0994125 | 0.920811 | 0.992138 |
| ik                 | 1633.529106 | 0.045634815  | 0.0796761 | 0.5727544 | 0.566811 | 0.948739 |
| zgc:110366         | 108.3648369 | 0.077844049  | 0.1972171 | 0.3947125 | 0.693055 | 0.96736  |
| stmn1a             | 956.7172347 | -0.120713259 | 0.0974768 | -1.238379 | 0.215575 | 0.783025 |
| rabac1             | 697.7590053 | 0.20884437   | 0.0929615 | 2.2465675 | 0.024668 | 0.302262 |
| copa               | 4745.276994 | -0.038887762 | 0.0642239 | -0.605503 | 0.544845 | 0.945463 |
| cnot1              | 4361.957319 | -0.006092825 | 0.0897641 | -0.067876 | 0.945884 | 0.993759 |
| ulk4               | 70.56633732 | -0.151085803 | 0.2322247 | -0.650602 | 0.515304 | 0.9377   |
| fam169ab           | 190.1176413 | 0.239383986  | 0.1478529 | 1.6190684 | 0.105433 | 0.614144 |
| nflb               | 96.42018368 | 0.321958241  | 0.203709  | 1.5804812 | 0.113997 | 0.632839 |
| zgc:122979         | 148.8778715 | 0.57513953   | 0.1788487 | 3.2157881 | 0.001301 | 0.038109 |
| cbx1a              | 1613.370742 | 0.07393737   | 0.0791134 | 0.9345748 | 0.350007 | 0.880195 |
| tnfsf101           | 469.8196622 | 0.032960769  | 0.1070163 | 0.3079975 | 0.758084 | 0.975374 |
| spaml              | 84.50558642 | 0.585431331  | 0.2491242 | 2.3499581 | 0.018776 | 0.255518 |
| efhc2              | 35.72594089 | 0.083968201  | 0.3309649 | 0.2537072 | 0.799722 | 0.979377 |
| ccdc106a           | 765.4153261 | -0.052257091 | 0.0914701 | -0.571303 | 0.567794 | 0.948739 |
| rnd1b              | 608.8632496 | 0.118030343  | 0.1068019 | 1.1051335 | 0.269102 | 0.834439 |
| slc6a3             | 169.6360531 | -0.126117447 | 0.1758491 | -0.717191 | 0.473256 | 0.924993 |
| pde3a              | 60.04956578 | 0.026880726  | 0.2765078 | 0.0972151 | 0.922556 | 0.99233  |

|                  |             |              |           |           |          |          |
|------------------|-------------|--------------|-----------|-----------|----------|----------|
| dlb              | 441.0154731 | 0.125134343  | 0.1113072 | 1.1242249 | 0.260918 | 0.829083 |
| asic4b           | 9.592033464 | 0.204727655  | 0.6157048 | 0.3325094 | 0.739505 | NA       |
| slit2            | 1380.921704 | 0.13209624   | 0.0824103 | 1.6029103 | 0.108954 | 0.622318 |
| dhfr             | 275.0427456 | -0.103155631 | 0.1282989 | -0.804026 | 0.421382 | 0.90651  |
| wnt11            | 33.43779923 | -0.063868767 | 0.3625442 | -0.176168 | 0.860162 | 0.985773 |
| cul5b            | 73.89015281 | 0.009482979  | 0.2304202 | 0.0411552 | 0.967172 | 0.996315 |
| tmed9            | 2197.101513 | 0.095592856  | 0.075257  | 1.2702188 | 0.204007 | 0.771764 |
| cyp46a1.2        | 23.47147787 | 0.405038928  | 0.3938915 | 1.0283007 | 0.303808 | 0.858093 |
| at13             | 747.5294466 | -0.018934976 | 0.0937107 | -0.202058 | 0.839871 | 0.984979 |
| zgc:112496       | 52.49323285 | -0.072140976 | 0.2787976 | -0.258757 | 0.795822 | 0.978498 |
| seh11            | 763.8950197 | -0.032151728 | 0.095185  | -0.337781 | 0.735528 | 0.972535 |
| zgc:77375        | 136.3421606 | -0.192236911 | 0.1885012 | -1.019818 | 0.307815 | 0.861088 |
| hecw1b           | 102.3699666 | -0.0283135   | 0.2201828 | -0.128591 | 0.897681 | 0.990121 |
| ambp             | 1372.917329 | 0.185547312  | 0.1073945 | 1.7277172 | 0.084039 | 0.557646 |
| irf2bp1          | 1973.932052 | -0.021085944 | 0.0808967 | -0.260653 | 0.79436  | 0.977937 |
| rhogb            | 153.9574911 | -0.219149442 | 0.1799312 | -1.217963 | 0.223238 | 0.789115 |
| slc45a1          | 248.4794994 | 0.087951303  | 0.137417  | 0.640032  | 0.522152 | 0.939056 |
| vangl1           | 224.9067545 | -0.015516331 | 0.1378657 | -0.112547 | 0.91039  | 0.990702 |
| klhl18           | 263.9735111 | 0.26666949   | 0.1350682 | 1.974332  | 0.048344 | 0.433147 |
| lypd6            | 206.5506039 | -0.083702276 | 0.1516061 | -0.552103 | 0.580877 | 0.951731 |
| fam8a1b          | 247.4372032 | 0.03607308   | 0.1475579 | 0.2444672 | 0.806869 | 0.980254 |
| ldlrapla         | 180.0085513 | -0.026902535 | 0.1663385 | -0.161734 | 0.871516 | 0.987754 |
| cbwd             | 201.9635937 | 0.02769322   | 0.1523208 | 0.1818085 | 0.855733 | 0.985174 |
| ush1ga           | 114.7344135 | 0.106915771  | 0.1926583 | 0.5549501 | 0.578929 | 0.951052 |
| casp9            | 342.946452  | -0.287780188 | 0.1288467 | -2.233509 | 0.025515 | 0.309193 |
| LIN28A           | 1.16600141  | 0.393120273  | 1.8307582 | 0.2147309 | 0.829977 | NA       |
| exoc4            | 403.6741746 | 0.126527394  | 0.1162757 | 1.0881674 | 0.276521 | 0.839541 |
| nelfe            | 435.5317665 | -0.038585252 | 0.1128053 | -0.342052 | 0.732312 | 0.971719 |
| gnb3a            | 1729.862248 | -0.183326607 | 0.087073  | -2.105436 | 0.035253 | 0.365357 |
| lhfp16           | 401.3950452 | 0.110466367  | 0.1158736 | 0.9533351 | 0.34042  | 0.87805  |
| fmnl3            | 363.9342444 | 0.162957962  | 0.119934  | 1.35873   | 0.174232 | 0.734375 |
| ppplr13ba        | 731.345311  | 0.099189303  | 0.1058859 | 0.9367565 | 0.348884 | 0.880195 |
| yrk              | 272.7338918 | 0.030223245  | 0.1339949 | 0.2255552 | 0.821547 | 0.981928 |
| si:dkey-153k10.9 | 1430.942877 | -0.00275848  | 0.0774793 | -0.035603 | 0.971599 | 0.996315 |
| hdr              | 74.10418119 | 0.082326597  | 0.246942  | 0.3333843 | 0.738844 | 0.972722 |
| b3gnt5b          | 73.83526372 | -0.132640403 | 0.2250968 | -0.589259 | 0.555687 | 0.947621 |
| elov16           | 823.7492143 | 0.141631838  | 0.0984267 | 1.4389571 | 0.150163 | 0.698387 |
| snx10a           | 58.69958559 | -0.299382851 | 0.2965578 | -1.009526 | 0.312722 | 0.864656 |
| spra             | 246.9667221 | 0.123311631  | 0.1366134 | 0.9026317 | 0.366721 | 0.88734  |
| tcf712           | 3178.157148 | -0.114927831 | 0.0722846 | -1.589936 | 0.111849 | 0.627242 |
| dpy30            | 443.9702525 | -0.368636341 | 0.1334655 | -2.762035 | 0.005744 | 0.113814 |
| btk              | 34.28199078 | -0.045449459 | 0.3329833 | -0.136492 | 0.891433 | 0.989291 |
| fam92a1          | 101.9157726 | -0.160448619 | 0.2039978 | -0.786521 | 0.431562 | 0.91277  |
| grm5a            | 162.1851935 | 0.036726469  | 0.1642704 | 0.2235733 | 0.823089 | 0.982189 |
| aplnr2           | 21.62864778 | 0.278824061  | 0.4158009 | 0.670571  | 0.502494 | 0.935304 |
| tnfrsfa          | 372.0440857 | 0.042099032  | 0.1291942 | 0.3258586 | 0.744531 | 0.974094 |
| tardbp1          | 4833.347464 | -0.047972679 | 0.0735161 | -0.652546 | 0.514049 | 0.936851 |
| p2rx5            | 92.41068755 | 0.205622558  | 0.2039553 | 1.0081745 | 0.313371 | 0.865132 |
| unc119.2         | 36.4831017  | 0.625474288  | 0.3563531 | 1.7552093 | 0.079224 | 0.547489 |
| desi2            | 412.2349839 | -0.09486415  | 0.113049  | -0.839142 | 0.40139  | 0.90084  |
| prkesh           | 2006.412619 | -0.053847023 | 0.0716101 | -0.751948 | 0.452082 | 0.918781 |
| atat1            | 392.6015515 | -0.001334576 | 0.1193026 | -0.011186 | 0.991075 | 0.997679 |
| tbx21            | 21.14713949 | -0.528484338 | 0.4311616 | -1.225722 | 0.220303 | 0.787184 |
| pcytlab          | 240.172381  | -0.239753046 | 0.1391138 | -1.723432 | 0.084811 | 0.560519 |

|            |             |              |           |           |          |          |
|------------|-------------|--------------|-----------|-----------|----------|----------|
| tspan33a   | 222.0704168 | 0.119891365  | 0.1402578 | 0.8547926 | 0.392666 | 0.897688 |
| xkr8.1     | 14.60142818 | 1.028940314  | 0.5006347 | 2.0552717 | 0.039853 | 0.391511 |
| rcor3      | 67.80641108 | 0.134037482  | 0.2477406 | 0.5410397 | 0.58848  | 0.953319 |
| ppat       | 323.6023244 | -0.195155004 | 0.1222396 | -1.596495 | 0.110378 | 0.624676 |
| zgc:63882  | 171.2785796 | -0.029025245 | 0.1576706 | -0.184088 | 0.853945 | 0.985174 |
| pin4       | 317.4822018 | -0.038676777 | 0.1295382 | -0.298574 | 0.765265 | 0.975374 |
| zgc:173742 | 20.63038643 | -0.293340752 | 0.441426  | -0.66453  | 0.506351 | 0.935724 |
| kmt2a      | 399.7030421 | -0.088710184 | 0.1311918 | -0.676187 | 0.498922 | 0.934006 |
| ptgs2a     | 986.0434347 | 0.154930568  | 0.1020122 | 1.5187451 | 0.128827 | 0.659982 |
| prkcg      | 12.56655507 | 0.228225114  | 0.532612  | 0.4285017 | 0.668286 | 0.964736 |
| gtf3c2     | 139.4433272 | -0.215796168 | 0.1751087 | -1.232356 | 0.217816 | 0.785256 |
| plk4       | 283.6462378 | -0.17217965  | 0.1273392 | -1.352134 | 0.176332 | 0.73663  |
| zgc:194665 | 296.7559133 | -0.084460544 | 0.1265812 | -0.667244 | 0.504616 | 0.935617 |
| nmnat2     | 1010.79407  | -0.016004334 | 0.0959567 | -0.166787 | 0.867538 | 0.987231 |
| sel1l      | 934.2795986 | 0.315152988  | 0.0883104 | 3.5686958 | 0.000359 | 0.013616 |
| ntrk1      | 20.62521113 | -0.344113968 | 0.4659368 | -0.738542 | 0.460185 | 0.921978 |
| kat5a      | 512.3474403 | -0.048117635 | 0.1087633 | -0.442407 | 0.658195 | 0.962545 |
| sox4a      | 6693.96462  | -0.13870806  | 0.0645682 | -2.148241 | 0.031695 | 0.345305 |
| gpr22a     | 284.9157523 | -0.011319369 | 0.1384606 | -0.081752 | 0.934844 | 0.992702 |
| znf800a    | 307.5659062 | -0.112820468 | 0.1267347 | -0.89021  | 0.373353 | 0.893571 |
| lrrc4ba    | 72.46390524 | -0.001623152 | 0.2271039 | -0.007147 | 0.994297 | 0.998694 |
| or102-2    | 3.783978736 | -0.660031124 | 0.9780924 | -0.674815 | 0.499794 | NA       |
| mtmr2      | 384.8043384 | 0.116027084  | 0.1189373 | 0.9755312 | 0.329297 | 0.873436 |
| stx2a      | 109.7133686 | 0.038638943  | 0.2031234 | 0.190224  | 0.849134 | 0.985174 |
| gpm6ab     | 6160.542793 | 0.030488174  | 0.0700915 | 0.4349771 | 0.663579 | 0.964736 |
| panx3      | 64.1883146  | -0.015984375 | 0.2546928 | -0.062759 | 0.949958 | 0.99381  |
| egln1b     | 315.9930924 | -0.20465794  | 0.1287419 | -1.589676 | 0.111908 | 0.627242 |
| epn3b      | 13.65522621 | 0.411445572  | 0.55859   | 0.7365788 | 0.461379 | 0.922161 |
| osbp       | 145.0705976 | 0.200543043  | 0.1771263 | 1.1322037 | 0.257549 | 0.825314 |
| epha7      | 665.4911177 | -0.367481054 | 0.103152  | -3.56252  | 0.000367 | 0.013861 |
| ccdc9      | 690.3227797 | 0.034689987  | 0.1071575 | 0.323729  | 0.746143 | 0.97419  |
| cdhrla     | 397.8935721 | 0.28028602   | 0.113695  | 2.4652441 | 0.013692 | 0.210066 |
| spicel     | 94.96101173 | -0.024683213 | 0.2116552 | -0.11662  | 0.907161 | 0.990702 |
| kctd16a    | 7.489171937 | -0.074394173 | 0.705033  | -0.105519 | 0.915964 | NA       |
| zgc:101810 | 529.763858  | 0.248550294  | 0.1139326 | 2.181556  | 0.029142 | 0.330614 |
| ptk2ab     | 807.5120991 | 0.046984978  | 0.0926383 | 0.5071873 | 0.612023 | 0.95688  |
| dnajb6a    | 1638.269354 | -0.044865822 | 0.0870312 | -0.515514 | 0.606194 | 0.956718 |
| acaal      | 387.3282821 | -0.29052128  | 0.1334417 | -2.177141 | 0.02947  | 0.332709 |
| nabpla     | 281.8795773 | 0.183409851  | 0.1347676 | 1.3609348 | 0.173534 | 0.732906 |
| six4a      | 113.7061777 | -0.26064808  | 0.1927422 | -1.352315 | 0.176275 | 0.736614 |
| eefsec     | 144.5649246 | -0.049774915 | 0.1688728 | -0.294748 | 0.768186 | 0.975687 |
| rxrgb      | 255.5437577 | -0.443592057 | 0.1408126 | -3.150229 | 0.001631 | 0.046066 |
| irf2bp2a   | 968.4819032 | 0.048472963  | 0.1005195 | 0.4822244 | 0.629647 | 0.957354 |
| syf2       | 1038.216347 | -0.199891075 | 0.088382  | -2.261672 | 0.023718 | 0.297019 |
| tbr1b      | 411.8349321 | -0.059268226 | 0.1156651 | -0.512412 | 0.608362 | 0.956718 |
| mad2l1     | 384.8769012 | -0.252307381 | 0.1198896 | -2.104498 | 0.035335 | 0.36572  |
| tcf12      | 1604.60548  | -0.011187142 | 0.08196   | -0.136495 | 0.89143  | 0.989291 |
| mpp5b      | 54.8410105  | -0.492315127 | 0.2725204 | -1.806526 | 0.070836 | 0.520712 |
| tcea3      | 117.7665071 | -0.3740184   | 0.1934253 | -1.933658 | 0.053155 | 0.452412 |
| trappc1l   | 1104.531413 | -0.016355251 | 0.0842612 | -0.194102 | 0.846096 | 0.985174 |
| hnrnpub    | 4853.976963 | -0.007577748 | 0.0667213 | -0.113573 | 0.909576 | 0.990702 |
| lmbr1l     | 161.2743817 | -0.003319942 | 0.1655639 | -0.020052 | 0.984002 | 0.996944 |
| zgc:100868 | 2152.442561 | -0.083849071 | 0.1181628 | -0.709606 | 0.477948 | 0.926857 |
| mylkb      | 58.25997256 | -0.060352215 | 0.2618299 | -0.230502 | 0.817702 | 0.981594 |

|                |             |              |           |           |          |          |
|----------------|-------------|--------------|-----------|-----------|----------|----------|
| hspa4a         | 1383.390682 | 0.175931993  | 0.0826831 | 2.1277855 | 0.033355 | 0.355558 |
| ybx1           | 14079.64573 | -0.139634637 | 0.0796178 | -1.753813 | 0.079463 | 0.547489 |
| hhla2a.2       | 5.238384069 | -0.538652683 | 0.8605235 | -0.625959 | 0.531342 | NA       |
| ankrd10b       | 327.4483591 | 0.119390976  | 0.1215048 | 0.9826033 | 0.325803 | 0.871896 |
| wdr36          | 483.7722165 | -0.149939391 | 0.1083657 | -1.383643 | 0.166468 | 0.722981 |
| fgfr3          | 2164.442176 | 0.083698503  | 0.0738554 | 1.1332754 | 0.257099 | 0.825303 |
| cops2          | 950.738817  | -0.044602191 | 0.0922844 | -0.483312 | 0.628874 | 0.957354 |
| lrplba         | 27.8301871  | -0.208853644 | 0.3587357 | -0.582194 | 0.560436 | 0.948728 |
| ccdc146        | 18.22131731 | 0.329278311  | 0.4461867 | 0.7379833 | 0.460525 | 0.921978 |
| mgrn1b         | 842.1966607 | 0.05723573   | 0.0940343 | 0.6086689 | 0.542744 | 0.944974 |
| grwd1          | 336.2072209 | -0.046916896 | 0.1232042 | -0.380806 | 0.703347 | 0.968134 |
| asz1           | 3.944434732 | -0.971028866 | 0.9739744 | -0.996976 | 0.318776 | NA       |
| flot2a         | 4681.439058 | -0.004878748 | 0.0695829 | -0.070114 | 0.944103 | 0.993364 |
| dnajc5ab       | 2686.330595 | -0.052900616 | 0.0816297 | -0.648056 | 0.516949 | 0.938543 |
| rassf1         | 506.3614364 | 0.112885704  | 0.1117211 | 1.0104244 | 0.312292 | 0.864401 |
| foxpla         | 737.0438542 | -0.384521433 | 0.0959486 | -4.007578 | 6.13E-05 | 0.003262 |
| hinfp          | 127.2894776 | -0.022039035 | 0.1853391 | -0.118912 | 0.905345 | 0.990702 |
| esrrga         | 472.8549042 | 0.020947553  | 0.1059227 | 0.1977626 | 0.843231 | 0.985174 |
| zgc:171734     | 0.325452849 | 0.005883619  | 3.3177086 | 0.0017734 | 0.998585 | NA       |
| mindyl         | 516.4946996 | 0.018773493  | 0.1085132 | 0.1730066 | 0.862646 | 0.985841 |
| penka          | 221.7654243 | -0.371145938 | 0.1427922 | -2.599203 | 0.009344 | 0.162078 |
| psen1          | 875.3297129 | -0.076757161 | 0.092525  | -0.829583 | 0.406774 | 0.901305 |
| mst1rb         | 9.901199558 | 0.312305982  | 0.6293513 | 0.4962347 | 0.619729 | NA       |
| spata6l        | 24.28844944 | -0.237072722 | 0.4029084 | -0.588404 | 0.556261 | 0.947902 |
| tmc6b          | 322.4577218 | -0.299037839 | 0.1230038 | -2.431127 | 0.015052 | 0.224971 |
| rock2b         | 478.7578154 | -0.08022105  | 0.1179426 | -0.68017  | 0.496397 | 0.932436 |
| acsm3          | 104.6011671 | -0.176819467 | 0.2182008 | -0.810352 | 0.417738 | 0.906237 |
| aga            | 188.1511244 | -0.286874088 | 0.1536509 | -1.867051 | 0.061895 | 0.485483 |
| pex19          | 998.801918  | 0.108163269  | 0.0958606 | 1.1283391 | 0.259177 | 0.82755  |
| zp212          | 0.995966258 | -1.056292575 | 2.0854203 | -0.506513 | 0.612497 | NA       |
| gys2           | 274.8513235 | 0.441990819  | 0.1390194 | 3.1793459 | 0.001476 | 0.04224  |
| stipl          | 1767.985804 | 0.023669949  | 0.0832523 | 0.284316  | 0.776168 | 0.975826 |
| immp21         | 83.46454079 | -0.353935079 | 0.2174055 | -1.627995 | 0.103526 | 0.609625 |
| lmo7a          | 1258.420511 | -0.01754846  | 0.1082094 | -0.162171 | 0.871171 | 0.987754 |
| slc8a3         | 32.41313122 | 0.239144371  | 0.3539508 | 0.6756429 | 0.499267 | 0.934006 |
| anos1b         | 336.5333478 | 0.161758256  | 0.1236455 | 1.3082422 | 0.190791 | 0.755212 |
| skp2           | 159.2599437 | 0.030027135  | 0.1636018 | 0.1835379 | 0.854376 | 0.985174 |
| mtdhb          | 542.898567  | 0.217142122  | 0.1084259 | 2.0026783 | 0.045212 | 0.417766 |
| bccip          | 966.7793603 | -0.191122514 | 0.093113  | -2.052586 | 0.040113 | 0.392085 |
| rsad2          | 4.251712716 | 0.186102543  | 0.979076  | 0.1900798 | 0.849247 | NA       |
| mxb            | 3.758706303 | 0.835972124  | 1.0212801 | 0.8185532 | 0.413041 | NA       |
| grna           | 44.78493679 | 0.595861004  | 0.2996118 | 1.9887768 | 0.046726 | 0.424613 |
| zmat2          | 725.5632423 | -0.116065571 | 0.09331   | -1.24387  | 0.213547 | 0.781737 |
| cyp4t8         | 130.6645327 | -0.409843965 | 0.1773976 | -2.310312 | 0.020871 | 0.27277  |
| elov15         | 104.345925  | 0.218605848  | 0.1982114 | 1.1028926 | 0.270074 | 0.834705 |
| ppp3ca         | 2085.620425 | -0.039498563 | 0.0889221 | -0.444193 | 0.656903 | 0.96205  |
| brflb          | 154.5703366 | -0.050873153 | 0.1642091 | -0.309807 | 0.756708 | 0.975374 |
| slc5a12        | 114.4282454 | 0.426431785  | 0.1938676 | 2.1996029 | 0.027835 | 0.323391 |
| si:dkeyp-2e4.8 | 32.19979392 | -0.477069197 | 0.3428687 | -1.391405 | 0.164103 | 0.71945  |
| tspy           | 775.3114978 | 0.056452614  | 0.0901465 | 0.6262322 | 0.531163 | 0.942209 |
| fkbp9          | 712.502517  | 0.303004475  | 0.3238949 | 0.9355024 | 0.349529 | 0.880195 |
| tshz1          | 1210.318286 | -0.104522753 | 0.0855351 | -1.221987 | 0.221713 | 0.78829  |
| crppa          | 247.8190827 | 0.044552233  | 0.1399171 | 0.3184189 | 0.750167 | 0.97419  |
| rab20          | 92.11586539 | -0.304545538 | 0.2109048 | -1.443996 | 0.14874  | 0.69636  |

|                    |              |               |            |            |           |           |
|--------------------|--------------|---------------|------------|------------|-----------|-----------|
| wnt2ba             | 22. 33694951 | 0. 033331173  | 0. 4208727 | 0. 0791954 | 0. 936877 | 0. 992702 |
| dimt11             | 214. 0462914 | 0. 27134789   | 0. 149468  | 1. 8154252 | 0. 069459 | 0. 514708 |
| ncapd2             | 992. 1591889 | -0. 070206371 | 0. 0920838 | -0. 762419 | 0. 44581  | 0. 917154 |
| EIF4E3             | 781. 2313181 | -0. 018397797 | 0. 1084881 | -0. 169583 | 0. 865338 | 0. 986385 |
| ggctb              | 561. 1160281 | -0. 003488171 | 0. 1101964 | -0. 031654 | 0. 974748 | 0. 996605 |
| cep89              | 62. 66545779 | 0. 27381791   | 0. 2570007 | 1. 0654365 | 0. 286678 | 0. 84596  |
| glcea              | 333. 4270293 | 0. 292285454  | 0. 1217628 | 2. 4004485 | 0. 016375 | 0. 236243 |
| ZGC:86764          | 311. 8649685 | 0. 004936016  | 0. 1280075 | 0. 0385604 | 0. 969241 | 0. 996315 |
| limk2              | 920. 3976392 | -0. 138001577 | 0. 0882583 | -1. 563611 | 0. 117909 | 0. 641446 |
| oclna              | 873. 104332  | -0. 189825459 | 0. 1076969 | -1. 762591 | 0. 07797  | 0. 544026 |
| cdh17              | 2256. 76186  | -0. 185891069 | 0. 0781068 | -2. 379959 | 0. 017315 | 0. 243166 |
| calub              | 1049. 990414 | 0. 16376667   | 0. 0861038 | 1. 9019683 | 0. 057175 | 0. 469122 |
| atp2a2b            | 2721. 1384   | 0. 108103608  | 0. 0752075 | 1. 437405  | 0. 150603 | 0. 698912 |
| large1             | 36. 15009427 | 0. 306055626  | 0. 3240757 | 0. 9443955 | 0. 344968 | 0. 878434 |
| rnaseh2b           | 214. 8381003 | 0. 214569996  | 0. 1405408 | 1. 5267457 | 0. 126824 | 0. 656588 |
| psmd11b            | 1092. 30968  | 0. 118430724  | 0. 0890606 | 1. 3297765 | 0. 183592 | 0. 747284 |
| hhat1b             | 520. 5081488 | 0. 351619475  | 0. 1027187 | 3. 4231315 | 0. 000619 | 0. 020853 |
| camkvb             | 462. 9177225 | 0. 039357018  | 0. 1186515 | 0. 3317026 | 0. 740114 | 0. 972943 |
| tbx20              | 32. 22591182 | -0. 513625401 | 0. 3416762 | -1. 503252 | 0. 132774 | 0. 667381 |
| aspa               | 9. 49816035  | 0. 074451669  | 0. 623755  | 0. 1193604 | 0. 90499  | NA        |
| cyth1a             | 379. 6077936 | -0. 090182516 | 0. 1240083 | -0. 72723  | 0. 467085 | 0. 924328 |
| tpm3               | 8487. 799683 | 0. 073087949  | 0. 0674426 | 1. 0837065 | 0. 278495 | 0. 842429 |
| efr3a              | 74. 29368087 | -0. 099955154 | 0. 2327393 | -0. 429473 | 0. 667579 | 0. 964736 |
| dynl12b            | 622. 1463632 | 0. 021547101  | 0. 1048045 | 0. 2055932 | 0. 837109 | 0. 984645 |
| ZGC:101040         | 86. 75963091 | -0. 202820931 | 0. 2169504 | -0. 934872 | 0. 349854 | 0. 880195 |
| dglucy             | 299. 8105473 | -0. 08088678  | 0. 140251  | -0. 576729 | 0. 564123 | 0. 948739 |
| cpn1               | 6. 002436204 | -0. 10804383  | 0. 8428652 | -0. 128186 | 0. 898001 | NA        |
| sp4                | 812. 7831496 | 0. 096068492  | 0. 092722  | 1. 0360922 | 0. 300159 | 0. 856224 |
| ahcy               | 8165. 752217 | -0. 14880889  | 0. 0925862 | -1. 607248 | 0. 108    | 0. 619371 |
| coro2a             | 394. 7089557 | 0. 021460123  | 0. 1225017 | 0. 1751823 | 0. 860936 | 0. 985773 |
| ZGC:158328         | 20. 20780674 | 0. 717414017  | 0. 435363  | 1. 6478527 | 0. 099383 | 0. 599511 |
| wrnip1             | 71. 99578898 | -0. 0741574   | 0. 2294956 | -0. 323132 | 0. 746595 | 0. 97419  |
| pdc6               | 564. 900524  | 0. 023209705  | 0. 1076659 | 0. 2155716 | 0. 829322 | 0. 982805 |
| desmb              | 182. 0417806 | -0. 075644229 | 0. 1566943 | -0. 48275  | 0. 629273 | 0. 957354 |
| ssr2               | 2179. 625252 | -0. 136577126 | 0. 0744636 | -1. 834147 | 0. 066632 | 0. 504944 |
| ccdc85ca           | 53. 79203053 | 0. 17768126   | 0. 2943737 | 0. 6035907 | 0. 546116 | 0. 945526 |
| srcap              | 1394. 216647 | 0. 057446249  | 0. 0863843 | 0. 6650078 | 0. 506046 | 0. 935724 |
| asb3               | 99. 69510182 | -0. 049133352 | 0. 2227975 | -0. 220529 | 0. 825459 | 0. 982196 |
| rpe                | 483. 6413613 | -0. 011063592 | 0. 1090844 | -0. 101422 | 0. 919215 | 0. 991623 |
| kdelr2a            | 1481. 871906 | 0. 223338147  | 0. 0835041 | 2. 6745756 | 0. 007482 | 0. 136997 |
| zc3h12a            | 27. 94025694 | -0. 115201707 | 0. 3572938 | -0. 322428 | 0. 747128 | 0. 97419  |
| rad52              | 67. 80904276 | -0. 04001343  | 0. 2355971 | -0. 169838 | 0. 865137 | 0. 986367 |
| fbx115             | 86. 65666166 | 0. 267623037  | 0. 2101685 | 1. 2733735 | 0. 202886 | 0. 769849 |
| CALHM1 (1 of many) | 5. 353635404 | 0. 374080631  | 0. 8723163 | 0. 428836  | 0. 668043 | NA        |
| celf1              | 2026. 681829 | 0. 045017615  | 0. 0752323 | 0. 5983813 | 0. 549586 | 0. 946312 |
| stam2              | 722. 0328944 | 0. 009725892  | 0. 0920603 | 0. 1056469 | 0. 915862 | 0. 991314 |
| nipsnap1           | 83. 384457   | -0. 49762644  | 0. 222318  | -2. 238354 | 0. 025198 | 0. 30686  |
| ftr66              | 1. 964116229 | 0. 510643648  | 1. 3857694 | 0. 3684911 | 0. 712507 | NA        |
| lipib              | 56. 79085244 | -0. 011248342 | 0. 2691719 | -0. 041789 | 0. 966667 | 0. 996315 |
| slc22a4            | 14. 29416894 | 0. 321073427  | 0. 5175513 | 0. 6203702 | 0. 535014 | 0. 943336 |
| ccdc85a1           | 283. 4019452 | 0. 01283163   | 0. 126579  | 0. 1013725 | 0. 919255 | 0. 991623 |
| dip2ba             | 1157. 969733 | -0. 120127297 | 0. 0897662 | -1. 338224 | 0. 180824 | 0. 741776 |
| larp6a             | 370. 7944637 | -0. 002540396 | 0. 1289559 | -0. 0197   | 0. 984283 | 0. 996944 |
| tyro3              | 18. 18024045 | 0. 74298171   | 0. 4489989 | 1. 6547517 | 0. 097975 | 0. 59749  |

|          |             |              |           |           |          |          |
|----------|-------------|--------------|-----------|-----------|----------|----------|
| suc1a2   | 3355.220151 | 0.144115869  | 0.0818512 | 1.7607063 | 0.078288 | 0.545287 |
| grin3ba  | 56.19937916 | -0.041635393 | 0.2721998 | -0.152959 | 0.878431 | 0.987881 |
| mcamb    | 718.5700529 | -0.016010099 | 0.0917426 | -0.174511 | 0.861464 | 0.985841 |
| gprc6a   | 23.85216812 | 0.3006779    | 0.4037998 | 0.7446212 | 0.456501 | 0.921215 |
| camk4    | 361.2147403 | -0.042125802 | 0.1168305 | -0.360572 | 0.718419 | 0.96909  |
| tubgcp4  | 428.5587745 | 0.088328435  | 0.1099865 | 0.8030843 | 0.421926 | 0.90651  |
| prdm9    | 235.1923701 | -0.1728005   | 0.1417764 | -1.218825 | 0.222911 | 0.789115 |
| slc5a5   | 15.9482868  | 0.104704929  | 0.5954641 | 0.1758375 | 0.860422 | 0.985773 |
| dnmt3aa  | 27.99884209 | 0.455369056  | 0.372119  | 1.2237187 | 0.221058 | 0.787641 |
| trim3b   | 1098.73895  | 0.115617244  | 0.0835421 | 1.3839397 | 0.166377 | 0.722981 |
| grapa    | 112.150711  | -0.041177574 | 0.204991  | -0.200875 | 0.840796 | 0.985092 |
| map3k5   | 677.3043966 | 0.009701631  | 0.1015008 | 0.0955818 | 0.923853 | 0.992628 |
| pgam1a   | 2215.314985 | -0.098884752 | 0.0724862 | -1.364187 | 0.172509 | 0.731348 |
| wdfyl    | 75.65759057 | 0.111869712  | 0.2345226 | 0.4770105 | 0.633355 | 0.957562 |
| mtfmt    | 109.1259079 | 0.148189481  | 0.1899158 | 0.7802904 | 0.43522  | 0.914408 |
| gdi2     | 6163.273672 | -0.012121774 | 0.0671885 | -0.180414 | 0.856827 | 0.985597 |
| foxp2    | 462.496036  | -0.084648172 | 0.1112966 | -0.760564 | 0.446918 | 0.917154 |
| tacc3    | 818.8750005 | -0.16559694  | 0.0908671 | -1.822409 | 0.068393 | 0.512556 |
| katnbl   | 645.1637069 | -0.076003067 | 0.0977089 | -0.777852 | 0.436656 | 0.914408 |
| csnklg2a | 908.579515  | 0.012590388  | 0.0865613 | 0.1454506 | 0.884355 | 0.98879  |
| kif4     | 775.3704415 | -0.039810244 | 0.0962823 | -0.413474 | 0.679259 | 0.965257 |
| slc30a1a | 561.5758703 | 0.309768428  | 0.1122372 | 2.7599442 | 0.005781 | 0.11443  |
| dnasell1 | 161.3614182 | -0.091688374 | 0.1710651 | -0.535985 | 0.591969 | 0.954434 |
| irf2bp1  | 628.4588498 | -0.004559762 | 0.1078538 | -0.042277 | 0.966278 | 0.996315 |
| nav3     | 219.9646607 | 0.186386954  | 0.1446762 | 1.288304  | 0.19764  | 0.762928 |
| tenm3    | 2309.561242 | 0.030312166  | 0.0820724 | 0.3693345 | 0.711878 | 0.969006 |
| nfkbiaa  | 539.0759905 | -0.477320808 | 0.136487  | -3.497189 | 0.00047  | 0.017028 |
| rapgef2  | 1973.292948 | 0.027428056  | 0.080027  | 0.3427352 | 0.731798 | 0.971572 |
| ucmab    | 686.0649199 | -0.17750974  | 0.1065326 | -1.666248 | 0.095664 | 0.588752 |
| dgcr6    | 198.6092736 | -0.126513786 | 0.1459353 | -0.866917 | 0.385988 | 0.89551  |
| gdf6b    | 8.150218759 | -0.157537014 | 0.66955   | -0.235288 | 0.813985 | NA       |
| naca     | 9559.047831 | -0.227225946 | 0.0696682 | -3.261542 | 0.001108 | 0.033401 |
| slc5a9   | 73.56678439 | -0.084777857 | 0.2245651 | -0.37752  | 0.705787 | 0.968412 |
| galr1a   | 11.60527518 | 0.05223557   | 0.5676247 | 0.0920248 | 0.926678 | 0.992702 |
| acy3.2   | 225.3101824 | -0.077522494 | 0.1452914 | -0.533566 | 0.593642 | 0.954434 |
| igfnl.1  | 815.2468871 | 0.374856399  | 0.112966  | 3.3183119 | 0.000906 | 0.028837 |
| ubr7     | 651.966982  | -0.070231228 | 0.0975281 | -0.720112 | 0.471456 | 0.924838 |
| xpo7     | 1319.582158 | -0.148738011 | 0.0791092 | -1.880161 | 0.060086 | 0.478687 |
| wif1     | 556.8867893 | 0.074217704  | 0.1075605 | 0.6900089 | 0.490189 | 0.931926 |
| btbd3a   | 10.70312144 | -0.940361848 | 0.6505447 | -1.445499 | 0.148318 | NA       |
| rint1    | 192.5867232 | -0.215641217 | 0.1483889 | -1.453217 | 0.146164 | 0.691942 |
| znf710b  | 1136.099824 | -0.180210239 | 0.0806076 | -2.235649 | 0.025375 | 0.308303 |
| hnrnph11 | 2654.190254 | -0.077289939 | 0.0769079 | -1.004967 | 0.314913 | 0.866054 |
| pou4f1   | 402.1610523 | -0.027446242 | 0.1136839 | -0.241426 | 0.809225 | 0.980642 |
| ywhah    | 5885.549624 | 0.002230465  | 0.0676159 | 0.0329873 | 0.973685 | 0.996315 |
| gfm2     | 268.9074417 | -0.006579065 | 0.1351867 | -0.048667 | 0.961185 | 0.995729 |
| entpd8   | 49.11500768 | -0.756112306 | 0.2805671 | -2.694943 | 0.00704  | 0.13096  |
| vsx2     | 450.0205464 | 0.017488686  | 0.115577  | 0.1513164 | 0.879726 | 0.987881 |
| mphosph8 | 1101.231742 | 0.049630053  | 0.0841868 | 0.5895231 | 0.55551  | 0.947607 |
| ugp2a    | 46.72632779 | 0.026551182  | 0.3094003 | 0.085815  | 0.931614 | 0.992702 |
| zbtb20   | 3.701774465 | -1.046137009 | 1.0561667 | -0.990504 | 0.321928 | NA       |
| mtf2     | 425.5202331 | 0.070165586  | 0.1127508 | 0.622307  | 0.53374  | 0.943276 |
| rxrga    | 148.2046609 | -0.398792302 | 0.1728129 | -2.307654 | 0.021018 | 0.273449 |
| adgb     | 76.40437836 | 0.04388623   | 0.2278144 | 0.1926403 | 0.847241 | 0.985174 |

|                 |             |              |           |           |          |          |
|-----------------|-------------|--------------|-----------|-----------|----------|----------|
| paxipl          | 500.5220816 | -0.059094621 | 0.1041885 | -0.567189 | 0.570586 | 0.949061 |
| aph1b           | 829.1306965 | 0.045459286  | 0.0911421 | 0.4987738 | 0.617939 | 0.957354 |
| bfb             | 44.1627867  | -0.201825932 | 0.3282005 | -0.614947 | 0.53859  | 0.943336 |
| nek2            | 84.51825427 | 0.123247793  | 0.2266562 | 0.5437654 | 0.586603 | 0.953319 |
| macola          | 297.1342627 | 0.146507655  | 0.1474212 | 0.9938031 | 0.320319 | 0.868202 |
| RHO (1 of many) | 58.38383253 | 0.058364644  | 0.2565498 | 0.2274983 | 0.820036 | 0.981594 |
| zmp:0000000527  | 2.411113467 | 1.926067046  | 1.3632399 | 1.4128599 | 0.157697 | NA       |
| smyd2b          | 399.1286354 | 0.235591498  | 0.1211095 | 1.9452762 | 0.051742 | 0.446202 |
| adat3           | 37.96732317 | -0.178659602 | 0.338587  | -0.527662 | 0.597734 | 0.95534  |
| gcat            | 415.7752574 | 0.249859457  | 0.1284683 | 1.9449113 | 0.051786 | 0.446386 |
| robo3           | 1235.140622 | -0.161598369 | 0.0811739 | -1.990768 | 0.046506 | 0.423787 |
| olfml2a         | 133.2727902 | 0.244137638  | 0.1834801 | 1.3305949 | 0.183322 | 0.747003 |
| hrasb           | 932.4127038 | -0.002383812 | 0.0892442 | -0.026711 | 0.97869  | 0.996762 |
| man1a1          | 1018.957233 | -0.04973942  | 0.0834541 | -0.596009 | 0.551169 | 0.946571 |
| ttbk2a          | 27.71335758 | -0.328671023 | 0.3612847 | -0.909729 | 0.362966 | 0.885944 |
| f3b             | 181.9851639 | 0.464034109  | 0.1855019 | 2.5015062 | 0.012367 | 0.196732 |
| sec61a11        | 601.318943  | 0.043405625  | 0.0964373 | 0.4500919 | 0.652644 | 0.960708 |
| trip10a         | 369.0537696 | 0.047622192  | 0.1201147 | 0.3964726 | 0.691756 | 0.967305 |
| slc25a23a       | 546.524046  | 0.27812107   | 0.1124943 | 2.4723133 | 0.013424 | 0.207707 |
| ddx19           | 509.3402931 | 0.166759647  | 0.1030002 | 1.6190226 | 0.105442 | 0.614144 |
| eps813b         | 356.5959108 | -0.828285672 | 0.129479  | -6.397067 | 1.58E-10 | 3.64E-08 |
| ethel           | 317.1777244 | -0.496427064 | 0.1384542 | -3.585496 | 0.000336 | 0.012973 |
| olfml2ba        | 64.00834751 | -0.084356313 | 0.2466965 | -0.341944 | 0.732393 | 0.971719 |
| rpfl            | 279.729202  | 0.153348461  | 0.1438272 | 1.0661995 | 0.286333 | 0.845942 |
| gpm6ba          | 1350.934499 | 0.047303977  | 0.0831451 | 0.5689326 | 0.569402 | 0.948983 |
| cand2           | 278.9349347 | 0.274579319  | 0.1296078 | 2.1185399 | 0.034129 | 0.359261 |
| ptrfb           | 3378.557961 | 0.003863117  | 0.0801315 | 0.0482097 | 0.961549 | 0.995845 |
| coll4a1a        | 348.7621297 | -0.170883386 | 0.1299886 | -1.314602 | 0.188644 | 0.753288 |
| tsr2            | 279.2065142 | -0.178526388 | 0.1322541 | -1.349874 | 0.177056 | 0.738098 |
| ddx3xb          | 5754.333006 | 0.015035967  | 0.0740447 | 0.2030661 | 0.839083 | 0.984979 |
| scn8aa          | 679.2829568 | 0.04925187   | 0.0946713 | 0.5202408 | 0.602896 | 0.956045 |
| guk1b           | 714.328614  | 0.157898311  | 0.0960019 | 1.6447422 | 0.100023 | 0.601211 |
| npy8br          | 8.332631478 | 0.393599298  | 0.6651216 | 0.5917704 | 0.554004 | NA       |
| ncanb           | 47.52420612 | -0.160779788 | 0.3022605 | -0.531925 | 0.594778 | 0.954434 |
| ppmlf           | 8.40315104  | 0.351639882  | 0.6783088 | 0.5184068 | 0.604175 | NA       |
| enppl           | 733.105576  | 0.208697242  | 0.0928509 | 2.2476588 | 0.024598 | 0.302262 |
| rpl28           | 13064.15975 | -0.266920187 | 0.0773231 | -3.452012 | 0.000556 | 0.019235 |
| smim14          | 160.1768279 | -0.166637471 | 0.1647137 | -1.011679 | 0.311691 | 0.864257 |
| ampd3a          | 130.2497045 | 0.440717646  | 0.2019473 | 2.1823404 | 0.029084 | 0.330497 |
| klhl10a         | 1.148909967 | 1.312490708  | 1.8001617 | 0.729096  | 0.465943 | NA       |
| ncf2            | 16.9058725  | 0.299071902  | 0.4694756 | 0.6370339 | 0.524103 | 0.939336 |
| slc39a10        | 754.0573728 | 0.122545637  | 0.0968047 | 1.2659058 | 0.205547 | 0.773646 |
| EIF2S1A         | 720.3526456 | 0.004188407  | 0.0930273 | 0.0450234 | 0.964089 | 0.995927 |
| faima           | 114.3298795 | -0.092914711 | 0.1849258 | -0.502443 | 0.615356 | 0.95688  |
| gatad2b         | 47.53705761 | 0.444350926  | 0.3063579 | 1.4504307 | 0.146938 | 0.693731 |
| got2b           | 2649.335867 | 0.13081872   | 0.0842299 | 1.5531154 | 0.120396 | 0.645215 |
| tnni2a.2        | 521.5621118 | 0.170818875  | 0.1167615 | 1.4629732 | 0.143475 | 0.686804 |
| cd9a            | 634.9791158 | -0.143728837 | 0.1030287 | -1.395037 | 0.163005 | 0.717875 |
| SP5             | 4.881132812 | 0.31244379   | 0.8528734 | 0.3663425 | 0.71411  | NA       |
| slc25a6         | 176.0068059 | 0.066111843  | 0.1646395 | 0.4015552 | 0.688011 | 0.966493 |
| ralgapa2        | 1094.32934  | -0.002892745 | 0.0872014 | -0.033173 | 0.973537 | 0.996315 |
| or131-1         | 0.837291216 | -1.914743452 | 2.2412189 | -0.854331 | 0.392921 | NA       |
| gon4l           | 775.8202115 | 0.033248106  | 0.0953549 | 0.3486773 | 0.727332 | 0.970402 |
| mmadhc          | 613.4335139 | 0.002215426  | 0.1103539 | 0.0200756 | 0.983983 | 0.996944 |

|            |             |              |           |           |          |          |
|------------|-------------|--------------|-----------|-----------|----------|----------|
| rfx1a      | 391.6229974 | -0.095338853 | 0.1179548 | -0.808266 | 0.418938 | 0.906406 |
| cyb5r3     | 543.915363  | 0.016724815  | 0.1046938 | 0.1597499 | 0.873078 | 0.987846 |
| slc7a9     | 48.74677187 | -1.259355635 | 0.2875064 | -4.380271 | 1.19E-05 | 0.000834 |
| dera       | 128.7075918 | 0.173500835  | 0.1767097 | 0.9818409 | 0.326178 | 0.872073 |
| clk4b      | 690.8444304 | -0.157181462 | 0.0975922 | -1.610595 | 0.107268 | 0.617322 |
| tgm113     | 49.44315385 | -1.943051723 | 0.3611582 | -5.380057 | 7.45E-08 | 1.07E-05 |
| tcf3a      | 34.21981993 | 0.18302083   | 0.3377397 | 0.5418991 | 0.587888 | 0.953319 |
| srpk3      | 464.3403197 | 0.031430981  | 0.1069705 | 0.2938284 | 0.768889 | 0.975687 |
| serpina10a | 1408.580364 | 0.021372873  | 0.0804312 | 0.2657285 | 0.790448 | 0.977359 |
| ak2        | 2207.907586 | -0.459606288 | 0.0918588 | -5.003402 | 5.63E-07 | 6.22E-05 |
| tbc1d17    | 632.389326  | -0.124695146 | 0.1037017 | -1.202441 | 0.229193 | 0.796702 |
| clul1      | 1434.150778 | 0.05676396   | 0.0773426 | 0.7339285 | 0.462992 | 0.922698 |
| v2r11      | 21.62084185 | -0.484014729 | 0.4086931 | -1.184299 | 0.236295 | 0.805463 |
| htra4      | 67.64436833 | 0.456503408  | 0.2368614 | 1.9273015 | 0.053942 | 0.455056 |
| sart1      | 1636.048863 | 0.092979297  | 0.0751326 | 1.2375357 | 0.215888 | 0.783484 |
| ankmy2a    | 173.0960201 | 0.060041808  | 0.173907  | 0.3452525 | 0.729905 | 0.971143 |
| ric8b      | 661.8368826 | 0.028937776  | 0.0992675 | 0.2915132 | 0.770659 | 0.975687 |
| sfswap     | 1433.489975 | -0.090895474 | 0.0774351 | -1.173828 | 0.240464 | 0.808525 |
| rgl1       | 858.1247783 | -0.280591884 | 0.0928244 | -3.022824 | 0.002504 | 0.063006 |
| prclb      | 188.7138473 | -0.185536446 | 0.1575891 | -1.177343 | 0.239058 | 0.807768 |
| mycla      | 164.6715089 | 0.010206957  | 0.161998  | 0.0630067 | 0.949761 | 0.99381  |
| dct        | 1763.945184 | -0.033886084 | 0.0889    | -0.381171 | 0.703076 | 0.968134 |
| bmila      | 303.2873667 | -0.069255327 | 0.1424877 | -0.486044 | 0.626936 | 0.957354 |
| klhl42     | 38.73505427 | -0.133730273 | 0.3190296 | -0.419178 | 0.675086 | 0.965257 |
| tktb       | 4467.339672 | -0.26045772  | 0.0775579 | -3.358237 | 0.000784 | 0.025553 |
| tp53i11b   | 696.9445069 | -0.02870215  | 0.1040481 | -0.275855 | 0.78266  | 0.97627  |
| lta4h      | 886.7912989 | -0.578693779 | 0.0958069 | -6.040209 | 1.54E-09 | 3.11E-07 |
| abat       | 3849.417712 | 0.00098583   | 0.0898729 | 0.0109692 | 0.991248 | 0.997679 |
| aebp2      | 521.8972309 | 0.020433134  | 0.1121637 | 0.1821724 | 0.855447 | 0.985174 |
| cyp20a1    | 409.8652078 | -0.023668177 | 0.1133031 | -0.208893 | 0.834532 | 0.983992 |
| usta       | 141.8747341 | -0.306539543 | 0.1716516 | -1.785824 | 0.074128 | 0.530917 |
| malt2      | 78.51204459 | -0.065025885 | 0.2206775 | -0.294665 | 0.76825  | 0.975687 |
| crybglb    | 296.9383188 | -0.043389037 | 0.1542744 | -0.281246 | 0.778522 | 0.975942 |
| akap1b     | 1320.454535 | 0.018670198  | 0.0804273 | 0.2321375 | 0.816431 | 0.981594 |
| znf385b    | 106.5272113 | -0.053028378 | 0.1978589 | -0.268011 | 0.788691 | 0.976703 |
| uck2a      | 601.6551919 | 0.008089871  | 0.1026698 | 0.078795  | 0.937196 | 0.99279  |
| gpr3711a   | 34.68729099 | 0.391812734  | 0.3559527 | 1.1007439 | 0.271008 | 0.835943 |
| rad21a     | 6157.09067  | -0.071326038 | 0.0662471 | -1.076667 | 0.281629 | 0.84357  |
| cdk15      | 48.26180266 | 0.428754795  | 0.2810784 | 1.5253924 | 0.127161 | 0.656588 |
| igf2r      | 160.1948353 | 0.250736524  | 0.1864647 | 1.3446865 | 0.178726 | 0.739486 |
| pimr185    | 2.296881697 | 0.424419626  | 1.2199724 | 0.3478928 | 0.727921 | NA       |
| chrd       | 76.67547542 | -0.172694421 | 0.2511201 | -0.687696 | 0.491644 | 0.931926 |
| myof       | 477.1262626 | -0.154498911 | 0.1125829 | -1.372312 | 0.169966 | 0.727155 |
| tbx2b      | 1189.949232 | -0.165194301 | 0.0845986 | -1.952684 | 0.050857 | 0.44241  |
| kdm5c      | 3790.65965  | -0.10089593  | 0.0699638 | -1.442116 | 0.14927  | 0.696454 |
| csnk1db    | 3205.271969 | -0.005907903 | 0.0693877 | -0.085143 | 0.932147 | 0.992702 |
| cep170aa   | 1257.726684 | -0.054263015 | 0.0799902 | -0.678371 | 0.497536 | 0.933353 |
| star       | 86.87845939 | 0.385399752  | 0.2555283 | 1.5082469 | 0.131491 | 0.66499  |
| pdellal    | 24.52078131 | 0.319521452  | 0.381131  | 0.8383506 | 0.401834 | 0.90084  |
| lrrk2      | 293.7260503 | -0.138692787 | 0.1470293 | -0.9433   | 0.345527 | 0.878434 |
| lrrc23     | 22.87557575 | -0.150784519 | 0.4013431 | -0.3757   | 0.70714  | 0.968664 |
| hif1aa     | 271.2966664 | 0.229033425  | 0.1325827 | 1.7274757 | 0.084082 | 0.557747 |
| gatad2ab   | 683.1314967 | -0.051929729 | 0.1004273 | -0.517088 | 0.605095 | 0.95651  |
| savl       | 464.8637007 | 0.124661056  | 0.1164571 | 1.0704461 | 0.284419 | 0.844955 |



|                   |             |              |           |           |          |          |
|-------------------|-------------|--------------|-----------|-----------|----------|----------|
| eif4g1a           | 4698.112234 | 0.067023458  | 0.0697805 | 0.9604899 | 0.336809 | 0.876088 |
| erbb3a            | 614.2922031 | -0.373043933 | 0.1029738 | -3.622706 | 0.000292 | 0.011553 |
| pou4f3            | 81.52697056 | 0.476529738  | 0.2243448 | 2.1240955 | 0.033662 | 0.357045 |
| gpx1b             | 217.6439158 | -0.46576608  | 0.1585128 | -2.93835  | 0.0033   | 0.076671 |
| akr1b1.1          | 426.4402145 | -0.036037557 | 0.1103236 | -0.326653 | 0.74393  | 0.974094 |
| gnl3              | 709.6530273 | 0.043371429  | 0.0959015 | 0.4522495 | 0.651089 | 0.960708 |
| ugtlab            | 1731.453604 | -0.530735974 | 0.07914   | -6.706295 | 2.00E-11 | 5.41E-09 |
| ddx39aa           | 2633.551247 | -0.181421609 | 0.0750693 | -2.416723 | 0.015661 | 0.229392 |
| brms11a           | 657.1624003 | -0.072843964 | 0.1098017 | -0.663414 | 0.507066 | 0.935734 |
| slc27a1a          | 632.7085926 | 0.042654141  | 0.1024193 | 0.4164659 | 0.677069 | 0.965257 |
| ptp4a1            | 5524.140023 | -0.028311034 | 0.0738819 | -0.383193 | 0.701577 | 0.968134 |
| ell2              | 591.0514475 | 0.182701647  | 0.0971527 | 1.8805625 | 0.060031 | 0.478654 |
| mier3a            | 461.1730703 | -0.057951499 | 0.1102524 | -0.525626 | 0.599148 | 0.955891 |
| vldlr             | 1735.077725 | 0.043326088  | 0.0848121 | 0.5108479 | 0.609458 | 0.956718 |
| tuba814           | 9323.859507 | -0.046346989 | 0.1074301 | -0.431415 | 0.666166 | 0.964736 |
| stat1a            | 664.8621553 | -0.081053063 | 0.0991026 | -0.81787  | 0.413431 | 0.905838 |
| mpp5a             | 168.5982995 | -0.129965703 | 0.1737294 | -0.748093 | 0.454404 | 0.920544 |
| rragd             | 52.97890481 | 0.260645647  | 0.3004322 | 0.8675688 | 0.38563  | 0.89551  |
| was1b             | 592.0010963 | -0.160360612 | 0.1075103 | -1.491584 | 0.135808 | 0.672208 |
| prdm5             | 61.16875224 | 0.136220135  | 0.2556838 | 0.5327679 | 0.594194 | 0.954434 |
| ndufs5            | 2008.575559 | -0.075940898 | 0.1962739 | -0.386913 | 0.698821 | 0.967998 |
| maats1            | 44.95707412 | 0.258003963  | 0.2973033 | 0.867814  | 0.385496 | 0.89551  |
| arhgef7a          | 1122.598505 | 0.070712918  | 0.0811663 | 0.87121   | 0.383639 | 0.895192 |
| psmd9             | 243.9405205 | -0.266476121 | 0.139599  | -1.908868 | 0.056279 | 0.465438 |
| RAPH1 (1 of many) | 987.2091769 | -0.004809403 | 0.1087473 | -0.044225 | 0.964725 | 0.996004 |
| shisa4            | 396.5106316 | 0.001583425  | 0.1371699 | 0.0115435 | 0.99079  | 0.997679 |
| ptpn18            | 17.06121104 | 0.442387044  | 0.4728532 | 0.9355696 | 0.349495 | 0.880195 |
| itgav             | 2148.592597 | 0.206526474  | 0.0776739 | 2.6588906 | 0.00784  | 0.142065 |
| rpl23a            | 16859.79678 | -0.348215895 | 0.0811132 | -4.292962 | 1.76E-05 | 0.001125 |
| snx14             | 931.6448837 | -0.010792253 | 0.0870612 | -0.123962 | 0.901346 | 0.990121 |
| tas1r3            | 2.952202733 | -1.831067659 | 1.2689793 | -1.442945 | 0.149036 | NA       |
| med17             | 260.4170752 | -0.21655892  | 0.1353601 | -1.599873 | 0.109627 | 0.623766 |
| nkx1.21a          | 15.81143197 | -0.445878682 | 0.5170435 | -0.862362 | 0.388488 | 0.896271 |
| itga5             | 368.3945405 | 0.019143361  | 0.1181965 | 0.1619622 | 0.871336 | 0.987754 |
| slc18a3a          | 864.4162527 | 0.193403157  | 0.0907489 | 2.1311906 | 0.033073 | 0.354192 |
| crlf1b            | 30.14985461 | -0.00047302  | 0.3682755 | -0.001284 | 0.998975 | 0.999632 |
| atp6v1h           | 2668.358836 | 0.014063281  | 0.0702665 | 0.2001419 | 0.84137  | 0.985174 |
| ugt5c2            | 4.33346125  | 0.014887252  | 0.8984707 | 0.0165695 | 0.98678  | NA       |
| stxbp51           | 333.6195953 | 0.024940196  | 0.1249947 | 0.1995301 | 0.841848 | 0.985174 |
| triobpb           | 351.7599854 | -0.164950542 | 0.1188187 | -1.388254 | 0.16506  | 0.721223 |
| smad2             | 874.0817844 | 0.02262727   | 0.094768  | 0.2387648 | 0.811288 | 0.981081 |
| exosc9            | 221.2938546 | 0.043944217  | 0.1442945 | 0.3045453 | 0.760712 | 0.975374 |
| rbm25b            | 1701.372787 | -0.040136714 | 0.0807983 | -0.496752 | 0.619364 | 0.957354 |
| nrcama            | 246.1294356 | 0.011850605  | 0.1359345 | 0.0871788 | 0.930529 | 0.992702 |
| laptm4a           | 2770.299717 | 0.016176961  | 0.0712099 | 0.2271728 | 0.820289 | 0.981594 |
| ywhael            | 4816.074097 | 0.011105368  | 0.0751088 | 0.147857  | 0.882456 | 0.988344 |
| hmgb3b            | 1081.867582 | -0.128784517 | 0.086201  | -1.494003 | 0.135175 | 0.670689 |
| mapk12b           | 15.60658749 | -0.051047287 | 0.5238122 | -0.097453 | 0.922366 | 0.99233  |
| rpl38             | 3045.811881 | -0.30148704  | 0.1141575 | -2.640974 | 0.008267 | 0.147176 |
| atrnl1b           | 1467.692696 | 0.053776172  | 0.0857577 | 0.6270712 | 0.530613 | 0.942209 |
| esyt3             | 200.0014897 | 0.161653527  | 0.1456704 | 1.1097211 | 0.267119 | 0.833191 |
| fabp2             | 2097.296366 | -0.919807631 | 0.1004552 | -9.156397 | 5.37E-20 | 4.82E-17 |
| polr1e            | 228.6445989 | 0.016776503  | 0.1597585 | 0.1050116 | 0.916367 | 0.991314 |
| slc19a3a          | 11.00283241 | 0.014780194  | 0.6073078 | 0.0243372 | 0.980584 | NA       |

|            |             |              |           |           |          |          |
|------------|-------------|--------------|-----------|-----------|----------|----------|
| pdgfr1     | 367.3030301 | 0.227073226  | 0.1247102 | 1.8208071 | 0.068636 | 0.513124 |
| pcdh8      | 227.5483266 | 0.445931028  | 0.1478384 | 3.016342  | 0.002558 | 0.064039 |
| grap2a     | 38.60215959 | 0.089216844  | 0.3122717 | 0.2857026 | 0.775106 | 0.975687 |
| saxo2      | 11.25041867 | -0.930583492 | 0.651083  | -1.429286 | 0.152922 | 0.702086 |
| ddi2       | 1199.477964 | 0.093032946  | 0.0819409 | 1.1353669 | 0.256222 | 0.824633 |
| anp32a     | 8789.5026   | -0.142111252 | 0.0677799 | -2.096657 | 0.036024 | 0.370238 |
| agpat9l    | 279.6323191 | -0.264810674 | 0.136367  | -1.941898 | 0.05215  | 0.44874  |
| asb7       | 243.5815639 | -0.025025793 | 0.136402  | -0.183471 | 0.854429 | 0.985174 |
| rtn1a      | 9223.066355 | 0.048220854  | 0.0633111 | 0.7616493 | 0.446269 | 0.917154 |
| cyp2x10.2  | 1.012669898 | -0.989442317 | 1.8898446 | -0.523558 | 0.600586 | NA       |
| pip5k1bb   | 234.4395109 | -0.170972089 | 0.1373295 | -1.244977 | 0.21314  | 0.781631 |
| her6       | 1022.993407 | -0.139281177 | 0.090549  | -1.538186 | 0.124003 | 0.652658 |
| otop2      | 34.32680789 | -0.782254643 | 0.3322687 | -2.354284 | 0.018558 | 0.253962 |
| supt6h     | 2516.027899 | 0.008185257  | 0.0735977 | 0.1112162 | 0.911445 | 0.991066 |
| fn1b       | 4847.688647 | 0.034214695  | 0.0811427 | 0.4216608 | 0.673273 | 0.965257 |
| brd3a      | 987.9348863 | 0.054911295  | 0.0866969 | 0.6333708 | 0.526492 | 0.940506 |
| clqtnf6b   | 75.95694077 | 0.237667841  | 0.2372941 | 1.0015751 | 0.316549 | 0.867129 |
| rgpl       | 276.987119  | 0.061818214  | 0.1394568 | 0.4432784 | 0.657564 | 0.96252  |
| ak4        | 645.0252541 | -0.036742372 | 0.0961257 | -0.382233 | 0.702289 | 0.968134 |
| rras       | 603.645735  | -0.167179551 | 0.1019301 | -1.640139 | 0.100976 | 0.604004 |
| irf4a      | 4.272475133 | -0.195838938 | 0.9343848 | -0.209591 | 0.833987 | NA       |
| nlk1       | 1582.710443 | 0.051577151  | 0.0758196 | 0.6802617 | 0.496339 | 0.932415 |
| dus4l      | 94.20559064 | 0.019559993  | 0.2091078 | 0.0935402 | 0.925474 | 0.992676 |
| kcnmb2     | 23.49231658 | 0.032636729  | 0.4414577 | 0.0739295 | 0.941067 | 0.992857 |
| nadka      | 18.35575191 | -0.21905312  | 0.4855097 | -0.451182 | 0.651859 | 0.960708 |
| clnd       | 4.552851705 | -0.30246027  | 0.8915766 | -0.339242 | 0.734427 | NA       |
| phf8       | 1022.58731  | 0.010779435  | 0.084761  | 0.1271745 | 0.898802 | 0.990121 |
| DMWD       | 27.04716774 | -0.28161997  | 0.3753379 | -0.75031  | 0.453068 | 0.919811 |
| zgc:111983 | 2747.823718 | 0.320640935  | 0.1909021 | 1.6796096 | 0.093033 | 0.580695 |
| sgk2b      | 320.2919371 | 0.338535508  | 0.1320811 | 2.5630875 | 0.010375 | 0.17519  |
| lsm14aa    | 703.7356155 | -0.035178983 | 0.0972031 | -0.361912 | 0.717418 | 0.96909  |
| kaznb      | 219.7611419 | -0.006620184 | 0.1494824 | -0.044287 | 0.964675 | 0.996004 |
| chrna2a    | 46.46349634 | 0.151123041  | 0.3036332 | 0.4977158 | 0.618684 | 0.957354 |
| csrpla     | 332.7047207 | 0.059708159  | 0.118983  | 0.5018209 | 0.615794 | 0.95688  |
| nectin3b   | 148.9951157 | -0.22669946  | 0.16464   | -1.37694  | 0.168531 | 0.725919 |
| gpr27      | 342.8201108 | 0.014531074  | 0.1234807 | 0.1176789 | 0.906322 | 0.990702 |
| map2k2a    | 1115.253269 | 0.032969637  | 0.0914389 | 0.3605647 | 0.718425 | 0.96909  |
| hnflba     | 411.9210575 | -0.481554774 | 0.1276667 | -3.771969 | 0.000162 | 0.00723  |
| napga      | 554.834718  | -0.070386046 | 0.1005896 | -0.699735 | 0.484093 | 0.929461 |
| pspc1      | 753.4191739 | -0.091221212 | 0.0897982 | -1.015846 | 0.309703 | 0.86172  |
| ppp2r2ab   | 1019.630046 | 0.121631867  | 0.094525  | 1.2867692 | 0.198175 | 0.76333  |
| slitrk2    | 265.3169652 | -0.012171886 | 0.1468151 | -0.082906 | 0.933926 | 0.992702 |
| lnpk       | 375.7316698 | -0.03564496  | 0.1184512 | -0.300925 | 0.763472 | 0.975374 |
| eomesa     | 396.9979976 | -0.188824669 | 0.1163911 | -1.622329 | 0.104733 | 0.612652 |
| drg2       | 458.0409451 | -0.040045533 | 0.110942  | -0.360959 | 0.71813  | 0.96909  |
| bud13      | 241.4643905 | -0.070007706 | 0.1384186 | -0.505768 | 0.61302  | 0.95688  |
| fam49a     | 503.4503518 | -0.183562959 | 0.1262184 | -1.454328 | 0.145855 | 0.691641 |
| ripk1l     | 39.30113542 | 0.180856561  | 0.3116564 | 0.5803075 | 0.561707 | 0.948728 |
| pth2r      | 19.32556115 | -0.002884734 | 0.4506789 | -0.006401 | 0.994893 | 0.998694 |
| arhgef6    | 437.2338173 | -0.036561509 | 0.1088406 | -0.335918 | 0.736933 | 0.972535 |
| rpl12      | 17308.03098 | -0.414720974 | 0.0786846 | -5.270678 | 1.36E-07 | 1.82E-05 |
| wipf2b     | 651.1523377 | -0.111252231 | 0.0987882 | -1.126169 | 0.260094 | 0.828288 |
| specc1la   | 785.0583491 | -0.00880547  | 0.0896923 | -0.098174 | 0.921794 | 0.992138 |
| tmem178b   | 561.9277918 | 0.027414919  | 0.1115233 | 0.2458222 | 0.80582  | 0.979908 |

|                    |             |              |           |           |          |          |
|--------------------|-------------|--------------|-----------|-----------|----------|----------|
| mllt3              | 330.3099598 | 0.140524133  | 0.1311709 | 1.0713056 | 0.284032 | 0.844697 |
| klh141b            | 1095.106387 | 0.124793124  | 0.1126857 | 1.1074441 | 0.268102 | 0.833343 |
| fam234b            | 523.4265908 | 0.012475769  | 0.1059957 | 0.1177007 | 0.906305 | 0.990702 |
| slc24a3            | 60.24628482 | 0.312542593  | 0.2605944 | 1.1993451 | 0.230394 | 0.798424 |
| snd1               | 3590.783254 | -0.149212565 | 0.07865   | -1.897172 | 0.057805 | 0.471676 |
| elov14a            | 142.644092  | 0.006728665  | 0.1676055 | 0.0401459 | 0.967977 | 0.996315 |
| cass4              | 22.70800178 | 0.355901001  | 0.4153443 | 0.8568819 | 0.39151  | 0.897688 |
| rb1                | 489.1686445 | 0.065341294  | 0.1053391 | 0.6202947 | 0.535064 | 0.943336 |
| copz2              | 740.0224563 | 0.058063258  | 0.095677  | 0.6068674 | 0.543939 | 0.945438 |
| arntl1a            | 608.6353475 | -0.133692302 | 0.0960324 | -1.392159 | 0.163874 | 0.71945  |
| nt5dc1             | 140.7228392 | 0.020187699  | 0.1823781 | 0.1106915 | 0.911861 | 0.991066 |
| sult1st6           | 123.9905369 | -0.146640079 | 0.1809584 | -0.810352 | 0.417738 | 0.906237 |
| wdr26b             | 1400.205911 | -0.089056229 | 0.0798958 | -1.114654 | 0.264999 | 0.830836 |
| gtf2f2b            | 0.349228403 | 0.005884014  | 3.2372587 | 0.0018176 | 0.99855  | NA       |
| urod               | 165.3844148 | 0.183734175  | 0.1687611 | 1.0887233 | 0.276276 | 0.839541 |
| galnt9             | 781.8181277 | 0.059623849  | 0.1006146 | 0.5925966 | 0.553451 | 0.947265 |
| mycn               | 2130.824851 | 0.972317845  | 0.0784082 | 12.400723 | 2.59E-35 | 1.28E-31 |
| eef1a2             | 38.39117075 | 0.163036187  | 0.3307921 | 0.4928661 | 0.622107 | 0.957354 |
| gnmt               | 756.0963196 | 0.095812043  | 0.0988164 | 0.9695962 | 0.332248 | 0.874653 |
| parp9              | 203.0340818 | -0.248839256 | 0.1490026 | -1.670033 | 0.094913 | 0.585587 |
| asic2              | 113.5039116 | 0.032438126  | 0.1980058 | 0.1638241 | 0.86987  | 0.987395 |
| nkain1             | 690.0975091 | -0.089583971 | 0.0944732 | -0.948248 | 0.343003 | 0.878434 |
| kifap3b            | 1115.615611 | -0.009575813 | 0.0900913 | -0.10629  | 0.915352 | 0.991171 |
| si:ch1073-349o24.2 | 69.46429725 | 0.422675622  | 0.2492755 | 1.6956166 | 0.089959 | 0.57419  |
| glra4a             | 251.0425727 | 0.227141041  | 0.141479  | 1.605475  | 0.108389 | 0.620165 |
| trh                | 148.4996028 | 0.322493589  | 0.1737838 | 1.8557177 | 0.063494 | 0.49217  |
| stx17              | 71.17957387 | -0.289000258 | 0.2306691 | -1.252878 | 0.21025  | 0.778043 |
| enpp4              | 1.292891743 | 2.681696034  | 1.8542769 | 1.446222  | 0.148115 | NA       |
| phf21aa            | 587.6640791 | -0.04257693  | 0.1153096 | -0.36924  | 0.711949 | 0.969006 |
| mpped2a            | 925.7492766 | -0.064650665 | 0.0894454 | -0.722794 | 0.469806 | 0.924741 |
| kcns3a             | 125.7880363 | 0.364804271  | 0.1988532 | 1.8345408 | 0.066574 | 0.504929 |
| myo3b              | 177.0397844 | 0.206292904  | 0.1694318 | 1.2175575 | 0.223392 | 0.789519 |
| oprk1              | 12.44576503 | 0.542877233  | 0.5627675 | 0.9646563 | 0.334717 | 0.875699 |
| lhx6               | 242.5528803 | -0.069955846 | 0.134798  | -0.518968 | 0.603783 | 0.956207 |
| far1               | 203.2601759 | 0.049293088  | 0.1542931 | 0.3194769 | 0.749365 | 0.97419  |
| impdh2             | 751.4952161 | 0.072014213  | 0.0943767 | 0.7630508 | 0.445433 | 0.917117 |
| si:ch1073-459j12.1 | 806.8669291 | 0.219350895  | 0.1027137 | 2.1355563 | 0.032716 | 0.352352 |
| wnt8b              | 54.85333849 | -0.174322399 | 0.2710744 | -0.64308  | 0.520172 | 0.939056 |
| arl8ba             | 579.3598032 | -0.121548217 | 0.1145009 | -1.061548 | 0.288441 | 0.845979 |
| lrp5               | 1240.342293 | -0.061409945 | 0.0854965 | -0.718274 | 0.472588 | 0.924838 |
| cacnalab           | 79.57386197 | 0.2004276    | 0.2284438 | 0.8773605 | 0.380291 | 0.895192 |
| fbxo38             | 416.4018174 | -0.015925662 | 0.1152523 | -0.138181 | 0.890097 | 0.989291 |
| tbx16l             | 4.477879896 | -0.543281226 | 0.8943932 | -0.60743  | 0.543566 | NA       |
| gdpd3b             | 55.71316196 | -0.760155637 | 0.2833865 | -2.682399 | 0.00731  | 0.134958 |
| csell              | 1606.009489 | 0.070378067  | 0.0770832 | 0.9130143 | 0.361235 | 0.885686 |
| zak                | 25.67069769 | -0.21996413  | 0.4090918 | -0.537689 | 0.590792 | 0.954193 |
| ccdc113            | 14.56857614 | 0.191006562  | 0.5014414 | 0.380915  | 0.703266 | 0.968134 |
| celf3b             | 657.7707934 | 0.045338154  | 0.0969639 | 0.4675779 | 0.640087 | 0.959994 |
| creld1b            | 321.7409957 | 0.012231682  | 0.1397382 | 0.0875328 | 0.930248 | 0.992702 |
| hoxa11b            | 85.25744094 | -0.029050441 | 0.2131165 | -0.136313 | 0.891574 | 0.989291 |
| ms4a17a.6          | 4.621741319 | -0.211505468 | 0.8690414 | -0.243378 | 0.807713 | NA       |
| uox                | 916.8109836 | 0.402994464  | 0.0929044 | 4.3377349 | 1.44E-05 | 0.000972 |
| ttc9c              | 77.29777694 | -0.262284942 | 0.2325177 | -1.128021 | 0.259311 | 0.827577 |
| hnrpk1             | 1563.721033 | 0.082265351  | 0.0809122 | 1.0167232 | 0.309285 | 0.861381 |

|                   |             |              |           |           |          |          |
|-------------------|-------------|--------------|-----------|-----------|----------|----------|
| tmigd1            | 21.68657553 | -1.010167047 | 0.4398489 | -2.296623 | 0.02164  | 0.278385 |
| cnot4a            | 388.7919095 | -0.034858715 | 0.1263226 | -0.27595  | 0.782587 | 0.97627  |
| mrps18b           | 293.146816  | 0.099138729  | 0.1272308 | 0.7792038 | 0.43586  | 0.914408 |
| si:dkey-19a16.16  | 0 NA        | NA           | NA        | NA        | NA       | NA       |
| ankrd501          | 280.2217057 | 0.221121349  | 0.1545878 | 1.4303935 | 0.152604 | 0.701776 |
| rhcgl1            | 227.3036038 | 0.945229799  | 0.1882643 | 5.0207608 | 5.15E-07 | 5.78E-05 |
| pias4a            | 1145.313722 | 0.069926916  | 0.0810083 | 0.8632066 | 0.388024 | 0.896144 |
| aqp10a            | 20.80455487 | 0.816563496  | 0.443574  | 1.8408731 | 0.06564  | 0.500566 |
| xab2              | 500.2886875 | -0.175064264 | 0.117922  | -1.484577 | 0.137656 | 0.675209 |
| her13             | 95.91855796 | 0.023950059  | 0.2120953 | 0.1129212 | 0.910093 | 0.990702 |
| itm2ba            | 3893.418513 | 0.032571415  | 0.0721681 | 0.4513271 | 0.651754 | 0.960708 |
| cx43.4            | 953.3706508 | 0.038397304  | 0.0919298 | 0.4176808 | 0.67618  | 0.965257 |
| lipia             | 233.7116207 | -0.150406151 | 0.1420585 | -1.058762 | 0.289708 | 0.846246 |
| asb6              | 125.7708345 | -0.061668123 | 0.1773393 | -0.347741 | 0.728035 | 0.970402 |
| acat2             | 493.714183  | -0.811775629 | 0.1288669 | -6.299332 | 2.99E-10 | 6.57E-08 |
| slc6a16a          | 75.55652013 | 0.294045053  | 0.2337001 | 1.2582153 | 0.208314 | 0.775404 |
| mrto4             | 187.0989118 | 0.123357923  | 0.1597666 | 0.7721135 | 0.440047 | 0.916082 |
| cnot3a            | 1032.299694 | 0.010009217  | 0.0848088 | 0.118021  | 0.906051 | 0.990702 |
| gtf2h4            | 118.953651  | 0.241536965  | 0.1925467 | 1.2544329 | 0.209685 | 0.777044 |
| psmc3             | 3358.260306 | 0.015198262  | 0.0774732 | 0.1961746 | 0.844474 | 0.985174 |
| llcama            | 418.3806976 | 0.032463709  | 0.1277947 | 0.2540302 | 0.799472 | 0.979366 |
| kcnk2b            | 15.44270366 | 0.031028487  | 0.486636  | 0.0637612 | 0.94916  | 0.99381  |
| itgblbp1          | 396.9378821 | -0.020503952 | 0.1194151 | -0.171703 | 0.863671 | 0.985952 |
| aigl              | 185.3387701 | -0.194530271 | 0.1674945 | -1.161413 | 0.245474 | 0.815388 |
| plxna3            | 578.7140999 | -0.062526421 | 0.1060165 | -0.58978  | 0.555338 | 0.947452 |
| recq1             | 239.2967951 | -0.037680919 | 0.145465  | -0.259038 | 0.795606 | 0.978498 |
| sash1a            | 736.9283012 | -0.324648949 | 0.0906487 | -3.581399 | 0.000342 | 0.013122 |
| slc30a4           | 357.824557  | -0.18510561  | 0.1395215 | -1.326717 | 0.184602 | 0.747376 |
| nadk2             | 275.155108  | -0.128777197 | 0.1335154 | -0.964512 | 0.334789 | 0.875699 |
| zbtb16a           | 763.9870208 | -0.23080381  | 0.091098  | -2.533578 | 0.01129  | 0.184823 |
| ppplr8a           | 59.20336127 | -0.193479904 | 0.2498887 | -0.774264 | 0.438775 | 0.915997 |
| grm2b             | 857.6923152 | 0.1158302    | 0.0918971 | 1.2604337 | 0.207513 | 0.775175 |
| rael              | 762.5264825 | 0.018861581  | 0.0928738 | 0.2030883 | 0.839066 | 0.984979 |
| mtal              | 510.3977462 | -0.105528359 | 0.1072672 | -0.983789 | 0.325219 | 0.871629 |
| CR846090.1        | 0.166657454 | -0.955901296 | 4.0804729 | -0.234262 | 0.814781 | NA       |
| cnpy2             | 270.6971015 | 0.188110217  | 0.1351512 | 1.39185   | 0.163968 | 0.71945  |
| abcel             | 2658.013137 | -0.018402448 | 0.0771692 | -0.238469 | 0.811517 | 0.981081 |
| wdr55             | 140.0990577 | 0.228151182  | 0.1691164 | 1.3490776 | 0.177312 | 0.738201 |
| actn1             | 1438.413122 | 0.111293306  | 0.0814404 | 1.3665618 | 0.171763 | 0.730416 |
| ncamlb            | 573.5755885 | 0.037191425  | 0.1023769 | 0.3632795 | 0.716396 | 0.96909  |
| pbk               | 307.7011987 | -0.246691043 | 0.1266233 | -1.948228 | 0.051388 | 0.444245 |
| ryk               | 644.8089374 | 0.140777633  | 0.0988256 | 1.4245053 | 0.1543   | 0.70398  |
| mycb              | 589.1991125 | 0.115278171  | 0.1058675 | 1.0888906 | 0.276202 | 0.839541 |
| acp2              | 456.4773856 | -0.071911866 | 0.1219005 | -0.589923 | 0.555243 | 0.947449 |
| rundc3aa          | 37.82043399 | 0.362617613  | 0.3266962 | 1.1099535 | 0.267019 | 0.833191 |
| ric8a             | 582.9493911 | 0.105265633  | 0.101268  | 1.0394762 | 0.298583 | 0.854441 |
| usel              | 416.9958231 | -0.023680582 | 0.1194976 | -0.198168 | 0.842914 | 0.985174 |
| rab5ab            | 461.0957272 | -0.102666814 | 0.107567  | -0.954445 | 0.339858 | 0.87805  |
| nipsnap2          | 570.2036172 | 0.072713014  | 0.1092634 | 0.6654837 | 0.505741 | 0.935724 |
| mynn              | 484.4084503 | -0.03648875  | 0.1093592 | -0.33366  | 0.738636 | 0.972722 |
| si:ch211-251b21.1 | 8100.669951 | 0.210512137  | 0.0639694 | 3.2908231 | 0.000999 | 0.030961 |
| ela3l             | 132.7559563 | -0.721788767 | 0.2137083 | -3.377448 | 0.000732 | 0.023992 |
| myf5              | 39.568704   | -0.176763308 | 0.3111251 | -0.568142 | 0.569938 | 0.948983 |
| ect2              | 326.2303885 | -0.09764471  | 0.1249383 | -0.781543 | 0.434483 | 0.914278 |

|           |             |              |           |           |          |          |
|-----------|-------------|--------------|-----------|-----------|----------|----------|
| yipf5     | 622.391728  | 0.132045004  | 0.1082414 | 1.2199125 | 0.222498 | 0.788748 |
| mrpl57    | 450.6635387 | -0.033281824 | 0.1115504 | -0.298357 | 0.765431 | 0.975374 |
| metrnlb   | 36.93258875 | -0.086238575 | 0.3139839 | -0.274659 | 0.783578 | 0.97627  |
| aco2      | 9423.54146  | 0.088104541  | 0.0635651 | 1.3860514 | 0.165731 | 0.721576 |
| sh3gl3b   | 190.3223862 | -0.621032914 | 0.1522351 | -4.079434 | 4.51E-05 | 0.002487 |
| tmpoa     | 437.8220793 | -0.135285765 | 0.12313   | -1.098723 | 0.271889 | 0.836816 |
| rpl7      | 21923.34914 | -0.362203619 | 0.0906812 | -3.994252 | 6.49E-05 | 0.0034   |
| chmp4bb   | 1197.679138 | -0.12172215  | 0.0840681 | -1.447899 | 0.147645 | 0.694905 |
| tbx16     | 6.739927876 | 0.503079728  | 0.7582505 | 0.6634743 | 0.507027 | NA       |
| tcap      | 427.548985  | -0.367166687 | 0.157901  | -2.325297 | 0.020056 | 0.266383 |
| degs1     | 823.2495079 | 0.078309614  | 0.0994604 | 0.787345  | 0.43108  | 0.91234  |
| dmrt1     | 3.640076028 | -1.146635083 | 1.0659907 | -1.075652 | 0.282083 | NA       |
| fgf20a    | 67.56214406 | -0.034904258 | 0.2372009 | -0.147151 | 0.883013 | 0.988659 |
| cxcr3.1   | 2.665287728 | -1.125376781 | 1.1680178 | -0.963493 | 0.3353   | NA       |
| UBL4A     | 256.3053814 | -0.047895112 | 0.1365628 | -0.350719 | 0.7258   | 0.970402 |
| sft2d1    | 504.62287   | 0.004844884  | 0.107449  | 0.0450901 | 0.964036 | 0.995927 |
| AMDHD1    | 68.6935162  | -0.11671258  | 0.2436676 | -0.478983 | 0.631951 | 0.957356 |
| tcf7l1b   | 593.1851087 | -0.099819692 | 0.1263383 | -0.790099 | 0.42947  | 0.911489 |
| dysf      | 282.830811  | 0.040572501  | 0.147569  | 0.2749393 | 0.783363 | 0.97627  |
| slc26a3.1 | 0.839019598 | -0.671793185 | 2.356059  | -0.285134 | 0.775541 | NA       |
| odc1      | 3797.657058 | 0.226022798  | 0.0933474 | 2.4213084 | 0.015465 | 0.228575 |
| ubtdla    | 252.0472854 | 0.341654907  | 0.1353947 | 2.5233985 | 0.011623 | 0.189002 |
| kenk6     | 275.777184  | -0.168657025 | 0.1568575 | -1.075224 | 0.282274 | 0.843666 |
| cct7      | 5680.448834 | -0.058053623 | 0.1001923 | -0.579422 | 0.562304 | 0.948728 |
| irf2a     | 238.7295902 | 0.009635834  | 0.13669   | 0.0704941 | 0.9438   | 0.993364 |
| rnd3b     | 172.7219373 | 0.131291456  | 0.1581714 | 0.8300582 | 0.406506 | 0.901305 |
| lrrk1     | 16.84437373 | 0.064144893  | 0.4604787 | 0.1393005 | 0.889213 | 0.989291 |
| strap     | 1052.445045 | -0.058012851 | 0.0894585 | -0.648489 | 0.516669 | 0.938543 |
| phox2a    | 444.8420847 | -0.248563394 | 0.1145944 | -2.16907  | 0.030077 | 0.335259 |
| barx1     | 296.2612607 | -0.168173267 | 0.1265989 | -1.328395 | 0.184048 | 0.747376 |
| ppifa     | 106.8455371 | -0.16456251  | 0.201664  | -0.816023 | 0.414487 | 0.906237 |
| slc2a1b   | 255.3773369 | -0.168261245 | 0.1568398 | -1.072822 | 0.283351 | 0.84466  |
| arid2     | 1048.556434 | -0.008383775 | 0.0984835 | -0.085129 | 0.932159 | 0.992702 |
| chmp4c    | 90.96099354 | 0.097200608  | 0.2116655 | 0.4592179 | 0.646078 | 0.96029  |
| ftcd      | 599.8366698 | 0.043236963  | 0.1117534 | 0.3868963 | 0.698833 | 0.967998 |
| apoll     | 114.3368435 | -0.248202104 | 0.1976611 | -1.255695 | 0.209227 | 0.776073 |
| ndor1     | 225.4285823 | 0.041132059  | 0.1441769 | 0.2852888 | 0.775423 | 0.975687 |
| prdm12b   | 367.6373378 | 0.066078003  | 0.1177684 | 0.5610843 | 0.57474  | 0.950037 |
| avpr2aa   | 36.80254798 | -0.153661374 | 0.3226378 | -0.476266 | 0.633885 | 0.95776  |
| ube2ib    | 2044.699411 | -0.091468814 | 0.0855804 | -1.068805 | 0.285157 | 0.845129 |
| fbx118    | 110.0837487 | -0.041809196 | 0.2093375 | -0.199721 | 0.841698 | 0.985174 |
| ift81     | 73.32075891 | -0.202938653 | 0.2341354 | -0.866758 | 0.386075 | 0.89551  |
| slc25a39  | 523.2792199 | 0.048500941  | 0.1064017 | 0.4558285 | 0.648513 | 0.960708 |
| srgap1a   | 49.10452111 | 0.212442167  | 0.285784  | 0.7433662 | 0.45726  | 0.921679 |
| tdrd1     | 26.2448842  | -0.066970736 | 0.381707  | -0.175451 | 0.860726 | 0.985773 |
| ifit10    | 5.462608657 | -0.826996813 | 0.8225468 | -1.00541  | 0.314699 | NA       |
| fbxo8     | 238.7632575 | 0.306610305  | 0.1438763 | 2.1310685 | 0.033084 | 0.354192 |
| rpe65a    | 3202.571386 | -0.151647976 | 0.1097589 | -1.381647 | 0.16708  | 0.723651 |
| epc2      | 541.8843625 | -0.140217968 | 0.1098348 | -1.276626 | 0.201734 | 0.767736 |
| adrb1     | 19.21627181 | -0.1997051   | 0.4270132 | -0.467679 | 0.640014 | 0.959994 |
| st3gal8   | 161.4323228 | 0.179271721  | 0.1824413 | 0.9826267 | 0.325791 | 0.871896 |
| uf11      | 616.1083569 | -0.151721328 | 0.0958999 | -1.58208  | 0.113631 | 0.631874 |
| kmt2e     | 1641.760292 | -0.156173485 | 0.0995061 | -1.569487 | 0.116534 | 0.639148 |
| ndufs2    | 3937.723237 | 0.076646641  | 0.0749362 | 1.022825  | 0.306391 | 0.860027 |

|                    |             |              |           |           |          |          |
|--------------------|-------------|--------------|-----------|-----------|----------|----------|
| zcchc9             | 160.4517549 | 0.1699508    | 0.1581134 | 1.0748662 | 0.282435 | 0.843666 |
| itln1              | 3.459158892 | 0.170002151  | 1.0220201 | 0.1663393 | 0.86789  | NA       |
| opn4.1             | 500.9303093 | 0.179359494  | 0.1305557 | 1.3738161 | 0.169499 | 0.726744 |
| sema3b1            | 157.4549576 | 0.057588828  | 0.1696999 | 0.3393569 | 0.734341 | 0.972021 |
| cdh23              | 9.555134028 | -1.278876097 | 0.6802839 | -1.879915 | 0.06012  | NA       |
| appbp2             | 818.2911587 | 0.090944703  | 0.0919102 | 0.9894949 | 0.322421 | 0.870226 |
| crybb111           | 30709.61321 | -0.125949877 | 0.0788796 | -1.596735 | 0.110325 | 0.624637 |
| si:ch1073-155h21.1 | 7.164081389 | -0.039148791 | 0.7430108 | -0.052689 | 0.957979 | NA       |
| bloc1s4            | 160.9983117 | -0.097562688 | 0.1636449 | -0.596185 | 0.551051 | 0.946549 |
| zmynd8             | 328.2005596 | 0.127504001  | 0.1227248 | 1.0389423 | 0.298832 | 0.85478  |
| stxbp2             | 589.8654677 | -0.132594908 | 0.1009942 | -1.312897 | 0.189218 | 0.753954 |
| wwox               | 153.8753649 | -0.209076548 | 0.1671366 | -1.250932 | 0.210959 | 0.778412 |
| gins1              | 127.9310959 | -0.020591645 | 0.1810058 | -0.113762 | 0.909426 | 0.990702 |
| mkrn2              | 417.1198203 | -0.102583462 | 0.1112741 | -0.921899 | 0.356581 | 0.883422 |
| cnot4b             | 457.6253509 | 0.075060645  | 0.1130571 | 0.663918  | 0.506743 | 0.935734 |
| nsfa               | 4446.62419  | 0.072720804  | 0.0720162 | 1.0097839 | 0.312599 | 0.864642 |
| crybb113           | 122.6192105 | -0.017071636 | 0.1923354 | -0.08876  | 0.929273 | 0.992702 |
| ccnh               | 109.4951022 | -0.080892824 | 0.1943294 | -0.416266 | 0.677215 | 0.965257 |
| amph               | 2660.231448 | 0.05899996   | 0.0743853 | 0.7931674 | 0.42768  | 0.91075  |
| ghrb               | 321.7007615 | 0.091503502  | 0.1240726 | 0.7374994 | 0.460819 | 0.921978 |
| ttyh3b             | 3719.469383 | 0.085365313  | 0.069974  | 1.2199579 | 0.222481 | 0.788748 |
| ppdpfa             | 1893.008582 | 0.140991128  | 0.093217  | 1.5125038 | 0.130406 | 0.662797 |
| cullb              | 632.2025832 | -0.228584505 | 0.0959228 | -2.383004 | 0.017172 | 0.242176 |
| nfkbiab            | 1361.571687 | -0.412441822 | 0.1002138 | -4.115621 | 3.86E-05 | 0.002188 |
| fabp7a             | 11931.62973 | 0.053412179  | 0.065513  | 0.8152915 | 0.414906 | 0.906237 |
| nsa2               | 3951.24262  | -0.397104342 | 0.091976  | -4.317477 | 1.58E-05 | 0.001037 |
| adamts8a           | 60.24414993 | 0.222404166  | 0.2537315 | 0.8765336 | 0.38074  | 0.895192 |
| rab3i11            | 141.5870594 | -0.104519961 | 0.1717004 | -0.608735 | 0.5427   | 0.944974 |
| lgsn               | 1894.001707 | 0.186667591  | 0.0759956 | 2.4562949 | 0.014038 | 0.214185 |
| sub1b              | 571.7184647 | -0.08300847  | 0.1099224 | -0.755155 | 0.450156 | 0.918761 |
| nudt8              | 135.0305915 | 0.020450911  | 0.1703274 | 0.1200683 | 0.904429 | 0.99032  |
| efnbl              | 176.3694374 | 0.241573349  | 0.1572968 | 1.5357804 | 0.124592 | 0.653845 |
| rgl2               | 30.7308749  | -0.381328496 | 0.3430096 | -1.111714 | 0.266261 | 0.832419 |
| stn1               | 89.68809231 | -0.13556973  | 0.2171093 | -0.624431 | 0.532345 | 0.942651 |
| zygl1              | 683.2049652 | 0.120393043  | 0.0933253 | 1.2900367 | 0.197038 | 0.761944 |
| atplala.2          | 3077.397451 | -0.021490017 | 0.094138  | -0.228282 | 0.819427 | 0.981594 |
| ill151             | 20.4824893  | -0.161944965 | 0.4276664 | -0.378671 | 0.704932 | 0.968134 |
| tsr1               | 1048.244596 | -0.099284799 | 0.0910162 | -1.090847 | 0.27534  | 0.839541 |
| uqcrfs1            | 4121.122388 | 0.006841077  | 0.0717631 | 0.0953286 | 0.924054 | 0.992676 |
| lmn13              | 91.8246231  | -0.002252514 | 0.2065637 | -0.010905 | 0.991299 | 0.997679 |
| cpne2              | 596.9169579 | -0.040693708 | 0.1038382 | -0.391895 | 0.695136 | 0.96736  |
| wdr61              | 363.5702998 | 0.085980123  | 0.1270708 | 0.6766316 | 0.49864  | 0.934006 |
| spg21              | 251.4055573 | 0.101661086  | 0.1414765 | 0.7185723 | 0.472404 | 0.924838 |
| klhdc10            | 542.4945921 | 0.004587929  | 0.1030787 | 0.044509  | 0.964499 | 0.995927 |
| sult5a1            | 22.72197104 | -0.360910393 | 0.4046026 | -0.892012 | 0.372386 | 0.892843 |
| vash2              | 592.5749792 | -0.319516756 | 0.1033488 | -3.091636 | 0.001991 | 0.053335 |
| blk                | 3.808222402 | -0.886825723 | 1.0837986 | -0.818257 | 0.413211 | NA       |
| tmx2b              | 1298.694265 | 0.038566917  | 0.0786029 | 0.4906549 | 0.623671 | 0.957354 |
| zgc:l12965         | 1.727511566 | 2.104037042  | 1.7084701 | 1.2315328 | 0.218124 | NA       |
| atp2blb            | 1230.644855 | 0.086780355  | 0.1005086 | 0.8634121 | 0.387911 | 0.896133 |
| ppp2r1ba           | 4952.986846 | -0.001013219 | 0.0677105 | -0.014964 | 0.988061 | 0.997369 |
| cst3               | 2579.653545 | -0.02314166  | 0.0734242 | -0.315177 | 0.752627 | 0.97481  |
| gas6               | 396.895015  | 0.10429034   | 0.1216465 | 0.8573227 | 0.391267 | 0.897688 |
| cyth3a             | 347.4285183 | 0.105876223  | 0.1168698 | 0.9059328 | 0.364971 | 0.886714 |

|                   |             |              |           |           |          |          |
|-------------------|-------------|--------------|-----------|-----------|----------|----------|
| zdhhc16a          | 377.9411398 | 0.048588045  | 0.1184984 | 0.4100313 | 0.681783 | 0.965476 |
| sp3b              | 884.5663964 | -0.064067106 | 0.094504  | -0.67793  | 0.497816 | 0.933482 |
| rnpepl1           | 294.0498863 | 0.036672303  | 0.1346882 | 0.2722755 | 0.78541  | 0.97627  |
| palmlb            | 1863.574786 | 0.127597804  | 0.0763934 | 1.6702728 | 0.094865 | 0.585477 |
| atf3              | 819.8448444 | 0.286502667  | 0.1161702 | 2.4662322 | 0.013654 | 0.20979  |
| camtalb           | 1665.202168 | 0.028354854  | 0.0788621 | 0.3595497 | 0.719184 | 0.969183 |
| map2kl            | 947.1321485 | 0.152751472  | 0.0863831 | 1.7683023 | 0.07701  | 0.540058 |
| ctsla             | 17394.22345 | 0.284580663  | 0.0782446 | 3.637065  | 0.000276 | 0.011106 |
| MCHR2 (1 of many) | 12.74084292 | -0.421911399 | 0.5607783 | -0.752368 | 0.45183  | 0.918761 |
| rtn4rll1a         | 9.5932182   | -0.718600694 | 0.6379388 | -1.126441 | 0.259979 | NA       |
| tra2a             | 1628.934481 | -0.081855454 | 0.0810262 | -1.010234 | 0.312383 | 0.864401 |
| pimr195           | 0           | NA           | NA        | NA        | NA       | NA       |
| dazap2            | 2686.62247  | -0.075763514 | 0.0709351 | -1.068069 | 0.28549  | 0.845164 |
| ehd3              | 21.06494903 | 0.405812782  | 0.4403468 | 0.9215754 | 0.35675  | 0.883422 |
| fanc1             | 16.84381509 | 0.50919413   | 0.4666962 | 1.0910613 | 0.275246 | 0.839541 |
| slc35b2           | 305.8638273 | -0.18998375  | 0.1279991 | -1.484259 | 0.13774  | 0.675209 |
| meox1             | 212.1134795 | -0.136765419 | 0.1468311 | -0.931447 | 0.351622 | 0.880769 |
| pdcd2             | 32.76028341 | -0.536678227 | 0.3550452 | -1.511577 | 0.130641 | 0.662797 |
| crnk11            | 445.8118757 | -0.023895211 | 0.1150569 | -0.207682 | 0.835478 | 0.984089 |
| lrp2b             | 60.00960839 | -2.926418003 | 0.3302418 | -8.861439 | 7.90E-19 | 6.01E-16 |
| si:ch211-196i2.1  | 624.6035421 | 0.319727356  | 0.1026179 | 3.1157089 | 0.001835 | 0.050201 |
| xpnpep3           | 272.0718139 | -0.059272544 | 0.1344349 | -0.440901 | 0.659284 | 0.962839 |
| ttc27             | 491.8081952 | -0.039201004 | 0.1082908 | -0.361997 | 0.717354 | 0.96909  |
| ptpn1             | 709.0535964 | 0.039708486  | 0.0956558 | 0.4151186 | 0.678055 | 0.965257 |
| hmx4              | 371.9510555 | 0.097793271  | 0.1250175 | 0.7822367 | 0.434075 | 0.914001 |
| gabpb2a           | 390.6634382 | -0.044050953 | 0.1189187 | -0.370429 | 0.711063 | 0.968985 |
| lhx1b             | 127.4261214 | 0.064754586  | 0.1854608 | 0.3491551 | 0.726973 | 0.970402 |
| itgallb           | 27.10516861 | -0.1930393   | 0.3638085 | -0.530607 | 0.595691 | 0.954434 |
| iars              | 1147.932881 | -0.077680686 | 0.1023261 | -0.759149 | 0.447764 | 0.917154 |
| hibadhb           | 1467.010252 | 0.074418583  | 0.0851649 | 0.8738173 | 0.382218 | 0.895192 |
| hnrnpaba          | 14118.50802 | -0.088873508 | 0.0707215 | -1.25667  | 0.208873 | 0.776073 |
| ckslb             | 238.8054091 | 0.178494901  | 0.1423218 | 1.2541638 | 0.209782 | 0.77726  |
| fth1b             | 586.3795822 | -0.136098623 | 0.0991282 | -1.372955 | 0.169766 | 0.726965 |
| si:ch211-220f16.2 | 329.076335  | -0.016966903 | 0.1291598 | -0.131364 | 0.895488 | 0.989814 |
| onecut1           | 80.17984846 | -0.04741022  | 0.2343907 | -0.20227  | 0.839706 | 0.984979 |
| masp2             | 150.191159  | 0.047171644  | 0.1778965 | 0.2651634 | 0.790884 | 0.977402 |
| nedd8             | 694.418251  | 0.007596964  | 0.1069245 | 0.0710498 | 0.943358 | 0.993364 |
| wtlb              | 26.63191858 | -0.30688994  | 0.3669666 | -0.836289 | 0.402993 | 0.90084  |
| pou2flb           | 218.1371432 | 0.04612418   | 0.1456103 | 0.3167645 | 0.751422 | 0.97419  |
| zgc:194189        | 13.5644973  | -0.592630444 | 0.5410046 | -1.095426 | 0.27333  | 0.838214 |
| nudt17            | 278.3581481 | -0.250667485 | 0.1325431 | -1.891215 | 0.058596 | 0.473924 |
| mxg               | 2.299317655 | 0.341892505  | 1.3878956 | 0.2463388 | 0.80542  | NA       |
| med31             | 275.6864082 | -0.017061013 | 0.1301862 | -0.131051 | 0.895735 | 0.989814 |
| kif18a            | 193.2071315 | -0.042639673 | 0.1500936 | -0.284087 | 0.776344 | 0.975826 |
| fam129bb          | 384.4979378 | -0.174448777 | 0.1247543 | -1.398339 | 0.162011 | 0.716531 |
| mepla.2           | 14.01425296 | -1.497971949 | 0.5432484 | -2.757435 | 0.005826 | 0.114852 |
| myl9b             | 1188.12115  | 0.167874541  | 0.0888098 | 1.8902709 | 0.058722 | 0.474103 |
| sart3             | 1291.415545 | 0.0081961    | 0.0805349 | 0.1017707 | 0.918939 | 0.991623 |
| skib              | 813.7803005 | 0.079322427  | 0.0942842 | 0.8413121 | 0.400173 | 0.90084  |
| si:dkey-42i9.4    | 1656.865434 | -0.486920204 | 0.2505658 | -1.943283 | 0.051982 | 0.447688 |
| scara3            | 110.5919207 | 0.087988084  | 0.1876926 | 0.4687882 | 0.639221 | 0.959994 |
| tma16             | 245.6753127 | 0.058607191  | 0.137977  | 0.4247606 | 0.671011 | 0.965257 |
| illr4             | 4.398787045 | -0.130072405 | 0.9865019 | -0.131852 | 0.895101 | NA       |
| olfcd1            | 1.013460044 | -2.21473548  | 2.0108742 | -1.101379 | 0.270732 | NA       |

|                   |             |              |           |           |          |          |
|-------------------|-------------|--------------|-----------|-----------|----------|----------|
| srsf9             | 966.2116597 | -0.084130215 | 0.0845655 | -0.994852 | 0.319808 | 0.86809  |
| ifit9             | 1.205810811 | 1.348074313  | 1.7970906 | 0.7501427 | 0.453169 | NA       |
| slc7a10a          | 728.7442625 | 0.237975927  | 0.1065044 | 2.2344233 | 0.025455 | 0.308994 |
| mettl2a           | 209.8947153 | 0.074646175  | 0.1444029 | 0.5169298 | 0.605205 | 0.95651  |
| src               | 78.27424237 | 0.342073643  | 0.2285006 | 1.497036  | 0.134384 | 0.670529 |
| si:ch211-195d17.2 | 356.9071867 | -0.06343606  | 0.1188194 | -0.533887 | 0.59342  | 0.954434 |
| pcdh15b           | 205.4742297 | -0.075808296 | 0.151377  | -0.500792 | 0.616518 | 0.95688  |
| sox1b             | 574.0121329 | -0.036509975 | 0.1372359 | -0.266038 | 0.79021  | 0.977338 |
| foxl1             | 181.6341128 | -0.180786349 | 0.1628197 | -1.110347 | 0.26685  | 0.833073 |
| kcnabla           | 25.70913512 | 0.241457652  | 0.3753324 | 0.6433168 | 0.520019 | 0.938995 |
| rb1l              | 330.7364474 | -0.127249872 | 0.1341824 | -0.948335 | 0.342959 | 0.878434 |
| stxbp3            | 601.7996178 | -0.021643185 | 0.1044569 | -0.207197 | 0.835856 | 0.984089 |
| serinc5           | 811.7679594 | 0.096628946  | 0.0889083 | 1.0868385 | 0.277108 | 0.840549 |
| sms               | 1045.262861 | 0.072035688  | 0.0965792 | 0.7458714 | 0.455745 | 0.921215 |
| btr33             | 31.61585753 | -0.230672649 | 0.3431408 | -0.672239 | 0.501432 | 0.934613 |
| caspa             | 108.7940339 | 0.157827684  | 0.1955849 | 0.8069524 | 0.419694 | 0.90651  |
| dbnla             | 246.5612398 | 0.024761428  | 0.1424292 | 0.1738508 | 0.861983 | 0.985841 |
| hoxbla            | 11.48682009 | -0.807552524 | 0.569048  | -1.419129 | 0.155861 | 0.705963 |
| si:ch73-111e15.1  | 1.03982315  | 1.062941397  | 2.0584146 | 0.5163884 | 0.605583 | NA       |
| mia3              | 904.0121165 | -0.034875541 | 0.0867065 | -0.402225 | 0.687518 | 0.966376 |
| syk               | 160.9591456 | -0.025244565 | 0.1703506 | -0.148192 | 0.882191 | 0.988344 |
| sfl               | 2470.284315 | 0.022414279  | 0.0915775 | 0.2447576 | 0.806644 | 0.980254 |
| tmeffla           | 22.7489891  | 0.497579568  | 0.413295  | 1.2039331 | 0.228615 | 0.796028 |
| pankla            | 203.8627498 | 0.333424158  | 0.1442572 | 2.311318  | 0.020815 | 0.272701 |
| ugp2b             | 1002.911432 | -0.11796847  | 0.0955097 | -1.235147 | 0.216776 | 0.784252 |
| paxla             | 57.95012039 | 0.54256333   | 0.2672762 | 2.0299722 | 0.042359 | 0.404449 |
| myt1la            | 973.6582071 | -0.037814981 | 0.0988927 | -0.382384 | 0.702177 | 0.968134 |
| kcnk13a           | 13.25701375 | 0.205789206  | 0.5549675 | 0.3708131 | 0.710777 | 0.968985 |
| znf410            | 560.9450447 | 0.058207024  | 0.1135075 | 0.5128036 | 0.608089 | 0.956718 |
| crygm4            | 1.121798001 | -0.423136943 | 1.8510039 | -0.228599 | 0.819181 | NA       |
| vps35             | 2206.954535 | 0.023632325  | 0.0730227 | 0.3236298 | 0.746218 | 0.97419  |
| cog5              | 380.7173681 | 0.066593833  | 0.1251993 | 0.5319027 | 0.594793 | 0.954434 |
| sars              | 2499.724712 | 0.011813639  | 0.072492  | 0.1629648 | 0.870546 | 0.987505 |
| manba             | 86.47562632 | -0.327123677 | 0.2195385 | -1.490051 | 0.136211 | 0.673089 |
| mocs3             | 88.16558797 | -0.307970414 | 0.2141036 | -1.438418 | 0.150316 | 0.698669 |
| cct8              | 4693.948116 | -0.104480366 | 0.0797515 | -1.310074 | 0.190171 | 0.754837 |
| vezfla            | 67.67940146 | -0.38725203  | 0.2491822 | -1.554092 | 0.120162 | 0.645215 |
| ptchd4            | 25.83415239 | 0.348257705  | 0.384047  | 0.9068102 | 0.364507 | 0.886564 |
| cnot6a            | 1313.63391  | 0.157191618  | 0.0779762 | 2.0158914 | 0.043811 | 0.411165 |
| mfsd4ab           | 203.6410168 | -0.151167803 | 0.1449865 | -1.042634 | 0.297118 | 0.853945 |
| klhl24b           | 851.5008069 | -0.218345549 | 0.0896948 | -2.434317 | 0.01492  | 0.223742 |
| rcor2             | 834.8852599 | -0.081931545 | 0.0975001 | -0.840323 | 0.400728 | 0.90084  |
| map2k7            | 7.504147194 | -0.191471541 | 0.7026898 | -0.272484 | 0.78525  | NA       |
| fam114a1          | 286.8454805 | -0.091758089 | 0.1253257 | -0.732157 | 0.464073 | 0.923197 |
| eif2s3            | 5531.191275 | -0.204607878 | 0.0746355 | -2.741428 | 0.006117 | 0.118579 |
| hand2             | 260.4960271 | -0.092295777 | 0.1360336 | -0.678478 | 0.497469 | 0.933353 |
| rdh5              | 478.9576242 | 0.044818755  | 0.1310681 | 0.3419501 | 0.732388 | 0.971719 |
| ip6k2a            | 1761.904568 | 0.030478596  | 0.0780381 | 0.3905605 | 0.696122 | 0.96736  |
| ambrala           | 187.48083   | -0.198248243 | 0.1795144 | -1.104358 | 0.269438 | 0.834705 |
| asicla            | 69.8616576  | 0.358829434  | 0.2532123 | 1.4171089 | 0.156451 | 0.706639 |
| znf12a            | 38.59627537 | 0.443961951  | 0.3067498 | 1.4473097 | 0.14781  | 0.695242 |
| mcl1b             | 1665.770665 | -0.117508106 | 0.0926953 | -1.267681 | 0.204912 | 0.772822 |
| csnklda           | 4700.83227  | 0.009338412  | 0.0663688 | 0.1407049 | 0.888103 | 0.989291 |
| spred2b           | 91.19695829 | -0.007506265 | 0.2108302 | -0.035603 | 0.971599 | 0.996315 |



|                   |             |              |           |           |          |          |
|-------------------|-------------|--------------|-----------|-----------|----------|----------|
| epn2              | 1631.312883 | 0.115868898  | 0.07725   | 1.4999217 | 0.133635 | 0.66814  |
| brd7              | 943.3119715 | 0.03470682   | 0.090176  | 0.3848788 | 0.700327 | 0.967998 |
| arpc1a            | 3366.073002 | 0.089226799  | 0.0761898 | 1.1711119 | 0.241554 | 0.810471 |
| hdac6             | 388.6659342 | -0.029082288 | 0.1145395 | -0.253906 | 0.799568 | 0.979366 |
| mmp14b            | 1445.153431 | 0.20980846   | 0.081692  | 2.568285  | 0.01022  | 0.17288  |
| snupn             | 290.2094963 | -0.106012605 | 0.1404306 | -0.754911 | 0.450302 | 0.918761 |
| ftr24             | 90.89654543 | 0.06065115   | 0.2151272 | 0.2819316 | 0.777996 | 0.975942 |
| cacnalc           | 41.84825732 | 0.062008651  | 0.310219  | 0.1998867 | 0.841569 | 0.985174 |
| phospho1          | 71.22650445 | 0.309251081  | 0.2550829 | 1.2123552 | 0.225376 | 0.792847 |
| tspan7b           | 3092.205804 | 0.092496603  | 0.0727014 | 1.2722814 | 0.203273 | 0.77034  |
| atp11a            | 1223.718352 | 0.091757402  | 0.0824865 | 1.1123927 | 0.265969 | 0.831945 |
| exoc312a          | 76.50601108 | -0.27807148  | 0.2206027 | -1.260508 | 0.207486 | 0.775175 |
| unc45b            | 433.9667588 | 0.474513062  | 0.1152437 | 4.1174762 | 3.83E-05 | 0.00218  |
| bcl2l1            | 590.6598433 | -0.011967877 | 0.098636  | -0.121334 | 0.903427 | 0.990154 |
| atxn10            | 84.52446997 | 0.019657494  | 0.2156632 | 0.091149  | 0.927374 | 0.992702 |
| fkbp4             | 1499.262605 | 0.071704135  | 0.0791873 | 0.9055    | 0.365201 | 0.886714 |
| pcolce2a          | 63.26460516 | 0.13391843   | 0.2498622 | 0.5359692 | 0.59198  | 0.954434 |
| cpeblb            | 22.65875599 | -0.061274106 | 0.4410712 | -0.138921 | 0.889512 | 0.989291 |
| faah2a            | 241.2740463 | -0.426817383 | 0.1439995 | -2.964019 | 0.003036 | 0.07278  |
| anapc5            | 236.9843185 | 0.036828154  | 0.1481216 | 0.2486345 | 0.803644 | 0.979643 |
| apex2             | 143.6108273 | -0.172777223 | 0.1684845 | -1.025478 | 0.305138 | 0.859759 |
| asb14a            | 0.489712128 | -0.887840729 | 2.693685  | -0.329601 | 0.741702 | NA       |
| trmt61a           | 167.3006911 | -0.1289684   | 0.1600334 | -0.805884 | 0.42031  | 0.90651  |
| lrp3              | 68.66008604 | -0.049369136 | 0.2381993 | -0.20726  | 0.835807 | 0.984089 |
| dmd               | 839.9032162 | 0.033022339  | 0.0921708 | 0.3582734 | 0.720139 | 0.969318 |
| ltvl              | 609.610548  | -0.015191424 | 0.0978681 | -0.155223 | 0.876645 | 0.987881 |
| si:ch211-107o10.3 | 265.147837  | -0.289089395 | 0.1637036 | -1.765932 | 0.077407 | 0.542016 |
| myl6              | 773.6457336 | -0.050675465 | 0.0967056 | -0.524018 | 0.600266 | 0.956045 |
| pnol              | 906.8107042 | -0.052026407 | 0.0903407 | -0.575891 | 0.564689 | 0.948739 |
| glccila           | 147.5234445 | -0.16115554  | 0.1739546 | -0.926423 | 0.354226 | 0.882064 |
| sox21b            | 216.6845539 | 0.124491019  | 0.1456734 | 0.8545899 | 0.392778 | 0.897688 |
| chia.4            | 6.450964848 | -1.171706352 | 0.7787125 | -1.504671 | 0.132409 | NA       |
| yod1              | 841.7147279 | -0.032238222 | 0.1009643 | -0.319303 | 0.749497 | 0.97419  |
| arhgap12a         | 479.5012146 | 0.062295363  | 0.1068048 | 0.5832637 | 0.559716 | 0.948478 |
| pole3             | 555.8697589 | -0.026778464 | 0.1063209 | -0.251865 | 0.801146 | 0.979377 |
| zgc:136872        | 139.439571  | -0.926698896 | 0.1843548 | -5.026715 | 4.99E-07 | 5.67E-05 |
| brap              | 262.6119866 | -0.076151281 | 0.1345815 | -0.565837 | 0.571504 | 0.949418 |
| slc25a24          | 307.9940673 | -0.308837058 | 0.1289734 | -2.394579 | 0.016639 | 0.2379   |
| fam20b            | 591.6126865 | 0.071665024  | 0.1030381 | 0.6955199 | 0.48673  | 0.930882 |
| lyst              | 165.06455   | 0.142155613  | 0.1603491 | 0.886538  | 0.375328 | 0.894316 |
| mtmr8             | 137.6441116 | -0.068725577 | 0.172757  | -0.397816 | 0.690766 | 0.967157 |
| nbas              | 153.1224081 | 0.06019407   | 0.1755486 | 0.3428912 | 0.73168  | 0.971557 |
| cops3             | 757.3661321 | -0.065870364 | 0.0971112 | -0.678298 | 0.497583 | 0.933353 |
| mttp              | 820.6455141 | -0.213774446 | 0.0910044 | -2.349057 | 0.018821 | 0.255627 |
| kifap3a           | 872.9982128 | -0.024779646 | 0.0933682 | -0.265397 | 0.790704 | 0.977402 |
| coro1b            | 1471.054072 | 0.038615025  | 0.0770477 | 0.5011835 | 0.616242 | 0.95688  |
| fign              | 94.78153234 | 0.10174377   | 0.2117416 | 0.480509  | 0.630865 | 0.957354 |
| snx3              | 980.8576642 | 0.013885895  | 0.0946077 | 0.1467734 | 0.883311 | 0.988706 |
| epasla            | 919.1432567 | 0.107238074  | 0.0853855 | 1.2559284 | 0.209142 | 0.776073 |
| apeh              | 473.5246065 | -0.154574003 | 0.1161217 | -1.331138 | 0.183144 | 0.746697 |
| paip2b            | 3391.37626  | -0.168244038 | 0.0732583 | -2.296585 | 0.021642 | 0.278385 |
| lmo3              | 1977.311984 | -0.073134788 | 0.082638  | -0.885002 | 0.376156 | 0.894698 |
| prkcba            | 329.1166143 | 0.192009753  | 0.127138  | 1.5102467 | 0.13098  | 0.663795 |
| ranbp3a           | 15.13618897 | -0.205640261 | 0.4953213 | -0.415165 | 0.678021 | 0.965257 |

|                  |             |              |           |           |          |          |
|------------------|-------------|--------------|-----------|-----------|----------|----------|
| zgc:66479        | 846.0089214 | 0.274266296  | 0.0921826 | 2.9752501 | 0.002927 | 0.070768 |
| atp6ap2          | 2858.522056 | -0.042646233 | 0.07547   | -0.565075 | 0.572023 | 0.949494 |
| esf1             | 237.513184  | -0.024054049 | 0.1465233 | -0.164165 | 0.869601 | 0.987282 |
| ube2na           | 2270.537603 | 0.01918521   | 0.0821104 | 0.2336515 | 0.815256 | 0.981185 |
| entpd6           | 686.9869955 | 0.191423093  | 0.0945308 | 2.0249822 | 0.042869 | 0.406764 |
| tmed5            | 410.7502574 | 0.176960732  | 0.1133398 | 1.5613294 | 0.118446 | 0.641861 |
| tle2b            | 131.7619969 | -0.243673829 | 0.1959053 | -1.243835 | 0.21356  | 0.781737 |
| cacngla          | 366.1320406 | 0.189804905  | 0.1217397 | 1.5591045 | 0.118972 | 0.642772 |
| prpf4ba          | 267.3762986 | 0.052624058  | 0.1379043 | 0.3815985 | 0.702759 | 0.968134 |
| dldh             | 3691.945152 | -0.073210883 | 0.0660826 | -1.107869 | 0.267918 | 0.833349 |
| camklgb          | 636.8101939 | 0.301307434  | 0.1027873 | 2.9313694 | 0.003375 | 0.077672 |
| actr3b           | 16.52442822 | 0.24797586   | 0.4891986 | 0.5069023 | 0.612223 | 0.95688  |
| her5             | 1.961408324 | -0.984996006 | 1.4132582 | -0.696968 | 0.485823 | NA       |
| marcksb          | 8671.159679 | -0.039863013 | 0.075058  | -0.531096 | 0.595352 | 0.954434 |
| orc3             | 188.9085373 | -0.108094528 | 0.1538069 | -0.702794 | 0.482184 | 0.928585 |
| bokb             | 12.47883558 | 0.444042547  | 0.5441157 | 0.8160812 | 0.414454 | 0.906237 |
| eml2             | 1566.452526 | -0.035832232 | 0.0852757 | -0.420193 | 0.674345 | 0.965257 |
| cmtm3            | 81.32753476 | 0.454863707  | 0.2241555 | 2.0292333 | 0.042435 | 0.404971 |
| gludla           | 1204.742317 | 0.021108216  | 0.0870184 | 0.2425719 | 0.808337 | 0.980642 |
| hsf1             | 207.3478304 | 0.053857649  | 0.1422539 | 0.3786022 | 0.704983 | 0.968134 |
| chga             | 712.7959955 | 0.294889159  | 0.0963428 | 3.0608313 | 0.002207 | 0.057504 |
| neul             | 203.0726305 | -0.068613807 | 0.1461407 | -0.469505 | 0.638709 | 0.959628 |
| si:dkey-46g23.5  | 4.643520045 | -1.051399954 | 0.8957239 | -1.173799 | 0.240475 | NA       |
| hmbsa            | 290.1959735 | -0.033813915 | 0.1292055 | -0.261707 | 0.793548 | 0.977937 |
| ptprq            | 13.21240591 | -0.157879299 | 0.5756758 | -0.27425  | 0.783892 | 0.97627  |
| elp4             | 112.0601681 | -0.206572656 | 0.1890651 | -1.092601 | 0.274569 | 0.839136 |
| cyp7b1           | 32.05197796 | 0.101214831  | 0.3778456 | 0.2678735 | 0.788797 | 0.976747 |
| mylipa           | 387.9020586 | 0.048082722  | 0.1282194 | 0.3750036 | 0.707658 | 0.968664 |
| tfap2e           | 314.532752  | -0.038883477 | 0.1220449 | -0.3186   | 0.75003  | 0.97419  |
| cabp4            | 32.07310461 | 0.162213934  | 0.343229  | 0.4726114 | 0.63649  | 0.958565 |
| rap1b            | 1405.757053 | 0.153652207  | 0.0881196 | 1.7436774 | 0.081215 | 0.551495 |
| usp28            | 471.3301235 | 0.155003574  | 0.1209075 | 1.2820009 | 0.199842 | 0.765237 |
| hprt1            | 800.2283009 | 0.139131579  | 0.0923342 | 1.5068253 | 0.131855 | 0.665566 |
| msx1b            | 164.811155  | 0.030170998  | 0.1612525 | 0.1871041 | 0.851579 | 0.985174 |
| ctns             | 101.5601874 | 0.016765321  | 0.19578   | 0.0856335 | 0.931758 | 0.992702 |
| smarca2          | 561.3304923 | -0.100984455 | 0.1073407 | -0.940784 | 0.346815 | 0.8794   |
| si:ch211-241e1.5 | 81.57446556 | -0.469487155 | 0.2244764 | -2.091477 | 0.036485 | 0.373234 |
| slc8a2a          | 62.62013047 | 0.004016403  | 0.2510839 | 0.0159963 | 0.987237 | 0.997136 |
| mrpl53           | 192.4083492 | -0.096159175 | 0.1599138 | -0.601319 | 0.547628 | 0.945581 |
| renbp            | 78.1754744  | -0.083632622 | 0.2373196 | -0.352405 | 0.724534 | 0.970402 |
| secl1a           | 568.5100647 | 0.031449322  | 0.1148041 | 0.2739389 | 0.784132 | 0.97627  |
| ccdc127b         | 73.85337563 | -0.017605015 | 0.2358619 | -0.074641 | 0.9405   | 0.992857 |
| rtf1             | 1721.465383 | -0.071286598 | 0.0739278 | -0.964273 | 0.334909 | 0.875876 |
| pla2g3           | 6.105745906 | -0.406344983 | 0.7861147 | -0.516903 | 0.605224 | NA       |
| pofut1           | 281.6574281 | -0.164420053 | 0.1264803 | -1.299966 | 0.193613 | 0.757219 |
| tbl1xrlb         | 776.1716398 | -0.045028595 | 0.0980988 | -0.459013 | 0.646225 | 0.96032  |
| fgb              | 2786.832644 | 0.143942198  | 0.1118518 | 1.2869012 | 0.198129 | 0.76333  |
| mdn1             | 903.0106913 | -0.173114498 | 0.0963334 | -1.797036 | 0.07233  | 0.525828 |
| golgal           | 464.9384101 | -0.027075608 | 0.106952  | -0.253157 | 0.800147 | 0.979377 |
| casq2            | 2737.28515  | 0.138720881  | 0.0845846 | 1.6400245 | 0.101    | 0.604004 |
| sh3glb2a         | 16.04426972 | -0.408654704 | 0.486037  | -0.840789 | 0.400466 | 0.90084  |
| e2f7             | 187.1187686 | -0.06122354  | 0.1621735 | -0.377519 | 0.705788 | 0.968412 |
| pdia6            | 2115.384718 | -0.302173203 | 0.0819808 | -3.685904 | 0.000228 | 0.009487 |
| coll1a1b         | 5500.520081 | 0.270584703  | 0.0764163 | 3.5409301 | 0.000399 | 0.014765 |

|                 |             |              |           |           |          |          |
|-----------------|-------------|--------------|-----------|-----------|----------|----------|
| rhbg            | 3505.45612  | 0.362261781  | 0.0779085 | 4.649837  | 3.32E-06 | 0.000287 |
| cnrl            | 20.90309981 | 0.649145164  | 0.4234417 | 1.5330215 | 0.125271 | 0.654648 |
| chrnal          | 730.9919112 | 0.174287365  | 0.1128254 | 1.544753  | 0.122406 | 0.650311 |
| ankrd28b        | 868.6523856 | -0.028784054 | 0.0920117 | -0.31283  | 0.754409 | 0.975114 |
| ank2a           | 668.9667841 | 0.055021344  | 0.0965059 | 0.5701347 | 0.568586 | 0.948983 |
| tnikb           | 586.8951205 | -0.008293232 | 0.1001943 | -0.082772 | 0.934033 | 0.992702 |
| si:ch73-141c7.1 | 427.2453559 | 0.427308018  | 0.1394934 | 3.0632846 | 0.002189 | 0.057186 |
| nphpl           | 73.71451121 | -0.075712907 | 0.2255312 | -0.335709 | 0.73709  | 0.972535 |
| cbr4            | 78.9940297  | 0.045048025  | 0.222783  | 0.2022058 | 0.839756 | 0.984979 |
| BX296551.1      | 16.33773155 | 0.37939973   | 0.4792697 | 0.7916205 | 0.428582 | 0.911378 |
| cd74a           | 2.290009204 | 0.394129153  | 1.2682449 | 0.3107674 | 0.755977 | NA       |
| gata2b          | 12.80350592 | 0.246602111  | 0.5475144 | 0.450403  | 0.65242  | 0.960708 |
| serinc1         | 5473.151366 | -0.037717661 | 0.0697847 | -0.540486 | 0.588862 | 0.953345 |
| pigc            | 118.8400392 | 0.172853916  | 0.1848031 | 0.9353408 | 0.349613 | 0.880195 |
| sele            | 101.4644872 | -0.114942459 | 0.2647617 | -0.434135 | 0.66419  | 0.964736 |
| slc10a4         | 25.67003767 | 0.915966991  | 0.3879338 | 2.3611426 | 0.018219 | 0.25105  |
| myoleb          | 536.0250783 | -0.059795874 | 0.1000165 | -0.59786  | 0.549933 | 0.94648  |
| hlx1            | 193.6500896 | -0.01165229  | 0.1515179 | -0.076904 | 0.9387   | 0.992857 |
| tp53bp2a        | 1136.919757 | -0.198512833 | 0.08578   | -2.31421  | 0.020656 | 0.271399 |
| ppplr13bb       | 1386.138637 | 0.142333463  | 0.0777284 | 1.8311631 | 0.067076 | 0.506251 |
| pla2glb         | 4.323238798 | 0.196117318  | 0.9489974 | 0.2066574 | 0.836277 | NA       |
| kmo             | 225.7636993 | -0.38880151  | 0.1428748 | -2.721275 | 0.006503 | 0.12329  |
| ftr55           | 1.110561499 | 2.435091206  | 2.0673778 | 1.1778646 | 0.238851 | NA       |
| moblba          | 610.7356243 | -0.059526208 | 0.0966518 | -0.615883 | 0.537972 | 0.943336 |
| ctr9            | 1242.948368 | -0.129337416 | 0.0809801 | -1.59715  | 0.110232 | 0.62463  |
| zfand1          | 146.535928  | 0.123536733  | 0.1653776 | 0.746998  | 0.455065 | 0.921022 |
| coll6a1         | 2218.951137 | 0.27581169   | 0.0861577 | 3.2012442 | 0.001368 | 0.039791 |
| anxa3a          | 246.9597666 | -0.339571427 | 0.1382194 | -2.456757 | 0.01402  | 0.214075 |
| prkcd           | 404.1321698 | 0.094088285  | 0.1108359 | 0.8488973 | 0.395938 | 0.899504 |
| slc9a6a         | 285.8646968 | 0.100338152  | 0.1284178 | 0.7813417 | 0.434602 | 0.914333 |
| ppiaa           | 24346.59455 | -0.365148858 | 0.0971177 | -3.759858 | 0.00017  | 0.007454 |
| mfsd13a         | 651.5559997 | 0.041811335  | 0.0982564 | 0.425533  | 0.670448 | 0.965257 |
| zgc:112437      | 96.17719164 | 0.09114826   | 0.2032201 | 0.4485198 | 0.653778 | 0.961168 |
| tom112          | 62.88767567 | -0.362532708 | 0.254115  | -1.426648 | 0.153681 | 0.702578 |
| mars2           | 73.9422379  | -0.106470543 | 0.2309649 | -0.460982 | 0.644812 | 0.96029  |
| fev             | 71.66397349 | -0.340422352 | 0.2326516 | -1.463228 | 0.143405 | 0.686804 |
| etfb            | 2143.604555 | -0.096281937 | 0.084116  | -1.144632 | 0.252361 | 0.821887 |
| napepld         | 88.63441995 | 0.254047381  | 0.2231011 | 1.1387095 | 0.254824 | 0.823484 |
| rtraf           | 553.3007691 | 0.091971859  | 0.1170504 | 0.7857457 | 0.432016 | 0.912876 |
| FAR2            | 17.68039789 | 0.261301504  | 0.4678127 | 0.55856   | 0.576462 | 0.950611 |
| uevld           | 148.6257227 | 0.01043443   | 0.1709363 | 0.0610428 | 0.951325 | 0.99381  |
| zgc:136439      |             | 0 NA         | NA        | NA        | NA       | NA       |
| ppmlda          | 591.3171798 | -0.004475533 | 0.1029555 | -0.043471 | 0.965326 | 0.996257 |
| smyd1a          | 1494.754658 | 0.270451102  | 0.1148437 | 2.3549486 | 0.018525 | 0.253683 |
| dnmlb           | 460.5782228 | 0.08427756   | 0.1258395 | 0.6697227 | 0.503035 | 0.935304 |
| rpl15           | 11149.07732 | -0.348027384 | 0.0809617 | -4.298667 | 1.72E-05 | 0.0011   |
| dusp8a          | 597.2357774 | -0.137195205 | 0.1135793 | -1.207924 | 0.227076 | 0.794587 |
| pvalb6          | 1101.14414  | 0.129809035  | 0.097797  | 1.327331  | 0.184399 | 0.747376 |
| napsa           | 93.58269068 | -0.343868126 | 0.230151  | -1.494098 | 0.13515  | 0.670689 |
| clgn            | 2097.193287 | 0.049681378  | 0.0724613 | 0.6856261 | 0.492949 | 0.931926 |
| aif11           | 1043.447215 | 0.038530692  | 0.0862695 | 0.4466317 | 0.655141 | 0.961614 |
| nrp             | 593.5915583 | 0.200123884  | 0.1119878 | 1.7870154 | 0.073935 | 0.530091 |
| txndc5          | 2833.298781 | 0.100250027  | 0.0749216 | 1.3380656 | 0.180875 | 0.741776 |
| caprinla        | 1016.068658 | 0.071684897  | 0.0849768 | 0.8435825 | 0.398903 | 0.900446 |

|                   |             |              |           |           |          |          |
|-------------------|-------------|--------------|-----------|-----------|----------|----------|
| atg3              | 674.3274009 | -0.07250397  | 0.0998929 | -0.725817 | 0.467951 | 0.924328 |
| fgf6a             | 72.49259023 | 0.108955828  | 0.269693  | 0.4039994 | 0.686213 | 0.966376 |
| diras1b           | 4.644179547 | 0.200413293  | 0.865203  | 0.2316373 | 0.81682  | NA       |
| mpp4l             | 141.8382683 | 0.16368518   | 0.1691328 | 0.9677911 | 0.333149 | 0.874926 |
| robo4             | 576.7009438 | -0.086862201 | 0.1026859 | -0.845902 | 0.397607 | 0.899672 |
| npl               | 213.7254761 | -0.29857867  | 0.1545746 | -1.931615 | 0.053407 | 0.45286  |
| vcanb             | 1493.447139 | 0.393668234  | 0.0814254 | 4.8347119 | 1.33E-06 | 0.000128 |
| si:ch211-210b2.2  | 47.06843358 | 0.767231633  | 0.2867488 | 2.6756225 | 0.007459 | 0.136696 |
| mef2cb            | 1454.207445 | 0.052037724  | 0.081314  | 0.6399602 | 0.522198 | 0.939056 |
| tmem30c           | 125.3406242 | -0.345109318 | 0.1808602 | -1.908155 | 0.056371 | 0.46581  |
| ubxn7             | 412.4004899 | -0.176755543 | 0.1105651 | -1.598656 | 0.109897 | 0.624178 |
| myog              | 52.50035832 | 0.086142354  | 0.2876055 | 0.2995157 | 0.764547 | 0.975374 |
| zgc:92137         | 51.5298633  | -0.568019821 | 0.3555833 | -1.597431 | 0.11017  | 0.62463  |
| atp5mc3b          | 5999.57972  | 0.031654243  | 0.2077875 | 0.1523395 | 0.878919 | 0.987881 |
| slc35e4           | 14.89114182 | -0.390989811 | 0.52477   | -0.745069 | 0.45623  | 0.921215 |
| rgs9bp            | 53.29853907 | 0.359694694  | 0.2898208 | 1.2410934 | 0.214571 | 0.782493 |
| hnfla             | 61.25990364 | 0.01532509   | 0.2617301 | 0.058553  | 0.953308 | 0.994184 |
| nid2b             | 1.657494491 | -1.086853109 | 1.7352975 | -0.626321 | 0.531104 | NA       |
| med19b            | 197.0723363 | 0.018908387  | 0.1458527 | 0.1296403 | 0.896851 | 0.989971 |
| ppar db           | 589.9901695 | 0.087914613  | 0.1009947 | 0.8704878 | 0.384034 | 0.895192 |
| prkar2ab          | 167.9906099 | 0.221537346  | 0.1701804 | 1.3017792 | 0.192992 | 0.756795 |
| pdc1              | 2064.969206 | -0.082382116 | 0.0823115 | -1.000857 | 0.316896 | 0.867308 |
| slc38a8a          | 11.35148787 | 0.259915734  | 0.5698708 | 0.4560959 | 0.648321 | 0.960708 |
| arfl              | 2078.812487 | -0.054325424 | 0.0755935 | -0.718652 | 0.472355 | 0.924838 |
| gipc2             | 475.8856668 | -0.215024371 | 0.1180207 | -1.82192  | 0.068467 | 0.512635 |
| MAP3K13           | 26.84599291 | -0.090381886 | 0.3933526 | -0.229773 | 0.818268 | 0.981594 |
| xrcc1             | 650.0533623 | -0.036470854 | 0.0988139 | -0.369086 | 0.712063 | 0.969006 |
| synela            | 2490.570917 | 0.081111903  | 0.0859589 | 0.9436122 | 0.345368 | 0.878434 |
| prelid3b          | 1487.083861 | 0.114988383  | 0.087107  | 1.3200827 | 0.186807 | 0.750951 |
| tnfa              | 5.578901287 | -1.277412656 | 0.8446407 | -1.512374 | 0.130439 | NA       |
| rnf150b           | 184.6591714 | -0.267287811 | 0.1545062 | -1.729948 | 0.08364  | 0.557158 |
| tiall             | 1884.578375 | 0.044026089  | 0.0787309 | 0.559197  | 0.576027 | 0.950611 |
| wls               | 1587.079185 | 0.172557913  | 0.081817  | 2.1090729 | 0.034938 | 0.363807 |
| cldnb             | 1721.363598 | -0.045322851 | 0.0875627 | -0.517605 | 0.604734 | 0.95651  |
| ubr4              | 3068.563003 | -0.035671105 | 0.0798724 | -0.446601 | 0.655163 | 0.961614 |
| foxi3b            | 260.0368026 | -0.030689262 | 0.1585307 | -0.193586 | 0.8465   | 0.985174 |
| gng3              | 3484.185111 | 0.027326811  | 0.0862022 | 0.3170083 | 0.751237 | 0.97419  |
| wrap73            | 163.8515852 | 0.107667755  | 0.1643986 | 0.6549191 | 0.51252  | 0.936253 |
| spegb             | 812.4013055 | 0.200172132  | 0.0902162 | 2.2188056 | 0.0265   | 0.313216 |
| cal0b             | 113.8274296 | -0.113477059 | 0.1966008 | -0.577195 | 0.563808 | 0.948739 |
| papola            | 2874.966015 | -0.044419997 | 0.0764549 | -0.580996 | 0.561243 | 0.948728 |
| nr1d2b            | 3548.237638 | 0.122583659  | 0.0712315 | 1.7209188 | 0.085266 | 0.560519 |
| ccnc              | 822.4609704 | -0.167906455 | 0.0967423 | -1.735605 | 0.082634 | 0.554782 |
| rgs12a            | 306.8080884 | -0.327521714 | 0.1320631 | -2.480039 | 0.013137 | 0.204864 |
| chia.3            | 9.141476782 | -1.043981109 | 0.6365    | -1.64019  | 0.100966 | NA       |
| CABZ01027646.1    | 46.26437534 | 0.021695837  | 0.2981841 | 0.0727599 | 0.941997 | 0.993099 |
| nrbp2b            | 125.1776298 | -0.054137849 | 0.1882055 | -0.287653 | 0.773612 | 0.975687 |
| unc119.1          | 389.2739866 | 0.044380674  | 0.1139798 | 0.3893733 | 0.697    | 0.96736  |
| rcvrn3            | 9553.467501 | 0.380395111  | 0.0909038 | 4.1845896 | 2.86E-05 | 0.001686 |
| psmb1             | 2423.920275 | -0.169966574 | 0.0828619 | -2.051203 | 0.040247 | 0.392394 |
| lhfp12a           | 264.3983895 | -0.424552759 | 0.1477226 | -2.873986 | 0.004053 | 0.087787 |
| fgfr1op2          | 309.3869305 | -0.231090487 | 0.1344219 | -1.719143 | 0.085588 | 0.561521 |
| si:ch211-197g15.6 | 5.341097347 | 0.558257031  | 0.8101373 | 0.6890894 | 0.490767 | NA       |
| dlg1              | 1081.451045 | 0.040277913  | 0.0859433 | 0.4686569 | 0.639315 | 0.959994 |

|          |             |              |           |           |          |          |
|----------|-------------|--------------|-----------|-----------|----------|----------|
| med27    | 303.9993898 | -0.135475897 | 0.1243729 | -1.089272 | 0.276034 | 0.839541 |
| ppa2     | 163.4578807 | -0.02801418  | 0.159552  | -0.17558  | 0.860624 | 0.985773 |
| daamlb   | 994.0774526 | 0.050222059  | 0.0866517 | 0.5795857 | 0.562194 | 0.948728 |
| llgl1    | 567.0803069 | 0.105510043  | 0.1125425 | 0.9375132 | 0.348495 | 0.880195 |
| ascl1b   | 25.99093951 | 0.313199579  | 0.3784391 | 0.827609  | 0.407892 | 0.901493 |
| rpn2     | 3555.149345 | -0.00147969  | 0.078419  | -0.018869 | 0.984946 | 0.996944 |
| twf2b    | 51.37621503 | 0.409196595  | 0.2859764 | 1.4308755 | 0.152466 | 0.70162  |
| kif21b   | 43.09945469 | 0.105521854  | 0.3023061 | 0.3490563 | 0.727047 | 0.970402 |
| gigyf2   | 1200.470432 | 0.025179226  | 0.0873089 | 0.2883925 | 0.773046 | 0.975687 |
| cacnb4a  | 3.960697999 | -0.000779022 | 0.9284538 | -0.000839 | 0.999331 | NA       |
| ppplr7   | 1140.517617 | 0.043701858  | 0.0856598 | 0.5101794 | 0.609926 | 0.95688  |
| efhc1    | 75.57661684 | -0.36260558  | 0.2280903 | -1.589746 | 0.111892 | 0.627242 |
| fbxw2    | 633.0342316 | 0.14583556   | 0.0958384 | 1.5216822 | 0.128089 | 0.658954 |
| dffb     | 93.68819843 | -0.354398902 | 0.2139761 | -1.656254 | 0.09767  | 0.596644 |
| sf3b6    | 500.6537764 | 0.071723831  | 0.1091815 | 0.6569227 | 0.511231 | 0.936253 |
| zc3h11a  | 1775.396164 | -0.088385441 | 0.0818552 | -1.079779 | 0.280241 | 0.843423 |
| srekl    | 254.562324  | -0.090545241 | 0.1327802 | -0.681918 | 0.495291 | 0.931928 |
| ppmel    | 2037.073844 | -0.063263131 | 0.0861234 | -0.734564 | 0.462605 | 0.922698 |
| mc11a    | 1301.307057 | -0.16001723  | 0.1042435 | -1.535033 | 0.124776 | 0.654423 |
| myh11a   | 677.5291937 | -0.162748991 | 0.1087241 | -1.496898 | 0.13442  | 0.670539 |
| slc49a4  | 550.7094503 | 0.0301054    | 0.1038788 | 0.2898126 | 0.77196  | 0.975687 |
| k1c1a    | 869.3136396 | 0.218860635  | 0.0960173 | 2.2793869 | 0.022644 | 0.287397 |
| smfn     | 162.6996218 | 0.114515314  | 0.1754146 | 0.6528267 | 0.513868 | 0.936778 |
| her4.4   | 216.3615164 | 0.011008186  | 0.1512382 | 0.0727871 | 0.941976 | 0.993099 |
| pou3f1   | 1658.318192 | 0.027088709  | 0.0875994 | 0.3092341 | 0.757143 | 0.975374 |
| mmp23bb  | 207.9120692 | -0.086013674 | 0.1801028 | -0.477581 | 0.632949 | 0.957356 |
| hdlbpa   | 14506.98947 | -0.028713941 | 0.0685637 | -0.418792 | 0.675368 | 0.965257 |
| agk      | 493.563858  | -0.074210672 | 0.1075621 | -0.689933 | 0.490236 | 0.931926 |
| fam117bb | 122.4019979 | -0.145125106 | 0.185944  | -0.780478 | 0.43511  | 0.914408 |
| dusp23a  | 58.33456577 | -0.533940636 | 0.2905885 | -1.837446 | 0.066144 | 0.502802 |
| wdr41    | 504.296352  | 0.017261408  | 0.1064539 | 0.1621491 | 0.871188 | 0.987754 |
| dcps     | 363.2504285 | 0.020519574  | 0.1248842 | 0.1643088 | 0.869488 | 0.987282 |
| ddx55    | 199.186006  | 0.01317013   | 0.1493625 | 0.0881756 | 0.929737 | 0.992702 |
| dcaf11   | 803.5321519 | -0.13207306  | 0.0916941 | -1.440366 | 0.149764 | 0.697935 |
| mapk8b   | 63.39332024 | -0.082673935 | 0.2514874 | -0.32874  | 0.742352 | 0.973154 |
| snrpc    | 680.7903734 | -0.03707434  | 0.1106852 | -0.334953 | 0.737661 | 0.972535 |
| cyp2k6   |             | 0 NA         | NA        | NA        | NA       | NA       |
| ier5     | 1488.279556 | -0.233112078 | 0.0803084 | -2.902713 | 0.003699 | 0.082473 |
| sult3st1 | 5.81544542  | 0.090369413  | 0.7961875 | 0.1135027 | 0.909632 | NA       |
| rnf114   | 125.1756774 | 0.394693448  | 0.1929656 | 2.045408  | 0.040815 | 0.394957 |
| znf385a  | 57.69627879 | 0.105535932  | 0.2686914 | 0.3927775 | 0.694484 | 0.96736  |
| slc38a5a | 640.9989236 | 0.120386718  | 0.0979074 | 1.2295972 | 0.218848 | 0.785734 |
| dmbx1a   | 848.2528677 | -0.032810405 | 0.0996874 | -0.329133 | 0.742055 | 0.973154 |
| cadm2a   | 36.30652208 | 0.5967617    | 0.3234194 | 1.8451637 | 0.065014 | 0.497901 |
| micu2    | 638.0132713 | -0.210441528 | 0.1115297 | -1.886866 | 0.059178 | 0.475427 |
| ercla    | 734.974053  | -0.00451496  | 0.0953943 | -0.047329 | 0.962251 | 0.995907 |
| cdc6     | 363.7215695 | -0.100259493 | 0.1298069 | -0.772374 | 0.439893 | 0.916082 |
| fndc4b   | 504.6452311 | 0.030202423  | 0.1161398 | 0.2600523 | 0.794823 | 0.978206 |
| edf1     | 1545.44327  | -0.222478265 | 0.0821054 | -2.709667 | 0.006735 | 0.126476 |
| med14    | 947.7436029 | -0.090462503 | 0.1039661 | -0.870115 | 0.384238 | 0.895192 |
| cbl      | 211.8844867 | 0.0273448    | 0.1425151 | 0.1918731 | 0.847842 | 0.985174 |
| rundc3b  | 6.996471156 | -0.400611888 | 0.7068341 | -0.566769 | 0.570871 | NA       |
| icn      | 3734.592075 | -0.282817195 | 0.2380123 | -1.188246 | 0.234736 | 0.803509 |
| fam199x  | 993.1237015 | 0.014794337  | 0.0937227 | 0.1578522 | 0.874573 | 0.987881 |

|                  |             |              |           |           |          |          |
|------------------|-------------|--------------|-----------|-----------|----------|----------|
| gnalla           | 165.5918394 | -0.053153279 | 0.1602234 | -0.331745 | 0.740082 | 0.972943 |
| vim              | 1053.701939 | -0.104078305 | 0.0953127 | -1.091967 | 0.274848 | 0.839487 |
| triml3           | 754.1186084 | 0.240399057  | 0.0996512 | 2.4124055 | 0.015848 | 0.231784 |
| qki2             | 315.5488652 | -0.144054949 | 0.1215641 | -1.185013 | 0.236012 | 0.805056 |
| grpell           | 658.7266663 | 0.108429996  | 0.1019777 | 1.0632717 | 0.287659 | 0.845979 |
| CU856539.1       | 378.2810359 | 0.302746643  | 0.1176419 | 2.5734603 | 0.010069 | 0.171342 |
| sponla           | 26.78556806 | 0.448716679  | 0.377038  | 1.1901101 | 0.234003 | 0.802633 |
| ssh1b            | 481.8323132 | 0.006523993  | 0.1070677 | 0.0609333 | 0.951412 | 0.99381  |
| cmtm7            | 224.3945923 | -0.022369211 | 0.1438053 | -0.155552 | 0.876386 | 0.987881 |
| engase           | 125.978898  | -0.315639573 | 0.183396  | -1.721082 | 0.085236 | 0.560519 |
| dnmla            | 108.0454467 | 0.202983605  | 0.1904846 | 1.0656169 | 0.286597 | 0.845942 |
| neu3.2           | 82.69898935 | 0.139107127  | 0.2258024 | 0.6160568 | 0.537857 | 0.943336 |
| ufd11            | 1054.352676 | -0.016245489 | 0.0851309 | -0.19083  | 0.848659 | 0.985174 |
| ndrg3b           | 1946.281509 | -0.122053548 | 0.074043  | -1.648415 | 0.099267 | 0.599058 |
| itpkb            | 25.61693933 | 0.043424113  | 0.4001423 | 0.1085217 | 0.913582 | 0.991119 |
| adam9            | 297.2262468 | 0.084684278  | 0.1368417 | 0.6188484 | 0.536016 | 0.943336 |
| CR792422.1       | 17.61669547 | -0.015370592 | 0.467876  | -0.032852 | 0.973793 | 0.996315 |
| nup133           | 566.947561  | 0.049785481  | 0.0985461 | 0.5051999 | 0.613418 | 0.95688  |
| rbfox3a          | 1250.566376 | 0.053776331  | 0.0821313 | 0.6547603 | 0.512622 | 0.936253 |
| p4ha2            | 473.7697174 | -0.306394212 | 0.1169345 | -2.620221 | 0.008787 | 0.155004 |
| slc1a6           | 63.12450108 | 0.052322548  | 0.2425025 | 0.2157609 | 0.829174 | 0.982743 |
| f9a              | 10.46341279 | 0.049464476  | 0.588174  | 0.0840984 | 0.932978 | NA       |
| pank1b           | 642.2201454 | -0.00958332  | 0.0993206 | -0.096489 | 0.923132 | 0.992588 |
| bri3bp           | 252.9712262 | 0.046479314  | 0.133201  | 0.3489411 | 0.727134 | 0.970402 |
| ndufb8           | 2299.39148  | -0.007368597 | 0.0888806 | -0.082904 | 0.933928 | 0.992702 |
| smpd13b          | 150.072267  | 0.233840638  | 0.1697747 | 1.3773584 | 0.168401 | 0.725919 |
| dacha            | 831.1331732 | -0.12465737  | 0.0894835 | -1.393077 | 0.163597 | 0.71945  |
| ldbla            | 3091.959067 | -0.013611386 | 0.0702482 | -0.193761 | 0.846363 | 0.985174 |
| plppr3a          | 981.2256267 | -0.152816433 | 0.0989453 | -1.544454 | 0.122478 | 0.65052  |
| tor4aa           | 131.3666461 | -0.035653525 | 0.1843817 | -0.193368 | 0.846671 | 0.985174 |
| cpa2             | 42.80333399 | -0.068993687 | 0.3228666 | -0.213691 | 0.830788 | 0.982994 |
| atp5fa1          | 16976.72923 | -0.076089948 | 0.1041016 | -0.73092  | 0.464828 | 0.923584 |
| vstm4a           | 108.1457517 | -0.097195095 | 0.1988978 | -0.488668 | 0.625076 | 0.957354 |
| abila            | 1003.527975 | -0.034459594 | 0.0829071 | -0.415641 | 0.677673 | 0.965257 |
| rps15a           | 6655.31657  | -0.250185638 | 0.083747  | -2.987399 | 0.002814 | 0.068857 |
| myd88            | 153.0896157 | 0.183311896  | 0.1720726 | 1.0653175 | 0.286732 | 0.845979 |
| asap2a           | 353.7894649 | 0.041648459  | 0.1291761 | 0.3224161 | 0.747137 | 0.97419  |
| si:ch73-265h17.1 | 7.551498882 | -0.168037114 | 0.7158308 | -0.234744 | 0.814407 | NA       |
| myo3a            | 185.9129441 | 0.114372113  | 0.1560231 | 0.7330462 | 0.46353  | 0.92286  |
| pax3a            | 26.83469037 | -0.340676505 | 0.3771283 | -0.903344 | 0.366343 | 0.887239 |
| eif4bb           | 2286.369006 | -0.127206495 | 0.0734732 | -1.731332 | 0.083393 | 0.556666 |
| smad3b           | 171.9429656 | 0.042584509  | 0.1596148 | 0.2667955 | 0.789627 | 0.977238 |
| ppmlna           | 141.5134406 | 0.792629744  | 0.1982331 | 3.9984738 | 6.38E-05 | 0.00338  |
| rbm22            | 608.8958608 | -0.180486228 | 0.1011595 | -1.784174 | 0.074395 | 0.531273 |
| rpl2211          | 2713.282516 | -0.331750202 | 0.1001182 | -3.313585 | 0.000921 | 0.029142 |
| prmt1            | 3298.370241 | 0.045557187  | 0.1054684 | 0.4319509 | 0.665777 | 0.964736 |
| wdr54            | 310.9527742 | -0.077136231 | 0.1295138 | -0.595583 | 0.551454 | 0.946978 |
| nqol             | 778.144595  | -0.007538883 | 0.0944326 | -0.079833 | 0.93637  | 0.992702 |
| jak3             | 24.67801901 | 0.026303519  | 0.3792649 | 0.069354  | 0.944708 | 0.993409 |
| bin2b            | 124.6404765 | 0.226155269  | 0.2093866 | 1.0800846 | 0.280104 | 0.843423 |
| igf2bp3          | 1560.788669 | 0.041592884  | 0.0787999 | 0.5278294 | 0.597618 | 0.95534  |
| dpydb            | 709.3601545 | -0.281184333 | 0.1104293 | -2.546284 | 0.010888 | 0.180962 |
| fezfl            | 206.7184128 | -0.061363268 | 0.163882  | -0.374436 | 0.70808  | 0.968664 |
| ptgs2b           | 320.6284335 | 0.167324285  | 0.3747261 | 0.4465242 | 0.655219 | 0.961614 |

|                   |             |              |           |           |          |          |
|-------------------|-------------|--------------|-----------|-----------|----------|----------|
| scamp2            | 696.5951717 | -0.014924981 | 0.1064527 | -0.140203 | 0.8885   | 0.989291 |
| claspla           | 1075.563047 | 0.070870218  | 0.0858521 | 0.8254923 | 0.409092 | 0.901769 |
| xpo4              | 524.294957  | -0.141254423 | 0.1052892 | -1.341585 | 0.179731 | 0.741062 |
| fmodb             | 59.26623736 | 0.346872688  | 0.262274  | 1.3225585 | 0.185982 | 0.75038  |
| kcnh6b            | 24.58801001 | 0.3790134    | 0.4093576 | 0.9258735 | 0.354512 | 0.882105 |
| traf3ip1          | 59.82232373 | -0.102752328 | 0.2522039 | -0.407418 | 0.683701 | 0.965679 |
| b4gal t6          | 932.7500463 | 0.099815108  | 0.0913411 | 1.0927731 | 0.274493 | 0.839136 |
| cp                | 649.3569842 | -0.19457168  | 0.3796381 | -0.512519 | 0.608288 | 0.956718 |
| qars              | 1008.342107 | 0.183121252  | 0.0915978 | 1.999189  | 0.045588 | 0.418697 |
| gpr183a           | 10.18334145 | -0.015150499 | 0.601732  | -0.025178 | 0.979913 | NA       |
| srpx              | 764.787834  | 0.039066658  | 0.0998429 | 0.3912811 | 0.695589 | 0.96736  |
| radx              | 19.14479226 | 0.400947553  | 0.4384267 | 0.9145145 | 0.360447 | 0.885686 |
| zgc:56231         | 4.517547615 | 0.994466447  | 0.9500911 | 1.0467064 | 0.295235 | NA       |
| acer1             | 78.15355015 | -0.397118273 | 0.2320487 | -1.711358 | 0.087015 | 0.565255 |
| clql3a            | 25.05747316 | -0.20211581  | 0.3759571 | -0.537603 | 0.590851 | 0.954193 |
| slc5a3a           | 0.166657454 | -0.955901296 | 4.0804729 | -0.234262 | 0.814781 | NA       |
| rnf2              | 1753.138008 | -0.131426775 | 0.07529   | -1.745607 | 0.080879 | 0.550801 |
| lpar5a            | 4.203063818 | 0.613822546  | 1.0389519 | 0.5908094 | 0.554648 | NA       |
| sept4a            | 324.0083652 | 0.017917559  | 0.1338643 | 0.1338486 | 0.893522 | 0.989291 |
| lrrfip2           | 434.2181959 | -0.07298256  | 0.1185701 | -0.615522 | 0.53821  | 0.943336 |
| ppp4r4            | 170.3239736 | -0.268041416 | 0.1565792 | -1.711858 | 0.086923 | 0.565027 |
| igsf9b            | 287.8142436 | -0.157300726 | 0.1327761 | -1.184706 | 0.236134 | 0.805191 |
| epnl              | 1404.245842 | -0.01802851  | 0.0943675 | -0.191046 | 0.84849  | 0.985174 |
| sirt4             | 99.1950784  | 0.133321304  | 0.2167179 | 0.6151836 | 0.538434 | 0.943336 |
| ndrg1b            | 2029.337837 | -0.336698313 | 0.0869961 | -3.870268 | 0.000109 | 0.005269 |
| npsn              | 157.9864483 | -0.20461485  | 0.208991  | -0.97906  | 0.32755  | 0.872701 |
| scara5            | 134.8630398 | 0.12150268   | 0.176532  | 0.6882757 | 0.491279 | 0.931926 |
| eaf2              | 374.9667193 | -0.020970533 | 0.1183537 | -0.177185 | 0.859363 | 0.985773 |
| clu               | 984.3327628 | -0.108132255 | 0.1038174 | -1.041562 | 0.297615 | 0.85401  |
| tent5c            | 160.1582312 | 0.266564775  | 0.1581372 | 1.6856547 | 0.091862 | 0.57849  |
| rnf11a            | 497.3921826 | -0.191615885 | 0.1067197 | -1.795506 | 0.072573 | 0.52617  |
| trabd             | 218.3391986 | 0.079452079  | 0.1516116 | 0.52405   | 0.600244 | 0.956045 |
| gucala            | 26.4621021  | 0.685192819  | 0.3798381 | 1.8039077 | 0.071246 | 0.522712 |
| atpla2a           | 1867.115221 | 0.420994906  | 0.0913867 | 4.6067422 | 4.09E-06 | 0.000344 |
| p2rx3a            | 31.2436411  | 0.7164833    | 0.3631578 | 1.9729255 | 0.048504 | 0.433449 |
| hsp90aa1.1        | 799.4950884 | 0.606233598  | 0.0936732 | 6.4717935 | 9.68E-11 | 2.34E-08 |
| bzwl a            | 3182.956764 | 0.055727211  | 0.0735143 | 0.7580457 | 0.448424 | 0.917768 |
| prg4a             | 28.88745106 | 0.57141622   | 0.3775975 | 1.5132944 | 0.130205 | 0.662797 |
| sael              | 934.2178181 | -0.042688135 | 0.1052336 | -0.405651 | 0.684999 | 0.966146 |
| cxcr5             | 6.844348586 | 0.070134917  | 0.7132977 | 0.0983249 | 0.921674 | NA       |
| dv11a             | 37.88041769 | -0.006001416 | 0.3543434 | -0.016937 | 0.986487 | 0.996965 |
| rpl2l             | 8582.898836 | -0.175029613 | 0.0762883 | -2.294318 | 0.021772 | 0.279561 |
| per3              | 1926.590315 | 0.007473788  | 0.0743211 | 0.1005607 | 0.919899 | 0.991857 |
| si:ch211-282j22.3 | 133.6976816 | -0.102547649 | 0.1783683 | -0.574921 | 0.565345 | 0.948739 |
| scamp4            | 685.6713835 | 0.123811611  | 0.0957017 | 1.2937248 | 0.19576  | 0.76113  |
| mmgt1             | 738.4154793 | 0.048477946  | 0.1073744 | 0.4514851 | 0.65164  | 0.960708 |
| pdhalb            | 144.9318668 | 0.268986947  | 0.1742517 | 1.543669  | 0.122669 | 0.650831 |
| mmp25b            | 49.73655354 | -0.111128103 | 0.2849355 | -0.390011 | 0.696528 | 0.96736  |
| spopla            | 329.5308318 | -0.0970161   | 0.1357005 | -0.714928 | 0.474653 | 0.925287 |
| aqp4              | 5.542848337 | -0.013514283 | 0.8207689 | -0.016465 | 0.986863 | NA       |
| ezh2              | 533.5146235 | 0.203528215  | 0.1177813 | 1.7280184 | 0.083985 | 0.557646 |
| slc25a25a         | 621.2973247 | 0.353577466  | 0.099729  | 3.545382  | 0.000392 | 0.014572 |
| pard3ab           | 327.0806108 | -0.137041731 | 0.1296131 | -1.057314 | 0.290368 | 0.846262 |
| tex9              | 63.93333284 | -0.100681171 | 0.2450661 | -0.410833 | 0.681195 | 0.965476 |

|                |             |              |           |           |          |          |
|----------------|-------------|--------------|-----------|-----------|----------|----------|
| foxn4          | 303.6712303 | -0.126545189 | 0.1462127 | -0.865487 | 0.386771 | 0.89551  |
| slc7a6os       | 850.1235557 | 0.080298143  | 0.0966589 | 0.8307374 | 0.406122 | 0.901305 |
| mtmr10         | 278.5994464 | 0.117323862  | 0.1293625 | 0.9069386 | 0.364439 | 0.886564 |
| zgc:112294     | 49.33630628 | 0.178523622  | 0.3059152 | 0.5835723 | 0.559508 | 0.948478 |
| kctd9b         | 294.4699694 | -0.079486773 | 0.136931  | -0.580488 | 0.561586 | 0.948728 |
| sarml          | 424.3331149 | 0.118565335  | 0.1273991 | 0.9306605 | 0.352029 | 0.880844 |
| themis         | 5.115703613 | 0.647519033  | 0.8773865 | 0.7380089 | 0.460509 | NA       |
| clic2          | 138.8505469 | 0.227578869  | 0.1700111 | 1.338612  | 0.180697 | 0.741776 |
| hoxb6a         | 176.7483146 | 0.206462405  | 0.1583991 | 1.3034318 | 0.192427 | 0.756795 |
| slc20a1b       | 4918.65391  | 0.131357023  | 0.0780967 | 1.6819783 | 0.092573 | 0.579468 |
| arhgap42b      | 14.58836681 | -0.259445759 | 0.4934243 | -0.525807 | 0.599023 | 0.955806 |
| ppmlk          | 575.6605924 | -0.292659982 | 0.1002817 | -2.918378 | 0.003519 | 0.079772 |
| insigl         | 975.6822398 | 0.046577114  | 0.0974407 | 0.4780045 | 0.632647 | 0.957356 |
| fbxo36a        | 5.693566548 | 0.578595846  | 0.877211  | 0.6595857 | 0.50952  | NA       |
| trim16         | 213.3683187 | -0.183048876 | 0.1535384 | -1.192203 | 0.233182 | 0.801623 |
| gngt2a         | 819.8097519 | -0.160849743 | 0.1118463 | -1.438132 | 0.150397 | 0.698669 |
| tjapl          | 653.9543708 | -0.184083013 | 0.1268713 | -1.450943 | 0.146796 | 0.693524 |
| il17d          | 3.539432946 | 0.175466513  | 1.0211105 | 0.1718389 | 0.863564 | NA       |
| crygs4         | 0.854974378 | 0.638273715  | 2.0970274 | 0.3043707 | 0.760845 | NA       |
| msil           | 1370.427507 | -0.039567897 | 0.0794948 | -0.497742 | 0.618666 | 0.957354 |
| npffr113       | 13.00732743 | 0.545107397  | 0.5438938 | 1.0022313 | 0.316232 | 0.866931 |
| chchd10        | 838.1701423 | 0.10640694   | 0.0999492 | 1.0646099 | 0.287053 | 0.845979 |
| 6-Sep          | 2313.813396 | 0.02154524   | 0.0740475 | 0.2909652 | 0.771078 | 0.975687 |
| ttyh21         | 519.4826385 | -0.098175343 | 0.1068618 | -0.918713 | 0.358245 | 0.884398 |
| scin           | 267.7354395 | -0.22227091  | 0.1367832 | -1.624987 | 0.104165 | 0.611388 |
| CABZ01073795.1 | 0.157187365 | -0.955901296 | 4.0804729 | -0.234262 | 0.814781 | NA       |
| xrcc4          | 115.2270104 | 0.046220218  | 0.1860418 | 0.2484399 | 0.803794 | 0.979643 |
| zgc:101716     | 53.45447581 | -0.08666435  | 0.2713167 | -0.319421 | 0.749407 | 0.97419  |
| dnaja2b        | 2020.588612 | 0.022102768  | 0.0782429 | 0.2824891 | 0.777568 | 0.975942 |
| acs14b         | 419.7757772 | -0.032689785 | 0.1275237 | -0.256343 | 0.797686 | 0.978668 |
| nod2           | 69.52476963 | 0.062850909  | 0.2343098 | 0.2682385 | 0.788516 | 0.976703 |
| capn12         | 282.738652  | 0.544883177  | 0.1554383 | 3.5054634 | 0.000456 | 0.01663  |
| flj13639       | 93.51511    | 0.422817     | 0.2240228 | 1.8873839 | 0.059109 | 0.475427 |
| epha41         | 218.2520275 | 0.0239252    | 0.141295  | 0.1693279 | 0.865539 | 0.986465 |
| sox19a         | 858.1079717 | 0.063146675  | 0.1024369 | 0.6164446 | 0.537601 | 0.943336 |
| pnpla6         | 1125.668006 | -0.385740618 | 0.2101565 | -1.835493 | 0.066433 | 0.504618 |
| tlk2           | 828.533638  | 0.008922763  | 0.0965025 | 0.0924614 | 0.926331 | 0.992702 |
| zgc:55621      |             | 0 NA         | NA        | NA        | NA       | NA       |
| ppplr12a       | 1087.382531 | -0.035956605 | 0.0835084 | -0.430575 | 0.666778 | 0.964736 |
| thbs1b         | 5896.502469 | 0.304671844  | 0.06944   | 4.3875563 | 1.15E-05 | 0.000811 |
| homer3b        | 520.6962678 | 0.087324008  | 0.1023722 | 0.8530048 | 0.393657 | 0.898242 |
| dla            | 577.2459883 | -0.138509155 | 0.1103286 | -1.255424 | 0.209325 | 0.776293 |
| cdc25b         | 442.9009739 | 0.064935911  | 0.1163037 | 0.5583308 | 0.576619 | 0.950611 |
| tfeb           | 221.4330691 | 0.077625478  | 0.1474336 | 0.5265115 | 0.598533 | 0.955488 |
| slc7a14a       | 726.1467258 | 0.193695424  | 0.1077413 | 1.7977827 | 0.072211 | 0.525546 |
| memol          | 400.948965  | 0.170530112  | 0.1125812 | 1.51473   | 0.129841 | 0.662436 |
| churc1         | 182.1495324 | -0.475930883 | 0.1576408 | -3.019085 | 0.002535 | 0.063623 |
| fshb           | 0.158795395 | 0.967652056  | 4.0804729 | 0.2371421 | 0.812547 | NA       |
| kras           | 112.1575549 | 0.19604057   | 0.2004092 | 0.9782015 | 0.327975 | 0.872701 |
| amt            | 340.7639137 | -0.243658697 | 0.1307164 | -1.864026 | 0.062318 | 0.487498 |
| DDX17          | 1977.797223 | -0.269226811 | 0.0747366 | -3.602344 | 0.000315 | 0.0123   |
| cdkn1ca        | 315.140921  | 0.268178708  | 0.143083  | 1.8742881 | 0.060891 | 0.482482 |
| mettl13        | 153.1497328 | -0.018946235 | 0.1681527 | -0.112673 | 0.91029  | 0.990702 |
| npr13          | 197.1373389 | -0.243662064 | 0.1643981 | -1.482146 | 0.138301 | 0.676087 |



|                   |             |              |           |           |          |          |
|-------------------|-------------|--------------|-----------|-----------|----------|----------|
| HTRA3             | 99.83442323 | -0.139249724 | 0.2185028 | -0.63729  | 0.523936 | 0.939336 |
| cacnalfa          | 42.03723224 | -0.323573997 | 0.310649  | -1.041607 | 0.297594 | 0.85401  |
| sytl4a            | 16.6681055  | 0.674073112  | 0.4732559 | 1.4243311 | 0.154351 | 0.70398  |
| abcb4             | 394.9317915 | -0.18946567  | 0.1307185 | -1.449417 | 0.147221 | 0.69409  |
| BX957278.1        | 83.5419369  | -0.090625496 | 0.2235165 | -0.405453 | 0.685144 | 0.966146 |
| pomgnt2           | 112.6375351 | -0.020154198 | 0.1947909 | -0.103466 | 0.917593 | 0.991623 |
| rapgef6           | 393.6007352 | -0.07891907  | 0.1426186 | -0.553357 | 0.580019 | 0.951257 |
| cbsb              | 1232.486901 | 0.042225925  | 0.0813172 | 0.5192742 | 0.60357  | 0.956045 |
| kif11             | 1203.56477  | -0.121642751 | 0.0853209 | -1.425708 | 0.153953 | 0.702738 |
| ndella            | 831.4834973 | 0.028696716  | 0.0880468 | 0.3259258 | 0.74448  | 0.974094 |
| sh3glb1b          | 316.8407702 | 0.012518336  | 0.1310614 | 0.095515  | 0.923906 | 0.992628 |
| mpp2b             | 915.7736871 | 0.105746916  | 0.0916544 | 1.153757  | 0.2486   | 0.817939 |
| glmb              | 229.8171708 | 0.236033525  | 0.1418977 | 1.6634062 | 0.096231 | 0.590771 |
| fkbp7             | 245.8583744 | 0.303028771  | 0.1536769 | 1.9718569 | 0.048626 | 0.433734 |
| psma8             | 2923.742789 | -0.025704083 | 0.0800468 | -0.321113 | 0.748125 | 0.97419  |
| rab34b            | 48.89895294 | -0.232124544 | 0.2781981 | -0.834386 | 0.404064 | 0.901191 |
| trmt1             | 183.9930992 | -0.014623892 | 0.1648877 | -0.08869  | 0.929328 | 0.992702 |
| zdhhc3a           | 87.74061747 | -0.052967051 | 0.2219606 | -0.238633 | 0.81139  | 0.981081 |
| gtf2a1            | 865.4085867 | 0.022859476  | 0.089192  | 0.2562951 | 0.797723 | 0.978668 |
| hnrnpala          | 7814.655518 | -0.092723638 | 0.0930638 | -0.996345 | 0.319082 | 0.867746 |
| pdlim3a           | 24.42373501 | -0.100306497 | 0.416487  | -0.240839 | 0.80968  | 0.980648 |
| zgc:92907         | 70.76856614 | 0.167324346  | 0.2363893 | 0.7078339 | 0.479048 | 0.926978 |
| fgfr1a            | 1079.838677 | 0.042072486  | 0.0989037 | 0.4253885 | 0.670554 | 0.965257 |
| pgbd5             | 44.10976039 | 0.057342381  | 0.2924644 | 0.1960662 | 0.844558 | 0.985174 |
| slc17a9b          | 164.6075692 | 0.188037965  | 0.1594721 | 1.1791277 | 0.238347 | 0.807449 |
| fbxo9             | 963.0147624 | -0.062116141 | 0.0953988 | -0.651121 | 0.514969 | 0.937646 |
| camk2b1           | 2940.38999  | 0.020177339  | 0.0747447 | 0.2699499 | 0.787199 | 0.976596 |
| glra3             | 407.0468497 | 0.113062771  | 0.1346451 | 0.8397093 | 0.401071 | 0.90084  |
| ddx11             | 147.1357836 | -0.106147642 | 0.1744926 | -0.608322 | 0.542974 | 0.944974 |
| zgc:91968         | 169.3630232 | 0.103957229  | 0.1637422 | 0.6348835 | 0.525504 | 0.94013  |
| wdr3              | 823.2690442 | -0.299631871 | 0.0987187 | -3.03521  | 0.002404 | 0.061172 |
| si:dkey-42123.2   | 3.046851276 | -0.627152543 | 1.1344861 | -0.552808 | 0.580395 | NA       |
| si:ch211-288d18.1 | 507.5914828 | -0.144827416 | 0.1018365 | -1.422156 | 0.154981 | 0.704624 |
| drd2b             | 51.74981565 | 0.127813154  | 0.281672  | 0.4537659 | 0.649997 | 0.960708 |
| ccna2             | 935.648923  | -0.061893748 | 0.0943276 | -0.656157 | 0.511723 | 0.936253 |
| chrna10a          | 50.29172855 | 0.12706709   | 0.2802959 | 0.4533319 | 0.65031  | 0.960708 |
| pptc7a            | 1028.409718 | 0.042172755  | 0.0875607 | 0.4816402 | 0.630062 | 0.957354 |
| snrpb             | 2453.683551 | -0.3358609   | 0.0805105 | -4.171639 | 3.02E-05 | 0.001759 |
| dpysl5a           | 2340.065017 | 0.115584899  | 0.0844455 | 1.3687507 | 0.171077 | 0.729069 |
| uqcrb             | 20.11827902 | 0.04209115   | 0.5416611 | 0.0777075 | 0.938061 | 0.99279  |
| rpp14             | 185.7458823 | -0.089379253 | 0.1514379 | -0.590204 | 0.555054 | 0.947449 |
| arhgef18a         | 399.3982081 | -0.102491098 | 0.1137203 | -0.901256 | 0.367452 | 0.887458 |
| sema3fa           | 909.2972153 | 0.056546739  | 0.0935939 | 0.6041709 | 0.54573  | 0.945526 |
| cahz              | 1202.5711   | 0.191343966  | 0.0952755 | 2.0083219 | 0.044609 | 0.41583  |
| ndrg2             | 4537.364934 | 0.138801389  | 0.0725094 | 1.9142525 | 0.055588 | 0.461579 |
| si:ch211-12m10.1  | 1363.29004  | 0.056147581  | 0.0874431 | 0.6421041 | 0.520806 | 0.939056 |
| atp6vld           | 2691.148842 | -0.175126559 | 0.0781741 | -2.240213 | 0.025077 | 0.306095 |
| acvr2aa           | 1908.594624 | 0.013985184  | 0.0759787 | 0.1840671 | 0.853961 | 0.985174 |
| fgfr1b            | 238.3716772 | -0.105418245 | 0.161723  | -0.651844 | 0.514502 | 0.937328 |
| dnajc11a          | 1081.267409 | -0.148572414 | 0.0819957 | -1.811954 | 0.069993 | 0.516704 |
| rplp21            | 5015.218578 | -0.413031484 | 0.103348  | -3.996511 | 6.43E-05 | 0.003387 |
| akt2              | 2147.205338 | -0.097877036 | 0.0729978 | -1.340822 | 0.179978 | 0.741126 |
| ccdc28b           | 142.0756576 | -0.068044316 | 0.1775219 | -0.383301 | 0.701497 | 0.968134 |
| pcytlaa           | 205.8258342 | -0.009207071 | 0.1463765 | -0.0629   | 0.949846 | 0.99381  |

|                  |             |              |           |           |          |          |
|------------------|-------------|--------------|-----------|-----------|----------|----------|
| otx2b            | 1349.657911 | -0.079908457 | 0.0831014 | -0.961578 | 0.336262 | 0.876088 |
| ppplr14aa        | 155.5577306 | 0.124730641  | 0.1695206 | 0.7357845 | 0.461862 | 0.922466 |
| ift46            | 354.8870761 | -0.05544026  | 0.1201982 | -0.461241 | 0.644626 | 0.96029  |
| esrpl            | 528.7649448 | -0.125141547 | 0.1102984 | -1.134573 | 0.256554 | 0.824839 |
| krri1            | 239.2003353 | -0.034573633 | 0.1536118 | -0.225071 | 0.821924 | 0.982156 |
| rnpc3            | 374.6645228 | -0.11105954  | 0.1159093 | -0.958159 | 0.337982 | 0.876609 |
| enpp2            | 221.5564676 | -0.094984981 | 0.1500167 | -0.633163 | 0.526627 | 0.940528 |
| trpmla           | 266.907525  | -0.058040822 | 0.1414534 | -0.410318 | 0.681573 | 0.965476 |
| traip            | 85.48391307 | -0.040256193 | 0.2207614 | -0.182352 | 0.855307 | 0.985174 |
| uqcc2            | 444.3861986 | 0.132354325  | 0.1125288 | 1.1761817 | 0.239522 | 0.808091 |
| tlx2             | 234.9844502 | -0.031684834 | 0.1385992 | -0.228608 | 0.819174 | 0.981594 |
| si:dkey-110k5.10 | 12.71807647 | 0.531985701  | 0.5739902 | 0.9268202 | 0.35402  | 0.881994 |
| atf7a            | 169.182158  | -0.094918688 | 0.1726483 | -0.549781 | 0.58247  | 0.952117 |
| blzfl            | 549.0545795 | -0.050276719 | 0.1032343 | -0.487015 | 0.626247 | 0.957354 |
| nael             | 941.5484888 | -0.025464791 | 0.090339  | -0.28188  | 0.778035 | 0.975942 |
| stk3             | 715.1555495 | 0.167949673  | 0.0969929 | 1.7315662 | 0.083351 | 0.556629 |
| adralba          | 8.810354836 | 0.283827104  | 0.6311747 | 0.4496807 | 0.652941 | NA       |
| ankrd45          | 15.23023151 | -0.310776331 | 0.4796275 | -0.647954 | 0.517015 | 0.938543 |
| arhgap33         | 134.5029618 | 0.075171124  | 0.1948486 | 0.3857924 | 0.69965  | 0.967998 |
| ncaldb           | 449.4743255 | 0.401095622  | 0.1064267 | 3.7687517 | 0.000164 | 0.007299 |
| nfatc2ip         | 283.9869608 | -0.050076408 | 0.127772  | -0.39192  | 0.695117 | 0.96736  |
| fyna             | 1501.880814 | -0.015235668 | 0.0874083 | -0.174305 | 0.861626 | 0.985841 |
| zgc:64106        | 273.6650695 | -0.483699925 | 0.1476577 | -3.275819 | 0.001054 | 0.032299 |
| mnk2a            | 266.708569  | 0.214879257  | 0.1405621 | 1.5287142 | 0.126335 | 0.655241 |
| dnasell4.2       | 72.70127768 | -0.12664849  | 0.225789  | -0.560915 | 0.574855 | 0.950037 |
| tnncla           | 89.20644978 | 0.166281506  | 0.2322606 | 0.7159264 | 0.474037 | 0.924993 |
| fen1             | 606.2501622 | -0.069514117 | 0.0978526 | -0.710397 | 0.477458 | 0.926857 |
| rps9             | 16967.24699 | -0.324505509 | 0.093607  | -3.466681 | 0.000527 | 0.018573 |
| col2alb          | 16304.30597 | 0.171967727  | 0.0809632 | 2.1240236 | 0.033668 | 0.357045 |
| aadat            | 29.45802224 | -0.044334043 | 0.3619959 | -0.122471 | 0.902526 | 0.990121 |
| sigmar1          | 357.7744649 | -0.136378386 | 0.1195328 | -1.140928 | 0.2539   | 0.823394 |
| ryrla            | 1074.78626  | -0.021736468 | 0.0914855 | -0.237595 | 0.812196 | 0.981081 |
| ptger2a          | 47.93634975 | -0.029555666 | 0.3002418 | -0.09844  | 0.921583 | 0.992138 |
| elmsanla         | 134.8690032 | -0.485799416 | 0.1726715 | -2.813431 | 0.004902 | 0.102006 |
| fes              | 99.86025548 | 0.22090477   | 0.1994603 | 1.1075123 | 0.268072 | 0.83343  |
| gsna             | 722.7120653 | 0.082312668  | 0.0952269 | 0.8643845 | 0.387377 | 0.895778 |
| otubl            | 704.308565  | 0.068206482  | 0.1029361 | 0.6626097 | 0.507581 | 0.935734 |
| CABZ01044048.1   | 16.63682557 | -0.182580965 | 0.5049894 | -0.361554 | 0.717685 | 0.96909  |
| afglla           | 199.2729197 | 0.041299013  | 0.1522941 | 0.2711793 | 0.786253 | 0.976471 |
| calcr1a          | 39.86439068 | 0.2140811    | 0.317929  | 0.6733613 | 0.500717 | 0.93428  |
| gnaq             | 207.609042  | -0.010838037 | 0.1639685 | -0.066098 | 0.9473   | 0.99381  |
| sirt2            | 580.4922982 | 0.089599546  | 0.1171707 | 0.7646924 | 0.444455 | 0.916726 |
| scube3           | 80.37908478 | 0.201788501  | 0.2196777 | 0.9185663 | 0.358322 | 0.884398 |
| dcunld3          | 313.2963852 | -0.072786996 | 0.1245094 | -0.58459  | 0.558823 | 0.948478 |
| ppmlbb           | 2660.960994 | 0.07628493   | 0.0707975 | 1.0775091 | 0.281253 | 0.84357  |
| si:ch211-212o1.2 | 266.1148745 | -0.032627238 | 0.1296545 | -0.251648 | 0.801313 | 0.979377 |
| lpcat1           | 146.2663663 | -0.087536617 | 0.1684673 | -0.519606 | 0.603338 | 0.956045 |
| rcc2             | 2881.145839 | -0.03266637  | 0.0697178 | -0.468551 | 0.639391 | 0.959994 |
| oraila           | 102.629136  | 0.247174537  | 0.1982385 | 1.2468544 | 0.212451 | 0.780421 |
| myl4             | 693.0811978 | 0.042486628  | 0.0948911 | 0.447741  | 0.65434  | 0.961305 |
| upbl             | 257.3794809 | 0.220768964  | 0.1426051 | 1.548114  | 0.121595 | 0.648265 |
| sema6dl          | 689.6337733 | -0.047249728 | 0.096372  | -0.490285 | 0.623932 | 0.957354 |
| ugt2a5           | 164.9680724 | -0.052779701 | 0.1692876 | -0.311775 | 0.755211 | 0.975318 |
| arrb2b           | 1856.146063 | -0.085666914 | 0.0796913 | -1.074984 | 0.282382 | 0.843666 |

|                  |             |              |           |           |          |          |
|------------------|-------------|--------------|-----------|-----------|----------|----------|
| clql4a           | 34.76670179 | 0.447056644  | 0.3491182 | 1.2805308 | 0.200359 | 0.766727 |
| atp5pb           | 6621.81382  | -0.0349562   | 0.074589  | -0.468651 | 0.639319 | 0.959994 |
| spag7            | 1094.882717 | 0.019775688  | 0.0814231 | 0.2428757 | 0.808102 | 0.980642 |
| sfpq             | 4790.734619 | -0.087057372 | 0.0826585 | -1.053217 | 0.292241 | 0.848075 |
| pou6f1           | 542.1054169 | 0.059634047  | 0.1044094 | 0.5711558 | 0.567894 | 0.948761 |
| calcr1b          | 9.15920123  | -0.792480448 | 0.6358967 | -1.246241 | 0.212676 | NA       |
| abcb11a          | 217.8220947 | -1.240285514 | 0.151023  | -8.212562 | 2.17E-16 | 1.22E-13 |
| hoxb10a          | 94.77201111 | 0.051174525  | 0.2116483 | 0.2417904 | 0.808943 | 0.980642 |
| si:dkey-23k10.5  | 32.89183108 | -1.132254797 | 0.3508469 | -3.227204 | 0.00125  | 0.036865 |
| sox5             | 1742.942191 | -0.034490468 | 0.0775529 | -0.444735 | 0.656512 | 0.961833 |
| cry1b            | 536.2106685 | -0.098657103 | 0.1020545 | -0.96671  | 0.333689 | 0.874933 |
| smarcb1b         | 677.2585909 | -0.091958408 | 0.0938622 | -0.979717 | 0.327226 | 0.872658 |
| atxn21           | 774.6083859 | 0.085948714  | 0.1140148 | 0.7538384 | 0.450946 | 0.918761 |
| epha4b           | 45.10392866 | 0.104811298  | 0.310571  | 0.3374794 | 0.735756 | 0.972535 |
| si:dkeyp-117h8.2 | 849.9508959 | -0.039759661 | 0.0972549 | -0.408819 | 0.682672 | 0.965476 |
| dennd6b          | 393.1470995 | -0.042268156 | 0.1177959 | -0.358825 | 0.719726 | 0.969318 |
| FOXK2            | 991.6986242 | -0.222138398 | 0.0843395 | -2.633859 | 0.008442 | 0.14985  |
| actr1            | 2503.33824  | -0.028315482 | 0.072701  | -0.389479 | 0.696922 | 0.96736  |
| rbm39a           | 3245.131746 | -0.037582437 | 0.0832903 | -0.451222 | 0.651829 | 0.960708 |
| mybpc3           | 1355.624217 | 0.230792789  | 0.0829609 | 2.7819465 | 0.005403 | 0.109079 |
| slc26a2          | 352.345657  | 0.187794661  | 0.1187775 | 1.581062  | 0.113864 | 0.632634 |
| scxb             | 10.21285159 | 0.169898004  | 0.6008817 | 0.2827479 | 0.77737  | NA       |
| syt5b            | 2909.909158 | 0.026233671  | 0.0804528 | 0.3260755 | 0.744367 | 0.974094 |
| snrpd1           | 1022.699167 | -0.197942723 | 0.0891345 | -2.220721 | 0.02637  | 0.312638 |
| ftr52p           | 12.80386263 | -0.048799743 | 0.5474407 | -0.089142 | 0.928969 | 0.992702 |
| twf1b            | 577.37266   | 0.013069678  | 0.1124767 | 0.116199  | 0.907495 | 0.990702 |
| chuk             | 912.0952706 | 0.020139467  | 0.0870016 | 0.2314838 | 0.816939 | 0.981594 |
| aldoaa           | 12372.66427 | 0.007378003  | 0.0693552 | 0.10638   | 0.915281 | 0.991171 |
| pde6b            | 323.1719514 | 0.26538699   | 0.1349061 | 1.9671982 | 0.04916  | 0.435115 |
| sema3b           | 400.2556672 | 0.088863935  | 0.1170541 | 0.75917   | 0.447751 | 0.917154 |
| si:ch211-246m6.5 | 94.51182696 | -0.096906769 | 0.2107282 | -0.459866 | 0.645612 | 0.96029  |
| prtfcd1          | 171.0187325 | -0.105167197 | 0.1646221 | -0.63884  | 0.522927 | 0.939336 |
| ttc36            | 81.22469886 | 0.468107281  | 0.2245512 | 2.0846352 | 0.037102 | 0.377011 |
| esrrgb           | 15.77672947 | 0.155142157  | 0.5018927 | 0.3091142 | 0.757235 | 0.975374 |
| ctsl1            | 20.80676903 | -0.0346876   | 0.4409745 | -0.078661 | 0.937302 | 0.99279  |
| clocka           | 84.78478905 | 0.106759828  | 0.2113375 | 0.5051627 | 0.613445 | 0.95688  |
| zgc:56556        | 101.1714541 | -0.046229784 | 0.1956128 | -0.236333 | 0.813174 | 0.981081 |
| marveld1         | 145.8016505 | 0.244404146  | 0.1720414 | 1.4206126 | 0.155429 | 0.705158 |
| b9d1             | 215.20989   | -0.320127052 | 0.1582027 | -2.023525 | 0.043019 | 0.407353 |
| u2af2b           | 2394.653111 | -0.002688636 | 0.0698756 | -0.038477 | 0.969307 | 0.996315 |
| pigo             | 540.7425638 | 0.191818284  | 0.1201364 | 1.596671  | 0.110339 | 0.624637 |
| ints13           | 406.2320498 | -0.007007188 | 0.1115328 | -0.062826 | 0.949905 | 0.99381  |
| cpm              | 227.7603343 | 0.114426019  | 0.1519691 | 0.7529559 | 0.451476 | 0.918761 |
| dhrrs12          | 561.0220808 | 0.048291678  | 0.1038342 | 0.4650847 | 0.641871 | 0.959994 |
| cttn             | 1756.077811 | -0.091466357 | 0.0802632 | -1.13958  | 0.254461 | 0.823475 |
| stag2a           | 831.4192886 | -0.065076649 | 0.0907782 | -0.716876 | 0.473451 | 0.924993 |
| tbx6             | 44.37359782 | -0.063952711 | 0.3347117 | -0.191068 | 0.848472 | 0.985174 |
| tent5bb          | 228.8655845 | 0.253500855  | 0.1379313 | 1.8378774 | 0.06608  | 0.502802 |
| wars2            | 90.48775771 | -0.095829046 | 0.2215183 | -0.432601 | 0.665305 | 0.964736 |
| micall           | 12.88937808 | -0.304962108 | 0.5434181 | -0.561192 | 0.574666 | 0.950037 |
| batf             | 4.83452673  | -0.740067727 | 0.9020005 | -0.820474 | 0.411946 | NA       |
| pcnx1            | 977.6582478 | 0.007296513  | 0.1020095 | 0.0715277 | 0.942978 | 0.993364 |
| plod2            | 710.1014777 | 0.228241273  | 0.0933229 | 2.4457165 | 0.014456 | 0.218716 |
| pbxiplb          | 621.7017504 | 0.098057312  | 0.1017567 | 0.9636447 | 0.335224 | 0.876088 |

|            |             |              |           |           |          |          |
|------------|-------------|--------------|-----------|-----------|----------|----------|
| cetn3      | 255.2606149 | 0.141406991  | 0.1464065 | 0.9658517 | 0.334118 | 0.875263 |
| zgc:100846 | 180.4354044 | 0.044506066  | 0.1591666 | 0.2796193 | 0.77977  | 0.976146 |
| atp5l      | 4313.354677 | -0.109595882 | 0.0922137 | -1.188499 | 0.234637 | 0.803509 |
| chn2       | 23.1741752  | -0.143621973 | 0.4111095 | -0.349352 | 0.726825 | 0.970402 |
| map2k5     | 196.9057948 | 0.068104943  | 0.1489247 | 0.4573113 | 0.647447 | 0.960581 |
| aakla      | 34.96114877 | -0.032751086 | 0.3364721 | -0.097337 | 0.922459 | 0.99233  |
| inaa       | 368.6092439 | 0.457385469  | 0.1226656 | 3.7287196 | 0.000192 | 0.008264 |
| ptk7a      | 718.984489  | 0.047805534  | 0.0945363 | 0.5056843 | 0.613078 | 0.95688  |
| galnt8a.2  | 1.820454227 | -0.279786658 | 1.4495387 | -0.193018 | 0.846945 | NA       |
| sp8a       | 274.2984598 | 0.2079615    | 0.1328624 | 1.5652392 | 0.117527 | 0.641232 |
| ednraa     | 447.4201707 | 0.132963688  | 0.1096951 | 1.2121208 | 0.225466 | 0.793022 |
| foxn1      | 43.82572263 | 0.628578507  | 0.3115542 | 2.0175577 | 0.043637 | 0.410116 |
| MFN1       | 37.73731187 | 0.05987885   | 0.3110992 | 0.1924751 | 0.84737  | 0.985174 |
| mrpl19     | 558.9440132 | -0.163816814 | 0.102802  | -1.593518 | 0.111044 | 0.626294 |
| pdca       | 210.8538203 | 0.445336416  | 0.1545494 | 2.8815151 | 0.003958 | 0.086474 |
| cry4       | 778.0602527 | -0.278281099 | 0.0955989 | -2.910924 | 0.003604 | 0.081067 |
| tsg101b    | 414.44298   | -0.006100353 | 0.1123201 | -0.054312 | 0.956686 | 0.994543 |
| itpr2      | 146.5707551 | -0.332415878 | 0.1766884 | -1.881368 | 0.059922 | 0.478654 |
| txn11      | 1323.587856 | -0.04642378  | 0.079118  | -0.586766 | 0.557361 | 0.948478 |
| spns1      | 1374.291715 | 0.270729876  | 0.0907238 | 2.9841096 | 0.002844 | 0.069229 |
| tpgs2      | 141.0914407 | -0.333210357 | 0.1691747 | -1.969623 | 0.048882 | 0.434811 |
| plp1b      | 352.5103422 | 0.442601108  | 0.1239939 | 3.5695386 | 0.000358 | 0.013599 |
| prkcbp11   | 1568.128529 | -0.178211679 | 0.0765837 | -2.327019 | 0.019964 | 0.266381 |
| gyglA      | 799.9663341 | -0.040626639 | 0.1096134 | -0.370636 | 0.710909 | 0.968985 |
| bmpr2a     | 559.3747453 | -0.052199006 | 0.1127753 | -0.462858 | 0.643466 | 0.959994 |
| slc35e1    | 668.2235813 | 0.15346199   | 0.0950245 | 1.6149726 | 0.106317 | 0.615567 |
| insra      | 1326.017589 | -0.050227048 | 0.082544  | -0.608488 | 0.542864 | 0.944974 |
| dlx4a      | 177.7240171 | -0.255007706 | 0.1616777 | -1.57726  | 0.114736 | 0.635336 |
| ctnbn11    | 722.7809149 | -0.118708469 | 0.1029447 | -1.153129 | 0.248857 | 0.81797  |
| csrp2      | 442.2239506 | 0.105505508  | 0.1113019 | 0.9479222 | 0.343169 | 0.878434 |
| slc35d1a   | 211.8416087 | 0.150282868  | 0.1443403 | 1.0411704 | 0.297796 | 0.85401  |
| fmnl       | 13.72813377 | -1.06581564  | 0.5297994 | -2.011734 | 0.044248 | 0.413497 |
| zgc:136908 | 281.6620074 | -0.0434536   | 0.145526  | -0.298597 | 0.765248 | 0.975374 |
| crx        | 2431.078052 | -0.064210978 | 0.0845685 | -0.759277 | 0.447687 | 0.917154 |
| bfsp2      | 3470.373126 | 0.172197951  | 0.0763195 | 2.2562775 | 0.024053 | 0.299515 |
| ybey       |             | 0 NA         | NA        | NA        | NA       | NA       |
| slc38a7    | 313.6063972 | 0.142749094  | 0.1330818 | 1.0726414 | 0.283432 | 0.84466  |
| mob2b      | 617.048184  | 0.055181542  | 0.107475  | 0.5134362 | 0.607646 | 0.956718 |
| cpa6       | 56.7972674  | 0.231205139  | 0.2589059 | 0.8930085 | 0.371853 | 0.892248 |
| hpgd       | 241.357374  | -0.04109903  | 0.1372354 | -0.299478 | 0.764575 | 0.975374 |
| glral      | 840.7117494 | 0.131706275  | 0.095924  | 1.3730277 | 0.169744 | 0.726965 |
| kdsr       | 350.9229203 | -0.073860676 | 0.1211622 | -0.609602 | 0.542126 | 0.944974 |
| hs6st2     | 571.3684781 | 0.017305044  | 0.1008527 | 0.1715874 | 0.863762 | 0.985952 |
| dnaaf1     | 13.51074814 | -0.338685797 | 0.5232083 | -0.647325 | 0.517422 | 0.938592 |
| zgc:100832 | 135.765     | -0.070123093 | 0.1710997 | -0.409838 | 0.681925 | 0.965476 |
| ttc26      | 196.7439519 | 0.073990883  | 0.1533016 | 0.4826491 | 0.629345 | 0.957354 |
| rnf19a     | 983.9160576 | -0.10767121  | 0.0863381 | -1.247088 | 0.212365 | 0.780251 |
| polr3gla   | 67.90260717 | -0.168093844 | 0.2453615 | -0.685087 | 0.493289 | 0.931926 |
| mettl21a   | 34.30761669 | 0.213492552  | 0.3614991 | 0.5905757 | 0.554805 | 0.947449 |
| mtnrlal    | 8.125492417 | 0.414438443  | 0.6661674 | 0.6221236 | 0.533861 | NA       |
| thbs3b     | 168.9181718 | 0.361752248  | 0.1699216 | 2.1289357 | 0.03326  | 0.355427 |
| dcn        | 2318.750002 | 0.298541791  | 0.0704902 | 4.2352213 | 2.28E-05 | 0.001407 |
| angpt11a   | 334.4328206 | 0.076342649  | 0.1251273 | 0.6101201 | 0.541782 | 0.944974 |
| dmac21     | 131.9600102 | -0.112257066 | 0.1785375 | -0.628759 | 0.529507 | 0.942209 |

|             |             |              |           |           |          |          |
|-------------|-------------|--------------|-----------|-----------|----------|----------|
| kif15       | 379.434948  | -0.035689313 | 0.1156027 | -0.308724 | 0.757532 | 0.975374 |
| apoala      | 13026.05938 | 0.197436549  | 0.205437  | 0.9610565 | 0.336524 | 0.876088 |
| meislb      | 4117.423222 | -0.072594338 | 0.0674141 | -1.076843 | 0.28155  | 0.84357  |
| c19h1orf109 | 79.00545265 | -0.336306926 | 0.2273939 | -1.478962 | 0.13915  | 0.677963 |
| cngalb      | 120.9777766 | 0.171242295  | 0.2066923 | 0.8284891 | 0.407394 | 0.901305 |
| zgc:109965  | 496.8479028 | -0.142675753 | 0.1273448 | -1.120389 | 0.262548 | 0.830166 |
| fbx12       | 169.9356726 | 0.045568181  | 0.1587854 | 0.2869796 | 0.774128 | 0.975687 |
| cyp46a1.1   | 152.2368453 | -1.004990678 | 0.1813791 | -5.540831 | 3.01E-08 | 4.54E-06 |
| sgce        | 949.4848574 | 0.075644366  | 0.0851824 | 0.8880279 | 0.374526 | 0.894213 |
| ccn11b      | 984.5587328 | 0.150904902  | 0.0866907 | 1.7407276 | 0.081731 | 0.552725 |
| papolg      | 1856.372901 | -0.097551342 | 0.0751199 | -1.298609 | 0.194078 | 0.75784  |
| emc7        | 1257.356412 | 0.075037874  | 0.0820832 | 0.914168  | 0.360629 | 0.885686 |
| rab4b       | 24.86632554 | 0.275321525  | 0.3792573 | 0.7259493 | 0.46787  | 0.924328 |
| zgc:162872  | 48.17511708 | 0.140777798  | 0.2877213 | 0.4892853 | 0.62464  | 0.957354 |
| cant1a      | 443.085922  | -0.299940659 | 0.1119461 | -2.679332 | 0.007377 | 0.135568 |
| scp2a       | 1229.829373 | -0.044466437 | 0.0866683 | -0.513065 | 0.607906 | 0.956718 |
| fer         | 24.25021592 | -0.019213127 | 0.4226256 | -0.045461 | 0.96374  | 0.995927 |
| gpt2        | 664.3431806 | 0.286880994  | 0.1030881 | 2.7828721 | 0.005388 | 0.109051 |
| CDK18       | 62.23362705 | -0.03774659  | 0.2472177 | -0.152686 | 0.878646 | 0.987881 |
| umps        | 276.2681277 | -0.183090356 | 0.1338244 | -1.368139 | 0.171269 | 0.729413 |
| dpf2        | 243.6747341 | 0.032407921  | 0.1452477 | 0.2231217 | 0.823441 | 0.982196 |
| nup35       | 288.8143982 | 0.199737949  | 0.1262218 | 1.5824367 | 0.11355  | 0.631853 |
| psme3       | 644.80364   | 0.023977115  | 0.0996212 | 0.2406829 | 0.809801 | 0.980648 |
| ube2e3      | 1890.215481 | -0.116599257 | 0.0864485 | -1.348772 | 0.17741  | 0.738316 |
| def6a       | 9.200782712 | -0.511313697 | 0.6548971 | -0.780754 | 0.434947 | NA       |
| rgma        | 2646.940576 | 0.060116399  | 0.0721462 | 0.8332577 | 0.404699 | 0.901305 |
| eftud2      | 1530.70197  | -0.078969658 | 0.082313  | -0.959382 | 0.337366 | 0.876394 |
| clcn1b      | 51.19235866 | 0.24050811   | 0.2687337 | 0.8949681 | 0.370804 | 0.890813 |
| tmem206     | 71.88842988 | 0.09794981   | 0.2542278 | 0.3852837 | 0.700027 | 0.967998 |
| eif4e1c     | 1098.897599 | 0.280101201  | 0.0813003 | 3.4452684 | 0.00057  | 0.019517 |
| katna12     | 9.90845297  | 1.371124574  | 0.6697222 | 2.0473035 | 0.040628 | NA       |
| zgc:65851   | 224.2212777 | 0.119252415  | 0.1421181 | 0.839108  | 0.401409 | 0.90084  |
| bcs11       | 238.965117  | -0.076761177 | 0.135469  | -0.566633 | 0.570964 | 0.949079 |
| cnga3b      | 40.16379524 | 0.49412699   | 0.318516  | 1.551341  | 0.12082  | 0.645876 |
| sytl3       | 502.6284211 | 0.144262766  | 0.109214  | 1.3209187 | 0.186528 | 0.750917 |
| myoz2a      | 246.5245954 | 0.2750619    | 0.1419532 | 1.9376937 | 0.052661 | 0.450394 |
| usp25       | 1200.01476  | -0.025761802 | 0.0857386 | -0.300469 | 0.763819 | 0.975374 |
| zgc:110269  | 196.1940184 | -0.294927204 | 0.1681541 | -1.75391  | 0.079446 | 0.547489 |
| ptpn11b     | 246.6466008 | 0.241586412  | 0.1351311 | 1.7877924 | 0.07381  | 0.529749 |
| capn9       | 535.3067825 | -0.204561649 | 0.1035821 | -1.974875 | 0.048282 | 0.432986 |
| nacad       | 550.892203  | 0.09005377   | 0.104966  | 0.8579328 | 0.39093  | 0.897643 |
| vipr2       | 61.57977826 | -0.022662752 | 0.2543256 | -0.089109 | 0.928995 | 0.992702 |
| galnt8a.1   | 8.997498262 | -0.77029437  | 0.6539289 | -1.177948 | 0.238817 | NA       |
| fbp2        | 1263.592432 | -1.091897573 | 0.0958812 | -11.38802 | 4.80E-30 | 1.05E-26 |
| trim46a     | 144.3890892 | 0.01584052   | 0.1799258 | 0.0880392 | 0.929846 | 0.992702 |
| ttc21b      | 285.7611573 | -0.002318001 | 0.1306173 | -0.017747 | 0.985841 | 0.996944 |
| rdh10b      | 184.1049161 | 0.111645156  | 0.1626418 | 0.6864479 | 0.492431 | 0.931926 |
| naa35       | 861.4732652 | 0.05901889   | 0.0923083 | 0.6393668 | 0.522584 | 0.939331 |
| hsc70       | 1175.217716 | 0.618786293  | 0.1009689 | 6.1284858 | 8.87E-10 | 1.87E-07 |
| pdhala      | 4151.689974 | 0.084503144  | 0.0676245 | 1.2495938 | 0.211448 | 0.778917 |
| cox4i11     | 118.3076279 | -0.632857816 | 0.216606  | -2.9217   | 0.003481 | 0.079216 |
| adar        | 663.4864453 | -0.041947016 | 0.0979586 | -0.428212 | 0.668497 | 0.96478  |
| kcnk5b      | 155.8909948 | 0.508354199  | 0.1677228 | 3.0309191 | 0.002438 | 0.061888 |
| mmp13a      | 100.2876542 | -0.028577925 | 0.2477171 | -0.115365 | 0.908156 | 0.990702 |

|                   |             |              |           |           |          |          |
|-------------------|-------------|--------------|-----------|-----------|----------|----------|
| eya4              | 580.0384622 | 0.106173287  | 0.1011708 | 1.0494458 | 0.293973 | 0.849999 |
| adssl             | 1310.509212 | -0.094017948 | 0.0800317 | -1.174758 | 0.240091 | 0.808111 |
| ercc612           | 120.0497877 | -0.082747145 | 0.1848857 | -0.447558 | 0.654472 | 0.961305 |
| coll1a            | 32753.84354 | 0.303986352  | 0.1065754 | 2.8523128 | 0.00434  | 0.093084 |
| mgat1a            | 410.7377422 | -0.049315192 | 0.1146475 | -0.430146 | 0.667089 | 0.964736 |
| rnf207b           | 88.32446759 | 0.367320823  | 0.2093683 | 1.7544246 | 0.079358 | 0.547489 |
| coll1a2           | 16012.18306 | 0.115733682  | 0.0969749 | 1.1934401 | 0.232697 | 0.80121  |
| neflb             | 951.8861649 | 0.140249888  | 0.0915893 | 1.5312916 | 0.125697 | 0.654803 |
| fam76b            | 1035.404585 | -0.025353157 | 0.0957527 | -0.264778 | 0.791181 | 0.977461 |
| spic              | 0.679983498 | -1.527277543 | 2.5551009 | -0.597737 | 0.550016 | NA       |
| zgc:113057        | 1.118581941 | -2.434763583 | 2.0644676 | -1.179366 | 0.238252 | NA       |
| si:ch211-169p10.1 | 8.631167378 | -0.79246538  | 0.6798098 | -1.165716 | 0.243729 | NA       |
| vmp1              | 785.086903  | 0.071798923  | 0.0993917 | 0.7223832 | 0.470059 | 0.924787 |
| rnl5              | 331.4241397 | -0.19265427  | 0.1273675 | -1.512586 | 0.130385 | 0.662797 |
| zgc:77849         | 2322.312733 | -0.154228296 | 0.0783475 | -1.968515 | 0.049009 | 0.435115 |
| rassf4            | 73.81074726 | -0.210466147 | 0.2298378 | -0.915716 | 0.359816 | 0.885611 |
| spintl1b          | 589.2834385 | 0.041199251  | 0.1017831 | 0.4047751 | 0.685643 | 0.966307 |
| aacs              | 62.18546058 | -0.172548197 | 0.2556256 | -0.675004 | 0.499674 | 0.934065 |
| aurka             | 251.968794  | -0.163343022 | 0.145655  | -1.121438 | 0.262102 | 0.830166 |
| mphosph10         | 323.8565449 | -0.171503032 | 0.1277139 | -1.342869 | 0.179314 | 0.740258 |
| GPR62 (1 of many) | 18.80100641 | 0.666648698  | 0.4418961 | 1.5086097 | 0.131399 | 0.664861 |
| per1b             | 2258.65797  | 0.035129372  | 0.072055  | 0.4875355 | 0.625879 | 0.957354 |
| rlbpla            | 1084.662761 | 0.082508942  | 0.09234   | 0.893534  | 0.371571 | 0.892003 |
| u2af2a            | 1365.711287 | 0.030850539  | 0.0843433 | 0.3657734 | 0.714534 | 0.96909  |
| rnpep             | 315.0836423 | 0.234198757  | 0.1249776 | 1.8739263 | 0.060941 | 0.482482 |
| sdcbp2            | 2169.000402 | -0.114897515 | 0.0812597 | -1.413955 | 0.157375 | 0.708089 |
| hfc1b             | 1812.87192  | -0.035882412 | 0.0848854 | -0.422716 | 0.672503 | 0.965257 |
| slc6a6a           | 20.06383268 | -0.268755364 | 0.4820912 | -0.557478 | 0.577201 | 0.950788 |
| epx               | 8.933588736 | 0.762742446  | 0.6371652 | 1.1970875 | 0.231272 | NA       |
| dnase1            | 2.496544088 | 0.208764915  | 1.2037135 | 0.1734341 | 0.86231  | NA       |
| rap1aa            | 1124.808803 | 0.068215787  | 0.0930066 | 0.733451  | 0.463283 | 0.922698 |
| ak5               | 358.5591925 | 0.082756834  | 0.1191566 | 0.6945214 | 0.487355 | 0.931584 |
| pdss2             | 245.8934356 | 0.313999652  | 0.1470965 | 2.134651  | 0.03279  | 0.352808 |
| polr3f            | 156.9699162 | -0.182733312 | 0.1624183 | -1.125079 | 0.260556 | 0.828546 |
| slkb              | 586.9526078 | 0.071768981  | 0.112294  | 0.6391169 | 0.522747 | 0.939336 |
| waca              | 1466.352029 | 0.015597612  | 0.0773805 | 0.2015703 | 0.840253 | 0.985029 |
| AL590149.1        | 322.5575348 | 0.120644413  | 0.1238069 | 0.9744563 | 0.32983  | 0.873938 |
| fmnl2a            | 51.57364239 | 0.255664755  | 0.2861417 | 0.8934899 | 0.371595 | 0.892003 |
| ptdss1a           | 227.0613532 | -0.181104565 | 0.1530407 | -1.183375 | 0.23666  | 0.805854 |
| pdcd10b           | 424.2838667 | -0.113408366 | 0.1156905 | -0.980274 | 0.326951 | 0.872658 |
| col5a1            | 8947.404373 | 0.251704645  | 0.0644027 | 3.9082944 | 9.29E-05 | 0.004595 |
| si:dkey-97a13.6   | 31.73373582 | -0.470564078 | 0.3605431 | -1.305154 | 0.191841 | 0.75597  |
| EIF3JA            | 433.3832395 | -0.053092288 | 0.1134016 | -0.468179 | 0.639656 | 0.959994 |
| hpxa              | 7.149207444 | -0.654652183 | 0.7686859 | -0.851651 | 0.394408 | NA       |
| saga              | 1119.289906 | 0.169041549  | 0.0943643 | 1.7913724 | 0.073234 | 0.527933 |
| prkag2a           | 554.8996679 | 0.055819801  | 0.0999003 | 0.5587551 | 0.576329 | 0.950611 |
| cdc34b            | 1016.652441 | -0.09132527  | 0.0958085 | -0.953206 | 0.340486 | 0.87805  |
| zgc:92749         | 32.12167228 | -0.010007364 | 0.334331  | -0.029933 | 0.976121 | 0.996762 |
| cid1b             | 26.98113868 | 0.222975542  | 0.3876846 | 0.5751468 | 0.565192 | 0.948739 |
| si:ch211-266d19.4 | 133.4237008 | -0.014400098 | 0.1724608 | -0.083498 | 0.933456 | 0.992702 |
| smad4b            | 125.3449309 | -0.239697424 | 0.1839946 | -1.302742 | 0.192663 | 0.756795 |
| atf6              | 1133.125849 | 0.229817007  | 0.0826147 | 2.7817927 | 0.005406 | 0.109079 |
| tfap2b            | 1420.607492 | 0.007882581  | 0.0938851 | 0.0839599 | 0.933088 | 0.992702 |
| inhbaa            | 140.9100247 | -0.153772638 | 0.1692759 | -0.908414 | 0.363659 | 0.886174 |

|          |             |              |           |           |          |          |
|----------|-------------|--------------|-----------|-----------|----------|----------|
| gtf2e2   | 571.7969484 | -0.010212368 | 0.1060855 | -0.096265 | 0.92331  | 0.992588 |
| rpud4    | 123.9434042 | -0.13931398  | 0.1876815 | -0.742289 | 0.457912 | 0.921978 |
| pfn2l    | 5728.958752 | 0.133736667  | 0.0747746 | 1.7885295 | 0.073691 | 0.529749 |
| atp2bla  | 1652.806508 | 0.201976186  | 0.0957175 | 2.1101283 | 0.034847 | 0.363434 |
| EIF1B    | 9868.765122 | -0.042251633 | 0.0768162 | -0.550036 | 0.582295 | 0.95207  |
| C3A.1    | 4899.546986 | 0.107476056  | 0.2230253 | 0.4819007 | 0.629877 | 0.957354 |
| bbx      | 17.07227908 | -0.215210373 | 0.4783476 | -0.449904 | 0.65278  | 0.960708 |
| wee2     | 1.18109702  | -0.359546947 | 1.8242229 | -0.197096 | 0.843752 | NA       |
| rbm14a   | 992.9310246 | -0.073980998 | 0.0940229 | -0.78684  | 0.431376 | 0.912692 |
| calhm5.2 | 33.90246786 | -0.067567587 | 0.3302257 | -0.20461  | 0.837877 | 0.984701 |
| hcls1    | 276.2232072 | 0.180713787  | 0.130749  | 1.3821432 | 0.166928 | 0.723549 |
| macolb   | 883.6153103 | 0.014706703  | 0.0887004 | 0.165802  | 0.868313 | 0.987245 |
| poc1bl   | 121.3155778 | -0.250939082 | 0.194506  | -1.290135 | 0.197004 | 0.761944 |
| rer1     | 1029.758589 | 0.118727223  | 0.0915534 | 1.2968085 | 0.194697 | 0.758758 |
| arll3b   | 328.9305889 | 0.022335039  | 0.1238208 | 0.1803819 | 0.856853 | 0.985597 |
| smarca1  | 193.9908164 | -0.084219225 | 0.1485407 | -0.566977 | 0.57073  | 0.949061 |
| nucks1b  | 2050.656148 | -0.02989988  | 0.0872394 | -0.342734 | 0.731799 | 0.971572 |
| foxa3    | 359.4731113 | -0.215529865 | 0.1240814 | -1.737003 | 0.082387 | 0.553931 |
| plek2    | 223.9974112 | 0.682576353  | 0.3232469 | 2.1116252 | 0.034719 | 0.362665 |
| tmem161a | 520.8136113 | 0.230405533  | 0.1051561 | 2.1910813 | 0.028446 | 0.327409 |
| hnmt     | 164.8789736 | -0.500973667 | 0.177389  | -2.824153 | 0.004741 | 0.099196 |
| pfkpb    | 537.6040771 | -0.014333388 | 0.1220664 | -0.117423 | 0.906525 | 0.990702 |
| dipk2aa  | 73.3250648  | -0.067241086 | 0.2439016 | -0.275689 | 0.782787 | 0.97627  |
| csnk2a2a | 891.7135612 | -0.004103755 | 0.0898725 | -0.045662 | 0.96358  | 0.995927 |
| nop56    | 2181.740745 | -0.159366611 | 0.0891257 | -1.78811  | 0.073758 | 0.529749 |
| dlgap4b  | 33.07303079 | -0.303326659 | 0.3469875 | -0.874172 | 0.382025 | 0.895192 |
| itga3b   | 371.7177901 | 0.379798353  | 0.1207104 | 3.1463605 | 0.001653 | 0.046434 |
| mettl3   | 208.9319712 | 0.193313932  | 0.1417437 | 1.3638276 | 0.172622 | 0.731348 |
| asah2    | 78.09455046 | -0.532897899 | 0.2587186 | -2.059758 | 0.039422 | 0.389957 |
| foxn3    | 35.97636336 | 0.107524194  | 0.3292309 | 0.326592  | 0.743976 | 0.974094 |
| alg9     | 732.9816685 | 0.013827721  | 0.0941361 | 0.1468907 | 0.883218 | 0.988706 |
| arih2    | 1537.787262 | -0.071870045 | 0.095332  | -0.753892 | 0.450914 | 0.918761 |
| tmprss4b | 29.66825743 | 0.382377866  | 0.3666183 | 1.0429864 | 0.296955 | 0.853798 |
| picalma  | 1351.336321 | 0.061346346  | 0.0776    | 0.7905458 | 0.429209 | 0.911406 |
| npepl1   | 1241.160623 | -0.062885356 | 0.0849914 | -0.739903 | 0.459359 | 0.921978 |
| snap23.1 | 735.5376672 | -0.118532953 | 0.1022304 | -1.159468 | 0.246265 | 0.816376 |
| slc4ala  | 281.8051091 | 0.282785092  | 0.1653688 | 1.7100272 | 0.087261 | 0.566108 |
| znf143a  | 461.8929035 | -0.120840485 | 0.1082634 | -1.116172 | 0.264349 | 0.830245 |
| ammecr1  | 145.3099122 | -0.084213931 | 0.1783053 | -0.472302 | 0.636711 | 0.958679 |
| anos1a   | 1133.181481 | 0.115175787  | 0.089472  | 1.2872833 | 0.197996 | 0.763261 |
| ddx49    | 158.8394797 | -0.110956933 | 0.1673332 | -0.66309  | 0.507273 | 0.935734 |
| slc34a2a | 38.59776013 | 1.315978732  | 0.3241309 | 4.0600231 | 4.91E-05 | 0.002688 |
| arhgef4  | 2276.078689 | 0.048860682  | 0.0724432 | 0.6744685 | 0.500013 | 0.934224 |
| ech1     | 338.6304853 | -0.138924722 | 0.1429702 | -0.971704 | 0.331198 | 0.874339 |
| tcea2    | 345.5821143 | 0.113303044  | 0.1167169 | 0.970751  | 0.331672 | 0.874653 |
| EIF2D    | 287.4622844 | 0.017928976  | 0.1292019 | 0.1387671 | 0.889634 | 0.989291 |
| mat2b    | 445.9304601 | -0.17852354  | 0.1185372 | -1.506055 | 0.132053 | 0.665787 |
| itgb5    | 563.3988215 | 0.145063832  | 0.1037398 | 1.3983426 | 0.16201  | 0.716531 |
| myh2     | 22414.59667 | 0.270403573  | 0.0999399 | 2.7056623 | 0.006817 | 0.127648 |
| tnfsf13b | 18.99502116 | 0.164196013  | 0.4404167 | 0.3728197 | 0.709283 | 0.968736 |
| syap1    | 948.5523837 | -0.070189833 | 0.0890657 | -0.788068 | 0.430657 | 0.912304 |
| scml2    | 733.9796332 | -0.044621526 | 0.0979696 | -0.455463 | 0.648776 | 0.960708 |
| mob1bb   | 318.8844296 | 0.199878553  | 0.1305963 | 1.530507  | 0.125891 | 0.654803 |
| rhoub    | 841.971884  | 0.13319096   | 0.0881998 | 1.5101055 | 0.131016 | 0.663795 |

|                 |             |              |           |           |          |          |
|-----------------|-------------|--------------|-----------|-----------|----------|----------|
| cfll1           | 3074.943398 | 0.049434405  | 0.1023246 | 0.4831134 | 0.629015 | 0.957354 |
| osbp17          | 1227.387489 | 0.280192699  | 0.0815479 | 3.4359265 | 0.000591 | 0.020129 |
| nfla            | 795.3084945 | -0.043811333 | 0.0938083 | -0.467031 | 0.640478 | 0.959994 |
| adal            | 38.37535784 | 0.256045937  | 0.3255922 | 0.7864008 | 0.431633 | 0.91277  |
| gpia            | 5575.278349 | -0.115611289 | 0.0934833 | -1.236705 | 0.216197 | 0.783589 |
| ppfia2          | 604.4840973 | 0.051659703  | 0.1386823 | 0.372504  | 0.709518 | 0.968856 |
| tdg.1           | 996.9575696 | 0.170556075  | 0.0897335 | 1.9006951 | 0.057342 | 0.469987 |
| opcml           | 60.49768396 | 0.405104695  | 0.2528429 | 1.602199  | 0.109112 | 0.622856 |
| pibf1           |             | 0 NA         | NA        | NA        | NA       | NA       |
| ubiad1          | 507.4078517 | 0.065879171  | 0.1187278 | 0.5548756 | 0.57898  | 0.951052 |
| or101-1         | 9.957374935 | 0.321386327  | 0.6538438 | 0.4915338 | 0.623049 | NA       |
| pole4           | 74.79512173 | 0.07543458   | 0.2357557 | 0.3199692 | 0.748992 | 0.97419  |
| dtbbb           | 12.24225332 | 0.227637057  | 0.5717674 | 0.3981288 | 0.690535 | 0.967111 |
| si:ch211-59h6.1 | 35.22095894 | -0.461703836 | 0.3330392 | -1.386335 | 0.165645 | 0.721576 |
| nsun3           | 62.1674877  | -0.190981488 | 0.2587133 | -0.738197 | 0.460394 | 0.921978 |
| erapla          | 116.658759  | -0.120292822 | 0.183541  | -0.6554   | 0.51221  | 0.936253 |
| ints6           | 214.5101713 | 0.141319149  | 0.1473893 | 0.9588154 | 0.337652 | 0.876395 |
| mta2            | 3436.252308 | 0.044551518  | 0.0680459 | 0.6547278 | 0.512643 | 0.936253 |
| ndufv2          | 2148.038402 | 0.092849226  | 0.0963073 | 0.9640936 | 0.334999 | 0.875906 |
| abcc12          | 447.7857781 | -0.563458905 | 0.1219036 | -4.622168 | 3.80E-06 | 0.000321 |
| zgc:158412      | 32.97265455 | -0.692667704 | 0.3482279 | -1.989122 | 0.046688 | 0.424613 |
| itpkla          | 284.5948513 | -0.722045368 | 0.1295833 | -5.572055 | 2.52E-08 | 3.89E-06 |
| hoxb5a          | 696.2209216 | -0.140732317 | 0.0956875 | -1.470749 | 0.141359 | 0.681968 |
| ascc2           | 265.7825411 | 0.019513642  | 0.1431398 | 0.1363258 | 0.891564 | 0.989291 |
| oxctla          | 1352.449363 | 0.046257885  | 0.0784937 | 0.5893198 | 0.555647 | 0.947621 |
| mmp15b          | 74.6331344  | 0.180010307  | 0.2395817 | 0.7513525 | 0.452441 | 0.919104 |
| mrpl11          | 435.6942059 | -0.189983409 | 0.1166186 | -1.6291   | 0.103292 | 0.609625 |
| bmilb           | 476.0790449 | 0.005762885  | 0.1063088 | 0.0542089 | 0.956769 | 0.994543 |
| ywhaba          | 13869.92532 | 0.043326516  | 0.0666369 | 0.6501884 | 0.515571 | 0.9377   |
| tubgcp2         | 437.9197467 | 0.001466039  | 0.1137881 | 0.0128839 | 0.98972  | 0.997612 |
| uap111          | 285.7203716 | -0.148677462 | 0.1340397 | -1.109205 | 0.267342 | 0.833191 |
| ndrg3a          | 4079.241045 | 0.059327938  | 0.0663179 | 0.8945993 | 0.371001 | 0.891178 |
| gclc            | 1019.504254 | -0.166671717 | 0.1119126 | -1.489303 | 0.136408 | 0.673303 |
| dmtn            | 363.5643183 | 0.008230003  | 0.1169255 | 0.0703867 | 0.943886 | 0.993364 |
| hiatla          | 726.7912302 | 0.020478509  | 0.0952192 | 0.2150671 | 0.829715 | 0.982805 |
| maf1            | 625.3100695 | 0.035534047  | 0.096305  | 0.368974  | 0.712147 | 0.969006 |
| dlx1a           | 294.5385224 | -0.12556819  | 0.1242466 | -1.010637 | 0.31219  | 0.864401 |
| pdk1            | 80.34750703 | 0.23222797   | 0.2240855 | 1.0363363 | 0.300045 | 0.856146 |
| prph2la         | 85.35005908 | 0.003394031  | 0.2251869 | 0.0150721 | 0.987975 | 0.997369 |
| atplb1a         | 6492.026993 | -0.078637674 | 0.0672826 | -1.168767 | 0.242497 | 0.811298 |
| dhx16           | 428.1832035 | -0.122879736 | 0.1145866 | -1.072374 | 0.283552 | 0.84466  |
| dennd3b         | 9.631224402 | 0.108760252  | 0.5994864 | 0.1814224 | 0.856036 | NA       |
| zgc:55558       | 1511.846243 | 0.054621112  | 0.0834476 | 0.6545558 | 0.512754 | 0.936253 |
| jag1b           | 538.4582901 | 0.064276754  | 0.1091141 | 0.5890785 | 0.555809 | 0.947625 |
| nkf3            | 90.36026649 | 0.116236341  | 0.2092535 | 0.555481  | 0.578566 | 0.951052 |
| si:ch211-1f22.1 | 1.804341312 | -0.79774002  | 1.3966279 | -0.57119  | 0.567871 | NA       |
| zeblb           | 897.2230013 | -0.077319209 | 0.0898708 | -0.860337 | 0.389603 | 0.896421 |
| htr2c12         | 4.276171362 | 0.171508951  | 1.0482094 | 0.1636209 | 0.87003  | NA       |
| pde4ca          | 227.6805797 | 0.290990495  | 0.1415703 | 2.0554481 | 0.039836 | 0.391511 |
| slc35a3a        | 187.3418017 | 0.152430174  | 0.1606891 | 0.9486028 | 0.342823 | 0.878434 |
| phc2b           | 715.3891116 | -0.121864179 | 0.0959657 | -1.269872 | 0.20413  | 0.771764 |
| glulc           | 32.7935041  | 0.086007373  | 0.3381414 | 0.2543533 | 0.799223 | 0.979293 |
| dhcr24          | 105.3999302 | -0.67274117  | 0.2086386 | -3.224433 | 0.001262 | 0.037142 |
| zgc:172271      | 36.54176542 | 0.613776625  | 0.3449897 | 1.7791157 | 0.075221 | 0.534207 |



|                |             |              |           |           |          |          |
|----------------|-------------|--------------|-----------|-----------|----------|----------|
| wbp11a         | 68.91346767 | -0.097461475 | 0.2380457 | -0.409423 | 0.682229 | 0.965476 |
| tars           | 1954.214893 | -0.011469221 | 0.0732469 | -0.156583 | 0.875573 | 0.987881 |
| hsf4           | 204.1371149 | 0.259207408  | 0.1686159 | 1.537266  | 0.124228 | 0.652801 |
| tmc5           | 102.324285  | -0.73086126  | 0.2076672 | -3.519388 | 0.000433 | 0.015869 |
| colec11        | 29.14392821 | -0.400035236 | 0.3591731 | -1.113767 | 0.265379 | 0.831302 |
| eif4eb         | 280.8360973 | 0.137650165  | 0.1359996 | 1.0121364 | 0.311473 | 0.863945 |
| znf76          | 105.1175731 | -0.138449417 | 0.1977229 | -0.700219 | 0.48379  | 0.929461 |
| tmem179aa      | 335.1205465 | 0.08854324   | 0.1267925 | 0.6983316 | 0.48497  | 0.93001  |
| crispldlb      | 258.5335278 | 0.347708439  | 0.133317  | 2.6081333 | 0.009104 | 0.159622 |
| slc2a3a        | 1931.479482 | 0.240586785  | 0.0863306 | 2.7868067 | 0.005323 | 0.108022 |
| gpx8           | 99.6656093  | -0.158668881 | 0.2107093 | -0.753023 | 0.451436 | 0.918761 |
| rpl19          | 9345.740492 | -0.296460283 | 0.079819  | -3.714157 | 0.000204 | 0.008689 |
| map3k15        | 198.1155432 | 0.165592307  | 0.146549  | 1.1299452 | 0.258499 | 0.826711 |
| cadps2         | 267.9109644 | -0.101088957 | 0.1372499 | -0.736532 | 0.461407 | 0.922161 |
| pygmb          | 5048.714022 | 0.066316182  | 0.0899324 | 0.7374003 | 0.460879 | 0.921978 |
| ttc5           | 328.2529949 | -0.057442654 | 0.1252954 | -0.458458 | 0.646624 | 0.960362 |
| ndufa10        | 2847.409448 | -0.026830727 | 0.0749808 | -0.357835 | 0.720467 | 0.969318 |
| anxa6          | 895.1162085 | 0.121280982  | 0.0942186 | 1.2872303 | 0.198014 | 0.763261 |
| kif26ba        | 996.6133274 | -0.141111061 | 0.1036823 | -1.360995 | 0.173515 | 0.732906 |
| tasorb         | 1369.633638 | 0.002600972  | 0.0972266 | 0.0267516 | 0.978658 | 0.996762 |
| cirbpb         | 49381.62539 | -0.1501913   | 0.0615943 | -2.438394 | 0.014753 | 0.222347 |
| sh3gl3a        | 397.4159034 | 0.20631315   | 0.1141239 | 1.8078001 | 0.070638 | 0.520155 |
| isoc2          | 123.8782436 | -0.034384182 | 0.1788776 | -0.192222 | 0.847568 | 0.985174 |
| ppp6r3         | 1786.17416  | 0.136153217  | 0.0851204 | 1.5995368 | 0.109701 | 0.623766 |
| cwc15          | 176.3255539 | 0.155581965  | 0.1612982 | 0.9645611 | 0.334765 | 0.875699 |
| gabra4         | 14.62992455 | 0.270563333  | 0.4899932 | 0.5521777 | 0.580827 | 0.951731 |
| CABZ01088367.1 | 12.89817512 | -0.533629819 | 0.5396879 | -0.988775 | 0.322773 | 0.870524 |
| gucalb         | 56.33699157 | 0.213512321  | 0.264516  | 0.8071812 | 0.419562 | 0.90651  |
| bnip2          | 215.3502017 | 0.395291022  | 0.143979  | 2.745477  | 0.006042 | 0.117821 |
| bmp2a          | 78.72231401 | 0.049377298  | 0.2196523 | 0.2247975 | 0.822137 | 0.982186 |
| lin7a          | 1239.055723 | 0.138950691  | 0.0865833 | 1.6048205 | 0.108533 | 0.62063  |
| lmna           | 414.6177304 | -0.046378775 | 0.1088851 | -0.425942 | 0.67015  | 0.965223 |
| slc8a1a        | 26.81765875 | 0.043071946  | 0.3705286 | 0.1162446 | 0.907459 | 0.990702 |
| bhmt           | 11348.38868 | 0.078848491  | 0.1010457 | 0.7803252 | 0.4352   | 0.914408 |
| hira           | 639.7701927 | -0.055413518 | 0.1130671 | -0.490094 | 0.624067 | 0.957354 |
| syep3          | 5.408925958 | 0.209545457  | 0.8233119 | 0.2545153 | 0.799098 | NA       |
| hey2           | 89.15148485 | 0.225394137  | 0.2189167 | 1.0295888 | 0.303203 | 0.85729  |
| atp6v1ba       | 4850.685525 | 0.047455189  | 0.064303  | 0.7379931 | 0.460519 | 0.921978 |
| tdrd9          | 28.13210182 | 0.041344387  | 0.360073  | 0.1148222 | 0.908586 | 0.990702 |
| mtrex          | 799.3389858 | -0.152121456 | 0.0914086 | -1.664191 | 0.096074 | 0.590174 |
| wfikn2a        | 112.6113916 | 0.203246564  | 0.1906403 | 1.0661262 | 0.286367 | 0.845942 |
| supt71         | 69.48762395 | -0.032548317 | 0.2616851 | -0.12438  | 0.901015 | 0.990121 |
| nedd1          | 238.7043475 | -0.096032041 | 0.1362988 | -0.70457  | 0.481078 | 0.927927 |
| cct4           | 4716.529072 | -0.16266412  | 0.0874933 | -1.859161 | 0.063004 | 0.489719 |
| arhgef39       | 85.73472553 | -0.527601649 | 0.2190892 | -2.408159 | 0.016033 | 0.233377 |
| gatala         | 8.932222654 | 0.682851863  | 0.6764834 | 1.009414  | 0.312776 | NA       |
| rrp15          | 260.4534115 | -0.065965901 | 0.143157  | -0.460794 | 0.644946 | 0.96029  |
| map3k9         | 54.53025363 | -0.033026977 | 0.2686735 | -0.122926 | 0.902166 | 0.990121 |
| zbtb34         | 33.48243425 | -0.078098868 | 0.3351215 | -0.233046 | 0.815725 | 0.981571 |
| abca2          | 531.3925041 | 0.103042348  | 0.1157704 | 0.8900574 | 0.373435 | 0.893659 |
| ube2kb         | 1467.152113 | -0.078168032 | 0.0897629 | -0.870828 | 0.383848 | 0.895192 |
| pck1           | 2061.085698 | 0.207637554  | 0.107205  | 1.9368273 | 0.052766 | 0.450909 |
| cyp2a1         | 26.00920377 | -0.538559159 | 0.3717964 | -1.448533 | 0.147468 | 0.694625 |
| svapl          | 388.6113041 | 0.085565018  | 0.113052  | 0.7568641 | 0.449131 | 0.91823  |

|                  |             |              |           |           |          |          |
|------------------|-------------|--------------|-----------|-----------|----------|----------|
| mcm9             | 77.05870016 | -0.233011493 | 0.2398544 | -0.97147  | 0.331314 | 0.874362 |
| hoxb4a           | 347.5380275 | 0.106440789  | 0.1226822 | 0.8676138 | 0.385606 | 0.89551  |
| ikzfl            | 35.83253005 | 0.360734101  | 0.3370266 | 1.0703431 | 0.284465 | 0.844955 |
| lpgat1           | 910.8111373 | -0.041750256 | 0.1003894 | -0.415883 | 0.677496 | 0.965257 |
| pgml             | 2206.952016 | 0.094836278  | 0.0764305 | 1.2408171 | 0.214673 | 0.782493 |
| rxf2             | 500.7222843 | -0.181836041 | 0.1179505 | -1.54163  | 0.123164 | 0.651012 |
| gadd45bb         | 231.6566297 | 0.19647756   | 0.1457173 | 1.3483475 | 0.177547 | 0.738343 |
| csnk2a2b         | 1049.742601 | 0.00572961   | 0.0852288 | 0.0672262 | 0.946402 | 0.99381  |
| brd1a            | 545.6367555 | 0.072817065  | 0.1145906 | 0.6354541 | 0.525132 | 0.940066 |
| tnfb             | 72.56852186 | -0.543415435 | 0.2627369 | -2.068287 | 0.038613 | 0.385234 |
| sema3gb          | 198.4575588 | 0.154392083  | 0.1495652 | 1.0322728 | 0.301944 | 0.856944 |
| anxa131          | 298.1734225 | 0.244035532  | 0.1254259 | 1.9456554 | 0.051696 | 0.446003 |
| pbx3b            | 3043.305483 | -0.021991951 | 0.0788408 | -0.278941 | 0.78029  | 0.97627  |
| vdac2            | 11972.2057  | -0.05571085  | 0.0787705 | -0.707255 | 0.479408 | 0.927091 |
| cd164            | 1787.983687 | -0.297080983 | 0.07517   | -3.952119 | 7.75E-05 | 0.003948 |
| cntn3a.2         | 5.342165981 | 0.345964861  | 0.8537707 | 0.4052199 | 0.685316 | NA       |
| casr             |             | 0 NA         | NA        | NA        | NA       | NA       |
| adgr14           | 57.7495268  | -0.376527696 | 0.2638887 | -1.426843 | 0.153625 | 0.702578 |
| tpd5212b         | 1850.633446 | -0.001347048 | 0.0759714 | -0.017731 | 0.985853 | 0.996944 |
| brox             | 364.7705529 | -0.087546265 | 0.1167952 | -0.749571 | 0.453513 | 0.920041 |
| tbck             | 378.1643642 | -0.011868864 | 0.1154882 | -0.102771 | 0.918145 | 0.991623 |
| napba            | 529.0918784 | 0.079100368  | 0.1088912 | 0.7264167 | 0.467583 | 0.924328 |
| hyoul            | 1364.283625 | 0.122516294  | 0.0894654 | 1.369426  | 0.170866 | 0.728484 |
| si:dkey-42i9.6   | 1140.385267 | 0.007452796  | 0.0896718 | 0.0831119 | 0.933763 | 0.992702 |
| vsig8b           | 23.39282667 | -0.126574981 | 0.4079719 | -0.310254 | 0.756368 | 0.975374 |
| cilp2            | 91.54896507 | 0.378615178  | 0.2138898 | 1.7701417 | 0.076704 | 0.539626 |
| stimate          | 300.6142721 | 0.003812161  | 0.1294614 | 0.0294463 | 0.976509 | 0.996762 |
| cers2a           | 68.47806352 | -0.066648771 | 0.2351362 | -0.283448 | 0.776834 | 0.975826 |
| ccm2             | 131.0177356 | 0.296514154  | 0.1735206 | 1.7088125 | 0.087486 | 0.566637 |
| usp9             | 3526.765426 | 0.068794912  | 0.0724963 | 0.9489435 | 0.342649 | 0.878434 |
| zgc:77486        | 331.5624045 | -0.292676516 | 0.12622   | -2.318782 | 0.020407 | 0.268884 |
| gtse1            | 220.8214288 | -0.266599616 | 0.1417512 | -1.880757 | 0.060005 | 0.478654 |
| g6pca.2          | 2135.883196 | 0.333175127  | 0.0917589 | 3.6309849 | 0.000282 | 0.011325 |
| ap4b1            | 184.7223402 | -0.145789327 | 0.1581848 | -0.921639 | 0.356717 | 0.883422 |
| srsf6a           | 2141.572929 | -0.174580832 | 0.085356  | -2.045325 | 0.040823 | 0.394957 |
| slc4a4a          | 2646.234451 | 0.07146273   | 0.0727165 | 0.9827575 | 0.325727 | 0.871896 |
| vtal             | 551.3851743 | -0.170408231 | 0.1096722 | -1.553796 | 0.120233 | 0.645215 |
| polr3g1b         | 273.2994219 | -0.210028574 | 0.1394039 | -1.506619 | 0.131908 | 0.665566 |
| lancl1           | 502.0032316 | 0.011811888  | 0.1030512 | 0.1146215 | 0.908745 | 0.990702 |
| slc25a55b        | 312.5833516 | -0.089866655 | 0.1535003 | -0.585449 | 0.558246 | 0.948478 |
| enolb            | 1455.054761 | 0.236309659  | 0.088618  | 2.6666097 | 0.007662 | 0.139512 |
| tnni2a.3         | 100.1660354 | -0.202088283 | 0.2290329 | -0.882355 | 0.377585 | 0.895192 |
| actn3a           | 11681.81288 | 0.418813025  | 0.0815434 | 5.1360736 | 2.81E-07 | 3.42E-05 |
| rrbpla           | 1085.444916 | 0.061100094  | 0.090196  | 0.6774143 | 0.498143 | 0.933765 |
| ctss2.2          | 71.63367102 | 0.258916098  | 0.2322546 | 1.1147941 | 0.264939 | 0.830836 |
| si:dkey-246g23.4 | 28.35242357 | 0.286316417  | 0.3766903 | 0.7600844 | 0.447204 | 0.917154 |
| thopl            | 1472.440467 | 0.043749705  | 0.0840755 | 0.5203622 | 0.602811 | 0.956045 |
| ppplr131         | 529.3310287 | 0.152612535  | 0.1054965 | 1.4466118 | 0.148006 | 0.695665 |
| zgc:77158        | 121.9902662 | 0.181762582  | 0.1834172 | 0.9909789 | 0.321696 | 0.869375 |
| gucylal          | 293.5901894 | 0.018347674  | 0.1318112 | 0.1391966 | 0.889295 | 0.989291 |
| simlb            | 19.45181463 | -0.601265977 | 0.446627  | -1.346237 | 0.178226 | 0.739299 |
| klf11b           | 697.7583669 | -0.209546371 | 0.1210093 | -1.731656 | 0.083335 | 0.556629 |
| hps4             | 84.94217546 | -0.216126037 | 0.2268072 | -0.952906 | 0.340637 | 0.878134 |
| snrpd3           | 0.650476611 | 1.436325931  | 2.5890223 | 0.5547754 | 0.579048 | NA       |

|                   |             |              |           |           |          |          |
|-------------------|-------------|--------------|-----------|-----------|----------|----------|
| pcid2             | 350.2646868 | -0.132002377 | 0.1285539 | -1.026826 | 0.304503 | 0.858905 |
| capns1b           | 1603.826713 | -0.024294123 | 0.0828782 | -0.29313  | 0.769422 | 0.975687 |
| fam219ab          | 441.5849689 | 0.045310915  | 0.1149661 | 0.3941242 | 0.693489 | 0.96736  |
| anapc16           | 414.4384623 | -0.288838819 | 0.1252465 | -2.306164 | 0.021101 | 0.273793 |
| snx13             | 37.17977286 | 0.343786329  | 0.3263424 | 1.0534529 | 0.292133 | 0.848075 |
| osbp12b           | 499.252904  | 0.000353043  | 0.1211181 | 0.0029149 | 0.997674 | 0.999174 |
| arhgef3           | 39.70420386 | -0.180233534 | 0.3227317 | -0.558462 | 0.576529 | 0.950611 |
| spoll             | 1.814481193 | -1.399828196 | 1.5816487 | -0.885044 | 0.376133 | NA       |
| sulf2b            | 3254.494198 | 0.112397376  | 0.0729492 | 1.5407619 | 0.123375 | 0.651258 |
| aldh3b1           | 235.0003673 | -0.087148324 | 0.1428898 | -0.609899 | 0.541929 | 0.944974 |
| abl2              | 510.2382947 | 0.096813566  | 0.1044911 | 0.9265241 | 0.354174 | 0.882044 |
| tbc1d19           | 120.4618624 | 0.19361505   | 0.1811872 | 1.0685914 | 0.285254 | 0.845164 |
| sept5a            | 626.6167142 | -0.017191294 | 0.1039124 | -0.16544  | 0.868597 | 0.987245 |
| ttc14             | 380.0501568 | -0.253293445 | 0.1224548 | -2.068465 | 0.038596 | 0.385234 |
| egfra             | 461.5137909 | -0.218938697 | 0.1124965 | -1.946183 | 0.051633 | 0.445651 |
| lmo4a             | 543.7291842 | 0.003618717  | 0.1003845 | 0.0360486 | 0.971244 | 0.996315 |
| slc12a3           | 358.8535363 | 0.076829214  | 0.1364859 | 0.5629097 | 0.573496 | 0.949869 |
| amy2a             | 131.5831375 | -0.502146531 | 0.2267923 | -2.214125 | 0.02682  | 0.31568  |
| cdc14aa           | 45.23828103 | 0.226833318  | 0.3054836 | 0.7425383 | 0.457761 | 0.921978 |
| ptpmt1            | 147.0109706 | -0.133941211 | 0.177177  | -0.755974 | 0.449665 | 0.918526 |
| armc1             | 433.7586583 | 0.129318895  | 0.1221484 | 1.0587028 | 0.289735 | 0.846246 |
| fam133b           | 458.0921673 | -0.16605296  | 0.1216789 | -1.364681 | 0.172353 | 0.731348 |
| slc5a1            | 274.0743377 | -0.297929415 | 0.1304657 | -2.283585 | 0.022396 | 0.285346 |
| spata20           | 205.0029184 | -0.212536506 | 0.1613862 | -1.316944 | 0.187858 | 0.752419 |
| pi4k2b            | 293.7615587 | 0.007461524  | 0.1257199 | 0.0593504 | 0.952673 | 0.993993 |
| sor11             | 1044.859733 | 0.0148489    | 0.0947131 | 0.1567777 | 0.87542  | 0.987881 |
| si:ch211-253p14.2 | 0.158795395 | 0.967652056  | 4.0804729 | 0.2371421 | 0.812547 | NA       |
| frya              | 804.6335983 | 0.189954229  | 0.0896713 | 2.1183381 | 0.034146 | 0.359261 |
| slc16a9a          | 353.1311111 | 0.039970146  | 0.1242846 | 0.3216017 | 0.747754 | 0.97419  |
| plekhh2           | 307.3875802 | -0.08429602  | 0.1289515 | -0.653703 | 0.513303 | 0.936525 |
| eif3m             | 3232.376279 | -0.237581861 | 0.0868191 | -2.736515 | 0.006209 | 0.119726 |
| XRCC2             | 19.55905002 | 0.100427416  | 0.4272427 | 0.2350594 | 0.814163 | 0.981081 |
| psmb3             | 1939.219319 | 0.014005042  | 0.073737  | 0.1899324 | 0.849362 | 0.985174 |
| ivnslabpb         | 2048.499172 | -0.238111703 | 0.0867645 | -2.744346 | 0.006063 | 0.117889 |
| pdf               | 89.75439326 | -0.284288431 | 0.2096395 | -1.356082 | 0.175073 | 0.735545 |
| slc31a1           | 724.3943215 | -0.343838577 | 0.1095919 | -3.137444 | 0.001704 | 0.047485 |
| mipb              | 3669.664422 | 0.002326532  | 0.0696511 | 0.0334026 | 0.973353 | 0.996315 |
| cul2              | 798.2877232 | 0.027051109  | 0.091531  | 0.2955404 | 0.767581 | 0.975687 |
| psma6b            | 717.5127133 | -0.112530478 | 0.0994426 | -1.131613 | 0.257797 | 0.825314 |
| psap              | 7019.239659 | -0.075018553 | 0.0760737 | -0.98613  | 0.324069 | 0.870928 |
| pex3              | 217.6097532 | 0.179333636  | 0.1419242 | 1.2635876 | 0.206378 | 0.774011 |
| anxa13            | 1820.172903 | 0.053859009  | 0.0764873 | 0.704156  | 0.481336 | 0.928307 |
| ndfipl            | 2441.835474 | 0.118100506  | 0.0725102 | 1.6287425 | 0.103368 | 0.609625 |
| ube2q2            | 1749.70148  | 0.084141807  | 0.0768477 | 1.0949161 | 0.273553 | 0.838253 |
| ern1              | 348.7171241 | 0.043542081  | 0.1350537 | 0.3224056 | 0.747145 | 0.97419  |
| stard8            | 278.5416839 | -0.012643613 | 0.1281441 | -0.098667 | 0.921403 | 0.992138 |
| eif2b4            | 987.3590957 | -0.024014792 | 0.0967459 | -0.248225 | 0.80396  | 0.979643 |
| lrrc45            | 217.3233923 | -0.076242042 | 0.1476659 | -0.516314 | 0.605635 | 0.95651  |
| cwc22             | 830.3965414 | -0.10369967  | 0.0892524 | -1.16187  | 0.245288 | 0.815319 |
| lbr               | 1054.623933 | 0.060635089  | 0.0877543 | 0.6909642 | 0.489588 | 0.931926 |
| pdia7             | 1308.289454 | 0.064297121  | 0.0899881 | 0.7145069 | 0.474914 | 0.925399 |
| rrml              | 2409.280304 | -0.079705654 | 0.085076  | -0.936876 | 0.348822 | 0.880195 |
| lhx1a             | 1323.238481 | -0.015304754 | 0.0841988 | -0.181769 | 0.855764 | 0.985174 |
| ms4a17a.4         | 9.839069868 | -0.018319919 | 0.6182797 | -0.02963  | 0.976362 | NA       |

|                  |             |              |           |           |          |          |
|------------------|-------------|--------------|-----------|-----------|----------|----------|
| abcc2            | 1588.070564 | -0.425964737 | 0.1071824 | -3.974206 | 7.06E-05 | 0.003655 |
| si:dkeyp-93d12.1 | 31.54644964 | -0.121923379 | 0.3576814 | -0.340871 | 0.7332   | 0.971947 |
| smarcad1a        | 523.2318381 | 0.127572601  | 0.1068889 | 1.1935062 | 0.232671 | 0.80121  |
| cldn7b           | 2713.636239 | 0.000487213  | 0.0834091 | 0.0058412 | 0.995339 | 0.998723 |
| ngfb             | 66.43153768 | -0.109514698 | 0.2367585 | -0.462559 | 0.643681 | 0.960014 |
| olfmlb           | 1643.656451 | 0.050317254  | 0.0785173 | 0.6408426 | 0.521625 | 0.939056 |
| gabrr2b          | 35.13998545 | 0.772026448  | 0.3434062 | 2.2481437 | 0.024567 | 0.302262 |
| rab36            | 33.37120026 | 0.045032886  | 0.3746033 | 0.1202149 | 0.904313 | 0.990306 |
| cldn5b           | 352.9866188 | -0.17145067  | 0.1307447 | -1.311339 | 0.189743 | 0.754269 |
| pgamlb           | 3742.274027 | 0.03234184   | 0.0826382 | 0.3913667 | 0.695526 | 0.96736  |
| fam184a          | 601.3441698 | -0.11205199  | 0.1040902 | -1.076489 | 0.281708 | 0.84357  |
| wdr82            | 1175.218324 | 0.033715513  | 0.0920641 | 0.3662178 | 0.714203 | 0.96909  |
| atp6v1e1a        | 317.1713836 | 0.101097916  | 0.125815  | 0.803544  | 0.42166  | 0.90651  |
| osr1             | 213.4648787 | -0.012634082 | 0.1538899 | -0.082098 | 0.934569 | 0.992702 |
| pkd2             | 67.84923127 | 0.278457311  | 0.2584559 | 1.077388  | 0.281307 | 0.84357  |
| pyroxd2          | 382.8889571 | -0.034992746 | 0.1176647 | -0.297394 | 0.766166 | 0.975374 |
| dkk1a            | 18.6680356  | -0.517953007 | 0.464176  | -1.115855 | 0.264484 | 0.830245 |
| cfl2             | 1171.097308 | 0.163861788  | 0.1047989 | 1.5635838 | 0.117915 | 0.641446 |
| wasla            | 638.9874502 | -0.111627178 | 0.1017973 | -1.096563 | 0.272832 | 0.838096 |
| picalmb          | 1907.279014 | 0.033190409  | 0.0781564 | 0.4246664 | 0.67108  | 0.965257 |
| acot8            | 79.60733267 | -0.275894101 | 0.2269909 | -1.215441 | 0.224198 | 0.791484 |
| srp72            | 1225.698269 | -0.175805336 | 0.0925966 | -1.898616 | 0.057615 | 0.470971 |
| med22            | 212.9779163 | 0.062263186  | 0.1617849 | 0.3848517 | 0.700347 | 0.967998 |
| mtdha            | 1994.352912 | -0.115705132 | 0.0768989 | -1.504639 | 0.132417 | 0.666729 |
| ercc4            | 205.2587293 | -0.022307121 | 0.144606  | -0.154261 | 0.877404 | 0.987881 |
| ssr3             | 1333.326866 | -0.168156475 | 0.0926402 | -1.815156 | 0.0695   | 0.514708 |
| CABZ01041610.1   | 14.07898536 | 0.508421761  | 0.5051804 | 1.0064162 | 0.314215 | 0.865176 |
| blocls1          | 168.2329091 | -0.083409495 | 0.1631451 | -0.51126  | 0.609169 | 0.956718 |
| pfkma            | 1294.448749 | 0.377168294  | 0.0896431 | 4.2074444 | 2.58E-05 | 0.001562 |
| ildr2            | 223.4069033 | 0.054131371  | 0.1494766 | 0.3621394 | 0.717248 | 0.96909  |
| foxplb           | 349.3261315 | -0.16702212  | 0.1191033 | -1.40233  | 0.160817 | 0.713963 |
| sst2             | 47.05530451 | 0.205307137  | 0.389469  | 0.5271463 | 0.598092 | 0.955459 |
| myl1             | 13852.24059 | 0.185341273  | 0.0865128 | 2.1423574 | 0.032165 | 0.349081 |
| otpa             | 1240.712391 | -0.073556082 | 0.0975006 | -0.754417 | 0.450599 | 0.918761 |
| zgc:55413        | 14.51667131 | -0.064687119 | 0.521637  | -0.124008 | 0.901309 | 0.990121 |
| odf3l2a          | 16.74360555 | 0.310262719  | 0.463914  | 0.6687937 | 0.503627 | 0.935304 |
| cdh13            | 1339.473522 | 0.065768971  | 0.080864  | 0.8133287 | 0.41603  | 0.906237 |
| mecp2            | 10.3452359  | 0.204232757  | 0.6462947 | 0.3160056 | 0.751998 | NA       |
| zgc:86598        | 1381.74952  | -0.095573409 | 0.0852774 | -1.120735 | 0.2624   | 0.830166 |
| dlst             | 3178.99002  | -0.027442464 | 0.0814481 | -0.336932 | 0.736168 | 0.972535 |
| si:dkey-121j17.5 | 69.77119113 | -0.970275269 | 0.2488336 | -3.899293 | 9.65E-05 | 0.004757 |
| sept8b           | 454.9212744 | -0.131209106 | 0.1175427 | -1.116268 | 0.264308 | 0.830245 |
| esytlb           | 109.3704969 | 0.089953074  | 0.1977709 | 0.4548348 | 0.649228 | 0.960708 |
| rbmx             | 1846.666371 | -0.029186904 | 0.0795509 | -0.366896 | 0.713697 | 0.96909  |
| jag2a            | 9.67055918  | -0.492760797 | 0.6074876 | -0.811145 | 0.417282 | NA       |
| pdlim3b          | 88.05227901 | 0.203305846  | 0.2171569 | 0.9362164 | 0.349162 | 0.880195 |
| eyal             | 1143.730813 | -0.094665773 | 0.0836515 | -1.131668 | 0.257774 | 0.825314 |
| camk2d2          | 1802.138022 | 0.090769335  | 0.0897318 | 1.0115626 | 0.311747 | 0.864257 |
| rfc2             | 244.6581803 | -0.164208701 | 0.1330435 | -1.234249 | 0.21711  | 0.784302 |
| dlgapla          | 17.49695172 | -0.370623868 | 0.5483454 | -0.675895 | 0.499107 | 0.934006 |
| eno2             | 2090.030377 | 0.160528012  | 0.0746158 | 2.1513932 | 0.031445 | 0.343534 |
| med15            | 314.2311669 | -0.072217589 | 0.1265422 | -0.5707   | 0.568203 | 0.948983 |
| brinp2           | 158.2360791 | -0.058750392 | 0.1644481 | -0.357258 | 0.720899 | 0.969534 |
| vac14            | 421.6105728 | 0.007771692  | 0.1125237 | 0.0690671 | 0.944936 | 0.993409 |

|            |              |               |            |            |           |           |
|------------|--------------|---------------|------------|------------|-----------|-----------|
| spaw       | 1. 33588621  | -0. 674429397 | 1. 6626744 | -0. 405629 | 0. 685015 | NA        |
| pgghg      | 161. 1357231 | 0. 199188271  | 0. 1783743 | 1. 1166869 | 0. 264128 | 0. 830245 |
| atp5pf     | 2451. 309396 | 0. 055382749  | 0. 0861922 | 0. 6425493 | 0. 520517 | 0. 939056 |
| gucy2c     | 200. 6866075 | -0. 749010914 | 0. 1607992 | -4. 658052 | 3. 19E-06 | 0. 000278 |
| enla       | 30. 65969262 | 0. 176331844  | 0. 3553137 | 0. 4962709 | 0. 619703 | 0. 957354 |
| sh2d5      | 91. 31406201 | -0. 114876223 | 0. 2067718 | -0. 55557  | 0. 578505 | 0. 951052 |
| npmla      | 2745. 727596 | -0. 187122826 | 0. 0779153 | -2. 401617 | 0. 016323 | 0. 235941 |
| ormdl1     | 383. 7964994 | 0. 20997639   | 0. 1136435 | 1. 8476757 | 0. 064649 | 0. 497355 |
| rab11a1    | 175. 8350894 | -0. 044250891 | 0. 1584744 | -0. 279231 | 0. 780068 | 0. 976146 |
| stk17b     | 177. 1104562 | 0. 065754848  | 0. 1581193 | 0. 4158559 | 0. 677515 | 0. 965257 |
| krt95      | 1. 363667969 | 0. 069617777  | 1. 7253717 | 0. 0403494 | 0. 967815 | NA        |
| amh        | 5. 614567051 | 1. 258156318  | 0. 8265472 | 1. 5221832 | 0. 127963 | NA        |
| optc       | 23. 01453252 | -0. 061554004 | 0. 4019278 | -0. 153147 | 0. 878282 | 0. 987881 |
| tmbim4     | 1363. 314075 | 0. 058141733  | 0. 0839732 | 0. 6923842 | 0. 488696 | 0. 931926 |
| luc7l3     | 908. 4876219 | -0. 026843414 | 0. 0896688 | -0. 299362 | 0. 764664 | 0. 975374 |
| ddx4       | 57. 97376513 | 0. 460051619  | 0. 2738315 | 1. 6800537 | 0. 092947 | 0. 580357 |
| slc12a4    | 458. 8044173 | 0. 115804846  | 0. 1086158 | 1. 0661876 | 0. 286339 | 0. 845942 |
| galnt6     | 509. 0109482 | -0. 225077724 | 0. 1025391 | -2. 195042 | 0. 028161 | 0. 325071 |
| selenoo2   | 16. 44993448 | -0. 05058359  | 0. 5205351 | -0. 097176 | 0. 922587 | 0. 99233  |
| smclb      | 3. 986040298 | 0. 222753268  | 0. 9418183 | 0. 2365141 | 0. 813034 | NA        |
| elavl3     | 1695. 848264 | -0. 157820293 | 0. 0927479 | -1. 701606 | 0. 088829 | 0. 570481 |
| mxe        | 1. 818018269 | -0. 180966542 | 1. 4787402 | -0. 122379 | 0. 902599 | NA        |
| ppp2r5d    | 1057. 845487 | 0. 061391253  | 0. 0905441 | 0. 6780261 | 0. 497755 | 0. 93348  |
| rabgef1    | 849. 0619079 | 0. 041678677  | 0. 0869232 | 0. 4794886 | 0. 631591 | 0. 957356 |
| dgkza      | 503. 8573789 | 0. 051433355  | 0. 1090676 | 0. 4715731 | 0. 637232 | 0. 958872 |
| rab3c      | 450. 5417837 | -0. 143952198 | 0. 1116847 | -1. 288916 | 0. 197427 | 0. 762635 |
| usf1l      | 405. 4482922 | -0. 041500051 | 0. 1138166 | -0. 364622 | 0. 715393 | 0. 96909  |
| arhgef25b  | 177. 0273955 | 0. 388190347  | 0. 1552481 | 2. 500451  | 0. 012404 | 0. 19716  |
| yipf1      | 276. 4980873 | -0. 050969242 | 0. 1345649 | -0. 378771 | 0. 704858 | 0. 968134 |
| sstr3      | 7. 505388373 | 1. 462424117  | 0. 7377828 | 1. 9821878 | 0. 047458 | NA        |
| ptfla      | 45. 83490506 | -0. 309757062 | 0. 2916094 | -1. 062233 | 0. 28813  | 0. 845979 |
| nr6alb     | 38. 5461855  | -0. 086927284 | 0. 3504251 | -0. 248062 | 0. 804086 | 0. 979643 |
| ca2        | 557. 2783455 | 0. 104178749  | 0. 1191659 | 0. 8742331 | 0. 381991 | 0. 895192 |
| tacl       | 349. 3677634 | 0. 178564839  | 0. 1224929 | 1. 4577561 | 0. 144908 | 0. 688986 |
| trpv6      | 451. 6731181 | 0. 2441315    | 0. 1455572 | 1. 6772203 | 0. 093499 | 0. 581585 |
| ythdf2     | 801. 1618721 | 0. 20010664   | 0. 0929995 | 2. 151696  | 0. 031421 | 0. 343463 |
| nutf21     | 458. 6092235 | -0. 25332452  | 0. 1087594 | -2. 32922  | 0. 019847 | 0. 265495 |
| tmem126a   | 347. 4132894 | 0. 045391355  | 0. 1252021 | 0. 3625446 | 0. 716945 | 0. 96909  |
| usp5       | 2338. 117799 | 0. 037518841  | 0. 071787  | 0. 5226409 | 0. 601224 | 0. 956045 |
| cdh6       | 1413. 502938 | 0. 042793078  | 0. 0773051 | 0. 5535612 | 0. 579879 | 0. 951257 |
| pdk3a      | 54. 95591531 | -0. 014145364 | 0. 2878897 | -0. 049135 | 0. 960812 | 0. 9956   |
| atg4a      | 227. 0471247 | 0. 056757559  | 0. 1376169 | 0. 4124315 | 0. 680023 | 0. 965311 |
| aida       | 185. 5633317 | 0. 085912881  | 0. 1664602 | 0. 5161166 | 0. 605773 | 0. 956524 |
| pdfn1      | 647. 1890268 | -0. 078515171 | 0. 1099724 | -0. 713953 | 0. 475256 | 0. 925754 |
| golim4b    | 84. 63364729 | -0. 004890176 | 0. 2106751 | -0. 023212 | 0. 981481 | 0. 996944 |
| rfx3       | 216. 6851551 | -0. 161708411 | 0. 1496676 | -1. 08045  | 0. 279942 | 0. 843423 |
| ppplr3cb   | 563. 7741446 | 0. 25175885   | 0. 105213  | 2. 3928495 | 0. 016718 | 0. 238173 |
| serpinb1l3 | 439. 575448  | -0. 491802227 | 0. 1335282 | -3. 683133 | 0. 00023  | 0. 009571 |
| eif4e1b    | 2. 134591507 | 1. 167970524  | 1. 3957492 | 0. 8368054 | 0. 402702 | NA        |
| hnrnpr     | 2297. 647407 | -0. 129923027 | 0. 0826985 | -1. 571044 | 0. 116172 | 0. 63841  |
| ctnbl      | 9011. 738855 | -0. 035085834 | 0. 0712049 | -0. 492744 | 0. 622193 | 0. 957354 |
| chpt1      | 1160. 753252 | -0. 178760488 | 0. 0892453 | -2. 003024 | 0. 045175 | 0. 417766 |
| rhpn2      | 555. 7203934 | -0. 090946945 | 0. 1089364 | -0. 834863 | 0. 403795 | 0. 900979 |
| exoc3      | 814. 6542701 | -0. 046155204 | 0. 0997179 | -0. 462858 | 0. 643466 | 0. 959994 |

|                   |             |              |           |           |          |          |
|-------------------|-------------|--------------|-----------|-----------|----------|----------|
| slc38a5b          | 1980.840048 | -0.179812013 | 0.0823737 | -2.18288  | 0.029045 | 0.330497 |
| adcy2b            | 365.7786013 | -0.123154177 | 0.1137796 | -1.082392 | 0.279078 | 0.842806 |
| ilf2              | 3833.017447 | -0.10340504  | 0.0772273 | -1.338969 | 0.180581 | 0.741768 |
| dennd1a           | 115.1406231 | -0.090988065 | 0.1915917 | -0.474906 | 0.634854 | 0.9578   |
| slc5a6b           | 57.29295923 | -0.060745615 | 0.2589276 | -0.234605 | 0.814516 | 0.981081 |
| si:ch211-212d10.1 | 8.468518367 | -0.141189745 | 0.6618745 | -0.213318 | 0.831079 | NA       |
| si:dkeyp-94g1.1   | 2.507124096 | -0.208616168 | 1.3526392 | -0.154229 | 0.877429 | NA       |
| dlx3b             | 456.3227877 | -0.112270436 | 0.10924   | -1.027741 | 0.304071 | 0.858423 |
| mbtpsi1           | 1317.607291 | -0.023190492 | 0.0919859 | -0.252109 | 0.800957 | 0.979377 |
| aoc2              | 1784.545285 | 0.317784404  | 0.0896805 | 3.5435187 | 0.000395 | 0.014648 |
| svilb             | 30.04269453 | -0.119165289 | 0.3542096 | -0.336426 | 0.73655  | 0.972535 |
| ankrd13b          | 177.0150677 | 0.100532882  | 0.1529324 | 0.657368  | 0.510944 | 0.936253 |
| itprla            | 137.7395108 | 0.134997835  | 0.171351  | 0.7878438 | 0.430788 | 0.91234  |
| zgc:171731        | 1.467810344 | -1.756356131 | 1.7046236 | -1.030348 | 0.302846 | NA       |
| colgal12          | 68.51431951 | 0.220584816  | 0.2360894 | 0.9343273 | 0.350135 | 0.880195 |
| fzd9b             | 391.4584372 | 0.065156288  | 0.1134401 | 0.5743672 | 0.565719 | 0.948739 |
| acs13b            | 1735.302306 | 0.074005124  | 0.0789778 | 0.9370367 | 0.34874  | 0.880195 |
| efna3a            | 254.3961717 | 0.032788244  | 0.1411192 | 0.2323443 | 0.816271 | 0.981594 |
| bckdhh            | 809.5825303 | 0.015082604  | 0.1002149 | 0.1505026 | 0.880368 | 0.987881 |
| znf710a           | 413.2553914 | 0.02259398   | 0.1207229 | 0.1871558 | 0.851539 | 0.985174 |
| tmem26b           | 10.44913941 | 0.688520106  | 0.6273325 | 1.0975362 | 0.272407 | NA       |
| esco2             | 479.5633877 | -0.100188124 | 0.1083972 | -0.924268 | 0.355347 | 0.882347 |
| rps4x             | 19768.2758  | -0.249185519 | 0.0731434 | -3.406807 | 0.000657 | 0.021954 |
| znf622            | 626.5775583 | -0.123170925 | 0.0979296 | -1.25775  | 0.208482 | 0.775404 |
| pgm211            | 175.4504725 | 0.006257277  | 0.1586873 | 0.0394315 | 0.968546 | 0.996315 |
| dync1h1           | 803.4549607 | -0.027657778 | 0.2378015 | -0.116306 | 0.90741  | 0.990702 |
| her1              | 0.488104098 | -2.415107183 | 2.7936704 | -0.864493 | 0.387317 | NA       |
| acox1             | 737.8784075 | -0.095168037 | 0.0921522 | -1.032726 | 0.301732 | 0.856944 |
| cacybp            | 298.6555091 | -0.128284024 | 0.1331931 | -0.963143 | 0.335476 | 0.876088 |
| rbfox1            | 3686.855157 | 0.022969072  | 0.0677251 | 0.3391514 | 0.734496 | 0.972021 |
| mfzd61            | 45.37997783 | -0.091829891 | 0.2879178 | -0.318945 | 0.749768 | 0.97419  |
| arf2a             | 7524.964677 | 0.013044814  | 0.0648051 | 0.201293  | 0.840469 | 0.985042 |
| usp4              | 1221.581311 | 0.21527432   | 0.0845587 | 2.5458578 | 0.010901 | 0.180962 |
| zgc:113220        | 92.90854475 | -0.081069254 | 0.2077261 | -0.39027  | 0.696337 | 0.96736  |
| g3bp2             | 1038.981148 | -0.004298044 | 0.0846489 | -0.050775 | 0.959505 | 0.995187 |
| lrrc4bb           | 545.3324471 | -0.034767185 | 0.1218003 | -0.285444 | 0.775304 | 0.975687 |
| ehd1b             | 1175.865858 | 0.099834727  | 0.0885352 | 1.1276277 | 0.259477 | 0.827693 |
| uqcrc2a           | 2633.716654 | 0.035899197  | 0.0956461 | 0.3753336 | 0.707412 | 0.968664 |
| wnt11r            | 943.5614323 | 0.197617705  | 0.0995572 | 1.984967  | 0.047148 | 0.42638  |
| cryball2          | 429.5259701 | 0.176528978  | 0.112381  | 1.5708084 | 0.116227 | 0.63841  |
| cacna2d1a         | 271.1186943 | 0.151604766  | 0.1527515 | 0.9924926 | 0.320957 | 0.868715 |
| fh15              | 115.746951  | 0.317486892  | 0.1967605 | 1.6135701 | 0.106621 | 0.615567 |
| hacd2             | 1728.314309 | -0.009239391 | 0.0819012 | -0.112811 | 0.91018  | 0.990702 |
| ranbp1            | 2137.546092 | -0.117872806 | 0.0886454 | -1.329711 | 0.183613 | 0.747284 |
| si:dkeyp-69b9.6   | 1082.650877 | -0.032085387 | 0.0829357 | -0.38687  | 0.698852 | 0.967998 |
| l3mbt11a          | 302.6035051 | 0.083666436  | 0.1315109 | 0.6361939 | 0.52465  | 0.939713 |
| prph2b            | 4297.737787 | 0.321677655  | 0.0893275 | 3.6011056 | 0.000317 | 0.01233  |
| pihd2             | 21.12442869 | 0.131155089  | 0.4111995 | 0.3189573 | 0.749759 | 0.97419  |
| reep1             | 7.190041156 | -0.177602826 | 0.7194662 | -0.246854 | 0.805022 | NA       |
| drd21             | 4.390364507 | 0.103195798  | 0.9955929 | 0.1036526 | 0.917445 | NA       |
| hprt11            | 251.2672002 | 0.033583039  | 0.1484151 | 0.2262778 | 0.820985 | 0.981628 |
| rpl8              | 23450.33591 | -0.233909553 | 0.0838451 | -2.789783 | 0.005274 | 0.107431 |
| syng3a            | 1174.59714  | 0.102553519  | 0.0807324 | 1.2702897 | 0.203981 | 0.771764 |
| abi2b             | 1111.06648  | 0.02011583   | 0.0833426 | 0.2413632 | 0.809274 | 0.980642 |

|            |             |              |           |           |          |          |
|------------|-------------|--------------|-----------|-----------|----------|----------|
| robo2      | 1442.802837 | -0.00881909  | 0.091775  | -0.096095 | 0.923445 | 0.992588 |
| ncbp2      | 362.0891636 | -0.065276902 | 0.1171427 | -0.557243 | 0.577362 | 0.950805 |
| htralb     | 267.7892906 | 0.104240722  | 0.1408016 | 0.7403378 | 0.459095 | 0.921978 |
| panx1b     | 189.2569459 | -0.004233333 | 0.148686  | -0.028472 | 0.977286 | 0.996762 |
| lamp2      | 794.5773514 | 0.084249307  | 0.0896409 | 0.9398533 | 0.347293 | 0.880123 |
| ndufab1b   | 715.9189988 | 0.062620781  | 0.1006637 | 0.622079  | 0.53389  | 0.943276 |
| slc10a2    | 78.14585895 | -1.108631545 | 0.2427938 | -4.566144 | 4.97E-06 | 0.000396 |
| uts1       | 77.55834493 | 0.504138301  | 0.2463889 | 2.0461077 | 0.040746 | 0.394957 |
| p2ry11     | 7.870089529 | -1.050133034 | 0.7537328 | -1.393243 | 0.163546 | NA       |
| KCNN2      | 27.26285685 | 0.26241387   | 0.4188312 | 0.6265385 | 0.530962 | 0.942209 |
| tprkb      | 47.30287266 | 0.056603398  | 0.2870857 | 0.1971655 | 0.843698 | 0.985174 |
| kif23      | 700.8005094 | -0.119482708 | 0.0913368 | -1.308155 | 0.190821 | 0.755212 |
| znf598     | 723.2589426 | 0.048460013  | 0.0967201 | 0.5010333 | 0.616348 | 0.95688  |
| angpt2a    | 30.03628931 | -0.265901339 | 0.359528  | -0.739584 | 0.459552 | 0.921978 |
| svopb      | 5.352746236 | -0.524393567 | 0.8487112 | -0.61787  | 0.536661 | NA       |
| cnih3      | 182.7598705 | -0.169853452 | 0.1499829 | -1.132485 | 0.25743  | 0.825314 |
| snx33      | 49.25083578 | 0.114882993  | 0.2720709 | 0.4222538 | 0.67284  | 0.965257 |
| diablob    | 247.8255539 | -0.154745706 | 0.1517316 | -1.019865 | 0.307793 | 0.861088 |
| ppp3cca    | 601.1255944 | 0.118738416  | 0.1055704 | 1.1247321 | 0.260703 | 0.828666 |
| triapl     | 166.6121216 | 0.173886495  | 0.1694698 | 1.0260619 | 0.304862 | 0.859575 |
| ccdc82     | 339.0786496 | -0.056467707 | 0.1202528 | -0.469575 | 0.638659 | 0.959628 |
| g6pcb      | 4.466523042 | 0.092251977  | 0.9019498 | 0.1022806 | 0.918534 | NA       |
| ankhb      | 701.6232932 | 0.140891479  | 0.0946237 | 1.4889668 | 0.136496 | 0.673303 |
| ntngla     | 300.8268267 | 0.109836307  | 0.1365015 | 0.804653  | 0.42102  | 0.90651  |
| irgel      | 7.610606417 | -0.496826131 | 0.6958887 | -0.713945 | 0.475261 | NA       |
| lims2      | 190.746158  | 0.209086227  | 0.1539667 | 1.3579966 | 0.174465 | 0.734611 |
| acvr11     | 1168.250075 | 0.038264603  | 0.080636  | 0.4745348 | 0.635119 | 0.957927 |
| tbp        | 323.0693896 | 0.055723783  | 0.1282043 | 0.4346481 | 0.663818 | 0.964736 |
| jagn1b     | 290.5686982 | -0.064686302 | 0.140858  | -0.45923  | 0.646069 | 0.96029  |
| cdh4       | 1075.457708 | 0.048797053  | 0.0868395 | 0.5619226 | 0.574169 | 0.950037 |
| arhgap4b   | 785.9955365 | 0.003635968  | 0.0915281 | 0.0397252 | 0.968312 | 0.996315 |
| dnm11      | 1832.560009 | 0.000154206  | 0.0795597 | 0.0019382 | 0.998454 | 0.999364 |
| ccdc114    | 63.23047282 | 0.413849764  | 0.2465743 | 1.678398  | 0.093269 | 0.580702 |
| tspan18b   | 1044.243987 | -0.023156424 | 0.0844059 | -0.274346 | 0.783819 | 0.97627  |
| kif26ab    | 760.0960243 | -0.126593568 | 0.0941451 | -1.344665 | 0.178734 | 0.739486 |
| llcamb     | 202.8169203 | -0.01982723  | 0.1621041 | -0.122312 | 0.902652 | 0.990121 |
| slc23a1    | 62.24585707 | 0.454266321  | 0.267536  | 1.6979636 | 0.089515 | 0.572876 |
| calm2b     | 12309.32592 | -0.089446867 | 0.0761835 | -1.174097 | 0.240356 | 0.808437 |
| grip1      | 721.4175293 | 0.041320049  | 0.0956407 | 0.432034  | 0.665717 | 0.964736 |
| ube2d4     | 33.21177656 | 0.403971208  | 0.3364566 | 1.2006637 | 0.229882 | 0.79764  |
| daam1a     | 1103.204187 | -0.063658577 | 0.0845718 | -0.752716 | 0.45162  | 0.918761 |
| esrrd      | 7.698704653 | -0.081081308 | 0.7607691 | -0.106578 | 0.915124 | NA       |
| c4         | 9.423376676 | 0.242203668  | 0.6270979 | 0.3862294 | 0.699327 | NA       |
| txk        | 0.356300316 | 0.005884122  | 3.214964  | 0.0018302 | 0.99854  | NA       |
| pola2      | 323.1410566 | -0.029564529 | 0.126392  | -0.233911 | 0.815054 | 0.981081 |
| dmrt2a     | 235.8853799 | -0.053141414 | 0.145585  | -0.36502  | 0.715097 | 0.96909  |
| gja8b      | 267.5983134 | 0.098781572  | 0.1427228 | 0.692122  | 0.488861 | 0.931926 |
| dnajb11    | 1062.586922 | 0.14890895   | 0.0877504 | 1.6969613 | 0.089704 | 0.573763 |
| slc18a2    | 6.401808966 | -0.693027725 | 0.7817929 | -0.88646  | 0.37537  | NA       |
| ddx39ab    | 3547.836647 | -0.154497208 | 0.1038734 | -1.487361 | 0.136919 | 0.673303 |
| dnasell4.1 | 260.3604716 | -0.2483394   | 0.1632239 | -1.521465 | 0.128143 | 0.658954 |
| gorasp2    | 1057.301958 | -0.004205114 | 0.0944479 | -0.044523 | 0.964487 | 0.995927 |
| rpl27      | 8697.134713 | -0.262065029 | 0.0935206 | -2.802217 | 0.005075 | 0.104214 |
| camkk1b    | 284.6766295 | 0.440104034  | 0.1265972 | 3.4764116 | 0.000508 | 0.018073 |

|           |             |              |           |           |          |          |
|-----------|-------------|--------------|-----------|-----------|----------|----------|
| sh2d4bb   | 11.06970948 | -0.39389348  | 0.5760486 | -0.683785 | 0.494111 | 0.931926 |
| wasa      | 7.165984607 | 0.340310202  | 0.7158037 | 0.4754239 | 0.634485 | NA       |
| wdr91     | 141.5782563 | -0.027237756 | 0.1800326 | -0.151293 | 0.879744 | 0.987881 |
| fb1n2     | 857.9120105 | 0.21453435   | 0.0931417 | 2.3033124 | 0.021261 | 0.275144 |
| slc50a1   | 40.79836063 | -0.132807851 | 0.3252645 | -0.408307 | 0.683048 | 0.965476 |
| zgc:92664 | 235.1202367 | -0.05934151  | 0.1375714 | -0.431351 | 0.666214 | 0.964736 |
| mknk2b    | 3875.341382 | -0.067131949 | 0.0891638 | -0.752906 | 0.451507 | 0.918761 |
| atp6v0a1b | 1740.560362 | 0.188820459  | 0.0865386 | 2.1819225 | 0.029115 | 0.330497 |
| ror1      | 266.5787905 | 0.031827557  | 0.1360343 | 0.2339671 | 0.815011 | 0.981081 |
| mpp3a     | 519.0850683 | 0.067036208  | 0.104498  | 0.6415073 | 0.521193 | 0.939056 |
| cb1b      | 425.1653852 | -0.097773788 | 0.1100568 | -0.888394 | 0.374329 | 0.893914 |
| pcmt      | 833.0193444 | 0.007980198  | 0.0936474 | 0.0852154 | 0.93209  | 0.992702 |
| hnrnpua   | 1565.14761  | 0.041645324  | 0.0849283 | 0.4903584 | 0.62388  | 0.957354 |
| rbb41     | 1431.819881 | -0.098475985 | 0.0867743 | -1.134851 | 0.256438 | 0.824773 |
| nsrpl     | 244.9990677 | -0.253139616 | 0.1538007 | -1.645894 | 0.099786 | 0.600955 |
| cb111     | 179.3515067 | -0.116190602 | 0.1724205 | -0.673879 | 0.500388 | 0.934237 |
| cd2ap     | 813.1400165 | -0.144839762 | 0.0938678 | -1.543019 | 0.122826 | 0.650905 |
| erola     | 95.59649091 | -0.746602357 | 0.2073506 | -3.600676 | 0.000317 | 0.01233  |
| pycr3     | 96.86569097 | -0.943399266 | 0.222737  | -4.235485 | 2.28E-05 | 0.001407 |
| prpf19    | 1343.554718 | -0.058323397 | 0.0874295 | -0.66709  | 0.504714 | 0.935617 |
| cdk15     | 429.526024  | 0.071870015  | 0.1147847 | 0.6261291 | 0.53123  | 0.942209 |
| st3gal3b  | 81.28849003 | 0.085834982  | 0.2184699 | 0.3928915 | 0.6944   | 0.96736  |
| fzrla     | 1003.582298 | -0.165832324 | 0.0903714 | -1.83501  | 0.066504 | 0.50468  |
| adma      | 211.4399653 | 0.206685612  | 0.1600842 | 1.2911056 | 0.196667 | 0.761944 |
| mab2112   | 2128.27066  | -0.077134047 | 0.0767602 | -1.00487  | 0.314959 | 0.866054 |
| alpi.1    | 300.6667174 | 0.03280967   | 0.1286118 | 0.2551062 | 0.798641 | 0.978884 |
| plxnc1    | 90.14341769 | 0.040456163  | 0.2230348 | 0.1813894 | 0.856062 | 0.985261 |
| sacml1a   | 399.6854517 | -0.094698994 | 0.124441  | -0.760995 | 0.44666  | 0.917154 |
| ube2g1a   | 676.935668  | 0.194018788  | 0.1014693 | 1.9120936 | 0.055864 | 0.462781 |
| fam110a   | 89.98427741 | -0.167604613 | 0.2306497 | -0.726663 | 0.467432 | 0.924328 |
| pitpnbl   | 1629.476039 | 0.129820234  | 0.0802614 | 1.6174669 | 0.105778 | 0.615371 |
| klf12a    | 310.9373983 | 0.084877586  | 0.130599  | 0.6499097 | 0.515751 | 0.9377   |
| zc4h2     | 3004.365154 | -0.091816584 | 0.0805233 | -1.140248 | 0.254183 | 0.823394 |
| psmc5     | 2525.612478 | -0.017667682 | 0.0786274 | -0.224701 | 0.822212 | 0.982186 |
| u2af1     | 1840.026931 | -0.188881963 | 0.0793873 | -2.379245 | 0.017348 | 0.243465 |
| comta     | 316.0034432 | -0.123952297 | 0.1211369 | -1.023241 | 0.306194 | 0.860027 |
| pgd       | 1743.770194 | -0.249488669 | 0.099332  | -2.511664 | 0.012016 | 0.193023 |
| mfge8a    | 1127.796279 | 0.048707636  | 0.0878037 | 0.5547334 | 0.579077 | 0.951052 |
| lsg1      | 514.3306899 | -0.22663046  | 0.1087919 | -2.083156 | 0.037237 | 0.377602 |
| fosl1a    | 972.5261638 | 0.628038127  | 0.2611075 | 2.4052856 | 0.01616  | 0.234787 |
| fchol     | 203.1540142 | -0.190243301 | 0.1514985 | -1.255743 | 0.209209 | 0.776073 |
| st3gal3a  | 401.0993348 | 0.041554424  | 0.1185572 | 0.3505011 | 0.725963 | 0.970402 |
| ndufs3    | 1574.83145  | -0.083840423 | 0.0871039 | -0.962533 | 0.335782 | 0.876088 |
| dhx15     | 2350.609596 | -0.066518557 | 0.0735696 | -0.904158 | 0.365911 | 0.887239 |
| thoc7     | 260.2829042 | 0.086128696  | 0.1344262 | 0.6407137 | 0.521709 | 0.939056 |
| foxfl     | 313.9417182 | -0.309341803 | 0.1252787 | -2.46923  | 0.01354  | 0.208689 |
| arl312    | 289.2592248 | -0.035936722 | 0.1457821 | -0.24651  | 0.805288 | 0.979883 |
| ppil1     | 322.2868679 | -0.231673092 | 0.1378326 | -1.68083  | 0.092796 | 0.579945 |
| slc24a4a  | 25.44867412 | 0.480148777  | 0.4241801 | 1.1319456 | 0.257657 | 0.825314 |
| hdac1     | 6763.3975   | -0.014829761 | 0.0683465 | -0.216979 | 0.828225 | 0.982721 |
| lim2.4    | 2946.019266 | 0.025350334  | 0.094378  | 0.2686044 | 0.788234 | 0.976703 |
| fut8a     | 1657.081682 | -0.106776701 | 0.0818391 | -1.304716 | 0.19199  | 0.756256 |
| racgap1   | 407.1302487 | -0.003982055 | 0.1164046 | -0.034209 | 0.972711 | 0.996315 |
| chd11     | 252.058825  | -0.208488706 | 0.137818  | -1.512783 | 0.130335 | 0.662797 |



|                   |             |              |           |           |          |          |
|-------------------|-------------|--------------|-----------|-----------|----------|----------|
| gpc4              | 1852.004706 | 0.146432639  | 0.072997  | 2.00601   | 0.044855 | 0.416612 |
| ppp2r5ea          | 1179.310913 | 0.164908434  | 0.0902915 | 1.8264012 | 0.06779  | 0.509881 |
| iqch              | 17.58659681 | 0.792965302  | 0.4695795 | 1.6886711 | 0.091282 | 0.578443 |
| zgc:113518        | 222.4031888 | -0.12323791  | 0.143663  | -0.857827 | 0.390988 | 0.897643 |
| klf3              | 488.8063893 | -0.208274495 | 0.1119697 | -1.860097 | 0.062872 | 0.48946  |
| adam10b           | 723.6572751 | -0.101910079 | 0.1122301 | -0.908046 | 0.363854 | 0.886174 |
| pibfl             | 596.2442353 | -0.401506628 | 0.0992946 | -4.043591 | 5.26E-05 | 0.002867 |
| mc4r              | 26.15623107 | -0.136199444 | 0.4051855 | -0.336141 | 0.736765 | 0.972535 |
| prps1a            | 1567.438014 | 0.091481812  | 0.0940288 | 0.9729128 | 0.330597 | 0.87417  |
| CU929145.1        | 0.990234925 | 0.997648457  | 1.9937656 | 0.500384  | 0.616805 | NA       |
| slc4a8            | 689.3257623 | 0.274520492  | 0.0943843 | 2.9085399 | 0.003631 | 0.081502 |
| sox6              | 1269.365065 | 0.00340864   | 0.0838605 | 0.0406466 | 0.967578 | 0.996315 |
| gad2              | 3068.053847 | 0.143497155  | 0.0812791 | 1.7654859 | 0.077482 | 0.542062 |
| znf207a           | 843.4561869 | -0.074888197 | 0.1013284 | -0.739064 | 0.459868 | 0.921978 |
| psen2             | 309.5856093 | 0.036935795  | 0.1359891 | 0.2716085 | 0.785923 | 0.97627  |
| sl100a1           | 23.18433283 | -0.451507518 | 0.4205054 | -1.073726 | 0.282946 | 0.844523 |
| alpl              | 348.3208649 | 0.066332879  | 0.1201229 | 0.5522083 | 0.580806 | 0.951731 |
| fth1a             | 10011.66896 | -0.323075159 | 0.0724726 | -4.457891 | 8.28E-06 | 0.000608 |
| phactr4a          | 507.8605708 | -0.067993484 | 0.1016594 | -0.668836 | 0.5036   | 0.935304 |
| zic2a             | 1118.956174 | -0.126901787 | 0.0851176 | -1.490899 | 0.135988 | 0.672424 |
| zgc:100829        | 574.06076   | -0.100931253 | 0.1176274 | -0.858059 | 0.39086  | 0.897643 |
| fst11a            | 216.3320811 | 0.190149535  | 0.141197  | 1.3466969 | 0.178078 | 0.738995 |
| zgc:123305        | 365.7491114 | -0.183585514 | 0.1214482 | -1.511636 | 0.130627 | 0.662797 |
| dnmt3ab           | 2055.635292 | -0.037102094 | 0.0772163 | -0.480496 | 0.630875 | 0.957354 |
| zic1              | 1253.934881 | -0.104087997 | 0.0886472 | -1.174183 | 0.240322 | 0.808437 |
| cyp3c1            | 747.7641266 | 0.062945304  | 0.1042669 | 0.6036938 | 0.546047 | 0.945526 |
| itrip             | 71.63107818 | -0.052129848 | 0.2297906 | -0.226858 | 0.820534 | 0.981594 |
| ankrd33bb         | 16.99766721 | 0.366822171  | 0.4672872 | 0.7850036 | 0.432451 | 0.91326  |
| clql2             | 2.805266554 | 0.528268623  | 1.1526052 | 0.4583257 | 0.646718 | NA       |
| si:ch211-220f21.2 | 7.681608807 | -1.037978168 | 0.6949188 | -1.493668 | 0.135262 | NA       |
| tubg1             | 741.0041904 | 0.01221112   | 0.0901424 | 0.1354647 | 0.892244 | 0.989291 |
| rasl11b           | 248.8204377 | -0.091593799 | 0.1366691 | -0.670187 | 0.502739 | 0.935304 |
| ada2b             | 17.52150676 | -0.492463842 | 0.4837855 | -1.017938 | 0.308707 | 0.861088 |
| rgs6              | 78.72330603 | 0.140376786  | 0.2385864 | 0.5883687 | 0.556285 | 0.947902 |
| psmd10            | 164.4219393 | 0.141740926  | 0.1959125 | 0.7234909 | 0.469378 | 0.924505 |
| gemin2            | 240.5342365 | -0.001888118 | 0.1490016 | -0.012672 | 0.98989  | 0.997612 |
| rap2c             | 1003.615581 | 0.036105229  | 0.0862999 | 0.4183693 | 0.675677 | 0.965257 |
| tnipl             | 2116.846391 | 0.048079742  | 0.0781417 | 0.6152888 | 0.538364 | 0.943336 |
| cal5a             | 434.5396239 | 0.332441716  | 0.1192998 | 2.7866086 | 0.005326 | 0.108022 |
| zgc:77112         | 62.87622129 | -0.027218912 | 0.276454  | -0.098457 | 0.921569 | 0.992138 |
| pla2g12b          | 1590.007764 | -0.050742532 | 0.1033289 | -0.491078 | 0.623371 | 0.957354 |
| msx3              | 197.345827  | 0.061480192  | 0.15477   | 0.3972358 | 0.691194 | 0.967295 |
| nmd3              | 767.302959  | 0.098564236  | 0.1001168 | 0.9844924 | 0.324873 | 0.871294 |
| si:dkeyp-75b4.9   |             | 0 NA         | NA        | NA        | NA       | NA       |
| gsk3ab            | 2193.124606 | -0.089346914 | 0.0807228 | -1.106836 | 0.268365 | 0.833634 |
| bmp6              | 55.7961141  | 0.003565538  | 0.2777269 | 0.0128383 | 0.989757 | 0.997612 |
| dvl3a             | 379.1622991 | -0.040613378 | 0.1141294 | -0.355854 | 0.72195  | 0.970024 |
| hsd17b12a         | 1357.315232 | -0.044828425 | 0.0922933 | -0.485717 | 0.627168 | 0.957354 |
| kctd5a            | 248.6544869 | 0.098923958  | 0.1364989 | 0.7247236 | 0.468622 | 0.924328 |
| ano5a             | 25.20854993 | -0.209121331 | 0.3854512 | -0.542536 | 0.587449 | 0.953319 |
| cax2              | 82.61172761 | 0.260421075  | 0.2361238 | 1.1029006 | 0.27007  | 0.834705 |
| aicda             | 0.173729368 | -0.955901296 | 4.0804729 | -0.234262 | 0.814781 | NA       |
| aarsd1            | 230.5265813 | -0.126868    | 0.1575026 | -0.805498 | 0.420532 | 0.90651  |
| hps3              | 154.3797417 | 0.192685001  | 0.1755038 | 1.0978964 | 0.27225  | 0.837242 |

|            |             |              |           |           |          |          |
|------------|-------------|--------------|-----------|-----------|----------|----------|
| zap70      | 5.381017058 | 1.394093654  | 0.8763573 | 1.5907823 | 0.111659 | NA       |
| tmem50a    | 1457.448554 | -0.040713087 | 0.0895522 | -0.45463  | 0.649376 | 0.960708 |
| tspan7     | 1471.145838 | 0.054462043  | 0.0790967 | 0.6885503 | 0.491106 | 0.931926 |
| iah1       | 45.19507258 | 0.045458646  | 0.3093648 | 0.1469419 | 0.883178 | 0.988706 |
| ankrd46b   | 547.7265806 | -0.043264729 | 0.1115247 | -0.387939 | 0.698061 | 0.967998 |
| atplb3a    | 2560.875453 | 0.079436193  | 0.0719785 | 1.1036094 | 0.269763 | 0.834705 |
| creb3l1    | 268.6390898 | 0.114484278  | 0.1573568 | 0.7275456 | 0.466892 | 0.924328 |
| smcr8b     | 164.802158  | 0.064731694  | 0.1966981 | 0.3290916 | 0.742086 | 0.973154 |
| cgnl1      | 415.7093724 | -0.101850335 | 0.1178801 | -0.864016 | 0.387579 | 0.895884 |
| rab22a     | 228.9502225 | -0.12125024  | 0.139143  | -0.871408 | 0.383532 | 0.895192 |
| sesn3      | 701.6426868 | -0.009338286 | 0.0961056 | -0.097167 | 0.922594 | 0.99233  |
| vps26b     | 504.6716539 | 0.090570369  | 0.1035728 | 0.8744613 | 0.381867 | 0.895192 |
| lemd3      | 781.3614789 | 0.039929902  | 0.0996748 | 0.4006017 | 0.688713 | 0.966672 |
| mov10a     | 403.6074573 | -0.071839478 | 0.1166958 | -0.615613 | 0.53815  | 0.943336 |
| EIF4E2RS1  | 563.5992654 | 0.018391243  | 0.0999787 | 0.1839516 | 0.854051 | 0.985174 |
| pnn        | 2092.508339 | -0.119942349 | 0.085672  | -1.400018 | 0.161508 | 0.715364 |
| chata      | 577.5413786 | 0.197893659  | 0.1120759 | 1.7657109 | 0.077444 | 0.542062 |
| slc25a40   | 195.0023906 | 0.021986935  | 0.14644   | 0.150143  | 0.880652 | 0.987917 |
| mtmr9      | 233.0069573 | 0.129733334  | 0.1432343 | 0.9057423 | 0.365072 | 0.886714 |
| rpl5b      | 16184.72136 | -0.295937731 | 0.0957106 | -3.092006 | 0.001988 | 0.053335 |
| socs6b     | 430.0520303 | -0.060958834 | 0.1179455 | -0.516839 | 0.605269 | 0.95651  |
| apoa2      | 33076.33788 | 0.076864166  | 0.2304555 | 0.3335315 | 0.738733 | 0.972722 |
| slc22a16   | 276.6771854 | -0.113478172 | 0.1321337 | -0.858813 | 0.390443 | 0.897304 |
| npas1      | 137.6892651 | -0.150286835 | 0.1814813 | -0.828112 | 0.407607 | 0.901327 |
| pax8       | 163.374987  | -0.146639224 | 0.1734428 | -0.845462 | 0.397853 | 0.899672 |
| b2ml       | 1025.472999 | -0.066481404 | 0.095044  | -0.699481 | 0.484252 | 0.929579 |
| zc3h15     | 760.8669935 | 0.069770143  | 0.0908675 | 0.7678226 | 0.442593 | 0.916336 |
| mafa       | 249.3919957 | -0.033708545 | 0.1331967 | -0.253073 | 0.800211 | 0.979377 |
| ptprea     | 221.0097624 | 0.011872918  | 0.1412139 | 0.0840776 | 0.932995 | 0.992702 |
| ptbp2b     | 1649.596019 | 0.014161898  | 0.0827312 | 0.1711796 | 0.864083 | 0.98601  |
| stat6      | 86.51496731 | 0.173386929  | 0.2162383 | 0.8018326 | 0.42265  | 0.906865 |
| lzlrl      | 623.9282934 | 0.052743697  | 0.1055872 | 0.4995273 | 0.617408 | 0.957354 |
| mxtx2      | 1.204202781 | 0.475444534  | 1.7483234 | 0.2719431 | 0.785666 | NA       |
| dcblld1    | 298.3856629 | 0.057463093  | 0.1252368 | 0.4588355 | 0.646352 | 0.960362 |
| slc25a36b  | 692.4061988 | -0.273160849 | 0.0988639 | -2.762999 | 0.005727 | 0.113592 |
| rnft1      | 418.456778  | -0.050146017 | 0.1195182 | -0.419568 | 0.674801 | 0.965257 |
| dlat       | 2366.748973 | 0.067869894  | 0.0784813 | 0.8647904 | 0.387154 | 0.895778 |
| pwpl       | 571.0146129 | -0.127715028 | 0.0990018 | -1.290028 | 0.197041 | 0.761944 |
| stk17al    | 148.8027397 | -0.145443621 | 0.1733879 | -0.838834 | 0.401563 | 0.90084  |
| rwddl      | 612.1621206 | -0.050971867 | 0.1091122 | -0.467151 | 0.640392 | 0.959994 |
| snapp91b   | 3011.134792 | 0.132139357  | 0.0853259 | 1.5486431 | 0.121468 | 0.647929 |
| kptn       | 268.8435218 | 0.033338236  | 0.1279152 | 0.2606276 | 0.79438  | 0.977937 |
| slc44a1a   | 337.4478029 | -0.220871451 | 0.1229683 | -1.796165 | 0.072468 | 0.526156 |
| matn4      | 10578.72814 | 0.180317053  | 0.0679644 | 2.653109  | 0.007975 | 0.143761 |
| cldnc      | 839.6148431 | -0.531612562 | 0.0939454 | -5.658739 | 1.52E-08 | 2.53E-06 |
| ZGC:153311 | 9.757986629 | -0.458348339 | 0.6200427 | -0.739221 | 0.459773 | NA       |
| yaf2       | 479.803617  | 0.084053597  | 0.1058148 | 0.7943463 | 0.426994 | 0.910533 |
| rabgef11   | 64.54308506 | -0.103641163 | 0.2572617 | -0.402863 | 0.687049 | 0.966376 |
| phip       | 51.92011331 | 0.119217641  | 0.2879185 | 0.4140673 | 0.678825 | 0.965257 |
| rapgef1b   | 168.0879552 | -0.095100568 | 0.1603235 | -0.593179 | 0.553061 | 0.947265 |
| COX5B      | 7214.241106 | -0.104397998 | 0.0854855 | -1.221236 | 0.221997 | 0.788551 |
| abcc9      | 263.7133329 | 0.154809588  | 0.1289101 | 1.2009117 | 0.229785 | 0.79764  |
| zdhhc16b   | 303.3592118 | 0.158081655  | 0.1238305 | 1.2765966 | 0.201745 | 0.767736 |
| hcfcla     | 1793.803449 | 0.114981421  | 0.0802817 | 1.4322249 | 0.152079 | 0.700984 |

|                |             |              |           |           |          |          |
|----------------|-------------|--------------|-----------|-----------|----------|----------|
| mfsd5          | 185.2319499 | 0.088192389  | 0.15531   | 0.5678475 | 0.570139 | 0.948983 |
| wdhd1          | 309.527145  | -0.138068244 | 0.1268437 | -1.088491 | 0.276378 | 0.839541 |
| nup107         | 1215.046711 | -0.070935068 | 0.0931903 | -0.761185 | 0.446546 | 0.917154 |
| gpcpd1         | 914.0437506 | -0.002065111 | 0.1143661 | -0.018057 | 0.985593 | 0.996944 |
| dbnlb          | 1221.883603 | -0.02024131  | 0.0959666 | -0.21092  | 0.832949 | 0.983557 |
| zic5           | 489.0411613 | -0.154340842 | 0.1051121 | -1.468345 | 0.142011 | 0.683406 |
| hacd3          | 415.4290085 | 0.068280919  | 0.1151534 | 0.5929562 | 0.55321  | 0.947265 |
| gins4          | 200.2316334 | -0.195769016 | 0.1583894 | -1.235998 | 0.216459 | 0.783724 |
| gpat3          | 608.7167306 | 0.394712673  | 0.0965922 | 4.0863814 | 4.38E-05 | 0.00242  |
| mhc11aa        | 87.47004469 | -0.199123445 | 0.2094542 | -0.950678 | 0.341768 | 0.878134 |
| fibpa          | 516.7779896 | -0.011447198 | 0.1034341 | -0.110671 | 0.911877 | 0.991066 |
| rab5b          | 263.2366024 | 0.147018638  | 0.1401434 | 1.0490588 | 0.294151 | 0.849999 |
| tlr3           | 8.649500151 | 0.487375384  | 0.6847989 | 0.7117059 | 0.476647 | NA       |
| cryz           | 217.5632599 | 0.002194337  | 0.140132  | 0.0156591 | 0.987506 | 0.997189 |
| nobl           | 299.419325  | 0.017178471  | 0.1282942 | 0.133899  | 0.893482 | 0.989291 |
| cldn151a       | 707.4736093 | -1.315153436 | 0.0975693 | -13.47917 | 2.07E-41 | 4.10E-37 |
| spsb4a         | 351.7399552 | -0.088365596 | 0.1218155 | -0.725405 | 0.468203 | 0.924328 |
| mbnl3          | 707.3514753 | 0.084426194  | 0.0978956 | 0.8624104 | 0.388462 | 0.896271 |
| smurf1         | 708.3942649 | 0.045136455  | 0.0929188 | 0.4857626 | 0.627135 | 0.957354 |
| rtn2a          | 152.8362874 | 0.535606232  | 0.1719358 | 3.1151516 | 0.001839 | 0.050214 |
| bicral         | 244.0477876 | -0.087734177 | 0.1375245 | -0.637953 | 0.523504 | 0.939336 |
| qtrt2          | 133.2447053 | -0.136611925 | 0.1765919 | -0.773602 | 0.439166 | 0.916082 |
| htr6           | 13.70858486 | -0.254274593 | 0.5655715 | -0.449589 | 0.653007 | 0.960792 |
| bbs12          | 33.20573074 | -0.772629027 | 0.3482058 | -2.218886 | 0.026494 | 0.313216 |
| exd2           | 303.8042985 | 0.04306656   | 0.1267566 | 0.3397581 | 0.734039 | 0.971993 |
| ptrhdl         | 107.2411825 | 0.24313998   | 0.1993975 | 1.2193732 | 0.222703 | 0.789115 |
| ap3m2          | 1002.07488  | 0.075210335  | 0.0911632 | 0.8250079 | 0.409367 | 0.90193  |
| keapla         | 254.1944506 | 0.094200745  | 0.1590947 | 0.592105  | 0.55378  | 0.947449 |
| nme6           | 63.33945334 | 0.104800575  | 0.2624215 | 0.3993598 | 0.689628 | 0.966799 |
| mkks           | 18.62477444 | -0.247882111 | 0.4527615 | -0.547489 | 0.584043 | 0.952214 |
| slc6a2         | 179.7199682 | 0.255130731  | 0.1553007 | 1.6428171 | 0.100421 | 0.602464 |
| xiap           | 407.6032657 | 0.130737889  | 0.1211091 | 1.0795053 | 0.280363 | 0.843423 |
| dag1           | 1949.690584 | 0.181270642  | 0.0872941 | 2.0765512 | 0.037843 | 0.381012 |
| zfp3611a       | 1928.059334 | 0.141623745  | 0.0773411 | 1.8311585 | 0.067077 | 0.506251 |
| fam53b         | 437.4594244 | -0.039265653 | 0.1150741 | -0.341221 | 0.732938 | 0.971844 |
| gmpr           | 887.2293238 | 0.268337668  | 0.0885801 | 3.029321  | 0.002451 | 0.062137 |
| ccdc170        | 13.11137404 | 0.210463953  | 0.5451957 | 0.3860338 | 0.699472 | 0.967998 |
| usp33          | 1306.66815  | 0.092469684  | 0.0844094 | 1.0954902 | 0.273302 | 0.838214 |
| cct3           | 5639.393356 | -0.168334479 | 0.076583  | -2.198067 | 0.027944 | 0.323709 |
| EIF4ENIF1      | 443.1453071 | 0.068988603  | 0.141905  | 0.4861605 | 0.626853 | 0.957354 |
| trim33         | 1034.464599 | -0.041464576 | 0.0938127 | -0.441993 | 0.658494 | 0.962545 |
| SBNO2          | 509.4648389 | -0.133769056 | 0.1252855 | -1.067714 | 0.28565  | 0.845448 |
| trib3          | 721.4129284 | 0.046012801  | 0.1078898 | 0.4264795 | 0.669758 | 0.965223 |
| zgc:112408     | 3.483480383 | -0.159046647 | 1.0297922 | -0.154445 | 0.877259 | NA       |
| nup214         | 302.1262794 | -0.11746949  | 0.1588002 | -0.739732 | 0.459463 | 0.921978 |
| zmp:0000001048 | 65.95367516 | 0.35356449   | 0.3100488 | 1.140351  | 0.25414  | 0.823394 |
| mhc11ba        | 6.092782264 | -0.052752198 | 0.8137563 | -0.064826 | 0.948313 | NA       |
| bcap29         | 161.0619538 | 0.129606411  | 0.160356  | 0.8082417 | 0.418951 | 0.906406 |
| sdr16c5a       | 379.5711153 | -0.036415454 | 0.1128761 | -0.322614 | 0.746987 | 0.97419  |
| arl6ip5b       | 445.8772096 | 0.115847143  | 0.114526  | 1.0115358 | 0.31176  | 0.864257 |
| psmd13         | 1346.282797 | -0.1055685   | 0.0960279 | -1.099352 | 0.271615 | 0.83659  |
| ralab          | 549.9245068 | -0.079937353 | 0.100123  | -0.798392 | 0.424643 | 0.9085   |
| chmp4ba        | 620.5718244 | 0.106052795  | 0.1057885 | 1.0024985 | 0.316103 | 0.866931 |
| nudt3a         | 205.66064   | -0.177502779 | 0.1481538 | -1.198098 | 0.230879 | 0.799177 |

|           |             |              |           |           |          |          |
|-----------|-------------|--------------|-----------|-----------|----------|----------|
| fxr2      | 1560.927453 | 0.162700577  | 0.0762433 | 2.1339646 | 0.032846 | 0.353176 |
| zdhhc5a   | 859.2877677 | 0.020406336  | 0.1043832 | 0.1954944 | 0.845006 | 0.985174 |
| eiflad    | 222.005532  | -0.126728917 | 0.1523498 | -0.831828 | 0.405506 | 0.901305 |
| clcal     | 1.814708353 | 0.186512888  | 1.5197095 | 0.1227293 | 0.902321 | NA       |
| zgc:65894 | 3305.527524 | 0.215446661  | 0.066698  | 3.23018   | 0.001237 | 0.036676 |
| upfl      | 1773.290866 | -0.076920679 | 0.0890297 | -0.863989 | 0.387594 | 0.895884 |
| tfdplb    | 254.3493486 | -0.2688112   | 0.1386475 | -1.938811 | 0.052524 | 0.449813 |
| mrpl46    | 272.2822307 | 0.055533922  | 0.132725  | 0.4184134 | 0.675645 | 0.965257 |
| dock9b    | 513.9347242 | -0.045861858 | 0.1028347 | -0.445976 | 0.655614 | 0.96173  |
| med7      | 293.0602969 | 0.041265021  | 0.1241486 | 0.3323842 | 0.739599 | 0.972943 |
| c9        | 2113.576894 | 0.282460164  | 0.2441969 | 1.1566903 | 0.247399 | 0.81686  |
| tmco6     | 93.37999824 | -0.129019237 | 0.2282407 | -0.565277 | 0.571885 | 0.949494 |
| lctlb     | 551.7433394 | -0.020072191 | 0.1014547 | -0.197844 | 0.843167 | 0.985174 |
| zgc:92518 | 149.80898   | 0.103889473  | 0.1796952 | 0.5781429 | 0.563168 | 0.948728 |
| ncoa5     | 1309.84308  | -0.03907237  | 0.0849588 | -0.459898 | 0.645589 | 0.96029  |
| dip2bb    | 39.74420244 | 0.037852225  | 0.3067988 | 0.123378  | 0.901808 | 0.990121 |
| cap1      | 246.2894182 | 0.054890233  | 0.1394523 | 0.3936129 | 0.693867 | 0.96736  |
| fmo5      | 238.4750574 | -0.245101501 | 0.137864  | -1.77785  | 0.075429 | 0.534788 |
| kpna1     | 1275.524568 | 0.198493578  | 0.0892716 | 2.223479  | 0.026184 | 0.311899 |
| her8a     | 140.6429085 | -0.281982904 | 0.172161  | -1.637903 | 0.101442 | 0.605353 |
| gna15.1   | 156.1805126 | -0.203985294 | 0.173505  | -1.175674 | 0.239725 | 0.808111 |
| zbtb8os   | 242.168713  | 0.050125191  | 0.1354211 | 0.3701431 | 0.711276 | 0.969006 |
| asns      | 396.276767  | 0.046170435  | 0.1117668 | 0.4130962 | 0.679536 | 0.965257 |
| calcocolb | 23.97010765 | 0.231059742  | 0.4059909 | 0.5691255 | 0.569271 | 0.948983 |
| arf2b     | 3.135393141 | 0.464836258  | 1.0787995 | 0.4308829 | 0.666554 | NA       |
| fam219aa  | 20.7557085  | -0.008462454 | 0.4214044 | -0.020082 | 0.983978 | 0.996944 |
| riok1     | 312.1109434 | -0.040614303 | 0.127651  | -0.318167 | 0.750358 | 0.97419  |
| ptchl     | 730.9740952 | -0.107414801 | 0.1111107 | -0.966737 | 0.333675 | 0.874933 |
| agt       | 1112.874422 | 0.321505405  | 0.1275884 | 2.5198648 | 0.01174  | 0.190597 |
| dhtkd1    | 969.2559156 | 0.213894185  | 0.0854062 | 2.5044352 | 0.012265 | 0.195612 |
| crygm1    |             | 0 NA         | NA        | NA        | NA       | NA       |
| fign11    | 85.01601984 | -0.334160209 | 0.2161175 | -1.546197 | 0.122057 | 0.649408 |
| farp2     | 490.3293564 | 0.058154321  | 0.1034879 | 0.5619429 | 0.574155 | 0.950037 |
| slc7a1    | 22.57960972 | -0.153600873 | 0.4549674 | -0.337609 | 0.735658 | 0.972535 |
| eif3c     | 6866.192317 | -0.194459814 | 0.0717523 | -2.710156 | 0.006725 | 0.12641  |
| ythdf1    | 1034.783048 | 0.021539568  | 0.0848075 | 0.2539819 | 0.79951  | 0.979366 |
| vtg3      | 1.852202149 | 0.869537402  | 1.455503  | 0.5974137 | 0.550231 | NA       |
| esr2a     | 6.744681524 | 1.058429093  | 0.7737921 | 1.3678468 | 0.17136  | NA       |
| irf9      | 126.8999088 | -0.488545538 | 0.1922438 | -2.541282 | 0.011045 | 0.18215  |
| fut9a     | 574.3048332 | -0.008688076 | 0.0997605 | -0.087089 | 0.9306   | 0.992702 |
| trappc6b  | 267.3607213 | -0.043426903 | 0.1403365 | -0.309448 | 0.75698  | 0.975374 |
| cdc42bpab | 308.743468  | -0.263066404 | 0.1248664 | -2.106783 | 0.035136 | 0.364718 |
| anxa5b    | 981.2961939 | -0.422584162 | 0.090962  | -4.645719 | 3.39E-06 | 0.000291 |
| galcb     | 410.9100046 | -0.000450498 | 0.1172863 | -0.003841 | 0.996935 | 0.999057 |
| eif4a2    | 735.4758243 | -0.153938599 | 0.0969872 | -1.587205 | 0.112466 | 0.627868 |
| ugt5a1    | 24.23391455 | -0.026781561 | 0.3930245 | -0.068142 | 0.945672 | 0.993609 |
| slc17a7a  | 311.6182175 | 0.191433861  | 0.124943  | 1.532169  | 0.125481 | 0.654803 |
| ptpn2a    | 168.2579662 | 0.035651606  | 0.1659265 | 0.2148639 | 0.829873 | 0.982821 |
| baiap212a | 79.02261466 | -1.132435865 | 0.2594067 | -4.365484 | 1.27E-05 | 0.000877 |
| dkc1      | 1012.103042 | 0.009184957  | 0.0942068 | 0.0974978 | 0.922331 | 0.99233  |
| rab11fip3 | 194.4881364 | 0.205836727  | 0.1530669 | 1.3447505 | 0.178706 | 0.739486 |
| ddc       | 220.5306495 | 0.055017638  | 0.165234  | 0.3329681 | 0.739158 | 0.972722 |
| cdk8      | 501.0530282 | 0.11291112   | 0.104782  | 1.0775812 | 0.281221 | 0.84357  |
| apbblip   | 171.0998465 | 0.032854197  | 0.1574112 | 0.2087157 | 0.83467  | 0.984067 |

|                   |             |              |           |           |          |          |
|-------------------|-------------|--------------|-----------|-----------|----------|----------|
| setd3             | 718.5205474 | 0.106902415  | 0.0996284 | 1.073011  | 0.283266 | 0.84466  |
| gtf2h2            | 217.2424461 | 0.069160793  | 0.143143  | 0.4831587 | 0.628983 | 0.957354 |
| rbm8a             | 1809.965471 | -0.156456307 | 0.0769772 | -2.032501 | 0.042103 | 0.402974 |
| ctdnepla          | 208.424733  | 0.095241461  | 0.1539282 | 0.6187395 | 0.536088 | 0.943336 |
| gata3             | 1570.004568 | -0.143267305 | 0.0852095 | -1.681354 | 0.092694 | 0.579675 |
| helz2             | 10.57283484 | 0.234548431  | 0.6343906 | 0.3697225 | 0.711589 | NA       |
| wdcp              | 178.4345607 | 0.411364755  | 0.1582374 | 2.5996682 | 0.009331 | 0.162001 |
| klhl4             | 96.73169896 | 0.094014595  | 0.2126133 | 0.4421859 | 0.658355 | 0.962545 |
| suco              | 2024.943234 | -0.004632202 | 0.0905846 | -0.051137 | 0.959217 | 0.995097 |
| npas2             | 33.74023418 | 0.006942382  | 0.4000952 | 0.0173518 | 0.986156 | 0.996965 |
| zgc:55888         | 1.356046616 | 0.792643957  | 1.7222439 | 0.4602391 | 0.645345 | NA       |
| sash3             | 29.59129399 | -0.376302106 | 0.3690909 | -1.019538 | 0.307948 | 0.861088 |
| mrm3a             | 70.28347819 | -0.265192049 | 0.2340864 | -1.132881 | 0.257264 | 0.825314 |
| zgc:154046        | 424.5642956 | 0.254924395  | 0.1165732 | 2.1868187 | 0.028756 | 0.328909 |
| eif5b             | 1377.184988 | -0.1768124   | 0.0919068 | -1.923824 | 0.054377 | 0.457162 |
| iqseclb           | 1366.074687 | 0.06841719   | 0.0817265 | 0.8371486 | 0.402509 | 0.90084  |
| prlra             | 264.7088906 | 0.314087002  | 0.1446963 | 2.1706637 | 0.029957 | 0.335036 |
| mroh1             | 628.1395122 | -0.104520447 | 0.1009416 | -1.035454 | 0.300457 | 0.856251 |
| rgs7a             | 503.8020585 | -0.026046866 | 0.1141537 | -0.228174 | 0.819511 | 0.981594 |
| haus4             | 105.3290348 | -0.179393303 | 0.1953143 | -0.918485 | 0.358365 | 0.884398 |
| ckmt1             | 5250.889968 | -0.026099181 | 0.0703995 | -0.370729 | 0.710839 | 0.968985 |
| pimr110           |             | 0 NA         | NA        | NA        | NA       | NA       |
| echdc2            | 164.9260653 | -0.35319836  | 0.1585354 | -2.227883 | 0.025888 | 0.310878 |
| scrn3             | 294.9294589 | -0.130329586 | 0.1367113 | -0.95332  | 0.340428 | 0.87805  |
| mcat              | 31.22397708 | -0.286154766 | 0.366095  | -0.781641 | 0.434426 | 0.914254 |
| si:ch211-195b13.1 | 919.6734741 | 0.326730695  | 0.086552  | 3.7749648 | 0.00016  | 0.007176 |
| tprb              | 1480.293731 | -0.0793484   | 0.0871169 | -0.910827 | 0.362387 | 0.885944 |
| akr7a3            | 262.0105172 | 0.018697182  | 0.1344187 | 0.1390966 | 0.889374 | 0.989291 |
| znf106a           | 1296.42606  | 0.158327329  | 0.0804906 | 1.9670293 | 0.04918  | 0.435115 |
| mgme1             | 211.5823708 | 0.032348201  | 0.1473904 | 0.219473  | 0.826282 | 0.982196 |
| rnf20             | 954.1609687 | 0.035000293  | 0.093319  | 0.3750607 | 0.707615 | 0.968664 |
| gabrb1b           | 62.03804675 | -0.075276719 | 0.252246  | -0.298426 | 0.765378 | 0.975374 |
| si:ch73-166o21.1  | 5.06953012  | -0.476320871 | 0.8800689 | -0.541231 | 0.588348 | NA       |
| gnaola            | 3962.283857 | 0.03615641   | 0.0699864 | 0.5166206 | 0.605421 | 0.95651  |
| acadvl            | 3697.99478  | -0.067532259 | 0.0716624 | -0.942367 | 0.346005 | 0.878857 |
| cd9b              | 1177.955809 | -0.263479613 | 0.0915867 | -2.876832 | 0.004017 | 0.08719  |
| p2rx1             | 54.32499257 | 0.309223755  | 0.2894633 | 1.0682657 | 0.285401 | 0.845164 |
| trpala            | 232.1843835 | -0.114809278 | 0.1353979 | -0.84794  | 0.396471 | 0.899672 |
| pblb              | 118.4489958 | -0.194018665 | 0.1808009 | -1.073107 | 0.283223 | 0.84466  |
| atic              | 1338.988755 | -0.158893285 | 0.0936809 | -1.696113 | 0.089865 | 0.573834 |
| rchyl             | 287.4078431 | -0.141526865 | 0.1263734 | -1.11991  | 0.262752 | 0.830166 |
| mmp11b            | 162.7420977 | 0.340334188  | 0.1787019 | 1.9044799 | 0.056848 | 0.467988 |
| sdha              | 5406.330803 | -0.017063418 | 0.0762424 | -0.223805 | 0.822909 | 0.982189 |
| zgc:162339        | 121.8875633 | 0.083029421  | 0.1786551 | 0.4647469 | 0.642113 | 0.959994 |
| gadd45gb.1        | 408.0952466 | -0.145429661 | 0.1106473 | -1.314353 | 0.188727 | 0.753461 |
| rxfank            | 15.30589444 | -0.686349486 | 0.4910359 | -1.397758 | 0.162186 | 0.716781 |
| psat1             | 1064.51547  | -0.102611875 | 0.0925193 | -1.109086 | 0.267393 | 0.833191 |
| lrrc4cb           | 303.0040486 | -0.012331523 | 0.1377334 | -0.089532 | 0.928659 | 0.992702 |
| rgs7bpb           | 248.4539917 | 0.162334438  | 0.1394397 | 1.1641908 | 0.244347 | 0.813858 |
| angel2            | 353.2390721 | 0.105243202  | 0.1230892 | 0.8550156 | 0.392543 | 0.897688 |
| slc35f6           | 718.1879504 | 0.064732484  | 0.0973835 | 0.6647169 | 0.506232 | 0.935724 |
| slcolc1           | 122.6968391 | 0.043062707  | 0.191624  | 0.224725  | 0.822193 | 0.982186 |
| abcc6a            | 62.17500112 | 0.009424945  | 0.2560462 | 0.0368095 | 0.970637 | 0.996315 |
| ipo9              | 738.374614  | 0.006590264  | 0.1014373 | 0.0649688 | 0.948199 | 0.99381  |

|                 |             |              |           |           |          |          |
|-----------------|-------------|--------------|-----------|-----------|----------|----------|
| tbca            | 805.546915  | -0.071424269 | 0.0954679 | -0.74815  | 0.45437  | 0.920544 |
| znf292a         | 431.6730818 | -0.061846965 | 0.1228864 | -0.503285 | 0.614764 | 0.95688  |
| scamp3          | 704.4767871 | 0.054889351  | 0.0940053 | 0.5838965 | 0.55929  | 0.948478 |
| sgtb            | 154.4275057 | 0.161699983  | 0.174269  | 0.9278757 | 0.353472 | 0.881844 |
| tfa             | 16546.30535 | 0.265466161  | 0.0913066 | 2.9074147 | 0.003644 | 0.081518 |
| cishb           | 54.85639429 | 0.049657875  | 0.2732275 | 0.1817455 | 0.855782 | 0.985174 |
| plekho2         | 192.012359  | 0.166332066  | 0.1550726 | 1.0726076 | 0.283447 | 0.84466  |
| aqr             | 831.197809  | -0.08306317  | 0.1001393 | -0.829476 | 0.406835 | 0.901305 |
| huwel           | 4461.302595 | -0.027082418 | 0.100397  | -0.269753 | 0.78735  | 0.976596 |
| srsf6b          | 3944.746169 | -0.113439463 | 0.0718035 | -1.57986  | 0.114139 | 0.633095 |
| zebla           | 19.35235049 | -0.264419163 | 0.4395405 | -0.601581 | 0.547453 | 0.945526 |
| zgc:152891      | 26.83771295 | 0.277547853  | 0.3764886 | 0.7372013 | 0.461    | 0.922038 |
| crybb1l2        | 36544.6359  | -0.038588694 | 0.0653393 | -0.59059  | 0.554795 | 0.947449 |
| mtmr6           | 561.9892423 | -0.098303416 | 0.1018045 | -0.96561  | 0.334239 | 0.875298 |
| prkacab         | 993.2124654 | 0.101145625  | 0.0853046 | 1.1856999 | 0.235741 | 0.804824 |
| ints3           | 584.2263865 | 0.029523573  | 0.1011032 | 0.2920141 | 0.770276 | 0.975687 |
| cascl           | 22.43180172 | 0.505595925  | 0.4196605 | 1.2047737 | 0.228291 | 0.795541 |
| abcg2d          | 44.49277136 | -0.329900635 | 0.2932526 | -1.124971 | 0.260601 | 0.828546 |
| vtg6            | 0.339758314 | 0.005883863  | 3.2682461 | 0.0018003 | 0.998564 | NA       |
| rimkla          | 7160.859677 | -0.156728417 | 0.0796429 | -1.967888 | 0.049081 | 0.435115 |
| tcirgla         | 248.5350507 | -0.239910653 | 0.1340313 | -1.78996  | 0.07346  | 0.528705 |
| glipr2l         | 123.0465232 | -0.015120401 | 0.1781774 | -0.084862 | 0.932371 | 0.992702 |
| neurod2         | 166.9563425 | -0.097035419 | 0.1777618 | -0.545873 | 0.585153 | 0.952487 |
| sf3b5           | 831.0586893 | -0.038381829 | 0.101248  | -0.379087 | 0.704623 | 0.968134 |
| pon2            | 208.0742489 | 0.033434723  | 0.1480718 | 0.2258008 | 0.821356 | 0.981845 |
| smad7           | 223.1173672 | 0.021956566  | 0.1459205 | 0.1504693 | 0.880394 | 0.987881 |
| farsb           | 930.7120347 | -0.011885405 | 0.0928107 | -0.128061 | 0.898101 | 0.990121 |
| fam102ab        | 53.47208784 | 0.029873295  | 0.2641844 | 0.1130775 | 0.909969 | 0.990702 |
| rnf128a         | 1073.620902 | -0.078152194 | 0.0865095 | -0.903394 | 0.366317 | 0.887239 |
| rhobtb4         | 27.52138641 | -0.116499944 | 0.3650685 | -0.319118 | 0.749637 | 0.97419  |
| smarcel         | 3870.11107  | -0.042828248 | 0.0731191 | -0.585732 | 0.558055 | 0.948478 |
| gysl            | 1118.860209 | 0.074141469  | 0.0923523 | 0.8028114 | 0.422084 | 0.90651  |
| dnajb9b         | 12.79896174 | -0.260775367 | 0.5282247 | -0.493683 | 0.62153  | 0.957354 |
| eif3g           | 2078.42831  | -0.179958866 | 0.0744318 | -2.417767 | 0.015616 | 0.229092 |
| fbxol5          | 7.379408691 | 0.993558481  | 0.7089492 | 1.4014523 | 0.161079 | NA       |
| wdr5            | 1420.21003  | 0.038773861  | 0.0840306 | 0.4614252 | 0.644494 | 0.96029  |
| bckdk           | 1270.554227 | 0.129938018  | 0.0787638 | 1.6497181 | 0.099001 | 0.598346 |
| zp3e            | 8.491664171 | -0.046092154 | 0.6422365 | -0.071768 | 0.942786 | NA       |
| ace2            | 482.3314359 | -0.345023405 | 0.1192246 | -2.893895 | 0.003805 | 0.08416  |
| si:dkey-94f20.4 | 50.433148   | 0.360246376  | 0.2774995 | 1.2981876 | 0.194223 | 0.758049 |
| ttyh2           | 55.23131648 | 0.008111241  | 0.2680454 | 0.0302607 | 0.975859 | 0.996762 |
| hmcn1           | 497.9547028 | -0.243107427 | 0.1107325 | -2.195447 | 0.028132 | 0.325071 |
| itgb2           | 78.38602551 | 0.334405755  | 0.2393989 | 1.3968561 | 0.162457 | 0.717058 |
| neurog3         | 2.194007624 | -0.64329868  | 1.3164545 | -0.48866  | 0.625082 | NA       |
| slc16a1a        | 207.629015  | -0.232095687 | 0.1465542 | -1.583685 | 0.113266 | 0.631061 |
| MCUR1           | 135.4313012 | -0.276952774 | 0.1838159 | -1.506685 | 0.131891 | 0.665566 |
| tmem214         | 1248.485644 | 0.006452275  | 0.0793382 | 0.0813262 | 0.935183 | 0.992702 |
| snx27b          | 225.5881132 | 0.089444603  | 0.1498094 | 0.5970559 | 0.55047  | 0.946549 |
| pmpcb           | 307.1411682 | -0.082226621 | 0.1306741 | -0.629249 | 0.529186 | 0.942209 |
| bcar3           | 466.941049  | -0.127927188 | 0.1110735 | -1.151734 | 0.24943  | 0.819036 |
| ssrplb          | 314.6762689 | 0.028087376  | 0.1214881 | 0.2311944 | 0.817164 | 0.981594 |
| lin28a          | 55.02026638 | -0.265264389 | 0.2645979 | -1.002519 | 0.316093 | 0.866931 |
| myo10           | 777.0117534 | 0.013205562  | 0.0911673 | 0.1448498 | 0.88483  | 0.988838 |
| dennd5a         | 273.1749977 | -0.004666676 | 0.1339154 | -0.034848 | 0.972201 | 0.996315 |

|                 |             |              |           |           |          |          |
|-----------------|-------------|--------------|-----------|-----------|----------|----------|
| nr4a2a          | 635.299841  | -0.046839068 | 0.1042645 | -0.449233 | 0.653263 | 0.960919 |
| scamp21         | 194.9994754 | 0.192082897  | 0.1494051 | 1.2856517 | 0.198565 | 0.763597 |
| ywhae2          | 2459.38518  | 0.130504266  | 0.0743413 | 1.755474  | 0.079178 | 0.547489 |
| ak7b            | 34.72605863 | -0.000282075 | 0.321329  | -0.000878 | 0.9993   | 0.999704 |
| sqor            | 514.7224431 | -0.274201751 | 0.1288192 | -2.128578 | 0.033289 | 0.355433 |
| svilc           | 612.5323686 | 0.268015101  | 0.1101036 | 2.4342083 | 0.014924 | 0.223742 |
| ikbkg           | 587.4582685 | -0.074527174 | 0.0994798 | -0.749169 | 0.453755 | 0.920074 |
| zgc:152670      | 0.863695607 | 1.965711988  | 2.22386   | 0.8839189 | 0.37674  | NA       |
| slc27a4         | 31.0586259  | -0.694844173 | 0.3497446 | -1.986719 | 0.046954 | 0.425314 |
| adsl            | 888.0203608 | 0.079645256  | 0.0996245 | 0.7994546 | 0.424027 | 0.908025 |
| zmynd12         | 9.676535717 | -0.269526576 | 0.6243926 | -0.431662 | 0.665987 | NA       |
| large2          | 1053.131373 | -0.028899579 | 0.0942112 | -0.306753 | 0.759031 | 0.975374 |
| chordc1b        | 296.5629254 | -0.021202256 | 0.1277063 | -0.166024 | 0.868138 | 0.987245 |
| mespaa          | 0.166657454 | -0.955901296 | 4.0804729 | -0.234262 | 0.814781 | NA       |
| bud31           | 729.0984678 | -0.089688672 | 0.0940873 | -0.953249 | 0.340464 | 0.87805  |
| asb12a          | 264.053498  | -0.241503433 | 0.1345589 | -1.794779 | 0.072689 | 0.52617  |
| emc8            | 507.5770407 | 0.104248955  | 0.1197754 | 0.8703706 | 0.384098 | 0.895192 |
| vaspb           | 2288.298622 | -0.002152531 | 0.0718152 | -0.029973 | 0.976088 | 0.996762 |
| nr2e1           | 282.45249   | -0.114520614 | 0.1379738 | -0.830017 | 0.406529 | 0.901305 |
| kcnalb          | 3.586196321 | 0.547534267  | 1.0285946 | 0.532313  | 0.594509 | NA       |
| fam8a1a         | 29.78580582 | 0.121248224  | 0.3516603 | 0.344788  | 0.730254 | 0.971335 |
| kctd10          | 795.2072749 | 0.032032162  | 0.0935924 | 0.3422518 | 0.732161 | 0.971665 |
| vps37a          | 656.4077311 | -0.017615655 | 0.0998362 | -0.176446 | 0.859944 | 0.985773 |
| mafba           | 638.1805409 | 0.045910288  | 0.1043655 | 0.439899  | 0.66001  | 0.963432 |
| ilvbl           | 581.7615923 | -0.156724304 | 0.1036477 | -1.512086 | 0.130512 | 0.662797 |
| pdzklipl        | 172.5422038 | -0.135406016 | 0.1549126 | -0.87408  | 0.382075 | 0.895192 |
| myof1           | 235.5862865 | 0.176984247  | 0.1369845 | 1.2920021 | 0.196356 | 0.761835 |
| zgc:63587       | 948.1088418 | 0.019328663  | 0.1003995 | 0.1925176 | 0.847337 | 0.985174 |
| pla2g4ab        | 7.827990996 | -0.268957477 | 0.7473282 | -0.359892 | 0.718928 | NA       |
| brd9            | 563.3131839 | -0.083330258 | 0.1009943 | -0.825098 | 0.409316 | 0.901918 |
| cables2b        | 30.24686556 | 0.221479277  | 0.3535186 | 0.6264997 | 0.530987 | 0.942209 |
| wnt10a          | 10.20982516 | -0.07777377  | 0.6008434 | -0.129441 | 0.897009 | NA       |
| kif3ca          | 185.3227548 | 0.302164457  | 0.1630659 | 1.853021  | 0.063879 | 0.493997 |
| sinup           | 0.473170125 | -0.833888596 | 2.9014002 | -0.287409 | 0.773799 | NA       |
| slc3a1          | 102.6103532 | -0.494426371 | 0.2161215 | -2.287724 | 0.022154 | 0.283074 |
| nr2f1b          | 410.5194322 | 0.084321311  | 0.1184992 | 0.711577  | 0.476727 | 0.926808 |
| si:dkey-29p10.4 | 76.2592327  | 0.065337258  | 0.2256914 | 0.2894983 | 0.7722   | 0.975687 |
| dlx2b           | 80.23546142 | -0.085755169 | 0.2193393 | -0.39097  | 0.695819 | 0.96736  |
| npc1            | 2122.251091 | 0.028189399  | 0.078588  | 0.3586986 | 0.719821 | 0.969318 |
| zpax2           | 2.985198621 | 0.675276084  | 1.0940658 | 0.6172171 | 0.537092 | NA       |
| cnna            | 5.360834459 | -0.934114195 | 0.834904  | -1.118828 | 0.263213 | NA       |
| foxf2a          | 343.0821971 | -0.225509077 | 0.1298618 | -1.736532 | 0.08247  | 0.554303 |
| elp2            | 307.3123832 | 0.100183167  | 0.1219846 | 0.8212771 | 0.411488 | 0.903483 |
| plxnb1b         | 998.8274171 | 0.131469507  | 0.090998  | 1.4447521 | 0.148528 | 0.696298 |
| pabpcla         | 12349.2733  | -0.184623238 | 0.0815846 | -2.262966 | 0.023638 | 0.296445 |
| otud7b          | 58.87215296 | -0.184403192 | 0.2781636 | -0.662931 | 0.507375 | 0.935734 |
| megf10          | 238.0099275 | 0.209402164  | 0.1393875 | 1.5023027 | 0.133019 | 0.667628 |
| fbxw11b         | 1446.884954 | 0.078964901  | 0.0792298 | 0.9966572 | 0.318931 | 0.867746 |
| npy8ar          | 1.364726559 | 1.599180424  | 1.7155395 | 0.9321735 | 0.351247 | NA       |
| eif5a           | 14139.6226  | -0.186184312 | 0.0693384 | -2.685155 | 0.00725  | 0.134075 |
| traf5           | 17.22404726 | 0.061305131  | 0.4542957 | 0.1349454 | 0.892655 | 0.989291 |
| garem           | 318.969594  | 0.072220612  | 0.1389921 | 0.5196024 | 0.603341 | 0.956045 |
| chd6            | 902.658411  | 0.173407159  | 0.0935128 | 1.8543686 | 0.063686 | 0.493277 |
| prx             | 1123.273618 | 0.230171984  | 0.1011249 | 2.2761168 | 0.022839 | 0.289129 |

|                |             |              |           |           |          |          |
|----------------|-------------|--------------|-----------|-----------|----------|----------|
| smt1b          | 5.605107253 | 0.027539366  | 0.8149955 | 0.0337908 | 0.973044 | NA       |
| kcnk1b         | 9.601136086 | -0.692596581 | 0.6214646 | -1.114459 | 0.265082 | NA       |
| tmed1b         | 145.0795276 | -0.18830047  | 0.1794318 | -1.049427 | 0.293982 | 0.849999 |
| gdpd1          | 892.7810169 | 0.213285507  | 0.0887665 | 2.4027704 | 0.016271 | 0.235374 |
| scml4          | 41.10096493 | 0.321471027  | 0.315132  | 1.0201154 | 0.307674 | 0.861088 |
| eapp           | 185.2192522 | -0.005435162 | 0.1489288 | -0.036495 | 0.970888 | 0.996315 |
| opnlsw2        | 11787.23073 | 0.23263115   | 0.083881  | 2.7733474 | 0.005548 | 0.111157 |
| gnai2b         | 963.8880407 | -0.046321265 | 0.0854113 | -0.542332 | 0.58759  | 0.953319 |
| fabp11a        | 1287.978435 | -0.11392552  | 0.102022  | -1.116676 | 0.264133 | 0.830245 |
| gpsm2          | 549.3367951 | 0.111057494  | 0.1098661 | 1.010844  | 0.312091 | 0.864401 |
| lmbird2b       | 835.176304  | 0.063615842  | 0.0977333 | 0.6509124 | 0.515103 | 0.937646 |
| celal.6        | 492.5934285 | -0.325200617 | 0.2629868 | -1.236566 | 0.216248 | 0.783589 |
| larp7          | 251.6850753 | 0.005165303  | 0.1567493 | 0.0329526 | 0.973712 | 0.996315 |
| bag5           | 81.12416558 | -0.114564366 | 0.2356235 | -0.486218 | 0.626813 | 0.957354 |
| fl1r.1         | 1333.152093 | -0.161999578 | 0.0778698 | -2.080391 | 0.03749  | 0.378999 |
| kdr            | 83.30212381 | 0.182969051  | 0.2305591 | 0.7935884 | 0.427435 | 0.91075  |
| cdkl1          | 140.5414503 | 0.184530545  | 0.1773559 | 1.0404537 | 0.298129 | 0.85401  |
| zgc:77929      | 222.5899011 | -0.091313572 | 0.1552948 | -0.588002 | 0.556531 | 0.94804  |
| kidins220b     | 7771.943724 | 0.046863909  | 0.0707015 | 0.6628414 | 0.507432 | 0.935734 |
| uts2b          | 8.809704998 | 1.092840121  | 0.6929814 | 1.5770122 | 0.114793 | NA       |
| epha2a         | 410.0580767 | 0.197696566  | 0.1211563 | 1.6317477 | 0.102733 | 0.609031 |
| rsph9          | 32.35709848 | -0.129691727 | 0.3675155 | -0.352888 | 0.724173 | 0.970402 |
| mettl8         | 38.24575892 | 0.035149739  | 0.3276517 | 0.1072777 | 0.914569 | 0.991119 |
| slc23a2        | 18.06350494 | 0.431873242  | 0.4866214 | 0.8874933 | 0.374813 | 0.894316 |
| prdm4          | 280.4319453 | -0.119031043 | 0.1343397 | -0.886045 | 0.375593 | 0.894316 |
| rhbdf1b        | 118.2797656 | -0.12553443  | 0.213891  | -0.586908 | 0.557265 | 0.948478 |
| sema3d         | 620.8739864 | 0.235737722  | 0.0964478 | 2.4441995 | 0.014517 | 0.21947  |
| b9d2           | 67.81310808 | -0.112833145 | 0.2426029 | -0.465094 | 0.641864 | 0.959994 |
| sobpb          | 337.9225772 | 0.084911663  | 0.1355749 | 0.6263082 | 0.531113 | 0.942209 |
| gstt1b         | 386.6721075 | 0.023669588  | 0.1213222 | 0.1950969 | 0.845317 | 0.985174 |
| unc13ba        | 67.86639963 | 0.323105407  | 0.2457028 | 1.3150256 | 0.188501 | 0.753276 |
| smarcc1a       | 2640.289945 | 0.005378219  | 0.1010849 | 0.053205  | 0.957569 | 0.99467  |
| slc44a5a       | 8.270187561 | -0.860188336 | 0.6949826 | -1.237712 | 0.215823 | NA       |
| klf1           | 8.386535638 | 0.876694464  | 0.6694712 | 1.3095328 | 0.190354 | NA       |
| apmap          | 1224.423395 | -0.023426737 | 0.0933484 | -0.25096  | 0.801845 | 0.979492 |
| pat11          | 1474.915777 | 0.01049894   | 0.0769232 | 0.136486  | 0.891437 | 0.989291 |
| crocc2         | 49.82091718 | 0.201241755  | 0.289828  | 0.6943489 | 0.487463 | 0.931584 |
| phf2011        | 488.0001218 | 0.061066973  | 0.1057621 | 0.5773996 | 0.56367  | 0.948739 |
| sphkap         | 644.0500814 | 0.016568236  | 0.1000472 | 0.1656042 | 0.868468 | 0.987245 |
| mindy2         | 96.53180946 | 0.115829832  | 0.1989435 | 0.5822248 | 0.560415 | 0.948728 |
| adcy3b         | 22.30014471 | 0.694546553  | 0.4416648 | 1.572565  | 0.11582  | 0.637943 |
| eif4ba         | 657.7953028 | 0.045291569  | 0.0956292 | 0.4736163 | 0.635774 | 0.958142 |
| mylz3          | 42033.62551 | 0.147872009  | 0.0911378 | 1.6225106 | 0.104694 | 0.612652 |
| hal            | 336.3987075 | -0.154472206 | 0.1666449 | -0.926954 | 0.35395  | 0.881976 |
| eif3i          | 4292.46027  | -0.225637225 | 0.0763452 | -2.955485 | 0.003122 | 0.073687 |
| camk1db        | 558.2664411 | 0.12044281   | 0.112362  | 1.0719181 | 0.283757 | 0.84466  |
| nup50          | 1025.88008  | -0.045778497 | 0.091924  | -0.498004 | 0.618481 | 0.957354 |
| ncam2          | 889.9971416 | 0.052471942  | 0.0906151 | 0.5790642 | 0.562546 | 0.948728 |
| zgc:l10699     | 56.3316431  | 0.037636715  | 0.2630049 | 0.1431027 | 0.886209 | 0.988936 |
| ifi45          | 23.38600063 | 0.225496156  | 0.3972231 | 0.5676813 | 0.570251 | 0.948989 |
| cel.1          | 345.7492619 | -0.3312137   | 0.131536  | -2.518045 | 0.011801 | 0.191113 |
| tgfbr1a        | 17.62279235 | 0.105091515  | 0.4540154 | 0.2314713 | 0.816949 | 0.981594 |
| rock2a         | 696.5395271 | -0.0992995   | 0.093427  | -1.062857 | 0.287847 | 0.845979 |
| si:ch211-1o7.3 | 10.06796382 | 0.532308536  | 0.5957581 | 0.8934978 | 0.371591 | NA       |



|                   |             |              |           |           |          |          |
|-------------------|-------------|--------------|-----------|-----------|----------|----------|
| ctdpl             | 275.8454025 | -0.220521934 | 0.1399358 | -1.57588  | 0.115054 | 0.635519 |
| ccnt1             | 70.15445595 | 0.602373718  | 0.2404926 | 2.5047496 | 0.012254 | 0.195612 |
| kif25             | 144.8462086 | -0.320476531 | 0.1715631 | -1.86798  | 0.061765 | 0.485049 |
| prkag3a           | 60.32127826 | 0.412241329  | 0.2567372 | 1.6056937 | 0.108341 | 0.620165 |
| fgfla             | 25.96978037 | 0.109111386  | 0.3824699 | 0.285281  | 0.775429 | 0.975687 |
| banp              | 234.0742881 | -0.117067263 | 0.1405616 | -0.832854 | 0.404927 | 0.901305 |
| itk               | 1.135343319 | 3.640271539  | 2.1311155 | 1.7081531 | 0.087608 | NA       |
| reep3a            | 259.4689785 | -0.11880601  | 0.1357327 | -0.875294 | 0.381414 | 0.895192 |
| mccc2             | 1948.602028 | 0.007274498  | 0.0796432 | 0.0913386 | 0.927224 | 0.992702 |
| si:ch211-195b15.7 | 23.88455635 | 0.393089656  | 0.3987985 | 0.9856849 | 0.324288 | 0.870928 |
| nit2              | 271.5708533 | 0.09990383   | 0.1302167 | 0.7672121 | 0.442955 | 0.916336 |
| fat1a             | 3022.14534  | 0.020883548  | 0.0700138 | 0.2982777 | 0.765491 | 0.975374 |
| ccdc6b            | 302.2358054 | -0.113226454 | 0.129117  | -0.876929 | 0.380525 | 0.895192 |
| ccng2             | 1355.721805 | -0.249779009 | 0.0816402 | -3.059511 | 0.002217 | 0.05751  |
| rpp40             | 100.6156208 | 0.157862641  | 0.1955115 | 0.8074339 | 0.419417 | 0.906454 |
| sys1              | 281.4552803 | -0.032845226 | 0.1260648 | -0.260542 | 0.794445 | 0.977937 |
| pnpo              | 356.8979465 | 0.087722404  | 0.1299247 | 0.6751788 | 0.499562 | 0.934006 |
| tlx3b             | 95.11733921 | 0.095819395  | 0.2128772 | 0.4501158 | 0.652627 | 0.960708 |
| alg6              | 304.5938654 | -0.06014239  | 0.1258629 | -0.477841 | 0.632764 | 0.957356 |
| krt4              | 86679.40241 | -0.053501526 | 0.0822386 | -0.650565 | 0.515327 | 0.9377   |
| pdc6              | 2564.48967  | 0.173977875  | 0.0873763 | 1.9911337 | 0.046466 | 0.423616 |
| rnfl67            | 166.0294432 | 0.100948827  | 0.1757374 | 0.57443   | 0.565677 | 0.948739 |
| cdh7b             | 9.665998011 | -0.178520614 | 0.6617611 | -0.269766 | 0.78734  | NA       |
| rgs13             | 25.63765606 | 0.415071554  | 0.4093507 | 1.0139755 | 0.310594 | 0.86284  |
| zgc:112163        | 34.96735355 | 0.103394728  | 0.3378924 | 0.3059989 | 0.759605 | 0.975374 |
| gmppb             | 1057.654232 | -0.045427051 | 0.0900822 | -0.504285 | 0.614061 | 0.95688  |
| sephs2            | 1357.444876 | 0.079991373  | 0.0841071 | 0.9510653 | 0.341571 | 0.878134 |
| braf              | 383.300722  | -0.02437598  | 0.1236731 | -0.1971   | 0.843749 | 0.985174 |
| snrkb             | 320.0574662 | 0.23146305   | 0.1301034 | 1.7790694 | 0.075228 | 0.534207 |
| nova2             | 4323.961055 | -0.173207893 | 0.0684729 | -2.529584 | 0.01142  | 0.186316 |
| utp4              | 434.419762  | -0.183702303 | 0.1104787 | -1.662784 | 0.096356 | 0.59086  |
| mmp2              | 3701.501008 | 0.370922988  | 0.0756256 | 4.9047255 | 9.36E-07 | 9.54E-05 |
| dnajc5gb          | 332.5692357 | -0.058332368 | 0.1269762 | -0.459396 | 0.64595  | 0.96029  |
| utp25             | 389.168468  | -0.051743324 | 0.1348517 | -0.383706 | 0.701197 | 0.968134 |
| paqr3a            | 209.8645157 | 0.116714883  | 0.1484347 | 0.7863044 | 0.431689 | 0.91277  |
| lrrc40            | 190.0504694 | -0.043285374 | 0.1490361 | -0.290435 | 0.771483 | 0.975687 |
| ppplr14ab         | 157.297746  | 0.102796373  | 0.1774928 | 0.5791581 | 0.562482 | 0.948728 |
| si:ch211-106h11.1 | 94.11801521 | -0.022975457 | 0.2269814 | -0.101222 | 0.919374 | 0.991639 |
| si:ch73-151m17.5  | 4.263712467 | -0.542464614 | 1.0023179 | -0.54121  | 0.588363 | NA       |
| phb2b             | 720.2583224 | 0.132444116  | 0.1090619 | 1.2143945 | 0.224597 | 0.791954 |
| ak51              | 75.87142378 | -0.09928795  | 0.2380418 | -0.417103 | 0.676603 | 0.965257 |
| sec63             | 1049.367946 | -0.046546339 | 0.085755  | -0.542783 | 0.58728  | 0.953319 |
| g3bp1             | 1898.713832 | 0.182514125  | 0.0744076 | 2.4528975 | 0.014171 | 0.214979 |
| grm6a             | 5.195400888 | -0.343213929 | 0.8690009 | -0.394952 | 0.692878 | NA       |
| smc2              | 1030.946853 | -0.104775827 | 0.0851539 | -1.230428 | 0.218537 | 0.785734 |
| arhgap29b         | 472.8347174 | -0.142635773 | 0.1084332 | -1.315425 | 0.188367 | 0.75324  |
| pik3cg            | 95.63063457 | -0.214256647 | 0.2140054 | -1.001174 | 0.316743 | 0.867129 |
| srrt              | 1569.029437 | -0.062943047 | 0.0808748 | -0.778278 | 0.436405 | 0.914408 |
| mdh1aa            | 7018.474554 | -0.07241352  | 0.0858168 | -0.843815 | 0.398773 | 0.900446 |
| slc16a12a         | 78.87378343 | 0.234369916  | 0.2321643 | 1.0095002 | 0.312735 | 0.864656 |
| atp5mc3a          | 2027.69609  | -0.02681481  | 0.0981149 | -0.2733   | 0.784623 | 0.97627  |
| rorcb             | 310.1822484 | -0.129891649 | 0.1222474 | -1.062531 | 0.287995 | 0.845979 |
| hsl17b10          | 763.9465514 | -0.013048128 | 0.0993701 | -0.131308 | 0.895531 | 0.989814 |
| zgc:158689        | 6.265280117 | -0.008930827 | 0.7435444 | -0.012011 | 0.990417 | NA       |

|                  |             |              |           |           |          |          |
|------------------|-------------|--------------|-----------|-----------|----------|----------|
| chrnb2           | 496.2334649 | 0.034902048  | 0.1098875 | 0.3176161 | 0.750776 | 0.97419  |
| sdr16c5b         | 692.3461077 | -0.297087019 | 0.0984855 | -3.016554 | 0.002557 | 0.064039 |
| bcor             | 1844.592744 | -0.120353745 | 0.1006911 | -1.195277 | 0.231979 | 0.800126 |
| tgml             | 117.6271293 | 0.255906877  | 0.1898047 | 1.3482644 | 0.177573 | 0.738343 |
| gsk3ba           | 1862.289477 | 0.083083875  | 0.0832912 | 0.9975107 | 0.318517 | 0.867746 |
| stard3           | 413.1960477 | -0.064938032 | 0.1136575 | -0.571348 | 0.567763 | 0.948739 |
| si:ch211-210c8.6 | 185.5005436 | -0.072797903 | 0.1593468 | -0.456852 | 0.647778 | 0.960708 |
| pigs             | 366.3096335 | 0.03175699   | 0.1183015 | 0.2684412 | 0.78836  | 0.976703 |
| gata5            | 266.8410551 | -0.368754473 | 0.1382161 | -2.667956 | 0.007631 | 0.13921  |
| mical12b         | 119.3085583 | -0.040409087 | 0.2159075 | -0.187159 | 0.851536 | 0.985174 |
| brfla            | 106.5205217 | -0.249423617 | 0.1936076 | -1.288295 | 0.197643 | 0.762928 |
| cand1            | 1634.566441 | 0.031110382  | 0.0746557 | 0.416718  | 0.676885 | 0.965257 |
| syvn1            | 637.9351172 | 0.015019608  | 0.0971011 | 0.15468   | 0.877074 | 0.987881 |
| srsflb           | 1983.443664 | -0.087550535 | 0.0841294 | -1.040665 | 0.298031 | 0.85401  |
| copz1            | 1256.160268 | -0.011990025 | 0.0837645 | -0.14314  | 0.88618  | 0.988936 |
| prepl            | 80.51178019 | -0.173209483 | 0.2229309 | -0.776965 | 0.43718  | 0.914408 |
| rgs5b            | 97.95817364 | 0.037115737  | 0.2288756 | 0.1621656 | 0.871175 | 0.987754 |
| dnajc3b          | 508.3536378 | 0.186359784  | 0.1100783 | 1.6929742 | 0.09046  | 0.576277 |
| kcnip3b          | 120.6212338 | 0.053739912  | 0.1911449 | 0.2811475 | 0.778597 | 0.975942 |
| rdh1             | 160.4822391 | -0.295736205 | 0.1647801 | -1.794732 | 0.072696 | 0.52617  |
| bgna             | 55.49905287 | -0.442233473 | 0.2589017 | -1.708114 | 0.087615 | 0.566637 |
| zbtb11           | 621.711515  | -0.118830037 | 0.101129  | -1.175035 | 0.239981 | 0.808111 |
| tcp1             | 4694.085483 | -0.11863178  | 0.0704542 | -1.683815 | 0.092218 | 0.57849  |
| tln2a            | 586.426195  | 0.119600999  | 0.1093351 | 1.0938935 | 0.274002 | 0.838846 |
| casp3a           | 1727.696096 | -0.132222245 | 0.076498  | -1.728441 | 0.083909 | 0.557501 |
| pdssl            | 477.0278531 | 0.045158638  | 0.1066742 | 0.4233321 | 0.672053 | 0.965257 |
| her7             | 2.31319428  | -0.77869527  | 1.3558072 | -0.574341 | 0.565737 | NA       |
| cx36.7           | 1.030311776 | 0.994458412  | 1.953155  | 0.5091549 | 0.610644 | NA       |
| xrcc3            | 50.95375406 | 0.140146349  | 0.2736525 | 0.5121326 | 0.608558 | 0.956718 |
| ncoa2            | 1559.694595 | -0.036522567 | 0.0799214 | -0.456981 | 0.647685 | 0.960645 |
| ints6l           | 85.76052591 | 0.343642348  | 0.2148178 | 1.5996924 | 0.109667 | 0.623766 |
| ptk6a            | 40.13320289 | -0.283680855 | 0.3364643 | -0.843123 | 0.39916  | 0.900683 |
| tp73             | 23.88767788 | 0.403961442  | 0.3885227 | 1.039737  | 0.298462 | 0.85439  |
| sfxn2            | 587.3321764 | -0.117058456 | 0.1144243 | -1.023021 | 0.306298 | 0.860027 |
| cyp39a1          | 25.55104539 | 0.008727464  | 0.3889865 | 0.0224364 | 0.9821   | 0.996944 |
| rsph14           | 21.90550172 | 0.248554067  | 0.4234544 | 0.5869678 | 0.557225 | 0.948478 |
| zgc:172106       | 1.055856997 | 2.296593324  | 2.1028377 | 1.0921401 | 0.274772 | NA       |
| zgc:77739        | 77.3872871  | -0.103598823 | 0.2213731 | -0.467983 | 0.639797 | 0.959994 |
| vps13d           | 476.9884305 | -0.021993269 | 0.1070812 | -0.205389 | 0.837268 | 0.984645 |
| dse              | 407.7380403 | 0.17636229   | 0.1256329 | 1.403791  | 0.160381 | 0.71328  |
| tssk6            |             | 0 NA         | NA        | NA        | NA       | NA       |
| ubpl             | 199.1073298 | 0.053986439  | 0.1574008 | 0.3429871 | 0.731608 | 0.971557 |
| ecil             | 499.1971041 | -0.221201711 | 0.1154117 | -1.916631 | 0.055285 | 0.46072  |
| nkx2.5           | 26.78151143 | -0.357344456 | 0.3802224 | -0.93983  | 0.347305 | 0.880123 |
| vrk1             | 255.9267199 | -0.033125348 | 0.1646351 | -0.201205 | 0.840539 | 0.985042 |
| mdh1b            | 13.24931224 | 0.287465529  | 0.526351  | 0.5461479 | 0.584964 | 0.952436 |
| crtap            | 693.2782698 | 0.202629881  | 0.105108  | 1.9278257 | 0.053877 | 0.454699 |
| msh2             | 448.1197281 | 0.022288677  | 0.1128712 | 0.1974701 | 0.84346  | 0.985174 |
| tbx2a            | 545.9164849 | -0.003007716 | 0.1143937 | -0.026293 | 0.979024 | 0.996802 |
| scn8ab           | 77.91411211 | 0.216686698  | 0.2327668 | 0.9309174 | 0.351896 | 0.88081  |
| msantd4          | 16.91896112 | -0.465538604 | 0.4879365 | -0.954097 | 0.340035 | 0.87805  |
| brms11b          | 288.1780562 | 0.14294133   | 0.1253267 | 1.1405496 | 0.254057 | 0.823394 |
| zgc:171704       | 22.19275186 | -0.273613538 | 0.418204  | -0.654259 | 0.512945 | 0.936253 |
| sf3b2            | 2009.798005 | -0.152209538 | 0.0907041 | -1.678089 | 0.09333  | 0.580895 |

|                 |             |              |           |           |          |          |
|-----------------|-------------|--------------|-----------|-----------|----------|----------|
| pik3r2          | 757.7487389 | 0.165888603  | 0.0926818 | 1.7898729 | 0.073474 | 0.528705 |
| neill           | 197.4277988 | 0.148141853  | 0.1473007 | 1.0057104 | 0.314555 | 0.865694 |
| ntm             | 26.22430841 | -0.194740518 | 0.3759668 | -0.517973 | 0.604477 | 0.95651  |
| ptchd1          | 164.3763544 | 0.224378341  | 0.1677188 | 1.3378244 | 0.180954 | 0.741776 |
| rdh12           | 275.3580704 | 0.040074547  | 0.1344212 | 0.2981267 | 0.765606 | 0.975374 |
| mrps22          | 546.8075105 | 0.001745397  | 0.1037578 | 0.0168218 | 0.986579 | 0.996965 |
| rbpl.1          | 2.175737239 | -1.104521527 | 1.3680625 | -0.807362 | 0.419458 | NA       |
| scap            | 79.86873368 | -0.189207953 | 0.2180633 | -0.867674 | 0.385573 | 0.89551  |
| casqlb          | 1053.905703 | 0.116809772  | 0.1099853 | 1.0620487 | 0.288214 | 0.845979 |
| EIF2B3          | 500.7330957 | -0.053660473 | 0.1076576 | -0.498436 | 0.618177 | 0.957354 |
| rab3da          | 120.2598463 | -0.111814196 | 0.188742  | -0.592418 | 0.553571 | 0.947322 |
| mafga           | 3.813022008 | 0.137853889  | 0.9858993 | 0.1398255 | 0.888798 | NA       |
| pak4            | 510.0267864 | -0.052098324 | 0.1019639 | -0.510949 | 0.609387 | 0.956718 |
| kdm7aa          | 390.8731515 | -0.09291382  | 0.1262189 | -0.736132 | 0.46165  | 0.922466 |
| CR392347.1      | 6.036594409 | 0.522008205  | 0.8273196 | 0.6309631 | 0.528065 | NA       |
| cenpj           | 79.3243449  | 0.077730507  | 0.2313174 | 0.3360339 | 0.736845 | 0.972535 |
| psmd3           | 1764.753942 | -0.00775175  | 0.0810002 | -0.0957   | 0.923759 | 0.992628 |
| midlip11        | 513.9706524 | 0.243143743  | 0.1106084 | 2.1982394 | 0.027932 | 0.323709 |
| gpx1a           | 675.5667147 | -0.095161439 | 0.102201  | -0.93112  | 0.351791 | 0.88081  |
| slc38a4         | 2411.517636 | 0.118835242  | 0.0817442 | 1.4537444 | 0.146017 | 0.69189  |
| nt5clba         | 188.8148819 | -0.009343593 | 0.1525418 | -0.061253 | 0.951158 | 0.99381  |
| ano10b          | 201.739842  | 0.016472789  | 0.1447872 | 0.1137724 | 0.909418 | 0.990702 |
| ctnnal1         | 119.7076594 | 0.095395071  | 0.182763  | 0.5219605 | 0.601698 | 0.956045 |
| depdcla         | 171.0314582 | -0.094681522 | 0.1560168 | -0.606868 | 0.543939 | 0.945438 |
| gnai2a          | 1798.290664 | -0.07431629  | 0.0854765 | -0.869436 | 0.384609 | 0.89551  |
| pgm2            | 759.5540807 | -0.000626272 | 0.0912662 | -0.006862 | 0.994525 | 0.998694 |
| acvr11          | 353.3141165 | 0.053974177  | 0.1331703 | 0.405302  | 0.685256 | 0.966146 |
| dnajc28         | 84.18483869 | 0.294941474  | 0.2218957 | 1.3291899 | 0.183785 | 0.747376 |
| asna1           | 1424.943487 | 0.037275196  | 0.0998199 | 0.3734245 | 0.708833 | 0.968664 |
| ubr5            | 3328.619809 | -0.038391292 | 0.1039893 | -0.369185 | 0.71199  | 0.969006 |
| nck2a           | 512.5394604 | -0.012875179 | 0.1022337 | -0.125939 | 0.89978  | 0.990121 |
| htr2c11         | 191.1106719 | -0.027677968 | 0.1540065 | -0.179719 | 0.857373 | 0.985703 |
| mfap1           | 789.5645207 | -0.145865821 | 0.0953607 | -1.529622 | 0.12611  | 0.654806 |
| ncoal           | 135.7060293 | -0.121626992 | 0.1749713 | -0.695126 | 0.486977 | 0.931104 |
| atpla3a         | 9921.620458 | 0.111487864  | 0.0801018 | 1.3918265 | 0.163975 | 0.71945  |
| bmp7a           | 8.735090993 | 0.49773576   | 0.6500576 | 0.7656794 | 0.443867 | NA       |
| pdia2           | 350.7239558 | -0.459977281 | 0.1341327 | -3.429271 | 0.000605 | 0.020492 |
| trim101         | 387.0791178 | 0.332709869  | 0.1155697 | 2.8788685 | 0.003991 | 0.08682  |
| methflda        | 717.4448842 | -0.054814339 | 0.1312147 | -0.417745 | 0.676133 | 0.965257 |
| olfmla          | 343.1358071 | 0.115813807  | 0.1220036 | 0.9492659 | 0.342485 | 0.878434 |
| wdr33           | 1726.123654 | -0.03430625  | 0.0790185 | -0.434155 | 0.664176 | 0.964736 |
| cfap161         | 6.222159629 | -0.077966947 | 0.7877289 | -0.098977 | 0.921157 | NA       |
| cyba            | 158.0799489 | -0.078026991 | 0.1677117 | -0.465245 | 0.641756 | 0.959994 |
| pdpk1b          | 1430.343581 | -0.101873813 | 0.0818883 | -1.244058 | 0.213478 | 0.781725 |
| rev1            | 419.2216697 | 0.072171289  | 0.1101788 | 0.655038  | 0.512443 | 0.936253 |
| si:ch73-186j5.2 | 1.022491002 | 2.265845936  | 2.0916203 | 1.083297  | 0.278677 | NA       |
| etv4            | 425.9219455 | -0.063527303 | 0.1156226 | -0.549437 | 0.582706 | 0.952214 |
| rell1           | 306.2259381 | -0.066482432 | 0.1268023 | -0.5243   | 0.60007  | 0.956045 |
| arglulb         | 1155.744297 | 0.086899657  | 0.0899768 | 0.9658008 | 0.334144 | 0.875263 |
| lbox1a          | 135.4297995 | -0.087746994 | 0.1980782 | -0.442992 | 0.657772 | 0.962538 |
| taf5            | 398.4771389 | 0.061067086  | 0.1163751 | 0.5247435 | 0.599762 | 0.956045 |
| illr3           | 0.365141898 | 1.973577737  | 3.3927314 | 0.5817076 | 0.560764 | NA       |
| rhocb           | 930.0488324 | -0.098382525 | 0.0889044 | -1.10661  | 0.268463 | 0.833634 |
| gc2             | 22.98964705 | -0.019134956 | 0.3919912 | -0.048815 | 0.961067 | 0.995659 |

|            |             |              |           |           |          |          |
|------------|-------------|--------------|-----------|-----------|----------|----------|
| rpl35      | 11313.21445 | -0.393498002 | 0.0952065 | -4.133101 | 3.58E-05 | 0.002051 |
| ggt1b      | 79.32341832 | 0.410201341  | 0.2343603 | 1.750302  | 0.080066 | 0.549631 |
| hpda       | 314.0039573 | 0.280994522  | 0.1367674 | 2.0545434 | 0.039923 | 0.391511 |
| sult1st3   | 30.67350902 | -0.107099239 | 0.3629345 | -0.295093 | 0.767923 | 0.975687 |
| prkcha     | 21.15744391 | -0.176056087 | 0.4117318 | -0.427599 | 0.668943 | 0.964961 |
| frzb       | 460.6408371 | 0.14006521   | 0.1208228 | 1.1592616 | 0.24635  | 0.816376 |
| kank2      | 39.44484711 | 0.22127918   | 0.3286236 | 0.6733514 | 0.500724 | 0.93428  |
| hpc        | 2531.620684 | 0.067306737  | 0.0776933 | 0.8663134 | 0.386318 | 0.89551  |
| rps6kbl1a  | 623.9584543 | -0.090476891 | 0.1034147 | -0.874894 | 0.381632 | 0.895192 |
| krt18a.1   | 2527.196719 | -0.173273212 | 0.0744754 | -2.326585 | 0.019987 | 0.266383 |
| mknk1      | 442.6530644 | 0.079900035  | 0.1128796 | 0.7078345 | 0.479048 | 0.926978 |
| pth1rb     | 31.77964671 | 0.145100809  | 0.3523594 | 0.4117977 | 0.680488 | 0.965431 |
| sulf2a     | 1347.074786 | 0.148010369  | 0.0793859 | 1.8644408 | 0.06226  | 0.487382 |
| ddx61      | 2036.923011 | 0.165103503  | 0.07597   | 2.1732712 | 0.02976  | 0.334058 |
| aldh7a1    | 2535.082509 | -0.029585379 | 0.0702084 | -0.421393 | 0.673468 | 0.965257 |
| m6pr       | 363.4079378 | -0.091397605 | 0.1154579 | -0.79161  | 0.428588 | 0.911378 |
| hegl       | 80.04064395 | 0.398572299  | 0.2220674 | 1.7948259 | 0.072681 | 0.52617  |
| msrb2      | 650.3148256 | -0.11817026  | 0.1066235 | -1.108295 | 0.267734 | 0.833349 |
| mbn12      | 905.6040134 | -0.000754405 | 0.0914206 | -0.008252 | 0.993416 | 0.998618 |
| zgc:56095  | 529.0433631 | -0.159349988 | 0.1015523 | -1.569143 | 0.116615 | 0.639148 |
| pak2b      | 1751.626296 | -0.001019835 | 0.075094  | -0.013581 | 0.989164 | 0.997589 |
| agxtb      | 1243.798334 | 0.602522113  | 0.084384  | 7.1402438 | 9.32E-13 | 3.37E-10 |
| cyp2v1     | 275.9192591 | -0.250876702 | 0.1368213 | -1.833608 | 0.066712 | 0.505041 |
| pdia4      | 1519.555043 | 0.119336997  | 0.0843764 | 1.4143404 | 0.157262 | 0.707876 |
| znf503     | 1383.643129 | -0.149293593 | 0.0886302 | -1.684456 | 0.092094 | 0.57849  |
| smn1       | 215.549239  | -0.11258469  | 0.1608974 | -0.699729 | 0.484096 | 0.929461 |
| ftr06      |             | 0 NA         | NA        | NA        | NA       | NA       |
| zdhhc8b    | 312.7202538 | 0.026288569  | 0.1278461 | 0.2056267 | 0.837083 | 0.984645 |
| stk38b     | 143.4374059 | 0.23054561   | 0.1775719 | 1.2983225 | 0.194177 | 0.758049 |
| or115-1    | 0.797014944 | -1.848753454 | 2.2697209 | -0.814529 | 0.415342 | NA       |
| midn       | 2403.551128 | 0.186024085  | 0.0744776 | 2.4977201 | 0.012499 | 0.198049 |
| lipf       | 785.6084724 | 0.01088319   | 0.1031407 | 0.1055179 | 0.915965 | 0.991314 |
| mapkapk2b  | 56.97271711 | 0.022177335  | 0.2691864 | 0.0823865 | 0.934339 | 0.992702 |
| slc6a9     | 2252.629303 | 0.135236451  | 0.075649  | 1.7876827 | 0.073827 | 0.529749 |
| hapln4     | 62.74633342 | 0.286842374  | 0.2514259 | 1.1408625 | 0.253927 | 0.823394 |
| ifih1      | 8.411256217 | 0.273714931  | 0.6490946 | 0.4216873 | 0.673253 | NA       |
| kdm7ab     | 570.2024427 | -0.077156454 | 0.1067065 | -0.723072 | 0.469636 | 0.924505 |
| cope       | 1797.894327 | -0.040346089 | 0.0768575 | -0.524947 | 0.59962  | 0.956045 |
| flnca      | 550.3723711 | -0.067622957 | 0.1164719 | -0.580595 | 0.561514 | 0.948728 |
| tnfrsfla   | 410.1006739 | -0.183629961 | 0.1268193 | -1.447966 | 0.147627 | 0.694905 |
| sf3b4      | 404.6792548 | -0.133441208 | 0.1132056 | -1.178751 | 0.238497 | 0.807659 |
| zgc:152658 | 0.547712847 | 2.559541715  | 2.9076406 | 0.8802813 | 0.378707 | NA       |
| parp16     | 243.524602  | -0.024737813 | 0.137798  | -0.179522 | 0.857528 | 0.985703 |
| retsat     | 526.1373265 | -0.245638734 | 0.1034395 | -2.37471  | 0.017563 | 0.245605 |
| rab5aa     | 1779.433221 | -0.062921766 | 0.0847538 | -0.742406 | 0.457841 | 0.921978 |
| lxl1b      | 38.54533832 | -0.020108311 | 0.3150774 | -0.06382  | 0.949113 | 0.99381  |
| agtr1a     | 10.87661311 | -0.264743073 | 0.567877  | -0.466198 | 0.641074 | NA       |
| cpsf6      | 1756.796147 | -0.069950459 | 0.0791431 | -0.883848 | 0.376779 | 0.895192 |
| cers4b     | 64.97440459 | 0.146427119  | 0.2646498 | 0.5532864 | 0.580067 | 0.951257 |
| slc6a19a.1 | 83.59310631 | 0.511464849  | 0.2355864 | 2.1710286 | 0.029929 | 0.335036 |
| rad54l     | 207.5509272 | -0.055748632 | 0.1512586 | -0.368565 | 0.712452 | 0.969087 |
| arl5a      | 286.2789708 | -0.027106281 | 0.1412713 | -0.191874 | 0.847841 | 0.985174 |
| sec6lg     | 1316.193391 | -0.00434281  | 0.2202511 | -0.019718 | 0.984269 | 0.996944 |
| igf2a      | 175.2078083 | 0.080763843  | 0.1562826 | 0.5167807 | 0.605309 | 0.95651  |

|                  |             |              |           |           |          |          |
|------------------|-------------|--------------|-----------|-----------|----------|----------|
| gtpbp3           | 38.64795433 | 0.087143605  | 0.3065355 | 0.2842855 | 0.776192 | 0.975826 |
| acot7            | 309.9601876 | 0.09796197   | 0.1290042 | 0.7593706 | 0.447631 | 0.917154 |
| aar2             | 238.232792  | 0.052071327  | 0.1374739 | 0.3787724 | 0.704857 | 0.968134 |
| si:ch211-262i1.4 | 0 NA        | NA           | NA        | NA        | NA       | NA       |
| saall            | 92.4320217  | -0.026285987 | 0.2312778 | -0.113655 | 0.909511 | 0.990702 |
| itga2b           | 4.420944525 | 0.341149016  | 0.9591105 | 0.3556931 | 0.72207  | NA       |
| elk3             | 424.2991166 | -0.017195026 | 0.1217623 | -0.141218 | 0.887698 | 0.989291 |
| phf2             | 816.1609406 | 0.083265886  | 0.0952946 | 0.8737737 | 0.382242 | 0.895192 |
| cdh2             | 4751.954031 | -0.060497576 | 0.0703827 | -0.859552 | 0.390036 | 0.897023 |
| carm1            | 1494.504833 | 0.131211321  | 0.0843427 | 1.5556935 | 0.119781 | 0.644854 |
| dgkh             | 97.82112414 | -0.281916886 | 0.2232692 | -1.262677 | 0.206705 | 0.774273 |
| npnta            | 358.9209487 | 0.086596038  | 0.1239888 | 0.6984185 | 0.484916 | 0.93001  |
| slco3a1          | 69.04703764 | 0.06702855   | 0.2313006 | 0.2897897 | 0.771977 | 0.975687 |
| zw10             | 439.3848646 | -0.095561372 | 0.1204964 | -0.793064 | 0.42774  | 0.91075  |
| psme4b           | 1142.718198 | 0.128108528  | 0.0847694 | 1.5112587 | 0.130723 | 0.662797 |
| scamp5a          | 113.915423  | 0.017417385  | 0.2084944 | 0.0835389 | 0.933423 | 0.992702 |
| prl2             | 11.73069903 | 0.707106069  | 0.596522  | 1.1853814 | 0.235867 | 0.804837 |
| npr1b            | 220.3078344 | -0.327359943 | 0.1419241 | -2.306584 | 0.021078 | 0.273668 |
| klf5l            | 489.2576164 | -0.512060656 | 0.1130719 | -4.528627 | 5.94E-06 | 0.00046  |
| pknox1.1         | 537.9925323 | -0.043091175 | 0.1054826 | -0.408514 | 0.682896 | 0.965476 |
| hivep2b          | 10.2173327  | -0.488242347 | 0.6091723 | -0.801485 | 0.422851 | NA       |
| kdm4aa           | 231.2428159 | -0.149181581 | 0.1577053 | -0.945952 | 0.344173 | 0.878434 |
| efnalb           | 688.4409229 | -0.008062752 | 0.0967797 | -0.08331  | 0.933605 | 0.992702 |
| st8sia2          | 12.78768382 | 0.89601388   | 0.5749708 | 1.5583642 | 0.119147 | 0.64321  |
| crygmx11         | 75.86646473 | -0.311029454 | 0.2381322 | -1.306121 | 0.191511 | 0.755886 |
| abhd3            | 251.1889989 | 0.409465285  | 0.1457567 | 2.8092379 | 0.004966 | 0.102608 |
| esrp2            | 687.1597291 | -0.141146679 | 0.0953752 | -1.47991  | 0.138897 | 0.677395 |
| bdnf             | 196.7760671 | 0.525397007  | 0.1704463 | 3.0824779 | 0.002053 | 0.054414 |
| flnclb           | 991.7403882 | 0.164255908  | 0.0838896 | 1.9580003 | 0.05023  | 0.438746 |
| tmem248          | 109.1880484 | 0.218374262  | 0.1900018 | 1.1493271 | 0.250421 | 0.820164 |
| trpc4apa         | 1109.034272 | 0.095432598  | 0.0805284 | 1.1850806 | 0.235986 | 0.805056 |
| dgat2            | 65.76583625 | 0.502185868  | 0.2448845 | 2.0507053 | 0.040296 | 0.392394 |
| si:dkey-199f5.8  | 756.0600512 | 0.111516667  | 0.1023615 | 1.0894396 | 0.27596  | 0.839541 |
| scaf4b           | 612.6002745 | -0.017525009 | 0.1124262 | -0.15588  | 0.876128 | 0.987881 |
| dcl1a            | 621.0847429 | 0.20714217   | 0.1052175 | 1.968705  | 0.048987 | 0.435115 |
| henmt1           | 26.36030419 | 1.571851971  | 0.3981242 | 3.9481446 | 7.88E-05 | 0.003993 |
| apobec2a         | 250.9432722 | 0.207603425  | 0.1328861 | 1.5622663 | 0.118225 | 0.641526 |
| jak2b            | 643.1065145 | -0.070908979 | 0.0986744 | -0.718616 | 0.472378 | 0.924838 |
| snrpa            | 1078.961955 | -0.041372069 | 0.0895049 | -0.462232 | 0.643915 | 0.96009  |
| rnaseh2a         | 359.0417947 | -0.086041676 | 0.1229584 | -0.699763 | 0.484076 | 0.929461 |
| mmp24            | 25.10850986 | -0.01489086  | 0.3950812 | -0.037691 | 0.969934 | 0.996315 |
| zfand5a          | 2224.627639 | 0.038470575  | 0.0883993 | 0.4351909 | 0.663424 | 0.964736 |
| pes              | 715.9204424 | -0.035600746 | 0.096729  | -0.368046 | 0.712839 | 0.96909  |
| aimp2            | 760.5090337 | -0.101322979 | 0.0963443 | -1.051676 | 0.292948 | 0.848631 |
| cstf3            | 1706.649347 | -0.14885043  | 0.0773059 | -1.925473 | 0.05417  | 0.455813 |
| kat6a            | 1909.354366 | -0.040228893 | 0.0878639 | -0.457855 | 0.647057 | 0.960362 |
| hnrnpk           | 2407.102318 | -0.122123588 | 0.0724204 | -1.686315 | 0.091735 | 0.57849  |
| rad17            | 187.620141  | 0.09854177   | 0.1562772 | 0.6305574 | 0.52833  | 0.941868 |
| lratd1           | 440.9736211 | -0.111711759 | 0.1087961 | -1.026799 | 0.304515 | 0.858905 |
| fat2             | 328.3427023 | 0.141185152  | 0.1279579 | 1.1033722 | 0.269866 | 0.834705 |
| zcchc17          | 307.5962253 | -0.113359791 | 0.1222835 | -0.927025 | 0.353914 | 0.881976 |
| hogal            | 211.832413  | 0.122178461  | 0.145808  | 0.8379408 | 0.402064 | 0.90084  |
| gclm             | 376.4590096 | -0.082744965 | 0.117969  | -0.701413 | 0.483045 | 0.929338 |
| tmem39b          | 314.3665529 | -0.079253539 | 0.1276966 | -0.62064  | 0.534837 | 0.943336 |

|                 |             |              |           |           |          |          |
|-----------------|-------------|--------------|-----------|-----------|----------|----------|
| nrarpb          | 64.20144261 | -0.09486924  | 0.246608  | -0.384696 | 0.700462 | 0.967998 |
| gtpbp4          | 2885.801207 | -0.336366304 | 0.0788703 | -4.264803 | 2.00E-05 | 0.001256 |
| cyb5r1          | 373.0088246 | -0.31989426  | 0.1175202 | -2.722036 | 0.006488 | 0.123125 |
| gabbr1a         | 33.10109216 | 0.175521939  | 0.3293257 | 0.5329737 | 0.594052 | 0.954434 |
| acvrlba         | 1872.598101 | -0.064114024 | 0.089659  | -0.715088 | 0.474555 | 0.925287 |
| b3gnt5a         | 505.6511438 | 0.06851245   | 0.1053674 | 0.6502246 | 0.515547 | 0.9377   |
| clptml          | 1860.826127 | 0.128194273  | 0.0775006 | 1.6541069 | 0.098106 | 0.59749  |
| sptlc2a         | 239.4118173 | -0.053120885 | 0.1512423 | -0.35123  | 0.725416 | 0.970402 |
| zgc:91890       | 169.6386002 | 0.030988066  | 0.1637731 | 0.1892134 | 0.849926 | 0.985174 |
| eya2            | 666.4012831 | -0.126672271 | 0.0948489 | -1.335516 | 0.181708 | 0.743756 |
| castor2         | 1088.439911 | -0.125367649 | 0.0890671 | -1.407564 | 0.15926  | 0.710139 |
| hspa4b          | 2951.240023 | -0.041018759 | 0.0816948 | -0.502097 | 0.615599 | 0.95688  |
| cplx21          | 2382.458765 | 0.114542435  | 0.0719345 | 1.5923165 | 0.111314 | 0.627048 |
| smc3            | 3386.314178 | -0.069431421 | 0.0720307 | -0.963915 | 0.335089 | 0.875906 |
| ak7a            | 85.32395897 | -0.040360681 | 0.2153335 | -0.187433 | 0.851321 | 0.985174 |
| smarcd1         | 1949.878345 | -0.030890028 | 0.0755793 | -0.40871  | 0.682753 | 0.965476 |
| erp44           | 1259.169513 | -0.078312089 | 0.0786202 | -0.996081 | 0.319211 | 0.867746 |
| barhl1b         | 360.8793247 | 0.263535481  | 0.1320733 | 1.9953733 | 0.046002 | 0.421189 |
| podn            | 4.90162669  | 0.193126438  | 0.9311158 | 0.207414  | 0.835687 | NA       |
| tmem59          | 1147.964473 | 0.017419051  | 0.0880821 | 0.1977594 | 0.843233 | 0.985174 |
| sgsm3           | 841.9225445 | 0.004074293  | 0.0910922 | 0.0447272 | 0.964325 | 0.995927 |
| snx12           | 2139.069733 | 0.014736286  | 0.0775136 | 0.1901123 | 0.849221 | 0.985174 |
| arpc5b          | 807.5534515 | -0.026530729 | 0.093583  | -0.2835   | 0.776794 | 0.975826 |
| fat1b           | 284.3042424 | 0.106440048  | 0.1356531 | 0.784649  | 0.432659 | 0.91326  |
| DHDH            | 229.0668941 | -0.103989523 | 0.1450502 | -0.716921 | 0.473423 | 0.924993 |
| si:ch73-160i9.2 | 1.805520255 | 0.249416744  | 1.3925451 | 0.1791086 | 0.857852 | NA       |
| myl7            | 728.4431724 | 0.354402734  | 0.0992773 | 3.5698252 | 0.000357 | 0.013599 |
| cd82a           | 1931.650052 | 0.071690124  | 0.0782229 | 0.9164847 | 0.359413 | 0.884844 |
| kdm4ab          | 757.3273288 | -0.234881302 | 0.0991332 | -2.36935  | 0.017819 | 0.247181 |
| mob3a           | 470.2552941 | -0.092911614 | 0.1136553 | -0.817486 | 0.413651 | 0.905864 |
| ing1            | 246.3058337 | 0.069732008  | 0.1391128 | 0.5012622 | 0.616187 | 0.95688  |
| parvb           | 551.3540165 | 0.022703309  | 0.0986954 | 0.2300341 | 0.818065 | 0.981594 |
| hel.2           | 7.26236758  | -0.670590954 | 0.7764834 | -0.863626 | 0.387794 | NA       |
| klhl140b        | 74.81404064 | 0.159320998  | 0.2757185 | 0.5778394 | 0.563373 | 0.948739 |
| tpm4b           | 693.5199076 | -0.089076198 | 0.1048    | -0.849964 | 0.395345 | 0.899293 |
| plk2b           | 489.4747732 | -0.071347202 | 0.1079415 | -0.66098  | 0.508625 | 0.935807 |
| ankefla         | 17.80394716 | 0.04190542   | 0.4561301 | 0.0918716 | 0.9268   | 0.992702 |
| tram1           | 598.539518  | -0.118131163 | 0.1033011 | -1.143562 | 0.252805 | 0.822335 |
| fam185a         | 76.93548985 | 0.228007528  | 0.2438533 | 0.9350194 | 0.349778 | 0.880195 |
| rab4a           | 233.2313212 | 0.092100839  | 0.1507147 | 0.611094  | 0.541137 | 0.944921 |
| haus5           | 149.1100875 | 0.061191338  | 0.1651974 | 0.3704135 | 0.711074 | 0.968985 |
| sh3bp51a        | 322.0070132 | 0.040381599  | 0.1203812 | 0.3354478 | 0.737287 | 0.972535 |
| lritla          | 313.8149077 | 0.216831151  | 0.1280016 | 1.693972  | 0.090271 | 0.575253 |
| rpsa            | 27996.68312 | -0.268888516 | 0.075223  | -3.574554 | 0.000351 | 0.013418 |
| slainla         | 205.3771729 | -0.156978092 | 0.1488461 | -1.054634 | 0.291593 | 0.847361 |
| 12-Sep          | 984.2668567 | -0.07917366  | 0.0879618 | -0.900092 | 0.368071 | 0.887482 |
| vps9d1          | 259.4359926 | 0.227697366  | 0.1351011 | 1.6853855 | 0.091914 | 0.57849  |
| fam120c         | 1184.988438 | 0.069779101  | 0.0872142 | 0.8000886 | 0.423659 | 0.907829 |
| abo             | 7.632769443 | -1.204982094 | 0.7241508 | -1.663993 | 0.096114 | NA       |
| camsapla        | 673.3237381 | 0.152108204  | 0.1021837 | 1.4885759 | 0.136599 | 0.673303 |
| CTBP1           | 1000.196774 | 0.066879812  | 0.0940674 | 0.7109773 | 0.477098 | 0.926857 |
| mrpl24          | 455.7398224 | -0.147495853 | 0.1057389 | -1.394907 | 0.163044 | 0.717888 |
| arglula         | 2445.482259 | -0.053519162 | 0.0899026 | -0.595302 | 0.551642 | 0.947138 |
| mogat2          | 154.0895744 | -0.660167674 | 0.1769617 | -3.730569 | 0.000191 | 0.00823  |

|                |             |              |           |           |          |          |
|----------------|-------------|--------------|-----------|-----------|----------|----------|
| rpl7a          | 33032.31291 | -0.365929454 | 0.080024  | -4.572745 | 4.81E-06 | 0.000387 |
| sptan1         | 8673.788949 | -0.015366109 | 0.0815253 | -0.188483 | 0.850498 | 0.985174 |
| nln            | 162.3425204 | 0.127778673  | 0.1644113 | 0.7771889 | 0.437047 | 0.914408 |
| sema3aa        | 1901.706922 | 0.103090478  | 0.073224  | 1.407878  | 0.159167 | 0.710139 |
| gsr            | 558.1156366 | -0.234715055 | 0.1167037 | -2.011205 | 0.044304 | 0.413823 |
| culla          | 1270.037605 | 0.120691126  | 0.0784313 | 1.5388138 | 0.12385  | 0.652372 |
| fancf          | 33.78491667 | 0.609178712  | 0.3349632 | 1.8186436 | 0.068966 | 0.513259 |
| rhag           | 2725.960324 | 0.096873249  | 0.0748874 | 1.2935854 | 0.195809 | 0.76113  |
| dhrrs9         | 173.5816326 | 0.009094221  | 0.1812095 | 0.0501862 | 0.959974 | 0.995388 |
| zbtb39         | 223.4707955 | -0.136432367 | 0.1417262 | -0.962647 | 0.335724 | 0.876088 |
| rasd1          | 290.4980086 | -0.02506889  | 0.1355348 | -0.184963 | 0.853258 | 0.985174 |
| GNB4           | 211.340057  | 0.063585751  | 0.1526293 | 0.4166025 | 0.676969 | 0.965257 |
| larsb          | 981.8425421 | -0.008139962 | 0.0880713 | -0.092425 | 0.926361 | 0.992702 |
| tfdpla         | 909.5974453 | -0.029865557 | 0.0870619 | -0.343038 | 0.73157  | 0.971557 |
| cb1n8          | 3.648571093 | -0.520663666 | 0.9957019 | -0.522911 | 0.601036 | NA       |
| znf687b        | 980.3539831 | -0.171301061 | 0.0873201 | -1.96176  | 0.04979  | 0.437386 |
| ints7          | 229.6532663 | -0.167722924 | 0.1444803 | -1.160871 | 0.245694 | 0.815435 |
| midlip1b       | 895.8589671 | 0.28704953   | 0.096964  | 2.9603734 | 0.003073 | 0.07338  |
| phactr3b       | 494.7307268 | -0.001998825 | 0.1113778 | -0.017946 | 0.985682 | 0.996944 |
| dusp5          | 190.8749616 | 0.163945781  | 0.1625749 | 1.0084321 | 0.313247 | 0.865104 |
| fbxo30b        | 66.84251284 | 0.114252915  | 0.2581108 | 0.4426507 | 0.658018 | 0.962545 |
| rab39ba        | 240.4166948 | 0.111889843  | 0.1344116 | 0.8324418 | 0.40516  | 0.901305 |
| fer116         | 45.9090626  | 0.184738075  | 0.3069892 | 0.601774  | 0.547325 | 0.945526 |
| prpsap2        | 784.2735642 | 0.042178596  | 0.0994879 | 0.4239571 | 0.671597 | 0.965257 |
| plxna4         | 1730.611131 | 0.080993605  | 0.0750107 | 1.0797605 | 0.280249 | 0.843423 |
| ndufb4         | 0.988894344 | -1.041944082 | 1.9792901 | -0.526423 | 0.598594 | NA       |
| hes6           | 388.8056522 | 0.053929214  | 0.1152962 | 0.4677448 | 0.639967 | 0.959994 |
| adprh12        | 363.2672793 | 0.052998651  | 0.1181728 | 0.4484842 | 0.653804 | 0.961168 |
| uxt            | 74.31517632 | -0.303337889 | 0.2253022 | -1.34636  | 0.178186 | 0.73929  |
| gpcla          | 65.14056464 | 0.143045777  | 0.2494537 | 0.5734361 | 0.566349 | 0.948739 |
| chrnd          | 354.3099548 | 0.278297186  | 0.1249827 | 2.2266851 | 0.025968 | 0.311101 |
| mark3a         | 1254.542634 | 0.025207265  | 0.092168  | 0.2734926 | 0.784475 | 0.97627  |
| sparc          | 20430.65821 | 0.273563895  | 0.086139  | 3.175841  | 0.001494 | 0.042508 |
| coa7           | 183.8389717 | -0.123153901 | 0.1514174 | -0.813341 | 0.416023 | 0.906237 |
| fabpla         |             | 0 NA         | NA        | NA        | NA       | NA       |
| sec23b         | 1527.92959  | 0.280774091  | 0.078898  | 3.5586964 | 0.000373 | 0.014011 |
| ptbpla         | 1330.170217 | -0.105715463 | 0.0814396 | -1.298084 | 0.194259 | 0.758049 |
| mbip           | 171.7500145 | 0.08957      | 0.1555089 | 0.5759798 | 0.564629 | 0.948739 |
| krt99          | 48.20882846 | -0.256536624 | 0.2843676 | -0.90213  | 0.366988 | 0.887458 |
| tgfb3          | 969.6699513 | 0.106421982  | 0.0952718 | 1.1170357 | 0.263979 | 0.830245 |
| flt1           | 173.9086123 | -0.056815929 | 0.1621296 | -0.350435 | 0.726012 | 0.970402 |
| cdc42bpb       | 1966.517578 | 0.009992898  | 0.0870516 | 0.1147928 | 0.908609 | 0.990702 |
| stat5a         | 17.5841477  | -0.161092518 | 0.4635248 | -0.347538 | 0.728187 | 0.970402 |
| rer gla        | 90.24090527 | -0.09231519  | 0.2156692 | -0.428041 | 0.668621 | 0.96478  |
| psma6a         | 1013.435076 | 0.020960376  | 0.0851565 | 0.2461395 | 0.805574 | 0.979893 |
| atp5fld        | 3670.593658 | 0.106237335  | 0.0805598 | 1.3187392 | 0.187256 | 0.751302 |
| zgc:63470      | 229.8528167 | -0.217259749 | 0.1394165 | -1.55835  | 0.11915  | 0.64321  |
| gadd45ga       | 692.3118008 | -0.262352126 | 0.097934  | -2.678868 | 0.007387 | 0.13563  |
| kcnj2a         | 94.93105025 | 0.326612704  | 0.2206678 | 1.4801101 | 0.138844 | 0.677395 |
| etnk1          | 1200.581453 | -0.028122069 | 0.0862413 | -0.326086 | 0.744359 | 0.974094 |
| trioa          | 401.6834489 | -0.122332824 | 0.1154344 | -1.059761 | 0.289253 | 0.845979 |
| rnf13          | 751.742352  | 0.160862842  | 0.0928005 | 1.7334268 | 0.08302  | 0.555556 |
| CABZ01086041.1 | 8.590758203 | -0.007820484 | 0.6479569 | -0.012069 | 0.99037  | NA       |
| ssr4           | 1794.223144 | -0.046055948 | 0.0869402 | -0.529743 | 0.59629  | 0.954499 |

|            |             |              |           |           |          |          |
|------------|-------------|--------------|-----------|-----------|----------|----------|
| pcsk2      | 181.9512481 | -0.030158108 | 0.1547942 | -0.194827 | 0.845528 | 0.985174 |
| tfe3b      | 7.235474989 | -0.139899784 | 0.7014302 | -0.199449 | 0.841911 | NA       |
| elf2a      | 427.9342595 | 0.159066121  | 0.112835  | 1.4097228 | 0.158622 | 0.709303 |
| zdhhc7     | 57.03976238 | -0.238311932 | 0.27464   | -0.867725 | 0.385545 | 0.89551  |
| tmx1       | 294.8620832 | -0.094176925 | 0.1289541 | -0.730314 | 0.465199 | 0.923671 |
| shbg       | 160.4189173 | 0.348681765  | 0.1705122 | 2.0449079 | 0.040864 | 0.394957 |
| esd        | 650.485943  | -0.02533141  | 0.1022107 | -0.247835 | 0.804262 | 0.979643 |
| cry5       | 748.1382754 | 0.395491807  | 0.1139523 | 3.4706787 | 0.000519 | 0.018364 |
| pcnx3      | 59.17729481 | 0.168976097  | 0.2523925 | 0.6694972 | 0.503178 | 0.935304 |
| zgc:103759 | 28.46230871 | 0.046157581  | 0.3605085 | 0.1280347 | 0.898122 | 0.990121 |
| mcm5       | 1044.40971  | 0.056210634  | 0.086752  | 0.647946  | 0.51702  | 0.938543 |
| sp7        | 162.7904563 | -0.349906347 | 0.1784715 | -1.960573 | 0.049929 | 0.437835 |
| mpx        | 241.0155322 | -0.165992885 | 0.3877693 | -0.428071 | 0.668599 | 0.96478  |
| tbcelb     | 99.61653332 | 0.153217336  | 0.2037063 | 0.7521482 | 0.451962 | 0.918761 |
| agfg1b     | 381.5473036 | 0.035410986  | 0.1225606 | 0.2889264 | 0.772638 | 0.975687 |
| parp1      | 1450.081419 | -0.021720666 | 0.0814767 | -0.266587 | 0.789787 | 0.977238 |
| hdgf12     | 800.9404482 | 0.077638117  | 0.0955969 | 0.8121406 | 0.416711 | 0.906237 |
| fads2      | 273.1655924 | -0.240721682 | 0.1313415 | -1.832792 | 0.066834 | 0.505573 |
| gpt21      | 1497.959694 | 0.014762223  | 0.0785172 | 0.1880125 | 0.850867 | 0.985174 |
| cds1       | 159.8233776 | -0.213925113 | 0.1739614 | -1.229728 | 0.218799 | 0.785734 |
| clcn7      | 467.0769914 | 0.080262021  | 0.1162819 | 0.6902367 | 0.490045 | 0.931926 |
| asap2b     | 558.2566477 | 0.088131168  | 0.1116927 | 0.7890502 | 0.430083 | 0.911615 |
| neurod1    | 2844.921881 | -0.184378506 | 0.0762015 | -2.419619 | 0.015537 | 0.228768 |
| taf7       | 841.5024769 | 0.042150938  | 0.0923891 | 0.4562326 | 0.648223 | 0.960708 |
| ldb2a      | 846.6856691 | -0.044267716 | 0.0898659 | -0.492598 | 0.622297 | 0.957354 |
| usol       | 1161.59265  | -0.110578965 | 0.0811502 | -1.362645 | 0.172994 | 0.732033 |
| gstk2      | 0.63196552  | 0.01215153   | 2.613686  | 0.0046492 | 0.99629  | NA       |
| chico      | 27.27462155 | 0.192415897  | 0.4145867 | 0.464115  | 0.642565 | 0.959994 |
| igl4v9     |             | 0 NA         | NA        | NA        | NA       | NA       |
| senp8      | 46.06123513 | -0.199513164 | 0.2967735 | -0.672274 | 0.501409 | 0.934613 |
| nrd1a      | 1339.440092 | -0.000297281 | 0.0829269 | -0.003585 | 0.99714  | 0.99906  |
| coll2a1b   | 1293.076045 | 0.361727198  | 0.0795838 | 4.5452348 | 5.49E-06 | 0.000429 |
| ip6k2b     | 1886.203496 | -0.047468379 | 0.079272  | -0.598804 | 0.549304 | 0.946312 |
| jade3      | 465.8897208 | 0.155367452  | 0.1071429 | 1.4500951 | 0.147032 | 0.693893 |
| yif1a      | 555.6767021 | 0.110026317  | 0.1033645 | 1.0644501 | 0.287125 | 0.845979 |
| ldhba      | 12071.77078 | -0.091250115 | 0.0954135 | -0.956365 | 0.338888 | 0.87745  |
| twist3     | 125.1780105 | -0.227469416 | 0.1810712 | -1.256243 | 0.209028 | 0.776073 |
| zgc:162239 | 0.84841062  | -0.578696897 | 2.0997862 | -0.275598 | 0.782857 | NA       |
| pou2f2a    | 162.8260641 | -0.206813263 | 0.1722889 | -1.200387 | 0.229989 | 0.797721 |
| rxfp2b     | 13.29907339 | 0.094582762  | 0.5333929 | 0.1773229 | 0.859255 | 0.985773 |
| fgl2b      | 17.83727711 | 0.695148905  | 0.4697193 | 1.4799239 | 0.138894 | 0.677395 |
| colq       | 182.2612422 | 0.432950744  | 0.1526435 | 2.8363528 | 0.004563 | 0.096402 |
| clcn5a     | 925.4056633 | 0.220771674  | 0.09021   | 2.4473075 | 0.014393 | 0.218087 |
| aldocb     | 12180.50308 | 0.012848355  | 0.0674034 | 0.1906188 | 0.848824 | 0.985174 |
| zar1       | 6.310033961 | 0.605374281  | 0.7572477 | 0.7994403 | 0.424035 | NA       |
| spout1     | 111.4996196 | -0.024103555 | 0.1899038 | -0.126925 | 0.899    | 0.990121 |
| rhousa     | 82.69535541 | 0.213260392  | 0.221925  | 0.9609572 | 0.336574 | 0.876088 |
| oatx       | 78.90598311 | 0.116756246  | 0.2231176 | 0.5232948 | 0.600769 | 0.956045 |
| metapld    | 83.90752053 | -0.213328917 | 0.2140921 | -0.996435 | 0.319039 | 0.867746 |
| pbx2       | 580.3344378 | 0.101826832  | 0.1023906 | 0.9944939 | 0.319982 | 0.868153 |
| celsr2     | 646.8020336 | -0.018487613 | 0.1195726 | -0.154614 | 0.877126 | 0.987881 |
| bmpr1aa    | 1064.521766 | -0.031681791 | 0.0836199 | -0.378879 | 0.704778 | 0.968134 |
| mtch2      | 1785.86402  | 0.028434548  | 0.0737531 | 0.385537  | 0.69984  | 0.967998 |
| ccndx      | 9.795902477 | 0.640519034  | 0.6039782 | 1.0605002 | 0.288917 | NA       |



|                   |             |              |           |           |          |          |
|-------------------|-------------|--------------|-----------|-----------|----------|----------|
| tlr4ba            | 5.49699546  | -0.432993302 | 0.8031657 | -0.539108 | 0.589812 | NA       |
| dctn1a            | 122.3095449 | -0.110035743 | 0.1787936 | -0.615435 | 0.538268 | 0.943336 |
| rfng              | 209.1269051 | -0.200091848 | 0.1540556 | -1.298829 | 0.194003 | 0.75784  |
| hsd3b2            | 7.405768389 | 0.821271326  | 0.7248611 | 1.1330051 | 0.257212 | NA       |
| romla             | 963.7503401 | 0.126439426  | 0.1039628 | 1.2161986 | 0.223909 | 0.790781 |
| kcnn3             | 400.5460393 | 0.096404468  | 0.1151872 | 0.8369376 | 0.402628 | 0.90084  |
| acp5a             | 19.43422855 | -0.423053247 | 0.4967568 | -0.851631 | 0.394419 | 0.898841 |
| zgc:158803        | 929.78237   | -0.286735053 | 0.0994425 | -2.883424 | 0.003934 | 0.086142 |
| si:ch1073-280e3.1 | 67.65840622 | 0.304919475  | 0.2417424 | 1.2613406 | 0.207186 | 0.775175 |
| zhx3              | 607.7493289 | -0.2718821   | 0.1024376 | -2.654125 | 0.007951 | 0.143459 |
| rps6              | 19456.83466 | -0.366777638 | 0.0801061 | -4.578646 | 4.68E-06 | 0.000379 |
| imp2a             | 99.43559107 | 0.105316075  | 0.2236163 | 0.4709678 | 0.637664 | 0.958872 |
| prmt3             | 260.5853139 | 0.125938614  | 0.1450342 | 0.8683371 | 0.38521  | 0.89551  |
| grich1            | 379.0891349 | -0.00318827  | 0.1156969 | -0.027557 | 0.978015 | 0.996762 |
| evpla             | 417.5932634 | -0.021022119 | 0.1181896 | -0.177868 | 0.858827 | 0.985773 |
| nfe2l3            | 774.1251476 | 0.067106315  | 0.0907434 | 0.7395175 | 0.459593 | 0.921978 |
| fnla              | 2145.454338 | 0.071587141  | 0.07456   | 0.9601285 | 0.336991 | 0.876088 |
| edrf1             | 253.5682127 | -0.035692115 | 0.1326183 | -0.269134 | 0.787826 | 0.976596 |
| nkx2.1            | 151.9990092 | 0.062869628  | 0.1721841 | 0.3651302 | 0.715014 | 0.96909  |
| ugdh              | 966.2826869 | -0.241193768 | 0.1049885 | -2.297335 | 0.0216   | 0.278249 |
| cnot3b            | 606.628728  | -0.065098353 | 0.101462  | -0.641603 | 0.521131 | 0.939056 |
| pdlim1            | 541.8459301 | 0.023431596  | 0.1066457 | 0.2197144 | 0.826094 | 0.982196 |
| atplalb           | 8438.455379 | 0.140424539  | 0.0656917 | 2.1376303 | 0.032547 | 0.351491 |
| fgl2a             | 50.85288554 | 0.040367375  | 0.2770379 | 0.1457107 | 0.88415  | 0.988784 |
| hsph1             | 57.81554411 | 0.100406929  | 0.2545293 | 0.3944808 | 0.693226 | 0.96736  |
| rbks              | 74.31317012 | -0.349729708 | 0.2363267 | -1.479857 | 0.138911 | 0.677395 |
| bsg               | 11576.90562 | 0.031010234  | 0.0617781 | 0.5019613 | 0.615695 | 0.95688  |
| gpat4             | 966.4345127 | 0.082331111  | 0.0858995 | 0.9584589 | 0.337831 | 0.876447 |
| rcvrn2            | 5406.057306 | 0.229614668  | 0.0789344 | 2.9089292 | 0.003627 | 0.081493 |
| dsccl             | 90.09868804 | -0.022026913 | 0.2140098 | -0.102925 | 0.918023 | 0.991623 |
| epb4l13b          | 1109.091348 | 0.012541179  | 0.100412  | 0.1248972 | 0.900605 | 0.990121 |
| lft1              | 1.005556699 | -1.067025392 | 1.9900474 | -0.536181 | 0.591834 | NA       |
| cmpk              | 1744.337805 | -0.123371478 | 0.0741044 | -1.664833 | 0.095946 | 0.589937 |
| tall              | 561.9403129 | -0.024682879 | 0.1015167 | -0.243141 | 0.807896 | 0.980642 |
| slc5a11           | 47.34379437 | -0.19069827  | 0.2838369 | -0.671859 | 0.501674 | 0.934712 |
| sgta              | 1415.617543 | 0.004045595  | 0.0821177 | 0.0492658 | 0.960707 | 0.995547 |
| ptprdb            | 118.701654  | 0.321729007  | 0.1832037 | 1.7561275 | 0.079067 | 0.547489 |
| serpinhlb         | 861.0166338 | 0.500923336  | 0.1026768 | 4.8786431 | 1.07E-06 | 0.000106 |
| carf              | 293.8989871 | -0.007466709 | 0.1419882 | -0.052587 | 0.958061 | 0.99467  |
| sec62             | 1048.616893 | 0.113508719  | 0.0848941 | 1.3370626 | 0.181202 | 0.742302 |
| znf513a           | 395.8965648 | 0.13314702   | 0.1200392 | 1.109196  | 0.267346 | 0.833191 |
| dopla             | 839.8420478 | 0.081316689  | 0.0910097 | 0.8934951 | 0.371592 | 0.892003 |
| sfxn1             | 30.91945387 | 0.178521661  | 0.3541914 | 0.5040259 | 0.614243 | 0.95688  |
| smarcd3b          | 948.2250159 | 0.050021632  | 0.0861351 | 0.5807346 | 0.561419 | 0.948728 |
| stk38a            | 91.02897293 | 0.014607792  | 0.2215775 | 0.0659263 | 0.947436 | 0.99381  |
| idil              | 1135.899253 | 0.011151824  | 0.0914651 | 0.1219243 | 0.902959 | 0.990121 |
| grhprb            | 1227.549095 | -0.059349999 | 0.2183757 | -0.271779 | 0.785792 | 0.97627  |
| cabpla            | 55.21165707 | 0.410145833  | 0.2679953 | 1.5304217 | 0.125912 | 0.654803 |
| bmp4              | 249.8972225 | -0.006870671 | 0.1454382 | -0.047241 | 0.962321 | 0.995907 |
| slc30a7           | 512.2459294 | -0.099882175 | 0.1041573 | -0.958955 | 0.337582 | 0.876395 |
| sh3bp4a           | 524.8381734 | -0.053808619 | 0.1011892 | -0.531762 | 0.594891 | 0.954434 |
| rad23aa           | 420.979026  | -0.070769622 | 0.1173953 | -0.602832 | 0.546621 | 0.945526 |
| colla2            | 21699.74887 | 0.301877098  | 0.1039983 | 2.9027108 | 0.003699 | 0.082473 |
| vcp               | 9072.735269 | 0.019451993  | 0.0669602 | 0.2905009 | 0.771433 | 0.975687 |

|                   |             |              |           |           |          |          |
|-------------------|-------------|--------------|-----------|-----------|----------|----------|
| bmp2k             | 486.3308087 | -0.012380752 | 0.1129999 | -0.109564 | 0.912755 | 0.991119 |
| mrps33            | 290.5399926 | 0.044727335  | 0.1314814 | 0.34018   | 0.733721 | 0.971993 |
| fam151b           | 72.12798523 | 0.197332102  | 0.2557284 | 0.7716473 | 0.440323 | 0.916329 |
| cps1              | 189.9074597 | -0.279795869 | 0.1559684 | -1.793927 | 0.072825 | 0.526522 |
| cldn11a           | 446.3078022 | 0.103779356  | 0.1228444 | 0.8448033 | 0.398221 | 0.899933 |
| vps35l            | 636.213187  | -0.107478766 | 0.0966902 | -1.111578 | 0.26632  | 0.83247  |
| cnot8             | 625.881083  | -0.059460486 | 0.1029386 | -0.577631 | 0.563513 | 0.948739 |
| ahrla             | 8.395699377 | -0.819000684 | 0.7109602 | -1.151964 | 0.249336 | NA       |
| nkdl              | 728.5661722 | 0.040348955  | 0.092402  | 0.4366674 | 0.662353 | 0.964665 |
| aox6              | 139.7546181 | 0.081325352  | 0.1751525 | 0.4643118 | 0.642424 | 0.959994 |
| bmpr2b            | 67.44546133 | -0.108208876 | 0.2537371 | -0.426461 | 0.669772 | 0.965223 |
| thbs4b            | 2239.139155 | 0.337750274  | 0.0797938 | 4.2327894 | 2.31E-05 | 0.001417 |
| nol10             | 510.1709418 | 0.0492909    | 0.1045917 | 0.4712696 | 0.637448 | 0.958872 |
| neil3             | 41.65353552 | -0.120804062 | 0.3154298 | -0.382982 | 0.701733 | 0.968134 |
| ekl               | 300.8730633 | 0.014031572  | 0.1335803 | 0.1050422 | 0.916342 | 0.991314 |
| tg                | 781.8880618 | 0.218916818  | 0.1226294 | 1.7851906 | 0.07423  | 0.530917 |
| slc33a1           | 266.0263689 | 0.078895688  | 0.1351529 | 0.5837513 | 0.559388 | 0.948478 |
| nuak1a            | 244.6564718 | 0.023293663  | 0.132837  | 0.1753552 | 0.860801 | 0.985773 |
| psmc2             | 2033.55498  | -0.012228369 | 0.0749271 | -0.163204 | 0.870358 | 0.987421 |
| kctd16b           | 55.74847599 | 0.047750385  | 0.2834583 | 0.1684564 | 0.866224 | 0.986673 |
| usp2a             | 1194.136615 | 0.214505096  | 0.0823495 | 2.6048134 | 0.009192 | 0.160717 |
| slc20a1a          | 504.6791031 | 0.281986049  | 0.1210063 | 2.3303415 | 0.019788 | 0.265102 |
| endou2            | 531.9326915 | -0.379577292 | 0.1133948 | -3.347395 | 0.000816 | 0.026229 |
| coq8aa            | 550.2667611 | -0.315063667 | 0.1024157 | -3.076322 | 0.002096 | 0.055328 |
| fnbp11            | 729.4891917 | -0.090410223 | 0.0939327 | -0.9625   | 0.335798 | 0.876088 |
| jdp2b             | 146.6829836 | 0.192149484  | 0.2232071 | 0.8608575 | 0.389317 | 0.896407 |
| sipal11           | 688.4969423 | 0.024509534  | 0.1020559 | 0.2401579 | 0.810208 | 0.980841 |
| ptges             | 89.93529103 | -0.065316921 | 0.2074816 | -0.314808 | 0.752907 | 0.97481  |
| pah               | 538.4110039 | 0.073892372  | 0.1139178 | 0.6486465 | 0.516567 | 0.938543 |
| acox1             | 11.52221415 | -0.193720364 | 0.5564355 | -0.348145 | 0.727731 | 0.970402 |
| spag6             | 51.45062658 | 0.063176172  | 0.2835666 | 0.2227913 | 0.823698 | 0.982196 |
| efnb2a            | 1649.17957  | -0.015396233 | 0.0818905 | -0.18801  | 0.850869 | 0.985174 |
| zbtb22a           | 118.3020484 | -0.119014631 | 0.2023207 | -0.588247 | 0.556366 | 0.947918 |
| noval             | 614.0753952 | 0.058244662  | 0.1012166 | 0.5754457 | 0.56499  | 0.948739 |
| GCA               | 910.7603365 | -0.059549085 | 0.1048625 | -0.567878 | 0.570118 | 0.948983 |
| ppefl             | 10.13662262 | 0.237141342  | 0.6121672 | 0.38738   | 0.698475 | NA       |
| rpl5a             | 17181.36955 | -0.168691006 | 0.0891718 | -1.891754 | 0.058524 | 0.473924 |
| cdc73             | 666.6613898 | -0.165828206 | 0.1029811 | -1.610278 | 0.107337 | 0.617344 |
| nf2a              | 72.50640967 | 0.187806525  | 0.2442452 | 0.7689261 | 0.441937 | 0.916336 |
| slclal            | 576.3272121 | -0.276115826 | 0.1085819 | -2.542926 | 0.010993 | 0.181902 |
| cpsf4             | 352.0012493 | -0.053972146 | 0.1229348 | -0.439031 | 0.660639 | 0.963881 |
| amfra             | 1084.466395 | 0.056654247  | 0.0827996 | 0.6842334 | 0.493828 | 0.931926 |
| dld               | 316.858357  | -0.199868745 | 0.1207911 | -1.654664 | 0.097993 | 0.59749  |
| si:ch211-225b10.3 | 51.05495424 | 0.202402177  | 0.279352  | 0.7245418 | 0.468733 | 0.924328 |
| usf2              | 1196.767698 | 0.078766793  | 0.0843646 | 0.9336473 | 0.350486 | 0.880195 |
| mapre3a           | 116.9987514 | 0.033303864  | 0.1886331 | 0.1765536 | 0.859859 | 0.985773 |
| EIF6              | 771.2297354 | -0.046041555 | 0.0984726 | -0.467557 | 0.640101 | 0.959994 |
| sept9a            | 977.8343745 | -0.061982664 | 0.0872228 | -0.710625 | 0.477317 | 0.926857 |
| mclr              | 18.90125124 | 0.811858552  | 0.4767982 | 1.7027298 | 0.088619 | 0.569498 |
| lpin1             | 809.5786767 | 0.014774849  | 0.1062605 | 0.1390437 | 0.889416 | 0.989291 |
| icmt              | 427.3113119 | 0.08396929   | 0.1148513 | 0.7311134 | 0.46471  | 0.923535 |
| fermt2            | 25.24797809 | 0.222556746  | 0.3941661 | 0.5646268 | 0.572328 | 0.949494 |
| rhoj              | 27.60034037 | -0.523805333 | 0.3660063 | -1.431138 | 0.152391 | 0.701601 |
| btbd10b           | 886.1939549 | -0.048665506 | 0.0900324 | -0.540533 | 0.588829 | 0.953345 |

|                  |             |              |           |           |          |          |
|------------------|-------------|--------------|-----------|-----------|----------|----------|
| ewsrla           | 7839.529174 | 0.006127306  | 0.0680918 | 0.0899859 | 0.928298 | 0.992702 |
| rab2a            | 4498.161512 | 0.035880739  | 0.0671972 | 0.5339622 | 0.593368 | 0.954434 |
| angpt16          | 38.55077196 | -0.024808701 | 0.3203413 | -0.077445 | 0.93827  | 0.99279  |
| si:dkeyp-120h9.1 | 359.5784824 | 0.132039606  | 0.1254851 | 1.0522333 | 0.292693 | 0.848607 |
| efcab7           | 223.2863314 | -0.249098495 | 0.1416921 | -1.758026 | 0.078743 | 0.546914 |
| si:ch211-278j3.3 | 381.3990272 | 0.286166312  | 0.1156563 | 2.4742823 | 0.01335  | 0.207377 |
| pif1             | 89.95875323 | 0.063888353  | 0.2079745 | 0.3071933 | 0.758696 | 0.975374 |
| TAF3             | 301.6120377 | 0.082786827  | 0.1288777 | 0.6423672 | 0.520635 | 0.939056 |
| btg2             | 1390.670568 | 0.241689887  | 0.1149632 | 2.1023243 | 0.035525 | 0.367016 |
| os9              | 685.345171  | 0.00073767   | 0.0972403 | 0.007586  | 0.993947 | 0.998694 |
| cnih1            | 1380.548002 | 0.12493978   | 0.0791297 | 1.5789236 | 0.114354 | 0.633752 |
| tyk2             | 132.7308419 | -0.497800028 | 0.1864676 | -2.669633 | 0.007593 | 0.138645 |
| plekha6          | 1253.137211 | -0.112012269 | 0.0816461 | -1.371925 | 0.170087 | 0.727199 |
| nkx2.9           | 7.400077252 | 1.13043017   | 0.7267868 | 1.5553807 | 0.119855 | NA       |
| ptpn1a           | 822.2346163 | -0.097014597 | 0.0912279 | -1.063431 | 0.287587 | 0.845979 |
| clasp2           | 4010.773182 | 0.003512796  | 0.0691482 | 0.050801  | 0.959484 | 0.995187 |
| lmx1a            | 10.73004729 | -0.656043543 | 0.5956094 | -1.101466 | 0.270694 | NA       |
| snrnp25          | 96.77149344 | -0.284639269 | 0.2561942 | -1.111029 | 0.266556 | 0.832634 |
| fbplb            | 890.478417  | -0.011861912 | 0.0893149 | -0.13281  | 0.894344 | 0.989689 |
| g6pc3            | 99.60531399 | 0.170979878  | 0.2040457 | 0.8379491 | 0.402059 | 0.90084  |
| eif4g2a          | 3905.853127 | 0.190194692  | 0.0690188 | 2.7556951 | 0.005857 | 0.115121 |
| nipsnap3a        | 180.9393473 | -0.300135167 | 0.1572253 | -1.908949 | 0.056269 | 0.465438 |
| mical2b          | 361.1450876 | -0.065645632 | 0.1165027 | -0.563469 | 0.573116 | 0.949762 |
| snx15            | 195.5338424 | -0.105657962 | 0.1464995 | -0.721217 | 0.470776 | 0.924838 |
| napab            | 721.0057521 | -0.056219496 | 0.105227  | -0.534269 | 0.593156 | 0.954434 |
| emx3             | 147.2698949 | -0.167819412 | 0.1708377 | -0.982333 | 0.325936 | 0.871896 |
| nceh1a           | 1.140109671 | 0.438235627  | 1.7543529 | 0.249799  | 0.802743 | NA       |
| snx5             | 560.5115339 | 0.098721149  | 0.1060337 | 0.9310352 | 0.351835 | 0.88081  |
| xkr6a            | 3.8268738   | 0.914323011  | 1.0801868 | 0.846449  | 0.397302 | NA       |
| tmtc4            | 440.9475403 | 0.060312361  | 0.1182291 | 0.5101312 | 0.60996  | 0.95688  |
| adil             | 242.0789127 | -0.112632194 | 0.1553924 | -0.724825 | 0.46856  | 0.924328 |
| yipf3            | 1132.336322 | 0.047739829  | 0.0885759 | 0.5389708 | 0.589907 | 0.953762 |
| cacng8a          | 489.7257403 | 0.180622805  | 0.1120481 | 1.6120108 | 0.10696  | 0.616444 |
| psmd8            | 1958.177186 | 0.274786711  | 0.0963026 | 2.8533688 | 0.004326 | 0.092876 |
| si:ch211-171h4.3 | 26.61337541 | 0.822513687  | 0.3715821 | 2.2135452 | 0.02686  | 0.315961 |
| ewsrlb           | 4178.720793 | -0.159716471 | 0.0711195 | -2.245747 | 0.02472  | 0.302486 |
| safb             | 2320.614576 | -0.020917992 | 0.0769589 | -0.271807 | 0.78577  | 0.97627  |
| map3k7           | 840.4790606 | 0.109322255  | 0.0908784 | 1.2029511 | 0.228995 | 0.796691 |
| hdhc3            | 178.797863  | -0.278577303 | 0.1747619 | -1.594039 | 0.110927 | 0.626294 |
| znrf1            | 529.9439509 | -0.049508725 | 0.1035432 | -0.478146 | 0.632547 | 0.957356 |
| nono             | 2607.457145 | 0.027209458  | 0.0754911 | 0.3604325 | 0.718524 | 0.96909  |
| lta              | 0.982922306 | 1.012515237  | 1.9057885 | 0.5312842 | 0.595222 | NA       |
| arhgap17a        | 70.02410173 | -0.17290078  | 0.2330517 | -0.741899 | 0.458149 | 0.921978 |
| lgila            | 869.6440032 | -0.043668248 | 0.087789  | -0.497423 | 0.618891 | 0.957354 |
| znf330           | 453.5463092 | -0.104523394 | 0.1100664 | -0.94964  | 0.342295 | 0.878434 |
| rab7a            | 1667.205203 | -0.153158715 | 0.0862238 | -1.776293 | 0.075685 | 0.535835 |
| h3f3a            | 7421.987477 | -0.059717777 | 0.0819807 | -0.728437 | 0.466346 | 0.923908 |
| srd5a1           | 11.43522723 | -0.509519608 | 0.6034013 | -0.844412 | 0.398439 | 0.900324 |
| exoc6            | 639.9436859 | 0.013459944  | 0.0957528 | 0.1405698 | 0.88821  | 0.989291 |
| nup621           | 790.8673947 | -0.167535922 | 0.0909085 | -1.842907 | 0.065343 | 0.500198 |
| hac11            | 193.2929886 | -0.203063897 | 0.1501535 | -1.352375 | 0.176255 | 0.736614 |
| isml             | 510.3461752 | 0.233470553  | 0.104824  | 2.2272619 | 0.02593  | 0.311101 |
| rem1             | 180.5439625 | 0.25197943   | 0.1576944 | 1.5978967 | 0.110066 | 0.624518 |
| si:dkey-77f5.10  | 0.8136773   | -1.876897407 | 2.1384966 | -0.877671 | 0.380122 | NA       |

|                   |             |              |           |           |          |          |
|-------------------|-------------|--------------|-----------|-----------|----------|----------|
| ddx3xa            | 2912.447633 | 0.172989527  | 0.069708  | 2.4816316 | 0.013078 | 0.204434 |
| atp2a1            | 77184.51976 | 0.263918211  | 0.1912895 | 1.3796797 | 0.167685 | 0.724848 |
| otofb             | 397.0347806 | 0.116610299  | 0.1205376 | 0.9674184 | 0.333335 | 0.874926 |
| txlnba            | 677.9394561 | 0.360180983  | 0.0948411 | 3.7977299 | 0.000146 | 0.006653 |
| gnl3l             | 424.4884319 | 0.071033066  | 0.1201929 | 0.590992  | 0.554526 | 0.947449 |
| migal             | 324.7371805 | -0.025443254 | 0.1223079 | -0.208026 | 0.835208 | 0.984089 |
| rnf144aa          | 14.19882396 | -0.023408976 | 0.5236702 | -0.044702 | 0.964345 | 0.995927 |
| grk7a             | 2686.525099 | 0.505605881  | 0.0942345 | 5.3653999 | 8.08E-08 | 1.15E-05 |
| nfe2              | 20.48399843 | 0.152661154  | 0.4399043 | 0.3470326 | 0.728567 | 0.970604 |
| emc3              | 1556.190753 | 0.10081117   | 0.0788626 | 1.2783136 | 0.201139 | 0.766855 |
| snap25a           | 6045.341569 | 0.163267067  | 0.0732069 | 2.2302132 | 0.025733 | 0.310555 |
| tnnt2a            | 235.8497578 | -0.104248104 | 0.1604124 | -0.649876 | 0.515773 | 0.9377   |
| si:ch211-160d20.3 | 83.63130091 | -0.022603944 | 0.219673  | -0.102898 | 0.918044 | 0.991623 |
| gatd3a            | 252.8493248 | 0.027095689  | 0.1398662 | 0.1937258 | 0.846391 | 0.985174 |
| aplbl             | 1738.454047 | -0.010785094 | 0.0753758 | -0.143084 | 0.886224 | 0.988936 |
| baxa              | 509.7116622 | -0.176745054 | 0.1093444 | -1.616408 | 0.106006 | 0.615567 |
| jak1              | 1410.457412 | -0.097000013 | 0.080346  | -1.207279 | 0.227325 | 0.794617 |
| gtdc1             | 107.089662  | -0.112496588 | 0.1996941 | -0.563345 | 0.5732   | 0.949762 |
| slc7a3a           | 3737.664549 | -0.027021761 | 0.078017  | -0.346358 | 0.729074 | 0.970822 |
| trpc4apb          | 341.9176517 | -0.177942795 | 0.1298075 | -1.370821 | 0.170431 | 0.728041 |
| INSM2             | 130.5233677 | 0.131025675  | 0.2002806 | 0.6542106 | 0.512976 | 0.936253 |
| prkg1a            | 37.96355875 | 0.369570067  | 0.3142765 | 1.1759391 | 0.239619 | 0.808091 |
| dpp3              | 1235.73446  | -0.104077766 | 0.0876503 | -1.18742  | 0.235062 | 0.803894 |
| clpp              | 635.2289569 | -0.087295327 | 0.1039071 | -0.840129 | 0.400836 | 0.90084  |
| sesn1             | 2139.345297 | -0.053413952 | 0.0813589 | -0.656522 | 0.511488 | 0.936253 |
| slc9a8            | 276.8948894 | 0.065632001  | 0.1292465 | 0.5078048 | 0.61159  | 0.95688  |
| odf2b             | 91.21119911 | 0.200925471  | 0.2155184 | 0.9322891 | 0.351187 | 0.880484 |
| mdkb              | 7299.53471  | 0.032110553  | 0.0707243 | 0.4540246 | 0.649811 | 0.960708 |
| rrm2              | 645.7740664 | -1.320746883 | 0.1047104 | -12.61333 | 1.78E-36 | 1.18E-32 |
| slc25a22a         | 14.42242285 | -0.263469612 | 0.5086723 | -0.517956 | 0.604489 | 0.95651  |
| smpd4             | 319.8885075 | -0.023033298 | 0.129704  | -0.177584 | 0.85905  | 0.985773 |
| efcab6            | 31.56137925 | -0.141302048 | 0.3498578 | -0.403884 | 0.686298 | 0.966376 |
| zgc:153921        | 2.585714461 | 1.122985608  | 1.2658028 | 0.8871726 | 0.374986 | NA       |
| fga               | 3019.979018 | 0.173543319  | 0.1012613 | 1.7138176 | 0.086562 | 0.563981 |
| bdkrb1            | 22.5676768  | -0.607036712 | 0.4410624 | -1.376306 | 0.168727 | 0.725919 |
| gfilaa            | 28.40959204 | -0.120368836 | 0.3636308 | -0.331019 | 0.74063  | 0.973154 |
| caprin2           | 21.36112093 | 0.570022656  | 0.4727063 | 1.2058707 | 0.227867 | 0.794963 |
| tmem178           | 324.4877492 | 0.182264546  | 0.1269603 | 1.4356028 | 0.151115 | 0.699147 |
| elf1              | 713.8391147 | -0.138140224 | 0.0929769 | -1.485748 | 0.137346 | 0.674358 |
| arrdc2            | 2247.193105 | -0.135036691 | 0.0730888 | -1.847571 | 0.064664 | 0.497355 |
| slmapb            | 601.7204091 | 0.094476121  | 0.1017979 | 0.9280751 | 0.353369 | 0.881808 |
| tnr               | 161.3917942 | 0.335611515  | 0.1720768 | 1.9503593 | 0.051133 | 0.443542 |
| cep85l            | 377.4753002 | 0.120283879  | 0.1207394 | 0.9962274 | 0.31914  | 0.867746 |
| lama4             | 2035.145579 | 0.140595243  | 0.0763314 | 1.8419058 | 0.065489 | 0.500378 |
| sla2              | 7.695958813 | -0.481497479 | 0.7000658 | -0.687789 | 0.491586 | NA       |
| neurod6b          | 922.558794  | -0.276451469 | 0.0923525 | -2.993439 | 0.002759 | 0.067771 |
| rac3b             | 2079.957068 | 0.081723084  | 0.0843226 | 0.9691715 | 0.33246  | 0.874653 |
| necap1            | 1111.828847 | 0.080006976  | 0.0825732 | 0.9689222 | 0.332584 | 0.874653 |
| efemp2b           | 148.521814  | -0.037729034 | 0.1715725 | -0.219901 | 0.825948 | 0.982196 |
| si:ch73-177h5.2   | 1.966872208 | -1.561998219 | 1.4395963 | -1.085025 | 0.277911 | NA       |
| faimb             | 172.1157396 | 0.226197008  | 0.1618935 | 1.3971965 | 0.162354 | 0.716781 |
| srp68             | 1478.929106 | -0.042014833 | 0.083932  | -0.500582 | 0.616666 | 0.95688  |
| ift22             | 63.12462956 | -0.112249284 | 0.2566648 | -0.437338 | 0.661866 | 0.964504 |
| si:dkey-230p4.1   | 90.44209892 | -0.172980829 | 0.2079569 | -0.831811 | 0.405516 | 0.901305 |

|                  |             |              |           |           |          |          |
|------------------|-------------|--------------|-----------|-----------|----------|----------|
| mcrs1            | 570.4592097 | -0.007932684 | 0.1001499 | -0.079208 | 0.936867 | 0.992702 |
| rbm7             | 303.3147886 | 0.033273561  | 0.129279  | 0.2573779 | 0.796887 | 0.978569 |
| tnslb            | 58.86728467 | 0.017437647  | 0.26236   | 0.0664646 | 0.947008 | 0.99381  |
| atp6v0a1a        | 1742.145752 | 0.183337651  | 0.0896967 | 2.0439732 | 0.040956 | 0.395057 |
| eef1a111         | 99614.27981 | -0.256754882 | 0.0742918 | -3.456034 | 0.000548 | 0.019137 |
| galr2a           | 2.29303713  | 0.062133857  | 1.3334868 | 0.046595  | 0.962836 | NA       |
| ccdc149b         | 311.3542591 | 0.067686737  | 0.1312274 | 0.5157972 | 0.605996 | 0.956686 |
| trim25l          | 57.88481865 | -0.240280955 | 0.2569269 | -0.935212 | 0.349679 | 0.880195 |
| apoa4b.2         | 1312.626177 | 0.271035487  | 0.1251724 | 2.1652979 | 0.030365 | 0.336756 |
| ptprz1b          | 1475.071221 | 0.035758345  | 0.0773106 | 0.4625284 | 0.643702 | 0.960014 |
| nfat5a           | 24.71151977 | -0.38378858  | 0.4088227 | -0.938765 | 0.347851 | 0.880195 |
| pdk2a            | 1664.328376 | -0.198911424 | 0.0881795 | -2.255757 | 0.024086 | 0.299543 |
| gli2b            | 173.8668159 | -0.319231924 | 0.1651668 | -1.932785 | 0.053263 | 0.452412 |
| armc11           | 230.6211794 | -0.158640982 | 0.1374581 | -1.154104 | 0.248457 | 0.817939 |
| tmod4            | 1895.35347  | 0.336366094  | 0.085178  | 3.9489806 | 7.85E-05 | 0.00399  |
| L0018197.1       | 179.8352582 | -0.043847934 | 0.1827226 | -0.23997  | 0.810354 | 0.980867 |
| slc25a55a        | 2700.410282 | 0.092628186  | 0.0793714 | 1.1670222 | 0.243201 | 0.812077 |
| bag1             | 357.8206555 | 0.005462549  | 0.1249921 | 0.0437031 | 0.965141 | 0.996154 |
| cyb5r4           | 189.1696624 | 0.10726185   | 0.1493612 | 0.7181373 | 0.472673 | 0.924838 |
| gabrp            | 349.6602457 | 0.072370555  | 0.1192178 | 0.6070451 | 0.543821 | 0.945438 |
| ddx56            | 378.9656367 | 0.100640137  | 0.1154822 | 0.8714772 | 0.383494 | 0.895192 |
| myolca           | 212.0874375 | 0.245581964  | 0.1460758 | 1.6811958 | 0.092725 | 0.579684 |
| creb3l3l         | 1999.066624 | 0.099020708  | 0.0811301 | 1.2205173 | 0.222269 | 0.788551 |
| fam49ba          | 290.6391116 | 0.039680633  | 0.1352084 | 0.2934775 | 0.769157 | 0.975687 |
| ezra             | 1002.960464 | -0.506250914 | 0.0938238 | -5.395762 | 6.82E-08 | 9.85E-06 |
| auts2b           | 539.3627579 | -0.073290299 | 0.1072307 | -0.683483 | 0.494302 | 0.931926 |
| gmcl1            | 594.7120198 | 0.038546905  | 0.10404   | 0.3705009 | 0.711009 | 0.968985 |
| si:ch211-214j8.1 | 169.1895155 | -0.823951573 | 0.1914917 | -4.302805 | 1.69E-05 | 0.001088 |
| dnajb6b          | 584.821678  | 0.106152477  | 0.1019016 | 1.0417154 | 0.297544 | 0.85401  |
| pck2             | 2234.3437   | -0.022769717 | 0.0777424 | -0.292887 | 0.769609 | 0.975687 |
| pth1ra           | 2.65892339  | -1.628192357 | 1.2695507 | -1.282495 | 0.199669 | NA       |
| hgs              | 680.4160355 | -0.022863022 | 0.1056222 | -0.21646  | 0.828629 | 0.982721 |
| thap12b          | 185.4100213 | 0.04795156   | 0.15293   | 0.3135524 | 0.753861 | 0.975056 |
| ubald1b          | 651.4293723 | -0.420273306 | 0.1097836 | -3.828199 | 0.000129 | 0.006006 |
| ripor3           | 149.9912644 | 0.122501349  | 0.1780682 | 0.6879461 | 0.491487 | 0.931926 |
| slc35a3b         | 50.62716857 | -0.251458006 | 0.2887593 | -0.870822 | 0.383851 | 0.895192 |
| prickle2a        | 487.7884991 | -0.001141766 | 0.1078285 | -0.010589 | 0.991552 | 0.997679 |
| slc16a10         | 748.4121467 | -0.205750037 | 0.0940429 | -2.187832 | 0.028682 | 0.328405 |
| ctul             | 105.646918  | -0.477945501 | 0.1975538 | -2.419318 | 0.01555  | 0.228768 |
| c5               | 546.4725794 | 0.163382349  | 0.1247146 | 1.3100499 | 0.190179 | 0.754837 |
| trim35-28        | 271.2714682 | -0.002161444 | 0.1309074 | -0.016511 | 0.986827 | 0.997062 |
| ift57            | 141.0738695 | -0.191708487 | 0.1721648 | -1.113517 | 0.265486 | 0.831302 |
| foxd3            | 257.853352  | -0.024050308 | 0.1387668 | -0.173315 | 0.862404 | 0.985841 |
| herpod2          | 472.9717583 | -0.093936355 | 0.1232981 | -0.761864 | 0.446141 | 0.917154 |
| rhbdd1           | 118.5280001 | -0.089591708 | 0.1854617 | -0.483074 | 0.629043 | 0.957354 |
| clptml1          | 659.9101406 | -0.077016709 | 0.1040788 | -0.739985 | 0.459309 | 0.921978 |
| isl11            | 6.66172181  | -0.188326266 | 0.8221694 | -0.22906  | 0.818822 | NA       |
| alas1            | 1680.928754 | -0.269886379 | 0.0886227 | -3.04534  | 0.002324 | 0.059686 |
| sec31a           | 844.0144279 | 0.200044149  | 0.0937542 | 2.1337077 | 0.032867 | 0.35321  |
| znf367           | 130.275643  | 0.133081776  | 0.1968427 | 0.6760819 | 0.498989 | 0.934006 |
| nelfcd           | 417.1266291 | -0.20885132  | 0.125605  | -1.662763 | 0.09636  | 0.59086  |
| sf3a2            | 974.9146787 | -0.070945003 | 0.0892619 | -0.794796 | 0.426732 | 0.910217 |
| pocl1b           | 144.2969689 | -0.313237154 | 0.1695497 | -1.847465 | 0.06468  | 0.497355 |
| c1d              | 169.2292447 | 0.09967091   | 0.1708288 | 0.583455  | 0.559587 | 0.948478 |

|                |             |              |           |           |          |          |
|----------------|-------------|--------------|-----------|-----------|----------|----------|
| ptmaa          | 13180.14093 | -0.055702319 | 0.0658914 | -0.845365 | 0.397907 | 0.899672 |
| spata6         | 37.00745626 | -0.144340888 | 0.3364157 | -0.429055 | 0.667883 | 0.964736 |
| ndc1           | 561.9746341 | -0.07980113  | 0.1118624 | -0.713387 | 0.475607 | 0.92611  |
| cfll1          | 13824.47689 | -0.144540267 | 0.0653636 | -2.211325 | 0.027013 | 0.316822 |
| dhrrs4         | 366.3919878 | -0.427046576 | 0.1306345 | -3.269017 | 0.001079 | 0.032882 |
| adgrv1         | 737.3860101 | 0.047916266  | 0.0947958 | 0.505468  | 0.61323  | 0.95688  |
| pabpc1b        | 1881.893848 | 0.071589784  | 0.0912293 | 0.7847233 | 0.432616 | 0.91326  |
| plekhf2        | 225.7073733 | 0.146523639  | 0.1438467 | 1.0186094 | 0.308388 | 0.861088 |
| rtn1b          | 2856.096497 | -0.144712006 | 0.0838028 | -1.726816 | 0.084201 | 0.55797  |
| nipal3         | 554.207482  | -0.006064953 | 0.0996357 | -0.060871 | 0.951462 | 0.99381  |
| cbr11          | 551.6301039 | -0.406622783 | 0.1054918 | -3.854544 | 0.000116 | 0.005551 |
| valopa         | 9.501739881 | 0.303172457  | 0.6204921 | 0.4886    | 0.625125 | NA       |
| ptpreb         | 686.4280922 | -0.043654043 | 0.0976196 | -0.447185 | 0.654741 | 0.961305 |
| zgc:92040      | 206.6806189 | 0.261506539  | 0.1562965 | 1.6731438 | 0.094299 | 0.583986 |
| thrb           | 543.1558348 | 0.025465708  | 0.1041042 | 0.2446176 | 0.806753 | 0.980254 |
| cyp2ad2        | 72.07212537 | 0.85678206   | 0.271396  | 3.1569447 | 0.001594 | 0.045166 |
| cept1b         | 282.8719739 | 0.293703455  | 0.1434687 | 2.0471601 | 0.040642 | 0.394726 |
| rbfox11        | 875.2816777 | 0.256438346  | 0.0969141 | 2.6460387 | 0.008144 | 0.14587  |
| si:dkeyp-4h4.1 | 10.75533943 | -0.28813493  | 0.6394149 | -0.450623 | 0.652261 | NA       |
| corolcb        | 2630.616502 | 0.099552409  | 0.0820674 | 1.2130571 | 0.225108 | 0.792185 |
| st8sia6        | 567.6617409 | 0.190485868  | 0.1031696 | 1.8463372 | 0.064843 | 0.497901 |
| nebl           | 18.93916446 | 0.156398315  | 0.4492322 | 0.3481458 | 0.727731 | 0.970402 |
| noto           | 9.966889318 | 1.113162095  | 0.6628075 | 1.6794652 | 0.093061 | NA       |
| serpind1       | 120.3527987 | 0.237063433  | 0.1883217 | 1.2588218 | 0.208095 | 0.775404 |
| kctd9a         | 12.26460366 | -0.331464995 | 0.558295  | -0.593709 | 0.552706 | 0.947265 |
| hmgcl          | 671.2654326 | -0.09888686  | 0.0935744 | -1.056773 | 0.290615 | 0.846337 |
| prkci          | 1367.400951 | -0.035658224 | 0.0808468 | -0.441059 | 0.65917  | 0.962839 |
| nkx2.7         | 17.95832185 | -0.716449643 | 0.4611488 | -1.553619 | 0.120275 | 0.645215 |
| pgls           | 214.3827963 | -0.074448496 | 0.1535756 | -0.484768 | 0.627841 | 0.957354 |
| apaf1          | 659.9318646 | -0.152416059 | 0.0981237 | -1.553305 | 0.12035  | 0.645215 |
| zgc:165604     | 146.7967539 | 0.134958772  | 0.1757921 | 0.7677181 | 0.442655 | 0.916336 |
| mvp            | 2392.827685 | -0.48264575  | 0.0943734 | -5.114213 | 3.15E-07 | 3.75E-05 |
| slc25a48       | 96.89948548 | 0.022496838  | 0.2018295 | 0.1114646 | 0.911248 | 0.991066 |
| cct6a          | 5386.317318 | -0.103065486 | 0.0781578 | -1.318685 | 0.187275 | 0.751302 |
| arhgap22       | 38.70317285 | -0.200744018 | 0.311007  | -0.645465 | 0.518626 | 0.938803 |
| eif3d          | 5209.160857 | -0.113561683 | 0.0825285 | -1.37603  | 0.168812 | 0.725919 |
| mybpc2b        | 1553.093635 | 0.068670572  | 0.094155  | 0.7293351 | 0.465797 | 0.923865 |
| rab7b          | 238.201374  | -0.077097983 | 0.1375576 | -0.560478 | 0.575154 | 0.950291 |
| mier3b         | 115.1927183 | -0.155479272 | 0.210726  | -0.737827 | 0.46062  | 0.921978 |
| slc30a2        | 7.203950818 | -0.641270173 | 0.7593474 | -0.844502 | 0.398389 | NA       |
| rhoca          | 590.1924791 | -0.019203805 | 0.1078486 | -0.178063 | 0.858674 | 0.985773 |
| nsun4          | 44.94208633 | -0.003040336 | 0.2848879 | -0.010672 | 0.991485 | 0.997679 |
| pax4           | 8.152861173 | -1.610958585 | 0.7000581 | -2.301178 | 0.021382 | NA       |
| cpa5           | 1133.033094 | -0.1530627   | 0.1076832 | -1.421417 | 0.155196 | 0.704997 |
| wsb1           | 3235.250278 | -0.194252553 | 0.0874388 | -2.221582 | 0.026312 | 0.312554 |
| prph21b        | 122.0242811 | 0.319646012  | 0.1842316 | 1.7350228 | 0.082737 | 0.554784 |
| pdhb           | 4061.647684 | 0.048366725  | 0.0653292 | 0.7403544 | 0.459085 | 0.921978 |
| nefma          | 1540.314413 | 0.032847315  | 0.088813  | 0.369848  | 0.711496 | 0.969006 |
| griala         | 759.4152487 | 0.039720804  | 0.0999539 | 0.3973912 | 0.691079 | 0.967256 |
| fbpla          | 395.5222577 | -0.206229907 | 0.1282065 | -1.608576 | 0.107709 | 0.6186   |
| mc3r           | 4.841135029 | 0.293851338  | 0.8663717 | 0.3391747 | 0.734478 | NA       |
| actr6          | 387.4111413 | 0.059579904  | 0.1139902 | 0.5226757 | 0.6012   | 0.956045 |
| tob1b          | 2419.192164 | 0.140387589  | 0.0811527 | 1.7299188 | 0.083645 | 0.557158 |
| cab3911        | 611.0910891 | 0.215827304  | 0.0959031 | 2.2504732 | 0.024419 | 0.3019   |

|                  |             |              |           |           |          |          |
|------------------|-------------|--------------|-----------|-----------|----------|----------|
| phf21ab          | 186.0490677 | -0.076583829 | 0.1499101 | -0.510865 | 0.609446 | 0.956718 |
| ppmlb            | 281.8231175 | -0.050148956 | 0.1257789 | -0.398707 | 0.690109 | 0.966857 |
| naalad2          | 273.8553001 | 0.169351762  | 0.12847   | 1.3182205 | 0.18743  | 0.75162  |
| jag2b            | 678.5283277 | 0.024442212  | 0.0983475 | 0.2485291 | 0.803725 | 0.979643 |
| chrnb5b          | 32.1325613  | 0.286624999  | 0.3415312 | 0.8392353 | 0.401337 | 0.90084  |
| mulla            | 232.245461  | -0.136212755 | 0.1386774 | -0.982228 | 0.325988 | 0.871917 |
| yipf2            | 671.3427743 | -0.165676112 | 0.0996496 | -1.662587 | 0.096395 | 0.59086  |
| mcm3ap           | 716.4618689 | 0.063923258  | 0.0994945 | 0.6424801 | 0.520562 | 0.939056 |
| zgc:110319       | 378.9969989 | -0.034073333 | 0.1162425 | -0.293123 | 0.769428 | 0.975687 |
| chd3             | 560.2351185 | 0.01192552   | 0.1100716 | 0.1083433 | 0.913723 | 0.991119 |
| poglut3          | 243.9746587 | 0.266028421  | 0.1475688 | 1.8027417 | 0.071429 | 0.522931 |
| odf3l2b          | 4.342931339 | 0.011093838  | 0.9081496 | 0.0122159 | 0.990253 | NA       |
| asmtl            | 319.272351  | 0.229780097  | 0.1285205 | 1.7878862 | 0.073794 | 0.529749 |
| ncoa4            | 1976.582337 | -0.023775485 | 0.0760594 | -0.312591 | 0.754591 | 0.975114 |
| cdh11            | 2538.523837 | 0.110155494  | 0.071887  | 1.5323414 | 0.125438 | 0.654803 |
| zfp3611b         | 1701.781954 | -0.092945321 | 0.0847579 | -1.096598 | 0.272817 | 0.838096 |
| prfl.2           |             | 0 NA         | NA        | NA        | NA       | NA       |
| strbp            | 722.1948346 | -0.026390828 | 0.0922134 | -0.286193 | 0.77473  | 0.975687 |
| dawl             | 56.9149797  | 0.474423399  | 0.2816248 | 1.6845939 | 0.092067 | 0.57849  |
| ireb2            | 906.0867023 | -0.146864508 | 0.0907295 | -1.618707 | 0.10551  | 0.614178 |
| olfml2bb         | 120.322858  | 0.612651092  | 0.1834919 | 3.338846  | 0.000841 | 0.026962 |
| cdc14b           | 810.2118762 | -0.060665114 | 0.0888805 | -0.682547 | 0.494893 | 0.931926 |
| cyth1b           | 329.2039073 | -0.080960345 | 0.1297745 | -0.623854 | 0.532723 | 0.942805 |
| hnf4a            | 213.148799  | -0.574580512 | 0.1509143 | -3.80733  | 0.00014  | 0.00646  |
| gpr132a          | 0.157187365 | -0.955901296 | 4.0804729 | -0.234262 | 0.814781 | NA       |
| tab2             | 391.1422363 | 0.002988925  | 0.115495  | 0.0258793 | 0.979354 | 0.996847 |
| rgsl4a           | 8.068632858 | 0.417687586  | 0.6696232 | 0.6237651 | 0.532782 | NA       |
| ephb2b           | 945.2120986 | -0.04863448  | 0.086765  | -0.560531 | 0.575117 | 0.950291 |
| vrk2             | 46.06732032 | -0.262432351 | 0.2944946 | -0.891128 | 0.372861 | 0.892868 |
| rad23b           | 2292.586492 | -0.180492963 | 0.0747851 | -2.413488 | 0.015801 | 0.231267 |
| prkn             | 49.09465593 | 0.210890162  | 0.287338  | 0.7339446 | 0.462983 | 0.922698 |
| ubl3b            | 1523.558996 | -0.018543581 | 0.0789646 | -0.234834 | 0.814337 | 0.981081 |
| wdr45b           | 657.2498731 | -0.059687204 | 0.1094507 | -0.545334 | 0.585524 | 0.95262  |
| OTOP1            | 28.64298939 | 0.152596386  | 0.3542029 | 0.4308164 | 0.666602 | 0.964736 |
| gdap2            | 344.0815631 | -0.04089149  | 0.1305975 | -0.313111 | 0.754197 | 0.975056 |
| cgas             | 3.517623225 | -0.67208193  | 1.1053986 | -0.608    | 0.543188 | NA       |
| slc16a7          | 50.11343731 | -0.1069979   | 0.2690153 | -0.397739 | 0.690823 | 0.967157 |
| orc5             | 127.9111206 | -0.278445435 | 0.1971312 | -1.412488 | 0.157806 | 0.709035 |
| dynlrb1          | 142.7554402 | 0.230004263  | 0.1682263 | 1.367231  | 0.171553 | 0.729995 |
| cntn5            | 718.1970989 | 0.0844071    | 0.1038837 | 0.8125153 | 0.416496 | 0.906237 |
| tmem60           | 139.5660496 | 0.050190875  | 0.1758373 | 0.2854392 | 0.775308 | 0.975687 |
| magi2a           | 180.1983432 | -0.012609655 | 0.151123  | -0.08344  | 0.933502 | 0.992702 |
| lhfp13           | 1137.923885 | 0.137551871  | 0.082721  | 1.662841  | 0.096344 | 0.59086  |
| negr1            | 354.8189588 | -0.000333469 | 0.1175947 | -0.002836 | 0.997737 | 0.999174 |
| si:dkey-151g10.3 | 156.4112263 | -0.056335212 | 0.1695293 | -0.332304 | 0.73966  | 0.972943 |
| sh3bgr           | 547.7031702 | 0.356276791  | 0.110866  | 3.2135804 | 0.001311 | 0.038289 |
| gnail            | 1678.272644 | -0.003297107 | 0.0774918 | -0.042548 | 0.966062 | 0.996315 |
| fzd3a            | 740.8902402 | 0.092781551  | 0.0975092 | 0.9515157 | 0.341343 | 0.878134 |
| sec61a1          | 5037.797532 | -0.020954661 | 0.0816678 | -0.256584 | 0.7975   | 0.978577 |
| phf11            | 10.13646222 | 0.253878448  | 0.595237  | 0.4265166 | 0.669731 | NA       |
| asrgl1           | 138.544076  | -0.432407592 | 0.17875   | -2.419064 | 0.015561 | 0.228768 |
| mxa              | 4.327757656 | 1.177407368  | 0.9204148 | 1.2792138 | 0.200822 | NA       |
| morn3            | 43.83924783 | 0.13884457   | 0.3110976 | 0.4463055 | 0.655377 | 0.961632 |
| pdc4a            | 1849.758768 | -0.200381438 | 0.0849185 | -2.359692 | 0.01829  | 0.251621 |

|                 |             |              |           |           |          |          |
|-----------------|-------------|--------------|-----------|-----------|----------|----------|
| col7a1          | 1119.850582 | 0.153560827  | 0.0964965 | 1.5913615 | 0.111528 | 0.627242 |
| cacnalba        | 141.0644101 | 0.07122905   | 0.1766082 | 0.4033168 | 0.686715 | 0.966376 |
| klhl24a         | 106.0417267 | 0.150655141  | 0.1969493 | 0.7649439 | 0.444305 | 0.916726 |
| ccdc25          | 356.136229  | 0.110987895  | 0.1230832 | 0.9017307 | 0.3672   | 0.887458 |
| abcb5           | 1899.973233 | 0.251909163  | 0.0871151 | 2.8916805 | 0.003832 | 0.084661 |
| myoc            | 517.8189023 | 0.480876868  | 0.1060738 | 4.5334198 | 5.80E-06 | 0.000452 |
| hmmr            | 424.9667767 | -0.126563839 | 0.1087544 | -1.163758 | 0.244522 | 0.814189 |
| tle5            | 70.67007951 | -0.156942219 | 0.2933935 | -0.534921 | 0.592705 | 0.954434 |
| zfp3612         | 1185.111008 | 0.001814903  | 0.0987739 | 0.0183743 | 0.98534  | 0.996944 |
| nmt2            | 745.1873821 | 0.032544963  | 0.0935695 | 0.347816  | 0.727978 | 0.970402 |
| calmla          | 9608.299742 | 0.028391583  | 0.0652975 | 0.4348032 | 0.663705 | 0.964736 |
| cherp           | 801.1436894 | -0.142205913 | 0.1052151 | -1.351573 | 0.176512 | 0.736982 |
| katnal          | 106.756016  | -0.25744667  | 0.2010867 | -1.280277 | 0.200448 | 0.766801 |
| ahr2            | 1388.681022 | -0.107299321 | 0.0801085 | -1.339426 | 0.180432 | 0.741452 |
| rps23           | 7160.378549 | -0.465952403 | 0.079233  | -5.880788 | 4.08E-09 | 7.41E-07 |
| hidla           | 72.11304554 | 0.01594746   | 0.2396517 | 0.0665443 | 0.946944 | 0.99381  |
| si:dkey-256h2.1 | 27.73697839 | -0.022498284 | 0.3875957 | -0.058046 | 0.953712 | 0.994213 |
| ntpcr           | 73.95172765 | 0.22125551   | 0.2345169 | 0.9434521 | 0.34545  | 0.878434 |
| arnt            | 186.9309046 | -0.052105456 | 0.1630046 | -0.319656 | 0.749229 | 0.97419  |
| erap1b          | 72.40212616 | -0.431785407 | 0.2479051 | -1.741737 | 0.081555 | 0.552315 |
| rplp1           | 17731.66107 | -0.462839068 | 0.0929501 | -4.979438 | 6.38E-07 | 6.85E-05 |
| upkla           | 8.359966201 | -0.007345468 | 0.6829795 | -0.010755 | 0.991419 | NA       |
| rca2            | 138.5337471 | 0.13182334   | 0.1698452 | 0.7761382 | 0.437667 | 0.914942 |
| fbxl3b          | 199.6016889 | 0.085902665  | 0.1628174 | 0.5276014 | 0.597776 | 0.95534  |
| cacull          | 5.54116887  | -0.786313    | 0.8194644 | -0.959545 | 0.337284 | NA       |
| gja3            | 90.51578259 | 0.192341371  | 0.2303003 | 0.8351765 | 0.403618 | 0.900979 |
| zbtb7b          | 188.8694017 | -0.222713237 | 0.1682674 | -1.323568 | 0.185647 | 0.749638 |
| discl           | 10.76532075 | 0.319144904  | 0.5693946 | 0.5604987 | 0.575139 | NA       |
| asap3           | 388.9925205 | -0.171362204 | 0.1182991 | -1.44855  | 0.147463 | 0.694625 |
| b4galt7         | 191.9193453 | 0.461681715  | 0.159842  | 2.8883629 | 0.003873 | 0.085098 |
| der11           | 1053.433308 | 0.074570344  | 0.0862154 | 0.8649309 | 0.387077 | 0.895735 |
| VSTM2A          | 2.25145806  | -0.856143254 | 1.3297808 | -0.643823 | 0.51969  | NA       |
| ak9             | 38.4180825  | -0.612606997 | 0.3243343 | -1.888813 | 0.058917 | 0.475038 |
| vax1            | 251.5173752 | -0.05972513  | 0.1311775 | -0.4553   | 0.648893 | 0.960708 |
| hsp70.3         | 1287.925253 | -0.099335748 | 0.3314351 | -0.299714 | 0.764395 | 0.975374 |
| smad9           | 178.3044644 | 0.202292848  | 0.1546573 | 1.3080074 | 0.190871 | 0.755212 |
| ddx23           | 1459.173636 | -0.018109048 | 0.0854241 | -0.21199  | 0.832115 | 0.983517 |
| tnc             | 3511.660359 | 0.309402444  | 0.0807307 | 3.8325261 | 0.000127 | 0.005957 |
| zgc:101100      | 91.91728671 | 0.047952953  | 0.2108553 | 0.2274211 | 0.820096 | 0.981594 |
| st13            | 2237.700193 | -0.141443887 | 0.0740602 | -1.909849 | 0.056153 | 0.464781 |
| sfr1            | 19.64908433 | -0.210379249 | 0.4365348 | -0.48193  | 0.629856 | 0.957354 |
| ginml           | 1146.777161 | -0.127881768 | 0.089601  | -1.427236 | 0.153512 | 0.702578 |
| mical3a         | 166.8368802 | -0.133373591 | 0.1715762 | -0.777343 | 0.436956 | 0.914408 |
| sh3bp2          | 4.300095255 | 0.009458212  | 0.9137502 | 0.010351  | 0.991741 | NA       |
| ndufa2          | 1007.498975 | -0.045228973 | 0.1107124 | -0.408527 | 0.682887 | 0.965476 |
| ercc2           | 248.6889711 | -0.158773503 | 0.137883  | -1.151509 | 0.249523 | 0.819204 |
| plecb           | 2238.67227  | 0.148063831  | 0.0742782 | 1.9933696 | 0.046221 | 0.422549 |
| erlin1          | 2016.516598 | -0.060878033 | 0.0714617 | -0.851897 | 0.394271 | 0.898711 |
| ppp2r2aa        | 64.50879905 | 0.080044403  | 0.2449898 | 0.3267255 | 0.743876 | 0.974094 |
| cfap206         | 10.9955599  | 0.018555574  | 0.5726951 | 0.0324004 | 0.974153 | NA       |
| traf3           | 255.4251907 | -0.339864363 | 0.1524473 | -2.229389 | 0.025788 | 0.310555 |
| zgc:66426       | 9.82132409  | 0.349255984  | 0.6053316 | 0.5769664 | 0.563962 | NA       |
| focad           | 221.9832898 | 0.038065373  | 0.149857  | 0.2540114 | 0.799487 | 0.979366 |
| maplab          | 502.2143132 | 0.19565485   | 0.1034561 | 1.8911874 | 0.058599 | 0.473924 |



|                   |             |              |           |           |          |          |
|-------------------|-------------|--------------|-----------|-----------|----------|----------|
| t1r4bb            |             | 0 NA         | NA        | NA        | NA       | NA       |
| si:dkey-34e4.1    | 69.44569629 | 0.292049056  | 0.2410526 | 1.2115572 | 0.225682 | 0.793245 |
| opn4a             | 2.385997333 | 0.877555654  | 1.3090177 | 0.6703925 | 0.502608 | NA       |
| obscnb            | 181.2612448 | 0.476946117  | 0.1550601 | 3.0758788 | 0.002099 | 0.055336 |
| rbm4.3            | 3454.64453  | -0.115046199 | 0.0814274 | -1.412869 | 0.157694 | 0.709014 |
| ocstamp           | 13.58409161 | -0.43046686  | 0.5396388 | -0.797694 | 0.425048 | 0.908819 |
| ttc23             | 34.00556268 | -0.167527747 | 0.3317469 | -0.504987 | 0.613568 | 0.95688  |
| mgst1.2           | 536.9500984 | 0.110018247  | 0.1075919 | 1.0225515 | 0.30652  | 0.860027 |
| IGLON5            | 426.1911903 | 0.120141665  | 0.111273  | 1.0797017 | 0.280275 | 0.843423 |
| ddx59             | 158.9403834 | -0.249979802 | 0.1653315 | -1.511991 | 0.130536 | 0.662797 |
| gstol             | 61.21547192 | -0.356463447 | 0.2738621 | -1.301616 | 0.193048 | 0.756795 |
| usp6n1            | 510.4943244 | -0.04552015  | 0.1070279 | -0.425311 | 0.67061  | 0.965257 |
| gtf2ird1          | 815.5682819 | -0.049174737 | 0.0975232 | -0.504237 | 0.614095 | 0.95688  |
| uck2b             | 798.6850868 | -0.437066    | 0.1036429 | -4.217038 | 2.48E-05 | 0.001506 |
| uck1              | 101.2087859 | 0.14540395   | 0.2004876 | 0.7252516 | 0.468298 | 0.924328 |
| ppan              | 296.1245172 | -0.15145243  | 0.1537573 | -0.98501  | 0.324619 | 0.871063 |
| prkcbb            | 903.2441208 | 0.179738521  | 0.0902502 | 1.991558  | 0.04642  | 0.423579 |
| si:ch211-57i17.1  | 119.8344841 | -0.181698573 | 0.1953213 | -0.930255 | 0.352239 | 0.880896 |
| pdzkl             | 476.393172  | -0.520211187 | 0.1092416 | -4.762026 | 1.92E-06 | 0.000175 |
| trim35-34         | 1.189776963 | 0.42714694   | 1.8029205 | 0.2369195 | 0.812719 | NA       |
| brd2a             | 1711.511375 | 0.079014738  | 0.0881542 | 0.896324  | 0.37008  | 0.889876 |
| hnf1bb            | 71.09432103 | -0.400218043 | 0.2656941 | -1.506312 | 0.131987 | 0.665721 |
| higdla            | 1276.814421 | 0.280684012  | 0.095797  | 2.9299876 | 0.00339  | 0.077847 |
| dspa              | 1718.889417 | -0.293281725 | 0.0734318 | -3.993933 | 6.50E-05 | 0.0034   |
| atp6v1g1          | 4081.224299 | -0.070573534 | 0.0756119 | -0.933366 | 0.350631 | 0.880195 |
| or115-5           |             | 0 NA         | NA        | NA        | NA       | NA       |
| si:ch211-156i18.7 | 0.173729368 | -0.955901296 | 4.0804729 | -0.234262 | 0.814781 | NA       |
| ufc1              | 359.5046509 | 0.011091019  | 0.1287511 | 0.0861431 | 0.931353 | 0.992702 |
| nek1              | 528.0131325 | 0.327828346  | 0.1013813 | 3.2336171 | 0.001222 | 0.036292 |
| kng1              | 548.2977845 | 0.07712124   | 0.1149671 | 0.6708112 | 0.502341 | 0.935304 |
| mtmr1b            | 104.8913631 | 0.130599935  | 0.1932902 | 0.6756675 | 0.499252 | 0.934006 |
| ntmt1             | 467.6726503 | 0.078914264  | 0.1045804 | 0.7545801 | 0.450501 | 0.918761 |
| rrp12             | 1203.698932 | -0.056361546 | 0.0848259 | -0.664438 | 0.50641  | 0.935724 |
| ing5a             | 91.65006946 | -0.348776502 | 0.2122626 | -1.643137 | 0.100355 | 0.602451 |
| faf1              | 794.2824364 | 0.024293486  | 0.0900097 | 0.2698987 | 0.787238 | 0.976596 |
| slc26a5           | 958.5222572 | -0.093113123 | 0.1023258 | -0.909967 | 0.36284  | 0.885944 |
| ppplr8b           | 662.4950487 | 0.001850707  | 0.1098574 | 0.0168465 | 0.986559 | 0.996965 |
| cd81b             | 344.58305   | -0.114942301 | 0.1187828 | -0.967668 | 0.33321  | 0.874926 |
| cox6a1            | 1456.266078 | 0.031316461  | 0.1007035 | 0.3109769 | 0.755818 | 0.975374 |
| enola             | 14907.62942 | 0.062916694  | 0.0839443 | 0.749505  | 0.453553 | 0.920041 |
| clcn5b            | 207.0631956 | 0.13838184   | 0.1660851 | 0.8331984 | 0.404733 | 0.901305 |
| rad2111           | 6.152422007 | 1.660469865  | 0.8468956 | 1.9606547 | 0.049919 | NA       |
| pkd211            | 94.61086254 | 0.119064496  | 0.2088087 | 0.5702086 | 0.568536 | 0.948983 |
| cox4i2            | 690.545095  | -0.129928113 | 0.1140499 | -1.139222 | 0.254611 | 0.823484 |
| zgc:109913        | 7.14142241  | 0.505583639  | 0.7568262 | 0.6680314 | 0.504114 | NA       |
| pex51a            | 15.01752291 | -0.152080766 | 0.5105293 | -0.297888 | 0.765788 | 0.975374 |
| mchr1b            | 254.6331886 | 0.085536076  | 0.1420084 | 0.6023311 | 0.546954 | 0.945526 |
| ntnlb             | 885.9760656 | 0.194632441  | 0.093426  | 2.0832784 | 0.037226 | 0.377602 |
| chrnb11           | 24.846314   | -0.434434997 | 0.4117283 | -1.05515  | 0.291357 | 0.847    |
| gxylt1b           | 88.43721161 | 0.106108371  | 0.2146692 | 0.4942878 | 0.621103 | 0.957354 |
| clcnk             | 103.4575028 | -0.037486927 | 0.2031416 | -0.184536 | 0.853593 | 0.985174 |
| zgc:56106         | 278.587553  | -0.108942829 | 0.1309988 | -0.831632 | 0.405617 | 0.901305 |
| nkx6.1            | 332.7901461 | 0.019065493  | 0.1305015 | 0.146094  | 0.883847 | 0.988706 |
| nmur3             | 32.23873045 | 0.073504111  | 0.3626014 | 0.2027133 | 0.839359 | 0.984979 |

|                   |             |              |           |           |          |          |
|-------------------|-------------|--------------|-----------|-----------|----------|----------|
| dnpep             | 541.4855851 | -0.117318266 | 0.1023    | -1.146807 | 0.251462 | 0.820927 |
| ddx43             | 80.71007586 | -0.19166995  | 0.2364573 | -0.81059  | 0.417601 | 0.906237 |
| si:ch211-241e1.3  | 428.9487452 | 0.063171981  | 0.1328034 | 0.4756803 | 0.634302 | 0.95776  |
| fbxo44            | 265.8206654 | -0.31025345  | 0.1438182 | -2.157261 | 0.030985 | 0.34077  |
| cyp2p9            | 191.234088  | 2.356418971  | 0.1829016 | 12.883536 | 5.57E-38 | 5.51E-34 |
| otud3             | 212.0427517 | -0.134477812 | 0.1439057 | -0.934485 | 0.350054 | 0.880195 |
| cyp2ad3           | 835.6633001 | 0.554248152  | 0.0934209 | 5.9328073 | 2.98E-09 | 5.50E-07 |
| psmf1             | 231.8024076 | -0.144748054 | 0.1395185 | -1.037483 | 0.299511 | 0.855609 |
| snx4              | 802.2842942 | 0.049978911  | 0.0980959 | 0.5094904 | 0.610408 | 0.95688  |
| armac2            | 56.82712117 | -0.572884943 | 0.2760429 | -2.075347 | 0.037954 | 0.381357 |
| grapb             | 28.81841488 | 0.305776665  | 0.3639109 | 0.8402515 | 0.400767 | 0.90084  |
| hel.3             |             | 0 NA         | NA        | NA        | NA       | NA       |
| fkbp1aa           | 9131.614689 | -0.0289228   | 0.0773639 | -0.373854 | 0.708513 | 0.968664 |
| itgblb.2          | 838.1883935 | 0.417696963  | 0.0964087 | 4.3325648 | 1.47E-05 | 0.000988 |
| chic2             | 435.3440877 | -0.121256499 | 0.1147243 | -1.056938 | 0.29054  | 0.846262 |
| lad1              | 168.7688204 | -0.920611512 | 0.175914  | -5.233303 | 1.67E-07 | 2.15E-05 |
| stat3             | 407.9787597 | -0.121113263 | 0.114368  | -1.058979 | 0.289609 | 0.846246 |
| casp8ap2          | 184.2797789 | 0.119552607  | 0.1528097 | 0.7823629 | 0.434001 | 0.914001 |
| epha2b            | 238.102449  | 0.116814744  | 0.1629781 | 0.7167513 | 0.473528 | 0.924993 |
| aasdh             | 26.65507778 | 0.327943826  | 0.3899818 | 0.8409209 | 0.400392 | 0.90084  |
| hpcal1            | 122.0490046 | -0.469277405 | 0.1868925 | -2.510948 | 0.012041 | 0.193258 |
| apobb.1           | 28812.56979 | 0.218656318  | 0.0846338 | 2.5835588 | 0.009779 | 0.167691 |
| gid8a             | 456.8077064 | -0.020484234 | 0.1050922 | -0.194917 | 0.845458 | 0.985174 |
| si:ch211-106a19.1 | 288.2898302 | 0.108432899  | 0.1273426 | 0.8515052 | 0.394489 | 0.898861 |
| cops7a            | 734.6503665 | 0.134583126  | 0.0962151 | 1.3987737 | 0.161881 | 0.716275 |
| golt1ba           | 68.49949667 | 0.390586587  | 0.2396035 | 1.6301375 | 0.103072 | 0.609625 |
| pitpnc1b          | 127.6219335 | -0.010242909 | 0.1754929 | -0.058367 | 0.953457 | 0.994213 |
| fzrlb             | 682.2512237 | 0.024333187  | 0.0939173 | 0.2590916 | 0.795565 | 0.978498 |
| dnd1              | 1.795620083 | -1.434666831 | 1.4695598 | -0.976256 | 0.328938 | NA       |
| pvalb3            | 195.5346197 | 0.118186265  | 0.1799182 | 0.656889  | 0.511252 | 0.936253 |
| bnip4             | 107.5372372 | -0.165677173 | 0.1923239 | -0.861449 | 0.388991 | 0.896295 |
| ptk2ba            | 17.3792285  | 0.417283012  | 0.4507624 | 0.9257272 | 0.354588 | 0.882105 |
| lias              | 349.2190548 | -0.097480611 | 0.1165056 | -0.836703 | 0.402759 | 0.90084  |
| eogt              | 57.82178337 | 0.039746427  | 0.262043  | 0.151679  | 0.87944  | 0.987881 |
| wnt7ba            | 20.73463297 | 0.460455543  | 0.4269648 | 1.078439  | 0.280838 | 0.84357  |
| zgc:175214        | 887.1239089 | -0.201927778 | 0.1205997 | -1.674364 | 0.094059 | 0.583414 |
| mcf2a             | 131.4268241 | 0.035462091  | 0.1790428 | 0.1980649 | 0.842994 | 0.985174 |
| skilb             | 198.0205689 | 0.201987738  | 0.147918  | 1.3655381 | 0.172084 | 0.731144 |
| znf1163           | 29.73704697 | -0.402835515 | 0.3673348 | -1.096644 | 0.272797 | 0.838096 |
| tbcc              | 150.1194303 | -0.205233928 | 0.1631948 | -1.257601 | 0.208536 | 0.775404 |
| taarl1            | 1.348572358 | 0.736885736  | 1.7227585 | 0.427736  | 0.668843 | NA       |
| ino80e            | 170.2425605 | 0.13535559   | 0.1689415 | 0.8011979 | 0.423017 | 0.90714  |
| ecd               | 203.6769736 | 0.078044081  | 0.1507589 | 0.5176749 | 0.604685 | 0.95651  |
| pth2              | 25.95819211 | -0.181534171 | 0.401029  | -0.452671 | 0.650786 | 0.960708 |
| zgc:66448         | 563.0897917 | -0.025288454 | 0.1095292 | -0.230883 | 0.817406 | 0.981594 |
| fxr1              | 1229.241848 | 0.047018644  | 0.0912616 | 0.5152073 | 0.606408 | 0.956718 |
| tm9sf1            | 523.7772625 | 0.089454434  | 0.1048406 | 0.8532426 | 0.393525 | 0.898076 |
| epha6             | 448.7771508 | 0.126144587  | 0.1286848 | 0.9802602 | 0.326958 | 0.872658 |
| wdr13             | 645.6131635 | 0.032427896  | 0.0987049 | 0.3285337 | 0.742508 | 0.973232 |
| tmpob             | 581.139929  | 0.129268805  | 0.1084193 | 1.1923039 | 0.233142 | 0.801623 |
| ccdc28a           | 13.37910249 | -0.247072977 | 0.5183256 | -0.476675 | 0.633593 | 0.957703 |
| clic4             | 1720.253942 | -0.10279003  | 0.083941  | -1.224552 | 0.220744 | 0.787641 |
| setx              | 256.7644879 | -0.003066325 | 0.1412199 | -0.021713 | 0.982677 | 0.996944 |
| dtl               | 101.7096902 | 0.008481648  | 0.2062652 | 0.0411201 | 0.9672   | 0.996315 |

|                 |             |              |           |           |          |          |
|-----------------|-------------|--------------|-----------|-----------|----------|----------|
| ccdc12          | 162.5802546 | -0.063431391 | 0.1717411 | -0.369343 | 0.711872 | 0.969006 |
| pkp2            | 145.818216  | 0.040173134  | 0.1710106 | 0.234916  | 0.814274 | 0.981081 |
| cdv3            | 1899.613465 | 0.050084709  | 0.0732442 | 0.6838041 | 0.494099 | 0.931926 |
| hoxa2b          | 144.3328985 | -0.049096475 | 0.1669192 | -0.294133 | 0.768656 | 0.975687 |
| si:dkey-23a23.2 | 207.3018685 | -0.142586862 | 0.1461876 | -0.975369 | 0.329377 | 0.873436 |
| zbtb1           | 212.6994324 | 0.041541627  | 0.1487561 | 0.27926   | 0.780045 | 0.976146 |
| fam129ab        | 17.66004569 | -0.028191676 | 0.4718787 | -0.059743 | 0.95236  | 0.993904 |
| foxo3a          | 2655.58222  | 0.041919831  | 0.0733461 | 0.5715342 | 0.567638 | 0.948739 |
| ccn1            | 838.2437846 | 0.145946327  | 0.1021496 | 1.4287512 | 0.153076 | 0.702423 |
| krt1-19d        | 1179.675248 | -0.434603579 | 0.1004304 | -4.327409 | 1.51E-05 | 0.001002 |
| scaper          | 658.1962669 | -0.136871749 | 0.0946001 | -1.446846 | 0.14794  | 0.695523 |
| mapk7           | 349.4698429 | -0.246351117 | 0.1229105 | -2.004313 | 0.045037 | 0.417316 |
| plg             | 1826.71451  | -0.229332618 | 0.1219156 | -1.881076 | 0.059962 | 0.478654 |
| gopc            | 170.1937785 | 0.017097996  | 0.1603463 | 0.1066317 | 0.915081 | 0.991123 |
| ucpl            | 457.2516193 | 0.320843055  | 0.1141461 | 2.8108096 | 0.004942 | 0.102322 |
| wdr73           | 80.37731062 | -0.185168911 | 0.22649   | -0.817559 | 0.413609 | 0.905864 |
| cb1n10          | 51.73802035 | 0.326637327  | 0.3089642 | 1.0572012 | 0.29042  | 0.846262 |
| snrnp40         | 385.8259482 | -0.071052567 | 0.1151524 | -0.617031 | 0.537214 | 0.943336 |
| v2rx4           | 0.63357355  | 1.435201493  | 2.6108194 | 0.5497131 | 0.582516 | NA       |
| fez1            | 3446.537617 | 0.027553174  | 0.0749623 | 0.3675605 | 0.713201 | 0.96909  |
| tdo2b           | 26.04080314 | -1.369920118 | 0.4032907 | -3.396856 | 0.000682 | 0.02273  |
| pcp411          | 395.3516554 | -0.021294081 | 0.1142498 | -0.186382 | 0.852145 | 0.985174 |
| si:rp71-1g18.13 | 29.8858943  | -0.277935255 | 0.3564492 | -0.779733 | 0.435548 | 0.914408 |
| lcpl            | 171.964323  | 0.138467515  | 0.1833659 | 0.7551433 | 0.450163 | 0.918761 |
| kpna4           | 2931.625083 | -0.014115396 | 0.0699019 | -0.201932 | 0.83997  | 0.985029 |
| mhc1lda         | 1.186560904 | -1.24155368  | 1.8444777 | -0.673119 | 0.500871 | NA       |
| mob2a           | 251.1716279 | -0.082530138 | 0.1524553 | -0.54134  | 0.588273 | 0.953319 |
| crema           | 328.9936355 | 0.148150669  | 0.134418  | 1.102164  | 0.27039  | 0.835161 |
| selenot2        | 1697.409956 | 0.051862846  | 0.0815667 | 0.6358333 | 0.524885 | 0.939846 |
| vsnl1a          | 3112.957308 | 0.258190063  | 0.0807671 | 3.1967219 | 0.00139  | 0.040243 |
| kenh1b          | 13.88243659 | -0.030425623 | 0.5177712 | -0.058763 | 0.953141 | 0.994157 |
| syne3           | 465.419999  | 0.077886117  | 0.108428  | 0.7183211 | 0.472559 | 0.924838 |
| atad1a          | 109.2261396 | -0.10790971  | 0.2005503 | -0.538068 | 0.59053  | 0.954193 |
| tfap2d          | 254.8963036 | 0.018380403  | 0.1364192 | 0.1347347 | 0.892822 | 0.989291 |
| psmd4b          | 1064.493925 | -0.044009026 | 0.0856769 | -0.513663 | 0.607488 | 0.956718 |
| hsl17b3         | 16.42902313 | -0.335129282 | 0.4932159 | -0.679478 | 0.496835 | 0.932829 |
| fabp3           | 3196.991508 | -0.029080534 | 0.0808407 | -0.359726 | 0.719052 | 0.969183 |
| rps27.1         | 7760.874451 | -0.357326798 | 0.07582   | -4.712833 | 2.44E-06 | 0.000216 |
| snul3b          | 812.9173166 | -0.098893607 | 0.0973881 | -1.015459 | 0.309887 | 0.861992 |
| gpbar1          | 2.834371097 | -0.188591653 | 1.1411324 | -0.165267 | 0.868734 | NA       |
| zgc:66427       | 619.0885268 | 0.177073438  | 0.0982493 | 1.8022863 | 0.0715   | 0.522931 |
| spryd4          | 288.3048453 | -0.112610961 | 0.1308666 | -0.860502 | 0.389513 | 0.896421 |
| sim1a           | 147.5354155 | -0.186271537 | 0.1732087 | -1.075417 | 0.282188 | 0.843666 |
| fmn2a           | 217.6731566 | 0.042111137  | 0.1453822 | 0.2896581 | 0.772078 | 0.975687 |
| ywhaqb          | 9926.79484  | -0.019250763 | 0.0747948 | -0.257381 | 0.796885 | 0.978569 |
| anp32b          | 4424.044153 | -0.132228464 | 0.0845363 | -1.564162 | 0.11778  | 0.641446 |
| nr5alb          | 5.592287053 | 0.126250285  | 0.8228191 | 0.1534363 | 0.878054 | NA       |
| mxl             | 4.244197523 | -0.905085036 | 1.0393549 | -0.870814 | 0.383856 | NA       |
| slc37a2         | 1117.598922 | -0.06934003  | 0.083655  | -0.828881 | 0.407172 | 0.901305 |
| atg5            | 372.700968  | -0.02400373  | 0.1226943 | -0.195639 | 0.844893 | 0.985174 |
| tjp2b           | 936.5308658 | -0.101951126 | 0.1067387 | -0.955147 | 0.339503 | 0.87805  |
| atp2b3b         | 1616.964634 | 0.178019164  | 0.0929333 | 1.9155582 | 0.055421 | 0.461238 |
| galnt14         | 313.3617165 | -0.129512918 | 0.1322109 | -0.979593 | 0.327287 | 0.872658 |
| ctnnb2          | 4339.211051 | 0.02143583   | 0.07297   | 0.2937622 | 0.76894  | 0.975687 |

|                   |              |               |            |            |           |           |
|-------------------|--------------|---------------|------------|------------|-----------|-----------|
| lrp13             | 3. 626592945 | 0. 525147765  | 0. 9956437 | 0. 5274455 | 0. 597884 | NA        |
| rflna             | 16. 41653246 | 0. 206635356  | 0. 5142003 | 0. 4018577 | 0. 687789 | 0. 966442 |
| ift74             | 557. 0364816 | 0. 119822946  | 0. 1224671 | 0. 9784091 | 0. 327872 | 0. 872701 |
| gmppab            | 359. 4594892 | 0. 029330456  | 0. 1161671 | 0. 2524849 | 0. 800666 | 0. 979377 |
| ankrd49           | 250. 3697145 | 0. 132625245  | 0. 1390948 | 0. 9534883 | 0. 340343 | 0. 87805  |
| BX323555. 1       |              | 0 NA          | NA         | NA         | NA        | NA        |
| ggt1a             | 32. 95606256 | -0. 118675757 | 0. 3786155 | -0. 313447 | 0. 753941 | 0. 975056 |
| pinx1             | 255. 9643715 | -0. 199228925 | 0. 1456033 | -1. 368299 | 0. 171218 | 0. 729413 |
| nnt               | 11210. 59765 | 0. 137659622  | 0. 0680862 | 2. 0218437 | 0. 043192 | 0. 407874 |
| ahr1b             | 229. 8529303 | -0. 088072201 | 0. 1406238 | -0. 626297 | 0. 53112  | 0. 942209 |
| cdh7a             | 417. 3299115 | -0. 088601166 | 0. 1154491 | -0. 767448 | 0. 442815 | 0. 916336 |
| kenn1b            | 43. 1911689  | -0. 062886963 | 0. 2947985 | -0. 213322 | 0. 831076 | 0. 982994 |
| lpp               | 449. 5906065 | -0. 101052036 | 0. 1080513 | -0. 935223 | 0. 349674 | 0. 880195 |
| coq9              | 572. 6189589 | -0. 034962502 | 0. 1100227 | -0. 317775 | 0. 750655 | 0. 97419  |
| cdc7              | 108. 2298392 | -0. 356790834 | 0. 1971331 | -1. 809898 | 0. 070312 | 0. 518591 |
| kenk5a            | 53. 89082015 | -0. 308125317 | 0. 2764229 | -1. 114688 | 0. 264984 | 0. 830836 |
| nrbf2b            | 414. 3760537 | -0. 267834233 | 0. 1150977 | -2. 327016 | 0. 019964 | 0. 266381 |
| sh3gl2a           | 1720. 655152 | 0. 26993418   | 0. 080254  | 3. 363499  | 0. 00077  | 0. 025154 |
| AL845324. 1       | 471. 4409648 | -0. 048006594 | 0. 1072481 | -0. 447622 | 0. 654426 | 0. 961305 |
| ggps1             | 764. 6632961 | -0. 102864443 | 0. 1112341 | -0. 924757 | 0. 355092 | 0. 882321 |
| kyat1             | 432. 8991633 | -0. 008056333 | 0. 1101882 | -0. 073114 | 0. 941715 | 0. 993099 |
| idh3g             | 1101. 989727 | 0. 049353183  | 0. 0845491 | 0. 583722  | 0. 559407 | 0. 948478 |
| hel. 1            | 32. 17684941 | -0. 53601709  | 0. 4314974 | -1. 242226 | 0. 214153 | 0. 782493 |
| gabpb1            | 97. 79221369 | 0. 068892896  | 0. 2050376 | 0. 3360013 | 0. 73687  | 0. 972535 |
| timm8a            | 317. 4853186 | 0. 007357511  | 0. 1546867 | 0. 047564  | 0. 962064 | 0. 995907 |
| ercc5             | 198. 9599385 | -0. 185988009 | 0. 1478127 | -1. 258268 | 0. 208295 | 0. 775404 |
| cacnalfb          | 443. 7964905 | 0. 054888887  | 0. 1138922 | 0. 4819372 | 0. 629851 | 0. 957354 |
| spon1b            | 2092. 803085 | 0. 027604466  | 0. 0723414 | 0. 3815862 | 0. 702768 | 0. 968134 |
| kctd6b            | 290. 1501875 | 0. 051387146  | 0. 1254556 | 0. 4096041 | 0. 682096 | 0. 965476 |
| mao               | 691. 8825294 | 0. 098611379  | 0. 1080754 | 0. 9124311 | 0. 361542 | 0. 88578  |
| aqpla. 1          | 1107. 090989 | -0. 114975804 | 0. 0822673 | -1. 397589 | 0. 162237 | 0. 716781 |
| hcrtr2            | 2. 767134206 | 1. 689980048  | 1. 2117395 | 1. 3946727 | 0. 163115 | NA        |
| cdc42se1          | 222. 587667  | -0. 071272512 | 0. 156094  | -0. 4566   | 0. 647959 | 0. 960708 |
| zgc:73226         | 132. 282919  | 0. 321442471  | 0. 1843427 | 1. 7437219 | 0. 081208 | 0. 551495 |
| gnsa              | 550. 5382104 | 0. 046750819  | 0. 1084802 | 0. 4309617 | 0. 666496 | 0. 964736 |
| mfsd4aa           | 18. 76920425 | 0. 263613922  | 0. 4475664 | 0. 588994  | 0. 555865 | 0. 94764  |
| gabrb3            | 960. 0132653 | 0. 150081773  | 0. 0893664 | 1. 6793987 | 0. 093074 | 0. 580702 |
| ryr1b             | 1331. 49921  | 0. 233798374  | 0. 0924061 | 2. 5301197 | 0. 011402 | 0. 186316 |
| dyrklab           | 1142. 100861 | 0. 101555453  | 0. 087152  | 1. 1652686 | 0. 24391  | 0. 813336 |
| uvrag             | 79. 6025541  | -0. 166491676 | 0. 2223821 | -0. 748674 | 0. 454054 | 0. 920295 |
| faxdc2            | 528. 0991275 | 0. 277609236  | 0. 105046  | 2. 6427399 | 0. 008224 | 0. 147048 |
| pfkfb2a           | 68. 54123855 | -0. 177072004 | 0. 2368005 | -0. 747769 | 0. 4546   | 0. 920747 |
| lsm4              | 858. 0977338 | -0. 209319698 | 0. 0976672 | -2. 143193 | 0. 032098 | 0. 348544 |
| ccdc174           | 319. 4716574 | -0. 058255839 | 0. 1372531 | -0. 424441 | 0. 671244 | 0. 965257 |
| dnase1111         | 515. 8338482 | 0. 169952506  | 0. 105579  | 1. 6097192 | 0. 107459 | 0. 617344 |
| si:dkey-172h23. 2 | 361. 3678566 | 0. 154564539  | 0. 1209174 | 1. 2782659 | 0. 201156 | 0. 766855 |
| stk24b            | 966. 2904801 | -0. 021916326 | 0. 0852159 | -0. 257186 | 0. 797035 | 0. 978569 |
| cacna2d4b         | 387. 543018  | 0. 27896106   | 0. 141442  | 1. 9722647 | 0. 048579 | 0. 433684 |
| casd1             | 474. 2297983 | 0. 062083133  | 0. 1070579 | 0. 5799025 | 0. 56198  | 0. 948728 |
| atf2              | 9. 507969078 | 0. 684675278  | 0. 6493331 | 1. 0544285 | 0. 291687 | NA        |
| mark4a            | 52. 148034   | 0. 212839937  | 0. 2803259 | 0. 7592588 | 0. 447698 | 0. 917154 |
| phactr1           | 286. 131146  | 0. 307492112  | 0. 1368754 | 2. 246511  | 0. 024671 | 0. 302262 |
| llgl2             | 1203. 610578 | -0. 080015636 | 0. 0888943 | -0. 900121 | 0. 368056 | 0. 887482 |
| dnajc24           | 50. 81544093 | 0. 179566457  | 0. 2786156 | 0. 6444953 | 0. 519254 | 0. 938945 |

|                  |             |              |           |           |          |          |
|------------------|-------------|--------------|-----------|-----------|----------|----------|
| skila            | 58.11696668 | -0.511843865 | 0.2624027 | -1.950604 | 0.051104 | 0.443542 |
| si:ch73-362m14.4 | 161.1992678 | -0.063679601 | 0.1622526 | -0.392472 | 0.69471  | 0.96736  |
| znhit3           | 34.59363546 | -0.120259005 | 0.3326621 | -0.361505 | 0.717722 | 0.96909  |
| fam167ab         | 84.86113318 | -0.17554095  | 0.215199  | -0.815715 | 0.414663 | 0.906237 |
| rnf181           | 90.88313344 | -0.098567622 | 0.211942  | -0.465069 | 0.641882 | 0.959994 |
| tpm4a            | 1612.138576 | -0.048978243 | 0.0975126 | -0.502276 | 0.615473 | 0.95688  |
| atp6v1c1a        | 2087.954877 | 0.023193973  | 0.0732323 | 0.3167179 | 0.751458 | 0.97419  |
| dctn4            | 532.0641624 | -0.31304721  | 0.1311982 | -2.386063 | 0.01703  | 0.241051 |
| pef1             | 319.0958601 | -0.010611979 | 0.1261467 | -0.084124 | 0.932958 | 0.992702 |
| heatr5a          | 484.2829011 | 0.024379989  | 0.1094052 | 0.2228412 | 0.823659 | 0.982196 |
| rprmb            | 71.14620938 | -0.18189367  | 0.2321328 | -0.783576 | 0.433289 | 0.913654 |
| mdga2a           | 350.8608065 | 0.009423434  | 0.1206164 | 0.0781273 | 0.937727 | 0.99279  |
| sdf2             | 344.5655681 | 0.092926665  | 0.1176508 | 0.7898517 | 0.429614 | 0.911615 |
| angpt12a         | 87.39732555 | 0.407476504  | 0.2182257 | 1.8672249 | 0.06187  | 0.485483 |
| coch             | 303.4432061 | 0.504243425  | 0.137703  | 3.6618195 | 0.00025  | 0.010194 |
| tmem38a          | 2652.177823 | 0.156120314  | 0.0966401 | 1.6154825 | 0.106206 | 0.615567 |
| dnajc4           | 268.3737298 | 0.076837186  | 0.1447718 | 0.5307471 | 0.595594 | 0.954434 |
| lmb1             | 105.8168218 | -0.079972872 | 0.1997672 | -0.40033  | 0.688913 | 0.966672 |
| adrald           | 75.59939005 | 0.316481058  | 0.2361325 | 1.3402691 | 0.180158 | 0.74128  |
| naa40            | 747.9751278 | 0.034734249  | 0.0943988 | 0.3679522 | 0.712909 | 0.96909  |
| gmppaa           | 261.2030304 | 0.098875529  | 0.1393462 | 0.7095674 | 0.477972 | 0.926857 |
| vamp8            | 342.116542  | 0.079933054  | 0.1304289 | 0.6128477 | 0.539977 | 0.944206 |
| sde2             | 499.7854549 | -0.059773148 | 0.1026334 | -0.582395 | 0.560301 | 0.948728 |
| p2rx8            | 10.91936421 | -0.312897344 | 0.6111265 | -0.512001 | 0.60865  | NA       |
| cav3             | 696.0948624 | 0.090158791  | 0.1034985 | 0.8711117 | 0.383693 | 0.895192 |
| haol             | 319.3464633 | 0.069785828  | 0.1350386 | 0.5167842 | 0.605307 | 0.95651  |
| kcnh1a           | 8.941904365 | 0.424299762  | 0.6446308 | 0.6582058 | 0.510406 | NA       |
| narf             | 470.8292156 | 0.016220913  | 0.1182272 | 0.1372012 | 0.890872 | 0.989291 |
| pnocb            | 68.10848578 | -0.360524915 | 0.2433003 | -1.481811 | 0.138391 | 0.676189 |
| znf395b          | 915.8739386 | -0.244345662 | 0.0970828 | -2.516879 | 0.01184  | 0.191129 |
| mcm3             | 873.8776239 | 0.049027506  | 0.0876179 | 0.5595601 | 0.57578  | 0.950373 |
| opn7a            | 0.166657454 | -0.955901296 | 4.0804729 | -0.234262 | 0.814781 | NA       |
| wasf2            | 795.9428571 | -0.163152962 | 0.0987791 | -1.651695 | 0.098597 | 0.59799  |
| ifngl            | 0.166657454 | -0.955901296 | 4.0804729 | -0.234262 | 0.814781 | NA       |
| cdk5rap2         | 294.6911642 | 0.024572875  | 0.1285034 | 0.1912236 | 0.84835  | 0.985174 |
| ubl7a            | 199.88778   | 0.246650217  | 0.1485326 | 1.66058   | 0.096798 | 0.592778 |
| pcbp4            | 1315.86852  | -0.031814986 | 0.0820165 | -0.387909 | 0.698083 | 0.967998 |
| pigm             | 75.7569571  | 0.208985611  | 0.2399341 | 0.8710124 | 0.383747 | 0.895192 |
| adh8b            | 1373.706641 | -0.763554281 | 0.1272994 | -5.998096 | 2.00E-09 | 3.77E-07 |
| slc11a2          | 545.2689166 | -0.12674301  | 0.1178237 | -1.0757   | 0.282061 | 0.843666 |
| clqtnf4          | 1123.109899 | -0.006122505 | 0.0951006 | -0.064379 | 0.948668 | 0.99381  |
| zbed4            | 506.3876227 | -0.088685039 | 0.1052154 | -0.84289  | 0.39929  | 0.900683 |
| nsmce4a          | 130.6024673 | 0.026338215  | 0.2056535 | 0.1280709 | 0.898093 | 0.990121 |
| herpud1          | 765.6058362 | -0.102628583 | 0.0977805 | -1.049581 | 0.293911 | 0.849999 |
| trap1            | 1250.178208 | -0.000371762 | 0.0809856 | -0.00459  | 0.996337 | 0.998902 |
| arhgap1          | 2481.005451 | 0.041925562  | 0.0890011 | 0.4710678 | 0.637592 | 0.958872 |
| col4a3bpa        | 309.8497299 | -0.077476449 | 0.1273506 | -0.608371 | 0.542941 | 0.944974 |
| crlfla           | 158.4278436 | -0.124631998 | 0.1703158 | -0.73177  | 0.464309 | 0.923325 |
| mstol            | 284.2837739 | -0.188789175 | 0.1488697 | -1.268151 | 0.204744 | 0.772783 |
| get4             | 963.8977625 | -0.044142218 | 0.0924438 | -0.477503 | 0.633004 | 0.957356 |
| twistnb          | 147.229682  | -0.073293329 | 0.1710484 | -0.428495 | 0.668291 | 0.964736 |
| ets1             | 75.55604517 | 0.088445169  | 0.2346164 | 0.3769778 | 0.70619  | 0.968459 |
| pvalb4           | 4690.81289  | -0.197670864 | 0.2017454 | -0.979804 | 0.327183 | 0.872658 |
| gnpda2           | 990.2141089 | 0.009269812  | 0.0987475 | 0.0938739 | 0.925209 | 0.992676 |

|                   |             |              |           |           |          |          |
|-------------------|-------------|--------------|-----------|-----------|----------|----------|
| mrps18a           | 415.8653584 | 0.020767468  | 0.1150843 | 0.1804544 | 0.856796 | 0.985597 |
| ns11              | 61.28432474 | -0.089547158 | 0.2482468 | -0.360718 | 0.71831  | 0.96909  |
| mpc2              | 1855.543076 | 0.090913369  | 0.0849653 | 1.0700061 | 0.284617 | 0.844955 |
| pigk              | 114.6783195 | -0.153006015 | 0.1848261 | -0.827838 | 0.407762 | 0.901408 |
| top2a             | 1996.270206 | -0.045117923 | 0.0723438 | -0.62366  | 0.532851 | 0.942805 |
| col9a2            | 19015.82359 | 0.088845677  | 0.091365  | 0.972426  | 0.330839 | 0.87417  |
| c6ast3            | 13.41041854 | 1.153050786  | 0.542942  | 2.1237089 | 0.033694 | 0.357045 |
| prfl.6            | 0.158795395 | 0.967652056  | 4.0804729 | 0.2371421 | 0.812547 | NA       |
| emilin1a          | 334.9265807 | 0.454011685  | 0.1239874 | 3.6617577 | 0.00025  | 0.010194 |
| tspan36           | 1205.856825 | -0.146397694 | 0.1251088 | -1.170163 | 0.241935 | 0.810713 |
| pla2g4aa          | 45.66178187 | 0.047446617  | 0.2889637 | 0.1641958 | 0.869577 | 0.987282 |
| cryba4            | 22644.52237 | -0.015284536 | 0.0782095 | -0.195431 | 0.845056 | 0.985174 |
| slc4a1b           | 92.66394332 | -0.140657599 | 0.2174217 | -0.646934 | 0.517674 | 0.938592 |
| nolc1             | 882.9591958 | 0.00062735   | 0.1087314 | 0.0057697 | 0.995396 | 0.99873  |
| sccpdhb           | 288.9663266 | -0.419981238 | 0.1269638 | -3.307883 | 0.00094  | 0.029552 |
| kif26bb           | 84.55624227 | 0.570966044  | 0.2202176 | 2.5927353 | 0.009522 | 0.163896 |
| gpc5b             | 192.3888098 | 0.215725847  | 0.1651508 | 1.3062359 | 0.191472 | 0.755886 |
| homezb            | 728.0797013 | 0.087768728  | 0.1069479 | 0.8206684 | 0.411835 | 0.903944 |
| zgc:162964        | 157.6226596 | -0.276727156 | 0.1814129 | -1.5254   | 0.127159 | 0.656588 |
| foxo6b            | 371.8518992 | 0.061487649  | 0.1158681 | 0.5306693 | 0.595648 | 0.954434 |
| nlrc5             | 4.954201555 | 0.037603004  | 0.8876391 | 0.0423629 | 0.966209 | NA       |
| pip5klab          | 585.6231582 | 0.02106724   | 0.09793   | 0.2151254 | 0.82967  | 0.982805 |
| snrpal            | 717.7192022 | -0.072918592 | 0.1031613 | -0.706841 | 0.479666 | 0.927091 |
| pgm3              | 250.1253436 | -0.145136594 | 0.1363421 | -1.064503 | 0.287101 | 0.845979 |
| oser1             | 591.6162435 | -0.035299052 | 0.1079807 | -0.326902 | 0.743742 | 0.974094 |
| panel             | 100.9899952 | -0.010520695 | 0.2370113 | -0.044389 | 0.964594 | 0.995973 |
| polr3g            | 2.855122227 | 0.188712634  | 1.2366611 | 0.1525985 | 0.878715 | NA       |
| lysmd3            | 145.0723743 | -0.056606498 | 0.171328  | -0.330398 | 0.741099 | 0.973154 |
| myo1b             | 1380.66401  | -0.016991127 | 0.0800446 | -0.212271 | 0.831896 | 0.98349  |
| slc25a23b         | 35.22828482 | 0.211792462  | 0.3323211 | 0.6373128 | 0.523921 | 0.939336 |
| selenbp1          | 358.5775135 | -0.329530675 | 0.1511265 | -2.180495 | 0.029221 | 0.331124 |
| hdhd2             | 134.843495  | -0.050145172 | 0.1727773 | -0.29023  | 0.77164  | 0.975687 |
| gnl3a             | 58.10648628 | -0.407095242 | 0.2661571 | -1.52953  | 0.126133 | 0.654806 |
| dpp6b             | 766.2858352 | 0.145849595  | 0.0950289 | 1.5347924 | 0.124835 | 0.654423 |
| hsp90aa1.2        | 2365.25625  | 0.208573767  | 0.1003081 | 2.0793311 | 0.037587 | 0.379013 |
| inhbab            | 44.76673016 | 0.106430298  | 0.3116203 | 0.3415384 | 0.732698 | 0.971719 |
| slc24a5           | 44.6872525  | 0.020540864  | 0.2946319 | 0.069717  | 0.944419 | 0.993364 |
| si:ch211-129c21.1 | 466.8593684 | -0.107238052 | 0.1146112 | -0.935668 | 0.349444 | 0.880195 |
| ctnna2            | 1364.627193 | 0.033803933  | 0.0944772 | 0.3577997 | 0.720493 | 0.969318 |
| mxc               | 18.49227967 | -0.450743277 | 0.4532116 | -0.994554 | 0.319953 | 0.868153 |
| ogfr12            | 19.49294087 | -0.167187976 | 0.4421403 | -0.378133 | 0.705332 | 0.968412 |
| rilpl2            | 154.8952973 | 0.18655878   | 0.1610506 | 1.1583861 | 0.246707 | 0.816669 |
| rnf150a           | 11.77537225 | -0.570218383 | 0.5849051 | -0.97489  | 0.329615 | 0.873583 |
| tmem134           | 387.001309  | -0.009415012 | 0.117204  | -0.08033  | 0.935975 | 0.992702 |
| tnn               | 5176.13656  | 0.286205299  | 0.0782436 | 3.657875  | 0.000254 | 0.010326 |
| crhbp             | 335.7303371 | 0.060104327  | 0.1213478 | 0.4953064 | 0.620384 | 0.957354 |
| max               | 3144.7418   | 0.008810496  | 0.0687934 | 0.1280719 | 0.898092 | 0.990121 |
| cops8             | 895.4437955 | 0.046501017  | 0.0874434 | 0.5317843 | 0.594875 | 0.954434 |
| col5a2b           | 231.9331093 | 0.079201004  | 0.1666905 | 0.475138  | 0.634689 | 0.9578   |
| dscama            | 1308.724476 | -0.02755749  | 0.1038999 | -0.265231 | 0.790831 | 0.977402 |
| dock4b            | 489.2355227 | -0.096671261 | 0.1057946 | -0.913764 | 0.360841 | 0.885686 |
| ptgr1             | 1480.873442 | -0.314778579 | 0.0986058 | -3.192292 | 0.001411 | 0.040686 |
| tbx5a             | 19.05688665 | 0.595804173  | 0.4423575 | 1.3468839 | 0.178018 | 0.738995 |
| fam50a            | 599.4576662 | -0.150945856 | 0.1089065 | -1.386013 | 0.165743 | 0.721576 |

|                  |             |              |           |           |          |          |
|------------------|-------------|--------------|-----------|-----------|----------|----------|
| stil             | 110.4245367 | -0.115528451 | 0.2134991 | -0.541119 | 0.588425 | 0.953319 |
| tmem136a         | 330.9417504 | 0.144141067  | 0.125558  | 1.148004  | 0.250967 | 0.820469 |
| spast            | 336.3370063 | -0.002939404 | 0.134846  | -0.021798 | 0.982609 | 0.996944 |
| rnf144b          | 277.7310413 | -0.092045812 | 0.1283147 | -0.717344 | 0.473162 | 0.924993 |
| tmed4            | 472.7373346 | -0.067108821 | 0.1112962 | -0.602975 | 0.546525 | 0.945526 |
| patj             | 274.2248339 | 0.045200831  | 0.1300406 | 0.3475901 | 0.728148 | 0.970402 |
| MARK4            | 1068.177003 | -0.023758657 | 0.090488  | -0.262561 | 0.792889 | 0.977937 |
| fancg            | 89.88475589 | -0.105743459 | 0.2079549 | -0.508492 | 0.611108 | 0.95688  |
| synj1            | 1645.771625 | -0.020351051 | 0.0884176 | -0.23017  | 0.81796  | 0.981594 |
| tpila            | 342.3869153 | 0.147549903  | 0.1244671 | 1.1854533 | 0.235838 | 0.804837 |
| gnal4a           | 18.52309135 | -0.022564803 | 0.4704256 | -0.047967 | 0.961743 | 0.995907 |
| prdm8            | 116.4598079 | -0.062811315 | 0.1855472 | -0.338519 | 0.734972 | 0.972129 |
| pnoca            | 100.6044508 | -0.009022412 | 0.2126093 | -0.042437 | 0.966151 | 0.996315 |
| nr3c1            | 1141.394892 | -0.025040902 | 0.0884669 | -0.283054 | 0.777136 | 0.975826 |
| stx5a            | 977.9986539 | 0.139449932  | 0.0857012 | 1.6271651 | 0.103702 | 0.610299 |
| syng3b           | 473.7948715 | 0.174488959  | 0.1187556 | 1.4693115 | 0.141748 | 0.682643 |
| trip13           | 119.1880055 | -0.120820623 | 0.1996747 | -0.605087 | 0.545121 | 0.945463 |
| AL935186.1       | 50.7234559  | -1.777677465 | 0.3334923 | -5.330491 | 9.79E-08 | 1.36E-05 |
| brd8             | 1187.431262 | -0.08697378  | 0.0827455 | -1.0511   | 0.293213 | 0.849024 |
| rpl18a           | 14702.59545 | -0.282897549 | 0.0856665 | -3.302311 | 0.000959 | 0.029926 |
| slc25a10         | 757.8872884 | -0.00947423  | 0.0923043 | -0.102641 | 0.918248 | 0.991623 |
| marveld2a        | 274.8961065 | -0.108504559 | 0.1290916 | -0.840524 | 0.400615 | 0.90084  |
| grnb             | 483.8269779 | -0.047836673 | 0.113122  | -0.422877 | 0.672385 | 0.965257 |
| lox14            | 280.26812   | 0.060973223  | 0.1267387 | 0.4810941 | 0.63045  | 0.957354 |
| ezrb             | 2483.712969 | 0.032017746  | 0.073496  | 0.4356396 | 0.663098 | 0.964736 |
| edem1            | 747.6167458 | -0.005923798 | 0.1032052 | -0.057398 | 0.954228 | 0.994409 |
| ppp3cb           | 2326.761941 | 0.027166629  | 0.0767936 | 0.3537618 | 0.723517 | 0.970402 |
| magixa           | 26.73458957 | -0.236745635 | 0.3708445 | -0.638396 | 0.523216 | 0.939336 |
| lbx2             | 212.4992732 | 0.169192633  | 0.1456342 | 1.1617647 | 0.245331 | 0.815324 |
| cd63             | 2209.666616 | -0.083493521 | 0.0864884 | -0.965373 | 0.334358 | 0.875361 |
| si:dkey-181c13.1 | 2.314256126 | 1.926318878  | 1.5343758 | 1.2554414 | 0.209319 | NA       |
| asic4a           | 288.6372449 | 0.021748409  | 0.1266977 | 0.1716559 | 0.863708 | 0.985952 |
| mpp7b            | 3.289981667 | 0.248328898  | 1.0717886 | 0.2316958 | 0.816774 | NA       |
| zgc:103482       | 12.18831098 | 0.190032011  | 0.5578548 | 0.3406478 | 0.733369 | 0.971993 |
| six6a            | 73.389827   | 0.040011635  | 0.2315315 | 0.172813  | 0.862798 | 0.985841 |
| cpne8            | 16.59244255 | 0.27855979   | 0.4816363 | 0.5783613 | 0.56302  | 0.948728 |
| syt2a            | 35.44702746 | -0.155319171 | 0.3225219 | -0.481577 | 0.630106 | 0.957354 |
| ints11           | 301.090042  | -0.015122493 | 0.1232581 | -0.12269  | 0.902353 | 0.990121 |
| myo5ab           | 208.5823691 | 0.606330984  | 0.1445476 | 4.1946812 | 2.73E-05 | 0.001635 |
| sppl3            | 747.098501  | 0.030929264  | 0.1123665 | 0.2752534 | 0.783122 | 0.97627  |
| znf668           | 143.9433661 | -0.143858004 | 0.1668808 | -0.862041 | 0.388665 | 0.896271 |
| lipt1            | 64.69927505 | 0.014752373  | 0.2434268 | 0.0606029 | 0.951675 | 0.993864 |
| s100a10b         | 1227.030089 | 0.187696854  | 0.0910444 | 2.061598  | 0.039246 | 0.388998 |
| pdcd6ip          | 2739.44802  | -0.073650191 | 0.0898751 | -0.819473 | 0.412517 | 0.904974 |
| gbgt111          | 32.18839943 | -0.370609146 | 0.3417656 | -1.084396 | 0.278189 | 0.841891 |
| panx1a           | 363.956663  | -0.000631616 | 0.1181477 | -0.005346 | 0.995735 | 0.998888 |
| tspan9a          | 9.430526784 | 1.043318484  | 0.6887063 | 1.5148961 | 0.129799 | NA       |
| gfap             | 6050.459381 | 0.114820997  | 0.0669092 | 1.7160728 | 0.086149 | 0.563157 |
| dixd1a           | 800.8449243 | -0.02154595  | 0.0894887 | -0.240767 | 0.809735 | 0.980648 |
| dpf3             | 132.5201606 | -0.452435849 | 0.1866005 | -2.424623 | 0.015324 | 0.227153 |
| cuzd1.2          | 1.998351438 | 0.004139829  | 1.402095  | 0.0029526 | 0.997644 | NA       |
| fynb             | 92.81306093 | -0.025960875 | 0.2088198 | -0.124322 | 0.90106  | 0.990121 |
| col21a1          | 46.24820241 | 0.464095517  | 0.297198  | 1.56157   | 0.118389 | 0.641743 |
| ccsapa           | 194.8759266 | -0.224800249 | 0.1504001 | -1.494682 | 0.134998 | 0.670689 |

|                  |             |              |           |           |          |          |
|------------------|-------------|--------------|-----------|-----------|----------|----------|
| myl12.2          | 692.3959039 | -0.109307393 | 0.1012516 | -1.079562 | 0.280337 | 0.843423 |
| rbm28            | 375.6441805 | 0.085059797  | 0.1209814 | 0.7030815 | 0.482005 | 0.928561 |
| nek10            | 10.66052892 | -0.257559968 | 0.5900396 | -0.436513 | 0.662465 | NA       |
| hagh             | 444.9731765 | -0.051821568 | 0.1063947 | -0.487069 | 0.62621  | 0.957354 |
| tusc2b           | 351.6775585 | 0.100468903  | 0.1193664 | 0.8416846 | 0.399964 | 0.90084  |
| znf277           | 120.7695133 | -0.197164995 | 0.1884186 | -1.04642  | 0.295367 | 0.851935 |
| igfbp5b          | 1081.605544 | 0.293363395  | 0.0888523 | 3.3016966 | 0.000961 | 0.029926 |
| prdx2            | 5534.372551 | -0.233769194 | 0.0980422 | -2.384373 | 0.017108 | 0.241859 |
| admp             | 0.804086858 | -1.860428069 | 2.2645275 | -0.821552 | 0.411332 | NA       |
| idh1             | 1860.05478  | -0.088895633 | 0.0837097 | -1.061952 | 0.288258 | 0.845979 |
| arl2bp           | 123.3203834 | 0.281097291  | 0.1841324 | 1.5266038 | 0.12686  | 0.656588 |
| lsm14b           | 3.378709501 | 0.883999793  | 1.086412  | 0.8136874 | 0.415824 | NA       |
| pfdn2            | 1076.352699 | 0.080077398  | 0.1036698 | 0.7724274 | 0.439861 | 0.916082 |
| srsf3a           | 40.53762756 | 0.109911885  | 0.3150876 | 0.3488297 | 0.727217 | 0.970402 |
| ftr83            | 326.69645   | -0.232469026 | 0.1539452 | -1.510077 | 0.131024 | 0.663795 |
| ube2g2           | 496.3878195 | -0.018120214 | 0.1086605 | -0.16676  | 0.867559 | 0.987231 |
| fzd5             | 180.4567351 | 0.040498624  | 0.1546841 | 0.261815  | 0.793464 | 0.977937 |
| tdrd3            | 516.6852012 | -0.040488231 | 0.1067553 | -0.379262 | 0.704493 | 0.968134 |
| socs3a           | 555.3619764 | -0.062371924 | 0.33564   | -0.18583  | 0.852578 | 0.985174 |
| msrbla           | 217.1208099 | -0.003026516 | 0.1417843 | -0.021346 | 0.98297  | 0.996944 |
| spon2a           | 242.3286087 | 0.177744056  | 0.1484617 | 1.1972384 | 0.231214 | 0.799444 |
| aatf             | 267.8318059 | -0.01017479  | 0.1326117 | -0.076726 | 0.938841 | 0.992857 |
| bnip3la          | 192.7524784 | 0.159590889  | 0.1540835 | 1.0357426 | 0.300322 | 0.856251 |
| gipr             | 28.44222948 | -0.035442461 | 0.3694217 | -0.09594  | 0.923568 | 0.992588 |
| nhlh2            | 681.7446824 | 0.087469336  | 0.1068565 | 0.818568  | 0.413033 | 0.905281 |
| mtx1a            | 279.7225944 | -0.011657338 | 0.1372506 | -0.084935 | 0.932313 | 0.992702 |
| gucy2f           | 141.6383305 | 0.100121569  | 0.182874  | 0.5474893 | 0.584043 | 0.952214 |
| si:ch73-335d12.2 | 0.491560863 | 0.853615855  | 2.865157  | 0.2979299 | 0.765757 | NA       |
| wdr24            | 236.42926   | -0.239929018 | 0.1386754 | -1.730149 | 0.083604 | 0.557158 |
| dip2cb           | 916.3848471 | 0.000891899  | 0.1039799 | 0.0085776 | 0.993156 | 0.998554 |
| zgc:101679       | 346.6904412 | -0.038692514 | 0.1217641 | -0.317766 | 0.750662 | 0.97419  |
| sgkl             | 2633.362078 | 0.175189375  | 0.0772235 | 2.2686023 | 0.023293 | 0.292994 |
| clintla          | 1137.809031 | -0.043072412 | 0.0861011 | -0.500254 | 0.616896 | 0.956957 |
| si:ch73-34314.6  |             | 0 NA         | NA        | NA        | NA       | NA       |
| ndufaf1          | 612.5774304 | 0.077446762  | 0.1056964 | 0.7327286 | 0.463724 | 0.922875 |
| wdr83os          | 559.8474051 | 0.096542541  | 0.1034515 | 0.9332156 | 0.350709 | 0.880195 |
| ormdl3           | 17.16966353 | 0.261988754  | 0.4606699 | 0.5687125 | 0.569551 | 0.948983 |
| pex1lg           | 46.56093474 | -0.611138024 | 0.3024163 | -2.02085  | 0.043295 | 0.40826  |
| slc25a3b         | 8476.688078 | -0.002446743 | 0.0689675 | -0.035477 | 0.9717   | 0.996315 |
| nf2b             | 471.2866265 | -0.057438019 | 0.1117177 | -0.514135 | 0.607157 | 0.956718 |
| mkln1            | 582.2024971 | 0.099273397  | 0.1012443 | 0.9805327 | 0.326823 | 0.872658 |
| zgc:66447        | 240.215545  | 0.015629321  | 0.1344693 | 0.1162296 | 0.907471 | 0.990702 |
| rpl10            | 16456.67716 | -0.359275302 | 0.0730548 | -4.917889 | 8.75E-07 | 9.01E-05 |
| plekhj1          | 237.3949894 | -0.068073895 | 0.1474002 | -0.46183  | 0.644203 | 0.960129 |
| agmo             | 150.5755358 | -0.286174915 | 0.1685434 | -1.69793  | 0.089521 | 0.572876 |
| or102-5          | 0.157187365 | -0.955901296 | 4.0804729 | -0.234262 | 0.814781 | NA       |
| trim35-14        | 0.166657454 | -0.955901296 | 4.0804729 | -0.234262 | 0.814781 | NA       |
| nvl              | 494.2702305 | -0.087994931 | 0.1037402 | -0.848224 | 0.396313 | 0.899672 |
| ifnphil          | 1.679609444 | 0.005089711  | 1.4178403 | 0.0035898 | 0.997136 | NA       |
| casp611          | 23.29958211 | 0.245680829  | 0.408898  | 0.6008365 | 0.547949 | 0.945768 |
| prrl51a          | 67.99733791 | -0.0725624   | 0.2349442 | -0.30885  | 0.757436 | 0.975374 |
| gli2a            | 629.0731196 | -0.059421952 | 0.0986595 | -0.602294 | 0.546979 | 0.945526 |
| or111-2          | 2.237462172 | 0.271244177  | 1.4380036 | 0.1886255 | 0.850386 | NA       |
| adgrb2           | 99.96007379 | 0.07060038   | 0.2070554 | 0.3409733 | 0.733124 | 0.971947 |



|                   |             |              |           |           |          |          |
|-------------------|-------------|--------------|-----------|-----------|----------|----------|
| fstl3             | 326.7676128 | 0.151868494  | 0.1363821 | 1.1135515 | 0.265472 | 0.831302 |
| grm6b             | 340.9545411 | 0.059243422  | 0.1279135 | 0.4631522 | 0.643255 | 0.959994 |
| antxrla           | 20.51853486 | -0.504117879 | 0.4214763 | -1.196077 | 0.231667 | 0.799752 |
| comtb             | 268.203609  | 0.071526477  | 0.1392692 | 0.5135844 | 0.607543 | 0.956718 |
| tmem9b            | 758.3187703 | -0.051267433 | 0.11098   | -0.461952 | 0.644116 | 0.960129 |
| mbdlb             | 593.0985643 | -0.178821471 | 0.1010818 | -1.769077 | 0.076881 | 0.540051 |
| dmgdh             | 767.4435767 | -0.004950569 | 0.1312603 | -0.037716 | 0.969914 | 0.996315 |
| cxxclb            | 321.2538659 | 0.064039443  | 0.1325207 | 0.4832412 | 0.628925 | 0.957354 |
| grinlb            | 3842.544718 | -0.012494557 | 0.0708677 | -0.176308 | 0.860052 | 0.985773 |
| ube2f             | 515.2757862 | -0.067567375 | 0.1092154 | -0.618662 | 0.536139 | 0.943336 |
| tspan35           | 235.9570425 | 0.069169823  | 0.144837  | 0.47757   | 0.632956 | 0.957356 |
| zgc:66440         | 188.4968513 | 0.134284346  | 0.1618578 | 0.829644  | 0.40674  | 0.901305 |
| si:ch211-125e6.11 | 0 NA        | NA           | NA        | NA        | NA       | NA       |
| chp2              | 158.7998526 | 0.01614856   | 0.1663698 | 0.0970642 | 0.922675 | 0.99233  |
| chd4b             | 3632.742716 | -0.072746556 | 0.0705043 | -1.031803 | 0.302164 | 0.857048 |
| abhd2a            | 26.50537784 | -0.155188707 | 0.3732523 | -0.415774 | 0.677575 | 0.965257 |
| taf5l             | 102.5127374 | -0.042319106 | 0.2005732 | -0.210991 | 0.832894 | 0.983557 |
| chek2             | 68.2985003  | -0.217621177 | 0.2669686 | -0.815157 | 0.414983 | 0.906237 |
| dmtf1             | 368.1243203 | -0.080272806 | 0.1284093 | -0.625132 | 0.531884 | 0.942359 |
| gnal2a            | 494.8682093 | -0.097492153 | 0.1067518 | -0.91326  | 0.361106 | 0.885686 |
| sox12             | 1221.626274 | -0.102414208 | 0.0869424 | -1.177954 | 0.238815 | 0.807768 |
| rps2l             | 8655.006871 | -0.176848229 | 0.1014163 | -1.743785 | 0.081197 | 0.551495 |
| ddx5l             | 192.8176405 | -0.029505123 | 0.1539174 | -0.191695 | 0.847981 | 0.985174 |
| camk2n1a          | 1808.472619 | 0.085930862  | 0.0816048 | 1.053012  | 0.292336 | 0.848099 |
| zgc:56525         | 1206.15571  | -0.042964836 | 0.0841217 | -0.510746 | 0.609529 | 0.956718 |
| lmf2b             | 653.1639242 | -0.079923211 | 0.1112312 | -0.718532 | 0.472429 | 0.924838 |
| ankddl1b          | 17.41631029 | -0.227227422 | 0.4718395 | -0.481578 | 0.630106 | 0.957354 |
| kctd2             | 57.90724293 | -0.104598859 | 0.2538891 | -0.411986 | 0.680349 | 0.965431 |
| usp14             | 1199.312195 | -0.013625432 | 0.0857529 | -0.158892 | 0.873754 | 0.987881 |
| shox              | 426.3822051 | -0.077322569 | 0.1232232 | -0.6275   | 0.530332 | 0.942209 |
| pnx               | 1.57818626  | 1.909813316  | 1.774008  | 1.0765528 | 0.28168  | NA       |
| plekhg5a          | 593.6295314 | 0.072368425  | 0.0986253 | 0.733771  | 0.463088 | 0.922698 |
| lgals911          | 74.99283039 | -0.082340432 | 0.2255269 | -0.365103 | 0.715035 | 0.96909  |
| tecrb             | 2231.263664 | 0.01552602   | 0.0733593 | 0.2116436 | 0.832385 | 0.983557 |
| bssl2l            | 158.6623596 | -0.172464621 | 0.1695671 | -1.017088 | 0.309112 | 0.861381 |
| si:dkey-190g11.3  | 10.53229137 | 0.003928453  | 0.5838309 | 0.0067288 | 0.994631 | NA       |
| tiamlb            | 165.9234291 | 0.119146959  | 0.1622033 | 0.7345531 | 0.462612 | 0.922698 |
| crygs3            | 2.775474421 | -0.182679766 | 1.1959654 | -0.152747 | 0.878598 | NA       |
| mlhl              | 119.9211034 | -0.352466506 | 0.1828023 | -1.92813  | 0.053839 | 0.454574 |
| irakl             | 81.18694861 | -0.206173245 | 0.2209211 | -0.933244 | 0.350694 | 0.880195 |
| rhoq              | 255.8586141 | 0.120564121  | 0.1460714 | 0.8253781 | 0.409157 | 0.901769 |
| mctsl             | 592.8375852 | 0.053879118  | 0.1033632 | 0.5212603 | 0.602185 | 0.956045 |
| magi3b            | 23.46970761 | 0.059793108  | 0.438462  | 0.1363701 | 0.891529 | 0.989291 |
| blmh              | 1347.531327 | -0.112330595 | 0.1174576 | -0.956351 | 0.338895 | 0.87745  |
| l3mbt13           | 14.90890863 | 0.023916039  | 0.5038642 | 0.0474652 | 0.962142 | 0.995907 |
| xpnpep2           | 93.04934369 | 0.438406249  | 0.211226  | 2.0755314 | 0.037937 | 0.381357 |
| mospd2            | 277.2134678 | -0.06188859  | 0.1291023 | -0.479376 | 0.631671 | 0.957356 |
| ankrd44           | 57.71383784 | 0.092644869  | 0.2790584 | 0.331991  | 0.739896 | 0.972943 |
| ube2b             | 483.7585122 | 0.051819635  | 0.1077711 | 0.4808307 | 0.630637 | 0.957354 |
| tscla             | 741.8204003 | 0.184484208  | 0.0912192 | 2.0224274 | 0.043132 | 0.407581 |
| mxl               | 4.880823235 | -0.212633457 | 0.900311  | -0.236178 | 0.813295 | NA       |
| ccdc3a            | 30.36096465 | -0.084844684 | 0.4046464 | -0.209676 | 0.83392  | 0.983583 |
| hltf              | 246.3896547 | -0.148906492 | 0.1397457 | -1.065553 | 0.286626 | 0.845942 |
| trappc5           | 569.5214046 | -0.011109809 | 0.1040114 | -0.106813 | 0.914937 | 0.991119 |

|                 |             |              |           |           |          |          |
|-----------------|-------------|--------------|-----------|-----------|----------|----------|
| cd82b           | 994.1395632 | 0.006197119  | 0.0909291 | 0.0681533 | 0.945664 | 0.993609 |
| pdcd5           | 647.3078348 | -0.053112218 | 0.1001532 | -0.53031  | 0.595897 | 0.954434 |
| lhcgr           | 1.614149009 | -0.60141512  | 1.5131948 | -0.397447 | 0.691038 | NA       |
| si:dkey-43k4.5  | 50.18280395 | -0.017786763 | 0.2923924 | -0.060832 | 0.951493 | 0.99381  |
| zgc:162324      | 19.09294205 | -0.314658627 | 0.475523  | -0.661711 | 0.508157 | 0.935735 |
| adprm           | 64.74898501 | 0.134247443  | 0.2775572 | 0.483675  | 0.628617 | 0.957354 |
| si:dkey-13a21.4 | 16.11744768 | -0.295226924 | 0.4810881 | -0.613665 | 0.539437 | 0.943908 |
| slc48a1b        | 303.24774   | -0.17932929  | 0.1332992 | -1.345314 | 0.178524 | 0.739486 |
| sfxn5b          | 192.8102578 | 0.007993182  | 0.1483232 | 0.0538903 | 0.957023 | 0.994543 |
| slc46a1         | 90.40657725 | -0.036429173 | 0.2210206 | -0.164823 | 0.869084 | 0.987245 |
| coll1a1a        | 23716.96052 | 0.169749053  | 0.0921882 | 1.841331  | 0.065573 | 0.500566 |
| emilin1b        | 556.1977353 | 0.063592623  | 0.1051691 | 0.60467   | 0.545398 | 0.945526 |
| hps1            | 140.8593356 | -0.010330122 | 0.1724428 | -0.059905 | 0.952232 | 0.993904 |
| ube3d           | 110.9103138 | -0.237092497 | 0.19723   | -1.202112 | 0.22932  | 0.796938 |
| prpf8           | 4716.225242 | -0.011229082 | 0.0727272 | -0.1544   | 0.877294 | 0.987881 |
| polr2eb         | 724.4695826 | -0.056922736 | 0.1076182 | -0.528932 | 0.596853 | 0.954913 |
| yju2            | 466.8815198 | 0.03243107   | 0.119642  | 0.2710675 | 0.786339 | 0.976476 |
| enoph1          | 630.5592062 | -0.079649193 | 0.0964534 | -0.825779 | 0.40893  | 0.90171  |
| fanci           | 170.1241877 | -0.157673108 | 0.1583707 | -0.995595 | 0.319447 | 0.867905 |
| nsd2            | 784.5843298 | -0.159261934 | 0.1061751 | -1.499993 | 0.133616 | 0.66814  |
| prnpa           | 216.8021463 | 0.746544889  | 0.1556076 | 4.7976127 | 1.61E-06 | 0.000148 |
| zgc:56585       | 94.71242766 | 0.354591696  | 0.2082773 | 1.7024984 | 0.088662 | 0.569591 |
| CR847944.1      |             | 0 NA         | NA        | NA        | NA       | NA       |
| insyn1          | 371.7950695 | 0.01130452   | 0.1399026 | 0.0808028 | 0.935599 | 0.992702 |
| slc1a7b         | 72.62663202 | -0.234174263 | 0.2334199 | -1.003232 | 0.315749 | 0.866931 |
| lyrml           | 54.36103435 | -0.091289864 | 0.2598941 | -0.351258 | 0.725395 | 0.970402 |
| erbb2           | 45.16739295 | 0.227055473  | 0.2948977 | 0.7699466 | 0.441332 | 0.916336 |
| zgc:112994      | 28.89246203 | -0.193690733 | 0.3569762 | -0.542587 | 0.587414 | 0.953319 |
| adgre5a         |             | 0 NA         | NA        | NA        | NA       | NA       |
| dhrs13a.1       | 312.0917494 | 0.166315266  | 0.1264917 | 1.3148312 | 0.188567 | 0.753276 |
| mmp11a          | 76.64810325 | 0.377608897  | 0.237691  | 1.5886548 | 0.112138 | 0.627454 |
| arhgap29a       | 334.6348113 | -0.004796796 | 0.1276579 | -0.037575 | 0.970026 | 0.996315 |
| xkr7            | 105.7656976 | 0.110766946  | 0.2005383 | 0.5523481 | 0.58071  | 0.951731 |
| susd4           | 227.4256647 | 0.015116394  | 0.1376753 | 0.1097974 | 0.91257  | 0.991119 |
| styxl1          | 1.965054466 | 1.588801095  | 1.4409003 | 1.1026447 | 0.270181 | NA       |
| csad            | 188.8020165 | 0.262853458  | 0.1541945 | 1.7046876 | 0.088253 | 0.568811 |
| wasb            | 20.17321665 | -0.381140948 | 0.4621142 | -0.824777 | 0.409498 | 0.902019 |
| pbl2            | 140.5991339 | 0.44215612   | 0.1694265 | 2.6097223 | 0.009062 | 0.159222 |
| dbi             | 2186.340459 | -0.207800183 | 0.0703431 | -2.954094 | 0.003136 | 0.073769 |
| acol            | 51.696548   | 0.117351744  | 0.2715192 | 0.4322043 | 0.665593 | 0.964736 |
| si:dkey-27j5.5  | 33.53595485 | 0.295941317  | 0.3316885 | 0.8922267 | 0.372271 | 0.892711 |
| pip4plb         | 57.96291531 | 0.228736927  | 0.2628612 | 0.8701813 | 0.384201 | 0.895192 |
| rfx4            | 226.3241991 | 0.159639462  | 0.1610856 | 0.9910224 | 0.321675 | 0.869375 |
| rad51d          | 45.26001922 | -0.025256563 | 0.2898565 | -0.087135 | 0.930564 | 0.992702 |
| heph1b          | 10.4597713  | 0.017930438  | 0.6429472 | 0.0278879 | 0.977752 | NA       |
| anxa5a          | 107.3757749 | 0.172809549  | 0.2040391 | 0.8469431 | 0.397027 | 0.899672 |
| ccr12b.2        | 0.639947932 | -1.440068751 | 2.4365394 | -0.59103  | 0.5545   | NA       |
| apob            | 338.5387495 | 0.097185171  | 0.1378277 | 0.705121  | 0.480735 | 0.927601 |
| med29           | 223.0059941 | 0.01069106   | 0.1399325 | 0.0764016 | 0.9391   | 0.992857 |
| zgc:66474       | 312.220772  | -0.003022046 | 0.1301606 | -0.023218 | 0.981477 | 0.996944 |
| mis12           | 119.4446144 | 0.06293661   | 0.2135474 | 0.2947196 | 0.768208 | 0.975687 |
| six1b           | 362.0665167 | 0.173122211  | 0.1156883 | 1.4964536 | 0.134535 | 0.670689 |
| tiall           | 2715.040082 | 0.089827614  | 0.0757388 | 1.1860184 | 0.235615 | 0.804824 |
| arhgap12b       | 980.9432783 | 0.076588856  | 0.0870361 | 0.8799664 | 0.378877 | 0.895192 |

|                  |             |              |           |           |          |          |
|------------------|-------------|--------------|-----------|-----------|----------|----------|
| rab15            | 401.8611451 | 0.226272566  | 0.1147027 | 1.9726871 | 0.048531 | 0.433449 |
| khsrp            | 1846.375086 | -0.193548947 | 0.0965387 | -2.004886 | 0.044975 | 0.417005 |
| ppmle            | 91.5398169  | 0.287416489  | 0.2143323 | 1.3409855 | 0.179925 | 0.741062 |
| xkr9             | 18.42927739 | 0.02340009   | 0.4397484 | 0.0532124 | 0.957563 | 0.99467  |
| si:ch211-285c6.3 | 1.121918354 | -0.422914697 | 1.8509454 | -0.228486 | 0.819269 | NA       |
| hoxb6b           | 217.0891432 | -0.154831008 | 0.156975  | -0.986342 | 0.323965 | 0.870928 |
| ralgps2          | 683.2367387 | 0.106655845  | 0.0963795 | 1.1066233 | 0.268457 | 0.833634 |
| alcama           | 1351.844647 | -0.021984781 | 0.0797362 | -0.275719 | 0.782764 | 0.97627  |
| ppp4r2a          | 644.6855571 | 0.016732696  | 0.0978253 | 0.1710467 | 0.864187 | 0.98601  |
| cyp2u1           | 27.30774682 | 0.345472307  | 0.3790413 | 0.9114371 | 0.362065 | 0.885944 |
| pimr196          | 0.323844819 | -1.825095364 | 3.274639  | -0.557342 | 0.577293 | NA       |
| cdk2             | 313.9804355 | -0.047491624 | 0.1240646 | -0.382798 | 0.70187  | 0.968134 |
| iscub            | 94.34978156 | 0.037379412  | 0.2082733 | 0.1794729 | 0.857566 | 0.985703 |
| pafah1b1b        | 3194.815625 | 0.10076359   | 0.0708103 | 1.4230067 | 0.154734 | 0.704573 |
| en2a             | 315.9155309 | -0.135330248 | 0.1376698 | -0.983006 | 0.325604 | 0.871896 |
| socs3b           | 795.4313337 | -0.196293529 | 0.2844399 | -0.690105 | 0.490128 | 0.931926 |
| zgc:113425       | 9.345930974 | 0.133771826  | 0.6345412 | 0.2108166 | 0.83303  | NA       |
| gmds             | 1228.432478 | -0.792051509 | 0.0802122 | -9.874453 | 5.37E-23 | 8.17E-20 |
| mark3b           | 1125.980453 | 0.015260144  | 0.0852242 | 0.1790588 | 0.857892 | 0.985703 |
| ehmt1b           | 1527.117127 | 0.030798619  | 0.079695  | 0.386456  | 0.699159 | 0.967998 |
| asb1             | 14.83915064 | 0.30445121   | 0.4924116 | 0.618286  | 0.536387 | 0.943336 |
| gosr1            | 303.6102487 | -0.084346119 | 0.1266287 | -0.66609  | 0.505354 | 0.935724 |
| tspo             | 611.7856483 | -0.225559441 | 0.1150673 | -1.960239 | 0.049968 | 0.437835 |
| t1r19            | 0.666939546 | 1.487980453  | 2.2924711 | 0.6490727 | 0.516291 | NA       |
| ur1l             | 874.5753348 | -0.176592714 | 0.0861026 | -2.050956 | 0.040271 | 0.392394 |
| slc25a14         | 876.9600272 | 0.208946566  | 0.0873136 | 2.3930579 | 0.016709 | 0.238173 |
| zgc:101583       | 128.7293715 | 0.245567278  | 0.1978961 | 1.2408902 | 0.214646 | 0.782493 |
| gtf2h1           | 255.8496903 | 0.118462848  | 0.1363349 | 0.8689104 | 0.384896 | 0.89551  |
| ftr72            | 1.97020862  | -0.487641474 | 1.3234626 | -0.368459 | 0.712531 | NA       |
| rab5c            | 2485.939782 | 0.045723452  | 0.0818851 | 0.5583854 | 0.576581 | 0.950611 |
| syncr1pl         | 785.3361034 | 0.214395287  | 0.0899937 | 2.3823361 | 0.017203 | 0.242176 |
| anxala           | 1228.815289 | 0.028121304  | 0.0979469 | 0.2871078 | 0.77403  | 0.975687 |
| ill1ra           | 36.36828821 | -0.351966059 | 0.3259064 | -1.07996  | 0.28016  | 0.843423 |
| grik4            | 231.0323454 | 0.150385674  | 0.1439948 | 1.0443824 | 0.296309 | 0.853286 |
| ldlrb            | 546.4512971 | -0.016226057 | 0.1092464 | -0.148527 | 0.881927 | 0.988344 |
| fam126a          | 455.7877454 | -0.136940065 | 0.1147558 | -1.193317 | 0.232745 | 0.801236 |
| ahsg1            | 12.73445141 | -0.089931799 | 0.5954764 | -0.151025 | 0.879956 | 0.987881 |
| bc12110          | 877.4877327 | 0.019988451  | 0.0892904 | 0.2238589 | 0.822867 | 0.982189 |
| no111            | 649.8690263 | -0.069470977 | 0.0992606 | -0.699885 | 0.483999 | 0.929461 |
| tmem41ab         | 110.2969978 | 0.607098872  | 0.1952616 | 3.1091563 | 0.001876 | 0.050962 |
| robo1            | 1616.175719 | -0.067064338 | 0.0914395 | -0.733429 | 0.463297 | 0.922698 |
| aqp7             | 68.45185649 | -0.280533089 | 0.2501076 | -1.12165  | 0.262011 | 0.830166 |
| grmla            | 575.4409548 | -0.198622955 | 0.1031127 | -1.926271 | 0.054071 | 0.455557 |
| suv39h1a         | 4.618752265 | -0.100389309 | 0.9766782 | -0.102786 | 0.918132 | NA       |
| stau2            | 5162.421152 | 0.035344005  | 0.0699458 | 0.5053057 | 0.613344 | 0.95688  |
| taf8             | 189.2645777 | -0.184877291 | 0.1497537 | -1.234543 | 0.217001 | 0.784302 |
| ext13            | 237.3575638 | 0.177680928  | 0.1381103 | 1.286515  | 0.198263 | 0.76333  |
| gucy2d           | 1516.850588 | 0.261806335  | 0.09121   | 2.8703696 | 0.0041   | 0.0887   |
| cot11            | 5002.678398 | -0.12538572  | 0.0758712 | -1.652614 | 0.098409 | 0.597834 |
| cdr21            | 700.3000627 | -0.08402196  | 0.0943299 | -0.890725 | 0.373077 | 0.893126 |
| slc25a32b        | 175.9756148 | 0.056942856  | 0.1579281 | 0.3605618 | 0.718427 | 0.96909  |
| med21            | 192.339163  | 0.035078517  | 0.1674692 | 0.2094625 | 0.834087 | 0.983673 |
| arhgap23b        | 76.04940676 | 0.286818932  | 0.2352388 | 1.2192669 | 0.222743 | 0.789115 |
| acin1b           | 2768.470367 | 0.05737202   | 0.076567  | 0.7493045 | 0.453674 | 0.920041 |

|                   |             |              |           |           |          |          |
|-------------------|-------------|--------------|-----------|-----------|----------|----------|
| rhoaa             | 3596.490486 | 0.00909255   | 0.0731602 | 0.1242827 | 0.901091 | 0.990121 |
| cacna2d4a         | 50.34106134 | -0.060855054 | 0.2973115 | -0.204685 | 0.837819 | 0.984701 |
| aktip             | 1041.159877 | 0.060960234  | 0.0973363 | 0.6262849 | 0.531128 | 0.942209 |
| si:ch211-226m16.3 | 0.182570949 | 0.967652056  | 4.0804729 | 0.2371421 | 0.812547 | NA       |
| fam107b           | 1174.271931 | -0.078873548 | 0.0844369 | -0.934112 | 0.350246 | 0.880195 |
| uchl1             | 595.3750733 | -0.001193664 | 0.1035655 | -0.011526 | 0.990804 | 0.997679 |
| fam57ba           | 525.5250304 | 0.161144351  | 0.1059637 | 1.5207505 | 0.128322 | 0.658954 |
| palmla            | 439.8956433 | 0.102048364  | 0.115475  | 0.8837268 | 0.376844 | 0.895192 |
| gpatch11          | 262.6816436 | -0.23678971  | 0.138541  | -1.709167 | 0.08742  | 0.566637 |
| tor113            | 3.85538121  | -1.847265497 | 1.0767748 | -1.715554 | 0.086244 | NA       |
| cryz11            | 207.690116  | 0.0880503    | 0.1654115 | 0.5323105 | 0.594511 | 0.954434 |
| cb1n13            | 7.875624602 | -0.259406474 | 0.7119429 | -0.364364 | 0.715586 | NA       |
| slc48a1a          | 48.51307711 | -0.320827322 | 0.2757475 | -1.163482 | 0.244634 | 0.814376 |
| tmed2             | 2211.921875 | -0.022730173 | 0.0710978 | -0.319703 | 0.749194 | 0.97419  |
| nos2a             | 1.161995204 | -0.406585265 | 1.814365  | -0.224092 | 0.822685 | NA       |
| rom1b             | 610.4172864 | 0.181067502  | 0.1094917 | 1.6537094 | 0.098187 | 0.59749  |
| fbxl4             | 203.1101633 | 0.050368265  | 0.1471685 | 0.3422489 | 0.732164 | 0.971665 |
| ap2s1             | 2448.860453 | 0.060834674  | 0.0772718 | 0.787282  | 0.431117 | 0.91234  |
| si:ch211-119o8.6  | 2.262897238 | -0.437223843 | 1.3142383 | -0.332682 | 0.739374 | NA       |
| krt1-c5           | 265.0583585 | 0.100485392  | 0.1402258 | 0.7165968 | 0.473623 | 0.924993 |
| lims1             | 1093.451553 | -0.025689544 | 0.0950483 | -0.270279 | 0.786946 | 0.976596 |
| rexo1             | 242.234755  | -0.186008708 | 0.1354085 | -1.373686 | 0.169539 | 0.726744 |
| tbc1d22b          | 5.486143505 | -0.818290548 | 0.8318949 | -0.983646 | 0.325289 | NA       |
| klhl6             | 9.863743544 | 0.172433752  | 0.6204363 | 0.2779234 | 0.781071 | NA       |
| zgc:85777         | 720.2821075 | -0.152543276 | 0.0950479 | -1.604909 | 0.108514 | 0.62063  |
| gbf1              | 1056.93761  | 0.109544792  | 0.0853327 | 1.2837374 | 0.199234 | 0.764601 |
| ppp2r5a           | 24.73225736 | -0.228693608 | 0.4014344 | -0.569691 | 0.568887 | 0.948983 |
| pcdh17            | 2167.129254 | 0.099114965  | 0.0772813 | 1.2825227 | 0.199659 | 0.76498  |
| scyl3             | 452.9025899 | 0.076866033  | 0.1067776 | 0.7198705 | 0.471605 | 0.924838 |
| arpc1b            | 633.7298151 | 0.193162472  | 0.1019753 | 1.8942091 | 0.058197 | 0.472993 |
| slc38a3a          | 1479.164939 | 0.222422285  | 0.0797653 | 2.7884608 | 0.005296 | 0.107627 |
| acbd4             | 72.70198577 | -0.07334827  | 0.2533044 | -0.289566 | 0.772149 | 0.975687 |
| cnppd1            | 1183.83294  | -0.039135675 | 0.0865969 | -0.451929 | 0.65132  | 0.960708 |
| znf804a           | 181.2031439 | -0.04505744  | 0.1579513 | -0.285262 | 0.775444 | 0.975687 |
| hmbox1a           | 35.95509905 | 0.075065812  | 0.3169055 | 0.2368713 | 0.812757 | 0.981081 |
| tgfb2             | 72.22653857 | -0.189461194 | 0.2314771 | -0.818488 | 0.413079 | 0.905281 |
| ptgdsb.1          | 3829.331794 | 0.614128505  | 0.0899635 | 6.8264219 | 8.71E-12 | 2.53E-09 |
| psmc4             | 2807.232217 | -0.014171684 | 0.0828819 | -0.170986 | 0.864234 | 0.98601  |
| zfr               | 4343.796781 | 0.040685657  | 0.0678701 | 0.5994633 | 0.548864 | 0.946312 |
| ephb4b            | 394.4292671 | -0.022335818 | 0.1222376 | -0.182725 | 0.855014 | 0.985174 |
| tmem218           | 35.94876151 | -0.401883661 | 0.3439884 | -1.168306 | 0.242683 | 0.811434 |
| tmem169a          | 93.44051437 | -0.347931799 | 0.2064861 | -1.685013 | 0.091986 | 0.57849  |
| nup160            | 961.167711  | -0.264665326 | 0.0999393 | -2.64826  | 0.008091 | 0.1451   |
| ube213b           | 1864.893065 | 0.048355501  | 0.0811312 | 0.5960164 | 0.551164 | 0.946571 |
| aptx              | 140.0603899 | 0.020043936  | 0.1774675 | 0.1129443 | 0.910075 | 0.990702 |
| gabrr3a           | 44.90630201 | 0.190442398  | 0.3129389 | 0.6085609 | 0.542816 | 0.944974 |
| tpd5212a          | 872.9312455 | 0.071368871  | 0.0863303 | 0.8266954 | 0.40841  | 0.90171  |
| fbxo28            | 155.6474657 | 0.046264543  | 0.1697805 | 0.2724962 | 0.78524  | 0.97627  |
| igl3v2            | 0.158795395 | 0.967652056  | 4.0804729 | 0.2371421 | 0.812547 | NA       |
| kpna7             | 4.676865706 | 1.089650127  | 0.8837111 | 1.2330389 | 0.217561 | NA       |
| phactr2           | 196.0575074 | 0.158450197  | 0.1519403 | 1.0428449 | 0.29702  | 0.853798 |
| rnf25             | 548.4109467 | -0.251384934 | 0.1048029 | -2.398646 | 0.016456 | 0.236409 |
| namptb            | 255.5291102 | -0.178840403 | 0.138475  | -1.291499 | 0.196531 | 0.761835 |
| kat8              | 552.5045441 | -0.024371464 | 0.1019703 | -0.239006 | 0.811101 | 0.981081 |

|                   |             |              |           |           |          |          |
|-------------------|-------------|--------------|-----------|-----------|----------|----------|
| hcn3              | 27.27279517 | 0.651610811  | 0.3769648 | 1.7285721 | 0.083886 | 0.557501 |
| si:dkey-1612.17   | 84.14026322 | -0.04800472  | 0.2170366 | -0.221183 | 0.82495  | 0.982196 |
| smad1             | 949.9863917 | -0.169305263 | 0.0863663 | -1.960316 | 0.049959 | 0.437835 |
| gabarapl2         | 817.5153195 | -0.108102759 | 0.0915791 | -1.18043  | 0.237829 | 0.806522 |
| adgrgl            | 289.2443032 | -0.219584917 | 0.1341751 | -1.636555 | 0.101723 | 0.605868 |
| ift88             | 290.4997398 | 0.059780593  | 0.1287116 | 0.4644537 | 0.642323 | 0.959994 |
| rsla              | 3632.410563 | 0.127470446  | 0.0869726 | 1.4656385 | 0.142747 | 0.684998 |
| btgl              | 5487.796106 | -0.171176218 | 0.0644203 | -2.657178 | 0.00788  | 0.142427 |
| numb              | 483.4515477 | 0.111445196  | 0.1061708 | 1.049678  | 0.293866 | 0.849999 |
| kcnflb            | 63.01286987 | -0.105230561 | 0.2713149 | -0.387854 | 0.698124 | 0.967998 |
| nrplb             | 101.603955  | 0.252381287  | 0.1987567 | 1.2698    | 0.204156 | 0.771764 |
| lspl              | 802.362024  | -0.063503702 | 0.1074165 | -0.591191 | 0.554392 | 0.947449 |
| tcp1112           | 1167.961813 | -0.070181834 | 0.0863815 | -0.812464 | 0.416526 | 0.906237 |
| lin7c             | 1610.056615 | 0.11059677   | 0.0846808 | 1.3060433 | 0.191538 | 0.755886 |
| mpz12b            | 401.7106392 | -0.101784528 | 0.1160232 | -0.877277 | 0.380336 | 0.895192 |
| zmy2              | 1316.917346 | -0.093239446 | 0.0810381 | -1.150563 | 0.249912 | 0.819849 |
| slc25a4           | 7169.700744 | 0.361607054  | 0.0835647 | 4.3272683 | 1.51E-05 | 0.001002 |
| cd2bp2            | 419.6053094 | -0.106877212 | 0.1292478 | -0.826917 | 0.408284 | 0.90171  |
| si:ch211-106h11.3 | 92.02360107 | 0.065767986  | 0.2158695 | 0.3046654 | 0.760621 | 0.975374 |
| ccdc171           | 92.7824909  | 0.197542017  | 0.2161971 | 0.9137128 | 0.360868 | 0.885686 |
| ccnd3             | 2.941894425 | 0.989209447  | 1.1194072 | 0.8836904 | 0.376863 | NA       |
| si:ch211-150g13.3 | 174.303894  | 0.039239118  | 0.1531949 | 0.2561386 | 0.797844 | 0.978695 |
| vangl2            | 1340.450064 | -0.008595628 | 0.0860187 | -0.099927 | 0.920402 | 0.992049 |
| zgp2              | 333.5221752 | 0.108747808  | 0.1197463 | 0.9081517 | 0.363798 | 0.886174 |
| trappc4           | 505.494247  | 0.012139434  | 0.1108663 | 0.1094962 | 0.912809 | 0.991119 |
| gad1b             | 3796.09525  | 0.217193101  | 0.0737326 | 2.9456879 | 0.003222 | 0.07565  |
| igflra            | 70.99555177 | 0.21801433   | 0.2351483 | 0.9271355 | 0.353856 | 0.881976 |
| slc25a3a          | 1109.689426 | 0.30937864   | 0.1037462 | 2.9820732 | 0.002863 | 0.06955  |
| rpp30             | 84.03765071 | 0.084244402  | 0.2156159 | 0.3907151 | 0.696008 | 0.96736  |
| mettl26           | 207.6264136 | -0.071250283 | 0.1477561 | -0.482216 | 0.629653 | 0.957354 |
| rmnd1             | 200.3597808 | 0.07150721   | 0.1488475 | 0.4804058 | 0.630939 | 0.957354 |
| hsd17b1           | 0.166657454 | -0.955901296 | 4.0804729 | -0.234262 | 0.814781 | NA       |
| gphb5             | 6.41666387  | -0.837675077 | 0.7629314 | -1.097969 | 0.272218 | NA       |
| uros              | 383.9988803 | -0.083648365 | 0.1275486 | -0.655816 | 0.511943 | 0.936253 |
| elov14b           | 1446.538219 | 0.170691783  | 0.1145706 | 1.4898391 | 0.136267 | 0.673089 |
| mastla            | 49.56260527 | -0.612879722 | 0.2878991 | -2.128801 | 0.033271 | 0.355427 |
| oxsrlb            | 417.7313092 | 0.042156348  | 0.1136574 | 0.3709072 | 0.710707 | 0.968985 |
| usp20             | 481.7070384 | 0.088838553  | 0.1080646 | 0.8220878 | 0.411027 | 0.903291 |
| trpc7a            | 10.44642062 | 0.346090168  | 0.6088096 | 0.5684703 | 0.569716 | NA       |
| hmx1a             | 200.0015083 | 0.17105517   | 0.4732525 | 0.3614459 | 0.717766 | 0.96909  |
| noxred1           | 4.344220591 | 1.188606194  | 0.9282832 | 1.2804348 | 0.200392 | NA       |
| TPGS1             | 116.6589367 | -0.457407853 | 0.1897109 | -2.411078 | 0.015905 | 0.232457 |
| mapk1             | 145.0693731 | 0.225632565  | 0.1693848 | 1.3320707 | 0.182837 | 0.745944 |
| pak6a             | 9.103067784 | 0.122908312  | 0.6440096 | 0.1908486 | 0.848644 | NA       |
| as3mt             | 139.6591318 | -0.19381563  | 0.1733239 | -1.118228 | 0.26347  | 0.830245 |
| angpt17           | 501.1005856 | 0.352315081  | 0.117316  | 3.0031295 | 0.002672 | 0.066215 |
| ttpa              | 161.7965821 | -0.191471481 | 0.1601147 | -1.195839 | 0.231759 | 0.799932 |
| top3b             | 321.9034961 | -0.147560155 | 0.127465  | -1.157652 | 0.247006 | 0.816669 |
| htr7b             | 3.769007976 | 0.661154778  | 0.9918423 | 0.6665926 | 0.505032 | NA       |
| fzd7b             | 803.3543019 | -0.060819114 | 0.0925918 | -0.656852 | 0.511276 | 0.936253 |
| 2-Sep             | 1603.065428 | 0.135496004  | 0.0855595 | 1.5836464 | 0.113274 | 0.631061 |
| selenot1b         | 480.1118328 | -0.196810989 | 0.1097524 | -1.793227 | 0.072937 | 0.526902 |
| fam221a           | 11.16497974 | 0.395857481  | 0.6028865 | 0.6566037 | 0.511436 | 0.936253 |
| pdlim5b           | 418.3687208 | -0.149752565 | 0.1250176 | -1.197852 | 0.230975 | 0.799177 |

|                   |             |              |           |           |          |          |
|-------------------|-------------|--------------|-----------|-----------|----------|----------|
| lrfnl             | 41.58739526 | 0.022315013  | 0.2995983 | 0.0744831 | 0.940626 | 0.992857 |
| hpn               | 51.87295781 | -0.107459753 | 0.2942094 | -0.365249 | 0.714925 | 0.96909  |
| cavin2a           | 977.1146086 | -0.026386641 | 0.0880665 | -0.299622 | 0.764466 | 0.975374 |
| gatad1            | 283.7915243 | 0.172599734  | 0.1291284 | 1.3366525 | 0.181336 | 0.742543 |
| grip2b            | 12.29678042 | 0.055350815  | 0.5620326 | 0.0984833 | 0.921549 | 0.992138 |
| bco2l             | 32.4157934  | -0.134193118 | 0.3480881 | -0.385515 | 0.699856 | 0.967998 |
| adralab           | 55.4520092  | -0.320848229 | 0.271758  | -1.180639 | 0.237746 | 0.806474 |
| zgc:165539        | 2.158525443 | -0.615437506 | 1.3478612 | -0.456603 | 0.647956 | NA       |
| cpsf3             | 1102.45833  | -0.067924333 | 0.0826418 | -0.821912 | 0.411127 | 0.903291 |
| crhb              | 76.92551945 | -0.085227766 | 0.2217032 | -0.384423 | 0.700665 | 0.967998 |
| irf10             | 7.487835011 | -0.254442795 | 0.726632  | -0.350167 | 0.726213 | NA       |
| si:ch211-13315.8  | 27.74674781 | -0.235271401 | 0.3727895 | -0.631111 | 0.527968 | 0.941647 |
| tmem230a          | 68.49507497 | 0.086631859  | 0.2402174 | 0.3606395 | 0.718369 | 0.96909  |
| poldl             | 767.1104869 | -0.051024942 | 0.0981332 | -0.519956 | 0.603094 | 0.956045 |
| zgc:103510        | 5.929972633 | 0.828624947  | 0.8334086 | 0.9942602 | 0.320096 | NA       |
| btbd16            | 2.984019679 | 0.040462297  | 1.1147069 | 0.0362986 | 0.971044 | NA       |
| dgkb              | 15.68216541 | 0.257970987  | 0.4964672 | 0.5196133 | 0.603333 | 0.956045 |
| srsf5b            | 4883.144568 | -0.072338068 | 0.0642299 | -1.126237 | 0.260065 | 0.828288 |
| si:ch211-13c6.2   | 915.1383675 | 0.031026913  | 0.0911128 | 0.3405329 | 0.733455 | 0.971993 |
| adcyp1b           | 1562.021112 | 0.096177489  | 0.0823158 | 1.1683968 | 0.242647 | 0.811434 |
| gadd45ba          | 741.4038669 | -0.068665002 | 0.1263244 | -0.543561 | 0.586744 | 0.953319 |
| hirip3            | 329.64455   | -0.153985801 | 0.1216632 | -1.265673 | 0.20563  | 0.77367  |
| dpp7              | 432.7442853 | 0.118148288  | 0.1341309 | 0.880843  | 0.378403 | 0.895192 |
| tnfaip3           | 19.57656429 | -0.41324449  | 0.4362287 | -0.947312 | 0.34348  | 0.878434 |
| adcyp6b           | 155.5190887 | 0.030366347  | 0.162926  | 0.1863813 | 0.852146 | 0.985174 |
| ucmaa             | 39.7989858  | 0.414108088  | 0.3154801 | 1.3126282 | 0.189308 | 0.753954 |
| sbds              | 302.6838588 | -0.042106145 | 0.1219423 | -0.345296 | 0.729872 | 0.971143 |
| frk               | 160.4308962 | 0.077035344  | 0.1634176 | 0.4714019 | 0.637354 | 0.958872 |
| nus1              | 782.160283  | 0.006035858  | 0.1007706 | 0.059897  | 0.952238 | 0.993904 |
| tmtops2b          | 17.32814056 | 0.08845322   | 0.4707741 | 0.1878889 | 0.850964 | 0.985174 |
| top1mt            | 408.0975146 | 0.085907997  | 0.1116793 | 0.7692384 | 0.441752 | 0.916336 |
| naa50             | 1432.720245 | -0.026491352 | 0.0921659 | -0.287431 | 0.773782 | 0.975687 |
| pudp              | 80.83902266 | -0.274558661 | 0.2212335 | -1.241035 | 0.214593 | 0.782493 |
| grinla            | 3625.850916 | 0.162797504  | 0.0699938 | 2.3258853 | 0.020025 | 0.266383 |
| ccdc191           | 30.42855682 | -0.28401931  | 0.38211   | -0.743292 | 0.457305 | 0.921679 |
| paplna            | 349.9069806 | 0.28239483   | 0.1238226 | 2.2806397 | 0.02257  | 0.286638 |
| zfyve21           | 381.8791422 | -0.059594902 | 0.1241686 | -0.479951 | 0.631262 | 0.957356 |
| sem1              | 1864.595975 | -0.083150979 | 0.0901321 | -0.922546 | 0.356244 | 0.883307 |
| adamts13          | 12.87308652 | 0.682787293  | 0.5792836 | 1.1786754 | 0.238527 | 0.807659 |
| si:ch211-216p19.6 | 10.83317595 | 0.026148754  | 0.6340309 | 0.0412421 | 0.967103 | NA       |
| zc2hc1a           | 619.3730579 | 0.055559873  | 0.1051717 | 0.5282779 | 0.597307 | 0.955244 |
| fntb              | 575.6134482 | -0.059789488 | 0.1092199 | -0.547423 | 0.584088 | 0.952214 |
| naprt             | 381.6070187 | -0.16244779  | 0.1160119 | -1.400268 | 0.161433 | 0.715364 |
| glis1b            | 31.09510505 | -0.321412483 | 0.3408459 | -0.942985 | 0.345689 | 0.87848  |
| rad18             | 179.4515918 | -0.048952241 | 0.1529576 | -0.320038 | 0.74894  | 0.97419  |
| kcnfla            | 45.65244925 | -0.831038701 | 0.2940422 | -2.826257 | 0.00471  | 0.09895  |
| fgf12a            | 444.5172773 | 0.097870214  | 0.1083883 | 0.9029593 | 0.366548 | 0.88734  |
| camkva            | 173.0093495 | -0.024133068 | 0.1590257 | -0.151756 | 0.87938  | 0.987881 |
| apls3b            | 165.6154008 | -0.062458113 | 0.1636598 | -0.381634 | 0.702733 | 0.968134 |
| yylb              | 721.3062423 | -0.155343436 | 0.0947357 | -1.639756 | 0.101056 | 0.604075 |
| gstz1             | 236.7765852 | 0.157964328  | 0.1665908 | 0.9482178 | 0.343019 | 0.878434 |
| slc35d1b          | 186.5297522 | -0.544226417 | 0.1567875 | -3.471109 | 0.000518 | 0.018364 |
| hao2              | 335.1694066 | -0.045739205 | 0.1279274 | -0.35754  | 0.720687 | 0.969381 |
| pfkpa             | 3186.8235   | 0.04576353   | 0.069544  | 0.6580515 | 0.510505 | 0.936253 |

|                    |             |              |           |           |          |          |
|--------------------|-------------|--------------|-----------|-----------|----------|----------|
| tpmt.2             | 4.743827517 | 0.948095335  | 0.9263831 | 1.0234376 | 0.306101 | NA       |
| tp53inp1           | 392.5497221 | 0.242403669  | 0.1111603 | 2.1806682 | 0.029208 | 0.331124 |
| trim63a            | 551.9514488 | 0.026741378  | 0.1366699 | 0.195664  | 0.844873 | 0.985174 |
| rdh8a              | 665.8396106 | 0.054244496  | 0.0954    | 0.5686006 | 0.569627 | 0.948983 |
| bmplb              | 109.4176691 | 0.401130348  | 0.2008003 | 1.9976577 | 0.045754 | 0.419441 |
| traf6              | 265.8001418 | 0.071073227  | 0.1359667 | 0.5227251 | 0.601166 | 0.956045 |
| diras1a            | 1871.879524 | 0.055945247  | 0.085266  | 0.6561258 | 0.511743 | 0.936253 |
| bnip3lb            | 1251.035829 | -0.151906257 | 0.0931379 | -1.630983 | 0.102894 | 0.609169 |
| bmpla              | 961.259483  | 0.092033125  | 0.0971154 | 0.9476675 | 0.343299 | 0.878434 |
| mapkapk5           | 247.5686339 | -0.041065895 | 0.1328917 | -0.309018 | 0.757308 | 0.975374 |
| zbtb2b             | 606.7386234 | 0.0209601    | 0.1006678 | 0.2082106 | 0.835065 | 0.984089 |
| aldh2.2            | 1547.991252 | -0.189100412 | 0.0825735 | -2.290085 | 0.022016 | 0.281963 |
| galk1              | 67.97290343 | -0.03822238  | 0.2492594 | -0.153344 | 0.878127 | 0.987881 |
| cldn23a            | 466.4501947 | 0.318534221  | 0.1118026 | 2.8490761 | 0.004385 | 0.093935 |
| fut9d              | 1416.627993 | 0.391193541  | 0.0964684 | 4.0551453 | 5.01E-05 | 0.002737 |
| sh2d3ca            | 113.1052446 | -0.041963021 | 0.1902071 | -0.220617 | 0.82539  | 0.982196 |
| glrx               | 239.2599189 | -0.065469984 | 0.1367013 | -0.478927 | 0.63199  | 0.957356 |
| dscamb             | 1256.411788 | -0.010970328 | 0.100088  | -0.109607 | 0.912721 | 0.991119 |
| sumo3a             | 4451.142864 | -0.041107366 | 0.0894243 | -0.459689 | 0.645739 | 0.96029  |
| hccsa.1            | 226.7639373 | -0.057496906 | 0.1486533 | -0.386785 | 0.698915 | 0.967998 |
| pax2a              | 773.8402629 | -0.015870289 | 0.0930253 | -0.170602 | 0.864537 | 0.98601  |
| tead1a             | 39.21060242 | -0.170226714 | 0.3112962 | -0.546832 | 0.584494 | 0.952406 |
| prg4b              | 52.45249064 | 0.447795943  | 0.3063439 | 1.4617428 | 0.143812 | 0.687224 |
| cst14a.1           | 11.55475337 | 0.265415043  | 0.59623   | 0.4451555 | 0.656207 | 0.961833 |
| slc4a2a            | 352.4272401 | -0.137464226 | 0.1201831 | -1.14379  | 0.252711 | 0.822335 |
| cradd              | 27.08011148 | 0.507804648  | 0.3861179 | 1.3151544 | 0.188458 | 0.753276 |
| ube2v2             | 2557.076265 | -0.03478833  | 0.0825446 | -0.421449 | 0.673427 | 0.965257 |
| commd8             | 249.913681  | -0.023184365 | 0.1392116 | -0.16654  | 0.867732 | 0.987245 |
| ttn.2              | 12557.01062 | 0.288328816  | 0.0808565 | 3.5659329 | 0.000363 | 0.013708 |
| itgb8              | 39.38620665 | -0.009983859 | 0.3095133 | -0.032257 | 0.974267 | 0.99644  |
| zbtb18             | 1304.703765 | -0.005937545 | 0.0956807 | -0.062056 | 0.950518 | 0.99381  |
| cyb561a3b          | 6.168052516 | 1.071921123  | 0.7713767 | 1.3896207 | 0.164644 | NA       |
| aldh3a2a           | 289.8198855 | -0.288394703 | 0.1280472 | -2.252252 | 0.024306 | 0.301184 |
| sult1st1           | 895.9050311 | -0.343625762 | 0.098069  | -3.50392  | 0.000458 | 0.016695 |
| si:ch211-196h16.12 | 21.554232   | -0.823469752 | 0.4788045 | -1.719846 | 0.085461 | 0.561427 |
| mkrn4              | 200.5665588 | -0.323256635 | 0.149514  | -2.162049 | 0.030614 | 0.338573 |
| prph               | 626.2100126 | 0.129635954  | 0.0999343 | 1.2972112 | 0.194559 | 0.758506 |
| synj2bp            | 253.3643242 | 0.211961622  | 0.1437677 | 1.4743342 | 0.140392 | 0.680585 |
| pex14              | 393.8867322 | -0.06738555  | 0.116852  | -0.576674 | 0.56416  | 0.948739 |
| gmfb               | 2234.584364 | 0.060813255  | 0.0746199 | 0.8149742 | 0.415087 | 0.906237 |
| nitr9              |             | 0 NA         | NA        | NA        | NA       | NA       |
| hmgala             | 26455.74253 | -0.10887013  | 0.0680192 | -1.60058  | 0.10947  | 0.623766 |
| dhdh1              | 745.6625255 | -0.291356537 | 0.100846  | -2.889124 | 0.003863 | 0.085067 |
| tesca              | 87.12216908 | -0.167196637 | 0.2146796 | -0.778819 | 0.436086 | 0.914408 |
| pax3b              | 9.050933292 | -0.196853081 | 0.6302434 | -0.312345 | 0.754779 | NA       |
| stxbp61            | 93.59950667 | 0.35915034   | 0.2346123 | 1.5308246 | 0.125813 | 0.654803 |
| sult2st3           | 123.4896905 | 0.287634054  | 0.1794611 | 1.6027653 | 0.108986 | 0.622321 |
| trub2              | 247.3932427 | 0.086111879  | 0.150513  | 0.5721227 | 0.567239 | 0.948739 |
| htatip2            | 207.0972698 | -0.194700543 | 0.1511482 | -1.288144 | 0.197696 | 0.762928 |
| rab44              | 3.351597534 | 0.290618934  | 1.0156842 | 0.2861312 | 0.774778 | NA       |
| daam2              | 13.27041622 | 1.214244849  | 0.5465376 | 2.2217043 | 0.026303 | 0.312554 |
| fkbp5              | 1075.970459 | 0.422497188  | 0.0924873 | 4.5681649 | 4.92E-06 | 0.000394 |
| rhogc              | 538.3353686 | -0.139543076 | 0.1057047 | -1.320121 | 0.186795 | 0.750951 |
| adnp2b             | 859.2059684 | 0.065852111  | 0.090461  | 0.7279617 | 0.466637 | 0.924218 |

|                   |             |              |           |           |          |          |
|-------------------|-------------|--------------|-----------|-----------|----------|----------|
| cplane2           | 61.37467353 | -0.152036651 | 0.2574654 | -0.590513 | 0.554847 | 0.947449 |
| edem2             | 323.9564345 | -0.2151117   | 0.1404992 | -1.531053 | 0.125756 | 0.654803 |
| rps6ka2           | 32.57713707 | -0.018374234 | 0.3464729 | -0.053032 | 0.957706 | 0.99467  |
| lin9              | 267.0048482 | 0.057736426  | 0.1442811 | 0.4001662 | 0.689034 | 0.966721 |
| si:ch211-173n18.3 | 72.17183491 | 0.287127997  | 0.2447709 | 1.1730481 | 0.240777 | 0.809163 |
| cabp5b            | 162.6174957 | 0.298422178  | 0.169515  | 1.7604466 | 0.078332 | 0.545401 |
| itgb4             | 1152.838054 | -0.02883621  | 0.0880318 | -0.327566 | 0.74324  | 0.973687 |
| hbpl              | 693.2390416 | -0.217303659 | 0.098544  | -2.205144 | 0.027444 | 0.320231 |
| clql3b            | 49.94443213 | 0.293648102  | 0.2775015 | 1.0581858 | 0.289971 | 0.846246 |
| inip              | 190.6914657 | 0.038685354  | 0.1480425 | 0.2613125 | 0.793852 | 0.977937 |
| macfla            | 4891.59491  | 0.060465107  | 0.0800753 | 0.755103  | 0.450187 | 0.918761 |
| morc2             | 1243.084977 | -0.061758782 | 0.0831796 | -0.742475 | 0.457799 | 0.921978 |
| si:ch211-121a2.4  | 19.3829915  | 0.27621819   | 0.4284031 | 0.6447623 | 0.519081 | 0.938945 |
| si:ch211-114c12.2 | 1930.708697 | -0.058691268 | 0.0868372 | -0.675877 | 0.499119 | 0.934006 |
| ndufs1            | 4.858587777 | -0.655516282 | 0.9120754 | -0.718708 | 0.472321 | NA       |
| plppr3b           | 713.7545073 | 0.189450408  | 0.0978736 | 1.9356639 | 0.052909 | 0.451736 |
| march5l           | 446.4355434 | 0.010517383  | 0.112153  | 0.0937771 | 0.925286 | 0.992676 |
| jkamp             | 347.8086615 | 0.145561181  | 0.120817  | 1.2048074 | 0.228278 | 0.795541 |
| si:ch211-234h8.7  | 80.94429689 | 0.118410806  | 0.2263583 | 0.5231122 | 0.600896 | 0.956045 |
| gpr135            | 44.11078557 | 0.535459262  | 0.2924069 | 1.8312128 | 0.067069 | 0.506251 |
| mospd1            | 592.3474171 | -0.182779493 | 0.1135427 | -1.609786 | 0.107445 | 0.617344 |
| krt18b            | 1048.92341  | -0.157316341 | 0.1242716 | -1.265907 | 0.205546 | 0.773646 |
| jph2              | 1071.453264 | 0.283048883  | 0.1035609 | 2.7331635 | 0.006273 | 0.120609 |
| gdap11l           | 41.2137742  | -0.379467849 | 0.2968196 | -1.278446 | 0.201092 | 0.766855 |
| ms4a17c.2         |             | 0 NA         | NA        | NA        | NA       | NA       |
| cntfr             | 1141.626222 | -0.044294522 | 0.0868485 | -0.51002  | 0.610037 | 0.95688  |
| tek               | 94.31589936 | 0.05652221   | 0.2234971 | 0.2528991 | 0.800346 | 0.979377 |
| ahsala            | 116.5344442 | 0.61381863   | 0.1875541 | 3.2727552 | 0.001065 | 0.032585 |
| nuak1b            | 1435.227581 | -0.044920046 | 0.0821781 | -0.546618 | 0.584641 | 0.952411 |
| exosc2            | 252.3705962 | 0.086218682  | 0.1468167 | 0.5872538 | 0.557033 | 0.948478 |
| crkl              | 1383.916067 | 0.101787849  | 0.0777785 | 1.3086895 | 0.19064  | 0.755212 |
| mindy3            | 723.3282302 | 0.003547859  | 0.1003841 | 0.0353428 | 0.971806 | 0.996315 |
| mapk14b           | 524.6900152 | 0.245255363  | 0.1034722 | 2.370253  | 0.017776 | 0.247053 |
| adralaa           | 1.863520974 | 1.446597312  | 1.5038905 | 0.9619034 | 0.336098 | NA       |
| stat4             | 122.7895263 | -0.596632122 | 0.2128224 | -2.803427 | 0.005056 | 0.10404  |
| msnb              | 47.20466362 | -0.285055186 | 0.3060306 | -0.93146  | 0.351616 | 0.880769 |
| tm9sf3            | 1462.92412  | 0.101648711  | 0.0800703 | 1.2694938 | 0.204265 | 0.772006 |
| gzmk              | 2.054383069 | 0.550735228  | 1.428156  | 0.3856268 | 0.699773 | NA       |
| si:dkey-24p1.6    | 37.41444665 | 0.139735887  | 0.3362672 | 0.4155501 | 0.677739 | 0.965257 |
| chst12a           | 11.01325852 | 0.357061978  | 0.5960496 | 0.5990475 | 0.549141 | NA       |
| nlk2              | 146.1696388 | 0.020776218  | 0.1659454 | 0.1251991 | 0.900366 | 0.990121 |
| CYTH2             | 31.96546021 | 0.297893693  | 0.3417181 | 0.8717527 | 0.383343 | 0.895192 |
| ankrd9            | 376.1004002 | 0.198658009  | 0.1139053 | 1.7440626 | 0.081148 | 0.551495 |
| zgc:162945        | 160.4026944 | -0.027243742 | 0.1807235 | -0.150748 | 0.880174 | 0.987881 |
| tmed3             | 489.8030619 | 0.157335856  | 0.1126471 | 1.396715  | 0.162499 | 0.717086 |
| slc34a1a          | 103.966052  | 0.414816424  | 0.272524  | 1.5221283 | 0.127977 | 0.658954 |
| calcr             | 69.27700428 | 0.091585262  | 0.2513722 | 0.3643412 | 0.715603 | 0.96909  |
| lsm12a            | 529.2068654 | -0.025269467 | 0.1159883 | -0.217862 | 0.827536 | 0.982721 |
| btr16             | 4.581753827 | -1.870778342 | 0.9780539 | -1.912756 | 0.055779 | NA       |
| sgsmla            | 9.282884172 | 0.209780783  | 0.7016689 | 0.298974  | 0.76496  | NA       |
| rdh20             | 23.90809798 | 0.108379954  | 0.4003535 | 0.2707106 | 0.786614 | 0.976596 |
| vipr1a            | 69.6250049  | 0.098040419  | 0.2375666 | 0.4126861 | 0.679837 | 0.965311 |
| ndufb10           | 1998.893351 | -0.131602233 | 0.0797634 | -1.649907 | 0.098962 | 0.598346 |
| mrgbp             | 378.8506607 | -0.006608535 | 0.1201075 | -0.055022 | 0.956121 | 0.994543 |



|                   |             |              |           |           |          |          |
|-------------------|-------------|--------------|-----------|-----------|----------|----------|
| plpp2b            | 222.6835823 | 0.04083968   | 0.1419755 | 0.2876531 | 0.773612 | 0.975687 |
| tekt4             | 44.35204615 | 0.098413255  | 0.2882545 | 0.3414109 | 0.732794 | 0.971719 |
| odf2a             | 98.64574362 | 0.098820649  | 0.2000193 | 0.4940557 | 0.621267 | 0.957354 |
| si:dkey-10h3.2    | 2.945908661 | -0.971398854 | 1.1481508 | -0.846055 | 0.397522 | NA       |
| taflb             | 107.6408985 | 0.041538867  | 0.1965991 | 0.2112872 | 0.832663 | 0.983557 |
| mtss1la           | 551.0709636 | 0.058666447  | 0.1054313 | 0.5564422 | 0.577909 | 0.951024 |
| ZBTB26            | 112.2362349 | -0.211049206 | 0.2105661 | -1.002294 | 0.316201 | 0.866931 |
| maff              | 848.3308608 | -0.095053056 | 0.0933903 | -1.017805 | 0.308771 | 0.861088 |
| cpsf2             | 898.6540863 | -0.100904167 | 0.0959798 | -1.051306 | 0.293118 | 0.848999 |
| tekt2             | 14.06139806 | 0.436297576  | 0.5247933 | 0.8313703 | 0.405764 | 0.901305 |
| pus3              | 74.30386691 | -0.101297552 | 0.2242365 | -0.451744 | 0.651453 | 0.960708 |
| pcca              | 948.01599   | -0.058357111 | 0.0853414 | -0.683808 | 0.494097 | 0.931926 |
| eiflaxa           | 370.0782607 | -0.320159694 | 0.132473  | -2.416793 | 0.015658 | 0.229392 |
| xpnpepl           | 770.9608363 | -0.3422985   | 0.0904671 | -3.783681 | 0.000155 | 0.006976 |
| cdkn1ba           | 536.6987471 | -0.101858232 | 0.1041449 | -0.978044 | 0.328053 | 0.872701 |
| epb41b            | 96.42518664 | 0.336490169  | 0.2347398 | 1.4334604 | 0.151726 | 0.700137 |
| rab32a            | 116.8464453 | -0.025570762 | 0.1938853 | -0.131886 | 0.895074 | 0.989814 |
| zdhhc23a          | 21.11253113 | 0.735028312  | 0.4315775 | 1.7031199 | 0.088546 | 0.569447 |
| nupl2             | 105.0203684 | 0.189508902  | 0.2045351 | 0.9265348 | 0.354168 | 0.882044 |
| pelii2            | 264.978851  | -0.104622876 | 0.1317726 | -0.793965 | 0.427216 | 0.91075  |
| gbela             | 6.972967549 | 0.034583252  | 0.7466146 | 0.0463201 | 0.963055 | NA       |
| tm6sf2            | 233.172279  | -0.296009122 | 0.1757153 | -1.684595 | 0.092067 | 0.57849  |
| rbbp4             | 2142.059943 | 0.031942728  | 0.0911639 | 0.3503881 | 0.726047 | 0.970402 |
| clpxa             | 1961.674585 | 0.042311558  | 0.0755784 | 0.5598369 | 0.575591 | 0.950373 |
| uqcrq             | 1729.740058 | -0.027374421 | 0.2254156 | -0.12144  | 0.903343 | 0.990121 |
| tnni2a.4          | 17601.41689 | 0.214307582  | 0.1765554 | 1.2138266 | 0.224814 | 0.792185 |
| creld2            | 156.5417807 | 0.136828114  | 0.1729406 | 0.7911854 | 0.428836 | 0.911406 |
| klf6a             | 2019.332183 | -0.010147928 | 0.088375  | -0.114828 | 0.908581 | 0.990702 |
| pfkfb4b           | 1173.158887 | 0.044366505  | 0.0873315 | 0.5080243 | 0.611436 | 0.95688  |
| guf1              | 164.6331177 | 0.120483598  | 0.1712839 | 0.7034146 | 0.481797 | 0.928392 |
| chchd1            | 410.97083   | -0.005616713 | 0.1392131 | -0.040346 | 0.967817 | 0.996315 |
| ftr51             | 116.3888569 | -0.26640428  | 0.1984047 | -1.342732 | 0.179359 | 0.740258 |
| ube2d1a           | 350.4460062 | 0.068054433  | 0.1230359 | 0.5531268 | 0.580177 | 0.951357 |
| gem               | 204.7587782 | 0.07404447   | 0.1520275 | 0.4870467 | 0.626225 | 0.957354 |
| si:dkey-40m6.8    | 1345.100593 | 0.091690727  | 0.0785103 | 1.1678821 | 0.242854 | 0.811584 |
| adamts15a         | 95.02791179 | -0.015192606 | 0.2028554 | -0.074894 | 0.940299 | 0.992857 |
| tubgcp3           | 816.3657128 | 0.154186732  | 0.0894174 | 1.724349  | 0.084645 | 0.560351 |
| lrplab            | 2053.636437 | -0.065655258 | 0.0933083 | -0.703638 | 0.481658 | 0.928386 |
| hsp90ab1          | 58549.49358 | -0.264230689 | 0.0645678 | -4.092296 | 4.27E-05 | 0.002379 |
| med23             | 575.6864905 | -0.119834493 | 0.1128736 | -1.06167  | 0.288386 | 0.845979 |
| ppfibp2b          | 437.3728808 | -0.092650023 | 0.1085473 | -0.853545 | 0.393357 | 0.898076 |
| si:ch211-200p22.4 | 1828.339682 | 0.058997421  | 0.0784346 | 0.7521865 | 0.451939 | 0.918761 |
| lnx2a             | 687.694241  | -0.092063839 | 0.1017161 | -0.905106 | 0.365409 | 0.886903 |
| foxdl             | 256.103583  | -0.128800592 | 0.136472  | -0.943788 | 0.345278 | 0.878434 |
| tyrpla            | 312.1228091 | -0.255197781 | 0.1363947 | -1.871024 | 0.061342 | 0.482931 |
| ube2z             | 642.7232186 | 0.067075135  | 0.1023966 | 0.6550521 | 0.512434 | 0.936253 |
| avpr2ab           | 2.414620719 | -0.211494448 | 1.2703758 | -0.166482 | 0.867778 | NA       |
| pnp4b             | 129.4829271 | 0.679561901  | 0.1952834 | 3.479875  | 0.000502 | 0.017905 |
| F0704779.1        | 20.84329809 | -0.185516437 | 0.4540568 | -0.408575 | 0.682851 | 0.965476 |
| stxbp5b           | 107.0305526 | 0.07492194   | 0.2014318 | 0.3719468 | 0.709932 | 0.968928 |
| syt9b             | 474.5226543 | -0.007983981 | 0.106369  | -0.075059 | 0.940168 | 0.992857 |
| fbxo3             | 427.2139853 | -0.180058663 | 0.1228148 | -1.466099 | 0.142621 | 0.684998 |
| fubpl             | 6034.807156 | -0.043266786 | 0.0706208 | -0.612663 | 0.540099 | 0.944206 |
| poli              | 105.7337672 | 0.002811687  | 0.2053599 | 0.0136915 | 0.989076 | 0.997589 |

|                   |             |              |           |           |          |          |
|-------------------|-------------|--------------|-----------|-----------|----------|----------|
| ssb               | 1406.935588 | -0.110816814 | 0.0805367 | -1.375979 | 0.168828 | 0.725919 |
| zgc:136493        | 74.05310751 | -0.025342159 | 0.232271  | -0.109106 | 0.913118 | 0.991119 |
| hoxb3a            | 985.8588457 | -0.036343151 | 0.0884346 | -0.410961 | 0.681101 | 0.965476 |
| stx11b.1          | 245.194197  | 0.217200837  | 0.13774   | 1.5768905 | 0.114821 | 0.635451 |
| ipmb              | 449.6048266 | -0.061786584 | 0.1085687 | -0.569101 | 0.569287 | 0.948983 |
| zgc:55943         | 650.69849   | 0.043692997  | 0.0974292 | 0.4484592 | 0.653822 | 0.961168 |
| nexmifb           | 554.6762384 | 0.145606529  | 0.1140403 | 1.2767989 | 0.201673 | 0.767736 |
| baiap211a         | 192.0884809 | 0.046930552  | 0.1597564 | 0.2937631 | 0.768939 | 0.975687 |
| rmc1              | 172.9902127 | -0.047890055 | 0.164245  | -0.291577 | 0.77061  | 0.975687 |
| prr151b           | 68.15575239 | -0.207480279 | 0.237753  | -0.872672 | 0.382842 | 0.895192 |
| atxn713           | 443.1084222 | -0.074599529 | 0.1254327 | -0.594738 | 0.552019 | 0.947215 |
| serpine2          | 555.3199213 | -0.09681164  | 0.1301109 | -0.74407  | 0.456834 | 0.921215 |
| mboat1            | 155.8412531 | 0.114345462  | 0.1638728 | 0.6977694 | 0.485321 | 0.930188 |
| ankrd6b           | 185.0362316 | -0.208288013 | 0.1788026 | -1.164905 | 0.244057 | 0.813415 |
| rasa4             | 285.5815926 | -0.039021929 | 0.1293077 | -0.301776 | 0.762823 | 0.975374 |
| aldh3a2b          | 27.97881943 | -0.655085454 | 0.3755566 | -1.744305 | 0.081106 | 0.551495 |
| si:dkey-90m5.4    | 104.3598206 | 0.932203814  | 0.2120159 | 4.3968577 | 1.10E-05 | 0.000793 |
| sort1a            | 550.7339259 | 0.005116791  | 0.103371  | 0.0494993 | 0.960521 | 0.995421 |
| h2afx             | 586.337296  | -0.121323027 | 0.1023406 | -1.185483 | 0.235826 | 0.804837 |
| mtx2              | 867.8139759 | 0.040885705  | 0.0918479 | 0.4451456 | 0.656215 | 0.961833 |
| si:ch211-147k10.5 | 6.651179934 | -0.732036924 | 0.7367814 | -0.993561 | 0.320437 | NA       |
| tph1a             | 51.3432195  | -0.297800251 | 0.2762338 | -1.078073 | 0.281001 | 0.84357  |
| atp2a2a           | 779.8662111 | 0.064332001  | 0.0963199 | 0.6678995 | 0.504198 | 0.935448 |
| zgc:92242         | 557.1929398 | -0.10549128  | 0.1021935 | -1.032269 | 0.301946 | 0.856944 |
| zgc:56676         | 1594.816041 | -0.045662857 | 0.0910032 | -0.501772 | 0.615828 | 0.95688  |
| cacn1sa           | 336.4281153 | 0.128625222  | 0.1293169 | 0.9946514 | 0.319906 | 0.868153 |
| cd209             | 0.349228403 | 0.005884014  | 3.2372587 | 0.0018176 | 0.99855  | NA       |
| asapla            | 1657.913006 | 0.02535559   | 0.0771414 | 0.3286898 | 0.74239  | 0.973154 |
| afdna             | 1273.061171 | -0.109627449 | 0.0827476 | -1.324842 | 0.185224 | 0.749153 |
| gstm.2            | 134.2768548 | -0.054644727 | 0.1750682 | -0.312134 | 0.754939 | 0.97522  |
| camk1b            | 527.3176951 | 0.096592144  | 0.1184662 | 0.8153563 | 0.414868 | 0.906237 |
| ldlra             | 518.2046399 | -0.20090195  | 0.1187395 | -1.691956 | 0.090654 | 0.576398 |
| zgc:86609         | 245.7117411 | -0.008999748 | 0.1347237 | -0.066802 | 0.94674  | 0.99381  |
| specc1            | 150.0686342 | -0.05772196  | 0.1702865 | -0.33897  | 0.734633 | 0.972021 |
| ush2a             | 55.88638938 | 0.147047419  | 0.2571525 | 0.5718296 | 0.567437 | 0.948739 |
| f9b               | 93.71835718 | -0.258680129 | 0.2095639 | -1.234373 | 0.217064 | 0.784302 |
| tfcp211           | 89.65651001 | 0.597901634  | 0.2181478 | 2.7408094 | 0.006129 | 0.118579 |
| rpl34             | 11380.80053 | -0.117052356 | 0.0767952 | -1.524214 | 0.127455 | 0.657527 |
| gsk3aa            | 328.5667859 | -0.029837007 | 0.126494  | -0.235877 | 0.813528 | 0.981081 |
| timml7a           | 1972.451053 | 0.163928497  | 0.0822673 | 1.9926333 | 0.046302 | 0.422877 |
| kcns3b            | 0.317831496 | 1.808837541  | 3.5779923 | 0.5055454 | 0.613176 | NA       |
| impdh1b           | 1427.433755 | -0.246687457 | 0.0793603 | -3.108451 | 0.001881 | 0.051014 |
| rpl18             | 17104.94237 | -0.287131776 | 0.068843  | -4.170819 | 3.04E-05 | 0.00176  |
| id2b              | 287.0048435 | 0.058539299  | 0.1264789 | 0.4628383 | 0.64348  | 0.959994 |
| gremla            | 11.82522161 | 2.046450219  | 0.662139  | 3.0906657 | 0.001997 | 0.053438 |
| kans13            | 1200.447682 | 0.023307042  | 0.0879073 | 0.265132  | 0.790908 | 0.977402 |
| snapcla           | 1.920153526 | 0.036725403  | 1.5303945 | 0.0239973 | 0.980855 | NA       |
| tbc1d7            | 392.0428258 | -0.018455773 | 0.1246999 | -0.148001 | 0.882342 | 0.988344 |
| msra              | 236.0516817 | 0.10926954   | 0.1543494 | 0.7079361 | 0.478985 | 0.926978 |
| trim55a           | 138.6180107 | 0.15447438   | 0.1787038 | 0.8644159 | 0.387359 | 0.895778 |
| wdr32             | 418.7220589 | -0.04654301  | 0.1182104 | -0.39373  | 0.69378  | 0.96736  |
| macrodl           | 51.84653906 | -0.260954466 | 0.2677989 | -0.974442 | 0.329837 | 0.873938 |
| gpkow             | 531.9638226 | 0.050299147  | 0.102893  | 0.4888493 | 0.624948 | 0.957354 |
| zgc:77056         | 358.2976036 | -0.034423371 | 0.1204099 | -0.285885 | 0.774966 | 0.975687 |

|                  |             |              |           |           |          |          |
|------------------|-------------|--------------|-----------|-----------|----------|----------|
| sgms1            | 289.3423774 | 0.069703794  | 0.1281161 | 0.5440674 | 0.586395 | 0.953319 |
| si:dkey-47k20.3  | 0.809821446 | 0.539374789  | 2.2312571 | 0.2417358 | 0.808985 | NA       |
| tomm70a          | 1823.62622  | -0.083582805 | 0.1051306 | -0.795038 | 0.426592 | 0.910189 |
| commd5           | 118.5040839 | 0.072875764  | 0.1838948 | 0.3962905 | 0.691891 | 0.96733  |
| rablab           | 1745.625669 | -0.042184394 | 0.0782576 | -0.539045 | 0.589856 | 0.953762 |
| criml            | 49.82547129 | 0.066065257  | 0.2800706 | 0.2358879 | 0.81352  | 0.981081 |
| xprlb            | 978.3476617 | -0.000264963 | 0.096057  | -0.002758 | 0.997799 | 0.999174 |
| hsp70.1          | 410.9562    | 0.0062844    | 0.3782485 | 0.0166145 | 0.986744 | 0.997062 |
| tkta             | 2689.931142 | 0.107215554  | 0.0725496 | 1.4778237 | 0.139455 | 0.678238 |
| rufy3            | 1074.664648 | 0.074488451  | 0.0939726 | 0.7926614 | 0.427975 | 0.910858 |
| pgp              | 460.2945583 | 0.086401387  | 0.1124422 | 0.7684073 | 0.442245 | 0.916336 |
| lrrc30a          | 42.12513299 | -0.091916967 | 0.298953  | -0.307463 | 0.758491 | 0.975374 |
| p2rx3b           | 142.579741  | -0.119947793 | 0.1775562 | -0.675548 | 0.499327 | 0.934006 |
| si:dkeyp-9d4.2   | 2.990821905 | -1.027487153 | 1.2464268 | -0.824346 | 0.409743 | NA       |
| hmgb2a           | 11.53039839 | -0.25247504  | 0.5653764 | -0.446561 | 0.655192 | 0.961614 |
| pqbp1            | 368.7563955 | -0.196106296 | 0.1268587 | -1.545863 | 0.122138 | 0.649408 |
| clybl            | 424.7162549 | -0.093336486 | 0.1103581 | -0.84576  | 0.397687 | 0.899672 |
| mepla.1          | 25.49099782 | 0.792267305  | 0.3950753 | 2.0053579 | 0.044925 | 0.417005 |
| wbp11b           | 102.9169165 | 0.064437945  | 0.2021547 | 0.3187556 | 0.749912 | 0.97419  |
| mpp6b            | 1101.698385 | 0.070977006  | 0.0998848 | 0.7105884 | 0.477339 | 0.926857 |
| mef2ca           | 1242.24574  | 0.192123186  | 0.0907348 | 2.1174143 | 0.034225 | 0.359596 |
| nrli2            | 151.0170655 | 0.006572292  | 0.1721561 | 0.0381764 | 0.969547 | 0.996315 |
| wapl             | 1130.000232 | -0.107002734 | 0.0884733 | -1.209435 | 0.226496 | 0.793959 |
| dedd             | 793.7560305 | 0.01158159   | 0.0892402 | 0.12978   | 0.896741 | 0.989971 |
| prxl2b           | 605.4320719 | -0.323930706 | 0.1049152 | -3.087547 | 0.002018 | 0.053856 |
| oxgr1b           | 0.515216064 | 0.926382026  | 2.6525479 | 0.3492423 | 0.726907 | NA       |
| srsf5a           | 6985.361626 | -0.105499383 | 0.0695562 | -1.51675  | 0.12933  | 0.661083 |
| cel.2            | 179.4055394 | -0.09605189  | 0.1704635 | -0.563475 | 0.573112 | 0.949762 |
| myf6             | 29.93966577 | 0.318192466  | 0.379518  | 0.838412  | 0.401799 | 0.90084  |
| slc26a1          | 234.5977368 | -0.143645437 | 0.1351069 | -1.063198 | 0.287692 | 0.845979 |
| si:dkey-23a13.11 | 0.316103113 | 0.005883447  | 3.3519121 | 0.0017553 | 0.9986   | NA       |
| tmprss9          | 161.3111445 | 0.104267854  | 0.176979  | 0.5891538 | 0.555758 | 0.947621 |
| zgc:161973       | 32.76611113 | 0.141692245  | 0.3463237 | 0.4091324 | 0.682443 | 0.965476 |
| cnm3b            | 579.5347465 | 0.074761233  | 0.1019078 | 0.7336165 | 0.463183 | 0.922698 |
| armh1            | 16.32196314 | 0.037634048  | 0.4747735 | 0.0792674 | 0.93682  | 0.992702 |
| rassf2a          | 665.5412076 | 0.102886782  | 0.0928652 | 1.1079156 | 0.267898 | 0.833349 |
| slc6a14          | 62.70191219 | -0.061981695 | 0.2452553 | -0.252723 | 0.800482 | 0.979377 |
| khk              | 159.4204609 | -0.559789335 | 0.1619869 | -3.45577  | 0.000549 | 0.019137 |
| kcnh2a           | 22.92485402 | -0.296755138 | 0.4367948 | -0.679393 | 0.496889 | 0.932829 |
| rab41            | 2194.808586 | 0.101083632  | 0.0765838 | 1.3199089 | 0.186865 | 0.750967 |
| si:dkeyp-86f7.4  | 4.292228698 | -0.737206766 | 1.0665499 | -0.691207 | 0.489435 | NA       |
| slc2a15a         | 73.61668058 | -0.361960435 | 0.2333025 | -1.551464 | 0.120791 | 0.645876 |
| cngala           | 102.8729371 | 0.141681491  | 0.2290625 | 0.6185276 | 0.536228 | 0.943336 |
| phyhd1           | 399.3895572 | 0.04975669   | 0.119476  | 0.4164577 | 0.677075 | 0.965257 |
| trim54           | 11.51608967 | -0.594389103 | 0.5628666 | -1.056003 | 0.290967 | 0.846568 |
| casc3            | 1069.422723 | 0.090560268  | 0.0892272 | 1.0149406 | 0.310134 | 0.862409 |
| ap3m1            | 312.5754163 | 0.025411898  | 0.1256263 | 0.2022816 | 0.839697 | 0.984979 |
| SPDEF            | 23.78945361 | -0.588950061 | 0.408036  | -1.443378 | 0.148914 | 0.696454 |
| atp13a1          | 799.8877481 | 0.112511122  | 0.1040747 | 1.0810609 | 0.27967  | 0.843169 |
| grtpla           | 319.6808119 | 0.056314234  | 0.1216778 | 0.4628142 | 0.643498 | 0.959994 |
| parpbp           | 168.6279777 | -0.38191157  | 0.1578613 | -2.419285 | 0.015551 | 0.228768 |
| ampd2b           | 626.2510031 | -0.050365175 | 0.0964287 | -0.522305 | 0.601458 | 0.956045 |
| glb1l            | 238.4683501 | 0.035650708  | 0.1589295 | 0.2243178 | 0.82251  | 0.982189 |
| si:dkey-42123.9  |             | 0 NA         | NA        | NA        | NA       | NA       |

|                   |             |              |           |           |          |          |
|-------------------|-------------|--------------|-----------|-----------|----------|----------|
| tnni2b.2          | 3177.030259 | 0.363357394  | 0.0909293 | 3.9960442 | 6.44E-05 | 0.003387 |
| BX511121.1        | 4.854766203 | -0.351511331 | 0.9707965 | -0.362085 | 0.717288 | NA       |
| slc6a7            | 248.5806117 | 0.099000905  | 0.1366028 | 0.7247356 | 0.468614 | 0.924328 |
| lrrfip1a          | 434.375699  | 0.011368463  | 0.1208657 | 0.0940587 | 0.925063 | 0.992676 |
| agfgla            | 366.801705  | 0.085072541  | 0.1165949 | 0.729642  | 0.465609 | 0.923865 |
| nup188            | 1068.237648 | -0.151030807 | 0.0841024 | -1.795797 | 0.072527 | 0.52617  |
| pimr135           | 0.332645115 | 0.005883744  | 3.2924249 | 0.0017871 | 0.998574 | NA       |
| grcc10            | 403.932866  | 0.007747847  | 0.1216354 | 0.0636973 | 0.949211 | 0.99381  |
| eef1db            | 2802.076706 | -0.311083456 | 0.0826538 | -3.763694 | 0.000167 | 0.007357 |
| tbx4              | 61.40248708 | 0.239412545  | 0.2707167 | 0.8843657 | 0.376499 | 0.89493  |
| plekhala          | 591.1211831 | -0.063897632 | 0.102699  | -0.622184 | 0.533821 | 0.943276 |
| glipr1b           | 189.2293399 | 0.240805254  | 0.1675774 | 1.436979  | 0.150724 | 0.698912 |
| nfkbi1b           | 1371.603791 | -0.183681308 | 0.0917742 | -2.001449 | 0.045344 | 0.418148 |
| tram2             | 264.5081424 | 0.259392408  | 0.1323751 | 1.9595255 | 0.050051 | 0.43812  |
| malb              | 74.31122367 | -0.341003916 | 0.2384788 | -1.429913 | 0.152742 | 0.701776 |
| ccdc78            | 16.13399982 | -0.739446691 | 0.5003658 | -1.477812 | 0.139458 | 0.678238 |
| sdcbp             | 126.2983944 | -0.031896145 | 0.1809546 | -0.176266 | 0.860085 | 0.985773 |
| sh3bp4            | 100.6057082 | 0.685295752  | 0.2002901 | 3.4215157 | 0.000623 | 0.020942 |
| stmn4             | 1760.664316 | 0.083536461  | 0.084408  | 0.9896743 | 0.322333 | 0.870226 |
| si:ch211-207i1.2  | 568.0663336 | -0.053023351 | 0.1023253 | -0.518184 | 0.60433  | 0.95651  |
| sec22ba           | 159.990318  | 0.072953824  | 0.1772305 | 0.4116324 | 0.680609 | 0.965476 |
| myod1             | 227.2560617 | 0.074350131  | 0.1398336 | 0.5317042 | 0.594931 | 0.954434 |
| vps4a             | 182.6674229 | -0.099715121 | 0.1539117 | -0.647872 | 0.517067 | 0.938543 |
| susd6             | 1653.480601 | 0.151144511  | 0.0805767 | 1.8757851 | 0.060685 | 0.48134  |
| sox7              | 216.7655183 | -0.437140088 | 0.1468145 | -2.9775   | 0.002906 | 0.070337 |
| si:ch211-87m7.2   | 30.62632347 | -0.079399174 | 0.3743782 | -0.212083 | 0.832042 | 0.98349  |
| fkbp6             | 3.287703845 | 0.249847362  | 1.0749957 | 0.2324171 | 0.816214 | NA       |
| sdhdb             | 991.596357  | -0.050683974 | 0.0892905 | -0.56763  | 0.570286 | 0.948989 |
| gnptab            | 628.5905444 | -0.008968598 | 0.1010108 | -0.088788 | 0.92925  | 0.992702 |
| pak7              | 399.9577898 | -0.05019959  | 0.1135106 | -0.442246 | 0.658311 | 0.962545 |
| ssbp3b            | 2026.247662 | 0.001517672  | 0.0767459 | 0.0197753 | 0.984223 | 0.996944 |
| naglu             | 157.6985188 | 0.179046207  | 0.1793528 | 0.9982904 | 0.318139 | 0.867746 |
| mybpc2a           | 237.2314492 | 0.211099244  | 0.1408867 | 1.4983621 | 0.134039 | 0.669349 |
| ppplr14bb         | 631.6681475 | 0.129108135  | 0.1033296 | 1.2494784 | 0.21149  | 0.778917 |
| cdk21             | 1.556139089 | 2.947626016  | 1.7933025 | 1.6436859 | 0.100241 | NA       |
| hyi               | 240.147613  | -0.053782841 | 0.1398599 | -0.384548 | 0.700572 | 0.967998 |
| traf2a            | 99.21473833 | 0.059713457  | 0.202105  | 0.2954576 | 0.767644 | 0.975687 |
| zgc:92429         | 144.0933009 | 0.291710522  | 0.1921098 | 1.5184576 | 0.128899 | 0.659982 |
| uchl3             | 619.2465807 | 0.124967592  | 0.1036804 | 1.2053159 | 0.228081 | 0.795505 |
| sap301            | 861.3727281 | -0.089027694 | 0.1089778 | -0.816935 | 0.413966 | 0.905905 |
| matn1             | 21340.00448 | 0.016246201  | 0.0790784 | 0.2054442 | 0.837225 | 0.984645 |
| ppp2ca            | 567.5588907 | 0.051447457  | 0.105849  | 0.4860457 | 0.626935 | 0.957354 |
| tmem30aa          | 815.4358779 | 0.205956757  | 0.0891142 | 2.3111562 | 0.020824 | 0.272701 |
| pgrmc2            | 874.8460075 | 0.134029821  | 0.0911596 | 1.4702769 | 0.141487 | 0.682048 |
| dennd6aa          | 21.57062474 | 0.271824085  | 0.4088458 | 0.6648573 | 0.506142 | 0.935724 |
| vbpl              | 917.4887953 | -0.054933676 | 0.0875283 | -0.62761  | 0.530259 | 0.942209 |
| dennd2db          | 44.8277097  | -0.386694142 | 0.30432   | -1.270682 | 0.203842 | 0.771579 |
| klhl36            | 66.14630542 | -0.02150367  | 0.2474087 | -0.086916 | 0.930739 | 0.992702 |
| cbln9             | 0.157187365 | -0.955901296 | 4.0804729 | -0.234262 | 0.814781 | NA       |
| si:ch211-220i18.4 | 40.09460489 | -0.31252328  | 0.3055285 | -1.022894 | 0.306358 | 0.860027 |
| mfsd2b            | 171.0570149 | 0.037662256  | 0.1573611 | 0.2393365 | 0.810845 | 0.981081 |
| scdb              | 1391.447361 | 0.178304766  | 0.0944427 | 1.8879671 | 0.05903  | 0.475271 |
| gtf3aa            | 193.0665056 | 0.187034994  | 0.1509946 | 1.238687  | 0.215461 | 0.783025 |
| grtplb            | 14.49503185 | -0.226056273 | 0.4957826 | -0.455958 | 0.64842  | 0.960708 |

|                  |             |              |           |           |          |          |
|------------------|-------------|--------------|-----------|-----------|----------|----------|
| tnnt3a           | 4066.842918 | 0.067193883  | 0.0943676 | 0.7120442 | 0.476437 | 0.926541 |
| idh3a            | 1409.507326 | 0.040360775  | 0.0816212 | 0.4944889 | 0.620961 | 0.957354 |
| jagla            | 187.0451281 | -0.050518972 | 0.1584745 | -0.318783 | 0.749891 | 0.97419  |
| sox13            | 570.1462254 | 0.08401693   | 0.1062229 | 0.790949  | 0.428974 | 0.911406 |
| hspal2b          | 67.11498117 | 0.123065487  | 0.2392814 | 0.5143128 | 0.607033 | 0.956718 |
| tmc2b            | 13.84726086 | 0.706344808  | 0.5379534 | 1.3130223 | 0.189175 | 0.753954 |
| efnala           | 570.0762586 | 0.064955633  | 0.1210967 | 0.5363948 | 0.591686 | 0.954434 |
| zc3h10           | 358.1086823 | -0.039039229 | 0.1278138 | -0.305438 | 0.760032 | 0.975374 |
| gukla            | 843.9670389 | -0.062151643 | 0.0911058 | -0.682192 | 0.495118 | 0.931928 |
| mespba           |             | 0 NA         | NA        | NA        | NA       | NA       |
| cryba2a          | 12297.35249 | 0.02453412   | 0.0744484 | 0.3295453 | 0.741744 | 0.973154 |
| mnx2b            | 25.2049369  | 0.621705858  | 0.3832948 | 1.6220045 | 0.104802 | 0.612652 |
| zgc:66313        | 30.85141093 | -0.434316984 | 0.3490173 | -1.2444   | 0.213353 | 0.781631 |
| angpt1           | 64.00714735 | 0.1072619    | 0.279006  | 0.3844429 | 0.70065  | 0.967998 |
| metrn            | 448.8691374 | 0.033482771  | 0.1076265 | 0.3111014 | 0.755724 | 0.975374 |
| naal5b           | 1009.279912 | 0.088442518  | 0.0871057 | 1.0153466 | 0.309941 | 0.861992 |
| grin2bb          | 698.368122  | 0.063243857  | 0.0987321 | 0.6405602 | 0.521808 | 0.939056 |
| prfl.1           | 1.22848649  | -0.350511206 | 1.8878393 | -0.185668 | 0.852705 | NA       |
| twist1a          | 214.4798739 | -0.060496001 | 0.1650545 | -0.366521 | 0.713976 | 0.96909  |
| rps26l           | 8923.849353 | -0.19256921  | 0.089953  | -2.140776 | 0.032292 | 0.349696 |
| crygn2           | 24739.47617 | 0.19920185   | 0.0795966 | 2.5026442 | 0.012327 | 0.196417 |
| pkd1a            | 397.2615646 | -0.117999555 | 0.1315844 | -0.89676  | 0.369847 | 0.889487 |
| rsrpl            | 2324.753731 | 0.139280533  | 0.0978944 | 1.4227629 | 0.154805 | 0.704573 |
| ppalb            | 1896.643777 | -0.061510236 | 0.0788823 | -0.779773 | 0.435525 | 0.914408 |
| sppl2            | 855.2368028 | 0.002729517  | 0.0936708 | 0.0291395 | 0.976753 | 0.996762 |
| crabp2b          | 901.3408969 | 0.052878417  | 0.0904545 | 0.5845858 | 0.558826 | 0.948478 |
| tppp3            | 109.3068261 | 0.068090232  | 0.1951336 | 0.3489416 | 0.727133 | 0.970402 |
| tmem263          | 532.4027805 | 0.245713302  | 0.1039141 | 2.3645815 | 0.01805  | 0.249253 |
| slc16a5a         | 33.36033795 | 0.297197255  | 0.3393632 | 0.8757497 | 0.381166 | 0.895192 |
| zgc:66484        | 258.167811  | -0.497100117 | 0.1347935 | -3.687864 | 0.000226 | 0.009434 |
| hmgb1b           | 6747.990559 | -0.054338331 | 0.0654389 | -0.830367 | 0.406331 | 0.901305 |
| sptb             | 497.7712533 | 0.182611208  | 0.1174428 | 1.5548953 | 0.119971 | 0.645215 |
| hju              | 107.1085394 | 0.226311992  | 0.2024335 | 1.1179572 | 0.263585 | 0.830245 |
| si:dkey-167k11.5 |             | 0 NA         | NA        | NA        | NA       | NA       |
| tsnaxipl         | 28.36361228 | 0.020182023  | 0.362875  | 0.055617  | 0.955647 | 0.994543 |
| acs11a           | 540.6057281 | -0.030324036 | 0.1054724 | -0.287507 | 0.773724 | 0.975687 |
| slc22a2          | 150.858741  | 0.216910474  | 0.1780831 | 1.2180298 | 0.223213 | 0.789115 |
| arhgef12a        | 745.0796723 | -0.109706637 | 0.097703  | -1.122859 | 0.261498 | 0.829593 |
| psmcla           | 2352.916686 | -0.129930944 | 0.07969   | -1.630454 | 0.103005 | 0.609625 |
| rnd1a            | 1515.84689  | 0.005609621  | 0.0839398 | 0.0668291 | 0.946718 | 0.99381  |
| helz             | 896.4885377 | 0.038384754  | 0.1047378 | 0.3664844 | 0.714004 | 0.96909  |
| zgc:77880        | 247.7101083 | 0.06071563   | 0.1374036 | 0.441878  | 0.658577 | 0.962545 |
| nudt1            | 56.11045358 | 0.174543873  | 0.2760426 | 0.6323077 | 0.527186 | 0.941186 |
| foxk2            | 1096.753951 | -0.039013362 | 0.0898237 | -0.434333 | 0.664047 | 0.964736 |
| slc10a1          | 22.55424046 | -0.47596262  | 0.400802  | -1.187525 | 0.23502  | 0.803894 |
| lrrc42           | 85.05117258 | -0.171911964 | 0.2294022 | -0.749391 | 0.453621 | 0.920041 |
| nampta           | 328.3469692 | 0.038385978  | 0.1225498 | 0.3132277 | 0.754108 | 0.975056 |
| rps19            | 14091.2773  | -0.231763397 | 0.0857858 | -2.701652 | 0.0069   | 0.128953 |
| phkgla           | 334.5805352 | 0.410442571  | 0.1320911 | 3.1072689 | 0.001888 | 0.051148 |
| rhogd            | 129.307861  | 0.108405328  | 0.189533  | 0.5719602 | 0.567349 | 0.948739 |
| sytl             | 6407.391851 | 0.051618121  | 0.0652996 | 0.7904816 | 0.429247 | 0.911406 |
| nfe211a          | 296.8386173 | 0.022901104  | 0.1268664 | 0.1805135 | 0.856749 | 0.985597 |
| th               | 123.782626  | 0.238085421  | 0.1881637 | 1.2653103 | 0.20576  | 0.773784 |
| lrit2            | 52.96141837 | 0.148873502  | 0.2689003 | 0.5536382 | 0.579826 | 0.951257 |

|                  |             |              |           |           |          |          |
|------------------|-------------|--------------|-----------|-----------|----------|----------|
| mfsd2aa          | 161.6421855 | 0.435074815  | 0.1617948 | 2.6890533 | 0.007165 | 0.132793 |
| ccdc3b           | 290.4195945 | 0.246530359  | 0.1294664 | 1.9042032 | 0.056884 | 0.468089 |
| plekhn3          | 236.4105957 | 0.047630122  | 0.1375115 | 0.346372  | 0.729063 | 0.970822 |
| pimr189          | 2.49942042  | -1.435466538 | 1.2329926 | -1.164213 | 0.244338 | NA       |
| tex30            | 18.97709376 | 0.627028627  | 0.4354173 | 1.4400638 | 0.149849 | 0.697935 |
| letmdl           | 144.6593973 | 0.08977036   | 0.1652824 | 0.5431332 | 0.587038 | 0.953319 |
| gnai3            | 60.99220448 | -0.20370051  | 0.2492923 | -0.817115 | 0.413863 | 0.905864 |
| r3hdml           | 21.52317375 | 0.680903551  | 0.4320519 | 1.5759764 | 0.115031 | 0.635519 |
| 3-Sep            | 1482.402374 | -0.078902303 | 0.0882768 | -0.893806 | 0.371426 | 0.891981 |
| CU929230.1       | 610.6535247 | -0.08276046  | 0.1046464 | -0.790858 | 0.429027 | 0.911406 |
| phka2            | 1043.211004 | 0.09096834   | 0.0972896 | 0.9350266 | 0.349775 | 0.880195 |
| atp6v1e1b        | 3803.728803 | 0.002183224  | 0.0730193 | 0.0298993 | 0.976147 | 0.996762 |
| ctpsla           | 1056.856895 | 0.0307454    | 0.098432  | 0.3123518 | 0.754773 | 0.975207 |
| otx2a            | 113.2727706 | 0.072592683  | 0.1915204 | 0.3790338 | 0.704663 | 0.968134 |
| ing4             | 1844.296847 | -0.079967143 | 0.076291  | -1.048186 | 0.294553 | 0.850664 |
| xirpl            | 169.2015726 | -0.218502484 | 0.1639242 | -1.332949 | 0.182549 | 0.745308 |
| cldn11b          | 203.8540156 | 0.215174343  | 0.1531873 | 1.4046486 | 0.160126 | 0.712495 |
| b3gat2           | 317.5392036 | 0.025501837  | 0.1280237 | 0.1991962 | 0.842109 | 0.985174 |
| sptlc3           | 252.8244887 | -0.41856371  | 0.1351067 | -3.098024 | 0.001948 | 0.052555 |
| gabrr3b          | 78.7074804  | 0.087748914  | 0.2236707 | 0.392313  | 0.694827 | 0.96736  |
| prrg4            | 321.8307565 | -0.155847103 | 0.1267734 | -1.229336 | 0.218946 | 0.785734 |
| dnmt1            | 1805.032233 | -0.072967312 | 0.0902259 | -0.808718 | 0.418678 | 0.906406 |
| gucalc           | 111.0996392 | 0.265441058  | 0.1965058 | 1.3508053 | 0.176758 | 0.737285 |
| melk             | 175.0279322 | -0.137154152 | 0.160378  | -0.855193 | 0.392444 | 0.897688 |
| sytl6            | 5.142382242 | -0.297337992 | 0.8383955 | -0.354651 | 0.722851 | NA       |
| hadh             | 853.1101057 | -0.130809269 | 0.087011  | -1.503364 | 0.132745 | 0.667381 |
| sybl1            | 487.1306495 | 0.049650239  | 0.1084732 | 0.4577189 | 0.647154 | 0.960435 |
| BX323854.1       | 0.981152638 | -0.049279921 | 1.9490317 | -0.025284 | 0.979828 | NA       |
| acads            | 558.4142122 | 0.066548431  | 0.1041638 | 0.6388825 | 0.522899 | 0.939336 |
| exoc3l2b         | 184.9461722 | -0.234185286 | 0.1574365 | -1.487491 | 0.136885 | 0.673303 |
| mpi              | 107.7355016 | -0.133116782 | 0.2059286 | -0.646422 | 0.518006 | 0.938592 |
| ddx18            | 813.2848742 | 0.003858051  | 0.1078537 | 0.0357712 | 0.971465 | 0.996315 |
| zgc:110006       | 25.03278261 | -0.32985649  | 0.3799106 | -0.868248 | 0.385259 | 0.89551  |
| fam120b          | 126.8470121 | 0.17706552   | 0.1767242 | 1.0019316 | 0.316377 | 0.867129 |
| znhit2           | 61.82023236 | -0.029975484 | 0.2539876 | -0.118019 | 0.906052 | 0.990702 |
| esyt2a           | 453.4124595 | -0.035961623 | 0.1078333 | -0.333493 | 0.738762 | 0.972722 |
| cmtrl            | 628.8759009 | -0.154154608 | 0.1116706 | -1.380441 | 0.167451 | 0.724546 |
| otofa            | 377.5568798 | -0.06217603  | 0.1202021 | -0.517263 | 0.604973 | 0.95651  |
| tescb            | 75.76247404 | -0.051001321 | 0.2307051 | -0.221067 | 0.82504  | 0.982196 |
| klf11a           | 1463.380624 | -0.221583008 | 0.092057  | -2.407019 | 0.016083 | 0.233847 |
| opn7c            | 13.68905764 | -0.447038587 | 0.5330434 | -0.838653 | 0.401664 | 0.90084  |
| siah1            | 958.7629308 | 0.024880848  | 0.08704   | 0.2858552 | 0.774989 | 0.975687 |
| cetp             | 122.9206754 | 0.22984925   | 0.2146093 | 1.0710123 | 0.284164 | 0.844697 |
| baxb             | 57.95112112 | -0.031830297 | 0.2677867 | -0.118864 | 0.905383 | 0.990702 |
| phf23a           | 312.7545494 | 0.073608215  | 0.1251457 | 0.5881799 | 0.556412 | 0.947918 |
| foxqla           | 202.9858389 | 0.27876234   | 0.1842692 | 1.5127996 | 0.130331 | 0.662797 |
| cited2           | 702.5860745 | -0.296208263 | 0.1033451 | -2.866205 | 0.004154 | 0.089484 |
| cluha            | 1636.846483 | 0.034547242  | 0.0820675 | 0.4209615 | 0.673783 | 0.965257 |
| tmem120a         | 157.7838462 | 0.21732483   | 0.1668111 | 1.3028202 | 0.192636 | 0.756795 |
| cpal             | 56.91505938 | -0.228748049 | 0.2808539 | -0.814473 | 0.415374 | 0.906237 |
| fgf10a           | 116.4340325 | -0.055981535 | 0.1903657 | -0.294074 | 0.768702 | 0.975687 |
| ksr1b            | 145.2738321 | 0.224591433  | 0.165193  | 1.3595698 | 0.173966 | 0.733946 |
| fermt3b          | 8.226191573 | -0.442148224 | 0.6803323 | -0.6499   | 0.515757 | NA       |
| si:ch211-259g3.4 | 664.5677582 | 0.134555447  | 0.1071031 | 1.2563169 | 0.209001 | 0.776073 |

|                 |             |              |           |           |          |          |
|-----------------|-------------|--------------|-----------|-----------|----------|----------|
| srprb           | 671.2049757 | -0.073275594 | 0.0961554 | -0.762054 | 0.446028 | 0.917154 |
| ftr56           | 28.32919935 | -0.261170097 | 0.4011495 | -0.651054 | 0.515011 | 0.937646 |
| yipf4           | 877.2990064 | 0.018122331  | 0.0862488 | 0.210117  | 0.833576 | 0.983583 |
| ak8             | 28.4324582  | 0.018768754  | 0.3727428 | 0.0503531 | 0.959841 | 0.995379 |
| pde12           | 199.2559608 | 0.044951545  | 0.1505149 | 0.2986518 | 0.765206 | 0.975374 |
| si:ch211-51a6.2 | 158.3511773 | 0.206333457  | 0.1663619 | 1.2402687 | 0.214876 | 0.782493 |
| dnajal          | 189.2060469 | 0.041167615  | 0.157662  | 0.2611131 | 0.794005 | 0.977937 |
| ccdc8011        | 112.0742667 | 0.389423043  | 0.1917152 | 2.0312581 | 0.042229 | 0.403776 |
| csrplb          | 74.46558996 | -0.691675954 | 0.2394742 | -2.888311 | 0.003873 | 0.085098 |
| tmem127         | 269.7159201 | 0.145356168  | 0.1278097 | 1.1372857 | 0.255419 | 0.823924 |
| mybl1           | 200.7679949 | -0.033738992 | 0.152698  | -0.220952 | 0.825129 | 0.982196 |
| dtna            | 79.86185227 | 0.034885228  | 0.2210823 | 0.157793  | 0.87462  | 0.987881 |
| pip4k2ca        | 1092.788584 | -0.118528624 | 0.0861513 | -1.37582  | 0.168877 | 0.725919 |
| lipg            | 302.91557   | 0.260130345  | 0.1296555 | 2.0063188 | 0.044822 | 0.416612 |
| nrlh5           | 59.85187282 | 0.196268449  | 0.2524656 | 0.7774068 | 0.436919 | 0.914408 |
| gspt1           | 598.7474652 | 0.178182561  | 0.1010547 | 1.7632284 | 0.077862 | 0.543659 |
| igsf21a         | 597.6940442 | 0.010390195  | 0.098436  | 0.1055528 | 0.915937 | 0.991314 |
| cadmla          | 338.7454026 | 0.246826253  | 0.1186721 | 2.0799016 | 0.037535 | 0.379013 |
| veph1           | 10.45330074 | 0.037535833  | 0.619974  | 0.0605442 | 0.951722 | NA       |
| tim50           | 482.791335  | 0.014482109  | 0.1150752 | 0.125849  | 0.899851 | 0.990121 |
| ivnslabpa       | 4337.382656 | -0.106550078 | 0.0732552 | -1.454505 | 0.145806 | 0.691641 |
| lrba            | 1224.218913 | -0.018222397 | 0.0839    | -0.217192 | 0.828059 | 0.982721 |
| dnal4a          | 19.9493037  | 0.061617857  | 0.4289452 | 0.1436497 | 0.885777 | 0.988936 |
| baiap211b       | 133.4819358 | -0.339054043 | 0.1764041 | -1.922031 | 0.054602 | 0.457793 |
| notumla         | 105.8116517 | 0.26332026   | 0.2039947 | 1.2908194 | 0.196766 | 0.761944 |
| moxdl           | 100.2603654 | -0.285210203 | 0.2041236 | -1.397243 | 0.162341 | 0.716781 |
| irx3b           | 46.71013288 | -0.146054186 | 0.2840319 | -0.514218 | 0.6071   | 0.956718 |
| gba3            | 21.89186869 | -0.502651643 | 0.4184664 | -1.201176 | 0.229683 | 0.79764  |
| nrl4a           | 74.64823908 | -0.283083173 | 0.228829  | -1.237095 | 0.216052 | 0.783484 |
| tuba812         | 1683.41635  | 0.073522079  | 0.1014765 | 0.7245231 | 0.468745 | 0.924328 |
| hmg20a          | 385.771878  | -0.080629613 | 0.113781  | -0.708638 | 0.478549 | 0.926978 |
| ppp2r5cb        | 1249.008392 | -0.023895559 | 0.0844113 | -0.283085 | 0.777112 | 0.975826 |
| alg11           | 216.2156816 | 0.030758288  | 0.1429527 | 0.215164  | 0.829639 | 0.982805 |
| commdl          | 225.5641322 | -0.141101322 | 0.1548763 | -0.911058 | 0.362265 | 0.885944 |
| arcnlb          | 1586.108603 | 0.029109271  | 0.0835593 | 0.3483666 | 0.727565 | 0.970402 |
| ssu72           | 762.6100351 | -0.024101155 | 0.1038468 | -0.232084 | 0.816473 | 0.981594 |
| lhx2b           | 320.1968097 | -0.188467969 | 0.1359489 | -1.386315 | 0.165651 | 0.721576 |
| podxl           | 685.6912126 | 0.174969201  | 0.09745   | 1.7954767 | 0.072578 | 0.52617  |
| kidins220a      | 402.1642273 | 0.04112303   | 0.112942  | 0.3641076 | 0.715778 | 0.96909  |
| snai3           | 4.118754577 | -0.360553045 | 0.9440361 | -0.381927 | 0.702515 | NA       |
| hbegfb          | 93.75717813 | -0.141586079 | 0.2106977 | -0.671987 | 0.501592 | 0.934648 |
| enkur           | 59.22780067 | -0.034616756 | 0.2567835 | -0.134809 | 0.892763 | 0.989291 |
| sap30bp         | 509.2090585 | 0.002180515  | 0.1181062 | 0.0184623 | 0.98527  | 0.996944 |
| rnf123          | 56.83103782 | -0.351345739 | 0.257974  | -1.361943 | 0.173216 | 0.732435 |
| si:ch73-193i2.2 | 7.540720479 | -0.994698797 | 0.7830061 | -1.270359 | 0.203957 | NA       |
| vampl           | 1770.213196 | 0.136413131  | 0.0783104 | 1.7419535 | 0.081517 | 0.552315 |
| dnajc9          | 337.5839895 | -0.011833754 | 0.1211504 | -0.097678 | 0.922188 | 0.992292 |
| dhrl1b          | 276.1750518 | -0.616189613 | 0.134718  | -4.573923 | 4.79E-06 | 0.000386 |
| smap1           | 1964.40787  | -0.000378404 | 0.0763085 | -0.004959 | 0.996043 | 0.998888 |
| zic4            | 337.4612004 | -0.074905374 | 0.1238933 | -0.604596 | 0.545448 | 0.945526 |
| six6b           | 418.8237318 | -0.00068434  | 0.1314216 | -0.005207 | 0.995845 | 0.998888 |
| ppdpfb          | 7886.070615 | -0.209013143 | 0.08555   | -2.44317  | 0.014559 | 0.219929 |
| tmedla          | 93.18864812 | -0.206223772 | 0.2129946 | -0.968211 | 0.332939 | 0.874926 |
| hsd20b2         | 163.9751387 | 0.100496771  | 0.1690958 | 0.5943184 | 0.552299 | 0.947265 |

|                  |             |              |           |           |          |          |
|------------------|-------------|--------------|-----------|-----------|----------|----------|
| hoxa10b          | 141.8320966 | 0.021872765  | 0.1868333 | 0.117071  | 0.906804 | 0.990702 |
| rab6bb           | 1274.481473 | 0.073891139  | 0.0856624 | 0.862585  | 0.388366 | 0.896271 |
| RTKN             | 64.07361094 | -0.062549665 | 0.2486234 | -0.251584 | 0.801363 | 0.979377 |
| rbml7            | 459.1120979 | -0.016062785 | 0.1058639 | -0.151731 | 0.879399 | 0.987881 |
| mc5ra            | 57.90111392 | -0.119196778 | 0.2625271 | -0.454036 | 0.649803 | 0.960708 |
| cmpk2            | 2.351582791 | -1.306968304 | 1.303324  | -1.002796 | 0.315959 | NA       |
| rtn4ipl          | 261.7471094 | -0.129399566 | 0.1368253 | -0.945729 | 0.344287 | 0.878434 |
| efna2a           | 393.0110818 | -0.041179528 | 0.1233658 | -0.3338   | 0.73853  | 0.972722 |
| reep2            | 774.1783006 | 0.051880701  | 0.0931524 | 0.556944  | 0.577566 | 0.95086  |
| klhl38a          | 32.25911429 | -0.273522781 | 0.3352598 | -0.815853 | 0.414584 | 0.906237 |
| cers4a           | 243.4251617 | 0.210644201  | 0.149283  | 1.4110394 | 0.158233 | 0.709224 |
| dctn2            | 1912.4497   | -0.034494448 | 0.0763294 | -0.451916 | 0.65133  | 0.960708 |
| wtla             | 57.72195159 | 0.070374988  | 0.2578209 | 0.2729607 | 0.784883 | 0.97627  |
| igfbp2b          | 29.65478995 | 0.654795776  | 0.3582614 | 1.827704  | 0.067594 | 0.508988 |
| csrnpla          | 350.0910832 | -0.028428092 | 0.1264617 | -0.224796 | 0.822138 | 0.982186 |
| calm2a           | 4260.914011 | 0.069579079  | 0.0779746 | 0.8923301 | 0.372216 | 0.892686 |
| rcor1            | 785.2440885 | 0.024059623  | 0.0915866 | 0.262698  | 0.792783 | 0.977937 |
| TXN              | 3949.199139 | -0.173397703 | 0.086115  | -2.013559 | 0.044056 | 0.412803 |
| kcnj11l          | 249.332635  | 0.234860249  | 0.1405905 | 1.6705272 | 0.094815 | 0.585466 |
| syt6b            | 193.6901204 | -0.072448255 | 0.1503293 | -0.48193  | 0.629855 | 0.957354 |
| col9a1b          | 3888.790585 | 0.206851781  | 0.2614462 | 0.7911829 | 0.428837 | 0.911406 |
| ognb             | 4.813156262 | 0.172530225  | 0.9608674 | 0.1795567 | 0.857501 | NA       |
| prrc2a           | 4057.229724 | 0.086699536  | 0.0662653 | 1.3083701 | 0.190748 | 0.755212 |
| seta             | 6062.557573 | -0.055931655 | 0.0689999 | -0.810605 | 0.417593 | 0.906237 |
| aplar            | 313.6549195 | 0.277785444  | 0.1327756 | 2.0921419 | 0.036426 | 0.372818 |
| flvcr2b          | 212.3124888 | -0.037201335 | 0.1491502 | -0.249422 | 0.803034 | 0.979643 |
| psmb2            | 1741.123169 | -0.114842669 | 0.0784683 | -1.463555 | 0.143316 | 0.686804 |
| ap5ml            | 91.40839121 | 0.048126251  | 0.2069372 | 0.2325645 | 0.8161   | 0.981594 |
| CU571315.1       | 39.07633662 | -1.006992777 | 0.3155231 | -3.191502 | 0.001415 | 0.040718 |
| tmem200a         | 64.61379509 | -0.065398757 | 0.2581936 | -0.253293 | 0.800041 | 0.979377 |
| ephb3a           | 1088.850142 | -0.057651805 | 0.0829368 | -0.695129 | 0.486974 | 0.931104 |
| srpk1b           | 608.1867476 | -0.005349926 | 0.0992308 | -0.053914 | 0.957004 | 0.994543 |
| tada2a           | 339.5445635 | -0.260801883 | 0.120925  | -2.156724 | 0.031027 | 0.340851 |
| flvcr1           | 432.6029142 | 0.192025716  | 0.1109568 | 1.7306357 | 0.083517 | 0.557158 |
| si:dkey-239b22.1 | 984.5550421 | 0.331671985  | 0.3247143 | 1.0214272 | 0.307052 | 0.860982 |
| calb1            | 339.1290763 | 0.073979699  | 0.1305438 | 0.566704  | 0.570915 | 0.949078 |
| rd3              | 124.3242874 | 0.068082532  | 0.2059796 | 0.3305304 | 0.740999 | 0.973154 |
| g6pca.1          | 136.6798332 | 0.349912034  | 0.1740785 | 2.0100819 | 0.044423 | 0.41454  |
| unm_sal261       | 97.66874889 | -0.00013675  | 0.2060445 | -0.000664 | 0.99947  | 0.999704 |
| chst10           | 253.9804265 | 0.02141117   | 0.1469513 | 0.1457025 | 0.884156 | 0.988784 |
| pan3             | 645.7524677 | 0.007104212  | 0.0973866 | 0.0729486 | 0.941847 | 0.993099 |
| stat2            | 220.3723472 | -0.339902379 | 0.141463  | -2.402764 | 0.016272 | 0.235374 |
| cort             | 340.2548309 | 0.300008687  | 0.1191734 | 2.5174137 | 0.011822 | 0.191129 |
| fahd1            | 170.6375097 | -0.295124349 | 0.1612283 | -1.830475 | 0.067179 | 0.506828 |
| si:ch211-207d6.2 | 255.7312557 | 0.00433089   | 0.131782  | 0.032864  | 0.973783 | 0.996315 |
| sox21a           | 80.04690451 | 0.234323222  | 0.2394115 | 0.9787466 | 0.327705 | 0.872701 |
| col5a2a          | 6780.851469 | 0.308623814  | 0.082946  | 3.7207806 | 0.000199 | 0.008482 |
| ercc1            | 187.4282571 | -0.334014801 | 0.1684754 | -1.982573 | 0.047415 | 0.427732 |
| atp6v0b          | 2375.434182 | 0.100748268  | 0.072208  | 1.3952515 | 0.16294  | 0.717875 |
| fosab            | 512.8442281 | 0.361525487  | 0.3701454 | 0.976712  | 0.328712 | 0.872945 |
| kif9             | 11.91561838 | -0.31291303  | 0.5439226 | -0.57529  | 0.565095 | 0.948739 |
| mylk2            | 33.69982449 | 0.092842975  | 0.3405538 | 0.2726235 | 0.785143 | 0.97627  |
| prkg1b           | 300.9947125 | 0.389324339  | 0.1427709 | 2.7269169 | 0.006393 | 0.122178 |
| ml1t1b           | 189.7557334 | 0.228332371  | 0.1528735 | 1.4936036 | 0.135279 | 0.670689 |



|                   |             |              |           |           |          |          |
|-------------------|-------------|--------------|-----------|-----------|----------|----------|
| grm3              | 66.08198633 | -0.459403109 | 0.26822   | -1.712785 | 0.086752 | 0.564768 |
| clstnl            | 8050.42157  | 0.102131855  | 0.076459  | 1.3357733 | 0.181623 | 0.743565 |
| si:ch73-27e22.6   |             | 0 NA         | NA        | NA        | NA       | NA       |
| pthlha            | 81.54673663 | -0.275523388 | 0.2460968 | -1.119573 | 0.262896 | 0.830166 |
| si:busml-266f07.2 | 15.05728342 | -0.141321013 | 0.5264892 | -0.268421 | 0.788375 | 0.976703 |
| C3AR1             | 5.201428251 | 0.292323701  | 0.8980163 | 0.3255216 | 0.744786 | NA       |
| np1a              | 84.2272015  | 0.168980406  | 0.2172777 | 0.7777161 | 0.436736 | 0.914408 |
| mef2aa            | 118.2785069 | -0.124705908 | 0.1935627 | -0.644266 | 0.519403 | 0.938945 |
| tmc4              | 56.08508643 | -0.403528872 | 0.2684834 | -1.502994 | 0.132841 | 0.667545 |
| dab2              | 271.6586157 | -0.385650963 | 0.1415287 | -2.724897 | 0.006432 | 0.122415 |
| smad6b            | 380.7180452 | 0.144066448  | 0.1162936 | 1.2388161 | 0.215414 | 0.783013 |
| rora              | 2110.959657 | 0.010153236  | 0.0870347 | 0.1166574 | 0.907132 | 0.990702 |
| kat7b             | 719.0028301 | -0.056683446 | 0.0998991 | -0.567407 | 0.570438 | 0.949061 |
| pus7              | 470.1433128 | 0.008218601  | 0.1112545 | 0.0738721 | 0.941112 | 0.992857 |
| ube2s             | 993.6404521 | 0.042546549  | 0.0853609 | 0.4984313 | 0.61818  | 0.957354 |
| fthl27            | 5800.424858 | -0.077266556 | 0.0950195 | -0.813165 | 0.416124 | 0.906237 |
| ppara             | 62.20077939 | 0.254863277  | 0.2449279 | 1.0405644 | 0.298078 | 0.85401  |
| crybg1a           | 735.108635  | -0.023120488 | 0.0931501 | -0.248207 | 0.803974 | 0.979643 |
| adcyl8            | 271.8964853 | -0.080846985 | 0.1303888 | -0.620046 | 0.535228 | 0.943336 |
| abcf1             | 2252.693071 | -0.019620376 | 0.079163  | -0.247848 | 0.804252 | 0.979643 |
| ache              | 1810.447774 | 0.195677627  | 0.0745546 | 2.6246214 | 0.008675 | 0.153289 |
| rbm24b            | 21.8317574  | 0.291132831  | 0.4563271 | 0.6379915 | 0.523479 | 0.939336 |
| dhrs13b.1         | 112.2163408 | -0.022547736 | 0.1854321 | -0.121596 | 0.903219 | 0.990121 |
| trim2a            | 44.3875197  | 0.084774247  | 0.2953923 | 0.2869887 | 0.774121 | 0.975687 |
| eif4ebp2          | 4047.428287 | 0.064384602  | 0.0742858 | 0.8667144 | 0.386099 | 0.89551  |
| vps37c            | 879.9908829 | -0.026062014 | 0.0873786 | -0.298265 | 0.765501 | 0.975374 |
| mboat2a           | 28.76519169 | 0.073014096  | 0.3613657 | 0.2020505 | 0.839877 | 0.984979 |
| pparg             | 71.51472461 | -0.9685406   | 0.2384487 | -4.061841 | 4.87E-05 | 0.002674 |
| trpalb            | 84.59565935 | -0.302534318 | 0.2225189 | -1.35959  | 0.17396  | 0.733946 |
| pard6ga           | 1.806499777 | 1.423624041  | 1.4738733 | 0.9659067 | 0.334091 | NA       |
| psmb12            | 2.004323476 | -1.017052804 | 1.4085527 | -0.722055 | 0.470261 | NA       |
| ift140            | 285.1035748 | 0.02530335   | 0.1263945 | 0.2001935 | 0.841329 | 0.985174 |
| mapk8a            | 286.4992455 | 0.092352667  | 0.1282307 | 0.7202069 | 0.471398 | 0.924838 |
| tcp1111           | 492.3030255 | 0.044543247  | 0.1049165 | 0.4245592 | 0.671158 | 0.965257 |
| tbx1              | 423.6314166 | 0.016301268  | 0.1183609 | 0.1377251 | 0.890458 | 0.989291 |
| lef1              | 938.8033225 | -0.056559445 | 0.0874784 | -0.646553 | 0.517921 | 0.938592 |
| ptbplb            | 1150.800428 | -0.017512635 | 0.080837  | -0.216641 | 0.828488 | 0.982721 |
| tns3.2            | 627.6879353 | -0.033442804 | 0.100656  | -0.332248 | 0.739702 | 0.972943 |
| hiflan            | 815.3116477 | -0.383806885 | 0.1124208 | -3.414019 | 0.00064  | 0.021454 |
| stard14           | 430.7839814 | 0.002284026  | 0.1194709 | 0.0191178 | 0.984747 | 0.996944 |
| erclb             | 0.484248244 | 0.852636534  | 2.8793247 | 0.2961238 | 0.767136 | NA       |
| mb                | 1568.096508 | -0.362612805 | 0.1049883 | -3.45384  | 0.000553 | 0.019206 |
| rbck1             | 68.00911025 | -0.250333222 | 0.2431179 | -1.029678 | 0.303161 | 0.85729  |
| tmem63a           | 149.5148918 | -0.050478906 | 0.1671843 | -0.301936 | 0.762701 | 0.975374 |
| cpped1            | 178.5937446 | 0.051671034  | 0.167452  | 0.3085722 | 0.757647 | 0.975374 |
| poglut2           | 204.0895413 | 0.133483389  | 0.1598502 | 0.8350528 | 0.403688 | 0.900979 |
| nos2b             | 25.49451827 | 0.671346146  | 0.3853011 | 1.7423934 | 0.08144  | 0.552315 |
| pcbd1             | 194.9875161 | -0.101528444 | 0.1637006 | -0.620208 | 0.535121 | 0.943336 |
| six4b             | 223.7306698 | -0.121752111 | 0.1470323 | -0.828064 | 0.407634 | 0.901327 |
| ptpa              | 692.1754661 | -0.079848507 | 0.0936755 | -0.852395 | 0.393995 | 0.898496 |
| ccdc65            | 28.7021781  | 0.05118254   | 0.3538417 | 0.1446481 | 0.884989 | 0.988911 |
| slc15a2           | 177.1357943 | -0.044106348 | 0.1544034 | -0.285657 | 0.775141 | 0.975687 |
| pafahlb1a         | 1630.293876 | -0.024655684 | 0.0787355 | -0.313146 | 0.75417  | 0.975056 |
| bet11             | 122.1237445 | -0.025215    | 0.186593  | -0.135134 | 0.892506 | 0.989291 |

|             |              |               |            |            |           |           |
|-------------|--------------|---------------|------------|------------|-----------|-----------|
| mxdl        | 18. 1735812  | -0. 22633839  | 0. 4504955 | -0. 502421 | 0. 615371 | 0. 95688  |
| ftr16       | 14. 11145778 | -0. 401916502 | 0. 5204765 | -0. 772209 | 0. 439991 | 0. 916082 |
| enah        | 1426. 228782 | -0. 003663619 | 0. 0774307 | -0. 047315 | 0. 962262 | 0. 995907 |
| arl6        | 455. 7060538 | 0. 140028291  | 0. 1084812 | 1. 2908068 | 0. 196771 | 0. 761944 |
| cdk16       | 322. 2337806 | 0. 083066707  | 0. 1331955 | 0. 6236448 | 0. 532861 | 0. 942805 |
| BX323082. 1 | 8. 855239477 | 0. 012933078  | 0. 6472384 | 0. 0199819 | 0. 984058 | NA        |
| acs13a      | 70. 34720798 | -0. 264320687 | 0. 2324077 | -1. 137315 | 0. 255407 | 0. 823924 |
| dpysl2b     | 1189. 158127 | 0. 006621458  | 0. 0870811 | 0. 0760378 | 0. 939389 | 0. 992857 |
| sgsh        | 144. 5177628 | -0. 113972273 | 0. 1968166 | -0. 579078 | 0. 562536 | 0. 948728 |
| c8g         | 152. 4181414 | 0. 24179757   | 0. 1999049 | 1. 2095627 | 0. 226447 | 0. 793959 |
| prdx3       | 1186. 658599 | -0. 062431243 | 0. 0859779 | -0. 726131 | 0. 467758 | 0. 924328 |
| mapk6       | 1331. 388913 | 0. 155975704  | 0. 09563   | 1. 6310332 | 0. 102883 | 0. 609169 |
| slain2      | 400. 9629305 | 0. 262944048  | 0. 1169686 | 2. 2479882 | 0. 024577 | 0. 302262 |
| cnot7       | 73. 79565565 | -0. 03171709  | 0. 2430461 | -0. 130498 | 0. 896172 | 0. 989971 |
| ddx1        | 964. 3180647 | 0. 152990581  | 0. 0878394 | 1. 7417079 | 0. 08156  | 0. 552315 |
| scg5        | 307. 9607764 | 0. 198993117  | 0. 1292245 | 1. 5399025 | 0. 123584 | 0. 651905 |
| gtf2f1      | 752. 1757141 | -0. 15350307  | 0. 0988515 | -1. 552865 | 0. 120455 | 0. 645323 |
| drd3        | 55. 65697351 | -0. 285589926 | 0. 2573155 | -1. 109882 | 0. 26705  | 0. 833191 |
| ppmlaa      | 277. 1276702 | -0. 041067356 | 0. 1305935 | -0. 314467 | 0. 753166 | 0. 97481  |
| zgc:171776  | 0. 48983248  | -0. 887840757 | 2. 6934859 | -0. 329625 | 0. 741683 | NA        |
| grk6        | 21. 84988901 | 1. 002220313  | 0. 4142569 | 2. 4193208 | 0. 01555  | 0. 228768 |
| srgap2      | 979. 8876349 | -0. 060469596 | 0. 0864361 | -0. 699587 | 0. 484185 | 0. 929542 |
| puf60a      | 1485. 020068 | -0. 107571389 | 0. 0859163 | -1. 252048 | 0. 210552 | 0. 778338 |
| lrrc8aa     | 54. 93892741 | 0. 164510215  | 0. 2605709 | 0. 6313452 | 0. 527815 | 0. 941629 |
| klf12b      | 28. 62278318 | 0. 320499423  | 0. 3538115 | 0. 905848  | 0. 365016 | 0. 886714 |
| gpc3        | 11. 45009976 | -0. 093831349 | 0. 5774403 | -0. 162495 | 0. 870916 | 0. 987697 |
| cthl        | 56. 74617254 | -0. 627804577 | 0. 2895443 | -2. 168251 | 0. 03014  | 0. 335575 |
| acss3       | 292. 9959768 | -0. 380053032 | 0. 1286597 | -2. 95394  | 0. 003137 | 0. 073769 |
| phactr4b    | 392. 5759763 | -0. 099554617 | 0. 1121894 | -0. 88738  | 0. 374874 | 0. 894316 |
| wnt2bb      | 30. 33312978 | 0. 205489889  | 0. 343288  | 0. 5985934 | 0. 549444 | 0. 946312 |
| anapc4      | 224. 3315206 | -0. 050077819 | 0. 1407015 | -0. 355915 | 0. 721904 | 0. 970024 |
| dnm3a       | 64. 82849102 | 0. 110363495  | 0. 2629659 | 0. 4196875 | 0. 674714 | 0. 965257 |
| tnnt2c      | 171. 7731422 | -0. 157222261 | 0. 1713553 | -0. 917522 | 0. 358869 | 0. 884602 |
| tmtopsb     | 38. 50275633 | 0. 290857844  | 0. 3263109 | 0. 891352  | 0. 37274  | 0. 892868 |
| txndc16     | 113. 6810335 | -0. 071899226 | 0. 2055734 | -0. 34975  | 0. 726527 | 0. 970402 |
| rngtt       | 564. 8444785 | -0. 027179066 | 0. 1142825 | -0. 237823 | 0. 812018 | 0. 981081 |
| zgc:110224  | 53. 88457458 | -0. 025197827 | 0. 2876312 | -0. 087605 | 0. 930191 | 0. 992702 |
| mybl2b      | 451. 9236989 | -0. 09266588  | 0. 11072   | -0. 836939 | 0. 402627 | 0. 90084  |
| sat1b       | 87. 42258741 | -0. 216711844 | 0. 2306617 | -0. 939522 | 0. 347463 | 0. 880195 |
| rars2       | 91. 51040458 | -0. 03154488  | 0. 2082172 | -0. 1515   | 0. 879581 | 0. 987881 |
| zgc:113294  | 57. 22415619 | -0. 186388736 | 0. 2894776 | -0. 64388  | 0. 519653 | 0. 938945 |
| pomp        | 1735. 210522 | -0. 039545529 | 0. 0762852 | -0. 51839  | 0. 604186 | 0. 95651  |
| tbc1d20     | 108. 961629  | -0. 069740228 | 0. 1911632 | -0. 36482  | 0. 715246 | 0. 96909  |
| tox         | 2540. 540778 | -0. 098820166 | 0. 0803679 | -1. 229598 | 0. 218848 | 0. 785734 |
| mfsd6a      | 164. 9224972 | -0. 371129537 | 0. 1712541 | -2. 167128 | 0. 030225 | 0. 336193 |
| mest        | 181. 4683648 | -0. 211809599 | 0. 1536596 | -1. 378434 | 0. 168069 | 0. 725792 |
| epb4115     | 772. 4207871 | -0. 050798623 | 0. 0908522 | -0. 559135 | 0. 57607  | 0. 950611 |
| mecr        | 169. 1589357 | 0. 043553501  | 0. 1729774 | 0. 2517872 | 0. 801206 | 0. 979377 |
| usp36       | 1242. 112842 | -0. 115647892 | 0. 0841529 | -1. 374259 | 0. 169361 | 0. 726744 |
| serhl       | 202. 836043  | 0. 126083803  | 0. 1502556 | 0. 8391287 | 0. 401397 | 0. 90084  |
| pde4a       | 539. 9016223 | 0. 13963963   | 0. 1015412 | 1. 3752023 | 0. 169069 | 0. 726144 |
| tipr1       | 316. 6600241 | -0. 109953846 | 0. 123501  | -0. 890308 | 0. 373301 | 0. 893554 |
| btbd6b      | 1066. 212271 | -0. 027040363 | 0. 0838568 | -0. 322459 | 0. 747105 | 0. 97419  |
| ccdc180     | 20. 18856039 | 0. 796385778  | 0. 4644059 | 1. 7148485 | 0. 086373 | 0. 563305 |

|                  |       |             |              |           |           |          |          |
|------------------|-------|-------------|--------------|-----------|-----------|----------|----------|
| rnf145b          |       | 776.7867358 | 0.203424559  | 0.0898955 | 2.2629006 | 0.023642 | 0.296445 |
| ombp             |       | 54.19806449 | 0.156370373  | 0.309284  | 0.5055882 | 0.613146 | 0.95688  |
| tspan12          |       | 128.9965825 | 0.276986119  | 0.181216  | 1.528486  | 0.126392 | 0.655289 |
| ckap4            |       | 848.7321133 | 0.185011747  | 0.1011979 | 1.8282166 | 0.067517 | 0.508678 |
| coq8ab           |       | 72.44905026 | 0.050877999  | 0.2365796 | 0.2150566 | 0.829723 | 0.982805 |
| ppp2r1bb         |       | 5065.453824 | 0.077944299  | 0.0774797 | 1.0059969 | 0.314417 | 0.865529 |
| mpv17            |       | 167.2312872 | -0.353660838 | 0.1573195 | -2.248043 | 0.024573 | 0.302262 |
| itga9            |       | 54.33673317 | 0.248713114  | 0.2856407 | 0.8707201 | 0.383907 | 0.895192 |
| mark2b           |       | 1276.305929 | -0.064724559 | 0.0780676 | -0.829083 | 0.407057 | 0.901305 |
| slc1a8b          |       | 48.83774121 | 0.949503549  | 0.3068529 | 3.0943282 | 0.001973 | 0.052997 |
| ampd3b           |       | 222.7528767 | -0.031056541 | 0.1468967 | -0.211418 | 0.832561 | 0.983557 |
| si:dkey-40c11.2  |       | 242.8130853 | 0.031094926  | 0.1370014 | 0.2269679 | 0.820449 | 0.981594 |
| pon1             |       | 213.9782886 | 0.077540431  | 0.1724527 | 0.4496329 | 0.652975 | 0.960792 |
| rrp36            |       | 131.5047565 | -0.180095654 | 0.1787719 | -1.007405 | 0.31374  | 0.865132 |
| arppi9a          |       | 1928.523215 | 0.030739399  | 0.0761263 | 0.403795  | 0.686364 | 0.966376 |
| praf2            |       | 381.6751834 | 0.018979574  | 0.114266  | 0.1660999 | 0.868078 | 0.987245 |
|                  | 5-Mar | 92.4781952  | 0.066865209  | 0.209713  | 0.3188414 | 0.749847 | 0.97419  |
| egln3            |       | 843.6339407 | -0.398383005 | 0.2415072 | -1.64957  | 0.099031 | 0.598346 |
| cacng2a          |       | 564.4107908 | -0.080038249 | 0.1048067 | -0.763675 | 0.445061 | 0.916958 |
| il20ra           |       | 93.98563507 | -0.490798592 | 0.2261227 | -2.170497 | 0.029969 | 0.335036 |
| ywhaz            |       | 4601.52413  | 0.036742104  | 0.0791709 | 0.464086  | 0.642586 | 0.959994 |
| clcn6            |       | 80.69014286 | 0.09649607   | 0.2210758 | 0.4364841 | 0.662486 | 0.964665 |
| pax2b            |       | 21.50680085 | -0.461084892 | 0.4366128 | -1.05605  | 0.290945 | 0.846568 |
| thns12           |       | 33.940834   | -0.280454747 | 0.3272531 | -0.856996 | 0.391447 | 0.897688 |
| macrod2          |       | 676.1016732 | -0.044708576 | 0.0985686 | -0.453578 | 0.650132 | 0.960708 |
| st71             |       | 214.9076849 | -0.303845276 | 0.1613591 | -1.883037 | 0.059695 | 0.478288 |
| sept8a           |       | 1098.303993 | -0.121162395 | 0.0859293 | -1.410024 | 0.158533 | 0.709224 |
| msi2b            |       | 404.5520038 | -0.026064145 | 0.1120358 | -0.232641 | 0.81604  | 0.981594 |
| fgfr11a          |       | 1037.959209 | 0.047228448  | 0.0855077 | 0.55233   | 0.580722 | 0.951731 |
| mgst1.1          |       | 209.8078279 | -0.02582048  | 0.1416504 | -0.182283 | 0.855361 | 0.985174 |
| tob1a            |       | 1976.268691 | 0.12606233   | 0.0733151 | 1.7194592 | 0.085531 | 0.561521 |
| rca3             |       | 966.9170101 | 0.089594286  | 0.0925769 | 0.967782  | 0.333153 | 0.874926 |
| SCYL2            |       | 553.909734  | -0.029492456 | 0.1008951 | -0.292308 | 0.770051 | 0.975687 |
| neb              |       | 10842.20208 | 0.306343573  | 0.0805744 | 3.8019948 | 0.000144 | 0.006578 |
| ltb4r            |       | 23.70461936 | -0.124757463 | 0.3956187 | -0.315348 | 0.752498 | 0.974708 |
| si:dkey-261m9.12 |       | 5.805654315 | 0.060763996  | 0.9100331 | 0.0667712 | 0.946764 | NA       |
| cd36             |       | 362.421438  | -0.357832843 | 0.1201388 | -2.978496 | 0.002897 | 0.070195 |
| fuk              |       | 168.173498  | -0.054053097 | 0.1554849 | -0.347642 | 0.728109 | 0.970402 |
| ppplr10          |       | 1758.87049  | 0.246664356  | 0.0869073 | 2.8382468 | 0.004536 | 0.09614  |
| sinhcaf          |       | 452.0922119 | -0.064418841 | 0.116375  | -0.553545 | 0.57989  | 0.951257 |
| qrsl1            |       | 151.0297194 | -0.036390689 | 0.1877931 | -0.193781 | 0.846348 | 0.985174 |
| foxglb           |       | 1172.386041 | -0.052130139 | 0.1005858 | -0.518265 | 0.604273 | 0.95651  |
| arl4cb           |       | 475.7023867 | -0.084390931 | 0.1070114 | -0.788616 | 0.430336 | 0.911957 |
| grialb           |       | 74.04009262 | -0.214446015 | 0.2271893 | -0.943909 | 0.345216 | 0.878434 |
| rps27a           |       | 17264.42165 | -0.24926128  | 0.0747519 | -3.334513 | 0.000854 | 0.027297 |
| gria3a           |       | 1417.133545 | 0.114795614  | 0.0830395 | 1.3824225 | 0.166842 | 0.723339 |
| si:dkey-11p23.7  |       | 3.192094564 | 0.509355849  | 1.0778534 | 0.4725651 | 0.636524 | NA       |
| tnfsf1013        |       | 41.38072069 | 0.258657362  | 0.3186654 | 0.8116895 | 0.41697  | 0.906237 |
| pde4d            |       | 12.3050101  | 0.708067413  | 0.5594569 | 1.2656335 | 0.205644 | 0.77367  |
| net1             |       | 1606.92309  | -0.071218848 | 0.092859  | -0.766957 | 0.443107 | 0.916336 |
| slc38a9          |       | 96.022799   | -0.062763024 | 0.2114073 | -0.296882 | 0.766557 | 0.97561  |
| pigf             |       | 292.1047969 | 0.033477812  | 0.1336845 | 0.250424  | 0.802259 | 0.979492 |
| tmem8a           |       | 58.208002   | -0.241934418 | 0.2720189 | -0.889403 | 0.373787 | 0.893677 |
| kcnd2            |       | 485.9695519 | 0.042889712  | 0.1081938 | 0.3964155 | 0.691799 | 0.967305 |

|                  |             |              |           |           |          |          |
|------------------|-------------|--------------|-----------|-----------|----------|----------|
| grk5             | 26.01279579 | 0.336229125  | 0.3929041 | 0.8557537 | 0.392134 | 0.897688 |
| ktn1             | 2677.754445 | -0.083835736 | 0.073307  | -1.143625 | 0.252779 | 0.822335 |
| tdrd7a           | 10.33711334 | -0.230200057 | 0.589614  | -0.390425 | 0.696222 | NA       |
| tm7sf2           | 190.5973077 | -0.059049854 | 0.1595924 | -0.370004 | 0.711379 | 0.969006 |
| rxfp2a           | 53.68240873 | 0.130873502  | 0.2689084 | 0.4866842 | 0.626482 | 0.957354 |
| htrala           | 373.8143639 | 0.273082913  | 0.122489  | 2.2294492 | 0.025784 | 0.310555 |
| pvalb5           | 698.4260806 | -0.009506181 | 0.1113314 | -0.085386 | 0.931954 | 0.992702 |
| si:dkey-206f10.1 | 371.8253157 | 0.176014987  | 0.1266497 | 1.3897784 | 0.164596 | 0.72071  |
| ndrgla           | 2955.974389 | -0.169094135 | 0.0844605 | -2.00205  | 0.045279 | 0.418148 |
| ccdc120          | 151.4175016 | 0.076558146  | 0.1688651 | 0.4533688 | 0.650283 | 0.960708 |
| lratd2           | 47.3133346  | -0.195256252 | 0.2877743 | -0.678505 | 0.497452 | 0.933353 |
| ugt5gl           | 107.1264943 | 0.193986486  | 0.2035122 | 0.9531935 | 0.340492 | 0.87805  |
| pacsin1a         | 606.6515097 | 0.047171172  | 0.1135042 | 0.4155896 | 0.67771  | 0.965257 |
| erh              | 1784.332916 | -0.105096049 | 0.0832068 | -1.26307  | 0.206564 | 0.774129 |
| pde4ba           | 2856.902008 | 0.027977736  | 0.0793565 | 0.3525578 | 0.72442  | 0.970402 |
| trit1            | 290.4699904 | -0.086304456 | 0.1344263 | -0.64202  | 0.52086  | 0.939056 |
| si:ch211-226m7.4 | 30.0124533  | 0.151785783  | 0.3854596 | 0.3937787 | 0.693744 | 0.96736  |
| xgb              | 4.806469737 | -0.099160752 | 0.8520856 | -0.116374 | 0.907356 | NA       |
| chchd3a          | 781.8562821 | 0.056498768  | 0.0987923 | 0.5718942 | 0.567394 | 0.948739 |
| cryball1         | 25698.837   | -0.027382854 | 0.0842839 | -0.324888 | 0.745266 | 0.974094 |
| cnksr1           | 89.8076796  | -0.061169975 | 0.2099869 | -0.291304 | 0.770819 | 0.975687 |
| dtx2             | 412.6366759 | -0.06002611  | 0.1117945 | -0.536933 | 0.591314 | 0.954193 |
| nrbp2a           | 287.5196942 | -0.096422428 | 0.1413109 | -0.682342 | 0.495022 | 0.931926 |
| kenc1b           | 163.7190058 | 0.196076727  | 0.1629878 | 1.2030147 | 0.228971 | 0.796691 |
| her12            | 188.3197714 | -0.415976551 | 0.1734059 | -2.39886  | 0.016446 | 0.236409 |
| cox4i1           | 4100.221049 | -0.031918541 | 0.0894306 | -0.356909 | 0.72116  | 0.969602 |
| cm1c1            | 278.2987896 | -0.008561685 | 0.1383776 | -0.061872 | 0.950665 | 0.99381  |
| mrp127           | 310.5679773 | -0.116656316 | 0.1295481 | -0.900486 | 0.367861 | 0.887482 |
| plxnb3           | 34.64003062 | -0.105702535 | 0.3269127 | -0.323336 | 0.746441 | 0.97419  |
| cc134b.3         | 1.369090567 | -0.712833094 | 1.6541989 | -0.430923 | 0.666524 | NA       |
| rnf185           | 363.1745881 | -0.107782837 | 0.1252381 | -0.860624 | 0.389445 | 0.896421 |
| h3f3c            | 21326.88863 | 0.07868136   | 0.0683153 | 1.1517387 | 0.249428 | 0.819036 |
| pcnt             | 846.4534782 | -0.077299653 | 0.0875053 | -0.883371 | 0.377036 | 0.895192 |
| ppcdc            | 30.5331885  | -0.191123706 | 0.3550822 | -0.538252 | 0.590403 | 0.954193 |
| pkd1b            | 220.3340512 | 0.04565226   | 0.1386523 | 0.3292572 | 0.741961 | 0.973154 |
| ptrprja          | 30.1268431  | 0.504044483  | 0.3475344 | 1.450344  | 0.146963 | 0.693731 |
| ccni2            | 48.2522336  | -0.312242178 | 0.2918601 | -1.069835 | 0.284694 | 0.844955 |
| zgc:171927       | 7.309455989 | 0.107317492  | 0.7431221 | 0.1444144 | 0.885173 | NA       |
| trim35-10        | 1.497897664 | 1.006742206  | 1.6084322 | 0.6259152 | 0.531371 | NA       |
| CR735102.1       | 191.6831343 | 0.453242904  | 0.1564263 | 2.8974859 | 0.003762 | 0.083577 |
| kif7             | 233.3620579 | -0.003058071 | 0.1475234 | -0.020729 | 0.983462 | 0.996944 |
| tmc2a            | 31.93590553 | 0.116044836  | 0.358899  | 0.3233357 | 0.746441 | 0.97419  |
| prkrip1          | 168.7504776 | 0.050123228  | 0.1599366 | 0.3133944 | 0.753981 | 0.975056 |
| ndufaf7          | 178.6671329 | -0.22299565  | 0.1518278 | -1.46874  | 0.141903 | 0.683173 |
| lyrm2            | 212.5596059 | 0.038099073  | 0.1459399 | 0.2610601 | 0.794046 | 0.977937 |
| desila           | 948.48995   | 0.120881097  | 0.0871547 | 1.3869709 | 0.165451 | 0.721223 |
| psme2            | 27.67697367 | -0.016188587 | 0.3823865 | -0.042336 | 0.966231 | 0.996315 |
| nr1d1            | 1662.544858 | 0.085704271  | 0.0914359 | 0.9373158 | 0.348596 | 0.880195 |
| sst1.2           | 141.3430779 | -0.417367859 | 0.187115  | -2.230542 | 0.025711 | 0.310555 |
| sult2st1         | 323.5918564 | 0.222624271  | 0.1256842 | 1.7712986 | 0.076511 | 0.538876 |
| trappe6b1        | 279.2476611 | -0.034680649 | 0.1304291 | -0.265897 | 0.790319 | 0.977338 |
| nr2f5            | 675.8371948 | 0.061667028  | 0.1006763 | 0.612528  | 0.540188 | 0.944279 |
| snrpe            | 656.2489996 | 0.033671876  | 0.1129239 | 0.2981821 | 0.765564 | 0.975374 |
| tmem243b         | 175.0081647 | -0.142035269 | 0.1640815 | -0.865638 | 0.386688 | 0.89551  |

|                |             |              |           |           |          |          |
|----------------|-------------|--------------|-----------|-----------|----------|----------|
| arl4ab         | 334.785747  | -0.105029397 | 0.1215116 | -0.864357 | 0.387392 | 0.895778 |
| prkar2aa       | 2092.44984  | -0.019352602 | 0.0798345 | -0.242409 | 0.808463 | 0.980642 |
| zgc:101840     | 675.7468001 | -0.054862987 | 0.0983674 | -0.557735 | 0.577025 | 0.950762 |
| lect2l         | 205.9658817 | -0.669853798 | 0.3833451 | -1.747391 | 0.080569 | 0.550664 |
| mcm6l          | 3.540424925 | -0.022458673 | 1.0842534 | -0.020713 | 0.983474 | NA       |
| stmn2a         | 4968.272881 | 0.066508372  | 0.0781343 | 0.8512056 | 0.394655 | 0.898861 |
| osbpl3a        | 171.7297952 | -0.007181059 | 0.1598078 | -0.044936 | 0.964159 | 0.995927 |
| dis3l2         | 292.4126985 | -0.044194273 | 0.1380925 | -0.320034 | 0.748943 | 0.97419  |
| primpol        | 209.3047416 | 0.039886829  | 0.1434512 | 0.2780516 | 0.780973 | 0.97627  |
| gsto2          | 560.3420737 | -0.220957689 | 0.1199235 | -1.842488 | 0.065404 | 0.500198 |
| gpr37b         | 156.7047866 | -0.023012681 | 0.1684585 | -0.136607 | 0.891341 | 0.989291 |
| igf2b          | 687.3324407 | 0.130669958  | 0.1061017 | 1.2315536 | 0.218116 | 0.785379 |
| sarlab         | 367.8421663 | 0.262034627  | 0.1281527 | 2.0447056 | 0.040884 | 0.394957 |
| unc5b          | 93.37777911 | 0.024748511  | 0.2313623 | 0.1069686 | 0.914814 | 0.991119 |
| cntl           | 93.38814542 | -0.375933325 | 0.2066784 | -1.818929 | 0.068922 | 0.513259 |
| zgc:101699     | 7.579023286 | -0.142453756 | 0.7710738 | -0.184747 | 0.853427 | NA       |
| asl            | 141.6806486 | -0.0990081   | 0.170871  | -0.579432 | 0.562298 | 0.948728 |
| mgst3b         | 1985.175364 | -0.197784492 | 0.0949721 | -2.082554 | 0.037292 | 0.377702 |
| rrm2b          | 720.6465691 | 0.158681027  | 0.0954888 | 1.6617755 | 0.096558 | 0.591675 |
| ppil3          | 44.43830173 | 0.079579001  | 0.3167954 | 0.2512    | 0.80166  | 0.979492 |
| chhd4a         | 182.6145449 | 0.140167937  | 0.1504753 | 0.9315015 | 0.351594 | 0.880769 |
| gyg2           | 20.71329797 | 0.46120942   | 0.4337659 | 1.0632681 | 0.28766  | 0.845979 |
| grifin         | 357.7076979 | -0.059729231 | 0.1235166 | -0.483573 | 0.628689 | 0.957354 |
| cabplb         | 27.70749319 | -0.032995752 | 0.367775  | -0.089717 | 0.928512 | 0.992702 |
| acot18         | 223.2685626 | -0.211171073 | 0.1466289 | -1.440174 | 0.149818 | 0.697935 |
| gpatchl        | 519.6999825 | -0.07743627  | 0.1083173 | -0.714902 | 0.474669 | 0.925287 |
| mboat7         | 441.1613024 | 0.041992861  | 0.1119928 | 0.3749605 | 0.70769  | 0.968664 |
| rps6ka1        | 576.1444474 | -0.052843998 | 0.0994135 | -0.531558 | 0.595032 | 0.954434 |
| metapl         | 1174.176486 | -0.189719151 | 0.0872271 | -2.175002 | 0.02963  | 0.333089 |
| mdm2           | 671.7239835 | 0.221880057  | 0.1042065 | 2.1292335 | 0.033235 | 0.355427 |
| map4k6         | 243.52125   | -0.054970856 | 0.1469628 | -0.374046 | 0.70837  | 0.968664 |
| tap2t          | 50.72050073 | -0.11990889  | 0.2902733 | -0.41309  | 0.679541 | 0.965257 |
| nxph1          | 1100.533745 | -0.015706932 | 0.0853412 | -0.184049 | 0.853975 | 0.985174 |
| nkap           | 539.424474  | -0.112118834 | 0.1102728 | -1.01674  | 0.309277 | 0.861381 |
| atpsckmt       | 81.42491999 | 0.236114604  | 0.2196849 | 1.0747876 | 0.28247  | 0.843666 |
| pimr1l1        |             | 0 NA         | NA        | NA        | NA       | NA       |
| tagln2         | 1010.02956  | -0.042947337 | 0.0976538 | -0.439792 | 0.660088 | 0.963432 |
| ube2jl         | 529.0083952 | -0.029776352 | 0.1082118 | -0.275167 | 0.783188 | 0.97627  |
| rorb           | 17.8390004  | 0.108855372  | 0.4471151 | 0.2434616 | 0.807648 | 0.980642 |
| zgc:64189      | 6.146881346 | -0.097578686 | 0.7816034 | -0.124844 | 0.900647 | NA       |
| efr3ba         | 174.4937479 | 0.006283455  | 0.1545486 | 0.0406568 | 0.967569 | 0.996315 |
| ccdc115        | 175.3108949 | 0.101727073  | 0.1522426 | 0.6681905 | 0.504012 | 0.93532  |
| p4hala         | 382.8041076 | 0.252248721  | 0.1228019 | 2.0541114 | 0.039965 | 0.391511 |
| paics          | 2251.348741 | -0.095654092 | 0.1120457 | -0.853706 | 0.393268 | 0.898076 |
| adamts15b      | 134.9088725 | 0.25965973   | 0.1850915 | 1.4028719 | 0.160655 | 0.713726 |
| fbxw4          | 264.3588046 | -0.020808619 | 0.1422612 | -0.146271 | 0.883708 | 0.988706 |
| cyp17a1        | 197.6517499 | 0.312531775  | 0.1612315 | 1.9384044 | 0.052574 | 0.449847 |
| fkbp1ab        | 142.7518691 | -0.064287813 | 0.1729598 | -0.371692 | 0.710122 | 0.968928 |
| mtrfl          | 42.68201385 | 0.081739003  | 0.2903387 | 0.2815298 | 0.778304 | 0.975942 |
| CABZ01088134.1 | 14.9676207  | -0.882862438 | 0.5191858 | -1.700475 | 0.089042 | 0.571473 |
| idol           | 13.89243067 | -1.142653014 | 0.553977  | -2.062636 | 0.039147 | 0.388646 |
| polr2c         | 432.5415914 | 0.033754111  | 0.1211807 | 0.2785436 | 0.780595 | 0.97627  |
| api5           | 2079.744236 | 0.074197211  | 0.0753812 | 0.9842928 | 0.324972 | 0.87132  |
| pdia8          | 528.5974512 | 0.099550312  | 0.1089157 | 0.9140128 | 0.36071  | 0.885686 |

|                   |             |              |           |           |          |          |
|-------------------|-------------|--------------|-----------|-----------|----------|----------|
| lrpapl            | 657.2162685 | -0.054050212 | 0.1061535 | -0.50917  | 0.610633 | 0.95688  |
| map1lc3a          | 497.0096428 | -0.094603465 | 0.1044853 | -0.905424 | 0.365241 | 0.886714 |
| morn5             | 6.617055783 | 1.034623976  | 0.801545  | 1.2907871 | 0.196778 | NA       |
| rasgef1ba         | 1038.420538 | -0.010972912 | 0.0846397 | -0.129643 | 0.896849 | 0.989971 |
| selenon           | 691.4174344 | 0.071916214  | 0.0977462 | 0.7357443 | 0.461886 | 0.922466 |
| NPFFR2            | 17.30381756 | 0.587008398  | 0.479579  | 1.2240077 | 0.220949 | 0.787641 |
| smarcbla          | 875.4934014 | -0.107240545 | 0.0944323 | -1.135634 | 0.25611  | 0.824633 |
| stmn1b            | 7487.064134 | 0.063404789  | 0.0620014 | 1.0226354 | 0.30648  | 0.860027 |
| scd               | 24.42843932 | 0.471609098  | 0.3933638 | 1.1989133 | 0.230562 | 0.798726 |
| pi4k2a            | 383.0496135 | 0.094908779  | 0.1187723 | 0.7990815 | 0.424243 | 0.908243 |
| tpma              | 73449.63554 | 0.307305791  | 0.1761713 | 1.7443582 | 0.081097 | 0.551495 |
| oxgr1a.1          | 1.67359612  | 1.199668891  | 1.5082627 | 0.7953978 | 0.426382 | NA       |
| adora2aa          | 43.06665539 | 0.10806634   | 0.2994892 | 0.3608355 | 0.718222 | 0.96909  |
| jadel             | 699.1174773 | -0.19068306  | 0.0921284 | -2.069754 | 0.038475 | 0.384637 |
| tshba             | 22.13121135 | 0.363663044  | 0.4199022 | 0.866066  | 0.386454 | 0.89551  |
| il12ba            | 0.643043639 | 1.435364982  | 2.5984886 | 0.5523846 | 0.580685 | NA       |
| ncf1              | 168.717135  | -0.667512963 | 0.173777  | -3.841204 | 0.000122 | 0.005778 |
| zgc:153867        | 4763.131446 | -0.129444913 | 0.0721907 | -1.793098 | 0.072957 | 0.526902 |
| nt5c1bb           | 66.13761225 | 0.108729855  | 0.2645255 | 0.4110374 | 0.681045 | 0.965476 |
| rbm48             | 106.615     | -0.433237476 | 0.1985484 | -2.182024 | 0.029108 | 0.330497 |
| ncaph2            | 241.605188  | -0.137410798 | 0.1417198 | -0.969595 | 0.332249 | 0.874653 |
| pmelb             | 726.9066287 | -0.422258772 | 0.1420745 | -2.972094 | 0.002958 | 0.071412 |
| trappc13          | 502.5105287 | -0.068123843 | 0.1089656 | -0.625187 | 0.531848 | 0.942359 |
| hspbap1           | 26.02955684 | 0.375384282  | 0.408311  | 0.9193588 | 0.357908 | 0.884398 |
| ndufb7            | 1648.592417 | -0.070009577 | 0.10418   | -0.672006 | 0.50158  | 0.934648 |
| cyp27a7           | 135.8785706 | 0.323023254  | 0.1724887 | 1.8727209 | 0.061107 | 0.482482 |
| snx27a            | 61.25018866 | -0.105040686 | 0.2496598 | -0.420735 | 0.673948 | 0.965257 |
| ampd1             | 5101.154273 | 0.49505485   | 0.0954671 | 5.1856093 | 2.15E-07 | 2.69E-05 |
| fat3a             | 138.2992401 | 0.086973672  | 0.1714219 | 0.5073661 | 0.611898 | 0.95688  |
| igsf9ba           | 1070.690447 | 0.021191168  | 0.0911556 | 0.2324726 | 0.816171 | 0.981594 |
| mad111            | 267.5528645 | 0.030987177  | 0.1323563 | 0.2341194 | 0.814892 | 0.981081 |
| abrab             | 190.6616526 | 0.203961825  | 0.1622433 | 1.2571353 | 0.208705 | 0.775884 |
| cnot9             | 779.0301558 | 0.035511623  | 0.0962125 | 0.3690958 | 0.712056 | 0.969006 |
| sepsecs           | 94.53861106 | -0.081031576 | 0.2010325 | -0.403077 | 0.686892 | 0.966376 |
| der13             | 178.0095251 | -0.113441937 | 0.1539718 | -0.736771 | 0.461262 | 0.922161 |
| spty2d1           | 454.528543  | -0.072095969 | 0.1102248 | -0.654081 | 0.513059 | 0.936253 |
| ap2mlb            | 3951.416995 | 0.050872595  | 0.0767229 | 0.6630692 | 0.507286 | 0.935734 |
| msi2a             | 660.7812412 | 0.009660409  | 0.0945159 | 0.1022094 | 0.91859  | 0.991623 |
| si:ch211-243j20.2 | 506.689671  | -0.520702395 | 0.1099772 | -4.734637 | 2.19E-06 | 0.000195 |
| ndfip2            | 2100.668971 | 0.132326542  | 0.0721856 | 1.8331434 | 0.066781 | 0.50537  |
| fbxol6            | 74.2310539  | -0.463651596 | 0.2396012 | -1.935098 | 0.052978 | 0.451939 |
| lamb2l            | 760.8985635 | -0.010354914 | 0.1054311 | -0.098215 | 0.921762 | 0.992138 |
| entpd2a.2         | 59.84609598 | -0.081253294 | 0.264741  | -0.306916 | 0.758907 | 0.975374 |
| CABZ01088025.1    | 2.661404136 | -1.558289373 | 1.2647212 | -1.232121 | 0.217904 | NA       |
| oxtr              | 3.987679569 | 1.29972836   | 1.0108459 | 1.2857829 | 0.198519 | NA       |
| trmt44            | 139.1122461 | -0.037883583 | 0.1792722 | -0.211319 | 0.832638 | 0.983557 |
| nitrli            | 0.166657454 | -0.955901296 | 4.0804729 | -0.234262 | 0.814781 | NA       |
| nup58             | 483.562898  | -0.038074633 | 0.1076838 | -0.353578 | 0.723655 | 0.970402 |
| trmt2b            | 33.83757766 | 0.148937001  | 0.3368443 | 0.4421538 | 0.658378 | 0.962545 |
| prrxla            | 540.9573515 | -0.037144538 | 0.1047894 | -0.354469 | 0.722988 | 0.970375 |
| mrps23            | 225.0287152 | 0.208372226  | 0.1424732 | 1.4625363 | 0.143594 | 0.686804 |
| nxn               | 768.8347899 | 0.035719634  | 0.0935715 | 0.3817364 | 0.702657 | 0.968134 |
| rsrcl             | 421.3169528 | -0.158499933 | 0.126974  | -1.248287 | 0.211926 | 0.77986  |
| slc19a1           | 67.80321394 | 0.239652843  | 0.251302  | 0.9536447 | 0.340264 | 0.87805  |

|                  |             |              |           |           |          |          |
|------------------|-------------|--------------|-----------|-----------|----------|----------|
| cyp26a1          | 686.592787  | -0.085065024 | 0.0964241 | -0.882197 | 0.37767  | 0.895192 |
| tango6           | 159.7925396 | -0.243879717 | 0.1689412 | -1.443578 | 0.148858 | 0.69636  |
| prom1b           | 2163.776811 | 0.1054497    | 0.0736401 | 1.4319611 | 0.152155 | 0.701049 |
| rgmd             | 986.6514484 | 0.015094902  | 0.0894202 | 0.1688086 | 0.865947 | 0.986517 |
| dnall            | 52.0476008  | -0.146521936 | 0.2918805 | -0.501993 | 0.615673 | 0.95688  |
| irx5a            | 664.8551579 | -0.150162717 | 0.0973684 | -1.542212 | 0.123022 | 0.65095  |
| zgc:92275        | 81.94103658 | 0.155660357  | 0.2549113 | 0.6106452 | 0.541434 | 0.944954 |
| csnk1g2b         | 840.0832711 | 0.134998629  | 0.0948873 | 1.4227262 | 0.154816 | 0.704573 |
| elac2            | 343.2304979 | 0.028172175  | 0.124035  | 0.2271308 | 0.820322 | 0.981594 |
| unm_sa911        | 86.1553219  | -0.338030318 | 0.253463  | -1.333648 | 0.182319 | 0.744719 |
| lrp11            | 127.8793621 | 0.183502441  | 0.1772205 | 1.0354469 | 0.30046  | 0.856251 |
| plcd1b           | 489.1431006 | -0.083681154 | 0.1085205 | -0.771109 | 0.440642 | 0.916336 |
| zgc:65895        | 937.8142662 | 0.020959072  | 0.1083709 | 0.1934013 | 0.846645 | 0.985174 |
| dclk2a           | 495.8585457 | -0.105859429 | 0.1100532 | -0.961893 | 0.336103 | 0.876088 |
| si:dkey-59111.10 | 1.01990345  | -0.910958137 | 1.9547665 | -0.466019 | 0.641202 | NA       |
| mtus1b           | 870.0011319 | 0.046614694  | 0.0924867 | 0.5040151 | 0.614251 | 0.95688  |
| act16b           | 48.82944647 | 0.128222871  | 0.2969738 | 0.4317649 | 0.665912 | 0.964736 |
| rarga            | 1331.533085 | -0.039974784 | 0.0877353 | -0.455629 | 0.648657 | 0.960708 |
| shisa2a          | 8.023954674 | -0.595637322 | 0.6745508 | -0.883013 | 0.377229 | NA       |
| ccnk             | 278.0575396 | -0.052375473 | 0.1283554 | -0.408051 | 0.683237 | 0.965476 |
| slc4a1ap         | 379.173874  | 0.042485271  | 0.1182305 | 0.3593427 | 0.719339 | 0.969183 |
| lingola          | 34.99106152 | -0.194347629 | 0.3507241 | -0.554132 | 0.579488 | 0.951257 |
| serpin1l         | 1364.452325 | -0.026831384 | 0.0901005 | -0.297794 | 0.765861 | 0.975374 |
| prkcq            | 45.91756958 | 0.088072347  | 0.2970155 | 0.2965244 | 0.76683  | 0.975687 |
| mrrf             | 321.2651156 | -0.075980203 | 0.126957  | -0.598472 | 0.549525 | 0.946312 |
| cpsfl            | 1211.579232 | -0.138065657 | 0.0855833 | -1.613231 | 0.106694 | 0.615633 |
| esr2b            | 27.96088722 | 0.068341295  | 0.3831028 | 0.1783889 | 0.858418 | 0.985773 |
| calm3a           | 4526.044145 | 0.111164584  | 0.0689025 | 1.6133606 | 0.106666 | 0.615633 |
| oxsrla           | 760.222527  | -0.062399185 | 0.1015486 | -0.614476 | 0.538901 | 0.943697 |
| top2b            | 2548.279967 | -0.066073685 | 0.0723067 | -0.913797 | 0.360823 | 0.885686 |
| cx44.2           | 75.34657435 | 0.224530871  | 0.2333495 | 0.9622087 | 0.335945 | 0.876088 |
| si:dkey-240h12.4 | 17.77452839 | -0.237209361 | 0.4554927 | -0.520775 | 0.602523 | 0.956045 |
| capn2l           | 766.1957085 | 0.038410905  | 0.100227  | 0.3832392 | 0.701542 | 0.968134 |
| rab42a           | 176.1895773 | -0.010558399 | 0.1545143 | -0.068333 | 0.945521 | 0.993589 |
| hslbp3           | 34.11741862 | -0.253104471 | 0.3338964 | -0.758033 | 0.448431 | 0.917768 |
| si:dkey-243i1.1  | 265.2575492 | 0.031578407  | 0.1381756 | 0.2285382 | 0.819228 | 0.981594 |
| kcnip3a          | 456.077507  | 0.172648513  | 0.1240977 | 1.391231  | 0.164155 | 0.71945  |
| capzala          | 2657.116979 | 0.007249036  | 0.0709054 | 0.1022353 | 0.91857  | 0.991623 |
| cdk10            | 262.5179016 | 0.023544673  | 0.1487268 | 0.1583082 | 0.874214 | 0.987881 |
| pld2             | 234.5432849 | -0.010559428 | 0.1422152 | -0.07425  | 0.940812 | 0.992857 |
| slit3            | 2162.496216 | 0.069630803  | 0.0845123 | 0.8239131 | 0.409989 | 0.902615 |
| ogdha            | 4726.755475 | 0.087615568  | 0.0673069 | 1.3017332 | 0.193008 | 0.756795 |
| rpl37            | 9000.164147 | -0.336401106 | 0.2373579 | -1.417274 | 0.156403 | 0.706639 |
| hif1ab           | 2911.044048 | 0.091175704  | 0.0955025 | 0.9546939 | 0.339733 | 0.87805  |
| sema3c           | 98.57357761 | 0.255193045  | 0.2017062 | 1.2651721 | 0.20581  | 0.773784 |
| chrne            | 516.9794309 | 0.401899385  | 0.1155429 | 3.4783576 | 0.000504 | 0.017975 |
| cox10            | 735.9377734 | 0.056685627  | 0.0916959 | 0.6181915 | 0.536449 | 0.943336 |
| ppp5c            | 1716.689477 | -0.016116302 | 0.0947367 | -0.170117 | 0.864918 | 0.986212 |
| palmdb           | 60.82376969 | 0.267701865  | 0.253082  | 1.0577671 | 0.290162 | 0.846262 |
| ing3             | 940.2587184 | -0.156155844 | 0.092744  | -1.683729 | 0.092234 | 0.57849  |
| si:dkey-88n24.7  | 0           | NA           | NA        | NA        | NA       | NA       |
| pcdh19           | 1654.367135 | 0.06003861   | 0.0796917 | 0.7533863 | 0.451218 | 0.918761 |
| hexb             | 1481.518006 | 0.003746848  | 0.0771463 | 0.0485681 | 0.961263 | 0.995758 |
| chst11           | 246.3037991 | -0.06303019  | 0.1497195 | -0.420989 | 0.673763 | 0.965257 |

|                   |             |              |           |           |          |          |
|-------------------|-------------|--------------|-----------|-----------|----------|----------|
| mars              | 714.1631668 | -0.049381921 | 0.135026  | -0.365722 | 0.714573 | 0.96909  |
| zgc:173443        | 44.10488423 | -0.03879662  | 0.2864126 | -0.135457 | 0.89225  | 0.989291 |
| pik3r3b           | 1933.848266 | 0.160936529  | 0.0719669 | 2.2362576 | 0.025335 | 0.308291 |
| irx6a             | 185.7858791 | -0.030105506 | 0.1543809 | -0.195008 | 0.845387 | 0.985174 |
| sncga             | 976.5675184 | 0.171907264  | 0.1130068 | 1.5212117 | 0.128207 | 0.658954 |
| atplb2b           | 1009.153848 | 0.290684009  | 0.1050751 | 2.7664395 | 0.005667 | 0.113081 |
| jpt2              | 1419.144832 | -0.036857812 | 0.0832324 | -0.44283  | 0.657889 | 0.962545 |
| zgc:172121        | 60.95444113 | -0.201034425 | 0.2487876 | -0.808056 | 0.419058 | 0.906406 |
| igflrb            | 541.8308915 | 0.02245838   | 0.1094907 | 0.2051168 | 0.837481 | 0.984665 |
| mpped2            | 415.0487493 | -0.213743783 | 0.1128366 | -1.894277 | 0.058188 | 0.472993 |
| unc119a           | 129.3490056 | 0.054882777  | 0.1828068 | 0.3002228 | 0.764007 | 0.975374 |
| si:ch211-163121.7 | 11.72713087 | 0.284079139  | 0.5553602 | 0.5115223 | 0.608985 | 0.956718 |
| aldoab            | 4945.810232 | 0.187620675  | 0.0939921 | 1.9961323 | 0.04592  | 0.420766 |
| ttyh3a            | 895.8384808 | 0.05108224   | 0.0912492 | 0.5598103 | 0.575609 | 0.950373 |
| grin2aa           | 722.1423457 | 0.119331478  | 0.0970845 | 1.2291502 | 0.219015 | 0.785734 |
| fbxl14a           | 316.9687712 | 0.045243864  | 0.1267148 | 0.3570527 | 0.721052 | 0.969602 |
| per2              | 3881.140663 | 0.122582103  | 0.0809141 | 1.514965  | 0.129781 | 0.662436 |
| lmo1              | 1164.458191 | -0.064407227 | 0.0913788 | -0.704838 | 0.480911 | 0.92776  |
| trdmt1            | 93.12869068 | -0.139716953 | 0.2037709 | -0.685657 | 0.492929 | 0.931926 |
| rab6ba            | 816.6949067 | 0.212265639  | 0.0971702 | 2.1844719 | 0.028928 | 0.329881 |
| chod1             | 174.1277123 | 0.307135087  | 0.1687209 | 1.8203734 | 0.068702 | 0.513248 |
| atp6vlaa          | 5254.451318 | 0.045954415  | 0.0696503 | 0.6597877 | 0.50939  | 0.936123 |
| tgfbr2b           | 531.220258  | 0.017967496  | 0.1167141 | 0.1539445 | 0.877653 | 0.987881 |
| pard3bb           | 141.8837881 | 0.118339882  | 0.171266  | 0.6909714 | 0.489584 | 0.931926 |
| srpx2             | 8.445758875 | 0.033948888  | 0.6630463 | 0.0512014 | 0.959165 | NA       |
| fitm2             | 227.6144723 | -0.077691562 | 0.1449422 | -0.536017 | 0.591947 | 0.954434 |
| gpr143            | 112.643377  | -0.246799389 | 0.1875304 | -1.31605  | 0.188157 | 0.753063 |
| si:dkey-23o4.6    | 49.44078022 | 0.08881641   | 0.2774268 | 0.3201436 | 0.748859 | 0.97419  |
| scn4ab            | 471.1580384 | 0.251382446  | 0.1089267 | 2.3078138 | 0.021009 | 0.273449 |
| tmem165           | 970.6258858 | -0.048176174 | 0.0873838 | -0.551317 | 0.581416 | 0.951731 |
| zgc:153169        | 65.60973448 | -0.067649478 | 0.2477327 | -0.273074 | 0.784796 | 0.97627  |
| insb              | 1.930681209 | -1.008161712 | 1.4919778 | -0.675722 | 0.499217 | NA       |
| mlf2              | 2208.903346 | 0.041877235  | 0.0777747 | 0.5384427 | 0.590271 | 0.954143 |
| nuf2              | 200.7063143 | -0.301589363 | 0.1487828 | -2.027045 | 0.042658 | 0.406074 |
| emc9              | 307.776919  | 0.033711638  | 0.134157  | 0.251285  | 0.801594 | 0.979492 |
| fh13a             | 508.1402801 | -0.105253094 | 0.1056116 | -0.996605 | 0.318956 | 0.867746 |
| fabp7b            | 155.9171718 | -0.162829046 | 0.1671549 | -0.974121 | 0.329997 | 0.874009 |
| CABZ01090041.1    | 26.41477269 | -0.509194043 | 0.3749525 | -1.358023 | 0.174456 | 0.734611 |
| celf3a            | 1897.485379 | -0.069836439 | 0.0893679 | -0.781449 | 0.434538 | 0.914297 |
| ube2e2            | 1595.919287 | -0.079740915 | 0.0971094 | -0.821145 | 0.411564 | 0.903549 |
| scel              | 609.1012887 | -0.083479099 | 0.1013587 | -0.823601 | 0.410166 | 0.902747 |
| tmem198b          | 627.8786253 | 0.032262657  | 0.1054505 | 0.3059506 | 0.759642 | 0.975374 |
| mysml             | 274.5641213 | 0.071767269  | 0.1445059 | 0.4966391 | 0.619444 | 0.957354 |
| vegfab            | 446.8945438 | -0.209911128 | 0.1280576 | -1.639194 | 0.101173 | 0.604409 |
| pvalb7            | 739.8923171 | 0.025666914  | 0.1027871 | 0.2497094 | 0.802812 | 0.979643 |
| ftr85             | 26.15819207 | -0.012198744 | 0.3778086 | -0.032288 | 0.974242 | 0.99644  |
| esytla            | 29.65901947 | -0.14022973  | 0.3732242 | -0.375725 | 0.707121 | 0.968664 |
| def6c             | 38.95821218 | -0.627812728 | 0.3086376 | -2.034142 | 0.041937 | 0.401972 |
| tfpia             | 689.8366787 | 0.025555487  | 0.0969811 | 0.2635101 | 0.792157 | 0.977937 |
| med6              | 382.6951567 | 0.038099032  | 0.1147853 | 0.3319156 | 0.739953 | 0.972943 |
| tspan3a           | 1872.814909 | 0.011064042  | 0.0812595 | 0.1361569 | 0.891697 | 0.989291 |
| zdhhc2            | 107.8688389 | 0.0685371    | 0.1980182 | 0.3461151 | 0.729256 | 0.970822 |
| phf3              | 688.4335548 | -0.162039668 | 0.1005754 | -1.611126 | 0.107152 | 0.617015 |
| rab13             | 183.7327283 | 0.25960894   | 0.1614359 | 1.6081238 | 0.107808 | 0.618989 |



|                  |             |              |           |           |          |          |
|------------------|-------------|--------------|-----------|-----------|----------|----------|
| ncapd3           | 467.9378072 | -0.194478854 | 0.1109698 | -1.752539 | 0.079681 | 0.548406 |
| txn2             | 459.6984871 | -0.080707513 | 0.110402  | -0.731033 | 0.464759 | 0.92354  |
| dachb            | 271.4704294 | -0.080468734 | 0.1328968 | -0.605498 | 0.544848 | 0.945463 |
| mylka            | 355.9495064 | 0.121795602  | 0.116396  | 1.0463899 | 0.295381 | 0.851935 |
| kcnip1b          | 615.4636977 | -0.086443048 | 0.0986807 | -0.875988 | 0.381037 | 0.895192 |
| asahlb           | 478.6908623 | -0.034360016 | 0.1111322 | -0.309182 | 0.757183 | 0.975374 |
| copg2            | 2821.570717 | 0.02191079   | 0.0717401 | 0.3054191 | 0.760047 | 0.975374 |
| uspl1            | 540.2630263 | 0.045929433  | 0.1115213 | 0.4118446 | 0.680453 | 0.965431 |
| si:dkey-222n6.2  | 116.9126224 | 0.085709022  | 0.191599  | 0.4473354 | 0.654633 | 0.961305 |
| nt5c211          | 445.4121607 | 0.257709948  | 0.1493519 | 1.7255222 | 0.084433 | 0.559138 |
| ccnb3            | 337.6603391 | 0.028936655  | 0.1378333 | 0.2099395 | 0.833715 | 0.983583 |
| f7               | 195.11155   | 0.093244488  | 0.154719  | 0.6026699 | 0.546728 | 0.945526 |
| mid2             | 104.9490901 | 0.061787063  | 0.2043964 | 0.3022904 | 0.762431 | 0.975374 |
| acbd5a           | 476.8028639 | 0.052293392  | 0.1048269 | 0.4988547 | 0.617882 | 0.957354 |
| bet1             | 321.961883  | 0.029604341  | 0.1244757 | 0.2378324 | 0.812011 | 0.981081 |
| rarab            | 1078.490089 | -0.013288336 | 0.0868021 | -0.153088 | 0.878329 | 0.987881 |
| tgfb1b           | 19.0206672  | -0.471489711 | 0.4356808 | -1.082191 | 0.279168 | 0.842806 |
| ldb2b            | 887.2372549 | 0.069986368  | 0.0984987 | 0.7105307 | 0.477375 | 0.926857 |
| rps10            | 12912.06614 | -0.337844157 | 0.079742  | -4.236714 | 2.27E-05 | 0.001407 |
| paqr7b           | 27.09076034 | 0.005760784  | 0.3797466 | 0.0151701 | 0.987896 | 0.997369 |
| si:ch211-152f2.2 | 0.647019846 | -1.455099716 | 2.4289208 | -0.599073 | 0.549125 | NA       |
| hat1             | 1213.450624 | -0.053101151 | 0.0952949 | -0.55723  | 0.577371 | 0.950805 |
| cx52.6           | 20.79686644 | -0.187264134 | 0.4201671 | -0.44569  | 0.655821 | 0.961833 |
| chchd3b          | 228.4595404 | -0.009611727 | 0.1373736 | -0.069968 | 0.944219 | 0.993364 |
| slc1a7a          | 39.10837918 | -0.131020207 | 0.3179691 | -0.412053 | 0.6803   | 0.965431 |
| si:dkey-224e22.2 | 94.09447812 | 0.021807799  | 0.2325905 | 0.0937605 | 0.925299 | 0.992676 |
| tm9sf5           | 755.8049298 | -0.011569607 | 0.0952742 | -0.121435 | 0.903347 | 0.990121 |
| myclb            | 523.5556854 | 0.066993421  | 0.1070087 | 0.6260556 | 0.531278 | 0.942209 |
| hddc2            | 206.4783498 | -0.128953096 | 0.1425212 | -0.904799 | 0.365572 | 0.887073 |
| gpr157           | 55.52945458 | -0.240181254 | 0.262002  | -0.916715 | 0.359292 | 0.884762 |
| zcchc8           | 486.9951941 | -0.08444114  | 0.1067306 | -0.791162 | 0.42885  | 0.911406 |
| asb4             | 44.82021051 | -0.107901329 | 0.314004  | -0.34363  | 0.731124 | 0.971557 |
| retsat1          | 1.151545593 | -2.472760569 | 2.0114878 | -1.229319 | 0.218952 | NA       |
| bag2             | 162.9327992 | 0.038406955  | 0.1628332 | 0.2358669 | 0.813536 | 0.981081 |
| trim35-27        | 12.36503124 | 0.712002534  | 0.5584662 | 1.274925  | 0.202336 | 0.768682 |
| thyl             | 553.4316541 | 0.124671876  | 0.131308  | 0.9494616 | 0.342386 | 0.878434 |
| khdc4            | 1064.753574 | 0.015261824  | 0.0979595 | 0.1557973 | 0.876193 | 0.987881 |
| lpcat4           | 188.4306229 | -0.181441805 | 0.1538615 | -1.179254 | 0.238297 | 0.807449 |
| pfdn5            | 972.0776642 | -0.133650733 | 0.0899454 | -1.485909 | 0.137303 | 0.674358 |
| or115-10         |             | 0 NA         | NA        | NA        | NA       | NA       |
| pdc10a           | 763.840579  | -0.150650679 | 0.0931536 | -1.617229 | 0.105829 | 0.615489 |
| fgf13a           | 1247.717198 | 0.002289129  | 0.0825704 | 0.0277234 | 0.977883 | 0.996762 |
| ubtf             | 2905.894162 | 0.00451546   | 0.0694833 | 0.0649863 | 0.948185 | 0.99381  |
| rtell            | 181.0095679 | -0.112126651 | 0.1576814 | -0.711096 | 0.477025 | 0.926857 |
| hsf2bp           | 1.329752533 | 0.767635872  | 1.650511  | 0.4650898 | 0.641867 | NA       |
| si:ch211-254c8.3 | 0.182570949 | 0.967652056  | 4.0804729 | 0.2371421 | 0.812547 | NA       |
| tdgfl            | 21.39216049 | -0.15855901  | 0.4334458 | -0.36581  | 0.714506 | 0.96909  |
| dicp2.1          | 0.330916733 | -1.849579229 | 3.2489867 | -0.569279 | 0.569167 | NA       |
| glc              | 793.1835263 | -0.166589217 | 0.115284  | -1.445033 | 0.148449 | 0.696298 |
| camsap1b         | 612.3669688 | -0.036232645 | 0.0986324 | -0.36735  | 0.713358 | 0.96909  |
| rxrab            | 5.887710319 | 0.43350323   | 0.7858465 | 0.5516386 | 0.581196 | NA       |
| zgc:101858       | 294.2120831 | -0.216955681 | 0.1384687 | -1.566822 | 0.117156 | 0.640585 |
| surf4l           | 209.2833216 | 0.224169388  | 0.157051  | 1.4273668 | 0.153474 | 0.702578 |
| rgs3b            | 325.3457182 | 0.074369475  | 0.1275356 | 0.5831272 | 0.559808 | 0.948478 |

|                 |             |              |           |           |          |          |
|-----------------|-------------|--------------|-----------|-----------|----------|----------|
| pho             | 84.42913956 | 0.07296273   | 0.2189762 | 0.3331994 | 0.738984 | 0.972722 |
| selenow1        | 2414.740272 | 0.046743354  | 0.0760286 | 0.6148124 | 0.538679 | 0.943391 |
| ehd2a           | 2.075640094 | 0.572762562  | 1.4177906 | 0.4039825 | 0.686226 | NA       |
| polr2j          | 299.9162823 | -0.004434688 | 0.1402879 | -0.031611 | 0.974782 | 0.996605 |
| lrwd1           | 130.7286215 | 0.045002416  | 0.1936049 | 0.2324446 | 0.816193 | 0.981594 |
| orai2           | 53.52873779 | 0.137272452  | 0.2675742 | 0.5130257 | 0.607933 | 0.956718 |
| pex12           | 60.78908709 | -0.110023167 | 0.2521903 | -0.43627  | 0.662641 | 0.964665 |
| dr11.2          | 0.94955631  | 1.001959126  | 2.2550603 | 0.4443159 | 0.656814 | NA       |
| dr11.1          | 3.521124531 | 1.023895559  | 1.0368561 | 0.9875001 | 0.323398 | NA       |
| ap2b1           | 3142.700913 | -0.022397297 | 0.0687346 | -0.325852 | 0.744536 | 0.974094 |
| pkdcca          | 89.60037056 | 0.650013533  | 0.2173477 | 2.9906616 | 0.002784 | 0.06821  |
| tmem136b        | 109.3068756 | 0.140942     | 0.1909637 | 0.7380567 | 0.46048  | 0.921978 |
| mrpl48          | 264.886069  | -0.060434668 | 0.1457441 | -0.414663 | 0.678389 | 0.965257 |
| layna           | 9.060547097 | 0.922873293  | 0.6393997 | 1.4433434 | 0.148924 | NA       |
| btg4            |             | 0 NA         | NA        | NA        | NA       | NA       |
| schipl          | 1334.632506 | 0.006364272  | 0.0781834 | 0.0814018 | 0.935122 | 0.992702 |
| gna14           | 115.7317235 | 0.147312825  | 0.1927715 | 0.7641837 | 0.444758 | 0.916777 |
| slc25a46        | 340.5541215 | 0.086859497  | 0.1202658 | 0.7222292 | 0.470154 | 0.924787 |
| tmem150ab       | 18.88608119 | 0.280740945  | 0.4470293 | 0.6280147 | 0.529994 | 0.942209 |
| fzd9a           | 39.9199466  | 0.147762268  | 0.3114334 | 0.4744586 | 0.635173 | 0.957927 |
| abl1            | 379.5024013 | 0.194894136  | 0.1314621 | 1.4825124 | 0.138204 | 0.675945 |
| rab141          | 880.771039  | 0.033951062  | 0.0985894 | 0.3443684 | 0.730569 | 0.97149  |
| fam81b          | 1.275648953 | -2.653845067 | 1.9988247 | -1.327703 | 0.184276 | NA       |
| gcnt4a          | 187.5478867 | 0.229423802  | 0.1615028 | 1.4205564 | 0.155446 | 0.705158 |
| si:dkey-47k20.8 | 1.161805827 | -3.660681204 | 1.934818  | -1.892003 | 0.058491 | NA       |
| zgc:110249      | 27.72638471 | 0.062497302  | 0.380246  | 0.1643602 | 0.869448 | 0.987282 |
| npr3            | 509.5597203 | 0.017684761  | 0.1174989 | 0.15051   | 0.880362 | 0.987881 |
| eef212          | 5184.497046 | 0.262728398  | 0.0843258 | 3.1156344 | 0.001835 | 0.050201 |
| akrl1a          | 68.30067983 | 0.513220244  | 0.2715094 | 1.8902487 | 0.058725 | 0.474103 |
| riok2           | 423.9246242 | -0.037921928 | 0.1115645 | -0.33991  | 0.733924 | 0.971993 |
| tmtc2b          | 14.50390572 | -0.728258054 | 0.5266498 | -1.382813 | 0.166722 | 0.723339 |
| emc6            | 885.4880454 | 0.039481888  | 0.0913299 | 0.4322999 | 0.665523 | 0.964736 |
| ncor1           | 2200.641252 | -0.018857857 | 0.0916687 | -0.205717 | 0.837012 | 0.984645 |
| dmrt3a          | 51.49428565 | -0.107513976 | 0.2774044 | -0.387571 | 0.698333 | 0.967998 |
| grb10b          | 46.70757006 | -0.306447919 | 0.2792017 | -1.097586 | 0.272385 | 0.837519 |
| entpd3          | 738.8830699 | 0.35544157   | 0.0963418 | 3.6893817 | 0.000225 | 0.009418 |
| myh7bb          | 638.3923207 | -0.103861994 | 0.0958042 | -1.084107 | 0.278317 | 0.84215  |
| hnrnp1          | 4616.640357 | -0.079985769 | 0.0889833 | -0.898885 | 0.368714 | 0.888057 |
| srsf7a          | 2198.633909 | -0.110555118 | 0.0724361 | -1.526243 | 0.126949 | 0.656588 |
| nccrp1          | 504.4208466 | -0.102879855 | 0.117832  | -0.873106 | 0.382605 | 0.895192 |
| ckma            | 31894.38711 | 0.193639969  | 0.1059803 | 1.8271315 | 0.06768  | 0.509442 |
| capns1a         | 1904.302011 | -0.078899374 | 0.0804438 | -0.980801 | 0.326691 | 0.872642 |
| taf1            | 1150.892615 | 0.003715859  | 0.0912955 | 0.0407014 | 0.967534 | 0.996315 |
| cfap298         | 176.8359599 | 0.149693364  | 0.1516653 | 0.9869982 | 0.323644 | 0.870928 |
| mis18a          | 69.03777269 | -0.134576386 | 0.2481695 | -0.542276 | 0.587628 | 0.953319 |
| tppp2           | 350.1015415 | 0.239564187  | 0.1289346 | 1.8580289 | 0.063165 | 0.490775 |
| ftr99           | 5.729467772 | 0.942180337  | 0.8054694 | 1.1697283 | 0.24211  | NA       |
| ins             | 401.4358231 | 0.202388649  | 0.158149  | 1.2797341 | 0.200639 | 0.766801 |
| pafah1b2        | 138.0307906 | 0.289547654  | 0.1802629 | 1.6062521 | 0.108219 | 0.620087 |
| gnb2            | 1613.50764  | 0.061873181  | 0.0829681 | 0.7457463 | 0.455821 | 0.921215 |
| mink1           | 992.8643295 | -0.072109644 | 0.0843689 | -0.854694 | 0.39272  | 0.897688 |
| fgf5            | 10.68569519 | -0.254745924 | 0.6312963 | -0.403528 | 0.68656  | NA       |
| tmem174         | 20.91067354 | 0.042291909  | 0.4268905 | 0.0990697 | 0.921083 | 0.992138 |
| fcho2           | 654.0976699 | -0.000173409 | 0.095514  | -0.001816 | 0.998551 | 0.999364 |

|                  |             |              |           |           |          |          |
|------------------|-------------|--------------|-----------|-----------|----------|----------|
| tnpol            | 1013.593289 | -0.117445406 | 0.0949057 | -1.237495 | 0.215903 | 0.783484 |
| ptcd2            | 59.9765326  | 0.232580291  | 0.2546631 | 0.9132864 | 0.361092 | 0.885686 |
| encl             | 1208.53634  | 0.040168606  | 0.0799961 | 0.5021318 | 0.615575 | 0.95688  |
| ankra2           | 700.0606541 | 0.142868964  | 0.1103058 | 1.2952077 | 0.195249 | 0.760159 |
| btf3             | 7308.645749 | -0.287111959 | 0.2503109 | -1.147021 | 0.251373 | 0.820814 |
| ttc33            | 230.9942663 | -0.081103357 | 0.1370562 | -0.591753 | 0.554016 | 0.947449 |
| ptger4b          | 16.18188731 | -0.360052    | 0.4743876 | -0.758983 | 0.447863 | 0.917154 |
| ophn1            | 196.3824398 | -0.031112619 | 0.1550859 | -0.200615 | 0.840999 | 0.985174 |
| ccn111           | 83.10189089 | -0.085887548 | 0.2200069 | -0.390386 | 0.696251 | 0.96736  |
| surf6            | 30.01990967 | 0.106758183  | 0.4052692 | 0.2634253 | 0.792223 | 0.977937 |
| arpc51b          | 299.2597777 | -0.129514278 | 0.1248307 | -1.037519 | 0.299494 | 0.855609 |
| zmat5            | 199.9762914 | 0.075817788  | 0.1553146 | 0.4881561 | 0.625439 | 0.957354 |
| ml7              | 6.956593726 | -0.414851316 | 0.7334017 | -0.565654 | 0.571629 | NA       |
| myhc4            | 565.72056   | 0.677693323  | 0.3733908 | 1.8149706 | 0.069528 | 0.514708 |
| camkk1a          | 41.05807289 | 0.019783533  | 0.3050321 | 0.0648572 | 0.948288 | 0.99381  |
| atp2a11          | 7767.008865 | 0.579192188  | 0.1038007 | 5.5798507 | 2.41E-08 | 3.78E-06 |
| spns3            | 58.17496945 | -0.529097784 | 0.2661142 | -1.988236 | 0.046786 | 0.424961 |
| slc25a25b        | 49.96348116 | 0.587934279  | 0.2939328 | 2.0002336 | 0.045475 | 0.418148 |
| sh3glb2b         | 1056.42921  | 0.091744814  | 0.0846546 | 1.0837545 | 0.278474 | 0.842429 |
| si:dkey-220k22.1 | 375.7766055 | 0.094355226  | 0.1194168 | 0.7901335 | 0.42945  | 0.911489 |
| nelfb            | 475.8520594 | -0.131980791 | 0.1075251 | -1.227442 | 0.219657 | 0.786189 |
| entpd2a.1        | 66.50191572 | -0.371891059 | 0.2577928 | -1.442597 | 0.149134 | 0.696454 |
| ddx31            | 144.3903456 | -0.100621613 | 0.179269  | -0.561288 | 0.574601 | 0.950037 |
| barh11a          | 252.4589627 | -0.25585176  | 0.1332996 | -1.919374 | 0.054937 | 0.459334 |
| adam28           | 201.2984158 | 0.002864015  | 0.1565513 | 0.0182944 | 0.985404 | 0.996944 |
| tm2d2            | 290.5702883 | -0.003654435 | 0.1280002 | -0.02855  | 0.977223 | 0.996762 |
| histh11          | 30342.84999 | -0.29890524  | 0.0799064 | -3.74069  | 0.000184 | 0.007935 |
| sfrpla           | 290.5050992 | 0.189874501  | 0.1416819 | 1.3401467 | 0.180198 | 0.74128  |
| zgc:110329       | 183.2686814 | -0.091859865 | 0.1565993 | -0.586592 | 0.557478 | 0.948478 |
| tacrla           | 20.08649692 | -0.592532922 | 0.4367514 | -1.356682 | 0.174882 | 0.735545 |
| rasala           | 786.9982332 | -0.09990792  | 0.0933985 | -1.069695 | 0.284757 | 0.844955 |
| atp6v0a2a        | 522.9853799 | 0.085064603  | 0.1153618 | 0.7373725 | 0.460896 | 0.921978 |
| brwd3            | 681.2373693 | -0.00764621  | 0.0985404 | -0.077595 | 0.93815  | 0.99279  |
| etnpp1           | 337.9487106 | 0.445019502  | 0.1181305 | 3.767187  | 0.000165 | 0.007304 |
| jmjd7            | 96.25690486 | -0.111131107 | 0.1985707 | -0.559655 | 0.575715 | 0.950373 |
| uprt             | 513.505003  | 0.000446111  | 0.1091887 | 0.0040857 | 0.99674  | 0.998936 |
| cfap73           | 6.019629955 | -0.50373326  | 0.7955628 | -0.633179 | 0.526617 | NA       |
| iqcd             | 11.65437111 | 0.274028117  | 0.5687198 | 0.4818333 | 0.629924 | 0.957354 |
| agtr2            | 160.4136065 | -0.03541318  | 0.1582048 | -0.223844 | 0.822879 | 0.982189 |
| cx27.5           | 33.44633159 | -0.240630627 | 0.3396224 | -0.708524 | 0.47862  | 0.926978 |
| gbgt113          | 78.14393356 | -0.332223323 | 0.2206632 | -1.505567 | 0.132178 | 0.666055 |
| rps6ka3a         | 954.7560419 | 0.046162242  | 0.0876402 | 0.5267247 | 0.598385 | 0.955488 |
| gabarapa         | 1609.31227  | 0.068003729  | 0.0779178 | 0.8727627 | 0.382792 | 0.895192 |
| gps2             | 581.6641722 | -0.033629484 | 0.1019321 | -0.329921 | 0.74146  | 0.973154 |
| tp53             | 891.0741354 | 0.035749782  | 0.0957153 | 0.3735014 | 0.708775 | 0.968664 |
| capga            | 13.12428292 | 0.263628697  | 0.5605212 | 0.4703278 | 0.638121 | 0.959194 |
| mpdula           | 147.6785088 | 0.193107396  | 0.1640579 | 1.1770683 | 0.239168 | 0.807768 |
| znf703           | 1164.069927 | -0.090100815 | 0.0913416 | -0.986416 | 0.323929 | 0.870928 |
| dgcr8            | 1042.314734 | -0.013662506 | 0.085884  | -0.159081 | 0.873605 | 0.987858 |
| atp6v0a2b        | 304.3272264 | -0.059478163 | 0.1298548 | -0.458036 | 0.646927 | 0.960362 |
| cyp1d1           | 272.9379826 | 0.092691989  | 0.1311518 | 0.7067537 | 0.47972  | 0.927091 |
| zgc:101016       | 145.2614948 | 0.109004392  | 0.1804799 | 0.6039697 | 0.545864 | 0.945526 |
| abhd17b          | 415.0981712 | 0.105329006  | 0.1103913 | 0.9541427 | 0.340011 | 0.87805  |
| AK6              | 201.2119411 | 0.061980486  | 0.1453757 | 0.4263469 | 0.669855 | 0.965223 |

|                   |             |              |           |           |          |          |
|-------------------|-------------|--------------|-----------|-----------|----------|----------|
| cds2              | 1584.683214 | 0.059556453  | 0.0771375 | 0.7720822 | 0.440066 | 0.916082 |
| hs3st112          | 180.6223366 | -0.17617664  | 0.1611282 | -1.093394 | 0.274221 | 0.839127 |
| si:dkey-174n20.1  | 92.1164919  | -0.060030787 | 0.2043042 | -0.29383  | 0.768887 | 0.975687 |
| ficd              | 157.2980634 | 0.523339765  | 0.1668043 | 3.1374472 | 0.001704 | 0.047485 |
| ISCU (1 of many)  | 494.6359486 | -0.039779721 | 0.1151783 | -0.345375 | 0.729812 | 0.971143 |
| corolca           | 1538.451765 | -0.106754332 | 0.0856566 | -1.246306 | 0.212652 | 0.780725 |
| dao.3             | 4.418772514 | 0.092866402  | 0.892773  | 0.1040202 | 0.917153 | NA       |
| dao.1             | 23.47197977 | 0.011592158  | 0.3988213 | 0.029066  | 0.976812 | 0.996762 |
| dao.2             | 126.2377491 | 0.132743472  | 0.1921655 | 0.6907768 | 0.489706 | 0.931926 |
| tchp              | 222.6835673 | -0.133635875 | 0.1393304 | -0.959129 | 0.337494 | 0.876395 |
| aldh3b2           | 49.35218318 | -0.078102804 | 0.2748373 | -0.284178 | 0.776274 | 0.975826 |
| ankle2            | 72.90738658 | 0.148192838  | 0.240774  | 0.6154853 | 0.538234 | 0.943336 |
| pgam5             | 747.2699591 | -0.024168073 | 0.09766   | -0.247472 | 0.804543 | 0.979705 |
| mtnrlc            | 2.794455884 | -0.163811091 | 1.100302  | -0.148878 | 0.88165  | NA       |
| zgc:113208        | 363.0724184 | -0.018422938 | 0.1164566 | -0.158196 | 0.874303 | 0.987881 |
| coq5              | 316.7668347 | -0.157378472 | 0.1256345 | -1.252669 | 0.210326 | 0.778043 |
| xbp1              | 4673.393986 | 0.041385416  | 0.0931362 | 0.4443537 | 0.656787 | 0.96205  |
| snrnp27           | 522.1167941 | 0.049524311  | 0.1034958 | 0.4785153 | 0.632283 | 0.957356 |
| parvab            | 94.41834059 | 0.197867304  | 0.2084134 | 0.9493981 | 0.342418 | 0.878434 |
| ypell             | 182.5741364 | -0.278999363 | 0.1751931 | -1.592525 | 0.111267 | 0.627048 |
| sdf211            | 598.7822956 | -0.046597997 | 0.1238398 | -0.376277 | 0.706711 | 0.968636 |
| ccl19a.2          |             | 0 NA         | NA        | NA        | NA       | NA       |
| tctn2             | 127.4566388 | -0.297126838 | 0.1798446 | -1.652131 | 0.098508 | 0.597984 |
| rfc5              | 511.2185712 | -0.027858155 | 0.1130492 | -0.246425 | 0.805353 | 0.979883 |
| pimr123           | 0.157187365 | -0.955901296 | 4.0804729 | -0.234262 | 0.814781 | NA       |
| irx4a             | 233.4933618 | -0.125052512 | 0.1363329 | -0.917258 | 0.359007 | 0.884725 |
| extlc             | 352.6913115 | -0.13406258  | 0.1243696 | -1.077937 | 0.281062 | 0.84357  |
| evla              | 738.1987192 | 0.055300903  | 0.0953339 | 0.580076  | 0.561863 | 0.948728 |
| sat1a.1           | 566.0646926 | -0.054879379 | 0.1159874 | -0.47315  | 0.636106 | 0.958498 |
| rad21b            | 571.1725698 | 0.049491421  | 0.125325  | 0.3949045 | 0.692913 | 0.96736  |
| BX649384.1        | 0.182570949 | 0.967652056  | 4.0804729 | 0.2371421 | 0.812547 | NA       |
| si:ch211-193k19.1 | 139.9117889 | -0.106993104 | 0.1839836 | -0.581536 | 0.560879 | 0.948728 |
| zgc:103438        | 19.46419554 | -0.44092352  | 0.4415951 | -0.998479 | 0.318047 | 0.867746 |
| si:dkey-267n13.1  | 9.647646204 | 0.138166811  | 0.6435076 | 0.2147089 | 0.829994 | NA       |
| ptp4a2b           | 2095.29743  | 0.025851158  | 0.0864649 | 0.2989788 | 0.764956 | 0.975374 |
| bmp8a             | 40.74326913 | -0.225946876 | 0.3121858 | -0.723758 | 0.469214 | 0.924496 |
| zgc:91910         | 982.9402637 | 0.135680342  | 0.1152    | 1.1777806 | 0.238884 | 0.807768 |
| si:rp71-45k5.4    | 1285.427961 | -0.009382041 | 0.0926866 | -0.101223 | 0.919373 | 0.991639 |
| zgc:113424        | 0.688986717 | 0.114008068  | 2.399209  | 0.047519  | 0.9621   | NA       |
| FP102018.1        | 580.156157  | 0.141040553  | 0.1027703 | 1.3723858 | 0.169943 | 0.727155 |
| mon1ba            | 9.598511244 | -0.140859765 | 0.6565765 | -0.214537 | 0.830129 | NA       |
| rps3a             | 21389.87662 | -0.302487006 | 0.0803193 | -3.766056 | 0.000166 | 0.007304 |
| stm               | 3275.960146 | 0.224167223  | 0.0768199 | 2.9180879 | 0.003522 | 0.079772 |
| scxa              | 101.7415934 | 0.045399696  | 0.2064168 | 0.2199419 | 0.825916 | 0.982196 |
| spinb             | 33.95972126 | -0.426651288 | 0.3325348 | -1.283027 | 0.199482 | 0.764896 |
| srp19             | 362.6968329 | -0.132010092 | 0.1204342 | -1.096118 | 0.273027 | 0.838141 |
| zgc:101664        | 128.6542535 | 0.279221227  | 0.1812084 | 1.5408845 | 0.123345 | 0.651258 |
| dock6             | 316.5738292 | -0.248993163 | 0.1386313 | -1.796082 | 0.072482 | 0.526156 |
| marcks11b         | 14645.34273 | 0.048275744  | 0.0630104 | 0.7661554 | 0.443584 | 0.916631 |
| cbln6             |             | 0 NA         | NA        | NA        | NA       | NA       |
| arl5c             | 208.6213273 | 0.066670101  | 0.1464228 | 0.4553261 | 0.648875 | 0.960708 |
| arntl1b           | 215.4061308 | 0.096410545  | 0.1441246 | 0.6689388 | 0.503535 | 0.935304 |
| gsx1              | 189.7629905 | -0.128126141 | 0.1523285 | -0.841117 | 0.400282 | 0.90084  |
| slc25a11          | 2201.504836 | 0.169847929  | 0.0762722 | 2.2268651 | 0.025956 | 0.311101 |

|                    |             |              |           |           |          |          |
|--------------------|-------------|--------------|-----------|-----------|----------|----------|
| ipo7               | 3550.383786 | -0.159612695 | 0.0703092 | -2.270154 | 0.023198 | 0.292366 |
| stx18              | 246.6115895 | -0.247455608 | 0.1378979 | -1.794485 | 0.072736 | 0.526264 |
| CU633984.1         | 12.39482494 | 0.59999009   | 0.5719065 | 1.0491053 | 0.29413  | 0.849999 |
| si:ch1073-157b13.1 | 360.5487376 | -0.045013319 | 0.1250244 | -0.360036 | 0.71882  | 0.969092 |
| ctdnep1b           | 235.4304465 | 0.095518756  | 0.1388894 | 0.6877323 | 0.491621 | 0.931926 |
| cdh3l              | 0.489712128 | -0.887840729 | 2.693685  | -0.329601 | 0.741702 | NA       |
| si:dkey-17m8.2     | 0 NA        | NA           | NA        | NA        | NA       | NA       |
| nggt1              | 1169.484885 | 0.226132091  | 0.1223087 | 1.8488636 | 0.064478 | 0.496874 |
| clcn4              | 570.4525757 | 0.00284314   | 0.1139751 | 0.0249453 | 0.980099 | 0.996879 |
| colla1b            | 24425.24927 | 0.302513317  | 0.1804292 | 1.6766313 | 0.093615 | 0.582118 |
| rgcc               | 917.5282218 | 0.179142291  | 0.0956398 | 1.8730933 | 0.061056 | 0.482482 |
| sirt3              | 157.763201  | 0.225513289  | 0.1766667 | 1.2764902 | 0.201782 | 0.767736 |
| drd4b              | 15.66494091 | 0.735684888  | 0.5138907 | 1.431598  | 0.152259 | 0.701157 |
| si:ch211-173p18.3  | 1341.097117 | -0.035127396 | 0.0805422 | -0.436137 | 0.662738 | 0.964665 |
| zymy4              | 515.3381818 | -0.201259498 | 0.1057946 | -1.902361 | 0.057124 | 0.468896 |
| pyyb               | 74.90209154 | -0.79841942  | 0.2558182 | -3.121042 | 0.001802 | 0.049493 |
| eef2k              | 1529.932693 | -0.209412401 | 0.0839698 | -2.493901 | 0.012635 | 0.199712 |
| mosmob             | 122.5712642 | 0.023121087  | 0.1885978 | 0.1225947 | 0.902428 | 0.990121 |
| cart3              | 49.38022207 | -0.563454055 | 0.294047  | -1.916204 | 0.055339 | 0.460942 |
| cdkn2aip           | 131.3078957 | -0.05381335  | 0.1727286 | -0.311549 | 0.755384 | 0.975318 |
| cnn2               | 1452.255347 | 0.088715018  | 0.0818091 | 1.0844156 | 0.278181 | 0.841891 |
| angpt14            | 2820.828928 | 0.012725239  | 0.0834041 | 0.1525733 | 0.878735 | 0.987881 |
| rps28              | 6078.463899 | -0.344473406 | 0.1866891 | -1.845172 | 0.065013 | 0.497901 |
| si:rp71-39b20.4    | 121.0344612 | 0.445760999  | 0.1917044 | 2.3252523 | 0.020058 | 0.266383 |
| insl3              | 1.695240948 | 0.547460725  | 1.6714392 | 0.3275385 | 0.743261 | NA       |
| spirela            | 333.9815304 | -0.276362683 | 0.1332737 | -2.073648 | 0.038112 | 0.382552 |
| azin1b             | 7047.988435 | 0.019053283  | 0.0834502 | 0.2283193 | 0.819398 | 0.981594 |
| laptm4b            | 1088.548372 | 0.162111275  | 0.0846208 | 1.9157377 | 0.055398 | 0.461238 |
| rpl30              | 11598.17475 | -0.428287654 | 0.0855712 | -5.005042 | 5.58E-07 | 6.20E-05 |
| hsd17b12b          | 662.4809373 | 0.010894398  | 0.097746  | 0.1114562 | 0.911255 | 0.991066 |
| fjx1               | 57.31713551 | -0.058294609 | 0.2689774 | -0.216727 | 0.828421 | 0.982721 |
| tmem54b            | 9.450117642 | 0.678979344  | 0.6705313 | 1.012599  | 0.311252 | NA       |
| fucal.2            | 217.4355621 | -0.136542503 | 0.1492772 | -0.914691 | 0.360354 | 0.885686 |
| atp6v1c1b          | 996.3707516 | 0.066562853  | 0.0912484 | 0.7294689 | 0.465715 | 0.923865 |
| rida               | 428.7370409 | -0.187538377 | 0.1193199 | -1.571728 | 0.116014 | 0.63841  |
| nt5claa            | 135.1483844 | 0.349790176  | 0.1850957 | 1.8897796 | 0.058787 | 0.474281 |
| zgc:91944          | 314.0067643 | -0.060101021 | 0.1320176 | -0.45525  | 0.648929 | 0.960708 |
| zbtb8b             | 324.1588776 | -0.027396057 | 0.1215645 | -0.225362 | 0.821697 | 0.982004 |
| fucal.1            | 951.636247  | -0.155345597 | 0.0960809 | -1.616821 | 0.105917 | 0.615567 |
| acana              | 2042.10585  | 0.153276964  | 0.0844741 | 1.8144855 | 0.069603 | 0.514708 |
| fncl5b             | 139.8965916 | 0.096581935  | 0.172063  | 0.5613173 | 0.574581 | 0.950037 |
| lingo1b            | 448.9626701 | 0.071666554  | 0.1069542 | 0.6700679 | 0.502814 | 0.935304 |
| crabp1b            | 280.6867503 | 0.088878299  | 0.1404971 | 0.6325988 | 0.526996 | 0.941016 |
| slc25a44b          | 270.7539674 | 0.033689668  | 0.1324388 | 0.2543792 | 0.799203 | 0.979293 |
| fam49a1            | 2634.107822 | 0.047284893  | 0.0799071 | 0.5917483 | 0.554019 | 0.947449 |
| mfsd2ab            | 944.0922444 | 0.266282362  | 0.0918047 | 2.9005295 | 0.003725 | 0.082862 |
| znf281b            | 710.1068963 | -0.0923196   | 0.0921676 | -1.001649 | 0.316513 | 0.867129 |
| yars               | 1008.518916 | 0.107886041  | 0.0844625 | 1.2773247 | 0.201488 | 0.767524 |
| tmem167a           | 393.5483969 | -0.187165795 | 0.1409724 | -1.327677 | 0.184285 | 0.747376 |
| bzw2               | 910.4937262 | 0.152632476  | 0.0891604 | 1.7118867 | 0.086918 | 0.565027 |
| dync11i2           | 1081.514591 | 0.142009641  | 0.0994473 | 1.4279889 | 0.153295 | 0.702578 |
| hrh3               | 52.52880471 | 0.52209264   | 0.2715551 | 1.9226031 | 0.05453  | 0.457793 |
| sync               | 40.2997506  | 0.077190691  | 0.3083207 | 0.2503584 | 0.80231  | 0.979492 |
| tmem106bb          | 172.6338912 | 0.005135748  | 0.1561725 | 0.0328851 | 0.973766 | 0.996315 |

|                 |             |              |           |           |          |          |
|-----------------|-------------|--------------|-----------|-----------|----------|----------|
| cdr2a           | 22.14088844 | 0.755307001  | 0.4229757 | 1.7856982 | 0.074148 | 0.530917 |
| tdp2b           | 107.2536573 | 0.209548615  | 0.1926748 | 1.0875764 | 0.276782 | 0.840075 |
| gmnn            | 151.5693199 | -0.227806516 | 0.1757695 | -1.296053 | 0.194957 | 0.759324 |
| tnni2b.1        | 1143.610844 | -0.041892536 | 0.1039636 | -0.402954 | 0.686982 | 0.966376 |
| kcng2           | 45.72293694 | 0.094446826  | 0.2862607 | 0.3299329 | 0.741451 | 0.973154 |
| ccdc96          | 23.05268582 | 0.233807717  | 0.4065303 | 0.5751298 | 0.565204 | 0.948739 |
| pgr             | 5.806923612 | -0.095873505 | 0.7779919 | -0.123232 | 0.901923 | NA       |
| ptprn2          | 1913.857317 | 0.059335952  | 0.0721913 | 0.8219262 | 0.411119 | 0.903291 |
| ube3c           | 555.0847083 | -0.045755533 | 0.0994338 | -0.460161 | 0.645401 | 0.96029  |
| mx1             | 80.37551493 | 0.241349763  | 0.2304596 | 1.0472543 | 0.294982 | 0.851519 |
| fam210aa        | 387.1023077 | 0.194480273  | 0.1268823 | 1.5327607 | 0.125335 | 0.654648 |
| ptpn2b          | 432.8962414 | -0.06628821  | 0.1126554 | -0.588416 | 0.556253 | 0.947902 |
| psmg2           | 298.6894335 | -0.254127542 | 0.1302433 | -1.951176 | 0.051036 | 0.443404 |
| cited4a         | 1579.245688 | 0.047321638  | 0.0957957 | 0.4939849 | 0.621317 | 0.957354 |
| sumo3b          | 1328.50363  | 0.011398604  | 0.1011489 | 0.1126913 | 0.910275 | 0.990702 |
| pitpnb          | 189.1291285 | 0.13692202   | 0.1558992 | 0.8782727 | 0.379796 | 0.895192 |
| caly            | 926.3828671 | 0.136235361  | 0.0957094 | 1.4234266 | 0.154613 | 0.704307 |
| arrdc3b         | 7017.827578 | -0.091748988 | 0.0808296 | -1.135091 | 0.256337 | 0.824633 |
| sept5b          | 98.77849349 | 0.143874404  | 0.2032367 | 0.7079154 | 0.478998 | 0.926978 |
| mdka            | 8024.308945 | 0.149363211  | 0.0657218 | 2.2726603 | 0.023047 | 0.291198 |
| harbil          | 196.9755498 | -0.1519982   | 0.1587101 | -0.95771  | 0.338209 | 0.876778 |
| atg13           | 1331.916971 | -0.048834147 | 0.0876058 | -0.557431 | 0.577233 | 0.950788 |
| f2              | 1741.683771 | 0.384834235  | 0.0855275 | 4.4995384 | 6.81E-06 | 0.00052  |
| znf408          | 31.89224422 | 0.364162772  | 0.3378367 | 1.0779254 | 0.281067 | 0.84357  |
| rps20           | 15728.25926 | -0.381267769 | 0.0860454 | -4.431007 | 9.38E-06 | 0.000687 |
| penkb           | 188.5053293 | -0.131039412 | 0.1554469 | -0.842985 | 0.399237 | 0.900683 |
| irx4b           | 105.9333299 | -0.009477228 | 0.1905648 | -0.049732 | 0.960336 | 0.995421 |
| thapl1          | 219.4402195 | -0.079581854 | 0.143995  | -0.552671 | 0.580489 | 0.951621 |
| vrk3            | 192.7365606 | 0.020127514  | 0.1484999 | 0.1355389 | 0.892186 | 0.989291 |
| tradd           | 138.7403448 | -0.28998844  | 0.1755963 | -1.651449 | 0.098647 | 0.59799  |
| gnaolb          | 3445.723713 | 0.063844064  | 0.086616  | 0.7370933 | 0.461066 | 0.922038 |
| tmppe           | 221.3096848 | -0.02207279  | 0.1428557 | -0.154511 | 0.877207 | 0.987881 |
| exosc6          | 174.9953947 | 0.303581157  | 0.1673063 | 1.8145231 | 0.069597 | 0.514708 |
| ogfod1          | 130.868922  | -0.139396199 | 0.1782114 | -0.782196 | 0.434099 | 0.914001 |
| ppplr11         | 568.7626054 | 0.09279122   | 0.0996086 | 0.9315585 | 0.351565 | 0.880769 |
| cnplr1          | 242.5854829 | -0.020616026 | 0.1360838 | -0.151495 | 0.879585 | 0.987881 |
| mgatl1b         | 295.5113376 | 0.107418546  | 0.124753  | 0.8610499 | 0.389211 | 0.896362 |
| si:dkey-78a14.4 | 18.49194307 | 0.085881997  | 0.4591797 | 0.1870335 | 0.851634 | 0.985174 |
| ddx39b          | 537.6849243 | 0.067916202  | 0.1067774 | 0.6360538 | 0.524741 | 0.939791 |
| znrd1           | 35.59758815 | -0.057155649 | 0.3474257 | -0.164512 | 0.869328 | 0.987274 |
| gtf2h4          | 0.878629579 | 0.686795053  | 2.2010162 | 0.3120354 | 0.755014 | NA       |
| cebpg           | 1637.115459 | -0.060321226 | 0.0837291 | -0.720433 | 0.471258 | 0.924838 |
| cebpa           | 706.5715793 | -0.069495512 | 0.0928338 | -0.748602 | 0.454097 | 0.920295 |
| heatr3          | 335.2954066 | -0.077469759 | 0.123697  | -0.626287 | 0.531127 | 0.942209 |
| cd81a           | 12915.05454 | 0.083714581  | 0.0653986 | 1.2800663 | 0.200522 | 0.766801 |
| tph1b           | 65.03190566 | -0.40228566  | 0.2431763 | -1.654296 | 0.098067 | 0.59749  |
| itln2           | 3.996604593 | -0.338518989 | 1.1163666 | -0.303233 | 0.761712 | NA       |
| itgalla         | 232.2842768 | 0.208503591  | 0.1416064 | 1.4724168 | 0.140908 | 0.681252 |
| pard6gb         | 321.7548881 | -0.037611485 | 0.1297196 | -0.289945 | 0.771859 | 0.975687 |
| sdhaf3          | 181.7243823 | 0.141538839  | 0.151248  | 0.9358061 | 0.349373 | 0.880195 |
| piasla          | 322.7401748 | -0.128075704 | 0.1267219 | -1.010683 | 0.312168 | 0.864401 |
| smad3a          | 418.4933004 | 0.083391026  | 0.1210822 | 0.6887144 | 0.491003 | 0.931926 |
| eya3            | 564.7770387 | 0.049742858  | 0.102173  | 0.4868496 | 0.626365 | 0.957354 |
| ctdsp2          | 2739.278451 | -0.076305793 | 0.0755015 | -1.010653 | 0.312182 | 0.864401 |

|                  |              |               |            |            |           |           |
|------------------|--------------|---------------|------------|------------|-----------|-----------|
| myo1g            | 3. 387788532 | 0. 01564599   | 1. 0558498 | 0. 0148184 | 0. 988177 | NA        |
| si:dkeyp-92c9. 2 | 3. 857622245 | -0. 599625394 | 1. 0155758 | -0. 590429 | 0. 554903 | NA        |
| rgs18            | 13. 62286564 | 0. 21607484   | 0. 5188069 | 0. 4164842 | 0. 677056 | 0. 965257 |
| txnipa           | 10098. 1058  | -0. 084069121 | 0. 0816341 | -1. 029829 | 0. 30309  | 0. 85729  |
| mtx1b            | 130. 8109273 | -0. 135046672 | 0. 1878893 | -0. 718757 | 0. 472291 | 0. 924838 |
| EIF3hb           | 246. 0667624 | -0. 127721441 | 0. 1405676 | -0. 908612 | 0. 363555 | 0. 886101 |
| mchr2            | 3. 620070472 | 0. 266801763  | 0. 9818007 | 0. 2717474 | 0. 785816 | NA        |
| nitr13           | 0. 166657454 | -0. 955901296 | 4. 0804729 | -0. 234262 | 0. 814781 | NA        |
| bbox1            | 540. 4590575 | -0. 099454193 | 0. 1150887 | -0. 864153 | 0. 387504 | 0. 895884 |
| tipin            | 168. 8571146 | 0. 030073636  | 0. 1554908 | 0. 1934111 | 0. 846637 | 0. 985174 |
| lctla            | 891. 876563  | 0. 259888152  | 0. 1027347 | 2. 5297024 | 0. 011416 | 0. 186316 |
| crybgx           | 3230. 925751 | -0. 013696973 | 0. 0786802 | -0. 174084 | 0. 861799 | 0. 985841 |
| tssc4            | 546. 2178205 | 0. 057660283  | 0. 1244175 | 0. 463442  | 0. 643048 | 0. 959994 |
| ano5b            | 600. 2971093 | 0. 162344646  | 0. 1074003 | 1. 5115849 | 0. 130639 | 0. 662797 |
| gas2b            | 30. 20299339 | -0. 027133905 | 0. 3433246 | -0. 079033 | 0. 937007 | 0. 992786 |
| gla              | 66. 40277066 | 0. 171475408  | 0. 2405873 | 0. 7127366 | 0. 476009 | 0. 926338 |
| fnbpla           | 14. 79347469 | 0. 538325068  | 0. 5519758 | 0. 9752693 | 0. 329427 | 0. 873436 |
| nudcd1           | 287. 2091381 | 0. 003152154  | 0. 127407  | 0. 0247408 | 0. 980262 | 0. 996879 |
| trhrb            | 5. 141155378 | 0. 705224634  | 0. 94431   | 0. 7468147 | 0. 455175 | NA        |
| hnrnpa01         | 7828. 145469 | -0. 171417358 | 0. 065485  | -2. 61766  | 0. 008853 | 0. 156033 |
| hnrnpa0b         | 144. 8131953 | 0. 239016813  | 0. 1848352 | 1. 2931346 | 0. 195964 | 0. 761148 |
| cars             | 864. 9525141 | 0. 024356215  | 0. 0916195 | 0. 265841  | 0. 790362 | 0. 977338 |
| nfatc1           | 202. 8547274 | -0. 139402543 | 0. 1519781 | -0. 917254 | 0. 35901  | 0. 884725 |
| rnase13          | 265. 8087248 | 0. 703707405  | 0. 1427305 | 4. 9303242 | 8. 21E-07 | 8. 54E-05 |
| pcdh1b           | 889. 4402005 | -0. 0091982   | 0. 1023558 | -0. 089865 | 0. 928395 | 0. 992702 |
| myolea           | 585. 1266275 | -0. 142461219 | 0. 097667  | -1. 458643 | 0. 144663 | 0. 688975 |
| ccnb2            | 100. 7299182 | -0. 189482765 | 0. 2102847 | -0. 901077 | 0. 367547 | 0. 887458 |
| mbpa             | 915. 414934  | 0. 224129248  | 0. 088351  | 2. 5368063 | 0. 011187 | 0. 183548 |
| spata4           | 15. 69817846 | -0. 270081473 | 0. 4722542 | -0. 571898 | 0. 567391 | 0. 948739 |
| txn14a           | 415. 5387521 | 0. 113757428  | 0. 1194067 | 0. 9526889 | 0. 340748 | 0. 878134 |
| pitx2            | 649. 40057   | -0. 051492106 | 0. 0980657 | -0. 525077 | 0. 599529 | 0. 956045 |
| tbcld5           | 781. 5900865 | 0. 014679351  | 0. 0931356 | 0. 1576126 | 0. 874762 | 0. 987881 |
| daz1             | 6. 721575763 | 0. 896369832  | 0. 7484045 | 1. 1977077 | 0. 231031 | NA        |
| lcp2b            | 3. 249393254 | -0. 740375907 | 1. 1675185 | -0. 634145 | 0. 525986 | NA        |
| npy              | 78. 78881066 | 0. 29929389   | 0. 2225624 | 1. 3447638 | 0. 178702 | 0. 739486 |
| npvf             | 90. 66554345 | 0. 052963373  | 0. 2124461 | 0. 2493027 | 0. 803127 | 0. 979643 |
| trpm7            | 897. 3705932 | 0. 095376699  | 0. 0923681 | 1. 0325719 | 0. 301804 | 0. 856944 |
| zbtb3            | 163. 309103  | 0. 047977192  | 0. 1630908 | 0. 2941747 | 0. 768624 | 0. 975687 |
| slc27a2a         | 664. 0244862 | 0. 067233525  | 0. 1180671 | 0. 5694516 | 0. 56905  | 0. 948983 |
| gatm             | 3189. 814182 | 0. 092280991  | 0. 0944751 | 0. 9767762 | 0. 32868  | 0. 872945 |
| sb:cb649         | 51. 4923668  | -0. 180433156 | 0. 2720542 | -0. 663225 | 0. 507186 | 0. 935734 |
| tmem144b         | 1. 999048969 | 0. 975922653  | 1. 3685926 | 0. 7130849 | 0. 475793 | NA        |
| rras2            | 641. 0498406 | 0. 148869723  | 0. 0959307 | 1. 5518461 | 0. 120699 | 0. 645578 |
| hoxa13b          | 19. 82217617 | -0. 045519769 | 0. 4333557 | -0. 10504  | 0. 916344 | 0. 991314 |
| rasal2           | 909. 2765766 | -0. 066386831 | 0. 0899063 | -0. 7384   | 0. 460271 | 0. 921978 |
| gcgrb            | 27. 90390589 | 0. 19537566   | 0. 3800181 | 0. 514122  | 0. 607167 | 0. 956718 |
| lamc1            | 3609. 719755 | 0. 049088438  | 0. 0715361 | 0. 6862049 | 0. 492584 | 0. 931926 |
| CC2D1A           | 150. 1908449 | 0. 127677946  | 0. 1698954 | 0. 751509  | 0. 452346 | 0. 919102 |
| rnaset2          | 545. 8726177 | -0. 003635598 | 0. 1061747 | -0. 034242 | 0. 972684 | 0. 996315 |
| nucb2b           | 281. 2460372 | -0. 230715817 | 0. 1456507 | -1. 584035 | 0. 113186 | 0. 631061 |
| cdx4             | 12. 02654714 | 0. 364450955  | 0. 5533108 | 0. 6586731 | 0. 510106 | 0. 936253 |
| gnb11            | 24. 31356122 | 0. 63930459   | 0. 4056861 | 1. 5758604 | 0. 115058 | 0. 635519 |
| golga7ba         | 616. 7209573 | 0. 153445296  | 0. 0992044 | 1. 5467586 | 0. 121921 | 0. 649101 |
| rps13            | 9187. 232908 | -0. 343211151 | 0. 0861208 | -3. 985231 | 6. 74E-05 | 0. 003508 |

|                  |             |              |           |           |          |          |
|------------------|-------------|--------------|-----------|-----------|----------|----------|
| nucb2a           | 1854.448803 | 0.107179923  | 0.0837768 | 1.2793506 | 0.200774 | 0.766855 |
| dnaaf3l          | 12.0448701  | 0.220719095  | 0.5752578 | 0.3836873 | 0.70121  | 0.968134 |
| phf23b           | 292.0934712 | 0.044454141  | 0.133479  | 0.3330422 | 0.739102 | 0.972722 |
| nod1             | 3.149578253 | 0.483808077  | 1.1210099 | 0.4315823 | 0.666045 | NA       |
| rpl39            | 9418.477417 | -0.312311335 | 0.1111039 | -2.810985 | 0.004939 | 0.102322 |
| ndufal           | 1097.738302 | -0.009045462 | 0.1196831 | -0.075578 | 0.939754 | 0.992857 |
| clgalt1c1        | 435.384513  | 0.067111425  | 0.1079581 | 0.6216434 | 0.534176 | 0.943276 |
| cers3b           | 51.33161818 | -0.238119715 | 0.2742275 | -0.868329 | 0.385214 | 0.89551  |
| vps1l            | 509.7416884 | -0.042858957 | 0.1095397 | -0.391264 | 0.695602 | 0.96736  |
| calb2b           | 4149.288071 | 0.058830713  | 0.0793685 | 0.7412353 | 0.458551 | 0.921978 |
| cmtr2            | 178.1089941 | -0.279417933 | 0.1605621 | -1.740248 | 0.081815 | 0.552725 |
| riox2            | 103.1769683 | 0.003929872  | 0.192092  | 0.0204583 | 0.983678 | 0.996944 |
| actala           | 3813.02881  | 0.126324246  | 0.096861  | 1.3041803 | 0.192172 | 0.756673 |
| cyfip2           | 2945.314734 | 0.03420618   | 0.0746164 | 0.4584272 | 0.646646 | 0.960362 |
| cldn7a           | 975.142405  | 0.112555678  | 0.1002246 | 1.123034  | 0.261423 | 0.829593 |
| ponzr6           | 57.9007738  | -0.54338247  | 0.2734264 | -1.987308 | 0.046888 | 0.425112 |
| slc24a6a         | 539.736304  | 0.177054151  | 0.1057239 | 1.6746845 | 0.093996 | 0.58339  |
| rbm4.1           | 540.829899  | 0.006053285  | 0.1142272 | 0.0529934 | 0.957737 | 0.99467  |
| pop7             | 566.061554  | 0.102537114  | 0.1002343 | 1.0229748 | 0.30632  | 0.860027 |
| si:ch211-81a5.5  | 22.81840159 | 0.345856196  | 0.4257208 | 0.8124014 | 0.416561 | 0.906237 |
| si:ch73-335121.1 | 831.4429766 | 0.113186648  | 0.1003592 | 1.1278158 | 0.259398 | 0.827693 |
| glb1             | 196.5772029 | 0.254054132  | 0.1554775 | 1.6340249 | 0.102254 | 0.607744 |
| si:dkey-33c9.6   | 22.23597324 | -0.15870962  | 0.4146104 | -0.382792 | 0.701874 | 0.968134 |
| ntn5             | 282.3771741 | -0.010972148 | 0.1384695 | -0.079239 | 0.936843 | 0.992702 |
| pcdh20           | 195.8037749 | 0.247896123  | 0.1535828 | 1.6140874 | 0.106508 | 0.615567 |
| zgc:103586       | 178.7526449 | 0.211458261  | 0.1623576 | 1.3024231 | 0.192772 | 0.756795 |
| slc3a2a          | 2312.443312 | -0.039348432 | 0.0858536 | -0.45832  | 0.646722 | 0.960362 |
| si:dkey-264d12.4 | 127.6023788 | -0.195068187 | 0.1888296 | -1.033038 | 0.301586 | 0.856944 |
| sat2a            |             | 0 NA         | NA        | NA        | NA       | NA       |
| ndufv1           | 4983.424477 | 0.079831768  | 0.0812524 | 0.9825153 | 0.325846 | 0.871896 |
| atp11c           | 233.9800828 | 0.257121965  | 0.1403824 | 1.8315823 | 0.067014 | 0.506251 |
| serpinh2         | 261.4395394 | 0.265014392  | 0.1321701 | 2.0051006 | 0.044952 | 0.417005 |
| PRKAR2B          | 255.5214947 | 0.067773725  | 0.1614554 | 0.4197674 | 0.674655 | 0.965257 |
| anxa4            | 1679.68595  | -0.445492591 | 0.0881889 | -5.051571 | 4.38E-07 | 5.04E-05 |
| cacng6a          | 195.0753388 | 0.379931571  | 0.1491039 | 2.5480988 | 0.010831 | 0.180681 |
| prlhr2b          | 3.29685416  | 0.27107151   | 1.0351481 | 0.2618674 | 0.793424 | NA       |
| tmtops3a         | 7.788023212 | 0.074835965  | 0.6869267 | 0.1089432 | 0.913248 | NA       |
| rab11fip1b       | 27.52116728 | -0.456904244 | 0.3757246 | -1.216061 | 0.223962 | 0.790824 |
| dand5            | 3.422964639 | -0.680587392 | 1.0643958 | -0.639412 | 0.522555 | NA       |
| snape2           | 134.1536674 | -0.193505488 | 0.1722615 | -1.123324 | 0.2613   | 0.829527 |
| si:dkeyp-80c12.4 | 2.200210324 | -0.168395489 | 1.3110895 | -0.128439 | 0.897801 | NA       |
| tcn2             | 1344.620755 | -0.320366391 | 0.1017811 | -3.147601 | 0.001646 | 0.046303 |
| hexim1           | 1015.365432 | 0.078362544  | 0.0881441 | 0.8890273 | 0.373988 | 0.893685 |
| clql3b           | 27.03553014 | -0.170098885 | 0.3680454 | -0.462168 | 0.643961 | 0.96009  |
| zgc:l12356       | 2037.614885 | -0.052304025 | 0.0848272 | -0.616595 | 0.537502 | 0.943336 |
| si:ch73-174h16.4 | 178.5576768 | 0.077616701  | 0.1581535 | 0.4907682 | 0.62359  | 0.957354 |
| gstcd            | 89.75318361 | -0.018022144 | 0.2093612 | -0.086082 | 0.931402 | 0.992702 |
| zgc:l62171       | 22.04469244 | -0.534526599 | 0.4085099 | -1.308479 | 0.190711 | 0.755212 |
| fam122b          | 545.8232609 | -0.017683423 | 0.1031352 | -0.171459 | 0.863863 | 0.985952 |
| rab39bb          | 348.4342034 | 0.027741038  | 0.1355284 | 0.204688  | 0.837816 | 0.984701 |
| syt4             | 1289.987458 | -0.013206675 | 0.0801449 | -0.164785 | 0.869113 | 0.987245 |
| ccnt2b           | 1186.97025  | 0.074772947  | 0.0850586 | 0.8790757 | 0.37936  | 0.895192 |
| rhbdf1a          | 568.55187   | 0.010301456  | 0.124648  | 0.0826444 | 0.934134 | 0.992702 |
| pknox1.2         | 145.6508024 | 0.078496325  | 0.1730986 | 0.4534774 | 0.650205 | 0.960708 |



|                    |              |               |            |            |           |           |
|--------------------|--------------|---------------|------------|------------|-----------|-----------|
| tmprss3b           | 8. 658108658 | 0. 223657562  | 0. 6466522 | 0. 34587   | 0. 72944  | NA        |
| pdxkb              | 53. 40906296 | 0. 371385494  | 0. 2770878 | 1. 340317  | 0. 180142 | 0. 74128  |
| s1pr2              | 343. 2244035 | 0. 093315293  | 0. 1346588 | 0. 692976  | 0. 488325 | 0. 93189  |
| agpat3             | 2180. 156069 | 0. 055541361  | 0. 0823191 | 0. 6747079 | 0. 499861 | 0. 934224 |
| coll8a1a           | 5909. 841402 | 0. 14193449   | 0. 0808212 | 1. 7561543 | 0. 079062 | 0. 547489 |
| gpr185b            | 10. 45034184 | 0. 391100294  | 0. 6069167 | 0. 6444053 | 0. 519313 | NA        |
| aanat1             | 38. 7272989  | 0. 343465004  | 0. 3090529 | 1. 1113468 | 0. 266419 | 0. 832634 |
| bach2a             | 59. 83655816 | -0. 26166064  | 0. 2673923 | -0. 978564 | 0. 327795 | 0. 872701 |
| sema3e             | 238. 1190913 | 0. 094001578  | 0. 1359182 | 0. 6916038 | 0. 489186 | 0. 931926 |
| si:ch73-71d17. 2   | 90. 70254905 | -0. 23221627  | 0. 2149291 | -1. 080432 | 0. 27995  | 0. 843423 |
| atp6v0cb           | 8108. 633239 | 0. 132610506  | 0. 075532  | 1. 7556857 | 0. 079142 | 0. 547489 |
| st8sia5            | 278. 0350583 | 0. 092688553  | 0. 1363282 | 0. 6798926 | 0. 496572 | 0. 932588 |
| cbrl               | 417. 121542  | 0. 02872445   | 0. 1152718 | 0. 2491888 | 0. 803215 | 0. 979643 |
| mhc1zba            | 540. 1312915 | 0. 271926958  | 0. 1344292 | 2. 0228267 | 0. 043091 | 0. 4075   |
| setd4              | 117. 4156673 | -0. 14575333  | 0. 2020833 | -0. 721254 | 0. 470753 | 0. 924838 |
| kdm2ba             | 1966. 504252 | -0. 009910267 | 0. 0801466 | -0. 123652 | 0. 901591 | 0. 990121 |
| tab1               | 287. 6934541 | -0. 219677408 | 0. 1366387 | -1. 607724 | 0. 107896 | 0. 619311 |
| gpr182             | 61. 45878333 | 0. 1414214    | 0. 2638067 | 0. 5360796 | 0. 591904 | 0. 954434 |
| mgat3b             | 82. 97390653 | 0. 00152686   | 0. 2485665 | 0. 0061427 | 0. 995099 | 0. 998694 |
| polr2f             | 581. 9772464 | -0. 267971672 | 0. 0980508 | -2. 732988 | 0. 006276 | 0. 120609 |
| sema6ba            | 5. 289353913 | 0. 546020313  | 0. 8487747 | 0. 6433042 | 0. 520027 | NA        |
| cd74b              | 5. 656557411 | 0. 510670674  | 0. 8385901 | 0. 6089634 | 0. 542549 | NA        |
| rps14              | 13612. 0504  | -0. 481959569 | 0. 0709401 | -6. 793894 | 1. 09E-11 | 3. 08E-09 |
| plp2               | 726. 3495281 | -0. 08027229  | 0. 1053228 | -0. 762155 | 0. 445968 | 0. 917154 |
| ebpl               | 51. 48719525 | -0. 264480832 | 0. 2841946 | -0. 930633 | 0. 352044 | 0. 880844 |
| arl11              | 35. 75138902 | 0. 050933315  | 0. 3206104 | 0. 1588636 | 0. 873776 | 0. 987881 |
| rcbtb1             | 240. 7586567 | 0. 122495481  | 0. 14059   | 0. 8712959 | 0. 383593 | 0. 895192 |
| cdadcl             | 187. 0389791 | -0. 034848141 | 0. 1659514 | -0. 20999  | 0. 833675 | 0. 983583 |
| cab391             | 1590. 53996  | -0. 079542019 | 0. 0753114 | -1. 056176 | 0. 290888 | 0. 846568 |
| aplrb              | 252. 3860781 | -0. 156705201 | 0. 1392232 | -1. 125568 | 0. 260348 | 0. 828473 |
| tnni4b. 2          | 317. 990272  | 0. 396904405  | 0. 135486  | 2. 9294856 | 0. 003395 | 0. 077847 |
| hnrnpa1b           | 6402. 587256 | -0. 146730436 | 0. 0867174 | -1. 692052 | 0. 090636 | 0. 576398 |
| trmt10a            | 96. 79572276 | 0. 216475041  | 0. 2154194 | 1. 0049006 | 0. 314945 | 0. 866054 |
| ndufa7             | 608. 7579077 | -0. 165811624 | 0. 1277678 | -1. 297758 | 0. 194371 | 0. 758233 |
| ccnt2a             | 852. 0671409 | 0. 062584418  | 0. 0926091 | 0. 6757912 | 0. 499173 | 0. 934006 |
| bcl9               | 2024. 109686 | -0. 038219372 | 0. 0870518 | -0. 439042 | 0. 660631 | 0. 963881 |
| calcocola          | 768. 5734247 | -0. 112078918 | 0. 0987367 | -1. 135129 | 0. 256321 | 0. 824633 |
| znf865             | 1680. 523818 | 0. 022431782  | 0. 0766171 | 0. 2927776 | 0. 769692 | 0. 975687 |
| si:ch211-114n24. 6 | 1034. 618262 | 0. 169663894  | 0. 0929146 | 1. 8260193 | 0. 067847 | 0. 509884 |
| tmem18             | 325. 4850369 | -0. 18619891  | 0. 119671  | -1. 555924 | 0. 119726 | 0. 644854 |
| tomm401            | 733. 0576282 | 0. 057547281  | 0. 0974474 | 0. 5905468 | 0. 554824 | 0. 947449 |
| slc9a3. 2          | 23. 02664648 | 0. 462245041  | 0. 4134925 | 1. 1179042 | 0. 263608 | 0. 830245 |
| si:dkey-211g8. 1   |              | 0 NA          | NA         | NA         | NA        | NA        |
| nitr7a             | 0. 158795395 | 0. 967652056  | 4. 0804729 | 0. 2371421 | 0. 812547 | NA        |
| nitr8              | 0. 157187365 | -0. 955901296 | 4. 0804729 | -0. 234262 | 0. 814781 | NA        |
| hmgn3              | 3840. 743442 | 0. 036287779  | 0. 0697533 | 0. 5202303 | 0. 602903 | 0. 956045 |
| prmt9              | 119. 628876  | 0. 106416008  | 0. 1903677 | 0. 5590023 | 0. 57616  | 0. 950611 |
| hax1               | 504. 9092059 | -0. 088842692 | 0. 1099669 | -0. 807904 | 0. 419146 | 0. 906406 |
| urgcp              | 70. 9284736  | -0. 094204636 | 0. 2533459 | -0. 371842 | 0. 71001  | 0. 968928 |
| pygo2              | 1044. 58088  | 0. 042118589  | 0. 0846532 | 0. 4975431 | 0. 618806 | 0. 957354 |
| s100s              | 337. 1385292 | 0. 065036789  | 0. 1214605 | 0. 5354561 | 0. 592335 | 0. 954434 |
| rgs12b             | 773. 6045662 | 0. 037692108  | 0. 0942823 | 0. 3997792 | 0. 689319 | 0. 966763 |
| dtd2               | 61. 9927229  | -0. 287709222 | 0. 2649742 | -1. 085801 | 0. 277567 | 0. 84125  |
| aldh8a1            | 350. 9111127 | -0. 778669962 | 0. 118483  | -6. 571997 | 4. 96E-11 | 1. 23E-08 |

|                   |             |              |           |           |          |          |
|-------------------|-------------|--------------|-----------|-----------|----------|----------|
| hbs11             | 958.1776344 | -0.015537506 | 0.0851906 | -0.182385 | 0.855281 | 0.985174 |
| si:dkey-170110.1  | 49.16169538 | 0.348720813  | 0.2958747 | 1.17861   | 0.238554 | 0.807659 |
| commd7            | 201.9305027 | 0.031219307  | 0.1539116 | 0.2028392 | 0.839261 | 0.984979 |
| si:ch211-226m16.2 | 420.4024412 | -0.119490774 | 0.1096444 | -1.089803 | 0.2758   | 0.839541 |
| tap2a             | 1.338122747 | -0.741451151 | 1.6474665 | -0.450055 | 0.652671 | NA       |
| dnmt3bb.1         | 559.5626352 | 0.014642337  | 0.1153349 | 0.1269549 | 0.898976 | 0.990121 |
| ttl15             | 22.34127966 | 0.410581378  | 0.4133544 | 0.9932913 | 0.320568 | 0.868418 |
| si:ch211-106j24.1 | 397.0408832 | 0.427989974  | 0.1174219 | 3.6448898 | 0.000268 | 0.010817 |
| ifrd2             | 1025.955517 | 0.039008332  | 0.0850818 | 0.4584805 | 0.646607 | 0.960362 |
| pou2f2a           | 750.8696317 | -0.061457478 | 0.0934368 | -0.657743 | 0.510703 | 0.936253 |
| hyal3             | 11.63145114 | 0.413427179  | 0.6073194 | 0.6807409 | 0.496035 | 0.932377 |
| mgll              | 950.5792815 | -0.001222372 | 0.0945623 | -0.012927 | 0.989686 | 0.997612 |
| ankrd52a          | 22.3435766  | 0.651506254  | 0.4283401 | 1.5210024 | 0.128259 | 0.658954 |
| krt91             | 14164.52311 | 0.094215946  | 0.0868633 | 1.0846461 | 0.278078 | 0.841891 |
| rnf41             | 836.4450004 | 0.087558717  | 0.0905775 | 0.9666718 | 0.333708 | 0.874933 |
| cyt11             | 10174.75681 | -0.071781714 | 0.0982418 | -0.730663 | 0.464985 | 0.923671 |
| upp2              | 1.185891111 | -0.36621692  | 1.8036008 | -0.203048 | 0.839098 | NA       |
| krt92             | 4455.225075 | -0.603390794 | 0.0911633 | -6.61879  | 3.62E-11 | 9.18E-09 |
| krt15             | 1600.872649 | 0.106604819  | 0.0978296 | 1.0896985 | 0.275846 | 0.839541 |
| tsen54            | 108.4012569 | -0.116502257 | 0.1892707 | -0.615532 | 0.538203 | 0.943336 |
| anks4b            | 320.4089237 | -0.718915664 | 0.1244771 | -5.775486 | 7.67E-09 | 1.34E-06 |
| slc43a2a          | 886.5902781 | -0.121013934 | 0.1038813 | -1.164925 | 0.244049 | 0.813415 |
| DX0               | 47.61192559 | -0.066334593 | 0.2996257 | -0.221392 | 0.824788 | 0.982196 |
| plagx             | 879.4726811 | -0.09548818  | 0.0917383 | -1.040876 | 0.297933 | 0.85401  |
| myold             | 422.4861358 | -0.119479583 | 0.11187   | -1.068021 | 0.285511 | 0.845164 |
| slc34a2b          | 343.0268306 | -1.199766908 | 0.1395214 | -8.599158 | 8.03E-18 | 5.12E-15 |
| slc2a12           | 207.3135849 | 0.056620568  | 0.1507621 | 0.3755623 | 0.707242 | 0.968664 |
| tbpl1             | 140.333327  | 0.276632075  | 0.1823142 | 1.5173367 | 0.129182 | 0.660844 |
| tcf21             | 42.41056817 | -0.298013232 | 0.3226086 | -0.923761 | 0.355611 | 0.882511 |
| arihl1            | 322.5348289 | 0.088964131  | 0.1326193 | 0.6708232 | 0.502333 | 0.935304 |
| rps12             | 20921.91153 | -0.397054736 | 0.0743834 | -5.337945 | 9.40E-08 | 1.32E-05 |
| zgc:153284        | 202.2571103 | 0.237050594  | 0.1603155 | 1.4786509 | 0.139234 | 0.677963 |
| sh3bgr12          | 599.4988132 | 0.079583698  | 0.100325  | 0.7932588 | 0.427627 | 0.91075  |
| zgc:153935        | 64.63993599 | 0.01642324   | 0.2486173 | 0.0660583 | 0.947331 | 0.99381  |
| f13alb            | 291.5663683 | -0.03949957  | 0.1452454 | -0.271951 | 0.78566  | 0.97627  |
| aimplb            | 249.8684202 | -0.072099917 | 0.1419781 | -0.507824 | 0.611577 | 0.95688  |
| sgms2b            | 38.68850504 | 0.25633079   | 0.3241623 | 0.7907483 | 0.429091 | 0.911406 |
| irak1bp1          | 48.11983867 | -0.113475553 | 0.2761475 | -0.410924 | 0.681129 | 0.965476 |
| scamp1            | 341.8694178 | 0.183338581  | 0.1298262 | 1.4121843 | 0.157896 | 0.709114 |
| edn1              | 36.17320493 | -0.088897086 | 0.3293462 | -0.26992  | 0.787222 | 0.976596 |
| st6galnac6        | 7.5261108   | -0.866445861 | 0.7293429 | -1.187981 | 0.234841 | NA       |
| dolppl            | 79.75004317 | 0.122375052  | 0.2210052 | 0.5537203 | 0.57977  | 0.951257 |
| tatdn1            | 57.3053916  | 0.137036577  | 0.2526483 | 0.5424006 | 0.587543 | 0.953319 |
| rnf139            | 279.4204442 | 0.046639048  | 0.1478338 | 0.3154829 | 0.752395 | 0.974684 |
| tbx18             | 71.34108328 | -0.18388263  | 0.2409113 | -0.763279 | 0.445297 | 0.917117 |
| ctssl             | 13.53794159 | -0.178151224 | 0.5466146 | -0.325917 | 0.744487 | 0.974094 |
| gpd1c             | 528.7645677 | -0.357728497 | 0.124304  | -2.877853 | 0.004004 | 0.087004 |
| golph31           | 410.9203475 | -0.159130799 | 0.1133171 | -1.404297 | 0.16023  | 0.7128   |
| ensaa             | 121.6761608 | 0.176853442  | 0.1920193 | 0.9210189 | 0.357041 | 0.883467 |
| zgc:198371        | 56.24419443 | -0.001264663 | 0.2603373 | -0.004858 | 0.996124 | 0.998888 |
| asx11             | 1943.651949 | -0.032883939 | 0.0894491 | -0.367627 | 0.713151 | 0.96909  |
| rnf24             | 150.4983925 | -0.110632234 | 0.1942142 | -0.56964  | 0.568922 | 0.948983 |
| hsd3b7            | 373.9481461 | 0.041007     | 0.1172981 | 0.3495964 | 0.726642 | 0.970402 |
| smox              | 2573.891437 | 0.021293317  | 0.0875452 | 0.2432265 | 0.80783  | 0.980642 |

|                   |             |              |           |           |          |          |
|-------------------|-------------|--------------|-----------|-----------|----------|----------|
| si:ch1073-416d2.3 | 31.95383797 | 0.064553473  | 0.3498394 | 0.1845232 | 0.853603 | 0.985174 |
| rippy3            | 5.184685586 | 0.262485464  | 0.9347461 | 0.2808094 | 0.778857 | NA       |
| plxnb2b           | 62.09834054 | 0.465750877  | 0.2528618 | 1.8419184 | 0.065487 | 0.500378 |
| has2              | 84.56559987 | 0.045061627  | 0.2180838 | 0.2066253 | 0.836302 | 0.984231 |
| dctd              | 113.0039253 | -0.094730537 | 0.1970624 | -0.480713 | 0.63072  | 0.957354 |
| erbb3b            | 300.1968894 | -0.327610575 | 0.1348969 | -2.428601 | 0.015157 | 0.225353 |
| tbc1d16           | 200.4576486 | -0.204968076 | 0.1462405 | -1.401582 | 0.16104  | 0.714313 |
| lsm6              | 541.5833806 | -0.028303078 | 0.1379284 | -0.205201 | 0.837415 | 0.984665 |
| arf3b             | 14.42499429 | 0.077620785  | 0.5064782 | 0.1532559 | 0.878196 | 0.987881 |
| DISP3             | 23.8416     | 0.229215199  | 0.4121935 | 0.5560864 | 0.578152 | 0.951024 |
| fkbp11            | 178.1182005 | -0.141941133 | 0.1565601 | -0.906624 | 0.364606 | 0.886586 |
| zgc:152968        | 4.082403184 | -0.097672661 | 0.9419125 | -0.103696 | 0.917411 | NA       |
| bsc12             | 452.7979221 | 0.134996635  | 0.1072911 | 1.2582274 | 0.20831  | 0.775404 |
| banf1             | 1692.590365 | -0.104441805 | 0.0765737 | -1.363938 | 0.172587 | 0.731348 |
| slc3a2b           | 4110.533671 | -0.054717172 | 0.0679666 | -0.80506  | 0.420785 | 0.90651  |
| ube4b             | 1580.697424 | 0.003750056  | 0.0880678 | 0.0425814 | 0.966035 | 0.996315 |
| gab1              | 446.2771837 | -0.060317627 | 0.11009   | -0.547894 | 0.583765 | 0.952214 |
| kif1b             | 3343.263185 | 0.049260303  | 0.0736071 | 0.6692333 | 0.503347 | 0.935304 |
| casz1             | 263.09008   | -0.017660959 | 0.1419019 | -0.124459 | 0.900952 | 0.990121 |
| ptger2b           | 13.33230899 | 0.322566467  | 0.5708098 | 0.5651032 | 0.572004 | 0.949494 |
| psmc6             | 2300.839383 | -0.078651894 | 0.0866084 | -0.908133 | 0.363808 | 0.886174 |
| cgrrf1            | 58.94662156 | 0.106005428  | 0.2576432 | 0.4114427 | 0.680748 | 0.965476 |
| ddhd1b            | 235.0610125 | 0.212797445  | 0.1397547 | 1.5226492 | 0.127846 | 0.658686 |
| rad51b            | 51.94688841 | 0.051506955  | 0.2662349 | 0.1934643 | 0.846595 | 0.985174 |
| zte38             | 1.308375155 | 0.736523946  | 1.6727564 | 0.4403056 | 0.659716 | NA       |
| gcdha             | 1083.841369 | 0.366380852  | 0.092507  | 3.9605735 | 7.48E-05 | 0.00383  |
| slc44a2           | 1165.689533 | -0.020279425 | 0.0840597 | -0.24125  | 0.809361 | 0.980642 |
| kmt2d             | 572.3274037 | -0.008055046 | 0.1031163 | -0.078116 | 0.937736 | 0.99279  |
| aldh9a1b          | 304.0903965 | -0.23709169  | 0.1236643 | -1.91722  | 0.05521  | 0.460643 |
| dhh               | 12.36756021 | 0.192910191  | 0.5443542 | 0.3543836 | 0.723051 | 0.970383 |
| galca             | 379.2791099 | -0.007178893 | 0.1336645 | -0.053708 | 0.957168 | 0.994589 |
| lgals8a           | 95.9707878  | 0.095756812  | 0.2054216 | 0.4661477 | 0.64111  | 0.959994 |
| dnajc22           | 30.54041982 | -0.322877964 | 0.3563663 | -0.906028 | 0.364921 | 0.886714 |
| ikzf4             | 85.81754952 | 0.428240699  | 0.2206921 | 1.9404442 | 0.052326 | 0.449084 |
| zdhhc14           | 27.02208851 | -0.087442963 | 0.3796661 | -0.230315 | 0.817847 | 0.981594 |
| tmem242           | 198.5638295 | 0.115950848  | 0.1557054 | 0.744681  | 0.456465 | 0.921215 |
| rps26             | 4006.332266 | -0.428556859 | 0.0772857 | -5.545096 | 2.94E-08 | 4.47E-06 |
| si:dkey-60a16.1   | 177.255314  | 0.228691033  | 0.1602967 | 1.4266736 | 0.153674 | 0.702578 |
| cfap36            | 450.4281289 | 0.019900647  | 0.1136452 | 0.175112  | 0.860992 | 0.985773 |
| asah1a            | 237.4501339 | 0.1212984    | 0.1412496 | 0.8587521 | 0.390477 | 0.897304 |
| slc7a2            | 532.6489596 | 0.275183661  | 0.1074928 | 2.5600206 | 0.010467 | 0.176292 |
| irs2a             | 668.5711058 | -0.131149183 | 0.107184  | -1.223589 | 0.221107 | 0.787641 |
| ankrd10a          | 201.2969626 | 0.028269114  | 0.1514805 | 0.1866188 | 0.85196  | 0.985174 |
| mtmr7a            | 337.5712563 | 0.128123668  | 0.1185209 | 1.0810217 | 0.279687 | 0.843169 |
| pfdn6             | 414.1565853 | -0.218400242 | 0.1231068 | -1.774071 | 0.076051 | 0.537342 |
| pwp2h             | 536.9800883 | -0.053634012 | 0.1086859 | -0.493477 | 0.621675 | 0.957354 |
| cxcl12a           | 1035.192362 | 0.089469035  | 0.101638  | 0.8802717 | 0.378712 | 0.895192 |
| mat2ab            | 485.0001759 | 0.186812219  | 0.1142553 | 1.6350415 | 0.10204  | 0.607206 |
| TENM2             | 1211.889396 | 0.005768701  | 0.0832106 | 0.0693265 | 0.94473  | 0.993409 |
| pfkfb1            | 103.1172033 | -0.056383972 | 0.2026949 | -0.278172 | 0.780881 | 0.97627  |
| zgc:153146        | 29.41163762 | 0.105281622  | 0.3514356 | 0.2995758 | 0.764501 | 0.975374 |
| cpb2              | 81.77907821 | 0.541846707  | 0.2551425 | 2.1237019 | 0.033695 | 0.357045 |
| slc8a4b           | 251.4675417 | 0.022533591  | 0.1362658 | 0.165365  | 0.868657 | 0.987245 |
| atp6ap1b          | 743.9855608 | 0.004391491  | 0.0975781 | 0.0450049 | 0.964103 | 0.995927 |

|                    |             |              |           |           |          |          |
|--------------------|-------------|--------------|-----------|-----------|----------|----------|
| hivep3b            | 300.6958322 | -0.108891623 | 0.144715  | -0.752456 | 0.451777 | 0.918761 |
| si:dkey-78k11.9    | 5.303158258 | -1.289041984 | 0.9165824 | -1.406357 | 0.159618 | NA       |
| rccl               | 381.6700111 | -0.260362731 | 0.138931  | -1.874044 | 0.060924 | 0.482482 |
| oprdbl             | 34.98046101 | -0.444563684 | 0.3323091 | -1.337802 | 0.180961 | 0.741776 |
| ddrgkl             | 74.85792332 | -0.028446216 | 0.2305256 | -0.123397 | 0.901793 | 0.990121 |
| nek12              | 24.33159102 | 0.063534936  | 0.4030848 | 0.1576218 | 0.874755 | 0.987881 |
| ggh                | 91.79157835 | 0.11247568   | 0.2133568 | 0.5271717 | 0.598074 | 0.955459 |
| zc3h13             | 1619.181103 | -0.105146703 | 0.0938366 | -1.12053  | 0.262488 | 0.830166 |
| zic2b              | 179.4672299 | -0.151364261 | 0.1558264 | -0.971365 | 0.331367 | 0.874362 |
| tpbgb              | 72.7593205  | 0.320133596  | 0.2361523 | 1.3556232 | 0.175219 | 0.735698 |
| rpa2               | 587.0234631 | -0.173323899 | 0.1028654 | -1.684959 | 0.091997 | 0.57849  |
| ttr                | 128.2116998 | 0.46343652   | 0.1924552 | 2.4080228 | 0.016039 | 0.233377 |
| zgc:113364         | 32.81121314 | -0.358147049 | 0.3375428 | -1.061042 | 0.288671 | 0.845979 |
| tshr               | 2.571911483 | -0.994166215 | 1.2942635 | -0.768133 | 0.442408 | NA       |
| arid5b             | 835.3006856 | 0.040232617  | 0.0961898 | 0.4182627 | 0.675755 | 0.965257 |
| zgc:101851         | 90.14192941 | -0.094782127 | 0.2043752 | -0.463765 | 0.642816 | 0.959994 |
| denr               | 973.7033055 | -0.148743473 | 0.1173551 | -1.267465 | 0.204989 | 0.772822 |
| smad5              | 563.8529936 | -0.030655615 | 0.1002275 | -0.30586  | 0.759711 | 0.975374 |
| gpr137             | 102.8676678 | -0.028876703 | 0.1994207 | -0.144803 | 0.884866 | 0.988838 |
| trmo               | 28.01480986 | -0.137871693 | 0.3659403 | -0.37676  | 0.706352 | 0.968459 |
| pimr212            | 0.158915748 | 0.967652056  | 4.0804729 | 0.2371421 | 0.812547 | NA       |
| si:ch211-145b13.5  | 47.27462142 | 0.361476023  | 0.281535  | 1.283947  | 0.19916  | 0.764592 |
| ndufb6             | 1190.90889  | -0.062333065 | 0.0910874 | -0.684322 | 0.493772 | 0.931926 |
| toporsa            | 123.0807582 | -0.194629617 | 0.2007676 | -0.969427 | 0.332332 | 0.874653 |
| mtap               | 299.2131223 | -0.247322982 | 0.130487  | -1.895384 | 0.058042 | 0.472311 |
| cdkn2a/b           | 5.490155204 | 0.830785744  | 0.8173799 | 1.016401  | 0.309438 | NA       |
| myoz2b             | 190.5628661 | 0.291827823  | 0.1674979 | 1.7422779 | 0.08146  | 0.552315 |
| zgc:158263         | 174.0405867 | -0.364957843 | 0.1571066 | -2.322995 | 0.020179 | 0.266908 |
| map9               | 79.01954713 | -0.115989238 | 0.2251523 | -0.515159 | 0.606442 | 0.956718 |
| lrata              | 34.11939304 | -0.093150744 | 0.3417152 | -0.272598 | 0.785163 | 0.97627  |
| fgg                | 1672.885274 | 0.356122786  | 0.1013344 | 3.5143342 | 0.000441 | 0.016114 |
| plrgl              | 726.4017151 | 0.109407324  | 0.0917082 | 1.1929933 | 0.232872 | 0.801255 |
| ptges3a            | 1358.70121  | 0.090606487  | 0.0792851 | 1.1427929 | 0.253125 | 0.822746 |
| mipa               | 2817.073674 | 0.104704333  | 0.0727298 | 1.439634  | 0.149971 | 0.697935 |
| si:dkey-30k22.7    | 2.182878176 | 0.28030228   | 1.3988912 | 0.2003746 | 0.841188 | NA       |
| dpf2l              | 1022.991201 | -0.145177449 | 0.091191  | -1.592015 | 0.111381 | 0.627123 |
| chrmla             | 4.193767824 | -0.004935696 | 0.9627293 | -0.005127 | 0.995909 | NA       |
| gnpdal             | 308.5772118 | -0.693736198 | 0.1337083 | -5.188429 | 2.12E-07 | 2.67E-05 |
| gatb               | 151.5772206 | -0.131547111 | 0.1777391 | -0.740114 | 0.459231 | 0.921978 |
| ddost              | 3560.277482 | -0.015232336 | 0.0713456 | -0.213501 | 0.830936 | 0.982994 |
| fam131c            | 36.40292238 | -0.074407912 | 0.3141607 | -0.236847 | 0.812776 | 0.981081 |
| klhl17             | 484.0842347 | 0.02475041   | 0.105323  | 0.2349954 | 0.814212 | 0.981081 |
| wdr92              | 194.0434237 | -0.224802248 | 0.1464649 | -1.534854 | 0.12482  | 0.654423 |
| cnriplb            | 374.331837  | 0.050452574  | 0.1155703 | 0.4365532 | 0.662435 | 0.964665 |
| rp19               | 151.6358866 | -0.167443943 | 0.2104773 | -0.795544 | 0.426297 | 0.909969 |
| frs2b              | 270.3963358 | -0.003123821 | 0.1350981 | -0.023123 | 0.981552 | 0.996944 |
| polr3e             | 924.4891783 | -0.040516891 | 0.0893977 | -0.453221 | 0.65039  | 0.960708 |
| si:ch1073-272o11.3 | 10.28199829 | 0.750182978  | 0.625484  | 1.199364  | 0.230386 | NA       |
| kdelr2b            | 813.0174744 | 0.021356465  | 0.0966489 | 0.2209695 | 0.825116 | 0.982196 |
| scube2             | 276.5957389 | -0.002428051 | 0.1385847 | -0.01752  | 0.986022 | 0.996944 |
| st5                | 682.829482  | 0.138320413  | 0.0978422 | 1.4137095 | 0.157447 | 0.708089 |
| ephb2a             | 68.14632115 | -0.196120575 | 0.2383404 | -0.822859 | 0.410588 | 0.903084 |
| qdprbl             | 107.4411691 | -0.330913613 | 0.2136497 | -1.548861 | 0.121415 | 0.647929 |
| pax5               | 15.7108714  | -0.590622598 | 0.4783287 | -1.234763 | 0.216919 | 0.784302 |

|                   |             |              |           |           |          |          |
|-------------------|-------------|--------------|-----------|-----------|----------|----------|
| gsgl1             | 111.561335  | 0.026421174  | 0.1947057 | 0.135698  | 0.89206  | 0.989291 |
| med19a            | 413.1716641 | 0.062610679  | 0.1252956 | 0.4997039 | 0.617284 | 0.957346 |
| slc43a1a          | 524.7164242 | -0.045860261 | 0.1000661 | -0.4583   | 0.646737 | 0.960362 |
| ssrpla            | 1023.993777 | -0.018458229 | 0.09364   | -0.197119 | 0.843734 | 0.985174 |
| zgc:113229        | 17.53707234 | -0.406453277 | 0.4844409 | -0.839015 | 0.401461 | 0.90084  |
| lim2.3            | 686.6238934 | -0.052989829 | 0.0970053 | -0.546257 | 0.584889 | 0.952436 |
| si:dkey-4p15.3    | 104.3312343 | 0.338618754  | 0.1935951 | 1.7491077 | 0.080272 | 0.549641 |
| zgc:112083        | 144.3774309 | -0.109050235 | 0.1674176 | -0.651367 | 0.51481  | 0.937646 |
| wdr19             | 216.1882127 | 0.118547622  | 0.1544603 | 0.7674959 | 0.442787 | 0.916336 |
| tbc1d10c          | 8.720810113 | 0.274862277  | 0.6490432 | 0.4234884 | 0.671939 | NA       |
| tmem144a          | 139.4314223 | 0.01564743   | 0.1752136 | 0.0893049 | 0.92884  | 0.992702 |
| med28             | 276.4269379 | 0.013204135  | 0.1269957 | 0.1039731 | 0.917191 | 0.991572 |
| npylr             | 11.01718254 | -1.003933939 | 0.5934918 | -1.691572 | 0.090728 | NA       |
| dlgap1b           | 17.9688245  | 0.306714303  | 0.4821049 | 0.6361983 | 0.524647 | 0.939713 |
| egr1              | 943.69669   | 0.152726125  | 0.1231034 | 1.2406333 | 0.214741 | 0.782493 |
| smim19            | 354.8889903 | 0.066996866  | 0.1206111 | 0.5554783 | 0.578568 | 0.951052 |
| sl00a10a          | 588.3388544 | -1.2978135   | 0.1122038 | -11.56657 | 6.09E-31 | 1.72E-27 |
| si:ch211-39a7.1   | 18.47946087 | -0.388529896 | 0.4484823 | -0.866322 | 0.386314 | 0.89551  |
| tll1              | 13.70237413 | 0.148979009  | 0.5099998 | 0.2921158 | 0.770198 | 0.975687 |
| haus7             | 137.4936256 | -0.243027027 | 0.173334  | -1.402074 | 0.160893 | 0.714142 |
| fmr1              | 883.0227957 | -0.099249292 | 0.0857308 | -1.157686 | 0.246992 | 0.816669 |
| ugt8              | 388.5366765 | 0.020789556  | 0.1133493 | 0.1834115 | 0.854475 | 0.985174 |
| cd79a             | 1.172093801 | -1.384729205 | 1.9581194 | -0.707173 | 0.479459 | NA       |
| foxb2             | 35.88553264 | 0.076715863  | 0.3268753 | 0.2346946 | 0.814446 | 0.981081 |
| sorbs3            | 357.8835814 | -0.094888096 | 0.121802  | -0.779036 | 0.435959 | 0.914408 |
| tmem192           | 242.0437006 | -0.078325157 | 0.1381951 | -0.566772 | 0.570869 | 0.949078 |
| 1-Mar             | 30.59993876 | 0.159790356  | 0.3968473 | 0.4026495 | 0.687206 | 0.966376 |
| canx              | 7325.960712 | 0.011212822  | 0.0738111 | 0.1519125 | 0.879256 | 0.987881 |
| bmp15             | 3.483668765 | -0.430260855 | 1.0336215 | -0.416265 | 0.677216 | NA       |
| rtn4r12b          | 39.72227109 | 0.231552054  | 0.3033508 | 0.7633146 | 0.445276 | 0.917117 |
| gria4a            | 526.4427714 | 0.007131049  | 0.1032816 | 0.0690447 | 0.944954 | 0.993409 |
| gria3b            | 733.209196  | 0.055417834  | 0.0948584 | 0.5842162 | 0.559075 | 0.948478 |
| aasdhppt          | 43.53842391 | 0.085112369  | 0.3017379 | 0.2820739 | 0.777887 | 0.975942 |
| thoc2             | 1751.542432 | -0.089835282 | 0.0769226 | -1.167867 | 0.242861 | 0.811584 |
| prps1b            | 425.2067843 | -0.070691073 | 0.121009  | -0.58418  | 0.559099 | 0.948478 |
| kctd12b           | 40.96082156 | 0.382481317  | 0.3072668 | 1.2447856 | 0.213211 | 0.781631 |
| hdac3             | 766.6741278 | 0.089289372  | 0.0953172 | 0.9367606 | 0.348882 | 0.880195 |
| slc35c2           | 1255.405798 | 0.315295255  | 0.0842962 | 3.7403244 | 0.000184 | 0.007935 |
| CR749762.1        | 2.159892768 | -0.17488655  | 1.3304961 | -0.131445 | 0.895424 | NA       |
| si:rp71-17i16.5   | 2.645869394 | 0.380416939  | 1.1724021 | 0.3244765 | 0.745577 | NA       |
| si:ch211-191a24.4 | 142.5881215 | -0.304938321 | 0.1670086 | -1.825884 | 0.067868 | 0.509884 |
| mcm31             | 11.92036114 | -0.070804887 | 0.545576  | -0.12978  | 0.89674  | 0.989971 |
| mep1b             | 0.347458735 | -1.908042286 | 3.4571486 | -0.551912 | 0.581009 | NA       |
| ccnq              | 197.4737576 | -0.058287837 | 0.1487142 | -0.391945 | 0.695099 | 0.96736  |
| tnnc1b            | 1833.122803 | 0.061934887  | 0.1029657 | 0.60151   | 0.5475   | 0.945526 |
| mtnr1aa           | 12.59765402 | 0.341961199  | 0.5661984 | 0.60396   | 0.54587  | 0.945526 |
| cyp21a2           | 43.7544475  | 0.290340273  | 0.2873351 | 1.0104588 | 0.312276 | 0.864401 |
| pm20d1.1          | 51.35066045 | -1.691804715 | 0.3027349 | -5.588404 | 2.29E-08 | 3.63E-06 |
| illrap12          | 91.36050141 | 0.135857994  | 0.2130533 | 0.6376713 | 0.523688 | 0.939336 |
| arhgef31          | 51.43247274 | -0.615722288 | 0.276834  | -2.224157 | 0.026138 | 0.311732 |
| atoh8             | 280.1120658 | 0.029957258  | 0.1345969 | 0.2225702 | 0.82387  | 0.982196 |
| st3gal5           | 492.7133729 | 0.061043921  | 0.1059592 | 0.5761076 | 0.564542 | 0.948739 |
| asb12b            | 29.17958042 | 0.157460352  | 0.3651506 | 0.4312202 | 0.666308 | 0.964736 |
| ubal              | 6502.496639 | -0.005512626 | 0.0735906 | -0.074909 | 0.940287 | 0.992857 |

|            |             |              |           |           |          |          |
|------------|-------------|--------------|-----------|-----------|----------|----------|
| mtml       | 270.7164743 | -0.076470079 | 0.1386447 | -0.551554 | 0.581254 | 0.951731 |
| polrld     | 120.0600098 | -0.086784132 | 0.1845067 | -0.470358 | 0.6381   | 0.959194 |
| rps6kal    | 1422.111537 | 0.081037965  | 0.0895826 | 0.9046177 | 0.365668 | 0.887084 |
| BX530018.1 | 2.000307227 | 0.047416512  | 1.4426464 | 0.0328677 | 0.97378  | NA       |
| SYNPR      | 512.6310477 | -0.076859808 | 0.1116386 | -0.68847  | 0.491157 | 0.931926 |
| bhlhe23    | 463.5541229 | 0.156985384  | 0.125775  | 1.2481447 | 0.211978 | 0.77986  |
| gid8b      | 595.2373775 | -0.02506883  | 0.0994448 | -0.252088 | 0.800973 | 0.979377 |
| prickle2b  | 559.9190729 | 0.072478172  | 0.1106346 | 0.6551131 | 0.512395 | 0.936253 |
| prfl.5     | 59.15083395 | -0.041228149 | 0.2524611 | -0.163305 | 0.870278 | 0.987421 |
| zgc:162144 | 36.6085796  | 0.322822099  | 0.3146666 | 1.0259179 | 0.30493  | 0.859575 |
| no141b     | 60.19912163 | -0.350234981 | 0.2529928 | -1.384367 | 0.166246 | 0.722887 |
| lgals8b    | 78.47554668 | 0.062739687  | 0.2399912 | 0.2614249 | 0.793765 | 0.977937 |
| ddit4      | 1049.164954 | -0.08952256  | 0.2771342 | -0.32303  | 0.746673 | 0.97419  |
| BX569798.1 | 5.21314942  | 0.487430593  | 0.8251875 | 0.5906907 | 0.554728 | NA       |
| trpt1      | 155.7137735 | -0.031331328 | 0.1647949 | -0.190123 | 0.849213 | 0.985174 |
| lengl      | 186.9708746 | -0.176738581 | 0.148668  | -1.188814 | 0.234513 | 0.803509 |
| nkx3-2     | 114.1873562 | 0.003915102  | 0.187264  | 0.0209069 | 0.98332  | 0.996944 |
| aurkb      | 534.2423975 | -0.31135474  | 0.1081389 | -2.879211 | 0.003987 | 0.08682  |
| zgc:173570 | 87.74435468 | -0.188989483 | 0.2132999 | -0.886027 | 0.375603 | 0.894316 |
| rgs11      | 260.4241903 | -0.006302156 | 0.1499176 | -0.042037 | 0.966469 | 0.996315 |
| rnf175     | 605.1525774 | -0.028800866 | 0.114434  | -0.251681 | 0.801288 | 0.979377 |
| zgc:56409  | 104.0491678 | 0.123378887  | 0.1916424 | 0.6437975 | 0.519707 | 0.938945 |
| pmm2       | 232.6579482 | 0.073269216  | 0.1352076 | 0.5419016 | 0.587886 | 0.953319 |
| pls3       | 1995.001374 | 0.213345179  | 0.0763554 | 2.7941058 | 0.005204 | 0.106533 |
| npmlb      | 498.2873405 | -0.063033854 | 0.1175603 | -0.536183 | 0.591832 | 0.954434 |
| fgf24      | 109.899114  | 0.337595365  | 0.1953241 | 1.7283853 | 0.083919 | 0.557501 |
| zgc:103678 | 330.393226  | -0.088353578 | 0.1312443 | -0.6732   | 0.50082  | 0.93428  |
| pcdh2ab2   | 0.63357355  | 1.435201493  | 2.6108194 | 0.5497131 | 0.582516 | NA       |
| pcdh2aa1   | 0.365141898 | 1.973577737  | 3.3927314 | 0.5817076 | 0.560764 | NA       |
| gss        | 96.34967753 | -0.202403682 | 0.2137555 | -0.946893 | 0.343693 | 0.878434 |
| exosc10    | 585.0850639 | -0.064814488 | 0.1031182 | -0.628546 | 0.529647 | 0.942209 |
| pcnp       | 824.6865645 | -0.031252985 | 0.096379  | -0.324272 | 0.745732 | 0.97419  |
| fbx131     | 44.86286745 | -0.901862113 | 0.3000019 | -3.006188 | 0.002645 | 0.065718 |
| zgc:112980 | 241.4926328 | -0.045660727 | 0.1416067 | -0.322448 | 0.747114 | 0.97419  |
| actb1      | 60669.78951 | -0.011865034 | 0.0954311 | -0.124331 | 0.901053 | 0.990121 |
| fscn1b     | 431.1208333 | -0.036758445 | 0.1362932 | -0.269701 | 0.78739  | 0.976596 |
| slc43a1b   | 270.1877029 | 0.329649562  | 0.151998  | 2.1687754 | 0.0301   | 0.33532  |
| tlr2       | 0.967129164 | -0.023635743 | 1.9568585 | -0.012078 | 0.990363 | NA       |
| uncx4.1    | 336.0884924 | -0.161730248 | 0.1274972 | -1.2685   | 0.204619 | 0.77258  |
| rybpa      | 777.0411286 | 0.063675455  | 0.0962459 | 0.6615917 | 0.508233 | 0.935735 |
| stk16      | 241.2315029 | 0.078001727  | 0.135878  | 0.5740569 | 0.565929 | 0.948739 |
| acss2      | 1245.966517 | -0.111497922 | 0.0858486 | -1.298774 | 0.194021 | 0.75784  |
| sox8b      | 13.12027219 | 0.723129645  | 0.5256171 | 1.3757726 | 0.168892 | 0.725919 |
| proza      | 1904.970217 | -0.041464632 | 0.0822203 | -0.504311 | 0.614043 | 0.95688  |
| pvalb1     | 57152.72873 | 0.192679488  | 0.2302824 | 0.8367096 | 0.402756 | 0.90084  |
| pvalb8     | 925.6022322 | 0.137579603  | 0.1048688 | 1.3119213 | 0.189547 | 0.754269 |
| nptx2a     | 29.97111046 | -0.189413785 | 0.3702066 | -0.511643 | 0.608901 | 0.956718 |
| phlda3     | 195.2144674 | 0.235666693  | 0.1651341 | 1.4271233 | 0.153544 | 0.702578 |
| lgals3bpa  | 23.16866246 | -0.479879855 | 0.4056482 | -1.182995 | 0.236811 | 0.805854 |
| adtrpl     | 141.9254769 | 0.195846676  | 0.1706106 | 1.1479163 | 0.251003 | 0.820469 |
| zgc:113278 | 10.44280438 | 0.531101631  | 0.6103516 | 0.8701568 | 0.384215 | NA       |
| b4galt5    | 7.147545795 | 1.217365225  | 0.7426242 | 1.639275  | 0.101156 | NA       |
| mitfb      | 3.631200915 | 0.79205473   | 1.056526  | 0.7496784 | 0.453448 | NA       |
| polr3k     | 132.7328904 | 0.02409269   | 0.1797107 | 0.1340637 | 0.893352 | 0.989291 |

|            |             |              |           |           |          |          |
|------------|-------------|--------------|-----------|-----------|----------|----------|
| igfals     | 10.86040238 | 1.71788314   | 0.6804402 | 2.5246642 | 0.011581 | NA       |
| ogfr       | 570.0935491 | -0.083617738 | 0.1031071 | -0.81098  | 0.417377 | 0.906237 |
| unkl       | 759.6975892 | -0.146356813 | 0.0941166 | -1.555059 | 0.119932 | 0.645215 |
| col9a3     | 14735.84866 | 0.084118615  | 0.0837017 | 1.0049807 | 0.314906 | 0.866054 |
| hml3       | 1372.53998  | 0.042747491  | 0.0844296 | 0.5063091 | 0.61264  | 0.95688  |
| zgc:101663 | 375.6352587 | -0.287815219 | 0.116521  | -2.470072 | 0.013509 | 0.208523 |
| taf11      | 550.9295229 | -0.043997674 | 0.1025624 | -0.428985 | 0.667934 | 0.964736 |
| il11a      | 35.21711941 | 0.173646125  | 0.3740448 | 0.4642388 | 0.642477 | 0.959994 |
| cox6b2     | 5384.484382 | 0.056727911  | 0.0828215 | 0.6849421 | 0.49338  | 0.931926 |
| slc2a3b    | 151.8191471 | -0.085642722 | 0.1793251 | -0.477584 | 0.632947 | 0.957356 |
| cln3       | 237.9988438 | -0.080441504 | 0.140778  | -0.571407 | 0.567724 | 0.948739 |
| atp5mf     | 2775.176229 | -0.014568289 | 0.1002644 | -0.145299 | 0.884475 | 0.98879  |
| actb2      | 49018.02051 | -0.100674544 | 0.0900903 | -1.117485 | 0.263787 | 0.830245 |
| wipi2      | 1091.404553 | -0.034003612 | 0.0961903 | -0.353503 | 0.723711 | 0.970402 |
| foxk1      | 442.654741  | -0.22091631  | 0.109079  | -2.025286 | 0.042838 | 0.406662 |
| cyp3c3     | 43.22675154 | -0.648943782 | 0.3535783 | -1.835361 | 0.066452 | 0.504618 |
| cyp3c3     | 14.8410172  | -0.240675915 | 0.5552824 | -0.43343  | 0.664703 | 0.964736 |
| lfng       | 972.0871182 | 0.115138467  | 0.0890974 | 1.2922765 | 0.196261 | 0.761702 |
| prcp       | 70.94140793 | -0.147000733 | 0.2424016 | -0.606435 | 0.544226 | 0.945438 |
| rab30      | 101.1183286 | -0.06114073  | 0.2046945 | -0.298693 | 0.765175 | 0.975374 |
| wnt9b      | 266.6717015 | 0.001329947  | 0.1547535 | 0.008594  | 0.993143 | 0.998554 |
| mlx        | 259.494457  | -0.093668808 | 0.1357476 | -0.690022 | 0.49018  | 0.931926 |
| psmc3ip    | 67.53621764 | 0.019861778  | 0.2404802 | 0.0825922 | 0.934176 | 0.992702 |
| ezh1       | 188.1288311 | -0.222596792 | 0.1617576 | -1.376113 | 0.168787 | 0.725919 |
| ramp2      | 225.9993495 | 0.10100107   | 0.1555733 | 0.6492185 | 0.516197 | 0.937997 |
| cacnalaa   | 338.6639847 | 0.087353436  | 0.1201331 | 0.7271386 | 0.467141 | 0.924328 |
| alkbh7     | 136.8611411 | -0.105814022 | 0.1822823 | -0.580495 | 0.561581 | 0.948728 |
| tim29      | 224.8315086 | -0.00262695  | 0.1389585 | -0.018905 | 0.984917 | 0.996944 |
| nmrk1      | 24.58119703 | 0.003109741  | 0.3861481 | 0.0080532 | 0.993575 | 0.998672 |
| znfl1      | 1.314079744 | 0.007937271  | 1.657586  | 0.0047885 | 0.996179 | NA       |
| cdk5r1a    | 108.8352334 | 0.087167659  | 0.2340744 | 0.3723929 | 0.7096   | 0.968902 |
| itga3a     | 153.3925097 | -0.056664934 | 0.172224  | -0.329019 | 0.742141 | 0.973154 |
| rbbp6      | 990.4227211 | -0.139199265 | 0.0963674 | -1.444465 | 0.148608 | 0.69636  |
| gngl3b     | 1582.506305 | 0.119934968  | 0.0895027 | 1.340015  | 0.18024  | 0.74128  |
| gna13b     | 276.9450345 | 0.012038871  | 0.1395158 | 0.0862904 | 0.931236 | 0.992702 |
| rgs9a      | 256.4031539 | 0.242302707  | 0.1457269 | 1.6627176 | 0.096369 | 0.59086  |
| ddx42      | 1164.164164 | 0.036789597  | 0.081075  | 0.4537724 | 0.649993 | 0.960708 |
| strada     | 394.0895524 | 0.1830131    | 0.1106622 | 1.653799  | 0.098168 | 0.59749  |
| rnfl13a    | 229.8253162 | 0.012216975  | 0.1494377 | 0.0817529 | 0.934843 | 0.992702 |
| lin7b      | 1244.534758 | 0.045166412  | 0.0836529 | 0.5399265 | 0.589248 | 0.953345 |
| aldh16a1   | 344.390992  | 0.014258881  | 0.1262571 | 0.1129352 | 0.910082 | 0.990702 |
| syta5a     | 745.1166722 | 0.367353396  | 0.0985267 | 3.7284637 | 0.000193 | 0.008264 |
| cpt1cb     | 54.94621219 | 0.18381164   | 0.2687443 | 0.6839648 | 0.493997 | 0.931926 |
| prl        | 59.44823356 | 0.258306711  | 0.2589201 | 0.9976309 | 0.318458 | 0.867746 |
| tnnt1      | 194.0538364 | 0.01804351   | 0.1639817 | 0.1100337 | 0.912383 | 0.991119 |
| pih1d1     | 110.4672147 | 0.195666683  | 0.1962518 | 0.9970186 | 0.318755 | 0.867746 |
| nosip      | 481.5277658 | -0.07368967  | 0.1156939 | -0.636937 | 0.524166 | 0.939336 |
| lrrc17     | 705.5813537 | 0.373839991  | 0.0975827 | 3.8310057 | 0.000128 | 0.005966 |
| rcn3       | 916.2153311 | 0.226827063  | 0.0863857 | 2.6257492 | 0.008646 | 0.152919 |
| psmb7      | 2344.233987 | -0.043457577 | 0.0893662 | -0.486286 | 0.626764 | 0.957354 |
| nek6       | 125.8638795 | -0.341457339 | 0.1820058 | -1.87608  | 0.060644 | 0.481212 |
| lhx2a      | 6.967183645 | 0.70548449   | 0.7190412 | 0.9811461 | 0.326521 | NA       |
| srrm2      | 1352.971808 | -0.103322645 | 0.0907697 | -1.138294 | 0.254998 | 0.82364  |
| thoc6      | 169.3897523 | -0.098255398 | 0.1596925 | -0.615279 | 0.538371 | 0.943336 |

|                   |             |              |           |           |          |          |
|-------------------|-------------|--------------|-----------|-----------|----------|----------|
| si:dkey-1612.16   | 275.4115483 | 0.049251754  | 0.1318139 | 0.373646  | 0.708668 | 0.968664 |
| fus               | 3873.1748   | -0.105235181 | 0.0715125 | -1.471564 | 0.141139 | 0.681968 |
| elob              | 4776.961431 | -0.031501171 | 0.078833  | -0.399594 | 0.689456 | 0.966763 |
| gdf3              | 113.6879832 | -0.118774555 | 0.1920638 | -0.618412 | 0.536304 | 0.943336 |
| tubb5             | 8176.117827 | 0.100136742  | 0.0863691 | 1.1594042 | 0.246291 | 0.816376 |
| flot1b            | 4345.22664  | -0.081596089 | 0.0691145 | -1.180593 | 0.237764 | 0.806474 |
| crls1             | 270.0010409 | 0.052596862  | 0.139197  | 0.3778591 | 0.705535 | 0.968412 |
| med25             | 512.8219881 | 0.018491727  | 0.1067005 | 0.173305  | 0.862412 | 0.985841 |
| osr2              | 90.56611174 | -0.51750114  | 0.2064999 | -2.50606  | 0.012209 | 0.195183 |
| CT573429.1        | 3.588601285 | -1.435280134 | 1.0697566 | -1.341689 | 0.179697 | NA       |
| rac2              | 429.8850575 | 0.140317931  | 0.1086356 | 1.2916385 | 0.196482 | 0.761835 |
| cyth4a            | 38.10263101 | 0.14097928   | 0.3176596 | 0.4438061 | 0.657183 | 0.962175 |
| fam83fa           | 46.3863489  | -0.143569478 | 0.3095781 | -0.463759 | 0.642821 | 0.959994 |
| prph2a            | 2873.440793 | 0.354945628  | 0.078821  | 4.5031838 | 6.69E-06 | 0.000513 |
| flr               | 221.0001524 | 0.150992656  | 0.1400106 | 1.078437  | 0.280839 | 0.84357  |
| cbx7a             | 398.8343601 | -0.129031464 | 0.1405877 | -0.9178   | 0.358723 | 0.884602 |
| nol12             | 290.828918  | 0.124249047  | 0.1311043 | 0.9477111 | 0.343277 | 0.878434 |
| ndufa6            | 1140.767436 | 0.005235978  | 0.104824  | 0.0499502 | 0.960162 | 0.995388 |
| rbx1              | 832.1569383 | -0.254162216 | 0.099421  | -2.556425 | 0.010575 | 0.17767  |
| tpk1              | 133.109915  | -0.125964161 | 0.1734883 | -0.726067 | 0.467798 | 0.924328 |
| si:ch211-149k23.9 | 6.674286691 | 0.005197358  | 0.8043335 | 0.0064617 | 0.994844 | NA       |
| fgfbp2b           | 1820.579171 | -0.004792086 | 0.109316  | -0.043837 | 0.965034 | 0.996154 |
| grb2b             | 1329.722608 | 0.030098287  | 0.0859545 | 0.3501654 | 0.726215 | 0.970402 |
| chmp3             | 275.0023394 | 0.023650017  | 0.1278328 | 0.1850074 | 0.853223 | 0.985174 |
| kpna2             | 1537.246359 | -0.265076085 | 0.0790393 | -3.353725 | 0.000797 | 0.025763 |
| smurf2            | 552.3088188 | -0.067176671 | 0.1073032 | -0.626045 | 0.531285 | 0.942209 |
| ddx5              | 12482.75868 | 0.124170318  | 0.069429  | 1.7884494 | 0.073704 | 0.529749 |
| mgat3a            | 9.145768386 | -0.436446394 | 0.6682754 | -0.653094 | 0.513696 | NA       |
| ptx4              | 2.758622689 | -1.277645537 | 1.1971822 | -1.067211 | 0.285877 | NA       |
| ergic3            | 391.0307876 | 0.070446305  | 0.1177383 | 0.5983293 | 0.54962  | 0.946312 |
| cycl              | 4719.877047 | -0.062902209 | 0.0742484 | -0.847186 | 0.396891 | 0.899672 |
| romol             | 1351.491661 | -0.112299889 | 0.0793705 | -1.414882 | 0.157103 | 0.707805 |
| TMEM114           | 17.58258528 | 0.057836565  | 0.4901546 | 0.1179966 | 0.90607  | 0.990702 |
| clec16a           | 625.1923096 | -0.014466594 | 0.100771  | -0.143559 | 0.885849 | 0.988936 |
| socsla            | 50.22372162 | -0.313124379 | 0.306996  | -1.019962 | 0.307746 | 0.861088 |
| pigq              | 409.003276  | -0.038532391 | 0.1100401 | -0.350167 | 0.726213 | 0.970402 |
| gskip             | 689.15626   | 0.068410981  | 0.0947427 | 0.7220715 | 0.470251 | 0.924787 |
| slc37a4a          | 382.7690619 | -0.217846251 | 0.1260882 | -1.72773  | 0.084037 | 0.557646 |
| sgcg              | 307.9703744 | 0.108053453  | 0.124679  | 0.8666535 | 0.386132 | 0.89551  |
| si:dkeyp-59c12.1  | 6.668544319 | 0.171714089  | 0.7338569 | 0.2339885 | 0.814994 | NA       |
| rprdlb            | 367.0789996 | -0.082387602 | 0.122028  | -0.675153 | 0.499578 | 0.934006 |
| xpa               | 69.10634249 | -0.198875079 | 0.2491756 | -0.798132 | 0.424794 | 0.908585 |
| gnrhr4            | 1.678080482 | -0.611659387 | 1.5253744 | -0.40099  | 0.688428 | NA       |
| si:ch211-13k12.2  | 21.1484171  | 0.040475152  | 0.4290541 | 0.0943358 | 0.924842 | 0.992676 |
| myl9a             | 516.9077958 | -0.310457448 | 0.1106315 | -2.80623  | 0.005012 | 0.103462 |
| zgc:113411        | 71.61347264 | 0.119140251  | 0.2354283 | 0.5060575 | 0.612816 | 0.95688  |
| pdgfb             | 118.8484284 | 0.130203137  | 0.1951795 | 0.6670943 | 0.504712 | 0.935617 |
| atf4b             | 5918.43087  | 0.078899065  | 0.0642433 | 1.228129  | 0.219399 | 0.78594  |
| hbbe3             | 6.662672083 | -1.584440211 | 0.8533851 | -1.856653 | 0.063361 | NA       |
| zgc:92360         | 486.1400459 | -0.076268744 | 0.1189585 | -0.641137 | 0.521434 | 0.939056 |
| lgals2b           | 3125.298759 | -0.826568629 | 0.0713842 | -11.57915 | 5.26E-31 | 1.72E-27 |
| isca2             | 354.4618648 | 0.124816949  | 0.1215564 | 1.0268236 | 0.304504 | 0.858905 |
| duspl1            | 416.6115696 | 0.157097124  | 0.1192638 | 1.3172241 | 0.187764 | 0.752195 |
| tcf7l1a           | 665.2873247 | -0.254400248 | 0.119771  | -2.124056 | 0.033665 | 0.357045 |



|                 |             |              |           |           |          |          |
|-----------------|-------------|--------------|-----------|-----------|----------|----------|
| hyal6           | 62.76589237 | 0.06924579   | 0.2571856 | 0.2692444 | 0.787742 | 0.976596 |
| cyb561          | 28.69023328 | -0.069204004 | 0.3635403 | -0.190361 | 0.849026 | 0.985174 |
| gh1             | 181.1357752 | 0.43910655   | 0.1627577 | 2.6979158 | 0.006978 | 0.130041 |
| zgc:103564      | 35.73366935 | -0.298183699 | 0.326207  | -0.914094 | 0.360668 | 0.885686 |
| smt1a           | 5.428185067 | -0.458439517 | 0.819975  | -0.55909  | 0.576101 | NA       |
| cdab            | 72.38185471 | 0.13406935   | 0.2314173 | 0.5793401 | 0.56236  | 0.948728 |
| her2            | 112.1762793 | -0.009769514 | 0.19363   | -0.050455 | 0.95976  | 0.995348 |
| aldh4a1         | 497.8036024 | 0.255696409  | 0.1097442 | 2.3299318 | 0.01981  | 0.265212 |
| slc35b1         | 672.8853687 | 0.057818184  | 0.0989514 | 0.5843087 | 0.559013 | 0.948478 |
| tyw3            | 50.63178664 | -0.50780888  | 0.2716147 | -1.869593 | 0.06154  | 0.483664 |
| nras            | 558.2152313 | 0.023829976  | 0.1012449 | 0.2353697 | 0.813922 | 0.981081 |
| CABZ01074994.1  | 1.313718686 | 0.007433509  | 1.6576955 | 0.0044842 | 0.996422 | NA       |
| selenow2a       | 2377.465801 | 0.00166549   | 0.0853516 | 0.0195133 | 0.984432 | 0.996944 |
| pkdccb          | 121.9024064 | -0.05649289  | 0.1823479 | -0.309808 | 0.756707 | 0.975374 |
| tnpo2           | 1729.785876 | -0.049613151 | 0.079833  | -0.621461 | 0.534296 | 0.943336 |
| zgc:113333      | 182.7748291 | 0.141561871  | 0.1538032 | 0.9204091 | 0.357359 | 0.883904 |
| e4f1            | 225.780805  | 0.014132892  | 0.1399048 | 0.1010179 | 0.919536 | 0.991651 |
| ggact.2         | 365.9252858 | 0.00692501   | 0.1231116 | 0.0562499 | 0.955143 | 0.994543 |
| proca           | 80.16467282 | 0.059794769  | 0.2472306 | 0.2418583 | 0.80889  | 0.980642 |
| PIGG            | 178.0487654 | 0.145548743  | 0.1837013 | 0.7923122 | 0.428179 | 0.911082 |
| zgc:113293      | 1.93598671  | 0.44942462   | 1.4946638 | 0.3006861 | 0.763654 | NA       |
| ptgir           | 17.13293338 | -0.012221413 | 0.4588805 | -0.026633 | 0.978752 | 0.996762 |
| natd1           | 978.93694   | -0.096639563 | 0.0933914 | -1.03478  | 0.300772 | 0.856365 |
| wnt6a           | 21.75236971 | -0.504642072 | 0.4386564 | -1.150427 | 0.249968 | 0.819849 |
| cd151           | 147.6653717 | -0.007763347 | 0.1949    | -0.039832 | 0.968227 | 0.996315 |
| thoc5           | 598.6000719 | -0.225453519 | 0.1136077 | -1.984491 | 0.047201 | 0.426579 |
| zgc:103559      | 24.78738139 | 1.312803408  | 0.396963  | 3.3071179 | 0.000943 | 0.029586 |
| tmem86b         | 357.0583007 | -0.033029453 | 0.1438841 | -0.229556 | 0.818437 | 0.981594 |
| aspdh           | 50.50109365 | -0.189225467 | 0.2770409 | -0.683024 | 0.494592 | 0.931926 |
| rnf34a          | 197.3419264 | 0.354536278  | 0.1474947 | 2.4037222 | 0.016229 | 0.235102 |
| ccar2           | 405.3297231 | 0.049985774  | 0.1164237 | 0.4293434 | 0.667673 | 0.964736 |
| vgll3           | 17.49011196 | -0.462021484 | 0.4624362 | -0.999103 | 0.317745 | 0.867607 |
| tsc22d1         | 3080.845264 | -0.016053607 | 0.0702091 | -0.228654 | 0.819138 | 0.981594 |
| ykt6            | 318.6831546 | 0.166629904  | 0.1297556 | 1.2841824 | 0.199078 | 0.764531 |
| dnajc15         | 358.6167823 | -0.090448888 | 0.1262972 | -0.716159 | 0.473893 | 0.924993 |
| rcl1            | 304.3392347 | -0.185329913 | 0.1314128 | -1.410288 | 0.158455 | 0.709224 |
| zgc:172053      | 3.405432823 | 0.678101267  | 1.0612736 | 0.6389505 | 0.522855 | NA       |
| pigh            | 225.4410798 | -0.008499285 | 0.1554124 | -0.054689 | 0.956387 | 0.994543 |
| slc27a1b        |             | 0 NA         | NA        | NA        | NA       | NA       |
| enosf1          | 410.5790679 | 0.387374955  | 0.1182459 | 3.2760118 | 0.001053 | 0.032299 |
| thg11           | 91.62621031 | 0.096446726  | 0.2135104 | 0.4517192 | 0.651471 | 0.960708 |
| drd4a           | 112.1603154 | 0.281682641  | 0.1914879 | 1.4710203 | 0.141286 | 0.681968 |
| sagb            | 3195.989831 | 0.130034315  | 0.0891208 | 1.4590795 | 0.144543 | 0.688888 |
| th2             | 18.59416164 | 0.518218976  | 0.4468445 | 1.1597299 | 0.246159 | 0.816291 |
| asc11a          | 487.8964712 | -0.236220636 | 0.1174075 | -2.011973 | 0.044223 | 0.413497 |
| si:dkeyp-52c3.7 | 0.356300316 | 0.005884122  | 3.214964  | 0.0018302 | 0.99854  | NA       |
| rpap2           | 121.8460357 | 0.002153652  | 0.1897378 | 0.0113507 | 0.990944 | 0.997679 |
| pmml            | 2.163469886 | 0.697330298  | 1.2645909 | 0.5514276 | 0.581341 | NA       |
| zgc:153921      | 6.939014926 | 1.298379274  | 0.7797102 | 1.6652076 | 0.095871 | NA       |
| b3galt6         | 314.4669435 | 0.066341053  | 0.1339913 | 0.4951145 | 0.620519 | 0.957354 |
| entpd4          | 391.9004239 | 0.179575947  | 0.1244286 | 1.4432043 | 0.148963 | 0.696454 |
| c4b             | 285.8653442 | 0.086050641  | 0.1706438 | 0.5042707 | 0.614071 | 0.95688  |
| sulf1           | 1005.100736 | 0.132228437  | 0.0849649 | 1.5562712 | 0.119644 | 0.644641 |
| csrnplb         | 472.6481796 | 0.053827594  | 0.107217  | 0.5020432 | 0.615637 | 0.95688  |

|                   |             |              |           |           |          |          |
|-------------------|-------------|--------------|-----------|-----------|----------|----------|
| actr10            | 1541.049152 | 0.007783067  | 0.0849233 | 0.0916482 | 0.926978 | 0.992702 |
| fabp10a           | 801.4921675 | 0.657831681  | 0.11284   | 5.8297721 | 5.55E-09 | 9.98E-07 |
| plcgl             | 1805.823142 | -0.028059908 | 0.0905417 | -0.309911 | 0.756628 | 0.975374 |
| spire1b           | 12.82598133 | -0.171098648 | 0.546764  | -0.31293  | 0.754334 | 0.975114 |
| nrp2b             | 1769.822747 | -0.021686472 | 0.0756225 | -0.286773 | 0.774286 | 0.975687 |
| mrps35            | 481.5113931 | -0.093395852 | 0.1216571 | -0.767697 | 0.442667 | 0.916336 |
| stmn3             | 630.4166405 | 0.355675413  | 0.0979435 | 3.6314355 | 0.000282 | 0.011325 |
| igsf8             | 205.8772418 | 0.300338583  | 0.1559771 | 1.9255298 | 0.054163 | 0.455813 |
| ube2d3            | 1307.582824 | 0.107627166  | 0.0938903 | 1.1463078 | 0.251668 | 0.821198 |
| acyl              | 557.5307774 | -0.236484182 | 0.1114387 | -2.122101 | 0.033829 | 0.357857 |
| si:dkeyp-68b7.7   | 112.4967856 | 0.101210145  | 0.1882177 | 0.5377291 | 0.590764 | 0.954193 |
| b3gnt7            | 239.3008419 | 0.041599834  | 0.1521176 | 0.2734715 | 0.784491 | 0.97627  |
| cep41             | 80.63251845 | 0.053020839  | 0.2246383 | 0.2360276 | 0.813411 | 0.981081 |
| polr2h            | 229.0555972 | 0.109242443  | 0.1461689 | 0.7473715 | 0.454839 | 0.921022 |
| chrnb3b           | 37.34651791 | 0.635141883  | 0.3211055 | 1.9779851 | 0.04793  | 0.43124  |
| snap29            | 596.8231383 | 0.038204103  | 0.1046153 | 0.3651865 | 0.714972 | 0.96909  |
| pik3r1            | 2488.640031 | 0.124181608  | 0.0727173 | 1.7077304 | 0.087686 | 0.566637 |
| ggal              | 857.754267  | 0.125220859  | 0.0943573 | 1.3270931 | 0.184478 | 0.747376 |
| ccr12a            | 7.688520048 | 0.939604773  | 0.717563  | 1.3094386 | 0.190386 | NA       |
| wdr48b            | 241.8271645 | 0.069763259  | 0.1376261 | 0.5069041 | 0.612222 | 0.95688  |
| BX890608.1        | 0.816385205 | 1.891093756  | 2.136903  | 0.8849694 | 0.376173 | NA       |
| zgc:l12185        | 64.98503074 | 0.0972131    | 0.2440115 | 0.3983956 | 0.690339 | 0.966973 |
| anks3             | 135.3674743 | 0.029445945  | 0.2010313 | 0.1464744 | 0.883547 | 0.988706 |
| hlf0              | 21675.90848 | -0.264058476 | 0.0714997 | -3.69314  | 0.000222 | 0.009319 |
| klf6b             | 6.958032334 | 0.134945368  | 0.7216237 | 0.1870024 | 0.851659 | NA       |
| pitrm1            | 762.5304971 | 0.034467434  | 0.0976251 | 0.3530591 | 0.724044 | 0.970402 |
| gnptg             | 203.4223768 | -0.130457217 | 0.1569773 | -0.831058 | 0.405941 | 0.901305 |
| tsr3              | 199.2191399 | -0.223944154 | 0.1488906 | -1.504085 | 0.132559 | 0.666979 |
| fzd8b             | 51.64455991 | -0.331106338 | 0.2741626 | -1.207701 | 0.227162 | 0.794617 |
| BX548047.1        |             | 0 NA         | NA        | NA        | NA       | NA       |
| scg2b             | 2530.118474 | 0.206334222  | 0.0733584 | 2.8126852 | 0.004913 | 0.102047 |
| ube2dlb           | 1029.814702 | 0.187502307  | 0.0846152 | 2.2159422 | 0.026695 | 0.315011 |
| cox6c             | 2856.35095  | -0.001037125 | 0.1162058 | -0.008925 | 0.992879 | 0.998437 |
| abraa             | 199.3891278 | 0.338966736  | 0.1654258 | 2.0490558 | 0.040457 | 0.393309 |
| eif4e2            | 214.4407881 | 0.097575915  | 0.1475439 | 0.6613348 | 0.508398 | 0.93575  |
| CU929150.1        | 2.45544643  | -0.624210837 | 1.2425962 | -0.502344 | 0.615426 | NA       |
| rspo4             | 5.495958816 | 1.906568984  | 0.8710639 | 2.188782  | 0.028613 | NA       |
| sdhc              | 1320.805389 | 0.037873451  | 0.1005716 | 0.3765821 | 0.706484 | 0.968459 |
| mpz               | 168.1813251 | 0.263099067  | 0.1630467 | 1.6136422 | 0.106605 | 0.615567 |
| pihd3             | 20.37383823 | 0.163528149  | 0.4271192 | 0.382863  | 0.701821 | 0.968134 |
| pip4pla           | 406.4267042 | -0.164050569 | 0.1203679 | -1.362909 | 0.172911 | 0.731956 |
| cpt2              | 585.8877767 | -0.035177437 | 0.1089593 | -0.322849 | 0.746809 | 0.97419  |
| magoh             | 918.5663519 | -0.033070225 | 0.0921636 | -0.358821 | 0.719729 | 0.969318 |
| elov16l           | 231.5314291 | -0.097350691 | 0.1784222 | -0.54562  | 0.585327 | 0.952585 |
| alas2             | 350.3572118 | 0.207521942  | 0.1513816 | 1.3708527 | 0.170421 | 0.728041 |
| ftr11             | 1.323817282 | -0.795924658 | 1.8294525 | -0.435062 | 0.663518 | NA       |
| ajapl             | 65.93006257 | 0.107479084  | 0.2530876 | 0.4246715 | 0.671076 | 0.965257 |
| cavin4a           | 741.8192604 | 0.194976949  | 0.0940866 | 2.0723129 | 0.038236 | 0.383215 |
| igfbplb           | 124.8423103 | -0.410543046 | 0.2052203 | -2.000499 | 0.045446 | 0.418148 |
| fggy              | 112.630787  | -0.104595388 | 0.2038767 | -0.513032 | 0.607929 | 0.956718 |
| gbp1              | 41.6763806  | -0.137428669 | 0.3181349 | -0.431982 | 0.665754 | 0.964736 |
| gbp2              | 25.88640544 | -0.281614388 | 0.3865889 | -0.72846  | 0.466332 | 0.923908 |
| tcf7              | 62.39347756 | -0.019949157 | 0.2564267 | -0.077797 | 0.93799  | 0.99279  |
| MFAP4 (1 of many) | 1.144594032 | -2.465288488 | 1.9220008 | -1.282668 | 0.199608 | NA       |

|                   |             |              |           |           |          |          |
|-------------------|-------------|--------------|-----------|-----------|----------|----------|
| zgc:171687        | 2.768282155 | -0.177533434 | 1.1445404 | -0.155113 | 0.876732 | NA       |
| si:zfos-2330d3.1  | 26.96658885 | 1.223043555  | 0.3963537 | 3.085738  | 0.00203  | 0.054039 |
| si:ch211-134m17.9 | 126.1238441 | -0.150253652 | 0.1997107 | -0.752357 | 0.451837 | 0.918761 |
| nfkb2             | 755.4617042 | -0.411667837 | 0.0996425 | -4.13145  | 3.60E-05 | 0.00206  |
| gng7              | 499.7835446 | 0.223988627  | 0.1148714 | 1.9499069 | 0.051187 | 0.443542 |
| zgc:101744        | 633.9910187 | -0.132844123 | 0.1106526 | -1.200551 | 0.229925 | 0.79764  |
| elav11a           | 3909.429606 | 0.068315071  | 0.0689145 | 0.9913019 | 0.321538 | 0.869201 |
| gpr160            | 32.92091285 | -0.439975406 | 0.3380262 | -1.301601 | 0.193053 | 0.756795 |
| hkdc1             | 282.9116405 | -0.181913078 | 0.1315806 | -1.382522 | 0.166811 | 0.723339 |
| si:dkeyp-66d1.7   | 55.04278051 | -0.373935123 | 0.2608796 | -1.433363 | 0.151754 | 0.700137 |
| tepl              | 70.99421344 | -0.517849529 | 0.2421774 | -2.138306 | 0.032492 | 0.35109  |
| casqla            | 2578.595829 | 0.42485311   | 0.0932145 | 4.5578006 | 5.17E-06 | 0.000411 |
| zp3f.1            | 1.142078759 | 1.327282915  | 1.913709  | 0.6935657 | 0.487955 | NA       |
| ch25h12           | 9.626468093 | 0.092499056  | 0.6085993 | 0.1519868 | 0.879197 | NA       |
| s100z             | 78.31942824 | -0.245846385 | 0.2303806 | -1.067131 | 0.285912 | 0.845942 |
| slc25a36a         | 1204.930436 | -0.089299898 | 0.0924344 | -0.966089 | 0.333999 | 0.875256 |
| phf20b            | 996.1345514 | 0.046729681  | 0.0910778 | 0.5130742 | 0.607899 | 0.956718 |
| rbpl.2            | 237.8567969 | -0.085772992 | 0.165876  | -0.517091 | 0.605093 | 0.95651  |
| copb2             | 3533.540085 | 0.019645897  | 0.0756018 | 0.2598602 | 0.794972 | 0.978328 |
| plk3              | 811.8719152 | 0.194136575  | 0.1176918 | 1.6495334 | 0.099038 | 0.598346 |
| mrpl12            | 970.9627321 | 0.030754665  | 0.0987048 | 0.3115823 | 0.755358 | 0.975318 |
| zgc:103625        | 101.7892208 | -0.02312074  | 0.1942358 | -0.119034 | 0.905248 | 0.990702 |
| ubtfl             | 1237.173849 | 0.109628357  | 0.0833932 | 1.3145957 | 0.188646 | 0.753288 |
| faim2a            | 95.59730832 | 0.372765327  | 0.2136917 | 1.744407  | 0.081088 | 0.551495 |
| abcf2a            | 1343.023517 | 0.508327327  | 0.0803476 | 6.3265994 | 2.51E-10 | 5.63E-08 |
| smarcd3a          | 618.087504  | 0.046794345  | 0.0987613 | 0.4738125 | 0.635634 | 0.958142 |
| tmubl             | 510.0659491 | -0.045424916 | 0.1156429 | -0.392803 | 0.694465 | 0.96736  |
| dnail.2           | 45.50623537 | 0.054225737  | 0.2860712 | 0.1895533 | 0.849659 | 0.985174 |
| tmem53            | 177.7074723 | -0.124327227 | 0.1532882 | -0.811069 | 0.417326 | 0.906237 |
| klf17             | 67.94563889 | -0.181153813 | 0.2394892 | -0.756418 | 0.449399 | 0.918383 |
| ccdc24            | 17.83788934 | 0.103746938  | 0.4854238 | 0.2137244 | 0.830762 | 0.982994 |
| zgc:113531        | 166.6094518 | 0.129512433  | 0.1614355 | 0.8022551 | 0.422405 | 0.906561 |
| klh120            | 348.0355969 | 0.032006213  | 0.1201407 | 0.2664061 | 0.789926 | 0.977338 |
| cenpl             | 86.46136079 | 0.05968183   | 0.2145629 | 0.2781554 | 0.780893 | 0.97627  |
| pigp              | 171.5867862 | -0.307643908 | 0.2151052 | -1.430202 | 0.152659 | 0.701776 |
| e2f5              | 38.91722545 | -0.105014265 | 0.3046236 | -0.344735 | 0.730294 | 0.971335 |
| myrip             | 707.5533976 | -0.044714972 | 0.0964936 | -0.463398 | 0.643079 | 0.959994 |
| mrclb             | 91.98538657 | 0.298639714  | 0.2124217 | 1.4058814 | 0.159759 | 0.711986 |
| jph1b             | 1258.568138 | 0.312755462  | 0.1098872 | 2.8461491 | 0.004425 | 0.094496 |
| etfdh             | 1206.2447   | -0.101738052 | 0.0924886 | -1.100006 | 0.271329 | 0.836239 |
| ppid              | 1102.617861 | -0.125336269 | 0.0888158 | -1.411193 | 0.158188 | 0.709224 |
| ldhd              | 238.3538588 | -0.002837545 | 0.1422216 | -0.019952 | 0.984082 | 0.996944 |
| gins3             | 84.41708055 | -0.132647367 | 0.2148248 | -0.617468 | 0.536926 | 0.943336 |
| chmp5a            | 149.1840866 | 0.049373004  | 0.1763705 | 0.2799391 | 0.779524 | 0.976146 |
| setd7             | 451.9121984 | -0.110511486 | 0.1072022 | -1.030869 | 0.302602 | 0.85729  |
| rgs20             | 542.215007  | 0.160269436  | 0.1188313 | 1.348714  | 0.177429 | 0.738316 |
| kcnb2             | 411.0670791 | 0.470878845  | 0.1185331 | 3.9725504 | 7.11E-05 | 0.003671 |
| babam2            | 457.3632228 | -0.096139448 | 0.110322  | -0.871444 | 0.383512 | 0.895192 |
| acox3             | 258.1169125 | -0.085035202 | 0.1321142 | -0.643649 | 0.519803 | 0.938945 |
| trappc8           | 688.9320616 | -0.036494024 | 0.1048186 | -0.348164 | 0.727717 | 0.970402 |
| shhb              | 170.4901208 | 0.040572614  | 0.170527  | 0.2379249 | 0.811939 | 0.981081 |
| en2b              | 123.1136009 | -0.084221428 | 0.1867588 | -0.450964 | 0.652016 | 0.960708 |
| htr5aa            | 4.083257855 | -0.622733897 | 0.996426  | -0.624968 | 0.531992 | NA       |
| slu7              | 907.965675  | -0.002431509 | 0.0888455 | -0.027368 | 0.978166 | 0.996762 |

|                    |             |              |           |           |          |          |
|--------------------|-------------|--------------|-----------|-----------|----------|----------|
| zgc:101569         | 229.749414  | -0.051460249 | 0.1374783 | -0.374316 | 0.70817  | 0.968664 |
| il12a              | 3.97817145  | 2.805255335  | 1.1908943 | 2.3555871 | 0.018493 | NA       |
| ift80              | 354.7680336 | -0.00985225  | 0.1236362 | -0.079687 | 0.936486 | 0.992702 |
| acaa2              | 1406.144974 | -0.095811501 | 0.0811132 | -1.181207 | 0.23752  | 0.806474 |
| smc4               | 1043.023767 | -0.183025481 | 0.097274  | -1.881546 | 0.059898 | 0.478654 |
| AL954146.1         | 38.1315079  | 0.203818781  | 0.3171406 | 0.6426765 | 0.520434 | 0.939056 |
| tmx3a              | 550.9427372 | 0.084163698  | 0.1251905 | 0.672285  | 0.501402 | 0.934613 |
| zgc:113691         | 4.17226768  | -0.095969777 | 0.9076483 | -0.105735 | 0.915793 | NA       |
| acadm              | 2829.951096 | 0.007927946  | 0.0841166 | 0.0942494 | 0.924911 | 0.992676 |
| tmem256            | 277.0942501 | -0.189483479 | 0.1335261 | -1.419074 | 0.155877 | 0.705963 |
| hectd3             | 959.3435746 | -0.073206466 | 0.086915  | -0.842277 | 0.399633 | 0.90084  |
| mssl2a             | 444.6122786 | 0.049026085  | 0.1077132 | 0.455154  | 0.648998 | 0.960708 |
| pccb               | 1318.018759 | 0.027163967  | 0.0885466 | 0.306776  | 0.759014 | 0.975374 |
| rad50              | 176.4713113 | -0.102055495 | 0.1553523 | -0.656929 | 0.511226 | 0.936253 |
| drdlb              | 25.79525641 | 0.560870685  | 0.3887688 | 1.4426846 | 0.149109 | 0.696454 |
| itprid2            | 368.4725884 | -0.107382598 | 0.1288677 | -0.833278 | 0.404688 | 0.901305 |
| ppplr1c            | 175.4266813 | -0.044806922 | 0.171924  | -0.26062  | 0.794385 | 0.977937 |
| ctnbip1            | 1611.245016 | -0.019195232 | 0.0798281 | -0.240457 | 0.809976 | 0.980764 |
| pimr68             | 3.992991858 | 0.219330585  | 0.9460919 | 0.231828  | 0.816672 | NA       |
| fdx1b              | 7.445147861 | 0.591907423  | 0.6929886 | 0.8541374 | 0.393029 | NA       |
| flvcr2a            | 26.81462618 | -0.092785725 | 0.381956  | -0.242923 | 0.808065 | 0.980642 |
| traf4b             | 90.93204274 | -0.423134979 | 0.211497  | -2.000666 | 0.045428 | 0.418148 |
| cul3a              | 1489.354853 | 0.070286836  | 0.0773013 | 0.9092584 | 0.363214 | 0.885944 |
| ccr6b              | 3.521787566 | -0.449322884 | 1.0713528 | -0.419398 | 0.674926 | NA       |
| zgc:113142         | 40.00623454 | -0.26880704  | 0.3623506 | -0.741842 | 0.458183 | 0.921978 |
| DPYSL2 (1 of many) | 124.2259581 | 0.293138459  | 0.2014223 | 1.4553426 | 0.145574 | 0.691067 |
| pdc7               | 299.0835589 | 0.01739536   | 0.1326149 | 0.131172  | 0.895639 | 0.989814 |
| slc25a24l          | 5.639837318 | -0.484894395 | 0.8154215 | -0.594655 | 0.552074 | NA       |
| dnajb4             | 330.2224357 | -0.060639558 | 0.1240036 | -0.489014 | 0.624831 | 0.957354 |
| si:dkey-24c2.9     | 6.531145168 | 1.038287266  | 0.7692416 | 1.3497544 | 0.177095 | NA       |
| txndc12            | 1016.66055  | 0.050875484  | 0.0875848 | 0.5808711 | 0.561327 | 0.948728 |
| zgc:153615         | 670.5860886 | 0.067648808  | 0.0977581 | 0.6920024 | 0.488936 | 0.931926 |
| cdyl               | 123.6891719 | -0.14288045  | 0.1953558 | -0.731386 | 0.464543 | 0.923483 |
| si:dkey-31m5.5     | 0.157187365 | -0.955901296 | 4.0804729 | -0.234262 | 0.814781 | NA       |
| wnt3               | 88.90504761 | 0.164181753  | 0.2352449 | 0.6979184 | 0.485228 | 0.930188 |
| nsfb               | 498.0972126 | -0.141909886 | 0.106598  | -1.331263 | 0.183103 | 0.746684 |
| egln1a             | 57.09328391 | -0.21669187  | 0.2602457 | -0.832644 | 0.405046 | 0.901305 |
| trappc1            | 471.1243126 | 0.096856836  | 0.1171189 | 0.8269957 | 0.40824  | 0.90171  |
| eno3               | 7314.796874 | -0.323810617 | 0.1065957 | -3.037746 | 0.002384 | 0.06083  |
| zgc:85858          | 437.5384664 | 0.064338728  | 0.1326708 | 0.4849503 | 0.627712 | 0.957354 |
| fbxo5              | 132.1609055 | -0.147689572 | 0.1763119 | -0.837661 | 0.402221 | 0.90084  |
| stk25b             | 1137.756967 | 0.044505455  | 0.0818257 | 0.5439055 | 0.586507 | 0.953319 |
| marcks11a          | 4535.114224 | -0.00196965  | 0.0718884 | -0.027399 | 0.978142 | 0.996762 |
| sfrp5              | 244.3150973 | 0.032405106  | 0.1368021 | 0.2368757 | 0.812753 | 0.981081 |
| hhat1a             | 3146.359218 | 0.358820589  | 0.0832889 | 4.3081455 | 1.65E-05 | 0.001071 |
| klhl40a            | 76.88881877 | 0.670930835  | 0.2356809 | 2.8467761 | 0.004416 | 0.094496 |
| morn4              | 345.5354434 | 0.132635865  | 0.1183225 | 1.120969  | 0.262301 | 0.830166 |
| CR847936.1         | 68.25172752 | -0.193170923 | 0.248477  | -0.77742  | 0.436911 | 0.914408 |
| st3gal7            | 239.0391092 | -0.306665069 | 0.1617625 | -1.895773 | 0.05799  | 0.47228  |
| trpc2a             | 0.682853041 | 2.891318346  | 2.3286279 | 1.2416403 | 0.214369 | NA       |
| klhl131            | 1175.888211 | 0.173375757  | 0.1090836 | 1.5893846 | 0.111974 | 0.627242 |
| srd5a2b            | 11.36106503 | 0.450931352  | 0.601529  | 0.749642  | 0.45347  | 0.920041 |
| slx4ip             | 64.51772717 | -0.008696602 | 0.249568  | -0.034847 | 0.972202 | 0.996315 |
| im:7138239         | 8.413927182 | 1.108697015  | 0.6872028 | 1.6133477 | 0.106669 | NA       |

|                 |              |               |            |            |           |           |
|-----------------|--------------|---------------|------------|------------|-----------|-----------|
| tyr             | 151. 8371014 | 0. 138694827  | 0. 1863893 | 0. 7441137 | 0. 456808 | 0. 921215 |
| zgc:123010      | 412. 6234051 | 0. 067524583  | 0. 1268233 | 0. 5324304 | 0. 594428 | 0. 954434 |
| got1            | 5001. 711255 | 0. 253002516  | 0. 0690846 | 3. 6622129 | 0. 00025  | 0. 010194 |
| nkx2. 3         | 97. 43447949 | -0. 30487723  | 0. 2262222 | -1. 34769  | 0. 177758 | 0. 738343 |
| si:dkey-24p1. 1 | 0. 476626891 | 2. 395187592  | 2. 815932  | 0. 8505843 | 0. 395    | NA        |
| ca8             | 291. 3465749 | -0. 137381385 | 0. 1356135 | -1. 013036 | 0. 311043 | 0. 863236 |
| aep1            | 2178. 926438 | 0. 102223231  | 0. 0823014 | 1. 2420598 | 0. 214214 | 0. 782493 |
| jac7            | 2. 188742165 | -2. 456045621 | 1. 6217617 | -1. 514431 | 0. 129917 | NA        |
| trim35-9        | 12. 41354373 | -0. 148238815 | 0. 5669706 | -0. 261458 | 0. 79374  | 0. 977937 |
| nr5a5           | 17. 60883465 | 0. 053418286  | 0. 4573794 | 0. 1167921 | 0. 907025 | 0. 990702 |
| tefa            | 3667. 277673 | 0. 173823934  | 0. 0705804 | 2. 4627776 | 0. 013787 | 0. 211002 |
| trim9           | 640. 619839  | -0. 028045962 | 0. 102807  | -0. 272802 | 0. 785005 | 0. 97627  |
| map4k5          | 660. 3451403 | 0. 079326772  | 0. 0946081 | 0. 8384773 | 0. 401763 | 0. 90084  |
| cdkn3           | 82. 56459442 | 0. 102581001  | 0. 2230946 | 0. 4598094 | 0. 645653 | 0. 96029  |
| atplala. 3      | 1159. 966641 | 0. 241685722  | 0. 1079776 | 2. 238295  | 0. 025202 | 0. 30686  |
| lamb4           | 542. 010756  | 0. 316013167  | 0. 1051858 | 3. 0043329 | 0. 002662 | 0. 066037 |
| cox16           | 134. 7757806 | -0. 044360102 | 0. 17537   | -0. 252952 | 0. 800306 | 0. 979377 |
| arpc5a          | 1032. 075547 | 0. 004728905  | 0. 0840255 | 0. 0562794 | 0. 955119 | 0. 994543 |
| plaub           | 44. 45475103 | 0. 227769718  | 0. 2946592 | 0. 7729936 | 0. 439526 | 0. 916082 |
| lgnn            | 3133. 992901 | 0. 175346819  | 0. 0755374 | 2. 3213247 | 0. 020269 | 0. 267561 |
| fbxo36b         | 3. 941248424 | 0. 19767726   | 1. 0260733 | 0. 1926541 | 0. 84723  | NA        |
| rhebl1          | 918. 1836159 | -0. 092196236 | 0. 0854249 | -1. 079266 | 0. 280469 | 0. 843423 |
| mhcluma         |              | 0 NA          | NA         | NA         | NA        | NA        |
| ctslb           | 2. 263167942 | 0. 797165978  | 1. 5012195 | 0. 5310123 | 0. 59541  | NA        |
| olfm3b          | 21. 29374737 | 0. 588294256  | 0. 4482637 | 1. 3123843 | 0. 189391 | 0. 75413  |
| trpm3           | 64. 38216711 | -0. 164919317 | 0. 2569092 | -0. 641936 | 0. 520915 | 0. 939056 |
| nfyba           | 1091. 363648 | -0. 088677156 | 0. 0880057 | -1. 00763  | 0. 313632 | 0. 865132 |
| grebl1          | 155. 7701883 | -0. 058527253 | 0. 1634981 | -0. 357969 | 0. 720366 | 0. 969318 |
| zgc:110130      | 417. 7840827 | 0. 103140993  | 0. 1182198 | 0. 8724507 | 0. 382963 | 0. 895192 |
| nasp            | 1311. 335839 | -0. 062061879 | 0. 0901214 | -0. 688648 | 0. 491045 | 0. 931926 |
| zgc:77439       | 467. 126985  | 0. 136021054  | 0. 1142281 | 1. 1907843 | 0. 233738 | 0. 80256  |
| prpf38a         | 259. 3761634 | -0. 159246765 | 0. 131236  | -1. 213438 | 0. 224962 | 0. 792185 |
| arrb2a          | 510. 3562307 | -0. 061970988 | 0. 1073853 | -0. 57709  | 0. 563879 | 0. 948739 |
| orcl            | 202. 9013081 | 0. 129066457  | 0. 1621522 | 0. 7959589 | 0. 426056 | 0. 909755 |
| gpr101          | 5. 513902177 | -0. 322885782 | 0. 8626367 | -0. 374301 | 0. 70818  | NA        |
| st6galnac5a     | 5. 790887504 | -0. 268900339 | 0. 8486815 | -0. 316845 | 0. 751361 | NA        |
| mpl             | 1. 331480916 | 1. 593955787  | 1. 7098336 | 0. 9322286 | 0. 351218 | NA        |
| vps13a          | 1374. 603519 | 0. 003327655  | 0. 0905012 | 0. 0367692 | 0. 970669 | 0. 996315 |
| cep78           | 129. 652536  | -0. 077876036 | 0. 1887667 | -0. 412552 | 0. 679935 | 0. 965311 |
| zgc:171579      | 2. 962721368 | -0. 003197833 | 1. 0730994 | -0. 00298  | 0. 997622 | NA        |
| cacng5b         | 6. 288348096 | 0. 172105691  | 0. 7522594 | 0. 228785  | 0. 819036 | NA        |
| zgc:152791      | 2. 26281817  | -0. 399153687 | 1. 3056015 | -0. 305724 | 0. 759815 | NA        |
| klh121          | 796. 8242721 | -0. 164448323 | 0. 096728  | -1. 700111 | 0. 08911  | 0. 571727 |
| spega           | 215. 3352901 | 0. 18184211   | 0. 1475532 | 1. 2323833 | 0. 217806 | 0. 785256 |
| zbtb48          | 97. 82522089 | -0. 228612179 | 0. 2099821 | -1. 088722 | 0. 276276 | 0. 839541 |
| igfbp5a         | 95. 80472208 | 0. 213980657  | 0. 2152961 | 0. 9938902 | 0. 320276 | 0. 868202 |
| arhgap4a        | 32. 1015779  | -0. 114500662 | 0. 3420508 | -0. 334747 | 0. 737816 | 0. 972535 |
| rhm25a          | 538. 6029875 | -0. 089718731 | 0. 1314577 | -0. 682491 | 0. 494928 | 0. 931926 |
| emc4            | 254. 490444  | 0. 182314068  | 0. 1640686 | 1. 1112063 | 0. 26648  | 0. 832634 |
| arg2            | 776. 0138165 | 0. 248629146  | 0. 1244004 | 1. 9986206 | 0. 045649 | 0. 41876  |
| vtilb           | 159. 3420282 | -0. 148585612 | 0. 1631012 | -0. 911002 | 0. 362294 | 0. 885944 |
| pls1            | 291. 6485619 | -0. 834674021 | 0. 1518274 | -5. 497518 | 3. 85E-08 | 5. 77E-06 |
| fbln5           | 251. 5147589 | 0. 126173239  | 0. 1430748 | 0. 8818692 | 0. 377848 | 0. 895192 |
| golga5          | 813. 5614301 | -0. 078843932 | 0. 0905375 | -0. 870842 | 0. 38384  | 0. 895192 |

|                   |             |              |           |           |          |          |
|-------------------|-------------|--------------|-----------|-----------|----------|----------|
| rdh14a            | 204.0530804 | -0.046210547 | 0.1450433 | -0.318598 | 0.750031 | 0.97419  |
| terfa             | 361.6064406 | -0.119251082 | 0.1345062 | -0.886584 | 0.375303 | 0.894316 |
| six1a             | 150.4695031 | 0.197925257  | 0.1872315 | 1.0571154 | 0.290459 | 0.846262 |
| hook2             | 32.64334771 | -0.037264435 | 0.3310004 | -0.112581 | 0.910363 | 0.990702 |
| parla             | 166.5113769 | 0.283154018  | 0.159986  | 1.7698676 | 0.076749 | 0.539626 |
| vps37b            | 349.7814791 | -0.016229251 | 0.1174164 | -0.13822  | 0.890067 | 0.989291 |
| pmepal            | 25.24776777 | -0.272155556 | 0.3836311 | -0.70942  | 0.478064 | 0.926857 |
| ccndbp1           | 332.7886997 | 0.104656266  | 0.1344854 | 0.7781982 | 0.436452 | 0.914408 |
| st6gal2a          | 2009.296209 | -0.069678708 | 0.0777488 | -0.896204 | 0.370144 | 0.889876 |
| gadd45gip1        | 499.3718238 | -0.098990202 | 0.1098856 | -0.900848 | 0.367669 | 0.887476 |
| tmem209           | 491.5192044 | -0.03603602  | 0.103661  | -0.347633 | 0.728116 | 0.970402 |
| ahcy12            | 1601.217277 | -0.013987142 | 0.081075  | -0.172521 | 0.863028 | 0.985841 |
| drg1              | 704.0955066 | -0.051014124 | 0.1006379 | -0.506908 | 0.612219 | 0.95688  |
| ndufa5            | 780.5475217 | -0.085500845 | 0.1128556 | -0.757613 | 0.448683 | 0.917876 |
| rps24             | 9878.391516 | -0.228937968 | 0.0895721 | -2.555908 | 0.010591 | 0.177783 |
| qrfpra            | 4.154436425 | -1.343937924 | 0.9602299 | -1.3996   | 0.161633 | NA       |
| ssbp1             | 179.8358686 | -0.153015752 | 0.1575798 | -0.971037 | 0.33153  | 0.874556 |
| ccl19b            | 43.8091922  | 1.128933917  | 0.314646  | 3.5879494 | 0.000333 | 0.012922 |
| pald1b            | 212.3811784 | 0.211031287  | 0.1423749 | 1.4822226 | 0.138281 | 0.676087 |
| skal              | 89.18035292 | -0.305789681 | 0.2133809 | -1.43307  | 0.151838 | 0.700196 |
| zgc:194209        | 256.224284  | -0.131056864 | 0.1375585 | -0.952735 | 0.340724 | 0.878134 |
| dnajb12a          | 495.0192751 | 0.042820936  | 0.1180837 | 0.362632  | 0.71688  | 0.96909  |
| cuedc2            | 278.9445788 | -0.05150377  | 0.1354539 | -0.380231 | 0.703774 | 0.968134 |
| epha3             | 50.85794337 | 0.303897915  | 0.2705576 | 1.1232281 | 0.261341 | 0.829527 |
| apool             | 397.9069112 | -0.048122364 | 0.1141321 | -0.421638 | 0.67329  | 0.965257 |
| rcn2              | 114.3632651 | 0.186355725  | 0.1864933 | 0.9992622 | 0.317668 | 0.867607 |
| ch25h11.1         | 198.5197532 | -0.198895984 | 0.155392  | -1.279963 | 0.200558 | 0.766801 |
| dlg4b             | 400.1978886 | -0.027056389 | 0.1170628 | -0.231127 | 0.817216 | 0.981594 |
| sdhaf4            | 169.8811668 | -0.120754034 | 0.1960093 | -0.616063 | 0.537853 | 0.943336 |
| wnk1b             | 1163.031278 | 0.031014297  | 0.0887649 | 0.3493983 | 0.72679  | 0.970402 |
| si:ch211-240119.5 | 69.0051001  | -0.585435455 | 0.2537228 | -2.307382 | 0.021034 | 0.273449 |
| nt5c2a            | 1069.341677 | -0.038765746 | 0.0936992 | -0.413725 | 0.679075 | 0.965257 |
| polr1c            | 174.3220033 | -0.120815054 | 0.157249  | -0.768304 | 0.442307 | 0.916336 |
| prom2             | 132.0410562 | 0.181794714  | 0.20184   | 0.9006872 | 0.367755 | 0.887476 |
| cep68             | 87.67612134 | 0.034339528  | 0.2129578 | 0.1612504 | 0.871896 | 0.987846 |
| dmrta2            | 111.8060095 | -0.359985065 | 0.1887908 | -1.906794 | 0.056547 | 0.46635  |
| fuom              | 16.67580165 | -0.585969115 | 0.4747331 | -1.234313 | 0.217086 | 0.784302 |
| AL831745.1        | 104.0867984 | -1.171878673 | 0.2291767 | -5.113429 | 3.16E-07 | 3.75E-05 |
| snrpb2            | 463.8462719 | -0.024272078 | 0.1123166 | -0.216104 | 0.828907 | 0.982721 |
| adka              | 1037.653206 | -0.042183513 | 0.0841922 | -0.501038 | 0.616344 | 0.95688  |
| msl2b             | 688.3278866 | 0.003897875  | 0.0923663 | 0.0422002 | 0.966339 | 0.996315 |
| oprml             | 7.139216251 | -1.322277762 | 0.7807892 | -1.693514 | 0.090358 | NA       |
| rgs17             | 169.4262139 | -0.064824645 | 0.1563602 | -0.414585 | 0.678445 | 0.965257 |
| il13ra2           | 88.13169898 | 0.287854623  | 0.2395182 | 1.2018067 | 0.229438 | 0.797069 |
| il22ra2           | 0.157187365 | -0.955901296 | 4.0804729 | -0.234262 | 0.814781 | NA       |
| zgc:110353        | 27.72255117 | -0.046427694 | 0.3564856 | -0.130237 | 0.896379 | 0.989971 |
| hkl               | 3979.737158 | 0.014014345  | 0.0737502 | 0.1900245 | 0.84929  | 0.985174 |
| dhrrs7ca          | 56.85529315 | 0.180406003  | 0.2754353 | 0.6549849 | 0.512477 | 0.936253 |
| tspan15           | 239.6033275 | -0.15141471  | 0.1383232 | -1.094644 | 0.273672 | 0.838381 |
| acbd6             | 566.2072639 | 0.060805096  | 0.1025373 | 0.5930048 | 0.553178 | 0.947265 |
| lhx4              | 458.4047187 | -0.041839321 | 0.1082313 | -0.386573 | 0.699072 | 0.967998 |
| qsox1             | 780.0423907 | 0.245765097  | 0.1071847 | 2.2929123 | 0.021853 | 0.280334 |
| hnrnph3           | 237.6987815 | 0.026664334  | 0.1353796 | 0.1969597 | 0.843859 | 0.985174 |
| terb2             | 5.595572136 | 1.023793726  | 0.8477353 | 1.2076809 | 0.22717  | NA       |

|                   |             |              |           |           |          |          |
|-------------------|-------------|--------------|-----------|-----------|----------|----------|
| calhm2.1          | 62.039972   | 0.477236027  | 0.2548461 | 1.8726444 | 0.061118 | 0.482482 |
| si:dkey-51a16.9   | 545.9690455 | -0.160327219 | 0.1044951 | -1.534304 | 0.124955 | 0.654531 |
| bag3              | 268.8117295 | 0.180931473  | 0.1437271 | 1.2588542 | 0.208083 | 0.775404 |
| git1              | 700.6994325 | -0.015070238 | 0.0914017 | -0.164879 | 0.869039 | 0.987245 |
| pitpnaa           | 844.3607168 | -0.257871512 | 0.1015046 | -2.540491 | 0.011107 | 0.18241  |
| naa20             | 455.7250031 | 0.128790319  | 0.111457  | 1.1555162 | 0.247879 | 0.81711  |
| ccdc85a           | 99.63930484 | 0.153227446  | 0.2082534 | 0.7357742 | 0.461868 | 0.922466 |
| soul2             | 427.5254217 | 0.280221445  | 0.1107264 | 2.5307561 | 0.011382 | 0.186155 |
| si:cabz01090165.1 | 134.2039583 | 0.218072823  | 0.1748058 | 1.2475148 | 0.212209 | 0.780111 |
| ugt2a6            | 79.59271727 | -0.372988239 | 0.2418728 | -1.542085 | 0.123053 | 0.65095  |
| eefl1a            | 1273.145404 | 0.199795197  | 0.0809603 | 2.4678158 | 0.013594 | 0.209269 |
| aplm3             | 149.1543246 | 0.088830693  | 0.1848436 | 0.4805721 | 0.630821 | 0.957354 |
| zgc:153119        | 17.07870559 | 0.40521262   | 0.5267558 | 0.7692608 | 0.441739 | 0.916336 |
| c8a               | 438.6327748 | 0.358140009  | 0.1224407 | 2.9250084 | 0.003444 | 0.078559 |
| c8b               | 427.7633835 | 0.320877008  | 0.1354557 | 2.3688711 | 0.017842 | 0.247192 |
| ssx2ipa           | 309.8024116 | -0.113127089 | 0.1238929 | -0.913104 | 0.361188 | 0.885686 |
| tubb2             | 1144.241099 | 0.177246923  | 0.0867038 | 2.0442814 | 0.040926 | 0.394957 |
| rrh               | 72.10922489 | -0.302341631 | 0.2497166 | -1.210739 | 0.225995 | 0.793556 |
| dappl             | 20.45138457 | -0.393881813 | 0.4604312 | -0.855463 | 0.392295 | 0.897688 |
| mrps6             | 299.0868906 | -0.11915129  | 0.1424612 | -0.836377 | 0.402943 | 0.90084  |
| lox13b            | 1058.152525 | 0.113999411  | 0.0858293 | 1.3282116 | 0.184108 | 0.747376 |
| emx1              | 44.25687749 | -0.046161548 | 0.3024204 | -0.15264  | 0.878682 | 0.987881 |
| fst11b            | 5613.48127  | 0.189285954  | 0.0631735 | 2.9962887 | 0.002733 | 0.067381 |
| ptk2bb            | 439.3301769 | 0.005767177  | 0.1088269 | 0.0529941 | 0.957737 | 0.99467  |
| pa2g4a            | 3084.995669 | -0.071482618 | 0.0695367 | -1.027984 | 0.303957 | 0.858391 |
| cfid              | 2397.151838 | 0.51702901   | 0.0912626 | 5.6652907 | 1.47E-08 | 2.46E-06 |
| ier3ipl           | 226.477409  | -0.07211235  | 0.1489752 | -0.484056 | 0.628346 | 0.957354 |
| atohlc            | 10.17697371 | -0.537365672 | 0.6079394 | -0.883913 | 0.376743 | NA       |
| mat1a             | 2474.639913 | 0.414173405  | 0.071811  | 5.7675466 | 8.04E-09 | 1.38E-06 |
| poll              | 163.2485656 | -0.176835873 | 0.1597867 | -1.106699 | 0.268424 | 0.833634 |
| fgf8b             | 42.01999925 | 0.439880029  | 0.3030456 | 1.4515309 | 0.146632 | 0.692998 |
| cenpk             | 91.00660762 | 0.027879201  | 0.2112063 | 0.1319999 | 0.894984 | 0.989814 |
| nrgna             | 740.3353466 | -0.148769142 | 0.1000237 | -1.487339 | 0.136925 | 0.673303 |
| slc6a1b           | 4418.106918 | 0.151937763  | 0.0703984 | 2.1582567 | 0.030908 | 0.340296 |
| mtif3             | 163.3982668 | -0.101994194 | 0.159096  | -0.641086 | 0.521467 | 0.939056 |
| itm2cb            | 694.4181226 | 0.17697435   | 0.1003553 | 1.7634771 | 0.07782  | 0.543558 |
| si:dkey-235d18.5  | 268.9034851 | -0.416999855 | 0.135035  | -3.088088 | 0.002014 | 0.05383  |
| fank1             | 10.06611409 | 0.05661832   | 0.6028124 | 0.0939236 | 0.92517  | NA       |
| slc36a4           | 460.0406358 | 0.028742846  | 0.1116236 | 0.2574979 | 0.796794 | 0.978569 |
| tsta3             | 191.1141193 | 0.176501276  | 0.1550468 | 1.1383744 | 0.254964 | 0.82364  |
| mrpl38            | 612.930002  | -0.106874967 | 0.1112603 | -0.960585 | 0.336761 | 0.876088 |
| TSTA3 (1 of many) | 1414.745277 | -0.401049507 | 0.0815879 | -4.915549 | 8.85E-07 | 9.07E-05 |
| dsc21             | 573.5878515 | -0.060059733 | 0.10955   | -0.54824  | 0.583527 | 0.952214 |
| samm501           | 713.7822171 | 0.156265961  | 0.0921781 | 1.6952618 | 0.090026 | 0.574248 |
| si:ch211-121a2.2  | 3.78754581  | 0.628178154  | 0.9752731 | 0.6441048 | 0.519507 | NA       |
| sirt5             | 274.4524884 | -0.012124929 | 0.1273697 | -0.095195 | 0.92416  | 0.992676 |
| zgc:194221        | 71.00207054 | 0.388344547  | 0.2639965 | 1.4710214 | 0.141285 | 0.681968 |
| shtn1             | 78.27667587 | 0.000921614  | 0.2263311 | 0.004072  | 0.996751 | 0.998936 |
| fam204a           | 297.8154039 | 0.079850904  | 0.1239774 | 0.6440764 | 0.519526 | 0.938945 |
| emx2              | 621.7394843 | -0.055582816 | 0.1058523 | -0.525098 | 0.599515 | 0.956045 |
| mrps26            | 534.3715053 | -0.09372087  | 0.1141155 | -0.821281 | 0.411486 | 0.903483 |
| OSBPL8            | 15.39218813 | 0.01409696   | 0.5096971 | 0.0276575 | 0.977935 | 0.996762 |
| zgc:123321        | 64.40568623 | 0.331560481  | 0.2452456 | 1.3519531 | 0.17639  | 0.73663  |
| asapl1b           | 1064.483827 | 0.047797003  | 0.091143  | 0.5244177 | 0.599988 | 0.956045 |

|                  |             |              |           |           |          |          |
|------------------|-------------|--------------|-----------|-----------|----------|----------|
| zgc:112160       | 436.7737797 | -0.585578    | 0.1507288 | -3.884978 | 0.000102 | 0.004972 |
| BX914200.1       | 3.709035756 | -0.215227669 | 1.0854222 | -0.198289 | 0.842819 | NA       |
| ldlrap1b         | 59.19572964 | -0.015791834 | 0.27251   | -0.05795  | 0.953789 | 0.994213 |
| si:ch73-308m11.1 | 151.5143546 | -1.100958949 | 0.3755967 | -2.931227 | 0.003376 | 0.077672 |
| xpc              | 545.1197117 | -0.114059987 | 0.1114861 | -1.023087 | 0.306267 | 0.860027 |
| prop1            | 4.711259298 | 0.027028854  | 0.86858   | 0.0311184 | 0.975175 | NA       |
| mcf2             | 536.9011073 | -0.093642132 | 0.1055054 | -0.887558 | 0.374779 | 0.894316 |
| dync2li1         | 36.4830353  | -0.187321071 | 0.323842  | -0.578434 | 0.562971 | 0.948728 |
| tbxtb            | 9.85639073  | 0.159320349  | 0.601898  | 0.2646966 | 0.791243 | NA       |
| meal             | 910.805137  | 0.061285088  | 0.0972272 | 0.6303286 | 0.52848  | 0.941896 |
| zgc:172182       | 3.375294021 | 0.326934744  | 1.0341058 | 0.3161521 | 0.751887 | NA       |
| bbs5             | 157.2357518 | 0.247830221  | 0.163182  | 1.5187352 | 0.128829 | 0.659982 |
| zp3b             | 30.13493436 | -0.18359867  | 0.344571  | -0.532833 | 0.594149 | 0.954434 |
| gng5             | 734.3042816 | -0.136492774 | 0.1039545 | -1.313005 | 0.189181 | 0.753954 |
| gsta.2           | 136.9167103 | -0.838180778 | 0.197858  | -4.236275 | 2.27E-05 | 0.001407 |
| znf800b          | 121.3971073 | -0.058425914 | 0.2003342 | -0.291642 | 0.77056  | 0.975687 |
| dusp22b          | 86.81591337 | -0.186946771 | 0.2159459 | -0.865711 | 0.386649 | 0.89551  |
| dhdds            | 339.3585021 | -0.083987143 | 0.1272765 | -0.65988  | 0.509331 | 0.936123 |
| ftr93            | 23.74960362 | 0.312478108  | 0.3959551 | 0.7891757 | 0.430009 | 0.911615 |
| lifrb            | 135.2233291 | -0.048263964 | 0.1791071 | -0.26947  | 0.787568 | 0.976596 |
| rpz4             | 92.93597289 | -0.195691572 | 0.205468  | -0.952419 | 0.340885 | 0.878134 |
| lamtor2          | 346.0660933 | -0.10779699  | 0.1212365 | -0.889146 | 0.373924 | 0.893677 |
| ambra1b          | 680.9756501 | -0.102458264 | 0.0978786 | -1.046789 | 0.295197 | 0.851652 |
| arpp19b          | 708.1149501 | -0.090258409 | 0.1020209 | -0.884705 | 0.376316 | 0.894814 |
| cemip            | 545.7491702 | 0.209688541  | 0.1025714 | 2.0443183 | 0.040922 | 0.394957 |
| ap3s2            | 667.1531173 | -0.146268477 | 0.1010269 | -1.447817 | 0.147668 | 0.694905 |
| clqbp            | 1266.415725 | -0.129428029 | 0.1079889 | -1.19853  | 0.230711 | 0.798822 |
| CR855393.1       |             | 0 NA         | NA        | NA        | NA       | NA       |
| BX323555.2       |             | 0 NA         | NA        | NA        | NA       | NA       |
| gnpna1           | 160.808247  | 0.097577178  | 0.1657851 | 0.5885763 | 0.556146 | 0.947902 |
| zbtb7a           | 5.38134588  | 0.012665187  | 0.830315  | 0.0152535 | 0.98783  | NA       |
| si:ch73-168d20.1 | 0.831706979 | -0.653219184 | 2.2172216 | -0.294612 | 0.768291 | NA       |
| sh3gl2b          | 16.88525527 | 0.075215825  | 0.4759353 | 0.1580379 | 0.874427 | 0.987881 |
| rbm42            | 384.5809359 | 0.035835493  | 0.1203689 | 0.2977138 | 0.765922 | 0.975374 |
| tmem147          | 1052.271494 | -0.103397078 | 0.0959995 | -1.077058 | 0.281454 | 0.84357  |
| gapdhs           | 25549.01398 | 0.021203188  | 0.0589388 | 0.3597493 | 0.719035 | 0.969183 |
| bolal            | 240.1848563 | -0.067229357 | 0.1371225 | -0.490287 | 0.623931 | 0.957354 |
| ckmt2b           | 2696.049843 | 0.375683769  | 0.0935557 | 4.0156172 | 5.93E-05 | 0.003192 |
| slc25a33         | 746.0197278 | 0.3486924    | 0.0991979 | 3.515119  | 0.00044  | 0.016096 |
| hles             | 91.84570991 | 0.145711224  | 0.2133631 | 0.6829262 | 0.494653 | 0.931926 |
| CABZ01064671.1   | 14.01734076 | 0.023189006  | 0.5209118 | 0.0445162 | 0.964493 | 0.995927 |
| ccdc172          | 3.468470599 | 1.322507468  | 1.1253223 | 1.1752255 | 0.239904 | NA       |
| tent5ba          | 681.6883797 | 0.059684881  | 0.0949838 | 0.6283689 | 0.529762 | 0.942209 |
| fibina           | 314.7912137 | -0.133379858 | 0.1293899 | -1.030837 | 0.302617 | 0.85729  |
| si:ch211-87j1.4  | 16.00797814 | 0.250727671  | 0.5139337 | 0.48786   | 0.625649 | 0.957354 |
| utpl1            | 124.929255  | 0.026888398  | 0.1780691 | 0.1509998 | 0.879976 | 0.987881 |
| gdnfa            | 36.48000055 | 0.656944141  | 0.3390947 | 1.9373471 | 0.052703 | 0.450561 |
| st7              | 72.84696444 | -0.215729837 | 0.2488048 | -0.867065 | 0.385907 | 0.89551  |
| fgfbp1b          | 22.41102415 | -0.327109739 | 0.4531606 | -0.721841 | 0.470393 | 0.924838 |
| fgfbp2a          | 51.27227626 | 0.109593613  | 0.2857225 | 0.3835666 | 0.7013   | 0.968134 |
| prom1a           | 777.718268  | 0.086439915  | 0.0916763 | 0.9428822 | 0.345741 | 0.87848  |
| akirin1          | 926.2654376 | 0.113503745  | 0.1017172 | 1.1158753 | 0.264476 | 0.830245 |
| cnr2             | 7.90778906  | 0.721894595  | 0.6878325 | 1.0495209 | 0.293938 | NA       |
| rail4            | 348.2608244 | -0.104630357 | 0.1179778 | -0.886865 | 0.375152 | 0.894316 |



|                   |             |              |           |           |          |          |
|-------------------|-------------|--------------|-----------|-----------|----------|----------|
| tecr12b           | 38.18701365 | 0.393846942  | 0.3246001 | 1.2133296 | 0.225004 | 0.792185 |
| ppt1              | 865.308647  | -0.058796853 | 0.1019884 | -0.576505 | 0.564274 | 0.948739 |
| hivep2a           | 598.2000815 | 0.171006937  | 0.1001982 | 1.7066874 | 0.08788  | 0.567519 |
| snrnp48           | 134.2756503 | -0.148650611 | 0.1898375 | -0.783041 | 0.433603 | 0.913667 |
| xkr8.3            | 66.38445347 | 0.099268236  | 0.2413833 | 0.4112474 | 0.680891 | 0.965476 |
| ptp4a3a           | 1104.271028 | 0.174463529  | 0.0834831 | 2.0898057 | 0.036635 | 0.374263 |
| slc13a5b          | 32.26465987 | 0.398458138  | 0.3368283 | 1.182971  | 0.236821 | 0.805854 |
| fryl              | 1478.245364 | -0.013778082 | 0.0869799 | -0.158405 | 0.874137 | 0.987881 |
| pnpla7b           | 581.4430551 | 0.016787658  | 0.1049927 | 0.1598936 | 0.872965 | 0.987846 |
| si:ch211-244a23.1 | 39.466882   | -0.132474355 | 0.3569456 | -0.371133 | 0.710538 | 0.968985 |
| scfd2             | 173.0552491 | -0.226866189 | 0.1727201 | -1.313491 | 0.189018 | 0.753954 |
| neurod6a          | 343.773089  | -0.101060611 | 0.1399015 | -0.72237  | 0.470067 | 0.924787 |
| palld             | 1458.90361  | 0.055961414  | 0.093224  | 0.6002895 | 0.548313 | 0.945871 |
| ebag9             | 656.5934265 | -0.181712842 | 0.1040067 | -1.747127 | 0.080615 | 0.550664 |
| gpd11             | 424.7545897 | 0.139633881  | 0.1162931 | 1.2007064 | 0.229865 | 0.79764  |
| osbpl10b          | 397.2767993 | -0.008708477 | 0.1163106 | -0.074873 | 0.940316 | 0.992857 |
| tardbp            | 4793.297571 | -0.069485192 | 0.0717085 | -0.968995 | 0.332548 | 0.874653 |
| trmt11            | 113.180112  | 0.042537271  | 0.1866558 | 0.2278915 | 0.819731 | 0.981594 |
| tcf19l            | 37.39098639 | -0.078591903 | 0.3134968 | -0.250694 | 0.80205  | 0.979492 |
| pttglipb          | 281.231755  | -0.325169829 | 0.1630596 | -1.994178 | 0.046133 | 0.421936 |
| mcm4              | 1629.512041 | 0.034672848  | 0.0844318 | 0.4106611 | 0.681321 | 0.965476 |
| cldn1             | 299.3461776 | -0.008073267 | 0.1369022 | -0.058971 | 0.952975 | 0.994151 |
| snai2             | 1183.457431 | -0.186749003 | 0.0836452 | -2.232632 | 0.025573 | 0.309666 |
| GALNTL6           | 650.8560921 | -0.104545578 | 0.1000727 | -1.044696 | 0.296163 | 0.853273 |
| gbp               | 549.9575823 | -0.166531933 | 0.1032808 | -1.612419 | 0.106871 | 0.616112 |
| acp6              | 175.7783676 | 0.374649736  | 0.1796036 | 2.085981  | 0.03698  | 0.376157 |
| gja5a             | 21.71152185 | 0.28937891   | 0.4076755 | 0.7098267 | 0.477812 | 0.926857 |
| coil              | 146.4686796 | 0.024067844  | 0.1800423 | 0.1336788 | 0.893657 | 0.989291 |
| scpep1            | 421.4693294 | -0.180881115 | 0.1157668 | -1.562462 | 0.118179 | 0.641526 |
| pycard            | 333.1057409 | 0.017143178  | 0.1392605 | 0.1231015 | 0.902027 | 0.990121 |
| flilb             | 58.9812827  | -0.005380466 | 0.264646  | -0.020331 | 0.983779 | 0.996944 |
| zp3d.1            | 6.499959062 | 0.122487162  | 0.7923073 | 0.1545955 | 0.87714  | NA       |
| ccsapb            | 536.7833136 | -0.084995798 | 0.1033592 | -0.822334 | 0.410887 | 0.903176 |
| epb4114a          | 369.0631659 | -0.052119224 | 0.1150925 | -0.452846 | 0.650659 | 0.960708 |
| si:dkey-95h12.1   | 274.2279031 | 0.487168652  | 0.1277275 | 3.8141264 | 0.000137 | 0.006329 |
| kif20bb           | 152.2396799 | -0.190285966 | 0.1704055 | -1.116666 | 0.264137 | 0.830245 |
| pi4kb             | 1069.928061 | 0.077375615  | 0.092797  | 0.833816  | 0.404385 | 0.901305 |
| znf366            | 9.457027917 | 0.667737315  | 0.6477067 | 1.0309255 | 0.302576 | NA       |
| zgc:113232        | 1626.979049 | 0.108838681  | 0.3984242 | 0.2731728 | 0.78472  | 0.97627  |
| psma2             | 970.1784466 | -0.166838309 | 0.0964662 | -1.729499 | 0.08372  | 0.557399 |
| zfpm2a            | 703.6108454 | -0.050776963 | 0.0976961 | -0.519744 | 0.603242 | 0.956045 |
| si:ch211-215k15.4 | 1.841160817 | -2.158421599 | 1.5579239 | -1.385447 | 0.165916 | NA       |
| zfyve26           | 323.9594989 | 0.15550542   | 0.1234795 | 1.2593623 | 0.2079   | 0.775404 |
| ackr4b            | 70.43999051 | -0.207501263 | 0.2374882 | -0.873733 | 0.382264 | 0.895192 |
| fosaa             | 52.14793814 | 0.670356727  | 0.3107174 | 2.157448  | 0.030971 | 0.34077  |
| jdp2a             | 71.38413058 | 0.151471515  | 0.2285288 | 0.6628114 | 0.507451 | 0.935734 |
| si:ch73-138e16.5  | 25.38929209 | 0.285061053  | 0.4156199 | 0.6858696 | 0.492795 | 0.931926 |
| nek4              | 202.1910269 | -0.118442384 | 0.1462129 | -0.810068 | 0.417901 | 0.906293 |
| grm4              | 579.062094  | 0.015668883  | 0.106259  | 0.1474594 | 0.882769 | 0.988508 |
| glt8dl            | 261.6821475 | 0.186723718  | 0.1307384 | 1.4282241 | 0.153227 | 0.702508 |
| cdc42l            | 2129.874691 | -0.111536488 | 0.0780486 | -1.429064 | 0.152986 | 0.702214 |
| wnt4b             | 376.2004817 | 0.101408023  | 0.1182083 | 0.8578754 | 0.390961 | 0.897643 |
| zgc:92287         | 494.029835  | 0.241807736  | 0.1117635 | 2.1635659 | 0.030498 | 0.337781 |
| zgc:165461        | 1476.19776  | 0.173588823  | 0.0805686 | 2.1545478 | 0.031197 | 0.341959 |

|                  |             |              |           |           |          |          |
|------------------|-------------|--------------|-----------|-----------|----------|----------|
| priml            | 269.6847482 | -0.143811556 | 0.1291613 | -1.113426 | 0.265526 | 0.831302 |
| rgsl6            | 272.0398178 | 0.065419177  | 0.1351639 | 0.4839989 | 0.628387 | 0.957354 |
| havcr1           | 36.24462076 | 0.91034366   | 0.3221865 | 2.8255177 | 0.00472  | 0.098984 |
| zgc:101562       | 65.85944133 | 0.075897107  | 0.2392719 | 0.3172002 | 0.751092 | 0.97419  |
| slc35a1          | 380.5559558 | -0.080235713 | 0.1187465 | -0.675689 | 0.499238 | 0.934006 |
| syncrip          | 5318.303433 | -0.023209489 | 0.0768301 | -0.302088 | 0.762585 | 0.975374 |
| fam210ab         | 205.0776386 | -0.113389798 | 0.1484767 | -0.763687 | 0.445054 | 0.916958 |
| qdpra            | 405.5433753 | 0.136241995  | 0.1336228 | 1.0196014 | 0.307918 | 0.861088 |
| nenf             | 279.0775258 | -0.097892018 | 0.1464028 | -0.668648 | 0.50372  | 0.935314 |
| fstl5            | 3107.944952 | 0.074727183  | 0.0749368 | 0.9972021 | 0.318666 | 0.867746 |
| BX465228.1       | 24.64652824 | 0.166183985  | 0.3863029 | 0.4301909 | 0.667057 | 0.964736 |
| scrt1b           | 207.0006218 | 0.155189844  | 0.1459096 | 1.0636026 | 0.287509 | 0.845979 |
| krcp             | 478.7109242 | -0.071817196 | 0.111931  | -0.64162  | 0.52112  | 0.939056 |
| si:dkey-37m8.11  | 4.604889587 | -0.850997253 | 0.8792092 | -0.967912 | 0.333088 | NA       |
| mef2d            | 1813.671017 | -0.065654089 | 0.0765627 | -0.857521 | 0.391157 | 0.897688 |
| kpnb3            | 3535.208763 | -0.03601801  | 0.0769617 | -0.467999 | 0.639785 | 0.959994 |
| rap2ab           | 7.142916875 | -0.320655302 | 0.7814927 | -0.410311 | 0.681578 | NA       |
| oxgr1a.3         | 0.173729368 | -0.955901296 | 4.0804729 | -0.234262 | 0.814781 | NA       |
| crata            | 753.7398512 | -0.087531461 | 0.104249  | -0.839638 | 0.401111 | 0.90084  |
| tlr18            | 34.87955918 | 0.396437772  | 0.3243421 | 1.2222828 | 0.221601 | 0.78829  |
| si:ch211-132g1.1 | 0.365141898 | 1.973577737  | 3.3927314 | 0.5817076 | 0.560764 | NA       |
| ctsk             | 574.9112848 | 0.112894943  | 0.1133321 | 0.996143  | 0.319181 | 0.867746 |
| atplala.5        | 129.4826068 | 0.211282792  | 0.1959912 | 1.0780219 | 0.281024 | 0.84357  |
| onecut1          | 390.0772726 | 0.145516056  | 0.1154595 | 1.2603213 | 0.207553 | 0.775175 |
| hormad1          | 4.671020809 | 0.006990199  | 0.8696997 | 0.0080375 | 0.993587 | NA       |
| ephx2            | 389.0835397 | -0.466391032 | 0.124363  | -3.750239 | 0.000177 | 0.007729 |
| slc38a11         | 22.76206072 | -1.375256278 | 0.4171397 | -3.296872 | 0.000978 | 0.030397 |
| si:ch73-340m8.2  | 24.62501821 | 0.285262929  | 0.3887666 | 0.733764  | 0.463093 | 0.922698 |
| runx2a           | 2.149092142 | -3.475601723 | 1.6113237 | -2.156985 | 0.031007 | NA       |
| mpdulb           | 690.8004989 | 0.020971589  | 0.095381  | 0.2198718 | 0.825971 | 0.982196 |
| sox19b           | 402.4060501 | -0.066995814 | 0.1255779 | -0.5335   | 0.593687 | 0.954434 |
| scamp5b          | 1230.578859 | 0.243999272  | 0.0894724 | 2.7270902 | 0.00639  | 0.122178 |
| fbxo32           | 83.26503506 | -0.264512537 | 0.2314689 | -1.142756 | 0.25314  | 0.822746 |
| klhl138b         | 43.00869348 | -0.040431921 | 0.330672  | -0.122272 | 0.902684 | 0.990121 |
| zgc:110182       | 135.3962905 | -0.091290639 | 0.1774044 | -0.514591 | 0.606839 | 0.956718 |
| zgc:92590        | 2.913453164 | -1.356989124 | 1.1796197 | -1.150362 | 0.249995 | NA       |
| si:dkey-79d12.5  | 382.6288442 | 0.285638803  | 0.1480996 | 1.9286937 | 0.053769 | 0.454191 |
| ubl7b            | 456.5182569 | -0.136937191 | 0.1108695 | -1.235121 | 0.216786 | 0.784252 |
| ywhab1           | 12836.51532 | -0.031461513 | 0.0663994 | -0.473822 | 0.635627 | 0.958142 |
| pon3.2           | 224.8577869 | -0.046865282 | 0.152603  | -0.307106 | 0.758763 | 0.975374 |
| cadm4            | 1785.061142 | 0.102615894  | 0.0774939 | 1.3241806 | 0.185443 | 0.74928  |
| apoeb            | 10150.08991 | 0.339682849  | 0.0767443 | 4.4261619 | 9.59E-06 | 0.000697 |
| apoa4b.1         | 7769.358496 | 0.369221206  | 0.0857854 | 4.3040091 | 1.68E-05 | 0.001087 |
| gtpbp10          | 258.4465651 | -0.018935792 | 0.1424921 | -0.13289  | 0.89428  | 0.989689 |
| osgin2           | 7.138672972 | 0.591938345  | 0.7365673 | 0.8036446 | 0.421602 | NA       |
| nbn              | 186.7437787 | -0.078495294 | 0.1707748 | -0.459642 | 0.645773 | 0.96029  |
| otomp            | 744.6232737 | 0.244562609  | 0.0982282 | 2.4897402 | 0.012784 | 0.200782 |
| pxdclb           | 142.7450451 | -0.172048449 | 0.1745662 | -0.985577 | 0.324341 | 0.870928 |
| prpf4bb          | 738.7460715 | -0.105713557 | 0.0982248 | -1.076241 | 0.281819 | 0.843666 |
| psph             | 950.7927311 | -0.033142503 | 0.105211  | -0.31501  | 0.752754 | 0.97481  |
| CABZ01041494.1   | 0.31598276  | 0.005883445  | 3.3523626 | 0.001755  | 0.9986   | NA       |
| rx2              | 142.9571285 | 0.093204912  | 0.1757937 | 0.5301947 | 0.595977 | 0.954434 |
| dhx29            | 350.2564719 | -0.024705015 | 0.1282992 | -0.192558 | 0.847305 | 0.985174 |
| crfb2            | 61.53147455 | -0.019037113 | 0.2536581 | -0.07505  | 0.940175 | 0.992857 |

|                  |             |              |           |           |          |          |
|------------------|-------------|--------------|-----------|-----------|----------|----------|
| mat2aa           | 2906.287405 | 0.242098719  | 0.089702  | 2.6989234 | 0.006956 | 0.12977  |
| hvcn1            | 282.7659151 | -0.073437928 | 0.1274234 | -0.57633  | 0.564392 | 0.948739 |
| rpp38            | 121.7596072 | -0.295893995 | 0.182422  | -1.62203  | 0.104797 | 0.612652 |
| crot             | 670.0243882 | -0.162646721 | 0.1132511 | -1.436161 | 0.150957 | 0.698912 |
| spred3           | 591.4101115 | 0.131994304  | 0.1004751 | 1.3137016 | 0.188947 | 0.753954 |
| ehd2b            | 555.1689631 | 0.093804334  | 0.1067846 | 0.878444  | 0.379703 | 0.895192 |
| tmem182a         | 603.2387123 | 0.349948325  | 0.1044379 | 3.3507779 | 0.000806 | 0.025953 |
| arhgef1a         | 316.1519415 | -0.066531661 | 0.1344383 | -0.494886 | 0.62068  | 0.957354 |
| mmd              | 204.5937628 | 0.148411952  | 0.1468787 | 1.010439  | 0.312285 | 0.864401 |
| bcl7bb           | 182.2931424 | 0.068431289  | 0.1860514 | 0.3678085 | 0.713016 | 0.96909  |
| slc25a20         | 743.1984872 | -0.122699722 | 0.1089382 | -1.126324 | 0.260028 | 0.828288 |
| usp22            | 604.7127707 | -0.016227523 | 0.1142637 | -0.142018 | 0.887066 | 0.989231 |
| acot19           | 11.32637891 | -2.221993094 | 0.648217  | -3.427854 | 0.000608 | 0.020564 |
| nptxra           | 230.5205417 | 0.203331722  | 0.1576783 | 1.2895355 | 0.197212 | 0.762204 |
| klf2b            | 697.8465589 | -0.106570693 | 0.0948301 | -1.123807 | 0.261095 | 0.829247 |
| cyp2k22          |             | 0 NA         | NA        | NA        | NA       | NA       |
| rsl24d1          | 3193.4939   | -0.262106824 | 0.0850972 | -3.080089 | 0.002069 | 0.054779 |
| snrpd2           | 1117.967879 | -0.109123692 | 0.1032311 | -1.057082 | 0.290474 | 0.846262 |
| prtgb            | 3.942894484 | -0.509877687 | 0.9551967 | -0.533793 | 0.593484 | NA       |
| polr2i           | 253.227599  | -0.083538328 | 0.1369772 | -0.60987  | 0.541948 | 0.944974 |
| si:ch211-219a4.3 | 45.08690056 | -0.146199711 | 0.2854301 | -0.512208 | 0.608505 | 0.956718 |
| fam214a          | 805.2678198 | -0.052764216 | 0.107408  | -0.491251 | 0.623249 | 0.957354 |
| wdfy2            | 611.9502608 | -0.042701689 | 0.1036647 | -0.411921 | 0.680397 | 0.965431 |
| unc50            | 297.9688498 | 0.059334311  | 0.1424122 | 0.4166377 | 0.676943 | 0.965257 |
| slc25a51b        | 303.7348779 | -0.230138223 | 0.1464772 | -1.571154 | 0.116147 | 0.63841  |
| irf2             | 146.1122649 | -0.343745877 | 0.168149  | -2.044294 | 0.040925 | 0.394957 |
| vill             | 2200.501873 | -0.752315887 | 0.0769409 | -9.77784  | 1.40E-22 | 1.75E-19 |
| enpp6            | 173.6159168 | 0.107158921  | 0.1582619 | 0.6770987 | 0.498343 | 0.933963 |
| snx10b           | 6.681189336 | 0.481663238  | 0.7989515 | 0.6028692 | 0.546596 | NA       |
| lrp2bp           | 8.59619519  | -0.037383103 | 0.6725287 | -0.055586 | 0.955672 | NA       |
| cga              | 63.36302388 | 0.488153526  | 0.2590165 | 1.8846428 | 0.059478 | 0.476934 |
| osbp13b          | 187.604262  | 0.071699375  | 0.1565217 | 0.4580794 | 0.646895 | 0.960362 |
| gsdmeb           | 82.45943204 | -0.285371179 | 0.2197412 | -1.29867  | 0.194057 | 0.75784  |
| zgc:113176       | 101.8295198 | -0.330019322 | 0.1975653 | -1.670431 | 0.094834 | 0.585466 |
| dusp19a          | 7.885724441 | -0.357933085 | 0.6823692 | -0.524545 | 0.5999   | NA       |
| mthfd1b          | 1026.309654 | -0.27742988  | 0.0933619 | -2.971553 | 0.002963 | 0.071451 |
| BX004816.1       |             | 0 NA         | NA        | NA        | NA       | NA       |
| sb:cb81          | 591.1013524 | -0.105132841 | 0.1120125 | -0.938581 | 0.347946 | 0.880195 |
| yif1b            | 305.3178584 | 0.053627271  | 0.1299494 | 0.4126782 | 0.679842 | 0.965311 |
| cal5b            | 3.023708727 | 0.386810357  | 1.1341993 | 0.3410427 | 0.733071 | NA       |
| zgc:92313        | 383.3405662 | -0.051704641 | 0.1310074 | -0.394669 | 0.693087 | 0.96736  |
| smpd2a           | 106.163724  | 0.47280812   | 0.2122303 | 2.227807  | 0.025893 | 0.310878 |
| slpr5a           | 160.3376708 | -0.022006417 | 0.1624585 | -0.135459 | 0.892249 | 0.989291 |
| siae             | 159.5388854 | 0.215041562  | 0.1782671 | 1.2062886 | 0.227706 | 0.794934 |
| lgals3bpb        | 79.23032867 | 0.871829838  | 0.2521079 | 3.458162  | 0.000544 | 0.019035 |
| epcam            | 6966.429534 | 0.039719949  | 0.0920348 | 0.4315754 | 0.66605  | 0.964736 |
| csgalnact1a      | 260.2781407 | 0.256169286  | 0.1406654 | 1.821125  | 0.068588 | 0.513124 |
| ftr90            | 0.999705014 | 0.975110312  | 1.9871203 | 0.4907153 | 0.623628 | NA       |
| spsb4b           | 188.9986057 | -0.476689574 | 0.1555503 | -3.064537 | 0.00218  | 0.057157 |
| b3gat1a          | 78.14420295 | 0.378577594  | 0.2243346 | 1.6875575 | 0.091496 | 0.57849  |
| tmem97           | 167.461055  | -0.074072679 | 0.1741583 | -0.425318 | 0.670605 | 0.965257 |
| bckdha           | 1176.796073 | 0.088547618  | 0.0799733 | 1.1072154 | 0.268201 | 0.833475 |
| ift20            | 198.3116101 | 0.08655472   | 0.1482533 | 0.5838299 | 0.559335 | 0.948478 |
| exosc5           | 209.4387512 | -0.235843954 | 0.1489043 | -1.583862 | 0.113225 | 0.631061 |

|                   |             |              |           |           |          |          |
|-------------------|-------------|--------------|-----------|-----------|----------|----------|
| rad1              | 111.4614685 | -0.123827945 | 0.1981103 | -0.625045 | 0.531941 | 0.942359 |
| hnrnpull          | 2001.715558 | -0.1530226   | 0.0721787 | -2.120051 | 0.034002 | 0.359162 |
| ckmb              | 48874.75142 | 0.209636205  | 0.1066419 | 1.9657951 | 0.049322 | 0.435504 |
| phykpl            | 92.56659149 | -0.073102623 | 0.2202728 | -0.331873 | 0.739985 | 0.972943 |
| pdzd3a            | 51.91923269 | -0.470134357 | 0.2780831 | -1.690626 | 0.090908 | 0.577827 |
| ube4a             | 445.0908709 | 0.103724128  | 0.1126468 | 0.9207907 | 0.35716  | 0.883583 |
| c18h3orf33        | 32.19906941 | -0.014765823 | 0.3381156 | -0.043671 | 0.965167 | 0.996154 |
| eeflakmt1         | 170.8167376 | 0.136180276  | 0.157028  | 0.8672357 | 0.385813 | 0.89551  |
| v2rh32            | 2.980751047 | 0.298946829  | 1.1109496 | 0.2690913 | 0.787859 | NA       |
| CU570684.1        |             | 0 NA         | NA        | NA        | NA       | NA       |
| tfap2c            | 958.0358273 | -0.026389772 | 0.0910767 | -0.289753 | 0.772005 | 0.975687 |
| rtf2              | 747.3631258 | -0.063613572 | 0.0907749 | -0.700784 | 0.483438 | 0.929461 |
| gcnt7             | 125.2378476 | -0.094781295 | 0.1901237 | -0.498524 | 0.618114 | 0.957354 |
| si:ch73-352p4.8   | 208.7226034 | 0.127606415  | 0.1465068 | 0.8709933 | 0.383758 | 0.895192 |
| sestd1            | 1129.307327 | -0.050514829 | 0.0836813 | -0.603658 | 0.546071 | 0.945526 |
| ilkap             | 137.0915984 | 0.157019354  | 0.1784048 | 0.8801295 | 0.378789 | 0.895192 |
| psmg1             | 362.9283533 | -0.114785154 | 0.1178188 | -0.974252 | 0.329932 | 0.874009 |
| lrrc32            | 32.59023459 | -0.042140388 | 0.3448165 | -0.122211 | 0.902732 | 0.990121 |
| fosl2             | 556.9992562 | 0.161141528  | 0.1022163 | 1.5764751 | 0.114916 | 0.635519 |
| grik1b            | 191.6694124 | 0.169674114  | 0.1499446 | 1.1315787 | 0.257812 | 0.825314 |
| zgc:110333        | 363.434473  | -0.141257356 | 0.1199018 | -1.178109 | 0.238753 | 0.807768 |
| v2rx1             | 3.662393904 | -0.578186097 | 1.0920696 | -0.529441 | 0.5965   | NA       |
| PRMT8             | 9.05958791  | -0.366392585 | 0.6352599 | -0.57676  | 0.564101 | NA       |
| rnfl1b            | 174.2772974 | 0.136420659  | 0.1623493 | 0.8402908 | 0.400745 | 0.90084  |
| si:ch73-44m9.3    | 0.339758314 | 0.005883863  | 3.2682461 | 0.0018003 | 0.998564 | NA       |
| ccr10             | 0.173729368 | -0.955901296 | 4.0804729 | -0.234262 | 0.814781 | NA       |
| pxylp1            | 345.0090606 | 0.154045903  | 0.1221638 | 1.2609785 | 0.207317 | 0.775175 |
| prickle1a         | 290.5744149 | -0.038393862 | 0.1257633 | -0.305287 | 0.760148 | 0.975374 |
| gps1              | 862.4538192 | 0.045532064  | 0.0885055 | 0.5144549 | 0.606934 | 0.956718 |
| wipil             | 485.6225404 | -0.134771561 | 0.1090854 | -1.235468 | 0.216656 | 0.78407  |
| nifk              | 397.9673637 | 0.059722666  | 0.1340331 | 0.4455816 | 0.6559   | 0.961833 |
| lrrc51            | 4.528134411 | -0.800971598 | 0.9491602 | -0.843874 | 0.39874  | NA       |
| ctdsp1            | 734.5196111 | -0.077264554 | 0.0961192 | -0.803841 | 0.421489 | 0.90651  |
| ccdc93            | 277.2728485 | -0.167281463 | 0.1313938 | -1.273131 | 0.202972 | 0.769914 |
| MEP1B             | 20.12876503 | -1.034087526 | 0.4340806 | -2.382248 | 0.017207 | 0.242176 |
| plcd4b            | 68.99671931 | -0.054547839 | 0.2488949 | -0.21916  | 0.826525 | 0.982253 |
| fkbp14            | 195.0418667 | 0.190928659  | 0.1626145 | 1.174118  | 0.240348 | 0.808437 |
| plekha8           | 271.1356691 | 0.144964329  | 0.1414219 | 1.0250485 | 0.30534  | 0.85982  |
| nabl1b            | 13.41437195 | -0.309180978 | 0.5322916 | -0.580849 | 0.561342 | 0.948728 |
| si:ch211-113j13.2 | 1.528634823 | -1.028202071 | 1.6599902 | -0.619402 | 0.535651 | NA       |
| BX936415.1        | 11.7883464  | 0.597436271  | 0.5824876 | 1.0256635 | 0.30505  | 0.859636 |
| glsb              | 506.1982576 | 0.16784627   | 0.10838   | 1.5486828 | 0.121458 | 0.647929 |
| chchd4b           | 117.3853322 | -0.233678399 | 0.201616  | -1.159027 | 0.246445 | 0.816419 |
| adprh             | 123.5685869 | -0.088743475 | 0.1790322 | -0.495684 | 0.620117 | 0.957354 |
| rbbp9             | 281.007172  | -0.279174983 | 0.133944  | -2.084266 | 0.037136 | 0.377158 |
| macc1             | 242.4732966 | 0.077620869  | 0.1347213 | 0.5761589 | 0.564508 | 0.948739 |
| zgc:114130        | 228.8485589 | -0.157336398 | 0.1391778 | -1.13047  | 0.258278 | 0.826273 |
| tfblm             | 66.0821544  | -0.050142106 | 0.237766  | -0.210889 | 0.832974 | 0.983557 |
| wdr75             | 626.5193519 | -0.084996948 | 0.1036083 | -0.820369 | 0.412006 | 0.904218 |
| elav12            | 5.091563745 | -0.114664671 | 0.8490789 | -0.135046 | 0.892576 | NA       |
| crygm6            |             | 0 NA         | NA        | NA        | NA       | NA       |
| crygm7            | 2.238892264 | -1.864255946 | 1.5779697 | -1.181427 | 0.237433 | NA       |
| zgc:153846        | 0.982760668 | 0.918233209  | 2.0855726 | 0.4402787 | 0.659735 | NA       |
| kcnabl1b          | 230.2656091 | 0.240943962  | 0.1431271 | 1.683426  | 0.092293 | 0.57849  |

|                  |             |              |           |           |          |          |
|------------------|-------------|--------------|-----------|-----------|----------|----------|
| tm4sf4           | 659.4679375 | -0.652393577 | 0.108169  | -6.031243 | 1.63E-09 | 3.19E-07 |
| idl              | 362.4292529 | -0.410377569 | 0.1264051 | -3.246527 | 0.001168 | 0.034842 |
| drd6b            | 4.767032681 | -0.909906495 | 0.8890603 | -1.023447 | 0.306096 | NA       |
| inhbb            | 269.5750616 | -0.010300131 | 0.1287915 | -0.079975 | 0.936257 | 0.992702 |
| ralba            | 182.3931182 | 0.143068206  | 0.1691427 | 0.8458432 | 0.39764  | 0.899672 |
| med16            | 314.9372284 | 0.03549129   | 0.128955  | 0.2752224 | 0.783145 | 0.97627  |
| sult3st4         | 57.08994082 | -0.852949505 | 0.3310426 | -2.576555 | 0.009979 | 0.170402 |
| sst1.1           | 398.7720153 | 0.031796897  | 0.1195348 | 0.2660054 | 0.790235 | 0.977338 |
| lactb            | 234.1380919 | -0.101373877 | 0.1381362 | -0.733869 | 0.463029 | 0.922698 |
| ncf4             | 26.7703315  | -0.04506753  | 0.3699338 | -0.121826 | 0.903037 | 0.990121 |
| tsku             | 299.7730154 | -0.102864904 | 0.1311068 | -0.784588 | 0.432695 | 0.91326  |
| si:dkey-27n14.1  | 21.52544847 | 0.509642686  | 0.4182781 | 1.2184302 | 0.223061 | 0.789115 |
| fundc1           | 967.0029532 | 0.041894554  | 0.0960531 | 0.4361603 | 0.66272  | 0.964665 |
| dcun1d2a         | 717.4251087 | 0.246252038  | 0.0918614 | 2.6806924 | 0.007347 | 0.13527  |
| adra2a           | 57.79083828 | -0.048457723 | 0.2552768 | -0.189824 | 0.849447 | 0.985174 |
| plekhh2          | 72.15860604 | -0.03130234  | 0.2267471 | -0.13805  | 0.890201 | 0.989291 |
| shoc2            | 420.2686886 | 0.120460503  | 0.1136515 | 1.0599113 | 0.289185 | 0.845979 |
| tsg101a          | 846.5565614 | 0.142854256  | 0.1110864 | 1.2859743 | 0.198452 | 0.763597 |
| tcf25            | 377.3984378 | -0.032805768 | 0.1146421 | -0.286158 | 0.774757 | 0.975687 |
| si:dkey-286j15.1 | 966.5752336 | -0.227855541 | 0.0951857 | -2.393799 | 0.016675 | 0.2379   |
| uppl             | 7.597698275 | -0.011071086 | 0.6939936 | -0.015953 | 0.987272 | NA       |
| add3a            | 1152.880238 | -0.006384417 | 0.0850334 | -0.075081 | 0.94015  | 0.992857 |
| hnrnph1          | 324.1781701 | 0.073024682  | 0.1328991 | 0.5494744 | 0.58268  | 0.952214 |
| mxil             | 2042.363852 | -0.0678701   | 0.0780788 | -0.869251 | 0.38471  | 0.89551  |
| fdps             | 746.6131943 | -0.032379021 | 0.0974262 | -0.332344 | 0.739629 | 0.972943 |
| gpa33b           | 28.67319868 | -0.945176073 | 0.39463   | -2.395094 | 0.016616 | 0.237747 |
| si:dkey-11d18.4  | 0.515216064 | 0.926382026  | 2.6525479 | 0.3492423 | 0.726907 | NA       |
| si:ch73-113g13.1 | 0.158795395 | 0.967652056  | 4.0804729 | 0.2371421 | 0.812547 | NA       |
| gcgb             | 180.9175222 | 0.492063809  | 0.1678791 | 2.931061  | 0.003378 | 0.077672 |
| ildr1b           | 208.0533993 | -0.39738132  | 0.1548887 | -2.565592 | 0.0103   | 0.174078 |
| meox2a           | 17.91527377 | 0.271849063  | 0.4494236 | 0.6048838 | 0.545256 | 0.945526 |
| kdelr3           | 270.0077629 | -0.049743277 | 0.1308702 | -0.380096 | 0.703874 | 0.968134 |
| cbfb             | 934.1631652 | -0.14906006  | 0.1065329 | -1.399193 | 0.161755 | 0.716022 |
| si:dkey-49n23.1  | 580.8287907 | 0.147743502  | 0.1115713 | 1.3242072 | 0.185434 | 0.74928  |
| zmp:0000000606   | 1.642507947 | 1.187327128  | 1.5663803 | 0.7580069 | 0.448447 | NA       |
| wnt10b           | 34.40468365 | -0.333671554 | 0.3329056 | -1.002301 | 0.316198 | 0.866931 |
| nr2f2            | 3055.120537 | 0.08840521   | 0.0770346 | 1.147604  | 0.251132 | 0.820469 |
| depor            | 359.6419118 | -0.046681235 | 0.1250842 | -0.373199 | 0.709001 | 0.968664 |
| ssuh2.1          | 4.457643678 | -0.094544898 | 0.8778982 | -0.107695 | 0.914238 | NA       |
| pnp6             | 285.2633007 | 0.217992521  | 0.1478732 | 1.4741856 | 0.140432 | 0.680611 |
| ntd5             | 544.8268121 | 0.006614221  | 0.10738   | 0.0615964 | 0.950884 | 0.99381  |
| olig2            | 261.4422516 | 0.005409466  | 0.1427901 | 0.037884  | 0.96978  | 0.996315 |
| olig1            | 76.82562879 | 0.214865718  | 0.2349237 | 0.9146192 | 0.360392 | 0.885686 |
| dharma           | 0.476747244 | 2.393381959  | 3.0525537 | 0.7840589 | 0.433006 | NA       |
| rab13            | 96.30756793 | 0.149521813  | 0.2059154 | 0.7261322 | 0.467758 | 0.924328 |
| zgc:101731       | 53.2063026  | 0.042633152  | 0.2664921 | 0.159979  | 0.872898 | 0.987846 |
| zgc:113149       | 378.8255138 | 0.074722126  | 0.1154999 | 0.6469453 | 0.517667 | 0.938592 |
| zgc:92606        | 1522.918092 | -0.361815913 | 0.0921368 | -3.926943 | 8.60E-05 | 0.004322 |
| fgf14            | 150.4477176 | 0.093755723  | 0.1640534 | 0.5714951 | 0.567664 | 0.948739 |
| hspal3           | 163.3975762 | 0.257600038  | 0.166758  | 1.5447542 | 0.122406 | 0.650311 |
| itgbl1           | 388.6626875 | 0.275974253  | 0.1155946 | 2.3874317 | 0.016967 | 0.240499 |
| tpilb            | 7595.493201 | -0.084152288 | 0.070413  | -1.195124 | 0.232039 | 0.800126 |
| usp37            | 478.5453629 | 0.160199542  | 0.1071254 | 1.4954395 | 0.1348   | 0.670689 |
| cttnbp2          | 1216.775276 | 0.118806822  | 0.0858254 | 1.3842853 | 0.166271 | 0.722887 |

|                  |             |              |           |           |          |          |
|------------------|-------------|--------------|-----------|-----------|----------|----------|
| or102-4          | 0.514116189 | -2.475533565 | 2.7461255 | -0.901464 | 0.367342 | NA       |
| or102-1          | 0.173729368 | -0.955901296 | 4.0804729 | -0.234262 | 0.814781 | NA       |
| st3gal4          | 173.3988072 | 0.235327147  | 0.1621067 | 1.4516801 | 0.146591 | 0.692967 |
| AL845428.1       | 0.792850356 | 1.849779641  | 2.4264239 | 0.7623481 | 0.445852 | NA       |
| gemin7           | 135.7279901 | -0.208753441 | 0.1832606 | -1.139107 | 0.254658 | 0.823484 |
| or111-11         | 10.8414807  | -0.009929081 | 0.5769028 | -0.017211 | 0.986268 | NA       |
| pdcd4b           | 1008.704197 | -0.089911371 | 0.0922077 | -0.975096 | 0.329513 | 0.873467 |
| or111-6          | 3.383973964 | 0.608146579  | 1.0352029 | 0.5874661 | 0.556891 | NA       |
| or111-1          | 6.216622346 | 0.765143446  | 0.7970714 | 0.9599434 | 0.337084 | NA       |
| or107-1          | 5.392844037 | 1.370583886  | 0.8564365 | 1.6003334 | 0.109525 | NA       |
| or119-2          | 18.53612172 | 0.613988385  | 0.4531916 | 1.3548096 | 0.175478 | 0.736242 |
| zgc:152857       | 5.798168009 | 0.469225196  | 0.861735  | 0.5445122 | 0.586089 | NA       |
| piga             | 124.9971723 | 0.199448791  | 0.1958592 | 1.0183276 | 0.308522 | 0.861088 |
| cxcr3.2          | 28.7237848  | 1.125470237  | 0.3822028 | 2.9446942 | 0.003233 | 0.07565  |
| midlip1a         | 955.5778374 | 0.060966362  | 0.0900663 | 0.6769054 | 0.498466 | 0.934006 |
| lgals913         | 216.9402976 | -0.288234765 | 0.1404844 | -2.051721 | 0.040197 | 0.392132 |
| calb2a           | 3500.471698 | -0.034337879 | 0.0728346 | -0.47145  | 0.637319 | 0.958872 |
| hspb1            | 331.2810145 | -0.05275264  | 0.1461815 | -0.360871 | 0.718196 | 0.96909  |
| got2a            | 1291.368562 | 0.253486302  | 0.0857252 | 2.9569638 | 0.003107 | 0.073687 |
| jagn1a           | 248.2017283 | -0.054250657 | 0.1371526 | -0.39555  | 0.692437 | 0.96736  |
| mier1a           | 339.3132963 | -0.029808999 | 0.1203411 | -0.247704 | 0.804363 | 0.979643 |
| si:dkey-12e7.4   | 25.92280921 | 0.020398515  | 0.3762047 | 0.0542219 | 0.956758 | 0.994543 |
| chka             | 809.5295328 | -0.026828456 | 0.0970832 | -0.276345 | 0.782283 | 0.97627  |
| thap3            | 43.35362915 | -0.160913359 | 0.3137587 | -0.512857 | 0.608051 | 0.956718 |
| kmt5b            | 1196.939827 | 0.103348237  | 0.0971494 | 1.063807  | 0.287416 | 0.845979 |
| anpepa           | 91.32373791 | -1.051588283 | 0.2125791 | -4.946808 | 7.54E-07 | 7.89E-05 |
| arpin            | 129.2765139 | -0.315990895 | 0.1904582 | -1.659109 | 0.097094 | 0.593855 |
| L0018380.1       | 11.18543119 | -0.036288092 | 0.5697619 | -0.06369  | 0.949217 | 0.99381  |
| pgpep11          | 10.52685606 | 0.706790513  | 0.5883733 | 1.2012621 | 0.22965  | NA       |
| barx2            | 85.9749261  | 0.054118203  | 0.2313481 | 0.2339254 | 0.815043 | 0.981081 |
| cftr             | 96.1128936  | -0.083001443 | 0.2131189 | -0.389461 | 0.696935 | 0.96736  |
| ctsh             | 236.1396542 | 0.030012185  | 0.1457406 | 0.2059288 | 0.836847 | 0.984636 |
| dnajc3a          | 414.0351849 | -0.024424187 | 0.1129522 | -0.216235 | 0.828805 | 0.982721 |
| wdr18            | 327.1463103 | -0.08082518  | 0.1186649 | -0.681121 | 0.495795 | 0.932377 |
| cnfn             | 171.5058641 | 0.123453428  | 0.1706411 | 0.7234682 | 0.469392 | 0.924505 |
| wnt2             | 47.41501638 | -0.227623728 | 0.2799237 | -0.813164 | 0.416124 | 0.906237 |
| ceacam1          | 1516.308445 | 0.17364832   | 0.0857806 | 2.0243309 | 0.042936 | 0.407008 |
| rapsn            | 239.2728677 | 0.216528714  | 0.1453466 | 1.4897405 | 0.136292 | 0.673089 |
| dhrrs13a.3       | 345.5871768 | 0.19642337   | 0.1188188 | 1.6531332 | 0.098304 | 0.597502 |
| ddb2             | 600.532925  | 0.012473961  | 0.109379  | 0.1140434 | 0.909203 | 0.990702 |
| crybala          | 97.64339286 | 0.158950775  | 0.2023144 | 0.785662  | 0.432066 | 0.912882 |
| paqr5a           | 75.40081048 | -0.162779938 | 0.2333172 | -0.697677 | 0.485379 | 0.930209 |
| slc17a6b         | 1801.425853 | 0.2310114    | 0.0868904 | 2.6586527 | 0.007845 | 0.142065 |
| morf411          | 956.3766641 | -0.075672701 | 0.0891218 | -0.849093 | 0.39583  | 0.899464 |
| si:ch211-63p21.4 | 2.851356728 | -0.140069982 | 1.1048656 | -0.126776 | 0.899118 | NA       |
| rab32b           | 5.148286498 | -1.266885892 | 0.8578842 | -1.476756 | 0.139741 | NA       |
| aagab            | 321.5819203 | 0.079589116  | 0.1233794 | 0.6450762 | 0.518878 | 0.938919 |
| crygs2           | 0.804086858 | -1.860428069 | 2.2645275 | -0.821552 | 0.411332 | NA       |
| adralbb          | 12.8009953  | 0.915852817  | 0.5665037 | 1.6166757 | 0.105948 | 0.615567 |
| crygm5           | 495.4747322 | 0.035417563  | 0.1050449 | 0.337166  | 0.735992 | 0.972535 |
| rpl4             | 27581.11548 | -0.247866871 | 0.0729997 | -3.395449 | 0.000685 | 0.02277  |
| alg12            | 168.283354  | -0.060562781 | 0.1639359 | -0.36943  | 0.711807 | 0.969006 |
| drapl            | 1558.578937 | -0.081169175 | 0.0954061 | -0.850775 | 0.394894 | 0.899087 |
| slc6a11          | 133.2640838 | -0.117954499 | 0.1734435 | -0.680075 | 0.496457 | 0.932461 |

|                   |             |              |           |           |          |          |
|-------------------|-------------|--------------|-----------|-----------|----------|----------|
| cetn4             | 186.6366618 | -0.098934006 | 0.1527392 | -0.647732 | 0.517158 | 0.938592 |
| xpo6              | 851.3691299 | -0.022884875 | 0.1161995 | -0.196945 | 0.843871 | 0.985174 |
| ftr53             | 10.73237355 | 0.860974012  | 0.5826149 | 1.4777756 | 0.139468 | NA       |
| zmp:0000000608    | 0.814536469 | 0.637862482  | 2.230678  | 0.28595   | 0.774916 | NA       |
| fam173a           | 152.6916144 | -0.051601751 | 0.1692688 | -0.304851 | 0.76048  | 0.975374 |
| cdc40             | 773.8290355 | -0.365652123 | 0.1027935 | -3.557151 | 0.000375 | 0.014067 |
| rps29             | 6730.201574 | -0.309091221 | 0.1804707 | -1.712695 | 0.086769 | 0.564768 |
| med18             | 65.93971116 | 0.234648593  | 0.2475364 | 0.9479357 | 0.343162 | 0.878434 |
| wdr20b            | 122.0782021 | -0.131396244 | 0.2007527 | -0.654518 | 0.512778 | 0.936253 |
| setdb1a           | 590.4257254 | -0.107140908 | 0.1005504 | -1.065545 | 0.28663  | 0.845942 |
| si:dkey-24117.6   | 0.840359184 | -3.190376554 | 2.3269423 | -1.37106  | 0.170356 | NA       |
| gemin4            | 6.674862874 | -0.289532775 | 0.7248148 | -0.399458 | 0.689556 | NA       |
| smtn11            | 72.52738764 | 0.304344246  | 0.2434116 | 1.2503276 | 0.21118  | 0.77879  |
| si:ch211-231m23.4 | 1.197759375 | -0.38361194  | 1.8179428 | -0.211014 | 0.832876 | NA       |
| noxola            | 421.8016773 | -0.862426262 | 0.1500582 | -5.74728  | 9.07E-09 | 1.55E-06 |
| lim2.5            | 491.530909  | 0.044677466  | 0.110759  | 0.4033755 | 0.686672 | 0.966376 |
| zgc:110796        | 68.28013773 | -0.036338038 | 0.2412171 | -0.150645 | 0.880256 | 0.987881 |
| drc3              | 66.76165782 | 0.106124869  | 0.2519549 | 0.4212058 | 0.673605 | 0.965257 |
| crybb3            | 4.106728178 | -0.314439161 | 0.9580361 | -0.328212 | 0.742751 | NA       |
| trakla            | 448.6774456 | -0.013935856 | 0.1271887 | -0.109568 | 0.912752 | 0.991119 |
| mrps25            | 841.1417233 | -0.056985195 | 0.0955134 | -0.59662  | 0.550761 | 0.946549 |
| ndufb9            | 2091.311358 | -0.024234127 | 0.0811082 | -0.298788 | 0.765102 | 0.975374 |
| rangapla          | 847.8873376 | -0.206893222 | 0.1002149 | -2.064496 | 0.038971 | 0.387434 |
| csdc2a            | 864.7166134 | -0.027796272 | 0.0910713 | -0.305214 | 0.760203 | 0.975374 |
| tmem33            | 915.7351375 | -0.013060156 | 0.1022367 | -0.127744 | 0.898351 | 0.990121 |
| si:dkey-125e8.4   | 6.507432229 | 0.140654576  | 0.7632028 | 0.1842951 | 0.853782 | NA       |
| zgc:92380         | 1062.671474 | 0.112156482  | 0.0861097 | 1.3024835 | 0.192751 | 0.756795 |
| mrpl51            | 678.5334483 | 0.03030715   | 0.1004121 | 0.3018277 | 0.762783 | 0.975374 |
| cyp19a1a          | 1.504272046 | -0.28893243  | 1.4975093 | -0.192942 | 0.847004 | NA       |
| ankrd39           | 56.35459437 | -0.090852489 | 0.2729182 | -0.332893 | 0.739215 | 0.972732 |
| lgi3              | 61.78701651 | 0.252205809  | 0.2479951 | 1.016979  | 0.309163 | 0.861381 |
| zgc:161969        | 477.434875  | -0.003122619 | 0.1033825 | -0.030205 | 0.975904 | 0.996762 |
| ttk               | 377.7211697 | -0.03859304  | 0.121377  | -0.31796  | 0.750515 | 0.97419  |
| chmp7             | 449.1436598 | 0.016567517  | 0.1090237 | 0.1519625 | 0.879217 | 0.987881 |
| dctn3             | 988.8015041 | -0.021958648 | 0.0890731 | -0.246524 | 0.805277 | 0.979883 |
| zgc:136564        | 190.2135825 | -0.579290986 | 0.1804328 | -3.210564 | 0.001325 | 0.038636 |
| si:ch211-57i17.5  | 3.351088384 | -0.556567768 | 1.1081597 | -0.502245 | 0.615495 | NA       |
| rmil              | 85.15189643 | -0.039576188 | 0.2238056 | -0.176833 | 0.85964  | 0.985773 |
| sh2d4a            | 71.60692567 | -0.538044829 | 0.2368593 | -2.27158  | 0.023112 | 0.291648 |
| si:ch211-245j22.3 | 14.11102531 | 0.447889203  | 0.5052068 | 0.8865463 | 0.375323 | 0.894316 |
| arnt12            | 173.4811457 | -0.192972266 | 0.1612076 | -1.197042 | 0.23129  | 0.799569 |
| si:dkey-283b15.2  | 203.671369  | -0.042007864 | 0.1459302 | -0.287863 | 0.773452 | 0.975687 |
| si:dkey-81n2.1    | 0.815164977 | -0.617697568 | 2.1259573 | -0.29055  | 0.771395 | NA       |
| tmed10            | 2910.445926 | -0.081886445 | 0.0734797 | -1.11441  | 0.265103 | 0.831033 |
| dnajblb           | 296.8533627 | -0.09333498  | 0.1283996 | -0.72691  | 0.467281 | 0.924328 |
| EIF2B2            | 456.6366186 | 0.256487223  | 0.1171522 | 2.18935   | 0.028571 | 0.328246 |
| adgre7            |             | 0 NA         | NA        | NA        | NA       | NA       |
| ndufa3            | 970.6639793 | 0.009802477  | 0.1230956 | 0.079633  | 0.936529 | 0.992702 |
| zc3h14            | 618.0410763 | -0.27510988  | 0.1049947 | -2.620226 | 0.008787 | 0.155004 |
| rmdn3             | 331.9269746 | -0.004091926 | 0.1286242 | -0.031813 | 0.974621 | 0.996579 |
| rad51             | 397.8158496 | -0.505818234 | 0.1235206 | -4.095012 | 4.22E-05 | 0.002358 |
| adgrg11           | 5.290010159 | 0.904667154  | 0.8594737 | 1.0525827 | 0.292532 | NA       |
| bmf2              | 168.8276241 | -0.022037627 | 0.1587769 | -0.138796 | 0.889611 | 0.989291 |
| atp6apla          | 3291.262052 | 0.052225985  | 0.0770437 | 0.677875  | 0.497851 | 0.933482 |

|                  |             |              |           |           |          |          |
|------------------|-------------|--------------|-----------|-----------|----------|----------|
| taz              | 308.6021936 | -0.057741863 | 0.1347538 | -0.428499 | 0.668288 | 0.964736 |
| yrdc             | 204.9508422 | 0.322682351  | 0.1459855 | 2.210372  | 0.027079 | 0.317032 |
| ints14           | 446.8701194 | -0.07585216  | 0.1119116 | -0.677786 | 0.497907 | 0.933499 |
| bmp2b            | 213.6781436 | 0.067394333  | 0.1483894 | 0.4541721 | 0.649705 | 0.960708 |
| slc24a1          | 88.20656621 | 0.286749479  | 0.2333966 | 1.2285934 | 0.219224 | 0.785734 |
| si:dkey-7c18.24  | 198.5728601 | -0.418394929 | 0.1958097 | -2.136742 | 0.032619 | 0.352078 |
| uba52            | 9959.880505 | -0.237445608 | 0.102704  | -2.311942 | 0.020781 | 0.272632 |
| spred1           | 773.6233072 | 0.107064579  | 0.0914855 | 1.1702898 | 0.241884 | 0.810713 |
| rab11a           | 4482.396939 | 0.024722035  | 0.0711567 | 0.347431  | 0.728268 | 0.970402 |
| taar12b          | 0.656489935 | -1.4754824   | 2.3018704 | -0.640993 | 0.521527 | NA       |
| pimr183          | 0.48983248  | -0.887840757 | 2.6934859 | -0.329625 | 0.741683 | NA       |
| smg5             | 1242.743615 | 0.012499992  | 0.0840629 | 0.1486981 | 0.881792 | 0.988344 |
| paqr6            | 205.0944052 | 0.459954046  | 0.1561751 | 2.9451186 | 0.003228 | 0.07565  |
| afp4             | 216.6667932 | -0.471282164 | 0.5641705 | -0.835354 | 0.403518 | 0.900979 |
| si:ch211-196f5.2 | 71.33159104 | -0.070596191 | 0.2495811 | -0.282859 | 0.777285 | 0.975826 |
| ipo4             | 554.5583943 | 0.060841182  | 0.1049082 | 0.5799471 | 0.56195  | 0.948728 |
| tgfb1a           | 578.7097088 | 0.17350206   | 0.1047452 | 1.6564197 | 0.097637 | 0.596644 |
| med4             | 219.4081284 | -0.125892776 | 0.1557875 | -0.808106 | 0.41903  | 0.906406 |
| itm2bb           | 1839.910689 | 0.037792795  | 0.1068283 | 0.3537715 | 0.72351  | 0.970402 |
| pex10            | 57.34277409 | 0.039716497  | 0.255624  | 0.1553708 | 0.876529 | 0.987881 |
| rasal1b          | 7.700903255 | -0.112788871 | 0.6879283 | -0.163954 | 0.869767 | NA       |
| ppih             | 306.1863265 | -0.25362322  | 0.1313526 | -1.930858 | 0.053501 | 0.453265 |
| ccdc130          | 128.0735059 | -0.281126343 | 0.1864923 | -1.507442 | 0.131697 | 0.665187 |
| mrps28           | 215.3496227 | -0.00941193  | 0.149391  | -0.063002 | 0.949765 | 0.99381  |
| sult1st2         | 15.79534637 | 0.141144021  | 0.4901397 | 0.2879669 | 0.773372 | 0.975687 |
| gypc             | 123.0827119 | 0.221414438  | 0.1929021 | 1.1478076 | 0.251048 | 0.820469 |
| pimr138          | 4.978701137 | 0.964804048  | 0.9076507 | 1.0629684 | 0.287796 | NA       |
| unc93a           | 7.698531823 | -0.245720592 | 0.7036695 | -0.349199 | 0.72694  | NA       |
| si:dkey-102f14.5 | 103.1929575 | -0.027475168 | 0.1934401 | -0.142035 | 0.887053 | 0.989231 |
| tnfaip1          | 194.8756979 | 0.317774352  | 0.1517312 | 2.0943241 | 0.036231 | 0.37198  |
| ces2             | 4278.817847 | 0.036322816  | 0.2143195 | 0.1694798 | 0.865419 | 0.986385 |
| mrpl39           | 454.4844839 | -0.112165863 | 0.1062611 | -1.055568 | 0.291166 | 0.846582 |
| zfpml            | 241.2958295 | -0.448767766 | 0.1526436 | -2.939971 | 0.003282 | 0.076541 |
| trmt10c          | 119.6784221 | -0.081241449 | 0.1861205 | -0.436499 | 0.662475 | 0.964665 |
| nudt18           | 100.3666823 | -0.194110609 | 0.2100698 | -0.924029 | 0.355471 | 0.882386 |
| znf143b          | 427.4811738 | 0.196204731  | 0.1107016 | 1.772375  | 0.076332 | 0.538373 |
| dhx40            | 134.2254437 | -0.073159051 | 0.176757  | -0.413896 | 0.67895  | 0.965257 |
| adprh11          | 38.54405737 | -0.124034579 | 0.3242705 | -0.382503 | 0.702088 | 0.968134 |
| dcun1d2b         | 771.0918705 | -0.145254277 | 0.109328  | -1.32861  | 0.183977 | 0.747376 |
| ces3             | 1957.294547 | -0.204369533 | 0.2893122 | -0.706398 | 0.479941 | 0.927154 |
| zgc:91860        | 1472.144785 | 0.008763193  | 0.0816271 | 0.1073564 | 0.914506 | 0.991119 |
| wdr83            | 112.1093858 | -0.017457992 | 0.189031  | -0.092355 | 0.926416 | 0.992702 |
| zgc:92335        | 304.3669323 | -0.117790355 | 0.1263082 | -0.932563 | 0.351046 | 0.880473 |
| eif4ebp31        | 1055.089363 | -0.303620767 | 0.1177297 | -2.578966 | 0.00991  | 0.169473 |
| adarb1a          | 616.1369962 | 0.080133948  | 0.1051758 | 0.761905  | 0.446117 | 0.917154 |
| b3gnt9           | 32.10438204 | 0.725225528  | 0.3545431 | 2.0455216 | 0.040803 | 0.394957 |
| nme5             | 40.35101122 | -0.207493419 | 0.3109127 | -0.667369 | 0.504537 | 0.935617 |
| rack1            | 31085.24002 | -0.279433479 | 0.0824026 | -3.391076 | 0.000696 | 0.023059 |
| bbs2             | 663.6627794 | 0.179613107  | 0.0999856 | 1.7963904 | 0.072432 | 0.526156 |
| mt2              | 892.1054631 | 0.010379975  | 0.1135453 | 0.091417  | 0.927161 | 0.992702 |
| fam192a          | 506.8190437 | -0.126095658 | 0.1025337 | -1.229798 | 0.218773 | 0.785734 |
| si:dkey-194e6.1  | 89.07259207 | 0.616772146  | 0.2228601 | 2.7675304 | 0.005648 | 0.112817 |
| sb:cb37          | 420.0405269 | -0.018832265 | 0.1566614 | -0.12021  | 0.904317 | 0.990306 |
| opr1a            | 8.121643199 | -0.236601982 | 0.7103749 | -0.333066 | 0.739084 | NA       |



|                   |             |              |           |           |          |          |
|-------------------|-------------|--------------|-----------|-----------|----------|----------|
| mkrnl             | 788.751785  | 0.007401541  | 0.0922241 | 0.080256  | 0.936034 | 0.992702 |
| si:dkey-105h12.2  | 89.63157254 | 0.469908628  | 0.234389  | 2.0048241 | 0.044982 | 0.417005 |
| usfl              | 630.9204691 | -0.052162682 | 0.0948017 | -0.55023  | 0.582162 | 0.952028 |
| bhlhe41           | 630.0615452 | 0.033052185  | 0.095348  | 0.3466481 | 0.728856 | 0.970662 |
| piwill            | 29.41727656 | -0.398997024 | 0.3523367 | -1.132431 | 0.257453 | 0.825314 |
| rfx6              | 1.7000073   | -1.196582402 | 1.5272193 | -0.783504 | 0.433331 | NA       |
| rrbplb            | 1039.055196 | 0.115591855  | 0.0904007 | 1.2786607 | 0.201017 | 0.766855 |
| si:busml-228j01.6 | 0.341486697 | 1.892317624  | 3.2124068 | 0.5890654 | 0.555817 | NA       |
| vgl12a            | 14.16945041 | -1.447907103 | 0.5272709 | -2.74604  | 0.006032 | 0.117745 |
| kat14             | 698.1050051 | 0.031075867  | 0.0984106 | 0.3157776 | 0.752171 | 0.974577 |
| bco2b             | 7.372171731 | 0.396049169  | 0.7148633 | 0.5540209 | 0.579565 | NA       |
| arpc51a           | 545.730935  | 0.085050953  | 0.1003072 | 0.8479044 | 0.396491 | 0.899672 |
| TUBB4B            | 681.2301082 | 0.251891031  | 0.0965164 | 2.6098275 | 0.009059 | 0.159222 |
| glipr2            | 37.268426   | 0.394447461  | 0.3474296 | 1.1353305 | 0.256237 | 0.824633 |
| man1a2            | 1225.669867 | 0.061134181  | 0.08821   | 0.6930531 | 0.488276 | 0.93189  |
| sntbl             | 290.0649874 | -0.177563483 | 0.138985  | -1.277573 | 0.2014   | 0.767338 |
| tbc1d32           | 131.5794866 | -0.401068827 | 0.1827465 | -2.194673 | 0.028187 | 0.325187 |
| tmem237a          | 490.7744026 | 0.193600398  | 0.1049216 | 1.8451906 | 0.06501  | 0.497901 |
| hsdl1             | 102.3251471 | -0.042259912 | 0.2001232 | -0.211169 | 0.832755 | 0.983557 |
| sspn              | 138.3163811 | -0.077099898 | 0.1814618 | -0.424882 | 0.670923 | 0.965257 |
| ccdc92            | 464.9727712 | -0.107201587 | 0.1138922 | -0.941255 | 0.346574 | 0.8794   |
| ndst3             | 564.9027115 | 0.05634892   | 0.0988001 | 0.5703329 | 0.568452 | 0.948983 |
| trdn              | 237.4745449 | 0.04025787   | 0.1411909 | 0.2851308 | 0.775544 | 0.975687 |
| cx32.3            | 185.3782518 | -0.162693984 | 0.1533016 | -1.061268 | 0.288568 | 0.845979 |
| mgat4c            | 13.62587549 | 1.12610265   | 0.5742209 | 1.9610967 | 0.049868 | 0.437835 |
| cx28.1            | 2.072144456 | -0.224981179 | 1.4581081 | -0.154297 | 0.877376 | NA       |
| cx28.9            | 148.8350393 | -0.231744536 | 0.1954386 | -1.185766 | 0.235715 | 0.804824 |
| cx43              | 3239.540419 | 0.055523635  | 0.0709657 | 0.782401  | 0.433979 | 0.914001 |
| rnf141            | 226.9205146 | 0.023659954  | 0.1473915 | 0.1605245 | 0.872468 | 0.987846 |
| rps25             | 9894.080863 | -0.427459306 | 0.1106427 | -3.863419 | 0.000112 | 0.005406 |
| si:dkeyp-28d2.4   | 1.133855642 | 2.462671251  | 1.9506495 | 1.2624878 | 0.206773 | NA       |
| tsn               | 407.6253813 | 0.060204945  | 0.1277903 | 0.4711229 | 0.637553 | 0.958872 |
| ccl38a.5          | 3.106153703 | 0.767946707  | 1.0707303 | 0.7172177 | 0.47324  | NA       |
| tsc22d2           | 667.1788111 | 0.035061731  | 0.0949278 | 0.3693518 | 0.711866 | 0.969006 |
| rh50              | 7.996757599 | 0.997870109  | 0.702841  | 1.4197665 | 0.155676 | NA       |
| rbm39b            | 1667.91056  | -0.117998306 | 0.0773541 | -1.525432 | 0.127152 | 0.656588 |
| ren               | 24.3119866  | -0.063706531 | 0.4431003 | -0.143775 | 0.885679 | 0.988936 |
| capn3a            | 5632.082869 | -0.018700118 | 0.0646925 | -0.289062 | 0.772534 | 0.975687 |
| tnfrsf19          | 452.1568471 | 0.138011532  | 0.112034  | 1.2318714 | 0.217997 | 0.785379 |
| ift172            | 394.8595396 | -0.109172779 | 0.1211632 | -0.901039 | 0.367568 | 0.887458 |
| si:dkey-221h15.4  | 5.100487897 | 0.114664748  | 0.8967764 | 0.1278632 | 0.898257 | NA       |
| ube2v1            | 1695.629585 | -0.055477572 | 0.0974485 | -0.569302 | 0.569152 | 0.948983 |
| rab11ba           | 1351.229466 | 0.098450504  | 0.0815278 | 1.2075704 | 0.227213 | 0.794617 |
| sf3a1             | 2190.560987 | -0.063319994 | 0.0949173 | -0.667107 | 0.504704 | 0.935617 |
| cad               | 1637.986629 | -0.250134039 | 0.0839251 | -2.980444 | 0.002878 | 0.069835 |
| dnajc5ga          | 835.6421733 | -0.007700704 | 0.0979795 | -0.078595 | 0.937355 | 0.99279  |
| ankzf1            | 134.1924894 | -0.02877085  | 0.1757027 | -0.163747 | 0.86993  | 0.987395 |
| usp39             | 585.188752  | 0.040524167  | 0.0981326 | 0.412953  | 0.679641 | 0.965311 |
| znf512            | 35.71345248 | 0.333563875  | 0.3580563 | 0.9315961 | 0.351545 | 0.880769 |
| si:ch211-245h14.1 | 12.92946071 | -0.829078142 | 0.5498494 | -1.507828 | 0.131599 | 0.665022 |
| stum              | 39.06489654 | -0.140175076 | 0.3141507 | -0.446203 | 0.65545  | 0.961632 |
| ccl38a.4          | 1.609902098 | -1.227764369 | 1.6314598 | -0.752556 | 0.451717 | NA       |
| ccl38.1           | 3.990407809 | -0.442504236 | 1.0041402 | -0.44068  | 0.659445 | NA       |
| hsbplb            | 954.5022718 | -0.065551838 | 0.0904561 | -0.724681 | 0.468648 | 0.924328 |

|                  |             |              |           |           |          |          |
|------------------|-------------|--------------|-----------|-----------|----------|----------|
| ccl38.6          | 8.72585095  | -1.457173164 | 0.6787396 | -2.146881 | 0.031803 | NA       |
| cryba2b          | 15422.38286 | 0.024918282  | 0.0737109 | 0.3380543 | 0.735322 | 0.972528 |
| dlg4a            | 30.92532827 | 0.16899022   | 0.3508639 | 0.4816404 | 0.630061 | 0.957354 |
| adat2            | 72.45007714 | -0.2675202   | 0.2315157 | -1.155517 | 0.247879 | 0.81711  |
| styk1b           | 267.6804861 | -0.022899039 | 0.1316981 | -0.173875 | 0.861964 | 0.985841 |
| selenool         | 362.8145739 | 0.028107988  | 0.1278239 | 0.2198962 | 0.825952 | 0.982196 |
| prox2            | 110.723228  | 0.18525195   | 0.2020241 | 0.9169795 | 0.359153 | 0.884751 |
| cxcr4b           | 112.4714743 | -0.113713237 | 0.1971114 | -0.576898 | 0.564008 | 0.948739 |
| si:ch211-173a9.6 | 59.5841638  | -1.564148833 | 0.2726642 | -5.73654  | 9.66E-09 | 1.63E-06 |
| brkl             | 2720.390761 | -0.020590904 | 0.0880083 | -0.233966 | 0.815012 | 0.981081 |
| il17a/f3         | 2.652710646 | -0.759080918 | 1.159807  | -0.654489 | 0.512797 | NA       |
| calhm6           | 5.277394124 | 1.131486415  | 0.9102389 | 1.2430653 | 0.213844 | NA       |
| adamts6          | 25.0231691  | -0.428452623 | 0.4004601 | -1.069901 | 0.284664 | 0.844955 |
| rrp9             | 282.8360553 | -0.223218733 | 0.135955  | -1.641857 | 0.10062  | 0.603272 |
| zgc:113337       | 84.93538682 | 0.145724548  | 0.2255295 | 0.6461442 | 0.518186 | 0.938592 |
| si:ch211-63o20.7 | 75.12842248 | -0.26514796  | 0.2433356 | -1.089639 | 0.275872 | 0.839541 |
| nfya             | 1317.352373 | -0.043755816 | 0.087087  | -0.502438 | 0.615359 | 0.95688  |
| elp3             | 287.2052153 | -0.317988622 | 0.1333674 | -2.384306 | 0.017111 | 0.241859 |
| pklr             | 1106.930156 | 0.077670395  | 0.1128809 | 0.6880741 | 0.491406 | 0.931926 |
| cyp11c1          | 106.8771472 | -0.102137832 | 0.1931382 | -0.528833 | 0.596921 | 0.954913 |
| fh12a            | 789.7639272 | 0.22202768   | 0.0957546 | 2.3187167 | 0.02041  | 0.268884 |
| mapk12a          | 546.5846529 | 0.002747436  | 0.1073096 | 0.0256029 | 0.979574 | 0.996866 |
| si:dkeyp-118h3.6 | 188.6499613 | -0.060048432 | 0.1523035 | -0.394268 | 0.693383 | 0.96736  |
| prrx1b           | 384.3778994 | -0.094582809 | 0.1205781 | -0.784411 | 0.432799 | 0.91326  |
| kpna5            | 1391.022629 | 0.002152775  | 0.0806334 | 0.0266983 | 0.9787   | 0.996762 |
| gorab            | 99.90923848 | 0.019556864  | 0.2199567 | 0.0889123 | 0.929152 | 0.992702 |
| pou3f3a          | 609.1396541 | -0.093850117 | 0.097646  | -0.961126 | 0.336489 | 0.876088 |
| mett11b          | 32.21688505 | 1.336160702  | 0.3520937 | 3.7949008 | 0.000148 | 0.006714 |
| tal2             | 408.7168102 | -0.110116492 | 0.1163217 | -0.946655 | 0.343815 | 0.878434 |
| hmg20b           | 621.0868133 | -0.10091584  | 0.1088722 | -0.92692  | 0.353968 | 0.881976 |
| zgc:171971       | 122.989126  | 0.091635582  | 0.1824057 | 0.5023722 | 0.615406 | 0.95688  |
| fam129aa         | 60.98636358 | 0.165611522  | 0.2635744 | 0.6283294 | 0.529788 | 0.942209 |
| mau2             | 718.8405732 | -0.03069847  | 0.0957956 | -0.320458 | 0.748621 | 0.97419  |
| trmt11           | 230.0565041 | -0.189746979 | 0.1595099 | -1.189562 | 0.234219 | 0.802815 |
| si:ch211-145c1.1 | 1.939172771 | -0.030264765 | 1.5009051 | -0.020164 | 0.983912 | NA       |
| eef2a.2          | 15.00672274 | 0.791314263  | 0.5050683 | 1.5667472 | 0.117174 | 0.640585 |
| pebpl            | 583.9576237 | 0.021802512  | 0.1096809 | 0.1987814 | 0.842434 | 0.985174 |
| fbx117           | 29.89398294 | -0.596658748 | 0.3611632 | -1.652047 | 0.098525 | 0.597984 |
| dmap1            | 654.2712294 | 0.041190474  | 0.1045959 | 0.3938059 | 0.693724 | 0.96736  |
| si:ch73-55i23.1  | 15.64796612 | -0.961088158 | 0.508338  | -1.890648 | 0.058671 | 0.474103 |
| btbd2a           | 937.7545758 | -0.007175699 | 0.0869204 | -0.082555 | 0.934205 | 0.992702 |
| eef2a.1          | 476.314322  | -0.157520278 | 0.1104848 | -1.42572  | 0.153949 | 0.702738 |
| mnx2a            | 26.88728062 | -0.198464746 | 0.3704146 | -0.535791 | 0.592103 | 0.954434 |
| si:dkey-44k1.5   | 210.0649619 | 0.116109215  | 0.144496  | 0.8035465 | 0.421659 | 0.90651  |
| diol             | 74.94991247 | -0.027015601 | 0.2244687 | -0.120354 | 0.904203 | 0.990291 |
| binla            | 27.00194764 | 0.327828831  | 0.3698902 | 0.8862868 | 0.375463 | 0.894316 |
| tmem198a         | 90.03040532 | -0.268979749 | 0.2189509 | -1.228494 | 0.219262 | 0.785734 |
| trim35-40        | 118.1807352 | 0.100646752  | 0.1920685 | 0.5240148 | 0.600268 | 0.956045 |
| si:dkey-97o5.1   | 167.9163218 | -0.106115969 | 0.1599169 | -0.663569 | 0.506966 | 0.935734 |
| acot11b          | 91.45665666 | 0.277782761  | 0.2289786 | 1.2131387 | 0.225077 | 0.792185 |
| nudt3b           | 18.84385957 | -0.049787531 | 0.4322468 | -0.115183 | 0.9083   | 0.990702 |
| si:dkey-4e7.3    | 150.5065367 | 0.034472225  | 0.1885657 | 0.1828128 | 0.854945 | 0.985174 |
| elmo3            | 44.39919819 | 0.458214487  | 0.29224   | 1.5679391 | 0.116895 | 0.639958 |
| pacsin1b         | 668.16215   | 0.000282788  | 0.1005104 | 0.0028135 | 0.997755 | 0.999174 |

|                   |             |              |           |           |          |          |
|-------------------|-------------|--------------|-----------|-----------|----------|----------|
| zp3a.1            | 0.158795395 | 0.967652056  | 4.0804729 | 0.2371421 | 0.812547 | NA       |
| zp3a.2            | 3.286247409 | 0.919792463  | 1.0722727 | 0.8577971 | 0.391004 | NA       |
| si:dkey-51e6.1    | 60.13081291 | 0.319045933  | 0.2566546 | 1.2430943 | 0.213833 | 0.782251 |
| selp              | 3.410047828 | -2.583702156 | 1.2306593 | -2.099446 | 0.035778 | NA       |
| fpgt              | 49.88426882 | -0.2735948   | 0.2843289 | -0.962247 | 0.335925 | 0.876088 |
| myo6b             | 172.5431237 | -0.136500191 | 0.1542711 | -0.884808 | 0.37626  | 0.894789 |
| lhx8b             | 7.562731881 | -0.585371665 | 0.7048506 | -0.83049  | 0.406262 | NA       |
| rbbp5             | 516.2162653 | -0.05164121  | 0.1093083 | -0.472436 | 0.636615 | 0.958607 |
| skia              | 1292.883033 | -0.017297003 | 0.0850682 | -0.203331 | 0.838876 | 0.984979 |
| ppil6             | 10.71092272 | 0.205255168  | 0.6006714 | 0.3417096 | 0.732569 | NA       |
| RFESD (1 of many) | 36.30202602 | -0.099516823 | 0.3336906 | -0.298231 | 0.765527 | 0.975374 |
| c7a               | 191.3923303 | 0.420701443  | 0.1763145 | 2.3860856 | 0.017029 | 0.241051 |
| foxl2a            | 46.77732732 | -0.16000976  | 0.3297606 | -0.48523  | 0.627513 | 0.957354 |
| drcl              | 24.62131842 | 0.162359049  | 0.3890472 | 0.4173248 | 0.676441 | 0.965257 |
| paplnb            | 17.92226122 | 0.696685277  | 0.5006868 | 1.3914593 | 0.164086 | 0.71945  |
| smekl             | 2191.474541 | -0.01710094  | 0.0775715 | -0.220454 | 0.825518 | 0.982196 |
| ttc38             | 69.7399271  | -0.273860551 | 0.2387632 | -1.146997 | 0.251383 | 0.820814 |
| tspan33b          | 34.4996656  | 0.029728171  | 0.3692454 | 0.0805106 | 0.935831 | 0.992702 |
| sema3ab           | 40.40917116 | -0.163588028 | 0.298779  | -0.547522 | 0.58402  | 0.952214 |
| si:ch211-233h19.2 | 57.02453224 | 0.348173705  | 0.2779401 | 1.2526931 | 0.210317 | 0.778043 |
| tmem243a          | 28.41585107 | -0.185791722 | 0.3698077 | -0.502401 | 0.615386 | 0.95688  |
| pias4b            | 8.709460295 | -0.59326102  | 0.6516516 | -0.910396 | 0.362614 | NA       |
| mthfd11           | 930.0199711 | -0.753703924 | 0.2523548 | -2.986683 | 0.00282  | 0.068933 |
| stx11b.2          | 33.89478214 | -1.167566048 | 0.3657172 | -3.192538 | 0.00141  | 0.040686 |
| specc11b          | 66.33894723 | -0.071583277 | 0.2504673 | -0.285799 | 0.775032 | 0.975687 |
| fgf16             | 35.89095161 | 0.033472548  | 0.3341272 | 0.1001791 | 0.920202 | 0.992044 |
| atrx              | 4238.69063  | 0.028188556  | 0.0659924 | 0.4271487 | 0.669271 | 0.965082 |
| myl13             | 2455.744353 | 0.219926884  | 0.0855332 | 2.5712445 | 0.010133 | 0.171998 |
| FRMD4A            | 69.31555878 | -0.100631382 | 0.2501497 | -0.402285 | 0.687475 | 0.966376 |
| eif4h             | 2154.112795 | -0.033113168 | 0.080161  | -0.413083 | 0.679546 | 0.965257 |
| tgfbr1b           | 49.12622019 | -0.087340598 | 0.2781846 | -0.313966 | 0.753547 | 0.974981 |
| cdan1             | 138.6043587 | 0.108314511  | 0.1826203 | 0.5931131 | 0.553105 | 0.947265 |
| arsa              | 131.6913352 | -0.058338734 | 0.1935512 | -0.301412 | 0.7631   | 0.975374 |
| tmem231           | 119.8056078 | 0.208180492  | 0.2087965 | 0.9970498 | 0.31874  | 0.867746 |
| efnb3b            | 166.8143457 | 0.011724823  | 0.1568826 | 0.0747363 | 0.940425 | 0.992857 |
| itga6a            | 363.6770508 | 0.087795125  | 0.1189032 | 0.738375  | 0.460287 | 0.921978 |
| atp8b3            | 535.8466728 | 0.114027604  | 0.0999449 | 1.1409045 | 0.25391  | 0.823394 |
| dlx6a             | 135.3203708 | -0.367574697 | 0.1871223 | -1.964356 | 0.049489 | 0.436093 |
| ca4b              | 99.25138044 | -0.990793187 | 0.2295878 | -4.315531 | 1.59E-05 | 0.001043 |
| dlx5a             | 369.3717396 | -0.094508474 | 0.1208743 | -0.781874 | 0.434289 | 0.914161 |
| arhgef18b         | 72.36880449 | -0.008648466 | 0.2378943 | -0.036354 | 0.971    | 0.996315 |
| cdca4             | 1166.072679 | 0.055801662  | 0.0830818 | 0.6716476 | 0.501808 | 0.934874 |
| si:dkey-177p2.6   | 710.9411901 | 0.353564676  | 0.0988519 | 3.5767111 | 0.000348 | 0.013334 |
| si:dkey-91ml1.5   | 302.5662595 | -0.082169673 | 0.1421461 | -0.578065 | 0.56322  | 0.948728 |
| plin2             | 176.4428952 | -0.164448459 | 0.1821432 | -0.902853 | 0.366604 | 0.88734  |
| impdh1a           | 475.6700646 | 0.136194941  | 0.1056171 | 1.2895164 | 0.197219 | 0.762204 |
| chracl            | 224.8963071 | -0.02796227  | 0.1506544 | -0.185605 | 0.852754 | 0.985174 |
| lpar2a            | 84.09857601 | -0.321278089 | 0.2187573 | -1.468651 | 0.141928 | 0.683173 |
| tmem251           | 327.98462   | -0.01288668  | 0.1198922 | -0.107486 | 0.914404 | 0.991119 |
| trmt6             | 156.2664528 | 0.100795196  | 0.165393  | 0.6094284 | 0.542241 | 0.944974 |
| si:dkeyp-55f12.3  | 92.59866665 | -0.207330298 | 0.2277604 | -0.9103   | 0.362664 | 0.885944 |
| sytlb             | 15.93141451 | 0.710186109  | 0.5035018 | 1.4104937 | 0.158394 | 0.709224 |
| cldnk             | 220.1199847 | 0.281162993  | 0.1534753 | 1.831975  | 0.066955 | 0.506105 |
| kif26aa           | 255.917481  | 0.085913674  | 0.1515418 | 0.5669305 | 0.570761 | 0.949061 |

|                  |             |              |           |           |          |          |
|------------------|-------------|--------------|-----------|-----------|----------|----------|
| ptafr            | 9.642815051 | -0.658116845 | 0.6551517 | -1.004526 | 0.315125 | NA       |
| zgc:103681       | 56.87956347 | -0.334001165 | 0.2669686 | -1.251088 | 0.210902 | 0.778412 |
| zbtb25           | 60.96278449 | -0.041552296 | 0.2538049 | -0.163717 | 0.869954 | 0.987395 |
| zgc:77752        | 77.61105626 | 0.127940534  | 0.2356772 | 0.5428635 | 0.587224 | 0.953319 |
| syndig11         | 46.53624779 | -0.125134582 | 0.2885843 | -0.433615 | 0.664568 | 0.964736 |
| trim35-30        | 34.68691986 | 0.04350216   | 0.3238492 | 0.1343284 | 0.893143 | 0.989291 |
| der12            | 303.4283416 | 0.067356401  | 0.1278831 | 0.5267029 | 0.5984   | 0.955488 |
| RALGDS           | 65.05274773 | 0.033342561  | 0.2462765 | 0.1353867 | 0.892306 | 0.989291 |
| rab40b           | 313.929656  | -0.127988905 | 0.1267617 | -1.009681 | 0.312648 | 0.864656 |
| galnt17          | 228.317309  | -0.018717659 | 0.138266  | -0.135374 | 0.892316 | 0.989291 |
| gstt1a           | 851.9663178 | -0.31110109  | 0.1010323 | -3.079223 | 0.002075 | 0.054865 |
| p2rx7            | 60.16029056 | -0.268003631 | 0.2569054 | -1.0432   | 0.296856 | 0.853798 |
| p2rx4b           | 4.588660569 | 0.635759845  | 0.9109362 | 0.6979192 | 0.485228 | NA       |
| mad212           | 169.5598357 | -0.115235637 | 0.1624787 | -0.709235 | 0.478178 | 0.926857 |
| rfc4             | 339.183708  | -0.17810306  | 0.1233158 | -1.444284 | 0.148659 | 0.69636  |
| tlkla            | 774.0558904 | 0.047100611  | 0.0977491 | 0.4818519 | 0.629911 | 0.957354 |
| ndufa12          | 1677.780042 | -0.080613404 | 0.1209247 | -0.666641 | 0.505001 | 0.935724 |
| slpr3a           | 45.66598809 | -0.108576421 | 0.2863103 | -0.379226 | 0.70452  | 0.968134 |
| nr2c2            | 610.4545028 | 0.001549918  | 0.0986826 | 0.0157061 | 0.987469 | 0.997189 |
| t1e2a            | 1205.460833 | 0.004130238  | 0.0807478 | 0.0511498 | 0.959206 | 0.995097 |
| foxd5            | 9.551722696 | -0.508145158 | 0.6237886 | -0.814611 | 0.415295 | NA       |
| thap12a          | 333.6059347 | -0.177420276 | 0.1224938 | -1.448402 | 0.147505 | 0.694631 |
| si:dkey-250d21.1 | 7.03717977  | 0.004865287  | 0.7191793 | 0.0067651 | 0.994602 | NA       |
| parp12a          | 38.86465507 | -0.057553797 | 0.3508394 | -0.164046 | 0.869695 | 0.987304 |
| ubr3             | 754.7108244 | -0.04709929  | 0.1080574 | -0.435873 | 0.662929 | 0.964736 |
| glod4            | 147.7518099 | -0.195152464 | 0.1723772 | -1.132124 | 0.257582 | 0.825314 |
| acot20           | 102.4509302 | 0.323251604  | 0.2014479 | 1.6046411 | 0.108573 | 0.620676 |
| acot21           | 2.725876    | 0.779510417  | 1.1753579 | 0.6632111 | 0.507195 | NA       |
| gpr176           | 108.1889504 | 0.252128421  | 0.1909628 | 1.320301  | 0.186735 | 0.750951 |
| hipk2            | 38.04047429 | 0.384772805  | 0.3424136 | 1.1237077 | 0.261137 | 0.829247 |
| UTP14C           | 386.8298969 | -0.07630184  | 0.1123081 | -0.679397 | 0.496886 | 0.932829 |
| si:dkey-251i10.1 | 57.33152404 | 0.13619407   | 0.2527149 | 0.5389237 | 0.58994  | 0.953762 |
| katnbl1          | 234.9393739 | -0.109524609 | 0.1364436 | -0.802709 | 0.422143 | 0.90651  |
| ebf2             | 288.5038434 | 0.105567124  | 0.14041   | 0.7518489 | 0.452142 | 0.918781 |
| sebox            | 74.98094789 | -0.087892761 | 0.2298163 | -0.382448 | 0.702129 | 0.968134 |
| unga             | 125.2858041 | -0.04701314  | 0.1901414 | -0.247254 | 0.804712 | 0.979705 |
| gnat2            | 11658.35824 | 0.375790951  | 0.0819176 | 4.5874276 | 4.49E-06 | 0.000369 |
| nup205           | 1228.858552 | -0.147609278 | 0.0953233 | -1.548513 | 0.121499 | 0.647929 |
| gstm.1           | 696.0980906 | -0.056473894 | 0.106373  | -0.530904 | 0.595485 | 0.954434 |
| rsrc2            | 1135.012464 | -0.051819137 | 0.0845169 | -0.613121 | 0.539796 | 0.944178 |
| actc1a           | 2089.277405 | 0.27355934   | 0.0979287 | 2.7934545 | 0.005215 | 0.106637 |
| si:dkey-48j7.3   | 0.333314908 | -1.858695402 | 3.5126701 | -0.52914  | 0.596708 | NA       |
| ywhaqa           | 4031.230722 | 0.140225465  | 0.075702  | 1.8523356 | 0.063978 | 0.49437  |
| degs2            | 3.466110453 | 0.165937656  | 1.0111213 | 0.1641125 | 0.869643 | NA       |
| sema3ga          | 82.32143772 | -0.08782831  | 0.2268577 | -0.387152 | 0.698644 | 0.967998 |
| tpd5211          | 353.0490414 | -0.009999258 | 0.1247447 | -0.080158 | 0.936112 | 0.992702 |
| mboat2b          | 517.257621  | -0.049079067 | 0.1163057 | -0.421983 | 0.673037 | 0.965257 |
| cacnalsb         | 853.6974829 | 0.361003908  | 0.0934876 | 3.8615144 | 0.000113 | 0.005422 |
| pex7             | 95.87092917 | 0.102684451  | 0.2132258 | 0.4815762 | 0.630107 | 0.957354 |
| dym              | 204.467713  | 0.008729222  | 0.1436061 | 0.0607859 | 0.95153  | 0.99381  |
| rnf144ab         | 390.9996628 | -0.224393282 | 0.1118371 | -2.00643  | 0.04481  | 0.416612 |
| tnnilc           | 236.2662577 | 0.150090903  | 0.1413607 | 1.0617581 | 0.288346 | 0.845979 |
| lpar2b           | 185.5188229 | -0.064298141 | 0.1555522 | -0.413354 | 0.679347 | 0.965257 |
| allc             | 44.90138098 | 0.08688512   | 0.310484  | 0.2798377 | 0.779602 | 0.976146 |

|                    |             |              |           |           |          |          |
|--------------------|-------------|--------------|-----------|-----------|----------|----------|
| mis18bp1           | 80.15519107 | -0.226433194 | 0.2275805 | -0.994959 | 0.319756 | 0.86809  |
| rps7               | 18748.08436 | -0.293314336 | 0.0772007 | -3.799372 | 0.000145 | 0.006625 |
| rnasehl            | 250.7518493 | 0.222707829  | 0.1439825 | 1.5467699 | 0.121919 | 0.649101 |
| batf3              | 5.550107214 | 0.451791535  | 0.8613234 | 0.5245318 | 0.599909 | NA       |
| rbml9              | 329.7477552 | 0.029659502  | 0.1208005 | 0.2455246 | 0.80605  | 0.980105 |
| ical               | 131.4088307 | -0.136558221 | 0.1754248 | -0.778443 | 0.436308 | 0.914408 |
| crp3               | 122.9770529 | 0.34190788   | 0.2291252 | 1.4922318 | 0.135638 | 0.671761 |
| sema3h             | 76.01591248 | 0.232065936  | 0.2224354 | 1.0432958 | 0.296811 | 0.853798 |
| gstr               | 1082.937257 | -0.316481972 | 0.0853703 | -3.707166 | 0.00021  | 0.008913 |
| cryaba             | 0.173729368 | -0.955901296 | 4.0804729 | -0.234262 | 0.814781 | NA       |
| acbd3              | 696.0296428 | -0.079396657 | 0.0999748 | -0.794167 | 0.427098 | 0.910658 |
| nhs11b             | 611.5980715 | -0.118946691 | 0.1112474 | -1.069209 | 0.284976 | 0.845094 |
| hebp2              | 746.4021564 | 0.30093729   | 0.107462  | 2.8004069 | 0.005104 | 0.104597 |
| tert               | 148.1102911 | -0.372297625 | 0.1993243 | -1.867798 | 0.06179  | 0.485049 |
| cyp5l              | 491.4717884 | -0.429068272 | 0.1347982 | -3.183042 | 0.001457 | 0.041826 |
| wtap               | 1255.379334 | 0.071078874  | 0.0878407 | 0.8091792 | 0.418412 | 0.906406 |
| si:ch1073-440p11.2 | 0.547712847 | 2.559541715  | 2.9076406 | 0.8802813 | 0.378707 | NA       |
| sod2               | 736.3717221 | -0.116633512 | 0.1044201 | -1.116965 | 0.26401  | 0.830245 |
| zgc:77784          | 665.0832932 | -0.065191442 | 0.113351  | -0.575129 | 0.565204 | 0.948739 |
| rreblb             | 493.3165133 | -0.220351511 | 0.1049102 | -2.100382 | 0.035695 | 0.368007 |
| nrnlb              | 36.28557163 | 0.459427342  | 0.3314592 | 1.3860752 | 0.165724 | 0.721576 |
| acad8              | 489.0916916 | 0.096573056  | 0.1152848 | 0.8376908 | 0.402204 | 0.90084  |
| thyn1              | 108.9528959 | -0.265446491 | 0.1938767 | -1.369151 | 0.170952 | 0.728693 |
| fam32a             | 906.4552168 | 0.011574889  | 0.1123852 | 0.102993  | 0.917969 | 0.991623 |
| tsta312            | 0.340386822 | -1.882368278 | 3.2159502 | -0.585323 | 0.558331 | NA       |
| si:dkeyp-70f9.7    | 0.508023798 | 0.926122713  | 2.6636728 | 0.3476864 | 0.728076 | NA       |
| klf2a              | 390.999517  | -0.102739017 | 0.1344226 | -0.764299 | 0.444689 | 0.916777 |
| eps1511a           | 708.3264031 | 0.023171795  | 0.1053839 | 0.2198799 | 0.825965 | 0.982196 |
| odr4               | 126.0357674 | 0.30823952   | 0.1828877 | 1.685403  | 0.091911 | 0.57849  |
| cadmlb             | 12.11149168 | 0.047980522  | 0.5477556 | 0.0875948 | 0.930199 | 0.992702 |
| si:dkey-15j16.3    | 5.639631857 | 2.546785026  | 0.9569556 | 2.6613408 | 0.007783 | NA       |
| serpincl           | 1032.706202 | 0.222750446  | 0.1018771 | 2.1864615 | 0.028782 | 0.328978 |
| bora               | 85.24009196 | 0.096983988  | 0.2177486 | 0.4453943 | 0.656035 | 0.961833 |
| zbtb37             | 30.23128089 | -0.039824032 | 0.3528724 | -0.112857 | 0.910144 | 0.990702 |
| slpr1              | 1615.15792  | 0.07742767   | 0.0819583 | 0.94472   | 0.344802 | 0.878434 |
| si:dkey-15j16.6    | 9.379760131 | 1.756168322  | 0.7596786 | 2.3117254 | 0.020793 | NA       |
| parp6a             | 339.0106795 | 0.117801433  | 0.1351776 | 0.8714567 | 0.383505 | 0.895192 |
| cx30.3             | 267.5547124 | -0.003938027 | 0.1452913 | -0.027104 | 0.978376 | 0.996762 |
| tuba8l             | 7186.913546 | -0.053781132 | 0.0807005 | -0.666429 | 0.505137 | 0.935724 |
| adipor1b           | 449.7591291 | 0.00796179   | 0.1142331 | 0.0696977 | 0.944434 | 0.993364 |
| blnk               | 25.93375236 | 0.125265671  | 0.38538   | 0.3250445 | 0.745147 | 0.974094 |
| gfra2a             | 31.59991778 | 0.021006294  | 0.3495427 | 0.0600965 | 0.952079 | 0.993904 |
| supt5h             | 2612.282036 | -0.123197354 | 0.0733822 | -1.678845 | 0.093182 | 0.580702 |
| cebpb              | 1972.945549 | 0.018071414  | 0.1116972 | 0.1617893 | 0.871472 | 0.987754 |
| grb7               | 48.66643885 | -0.221770276 | 0.2851824 | -0.777644 | 0.436779 | 0.914408 |
| exo5               | 79.86261142 | -0.386605046 | 0.2173681 | -1.778573 | 0.07531  | 0.534207 |
| plaa               | 528.18057   | 0.048079878  | 0.1145612 | 0.4196873 | 0.674714 | 0.965257 |
| tmem189            | 831.5452388 | -0.005956872 | 0.098745  | -0.060326 | 0.951896 | 0.993864 |
| slc52a3            | 61.28907051 | -0.347954018 | 0.2580352 | -1.348475 | 0.177506 | 0.738343 |
| stx6               | 902.6935761 | -0.073307275 | 0.0871239 | -0.841414 | 0.400116 | 0.90084  |
| coasy              | 312.4313925 | -0.036384066 | 0.1267425 | -0.287071 | 0.774058 | 0.975687 |
| riok3              | 1321.574335 | 0.039926858  | 0.0796276 | 0.5014201 | 0.616076 | 0.95688  |
| si:ch211-282j17.11 |             | 0 NA         | NA        | NA        | NA       | NA       |
| cts12              | 125.76109   | 0.124383859  | 0.1784362 | 0.6970776 | 0.485754 | 0.930598 |

|                   |             |              |           |           |          |          |
|-------------------|-------------|--------------|-----------|-----------|----------|----------|
| cnstb             | 45.87246326 | 0.013123166  | 0.2981032 | 0.0440222 | 0.964887 | 0.996119 |
| ndufal1           | 711.5266624 | -0.128803356 | 0.1320282 | -0.975574 | 0.329275 | 0.873436 |
| apoba             | 4651.342289 | 0.291200275  | 0.0998154 | 2.9173884 | 0.00353  | 0.07986  |
| gdf7              | 20.80817834 | 0.758824762  | 0.4435083 | 1.7109595 | 0.087089 | 0.565361 |
| git2b             | 243.7957308 | 0.141944851  | 0.1344486 | 1.0557553 | 0.29108  | 0.846568 |
| tppl              | 377.6620129 | -0.032413756 | 0.1162882 | -0.278736 | 0.780447 | 0.97627  |
| yyla              | 1500.19982  | -0.111817444 | 0.0851714 | -1.312852 | 0.189233 | 0.753954 |
| atpaf1            | 530.8862261 | -0.021099103 | 0.1004402 | -0.210066 | 0.833616 | 0.983583 |
| slc16a4           | 414.6758069 | 0.266838776  | 0.1101724 | 2.4220118 | 0.015435 | 0.22845  |
| or128-10          | 2.997695393 | 0.316882015  | 1.0955809 | 0.2892365 | 0.7724   | NA       |
| fgflb             | 36.42528378 | 0.092004396  | 0.3204876 | 0.2870763 | 0.774054 | 0.975687 |
| alkal2b           | 21.8918963  | 0.306784244  | 0.4116541 | 0.7452476 | 0.456122 | 0.921215 |
| mmp9              | 1149.050459 | -0.558679783 | 0.2516935 | -2.219683 | 0.02644  | 0.313072 |
| agps              | 142.7918022 | -0.113875682 | 0.1708673 | -0.666457 | 0.505119 | 0.935724 |
| spsc2             | 994.3571698 | -0.131318027 | 0.1029069 | -1.276086 | 0.201925 | 0.76786  |
| nfe2l2a           | 1703.386238 | -0.086729246 | 0.0791291 | -1.096047 | 0.273058 | 0.838141 |
| rnf169            | 267.0922442 | 0.220701561  | 0.1280759 | 1.7232086 | 0.084851 | 0.560519 |
| egr2b             | 72.21357561 | -0.637060185 | 0.2336283 | -2.726811 | 0.006395 | 0.122178 |
| adoa              | 275.5699255 | -0.233560094 | 0.1286279 | -1.815781 | 0.069404 | 0.514708 |
| si:dkey-30j22.1   | 34.19931267 | -0.300755103 | 0.3862441 | -0.778666 | 0.436177 | 0.914408 |
| rffl              | 172.1077334 | -0.054863796 | 0.1572777 | -0.348834 | 0.727214 | 0.970402 |
| tfdp2             | 675.5465896 | -0.055228352 | 0.0954585 | -0.578559 | 0.562887 | 0.948728 |
| atplb3b           | 4655.184998 | 0.115467543  | 0.0709889 | 1.6265567 | 0.103831 | 0.610348 |
| dph6              | 105.977665  | -0.270558191 | 0.1987157 | -1.361534 | 0.173345 | 0.732435 |
| eml1              | 1223.235896 | -0.018576175 | 0.0846534 | -0.219438 | 0.826309 | 0.982196 |
| oxt               | 79.64734354 | 0.437197051  | 0.2361625 | 1.8512552 | 0.064133 | 0.495295 |
| disp2             | 383.9700342 | 0.062912888  | 0.1137732 | 0.5529677 | 0.580286 | 0.951457 |
| pcmt1             | 220.9354174 | -0.13466438  | 0.1603078 | -0.840036 | 0.400888 | 0.90084  |
| nphs2             | 38.13745698 | -0.191462973 | 0.3203078 | -0.597747 | 0.550009 | 0.94648  |
| srp9              | 285.2268202 | -0.407517628 | 0.1407772 | -2.89477  | 0.003794 | 0.08411  |
| ivd               | 1314.720183 | 0.046873457  | 0.0781325 | 0.5999226 | 0.548558 | 0.946195 |
| ephx1             | 362.7516183 | -0.603676201 | 0.1259706 | -4.792197 | 1.65E-06 | 0.000152 |
| itpka             | 181.8307433 | -0.065136634 | 0.1518758 | -0.428881 | 0.66801  | 0.964736 |
| si:ch211-246m6.4  | 62.60168149 | 0.380646557  | 0.2570467 | 1.480846  | 0.138648 | 0.676943 |
| slc5a6a           | 12.46304923 | -0.183316817 | 0.528169  | -0.34708  | 0.728531 | 0.970604 |
| ltk               | 73.34444519 | -0.165113905 | 0.2409322 | -0.685313 | 0.493147 | 0.931926 |
| rpl17l1           | 753.6056451 | -0.078487529 | 0.1172644 | -0.669321 | 0.503291 | 0.935304 |
| cx35.4            | 285.3438938 | 0.170078538  | 0.1348666 | 1.2610868 | 0.207278 | 0.775175 |
| zdhhc8a           | 92.56677213 | -0.028203387 | 0.2306533 | -0.122276 | 0.90268  | 0.990121 |
| slc25a27          | 38.08034997 | -0.145638393 | 0.3344615 | -0.435441 | 0.663242 | 0.964736 |
| phlda2            | 375.2961673 | 0.088775613  | 0.1441073 | 0.6160385 | 0.537869 | 0.943336 |
| abracl            | 885.841536  | 0.148869621  | 0.0966778 | 1.5398529 | 0.123596 | 0.651905 |
| heca              | 191.8515671 | -0.045387121 | 0.1509715 | -0.300634 | 0.763694 | 0.975374 |
| si:ch211-222f23.6 | 12.04956038 | 0.359678576  | 0.6011775 | 0.5982902 | 0.549646 | 0.946312 |
| nthl1             | 119.1006387 | -0.217812849 | 0.1901356 | -1.145566 | 0.251975 | 0.821478 |
| TNPO2             | 846.0851825 | 0.07350873   | 0.0942984 | 0.7795334 | 0.435666 | 0.914408 |
| paip1             | 822.7792812 | -0.096652222 | 0.0949145 | -1.018308 | 0.308531 | 0.861088 |
| tyms              | 414.1542999 | 0.006802407  | 0.1116993 | 0.0608993 | 0.951439 | 0.99381  |
| si:ch211-163121.8 | 136.8665634 | 0.026663205  | 0.1794293 | 0.1486    | 0.881869 | 0.988344 |
| gtpbp1l           | 184.408263  | 0.234152641  | 0.1658269 | 1.4120302 | 0.157941 | 0.709157 |
| afg11b            | 77.15648821 | -0.370289548 | 0.2306411 | -1.605479 | 0.108388 | 0.620165 |
| foxo3b            | 1451.307646 | 0.112178549  | 0.076708  | 1.4624099 | 0.143629 | 0.686804 |
| rpl10a            | 22013.80005 | -0.287890917 | 0.0988063 | -2.91369  | 0.003572 | 0.080595 |
| hsh2d             | 31.39007013 | -0.170193362 | 0.370024  | -0.459952 | 0.64555  | 0.96029  |

|                   |              |               |            |            |           |           |
|-------------------|--------------|---------------|------------|------------|-----------|-----------|
| sult3st3          | 113. 8816406 | -0. 700586056 | 0. 1953994 | -3. 585405 | 0. 000337 | 0. 012973 |
| gprl73            | 51. 00063953 | 0. 010544791  | 0. 2745427 | 0. 0384086 | 0. 969362 | 0. 996315 |
| mfng              | 57. 66653745 | 0. 492713604  | 0. 2643834 | 1. 8636327 | 0. 062373 | 0. 487498 |
| maprela           | 148. 7528485 | 0. 172632411  | 0. 166204  | 1. 0386778 | 0. 298955 | 0. 855008 |
| tmem120b          | 56. 42128478 | 0. 323968593  | 0. 2822369 | 1. 1478604 | 0. 251026 | 0. 820469 |
| bloc1s6           | 594. 5872155 | 0. 015503163  | 0. 1120812 | 0. 1383209 | 0. 889987 | 0. 989291 |
| ccn2a             | 3400. 720863 | -0. 190634859 | 0. 07793   | -2. 446231 | 0. 014436 | 0. 218572 |
| fam228a           | 24. 1401468  | 0. 638293359  | 0. 3905103 | 1. 634511  | 0. 102152 | 0. 607531 |
| si:dkey-256e7. 5  | 19. 95316065 | -0. 036033223 | 0. 4211162 | -0. 085566 | 0. 931811 | 0. 992702 |
| nabla             | 202. 4613104 | 0. 31259077   | 0. 1599843 | 1. 9538841 | 0. 050715 | 0. 44139  |
| hook1             | 532. 6189489 | -0. 369106643 | 0. 1022956 | -3. 608237 | 0. 000308 | 0. 012095 |
| mstna             | 0. 158795395 | 0. 967652056  | 4. 0804729 | 0. 2371421 | 0. 812547 | NA        |
| dnajc5aa          | 216. 7513451 | -0. 004789806 | 0. 1477996 | -0. 032407 | 0. 974147 | 0. 99644  |
| cyp2n13           | 86. 36875076 | -0. 980217502 | 0. 2441655 | -4. 014561 | 5. 96E-05 | 0. 003192 |
| slc17a9a          | 32. 14673482 | 0. 142216402  | 0. 349308  | 0. 4071375 | 0. 683907 | 0. 965679 |
| cyp2ad6           | 122. 2746553 | 0. 714346866  | 0. 1999766 | 3. 5721516 | 0. 000354 | 0. 013516 |
| zgc:100920        | 193. 7779154 | -0. 610042323 | 0. 1799758 | -3. 38958  | 0. 0007   | 0. 023147 |
| dgcr2             | 377. 2830449 | 0. 073861868  | 0. 1251198 | 0. 5903289 | 0. 55497  | 0. 947449 |
| znf1035           | 921. 4588544 | -0. 072168979 | 0. 095683  | -0. 754251 | 0. 450699 | 0. 918761 |
| gng8              | 88. 48497023 | -0. 101995651 | 0. 2091887 | -0. 487577 | 0. 625849 | 0. 957354 |
| zgc:136605        | 1. 167462343 | 2. 488720452  | 2. 0131823 | 1. 2362121 | 0. 21638  | NA        |
| auh               | 661. 1544352 | -0. 070507764 | 0. 1023449 | -0. 688923 | 0. 490872 | 0. 931926 |
| nfil3             | 782. 1985373 | -0. 193926873 | 0. 126176  | -1. 536955 | 0. 124304 | 0. 653027 |
| cyp2p6            | 176. 3626312 | 0. 234134321  | 0. 1579151 | 1. 4826598 | 0. 138165 | 0. 675945 |
| cyp2p7            | 104. 5876589 | -0. 141006041 | 0. 1958941 | -0. 719808 | 0. 471644 | 0. 924838 |
| cyp2p8            | 175. 6598213 | -0. 245306136 | 0. 156324  | -1. 569216 | 0. 116598 | 0. 639148 |
| has1              | 3. 257128324 | 1. 236982754  | 1. 1095362 | 1. 1148647 | 0. 264908 | NA        |
| fpr1              | 65. 6639515  | -0. 226546308 | 0. 2701043 | -0. 838736 | 0. 401617 | 0. 90084  |
| slc24a2           | 1335. 266293 | 0. 27756057   | 0. 1196813 | 2. 3191634 | 0. 020386 | 0. 268884 |
| si:dkeyp-84f3. 5  | 474. 7035447 | 0. 158577555  | 0. 1068755 | 1. 4837592 | 0. 137873 | 0. 675313 |
| cyp2p10           | 94. 78116033 | -0. 477382325 | 0. 2072822 | -2. 303055 | 0. 021276 | 0. 275152 |
| crygs1            | 0. 340386822 | -1. 882368278 | 3. 2159502 | -0. 585323 | 0. 558331 | NA        |
| prssl             | 1584. 786914 | -0. 563605697 | 0. 2286242 | -2. 465206 | 0. 013693 | 0. 210066 |
| sptlc1            | 512. 6410204 | -0. 087110115 | 0. 1133487 | -0. 768514 | 0. 442182 | 0. 916336 |
| vmola             | 7. 326777918 | 0. 939289759  | 0. 7994518 | 1. 1749173 | 0. 240028 | NA        |
| pcyt2             | 933. 3688885 | 0. 002786646  | 0. 0843528 | 0. 0330356 | 0. 973646 | 0. 996315 |
| si:dkeyp-117h8. 4 | 72. 30160218 | 0. 198091106  | 0. 24732   | 0. 8009507 | 0. 42316  | 0. 907185 |
| gnav1             | 126. 0636652 | -0. 078490316 | 0. 181601  | -0. 432213 | 0. 665587 | 0. 964736 |
| fam43a            | 986. 7568203 | -0. 041916223 | 0. 0860147 | -0. 487315 | 0. 626035 | 0. 957354 |
| camk2d1           | 561. 3314134 | 0. 153860983  | 0. 1012485 | 1. 5196366 | 0. 128602 | 0. 659646 |
| chst14            | 58. 31483053 | -0. 321559585 | 0. 2551436 | -1. 260308 | 0. 207558 | 0. 775175 |
| napgb             | 433. 3348022 | -0. 027473845 | 0. 1268874 | -0. 216522 | 0. 828581 | 0. 982721 |
| exoc1             | 1250. 05021  | -0. 207001424 | 0. 0843328 | -2. 454578 | 0. 014105 | 0. 214639 |
| slc26a11          | 161. 3941231 | -0. 148565625 | 0. 1638278 | -0. 90684  | 0. 364491 | 0. 886564 |
| ttbk2b            | 650. 3336175 | 0. 170424787  | 0. 1058662 | 1. 6098123 | 0. 107439 | 0. 617344 |
| ints10            | 270. 6379941 | -0. 004224172 | 0. 1356094 | -0. 03115  | 0. 97515  | 0. 996762 |
| capn3b            | 273. 1505696 | 0. 223647494  | 0. 1374594 | 1. 6270074 | 0. 103736 | 0. 610314 |
| fbx15             | 1136. 833689 | -0. 127603045 | 0. 0899942 | -1. 417903 | 0. 156219 | 0. 70658  |
| hiatl1b           | 709. 5755931 | -0. 065226436 | 0. 097533  | -0. 668763 | 0. 503647 | 0. 935304 |
| nog2              | 253. 2702265 | -0. 075552416 | 0. 14636   | -0. 516209 | 0. 605708 | 0. 95651  |
| grp               | 21. 42787689 | 0. 185564037  | 0. 4139452 | 0. 4482816 | 0. 65395  | 0. 961214 |
| nisch             | 718. 5414237 | -0. 01667577  | 0. 0950642 | -0. 175416 | 0. 860753 | 0. 985773 |
| MMP23B            | 63. 07009917 | 0. 271627443  | 0. 2506782 | 1. 0835703 | 0. 278555 | 0. 842483 |
| ctsz              | 655. 7374188 | 0. 060417282  | 0. 1008034 | 0. 5993578 | 0. 548934 | 0. 946312 |

|                   |             |              |           |           |          |          |
|-------------------|-------------|--------------|-----------|-----------|----------|----------|
| abhd17ab          | 99.47847421 | -0.108369201 | 0.202242  | -0.535839 | 0.59207  | 0.954434 |
| alox5b.1          | 3.33596603  | 0.018100104  | 1.0488862 | 0.0172565 | 0.986232 | NA       |
| alox5b.2          | 1.161136035 | -2.48301767  | 1.9168088 | -1.295391 | 0.195185 | NA       |
| mpegl.2           | 279.0641239 | -0.317312255 | 0.1605563 | -1.97633  | 0.048117 | 0.432341 |
| gnas              | 571.4049074 | -0.002585508 | 0.1014932 | -0.025475 | 0.979676 | 0.99687  |
| kctd6a            | 190.5102853 | -0.223223955 | 0.1486646 | -1.501528 | 0.133219 | 0.667628 |
| lxn               | 314.906444  | -0.361346635 | 0.1418205 | -2.547916 | 0.010837 | 0.180681 |
| qtrtl             | 91.4121251  | -0.222509885 | 0.2066763 | -1.07661  | 0.281654 | 0.84357  |
| blf               | 31.62677405 | 0.15301396   | 0.4174703 | 0.3665266 | 0.713972 | 0.96909  |
| cldne             | 2033.327074 | 0.027356251  | 0.0754098 | 0.3627679 | 0.716778 | 0.96909  |
| notch2            | 1314.526236 | 4.55E-05     | 0.091397  | 0.0004976 | 0.999603 | 0.999704 |
| BX664625.1        | 2.487393773 | 0.182899978  | 1.1958309 | 0.152948  | 0.878439 | NA       |
| cldnf             | 308.1843085 | -0.07620493  | 0.1216985 | -0.626178 | 0.531198 | 0.942209 |
| cuxlb             | 394.9196602 | 0.212591146  | 0.1237832 | 1.7174474 | 0.085897 | 0.562802 |
| pomca             | 74.56639792 | 0.207919445  | 0.2454268 | 0.8471748 | 0.396898 | 0.899672 |
| cdca8             | 424.2928294 | -0.367037381 | 0.1127268 | -3.25599  | 0.00113  | 0.033958 |
| si:ch211-132f19.7 | 295.7089923 | 0.319390628  | 0.1366866 | 2.3366639 | 0.019457 | 0.261725 |
| orl08-3           | 0.809821446 | 0.539374789  | 2.2312571 | 0.2417358 | 0.808985 | NA       |
| slc1a3b           | 768.8284848 | 0.0813639    | 0.100614  | 0.8086741 | 0.418703 | 0.906406 |
| ucp2              | 2977.497094 | 0.107260046  | 0.0929615 | 1.1538112 | 0.248578 | 0.817939 |
| dnajb13           | 14.49276504 | 0.592815484  | 0.5393611 | 1.0991068 | 0.271721 | 0.836643 |
| celal.5           | 8.73201562  | -0.824044292 | 0.648548  | -1.270599 | 0.203871 | NA       |
| celal.4           | 234.4829651 | -0.040331071 | 0.1482309 | -0.272083 | 0.785558 | 0.97627  |
| celal.3           | 5.548164129 | -0.693459255 | 0.8325453 | -0.832939 | 0.404879 | NA       |
| celal.1           | 5.713761576 | -0.474640653 | 0.8313196 | -0.570948 | 0.568035 | NA       |
| lsml              | 133.5813534 | -0.091253121 | 0.1864375 | -0.489457 | 0.624518 | 0.957354 |
| bag4              | 205.9929593 | -0.097178086 | 0.161291  | -0.602502 | 0.54684  | 0.945526 |
| gpd1b             | 803.6087747 | 0.154715822  | 0.1079152 | 1.4336799 | 0.151664 | 0.700137 |
| hhla2a.1          | 511.6203683 | -0.083156145 | 0.1160254 | -0.716707 | 0.473555 | 0.924993 |
| mlt1a             | 487.6009574 | 0.075075178  | 0.1090622 | 0.6883701 | 0.49122  | 0.931926 |
| rnase12           | 0.513487682 | -0.887846295 | 2.6557956 | -0.334305 | 0.738149 | NA       |
| si:rp71-1i20.2    | 4.438662215 | -0.105377682 | 0.9002366 | -0.117056 | 0.906816 | NA       |
| nsun5             | 113.0207917 | -0.094861965 | 0.1862004 | -0.509462 | 0.610429 | 0.95688  |
| nfic              | 10.73460268 | -0.315673057 | 0.5937973 | -0.531618 | 0.594991 | NA       |
| ripk4             | 266.6299138 | 0.133176985  | 0.1422518 | 0.9362059 | 0.349167 | 0.880195 |
| adam17a           | 769.0037967 | 0.067077143  | 0.0900061 | 0.7452508 | 0.45612  | 0.921215 |
| kcnh5a            | 8.972699763 | 0.259953327  | 0.6519258 | 0.3987468 | 0.69008  | NA       |
| nfixa             | 9.018502278 | -0.41923497  | 0.6657586 | -0.62971  | 0.528884 | NA       |
| CT573139.1        | 6.038970216 | -0.49434415  | 0.8035236 | -0.61522  | 0.538409 | NA       |
| ccnal             | 5.941363019 | -1.013224254 | 0.7878984 | -1.285983 | 0.198449 | NA       |
| atgl1612          | 2.988813769 | 0.039232244  | 1.1513535 | 0.0340749 | 0.972817 | NA       |
| arrbl             | 27.23858445 | 0.651055058  | 0.3767002 | 1.728311  | 0.083932 | 0.557501 |
| si:dkey-222f2.1   | 595.2406822 | 0.177183446  | 0.0998298 | 1.7748553 | 0.075922 | 0.536938 |
| prkchb            | 101.2634646 | 0.397479497  | 0.2210037 | 1.7985197 | 0.072095 | 0.525083 |
| gtf3c3            | 292.831324  | -0.07830026  | 0.1284012 | -0.609809 | 0.541988 | 0.944974 |
| irflb             | 324.5677757 | -0.653723328 | 0.3323071 | -1.967227 | 0.049157 | 0.435115 |
| ppmlab            | 411.2185593 | 0.290392784  | 0.1127768 | 2.5749331 | 0.010026 | 0.171049 |
| ckbb              | 30104.32821 | 0.110268725  | 0.084102  | 1.3111312 | 0.189813 | 0.754269 |
| xylb              | 90.72672518 | -0.287935169 | 0.2244058 | -1.2831   | 0.199457 | 0.764896 |
| morc3b            | 7.878828358 | 0.352611845  | 0.6838461 | 0.5156304 | 0.606113 | NA       |
| mgmt              | 83.76390722 | -0.580458954 | 0.222699  | -2.606473 | 0.009148 | 0.160082 |
| aqp12             | 129.4062951 | -0.017806907 | 0.2120201 | -0.083987 | 0.933067 | 0.992702 |
| stap2b            | 194.9953311 | -0.433216269 | 0.1496376 | -2.895102 | 0.00379  | 0.08411  |
| prrgl             | 437.752823  | 0.036373225  | 0.1143356 | 0.3181268 | 0.750389 | 0.97419  |



|                   |              |               |            |            |           |           |
|-------------------|--------------|---------------|------------|------------|-----------|-----------|
| zbtb21            | 34. 50443014 | 0. 050628456  | 0. 3368264 | 0. 1503103 | 0. 88052  | 0. 987881 |
| atgl01            | 351. 1663171 | -0. 046428451 | 0. 1276175 | -0. 363809 | 0. 716    | 0. 96909  |
| impact            | 182. 3146517 | -0. 271563638 | 0. 1611113 | -1. 685566 | 0. 091879 | 0. 57849  |
| nmu               | 32. 17955113 | -0. 183641528 | 0. 3582864 | -0. 512555 | 0. 608263 | 0. 956718 |
| gtf3c6            | 81. 45129484 | 0. 199261099  | 0. 2280729 | 0. 8736727 | 0. 382297 | 0. 895192 |
| nop2              | 512. 8090862 | 0. 041068964  | 0. 1075954 | 0. 3816981 | 0. 702685 | 0. 968134 |
| srd5a3            | 57. 54198809 | -0. 169714164 | 0. 2641298 | -0. 642541 | 0. 520522 | 0. 939056 |
| obsena            | 184. 0738443 | -0. 000814915 | 0. 1545303 | -0. 005273 | 0. 995792 | 0. 998888 |
| ank2b             | 3850. 05399  | -0. 018356992 | 0. 0710389 | -0. 258408 | 0. 796092 | 0. 978498 |
| kita              | 51. 24798641 | -0. 184512265 | 0. 285468  | -0. 64635  | 0. 518053 | 0. 938592 |
| gsx2              | 77. 0994489  | -0. 140775473 | 0. 22586   | -0. 623287 | 0. 533096 | 0. 942969 |
| lnx1              | 609. 179704  | 0. 026415585  | 0. 0981259 | 0. 269201  | 0. 787775 | 0. 976596 |
| fip111a           | 15. 07870021 | 1. 411664576  | 0. 5545404 | 2. 545648  | 0. 010908 | 0. 180962 |
| prkc2             | 44. 21562136 | 0. 079233737  | 0. 2866552 | 0. 2764078 | 0. 782235 | 0. 97627  |
| ccdc6a            | 771. 9126927 | -0. 125238823 | 0. 0955373 | -1. 31089  | 0. 189895 | 0. 754269 |
| abraxas1          | 57. 34633644 | 0. 099053254  | 0. 2797578 | 0. 3540678 | 0. 723288 | 0. 970402 |
| np4r              | 2. 783216127 | -0. 524146356 | 1. 1458538 | -0. 457429 | 0. 647363 | NA        |
| gpx3              | 139. 4958366 | 0. 138908232  | 0. 1833327 | 0. 7576837 | 0. 44864  | 0. 917876 |
| tbl2              | 352. 397452  | 0. 069013966  | 0. 1225436 | 0. 563179  | 0. 573313 | 0. 949869 |
| rmnd5b            | 1077. 113823 | -0. 062637828 | 0. 0913113 | -0. 685981 | 0. 492725 | 0. 931926 |
| dph3              | 20. 42882256 | -0. 007540337 | 0. 430251  | -0. 017525 | 0. 986017 | 0. 996944 |
| nck2b             | 261. 1898461 | 0. 108079428  | 0. 1308603 | 0. 8259143 | 0. 408853 | 0. 90171  |
| mdh2              | 9158. 103826 | 0. 047134401  | 0. 0658969 | 0. 7152755 | 0. 474439 | 0. 925203 |
| atraid            |              | 0 NA          | NA         | NA         | NA        | NA        |
| si:dkey-71h2. 2   | 151. 821691  | 0. 108651155  | 0. 1756497 | 0. 6185671 | 0. 536202 | 0. 943336 |
| crip3             | 84. 42697223 | -0. 112915462 | 0. 2333016 | -0. 483989 | 0. 628393 | 0. 957354 |
| fncl4a            | 75. 05071177 | 0. 155687999  | 0. 2260247 | 0. 6888095 | 0. 490943 | 0. 931926 |
| nitr2a            | 0. 476626891 | 2. 395187592  | 2. 815932  | 0. 8505843 | 0. 395    | NA        |
| zgc:171480        | 316. 7664652 | -0. 112124628 | 0. 1288457 | -0. 870224 | 0. 384178 | 0. 895192 |
| paox1             | 100. 1806712 | 0. 178395855  | 0. 1952393 | 0. 913729  | 0. 360859 | 0. 885686 |
| rpp21             | 86. 05538086 | -0. 04530877  | 0. 2110957 | -0. 214636 | 0. 830051 | 0. 982899 |
| slc8a1b           | 572. 9329862 | 0. 004907593  | 0. 123769  | 0. 0396512 | 0. 968371 | 0. 996315 |
| xkr6b             | 39. 02438506 | 0. 064142992  | 0. 3037837 | 0. 2111469 | 0. 832773 | 0. 983557 |
| tnfaip2a          | 183. 4062928 | 0. 463615377  | 0. 1528269 | 3. 0335983 | 0. 002417 | 0. 06142  |
| eipr1             | 545. 2798158 | 0. 009519171  | 0. 1108688 | 0. 0858598 | 0. 931578 | 0. 992702 |
| b3gnt11           | 99. 29986108 | -0. 070790452 | 0. 1969796 | -0. 35938  | 0. 719311 | 0. 969183 |
| si:dkey-5n18. 1   | 20. 79051077 | 0. 166144507  | 0. 4352655 | 0. 3817084 | 0. 702678 | 0. 968134 |
| zgc:153665        | 292. 9671651 | -0. 095100251 | 0. 1459505 | -0. 651593 | 0. 514664 | 0. 937537 |
| kcnj13            | 185. 3234642 | 0. 238030265  | 0. 1660548 | 1. 4334442 | 0. 151731 | 0. 700137 |
| si:ch211-152f2. 3 | 1. 015858219 | -2. 218611177 | 2. 2570181 | -0. 982983 | 0. 325616 | NA        |
| efhd1             | 526. 2317732 | 0. 205103131  | 0. 1265656 | 1. 620528  | 0. 105119 | 0. 613317 |
| gpr55a            | 3. 166508057 | 0. 146153233  | 1. 0623197 | 0. 1375793 | 0. 890573 | NA        |
| itm2ca            | 2342. 126637 | 0. 019305371  | 0. 078659  | 0. 245431  | 0. 806123 | 0. 980105 |
| cab39             | 115. 7166535 | 0. 144353153  | 0. 1980599 | 0. 7288359 | 0. 466102 | 0. 923865 |
| rps5              | 13316. 52554 | -0. 314251883 | 0. 0814306 | -3. 859136 | 0. 000114 | 0. 005461 |
| gapdh             | 20754. 38044 | -0. 126946979 | 0. 2148628 | -0. 590828 | 0. 554636 | 0. 947449 |
| wu:fj39g12        | 107. 016013  | -0. 084622779 | 0. 191552  | -0. 441775 | 0. 658652 | 0. 962545 |
| atp6v1b2          | 3563. 115483 | 0. 025489093  | 0. 0728296 | 0. 3499827 | 0. 726352 | 0. 970402 |
| kcnk3a            | 3. 157587408 | -0. 144960835 | 1. 0694863 | -0. 135542 | 0. 892183 | NA        |
| ndufb11           | 843. 0827716 | 0. 031123038  | 0. 101031  | 0. 3080543 | 0. 758041 | 0. 975374 |
| sytl3             | 1. 695522939 | 0. 603725578  | 1. 4373587 | 0. 4200243 | 0. 674468 | NA        |
| rsph3             | 27. 89635523 | 0. 187814992  | 0. 3588585 | 0. 5233678 | 0. 600718 | 0. 956045 |
| atp2b3a           | 2982. 979486 | 0. 104637264  | 0. 1023411 | 1. 0224367 | 0. 306574 | 0. 860027 |
| tagapb            | 62. 86262106 | 0. 057437884  | 0. 2425634 | 0. 2367953 | 0. 812816 | 0. 981081 |

|                  |             |              |           |           |          |          |
|------------------|-------------|--------------|-----------|-----------|----------|----------|
| opn8c            | 4.255420478 | -0.92993266  | 0.9468578 | -0.982125 | 0.326038 | NA       |
| rbbp8            | 74.53100619 | -0.270183296 | 0.233706  | -1.156082 | 0.247648 | 0.81711  |
| b3gnt3.1         | 83.34728857 | 0.29529689   | 0.2179368 | 1.3549657 | 0.175428 | 0.736233 |
| otx5             | 1075.813496 | -0.126094681 | 0.0909088 | -1.387046 | 0.165428 | 0.721223 |
| ube2d2           | 2234.100686 | 0.042815166  | 0.0789288 | 0.5424527 | 0.587507 | 0.953319 |
| si:ch211-22i13.2 | 423.356233  | -0.106803914 | 0.112464  | -0.949672 | 0.342279 | 0.878434 |
| irfla            | 14.74935522 | -0.519159388 | 0.5382702 | -0.964496 | 0.334797 | 0.875699 |
| cltca            | 6121.749414 | -0.056576772 | 0.0917041 | -0.61695  | 0.537268 | 0.943336 |
| scrn2            | 682.1787862 | 0.111841835  | 0.1095955 | 1.020497  | 0.307493 | 0.861088 |
| ccdc124          | 972.6825765 | 0.069958013  | 0.0865554 | 0.8082452 | 0.418949 | 0.906406 |
| rp111            | 9720.162231 | -0.329353865 | 0.2193893 | -1.50123  | 0.133296 | 0.667628 |
| vamp4            | 717.7672065 | 0.006765958  | 0.0976245 | 0.069306  | 0.944746 | 0.993409 |
| prdx6            | 1283.728129 | -0.126300741 | 0.0840954 | -1.501874 | 0.13313  | 0.667628 |
| si:dkey-239i20.4 | 35.59662573 | -0.062535258 | 0.3211524 | -0.194721 | 0.845611 | 0.985174 |
| si:dkey-239i20.2 | 59.18509683 | -0.720853918 | 0.2706456 | -2.66346  | 0.007734 | 0.140565 |
| plpp6            | 24.92564367 | 0.368560971  | 0.3941354 | 0.9351126 | 0.34973  | 0.880195 |
| jun              | 2231.327765 | -0.363483233 | 0.078068  | -4.655985 | 3.22E-06 | 0.00028  |
| si:dkey-86e18.1  | 64.93687891 | -0.196774968 | 0.2530066 | -0.777746 | 0.436719 | 0.914408 |
| zpr1             | 275.4403898 | 0.092292908  | 0.1274175 | 0.7243348 | 0.46886  | 0.924328 |
| atg4da           | 320.4730915 | -0.019200061 | 0.14064   | -0.136519 | 0.891411 | 0.989291 |
| ENKD1            | 71.77499642 | -0.004834616 | 0.2289555 | -0.021116 | 0.983153 | 0.996944 |
| ches1            | 14.96132146 | 0.183044685  | 0.5034802 | 0.3635589 | 0.716187 | 0.96909  |
| mrpl40           | 366.5520815 | 0.066537399  | 0.1177876 | 0.564893  | 0.572147 | 0.949494 |
| tmem30ab         | 846.2729685 | 0.187373809  | 0.0965562 | 1.9405672 | 0.052311 | 0.449084 |
| kcnk13b          | 0.325573202 | 0.005883621  | 3.3172783 | 0.0017736 | 0.998585 | NA       |
| gle1             | 439.2888625 | -0.029508494 | 0.1094838 | -0.269524 | 0.787527 | 0.976596 |
| psmc1b           | 1410.391186 | -0.106890524 | 0.0999891 | -1.069021 | 0.28506  | 0.845094 |
| zgc:65997        | 136.373858  | -0.186441391 | 0.1800767 | -1.035345 | 0.300508 | 0.856251 |
| nepro            | 78.85477285 | -0.290185559 | 0.229529  | -1.264265 | 0.206135 | 0.773855 |
| dram2a           | 8.403413498 | -1.267445112 | 0.6847565 | -1.850943 | 0.064178 | NA       |
| KIF2A            | 936.4675674 | -0.067145419 | 0.0942543 | -0.712386 | 0.476226 | 0.926403 |
| gadd45aa         | 202.7543951 | -0.185806466 | 0.1570851 | -1.18284  | 0.236873 | 0.805854 |
| ifit15           | 1.87232127  | 2.165498693  | 1.697339  | 1.2758198 | 0.202019 | NA       |
| fas              | 17.44839295 | 0.392017587  | 0.510222  | 0.7683275 | 0.442293 | 0.916336 |
| srd5a2a          | 194.7792206 | -0.274709024 | 0.1523535 | -1.803103 | 0.071372 | 0.522931 |
| ca4a             | 27.15739445 | -0.048903919 | 0.3821105 | -0.127984 | 0.898162 | 0.990121 |
| rapgef1a         | 81.00308297 | -0.506615706 | 0.2281344 | -2.22069  | 0.026372 | 0.312638 |
| eif4ebp1         | 1380.772716 | -0.174266606 | 0.084306  | -2.067073 | 0.038727 | 0.38611  |
| pqlc2            | 451.4434186 | 0.016409919  | 0.1300767 | 0.1261557 | 0.899609 | 0.990121 |
| tbc1d9           | 17.63856922 | -0.364449783 | 0.4684523 | -0.777987 | 0.436577 | 0.914408 |
| bcas2            | 658.6410695 | -0.157670342 | 0.1232216 | -1.279567 | 0.200697 | 0.766855 |
| cmc2             | 208.8253183 | 0.122010969  | 0.1528027 | 0.7984872 | 0.424588 | 0.9085   |
| cenpn            | 104.6609111 | -0.066732102 | 0.1975517 | -0.337796 | 0.735517 | 0.972535 |
| ehbp1            | 791.6566837 | 0.074753383  | 0.0921563 | 0.8111587 | 0.417275 | 0.906237 |
| vkorc111         | 162.2778223 | -0.259880917 | 0.1708917 | -1.520735 | 0.128326 | 0.658954 |
| slc6a8           | 55.87132222 | 0.606158762  | 0.293895  | 2.0625008 | 0.03916  | 0.388646 |
| pnck             | 4.104508093 | 1.090391271  | 0.9725146 | 1.1212081 | 0.262199 | NA       |
| cxadr            | 366.8254797 | -0.079153874 | 0.1222196 | -0.647636 | 0.51722  | 0.938592 |
| cadpsa           | 101.2305804 | 0.168913827  | 0.2245664 | 0.7521776 | 0.451944 | 0.918761 |
| cnih2            | 544.3056112 | 0.100236978  | 0.102326  | 0.9795848 | 0.327291 | 0.872658 |
| faub             | 154.9923813 | -0.118927705 | 0.1723374 | -0.690087 | 0.49014  | 0.931926 |
| si:dkey-63b1.1   | 3.306994042 | -0.018682317 | 1.0894819 | -0.017148 | 0.986319 | NA       |
| glrx5            | 583.7985756 | -0.06285959  | 0.1050864 | -0.598171 | 0.549726 | 0.946312 |
| abt1             | 124.2132439 | 0.295912708  | 0.1860961 | 1.590107  | 0.111811 | 0.627242 |

|                   |             |              |           |           |          |          |
|-------------------|-------------|--------------|-----------|-----------|----------|----------|
| zgc:100997        | 89.91247832 | -0.277986817 | 0.219706  | -1.265267 | 0.205776 | 0.773784 |
| si:dkey-174m14.3  | 628.212093  | 0.132707283  | 0.1016518 | 1.3055088 | 0.19172  | 0.755945 |
| ylpml             | 788.6741521 | 0.063270322  | 0.0977614 | 0.6471914 | 0.517508 | 0.938592 |
| bpntl             | 286.9302447 | -0.735504565 | 0.1320381 | -5.570395 | 2.54E-08 | 3.90E-06 |
| nabplb            | 0.809272006 | 1.852129802  | 2.2597637 | 0.8196122 | 0.412437 | NA       |
| si:ch211-59d15.9  | 64.12454911 | 0.044890212  | 0.2425205 | 0.1850987 | 0.853152 | 0.985174 |
| nefmb             | 1231.887551 | 0.041650506  | 0.1069511 | 0.3894351 | 0.696954 | 0.96736  |
| gpdla             | 303.4172327 | 0.257671612  | 0.1361534 | 1.89251   | 0.058423 | 0.473924 |
| mob3c             | 73.32118484 | -0.415791082 | 0.2277089 | -1.825976 | 0.067854 | 0.509884 |
| parvaa            | 171.8290141 | 0.070520179  | 0.1734048 | 0.4066795 | 0.684243 | 0.965824 |
| asflbb            | 595.5643199 | 0.016390569  | 0.1004468 | 0.1631765 | 0.870379 | 0.987421 |
| cldn5a            | 81.82172988 | 0.04524783   | 0.2182486 | 0.2073224 | 0.835758 | 0.984089 |
| c3a.6             | 472.4801467 | 0.200169898  | 0.3596891 | 0.5565081 | 0.577864 | 0.951024 |
| cdc45             | 175.7252824 | -0.102008501 | 0.1655027 | -0.616356 | 0.53766  | 0.943336 |
| cpa4              | 315.5431427 | -0.344027649 | 0.1491172 | -2.307096 | 0.021049 | 0.273477 |
| cwc27             | 242.5446388 | -0.084772849 | 0.1419262 | -0.597302 | 0.550305 | 0.946549 |
| sreklip1          | 96.31233945 | -0.219807115 | 0.2011635 | -1.092679 | 0.274535 | 0.839136 |
| plac8.1           | 411.2037912 | -0.796520252 | 0.1150603 | -6.922631 | 4.43E-12 | 1.39E-09 |
| cops4             | 1107.656028 | -0.049824569 | 0.0862071 | -0.577964 | 0.563289 | 0.948739 |
| trmu              | 99.38789889 | -0.135680027 | 0.203009  | -0.668345 | 0.503913 | 0.93532  |
| si:ch211-282j17.8 | 0.515216064 | 0.926382026  | 2.6525479 | 0.3492423 | 0.726907 | NA       |
| efcab11           | 18.08144405 | 0.228368259  | 0.4598438 | 0.4966214 | 0.619456 | 0.957354 |
| nrxn3a            | 1552.711194 | 0.07895596   | 0.0932149 | 0.8470316 | 0.396978 | 0.899672 |
| ptbp3             | 43.11466748 | 0.415016352  | 0.3430977 | 1.2096156 | 0.226426 | 0.793959 |
| si:ch211-282j17.3 |             | 0 NA         | NA        | NA        | NA       | NA       |
| si:ch211-282j17.2 |             | 0 NA         | NA        | NA        | NA       | NA       |
| si:ch211-282j17.1 | 0.31598276  | 0.005883445  | 3.3523626 | 0.001755  | 0.9986   | NA       |
| si:dkey-192d15.2  | 76.14133813 | 0.536368945  | 0.247816  | 2.1643843 | 0.030435 | 0.337343 |
| psmb10            | 114.7363785 | -0.253990749 | 0.1894014 | -1.341018 | 0.179915 | 0.741062 |
| si:rp71-7119.2    | 2.027271102 | -0.399650865 | 1.4669433 | -0.272438 | 0.785285 | NA       |
| arhgdia           | 2670.299785 | -0.120241864 | 0.0874054 | -1.37568  | 0.168921 | 0.725919 |
| ms4a17a.7         | 140.1259597 | 0.259577473  | 0.2046478 | 1.2684108 | 0.204651 | 0.77258  |
| cdc5l             | 1655.097198 | -0.102297342 | 0.0798567 | -1.281011 | 0.20019  | 0.766271 |
| ms4a17a.1         | 23.08740213 | 0.890265023  | 0.4335773 | 2.0533016 | 0.040043 | 0.391989 |
| zmp:0000000619    | 32.97878645 | 0.196197507  | 0.3420213 | 0.5736411 | 0.566211 | 0.948739 |
| ms4a17a.8         | 76.54286134 | 0.286993217  | 0.2438623 | 1.1768661 | 0.239249 | 0.807768 |
| postna            | 1094.137872 | 0.16979944   | 0.0890538 | 1.9067069 | 0.056559 | 0.46635  |
| st6galnac1.1      | 99.58296937 | -0.261162527 | 0.2111816 | -1.236672 | 0.216209 | 0.783589 |
| st6galnac1.2      | 2.801407445 | -0.167989194 | 1.1069243 | -0.151762 | 0.879375 | NA       |
| si:ch211-119c20.2 | 31.17978186 | 0.05443708   | 0.3464706 | 0.1571189 | 0.875151 | 0.987881 |
| nme2a             | 620.8151454 | 0.221642653  | 0.1259665 | 1.7595369 | 0.078486 | 0.545813 |
| klf7b             | 939.7344293 | -0.03107598  | 0.0928783 | -0.334588 | 0.737936 | 0.972535 |
| rab3ab            | 72.13979541 | 0.238297066  | 0.2397709 | 0.9938531 | 0.320294 | 0.868202 |
| si:ch73-111k22.2  | 1098.247036 | 0.127801182  | 0.083375  | 1.5328476 | 0.125313 | 0.654648 |
| akap7             | 165.9234814 | -0.338517439 | 0.1663927 | -2.034448 | 0.041906 | 0.401871 |
| tmem244           | 68.52112272 | -0.307467612 | 0.2372992 | -1.295696 | 0.19508  | 0.759653 |
| sod1              | 887.9992825 | -0.403477522 | 0.1048903 | -3.846664 | 0.00012  | 0.005664 |
| ftr54             | 4.731700852 | -0.285175349 | 0.8805195 | -0.323872 | 0.746035 | NA       |
| ppil4             | 319.6710865 | 0.002780087  | 0.1289225 | 0.021564  | 0.982796 | 0.996944 |
| amd1              | 5037.102523 | 0.198487853  | 0.0724277 | 2.7404966 | 0.006135 | 0.118579 |
| ufml              | 732.803213  | 0.055615677  | 0.0949095 | 0.5859863 | 0.557885 | 0.948478 |
| cdk19             | 20.08136757 | 0.637456425  | 0.4435578 | 1.437144  | 0.150677 | 0.698912 |
| nptnb             | 1190.391549 | 0.056588613  | 0.0854213 | 0.6624651 | 0.507673 | 0.935734 |
| tim9              | 388.6597048 | -0.223047496 | 0.1199341 | -1.859751 | 0.062921 | 0.489621 |

|                   |             |              |           |           |          |          |
|-------------------|-------------|--------------|-----------|-----------|----------|----------|
| arid4a            | 1458.084911 | -0.107783664 | 0.0798511 | -1.349807 | 0.177078 | 0.738098 |
| mmachc            | 38.91533217 | -0.229372592 | 0.3108591 | -0.737867 | 0.460595 | 0.921978 |
| nup43             | 221.8556127 | 0.009177907  | 0.1470762 | 0.0624024 | 0.950242 | 0.99381  |
| si:ch211-214k5.3  | 0.657159727 | -2.841717825 | 2.5166161 | -1.129182 | 0.258821 | NA       |
| timml0b           | 149.994827  | 0.154535232  | 0.1699599 | 0.9092455 | 0.363221 | 0.885944 |
| psma6l            | 52.03732577 | -0.484823946 | 0.2837867 | -1.70841  | 0.08756  | 0.566637 |
| ugt5g2            | 0.484368597 | 0.855487352  | 2.7040894 | 0.316368  | 0.751723 | NA       |
| gabrr1            | 243.4994449 | 0.260470801  | 0.1484493 | 1.7546114 | 0.079326 | 0.547489 |
| pnrc1             | 37.82816399 | 0.120302847  | 0.3571106 | 0.3368784 | 0.736209 | 0.972535 |
| rnfl4             | 373.6701966 | 0.132100443  | 0.1154328 | 1.1443925 | 0.252461 | 0.82189  |
| fgfl1b            | 433.4846931 | 0.048371205  | 0.1172814 | 0.412437  | 0.680019 | 0.965311 |
| mei4              | 2.259900554 | 1.31216772   | 1.3339459 | 0.9836739 | 0.325276 | NA       |
| F0904943.1        | 3.554644412 | -1.317807944 | 1.0656499 | -1.236624 | 0.216227 | NA       |
| sox9b             | 936.2172577 | 0.049279245  | 0.0890638 | 0.5533025 | 0.580056 | 0.951257 |
| gpn1              | 237.1537512 | -0.011482808 | 0.1353459 | -0.08484  | 0.932388 | 0.992702 |
| stmn4l            | 1309.469755 | -0.279330018 | 0.1028636 | -2.715538 | 0.006617 | 0.124967 |
| il17a/f1          | 0.173729368 | -0.955901296 | 4.0804729 | -0.234262 | 0.814781 | NA       |
| il17a/f2          |             | 0 NA         | NA        | NA        | NA       | NA       |
| lrrc57            | 217.6384042 | 0.019803767  | 0.1609063 | 0.1230764 | 0.902047 | 0.990121 |
| rpf2              | 549.366375  | -0.035437805 | 0.1212061 | -0.292376 | 0.769999 | 0.975687 |
| fgf18b            | 44.31325591 | 0.558338129  | 0.2905183 | 1.9218692 | 0.054622 | 0.457793 |
| si:ch211-241j12.3 | 292.3556335 | 0.074769694  | 0.1274477 | 0.5866697 | 0.557426 | 0.948478 |
| lrpprc            | 2426.03382  | -0.070767117 | 0.0742974 | -0.952485 | 0.340851 | 0.878134 |
| ppp2r3c           | 284.6860284 | -0.054003146 | 0.1369312 | -0.394382 | 0.693299 | 0.96736  |
| znf292b           | 1232.257787 | -0.181885591 | 0.0858272 | -2.119207 | 0.034073 | 0.359261 |
| etflb             | 3713.863704 | 0.041417635  | 0.0722745 | 0.5730603 | 0.566604 | 0.948739 |
| tubel             |             | 0 NA         | NA        | NA        | NA       | NA       |
| setd6             | 106.3649258 | 0.076468066  | 0.1944974 | 0.3931573 | 0.694203 | 0.96736  |
| cyp2x8            | 19.53431681 | 0.697734492  | 0.4783168 | 1.4587288 | 0.14464  | 0.688975 |
| lgals3b           | 1243.298122 | 0.014593157  | 0.0828771 | 0.1760819 | 0.86023  | 0.985773 |
| cyp2x7            | 164.6985182 | 0.638020656  | 0.1629622 | 3.9151456 | 9.03E-05 | 0.004478 |
| lox12a            | 561.8508314 | 0.252123435  | 0.0991077 | 2.5439349 | 0.010961 | 0.181681 |
| xkrx              | 306.6576868 | -0.035870709 | 0.1265501 | -0.283451 | 0.776831 | 0.975826 |
| gfra2b            | 118.6172736 | 0.230104279  | 0.2001929 | 1.1494128 | 0.250386 | 0.820164 |
| myo6a             | 1831.259155 | -0.306459668 | 0.076395  | -4.011516 | 6.03E-05 | 0.003224 |
| nkl.4             | 0.158795395 | 0.967652056  | 4.0804729 | 0.2371421 | 0.812547 | NA       |
| tmem86a           | 15.43388681 | -0.331389976 | 0.5416907 | -0.61177  | 0.54069  | 0.944633 |
| zbtb2a            | 23.82753227 | -0.41350377  | 0.4012605 | -1.030512 | 0.30277  | 0.85729  |
| stx11a            | 28.98394276 | 0.144334936  | 0.3840316 | 0.3758413 | 0.707035 | 0.968664 |
| rassf2b           | 9.767585071 | -0.012740553 | 0.6431717 | -0.019809 | 0.984196 | NA       |
| slc18b1           | 82.73535315 | -0.887332126 | 0.2170999 | -4.087207 | 4.37E-05 | 0.002418 |
| prnpb             | 51.81445488 | 0.094113857  | 0.2675156 | 0.351807  | 0.724983 | 0.970402 |
| vsnl1b            | 1501.720318 | 0.119740319  | 0.0780387 | 1.5343702 | 0.124939 | 0.654531 |
| ahil              | 334.2109683 | -0.025094347 | 0.1214386 | -0.206642 | 0.836289 | 0.984231 |
| lft2              | 4.927306551 | 0.763554967  | 0.8970892 | 0.8511472 | 0.394688 | NA       |
| adora4a           | 0.339758314 | 0.005883863  | 3.2682461 | 0.0018003 | 0.998564 | NA       |
| ctbp2a            | 2203.584456 | -0.005233502 | 0.0801788 | -0.065273 | 0.947957 | 0.99381  |
| TATDN3            | 122.2680852 | -0.001405656 | 0.1801253 | -0.007804 | 0.993774 | 0.998672 |
| fuca2             | 919.5679037 | -0.111682586 | 0.0977002 | -1.143115 | 0.252991 | 0.822599 |
| lox12b            | 1098.543241 | 0.303002259  | 0.0840093 | 3.6067694 | 0.00031  | 0.012137 |
| pelilb            | 191.3178087 | 0.143049686  | 0.1513002 | 0.9454696 | 0.344419 | 0.878434 |
| zmpste24          | 834.4931636 | 0.128750514  | 0.0933233 | 1.3796186 | 0.167704 | 0.724848 |
| pitpnab           | 892.7993734 | 0.205037773  | 0.0961633 | 2.132183  | 0.032992 | 0.353977 |
| atp5if1b          | 1502.409704 | -0.007373287 | 0.0830366 | -0.088796 | 0.929244 | 0.992702 |

|                   |             |              |           |           |          |          |
|-------------------|-------------|--------------|-----------|-----------|----------|----------|
| rpl13a            | 16898.13444 | -0.223101047 | 0.0818745 | -2.724914 | 0.006432 | 0.122415 |
| gfpt2             | 206.4983357 | -0.34512959  | 0.1435089 | -2.404934 | 0.016175 | 0.23484  |
| egr2a             | 43.23510956 | 0.531150218  | 0.3139238 | 1.6919717 | 0.090651 | 0.576398 |
| znf593            | 340.6471442 | -0.073925188 | 0.1244524 | -0.594004 | 0.55251  | 0.947265 |
| cyb561d2          | 15.79552787 | 0.775644194  | 0.4805797 | 1.6139761 | 0.106533 | 0.615567 |
| txn               | 448.8568756 | -0.056982087 | 0.1265977 | -0.450104 | 0.652636 | 0.960708 |
| si:ch211-214p16.1 | 1.512134105 | -0.953111348 | 1.578721  | -0.603724 | 0.546027 | NA       |
| ogna              | 668.1959944 | 0.262608642  | 0.0988912 | 2.6555296 | 0.007918 | 0.142994 |
| iars2             | 826.5826442 | 0.050644461  | 0.0875335 | 0.578572  | 0.562878 | 0.948728 |
| cenpp             | 146.4496823 | 0.005761348  | 0.1692184 | 0.0340468 | 0.97284  | 0.996315 |
| rab3gap2          | 651.8810203 | 0.035185415  | 0.099492  | 0.3536508 | 0.723601 | 0.970402 |
| acssl             | 300.7076262 | -0.390205534 | 0.1590889 | -2.452751 | 0.014177 | 0.214979 |
| nol8              | 170.499866  | 0.107101987  | 0.1624902 | 0.6591288 | 0.509813 | 0.936253 |
| wapla             | 128.1791311 | -0.010863338 | 0.1773696 | -0.061247 | 0.951163 | 0.99381  |
| ppplcb            | 4291.527436 | -0.079732311 | 0.0711317 | -1.120911 | 0.262326 | 0.830166 |
| mafaa             | 390.8567851 | 0.153844884  | 0.1113774 | 1.3812931 | 0.167189 | 0.723887 |
| grid1b            | 122.5609471 | 0.125464617  | 0.193042  | 0.6499343 | 0.515735 | 0.9377   |
| padi2             | 1374.18897  | 0.338982618  | 0.0809825 | 4.1858751 | 2.84E-05 | 0.001682 |
| prelid1b          | 53.81635351 | 0.073814514  | 0.2926545 | 0.2522241 | 0.800868 | 0.979377 |
| oxtrl             | 4.177494113 | 0.603235684  | 0.9250875 | 0.652085  | 0.514346 | NA       |
| rbms2a            | 906.7547151 | -0.008691001 | 0.0939797 | -0.092477 | 0.926319 | 0.992702 |
| staul             | 2566.035569 | 0.006278115  | 0.0774055 | 0.0811069 | 0.935357 | 0.992702 |
| prkabla           | 650.5744325 | -0.002404345 | 0.1019526 | -0.023583 | 0.981185 | 0.996944 |
| gxylt2            | 161.6457413 | 0.108403852  | 0.1623991 | 0.6675151 | 0.504443 | 0.935552 |
| tcta              | 388.3090433 | -0.030204388 | 0.1190448 | -0.253723 | 0.79971  | 0.979377 |
| gnat1             | 2102.357003 | 0.302277079  | 0.1100651 | 2.7463492 | 0.006026 | 0.117745 |
| sumf1             | 252.6269488 | -0.251790684 | 0.1379283 | -1.825519 | 0.067923 | 0.510097 |
| endou             | 35.60607137 | -0.340212599 | 0.3199559 | -1.063311 | 0.287641 | 0.845979 |
| fto               | 241.0239053 | -0.091765628 | 0.1476817 | -0.621374 | 0.534353 | 0.943336 |
| si:dkey-27b3.2    | 733.100068  | 0.000988305  | 0.0936675 | 0.0105512 | 0.991582 | 0.997679 |
| BX005421.1        | 0.666939546 | 1.487980453  | 2.2924711 | 0.6490727 | 0.516291 | NA       |
| dram2b            | 370.0614138 | 0.084611335  | 0.1277403 | 0.6623698 | 0.507734 | 0.935734 |
| snx18b            | 42.37585499 | -0.200484072 | 0.2944882 | -0.680788 | 0.496006 | 0.932377 |
| rasgef1bb         | 405.9340145 | -0.063933293 | 0.1222399 | -0.523015 | 0.600964 | 0.956045 |
| paqr3b            | 117.9362915 | 0.391143917  | 0.4899472 | 0.798339  | 0.424674 | 0.9085   |
| anxa3b            | 735.363216  | -0.076726419 | 0.0993042 | -0.77264  | 0.439735 | 0.916082 |
| rbm18             | 340.8397816 | -0.172927407 | 0.1249786 | -1.383656 | 0.166464 | 0.722981 |
| si:ch211-243g18.2 | 819.3836356 | 0.073885041  | 0.1003977 | 0.7359234 | 0.461777 | 0.922466 |
| pimr71            | 1.352428212 | -0.694422538 | 1.6416302 | -0.423008 | 0.67229  | NA       |
| cdc3711           | 93.59241976 | 0.123912168  | 0.2064123 | 0.6003139 | 0.548297 | 0.945871 |
| sumo1             | 1291.380023 | -0.032883257 | 0.0858228 | -0.383153 | 0.701606 | 0.968134 |
| sppl              | 65.97555244 | -0.092805542 | 0.2481716 | -0.373957 | 0.708436 | 0.968664 |
| synpr             | 60.47576771 | 0.071321041  | 0.2521465 | 0.2828556 | 0.777288 | 0.975826 |
| opnlmw3           | 0.641435609 | -0.01573847  | 2.4541227 | -0.006413 | 0.994883 | NA       |
| opnlmw2           | 436.3961539 | 0.79352688   | 0.1362204 | 5.825314  | 5.70E-09 | 1.02E-06 |
| erbin             | 1287.488765 | -0.178446017 | 0.0927172 | -1.924626 | 0.054276 | 0.456511 |
| smc5              | 350.3029915 | -0.288600894 | 0.1216889 | -2.371628 | 0.01771  | 0.246724 |
| rph3al            |             | 0 NA         | NA        | NA        | NA       | NA       |
| pip5klba          | 105.1579932 | -0.092901494 | 0.1980982 | -0.468967 | 0.639093 | 0.959927 |
| phax              | 384.462303  | 0.042509417  | 0.1376397 | 0.3088457 | 0.757439 | 0.975374 |
| lmnb1             | 2489.568166 | 0.06351035   | 0.076185  | 0.8336338 | 0.404487 | 0.901305 |
| atf1              | 840.5207866 | -0.093063701 | 0.0975656 | -0.953857 | 0.340156 | 0.87805  |
| prrc1             | 567.1546914 | -0.002960646 | 0.102463  | -0.028895 | 0.976949 | 0.996762 |
| itgb7             | 24.42359329 | -0.193116616 | 0.3901006 | -0.495043 | 0.62057  | 0.957354 |

|                   |             |              |           |           |          |          |
|-------------------|-------------|--------------|-----------|-----------|----------|----------|
| fstl4             | 132.7538454 | -0.095138853 | 0.1794126 | -0.53028  | 0.595918 | 0.954434 |
| zgc:193690        | 59.05304919 | -0.440036732 | 0.253771  | -1.733991 | 0.08292  | 0.555438 |
| BX950188.1        | 13.55923507 | -0.218680205 | 0.5382357 | -0.406291 | 0.684529 | 0.966043 |
| tmem185           | 448.1140375 | 0.003846185  | 0.1118636 | 0.0343828 | 0.972572 | 0.996315 |
| ankrd46a          | 1198.703789 | -0.019199293 | 0.0849209 | -0.226084 | 0.821136 | 0.981748 |
| zranb2            | 797.5053386 | -0.105062739 | 0.0950386 | -1.105474 | 0.268954 | 0.834243 |
| si:ch211-218m3.16 | 4.283202237 | -0.685089387 | 0.9268254 | -0.739178 | 0.459799 | NA       |
| or115-6           | 0.50625413  | -0.940106488 | 2.8357787 | -0.331516 | 0.740255 | NA       |
| or115-7           | 1.499238245 | 2.909600561  | 1.7684723 | 1.6452622 | 0.099916 | NA       |
| rp2               | 448.874928  | 0.020090906  | 0.1179329 | 0.1703588 | 0.864728 | 0.986052 |
| chst7             | 227.591244  | 0.100606594  | 0.1459139 | 0.6894928 | 0.490513 | 0.931926 |
| or115-13          | 0 NA        | NA           | NA        | NA        | NA       | NA       |
| cyfipl            | 1797.914358 | -0.012933076 | 0.0804785 | -0.160702 | 0.872328 | 0.987846 |
| CT030712.1        | 3.346133651 | 0.580591656  | 1.0341509 | 0.5614187 | 0.574512 | NA       |
| tp63              | 637.1118026 | 0.117429463  | 0.1039478 | 1.1296969 | 0.258604 | 0.826732 |
| tbcl23            | 951.0410007 | 0.060091612  | 0.0882537 | 0.6808966 | 0.495937 | 0.932377 |
| unc119b           | 1207.235431 | 0.077175083  | 0.0867952 | 0.8891634 | 0.373915 | 0.893677 |
| angpt13           | 209.0255385 | 0.67520781   | 0.1597923 | 4.225534  | 2.38E-05 | 0.001457 |
| atg4c             | 233.4750057 | -0.05075559  | 0.1498281 | -0.338759 | 0.734791 | 0.972021 |
| zgc:158291        | 894.8094467 | -0.007484749 | 0.0944075 | -0.079281 | 0.936809 | 0.992702 |
| rbmx2             | 132.1789483 | -0.426507453 | 0.207855  | -2.051947 | 0.040175 | 0.392132 |
| siah21            | 576.6560767 | 0.179109052  | 0.1214041 | 1.4753128 | 0.140128 | 0.679809 |
| cldn2             | 227.5022604 | 0.097101635  | 0.1375731 | 0.7058184 | 0.480301 | 0.927397 |
| wdr78             | 19.42751227 | 0.304828307  | 0.4400386 | 0.6927308 | 0.488479 | 0.931926 |
| nop16             | 217.9285229 | 0.061209669  | 0.1716152 | 0.3566682 | 0.72134  | 0.969666 |
| pars2             | 70.18918183 | -0.034308721 | 0.2449593 | -0.140059 | 0.888613 | 0.989291 |
| ttc4              | 201.8944769 | 0.122887975  | 0.146855  | 0.836798  | 0.402706 | 0.90084  |
| csmdla            | 5.453372486 | 0.439849199  | 0.8063143 | 0.5455059 | 0.585406 | NA       |
| tlr5a             | 24.74425639 | -0.039238148 | 0.4084574 | -0.096064 | 0.92347  | 0.992588 |
| displ             | 199.4031139 | 0.124054865  | 0.1528655 | 0.8115297 | 0.417062 | 0.906237 |
| dnajc19           | 129.9779252 | 0.002392075  | 0.187593  | 0.0127514 | 0.989826 | 0.997612 |
| acvr2ba           | 84.01489564 | -0.340897161 | 0.2180455 | -1.563422 | 0.117953 | 0.641477 |
| ppig              | 577.2176375 | -0.059606843 | 0.1057963 | -0.563411 | 0.573155 | 0.949762 |
| sned1             | 165.9317083 | 0.245590524  | 0.1753661 | 1.400445  | 0.16138  | 0.715364 |
| rps6ka4           | 49.50664259 | -0.245538415 | 0.2936374 | -0.836196 | 0.403045 | 0.900848 |
| cdca5             | 235.6956813 | -0.226997693 | 0.1439763 | -1.576632 | 0.11488  | 0.635519 |
| si:ch73-194h10.2  | 237.4486255 | -1.325186437 | 0.1446539 | -9.161081 | 5.14E-20 | 4.82E-17 |
| gfilab            | 60.14132514 | -0.010550703 | 0.2589896 | -0.040738 | 0.967505 | 0.996315 |
| cdc23             | 275.3188166 | 0.022011481  | 0.1330987 | 0.1653772 | 0.868647 | 0.987245 |
| sall4             | 274.7476077 | -0.124333792 | 0.1279456 | -0.97177  | 0.331165 | 0.874339 |
| paklip1           | 390.1886655 | -0.146200641 | 0.1211324 | -1.206949 | 0.227452 | 0.794775 |
| tlr9              | 0.31759079  | 1.807926197  | 3.579045  | 0.5051421 | 0.613459 | NA       |
| kif20a            | 409.5657329 | -0.073689508 | 0.111241  | -0.662431 | 0.507695 | 0.935734 |
| ublcpl            | 308.9988866 | 0.13110319   | 0.1212059 | 1.0816566 | 0.279405 | 0.842882 |
| viml              | 41.62579076 | -0.44651068  | 0.3217993 | -1.387544 | 0.165276 | 0.721223 |
| etv5b             | 929.9029192 | 0.036026662  | 0.096627  | 0.3728427 | 0.709266 | 0.968736 |
| ca4c              | 31.72786612 | 0.028520122  | 0.3525932 | 0.0808868 | 0.935532 | 0.992702 |
| tpst11            | 451.1774087 | 0.09084164   | 0.1093478 | 0.8307586 | 0.40611  | 0.901305 |
| st6gall           | 24.77081981 | 0.2634935    | 0.3839212 | 0.6863219 | 0.49251  | 0.931926 |
| eef1b2            | 5690.359838 | -0.376999751 | 0.1913201 | -1.970518 | 0.048779 | 0.434204 |
| def6b             | 78.35146374 | -0.01551548  | 0.2364934 | -0.065606 | 0.947691 | 0.99381  |
| pparda            | 60.24343134 | 0.208770578  | 0.2603723 | 0.8018156 | 0.42266  | 0.906865 |
| camk1ga           | 242.4102678 | 0.326677049  | 0.139291  | 2.3452848 | 0.019013 | 0.257244 |
| slc15a1b          | 140.8627304 | -0.703809052 | 0.2123269 | -3.314742 | 0.000917 | 0.029089 |

|               |             |              |           |           |          |          |
|---------------|-------------|--------------|-----------|-----------|----------|----------|
| nr4a2b        | 516.9359625 | 0.025556152  | 0.1012895 | 0.252308  | 0.800803 | 0.979377 |
| CR631122.1    | 5.614026907 | -0.49250602  | 0.8243752 | -0.597429 | 0.550221 | NA       |
| fkbp2         | 905.7546394 | -0.009593162 | 0.0874118 | -0.109747 | 0.91261  | 0.991119 |
| ppplr14ba     | 1669.546022 | -0.00153182  | 0.0892274 | -0.017168 | 0.986303 | 0.996965 |
| zgc:110782    | 36.93055239 | -0.079734215 | 0.3357287 | -0.237496 | 0.812272 | 0.981081 |
| zgc:77262     | 1456.796668 | -0.019899884 | 0.0839011 | -0.237183 | 0.812515 | 0.981081 |
| zgc:112416    | 7.142103242 | 0.492349808  | 0.7213601 | 0.6825298 | 0.494904 | NA       |
| hif1a12       | 54.10475247 | 0.271250238  | 0.3070968 | 0.8832729 | 0.377089 | 0.895192 |
| atg9a         | 647.1352492 | 0.029789251  | 0.0999029 | 0.2981819 | 0.765564 | 0.975374 |
| pacsla        | 322.2555501 | 0.103189211  | 0.1340746 | 0.76964   | 0.441513 | 0.916336 |
| ccr7          | 2.200169039 | -0.208059758 | 1.2753711 | -0.163137 | 0.870411 | NA       |
| cycsb         | 4614.360418 | 0.171363553  | 0.0732301 | 2.3400703 | 0.01928  | 0.259881 |
| olal          | 2868.83093  | -0.133112824 | 0.0729541 | -1.824609 | 0.06806  | 0.51036  |
| fabp6         | 184.7446125 | -1.915979857 | 0.2178374 | -8.795461 | 1.42E-18 | 1.04E-15 |
| ttcl          | 171.6259169 | -0.127097819 | 0.1578839 | -0.805008 | 0.420815 | 0.90651  |
| cldn19        | 243.7535321 | 0.248585554  | 0.1417139 | 1.7541372 | 0.079407 | 0.547489 |
| cdc42         | 3799.053598 | 0.004165281  | 0.0716591 | 0.0581263 | 0.953648 | 0.994213 |
| rbms3         | 40.30085763 | 0.146444686  | 0.3098523 | 0.4726273 | 0.636479 | 0.958565 |
| vars          | 1383.152346 | -0.125047674 | 0.0799729 | -1.563626 | 0.117905 | 0.641446 |
| tex261        | 228.2846402 | 0.257217823  | 0.1454545 | 1.7683726 | 0.076999 | 0.540058 |
| emp2          | 1269.247086 | 0.100416192  | 0.0801865 | 1.2522824 | 0.210467 | 0.778338 |
| pgap2         | 75.60400563 | 0.008378379  | 0.2380965 | 0.035189  | 0.971929 | 0.996315 |
| ncbp3         | 566.2245227 | 0.033063587  | 0.0991474 | 0.3334792 | 0.738773 | 0.972722 |
| plppr2b       | 33.65599086 | -0.034139701 | 0.3301636 | -0.103402 | 0.917644 | 0.991623 |
| rtn4a         | 4262.259116 | 0.163846753  | 0.0690909 | 2.3714668 | 0.017718 | 0.246724 |
| stx121        | 451.7908393 | -0.189017329 | 0.1065579 | -1.773847 | 0.076088 | 0.537348 |
| clqb          | 1.819038829 | 4.314240719  | 3.5266802 | 1.223315  | 0.221211 | NA       |
| clqa          | 3.702316027 | 0.603058782  | 1.0916209 | 0.5524434 | 0.580645 | NA       |
| zak           | 311.0666103 | 0.104330847  | 0.1304886 | 0.7995397 | 0.423978 | 0.908025 |
| birc2         | 2047.639039 | -0.05282397  | 0.0747581 | -0.706598 | 0.479816 | 0.927094 |
| polq          | 59.25973589 | -0.014512409 | 0.251835  | -0.057627 | 0.954046 | 0.994271 |
| pcf11         | 1217.167609 | -0.008453139 | 0.0984182 | -0.08589  | 0.931554 | 0.992702 |
| ccdc90b       | 62.81463973 | -0.29334631  | 0.2562362 | -1.144828 | 0.25228  | 0.821887 |
| alg8          | 143.2674585 | -0.166286396 | 0.1707626 | -0.973787 | 0.330162 | 0.874097 |
| dtd1          | 277.6328238 | -0.124880606 | 0.1399469 | -0.892343 | 0.372209 | 0.892686 |
| gucald        | 14.681825   | 1.046610776  | 0.5046994 | 2.073731  | 0.038104 | 0.382552 |
| myo7ab        | 164.3906371 | 0.124873585  | 0.1676031 | 0.7450551 | 0.456238 | 0.921215 |
| sc5d          | 120.1846979 | -0.32110956  | 0.1855753 | -1.730347 | 0.083568 | 0.557158 |
| st14b         | 263.6877556 | -0.387003033 | 0.140464  | -2.755176 | 0.005866 | 0.115189 |
| hplbp3        | 8225.158551 | -0.062340889 | 0.0613422 | -1.016281 | 0.309496 | 0.861604 |
| parapinopsinb | 93.26220074 | 0.148330701  | 0.2129464 | 0.6965635 | 0.486076 | 0.930833 |
| rbp41         | 402.1410148 | 0.212864467  | 0.1387639 | 1.5340044 | 0.125029 | 0.654648 |
| nr0b2a        | 79.07640256 | -0.194335067 | 0.2501363 | -0.776917 | 0.437208 | 0.914408 |
| dusp4         | 422.1039891 | 0.092300251  | 0.1157088 | 0.7976941 | 0.425048 | 0.908819 |
| ppplr3b       | 114.4429539 | 0.072262315  | 0.2003745 | 0.3606363 | 0.718371 | 0.96909  |
| eril          | 185.5346195 | 0.093936833  | 0.1602478 | 0.5861974 | 0.557743 | 0.948478 |
| fybb          | 37.64750933 | 0.010868801  | 0.3121491 | 0.0348193 | 0.972224 | 0.996315 |
| ccdc8012      | 200.5346063 | 0.299072401  | 0.1461915 | 2.045758  | 0.04078  | 0.394957 |
| or137-2       | 0.658957134 | 2.851427774  | 2.5143902 | 1.1340434 | 0.256776 | NA       |
| vav2          | 445.4633203 | 0.05609205   | 0.10675   | 0.5254525 | 0.599269 | 0.955949 |
| or115-12      | 7.589833803 | 0.071009569  | 0.7144599 | 0.0993892 | 0.920829 | NA       |
| ddt           | 647.8838147 | -0.071996375 | 0.0994755 | -0.72376  | 0.469213 | 0.924496 |
| p2rx4a        | 50.94999243 | -1.36356122  | 0.2820089 | -4.83517  | 1.33E-06 | 0.000128 |
| idh3b         | 1503.960443 | 0.050402727  | 0.0780214 | 0.6460118 | 0.518272 | 0.938661 |

|                 |             |              |           |           |          |          |
|-----------------|-------------|--------------|-----------|-----------|----------|----------|
| gnrh2           | 43.39485038 | -0.439421393 | 0.307918  | -1.427073 | 0.153559 | 0.702578 |
| si:dkeyp-87d8.8 | 26.85536519 | -0.004535823 | 0.400111  | -0.011336 | 0.990955 | 0.997679 |
| gnaia           | 853.0491716 | -0.071152134 | 0.0931404 | -0.763923 | 0.444913 | 0.916906 |
| mitd1           | 103.2536363 | 0.178923701  | 0.201893  | 0.8862303 | 0.375493 | 0.894316 |
| tspan10         | 32.73935658 | -0.298569398 | 0.3627929 | -0.822975 | 0.410522 | 0.903084 |
| kctd13          | 570.8044269 | -0.093599966 | 0.0994968 | -0.940734 | 0.346841 | 0.8794   |
| pou5f3          | 9.137955491 | -1.131795659 | 0.6621651 | -1.709235 | 0.087407 | NA       |
| fut7            | 5.801381656 | 0.754985306  | 0.7856989 | 0.9609093 | 0.336598 | NA       |
| clic3           | 130.5773244 | -0.076463795 | 0.1833245 | -0.417095 | 0.676609 | 0.965257 |
| bace2           | 204.6865563 | -0.139388002 | 0.1573499 | -0.885847 | 0.3757   | 0.894316 |
| entpd2b         | 4.373150299 | 0.252795547  | 0.9042089 | 0.2795765 | 0.779802 | NA       |
| cd8a            |             | 0 NA         | NA        | NA        | NA       | NA       |
| wdr38           | 6.652040099 | 0.15139751   | 0.7361272 | 0.2056676 | 0.837051 | NA       |
| aadacl4         | 3.596934559 | -0.907275404 | 1.2165545 | -0.745775 | 0.455804 | NA       |
| dhrr3b          | 300.346437  | -0.004176423 | 0.1239481 | -0.033695 | 0.97312  | 0.996315 |
| dck             | 139.382871  | -0.042721862 | 0.1751409 | -0.243928 | 0.807286 | 0.980545 |
| slc4a4b         | 184.1737583 | 0.248158584  | 0.1654055 | 1.5003043 | 0.133536 | 0.667982 |
| fpgs            | 417.8972105 | -0.137715152 | 0.1121994 | -1.227414 | 0.219667 | 0.786189 |
| cdk9            | 752.6755339 | -0.054385738 | 0.0903224 | -0.602129 | 0.547088 | 0.945526 |
| ttcl7           | 502.2395166 | 0.076910141  | 0.1159954 | 0.6630449 | 0.507302 | 0.935734 |
| vps33b          | 254.1322536 | -0.081062056 | 0.1320995 | -0.613644 | 0.539451 | 0.943908 |
| serinc4         | 234.3471438 | -0.002721065 | 0.1385524 | -0.019639 | 0.984331 | 0.996944 |
| cstfl           | 475.7364582 | -0.122566362 | 0.1091723 | -1.122687 | 0.26157  | 0.829691 |
| wnt7aa          | 621.5613906 | 0.300129128  | 0.0956598 | 3.1374643 | 0.001704 | 0.047485 |
| zgc:171599      | 133.8492331 | -0.30732337  | 0.1818372 | -1.690102 | 0.091009 | 0.578093 |
| wbp2n1          | 953.0382851 | -0.123535405 | 0.1157819 | -1.066966 | 0.285987 | 0.845942 |
| opn1lw2         | 19854.6338  | 0.312969501  | 0.0933204 | 3.3537095 | 0.000797 | 0.025763 |
| opn1lw1         | 4.7098439   | 1.349805194  | 0.9216147 | 1.464609  | 0.143028 | NA       |
| zgc:92107       | 585.6421407 | -0.121855421 | 0.1031981 | -1.180791 | 0.237686 | 0.806474 |
| crygm2e         | 15.4708169  | -0.564511894 | 0.5373267 | -1.050593 | 0.293445 | 0.849325 |
| zgc:113307      | 205.3823135 | 0.123116739  | 0.1454867 | 0.8462405 | 0.397419 | 0.899672 |
| fmoda           | 1623.102551 | 0.211985068  | 0.0776014 | 2.7317178 | 0.006301 | 0.120958 |
| tmem183a        | 466.7725018 | 0.101623569  | 0.1167033 | 0.8707858 | 0.383871 | 0.895192 |
| prlhr2a         | 15.07566495 | 0.347987956  | 0.5039948 | 0.6904594 | 0.489905 | 0.931926 |
| atp2b4          | 3722.434171 | 0.080987899  | 0.0706571 | 1.1462099 | 0.251708 | 0.821198 |
| suc1g2          | 1136.589822 | -0.180689094 | 0.0838249 | -2.155555 | 0.031118 | 0.341651 |
| ube2w           | 216.7836246 | -0.093728644 | 0.1642796 | -0.570543 | 0.568309 | 0.948983 |
| gdf11           | 6.297148392 | 0.318472818  | 0.7416264 | 0.4294248 | 0.667614 | NA       |
| cdk5rap1        | 100.2736126 | -0.227934276 | 0.2007531 | -1.135396 | 0.256209 | 0.824633 |
| hpd             | 184.3653601 | 0.116020278  | 0.1712045 | 0.6776708 | 0.49798  | 0.933548 |
| cbx2            | 419.7966981 | -0.443455379 | 0.134993  | -3.285025 | 0.00102  | 0.031507 |
| mrpl45          | 345.8265176 | -0.105656126 | 0.1208923 | -0.873969 | 0.382135 | 0.895192 |
| npepps          | 1895.042143 | 0.055755383  | 0.0773464 | 0.7208534 | 0.471    | 0.924838 |
| rnf8            | 340.8875285 | -0.134066686 | 0.1192201 | -1.124531 | 0.260788 | 0.828804 |
| slitla          | 214.9474629 | 0.15594992   | 0.1504293 | 1.0366989 | 0.299876 | 0.855995 |
| zgc:114123      | 1.839504714 | 1.42777393   | 1.4235548 | 1.0029638 | 0.315878 | NA       |
| vcla            | 438.8051155 | 0.314194793  | 0.1130904 | 2.7782627 | 0.005465 | 0.109711 |
| bcap31          | 802.7692385 | 0.049945856  | 0.0910314 | 0.5486663 | 0.583234 | 0.952214 |
| krt98           | 14.8038423  | 0.170507815  | 0.5083909 | 0.3353872 | 0.737333 | 0.972535 |
| krt94           | 1017.549343 | 0.070282364  | 0.0913948 | 0.7689975 | 0.441895 | 0.916336 |
| krt93           | 18.02101918 | -2.318428905 | 0.5193457 | -4.464134 | 8.04E-06 | 0.000593 |
| kpna6           | 63.0156505  | -0.191115353 | 0.2469554 | -0.773886 | 0.438998 | 0.916082 |
| dhrr3a          | 208.2625566 | 0.027198387  | 0.1593166 | 0.1707191 | 0.864445 | 0.98601  |
| plvapb          | 816.5983942 | -0.095922824 | 0.093003  | -1.031395 | 0.302355 | 0.85729  |



|                  |             |              |           |           |          |          |
|------------------|-------------|--------------|-----------|-----------|----------|----------|
| ptprga           | 105.7072739 | 0.11805139   | 0.2168039 | 0.5445077 | 0.586092 | 0.953231 |
| tapbp.2          | 22.03214295 | -0.380984411 | 0.4127039 | -0.923142 | 0.355933 | 0.882844 |
| tuba2            | 5871.463193 | 0.190499315  | 0.0747014 | 2.5501453 | 0.010768 | 0.179985 |
| cyp27b1          | 21.92669827 | 1.249540542  | 0.4297363 | 2.9076915 | 0.003641 | 0.081518 |
| npffl            | 120.3662332 | -0.097087458 | 0.1830926 | -0.530264 | 0.595929 | 0.954434 |
| pdrgl            | 161.8217993 | -0.05408791  | 0.1624183 | -0.333016 | 0.739122 | 0.972722 |
| aamp             | 763.79472   | -0.316711391 | 0.0996623 | -3.177846 | 0.001484 | 0.042398 |
| lhfp15a          | 19.27285176 | 0.375850074  | 0.4642829 | 0.8095281 | 0.418211 | 0.906406 |
| ift52            | 273.3816042 | -0.039504101 | 0.129836  | -0.304262 | 0.760929 | 0.975374 |
| rab9a            | 58.3839336  | -0.226871759 | 0.2511832 | -0.903212 | 0.366413 | 0.887239 |
| cdc42ep4b        | 744.757034  | 0.124345122  | 0.0952267 | 1.3057798 | 0.191627 | 0.755886 |
| tekt3            | 33.83957464 | 0.268522924  | 0.33719   | 0.7963549 | 0.425826 | 0.909514 |
| kcnj16           | 5.946820114 | 0.004311976  | 0.7579672 | 0.0056889 | 0.995461 | NA       |
| slc16a3          | 1825.983794 | -0.074222804 | 0.0870512 | -0.852633 | 0.393863 | 0.898496 |
| abl1mb           | 876.5736916 | -0.020843964 | 0.0920517 | -0.226438 | 0.820861 | 0.981628 |
| vtila            | 202.727355  | 0.01997019   | 0.1489201 | 0.1341    | 0.893323 | 0.989291 |
| entpd1           | 586.8494648 | 0.213847488  | 0.0992171 | 2.1553482 | 0.031135 | 0.341651 |
| kcnkla           | 24.01155045 | 0.761962541  | 0.4031269 | 1.8901307 | 0.05874  | 0.474103 |
| itgb3b           | 20.02138698 | 0.412876165  | 0.4326967 | 0.9541929 | 0.339986 | 0.87805  |
| chad             | 293.7810402 | -0.101721541 | 0.1554844 | -0.654224 | 0.512968 | 0.936253 |
| arl4d            | 788.8406625 | -0.017829073 | 0.1035191 | -0.17223  | 0.863257 | 0.985841 |
| tmem106a         | 220.8350352 | -0.22828163  | 0.1536594 | -1.485634 | 0.137376 | 0.674358 |
| cdk5r1b          | 611.8386054 | 0.015088735  | 0.1036389 | 0.1455895 | 0.884245 | 0.98879  |
| si:ch211-270n8.1 | 97.5082542  | 0.640482204  | 0.2700505 | 2.3717124 | 0.017706 | 0.246724 |
| mrpl10           | 244.3585424 | 0.114486123  | 0.1352613 | 0.846407  | 0.397326 | 0.899672 |
| cdk5rap3         | 382.5017464 | -0.087297091 | 0.113986  | -0.765858 | 0.443761 | 0.916631 |
| si:dkey-222b8.1  | 13.00049722 | 0.856797136  | 0.5366157 | 1.5966681 | 0.11034  | 0.624637 |
| elac1            | 153.2515407 | 0.105702694  | 0.183189  | 0.5770143 | 0.56393  | 0.948739 |
| foxn2b           | 573.084893  | -0.074057983 | 0.0989276 | -0.748608 | 0.454094 | 0.920295 |
| oplah            | 515.4542185 | -0.277803415 | 0.1143763 | -2.428854 | 0.015147 | 0.225353 |
| FAM53C           | 609.3562907 | 0.057796858  | 0.1028795 | 0.561792  | 0.574258 | 0.950037 |
| fkbp10b          | 471.071668  | 0.193834577  | 0.1084799 | 1.786824  | 0.073966 | 0.53012  |
| klhl11           | 211.6633667 | 0.043796394  | 0.140989  | 0.310637  | 0.756077 | 0.975374 |
| id4              | 664.6834562 | 0.065129463  | 0.0977036 | 0.6666028 | 0.505026 | 0.935724 |
| vdac1            | 6369.400422 | -0.05307031  | 0.0712489 | -0.744858 | 0.456358 | 0.921215 |
| CABZ01084564.1   | 3.143591673 | 0.768833306  | 1.1366807 | 0.6763846 | 0.498796 | NA       |
| ca7              | 45.09105839 | -0.148512872 | 0.2929235 | -0.507002 | 0.612153 | 0.95688  |
| lcmt1            | 238.2821525 | -0.020390007 | 0.1596275 | -0.127735 | 0.898359 | 0.990121 |
| aqp8a.1          | 252.908889  | -0.301689632 | 0.1365042 | -2.210113 | 0.027097 | 0.317055 |
| hbae5            | 40.49415602 | -0.627018374 | 0.3120413 | -2.009409 | 0.044494 | 0.41501  |
| hbbe2            | 2311.798758 | -0.015040429 | 0.0837239 | -0.179643 | 0.857433 | 0.985703 |
| zgc:163057       | 22.74136561 | 0.185589614  | 0.4171516 | 0.4448973 | 0.656394 | 0.961833 |
| shisa9a          | 377.9221637 | -0.08478946  | 0.1280628 | -0.662093 | 0.507912 | 0.935734 |
| tomm22           | 989.784681  | -0.064423925 | 0.0900219 | -0.715647 | 0.474209 | 0.925066 |
| tmem184ba        | 1013.077282 | 0.179395534  | 0.0844232 | 2.1249548 | 0.03359  | 0.357045 |
| csnkle           | 991.8854379 | -0.108764363 | 0.0859762 | -1.265052 | 0.205853 | 0.773784 |
| slc16a8          | 30.01521258 | -0.122324593 | 0.409773  | -0.298518 | 0.765308 | 0.975374 |
| phf5a            | 196.4195709 | -0.103825086 | 0.1808994 | -0.573938 | 0.56601  | 0.948739 |
| rgs9b            | 271.7333835 | -0.041046624 | 0.1322028 | -0.310482 | 0.756194 | 0.975374 |
| si:ch211-147h1.4 | 1.479747632 | 0.372261087  | 1.6452828 | 0.2262596 | 0.820999 | NA       |
| zdhhc4           | 266.592628  | -0.064142758 | 0.1350431 | -0.47498  | 0.634801 | 0.9578   |
| msrb1b           |             | 0 NA         | NA        | NA        | NA       | NA       |
| npix2b           | 17.0064386  | 0.252845772  | 0.4767639 | 0.5303375 | 0.595878 | 0.954434 |
| bhlha15          | 5.334386492 | 0.561092373  | 0.8236099 | 0.6812598 | 0.495707 | NA       |

|                   |             |              |           |           |          |          |
|-------------------|-------------|--------------|-----------|-----------|----------|----------|
| dlgap5            | 611.6423492 | -0.101012011 | 0.1146652 | -0.88093  | 0.378356 | 0.895192 |
| minpp1b           | 55.9626411  | -0.028828304 | 0.2629353 | -0.10964  | 0.912695 | 0.991119 |
| pofut2            | 183.8266612 | 0.041327411  | 0.1499948 | 0.2755256 | 0.782912 | 0.97627  |
| acta2             | 1541.445857 | -0.379939845 | 0.0865994 | -4.387329 | 1.15E-05 | 0.000811 |
| ch25h             | 30.03746104 | -0.233377273 | 0.3715044 | -0.628195 | 0.529876 | 0.942209 |
| zgc:55262         | 521.5152659 | -0.040728223 | 0.1020395 | -0.399142 | 0.689789 | 0.966819 |
| duspl9b           | 125.1549516 | 0.012964294  | 0.1874748 | 0.0691522 | 0.944868 | 0.993409 |
| dkk1b             | 29.31839532 | 0.067770419  | 0.3888614 | 0.1742791 | 0.861646 | 0.985841 |
| glipr1a           | 10.26642731 | -0.26945528  | 0.6048592 | -0.445484 | 0.65597  | NA       |
| stub1             | 688.7114634 | 0.094254899  | 0.0980649 | 0.9611478 | 0.336478 | 0.876088 |
| cox6b1            | 1816.407621 | -0.459082211 | 0.0883452 | -5.196458 | 2.03E-07 | 2.59E-05 |
| h3f3b.1           | 12077.25864 | -0.158574856 | 0.0690534 | -2.29641  | 0.021652 | 0.278385 |
| nif3l1            | 223.9632166 | -0.282499804 | 0.1559292 | -1.811719 | 0.07003  | 0.516704 |
| zmp:0000000624    | 92.59186824 | 0.04725195   | 0.2154305 | 0.2193373 | 0.826387 | 0.982196 |
| decr2             | 206.9301523 | -0.353467391 | 0.1547706 | -2.283815 | 0.022382 | 0.285346 |
| gsnb              | 1279.300369 | -0.053076298 | 0.0996823 | -0.532455 | 0.594411 | 0.954434 |
| gsg112b           | 69.13695309 | 0.246523257  | 0.2331624 | 1.0573027 | 0.290373 | 0.846262 |
| tectb             | 165.0053482 | 0.308744644  | 0.1566906 | 1.9704099 | 0.048791 | 0.434204 |
| pts               | 142.3485376 | -0.414209444 | 0.1967542 | -2.105213 | 0.035273 | 0.365366 |
| tmem204           | 122.4260227 | -0.011327293 | 0.1814994 | -0.06241  | 0.950237 | 0.99381  |
| klhl14            | 204.1325127 | -0.068174855 | 0.156288  | -0.436213 | 0.662682 | 0.964665 |
| rdh12l            | 31.23509875 | -0.254142165 | 0.3668269 | -0.692812 | 0.488427 | 0.931926 |
| gpr137c           | 121.4582053 | -0.244697794 | 0.1827873 | -1.338702 | 0.180668 | 0.741776 |
| sh3glb1a          | 287.9884989 | 0.135104494  | 0.1543552 | 0.8752829 | 0.38142  | 0.895192 |
| cops9             | 488.0631003 | -0.067183786 | 0.1386672 | -0.484497 | 0.628034 | 0.957354 |
| phb2a             | 1627.290817 | -0.018770065 | 0.0749911 | -0.250297 | 0.802358 | 0.979492 |
| wipf2a            | 775.0173249 | 0.099400894  | 0.1071996 | 0.9272507 | 0.353796 | 0.881976 |
| vmolb             | 139.5119112 | -0.142923275 | 0.2100337 | -0.680478 | 0.496202 | 0.932415 |
| st8sia3           | 7.487307365 | 1.821628108  | 0.7443825 | 2.4471667 | 0.014398 | NA       |
| smpx              | 346.1896436 | -0.010049882 | 0.1220976 | -0.08231  | 0.9344   | 0.992702 |
| mtfr1             | 229.1198588 | 0.212213484  | 0.138421  | 1.5331021 | 0.125251 | 0.654648 |
| pde7a             | 1164.600733 | -0.016299453 | 0.0837456 | -0.194631 | 0.845682 | 0.985174 |
| slc51a            | 234.7430065 | 0.412515208  | 0.1408249 | 2.9292781 | 0.003398 | 0.077847 |
| polal             | 655.4741767 | -0.208797209 | 0.1077144 | -1.938433 | 0.05257  | 0.449847 |
| map7d2b           | 1996.250419 | -0.045510725 | 0.0744335 | -0.611428 | 0.540916 | 0.944633 |
| pkp4              | 720.9088407 | 0.01643117   | 0.0949482 | 0.173054  | 0.862609 | 0.985841 |
| si:ch211-140b10.6 | 149.9708899 | -0.163198874 | 0.1640259 | -0.994958 | 0.319757 | 0.86809  |
| usp46             | 4.428642533 | 0.037005916  | 0.9852832 | 0.0375587 | 0.97004  | NA       |
| ccdc58            | 133.2567284 | -0.056097133 | 0.1756067 | -0.319448 | 0.749387 | 0.97419  |
| cst14a.2          | 441.9481881 | -0.123327303 | 0.1332025 | -0.925863 | 0.354517 | 0.882105 |
| eloca             | 182.768136  | -0.18976527  | 0.1603729 | -1.183275 | 0.2367   | 0.805854 |
| elocb             | 1007.171079 | 0.086539196  | 0.0991637 | 0.8726905 | 0.382832 | 0.895192 |
| flj110111         | 299.3753871 | 0.196658275  | 0.1320875 | 1.4888487 | 0.136527 | 0.673303 |
| trappc3           | 638.0248479 | 0.046500012  | 0.0970191 | 0.4792872 | 0.631734 | 0.957356 |
| tubalb            | 1836.321408 | -0.225858329 | 0.0812452 | -2.77996  | 0.005437 | 0.10944  |
| prdm14            | 15.55591818 | 0.379877881  | 0.5128919 | 0.7406588 | 0.4589   | 0.921978 |
| ngdn              | 147.6457975 | -0.003455863 | 0.1705693 | -0.020261 | 0.983835 | 0.996944 |
| pabpn1            | 3716.698484 | -0.01760715  | 0.0746471 | -0.235872 | 0.813532 | 0.981081 |
| pil5a             | 4.510926119 | -0.518191062 | 0.8876956 | -0.583749 | 0.559389 | NA       |
| gpr22b            | 184.813521  | 0.215640358  | 0.1624711 | 1.327254  | 0.184425 | 0.747376 |
| cd226             | 40.78116619 | -0.104300046 | 0.3265137 | -0.319435 | 0.749396 | 0.97419  |
| mtrr              | 165.1559682 | -0.181480218 | 0.1565942 | -1.158921 | 0.246489 | 0.816426 |
| cct5              | 4822.529551 | -0.098108962 | 0.0737338 | -1.330584 | 0.183326 | 0.747003 |
| mllt10            | 1658.215992 | -0.14610997  | 0.0909167 | -1.607075 | 0.108038 | 0.619409 |

|                   |             |              |           |           |          |          |
|-------------------|-------------|--------------|-----------|-----------|----------|----------|
| commd3            | 236.0916114 | 0.019072155  | 0.1438713 | 0.132564  | 0.894538 | 0.989716 |
| tagln             | 325.3850753 | -0.470278508 | 0.1248622 | -3.766379 | 0.000166 | 0.007304 |
| acad11            | 249.3401067 | -0.190820162 | 0.1347561 | -1.416041 | 0.156764 | 0.707081 |
| gcm2              | 183.2211098 | -0.021892848 | 0.1530317 | -0.143061 | 0.886242 | 0.988936 |
| elov12            | 237.7677036 | -0.176004716 | 0.1452709 | -1.211562 | 0.22568  | 0.793245 |
| gnal              | 97.35437395 | 0.159744224  | 0.198053  | 0.8065731 | 0.419912 | 0.90651  |
| mppel             | 201.5600113 | -0.031327063 | 0.1510409 | -0.207408 | 0.835691 | 0.984089 |
| fam49bb           | 329.5907306 | -0.030385671 | 0.1391397 | -0.218382 | 0.827131 | 0.982678 |
| epdr1             | 360.1369548 | 0.060027018  | 0.120704  | 0.4973074 | 0.618972 | 0.957354 |
| stard3nl          | 372.664346  | -0.152188586 | 0.1149359 | -1.324117 | 0.185464 | 0.74928  |
| otulina           | 206.9232223 | 0.282715104  | 0.159137  | 1.7765515 | 0.075642 | 0.535726 |
| si:ch211-146110.8 | 0 NA        | NA           | NA        | NA        | NA       | NA       |
| zgc:173856        | 0 NA        | NA           | NA        | NA        | NA       | NA       |
| si:dkey-96n2.3    | 1.471026404 | -0.306609088 | 1.5202188 | -0.201687 | 0.840161 | NA       |
| mcee              | 218.8896652 | 0.013676228  | 0.1516292 | 0.0901952 | 0.928132 | 0.992702 |
| slc35b3           | 254.6711766 | 0.249499794  | 0.1486143 | 1.6788409 | 0.093183 | 0.580702 |
| cpbl              | 888.678764  | -0.459717425 | 0.1301309 | -3.532731 | 0.000411 | 0.015173 |
| agtrlb            | 30.05099266 | -0.028846725 | 0.356252  | -0.080973 | 0.935464 | 0.992702 |
| fzd8a             | 546.1901123 | -0.067674617 | 0.1182951 | -0.572083 | 0.567266 | 0.948739 |
| slc35g2b          | 798.7087439 | -0.072365026 | 0.0924017 | -0.783157 | 0.433535 | 0.913667 |
| fl3a1a.1          | 1.929313885 | -1.585101638 | 1.6063823 | -0.986752 | 0.323764 | NA       |
| ralaa             | 554.0864614 | -0.033327488 | 0.1058446 | -0.314872 | 0.752859 | 0.97481  |
| lanc12            | 968.1795383 | -0.130006698 | 0.0861301 | -1.509423 | 0.131191 | 0.663979 |
| gsap              | 79.65255111 | -0.155875077 | 0.218121  | -0.714627 | 0.47484  | 0.925399 |
| stk381            | 409.5503912 | -0.019424157 | 0.1145745 | -0.169533 | 0.865377 | 0.986385 |
| lrtm2a            | 167.8432129 | -0.165030067 | 0.1642422 | -1.004797 | 0.314995 | 0.866054 |
| dcplb             | 193.1555878 | 0.109190002  | 0.1631869 | 0.6691101 | 0.503425 | 0.935304 |
| rassf8b           | 169.6962851 | 0.179589903  | 0.1574198 | 1.1408346 | 0.253939 | 0.823394 |
| pawr              | 381.4704003 | -0.12708327  | 0.1163575 | -1.092179 | 0.274754 | 0.839332 |
| rps16             | 10064.98331 | -0.36464431  | 0.0972606 | -3.749149 | 0.000177 | 0.007745 |
| ndufb2            | 1768.41285  | 0.028573112  | 0.0807318 | 0.3539265 | 0.723394 | 0.970402 |
| slc35e3           | 231.4956477 | 0.04469834   | 0.1531139 | 0.2919287 | 0.770341 | 0.975687 |
| gramd4b           | 544.188569  | 0.046460446  | 0.1088227 | 0.426937  | 0.669425 | 0.965093 |
| tbc1d22a          | 242.6742561 | -0.084781    | 0.1360699 | -0.623069 | 0.533239 | 0.942971 |
| taf3              | 788.7819071 | -0.052704626 | 0.1233484 | -0.427283 | 0.669173 | 0.965037 |
| atp5f1c           | 6440.004032 | 0.014359318  | 0.0851912 | 0.168554  | 0.866148 | 0.986647 |
| kin               | 139.689452  | -0.016965695 | 0.1770995 | -0.095798 | 0.923681 | 0.992628 |
| itih2             | 1587.107493 | 0.185803682  | 0.1042672 | 1.7819953 | 0.07475  | 0.532583 |
| itih5             | 51.27967902 | -0.032621061 | 0.2739909 | -0.119059 | 0.905229 | 0.990702 |
| tmem1101          | 320.4432055 | 0.105538943  | 0.1340405 | 0.7873659 | 0.431068 | 0.91234  |
| sfmbt2            | 20.04070328 | -0.435236755 | 0.4491145 | -0.9691   | 0.332495 | 0.874653 |
| acot15            | 324.7417193 | -0.17038193  | 0.1560815 | -1.091622 | 0.274999 | 0.839541 |
| lamb1b            | 503.2109566 | 0.047424008  | 0.105677  | 0.4487637 | 0.653602 | 0.961112 |
| tmcc3             | 723.5725034 | -0.095738136 | 0.0932424 | -1.026767 | 0.30453  | 0.858905 |
| nr2c1             | 573.4518543 | -0.122011384 | 0.0976199 | -1.249862 | 0.21135  | 0.778917 |
| fgd6              | 219.3357437 | 0.037167259  | 0.1420203 | 0.2617039 | 0.79355  | 0.977937 |
| si:ch211-244b2.4  | 23.32238252 | -0.139757731 | 0.400242  | -0.349183 | 0.726952 | 0.970402 |
| ppp6r2a           | 829.0999174 | 0.129003093  | 0.0883979 | 1.4593461 | 0.14447  | 0.688868 |
| gcc1              | 314.5674432 | -0.12958285  | 0.1213093 | -1.068202 | 0.285429 | 0.845164 |
| lamtor4           | 509.6468606 | -0.199125642 | 0.1088581 | -1.829222 | 0.067366 | 0.508048 |
| atp6v1f           | 913.8642745 | 0.139364742  | 0.0886906 | 1.5713593 | 0.116099 | 0.63841  |
| hgfa              | 61.10322083 | 0.37647734   | 0.2477834 | 1.519381  | 0.128667 | 0.659646 |
| lepb              | 48.07301449 | 0.430116261  | 0.3635581 | 1.1830745 | 0.23678  | 0.805854 |
| bik               | 67.3009804  | 0.007439474  | 0.257015  | 0.0289457 | 0.976908 | 0.996762 |

|                  |             |              |           |           |          |          |
|------------------|-------------|--------------|-----------|-----------|----------|----------|
| si:dkey-202b22.6 | 11.25515564 | 0.287995353  | 0.5876458 | 0.4900832 | 0.624075 | 0.957354 |
| hsd17b2          | 27.74157067 | -0.179491398 | 0.3615499 | -0.49645  | 0.619577 | 0.957354 |
| snx20            | 23.58375401 | 0.544796907  | 0.3919681 | 1.3899012 | 0.164559 | 0.720706 |
| sco2             | 0 NA        | NA           | NA        | NA        | NA       | NA       |
| OTUD7A           | 147.5684913 | 0.159887462  | 0.1754894 | 0.9110944 | 0.362246 | 0.885944 |
| socs2            | 59.89574863 | 0.130237211  | 0.2523969 | 0.5160015 | 0.605853 | 0.956575 |
| mybpc1           | 1013.058389 | 0.064253855  | 0.0871075 | 0.7376385 | 0.460734 | 0.921978 |
| dram1            | 39.78870389 | -0.094129297 | 0.3158374 | -0.298031 | 0.76568  | 0.975374 |
| pus1             | 140.8819728 | -0.097335486 | 0.1753987 | -0.554939 | 0.578937 | 0.951052 |
| washc3           | 299.336     | -0.07154663  | 0.1260757 | -0.56749  | 0.570382 | 0.949061 |
| noc4l            | 291.1146182 | -0.228948742 | 0.1270456 | -1.802099 | 0.07153  | 0.522931 |
| phpt1            | 254.8584353 | -0.127745914 | 0.1343672 | -0.950722 | 0.341745 | 0.878134 |
| bcat1            | 458.3970656 | 0.039775194  | 0.1204499 | 0.3302218 | 0.741232 | 0.973154 |
| lrmp             | 408.4318439 | 0.247806166  | 0.1143751 | 2.1666097 | 0.030265 | 0.33626  |
| lum              | 1731.248933 | 0.244080309  | 0.0738459 | 3.3052659 | 0.000949 | 0.029735 |
| zgc:172145       | 48.9474431  | 0.36828726   | 0.2906941 | 1.2669238 | 0.205183 | 0.773257 |
| kcnj8            | 24.44269688 | 0.469456662  | 0.4272844 | 1.0986984 | 0.2719   | 0.836816 |
| tnni2a.1         | 744.0255433 | -0.090486044 | 0.0935234 | -0.967523 | 0.333282 | 0.874926 |
| shisalla         | 141.1252125 | -0.252770339 | 0.1699721 | -1.487129 | 0.136981 | 0.673303 |
| si:dkey-14k9.3   | 108.6886916 | -0.063465023 | 0.1887319 | -0.336271 | 0.736667 | 0.972535 |
| rassf8a          | 66.82998543 | 0.057675816  | 0.2515761 | 0.229258  | 0.818668 | 0.981594 |
| akr1b1.2         | 110.4719064 | 0.472790164  | 0.1910137 | 2.475164  | 0.013318 | 0.207028 |
| cax1             | 45.42660027 | -0.104723727 | 0.2907272 | -0.360213 | 0.718688 | 0.969092 |
| ticrr            | 219.6253413 | -0.20559046  | 0.1428786 | -1.438917 | 0.150174 | 0.698387 |
| alkbh3           | 118.6316127 | -0.160210972 | 0.1915562 | -0.836366 | 0.402949 | 0.90084  |
| tafa5b           | 175.0129205 | -0.071519432 | 0.1561615 | -0.457984 | 0.646964 | 0.960362 |
| nfybb            | 265.776299  | -0.30240259  | 0.1429303 | -2.115735 | 0.034367 | 0.360397 |
| lrrc10           | 12.36412099 | 0.488775439  | 0.54829   | 0.8914542 | 0.372686 | 0.892868 |
| clta             | 5152.19943  | 0.023007571  | 0.0683493 | 0.3366173 | 0.736405 | 0.972535 |
| nansa            | 597.4792723 | -0.036289763 | 0.0967984 | -0.3749   | 0.707735 | 0.968664 |
| nek8             | 66.57920087 | 0.136186529  | 0.2425485 | 0.5614817 | 0.574469 | 0.950037 |
| rab34a           | 137.2651079 | 0.114380414  | 0.1756308 | 0.6512548 | 0.514882 | 0.937646 |
| asb15a           | 150.523323  | 0.195296746  | 0.1822293 | 1.0717085 | 0.283851 | 0.844676 |
| lmod2a           | 1.49754665  | -1.062363946 | 1.7496145 | -0.607199 | 0.543719 | NA       |
| rb12             | 288.240974  | 0.019737804  | 0.1334485 | 0.1479057 | 0.882417 | 0.988344 |
| slc13a1          | 165.2316395 | -0.745850185 | 0.1936836 | -3.850869 | 0.000118 | 0.005608 |
| elavl4           | 6413.52884  | 0.018500874  | 0.0678247 | 0.272775  | 0.785026 | 0.97627  |
| usp3             | 195.499836  | -0.144100994 | 0.1536611 | -0.937785 | 0.348355 | 0.880195 |
| cal2             | 21.27044499 | 0.36220087   | 0.4358681 | 0.8309874 | 0.405981 | 0.901305 |
| msrb3            | 456.9480844 | 0.314533543  | 0.1105575 | 2.8449777 | 0.004441 | 0.094639 |
| hic11            | 305.7521698 | -0.05960833  | 0.1301732 | -0.457915 | 0.647013 | 0.960362 |
| irf7             | 110.6291201 | -0.281003466 | 0.1944847 | -1.444862 | 0.148497 | 0.696298 |
| ANKRD50          | 225.8579655 | 0.2730202    | 0.155817  | 1.7521851 | 0.079742 | 0.548458 |
| si:dkey-39a18.1  | 33.80233532 | -0.308880855 | 0.3280103 | -0.94168  | 0.346356 | 0.879249 |
| ifnglr           | 0 NA        | NA           | NA        | NA        | NA       | NA       |
| il26             | 1.805681893 | 0.297287591  | 1.5041014 | 0.1976513 | 0.843318 | NA       |
| il22             | 4.484643323 | -1.189880749 | 1.0142747 | -1.173135 | 0.240742 | NA       |
| mdml             | 46.38827173 | 0.087593745  | 0.3022586 | 0.2897974 | 0.771971 | 0.975687 |
| calua            | 1675.719534 | 0.198347752  | 0.0778791 | 2.5468681 | 0.010869 | 0.180962 |
| opnlsw1          | 45416.23535 | 0.371200098  | 0.0814901 | 4.5551552 | 5.23E-06 | 0.000414 |
| tnpo3            | 1020.493604 | -0.021476283 | 0.0837615 | -0.256398 | 0.797643 | 0.978668 |
| irf5             | 91.83072314 | -0.298026972 | 0.2103655 | -1.416711 | 0.156568 | 0.706842 |
| ccdc87           | 8.625234117 | -0.122881884 | 0.6472275 | -0.189859 | 0.84942  | NA       |
| cntn1b           | 832.5561626 | 0.139982607  | 0.0913007 | 1.5332038 | 0.125226 | 0.654648 |

|                    |             |              |           |           |          |          |
|--------------------|-------------|--------------|-----------|-----------|----------|----------|
| pdzrn4             | 479.6014303 | -0.058014296 | 0.1109552 | -0.522863 | 0.60107  | 0.956045 |
| zcrbl              | 118.4554394 | -0.181131175 | 0.2007104 | -0.90245  | 0.366818 | 0.88734  |
| pphln1             | 781.0537012 | 0.021666116  | 0.089743  | 0.2414241 | 0.809226 | 0.980642 |
| prickle1b          | 750.098246  | 0.050620556  | 0.0974577 | 0.5194104 | 0.603475 | 0.956045 |
| myca               | 885.0480232 | -0.030300338 | 0.0936613 | -0.32351  | 0.746309 | 0.97419  |
| mrpl23             | 750.9877826 | -0.162697277 | 0.0926779 | -1.755513 | 0.079172 | 0.547489 |
| dclrelc            | 245.3709117 | -0.127725661 | 0.1342141 | -0.951656 | 0.341272 | 0.878134 |
| meigl              | 64.03792225 | -0.070388008 | 0.2389942 | -0.294518 | 0.768362 | 0.975687 |
| tspan9b            | 251.7404111 | 0.056281719  | 0.1340765 | 0.4197732 | 0.674651 | 0.965257 |
| adm2a              | 75.39296939 | -0.222640272 | 0.235698  | -0.9446   | 0.344863 | 0.878434 |
| ciapin1            | 656.4889205 | 0.072724789  | 0.0998356 | 0.7284454 | 0.466341 | 0.923908 |
| gucalg             | 60.41337696 | 0.40661553   | 0.249088  | 1.632417  | 0.102592 | 0.608473 |
| cped1              | 382.2512987 | 0.102801307  | 0.1151178 | 0.8930096 | 0.371852 | 0.892248 |
| stab2              | 118.9885967 | -0.007621209 | 0.2113421 | -0.036061 | 0.971234 | 0.996315 |
| ppfibpla           | 473.7228479 | -0.144229458 | 0.108527  | -1.328973 | 0.183857 | 0.747376 |
| sytl0              | 195.4496807 | 0.121863268  | 0.1513047 | 0.8054161 | 0.42058  | 0.90651  |
| si:ch211-161n3.4   | 2.512227917 | 0.978540643  | 1.3795503 | 0.7093186 | 0.478127 | NA       |
| tmtc2a             | 267.4739311 | -0.002544952 | 0.1311748 | -0.019401 | 0.984521 | 0.996944 |
| mettl25            | 53.94899065 | 0.040358037  | 0.2647136 | 0.1524593 | 0.878825 | 0.987881 |
| ccdc59             | 33.74727933 | 0.161356227  | 0.333889  | 0.4832631 | 0.628909 | 0.957354 |
| cracr2ab           | 21.44296897 | -0.580595847 | 0.4281657 | -1.356008 | 0.175097 | 0.735545 |
| prmt8b             | 209.3016501 | 0.263221772  | 0.1468128 | 1.7929079 | 0.072988 | 0.526929 |
| asb13a.2           | 9.003724326 | 0.461328018  | 0.6606333 | 0.6983118 | 0.484982 | NA       |
| cryla              | 2679.484868 | -0.02658284  | 0.0710034 | -0.374388 | 0.708116 | 0.968664 |
| PYURF              | 141.8787624 | -0.091843081 | 0.1892161 | -0.485387 | 0.627402 | 0.957354 |
| cnbpa              | 3015.81896  | -0.011982548 | 0.0687248 | -0.174356 | 0.861586 | 0.985841 |
| zgc:103499         | 160.3613892 | 0.135876858  | 0.1592175 | 0.8534041 | 0.393435 | 0.898076 |
| avprlab            | 88.36400764 | 0.043164457  | 0.2362647 | 0.1826953 | 0.855037 | 0.985174 |
| srgap1b            | 812.7144722 | -0.040692457 | 0.0946788 | -0.429795 | 0.667345 | 0.964736 |
| si:ch211-125a15.1  | 160.5661003 | -0.208542371 | 0.1664864 | -1.252609 | 0.210348 | 0.778043 |
| si:dkey-106n21.1   | 24.52295866 | 0.68734934   | 0.4218173 | 1.6294953 | 0.103208 | 0.609625 |
| si:ch211-68a17.7   | 228.3425657 | 0.123441399  | 0.1620091 | 0.7619414 | 0.446095 | 0.917154 |
| acanb              | 148.4021397 | 0.240340701  | 0.1669445 | 1.4396447 | 0.149968 | 0.697935 |
| fbxl14b            | 716.364812  | 0.127777507  | 0.0943649 | 1.3540794 | 0.175711 | 0.736411 |
| hapln3             | 132.8353114 | 0.288338279  | 0.1739791 | 1.6573155 | 0.097456 | 0.595884 |
| mfge8b             | 350.5091292 | 0.114011273  | 0.1300499 | 0.876673  | 0.380664 | 0.895192 |
| abhd2b             | 221.7163871 | 0.101680073  | 0.1381935 | 0.7357806 | 0.461864 | 0.922466 |
| rlbplb             | 244.4756894 | -0.258215404 | 0.1752979 | -1.473009 | 0.140749 | 0.681252 |
| lrtm2b             | 93.53485048 | 0.211645714  | 0.220975  | 0.9577813 | 0.338173 | 0.876778 |
| samm50             | 1055.676529 | 0.105945072  | 0.0855663 | 1.2381641 | 0.215655 | 0.78305  |
| mcm10              | 106.5838931 | 0.003583471  | 0.1978522 | 0.0181119 | 0.98555  | 0.996944 |
| tnnt2e             | 832.0517687 | 0.112510174  | 0.1050062 | 1.0714626 | 0.283961 | 0.844697 |
| zgc:101783         | 239.4651528 | -0.237138537 | 0.137634  | -1.722965 | 0.084895 | 0.560519 |
| lyrm5b             | 36.62646242 | -0.744843651 | 0.323363  | -2.303429 | 0.021255 | 0.275144 |
| cart2              | 72.71391365 | -0.004541799 | 0.2272415 | -0.019987 | 0.984054 | 0.996944 |
| si:dkey-14d8.7     | 16.93009187 | -0.310652359 | 0.4925394 | -0.630716 | 0.528226 | 0.941768 |
| si:dkey-14d8.6     | 34.89832624 | -0.198296656 | 0.3415978 | -0.580497 | 0.561579 | 0.948728 |
| mapk11             | 296.8593937 | 0.014945885  | 0.1412398 | 0.1058192 | 0.915726 | 0.991314 |
| si:dkey-14d8.20    | 53.03661746 | -0.058217816 | 0.281199  | -0.207034 | 0.835983 | 0.984089 |
| zgc:113263         | 674.0569012 | -0.287916747 | 0.0973618 | -2.957184 | 0.003105 | 0.073687 |
| apex1              | 1888.807955 | -0.096772825 | 0.079652  | -1.214946 | 0.224387 | 0.79161  |
| osgep              | 184.0957243 | -0.142652969 | 0.1651644 | -0.863703 | 0.387751 | 0.896133 |
| si:ch211-214j24.10 | 998.5001817 | -0.125086551 | 0.0999152 | -1.251927 | 0.210596 | 0.778338 |
| ccdc167            | 233.2413229 | -0.127510871 | 0.145964  | -0.873578 | 0.382348 | 0.895192 |

|                  |             |              |           |           |          |          |
|------------------|-------------|--------------|-----------|-----------|----------|----------|
| galnt8b.1        | 41.37787251 | -0.291204287 | 0.3186659 | -0.913823 | 0.36081  | 0.885686 |
| rad51ap1         | 111.874285  | -0.106327181 | 0.1861229 | -0.571274 | 0.567814 | 0.948739 |
| fgf23            | 7.185158702 | 1.376123048  | 0.7314625 | 1.8813309 | 0.059927 | NA       |
| fgf6b            | 5.507163081 | -0.092962368 | 0.8216518 | -0.113141 | 0.909919 | NA       |
| cebpz            | 560.4022728 | -0.220629751 | 0.1031002 | -2.139954 | 0.032359 | 0.350031 |
| tigarb           | 107.1082597 | 0.078212901  | 0.210191  | 0.3721039 | 0.709815 | 0.968928 |
| asb15b           | 7.314660455 | -0.794068057 | 0.7183358 | -1.105427 | 0.268974 | NA       |
| lmod2b           | 43.1390607  | 0.269521534  | 0.3089869 | 0.872275  | 0.383058 | 0.895192 |
| plekha5          | 1103.564675 | -0.095751601 | 0.1002094 | -0.955515 | 0.339317 | 0.87805  |
| frs2a            | 33.11758962 | 0.056793536  | 0.3325041 | 0.1708055 | 0.864377 | 0.98601  |
| yeats4           | 396.68644   | -0.21760231  | 0.1136343 | -1.914935 | 0.055501 | 0.461579 |
| ube2nb           | 1053.63828  | 0.005093422  | 0.0962932 | 0.0528949 | 0.957816 | 0.99467  |
| nudt4b           | 417.6632875 | 0.23689035   | 0.1144319 | 2.0701427 | 0.038439 | 0.384468 |
| gas2l3           | 148.4912919 | 0.154405619  | 0.180395  | 0.8559305 | 0.392036 | 0.897688 |
| scaf11           | 1131.021079 | -0.166634747 | 0.085914  | -1.939553 | 0.052434 | 0.449428 |
| slc38a2          | 2565.007154 | 0.212990733  | 0.0875638 | 2.4324058 | 0.014999 | 0.224348 |
| mmp30            | 423.6527592 | 0.303485154  | 0.1366274 | 2.221261  | 0.026333 | 0.312554 |
| acat1            | 1832.302761 | 0.116842418  | 0.077312  | 1.511311  | 0.130709 | 0.662797 |
| kctd15a          | 732.6780352 | 0.237815921  | 0.1004542 | 2.3674058 | 0.017913 | 0.247704 |
| si:ch211-152c2.3 | 480.0831694 | 0.174205979  | 0.1090184 | 1.5979497 | 0.110054 | 0.624518 |
| agbl5            | 303.1834059 | -0.157977816 | 0.1360718 | -1.160988 | 0.245647 | 0.815431 |
| nr2e3            | 271.1354031 | -0.031866654 | 0.158664  | -0.200844 | 0.840821 | 0.985092 |
| dynlt1           | 71.26167812 | -0.36073552  | 0.2659491 | -1.356408 | 0.174969 | 0.735545 |
| tmem181          | 674.8932037 | -0.031549307 | 0.1121575 | -0.281295 | 0.778484 | 0.975942 |
| tulp4a           | 642.7594296 | -0.017292336 | 0.1077036 | -0.160555 | 0.872444 | 0.987846 |
| mrps10           | 245.9540878 | -0.100825555 | 0.1648886 | -0.611477 | 0.540884 | 0.944633 |
| si:ch211-51e12.7 | 3005.258935 | -0.10065532  | 0.0736823 | -1.366071 | 0.171917 | 0.730757 |
| crabp1a          | 494.4082899 | 0.046141384  | 0.1131013 | 0.4079651 | 0.683299 | 0.965476 |
| slc25a44a        | 27.46381231 | 0.31206238   | 0.3905458 | 0.7990417 | 0.424266 | 0.908243 |
| psma4            | 1547.083152 | -0.068410554 | 0.0799514 | -0.855651 | 0.392191 | 0.897688 |
| oaz2a            | 2359.65603  | 0.104610279  | 0.0780967 | 1.3394962 | 0.180409 | 0.741452 |
| rbpms2a          | 2268.946473 | -0.058225368 | 0.0740709 | -0.786076 | 0.431823 | 0.912787 |
| cpebl1a          | 19.5091976  | 0.345235739  | 0.4423823 | 0.7804013 | 0.435155 | 0.914408 |
| immp11           | 42.68429697 | -0.352750419 | 0.2996907 | -1.177048 | 0.239176 | 0.807768 |
| pax6b            | 857.1228166 | 0.074326722  | 0.111005  | 0.6695797 | 0.503126 | 0.935304 |
| slc6a1a          | 489.4824377 | 0.120069657  | 0.1129982 | 1.0625801 | 0.287972 | 0.845979 |
| syn2a            | 2627.155619 | 0.10761449   | 0.0719803 | 1.4950557 | 0.1349   | 0.670689 |
| sec24d           | 1106.085307 | 0.006823904  | 0.0980958 | 0.0695637 | 0.944541 | 0.993409 |
| hrc              | 2843.318856 | 0.141538753  | 0.0964323 | 1.4677532 | 0.142171 | 0.683847 |
| kat5b            | 496.8470288 | -0.123487998 | 0.1081812 | -1.141492 | 0.253665 | 0.823394 |
| prlrb            | 10.15374304 | 0.445497854  | 0.5916944 | 0.7529188 | 0.451499 | NA       |
| kcnk10b          | 7.686117375 | 0.380410401  | 0.6774592 | 0.5615252 | 0.57444  | NA       |
| gpr65            | 0.31437473  | -1.788572922 | 3.5930657 | -0.497785 | 0.618636 | NA       |
| egfl6            | 1834.395296 | 0.271405494  | 0.0868732 | 3.1241552 | 0.001783 | 0.049384 |
| csf3r            | 8.444168541 | 0.614344503  | 0.6930188 | 0.886476  | 0.375361 | NA       |
| spg11            | 448.0234893 | -0.012638359 | 0.1201196 | -0.105215 | 0.916205 | 0.991314 |
| sidt2            | 902.0016154 | -0.199341437 | 0.1068916 | -1.864893 | 0.062196 | 0.487078 |
| chchd6b          | 606.9497261 | 0.008664937  | 0.1039689 | 0.0833416 | 0.93358  | 0.992702 |
| zgc:l53704       | 754.7704502 | 0.040851256  | 0.1029296 | 0.3968855 | 0.691452 | 0.967305 |
| si:ch73-55i23.1  | 1.343078476 | -0.679794512 | 1.7232066 | -0.394494 | 0.693216 | NA       |
| zbtb43           | 4.864267533 | 0.283942516  | 0.8819076 | 0.321964  | 0.74748  | NA       |
| arf4a            | 397.2472891 | 0.093289444  | 0.1142949 | 0.8162169 | 0.414376 | 0.906237 |
| saa              | 5.833548158 | -2.036597977 | 0.9082933 | -2.242225 | 0.024947 | NA       |
| necap2           | 729.3729016 | -0.084568897 | 0.1177056 | -0.718478 | 0.472462 | 0.924838 |

|                     |              |               |            |            |           |           |
|---------------------|--------------|---------------|------------|------------|-----------|-----------|
| med20               | 231. 8829274 | -0. 105093373 | 0. 1371707 | -0. 76615  | 0. 443587 | 0. 916631 |
| tmcc2               | 306. 2952872 | -0. 036977156 | 0. 1410572 | -0. 262143 | 0. 793211 | 0. 977937 |
| kdm2bb              | 742. 59613   | -0. 071864885 | 0. 0929025 | -0. 773552 | 0. 439196 | 0. 916082 |
| slc47a1             | 102. 5678677 | 0. 087679388  | 0. 2002944 | 0. 4377525 | 0. 661566 | 0. 964237 |
| rasl11a             | 148. 7463832 | -0. 004516365 | 0. 1675056 | -0. 026962 | 0. 97849  | 0. 996762 |
| kcna6a              | 74. 70238047 | 0. 18401947   | 0. 2320329 | 0. 7930749 | 0. 427734 | 0. 91075  |
| snailb              | 481. 2745975 | -0. 26600231  | 0. 1079814 | -2. 463409 | 0. 013762 | 0. 210896 |
| CU914487. 1         | 19. 07597195 | -0. 223408306 | 0. 4723593 | -0. 472963 | 0. 63624  | 0. 958561 |
| tmed7               | 1339. 409066 | 0. 049852663  | 0. 087554  | 0. 5693936 | 0. 569089 | 0. 948983 |
| pym1                | 202. 0512668 | -0. 167069015 | 0. 1580575 | -1. 057014 | 0. 290505 | 0. 846262 |
| zgc:110339          | 1143. 53748  | 0. 02978306   | 0. 0953901 | 0. 3122237 | 0. 754871 | 0. 97522  |
| slc27a6             | 44. 43512221 | 0. 026359665  | 0. 2941793 | 0. 0896041 | 0. 928602 | 0. 992702 |
| CT027815. 1         | 200. 2438007 | 0. 086716511  | 0. 1604768 | 0. 540368  | 0. 588943 | 0. 953345 |
| zgc:77838           | 129. 8196746 | -0. 02262726  | 0. 1944209 | -0. 116383 | 0. 907349 | 0. 990702 |
| snx16               | 264. 6138913 | 0. 159254684  | 0. 1411541 | 1. 1282329 | 0. 259222 | 0. 82755  |
| stk11               | 777. 0207255 | -0. 022350086 | 0. 0918349 | -0. 243372 | 0. 807717 | 0. 980642 |
| cacng6b             | 42. 04325517 | -0. 102975124 | 0. 31284   | -0. 329162 | 0. 742033 | 0. 973154 |
| bloc1s2             | 180. 6664459 | -0. 118139929 | 0. 154305  | -0. 765626 | 0. 443899 | 0. 916631 |
| brd2b               | 101. 8190433 | -0. 154634633 | 0. 2076095 | -0. 744834 | 0. 456372 | 0. 921215 |
| dhrs11a             | 60. 56986198 | -0. 056371363 | 0. 2570679 | -0. 219286 | 0. 826427 | 0. 982196 |
| si:ch211-283g2. 1   | 74. 47125055 | 0. 004687306  | 0. 2325239 | 0. 0201584 | 0. 983917 | 0. 996944 |
| si:ch211-283g2. 3   |              | 0 NA          | NA         | NA         | NA        | NA        |
| ebp                 | 138. 1490983 | -0. 308821055 | 0. 1706973 | -1. 809173 | 0. 070424 | 0. 519033 |
| rab10               | 2262. 950345 | 0. 173098227  | 0. 0735468 | 2. 35358   | 0. 018594 | 0. 254199 |
| caskin1             | 1362. 028845 | -0. 028097975 | 0. 0863676 | -0. 32533  | 0. 744931 | 0. 974094 |
| rab11fip1a          | 141. 863227  | 0. 152393855  | 0. 1709337 | 0. 891538  | 0. 372641 | 0. 892868 |
| tk2                 | 198. 8750915 | 0. 008817943  | 0. 1546873 | 0. 057005  | 0. 954541 | 0. 994533 |
| dynlt3              | 1084. 445881 | -0. 012111664 | 0. 0922584 | -0. 13128  | 0. 895554 | 0. 989814 |
| b3galnt2            | 115. 878128  | -0. 131676571 | 0. 2026172 | -0. 649879 | 0. 515771 | 0. 9377   |
| zgc:112038          | 7. 117663688 | -0. 900968083 | 0. 7193983 | -1. 252391 | 0. 210427 | NA        |
| zgc:162025          | 33. 95329789 | -0. 189548745 | 0. 3518454 | -0. 538727 | 0. 590075 | 0. 953903 |
| si:ch211-170d8. 5   | 32. 33584251 | 0. 67896273   | 0. 3575538 | 1. 8989105 | 0. 057576 | 0. 470971 |
| prkab1b             | 661. 6578531 | -0. 137571334 | 0. 1017029 | -1. 352678 | 0. 176159 | 0. 736595 |
| tnfaip812b          | 130. 6820911 | -0. 198919138 | 0. 1932111 | -1. 029543 | 0. 303224 | 0. 85729  |
| b4galnt4a           | 133. 9106387 | 0. 118287828  | 0. 1769368 | 0. 6685314 | 0. 503794 | 0. 935314 |
| RPS17               | 10080. 69746 | -0. 296328048 | 0. 081902  | -3. 618081 | 0. 000297 | 0. 011738 |
| CR339041. 1         | 2. 625644215 | 1. 597784907  | 1. 3735324 | 1. 163267  | 0. 244721 | NA        |
| CR339041. 2         | 4. 751885588 | -0. 166843382 | 0. 9489733 | -0. 175815 | 0. 86044  | NA        |
| mhc11fa             | 8. 061286832 | -0. 448565471 | 0. 703349  | -0. 637757 | 0. 523632 | NA        |
| mhc11ga             | 3. 475778967 | -0. 997344656 | 1. 0431524 | -0. 956087 | 0. 339028 | NA        |
| si:ch211-113a14. 24 | 4. 296999548 | -0. 425853306 | 0. 9034068 | -0. 471386 | 0. 637365 | NA        |
| nfatc3b             | 162. 3244442 | -0. 015992952 | 0. 1619695 | -0. 09874  | 0. 921344 | 0. 992138 |
| slc7a10b            | 209. 4609677 | 0. 073840571  | 0. 1518893 | 0. 4861473 | 0. 626863 | 0. 957354 |
| faap24              | 14. 22963842 | -0. 755561158 | 0. 5548453 | -1. 361751 | 0. 173276 | 0. 732435 |
| si:ch211-113a14. 18 | 10. 7217266  | 1. 065594984  | 0. 607412  | 1. 7543198 | 0. 079376 | NA        |
| hist1h2a4           | 2. 698914385 | 1. 161843446  | 2. 6284126 | 0. 4420324 | 0. 658466 | NA        |
| zgc:173552          | 4. 87880366  | 0. 939791974  | 0. 9472679 | 0. 9921079 | 0. 321145 | NA        |
| ada2a               | 352. 5460279 | -0. 148933389 | 0. 1176116 | -1. 266315 | 0. 2054   | 0. 773635 |
| ccnd2a              | 190. 3407823 | 0. 294258597  | 0. 1592862 | 1. 8473573 | 0. 064695 | 0. 497355 |
| tigara              | 51. 26516584 | 0. 245028225  | 0. 2794641 | 0. 8767789 | 0. 380607 | 0. 895192 |
| rprip11             | 60. 71356253 | 0. 07116864   | 0. 2503222 | 0. 2843081 | 0. 776174 | 0. 975826 |
| pdhx                | 540. 1339509 | 0. 05899583   | 0. 1081755 | 0. 5453713 | 0. 585498 | 0. 95262  |
| igl4v10             | 0. 513487682 | -0. 887846295 | 2. 6557956 | -0. 334305 | 0. 738149 | NA        |
| trim44              | 185. 8236739 | -0. 054122265 | 0. 1508718 | -0. 35873  | 0. 719797 | 0. 969318 |

|                   |             |              |           |           |          |          |
|-------------------|-------------|--------------|-----------|-----------|----------|----------|
| CABZ01080568.1    | 293.5476642 | 0.495428928  | 0.1514279 | 3.2717153 | 0.001069 | 0.03262  |
| sntb2             | 289.2883853 | 0.020060907  | 0.1341574 | 0.1495327 | 0.881133 | 0.988177 |
| fhod1             | 215.056885  | 0.012987144  | 0.1468364 | 0.0884463 | 0.929522 | 0.992702 |
| rplp0             | 20794.14485 | -0.248624075 | 0.1762422 | -1.410696 | 0.158334 | 0.709224 |
| dhx33             | 56.88943441 | 0.010627177  | 0.2598896 | 0.0408911 | 0.967383 | 0.996315 |
| zgc:113426        | 31.12109925 | -0.356318035 | 0.366021  | -0.973491 | 0.330309 | 0.874098 |
| si:dkeyp-110c12.3 | 1.9678137   | 1.585325189  | 1.440232  | 1.1007429 | 0.271009 | NA       |
| brdlb             | 611.9718115 | 0.022601318  | 0.1025601 | 0.2203715 | 0.825582 | 0.982196 |
| fnbp4             | 2703.558027 | -0.058192771 | 0.0746686 | -0.779348 | 0.435775 | 0.914408 |
| BX664721.1        | 0.981193923 | 0.036684775  | 1.9489489 | 0.0188229 | 0.984982 | NA       |
| CU469568.1        | 53.23714502 | 0.325342438  | 0.2750772 | 1.1827314 | 0.236916 | 0.805854 |
| btr12             | 62.01060059 | -0.201886278 | 0.2531881 | -0.797377 | 0.425232 | 0.908835 |
| ptrz1a            | 1044.520621 | 0.035000486  | 0.0841091 | 0.4161319 | 0.677313 | 0.965257 |
| aass              | 430.3904739 | 0.257488941  | 0.1308463 | 1.9678739 | 0.049083 | 0.435115 |
| swap70a           | 60.6197305  | 0.241972229  | 0.246443  | 0.9818588 | 0.326169 | 0.872073 |
| hyal4             | 256.8612582 | 0.136312607  | 0.1381885 | 0.9864248 | 0.323925 | 0.870928 |
| tmef2a            | 907.7295092 | -0.096642025 | 0.0857725 | -1.126726 | 0.259858 | 0.828288 |
| si:dkeyp-19e1.3   | 112.7248514 | -0.1435601   | 0.1986485 | -0.722684 | 0.469874 | 0.924783 |
| ctu2              | 118.7215517 | -0.324727036 | 0.1878117 | -1.729003 | 0.083809 | 0.557501 |
| kcncla            | 592.5544186 | 0.12732285   | 0.1057538 | 1.2039554 | 0.228607 | 0.796028 |
| galns             | 206.2851268 | -0.218950109 | 0.1553735 | -1.409185 | 0.15878  | 0.709382 |
| cdt1              | 171.6957855 | -0.184958846 | 0.1668718 | -1.108389 | 0.267694 | 0.833349 |
| tes               | 279.90892   | -0.052270878 | 0.13769   | -0.379627 | 0.704222 | 0.968134 |
| ccdc33            | 1.535978683 | 1.070276215  | 1.659346  | 0.6449988 | 0.518928 | NA       |
| pkp3a             | 1316.95423  | 0.037540224  | 0.0828841 | 0.4529245 | 0.650603 | 0.960708 |
| zgc:158222        | 288.8321113 | -0.024701622 | 0.135426  | -0.182399 | 0.855269 | 0.985174 |
| stra6             | 852.5153534 | 0.169975678  | 0.0896771 | 1.8954183 | 0.058037 | 0.472311 |
| islr2             | 6366.784494 | 0.024383597  | 0.0690524 | 0.3531174 | 0.724    | 0.970402 |
| ush1c             | 244.2697559 | -0.882847956 | 0.1398702 | -6.311911 | 2.76E-10 | 6.12E-08 |
| abcc8             | 519.1466593 | 0.031701983  | 0.1053737 | 0.3008528 | 0.763527 | 0.975374 |
| kcnj11            | 147.7526174 | 0.37145879   | 0.1793685 | 2.0709251 | 0.038366 | 0.384124 |
| ankrd11           | 272.5977553 | -0.1620995   | 0.1272278 | -1.274089 | 0.202632 | 0.769545 |
| ist1              | 1791.424053 | -0.053088176 | 0.076804  | -0.691216 | 0.48943  | 0.931926 |
| dhodh             | 293.8963194 | -0.173636483 | 0.1269931 | -1.36729  | 0.171534 | 0.729995 |
| hp                | 6.153177061 | -0.931696183 | 0.8440224 | -1.103876 | 0.269647 | NA       |
| rsph10b           | 28.56684289 | 0.31842911   | 0.3687333 | 0.8635756 | 0.387821 | 0.896133 |
| kcnq4b            | 40.1137704  | 0.501345202  | 0.3212346 | 1.5606823 | 0.118599 | 0.642318 |
| fbn2a             | 82.18263249 | 0.092547557  | 0.2294995 | 0.4032581 | 0.686758 | 0.966376 |
| exoc311           | 144.1588895 | -0.042336732 | 0.1912632 | -0.221353 | 0.824817 | 0.982196 |
| prmt7             | 292.7297437 | 0.108622357  | 0.1269422 | 0.8556833 | 0.392173 | 0.897688 |
| hpxb              | 171.9793032 | -0.314974142 | 0.1814865 | -1.735524 | 0.082648 | 0.554782 |
| slc14a2           | 33.22189234 | 0.430643562  | 0.3412455 | 1.2619758 | 0.206958 | 0.774778 |
| pde5ab            | 16.11778994 | -0.857306196 | 0.4929889 | -1.738997 | 0.082035 | 0.552886 |
| cdk7              | 311.4856294 | 0.178470666  | 0.1230147 | 1.4508076 | 0.146833 | 0.693524 |
| nsmaf             | 295.6690186 | -0.304824149 | 0.1298757 | -2.347046 | 0.018923 | 0.256465 |
| slc30a5           | 627.8259746 | 0.081802957  | 0.0972811 | 0.8408925 | 0.400408 | 0.90084  |
| ccnbl             | 715.8243711 | -0.087931818 | 0.0986065 | -0.891745 | 0.37253  | 0.892868 |
| cyb5r2            | 261.7589621 | -0.703223534 | 0.1368185 | -5.139828 | 2.75E-07 | 3.40E-05 |
| plagl             | 151.0381496 | -0.039913642 | 0.1683014 | -0.237156 | 0.812536 | 0.981081 |
| edc3              | 384.3178999 | -0.078435397 | 0.1171862 | -0.669323 | 0.503289 | 0.935304 |
| kxd1              | 84.72733571 | -0.277100215 | 0.2235744 | -1.239409 | 0.215194 | 0.78279  |
| ergic2            | 322.6487597 | -0.002049256 | 0.1292774 | -0.015852 | 0.987353 | 0.997136 |
| pcxb              | 1097.469089 | -0.744388579 | 0.1049703 | -7.091421 | 1.33E-12 | 4.45E-10 |
| ugt2a4            | 698.3340111 | -0.622040952 | 0.1133822 | -5.486232 | 4.11E-08 | 6.10E-06 |



|                   |             |              |           |           |          |          |
|-------------------|-------------|--------------|-----------|-----------|----------|----------|
| ythdc1            | 1288.663874 | -0.093951262 | 0.089163  | -1.053702 | 0.292019 | 0.848075 |
| brmsl             | 231.4872051 | 0.058040806  | 0.1379878 | 0.4206227 | 0.674031 | 0.965257 |
| iscal             | 803.5223645 | 0.046590477  | 0.1025966 | 0.4541133 | 0.649747 | 0.960708 |
| selenom           | 275.1070861 | 0.056611562  | 0.1419678 | 0.3987634 | 0.690068 | 0.966857 |
| zpd               |             | 0 NA         | NA        | NA        | NA       | NA       |
| mmp15a            | 134.1823438 | -0.062041986 | 0.1768378 | -0.350841 | 0.725707 | 0.970402 |
| btr01             | 55.48350643 | -0.173313156 | 0.2700231 | -0.641846 | 0.520973 | 0.939056 |
| smulb             | 254.3300637 | -0.018297357 | 0.1471849 | -0.124315 | 0.901065 | 0.990121 |
| cd99              | 738.1914635 | 0.176524265  | 0.0918515 | 1.9218451 | 0.054625 | 0.457793 |
| STX3              | 174.9758798 | 0.030930206  | 0.1530678 | 0.2020687 | 0.839863 | 0.984979 |
| ndufs8a           | 3926.147745 | 0.04766578   | 0.0723188 | 0.6591066 | 0.509827 | 0.936253 |
| tmem187           | 47.5896638  | 0.558153682  | 0.2892777 | 1.9294736 | 0.053672 | 0.45394  |
| si:dkey-9i23.4    | 0.667059899 | 1.488443644  | 2.4079024 | 0.6181495 | 0.536477 | NA       |
| cav2              | 247.5875372 | -0.206829639 | 0.1366686 | -1.513366 | 0.130187 | 0.662797 |
| ciao2b            | 285.39082   | 0.142185257  | 0.1306537 | 1.0882607 | 0.27648  | 0.839541 |
| rrad              | 196.863565  | 0.081159912  | 0.1631385 | 0.4974907 | 0.618843 | 0.957354 |
| rtn4r12a          | 88.87500728 | 0.592877969  | 0.2663095 | 2.226274  | 0.025996 | 0.311101 |
| cabp2a            | 153.5653601 | 0.067315498  | 0.1718903 | 0.3916189 | 0.69534  | 0.96736  |
| si:ch73-109d9.1   | 106.8439213 | -0.078722213 | 0.1992805 | -0.395032 | 0.692819 | 0.96736  |
| cmtm4             | 17.41853229 | -0.296723184 | 0.4577586 | -0.648209 | 0.51685  | 0.938543 |
| pomgnt1           | 464.3197051 | 0.041639286  | 0.1066129 | 0.3905651 | 0.696119 | 0.96736  |
| tspan1            | 37.47111543 | 0.051003674  | 0.3339023 | 0.1527503 | 0.878595 | 0.987881 |
| akr1a1b           | 349.7960352 | -0.154374058 | 0.1173074 | -1.315979 | 0.188181 | 0.753063 |
| nxn11             | 96.32675832 | 0.44361529   | 0.2050524 | 2.1634239 | 0.030509 | 0.337781 |
| trim35-1          | 35.32724513 | 0.279611675  | 0.3287267 | 0.8505901 | 0.394997 | 0.899122 |
| caspb             | 804.7234059 | -0.113896831 | 0.1266902 | -0.899019 | 0.368643 | 0.888057 |
| ggt5a             | 265.3234908 | 0.226444874  | 0.132962  | 1.7030798 | 0.088553 | 0.569447 |
| parietopsin       | 1.157631196 | 2.488108944  | 1.9178096 | 1.2973702 | 0.194504 | NA       |
| pcolceb           | 690.6141732 | 0.019752372  | 0.1164023 | 0.1696905 | 0.865254 | 0.986367 |
| PAQR9             | 95.17921442 | 0.205973859  | 0.2242558 | 0.9184773 | 0.358369 | 0.884398 |
| col4a6            | 4483.418735 | 0.175940487  | 0.0709292 | 2.4805077 | 0.01312  | 0.204756 |
| col4a5            | 11458.28736 | 0.206352011  | 0.0867033 | 2.3799778 | 0.017314 | 0.243166 |
| si:dkeyp-93a5.2   |             | 0 NA         | NA        | NA        | NA       | NA       |
| dnajb9a           | 50.11965994 | -0.212543027 | 0.2763701 | -0.769052 | 0.441862 | 0.916336 |
| blcap             | 1021.145979 | -0.034098898 | 0.0853726 | -0.399413 | 0.689589 | 0.966799 |
| si:ch211-122f10.4 | 218.618697  | -0.251606554 | 0.1420426 | -1.771346 | 0.076503 | 0.538876 |
| gabarapb          | 2583.885267 | -0.086664308 | 0.0755275 | -1.147453 | 0.251194 | 0.820469 |
| cxcr1             | 10.90994557 | 0.455650919  | 0.6052672 | 0.7528095 | 0.451564 | NA       |
| CCKAR             | 24.22563079 | 0.060119126  | 0.4207618 | 0.1428816 | 0.886384 | 0.988936 |
| rbpjb             | 48.31463032 | -0.113538731 | 0.2780434 | -0.408349 | 0.683018 | 0.965476 |
| notch1b           | 284.9137619 | 0.075211313  | 0.1303434 | 0.5770242 | 0.563923 | 0.948739 |
| trim35-31         | 2.348514823 | -0.844313062 | 1.2558901 | -0.672283 | 0.501404 | NA       |
| agxta             | 256.1913341 | 0.275753637  | 0.1452272 | 1.8987746 | 0.057594 | 0.470971 |
| dtymk             | 134.6482253 | -0.235659392 | 0.1748093 | -1.348094 | 0.177628 | 0.738343 |
| atg4b             | 351.6336887 | -0.090469652 | 0.1189274 | -0.760713 | 0.446828 | 0.917154 |
| zgc:114041        | 32.17353636 | 0.223038573  | 0.35163   | 0.6342991 | 0.525886 | 0.940223 |
| mboat4            | 0.824006558 | 0.61083159   | 2.1185808 | 0.2883211 | 0.773101 | NA       |
| hexa              | 440.3892221 | 0.039127428  | 0.1136624 | 0.3442424 | 0.730664 | 0.97149  |
| crtc3             | 44.4722316  | 0.190724641  | 0.3008596 | 0.6339325 | 0.526125 | 0.94048  |
| ehf               | 13.43098832 | 0.47587525   | 0.5558251 | 0.8561601 | 0.391909 | 0.897688 |
| adamts15          | 95.1032321  | 0.136014769  | 0.2032535 | 0.6691878 | 0.503376 | 0.935304 |
| rag2              | 18.1705254  | 0.309313248  | 0.475803  | 0.6500868 | 0.515636 | 0.9377   |
| rag1              | 46.24534224 | -0.31675626  | 0.2808086 | -1.128015 | 0.259314 | 0.827577 |
| accs              | 245.5586023 | 0.207361036  | 0.1386879 | 1.4951629 | 0.134872 | 0.670689 |

|                   |             |              |           |           |          |          |
|-------------------|-------------|--------------|-----------|-----------|----------|----------|
| boka              | 167.6461025 | 0.022391451  | 0.163389  | 0.1370438 | 0.890996 | 0.989291 |
| gli3              | 220.3263509 | -0.097180229 | 0.1516845 | -0.640673 | 0.521735 | 0.939056 |
| slc1a2a           | 730.302228  | 0.346907538  | 0.1063239 | 3.2627424 | 0.001103 | 0.033311 |
| notch3            | 2206.979951 | 0.020039134  | 0.0766051 | 0.2615899 | 0.793638 | 0.977937 |
| acvr1bb           | 21.35143808 | 0.003590866  | 0.4114184 | 0.008728  | 0.993036 | 0.99854  |
| ptgs1             | 206.387023  | 0.178961406  | 0.1492876 | 1.1987695 | 0.230618 | 0.79878  |
| pbx4              | 3278.544978 | -0.008280432 | 0.0702865 | -0.11781  | 0.906218 | 0.990702 |
| lix1              | 365.9944469 | -0.26162159  | 0.1274281 | -2.053092 | 0.040064 | 0.391993 |
| lrrc8ab           | 455.4333061 | -0.147273661 | 0.1092729 | -1.347761 | 0.177735 | 0.738343 |
| il12rb2           | 17.5774267  | 0.056445733  | 0.4678099 | 0.1206596 | 0.903961 | 0.990291 |
| il23r             | 2.874060145 | 0.175591628  | 1.1472468 | 0.1530548 | 0.878355 | NA       |
| znf507            | 44.52523646 | -0.126233025 | 0.2989816 | -0.42221  | 0.672872 | 0.965257 |
| si:ch211-236k19.2 | 0.173729368 | -0.955901296 | 4.0804729 | -0.234262 | 0.814781 | NA       |
| uapl              | 452.8225926 | -0.232222329 | 0.1109132 | -2.093731 | 0.036284 | 0.372062 |
| zgc:171711        | 6.434388318 | -0.49593674  | 0.7744227 | -0.640395 | 0.521916 | NA       |
| eif2s1b           | 2438.596621 | -0.187120248 | 0.0808837 | -2.313449 | 0.020698 | 0.271768 |
| rbfox2            | 3055.652662 | 0.070498237  | 0.0752125 | 0.9373204 | 0.348594 | 0.880195 |
| znf541            | 3.817778069 | 1.173373341  | 1.0877206 | 1.0787451 | 0.280701 | NA       |
| fdx2              | 160.6791747 | 0.026950515  | 0.1646754 | 0.1636584 | 0.87     | 0.987395 |
| s1pr5b            | 5.12827744  | -0.276188339 | 0.8231363 | -0.335532 | 0.737224 | NA       |
| c3a.3             | 799.3797375 | 0.575700258  | 0.3057092 | 1.8831631 | 0.059678 | 0.478288 |
| btr02             | 113.0997796 | -0.033164522 | 0.1894312 | -0.175074 | 0.861021 | 0.985773 |
| zgc:114118        | 8.916297873 | 0.889534008  | 0.6408344 | 1.3880871 | 0.165111 | NA       |
| rcvrna            | 1183.193031 | 0.242944245  | 0.0990106 | 2.4537184 | 0.014139 | 0.214731 |
| aff2              | 317.111153  | -0.027825227 | 0.1282874 | -0.216898 | 0.828288 | 0.982721 |
| zgc:158564        | 1322.240237 | 0.230362605  | 0.0833359 | 2.7642665 | 0.005705 | 0.113266 |
| alkbh4            | 126.9070979 | -0.12023762  | 0.1794847 | -0.669904 | 0.502919 | 0.935304 |
| trim35-3          | 1.914913393 | -0.225421391 | 1.5437063 | -0.146026 | 0.883901 | NA       |
| rab1aa            | 416.6675015 | -0.012541399 | 0.1263598 | -0.099251 | 0.920939 | 0.992138 |
| slc22a18          | 395.2044544 | -0.165740877 | 0.1106116 | -1.498404 | 0.134028 | 0.669349 |
| cabp2b            | 108.2810248 | -0.012815448 | 0.2043141 | -0.062724 | 0.949986 | 0.99381  |
| osgn1             | 430.1837838 | -0.095401117 | 0.1167482 | -0.817152 | 0.413841 | 0.905864 |
| zmp:0000000634    | 78.10805576 | 0.384087131  | 0.236846  | 1.6216742 | 0.104873 | 0.612814 |
| rab33ba           | 281.3700719 | 0.002500194  | 0.1314167 | 0.0190249 | 0.984821 | 0.996944 |
| pimr198           |             | 0 NA         | NA        | NA        | NA       | NA       |
| zgc:171489        | 35.84139838 | 0.445280828  | 0.3241175 | 1.3738254 | 0.169496 | 0.726744 |
| uqcrc1            | 5101.207651 | 0.021699033  | 0.0742535 | 0.292229  | 0.770112 | 0.975687 |
| pimr196           | 0.31437473  | -1.788572922 | 3.5930657 | -0.497785 | 0.618636 | NA       |
| t1r5b             | 100.243556  | 0.506745305  | 0.2087501 | 2.4275214 | 0.015202 | 0.225685 |
| slc4a2b           | 92.61404641 | -0.220112349 | 0.2019172 | -1.090112 | 0.275664 | 0.839541 |
| abcf2b            | 85.04118815 | 0.274047557  | 0.2329113 | 1.1766179 | 0.239348 | 0.807932 |
| ftr98             | 1.452835086 | -1.011714448 | 1.6795834 | -0.60236  | 0.546934 | NA       |
| ociad1            | 660.4563608 | -0.02411107  | 0.0933564 | -0.258269 | 0.796199 | 0.978498 |
| ociad2            | 304.6476382 | -1.367291519 | 0.1328876 | -10.28908 | 7.89E-25 | 1.30E-21 |
| sgcb              | 349.6729265 | -1.228622711 | 0.1357819 | -9.048501 | 1.45E-19 | 1.19E-16 |
| spata18           | 52.71319218 | 0.397938602  | 0.2883484 | 1.3800619 | 0.167568 | 0.724734 |
| tbl3              | 615.1528012 | -0.182110758 | 0.117591  | -1.54868  | 0.121459 | 0.647929 |
| smarca5           | 2698.149653 | -0.008791616 | 0.0759935 | -0.115689 | 0.907899 | 0.990702 |
| si:dkey-156n14.3  | 662.1558572 | 0.057896201  | 0.0991517 | 0.5839151 | 0.559277 | 0.948478 |
| cacng1b           | 2.049235703 | -0.962029482 | 1.3853896 | -0.694411 | 0.487425 | NA       |
| il15              | 56.02194096 | 0.034528864  | 0.262555  | 0.131511  | 0.895371 | 0.989814 |
| cltb              | 147.948757  | 0.409950503  | 0.1764259 | 2.3236418 | 0.020145 | 0.266806 |
| higd2a            | 533.2218138 | 0.047135534  | 0.1122543 | 0.4198995 | 0.674559 | 0.965257 |
| faf2              | 924.5151926 | -0.01296486  | 0.0871639 | -0.148741 | 0.881758 | 0.988344 |

|                   |             |              |           |           |          |          |
|-------------------|-------------|--------------|-----------|-----------|----------|----------|
| zgc:66455         | 4.31299211  | -0.212183118 | 0.8982527 | -0.236218 | 0.813264 | NA       |
| b3gnt2a           | 3.927366378 | -1.187204437 | 1.0923885 | -1.086797 | 0.277127 | NA       |
| psmd12            | 1712.749356 | 0.108420913  | 0.0786964 | 1.3777109 | 0.168293 | 0.725919 |
| ccdc22            | 507.9141096 | -0.138627547 | 0.1096107 | -1.264726 | 0.205969 | 0.773798 |
| clndnd1b          | 269.2047406 | -0.10534118  | 0.1360276 | -0.77441  | 0.438688 | 0.915997 |
| pou2f3            | 160.8768414 | -0.235784197 | 0.1611821 | -1.462844 | 0.14351  | 0.686804 |
| pcgf5b            | 32.74853622 | 0.026981984  | 0.3336331 | 0.0808732 | 0.935543 | 0.992702 |
| tmed8             | 493.0561314 | 0.163911349  | 0.1033257 | 1.5863555 | 0.112659 | 0.628587 |
| pkz               | 17.98130938 | 0.401065875  | 0.4604204 | 0.8710861 | 0.383707 | 0.895192 |
| gpr6              | 7.246993234 | -0.028323449 | 0.7563899 | -0.037446 | 0.97013  | NA       |
| dnmt3ba           | 930.2458612 | 0.029866094  | 0.0849118 | 0.3517307 | 0.72504  | 0.970402 |
| pak6b             | 69.51946785 | 0.251378526  | 0.2605724 | 0.9647167 | 0.334687 | 0.875699 |
| mgat2             | 324.8262701 | -0.190831552 | 0.1292158 | -1.476844 | 0.139718 | 0.678481 |
| si:dkey-7111.1    | 53.04895954 | 0.287041291  | 0.2786166 | 1.0302377 | 0.302898 | 0.85729  |
| crfb12            | 88.46305656 | 0.471205598  | 0.233346  | 2.0193428 | 0.043452 | 0.409149 |
| ankrd12           | 923.0774149 | -0.205610722 | 0.0919741 | -2.235528 | 0.025383 | 0.308303 |
| ppp1r12c          | 526.0349797 | -0.057336952 | 0.1020837 | -0.561666 | 0.574344 | 0.950037 |
| si:ch211-256e16.3 | 245.2963259 | -0.092793992 | 0.1491518 | -0.622145 | 0.533847 | 0.943276 |
| bicd12            | 152.0049884 | -0.251272058 | 0.167221  | -1.502634 | 0.132933 | 0.667628 |
| si:dkey-43k4.3    | 27.17695176 | -0.397812467 | 0.3732594 | -1.06578  | 0.286523 | 0.845942 |
| syngn2a           | 518.6574469 | -0.201403153 | 0.1135875 | -1.773111 | 0.07621  | 0.538016 |
| inha              | 0.365141898 | 1.973577737  | 3.3927314 | 0.5817076 | 0.560764 | NA       |
| spred2a           | 447.010446  | 0.065110557  | 0.116515  | 0.5588169 | 0.576287 | 0.950611 |
| mia               | 813.9876737 | -0.057597624 | 0.0913056 | -0.630823 | 0.528157 | 0.941768 |
| actr2a            | 1595.270911 | -0.038014567 | 0.0886603 | -0.428766 | 0.668093 | 0.964736 |
| hspb2             | 67.95578403 | 0.25470919   | 0.2725859 | 0.934418  | 0.350088 | 0.880195 |
| rhpn1             | 5.940875815 | 0.824204419  | 0.7893904 | 1.0441024 | 0.296438 | NA       |
| porcn1            | 156.4010779 | -0.154440779 | 0.1627662 | -0.948851 | 0.342697 | 0.878434 |
| pisd              | 813.0985177 | 0.101625761  | 0.0966293 | 1.051708  | 0.292934 | 0.848631 |
| dusp10            | 4.281636488 | 0.017568423  | 0.910727  | 0.0192905 | 0.984609 | NA       |
| gsk3bb            | 36.62339484 | -0.114592384 | 0.3309498 | -0.346253 | 0.729153 | 0.970822 |
| igfbp2a           | 1149.244205 | 0.275683823  | 0.0999282 | 2.7588179 | 0.005801 | 0.114711 |
| tafla             | 106.8846062 | 0.101311673  | 0.1910145 | 0.5303873 | 0.595843 | 0.954434 |
| pcdd11            | 984.1898613 | -0.087393231 | 0.0885473 | -0.986967 | 0.323659 | 0.870928 |
| arhgef11          | 917.3549507 | 0.018029896  | 0.0964244 | 0.1869848 | 0.851673 | 0.985174 |
| pcdh18b           | 1433.832484 | -0.029113787 | 0.0820152 | -0.35498  | 0.722604 | 0.970375 |
| arhgap45a         | 13.99275157 | 0.433112939  | 0.5468006 | 0.7920857 | 0.428311 | 0.911082 |
| zgc:110789        | 148.5591981 | -0.503205111 | 0.1747074 | -2.880273 | 0.003973 | 0.086636 |
| lin28b            | 4.977601262 | 0.543509786  | 0.9033323 | 0.6016721 | 0.547392 | NA       |
| tsgal0            | 65.31635023 | 0.080445226  | 0.2575827 | 0.3123084 | 0.754806 | 0.975207 |
| calcoco2          | 55.80291821 | 0.275824607  | 0.2698183 | 1.0222605 | 0.306658 | 0.86012  |
| stx4              | 358.2739134 | 0.145324012  | 0.123573  | 1.1760179 | 0.239588 | 0.808091 |
| sgms2a            | 63.83326225 | -0.176276718 | 0.243608  | -0.723608 | 0.469306 | 0.924505 |
| snx11             | 248.3498702 | -0.027882828 | 0.1419985 | -0.19636  | 0.844328 | 0.985174 |
| mullb             | 84.10743973 | -0.100492019 | 0.2204581 | -0.455833 | 0.64851  | 0.960708 |
| CR762407.1        | 20.32133164 | -0.019196108 | 0.4186222 | -0.045855 | 0.963425 | 0.995927 |
| ubxn10            | 7.132604418 | -0.439663095 | 0.7382231 | -0.595569 | 0.551463 | NA       |
| tial              | 1586.285065 | 0.14514812   | 0.0825281 | 1.7587727 | 0.078616 | 0.546417 |
| cptp              | 244.701865  | 0.185979765  | 0.1424284 | 1.3057776 | 0.191628 | 0.755886 |
| lig3              | 880.4199519 | 0.033839625  | 0.0883523 | 0.383008  | 0.701714 | 0.968134 |
| fgfr11b           | 469.8352812 | 0.011653901  | 0.1184392 | 0.0983957 | 0.921618 | 0.992138 |
| porcn             | 182.1701363 | 0.017684126  | 0.1636918 | 0.1080331 | 0.913969 | 0.991119 |
| cenpi             | 199.7236031 | -0.11820422  | 0.1621506 | -0.728978 | 0.466015 | 0.923865 |
| tmem35            | 2432.355097 | 0.058918746  | 0.0817794 | 0.7204592 | 0.471242 | 0.924838 |

|                   |             |              |           |           |          |          |
|-------------------|-------------|--------------|-----------|-----------|----------|----------|
| arl13a            | 226.9474743 | -0.129212163 | 0.1590272 | -0.812516 | 0.416495 | 0.906237 |
| c6ast4            | 137.0948735 | -0.077989156 | 0.5324691 | -0.146467 | 0.883553 | 0.988706 |
| nkiras2           | 455.948905  | -0.059635238 | 0.1061069 | -0.56203  | 0.574096 | 0.950037 |
| cpeb2             | 14.09848427 | -0.300681467 | 0.5371295 | -0.559793 | 0.57562  | 0.950373 |
| dpp9              | 1598.211967 | 0.085763156  | 0.0788036 | 1.0883148 | 0.276456 | 0.839541 |
| CU468164.1        | 0.846012444 | -0.57358332  | 2.1013569 | -0.272959 | 0.784885 | NA       |
| olig4             | 41.11840304 | -0.353523029 | 0.3105063 | -1.138537 | 0.254896 | 0.823581 |
| tnmd              | 693.4285549 | 0.371624291  | 0.0968544 | 3.8369389 | 0.000125 | 0.005865 |
| raver1            | 388.3559595 | 0.014801962  | 0.1122973 | 0.1318105 | 0.895134 | 0.989814 |
| ahrrb             | 2.297362113 | -1.312358568 | 1.3717981 | -0.95667  | 0.338734 | NA       |
| bsdc1             | 1115.494072 | -0.062907878 | 0.0848821 | -0.74112  | 0.45862  | 0.921978 |
| spryd7a           | 384.2217794 | 0.054507193  | 0.1133538 | 0.4808592 | 0.630617 | 0.957354 |
| fkbp1b            | 516.6669933 | 0.422429277  | 0.1031487 | 4.0953424 | 4.22E-05 | 0.002358 |
| AL954655.1        | 17.61165038 | 0.355286615  | 0.5060257 | 0.7021118 | 0.482609 | 0.929042 |
| si:ch211-106n13.3 | 117.7703736 | -0.094664974 | 0.2029016 | -0.466556 | 0.640817 | 0.959994 |
| fam210b           | 217.8710976 | -0.271803776 | 0.1838578 | -1.478337 | 0.139318 | 0.678204 |
| kpna3             | 1557.167594 | 0.158556295  | 0.0817013 | 1.9406817 | 0.052297 | 0.449084 |
| shisa9b           | 5.943211754 | -0.840791973 | 0.790625  | -1.063452 | 0.287577 | NA       |
| cal0a             | 570.1545212 | 0.186585592  | 0.099611  | 1.873142  | 0.061049 | 0.482482 |
| ftr69             | 2.946489095 | 1.015072657  | 1.1238134 | 0.9032395 | 0.366399 | NA       |
| hs3st4            | 20.17770528 | -0.503897431 | 0.4568212 | -1.103052 | 0.270005 | 0.834705 |
| ube2ia            | 1337.918202 | -0.002511636 | 0.0804796 | -0.031208 | 0.975103 | 0.996762 |
| fermt1            | 468.9490202 | -0.235440615 | 0.1082097 | -2.175781 | 0.029572 | 0.332811 |
| thrab             | 93.14550401 | -0.151361593 | 0.2108964 | -0.717706 | 0.472939 | 0.924993 |
| si:ch211-193e13.5 | 2.156906127 | 0.220425787  | 1.2793919 | 0.1722895 | 0.86321  | NA       |
| pptc7b            | 43.2609523  | -0.191745952 | 0.2912123 | -0.65844  | 0.510255 | 0.936253 |
| sept7b            | 1955.016263 | -0.063799537 | 0.0772598 | -0.825779 | 0.408929 | 0.90171  |
| csnkl1a1          | 3552.661769 | 0.017929324  | 0.0673447 | 0.266232  | 0.790061 | 0.977338 |
| si:ch211-138g9.2  | 0.650115553 | 1.435486287  | 2.5894636 | 0.5543566 | 0.579335 | NA       |
| si:dkey-182g1.2   | 332.6250848 | -0.159222052 | 0.130833  | -1.216987 | 0.223609 | 0.790003 |
| paqr5b            | 60.32926786 | -0.25427674  | 0.2775019 | -0.916306 | 0.359506 | 0.884959 |
| arrdc3a           | 4854.295018 | 0.136563092  | 0.0733345 | 1.862194  | 0.062576 | 0.487923 |
| si:dkey-172m14.1  | 283.5660808 | -0.186077051 | 0.1374336 | -1.353942 | 0.175755 | 0.736411 |
| nr2fla            | 2353.250308 | 0.072171876  | 0.0751196 | 0.9607602 | 0.336673 | 0.876088 |
| bdh2              |             | 0 NA         | NA        | NA        | NA       | NA       |
| fam172a           | 259.5308422 | 0.055279574  | 0.143477  | 0.3852852 | 0.700026 | 0.967998 |
| SLC9B2            | 299.8273725 | -0.065619785 | 0.1349651 | -0.486198 | 0.626827 | 0.957354 |
| smpd2b            | 119.1893478 | -0.021206957 | 0.2037743 | -0.104071 | 0.917113 | 0.991572 |
| capn1a            | 815.6440964 | 0.121023388  | 0.0952092 | 1.2711316 | 0.203682 | 0.771276 |
| cisd2             | 172.7793042 | -0.005824395 | 0.1553136 | -0.037501 | 0.970086 | 0.996315 |
| pkp1b             | 186.3176671 | -0.16559702  | 0.1656173 | -0.999878 | 0.31737  | 0.867404 |
| tnnilb            | 178.9102019 | -0.11289862  | 0.1627361 | -0.693753 | 0.487837 | 0.931809 |
| suc1g1            | 3216.730504 | -0.069112008 | 0.0767277 | -0.900744 | 0.367724 | 0.887476 |
| lrrtml            | 660.9419666 | 0.219393799  | 0.093932  | 2.3356651 | 0.019509 | 0.262069 |
| prim2             | 382.5812731 | -0.044054661 | 0.1204799 | -0.36566  | 0.714619 | 0.96909  |
| s1tm              | 2526.868827 | -0.045728979 | 0.0743621 | -0.61495  | 0.538588 | 0.943336 |
| ankrd31           | 1.84649756  | 1.471731511  | 1.5572461 | 0.945086  | 0.344615 | NA       |
| hmgcra            | 734.0114823 | -0.100932286 | 0.1110364 | -0.909002 | 0.363349 | 0.885944 |
| egf               | 67.97554988 | -0.101083792 | 0.2678208 | -0.377431 | 0.705854 | 0.968412 |
| card11            | 110.1141445 | 0.016784106  | 0.1919557 | 0.0874374 | 0.930324 | 0.992702 |
| grinab            | 1169.659579 | -0.088234273 | 0.0908439 | -0.971273 | 0.331412 | 0.874362 |
| gpatch3           | 255.8233799 | -0.280938534 | 0.1437655 | -1.954145 | 0.050684 | 0.44139  |
| capn1b            | 415.1590269 | 0.075797143  | 0.1102283 | 0.687638  | 0.491681 | 0.931926 |
| pimr130           | 1.302602537 | 2.681479841  | 1.8879348 | 1.4203244 | 0.155513 | NA       |

|                  |             |              |           |           |          |          |
|------------------|-------------|--------------|-----------|-----------|----------|----------|
| chrnb3a          | 338.2139982 | -0.01547032  | 0.1227973 | -0.125983 | 0.899746 | 0.990121 |
| gria2b           | 1079.68118  | -0.00287036  | 0.0867595 | -0.033084 | 0.973608 | 0.996315 |
| si:ch211-239f4.1 | 36.89029941 | 0.270671253  | 0.313961  | 0.8621175 | 0.388623 | 0.896271 |
| glrbb            | 1493.439894 | 0.067895194  | 0.0793595 | 0.8555394 | 0.392253 | 0.897688 |
| opn3             | 94.92202421 | 0.135156212  | 0.2018822 | 0.6694807 | 0.503189 | 0.935304 |
| zgc:153932       | 205.8183645 | 0.722998693  | 0.3639615 | 1.9864703 | 0.046981 | 0.425369 |
| glrba            | 260.2122829 | 0.234374414  | 0.1316679 | 1.7800418 | 0.075069 | 0.533746 |
| cdc42ep3         | 325.6070922 | 0.282602249  | 0.1223647 | 2.3095075 | 0.020915 | 0.273172 |
| zdhhc12b         | 97.04727354 | 0.132286064  | 0.2074559 | 0.6376587 | 0.523696 | 0.939336 |
| azinla           | 545.5665671 | 0.019334326  | 0.1055519 | 0.1831737 | 0.854662 | 0.985174 |
| shmt1            | 847.1614528 | -0.237912765 | 0.093617  | -2.54134  | 0.011043 | 0.18215  |
| smcr8a           | 201.8974511 | 0.300599219  | 0.1527722 | 1.9676304 | 0.049111 | 0.435115 |
| runx3            | 198.4012373 | -0.187718784 | 0.1470147 | -1.276871 | 0.201648 | 0.767736 |
| top3a            | 149.608818  | -0.159436832 | 0.1671118 | -0.954073 | 0.340047 | 0.87805  |
| zfang3           | 1891.625628 | -0.0375857   | 0.0945351 | -0.397585 | 0.690936 | 0.967157 |
| ndufs4           | 866.851656  | 0.124296525  | 0.1059177 | 1.1735198 | 0.240587 | 0.808802 |
| ppifb            | 546.474859  | -0.008444921 | 0.1095633 | -0.077078 | 0.938562 | 0.992849 |
| fsta             | 530.8339252 | -0.08296961  | 0.1036521 | -0.800462 | 0.423443 | 0.90766  |
| golp3            | 1201.388239 | -0.011454543 | 0.0811343 | -0.14118  | 0.887728 | 0.989291 |
| ctso             | 66.62969089 | 0.115164738  | 0.2734969 | 0.4210825 | 0.673695 | 0.965257 |
| khdrbs1a         | 14196.39998 | -0.050307989 | 0.0667878 | -0.753251 | 0.451299 | 0.918761 |
| chp1             | 107.3702005 | -0.1121362   | 0.2039515 | -0.549818 | 0.582444 | 0.952117 |
| htt              | 830.0501618 | 0.030667784  | 0.1043061 | 0.2940173 | 0.768745 | 0.975687 |
| CR933791.1       | 2.141233338 | -0.239702095 | 1.3293395 | -0.180317 | 0.856904 | NA       |
| CR933791.2       | 0.166657454 | -0.955901296 | 4.0804729 | -0.234262 | 0.814781 | NA       |
| dnajb5           | 25.66562571 | 0.70295893   | 0.3759255 | 1.8699421 | 0.061492 | 0.483475 |
| rx3              | 254.9361785 | 0.043519108  | 0.1418214 | 0.3068585 | 0.758951 | 0.975374 |
| znf532           | 118.1497443 | 0.021647486  | 0.2038586 | 0.1061887 | 0.915433 | 0.991171 |
| htra3a           | 5.91287694  | -0.314279182 | 0.7736277 | -0.406241 | 0.684566 | NA       |
| atxn2            | 449.7967099 | 0.223543714  | 0.1229004 | 1.8189021 | 0.068926 | 0.513259 |
| kenk3b           | 8.637162451 | 0.559197357  | 0.7288272 | 0.7672565 | 0.442929 | NA       |
| CU550714.1       | 0.182570949 | 0.967652056  | 4.0804729 | 0.2371421 | 0.812547 | NA       |
| zgc:153642       |             | 0 NA         | NA        | NA        | NA       | NA       |
| rtnk2b           | 60.70170955 | 0.109264887  | 0.2617868 | 0.4173812 | 0.6764   | 0.965257 |
| zgc:165423       | 670.5146567 | -0.143304226 | 0.1142162 | -1.254675 | 0.209597 | 0.776996 |
| bcl7a            | 961.6874614 | 0.085978187  | 0.0885936 | 0.9704788 | 0.331808 | 0.874653 |
| wnt8a            |             | 0 NA         | NA        | NA        | NA       | NA       |
| si:dkey-57n24.6  | 122.2900998 | -0.071288272 | 0.1953955 | -0.364841 | 0.71523  | 0.96909  |
| si:ch211-202f3.3 | 387.2450358 | 0.223050343  | 0.1143936 | 1.9498494 | 0.051194 | 0.443542 |
| adrb3b           | 0.158915748 | 0.967652056  | 4.0804729 | 0.2371421 | 0.812547 | NA       |
| zgc:113162       | 211.1962356 | -0.182757312 | 0.1485915 | -1.229931 | 0.218723 | 0.785734 |
| arf6b            | 1141.688284 | 0.243585519  | 0.0865389 | 2.8147502 | 0.004882 | 0.101715 |
| aspg             | 496.5341152 | -0.092394662 | 0.1034952 | -0.892744 | 0.371994 | 0.89248  |
| nppal            | 106.1171504 | -0.037312135 | 0.192781  | -0.193547 | 0.846531 | 0.985174 |
| arhgap23a        | 1268.427591 | -0.083592345 | 0.0807586 | -1.035088 | 0.300628 | 0.856282 |
| rab25b           | 28.56615168 | -0.76239504  | 0.3767933 | -2.023377 | 0.043034 | 0.407353 |
| plcd3a           | 331.7022437 | 0.032597487  | 0.1181504 | 0.2758981 | 0.782626 | 0.97627  |
| nppb             | 8.466021169 | -0.833179915 | 0.7138148 | -1.167221 | 0.243121 | NA       |
| nppa             | 152.3737868 | -0.096873915 | 0.1801691 | -0.537683 | 0.590796 | 0.954193 |
| nmt1a            | 2264.335531 | 0.024330866  | 0.0813034 | 0.2992601 | 0.764742 | 0.975374 |
| ubqln4           | 2087.694977 | 0.036175039  | 0.0863698 | 0.4188388 | 0.675334 | 0.965257 |
| mbnl1            | 43.99512322 | 0.227873512  | 0.2957678 | 0.7704472 | 0.441035 | 0.916336 |
| gabrr2a          | 117.154629  | 0.427858149  | 0.1859447 | 2.3009972 | 0.021392 | 0.276471 |
| xcr1b.1          |             | 0 NA         | NA        | NA        | NA       | NA       |

|                   |             |              |           |           |          |          |
|-------------------|-------------|--------------|-----------|-----------|----------|----------|
| slc25a28          | 1051.004747 | 0.081427167  | 0.0872555 | 0.9332036 | 0.350715 | 0.880195 |
| sema4e            | 270.237294  | 0.270504464  | 0.1322065 | 2.0460751 | 0.040749 | 0.394957 |
| slc35f1           | 248.1037958 | 0.056719177  | 0.1347782 | 0.4208334 | 0.673877 | 0.965257 |
| cd22              | 10.81495379 | -0.660752148 | 0.5875273 | -1.124632 | 0.260745 | NA       |
| lpcat2            | 177.127342  | -0.107889671 | 0.1659928 | -0.649966 | 0.515714 | 0.9377   |
| rnft2             | 324.8162649 | 0.182815785  | 0.1435027 | 1.273954  | 0.20268  | 0.769545 |
| grsfl             | 386.7210037 | 0.084418887  | 0.1135841 | 0.7432278 | 0.457344 | 0.921679 |
| kif19             | 466.5335493 | -0.308050749 | 0.1143338 | -2.69431  | 0.007053 | 0.131086 |
| si:dkey-33i11.1   | 5.07439649  | 0.860185401  | 0.8698884 | 0.9888457 | 0.322739 | NA       |
| si:ch211-203b20.7 | 3.36019841  | 0.597187268  | 1.032289  | 0.5785079 | 0.562921 | NA       |
| EIF2S2            | 4057.777448 | 0.009906662  | 0.0697263 | 0.1420793 | 0.887017 | 0.989231 |
| rps11             | 12341.0561  | -0.372917877 | 0.1045452 | -3.56705  | 0.000361 | 0.013676 |
| CR628323.2        | 3.655522653 | -0.523832987 | 0.9791613 | -0.534981 | 0.592663 | NA       |
| tubb1             | 17.93004819 | 0.426819089  | 0.4582655 | 0.9313795 | 0.351657 | 0.880769 |
| cyp8b1            | 338.3623168 | -0.403192444 | 0.1277556 | -3.155966 | 0.0016   | 0.045253 |
| gosr2             | 433.1874492 | -0.222704093 | 0.1177206 | -1.891802 | 0.058517 | 0.473924 |
| gipc3             | 49.95477581 | -0.171065902 | 0.2738772 | -0.624608 | 0.532228 | 0.942546 |
| thada             | 178.7278815 | -0.450224764 | 0.1581724 | -2.846418 | 0.004421 | 0.094496 |
| mthfr             | 493.708897  | -0.058477795 | 0.1112059 | -0.525851 | 0.598991 | 0.955806 |
| si:ch211-204c21.1 | 708.1539752 | -0.139919244 | 0.1002312 | -1.395965 | 0.162725 | 0.717762 |
| hsf2              | 1255.02297  | -0.250785331 | 0.086644  | -2.894433 | 0.003798 | 0.08411  |
| prpf38b           | 983.1027374 | -0.051396068 | 0.0899405 | -0.571445 | 0.567698 | 0.948739 |
| fam102ba          | 88.48552611 | 0.541761991  | 0.2131512 | 2.5416797 | 0.011032 | 0.18215  |
| cep44             | 64.55229778 | -0.009148901 | 0.2492357 | -0.036708 | 0.970718 | 0.996315 |
| pkib              | 298.3733616 | -0.037789772 | 0.130353  | -0.289903 | 0.77189  | 0.975687 |
| ly75              | 315.3184752 | 0.139390504  | 0.1281204 | 1.0879652 | 0.27661  | 0.839683 |
| si:ch211-272h9.3  | 0.166657454 | -0.955901296 | 4.0804729 | -0.234262 | 0.814781 | NA       |
| smpd13a           | 26.50437426 | -0.735903943 | 0.394527  | -1.865281 | 0.062142 | 0.486844 |
| clvs2             | 18.08049711 | 0.257394001  | 0.4593982 | 0.5602851 | 0.575285 | 0.95035  |
| si:dkey-148a17.6  | 1.753484786 | 2.139621533  | 1.6668905 | 1.2836005 | 0.199282 | NA       |
| helb              | 96.54582456 | -0.19552869  | 0.2070924 | -0.944161 | 0.345087 | 0.878434 |
| carhsp1           | 437.5633869 | -0.083462643 | 0.1183654 | -0.705127 | 0.480731 | 0.927601 |
| pcp4a             | 1106.459822 | 0.058678338  | 0.0983939 | 0.5963615 | 0.550934 | 0.946549 |
| irak3             | 35.1974825  | -0.09695623  | 0.3352242 | -0.289228 | 0.772407 | 0.975687 |
| b3gnt71           | 143.3780287 | 0.22393653   | 0.1934054 | 1.1578607 | 0.246921 | 0.816669 |
| taslr2.1          |             | 0 NA         | NA        | NA        | NA       | NA       |
| b2m               | 29.80143922 | 0.035157754  | 0.3778003 | 0.0930591 | 0.925857 | 0.992702 |
| lrrc47            | 519.6224439 | -0.176945966 | 0.103125  | -1.715839 | 0.086191 | 0.563157 |
| pcmt1             | 616.3360547 | -0.323189696 | 0.0976503 | -3.309663 | 0.000934 | 0.029459 |
| alg3              | 364.1715812 | 0.066551957  | 0.1197736 | 0.5556481 | 0.578451 | 0.951052 |
| prss56            | 8.224589799 | 0.44339293   | 0.7057208 | 0.6282838 | 0.529818 | NA       |
| zgc:110626        | 280.1114132 | 0.096740219  | 0.1302887 | 0.7425063 | 0.457781 | 0.921978 |
| zgc:113377        | 21.64846739 | -0.223406587 | 0.4491102 | -0.497443 | 0.618877 | 0.957354 |
| chic1             | 162.9630502 | -0.264675214 | 0.1613879 | -1.639994 | 0.101006 | 0.604004 |
| cttnbp2n1a        | 75.1886995  | -0.070366911 | 0.2306389 | -0.305096 | 0.760293 | 0.975374 |
| vstm4b            | 40.18065587 | -0.061131235 | 0.3079032 | -0.19854  | 0.842622 | 0.985174 |
| galnt16           | 332.8149725 | 0.169505517  | 0.1260517 | 1.34473   | 0.178712 | 0.739486 |
| pdzd11            | 487.3446501 | 0.177280716  | 0.1094566 | 1.6196438 | 0.105309 | 0.613727 |
| mtor              | 1209.628509 | -0.045551129 | 0.0816466 | -0.557906 | 0.576908 | 0.950728 |
| dis3l             | 136.2381188 | -0.242886749 | 0.1840886 | -1.319401 | 0.187035 | 0.751002 |
| zgc:172323        | 44.37115338 | 0.204628153  | 0.3007674 | 0.6803534 | 0.496281 | 0.932415 |
| snx22             | 47.58599251 | -0.155857255 | 0.2868355 | -0.543368 | 0.586876 | 0.953319 |
| ppfia4            | 163.6775495 | 0.08759401   | 0.1650826 | 0.5306073 | 0.595691 | 0.954434 |
| smad6a            | 400.0366222 | -0.124904393 | 0.119389  | -1.046197 | 0.29547  | 0.852067 |

|                   |             |              |           |           |          |          |
|-------------------|-------------|--------------|-----------|-----------|----------|----------|
| mel               | 90.38011226 | 0.175170758  | 0.241608  | 0.7250206 | 0.468439 | 0.924328 |
| cox7a2a           | 1691.300415 | -0.043316613 | 0.1177013 | -0.368021 | 0.712857 | 0.96909  |
| asb5b             | 262.2655139 | 0.149014523  | 0.1414849 | 1.0532183 | 0.292241 | 0.848075 |
| itgblb.1          | 380.6985186 | 0.218535727  | 0.1139123 | 1.9184558 | 0.055053 | 0.459919 |
| kif6              | 13.24242881 | 0.153695332  | 0.5518669 | 0.2785007 | 0.780628 | 0.97627  |
| sts               | 62.03931868 | 0.014409213  | 0.2577622 | 0.0559012 | 0.955421 | 0.994543 |
| depdc7b           | 2.12476036  | 1.178327444  | 1.3385161 | 0.8803237 | 0.378684 | NA       |
| inab              | 599.4206033 | 0.205277813  | 0.1044853 | 1.9646581 | 0.049454 | 0.436093 |
| mylpfa            | 75609.85044 | 0.133837241  | 0.1087918 | 1.2302143 | 0.218617 | 0.785734 |
| zgc:113090        | 69.83427903 | 0.165327667  | 0.2355606 | 0.7018476 | 0.482774 | 0.929133 |
| atplb4            | 3212.953801 | 0.219099739  | 0.0731193 | 2.99647   | 0.002731 | 0.067381 |
| zgc:113372        | 78.68021722 | -0.169135553 | 0.2188435 | -0.772861 | 0.439605 | 0.916082 |
| slc2a15b          | 123.9146874 | -0.037031421 | 0.1776334 | -0.208471 | 0.834861 | 0.984089 |
| RAP1GAP           | 96.29337912 | -0.161859576 | 0.2305702 | -0.701997 | 0.482681 | 0.929089 |
| apln              | 1848.329368 | 0.080972786  | 0.0777861 | 1.0409666 | 0.297891 | 0.85401  |
| pnrc2             | 6797.395364 | -0.059083508 | 0.0715083 | -0.826247 | 0.408664 | 0.90171  |
| ftr14             | 46.50315792 | -0.112054795 | 0.3032004 | -0.369573 | 0.7117   | 0.969006 |
| nkx2.2a           | 289.5342571 | 0.103883765  | 0.1247485 | 0.8327458 | 0.404988 | 0.901305 |
| insmlb            | 605.6276203 | -0.102602755 | 0.1078101 | -0.951699 | 0.341249 | 0.878134 |
| tespal            | 18.57301846 | 0.100012858  | 0.4359862 | 0.2293945 | 0.818562 | 0.981594 |
| tmprss3a          | 48.14505518 | 0.03402756   | 0.2853189 | 0.1192615 | 0.905068 | 0.990702 |
| lrrc6             | 33.38481884 | 0.142781118  | 0.3280431 | 0.4352511 | 0.66338  | 0.964736 |
| zgc:112285        | 1148.681011 | 0.030674139  | 0.0877694 | 0.3494855 | 0.726725 | 0.970402 |
| gnallb            | 81.9367352  | -0.122136317 | 0.2346264 | -0.520556 | 0.602676 | 0.956045 |
| si:ch211-138g9.3  | 0.158915748 | 0.967652056  | 4.0804729 | 0.2371421 | 0.812547 | NA       |
| adgrdl            | 15.75846478 | -0.330906703 | 0.4814507 | -0.687312 | 0.491886 | 0.931926 |
| si:dkey-56i24.1   | 15.24652252 | 0.116603563  | 0.4875445 | 0.239165  | 0.810978 | 0.981081 |
| baspl             | 8204.150736 | 0.060231352  | 0.0691412 | 0.8711351 | 0.38368  | 0.895192 |
| cilp              | 1307.646228 | 0.352864167  | 0.080731  | 4.3708625 | 1.24E-05 | 0.000862 |
| pax10             | 297.8023952 | 0.060267116  | 0.1437949 | 0.4191186 | 0.675129 | 0.965257 |
| rpl31             | 10042.59225 | -0.472108287 | 0.1073421 | -4.398165 | 1.09E-05 | 0.000791 |
| ftr12             | 7.387239509 | 0.418454123  | 0.7541435 | 0.5548733 | 0.578981 | NA       |
| eif3jb            | 855.9496905 | 0.183845184  | 0.0950835 | 1.9335125 | 0.053173 | 0.452412 |
| nptxrb            | 493.7063354 | 0.100587294  | 0.1192354 | 0.8436025 | 0.398892 | 0.900446 |
| fam189a1          | 280.6790505 | -0.175136853 | 0.1331054 | -1.315776 | 0.188249 | 0.753073 |
| plppla            | 612.5759154 | 0.076946109  | 0.1113581 | 0.6909787 | 0.489579 | 0.931926 |
| rprma             | 62.14899762 | 0.016543617  | 0.2502801 | 0.0661004 | 0.947298 | 0.99381  |
| wdr27             | 5.828665551 | -0.043629462 | 0.8162126 | -0.053454 | 0.957371 | NA       |
| CU207281.1        |             | 0 NA         | NA        | NA        | NA       | NA       |
| jade2             | 6.836486527 | 0.209480812  | 0.7143129 | 0.293262  | 0.769322 | NA       |
| cdkn2aipn1        | 514.9221017 | -0.124127726 | 0.1245232 | -0.996824 | 0.31885  | 0.867746 |
| PPP2CA            | 1537.012389 | -0.066889782 | 0.0762917 | -0.876763 | 0.380615 | 0.895192 |
| sord              | 323.5746221 | -0.118886595 | 0.132253  | -0.898933 | 0.368688 | 0.888057 |
| myl2b             | 83.61928398 | -0.187598564 | 0.2304264 | -0.814137 | 0.415567 | 0.906237 |
| serinc21          | 12.42329956 | 0.818825678  | 0.5699089 | 1.4367658 | 0.150785 | 0.698912 |
| si:ch211-257p13.3 | 360.1515742 | 0.147536507  | 0.1295339 | 1.1389798 | 0.254712 | 0.823484 |
| subla             | 1204.80062  | -0.054758505 | 0.1172432 | -0.467051 | 0.640464 | 0.959994 |
| ppp4r2b           | 944.7017192 | -0.046505032 | 0.088233  | -0.52707  | 0.598145 | 0.955466 |
| si:ch211-251f6.6  | 349.1110808 | -0.105219031 | 0.1375381 | -0.765018 | 0.444261 | 0.916726 |
| pyya              | 285.3254635 | 0.041239736  | 0.1383104 | 0.298168  | 0.765575 | 0.975374 |
| ftr06             | 1.108833117 | 1.320027098  | 2.0128984 | 0.6557843 | 0.511963 | NA       |
| pop5              | 119.8134717 | -0.148794834 | 0.1875619 | -0.793311 | 0.427597 | 0.91075  |
| mpp2a             | 143.7182937 | -0.081438924 | 0.1670254 | -0.487584 | 0.625844 | 0.957354 |
| cntn3b            | 18.86245448 | 0.020449376  | 0.4481308 | 0.0456326 | 0.963603 | 0.995927 |

|                 |             |              |           |           |          |          |
|-----------------|-------------|--------------|-----------|-----------|----------|----------|
| ccdc103         | 28.76218851 | 0.046065749  | 0.3707085 | 0.1242641 | 0.901106 | 0.990121 |
| GK3P            | 567.2415161 | 0.111294109  | 0.1017986 | 1.0932776 | 0.274272 | 0.839136 |
| rp123           | 12085.0902  | -0.377917343 | 0.1068048 | -3.538393 | 0.000403 | 0.014879 |
| rybpb           | 740.1068355 | -0.027059046 | 0.0910334 | -0.297243 | 0.766281 | 0.975437 |
| si:dkey-283b1.7 | 11.86521276 | 0.188378187  | 0.5829563 | 0.3231429 | 0.746587 | 0.97419  |
| c3a.5           | 0.158795395 | 0.967652056  | 4.0804729 | 0.2371421 | 0.812547 | NA       |
| poglut1         | 218.9909491 | 0.185562958  | 0.1499934 | 1.237141  | 0.216035 | 0.783484 |
| timmcd1         | 400.7344742 | 0.058745157  | 0.1175837 | 0.4996029 | 0.617355 | 0.957354 |
| gtpbp1          | 1185.125638 | 0.039175819  | 0.0803414 | 0.4876168 | 0.625821 | 0.957354 |
| adam10a         | 2449.109876 | -0.037025149 | 0.0714857 | -0.517938 | 0.604502 | 0.95651  |
| tdrkh           | 290.6472494 | 0.18683805   | 0.1273319 | 1.4673313 | 0.142286 | 0.684232 |
| ngb             | 524.40735   | 0.032698277  | 0.1063613 | 0.3074265 | 0.758519 | 0.975374 |
| lipca           | 12.43931118 | 0.995377319  | 0.6015614 | 1.6546563 | 0.097994 | 0.59749  |
| gdf6a           | 151.5091309 | -0.402522087 | 0.1750236 | -2.299816 | 0.021459 | 0.276973 |
| aqp9b           | 1354.20449  | 0.247751346  | 0.0916693 | 2.7026646 | 0.006879 | 0.128683 |
| entpd5a         | 153.2313153 | -0.010659435 | 0.1710294 | -0.062325 | 0.950304 | 0.99381  |
| zgc:113054      | 513.9396292 | 0.133638526  | 0.1047384 | 1.2759272 | 0.201981 | 0.76789  |
| syne2b          | 818.6140917 | -0.100652315 | 0.100006  | -1.006462 | 0.314193 | 0.865176 |
| aldh6a1         | 3644.860663 | -0.087324032 | 0.0767625 | -1.137588 | 0.255293 | 0.823868 |
| osbp2           | 386.362997  | 0.365880672  | 0.1149768 | 3.1822123 | 0.001462 | 0.041885 |
| si:ch73-22a13.3 | 5.333327902 | 0.204593977  | 0.8345108 | 0.2451664 | 0.806328 | NA       |
| aldh1a2         | 1161.150346 | -0.244918031 | 0.0977321 | -2.506015 | 0.01221  | 0.195183 |
| gemin8          | 259.4131809 | -0.1100746   | 0.1439382 | -0.764735 | 0.444429 | 0.916726 |
| ednrbb          | 1.141958407 | 1.326526475  | 1.8207251 | 0.7285704 | 0.466264 | NA       |
| isl2b           | 492.7437696 | -0.147377223 | 0.112518  | -1.30981  | 0.19026  | 0.754967 |
| cbsa            | 176.0258864 | 0.158569355  | 0.1667904 | 0.9507102 | 0.341752 | 0.878134 |
| cryaa           | 1002.698708 | -0.079005897 | 0.0975245 | -0.810113 | 0.417875 | 0.906293 |
| fbxo22          | 659.03709   | 0.017965792  | 0.1041307 | 0.1725311 | 0.86302  | 0.985841 |
| kazald3         | 206.3569583 | 0.33785217   | 0.1702127 | 1.9848828 | 0.047158 | 0.42638  |
| crybb2          | 12.99196775 | -0.153758546 | 0.5367507 | -0.286462 | 0.774524 | 0.975687 |
| si:dkey-1f12.3  | 785.85654   | -0.072368026 | 0.1015054 | -0.712947 | 0.475878 | 0.926338 |
| adhfel          | 146.7872108 | -0.061000499 | 0.1659369 | -0.367613 | 0.713162 | 0.96909  |
| L0017829.1      | 25.79618856 | 0.046175916  | 0.3797066 | 0.1216095 | 0.903208 | 0.990121 |
| enpp7.2         | 0.158915748 | 0.967652056  | 4.0804729 | 0.2371421 | 0.812547 | NA       |
| enpp7.1         | 4.495563059 | -0.090510502 | 0.8823123 | -0.102583 | 0.918294 | NA       |
| snx24           | 38.19081545 | -0.071572342 | 0.319539  | -0.223986 | 0.822768 | 0.982189 |
| nog3            | 221.0061387 | -0.026861801 | 0.1437052 | -0.186923 | 0.851721 | 0.985174 |
| cyp4f3          | 7.878436152 | -0.536736202 | 0.7328783 | -0.732367 | 0.463944 | NA       |
| lmo7b           | 244.0781516 | 0.131251789  | 0.1510359 | 0.8690104 | 0.384841 | 0.89551  |
| kctd12.2        | 244.9604427 | 0.243866002  | 0.1343861 | 1.8146672 | 0.069575 | 0.514708 |
| hspa41          | 1112.593151 | 0.303948652  | 0.0972583 | 3.1251708 | 0.001777 | 0.049283 |
| jakmip2         | 1207.16898  | 0.10142385   | 0.0910704 | 1.1136865 | 0.265414 | 0.831302 |
| wdr76           | 407.2722697 | 0.161031851  | 0.1232409 | 1.3066431 | 0.191334 | 0.755886 |
| rtnk2a          | 127.4408341 | 0.095187062  | 0.1817583 | 0.5237012 | 0.600486 | 0.956045 |
| tspan3b         | 524.528742  | -0.055511268 | 0.1065172 | -0.521148 | 0.602264 | 0.956045 |
| ms4a17a.12      | 16.18649451 | -0.509032787 | 0.5152324 | -0.987967 | 0.323169 | 0.870607 |
| pstpip1b        | 2.610036199 | -0.735004429 | 1.1858366 | -0.619819 | 0.535377 | NA       |
| sox3            | 865.0648845 | -0.179103838 | 0.0946844 | -1.891588 | 0.058546 | 0.473924 |
| AL590151.1      | 9.782438733 | -0.129684519 | 0.6238728 | -0.20787  | 0.83533  | NA       |
| adob            | 556.9324543 | -0.273932728 | 0.1032647 | -2.652724 | 0.007985 | 0.143794 |
| fancd2          | 373.9188617 | 0.000968093  | 0.1153291 | 0.0083942 | 0.993302 | 0.998554 |
| gpat2           | 18.90481449 | 0.428521565  | 0.4871842 | 0.8795885 | 0.379082 | 0.895192 |
| htr1fb          | 1.50674929  | -0.34759043  | 1.6384219 | -0.21215  | 0.83199  | NA       |
| cers6           | 253.3364045 | 0.048724479  | 0.1377005 | 0.3538438 | 0.723456 | 0.970402 |



|                   |             |              |           |           |          |          |
|-------------------|-------------|--------------|-----------|-----------|----------|----------|
| crebla            | 901.0874695 | -0.003727911 | 0.0949303 | -0.03927  | 0.968675 | 0.996315 |
| gatd1             | 325.2647165 | -0.194621735 | 0.1205226 | -1.614816 | 0.106351 | 0.615567 |
| camk2a            | 142.1877128 | 0.174639797  | 0.1767124 | 0.9882714 | 0.32302  | 0.870607 |
| sral              | 223.8599085 | -0.045516671 | 0.1497645 | -0.303922 | 0.761188 | 0.975374 |
| ebi3              | 14.61964724 | 1.333673757  | 0.5144019 | 2.5926687 | 0.009523 | 0.163896 |
| csflrb            | 3.67853806  | 0.519303748  | 0.9984485 | 0.5201107 | 0.602986 | NA       |
| anxa2b            | 739.5221279 | -0.899031339 | 0.0939364 | -9.570642 | 1.06E-21 | 1.17E-18 |
| si:dkey-182o15.5  | 0.173729368 | -0.955901296 | 4.0804729 | -0.234262 | 0.814781 | NA       |
| cracr2b           | 87.56251095 | -0.317501422 | 0.2149786 | -1.476898 | 0.139703 | 0.678481 |
| got111            | 10.79061851 | 0.038493526  | 0.5865342 | 0.0656288 | 0.947673 | NA       |
| adrb3a            | 60.32104327 | 0.068038132  | 0.2702502 | 0.2517598 | 0.801227 | 0.979377 |
| or135-1           | 1.163603234 | 0.397890555  | 1.8318468 | 0.2172073 | 0.828047 | NA       |
| foxb1b            | 49.43936102 | -0.317883166 | 0.2847706 | -1.116278 | 0.264303 | 0.830245 |
| ndufaf6           | 119.2452236 | -0.069032132 | 0.1882888 | -0.366629 | 0.713896 | 0.96909  |
| lypla2            | 1835.61399  | 0.13030136   | 0.0898888 | 1.4495833 | 0.147175 | 0.69407  |
| gabrg2            | 15.04041077 | 0.78622352   | 0.510214  | 1.540968  | 0.123325 | 0.651258 |
| myb               | 439.7897994 | -0.147186204 | 0.1111742 | -1.323924 | 0.185528 | 0.749313 |
| stag2b            | 2260.005139 | -0.051434893 | 0.0836253 | -0.615064 | 0.538513 | 0.943336 |
| aldob             | 7379.785354 | -0.253752525 | 0.2032349 | -1.248567 | 0.211823 | 0.779854 |
| gtf2a2            | 248.9712119 | 0.015779452  | 0.1334178 | 0.118271  | 0.905853 | 0.990702 |
| maea              | 1069.161892 | -0.059217998 | 0.0854173 | -0.693279 | 0.488135 | 0.93189  |
| zgc:162948        | 89.23648529 | -0.057757118 | 0.2088457 | -0.276554 | 0.782123 | 0.97627  |
| il2rgb            | 12.9560187  | -0.063705574 | 0.5236669 | -0.121653 | 0.903174 | 0.990121 |
| ghrhrb            | 17.56622833 | -0.043369239 | 0.4601429 | -0.094252 | 0.924909 | 0.992676 |
| si:ch73-89b15.3   | 66.19557929 | -0.828253365 | 0.2429799 | -3.408731 | 0.000653 | 0.021837 |
| GPR68             | 3.527337275 | 0.427371899  | 1.0327804 | 0.4138071 | 0.679015 | NA       |
| ccdc88c           | 667.282847  | 0.074473485  | 0.0948077 | 0.7855215 | 0.432148 | 0.912959 |
| zgc:153990        | 369.784995  | -0.1499748   | 0.122045  | -1.228848 | 0.219129 | 0.785734 |
| adcyp1r1a         | 117.4496443 | -0.046124666 | 0.1838384 | -0.250898 | 0.801893 | 0.979492 |
| tt113             | 23.41114739 | -0.377061855 | 0.3936373 | -0.957891 | 0.338117 | 0.876778 |
| AL954695.1        | 4.891743218 | 0.007533135  | 0.9055065 | 0.0083193 | 0.993362 | NA       |
| dcdc2b            | 46.77091627 | 0.112866943  | 0.2810646 | 0.4015694 | 0.688001 | 0.966493 |
| CABZ01084566.1    | 199.364252  | 0.111376216  | 0.1514985 | 0.7351639 | 0.46224  | 0.922698 |
| mff               | 599.3069404 | 0.010689921  | 0.096988  | 0.110219  | 0.912236 | 0.991119 |
| si:dkey-187j14.4  | 91.59105281 | 0.093130905  | 0.20688   | 0.4501688 | 0.652589 | 0.960708 |
| apbb3             | 36.79034395 | 0.209750711  | 0.3193423 | 0.656821  | 0.511296 | 0.936253 |
| vgl12b            | 53.70942439 | 0.077951608  | 0.275439  | 0.2830086 | 0.77717  | 0.975826 |
| alpi.2            | 47.01786869 | -1.21123605  | 0.3107935 | -3.897238 | 9.73E-05 | 0.004774 |
| si:ch211-218m3.13 | 2.705409119 | 0.403021954  | 1.2517504 | 0.3219667 | 0.747478 | NA       |
| si:rp71-1g18.1    | 230.7006941 | -0.284679258 | 0.1541127 | -1.847215 | 0.064716 | 0.497355 |
| si:ch211-276c2.4  | 467.3103872 | -0.062145304 | 0.1171149 | -0.530636 | 0.595671 | 0.954434 |
| cbln5             | 9.303091386 | 0.105770925  | 0.6165626 | 0.1715494 | 0.863792 | NA       |
| klhl43            | 398.5203178 | 0.370589242  | 0.1425199 | 2.600263  | 0.009315 | 0.162001 |
| osbpl2a           | 20.40875535 | -0.040754866 | 0.4617477 | -0.088262 | 0.929668 | 0.992702 |
| trubl             | 90.75400073 | 0.156232156  | 0.2086804 | 0.748667  | 0.454058 | 0.920295 |
| hnrnpc            | 1530.615463 | -0.090628026 | 0.0850517 | -1.065564 | 0.286621 | 0.845942 |
| or115-11          | 5.987295806 | -0.022475656 | 0.8032585 | -0.027981 | 0.977678 | NA       |
| or115-2           |             | 0 NA         | NA        | NA        | NA       | NA       |
| pcmt2a            | 224.1710017 | -0.311839167 | 0.1530977 | -2.036863 | 0.041664 | 0.400593 |
| ubxn11            | 14.54741991 | -0.429849046 | 0.5299522 | -0.811109 | 0.417303 | 0.906237 |
| pax9              | 246.0174616 | -0.030163855 | 0.153342  | -0.19671  | 0.844055 | 0.985174 |
| vtnb              | 958.6632852 | 0.21032799   | 0.0986261 | 2.1325797 | 0.032959 | 0.35382  |
| mtnr1ba           | 1.800015086 | 0.733377371  | 1.542912  | 0.4753203 | 0.634559 | NA       |
| plekhh1           | 37.01455161 | 0.53912523   | 0.3201448 | 1.6840042 | 0.092181 | 0.57849  |

|                   |             |              |           |           |          |          |
|-------------------|-------------|--------------|-----------|-----------|----------|----------|
| si:ch211-284o19.8 | 52.9329911  | -1.048287623 | 0.2902207 | -3.612035 | 0.000304 | 0.011943 |
| ei24              | 242.0186379 | 0.176946343  | 0.1352449 | 1.3083401 | 0.190758 | 0.755212 |
| cbln14            | 21.42614485 | 0.115619137  | 0.4045994 | 0.285762  | 0.77506  | 0.975687 |
| slc13a2           | 633.5173211 | -0.080463262 | 0.1460539 | -0.550915 | 0.581692 | 0.951868 |
| uts2a             | 6.43477612  | -0.660941272 | 0.7538791 | -0.87672  | 0.380638 | NA       |
| ccdc187           | 256.8883158 | -0.100507731 | 0.1510609 | -0.665346 | 0.505829 | 0.935724 |
| cripl             | 829.403796  | -0.15890177  | 0.088343  | -1.798691 | 0.072068 | 0.525083 |
| ism2b             | 4.594972336 | 1.568955315  | 0.9620126 | 1.6309092 | 0.102909 | NA       |
| crygmX            | 5602.853677 | 0.089887461  | 0.0711697 | 1.2630019 | 0.206589 | 0.774129 |
| elmsan1b          | 617.229459  | 0.14470349   | 0.1111656 | 1.3016928 | 0.193021 | 0.756795 |
| etv2              | 66.59561551 | -0.338472503 | 0.2819184 | -1.200605 | 0.229905 | 0.79764  |
| crybalb           | 19194.8472  | -0.01901612  | 0.0707011 | -0.268965 | 0.787957 | 0.976685 |
| klhl26            | 51.29964744 | 0.034225796  | 0.2804069 | 0.1220576 | 0.902853 | 0.990121 |
| cpdb              | 1.495310112 | -0.994696088 | 1.5684186 | -0.634203 | 0.525948 | NA       |
| inpp5l            | 462.6493478 | 0.125520636  | 0.1084387 | 1.1575264 | 0.247057 | 0.816669 |
| med13a            | 1778.076594 | -0.008877039 | 0.0974968 | -0.09105  | 0.927453 | 0.992702 |
| tmem62            | 47.81917898 | 0.079381361  | 0.2822591 | 0.2812358 | 0.77853  | 0.975942 |
| slc30a1b          | 40.20484231 | 0.522712156  | 0.3104726 | 1.6836017 | 0.092259 | 0.57849  |
| angpt2b           | 46.68731384 | 0.667872646  | 0.2867607 | 2.3290247 | 0.019858 | 0.265495 |
| si:dkey-42123.3   | 0           | NA           | NA        | NA        | NA       | NA       |
| fb1               | 2310.392096 | -0.193394418 | 0.0863771 | -2.238954 | 0.025159 | 0.30686  |
| alg10             | 132.8503118 | -0.048794808 | 0.1810059 | -0.269576 | 0.787487 | 0.976596 |
| srfa              | 34.30652804 | 0.395973571  | 0.3419441 | 1.1580068 | 0.246861 | 0.816669 |
| si:dkey-117a8.3   | 1.657414181 | -1.213759884 | 1.5969087 | -0.760068 | 0.447214 | NA       |
| opn4b             | 29.65797698 | 0.236749262  | 0.3585702 | 0.6602592 | 0.509088 | 0.936123 |
| si:dkey-42123.5   | 0           | NA           | NA        | NA        | NA       | NA       |
| hdhd3             | 94.03891108 | -0.151092484 | 0.2138613 | -0.706498 | 0.479879 | 0.927125 |
| si:ch211-137j23.8 | 0           | NA           | NA        | NA        | NA       | NA       |
| tgfa              | 107.281484  | 0.329187781  | 0.1989255 | 1.6548296 | 0.097959 | 0.59749  |
| btr32             | 8.399494854 | 0.138607217  | 0.7145032 | 0.193991  | 0.846183 | NA       |
| lin37             | 214.1914607 | -0.138232125 | 0.1707546 | -0.809537 | 0.418207 | 0.906406 |
| myadml2           | 17.12740463 | 0.549888821  | 0.5374192 | 1.0232028 | 0.306212 | 0.860027 |
| sptbn2            | 1249.13016  | -0.021266356 | 0.0896867 | -0.237118 | 0.812565 | 0.981081 |
| cdc42ep2          | 39.14290756 | -0.202321086 | 0.3069195 | -0.659199 | 0.509768 | 0.936253 |
| slc2a11a          | 17.93309923 | 1.192638065  | 0.4585698 | 2.6007777 | 0.009301 | 0.162001 |
| npm2b             | 4.944556129 | 0.518728999  | 0.8953113 | 0.5793839 | 0.56233  | NA       |
| cypl7a2           | 15.81318029 | 0.433287396  | 0.5326106 | 0.8135162 | 0.415922 | 0.906237 |
| fetub             | 7379.94389  | 0.296884674  | 0.2094799 | 1.4172467 | 0.156411 | 0.706639 |
| chmp2a            | 608.3525398 | -0.112488006 | 0.1045558 | -1.075865 | 0.281988 | 0.843666 |
| htrlb             | 53.13162804 | 0.332625297  | 0.263301  | 1.2632893 | 0.206485 | 0.774129 |
| hmgb2b            | 6133.828744 | -0.276993055 | 0.0661156 | -4.189527 | 2.80E-05 | 0.001665 |
| sfil              | 156.9529493 | -0.032603122 | 0.1747762 | -0.186542 | 0.85202  | 0.985174 |
| gpank1            | 153.7570228 | -0.182293764 | 0.174863  | -1.042495 | 0.297182 | 0.853945 |
| rargb             | 6.155671599 | 0.541202192  | 0.7707005 | 0.7022212 | 0.482541 | NA       |
| ppplr2            | 317.7805036 | -0.022409121 | 0.1277752 | -0.175379 | 0.860782 | 0.985773 |
| scafl             | 2468.551931 | 0.004437131  | 0.0953563 | 0.0465321 | 0.962886 | 0.995927 |
| ttl16             | 63.81730287 | -0.041324743 | 0.2488624 | -0.166055 | 0.868114 | 0.987245 |
| hoxb8b            | 92.42771119 | 0.01485889   | 0.2175652 | 0.0682963 | 0.94555  | 0.993589 |
| mustn1a           | 13.5201232  | -0.157891939 | 0.5194387 | -0.303966 | 0.761153 | 0.975374 |
| hoxb5b            | 527.570692  | -0.072427413 | 0.1071929 | -0.675673 | 0.499248 | 0.934006 |
| mxd4              | 361.5960626 | -0.284140317 | 0.1204865 | -2.358276 | 0.01836  | 0.25227  |
| rab24             | 187.9036465 | 0.003729582  | 0.1494317 | 0.0249584 | 0.980088 | 0.996879 |
| hoxblb            | 147.0524077 | -0.036614939 | 0.1703724 | -0.214911 | 0.829837 | 0.982821 |
| rnf34b            | 8.221721251 | 0.550238281  | 0.6747004 | 0.8155298 | 0.414769 | NA       |

|                  |             |              |           |           |          |          |
|------------------|-------------|--------------|-----------|-----------|----------|----------|
| plin1            | 8.286729563 | -0.863858166 | 0.7030091 | -1.228801 | 0.219146 | NA       |
| vsig8a           | 122.2990482 | 0.024400843  | 0.1884634 | 0.1294726 | 0.896984 | 0.990006 |
| zgc:153219       | 9.167597045 | 0.543278231  | 0.6733417 | 0.8068389 | 0.419759 | NA       |
| ostn             | 38.26702138 | 0.133591344  | 0.3086265 | 0.4328576 | 0.665118 | 0.964736 |
| hlfx             | 3360.591014 | -0.364794547 | 0.0730752 | -4.992042 | 5.97E-07 | 6.51E-05 |
| pof1b            | 570.9103864 | 0.086100268  | 0.099482  | 0.8654857 | 0.386772 | 0.89551  |
| arpc4            | 943.3419624 | 0.031877267  | 0.099097  | 0.3216776 | 0.747697 | 0.97419  |
| tatdn3           | 23.35068222 | -0.248448735 | 0.4019454 | -0.618116 | 0.536499 | 0.943336 |
| irsl             | 364.8108253 | 0.033451888  | 0.1267941 | 0.2638284 | 0.791912 | 0.977937 |
| rbm41            | 39.81125805 | -0.066445497 | 0.3294316 | -0.201697 | 0.840153 | 0.985029 |
| rippy1           | 37.07217314 | 0.249333403  | 0.3262164 | 0.764319  | 0.444677 | 0.916777 |
| tmem30b          | 359.7545665 | 0.067975174  | 0.1142956 | 0.5947315 | 0.552023 | 0.947215 |
| htr1d            | 142.1654043 | -0.029386236 | 0.1770057 | -0.166019 | 0.868142 | 0.987245 |
| slc26a61         | 69.80685852 | 0.491039012  | 0.2364028 | 2.0771283 | 0.03779  | 0.380669 |
| im:7136021       | 74.66671167 | 0.036375161  | 0.2300504 | 0.1581182 | 0.874364 | 0.987881 |
| ccdc105          | 11.90825301 | 0.225894928  | 0.5658667 | 0.3992016 | 0.689745 | 0.966819 |
| adgrg6           | 468.0691096 | 0.133277904  | 0.1076857 | 1.2376569 | 0.215843 | 0.783484 |
| cx23             | 289.2728546 | 0.097466255  | 0.1429457 | 0.6818409 | 0.49534  | 0.931928 |
| nmbr             | 10.53962832 | -0.125784773 | 0.5987156 | -0.210091 | 0.833597 | NA       |
| ftr50            | 0.809151653 | 1.852283317  | 2.2398915 | 0.8269523 | 0.408264 | NA       |
| bms1             | 763.6233897 | 0.023487944  | 0.0905829 | 0.2592977 | 0.795406 | 0.978498 |
| pcna             | 4292.065529 | -0.071681705 | 0.0937953 | -0.764235 | 0.444727 | 0.916777 |
| zgc:113625       | 9.013449487 | 1.04595687   | 0.7389907 | 1.4153857 | 0.156955 | NA       |
| nfatc4           | 101.879934  | 0.086107037  | 0.2080311 | 0.4139143 | 0.678937 | 0.965257 |
| mrps17           | 178.0965266 | -0.208766521 | 0.1553363 | -1.343965 | 0.17896  | 0.73986  |
| ltb4r2b          | 45.63341694 | 0.545173123  | 0.2925252 | 1.863679  | 0.062367 | 0.487498 |
| pgrmc1           | 782.4437079 | -0.244306348 | 0.1031932 | -2.367467 | 0.01791  | 0.247704 |
| adgrala          | 483.5634997 | 0.045743716  | 0.1120854 | 0.4081147 | 0.683189 | 0.965476 |
| valopb           | 16.79395408 | 0.1100941    | 0.4647875 | 0.2368697 | 0.812758 | 0.981081 |
| btr06            | 19.83091811 | -1.32752586  | 0.4542182 | -2.922661 | 0.003471 | 0.079063 |
| ncslb            | 109.3119006 | -0.174747967 | 0.1918065 | -0.911064 | 0.362262 | 0.885944 |
| pgkl             | 9420.156242 | -0.043233136 | 0.0798808 | -0.541221 | 0.588356 | 0.953319 |
| slc38a8b         | 30.01719479 | 0.608555915  | 0.3625704 | 1.678449  | 0.093259 | 0.580702 |
| mthfd21          | 42.0174381  | 0.162492292  | 0.2931065 | 0.5543797 | 0.579319 | 0.951257 |
| rnf40            | 1521.998416 | -0.015646432 | 0.0774267 | -0.202081 | 0.839854 | 0.984979 |
| hbl4             | 19.42971131 | -0.280849511 | 0.4797758 | -0.585377 | 0.558295 | 0.948478 |
| npffr111         | 2.713391684 | 0.16139052   | 1.2526068 | 0.1288437 | 0.897481 | NA       |
| CU682777.1       | 9.3105948   | 0.038250223  | 0.6430733 | 0.0594803 | 0.95257  | NA       |
| phkg2            | 245.4936309 | 0.07820637   | 0.1422786 | 0.5496707 | 0.582545 | 0.952161 |
| st8sia7.1        | 49.16665296 | -0.894297797 | 0.2946055 | -3.035577 | 0.002401 | 0.061172 |
| hectd1           | 4199.920981 | 0.045054322  | 0.0823485 | 0.5471174 | 0.584298 | 0.952332 |
| si:ch73-269m23.5 | 57.98615334 | -0.180304253 | 0.2550577 | -0.706916 | 0.479619 | 0.927091 |
| ap4sl            | 95.29376324 | -0.201423268 | 0.2196138 | -0.917171 | 0.359053 | 0.884725 |
| fbxl8            | 52.56441519 | -0.256994056 | 0.2698635 | -0.952311 | 0.340939 | 0.878134 |
| ipoll            | 331.37547   | 0.127811704  | 0.1312899 | 0.9735078 | 0.330301 | 0.874098 |
| taarl6a          |             | 0 NA         | NA        | NA        | NA       | NA       |
| ghrl             | 3.921838121 | -0.479920225 | 0.9699521 | -0.494788 | 0.62075  | NA       |
| crbn             | 273.0277529 | -0.223819696 | 0.1430522 | -1.564602 | 0.117676 | 0.641446 |
| pqlc3            | 78.50395075 | 0.048307119  | 0.220831  | 0.2187515 | 0.826844 | 0.982473 |
| taarl8d          |             | 0 NA         | NA        | NA        | NA       | NA       |
| sobpa            | 13.44097452 | -0.109429524 | 0.5134031 | -0.213145 | 0.831214 | 0.983098 |
| taarl8a          | 0.332645115 | 0.005883744  | 3.2924249 | 0.0017871 | 0.998574 | NA       |
| tctex1d2         | 68.77155612 | 0.207556006  | 0.2370098 | 0.8757275 | 0.381178 | 0.895192 |
| nat10            | 544.8691952 | -0.021620873 | 0.1041567 | -0.20758  | 0.835557 | 0.984089 |

|                   |             |              |           |           |          |          |
|-------------------|-------------|--------------|-----------|-----------|----------|----------|
| taar20c           | 0.349228403 | 0.005884014  | 3.2372587 | 0.0018176 | 0.99855  | NA       |
| cog4              | 388.8134729 | 0.156727477  | 0.1178387 | 1.3300175 | 0.183513 | 0.747284 |
| cdkn1bb           | 1415.224729 | -0.019971494 | 0.089791  | -0.222422 | 0.823985 | 0.982196 |
| caprin1b          | 2874.549715 | -0.237917027 | 0.0740199 | -3.214231 | 0.001308 | 0.038259 |
| zgc:63972         | 66.13575038 | -0.265061107 | 0.2393219 | -1.107551 | 0.268056 | 0.83343  |
| acinla            | 3886.547152 | -0.160974156 | 0.0991749 | -1.623134 | 0.104561 | 0.612567 |
| si:ch211-14a17.11 | 246.0105284 | -0.132291859 | 0.1418761 | -0.932446 | 0.351106 | 0.880473 |
| dhrrs1            | 639.3280346 | -0.702789558 | 0.1118502 | -6.283311 | 3.31E-10 | 7.12E-08 |
| kti12             | 121.3057199 | 0.035787824  | 0.182001  | 0.1966353 | 0.844113 | 0.985174 |
| ehd4              | 117.3831822 | 0.253560044  | 0.1977725 | 1.2820795 | 0.199815 | 0.765237 |
| homeza            | 504.5035456 | -0.141038223 | 0.1099455 | -1.282801 | 0.199562 | 0.764903 |
| zgc:77151         | 442.4620021 | 0.153005438  | 0.1114591 | 1.3727499 | 0.16983  | 0.726965 |
| slc38a6           | 139.6739251 | -0.060906566 | 0.172745  | -0.352581 | 0.724403 | 0.970402 |
| zp3f.2            | 2.103902422 | -0.656949399 | 1.354709  | -0.484938 | 0.627721 | NA       |
| stk33             | 12.99557385 | 0.22577704   | 0.5348326 | 0.4221452 | 0.672919 | 0.965257 |
| oxctlb            | 624.5411262 | 0.346693492  | 0.1048079 | 3.3078956 | 0.00094  | 0.029552 |
| ap2a1             | 4844.774968 | 0.061373036  | 0.0655782 | 0.9358755 | 0.349337 | 0.880195 |
| ngs               | 1682.537943 | 0.115198268  | 0.2777926 | 0.4146916 | 0.678368 | 0.965257 |
| pparab            | 2.795153415 | 0.504690138  | 1.1403369 | 0.4425799 | 0.65807  | NA       |
| rerqlb            | 63.94856886 | 0.215284618  | 0.2472943 | 0.8705602 | 0.383994 | 0.895192 |
| ccn4a             | 6.142744744 | 0.235571285  | 0.7773595 | 0.3030403 | 0.761859 | NA       |
| trim66            | 147.2415686 | -0.054119035 | 0.1699476 | -0.318445 | 0.750147 | 0.97419  |
| dctpp1            |             | 0 NA         | NA        | NA        | NA       | NA       |
| aplg2             | 761.942651  | -0.077679265 | 0.0941672 | -0.824908 | 0.409424 | 0.901955 |
| slala             | 5.217945923 | 0.541303091  | 0.8470004 | 0.6390824 | 0.522769 | NA       |
| slc7a8b           | 26.08712731 | 0.214489167  | 0.3935641 | 0.5449917 | 0.585759 | 0.952847 |
| gabpb2b           | 52.71016253 | -0.21917495  | 0.2779651 | -0.788498 | 0.430405 | 0.912006 |
| lrre9             | 13.52582996 | 0.060678551  | 0.531042  | 0.1142632 | 0.909029 | 0.990702 |
| dcaf7             | 3069.577728 | 0.025647478  | 0.0728185 | 0.3522111 | 0.72468  | 0.970402 |
| ccdc47            | 1804.236872 | 0.158159481  | 0.0767648 | 2.0603137 | 0.039369 | 0.389822 |
| si:zfos-464b6.2   | 66.24804376 | 0.146580135  | 0.2414445 | 0.6070965 | 0.543787 | 0.945438 |
| b3gnt3.2          | 5.180212511 | 0.30019736   | 0.8741576 | 0.3434133 | 0.731288 | NA       |
| alg13             | 3.564428728 | 0.756334518  | 1.040583  | 0.7268373 | 0.467326 | NA       |
| pcbp3             | 87.33823343 | 0.031692263  | 0.2219459 | 0.1427927 | 0.886454 | 0.988936 |
| rhof              | 37.36464535 | -0.193229528 | 0.3267406 | -0.591385 | 0.554262 | 0.947449 |
| si:ch211-198n5.11 | 220.824765  | -0.107417587 | 0.1439098 | -0.746423 | 0.455412 | 0.921215 |
| spata17           | 6.207080973 | 0.292385364  | 0.7770112 | 0.3762949 | 0.706698 | NA       |
| ssuh2.2           | 10.58036393 | -0.004486668 | 0.6107945 | -0.007346 | 0.994139 | NA       |
| rpe65c            | 60.01173692 | -0.079956822 | 0.2531919 | -0.315795 | 0.752158 | 0.974577 |
| slc7a6            | 360.3869653 | 0.278360458  | 0.1211249 | 2.2981279 | 0.021555 | 0.278029 |
| yipf6             | 515.7049084 | -0.219007734 | 0.1052954 | -2.079936 | 0.037531 | 0.379013 |
| fzd2              | 1172.721976 | 0.179369575  | 0.0830346 | 2.1601792 | 0.030759 | 0.339614 |
| cbx1b             | 1349.867022 | 0.086479697  | 0.0798898 | 1.0824879 | 0.279036 | 0.842806 |
| ccdc43            | 247.511572  | -0.029086447 | 0.1365414 | -0.213023 | 0.831309 | 0.983152 |
| slc29a1b          | 91.5443483  | -0.184513516 | 0.2210078 | -0.834873 | 0.403789 | 0.900979 |
| kif1c             | 5.441514265 | -0.102225447 | 0.8264866 | -0.123687 | 0.901563 | NA       |
| lox11             | 678.5695245 | 0.227863713  | 0.0984055 | 2.3155586 | 0.020582 | 0.270609 |
| epha4a            | 1340.828675 | -0.003392418 | 0.0799923 | -0.042409 | 0.966172 | 0.996315 |
| clip3             | 327.9573876 | 0.049161714  | 0.1398933 | 0.351423  | 0.725271 | 0.970402 |
| slmapa            | 672.2767438 | 0.187798548  | 0.1181929 | 1.5889154 | 0.11208  | 0.627454 |
| tinf2             | 121.2295764 | -0.078424859 | 0.1818774 | -0.431196 | 0.666326 | 0.964736 |
| stampa            | 361.671132  | -0.187419964 | 0.122531  | -1.529572 | 0.126123 | 0.654806 |
| adrb2b            | 40.51453565 | 0.275949974  | 0.3329055 | 0.8289139 | 0.407153 | 0.901305 |
| rars              | 969.7988317 | -0.048139976 | 0.0878665 | -0.547876 | 0.583777 | 0.952214 |

|                   |             |              |           |           |          |          |
|-------------------|-------------|--------------|-----------|-----------|----------|----------|
| araf              | 779.4185067 | 0.091832804  | 0.0936322 | 0.9807822 | 0.3267   | 0.872642 |
| ACOT12            | 39.46050931 | -0.23835838  | 0.3331167 | -0.71554  | 0.474275 | 0.925066 |
| nhs11a            | 960.9791123 | 0.028658797  | 0.0871141 | 0.32898   | 0.742171 | 0.973154 |
| lrp10             | 789.0578139 | -0.089728686 | 0.104969  | -0.854811 | 0.392656 | 0.897688 |
| imp4              | 226.0332772 | -0.245129952 | 0.1385342 | -1.769455 | 0.076818 | 0.539801 |
| ill2bb            | 10.24873411 | -0.175475095 | 0.5888979 | -0.297972 | 0.765725 | NA       |
| samsn1a           | 679.1061845 | -0.098740336 | 0.1009637 | -0.977979 | 0.328085 | 0.872701 |
| si:ch73-285p12.4  | 0           | NA           | NA        | NA        | NA       | NA       |
| her15.2           | 160.5483387 | -0.364665373 | 0.1623218 | -2.246559 | 0.024668 | 0.302262 |
| her15.1           | 530.9125006 | -0.240900774 | 0.1096797 | -2.196402 | 0.028063 | 0.324895 |
| smg1              | 2981.381532 | -0.000667112 | 0.0835206 | -0.007987 | 0.993627 | 0.998672 |
| wdr95             | 15.68106243 | -0.089895282 | 0.4992368 | -0.180065 | 0.857101 | 0.985597 |
| znhit1            | 176.0314532 | -0.190230164 | 0.1629614 | -1.167332 | 0.243076 | 0.812061 |
| waif2             | 15.69597533 | 0.176247483  | 0.4971787 | 0.3544952 | 0.722968 | 0.970375 |
| arl6ipl           | 2894.210132 | 0.024148085  | 0.0801439 | 0.3013089 | 0.763179 | 0.975374 |
| mfsd6b            | 165.8864193 | 0.009703116  | 0.1793802 | 0.0540924 | 0.956862 | 0.994543 |
| F0681288.1        | 76.77646053 | -0.157376005 | 0.2299456 | -0.684405 | 0.493719 | 0.931926 |
| cox6a2            | 62.31127329 | -0.19825491  | 0.2584658 | -0.767045 | 0.443055 | 0.916336 |
| cnot6l            | 371.2537808 | 0.200436348  | 0.1178502 | 1.7007721 | 0.088986 | 0.5713   |
| mrpl1             | 215.0919298 | 0.086158542  | 0.1415702 | 0.6085923 | 0.542795 | 0.944974 |
| slco2b1           | 303.1217503 | 0.116503027  | 0.1276625 | 0.9125864 | 0.36146  | 0.885719 |
| corola            | 84.83847928 | 0.062201527  | 0.2462325 | 0.2526129 | 0.800567 | 0.979377 |
| cldni             | 2609.404541 | 0.15770302   | 0.0775593 | 2.0333213 | 0.04202  | 0.402375 |
| fras1             | 1280.085136 | 0.186993212  | 0.0850246 | 2.1992836 | 0.027858 | 0.323464 |
| flila             | 567.0279364 | -0.094064098 | 0.1161545 | -0.809819 | 0.418044 | 0.906305 |
| tent5ab           | 451.8506635 | 0.544555277  | 0.1263173 | 4.3110096 | 1.63E-05 | 0.001061 |
| si:ch211-51c14.1  | 266.6165994 | -0.116134233 | 0.1414046 | -0.821291 | 0.411481 | 0.903483 |
| rac1l             | 2.159222975 | 0.25875996   | 1.3309414 | 0.1944187 | 0.845848 | NA       |
| si:ch211-1f22.5   | 0.173729368 | -0.955901296 | 4.0804729 | -0.234262 | 0.814781 | NA       |
| slc34a1b          | 8.213551875 | 0.344756064  | 0.6634678 | 0.5196274 | 0.603323 | NA       |
| pgpepl            | 122.870269  | -0.068878702 | 0.1895743 | -0.363334 | 0.716356 | 0.96909  |
| adra2db           | 9.291545155 | 0.099136476  | 0.6166034 | 0.1607784 | 0.872268 | NA       |
| chrna9            | 34.49018729 | -0.112887473 | 0.326134  | -0.346138 | 0.729239 | 0.970822 |
| prdm8b            | 964.1104278 | -0.006131867 | 0.0921368 | -0.066552 | 0.946939 | 0.99381  |
| si:dkey-166k12.1  | 12.73504446 | 0.173782907  | 0.539289  | 0.3222445 | 0.747268 | 0.97419  |
| psmb4             | 2496.531917 | -0.086917542 | 0.0953012 | -0.91203  | 0.361753 | 0.885944 |
| prlh2r            | 1.313649662 | -2.692304005 | 1.8571878 | -1.449667 | 0.147151 | NA       |
| dhx8              | 1137.067194 | 0.0182758    | 0.0893315 | 0.2045841 | 0.837897 | 0.984701 |
| or118-2           | 0.158795395 | 0.967652056  | 4.0804729 | 0.2371421 | 0.812547 | NA       |
| or118-3           | 0           | NA           | NA        | NA        | NA       | NA       |
| or118-1           | 0           | NA           | NA        | NA        | NA       | NA       |
| si:ch211-242b18.1 | 2537.583192 | 0.045821326  | 0.081164  | 0.5645524 | 0.572378 | 0.949494 |
| or116-1           | 3.708839591 | 0.869803025  | 1.0954538 | 0.7940116 | 0.427189 | NA       |
| prkg2             | 14.77179693 | -0.089559025 | 0.488896  | -0.183186 | 0.854652 | 0.985174 |
| si:ch211-244e12.7 | 24.92795943 | 0.372988934  | 0.4009565 | 0.9302479 | 0.352243 | 0.880896 |
| uggt1             | 453.9891993 | 0.133977164  | 0.1108592 | 1.2085341 | 0.226842 | 0.794528 |
| cuedc1b           | 35.11341597 | -0.197472617 | 0.324151  | -0.609199 | 0.542392 | 0.944974 |
| lmo4b             | 1253.979472 | -0.053178292 | 0.0836823 | -0.635479 | 0.525116 | 0.940066 |
| coll0a1a          | 4271.665557 | 0.004941488  | 0.0878566 | 0.0562449 | 0.955147 | 0.994543 |
| hs6st1a           | 86.10101097 | -0.295546355 | 0.218317  | -1.353749 | 0.175817 | 0.736411 |
| alox5ap           | 8.736636662 | 1.235165363  | 0.7199249 | 1.7156863 | 0.086219 | NA       |
| ghra              | 25.78832183 | 0.071068208  | 0.3991225 | 0.1780611 | 0.858675 | 0.985773 |
| si:dkey-46a10.3   | 436.367303  | -0.069991626 | 0.1075031 | -0.651066 | 0.515004 | 0.937646 |
| pogza             | 207.4807902 | -0.066087981 | 0.1549578 | -0.42649  | 0.669751 | 0.965223 |

|            |             |              |           |           |          |          |
|------------|-------------|--------------|-----------|-----------|----------|----------|
| faah2b     | 61.11367097 | -1.191526618 | 0.2771238 | -4.299618 | 1.71E-05 | 0.001098 |
| lysmdl     | 66.00316027 | -0.048985296 | 0.2429792 | -0.201603 | 0.840227 | 0.985029 |
| emc10      | 900.388917  | -0.10575604  | 0.0945467 | -1.118559 | 0.263328 | 0.830245 |
| plcxd3     | 467.4603754 | 0.046026271  | 0.1098203 | 0.4191051 | 0.675139 | 0.965257 |
| zgc:153441 | 195.1303708 | -0.204716422 | 0.1578129 | -1.29721  | 0.194559 | 0.758506 |
| rfc1       | 496.611336  | -0.007702866 | 0.1065923 | -0.072265 | 0.942391 | 0.993276 |
| anp32e     | 11714.14971 | 0.052963372  | 0.0683933 | 0.7743938 | 0.438698 | 0.915997 |
| btr09      | 3.819234752 | -0.377846935 | 0.9737702 | -0.388025 | 0.697998 | NA       |
| sec13      | 1260.207503 | 0.014081995  | 0.0962576 | 0.1462949 | 0.883689 | 0.988706 |
| ptp4a3b    | 1257.440809 | 0.135674325  | 0.0799655 | 1.69666   | 0.089761 | 0.573763 |
| rpl32      | 12077.77838 | -0.411683198 | 0.0729312 | -5.644813 | 1.65E-08 | 2.70E-06 |
| nubpl      | 115.6562968 | -0.040179208 | 0.1898189 | -0.211671 | 0.832364 | 0.983557 |
| id3        | 674.5753494 | -0.004551443 | 0.0980045 | -0.046441 | 0.962959 | 0.995927 |
| ssuh2.4    | 30.16572974 | -0.093854817 | 0.3836043 | -0.244666 | 0.806715 | 0.980254 |
| pik3c3     | 598.3565176 | -0.006460861 | 0.0993309 | -0.065044 | 0.948139 | 0.99381  |
| nucbl      | 965.3029038 | 0.215574657  | 0.0887594 | 2.4287526 | 0.015151 | 0.225353 |
| ugt5f1     | 63.29746171 | -0.076501954 | 0.2490974 | -0.307117 | 0.758755 | 0.975374 |
| zgc:136870 | 18.09131017 | -0.457300017 | 0.4762954 | -0.960119 | 0.336996 | 0.876088 |
| hsd17b14   | 156.8255723 | -0.267728712 | 0.172518  | -1.551889 | 0.120689 | 0.645578 |
| CU657980.1 | 5.241171884 | 0.681075426  | 0.8615153 | 0.7905552 | 0.429204 | NA       |
| xcrla.1    |             | 0 NA         | NA        | NA        | NA       | NA       |
| pdk4       | 294.993929  | -0.024397471 | 0.134356  | -0.181588 | 0.855906 | 0.985174 |
| bcat2      | 1131.202143 | 0.183036332  | 0.0880233 | 2.079408  | 0.03758  | 0.379013 |
| CSKMT      | 60.36433709 | -0.289136714 | 0.2500624 | -1.156258 | 0.247576 | 0.817092 |
| tp53bp2b   | 711.9996299 | 0.0097057    | 0.0993061 | 0.0977352 | 0.922143 | 0.992292 |
| aplp2      | 5178.496192 | 0.158687047  | 0.0703692 | 2.2550628 | 0.024129 | 0.299742 |
| hibch      | 450.9967788 | 0.166258847  | 0.110007  | 1.511348  | 0.1307   | 0.662797 |
| gpsmlb     | 158.0300518 | 0.101564445  | 0.176676  | 0.5748628 | 0.565384 | 0.948739 |
| six2b      | 56.89334053 | 0.192455629  | 0.2714168 | 0.7090779 | 0.478276 | 0.926927 |
| six3b      | 901.7827672 | 0.016057401  | 0.0976187 | 0.164491  | 0.869345 | 0.987274 |
| FP015808.1 | 1.641419359 | -1.960714519 | 1.6347667 | -1.199385 | 0.230378 | NA       |
| rgra       | 542.3220687 | 0.172582768  | 0.2834503 | 0.6088643 | 0.542614 | 0.944974 |
| ms4a17a.16 | 17.60092595 | -2.20261706  | 0.5164464 | -4.264948 | 2.00E-05 | 0.001256 |
| mta3       | 499.4134737 | -0.01774389  | 0.10405   | -0.170532 | 0.864592 | 0.98601  |
| ier5l      | 1438.917874 | 0.02044      | 0.0902069 | 0.2265903 | 0.820742 | 0.981594 |
| cox7a2l    | 1012.820337 | 0.036360466  | 0.0996038 | 0.365051  | 0.715073 | 0.96909  |
| tmsb       | 342.5247912 | -0.099337382 | 0.1733393 | -0.573081 | 0.56659  | 0.948739 |
| dgatl1b    | 260.0255046 | -0.090731351 | 0.1408364 | -0.644232 | 0.519425 | 0.938945 |
| eif4ebp3   | 348.8651494 | -0.350242554 | 0.1357947 | -2.579207 | 0.009903 | 0.169473 |
| zgc:110540 | 258.1828985 | -0.023435382 | 0.1449659 | -0.161661 | 0.871573 | 0.987762 |
| tpral      | 94.68294    | -0.149078976 | 0.2070087 | -0.720158 | 0.471428 | 0.924838 |
| ppp2r5b    | 772.463883  | 0.039566614  | 0.0899544 | 0.4398517 | 0.660045 | 0.963432 |
| zgc:101765 | 32.41725604 | 0.014546751  | 0.3762203 | 0.0386655 | 0.969157 | 0.996315 |
| badb       | 110.3680242 | -0.097026332 | 0.1878185 | -0.516596 | 0.605438 | 0.95651  |
| ldlrad4b   | 5.290058233 | -0.38956333  | 0.8333003 | -0.467495 | 0.640146 | NA       |
| lgals2a    | 410.7118723 | 0.160744976  | 0.1211358 | 1.3269812 | 0.184515 | 0.747376 |
| mc5rb      | 4.50601267  | 0.340803361  | 0.8782391 | 0.388053  | 0.697977 | NA       |
| mc2r       | 0.341486697 | 1.892317624  | 3.2124068 | 0.5890654 | 0.555817 | NA       |
| eef2kmt    | 48.30574209 | -0.208368581 | 0.3043992 | -0.684524 | 0.493644 | 0.931926 |
| znf1015    | 61.5262955  | -0.226125206 | 0.2485897 | -0.909632 | 0.363017 | 0.885944 |
| alg1       | 193.7832736 | -0.048286764 | 0.1677111 | -0.287916 | 0.773411 | 0.975687 |
| cd40       | 20.90681656 | -0.996837493 | 0.4472058 | -2.229035 | 0.025812 | 0.31065  |
| itsn2b     | 1040.961738 | -0.032524843 | 0.1009521 | -0.322181 | 0.747316 | 0.97419  |
| cxcr2      | 0.499972362 | -2.44370697  | 3.0013188 | -0.814211 | 0.415524 | NA       |

|                  |             |              |           |           |          |          |
|------------------|-------------|--------------|-----------|-----------|----------|----------|
| kifc3            | 1845.232529 | -0.032216579 | 0.0761126 | -0.423275 | 0.672094 | 0.965257 |
| ebnalbp2         | 444.7033304 | 0.15436129   | 0.1126523 | 1.3702454 | 0.17061  | 0.728116 |
| zbtb41           | 216.8331008 | -0.159795022 | 0.1427261 | -1.119592 | 0.262888 | 0.830166 |
| col4a1           | 376.226011  | 0.236028748  | 0.1228306 | 1.9215786 | 0.054659 | 0.457793 |
| si:dkey-33m11.7  | 1.487688759 | -0.324299566 | 1.5016004 | -0.215969 | 0.829012 | NA       |
| si:dkey-33m11.8  | 75.39647327 | 0.007979211  | 0.2271275 | 0.035131  | 0.971975 | 0.996315 |
| pds5a            | 1552.48747  | -0.065817229 | 0.0799459 | -0.823272 | 0.410353 | 0.902997 |
| ptch2            | 1167.694579 | -0.003570421 | 0.0893606 | -0.039955 | 0.968129 | 0.996315 |
| potm2            | 310.0191996 | -0.013213942 | 0.1267555 | -0.104248 | 0.916973 | 0.991572 |
| itih3a           | 298.8567122 | 0.442741475  | 0.1636064 | 2.7061377 | 0.006807 | 0.127586 |
| depdc7a          | 118.9707521 | -0.132798813 | 0.1810705 | -0.733409 | 0.463309 | 0.922698 |
| casp3b           | 224.280163  | 0.243536472  | 0.1443945 | 1.6866052 | 0.091679 | 0.57849  |
| ponzr5           | 241.8504464 | -0.717275595 | 0.1488333 | -4.819321 | 1.44E-06 | 0.000136 |
| map2             | 1288.365804 | 0.018152926  | 0.0865505 | 0.2097379 | 0.833872 | 0.983583 |
| itih1            | 370.6104838 | -0.178366691 | 0.11984   | -1.488374 | 0.136652 | 0.673303 |
| bcl9l            | 826.6122958 | 0.01743174   | 0.1041002 | 0.1674516 | 0.867015 | 0.986978 |
| prdx5            | 1165.54759  | 0.146147349  | 0.1066742 | 1.3700351 | 0.170676 | 0.728116 |
| zdhhc20a         | 22.8437361  | 0.517195703  | 0.4291161 | 1.2052583 | 0.228104 | 0.795505 |
| borcs7           | 104.1884266 | -0.049227803 | 0.1968538 | -0.250073 | 0.802531 | 0.979583 |
| svila            | 1134.590951 | -0.004641383 | 0.0827575 | -0.056084 | 0.955275 | 0.994543 |
| nxf1             | 1192.48519  | 0.014592991  | 0.0888409 | 0.1642598 | 0.869527 | 0.987282 |
| chac2            | 93.56843633 | 0.555532143  | 0.202679  | 2.7409456 | 0.006126 | 0.118579 |
| rbm4.2           | 1059.111328 | -0.032491795 | 0.097816  | -0.332173 | 0.739759 | 0.972943 |
| ggnbp2           | 777.111034  | -0.01198424  | 0.0929686 | -0.128906 | 0.897432 | 0.990121 |
| pora             | 1527.006703 | -0.013918823 | 0.0757222 | -0.183814 | 0.854159 | 0.985174 |
| cdh27            | 237.3558716 | 0.070722265  | 0.1578837 | 0.4479391 | 0.654197 | 0.961305 |
| fam184b          | 506.9405662 | -0.107025288 | 0.1200871 | -0.89123  | 0.372806 | 0.892868 |
| cxcl12b          | 418.8665571 | 0.072193685  | 0.1152222 | 0.6265605 | 0.530947 | 0.942209 |
| znf148           | 413.2490057 | 0.084742749  | 0.1147244 | 0.7386638 | 0.460111 | 0.921978 |
| gdel             | 357.6280897 | 0.03007802   | 0.115851  | 0.2596269 | 0.795152 | 0.978466 |
| pom12l           | 301.7513219 | 0.120452077  | 0.1424118 | 0.8458015 | 0.397664 | 0.899672 |
| dtmbpla          | 484.9816954 | -0.156682765 | 0.1072937 | -1.460317 | 0.144203 | 0.688428 |
| mylipb           | 195.1070732 | 0.352471802  | 0.1578141 | 2.2334622 | 0.025518 | 0.309193 |
| ctsba            | 2961.128394 | -0.077699466 | 0.0954225 | -0.814268 | 0.415492 | 0.906237 |
| kenk2a           | 39.4243415  | 0.132698294  | 0.3187515 | 0.4163064 | 0.677186 | 0.965257 |
| ccn1la           | 1533.97165  | -0.092549763 | 0.0793481 | -1.166377 | 0.243462 | 0.81239  |
| armac4           | 71.74998426 | -0.107178108 | 0.2295355 | -0.466935 | 0.640547 | 0.959994 |
| pim3             | 1020.296889 | 0.021392173  | 0.0943809 | 0.2266578 | 0.82069  | 0.981594 |
| lrfn4a           | 294.4300733 | -0.010204215 | 0.1279263 | -0.079766 | 0.936423 | 0.992702 |
| cenpf            | 461.8376939 | 0.044564041  | 0.11088   | 0.4019124 | 0.687748 | 0.966442 |
| si:dkey-101k6.5  | 49.98039304 | 0.137769201  | 0.2866721 | 0.4805811 | 0.630814 | 0.957354 |
| zgc:110410       | 51.90162308 | -0.895882245 | 0.2756547 | -3.250016 | 0.001154 | 0.034522 |
| smyd2a           | 721.4382265 | 0.069147838  | 0.0959039 | 0.721012  | 0.470902 | 0.924838 |
| slc8a4a          | 27.17683888 | -0.055361059 | 0.4495347 | -0.123152 | 0.901987 | 0.990121 |
| prox1a           | 515.9919828 | -0.17985473  | 0.1037981 | -1.732736 | 0.083143 | 0.55599  |
| cyp27a1.4        | 14.89562056 | -0.12150684  | 0.488167  | -0.248904 | 0.803435 | 0.979643 |
| chadla           | 13.16766745 | -0.099098382 | 0.5188233 | -0.191006 | 0.848521 | 0.985174 |
| zhx2a            | 550.7430919 | -0.043840889 | 0.1068643 | -0.410248 | 0.681624 | 0.965476 |
| epoa             | 36.50545148 | -0.482299542 | 0.3318382 | -1.453418 | 0.146108 | 0.691942 |
| si:ch211-256m1.8 | 505.0729259 | -0.611610159 | 0.1225307 | -4.991484 | 5.99E-07 | 6.51E-05 |
| clqtnf6a         | 7.104730888 | 0.315382746  | 0.7376501 | 0.4275506 | 0.668978 | NA       |
| pxdcl1a          | 84.05292637 | 0.013686853  | 0.2353859 | 0.0581464 | 0.953632 | 0.994213 |
| tm4sf5           | 95.43144667 | -0.949000222 | 0.2087818 | -4.545417 | 5.48E-06 | 0.000429 |
| ccr9a            | 36.02289088 | 0.135532974  | 0.324211  | 0.4180394 | 0.675918 | 0.965257 |

|                    |             |              |           |           |          |          |
|--------------------|-------------|--------------|-----------|-----------|----------|----------|
| slc17a5            | 672.6723712 | 0.193077981  | 0.1093223 | 1.766136  | 0.077373 | 0.541968 |
| zgc:136930         | 10729.9172  | 0.338943816  | 0.0924102 | 3.6678172 | 0.000245 | 0.010078 |
| dtncp1b            | 153.9923378 | 0.086005979  | 0.2122355 | 0.4052384 | 0.685302 | 0.966146 |
| tubalc             | 15988.5246  | 0.065540015  | 0.0961218 | 0.6818437 | 0.495338 | 0.931928 |
| ablim2             | 125.5381265 | -0.122075809 | 0.1843435 | -0.662219 | 0.507831 | 0.935734 |
| dock8              | 478.8376034 | 0.006398958  | 0.1066555 | 0.0599965 | 0.952158 | 0.993904 |
| slc7a7             | 263.1781351 | 0.030428557  | 0.1400986 | 0.2171938 | 0.828057 | 0.982721 |
| ncsla              | 193.5643345 | 0.086309679  | 0.147432  | 0.5854204 | 0.558265 | 0.948478 |
| fance              | 74.40933123 | -0.220279723 | 0.2287134 | -0.963126 | 0.335484 | 0.876088 |
| kif17              | 17.27616264 | 0.096585314  | 0.4711438 | 0.2050018 | 0.837571 | 0.984665 |
| xdh                | 230.048328  | 0.123467121  | 0.1396247 | 0.8842786 | 0.376546 | 0.89493  |
| zmp:0000000650     | 5.59289123  | 0.182943211  | 0.8517598 | 0.2147826 | 0.829937 | NA       |
| cntd2              | 6.24596968  | 1.086381684  | 0.7945179 | 1.3673471 | 0.171517 | NA       |
| snap23.2           | 47.61858729 | 0.073782998  | 0.3134323 | 0.2354033 | 0.813896 | 0.981081 |
| slc12a10.3         | 51.10949224 | 0.409048681  | 0.2756193 | 1.4841078 | 0.13778  | 0.675209 |
| pitpnm3            | 127.3548648 | -0.149273181 | 0.1802289 | -0.828242 | 0.407533 | 0.901305 |
| si:ch1073-358c10.1 | 101.6020603 | -0.094408389 | 0.2107019 | -0.448066 | 0.654105 | 0.961305 |
| nkda               | 47.95577329 | -0.043870599 | 0.2794836 | -0.15697  | 0.875268 | 0.987881 |
| rel                | 208.4913199 | -0.407974835 | 0.1693077 | -2.409665 | 0.015967 | 0.233052 |
| cfb                | 900.7574788 | 0.130201626  | 0.2636865 | 0.4937743 | 0.621466 | 0.957354 |
| b3gat1b            | 160.087403  | 0.125421199  | 0.1754122 | 0.7150082 | 0.474604 | 0.925287 |
| id2a               | 2829.160982 | -0.182569295 | 0.071036  | -2.570095 | 0.010167 | 0.172274 |
| afap1              | 237.7328675 | 0.128468231  | 0.1481873 | 0.8669315 | 0.38598  | 0.89551  |
| prelid3a           | 204.865817  | 0.345796612  | 0.1617051 | 2.1384399 | 0.032481 | 0.35109  |
| mpegl.1            | 63.79177501 | 0.689237365  | 0.2634371 | 2.6163261 | 0.008888 | 0.156504 |
| rab18a             | 680.2162872 | -0.020972566 | 0.0974446 | -0.215226 | 0.829591 | 0.982805 |
| atg9b              | 693.3661088 | -0.131265599 | 0.112074  | -1.17124  | 0.241502 | 0.810471 |
| atoh1a             | 45.30127122 | -0.55879122  | 0.2921142 | -1.91292  | 0.055758 | 0.462291 |
| cyb561d1           | 11.94988483 | -0.13904129  | 0.558383  | -0.249007 | 0.803355 | 0.979643 |
| atxn712a           | 126.5896104 | -0.118017237 | 0.1835721 | -0.642893 | 0.520293 | 0.939056 |
| grid2              | 270.7951191 | -0.07436117  | 0.1440553 | -0.516199 | 0.605715 | 0.95651  |
| ret                | 759.7424978 | 0.089391854  | 0.1005687 | 0.8888639 | 0.374076 | 0.893787 |
| sypl2a             | 1572.556907 | 0.014222707  | 0.0762011 | 0.186647  | 0.851937 | 0.985174 |
| slc12a10.1         | 25.30549254 | -0.773462035 | 0.4183398 | -1.848885 | 0.064474 | 0.496874 |
| mcmcp              | 841.0662697 | 0.090913974  | 0.0908522 | 1.0006794 | 0.316982 | 0.867335 |
| clql4b             | 86.00854597 | 0.086651338  | 0.2082233 | 0.4161461 | 0.677303 | 0.965257 |
| aldh9a1a.2         | 32.75374734 | -0.518830121 | 0.350851  | -1.478776 | 0.1392   | 0.677963 |
| si:dkey-28d5.11    |             | 0 NA         | NA        | NA        | NA       | NA       |
| zmp:0000000652     | 1.33749424  | 0.038256826  | 1.6335383 | 0.0234196 | 0.981316 | NA       |
| si:dkeyp-50d11.2   | 70.35577532 | 0.446050526  | 0.2421945 | 1.8417036 | 0.065519 | 0.500411 |
| si:ch73-1a9.4      | 766.7111972 | -0.088194111 | 0.0949863 | -0.928493 | 0.353152 | 0.881552 |
| slc16a13           | 170.217373  | -0.057376679 | 0.1671947 | -0.343173 | 0.731468 | 0.971557 |
| mipep              | 262.2660767 | 0.094004841  | 0.1350084 | 0.6962888 | 0.486248 | 0.930833 |
| si:dkey-83f18.2    | 0.182570949 | 0.967652056  | 4.0804729 | 0.2371421 | 0.812547 | NA       |
| pknox2             | 511.8272466 | 0.004433601  | 0.1176503 | 0.0376846 | 0.969939 | 0.996315 |
| sun1               | 1128.966729 | 0.142385423  | 0.0904734 | 1.5737813 | 0.115538 | 0.637206 |
| leol               | 705.7964351 | -0.080358755 | 0.0954795 | -0.841634 | 0.399993 | 0.90084  |
| sp100.1            | 7.150104519 | 1.226483222  | 0.7671403 | 1.598773  | 0.109871 | NA       |
| llph               | 490.0195959 | -0.064349019 | 0.1132109 | -0.568399 | 0.569764 | 0.948983 |
| si:dkey-25e12.3    | 50.2885796  | 0.584193752  | 0.319781  | 1.8268555 | 0.067721 | 0.50956  |
| zgc:163121         | 56.90054206 | -0.254403017 | 0.2550671 | -0.997397 | 0.318572 | 0.867746 |
| sema3fb            | 582.1143994 | 0.13530437   | 0.1106779 | 1.2225056 | 0.221516 | 0.788243 |
| irf4b              | 3.143405551 | 1.097834121  | 1.1545954 | 0.9508388 | 0.341686 | NA       |
| gnb5b              | 1282.537867 | 0.249679756  | 0.1017126 | 2.4547576 | 0.014098 | 0.214639 |



|                    |             |              |           |           |          |          |
|--------------------|-------------|--------------|-----------|-----------|----------|----------|
| bambia             | 499.9974114 | -0.062539764 | 0.103577  | -0.6038   | 0.545977 | 0.945526 |
| zgc:66160          | 403.3079421 | 0.176649614  | 0.1137857 | 1.5524767 | 0.120548 | 0.645578 |
| vtna               | 554.053063  | 0.257462524  | 0.1182878 | 2.1765777 | 0.029512 | 0.332709 |
| si:dkey-67c22.2    | 997.7494805 | -0.051440437 | 0.0897818 | -0.57295  | 0.566679 | 0.948739 |
| foxqlb             | 192.6737347 | -0.073457904 | 0.1768101 | -0.415462 | 0.677804 | 0.965257 |
| foxclb             | 526.8161975 | 0.015163131  | 0.1123591 | 0.1349524 | 0.89265  | 0.989291 |
| si:dkey-56f14.7    | 677.2661816 | 0.153362875  | 0.0965932 | 1.5877197 | 0.11235  | 0.627572 |
| mylk4b             | 63.02907261 | 0.168626959  | 0.2503961 | 0.673441  | 0.500667 | 0.93428  |
| zp211              | 0.499182217 | -0.916838237 | 2.6774436 | -0.34243  | 0.732027 | NA       |
| serpinb1           | 543.9037332 | -0.730525599 | 0.1023401 | -7.138213 | 9.46E-13 | 3.37E-10 |
| rwdd2b             | 95.79137175 | 0.440253655  | 0.2081351 | 2.1152304 | 0.03441  | 0.360397 |
| kat6b              | 898.9217791 | -0.046839961 | 0.0930655 | -0.503301 | 0.614753 | 0.95688  |
| BX248515.1         | 11.75086739 | 0.280190202  | 0.5501094 | 0.5093354 | 0.610517 | 0.95688  |
| vps26b1            | 45.3156318  | -0.113466528 | 0.2940111 | -0.385926 | 0.699551 | 0.967998 |
| ftr97              | 42.65403847 | -0.11611401  | 0.3057667 | -0.379747 | 0.704133 | 0.968134 |
| METTL21C           | 3.492242897 | 0.151951359  | 0.9860217 | 0.1541055 | 0.877527 | NA       |
| adamts17           | 65.42872511 | 0.288495889  | 0.2679973 | 1.076488  | 0.281709 | 0.84357  |
| zcchc7             | 178.8908076 | -0.22535031  | 0.1601044 | -1.407521 | 0.159273 | 0.710139 |
| slc22a15           | 235.1034757 | 0.050747274  | 0.1508423 | 0.3364259 | 0.73655  | 0.972535 |
| gpm6aa             | 22410.5064  | 0.026302411  | 0.064151  | 0.4100078 | 0.6818   | 0.965476 |
| dlgap3             | 149.0761688 | -0.03879033  | 0.176832  | -0.219363 | 0.826368 | 0.982196 |
| lrit3a             | 262.8087703 | 0.274671723  | 0.1421079 | 1.9328386 | 0.053256 | 0.452412 |
| si:dkeyp-3f10.14   | 6.815621801 | 0.660837381  | 0.7289493 | 0.9065616 | 0.364639 | NA       |
| cdcl6              | 291.4910309 | -0.158049171 | 0.1243916 | -1.270578 | 0.203879 | 0.771579 |
| nubpl              | 230.756188  | -0.239418375 | 0.1414448 | -1.692663 | 0.09052  | 0.576398 |
| dexi               |             | 0 NA         | NA        | NA        | NA       | NA       |
| rps27.2            | 4369.08858  | -0.424231667 | 0.1088802 | -3.896314 | 9.77E-05 | 0.00478  |
| CR352329.1         | 5.052041705 | -1.002279979 | 1.0087353 | -0.993601 | 0.320417 | NA       |
| pelo               | 504.3350151 | 0.02266145   | 0.106221  | 0.2133424 | 0.83106  | 0.982994 |
| mmp20b             | 2.57129993  | 0.015701013  | 1.2908427 | 0.0121634 | 0.990295 | NA       |
| atf7b              | 1032.360591 | 0.018125195  | 0.0854378 | 0.2121449 | 0.831994 | 0.98349  |
| galnt12            | 44.06611959 | -0.221086526 | 0.3050163 | -0.724835 | 0.468553 | 0.924328 |
| hic1               | 202.6795574 | 0.018721013  | 0.1443281 | 0.1297115 | 0.896795 | 0.989971 |
| si:ch1073-184j22.1 | 74.32866701 | -0.021416817 | 0.2424788 | -0.088324 | 0.929619 | 0.992702 |
| cicb               | 1530.864308 | 0.003436938  | 0.0808984 | 0.0424846 | 0.966112 | 0.996315 |
| si:ch211-212k18.7  | 905.6002991 | -0.15804313  | 0.0977642 | -1.616574 | 0.10597  | 0.615567 |
| si:ch211-37e10.1   | 1.999598409 | 0.473439221  | 1.4046542 | 0.3370504 | 0.736079 | NA       |
| ypel3              | 728.085916  | -0.284287335 | 0.1035709 | -2.744857 | 0.006054 | 0.117821 |
| icn2               | 636.2367831 | -0.22646998  | 0.2425284 | -0.933787 | 0.350414 | 0.880195 |
| pygma              | 1604.074166 | 0.511171244  | 0.1063619 | 4.8059629 | 1.54E-06 | 0.000143 |
| ftr61              | 6.296258228 | -1.09238699  | 0.7712966 | -1.4163   | 0.156688 | NA       |
| slc22a61           | 204.2977564 | -0.715584163 | 0.1714574 | -4.17354  | 3.00E-05 | 0.001755 |
| rnf7               | 1016.625    | -0.092820687 | 0.0877756 | -1.057477 | 0.290294 | 0.846262 |
| lgals1b            | 8.120085531 | 0.685308937  | 0.7583604 | 0.9036719 | 0.366169 | NA       |
| cmn                | 1331.580751 | 0.256507177  | 0.2350645 | 1.0912203 | 0.275176 | 0.839541 |
| sertad2b           | 432.2961016 | -0.00742446  | 0.1086253 | -0.068349 | 0.945508 | 0.993589 |
| grk7b              | 75.42044248 | 0.458317431  | 0.231909  | 1.9762815 | 0.048123 | 0.432341 |
| otub1a             | 750.3528673 | -0.075000834 | 0.0926083 | -0.809872 | 0.418014 | 0.906305 |
| av19               | 514.6407592 | 0.102949014  | 0.1052742 | 0.9779133 | 0.328117 | 0.872701 |
| epd12              | 466.0498    | -1.240293061 | 0.1502897 | -8.252679 | 1.55E-16 | 9.01E-14 |
| pfkfb4a            | 263.2233401 | -0.054914822 | 0.1346569 | -0.407813 | 0.683411 | 0.965476 |
| appb               | 6941.097904 | 0.10565125   | 0.074201  | 1.4238512 | 0.15449  | 0.704213 |
| npat               | 430.5628574 | -0.064340634 | 0.1091017 | -0.589731 | 0.555371 | 0.947452 |
| F0834888.1         | 8.098377195 | -0.293205148 | 0.7185673 | -0.408041 | 0.683243 | NA       |

|                   |             |              |           |           |          |          |
|-------------------|-------------|--------------|-----------|-----------|----------|----------|
| dv11b             | 103.2808422 | -0.008866023 | 0.1969676 | -0.045013 | 0.964097 | 0.995927 |
| wnt1              | 17.91032257 | -0.111392484 | 0.4471535 | -0.249115 | 0.803272 | 0.979643 |
| chrna6            | 334.1198741 | 0.24686363   | 0.1226147 | 2.0133289 | 0.04408  | 0.412803 |
| p2ry8             | 3.125210979 | -0.480644452 | 1.0717111 | -0.448483 | 0.653805 | NA       |
| clgalt1b          | 311.8158046 | 0.163811433  | 0.1252929 | 1.3074278 | 0.191067 | 0.755785 |
| droscha           | 447.1993761 | 0.023881075  | 0.1116862 | 0.213823  | 0.830685 | 0.982994 |
| cacnb2b           | 131.8959414 | 0.218629069  | 0.184879  | 1.1825523 | 0.236987 | 0.805854 |
| mast1             | 224.1948972 | -0.135263949 | 0.1381513 | -0.9791   | 0.327531 | 0.872701 |
| ghdc              | 64.9313776  | 0.12206766   | 0.2453467 | 0.4975314 | 0.618814 | 0.957354 |
| gpr61             | 81.52699287 | -0.187683561 | 0.2216295 | -0.846835 | 0.397087 | 0.899672 |
| FOXN2 (1 of many) | 18.56916136 | 0.185466769  | 0.4728084 | 0.3922663 | 0.694861 | 0.96736  |
| pcolce2b          | 359.5251215 | 0.037798717  | 0.1260736 | 0.2998147 | 0.764319 | 0.975374 |
| clgalt1a          | 105.0473935 | 0.169638411  | 0.2010471 | 0.8437747 | 0.398795 | 0.900446 |
| stat5b            | 132.3864508 | -0.111542176 | 0.184085  | -0.605928 | 0.544563 | 0.945438 |
| s100t             | 375.4895264 | 0.279970791  | 0.1177529 | 2.377613  | 0.017425 | 0.244372 |
| pipox             | 139.5160758 | -0.663437229 | 0.191564  | -3.463266 | 0.000534 | 0.018777 |
| capn2b            | 417.1783972 | 0.009842448  | 0.1213893 | 0.0810817 | 0.935377 | 0.992702 |
| clull             | 53.06102668 | 1.441756129  | 0.3042703 | 4.7384065 | 2.15E-06 | 0.000192 |
| cgna              | 189.9264942 | -0.047581029 | 0.1698714 | -0.2801   | 0.779401 | 0.976146 |
| exoc2             | 978.9410978 | -0.249351298 | 0.0931304 | -2.677444 | 0.007419 | 0.136082 |
| zgc:123238        | 208.3444446 | 0.020540346  | 0.1517512 | 0.1353554 | 0.892331 | 0.989291 |
| actalb            | 12239.05989 | 0.492039678  | 0.2205692 | 2.2307727 | 0.025696 | 0.310555 |
| acad9             | 337.9703699 | -0.102989274 | 0.1367497 | -0.753122 | 0.451376 | 0.918761 |
| zgc:153345        | 24.506176   | 0.064464512  | 0.3950284 | 0.1631896 | 0.870369 | 0.987421 |
| dipk2ab           | 257.6725332 | 0.206949923  | 0.1381198 | 1.4983367 | 0.134046 | 0.669349 |
| foxh1             | 5.863347542 | 0.622815112  | 0.8200778 | 0.7594586 | 0.447578 | NA       |
| smtnl             | 213.8171766 | -0.096528381 | 0.1457443 | -0.662313 | 0.50777  | 0.935734 |
| crk               | 1447.124585 | -0.024792731 | 0.080522  | -0.3079   | 0.758158 | 0.975374 |
| ankrd33aa         | 112.9860758 | 0.229137434  | 0.2267362 | 1.0105905 | 0.312212 | 0.864401 |
| ruvb12            | 723.8763683 | 0.052541837  | 0.1010919 | 0.5197432 | 0.603243 | 0.956045 |
| si:ch211-217a12.1 | 132.3834361 | 0.368767062  | 0.1797312 | 2.0517699 | 0.040192 | 0.392132 |
| prss60.2          | 203.1004685 | -0.335922519 | 0.1493409 | -2.249368 | 0.024489 | 0.3019   |
| ftr82             | 443.5247677 | -0.297370417 | 0.1075605 | -2.76468  | 0.005698 | 0.113266 |
| cpda              | 664.5129648 | 0.158503294  | 0.094019  | 1.6858645 | 0.091822 | 0.57849  |
| aclyb             | 65.48751337 | 0.57400944   | 0.2832134 | 2.0267734 | 0.042686 | 0.406074 |
| nubp2             | 68.23780325 | -0.504105961 | 0.2391815 | -2.107629 | 0.035063 | 0.364435 |
| birc5b            | 3.263608517 | 0.264125569  | 1.0571213 | 0.2498536 | 0.802701 | NA       |
| pdzd3b            | 42.6854123  | -0.266755135 | 0.3096151 | -0.86157  | 0.388924 | 0.896295 |
| gpr161            | 80.79777517 | 0.371964748  | 0.2303043 | 1.6151013 | 0.106289 | 0.615567 |
| map3k10           | 9.857809783 | -0.366430541 | 0.6371881 | -0.575074 | 0.565241 | NA       |
| arntl             | 211.6130709 | -0.177269342 | 0.1474277 | -1.202415 | 0.229203 | 0.796702 |
| akap12b           | 2434.976083 | 0.004245971  | 0.0702423 | 0.0604475 | 0.951799 | 0.993864 |
| mtol              | 259.5395052 | -0.189661707 | 0.1334633 | -1.421078 | 0.155294 | 0.705118 |
| pimr191           | 9.020079067 | -0.664005148 | 0.6619874 | -1.003048 | 0.315838 | NA       |
| CU655961.1        | 42.82928233 | -0.124995044 | 0.2934545 | -0.425943 | 0.670149 | 0.965223 |
| pcnx2             | 756.0780764 | 0.133887781  | 0.0969977 | 1.3803185 | 0.167489 | 0.72455  |
| f5                | 356.1368591 | 0.115072772  | 0.1411619 | 0.815183  | 0.414968 | 0.906237 |
| timm8b            | 405.87089   | -0.043770965 | 0.1162275 | -0.376597 | 0.706473 | 0.968459 |
| sdhda             | 30.58204029 | 0.510012029  | 0.3576064 | 1.4261824 | 0.153816 | 0.702599 |
| fmn11a            | 638.1495047 | 0.149626188  | 0.1005331 | 1.4883274 | 0.136665 | 0.673303 |
| capn8             | 472.9954929 | 0.04530216   | 0.1063773 | 0.4258631 | 0.670208 | 0.965236 |
| ino80c            | 274.585549  | -0.007481949 | 0.1353287 | -0.055287 | 0.95591  | 0.994543 |
| bco2a             | 140.3514424 | -0.434202789 | 0.1725174 | -2.516863 | 0.01184  | 0.191129 |
| hsp701            | 2059.851604 | 0.081258653  | 0.2681716 | 0.30301   | 0.761882 | 0.975374 |

|                   |             |              |           |           |          |          |
|-------------------|-------------|--------------|-----------|-----------|----------|----------|
| trim35-29         | 10.67185418 | -0.400459885 | 0.6557485 | -0.610691 | 0.541404 | NA       |
| si:dkeyp-69e1.8   | 70.85314636 | 0.059738297  | 0.2305956 | 0.2590609 | 0.795588 | 0.978498 |
| ube3a             | 1435.131401 | 0.059510397  | 0.0872168 | 0.6823273 | 0.495032 | 0.931926 |
| ribc1             | 18.6639712  | -0.055740786 | 0.4583086 | -0.121623 | 0.903198 | 0.990121 |
| 9-Mar             | 314.7877637 | 0.117096908  | 0.1361183 | 0.8602581 | 0.389647 | 0.896421 |
| ankrd54           | 421.4171714 | -0.034930432 | 0.1076271 | -0.32455  | 0.745521 | 0.974094 |
| si:ch211-238g23.1 | 1.623378393 | -0.611067996 | 1.5115622 | -0.404263 | 0.68602  | NA       |
| foxp3a            | 5.346760651 | 0.361013354  | 0.8247349 | 0.4377326 | 0.66158  | NA       |
| fosb              | 75.73878446 | 0.868875414  | 0.2894778 | 3.0015265 | 0.002686 | 0.066466 |
| npas4a            | 75.29106254 | 1.344490079  | 0.5908917 | 2.275358  | 0.022884 | 0.289518 |
| suv39h1b          | 304.6307306 | 0.122915608  | 0.1322696 | 0.9292808 | 0.352744 | 0.881552 |
| smc1a             | 23.3686461  | 0.298198463  | 0.4313677 | 0.691286  | 0.489386 | 0.931926 |
| tmem9             | 283.2834499 | 0.25688912   | 0.1337252 | 1.9210226 | 0.054729 | 0.458175 |
| efhd2             | 1121.365455 | 0.161320235  | 0.0862228 | 1.8709705 | 0.061349 | 0.482931 |
| srm               | 525.5919018 | 0.119391678  | 0.1136293 | 1.0507124 | 0.293391 | 0.849291 |
| tmem115           | 767.7154575 | -0.036298684 | 0.0979978 | -0.370403 | 0.711082 | 0.968985 |
| dfffa             | 165.0720697 | -0.131703925 | 0.1624812 | -0.81058  | 0.417607 | 0.906237 |
| ptger3            | 3.528313542 | -0.108814872 | 1.0291318 | -0.105735 | 0.915793 | NA       |
| ptpn3             | 422.8462281 | -0.291759294 | 0.1128842 | -2.584588 | 0.00975  | 0.167496 |
| prss23            | 371.1017169 | 0.152974354  | 0.1174639 | 1.3023092 | 0.192811 | 0.756795 |
| dzank1            | 41.86655041 | 0.294673226  | 0.3391937 | 0.8687462 | 0.384986 | 0.89551  |
| zgc:158423        | 453.3336154 | -0.023824565 | 0.120405  | -0.19787  | 0.843147 | 0.985174 |
| foxo4             | 1535.685842 | -0.078923513 | 0.0766545 | -1.0296   | 0.303198 | 0.85729  |
| cnpy4             | 219.9703432 | -0.06036285  | 0.1396593 | -0.432215 | 0.665585 | 0.964736 |
| heyl              | 35.07906468 | 0.393471999  | 0.3335454 | 1.1796653 | 0.238133 | 0.807277 |
| vtg2              | 0.854974378 | 0.638273715  | 2.0970274 | 0.3043707 | 0.760845 | NA       |
| si:dkey-225f5.5   | 40.67400494 | 0.20312138   | 0.3057873 | 0.664257  | 0.506526 | 0.935729 |
| celsr3            | 219.5326034 | -0.037624059 | 0.1439171 | -0.261429 | 0.793762 | 0.977937 |
| si:dkey-182g1.6   | 4.925230562 | 0.802106568  | 0.8898173 | 0.9014283 | 0.367361 | NA       |
| lectin            | 0.173729368 | -0.955901296 | 4.0804729 | -0.234262 | 0.814781 | NA       |
| slc26a6           | 90.16517121 | 0.049597195  | 0.2105651 | 0.2355433 | 0.813787 | 0.981081 |
| arhgef1b          | 1039.296182 | 0.046151715  | 0.0852256 | 0.5415239 | 0.588146 | 0.953319 |
| mettl16           | 132.0149595 | -0.013823127 | 0.181767  | -0.076049 | 0.93938  | 0.992857 |
| march4l           | 78.17806472 | -0.032748019 | 0.2240618 | -0.146156 | 0.883798 | 0.988706 |
| CABZ01046427.1    | 0           | NA           | NA        | NA        | NA       | NA       |
| cdh10a            | 169.0071454 | 0.109797328  | 0.1754721 | 0.6257254 | 0.531495 | 0.942358 |
| mtnrlab           | 75.47531103 | 0.209852554  | 0.2522112 | 0.8320509 | 0.40538  | 0.901305 |
| nr4a3             | 373.6888589 | 0.229433792  | 0.1262734 | 1.8169603 | 0.069223 | 0.514556 |
| kcnc3a            | 130.2224673 | 0.064736239  | 0.202467  | 0.3197373 | 0.749167 | 0.97419  |
| tor11l            | 0.499182217 | -0.916838237 | 2.6774436 | -0.34243  | 0.732027 | NA       |
| doplb             | 1062.576975 | 0.016221699  | 0.0900506 | 0.1801398 | 0.857043 | 0.985597 |
| rs1ld1            | 528.0309662 | -0.271680497 | 0.11069   | -2.454426 | 0.014111 | 0.214639 |
| cpe               | 9999.014269 | 0.127691525  | 0.0734414 | 1.7386854 | 0.08209  | 0.553066 |
| pag1              | 823.0690215 | 0.101101845  | 0.0980926 | 1.0306777 | 0.302692 | 0.85729  |
| msmol             | 320.9619958 | -0.217744553 | 0.1241131 | -1.754405 | 0.079361 | 0.547489 |
| dmcl              | 1.950601905 | 2.338222269  | 1.59317   | 1.467654  | 0.142198 | NA       |
| tex10             | 528.6928444 | -0.004024128 | 0.1091007 | -0.036885 | 0.970577 | 0.996315 |
| zgc:153215        | 32.72775041 | 0.106964637  | 0.3440011 | 0.3109428 | 0.755844 | 0.975374 |
| nmnat1-rbp7a      | 0           | NA           | NA        | NA        | NA       | NA       |
| zgc:154093        | 396.3535517 | 0.304432107  | 0.123422  | 2.4665959 | 0.01364  | 0.20974  |
| lzic              | 162.1884628 | 0.097611454  | 0.1621839 | 0.6018566 | 0.54727  | 0.945526 |
| zswim5            | 2236.789151 | -0.0439054   | 0.0740414 | -0.592984 | 0.553192 | 0.947265 |
| steap4            | 353.7308101 | -0.677011752 | 0.1407113 | -4.811355 | 1.50E-06 | 0.00014  |
| luc7l             | 1844.711144 | -0.042914236 | 0.0822136 | -0.521985 | 0.601681 | 0.956045 |

|                    |             |              |           |           |          |          |
|--------------------|-------------|--------------|-----------|-----------|----------|----------|
| nipa2              | 470.2075046 | -0.074511797 | 0.1097755 | -0.678765 | 0.497286 | 0.93322  |
| nipal              | 69.36525198 | -0.647795304 | 0.2403738 | -2.694949 | 0.00704  | 0.13096  |
| si:dkey-47k20.9    | 0 NA        | NA           | NA        | NA        | NA       | NA       |
| foxi3a             | 154.5464246 | 0.017251421  | 0.1846855 | 0.0934097 | 0.925578 | 0.992676 |
| zc3h7bb            | 859.3655559 | 0.029783308  | 0.0993433 | 0.2998019 | 0.764328 | 0.975374 |
| si:ch1073-416j23.1 | 11.10284253 | 0.321662393  | 0.5718706 | 0.562474  | 0.573793 | 0.949988 |
| tspan14            | 496.8087737 | 0.058663301  | 0.1047574 | 0.5599917 | 0.575485 | 0.950373 |
| asph               | 2628.612567 | 0.125150948  | 0.0682427 | 1.8339085 | 0.066668 | 0.504944 |
| v2rc2              | 2.852923473 | 0.160116477  | 1.1096438 | 0.1442954 | 0.885267 | NA       |
| lcp2a              | 12.63289941 | 0.336827062  | 0.5550085 | 0.6068863 | 0.543926 | 0.945438 |
| k1c3               | 68.63373917 | 0.025893903  | 0.2443363 | 0.1059765 | 0.915601 | 0.9913   |
| cflara             | 153.8589899 | -0.088203408 | 0.1720092 | -0.512783 | 0.608103 | 0.956718 |
| rfc3               | 205.8896864 | -0.088418185 | 0.1547591 | -0.571328 | 0.567777 | 0.948739 |
| zgc:136971         | 119.7160274 | -0.077896152 | 0.1935633 | -0.402432 | 0.687366 | 0.966376 |
| zar11              | 1.767051434 | 0.777420258  | 1.5123228 | 0.5140571 | 0.607212 | NA       |
| tpmt.1             | 154.6709278 | -0.327143242 | 0.1633379 | -2.002862 | 0.045192 | 0.417766 |
| pecr               | 205.7126839 | -0.058002264 | 0.1526879 | -0.379875 | 0.704039 | 0.968134 |
| gzm3.2             | 0.789393591 | -0.56601807  | 2.4000363 | -0.235837 | 0.813559 | NA       |
| tmem161b           | 509.9856197 | 0.188411375  | 0.1045139 | 1.802739  | 0.071429 | 0.522931 |
| hmbsb              | 203.0894444 | 0.091891509  | 0.1465534 | 0.6270174 | 0.530648 | 0.942209 |
| v2rh1              | 0.341366344 | 1.891903201  | 3.2128156 | 0.5888614 | 0.555954 | NA       |
| rps8a              | 8866.399604 | -0.235851521 | 0.0800854 | -2.944999 | 0.00323  | 0.07565  |
| si:ch211-59d17.3   | 230.490866  | -0.046364774 | 0.1541446 | -0.300787 | 0.763577 | 0.975374 |
| v2rh7              | 0.325573202 | 0.005883621  | 3.3172783 | 0.0017736 | 0.998585 | NA       |
| fryb               | 2032.280776 | -1.03E-06    | 0.0862956 | -1.20E-05 | 0.99999  | 0.99999  |
| sprn               | 320.1894139 | 0.128434262  | 0.135904  | 0.9450369 | 0.34464  | 0.878434 |
| dnajc18            | 834.2544336 | 0.167592312  | 0.0905944 | 1.8499189 | 0.064325 | 0.496087 |
| si:dkey-47k20.2    | 4.27066418  | -0.454803258 | 0.9342506 | -0.486811 | 0.626392 | NA       |
| cyb5d1             | 17.457542   | -0.243533341 | 0.4987693 | -0.488268 | 0.62536  | 0.957354 |
| atp5mc1            | 4290.901061 | 0.03580436   | 0.0741252 | 0.4830257 | 0.629077 | 0.957354 |
| v2rh9              | 0 NA        | NA           | NA        | NA        | NA       | NA       |
| evel               | 7.834511232 | -0.686723042 | 0.6778856 | -1.013037 | 0.311043 | NA       |
| si:dkey-47k20.7    | 0 NA        | NA           | NA        | NA        | NA       | NA       |
| hoxb13a            | 12.88093216 | -0.69267732  | 0.5817707 | -1.190636 | 0.233796 | 0.802571 |
| itga6l             | 40.52039986 | 0.09304739   | 0.3071696 | 0.3029186 | 0.761952 | 0.975374 |
| ttbkla             | 573.481055  | -0.155128101 | 0.1046315 | -1.482614 | 0.138177 | 0.675945 |
| sostdc1b           | 13.90731468 | -0.11965891  | 0.5113782 | -0.233993 | 0.81499  | 0.981081 |
| hoxb9a             | 294.5524834 | 0.097949411  | 0.1257558 | 0.7788857 | 0.436047 | 0.914408 |
| evalc              | 7.802018947 | -0.288219985 | 0.6880965 | -0.418866 | 0.675314 | NA       |
| tprgl              | 307.9535322 | -0.505889616 | 0.1259015 | -4.018139 | 5.87E-05 | 0.003169 |
| hoxb8a             | 488.6582387 | 0.072327063  | 0.1172218 | 0.6170106 | 0.537228 | 0.943336 |
| slc22a7a           | 254.7461049 | -0.1836535   | 0.140033  | -1.311501 | 0.189689 | 0.754269 |
| cyp26c1            | 235.8018843 | -0.061256492 | 0.1413172 | -0.433468 | 0.664675 | 0.964736 |
| hoxb7a             | 109.4568952 | 0.098105252  | 0.2004241 | 0.4894882 | 0.624496 | 0.957354 |
| pip4p2             | 104.2666316 | -0.408631622 | 0.1938797 | -2.107655 | 0.035061 | 0.364435 |
| stxbp1b            | 1849.940168 | 0.118250681  | 0.0829096 | 1.4262608 | 0.153793 | 0.702599 |
| itih6              | 155.2625268 | -0.211003244 | 0.1707149 | -1.235998 | 0.216459 | 0.783724 |
| si:ch73-139e5.4    | 101.2024557 | -0.975035849 | 0.2222534 | -4.387047 | 1.15E-05 | 0.000811 |
| noxal              | 19.61276633 | -0.41644755  | 0.4574685 | -0.91033  | 0.362648 | 0.885944 |
| kctd17             | 533.85963   | 0.170176479  | 0.0995753 | 1.7090231 | 0.087447 | 0.566637 |
| grem2a             | 10.13649138 | 0.18356281   | 0.6135379 | 0.2991874 | 0.764797 | NA       |
| rangap1b           | 452.6714864 | 0.105323215  | 0.1178835 | 0.8934517 | 0.371615 | 0.892003 |
| adgre14            | 2.293146196 | 1.316308218  | 1.3179731 | 0.9987368 | 0.317922 | NA       |
| mov10b.2           | 4.254053154 | -1.176451322 | 0.9419986 | -1.248889 | 0.211706 | NA       |

|                   |             |              |           |           |          |          |
|-------------------|-------------|--------------|-----------|-----------|----------|----------|
| rca2.1            | 922.4343826 | -0.05000418  | 0.0942872 | -0.530339 | 0.595877 | 0.954434 |
| dcst1             | 4.229962077 | 0.685820229  | 0.9566703 | 0.7168825 | 0.473447 | NA       |
| rftn2             | 522.3897114 | 0.079062333  | 0.1073208 | 0.7366917 | 0.46131  | 0.922161 |
| l3mbt12           | 454.4134199 | 0.098105484  | 0.1305642 | 0.7513963 | 0.452414 | 0.919104 |
| si:dkey-191g9.5   | 103.4867232 | 0.219317798  | 0.2304891 | 0.9515322 | 0.341334 | 0.878134 |
| igsf21b           | 482.7079199 | 0.039119018  | 0.1114926 | 0.3508664 | 0.725689 | 0.970402 |
| mob4              | 1871.736632 | -0.084950397 | 0.0907226 | -0.936376 | 0.34908  | 0.880195 |
| ecrg4a            | 403.8296567 | 0.164928604  | 0.120935  | 1.363779  | 0.172637 | 0.731348 |
| nrbp1             | 1019.079848 | 0.303725121  | 0.0929611 | 3.2672294 | 0.001086 | 0.032938 |
| capza1b           | 3996.334553 | 0.110371938  | 0.0803924 | 1.3729154 | 0.169779 | 0.726965 |
| cttnbp2nlb        | 146.2476527 | 0.127332144  | 0.1702098 | 0.7480893 | 0.454406 | 0.920544 |
| si:dkey-12h9.6    | 584.6052076 | 0.058275052  | 0.1011809 | 0.575949  | 0.56465  | 0.948739 |
| gtf2h5            | 313.0344714 | 0.4300464    | 0.1307141 | 3.2899766 | 0.001002 | 0.031006 |
| kcnd3             | 153.4079351 | -0.081513387 | 0.1834886 | -0.444242 | 0.656867 | 0.96205  |
| uxsl              | 619.9626124 | -0.011443425 | 0.0982788 | -0.116438 | 0.907305 | 0.990702 |
| sytl1b            | 258.848093  | 0.045318784  | 0.1386468 | 0.3268649 | 0.74377  | 0.974094 |
| ndufa4            | 4187.118385 | -0.033332659 | 0.069561  | -0.479186 | 0.631806 | 0.957356 |
| lmod1a            | 39.17115398 | 0.566789151  | 0.3428788 | 1.6530306 | 0.098325 | 0.597502 |
| pikfyve           | 866.82247   | -0.018895816 | 0.0954195 | -0.198029 | 0.843023 | 0.985174 |
| eef1g             | 16625.92837 | -0.280845724 | 0.083098  | -3.379691 | 0.000726 | 0.023836 |
| serac1            | 248.524456  | 0.104470645  | 0.1395474 | 0.748639  | 0.454075 | 0.920295 |
| gdil              | 4211.154489 | 0.10056835   | 0.0832182 | 1.2084905 | 0.226859 | 0.794528 |
| myct1a            | 8.354064181 | 1.082291194  | 0.6871472 | 1.57505   | 0.115245 | NA       |
| polr2g1           | 569.3223016 | -0.059331715 | 0.1035358 | -0.573055 | 0.566608 | 0.948739 |
| fastkd1           | 268.6815847 | -0.015442674 | 0.1343923 | -0.114907 | 0.908518 | 0.990702 |
| neurog1           | 155.0063421 | -0.197558316 | 0.1688905 | -1.169742 | 0.242105 | 0.810733 |
| kitb              | 23.73387075 | -0.101851944 | 0.3866967 | -0.26339  | 0.79225  | 0.977937 |
| clqtnf5           | 34.38846033 | 0.665613564  | 0.3349874 | 1.986981  | 0.046925 | 0.425245 |
| sf3b1             | 6744.403036 | -0.039866764 | 0.0618134 | -0.644953 | 0.518957 | 0.938945 |
| coq10b            | 1001.660701 | 0.457585014  | 0.0935999 | 4.8887329 | 1.01E-06 | 0.000102 |
| zgc:123244        | 25.6132229  | -0.105474258 | 0.3759825 | -0.28053  | 0.779071 | 0.976146 |
| si:dkey-159a18.1  | 42.76423097 | 0.561697617  | 0.3082806 | 1.8220334 | 0.06845  | 0.512635 |
| rbms2b            | 409.4128675 | -0.057633773 | 0.1421342 | -0.405488 | 0.685119 | 0.966146 |
| tyrplb            | 4510.923555 | -0.097333622 | 0.0792764 | -1.227775 | 0.219531 | 0.786189 |
| fam3c             | 295.3306618 | 0.161330187  | 0.1280134 | 1.26026   | 0.207576 | 0.775175 |
| si:ch211-229c8.4  | 0.499182217 | -0.916838237 | 2.6774436 | -0.34243  | 0.732027 | NA       |
| npdc1b            | 1124.920845 | 0.218842909  | 0.0870657 | 2.5135369 | 0.011953 | 0.192313 |
| hspd1             | 4572.514081 | -0.057298607 | 0.0646344 | -0.886504 | 0.375346 | 0.894316 |
| nr2c2ap           | 38.25434898 | -0.368643511 | 0.3132166 | -1.17696  | 0.239211 | 0.807768 |
| slc25a51a         | 8.799780374 | -0.401242308 | 0.653565  | -0.613929 | 0.539262 | NA       |
| si:ch211-215a10.4 | 304.4665335 | 0.238144129  | 0.1356823 | 1.7551593 | 0.079232 | 0.547489 |
| jac2              | 0.339758314 | 0.005883863  | 3.2682461 | 0.0018003 | 0.998564 | NA       |
| hsp1              | 1413.976588 | -0.176030864 | 0.089678  | -1.962921 | 0.049655 | 0.436976 |
| scrt2             | 353.7114863 | -0.04503875  | 0.1209874 | -0.37226  | 0.709699 | 0.968928 |
| dpt               | 9.393896533 | 0.338808835  | 0.6297985 | 0.5379639 | 0.590602 | NA       |
| v2ral7            | 0.856462055 | 1.928072848  | 2.2076658 | 0.8733536 | 0.38247  | NA       |
| ncam1a            | 806.938123  | 0.130421381  | 0.096306  | 1.3542393 | 0.17566  | 0.736411 |
| dvl2              | 539.2095275 | -0.109769491 | 0.1026774 | -1.069072 | 0.285037 | 0.845094 |
| eif5a2            | 7567.077113 | -0.092807579 | 0.0728881 | -1.273289 | 0.202916 | 0.769849 |
| si:ch211-168k14.2 | 25.60527089 | 0.033195938  | 0.3926609 | 0.084541  | 0.932626 | 0.992702 |
| nme7              | 121.1893489 | -0.197268728 | 0.1889407 | -1.044077 | 0.29645  | 0.853523 |
| slc2a2            | 261.1848001 | 0.449685525  | 0.1357466 | 3.3126837 | 0.000924 | 0.029189 |
| abcb9             | 141.2096878 | -0.244073293 | 0.1689353 | -1.444774 | 0.148521 | 0.696298 |
| si:ch211-201h21.5 | 143.2212253 | -0.43325384  | 0.1841112 | -2.353219 | 0.018612 | 0.254199 |

|                   |             |              |           |           |          |          |
|-------------------|-------------|--------------|-----------|-----------|----------|----------|
| zgc:113436        | 168.5514936 | 0.013568524  | 0.1643375 | 0.082565  | 0.934197 | 0.992702 |
| camk2g2           | 3486.537678 | 0.075672188  | 0.0704093 | 1.0747473 | 0.282488 | 0.843666 |
| myoz1a            | 803.7048698 | 0.236091701  | 0.1005784 | 2.3473392 | 0.018908 | 0.256439 |
| si:ch211-199o1.2  | 39.37016892 | 0.345809202  | 0.3133966 | 1.1034235 | 0.269843 | 0.834705 |
| ogfod2            | 33.75640049 | 0.184529202  | 0.3296408 | 0.5597888 | 0.575624 | 0.950373 |
| si:ch73-130a3.4   | 42.07489348 | 0.409259137  | 0.3021428 | 1.3545223 | 0.17557  | 0.736411 |
| gnrh3             | 40.80475969 | -0.320274632 | 0.3222267 | -0.993942 | 0.320251 | 0.868202 |
| tnika             | 1058.061201 | -0.076921377 | 0.0836726 | -0.919314 | 0.357931 | 0.884398 |
| creb3l3a          | 31.15106309 | -0.522349511 | 0.408503  | -1.278692 | 0.201006 | 0.766855 |
| pld1a             | 279.6039178 | -0.104155926 | 0.1347987 | -0.772678 | 0.439713 | 0.916082 |
| ghsra             | 2.945908661 | -0.971398854 | 1.1481508 | -0.846055 | 0.397522 | NA       |
| zgc:110591        | 275.7037668 | -0.279884193 | 0.1275988 | -2.193471 | 0.028273 | 0.325989 |
| smndc1            | 1298.431387 | -0.004368271 | 0.0795252 | -0.054929 | 0.956195 | 0.994543 |
| tmem45b           | 351.9134746 | -0.212325527 | 0.1189172 | -1.785491 | 0.074182 | 0.530917 |
| zgc:171740        | 46.08209492 | 0.064024116  | 0.3085802 | 0.2074797 | 0.835635 | 0.984089 |
| zgc:162952        | 125.7059571 | -0.171678574 | 0.1765125 | -0.972614 | 0.330745 | 0.87417  |
| bricd5            | 104.5141906 | 0.147386735  | 0.2134421 | 0.6905231 | 0.489865 | 0.931926 |
| si:dkey-183i3.5   | 12842.72584 | 0.421356635  | 0.0824284 | 5.111791  | 3.19E-07 | 3.76E-05 |
| add3b             | 123.9102569 | 0.144770806  | 0.1793917 | 0.8070095 | 0.419661 | 0.90651  |
| sort1b            | 771.759863  | 0.099642729  | 0.1002118 | 0.9943217 | 0.320066 | 0.868153 |
| cdc27             | 975.7244287 | 0.028592502  | 0.0871979 | 0.3279037 | 0.742984 | 0.973486 |
| tmem131           | 1364.715144 | -0.028031381 | 0.0806764 | -0.347455 | 0.72825  | 0.970402 |
| slc35g2a          | 388.4747779 | 0.238438806  | 0.1171013 | 2.0361764 | 0.041733 | 0.400593 |
| dixdc1b           | 263.4211987 | -0.171450643 | 0.1395167 | -1.22889  | 0.219113 | 0.785734 |
| atxn712b          | 241.3276535 | -0.141460188 | 0.144793  | -0.976982 | 0.328578 | 0.872945 |
| atpaf2            | 232.496421  | 0.07957826   | 0.1434335 | 0.5548095 | 0.579025 | 0.951052 |
| or132-5           | 6.689329977 | -0.268341122 | 0.7258    | -0.369718 | 0.711593 | NA       |
| ccdc157           | 18.98372592 | -0.184255313 | 0.4395669 | -0.419175 | 0.675088 | 0.965257 |
| cyb561a3a         | 67.15077893 | -0.169052903 | 0.2574251 | -0.656707 | 0.511369 | 0.936253 |
| drd7              | 10.93648011 | 0.511413543  | 0.5924927 | 0.8631558 | 0.388052 | NA       |
| vsx1              | 1849.583134 | 0.06818684   | 0.0802042 | 0.850166  | 0.395233 | 0.899244 |
| si:ch211-183d21.3 | 62.09344987 | -0.041144038 | 0.2559141 | -0.160773 | 0.872272 | 0.987846 |
| znf706            | 1254.804855 | -0.173677254 | 0.0861704 | -2.015509 | 0.043851 | 0.411346 |
| a2ml              | 1802.766892 | 0.107646363  | 0.112418  | 0.9575547 | 0.338287 | 0.876778 |
| kans12            | 3.324203577 | -0.308248442 | 1.0461689 | -0.294645 | 0.768265 | NA       |
| ldb3a             | 1394.752968 | 0.281718944  | 0.0906016 | 3.1094243 | 0.001875 | 0.050962 |
| zgc:123295        | 52.53071184 | 0.075430924  | 0.277746  | 0.2715824 | 0.785943 | 0.97627  |
| rhot2             | 149.166271  | 0.165972453  | 0.1793597 | 0.9253611 | 0.354778 | 0.882105 |
| mhc2dbb           | 9.930974889 | 0.400720408  | 0.5975986 | 0.6705512 | 0.502507 | NA       |
| ahcyll            | 1807.37677  | 0.170726482  | 0.0769717 | 2.2180409 | 0.026552 | 0.313644 |
| mlh3              | 62.34444043 | 0.042316675  | 0.2465155 | 0.1716593 | 0.863705 | 0.985952 |
| szrd1             | 688.0010356 | 0.079589394  | 0.1031611 | 0.7715056 | 0.440407 | 0.916336 |
| stk31             | 5.287512961 | -0.196423064 | 0.8987257 | -0.218557 | 0.826995 | NA       |
| acapl             | 89.68552703 | -0.201805145 | 0.230433  | -0.875765 | 0.381158 | 0.895192 |
| rab3aa            | 787.1409055 | 0.108354553  | 0.0898265 | 1.2062644 | 0.227716 | 0.794934 |
| mpv1712           | 134.64804   | -0.114596838 | 0.1743096 | -0.657433 | 0.510903 | 0.936253 |
| ufsp2             | 400.2927234 | -0.207754135 | 0.1102259 | -1.884804 | 0.059456 | 0.476934 |
| noxolb            | 21.04401606 | -0.468314138 | 0.4743565 | -0.987262 | 0.323514 | 0.870837 |
| ankrd37           | 486.3318336 | -0.319229031 | 0.1299252 | -2.457021 | 0.014009 | 0.214075 |
| ifi30             | 420.3703417 | 0.103731198  | 0.1297449 | 0.7995014 | 0.424    | 0.908025 |
| si:ch73-86n18.1   | 257.9773748 | -0.287153956 | 0.3069305 | -0.935567 | 0.349496 | 0.880195 |
| cfap97            | 137.1332237 | -0.178011854 | 0.1712207 | -1.039663 | 0.298496 | 0.85439  |
| TMC1              | 11.43014001 | -0.245242925 | 0.5982055 | -0.409964 | 0.681832 | 0.965476 |
| rnf17             | 31.96732058 | 0.105272054  | 0.37126   | 0.2835535 | 0.776753 | 0.975826 |

|                   |       |             |              |           |           |          |          |
|-------------------|-------|-------------|--------------|-----------|-----------|----------|----------|
| TOM1L2            |       | 477.0091991 | -0.075834914 | 0.1064473 | -0.712418 | 0.476206 | 0.926403 |
| onecut3a          |       | 5.579558776 | -0.865121708 | 0.8377554 | -1.032666 | 0.30176  | NA       |
| dusp22a           |       | 162.8609277 | -0.242261948 | 0.1740042 | -1.392276 | 0.163839 | 0.71945  |
| helt              |       | 103.4019996 | -0.255632714 | 0.1965917 | -1.300323 | 0.19349  | 0.757219 |
| irf8              |       | 29.58740534 | 0.096973641  | 0.3649867 | 0.2656909 | 0.790477 | 0.977359 |
| fdx1              |       | 743.8424986 | -0.085138838 | 0.0931573 | -0.913926 | 0.360756 | 0.885686 |
| uspl              |       | 633.0425901 | 0.089672451  | 0.0986429 | 0.9090614 | 0.363318 | 0.885944 |
| auts2a            |       | 1974.595577 | -0.050205904 | 0.0876535 | -0.572777 | 0.566796 | 0.948739 |
| her9              |       | 783.8770749 | -0.296543593 | 0.1003069 | -2.956362 | 0.003113 | 0.073687 |
|                   | 4-Mar | 8.298626656 | -0.524882547 | 0.7216724 | -0.727314 | 0.467034 | NA       |
| zgc:152753        |       | 0.341366344 | 1.891903201  | 3.2128156 | 0.5888614 | 0.555954 | NA       |
| MANEAL            |       | 418.2899274 | 0.128409676  | 0.112634  | 1.1400613 | 0.254261 | 0.823394 |
| afap111b          |       | 102.7179215 | 0.097507936  | 0.194258  | 0.5019508 | 0.615702 | 0.95688  |
| lhfp15b           |       | 51.51961394 | -0.270842997 | 0.2750572 | -0.984679 | 0.324782 | 0.871284 |
| crp2              |       | 7.881532855 | 0.193501185  | 0.6808742 | 0.2841952 | 0.776261 | NA       |
| fitml1            |       | 207.6464274 | 0.50431412   | 0.1446499 | 3.4864472 | 0.000489 | 0.017534 |
| tmub2             |       | 187.1067222 | -0.016456458 | 0.1525995 | -0.107841 | 0.914122 | 0.991119 |
| asb16             |       | 37.63347924 | 0.092197058  | 0.3251673 | 0.2835373 | 0.776765 | 0.975826 |
| chaf1b            |       | 350.8512265 | -0.080157127 | 0.1327778 | -0.603694 | 0.546047 | 0.945526 |
| trnaulapb         |       | 1577.844581 | -0.165745197 | 0.0882339 | -1.878475 | 0.060316 | 0.479378 |
| ccdc125           |       | 75.87095024 | -0.252733695 | 0.2465148 | -1.025227 | 0.305256 | 0.85982  |
| si:ch211-168b3.1  |       | 291.3892163 | 0.110883425  | 0.136801  | 0.8105455 | 0.417627 | 0.906237 |
| rab1bb            |       | 740.5912783 | -0.056863906 | 0.1007152 | -0.564601 | 0.572345 | 0.949494 |
| cpvl              |       | 656.0260453 | -0.10216421  | 0.0997049 | -1.024666 | 0.305521 | 0.859981 |
| vat1              |       | 3666.353502 | 0.03190087   | 0.0768025 | 0.4153626 | 0.677877 | 0.965257 |
| ssbp4             |       | 2891.013321 | -0.140069564 | 0.0704229 | -1.988978 | 0.046704 | 0.424613 |
| zgc:110158        |       | 1682.285419 | -0.057114457 | 0.0807703 | -0.707122 | 0.479491 | 0.927091 |
| ikzf5             |       | 430.1802901 | -0.155450598 | 0.1106425 | -1.404981 | 0.160027 | 0.712495 |
| crp2              |       | 79.68417496 | 1.427670042  | 0.2689124 | 5.3090516 | 1.10E-07 | 1.51E-05 |
| ca6               |       | 1186.684956 | 0.16291155   | 0.0912437 | 1.7854547 | 0.074188 | 0.530917 |
| si:ch211-208g24.8 |       | 0.476747244 | 2.393381959  | 3.0525537 | 0.7840589 | 0.433006 | NA       |
| si:ch73-334d15.4  |       | 8.933434133 | -0.423004344 | 0.6323016 | -0.668991 | 0.503501 | NA       |
| frgl              |       | 317.5365308 | -0.189786255 | 0.1267659 | -1.497139 | 0.134357 | 0.670529 |
| si:ch73-113g13.2  |       | 0.513487682 | -0.887846295 | 2.6557956 | -0.334305 | 0.738149 | NA       |
| pdik11            |       | 192.625308  | -0.19342276  | 0.1570365 | -1.231706 | 0.218059 | 0.785379 |
| gstkl             |       | 376.0384994 | 0.003114496  | 0.1169897 | 0.026622  | 0.978761 | 0.996762 |
| arr3a             |       | 15587.04961 | 0.383634103  | 0.0730848 | 5.2491616 | 1.53E-07 | 2.00E-05 |
| spsbl             |       | 511.8464057 | -0.130586313 | 0.1132395 | -1.153187 | 0.248834 | 0.81797  |
| thoc3             |       | 337.362161  | -0.075640048 | 0.1299641 | -0.582007 | 0.560562 | 0.948728 |
| si:dkey-280e21.3  |       | 496.137089  | 0.081208419  | 0.1094627 | 0.7418819 | 0.458159 | 0.921978 |
| bcar1             |       | 753.8530587 | -0.05123838  | 0.0949516 | -0.539626 | 0.589455 | 0.953498 |
| cpamd8            |       | 676.1616141 | 0.135094847  | 0.095214  | 1.4188546 | 0.155941 | 0.705963 |
| nutf2             |       | 1044.401055 | 0.099853999  | 0.0901106 | 1.1081269 | 0.267807 | 0.833349 |
| serinc2           |       | 477.7138105 | 0.047762309  | 0.1058072 | 0.4514089 | 0.651695 | 0.960708 |
| pla2g4f.1         |       | 101.6291812 | -0.107751268 | 0.2046581 | -0.526494 | 0.598545 | 0.955488 |
| nr0b1             |       | 70.92565592 | 0.046247549  | 0.2440069 | 0.1895338 | 0.849674 | 0.985174 |
| vps26a            |       | 780.2505918 | 0.035909389  | 0.0916422 | 0.3918433 | 0.695174 | 0.96736  |
| tango2            |       | 384.9327658 | 0.066066896  | 0.1174656 | 0.5624362 | 0.573819 | 0.949988 |
| slc22a13a         |       | 1.861362508 | -0.749752561 | 1.4509934 | -0.516717 | 0.605354 | NA       |
| raplgap           |       | 36.95426841 | 0.279980937  | 0.3416822 | 0.8194191 | 0.412547 | 0.904974 |
| copbl             |       | 3634.257854 | 0.026949623  | 0.0686688 | 0.392458  | 0.69472  | 0.96736  |
| ccz1              |       | 606.4549397 | 0.056076447  | 0.1021716 | 0.5488455 | 0.583111 | 0.952214 |
| asb11             |       | 0.158795395 | 0.967652056  | 4.0804729 | 0.2371421 | 0.812547 | NA       |
| necab1            |       | 181.5270834 | -0.065561679 | 0.1667311 | -0.393218 | 0.694158 | 0.96736  |

|                     |             |              |           |           |          |          |
|---------------------|-------------|--------------|-----------|-----------|----------|----------|
| nrsn11              | 135.5279174 | -0.34253437  | 0.1962337 | -1.745543 | 0.08089  | 0.550801 |
| arf2b               | 106.5063583 | 0.382929837  | 0.2009491 | 1.9056061 | 0.056701 | 0.467172 |
| ndufs6              | 887.1029798 | 0.007635702  | 0.1081692 | 0.0705904 | 0.943724 | 0.993364 |
| cyp2r1              | 41.74588363 | 0.589769107  | 0.3231287 | 1.8251835 | 0.067973 | 0.510097 |
| calca               | 205.2302723 | 0.323563867  | 0.1641264 | 1.9714313 | 0.048675 | 0.433734 |
| gucylb2             | 2.445347834 | -0.19730206  | 1.1940522 | -0.165237 | 0.868757 | NA       |
| irx1b               | 264.0109528 | -0.277209726 | 0.1358706 | -2.040248 | 0.041326 | 0.398192 |
| pimr47              | 0.182570949 | 0.967652056  | 4.0804729 | 0.2371421 | 0.812547 | NA       |
| papss2b             | 1176.043529 | 0.119088091  | 0.0839898 | 1.4178871 | 0.156224 | 0.70658  |
| plekha3             | 210.8193609 | -0.17308894  | 0.151897  | -1.139515 | 0.254488 | 0.823475 |
| mcf2b               | 12.1927588  | -0.012511484 | 0.5646502 | -0.022158 | 0.982322 | 0.996944 |
| wbp2                | 605.9586807 | 0.184497868  | 0.1036163 | 1.780587  | 0.07498  | 0.533634 |
| atad1b              | 251.4868018 | -0.047609279 | 0.1352976 | -0.351886 | 0.724924 | 0.970402 |
| cybb                | 77.56610246 | 0.042883862  | 0.2237778 | 0.1916359 | 0.848027 | 0.985174 |
| pimr48              | 0.173729368 | -0.955901296 | 4.0804729 | -0.234262 | 0.814781 | NA       |
| rpgra               | 32.24737276 | -0.385310222 | 0.3400353 | -1.133148 | 0.257152 | 0.825314 |
| xk                  | 102.6360424 | 0.062889286  | 0.1985196 | 0.3167913 | 0.751402 | 0.97419  |
| arhgap42a           | 451.8706516 | -0.141883589 | 0.1073204 | -1.322056 | 0.18615  | 0.750443 |
| grpr                | 16.24583418 | 0.673837426  | 0.4794081 | 1.4055613 | 0.159854 | 0.712089 |
| ctcf                | 2855.843725 | 0.052413897  | 0.071899  | 0.7289929 | 0.466006 | 0.923865 |
| ptenb               | 1206.417755 | 0.157417346  | 0.0830292 | 1.895928  | 0.05797  | 0.47228  |
| vegfd               | 30.11668242 | 0.22294948   | 0.3492969 | 0.6382807 | 0.523291 | 0.939336 |
| trpc6a              | 69.71362252 | -0.185500771 | 0.2448485 | -0.757614 | 0.448682 | 0.917876 |
| cxcl14              | 607.3396979 | 0.084919635  | 0.1058087 | 0.8025773 | 0.422219 | 0.90651  |
| tmem170a            | 171.0408518 | -0.14885498  | 0.1662141 | -0.895562 | 0.370487 | 0.890489 |
| angpt15             | 157.0027538 | 0.025374592  | 0.1683403 | 0.1507339 | 0.880186 | 0.987881 |
| fgf13b              | 783.8117497 | 0.020743167  | 0.0942962 | 0.2199788 | 0.825888 | 0.982196 |
| pir                 | 311.4424541 | -0.062548234 | 0.1351195 | -0.46291  | 0.643429 | 0.959994 |
| carmil2             | 700.1283268 | -0.079439912 | 0.1024365 | -0.775504 | 0.438042 | 0.915284 |
| rpia                | 815.0596752 | -0.099383561 | 0.1063802 | -0.93423  | 0.350185 | 0.880195 |
| hdac9b              | 485.5409344 | 0.137774466  | 0.1054068 | 1.3070734 | 0.191188 | 0.755886 |
| slc22a7b.1          | 52.51806908 | 0.534817206  | 0.2781537 | 1.9227402 | 0.054513 | 0.457793 |
| klhl3               | 424.0388488 | 0.08037235   | 0.1094095 | 0.7346015 | 0.462582 | 0.922698 |
| ext2                | 1193.817494 | 0.056566096  | 0.0841687 | 0.672056  | 0.501548 | 0.934648 |
| htatsf1             | 525.3284156 | 0.042406798  | 0.1102639 | 0.3845936 | 0.700539 | 0.967998 |
| zgc:113276          | 70.98194811 | 0.339124132  | 0.2324944 | 1.4586336 | 0.144666 | 0.688975 |
| gfra4a              | 135.5822932 | 0.147194862  | 0.1908449 | 0.77128   | 0.440541 | 0.916336 |
| SLC22A7 (1 of many) | 28.33447636 | 0.398014483  | 0.3624661 | 1.0980738 | 0.272172 | 0.837242 |
| fh11b               | 138.609074  | -0.01571961  | 0.1774462 | -0.088588 | 0.929409 | 0.992702 |
| gna15.3             | 9.431709949 | 0.427921693  | 0.6366695 | 0.6721253 | 0.501504 | NA       |
| tspan18a            | 347.5603106 | 0.010816004  | 0.115618  | 0.0935495 | 0.925467 | 0.992676 |
| ttbklb              | 217.0910136 | 0.243867899  | 0.1420798 | 1.7164154 | 0.086086 | 0.563109 |
| arfip2b             | 0.998646424 | -0.967051882 | 1.9878844 | -0.486473 | 0.626632 | NA       |
| nsun2               | 480.210967  | -0.196490071 | 0.1048921 | -1.87326  | 0.061033 | 0.482482 |
| sp8b                | 10.67293407 | 0.267840565  | 0.5910701 | 0.4531452 | 0.650444 | NA       |
| abcb8               | 424.2774774 | 0.134733498  | 0.1227644 | 1.0974962 | 0.272425 | 0.837519 |
| BX530018.2          | 78.62307148 | 0.012335229  | 0.2219627 | 0.0555734 | 0.955682 | 0.994543 |
| trim47              | 360.3240906 | -0.024191269 | 0.1193445 | -0.202701 | 0.839369 | 0.984979 |
| morc3a              | 207.7377351 | -0.011275531 | 0.1597577 | -0.070579 | 0.943733 | 0.993364 |
| stc2a               | 339.1608957 | -0.064697994 | 0.130199  | -0.496916 | 0.619248 | 0.957354 |
| cdk5                | 131.2878898 | -0.006746356 | 0.1921099 | -0.035117 | 0.971986 | 0.996315 |
| mtmrla              | 895.7064867 | 0.030090692  | 0.087194  | 0.3451006 | 0.730019 | 0.971177 |
| cpeb4a              | 704.1437214 | 0.167786175  | 0.1030591 | 1.6280583 | 0.103513 | 0.609625 |
| phc2a               | 839.3334747 | -0.186686428 | 0.0897212 | -2.080738 | 0.037458 | 0.378871 |



|                   |             |              |           |           |          |          |
|-------------------|-------------|--------------|-----------|-----------|----------|----------|
| RAMP1             | 306.625716  | 0.1820505    | 0.1475669 | 1.2336815 | 0.217322 | 0.784755 |
| pskh1             | 141.6682671 | 0.167166431  | 0.1714409 | 0.9750671 | 0.329527 | 0.873467 |
| vars2             | 251.3047728 | 0.047620762  | 0.1434678 | 0.3319265 | 0.739945 | 0.972943 |
| slc6a19b          | 54.09782653 | 0.394229341  | 0.2833723 | 1.3912063 | 0.164163 | 0.71945  |
| utp3              | 157.3610336 | -0.122740912 | 0.172906  | -0.709871 | 0.477784 | 0.926857 |
| cd9912            | 5217.57253  | 0.079417166  | 0.0773884 | 1.026215  | 0.30479  | 0.859515 |
| fhad1             | 27.09351209 | 0.139056747  | 0.3694349 | 0.3764039 | 0.706617 | 0.968573 |
| hmgb3a            | 14116.931   | -0.010943241 | 0.0623651 | -0.175471 | 0.86071  | 0.985773 |
| mettl7a           | 100.7454559 | 0.310826073  | 0.2019905 | 1.5388155 | 0.123849 | 0.652372 |
| her4.2            | 168.8217659 | -0.203169524 | 0.1592096 | -1.276113 | 0.201915 | 0.76786  |
| her4.1            | 101.2926009 | -0.052273766 | 0.2047317 | -0.255328 | 0.79847  | 0.978884 |
| tas1r1            | 4.518619751 | 0.785731542  | 0.909626  | 0.8637963 | 0.3877   | NA       |
| tmef1b            | 2899.583833 | -0.038878473 | 0.0863598 | -0.450192 | 0.652572 | 0.960708 |
| senp3b            | 428.4428237 | -0.081220531 | 0.1078999 | -0.752739 | 0.451607 | 0.918761 |
| crmp1             | 980.0491877 | 0.138844872  | 0.1019477 | 1.3619226 | 0.173222 | 0.732435 |
| cavin4b           | 1119.789281 | 0.311535679  | 0.1021966 | 3.0483952 | 0.002301 | 0.059236 |
| ela2              | 269.8774877 | -0.448941498 | 0.1795863 | -2.499865 | 0.012424 | 0.197293 |
| necab2            | 2007.873402 | 0.082061237  | 0.0728951 | 1.1257449 | 0.260273 | 0.828368 |
| si:ch211-254p10.2 | 75.23282335 | 0.074988942  | 0.2385285 | 0.3143814 | 0.753231 | 0.974828 |
| dctn1b            | 873.2246322 | -0.082122467 | 0.0891055 | -0.921632 | 0.356721 | 0.883422 |
| slc39a8           | 60.96389318 | -1.17021733  | 0.2821241 | -4.147881 | 3.36E-05 | 0.001935 |
| zgc:172079        | 4.847388063 | -0.917460447 | 0.8805877 | -1.041873 | 0.297471 | NA       |
| hyd1n             | 65.23250169 | -0.686945075 | 0.2544347 | -2.699887 | 0.006936 | 0.129517 |
| ela2l             | 326.293963  | -0.589941135 | 0.1576169 | -3.742881 | 0.000182 | 0.007911 |
| itgb3a            | 121.3473493 | 0.36024837   | 0.19411   | 1.8558977 | 0.063468 | 0.492164 |
| rprml             | 79.41991842 | 0.380067672  | 0.2364674 | 1.6072729 | 0.107995 | 0.619371 |
| zgc:163079        | 0.63357355  | 1.435201493  | 2.6108194 | 0.5497131 | 0.582516 | NA       |
| gpr3711b          | 57.29183853 | -0.066528499 | 0.2529445 | -0.263016 | 0.792538 | 0.977937 |
| ssh1a             | 8.742577554 | 0.162778524  | 0.6633914 | 0.2453733 | 0.806167 | NA       |
| zan1              | 396.0132232 | -0.649184496 | 0.1344703 | -4.827717 | 1.38E-06 | 0.000131 |
| raraa             | 543.1851169 | 0.050593421  | 0.1100511 | 0.4597268 | 0.645712 | 0.96029  |
| aire              | 2.732878889 | -0.315671489 | 1.2060257 | -0.261745 | 0.793518 | NA       |
| pde6ga            | 23.0691388  | 0.198890382  | 0.4370847 | 0.4550386 | 0.649082 | 0.960708 |
| jaz1b             | 102.9644275 | 0.153856849  | 0.2186429 | 0.7036901 | 0.481626 | 0.928386 |
| arl3a             | 22.19529572 | -0.163325357 | 0.4072075 | -0.401086 | 0.688357 | 0.966672 |
| serpine1          | 354.2471033 | 0.451788192  | 0.149475  | 3.0224999 | 0.002507 | 0.063006 |
| ppp2r2ca          | 283.031027  | 0.281891553  | 0.1273882 | 2.212854  | 0.026908 | 0.316334 |
| zgc:123297        | 0.513487682 | -0.887846295 | 2.6557956 | -0.334305 | 0.738149 | NA       |
| sufu              | 577.8065001 | -0.044383136 | 0.1036504 | -0.4282   | 0.668505 | 0.96478  |
| ap1s1             | 887.939782  | 0.031589324  | 0.0902468 | 0.3500327 | 0.726314 | 0.970402 |
| si:dkey-40g16.6   | 6.041875551 | -1.394248442 | 0.8663289 | -1.609375 | 0.107534 | NA       |
| plch2b            | 45.93531848 | 0.34619219   | 0.2948226 | 1.1742388 | 0.240299 | 0.808437 |
| pde5aa            | 36.84268341 | 0.815690548  | 0.3400849 | 2.3984907 | 0.016463 | 0.236409 |
| hoxa9b            | 154.6575696 | -0.119544743 | 0.1645305 | -0.726581 | 0.467483 | 0.924328 |
| zmp:0000000662    | 291.6287614 | 0.028243752  | 0.133303  | 0.2118764 | 0.832203 | 0.983557 |
| si:ch211-107m4.1  | 25.99022642 | 0.2082337    | 0.3743675 | 0.5562281 | 0.578055 | 0.951024 |
| gng2              | 1688.28929  | -0.061852324 | 0.0866189 | -0.714075 | 0.475181 | 0.925737 |
| exo1              | 76.15186191 | 0.056569979  | 0.2296717 | 0.246308  | 0.805444 | 0.979883 |
| svopa             | 22.44588403 | 0.765074956  | 0.4270765 | 1.7914236 | 0.073225 | 0.527933 |
| laynb             | 23.43152816 | 0.112716043  | 0.3899232 | 0.2890724 | 0.772526 | 0.975687 |
| si:ch211-125o16.4 | 737.0027598 | -0.045778598 | 0.1036136 | -0.441821 | 0.658619 | 0.962545 |
| pimr93            | 1.685032042 | -0.618937429 | 1.5371164 | -0.402661 | 0.687197 | NA       |
| otud5b            | 926.2515907 | 0.052565724  | 0.0894405 | 0.5877174 | 0.556722 | 0.94812  |
| usp30             | 65.86760081 | -0.076579428 | 0.2574566 | -0.297446 | 0.766126 | 0.975374 |

|                   |             |              |           |           |          |          |
|-------------------|-------------|--------------|-----------|-----------|----------|----------|
| si:dkey-27c15.3   | 84.62582498 | 0.222859311  | 0.2126846 | 1.0478392 | 0.294713 | 0.851    |
| gatc              | 203.7472572 | -0.092960298 | 0.1446091 | -0.642838 | 0.520329 | 0.939056 |
| tax1bplb          | 2441.566397 | -0.014533583 | 0.073077  | -0.19888  | 0.842356 | 0.985174 |
| spx               | 35.54836225 | 0.372600106  | 0.3221298 | 1.1566769 | 0.247404 | 0.81686  |
| cep63             | 150.7171987 | -0.129354648 | 0.1685167 | -0.767608 | 0.44272  | 0.916336 |
| ap4ml             | 148.562918  | 0.21462295   | 0.1691544 | 1.2687989 | 0.204513 | 0.772352 |
| and3              | 946.2520266 | 0.395411084  | 0.099934  | 3.9567212 | 7.60E-05 | 0.003883 |
| lygl1             | 89.32596527 | 0.165017585  | 0.2105648 | 0.7836904 | 0.433222 | 0.913654 |
| vamp2             | 1215.68652  | 0.217744106  | 0.0921427 | 2.3631177 | 0.018122 | 0.250046 |
| per1a             | 464.3684737 | -0.017628461 | 0.1154739 | -0.152662 | 0.878665 | 0.987881 |
| tbccd1            | 152.1987906 | 0.104389142  | 0.1614041 | 0.6467565 | 0.51779  | 0.938592 |
| dnah51            | 117.5871438 | 0.197792464  | 0.2036403 | 0.9712835 | 0.331407 | 0.874362 |
| mpp6a             | 465.9562221 | 0.199905714  | 0.1086967 | 1.8391144 | 0.065898 | 0.501955 |
| ttc12             | 25.91236059 | 0.093051008  | 0.3715189 | 0.250461  | 0.802231 | 0.979492 |
| mrpl13            | 618.2812184 | 0.030496897  | 0.1078323 | 0.2828179 | 0.777316 | 0.975826 |
| si:rp71-45g20.10  | 4.100628876 | -0.960013326 | 1.0337181 | -0.928699 | 0.353045 | NA       |
| L0018309.1        | 12.53461784 | -0.149705686 | 0.5743862 | -0.260636 | 0.794373 | 0.977937 |
| CU234171.1        | 12.58420373 | -0.158231086 | 0.5320979 | -0.297372 | 0.766182 | 0.975374 |
| or133-1           | 2.826952666 | 0.205963614  | 1.1178571 | 0.1842486 | 0.853818 | NA       |
| pcolcea           | 483.3139323 | 0.335001292  | 0.1264435 | 2.6494147 | 0.008063 | 0.144946 |
| emg1              | 182.3519068 | 0.112384044  | 0.1563319 | 0.7188809 | 0.472214 | 0.924838 |
| si:ch211-23714.6  | 85.63703137 | 0.449385266  | 0.2181432 | 2.0600471 | 0.039394 | 0.389879 |
| si:rp71-45g20.4   | 9.130570961 | 0.685234516  | 0.6304808 | 1.0868443 | 0.277106 | NA       |
| tmem88a           | 34.38755191 | -0.196582719 | 0.3456674 | -0.568705 | 0.569556 | 0.948983 |
| ankk1             | 29.70464176 | -0.156119803 | 0.3490996 | -0.447207 | 0.654726 | 0.961305 |
| ltbpl             | 861.9900613 | 0.108831603  | 0.0897069 | 1.2131907 | 0.225057 | 0.792185 |
| dbr1              | 540.5727824 | 0.031230517  | 0.1043817 | 0.2991952 | 0.764791 | 0.975374 |
| sap130a           | 483.7702058 | -0.071070679 | 0.1142081 | -0.622291 | 0.53375  | 0.943276 |
| drd2a             | 24.37426564 | -0.095204409 | 0.4351265 | -0.218797 | 0.826808 | 0.982473 |
| kdm6bb            | 391.5546833 | -0.072336513 | 0.133945  | -0.540046 | 0.589165 | 0.953345 |
| tfip11            | 801.0782323 | -0.106873017 | 0.0960625 | -1.112537 | 0.265907 | 0.831945 |
| hepacama          | 510.5517364 | 0.212972609  | 0.1170263 | 1.8198695 | 0.068779 | 0.513259 |
| kera              | 988.2157865 | 0.422502757  | 0.0862086 | 4.9009373 | 9.54E-07 | 9.67E-05 |
| or125-8           | 1.314938914 | 1.626939831  | 1.7740828 | 0.9170597 | 0.359111 | NA       |
| htr7a             | 7.267901752 | -0.948659861 | 0.7198822 | -1.317799 | 0.187571 | NA       |
| epyc              | 4860.883653 | 0.049147912  | 0.078567  | 0.6255541 | 0.531607 | 0.942358 |
| si:dkeyp-38g8.5   | 23.23757045 | -0.07390351  | 0.4166781 | -0.177364 | 0.859223 | 0.985773 |
| ccdc30            | 86.0647421  | -0.119522122 | 0.2225686 | -0.537012 | 0.591259 | 0.954193 |
| ilk               | 1002.883298 | 0.041883462  | 0.0876587 | 0.4778016 | 0.632791 | 0.957356 |
| nek7              | 481.056121  | 0.033667655  | 0.1051006 | 0.3203374 | 0.748713 | 0.97419  |
| ifit16            | 37.12782251 | 0.116161582  | 0.3197853 | 0.3632487 | 0.716419 | 0.96909  |
| letml             | 142.0358082 | 0.293851239  | 0.1753397 | 1.6758971 | 0.093758 | 0.582645 |
| lhx9              | 977.8676289 | -0.129761208 | 0.0915569 | -1.417274 | 0.156403 | 0.706639 |
| rad9a             | 60.27642884 | 0.023090785  | 0.257487  | 0.0896775 | 0.928544 | 0.992702 |
| tpte              | 263.9494811 | -0.170260451 | 0.1376993 | -1.236466 | 0.216285 | 0.783589 |
| dact2             | 173.788248  | -0.052474283 | 0.166696  | -0.31479  | 0.752921 | 0.97481  |
| snaila            | 332.3748407 | -0.170032086 | 0.1215309 | -1.399085 | 0.161788 | 0.716022 |
| kirrellb          | 490.1432194 | 0.067229249  | 0.1043192 | 0.6444571 | 0.519279 | 0.938945 |
| camkv1            | 463.8405378 | 0.11478375   | 0.1153004 | 0.9955187 | 0.319484 | 0.867905 |
| si:ch211-287a12.9 | 51.80666135 | 0.01560632   | 0.2687118 | 0.0580783 | 0.953686 | 0.994213 |
| fam241a           | 245.6803327 | 0.017027782  | 0.1482615 | 0.1148497 | 0.908564 | 0.990702 |
| ctbpl             | 4645.848239 | -0.05629722  | 0.0772311 | -0.728945 | 0.466035 | 0.923865 |
| si:dkey-154b15.1  | 24.2599469  | -0.429429644 | 0.4257206 | -1.008712 | 0.313113 | 0.865039 |
| dpml              | 322.0636288 | -0.205967036 | 0.1269142 | -1.622884 | 0.104614 | 0.612567 |

|                   |             |              |           |           |          |          |
|-------------------|-------------|--------------|-----------|-----------|----------|----------|
| cadm3             | 442.6154104 | 0.071134309  | 0.1164722 | 0.6107406 | 0.541371 | 0.944954 |
| cdc14ab           | 489.3424362 | 0.016122406  | 0.1089652 | 0.1479592 | 0.882375 | 0.988344 |
| slc6a4b           | 14.91817564 | -0.010341181 | 0.4964378 | -0.020831 | 0.983381 | 0.996944 |
| vps36             | 278.4869369 | -0.057529592 | 0.1292687 | -0.445039 | 0.656292 | 0.961833 |
| chrna2b           | 165.556833  | 0.053554651  | 0.1588705 | 0.3370964 | 0.736044 | 0.972535 |
| ran               | 9276.779342 | -0.158066028 | 0.0797089 | -1.98304  | 0.047363 | 0.427455 |
| rtn2b             | 368.9794088 | 0.642766763  | 0.1353292 | 4.7496542 | 2.04E-06 | 0.000185 |
| htr2aa            | 28.33698247 | 0.106320237  | 0.3605981 | 0.2948441 | 0.768113 | 0.975687 |
| ppmlnb            | 578.3765462 | 0.157596276  | 0.1035665 | 1.5216918 | 0.128086 | 0.658954 |
| stoml3b           | 455.2166979 | -1.107596299 | 0.1269156 | -8.727032 | 2.61E-18 | 1.78E-15 |
| kcnk12l           | 2.021294566 | -1.600702766 | 1.5254152 | -1.049355 | 0.294015 | NA       |
| si:ch211-191j22.8 | 11.95018327 | 0.330417685  | 0.5535305 | 0.5969277 | 0.550556 | 0.946549 |
| tm2d1             | 167.6827292 | -0.030199178 | 0.1645222 | -0.183557 | 0.854361 | 0.985174 |
| kcnk18            | 27.5355069  | 0.070696146  | 0.3664624 | 0.1929151 | 0.847025 | 0.985174 |
| zgc:91976         | 526.2716819 | -0.037765789 | 0.1051594 | -0.359129 | 0.719499 | 0.969299 |
| lrit3b            | 8.707771954 | -0.724943862 | 0.6581652 | -1.101462 | 0.270696 | NA       |
| ndufs8b           | 11.52322382 | 0.247487647  | 0.55668   | 0.4445779 | 0.656625 | 0.961928 |
| minppla           | 247.5716634 | -0.087720543 | 0.1456547 | -0.60225  | 0.547008 | 0.945526 |
| tvp23b            | 291.3542797 | -0.23602545  | 0.1299111 | -1.816823 | 0.069244 | 0.514556 |
| si:dkey-157g16.6  | 149.4930394 | -0.24321713  | 0.1734251 | -1.402433 | 0.160786 | 0.713963 |
| enpep             | 298.1841821 | -0.905392678 | 0.1298235 | -6.974026 | 3.08E-12 | 1.02E-09 |
| rpgrb             | 221.2800227 | -0.182007681 | 0.1487928 | -1.223229 | 0.221243 | 0.787842 |
| lamtor3           | 224.4526359 | -0.221911598 | 0.1672694 | -1.326672 | 0.184617 | 0.747376 |
| ftsjl             | 161.8664678 | 0.048674478  | 0.168496  | 0.2888761 | 0.772676 | 0.975687 |
| zmp:0000001103    | 2.73055215  | 0.876411384  | 1.2575846 | 0.6969006 | 0.485865 | NA       |
| kdm5ba            | 2568.283657 | -0.251631894 | 0.0781522 | -3.219765 | 0.001283 | 0.03764  |
| ndr1              | 1.705233733 | 0.592496448  | 1.5482586 | 0.3826857 | 0.701953 | NA       |
| htrlab            | 41.96837498 | 0.098156308  | 0.3155674 | 0.311047  | 0.755765 | 0.975374 |
| papssl            | 424.5610449 | 0.250590947  | 0.1149888 | 2.1792647 | 0.029312 | 0.331778 |
| zwilch            | 76.25113592 | 0.285446111  | 0.2288795 | 1.2471456 | 0.212344 | 0.780251 |
| rnf180            | 72.89026228 | -0.192894032 | 0.2291949 | -0.841616 | 0.400003 | 0.90084  |
| nlel              | 221.0290632 | 0.090098869  | 0.1432423 | 0.6289963 | 0.529351 | 0.942209 |
| si:ch73-383g2.1   | 7.100483977 | 0.183982003  | 0.7525841 | 0.244467  | 0.806869 | NA       |
| serpine3          | 94.46800489 | -0.564473611 | 0.2256027 | -2.502069 | 0.012347 | 0.196577 |
| slc25a1a          | 391.9072866 | -0.11635301  | 0.1201922 | -0.968058 | 0.333015 | 0.874926 |
| gpr25             | 0.649418021 | -1.460710349 | 2.4263694 | -0.602015 | 0.547164 | NA       |
| c6                | 330.3582866 | 0.159613511  | 0.1399368 | 1.1406116 | 0.254032 | 0.823394 |
| hpf1              | 397.5804049 | -0.118449869 | 0.124054  | -0.954825 | 0.339666 | 0.87805  |
| ghsrb             | 6.206610695 | -0.197663374 | 0.7732343 | -0.255632 | 0.798235 | NA       |
| c7b               | 246.3980369 | -0.535637167 | 0.1905365 | -2.811206 | 0.004936 | 0.102322 |
| pldb              | 252.9865578 | -0.214237036 | 0.1415387 | -1.513629 | 0.13012  | 0.662797 |
| hadhaa            | 832.3438786 | 0.374045794  | 0.0878283 | 4.2588297 | 2.05E-05 | 0.001286 |
| zgc:174164        | 97.34593262 | -0.05271299  | 0.2051364 | -0.256966 | 0.797205 | 0.978577 |
| zgc:110045        | 377.6162427 | -0.114503545 | 0.1161444 | -0.985872 | 0.324196 | 0.870928 |
| zgc:194252        | 6.37585911  | 0.851291968  | 0.7816695 | 1.0890689 | 0.276124 | NA       |
| nradd             | 88.1004335  | 0.294504996  | 0.2064431 | 1.4265676 | 0.153705 | 0.702578 |
| mocos             | 65.04652071 | 0.208662307  | 0.24998   | 0.8347161 | 0.403878 | 0.900979 |
| prep              | 248.4442373 | -0.366679354 | 0.1367245 | -2.681886 | 0.007321 | 0.135037 |
| ankrd29           | 109.5100942 | 0.002601929  | 0.1913618 | 0.0135969 | 0.989152 | 0.997589 |
| lrmda             | 16.10789511 | -0.554596813 | 0.4787041 | -1.158538 | 0.246645 | 0.816669 |
| eif4g2b           | 5592.432273 | 0.01425746   | 0.0659066 | 0.2163283 | 0.828732 | 0.982721 |
| abca4a            | 210.5091331 | 0.17688176   | 0.1584753 | 1.1161471 | 0.264359 | 0.830245 |
| ifit8             | 0.48448895  | 0.85344211   | 2.878836  | 0.2964539 | 0.766883 | NA       |
| il17c             | 2.937845939 | -0.686529056 | 1.1522742 | -0.595804 | 0.551306 | NA       |

|                   |             |              |           |           |          |          |
|-------------------|-------------|--------------|-----------|-----------|----------|----------|
| zgc:55781         | 176.20794   | 0.16368116   | 0.1560804 | 1.0486976 | 0.294317 | 0.850231 |
| nmt1b             | 44.92271122 | 0.230543619  | 0.3242009 | 0.7111134 | 0.477014 | 0.926857 |
| plppr5a           | 59.8723466  | -0.033483054 | 0.2594036 | -0.129077 | 0.897297 | 0.990121 |
| has3              | 12.94258345 | 0.148344374  | 0.5212269 | 0.2846061 | 0.775946 | 0.975826 |
| tbc1d15           | 431.1229134 | -0.210299784 | 0.1216447 | -1.728803 | 0.083844 | 0.557501 |
| si:dkey-222b8.4   | 77.75401802 | -0.002447436 | 0.229201  | -0.010678 | 0.99148  | 0.997679 |
| rorca             | 238.9190623 | 0.193454257  | 0.1346256 | 1.4369798 | 0.150724 | 0.698912 |
| chtopa            | 2176.380571 | -0.080728334 | 0.0723126 | -1.11638  | 0.264259 | 0.830245 |
| si:dkey-30k6.5    | 100.7545891 | 0.104838997  | 0.2030457 | 0.5163321 | 0.605622 | 0.95651  |
| tph2              | 112.5187252 | -0.125105193 | 0.2190038 | -0.571247 | 0.567833 | 0.948739 |
| tnfsf10           | 377.1663575 | -0.20790353  | 0.1338504 | -1.553253 | 0.120363 | 0.645215 |
| im:7138535        | 96.65316117 | -0.223618359 | 0.208451  | -1.072762 | 0.283378 | 0.84466  |
| sclt1             | 258.7068525 | -0.129362183 | 0.1357621 | -0.95286  | 0.340661 | 0.878134 |
| zmynd11           | 1958.984459 | -0.08810445  | 0.0738484 | -1.193044 | 0.232852 | 0.801255 |
| pimr141           | 0 NA        | NA           | NA        | NA        | NA       | NA       |
| emc1              | 1917.869888 | 0.15877183   | 0.0871747 | 1.8213073 | 0.06856  | 0.513124 |
| si:dkey-91i10.3   | 199.3987395 | -0.667673545 | 0.1529977 | -4.363946 | 1.28E-05 | 0.00088  |
| zgc:173729        | 13.05624299 | -0.866305138 | 0.5262792 | -1.646094 | 0.099744 | 0.600955 |
| pimr52            | 0 NA        | NA           | NA        | NA        | NA       | NA       |
| slc30a9           | 933.5774141 | 0.053282069  | 0.0880307 | 0.6052671 | 0.545002 | 0.945463 |
| alox5a            | 13.53087551 | 1.005639394  | 0.5284148 | 1.9031251 | 0.057024 | 0.46866  |
| iqcal             | 21.87011327 | -0.065714301 | 0.4681246 | -0.140378 | 0.888361 | 0.989291 |
| pimr54            | 0 NA        | NA           | NA        | NA        | NA       | NA       |
| swap70b           | 316.0309609 | -0.094412421 | 0.1303539 | -0.724278 | 0.468895 | 0.924328 |
| slc25a16          | 362.794798  | -0.068569523 | 0.1160235 | -0.590997 | 0.554523 | 0.947449 |
| cb1n1             | 780.3209396 | 0.134240949  | 0.0900345 | 1.490994  | 0.135963 | 0.672424 |
| pbdc1             | 616.4502545 | 0.009070612  | 0.0957633 | 0.0947191 | 0.924538 | 0.992676 |
| galnt7            | 1306.517008 | -0.113465751 | 0.0831983 | -1.363799 | 0.172631 | 0.731348 |
| rwdd3             | 60.15098747 | 0.041438914  | 0.2676177 | 0.1548437 | 0.876945 | 0.987881 |
| nexn              | 887.8825802 | 0.238853022  | 0.0980803 | 2.4352806 | 0.01488  | 0.223418 |
| tut1              | 258.8136243 | -0.237336033 | 0.1317511 | -1.801397 | 0.07164  | 0.523122 |
| tmem47            | 1164.136032 | 0.141015807  | 0.0886761 | 1.5902352 | 0.111782 | 0.627242 |
| e2f8              | 355.6811269 | -0.025471382 | 0.1167048 | -0.218255 | 0.827231 | 0.982682 |
| cth1              | 0.473290478 | -0.833892061 | 2.901156  | -0.287434 | 0.77378  | NA       |
| kenk7             | 3.708846379 | -1.049014492 | 1.0561306 | -0.993262 | 0.320582 | NA       |
| cmasa             | 781.3370441 | -0.053812285 | 0.0964796 | -0.557758 | 0.57701  | 0.950762 |
| slc25a29          | 9.083767543 | 0.55724257   | 0.6633713 | 0.8400161 | 0.400899 | NA       |
| ehbp111a          | 170.2795226 | 0.129342664  | 0.1774788 | 0.728778  | 0.466138 | 0.923865 |
| elov18b           | 79.77145825 | -0.065334559 | 0.2529535 | -0.258287 | 0.796186 | 0.978498 |
| rps8b             | 109.7154651 | 0.025860019  | 0.1892637 | 0.1366348 | 0.891319 | 0.989291 |
| sfxn3             | 118.5954207 | -0.048878508 | 0.1915838 | -0.255129 | 0.798624 | 0.978884 |
| selenoula         | 1148.62533  | 0.122131282  | 0.0905213 | 1.3491991 | 0.177273 | 0.738201 |
| lrrc31            | 47.27186634 | -0.611324967 | 0.2976026 | -2.054165 | 0.03996  | 0.391511 |
| rab33a            | 215.6327541 | -0.087290371 | 0.1506828 | -0.579299 | 0.562387 | 0.948728 |
| si:ch211-130m23.3 | 44.2206408  | -0.615456601 | 0.3134096 | -1.963745 | 0.04956  | 0.436328 |
| CR847953.1        | 344.2904241 | 0.068895672  | 0.1204104 | 0.572174  | 0.567204 | 0.948739 |
| CABZ01067232.1    | 173.60225   | 0.084566574  | 0.1712145 | 0.4939217 | 0.621361 | 0.957354 |
| rxfp3             | 28.35198815 | 0.021904817  | 0.3969926 | 0.0551769 | 0.955998 | 0.994543 |
| phb               | 3414.040487 | -0.035935201 | 0.0836999 | -0.429334 | 0.66768  | 0.964736 |
| nudt13            | 30.05471445 | -0.376239529 | 0.3924681 | -0.95865  | 0.337735 | 0.876395 |
| slc44a5b          | 197.2410941 | -0.112512647 | 0.148757  | -0.756352 | 0.449438 | 0.918383 |
| oard1             | 46.47875679 | -0.283289995 | 0.3041444 | -0.931432 | 0.35163  | 0.880769 |
| sv2ba             | 2071.184389 | 0.347862885  | 0.1009227 | 3.4468259 | 0.000567 | 0.019439 |
| arg1              | 19.53210259 | 0.430671086  | 0.4469502 | 0.9635773 | 0.335258 | 0.876088 |

|                    |             |              |           |           |          |          |
|--------------------|-------------|--------------|-----------|-----------|----------|----------|
| st6galnac5b        | 62.82062466 | 0.344782833  | 0.250163  | 1.3782328 | 0.168131 | 0.725902 |
| amacr              | 104.9097561 | 0.074433908  | 0.1963235 | 0.379139  | 0.704585 | 0.968134 |
| apodb              | 701.4482144 | -0.294260462 | 0.0982739 | -2.99429  | 0.002751 | 0.06774  |
| phf1               | 4.944206532 | -0.81969037  | 0.9344343 | -0.877205 | 0.380375 | NA       |
| si:dkey-228d14.5   | 51.42474976 | 0.102398381  | 0.2741171 | 0.373557  | 0.708734 | 0.968664 |
| ston2              | 573.0091692 | 0.071974122  | 0.0992327 | 0.7253062 | 0.468264 | 0.924328 |
| ppp3ccb            | 573.0901665 | 0.187988603  | 0.1023026 | 1.8375737 | 0.066125 | 0.502802 |
| crygm2d13          | 15961.4855  | 0.050531939  | 0.0671707 | 0.7522916 | 0.451876 | 0.918761 |
| gfpt1              | 459.2094383 | 0.04626012   | 0.1069928 | 0.4323668 | 0.665475 | 0.964736 |
| kenc2              | 71.99969745 | -0.026111637 | 0.2317637 | -0.112665 | 0.910296 | 0.990702 |
| lrrc28             | 51.84261169 | -0.29056942  | 0.2702022 | -1.075378 | 0.282206 | 0.843666 |
| hrh2b              | 2.795754184 | -0.88380829  | 1.145882  | -0.771291 | 0.440535 | NA       |
| RNF157             | 474.8797118 | 0.049619697  | 0.1072835 | 0.4625101 | 0.643716 | 0.960014 |
| srsf2a             | 3503.501402 | 0.026551661  | 0.0707192 | 0.3754522 | 0.707324 | 0.968664 |
| n4bpl              | 380.4209411 | 0.090495298  | 0.1287234 | 0.7030211 | 0.482043 | 0.928561 |
| stk351             | 550.0504286 | 0.073896278  | 0.1032224 | 0.7158938 | 0.474057 | 0.924993 |
| happ2              | 126.4149605 | 0.427278725  | 0.1821968 | 2.3451498 | 0.019019 | 0.257244 |
| si:dkey-202g17.3   | 137.5419662 | -0.203450162 | 0.2083474 | -0.976495 | 0.328819 | 0.873113 |
| mdm4               | 1258.860361 | -0.042109372 | 0.0834708 | -0.50448  | 0.613924 | 0.95688  |
| pcdh1g9            | 272.86081   | 0.00789079   | 0.1392788 | 0.0566546 | 0.95482  | 0.994543 |
| mef2ab             | 89.51857151 | -0.027961596 | 0.2112512 | -0.132362 | 0.894698 | 0.989716 |
| itpa               | 194.2175903 | 0.218691225  | 0.1524922 | 1.4341146 | 0.15154  | 0.700127 |
| pgap3              | 9.798531314 | 0.966462855  | 0.6105219 | 1.5830109 | 0.113419 | NA       |
| crygm2a            | 0.158795395 | 0.967652056  | 4.0804729 | 0.2371421 | 0.812547 | NA       |
| rpl17              | 12542.42306 | -0.278909807 | 0.0813165 | -3.429927 | 0.000604 | 0.020478 |
| polr3c             | 92.79196606 | -0.113253756 | 0.2056167 | -0.5508   | 0.581771 | 0.95187  |
| nefla              | 267.5442499 | 0.014249334  | 0.1295529 | 0.1099886 | 0.912418 | 0.991119 |
| pgam2              | 1610.191728 | 0.230065264  | 0.0892161 | 2.5787422 | 0.009916 | 0.169473 |
| pnp4a              | 307.4819134 | -0.707915678 | 0.1255989 | -5.636321 | 1.74E-08 | 2.82E-06 |
| mbtps2             | 342.7894436 | 0.15310392   | 0.1240587 | 1.2341248 | 0.217156 | 0.784302 |
| prrc2c             | 1841.890424 | 0.050706813  | 0.1050861 | 0.4825263 | 0.629432 | 0.957354 |
| sall3b             | 348.2371456 | 0.046011225  | 0.1176091 | 0.3912217 | 0.695633 | 0.96736  |
| si:ch1073-396h14.1 | 291.2978406 | 0.225062153  | 0.1279164 | 1.7594467 | 0.078502 | 0.545813 |
| s100b              | 272.0243241 | -0.003531184 | 0.1470268 | -0.024017 | 0.980839 | 0.996944 |
| arl4ca             | 296.0027646 | 0.141497888  | 0.1331261 | 1.0628863 | 0.287834 | 0.845979 |
| cdkn2c             | 67.46063185 | 0.319473577  | 0.2511674 | 1.2719547 | 0.203389 | 0.770611 |
| nitr3c             | 4.777460962 | 0.720588887  | 0.9107214 | 0.7912287 | 0.428811 | NA       |
| cops5              | 624.3545505 | 0.19774167   | 0.1005905 | 1.9658083 | 0.049321 | 0.435504 |
| duspl4             | 167.8216746 | 0.009305503  | 0.1609773 | 0.0578063 | 0.953903 | 0.994255 |
| josd2              | 411.6241106 | -0.159035129 | 0.1213216 | -1.310856 | 0.189907 | 0.754269 |
| galm               | 221.3381961 | -0.532277574 | 0.1725726 | -3.084369 | 0.00204  | 0.054215 |
| ppplr42            | 8.885086934 | 0.856694258  | 0.6440546 | 1.3301579 | 0.183466 | NA       |
| cxcr4a             | 98.22553326 | 0.002330211  | 0.203466  | 0.0114526 | 0.990862 | 0.997679 |
| wdr34              | 38.29932702 | -0.020249919 | 0.3305635 | -0.061259 | 0.951153 | 0.99381  |
| adam8b             | 66.29085817 | -0.029404554 | 0.2578822 | -0.114023 | 0.909219 | 0.990702 |
| dnttip2            | 455.8697026 | -0.057402807 | 0.1110856 | -0.516744 | 0.605335 | 0.95651  |
| satbla             | 150.978095  | 0.0810679    | 0.1936182 | 0.4186998 | 0.675436 | 0.965257 |
| dbpb               | 612.7782526 | -0.010777665 | 0.1092679 | -0.098635 | 0.921428 | 0.992138 |
| dhx57              | 354.5223006 | -0.114307016 | 0.1217146 | -0.93914  | 0.347659 | 0.880195 |
| aldoca             | 226.2135346 | -0.632996665 | 0.1410474 | -4.487828 | 7.20E-06 | 0.000541 |
| sprn2              | 146.7073512 | 0.231067552  | 0.167324  | 1.3809592 | 0.167292 | 0.724173 |
| epas1b             | 419.2899966 | 0.255178722  | 0.1181293 | 2.160164  | 0.03076  | 0.339614 |
| plpp5              | 490.4031477 | 0.132422327  | 0.1161625 | 1.1399746 | 0.254297 | 0.823394 |
| golga7             | 1355.045849 | 0.032720757  | 0.0782344 | 0.41824   | 0.675772 | 0.965257 |

|                    |             |              |           |           |          |          |
|--------------------|-------------|--------------|-----------|-----------|----------|----------|
| neu4               | 11.05849294 | 0.383888707  | 0.5763584 | 0.666059  | 0.505373 | NA       |
| sfrplb             | 72.41419816 | 0.466966181  | 0.2457343 | 1.900289  | 0.057395 | 0.470146 |
| sh2b1              | 785.986261  | -0.002793313 | 0.1148639 | -0.024318 | 0.980599 | 0.996944 |
| foxj2              | 128.2428436 | -0.08781852  | 0.1784438 | -0.492135 | 0.622624 | 0.957354 |
| si:ch211-266o15.1  | 853.9432475 | -0.148813882 | 0.089592  | -1.661018 | 0.09671  | 0.592423 |
| mcm6               | 1160.219254 | 0.065793992  | 0.0901872 | 0.7295267 | 0.46568  | 0.923865 |
| sbk3               | 56.7318761  | 0.250057129  | 0.2657591 | 0.9409165 | 0.346748 | 0.8794   |
| icall              | 360.7344206 | -0.119655381 | 0.1228275 | -0.974174 | 0.32997  | 0.874009 |
| srsfla             | 4453.567111 | -0.051906875 | 0.0645713 | -0.803869 | 0.421472 | 0.90651  |
| ctsd               | 3494.370969 | -0.040386127 | 0.0888687 | -0.454447 | 0.649507 | 0.960708 |
| styx               | 199.4709035 | -0.205222783 | 0.1575976 | -1.302195 | 0.19285  | 0.756795 |
| si:ch211-137i24.10 | 394.1960322 | -0.626033561 | 0.1187551 | -5.271637 | 1.35E-07 | 1.82E-05 |
| zgc:66443          | 158.8333968 | -0.023881811 | 0.1705102 | -0.140061 | 0.888612 | 0.989291 |
| zgc:175264         | 553.6928496 | -0.088920309 | 0.1018786 | -0.872807 | 0.382768 | 0.895192 |
| cmah               | 307.9743781 | -0.396753218 | 0.131065  | -3.027148 | 0.002469 | 0.062293 |
| at12               | 497.7110578 | 0.170169863  | 0.104204  | 1.6330456 | 0.102459 | 0.608235 |
| slc17a8            | 28.37701771 | -0.307058338 | 0.3711614 | -0.827291 | 0.408072 | 0.90171  |
| ephb6              | 162.7942741 | -0.04173061  | 0.1755827 | -0.237669 | 0.812138 | 0.981081 |
| anol0a             | 618.4084308 | 0.004076097  | 0.0977178 | 0.041713  | 0.966728 | 0.996315 |
| rxraa              | 172.037626  | -0.090289283 | 0.1569845 | -0.575148 | 0.565191 | 0.948739 |
| hells              | 560.9246823 | 0.171566755  | 0.1076653 | 1.5935199 | 0.111044 | 0.626294 |
| nrlh4              | 96.79105008 | -0.395592528 | 0.2163158 | -1.828774 | 0.067434 | 0.508361 |
| si:dkey-10f21.4    | 118.247474  | 0.020399277  | 0.1850933 | 0.1102108 | 0.912242 | 0.991119 |
| zbtb47a            | 67.55045599 | 0.264442013  | 0.2631637 | 1.0048575 | 0.314965 | 0.866054 |
| nudt4a             | 335.9317703 | 0.183814007  | 0.1317904 | 1.3947447 | 0.163093 | 0.717943 |
| pimr55             | 5.795488932 | 0.451157181  | 0.8084433 | 0.5580567 | 0.576806 | NA       |
| 7-Mar              | 259.3178548 | -0.251232437 | 0.1477995 | -1.699819 | 0.089165 | 0.571894 |
| baz2ba             | 2373.48534  | -0.227630578 | 0.0907545 | -2.5082   | 0.012135 | 0.194451 |
| itgae.2            | 12.54988257 | 0.78730634   | 0.5816745 | 1.353517  | 0.175891 | 0.736505 |
| lyz                | 4.628387648 | 0.042308788  | 0.9006947 | 0.0469735 | 0.962534 | NA       |
| ankrd6a            | 130.4533526 | -0.098440318 | 0.1916059 | -0.513764 | 0.607417 | 0.956718 |
| cx52.7             | 27.12642126 | 0.071374707  | 0.3613023 | 0.1975484 | 0.843398 | 0.985174 |
| mrpl28             | 693.0783398 | -0.04962378  | 0.095899  | -0.517459 | 0.604836 | 0.95651  |
| si:ch73-61d6.3     | 168.784246  | -0.453352828 | 0.1623487 | -2.792464 | 0.005231 | 0.106854 |
| dnmt3bb.2          | 181.6568468 | -0.025201854 | 0.1605476 | -0.156974 | 0.875265 | 0.987881 |
| gulplb             | 55.13704948 | 0.182059488  | 0.2761865 | 0.6591903 | 0.509774 | 0.936253 |
| zgc:171470         | 2.585752491 | -0.352319945 | 1.1984029 | -0.293991 | 0.768765 | NA       |
| atp6v0ca           | 4997.289063 | -0.032263341 | 0.0668665 | -0.482504 | 0.629448 | 0.957354 |
| sap18              |             | 0 NA         | NA        | NA        | NA       | NA       |
| mrps31             | 500.711951  | 0.072509661  | 0.1034291 | 0.7010569 | 0.483267 | 0.92946  |
| arfrpl             | 298.6820901 | 0.296810123  | 0.1285945 | 2.3081092 | 0.020993 | 0.273449 |
| hoxd10a            | 93.53442598 | 0.172331012  | 0.2183588 | 0.7892102 | 0.429989 | 0.911615 |
| dnmt3bb.3          | 125.1942027 | -0.099272149 | 0.1872502 | -0.530158 | 0.596003 | 0.954434 |
| laspl              | 2485.896711 | 0.005706086  | 0.0700827 | 0.0814193 | 0.935109 | 0.992702 |
| cdc4212            | 37.75234999 | -0.204500066 | 0.3337319 | -0.612768 | 0.54003  | 0.944206 |
| p3h3               | 278.0683969 | 0.278532724  | 0.1378164 | 2.0210424 | 0.043275 | 0.40826  |
| si:dkey-33c12.3    | 1176.370371 | 0.243389277  | 0.0897917 | 2.7105989 | 0.006716 | 0.126361 |
| arpc3              | 1616.696032 | 0.033118599  | 0.0925262 | 0.3579374 | 0.72039  | 0.969318 |
| zgc:114174         | 47.11702908 | -0.110412686 | 0.2798097 | -0.394599 | 0.693139 | 0.96736  |
| BX901922.1         | 0.853874503 | -1.902668424 | 2.1134959 | -0.900247 | 0.367989 | NA       |
| nts                | 26.56943658 | 0.010187934  | 0.3708491 | 0.0274719 | 0.978083 | 0.996762 |
| si:dkey-33c12.4    | 403.6770216 | -0.140314987 | 0.1212066 | -1.157652 | 0.247006 | 0.816669 |
| zgc:114081         | 65.76570843 | -0.270279598 | 0.2524106 | -1.070793 | 0.284262 | 0.844697 |
| si:ch211-266g18.10 | 178.4059677 | 0.339471009  | 0.1573843 | 2.1569554 | 0.031009 | 0.340842 |

|                 |             |              |           |           |          |          |
|-----------------|-------------|--------------|-----------|-----------|----------|----------|
| si:ch73-181d5.4 | 351.1152195 | -0.115828848 | 0.1236688 | -0.936606 | 0.348961 | 0.880195 |
| mrps34          | 719.1020797 | 0.059453868  | 0.0980661 | 0.6062634 | 0.54434  | 0.945438 |
| zgc:86709       | 984.000127  | 0.182220932  | 0.1184114 | 1.5388798 | 0.123834 | 0.652372 |
| eif1axb         | 2548.670241 | -0.006284121 | 0.077604  | -0.080977 | 0.93546  | 0.992702 |
| sytl1a          | 2445.249252 | 0.154233229  | 0.0811435 | 1.9007464 | 0.057335 | 0.469987 |
| tsc1b           | 661.0815725 | -0.26411209  | 0.0957661 | -2.757888 | 0.005818 | 0.114852 |
| ccdc136b        | 178.2193217 | 0.062633517  | 0.1598271 | 0.3918829 | 0.695145 | 0.96736  |
| rps6ka3b        | 82.03168871 | -0.189251859 | 0.2264239 | -0.83583  | 0.403251 | 0.900901 |
| mzt2b           | 390.5833292 | 0.039060317  | 0.1114621 | 0.3504359 | 0.726012 | 0.970402 |
| nafl            | 192.5899647 | -0.056392529 | 0.1477732 | -0.381616 | 0.702747 | 0.968134 |
| lhx5            | 713.1619133 | -0.127819082 | 0.1049307 | -1.218128 | 0.223175 | 0.789115 |
| ythdf3          | 264.4293247 | 0.251282319  | 0.1366937 | 1.8382879 | 0.06602  | 0.502687 |
| didol           | 1493.064287 | -0.040384264 | 0.1002834 | -0.402701 | 0.687168 | 0.966376 |
| glt8d2          | 22.33028603 | 0.720408347  | 0.420798  | 1.7120052 | 0.086896 | 0.565027 |
| slc43a3b        | 274.3577121 | 0.121410887  | 0.1288921 | 0.9419576 | 0.346214 | 0.87905  |
| dph1            | 185.7674532 | -0.14691605  | 0.1532436 | -0.958709 | 0.337705 | 0.876395 |
| parp12b         | 206.8750874 | -0.03770802  | 0.1418361 | -0.265856 | 0.79035  | 0.977338 |
| plcd4a          | 71.13619778 | 0.14467644   | 0.2467028 | 0.5864402 | 0.55758  | 0.948478 |
| svopl           | 193.3215312 | -0.319522612 | 0.1576891 | -2.026282 | 0.042736 | 0.406083 |
| eps811a         | 147.8622388 | -0.024836682 | 0.1663227 | -0.149328 | 0.881295 | 0.988245 |
| ints8           | 484.7925391 | 0.010017927  | 0.1134574 | 0.0882968 | 0.929641 | 0.992702 |
| uba3            | 742.1777012 | 0.068705558  | 0.0930494 | 0.738377  | 0.460285 | 0.921978 |
| fstb            | 296.3314835 | 0.344801843  | 0.1419078 | 2.4297598 | 0.015109 | 0.225333 |
| arl15b          | 292.1049833 | -0.021561471 | 0.1288332 | -0.16736  | 0.867087 | 0.986978 |
| tmf1            | 757.9202867 | -0.086940108 | 0.0932448 | -0.932385 | 0.351137 | 0.880473 |
| cep350          | 730.8372819 | 0.022695272  | 0.1016967 | 0.2231662 | 0.823406 | 0.982196 |
| wfdcl           | 534.6610717 | 0.23287097   | 0.1221102 | 1.9070553 | 0.056513 | 0.46635  |
| six2a           | 281.3709443 | -0.107226089 | 0.1311819 | -0.817385 | 0.413708 | 0.905864 |
| hgd             | 430.9018604 | -0.015952631 | 0.1239274 | -0.128726 | 0.897575 | 0.990121 |
| six3a           | 915.7324056 | 0.049681212  | 0.0928946 | 0.5348128 | 0.592779 | 0.954434 |
| arxa            | 264.2030229 | 0.021202044  | 0.1399618 | 0.1514845 | 0.879594 | 0.987881 |
| ano3            | 35.6723296  | -0.092571675 | 0.3291724 | -0.281225 | 0.778537 | 0.975942 |
| fbxw9           | 41.83424917 | -0.354748454 | 0.3063332 | -1.158048 | 0.246845 | 0.816669 |
| ormdl2          | 237.6102068 | -0.045066284 | 0.149771  | -0.300901 | 0.76349  | 0.975374 |
| si:dkey-11o15.7 | 18.8559827  | 0.837241261  | 0.4422515 | 1.8931336 | 0.05834  | 0.473924 |
| hspal4          | 486.3888486 | 0.030984416  | 0.1045254 | 0.2964294 | 0.766902 | 0.975687 |
| si:dkey-6n6.2   | 158.7050154 | -0.155934495 | 0.1679209 | -0.928619 | 0.353087 | 0.881552 |
| eml3            | 141.8337368 | 0.065426613  | 0.1772637 | 0.369092  | 0.712059 | 0.969006 |
| bhlhe22         | 942.7793893 | -0.006953122 | 0.0871953 | -0.079742 | 0.936442 | 0.992702 |
| ndufa8          | 1510.868202 | -0.082837967 | 0.0757054 | -1.094214 | 0.273861 | 0.838546 |
| kitlgb          | 7.762814812 | -0.385711156 | 0.7718078 | -0.49975  | 0.617251 | NA       |
| rablba          | 4544.206522 | 0.037008873  | 0.0707702 | 0.5229446 | 0.601013 | 0.956045 |
| tlr21           | 4.756920385 | -0.170260487 | 0.9029324 | -0.188564 | 0.850435 | NA       |
| pafahlb3        | 805.8361719 | 0.026912425  | 0.1005609 | 0.2676232 | 0.788989 | 0.976924 |
| ugt5e1          |             | 0 NA         | NA        | NA        | NA       | NA       |
| smyd3           | 58.57172326 | -0.04545798  | 0.2587827 | -0.175661 | 0.86056  | 0.985773 |
| serping1        | 213.3139956 | 0.107420116  | 0.1409102 | 0.7623303 | 0.445863 | 0.917154 |
| igf3            | 0.482640214 | -0.866525639 | 2.7061322 | -0.320208 | 0.748811 | NA       |
| magt1           | 543.2403604 | -0.071487046 | 0.1058647 | -0.675268 | 0.499505 | 0.934006 |
| cx31.7          | 2.204457235 | 0.257115366  | 1.2965921 | 0.1983009 | 0.84281  | NA       |
| tnfsf1014       | 19.45649937 | 0.005960957  | 0.4306905 | 0.0138405 | 0.988957 | 0.997589 |
| snf8            | 230.5396161 | 0.035255921  | 0.1641454 | 0.2147847 | 0.829935 | 0.982821 |
| txndc17         | 239.2304828 | -0.174331464 | 0.1369529 | -1.27293  | 0.203043 | 0.770037 |
| birc7           | 196.3411407 | 0.33177337   | 0.1515467 | 2.1892491 | 0.028579 | 0.328246 |

|                   |             |              |           |           |          |          |
|-------------------|-------------|--------------|-----------|-----------|----------|----------|
| aifml             | 1532.396842 | -0.044265952 | 0.0801997 | -0.551947 | 0.580985 | 0.951731 |
| rprd2a            | 601.0547182 | -0.052897543 | 0.1157405 | -0.457036 | 0.647645 | 0.960645 |
| cfap57            | 15.65381499 | 0.165485078  | 0.5360497 | 0.3087122 | 0.75754  | 0.975374 |
| ciarta            | 1683.060826 | -0.165514363 | 0.0933765 | -1.772549 | 0.076303 | 0.538373 |
| b3gnt3.4          | 67.00660724 | -0.276988799 | 0.2389743 | -1.159073 | 0.246426 | 0.816419 |
| sardh             | 699.7266024 | -0.025808146 | 0.1127037 | -0.228991 | 0.818876 | 0.981594 |
| glra4b            | 117.4825637 | 0.051473602  | 0.2088946 | 0.2464095 | 0.805365 | 0.979883 |
| rpl36a            | 11368.00085 | -0.374565051 | 0.1911052 | -1.959994 | 0.049996 | 0.437835 |
| eps812            | 195.3871213 | -0.392427323 | 0.145779  | -2.691933 | 0.007104 | 0.1319   |
| impad1            | 276.4684109 | 0.112635848  | 0.1429351 | 0.788021  | 0.430684 | 0.912304 |
| fgfr2             | 3005.322996 | 0.047641396  | 0.0697497 | 0.6830341 | 0.494585 | 0.931926 |
| snap25b           | 4517.933563 | 0.028283973  | 0.0677763 | 0.4173136 | 0.676449 | 0.965257 |
| GPR83             | 3.663765726 | 0.820395966  | 1.0153666 | 0.8079801 | 0.419102 | NA       |
| hcfc2             | 128.2664403 | -0.105331422 | 0.18015   | -0.584687 | 0.558758 | 0.948478 |
| msna              | 2090.556874 | 0.07962586   | 0.0722414 | 1.1022185 | 0.270367 | 0.835161 |
| foxd2             | 300.246289  | -0.155828935 | 0.124138  | -1.255288 | 0.209374 | 0.77633  |
| ttc25             | 34.89450437 | 0.282156095  | 0.3501969 | 0.805707  | 0.420412 | 0.90651  |
| atp7b             | 43.77321824 | -0.144672132 | 0.3252602 | -0.444789 | 0.656472 | 0.961833 |
| dnajc5b           | 21.96996956 | 0.64547703   | 0.423145  | 1.5254275 | 0.127153 | 0.656588 |
| dnajc7            | 2228.736748 | 0.046674364  | 0.0759878 | 0.6142351 | 0.53906  | 0.943733 |
| znf385c           | 215.305553  | 0.23156418   | 0.1480111 | 1.564506  | 0.117699 | 0.641446 |
| trim55b           | 113.7900884 | -0.255000407 | 0.190241  | -1.340407 | 0.180113 | 0.74128  |
| ipo8              | 424.90834   | -0.039749997 | 0.1091115 | -0.364306 | 0.715629 | 0.96909  |
| tnfaip2b          | 91.39199724 | -0.125654912 | 0.2356226 | -0.533289 | 0.593834 | 0.954434 |
| pcytlba           | 81.20445097 | -0.026955124 | 0.2237878 | -0.120449 | 0.904127 | 0.990291 |
| htr2ab            | 10.12096752 | 0.723570399  | 0.5934553 | 1.2192501 | 0.222749 | NA       |
| zdhhc20b          | 188.4649128 | 0.050606303  | 0.1533847 | 0.3299305 | 0.741452 | 0.973154 |
| ackr3b            | 1023.316082 | 0.054137359  | 0.0892359 | 0.6066769 | 0.544065 | 0.945438 |
| exoc314           | 33.8384218  | -0.75179188  | 0.3327014 | -2.259659 | 0.023842 | 0.298015 |
| plcx2             | 32.74053473 | 0.230065098  | 0.3443157 | 0.6681807 | 0.504018 | 0.93532  |
| pex16             | 185.9252136 | 0.034562174  | 0.1586044 | 0.2179143 | 0.827496 | 0.982721 |
| smclal            | 2023.487658 | -0.134662728 | 0.0816947 | -1.648366 | 0.099278 | 0.599058 |
| si:ch211-153b23.5 | 1459.351621 | -0.240756571 | 0.1203164 | -2.001029 | 0.045389 | 0.418148 |
| abi2a             | 259.9813119 | -0.005118327 | 0.1407873 | -0.036355 | 0.970999 | 0.996315 |
| slc25a26          | 195.8978056 | -0.144475266 | 0.1530411 | -0.944029 | 0.345155 | 0.878434 |
| ndnl2             | 168.8183765 | 0.109714517  | 0.1716337 | 0.6392364 | 0.522669 | 0.939336 |
| fam151a           | 33.13943083 | 0.130652321  | 0.3650624 | 0.3578904 | 0.720425 | 0.969318 |
| tubd1             | 63.88752354 | 0.101010372  | 0.2441369 | 0.4137449 | 0.679061 | 0.965257 |
| tada3l            | 659.1662707 | 0.029281249  | 0.0929532 | 0.3150107 | 0.752754 | 0.97481  |
| ugcg              | 240.6706634 | 0.003022457  | 0.1386263 | 0.0218029 | 0.982605 | 0.996944 |
| mpp4a             | 63.09747857 | -0.143850522 | 0.2592079 | -0.554962 | 0.578921 | 0.951052 |
| arpc4l            | 834.3334027 | -0.041913353 | 0.1033155 | -0.405683 | 0.684975 | 0.966146 |
| ak3               | 490.4962438 | -0.429715402 | 0.1050899 | -4.089027 | 4.33E-05 | 0.002406 |
| acot11a           | 66.63045945 | -0.271015109 | 0.2527865 | -1.072111 | 0.28367  | 0.84466  |
| rps6kb1b          | 936.9272939 | 0.071597428  | 0.0953591 | 0.7508194 | 0.452761 | 0.919551 |
| nt5c2b            | 597.3814925 | 0.074279991  | 0.1153225 | 0.6441064 | 0.519506 | 0.938945 |
| fbrs1l            | 1595.052931 | -0.051855213 | 0.0855584 | -0.60608  | 0.544462 | 0.945438 |
| ssbp3a            | 182.844177  | 0.021910396  | 0.1628541 | 0.13454   | 0.892976 | 0.989291 |
| phactr3a          | 427.6382498 | -0.054672818 | 0.1342503 | -0.407245 | 0.683828 | 0.965679 |
| il17rala          | 105.8911268 | -0.274721794 | 0.2013802 | -1.364195 | 0.172506 | 0.731348 |
| cysltrl           | 25.55203182 | 0.257236865  | 0.4021364 | 0.6396756 | 0.522384 | 0.939056 |
| si:dkeyp-77h1.4   | 48.9004028  | 0.259513642  | 0.3158164 | 0.8217232 | 0.411234 | 0.903427 |
| adamts15b         | 8.861389452 | 0.389546944  | 0.656136  | 0.5936984 | 0.552714 | NA       |
| si:ch211-213d14.1 | 10.31950354 | 0.216735753  | 0.6050382 | 0.3582183 | 0.72018  | NA       |



|                  |             |              |           |           |          |          |
|------------------|-------------|--------------|-----------|-----------|----------|----------|
| draxin           | 370.505414  | 0.032173795  | 0.1165294 | 0.2761003 | 0.782471 | 0.97627  |
| slc39a1          | 111.3771211 | -0.242657482 | 0.1984911 | -1.222511 | 0.221515 | 0.788243 |
| celsr1b          | 587.6590464 | -0.043326154 | 0.1006675 | -0.430389 | 0.666913 | 0.964736 |
| cip2a            | 145.3721503 | -0.125969628 | 0.1686507 | -0.746926 | 0.455108 | 0.921022 |
| glmna            | 290.2936296 | 0.089683885  | 0.1349979 | 0.6643355 | 0.506476 | 0.935724 |
| COLGALT1         | 139.7859109 | 0.061178952  | 0.1817348 | 0.3366387 | 0.736389 | 0.972535 |
| si:dkey-208b23.5 | 7.322085643 | -0.372656425 | 0.6975823 | -0.534211 | 0.593195 | NA       |
| CT990561.1       | 21.25793764 | -0.344133617 | 0.4286762 | -0.802782 | 0.422101 | 0.90651  |
| cpt1b            | 483.8275326 | 0.227863632  | 0.1033339 | 2.2051206 | 0.027446 | 0.320231 |
| gpalppl          | 311.382507  | -0.01684243  | 0.125058  | -0.134677 | 0.892867 | 0.989291 |
| sephs1           | 992.6185666 | 0.041674571  | 0.0900333 | 0.4628795 | 0.643451 | 0.959994 |
| timml3           | 1042.64779  | 0.06949571   | 0.0854842 | 0.8129658 | 0.416238 | 0.906237 |
| zgc:173737       | 4.429116314 | 0.791898059  | 0.9612827 | 0.8237931 | 0.410057 | NA       |
| sh3bgr1          | 597.5529844 | 0.216434664  | 0.115053  | 1.8811732 | 0.059948 | 0.478654 |
| prpf18           | 467.7542343 | 0.076281557  | 0.1079529 | 0.7066187 | 0.479803 | 0.927094 |
| clqtnf9          | 252.1494611 | 0.34098641   | 0.1430758 | 2.3832563 | 0.01716  | 0.242176 |
| cep76            | 121.0282162 | -0.11714414  | 0.1860115 | -0.629768 | 0.528846 | 0.942109 |
| enc3             | 522.5236565 | 0.03304279   | 0.1084026 | 0.3048155 | 0.760507 | 0.975374 |
| tmbim1a          | 187.1132361 | 0.002420954  | 0.1553769 | 0.0155812 | 0.987569 | 0.997201 |
| casps8           | 108.3603868 | -0.149983718 | 0.2016856 | -0.743651 | 0.457088 | 0.921539 |
| neu3.3           | 22.6630209  | -0.59321089  | 0.414655  | -1.430613 | 0.152541 | 0.701776 |
| lsm7             | 962.0711031 | 0.164891121  | 0.1209567 | 1.3632238 | 0.172812 | 0.731888 |
| btr21            | 4.095447136 | -0.583210865 | 0.9481378 | -0.615112 | 0.538481 | NA       |
| krt18a.2         | 50.75931056 | -1.476162014 | 0.2877966 | -5.129186 | 2.91E-07 | 3.53E-05 |
| slc25a22b        | 13.72076049 | 0.746376318  | 0.5149853 | 1.4493159 | 0.147249 | 0.69409  |
| grhl2a           | 168.8316414 | -0.05613478  | 0.1699233 | -0.330354 | 0.741133 | 0.973154 |
| si:dkey-5i3.5    | 147.6427482 | 0.045355262  | 0.1824219 | 0.2486283 | 0.803648 | 0.979643 |
| sass6            | 70.82839942 | -0.071984052 | 0.2391662 | -0.300979 | 0.76343  | 0.975374 |
| scin1b           | 700.3138939 | -0.104188919 | 0.1000239 | -1.04164  | 0.297579 | 0.85401  |
| polr21           | 445.6253424 | -0.224123152 | 0.1380786 | -1.623157 | 0.104556 | 0.612567 |
| tapbpl           | 619.2261184 | 0.090272388  | 0.0991549 | 0.9104175 | 0.362602 | 0.885944 |
| acot9.1          | 284.7407602 | -0.037493616 | 0.1260516 | -0.297446 | 0.766126 | 0.975374 |
| selenot1a        | 1430.833598 | -0.044792504 | 0.0857725 | -0.522224 | 0.601514 | 0.956045 |
| ankrd33ba        | 79.11406295 | -0.043281087 | 0.2182165 | -0.19834  | 0.842779 | 0.985174 |
| krt8             | 8407.817685 | -0.092056242 | 0.0842448 | -1.092723 | 0.274516 | 0.839136 |
| hspb8            | 325.9944404 | 0.381744589  | 0.1256367 | 3.0384807 | 0.002378 | 0.060825 |
| si:dkey-222f8.3  | 377.7474559 | -0.186225412 | 0.1281881 | -1.452751 | 0.146293 | 0.692388 |
| abhd14a          | 47.69132986 | 0.035528629  | 0.2987873 | 0.1189094 | 0.905347 | 0.990702 |
| mex3b            | 1262.555511 | -0.046233944 | 0.0852128 | -0.542571 | 0.587425 | 0.953319 |
| ropn11           | 15.38754998 | 0.463465801  | 0.5163703 | 0.8975454 | 0.369428 | 0.889127 |
| krt5             | 29471.66177 | 0.299087062  | 0.0776564 | 3.8514154 | 0.000117 | 0.005608 |
| mcph1            | 26.02018599 | -0.119959892 | 0.3754586 | -0.319502 | 0.749346 | 0.97419  |
| otpb             | 835.2088894 | -0.02428316  | 0.0933585 | -0.260106 | 0.794782 | 0.978206 |
| zgc:171775       | 565.0737055 | 0.112822643  | 0.1093102 | 1.0321327 | 0.30201  | 0.856944 |
| pimr57           |             | 0 NA         | NA        | NA        | NA       | NA       |
| ccl19a.1         | 10.1269726  | -1.071934415 | 0.636949  | -1.68292  | 0.092391 | NA       |
| acot9.2          | 66.8469053  | 0.07411347   | 0.2431318 | 0.3048284 | 0.760497 | 0.975374 |
| adcy2a           | 151.0630502 | 0.104594725  | 0.1784137 | 0.5862483 | 0.557709 | 0.948478 |
| tagln3b          | 588.5460279 | 0.099444187  | 0.1038469 | 0.9576037 | 0.338263 | 0.876778 |
| hce211           | 7.667675308 | 0.648106188  | 0.704076  | 0.920506  | 0.357308 | NA       |
| CR956623.1       | 39.32041214 | 0.151447413  | 0.3546738 | 0.4270048 | 0.669376 | 0.965092 |
| rnaset21         | 6.274189727 | 0.000853396  | 0.801417  | 0.0010649 | 0.99915  | NA       |
| bglap            | 0.173729368 | -0.955901296 | 4.0804729 | -0.234262 | 0.814781 | NA       |
| si:dkey-11m19.5  | 1.457700461 | 1.008854538  | 1.6187964 | 0.6232127 | 0.533145 | NA       |

|                   |             |              |           |           |          |          |
|-------------------|-------------|--------------|-----------|-----------|----------|----------|
| gcn1              | 2309.059319 | -0.189498029 | 0.0965724 | -1.962238 | 0.049735 | 0.437286 |
| lgilb             | 137.8726884 | 0.208149736  | 0.1741731 | 1.1950737 | 0.232058 | 0.800126 |
| rab35b            | 213.260896  | 0.013514412  | 0.1529624 | 0.0883512 | 0.929598 | 0.992702 |
| snx6              | 155.1939264 | -0.08274233  | 0.1645852 | -0.502732 | 0.615152 | 0.95688  |
| zgc:136472        | 107.1575975 | -0.892036045 | 0.1997843 | -4.464996 | 8.01E-06 | 0.000593 |
| zrsr2             | 173.2337307 | 0.181871166  | 0.1605284 | 1.1329531 | 0.257234 | 0.825314 |
| rpl6              | 32077.5143  | -0.33510426  | 0.0908532 | -3.688413 | 0.000226 | 0.009434 |
| abhd17c           | 872.0899952 | -0.012532662 | 0.0908125 | -0.138006 | 0.890236 | 0.989291 |
| dyn111            | 2795.377147 | 0.056943154  | 0.1040065 | 0.5474962 | 0.584038 | 0.952214 |
| plekhg2           | 277.5187544 | -0.185331175 | 0.1313993 | -1.410443 | 0.158409 | 0.709224 |
| cacng3a           | 3.435813421 | 1.031635984  | 1.1080511 | 0.9310365 | 0.351835 | NA       |
| icel              | 196.4853731 | -0.00227052  | 0.1478373 | -0.015358 | 0.987746 | 0.997329 |
| zgc:158846        | 3365.404171 | -1.002533176 | 0.0877118 | -11.42986 | 2.97E-30 | 7.33E-27 |
| ndufabla          | 1006.850317 | 0.04198762   | 0.0882145 | 0.475972  | 0.634094 | 0.95776  |
| rasd3             | 15.29544145 | -0.083591209 | 0.4966203 | -0.16832  | 0.866331 | 0.986673 |
| prpf40a           | 1197.690429 | -0.004004845 | 0.0839956 | -0.047679 | 0.961972 | 0.995907 |
| mapk13            | 88.20145482 | 0.080622529  | 0.2157845 | 0.3736252 | 0.708683 | 0.968664 |
| plk1              | 869.1772039 | -0.078475861 | 0.086602  | -0.906166 | 0.364848 | 0.886714 |
| st6galnac3        | 35.66647562 | 0.267561398  | 0.3290704 | 0.8130826 | 0.416171 | 0.906237 |
| ern2              | 46.33925964 | -0.193020593 | 0.2895373 | -0.666652 | 0.504995 | 0.935724 |
| stc11             | 130.4762997 | 0.676077921  | 0.1940754 | 3.4835836 | 0.000495 | 0.017691 |
| pimr72            | 0.356300316 | 0.005884122  | 3.214964  | 0.0018302 | 0.99854  | NA       |
| zgc:110425        | 25.01136882 | 0.589104826  | 0.4462255 | 1.3201953 | 0.18677  | 0.750951 |
| chtf18            | 171.5089969 | -0.196167916 | 0.1612381 | -1.216635 | 0.223743 | 0.790335 |
| caps2             | 5.32051111  | 1.142112206  | 0.8395294 | 1.3604195 | 0.173697 | NA       |
| adora2ab          | 12.49453087 | 0.069743535  | 0.5487312 | 0.1270996 | 0.898862 | 0.990121 |
| si:dkey-30c15.17  | 28.79488821 | 0.088296261  | 0.3654892 | 0.2415838 | 0.809103 | 0.980642 |
| dnaja3a           | 834.2042613 | -2.65E-05    | 0.1003    | -0.000265 | 0.999789 | 0.999839 |
| slc9a3.1          | 170.7558735 | 0.105832882  | 0.1550481 | 0.6825811 | 0.494872 | 0.931926 |
| olah              | 83.81073175 | -0.405225663 | 0.2166623 | -1.87031  | 0.061441 | 0.483266 |
| flt3              | 3.025275472 | 0.676030926  | 1.0972996 | 0.616086  | 0.537838 | NA       |
| apls2             | 1055.026056 | 0.110340746  | 0.0979943 | 1.1259912 | 0.260169 | 0.828288 |
| cfap70            | 29.99791577 | -0.070764809 | 0.3671155 | -0.192759 | 0.847148 | 0.985174 |
| shq1              | 91.8026722  | -0.17868206  | 0.2277513 | -0.784549 | 0.432718 | 0.91326  |
| cnot10            | 384.15987   | -0.055158769 | 0.1164352 | -0.473729 | 0.635693 | 0.958142 |
| pimr209           | 0.340386822 | -1.882368278 | 3.2159502 | -0.585323 | 0.558331 | NA       |
| pole              | 474.5332464 | -0.131233147 | 0.1057422 | -1.241067 | 0.214581 | 0.782493 |
| si:dkey-211g8.7   | 0.173729368 | -0.955901296 | 4.0804729 | -0.234262 | 0.814781 | NA       |
| si:dkey-102c8.2   | 1.209546312 | -0.321199246 | 1.8955078 | -0.169453 | 0.86544  | NA       |
| alcamb            | 1664.413905 | -0.074535263 | 0.0811733 | -0.918224 | 0.358501 | 0.884398 |
| lama5             | 2895.844269 | 0.024186353  | 0.0715643 | 0.3379666 | 0.735388 | 0.972535 |
| si:dkey-30c15.12  | 6.138991796 | -1.0219059   | 0.8051476 | -1.269216 | 0.204364 | NA       |
| si:ch73-160i9.3   | 2.299589602 | 1.892552949  | 1.3542231 | 1.3975194 | 0.162257 | NA       |
| bves              | 254.2866463 | 0.061079094  | 0.1408015 | 0.4337957 | 0.664437 | 0.964736 |
| popdc3            | 97.7676641  | 0.27982878   | 0.1994537 | 1.4029762 | 0.160624 | 0.713726 |
| sprb              | 9.834634998 | -0.772781541 | 0.6484454 | -1.191745 | 0.233361 | NA       |
| muc5.2            | 638.4118947 | 0.738814044  | 0.1142807 | 6.4649079 | 1.01E-10 | 2.41E-08 |
| il11b             | 5.275865162 | 0.911663632  | 0.878431  | 1.0378318 | 0.299348 | NA       |
| lzts3b            | 33.28520311 | 0.246221517  | 0.3273738 | 0.7521113 | 0.451984 | 0.918761 |
| adrm1             | 1381.297579 | -0.064728348 | 0.0923422 | -0.700962 | 0.483327 | 0.92946  |
| fbxo30a           | 39.34964939 | 0.386472371  | 0.3071941 | 1.2580723 | 0.208366 | 0.775404 |
| znf991            | 80.33880048 | -0.039075649 | 0.2243048 | -0.174208 | 0.861702 | 0.985841 |
| ubox5             | 116.1329784 | -0.2892752   | 0.1981811 | -1.459651 | 0.144386 | 0.688868 |
| si:ch73-368j24.17 | 2.38097032  | -0.410107889 | 1.3118331 | -0.312622 | 0.754568 | NA       |

|                    |              |               |            |            |           |           |
|--------------------|--------------|---------------|------------|------------|-----------|-----------|
| socs6a             | 8. 643563483 | 0. 670497985  | 0. 6605725 | 1. 0150256 | 0. 310094 | NA        |
| si:dkey-253d23. 5  | 35. 67207878 | 0. 072444959  | 0. 3279291 | 0. 2209166 | 0. 825157 | 0. 982196 |
| avp                | 30. 42629721 | 0. 668134271  | 0. 3803583 | 1. 7565919 | 0. 078987 | 0. 547489 |
| ccl27a             | 1. 641648778 | -0. 058871685 | 1. 5562357 | -0. 03783  | 0. 969824 | NA        |
| pdp2               | 41. 55891671 | 0. 058510108  | 0. 2959341 | 0. 1977133 | 0. 843269 | 0. 985174 |
| abcg2c             | 298. 9949794 | -0. 15881203  | 0. 1381389 | -1. 149654 | 0. 250286 | 0. 820164 |
| ccdc106b           | 16. 79379445 | 0. 315338328  | 0. 4996036 | 0. 6311771 | 0. 527925 | 0. 941647 |
| si:ch211-274f20. 2 | 32. 4716028  | -1. 137254188 | 0. 3641768 | -3. 122808 | 0. 001791 | 0. 049451 |
| chst2b             | 188. 449124  | 0. 097898372  | 0. 1530255 | 0. 6397521 | 0. 522334 | 0. 939056 |
| terbl              | 0. 965400781 | -1. 006309521 | 1. 9906007 | -0. 505531 | 0. 613186 | NA        |
| sri                | 857. 5971645 | -0. 081675903 | 0. 0868152 | -0. 940802 | 0. 346806 | 0. 8794   |
| nt5c3a             | 982. 0064659 | 0. 150840946  | 0. 0869409 | 1. 7349821 | 0. 082744 | 0. 554784 |
| sox18              | 192. 1804721 | -0. 262890353 | 0. 1614552 | -1. 628256 | 0. 103471 | 0. 609625 |
| gdapl              | 272. 93326   | 0. 08302648   | 0. 1307242 | 0. 6351269 | 0. 525346 | 0. 94013  |
| jph1a              | 53. 39723676 | -0. 275587867 | 0. 2638043 | -1. 044668 | 0. 296176 | 0. 853273 |
| vsig10             | 250. 6503129 | -0. 057712833 | 0. 1354039 | -0. 426227 | 0. 669942 | 0. 965223 |
| sik1               | 2438. 691469 | 0. 313129726  | 0. 0781367 | 4. 0074583 | 6. 14E-05 | 0. 003262 |
| wsb2               | 53. 230138   | 0. 142276921  | 0. 278423  | 0. 5110099 | 0. 609344 | 0. 956718 |
| zgc:162472         | 288. 2026794 | -0. 157785338 | 0. 1320439 | -1. 194946 | 0. 232108 | 0. 800157 |
| CABZ01030107. 1    | 52. 6998617  | -0. 143044916 | 0. 2783394 | -0. 513923 | 0. 607306 | 0. 956718 |
| si:ch211-71m22. 1  | 386. 393105  | -0. 702902393 | 0. 1144327 | -6. 142497 | 8. 12E-10 | 1. 73E-07 |
| dnajb2             | 89. 85402909 | 0. 023304257  | 0. 2059664 | 0. 1131459 | 0. 909915 | 0. 990702 |
| ptprna             | 1421. 935304 | 0. 117138903  | 0. 0794374 | 1. 474606  | 0. 140318 | 0. 680564 |
| hck                | 56. 27501301 | -0. 124421037 | 0. 2602485 | -0. 478085 | 0. 632589 | 0. 957356 |
| trim46b            | 305. 9495885 | 0. 065003369  | 0. 1278439 | 0. 508459  | 0. 611131 | 0. 95688  |
| dpm3               | 210. 7634462 | 0. 028566164  | 0. 1418703 | 0. 2013541 | 0. 840422 | 0. 985042 |
| desma              | 2802. 393891 | 0. 16542516   | 0. 1086094 | 1. 5231197 | 0. 127729 | 0. 658251 |
| si:dkey-178e17. 3  | 46. 63635404 | 0. 475904273  | 0. 2859113 | 1. 6645175 | 0. 096009 | 0. 590141 |
| ilf3a              | 1690. 47161  | -0. 039376727 | 0. 0772703 | -0. 509597 | 0. 610334 | 0. 95688  |
| pimr94             | 0. 173729368 | -0. 955901296 | 4. 0804729 | -0. 234262 | 0. 814781 | NA        |
| dennd2da           | 264. 6152349 | -0. 061743444 | 0. 1359106 | -0. 454295 | 0. 649617 | 0. 960708 |
| nuggc. 3           | 14. 28507033 | 0. 653735584  | 0. 5341068 | 1. 2239792 | 0. 22096  | 0. 787641 |
| nkl. 2             | 0. 31759079  | 1. 807926197  | 3. 579045  | 0. 5051421 | 0. 613459 | NA        |
| aqp10b             | 21. 17716253 | 0. 252518528  | 0. 4180595 | 0. 6040254 | 0. 545827 | 0. 945526 |
| zgc:114104         | 55. 91138091 | -0. 422065927 | 0. 2752406 | -1. 533444 | 0. 125167 | 0. 654648 |
| cd8b               | 0. 341366344 | 1. 891903201  | 3. 2128156 | 0. 5888614 | 0. 555954 | NA        |
| pimr204            | 0. 944852573 | -2. 150786085 | 2. 3013054 | -0. 934594 | 0. 349998 | NA        |
| si:dkey-204a24. 11 | 0. 332524763 | 0. 005883742  | 3. 292841  | 0. 0017868 | 0. 998574 | NA        |
| cgnb               | 220. 0642042 | 0. 004278987  | 0. 1411838 | 0. 0303079 | 0. 975821 | 0. 996762 |
| fzd3b              | 98. 78007725 | -0. 053122944 | 0. 2052685 | -0. 258797 | 0. 795792 | 0. 978498 |
| cast               | 2898. 487774 | 0. 078412891  | 0. 090811  | 0. 8634731 | 0. 387877 | 0. 896133 |
| ddr2b              | 349. 175931  | -0. 103828349 | 0. 1222547 | -0. 849279 | 0. 395726 | 0. 899378 |
| tbl1xr1a           | 795. 6435571 | -0. 269719517 | 0. 0896162 | -3. 009719 | 0. 002615 | 0. 065122 |
| tmef2b             | 486. 0281623 | -0. 223132183 | 0. 1046918 | -2. 131325 | 0. 033062 | 0. 354192 |
| si:dkey-73p2. 2    | 1. 281503894 | -0. 740244924 | 1. 7458823 | -0. 423995 | 0. 67157  | NA        |
| noslapb            | 12. 15635685 | 0. 593719656  | 0. 5851871 | 1. 0145809 | 0. 310306 | 0. 862656 |
| vax2               | 6. 249455981 | -1. 299364645 | 0. 7809723 | -1. 663778 | 0. 096157 | NA        |
| terfl              | 96. 68005841 | -0. 11488319  | 0. 2145377 | -0. 535492 | 0. 59231  | 0. 954434 |
| ceptla             | 18. 99940512 | 0. 316979167  | 0. 453668  | 0. 6987029 | 0. 484738 | 0. 93001  |
| si:dkey-119f1. 1   | 178. 3945537 | 0. 098324247  | 0. 1609642 | 0. 6108456 | 0. 541302 | 0. 944954 |
| or126-7            |              | 0 NA          | NA         | NA         | NA        | NA        |
| rfesd              | 19. 94339909 | 1. 057270825  | 0. 4670479 | 2. 263731  | 0. 023591 | 0. 296275 |
| nudt2              | 208. 7767599 | 0. 197586274  | 0. 15167   | 1. 3027377 | 0. 192664 | 0. 756795 |
| akirin2            | 689. 977522  | -0. 071407084 | 0. 0943756 | -0. 756627 | 0. 449273 | 0. 918313 |

|                  |             |              |           |           |          |          |
|------------------|-------------|--------------|-----------|-----------|----------|----------|
| rdh10a           | 1216.710747 | 0.151295717  | 0.0878739 | 1.7217367 | 0.085117 | 0.560519 |
| slc2a6           | 51.96615744 | 0.20798936   | 0.2786476 | 0.7464244 | 0.455411 | 0.921215 |
| scgn             | 81.07346672 | -0.022655677 | 0.215425  | -0.105167 | 0.916243 | 0.991314 |
| ihha             | 66.83595187 | -0.318288499 | 0.2607207 | -1.220803 | 0.222161 | 0.788551 |
| prdx1            | 1438.627749 | -0.235952869 | 0.2674704 | -0.882164 | 0.377688 | 0.895192 |
| gabra6b          | 19.27390127 | 0.043294503  | 0.4682571 | 0.0924588 | 0.926333 | 0.992702 |
| si:ch211-117c9.2 | 29.05451211 | -0.233110433 | 0.4211444 | -0.553517 | 0.57991  | 0.951257 |
| ube2r2           | 238.2586509 | -0.010976687 | 0.1356854 | -0.080898 | 0.935523 | 0.992702 |
| ubap1            | 725.1326838 | -0.007039273 | 0.093371  | -0.07539  | 0.939904 | 0.992857 |
| si:ch73-213k20.5 |             | 0 NA         | NA        | NA        | NA       | NA       |
| or128-3          | 0.166657454 | -0.955901296 | 4.0804729 | -0.234262 | 0.814781 | NA       |
| or128-2          | 0.158915748 | 0.967652056  | 4.0804729 | 0.2371421 | 0.812547 | NA       |
| nav1b            | 45.28033946 | 0.369780148  | 0.3095356 | 1.1946288 | 0.232232 | 0.800306 |
| CABZ01053221.1   |             | 0 NA         | NA        | NA        | NA       | NA       |
| 2-Oct            | 34.0778057  | 0.143160453  | 0.3418102 | 0.4188302 | 0.67534  | 0.965257 |
| slc9a2           | 89.82536275 | 0.006525879  | 0.2098165 | 0.0311028 | 0.975188 | 0.996762 |
| si:ch73-242m19.1 | 29.80821771 | 0.110783339  | 0.3556195 | 0.3115221 | 0.755404 | 0.975318 |
| zgc:171887       | 2.358063979 | -0.889056567 | 1.3159448 | -0.675603 | 0.499293 | NA       |
| si:dkey-19a16.2  | 39.38711148 | -0.138820501 | 0.3036054 | -0.45724  | 0.647499 | 0.960585 |
| mybpha           | 462.0998362 | 0.114938834  | 0.1127899 | 1.0190529 | 0.308178 | 0.861088 |
| rab25a           | 125.8747469 | -0.128373557 | 0.1873184 | -0.685323 | 0.49314  | 0.931926 |
| rev3l            | 731.5866921 | -0.148797203 | 0.0906585 | -1.641293 | 0.100737 | 0.603443 |
| grkla            | 684.1455549 | 0.239575738  | 0.1138643 | 2.1040468 | 0.035374 | 0.365843 |
| naxe             | 347.4587195 | -0.006248865 | 0.1216591 | -0.051364 | 0.959036 | 0.995095 |
| ihhb             | 19.45778097 | -0.194071736 | 0.4592121 | -0.422619 | 0.672573 | 0.965257 |
| rbm38            | 324.0286795 | -0.175826049 | 0.1229512 | -1.430048 | 0.152703 | 0.701776 |
| nogl             | 113.4930413 | 0.060507369  | 0.1859977 | 0.3253125 | 0.744945 | 0.974094 |
| bin1b            | 122.4898146 | 0.277262655  | 0.1800321 | 1.5400735 | 0.123542 | 0.651905 |
| sema5a           | 927.5475213 | -0.001885292 | 0.0943878 | -0.019974 | 0.984064 | 0.996944 |
| wnt3a            | 1.832752574 | 1.384701176  | 1.5765857 | 0.8782911 | 0.379786 | NA       |
| mrpl4            | 650.251783  | -0.062726184 | 0.0988406 | -0.63462  | 0.525676 | 0.940145 |
| ccdc5l           | 178.9760327 | 0.051492365  | 0.1650272 | 0.3120235 | 0.755023 | 0.975231 |
| zgc:171424       | 0.325452849 | 0.005883619  | 3.3177086 | 0.0017734 | 0.998585 | NA       |
| zdhhc3b          | 260.6697381 | 0.000869479  | 0.1316924 | 0.0066023 | 0.994732 | 0.998694 |
| si:ch73-212j7.3  | 95.86233689 | 0.009661804  | 0.2145772 | 0.0450272 | 0.964086 | 0.995927 |
| susdl            | 28.46490209 | -0.614492404 | 0.3772373 | -1.628928 | 0.103328 | 0.609625 |
| mcoln1b          | 10.69437963 | 0.212333558  | 0.6098275 | 0.3481863 | 0.7277   | NA       |
| sash1b           | 305.5553706 | -0.047978334 | 0.1236765 | -0.387934 | 0.698065 | 0.967998 |
| zgc:112052       | 333.3546917 | -0.115988512 | 0.1286938 | -0.901275 | 0.367442 | 0.887458 |
| ncln             | 902.1909196 | -0.029678989 | 0.103533  | -0.286662 | 0.774371 | 0.975687 |
| endog            | 188.2598016 | 0.106001341  | 0.1559977 | 0.679506  | 0.496817 | 0.932829 |
| apc              | 3639.316952 | 0.025278029  | 0.0692024 | 0.3652766 | 0.714905 | 0.96909  |
| CABZ01040556.1   | 46.0932975  | -0.254228565 | 0.2891892 | -0.879108 | 0.379343 | 0.895192 |
| zgc:171857       | 88.20129721 | -0.121132076 | 0.2092377 | -0.578921 | 0.562643 | 0.948728 |
| ptpdc1b          | 235.7322084 | 0.413991484  | 0.1407473 | 2.941381  | 0.003268 | 0.076374 |
| zgc:113227       | 42.19362918 | 0.031328884  | 0.3012831 | 0.1039849 | 0.917181 | 0.991572 |
| mmp16b           | 28.05066497 | -0.0947819   | 0.368946  | -0.256899 | 0.797257 | 0.978577 |
| cldnj            | 54.15190297 | -0.086784564 | 0.2925367 | -0.296662 | 0.766724 | 0.975687 |
| ttc29            | 4.11563754  | 0.57185956   | 0.9477924 | 0.6033595 | 0.54627  | NA       |
| cepl70ab         | 110.7495935 | 0.086579836  | 0.1901881 | 0.4552326 | 0.648942 | 0.960708 |
| nhejl            | 155.7903795 | -0.146048616 | 0.1767072 | -0.826501 | 0.40852  | 0.90171  |
| si:ch211-237c6.4 | 126.5327351 | 0.08650856   | 0.1861374 | 0.4647565 | 0.642106 | 0.959994 |
| si:ch211-18115.2 | 11.95059464 | 0.111076124  | 0.5851246 | 0.1898333 | 0.84944  | 0.985174 |
| nnr              |             | 0 NA         | NA        | NA        | NA       | NA       |

|                   |             |              |           |           |          |          |
|-------------------|-------------|--------------|-----------|-----------|----------|----------|
| pou1f1            | 6.686965056 | 0.742541738  | 0.7755315 | 0.9574617 | 0.338334 | NA       |
| si:busm1-52i16.2  | 2.125027809 | 0.652244066  | 1.4183524 | 0.4598604 | 0.645616 | NA       |
| cldn10a           | 7.457685948 | -1.042779094 | 0.7916971 | -1.317144 | 0.18779  | NA       |
| b4galnt3b         | 162.2291716 | 0.162157549  | 0.1593055 | 1.0179029 | 0.308724 | 0.861088 |
| si:ch211-248e11.2 | 45.58652876 | -0.237902093 | 0.2959675 | -0.803811 | 0.421506 | 0.90651  |
| cdcp1a            | 121.5646155 | -0.583625212 | 0.1876106 | -3.110832 | 0.001866 | 0.050813 |
| si:dkey-8e10.3    | 18.83402022 | 0.502337635  | 0.449003  | 1.1187846 | 0.263232 | 0.830245 |
| acot22            | 0.341366344 | 1.891903201  | 3.2128156 | 0.5888614 | 0.555954 | NA       |
| CU856539.2        | 500.5790745 | -0.338578287 | 0.1145663 | -2.955305 | 0.003124 | 0.073687 |
| spina             | 28.09869571 | 0.039024252  | 0.3826287 | 0.1019899 | 0.918765 | 0.991623 |
| abcc4             | 671.0914418 | 0.271126536  | 0.0960649 | 2.8223265 | 0.004768 | 0.099657 |
| trim35-7          | 14.80477513 | -0.018709727 | 0.4998856 | -0.037428 | 0.970144 | 0.996315 |
| otol1b            | 37.97359295 | 0.491170566  | 0.3301033 | 1.48793   | 0.136769 | 0.673303 |
| ngfa              | 53.46552398 | 0.142872241  | 0.2870817 | 0.4976709 | 0.618716 | 0.957354 |
| txn14b            | 145.4059116 | 0.047969867  | 0.1739158 | 0.2758224 | 0.782684 | 0.97627  |
| themis2           | 7.383380494 | -0.373659935 | 0.7448963 | -0.501627 | 0.61593  | NA       |
| zgc:112332        | 113.8731111 | -0.104235629 | 0.2002609 | -0.520499 | 0.602716 | 0.956045 |
| haus1             | 88.29788855 | -0.101626675 | 0.2194411 | -0.463116 | 0.643281 | 0.959994 |
| cntnap2a          | 724.6484247 | 0.012928305  | 0.1017977 | 0.127     | 0.89894  | 0.990121 |
| zgc:113423        | 115.7358674 | 0.068149231  | 0.1859606 | 0.3664714 | 0.714013 | 0.96909  |
| rad23ab           | 212.4737371 | -0.012412518 | 0.1541901 | -0.080501 | 0.935839 | 0.992702 |
| KCNJ6             | 112.5084796 | 0.137490536  | 0.2080647 | 0.6608066 | 0.508736 | 0.935875 |
| KCNJ15            | 67.69064148 | 0.389069982  | 0.2447159 | 1.5898846 | 0.111861 | 0.627242 |
| slc35a2           | 143.8271964 | 0.168231298  | 0.1739032 | 0.9673849 | 0.333352 | 0.874926 |
| cers2b            | 597.1719106 | 0.097832121  | 0.1068867 | 0.9152878 | 0.360041 | 0.885686 |
| rock1             | 755.6602511 | -0.0455117   | 0.0922331 | -0.493442 | 0.6217   | 0.957354 |
| stx1a             | 12.60078377 | -0.460181923 | 0.5285335 | -0.870677 | 0.383931 | 0.895192 |
| jmjd4             | 73.13151163 | -0.044360886 | 0.2344338 | -0.189226 | 0.849916 | 0.985174 |
| jam2a             | 170.2466576 | 0.03740903   | 0.1620571 | 0.2308386 | 0.81744  | 0.981594 |
| pim2              | 774.890215  | -0.297404428 | 0.1084923 | -2.74125  | 0.006121 | 0.118579 |
| strip2            | 392.3443185 | 0.03607004   | 0.1201677 | 0.3001642 | 0.764052 | 0.975374 |
| otud5a            | 938.9460196 | -0.206080418 | 0.0934792 | -2.204559 | 0.027485 | 0.320429 |
| lim2.2            | 16.92672947 | -0.346924709 | 0.4657074 | -0.744941 | 0.456307 | 0.921215 |
| thap1             | 118.6577503 | -0.092469035 | 0.1845922 | -0.500937 | 0.616416 | 0.95688  |
| zgc:123217        | 10.21052003 | 0.426209715  | 0.6149815 | 0.6930448 | 0.488281 | NA       |
| srrd              | 40.29188914 | -0.096209322 | 0.3232686 | -0.297614 | 0.765998 | 0.975374 |
| mmp28             | 128.6775143 | 0.330381373  | 0.2063446 | 1.6011147 | 0.109352 | 0.623408 |
| porb              | 1778.534017 | -0.150251275 | 0.0740151 | -2.030008 | 0.042356 | 0.404449 |
| F0904903.1        |             | 0 NA         | NA        | NA        | NA       | NA       |
| ntf3              | 14.01865158 | -0.290880101 | 0.514813  | -0.565021 | 0.57206  | 0.949494 |
| epm2a             | 13.03910118 | 0.581790785  | 0.5679278 | 1.0244097 | 0.305642 | 0.860027 |
| psmd5             | 420.6461132 | -0.209473581 | 0.1270333 | -1.648966 | 0.099155 | 0.598682 |
| mpz111            | 245.1450234 | -0.055694262 | 0.1428465 | -0.389889 | 0.696619 | 0.96736  |
| zgc:174904        | 192.4223991 | 0.305641015  | 0.1546331 | 1.9765559 | 0.048092 | 0.432341 |
| slc13a4           | 439.1740166 | 0.368908478  | 0.1120746 | 3.2916341 | 0.000996 | 0.03092  |
| pdk2b             | 867.7801708 | -0.086509607 | 0.2400354 | -0.360404 | 0.718545 | 0.96909  |
| ft1               | 7.542301735 | 0.768059168  | 0.7427994 | 1.0340062 | 0.301133 | NA       |
| atpv0e2           | 837.2126018 | 0.022433365  | 0.0906899 | 0.2473634 | 0.804627 | 0.979705 |
| vipr1b            | 13.31280396 | -0.885232089 | 0.5290632 | -1.673207 | 0.094287 | 0.583986 |
| emsy              | 635.0971512 | -0.140994332 | 0.1038513 | -1.357656 | 0.174573 | 0.734625 |
| lgals1a           | 94.1137937  | -0.003862204 | 0.2146651 | -0.017992 | 0.985645 | 0.996944 |
| rassf3            | 165.6260926 | 0.146488844  | 0.1627481 | 0.9000953 | 0.36807  | 0.887482 |
| jupb              | 22.82749608 | 0.296146485  | 0.4197794 | 0.7054812 | 0.480511 | 0.927601 |
| gars              | 3304.692103 | -0.123711992 | 0.0738507 | -1.675164 | 0.093902 | 0.582989 |

|                   |              |               |            |            |           |           |
|-------------------|--------------|---------------|------------|------------|-----------|-----------|
| gsc               | 214. 8028621 | -0. 339884068 | 0. 1457859 | -2. 331393 | 0. 019733 | 0. 264538 |
| nip7              | 169. 9122976 | -0. 020304901 | 0. 1563176 | -0. 129895 | 0. 896649 | 0. 989971 |
| vps25             | 1042. 278352 | 0. 058497043  | 0. 0849571 | 0. 688548  | 0. 491108 | 0. 931926 |
| L0018513. 1       | 16. 39087005 | 0. 61784788   | 0. 4754238 | 1. 2995729 | 0. 193747 | 0. 757596 |
| ppp2r5ca          | 380. 4125029 | -0. 103358208 | 0. 1160079 | -0. 890959 | 0. 372951 | 0. 892934 |
| sstr2a            | 40. 39813245 | 0. 683413184  | 0. 3299828 | 2. 071057  | 0. 038353 | 0. 384124 |
| ank1a             | 184. 1139738 | 0. 141293724  | 0. 1642512 | 0. 8602297 | 0. 389662 | 0. 896421 |
| nktr              | 789. 3496234 | -0. 204003931 | 0. 1108397 | -1. 840532 | 0. 06569  | 0. 500755 |
| si:ch73-126o18. 1 | 0 NA         | NA            | NA         | NA         | NA        | NA        |
| si:dkeyp-113d7. 1 | 726. 3495285 | -0. 09735696  | 0. 0936941 | -1. 039094 | 0. 298761 | 0. 85478  |
| heatr5b           | 349. 6426933 | 0. 045808988  | 0. 143928  | 0. 3182772 | 0. 750275 | 0. 97419  |
| EFEMP1            | 10. 82878085 | 0. 04006098   | 0. 5740182 | 0. 0697904 | 0. 94436  | NA        |
| plcd1a            | 458. 00131   | 0. 013086931  | 0. 1070061 | 0. 1223008 | 0. 902661 | 0. 990121 |
| prkacbb           | 1102. 974171 | 0. 067003723  | 0. 087966  | 0. 7616999 | 0. 446239 | 0. 917154 |
| uqcrh             | 2658. 089189 | -0. 19063215  | 0. 0903994 | -2. 108776 | 0. 034964 | 0. 363882 |
| gatalb            | 0. 523937293 | 2. 50362281   | 2. 7291625 | 0. 9173594 | 0. 358954 | NA        |
| spdya             | 4. 720609034 | 0. 023352169  | 0. 868723  | 0. 026881  | 0. 978555 | NA        |
| wfikkn2b          | 5. 911568596 | 0. 520605778  | 0. 8346852 | 0. 6237151 | 0. 532815 | NA        |
| tmem107           | 175. 4491673 | -0. 285376124 | 0. 160559  | -1. 777391 | 0. 075504 | 0. 535131 |
| rbp3              | 3580. 869174 | 0. 409659448  | 0. 0839838 | 4. 8778408 | 1. 07E-06 | 0. 000106 |
| slc22a13b         | 14. 4136096  | 0. 349024815  | 0. 5323415 | 0. 6556408 | 0. 512055 | 0. 936253 |
| gdf2              | 14. 78250204 | -0. 122942261 | 0. 5307727 | -0. 231629 | 0. 816826 | 0. 981594 |
| cep19             | 69. 85702506 | -0. 18656046  | 0. 2432273 | -0. 767021 | 0. 443069 | 0. 916336 |
| tax1bp3           | 484. 6117178 | 0. 05280111   | 0. 1104106 | 0. 4782249 | 0. 63249  | 0. 957356 |
| CU467633. 1       | 0. 997976631 | 0. 006464214  | 1. 862781  | 0. 0034702 | 0. 997231 | NA        |
| tspan2b           | 251. 6384855 | -0. 33396289  | 0. 1397448 | -2. 389806 | 0. 016857 | 0. 23981  |
| abhd13            | 15. 6423672  | 0. 266247541  | 0. 4829343 | 0. 5513121 | 0. 58142  | 0. 951731 |
| ciaol             | 504. 125935  | -0. 061586604 | 0. 1134097 | -0. 543045 | 0. 587099 | 0. 953319 |
| zbtb8a            | 80. 6724307  | 0. 084390853  | 0. 2167059 | 0. 3894257 | 0. 696961 | 0. 96736  |
| fabplb. 1         | 1602. 480668 | -0. 880392862 | 0. 100392  | -8. 769555 | 1. 79E-18 | 1. 27E-15 |
| heph11a           | 116. 587872  | 0. 136340213  | 0. 1939935 | 0. 7028081 | 0. 482175 | 0. 928585 |
| runx2b            | 14. 58718462 | -0. 659343061 | 0. 5057121 | -1. 303791 | 0. 192305 | 0. 756743 |
| mrps27            | 476. 7643283 | -0. 061564594 | 0. 117377  | -0. 524503 | 0. 599929 | 0. 956045 |
| zgc:113274        | 81. 45944034 | -0. 171785142 | 0. 2181667 | -0. 787403 | 0. 431046 | 0. 91234  |
| ptger4a           | 5. 206943464 | -0. 453211532 | 0. 8347752 | -0. 542914 | 0. 587189 | NA        |
| arfip2a           | 812. 3654118 | 0. 065073686  | 0. 093504  | 0. 6959456 | 0. 486463 | 0. 930833 |
| hnrnpd            | 1558. 660727 | -0. 006421472 | 0. 0913515 | -0. 070294 | 0. 94396  | 0. 993364 |
| tmem54a           | 314. 8363573 | 0. 127517588  | 0. 1345696 | 0. 9475958 | 0. 343335 | 0. 878434 |
| zpcx              | 0. 673073222 | -1. 460830855 | 2. 4012698 | -0. 608358 | 0. 54295  | NA        |
| illrl             | 0. 508023798 | 0. 926122713  | 2. 6636728 | 0. 3476864 | 0. 728076 | NA        |
| evx2              | 255. 4488935 | 0. 200081771  | 0. 1302375 | 1. 536284  | 0. 124469 | 0. 653544 |
| hoxd13a           | 7. 970273145 | 0. 115923529  | 0. 6606196 | 0. 175477  | 0. 860705 | NA        |
| pabpc4            | 2935. 723578 | 0. 085913549  | 0. 0974227 | 0. 8818639 | 0. 37785  | 0. 895192 |
| hoxd12a           | 23. 49585628 | 0. 407316735  | 0. 4273012 | 0. 953231  | 0. 340473 | 0. 87805  |
| hoxd11a           | 50. 50160829 | 0. 022826425  | 0. 28724   | 0. 0794681 | 0. 93666  | 0. 992702 |
| hoxd9a            | 125. 5558149 | 0. 023521425  | 0. 1847049 | 0. 1273459 | 0. 898667 | 0. 990121 |
| hoxd4a            | 135. 4316014 | -0. 124436194 | 0. 1794421 | -0. 693461 | 0. 48802  | 0. 93189  |
| tfap2a            | 3227. 789109 | 0. 02030305   | 0. 074584  | 0. 2722173 | 0. 785455 | 0. 97627  |
| hoxd3a            | 477. 4242154 | 0. 128585127  | 0. 114401  | 1. 1239857 | 0. 261019 | 0. 829139 |
| mak               | 480. 8023327 | 0. 004881018  | 0. 1074789 | 0. 0454137 | 0. 963778 | 0. 995927 |
| marco             | 46. 20891908 | -0. 35707337  | 0. 2901592 | -1. 230612 | 0. 218468 | 0. 785734 |
| spcs1             | 330. 5733154 | -0. 064594772 | 0. 1426187 | -0. 452919 | 0. 650607 | 0. 960708 |
| hnrnp12           | 3075. 865118 | -0. 09009925  | 0. 0736209 | -1. 223827 | 0. 221017 | 0. 787641 |
| chchd2            | 1065. 85913  | 0. 162715832  | 0. 0994115 | 1. 6367907 | 0. 101674 | 0. 605756 |

|                   |             |              |           |           |          |          |
|-------------------|-------------|--------------|-----------|-----------|----------|----------|
| tmem37            | 67.23125991 | 0.239059129  | 0.2418685 | 0.9883849 | 0.322964 | 0.870607 |
| golt1bb           | 334.5998911 | -0.210081708 | 0.1220428 | -1.721378 | 0.085182 | 0.560519 |
| dpys15b           | 3105.306619 | 0.086215267  | 0.0825859 | 1.0439461 | 0.29651  | 0.853573 |
| ora3              | 10.06646486 | 0.71787245   | 0.5991498 | 1.1981518 | 0.230858 | NA       |
| topbpl            | 304.2272602 | -0.189974526 | 0.1301889 | -1.459222 | 0.144504 | 0.688868 |
| rpn1              | 2562.246872 | -0.115723411 | 0.093442  | -1.238451 | 0.215549 | 0.783025 |
| gata2a            | 442.0864419 | -0.155063606 | 0.1201569 | -1.29051  | 0.196874 | 0.761944 |
| si:ch211-285f17.1 | 428.2870008 | -0.027953884 | 0.1255606 | -0.222633 | 0.823821 | 0.982196 |
| tgif1             | 1056.895685 | -0.102540552 | 0.092694  | -1.106227 | 0.268628 | 0.833906 |
| dlgap2a           | 25.7629538  | 0.065469202  | 0.3711161 | 0.1764117 | 0.859971 | 0.985773 |
| avil              | 78.27459901 | -0.233396767 | 0.2236965 | -1.043364 | 0.29678  | 0.853798 |
| calml4b           | 2.164486196 | -0.25998089  | 1.3544931 | -0.19194  | 0.847789 | NA       |
| rxfp3.3b          | 29.81050573 | 0.022103755  | 0.3549514 | 0.0622726 | 0.950346 | 0.99381  |
| homer2            | 196.6478162 | -0.032337567 | 0.1488064 | -0.217313 | 0.827964 | 0.982721 |
| hnrnpa3           | 410.7220989 | -0.125668611 | 0.1121863 | -1.120178 | 0.262638 | 0.830166 |
| glmp              | 384.6432359 | -0.251846059 | 0.1173194 | -2.14667  | 0.03182  | 0.34636  |
| sarnp             | 779.2304522 | -0.150017168 | 0.0988914 | -1.516989 | 0.129269 | 0.661022 |
| srsf3b            | 3746.790216 | -0.140317835 | 0.0728532 | -1.926034 | 0.0541   | 0.455611 |
| slc39a4           | 10.75345366 | 0.323211739  | 0.6284353 | 0.5143119 | 0.607034 | NA       |
| cavin1b           | 443.0012615 | 0.039649068  | 0.111272  | 0.3563257 | 0.721597 | 0.969747 |
| tgfbr2a           | 43.90153863 | -0.310094703 | 0.3023254 | -1.025699 | 0.305034 | 0.859636 |
| nipal4            | 182.8539499 | 0.145076225  | 0.155714  | 0.931684  | 0.3515   | 0.880769 |
| mfap2             | 1612.076215 | 0.079423015  | 0.0950742 | 0.8353792 | 0.403504 | 0.900979 |
| gria4b            | 783.5288753 | 0.137992425  | 0.0943656 | 1.462317  | 0.143654 | 0.686804 |
| si:ch1073-15f12.3 | 4.999139283 | -0.201662175 | 0.8523507 | -0.236595 | 0.812971 | NA       |
| nrld4b            | 78.84362576 | -0.532912313 | 0.2225849 | -2.394198 | 0.016657 | 0.2379   |
| dnajc8            | 1317.347816 | -0.096313196 | 0.0925567 | -1.040586 | 0.298068 | 0.85401  |
| fgf7              | 11.40202804 | 0.218445126  | 0.5725412 | 0.3815361 | 0.702806 | 0.968134 |
| bdh1              | 185.7407343 | 0.043298644  | 0.1661462 | 0.2606056 | 0.794397 | 0.977937 |
| gyglb             | 598.7577087 | 0.275093843  | 0.1064776 | 2.5835842 | 0.009778 | 0.167691 |
| taslr2.2          | 0.158915748 | 0.967652056  | 4.0804729 | 0.2371421 | 0.812547 | NA       |
| myef2             | 2363.068049 | -0.170077384 | 0.0717071 | -2.371834 | 0.0177   | 0.246724 |
| si:ch211-160o17.6 | 106.2216545 | 0.034849157  | 0.2228758 | 0.1563614 | 0.875748 | 0.987881 |
| tmem167b          | 657.926961  | -0.008228338 | 0.0949643 | -0.086647 | 0.930952 | 0.992702 |
| rab43             | 245.7991371 | -0.005431381 | 0.1331553 | -0.04079  | 0.967463 | 0.996315 |
| raf1b             | 446.580643  | -0.309542659 | 0.1082961 | -2.858298 | 0.004259 | 0.091545 |
| abcd2             | 9.832025715 | -0.148087016 | 0.6778401 | -0.218469 | 0.827064 | NA       |
| ccr12b.1          | 0.488104098 | -2.415107183 | 2.7936704 | -0.864493 | 0.387317 | NA       |
| impa2             | 86.31538544 | 0.218131096  | 0.222265  | 0.9814011 | 0.326395 | 0.87218  |
| zgc:111976        | 6.672265278 | -0.276178939 | 0.7546886 | -0.365951 | 0.714402 | NA       |
| prune2            | 894.5172413 | 0.205956636  | 0.0937952 | 2.195812  | 0.028105 | 0.325071 |
| rnf215            | 20.25257608 | -0.154811078 | 0.4317564 | -0.358561 | 0.719923 | 0.969318 |
| fsd11             | 174.0309765 | 0.024479156  | 0.1620952 | 0.1510171 | 0.879962 | 0.987881 |
| fktn              | 413.2839966 | 0.042560461  | 0.1119094 | 0.3803119 | 0.703714 | 0.968134 |
| galnt18b          | 248.8726147 | 0.112942244  | 0.1331948 | 0.8479479 | 0.396467 | 0.899672 |
| smtnb             | 1019.723848 | 0.14963287   | 0.0923188 | 1.6208279 | 0.105055 | 0.613317 |
| dqx1              | 74.0016092  | -0.015154069 | 0.2274064 | -0.066639 | 0.946869 | 0.99381  |
| si:ch211-283h6.4  | 112.1148941 | -0.082465638 | 0.1923716 | -0.428679 | 0.668157 | 0.964736 |
| sbf2              | 845.2767154 | -0.199645801 | 0.0926613 | -2.154575 | 0.031195 | 0.341959 |
| mepce             | 577.0793902 | -0.087850239 | 0.0987213 | -0.889881 | 0.37353  | 0.893669 |
| wasf3a            | 156.4805317 | 0.040417435  | 0.1775619 | 0.2276244 | 0.819938 | 0.981594 |
| arhgap31          | 38.96176881 | 0.079005066  | 0.3327193 | 0.2374526 | 0.812306 | 0.981081 |
| kank4             | 89.6308031  | 0.109467659  | 0.2217596 | 0.4936322 | 0.621566 | 0.957354 |
| mlxip             | 176.8395504 | -0.00099629  | 0.1641978 | -0.006068 | 0.995159 | 0.998694 |

|                   |             |              |           |           |          |          |
|-------------------|-------------|--------------|-----------|-----------|----------|----------|
| camsap3           | 473.7216612 | -0.163664707 | 0.1175083 | -1.392793 | 0.163683 | 0.71945  |
| tead1b            | 473.2581529 | 0.004714322  | 0.1092976 | 0.0431329 | 0.965596 | 0.996315 |
| emb               | 66.71432451 | 0.117637889  | 0.2438712 | 0.4823771 | 0.629538 | 0.957354 |
| cplx4b            | 0.538871265 | 0.999144257  | 2.7784799 | 0.359601  | 0.719146 | NA       |
| arl16             | 225.4336298 | -0.115234726 | 0.1382319 | -0.833634 | 0.404488 | 0.901305 |
| ACSF3             | 135.1822995 | -0.181033316 | 0.1744007 | -1.038031 | 0.299256 | 0.855386 |
| si:dkey-163m14.2  | 37.11180979 | 0.245324541  | 0.3339556 | 0.7346022 | 0.462582 | 0.922698 |
| coq2              | 251.1682388 | 0.019467432  | 0.1415816 | 0.1374998 | 0.890636 | 0.989291 |
| rims4             | 23.01633544 | 0.138579941  | 0.4440243 | 0.3120999 | 0.754965 | 0.97522  |
| KIAA0895L         | 88.28496968 | 0.186340721  | 0.2116225 | 0.8805338 | 0.37857  | 0.895192 |
| si:ch211-146m13.3 | 600.6169054 | 0.076834537  | 0.0996876 | 0.7707533 | 0.440853 | 0.916336 |
| akap10            | 249.5676669 | 0.113764911  | 0.1477235 | 0.7701207 | 0.441228 | 0.916336 |
| sympk             | 1089.791424 | -0.105766875 | 0.0924403 | -1.144164 | 0.252556 | 0.822063 |
| recql5            | 205.6787739 | -0.196411651 | 0.1549172 | -1.26785  | 0.204852 | 0.772822 |
| xylt2             | 21.93113506 | -0.018610105 | 0.4168417 | -0.044646 | 0.96439  | 0.995927 |
| tecta             | 137.8402241 | 0.201052777  | 0.184934  | 1.0871594 | 0.276966 | 0.840247 |
| si:ch73-281f12.4  | 179.4771017 | -0.106169028 | 0.1588985 | -0.668156 | 0.504034 | 0.93532  |
| fscn2a            | 97.3206327  | 0.357992611  | 0.2286226 | 1.5658674 | 0.11738  | 0.640853 |
| uhmk1             | 23.89196974 | -0.629463059 | 0.4019958 | -1.565845 | 0.117385 | 0.640853 |
| mbd5              | 219.1253844 | 0.256546432  | 0.1778767 | 1.4422713 | 0.149226 | 0.696454 |
| sowahcb           | 145.6701022 | -0.044525864 | 0.1703832 | -0.261328 | 0.79384  | 0.977937 |
| rccl1             | 388.0882066 | -0.018150331 | 0.1192414 | -0.152215 | 0.879017 | 0.987881 |
| CU928117.1        | 473.1902874 | -0.057957861 | 0.1102225 | -0.525826 | 0.599009 | 0.955806 |
| clip2             | 233.2241591 | 0.0515787    | 0.142065  | 0.3630642 | 0.716557 | 0.96909  |
| rabep1            | 643.3449486 | 0.065364795  | 0.0939547 | 0.6957058 | 0.486613 | 0.930859 |
| maplaa            | 1981.227719 | 0.000595466  | 0.0736442 | 0.0080857 | 0.993549 | 0.998672 |
| mtssl             | 531.3836351 | -0.167466341 | 0.1064345 | -1.573421 | 0.115621 | 0.637206 |
| ccdc84            | 117.5217944 | 0.011715358  | 0.1970032 | 0.0594679 | 0.952579 | 0.99398  |
| gpr146            | 930.9363814 | -0.00208685  | 0.0878746 | -0.023748 | 0.981054 | 0.996944 |
| npr12             | 176.0890086 | 0.222601888  | 0.1577042 | 1.4115153 | 0.158093 | 0.709224 |
| hs3st2            | 42.39036313 | -0.11097178  | 0.304392  | -0.364569 | 0.715433 | 0.96909  |
| asphd2            | 437.2430492 | 0.131377334  | 0.1141421 | 1.150998  | 0.249733 | 0.819758 |
| mlec              | 166.7728747 | 0.113323376  | 0.162914  | 0.6956024 | 0.486678 | 0.930882 |
| thumpd3           | 236.9297147 | 0.065317729  | 0.1433635 | 0.4556093 | 0.648671 | 0.960708 |
| si:ch211-127d4.3  | 67.97470844 | -0.2347711   | 0.264831  | -0.886494 | 0.375351 | 0.894316 |
| mtmr14            | 506.2711805 | 0.054761582  | 0.104151  | 0.5257901 | 0.599034 | 0.955806 |
| nt5dc2            | 2191.730204 | -0.352269454 | 0.0726035 | -4.851965 | 1.22E-06 | 0.000119 |
| cidec             | 21.89384868 | 0.120586676  | 0.408363  | 0.2952928 | 0.76777  | 0.975687 |
| kdm2aa            | 1318.760474 | -0.093460737 | 0.0861846 | -1.084425 | 0.278176 | 0.841891 |
| EIF3ba            | 6819.676537 | -0.217459639 | 0.0788618 | -2.757476 | 0.005825 | 0.114852 |
| mks1              | 135.900224  | -0.145218435 | 0.1747257 | -0.831122 | 0.405905 | 0.901305 |
| mrml              | 11.49553468 | -0.078288477 | 0.5597151 | -0.139872 | 0.888761 | 0.989291 |
| arhgap36          | 160.4632694 | -0.201852178 | 0.1614077 | -1.250573 | 0.21109  | 0.778604 |
| fscn1a            | 4002.611765 | -0.005748324 | 0.0673771 | -0.085316 | 0.93201  | 0.992702 |
| slc43a3a          | 150.5251263 | 0.090948237  | 0.1831321 | 0.4966264 | 0.619453 | 0.957354 |
| mblac2            | 26.19722414 | 0.725901704  | 0.42967   | 1.6894399 | 0.091135 | 0.578217 |
| slc29a4           | 452.4393146 | 0.121359102  | 0.1088575 | 1.1148441 | 0.264917 | 0.830836 |
| adam19a           | 345.3337755 | -0.016589515 | 0.1255574 | -0.132127 | 0.894884 | 0.989814 |
| dusp28            | 11.76992817 | -0.025996973 | 0.5834373 | -0.044558 | 0.964459 | 0.995927 |
| dnajc16           | 27.94098495 | -0.645449158 | 0.3781729 | -1.706757 | 0.087867 | 0.567519 |
| agmat             | 31.95729032 | -0.472702234 | 0.3595155 | -1.314831 | 0.188567 | 0.753276 |
| flii              | 1075.048071 | 0.065068828  | 0.0917242 | 0.7093968 | 0.478078 | 0.926857 |
| vwa5b1            | 5.132469766 | -0.277975632 | 0.9028984 | -0.30787  | 0.758181 | NA       |
| si:ch211-216l23.1 | 1424.975883 | -0.101805881 | 0.0813658 | -1.251213 | 0.210857 | 0.778412 |



|                |             |              |           |           |          |          |
|----------------|-------------|--------------|-----------|-----------|----------|----------|
| nol6           | 556.1693229 | 0.019200403  | 0.1044043 | 0.1839044 | 0.854088 | 0.985174 |
| slc19a2        | 8.332402059 | 0.069106299  | 0.6799053 | 0.1016411 | 0.919042 | NA       |
| arsk           | 42.65293188 | 0.001831338  | 0.3009089 | 0.006086  | 0.995144 | 0.998694 |
| fam169aa       | 8.36753648  | 0.161612613  | 0.6775342 | 0.2385306 | 0.81147  | NA       |
| ubac1          | 602.4107737 | 0.210110346  | 0.0992659 | 2.1166411 | 0.03429  | 0.360094 |
| hypk           | 1051.701337 | -0.17991026  | 0.0979079 | -1.837546 | 0.066129 | 0.502802 |
| sec1418        | 240.3249826 | -0.238786035 | 0.1367654 | -1.745953 | 0.080819 | 0.550801 |
| ptprsa         | 211.3915684 | 0.127955457  | 0.1448156 | 0.8835749 | 0.376926 | 0.895192 |
| tmem98         | 42.37506896 | 0.277978454  | 0.2931547 | 0.9482314 | 0.343012 | 0.878434 |
| plod1a         | 1196.236904 | 0.002877241  | 0.0983099 | 0.029267  | 0.976652 | 0.996762 |
| kcnj19a        | 47.22708588 | 0.2323326    | 0.3001956 | 0.7739374 | 0.438968 | 0.916082 |
| abtb2a         | 171.0533338 | 0.22785844   | 0.1596623 | 1.4271275 | 0.153543 | 0.702578 |
| wdtc1          | 462.3789174 | 0.034305668  | 0.1119305 | 0.3064909 | 0.759231 | 0.975374 |
| gabrd          | 348.1300186 | 0.06389634   | 0.1344619 | 0.4752003 | 0.634644 | 0.9578   |
| gpatch8        | 3584.43768  | -0.07920267  | 0.0776686 | -1.019751 | 0.307846 | 0.861088 |
| cpt1aa         | 708.9424202 | 0.099695962  | 0.0979594 | 1.0177271 | 0.308808 | 0.861088 |
| SRCIN1         | 209.3151595 | 0.190565371  | 0.1628218 | 1.1703923 | 0.241843 | 0.810713 |
| dub            | 91.20892997 | -0.12092423  | 0.2165966 | -0.558292 | 0.576645 | 0.950611 |
| slc32a1        | 2841.83826  | 0.167773879  | 0.0777108 | 2.1589528 | 0.030854 | 0.33998  |
| atcayb         | 220.4672769 | 0.188493092  | 0.1428626 | 1.3194009 | 0.187035 | 0.751002 |
| parp8          | 208.8533943 | 0.063411311  | 0.146254  | 0.4335698 | 0.664601 | 0.964736 |
| trpm5          | 112.8870264 | -0.120820417 | 0.1995609 | -0.605431 | 0.544893 | 0.945463 |
| kdm6a1         | 760.5972654 | 0.037463927  | 0.1153429 | 0.3248047 | 0.745329 | 0.974094 |
| kcnql.1        | 41.8731629  | 0.184258044  | 0.3033485 | 0.6074138 | 0.543576 | 0.945438 |
| pdzd2          | 203.8992291 | -0.051231384 | 0.1444574 | -0.354647 | 0.722854 | 0.970375 |
| retreg3        | 704.9690795 | 0.138335883  | 0.0981167 | 1.4099114 | 0.158566 | 0.709224 |
| slc25a38a      | 58.78003433 | 0.201438074  | 0.3085385 | 0.6528783 | 0.513835 | 0.936778 |
| sacm1lb        | 281.2572398 | -0.03913525  | 0.1278068 | -0.306206 | 0.759448 | 0.975374 |
| caska          | 839.0409774 | 0.040522613  | 0.0914873 | 0.4429318 | 0.657815 | 0.962538 |
| smpd5          | 328.3470059 | -0.010482854 | 0.1221003 | -0.085854 | 0.931582 | 0.992702 |
| sin3ab         | 1179.584428 | 0.000525316  | 0.0884563 | 0.0059387 | 0.995262 | 0.998696 |
| oaz2b          | 194.566382  | 0.039286177  | 0.1483553 | 0.2648114 | 0.791155 | 0.977461 |
| zgc:136864     |             | 0 NA         | NA        | NA        | NA       | NA       |
| mtmr12         | 157.5529245 | 0.117196847  | 0.1666132 | 0.7034067 | 0.481802 | 0.928392 |
| kif5ab         | 135.557689  | 0.170646929  | 0.1858892 | 0.9180033 | 0.358617 | 0.884532 |
| soat2          | 109.7021201 | -0.14050904  | 0.2012913 | -0.698038 | 0.485153 | 0.930136 |
| crtac1a        | 614.0781302 | 0.373084554  | 0.2387803 | 1.5624592 | 0.11818  | 0.641526 |
| adgrb3         | 1161.537691 | 0.097244451  | 0.090155  | 1.0786358 | 0.28075  | 0.84357  |
| zfyve27        | 333.4130616 | 0.053743815  | 0.1225081 | 0.4386959 | 0.660882 | 0.964022 |
| ddit3          | 562.1778537 | -0.135135693 | 0.1171873 | -1.15316  | 0.248845 | 0.81797  |
| exosc1         | 207.0370483 | -0.278185016 | 0.1727772 | -1.61008  | 0.10738  | 0.617344 |
| fam135a        | 851.5750992 | 0.096737406  | 0.093595  | 1.0335742 | 0.301335 | 0.856944 |
| epg5           | 89.48044821 | 0.140273649  | 0.223292  | 0.6282074 | 0.529868 | 0.942209 |
| slc35f3b       | 4.723116429 | 0.670406075  | 0.9209164 | 0.7279772 | 0.466628 | NA       |
| manba1         | 376.9270018 | -0.125823644 | 0.115462  | -1.089741 | 0.275827 | 0.839541 |
| CABZ01041604.1 | 59.85671275 | 0.016282624  | 0.2502707 | 0.06506   | 0.948126 | 0.99381  |
| wdr66          | 25.48146043 | 0.548657938  | 0.3893138 | 1.4092949 | 0.158748 | 0.709382 |
| alkbh2         | 64.10313118 | -0.264587616 | 0.2619531 | -1.010057 | 0.312468 | 0.864401 |
| blvra          | 97.11340785 | -0.018014196 | 0.2076471 | -0.086754 | 0.930867 | 0.992702 |
| pappab         | 8.906064382 | 0.88220253   | 0.6491611 | 1.3589887 | 0.17415  | NA       |
| cactin         | 669.5799955 | 0.061825672  | 0.0990745 | 0.6240322 | 0.532606 | 0.942805 |
| clk2b          | 276.2358925 | -0.0361975   | 0.1305951 | -0.277173 | 0.781647 | 0.97627  |
| shrprbck1r     | 426.4390871 | -0.001998612 | 0.1143399 | -0.01748  | 0.986054 | 0.996944 |
| trpv1          | 30.40141989 | 0.216652423  | 0.3556287 | 0.6092097 | 0.542385 | 0.944974 |

|                   |             |              |           |           |          |          |
|-------------------|-------------|--------------|-----------|-----------|----------|----------|
| frmd3             | 24.90748856 | 0.454235903  | 0.3905012 | 1.1632124 | 0.244743 | 0.814435 |
| fam222ba          | 485.2972728 | 0.044922494  | 0.1079762 | 0.4160409 | 0.67738  | 0.965257 |
| erall             | 225.5381562 | 0.068465478  | 0.1428018 | 0.4794441 | 0.631623 | 0.957356 |
| ago3a             | 15.45552709 | 0.509358211  | 0.5239349 | 0.9721784 | 0.330962 | 0.874224 |
| AL929217.1        | 9.835483876 | 0.100766885  | 0.6193342 | 0.162702  | 0.870753 | NA       |
| ntrk2a            | 245.8788807 | 0.031957091  | 0.1349577 | 0.2367934 | 0.812817 | 0.981081 |
| CR847944.2        | 5.022867759 | 2.306622102  | 0.9962416 | 2.3153241 | 0.020595 | NA       |
| tbc1d9            | 41.62067692 | -0.151789087 | 0.30273   | -0.501401 | 0.616089 | 0.95688  |
| vps16             | 967.2677138 | -0.065757507 | 0.085039  | -0.773263 | 0.439367 | 0.916082 |
| hs3st31           | 103.9795822 | 0.175534798  | 0.1969612 | 0.8912151 | 0.372814 | 0.892868 |
| sdc4              | 3828.084042 | 0.06562574   | 0.0772666 | 0.8493413 | 0.395691 | 0.899378 |
| si:ch211-217k17.7 | 364.1012761 | -0.063783872 | 0.1196049 | -0.533288 | 0.593834 | 0.954434 |
| bbs7              | 298.2943046 | 0.154364586  | 0.1449506 | 1.0649465 | 0.2869   | 0.845979 |
| sdr42e2           | 22.84408573 | -0.332649457 | 0.435606  | -0.763648 | 0.445077 | 0.916958 |
| hyal1             | 49.60010947 | 0.281991268  | 0.2748737 | 1.0258938 | 0.304942 | 0.859575 |
| ccnj              | 21.39539015 | -0.00095909  | 0.4130659 | -0.002322 | 0.998147 | 0.999281 |
| zgc:162613        | 191.7652075 | -0.118264436 | 0.1491233 | -0.793065 | 0.42774  | 0.91075  |
| slc25a47a         | 146.9352921 | 0.361657504  | 0.1744516 | 2.0731109 | 0.038162 | 0.382665 |
| usp24             | 750.9415458 | -0.073122594 | 0.1150857 | -0.635375 | 0.525184 | 0.940073 |
| hyal2a            | 36.10725342 | -0.042597496 | 0.3465818 | -0.122907 | 0.90218  | 0.990121 |
| plpp3             | 2301.618231 | 0.085442202  | 0.0785072 | 1.0883361 | 0.276447 | 0.839541 |
| herc4             | 98.54170987 | 0.082385208  | 0.2024775 | 0.4068858 | 0.684092 | 0.965679 |
| dabla             | 27.44523553 | 0.315114457  | 0.3650329 | 0.8632495 | 0.388    | 0.896144 |
| clqtnf2           | 25.89588713 | 0.330386504  | 0.4060269 | 0.813706  | 0.415813 | 0.906237 |
| sv2a              | 5863.149843 | 0.120911067  | 0.0690134 | 1.7519942 | 0.079775 | 0.548493 |
| si:dkey-121b10.7  | 4.41628836  | -0.925631282 | 1.0254689 | -0.902642 | 0.366716 | NA       |
| plxdc2            | 690.6432158 | 0.14168516   | 0.0959611 | 1.4764856 | 0.139814 | 0.678781 |
| p1d6              | 2.322814721 | 0.439458333  | 1.2953654 | 0.3392543 | 0.734418 | NA       |
| ptk6b             | 86.02807216 | -0.774107528 | 0.2377993 | -3.255297 | 0.001133 | 0.033989 |
| plch2a            | 1072.29825  | -0.00745621  | 0.0924856 | -0.08062  | 0.935744 | 0.992702 |
| chpf2             | 415.2101904 | 0.256817824  | 0.1183449 | 2.1700788 | 0.030001 | 0.335162 |
| polk              | 84.66293468 | 0.079290259  | 0.2134783 | 0.3714208 | 0.710324 | 0.968985 |
| camsap2b          | 96.02195359 | -0.149194398 | 0.2049976 | -0.727786 | 0.466745 | 0.924327 |
| raly              | 480.578102  | -0.050725546 | 0.1053078 | -0.481688 | 0.630027 | 0.957354 |
| cplx4a            | 1455.60923  | 0.177877129  | 0.091524  | 1.9435027 | 0.051955 | 0.447654 |
| poc5              | 52.23454228 | -0.235727388 | 0.2726464 | -0.86459  | 0.387264 | 0.895778 |
| zufsp             | 128.290923  | -0.17314877  | 0.1870734 | -0.925566 | 0.354672 | 0.882105 |
| dnah12            | 76.63414587 | 0.347169957  | 0.2417989 | 1.4357799 | 0.151065 | 0.699078 |
| trpm4a            | 882.9322845 | -0.691519199 | 0.1049996 | -6.585922 | 4.52E-11 | 1.13E-08 |
| sv2ca             | 4.460818453 | 0.304542591  | 0.8847307 | 0.3442207 | 0.73068  | NA       |
| mettl9            | 231.8161993 | 0.052659543  | 0.1442667 | 0.3650152 | 0.7151   | 0.96909  |
| oggl              | 26.31245785 | -0.617850535 | 0.3843851 | -1.607374 | 0.107972 | 0.619371 |
| fzd7a             | 1540.152913 | 0.022386468  | 0.0821648 | 0.272458  | 0.78527  | 0.97627  |
| mtrf11            | 74.99389826 | -0.698989166 | 0.2289466 | -3.053066 | 0.002265 | 0.058495 |
| nedd41            | 724.4385241 | -0.098817999 | 0.0923906 | -1.069568 | 0.284814 | 0.844998 |
| n4bp3             | 25.3924127  | 0.02940968   | 0.3872575 | 0.0759435 | 0.939464 | 0.992857 |
| hhip12            | 190.7260218 | 0.472872652  | 0.1568263 | 3.0152628 | 0.002568 | 0.064186 |
| iqgap2            | 355.540111  | 0.030595051  | 0.1367988 | 0.2236501 | 0.82303  | 0.982189 |
| f2r               | 20.38231001 | -0.363099455 | 0.428828  | -0.846725 | 0.397148 | 0.899672 |
| nsd1a             | 753.6864415 | -0.016206418 | 0.0983534 | -0.164777 | 0.869119 | 0.987245 |
| si:ch1073-44g3.1  | 539.8119158 | -0.034196712 | 0.1053637 | -0.324559 | 0.745515 | 0.974094 |
| vcpkmt            | 138.2952732 | -0.241499006 | 0.1787869 | -1.350764 | 0.176771 | 0.737285 |
| ncapg2            | 262.6435809 | -0.017632517 | 0.1332404 | -0.132336 | 0.894718 | 0.989716 |
| nsmfa             | 21.61012615 | 0.572492042  | 0.4532137 | 1.2631834 | 0.206523 | 0.774129 |

|                  |             |              |           |           |          |          |
|------------------|-------------|--------------|-----------|-----------|----------|----------|
| noml             | 166.0523559 | 0.030704032  | 0.1665203 | 0.1843861 | 0.853711 | 0.985174 |
| fam160b2         | 245.9303947 | 0.024305809  | 0.1412375 | 0.1720917 | 0.863365 | 0.985841 |
| setd1a           | 1058.963422 | -0.071687813 | 0.0942504 | -0.76061  | 0.44689  | 0.917154 |
| tmem151ba        | 79.42879984 | 0.620120421  | 0.2181853 | 2.8421732 | 0.004481 | 0.09535  |
| rnf32            | 23.74171601 | -0.188833431 | 0.4060062 | -0.4651   | 0.64186  | 0.959994 |
| aimpla           | 1067.919945 | -0.02768554  | 0.087598  | -0.316052 | 0.751963 | 0.974526 |
| lig1             | 580.5580322 | -0.105711469 | 0.1087905 | -0.971697 | 0.331201 | 0.874339 |
| zgc:195075       | 4.205472037 | -0.109311544 | 0.9150919 | -0.119454 | 0.904916 | NA       |
| slc47a2.1        | 52.14524709 | 0.656146496  | 0.2984795 | 2.1982966 | 0.027928 | 0.323709 |
| epclb            | 772.1933672 | -0.069710931 | 0.1112858 | -0.626413 | 0.531044 | 0.942209 |
| cylda            | 708.7450272 | -0.029546318 | 0.0979929 | -0.301515 | 0.763022 | 0.975374 |
| lrrc74a          | 6.580054931 | -0.135430198 | 0.825733  | -0.164012 | 0.869722 | NA       |
| ubap2b           | 2237.723126 | -0.090217025 | 0.0953181 | -0.946484 | 0.343902 | 0.878434 |
| fam98b           | 251.9628249 | 0.045559786  | 0.1607984 | 0.2833348 | 0.77692  | 0.975826 |
| isocl            | 111.3115625 | -0.110543836 | 0.1874004 | -0.58988  | 0.555271 | 0.947449 |
| adcy7            | 290.6390549 | 0.320761071  | 0.1408994 | 2.2765258 | 0.022815 | 0.289004 |
| tent4b           | 622.8000712 | 0.197509593  | 0.0980539 | 2.0142971 | 0.043978 | 0.412341 |
| abi3a            | 199.3171249 | 0.16628135   | 0.1635789 | 1.0165206 | 0.309382 | 0.861497 |
| crb2b            |             | 0 NA         | NA        | NA        | NA       | NA       |
| kcnq3            | 17.43236626 | 0.383575168  | 0.4594714 | 0.8348183 | 0.40382  | 0.900979 |
| btaf1            | 1107.762187 | 0.046990509  | 0.0869    | 0.5407423 | 0.588685 | 0.953319 |
| zgc:165481       | 99.95686739 | -0.072587731 | 0.2044853 | -0.354978 | 0.722606 | 0.970375 |
| dapk1            | 633.3071466 | -0.061384062 | 0.0969013 | -0.63347  | 0.526427 | 0.940506 |
| ptgis            | 184.3879369 | -0.179867082 | 0.1601866 | -1.12286  | 0.261497 | 0.829593 |
| kcnbl            | 7.559324306 | 0.278773465  | 0.7212232 | 0.3865287 | 0.699105 | NA       |
| tbcld10ab        | 24.94812177 | 0.596054114  | 0.387889  | 1.5366616 | 0.124376 | 0.653231 |
| trappc12         | 667.92957   | 0.073468553  | 0.1039524 | 0.706752  | 0.479721 | 0.927091 |
| kankla           | 785.3434882 | -0.040623128 | 0.0912377 | -0.445245 | 0.656143 | 0.961833 |
| cpeb3            | 18.09133561 | 0.308182094  | 0.4904133 | 0.628413  | 0.529733 | 0.942209 |
| crb2a            | 42.94717198 | 0.173301009  | 0.3080062 | 0.5626544 | 0.57367  | 0.949904 |
| aggf1            | 214.0423311 | -0.155593216 | 0.1556086 | -0.999901 | 0.317358 | 0.867404 |
| sybu             | 345.1150375 | -0.019550902 | 0.117708  | -0.166097 | 0.868081 | 0.987245 |
| znf395a          | 3162.380598 | -0.448411306 | 0.0994305 | -4.509797 | 6.49E-06 | 0.000501 |
| lrrn1            | 1600.646694 | -0.004261163 | 0.079254  | -0.053766 | 0.957122 | 0.994589 |
| camkla           | 35.00010889 | -0.152846248 | 0.3217958 | -0.474979 | 0.634802 | 0.9578   |
| glyctk           | 255.0587388 | 0.135814249  | 0.1332635 | 1.0191408 | 0.308136 | 0.861088 |
| cal6b            | 780.475018  | 0.026641237  | 0.0910631 | 0.2925579 | 0.76986  | 0.975687 |
| timml7b          | 30.42850648 | -0.16374933  | 0.3463629 | -0.472768 | 0.636379 | 0.958565 |
| acypl            | 144.2639568 | 0.035748813  | 0.1863706 | 0.1918157 | 0.847887 | 0.985174 |
| adants3          | 35.67618167 | 0.252569573  | 0.3218502 | 0.7847426 | 0.432604 | 0.91326  |
| dusp3b           | 1.030002046 | -2.236497097 | 2.086282  | -1.072001 | 0.283719 | NA       |
| sh3pxd2aa        | 51.92785489 | -0.114503127 | 0.2769708 | -0.413412 | 0.679305 | 0.965257 |
| ablim1a          | 410.6011142 | 0.243404028  | 0.1112067 | 2.1887543 | 0.028615 | 0.328246 |
| psmd11a          | 1178.167165 | -0.055063099 | 0.0833102 | -0.66094  | 0.50865  | 0.935807 |
| fam155b          | 144.1319996 | -0.020311877 | 0.1776589 | -0.114331 | 0.908976 | 0.990702 |
| h6pd             | 480.4426076 | -0.209950097 | 0.1196029 | -1.755393 | 0.079192 | 0.547489 |
| dnah7            | 24.04279629 | -0.040091272 | 0.3936234 | -0.101852 | 0.918874 | 0.991623 |
| fam160b1         | 86.37504772 | -0.149524626 | 0.2176291 | -0.687062 | 0.492044 | 0.931926 |
| mns1             | 91.03068378 | -0.273775567 | 0.2078238 | -1.317345 | 0.187723 | 0.752195 |
| trmt10b          | 44.16117103 | 0.371662738  | 0.2978523 | 1.2478088 | 0.212101 | 0.77986  |
| vepipl           | 60.15364691 | -0.410459301 | 0.2523384 | -1.626622 | 0.103817 | 0.610348 |
| pkn1a            | 624.11712   | 0.057532552  | 0.0981076 | 0.5864228 | 0.557591 | 0.948478 |
| si:ch211-214c7.5 | 0.182570949 | 0.967652056  | 4.0804729 | 0.2371421 | 0.812547 | NA       |
| rpusd1           | 46.91337574 | 0.226493045  | 0.2870373 | 0.7890719 | 0.43007  | 0.911615 |

|                   |             |              |           |           |          |          |
|-------------------|-------------|--------------|-----------|-----------|----------|----------|
| lhpp              | 267.0504374 | 0.063240241  | 0.1361707 | 0.4644187 | 0.642348 | 0.959994 |
| atp2c1            | 400.8267561 | -0.060155934 | 0.12203   | -0.49296  | 0.622041 | 0.957354 |
| mrpl18            | 357.2592256 | -0.063404769 | 0.1314096 | -0.482497 | 0.629453 | 0.957354 |
| CU019662.1        | 12.32198548 | -0.626626614 | 1.2213276 | -0.51307  | 0.607902 | 0.956718 |
| traf7             | 252.2344188 | 0.039104961  | 0.1393627 | 0.2805984 | 0.779018 | 0.976146 |
| d2hgdh            | 94.49640316 | -0.044399102 | 0.2112707 | -0.210153 | 0.833549 | 0.983583 |
| ankeflb           | 2.125400153 | -0.630319348 | 1.3838149 | -0.455494 | 0.648754 | NA       |
| cep85             | 205.1308135 | 0.038414428  | 0.1527793 | 0.2514374 | 0.801476 | 0.979444 |
| scn1ba            | 196.039807  | 0.209043005  | 0.148263  | 1.4099468 | 0.158555 | 0.709224 |
| mst1ra            | 149.631421  | -0.168054617 | 0.1714764 | -0.980045 | 0.327064 | 0.872658 |
| dok7              | 109.4486221 | 0.322816516  | 0.2013203 | 1.6034968 | 0.108825 | 0.621829 |
| uacab             | 955.8101644 | 0.081066605  | 0.0864996 | 0.937191  | 0.34866  | 0.880195 |
| enox1             | 371.7774321 | -0.143037797 | 0.1149093 | -1.244789 | 0.213209 | 0.781631 |
| slc16a6b          | 1835.369151 | 0.07312357   | 0.0827999 | 0.8831359 | 0.377163 | 0.895192 |
| fgd4b             | 52.89905593 | 0.019934317  | 0.2818919 | 0.0707162 | 0.943624 | 0.993364 |
| wdr44             | 1040.323066 | 0.017450238  | 0.086209  | 0.2024179 | 0.83959  | 0.984979 |
| mogs              | 717.5544284 | 0.043431707  | 0.0967242 | 0.4490261 | 0.653413 | 0.960996 |
| si:ch211-216b21.2 | 71.01970859 | 0.081228076  | 0.2501223 | 0.3247534 | 0.745368 | 0.974094 |
| alkbh8            | 71.88280559 | 0.421487701  | 0.2394759 | 1.7600426 | 0.078401 | 0.545524 |
| zranbla           | 1153.218347 | -0.072912808 | 0.0946375 | -0.770443 | 0.441037 | 0.916336 |
| zgc:162160        | 17.267358   | -0.174126016 | 0.4646549 | -0.374743 | 0.707852 | 0.968664 |
| pecam1            | 227.0696192 | -0.256765884 | 0.1467176 | -1.750069 | 0.080106 | 0.549631 |
| si:dkey-37g12.1   | 4.473732008 | 0.528557643  | 0.989856  | 0.5339743 | 0.593359 | NA       |
| pde9a             | 48.45097033 | 0.192000347  | 0.2853156 | 0.6729402 | 0.500985 | 0.934398 |
| rnf121            | 667.8616646 | 0.054857279  | 0.0991265 | 0.5534069 | 0.579985 | 0.951257 |
| plpbp             | 1126.070365 | 0.083168488  | 0.0879783 | 0.9453295 | 0.344491 | 0.878434 |
| arhgap35b         | 705.4675157 | 0.164622749  | 0.0956461 | 1.721166  | 0.085221 | 0.560519 |
| nin               | 199.7003864 | 0.056546689  | 0.1469464 | 0.3848117 | 0.700377 | 0.967998 |
| slc4a10b          | 49.25383627 | 0.501785164  | 0.2853817 | 1.758295  | 0.078697 | 0.546789 |
| tfcp2             | 1025.196531 | -0.090295905 | 0.0848965 | -1.0636   | 0.28751  | 0.845979 |
| urbl              | 349.9568275 | -0.090511402 | 0.1188578 | -0.76151  | 0.446352 | 0.917154 |
| srgap3            | 41.26840727 | 0.379488749  | 0.3391227 | 1.1190309 | 0.263127 | 0.830245 |
| wdr62             | 311.3204267 | -0.009586493 | 0.1209156 | -0.079283 | 0.936808 | 0.992702 |
| rabgap112         | 211.0726038 | -0.196623245 | 0.1793601 | -1.096248 | 0.27297  | 0.838141 |
| cish              | 263.7741706 | -0.110712621 | 0.1677398 | -0.660026 | 0.509237 | 0.936123 |
| scn4bb            | 5.556164236 | 0.17937605   | 0.8608549 | 0.2083697 | 0.83494  | NA       |
| dcaf5             | 345.4220607 | 0.016176197  | 0.1302289 | 0.1242136 | 0.901146 | 0.990121 |
| zgc:153654        | 10.52343624 | 0.165583289  | 0.5994783 | 0.2762123 | 0.782385 | NA       |
| exoc5             | 259.0441889 | -0.110255857 | 0.1385468 | -0.795802 | 0.426147 | 0.909807 |
| fam20c1           | 1.157520887 | -0.478318508 | 1.9214732 | -0.248933 | 0.803412 | NA       |
| map1sb            | 340.1822704 | 0.024367544  | 0.1299415 | 0.187527  | 0.851247 | 0.985174 |
| si:ch211-284e13.4 | 110.372498  | -0.224394833 | 0.2171632 | -1.0333   | 0.301463 | 0.856944 |
| trmt12            | 37.86287348 | -0.18329856  | 0.3445012 | -0.532069 | 0.594678 | 0.954434 |
| si:dkey-157119.2  | 28.19646409 | -0.131139091 | 0.3863229 | -0.339455 | 0.734267 | 0.972021 |
| apoda.1           | 318.898485  | -0.542201359 | 0.1251384 | -4.332814 | 1.47E-05 | 0.000988 |
| map3k3            | 169.8313476 | -0.144233097 | 0.1624726 | -0.887738 | 0.374682 | 0.894316 |
| wasf1             | 437.6137359 | 0.133735686  | 0.1132455 | 1.1809365 | 0.237628 | 0.806474 |
| apoda.2           | 1129.022273 | -0.286208267 | 0.2797532 | -1.023074 | 0.306273 | 0.860027 |
| samd7             | 285.8881395 | 0.035756218  | 0.1410332 | 0.2535305 | 0.799858 | 0.979377 |
| cep104            | 17.46141632 | 0.165672344  | 0.4581159 | 0.3616385 | 0.717622 | 0.96909  |
| nadkb             | 427.9241729 | 0.050302329  | 0.126254  | 0.3984216 | 0.690319 | 0.966973 |
| slc12a9           | 209.3696868 | -0.211732473 | 0.1463124 | -1.447126 | 0.147862 | 0.695319 |
| syn1              | 2076.736883 | 0.103841474  | 0.0768079 | 1.3519641 | 0.176387 | 0.73663  |
| plxna2            | 63.25355395 | 0.284720861  | 0.2615361 | 1.0886483 | 0.276309 | 0.839541 |

|                   |             |              |           |           |          |          |
|-------------------|-------------|--------------|-----------|-----------|----------|----------|
| tll111            | 20.13254254 | -0.177901628 | 0.4493913 | -0.395872 | 0.692199 | 0.96736  |
| coq6              | 508.5707235 | 0.00326714   | 0.1069141 | 0.0305585 | 0.975622 | 0.996762 |
| mmaa              | 252.1293342 | -0.145036442 | 0.131679  | -1.101439 | 0.270706 | 0.835351 |
| stk26             | 465.6992736 | -0.001522767 | 0.1064804 | -0.014301 | 0.98859  | 0.997519 |
| ash21             | 1015.926718 | -0.074955908 | 0.0859843 | -0.871739 | 0.383351 | 0.895192 |
| fibcd1            | 66.75064529 | 0.015131155  | 0.2483104 | 0.0609364 | 0.95141  | 0.99381  |
| mtfr2             | 149.5936128 | -0.165406409 | 0.1730572 | -0.955791 | 0.339178 | 0.877867 |
| si:dkey-57k2.7    | 186.6035043 | -0.368029189 | 0.157523  | -2.336352 | 0.019473 | 0.261766 |
| hhip              | 996.2197082 | 0.072159577  | 0.0853771 | 0.8451863 | 0.398007 | 0.899672 |
| rft1              | 159.6025132 | 0.227297788  | 0.1630061 | 1.3944126 | 0.163193 | 0.718029 |
| gpr185a           | 5.028729735 | 0.2124081    | 0.8404738 | 0.2527242 | 0.800481 | NA       |
| thbs2a            | 239.5538492 | 0.263090397  | 0.139044  | 1.8921381 | 0.058473 | 0.473924 |
| ddx28             | 149.4665322 | 0.069732302  | 0.1645535 | 0.4237667 | 0.671736 | 0.965257 |
| si:ch211-157b11.8 | 9.008529456 | 0.556234059  | 0.6782506 | 0.8201011 | 0.412159 | NA       |
| arhgef28a         | 419.1639412 | 0.072559828  | 0.114549  | 0.6334394 | 0.526447 | 0.940506 |
| zfyve28           | 47.59253093 | 0.06476143   | 0.2829557 | 0.2288748 | 0.818966 | 0.981594 |
| map1b             | 941.7891098 | 0.088349125  | 0.0955369 | 0.924764  | 0.355089 | 0.882321 |
| bnip1             | 97.5623128  | 0.151882014  | 0.2014949 | 0.753776  | 0.450984 | 0.918761 |
| tbl1x             | 149.3930467 | 0.045409186  | 0.1717261 | 0.264428  | 0.79145  | 0.977645 |
| clcn2c            | 331.2770688 | 0.37902788   | 0.127689  | 2.9683674 | 0.002994 | 0.071933 |
| tmem259           | 649.1455653 | 0.082579076  | 0.0951701 | 0.8677001 | 0.385559 | 0.89551  |
| elp6              | 110.8537708 | -0.073120982 | 0.1898875 | -0.385075 | 0.700182 | 0.967998 |
| sdk2b             | 493.3411453 | 0.019847565  | 0.1084535 | 0.1830052 | 0.854794 | 0.985174 |
| pmp22b            | 2763.951692 | 0.143315018  | 0.0759538 | 1.8868697 | 0.059178 | 0.475427 |
| pik3r4            | 627.6414613 | 0.154100151  | 0.1059516 | 1.4544392 | 0.145825 | 0.691641 |
| gcnt3             | 22.26363208 | -0.145928928 | 0.4123663 | -0.353882 | 0.723427 | 0.970402 |
| vps8              | 794.2985291 | 0.063507514  | 0.1011613 | 0.6277845 | 0.530145 | 0.942209 |
| ubrl              | 60.73267656 | 0.086781752  | 0.2601206 | 0.3336212 | 0.738665 | 0.972722 |
| at11              | 910.46405   | -0.068991341 | 0.0935257 | -0.737672 | 0.460714 | 0.921978 |
| mid1              | 16.20928101 | -0.205962351 | 0.4984853 | -0.413176 | 0.679477 | 0.965257 |
| selenoi           | 160.3997647 | 0.272220336  | 0.174453  | 1.5604219 | 0.11866  | 0.642318 |
| mrpl32            | 415.1061031 | 0.113341525  | 0.1191118 | 0.951556  | 0.341322 | 0.878134 |
| eprs              | 3611.97999  | -0.058544963 | 0.0708994 | -0.825747 | 0.408948 | 0.90171  |
| cacnalha          | 282.6377243 | 0.224368545  | 0.1287116 | 1.743188  | 0.081301 | 0.551885 |
| tnfrsf9a          | 65.00605483 | -0.163608857 | 0.2487659 | -0.657682 | 0.510743 | 0.936253 |
| l2hgdh            | 247.673964  | -0.274511212 | 0.1517139 | -1.8094   | 0.070389 | 0.518967 |
| dpcd              | 72.4403901  | 0.1706338    | 0.2437087 | 0.7001548 | 0.483831 | 0.929461 |
| pfkla             | 95.84258042 | 0.147524054  | 0.2125866 | 0.693948  | 0.487715 | 0.931809 |
| sos2              | 662.2188963 | 0.171588197  | 0.1222699 | 1.4033565 | 0.160511 | 0.713404 |
| cul4b             | 1264.512773 | -0.034658744 | 0.0842862 | -0.411203 | 0.680924 | 0.965476 |
| kbtbd3            | 69.44642163 | -0.086640033 | 0.2335545 | -0.370963 | 0.710665 | 0.968985 |
| zdhhc9            | 895.5924341 | -0.019428787 | 0.0897033 | -0.21659  | 0.828528 | 0.982721 |
| psk5b             | 420.0874123 | 0.062661984  | 0.1130976 | 0.5540525 | 0.579543 | 0.951257 |
| rbm27             | 234.6620004 | 0.09464029   | 0.1501478 | 0.6303143 | 0.528489 | 0.941896 |
| rfk               | 50.55140154 | -0.041063046 | 0.299762  | -0.136985 | 0.891042 | 0.989291 |
| bmp3              | 243.5226706 | 0.048647697  | 0.1388114 | 0.3504589 | 0.725994 | 0.970402 |
| nkx6.3            | 37.8527074  | -0.32006311  | 0.3483908 | -0.91869  | 0.358258 | 0.884398 |
| adam22            | 63.29371313 | 0.102879497  | 0.252141  | 0.4080236 | 0.683256 | 0.965476 |
| sgppl             | 41.75708721 | 0.472113031  | 0.313189  | 1.5074379 | 0.131698 | 0.665187 |
| atad2b            | 194.6692309 | -0.103564634 | 0.1614303 | -0.641544 | 0.521169 | 0.939056 |
| shank1            | 111.0305642 | -0.082616903 | 0.2471753 | -0.334244 | 0.738195 | 0.972535 |
| lgr4              | 1157.445811 | 0.005317774  | 0.079999  | 0.066473  | 0.947001 | 0.99381  |
| ecell             | 155.2380975 | 0.027828008  | 0.1690037 | 0.1646592 | 0.869212 | 0.987274 |
| rps6ka5           | 13.19812033 | 0.501313363  | 0.5269807 | 0.9512935 | 0.341455 | 0.878134 |

|                    |             |              |           |           |          |          |
|--------------------|-------------|--------------|-----------|-----------|----------|----------|
| mut                | 1016.250046 | -0.14223854  | 0.0900093 | -1.580265 | 0.114046 | 0.632852 |
| dis3               | 255.165587  | 0.106295504  | 0.1325018 | 0.8022195 | 0.422426 | 0.906561 |
| slc25a21           | 109.0178872 | -0.108248781 | 0.193841  | -0.558441 | 0.576543 | 0.950611 |
| cluhb              | 71.0468533  | -0.23438085  | 0.2593789 | -0.903623 | 0.366195 | 0.887239 |
| tmem229b           | 564.5908957 | 0.113966938  | 0.1291098 | 0.8827136 | 0.377391 | 0.895192 |
| si:dkey-226m8.10   | 98.77888151 | 0.106899038  | 0.2027348 | 0.527285  | 0.597996 | 0.955459 |
| taspl              | 258.3414798 | 0.025300099  | 0.1336658 | 0.1892788 | 0.849874 | 0.985174 |
| kank1b             | 9.38591521  | 0.438077966  | 0.6529681 | 0.6709025 | 0.502283 | NA       |
| ctdsp12b           | 1192.042013 | 0.003505787  | 0.1014502 | 0.0345567 | 0.972433 | 0.996315 |
| hadhab             | 2873.162119 | -0.061401139 | 0.0720279 | -0.852463 | 0.393957 | 0.898496 |
| prkaal             | 845.2642854 | 0.047337815  | 0.0956494 | 0.4949096 | 0.620664 | 0.957354 |
| zgc:158659         | 29.37835864 | -0.23077918  | 0.4016047 | -0.574643 | 0.565533 | 0.948739 |
| capn15             | 240.177281  | -0.002836238 | 0.1414943 | -0.020045 | 0.984008 | 0.996944 |
| rgs7bpa            | 379.7284102 | 0.122276033  | 0.1175094 | 1.0405641 | 0.298078 | 0.85401  |
| cd109              | 154.5559812 | 0.16495118   | 0.1683101 | 0.9800432 | 0.327065 | 0.872658 |
| pcdh7b             | 397.2184868 | 0.050224419  | 0.1230384 | 0.4082012 | 0.683126 | 0.965476 |
| ipol3              | 151.2256812 | 0.159349985  | 0.1646961 | 0.9675396 | 0.333274 | 0.874926 |
| lig4               | 91.48462691 | -0.285719184 | 0.2102765 | -1.358779 | 0.174217 | 0.734375 |
| si:ch73-14h1.2     | 86.42356577 | -0.808623231 | 0.2189911 | -3.692493 | 0.000222 | 0.009323 |
| dgkaa              | 668.3204467 | -0.125538021 | 0.0995775 | -1.260707 | 0.207415 | 0.775175 |
| hip1ra             | 40.29821891 | -0.245572539 | 0.3095062 | -0.793433 | 0.427525 | 0.91075  |
| GARNL3             | 212.9010976 | 0.062786952  | 0.1611437 | 0.3896333 | 0.696808 | 0.96736  |
| uspl6              | 6.419480842 | 0.051006877  | 0.7625664 | 0.0668884 | 0.946671 | NA       |
| clstn2             | 829.5514206 | 0.054011676  | 0.098402  | 0.548888  | 0.583082 | 0.952214 |
| CLSTN2 (1 of many) | 92.46993614 | 0.158307384  | 0.2122264 | 0.7459363 | 0.455706 | 0.921215 |
| apba2b             | 1725.292317 | 0.000582351  | 0.0785837 | 0.0074106 | 0.994087 | 0.998694 |
| prkaa2             | 11.30910996 | 0.374261414  | 0.5862642 | 0.6383835 | 0.523224 | 0.939336 |
| sirt7              | 64.99641017 | 0.32131877   | 0.2492161 | 1.2893178 | 0.197288 | 0.762244 |
| senp5              | 198.4799025 | -0.06375139  | 0.1507348 | -0.422937 | 0.672341 | 0.965257 |
| BX005421.2         | 0.491560863 | 0.853615855  | 2.865157  | 0.2979299 | 0.765757 | NA       |
| si:ch211-10a23.2   | 552.0721074 | 0.119103323  | 0.1125636 | 1.0580984 | 0.290011 | 0.846246 |
| klf8               | 522.9409525 | 0.040075238  | 0.1103196 | 0.3632649 | 0.716407 | 0.96909  |
| prf1.9             | 2.917889451 | 0.024714463  | 1.1427822 | 0.0216266 | 0.982746 | NA       |
| tm4sf18            | 152.0691226 | -0.219037235 | 0.1635132 | -1.339569 | 0.180385 | 0.741452 |
| lct                | 7.662426681 | -1.069017592 | 0.717689  | -1.489528 | 0.136348 | NA       |
| ndst2b             | 67.07870682 | 0.143989705  | 0.2464581 | 0.584236  | 0.559062 | 0.948478 |
| kdmla              | 3596.685888 | -0.089166413 | 0.0694655 | -1.283607 | 0.199279 | 0.764601 |
| si:ch73-127m5.1    | 88.45197092 | -0.149512527 | 0.2248503 | -0.664943 | 0.506087 | 0.935724 |
| agr1               | 1073.525843 | -0.135133232 | 0.0924796 | -1.461222 | 0.143955 | 0.687741 |
| lrsam1             | 107.8657558 | 0.058338192  | 0.2040766 | 0.2858642 | 0.774982 | 0.975687 |
| chd2               | 1804.166187 | -0.079904867 | 0.0792554 | -1.008195 | 0.313361 | 0.865132 |
| trim69             | 36.01335913 | -0.325812726 | 0.3313225 | -0.98337  | 0.325425 | 0.871896 |
| znf346             | 1401.92672  | 0.197303147  | 0.0886508 | 2.2256216 | 0.02604  | 0.311101 |
| kmt2bb             | 1205.555281 | 0.115625868  | 0.0871194 | 1.3272112 | 0.184439 | 0.747376 |
| npffr2b            | 0.482760567 | -0.866527181 | 2.7059286 | -0.320233 | 0.748792 | NA       |
| nsdlb              | 136.2346903 | 0.055619478  | 0.1758812 | 0.3162331 | 0.751826 | 0.974458 |
| pex11a             | 36.94386704 | 0.13518477   | 0.3330377 | 0.4059143 | 0.684806 | 0.966146 |
| sv2bb              | 1709.518963 | 0.152977693  | 0.0924688 | 1.6543701 | 0.098052 | 0.59749  |
| prkx               | 187.0769299 | 0.032306565  | 0.1778832 | 0.1816167 | 0.855884 | 0.985174 |
| stimla             | 1096.093252 | 0.132563079  | 0.0850797 | 1.5581038 | 0.119209 | 0.643307 |
| dnajc161           | 786.1082897 | 0.048441037  | 0.0988225 | 0.4901823 | 0.624005 | 0.957354 |
| trim8b             | 1307.489472 | 0.038725343  | 0.0874309 | 0.442925  | 0.65782  | 0.962538 |
| appl1              | 126.7165546 | -0.085286808 | 0.1808646 | -0.471551 | 0.637248 | 0.958872 |
| sytl7              | 5.135462918 | 1.088375455  | 0.8492936 | 1.2815067 | 0.200016 | NA       |

|                   |             |              |           |           |          |          |
|-------------------|-------------|--------------|-----------|-----------|----------|----------|
| pgm5              | 20.95018184 | -0.02126162  | 0.4336156 | -0.049033 | 0.960893 | 0.9956   |
| tsfm              | 309.220295  | 0.109390252  | 0.1322928 | 0.8268802 | 0.408305 | 0.90171  |
| taok3a            | 439.9182704 | -0.01382068  | 0.12037   | -0.114818 | 0.908589 | 0.990702 |
| pear1             | 177.5303274 | -0.115174352 | 0.1574271 | -0.731604 | 0.46441  | 0.923403 |
| abhd6a            | 35.47605155 | -0.140353877 | 0.3367137 | -0.416834 | 0.6768   | 0.965257 |
| nphs1             | 69.38157548 | 0.036664922  | 0.2454087 | 0.1494035 | 0.881235 | 0.988235 |
| pxnb              | 10.08049862 | 0.054072065  | 0.5867551 | 0.0921544 | 0.926575 | NA       |
| smg7              | 2591.874072 | -0.047974853 | 0.0788592 | -0.608361 | 0.542948 | 0.944974 |
| ankib1a           | 86.38882878 | -0.047187636 | 0.2403274 | -0.196347 | 0.844338 | 0.985174 |
| map7d3            | 910.2619157 | -0.003623481 | 0.0889691 | -0.040727 | 0.967513 | 0.996315 |
| acap2             | 240.7414579 | 0.086269817  | 0.1461605 | 0.5902402 | 0.55503  | 0.947449 |
| pcnx4             | 502.6789056 | -0.045877834 | 0.11086   | -0.413836 | 0.678994 | 0.965257 |
| lrrc14b           | 31.94299385 | 0.252488273  | 0.3379432 | 0.7471323 | 0.454984 | 0.921022 |
| slc20a2           | 998.5933746 | 0.179306272  | 0.0885154 | 2.0257081 | 0.042795 | 0.406447 |
| pfkmb             | 512.9855607 | 0.248175582  | 0.1117939 | 2.2199388 | 0.026423 | 0.313054 |
| map1sa            | 364.1788509 | -0.109609809 | 0.1173415 | -0.93411  | 0.350247 | 0.880195 |
| mecom             | 207.7701824 | -0.234731518 | 0.1490139 | -1.575233 | 0.115203 | 0.636141 |
| plekha7a          | 252.5633574 | 0.109829876  | 0.131677  | 0.8340857 | 0.404233 | 0.901305 |
| car15             | 16.94193286 | 0.639401499  | 0.4580846 | 1.3958154 | 0.16277  | 0.7178   |
| fam83hb           | 288.1189549 | 0.094011383  | 0.1430411 | 0.6572333 | 0.511031 | 0.936253 |
| tecpr2            | 70.15742935 | 0.031679508  | 0.2333768 | 0.1357441 | 0.892024 | 0.989291 |
| trpc5b            | 75.66436624 | 0.180928227  | 0.2266165 | 0.7983896 | 0.424644 | 0.9085   |
| trim35-33         | 3.861240648 | -0.083449989 | 0.9943487 | -0.083924 | 0.933117 | NA       |
| pik3c2a           | 753.8273644 | 0.030474182  | 0.0943076 | 0.3231362 | 0.746592 | 0.97419  |
| antxr1d           | 25.61265879 | 0.466654355  | 0.3765554 | 1.2392715 | 0.215245 | 0.782831 |
| cabp7b            | 96.33863792 | 0.257506337  | 0.1992452 | 1.292409  | 0.196216 | 0.761674 |
| setd1ba           | 453.058072  | 0.017831242  | 0.1142088 | 0.1561284 | 0.875932 | 0.987881 |
| dlgap4a           | 544.5981722 | -0.106231446 | 0.1077095 | -0.986278 | 0.323997 | 0.870928 |
| nckap1            | 4145.487005 | -0.05029327  | 0.0655095 | -0.767725 | 0.442651 | 0.916336 |
| kctd3             | 88.82166151 | -0.095169108 | 0.2072462 | -0.459208 | 0.646085 | 0.96029  |
| pstpipla          | 3.095745377 | 0.160940701  | 1.0756697 | 0.1496191 | 0.881065 | NA       |
| dars2             | 179.6111177 | 0.043299654  | 0.1541523 | 0.2808888 | 0.778796 | 0.976037 |
| atxn1b            | 792.5484245 | -0.055892548 | 0.0891467 | -0.626973 | 0.530677 | 0.942209 |
| scai              | 9.532074543 | -0.048425085 | 0.6184058 | -0.078306 | 0.937584 | NA       |
| mbtd1             | 274.1239514 | 0.066487727  | 0.1295834 | 0.5130883 | 0.60789  | 0.956718 |
| mctplb            | 121.1455712 | 0.05959104   | 0.1874886 | 0.3178382 | 0.750608 | 0.97419  |
| pdela             | 75.53237341 | 0.183212924  | 0.2596775 | 0.7055401 | 0.480474 | 0.927601 |
| edil3b            | 15.71083337 | -0.347517078 | 0.4851202 | -0.716353 | 0.473774 | 0.924993 |
| slc28a1           | 46.17073641 | -1.010652495 | 0.2885023 | -3.503101 | 0.00046  | 0.016716 |
| nmurla            | 3.040768928 | -0.989439688 | 1.1508932 | -0.859715 | 0.389946 | NA       |
| znf592            | 260.0995791 | -0.061762845 | 0.1411155 | -0.437676 | 0.661621 | 0.964247 |
| mett17a           |             | 0 NA         | NA        | NA        | NA       | NA       |
| col8a2            | 599.7310855 | 0.04711513   | 0.0982194 | 0.4796928 | 0.631446 | 0.957356 |
| znf362a           | 622.1005008 | 0.075446263  | 0.1078067 | 0.6998291 | 0.484034 | 0.929461 |
| trim62.1          | 52.33843982 | -0.21260262  | 0.2723869 | -0.780517 | 0.435087 | 0.914408 |
| si:ch211-126i22.5 | 290.3378328 | -0.101870047 | 0.1256944 | -0.810458 | 0.417677 | 0.906237 |
| fbx116            | 170.0297463 | 0.294349965  | 0.1693139 | 1.7384867 | 0.082125 | 0.553114 |
| anln              | 687.1200133 | -0.05157007  | 0.0925778 | -0.557046 | 0.577496 | 0.950825 |
| pla2g6            | 667.9406432 | 0.000726114  | 0.1135902 | 0.0063924 | 0.9949   | 0.998694 |
| ess2              | 619.5379899 | -0.017459448 | 0.1041042 | -0.167711 | 0.86681  | 0.986958 |
| jarid2a           | 505.6190588 | -0.129856128 | 0.1164365 | -1.115253 | 0.264742 | 0.830616 |
| rnf19b            | 47.7255623  | 0.310413566  | 0.2867409 | 1.0825577 | 0.279005 | 0.842806 |
| si:ch211-136a13.1 | 300.6463834 | 0.067290126  | 0.1484328 | 0.4533373 | 0.650306 | 0.960708 |
| rnf220a           | 1075.79936  | -0.038690232 | 0.0821489 | -0.470977 | 0.637657 | 0.958872 |

|                     |              |               |            |            |           |           |
|---------------------|--------------|---------------|------------|------------|-----------|-----------|
| baiap212b           | 23. 11386527 | -0. 378675482 | 0. 4004165 | -0. 945704 | 0. 3443   | 0. 878434 |
| adnp2a              | 292. 6294634 | 0. 074903847  | 0. 1304402 | 0. 574239  | 0. 565806 | 0. 948739 |
| ANKFN1              | 3. 651158645 | 0. 273853582  | 0. 9678786 | 0. 2829421 | 0. 777221 | NA        |
| rnf217              | 13. 33964371 | 0. 13927299   | 0. 5610818 | 0. 2482223 | 0. 803962 | 0. 979643 |
| pip5k11             | 46. 0376109  | 0. 032960539  | 0. 3016971 | 0. 1092504 | 0. 913004 | 0. 991119 |
| dync1i1             | 842. 1421706 | 0. 01138987   | 0. 0921893 | 0. 1235488 | 0. 901673 | 0. 990121 |
| polg                | 193. 6902746 | 0. 106517668  | 0. 1789789 | 0. 5951408 | 0. 551749 | 0. 947156 |
| si:ch1073-214b20. 2 | 3. 308105203 | -0. 248998081 | 1. 0527917 | -0. 236512 | 0. 813035 | NA        |
| tmcc1b              | 701. 8226402 | -0. 025913971 | 0. 0988083 | -0. 262265 | 0. 793117 | 0. 977937 |
| btr04               | 144. 5961514 | -0. 141147432 | 0. 1724515 | -0. 818476 | 0. 413085 | 0. 905281 |
| zgc:153018          | 600. 1656514 | 0. 120846044  | 0. 0988969 | 1. 2219395 | 0. 22173  | 0. 78829  |
| atp2a3              | 1128. 190404 | 0. 004037092  | 0. 0852465 | 0. 0473579 | 0. 962228 | 0. 995907 |
| atp8b1              | 288. 9765459 | -0. 083672256 | 0. 1281487 | -0. 652931 | 0. 513801 | 0. 936778 |
| smyd4               | 98. 29659186 | -0. 116910929 | 0. 2181173 | -0. 536    | 0. 591958 | 0. 954434 |
| zgc:154077          | 222. 3417471 | -0. 063719767 | 0. 1507537 | -0. 422675 | 0. 672533 | 0. 965257 |
| mief1               | 373. 7226196 | -0. 015815032 | 0. 1157501 | -0. 136631 | 0. 891323 | 0. 989291 |
| rpud2               | 93. 17547586 | 0. 239602247  | 0. 2174728 | 1. 1017575 | 0. 270567 | 0. 835315 |
| fbxw7               | 869. 4336053 | 0. 102876762  | 0. 0908708 | 1. 132121  | 0. 257584 | 0. 825314 |
| klhdc8a             | 8. 250642086 | 0. 45055773   | 0. 6736084 | 0. 6688719 | 0. 503577 | NA        |
| cox11               | 271. 8813778 | 0. 19712686   | 0. 144508  | 1. 3641239 | 0. 172529 | 0. 731348 |
| cyb5d2              | 126. 695034  | 0. 134605365  | 0. 1771726 | 0. 7597416 | 0. 447409 | 0. 917154 |
| hlfb                | 53. 07076415 | 0. 61039039   | 0. 2693316 | 2. 2663158 | 0. 023432 | 0. 294562 |
| ankfy1              | 945. 2158298 | 0. 067160676  | 0. 0973163 | 0. 690128  | 0. 490114 | 0. 931926 |
| kcnj5               | 13. 27595718 | 0. 496258105  | 0. 5459455 | 0. 9089884 | 0. 363356 | 0. 885944 |
| spns2               | 481. 2846525 | 0. 053639144  | 0. 1068386 | 0. 5020579 | 0. 615627 | 0. 95688  |
| ccdc186             | 494. 3978361 | -0. 042920152 | 0. 1071654 | -0. 400504 | 0. 688785 | 0. 966672 |
| fam160a1a           | 92. 07949636 | 0. 222292902  | 0. 2096445 | 1. 0603325 | 0. 288993 | 0. 845979 |
| si:dkey-72114. 4    | 582. 8078971 | -0. 104918542 | 0. 0997437 | -1. 051881 | 0. 292854 | 0. 848607 |
| rabggt              | 502. 2663019 | 0. 046286234  | 0. 1238207 | 0. 3738167 | 0. 708541 | 0. 968664 |
| vezf1b              | 50. 5585324  | -0. 082176735 | 0. 2690291 | -0. 305457 | 0. 760018 | 0. 975374 |
| dner                | 50. 07345794 | 0. 37199397   | 0. 2713244 | 1. 3710301 | 0. 170366 | 0. 728041 |
| atp10a              | 47. 28080779 | -0. 04656703  | 0. 2776817 | -0. 167699 | 0. 86682  | 0. 986958 |
| pum2                | 47. 65780229 | 0. 1805316    | 0. 2856005 | 0. 6321124 | 0. 527313 | 0. 941244 |
| gabbr2              | 17. 92388019 | -0. 066309932 | 0. 4687196 | -0. 14147  | 0. 887498 | 0. 989291 |
| si:dkey-72114. 3    | 88. 34228975 | 0. 201539979  | 0. 2132601 | 0. 945043  | 0. 344637 | 0. 878434 |
| abcg4a              | 13. 6799439  | 0. 331208639  | 0. 5689905 | 0. 5820987 | 0. 5605   | 0. 948728 |
| ranbp9              | 985. 9071658 | -0. 128018841 | 0. 0897308 | -1. 426699 | 0. 153667 | 0. 702578 |
| rnf182              | 102. 7118807 | -0. 316788864 | 0. 2065435 | -1. 533763 | 0. 125088 | 0. 654648 |
| brinp3a. 2          | 223. 7045661 | 0. 124517045  | 0. 1527299 | 0. 8152763 | 0. 414914 | 0. 906237 |
| nipblb              | 1583. 996431 | 0. 071536153  | 0. 0774641 | 0. 9234747 | 0. 35576  | 0. 882675 |
| cyhr1               | 467. 3185118 | -0. 077887942 | 0. 1180987 | -0. 659516 | 0. 509565 | 0. 936253 |
| stpg2               | 16. 41096822 | 0. 136290621  | 0. 4765766 | 0. 2859784 | 0. 774895 | 0. 975687 |
| dpagt1              | 240. 4742257 | 0. 056886098  | 0. 1375638 | 0. 4135251 | 0. 679222 | 0. 965257 |
| nemp2               | 263. 5185823 | -0. 084998651 | 0. 1290588 | -0. 658604 | 0. 51015  | 0. 936253 |
| c2cd21              | 467. 1027797 | 0. 183111916  | 0. 1166862 | 1. 5692678 | 0. 116586 | 0. 639148 |
| chst3a              | 16. 74147823 | 0. 497450648  | 0. 481817  | 1. 0324474 | 0. 301863 | 0. 856944 |
| arpp21              | 441. 5016015 | 0. 12929935   | 0. 1257139 | 1. 0285205 | 0. 303705 | 0. 857923 |
| igl4v8              | 0. 339758314 | 0. 005883863  | 3. 2682461 | 0. 0018003 | 0. 998564 | NA        |
| gtpbp6              | 67. 68451114 | -0. 131054348 | 0. 2460799 | -0. 532568 | 0. 594332 | 0. 954434 |
| phldb1a             | 343. 607974  | 0. 198990335  | 0. 1253022 | 1. 5880827 | 0. 112268 | 0. 627572 |
| stk36               | 67. 91824546 | 0. 025235268  | 0. 2660821 | 0. 0948402 | 0. 924442 | 0. 992676 |
| dapk2a              | 84. 90946635 | 0. 068479187  | 0. 2270032 | 0. 3016662 | 0. 762907 | 0. 975374 |
| nfasca              | 1059. 99276  | 0. 03604958   | 0. 0896101 | 0. 4022938 | 0. 687468 | 0. 966376 |
| nars                | 1357. 163716 | -0. 332379608 | 0. 1178116 | -2. 821281 | 0. 004783 | 0. 099772 |



|                   |             |              |           |           |          |          |
|-------------------|-------------|--------------|-----------|-----------|----------|----------|
| snx19a            | 175.5400284 | -0.101968988 | 0.1619044 | -0.62981  | 0.528819 | 0.942109 |
| slc19a3b          | 10.63334079 | 0.347185188  | 0.5980782 | 0.5805013 | 0.561577 | NA       |
| ep300b            | 1608.542738 | 0.034977685  | 0.0869091 | 0.4024629 | 0.687343 | 0.966376 |
| zbtb44            | 55.8908786  | -0.087768412 | 0.2732592 | -0.321191 | 0.748066 | 0.97419  |
| parga             | 605.19854   | -0.069463084 | 0.0998056 | -0.695984 | 0.486439 | 0.930833 |
| slc43a2b          | 3215.302059 | 0.071528866  | 0.1066775 | 0.6705148 | 0.50253  | 0.935304 |
| adgr13.1          | 1830.259498 | 0.025053084  | 0.0837368 | 0.2991884 | 0.764796 | 0.975374 |
| srpra             | 1200.429024 | 0.050804018  | 0.102857  | 0.4939285 | 0.621357 | 0.957354 |
| kif21a            | 552.7219513 | 0.181479344  | 0.1026848 | 1.7673434 | 0.077171 | 0.540934 |
| senp7b            | 340.3183525 | -0.259191209 | 0.1313439 | -1.973379 | 0.048452 | 0.433449 |
| colec12           | 936.8606817 | 0.237861214  | 0.0934054 | 2.5465461 | 0.010879 | 0.180962 |
| tapt1b            | 548.4992097 | -0.006366471 | 0.1011472 | -0.062943 | 0.949812 | 0.99381  |
| gfod2             | 270.6434258 | 0.122856534  | 0.1482642 | 0.8286323 | 0.407313 | 0.901305 |
| zfp64             | 144.5362244 | -0.087087019 | 0.180401  | -0.482741 | 0.629279 | 0.957354 |
| nrn11b            | 113.3522448 | 0.176420471  | 0.1948487 | 0.9054227 | 0.365241 | 0.886714 |
| bicra             | 744.181121  | -0.152429687 | 0.1213836 | -1.255768 | 0.2092   | 0.776073 |
| ube2j2            | 47.42145557 | 0.014930019  | 0.2979083 | 0.0501162 | 0.96003  | 0.995388 |
| slc6a4a           | 137.1644361 | 0.237551646  | 0.1766203 | 1.344985  | 0.17863  | 0.739486 |
| dhx34             | 190.3527383 | -0.018957184 | 0.1809847 | -0.104745 | 0.916578 | 0.991381 |
| larplb            | 1303.873198 | -0.091598207 | 0.085392  | -1.072679 | 0.283415 | 0.84466  |
| st14a             | 1352.755985 | -0.085589391 | 0.084695  | -1.01056  | 0.312227 | 0.864401 |
| znf740b           | 303.4477596 | -0.046184446 | 0.1284986 | -0.359416 | 0.719284 | 0.969183 |
| mov10b.1          | 61.86936808 | 0.068064372  | 0.2453171 | 0.2774546 | 0.781431 | 0.97627  |
| vps45             | 470.5867138 | 0.018269571  | 0.1058184 | 0.1726502 | 0.862926 | 0.985841 |
| nat15             | 433.6243991 | 0.097399225  | 0.1162001 | 0.8382026 | 0.401917 | 0.90084  |
| cbx5              | 4510.925968 | 0.035409079  | 0.0724147 | 0.4889761 | 0.624859 | 0.957354 |
| plekhola          | 334.1100786 | -0.00083854  | 0.119015  | -0.007046 | 0.994378 | 0.998694 |
| hectd2            | 20.73808999 | 0.377144851  | 0.4374531 | 0.8621377 | 0.388612 | 0.896271 |
| cnnm2a            | 22.81161745 | -0.246689324 | 0.4255451 | -0.579702 | 0.562116 | 0.948728 |
| emilin2a          | 168.8428048 | 0.097119971  | 0.16281   | 0.5965232 | 0.550826 | 0.946549 |
| armac7            | 52.71463557 | 0.57927536   | 0.2767177 | 2.0933801 | 0.036315 | 0.372071 |
| acsf2             | 834.0015178 | -0.11807869  | 0.097978  | -1.205155 | 0.228144 | 0.795505 |
| trpcl             | 240.9583303 | 0.258090675  | 0.1427491 | 1.8080018 | 0.070606 | 0.520155 |
| ddx20             | 222.9761037 | -0.139516019 | 0.1448222 | -0.963361 | 0.335367 | 0.876088 |
| stagla            | 815.2494695 | 0.00569875   | 0.1035273 | 0.0550459 | 0.956102 | 0.994543 |
| ttc7b             | 988.7114632 | -0.032291104 | 0.0912663 | -0.353812 | 0.72348  | 0.970402 |
| rab40c            | 1036.518146 | 0.102019193  | 0.0859574 | 1.1868573 | 0.235284 | 0.804375 |
| rabep2            | 308.1514636 | 0.199778427  | 0.1248316 | 1.6003836 | 0.109514 | 0.623766 |
| lpin2             | 1221.685873 | -0.025192017 | 0.0869491 | -0.289733 | 0.772021 | 0.975687 |
| fam149b1          | 481.9869196 | 0.001016202  | 0.1035986 | 0.009809  | 0.992174 | 0.997927 |
| hexdc             | 102.4789495 | -0.17196071  | 0.2023759 | -0.849709 | 0.395487 | 0.899378 |
| si:ch211-157j23.2 | 5.862770517 | 0.347551963  | 0.8383044 | 0.4145892 | 0.678443 | NA       |
| uba7              | 12.5802364  | -0.253582072 | 0.5546985 | -0.457153 | 0.647561 | 0.960606 |
| ogfr11            | 98.0132309  | -0.03428343  | 0.2141202 | -0.160113 | 0.872792 | 0.987846 |
| timp2a            | 1629.369992 | 0.023451661  | 0.0782493 | 0.2997042 | 0.764403 | 0.975374 |
| pfdn4             | 438.7208855 | -0.126531918 | 0.1192425 | -1.061131 | 0.28863  | 0.845979 |
| tinagl1           | 32.53136808 | 0.025828307  | 0.3648757 | 0.0707866 | 0.943568 | 0.993364 |
| abcc5             | 3289.928552 | -0.03818428  | 0.0688041 | -0.554971 | 0.578914 | 0.951052 |
| alg5              | 157.6676987 | 0.106153142  | 0.1749641 | 0.6067139 | 0.544041 | 0.945438 |
| cbln4             | 47.61484205 | -0.296277008 | 0.3000274 | -0.9875   | 0.323398 | 0.870761 |
| tuftla            | 306.5894209 | 0.195308455  | 0.1249781 | 1.5627418 | 0.118113 | 0.641526 |
| ubash3ba          | 23.06021598 | 0.161663446  | 0.4010498 | 0.4031007 | 0.686874 | 0.966376 |
| xylt1             | 41.09168887 | -0.131939115 | 0.3048836 | -0.432752 | 0.665195 | 0.964736 |
| myomla            | 3360.661271 | 0.463858375  | 0.0884937 | 5.2417093 | 1.59E-07 | 2.07E-05 |

|                  |             |              |           |           |          |          |
|------------------|-------------|--------------|-----------|-----------|----------|----------|
| dusp3a           | 175.0963202 | -0.02432683  | 0.1704783 | -0.142698 | 0.886529 | 0.988936 |
| si:dkey-44g23.5  | 555.4641997 | -0.06539707  | 0.1087886 | -0.601139 | 0.547747 | 0.945705 |
| zgc:153240       | 533.4210498 | 0.134539877  | 0.1108079 | 1.2141721 | 0.224682 | 0.791954 |
| sost             | 311.8205457 | 0.003195137  | 0.1228967 | 0.0259986 | 0.979258 | 0.996802 |
| si:dkey-202e22.2 | 169.0460868 | 0.392926132  | 0.1611305 | 2.4385587 | 0.014746 | 0.222347 |
| lmln             | 6.431231239 | 0.132769129  | 0.846728  | 0.1568026 | 0.8754   | NA       |
| ago2             | 5.81815432  | 1.327966744  | 0.8082458 | 1.6430234 | 0.100378 | NA       |
| BX294434.1       | 859.5572745 | 0.165915501  | 0.0879664 | 1.8861229 | 0.059278 | 0.475912 |
| lss              | 120.7418129 | -0.105437503 | 0.1872508 | -0.563082 | 0.573379 | 0.949869 |
| glgla            | 2693.928102 | 0.008054786  | 0.0770565 | 0.1045309 | 0.916748 | 0.99151  |
| kcnc4            | 32.39279008 | 0.016341154  | 0.3729513 | 0.0438158 | 0.965051 | 0.996154 |
| pil5b            | 16.37804486 | -0.087352985 | 0.4625808 | -0.188838 | 0.85022  | 0.985174 |
| arhgap5          | 1239.373925 | 0.076786633  | 0.0889372 | 0.8633805 | 0.387928 | 0.896133 |
| gmpr2            | 752.5171915 | -0.00934882  | 0.0906101 | -0.103176 | 0.917823 | 0.991623 |
| oca2             | 109.4139577 | -0.184286136 | 0.209602  | -0.87922  | 0.379282 | 0.895192 |
| ppplr9a          | 26.19559015 | 0.007676391  | 0.3814516 | 0.0201242 | 0.983944 | 0.996944 |
| znf438           | 119.773781  | -0.224117735 | 0.181712  | -1.233368 | 0.217439 | 0.784786 |
| ngrn             | 182.169443  | -0.180333175 | 0.1502787 | -1.199992 | 0.230143 | 0.797833 |
| cdon             | 1400.862585 | -0.016415766 | 0.0871019 | -0.188466 | 0.850511 | 0.985174 |
| galnt1           | 966.0452154 | 0.026488879  | 0.0950316 | 0.2787375 | 0.780446 | 0.97627  |
| ddx6             | 758.6783418 | -0.022462812 | 0.0983701 | -0.22835  | 0.819374 | 0.981594 |
| wwp2             | 2803.97447  | -0.028042638 | 0.0717869 | -0.390637 | 0.696065 | 0.96736  |
| adat1            | 44.34074185 | 0.122933198  | 0.312531  | 0.3933472 | 0.694063 | 0.96736  |
| tfpi2            | 57.77264703 | -0.062072859 | 0.2613586 | -0.237501 | 0.812268 | 0.981081 |
| bcl11aa          | 852.0619299 | -0.104174287 | 0.0891308 | -1.16878  | 0.242492 | 0.811298 |
| foxred2          | 513.2688567 | 0.117385451  | 0.1080566 | 1.0863332 | 0.277332 | 0.840857 |
| aocl             | 44.33346703 | -0.492717703 | 0.3118089 | -1.580191 | 0.114063 | 0.632852 |
| chst6            | 31.93239614 | 0.104060623  | 0.3404609 | 0.3056463 | 0.759874 | 0.975374 |
| dipklab          | 58.83489497 | 0.020773571  | 0.2605885 | 0.0797179 | 0.936462 | 0.992702 |
| GFOD1            | 7.8909762   | 0.32229604   | 0.6824991 | 0.4722293 | 0.636763 | NA       |
| hepacam2         | 70.30412758 | -0.115777282 | 0.2365993 | -0.489339 | 0.624602 | 0.957354 |
| klf13            | 23.82745972 | -0.087856249 | 0.4065574 | -0.216098 | 0.828911 | 0.982721 |
| tsen34           | 150.3608724 | -0.193883063 | 0.1688707 | -1.148116 | 0.250921 | 0.820469 |
| cdh18a           | 433.568378  | 0.032533883  | 0.1088877 | 0.298784  | 0.765105 | 0.975374 |
| cog7             | 581.6110415 | 0.040377096  | 0.1000512 | 0.4035641 | 0.686533 | 0.966376 |
| znf142           | 193.0157805 | -0.141592037 | 0.1473696 | -0.960795 | 0.336655 | 0.876088 |
| sgpl1            | 1071.322933 | 0.149735301  | 0.0986797 | 1.5173878 | 0.129169 | 0.660844 |
| efcab1           | 15.84344028 | 0.541946984  | 0.4817101 | 1.125048  | 0.260569 | 0.828546 |
| smg8             | 317.6924259 | -0.145080562 | 0.1208941 | -1.200063 | 0.230115 | 0.797833 |
| cmya5            | 200.1798506 | 0.472362417  | 0.1590911 | 2.969131  | 0.002986 | 0.071842 |
| serpinf2b        | 1079.369739 | 0.131418522  | 0.0994913 | 1.3209053 | 0.186533 | 0.750917 |
| haus3            | 145.3480982 | 0.036921511  | 0.1679631 | 0.2198191 | 0.826012 | 0.982196 |
| grhl1            | 258.1895598 | -0.1109322   | 0.1380687 | -0.803457 | 0.421711 | 0.90651  |
| trip12           | 3198.869403 | -0.032213122 | 0.0785378 | -0.410161 | 0.681688 | 0.965476 |
| epb4114b         | 169.765838  | 0.14355045   | 0.1658862 | 0.865355  | 0.386844 | 0.89551  |
| csgalnact2       | 344.4388556 | -0.001924362 | 0.1210701 | -0.015895 | 0.987318 | 0.997136 |
| evala            | 144.7663928 | 0.13861436   | 0.1740256 | 0.7965173 | 0.425731 | 0.909437 |
| bivm             | 146.4821291 | 0.007129341  | 0.1674517 | 0.0425755 | 0.96604  | 0.996315 |
| nelfa            | 277.4452862 | -0.130606781 | 0.1337072 | -0.976812 | 0.328662 | 0.872945 |
| sec23ip          | 824.6419222 | 0.112139442  | 0.0956961 | 1.1718283 | 0.241266 | 0.810257 |
| slx4             | 309.9730405 | 0.1891869    | 0.1458529 | 1.2971079 | 0.194594 | 0.758506 |
| c2cd4a           | 111.5560291 | -0.139648084 | 0.2007994 | -0.695461 | 0.486767 | 0.930882 |
| nubl             | 57.7195117  | 0.00520294   | 0.2699394 | 0.0192745 | 0.984622 | 0.996944 |
| zmat4b           | 28.35255614 | -0.452871389 | 0.3859755 | -1.173317 | 0.240669 | 0.808939 |

|                   |             |              |           |           |          |          |
|-------------------|-------------|--------------|-----------|-----------|----------|----------|
| FQ311928.1        | 295.6776052 | 0.024719503  | 0.130863  | 0.188896  | 0.850174 | 0.985174 |
| znf646            | 696.7340622 | 0.132139948  | 0.0963517 | 1.3714339 | 0.17024  | 0.727696 |
| zgc:194330        | 18.0112097  | -0.373794782 | 0.4552768 | -0.821027 | 0.411631 | 0.903595 |
| col6a2            | 2857.152804 | 0.12729857   | 0.0679918 | 1.8722625 | 0.06117  | 0.482482 |
| inpp5f            | 134.5507418 | -0.013781351 | 0.1869611 | -0.073712 | 0.941239 | 0.992857 |
| ugt5c3            | 138.8030122 | -0.057532814 | 0.17518   | -0.328421 | 0.742593 | 0.973232 |
| ugt5c1            | 5.255648189 | -0.543503156 | 0.8480037 | -0.640921 | 0.521574 | NA       |
| adcy6a            | 220.5903978 | -0.173704822 | 0.1550273 | -1.120479 | 0.26251  | 0.830166 |
| smap2             | 6.42620057  | -0.431266452 | 0.7854749 | -0.549052 | 0.58297  | NA       |
| tesk2             | 417.0263901 | -0.040993543 | 0.1114306 | -0.367884 | 0.71296  | 0.96909  |
| n4bp2             | 264.7784446 | -0.154425127 | 0.1399063 | -1.103775 | 0.269691 | 0.834705 |
| nrxn2a            | 1675.497012 | 0.024256495  | 0.0931159 | 0.2604978 | 0.79448  | 0.977937 |
| phf14             | 289.7575494 | -0.005853022 | 0.127279  | -0.045986 | 0.963322 | 0.995927 |
| si:dkey-253i9.4   | 990.1084606 | -0.073663415 | 0.0860016 | -0.856535 | 0.391702 | 0.897688 |
| dsela             | 31.21828451 | 0.012479853  | 0.3745477 | 0.0333198 | 0.97342  | 0.996315 |
| vwa7              | 55.4849852  | 0.094185326  | 0.2578932 | 0.3652106 | 0.714954 | 0.96909  |
| cpne5a            | 19.5567632  | -0.318278951 | 0.4645606 | -0.685118 | 0.493269 | 0.931926 |
| ncaph             | 387.8754202 | 0.014382552  | 0.1121783 | 0.1282115 | 0.897982 | 0.990121 |
| sema5ba           | 59.43267111 | -0.143990549 | 0.2530273 | -0.569071 | 0.569308 | 0.948983 |
| gba2              | 563.1991107 | -0.007228769 | 0.1018605 | -0.070967 | 0.943424 | 0.993364 |
| tbkbp1            | 346.2765836 | 0.129633497  | 0.1176464 | 1.101891  | 0.270509 | 0.835266 |
| igf2bp1           | 5079.454423 | -0.039265528 | 0.0671002 | -0.585177 | 0.558428 | 0.948478 |
| thsd7aa           | 331.695356  | -0.078867121 | 0.1371996 | -0.574835 | 0.565403 | 0.948739 |
| si:ch211-132b12.1 | 9.358345328 | 0.038782243  | 0.6234137 | 0.0622095 | 0.950396 | NA       |
| wu:fj05g07        | 222.662397  | 0.456785461  | 0.1496207 | 3.0529572 | 0.002266 | 0.058495 |
| DNAH10            | 169.6792227 | -0.282735565 | 0.1986215 | -1.423489 | 0.154594 | 0.704307 |
| u2surp            | 1648.107472 | -0.139378759 | 0.0899361 | -1.549753 | 0.121201 | 0.647458 |
| si:ch211-250e5.2  | 90.38601119 | -0.0385365   | 0.2099231 | -0.183574 | 0.854347 | 0.985174 |
| thsd7bb           | 20.94423525 | 0.744115337  | 0.4278268 | 1.7392911 | 0.081984 | 0.552725 |
| duspl3a           | 1.054757122 | 0.07669138   | 2.0202577 | 0.0379612 | 0.969719 | NA       |
| kdm4c             | 466.7328993 | 0.026326056  | 0.1127337 | 0.2335243 | 0.815354 | 0.981244 |
| mrps9             | 669.9481118 | -0.051271313 | 0.0972206 | -0.527371 | 0.597936 | 0.955459 |
| tgfbrap1          | 114.6622239 | -0.065073301 | 0.1968399 | -0.33059  | 0.740954 | 0.973154 |
| tbx3b             | 14.84025067 | 0.45820757   | 0.5042216 | 0.9087424 | 0.363486 | 0.886042 |
| tmtops2a          | 81.36041403 | -0.279788876 | 0.2274968 | -1.229858 | 0.21875  | 0.785734 |
| lrplbb            | 386.7675741 | 0.0723467    | 0.1184212 | 0.6109268 | 0.541248 | 0.944954 |
| b4galnt1a         | 42.19580471 | -0.025326732 | 0.3263441 | -0.077607 | 0.93814  | 0.99279  |
| slka              | 656.659859  | 0.089885098  | 0.1033502 | 0.869714  | 0.384457 | 0.89551  |
| nxt2              | 135.4760733 | 0.103324425  | 0.1787295 | 0.5781049 | 0.563193 | 0.948728 |
| unc5db            | 18.64292562 | 0.02384467   | 0.4468499 | 0.0533617 | 0.957444 | 0.99467  |
| ccdc85b           | 1181.871902 | 0.097445241  | 0.0853105 | 1.1422427 | 0.253353 | 0.823169 |
| ano6              | 20.16540238 | -0.101229213 | 0.4371508 | -0.231566 | 0.816875 | 0.981594 |
| zgc:153409        | 22.28015583 | 0.456694357  | 0.4402551 | 1.0373404 | 0.299577 | 0.855675 |
| si:ch211-145o7.3  | 49.47792219 | 0.286816393  | 0.2815358 | 1.0187563 | 0.308319 | 0.861088 |
| foxo1b            | 9.919771919 | -0.102081883 | 0.5968332 | -0.171039 | 0.864193 | NA       |
| rap1gap2a         | 65.70575222 | -0.750131721 | 0.2581211 | -2.906123 | 0.003659 | 0.081763 |
| tmem246           | 216.7061204 | -0.161076385 | 0.1446397 | -1.113639 | 0.265434 | 0.831302 |
| stim1b            | 65.71070573 | 0.0597669    | 0.2411693 | 0.2478213 | 0.804273 | 0.979643 |
| tmem121aa         | 147.6118532 | 0.192554995  | 0.1755622 | 1.096791  | 0.272733 | 0.838096 |
| slc7a3b           | 195.6357032 | -0.210356322 | 0.1569719 | -1.340089 | 0.180216 | 0.74128  |
| gldn              | 17.97510466 | 0.146252367  | 0.4763563 | 0.307023  | 0.758826 | 0.975374 |
| myo1cb            | 1343.844095 | 0.030570271  | 0.0790117 | 0.3869084 | 0.698824 | 0.967998 |
| kctd7             | 278.8373544 | 0.141988351  | 0.1266417 | 1.1211819 | 0.26221  | 0.830166 |
| cyp4v7            | 40.27555377 | -0.625208579 | 0.3356728 | -1.862553 | 0.062525 | 0.487868 |

|                  |             |              |           |           |          |          |
|------------------|-------------|--------------|-----------|-----------|----------|----------|
| ctdsp12a         | 911.0261621 | 0.026453918  | 0.0897452 | 0.2947669 | 0.768172 | 0.975687 |
| cachd1           | 1115.730651 | -0.016962328 | 0.0856861 | -0.197959 | 0.843077 | 0.985174 |
| abcb10           | 171.0272366 | 0.130307535  | 0.1680371 | 0.775469  | 0.438063 | 0.915284 |
| cemip2           | 416.4467096 | 0.099631827  | 0.1192833 | 0.8352541 | 0.403575 | 0.900979 |
| ssx2ipb          | 87.64976114 | -0.260607377 | 0.2134745 | -1.220789 | 0.222166 | 0.788551 |
| sorbs2b          | 1025.252091 | 0.047024933  | 0.0861169 | 0.5460591 | 0.585025 | 0.952436 |
| ufspl            | 26.10844376 | 0.015967932  | 0.4101267 | 0.0389341 | 0.968943 | 0.996315 |
| si:dkey-85k7.11  | 0.83328727  | -3.180757216 | 2.5122726 | -1.266088 | 0.205482 | NA       |
| them4            | 257.1141345 | 0.296146524  | 0.1316446 | 2.2495908 | 0.024475 | 0.3019   |
| kcng3            | 5.790581277 | -0.736493882 | 0.8030103 | -0.917166 | 0.359056 | NA       |
| ndufaf5          | 402.7643397 | -0.089000979 | 0.1176384 | -0.756564 | 0.449311 | 0.918313 |
| fbxolla          | 881.2812951 | 0.07600382   | 0.09254   | 0.8213077 | 0.411471 | 0.903483 |
| aifm4            | 448.0379764 | -0.494217986 | 0.1176988 | -4.199007 | 2.68E-05 | 0.001616 |
| myo5aa           | 95.41227858 | 0.193220954  | 0.2056286 | 0.9396598 | 0.347392 | 0.880195 |
| kcnj9            | 11.14951105 | 0.324568618  | 0.5884629 | 0.5515532 | 0.581255 | 0.951731 |
| dcakd            | 71.04357895 | -0.070411405 | 0.2502354 | -0.281381 | 0.778418 | 0.975942 |
| sipall2          | 1610.426473 | -0.145122661 | 0.0814044 | -1.782737 | 0.074629 | 0.532003 |
| ankrd34bb        | 27.34415554 | 0.219395947  | 0.4130927 | 0.5311059 | 0.595345 | 0.954434 |
| ensab            | 31.43260028 | -0.016366208 | 0.3668526 | -0.044612 | 0.964416 | 0.995927 |
| nrxnla           | 3292.056173 | 0.082051059  | 0.0707283 | 1.1600881 | 0.246013 | 0.816218 |
| marveld2b        | 155.7441393 | 0.127058532  | 0.1671702 | 0.7600551 | 0.447222 | 0.917154 |
| wwc3             | 364.4531897 | 0.157679891  | 0.1140336 | 1.3827492 | 0.166742 | 0.723339 |
| ptpdcla          | 254.1893662 | 0.021214365  | 0.1377456 | 0.1540112 | 0.877601 | 0.987881 |
| CABZ01055347.1   | 34.7531907  | 0.228920298  | 0.3308803 | 0.6918524 | 0.48903  | 0.931926 |
| zgc:162707       | 249.8495627 | 0.076081354  | 0.1318681 | 0.5769504 | 0.563973 | 0.948739 |
| hcn2b            | 215.304804  | 0.055218569  | 0.1586316 | 0.3480931 | 0.72777  | 0.970402 |
| si:ch73-334d15.1 | 151.0349302 | 0.065737893  | 0.1622668 | 0.4051222 | 0.685388 | 0.966198 |
| biccla           | 231.7735425 | -0.034902526 | 0.1484775 | -0.235069 | 0.814155 | 0.981081 |
| slc25a17         | 103.0628722 | -0.265345199 | 0.1990079 | -1.33334  | 0.18242  | 0.744977 |
| hcn4             | 5.363388479 | 1.157604006  | 0.9048561 | 1.2793239 | 0.200783 | NA       |
| atxnla           | 42.49217711 | 0.519701209  | 0.3146854 | 1.6514945 | 0.098638 | 0.59799  |
| arvcfb           | 1204.784379 | 0.144398193  | 0.0811849 | 1.7786332 | 0.0753   | 0.534207 |
| nxpe3            | 111.2417227 | 0.16261295   | 0.1976991 | 0.8225275 | 0.410777 | 0.90316  |
| qpct1a           | 241.1578144 | 0.115932511  | 0.1434425 | 0.8082158 | 0.418966 | 0.906406 |
| yjefn3           | 384.7130101 | 0.107757281  | 0.1194169 | 0.9023624 | 0.366864 | 0.88734  |
| cal4             | 82.97557858 | 0.26254572   | 0.2182571 | 1.2029197 | 0.229007 | 0.796691 |
| sipall3          | 46.42284812 | -0.053039351 | 0.2859232 | -0.185502 | 0.852835 | 0.985174 |
| map3k8           | 45.96982242 | -0.254813121 | 0.2972039 | -0.857368 | 0.391242 | 0.897688 |
| tpd52            | 203.852497  | 0.111878893  | 0.157603  | 0.7098778 | 0.47778  | 0.926857 |
| si:dkey-45k15.1  | 17.39236039 | 0.122893477  | 0.4969942 | 0.2472735 | 0.804697 | 0.979705 |
| cytip            | 6.726836383 | -0.425082548 | 0.8943929 | -0.475275 | 0.634591 | NA       |
| znf704           | 14.01745785 | -0.248114415 | 0.5119193 | -0.484675 | 0.627907 | 0.957354 |
| washc4           | 475.5887029 | -0.02241367  | 0.1231704 | -0.181973 | 0.855604 | 0.985174 |
| tmem64           | 42.37365499 | -0.208774929 | 0.3062166 | -0.681789 | 0.495373 | 0.931928 |
| mast3a           | 382.4437005 | -0.082761065 | 0.1216449 | -0.68035  | 0.496283 | 0.932415 |
| acot13           | 245.9541022 | 0.012623812  | 0.1399381 | 0.09021   | 0.92812  | 0.992702 |
| raph1b           | 648.8254605 | -0.098759764 | 0.1142119 | -0.864706 | 0.3872   | 0.895778 |
| hnrnpm           | 6143.291402 | -0.147806693 | 0.0738984 | -2.000134 | 0.045486 | 0.418148 |
| ank3a            | 1570.575663 | -0.002136154 | 0.0782933 | -0.027284 | 0.978233 | 0.996762 |
| ecel             | 380.3949386 | -0.140903917 | 0.1211289 | -1.163256 | 0.244726 | 0.814435 |
| 2-Mar            | 28.92677082 | 0.157446329  | 0.3803713 | 0.4139279 | 0.678927 | 0.965257 |
| itpr3            | 259.826807  | 0.014478465  | 0.1333202 | 0.1085992 | 0.91352  | 0.991119 |
| clasrp           | 590.4091003 | 0.010874086  | 0.1069837 | 0.1016424 | 0.919041 | 0.991623 |
| arhgef9a         | 568.5815268 | 0.142109641  | 0.1039101 | 1.3676206 | 0.171431 | 0.729863 |

|                   |             |              |           |           |          |          |
|-------------------|-------------|--------------|-----------|-----------|----------|----------|
| dipk2b            | 12.06017591 | 0.255931541  | 0.5624015 | 0.4550691 | 0.64906  | 0.960708 |
| htr3b             | 47.0064641  | 0.179970167  | 0.2925842 | 0.6151055 | 0.538485 | 0.943336 |
| ripor2            | 188.6216386 | 0.019344936  | 0.1496824 | 0.1292399 | 0.897168 | 0.990121 |
| rabgap11          | 1169.921753 | -0.127947124 | 0.0845672 | -1.512964 | 0.130289 | 0.662797 |
| sh3pxd2ab         | 135.9995256 | -0.04377146  | 0.1908306 | -0.229373 | 0.818579 | 0.981594 |
| kdm6a             | 1111.823491 | -0.039141972 | 0.084647  | -0.462414 | 0.643784 | 0.960045 |
| opa3              | 174.4879787 | 0.150540942  | 0.159216  | 0.9455137 | 0.344397 | 0.878434 |
| trim108           | 18.52558904 | -0.099032052 | 0.4837632 | -0.204712 | 0.837797 | 0.984701 |
| spata511          | 111.5788345 | -0.00604858  | 0.190182  | -0.031804 | 0.974628 | 0.996579 |
| ahnak             | 2803.768736 | 0.024004882  | 0.0775082 | 0.3097078 | 0.756783 | 0.975374 |
| bmp10             | 2.905940877 | -0.026843586 | 1.1457431 | -0.023429 | 0.981308 | NA       |
| abcd4             | 180.1768016 | -0.193173209 | 0.1645644 | -1.173846 | 0.240457 | 0.808525 |
| neur11ab          | 60.02910588 | 0.03792042   | 0.2488126 | 0.1524055 | 0.878867 | 0.987881 |
| mbd3a             | 1271.564308 | -0.069142219 | 0.081752  | -0.845756 | 0.397689 | 0.899672 |
| fmn2b             | 941.48439   | -0.008529813 | 0.1015731 | -0.083977 | 0.933075 | 0.992702 |
| arhgap25          | 6.973177013 | -0.406650297 | 0.723892  | -0.561755 | 0.574283 | NA       |
| klh12             | 332.7199161 | 0.023012266  | 0.1272146 | 0.1808933 | 0.856451 | 0.985537 |
| gn11              | 326.2974726 | -0.209055909 | 0.1241136 | -1.684392 | 0.092106 | 0.57849  |
| nyx               | 160.4469932 | 0.183614697  | 0.169176  | 1.0853473 | 0.277768 | 0.841388 |
| jam3b             | 1063.211873 | 0.087327782  | 0.0909615 | 0.9600521 | 0.337029 | 0.876088 |
| rasgrp4           | 369.2188392 | 0.100483063  | 0.1216304 | 0.8261342 | 0.408728 | 0.90171  |
| zgc:154006        | 23.57220027 | 0.050359528  | 0.3918262 | 0.1285252 | 0.897733 | 0.990121 |
| arhgap271         | 289.1513041 | -0.180566511 | 0.1366656 | -1.321229 | 0.186425 | 0.750788 |
| si:dkey-208k22.6  | 21.96997439 | -0.522795284 | 0.4107658 | -1.272733 | 0.203113 | 0.770099 |
| cnot2             | 1230.235602 | -0.132819161 | 0.0836296 | -1.588184 | 0.112245 | 0.627572 |
| si:ch211-194e15.5 | 162.1665901 | 0.007335238  | 0.1792007 | 0.0409331 | 0.967349 | 0.996315 |
| si:dkey-13n15.2   | 102.5889755 | -0.006900371 | 0.203323  | -0.033938 | 0.972927 | 0.996315 |
| mbd3b             | 2037.278889 | 0.033201542  | 0.086288  | 0.384776  | 0.700403 | 0.967998 |
| kif1aa            | 1942.699777 | 0.1462547    | 0.0763858 | 1.9146841 | 0.055533 | 0.461579 |
| meox2b            | 41.6351005  | -0.248438905 | 0.2988572 | -0.831296 | 0.405806 | 0.901305 |
| wscd2             | 26.84194055 | -0.156894384 | 0.3810123 | -0.411783 | 0.680499 | 0.965431 |
| UNC13A            | 136.6329676 | -0.110209361 | 0.1727234 | -0.638069 | 0.523429 | 0.939336 |
| prssl2            | 294.1422204 | 0.027428848  | 0.1318718 | 0.2079964 | 0.835232 | 0.984089 |
| sntgl             | 4.034113107 | -0.702332574 | 1.0563031 | -0.664897 | 0.506116 | NA       |
| zpld1a            | 36.55682292 | -0.112638378 | 0.3297571 | -0.34158  | 0.732667 | 0.971719 |
| nfixb             | 42.31548052 | -0.375033819 | 0.3024291 | -1.240072 | 0.214949 | 0.782493 |
| tiparp            | 939.1924197 | -0.196645097 | 0.089785  | -2.190178 | 0.028511 | 0.327971 |
| si:dkey-38p12.3   | 426.6764114 | -0.227791995 | 0.1084464 | -2.100504 | 0.035685 | 0.368007 |
| p1d7              | 292.011754  | 0.111356265  | 0.1267066 | 0.878851  | 0.379482 | 0.895192 |
| rxfp3.2b          | 33.68650516 | 0.059430175  | 0.3351133 | 0.1773435 | 0.859239 | 0.985773 |
| coll5a1b          | 1254.393582 | 0.092371031  | 0.0859662 | 1.0745036 | 0.282597 | 0.843865 |
| si:dkey-19b23.13  | 126.6910889 | 0.023094985  | 0.1817951 | 0.1270386 | 0.89891  | 0.990121 |
| olfml3a           | 70.16851845 | 0.368038096  | 0.2444698 | 1.5054544 | 0.132207 | 0.666055 |
| lman2             | 1240.981548 | -0.094524553 | 0.0833481 | -1.134093 | 0.256755 | 0.824902 |
| zgc:153968        | 120.139912  | 0.345553374  | 0.2185012 | 1.581471  | 0.11377  | 0.632292 |
| myo18ab           | 1704.920684 | 0.05919584   | 0.0833722 | 0.7100186 | 0.477693 | 0.926857 |
| hdlbpb            | 903.4402283 | -0.036722022 | 0.0864718 | -0.42467  | 0.671077 | 0.965257 |
| ddx10             | 374.9462952 | 0.015664742  | 0.1150194 | 0.1361921 | 0.891669 | 0.989291 |
| v2rx3             | 3.095824445 | 0.133928205  | 1.0962878 | 0.1221652 | 0.902768 | NA       |
| v2rh10            |             | 0 NA         | NA        | NA        | NA       | NA       |
| satb2             | 120.066495  | -0.111272527 | 0.1809062 | -0.615084 | 0.538499 | 0.943336 |
| ppcs              | 148.5466482 | -0.044489308 | 0.1701354 | -0.261494 | 0.793712 | 0.977937 |
| atp13a2           | 198.6544989 | -0.172006448 | 0.153021  | -1.124071 | 0.260983 | 0.829139 |
| usp32             | 932.6284577 | 0.053669291  | 0.0930136 | 0.5770047 | 0.563936 | 0.948739 |

|                 |             |              |           |           |          |          |
|-----------------|-------------|--------------|-----------|-----------|----------|----------|
| slco2a1         | 269.2497308 | -0.006426132 | 0.1289406 | -0.049838 | 0.960252 | 0.995388 |
| iqub            | 22.89438202 | -0.03364106  | 0.3973862 | -0.084656 | 0.932535 | 0.992702 |
| ankrd13a        | 120.5854668 | -0.144489772 | 0.2017637 | -0.716134 | 0.473909 | 0.924993 |
| v2ral8          | 3.216739331 | 0.198727244  | 1.1224662 | 0.1770452 | 0.859473 | NA       |
| fhod3b          | 72.67005334 | 0.225470889  | 0.2404758 | 0.9376031 | 0.348448 | 0.880195 |
| mfsd12a         | 148.8522987 | -0.208357588 | 0.1661897 | -1.253733 | 0.209939 | 0.777416 |
| si:ch73-233f7.1 | 1342.092085 | 0.017680068  | 0.0935072 | 0.189077  | 0.850032 | 0.985174 |
| git2a           | 336.1631311 | 0.082661833  | 0.1210527 | 0.6828583 | 0.494696 | 0.931926 |
| tmem51b         | 117.9897583 | -0.353413622 | 0.191975  | -1.840936 | 0.065631 | 0.500566 |
| cplx2           | 1019.02476  | 0.03593116   | 0.0921636 | 0.3898627 | 0.696638 | 0.96736  |
| gltpa           | 207.6879078 | -0.256364681 | 0.1468133 | -1.746195 | 0.080777 | 0.550801 |
| amot12a         | 1324.390391 | -0.080941794 | 0.0851337 | -0.950761 | 0.341726 | 0.878134 |
| fbxo10          | 22.77621822 | -0.249332215 | 0.4260802 | -0.585177 | 0.558429 | 0.948478 |
| htr4            | 7.975389269 | 0.102815582  | 0.7102632 | 0.144757  | 0.884903 | NA       |
| trpv4           | 186.6324394 | 0.038480093  | 0.1533074 | 0.2509996 | 0.801814 | 0.979492 |
| commd4          | 203.7190668 | 0.151547659  | 0.1553754 | 0.9753646 | 0.329379 | 0.873436 |
| amot12b         | 497.9392886 | -0.04843052  | 0.1260952 | -0.384079 | 0.70092  | 0.968134 |
| golgb1          | 994.253522  | -0.021156757 | 0.0838827 | -0.252218 | 0.800872 | 0.979377 |
| ecpas           | 1108.610841 | -0.013883772 | 0.0871742 | -0.159265 | 0.87346  | 0.987858 |
| sytl2a          | 82.80399843 | 0.066295046  | 0.2517917 | 0.2632933 | 0.792325 | 0.977937 |
| ube3b           | 34.36308483 | -0.000203351 | 0.3394439 | -0.000599 | 0.999522 | 0.999704 |
| vrtn            | 7.318082693 | 0.025836884  | 0.7147288 | 0.0361492 | 0.971163 | NA       |
| myolha          | 7.353111201 | 0.401253564  | 0.7041633 | 0.5698303 | 0.568793 | NA       |
| lingo3a         | 140.7645829 | 0.273288588  | 0.167494  | 1.6316325 | 0.102757 | 0.609031 |
| grhl2b          | 185.0719768 | -0.056617233 | 0.1652711 | -0.342572 | 0.731921 | 0.971665 |
| sema6bb         | 50.88258389 | 0.192838654  | 0.280957  | 0.6863636 | 0.492484 | 0.931926 |
| ppfibp2a        | 338.4934674 | 0.078922517  | 0.1333792 | 0.5917152 | 0.554041 | 0.947449 |
| lap3            | 457.3763534 | 0.034386388  | 0.1062315 | 0.323693  | 0.74617  | 0.97419  |
| rbm47           | 1007.099136 | -0.253100345 | 0.0852105 | -2.970296 | 0.002975 | 0.071657 |
| tbc1d2b         | 94.03217945 | 0.067568008  | 0.2019855 | 0.3345191 | 0.737988 | 0.972535 |
| mpnd            | 551.0957042 | -0.103459274 | 0.1111927 | -0.93045  | 0.352138 | 0.880879 |
| kcnh4b          | 55.6387792  | 0.226704929  | 0.2660822 | 0.852011  | 0.394208 | 0.898673 |
| dot11           | 39.20646267 | 0.426076486  | 0.3280295 | 1.298897  | 0.193979 | 0.75784  |
| wdr74           | 148.4975991 | -0.094361387 | 0.1805649 | -0.52259  | 0.60126  | 0.956045 |
| acacb           | 728.3858416 | 0.093533524  | 0.0969432 | 0.9648281 | 0.334631 | 0.875699 |
| abtb2b          | 195.3547438 | -0.150872809 | 0.1461783 | -1.032115 | 0.302018 | 0.856944 |
| adnpa           |             | 0 NA         | NA        | NA        | NA       | NA       |
| myo5b           | 952.7131657 | -0.373905018 | 0.0897206 | -4.167439 | 3.08E-05 | 0.001781 |
| hs2st1b         | 235.4509052 | -0.095804946 | 0.1385101 | -0.691682 | 0.489137 | 0.931926 |
| gpr18           | 0.794338034 | 3.131709106  | 2.3335617 | 1.3420297 | 0.179586 | NA       |
| vps51           | 437.4981485 | 0.130899601  | 0.113489  | 1.153412  | 0.248741 | 0.81797  |
| fsd1            | 212.7401348 | -0.020812689 | 0.1517188 | -0.137179 | 0.890889 | 0.989291 |
| rufy2           | 1069.807631 | -0.056399004 | 0.0931131 | -0.605704 | 0.544711 | 0.945438 |
| gsel            | 1670.162083 | -0.113158019 | 0.0857359 | -1.319844 | 0.186887 | 0.750967 |
| ccdc181         | 71.55064882 | 0.062866519  | 0.2307718 | 0.2724185 | 0.7853   | 0.97627  |
| fnhc3bb         | 139.7341904 | -0.080999477 | 0.1702847 | -0.475671 | 0.634309 | 0.95776  |
| kif1ab          | 333.4612032 | 0.081147218  | 0.1481066 | 0.5478976 | 0.583762 | 0.952214 |
| cpox            | 470.9157035 | -0.529384618 | 0.1144475 | -4.625567 | 3.74E-06 | 0.000317 |
| gpr17           | 19.78800758 | 0.287319599  | 0.4378823 | 0.6561571 | 0.511723 | 0.936253 |
| atp8b5a         | 49.21144991 | -0.227983327 | 0.2987319 | -0.76317  | 0.445362 | 0.917117 |
| mthfsd          | 14.00914446 | 0.2485652    | 0.5225394 | 0.475687  | 0.634297 | 0.95776  |
| illrap11a       | 649.5701833 | -0.113481915 | 0.1068261 | -1.062305 | 0.288097 | 0.845979 |
| arhgap45b       | 33.94148495 | -0.034392631 | 0.336443  | -0.102224 | 0.918579 | 0.991623 |
| casp2           | 250.436266  | 0.079269394  | 0.1342334 | 0.5905341 | 0.554833 | 0.947449 |

|                   |             |              |           |           |          |          |
|-------------------|-------------|--------------|-----------|-----------|----------|----------|
| kif1bp            | 568.8275035 | 0.081421752  | 0.0993369 | 0.8196524 | 0.412414 | 0.904913 |
| cptlab            | 1981.249326 | 0.025864502  | 0.0753355 | 0.343324  | 0.731355 | 0.971557 |
| rnf38             | 288.7450314 | -0.114295569 | 0.1279698 | -0.893145 | 0.371779 | 0.892248 |
| elmod1            | 2355.990694 | 0.037696715  | 0.0779029 | 0.4838936 | 0.628461 | 0.957354 |
| zgc:174945        | 1.306217685 | 0.741218782  | 1.6736071 | 0.442887  | 0.657847 | NA       |
| slc12a7b          | 2243.191748 | 0.368350179  | 0.0823372 | 4.4736803 | 7.69E-06 | 0.000576 |
| si:ch211-236114.4 | 250.4810326 | 0.420104136  | 0.136124  | 3.0861863 | 0.002027 | 0.05403  |
| gmebl             | 437.9857799 | -0.091815018 | 0.1162911 | -0.789527 | 0.429804 | 0.911615 |
| tab3              | 412.5605319 | 0.061742773  | 0.129511  | 0.4767376 | 0.633549 | 0.957703 |
| acsbgl            | 8.862418044 | 0.282399899  | 0.6339079 | 0.4454904 | 0.655965 | NA       |
| shc2              | 48.97172935 | 0.178911704  | 0.2866991 | 0.6240399 | 0.532601 | 0.942805 |
| tblcl1            | 673.852073  | 0.028310132  | 0.1020102 | 0.2775225 | 0.781379 | 0.97627  |
| hipk3b            | 73.57446916 | 0.806347296  | 0.257247  | 3.1345261 | 0.001721 | 0.047873 |
| dph7              | 207.0583101 | -0.141952735 | 0.1503371 | -0.94423  | 0.345052 | 0.878434 |
| clcn1a            | 88.91245966 | 0.341186147  | 0.2147561 | 1.5887144 | 0.112125 | 0.627454 |
| tkfc              | 280.7366712 | -0.346781804 | 0.1353806 | -2.561532 | 0.010421 | 0.175676 |
| kiaal5491b        | 16.54936359 | 0.043293429  | 0.470777  | 0.0919616 | 0.926729 | 0.992702 |
| ncehlb.1          | 67.07886177 | -0.151848338 | 0.2411471 | -0.629692 | 0.528896 | 0.942109 |
| uggt2             | 857.4766323 | 0.206238802  | 0.094312  | 2.1867723 | 0.028759 | 0.328909 |
| pm20d1.2          | 182.0030884 | -0.020578383 | 0.1528508 | -0.134631 | 0.892904 | 0.989291 |
| iffo2a            | 18.62497727 | -0.028652368 | 0.4374985 | -0.065491 | 0.947783 | 0.99381  |
| ankrd24           | 156.782574  | 0.025195533  | 0.1635537 | 0.1540505 | 0.87757  | 0.987881 |
| klf5b             | 38.14362801 | 0.124079128  | 0.3099813 | 0.4002794 | 0.688951 | 0.966672 |
| iffo1b            | 45.72846087 | -0.062675324 | 0.2839934 | -0.220693 | 0.825332 | 0.982196 |
| shdb              | 383.2836232 | -0.128433583 | 0.1131458 | -1.135116 | 0.256327 | 0.824633 |
| rxfp3.3a2         | 7.312814974 | -0.381719226 | 0.6987637 | -0.546278 | 0.584875 | NA       |
| tent4a            | 72.8601412  | -0.144297891 | 0.2342831 | -0.615912 | 0.537952 | 0.943336 |
| ctdsp1b           | 618.6695123 | 0.204438696  | 0.1039293 | 1.9670935 | 0.049172 | 0.435115 |
| klhl5             | 8.286961067 | -0.062327203 | 0.7090238 | -0.087906 | 0.929952 | NA       |
| agap1             | 1730.869444 | -0.051295845 | 0.0809504 | -0.63367  | 0.526296 | 0.940506 |
| mxra8b            | 383.311624  | 0.153956457  | 0.1190081 | 1.2936639 | 0.195782 | 0.76113  |
| cyp4v8            | 204.0290848 | -0.120088867 | 0.1695032 | -0.708476 | 0.47865  | 0.926978 |
| kcnab2b           | 45.19565281 | 0.068007164  | 0.3076648 | 0.2210431 | 0.825059 | 0.982196 |
| sytl5             | 17.41342862 | -0.442790439 | 0.4746704 | -0.932838 | 0.350904 | 0.880443 |
| stag1b            | 1179.895681 | 0.017665034  | 0.0820789 | 0.2152201 | 0.829596 | 0.982805 |
| ranbp10           | 414.0156135 | 0.084101413  | 0.113011  | 0.7441879 | 0.456763 | 0.921215 |
| eif2ak3           | 597.076397  | -0.125358956 | 0.1008639 | -1.242853 | 0.213922 | 0.782251 |
| stoml1            | 133.9118793 | 0.151573662  | 0.1861453 | 0.8142759 | 0.415487 | 0.906237 |
| larp4b            | 488.7152556 | 0.073723304  | 0.1077856 | 0.6839808 | 0.493987 | 0.931926 |
| otc               | 198.2048353 | 0.118453038  | 0.1545528 | 0.7664246 | 0.443424 | 0.916631 |
| SENP7             | 310.5437283 | 0.008679077  | 0.1257543 | 0.0690161 | 0.944977 | 0.993409 |
| chaf1a            | 1292.325804 | -0.158006677 | 0.0882675 | -1.790089 | 0.07344  | 0.528705 |
| dip2ca            | 519.289476  | 0.013427175  | 0.1030933 | 0.130243  | 0.896374 | 0.989971 |
| abi3bpa           | 27.34681848 | -0.095786754 | 0.3724664 | -0.257169 | 0.797048 | 0.978569 |
| atrn              | 698.6933273 | 0.047169566  | 0.0979339 | 0.481647  | 0.630057 | 0.957354 |
| tub               | 485.794439  | 0.178141576  | 0.1103663 | 1.6140945 | 0.106507 | 0.615567 |
| tmem168b          | 18.9985393  | -0.046445169 | 0.4499003 | -0.103234 | 0.917777 | 0.991623 |
| olfml3b           | 486.8506613 | 0.218844759  | 0.1047521 | 2.089168  | 0.036693 | 0.374386 |
| camsap2a          | 343.9124624 | 0.013223213  | 0.1270111 | 0.1041107 | 0.917081 | 0.991572 |
| cacnb4b           | 2040.258485 | 0.129428652  | 0.0798456 | 1.6209862 | 0.105021 | 0.613313 |
| dcblld2           | 149.017877  | -0.134704058 | 0.1653476 | -0.814672 | 0.41526  | 0.906237 |
| ripor1            | 657.5791158 | -0.063367429 | 0.0979642 | -0.646843 | 0.517734 | 0.938592 |
| bmt2              | 58.29537729 | 0.334149515  | 0.265847  | 1.2569242 | 0.208781 | 0.776022 |
| slc22a7b.3        | 17.11714906 | 0.445745447  | 0.4676776 | 0.9531041 | 0.340537 | 0.878053 |

|                   |             |              |           |           |          |          |
|-------------------|-------------|--------------|-----------|-----------|----------|----------|
| kif14             | 243.6740537 | 0.038838195  | 0.1375974 | 0.2822597 | 0.777744 | 0.975942 |
| PDE3B             | 593.0605086 | -0.150486215 | 0.1139889 | -1.320183 | 0.186774 | 0.750951 |
| TBC1D8B           | 546.4949864 | 0.122008281  | 0.1025623 | 1.1896021 | 0.234203 | 0.802815 |
| fbxo31            | 102.5222685 | 0.156667041  | 0.1969515 | 0.79546   | 0.426346 | 0.909969 |
| pcml              | 1251.312407 | -0.095017664 | 0.0864234 | -1.099444 | 0.271575 | 0.83659  |
| si:dkey-217124.1  | 44.53518961 | 0.144385076  | 0.2958412 | 0.4880492 | 0.625515 | 0.957354 |
| sigirr            | 76.89633026 | -0.109979462 | 0.2195341 | -0.500967 | 0.616394 | 0.95688  |
| skiv21            | 317.4148695 | -0.099009377 | 0.126769  | -0.781022 | 0.434789 | 0.914408 |
| prrtl             | 140.3943712 | 0.360129446  | 0.1940328 | 1.8560235 | 0.06345  | 0.492164 |
| mrps5             | 556.3193973 | 0.0592897    | 0.1082189 | 0.5478683 | 0.583782 | 0.952214 |
| narfl             | 299.7107083 | -0.02979597  | 0.1261558 | -0.236184 | 0.81329  | 0.981081 |
| kcnj3b            | 372.6282753 | 0.117464056  | 0.1330813 | 0.8826486 | 0.377426 | 0.895192 |
| plekha7b          | 306.0512718 | -0.09484358  | 0.1380628 | -0.68696  | 0.492108 | 0.931926 |
| arapla            | 110.3452309 | 0.493746393  | 0.197153  | 2.5043824 | 0.012267 | 0.195612 |
| mxra8a            | 230.1252832 | 0.231890178  | 0.1449999 | 1.5992434 | 0.109767 | 0.623766 |
| ino80db           | 513.0319265 | -0.081943758 | 0.1143923 | -0.71634  | 0.473781 | 0.924993 |
| adipoqa           | 5.859313351 | 0.594349931  | 0.8332962 | 0.7132517 | 0.47569  | NA       |
| znf362b           | 72.84106767 | -0.05313384  | 0.2460168 | -0.215976 | 0.829006 | 0.982721 |
| lrrc34            | 6.524363123 | -0.029159367 | 0.7760261 | -0.037575 | 0.970026 | NA       |
| nfs1              | 467.8429935 | 0.053217158  | 0.1144122 | 0.4651353 | 0.641835 | 0.959994 |
| si:ch211-15p9.2   |             | 0 NA         | NA        | NA        | NA       | NA       |
| setd2             | 1435.633247 | -0.023076774 | 0.082407  | -0.280034 | 0.779451 | 0.976146 |
| ptpn21            | 42.11340349 | 0.409355297  | 0.299182  | 1.3682486 | 0.171234 | 0.729413 |
| fbx17             | 66.56915255 | 0.276329345  | 0.2414422 | 1.144495  | 0.252418 | 0.821887 |
| armc8             | 310.5591435 | -0.05909439  | 0.1312715 | -0.450169 | 0.652588 | 0.960708 |
| ednrab            | 5.971464881 | -0.159169712 | 0.7651623 | -0.208021 | 0.835213 | NA       |
| arhgap17b         | 286.7820583 | -0.088355079 | 0.1376627 | -0.641823 | 0.520988 | 0.939056 |
| edc4              | 867.6612584 | 0.220822284  | 0.088605  | 2.4922113 | 0.012695 | 0.200185 |
| kdm3b             | 2736.688066 | -0.169744491 | 0.0785093 | -2.162094 | 0.030611 | 0.338573 |
| jarid2b           | 64.61277594 | 0.195679945  | 0.2437916 | 0.8026526 | 0.422176 | 0.90651  |
| fan1              | 210.5835628 | -0.129874417 | 0.146023  | -0.889411 | 0.373782 | 0.893677 |
| slc25a15b         | 129.8800644 | -0.103211948 | 0.1770179 | -0.583059 | 0.559853 | 0.948478 |
| afg312            | 1126.885465 | 0.065755931  | 0.0885582 | 0.7425164 | 0.457775 | 0.921978 |
| ppp2r2cb          | 184.0885564 | -0.182794024 | 0.1633389 | -1.119109 | 0.263094 | 0.830245 |
| si:dkey-202e17.1  | 15.73668277 | 0.352241965  | 0.4803319 | 0.7333304 | 0.463357 | 0.922701 |
| hacel             | 160.6488214 | -0.178299538 | 0.1682915 | -1.059468 | 0.289387 | 0.846123 |
| edaradd           | 19.0070758  | 0.086454967  | 0.4612997 | 0.187416  | 0.851334 | 0.985174 |
| qpct1b            | 26.11992961 | -0.227140317 | 0.3769774 | -0.60253  | 0.546821 | 0.945526 |
| soat1             | 35.22690594 | -0.699212684 | 0.3380078 | -2.068629 | 0.038581 | 0.385234 |
| znf652            | 297.3725183 | 0.177953055  | 0.1294261 | 1.3749396 | 0.16915  | 0.726198 |
| pdpk1a            | 213.5715126 | -0.144707371 | 0.1458945 | -0.991863 | 0.321264 | 0.868938 |
| rims3             | 4.833314255 | 0.511670522  | 0.8506974 | 0.6014719 | 0.547526 | NA       |
| ccdc61            | 237.3567138 | -0.000961225 | 0.1353058 | -0.007104 | 0.994332 | 0.998694 |
| si:ch211-1f22.14  | 0.500161739 | 2.450146464  | 2.7711133 | 0.8841741 | 0.376602 | NA       |
| wdr26a            | 319.184748  | 0.124315882  | 0.1242078 | 1.0008704 | 0.316889 | 0.867308 |
| rasl10a           | 3.961605242 | -1.273296815 | 0.9680552 | -1.315314 | 0.188404 | NA       |
| sik2b             | 1250.967895 | 0.154452893  | 0.0854429 | 1.8076745 | 0.070657 | 0.520155 |
| si:dkey-103g5.3   | 307.6102398 | 0.236022221  | 0.1364401 | 1.7298596 | 0.083655 | 0.557158 |
| adam23a           | 1652.070416 | 0.045434758  | 0.0746115 | 0.608951  | 0.542557 | 0.944974 |
| shank2b           | 309.7450175 | 0.155209528  | 0.124724  | 1.2444242 | 0.213343 | 0.781631 |
| hmgn7             | 7224.084219 | -0.071400626 | 0.0701052 | -1.018478 | 0.308451 | 0.861088 |
| rasgrp2           | 8.23504096  | -1.23875974  | 0.7332036 | -1.689517 | 0.09112  | NA       |
| b4galt3           | 60.64760396 | -0.226253049 | 0.2602937 | -0.869222 | 0.384726 | 0.89551  |
| si:ch211-233a24.2 | 1895.918086 | -0.000885921 | 0.082822  | -0.010697 | 0.991465 | 0.997679 |



|                  |             |              |           |           |          |          |
|------------------|-------------|--------------|-----------|-----------|----------|----------|
| nudt14           | 59.97283017 | 0.389084962  | 0.2608468 | 1.4916226 | 0.135798 | 0.672208 |
| zeb2a            | 2053.173618 | -0.031126092 | 0.0722716 | -0.430682 | 0.6667   | 0.964736 |
| wfsla            | 111.0461256 | 0.191262522  | 0.209482  | 0.913026  | 0.361229 | 0.885686 |
| cacnalea         | 70.76276545 | 0.020094935  | 0.2398359 | 0.0837862 | 0.933226 | 0.992702 |
| mtus2a           | 102.0681994 | 0.157629144  | 0.1975831 | 0.7977867 | 0.424994 | 0.908819 |
| arhgap15         | 5.913214255 | 0.60422254   | 0.7934203 | 0.7615416 | 0.446334 | NA       |
| synm             | 171.0864467 | -0.001922833 | 0.1564973 | -0.012287 | 0.990197 | 0.997679 |
| sema4ab          | 358.1868825 | -0.00251228  | 0.1182723 | -0.021241 | 0.983053 | 0.996944 |
| axdnd1           | 42.23809224 | 0.268089143  | 0.2988661 | 0.897021  | 0.369708 | 0.889476 |
| tafala           | 194.488616  | -0.058162748 | 0.1542715 | -0.377016 | 0.706162 | 0.968459 |
| scn3b            | 227.6897325 | -0.069222053 | 0.1580857 | -0.437877 | 0.661476 | 0.964234 |
| PAXBP1           | 970.1001297 | 0.011334666  | 0.0911173 | 0.1243964 | 0.901001 | 0.990121 |
| tpcn1            | 271.2378501 | 0.200588792  | 0.1332389 | 1.5054819 | 0.1322   | 0.666055 |
| phex             | 578.5486534 | 0.105865741  | 0.1118932 | 0.9461321 | 0.344081 | 0.878434 |
| bc12l13          | 698.3219639 | 0.287702299  | 0.0998887 | 2.8802299 | 0.003974 | 0.086636 |
| nrd1b            | 327.4266375 | 0.058578372  | 0.125041  | 0.4684735 | 0.639446 | 0.959994 |
| leng9            | 114.8737625 | -0.10030814  | 0.1902601 | -0.527216 | 0.598044 | 0.955459 |
| nlgn3b           | 1100.391209 | 0.001001824  | 0.0919287 | 0.0108978 | 0.991305 | 0.997679 |
| CRHR2            | 17.08768559 | -0.092017913 | 0.4687149 | -0.19632  | 0.84436  | 0.985174 |
| slc35a4          | 484.9612734 | -0.13491902  | 0.1047392 | -1.288143 | 0.197696 | 0.762928 |
| si:ch211-238n5.4 | 478.6157333 | 0.005741973  | 0.1062016 | 0.0540667 | 0.956882 | 0.994543 |
| snapin           | 480.6476312 | 0.081419967  | 0.107712  | 0.7559043 | 0.449707 | 0.918526 |
| flcn             | 541.2485537 | -0.250058234 | 0.1041522 | -2.400892 | 0.016355 | 0.236236 |
| cdc42ep5         | 240.1268904 | 0.014197645  | 0.1400626 | 0.1013664 | 0.91926  | 0.991623 |
| ankslaa          | 49.41627217 | -0.005151258 | 0.2734054 | -0.018841 | 0.984968 | 0.996944 |
| ndst1a           | 336.4602929 | 0.024949938  | 0.1262359 | 0.1976453 | 0.843323 | 0.985174 |
| znf319b          | 205.2622365 | 0.053199675  | 0.1476265 | 0.3603668 | 0.718573 | 0.96909  |
| frem1b           | 364.0028586 | 0.253912584  | 0.1194711 | 2.1253062 | 0.033561 | 0.357045 |
| ctnnd2a          | 686.0199261 | -0.025942901 | 0.1052059 | -0.246592 | 0.805224 | 0.979883 |
| t1l              | 64.96248616 | 0.145076315  | 0.2432329 | 0.5964502 | 0.550875 | 0.946549 |
| nfia             | 123.7384249 | -0.197416228 | 0.1904393 | -1.036636 | 0.299906 | 0.855995 |
| pex2             | 45.69531047 | 0.373222616  | 0.2863881 | 1.3032057 | 0.192505 | 0.756795 |
| zgc:153901       | 54.30986512 | -0.213485361 | 0.2754656 | -0.774998 | 0.438341 | 0.915672 |
| zgc:153521       | 220.0885802 | 0.021991825  | 0.1417074 | 0.1551918 | 0.87667  | 0.987881 |
| clcn2a           | 21.50449436 | 0.255593083  | 0.4162189 | 0.6140833 | 0.53916  | 0.943733 |
| trim109          | 45.19789166 | 0.161406187  | 0.2895328 | 0.5574712 | 0.577206 | 0.950788 |
| gpd2             | 79.42191742 | 0.037019635  | 0.2345921 | 0.1578043 | 0.874611 | 0.987881 |
| msrblb           | 6.706896195 | 0.657116941  | 0.7578947 | 0.8670293 | 0.385926 | NA       |
| pias1b           | 145.2365352 | -0.06982186  | 0.1656992 | -0.421377 | 0.67348  | 0.965257 |
| neur12           | 47.99653582 | 0.604909374  | 0.2908692 | 2.0796609 | 0.037557 | 0.379013 |
| hecw2a           | 413.8791472 | 0.02158008   | 0.1161261 | 0.1858331 | 0.852576 | 0.985174 |
| skor1b           | 300.1817534 | -0.109262965 | 0.1391675 | -0.785118 | 0.432384 | 0.91326  |
| xpr1a            | 770.1004322 | 0.170014276  | 0.0990463 | 1.7165125 | 0.086068 | 0.563109 |
| rnf115           | 526.6870139 | -0.110279458 | 0.113318  | -0.973186 | 0.330461 | 0.874098 |
| las1l            | 523.1155248 | -0.102715927 | 0.1114201 | -0.92188  | 0.356591 | 0.883422 |
| sgk3             | 366.1950314 | -0.007966274 | 0.1227007 | -0.064924 | 0.948234 | 0.99381  |
| shisa7a          | 99.47272188 | 0.115870472  | 0.1994576 | 0.580928  | 0.561289 | 0.948728 |
| zc3h12b          | 13.34284771 | 0.235152923  | 0.5223165 | 0.4502116 | 0.652558 | 0.960708 |
| pgap1            | 40.38339937 | -0.08281801  | 0.3157567 | -0.262284 | 0.793102 | 0.977937 |
| stra6l           | 66.14240547 | 0.294155052  | 0.2490962 | 1.1808896 | 0.237647 | 0.806474 |
| hipk3a           | 844.5772387 | -0.031990647 | 0.0912242 | -0.350682 | 0.725827 | 0.970402 |
| tafa4b           | 80.83670686 | -0.028243136 | 0.2275201 | -0.124135 | 0.901209 | 0.990121 |
| sin3b            | 833.7475751 | 0.061604828  | 0.1083249 | 0.5687044 | 0.569557 | 0.948983 |
| snape5           | 366.6339974 | 0.207954536  | 0.1165179 | 1.7847438 | 0.074303 | 0.530996 |

|                   |             |              |           |           |          |          |
|-------------------|-------------|--------------|-----------|-----------|----------|----------|
| kiaal5491a        | 1147.094776 | 0.146491973  | 0.0980672 | 1.4937917 | 0.13523  | 0.670689 |
| ackr3a            | 28.21807685 | 0.028982404  | 0.3930716 | 0.0737331 | 0.941223 | 0.992857 |
| vcamlb            | 539.9476044 | 0.018616239  | 0.1049426 | 0.1773945 | 0.859199 | 0.985773 |
| mlphb             | 87.47696291 | -0.593353563 | 0.2176846 | -2.725749 | 0.006416 | 0.122335 |
| lyvelb            | 23.32611585 | -0.38954319  | 0.4160367 | -0.936319 | 0.349109 | 0.880195 |
| dock11            | 252.3000721 | -0.003866284 | 0.1410589 | -0.027409 | 0.978134 | 0.996762 |
| si:dkey-6n6.1     | 522.6879747 | 0.021557581  | 0.1290345 | 0.1670683 | 0.867316 | 0.987125 |
| 8-Mar             | 746.8207964 | 0.133567466  | 0.0915863 | 1.4583776 | 0.144736 | 0.688986 |
| hhip11            | 233.229752  | -0.159608993 | 0.1370727 | -1.164411 | 0.244257 | 0.813808 |
| si:ch73-19616.5   | 6.685284747 | -0.422152443 | 0.736138  | -0.573469 | 0.566327 | NA       |
| zc3h18            | 1226.55275  | -0.051635962 | 0.0946449 | -0.545576 | 0.585358 | 0.952585 |
| cplx3a            | 21.37995931 | -0.034899467 | 0.4275191 | -0.081633 | 0.934939 | 0.992702 |
| bcl11ba           | 1695.977431 | -0.058024106 | 0.0916179 | -0.633327 | 0.52652  | 0.940506 |
| golga3            | 495.7079526 | -0.194163344 | 0.1075179 | -1.805869 | 0.070939 | 0.521075 |
| tecprla           | 142.3484949 | -0.007515279 | 0.1990488 | -0.037756 | 0.969882 | 0.996315 |
| si:ch211-107n13.1 | 51.58930651 | 0.048086868  | 0.2723336 | 0.1765734 | 0.859844 | 0.985773 |
| ulk1a             | 208.09428   | -0.017883642 | 0.1457677 | -0.122686 | 0.902356 | 0.990121 |
| abcc13            | 62.07509274 | 0.221709889  | 0.2463546 | 0.8999625 | 0.36814  | 0.88754  |
| atp9b             | 46.3411669  | 0.348238277  | 0.2913115 | 1.1954154 | 0.231925 | 0.800084 |
| ASTE1             | 34.25707887 | 0.227846167  | 0.3524981 | 0.6463756 | 0.518036 | 0.938592 |
| mapk8ip3          | 2349.69571  | 0.06197481   | 0.0802464 | 0.7723065 | 0.439933 | 0.916082 |
| washc2c           | 839.8022762 | -0.105510793 | 0.0993464 | -1.062049 | 0.288213 | 0.845979 |
| si:dkey-117i10.1  | 28.9487939  | -0.617907527 | 0.3692786 | -1.673283 | 0.094272 | 0.583986 |
| TMEM132C          | 101.2801972 | -0.201137304 | 0.2127957 | -0.945213 | 0.34455  | 0.878434 |
| acmsd             | 186.0694802 | -0.463384437 | 0.1552967 | -2.983865 | 0.002846 | 0.069229 |
| rc3h1a            | 20.39234352 | 0.588168357  | 0.4357852 | 1.3496748 | 0.17712  | 0.738119 |
| lpar6a            | 520.4950361 | -0.014588851 | 0.1125012 | -0.129677 | 0.896822 | 0.989971 |
| bach1a            | 102.8590447 | -0.017485744 | 0.1944557 | -0.089921 | 0.92835  | 0.992702 |
| rspryl            | 639.9096324 | 0.126626232  | 0.0969157 | 1.3065604 | 0.191362 | 0.755886 |
| adck1             | 152.7884583 | 0.04589124   | 0.1655674 | 0.2771756 | 0.781645 | 0.97627  |
| egln2             | 40.301933   | 0.243195576  | 0.3156787 | 0.7703897 | 0.441069 | 0.916336 |
| kcnh4a            | 39.55171349 | 0.1027917    | 0.3117706 | 0.329703  | 0.741624 | 0.973154 |
| mrpl2             | 889.2966882 | 0.004994688  | 0.0947224 | 0.0527298 | 0.957947 | 0.99467  |
| znrf3             | 227.8532779 | 0.161956612  | 0.1374308 | 1.1784591 | 0.238614 | 0.807659 |
| si:ch211-210g13.5 | 38.20192741 | 0.230334777  | 0.3117685 | 0.7388007 | 0.460028 | 0.921978 |
| arhgap35a         | 1177.349564 | -0.080468706 | 0.0834249 | -0.964565 | 0.334763 | 0.875699 |
| kremen1           | 14.72278174 | -0.549865671 | 0.5128161 | -1.072247 | 0.283609 | 0.84466  |
| brat1             | 211.8881369 | -0.102144548 | 0.1563822 | -0.653172 | 0.513645 | 0.936778 |
| pleca             | 1676.681507 | 0.246831405  | 0.0776838 | 3.1773877 | 0.001486 | 0.042404 |
| myl10             | 4234.090062 | 0.153233613  | 0.1086295 | 1.4106072 | 0.15836  | 0.709224 |
| stox1             | 261.2936363 | -0.018914651 | 0.1441592 | -0.131207 | 0.895612 | 0.989814 |
| coq7              | 273.6653857 | -0.035220797 | 0.135142  | -0.260621 | 0.794385 | 0.977937 |
| ltc4s             | 5.270330169 | -0.206427804 | 0.8462949 | -0.243919 | 0.807293 | NA       |
| piwil2            | 22.70341272 | 0.049653204  | 0.4117852 | 0.1205804 | 0.904023 | 0.990291 |
| si:dkey-26i13.8   | 123.663493  | 0.034236144  | 0.1910309 | 0.1792178 | 0.857767 | 0.985703 |
| dhx37             | 387.1325765 | -0.120577698 | 0.1136937 | -1.060549 | 0.288895 | 0.845979 |
| kcnj12b           | 211.5808972 | 0.381129078  | 0.1529994 | 2.4910491 | 0.012737 | 0.200229 |
| satb1b            | 79.97695706 | -0.065869808 | 0.2323627 | -0.283478 | 0.77681  | 0.975826 |
| dnah9l            | 23.05657846 | -0.020726127 | 0.4059822 | -0.051052 | 0.959284 | 0.995115 |
| npffr112          | 10.30465418 | -0.384379168 | 0.6020053 | -0.638498 | 0.52315  | NA       |
| duox              | 22.57138423 | -0.47741158  | 0.4108374 | -1.162045 | 0.245217 | 0.815227 |
| cadm2b            | 197.4858304 | 0.028244512  | 0.1480373 | 0.1907933 | 0.848688 | 0.985174 |
| kat2b             | 24.41240544 | -0.189755676 | 0.3909993 | -0.485309 | 0.627457 | 0.957354 |
| fem1b             | 290.5892078 | -0.007908242 | 0.1297852 | -0.060933 | 0.951412 | 0.99381  |

|                 |             |              |           |           |          |          |
|-----------------|-------------|--------------|-----------|-----------|----------|----------|
| kcnh8           | 20.45551806 | -0.330888816 | 0.4575133 | -0.723233 | 0.469537 | 0.924505 |
| tet3            | 3392.541335 | -0.117940745 | 0.0807393 | -1.46076  | 0.144081 | 0.68818  |
| rif1            | 865.3471173 | -0.109990633 | 0.0929408 | -1.183448 | 0.236632 | 0.805854 |
| zc3hc1          | 405.391716  | -0.02752817  | 0.1192653 | -0.230815 | 0.817459 | 0.981594 |
| ydjc            | 103.6156123 | 0.084609758  | 0.2206472 | 0.3834618 | 0.701377 | 0.968134 |
| abca4b          | 755.3394392 | 0.273458118  | 0.0994503 | 2.7496972 | 0.005965 | 0.116901 |
| lmod3           | 101.3145158 | 0.648851511  | 0.2211044 | 2.9345931 | 0.00334  | 0.077242 |
| oxnad1          | 276.2832021 | -0.109284645 | 0.1319984 | -0.827924 | 0.407713 | 0.9014   |
| mpp3b           | 212.324504  | 0.169371147  | 0.144037  | 1.1758866 | 0.23964  | 0.808091 |
| kcnj19b         | 112.6077538 | 0.035271217  | 0.1994381 | 0.1768529 | 0.859624 | 0.985773 |
| btbd10a         | 1130.174981 | -0.061345084 | 0.0818062 | -0.749883 | 0.453325 | 0.920041 |
| megf11          | 246.5598196 | 0.062856027  | 0.1614376 | 0.3893519 | 0.697016 | 0.96736  |
| kcnh7           | 19.75536019 | 0.119766482  | 0.4364977 | 0.2743806 | 0.783792 | 0.97627  |
| gpnmb           | 1285.037931 | -0.642137713 | 0.0868455 | -7.394026 | 1.42E-13 | 5.63E-11 |
| nrxn3b          | 407.1390744 | 0.142748082  | 0.1292685 | 1.1042757 | 0.269474 | 0.834705 |
| ccdc126         | 106.654302  | 0.003393585  | 0.1936597 | 0.0175234 | 0.986019 | 0.996944 |
| dgkg            | 8.739866393 | -0.608634811 | 0.6408705 | -0.9497   | 0.342265 | NA       |
| nkain4          | 124.1082104 | 0.182631134  | 0.1903814 | 0.9592908 | 0.337412 | 0.876394 |
| ankmyl          | 24.11961343 | -0.130368064 | 0.3833603 | -0.340067 | 0.733806 | 0.971993 |
| plat            | 38.47914385 | 0.603072005  | 0.3352452 | 1.798898  | 0.072035 | 0.525083 |
| gal3st1a        | 129.1875167 | 0.473325182  | 0.1772701 | 2.6700796 | 0.007583 | 0.138588 |
| tmem264         | 40.23436849 | -0.133132472 | 0.3017863 | -0.441148 | 0.659106 | 0.962839 |
| pcdh1a          | 493.7812404 | 0.106971244  | 0.1157008 | 0.9245509 | 0.3552   | 0.882342 |
| dennd4a         | 202.7392673 | 0.100098712  | 0.1476204 | 0.6780818 | 0.49772  | 0.93348  |
| cep290          | 527.1048758 | 0.012686614  | 0.1076257 | 0.1178772 | 0.906165 | 0.990702 |
| scn11ab         | 152.1355428 | 0.006235975  | 0.1721023 | 0.0362341 | 0.971096 | 0.996315 |
| socs5b          | 145.0452673 | 0.244758806  | 0.180861  | 1.353298  | 0.17596  | 0.736505 |
| pkn1b           | 49.25554472 | -0.124526235 | 0.283395  | -0.439409 | 0.660365 | 0.963766 |
| ino80b          | 301.2991406 | 0.003353056  | 0.1350491 | 0.0248284 | 0.980192 | 0.996879 |
| si:ch73-74h11.1 | 491.4896031 | 0.209894874  | 0.103497  | 2.0280293 | 0.042557 | 0.405751 |
| mfap3l          | 1027.722544 | 0.065074564  | 0.0899843 | 0.7231766 | 0.469571 | 0.924505 |
| naif1           | 9.716820657 | 0.609795567  | 0.6634065 | 0.9191884 | 0.357997 | NA       |
| pllp            | 179.2826684 | -0.522546655 | 0.1564738 | -3.339515 | 0.000839 | 0.02694  |
| zgc:158403      | 220.5268085 | -0.157701619 | 0.1549054 | -1.018051 | 0.308654 | 0.861088 |
| CR352265.1      | 46.31371161 | 0.261262718  | 0.2899145 | 0.9011715 | 0.367497 | 0.887458 |
| nsd3            | 92.44661561 | -0.018699828 | 0.2116046 | -0.088372 | 0.929581 | 0.992702 |
| snx21           | 20.62507138 | 0.097928817  | 0.4225745 | 0.2317433 | 0.816737 | 0.981594 |
| aifm3           | 9.330820821 | 0.10901423   | 0.6622963 | 0.1646004 | 0.869259 | NA       |
| glsl            | 24.49009777 | -0.121505654 | 0.3833837 | -0.31693  | 0.751297 | 0.97419  |
| adpgk2          | 29.52862003 | -0.177526686 | 0.3527959 | -0.503199 | 0.614824 | 0.95688  |
| irg1l           | 641.2084377 | -0.49342672  | 0.2597848 | -1.899367 | 0.057516 | 0.470942 |
| CU639469.1      | 2598.151115 | 0.047073695  | 0.073377  | 0.6415323 | 0.521177 | 0.939056 |
| trim36          | 600.7567787 | -0.025827344 | 0.1006362 | -0.256641 | 0.797456 | 0.978577 |
| abcb7           | 698.1207532 | -0.088529083 | 0.0938704 | -0.943099 | 0.34563  | 0.878469 |
| nell2b          | 3115.540821 | 0.082315108  | 0.079179  | 1.0396075 | 0.298522 | 0.85439  |
| baiap2a         | 416.1209708 | 0.080333338  | 0.1140211 | 0.7045477 | 0.481092 | 0.927927 |
| erf13           | 1149.388098 | 0.033925708  | 0.0808968 | 0.4193701 | 0.674946 | 0.965257 |
| ttl19           | 23.26735583 | -0.164899096 | 0.4103699 | -0.40183  | 0.687809 | 0.966442 |
| CR786571.1      | 20.94828419 | 0.087958538  | 0.4186758 | 0.2100874 | 0.833599 | 0.983583 |
| p2ry10          | 0.714370301 | 1.588951002  | 2.5174818 | 0.6311668 | 0.527931 | NA       |
| glsa            | 31.94511089 | 0.75012436   | 0.3445834 | 2.176902  | 0.029488 | 0.332709 |
| crym            | 82.96823416 | -0.690525879 | 0.2197876 | -3.141787 | 0.001679 | 0.047099 |
| irgf3           | 3.775917256 | -0.382487127 | 1.0567128 | -0.361959 | 0.717382 | NA       |
| slc6a15         | 101.5699783 | -0.241096165 | 0.2010589 | -1.199132 | 0.230477 | 0.798571 |

|                   |             |              |           |           |          |          |
|-------------------|-------------|--------------|-----------|-----------|----------|----------|
| pi4kab            | 109.4905568 | -0.182381408 | 0.2170405 | -0.840311 | 0.400734 | 0.90084  |
| alx1              | 72.46192291 | -0.537689468 | 0.2551318 | -2.107497 | 0.035074 | 0.364435 |
| si:ch73-171o20.1  | 0.157187365 | -0.955901296 | 4.0804729 | -0.234262 | 0.814781 | NA       |
| tent5d            | 14.46285919 | -0.043598514 | 0.5468598 | -0.079725 | 0.936456 | 0.992702 |
| si:ch73-22o12.1   | 1138.702057 | -0.077024426 | 0.0863627 | -0.891872 | 0.372462 | 0.892843 |
| ecsit             | 400.4325688 | 0.289397841  | 0.1131977 | 2.5565697 | 0.010571 | 0.17767  |
| spata13           | 932.8236422 | 0.04684783   | 0.0866398 | 0.5407192 | 0.588701 | 0.953319 |
| tmtc3             | 1009.266739 | 0.090918826  | 0.0900022 | 1.0101849 | 0.312407 | 0.864401 |
| kcnk10a           | 20.60258812 | -0.572272145 | 0.4349967 | -1.315578 | 0.188316 | 0.753187 |
| sdklb             | 77.01597758 | 0.010739479  | 0.2281145 | 0.0470793 | 0.96245  | 0.995907 |
| plekhg7           | 218.6047008 | -0.187322815 | 0.1541945 | -1.214848 | 0.224424 | 0.79161  |
| gk5               | 419.9896049 | -0.018524963 | 0.1209135 | -0.153208 | 0.878234 | 0.987881 |
| mras              | 678.1736578 | 0.061192152  | 0.0990684 | 0.6176756 | 0.536789 | 0.943336 |
| eeal              | 84.67955249 | -0.002929195 | 0.2162818 | -0.013543 | 0.989194 | 0.997589 |
| mrs2              | 147.6247778 | -0.031035304 | 0.1733446 | -0.179038 | 0.857908 | 0.985703 |
| slc2a11l          | 15.61043974 | 0.710405241  | 0.5325793 | 1.3338958 | 0.182238 | 0.74454  |
| hcar1-3           | 10.94439365 | 0.182146435  | 0.5631852 | 0.3234219 | 0.746376 | NA       |
| cntn3a.1          | 389.4325015 | 0.054700474  | 0.1227106 | 0.4457682 | 0.655765 | 0.961833 |
| map3k2            | 7.811705999 | 0.404265151  | 0.7090621 | 0.5701406 | 0.568582 | NA       |
| steap2            | 139.9372553 | 0.238079096  | 0.1902306 | 1.2515287 | 0.210742 | 0.778412 |
| foxe3             | 34.76518999 | -0.398478468 | 0.3301285 | -1.207041 | 0.227417 | 0.794775 |
| si:dkey-103i16.6  | 25.4425752  | -0.216993373 | 0.3783968 | -0.573455 | 0.566337 | 0.948739 |
| tnksb             | 1327.61333  | -0.081607589 | 0.0834537 | -0.977878 | 0.328135 | 0.872701 |
| si:ch211-81a5.1   | 42.65410902 | 0.490771088  | 0.3076225 | 1.5953681 | 0.11063  | 0.625514 |
| si:dkey-220f10.4  | 137.0183912 | -0.113378604 | 0.1807674 | -0.627207 | 0.530524 | 0.942209 |
| idua              | 56.76403922 | -0.272846149 | 0.2548061 | -1.070799 | 0.28426  | 0.844697 |
| kcnv2b            | 31.90918857 | 0.365803962  | 0.3386962 | 1.0800356 | 0.280126 | 0.843423 |
| furina            | 958.7010459 | 0.134480017  | 0.0899768 | 1.4946082 | 0.135017 | 0.670689 |
| polr3b            | 514.2907744 | -0.030138068 | 0.1089659 | -0.276583 | 0.782101 | 0.97627  |
| mrpl37            | 742.2062191 | -0.104661692 | 0.0940724 | -1.112566 | 0.265895 | 0.831945 |
| tceanc2           | 109.7534931 | 0.016168184  | 0.1989969 | 0.0812484 | 0.935244 | 0.992702 |
| si:ch211-243o19.4 | 6.893171651 | -0.524638879 | 0.7589439 | -0.691275 | 0.489393 | NA       |
| FAM83G            | 456.8103847 | 0.266605164  | 0.1095505 | 2.4336275 | 0.014948 | 0.223931 |
| cmip              | 1967.657404 | 0.054926042  | 0.0732998 | 0.7493343 | 0.453656 | 0.920041 |
| gpr12             | 13.52673682 | 0.859803948  | 0.532583  | 1.6144038 | 0.10644  | 0.615567 |
| ndnf              | 1499.704697 | 0.017303249  | 0.0769207 | 0.2249493 | 0.822019 | 0.982186 |
| kcnala            | 15.64582505 | 0.383113402  | 0.4761226 | 0.8046528 | 0.42102  | 0.90651  |
| tacol             | 139.1154954 | -0.371780948 | 0.1740256 | -2.136358 | 0.03265  | 0.352204 |
| amn               | 56.65904527 | -1.328053079 | 0.267792  | -4.959271 | 7.08E-07 | 7.48E-05 |
| wasf3b            | 819.567122  | -0.084033055 | 0.1002956 | -0.837854 | 0.402113 | 0.90084  |
| nt5dc3            | 6.856417514 | 0.091347151  | 0.7206579 | 0.1267552 | 0.899134 | NA       |
| meak7             |             | 0 NA         | NA        | NA        | NA       | NA       |
| clk2a             | 1551.441813 | -0.066598808 | 0.0783275 | -0.850261 | 0.39518  | 0.899244 |
| dipklaa           | 207.2945899 | 0.043484763  | 0.1549792 | 0.2805846 | 0.779029 | 0.976146 |
| dagla             | 620.4046258 | 0.07890552   | 0.1016302 | 0.7763982 | 0.437514 | 0.914814 |
| zgc:158785        | 164.2668563 | 0.076452183  | 0.165481  | 0.4619998 | 0.644081 | 0.960129 |
| armc10            | 192.2716913 | 0.196744375  | 0.1563879 | 1.258054  | 0.208372 | 0.775404 |
| kmt2ba            | 926.7493228 | -0.041541012 | 0.085503  | -0.485843 | 0.627079 | 0.957354 |
| si:dkey-246g23.2  | 5.969952619 | -0.003133983 | 0.8040674 | -0.003898 | 0.99689  | NA       |
| fam45a            | 224.1976916 | -0.005818907 | 0.1437829 | -0.04047  | 0.967718 | 0.996315 |
| kcng4a            | 88.68544136 | 0.201143219  | 0.2217704 | 0.9069886 | 0.364413 | 0.886564 |
| sbfl              | 1720.156383 | 0.048385644  | 0.0832897 | 0.5809318 | 0.561286 | 0.948728 |
| fam129ba          | 482.6409767 | -0.053944913 | 0.1059549 | -0.509131 | 0.61066  | 0.95688  |
| sdhaf2            | 547.018925  | 0.063595192  | 0.1051561 | 0.6047696 | 0.545332 | 0.945526 |

|                  |             |              |           |           |          |          |
|------------------|-------------|--------------|-----------|-----------|----------|----------|
| hipl             | 895.3444034 | -0.083138362 | 0.0854842 | -0.972558 | 0.330773 | 0.87417  |
| ttl17            | 603.9614004 | 0.072932695  | 0.1005146 | 0.7255929 | 0.468088 | 0.924328 |
| itga2.2          | 21.98192721 | -0.162288765 | 0.4114986 | -0.394385 | 0.693297 | 0.96736  |
| iffola           | 9.553064119 | 0.06381561   | 0.6185144 | 0.1031756 | 0.917824 | NA       |
| samd13           | 297.3213181 | 0.039976087  | 0.1236694 | 0.3232497 | 0.746506 | 0.97419  |
| ccdc151          | 29.2510855  | 0.234856806  | 0.3615246 | 0.6496289 | 0.515932 | 0.93786  |
| fbxo18           | 391.4126972 | -0.081263947 | 0.112243  | -0.724    | 0.469066 | 0.92448  |
| pnpla7a          | 923.8415673 | -0.065712794 | 0.0959813 | -0.684642 | 0.49357  | 0.931926 |
| tywl             | 314.3987991 | -0.266881175 | 0.1260144 | -2.117862 | 0.034187 | 0.359388 |
| abilb            | 29.30184626 | -0.09222736  | 0.3791375 | -0.243256 | 0.807807 | 0.980642 |
| si:dkey-14o18.2  | 8.81485339  | 0.586731841  | 0.7206492 | 0.8141712 | 0.415547 | NA       |
| hyal2b           | 390.5591096 | 0.207889152  | 0.1197785 | 1.735613  | 0.082632 | 0.554782 |
| pglyrp2          | 19.9291249  | 0.626183664  | 0.4343464 | 1.4416688 | 0.149396 | 0.696734 |
| atp8a1           | 44.79107178 | 0.124138709  | 0.3316313 | 0.3743275 | 0.708161 | 0.968664 |
| alkbh5           | 182.5678037 | -0.124385973 | 0.1569032 | -0.792756 | 0.42792  | 0.910858 |
| anapc7           | 263.5741472 | -0.04915567  | 0.1466403 | -0.335212 | 0.737465 | 0.972535 |
| cacng7a          | 50.1968861  | 0.145713234  | 0.2791172 | 0.5220504 | 0.601635 | 0.956045 |
| apc2             | 302.8539667 | -0.160513368 | 0.1225548 | -1.309728 | 0.190288 | 0.754967 |
| si:dkeyp-27e10.3 | 567.4677516 | 0.110067434  | 0.1081878 | 1.0173742 | 0.308975 | 0.861246 |
| catip            | 41.24346198 | 0.245086465  | 0.3006254 | 0.8152554 | 0.414926 | 0.906237 |
| antxr2b          | 48.58621393 | 0.170744692  | 0.2807489 | 0.6081759 | 0.543071 | 0.944974 |
| dbpa             | 641.7853818 | 0.159841991  | 0.1061201 | 1.5062372 | 0.132006 | 0.665721 |
| fam78ba          | 41.13627376 | -0.070031384 | 0.3177019 | -0.220431 | 0.825535 | 0.982196 |
| panx2            | 76.88563369 | 0.19790513   | 0.2328175 | 0.850044  | 0.395301 | 0.899293 |
| rpain            | 92.79743544 | -0.038292116 | 0.2109191 | -0.181549 | 0.855937 | 0.985174 |
| mlcl             | 124.4825959 | 0.235004716  | 0.1865007 | 1.260074  | 0.207643 | 0.775175 |
| mesd             | 406.628729  | 0.044531421  | 0.1169215 | 0.380866  | 0.703303 | 0.968134 |
| rad5412          | 1248.00341  | 0.074424661  | 0.0939553 | 0.7921281 | 0.428286 | 0.911082 |
| dok6             | 15.70907789 | -0.064747279 | 0.5442641 | -0.118963 | 0.905305 | 0.990702 |
| psd2             | 630.0262915 | 0.199453153  | 0.100277  | 1.9890222 | 0.046699 | 0.424613 |
| lipea            | 30.27666605 | -0.042937321 | 0.3436773 | -0.124935 | 0.900575 | 0.990121 |
| btbd11b          | 33.92407341 | 0.005927652  | 0.3341429 | 0.0177399 | 0.985846 | 0.996944 |
| thtpa            | 119.2815869 | -0.041880465 | 0.1839658 | -0.227653 | 0.819916 | 0.981594 |
| rc3h2            | 40.87018625 | 0.078176646  | 0.3055647 | 0.2558432 | 0.798072 | 0.978793 |
| bap1             | 521.1256738 | 0.088766034  | 0.1128644 | 0.7864838 | 0.431584 | 0.91277  |
| shank3b          | 217.6573713 | 0.014496641  | 0.158969  | 0.0911916 | 0.92734  | 0.992702 |
| tulp4b           | 766.3906325 | 0.089127832  | 0.0950178 | 0.9380119 | 0.348238 | 0.880195 |
| abcg8            | 28.79990832 | 0.038504648  | 0.3508091 | 0.1097595 | 0.9126   | 0.991119 |
| ubn2a            | 627.2688007 | -0.179682734 | 0.1141907 | -1.573532 | 0.115596 | 0.637206 |
| synelb           | 1372.11636  | 0.020324762  | 0.101041  | 0.2011537 | 0.840578 | 0.985042 |
| gripapl          | 80.86804281 | 0.102775976  | 0.2212309 | 0.4645644 | 0.642243 | 0.959994 |
| sogal            | 196.9072803 | -0.156934102 | 0.1707273 | -0.919209 | 0.357986 | 0.884398 |
| atrip            | 183.6028121 | -0.211841015 | 0.1538729 | -1.376727 | 0.168597 | 0.725919 |
| abcg5            | 55.20093025 | -0.584414317 | 0.2670512 | -2.188398 | 0.028641 | 0.328313 |
| ago3b            | 24.91379987 | -0.154732178 | 0.3801839 | -0.406993 | 0.684013 | 0.965679 |
| si:dkey-211g8.6  | 1.621341276 | -0.610147117 | 1.5935892 | -0.382876 | 0.701812 | NA       |
| ccm21            | 83.04167144 | -0.349063302 | 0.2401315 | -1.453634 | 0.146048 | 0.69189  |
| ctsf             | 3498.844252 | 0.113943985  | 0.0718163 | 1.5866023 | 0.112603 | 0.628452 |
| scubel           | 69.76598671 | -0.097468383 | 0.235927  | -0.413129 | 0.679512 | 0.965257 |
| psmd14           | 1455.547511 | -0.093076841 | 0.0815299 | -1.141628 | 0.253609 | 0.823394 |
| man2a2           | 810.8459065 | 0.083951529  | 0.0919234 | 0.9132766 | 0.361097 | 0.885686 |
| CABZ01059392.1   | 1.11484644  | -0.41260322  | 1.8539026 | -0.222559 | 0.823879 | NA       |
| si:ch73-160i9.1  |             | 0 NA         | NA        | NA        | NA       | NA       |
| gusb             | 289.4400416 | -0.189068596 | 0.1399598 | -1.350878 | 0.176735 | 0.737285 |

|                   |             |              |           |           |          |          |
|-------------------|-------------|--------------|-----------|-----------|----------|----------|
| si:ch211-38m6.7   | 9.793403288 | -0.745472884 | 0.6174453 | -1.207351 | 0.227297 | NA       |
| slc4a10a          | 3013.438204 | 0.048344312  | 0.0721055 | 0.6704662 | 0.502561 | 0.935304 |
| exd3              | 200.1735986 | 0.020414251  | 0.1627076 | 0.1254659 | 0.900155 | 0.990121 |
| shisa7b           | 1474.27488  | 0.054264789  | 0.0770812 | 0.7039951 | 0.481436 | 0.928386 |
| tfam              | 412.1181373 | -0.189656735 | 0.1306329 | -1.45183  | 0.146549 | 0.692967 |
| tmtc1             | 468.6420158 | 0.065197094  | 0.1126432 | 0.5787932 | 0.562729 | 0.948728 |
| nrxn2b            | 1025.030047 | 0.017933525  | 0.0932163 | 0.1923861 | 0.84744  | 0.985174 |
| bcl11ab           | 256.4043568 | -0.193740182 | 0.134889  | -1.436293 | 0.150919 | 0.698912 |
| dcaf12            | 681.0708989 | 0.01714805   | 0.1040233 | 0.1648482 | 0.869063 | 0.987245 |
| mapk8ip2          | 35.87429688 | -0.142022977 | 0.3349679 | -0.42399  | 0.671573 | 0.965257 |
| CABZ01081780.1    | 13.83827897 | 0.20440074   | 0.5426985 | 0.3766377 | 0.706443 | 0.968459 |
| si:dkey-32e23.4   | 54.60187014 | -0.136777287 | 0.267456  | -0.511401 | 0.60907  | 0.956718 |
| ppwd1             | 301.6126941 | 0.045317308  | 0.1327041 | 0.3414913 | 0.732734 | 0.971719 |
| cmtm8b            | 8.794289994 | -0.589428108 | 0.6530308 | -0.902604 | 0.366736 | NA       |
| chkb              | 396.8751305 | 0.132931671  | 0.1118842 | 1.188118  | 0.234787 | 0.803509 |
| ubn1              | 56.44936607 | 0.121865487  | 0.2653827 | 0.4592065 | 0.646086 | 0.96029  |
| manf              | 543.5820348 | 0.173936783  | 0.106497  | 1.6332556 | 0.102415 | 0.608235 |
| dock3             | 47.8929571  | -0.196970194 | 0.3044827 | -0.646901 | 0.517696 | 0.938592 |
| rc3h1b            | 626.0292918 | 0.121640835  | 0.0980767 | 1.2402627 | 0.214878 | 0.782493 |
| si:ch211-220f12.4 | 27.57881602 | -0.076984712 | 0.3666434 | -0.209972 | 0.83369  | 0.983583 |
| agpat5            | 435.2997107 | 0.077257794  | 0.1224403 | 0.6309835 | 0.528051 | 0.941711 |
| zran1b            | 949.9905774 | -0.028719068 | 0.0956828 | -0.300149 | 0.764064 | 0.975374 |
| ext12             | 65.94139578 | -0.136376387 | 0.2455037 | -0.555496 | 0.578555 | 0.951052 |
| lin54             | 469.1433876 | -0.082466288 | 0.1112863 | -0.741028 | 0.458676 | 0.921978 |
| pxk               | 459.35518   | -0.054554002 | 0.1088917 | -0.500993 | 0.616376 | 0.95688  |
| golga2            | 537.9500984 | -0.015217052 | 0.1056461 | -0.144038 | 0.88547  | 0.988936 |
| erbb4a            | 12.43686772 | 0.052712527  | 0.568389  | 0.0927402 | 0.92611  | 0.992702 |
| exoc8             | 218.7777359 | 0.315675248  | 0.1582081 | 1.9953172 | 0.046008 | 0.421189 |
| prmt2             | 38.49695954 | -0.691672952 | 0.315106  | -2.195049 | 0.02816  | 0.325071 |
| mtif2             | 260.436969  | 0.075860393  | 0.1332643 | 0.5692479 | 0.569188 | 0.948983 |
| lrrc3b            | 2.492228153 | -1.4304165   | 1.2737087 | -1.123033 | 0.261424 | NA       |
| ppm1la            | 936.1074404 | -0.031873296 | 0.0875073 | -0.364236 | 0.715682 | 0.96909  |
| ubap21            | 1982.998729 | 0.028641201  | 0.0961715 | 0.2978137 | 0.765845 | 0.975374 |
| ar114             | 128.2980968 | 0.004228863  | 0.1906906 | 0.0221766 | 0.982307 | 0.996944 |
| nxph2a            | 147.0123777 | -0.003851888 | 0.1678256 | -0.022952 | 0.981689 | 0.996944 |
| xpolb             | 4971.767542 | -0.186221855 | 0.0784746 | -2.373022 | 0.017643 | 0.246556 |
| bmp7b             | 95.59182239 | 0.043934623  | 0.2059031 | 0.2133753 | 0.831034 | 0.982994 |
| baz1a             | 325.6494497 | -0.254103063 | 0.1236139 | -2.055619 | 0.039819 | 0.391511 |
| ttc13             | 360.2237881 | 0.092977805  | 0.1232077 | 0.7546427 | 0.450463 | 0.918761 |
| lix11             | 197.5523418 | 0.311862076  | 0.159056  | 1.9607065 | 0.049913 | 0.437835 |
| mrpl9             | 405.8798874 | 0.035681826  | 0.1185283 | 0.3010404 | 0.763384 | 0.975374 |
| spata2            | 372.7256123 | -0.059187347 | 0.1151881 | -0.513832 | 0.607369 | 0.956718 |
| prcc              | 1071.300821 | 0.048504466  | 0.0932744 | 0.520019  | 0.60305  | 0.956045 |
| hecw2b            | 207.9569416 | -0.08934254  | 0.1458129 | -0.61272  | 0.540061 | 0.944206 |
| r3hdm4            | 598.3536965 | 0.048613222  | 0.1043716 | 0.4657706 | 0.64138  | 0.959994 |
| btbd11a           | 376.0445013 | 0.150161792  | 0.1193523 | 1.2581389 | 0.208342 | 0.775404 |
| si:ch211-194e18.2 | 13.05849369 | 0.404107283  | 0.5278013 | 0.7656429 | 0.443889 | 0.916631 |
| rfx5              | 249.123206  | 0.043252807  | 0.1347275 | 0.3210392 | 0.748181 | 0.97419  |
| pcdh9             | 82.3833646  | 0.450228885  | 0.2306538 | 1.9519679 | 0.050942 | 0.442781 |
| SLC35G1           | 57.72228409 | 0.432721839  | 0.2568425 | 1.6847749 | 0.092032 | 0.57849  |
| retreg2           | 146.4824788 | -0.302610725 | 0.1741922 | -1.737224 | 0.082348 | 0.553931 |
| msh3              | 142.6905456 | 0.303326912  | 0.1743205 | 1.7400535 | 0.08185  | 0.552725 |
| abi3b             | 90.37081615 | 0.122437385  | 0.2075648 | 0.5898755 | 0.555274 | 0.947449 |
| ube2t             | 104.3547418 | -0.218971932 | 0.1919688 | -1.140664 | 0.25401  | 0.823394 |

|                    |             |              |           |           |          |          |
|--------------------|-------------|--------------|-----------|-----------|----------|----------|
| slc2a11b           | 215.7294576 | 0.067240834  | 0.1500852 | 0.4480176 | 0.65414  | 0.961305 |
| ssuh2rs1           | 1997.825265 | 0.008048129  | 0.0753094 | 0.1068676 | 0.914894 | 0.991119 |
| neto2b             | 27.15787223 | 0.375369691  | 0.3838581 | 0.9778866 | 0.32813  | 0.872701 |
| myh9a              | 2601.523282 | 0.20967538   | 0.0701013 | 2.9910334 | 0.00278  | 0.06821  |
| abcb6a             | 114.2697385 | 0.192347588  | 0.185367  | 1.0376584 | 0.299429 | 0.855609 |
| pcloa              | 1669.199982 | 0.136051746  | 0.0761138 | 1.7874787 | 0.07386  | 0.529749 |
| CU655845.1         | 53.66762287 | 0.124494314  | 0.2839168 | 0.4384886 | 0.661032 | 0.964099 |
| sgsm2              | 41.76714415 | -0.102770271 | 0.3115554 | -0.329862 | 0.741504 | 0.973154 |
| tjp2a              | 855.7205975 | -0.086298538 | 0.0897894 | -0.961122 | 0.336491 | 0.876088 |
| oxr1b              | 917.9676965 | 0.163116803  | 0.0875241 | 1.8636785 | 0.062367 | 0.487498 |
| soga3a             |             | 0 NA         | NA        | NA        | NA       | NA       |
| plbd1              | 28.89392385 | 0.035507544  | 0.3556264 | 0.0998451 | 0.920467 | 0.99206  |
| apba2a             | 321.9472461 | 0.042366159  | 0.1221148 | 0.3469371 | 0.728639 | 0.970631 |
| FP085394.1         | 27.94856195 | 0.138210984  | 0.3866458 | 0.3574615 | 0.720746 | 0.969395 |
| rab12              | 254.8665993 | 0.075384619  | 0.1348407 | 0.5590645 | 0.576118 | 0.950611 |
| mgat4a             | 886.6367556 | -0.050130028 | 0.0933641 | -0.53693  | 0.591316 | 0.954193 |
| shank3a            | 33.09961325 | 0.379319475  | 0.3626457 | 1.0459782 | 0.295571 | 0.852234 |
| nup210             | 1167.219254 | -0.04032178  | 0.0857623 | -0.470157 | 0.638243 | 0.959231 |
| czib               | 407.2204015 | -0.048932593 | 0.1150074 | -0.425473 | 0.670492 | 0.965257 |
| fam162a            | 338.3949072 | -0.047007974 | 0.1221656 | -0.384789 | 0.700394 | 0.967998 |
| hrc                | 10.62539425 | 0.004436727  | 0.5970158 | 0.0074315 | 0.994071 | NA       |
| inpp4aa            | 1083.873957 | -0.055199909 | 0.0836622 | -0.659795 | 0.509385 | 0.936123 |
| abtb1              | 280.7318269 | 0.127541344  | 0.1301031 | 0.9803099 | 0.326933 | 0.872658 |
| GPR45              | 15.71244239 | -0.045139889 | 0.4982411 | -0.090598 | 0.927812 | 0.992702 |
| micul              | 1134.864775 | -0.206732245 | 0.0977343 | -2.115248 | 0.034409 | 0.360397 |
| si:ch211-1e14.1    | 27.13908904 | 0.216521003  | 0.385016  | 0.5623689 | 0.573865 | 0.949988 |
| sgk2a              | 81.77800914 | 0.073808063  | 0.2284951 | 0.3230181 | 0.746682 | 0.97419  |
| rasa3              | 534.9205449 | 0.052966172  | 0.1198391 | 0.4419774 | 0.658506 | 0.962545 |
| zpld1b             | 22.66901054 | -0.244043796 | 0.4079679 | -0.598194 | 0.549711 | 0.946312 |
| pter               | 125.2582162 | -0.185328446 | 0.1870708 | -0.990686 | 0.321839 | 0.869463 |
| cenpe              | 1033.407345 | -0.05738376  | 0.0866739 | -0.662065 | 0.507929 | 0.935734 |
| sec22c             | 22.86304285 | 0.250933143  | 0.4025602 | 0.6233432 | 0.533059 | 0.942969 |
| pvr12l             | 66.56257121 | 0.059800798  | 0.2630487 | 0.2273373 | 0.820161 | 0.981594 |
| L0018340.1         | 389.7835903 | 0.052254344  | 0.1212738 | 0.430879  | 0.666556 | 0.964736 |
| lrrc73             | 240.3426684 | -0.044225895 | 0.1433155 | -0.308591 | 0.757632 | 0.975374 |
| cers1              | 172.9045487 | -0.04253382  | 0.1666749 | -0.25519  | 0.798576 | 0.978884 |
| rxylt1             | 81.18455043 | -0.206122687 | 0.2204325 | -0.935083 | 0.349746 | 0.880195 |
| ptrk               | 1214.563157 | -0.068030005 | 0.0909099 | -0.748323 | 0.454265 | 0.920541 |
| erf                | 619.5210662 | 0.020969634  | 0.1057562 | 0.1982829 | 0.842824 | 0.985174 |
| DHX35              | 234.1337237 | -0.148962174 | 0.1410897 | -1.055798 | 0.291061 | 0.846568 |
| atp2b2             | 1404.889082 | 0.095397255  | 0.0931871 | 1.0237173 | 0.305969 | 0.860027 |
| trpm4b.2           | 80.67083034 | -0.251158876 | 0.2320721 | -1.082245 | 0.279144 | 0.842806 |
| rph3aa             | 31.23564681 | 0.080011891  | 0.3917089 | 0.2042637 | 0.838147 | 0.984797 |
| wnt9a              | 2.514423416 | -0.557624855 | 1.2516174 | -0.445523 | 0.655942 | NA       |
| srebf2             | 1585.316863 | -0.097144703 | 0.0901778 | -1.077257 | 0.281365 | 0.84357  |
| si:dkey-32n7.7     | 1.804420379 | -0.844592863 | 1.4389097 | -0.586967 | 0.557226 | NA       |
| snap47             | 183.415839  | 0.149707274  | 0.1788501 | 0.8370543 | 0.402562 | 0.90084  |
| iba57              | 167.1904895 | -0.195400692 | 0.1668758 | -1.170935 | 0.241625 | 0.810499 |
| ccdc13             | 6.470450933 | 0.379577446  | 0.7818535 | 0.4854841 | 0.627333 | NA       |
| wash1              | 84.64742616 | -0.147338957 | 0.211666  | -0.696092 | 0.486371 | 0.930833 |
| isyl               | 456.9787139 | 0.026543302  | 0.1086329 | 0.2443394 | 0.806968 | 0.980279 |
| arfgef1            | 1021.820347 | -0.112468201 | 0.0888054 | -1.266456 | 0.20535  | 0.773635 |
| abcg1              | 101.4411171 | 0.128609192  | 0.2066679 | 0.622299  | 0.533745 | 0.943276 |
| si:ch211-214j24.15 | 21.01696122 | -1.271556361 | 0.4745739 | -2.679364 | 0.007376 | 0.135568 |

|                   |             |              |           |           |          |          |
|-------------------|-------------|--------------|-----------|-----------|----------|----------|
| lrrec58b          | 376.0722632 | 0.261092952  | 0.12512   | 2.0867409 | 0.036912 | 0.376038 |
| si:ch211-15d5.11  | 308.9317735 | 0.059395799  | 0.1233896 | 0.4813679 | 0.630255 | 0.957354 |
| zgc:153913        | 406.7661447 | 0.341238776  | 0.1476984 | 2.310375  | 0.020867 | 0.27277  |
| PLEKHB1           | 244.7664527 | 0.269978069  | 0.1486714 | 1.8159385 | 0.06938  | 0.514708 |
| bbs4              | 196.0825932 | 0.275358142  | 0.1872519 | 1.4705227 | 0.14142  | 0.68201  |
| adpgk             | 400.3264793 | 0.294704688  | 0.1200936 | 2.4539586 | 0.014129 | 0.214731 |
| elmo2             | 1396.522027 | 0.063410276  | 0.0793091 | 0.7995335 | 0.423981 | 0.908025 |
| chd4a             | 3604.463414 | 0.009867249  | 0.0828437 | 0.1191068 | 0.905191 | 0.990702 |
| kalrn             | 1089.560276 | 0.041673672  | 0.0925416 | 0.4503236 | 0.652477 | 0.960708 |
| slc25a15a         | 100.8905036 | -0.171362835 | 0.1999312 | -0.857109 | 0.391385 | 0.897688 |
| pip4k2ab          | 14.30298387 | 0.191076288  | 0.5261103 | 0.3631867 | 0.716465 | 0.96909  |
| rlf               | 481.0726299 | -0.221394506 | 0.1061667 | -2.085348 | 0.037038 | 0.376547 |
| si:ch211-166g5.4  | 18.34764839 | -0.178813309 | 0.4913294 | -0.363938 | 0.715905 | 0.96909  |
| pigx              | 119.3775342 | -0.009546521 | 0.2059248 | -0.046359 | 0.963024 | 0.995927 |
| creb312           | 473.0468069 | 0.165162303  | 0.1070878 | 1.5423068 | 0.122999 | 0.65095  |
| syt7a             | 43.64128729 | 0.364398733  | 0.295508  | 1.2331264 | 0.217529 | 0.784786 |
| dyrklaa           | 1128.235421 | -0.005085291 | 0.0921374 | -0.055192 | 0.955985 | 0.994543 |
| perp              | 3567.657838 | 0.052803529  | 0.0715747 | 0.7377405 | 0.460672 | 0.921978 |
| vps41             | 591.7173361 | -0.08741657  | 0.1014723 | -0.861482 | 0.388973 | 0.896295 |
| mtg2              | 171.1039561 | -0.088846209 | 0.1622626 | -0.547546 | 0.584004 | 0.952214 |
| klh135            | 8.469643568 | 0.391010538  | 0.7373176 | 0.5303149 | 0.595894 | NA       |
| DGKI              | 358.2745278 | 0.108503825  | 0.1269358 | 0.854793  | 0.392666 | 0.897688 |
| ppplr9ala         | 299.978821  | 0.005518719  | 0.1317127 | 0.0418997 | 0.966579 | 0.996315 |
| map2k4a           | 40.67993243 | 0.225658752  | 0.3080671 | 0.7324987 | 0.463864 | 0.922875 |
| uba5              | 420.1758116 | 0.02850171   | 0.1127282 | 0.2528357 | 0.800395 | 0.979377 |
| hipkla            | 70.14752558 | -0.170985895 | 0.2353335 | -0.726569 | 0.46749  | 0.924328 |
| bud23             | 235.9735584 | -0.03981546  | 0.1374809 | -0.289607 | 0.772117 | 0.975687 |
| coro2bb           | 60.32656473 | -0.009440199 | 0.2601242 | -0.036291 | 0.97105  | 0.996315 |
| antxr1c           | 552.702651  | 0.114097019  | 0.1018996 | 1.1197009 | 0.262841 | 0.830166 |
| si:ch211-133n4.10 | 2.237463168 | 2.473652019  | 1.6243684 | 1.5228393 | 0.127799 | NA       |
| skor2             | 236.0430323 | -0.115459757 | 0.1487397 | -0.776254 | 0.437599 | 0.914896 |
| aadac             | 72.44904257 | 0.040204889  | 0.275338  | 0.1460202 | 0.883905 | 0.988706 |
| gfml              | 806.3076546 | 0.085297178  | 0.1064889 | 0.8009959 | 0.423134 | 0.907185 |
| ddx21             | 1538.179379 | -0.265783215 | 0.0924492 | -2.874911 | 0.004041 | 0.087626 |
| bop1              | 589.1105288 | -0.239070088 | 0.1052552 | -2.271338 | 0.023127 | 0.291648 |
| VIT               | 1193.050536 | 0.124145105  | 0.0986257 | 1.2587495 | 0.208121 | 0.775404 |
| hpse              | 195.2311269 | -0.183826589 | 0.1554793 | -1.182322 | 0.237078 | 0.80591  |
| nrxn1b            | 311.1925045 | 0.04108027   | 0.1424527 | 0.2883783 | 0.773057 | 0.975687 |
| galnt11           | 780.8602808 | 0.078648388  | 0.0928068 | 0.8474424 | 0.396749 | 0.899672 |
| lnpa              | 106.3246664 | 0.051387008  | 0.1992317 | 0.2579259 | 0.796464 | 0.97852  |
| tead3b            | 46.01744752 | -0.192304117 | 0.2804983 | -0.68558  | 0.492978 | 0.931926 |
| nuak2             | 267.076245  | -0.263661607 | 0.1396113 | -1.888541 | 0.058953 | 0.475038 |
| clp1              | 182.8664059 | 0.159851276  | 0.1594475 | 1.0025325 | 0.316086 | 0.866931 |
| mat2al            | 242.3258718 | -0.528564522 | 0.1397447 | -3.782357 | 0.000155 | 0.006997 |
| gtf2a11           | 16.04815392 | 0.871280869  | 0.4895117 | 1.7798981 | 0.075093 | 0.533746 |
| zmp:0000000711    | 454.6377607 | 0.070851631  | 0.1105763 | 0.6407486 | 0.521686 | 0.939056 |
| ccny              | 75.7474762  | -0.113097967 | 0.2342055 | -0.482901 | 0.629166 | 0.957354 |
| fhod3a            | 587.7802303 | 0.181325258  | 0.1039445 | 1.7444429 | 0.081082 | 0.551495 |
| ppmlh             | 362.244988  | -0.044023033 | 0.1191711 | -0.36941  | 0.711822 | 0.969006 |
| atp23             | 169.2541319 | 0.217309655  | 0.1747806 | 1.243328  | 0.213747 | 0.78213  |
| nrm               | 119.6012583 | -0.032355659 | 0.2028888 | -0.159475 | 0.873295 | 0.987846 |
| rrebl1a           | 536.3198499 | -0.27067384  | 0.1024937 | -2.640882 | 0.008269 | 0.147176 |
| pde8b             | 14.30701698 | 0.205699504  | 0.5110876 | 0.4024741 | 0.687335 | 0.966376 |
| trim3a            | 348.2615528 | -0.090596226 | 0.1200357 | -0.754744 | 0.450403 | 0.918761 |



|                  |             |              |           |           |          |          |
|------------------|-------------|--------------|-----------|-----------|----------|----------|
| syngap1a         | 339.4715064 | 0.152030983  | 0.1737151 | 0.8751741 | 0.381479 | 0.895192 |
| vps72a           | 559.4251573 | 0.056690586  | 0.1038078 | 0.5461113 | 0.584989 | 0.952436 |
| usp8             | 1370.72376  | -0.155352476 | 0.0941602 | -1.649875 | 0.098969 | 0.598346 |
| cdk12            | 990.7603804 | 0.026732053  | 0.0996261 | 0.2683239 | 0.78845  | 0.976703 |
| osbpl6           | 11.62654491 | -0.482616522 | 0.5634408 | -0.856552 | 0.391692 | 0.897688 |
| rbm45            | 17.1866806  | -0.404607028 | 0.4675796 | -0.865322 | 0.386862 | 0.89551  |
| pdella           | 18.13430866 | 0.634709893  | 0.4493525 | 1.4124988 | 0.157803 | 0.709035 |
| cox19            | 96.96363217 | 0.128428599  | 0.2076979 | 0.6183433 | 0.536349 | 0.943336 |
| mt-nd1           | 33221.42279 | 0.093155491  | 0.0723143 | 1.2882026 | 0.197675 | 0.762928 |
| mt-nd2           | 22548.7548  | 0.024613477  | 0.1019747 | 0.2413684 | 0.80927  | 0.980642 |
| mt-co1           | 256080.8098 | 0.002460716  | 0.066161  | 0.0371929 | 0.970331 | 0.996315 |
| mt-co2           | 68688.27516 | -0.029315883 | 0.0646942 | -0.453146 | 0.650444 | 0.960708 |
| mt-atp8          | 3700.989045 | 0.005765716  | 0.3480236 | 0.016567  | 0.986782 | 0.997062 |
| mt-atp6          | 43698.99309 | -0.091730027 | 0.0910063 | -1.007953 | 0.313477 | 0.865132 |
| mt-co3           | 76946.86712 | -0.026262516 | 0.0713983 | -0.367831 | 0.712999 | 0.96909  |
| mt-nd3           | 4292.730446 | 0.181300037  | 0.0940786 | 1.9271125 | 0.053966 | 0.45506  |
| mt-nd41          | 8138.164985 | 0.168322103  | 0.0861474 | 1.9538855 | 0.050715 | 0.44139  |
| mt-nd4           | 22302.67422 | 0.01919201   | 0.0797367 | 0.2406922 | 0.809794 | 0.980648 |
| mt-nd5           | 19288.20675 | 0.037052307  | 0.0837392 | 0.4424728 | 0.658147 | 0.962545 |
| mt-nd6           | 4058.217009 | -0.090863539 | 0.2078337 | -0.437193 | 0.661971 | 0.964543 |
| mt-cyb           | 62928.38624 | 0.049119227  | 0.0922794 | 0.5322879 | 0.594527 | 0.954434 |
| kctd8            | 496.1055271 | -0.140037946 | 0.114301  | -1.225168 | 0.220512 | 0.787502 |
| slc24a4b         | 8.858614761 | 0.196456089  | 0.649829  | 0.3023197 | 0.762408 | NA       |
| ccdc15           | 16.35744632 | 0.267146513  | 0.4783729 | 0.5584483 | 0.576538 | 0.950611 |
| zgc:158482       | 175.4547186 | -0.058411141 | 0.1619938 | -0.360576 | 0.718416 | 0.96909  |
| fut9b            | 84.2749206  | -0.034396057 | 0.2482946 | -0.138529 | 0.889822 | 0.989291 |
| psk5a            | 101.2429675 | -0.162537102 | 0.2015729 | -0.806344 | 0.420044 | 0.90651  |
| tcf15            | 34.75399781 | 0.56922885   | 0.331879  | 1.7151698 | 0.086314 | 0.563258 |
| adam19b          | 335.1696613 | 0.171943727  | 0.1253284 | 1.3719453 | 0.17008  | 0.727199 |
| si:ch211-193c2.2 | 5.651352308 | -1.053804975 | 0.833442  | -1.264401 | 0.206086 | NA       |
| adamts12         | 267.4133802 | 0.481081583  | 0.1354113 | 3.5527443 | 0.000381 | 0.014224 |
| gtf2h3           | 156.6938977 | -0.152480828 | 0.1631713 | -0.934483 | 0.350055 | 0.880195 |
| kisslr1b         | 3.750735178 | 0.343820837  | 1.0779658 | 0.3189534 | 0.749762 | NA       |
| zgc:153044       | 26.06386693 | 0.049962308  | 0.3993007 | 0.1251245 | 0.900425 | 0.990121 |
| sftpb1b          | 66.338965   | 0.064185804  | 0.2366455 | 0.2712319 | 0.786213 | 0.976471 |
| SLC6A13          | 25.0586808  | 0.577001353  | 0.3897445 | 1.4804605 | 0.13875  | 0.677277 |
| puraa            | 117.3926947 | 0.289392217  | 0.1857887 | 1.5576419 | 0.119318 | 0.643589 |
| BX901974.1       | 1.038053482 | 0.018230632  | 1.9186971 | 0.0095016 | 0.992419 | NA       |
| scol             | 294.1675737 | 0.028611805  | 0.1338755 | 0.2137195 | 0.830766 | 0.982994 |
| fancb            | 29.08138829 | -0.277986523 | 0.3571175 | -0.778417 | 0.436323 | 0.914408 |
| arfgap2          | 1090.704837 | 0.07873126   | 0.0955996 | 0.8235519 | 0.410194 | 0.902747 |
| napaa            | 481.3662828 | -0.014544574 | 0.1111873 | -0.130811 | 0.895924 | 0.989866 |
| rsph4a           | 53.53959762 | 0.047288518  | 0.2747777 | 0.1720974 | 0.863361 | 0.985841 |
| srebf1           | 79.36207206 | -0.111293031 | 0.2457974 | -0.452784 | 0.650705 | 0.960708 |
| zswim7           | 22.40375149 | -0.340616928 | 0.4220173 | -0.807116 | 0.4196   | 0.90651  |
| dnajc25          | 123.3154313 | 0.293886707  | 0.1829917 | 1.6060114 | 0.108271 | 0.620153 |
| ywhag1           | 777.2952417 | 0.095933457  | 0.1041662 | 0.9209656 | 0.357068 | 0.883467 |
| zgc:154075       | 260.2919548 | -0.440765639 | 0.1344015 | -3.27947  | 0.00104  | 0.031984 |
| prpf4            | 458.130057  | -0.153536348 | 0.1141939 | -1.344523 | 0.178779 | 0.739486 |
| tmem232          | 7.005556698 | 0.293822161  | 0.7464943 | 0.3936027 | 0.693874 | NA       |
| kcmf1            | 423.3822939 | -0.048582259 | 0.1256725 | -0.386578 | 0.699068 | 0.967998 |
| BX470189.1       | 160.8804296 | 0.085629499  | 0.1591671 | 0.537985  | 0.590587 | 0.954193 |
| ftr80            | 0.316103113 | 0.005883447  | 3.3519121 | 0.0017553 | 0.9986   | NA       |
| si:dkey-172m14.2 | 36.08510355 | 0.361397836  | 0.3541347 | 1.0205095 | 0.307487 | 0.861088 |

|                    |              |               |            |            |           |           |
|--------------------|--------------|---------------|------------|------------|-----------|-----------|
| fam167aa           | 6. 65593274  | -0. 745853789 | 0. 7517668 | -0. 992135 | 0. 321132 | NA        |
| cep57              | 39. 18962761 | 0. 09495955   | 0. 3269118 | 0. 2904746 | 0. 771453 | 0. 975687 |
| zglpl              | 2. 284665674 | 0. 821641665  | 1. 3203789 | 0. 6222772 | 0. 53376  | NA        |
| pomt1              | 287. 0931751 | -0. 049065854 | 0. 1312778 | -0. 373756 | 0. 708586 | 0. 968664 |
| card9              | 18. 1839342  | -0. 414888261 | 0. 4562239 | -0. 909396 | 0. 363141 | 0. 885944 |
| snopc4             | 137. 9484854 | -0. 094581548 | 0. 1981437 | -0. 477338 | 0. 633121 | 0. 957356 |
| plcl1              | 56. 67714015 | 0. 220530718  | 0. 2735042 | 0. 8063157 | 0. 420061 | 0. 90651  |
| myoz3a             | 106. 2449689 | -0. 002713663 | 0. 2300919 | -0. 011794 | 0. 99059  | 0. 997679 |
| shisallb           | 86. 24510159 | 0. 006480293  | 0. 2208381 | 0. 0293441 | 0. 97659  | 0. 996762 |
| parvg              | 22. 88373724 | 0. 219508166  | 0. 4015315 | 0. 5466774 | 0. 5846   | 0. 952411 |
| snx18a             | 534. 7341864 | 0. 018012679  | 0. 103413  | 0. 174182  | 0. 861722 | 0. 985841 |
| hspb3              | 25. 55259461 | -0. 453475536 | 0. 3930866 | -1. 153628 | 0. 248653 | 0. 81797  |
| tomm7              | 498. 7987604 | 0. 012124121  | 0. 1091142 | 0. 1111141 | 0. 911526 | 0. 991066 |
| si:dkey-3h3. 3     | 25. 85815716 | 0. 01761434   | 0. 4057381 | 0. 0434131 | 0. 965372 | 0. 996257 |
| wwtr1              | 39. 69624638 | 0. 013628585  | 0. 3190848 | 0. 0427115 | 0. 965932 | 0. 996315 |
| tank               | 78. 12494054 | -0. 199861844 | 0. 2280624 | -0. 876347 | 0. 380841 | 0. 895192 |
| arid3c             | 79. 2787653  | 0. 193607599  | 0. 2238228 | 0. 865004  | 0. 387037 | 0. 895735 |
| trpc6b             | 11. 78362296 | -0. 44183588  | 0. 5560761 | -0. 79456  | 0. 426869 | 0. 910366 |
| itpkcb             | 574. 2783937 | 0. 044297211  | 0. 1116789 | 0. 3966479 | 0. 691627 | 0. 967305 |
| si:rp71-68n21. 9   | 64. 76952282 | -0. 265165583 | 0. 2436717 | -1. 088208 | 0. 276503 | 0. 839541 |
| pigl               | 106. 1135237 | 0. 077689697  | 0. 1902712 | 0. 4083103 | 0. 683046 | 0. 965476 |
| zgc:158640         | 39. 69617606 | -0. 344199562 | 0. 3021749 | -1. 139074 | 0. 254672 | 0. 823484 |
| urp2               | 34. 05515525 | -0. 055562612 | 0. 3291172 | -0. 168823 | 0. 865936 | 0. 986517 |
| CABZ01088428. 1    | 16. 39454598 | -0. 290672461 | 0. 4917476 | -0. 591101 | 0. 554453 | 0. 947449 |
| cabz01076234. 2    | 15. 8095329  | -0. 077184751 | 0. 4922883 | -0. 156788 | 0. 875412 | 0. 987881 |
| ifngr2             | 490. 5488858 | 0. 249406124  | 0. 1044452 | 2. 3879133 | 0. 016944 | 0. 240499 |
| clpxb              | 590. 610273  | 0. 018974764  | 0. 1017695 | 0. 1864485 | 0. 852093 | 0. 985174 |
| spila              | 37. 8108859  | 0. 388872598  | 0. 3167796 | 1. 2275808 | 0. 219604 | 0. 786189 |
| CABZ01064472. 1    | 123. 04374   | -0. 064320013 | 0. 1827993 | -0. 351861 | 0. 724942 | 0. 970402 |
| ggcx               | 559. 936623  | 0. 168430191  | 0. 100642  | 1. 6735584 | 0. 094217 | 0. 583986 |
| zgc:158432         | 11. 57078072 | -0. 671887338 | 0. 5691217 | -1. 180569 | 0. 237774 | 0. 806474 |
| si:dkeyp-27c8. 1   | 0. 31759079  | 1. 807926197  | 3. 579045  | 0. 5051421 | 0. 613459 | NA        |
| zgc:171844         | 47. 84203799 | -0. 004881931 | 0. 3024068 | -0. 016144 | 0. 98712  | 0. 997136 |
| zmp:0000001127     | 1. 106743675 | 0. 427540854  | 3. 8920321 | 0. 1098503 | 0. 912528 | NA        |
| CABZ01060891. 1    | 7. 049077015 | 0. 440847734  | 0. 7281322 | 0. 6054501 | 0. 54488  | NA        |
| CABZ01083448. 1    | 306. 7641962 | 0. 210562917  | 0. 1283743 | 1. 6402268 | 0. 100958 | 0. 604004 |
| cntnap3            | 491. 9955425 | 0. 015017194  | 0. 119922  | 0. 1252247 | 0. 900346 | 0. 990121 |
| si:ch211-229c8. 13 | 1. 550520356 | -1. 831174474 | 1. 7752598 | -1. 031497 | 0. 302308 | NA        |
| ppargcla           | 124. 2658678 | 0. 101729168  | 0. 1901687 | 0. 5349416 | 0. 59269  | 0. 954434 |
| tbata              | 19. 98229064 | 0. 555122251  | 0. 4474928 | 1. 2405166 | 0. 214784 | 0. 782493 |
| tle2c              | 190. 2655716 | -0. 067865556 | 0. 1724834 | -0. 393461 | 0. 693979 | 0. 96736  |
| riox1              | 355. 1815432 | -0. 182879095 | 0. 1247918 | -1. 465474 | 0. 142792 | 0. 684998 |
| il21               |              | 0 NA          | NA         | NA         | NA        | NA        |
| nmrk2              | 877. 1008228 | 0. 772314776  | 0. 0944471 | 8. 1772243 | 2. 90E-16 | 1. 60E-13 |
| jund               | 549. 2016151 | -0. 014943088 | 0. 1011856 | -0. 14768  | 0. 882595 | 0. 988415 |
| lcn15              | 123. 095363  | 0. 363476652  | 0. 2058888 | 1. 7654025 | 0. 077496 | 0. 542062 |
| scospondin         | 47. 42979725 | 0. 392047371  | 0. 2910933 | 1. 3468099 | 0. 178041 | 0. 738995 |
| CU469531. 1        | 0. 870416506 | -1. 929882401 | 2. 2178997 | -0. 87014  | 0. 384224 | NA        |
| gltpd2             | 27. 51938283 | -0. 403182397 | 0. 3697027 | -1. 090558 | 0. 275467 | 0. 839541 |
| MAN1C1             | 19. 50674084 | -0. 275706823 | 0. 4876921 | -0. 56533  | 0. 57185  | 0. 949494 |
| ints9              | 202. 44705   | 0. 035466218  | 0. 1441594 | 0. 2460208 | 0. 805666 | 0. 979893 |
| lyn                | 45. 92590196 | 0. 373319855  | 0. 2852234 | 1. 3088681 | 0. 190579 | 0. 755212 |
| elp5               | 201. 3409926 | -0. 042348603 | 0. 1515811 | -0. 279379 | 0. 779954 | 0. 976146 |
| rab8a              | 79. 63212194 | 0. 028873297  | 0. 2296817 | 0. 1257101 | 0. 899961 | 0. 990121 |

|                   |             |              |           |           |          |          |
|-------------------|-------------|--------------|-----------|-----------|----------|----------|
| sstr1b            | 62.63498067 | 0.107962245  | 0.2578339 | 0.4187279 | 0.675415 | 0.965257 |
| EVA1A             | 1.803389528 | -0.31515553  | 1.5317887 | -0.205743 | 0.836991 | NA       |
| zcchc2            | 265.2784314 | -0.158958364 | 0.1332814 | -1.192652 | 0.233006 | 0.80134  |
| sh3glla           | 235.6188295 | 0.088187639  | 0.1389691 | 0.6345847 | 0.525699 | 0.940145 |
| slc6a5            | 767.5643371 | 0.267277509  | 0.1199484 | 2.2282707 | 0.025862 | 0.310878 |
| femla             | 108.6012166 | -0.179314912 | 0.1894871 | -0.946317 | 0.343987 | 0.878434 |
| atp5ifla          | 1243.44126  | -0.166005895 | 0.090352  | -1.837323 | 0.066162 | 0.502802 |
| ar                | 46.95040886 | -0.042914956 | 0.290313  | -0.147823 | 0.882482 | 0.988344 |
| nitr7b            | 0.158915748 | 0.967652056  | 4.0804729 | 0.2371421 | 0.812547 | NA       |
| gtf3c5            | 148.7225048 | 0.032594107  | 0.1816785 | 0.1794054 | 0.857619 | 0.985703 |
| zgc:103697        | 273.9131944 | -0.162554138 | 0.1327207 | -1.224784 | 0.220657 | 0.787641 |
| gas1b             | 261.6738305 | -0.019539878 | 0.1396547 | -0.139916 | 0.888727 | 0.989291 |
| ftr23             | 40.72806375 | -0.181153388 | 0.3050236 | -0.5939   | 0.552579 | 0.947265 |
| myhzl.1           | 175097.9459 | 0.409291906  | 0.0892684 | 4.5849609 | 4.54E-06 | 0.000369 |
| si:dkey-31e10.1   | 10.75052383 | 0.596216055  | 0.6055969 | 0.9845097 | 0.324865 | NA       |
| myhzl.2           | 64889.44047 | 0.438056053  | 0.08948   | 4.8955771 | 9.80E-07 | 9.89E-05 |
| csk               | 915.0916117 | 0.074791571  | 0.0905681 | 0.8258045 | 0.408915 | 0.90171  |
| myhzl.3           | 16991.919   | 0.682894619  | 0.08871   | 7.6980583 | 1.38E-14 | 6.66E-12 |
| CABZ01084793.1    | 222.8789157 | 0.006659484  | 0.145217  | 0.0458588 | 0.963423 | 0.995927 |
| gck               | 154.0038036 | 1.233136352  | 0.185156  | 6.6599846 | 2.74E-11 | 7.13E-09 |
| si:ch211-230g14.3 | 8.67979177  | -0.377936211 | 0.6601057 | -0.572539 | 0.566957 | NA       |
| ece2a             | 57.08917572 | 0.275503817  | 0.2742121 | 1.0047106 | 0.315036 | 0.866054 |
| si:cabz01007802.1 | 211.9304549 | 0.099972532  | 0.1511946 | 0.6612178 | 0.508473 | 0.93575  |
| tmem119b          | 238.2935879 | 0.092345152  | 0.1382001 | 0.6681988 | 0.504007 | 0.93532  |
| agbl4             | 33.48012953 | -0.05746331  | 0.3304684 | -0.173884 | 0.861956 | 0.985841 |
| sirt1             | 626.7783671 | 0.059111355  | 0.0989593 | 0.5973302 | 0.550287 | 0.946549 |
| BX664721.2        |             | 0 NA         | NA        | NA        | NA       | NA       |
| wbp4              | 141.3784382 | 0.058201213  | 0.1728109 | 0.3367913 | 0.736274 | 0.972535 |
| CT573494.1        | 0.158915748 | 0.967652056  | 4.0804729 | 0.2371421 | 0.812547 | NA       |
| psmb11b           | 0.499972362 | -2.44370697  | 3.0013188 | -0.814211 | 0.415524 | NA       |
| tcnba             | 826.2375199 | 0.097128089  | 0.0903377 | 1.0751667 | 0.2823   | 0.843666 |
| atf5a             | 1142.173322 | -0.190150861 | 0.0910158 | -2.089208 | 0.036689 | 0.374386 |
| si:ch211-198o12.4 | 1.344727791 | 0.097265354  | 1.731498  | 0.0561741 | 0.955203 | NA       |
| tafa5l            | 178.3118176 | 0.106619467  | 0.1548815 | 0.6883939 | 0.491205 | 0.931926 |
| cfap45            | 66.53801539 | -0.02222937  | 0.2485426 | -0.089439 | 0.928733 | 0.992702 |
| CABZ01040999.1    | 1.305159095 | -0.702694412 | 1.6729937 | -0.420022 | 0.674469 | NA       |
| CABZ01079818.1    | 4.519419941 | -0.099591983 | 0.9320512 | -0.106852 | 0.914906 | NA       |
| f11r.2            | 96.90156562 | 0.494564076  | 0.2082019 | 2.3754062 | 0.01753  | 0.24549  |
| CFAP77            | 30.5005775  | -0.327919576 | 0.348466  | -0.941037 | 0.346686 | 0.8794   |
| gkap1             | 575.0854926 | -0.114684856 | 0.1083403 | -1.058562 | 0.289799 | 0.846246 |
| opn7d             | 7.672242239 | 0.283556518  | 0.718644  | 0.3945716 | 0.693159 | NA       |
| nful              | 408.0012952 | 0.007991297  | 0.1136676 | 0.0703041 | 0.943952 | 0.993364 |
| nppc              | 77.91549846 | 0.05355134   | 0.2287964 | 0.2340567 | 0.814941 | 0.981081 |
| si:ch211-194e1.7  | 4.811775238 | 0.485549871  | 0.8636247 | 0.5622232 | 0.573964 | NA       |
| ppplr15b          | 106.4482676 | -0.396348368 | 0.1919196 | -2.065179 | 0.038906 | 0.386986 |
| spaca9            |             | 0 NA         | NA        | NA        | NA       | NA       |
| ch25h11.2         | 7.776421401 | -0.54968565  | 0.7161515 | -0.767555 | 0.442752 | NA       |
| si:dkey-24l11.2   | 130.8960488 | -0.256660918 | 0.1766035 | -1.453318 | 0.146136 | 0.691942 |
| tnfsf11           | 9.141540013 | 0.479070665  | 0.6201419 | 0.7725178 | 0.439808 | NA       |
| slc39a6           | 574.5441706 | 0.0852894    | 0.1064887 | 0.8009244 | 0.423175 | 0.907185 |
| nmba              | 11.01926073 | 0.386319141  | 0.6948666 | 0.5559616 | 0.578237 | NA       |
| pimr180           | 0.50625413  | -0.940106488 | 2.8357787 | -0.331516 | 0.740255 | NA       |
| arrdcla           | 198.0822568 | 0.083366426  | 0.1576457 | 0.5288213 | 0.596929 | 0.954913 |
| tprgll            | 23.05070627 | -0.146297306 | 0.4608463 | -0.317454 | 0.750899 | 0.97419  |

|                   |             |              |           |           |          |          |
|-------------------|-------------|--------------|-----------|-----------|----------|----------|
| malt3             | 65.27916933 | 0.117482258  | 0.2608808 | 0.4503293 | 0.652473 | 0.960708 |
| chchd7            | 173.1774636 | 0.194124103  | 0.1597655 | 1.2150561 | 0.224345 | 0.79161  |
| ehmt1a            | 367.0581167 | -0.051453031 | 0.1200027 | -0.428766 | 0.668094 | 0.964736 |
| si:dkey-16p6.4    | 0.678375468 | -2.878459328 | 2.4926399 | -1.154783 | 0.248179 | NA       |
| whrnb             | 92.6380882  | 0.296084404  | 0.2081447 | 1.422493  | 0.154883 | 0.704624 |
| hes2.2            | 58.40233711 | 0.059063874  | 0.2630476 | 0.2245369 | 0.82234  | 0.982189 |
| ing5b             | 55.2149824  | -0.063379336 | 0.2642357 | -0.239859 | 0.810439 | 0.980868 |
| uqccl             | 892.9515758 | -0.005370928 | 0.1184069 | -0.04536  | 0.96382  | 0.995927 |
| pak2a             | 1124.131758 | 0.104560248  | 0.0944734 | 1.1067693 | 0.268394 | 0.833634 |
| trib2             | 641.1534036 | 0.269715455  | 0.110677  | 2.4369606 | 0.014811 | 0.222891 |
| dpepl             | 124.66743   | -1.036786726 | 0.1939778 | -5.344872 | 9.05E-08 | 1.28E-05 |
| crb3b             | 79.59146722 | 0.005387538  | 0.2498667 | 0.0215616 | 0.982798 | 0.996944 |
| spg7              | 950.0992347 | 0.014303463  | 0.0899998 | 0.1589277 | 0.873726 | 0.987881 |
| pimr188           | 0.97357257  | 1.035850083  | 1.9870616 | 0.5212974 | 0.60216  | NA       |
| cdh15             | 66.56064879 | 0.281056968  | 0.2532591 | 1.1097606 | 0.267102 | 0.833191 |
| taf4a             | 191.2670699 | 0.004140901  | 0.1611906 | 0.0256895 | 0.979505 | 0.996866 |
| tmem44            | 12.21256804 | -0.123922742 | 0.6310578 | -0.196373 | 0.844318 | 0.985174 |
| klf9              | 239.2624013 | -0.08757923  | 0.1910348 | -0.458447 | 0.646632 | 0.960362 |
| pld3              | 86.68552983 | 0.07008255   | 0.2259219 | 0.3102069 | 0.756404 | 0.975374 |
| def8              | 496.7384843 | 0.124177811  | 0.115479  | 1.0753279 | 0.282228 | 0.843666 |
| fzd10             | 391.5105376 | 0.189965943  | 0.1217793 | 1.5599195 | 0.118779 | 0.642608 |
| ccni              | 5663.507645 | -0.09408099  | 0.0717424 | -1.311372 | 0.189732 | 0.754269 |
| stx2b             | 120.5536557 | 0.360326548  | 0.1930899 | 1.8661077 | 0.062026 | 0.486324 |
| b3gnt21           | 106.8084019 | 0.064215624  | 0.2191797 | 0.2929816 | 0.769536 | 0.975687 |
| mb12              | 88.59542267 | -1.690467372 | 0.2514234 | -6.723587 | 1.77E-11 | 4.87E-09 |
| MBL2 (1 of many)  | 18.82378599 | 0.262570938  | 0.4422727 | 0.5936856 | 0.552722 | 0.947265 |
| tmem150aa         | 46.46710588 | -0.236348009 | 0.285089  | -0.829032 | 0.407086 | 0.901305 |
| CRACR2A           | 44.89180861 | -0.191727406 | 0.2876312 | -0.666574 | 0.505044 | 0.935724 |
| cb1n12            | 52.01155963 | 0.020001417  | 0.2979523 | 0.0671296 | 0.946479 | 0.99381  |
| zgc:64051         | 21.19556495 | 0.013311006  | 0.4287142 | 0.0310487 | 0.975231 | 0.996762 |
| trim110           | 38.0185529  | -0.074745456 | 0.3310206 | -0.225803 | 0.821355 | 0.981845 |
| cngbla            | 202.8265356 | -0.03535211  | 0.1463232 | -0.241603 | 0.809088 | 0.980642 |
| plcb3             | 559.7523114 | -0.179973632 | 0.1015928 | -1.77152  | 0.076474 | 0.538876 |
| luzp2             | 650.7433976 | 0.013144798  | 0.1005165 | 0.1307726 | 0.895955 | 0.989866 |
| si:ch211-151h10.2 | 3.474601019 | -0.401616604 | 0.9912138 | -0.405177 | 0.685348 | NA       |
| nanos3            | 4.363195296 | 0.197165335  | 0.9752159 | 0.2021761 | 0.839779 | NA       |
| rwdd              | 316.0115614 | 0.039088636  | 0.120744  | 0.3237316 | 0.746141 | 0.97419  |
| kcne4             | 104.1908115 | -0.251945357 | 0.2150868 | -1.171366 | 0.241452 | 0.810468 |
| lrch4             | 354.8950367 | 0.049655269  | 0.1265439 | 0.3923956 | 0.694766 | 0.96736  |
| prosl             | 251.9993385 | -0.036490777 | 0.151412  | -0.241003 | 0.809553 | 0.980642 |
| vamp5             | 356.7835709 | -0.053749392 | 0.126609  | -0.424531 | 0.671179 | 0.965257 |
| csflb             | 38.25800781 | 0.678652677  | 0.3192766 | 2.1255946 | 0.033537 | 0.357045 |
| grhpra            | 52.8463285  | -0.173892194 | 0.2681365 | -0.648521 | 0.516648 | 0.938543 |
| tomm5             | 595.7809142 | 0.003880236  | 0.1423958 | 0.0272497 | 0.978261 | 0.996762 |
| si:ch211-203b8.6  | 80.67793039 | 0.124786834  | 0.2242346 | 0.5565013 | 0.577868 | 0.951024 |
| ptx3a             | 551.415947  | 0.413214407  | 0.1198387 | 3.4480871 | 0.000565 | 0.019382 |
| si:ch211-240b21.2 | 3.306524912 | 0.317669912  | 1.0901531 | 0.2913993 | 0.770746 | NA       |
| GRB14             | 20.45225604 | -0.445159486 | 0.4307195 | -1.033525 | 0.301358 | 0.856944 |
| cyp2x10.2         | 1.803430813 | -0.264503508 | 1.4521142 | -0.182151 | 0.855465 | NA       |
| slc7a4            | 15.6717024  | 0.327516183  | 0.4971165 | 0.6588318 | 0.510004 | 0.936253 |
| lamc2             | 112.747283  | 0.196787481  | 0.2304    | 0.8541123 | 0.393043 | 0.897878 |
| eif3k             | 1020.753546 | -0.129307775 | 0.0930704 | -1.389355 | 0.164725 | 0.720954 |
| cyp2x12           | 23.9837081  | -0.495553174 | 0.4005058 | -1.237318 | 0.215969 | 0.783484 |
| TMEM208           | 302.4146952 | -0.070580185 | 0.1245129 | -0.56685  | 0.570816 | 0.949072 |

|                     |             |              |           |           |          |          |
|---------------------|-------------|--------------|-----------|-----------|----------|----------|
| SLC03A1 (1 of many) | 368.9578056 | 0.174507485  | 0.1180164 | 1.4786716 | 0.139228 | 0.677963 |
| zgc:171509          | 2.79202997  | -1.229213255 | 1.2269429 | -1.00185  | 0.316416 | NA       |
| mrps14              | 285.4070272 | -0.037590106 | 0.1385993 | -0.271214 | 0.786226 | 0.976471 |
| astn1               | 1520.632051 | 0.002697931  | 0.08054   | 0.033498  | 0.973277 | 0.996315 |
| si:dkey-21n10.3     | 0           | NA           | NA        | NA        | NA       | NA       |
| mmab                | 132.1916463 | -0.157501965 | 0.175941  | -0.895198 | 0.370681 | 0.890626 |
| si:ch211-132b12.3   | 0           | NA           | NA        | NA        | NA       | NA       |
| lmlbb               | 283.3827831 | -0.047657932 | 0.125591  | -0.379469 | 0.704339 | 0.968134 |
| si:dkey-154p10.3    | 95.99792365 | -0.134832103 | 0.2107609 | -0.63974  | 0.522342 | 0.939056 |
| nfkbie              | 180.2388652 | -0.394085261 | 0.1772041 | -2.223906 | 0.026155 | 0.311744 |
| angpt12b            | 370.0422338 | 0.131083056  | 0.1286254 | 1.0191074 | 0.308152 | 0.861088 |
| ralgps1             | 18.36193044 | -0.071617245 | 0.4366543 | -0.164014 | 0.86972  | 0.987304 |
| zgc:158427          | 0.474778155 | 0.852397662  | 2.898154  | 0.2941175 | 0.768668 | NA       |
| si:ch211-132b12.7   | 581.3149793 | 0.500559878  | 0.112031  | 4.4680469 | 7.89E-06 | 0.000589 |
| foxglc              | 22.89862652 | -0.007506095 | 0.4050212 | -0.018533 | 0.985214 | 0.996944 |
| pglyrp5             | 36.5286113  | -0.203807914 | 0.3276679 | -0.621995 | 0.533945 | 0.943276 |
| slc6a18             | 19.07635738 | 0.281677396  | 0.4527284 | 0.6221774 | 0.533825 | 0.943276 |
| tns2b               | 413.3194402 | 0.2479224    | 0.1209006 | 2.0506298 | 0.040303 | 0.392394 |
| cep126              | 30.45209591 | -0.131483724 | 0.3485583 | -0.377222 | 0.706009 | 0.968412 |
| znf131              | 426.9979248 | 0.008901015  | 0.118397  | 0.0751794 | 0.940072 | 0.992857 |
| yap1                | 1755.83752  | 0.099228219  | 0.0795084 | 1.248022  | 0.212023 | 0.77986  |
| tbcb                | 1081.532652 | -0.078053688 | 0.0834033 | -0.935858 | 0.349346 | 0.880195 |
| six5                | 77.67367774 | -0.039350455 | 0.2286321 | -0.172113 | 0.863349 | 0.985841 |
| six9                | 17.49558058 | -0.484658794 | 0.5015042 | -0.96641  | 0.333839 | 0.87516  |
| vgl141              | 220.4378826 | -0.155712671 | 0.1545534 | -1.007501 | 0.313694 | 0.865132 |
| ptges1              | 665.8086555 | 0.152426129  | 0.1035134 | 1.4725257 | 0.140879 | 0.681252 |
| foxl2b              | 41.23486665 | -0.02437944  | 0.3121045 | -0.078113 | 0.937738 | 0.99279  |
| ttc9b               | 25.47680327 | 0.182988733  | 0.3891237 | 0.4702586 | 0.63817  | 0.959196 |
| si:ch211-153j24.3   | 17.53020071 | 0.484095681  | 0.4562941 | 1.060929  | 0.288722 | 0.845979 |
| si:ch211-195h23.3   | 22.5874849  | 0.008194397  | 0.4270379 | 0.0191889 | 0.98469  | 0.996944 |
| si:dkey-56m19.5     | 3210.36761  | 0.084234363  | 0.0725548 | 1.1609754 | 0.245652 | 0.815431 |
| h3f3b.1             | 3023.064544 | -0.114411221 | 0.0719828 | -1.589425 | 0.111964 | 0.627242 |
| si:ch1073-429i10.3  | 6022.000909 | -0.147090954 | 0.0867077 | -1.6964   | 0.08981  | 0.573799 |
| gucd1               | 332.4474417 | -0.092968185 | 0.1294118 | -0.71839  | 0.472517 | 0.924838 |
| CABZ01112732.1      | 9.359685756 | 0.213015616  | 0.6286886 | 0.3388253 | 0.734741 | NA       |
| tmem91              | 18.53991097 | 0.365322359  | 0.453596  | 0.8053914 | 0.420594 | 0.90651  |
| tnnt3b              | 40912.08163 | 0.262920995  | 0.0861464 | 3.0520267 | 0.002273 | 0.058601 |
| otog                | 149.4792558 | 0.236344658  | 0.1697281 | 1.3924896 | 0.163774 | 0.71945  |
| aopep               | 132.2352867 | 0.073345298  | 0.1748947 | 0.4193683 | 0.674947 | 0.965257 |
| zgc:136254          | 4.091282548 | 0.103892687  | 0.9769415 | 0.1063448 | 0.915309 | NA       |
| dnah3               | 17.20156976 | 0.152249858  | 0.4669832 | 0.3260285 | 0.744403 | 0.974094 |
| si:dkey-94e7.2      | 136.0124801 | 0.140883101  | 0.195747  | 0.7197203 | 0.471697 | 0.924838 |
| gpx4a               | 1810.390997 | -0.286887315 | 0.2702954 | -1.061384 | 0.288515 | 0.845979 |
| map7d2a             | 439.2176646 | 0.090587069  | 0.1125736 | 0.804692  | 0.420997 | 0.90651  |
| netol               | 102.1917249 | 0.279232188  | 0.2006646 | 1.3915369 | 0.164063 | 0.71945  |
| CABZ01100185.1      | 178.9114519 | 0.021689506  | 0.1594156 | 0.1360563 | 0.891777 | 0.989291 |
| cyp2y3              | 162.7731669 | -1.847497451 | 0.2135669 | -8.650675 | 5.12E-18 | 3.37E-15 |
| gbgt114             | 297.7763757 | 0.10988115   | 0.1299621 | 0.8454864 | 0.397839 | 0.899672 |
| crybb1              | 19586.08882 | -0.163828002 | 0.0989148 | -1.656253 | 0.097671 | 0.596644 |
| chs1                | 265.1338413 | -1.072471308 | 0.1375599 | -7.796395 | 6.37E-15 | 3.23E-12 |
| hapln1b             | 649.8506218 | 0.118027318  | 0.1073931 | 1.0990216 | 0.271759 | 0.836643 |
| v2rh14              | 3.85389     | 0.92204345   | 0.9952918 | 0.9264051 | 0.354235 | NA       |
| BX530037.1          | 0.817563152 | -0.628689195 | 2.3745149 | -0.264765 | 0.79119  | NA       |
| si:dkey-47k20.4     | 1.641260976 | 0.568773532  | 1.4684935 | 0.3873177 | 0.698521 | NA       |

|                   |             |              |           |           |          |          |
|-------------------|-------------|--------------|-----------|-----------|----------|----------|
| elov18a           | 42.38144169 | 0.232916815  | 0.317025  | 0.7346953 | 0.462525 | 0.922698 |
| htr5ab            | 50.29242766 | -0.159849977 | 0.300081  | -0.532689 | 0.594249 | 0.954434 |
| rbm33a            | 1370.557968 | -0.172625163 | 0.0819884 | -2.105482 | 0.035249 | 0.365357 |
| olfcq19           | 0.157187365 | -0.955901296 | 4.0804729 | -0.234262 | 0.814781 | NA       |
| shha              | 488.9013685 | -0.060252978 | 0.1093971 | -0.550773 | 0.581789 | 0.95187  |
| slc16a1b          | 367.3097505 | -0.00073159  | 0.1187104 | -0.006163 | 0.995083 | 0.998694 |
| tmem51a           | 109.0074621 | 0.033199201  | 0.2159882 | 0.1537084 | 0.87784  | 0.987881 |
| olfcd3            | 1.837037515 | -0.248740973 | 1.4062673 | -0.17688  | 0.859602 | NA       |
| glisla            | 14.44678672 | -0.345028233 | 0.505675  | -0.682312 | 0.495042 | 0.931926 |
| rnf44             | 52.2401838  | 0.202007581  | 0.2732249 | 0.7393454 | 0.459697 | 0.921978 |
| CU302253.1        | 177.9024685 | -1.295990743 | 0.1824743 | -7.10232  | 1.23E-12 | 4.18E-10 |
| rabggtb           | 564.9558405 | 0.112958098  | 0.1104053 | 1.0231222 | 0.30625  | 0.860027 |
| vimr1             | 818.6664903 | 0.097618888  | 0.1358682 | 0.7184824 | 0.47246  | 0.924838 |
| naa80             | 32.76390463 | -0.46726841  | 0.3653457 | -1.278976 | 0.200906 | 0.766855 |
| CU326366.2        | 1.003989955 | -2.202606988 | 1.9969604 | -1.10298  | 0.270036 | NA       |
| cnot11            | 364.291307  | -0.141173044 | 0.1314537 | -1.073938 | 0.282851 | 0.844367 |
| atmin             | 54.69840719 | -0.203230259 | 0.2582087 | -0.787078 | 0.431236 | 0.912495 |
| dalrd3            | 941.3251439 | 0.001915208  | 0.0888625 | 0.0215525 | 0.982805 | 0.996944 |
| si:ch211-181d7.3  |             | 0 NA         | NA        | NA        | NA       | NA       |
| sptbn4a           | 389.566182  | 0.18000349   | 0.1224716 | 1.4697564 | 0.141628 | 0.682394 |
| rab8b             | 487.0480394 | 0.039121823  | 0.1046116 | 0.3739722 | 0.708425 | 0.968664 |
| cd1511            | 552.6494641 | 0.042218916  | 0.1011809 | 0.4172615 | 0.676487 | 0.965257 |
| si:ch211-281124.3 | 447.0618513 | -0.160676846 | 0.1318086 | -1.219017 | 0.222838 | 0.789115 |
| lpar5b            | 10.43476761 | -0.998008309 | 0.5902064 | -1.690948 | 0.090847 | NA       |
| rsflb.1           | 767.3485622 | -0.102403071 | 0.0956375 | -1.070742 | 0.284285 | 0.844697 |
| taf10             | 622.8323713 | -0.048249513 | 0.1028152 | -0.469284 | 0.638867 | 0.959659 |
| fam214b           | 732.0208116 | 0.18531146   | 0.0929094 | 1.9945401 | 0.046093 | 0.42177  |
| rhoga             | 3.605215567 | 0.513695185  | 0.9867095 | 0.5206144 | 0.602635 | NA       |
| dnlz              | 123.8906665 | 0.137901928  | 0.1808143 | 0.7626716 | 0.445659 | 0.917154 |
| irgq2             | 39.85943527 | -0.349037417 | 0.3254505 | -1.072475 | 0.283507 | 0.84466  |
| or104-2           |             | 0 NA         | NA        | NA        | NA       | NA       |
| or105-1           |             | 0 NA         | NA        | NA        | NA       | NA       |
| or106-1           | 0.481032184 | -2.398473301 | 2.80721   | -0.854398 | 0.392885 | NA       |
| zgc:152951        | 30.6529373  | 0.052663745  | 0.3597289 | 0.1463984 | 0.883607 | 0.988706 |
| iqcg              | 5.118800562 | 1.096225225  | 0.8675081 | 1.2636484 | 0.206356 | NA       |
| ctrl              | 420.5818188 | -0.193208803 | 0.2776476 | -0.695878 | 0.486505 | 0.930833 |
| crfbl             | 70.29661129 | -0.223115835 | 0.2382631 | -0.936426 | 0.349054 | 0.880195 |
| chmp2ba           | 15.58914046 | -0.254199856 | 0.5158157 | -0.492811 | 0.622146 | 0.957354 |
| kctd4             | 331.010858  | -0.036885042 | 0.126286  | -0.292076 | 0.770229 | 0.975687 |
| psenen            | 501.0245717 | -0.090092327 | 0.1209007 | -0.745176 | 0.456165 | 0.921215 |
| gpr85             | 775.6474638 | -0.014124032 | 0.0986553 | -0.143166 | 0.886159 | 0.988936 |
| lysmd4            | 128.6185691 | 0.233333853  | 0.1808539 | 1.2901789 | 0.196989 | 0.761944 |
| or108-1           | 0.333314908 | -1.858695402 | 3.5126701 | -0.52914  | 0.596708 | NA       |
| tmem168a          | 276.3685845 | -0.051733226 | 0.1342318 | -0.385402 | 0.69994  | 0.967998 |
| ifrd1             | 2220.177551 | 0.2316788    | 0.0770276 | 3.0077388 | 0.002632 | 0.065465 |
| fam174b           | 215.7396991 | -0.094795038 | 0.1453719 | -0.652086 | 0.514345 | 0.937216 |
| nidla             | 1974.897275 | 0.326952805  | 0.0838696 | 3.898345  | 9.69E-05 | 0.004764 |
| crfb4             | 47.98709896 | 0.110636055  | 0.3157032 | 0.3504432 | 0.726006 | 0.970402 |
| si:dkey-14o1.20   | 1.005048545 | -0.006083169 | 1.9358873 | -0.003142 | 0.997493 | NA       |
| ksr1a             | 53.97604986 | -0.009866802 | 0.263909  | -0.037387 | 0.970176 | 0.996315 |
| cuedcla           | 611.3141235 | -0.000862045 | 0.1016188 | -0.008483 | 0.993232 | 0.998554 |
| gmnc              | 8.400895965 | -0.756050537 | 0.6581355 | -1.148776 | 0.250648 | NA       |
| maspl             | 92.72956078 | 0.210973074  | 0.2128266 | 0.9912909 | 0.321544 | 0.869201 |
| EIF2AK2           | 6.813700786 | -0.47427364  | 0.7470528 | -0.63486  | 0.52552  | NA       |

|                    |             |              |           |           |          |          |
|--------------------|-------------|--------------|-----------|-----------|----------|----------|
| rxfp21             | 19.26506409 | 0.406179958  | 0.4279711 | 0.9490827 | 0.342579 | 0.878434 |
| spry4              | 810.2541264 | 0.138830366  | 0.1122743 | 1.2365282 | 0.216262 | 0.783589 |
| cox5b2             | 114.0116383 | 0.055938724  | 0.2035059 | 0.2748752 | 0.783412 | 0.97627  |
| CR384085.1         | 1.451497761 | 0.290766955  | 1.6521281 | 0.1759954 | 0.860298 | NA       |
| map41              | 1762.825564 | 0.118419777  | 0.0754689 | 1.5691195 | 0.11662  | 0.639148 |
| si:ch211-250k18.5  | 0.959146752 | 0.977549673  | 2.0106641 | 0.4861825 | 0.626838 | NA       |
| exosc8             | 183.9374648 | 0.00561904   | 0.1567061 | 0.0358572 | 0.971396 | 0.996315 |
| si:ch211-244o22.2  | 473.8621398 | 0.019502249  | 0.1060641 | 0.1838723 | 0.854114 | 0.985174 |
| tnks1bp1           | 159.016009  | -0.442057484 | 0.1674756 | -2.639533 | 0.008302 | 0.14763  |
| mespab             | 0.50625413  | -0.940106488 | 2.8357787 | -0.331516 | 0.740255 | NA       |
| plcg2              | 53.53417855 | -0.131946618 | 0.269001  | -0.490506 | 0.623776 | 0.957354 |
| sparta             | 40.35794341 | -0.252473877 | 0.3042764 | -0.829752 | 0.406679 | 0.901305 |
| vsir               | 80.56013392 | -0.066727623 | 0.21876   | -0.305027 | 0.760346 | 0.975374 |
| slc6a17            | 61.13332595 | 0.092936257  | 0.250068  | 0.371644  | 0.710158 | 0.968928 |
| BX324132.1         | 1.802691997 | -1.439918492 | 1.4686844 | -0.980414 | 0.326882 | NA       |
| BX548044.1         | 1.13982768  | 0.359745903  | 1.9566936 | 0.183854  | 0.854128 | NA       |
| tlr7               | 1.297015045 | -0.037963565 | 1.8363812 | -0.020673 | 0.983506 | NA       |
| spata21            | 80.61748787 | -0.102584528 | 0.2251514 | -0.455625 | 0.64866  | 0.960708 |
| pimr149            |             | 0 NA         | NA        | NA        | NA       | NA       |
| BX548044.2         | 0.816144499 | 1.890298486  | 2.2559176 | 0.8379289 | 0.402071 | NA       |
| h2afva             | 2078.988396 | -0.110428843 | 0.0815584 | -1.353985 | 0.175741 | 0.736411 |
| purba              | 2013.478522 | 0.130340274  | 0.0728105 | 1.7901292 | 0.073433 | 0.528705 |
| blocls3            | 17.56027049 | 0.38391878   | 0.4531591 | 0.8472052 | 0.396881 | 0.899672 |
| zgc:172139         | 18.07100473 | -0.240121421 | 0.4506662 | -0.532814 | 0.594162 | 0.954434 |
| dclrelb            | 452.0377689 | 0.090028323  | 0.1115945 | 0.8067453 | 0.419813 | 0.90651  |
| zgc:66024          | 10.66119886 | -0.311732468 | 0.5877    | -0.530428 | 0.595815 | NA       |
| zgc:66024          | 0.964851341 | -0.019994509 | 2.0736065 | -0.009642 | 0.992307 | NA       |
| fam83ha            | 96.99383435 | -0.016200469 | 0.2257074 | -0.071776 | 0.94278  | 0.993364 |
| rnf183             | 496.8693224 | -0.238005065 | 0.1099004 | -2.165643 | 0.030339 | 0.336652 |
| si:ch211-163121.10 | 19.27136604 | -0.05887469  | 0.4443016 | -0.132511 | 0.89458  | 0.989716 |
| f2r11.1            | 39.87240303 | -0.292214751 | 0.3175901 | -0.9201   | 0.35752  | 0.884033 |
| gbp4               | 24.77668333 | -0.704554365 | 0.3879223 | -1.816226 | 0.069336 | 0.514708 |
| il2rga             | 10.06600831 | -0.939811214 | 0.6320024 | -1.487037 | 0.137005 | NA       |
| si:dkey-98f17.5    | 45.72665655 | 0.326027313  | 0.2953077 | 1.1040258 | 0.269582 | 0.834705 |
| si:dkey-61p9.7     | 7.22984606  | -0.60965712  | 0.7296858 | -0.835506 | 0.403433 | NA       |
| nap114b            | 1204.906509 | -0.015563016 | 0.0839805 | -0.185317 | 0.85298  | 0.985174 |
| si:ch211-250m6.4   | 0.847902465 | 0.655335913  | 2.102784  | 0.3116516 | 0.755305 | NA       |
| fance              | 80.91714745 | 0.14450182   | 0.2342258 | 0.6169338 | 0.537278 | 0.943336 |
| si:ch211-250m6.7   | 9.219677085 | -0.52430988  | 0.6810677 | -0.769835 | 0.441398 | NA       |
| zgc:153031         | 199.5578477 | -0.211196116 | 0.1454816 | -1.451703 | 0.146584 | 0.692967 |
| tspan13a           | 185.8204349 | -0.417526201 | 0.1688783 | -2.47235  | 0.013423 | 0.207707 |
| mrpl14             | 322.1738056 | -0.105835732 | 0.1442731 | -0.733579 | 0.463205 | 0.922698 |
| klhl41a            | 50.69350088 | 0.197494908  | 0.2801936 | 0.7048516 | 0.480903 | 0.92776  |
| sostdcla           | 183.3924216 | 0.26343937   | 0.1770883 | 1.4876159 | 0.136852 | 0.673303 |
| mettl5             | 305.2335233 | -0.098275657 | 0.1261683 | -0.778925 | 0.436024 | 0.914408 |
| nriplb             | 741.2551642 | -0.096718569 | 0.0963484 | -1.003842 | 0.315455 | 0.866773 |
| nos1               | 53.80622349 | -0.227428359 | 0.2698568 | -0.842774 | 0.399355 | 0.900683 |
| zgc:153012         | 230.8272016 | -0.224444378 | 0.1657783 | -1.353883 | 0.175774 | 0.736411 |
| si:ch73-42k18.1    | 2.087198782 | -0.685701579 | 1.3572948 | -0.505197 | 0.61342  | NA       |
| ppplr35            | 30.69836166 | -0.601218627 | 0.3546284 | -1.695348 | 0.090009 | 0.574248 |
| map2k2b            | 183.6563977 | 0.117792399  | 0.1616602 | 0.7286421 | 0.466221 | 0.923908 |
| rad51c             | 30.25203736 | 0.249916584  | 0.3929921 | 0.6359329 | 0.52482  | 0.939846 |
| umod11             | 19.52656778 | 0.103574165  | 0.4328382 | 0.2392907 | 0.81088  | 0.981081 |
| si:ch211-137a8.2   | 86.97822277 | -0.234933877 | 0.2157877 | -1.088727 | 0.276274 | 0.839541 |

|                   |             |              |           |           |          |          |
|-------------------|-------------|--------------|-----------|-----------|----------|----------|
| cyp1b1            | 48.47360781 | 0.242698582  | 0.2774252 | 0.8748254 | 0.381669 | 0.895192 |
| si:ch211-218m3.11 | 0 NA        | NA           | NA        | NA        | NA       | NA       |
| xaf1              | 7.438488335 | 0.199835099  | 0.7110263 | 0.2810516 | 0.778671 | NA       |
| atp5meb           | 2789.672405 | 0.031245621  | 0.1095799 | 0.28514   | 0.775537 | 0.975687 |
| zgc:113983        | 21.86409952 | 0.360801714  | 0.4734839 | 0.7620147 | 0.446051 | 0.917154 |
| BX897692.1        | 0.81902083  | -3.15978573  | 2.3136362 | -1.365723 | 0.172026 | NA       |
| si:ch211-264e16.1 | 77.48166753 | -0.003861917 | 0.2354339 | -0.016403 | 0.986913 | 0.997073 |
| si:ch211-219a15.4 | 14.97056978 | 0.592428117  | 0.5060022 | 1.1708015 | 0.241679 | 0.810541 |
| frmd7             | 6.351420399 | -0.141520162 | 0.7438248 | -0.19026  | 0.849105 | NA       |
| nripla            | 545.6781919 | -0.009488063 | 0.1120397 | -0.084685 | 0.932512 | 0.992702 |
| si:ch211-261n11.7 | 8.249328175 | 0.448658168  | 0.7080373 | 0.6336646 | 0.5263   | NA       |
| zgc:153372        | 93.43610875 | 0.203606937  | 0.2162279 | 0.9416313 | 0.346381 | 0.879249 |
| zgc:153759        | 3.010900983 | -0.316816742 | 1.0769331 | -0.294184 | 0.768617 | NA       |
| pdlim4            | 238.7107413 | 0.248029491  | 0.1390005 | 1.7843786 | 0.074362 | 0.531227 |
| lim2.1            | 785.1027588 | 0.026512848  | 0.0980325 | 0.2704495 | 0.786814 | 0.976596 |
| bsx               | 56.53327945 | -0.151969947 | 0.256071  | -0.593468 | 0.552868 | 0.947265 |
| glol              | 959.664558  | 0.005590664  | 0.0969683 | 0.0576545 | 0.954024 | 0.994271 |
| glceb             | 759.4349476 | 0.215282059  | 0.0929655 | 2.3157205 | 0.020574 | 0.270609 |
| jhy               | 18.63252281 | 0.129075988  | 0.4461081 | 0.2893379 | 0.772323 | 0.975687 |
| btbd9             | 463.3393145 | -0.136243238 | 0.1147919 | -1.186871 | 0.235278 | 0.804375 |
| gabral            | 91.12417471 | 0.013781001  | 0.2255155 | 0.0611089 | 0.951272 | 0.99381  |
| zgc:158862        | 21.3441267  | 0.016299031  | 0.4206661 | 0.0387458 | 0.969093 | 0.996315 |
| hspa8             | 47677.67138 | -0.144269867 | 0.0809696 | -1.781778 | 0.074785 | 0.532583 |
| zgc:153631        | 172.3590876 | -0.224848105 | 0.1599615 | -1.405639 | 0.159831 | 0.712089 |
| pimr129           | 0.663441495 | -1.490281006 | 2.4117839 | -0.617916 | 0.53663  | NA       |
| h2afx1            | 10285.78486 | -0.127540053 | 0.0813471 | -1.56785  | 0.116916 | 0.639958 |
| hist2h21          | 2103.830846 | -0.081324046 | 0.1005689 | -0.80864  | 0.418722 | 0.906406 |
| pcyox11           | 552.430994  | 0.047939091  | 0.1058422 | 0.4529297 | 0.650599 | 0.960708 |
| tle3b             | 1382.182094 | 0.018607517  | 0.087417  | 0.2128592 | 0.831437 | 0.983245 |
| si:ch211-147a11.3 | 172.3118812 | 0.120133893  | 0.1556171 | 0.7719837 | 0.440124 | 0.916107 |
| eps8b             | 5.595396212 | 0.676061857  | 0.829405  | 0.8151167 | 0.415006 | NA       |
| ifnphi2           | 0 NA        | NA           | NA        | NA        | NA       | NA       |
| prdx4             | 1075.465624 | -0.133357972 | 0.0871087 | -1.530938 | 0.125785 | 0.654803 |
| nphp4             | 159.2305895 | -0.056424029 | 0.1638607 | -0.344341 | 0.73059  | 0.97149  |
| elnb              | 467.6620824 | -0.07951771  | 0.1442169 | -0.551376 | 0.581376 | 0.951731 |
| cyp7a1            | 224.5440523 | -0.71587595  | 0.1738793 | -4.117086 | 3.84E-05 | 0.00218  |
| adcyla            | 8.666410843 | 0.104194586  | 0.6425795 | 0.1621505 | 0.871187 | NA       |
| admb              | 210.699942  | 0.178590662  | 0.1500591 | 1.1901352 | 0.233993 | 0.802633 |
| rxfp3.3a1         | 13.12506079 | 0.107312634  | 0.5234068 | 0.2050272 | 0.837551 | 0.984665 |
| acss21            | 30.72478126 | -0.324761658 | 0.3442589 | -0.943365 | 0.345494 | 0.878434 |
| skor1a            | 256.545871  | 0.01172529   | 0.1398618 | 0.0838348 | 0.933188 | 0.992702 |
| plac811           | 23.27101669 | -0.074156415 | 0.3977024 | -0.186462 | 0.852082 | 0.985174 |
| pimr51            | 0 NA        | NA           | NA        | NA        | NA       | NA       |
| akipl             | 27.34428626 | -0.009069716 | 0.36069   | -0.025145 | 0.979939 | 0.996879 |
| si:ch211-242e8.1  | 140.722817  | 0.128733683  | 0.1716576 | 0.7499444 | 0.453288 | 0.920041 |
| agpat4            | 153.9914386 | -0.216514452 | 0.1631638 | -1.326976 | 0.184517 | 0.747376 |
| chtf8             | 99.17112207 | -0.377133569 | 0.2000387 | -1.885303 | 0.059389 | 0.476605 |
| wu:fk65c09        | 3.666637559 | -1.469815592 | 1.1273042 | -1.303832 | 0.192291 | NA       |
| serpinf1          | 855.4707317 | 0.225478879  | 0.1074442 | 2.0985663 | 0.035855 | 0.369078 |
| ranbp3b           | 1174.451401 | 0.045197392  | 0.084908  | 0.5323105 | 0.594511 | 0.954434 |
| lgals914          | 0.984220606 | -1.041956579 | 2.232304  | -0.466763 | 0.64067  | NA       |
| btg3              | 554.1480819 | -0.224649785 | 0.1057636 | -2.124075 | 0.033664 | 0.357045 |
| nufip2            | 1062.870709 | 0.198928663  | 0.083719  | 2.376148  | 0.017494 | 0.24517  |
| cry3a             | 6954.986209 | 0.035628495  | 0.0663248 | 0.5371823 | 0.591142 | 0.954193 |



|                   |             |              |           |           |          |          |
|-------------------|-------------|--------------|-----------|-----------|----------|----------|
| mrm3b             | 109.2683847 | 0.033726765  | 0.2048998 | 0.1646013 | 0.869258 | 0.987274 |
| ints2             | 355.9033889 | -0.008872238 | 0.1159028 | -0.076549 | 0.938982 | 0.992857 |
| agrp              | 64.77679783 | 0.079932895  | 0.2698876 | 0.2961711 | 0.767099 | 0.975687 |
| atp6v0d1          | 3255.621356 | 0.039488155  | 0.0793339 | 0.4977461 | 0.618663 | 0.957354 |
| col2ala           | 79168.19202 | 0.13179626   | 0.0875824 | 1.5048256 | 0.132369 | 0.6667   |
| gls2a             | 45.04648794 | 1.032988161  | 0.2990583 | 3.4541368 | 0.000552 | 0.019206 |
| tmcol             | 681.8876866 | 0.115770075  | 0.1008891 | 1.1474982 | 0.251176 | 0.820469 |
| aldh9a1a.1        | 5130.11041  | -0.314867769 | 0.0859011 | -3.66547  | 0.000247 | 0.010149 |
| napbb             | 118.4865269 | -0.372158888 | 0.185781  | -2.003213 | 0.045154 | 0.417766 |
| zgc:112962        | 233.3328569 | 0.023370972  | 0.1405024 | 0.1663386 | 0.86789  | 0.987245 |
| si:dkeyp-82a1.4   | 0.832927207 | 1.89113355   | 2.1260675 | 0.8894983 | 0.373735 | NA       |
| fgfr4             | 1800.888164 | 0.099442666  | 0.0761483 | 1.3059079 | 0.191584 | 0.755886 |
| fam89b            | 103.8615115 | 0.480648475  | 0.2096359 | 2.292778  | 0.021861 | 0.280334 |
| znrd2             | 284.658379  | -0.004889899 | 0.1297357 | -0.037691 | 0.969934 | 0.996315 |
| ikzf2             | 46.83820408 | -0.046481539 | 0.3008122 | -0.15452  | 0.8772   | 0.987881 |
| dbn1              | 227.1687431 | -0.163997947 | 0.1460091 | -1.123204 | 0.261351 | 0.829527 |
| unc93b1           | 45.70383669 | -0.259868727 | 0.3106756 | -0.836463 | 0.402894 | 0.90084  |
| timm10            | 470.2958481 | 0.138339813  | 0.1069079 | 1.2940097 | 0.195662 | 0.761077 |
| kcnh5b            | 43.87737067 | 0.231524921  | 0.2882101 | 0.8033198 | 0.42179  | 0.90651  |
| ppp2r5eb          | 1167.827281 | 0.041294052  | 0.0850101 | 0.4857548 | 0.627141 | 0.957354 |
| si:ch211-216123.2 | 518.8720192 | -0.064179684 | 0.1070322 | -0.59963  | 0.548753 | 0.946312 |
| fhdc3             | 231.3007591 | 0.058857691  | 0.1354907 | 0.4344041 | 0.663995 | 0.964736 |
| mstnb             | 55.18038215 | 0.025189097  | 0.2836265 | 0.0888108 | 0.929232 | 0.992702 |
| vwc2l             | 3.59056033  | -0.256432997 | 1.0172173 | -0.252093 | 0.800969 | NA       |
| ppplr15a          | 2763.71524  | -0.281893299 | 0.0862637 | -3.267809 | 0.001084 | 0.032921 |
| grikla            | 254.024749  | 0.139314226  | 0.1581737 | 0.8807675 | 0.378444 | 0.895192 |
| aars              | 3929.327937 | -0.09763932  | 0.0696616 | -1.401623 | 0.161028 | 0.714313 |
| map3k7c1          | 22.89328525 | 0.033679199  | 0.4040087 | 0.0833625 | 0.933563 | 0.992702 |
| pex11b            | 133.2205172 | 0.294053673  | 0.1754958 | 1.6755593 | 0.093825 | 0.582691 |
| rit1              | 192.1754531 | 0.119567241  | 0.1479859 | 0.8079636 | 0.419112 | 0.906406 |
| tmem135           | 409.4087618 | 0.207205142  | 0.1157585 | 1.7899782 | 0.073457 | 0.528705 |
| tafa5a            | 254.6531691 | 0.065830411  | 0.1309331 | 0.5027789 | 0.61512  | 0.95688  |
| si:dkey-73n10.1   | 187.2103034 | -0.248059048 | 0.163351  | -1.518565 | 0.128872 | 0.659982 |
| cerk              | 102.2578469 | 0.176054984  | 0.2051598 | 0.8581358 | 0.390817 | 0.897643 |
| gramd4a           | 24.4849413  | -0.138277855 | 0.4069854 | -0.339761 | 0.734036 | 0.971993 |
| vps4b             | 1360.402298 | -0.042381617 | 0.0809257 | -0.52371  | 0.60048  | 0.956045 |
| ubtd2             | 468.2697662 | 0.006721664  | 0.1066128 | 0.0630474 | 0.949729 | 0.99381  |
| celsrla           | 710.1514235 | -0.146907763 | 0.1067109 | -1.376689 | 0.168608 | 0.725919 |
| cyp27a1.2         | 1.155163996 | -0.396716192 | 1.7478367 | -0.226976 | 0.820443 | NA       |
| si:dkey-242h9.3   | 40.16740971 | 0.065030796  | 0.3436021 | 0.1892619 | 0.849888 | 0.985174 |
| zgc:172339        | 13.7916916  | 0.240416246  | 0.506196  | 0.474947  | 0.634825 | 0.9578   |
| zgc:163030        | 414.1657162 | 0.124572543  | 0.1358504 | 0.9169831 | 0.359152 | 0.884751 |
| mycbpap           | 21.44865211 | 0.340655202  | 0.4087037 | 0.8335017 | 0.404562 | 0.901305 |
| ebf1b             | 102.302726  | -0.188965115 | 0.1966867 | -0.960742 | 0.336682 | 0.876088 |
| zgc:172120        | 41.28519345 | 0.184958952  | 0.3134162 | 0.5901385 | 0.555098 | 0.947449 |
| taarl5            |             | 0 NA         | NA        | NA        | NA       | NA       |
| stx7l             | 78.39743961 | -0.307167741 | 0.2252382 | -1.363746 | 0.172647 | 0.731348 |
| taarl4i           |             | 0 NA         | NA        | NA        | NA       | NA       |
| taarl4l           | 0.831198824 | 0.593716313  | 2.0278563 | 0.2927803 | 0.76969  | NA       |
| taarl0            | 0.647689638 | -2.824814845 | 2.5064236 | -1.12703  | 0.25973  | NA       |
| c6ast1            | 2.504646853 | -0.171240561 | 1.2078337 | -0.141775 | 0.887258 | NA       |
| zgc:153738        | 21.13059119 | 0.171614402  | 0.4119925 | 0.4165474 | 0.677009 | 0.965257 |
| ttc32             | 151.7267132 | 0.221863892  | 0.175386  | 1.2650034 | 0.20587  | 0.773784 |
| pdia5             | 860.9206344 | -0.082709645 | 0.0899618 | -0.919387 | 0.357893 | 0.884398 |

|                   |             |              |           |           |          |          |
|-------------------|-------------|--------------|-----------|-----------|----------|----------|
| si:ch211-244b2.3  | 13.88772606 | -0.768264243 | 0.5276698 | -1.455956 | 0.145405 | 0.690663 |
| matn3a            | 1606.120267 | 0.072360268  | 0.1238496 | 0.5842591 | 0.559046 | 0.948478 |
| rxfp3.3a3         | 7.911757483 | 0.869204811  | 0.6849794 | 1.2689503 | 0.204459 | NA       |
| aftpha            | 611.9477397 | 0.056997052  | 0.1033334 | 0.5515839 | 0.581233 | 0.951731 |
| uacaa             | 191.6638543 | -0.190059422 | 0.1577635 | -1.204711 | 0.228315 | 0.795541 |
| zpaxl             | 7.933963037 | 0.263161145  | 0.6829414 | 0.3853349 | 0.699989 | NA       |
| mixl1             | 8.481785945 | 1.272756241  | 0.6659725 | 1.9111243 | 0.055989 | NA       |
| chrn4a            | 219.0516272 | -0.233117064 | 0.1563869 | -1.490643 | 0.136055 | 0.672589 |
| rec8b             | 1.54286122  | -0.921930898 | 1.6254026 | -0.567202 | 0.570577 | NA       |
| metap2a           | 89.73492973 | 0.359571929  | 0.2186233 | 1.6447101 | 0.10003  | 0.601211 |
| erich3            | 18.17941964 | 0.223294969  | 0.4702072 | 0.4748863 | 0.634868 | 0.9578   |
| si:ch211-196h16.5 | 110.4923331 | -0.268428321 | 0.2157047 | -1.244425 | 0.213343 | 0.781631 |
| matn3b            | 145.2965306 | 0.293043863  | 0.2231129 | 1.3134334 | 0.189037 | 0.753954 |
| esrra             | 350.4636877 | 0.276981695  | 0.1232253 | 2.2477664 | 0.024591 | 0.302262 |
| wdr35             | 316.5167852 | -0.053808102 | 0.1214524 | -0.443039 | 0.657738 | 0.962538 |
| si:dkey-182i3.11  | 0.31598276  | 0.005883445  | 3.3523626 | 0.001755  | 0.9986   | NA       |
| kbtbd4            | 202.1206599 | -0.009195063 | 0.1445755 | -0.0636   | 0.949288 | 0.99381  |
| ighmbp2           | 127.1284709 | -0.178497126 | 0.1774457 | -1.005926 | 0.314451 | 0.865529 |
| pimr132           | 0.182570949 | 0.967652056  | 4.0804729 | 0.2371421 | 0.812547 | NA       |
| trmt5             | 162.6147237 | 0.051432932  | 0.1649873 | 0.3117388 | 0.755239 | 0.975318 |
| elov17a           | 630.9284284 | -0.029531686 | 0.0977591 | -0.302086 | 0.762586 | 0.975374 |
| tsen15            | 141.2507068 | -0.146319627 | 0.1819836 | -0.804026 | 0.421382 | 0.90651  |
| pimr109           | 0.681873518 | 0.003772382  | 2.2906421 | 0.0016469 | 0.998686 | NA       |
| bbc3              | 306.4119471 | -0.499310522 | 0.1306446 | -3.8219   | 0.000132 | 0.006147 |
| ercc8             | 211.8470594 | -0.150525565 | 0.1426029 | -1.055557 | 0.29117  | 0.846582 |
| ndufaf2           | 185.8773911 | 0.136961398  | 0.1547303 | 0.885162  | 0.376069 | 0.894658 |
| gabpa             | 562.5130799 | -0.084608796 | 0.1097163 | -0.77116  | 0.440612 | 0.916336 |
| bida              | 154.3912881 | -0.093582362 | 0.1632281 | -0.573322 | 0.566426 | 0.948739 |
| acot16            | 74.06145895 | 0.111419365  | 0.2365703 | 0.4709779 | 0.637657 | 0.958872 |
| ahsg2             | 12.54833337 | 1.20496748   | 0.5515193 | 2.1848146 | 0.028902 | 0.329785 |
| insl5b            | 2.310327993 | -0.396093506 | 1.2810772 | -0.309188 | 0.757179 | NA       |
| bcl6ab            | 336.5428493 | 0.086580832  | 0.1208857 | 0.7162204 | 0.473855 | 0.924993 |
| moxd11            | 110.4899034 | 0.208243373  | 0.1973912 | 1.0549778 | 0.291435 | 0.847104 |
| upf3a             | 798.3763493 | 0.129497584  | 0.0983416 | 1.3168133 | 0.187901 | 0.752442 |
| osbp19            | 848.471458  | 0.079060622  | 0.0934709 | 0.8458318 | 0.397647 | 0.899672 |
| tmem177           | 235.3484631 | 0.154280169  | 0.1435259 | 1.0749289 | 0.282407 | 0.843666 |
| snx9b             | 742.8582809 | 0.057320315  | 0.0993265 | 0.5770896 | 0.563879 | 0.948739 |
| si:ch211-203k16.3 | 45.71635686 | 0.441968804  | 0.2945333 | 1.5005734 | 0.133466 | 0.667982 |
| pomcb             | 13.84119086 | 0.491157895  | 0.5422829 | 0.9057227 | 0.365083 | 0.886714 |
| ill5ra            | 1.822370991 | -0.282870896 | 1.4492794 | -0.19518  | 0.845252 | NA       |
| oxall             | 650.7562399 | -0.011778736 | 0.1017171 | -0.115799 | 0.907812 | 0.990702 |
| tmem199           | 84.09614275 | -0.275359352 | 0.2272865 | -1.211507 | 0.225701 | 0.793245 |
| efr3bb            | 33.14079413 | 0.705417158  | 0.3414635 | 2.0658643 | 0.038841 | 0.386536 |
| fam169b           | 7.128558941 | -0.080601784 | 0.7910343 | -0.101894 | 0.918841 | NA       |
| si:ch73-122g19.1  | 2.825381424 | -1.708118189 | 1.2313843 | -1.387153 | 0.165395 | NA       |
| vps53             | 599.4839381 | 0.107360918  | 0.0973313 | 1.1030465 | 0.270007 | 0.834705 |
| mus81             | 142.0142574 | -0.173053366 | 0.1744753 | -0.99185  | 0.321271 | 0.868938 |
| nkx3.3            | 86.70509342 | 0.042393448  | 0.2225424 | 0.190496  | 0.84892  | 0.985174 |
| si:dkey-12e7.1    | 146.3406243 | -0.046000096 | 0.1706162 | -0.269611 | 0.787459 | 0.976596 |
| drgx              | 112.8391193 | -0.041814604 | 0.2106242 | -0.198527 | 0.842633 | 0.985174 |
| trip6             | 269.759244  | 0.051627205  | 0.1305432 | 0.3954797 | 0.692489 | 0.96736  |
| tmem72            | 15.86246548 | -0.12050743  | 0.4785467 | -0.25182  | 0.801181 | 0.979377 |
| FP102052.1        | 57.93287848 | 0.0530801    | 0.2622593 | 0.2023955 | 0.839608 | 0.984979 |
| zgc:114045        | 350.7033982 | 0.038504236  | 0.1212669 | 0.3175165 | 0.750852 | 0.97419  |

|                  |             |              |           |           |          |          |
|------------------|-------------|--------------|-----------|-----------|----------|----------|
| bcl6b            | 222.4055643 | 0.115897821  | 0.1442842 | 0.8032609 | 0.421824 | 0.90651  |
| tbc1d24          | 997.908775  | 0.086023469  | 0.0983097 | 0.8750256 | 0.38156  | 0.895192 |
| zgc:153115       | 780.2996739 | 0.162305492  | 0.1020322 | 1.5907277 | 0.111671 | 0.627242 |
| adgr12a          | 1172.214482 | -0.017342271 | 0.08733   | -0.198583 | 0.842589 | 0.985174 |
| ppp3r1b          | 2629.51893  | 0.073188221  | 0.0797628 | 0.9175739 | 0.358842 | 0.884602 |
| spa17            | 418.6840294 | 0.157136232  | 0.1083775 | 1.4498974 | 0.147087 | 0.693916 |
| CR847571.1       | 0.657349104 | 1.487939685  | 2.418178  | 0.6153144 | 0.538347 | NA       |
| zgc:153142       | 0 NA        | NA           | NA        | NA        | NA       | NA       |
| nrn11a           | 184.856708  | 0.004939965  | 0.1617658 | 0.0305378 | 0.975638 | 0.996762 |
| crep             | 81.00652941 | -0.041399377 | 0.2227098 | -0.185889 | 0.852532 | 0.985174 |
| sh2d4ba          | 8.26543575  | -0.366286805 | 0.6682937 | -0.548093 | 0.583628 | NA       |
| zgc:162608       | 546.42305   | 0.177336734  | 0.140484  | 1.2623267 | 0.206831 | 0.774452 |
| tnfsf12          | 90.19222126 | 0.381980002  | 0.2122485 | 1.7996832 | 0.071911 | 0.524516 |
| si:dkey-242g16.2 | 93.66306763 | 0.154959523  | 0.2181269 | 0.7104098 | 0.47745  | 0.926857 |
| pard6a           | 488.9589273 | -0.032366927 | 0.1039563 | -0.311351 | 0.755534 | 0.975318 |
| zgc:158868       | 14.87222931 | -0.210125897 | 0.5035291 | -0.417306 | 0.676454 | 0.965257 |
| si:ch211-125e6.5 | 6.452957147 | 0.519574703  | 0.7458149 | 0.6966536 | 0.48602  | NA       |
| mxtx1            | 0.489712128 | -0.887840729 | 2.693685  | -0.329601 | 0.741702 | NA       |
| cnga4            | 28.27720203 | 0.104178269  | 0.3634099 | 0.2866688 | 0.774366 | 0.975687 |
| mtgl             | 84.72340198 | 0.102036965  | 0.2241325 | 0.4552528 | 0.648927 | 0.960708 |
| tmem88b          | 45.86055389 | 0.169770532  | 0.2872198 | 0.5910822 | 0.554465 | 0.947449 |
| itga2.1          | 28.87201722 | -0.275888013 | 0.358883  | -0.768741 | 0.442047 | 0.916336 |
| zswim8           | 1527.310326 | 0.050775172  | 0.0931933 | 0.5448369 | 0.585866 | 0.952941 |
| si:dkeyp-114g9.1 | 3.808785141 | -0.91111685  | 0.9985922 | -0.912401 | 0.361557 | NA       |
| lrrc4.1          | 1138.037536 | 0.059814443  | 0.0912427 | 0.655553  | 0.512112 | 0.936253 |
| pln              | 82.38014358 | -0.031452081 | 0.2541863 | -0.123736 | 0.901524 | 0.990121 |
| zgc:194990       | 94.53557636 | 0.285249424  | 0.2165455 | 1.3172722 | 0.187747 | 0.752195 |
| gkup             | 157.1075584 | -0.158841104 | 0.1626179 | -0.976775 | 0.32868  | 0.872945 |
| cx34.5           | 2.618169958 | 1.567522295  | 1.2369838 | 1.2672132 | 0.205079 | NA       |
| coll7a1a         | 6464.610833 | 0.4282877    | 0.0858836 | 4.9868402 | 6.14E-07 | 6.63E-05 |
| trim23           | 279.7743872 | 0.201989907  | 0.1439114 | 1.4035717 | 0.160446 | 0.71328  |
| grpel2           | 1143.286712 | 0.051369057  | 0.0818458 | 0.6276322 | 0.530245 | 0.942209 |
| nhp2             | 542.5344236 | -0.08174867  | 0.1043757 | -0.783215 | 0.433501 | 0.913667 |
| tmie             | 142.5549645 | -0.218416219 | 0.1805264 | -1.209885 | 0.226323 | 0.793959 |
| hsbpla           | 892.9273089 | -0.007064778 | 0.0920592 | -0.076742 | 0.938829 | 0.992857 |
| nkain2           | 112.439202  | -0.000800373 | 0.1930569 | -0.004146 | 0.996692 | 0.998936 |
| slbp2            | 1.84135345  | 2.16383757   | 1.5572676 | 1.3895091 | 0.164678 | NA       |
| tp53i11a         | 118.199546  | 0.032729921  | 0.182553  | 0.17929   | 0.85771  | 0.985703 |
| slc26a4          | 9.629717685 | -0.532062163 | 0.6529968 | -0.814801 | 0.415186 | NA       |
| plscr3b          | 1544.665588 | 0.027879528  | 0.081044  | 0.3440049 | 0.730843 | 0.971497 |
| tnk1             | 404.4411241 | -0.254035356 | 0.1229041 | -2.06694  | 0.03874  | 0.38611  |
| cfap58           | 19.78621305 | -0.254340075 | 0.4637123 | -0.548487 | 0.583358 | 0.952214 |
| neur11aa         | 33.44930075 | 0.228216879  | 0.327732  | 0.6963522 | 0.486208 | 0.930833 |
| ptgdsa           | 163.2636147 | -0.007885136 | 0.158021  | -0.049899 | 0.960203 | 0.995388 |
| dachd            | 830.7316398 | -0.086321691 | 0.0875602 | -0.985855 | 0.324204 | 0.870928 |
| lpar6b           | 41.53990122 | -0.577087768 | 0.2989262 | -1.930536 | 0.05354  | 0.453409 |
| pimr128          | 2.654869111 | 0.707032785  | 1.1823403 | 0.5979943 | 0.549844 | NA       |
| dbh              | 81.77973379 | 0.089049263  | 0.234164  | 0.3802859 | 0.703733 | 0.968134 |
| gja5b            | 8.456931846 | 0.293573226  | 0.6702955 | 0.4379758 | 0.661404 | NA       |
| gja8a            | 99.35190472 | 0.057831914  | 0.2009075 | 0.2878534 | 0.773459 | 0.975687 |
| zgc:113314       | 60.19066804 | -0.1935238   | 0.2588723 | -0.747565 | 0.454723 | 0.920902 |
| si:dkey-6n21.13  | 35.93716348 | 0.299729536  | 0.3226289 | 0.9290225 | 0.352877 | 0.881552 |
| rnaseka          | 313.7804699 | -0.1866809   | 0.1294236 | -1.442402 | 0.149189 | 0.696454 |
| alox12           | 556.062179  | -0.025128813 | 0.1014354 | -0.247732 | 0.804342 | 0.979643 |

|                  |             |              |           |           |          |          |
|------------------|-------------|--------------|-----------|-----------|----------|----------|
| cox7a1           | 36.29366154 | -0.006510065 | 0.3641466 | -0.017878 | 0.985737 | 0.996944 |
| igsf9bb          | 21.58374776 | 0.175955382  | 0.4091399 | 0.4300617 | 0.667151 | 0.964736 |
| khdrbs2          | 652.3791112 | -0.027765045 | 0.1256876 | -0.220905 | 0.825166 | 0.982196 |
| mhclzca          | 85.28104817 | 0.230202473  | 0.2270675 | 1.0138061 | 0.310675 | 0.862927 |
| chsy3            | 668.3806273 | 0.195607509  | 0.1004409 | 1.9474892 | 0.051476 | 0.444687 |
| frem1a           | 528.4275269 | 0.292731189  | 0.1040581 | 2.8131521 | 0.004906 | 0.102006 |
| spint2           | 2090.620943 | 0.029675725  | 0.0789895 | 0.3756922 | 0.707146 | 0.968664 |
| slc13a3          | 149.0279041 | -0.132162048 | 0.1972393 | -0.670059 | 0.50282  | 0.935304 |
| ghrh             | 1.236658278 | 1.362380035  | 1.954156  | 0.6971706 | 0.485696 | NA       |
| traf1            | 17.43183024 | -0.361949207 | 0.4674727 | -0.774268 | 0.438772 | 0.915997 |
| dab2ipa          | 45.61738018 | -0.30210352  | 0.302778  | -0.997772 | 0.31839  | 0.867746 |
| spryd7b          | 303.8712972 | -0.058839932 | 0.1590805 | -0.369875 | 0.711476 | 0.969006 |
| tmem223          | 138.2986412 | -0.057372796 | 0.1716428 | -0.334257 | 0.738186 | 0.972535 |
| tmem179b         | 49.81431502 | -0.561152825 | 0.2805513 | -2.000179 | 0.045481 | 0.418148 |
| arl2             | 262.4218415 | 0.045900741  | 0.1309769 | 0.350449  | 0.726002 | 0.970402 |
| sumf2            | 107.8222889 | 0.139816812  | 0.1908415 | 0.7326331 | 0.463782 | 0.922875 |
| phkglb           | 162.605733  | 0.444465814  | 0.1632218 | 2.7230782 | 0.006468 | 0.122855 |
| spag1b           | 63.47650079 | -0.281954566 | 0.2506441 | -1.12492  | 0.260623 | 0.828546 |
| hs6st3b          | 3.152604936 | 0.154343508  | 1.044796  | 0.147726  | 0.882559 | NA       |
| abhd11           | 189.4129179 | 0.065868999  | 0.1569426 | 0.4197013 | 0.674704 | 0.965257 |
| cldnh            | 1372.201987 | -0.206193744 | 0.0852101 | -2.419827 | 0.015528 | 0.228768 |
| si:dkey-88e18.2  | 3.41581341  | 0.392263494  | 1.0398581 | 0.3772279 | 0.706004 | NA       |
| zgc:136892       | 110.1963134 | 0.067138965  | 0.188137  | 0.3568621 | 0.721195 | 0.969602 |
| mett127          | 34.583953   | 0.165997478  | 0.3378581 | 0.4913231 | 0.623198 | 0.957354 |
| bbs10            | 39.56923721 | -0.026177016 | 0.3290484 | -0.079554 | 0.936592 | 0.992702 |
| aqp3b            | 8.056297746 | 0.049720713  | 0.7512999 | 0.0661796 | 0.947235 | NA       |
| vps29            | 798.8225799 | -0.021216945 | 0.0933315 | -0.227329 | 0.820168 | 0.981594 |
| gpn3             | 108.7496975 | 0.161035656  | 0.1970946 | 0.8170474 | 0.413901 | 0.905864 |
| ube2glb          | 682.0522556 | 0.074591545  | 0.0982022 | 0.7595708 | 0.447511 | 0.917154 |
| zgc:153981       | 131.9388419 | 0.102080466  | 0.1732504 | 0.5892077 | 0.555722 | 0.947621 |
| si:dkey-238c7.16 | 248.0861253 | 0.195509702  | 0.1559405 | 1.2537459 | 0.209934 | 0.777416 |
| gtf3c4           | 153.5394497 | -0.091623568 | 0.1721595 | -0.532202 | 0.594586 | 0.954434 |
| si:dkey-30c15.2  | 30.38128125 | 0.733637612  | 0.3563275 | 2.0588857 | 0.039505 | 0.390393 |
| si:dkey-8e10.2   | 0.840668913 | 0.571309826  | 2.0205965 | 0.2827432 | 0.777374 | NA       |
| galt             | 149.3152384 | -0.060022332 | 0.1649153 | -0.363959 | 0.715889 | 0.96909  |
| atgl2            | 98.0781863  | -0.017483079 | 0.2258604 | -0.077407 | 0.9383   | 0.99279  |
| zgc:162780       | 106.7142731 | -0.106513276 | 0.1932378 | -0.551203 | 0.581494 | 0.951731 |
| zgc:162396       | 275.1663485 | -0.345225821 | 0.1285802 | -2.684907 | 0.007255 | 0.134075 |
| atoh7            | 57.14506953 | -0.07827345  | 0.2557948 | -0.306001 | 0.759604 | 0.975374 |
| CR388165.1       | 1.181176088 | -0.433914662 | 1.8067623 | -0.240161 | 0.810205 | NA       |
| muc13a           | 126.707283  | -0.374628205 | 0.1866876 | -2.006712 | 0.04478  | 0.416612 |
| kcnh3            | 37.42737556 | -0.112050515 | 0.3112285 | -0.360027 | 0.718827 | 0.969092 |
| zgc:153151       | 22.51245584 | -0.424786474 | 0.4431383 | -0.958587 | 0.337767 | 0.876395 |
| mucms1           | 40.64799282 | -0.092157861 | 0.3450738 | -0.267067 | 0.789417 | 0.977148 |
| zgc:114181       | 2041.110676 | 0.396849098  | 0.0799176 | 4.96573   | 6.84E-07 | 7.28E-05 |
| tmem222a         | 311.5820176 | 0.12690696   | 0.1275656 | 0.9948366 | 0.319816 | 0.86809  |
| tmem150c         | 63.62021724 | 0.177623531  | 0.2407812 | 0.7376968 | 0.460699 | 0.921978 |
| kif13a           | 244.1522633 | -0.019045393 | 0.1375213 | -0.138491 | 0.889853 | 0.989291 |
| si:ch211-214c7.4 | 700.4902806 | -0.106596621 | 0.095824  | -1.112421 | 0.265957 | 0.831945 |
| chrn5b           | 3.331169679 | 0.021389598  | 1.0675661 | 0.0200359 | 0.984015 | NA       |
| zgc:109889       | 1520.053446 | 0.004083129  | 0.077669  | 0.0525709 | 0.958074 | 0.99467  |
| snx30            | 295.9280119 | -0.039738554 | 0.1387249 | -0.286456 | 0.774529 | 0.975687 |
| taokla           | 1264.151874 | -0.03413498  | 0.078825  | -0.433047 | 0.66498  | 0.964736 |
| zgc:162331       | 143.5784003 | 0.148509357  | 0.1858907 | 0.7989069 | 0.424344 | 0.908312 |

|                   |             |              |           |           |          |          |
|-------------------|-------------|--------------|-----------|-----------|----------|----------|
| paln2             | 13.63487924 | -0.158796405 | 0.5277135 | -0.300914 | 0.76348  | 0.975374 |
| ckmt2a            | 4959.898664 | 0.259296626  | 0.084106  | 3.0829729 | 0.002049 | 0.054397 |
| atf7ip            | 3298.888232 | -0.116504161 | 0.0706178 | -1.649785 | 0.098987 | 0.598346 |
| mrps18c           | 346.8662963 | -0.018445738 | 0.1449454 | -0.12726  | 0.898735 | 0.990121 |
| si:ch211-255g12.8 | 7.476152468 | 0.053872031  | 0.6905741 | 0.0780105 | 0.93782  | NA       |
| tat               | 170.372951  | -0.883270766 | 0.1775125 | -4.975823 | 6.50E-07 | 6.94E-05 |
| empl              | 127.4424198 | 0.243396744  | 0.1869111 | 1.3022063 | 0.192846 | 0.756795 |
| vegfc             | 45.00740984 | 0.224307955  | 0.2967302 | 0.7559322 | 0.44969  | 0.918526 |
| tmem160           | 88.00362617 | -0.21017599  | 0.2104851 | -0.998531 | 0.318022 | 0.867746 |
| ppp6r2b           | 65.68669519 | -0.105437578 | 0.2449644 | -0.43042  | 0.66689  | 0.964736 |
| chrnbl            | 346.0418865 | 0.357096169  | 0.1272974 | 2.8052118 | 0.005028 | 0.103574 |
| si:dkey-121j17.6  | 54.65263565 | 0.103849866  | 0.2767131 | 0.375298  | 0.707439 | 0.968664 |
| fgf11a            | 10.36232198 | -0.226672378 | 0.6459556 | -0.35091  | 0.725656 | NA       |
| adra2c            | 77.90461462 | 0.174392393  | 0.2401141 | 0.7262896 | 0.467661 | 0.924328 |
| maipl             | 299.0156061 | 0.025156394  | 0.1344139 | 0.1871561 | 0.851538 | 0.985174 |
| tyw5              | 161.9507568 | -0.126276081 | 0.178199  | -0.708624 | 0.478558 | 0.926978 |
| chid1             | 307.8370433 | -0.088566119 | 0.1290587 | -0.686247 | 0.492558 | 0.931926 |
| tmem230b          | 258.0486091 | -0.185525023 | 0.1419671 | -1.306817 | 0.191275 | 0.755886 |
| her8.2            | 144.6052186 | -0.066175678 | 0.1707034 | -0.387665 | 0.698264 | 0.967998 |
| nicn1             | 26.18544624 | 0.735398824  | 0.3930057 | 1.8712168 | 0.061315 | 0.482931 |
| pcgf6             | 71.99215721 | -0.324333218 | 0.2379868 | -1.36282  | 0.172939 | 0.731956 |
| col7a11           | 397.5116496 | 0.251750374  | 0.1153305 | 2.1828607 | 0.029046 | 0.330497 |
| si:ch211-261n11.5 | 412.7672713 | -0.141750804 | 0.1155906 | -1.226317 | 0.220079 | 0.786751 |
| lrguk             | 8.872531182 | 0.290409394  | 0.6591425 | 0.4405867 | 0.659512 | NA       |
| lgi2b             | 195.542246  | 0.251125293  | 0.1492819 | 1.682222  | 0.092526 | 0.579378 |
| efhb              | 5.905468051 | 0.059617435  | 0.8725437 | 0.068326  | 0.945526 | NA       |
| prmt6             | 132.9794096 | 0.125747377  | 0.1729978 | 0.7268729 | 0.467304 | 0.924328 |
| si:ch211-113e8.5  | 0.182570949 | 0.967652056  | 4.0804729 | 0.2371421 | 0.812547 | NA       |
| cdc34a            | 755.5782891 | 0.06720127   | 0.0930316 | 0.722349  | 0.47008  | 0.924787 |
| vwa10.2           | 12.80299242 | -0.267940801 | 0.5312024 | -0.504404 | 0.613977 | 0.95688  |
| foxi2             | 40.0170108  | -0.191476005 | 0.3057069 | -0.626339 | 0.531093 | 0.942209 |
| zbbx              | 7.479452094 | 0.860282611  | 0.7006484 | 1.2278378 | 0.219508 | NA       |
| glis3             | 43.23725775 | -0.11469612  | 0.3169127 | -0.361917 | 0.717414 | 0.96909  |
| rpz3              | 65.50008709 | -0.013232998 | 0.2416712 | -0.054756 | 0.956333 | 0.994543 |
| mpg               | 32.40412012 | -0.04719529  | 0.343338  | -0.13746  | 0.890667 | 0.989291 |
| mavs              | 170.3459606 | -0.040845415 | 0.1695212 | -0.240946 | 0.809597 | 0.980642 |
| hbba2             | 1.163885225 | 0.470408     | 1.7459696 | 0.2694251 | 0.787603 | NA       |
| hbaa2             | 0.488104098 | -2.415107183 | 2.7936704 | -0.864493 | 0.387317 | NA       |
| pou4f2            | 1024.072773 | -0.134371853 | 0.0901222 | -1.490996 | 0.135963 | 0.672424 |
| fnkc5a            | 10.80584993 | 0.1130536    | 0.610691  | 0.1851241 | 0.853132 | NA       |
| cul5a             | 246.3190419 | 0.017102316  | 0.1396367 | 0.1224772 | 0.902521 | 0.990121 |
| mos               | 5.727264766 | -0.427955906 | 0.8297999 | -0.515734 | 0.60604  | NA       |
| slc35f2           | 119.726388  | -0.109762307 | 0.1853951 | -0.592045 | 0.55382  | 0.947449 |
| capn5b            | 8.486334832 | 0.730450538  | 0.6963802 | 1.0489248 | 0.294213 | NA       |
| ckba              | 686.1866735 | -0.116325573 | 0.1074847 | -1.082253 | 0.27914  | 0.842806 |
| mtmr11            | 501.9958015 | -0.099461243 | 0.1045924 | -0.950941 | 0.341634 | 0.878134 |
| si:dkey-189g17.2  | 15.33347315 | 0.342958816  | 0.5022628 | 0.6828274 | 0.494716 | 0.931926 |
| etv5a             | 927.8157328 | 0.078602307  | 0.0866343 | 0.9072885 | 0.364254 | 0.886494 |
| syngap1b          | 574.625482  | 0.011711781  | 0.1026433 | 0.1141018 | 0.909157 | 0.990702 |
| caln2             | 6.195252999 | -0.301951635 | 0.7873074 | -0.383524 | 0.701331 | NA       |
| nectin1a          | 91.72964205 | -0.217171591 | 0.2110878 | -1.028821 | 0.303564 | 0.857769 |
| gig2j             | 0.522329263 | 0.999930388  | 2.8066578 | 0.3562709 | 0.721638 | NA       |
| nitrlb            | 0.332645115 | 0.005883744  | 3.2924249 | 0.0017871 | 0.998574 | NA       |
| flot2b            | 1348.917877 | -0.093007696 | 0.0876718 | -1.060862 | 0.288753 | 0.845979 |

|                  |             |              |           |           |          |          |
|------------------|-------------|--------------|-----------|-----------|----------|----------|
| fbxo40.1         | 73.97535295 | -0.086342302 | 0.2310832 | -0.373642 | 0.708671 | 0.968664 |
| pus71            | 88.7852316  | -0.331622806 | 0.2142629 | -1.547738 | 0.121685 | 0.648399 |
| rec114           | 1.187378788 | 0.431861727  | 1.803976  | 0.2393944 | 0.8108   | NA       |
| tmc6a            | 3.268175202 | 0.515645311  | 1.2167851 | 0.4237768 | 0.671729 | NA       |
| dyn112a          | 1441.572987 | 0.033859836  | 0.0906305 | 0.373603  | 0.7087   | 0.968664 |
| crygm2d5         | 3649.580376 | -0.06328533  | 0.086728  | -0.729699 | 0.465574 | 0.923865 |
| zgc:154058       | 49.30434585 | 0.581359011  | 0.2882967 | 2.0165304 | 0.043745 | 0.410733 |
| znf1124          | 275.8858987 | -0.237984875 | 0.1265997 | -1.879821 | 0.060132 | 0.478687 |
| si:dkey-228114.1 | 0           | NA           | NA        | NA        | NA       | NA       |
| crygm2d12        | 8890.706629 | 0.107220692  | 0.0730877 | 1.4670134 | 0.142372 | 0.684315 |
| si:ch211-198k9.6 | 15.07488042 | -0.046050154 | 0.4997144 | -0.092153 | 0.926577 | 0.992702 |
| sstr2b           | 11.7343678  | -0.656632713 | 0.5776562 | -1.136719 | 0.255656 | 0.824285 |
| zdhhc18a         | 354.6573424 | -0.074851607 | 0.1169923 | -0.639799 | 0.522303 | 0.939056 |
| ostml            | 257.8805057 | -0.115438203 | 0.1460214 | -0.790557 | 0.429203 | 0.911406 |
| dnalil           | 36.42725187 | 0.012877055  | 0.3223046 | 0.0399531 | 0.968131 | 0.996315 |
| crygm2d17        | 14100.41529 | 0.126513018  | 0.0675978 | 1.8715566 | 0.061268 | 0.482931 |
| procal           | 112.1100872 | 0.203848988  | 0.1882306 | 1.0829747 | 0.27882  | 0.842767 |
| crygm2d15        | 8135.636159 | 0.002798789  | 0.1056559 | 0.0264897 | 0.978867 | 0.996762 |
| crygm2d11        | 8064.059927 | 0.065504518  | 0.0850966 | 0.7697668 | 0.441438 | 0.916336 |
| si:ch211-117n7.7 | 148.7272169 | -1.092369336 | 0.1735573 | -6.293998 | 3.09E-10 | 6.72E-08 |
| rragca           | 730.0901981 | -0.00110735  | 0.094454  | -0.011724 | 0.990646 | 0.997679 |
| sfxn4            | 171.1481195 | -0.145350993 | 0.1563913 | -0.929406 | 0.352679 | 0.881552 |
| rhbd12           | 202.9075272 | -0.124506745 | 0.1432842 | -0.86895  | 0.384875 | 0.89551  |
| pnpla4           | 13.44740148 | -0.448538357 | 0.5197187 | -0.863041 | 0.388115 | 0.89625  |
| CU571382.1       | 0.347458735 | -1.908042286 | 3.4571486 | -0.551912 | 0.581009 | NA       |
| kctd12.1         | 184.9403524 | 0.263321151  | 0.1563933 | 1.6837111 | 0.092238 | 0.57849  |
| acod1            | 85.45155409 | -0.058433532 | 0.2283307 | -0.255916 | 0.798015 | 0.978793 |
| zgc:162944       | 718.7294395 | -0.119828288 | 0.103119  | -1.162039 | 0.24522  | 0.815227 |
| nitrlb           | 0.166657454 | -0.955901296 | 4.0804729 | -0.234262 | 0.814781 | NA       |
| mrpl30           | 645.944491  | -0.126208792 | 0.1146884 | -1.10045  | 0.271136 | 0.835995 |
| lipt2            | 23.60469994 | -0.067573718 | 0.4218701 | -0.160177 | 0.872742 | 0.987846 |
| txndc9           | 1319.618233 | -0.013401153 | 0.0838171 | -0.159886 | 0.872971 | 0.987846 |
| pnisr            | 2219.491246 | -0.00593901  | 0.0826565 | -0.071852 | 0.94272  | 0.993364 |
| coq3             | 261.7284302 | -0.132951115 | 0.1645861 | -0.807791 | 0.419211 | 0.906406 |
| grxcrib          | 9.149280724 | -0.046954564 | 0.6385293 | -0.073535 | 0.94138  | NA       |
| sox1a            | 559.8833902 | 0.001392574  | 0.1192662 | 0.0116762 | 0.990684 | 0.997679 |
| zgc:113030       | 78.32959638 | -0.054063068 | 0.2369092 | -0.228202 | 0.819489 | 0.981594 |
| snul3a           | 346.8431575 | -0.109062931 | 0.1335982 | -0.81635  | 0.4143   | 0.906237 |
| cldna            | 115.0541829 | -0.007598869 | 0.1952891 | -0.038911 | 0.968961 | 0.996315 |
| sphk2            | 448.7857384 | -0.077949084 | 0.1054235 | -0.73939  | 0.45967  | 0.921978 |
| CR392036.1       | 1.293012095 | 2.68170335   | 1.8621377 | 1.4401209 | 0.149833 | NA       |
| pimr152          | 0           | NA           | NA        | NA        | NA       | NA       |
| CABZ01071903.1   | 134.4995945 | 0.148689258  | 0.1914485 | 0.776654  | 0.437363 | 0.914595 |
| si:dkey-33c12.12 | 289.7531129 | 0.153165961  | 0.1298205 | 1.1798284 | 0.238068 | 0.807196 |
| gtf2f2a          | 603.4169838 | -0.020563551 | 0.1022902 | -0.201031 | 0.840674 | 0.985092 |
| hmga2            | 195.0527953 | 0.153034159  | 0.1725923 | 0.8866801 | 0.375251 | 0.894316 |
| ska3             | 178.5512798 | -0.226032506 | 0.1663639 | -1.358663 | 0.174253 | 0.734375 |
| cox17            | 827.8933865 | 0.033883158  | 0.1235105 | 0.2743343 | 0.783828 | 0.97627  |
| plala            | 133.2822879 | 0.202209508  | 0.1936226 | 1.0443486 | 0.296324 | 0.853286 |
| hsd3b1           | 9.579500747 | 1.158698935  | 0.6642222 | 1.7444447 | 0.081082 | NA       |
| prkceb           | 24.95212199 | -0.279941121 | 0.3852243 | -0.726696 | 0.467412 | 0.924328 |
| CABZ01053976.1   | 150.332927  | -0.009935964 | 0.1861562 | -0.053374 | 0.957434 | 0.99467  |
| parp4            | 331.4056202 | -0.23754578  | 0.1283803 | -1.850329 | 0.064266 | 0.496018 |
| dnm2a            | 508.1996862 | -0.050924851 | 0.1175377 | -0.433264 | 0.664823 | 0.964736 |

|                   |             |              |           |           |          |          |
|-------------------|-------------|--------------|-----------|-----------|----------|----------|
| ppap2d            | 668.54982   | 0.13322011   | 0.0946389 | 1.4076682 | 0.159229 | 0.710139 |
| tdp2a             | 0.515095711 | 0.926015374  | 2.6527421 | 0.3490785 | 0.72703  | NA       |
| p2ry13            | 3.931139784 | 1.288570441  | 0.9863179 | 1.3064454 | 0.191401 | NA       |
| p2ry12            | 6.757961806 | 2.039088693  | 0.7999539 | 2.5490077 | 0.010803 | NA       |
| itga6b            | 923.4132982 | 0.067186843  | 0.10744   | 0.6253427 | 0.531746 | 0.942359 |
| eef1a112          | 326.2290302 | 0.287221287  | 0.1253549 | 2.2912648 | 0.021948 | 0.281271 |
| kcnq5b            | 117.8755251 | -0.011106835 | 0.1837217 | -0.060455 | 0.951794 | 0.993864 |
| kcnq5a            | 8.669940135 | 0.693819915  | 0.6478101 | 1.0710236 | 0.284159 | NA       |
| pdlim2            | 484.4180056 | -0.030308521 | 0.1107835 | -0.273583 | 0.784405 | 0.97627  |
| zgc:162936        | 59.90703802 | -0.338955189 | 0.2569105 | -1.319351 | 0.187052 | 0.751002 |
| sh2b3             | 1.946594704 | -0.468402419 | 1.4036711 | -0.333698 | 0.738607 | NA       |
| il21r.1           | 16.08949083 | -0.438557374 | 0.4728721 | -0.927433 | 0.353702 | 0.881976 |
| alox5b.3          | 10.21739478 | 0.433081887  | 0.6081032 | 0.7121849 | 0.47635  | NA       |
| pcsk7             | 365.3531206 | -0.116909615 | 0.1221839 | -0.956834 | 0.338651 | 0.877373 |
| lingo2b           | 332.0505502 | 0.132714402  | 0.124443  | 1.0664677 | 0.286212 | 0.845942 |
| mygl              | 643.6640381 | -0.164766297 | 0.1017787 | -1.618867 | 0.105476 | 0.614157 |
| cd281             | 97.8331574  | 0.167299159  | 0.1995047 | 0.8385724 | 0.401709 | 0.90084  |
| lman1             | 678.9204105 | 0.046959429  | 0.0998196 | 0.4704429 | 0.638039 | 0.959194 |
| cspg5a            | 4494.175852 | 0.013160467  | 0.0912159 | 0.1442782 | 0.885281 | 0.988936 |
| nkd3              | 1.646484154 | -0.008692931 | 1.423537  | -0.006107 | 0.995128 | NA       |
| arid6             | 155.257074  | -0.872520223 | 0.1697921 | -5.138755 | 2.77E-07 | 3.40E-05 |
| bnc2              | 575.1688679 | -0.084831187 | 0.0984679 | -0.861511 | 0.388956 | 0.896295 |
| dpy19111          | 39.09617653 | 0.326879856  | 0.3315021 | 0.9860567 | 0.324105 | 0.870928 |
| dnajb14           | 143.6355132 | 0.18750798   | 0.1670575 | 1.1224158 | 0.261686 | 0.82979  |
| si:ch211-145b13.6 | 17.89314989 | -0.27125193  | 0.4837121 | -0.560771 | 0.574953 | 0.950119 |
| txnipb            | 614.5796625 | 0.065484058  | 0.1010639 | 0.6479469 | 0.517019 | 0.938543 |
| rcn1              | 753.3299452 | 0.210505055  | 0.0914955 | 2.3007159 | 0.021408 | 0.276496 |
| hce212            | 14.4636594  | 0.522687553  | 0.5074895 | 1.0299474 | 0.303035 | 0.85729  |
| sesn2             | 378.5623538 | -0.046094403 | 0.1147489 | -0.401698 | 0.687906 | 0.966493 |
| dmrt2b            | 21.34687366 | -0.035902067 | 0.4260563 | -0.084266 | 0.932845 | 0.992702 |
| pimr173           | 0.513487682 | -0.887846295 | 2.6557956 | -0.334305 | 0.738149 | NA       |
| taf15             | 5968.46764  | -0.062583138 | 0.0716894 | -0.872976 | 0.382676 | 0.895192 |
| cyp3c4            | 54.12826079 | -0.758801958 | 0.2680378 | -2.830951 | 0.004641 | 0.097899 |
| dchsla            | 335.8547835 | -0.066356667 | 0.1228749 | -0.540034 | 0.589173 | 0.953345 |
| tmem41aa          | 311.7805941 | -0.014801617 | 0.1255232 | -0.117919 | 0.906132 | 0.990702 |
| ehhadh            | 260.5340787 | -0.506304924 | 0.1377068 | -3.676689 | 0.000236 | 0.009795 |
| rgs8              | 534.7623893 | 0.21569257   | 0.1138257 | 1.894937  | 0.058101 | 0.472597 |
| rbp2a             | 1038.371233 | -0.06018515  | 0.0968919 | -0.621158 | 0.534496 | 0.943336 |
| AL935184.1        |             | 0 NA         | NA        | NA        | NA       | NA       |
| zgc:162344        | 83.89469742 | 0.066317738  | 0.215038  | 0.3084001 | 0.757778 | 0.975374 |
| zgc:153920        | 11.28376416 | 0.271645324  | 0.5688332 | 0.4775483 | 0.632972 | 0.957356 |
| dars              | 2322.469395 | -0.124971726 | 0.0855616 | -1.460606 | 0.144124 | 0.688216 |
| celf4             | 315.4277403 | 0.093702829  | 0.1405744 | 0.6665712 | 0.505046 | 0.935724 |
| eny2              | 357.0125548 | -0.131895461 | 0.1294211 | -1.019118 | 0.308147 | 0.861088 |
| rgs4              | 706.368004  | -0.05158639  | 0.0950565 | -0.542692 | 0.587342 | 0.953319 |
| zgc:173548        | 29.13350404 | 0.006210629  | 0.3667712 | 0.0169333 | 0.98649  | 0.996965 |
| sfrp2             | 337.8690089 | 0.206551168  | 0.124426  | 1.6600323 | 0.096908 | 0.593269 |
| tdrd6             | 17.25138518 | 0.996597061  | 0.5072542 | 1.9646898 | 0.04945  | 0.436093 |
| foxgld            | 157.8520293 | 0.191909913  | 0.1751316 | 1.095804  | 0.273165 | 0.838141 |
| arfipl            | 250.4911098 | -0.011672356 | 0.1350964 | -0.0864   | 0.931148 | 0.992702 |
| adorala           | 3.207571219 | -1.493640465 | 1.2715492 | -1.174662 | 0.24013  | NA       |
| si:dkey-69o16.5   | 154.4798454 | -0.307959804 | 0.1705403 | -1.805789 | 0.070951 | 0.521075 |
| si:ch211-262i1.5  | 105.0411144 | 0.121591137  | 0.191544  | 0.6347947 | 0.525562 | 0.94013  |
| gfer              | 249.4549748 | -0.180131756 | 0.1337362 | -1.346918 | 0.178007 | 0.738995 |

|                   |             |              |           |           |          |          |
|-------------------|-------------|--------------|-----------|-----------|----------|----------|
| si:ch211-163c2.2  | 1.21367287  | 0.460988657  | 1.8129472 | 0.2542758 | 0.799282 | NA       |
| pitx3             | 276.6321136 | -0.079425595 | 0.1362141 | -0.583094 | 0.55983  | 0.948478 |
| si:dkey-13ml.5    | 3.723288649 | 0.51596056   | 1.0861176 | 0.4750504 | 0.634751 | NA       |
| lrp8              | 1269.887702 | -0.039719512 | 0.080134  | -0.495664 | 0.620132 | 0.957354 |
| actr2b            | 71.6702779  | 0.16708263   | 0.2395668 | 0.6974366 | 0.48553  | 0.930406 |
| abcb11b           | 150.2766634 | 0.420661557  | 0.1780286 | 2.3628873 | 0.018133 | 0.250046 |
| nbeaa             | 2206.613955 | 0.028289874  | 0.0956093 | 0.2958903 | 0.767314 | 0.975687 |
| rspo3             | 133.2770133 | -0.15707883  | 0.1883028 | -0.834182 | 0.404178 | 0.901305 |
| atp5flb           | 20637.15837 | -0.00546216  | 0.087874  | -0.062159 | 0.950436 | 0.99381  |
| phf10             | 312.0578623 | -0.100187153 | 0.1236751 | -0.810083 | 0.417892 | 0.906293 |
| mett16            | 77.27168901 | 0.374465257  | 0.2236301 | 1.6744854 | 0.094035 | 0.583414 |
| KCNV1             | 5.015641243 | -0.172486191 | 0.9003949 | -0.191567 | 0.848081 | NA       |
| sytl1             | 95.58186427 | 0.043992294  | 0.2032493 | 0.216445  | 0.828641 | 0.982721 |
| selenos           | 1068.339217 | -0.02055644  | 0.0903636 | -0.227486 | 0.820046 | 0.981594 |
| lcor1             | 629.5461064 | 0.151448352  | 0.1029957 | 1.4704335 | 0.141444 | 0.68201  |
| si:ch211-168d1.3  | 57.76525226 | 0.067752907  | 0.2624603 | 0.2581453 | 0.796295 | 0.978498 |
| six7              | 1062.633823 | 0.173458046  | 0.0903189 | 1.9205065 | 0.054794 | 0.458525 |
| dek               | 561.4262778 | -0.03946209  | 0.1040671 | -0.379199 | 0.70454  | 0.968134 |
| ncapg             | 818.7650003 | -0.116690907 | 0.0911327 | -1.280451 | 0.200387 | 0.766727 |
| opn5              | 6.758610648 | 0.206192222  | 0.7218808 | 0.2856319 | 0.77516  | NA       |
| nit1              | 71.46136023 | -0.125985787 | 0.2419109 | -0.520794 | 0.60251  | 0.956045 |
| ctcl              | 383.038159  | -0.282553477 | 0.1136704 | -2.485726 | 0.012929 | 0.202578 |
| rhoh              | 0.964730988 | -0.018658301 | 1.9582344 | -0.009528 | 0.992398 | NA       |
| stkl1ip           | 352.4243814 | -0.166136689 | 0.1203982 | -1.379893 | 0.16762  | 0.7248   |
| ptpn23a           | 937.3486433 | 0.020553026  | 0.1152312 | 0.1783634 | 0.858438 | 0.985773 |
| si:dkey-22111.6   | 41.54040974 | -0.048638931 | 0.302841  | -0.160609 | 0.872402 | 0.987846 |
| nfxl1             | 273.3530369 | -0.11270715  | 0.1402212 | -0.803781 | 0.421523 | 0.90651  |
| rpp25l            | 71.12340888 | 0.043354387  | 0.2376281 | 0.1824464 | 0.855232 | 0.985174 |
| astela            | 3.334976464 | 0.32506539   | 1.0447486 | 0.3111422 | 0.755693 | NA       |
| si:dkey-84o3.3    | 1.695213209 | -1.193025259 | 1.5279745 | -0.780789 | 0.434927 | NA       |
| RETSAT            | 25.18384643 | -0.551533809 | 0.38784   | -1.422065 | 0.155007 | 0.704624 |
| si:ch211-191i18.2 | 60.96162638 | 0.326399072  | 0.2666187 | 1.2242169 | 0.22087  | 0.787641 |
| cart4             | 93.61265833 | 0.135430922  | 0.2147104 | 0.6307609 | 0.528197 | 0.941768 |
| magila            | 779.675528  | -0.009908095 | 0.1281335 | -0.077326 | 0.938364 | 0.99279  |
| cygb2             | 236.3795781 | -0.017500682 | 0.1429424 | -0.122432 | 0.902557 | 0.990121 |
| jtb               | 704.7360361 | 0.099763729  | 0.0961861 | 1.0371952 | 0.299645 | 0.855745 |
| nfyc              | 1763.929858 | -0.029761589 | 0.0838535 | -0.354924 | 0.722647 | 0.970375 |
| tuba813           | 1252.269397 | 0.122118408  | 0.0839555 | 1.4545608 | 0.145791 | 0.691641 |
| tgm2a             | 317.8746423 | 0.270702577  | 0.1299206 | 2.0835997 | 0.037197 | 0.37758  |
| vamp3             | 1015.361349 | -0.123459381 | 0.0873186 | -1.413896 | 0.157393 | 0.708089 |
| stox2a            | 1550.991776 | 0.04205615   | 0.0777297 | 0.5410563 | 0.588469 | 0.953319 |
| ubr2              | 1215.735616 | -0.012249919 | 0.0876568 | -0.139749 | 0.888859 | 0.989291 |
| tnfrsflb          | 99.35535424 | -0.19479214  | 0.1984792 | -0.981423 | 0.326384 | 0.87218  |
| zgc:153499        | 0.31598276  | 0.005883445  | 3.3523626 | 0.001755  | 0.9986   | NA       |
| sod3a             | 93.62103698 | -0.081378951 | 0.2500388 | -0.325465 | 0.744829 | 0.974094 |
| si:ch211-225p5.8  | 82.38187839 | 0.571241565  | 0.2238257 | 2.5521718 | 0.010705 | 0.179263 |
| gria2a            | 1427.936494 | 0.030754567  | 0.0779567 | 0.3945084 | 0.693206 | 0.96736  |
| PLEKHH3           | 637.4085054 | 0.04381474   | 0.1008263 | 0.4345568 | 0.663884 | 0.964736 |
| zp3d.2            | 2.118166602 | -0.667368935 | 1.3153398 | -0.507374 | 0.611893 | NA       |
| dyrk1b            | 1600.720344 | 0.022746772  | 0.0873075 | 0.2605362 | 0.79445  | 0.977937 |
| si:dkey-13e3.1    |             | 0 NA         | NA        | NA        | NA       | NA       |
| si:zfos-2070c2.1  |             | 0 NA         | NA        | NA        | NA       | NA       |
| etnk2             | 3.987448907 | 0.48046754   | 0.9516837 | 0.5048605 | 0.613657 | NA       |
| slc41a1           | 37.7097983  | 0.20288765   | 0.3197898 | 0.6344407 | 0.525793 | 0.940223 |



| si:ch211-120e1.1   | 0 NA        | NA           | NA        | NA        | NA       |          |
|--------------------|-------------|--------------|-----------|-----------|----------|----------|
| pou3f2a            | 291.5755177 | 0.11406118   | 0.1255832 | 0.9082519 | 0.363745 | 0.886174 |
| fam43b             | 139.3862718 | -0.167803685 | 0.1772934 | -0.946475 | 0.343907 | 0.878434 |
| nhsa               | 47.7054273  | 0.008255583  | 0.2777929 | 0.0297185 | 0.976292 | 0.996762 |
| cdk6               | 49.60508536 | 0.103886231  | 0.2818134 | 0.3686348 | 0.7124   | 0.969087 |
| zgc:158258         | 80.28941987 | -0.36156563  | 0.2533488 | -1.427145 | 0.153538 | 0.702578 |
| aldh1l2            | 592.4576518 | -0.014859965 | 0.1134019 | -0.131038 | 0.895745 | 0.989814 |
| polh               | 202.1218974 | -0.008729759 | 0.1488013 | -0.058667 | 0.953217 | 0.994157 |
| kn11               | 318.641882  | -0.262315783 | 0.1255812 | -2.088815 | 0.036724 | 0.374517 |
| suz12a             | 427.9836269 | 0.074786479  | 0.1158216 | 0.6457039 | 0.518471 | 0.938765 |
| crlf3              | 418.4348785 | -0.163223516 | 0.1137445 | -1.435001 | 0.151287 | 0.699449 |
| spock3             | 2865.847063 | 0.125496888  | 0.0739087 | 1.6979996 | 0.089508 | 0.572876 |
| tut4               | 55.26571057 | -0.227051956 | 0.2683655 | -0.846055 | 0.397522 | 0.899672 |
| casp8l2            | 28.26786858 | 0.01166195   | 0.4147828 | 0.0281158 | 0.97757  | 0.996762 |
| mettl14            | 191.713369  | -0.090791151 | 0.1647221 | -0.551178 | 0.581512 | 0.951731 |
| hist1h2a3          | 24.10159304 | 0.024549577  | 0.4377783 | 0.0560776 | 0.95528  | 0.994543 |
| sft2d3             | 222.5417825 | 0.155745051  | 0.1482998 | 1.0502041 | 0.293624 | 0.849594 |
| si:ch211-113a14.22 | 11.40266164 | 1.17091719   | 0.5939957 | 1.9712554 | 0.048695 | 0.433734 |
| CR354435.1         | 13.80273161 | 0.584392624  | 0.5797533 | 1.0080023 | 0.313453 | 0.865132 |
| BX942819.1         | 5.584943345 | -0.361075493 | 0.853063  | -0.423269 | 0.672099 | NA       |
| cald1a             | 645.2495464 | 0.102576112  | 0.1026546 | 0.9992358 | 0.31768  | 0.867607 |
| irge4              | 2.788240727 | 0.441142802  | 1.2657093 | 0.3485341 | 0.727439 | NA       |
| arl8bb             | 106.7338605 | 0.07714212   | 0.1947416 | 0.3961255 | 0.692012 | 0.96733  |
| si:dkey-245p14.4   | 53.48961772 | -0.120211661 | 0.2827793 | -0.425108 | 0.670758 | 0.965257 |
| clrn2              | 39.08122992 | 0.443198264  | 0.339387  | 1.3058786 | 0.191594 | 0.755886 |
| muc5.1             | 1376.354423 | 0.1535183    | 0.0912934 | 1.6815919 | 0.092648 | 0.57957  |
| hoxc1a             | 147.0714875 | 0.039699028  | 0.1775383 | 0.2236083 | 0.823062 | 0.982189 |
| hoxc4a             | 333.973953  | -0.249169463 | 0.1192357 | -2.089723 | 0.036643 | 0.374263 |
| hoxc3a             | 461.724629  | 0.013679195  | 0.1069734 | 0.1278747 | 0.898248 | 0.990121 |
| hoxc5a             | 205.6983993 | -0.017402541 | 0.1536628 | -0.113251 | 0.909831 | 0.990702 |
| or134-1            | 3.81309782  | -0.912658793 | 0.9725951 | -0.938375 | 0.348052 | NA       |
| hoxc6a             | 236.1535358 | 0.086053923  | 0.1367864 | 0.6291118 | 0.529276 | 0.942209 |
| or137-3            | 4.727879373 | -0.835689022 | 0.9156709 | -0.912652 | 0.361426 | NA       |
| hoxc8a             | 316.4008191 | -0.023036415 | 0.1381029 | -0.166806 | 0.867523 | 0.987231 |
| hoxc10a            | 37.24240559 | -0.219532049 | 0.3124622 | -0.702587 | 0.482313 | 0.928726 |
| hoxc11a            | 34.64961375 | -0.018541798 | 0.3599252 | -0.051516 | 0.958915 | 0.995095 |
| hoxc12a            | 21.55103707 | -0.476350951 | 0.4509472 | -1.056334 | 0.290816 | 0.846568 |
| hoxc13a            | 4.495253329 | -0.750129482 | 0.8905347 | -0.842336 | 0.3996   | NA       |
| cx39.4             | 18.83546562 | 0.340677739  | 0.4411298 | 0.7722846 | 0.439946 | 0.916082 |
| smim12             | 297.0584407 | 0.043501983  | 0.1301679 | 0.3341991 | 0.738229 | 0.972535 |
| inkala             | 261.2758016 | -0.202076303 | 0.1433001 | -1.410161 | 0.158492 | 0.709224 |
| cx30.9             | 6.595008859 | 0.59786581   | 0.7576264 | 0.7891301 | 0.430036 | NA       |
| casp6l2            | 1.34044285  | 2.725103408  | 1.8428697 | 1.4787282 | 0.139213 | NA       |
| kat7a              | 429.3648785 | 0.083229971  | 0.1077597 | 0.7723663 | 0.439898 | 0.916082 |
| ccl35.2            | 0.812928439 | -0.504524747 | 2.2480137 | -0.224431 | 0.822422 | NA       |
| krtcap2            | 471.1788209 | -0.12636082  | 0.1067479 | -1.183731 | 0.23652  | 0.805854 |
| nudt7              | 50.85484687 | -0.097119481 | 0.2883862 | -0.336769 | 0.736291 | 0.972535 |
| foxf2b             | 91.82624333 | -0.552704262 | 0.2092149 | -2.641802 | 0.008247 | 0.147053 |
| flad1              | 445.4671608 | 0.044273864  | 0.1120549 | 0.3951088 | 0.692763 | 0.96736  |
| tspan4b            | 199.8521615 | 0.096570412  | 0.1555591 | 0.6207958 | 0.534734 | 0.943336 |
| tlr19              | 1.00508983  | 0.079172592  | 1.9360604 | 0.0408937 | 0.967381 | NA       |
| COQ10A             | 229.6979733 | 0.470601255  | 0.1474673 | 3.191224  | 0.001417 | 0.040718 |
| urocl              | 441.006718  | 0.322170813  | 0.1262503 | 2.5518417 | 0.010716 | 0.179263 |
| serpinb112         | 12.2621942  | -0.106984006 | 0.5561764 | -0.192356 | 0.847463 | 0.985174 |

|                   |             |              |           |           |          |          |
|-------------------|-------------|--------------|-----------|-----------|----------|----------|
| alg2              | 210.6178724 | -0.171763105 | 0.1610784 | -1.066332 | 0.286273 | 0.845942 |
| mala              | 0 NA        |              | NA        | NA        | NA       | NA       |
| wdyhv1            | 0 NA        |              | NA        | NA        | NA       | NA       |
| inkalb            | 80.62751604 | -0.094667976 | 0.2249214 | -0.420894 | 0.673833 | 0.965257 |
| abitramp          | 80.74071725 | 0.085446039  | 0.2333816 | 0.3661215 | 0.714274 | 0.96909  |
| ccnd2b            | 29.32245847 | 0.102362283  | 0.3917795 | 0.2612752 | 0.79388  | 0.977937 |
| mtmr7b            | 675.4185625 | 0.101508244  | 0.104962  | 0.9670949 | 0.333497 | 0.874933 |
| si:dkey-61f9.1    | 2.388945101 | 0.575163589  | 1.4392443 | 0.3996289 | 0.68943  | NA       |
| zgc:162816        | 143.3539324 | -0.284789222 | 0.1747744 | -1.629467 | 0.103214 | 0.609625 |
| nkd31             | 0 NA        |              | NA        | NA        | NA       | NA       |
| zgc:153157        | 70.01982457 | -0.078249835 | 0.2429862 | -0.322034 | 0.747427 | 0.97419  |
| d114              | 273.3879399 | -0.010842181 | 0.1345129 | -0.080603 | 0.935757 | 0.992702 |
| chac1             | 0 NA        |              | NA        | NA        | NA       | NA       |
| s100v1            | 680.2652998 | -0.208217273 | 0.0926821 | -2.246575 | 0.024667 | 0.302262 |
| si:dkey-222b8.1   | 73.32528252 | -0.192201455 | 0.2429493 | -0.791118 | 0.428875 | 0.911406 |
| chtopb            | 19.96431334 | -0.198682318 | 0.4283548 | -0.463827 | 0.642772 | 0.959994 |
| fip111b           | 1236.062442 | -0.127134882 | 0.0816882 | -1.556343 | 0.119627 | 0.644641 |
| ino80             | 531.7975924 | -0.024626239 | 0.1021756 | -0.241019 | 0.809541 | 0.980642 |
| vps18             | 514.0042049 | -0.08941423  | 0.1074732 | -0.831967 | 0.405427 | 0.901305 |
| rhov              | 114.1667494 | 0.117325041  | 0.1937065 | 0.6056846 | 0.544724 | 0.945438 |
| vapb              | 901.4757978 | 0.106400996  | 0.0938387 | 1.1338717 | 0.256848 | 0.825036 |
| rpl22             | 7889.813363 | -0.249856648 | 0.080555  | -3.101692 | 0.001924 | 0.051979 |
| atp6v1c2          | 14.36582932 | -0.092464077 | 0.5000378 | -0.184914 | 0.853296 | 0.985174 |
| zdhhc17           | 161.1296638 | 0.000439973  | 0.160283  | 0.002745  | 0.99781  | 0.999174 |
| si:ch211-113g11.6 | 1106.647659 | 0.15791887   | 0.0884629 | 1.785143  | 0.074238 | 0.530917 |
| slc39a9           | 601.2204091 | 0.045477971  | 0.1179517 | 0.3855643 | 0.699819 | 0.967998 |
| grk4              | 958.3681094 | -0.024010089 | 0.0929232 | -0.258386 | 0.796109 | 0.978498 |
| tspan5b           | 92.02500453 | 0.192213722  | 0.205733  | 0.9342874 | 0.350156 | 0.880195 |
| saraf             | 365.4144834 | 0.019890434  | 0.124165  | 0.1601936 | 0.872729 | 0.987846 |
| gchl              | 268.5437119 | 0.184108775  | 0.1299066 | 1.4172395 | 0.156413 | 0.706639 |
| pla2g12a          | 206.2037496 | 0.286197514  | 0.1546049 | 1.8511544 | 0.064147 | 0.495295 |
| tmem245           | 254.3798965 | 0.120218096  | 0.1365549 | 0.8803645 | 0.378662 | 0.895192 |
| zgc:153292        | 110.7370659 | -0.230924302 | 0.1897128 | -1.217231 | 0.223516 | 0.789816 |
| zgc:154061        | 60.62591695 | -0.073180187 | 0.2499655 | -0.292761 | 0.769705 | 0.975687 |
| e2f3              | 328.7122434 | -0.089830655 | 0.1206881 | -0.744321 | 0.456682 | 0.921215 |
| si:dkey-13n23.3   | 16.81531401 | -0.443334359 | 0.4682803 | -0.946729 | 0.343777 | 0.878434 |
| lactb11b          | 204.5880163 | 0.525260289  | 0.1517422 | 3.4615317 | 0.000537 | 0.018831 |
| sh3rf1            | 555.0932166 | 0.184728037  | 0.1044378 | 1.7687847 | 0.07693  | 0.540058 |
| tarbp2            | 385.0117349 | 0.07506892   | 0.1132101 | 0.6630938 | 0.50727  | 0.935734 |
| arf5              | 3131.038915 | 0.005733984  | 0.0778103 | 0.0736918 | 0.941256 | 0.992857 |
| parp6b            | 591.0271349 | 0.088754052  | 0.1034211 | 0.8581813 | 0.390792 | 0.897643 |
| khdrbs1b          | 5002.729423 | -0.028273991 | 0.0667078 | -0.423849 | 0.671676 | 0.965257 |
| dnajc2            | 324.5543814 | 0.198545463  | 0.1249111 | 1.5894943 | 0.111949 | 0.627242 |
| amn1              | 102.1345309 | -0.201575616 | 0.2063693 | -0.976771 | 0.328682 | 0.872945 |
| tspan13b          | 326.7929835 | 0.059082138  | 0.1306497 | 0.452218  | 0.651112 | 0.960708 |
| agr2              | 1807.195404 | -0.177393363 | 0.0763856 | -2.32234  | 0.020215 | 0.267195 |
| zgc:195001        | 682.4879503 | 0.355709515  | 0.1030268 | 3.4525932 | 0.000555 | 0.019228 |
| cenps             | 78.81305331 | 0.087384885  | 0.218667  | 0.3996254 | 0.689432 | 0.966763 |
| rbp7b             | 29.61326064 | 0.597080828  | 0.3618342 | 1.6501503 | 0.098912 | 0.598346 |
| zgc:110783        | 171.0445245 | 0.086524744  | 0.1544012 | 0.560389  | 0.575214 | 0.950312 |
| si:dkeyp-75b4.7   | 0.471562095 | -2.373056629 | 3.0645586 | -0.774355 | 0.438721 | NA       |
| hpcal4            | 446.5237578 | 0.124702697  | 0.1092939 | 1.1409852 | 0.253876 | 0.823394 |
| pdgfra            | 1402.131609 | -0.081189531 | 0.0806753 | -1.006375 | 0.314235 | 0.865176 |
| FRMD7             | 14.17334013 | 0.337831497  | 0.5073221 | 0.6659112 | 0.505468 | 0.935724 |

|                   |              |               |            |            |           |           |
|-------------------|--------------|---------------|------------|------------|-----------|-----------|
| bicclb            | 12. 71572677 | -0. 256251277 | 0. 5354434 | -0. 478578 | 0. 632239 | 0. 957356 |
| phyhip1b          | 159. 0175116 | 0. 414562148  | 0. 1749063 | 2. 3701954 | 0. 017779 | 0. 247053 |
| si:dkey-31e10. 5  | 15. 95104437 | -0. 386174261 | 0. 4938733 | -0. 78193  | 0. 434256 | 0. 914161 |
| trpc5a            | 8. 717070362 | -0. 385296173 | 0. 6445686 | -0. 597758 | 0. 550001 | NA        |
| trpc4a            | 116. 2531158 | -0. 128848496 | 0. 1938835 | -0. 664567 | 0. 506328 | 0. 935724 |
| si:dkey-183j2. 10 | 322. 5014457 | -0. 095941135 | 0. 1206777 | -0. 79502  | 0. 426602 | 0. 910189 |
| cnpy3             | 361. 0681587 | 0. 117405524  | 0. 1170707 | 1. 0028596 | 0. 315929 | 0. 866931 |
| brpf3a            | 293. 3278911 | 0. 026187158  | 0. 1313447 | 0. 1993773 | 0. 841968 | 0. 985174 |
| cacnali           | 20. 52030644 | -0. 235892282 | 0. 4426708 | -0. 532884 | 0. 594114 | 0. 954434 |
| zc2hc1c           | 12. 33150952 | 0. 747184385  | 0. 5496905 | 1. 3592819 | 0. 174057 | 0. 734137 |
| rippy2            | 1. 448040995 | -1. 007244037 | 1. 6721265 | -0. 602373 | 0. 546926 | NA        |
| creb5b            | 19. 56306    | -0. 583282206 | 0. 4662114 | -1. 251111 | 0. 210894 | 0. 778412 |
| stmn2b            | 2985. 540651 | -0. 068636026 | 0. 0959376 | -0. 715424 | 0. 474347 | 0. 925115 |
| hey1              | 923. 2707968 | 0. 020846923  | 0. 1020884 | 0. 2042046 | 0. 838194 | 0. 984797 |
| arf3a             | 511. 8215844 | -0. 064053962 | 0. 1105744 | -0. 579284 | 0. 562398 | 0. 948728 |
| si:dkeyp-97e7. 9  | 4. 354688277 | -0. 627318172 | 0. 9927726 | -0. 631885 | 0. 527462 | NA        |
| mafbb             | 189. 0824076 | -0. 120273439 | 0. 1653697 | -0. 7273   | 0. 467042 | 0. 924328 |
| grin2ab           | 660. 7973926 | 0. 039127958  | 0. 1136522 | 0. 3442782 | 0. 730637 | 0. 97149  |
| top1l             | 2204. 54593  | 0. 21465806   | 0. 0784908 | 2. 7348184 | 0. 006241 | 0. 120174 |
| msgnl             | 3. 134574261 | -1. 460934405 | 1. 1545367 | -1. 265386 | 0. 205733 | NA        |
| rnmt              | 697. 145578  | -0. 034337947 | 0. 0928483 | -0. 369829 | 0. 71151  | 0. 969006 |
| ldlrad4a          | 488. 0935499 | 0. 195456162  | 0. 1039331 | 1. 880596  | 0. 060027 | 0. 478654 |
| si:ch211-93g23. 2 | 49. 88543228 | -0. 051274192 | 0. 2709677 | -0. 189226 | 0. 849915 | 0. 985174 |
| nap114a           | 1246. 249158 | 0. 110744935  | 0. 0862556 | 1. 2839159 | 0. 199171 | 0. 764592 |
| adap2             | 102. 8184267 | 0. 145625267  | 0. 2017526 | 0. 721801  | 0. 470417 | 0. 924838 |
| cadpsb            | 2809. 90207  | 0. 026530192  | 0. 0719127 | 0. 3689221 | 0. 712186 | 0. 969006 |
| atad5a            | 467. 626274  | 0. 008828406  | 0. 1049855 | 0. 0840917 | 0. 932984 | 0. 992702 |
| ppp4ca            | 403. 3394371 | 0. 091731614  | 0. 1105879 | 0. 8294906 | 0. 406827 | 0. 901305 |
| inavab            | 174. 4795876 | 0. 040777585  | 0. 1735497 | 0. 234962  | 0. 814238 | 0. 981081 |
| mapk3             | 1750. 916748 | 0. 074806411  | 0. 0729794 | 1. 0250348 | 0. 305347 | 0. 85982  |
| fam131bb          | 14. 51353857 | 0. 327521453  | 0. 4945706 | 0. 6622339 | 0. 507821 | 0. 935734 |
| edn2              | 19. 5488479  | -0. 346201275 | 0. 4268449 | -0. 811071 | 0. 417325 | 0. 906237 |
| ggact. 3          | 161. 8286198 | -0. 147186559 | 0. 1581536 | -0. 930656 | 0. 352032 | 0. 880844 |
| ggact. 1          | 152. 5784108 | 0. 323907523  | 0. 1802307 | 1. 7971831 | 0. 072307 | 0. 525828 |
| itpk1b            | 214. 0517758 | 0. 122096127  | 0. 1679062 | 0. 7271686 | 0. 467123 | 0. 924328 |
| clic5b            | 646. 3236372 | -0. 130427138 | 0. 1126268 | -1. 158047 | 0. 246845 | 0. 816669 |
| mrpl35            | 254. 5033682 | 0. 035852132  | 0. 1555479 | 0. 2304893 | 0. 817712 | 0. 981594 |
| nt5clab           | 44. 58712185 | 0. 028838024  | 0. 2894357 | 0. 0996354 | 0. 920634 | 0. 992118 |
| prelp             | 299. 4049994 | 0. 052964609  | 0. 1277495 | 0. 4145975 | 0. 678437 | 0. 965257 |
| eno4              | 26. 92109025 | -0. 189910598 | 0. 3912472 | -0. 485398 | 0. 627394 | 0. 957354 |
| dyrk3             | 1249. 204657 | -0. 072551641 | 0. 0783753 | -0. 925695 | 0. 354604 | 0. 882105 |
| RASSF5            | 288. 6829479 | 0. 12516517   | 0. 1311948 | 0. 9540409 | 0. 340063 | 0. 87805  |
| hspal2a           | 10. 94770332 | 0. 448411663  | 0. 5914232 | 0. 7581909 | 0. 448337 | NA        |
| zgc:162509        | 21. 94329901 | -0. 124497506 | 0. 4015993 | -0. 310004 | 0. 756558 | 0. 975374 |
| b4galnt2. 2       | 4. 192397244 | -1. 179862503 | 1. 0612843 | -1. 111731 | 0. 266254 | NA        |
| ikbke             | 113. 3272305 | -0. 168236749 | 0. 2131201 | -0. 789399 | 0. 429879 | 0. 911615 |
| mrpl36            | 588. 3963599 | -0. 089466022 | 0. 1083768 | -0. 825509 | 0. 409083 | 0. 901769 |
| zgc:152986        |              | 0 NA          | NA         | NA         | NA        | NA        |
| vhl               | 149. 7229442 | -0. 12868896  | 0. 1704753 | -0. 754884 | 0. 450319 | 0. 918761 |
| tatdn2            | 3. 807318414 | 1. 508664062  | 1. 011838  | 1. 4910135 | 0. 135958 | NA        |
| grin2db           | 50. 40286621 | 0. 386254318  | 0. 2921253 | 1. 3222212 | 0. 186094 | 0. 750443 |
| FAM72B            | 357. 5274166 | -0. 066116254 | 0. 1201652 | -0. 550211 | 0. 582174 | 0. 952028 |
| med10             | 463. 0856048 | -0. 099703259 | 0. 1070701 | -0. 931196 | 0. 351752 | 0. 88081  |
| cacng7b           | 79. 53893671 | -0. 044152133 | 0. 2270881 | -0. 194427 | 0. 845841 | 0. 985174 |

|                   |             |              |           |           |          |          |
|-------------------|-------------|--------------|-----------|-----------|----------|----------|
| enpp5             | 231.2697819 | -0.102667243 | 0.165138  | -0.621706 | 0.534135 | 0.943276 |
| cacng8b           | 696.8014853 | 0.214878599  | 0.0951832 | 2.2575265 | 0.023975 | 0.299022 |
| pimr60            | 0.182570949 | 0.967652056  | 4.0804729 | 0.2371421 | 0.812547 | NA       |
| ttpal             | 305.9022105 | 0.053182292  | 0.1280141 | 0.415441  | 0.677819 | 0.965257 |
| prkcdB            | 1040.836433 | 0.049870501  | 0.086874  | 0.5740559 | 0.56593  | 0.948739 |
| pex5              | 660.1406593 | -0.029211232 | 0.1019354 | -0.286566 | 0.774445 | 0.975687 |
| si:ch211-69g19.2  | 868.0625715 | -0.118926721 | 0.0945618 | -1.257662 | 0.208514 | 0.775404 |
| pa2g4b            | 2604.582156 | -0.156506971 | 0.0808513 | -1.935738 | 0.0529   | 0.451736 |
| zbtb12.2          | 147.1563329 | 0.043077147  | 0.1748312 | 0.2463928 | 0.805378 | 0.979883 |
| si:ch211-182e10.4 | 0.182570949 | 0.967652056  | 4.0804729 | 0.2371421 | 0.812547 | NA       |
| rhol              | 114.95056   | 0.560543268  | 0.2026753 | 2.7657201 | 0.00568  | 0.113103 |
| cd4-1             | 1.16278535  | -1.292219773 | 1.7937845 | -0.720387 | 0.471286 | NA       |
| cxcr3.3           | 222.2303476 | -0.321203895 | 0.1586541 | -2.024555 | 0.042913 | 0.406985 |
| crip2             | 1027.38164  | 0.187785874  | 0.0846318 | 2.2188564 | 0.026496 | 0.313216 |
| slc2a9l1          | 3.636414049 | 1.432833121  | 1.0618905 | 1.3493229 | 0.177233 | NA       |
| ptgr2             | 169.0781557 | -0.110300605 | 0.1665457 | -0.662284 | 0.507789 | 0.935734 |
| psmd6             | 2214.310549 | 0.005836631  | 0.074716  | 0.0781176 | 0.937735 | 0.99279  |
| fam3a             | 339.2633263 | 0.003988895  | 0.1175943 | 0.0339208 | 0.97294  | 0.996315 |
| ifnphi3           | 2.572655968 | 1.532766764  | 1.4518113 | 1.0557617 | 0.291077 | NA       |
| fezf2             | 335.8555254 | -0.008764664 | 0.1227259 | -0.071417 | 0.943066 | 0.993364 |
| clqtnf12          | 170.9807275 | 0.090955756  | 0.1766262 | 0.5149617 | 0.60658  | 0.956718 |
| sdf4              | 1094.035494 | 0.141221153  | 0.0917897 | 1.5385288 | 0.123919 | 0.652391 |
| dkk3b             | 148.7109446 | 0.124075108  | 0.170047  | 0.7296517 | 0.465603 | 0.923865 |
| CR759887.1        | 0.802320445 | 1.849899411  | 2.4175996 | 0.7651802 | 0.444164 | NA       |
| cdipt             | 790.294492  | 0.046814466  | 0.0925262 | 0.5059589 | 0.612886 | 0.95688  |
| ncalda            | 1369.452843 | 0.050114712  | 0.0774033 | 0.6474492 | 0.517341 | 0.938592 |
| si:dkey-80c24.1   | 0.499972362 | -2.44370697  | 3.0013188 | -0.814211 | 0.415524 | NA       |
| nxph3             | 9.918472624 | -0.290774584 | 0.6079131 | -0.478316 | 0.632425 | NA       |
| kbtbd8            | 207.3921086 | 0.223743845  | 0.143141  | 1.5631014 | 0.118029 | 0.641526 |
| s100v2            | 589.6103978 | 0.089752661  | 0.1049708 | 0.8550253 | 0.392537 | 0.897688 |
| thap7             | 273.2614443 | -0.182349702 | 0.1365799 | -1.335114 | 0.181839 | 0.743853 |
| zgc:64022         | 50.14148748 | 0.185177614  | 0.2797375 | 0.6619692 | 0.507991 | 0.935734 |
| wu:fi42e03        | 2.492658236 | -0.163857423 | 1.1709947 | -0.13993  | 0.888715 | NA       |
| prss60.3          | 46.24387426 | 0.697643556  | 0.2969921 | 2.3490304 | 0.018822 | 0.255627 |
| prss60.1          | 1.642519234 | -0.523298403 | 1.5434776 | -0.339039 | 0.734581 | NA       |
| zgc:173544        |             | 0 NA         | NA        | NA        | NA       | NA       |
| slc25a18          | 247.4593461 | 0.34921088   | 0.1444116 | 2.4181629 | 0.015599 | 0.229092 |
| vdrb              | 9.444757557 | 0.273660504  | 0.619715  | 0.4415909 | 0.658785 | NA       |
| ndufa9a           | 2314.48642  | 0.0440559    | 0.083743  | 0.5260844 | 0.59883  | 0.955788 |
| chrna4b           | 77.35287844 | -0.3556041   | 0.2245995 | -1.583281 | 0.113357 | 0.631061 |
| cnga3a            | 194.7583082 | 0.172466104  | 0.1726388 | 0.9989996 | 0.317795 | 0.867607 |
| gabra5            | 252.5318936 | 0.042255021  | 0.1366489 | 0.3092233 | 0.757152 | 0.975374 |
| dyrk4             | 313.3004975 | 0.219896658  | 0.1258535 | 1.7472429 | 0.080595 | 0.550664 |
| rnd2              | 211.5746585 | -0.172466188 | 0.1498605 | -1.150845 | 0.249796 | 0.819829 |
| pimr89            |             | 0 NA         | NA        | NA        | NA       | NA       |
| tmem45a           | 232.890239  | -0.12494387  | 0.1392447 | -0.897297 | 0.36956  | 0.889338 |
| sft2d2a           | 48.12067938 | -0.056212881 | 0.3065913 | -0.183348 | 0.854525 | 0.985174 |
| ccr11.1           | 0.991963308 | 2.204864061  | 2.1328402 | 1.033769  | 0.301244 | NA       |
| si:ch211-155i14.1 | 0.166657454 | -0.955901296 | 4.0804729 | -0.234262 | 0.814781 | NA       |
| foxgla            | 518.9475521 | -0.127305308 | 0.1043064 | -1.220494 | 0.222278 | 0.788551 |
| her4.3            | 120.2858453 | -0.159292982 | 0.1969907 | -0.808632 | 0.418727 | 0.906406 |
| irgfl             | 9.283543499 | 1.308723082  | 0.6630074 | 1.9739193 | 0.048391 | NA       |
| cyp2x9            | 185.1770687 | -0.567107728 | 0.1568068 | -3.616601 | 0.000298 | 0.011781 |
| rln3a             | 64.55362177 | 0.225546491  | 0.2550302 | 0.8843912 | 0.376485 | 0.89493  |

|                    |             |              |           |           |          |          |
|--------------------|-------------|--------------|-----------|-----------|----------|----------|
| gjd2b              | 210.9684887 | 0.355672838  | 0.1476227 | 2.4093374 | 0.015982 | 0.233052 |
| znf770             | 451.8953262 | 0.015618187  | 0.1209707 | 0.1291072 | 0.897273 | 0.990121 |
| jupa               | 3241.413237 | -0.112756679 | 0.0692104 | -1.629186 | 0.103274 | 0.609625 |
| lrrc15             | 51.44468502 | 0.155994309  | 0.2681032 | 0.5818442 | 0.560672 | 0.948728 |
| grebl              | 129.6617614 | -0.040654881 | 0.1818459 | -0.223568 | 0.823094 | 0.982189 |
| eaf1               | 280.4564303 | 0.028890813  | 0.1466761 | 0.1969701 | 0.843851 | 0.985174 |
| pmvk               | 56.3482554  | 0.074140234  | 0.2669669 | 0.2777132 | 0.781233 | 0.97627  |
| zgc:109744         | 98.87610394 | 0.112387735  | 0.2048849 | 0.5485409 | 0.583321 | 0.952214 |
| opal               | 1664.739764 | 0.004666655  | 0.0751792 | 0.0620737 | 0.950504 | 0.99381  |
| znf516             | 666.7125206 | -0.007708808 | 0.1046727 | -0.073647 | 0.941291 | 0.992857 |
| ccka               | 110.8227357 | 0.235736973  | 0.1897683 | 1.2422356 | 0.21415  | 0.782493 |
| si:ch211-156118.6  | 0.173729368 | -0.955901296 | 4.0804729 | -0.234262 | 0.814781 | NA       |
| pax7b              | 171.9320481 | 0.042911246  | 0.1774371 | 0.2418392 | 0.808905 | 0.980642 |
| cnp                | 2034.827657 | -0.058858368 | 0.0732156 | -0.803905 | 0.421452 | 0.90651  |
| ndufb5             | 1632.322829 | 0.006920899  | 0.0826259 | 0.0837619 | 0.933246 | 0.992702 |
| bpgm               | 487.883743  | 0.089104512  | 0.1059908 | 0.8406814 | 0.400526 | 0.90084  |
| act16a             | 1237.829332 | -0.095155851 | 0.0890954 | -1.068022 | 0.285511 | 0.845164 |
| zgc:136858         | 260.4442498 | -0.313890289 | 0.144029  | -2.179354 | 0.029305 | 0.331778 |
| rftn1a             | 28.17673314 | 0.039982031  | 0.3812323 | 0.1048758 | 0.916474 | 0.991349 |
| snrka              | 1156.017619 | 0.078733705  | 0.0875799 | 0.8989929 | 0.368656 | 0.888057 |
| lin52              | 134.2022293 | -0.183649417 | 0.1893051 | -0.970124 | 0.331985 | 0.874653 |
| taf13              | 696.2416592 | 0.003031863  | 0.1164337 | 0.0260394 | 0.979226 | 0.996802 |
| tnnc2              | 27705.78058 | 0.1701261    | 0.0833575 | 2.0409215 | 0.041259 | 0.397781 |
| evi5b              | 262.8809133 | 0.082092787  | 0.1391271 | 0.5900559 | 0.555153 | 0.947449 |
| arid3a             | 53.12042005 | -0.272860187 | 0.2700694 | -1.010334 | 0.312335 | 0.864401 |
| gamt               | 2574.895028 | 0.099052982  | 0.0986932 | 1.0036456 | 0.315549 | 0.866773 |
| si:dkey-56d12.4    | 36.28032189 | 0.218990498  | 0.3266846 | 0.6703423 | 0.50264  | 0.935304 |
| dazapl             | 207.0970593 | -0.026013245 | 0.1541075 | -0.168799 | 0.865954 | 0.986517 |
| trim35-20          | 7.23675999  | -0.531545098 | 0.7609191 | -0.698557 | 0.484829 | NA       |
| rps15              | 7478.101461 | -0.388741647 | 0.0885643 | -4.389372 | 1.14E-05 | 0.000811 |
| si:ch211-282j17.10 | 1.021631832 | 0.046422221  | 1.8514003 | 0.0250741 | 0.979996 | NA       |
| si:dkey-88n24.6    | 0.347458735 | -1.908042286 | 3.4571486 | -0.551912 | 0.581009 | NA       |
| zgc:195077         | 0.846012444 | -0.57358332  | 2.1013569 | -0.272959 | 0.784885 | NA       |
| si:dkey-32e6.6     | 93.43372383 | 0.200803644  | 0.2273534 | 0.8832226 | 0.377116 | 0.895192 |
| si:busml-105116.2  | 16.72195846 | 0.369401451  | 0.4660056 | 0.7926974 | 0.427954 | 0.910858 |
| bcl6aa             | 376.8211137 | 0.09203215   | 0.1312827 | 0.7010225 | 0.483289 | 0.92946  |
| tmem11             | 542.4790561 | -0.179882936 | 0.1026357 | -1.752635 | 0.079665 | 0.548406 |
| smx5               |             | 0 NA         | NA        | NA        | NA       | NA       |
| cfap126            | 55.52116595 | -0.072472206 | 0.275859  | -0.262715 | 0.792771 | 0.977937 |
| cc125b             | 280.953815  | 0.003752895  | 0.140604  | 0.0266912 | 0.978706 | 0.996762 |
| asmt2              | 148.7823242 | -0.043260467 | 0.1840396 | -0.235061 | 0.814162 | 0.981081 |
| AL953867.1         |             | 0 NA         | NA        | NA        | NA       | NA       |
| BX510941.1         | 0.635422286 | 2.809933352  | 2.5211574 | 1.114541  | 0.265047 | NA       |
| si:ch211-262h13.5  | 9.659578842 | -0.021009179 | 0.6436475 | -0.032641 | 0.973961 | NA       |
| abhd6b             | 26.10122056 | 0.615520446  | 0.3760265 | 1.6369073 | 0.10165  | 0.605756 |
| si:ch211-262h13.3  | 224.5520671 | 0.111286751  | 0.1421157 | 0.7830715 | 0.433585 | 0.913667 |
| met                | 148.8929928 | -0.09548901  | 0.168672  | -0.566122 | 0.571311 | 0.949418 |
| sox2               | 1366.524049 | -0.044104597 | 0.081561  | -0.540756 | 0.588676 | 0.953319 |
| dusp6              | 2046.665164 | 0.057196895  | 0.0749674 | 0.7629571 | 0.445489 | 0.917137 |
| dnajc27            | 343.1918488 | 0.111001506  | 0.1270285 | 0.8738314 | 0.38221  | 0.895192 |
| kitlga             | 259.9387889 | 0.122560233  | 0.1341304 | 0.9137397 | 0.360854 | 0.885686 |
| si:ch211-284e20.8  | 476.8598989 | 0.369109763  | 0.1419403 | 2.6004578 | 0.00931  | 0.162001 |
| cpne5b             | 29.30860191 | 0.022842824  | 0.3478776 | 0.0656634 | 0.947646 | 0.99381  |
| cnbpb              | 3174.275457 | -0.053114287 | 0.0736687 | -0.720989 | 0.470916 | 0.924838 |

|                   |             |              |           |           |          |          |
|-------------------|-------------|--------------|-----------|-----------|----------|----------|
| zgc:158296        | 208.7414739 | 0.237920167  | 0.1473971 | 1.6141439 | 0.106496 | 0.615567 |
| sox14             | 383.8433148 | 0.000558498  | 0.1178504 | 0.004739  | 0.996219 | 0.998888 |
| cart1             | 16.01062598 | 0.06509929   | 0.4844886 | 0.134367  | 0.893112 | 0.989291 |
| si:ch211-232m10.6 | 152.4244678 | 0.105846673  | 0.1829906 | 0.578427  | 0.562976 | 0.948728 |
| hcrt              | 17.83242861 | 0.420199798  | 0.460824  | 0.9118445 | 0.361851 | 0.885944 |
| znf740a           | 555.5160391 | -0.095164954 | 0.1007423 | -0.944638 | 0.344844 | 0.878434 |
| igfbp6a           | 1.030311776 | 0.994458412  | 1.953155  | 0.5091549 | 0.610644 | NA       |
| styk1a            | 94.73284331 | -0.007368841 | 0.2178712 | -0.033822 | 0.973019 | 0.996315 |
| hmgalb            | 2464.490992 | 0.287345219  | 0.0749892 | 3.8318208 | 0.000127 | 0.00596  |
| fam131ba          | 127.3944726 | -0.266058568 | 0.1806438 | -1.472835 | 0.140795 | 0.681252 |
| pla2g4f.2         | 1.001591779 | -2.198778422 | 2.0996481 | -1.047213 | 0.295001 | NA       |
| hmx2              | 93.00558086 | -0.070333663 | 0.2129629 | -0.330263 | 0.741202 | 0.973154 |
| hmx3a             | 225.8184082 | -0.11593436  | 0.1435267 | -0.807755 | 0.419232 | 0.906406 |
| im:7160594        | 183.8203425 | -0.077999285 | 0.169942  | -0.458976 | 0.646251 | 0.96032  |
| pex6              | 104.960498  | -0.140777605 | 0.2127146 | -0.661814 | 0.50809  | 0.935734 |
| si:ch211-288g17.3 | 7708.80331  | 0.016440799  | 0.0681057 | 0.2414011 | 0.809244 | 0.980642 |
| si:ch211-288g17.4 | 96.4339471  | 0.295069912  | 0.2176727 | 1.3555667 | 0.175237 | 0.735698 |
| lepr              | 363.8033873 | 0.159468754  | 0.1256465 | 1.2691863 | 0.204375 | 0.772273 |
| si:rp71-15k1.1    | 0.976668277 | 3.423229811  | 2.0853785 | 1.6415389 | 0.100686 | NA       |
| insl5a            | 15.76417996 | -2.416850968 | 0.5597812 | -4.317492 | 1.58E-05 | 0.001037 |
| furinb            | 555.6771925 | -0.001462435 | 0.1141145 | -0.012816 | 0.989775 | 0.997612 |
| si:ch211-81a5.8   | 571.6183173 | 0.038752429  | 0.1046924 | 0.3701552 | 0.711267 | 0.969006 |
| si:dkey-88e12.3   | 2.097607108 | 0.193170451  | 1.3372151 | 0.1444573 | 0.885139 | NA       |
| ash11             | 2036.552098 | -0.048916071 | 0.0799367 | -0.611935 | 0.540581 | 0.944631 |
| mrps21            | 188.1142261 | -0.135582616 | 0.1576013 | -0.860289 | 0.38963  | 0.896421 |
| sergef            | 116.4422004 | -0.088459344 | 0.1892734 | -0.467363 | 0.64024  | 0.959994 |
| mlpha             | 93.65134103 | -0.023889437 | 0.2097009 | -0.113921 | 0.9093   | 0.990702 |
| inpp4ab           | 69.37282882 | -0.116524127 | 0.2575173 | -0.45249  | 0.650916 | 0.960708 |
| nuggc.1           | 3.350229215 | -1.202399941 | 1.0828358 | -1.110418 | 0.266819 | NA       |
| abhd12            | 423.2433975 | 0.058152855  | 0.1211603 | 0.4799664 | 0.631251 | 0.957356 |
| ppplr3ca          | 107.8551121 | 0.047994939  | 0.2024029 | 0.2371257 | 0.812559 | 0.981081 |
| pcgf5a            | 23.76197494 | -0.200334603 | 0.3930893 | -0.509641 | 0.610303 | 0.95688  |
| kif20ba           | 258.9299916 | -0.102841268 | 0.1391109 | -0.739275 | 0.45974  | 0.921978 |
| tuft1b            | 175.1013798 | 0.15199103   | 0.1610603 | 0.9436903 | 0.345328 | 0.878434 |
| cdk5r2a           | 1439.157461 | -0.034542489 | 0.0862808 | -0.400349 | 0.688899 | 0.966672 |
| ifit14            | 10.41178707 | 1.669869279  | 0.6312694 | 2.6452562 | 0.008163 | NA       |
| arl6ip6           | 41.77837415 | -0.281201913 | 0.3040095 | -0.924977 | 0.354978 | 0.882321 |
| s100u             | 773.8513459 | -0.165598234 | 0.096958  | -1.707937 | 0.087648 | 0.566637 |
| pbxipla           | 914.8374987 | 0.208451663  | 0.097408  | 2.1399851 | 0.032356 | 0.350031 |
| nt5e              | 169.5468162 | -0.135334067 | 0.175621  | -0.770603 | 0.440942 | 0.916336 |
| ptena             | 2036.971067 | 0.084323863  | 0.0830053 | 1.0158859 | 0.309684 | 0.86172  |
| si:dkey-42116.1   | 0.317831496 | 1.808837541  | 3.5779923 | 0.5055454 | 0.613176 | NA       |
| papss2a           | 764.9497763 | -0.566809637 | 0.1033559 | -5.484058 | 4.16E-08 | 6.13E-06 |
| zgc:171679        | 310.6654632 | -0.023612525 | 0.1298798 | -0.181803 | 0.855737 | 0.985174 |
| dytn              | 17.63206653 | 0.123045264  | 0.4546265 | 0.2706513 | 0.786659 | 0.976596 |
| mllt11            | 1732.261719 | 0.138350336  | 0.0791236 | 1.748535  | 0.080371 | 0.549728 |
| si:dkey-147f3.4   | 182.0922872 | 0.062702901  | 0.159707  | 0.3926122 | 0.694606 | 0.96736  |
| snx1a             | 2361.183471 | -0.019305591 | 0.0712263 | -0.271046 | 0.786356 | 0.976476 |
| pnkd              | 191.0842425 | 0.201041461  | 0.1691779 | 1.1883436 | 0.234698 | 0.803509 |
| si:dkey-286j15.3  | 160.863731  | 0.210923333  | 0.174386  | 1.2095197 | 0.226463 | 0.793959 |
| pex13             | 345.9781034 | 0.159941845  | 0.1229649 | 1.3007117 | 0.193357 | 0.757219 |
| smim8             | 109.5430625 | 0.204989134  | 0.1900081 | 1.0788444 | 0.280657 | 0.84355  |
| cx28.8            | 35.7503193  | 0.083738225  | 0.3158215 | 0.2651441 | 0.790898 | 0.977402 |
| zgc:153722        | 13.26278312 | 0.003785271  | 0.5355804 | 0.0070676 | 0.994361 | 0.998694 |

|                  |             |              |           |           |          |          |
|------------------|-------------|--------------|-----------|-----------|----------|----------|
| bbipl            | 222.4495059 | -0.077739847 | 0.14225   | -0.546502 | 0.584721 | 0.952411 |
| ccn6             | 542.3803073 | 0.070166402  | 0.115835  | 0.6057446 | 0.544684 | 0.945438 |
| si:dkey-119m7.4  | 55.74812748 | 0.257424345  | 0.2718993 | 0.9467636 | 0.343759 | 0.878434 |
| cbx6a            | 677.9325595 | 0.012469291  | 0.1002966 | 0.1243242 | 0.901059 | 0.990121 |
| si:dkey-150i13.2 | 5.474159139 | 0.608692949  | 0.8319342 | 0.7316599 | 0.464376 | NA       |
| ZNF512B          | 29.63542661 | -0.175140836 | 0.3533509 | -0.495657 | 0.620136 | 0.957354 |
| gtpbp2b          | 124.3868589 | 0.05551762   | 0.1854474 | 0.2993712 | 0.764657 | 0.975374 |
| naal0            | 894.6124456 | -0.138184048 | 0.0895656 | -1.542825 | 0.122873 | 0.650905 |
| hps5             | 267.6538757 | -0.236482637 | 0.1380172 | -1.713429 | 0.086634 | 0.56426  |
| g6pd             | 755.2051067 | -0.186880899 | 0.0944824 | -1.977944 | 0.047935 | 0.43124  |
| pthlhb           | 2.814722101 | 0.121046402  | 1.2109372 | 0.0999609 | 0.920375 | NA       |
| rccd1            | 58.15846771 | 0.112592007  | 0.2688488 | 0.4187931 | 0.675367 | 0.965257 |
| ldhbb            | 433.1074876 | 0.033944843  | 0.1171515 | 0.2897516 | 0.772006 | 0.975687 |
| p4halb           | 948.4526215 | -0.44687794  | 0.1235937 | -3.615702 | 0.0003   | 0.011799 |
| si:dkeyp-34c12.1 | 13.48928336 | -0.409148848 | 0.5585255 | -0.732552 | 0.463832 | 0.922875 |
| wipflb           | 224.4465839 | 0.2546809    | 0.1507533 | 1.6893883 | 0.091145 | 0.578217 |
| adgrg7.2         | 0.182570949 | 0.967652056  | 4.0804729 | 0.2371421 | 0.812547 | NA       |
| gpr155b          | 86.87631    | -0.085118102 | 0.2229555 | -0.381772 | 0.702631 | 0.968134 |
| slc35b4          | 478.4954587 | -0.193115963 | 0.1074965 | -1.796486 | 0.072417 | 0.526156 |
| adgrg7.1         | 0.31598276  | 0.005883445  | 3.3523626 | 0.001755  | 0.9986   | NA       |
| actn2b           | 708.8140311 | 0.104199605  | 0.0955897 | 1.0900718 | 0.275682 | 0.839541 |
| chrn3a           | 88.80308448 | -0.087448746 | 0.2093728 | -0.41767  | 0.676188 | 0.965257 |
| abi3bpb          | 1627.474438 | 0.252945292  | 0.0788778 | 3.2067995 | 0.001342 | 0.039088 |
| si:ch73-367f21.4 | 102.731632  | 0.362580387  | 0.211344  | 1.7155932 | 0.086237 | 0.563157 |
| si:dkey-222p3.1  | 55.04985085 | -0.042529216 | 0.2969172 | -0.143236 | 0.886104 | 0.988936 |
| wnt7bb           | 116.9262735 | 0.107917823  | 0.1908343 | 0.5655054 | 0.57173  | 0.949494 |
| xirp2a           | 935.1312632 | 0.266526489  | 0.1219747 | 2.1850968 | 0.028882 | 0.329785 |
| eepdl            | 123.4107023 | 0.309743832  | 0.193675  | 1.5992966 | 0.109755 | 0.623766 |
| zgc:64065        | 12.06245249 | 0.233451488  | 0.5755093 | 0.4056433 | 0.685005 | 0.966146 |
| si:dkey-208m12.2 | 20.6899524  | 0.798161464  | 0.45035   | 1.7723135 | 0.076343 | 0.538373 |
| cica             | 940.9218375 | 0.072487046  | 0.1122992 | 0.6454814 | 0.518615 | 0.938803 |
| pick1            | 80.34332919 | 0.032299189  | 0.2230697 | 0.1447942 | 0.884873 | 0.988838 |
| sft2d2b          | 136.6039191 | -0.27324852  | 0.1803457 | -1.515138 | 0.129738 | 0.662411 |
| alkbh1           | 46.33455626 | 0.066012424  | 0.3069155 | 0.2150834 | 0.829702 | 0.982805 |
| zmp:0000001138   | 0.841338706 | -0.563977448 | 2.2263736 | -0.253317 | 0.800024 | NA       |
| slc12a10.2       | 406.9700132 | 0.434005413  | 0.1209812 | 3.5873781 | 0.000334 | 0.012925 |
| pimr73           | 1.539555802 | 2.928625969  | 1.7835936 | 1.6419806 | 0.100594 | NA       |
| cx40.8           | 8.524052039 | -0.200252281 | 0.6967781 | -0.287397 | 0.773808 | NA       |
| cavin2b          | 1373.069622 | 0.028185235  | 0.082809  | 0.3403644 | 0.733582 | 0.971993 |
| usp40            | 485.3208007 | -0.025240088 | 0.1042433 | -0.242127 | 0.808682 | 0.980642 |
| fopnl            | 65.30215959 | -0.025315266 | 0.251831  | -0.100525 | 0.919928 | 0.991857 |
| sptssa           | 375.2610505 | -0.170955658 | 0.1128331 | -1.51512  | 0.129742 | 0.662411 |
| tmem170b         | 11.72955437 | 0.501606541  | 0.5932823 | 0.845477  | 0.397845 | 0.899672 |
| wnt4a            | 101.1074989 | 0.413656004  | 0.198777  | 2.0810059 | 0.037433 | 0.378816 |
| opr11            | 225.1558453 | -0.01576756  | 0.1376275 | -0.114567 | 0.908788 | 0.990702 |
| zgc:112255       | 334.1829002 | 0.239137376  | 0.1191049 | 2.0077872 | 0.044666 | 0.41583  |
| p3h1             | 372.1147754 | 0.046934094  | 0.1171569 | 0.4006088 | 0.688708 | 0.966672 |
| rgl3a            | 242.5923213 | 0.163160896  | 0.1405945 | 1.1605073 | 0.245842 | 0.815789 |
| palm3            | 93.33383537 | 0.102657257  | 0.2025196 | 0.5069003 | 0.612225 | 0.95688  |
| si:ch211-133n4.9 | 0.316103113 | 0.005883447  | 3.3519121 | 0.0017553 | 0.9986   | NA       |
| hs6st3a          | 9.039078749 | -0.933712259 | 0.7026031 | -1.328933 | 0.18387  | NA       |
| zgc:158445       | 11.40510379 | -0.12340896  | 0.5605361 | -0.220162 | 0.825745 | 0.982196 |
| si:ch211-133n4.4 | 1521.540622 | 0.166208184  | 0.0798149 | 2.0824194 | 0.037304 | 0.377702 |
| lrfn5a           | 27.89066561 | -0.001065461 | 0.4087373 | -0.002607 | 0.99792  | 0.999234 |

|                    |             |              |           |           |          |          |
|--------------------|-------------|--------------|-----------|-----------|----------|----------|
| zgc:158254         | 247.6978919 | 0.063916126  | 0.1545468 | 0.4135714 | 0.679188 | 0.965257 |
| si:ch211-117c9.5   | 1079.283378 | -0.090940468 | 0.0857349 | -1.060717 | 0.288818 | 0.845979 |
| ftr58              | 8.096461696 | -0.780433464 | 0.6755984 | -1.155174 | 0.248019 | NA       |
| trim35-39          | 63.68212042 | 0.079522531  | 0.2549155 | 0.3119564 | 0.755074 | 0.975234 |
| tmem79a            | 34.99028879 | -0.241715944 | 0.3782832 | -0.638981 | 0.522835 | 0.939336 |
| ppplr18            | 315.9940283 | 0.084308467  | 0.1315747 | 0.6407651 | 0.521675 | 0.939056 |
| fbxo34             | 1038.227052 | -0.100249198 | 0.0887642 | -1.129388 | 0.258734 | 0.826867 |
| zmp:0000001139     | 14.35024793 | 0.462340313  | 0.5443647 | 0.8493209 | 0.395703 | 0.899378 |
| si:zfos-452g4.1    | 63.91080603 | 0.324852041  | 0.2528707 | 1.2846569 | 0.198912 | 0.764191 |
| ncoa6              | 1367.308161 | -0.047568787 | 0.1125359 | -0.422699 | 0.672515 | 0.965257 |
| samhd1             | 168.7883587 | 0.164676499  | 0.1565186 | 1.0521211 | 0.292744 | 0.848607 |
| tonsl              | 181.3216616 | -0.120870727 | 0.1530595 | -0.789698 | 0.429704 | 0.911615 |
| chrn3b             | 0.173729368 | -0.955901296 | 4.0804729 | -0.234262 | 0.814781 | NA       |
| tbcl2              | 60.94159629 | 0.244994005  | 0.256197  | 0.9562718 | 0.338935 | 0.87745  |
| gip                | 2.821488783 | 0.546899828  | 1.1680579 | 0.4682129 | 0.639632 | NA       |
| si:dkey-7814.5     | 2.137965949 | 0.236687056  | 1.2602923 | 0.1878033 | 0.851031 | NA       |
| cbarpb             | 88.43360321 | 0.163329478  | 0.2278634 | 0.7167869 | 0.473506 | 0.924993 |
| ryr3               | 2498.12695  | 0.421608607  | 0.084307  | 5.0008722 | 5.71E-07 | 6.27E-05 |
| si:ch211-212d10.2  | 264.438522  | 0.111231649  | 0.1346785 | 0.825905  | 0.408858 | 0.90171  |
| mif                | 461.8818267 | -0.208770704 | 0.1103683 | -1.891581 | 0.058547 | 0.473924 |
| borcs8             | 101.3655815 | -0.000692777 | 0.2065319 | -0.003354 | 0.997324 | 0.999143 |
| abchl              | 75.73865269 | 0.195983097  | 0.2229569 | 0.879018  | 0.379392 | 0.895192 |
| mgst2              | 113.1508839 | -0.191579056 | 0.1963262 | -0.97582  | 0.329154 | 0.873436 |
| aftphb             | 248.6939122 | 0.105194355  | 0.1427576 | 0.7368739 | 0.461199 | 0.922161 |
| si:ch211-235e9.8   | 3565.700067 | 0.211893339  | 0.0662128 | 3.2001862 | 0.001373 | 0.039879 |
| si:ch211-197g15.7  | 28.04749763 | 0.135435566  | 0.3849247 | 0.3518495 | 0.724951 | 0.970402 |
| map4k3b            | 108.2645623 | 0.113156912  | 0.1980395 | 0.5713856 | 0.567738 | 0.948739 |
| morn2              | 23.71521706 | 0.074504502  | 0.3901458 | 0.1909658 | 0.848552 | 0.985174 |
| si:ch211-197g15.10 | 0.810062152 | 0.536965757  | 2.3785369 | 0.2257546 | 0.821392 | NA       |
| lrrtm2             | 503.9418728 | 0.072211793  | 0.1033341 | 0.6988188 | 0.484665 | 0.93001  |
| celf5a             | 40.00234035 | 0.152529028  | 0.308339  | 0.4946797 | 0.620826 | 0.957354 |
| hsl1b11a           | 348.4572104 | -0.004840731 | 0.1257079 | -0.038508 | 0.969283 | 0.996315 |
| micos13            | 563.6199437 | 0.169789839  | 0.1111939 | 1.5269708 | 0.126768 | 0.656588 |
| si:dkey-7814.11    | 0.491320158 | 0.8528132    | 2.8656354 | 0.2976    | 0.766008 | NA       |
| slc7a11            | 127.04621   | 0.206063155  | 0.1923639 | 1.0712155 | 0.284073 | 0.844697 |
| si:dkey-21e2.3     | 0.802320445 | 1.849899411  | 2.4175996 | 0.7651802 | 0.444164 | NA       |
| si:dkey-7814.6     | 0.166657454 | -0.955901296 | 4.0804729 | -0.234262 | 0.814781 | NA       |
| foxq2              | 46.18729884 | -0.376637676 | 0.2871675 | -1.311561 | 0.189668 | 0.754269 |
| camk2gl            | 4032.42305  | 0.079598805  | 0.0650934 | 1.2228407 | 0.22139  | 0.788076 |
| tim23a             | 1170.523185 | 0.030848903  | 0.0817404 | 0.3774008 | 0.705876 | 0.968412 |
| BX247870.1         | 1.006818213 | 1.048314579  | 1.9690503 | 0.532396  | 0.594452 | NA       |
| si:dkey-172o19.2   | 1.134337053 | 2.462221963  | 2.0582167 | 1.196289  | 0.231584 | NA       |
| oaz1a              | 6340.315165 | -0.005103405 | 0.0773082 | -0.066014 | 0.947367 | 0.99381  |
| tepsin             | 76.52593411 | 0.00953679   | 0.2339937 | 0.0407566 | 0.96749  | 0.996315 |
| AL935279.1         | 0.157187365 | -0.955901296 | 4.0804729 | -0.234262 | 0.814781 | NA       |
| arl3b              | 910.9564896 | 0.06543805   | 0.0864199 | 0.7572107 | 0.448924 | 0.917995 |
| cks2               | 85.0056761  | -0.146642989 | 0.2215339 | -0.661944 | 0.508007 | 0.935734 |
| mier2              | 273.6105927 | -0.074671233 | 0.1341919 | -0.556451 | 0.577902 | 0.951024 |
| cybc1              | 135.757554  | -0.422826945 | 0.1818045 | -2.325723 | 0.020033 | 0.266383 |
| gna15.4            | 5.120854511 | -0.875377763 | 0.8460345 | -1.034683 | 0.300817 | NA       |
| gbx1               | 144.0109491 | -0.001077454 | 0.1810322 | -0.005952 | 0.995251 | 0.998696 |
| ap3d1              | 985.2546178 | 0.047920733  | 0.0921141 | 0.5202321 | 0.602902 | 0.956045 |
| nat9               | 367.3307899 | 0.115248084  | 0.1254904 | 0.918382  | 0.358419 | 0.884398 |
| lrrc59             | 227.3812323 | -0.147183295 | 0.1390402 | -1.058566 | 0.289797 | 0.846246 |



|                  |             |              |           |           |          |          |
|------------------|-------------|--------------|-----------|-----------|----------|----------|
| tdo2a            | 264.7346819 | -0.07461675  | 0.1315251 | -0.56732  | 0.570497 | 0.949061 |
| ptprc            | 48.70530961 | -0.172699109 | 0.2823369 | -0.611677 | 0.540751 | 0.944633 |
| si:dkey-121a9.3  | 20.91303351 | 0.404132444  | 0.4236925 | 0.9538342 | 0.340168 | 0.87805  |
| myoz1b           | 2681.00673  | 0.430965902  | 0.0891903 | 4.8319837 | 1.35E-06 | 0.000129 |
| zgc:153659       | 0 NA        | NA           | NA        | NA        | NA       | NA       |
| fam234a          | 17.3897021  | 0.013717096  | 0.4769118 | 0.0287623 | 0.977054 | 0.996762 |
| tdrd5            | 7.178758871 | -0.36776228  | 0.7584155 | -0.484909 | 0.627741 | NA       |
| crpl             | 17.52883239 | 0.208304484  | 0.4537756 | 0.4590473 | 0.6462   | 0.96032  |
| crp7             | 0.665049525 | -0.08670226  | 2.5686305 | -0.033754 | 0.973073 | NA       |
| crp6             | 0.339758314 | 0.005883863  | 3.2682461 | 0.0018003 | 0.998564 | NA       |
| si:dkey-121a11.3 | 325.4741415 | 0.147698598  | 0.1209513 | 1.2211413 | 0.222033 | 0.788551 |
| si:ch211-234p6.5 | 116.0829239 | 0.155097603  | 0.1860822 | 0.8334896 | 0.404569 | 0.901305 |
| CU896602.1       | 0.158795395 | 0.967652056  | 4.0804729 | 0.2371421 | 0.812547 | NA       |
| lama3            | 97.22594757 | -0.839511089 | 0.2118474 | -3.962811 | 7.41E-05 | 0.003804 |
| zgc:154125       | 6.306608437 | 0.804624636  | 0.7890234 | 1.0197728 | 0.307836 | NA       |
| lrrc39           | 191.6483674 | 0.269951059  | 0.1707776 | 1.5807168 | 0.113943 | 0.632717 |
| zbtb33           | 288.9597913 | -0.047081273 | 0.1285813 | -0.366159 | 0.714246 | 0.96909  |
| mrpl54           | 326.5361802 | -0.008364498 | 0.1254438 | -0.066679 | 0.946837 | 0.99381  |
| znf618           | 63.77113706 | -0.163904018 | 0.2461125 | -0.665972 | 0.505429 | 0.935724 |
| aox5             | 226.2527499 | 0.065647037  | 0.143105  | 0.4587334 | 0.646426 | 0.960362 |
| lnx2b            | 404.0650739 | -0.200707452 | 0.117771  | -1.704218 | 0.08834  | 0.569189 |
| zgc:152948       | 45.23043171 | -0.463670375 | 0.2927806 | -1.583678 | 0.113267 | 0.631061 |
| nrros            | 27.64926934 | 0.645665633  | 0.3651431 | 1.7682535 | 0.077019 | 0.540058 |
| fbxo45           | 416.122627  | 0.105649185  | 0.1128973 | 0.9357988 | 0.349377 | 0.880195 |
| olfm3a           | 254.7516546 | 0.036381392  | 0.1488415 | 0.2444304 | 0.806897 | 0.980254 |
| fshr             | 0 NA        | NA           | NA        | NA        | NA       | NA       |
| sult3st5         | 5.753004758 | -1.082598878 | 0.94477   | -1.145886 | 0.251842 | NA       |
| zic6             | 102.3999643 | -0.092802653 | 0.2055945 | -0.451387 | 0.651711 | 0.960708 |
| zic3             | 964.1844996 | 0.116943969  | 0.0956325 | 1.2228474 | 0.221387 | 0.788076 |
| fh11a            | 198.9973507 | 0.02010771   | 0.1771116 | 0.1135313 | 0.909609 | 0.990702 |
| excl32b.1        | 0 NA        | NA           | NA        | NA        | NA       | NA       |
| fam207a          | 117.8692366 | -0.170600603 | 0.1879237 | -0.907818 | 0.363974 | 0.886249 |
| hs6st1b          | 222.5361234 | 0.13864715   | 0.1595469 | 0.8690055 | 0.384844 | 0.89551  |
| mgat5            | 744.9843427 | 0.127166378  | 0.0939738 | 1.3532104 | 0.175988 | 0.736505 |
| krt222           | 401.8746602 | -0.039830905 | 0.1326157 | -0.300348 | 0.763911 | 0.975374 |
| insrb            | 122.2467003 | -0.105916693 | 0.1873916 | -0.565216 | 0.571927 | 0.949494 |
| si:dkey-42i9.8   | 1.639291888 | -0.001819744 | 1.4395878 | -0.001264 | 0.998991 | NA       |
| si:dkey-42i9.7   | 0.824205979 | 0.498048327  | 2.3641483 | 0.2106671 | 0.833147 | NA       |
| josd1            | 565.7326596 | 0.093372511  | 0.1005238 | 0.9288596 | 0.352962 | 0.881552 |
| ecm2             | 243.6859471 | 0.361136858  | 0.1449765 | 2.4910026 | 0.012738 | 0.200229 |
| xrcc6            | 510.3557813 | -0.132426526 | 0.1025978 | -1.290735 | 0.196796 | 0.761944 |
| zgc:171500       | 0 NA        | NA           | NA        | NA        | NA       | NA       |
| CU929149.1       | 0.158795395 | 0.967652056  | 4.0804729 | 0.2371421 | 0.812547 | NA       |
| zgc:153675       | 237.7933194 | 0.1128549    | 0.1403054 | 0.8043515 | 0.421194 | 0.90651  |
| fb1im1           | 127.9923767 | -0.430237508 | 0.203849  | -2.11057  | 0.034809 | 0.363229 |
| dlx4b            | 73.18588072 | -0.273199328 | 0.2293081 | -1.191407 | 0.233494 | 0.802097 |
| mtus1a           | 178.1276446 | 0.012287875  | 0.1579561 | 0.077793  | 0.937993 | 0.99279  |
| hnf4g            | 92.69922191 | -0.877005932 | 0.2406791 | -3.643881 | 0.000269 | 0.010838 |
| ppplcab          | 1650.658364 | 0.026139441  | 0.0788681 | 0.3314322 | 0.740318 | 0.973082 |
| TSTD1            | 158.9991068 | 0.126925199  | 0.2105905 | 0.602711  | 0.546701 | 0.945526 |
| si:dkeyp-87e7.4  | 757.0966882 | -0.159100567 | 0.0913397 | -1.741855 | 0.081534 | 0.552315 |
| lsm5             | 192.3886095 | 0.092174145  | 0.1703872 | 0.5409686 | 0.588529 | 0.953319 |
| si:ch211-222k6.3 | 61.33806958 | 0.091993902  | 0.2580016 | 0.3565633 | 0.721419 | 0.969705 |
| urad             | 63.1327361  | 0.297657923  | 0.2422366 | 1.2287899 | 0.219151 | 0.785734 |

|                   |             |              |           |           |          |          |
|-------------------|-------------|--------------|-----------|-----------|----------|----------|
| si:ch211-222k6.1  | 26.66027806 | 0.635469108  | 0.3774938 | 1.6833895 | 0.0923   | 0.57849  |
| gtf3ab            | 1.8162786   | 0.814953581  | 1.541792  | 0.5285756 | 0.5971   | NA       |
| stard15           | 103.8272194 | 0.207833819  | 0.209409  | 0.9924779 | 0.320964 | 0.868715 |
| tgfbi             | 6049.877645 | 0.315157908  | 0.0751384 | 4.1943678 | 2.74E-05 | 0.001635 |
| BX539307.1        | 0.966579724 | 0.959501961  | 2.1265385 | 0.4512037 | 0.651843 | NA       |
| si:dkey-253d23.2  | 69.74527469 | -0.167540385 | 0.2406441 | -0.696217 | 0.486293 | 0.930833 |
| si:ch211-236g6.1  | 25.87192072 | -0.629260395 | 0.4005937 | -1.57082  | 0.116225 | 0.63841  |
| aqp8a.2           | 284.811339  | -1.079813314 | 0.1581756 | -6.826674 | 8.69E-12 | 2.53E-09 |
| TIMM21            | 106.811881  | -0.002663773 | 0.2102858 | -0.012667 | 0.989893 | 0.997612 |
| netoll            | 230.6044443 | 0.024509169  | 0.1411832 | 0.1735984 | 0.862181 | 0.985841 |
| pvalb9            | 841.1408609 | 0.343468408  | 0.0974787 | 3.5235231 | 0.000426 | 0.015652 |
| si:ch211-156p11.1 | 3.471201992 | 0.686111577  | 1.1258632 | 0.6094094 | 0.542253 | NA       |
| si:ch211-213a13.5 | 4.915289106 | 0.187913586  | 0.8647192 | 0.2173117 | 0.827965 | NA       |
| ptgdsb.2          |             | 0 NA         | NA        | NA        | NA       | NA       |
| BX511034.1        | 29.00154004 | -0.068082214 | 0.3577487 | -0.190307 | 0.849068 | 0.985174 |
| BX511034.2        | 0.341486697 | 1.892317624  | 3.2124068 | 0.5890654 | 0.555817 | NA       |
| drd1a             | 10.03592966 | -0.445821245 | 0.6216359 | -0.717174 | 0.473267 | NA       |
| zgc:171490        |             | 0 NA         | NA        | NA        | NA       | NA       |
| si:dkey-19a16.7   |             | 0 NA         | NA        | NA        | NA       | NA       |
| zgc:113298        | 12.24264247 | 0.096464489  | 0.5467862 | 0.1764209 | 0.859963 | 0.985773 |
| rrp8              | 98.55586753 | -0.131471227 | 0.2091842 | -0.628495 | 0.52968  | 0.942209 |
| si:ch73-256j6.2   | 0.166657454 | -0.955901296 | 4.0804729 | -0.234262 | 0.814781 | NA       |
| si:dkey-19a16.5   | 1.909102993 | 0.89942414   | 1.4922532 | 0.6027289 | 0.546689 | NA       |
| si:dkey-19a16.4   | 56.06308831 | -0.103046766 | 0.2719238 | -0.378955 | 0.704722 | 0.968134 |
| ywhag2            | 4969.955265 | 0.099649153  | 0.0689427 | 1.44539   | 0.148348 | 0.696298 |
| si:rp71-36a1.3    | 0.500282092 | 2.45023829   | 2.5970012 | 0.9434876 | 0.345432 | NA       |
| si:dkey-222f2.7   | 0.831868617 | -0.546811265 | 2.1107396 | -0.259061 | 0.795588 | NA       |
| smyd5             | 161.0852701 | -0.038783889 | 0.1675709 | -0.231448 | 0.816967 | 0.981594 |
| tma7              | 1330.496679 | -0.001005775 | 0.2214531 | -0.004542 | 0.996376 | 0.998902 |
| nudt22            | 163.1212096 | 0.042645992  | 0.1588053 | 0.2685427 | 0.788282 | 0.976703 |
| ctdspla           | 542.1217226 | -0.096926957 | 0.1058718 | -0.915513 | 0.359923 | 0.885686 |
| atcaya            | 745.6876714 | -0.168123523 | 0.0951906 | -1.766177 | 0.077366 | 0.541968 |
| mydgf             | 525.528232  | -0.033255692 | 0.1190743 | -0.279285 | 0.780026 | 0.976146 |
| lox15a            | 6.320950689 | 0.162674338  | 0.7828517 | 0.2077971 | 0.835387 | NA       |
| zfr2              | 761.7979447 | 0.148754832  | 0.1062614 | 1.3998959 | 0.161545 | 0.715364 |
| rx1               | 950.0279109 | 0.12050282   | 0.1045656 | 1.1524139 | 0.249151 | 0.818463 |
| slco5a1a          | 123.8452665 | 0.086484845  | 0.1949293 | 0.4436728 | 0.657279 | 0.962245 |
| uqcrc2b           | 3936.386187 | 0.020045678  | 0.0803838 | 0.2493746 | 0.803071 | 0.979643 |
| prex2             | 424.249461  | 0.037322889  | 0.1134268 | 0.3290481 | 0.742119 | 0.973154 |
| ndc80             | 422.7847148 | -0.246471177 | 0.1129247 | -2.182615 | 0.029064 | 0.330497 |
| pimr193           | 0.158915748 | 0.967652056  | 4.0804729 | 0.2371421 | 0.812547 | NA       |
| zgc:66433         | 640.5045562 | -0.046966308 | 0.0963477 | -0.487467 | 0.625928 | 0.957354 |
| ids               | 115.4880881 | -0.026898908 | 0.1885579 | -0.142656 | 0.886562 | 0.988936 |
| zgc:162941        | 0.157187365 | -0.955901296 | 4.0804729 | -0.234262 | 0.814781 | NA       |
| ppplr9bb          | 179.7177795 | -0.1107312   | 0.1776147 | -0.623435 | 0.532999 | 0.942965 |
| si:dkey-20i20.8   | 77.46088972 | -0.353138502 | 0.2210742 | -1.597376 | 0.110182 | 0.62463  |
| si:dkey-20i20.2   | 77.74543098 | -0.390457805 | 0.2391335 | -1.632803 | 0.10251  | 0.608356 |
| ankha             | 70.87179659 | 0.366728915  | 0.2464109 | 1.4882818 | 0.136677 | 0.673303 |
| znfl167           | 40.94165241 | -0.128392315 | 0.3123908 | -0.410999 | 0.681073 | 0.965476 |
| si:dkey-37o8.1    |             | 0 NA         | NA        | NA        | NA       | NA       |
| si:ch211-207i20.3 | 63.10325655 | -0.401486315 | 0.2524421 | -1.59041  | 0.111742 | 0.627242 |
| prlh2             | 43.5431448  | -0.153379991 | 0.2930322 | -0.523424 | 0.600679 | 0.956045 |
| zgc:112977        | 26.51258027 | 0.154734534  | 0.3700799 | 0.4181112 | 0.675866 | 0.965257 |
| pimr46            | 0.365141898 | 1.973577737  | 3.3927314 | 0.5817076 | 0.560764 | NA       |

|                  |             |              |           |           |          |          |
|------------------|-------------|--------------|-----------|-----------|----------|----------|
| si:ch211-253p2.2 | 101.1351159 | 0.017556316  | 0.2263611 | 0.0775589 | 0.938179 | 0.99279  |
| eef1e1           | 634.4569426 | 0.045442078  | 0.0987955 | 0.4599611 | 0.645544 | 0.96029  |
| znf1153          | 58.986307   | -0.139880336 | 0.2554076 | -0.547675 | 0.583915 | 0.952214 |
| znf1180          | 43.42754938 | 0.02127115   | 0.2961261 | 0.0718314 | 0.942736 | 0.993364 |
| adarb2           | 20.87567631 | -0.465562186 | 0.4298068 | -1.083189 | 0.278724 | 0.842736 |
| znf1162          | 29.54811591 | 0.167047064  | 0.3696332 | 0.4519266 | 0.651322 | 0.960708 |
| si:dkey-32n7.9   | 0 NA        | NA           | NA        | NA        | NA       | NA       |
| nrn1a            | 402.6657346 | -0.041270983 | 0.1177169 | -0.350595 | 0.725892 | 0.970402 |
| itgbla           | 2210.05132  | 0.203245493  | 0.072983  | 2.7848315 | 0.005356 | 0.108505 |
| si:ch73-134f24.1 | 0 NA        | NA           | NA        | NA        | NA       | NA       |
| znf711           | 289.0792096 | -0.21970158  | 0.1261757 | -1.741235 | 0.081642 | 0.552623 |
| glod5            | 261.9859472 | -0.029169389 | 0.1534702 | -0.190066 | 0.849258 | 0.985174 |
| zdhhc15b         | 430.5505842 | 0.063718287  | 0.1097124 | 0.5807756 | 0.561392 | 0.948728 |
| rell2            | 32.14520387 | -0.127717113 | 0.3400793 | -0.375551 | 0.707251 | 0.968664 |
| dhrs7cb          | 476.8206501 | 0.276275411  | 0.1060856 | 2.6042696 | 0.009207 | 0.16083  |
| trmt112          | 332.6788395 | -0.003412215 | 0.1211369 | -0.028168 | 0.977528 | 0.996762 |
| tgfb5            | 59.94996813 | 0.18939819   | 0.2812965 | 0.6733045 | 0.500754 | 0.93428  |
| pimr56           | 0.157187365 | -0.955901296 | 4.0804729 | -0.234262 | 0.814781 | NA       |
| arl9             | 380.7176585 | -0.047083403 | 0.148636  | -0.31677  | 0.751418 | 0.97419  |
| pcdh2ab1         | 4.538831639 | 0.620690438  | 0.9228968 | 0.6725459 | 0.501236 | NA       |
| CR847851.1       | 0.365141898 | 1.973577737  | 3.3927314 | 0.5817076 | 0.560764 | NA       |
| sec24b           | 987.5710639 | 0.003193061  | 0.115789  | 0.0275766 | 0.978    | 0.996762 |
| rasalb           | 76.86023587 | -0.028631828 | 0.2210271 | -0.12954  | 0.89693  | 0.990003 |
| adgra3           | 233.5636844 | -0.180019565 | 0.1462983 | -1.230496 | 0.218511 | 0.785734 |
| tlr8b            | 1.476211552 | 1.771389495  | 1.6751477 | 1.0574527 | 0.290305 | NA       |
| quo              | 544.2116617 | -0.183639747 | 0.1023608 | -1.794043 | 0.072806 | 0.526522 |
| heatr6           | 205.3550198 | -0.062245049 | 0.1449185 | -0.429518 | 0.667547 | 0.964736 |
| nav2a            | 780.268282  | -0.054803359 | 0.0912969 | -0.600277 | 0.548322 | 0.945871 |
| mamdc2b          | 71.78377583 | 0.451300646  | 0.2352419 | 1.9184532 | 0.055054 | 0.459919 |
| frmd8            | 563.6978436 | -0.078029764 | 0.0997343 | -0.782377 | 0.433993 | 0.914001 |
| col9ala          | 13802.84549 | 0.152635156  | 0.0871474 | 1.7514587 | 0.079867 | 0.548745 |
| si:dkeyp-72g9.4  | 1001.038388 | 0.016200988  | 0.0941274 | 0.1721176 | 0.863345 | 0.985841 |
| rbfa             | 75.87260976 | -0.369214712 | 0.2254573 | -1.637626 | 0.1015   | 0.605447 |
| cnksr2b          | 622.4065287 | 0.0318254    | 0.1193649 | 0.2666228 | 0.78976  | 0.977238 |
| zgc:171551       | 9.704676296 | -0.598562596 | 0.6341418 | -0.943894 | 0.345224 | NA       |
| fam149a          | 32.62336689 | 0.067550686  | 0.3498911 | 0.193062  | 0.84691  | 0.985174 |
| usp7             | 1799.954761 | -0.026736377 | 0.0729954 | -0.366275 | 0.71416  | 0.96909  |
| mmrn2b           | 75.08693174 | -0.108372738 | 0.2478234 | -0.437298 | 0.661895 | 0.964504 |
| vav3b            | 270.1343088 | 0.018801194  | 0.1402015 | 0.1341013 | 0.893322 | 0.989291 |
| cpxmla           | 489.6793825 | 0.085433041  | 0.1066085 | 0.8013716 | 0.422917 | 0.90714  |
| si:ch73-233k15.2 | 27.74127272 | 0.013101067  | 0.3948269 | 0.0331818 | 0.97353  | 0.996315 |
| si:dkey-250123.4 | 173.630153  | -0.105503384 | 0.1839061 | -0.573681 | 0.566184 | 0.948739 |
| smarcad1b        | 582.4719308 | 0.030886524  | 0.0999167 | 0.3091228 | 0.757228 | 0.975374 |
| zgc:194679       | 68.84709724 | -0.201668102 | 0.2406162 | -0.838132 | 0.401957 | 0.90084  |
| nlr1             | 305.7636191 | -0.050390349 | 0.1291392 | -0.390202 | 0.696387 | 0.96736  |
| zbtb32           | 0.500161739 | 2.450146464  | 2.7711133 | 0.8841741 | 0.376602 | NA       |
| gal3st3          | 166.3385702 | 0.208072861  | 0.1612986 | 1.2899855 | 0.197056 | 0.761944 |
| dok4             | 349.1872311 | 0.039810194  | 0.1202048 | 0.3311863 | 0.740504 | 0.973154 |
| myh14            | 963.6247513 | 0.027659117  | 0.0896163 | 0.3086393 | 0.757596 | 0.975374 |
| ftr95            | 1.839552787 | -3.211433563 | 1.6821863 | -1.909083 | 0.056251 | NA       |
| suds3            | 542.6533432 | -0.246588048 | 0.1067175 | -2.310662 | 0.020852 | 0.27277  |
| dennd2c          | 208.6708166 | -0.149116364 | 0.150525  | -0.990642 | 0.321861 | 0.869463 |
| RAP1GDS1         | 14.6750534  | 0.124844766  | 0.5257435 | 0.2374632 | 0.812297 | 0.981081 |
| prss59.2         | 2274.742095 | -0.430465284 | 0.2483857 | -1.733052 | 0.083086 | 0.555802 |

|                   |             |              |           |           |          |          |
|-------------------|-------------|--------------|-----------|-----------|----------|----------|
| slc25a37          | 10.26393878 | 0.003699869  | 0.5800278 | 0.0063788 | 0.994911 | NA       |
| ip6k1             | 892.9247289 | 0.141288461  | 0.0955155 | 1.4792199 | 0.139082 | 0.677963 |
| si:dkey-1j5.4     | 126.756371  | -0.077396872 | 0.2085561 | -0.371108 | 0.710557 | 0.968985 |
| crygm2d18         | 13572.9664  | -0.059560882 | 0.0892165 | -0.667599 | 0.50439  | 0.935541 |
| CACNA2D1          | 11.58028631 | 0.259847435  | 0.5562914 | 0.4671067 | 0.640424 | 0.959994 |
| taccl             | 142.1773468 | -0.207993162 | 0.1875581 | -1.108953 | 0.26745  | 0.833239 |
| slc12a7a          | 244.0001332 | -0.11777427  | 0.137719  | -0.855178 | 0.392452 | 0.897688 |
| pdzrn3a           | 26.52483987 | -0.284785448 | 0.3671217 | -0.775725 | 0.437911 | 0.915258 |
| myo19             | 41.44454885 | 0.29294231   | 0.3025387 | 0.9682805 | 0.332904 | 0.874926 |
| si:ch211-113j14.1 | 110.7853336 | -0.440560926 | 0.1867159 | -2.359526 | 0.018298 | 0.251621 |
| gnal3a            | 173.6541337 | -0.141007091 | 0.1589716 | -0.886996 | 0.375081 | 0.894316 |
| tnnild            | 276.3873712 | -0.003114115 | 0.1395012 | -0.022323 | 0.98219  | 0.996944 |
| magi2b            | 23.85971424 | 0.602866833  | 0.3942846 | 1.5290143 | 0.126261 | 0.655241 |
| tbc1d12b          | 181.9874023 | 0.17236555   | 0.1500557 | 1.1486775 | 0.250689 | 0.820469 |
| tti2              | 115.6518012 | 0.044761917  | 0.1939474 | 0.2307942 | 0.817475 | 0.981594 |
| si:dkey-17e16.9   | 5.428157328 | -1.005811941 | 0.8272264 | -1.215885 | 0.224029 | NA       |
| si:dkey-288i20.2  | 10.41395862 | -0.18597124  | 0.671296  | -0.277033 | 0.781755 | NA       |
| cmb1              | 222.8160331 | -0.300259411 | 0.1983151 | -1.514052 | 0.130013 | 0.662595 |
| si:ch73-303b9.1   | 0.522329263 | 0.999930388  | 2.8066578 | 0.3562709 | 0.721638 | NA       |
| zmp:0000000735    | 16.61552552 | -0.689204537 | 0.4939664 | -1.395246 | 0.162942 | 0.717875 |
| man1b1a           | 386.7050835 | -0.049711326 | 0.1129655 | -0.440058 | 0.659895 | 0.963364 |
| zgc:194210        | 34.47149164 | -0.112311106 | 0.3560499 | -0.315436 | 0.75243  | 0.974684 |
| si:dkeyp-104h9.5  | 320.4954892 | -0.019755113 | 0.1319906 | -0.149671 | 0.881025 | 0.988111 |
| cntnap51          | 346.9006342 | 0.173173645  | 0.1261563 | 1.3726916 | 0.169848 | 0.726965 |
| WDR31             | 8.408443344 | 0.487124583  | 0.7477279 | 0.651473  | 0.514741 | NA       |
| thbs2b            | 155.9358468 | 0.016196517  | 0.1732478 | 0.0934876 | 0.925516 | 0.992676 |
| or131-2           | 8.259543027 | -0.576119796 | 0.6557711 | -0.878538 | 0.379652 | NA       |
| scly              | 33.72742187 | 0.393055421  | 0.3318779 | 1.1843376 | 0.236279 | 0.805463 |
| pax1b             | 85.78001156 | 0.412818622  | 0.2216542 | 1.8624448 | 0.06254  | 0.487868 |
| zgc:174917        | 112.0530388 | -0.888823556 | 0.5331721 | -1.667048 | 0.095505 | 0.588012 |
| znf1177           | 15.59836894 | -0.770317643 | 0.5252742 | -1.466506 | 0.142511 | 0.684646 |
| L0017700.1        | 65.16824759 | 0.169045664  | 0.2648413 | 0.6382905 | 0.523285 | 0.939336 |
| RASGRF1           | 225.9318083 | 0.080194009  | 0.1467645 | 0.5464127 | 0.584782 | 0.952433 |
| senp2             | 620.8371457 | 0.131255962  | 0.0956715 | 1.3719445 | 0.170081 | 0.727199 |
| herc2             | 2354.458109 | 0.101170287  | 0.1042046 | 0.9708807 | 0.331608 | 0.874645 |
| myo9ab            | 1004.784138 | 0.039017073  | 0.0910576 | 0.4284878 | 0.668296 | 0.964736 |
| si:dkey-85k7.10   | 0.173729368 | -0.955901296 | 4.0804729 | -0.234262 | 0.814781 | NA       |
| zgc:110843        | 1037.493927 | -0.249481238 | 0.1009441 | -2.471479 | 0.013456 | 0.20803  |
| rbm15             | 454.467611  | 0.076951254  | 0.1114153 | 0.6906707 | 0.489772 | 0.931926 |
| arhgef7b          | 840.5836516 | -0.062072871 | 0.0886461 | -0.700233 | 0.483782 | 0.929461 |
| hdac7b            | 6.982877764 | 0.018749655  | 0.7100381 | 0.0264065 | 0.978933 | NA       |
| klf7a             | 30.24010068 | -0.442480467 | 0.3449685 | -1.282669 | 0.199608 | 0.764932 |
| pex26             | 177.3803412 | -0.034717192 | 0.1667022 | -0.208259 | 0.835027 | 0.984089 |
| kif13bb           | 247.0565433 | 0.013608403  | 0.143517  | 0.0948209 | 0.924457 | 0.992676 |
| gas2l2            | 0.323844819 | -1.825095364 | 3.274639  | -0.557342 | 0.577293 | NA       |
| tdpl              | 91.38339578 | -0.306367796 | 0.2037598 | -1.503574 | 0.132691 | 0.667303 |
| rex1bd            | 165.2881496 | -0.136962574 | 0.1572278 | -0.871109 | 0.383695 | 0.895192 |
| pdzrn3b           | 564.3611265 | -0.095213197 | 0.1012049 | -0.940796 | 0.346809 | 0.8794   |
| gdpd2             | 666.8527573 | 0.450831616  | 0.0981478 | 4.5933962 | 4.36E-06 | 0.000361 |
| tpst1             | 788.0883728 | 0.107096249  | 0.1056641 | 1.0135533 | 0.310796 | 0.862927 |
| crygm2d6          | 5079.468778 | -0.055929102 | 0.0829809 | -0.674    | 0.500312 | 0.934224 |
| si:ch1073-165f9.2 | 42.65003126 | -0.299722501 | 0.3017638 | -0.993236 | 0.320595 | 0.868418 |
| slc41a2b          | 404.1268805 | 0.09460015   | 0.1147856 | 0.8241464 | 0.409856 | 0.902506 |
| clstn3            | 2862.242729 | 0.119770274  | 0.0695686 | 1.7216143 | 0.085139 | 0.560519 |

|                   |             |              |           |           |          |          |
|-------------------|-------------|--------------|-----------|-----------|----------|----------|
| gdf10b            | 124.9022955 | -0.085177625 | 0.1934944 | -0.440207 | 0.659787 | 0.963278 |
| secisbp2          | 102.396763  | -0.401432578 | 0.1950804 | -2.05778  | 0.039611 | 0.390659 |
| dnase2            | 157.0310048 | 0.105191336  | 0.1812913 | 0.5802336 | 0.561757 | 0.948728 |
| cx47.1            | 49.78407496 | 0.206272379  | 0.3054771 | 0.6752467 | 0.499519 | 0.934006 |
| nempl             | 93.38423571 | -0.139306533 | 0.2284353 | -0.609829 | 0.541975 | 0.944974 |
| inka2             | 62.66609752 | 0.461376671  | 0.2823122 | 1.6342782 | 0.1022   | 0.60761  |
| CABZ01046997.1    | 2.026250295 | -1.556805599 | 1.4182557 | -1.09769  | 0.27234  | NA       |
| ptpn9b            | 285.7348222 | -0.047910649 | 0.1312761 | -0.364961 | 0.715141 | 0.96909  |
| zgc:92481         | 209.0053797 | -0.735705953 | 0.1709947 | -4.302509 | 1.69E-05 | 0.001088 |
| ppip5k1b          | 378.9800798 | 0.006415734  | 0.1181356 | 0.0543082 | 0.95669  | 0.994543 |
| cinp              | 112.3009931 | 0.097738485  | 0.1862444 | 0.5247861 | 0.599732 | 0.956045 |
| tmem255a          | 783.2181538 | 0.095750657  | 0.0895381 | 1.0693847 | 0.284896 | 0.845094 |
| si:ch211-202h22.7 | 30.11551903 | 0.188970704  | 0.3539186 | 0.5339383 | 0.593384 | 0.954434 |
| pimr213           | 13.31306075 | -2.783449086 | 0.658762  | -4.225273 | 2.39E-05 | 0.001457 |
| fam163ba          | 35.76692326 | 0.031454211  | 0.3317539 | 0.0948119 | 0.924464 | 0.992676 |
| znf1085           | 14.81113372 | -0.23814744  | 0.505071  | -0.471513 | 0.637275 | 0.958872 |
| b3glcta           | 274.9074951 | -0.036107599 | 0.1270637 | -0.284169 | 0.776281 | 0.975826 |
| rnf41l            | 163.820911  | 0.206221378  | 0.1619534 | 1.2733379 | 0.202898 | 0.769849 |
| cntnap5a          | 62.92270313 | 0.096270863  | 0.2589555 | 0.3717661 | 0.710067 | 0.968928 |
| adck2             | 162.8838724 | -0.088880016 | 0.1669021 | -0.532528 | 0.594361 | 0.954434 |
| synrg             | 751.0962284 | -0.016198434 | 0.1065342 | -0.152049 | 0.879148 | 0.987881 |
| otulina           | 34.95045214 | -0.355021398 | 0.3486312 | -1.018329 | 0.308521 | 0.861088 |
| gareml            | 18.56615272 | 0.316092574  | 0.44615   | 0.7084895 | 0.478641 | 0.926978 |
| wnt6b             | 6.89810565  | 0.806563978  | 0.7412397 | 1.0881284 | 0.276538 | NA       |
| BX511021.1        | 9.746878233 | 0.650917801  | 0.6205613 | 1.0489178 | 0.294216 | NA       |
| si:ch73-386h18.1  | 1342.192631 | -0.086656279 | 0.0833096 | -1.040172 | 0.29826  | 0.85401  |
| si:dkeyp-67e1.6   | 0.474898508 | 0.855240867  | 2.7202602 | 0.3143967 | 0.75322  | NA       |
| prokl             | 9.403542801 | 0.465050016  | 0.6185126 | 0.7518845 | 0.452121 | NA       |
| cd4-2.2           | 2.962102904 | -0.669981969 | 1.1811811 | -0.567214 | 0.570569 | NA       |
| slc4a7            | 149.9860512 | 0.023138014  | 0.1736455 | 0.1332485 | 0.893997 | 0.989527 |
| tox3              | 708.106701  | -0.022908291 | 0.0964007 | -0.237636 | 0.812163 | 0.981081 |
| pmch              | 29.04066486 | 0.084333096  | 0.3496628 | 0.2411841 | 0.809412 | 0.980642 |
| si:ch211-160j14.2 | 48.87498722 | -0.010499289 | 0.6177817 | -0.016995 | 0.98644  | 0.996965 |
| ccdc32            | 585.4433538 | 0.039553561  | 0.0986544 | 0.4009305 | 0.688471 | 0.966672 |
| si:ch211-258f14.2 | 88.70931735 | 0.060528868  | 0.2204354 | 0.2745878 | 0.783633 | 0.97627  |
| si:dkey-202b22.5  | 7.945078938 | 0.357981033  | 0.6628787 | 0.54004   | 0.589169 | NA       |
| mctp2b            | 51.83370844 | 0.160168148  | 0.265641  | 0.6029497 | 0.546542 | 0.945526 |
| colgalt1          | 70.59286228 | 0.207633477  | 0.2398182 | 0.8657953 | 0.386602 | 0.89551  |
| crabp2a           | 401.4695079 | 0.164296167  | 0.1125761 | 1.4594226 | 0.144449 | 0.688868 |
| pctp              | 26.0446345  | 0.141372713  | 0.3766614 | 0.375331  | 0.707414 | 0.968664 |
| mntb              | 472.0346673 | 0.012556838  | 0.104188  | 0.120521  | 0.90407  | 0.990291 |
| si:ch211-276k2.1  |             | 0 NA         | NA        | NA        | NA       | NA       |
| prickle3          | 60.85512745 | 0.119501709  | 0.2783898 | 0.4292604 | 0.667734 | 0.964736 |
| srpkla            | 609.7547304 | 0.175614695  | 0.1063811 | 1.6508071 | 0.098778 | 0.598346 |
| si:ch211-23110.3  | 35.82240232 | 0.380319468  | 0.3344517 | 1.1371431 | 0.255478 | 0.823982 |
| taptla            | 118.373849  | -0.176928637 | 0.2025503 | -0.873505 | 0.382388 | 0.895192 |
| crygmx12          | 11211.98118 | 0.03062628   | 0.0967873 | 0.3164287 | 0.751677 | 0.974352 |
| slc6alla          | 76.43635354 | 0.505730185  | 0.2459463 | 2.0562624 | 0.039757 | 0.391511 |
| stac              | 42.50976475 | -0.174014566 | 0.2933854 | -0.593126 | 0.553097 | 0.947265 |
| znf1059           | 58.82475879 | 0.046882412  | 0.2717372 | 0.1725285 | 0.863022 | 0.985841 |
| si:ch1073-159d7.7 | 16.12363355 | 0.371612167  | 0.4949844 | 0.7507554 | 0.4528   | 0.919551 |
| zgc:194275        | 1.295689006 | -0.690664441 | 1.7006876 | -0.406109 | 0.684663 | NA       |
| ptgfr             | 0.48448895  | 0.85344211   | 2.878836  | 0.2964539 | 0.766883 | NA       |
| usp3l             | 174.6830603 | 0.151262601  | 0.1595485 | 0.9480665 | 0.343096 | 0.878434 |

|                   |             |              |           |           |          |          |
|-------------------|-------------|--------------|-----------|-----------|----------|----------|
| rbms1a            | 1506.087893 | 0.069071981  | 0.0819006 | 0.8433636 | 0.399025 | 0.900619 |
| CT573248.1        | 20.85112967 | -0.368303878 | 0.422664  | -0.871387 | 0.383543 | 0.895192 |
| myt1a             | 2106.223926 | -0.144543985 | 0.0796592 | -1.814529 | 0.069596 | 0.514708 |
| fastkd2           | 319.4950185 | -0.101765462 | 0.1294694 | -0.786019 | 0.431856 | 0.912787 |
| adamts12          | 47.82890894 | -0.120514967 | 0.2784437 | -0.432816 | 0.665148 | 0.964736 |
| si:dkey-91i10.2   | 173.78509   | 0.351225096  | 0.1706678 | 2.0579456 | 0.039595 | 0.390659 |
| ky                | 17.27698835 | 0.496764285  | 0.4897104 | 1.0144041 | 0.31039  | 0.862656 |
| abca5             | 220.6333166 | -0.025500662 | 0.1447677 | -0.176149 | 0.860177 | 0.985773 |
| efnb2b            | 177.8232922 | 0.015613248  | 0.1720879 | 0.0907283 | 0.927708 | 0.992702 |
| si:ch211-281g13.5 | 1.297376104 | -0.034812563 | 1.7279065 | -0.020147 | 0.983926 | NA       |
| kctd1             | 220.1082054 | -0.113868101 | 0.1456655 | -0.78171  | 0.434385 | 0.914254 |
| calm3b            | 16087.7906  | 0.023514157  | 0.068807  | 0.341741  | 0.732546 | 0.971719 |
| dlg5a             | 1019.198937 | 0.024631598  | 0.0870731 | 0.2828842 | 0.777266 | 0.975826 |
| map3k14a          | 317.7136242 | -0.122912416 | 0.1269984 | -0.967826 | 0.333131 | 0.874926 |
| si:dkey-234i14.15 | 0 NA        | NA           | NA        | NA        | NA       | NA       |
| rem2              | 27.23382058 | 0.173147503  | 0.3734617 | 0.4636285 | 0.642914 | 0.959994 |
| tas2r200.2        | 0 NA        | NA           | NA        | NA        | NA       | NA       |
| zgc:l71452        | 5.307043864 | -0.362911308 | 0.837682  | -0.433233 | 0.664846 | NA       |
| irx5b             | 211.856686  | -0.235202818 | 0.1695383 | -1.387314 | 0.165346 | 0.721223 |
| mrnip             | 18.04579038 | 0.13051198   | 0.4636725 | 0.2814745 | 0.778346 | 0.975942 |
| BX511100.1        | 0.158915748 | 0.967652056  | 4.0804729 | 0.2371421 | 0.812547 | NA       |
| map6b             | 51.75954516 | 0.29593038   | 0.2680954 | 1.1038248 | 0.269669 | 0.834705 |
| rnf26             | 84.36079104 | -0.119290157 | 0.2145075 | -0.556112 | 0.578134 | 0.951024 |
| antxr1b           | 27.22113118 | -0.034644758 | 0.3620874 | -0.095681 | 0.923774 | 0.992628 |
| si:dkey-3d4.3     | 36.17694704 | -0.225240116 | 0.3211066 | -0.70145  | 0.483022 | 0.929338 |
| dnai2b            | 13.12114382 | 0.662862849  | 0.5370897 | 1.2341752 | 0.217138 | 0.784302 |
| gpc5c             | 7.826691453 | -0.053352037 | 0.7165594 | -0.074456 | 0.940648 | NA       |
| stripl            | 996.874455  | 0.171607015  | 0.0867347 | 1.9785275 | 0.047869 | 0.43124  |
| si:ch1073-188e1.1 | 0 NA        | NA           | NA        | NA        | NA       | NA       |
| tecpr1b           | 168.4412125 | 0.003357687  | 0.1691514 | 0.0198502 | 0.984163 | 0.996944 |
| nim1k             | 86.08919265 | 0.188975661  | 0.2152869 | 0.8777853 | 0.38006  | 0.895192 |
| tgm2b             | 701.868318  | -0.038567716 | 0.0953345 | -0.404551 | 0.685807 | 0.966307 |
| si:ch211-86h15.1  | 79.86095357 | 0.060308059  | 0.2218354 | 0.2718595 | 0.78573  | 0.97627  |
| zgc:l63014        | 2.120643845 | -0.712338836 | 1.4157264 | -0.503161 | 0.614851 | NA       |
| bedin3d           | 52.0920163  | -0.094354214 | 0.2877678 | -0.327883 | 0.743    | 0.973486 |
| si:dkey-1h24.2    | 31.21179606 | 0.08728549   | 0.3678258 | 0.2373012 | 0.812423 | 0.981081 |
| ftr12             | 56.24011758 | 0.197970018  | 0.2572921 | 0.7694368 | 0.441634 | 0.916336 |
| frmpd2            | 57.36193736 | 0.538021019  | 0.2792212 | 1.9268634 | 0.053997 | 0.455128 |
| usp2b             | 88.16588716 | -0.013330856 | 0.2268233 | -0.058772 | 0.953134 | 0.994157 |
| dnmbp             | 499.0304958 | 0.006991227  | 0.1058249 | 0.0660641 | 0.947327 | 0.99381  |
| znf1161           | 45.24680252 | -0.00683509  | 0.2959698 | -0.023094 | 0.981575 | 0.996944 |
| ttc39a            | 39.3619597  | -0.473928586 | 0.3053683 | -1.55199  | 0.120665 | 0.645578 |
| edem3             | 868.5833786 | 0.110932605  | 0.0881946 | 1.2578159 | 0.208458 | 0.775404 |
| kif5ba            | 1862.363338 | -0.048827121 | 0.0756114 | -0.645764 | 0.518432 | 0.938765 |
| scpp7             | 0.524057646 | 2.503896172  | 2.7289583 | 0.9175282 | 0.358866 | NA       |
| slc47a2.2         | 2.460512468 | 0.622636951  | 1.2614463 | 0.4935897 | 0.621596 | NA       |
| c2cd3             | 214.5733733 | 0.224313714  | 0.1521349 | 1.4744397 | 0.140363 | 0.680585 |
| myo1013           | 245.0981136 | 0.041592066  | 0.1447329 | 0.2873712 | 0.773828 | 0.975687 |
| zgc:l13452        | 113.3808606 | -0.212032419 | 0.1934708 | -1.09594  | 0.273105 | 0.838141 |
| rbpjl             | 2.658336168 | -1.12159655  | 1.1682715 | -0.960048 | 0.337031 | NA       |
| itpr1b            | 559.5003746 | -0.118822482 | 0.1103402 | -1.076874 | 0.281537 | 0.84357  |
| si:ch211-226h7.5  | 23.942247   | 0.037284005  | 0.4114816 | 0.0906092 | 0.927803 | 0.992702 |
| slitrk5b          | 16.59983799 | 0.072583303  | 0.4652539 | 0.156008  | 0.876027 | 0.987881 |
| sgca              | 446.7950203 | 0.293827953  | 0.1237151 | 2.3750367 | 0.017547 | 0.245562 |

|                    |             |              |           |           |          |          |
|--------------------|-------------|--------------|-----------|-----------|----------|----------|
| paqr4b             | 68.40384453 | 0.402216111  | 0.2470606 | 1.6280057 | 0.103524 | 0.609625 |
| tnrc6b             | 1357.256548 | -0.031123105 | 0.0882554 | -0.352648 | 0.724352 | 0.970402 |
| zgc:162879         | 100.6459976 | -0.097826436 | 0.2013768 | -0.485788 | 0.627118 | 0.957354 |
| birc6              | 2293.982622 | -0.022391299 | 0.108517  | -0.206339 | 0.836526 | 0.984386 |
| tasor2             | 530.4196635 | -0.084832659 | 0.1041048 | -0.814877 | 0.415143 | 0.906237 |
| gpam               | 503.4052107 | 0.326616243  | 0.1149444 | 2.8415151 | 0.00449  | 0.095365 |
| fbxo4              | 38.59608396 | -0.036913654 | 0.324037  | -0.113918 | 0.909303 | 0.990702 |
| calhm2.2           | 0.481032184 | -2.398473301 | 2.80721   | -0.854398 | 0.392885 | NA       |
| prokrla            | 5.839500704 | 0.112838587  | 0.8057615 | 0.1400397 | 0.888629 | NA       |
| si:dkey-172j4.3    | 675.0523939 | -0.02153993  | 0.1096707 | -0.196406 | 0.844293 | 0.985174 |
| arhgap32b          | 631.9046536 | 0.03783775   | 0.1046058 | 0.3617174 | 0.717563 | 0.96909  |
| psk9               | 25.85602093 | 0.686550629  | 0.376743  | 1.8223315 | 0.068405 | 0.512556 |
| zgc:172253         | 78.20789536 | 0.578428347  | 0.2455098 | 2.3560294 | 0.018471 | 0.253122 |
| flna               | 3704.474921 | 0.039258778  | 0.0773293 | 0.507683  | 0.611676 | 0.95688  |
| commd6             | 99.32283299 | 0.076886339  | 0.1968365 | 0.3906102 | 0.696085 | 0.96736  |
| si:dkey-1c7.3      | 0           | NA           | NA        | NA        | NA       | NA       |
| zgc:110286         | 9.211674688 | 0.136227772  | 0.6952787 | 0.1959326 | 0.844663 | NA       |
| SLC5A10            | 17.08429544 | -0.051525471 | 0.4826532 | -0.106755 | 0.914984 | 0.991119 |
| EIF3BB             | 32.89166211 | -0.203352129 | 0.3431045 | -0.592683 | 0.553393 | 0.947265 |
| wu:fc38h03         | 270.5005694 | 0.337975595  | 0.1342177 | 2.5181143 | 0.011799 | 0.191113 |
| si:dkey-188i13.6   | 8.890570063 | -0.337270929 | 0.6468607 | -0.521397 | 0.602091 | NA       |
| map3k22            | 22.36783799 | -0.481771279 | 0.4225651 | -1.140111 | 0.25424  | 0.823394 |
| zgc:172302         | 713.3380263 | 0.259472277  | 0.0999163 | 2.5968956 | 0.009407 | 0.162543 |
| rap1gap2b          | 19.89415087 | 0.576323212  | 0.432432  | 1.3327486 | 0.182614 | 0.745308 |
| MDFIC              | 149.935772  | 0.034873044  | 0.1655941 | 0.2105935 | 0.833204 | 0.983583 |
| si:ch211-269e2.1   | 505.0157657 | 0.111492038  | 0.1059379 | 1.0524286 | 0.292603 | 0.848607 |
| zgc:158398         | 297.9152191 | 0.004301493  | 0.1352379 | 0.0318069 | 0.974626 | 0.996579 |
| prrl2a             | 2638.550769 | -0.066032248 | 0.0831932 | -0.793722 | 0.427357 | 0.91075  |
| CU138547.1         | 10.29563014 | -0.331335125 | 0.634729  | -0.52201  | 0.601663 | NA       |
| pde4bb             | 114.2474757 | 0.121445548  | 0.1974553 | 0.6150532 | 0.53852  | 0.943336 |
| CR376783.1         | 18.46012157 | 0.408843311  | 0.4474558 | 0.9137065 | 0.360871 | 0.885686 |
| brpf3b             | 200.7524898 | 0.200121777  | 0.1596712 | 1.2533368 | 0.210083 | 0.777646 |
| serbpla            | 13179.02916 | -0.145355934 | 0.0620119 | -2.344    | 0.019078 | 0.257862 |
| arhgef101b         | 168.0658357 | 0.022943103  | 0.1648122 | 0.1392075 | 0.889286 | 0.989291 |
| spen               | 1385.420596 | -0.023552271 | 0.0878563 | -0.268077 | 0.78864  | 0.976703 |
| rab14              | 2224.691954 | 0.038426898  | 0.0706478 | 0.5439219 | 0.586495 | 0.953319 |
| tmem237b           | 218.8901145 | -0.169021392 | 0.1514624 | -1.11593  | 0.264452 | 0.830245 |
| olig3              | 93.60829631 | -0.221396596 | 0.2058491 | -1.075528 | 0.282138 | 0.843666 |
| abcb6b             | 33.3252744  | -0.20522559  | 0.4033675 | -0.508781 | 0.610906 | 0.95688  |
| micu3b             | 636.7832967 | 0.30025385   | 0.1056522 | 2.8419069 | 0.004484 | 0.09535  |
| gramd1bb           | 18.07271313 | 0.093064231  | 0.4472805 | 0.2080668 | 0.835177 | 0.984089 |
| nckla              | 474.8175422 | -0.097915076 | 0.1123808 | -0.87128  | 0.383601 | 0.895192 |
| dzip11             | 20.84723802 | 0.096841469  | 0.4128147 | 0.2345882 | 0.814528 | 0.981081 |
| si:ch1073-314i13.4 | 85.46554247 | -0.013375759 | 0.2294353 | -0.058299 | 0.953511 | 0.994213 |
| si:ch211-214e3.5   | 267.7642614 | -0.034606629 | 0.1387089 | -0.249491 | 0.802981 | 0.979643 |
| wrb                | 328.7478422 | 0.090665058  | 0.1307206 | 0.6935788 | 0.487946 | 0.931877 |
| POLR2E (1 of many) | 0           | NA           | NA        | NA        | NA       | NA       |
| limch1a            | 121.9948625 | 0.273757938  | 0.1871131 | 1.4630612 | 0.143451 | 0.686804 |
| si:ch73-12o23.1    | 360.226601  | 0.180362026  | 0.1223775 | 1.4738169 | 0.140531 | 0.680926 |
| inpp5d             | 39.4256496  | -0.205208717 | 0.3279947 | -0.625646 | 0.531547 | 0.942358 |
| si:ch73-335m24.2   | 155.8689029 | 0.232887125  | 0.17202   | 1.3538377 | 0.175788 | 0.736411 |
| hint3              | 139.6258227 | -0.006867042 | 0.1715339 | -0.040033 | 0.968067 | 0.996315 |
| sptlc2b            | 931.4953977 | 0.060829086  | 0.0858901 | 0.7082203 | 0.478808 | 0.926978 |
| tuba4l             | 15.7029506  | -1.183077739 | 0.4889447 | -2.419656 | 0.015535 | 0.228768 |

|                   |             |              |           |           |          |          |
|-------------------|-------------|--------------|-----------|-----------|----------|----------|
| adnpb             | 690.0999115 | 0.156893317  | 0.0971269 | 1.6153435 | 0.106236 | 0.615567 |
| znf1015           | 207.1682669 | -0.121806475 | 0.1586708 | -0.767668 | 0.442685 | 0.916336 |
| cth               | 895.3358509 | 0.06987201   | 0.1086133 | 0.6433097 | 0.520023 | 0.938995 |
| gpr183b           | 0.998956154 | 2.235011873  | 2.0006611 | 1.1171367 | 0.263936 | NA       |
| phf12a            | 645.4630645 | 0.105230079  | 0.1016688 | 1.0350282 | 0.300656 | 0.856282 |
| si:ch73-257c13.2  | 111.8246762 | 0.558959386  | 0.1994308 | 2.802774  | 0.005067 | 0.104143 |
| ctslb             |             | 0 NA         | NA        | NA        | NA       | NA       |
| rapgef5b          | 161.0227403 | -0.127316211 | 0.1729865 | -0.735989 | 0.461737 | 0.922466 |
| lrrc75ba          | 218.2305675 | 0.137960356  | 0.1586621 | 0.8695229 | 0.384561 | 0.89551  |
| cnm4b             | 15.42055888 | -0.508380603 | 0.5228989 | -0.972235 | 0.330934 | 0.874224 |
| rbfox3b           | 4.450622098 | -1.792024237 | 1.0404761 | -1.722312 | 0.085013 | NA       |
| mast2             | 916.5014056 | 0.016346058  | 0.085141  | 0.1919881 | 0.847752 | 0.985174 |
| ttc37             | 238.6119064 | -0.010594393 | 0.1452133 | -0.072957 | 0.94184  | 0.993099 |
| itgal             | 149.3960843 | -0.024615976 | 0.1661557 | -0.14815  | 0.882224 | 0.988344 |
| fam20ca           | 9.077576304 | -0.275205092 | 0.6307708 | -0.4363   | 0.662619 | NA       |
| sall1a            | 937.1400794 | 0.179088882  | 0.0854065 | 2.0968989 | 0.036003 | 0.37021  |
| CABZ01083937.1    | 23.85602382 | 0.209080079  | 0.3950509 | 0.5292485 | 0.596633 | 0.954903 |
| tead3a            | 46.46452857 | -0.11635491  | 0.2912398 | -0.399516 | 0.689513 | 0.966775 |
| si:ch211-194m7.3  | 88.69810965 | -0.071305177 | 0.2601791 | -0.274062 | 0.784037 | 0.97627  |
| efcab2            | 8.894705115 | 1.214401325  | 0.6651506 | 1.825754  | 0.067887 | NA       |
| taar12m           |             | 0 NA         | NA        | NA        | NA       | NA       |
| mcm8              | 80.34938839 | -0.411397274 | 0.2160987 | -1.903747 | 0.056943 | 0.468383 |
| apbalb            | 1105.152918 | 0.039751838  | 0.0856656 | 0.4640352 | 0.642623 | 0.959994 |
| arvcfa            | 349.360137  | -0.014534269 | 0.1407051 | -0.103296 | 0.917728 | 0.991623 |
| eif4g3b           | 751.013119  | 0.225806279  | 0.1206032 | 1.8723081 | 0.061164 | 0.482482 |
| si:ch1073-335m2.2 | 1542.910181 | 0.030256178  | 0.0874414 | 0.3460167 | 0.72933  | 0.970822 |
| si:dkey-1c7.1     | 0.673073222 | -1.460830855 | 2.4012698 | -0.608358 | 0.54295  | NA       |
| boc               | 1816.996222 | -0.070241357 | 0.0800965 | -0.876959 | 0.380509 | 0.895192 |
| cbfa2t2           | 315.7184261 | -0.136951713 | 0.1258328 | -1.088363 | 0.276435 | 0.839541 |
| serf2             | 1797.03288  | -0.014613733 | 0.1072742 | -0.136228 | 0.891641 | 0.989291 |
| hykk.2            | 58.93191425 | -0.29152934  | 0.2550417 | -1.143066 | 0.253011 | 0.822599 |
| si:ch211-214b16.4 | 97.76561315 | 0.324610501  | 0.222673  | 1.4577898 | 0.144898 | 0.688986 |
| l3mbt11b          | 201.0622855 | 0.123409569  | 0.1535034 | 0.8039536 | 0.421424 | 0.90651  |
| fxn               | 126.8041296 | 0.23050321   | 0.1841255 | 1.2518807 | 0.210613 | 0.778338 |
| znf11c            | 0.801959387 | 1.851619607  | 2.2655353 | 0.8172989 | 0.413758 | NA       |
| ftr57             | 0.643163992 | 1.4381025    | 2.4329265 | 0.5910999 | 0.554454 | NA       |
| zgc:165582        | 7.769673512 | 0.430642437  | 0.706444  | 0.6095918 | 0.542132 | NA       |
| TTC9              | 483.3282549 | 0.078743544  | 0.1039783 | 0.7573075 | 0.448866 | 0.917972 |
| zgc:171901        | 76.45326971 | -0.409075541 | 0.2349485 | -1.741129 | 0.081661 | 0.552623 |
| usp12b            | 546.0695237 | -0.066601496 | 0.1011805 | -0.658245 | 0.510381 | 0.936253 |
| tirap             | 5.00665157  | -0.970450258 | 0.9097794 | -1.066687 | 0.286113 | NA       |
| elfnlb            | 102.2995577 | 0.25781391   | 0.2274065 | 1.1337141 | 0.256914 | 0.82511  |
| mdgal             | 19.05135225 | 0.506723784  | 0.4777286 | 1.0606939 | 0.288829 | 0.845979 |
| junba             | 841.9729656 | -0.059394976 | 0.1087231 | -0.546296 | 0.584862 | 0.952436 |
| knstrn            | 203.0021478 | -0.274332783 | 0.1477114 | -1.857221 | 0.06328  | 0.491281 |
| farpl             | 872.0697759 | -0.010842561 | 0.0890564 | -0.121749 | 0.903098 | 0.990121 |
| slc12a8           | 28.11759687 | -0.20674597  | 0.3999132 | -0.516977 | 0.605172 | 0.95651  |
| alk11             | 11.84571586 | 0.176135259  | 0.574077  | 0.3068147 | 0.758984 | 0.975374 |
| gpr26             | 4.456344382 | -0.516436266 | 0.9387367 | -0.55014  | 0.582224 | NA       |
| tmem1761.4        | 1328.863155 | 0.077300548  | 0.0951108 | 0.8127418 | 0.416366 | 0.906237 |
| sh3y11            | 84.77457114 | -0.012029882 | 0.2125682 | -0.056593 | 0.954869 | 0.994543 |
| fscn2b            | 375.9318988 | 0.340144991  | 0.1256555 | 2.7069642 | 0.00679  | 0.12739  |
| gnpat             | 51.53708205 | -0.382844629 | 0.2801785 | -1.366431 | 0.171804 | 0.730433 |
| pex51b            | 26.48503304 | -0.298803335 | 0.4175697 | -0.715577 | 0.474253 | 0.925066 |



|                   |             |              |           |           |          |          |
|-------------------|-------------|--------------|-----------|-----------|----------|----------|
| bripl             | 138.3277636 | -0.185237252 | 0.1766334 | -1.04871  | 0.294311 | 0.850231 |
| sema4ba           | 19.32102454 | 0.111423001  | 0.4757288 | 0.2342154 | 0.814818 | 0.981081 |
| zgc:171482        | 60.6902822  | -0.069952146 | 0.3061713 | -0.228474 | 0.819278 | 0.981594 |
| hcn4l             | 32.96957115 | -0.338527766 | 0.3404849 | -0.994252 | 0.3201   | 0.868153 |
| ibtk              | 588.0608761 | 0.220572637  | 0.1162038 | 1.8981528 | 0.057676 | 0.471275 |
| si:busml-57f23.1  | 235.4226591 | -0.030345955 | 0.1536341 | -0.197521 | 0.84342  | 0.985174 |
| BX571825.1        |             | 0 NA         | NA        | NA        | NA       | NA       |
| hhat              | 8.760178146 | 0.373389335  | 0.657266  | 0.5680947 | 0.569971 | NA       |
| ddb1              | 1678.694312 | -0.043414743 | 0.0913838 | -0.475081 | 0.634729 | 0.9578   |
| ttc19             | 261.2701041 | 0.033084775  | 0.1397933 | 0.2366692 | 0.812913 | 0.981081 |
| gplbb             | 20.64104194 | 0.217768121  | 0.4455589 | 0.4887528 | 0.625017 | 0.957354 |
| alx4b             | 34.10694787 | -0.915162978 | 0.3589811 | -2.549335 | 0.010793 | 0.180252 |
| gas7a             | 134.8968528 | 0.075528897  | 0.1947208 | 0.3878831 | 0.698103 | 0.967998 |
| dapk3             | 470.9093191 | 0.00112807   | 0.1146552 | 0.0098388 | 0.99215  | 0.997927 |
| mmd1              | 120.7661549 | -0.167704667 | 0.1900921 | -0.882229 | 0.377653 | 0.895192 |
| zfx               | 627.6709256 | -0.160211356 | 0.1014413 | -1.579351 | 0.114256 | 0.633565 |
| setd9             | 42.01686809 | -0.483486977 | 0.3026642 | -1.597437 | 0.110168 | 0.62463  |
| si:dkey-96f10.1   | 1.630611944 | -0.56588234  | 1.5089763 | -0.375011 | 0.707652 | NA       |
| vps13c            | 643.0878591 | 0.055405157  | 0.0986698 | 0.561521  | 0.574442 | 0.950037 |
| gdpd3a            | 258.1293763 | -0.136016476 | 0.1394198 | -0.975589 | 0.329268 | 0.873436 |
| prdm11            | 140.535218  | 0.027052452  | 0.1686065 | 0.1604473 | 0.872529 | 0.987846 |
| amigo3            | 183.6585443 | 0.231992805  | 0.1622585 | 1.4297731 | 0.152782 | 0.701776 |
| vps39             | 572.8175251 | -0.118936761 | 0.1071761 | -1.109732 | 0.267115 | 0.833191 |
| odam              | 235.4953567 | -0.393883295 | 0.13938   | -2.825968 | 0.004714 | 0.09895  |
| cnksr2a           | 28.63857923 | -0.693949301 | 0.3554128 | -1.952516 | 0.050877 | 0.44241  |
| ulklb             | 49.18044646 | -0.005955156 | 0.285309  | -0.020873 | 0.983347 | 0.996944 |
| ifngr11           | 32.79978681 | 0.195457163  | 0.344127  | 0.5679798 | 0.570049 | 0.948983 |
| cas4              | 799.2794599 | 0.018969835  | 0.0886477 | 0.2139912 | 0.830554 | 0.982994 |
| chd9              | 2240.395316 | -0.09932697  | 0.0745252 | -1.332797 | 0.182598 | 0.745308 |
| tnip2             | 79.33635715 | -0.788420427 | 0.2443202 | -3.226996 | 0.001251 | 0.036865 |
| zmizla            | 1798.55812  | -0.124374408 | 0.0746587 | -1.665908 | 0.095732 | 0.588986 |
| mturn             | 60.10354541 | -0.148066578 | 0.2561151 | -0.578125 | 0.56318  | 0.948728 |
| tmem94            | 651.0578283 | -0.00839601  | 0.0976208 | -0.086006 | 0.931461 | 0.992702 |
| rmdn1             | 547.7380051 | -0.504449817 | 0.1155517 | -4.365578 | 1.27E-05 | 0.000877 |
| si:dkey-28e7.3    | 503.1856052 | 0.261099436  | 0.1159305 | 2.2522068 | 0.024309 | 0.301184 |
| tacr2             | 10.69120811 | 0.404994255  | 0.5827195 | 0.6950072 | 0.487051 | NA       |
| si:busml-104n07.3 | 1.868864504 | 0.85083392   | 1.5020443 | 0.5664506 | 0.571088 | NA       |
| BX248501.1        | 19.06666222 | 0.339051412  | 0.4333043 | 0.7824788 | 0.433933 | 0.914001 |
| map6a             | 189.0412238 | -0.061135565 | 0.1508611 | -0.405244 | 0.685298 | 0.966146 |
| cntnap1           | 23.91724664 | -0.222229866 | 0.3959754 | -0.561221 | 0.574647 | 0.950037 |
| zbtb16b           | 212.3498628 | -0.124583419 | 0.1531212 | -0.813626 | 0.415859 | 0.906237 |
| chst15            | 54.68417585 | 0.051979803  | 0.2620719 | 0.1983417 | 0.842778 | 0.985174 |
| unm_sa821         | 68.00395199 | -1.132873191 | 0.2463238 | -4.599121 | 4.24E-06 | 0.000353 |
| KCNK12            | 1.459669549 | 1.801334326  | 1.6829353 | 1.0703527 | 0.284461 | NA       |
| spag9a            | 62.50140396 | 0.056367288  | 0.2589939 | 0.2176394 | 0.82771  | 0.982721 |
| slc25a38b         | 697.6377563 | 0.133729327  | 0.0993909 | 1.3454888 | 0.178467 | 0.739486 |
| lingo2a           | 444.7986527 | 0.080393885  | 0.1084553 | 0.7412627 | 0.458534 | 0.921978 |
| si:dkey-179j5.5   | 0.158915748 | 0.967652056  | 4.0804729 | 0.2371421 | 0.812547 | NA       |
| gpr63             | 212.3215577 | 0.027985833  | 0.1658305 | 0.1687617 | 0.865984 | 0.986517 |
| znf1007           | 198.7505907 | -0.005460065 | 0.146654  | -0.037231 | 0.970301 | 0.996315 |
| si:ch211-213a13.2 | 55.2325677  | -0.183890581 | 0.283623  | -0.648363 | 0.51675  | 0.938543 |
| si:ch211-240119.8 | 0.856582408 | 1.927068658  | 2.1124105 | 0.9122605 | 0.361632 | NA       |
| zbtb17            | 382.5551956 | -0.093886145 | 0.1154047 | -0.813538 | 0.41591  | 0.906237 |
| ndufs7            | 1481.22693  | -0.10344499  | 0.0922981 | -1.12077  | 0.262386 | 0.830166 |

|                   |             |              |           |           |          |          |
|-------------------|-------------|--------------|-----------|-----------|----------|----------|
| tspan31           | 967.6878118 | -0.026416247 | 0.0919616 | -0.287253 | 0.773919 | 0.975687 |
| ganc              | 82.14749139 | 0.069079625  | 0.217842  | 0.3171088 | 0.751161 | 0.97419  |
| cntnap2b          | 254.4108396 | 0.001031503  | 0.1525435 | 0.006762  | 0.994605 | 0.998694 |
| CHST8             | 129.0263696 | 0.088940525  | 0.179904  | 0.4943776 | 0.62104  | 0.957354 |
| slc47a3           | 54.81810348 | 0.108982957  | 0.2655827 | 0.4103542 | 0.681546 | 0.965476 |
| gpr37a            | 43.78529961 | -0.046579744 | 0.3021111 | -0.154181 | 0.877467 | 0.987881 |
| fam57bb           | 30.70188916 | 0.182639116  | 0.3633914 | 0.5025962 | 0.615248 | 0.95688  |
| pus11             | 17.83726058 | 0.191143296  | 0.4624003 | 0.4133719 | 0.679334 | 0.965257 |
| gpaal             | 324.0901568 | -0.084191434 | 0.1196856 | -0.703438 | 0.481783 | 0.928392 |
| zgc:56304         | 1478.300144 | -0.103683415 | 0.086231  | -1.202391 | 0.229212 | 0.796702 |
| ppplr9alb         | 313.7502537 | -0.125703253 | 0.1261553 | -0.996417 | 0.319048 | 0.867746 |
| add2              | 869.7036637 | 0.007990155  | 0.0908718 | 0.0879278 | 0.929934 | 0.992702 |
| gfra4b            | 110.5158057 | 0.099767046  | 0.2043253 | 0.4882756 | 0.625355 | 0.957354 |
| gridla            | 224.9112885 | -0.072955459 | 0.1442427 | -0.505783 | 0.613009 | 0.95688  |
| METTL18           | 52.9990831  | 0.262137724  | 0.2693666 | 0.9731633 | 0.330472 | 0.874098 |
| rin2              | 254.2493698 | -0.051386755 | 0.1335127 | -0.384883 | 0.700324 | 0.967998 |
| wdpcp             | 74.21444084 | 0.097736611  | 0.2263227 | 0.4318463 | 0.665853 | 0.964736 |
| eda               | 14.56005783 | 0.133772534  | 0.4983267 | 0.2684434 | 0.788358 | 0.976703 |
| lzts2a            | 66.05458614 | -0.334060449 | 0.2417942 | -1.38159  | 0.167098 | 0.723651 |
| frmd4ba           | 618.5548489 | -0.003786958 | 0.1017884 | -0.037204 | 0.970322 | 0.996315 |
| gpr78a            | 27.26007453 | 0.323056787  | 0.3860581 | 0.8368087 | 0.4027   | 0.90084  |
| cbln2a            | 62.31671806 | 0.117435353  | 0.2489762 | 0.471673  | 0.63716  | 0.958872 |
| mrvil             | 7.685662038 | -0.28302022  | 0.8549809 | -0.331025 | 0.740625 | NA       |
| phc3              | 7.933331869 | 0.829215796  | 0.717348  | 1.1559464 | 0.247703 | NA       |
| unm_sa1506        | 0.484248244 | 0.852636534  | 2.8793247 | 0.2961238 | 0.767136 | NA       |
| si:ch211-113e8.6  | 1.000564183 | 3.450262048  | 2.0260994 | 1.7029086 | 0.088585 | NA       |
| wdr37             | 966.5909914 | 0.084506767  | 0.0876673 | 0.9639484 | 0.335072 | 0.875906 |
| si:ch211-240119.6 | 31.55645934 | -0.326675337 | 0.4166167 | -0.784115 | 0.432973 | 0.913433 |
| wfs1b             | 146.4069756 | -0.088921126 | 0.1848078 | -0.481155 | 0.630407 | 0.957354 |
| tbc1d31           | 159.8661547 | 0.154329768  | 0.1707489 | 0.9038406 | 0.36608  | 0.887239 |
| si:ch211-198a12.6 | 3179.414499 | 0.054013498  | 0.0694741 | 0.7774623 | 0.436886 | 0.914408 |
| pidd1             | 60.19465037 | -0.156761744 | 0.2702524 | -0.580057 | 0.561876 | 0.948728 |
| si:dkey-10o6.2    | 10.54078169 | 0.153315203  | 0.6187218 | 0.2477935 | 0.804294 | NA       |
| gpr35.1           | 15.10903135 | 0.133258603  | 0.5154751 | 0.2585161 | 0.796009 | 0.978498 |
| keap1b            | 532.6257438 | -0.132923228 | 0.110005  | -1.208338 | 0.226917 | 0.794587 |
| abcala            | 1397.664966 | -0.214790118 | 0.1047991 | -2.049542 | 0.040409 | 0.39304  |
| cepl70b           | 96.44110098 | 0.027497944  | 0.2236658 | 0.1229421 | 0.902153 | 0.990121 |
| loxhd1b           | 23.80626192 | 0.006369104  | 0.3901563 | 0.0163245 | 0.986976 | 0.997073 |
| si:dkeyp-51b7.3   | 26.34614458 | -0.170743226 | 0.3798277 | -0.449528 | 0.653051 | 0.960792 |
| spock1            | 12.19908285 | 0.387132191  | 0.5767184 | 0.6712673 | 0.50205  | 0.935237 |
| CABZ01032476.1    | 133.5010306 | 0.136075129  | 0.1775023 | 0.7666105 | 0.443313 | 0.916631 |
| adamts16          | 19.43245562 | 0.451894425  | 0.4639706 | 0.9739721 | 0.33007  | 0.874085 |
| smtna             | 7.70172114  | 0.130699748  | 0.6797978 | 0.1922627 | 0.847536 | NA       |
| si:ch211-233m11.1 |             | 0 NA         | NA        | NA        | NA       | NA       |
| ctss2.1           | 39.15847308 | -0.060953602 | 0.3448779 | -0.17674  | 0.859713 | 0.985773 |
| rilp              | 51.04930473 | -0.155768454 | 0.3070698 | -0.507274 | 0.611963 | 0.95688  |
| gperl             | 11.62945998 | 0.445471105  | 0.5893659 | 0.7558481 | 0.44974  | 0.918526 |
| cntf              | 26.23443958 | 0.317987129  | 0.3845795 | 0.8268437 | 0.408326 | 0.90171  |
| SAMD8             | 177.2727676 | -0.006243666 | 0.1778608 | -0.035104 | 0.971997 | 0.996315 |
| cdk14             | 13.74660995 | 0.445707504  | 0.5392993 | 0.8264567 | 0.408545 | 0.90171  |
| zgc:153760        | 26.25146399 | 0.465540172  | 0.3845246 | 1.2106902 | 0.226014 | 0.793556 |
| akt1sl            | 2269.62402  | -0.277067028 | 0.0867816 | -3.192693 | 0.00141  | 0.040686 |
| cacng4b           | 11.39871521 | -0.445138163 | 0.5729786 | -0.776884 | 0.437227 | 0.914408 |
| matk              | 0.182570949 | 0.967652056  | 4.0804729 | 0.2371421 | 0.812547 | NA       |

|                   |             |              |           |           |          |          |
|-------------------|-------------|--------------|-----------|-----------|----------|----------|
| nptx11            | 704.6515628 | 0.065636457  | 0.0973523 | 0.6742155 | 0.500174 | 0.934224 |
| pan2              | 537.397036  | -0.185476877 | 0.1103872 | -1.680239 | 0.092911 | 0.580357 |
| rprd2b            | 523.7961272 | -0.039383646 | 0.1043347 | -0.377474 | 0.705821 | 0.968412 |
| frem3             | 416.1966331 | 0.198931039  | 0.110835  | 1.794839  | 0.072679 | 0.52617  |
| rims1a            | 876.2974894 | -0.039350903 | 0.1031806 | -0.381379 | 0.702922 | 0.968134 |
| mlsl              | 100.5079108 | 0.204805155  | 0.2005404 | 1.0212663 | 0.307128 | 0.861074 |
| oga               | 3295.084109 | -0.186540639 | 0.0703922 | -2.650019 | 0.008049 | 0.144818 |
| fbrs              | 1345.023458 | 0.020502483  | 0.0909166 | 0.2255087 | 0.821584 | 0.981928 |
| ppmlj             | 81.69035664 | 0.108922643  | 0.2351281 | 0.463248  | 0.643187 | 0.959994 |
| mms221            | 185.2497895 | -0.262867403 | 0.1514655 | -1.735494 | 0.082653 | 0.554782 |
| mertka            | 160.6433609 | -0.149234308 | 0.1932052 | -0.772414 | 0.439869 | 0.916082 |
| zgc:194621        | 31.1594231  | 0.024202227  | 0.3700512 | 0.0654024 | 0.947854 | 0.99381  |
| npdcla            | 489.0882318 | 0.167817882  | 0.1071677 | 1.5659371 | 0.117363 | 0.640853 |
| sdsl              | 86.7756258  | -0.638495671 | 0.2190277 | -2.915136 | 0.003555 | 0.080346 |
| arfgf2            | 937.2164172 | -0.119172111 | 0.0971551 | -1.226617 | 0.219967 | 0.786668 |
| ccdc97            | 180.3326284 | -0.041473091 | 0.1623619 | -0.255436 | 0.798386 | 0.978884 |
| armc3             | 27.27050488 | 0.641148296  | 0.4019391 | 1.5951378 | 0.110681 | 0.625514 |
| si:ch211-186e20.2 | 0.491560863 | 0.853615855  | 2.865157  | 0.2979299 | 0.765757 | NA       |
| stk17a            | 760.0867976 | -0.077618251 | 0.1099385 | -0.706015 | 0.480179 | 0.927347 |
| rab38c            | 22.70911885 | -0.819647181 | 0.4096953 | -2.000626 | 0.045433 | 0.418148 |
| si:ch211-51h9.7   | 44.93554406 | -0.14410124  | 0.286473  | -0.503019 | 0.614951 | 0.95688  |
| rassf9            | 9.216839801 | -0.542488485 | 0.6448317 | -0.841287 | 0.400187 | NA       |
| myo1011           | 73.84255968 | 0.166365278  | 0.2349928 | 0.707959  | 0.478971 | 0.926978 |
| nrde2             | 169.0951188 | -0.094941448 | 0.1560646 | -0.608347 | 0.542957 | 0.944974 |
| dnajc10           | 499.2941162 | 0.107191526  | 0.1090778 | 0.9827074 | 0.325751 | 0.871896 |
| mfsd9             | 11.35406693 | -0.568277418 | 0.5781583 | -0.98291  | 0.325652 | 0.871896 |
| pkmyt1            | 98.79776996 | 0.200729718  | 0.2020836 | 0.9933003 | 0.320564 | 0.868418 |
| BX682234.1        | 1.495310112 | -0.994696088 | 1.5684186 | -0.634203 | 0.525948 | NA       |
| mlla              | 157.8876126 | -0.278043427 | 0.1625436 | -1.710577 | 0.087159 | 0.565634 |
| slitrk3b          | 168.7917888 | 0.122445579  | 0.1606977 | 0.7619624 | 0.446082 | 0.917154 |
| arhgap18          | 88.44935518 | -0.119267545 | 0.2113391 | -0.564342 | 0.572521 | 0.949494 |
| elmod3            | 5.147327927 | 0.295256162  | 0.8233738 | 0.3585931 | 0.7199   | NA       |
| zmp:0000000760    | 2035.538015 | 0.076666033  | 0.3167626 | 0.2420299 | 0.808757 | 0.980642 |
| kcndl             | 128.9143596 | 0.115957112  | 0.1794466 | 0.646193  | 0.518154 | 0.938592 |
| brwd1             | 578.2654522 | -0.109511258 | 0.1095459 | -0.999683 | 0.317464 | 0.867541 |
| abca12            | 2011.159381 | 0.087598268  | 0.0794587 | 1.102438  | 0.270271 | 0.835161 |
| qser1             | 346.2543064 | 0.007599375  | 0.1222778 | 0.0621485 | 0.950445 | 0.99381  |
| hlfa              | 1050.32691  | 0.287739718  | 0.0916371 | 3.1399911 | 0.00169  | 0.047321 |
| si:dkey-188i13.9  | 1.690969553 | 0.610696504  | 1.5782705 | 0.3869403 | 0.6988   | NA       |
| tfb2m             | 608.3456274 | -0.046615156 | 0.0971462 | -0.479845 | 0.631337 | 0.957356 |
| arv1              | 169.4199623 | 0.214155862  | 0.1636279 | 1.3087983 | 0.190603 | 0.755212 |
| csdel             | 7286.634177 | 0.025793418  | 0.0621381 | 0.415098  | 0.67807  | 0.965257 |
| ccar1             | 859.2113621 | -0.073949991 | 0.0978857 | -0.755473 | 0.449965 | 0.918761 |
| ttc7a             | 221.1125766 | 0.024675332  | 0.1458517 | 0.1691809 | 0.865654 | 0.986517 |
| bicd11            | 18.95867202 | 0.221730429  | 0.4443291 | 0.4990229 | 0.617763 | 0.957354 |
| BX571825.2        |             | 0 NA         | NA        | NA        | NA       | NA       |
| mrap2a            | 62.54390755 | 0.220771981  | 0.2461887 | 0.8967592 | 0.369847 | 0.889487 |
| zgc:171426        | 35.53211216 | -0.023244066 | 0.3195918 | -0.07273  | 0.942021 | 0.993099 |
| mhclzja           | 5.189349535 | 0.739063793  | 0.8903989 | 0.8300367 | 0.406518 | NA       |
| zgc:113295        | 63.5253059  | -0.192351684 | 0.2504562 | -0.768005 | 0.442484 | 0.916336 |
| ifngr1            | 48.16619956 | -0.030860906 | 0.2882437 | -0.107065 | 0.914737 | 0.991119 |
| ccl44             | 115.2123917 | 0.009458896  | 0.2049412 | 0.0461542 | 0.963187 | 0.995927 |
| si:dkey-110g7.8   | 32.98542951 | -0.249899095 | 0.3350111 | -0.745943 | 0.455702 | 0.921215 |
| tmem154           | 130.4486203 | 0.24120244   | 0.1912566 | 1.2611456 | 0.207256 | 0.775175 |

|                    |             |              |           |           |          |          |
|--------------------|-------------|--------------|-----------|-----------|----------|----------|
| ank1b              | 326.3843441 | 0.095185097  | 0.1324607 | 0.7185914 | 0.472393 | 0.924838 |
| alms1              | 361.284293  | -0.273332364 | 0.1175605 | -2.325036 | 0.02007  | 0.266383 |
| ptprt              | 40.98917356 | 0.075486911  | 0.3076108 | 0.2453975 | 0.806149 | 0.980105 |
| adgrg3             | 8.569034308 | 0.114828274  | 0.6416111 | 0.1789686 | 0.857962 | NA       |
| rab5if             | 1236.997932 | -0.150714221 | 0.0964131 | -1.563213 | 0.118003 | 0.641526 |
| aldh3a1            | 94.23571342 | -0.348408267 | 0.2078619 | -1.676153 | 0.093708 | 0.582517 |
| necab3             | 230.6233885 | -0.043850333 | 0.1409692 | -0.311063 | 0.755753 | 0.975374 |
| dbf4               | 149.2631554 | -0.122455896 | 0.1781414 | -0.687408 | 0.491825 | 0.931926 |
| cflarb             | 25.64031856 | -0.232950115 | 0.3829468 | -0.608309 | 0.542982 | 0.944974 |
| atxn7              | 208.3999549 | -0.079340861 | 0.1512171 | -0.524682 | 0.599804 | 0.956045 |
| afap112            | 405.0129691 | -0.169556937 | 0.1224527 | -1.384672 | 0.166153 | 0.722724 |
| tbrg4              | 715.7696915 | 0.161531546  | 0.105987  | 1.5240694 | 0.127491 | 0.657542 |
| megf6b             | 184.542742  | 0.165515348  | 0.1553019 | 1.0657648 | 0.28653  | 0.845942 |
| zgc:194392         | 80.33367406 | -0.093270477 | 0.2194575 | -0.425005 | 0.670833 | 0.965257 |
| fhdc1              | 84.57204751 | 0.096870956  | 0.2243169 | 0.4318486 | 0.665851 | 0.964736 |
| btr05              | 28.76284662 | -1.283773188 | 0.3797455 | -3.380615 | 0.000723 | 0.023796 |
| mxra5a             | 215.6671457 | 0.078344673  | 0.1413851 | 0.5541224 | 0.579495 | 0.951257 |
| si:zfos-367g9.1    |             | 0 NA         | NA        | NA        | NA       | NA       |
| si:cabz01036022.1  | 6.164764177 | -0.367410062 | 0.758617  | -0.484316 | 0.628162 | NA       |
| si:dkeyp-23e4.3    | 73.80419222 | -0.476621449 | 0.2409493 | -1.978098 | 0.047918 | 0.43124  |
| si:dkey-253d23.9   | 27.86265032 | 0.503865953  | 0.3947565 | 1.276397  | 0.201815 | 0.767736 |
| si:dkey-49c17.4    | 1.371719405 | 1.657057572  | 1.8000877 | 0.9205427 | 0.357289 | NA       |
| si:ch73-184c24.1   | 10.50709574 | 0.525299752  | 0.6172235 | 0.8510689 | 0.394731 | NA       |
| rhobtb2a           | 8.928345348 | 0.267579738  | 0.6721408 | 0.3981007 | 0.690556 | NA       |
| rasipl             | 124.4736776 | -0.284854502 | 0.1908972 | -1.492188 | 0.13565  | 0.671761 |
| setmar             | 21.3649804  | -0.021685314 | 0.4196004 | -0.051681 | 0.958783 | 0.995027 |
| impglb             | 148.9081997 | 0.192881651  | 0.1706562 | 1.1302354 | 0.258377 | 0.826456 |
| snx8a              | 55.50674904 | -0.127959484 | 0.2687844 | -0.476067 | 0.634026 | 0.95776  |
| phldb2b            | 539.5327396 | 0.025725869  | 0.1042296 | 0.2468193 | 0.805048 | 0.979883 |
| CABZ01061495.1     | 283.3165798 | 0.032758253  | 0.1311988 | 0.2496841 | 0.802832 | 0.979643 |
| si:dkeyp-68b7.12   | 6.929092962 | -1.146206302 | 0.738057  | -1.553005 | 0.120422 | NA       |
| smim7              | 157.6411482 | 0.108403203  | 0.1809311 | 0.5991408 | 0.549079 | 0.946312 |
| racla              | 1729.817971 | -0.008125729 | 0.0812829 | -0.099968 | 0.920369 | 0.992049 |
| il12rb2l           | 125.7818651 | 0.053166992  | 0.186476  | 0.2851144 | 0.775556 | 0.975687 |
| slpr4              | 3.113266902 | 0.79006505   | 1.0743458 | 0.7353918 | 0.462101 | NA       |
| myol5b             | 215.8300288 | -0.523726978 | 0.1656024 | -3.162557 | 0.001564 | 0.044368 |
| sh2dlab            | 0.633934609 | 1.436045836  | 2.6103598 | 0.5501333 | 0.582228 | NA       |
| stard7             | 908.3726526 | 0.197419597  | 0.0885437 | 2.2296299 | 0.025772 | 0.310555 |
| slc5a7a            | 184.9988478 | 0.395039818  | 0.1821215 | 2.1691008 | 0.030075 | 0.335259 |
| si:dkey-112m2.1    | 242.4467636 | 0.11126093   | 0.1384653 | 0.8035296 | 0.421669 | 0.90651  |
| frmpd3             | 498.3367079 | 0.011309075  | 0.1073515 | 0.1053462 | 0.916101 | 0.991314 |
| ptpn5              | 595.6299208 | 0.059679317  | 0.1074168 | 0.5555866 | 0.578494 | 0.951052 |
| stim2a             | 118.6673821 | 0.359448141  | 0.1863269 | 1.9291266 | 0.053715 | 0.45411  |
| AL929017.1         | 97.96098949 | -0.093151646 | 0.1978787 | -0.470751 | 0.637818 | 0.959031 |
| si:ch1073-291c23.2 | 360.5755667 | -0.047468845 | 0.131231  | -0.36172  | 0.717562 | 0.96909  |
| pimr170            |             | 0 NA         | NA        | NA        | NA       | NA       |
| abcd1              | 16.11169119 | 0.37956887   | 0.508756  | 0.7460724 | 0.455624 | 0.921215 |
| CT025742.1         | 80.1178445  | 0.108240447  | 0.2388652 | 0.4531446 | 0.650445 | 0.960708 |
| pde6d              | 391.0924912 | 0.038552523  | 0.1159907 | 0.332376  | 0.739605 | 0.972943 |
| myorg              | 799.1299825 | 0.070959085  | 0.08901   | 0.7972035 | 0.425333 | 0.908894 |
| tysnd1             | 37.93070529 | 0.153573724  | 0.3121863 | 0.4919297 | 0.622769 | 0.957354 |
| hes2.1             | 19.4346636  | 0.07265291   | 0.4867592 | 0.1492584 | 0.88135  | 0.988251 |
| taok2a             | 878.2452313 | -0.046136626 | 0.0931148 | -0.495481 | 0.620261 | 0.957354 |
| nol4la             | 14.55290459 | 0.140538915  | 0.5000466 | 0.2810516 | 0.778671 | 0.975942 |

|                   |             |              |           |           |          |          |
|-------------------|-------------|--------------|-----------|-----------|----------|----------|
| itcha             | 51.95112853 | 0.200131024  | 0.2651839 | 0.7546878 | 0.450436 | 0.918761 |
| si:ch211-253b8.5  | 221.0907512 | 0.417995614  | 0.1518766 | 2.752205  | 0.00592  | 0.116124 |
| camk1da           | 36.19376981 | 0.101923311  | 0.3253636 | 0.3132598 | 0.754083 | 0.975056 |
| znf831            | 13.45215291 | 0.402171619  | 0.5517974 | 0.7288392 | 0.4661   | 0.923865 |
| col6al            | 3933.88821  | 0.168924728  | 0.0683168 | 2.4726691 | 0.013411 | 0.207707 |
| dcaf17            | 49.90568654 | -0.063704506 | 0.2763741 | -0.230501 | 0.817702 | 0.981594 |
| crtc2             | 192.8891412 | -0.052752911 | 0.1481536 | -0.356069 | 0.721789 | 0.969939 |
| CU929346.1        | 4.144296544 | -1.071983804 | 0.9367278 | -1.144392 | 0.252461 | NA       |
| etaal             | 68.68555743 | -0.184554579 | 0.2414105 | -0.764485 | 0.444579 | 0.916777 |
| BFSP1             | 698.374815  | 0.117959385  | 0.1126592 | 1.0470466 | 0.295078 | 0.851519 |
| fam117ba          | 369.4346796 | -0.261724019 | 0.1146407 | -2.282994 | 0.022431 | 0.285605 |
| bublbb            | 220.6614303 | -0.102552322 | 0.1384006 | -0.740982 | 0.458705 | 0.921978 |
| si:dkey-234i14.13 | 0 NA        | NA           | NA        | NA        | NA       | NA       |
| si:ch1073-70f20.1 | 23.87107906 | 0.193339456  | 0.394788  | 0.4897298 | 0.624325 | 0.957354 |
| polg2             | 74.96716688 | -0.0333837   | 0.2252953 | -0.148178 | 0.882203 | 0.988344 |
| calhm5.1          | 37.23165947 | -0.332386694 | 0.3257515 | -1.020369 | 0.307553 | 0.861088 |
| clqtnf7           | 1.330381041 | -0.013681077 | 1.5829989 | -0.008643 | 0.993104 | NA       |
| zgc:194114        | 1.301781397 | -2.680907112 | 1.8600666 | -1.441296 | 0.149501 | NA       |
| nup98             | 2194.168353 | -0.13993332  | 0.0781064 | -1.791573 | 0.073201 | 0.527933 |
| or102-3           | 1.443756055 | 0.969583669  | 1.6798317 | 0.577191  | 0.56381  | NA       |
| zgc:162698        | 609.7655273 | 0.048600984  | 0.0995551 | 0.4881817 | 0.625421 | 0.957354 |
| polr2m            | 120.7719939 | 0.12414147   | 0.1992717 | 0.622976  | 0.5333   | 0.942992 |
| larp4ab           | 847.8610182 | 0.132672995  | 0.0893238 | 1.4853037 | 0.137463 | 0.674492 |
| jac9              | 10.3352661  | -0.339465938 | 0.7974212 | -0.425705 | 0.670323 | NA       |
| L0017656.1        | 5.66167453  | 1.236346162  | 0.863434  | 1.4318943 | 0.152174 | NA       |
| aurkaip1          | 675.5632634 | 0.071577836  | 0.0935584 | 0.7650604 | 0.444236 | 0.916726 |
| sparc11           | 739.6076719 | 0.235522258  | 0.0925209 | 2.5456124 | 0.010909 | 0.180962 |
| eif2b5            | 598.8939511 | -0.059697281 | 0.1037994 | -0.575122 | 0.565209 | 0.948739 |
| tbrg1             | 87.43507596 | 0.220019636  | 0.2155757 | 1.0206144 | 0.307437 | 0.861088 |
| chst2a            | 647.9671806 | 0.054880142  | 0.0967688 | 0.5671263 | 0.570628 | 0.949061 |
| pask              | 100.9047181 | -0.280470936 | 0.20074   | -1.397185 | 0.162358 | 0.716781 |
| glra2             | 186.1655495 | -0.007328472 | 0.1602731 | -0.045725 | 0.96353  | 0.995927 |
| usp45             | 251.4489455 | -0.007055111 | 0.1326974 | -0.053167 | 0.957599 | 0.99467  |
| sqstml            | 210.5816474 | -0.04404805  | 0.170385  | -0.258521 | 0.796005 | 0.978498 |
| soul5             | 777.0815129 | 0.320005962  | 0.2639115 | 1.2125504 | 0.225302 | 0.792725 |
| apobb.2           | 461.7759294 | 0.106102626  | 0.1452218 | 0.7306247 | 0.465008 | 0.923671 |
| myzap             | 237.981289  | 0.017404984  | 0.1376821 | 0.1264143 | 0.899404 | 0.990121 |
| fam120a           | 947.2057442 | 0.045795429  | 0.0846309 | 0.5411195 | 0.588425 | 0.953319 |
| si:ch211-93e11.8  | 2.657466954 | -0.697277337 | 1.2049192 | -0.578692 | 0.562797 | NA       |
| si:ch73-375g18.1  | 531.49183   | -0.041928952 | 0.1034669 | -0.40524  | 0.685301 | 0.966146 |
| cdc123            | 331.6783689 | -0.198776582 | 0.1201172 | -1.654855 | 0.097954 | 0.59749  |
| fgfr1bl           | 0 NA        | NA           | NA        | NA        | NA       | NA       |
| stx10             | 92.12782196 | -0.125457601 | 0.2060963 | -0.608733 | 0.542701 | 0.944974 |
| GTPBP8            | 55.81370838 | 0.423222659  | 0.2582204 | 1.638998  | 0.101214 | 0.60447  |
| raver2            | 389.8288374 | 0.037705581  | 0.1172907 | 0.3214712 | 0.747853 | 0.97419  |
| si:ch211-225k7.6  | 0 NA        | NA           | NA        | NA        | NA       | NA       |
| fml12b            | 1233.551447 | -0.042139207 | 0.0793281 | -0.531202 | 0.595279 | 0.954434 |
| si:dkeyp-123h10.2 | 525.8098434 | -0.054852647 | 0.1110879 | -0.493777 | 0.621464 | 0.957354 |
| cxcl18b           | 274.4654202 | -0.570493152 | 0.1750148 | -3.259685 | 0.001115 | 0.033569 |
| rnf151            | 20.02053007 | 0.314063428  | 0.4577127 | 0.6861584 | 0.492613 | 0.931926 |
| lonrf1            | 1443.229827 | 0.172624109  | 0.0824532 | 2.0936015 | 0.036295 | 0.372062 |
| sccpdha.2         | 15.27933932 | -0.054179138 | 0.4880571 | -0.11101  | 0.911609 | 0.991066 |
| rasgrf2a          | 96.71604195 | 0.265255245  | 0.201071  | 1.3192121 | 0.187098 | 0.751002 |
| ggt112.1          | 1.284290867 | 1.543812104  | 1.8520158 | 0.8335848 | 0.404515 | NA       |

|                    |             |              |           |           |          |          |
|--------------------|-------------|--------------|-----------|-----------|----------|----------|
| si:dkeyp-33b5.4    | 101.1625884 | 0.068989483  | 0.1955041 | 0.3528801 | 0.724178 | 0.970402 |
| gabra6a            | 224.0824822 | 0.405029649  | 0.1621066 | 2.498539  | 0.012471 | 0.19775  |
| aipl1              | 86.16973012 | 0.384378442  | 0.2132836 | 1.8021937 | 0.071515 | 0.522931 |
| rpap1              | 268.6240575 | 0.063755316  | 0.1377762 | 0.4627455 | 0.643547 | 0.959994 |
| prkdc              | 271.5968338 | -0.174741476 | 0.1286432 | -1.358342 | 0.174355 | 0.734611 |
| CU467646.1         | 0 NA        | NA           | NA        | NA        | NA       | NA       |
| si:dkey-52118.4    | 71.15723876 | -0.133036639 | 0.2291282 | -0.580621 | 0.561496 | 0.948728 |
| wdr17              | 326.4159232 | 0.144923548  | 0.1323604 | 1.0949161 | 0.273553 | 0.838253 |
| neolb              | 605.5047605 | 0.065001316  | 0.1026472 | 0.6332496 | 0.526571 | 0.940512 |
| nkx2.4a            | 110.1678484 | -0.052018746 | 0.1927776 | -0.269838 | 0.787285 | 0.976596 |
| tmco3              | 112.2828764 | -0.213351414 | 0.1920413 | -1.110967 | 0.266583 | 0.832634 |
| dab2ipb            | 139.0766499 | 0.050360491  | 0.1826768 | 0.2756808 | 0.782793 | 0.97627  |
| als2a              | 15.84460044 | 0.292925174  | 0.4959733 | 0.5906067 | 0.554784 | 0.947449 |
| tacr3a             | 2.771377862 | 0.490503279  | 1.1713513 | 0.4187499 | 0.675399 | NA       |
| nanog              | 3.309441286 | -0.915968951 | 1.0767869 | -0.85065  | 0.394964 | NA       |
| sall2              | 299.7304683 | -0.053928983 | 0.1364549 | -0.395215 | 0.692684 | 0.96736  |
| hbegfa             | 930.2637858 | 0.291010325  | 0.1101311 | 2.6423987 | 0.008232 | 0.147048 |
| trafd1             | 358.4921648 | -0.069499889 | 0.1186664 | -0.585674 | 0.558094 | 0.948478 |
| TMEM8B             | 415.0991122 | -0.069808997 | 0.117671  | -0.593256 | 0.55301  | 0.947265 |
| or103-5            | 3.956921213 | 0.45238471   | 0.9787171 | 0.4622222 | 0.643922 | NA       |
| mrps11             | 447.146273  | 0.042944783  | 0.1127623 | 0.3808435 | 0.703319 | 0.968134 |
| fh                 | 1814.745593 | -0.013037583 | 0.076152  | -0.171205 | 0.864063 | 0.98601  |
| adgrbl1            | 1395.193598 | 0.049532124  | 0.0859445 | 0.5763271 | 0.564394 | 0.948739 |
| adgrf11            | 0 NA        | NA           | NA        | NA        | NA       | NA       |
| hdac5              | 54.06328023 | 0.144723611  | 0.3025969 | 0.4782719 | 0.632457 | 0.957356 |
| SAT2               | 325.9379505 | 0.064515529  | 0.1258956 | 0.5124526 | 0.608334 | 0.956718 |
| gprc5bb            | 40.54181325 | 0.285574443  | 0.3323808 | 0.8591785 | 0.390242 | 0.897284 |
| nanp               | 88.24594819 | 0.117735733  | 0.2121269 | 0.5550249 | 0.578878 | 0.951052 |
| lrrc38a            | 67.95709402 | 0.210279028  | 0.2460445 | 0.8546382 | 0.392751 | 0.897688 |
| nagpa              | 69.08574101 | 0.096847138  | 0.2393778 | 0.4045786 | 0.685787 | 0.966307 |
| si:dkey-188i13.10  | 15.89332082 | -0.559361707 | 0.5058521 | -1.105781 | 0.268821 | 0.834131 |
| tbcl1d4            | 222.999192  | 0.03431267   | 0.1401966 | 0.2447468 | 0.806652 | 0.980254 |
| igdcc3             | 903.1278187 | -0.005205049 | 0.0917671 | -0.05672  | 0.954768 | 0.994543 |
| meltf              | 217.4049318 | -0.30081439  | 0.1452954 | -2.070365 | 0.038418 | 0.384454 |
| defb11             | 561.5335343 | -0.823239628 | 0.1269737 | -6.483543 | 8.96E-11 | 2.19E-08 |
| cxcl20             | 55.3483305  | -0.234130222 | 0.3027661 | -0.773304 | 0.439343 | 0.916082 |
| mylk5              | 559.5013822 | -0.084569738 | 0.1006005 | -0.840649 | 0.400545 | 0.90084  |
| zc3h6              | 36.31418209 | -0.058403141 | 0.3152169 | -0.185279 | 0.85301  | 0.985174 |
| bbs1               | 168.6980491 | 0.188004013  | 0.1649141 | 1.1400121 | 0.254281 | 0.823394 |
| zdhhc22            | 80.73826111 | 0.195029239  | 0.2234912 | 0.8726482 | 0.382855 | 0.895192 |
| fbxo25             | 586.7049825 | -0.286931925 | 0.0992402 | -2.891287 | 0.003837 | 0.084672 |
| si:ch1073-322p19.1 | 270.0975556 | -0.120834616 | 0.1321    | -0.914721 | 0.360338 | 0.885686 |
| ribc2              | 20.23607727 | 0.066954212  | 0.4471781 | 0.1497261 | 0.880981 | 0.988111 |
| lpcat3             | 572.7401946 | -0.376669163 | 0.1018065 | -3.699854 | 0.000216 | 0.009128 |
| si:dkey-59p5.2     | 0 NA        | NA           | NA        | NA        | NA       | NA       |
| crfb16             | 69.08985876 | 0.157169792  | 0.2353141 | 0.6679148 | 0.504188 | 0.935448 |
| rnf220b            | 159.5523557 | -0.058660617 | 0.1643664 | -0.356889 | 0.721175 | 0.969602 |
| adamts10           | 95.05137285 | 0.095469183  | 0.2115003 | 0.4513902 | 0.651708 | 0.960708 |
| cntnap5b           | 683.998521  | 0.03172752   | 0.0963941 | 0.3291439 | 0.742047 | 0.973154 |
| oacyl              | 68.57863414 | 0.421546729  | 0.2463723 | 1.7110149 | 0.087078 | 0.565361 |
| ymell1a            | 801.2779692 | -0.011933874 | 0.107641  | -0.110867 | 0.911722 | 0.991066 |
| BX908780.1         | 0 NA        | NA           | NA        | NA        | NA       | NA       |
| si:dkey-56e3.3     | 128.838038  | -0.208706734 | 0.1929321 | -1.081763 | 0.279358 | 0.842882 |
| inpp4b             | 465.9331223 | -0.016254691 | 0.110794  | -0.146711 | 0.88336  | 0.988706 |

|                    |              |               |            |            |           |           |
|--------------------|--------------|---------------|------------|------------|-----------|-----------|
| zgc:195212         | 3. 675044508 | 1. 148340064  | 1. 0460035 | 1. 0978357 | 0. 272276 | NA        |
| si:dkey-100n19. 2  | 10. 79588647 | -0. 016608095 | 0. 606182  | -0. 027398 | 0. 978142 | NA        |
| p4htm              | 215. 062823  | 0. 039643659  | 0. 1419591 | 0. 2792611 | 0. 780044 | 0. 976146 |
| chd7               | 3564. 163161 | -0. 081958275 | 0. 0881407 | -0. 929858 | 0. 352445 | 0. 881179 |
| 11-Mar             | 6. 181786595 | -1. 032893152 | 0. 7910481 | -1. 305727 | 0. 191645 | NA        |
| vezt               | 117. 1098939 | 0. 305124591  | 0. 1826528 | 1. 6705172 | 0. 094817 | 0. 585466 |
| tdrd12             | 2. 170703437 | 0. 732118802  | 1. 3354977 | 0. 5481992 | 0. 583555 | NA        |
| amer2              | 1323. 441893 | 0. 008082272  | 0. 0779024 | 0. 1037487 | 0. 917369 | 0. 991585 |
| si:ch211-223a10. 1 | 82. 24442355 | -0. 023900002 | 0. 216667  | -0. 110308 | 0. 912165 | 0. 991119 |
| smad4a             | 335. 4310075 | -0. 058962563 | 0. 1477188 | -0. 399154 | 0. 68978  | 0. 966819 |
| slc46a2            | 25. 34023672 | 0. 493526211  | 0. 3981508 | 1. 239546  | 0. 215143 | 0. 78275  |
| tet1               | 12. 60715235 | 0. 235744343  | 0. 5380183 | 0. 4381716 | 0. 661262 | 0. 964234 |
| pimr74             | 1. 959800294 | -1. 556886293 | 1. 4551202 | -1. 069937 | 0. 284648 | NA        |
| wdr11              | 398. 4883382 | 0. 027703813  | 0. 118167  | 0. 2344463 | 0. 814639 | 0. 981081 |
| zgc:172133         | 2. 457095745 | -0. 206129555 | 1. 2111562 | -0. 170192 | 0. 864859 | NA        |
| fam171a2a          | 851. 7331123 | 0. 055459949  | 0. 0899514 | 0. 6165544 | 0. 537529 | 0. 943336 |
| phrf1              | 735. 2210355 | 0. 070795706  | 0. 1092083 | 0. 6482633 | 0. 516815 | 0. 938543 |
| pik3cb             | 414. 259623  | -0. 032480969 | 0. 1130679 | -0. 287269 | 0. 773906 | 0. 975687 |
| timp2b             | 630. 1667853 | 0. 181304269  | 0. 127552  | 1. 4214145 | 0. 155196 | 0. 704997 |
| ankrd1a            | 33. 27727411 | 0. 301785701  | 0. 3352189 | 0. 9002647 | 0. 367979 | 0. 887482 |
| si:dkeyp-74a11. 1  | 111. 5026861 | 0. 067134364  | 0. 2033167 | 0. 330196  | 0. 741252 | 0. 973154 |
| plaua              | 10. 4945759  | 0. 382555117  | 0. 6315195 | 0. 6057693 | 0. 544668 | NA        |
| si:dkey-20i10. 7   | 123. 0095166 | -0. 390423098 | 0. 196058  | -1. 991365 | 0. 046441 | 0. 423579 |
| rapgef5a           | 20. 80698732 | 0. 049342013  | 0. 4412751 | 0. 1118169 | 0. 910969 | 0. 991059 |
| thsd1              | 2. 147944193 | -0. 244997877 | 1. 3020838 | -0. 188158 | 0. 850753 | NA        |
| si:dkeyp-14d3. 1   | 153. 0454783 | 0. 397671047  | 0. 1761638 | 2. 2573935 | 0. 023983 | 0. 299022 |
| tbc1d30            | 477. 7414854 | -0. 09247293  | 0. 1072248 | -0. 862421 | 0. 388456 | 0. 896271 |
| irs2b              | 862. 8221482 | -0. 122318841 | 0. 0924817 | -1. 322627 | 0. 185959 | 0. 75038  |
| kans11l            | 22. 57839349 | 0. 255330868  | 0. 411417  | 0. 6206133 | 0. 534854 | 0. 943336 |
| MRAS               | 10. 94345782 | 0. 041349268  | 0. 5904385 | 0. 0700315 | 0. 944169 | NA        |
| nitr4a             | 0. 365141898 | 1. 973577737  | 3. 3927314 | 0. 5817076 | 0. 560764 | NA        |
| myo15aa            | 102. 8367157 | -0. 588906788 | 0. 2123902 | -2. 772759 | 0. 005558 | 0. 111245 |
| tulp1a             | 484. 6400328 | 0. 034605493  | 0. 1178005 | 0. 2937636 | 0. 768939 | 0. 975687 |
| fam83c             | 6. 428202071 | 0. 206798224  | 0. 7530385 | 0. 2746184 | 0. 783609 | NA        |
| trnt1              | 287. 6779642 | -0. 132463392 | 0. 138731  | -0. 954822 | 0. 339668 | 0. 87805  |
| prxl2c             | 43. 7481202  | 0. 092182327  | 0. 291545  | 0. 3161856 | 0. 751862 | 0. 974458 |
| gsdf               | 10. 79824336 | -0. 02574103  | 0. 5878244 | -0. 04379  | 0. 965072 | NA        |
| kcnq2a             | 62. 4167605  | 0. 154337183  | 0. 2688859 | 0. 5739875 | 0. 565976 | 0. 948739 |
| zgc:174906         | 294. 4762177 | -0. 148504136 | 0. 1338976 | -1. 109088 | 0. 267392 | 0. 833191 |
| CABZ01071972. 1    | 2. 343401954 | 0. 880621204  | 1. 2998471 | 0. 6774806 | 0. 498101 | NA        |
| srfbp1             | 241. 0785855 | -0. 137808301 | 0. 1367793 | -1. 007523 | 0. 313683 | 0. 865132 |
| mrpl16             | 943. 8140266 | -0. 082075071 | 0. 1016204 | -0. 807664 | 0. 419284 | 0. 906406 |
| dock10             | 529. 3613508 | -0. 066707585 | 0. 1140719 | -0. 584785 | 0. 558692 | 0. 948478 |
| phox2ba            | 3. 143924992 | -0. 137077418 | 1. 0698043 | -0. 128133 | 0. 898044 | NA        |
| golga4             | 386. 3992344 | -0. 034548754 | 0. 1142372 | -0. 30243  | 0. 762324 | 0. 975374 |
| si:ch211-119d14. 3 | 19. 79378273 | -0. 539421762 | 0. 4288578 | -1. 25781  | 0. 20846  | 0. 775404 |
| tbc1d25            | 519. 4699576 | -0. 023292226 | 0. 1018836 | -0. 228616 | 0. 819167 | 0. 981594 |
| arhgap32a          | 402. 8179601 | 0. 250157604  | 0. 113077  | 2. 2122774 | 0. 026948 | 0. 316613 |
| lars2              | 187. 8429419 | -0. 18020987  | 0. 1533567 | -1. 175103 | 0. 239954 | 0. 808111 |
| ipp                | 140. 4753156 | 0. 084579346  | 0. 1888296 | 0. 4479137 | 0. 654215 | 0. 961305 |
| med1               | 359. 1994642 | 0. 049968055  | 0. 1180819 | 0. 4231645 | 0. 672175 | 0. 965257 |
| csfla              | 35. 08451366 | -0. 224346348 | 0. 3323018 | -0. 675128 | 0. 499594 | 0. 934006 |
| si:ch211-76123. 7  | 14. 59863671 | 0. 523718735  | 0. 5001808 | 1. 0470589 | 0. 295072 | 0. 851519 |
| tmem129            | 188. 4885703 | -0. 117483053 | 0. 1616926 | -0. 726583 | 0. 467482 | 0. 924328 |

|                   |             |              |           |           |          |          |
|-------------------|-------------|--------------|-----------|-----------|----------|----------|
| chfr              | 159.4832534 | -0.167170407 | 0.165825  | -1.008113 | 0.3134   | 0.865132 |
| si:ch73-138n13.1  | 797.7739577 | -0.082251218 | 0.0996494 | -0.825406 | 0.409141 | 0.901769 |
| brinp3b           | 169.916589  | 0.030808451  | 0.155125  | 0.1986041 | 0.842572 | 0.985174 |
| espl1             | 457.5884141 | -0.101555381 | 0.1098276 | -0.92468  | 0.355132 | 0.882321 |
| ftr29             | 1.316595017 | -3.843590041 | 1.8868985 | -2.036988 | 0.041651 | NA       |
| whrna             | 138.0231168 | 0.01281119   | 0.1862598 | 0.0687813 | 0.945164 | 0.993474 |
| mrm2              | 23.17201408 | -0.168921185 | 0.3933186 | -0.429477 | 0.667576 | 0.964736 |
| nck1b             | 750.6469302 | 0.083633889  | 0.0923851 | 0.9052747 | 0.36532  | 0.886795 |
| zgc:171501        | 15.69449878 | -0.074625323 | 0.4948224 | -0.150812 | 0.880124 | 0.987881 |
| sgsmlb            | 70.99412057 | 0.1259701    | 0.2407447 | 0.5232519 | 0.600799 | 0.956045 |
| kril              | 314.2124279 | 0.075486492  | 0.1296772 | 0.5821108 | 0.560492 | 0.948728 |
| slc9a6b           | 337.4065443 | -0.00956315  | 0.12211   | -0.078316 | 0.937577 | 0.99279  |
| gramd1ba          | 71.37304307 | 0.069290546  | 0.2428663 | 0.2853033 | 0.775412 | 0.975687 |
| L0017852.1        | 439.1067995 | -0.123185683 | 0.1191753 | -1.033651 | 0.301299 | 0.856944 |
| si:ch211-281g13.4 | 3.670459881 | 0.264020565  | 1.0757514 | 0.245429  | 0.806124 | NA       |
| spock2            | 2436.561939 | 0.030770885  | 0.0782715 | 0.3931301 | 0.694223 | 0.96736  |
| dguok             | 122.1595406 | 0.076594482  | 0.1796546 | 0.4263431 | 0.669858 | 0.965223 |
| cipca             | 222.259629  | -0.125817283 | 0.1411941 | -0.891094 | 0.372879 | 0.892868 |
| fbxo33            | 150.6337155 | -0.105427425 | 0.1684734 | -0.625781 | 0.531459 | 0.942358 |
| gpha2             | 2.130894036 | 0.243344004  | 1.3102391 | 0.1857249 | 0.852661 | NA       |
| adck5             | 158.8334808 | -0.106913726 | 0.1635786 | -0.653593 | 0.513374 | 0.93654  |
| BX571825.3        |             | 0 NA         | NA        | NA        | NA       | NA       |
| si:ch211-207k7.4  | 41.89755361 | 0.50229774   | 0.3099776 | 1.6204325 | 0.105139 | 0.613317 |
| zgc:175107        | 68.10976163 | 0.076192853  | 0.2347629 | 0.3245524 | 0.74552  | 0.974094 |
| pttgl             | 69.70408622 | -0.053297785 | 0.233528  | -0.228229 | 0.819469 | 0.981594 |
| MRPL49            | 229.7440779 | 0.100680138  | 0.1389947 | 0.7243452 | 0.468854 | 0.924328 |
| BX547992.1        | 0.488104098 | -2.415107183 | 2.7936704 | -0.864493 | 0.387317 | NA       |
| myom2a            | 5741.071916 | 0.344186297  | 0.1894405 | 1.8168568 | 0.069239 | 0.514556 |
| akap11            | 784.3160493 | 0.124141111  | 0.0927608 | 1.3382932 | 0.180801 | 0.741776 |
| sytl2b            | 104.0926052 | -0.603606617 | 0.204201  | -2.955943 | 0.003117 | 0.073687 |
| shc1              | 972.6357989 | 0.008404124  | 0.0850005 | 0.0988714 | 0.92124  | 0.992138 |
| vwa2              | 76.23282338 | 0.369856871  | 0.2259586 | 1.636835  | 0.101665 | 0.605756 |
| cgref1            | 206.5540078 | 0.149556137  | 0.1482883 | 1.0085497 | 0.313191 | 0.865069 |
| psmb5             | 2225.497697 | -0.066615094 | 0.0765349 | -0.870388 | 0.384088 | 0.895192 |
| naa25             | 957.5825877 | 0.030905013  | 0.0959379 | 0.3221358 | 0.74735  | 0.97419  |
| mkxa              | 363.6810395 | 0.171796029  | 0.1166496 | 1.4727526 | 0.140818 | 0.681252 |
| hdc               | 67.53340549 | 0.123459692  | 0.2465488 | 0.5007516 | 0.616546 | 0.95688  |
| soga3b            | 96.67142652 | -0.030132307 | 0.218045  | -0.138193 | 0.890088 | 0.989291 |
| pik3ca            | 59.69784218 | -0.056896238 | 0.2663845 | -0.213587 | 0.830869 | 0.982994 |
| ptpn20            | 146.4056453 | 0.255675577  | 0.1711384 | 1.4939698 | 0.135184 | 0.670689 |
| kmt5c             | 530.7589473 | 0.007731043  | 0.103418  | 0.0747553 | 0.940409 | 0.992857 |
| mss51             | 61.35787616 | 0.334282757  | 0.2567745 | 1.3018535 | 0.192966 | 0.756795 |
| shisa3            | 423.5581132 | 0.067237477  | 0.1087345 | 0.618364  | 0.536335 | 0.943336 |
| vwal              | 395.0246078 | 0.069350569  | 0.115262  | 0.6016776 | 0.547389 | 0.945526 |
| znf989            | 27.28398161 | 0.50813468   | 0.3867667 | 1.3138015 | 0.188913 | 0.753954 |
| nlrp15            | 0.158795395 | 0.967652056  | 4.0804729 | 0.2371421 | 0.812547 | NA       |
| si:dkey-63d15.12  | 29.9630355  | 0.169448386  | 0.3749597 | 0.451911  | 0.651333 | 0.960708 |
| zgc:173587        | 19.22837483 | 0.336316464  | 0.4559131 | 0.7376766 | 0.460711 | 0.921978 |
| si:ch211-267e7.3  | 213.7489707 | -0.329512434 | 0.1417421 | -2.324733 | 0.020086 | 0.266389 |
| si:ch211-26b3.4   | 1059.224529 | 0.12066997   | 0.0844841 | 1.4283158 | 0.153201 | 0.702508 |
| ccdc160           | 65.79901607 | -0.171375551 | 0.2447535 | -0.700197 | 0.483804 | 0.929461 |
| smim1             | 17.72385669 | 0.82108868   | 0.4661158 | 1.761555  | 0.078145 | 0.54467  |
| cdnf              | 128.9742616 | 0.557205099  | 0.1903166 | 2.9277803 | 0.003414 | 0.078133 |
| si:dkey-40c23.2   | 9.177940723 | -0.350571941 | 0.6376523 | -0.549785 | 0.582467 | NA       |



|                   |             |              |           |           |          |          |
|-------------------|-------------|--------------|-----------|-----------|----------|----------|
| si:ch211-132g1.7  | 13.62633734 | 0.196328215  | 0.5631225 | 0.3486421 | 0.727358 | 0.970402 |
| si:dkey-108k21.10 | 14.21177183 | 0.826098883  | 0.5711492 | 1.4463802 | 0.148071 | 0.695805 |
| phf12b            | 778.0898502 | 0.154845671  | 0.0899351 | 1.7217494 | 0.085115 | 0.560519 |
| ccdc136b          | 346.0476189 | 0.126794067  | 0.1256802 | 1.0088625 | 0.313041 | 0.865017 |
| cd37              | 15.10668674 | 0.213735773  | 0.5344711 | 0.3999014 | 0.689229 | 0.966763 |
| si:ch211-120k19.1 | 37.72501015 | 0.576261132  | 0.3354235 | 1.7180105 | 0.085795 | 0.562501 |
| cpz               | 179.5012924 | 0.56214331   | 0.1581668 | 3.5541172 | 0.000379 | 0.014176 |
| cln8              | 54.5443517  | 0.110709604  | 0.265595  | 0.4168361 | 0.676798 | 0.965257 |
| pwwp2a            | 403.4468353 | 0.036408924  | 0.1248675 | 0.2915804 | 0.770607 | 0.975687 |
| zgc:174154        | 0.157187365 | -0.955901296 | 4.0804729 | -0.234262 | 0.814781 | NA       |
| lyrm9             | 40.8316031  | -0.145802244 | 0.300397  | -0.485365 | 0.627417 | 0.957354 |
| pigu              | 137.7002128 | 0.038516506  | 0.174434  | 0.2208084 | 0.825242 | 0.982196 |
| slc4a11           | 75.1236483  | 0.225422804  | 0.2307442 | 0.9769381 | 0.3286   | 0.872945 |
| zbtb24            | 48.21702988 | -0.63756405  | 0.2977587 | -2.141211 | 0.032257 | 0.349508 |
| cpnel             | 1642.7156   | 0.013663853  | 0.0786584 | 0.1737113 | 0.862092 | 0.985841 |
| zgc:163061        | 35.54384532 | 0.35882223   | 0.3296458 | 1.0885086 | 0.276371 | 0.839541 |
| snphb             | 14.91176571 | 0.401676934  | 0.4930944 | 0.8146046 | 0.415299 | 0.906237 |
| BX649498.1        | 39.95447541 | -0.104711334 | 0.3183218 | -0.328948 | 0.742195 | 0.973154 |
| si:ch73-236c18.3  | 0.81823394  | 3.165585784  | 2.3439761 | 1.3505196 | 0.176849 | NA       |
| zfhx4             | 2544.052541 | -0.001595649 | 0.0784493 | -0.02034  | 0.983772 | 0.996944 |
| chd8              | 2016.799794 | 0.066736485  | 0.086984  | 0.7672267 | 0.442947 | 0.916336 |
| si:dkey-89b17.4   | 2476.446093 | -0.013380093 | 0.0719027 | -0.186086 | 0.852377 | 0.985174 |
| cdh5              | 488.7655126 | -0.127691551 | 0.1063349 | -1.200843 | 0.229812 | 0.79764  |
| aifm5             | 52.7965188  | 0.364930252  | 0.2748684 | 1.3276544 | 0.184292 | 0.747376 |
| adamts17          | 15.9290023  | 0.369123916  | 0.4780579 | 0.7721323 | 0.440036 | 0.916082 |
| luzpl             | 709.9364624 | -0.0412075   | 0.0940919 | -0.43795  | 0.661423 | 0.964234 |
| apcddl1           | 233.6680527 | 0.141978024  | 0.1488855 | 0.9536057 | 0.340283 | 0.87805  |
| ppmlg             | 1336.148655 | -0.046608512 | 0.0931129 | -0.500559 | 0.616682 | 0.95688  |
| kmt2cb            | 898.7299747 | -0.098844328 | 0.0919569 | -1.074899 | 0.28242  | 0.843666 |
| si:dkey-76k16.5   | 11.54929853 | -0.240637679 | 0.5560292 | -0.432779 | 0.665175 | 0.964736 |
| si:ch211-119o8.4  | 1.150397644 | 2.462741491  | 1.944031  | 1.2668222 | 0.205219 | NA       |
| fam13a            | 862.6577683 | -0.147262    | 0.0919434 | -1.601659 | 0.109231 | 0.623132 |
| lzts1             | 129.0746932 | -0.215563256 | 0.1814563 | -1.187962 | 0.234848 | 0.80358  |
| fbx120            | 39.15469136 | -0.011630327 | 0.3092098 | -0.037613 | 0.969996 | 0.996315 |
| gpbpl11           | 1362.574987 | -0.041989723 | 0.0953614 | -0.440322 | 0.659704 | 0.963227 |
| ide               | 1459.256544 | 0.087804004  | 0.0803432 | 1.0928622 | 0.274454 | 0.839136 |
| bicd2             | 22.89805904 | 1.15960704   | 0.4168169 | 2.7820539 | 0.005402 | 0.109079 |
| lrch2             | 26.8351111  | -0.005030911 | 0.3757448 | -0.013389 | 0.989317 | 0.997589 |
| itfgl             | 281.1486329 | -0.026026233 | 0.1331762 | -0.195427 | 0.845059 | 0.985174 |
| tnfaip812a        | 40.93592025 | 0.102696107  | 0.3238092 | 0.31715   | 0.75113  | 0.97419  |
| trim71            | 962.8687482 | -0.030782051 | 0.0883193 | -0.348531 | 0.727441 | 0.970402 |
| flrtl1b           | 427.1924936 | -0.10412418  | 0.1111903 | -0.93645  | 0.349041 | 0.880195 |
| ambn              | 0.492230656 | -0.896181115 | 2.8626633 | -0.313059 | 0.754236 | NA       |
| cdc25d            | 24.84148799 | 0.031478945  | 0.3864459 | 0.0814576 | 0.935078 | 0.992702 |
| si:dkeyp-41f9.3   | 47.72009065 | 0.653660498  | 0.2916815 | 2.2410081 | 0.025026 | 0.305655 |
| RNF5              | 171.6790175 | 0.202809748  | 0.1612236 | 1.2579408 | 0.208413 | 0.775404 |
| mical2a           | 46.14510225 | -0.054778332 | 0.2960395 | -0.185037 | 0.8532   | 0.985174 |
| ercc6             | 532.983949  | 0.050505086  | 0.1078882 | 0.4681241 | 0.639696 | 0.959994 |
| apoc4             | 1.852751589 | 0.34253551   | 1.4966504 | 0.2288681 | 0.818971 | NA       |
| polr2k            | 198.9385968 | -0.071690454 | 0.1966765 | -0.36451  | 0.715478 | 0.96909  |
| slc36a1           | 200.7870173 | 0.226416592  | 0.1502161 | 1.5072729 | 0.131741 | 0.66523  |
| cenpo             | 46.4087531  | -0.103825639 | 0.2814693 | -0.36887  | 0.712224 | 0.969006 |
| birc5a            | 207.3375132 | -0.056762829 | 0.1487335 | -0.381641 | 0.702728 | 0.968134 |
| zgc:174938        | 181.1337719 | 0.035877137  | 0.1845415 | 0.1944123 | 0.845853 | 0.985174 |

|                    |             |              |           |           |          |          |
|--------------------|-------------|--------------|-----------|-----------|----------|----------|
| bend5              | 13.20077855 | -0.520064729 | 0.5692933 | -0.913527 | 0.360966 | 0.885686 |
| lrigl              | 804.4836642 | -0.013653482 | 0.0932773 | -0.146375 | 0.883625 | 0.988706 |
| zgc:172090         |             | 0 NA         | NA        | NA        | NA       | NA       |
| si:dkey-197i20.6   | 85.26105709 | -0.372285972 | 0.2337912 | -1.592387 | 0.111298 | 0.627048 |
| rad9b              | 0.31598276  | 0.005883445  | 3.3523626 | 0.001755  | 0.9986   | NA       |
| si:ch211-225k7.4   | 1.794442136 | -0.254656755 | 1.5328234 | -0.166136 | 0.86805  | NA       |
| si:ch211-89o9.6    | 229.8801895 | -0.025289012 | 0.1456016 | -0.173686 | 0.862112 | 0.985841 |
| steap3             | 6.499320263 | 1.376334362  | 0.7800598 | 1.7643959 | 0.077665 | NA       |
| ifi35              | 32.7658148  | -0.038820377 | 0.3352172 | -0.115807 | 0.907806 | 0.990702 |
| sema5bb            | 93.88366834 | -0.201694691 | 0.2007207 | -1.004852 | 0.314968 | 0.866054 |
| vps26c             | 425.9641645 | -0.109069522 | 0.1125569 | -0.969017 | 0.332537 | 0.874653 |
| si:ch1073-429i10.1 | 35.68964803 | -0.272807655 | 0.3450871 | -0.790547 | 0.429208 | 0.911406 |
| tsc22d3            | 1683.855045 | 0.034015782  | 0.0755471 | 0.4502592 | 0.652524 | 0.960708 |
| rereb              | 627.3466557 | 0.109027365  | 0.0991946 | 1.0991264 | 0.271713 | 0.836643 |
| tlr4al             |             | 0 NA         | NA        | NA        | NA       | NA       |
| pms2               | 95.77102152 | 0.274280012  | 0.2022794 | 1.3559462 | 0.175116 | 0.735545 |
| arhgap21b          | 1655.387994 | -0.060146965 | 0.074191  | -0.810705 | 0.417535 | 0.906237 |
| fncl7b             | 131.4846911 | 0.067432274  | 0.1797716 | 0.3750996 | 0.707586 | 0.968664 |
| mrpl17             | 337.8773217 | -0.074798852 | 0.1184571 | -0.631442 | 0.527751 | 0.941629 |
| orc6               | 104.8956917 | 0.327071517  | 0.2077243 | 1.5745461 | 0.115361 | 0.636838 |
| tlr7               | 148.176082  | -0.003986998 | 0.1849733 | -0.021554 | 0.982803 | 0.996944 |
| anapc1             | 417.2065998 | -0.156421406 | 0.1151936 | -1.357901 | 0.174495 | 0.734611 |
| adoralb            | 16.1474913  | -0.088213461 | 0.4718472 | -0.186953 | 0.851697 | 0.985174 |
| si:ch73-38013.2    | 76.09933728 | 0.029505905  | 0.227393  | 0.1297573 | 0.896758 | 0.989971 |
| nkpd1              | 28.44954623 | -0.161601101 | 0.3761103 | -0.429664 | 0.66744  | 0.964736 |
| zswim2             | 5.438315747 | 0.569765357  | 0.845231  | 0.6740943 | 0.500251 | NA       |
| si:ch211-106h4.9   | 290.4845181 | -0.026441304 | 0.1364262 | -0.193814 | 0.846322 | 0.985174 |
| nid2a              | 1681.238188 | 0.119456578  | 0.0925    | 1.2914224 | 0.196557 | 0.761835 |
| ndufb3             | 1310.615638 | -0.013539053 | 0.0957951 | -0.141333 | 0.887606 | 0.989291 |
| shox2              | 405.3088452 | -0.008958635 | 0.1169583 | -0.076597 | 0.938944 | 0.992857 |
| si:dkey-27p23.3    | 16.90984995 | 0.204844796  | 0.4971745 | 0.4120179 | 0.680326 | 0.965431 |
| TMEM236            | 5.153577458 | -0.885753621 | 0.8594811 | -1.030568 | 0.302744 | NA       |
| rpz5               | 378.7779755 | 0.027430449  | 0.1173615 | 0.2337262 | 0.815198 | 0.981175 |
| il2rb              | 9.594604317 | 0.302337712  | 0.612289  | 0.4937827 | 0.62146  | NA       |
| zdhhc6             | 468.8246747 | -0.018973217 | 0.1071067 | -0.177143 | 0.859396 | 0.985773 |
| si:dkey-242e21.3   | 5.72082136  | -0.608338741 | 0.8404443 | -0.72383  | 0.46917  | NA       |
| cep152             | 126.7075161 | -0.065125055 | 0.1777077 | -0.366473 | 0.714012 | 0.96909  |
| dhrs7b             | 133.5457332 | -0.149158015 | 0.178039  | -0.837783 | 0.402153 | 0.90084  |
| map11c3c1          | 183.6600125 | 0.057864841  | 0.1658713 | 0.3488538 | 0.727199 | 0.970402 |
| dnph1              | 83.50587649 | -0.157144888 | 0.236172  | -0.665383 | 0.505805 | 0.935724 |
| zgc:174698         | 3.276395311 | -2.481686758 | 1.2368187 | -2.006508 | 0.044802 | NA       |
| taf4b              | 2.291345534 | -2.593707058 | 1.4999462 | -1.7292   | 0.083773 | NA       |
| zyx                | 397.0909119 | 0.080539931  | 0.1183936 | 0.6802727 | 0.496332 | 0.932415 |
| cxxc5b             | 608.295941  | 0.083280287  | 0.0994929 | 0.8370475 | 0.402566 | 0.90084  |
| zgc:165518         | 15.1697578  | 0.064705017  | 0.4872418 | 0.1327986 | 0.894353 | 0.989689 |
| mrpl47             | 216.1665932 | -0.048429464 | 0.1522772 | -0.318035 | 0.750458 | 0.97419  |
| ovgpl              | 5.827671487 | -0.577192554 | 0.7986529 | -0.722708 | 0.469859 | NA       |
| zfyvel6            | 135.1411661 | -0.145746961 | 0.1823943 | -0.799076 | 0.424246 | 0.908243 |
| NCKAP1L            | 57.88904003 | -0.52067501  | 0.2650489 | -1.964449 | 0.049478 | 0.436093 |
| myo18aa            | 636.6409554 | 0.283568729  | 0.0999016 | 2.8384812 | 0.004533 | 0.09614  |
| mril               | 44.53883794 | -0.090842644 | 0.3013469 | -0.301455 | 0.763067 | 0.975374 |
| gig2e              | 15.44190121 | 0.284710449  | 0.4874642 | 0.5840644 | 0.559177 | 0.948478 |
| ywhabb             | 5622.765066 | -0.069688137 | 0.0875447 | -0.796029 | 0.426015 | 0.909755 |
| samd4a             | 264.9029571 | -0.190312844 | 0.1329068 | -1.431928 | 0.152165 | 0.701049 |

|                    |             |              |           |           |          |          |
|--------------------|-------------|--------------|-----------|-----------|----------|----------|
| si:ch1073-287p18.1 | 44.96180756 | -0.049599013 | 0.315577  | -0.157169 | 0.875111 | 0.987881 |
| sccpdha.1          | 142.2022141 | 0.073035643  | 0.1830814 | 0.3989244 | 0.689949 | 0.966857 |
| sdhb               | 2634.274005 | 0.03433447   | 0.0873088 | 0.3932532 | 0.694132 | 0.96736  |
| foxj3              | 718.7702966 | -0.04529386  | 0.0978835 | -0.462732 | 0.643556 | 0.959994 |
| si:ch211-57m13.5   | 0.498553709 | 0.926267934  | 2.6786929 | 0.345791  | 0.7295   | NA       |
| hmgxb4a            | 234.2666714 | 0.044568907  | 0.1421982 | 0.3134281 | 0.753955 | 0.975056 |
| si:ch73-190m4.1    | 0.521188103 | -2.493476766 | 2.9577741 | -0.843025 | 0.399215 | NA       |
| si:dkey-79f11.5    | 0.833717353 | 0.587279662  | 2.212766  | 0.2654052 | 0.790697 | NA       |
| prex1              | 441.8146824 | 0.155719814  | 0.1118343 | 1.392415  | 0.163797 | 0.71945  |
| no17               | 324.8528552 | 0.224702141  | 0.1212467 | 1.8532643 | 0.063844 | 0.493997 |
| usp38              | 368.3827557 | -0.071033552 | 0.1198799 | -0.592539 | 0.55349  | 0.947265 |
| calm14a            | 76.55992321 | -0.830419427 | 0.2266993 | -3.663087 | 0.000249 | 0.010194 |
| grin3a             | 105.0393291 | 0.215999564  | 0.2018654 | 1.0700177 | 0.284611 | 0.844955 |
| slc41a2a           | 195.8110063 | 0.022088547  | 0.1622383 | 0.1361488 | 0.891704 | 0.989291 |
| si:dkey-219c3.2    | 173.3480985 | 0.04920317   | 0.1643436 | 0.299392  | 0.764641 | 0.975374 |
| kirrel3a           | 301.8050971 | 0.073196419  | 0.1356721 | 0.5395098 | 0.589535 | 0.953498 |
| traj39             |             | 0 NA         | NA        | NA        | NA       | NA       |
| kcnt2              | 25.96470026 | 0.210184644  | 0.3939771 | 0.5334946 | 0.593691 | 0.954434 |
| asphd1             | 239.2275841 | 0.14683988   | 0.142644  | 1.029415  | 0.303285 | 0.85729  |
| slc12a5a           | 33.73734396 | -0.015574656 | 0.3798299 | -0.041004 | 0.967292 | 0.996315 |
| mettl24            | 57.15021352 | 0.164237321  | 0.2577944 | 0.6370865 | 0.524069 | 0.939336 |
| dok2               | 26.75722258 | 0.383931501  | 0.3876652 | 0.9903688 | 0.321994 | 0.869586 |
| arhgef2            | 197.6469813 | -0.372868421 | 0.1534612 | -2.429725 | 0.01511  | 0.225333 |
| CU694442.1         | 3.439523094 | 0.941819321  | 1.1885374 | 0.7924188 | 0.428117 | NA       |
| plxnb1a            | 1027.473912 | -0.039461774 | 0.0884266 | -0.446266 | 0.655405 | 0.961632 |
| virma              | 1197.073034 | -0.007508077 | 0.0985277 | -0.076203 | 0.939258 | 0.992857 |
| dlec1              | 65.49401874 | 0.1270419    | 0.2529208 | 0.5022991 | 0.615457 | 0.95688  |
| msh4               | 2.862823644 | 1.24171776   | 1.2018815 | 1.0331449 | 0.301536 | NA       |
| f7i                | 112.9716408 | 0.071577072  | 0.2042534 | 0.3504328 | 0.726014 | 0.970402 |
| taarl4j            |             | 0 NA         | NA        | NA        | NA       | NA       |
| kiss1              | 2.033631938 | 0.014997283  | 1.3735429 | 0.0109187 | 0.991288 | NA       |
| syts               | 276.8402844 | 0.098600335  | 0.1370409 | 0.7194955 | 0.471836 | 0.924838 |
| slc7a8a            | 2086.816582 | 0.014764375  | 0.0777734 | 0.1898383 | 0.849436 | 0.985174 |
| lyvela             | 179.036331  | -0.037545796 | 0.1733621 | -0.216574 | 0.82854  | 0.982721 |
| si:dkey-182i3.8    | 69.97636887 | 0.280075394  | 0.2382853 | 1.1753786 | 0.239843 | 0.808111 |
| si:dkey-1d7.3      | 138.7316515 | 0.265101279  | 0.1716824 | 1.5441379 | 0.122555 | 0.650752 |
| pigt               | 40.61585637 | -0.003148498 | 0.3003997 | -0.010481 | 0.991638 | 0.997679 |
| kcnip2             | 6.430837696 | -0.386923491 | 0.7446303 | -0.519618 | 0.60333  | NA       |
| prrl2b             | 2281.318886 | -0.088380774 | 0.0932622 | -0.947659 | 0.343303 | 0.878434 |
| gnal2              | 330.8069573 | 0.076917992  | 0.1250673 | 0.6150128 | 0.538546 | 0.943336 |
| oafa               | 156.9178411 | 0.179169157  | 0.1773782 | 1.0100969 | 0.312449 | 0.864401 |
| sh3kbp1            | 656.229181  | -0.029652709 | 0.1013057 | -0.292705 | 0.769747 | 0.975687 |
| cx34.4             | 58.56637739 | -0.03153253  | 0.2593965 | -0.121561 | 0.903247 | 0.990121 |
| adgre10            | 13.91481519 | 0.324268076  | 0.5394884 | 0.6010659 | 0.547796 | 0.945706 |
| pgsl               | 122.2323059 | 0.224756344  | 0.1886014 | 1.1917001 | 0.233379 | 0.801883 |
| fam155a            | 30.0046712  | 0.56807409   | 0.3459032 | 1.6422923 | 0.100529 | 0.602933 |
| mcf21a             | 1006.70979  | 0.085943738  | 0.0861676 | 0.9974025 | 0.318569 | 0.867746 |
| igsf9a             | 375.2969696 | -0.253727695 | 0.1234216 | -2.055781 | 0.039804 | 0.391511 |
| cdcp2              | 32.62097651 | -0.241585431 | 0.3491676 | -0.69189  | 0.489007 | 0.931926 |
| mrtfaa             | 29.9601389  | -0.113355091 | 0.3841867 | -0.295052 | 0.767954 | 0.975687 |
| triobpa            | 78.72596952 | -0.224332336 | 0.2223086 | -1.009103 | 0.312925 | 0.864884 |
| si:ch211-39k3.2    | 127.802539  | -0.044014415 | 0.2170285 | -0.202805 | 0.839288 | 0.984979 |
| bub3               | 473.1527511 | -0.061629075 | 0.1189211 | -0.518235 | 0.604294 | 0.95651  |
| shprh              | 134.0270334 | 0.116860264  | 0.1747889 | 0.6685794 | 0.503764 | 0.935314 |

|                     |              |               |            |            |           |           |
|---------------------|--------------|---------------|------------|------------|-----------|-----------|
| vwa5b2              | 22. 57505048 | 0. 006146747  | 0. 4170022 | 0. 0147403 | 0. 988239 | 0. 997369 |
| herc3               | 236. 2130399 | -0. 057480403 | 0. 1364807 | -0. 421161 | 0. 673637 | 0. 965257 |
| sall1b              | 44. 24820542 | 0. 117939311  | 0. 3097241 | 0. 3807883 | 0. 70336  | 0. 968134 |
| bag6                | 1319. 345416 | 0. 036880048  | 0. 0920273 | 0. 4007511 | 0. 688603 | 0. 966672 |
| spata7              | 231. 3158571 | 0. 141002828  | 0. 1460439 | 0. 9654827 | 0. 334303 | 0. 875332 |
| si:ch1073-186i23. 1 | 270. 9885772 | -0. 026102211 | 0. 1383914 | -0. 188612 | 0. 850397 | 0. 985174 |
| chad1b              | 266. 470045  | 0. 08447535   | 0. 1295287 | 0. 6521748 | 0. 514288 | 0. 937198 |
| rflx1b              | 357. 5262774 | -0. 081498174 | 0. 1442679 | -0. 564909 | 0. 572136 | 0. 949494 |
| si:ch211-266g18. 9  | 15. 65168002 | -0. 19553504  | 0. 5046023 | -0. 387503 | 0. 698384 | 0. 967998 |
| slc35f3a            | 7. 818979746 | 0. 429168984  | 0. 6762209 | 0. 6346579 | 0. 525652 | NA        |
| kcnj14              | 2. 626818908 | -0. 743954913 | 1. 1538115 | -0. 64478  | 0. 51907  | NA        |
| si:ch73-70k4. 1     | 9. 664426499 | 0. 102833278  | 0. 6520894 | 0. 1576981 | 0. 874695 | NA        |
| zgc:66472           | 190. 1650938 | 0. 012800785  | 0. 1569966 | 0. 0815354 | 0. 935016 | 0. 992702 |
| cacna1db            | 47. 0474139  | 0. 17530673   | 0. 286304  | 0. 6123098 | 0. 540333 | 0. 944448 |
| ccser1              | 16. 87853567 | -0. 626236161 | 0. 4694653 | -1. 333935 | 0. 182225 | 0. 74454  |
| txnr2. 2            | 25. 26558674 | -0. 125900069 | 0. 4027152 | -0. 312628 | 0. 754563 | 0. 975114 |
| zgc:171558          | 652. 4893505 | 0. 096772608  | 0. 1006842 | 0. 9611501 | 0. 336477 | 0. 876088 |
| igfnl. 2            | 17. 59741785 | 0. 518506928  | 0. 5095136 | 1. 0176507 | 0. 308844 | 0. 861088 |
| hivep3a             | 41. 64295494 | 0. 07257499   | 0. 3186819 | 0. 2277349 | 0. 819852 | 0. 981594 |
| si:dkey-219c10. 4   | 29. 48185789 | -0. 215372935 | 0. 3584374 | -0. 600866 | 0. 547929 | 0. 945768 |
| adamts2             | 131. 6950089 | 0. 394708207  | 0. 1858942 | 2. 1232953 | 0. 033729 | 0. 357045 |
| acs15               | 359. 6460788 | -0. 470002347 | 0. 1422311 | -3. 304497 | 0. 000951 | 0. 02977  |
| si:ch73-21112. 3    | 0. 491320158 | 0. 8528132    | 2. 8656354 | 0. 2976    | 0. 766008 | NA        |
| cox15               | 375. 8521044 | -0. 104574212 | 0. 1189474 | -0. 879164 | 0. 379313 | 0. 895192 |
| sugpl               | 341. 1733698 | -0. 107476955 | 0. 1231348 | -0. 87284  | 0. 38275  | 0. 895192 |
| FRMD5               | 81. 7129888  | 0. 07386959   | 0. 223875  | 0. 3299591 | 0. 741431 | 0. 973154 |
| si:ch211-250c4. 5   | 6. 891903349 | 0. 166012865  | 0. 7528372 | 0. 2205163 | 0. 825469 | NA        |
| slco4a1             | 37. 63166136 | 0. 054585448  | 0. 3145958 | 0. 1735098 | 0. 862251 | 0. 985841 |
| prkd1               | 161. 0776146 | 0. 02533835   | 0. 1675668 | 0. 1512135 | 0. 879807 | 0. 987881 |
| mbd2                | 133. 1982523 | 0. 032151272  | 0. 1789694 | 0. 1796468 | 0. 85743  | 0. 985703 |
| serpinh1a           | 551. 4502682 | 0. 397874136  | 0. 1075821 | 3. 6983315 | 0. 000217 | 0. 00915  |
| faxca               | 57. 44034138 | 0. 113679103  | 0. 2834363 | 0. 4010746 | 0. 688365 | 0. 966672 |
| si:dkey-266f7. 9    | 22. 31348741 | -0. 530614046 | 0. 4068251 | -1. 30428  | 0. 192138 | 0. 756673 |
| cdh24a              | 45. 53288835 | -0. 098790844 | 0. 3107531 | -0. 317908 | 0. 750555 | 0. 97419  |
| vav3b               | 44. 64169394 | 0. 022598122  | 0. 2880668 | 0. 0784475 | 0. 937472 | 0. 99279  |
| mhcluba             | 3. 640429303 | -0. 281285031 | 1. 0527066 | -0. 267202 | 0. 789314 | NA        |
| plekhg4             | 1101. 737602 | 0. 049502346  | 0. 0875599 | 0. 565354  | 0. 571833 | 0. 949494 |
| BX324188. 1         | 3. 48107542  | 2. 090908957  | 1. 1343628 | 1. 8432454 | 0. 065293 | NA        |
| csrnp2              | 6. 191390234 | -0. 731952439 | 0. 8312375 | -0. 880558 | 0. 378557 | NA        |
| si:dkey-258f14. 3   | 43. 73470492 | 0. 038100468  | 0. 3022023 | 0. 126076  | 0. 899672 | 0. 990121 |
| slc45a3             | 26. 10955027 | -0. 180917418 | 0. 3817081 | -0. 473968 | 0. 635523 | 0. 958142 |
| prr5a               | 82. 60766331 | 0. 198324452  | 0. 2180891 | 0. 9093736 | 0. 363153 | 0. 885944 |
| tmem125b            | 98. 82128074 | 0. 259003596  | 0. 2033012 | 1. 2739896 | 0. 202667 | 0. 769545 |
| hsbp111             | 33. 05114136 | -0. 056432471 | 0. 3592771 | -0. 157072 | 0. 875188 | 0. 987881 |
| arpc2               | 2907. 468963 | -0. 095609652 | 0. 0775921 | -1. 232209 | 0. 217871 | 0. 785305 |
| acap3a              | 152. 9339325 | 0. 050282144  | 0. 1669552 | 0. 3011715 | 0. 763284 | 0. 975374 |
| clic5a              | 171. 7875018 | 0. 268343841  | 0. 1557732 | 1. 7226571 | 0. 084951 | 0. 560519 |
| znfl1b              | 1. 466888559 | 0. 924909503  | 1. 8132884 | 0. 510073  | 0. 61     | NA        |
| pip5klca            | 158. 5874538 | -0. 070400489 | 0. 1654833 | -0. 425423 | 0. 670528 | 0. 965257 |
| osbp15              | 178. 7192687 | -0. 204650734 | 0. 1555959 | -1. 315271 | 0. 188419 | 0. 753276 |
| ppp2r3b             | 188. 2613152 | 0. 015281757  | 0. 1699322 | 0. 0899286 | 0. 928344 | 0. 992702 |
| piezo2a. 2          | 249. 4523833 | -0. 058719146 | 0. 1331016 | -0. 44116  | 0. 659097 | 0. 962839 |
| umad1               | 49. 52134429 | 0. 486276584  | 0. 2774933 | 1. 7523906 | 0. 079707 | 0. 548406 |
| twist1b             | 146. 8822576 | -0. 096203159 | 0. 1707409 | -0. 563445 | 0. 573132 | 0. 949762 |

|                   |             |              |           |           |          |          |
|-------------------|-------------|--------------|-----------|-----------|----------|----------|
| si:ch211-149b19.3 | 353.6775022 | 0.026045886  | 0.1268322 | 0.205357  | 0.837293 | 0.984645 |
| mab2113           | 38.59315963 | 0.15997541   | 0.3110165 | 0.5143631 | 0.606998 | 0.956718 |
| ERC1              | 30.7744344  | 0.350188353  | 0.3907361 | 0.8962273 | 0.370131 | 0.889876 |
| si:ch73-139e5.2   | 15.47843907 | -0.132188083 | 0.4901697 | -0.269678 | 0.787408 | 0.976596 |
| tmem69            | 139.8378956 | 0.06218506   | 0.1688974 | 0.3681824 | 0.712737 | 0.96909  |
| ftr70             | 0.182570949 | 0.967652056  | 4.0804729 | 0.2371421 | 0.812547 | NA       |
| pappa2            | 225.2097476 | 0.392654634  | 0.1532305 | 2.5625094 | 0.010392 | 0.175332 |
| dgkzb             | 138.5323803 | 0.066068202  | 0.1778978 | 0.3713829 | 0.710352 | 0.968985 |
| kif5c             | 238.2058284 | -0.072852339 | 0.1408487 | -0.517238 | 0.60499  | 0.95651  |
| cacnb3b           | 15.24041243 | -0.132819721 | 0.4883735 | -0.271963 | 0.78565  | 0.97627  |
| arll5a            | 42.76802702 | 0.578817677  | 0.2958452 | 1.9564881 | 0.050408 | 0.439877 |
| wwc1              | 18.58732102 | -0.340413495 | 0.4634061 | -0.73459  | 0.462589 | 0.922698 |
| si:dkeyp-73d8.9   | 3.294968638 | 1.266007846  | 1.1343776 | 1.1160374 | 0.264406 | NA       |
| si:dkeyp-283j8.1  | 8.978507998 | -0.402161836 | 0.6549141 | -0.614068 | 0.53917  | NA       |
| sez6l2            | 719.0053046 | 0.128548713  | 0.0982813 | 1.3079669 | 0.190885 | 0.755212 |
| rpgr1p1           | 217.7212859 | 0.183361216  | 0.1608999 | 1.139598  | 0.254454 | 0.823475 |
| IYD               | 27.24940578 | 0.161850591  | 0.4287902 | 0.3774587 | 0.705833 | 0.968412 |
| gba               | 253.6775806 | 0.004214326  | 0.1418806 | 0.0297033 | 0.976304 | 0.996762 |
| diaph2            | 796.909096  | -0.023794196 | 0.1010648 | -0.235435 | 0.813871 | 0.981081 |
| 6-Mar             | 1439.982313 | 0.071012052  | 0.0818449 | 0.8676413 | 0.385591 | 0.89551  |
| crtcla            | 11.52780179 | 0.085357308  | 0.5681286 | 0.1502429 | 0.880573 | 0.987884 |
| dlgap2b           | 10.63040071 | -0.947662551 | 0.6229074 | -1.521354 | 0.128171 | NA       |
| ddal              | 1027.991848 | -0.032001487 | 0.0931601 | -0.343511 | 0.731214 | 0.971557 |
| myh7ba            | 107.3632494 | 0.025593699  | 0.1909674 | 0.1340213 | 0.893386 | 0.989291 |
| crtclb            | 23.79636468 | 0.192858883  | 0.4211786 | 0.4579028 | 0.647022 | 0.960362 |
| ushlgb            | 0.986657807 | -0.948525167 | 1.9936381 | -0.475776 | 0.634234 | NA       |
| CABZ01041962.1    | 190.0530588 | -0.035843309 | 0.1529683 | -0.234319 | 0.814738 | 0.981081 |
| jakmip1           | 266.2067409 | 0.019362229  | 0.1327668 | 0.1458364 | 0.884051 | 0.988784 |
| slc31a2           | 72.9540511  | 0.039179661  | 0.2297299 | 0.1705466 | 0.86458  | 0.98601  |
| ftr76             | 2.769580455 | -0.901262682 | 1.1748246 | -0.767147 | 0.442994 | NA       |
| klhl30            | 22.76437506 | 0.020406257  | 0.4327248 | 0.0471576 | 0.962388 | 0.995907 |
| grid2ipa          | 61.67648922 | -0.129761245 | 0.2533476 | -0.512187 | 0.60852  | 0.956718 |
| sema4bb           | 282.2177257 | -0.27077861  | 0.1419919 | -1.907    | 0.056521 | 0.46635  |
| ftr43             | 1.514601305 | 1.04180901   | 1.6547679 | 0.6295801 | 0.528969 | NA       |
| nwd1              | 19.70309429 | -0.694953558 | 0.4462235 | -1.557411 | 0.119373 | 0.643644 |
| CABZ01072254.1    | 22.44831887 | -0.464598419 | 0.4041787 | -1.149488 | 0.250355 | 0.820164 |
| stard5            | 4.633609583 | -0.215817366 | 0.8622512 | -0.250295 | 0.802359 | NA       |
| cdipl             | 203.7416543 | -0.001910622 | 0.1469437 | -0.013002 | 0.989626 | 0.997612 |
| emidl             | 980.7098497 | 0.00549812   | 0.0869336 | 0.063245  | 0.949571 | 0.99381  |
| foxp4             | 1937.175897 | -0.049685339 | 0.0779509 | -0.637393 | 0.523869 | 0.939336 |
| smpd1             | 390.626191  | 0.143573501  | 0.1283926 | 1.1182385 | 0.263465 | 0.830245 |
| si:ch211-160b11.4 | 1.201333238 | -2.500792036 | 1.9278236 | -1.29721  | 0.194559 | NA       |
| actcla            | 727.5039112 | -1.258059749 | 0.3203836 | -3.92673  | 8.61E-05 | 0.004322 |
| gabrb1            | 124.0450785 | 0.119093129  | 0.1934189 | 0.6157264 | 0.538075 | 0.943336 |
| prkarlaa          | 3256.648724 | -0.016124573 | 0.0700121 | -0.230311 | 0.81785  | 0.981594 |
| siglec15l         |             | 0 NA         | NA        | NA        | NA       | NA       |
| zgc:162972        | 18.23425212 | 0.060207628  | 0.4631909 | 0.1299845 | 0.896579 | 0.989971 |
| mmrn2a            | 324.55831   | 0.129675333  | 0.127954  | 1.013453  | 0.310844 | 0.862927 |
| si:dkey-98f17.3   | 16.30305914 | 0.926091225  | 0.5152471 | 1.7973729 | 0.072276 | 0.525826 |
| si:dkey-71p21.13  | 6.17219036  | 0.751676405  | 0.7948801 | 0.9456476 | 0.344328 | NA       |
| clcf1             | 57.92932683 | 0.017467336  | 0.2731835 | 0.0639399 | 0.949018 | 0.99381  |
| ppip5k1a          | 499.5915066 | 0.162247413  | 0.106725  | 1.5202375 | 0.128451 | 0.659397 |
| icam3             | 186.6424823 | -0.226009219 | 0.1683166 | -1.342763 | 0.179349 | 0.740258 |
| zgc:172075        | 72.59067254 | -0.073631171 | 0.2450095 | -0.300524 | 0.763778 | 0.975374 |

|                   |             |              |           |           |          |          |
|-------------------|-------------|--------------|-----------|-----------|----------|----------|
| si:ch211-1a19.2   | 0.325573202 | 0.005883621  | 3.3172783 | 0.0017736 | 0.998585 | NA       |
| lca5              | 53.1053913  | -0.275292939 | 0.2813122 | -0.978603 | 0.327776 | 0.872701 |
| mtpap             | 180.2508546 | 0.216834178  | 0.1506144 | 1.4396645 | 0.149962 | 0.697935 |
| zgc:165583        | 0.663561848 | -1.490280258 | 2.4116568 | -0.617949 | 0.536609 | NA       |
| si:dkey-285e18.2  | 1.622011068 | -1.238012138 | 1.6067485 | -0.770508 | 0.440999 | NA       |
| coll19a1          | 228.095344  | 0.242920751  | 0.1488034 | 1.6324947 | 0.102575 | 0.608473 |
| pold3             | 582.9533361 | 0.263659745  | 0.1184381 | 2.2261401 | 0.026005 | 0.311101 |
| pskln1            | 1395.154444 | 0.125454841  | 0.0944952 | 1.3276319 | 0.1843   | 0.747376 |
| znf827            | 1346.92332  | -0.084839424 | 0.0805242 | -1.053589 | 0.292071 | 0.848075 |
| trim2b            | 199.5767887 | -0.079920805 | 0.1582888 | -0.504905 | 0.613626 | 0.95688  |
| ptcd1             | 228.035813  | 0.048444496  | 0.1407137 | 0.344277  | 0.730638 | 0.97149  |
| ngef              | 273.1494361 | -0.155091463 | 0.1340749 | -1.156752 | 0.247374 | 0.81686  |
| stat1b            | 2.66092372  | 0.016159258  | 1.1267473 | 0.0143415 | 0.988558 | NA       |
| frrsla            | 6.17803076  | 0.884146649  | 0.7825504 | 1.1298271 | 0.258549 | NA       |
| lrrc3cb           | 1.830783485 | 0.799248267  | 1.3781958 | 0.5799236 | 0.561966 | NA       |
| ccdc88b           | 35.07183702 | 0.063402339  | 0.3287863 | 0.1928375 | 0.847086 | 0.985174 |
| fbx113            | 1.647824735 | 1.237995142  | 1.622278  | 0.7631214 | 0.445391 | NA       |
| ankrd1b           | 204.1836824 | 0.832386783  | 0.1584811 | 5.2522791 | 1.50E-07 | 1.98E-05 |
| si:ch211-226h7.6  | 13.83727812 | 0.702281364  | 0.6422041 | 1.0935485 | 0.274153 | 0.839127 |
| zdhhc11           | 14.80260729 | 0.202041667  | 0.5555454 | 0.3636817 | 0.716096 | 0.96909  |
| DOCK4 (1 of many) | 29.71322878 | -0.053730296 | 0.3620725 | -0.148397 | 0.88203  | 0.988344 |
| zgc:165514        | 0.67370173  | -2.870759253 | 2.497836  | -1.149299 | 0.250433 | NA       |
| b3galt4           | 15.07939832 | -0.777192953 | 0.5423107 | -1.433114 | 0.151825 | 0.700196 |
| fth128            | 232.3590375 | 0.536988914  | 0.156357  | 3.4343769 | 0.000594 | 0.020179 |
| SERP1             | 1154.206134 | -0.27194466  | 0.0983715 | -2.764465 | 0.005702 | 0.113266 |
| thal              | 128.8210008 | -0.280789986 | 0.1781383 | -1.576247 | 0.114969 | 0.635519 |
| ror2              | 281.8810475 | -0.177600273 | 0.1290532 | -1.376179 | 0.168766 | 0.725919 |
| kif2c             | 384.2675376 | -0.158147025 | 0.1134171 | -1.394384 | 0.163202 | 0.718029 |
| mrtfab            | 819.7551637 | -0.015660275 | 0.0978816 | -0.159992 | 0.872887 | 0.987846 |
| atp10b            | 119.9417424 | 0.097045132  | 0.1867497 | 0.5196535 | 0.603305 | 0.956045 |
| lrrc18b           | 4.855800557 | -0.49035951  | 0.8905935 | -0.550599 | 0.581909 | NA       |
| gram1c            | 151.5255506 | -0.37937663  | 0.178517  | -2.125157 | 0.033574 | 0.357045 |
| si:ch211-74f19.2  | 716.7327317 | 0.059265763  | 0.1134467 | 0.5224105 | 0.601385 | 0.956045 |
| txlnbb            | 488.8676447 | 0.295695224  | 0.1077754 | 2.7436255 | 0.006076 | 0.118032 |
| prune             | 21.41965691 | -0.113464542 | 0.4082273 | -0.277945 | 0.781055 | 0.97627  |
| dlk2              | 51.62852895 | 0.079421779  | 0.2740283 | 0.2898306 | 0.771946 | 0.975687 |
| ppplr3db          | 50.78267118 | -0.211879249 | 0.2861281 | -0.740505 | 0.458994 | 0.921978 |
| rasef             | 21.49390685 | -0.08793856  | 0.4071665 | -0.215977 | 0.829006 | 0.982721 |
| irf3              | 42.22555695 | -0.421837362 | 0.3002664 | -1.404877 | 0.160058 | 0.712495 |
| si:dkey-247i3.1   | 0.158915748 | 0.967652056  | 4.0804729 | 0.2371421 | 0.812547 | NA       |
| znf1084           | 15.81648437 | 0.167575873  | 0.4832817 | 0.3467457 | 0.728782 | 0.970631 |
| si:ch211-285c6.1  | 3.504929046 | 0.692918324  | 1.0151088 | 0.682605  | 0.494857 | NA       |
| tbr1a             | 20.21244619 | -0.368237997 | 0.4975184 | -0.740149 | 0.459209 | 0.921978 |
| pou3f2b           | 1082.694818 | 0.027725026  | 0.0982615 | 0.2821556 | 0.777824 | 0.975942 |
| zgc:195170        | 9.090780723 | -0.499435796 | 0.6679326 | -0.747734 | 0.454621 | NA       |
| ano8a             | 77.05937542 | 0.247997042  | 0.2320304 | 1.0688127 | 0.285154 | 0.845129 |
| zgc:172131        | 10.53887292 | 0.573229508  | 0.6762718 | 0.8476318 | 0.396643 | NA       |
| adamts13          | 194.0140737 | 0.005540458  | 0.1645699 | 0.0336663 | 0.973143 | 0.996315 |
| znf1041           | 67.41354377 | 0.034064765  | 0.2535771 | 0.1343369 | 0.893136 | 0.989291 |
| CR385050.1        | 0.688945432 | -0.015421672 | 2.3988056 | -0.006429 | 0.994871 | NA       |
| ppplr1b           | 522.2646297 | 0.101137569  | 0.1050667 | 0.9626038 | 0.335746 | 0.876088 |
| snrpd3l           | 636.6838929 | -0.040586998 | 0.0955953 | -0.424571 | 0.671149 | 0.965257 |
| si:dkey-125e8.1   | 0 NA        | NA           | NA        | NA        | NA       | NA       |
| calr              | 2443.787679 | 0.017681333  | 0.0791521 | 0.2233844 | 0.823236 | 0.982196 |

|                   |             |              |           |           |          |          |
|-------------------|-------------|--------------|-----------|-----------|----------|----------|
| tns2a             | 27.04242498 | 0.21027438   | 0.3911045 | 0.5376424 | 0.590824 | 0.954193 |
| klb               | 17.64822851 | 0.010935336  | 0.4578793 | 0.0238826 | 0.980946 | 0.996944 |
| triqk             | 376.7064572 | -0.289243545 | 0.1252549 | -2.309239 | 0.02093  | 0.273186 |
| nfatc3a           | 234.5591211 | 0.151772183  | 0.1375274 | 1.1035775 | 0.269776 | 0.834705 |
| FQ323119.1        | 436.078684  | 0.211611101  | 0.109002  | 1.9413505 | 0.052216 | 0.448919 |
| dtx4a             | 858.4068218 | 0.028684173  | 0.1035352 | 0.2770476 | 0.781744 | 0.97627  |
| uspl1             | 148.4680258 | 0.144925528  | 0.1654488 | 0.8759541 | 0.381055 | 0.895192 |
| lox13a            | 39.86996404 | 0.252821778  | 0.3018048 | 0.8376997 | 0.402199 | 0.90084  |
| si:zfos-2070c2.3  | 0.157187365 | -0.955901296 | 4.0804729 | -0.234262 | 0.814781 | NA       |
| pdpl              | 206.4394235 | 0.122788504  | 0.1528057 | 0.8035596 | 0.421651 | 0.90651  |
| mxra5b            | 5.366298343 | -1.134609969 | 0.8430778 | -1.345795 | 0.178369 | NA       |
| si:ch73-290k24.5  | 16.68464326 | 0.385371534  | 0.4974044 | 0.7747651 | 0.438478 | 0.915831 |
| myot              | 477.274326  | 0.347541979  | 0.1185273 | 2.9321694 | 0.003366 | 0.077672 |
| si:ch211-240119.7 | 0.173729368 | -0.955901296 | 4.0804729 | -0.234262 | 0.814781 | NA       |
| plod3             | 1546.590512 | -0.006492835 | 0.0834225 | -0.077831 | 0.937963 | 0.99279  |
| atp6vlab          | 1925.52527  | -0.030768747 | 0.0775528 | -0.396746 | 0.691555 | 0.967305 |
| ano9a             | 156.1414917 | -0.174218839 | 0.1640692 | -1.061862 | 0.288298 | 0.845979 |
| col28a2a          | 1744.98608  | 0.253984953  | 0.0999063 | 2.5422314 | 0.011015 | 0.182111 |
| lmtk2             | 946.8304451 | 0.096971286  | 0.0868785 | 1.1161718 | 0.264349 | 0.830245 |
| osbp111           | 47.85090608 | -0.387279624 | 0.2791007 | -1.387598 | 0.165259 | 0.721223 |
| duspl2            | 48.49511874 | -0.030869711 | 0.2927253 | -0.105456 | 0.916014 | 0.991314 |
| si:ch211-159i8.4  | 497.4688427 | 0.236432802  | 0.1088994 | 2.1711114 | 0.029923 | 0.335036 |
| mrpl43            | 189.6297454 | 0.149202285  | 0.1491199 | 1.0005528 | 0.317043 | 0.867335 |
| cln5              | 33.16119289 | -0.369258763 | 0.3352401 | -1.101475 | 0.27069  | 0.835351 |
| si:dkeyp-13d11.1  |             | 0 NA         | NA        | NA        | NA       | NA       |
| taar19p           | 0.173729368 | -0.955901296 | 4.0804729 | -0.234262 | 0.814781 | NA       |
| mylk3             | 58.66808518 | 0.157390479  | 0.296128  | 0.5314947 | 0.595076 | 0.954434 |
| brinp3a.1         | 515.2828958 | 0.053479456  | 0.1103754 | 0.4845232 | 0.628015 | 0.957354 |
| CABZ01102039.1    | 207.7525486 | 0.025005618  | 0.1659684 | 0.150665  | 0.88024  | 0.987881 |
| zmp:0000001161    | 0.158795395 | 0.967652056  | 4.0804729 | 0.2371421 | 0.812547 | NA       |
| rpl37             | 112.7814816 | 0.158621046  | 0.1897313 | 0.8360301 | 0.403138 | 0.900877 |
| CABZ01039859.1    | 230.9583758 | -0.196765295 | 0.1370012 | -1.436231 | 0.150937 | 0.698912 |
| tmem260           | 164.2151587 | 0.200102788  | 0.1602549 | 1.2486531 | 0.211792 | 0.779854 |
| si:dkey-178k16.1  | 1917.650787 | -0.045314937 | 0.0812033 | -0.558043 | 0.576815 | 0.950654 |
| CABZ01080074.1    | 396.1983615 | -0.143727006 | 0.1191504 | -1.206266 | 0.227715 | 0.794934 |
| voppl             | 63.59300771 | 0.127772749  | 0.2612972 | 0.488994  | 0.624846 | 0.957354 |
| tmem175           | 60.8626487  | 0.02686576   | 0.2537681 | 0.1058674 | 0.915688 | 0.991314 |
| nsmce2            | 87.51956529 | -0.224280561 | 0.208324  | -1.076595 | 0.281661 | 0.84357  |
| hnrnpa01          | 87.77014738 | -0.207706476 | 0.2132762 | -0.973885 | 0.330114 | 0.874085 |
| slc25a1b          | 238.067342  | -0.275389103 | 0.1417319 | -1.943028 | 0.052013 | 0.447758 |
| epd11             | 417.5750681 | 0.134639839  | 0.2827241 | 0.4762234 | 0.633915 | 0.95776  |
| zgc:194686        | 4.278550445 | 3.587132677  | 1.2849569 | 2.7916366 | 0.005244 | NA       |
| si:dkey-217f16.6  | 1.006818213 | 1.048314579  | 1.9690503 | 0.532396  | 0.594452 | NA       |
| npm2a             | 1.385673855 | -0.665060118 | 1.7096737 | -0.388998 | 0.697277 | NA       |
| tmem65            | 106.9201728 | 0.037567802  | 0.206769  | 0.1816897 | 0.855826 | 0.985174 |
| si:dkey-201121.4  |             | 0 NA         | NA        | NA        | NA       | NA       |
| caeng3b           | 741.2313113 | -0.032372843 | 0.0984598 | -0.328792 | 0.742313 | 0.973154 |
| nat16l            | 27.78718849 | -0.381853353 | 0.3755393 | -1.016813 | 0.309242 | 0.861381 |
| mctpla            | 157.6031234 | -0.085290371 | 0.1671476 | -0.51027  | 0.609863 | 0.95688  |
| ggcta             | 8.088991689 | 0.170037687  | 0.65758   | 0.258581  | 0.795959 | NA       |
| cavinla           | 21.39440143 | 0.209700539  | 0.4073603 | 0.5147791 | 0.606707 | 0.956718 |
| espn              | 42.17670403 | 0.160172623  | 0.3022467 | 0.5299399 | 0.596154 | 0.954444 |
| shroom2a          | 730.1704185 | 0.015339043  | 0.0907068 | 0.1691058 | 0.865713 | 0.986517 |
| si:dkeyp-117b11.2 | 92.21273498 | 0.164772372  | 0.212392  | 0.7757936 | 0.437871 | 0.915258 |

|                      |             |              |           |           |          |          |
|----------------------|-------------|--------------|-----------|-----------|----------|----------|
| dkk2                 | 13.01416868 | 0.311450737  | 0.5470581 | 0.5693193 | 0.569139 | 0.948983 |
| lrrc29               | 104.8690523 | 0.186162884  | 0.1968594 | 0.9456642 | 0.34432  | 0.878434 |
| ARHGAP22 (1 of many) | 313.8797666 | -0.091738792 | 0.1389573 | -0.660194 | 0.509129 | 0.936123 |
| abhd10a              | 419.8744653 | 0.248498238  | 0.1207572 | 2.0578339 | 0.039606 | 0.390659 |
| zgc:163143           | 53.1311244  | 0.015235416  | 0.2969985 | 0.051298  | 0.959088 | 0.995095 |
| ppp4cb               | 1573.296232 | 0.027938756  | 0.0918412 | 0.3042073 | 0.76097  | 0.975374 |
| btbd6a               | 361.6321449 | -0.061566259 | 0.1182338 | -0.520716 | 0.602564 | 0.956045 |
| zgc:174310           | 122.5367346 | -0.104584029 | 0.2204582 | -0.474394 | 0.635219 | 0.957927 |
| si:dkey-183c6.8      | 445.3241414 | -0.089000193 | 0.1109274 | -0.802328 | 0.422363 | 0.906561 |
| serpinf2a            | 220.6306514 | 0.343967976  | 0.1569229 | 2.1919557 | 0.028383 | 0.326872 |
| kbtbd13              | 6.005810399 | 0.170928057  | 0.7801454 | 0.2190977 | 0.826574 | NA       |
| prdm2b               | 905.9015283 | 0.029364847  | 0.0911761 | 0.3220673 | 0.747402 | 0.97419  |
| ndnfl                | 476.7180904 | -0.062344735 | 0.1111433 | -0.56094  | 0.574838 | 0.950037 |
| lamtor1              | 96.68270176 | 0.092579684  | 0.1998243 | 0.4633054 | 0.643145 | 0.959994 |
| maml1                | 340.8753129 | -0.13259134  | 0.1176848 | -1.126665 | 0.259884 | 0.828288 |
| ovolla               | 216.047518  | -0.175131365 | 0.1489034 | -1.176141 | 0.239539 | 0.808091 |
| trim37               | 516.3027946 | 0.005729623  | 0.1020399 | 0.0561508 | 0.955222 | 0.994543 |
| org                  | 2.644220079 | -0.00327282  | 1.1345402 | -0.002885 | 0.997698 | NA       |
| zgc:173770           | 0.158795395 | 0.967652056  | 4.0804729 | 0.2371421 | 0.812547 | NA       |
| mcf21b               | 324.6990962 | 0.278020149  | 0.1254839 | 2.2155837 | 0.02672  | 0.315011 |
| dhrrs13b.2           | 8.049577873 | -0.456432018 | 0.7380554 | -0.618425 | 0.536295 | NA       |
| stabl                | 159.4240157 | 0.05259617   | 0.1636105 | 0.3214718 | 0.747853 | 0.97419  |
| acpl                 | 614.7587546 | -0.24756251  | 0.0969872 | -2.552529 | 0.010694 | 0.179263 |
| haao                 | 189.0381002 | -0.283984346 | 0.1525485 | -1.861601 | 0.062659 | 0.488383 |
| ankrd40              | 475.7322758 | 0.146538199  | 0.1182738 | 1.2389741 | 0.215355 | 0.782987 |
| vcw2                 | 95.26393806 | 0.098826488  | 0.2038146 | 0.4848842 | 0.627759 | 0.957354 |
| frmd4bb              | 140.0977286 | 0.396824921  | 0.1857689 | 2.1361217 | 0.032669 | 0.352204 |
| usp53b               | 81.99749967 | 0.13803643   | 0.218981  | 0.630358  | 0.52846  | 0.941896 |
| chgb                 | 350.8960795 | 0.111187015  | 0.1269319 | 0.8759582 | 0.381053 | 0.895192 |
| asx12                | 41.88775638 | 0.019448251  | 0.3055572 | 0.0636485 | 0.94925  | 0.99381  |
| grm8b                | 286.9237509 | 0.167867997  | 0.138246  | 1.2142706 | 0.224644 | 0.791954 |
| polr2d               | 403.0577083 | -0.175325424 | 0.2892635 | -0.60611  | 0.544442 | 0.945438 |
| fgf22                | 11.28359474 | 0.531753289  | 0.5751846 | 0.9244916 | 0.35523  | 0.882342 |
| si:ch211-265g22.4    | 8.76703468  | 0.669636529  | 0.6898725 | 0.970667  | 0.331714 | NA       |
| mettl1               | 280.107826  | -0.133515606 | 0.1389373 | -0.960977 | 0.336564 | 0.876088 |
| mafB                 | 65.14881431 | -0.013727256 | 0.2429661 | -0.056499 | 0.954945 | 0.994543 |
| gar1                 | 1393.20393  | -0.202448815 | 0.0919379 | -2.202016 | 0.027664 | 0.321596 |
| mmla                 | 648.8071602 | 0.117648799  | 0.1096968 | 1.0724906 | 0.2835   | 0.84466  |
| jac6                 | 2.849078905 | -0.137979823 | 1.116776  | -0.123552 | 0.90167  | NA       |
| si:ch211-222121.1    | 17027.67482 | -0.085424753 | 0.0868098 | -0.984045 | 0.325093 | 0.871528 |
| nfe211b              | 328.4236905 | 0.30529483   | 0.125311  | 2.4362978 | 0.014838 | 0.223115 |
| si:ch211-14a17.10    | 7.119556964 | -0.195865242 | 0.7119133 | -0.275125 | 0.78322  | NA       |
| sc:d156              | 2.490128421 | 0.962595326  | 1.2991769 | 0.7409271 | 0.458738 | NA       |
| clcc3ba              | 8.456497513 | -0.988080905 | 0.6685547 | -1.477936 | 0.139425 | NA       |
| pogzb                | 758.637692  | 0.061346838  | 0.0937308 | 0.6545005 | 0.512789 | 0.936253 |
| aldh5a1              | 404.956556  | 0.017670316  | 0.1150153 | 0.1536345 | 0.877898 | 0.987881 |
| trhra                | 2.855362933 | 0.187853003  | 1.1560515 | 0.1624954 | 0.870916 | NA       |
| si:ch211-221f10.2    | 306.5597436 | 0.415745837  | 0.1254006 | 3.3153404 | 0.000915 | 0.029089 |
| si:dkey-266m15.5     | 29.2542565  | -0.630144047 | 0.3575612 | -1.762339 | 0.078012 | 0.54413  |
| zgc:193801           | 75.30383885 | -0.192122397 | 0.2315537 | -0.82971  | 0.406703 | 0.901305 |
| cdkn1a               | 145.3598547 | 0.328074596  | 0.1875526 | 1.7492408 | 0.080249 | 0.549641 |
| bicc2                | 77.98854847 | -0.21370434  | 0.234738  | -0.910395 | 0.362614 | 0.885944 |
| rb1cc1               | 984.0998246 | -0.079694125 | 0.0857718 | -0.929141 | 0.352816 | 0.881552 |
| apbb1                | 28.81042125 | 0.443268355  | 0.3738379 | 1.1857235 | 0.235732 | 0.804824 |



|                   |             |              |           |           |          |          |
|-------------------|-------------|--------------|-----------|-----------|----------|----------|
| rarres31          | 78.31730408 | -0.107175156 | 0.2303268 | -0.465318 | 0.641704 | 0.959994 |
| hspg2             | 393.4256657 | 0.273086444  | 0.1171236 | 2.3316093 | 0.019721 | 0.264538 |
| kank3             | 279.6309961 | -0.034492398 | 0.1296229 | -0.266098 | 0.790164 | 0.977338 |
| sec61b            | 1387.064848 | -0.046549993 | 0.0974917 | -0.477476 | 0.633023 | 0.957356 |
| ndp               | 62.61847861 | 0.169597593  | 0.2432905 | 0.6970991 | 0.485741 | 0.930598 |
| sp5a              | 237.829955  | 0.044721763  | 0.1411901 | 0.3167485 | 0.751434 | 0.97419  |
| crygm2d7          | 13294.06547 | 0.268588313  | 0.0913518 | 2.9401532 | 0.003281 | 0.076541 |
| si:dkey-88j15.3   | 2.781088656 | 0.484897148  | 1.1328522 | 0.4280321 | 0.668628 | NA       |
| si:ch73-160i9.3   | 19.74607523 | 0.032819064  | 0.4648265 | 0.070605  | 0.943712 | 0.993364 |
| patz1             | 379.3853425 | -0.025975132 | 0.1144838 | -0.226889 | 0.82051  | 0.981594 |
| si:ch211-113e8.11 | 663.0889923 | 0.150566781  | 0.1006878 | 1.495383  | 0.134815 | 0.670689 |
| csf2rb            | 22.73232491 | 0.172350718  | 0.402652  | 0.4280389 | 0.668623 | 0.96478  |
| atad2             | 745.8360425 | -0.082598054 | 0.0946542 | -0.872629 | 0.382865 | 0.895192 |
| man1b1b           | 29.66459916 | 0.19381202   | 0.3578379 | 0.5416196 | 0.588081 | 0.953319 |
| pcdh12            | 73.65165588 | 0.065022378  | 0.2296319 | 0.2831591 | 0.777055 | 0.975826 |
| sema4ga           | 22.09226    | -0.275246428 | 0.4067219 | -0.676743 | 0.498569 | 0.934006 |
| prssl6            | 330.9618637 | -0.227658198 | 0.1336457 | -1.703445 | 0.088485 | 0.569447 |
| si:ch211-199g17.9 | 68.49785792 | 0.211172214  | 0.2447254 | 0.8628945 | 0.388195 | 0.896271 |
| fbxo21            | 154.9676283 | -0.105287707 | 0.1795947 | -0.586252 | 0.557706 | 0.948478 |
| ssuh2.3           | 1.151545593 | -2.472760569 | 2.0114878 | -1.229319 | 0.218952 | NA       |
| tm2d3             | 825.3747434 | -0.099207358 | 0.0989813 | -1.002284 | 0.316206 | 0.866931 |
| abhd8b            | 63.07284261 | 0.123632374  | 0.246743  | 0.5010573 | 0.616331 | 0.95688  |
| atp13a3           | 34.46563314 | -0.389583566 | 0.3586531 | -1.086241 | 0.277373 | 0.840857 |
| coll4a1b          | 1268.195629 | 0.253386201  | 0.0856212 | 2.9593855 | 0.003083 | 0.073439 |
| ptprb             | 357.1038647 | 0.231982194  | 0.1164023 | 1.992935  | 0.046269 | 0.422789 |
| smg9              | 375.0935618 | -0.03398884  | 0.1203053 | -0.282522 | 0.777544 | 0.975942 |
| zdhhc12a          | 79.05558669 | -0.162099725 | 0.2234605 | -0.725407 | 0.468203 | 0.924328 |
| capn10            | 172.0510039 | 0.235415576  | 0.1633654 | 1.4410371 | 0.149574 | 0.697402 |
| F0082781.1        | 24.21295292 | -0.433863329 | 0.3980602 | -1.089944 | 0.275738 | 0.839541 |
| esamb             | 79.90310865 | 0.108618501  | 0.2197019 | 0.4943905 | 0.62103  | 0.957354 |
| kcnv2a            | 57.04565522 | 0.445641679  | 0.2624105 | 1.6982616 | 0.089458 | 0.572876 |
| pde9al            | 13.04825563 | 0.310554062  | 0.541087  | 0.5739448 | 0.566005 | 0.948739 |
| zgc:193807        | 0.31437473  | -1.788572922 | 3.5930657 | -0.497785 | 0.618636 | NA       |
| plagl2            | 49.26487357 | 0.126208322  | 0.2861866 | 0.4410002 | 0.659213 | 0.962839 |
| cdca7b            | 392.0797129 | -0.285883467 | 0.1264391 | -2.261036 | 0.023757 | 0.297136 |
| ccngl             | 7301.338612 | 0.300708563  | 0.0796239 | 3.7766129 | 0.000159 | 0.007145 |
| wu:fi04e12        | 583.6452122 | 0.154301357  | 0.1043312 | 1.4789576 | 0.139152 | 0.677963 |
| rail              | 314.8878019 | -0.276049301 | 0.1409168 | -1.958953 | 0.050118 | 0.438277 |
| ccn4b             | 22.77574336 | 0.583312747  | 0.4232883 | 1.3780507 | 0.168188 | 0.725919 |
| si:rp71-84d9.1    | 4.852440554 | 0.3067053    | 0.8967051 | 0.3420358 | 0.732324 | NA       |
| gramd1a           | 1019.138894 | 0.128156843  | 0.0882313 | 1.4525107 | 0.14636  | 0.692538 |
| avpr21            | 6.766806768 | 0.297453198  | 0.7589832 | 0.3919101 | 0.695125 | NA       |
| NAMPT (1 of many) | 0.817752529 | 3.164885207  | 2.3443606 | 1.3499993 | 0.177016 | NA       |
| SIP1              | 21.50650414 | -0.024848589 | 0.4542184 | -0.054706 | 0.956372 | 0.994543 |
| ipmka             | 37.3096377  | -1.016270033 | 0.3480581 | -2.919829 | 0.003502 | 0.07951  |
| b4galnt4b         | 227.6409336 | 0.057382712  | 0.1373745 | 0.41771   | 0.676159 | 0.965257 |
| CABZ01068356.1    | 3.002290064 | 0.341515882  | 1.0727024 | 0.3183696 | 0.750205 | NA       |
| zfang4            | 273.5244619 | -0.127436127 | 0.1363806 | -0.934415 | 0.35009  | 0.880195 |
| si:dkey-42123.7   | 40.93935225 | 0.160496975  | 0.3401517 | 0.4718394 | 0.637041 | 0.958872 |
| si:dkey-265c15.6  | 18.84612494 | 0.089894956  | 0.4404358 | 0.2041046 | 0.838272 | 0.984797 |
| palb2             | 45.81511501 | -0.249912229 | 0.2856882 | -0.874773 | 0.381698 | 0.895192 |
| prkra             | 276.1115474 | -0.103198674 | 0.1342514 | -0.768697 | 0.442073 | 0.916336 |
| zgc:171686        | 6.729047935 | 0.312920287  | 0.7763224 | 0.4030803 | 0.686889 | NA       |
| pi4kaa            | 123.4890461 | -0.121578937 | 0.2101189 | -0.57862  | 0.562846 | 0.948728 |

|                   |             |              |           |           |          |          |
|-------------------|-------------|--------------|-----------|-----------|----------|----------|
| si:ch211-247i17.1 | 3.575519304 | 0.242534074  | 1.0590916 | 0.229002  | 0.818867 | NA       |
| myo9aa            | 835.8751519 | 0.074943063  | 0.1154331 | 0.6492335 | 0.516187 | 0.937997 |
| syt6a             | 129.1980588 | -0.111254337 | 0.1809211 | -0.614933 | 0.538599 | 0.943336 |
| bard1             | 26.66512418 | -0.299539684 | 0.3691756 | -0.811374 | 0.417151 | 0.906237 |
| si:dkey-193c22.2  | 236.9066742 | 0.256354359  | 0.1369152 | 1.8723581 | 0.061157 | 0.482482 |
| cyth1a            | 1142.241065 | -0.097254162 | 0.0829475 | -1.172479 | 0.241005 | 0.809517 |
| zgc:193811        | 5.961980251 | -0.342652635 | 0.7888801 | -0.434353 | 0.664032 | NA       |
| TMCC1             | 52.23871437 | -0.070083823 | 0.277518  | -0.252538 | 0.800625 | 0.979377 |
| ntn2              | 19.09040002 | -0.2202352   | 0.4377658 | -0.503089 | 0.614902 | 0.95688  |
| tmem67            | 213.7180104 | -0.143996242 | 0.1513267 | -0.951559 | 0.341321 | 0.878134 |
| slc9a7            | 801.9999213 | 0.159157771  | 0.0926842 | 1.7172052 | 0.085942 | 0.562905 |
| ap5s1             | 160.842077  | -0.138455161 | 0.1707317 | -0.810952 | 0.417393 | 0.906237 |
| ephb1             | 13.25034068 | 0.193048692  | 0.52896   | 0.364959  | 0.715142 | 0.96909  |
| sp2               | 499.8932678 | -0.186541317 | 0.1063038 | -1.754795 | 0.079294 | 0.547489 |
| ddhd2             | 412.425485  | 0.23194151   | 0.11485   | 2.0195163 | 0.043434 | 0.409149 |
| zgc:163061        | 27.85992986 | 0.528520582  | 0.3990903 | 1.3243134 | 0.185399 | 0.74928  |
| pgfb              | 14.63298347 | 0.681536407  | 0.4994044 | 1.3646984 | 0.172348 | 0.731348 |
| reps2             | 6.514023574 | 0.690303514  | 0.7397968 | 0.9330989 | 0.350769 | NA       |
| lrrc58a           | 62.06364834 | 0.264819207  | 0.2486346 | 1.0650941 | 0.286833 | 0.845979 |
| gucy2g            | 9.107552145 | -0.197996857 | 0.6434326 | -0.30772  | 0.758296 | NA       |
| si:ch73-34314.5   | 0           | NA           | NA        | NA        | NA       | NA       |
| fam13b            | 2907.201429 | 0.09885731   | 0.0712607 | 1.3872621 | 0.165362 | 0.721223 |
| acadsb            | 611.9178865 | -0.058659999 | 0.0995299 | -0.589371 | 0.555613 | 0.947621 |
| trim45            | 137.2075643 | -0.007987313 | 0.1887427 | -0.042319 | 0.966245 | 0.996315 |
| angpt4            | 25.97598897 | -0.294500506 | 0.3770412 | -0.781083 | 0.434754 | 0.914408 |
| BX571825.4        | 0           | NA           | NA        | NA        | NA       | NA       |
| cx32.2            | 13.57326421 | 0.085592394  | 0.5185327 | 0.1650665 | 0.868892 | 0.987245 |
| crygm2d16         | 8178.153198 | 0.159361687  | 0.0875201 | 1.8208585 | 0.068628 | 0.513124 |
| cdk13             | 518.8104546 | 0.200604977  | 0.1301941 | 1.5408148 | 0.123362 | 0.651258 |
| dlg3              | 1586.580356 | 0.045719159  | 0.0768683 | 0.5947726 | 0.551995 | 0.947215 |
| si:dkey-178o16.4  | 20.40570434 | 0.074800436  | 0.4382463 | 0.1706813 | 0.864474 | 0.98601  |
| si:ch211-261p9.4  | 52.22189675 | 0.437323301  | 0.2882324 | 1.5172594 | 0.129201 | 0.660844 |
| rnd3a             | 1531.942185 | 4.40E-05     | 0.0867769 | 0.0005067 | 0.999596 | 0.999704 |
| tnfrsf18          | 3.697840539 | 0.578904965  | 1.002865  | 0.5772511 | 0.56377  | NA       |
| arap3             | 158.5998365 | 0.171584503  | 0.1711522 | 1.002526  | 0.31609  | 0.866931 |
| tradv30.0.1       | 0           | NA           | NA        | NA        | NA       | NA       |
| ttyh1             | 751.9511718 | 0.122651999  | 0.0940569 | 1.3040193 | 0.192227 | 0.756683 |
| leng8             | 2802.939902 | -0.032207065 | 0.0899287 | -0.35814  | 0.720239 | 0.969318 |
| zgc:174268        | 81.88232501 | 0.02465073   | 0.215394  | 0.1144449 | 0.908885 | 0.990702 |
| ganab             | 2075.419135 | -0.077078843 | 0.0755303 | -1.020502 | 0.30749  | 0.861088 |
| gzm3.4            | 7.671063049 | 0.509086854  | 0.678102  | 0.7507526 | 0.452802 | NA       |
| EIF3S10           | 8378.339143 | -0.138325865 | 0.0673879 | -2.052682 | 0.040103 | 0.392085 |
| nLrc8             | 0           | NA           | NA        | NA        | NA       | NA       |
| xkr8.2            | 37.11705747 | 0.167622817  | 0.3164594 | 0.529682  | 0.596332 | 0.954499 |
| CCKBR             | 7.264714427 | -0.264018714 | 0.7087813 | -0.372497 | 0.709523 | NA       |
| dpp6a             | 171.582875  | -0.182945322 | 0.1612956 | -1.134224 | 0.256701 | 0.824902 |
| zgc:194101        | 1.818526424 | -0.761925714 | 1.442107  | -0.528342 | 0.597262 | NA       |
| ankib1b           | 453.6991623 | -0.064402538 | 0.1100626 | -0.585144 | 0.558451 | 0.948478 |
| si:dkey-65b12.6   | 2661.612436 | 0.578248501  | 0.0841549 | 6.8712362 | 6.36E-12 | 1.94E-09 |
| iqck              | 41.73061837 | 0.06669929   | 0.3118595 | 0.2138761 | 0.830644 | 0.982994 |
| atpl1b1b          | 2739.705932 | 0.163065765  | 0.0800798 | 2.0362899 | 0.041721 | 0.400593 |
| LRRC75A           | 235.8327384 | 0.031578008  | 0.135393  | 0.2332322 | 0.815581 | 0.981457 |
| gpx4b             | 2028.244562 | -0.103750231 | 0.0904134 | -1.14751  | 0.251171 | 0.820469 |
| apom              | 1291.830453 | 0.124507419  | 0.1144073 | 1.0882823 | 0.276471 | 0.839541 |

|                    |             |              |           |           |          |          |
|--------------------|-------------|--------------|-----------|-----------|----------|----------|
| ftr86              | 137.9353371 | -0.172344381 | 0.2104278 | -0.819019 | 0.412776 | 0.904974 |
| si:dkey-174i8.1    | 69.12139068 | 0.044910549  | 0.2428247 | 0.1849505 | 0.853268 | 0.985174 |
| plin6              | 129.664778  | 0.479192855  | 0.1809524 | 2.6481704 | 0.008093 | 0.1451   |
| nitr6a             | 0 NA        | NA           | NA        | NA        | NA       | NA       |
| tnrc6c1            | 1319.049236 | 0.037949166  | 0.0869901 | 0.4362471 | 0.662657 | 0.964665 |
| zgc:l12492         | 94.21476319 | 0.200850584  | 0.2211693 | 0.9081307 | 0.363809 | 0.886174 |
| si:ch211-157b11.14 | 527.9461261 | -0.082169192 | 0.1067914 | -0.769437 | 0.441634 | 0.916336 |
| areg               | 69.04050799 | 0.053634934  | 0.2604951 | 0.2058961 | 0.836872 | 0.984636 |
| frem2a             | 241.9411899 | 0.280367716  | 0.1397529 | 2.0061673 | 0.044838 | 0.416612 |
| her3               | 10.25485759 | -0.099837689 | 0.6377266 | -0.156552 | 0.875598 | NA       |
| TCIM (1 of many)   | 41.13365482 | -0.120371673 | 0.3167734 | -0.379993 | 0.703951 | 0.968134 |
| tmem79b            | 324.0641803 | -0.179499099 | 0.1239978 | -1.447599 | 0.147729 | 0.695027 |
| gaskla             | 216.5080865 | 0.229250277  | 0.1534325 | 1.4941445 | 0.135138 | 0.670689 |
| si:ch73-193c12.2   | 52.03736993 | -0.425614899 | 0.2713969 | -1.568238 | 0.116826 | 0.639958 |
| mrtfbb             | 204.6701465 | -0.158289136 | 0.1514251 | -1.04533  | 0.295871 | 0.852974 |
| piezol             | 92.11765207 | 0.300014848  | 0.2076425 | 1.4448627 | 0.148496 | 0.696298 |
| mpp4l              | 269.9957951 | -0.077217215 | 0.1446054 | -0.533986 | 0.593351 | 0.954434 |
| unm_hu7912         | 184.0650387 | 0.131352636  | 0.1565824 | 0.8388722 | 0.401541 | 0.90084  |
| zgc:l71967         | 556.4313219 | 0.008062887  | 0.1156306 | 0.0697297 | 0.944409 | 0.993364 |
| ralgapal           | 1041.744301 | -0.069167513 | 0.0872902 | -0.792386 | 0.428136 | 0.911082 |
| rfxap              | 16.40027393 | 0.251298215  | 0.5410427 | 0.4644702 | 0.642311 | 0.959994 |
| flrt3              | 1371.764674 | 0.030275636  | 0.0840777 | 0.360091  | 0.718779 | 0.969092 |
| si:dkey-188g12.1   | 5.050734779 | -0.679573034 | 0.9666478 | -0.70302  | 0.482043 | NA       |
| slc2a13b           | 85.48520834 | 0.10819084   | 0.2386817 | 0.4532851 | 0.650343 | 0.960708 |
| prozb              | 33.70590766 | 0.348758206  | 0.3498275 | 0.9969435 | 0.318792 | 0.867746 |
| CR376751.1         | 0 NA        | NA           | NA        | NA        | NA       | NA       |
| bend3              | 213.0334262 | 0.166729793  | 0.1465309 | 1.1378472 | 0.255184 | 0.823839 |
| lox15b             | 52.46713785 | 0.127260175  | 0.2903752 | 0.4382612 | 0.661197 | 0.964234 |
| emel               | 124.2477631 | 0.171889452  | 0.1848543 | 0.9298645 | 0.352441 | 0.881179 |
| lacc1              | 68.97093139 | -0.490313878 | 0.3187934 | -1.53803  | 0.124041 | 0.652685 |
| igdcc4             | 140.0478586 | 0.162293051  | 0.1747998 | 0.928451  | 0.353174 | 0.881552 |
| ZNF335             | 387.2482265 | -0.031924401 | 0.1139622 | -0.280132 | 0.779377 | 0.976146 |
| kazna              | 213.8286936 | 0.124529762  | 0.1428489 | 0.8717585 | 0.38334  | 0.895192 |
| als2b              | 562.3072992 | -0.055871854 | 0.1032488 | -0.541138 | 0.588413 | 0.953319 |
| tet2               | 940.2069539 | 0.121033474  | 0.0912342 | 1.3266245 | 0.184633 | 0.747376 |
| aldh1a3            | 163.2771882 | -0.01893503  | 0.1650071 | -0.114753 | 0.908641 | 0.990702 |
| wdr60              | 147.7846585 | -0.10922835  | 0.193321  | -0.56501  | 0.572067 | 0.949494 |
| znf451             | 519.0753937 | -0.143027718 | 0.1119224 | -1.277919 | 0.201278 | 0.767169 |
| lhfp14b            | 105.7617807 | 0.115552033  | 0.1988613 | 0.5810684 | 0.561194 | 0.948728 |
| dsg2.1             | 889.6948486 | 0.043244602  | 0.1116081 | 0.3874682 | 0.69841  | 0.967998 |
| zgc:l73837         | 0 NA        | NA           | NA        | NA        | NA       | NA       |
| kel                | 23.60734682 | 0.117416867  | 0.4075457 | 0.2881072 | 0.773265 | 0.975687 |
| fer114             | 96.07485854 | -0.081524397 | 0.2153282 | -0.378605 | 0.704981 | 0.968134 |
| jac8               | 5.220192752 | -0.735103957 | 0.8523896 | -0.862404 | 0.388465 | NA       |
| si:ch211-38m6.6    | 25.24940381 | -0.430836771 | 0.4294758 | -1.003169 | 0.315779 | 0.866931 |
| paqr4a             | 15.20871444 | 0.567672661  | 0.4950869 | 1.1466122 | 0.251542 | 0.820927 |
| gdpd5b             | 627.9112938 | 0.106660101  | 0.0986436 | 1.081267  | 0.279578 | 0.843127 |
| cables2a           | 156.934288  | 0.192419826  | 0.1696053 | 1.1345154 | 0.256578 | 0.824839 |
| cep70              | 109.6530987 | -0.138720948 | 0.2051189 | -0.676295 | 0.498853 | 0.934006 |
| pagr1              | 362.187429  | -0.141803679 | 0.1194121 | -1.187515 | 0.235024 | 0.803894 |
| ftr22              | 0.976358547 | -0.047642605 | 2.2026384 | -0.02163  | 0.982743 | NA       |
| si:ch211-165b10.3  | 12.58091102 | -0.272139842 | 0.5578757 | -0.487814 | 0.625681 | 0.957354 |
| plvapa             | 149.6418194 | 0.245307034  | 0.1710972 | 1.4337287 | 0.15165  | 0.700137 |
| pdzd7a             | 10.22904924 | 0.356266094  | 0.6536935 | 0.5450048 | 0.58575  | NA       |

|                  |             |              |           |           |          |          |
|------------------|-------------|--------------|-----------|-----------|----------|----------|
| pmchl            | 59.48594858 | 0.077615315  | 0.2520428 | 0.307945  | 0.758124 | 0.975374 |
| ppplr16a         | 34.53464806 | -0.261024459 | 0.3356395 | -0.777693 | 0.43675  | 0.914408 |
| zgc:198329       | 23.89473814 | -0.436522907 | 0.3894873 | -1.120763 | 0.262389 | 0.830166 |
| rnase14          | 0 NA        | NA           | NA        | NA        | NA       | NA       |
| znf839           | 795.588698  | -0.04411415  | 0.0884137 | -0.498951 | 0.617814 | 0.957354 |
| dolk             | 8.823588164 | 0.38852313   | 0.6344743 | 0.6123544 | 0.540303 | NA       |
| adgra2           | 119.9100428 | -0.188057877 | 0.1902562 | -0.988445 | 0.322935 | 0.870607 |
| sharpin          | 317.7982958 | -0.044945557 | 0.1225075 | -0.36688  | 0.713708 | 0.96909  |
| si:ch73-182a11.2 | 77.60884471 | 0.02417092   | 0.2253007 | 0.1072829 | 0.914565 | 0.991119 |
| stxbp4           | 45.25057116 | 0.120672233  | 0.3250995 | 0.3711855 | 0.710499 | 0.968985 |
| si:ch73-92i20.1  | 8.681777558 | -0.047022477 | 0.6576338 | -0.071503 | 0.942998 | NA       |
| igsf3            | 328.3802489 | -0.007974747 | 0.1312304 | -0.060769 | 0.951543 | 0.99381  |
| aldh111          | 1801.349716 | -0.251425843 | 0.0855311 | -2.939583 | 0.003287 | 0.076547 |
| abcc8b           | 210.7817314 | 0.099567958  | 0.1591558 | 0.6256004 | 0.531577 | 0.942358 |
| wdfy4            | 199.1998409 | 0.021979472  | 0.1504923 | 0.1460504 | 0.883882 | 0.988706 |
| uhrflbp1         | 52.16816217 | 0.117567198  | 0.2747769 | 0.4278641 | 0.66875  | 0.964829 |
| eif4ea           | 297.2431492 | 0.009703734  | 0.133554  | 0.0726577 | 0.942078 | 0.993099 |
| znf280d          | 706.3485633 | -0.003510966 | 0.0986813 | -0.035579 | 0.971618 | 0.996315 |
| socs7            | 484.9112341 | 0.106265426  | 0.1085561 | 0.978899  | 0.32763  | 0.872701 |
| calhml           | 17.01522097 | 0.907777189  | 0.4729289 | 1.9194794 | 0.054924 | 0.459334 |
| fam131a          | 18.78192818 | -1.081583884 | 0.4800859 | -2.252896 | 0.024266 | 0.301022 |
| pcdhh            | 5.786454719 | -0.909434091 | 0.8355551 | -1.088419 | 0.27641  | NA       |
| si:dkey-94e7.1   | 8.73905276  | 0.05745185   | 0.68344   | 0.0840628 | 0.933007 | NA       |
| si:ch211-81n22.1 | 30.9633375  | 0.211815088  | 0.3613427 | 0.5861889 | 0.557749 | 0.948478 |
| bub1             | 454.745411  | -0.08496765  | 0.1147169 | -0.740672 | 0.458892 | 0.921978 |
| nmnat3           | 81.86952038 | 0.078726857  | 0.2277834 | 0.3456216 | 0.729627 | 0.971036 |
| pimr177          | 0.484248244 | 0.852636534  | 2.8793247 | 0.2961238 | 0.767136 | NA       |
| BX901889.1       | 0.330916733 | -1.849579229 | 3.2489867 | -0.569279 | 0.569167 | NA       |
| txlna            | 658.8103126 | 0.025547796  | 0.1004771 | 0.254265  | 0.799291 | 0.979316 |
| pbrml1           | 1345.773251 | -0.059580801 | 0.0800322 | -0.74446  | 0.456598 | 0.921215 |
| esama            | 190.8502872 | -0.034108374 | 0.1647373 | -0.207047 | 0.835973 | 0.984089 |
| si:ch211-85n16.4 | 42.34885084 | -0.187777656 | 0.3048992 | -0.615868 | 0.537982 | 0.943336 |
| arl6ip5a         | 75.05695519 | 0.305407299  | 0.241584  | 1.2641869 | 0.206163 | 0.773855 |
| scg5             | 17.4742876  | -2.813714222 | 0.5935203 | -4.740721 | 2.13E-06 | 0.000191 |
| ptrnbn           | 53.85127655 | 0.008813293  | 0.2618091 | 0.033663  | 0.973146 | 0.996315 |
| tnrc18           | 1520.757851 | -0.009310305 | 0.0818441 | -0.113757 | 0.909431 | 0.990702 |
| ppfia3           | 1480.137816 | -0.006893567 | 0.0903818 | -0.076272 | 0.939203 | 0.992857 |
| gask1b           | 98.41901809 | -0.160182788 | 0.2157333 | -0.742504 | 0.457782 | 0.921978 |
| escol            | 314.6410654 | -0.03215666  | 0.123163  | -0.26109  | 0.794023 | 0.977937 |
| celal.5          | 0 NA        | NA           | NA        | NA        | NA       | NA       |
| rbm6             | 815.6161947 | 0.087016221  | 0.0999379 | 0.8707025 | 0.383917 | 0.895192 |
| si:ch211-11p18.6 | 21.68056646 | -0.536959745 | 0.4160156 | -1.29072  | 0.196801 | 0.761944 |
| srgn             | 278.4652151 | -0.117959756 | 0.139079  | -0.848149 | 0.396355 | 0.899672 |
| si:ch73-280o22.2 | 120.9924498 | 0.006706092  | 0.1913961 | 0.0350378 | 0.97205  | 0.996315 |
| tancla           | 680.9684338 | -0.018605265 | 0.1015748 | -0.183168 | 0.854666 | 0.985174 |
| fastk            | 604.0751815 | 0.068144129  | 0.1127063 | 0.6046169 | 0.545434 | 0.945526 |
| zgc:173726       | 30.46349039 | -0.241364232 | 0.3664752 | -0.65861  | 0.510146 | 0.936253 |
| gprc5ba          | 391.9650917 | 0.261117034  | 0.1146524 | 2.277466  | 0.022758 | 0.288662 |
| slc38a10         | 895.3316775 | 0.026183927  | 0.088998  | 0.2942081 | 0.768599 | 0.975687 |
| agtrap           | 61.59644392 | -0.152991484 | 0.2674782 | -0.571977 | 0.567337 | 0.948739 |
| avprlaa          | 32.10135303 | -0.542527103 | 0.3416539 | -1.587943 | 0.112299 | 0.627572 |
| col28a1a         | 404.869116  | 0.298096802  | 0.1128117 | 2.6424278 | 0.008231 | 0.147048 |
| zgc:110821       | 119.4929956 | -0.168060767 | 0.180103  | -0.933137 | 0.350749 | 0.880195 |
| ankrd34ba        | 17.11509971 | -0.314073061 | 0.4878498 | -0.643791 | 0.519711 | 0.938945 |

|                    |             |              |           |           |          |          |
|--------------------|-------------|--------------|-----------|-----------|----------|----------|
| si:ch211-196g2.4   | 65.11043502 | -0.158801589 | 0.2431746 | -0.653035 | 0.513734 | 0.936778 |
| blm                | 192.2126637 | -0.224208245 | 0.1492612 | -1.50212  | 0.133066 | 0.667628 |
| si:ch211-127b11.1  | 4.461742498 | -0.516207622 | 1.0371528 | -0.497716 | 0.618684 | NA       |
| elk4               | 28.97600347 | 0.434814138  | 0.38178   | 1.1389129 | 0.25474  | 0.823484 |
| scaf4a             | 1284.748295 | -0.089866781 | 0.0843291 | -1.065667 | 0.286574 | 0.845942 |
| si:ch211-160o17.4  | 2636.225551 | -0.055161186 | 0.0755298 | -0.730323 | 0.465193 | 0.923671 |
| fndc7a             | 17.84484165 | 0.349191018  | 0.4559936 | 0.7657805 | 0.443807 | 0.916631 |
| si:ch211-226h8.6   | 0           | NA           | NA        | NA        | NA       | NA       |
| trim65             | 20.45350615 | 0.515147648  | 0.4265736 | 1.2076406 | 0.227186 | 0.794617 |
| zbtb10             | 154.5532658 | 0.208429667  | 0.1764053 | 1.1815387 | 0.237389 | 0.806412 |
| sema4aa            | 9.037858099 | -0.317246731 | 0.6834794 | -0.464164 | 0.64253  | NA       |
| oafb               | 15.84741983 | 0.670010996  | 0.5344167 | 1.253724  | 0.209942 | 0.777416 |
| si:ch211-180f4.1   | 156.909084  | 0.162634441  | 0.1679365 | 0.9684285 | 0.33283  | 0.874926 |
| arhgef16           | 274.9772603 | -0.235446825 | 0.1358281 | -1.733417 | 0.083022 | 0.555556 |
| si:ch73-44m9.1     | 0           | NA           | NA        | NA        | NA       | NA       |
| ccnjl              | 403.8520911 | -0.018962429 | 0.1108462 | -0.17107  | 0.864169 | 0.98601  |
| naxd               | 829.5072101 | -0.178135954 | 0.0871323 | -2.044432 | 0.040911 | 0.394957 |
| arid5a             | 7.258233238 | -0.381066514 | 0.6994306 | -0.544824 | 0.585875 | NA       |
| cyp26b1            | 1042.135042 | 0.089486905  | 0.0914837 | 0.9781737 | 0.327988 | 0.872701 |
| si:ch211-255p10.4  | 22.53776379 | 0.112668356  | 0.4198051 | 0.2683825 | 0.788405 | 0.976703 |
| snrnp70            | 3700.385873 | -0.148780255 | 0.0769157 | -1.934329 | 0.053073 | 0.452412 |
| bc110              | 235.0189521 | 0.005039634  | 0.1377683 | 0.0365805 | 0.970819 | 0.996315 |
| gpr158a            | 21.18997594 | 0.551177923  | 0.4156721 | 1.3259922 | 0.184842 | 0.747917 |
| si:dkey-28d5.14    | 0           | NA           | NA        | NA        | NA       | NA       |
| zgc:195173         | 69.11710588 | -0.068990522 | 0.2519859 | -0.273787 | 0.784248 | 0.97627  |
| col6a3             | 3202.739048 | 0.334701743  | 0.0665762 | 5.0273488 | 4.97E-07 | 5.67E-05 |
| znf526             | 231.9075799 | -0.037172688 | 0.1541185 | -0.241195 | 0.809404 | 0.980642 |
| adcy3a             | 284.9442744 | 0.0639859    | 0.1386612 | 0.461455  | 0.644472 | 0.96029  |
| cb1n2b             | 657.0302596 | 0.017854605  | 0.0944405 | 0.1890566 | 0.850048 | 0.985174 |
| si:ch211-157p22.10 | 65.76319115 | 0.025942791  | 0.2520722 | 0.1029181 | 0.918028 | 0.991623 |
| synpo2b            | 108.8087595 | 0.419476353  | 0.1969908 | 2.1294209 | 0.033219 | 0.355427 |
| ccdc153            | 9.048767196 | -0.251216449 | 0.667813  | -0.376178 | 0.706785 | NA       |
| nwd2               | 651.4882806 | -0.156102689 | 0.0962439 | -1.621948 | 0.104814 | 0.612652 |
| kcnj3a             | 131.7165175 | -0.005308723 | 0.1813947 | -0.029266 | 0.976652 | 0.996762 |
| nmbb               | 47.27605499 | -0.603799166 | 0.305731  | -1.974936 | 0.048275 | 0.432986 |
| si:ch211-153b23.4  | 607.873747  | -0.25353884  | 0.1398768 | -1.812586 | 0.069896 | 0.516293 |
| qsox2              | 85.12925617 | 0.066377353  | 0.2530657 | 0.2622929 | 0.793096 | 0.977937 |
| zgc:174888         | 165.200012  | 0.276289974  | 0.1590477 | 1.7371522 | 0.08236  | 0.553931 |
| map2k4b            | 527.6550698 | -0.139156123 | 0.1015671 | -1.370091 | 0.170659 | 0.728116 |
| zgc:152977         | 91.51687127 | -0.089832153 | 0.2076514 | -0.43261  | 0.665298 | 0.964736 |
| ccdc83             | 5.215158951 | 0.005396256  | 0.8399135 | 0.0064248 | 0.994874 | NA       |
| slc37a4b           | 716.0705862 | 0.301085651  | 0.0932504 | 3.2287858 | 0.001243 | 0.036745 |
| imp1a              | 236.7538797 | 0.382898248  | 0.1507497 | 2.5399599 | 0.011087 | 0.182535 |
| atrn11a            | 40.55140859 | -0.09213206  | 0.2990738 | -0.308058 | 0.758038 | 0.975374 |
| nags               | 57.41143407 | -0.127957673 | 0.2594239 | -0.493238 | 0.621845 | 0.957354 |
| chst12b            | 11.13427746 | -0.095612446 | 0.5908064 | -0.161834 | 0.871437 | 0.987754 |
| myo7bb             | 205.6995987 | -0.76135892  | 0.1546147 | -4.924234 | 8.47E-07 | 8.77E-05 |
| mocs2              | 90.68132079 | 0.201989402  | 0.2058973 | 0.9810203 | 0.326583 | 0.872564 |
| zgc:153116         | 27.39757111 | -0.065255856 | 0.3658145 | -0.178385 | 0.858421 | 0.985773 |
| lzts2b             | 27.89214345 | -0.272984168 | 0.3775324 | -0.723075 | 0.469634 | 0.924505 |
| or112-1            | 6.010392788 | -0.001706254 | 0.8564731 | -0.001992 | 0.99841  | NA       |
| eif4g3a            | 1303.883765 | -0.036287628 | 0.0823375 | -0.440718 | 0.659417 | 0.96288  |
| zgc:162184         | 122.2126286 | -0.026762543 | 0.1803514 | -0.148391 | 0.882034 | 0.988344 |
| si:ch211-106h4.6   | 19.30282119 | -0.025874046 | 0.4591886 | -0.056347 | 0.955065 | 0.994543 |

|                   |             |              |           |           |          |          |
|-------------------|-------------|--------------|-----------|-----------|----------|----------|
| si:ch211-208f21.3 | 2.943499199 | -0.020793767 | 1.1314159 | -0.018379 | 0.985337 | NA       |
| ypel2a            | 73.70246311 | -0.528168781 | 0.2402464 | -2.198446 | 0.027917 | 0.323709 |
| smarca4a          | 6113.864871 | -0.072588894 | 0.0815902 | -0.889676 | 0.37364  | 0.893677 |
| fbxl6             | 148.3833609 | -0.004545048 | 0.1639186 | -0.027727 | 0.97788  | 0.996762 |
| ntrk3a            | 594.0871444 | 0.027706897  | 0.099047  | 0.2797349 | 0.779681 | 0.976146 |
| ano8b             | 29.03066879 | 0.32557591   | 0.3624536 | 0.8982554 | 0.369049 | 0.888432 |
| vwf               | 53.82701546 | -0.131768727 | 0.3071677 | -0.42898  | 0.667938 | 0.964736 |
| hspb6             | 210.8051314 | 0.638834153  | 0.1518227 | 4.2077657 | 2.58E-05 | 0.001562 |
| rfx7a             | 526.5859673 | -0.264390365 | 0.1107384 | -2.387523 | 0.016962 | 0.240499 |
| si:ch211-165i18.2 | 1.935316918 | 0.957568656  | 1.4448608 | 0.6627411 | 0.507496 | NA       |
| cd2471            | 3.634575357 | 0.259952073  | 0.9816467 | 0.2648123 | 0.791154 | NA       |
| setdlbb           | 7.76493075  | 0.057973587  | 0.7437928 | 0.0779432 | 0.937873 | NA       |
| si:dkey-225n22.4  | 21.31073369 | 0.757046583  | 0.4311926 | 1.7557041 | 0.079139 | 0.547489 |
| zgc:171459        | 66.53279517 | -0.336791245 | 0.2451591 | -1.373766 | 0.169514 | 0.726744 |
| gmip              | 142.7691725 | 0.169559373  | 0.1682927 | 1.0075267 | 0.313682 | 0.865132 |
| si:rp71-36a1.5    | 36.72431745 | 0.07600177   | 0.3135005 | 0.2424295 | 0.808447 | 0.980642 |
| alkbh6            | 132.6128842 | 0.074303944  | 0.1813685 | 0.409685  | 0.682037 | 0.965476 |
| nat8l             | 2466.356712 | 0.074109727  | 0.0820942 | 0.9027399 | 0.366664 | 0.88734  |
| timd4             | 57.81490402 | 0.542617792  | 0.2822355 | 1.9225708 | 0.054534 | 0.457793 |
| si:dkey-28d5.13   | 1.202474398 | -0.315413906 | 1.8153552 | -0.173748 | 0.862064 | NA       |
| lmod1b            | 11.54892827 | 0.320509874  | 0.5660942 | 0.5661777 | 0.571273 | 0.949418 |
| si:ch73-27e22.3   | 10.25725567 | 0.278218848  | 0.5871723 | 0.4738283 | 0.635622 | NA       |
| wdr43             | 1276.443802 | -0.118208511 | 0.0853037 | -1.385737 | 0.165827 | 0.721626 |
| wdr89             | 92.93180321 | -0.005722117 | 0.2055987 | -0.027831 | 0.977797 | 0.996762 |
| zgc:174698        | 9.025378027 | 0.016135654  | 0.6398346 | 0.0252185 | 0.979881 | NA       |
| crisplda          | 80.89759104 | 0.131753423  | 0.2223295 | 0.5926043 | 0.553446 | 0.947265 |
| gdpd5a            | 221.3781487 | -0.378882765 | 0.145838  | -2.597971 | 0.009378 | 0.16228  |
| scarf1            | 46.59088241 | 0.068139017  | 0.2888019 | 0.2359369 | 0.813482 | 0.981081 |
| si:ch211-188c16.1 | 14.08105835 | 0.178451176  | 0.5289447 | 0.3373721 | 0.735836 | 0.972535 |
| mmp25a            | 2.604263582 | -0.007810395 | 1.1679243 | -0.006687 | 0.994664 | NA       |
| rps2              | 25923.4777  | -0.380198867 | 0.0968846 | -3.924246 | 8.70E-05 | 0.004355 |
| synpo2la          | 884.8897519 | 0.319496123  | 0.1108646 | 2.881859  | 0.003953 | 0.086474 |
| akap6             | 1030.849124 | 0.022656661  | 0.0943874 | 0.2400392 | 0.8103   | 0.980867 |
| nbr1a             | 1390.920596 | -0.129030963 | 0.0823    | -1.567812 | 0.116925 | 0.639958 |
| gas1a             | 730.4873293 | 0.063387866  | 0.0953093 | 0.6650752 | 0.506002 | 0.935724 |
| yars2             | 72.79894723 | 0.199728107  | 0.2284926 | 0.874112  | 0.382057 | 0.895192 |
| usp42             | 506.0609462 | 0.039325892  | 0.1053731 | 0.373206  | 0.708995 | 0.968664 |
| mlf1              | 321.7672253 | 0.307515205  | 0.1243316 | 2.4733468 | 0.013385 | 0.207707 |
| erg               | 20.94931696 | -0.316835747 | 0.4514814 | -0.701769 | 0.482823 | 0.929133 |
| cutc              | 207.0268037 | -0.182579797 | 0.1488344 | -1.226731 | 0.219924 | 0.786668 |
| tmem201           | 231.2047946 | -0.143754235 | 0.1435713 | -1.001274 | 0.316694 | 0.867129 |
| gpr84             | 185.689193  | -0.204089528 | 0.1937471 | -1.053381 | 0.292166 | 0.848075 |
| si:ch211-209f23.6 | 2.168693064 | 0.248812578  | 1.2709797 | 0.1957644 | 0.844795 | NA       |
| slc46a3           | 62.45142772 | -0.046178154 | 0.2564497 | -0.180067 | 0.8571   | 0.985597 |
| mblac1            | 42.20836855 | 0.459225894  | 0.3058208 | 1.5016176 | 0.133196 | 0.667628 |
| MB21D2            | 5.278392891 | -0.354017659 | 0.8116764 | -0.436156 | 0.662723 | NA       |
| snx29             | 330.2214805 | -0.074524575 | 0.1374648 | -0.542136 | 0.587725 | 0.953319 |
| CR376737.1        | 169.5915147 | -0.05306709  | 0.1666038 | -0.318523 | 0.750088 | 0.97419  |
| thap4             | 161.8991918 | 0.15390853   | 0.1699833 | 0.9054331 | 0.365236 | 0.886714 |
| slc45a4           | 448.5640862 | 0.130742946  | 0.1093646 | 1.1954778 | 0.2319   | 0.800084 |
| anol1             | 186.5977015 | 0.112146124  | 0.156014  | 0.7188211 | 0.472251 | 0.924838 |
| nlg2a             | 849.9607279 | -0.010830514 | 0.0995587 | -0.108785 | 0.913373 | 0.991119 |
| SH3TC1            | 60.89493552 | -0.350185883 | 0.2753844 | -1.271626 | 0.203506 | 0.770906 |
| si:ch211-171h4.5  | 1.511852115 | -1.010943093 | 1.5814422 | -0.639254 | 0.522658 | NA       |

|                    |             |              |           |           |          |          |
|--------------------|-------------|--------------|-----------|-----------|----------|----------|
| ptrh2              | 158.0349657 | 0.176229812  | 0.1720809 | 1.0241101 | 0.305783 | 0.860027 |
| ppplr14c           | 3020.469664 | -0.136206777 | 0.083162  | -1.637848 | 0.101453 | 0.605353 |
| sorcs3b            | 34.36381863 | -0.173214484 | 0.3263561 | -0.530753 | 0.59559  | 0.954434 |
| b4galnt1b          | 122.200715  | -0.161843904 | 0.1826821 | -0.885932 | 0.375654 | 0.894316 |
| rerea              | 1171.036898 | -0.176077237 | 0.1022234 | -1.722475 | 0.084983 | 0.560519 |
| sypl1              | 42.51425944 | -0.040495197 | 0.3028453 | -0.133716 | 0.893627 | 0.989291 |
| lrrc61             | 14.6947234  | -0.300371214 | 0.5148943 | -0.583365 | 0.559648 | 0.948478 |
| fth130             | 52.68572719 | 0.231840281  | 0.2773171 | 0.8360116 | 0.403148 | 0.900877 |
| bptf               | 1729.884856 | -0.034993024 | 0.0895529 | -0.390753 | 0.69598  | 0.96736  |
| mapk9              | 137.1092194 | 0.131636638  | 0.1784792 | 0.7375463 | 0.46079  | 0.921978 |
| ntng2a             | 251.1482446 | -0.04587932  | 0.1319171 | -0.347789 | 0.727999 | 0.970402 |
| slc30a6            | 178.5336964 | -0.054771274 | 0.1635108 | -0.33497  | 0.737647 | 0.972535 |
| kcnk15             | 62.0281984  | -0.302135723 | 0.252492  | -1.196615 | 0.231457 | 0.799752 |
| tfr1b              | 896.1980878 | -0.446211083 | 0.102365  | -4.359019 | 1.31E-05 | 0.000894 |
| si:dkey-85n7.6     | 257.4918246 | 0.179910958  | 0.1315556 | 1.3675661 | 0.171448 | 0.729863 |
| hcn5               | 46.28331077 | 0.359811489  | 0.2878233 | 1.2501123 | 0.211259 | 0.778917 |
| anx11a             | 1545.100244 | -0.101423199 | 0.0921443 | -1.1007   | 0.271027 | 0.835943 |
| dnah11             | 2.238716927 | -0.674951187 | 1.4062242 | -0.479974 | 0.631246 | NA       |
| rgsl9              | 34.69589474 | 0.223565303  | 0.3411009 | 0.6554228 | 0.512196 | 0.936253 |
| tctel              | 2.370754626 | 1.891439854  | 1.3582926 | 1.3925128 | 0.163767 | NA       |
| obs11b             | 319.2458771 | 0.25431857   | 0.1351637 | 1.8815599 | 0.059896 | 0.478654 |
| tradv27.0          |             | 0 NA         | NA        | NA        | NA       | NA       |
| si:dkey-81n2.2     |             | 0 NA         | NA        | NA        | NA       | NA       |
| tlcd2              | 415.7516912 | 0.108014396  | 0.1265943 | 0.8532325 | 0.39353  | 0.898076 |
| ubash3bb           | 128.3703712 | -0.001227367 | 0.1843024 | -0.00666  | 0.994687 | 0.998694 |
| rbm10              | 454.0977379 | -0.068100573 | 0.1164752 | -0.584679 | 0.558764 | 0.948478 |
| col8ala            | 428.5520451 | 0.15280555   | 0.1586478 | 0.963175  | 0.33546  | 0.876088 |
| ncoa3              | 1227.672165 | -0.0439675   | 0.0829013 | -0.530359 | 0.595863 | 0.954434 |
| psiplb             | 452.3611276 | -0.312612094 | 0.1471644 | -2.124237 | 0.03365  | 0.357045 |
| si:dkey-184p18.2   | 176.5717606 | -0.104197909 | 0.1565859 | -0.665436 | 0.505772 | 0.935724 |
| cby1               | 116.0100692 | 0.093644664  | 0.1905014 | 0.4915695 | 0.623024 | 0.957354 |
| myo9b              | 417.3549024 | -0.032249476 | 0.1115907 | -0.288998 | 0.772583 | 0.975687 |
| ftr08              |             | 0 NA         | NA        | NA        | NA       | NA       |
| zgc:194312         | 171.9633972 | -0.041037559 | 0.1611077 | -0.254721 | 0.798938 | 0.979066 |
| zmp:0000001175     | 3.928706958 | -0.629856636 | 1.0310761 | -0.610873 | 0.541284 | NA       |
| nectin4a           | 146.6245391 | 0.13536126   | 0.170929  | 0.7919153 | 0.42841  | 0.911195 |
| gpr20              | 1.979569643 | -2.234237259 | 1.6098219 | -1.387879 | 0.165174 | NA       |
| camtala            | 1235.121968 | 0.037157736  | 0.0797233 | 0.466084  | 0.641155 | 0.959994 |
| usf3               | 356.174008  | -0.025862519 | 0.1206672 | -0.214329 | 0.83029  | 0.982947 |
| mon1bb             | 274.1741688 | -0.04876048  | 0.1303686 | -0.37402  | 0.708389 | 0.968664 |
| SYDE1              | 98.90587541 | 0.182582714  | 0.2172957 | 0.8402501 | 0.400768 | 0.90084  |
| tubgcp5            | 507.5778512 | 0.112900286  | 0.10315   | 1.0945258 | 0.273724 | 0.838381 |
| si:dkey-234i14.14  |             | 0 NA         | NA        | NA        | NA       | NA       |
| si:ch211-113a14.12 | 6.774214414 | -0.073242367 | 0.7261114 | -0.100869 | 0.919654 | NA       |
| dhx32a             | 69.83605805 | 0.048445808  | 0.2375896 | 0.2039054 | 0.838427 | 0.984797 |
| sorcs2             | 568.8658566 | 0.010757052  | 0.1048025 | 0.1026412 | 0.918248 | 0.991623 |
| sox10              | 496.8778815 | 0.012097646  | 0.1088686 | 0.1111216 | 0.91152  | 0.991066 |
| si:ch73-206p6.1    | 220.6428565 | 0.18129371   | 0.1707065 | 1.0620199 | 0.288227 | 0.845979 |
| polr1b             | 222.9592719 | -0.013300023 | 0.148118  | -0.089793 | 0.928451 | 0.992702 |
| si:dkey-193b15.8   | 58.41143366 | 0.174749548  | 0.2639248 | 0.6621187 | 0.507895 | 0.935734 |
| hmces              | 45.75193499 | -0.106697124 | 0.3015821 | -0.353791 | 0.723495 | 0.970402 |
| mych               | 615.2345554 | 0.240943227  | 0.1160929 | 2.0754351 | 0.037946 | 0.381357 |
| pla2r1             | 11.98641446 | 0.264424916  | 0.5533443 | 0.4778669 | 0.632745 | 0.957356 |
| zgc:174353         |             | 0 NA         | NA        | NA        | NA       | NA       |

|                   |             |              |           |           |          |          |
|-------------------|-------------|--------------|-----------|-----------|----------|----------|
| msh5              | 12.91590611 | -0.625105694 | 0.5590027 | -1.118252 | 0.263459 | 0.830245 |
| si:dkey-76k16.6   | 22.76417549 | 0.010103993  | 0.4050252 | 0.0249466 | 0.980098 | 0.996879 |
| spsb3b            | 5.733666734 | -0.32878225  | 0.8367924 | -0.392908 | 0.694388 | NA       |
| si:ch73-289h5.4   | 29.45801493 | -0.084761675 | 0.3736713 | -0.226835 | 0.820552 | 0.981594 |
| lrfn2b            | 247.8290828 | 0.076216209  | 0.133916  | 0.5691344 | 0.569265 | 0.948983 |
| atp8a2            | 1981.557083 | -0.121041965 | 0.0877933 | -1.378715 | 0.167983 | 0.725719 |
| ptpn9a            | 95.49896848 | 0.134849628  | 0.2107676 | 0.6398023 | 0.522301 | 0.939056 |
| igsf10            | 75.97585417 | 0.355421646  | 0.223701  | 1.5888247 | 0.1121   | 0.627454 |
| plekho1b          | 229.4633014 | 0.068973383  | 0.1401287 | 0.4922144 | 0.622568 | 0.957354 |
| si:ch211-103n10.5 | 7.532362692 | 0.398584999  | 0.7355425 | 0.5418925 | 0.587893 | NA       |
| tjpla             | 2520.069646 | -0.078236548 | 0.0904183 | -0.865273 | 0.386889 | 0.89551  |
| ppplr3da          | 99.64859828 | -0.270515579 | 0.2193096 | -1.233487 | 0.217394 | 0.784786 |
| letm2             | 1104.261403 | 0.11171437   | 0.0856739 | 1.3039482 | 0.192251 | 0.756683 |
| recql4            | 99.15811271 | -0.17455075  | 0.2016975 | -0.865409 | 0.386815 | 0.89551  |
| si:dkey-6f10.4    | 0 NA        | NA           | NA        | NA        | NA       | NA       |
| tldr7b            | 171.2920836 | 0.067610554  | 0.1679668 | 0.4025233 | 0.687299 | 0.966376 |
| babam1            | 436.1932802 | 0.022123084  | 0.109074  | 0.2028264 | 0.839271 | 0.984979 |
| ahctf1            | 997.8502181 | -0.043852583 | 0.0927632 | -0.472737 | 0.636401 | 0.958565 |
| bag6l             | 524.9852425 | 0.129881639  | 0.1111182 | 1.1688604 | 0.24246  | 0.811298 |
| pign              | 106.1211174 | -0.239268602 | 0.1985827 | -1.204881 | 0.228249 | 0.795541 |
| EIF3F             | 3245.147098 | -0.327654324 | 0.0869466 | -3.768455 | 0.000164 | 0.007299 |
| snrnp200          | 2473.155979 | 0.071407583  | 0.0756735 | 0.9436271 | 0.34536  | 0.878434 |
| nudt19            | 149.7757497 | 0.168566765  | 0.2140282 | 0.7875913 | 0.430936 | 0.91234  |
| f2r11.2           | 300.1645977 | 0.191995991  | 0.152867  | 1.2559679 | 0.209128 | 0.776073 |
| si:dkeyp-75b4.8   | 5.613748172 | 0.175034727  | 0.8514487 | 0.2055728 | 0.837125 | NA       |
| toel              | 150.9884984 | -0.060370609 | 0.1667796 | -0.361978 | 0.717368 | 0.96909  |
| si:dkey-16p21.7   | 863.8466233 | 0.02726467   | 0.1113452 | 0.2448661 | 0.80656  | 0.980254 |
| zdhc1             | 365.8348734 | 0.143043518  | 0.1173618 | 1.2188249 | 0.222911 | 0.789115 |
| tmlhe             | 31.19454716 | 0.354842232  | 0.3647589 | 0.9728131 | 0.330646 | 0.87417  |
| aifm2             | 648.1615185 | -0.198660753 | 0.1119836 | -1.774016 | 0.07606  | 0.537342 |
| gcnt4b            | 0 NA        | NA           | NA        | NA        | NA       | NA       |
| rap2aa            | 34.69192751 | -0.117435671 | 0.3862575 | -0.304035 | 0.761101 | 0.975374 |
| nitr5             | 2.334532634 | -0.798295812 | 1.2644475 | -0.63134  | 0.527818 | NA       |
| L0017815.1        | 80.6397886  | 0.552967589  | 0.2534069 | 2.1821327 | 0.0291   | 0.330497 |
| grin2cb           | 97.50379585 | 0.09614322   | 0.1992502 | 0.4825252 | 0.629433 | 0.957354 |
| angell            | 52.78762489 | -0.313903689 | 0.2656015 | -1.18186  | 0.237261 | 0.806257 |
| lrrn3a            | 367.3485602 | 0.051974082  | 0.1285832 | 0.4042058 | 0.686061 | 0.966376 |
| cdh16             | 7.323803735 | 0.662229569  | 0.7008473 | 0.9448985 | 0.344711 | NA       |
| zgc:174862        | 4.982876016 | -0.981587193 | 0.9128854 | -1.075258 | 0.282259 | NA       |
| si:ch211-193k19.2 | 3.427132235 | 0.663052847  | 1.0961842 | 0.6048735 | 0.545263 | NA       |
| tmprss13b         | 65.86575078 | 0.361304825  | 0.2445395 | 1.4774904 | 0.139544 | 0.678238 |
| ntsrl             | 2.76346132  | 0.191801704  | 1.2935319 | 0.1482775 | 0.882124 | NA       |
| tspeara           | 22.0126753  | 0.090064113  | 0.421457  | 0.2136971 | 0.830783 | 0.982994 |
| zzz3              | 967.3338109 | -0.005058857 | 0.0936711 | -0.054007 | 0.95693  | 0.994543 |
| ank3b             | 177.0384574 | -0.030468932 | 0.1837299 | -0.165835 | 0.868286 | 0.987245 |
| b4gat1            | 281.2643764 | 0.010882502  | 0.1335477 | 0.0814878 | 0.935054 | 0.992702 |
| cln6a             | 307.6951286 | -0.122380393 | 0.1330703 | -0.919667 | 0.357747 | 0.884371 |
| pdgfc             | 165.5845517 | -0.020116959 | 0.1596217 | -0.126029 | 0.899709 | 0.990121 |
| CR847803.1        | 0 NA        | NA           | NA        | NA        | NA       | NA       |
| arsj              | 128.2946181 | 0.198785737  | 0.1807492 | 1.0997874 | 0.271425 | 0.836396 |
| phf24             | 992.018685  | 0.220014649  | 0.0936195 | 2.3500948 | 0.018769 | 0.255518 |
| CR394546.1        | 0.838940531 | -0.561526863 | 2.0217856 | -0.277738 | 0.781213 | NA       |
| frrslb            | 193.1088331 | 0.167059859  | 0.1495148 | 1.1173463 | 0.263846 | 0.830245 |
| arsia             | 88.83202235 | -0.153745355 | 0.2162976 | -0.710805 | 0.477205 | 0.926857 |



|                   |             |              |           |           |          |          |
|-------------------|-------------|--------------|-----------|-----------|----------|----------|
| dus2              | 243.7902054 | 0.009188904  | 0.1403915 | 0.065452  | 0.947814 | 0.99381  |
| gpr137bb          | 229.1945225 | 0.252344495  | 0.1707859 | 1.477549  | 0.139529 | 0.678238 |
| elfn2a            | 3.508784899 | 0.143582365  | 0.9858328 | 0.1456458 | 0.884201 | NA       |
| hykk.1            | 1.003361447 | -0.877559612 | 2.0717967 | -0.423574 | 0.671876 | NA       |
| si:ch211-206k20.5 | 235.2462617 | 0.035445269  | 0.1424428 | 0.2488386 | 0.803486 | 0.979643 |
| rin3              | 288.57894   | 0.109917368  | 0.1356134 | 0.8105199 | 0.417641 | 0.906237 |
| cdca7a            | 580.6786414 | 0.105406727  | 0.1065956 | 0.9888468 | 0.322738 | 0.870524 |
| si:ch211-263p13.7 | 8.467060689 | 0.079800654  | 0.6725306 | 0.1186573 | 0.905547 | NA       |
| tafa4a            | 1.175083697 | 1.334695785  | 1.855189  | 0.7194392 | 0.47187  | NA       |
| CU459089.1        | 21.93346123 | 0.200296939  | 0.4080795 | 0.4908282 | 0.623548 | 0.957354 |
| magixb            | 15.08263568 | -0.290251928 | 0.5158029 | -0.562719 | 0.573626 | 0.949904 |
| mal2              | 41.26693952 | -0.067082183 | 0.309164  | -0.216979 | 0.828224 | 0.982721 |
| zgc:171965        | 3.123795581 | 1.476674125  | 1.1145321 | 1.3249274 | 0.185195 | NA       |
| intu              | 317.3739099 | 0.120735205  | 0.124052  | 0.9732629 | 0.330423 | 0.874098 |
| thbs3a            | 266.92531   | 0.314178335  | 0.1384488 | 2.2692749 | 0.023252 | 0.292665 |
| lypd6b            | 75.93854521 | -0.021213633 | 0.2260311 | -0.093853 | 0.925226 | 0.992676 |
| zgc:172079        | 0.665331516 | 0.047715978  | 2.3078578 | 0.0206754 | 0.983505 | NA       |
| gpr78b            | 2.028168054 | 0.489124736  | 1.316488  | 0.3715376 | 0.710237 | NA       |
| si:ch211-42i9.8   | 101.0546148 | -0.193765539 | 0.1998524 | -0.969543 | 0.332274 | 0.874653 |
| tnksa             | 467.9396963 | -0.074988982 | 0.1113938 | -0.673188 | 0.500828 | 0.93428  |
| lratb.2           | 92.14699593 | -0.295015805 | 0.252628  | -1.167788 | 0.242892 | 0.811584 |
| rabl6b            | 480.8392261 | 0.177799433  | 0.107752  | 1.6500804 | 0.098926 | 0.598346 |
| grm8a             | 488.2280097 | -0.048557853 | 0.1167838 | -0.415793 | 0.677562 | 0.965257 |
| arfgef3           | 38.05996535 | -0.257735651 | 0.3280032 | -0.785772 | 0.432001 | 0.912876 |
| zgc:110239        | 687.7599373 | -0.273905198 | 0.0982267 | -2.788501 | 0.005295 | 0.107627 |
| pimr140           | 0.157187365 | -0.955901296 | 4.0804729 | -0.234262 | 0.814781 | NA       |
| evi5a             | 27.19561747 | -0.496050372 | 0.3831438 | -1.294685 | 0.195429 | 0.760412 |
| nlrpl6            | 31.54046327 | -0.465137679 | 0.3471663 | -1.339812 | 0.180306 | 0.741397 |
| pdgfd             | 61.39003575 | -0.18852723  | 0.2694183 | -0.699756 | 0.484079 | 0.929461 |
| aak1b             | 42.62501544 | 0.481596889  | 0.296336  | 1.6251718 | 0.104126 | 0.611338 |
| rpl               | 1.286727072 | -1.584087934 | 1.825231  | -0.867884 | 0.385458 | NA       |
| cpo               | 16.31798873 | -1.027981641 | 0.5159368 | -1.992457 | 0.046321 | 0.422877 |
| mb21d2            | 448.0132799 | -0.020618956 | 0.12148   | -0.169731 | 0.865222 | 0.986367 |
| slc13a5a          | 131.5363014 | 0.351292136  | 0.173195  | 2.0283042 | 0.042529 | 0.405679 |
| dtmba             | 1335.509036 | 0.349860987  | 0.0923297 | 3.7892572 | 0.000151 | 0.006841 |
| si:dkey-30h22.11  | 97.77383427 | 0.021332495  | 0.2095704 | 0.1017915 | 0.918922 | 0.991623 |
| si:dkey-105i14.1  | 74.91955627 | 0.07971385   | 0.2772008 | 0.2875672 | 0.773678 | 0.975687 |
| rsad1             | 11.62776489 | -0.003432698 | 0.5569489 | -0.006163 | 0.995082 | 0.998694 |
| CR749163.1        | 4.351721592 | 0.939375682  | 0.9731163 | 0.9653272 | 0.334381 | NA       |
| iqsec2b           | 360.4911793 | 0.033819692  | 0.1314218 | 0.2573369 | 0.796919 | 0.978569 |
| nlg1              | 35.16222437 | 0.075114316  | 0.3273425 | 0.229467  | 0.818506 | 0.981594 |
| zgc:113886        | 0.323844819 | -1.825095364 | 3.274639  | -0.557342 | 0.577293 | NA       |
| GRIK3             | 48.35181948 | 0.081857244  | 0.2799204 | 0.2924304 | 0.769958 | 0.975687 |
| rpl29             | 2927.604872 | -0.179442188 | 0.1092152 | -1.643015 | 0.10038  | 0.602451 |
| knop1             | 135.0820238 | -0.151723888 | 0.1829258 | -0.829429 | 0.406862 | 0.901305 |
| ppp2r3a           | 817.9530756 | 0.351712586  | 0.0932418 | 3.7720494 | 0.000162 | 0.00723  |
| nocta             | 431.1577837 | 0.535198635  | 0.1278509 | 4.1861163 | 2.84E-05 | 0.001682 |
| supv311           | 294.0326402 | 0.138557646  | 0.1254952 | 1.1040876 | 0.269555 | 0.834705 |
| alyref            | 3187.231453 | -0.059854403 | 0.0862173 | -0.694228 | 0.48754  | 0.93164  |
| spsb3a            | 436.851675  | -0.187824654 | 0.1243905 | -1.50996  | 0.131054 | 0.663795 |
| b3glctb           | 11.30992785 | 0.542546182  | 0.5769355 | 0.9403932 | 0.347016 | 0.879707 |
| zgc:175135        |             | 0 NA         | NA        | NA        | NA       | NA       |
| si:ch73-38013.2   | 1.697251321 | 1.219455701  | 1.5047527 | 0.8104028 | 0.417709 | NA       |
| AL935199.1        | 30.7453503  | 0.178296382  | 0.4006957 | 0.444967  | 0.656344 | 0.961833 |

|                  |             |              |           |           |          |          |
|------------------|-------------|--------------|-----------|-----------|----------|----------|
| usp54b           | 64.67869137 | -0.1237016   | 0.27975   | -0.442186 | 0.658354 | 0.962545 |
| no19             | 497.0823806 | 0.003488386  | 0.1077609 | 0.0323715 | 0.974176 | 0.99644  |
| ascc1            | 99.97303402 | -0.09047215  | 0.209132  | -0.432608 | 0.6653   | 0.964736 |
| nlgn4xb          | 21.20439609 | 0.355555084  | 0.4204475 | 0.8456587 | 0.397743 | 0.899672 |
| si:rp71-79p20.2  | 4.436696382 | 0.547112337  | 0.8923852 | 0.6130899 | 0.539817 | NA       |
| faah             | 80.97039795 | -0.007899461 | 0.2309372 | -0.034206 | 0.972713 | 0.996315 |
| malt1            | 76.77561131 | -0.130168967 | 0.2334293 | -0.557638 | 0.577092 | 0.950788 |
| cited1           | 223.1841848 | -0.185349464 | 0.1406497 | -1.317809 | 0.187568 | 0.75202  |
| baalca           | 33.88202847 | 0.090706362  | 0.3324115 | 0.2728737 | 0.78495  | 0.97627  |
| csnk2b           | 5822.542431 | -0.001715916 | 0.0645551 | -0.026581 | 0.978794 | 0.996762 |
| tmsb4x           | 18100.49065 | -0.078022701 | 0.1074792 | -0.725933 | 0.46788  | 0.924328 |
| adamts9          | 195.2017482 | 0.271800858  | 0.1481691 | 1.8343959 | 0.066595 | 0.504929 |
| acer2            | 6.593806553 | -1.286090635 | 0.8483297 | -1.516027 | 0.129513 | NA       |
| SRMS             | 102.1660826 | 0.034073085  | 0.1946519 | 0.1750462 | 0.861043 | 0.985773 |
| atf5b            | 768.7781941 | -0.055256984 | 0.1039003 | -0.531827 | 0.594846 | 0.954434 |
| arhgef10         | 203.5296002 | 0.237193621  | 0.1676047 | 1.4151966 | 0.157011 | 0.707677 |
| dcaf15           | 255.7336852 | -0.40546088  | 0.1368841 | -2.962075 | 0.003056 | 0.073064 |
| brsk2b           | 1197.215523 | -0.036546371 | 0.0866414 | -0.421812 | 0.673162 | 0.965257 |
| cdc42ep1b        | 68.85273019 | -0.193420769 | 0.2367193 | -0.817089 | 0.413878 | 0.905864 |
| CU468012.1       | 5.007091696 | -0.989118423 | 0.8769775 | -1.127872 | 0.259374 | NA       |
| egr4             | 101.3614443 | 0.657374816  | 0.2576009 | 2.5519121 | 0.010713 | 0.179263 |
| hgsnat           | 840.6464041 | -0.075324808 | 0.0911807 | -0.826105 | 0.408745 | 0.90171  |
| il13             | 2.010646529 | -0.478327043 | 1.3048551 | -0.366575 | 0.713936 | NA       |
| otud4            | 108.6170114 | -0.053341717 | 0.2420032 | -0.220417 | 0.825546 | 0.982196 |
| sox11a           | 3076.701384 | -0.057435967 | 0.0720156 | -0.797548 | 0.425133 | 0.908819 |
| slc5a3b          | 57.77524383 | 0.272080297  | 0.2734754 | 0.9948987 | 0.319786 | 0.86809  |
| si:dkey-34f9.3   | 6.153259384 | -0.304038593 | 0.817008  | -0.372137 | 0.709791 | NA       |
| cdc26            | 227.9090482 | -0.284651632 | 0.1408939 | -2.020327 | 0.04335  | 0.408576 |
| cxxc4            | 274.6185362 | 0.035582064  | 0.1298336 | 0.2740591 | 0.784039 | 0.97627  |
| nrg2a            | 100.6346007 | 0.121630991  | 0.2052408 | 0.5926257 | 0.553432 | 0.947265 |
| si:dkey-6i22.5   | 83.97536399 | -0.001588807 | 0.228362  | -0.006957 | 0.994449 | 0.998694 |
| hmgxb3           | 60.72041335 | 0.041426914  | 0.2596906 | 0.1595241 | 0.873256 | 0.987846 |
| efcc1            | 112.1470748 | -0.030506595 | 0.1910492 | -0.159679 | 0.873134 | 0.987846 |
| slc29a3          | 301.7204171 | -0.221730985 | 0.1376859 | -1.610412 | 0.107308 | 0.617344 |
| borcs5           | 102.8048963 | -0.194085852 | 0.2089803 | -0.928728 | 0.35303  | 0.881552 |
| ttc22            | 56.14737435 | 0.314987349  | 0.2692078 | 1.1700527 | 0.24198  | 0.810713 |
| dhx30            | 219.2985931 | 0.184755843  | 0.1814605 | 1.0181603 | 0.308602 | 0.861088 |
| meis2a           | 3137.526301 | -0.089464306 | 0.0869531 | -1.02888  | 0.303536 | 0.857769 |
| ajuba            | 487.6668873 | 0.084960045  | 0.1144021 | 0.7426439 | 0.457697 | 0.921978 |
| si:ch211-67f13.7 | 11.19279538 | -0.624561589 | 0.6031121 | -1.035565 | 0.300405 | 0.856251 |
| olfm2a           | 1327.751758 | -0.004071221 | 0.0861576 | -0.047253 | 0.962311 | 0.995907 |
| lgals3a          | 1202.226982 | 0.054566893  | 0.0862884 | 0.6323781 | 0.52714  | 0.941186 |
| samd11           | 916.2045343 | -0.097148063 | 0.0998046 | -0.973383 | 0.330363 | 0.874098 |
| ttl12            | 14.76337052 | -1.764033822 | 0.5600225 | -3.149934 | 0.001633 | 0.046066 |
| znrf2a           | 88.70360498 | -0.02863915  | 0.2401833 | -0.119239 | 0.905086 | 0.990702 |
| asipl            | 34.96510625 | -0.049503795 | 0.3346576 | -0.147924 | 0.882403 | 0.988344 |
| ndufaf4          | 152.8216798 | -0.002689581 | 0.1649165 | -0.016309 | 0.986988 | 0.997073 |
| ankhd1           | 1948.136238 | -0.035548462 | 0.1049328 | -0.338774 | 0.73478  | 0.972021 |
| sowahaa          | 25.80833419 | -0.549917635 | 0.3856738 | -1.425862 | 0.153908 | 0.702738 |
| si:dkey-169i5.4  | 60.20966984 | -0.101463269 | 0.2502664 | -0.405421 | 0.685168 | 0.966146 |
| mettl22          | 101.4938682 | 0.291612108  | 0.204267  | 1.4276026 | 0.153406 | 0.702578 |
| rasgrp3          | 13.68764224 | -0.023718341 | 0.5181029 | -0.045779 | 0.963486 | 0.995927 |
| nostrin          | 8.692397609 | -0.186155844 | 0.6768405 | -0.275036 | 0.783288 | NA       |
| taf9             | 666.6263588 | -0.111740088 | 0.0950982 | -1.174997 | 0.239996 | 0.808111 |

|                   |             |              |           |           |          |          |
|-------------------|-------------|--------------|-----------|-----------|----------|----------|
| CR626907.1        | 160.135731  | -0.021076969 | 0.1808747 | -0.116528 | 0.907234 | 0.990702 |
| vwa10.1           | 33.21999571 | -0.292243943 | 0.3437432 | -0.850181 | 0.395224 | 0.899244 |
| slc2a5            | 36.6657793  | 0.472600225  | 0.3292831 | 1.4352397 | 0.151219 | 0.699388 |
| znf11h            | 0.356300316 | 0.005884122  | 3.214964  | 0.0018302 | 0.99854  | NA       |
| si:dkey-192118.9  | 27.96681947 | -0.013858488 | 0.3557005 | -0.038961 | 0.968921 | 0.996315 |
| si:ch211-255i20.3 | 31.2048984  | 0.014405241  | 0.342563  | 0.0420514 | 0.966458 | 0.996315 |
| chl1a             | 386.5694767 | 0.044535207  | 0.1318883 | 0.3376736 | 0.735609 | 0.972535 |
| ccn5              | 11.21942793 | 0.240348985  | 0.5787027 | 0.4153238 | 0.677905 | 0.965257 |
| fam83d            | 101.449603  | -0.06909967  | 0.2124646 | -0.325229 | 0.745008 | 0.974094 |
| znf296            | 435.0186161 | 0.174427334  | 0.1114218 | 1.5654691 | 0.117473 | 0.641157 |
| wu:fj20b03        | 0.158915748 | 0.967652056  | 4.0804729 | 0.2371421 | 0.812547 | NA       |
| si:dkey-28d5.11   | 0.173729368 | -0.955901296 | 4.0804729 | -0.234262 | 0.814781 | NA       |
| si:ch211-141o9.10 | 7.537355208 | -0.119373855 | 0.694377  | -0.171915 | 0.863504 | NA       |
| herc1             | 1936.5903   | 0.056012717  | 0.105475  | 0.5310523 | 0.595383 | 0.954434 |
| csmd3a            | 29.57451361 | 0.138319114  | 0.3531835 | 0.3916353 | 0.695328 | 0.96736  |
| rnf165a           | 468.7546536 | -0.202819489 | 0.1160891 | -1.747102 | 0.08062  | 0.550664 |
| si:dkey-183p4.10  | 10.27066177 | 0.079988321  | 0.6280715 | 0.1273554 | 0.898659 | NA       |
| rcela             | 4.409274686 | -0.538020283 | 0.9151813 | -0.587884 | 0.55661  | NA       |
| si:zfos-1897c11.1 | 5.739527168 | 1.506912587  | 0.854667  | 1.7631576 | 0.077874 | NA       |
| treh              | 3.832200632 | 0.129192191  | 0.9969006 | 0.1295938 | 0.896888 | NA       |
| bcor11            | 365.0355479 | 0.041781194  | 0.1203946 | 0.3470355 | 0.728565 | 0.970604 |
| lmx1a1            | 2.680813421 | -0.313857236 | 1.2231765 | -0.256592 | 0.797494 | NA       |
| dnase2b           | 12.27820272 | -0.227096868 | 0.5471191 | -0.415078 | 0.678085 | 0.965257 |
| csmd3a            | 30.18542878 | 0.033469944  | 0.3962165 | 0.0844739 | 0.93268  | 0.992702 |
| si:dkey-48p11.3   | 75.17279807 | -0.170953546 | 0.2364288 | -0.723066 | 0.469639 | 0.924505 |
| ccdc173           | 30.32788364 | -0.19714183  | 0.3432236 | -0.574383 | 0.565709 | 0.948739 |
| tegt              | 2913.456321 | -0.137177255 | 0.079189  | -1.732276 | 0.083224 | 0.556259 |
| cd248b            | 314.3626674 | 0.147919339  | 0.1212235 | 1.2202204 | 0.222381 | 0.788748 |
| ints5             | 201.0396206 | -0.11904012  | 0.1511725 | -0.787446 | 0.431021 | 0.91234  |
| smarcc2           | 1416.02748  | 0.079822168  | 0.07843   | 1.0177503 | 0.308797 | 0.861088 |
| usp54a            | 579.6972813 | 0.009060066  | 0.1046708 | 0.0865577 | 0.931023 | 0.992702 |
| tor1              | 435.3869587 | -0.08826338  | 0.1182729 | -0.746269 | 0.455505 | 0.921215 |
| rnf6              | 381.9605161 | 0.039843376  | 0.1179124 | 0.3379065 | 0.735434 | 0.972535 |
| CU207281.2        | 1.709828404 | 0.638900379  | 1.5032996 | 0.4249987 | 0.670838 | NA       |
| si:ch211-186e20.7 | 103.1150464 | 0.225233605  | 0.2096891 | 1.0741314 | 0.282764 | 0.844235 |
| gltpb             | 5.017881036 | 0.581047288  | 0.8482582 | 0.6849887 | 0.493351 | NA       |
| si:ch211-140m22.7 | 1034.347439 | 0.153860418  | 0.1064856 | 1.4448935 | 0.148488 | 0.696298 |
| si:ch73-34314.8   | 0.948309339 | 0.013153536  | 2.2227673 | 0.0059176 | 0.995278 | NA       |
| tmem26a           | 13.76220032 | 0.52571565   | 0.5632912 | 0.9332929 | 0.350669 | 0.880195 |
| elf3              | 995.4027535 | -0.646673564 | 0.1160345 | -5.573116 | 2.50E-08 | 3.89E-06 |
| GPR89B            | 38.78174868 | -0.06397141  | 0.3141409 | -0.203639 | 0.838635 | 0.984979 |
| kiss2             | 2.641863189 | 0.029941083  | 1.1787311 | 0.0254011 | 0.979735 | NA       |
| TMEM151A          | 211.3115524 | -0.039497472 | 0.1450401 | -0.272321 | 0.785375 | 0.97627  |
| zfat              | 143.7865933 | 0.367368686  | 0.1763796 | 2.0828295 | 0.037267 | 0.377702 |
| abcc10            | 222.1466293 | -0.011734332 | 0.1421932 | -0.082524 | 0.93423  | 0.992702 |
| b4galt2           | 22.37362418 | -0.006912651 | 0.410026  | -0.016859 | 0.986549 | 0.996965 |
| cdh24b            | 37.36387699 | -0.031094015 | 0.3529882 | -0.088088 | 0.929807 | 0.992702 |
| nitr3a            | 5.826696216 | 0.410620039  | 0.8124535 | 0.5054074 | 0.613273 | NA       |
| kbtbd7            | 37.00593163 | -0.044951073 | 0.3344603 | -0.134399 | 0.893087 | 0.989291 |
| si:dkey-13n15.11  | 18.02694198 | -0.216493556 | 0.4676098 | -0.462979 | 0.643379 | 0.959994 |
| drl               | 3.178925761 | -0.157254919 | 1.1006051 | -0.14288  | 0.886385 | NA       |
| wscdlb            | 318.6012538 | -0.035268539 | 0.1239481 | -0.284543 | 0.775994 | 0.975826 |
| NAV1 (1 of many)  | 50.43229307 | -0.261375143 | 0.2746767 | -0.951574 | 0.341313 | 0.878134 |
| zgc:162060        | 0.317831496 | 1.808837541  | 3.5779923 | 0.5055454 | 0.613176 | NA       |

|                  |             |              |           |           |          |          |
|------------------|-------------|--------------|-----------|-----------|----------|----------|
| pacsin2          | 667.0398887 | -0.072378115 | 0.1000904 | -0.723127 | 0.469602 | 0.924505 |
| dtx4b            | 12.41027378 | -0.119926803 | 0.5649994 | -0.21226  | 0.831904 | 0.98349  |
| si:dkey-79d12.4  | 49.09063533 | -0.214005346 | 0.2742087 | -0.780447 | 0.435128 | 0.914408 |
| fycolb           | 39.94624546 | -0.109873142 | 0.3043864 | -0.360966 | 0.718125 | 0.96909  |
| zcchc24          | 575.9665077 | 0.131299886  | 0.0995875 | 1.3184379 | 0.187357 | 0.751481 |
| zgc:l12001       | 229.6728834 | -0.0221647   | 0.1454216 | -0.152417 | 0.878858 | 0.987881 |
| chpfb            | 117.4552645 | 0.002278454  | 0.1861818 | 0.0122378 | 0.990236 | 0.997679 |
| xpola            | 2873.100748 | -0.08239945  | 0.0717589 | -1.148282 | 0.250852 | 0.820469 |
| il10rb           | 438.4402806 | -0.059253494 | 0.1188657 | -0.498491 | 0.618138 | 0.957354 |
| phf19            | 139.6512578 | 0.260898032  | 0.1734222 | 1.5044097 | 0.132476 | 0.666729 |
| emilin3a         | 407.587575  | 0.079522013  | 0.1235913 | 0.6434273 | 0.519947 | 0.938995 |
| acd              | 79.22606323 | -0.19269972  | 0.2238156 | -0.860975 | 0.389252 | 0.896362 |
| RNF208           | 350.3135434 | 0.169011427  | 0.1213621 | 1.3926208 | 0.163734 | 0.71945  |
| snx8b            | 239.9306962 | 0.293907061  | 0.1722939 | 1.7058469 | 0.088037 | 0.568063 |
| dip2a            | 394.7191304 | -0.035117197 | 0.1165576 | -0.301286 | 0.763196 | 0.975374 |
| nudcd2           | 236.5208258 | 0.077641223  | 0.1490723 | 0.5208294 | 0.602486 | 0.956045 |
| syt7b            | 234.4506823 | 0.09870207   | 0.144333  | 0.6838497 | 0.49407  | 0.931926 |
| ftr05            | 9.116757351 | -0.014301885 | 0.6703193 | -0.021336 | 0.982978 | NA       |
| elk1             | 72.58981999 | -0.143817151 | 0.2364721 | -0.608178 | 0.543069 | 0.944974 |
| abcg4b           | 43.09243945 | 0.215006055  | 0.3000179 | 0.7166441 | 0.473594 | 0.924993 |
| rrm2             | 560.2534587 | 1.400793692  | 0.1203798 | 11.636451 | 2.69E-31 | 1.06E-27 |
| si:ch211-232i5.1 | 70.60438876 | -0.248657276 | 0.249321  | -0.997338 | 0.318601 | 0.867746 |
| nudt5            | 444.7308677 | -0.039710286 | 0.112562  | -0.352786 | 0.724249 | 0.970402 |
| ilrun            | 537.110857  | 0.014020198  | 0.1018917 | 0.137599  | 0.890557 | 0.989291 |
| nab2             | 48.03189154 | -0.279318615 | 0.296508  | -0.942027 | 0.346179 | 0.87905  |
| dph2             | 111.9963303 | -0.232128093 | 0.1874802 | -1.238147 | 0.215662 | 0.78305  |
| lrfn4b           | 360.8495952 | 0.024585158  | 0.1163721 | 0.2112634 | 0.832682 | 0.983557 |
| armac5           | 255.4353981 | 0.073806937  | 0.1322403 | 0.5581274 | 0.576757 | 0.950653 |
| CNNM1            | 68.90896076 | 0.197674901  | 0.237273  | 0.8331116 | 0.404782 | 0.901305 |
| si:ch211-186j3.6 | 491.3614756 | 0.170196649  | 0.1148684 | 1.4816669 | 0.138429 | 0.676209 |
| limd2            | 241.4375777 | 0.235775723  | 0.1397609 | 1.6869939 | 0.091605 | 0.57849  |
| zgc:l72065       | 6.503892741 | -0.221218798 | 0.7429939 | -0.29774  | 0.765902 | NA       |
| lmf2a            | 56.83201158 | -0.321229523 | 0.2602715 | -1.23421  | 0.217125 | 0.784302 |
| cipcb            | 1093.383148 | 0.046179639  | 0.0844936 | 0.5465462 | 0.584691 | 0.952411 |
| nlrc9            | 0.846174082 | -0.46494763  | 2.1994676 | -0.211391 | 0.832582 | NA       |
| psda             | 120.2951922 | 0.240400888  | 0.1848455 | 1.3005504 | 0.193412 | 0.757219 |
| depdc5           | 598.8405449 | 0.050603888  | 0.1220674 | 0.414557  | 0.678466 | 0.965257 |
| ocr1             | 661.5088898 | 0.058759687  | 0.0963609 | 0.6097874 | 0.542003 | 0.944974 |
| dok1a            | 75.77773244 | 0.446581204  | 0.2446659 | 1.8252694 | 0.06796  | 0.510097 |
| uspl2a           | 614.8673579 | -0.23428755  | 0.0992654 | -2.360215 | 0.018264 | 0.251504 |
| ap5z1            | 134.2497443 | 0.038567515  | 0.1869228 | 0.2063285 | 0.836534 | 0.984386 |
| atp5mea          | 702.9308531 | 0.094617684  | 0.1232903 | 0.7674379 | 0.442821 | 0.916336 |
| si:ch73-237c6.1  | 248.7545752 | 0.426956625  | 0.1389075 | 3.0736769 | 0.002114 | 0.055672 |
| sinhcafl         | 942.147905  | -0.265648914 | 0.0974326 | -2.726489 | 0.006401 | 0.122179 |
| sh3bp1           | 3.060489361 | -0.173789435 | 1.1622837 | -0.149524 | 0.88114  | NA       |
| slitrk3a         | 277.428986  | 0.14268141   | 0.1282403 | 1.1126098 | 0.265876 | 0.831945 |
| ruse1            | 131.3452239 | 0.379611937  | 0.1789925 | 2.1208265 | 0.033936 | 0.358663 |
| neur14           | 307.4254818 | -0.009778704 | 0.1310914 | -0.074595 | 0.940537 | 0.992857 |
| CR391986.1       | 56.01616897 | 0.019957013  | 0.2690179 | 0.0741847 | 0.940863 | 0.992857 |
| tex2l            | 113.2261139 | 0.218978924  | 0.2113888 | 1.0359058 | 0.300246 | 0.856251 |
| kdm2ab           | 1604.805363 | -0.042630903 | 0.0820808 | -0.519378 | 0.603497 | 0.956045 |
| crygm2f          | 39.0959287  | -0.355396931 | 0.3355618 | -1.05911  | 0.28955  | 0.846246 |
| mrc2             | 53.37500229 | -0.018938497 | 0.2808251 | -0.067439 | 0.946232 | 0.99381  |
| wdr47a           | 150.0656463 | -0.156598371 | 0.1798749 | -0.870596 | 0.383975 | 0.895192 |

|                   |             |              |           |           |          |          |
|-------------------|-------------|--------------|-----------|-----------|----------|----------|
| si:ch211-202h22.8 | 73.65625258 | -0.278752816 | 0.2315759 | -1.203721 | 0.228697 | 0.796173 |
| appl2             | 93.28114838 | -0.009463847 | 0.2058769 | -0.045968 | 0.963335 | 0.995927 |
| si:dkey-18j18.3   | 30.75297053 | 0.506015255  | 0.3721182 | 1.3598238 | 0.173886 | 0.733946 |
| SPAG9             | 1030.576859 | -0.022418797 | 0.1019074 | -0.219992 | 0.825878 | 0.982196 |
| si:ch211-218g4.2  | 104.2289454 | -0.267284628 | 0.2009145 | -1.33034  | 0.183406 | 0.747151 |
| il10              | 4.477210104 | -0.330422478 | 0.9353167 | -0.353273 | 0.723884 | NA       |
| grin2ca           | 230.3140073 | -0.287136992 | 0.14353   | -2.000536 | 0.045442 | 0.418148 |
| si:ch211-264f5.8  | 261.4907768 | -0.014481386 | 0.1332079 | -0.108713 | 0.91343  | 0.991119 |
| si:dkey-56i24.1   | 11.79735592 | -0.565981091 | 0.6040858 | -0.936922 | 0.348799 | 0.880195 |
| inavaa            | 297.5315895 | 0.171018134  | 0.1398091 | 1.2232261 | 0.221244 | 0.787842 |
| SLC18A1           | 2.756485174 | 0.88743765   | 1.2490485 | 0.710491  | 0.4774   | NA       |
| zgc:175284        | 65.94136827 | -0.417818179 | 0.2391768 | -1.746901 | 0.080654 | 0.550687 |
| pimr208           | 2.149913281 | 0.186176459  | 1.3397624 | 0.1389623 | 0.88948  | NA       |
| hpse2             | 4.971410095 | -0.960578608 | 0.883573  | -1.087153 | 0.276969 | NA       |
| znf576.2          | 748.1816578 | -0.050228818 | 0.0915283 | -0.548779 | 0.583157 | 0.952214 |
| si:dkey-78p8.1    | 86.13534285 | -0.080893081 | 0.2176808 | -0.371613 | 0.710181 | 0.968928 |
| si:dkeyp-100h4.1  | 14.41050614 | -0.331818584 | 0.5613017 | -0.591159 | 0.554414 | 0.947449 |
| cacna2d2b         | 185.5292242 | 0.026754419  | 0.1708449 | 0.1566006 | 0.87556  | 0.987881 |
| CU984600.1        | 511.6161456 | 0.058262497  | 0.1042401 | 0.5589258 | 0.576212 | 0.950611 |
| cxcr3.1           | 0.647689638 | -2.824814845 | 2.5064236 | -1.12703  | 0.25973  | NA       |
| art4              | 7.81656062  | -0.82223139  | 0.7206247 | -1.140998 | 0.253871 | NA       |
| fn3c3ba           | 478.2671784 | 0.106469853  | 0.1075898 | 0.989591  | 0.322374 | 0.870226 |
| sc:d0202          | 1.473262941 | -0.365764327 | 1.5700333 | -0.232966 | 0.815788 | NA       |
| zgc:194443        | 0.31437473  | -1.788572922 | 3.5930657 | -0.497785 | 0.618636 | NA       |
| zgc:165453        | 1.663695949 | -0.5971764   | 1.4430799 | -0.413821 | 0.679005 | NA       |
| pacs2             | 34.28589669 | 0.124945625  | 0.3268178 | 0.3823097 | 0.702232 | 0.968134 |
| tex2              | 243.2796123 | -0.001887195 | 0.1396039 | -0.013518 | 0.989214 | 0.997589 |
| slc12a5b          | 114.6188187 | 0.210898041  | 0.2112917 | 0.9981371 | 0.318213 | 0.867746 |
| fam160a2          | 149.0157257 | 0.065683608  | 0.171741  | 0.3824574 | 0.702122 | 0.968134 |
| crygm3            | 13.94186517 | -0.493154413 | 0.518692  | -0.950765 | 0.341724 | 0.878134 |
| zbtb46            | 112.6692306 | -0.108356902 | 0.1873284 | -0.578433 | 0.562972 | 0.948728 |
| si:ch211-67e16.3  | 4.39916239  | 0.241870285  | 0.9175928 | 0.2635922 | 0.792094 | NA       |
| fhit              | 99.91635955 | -0.119108142 | 0.2086809 | -0.570767 | 0.568158 | 0.948983 |
| vcamla            | 2.499850502 | -0.167781508 | 1.1959875 | -0.140287 | 0.888433 | NA       |
| BX072576.1        | 5.733879701 | -0.844443711 | 0.8342363 | -1.012236 | 0.311425 | NA       |
| ccl34b.9          | 0.173729368 | -0.955901296 | 4.0804729 | -0.234262 | 0.814781 | NA       |
| zgc:171506        | 0.983671166 | -0.053965044 | 1.9476354 | -0.027708 | 0.977895 | NA       |
| tulplb            | 38.51999261 | -0.150548131 | 0.3153423 | -0.477412 | 0.633069 | 0.957356 |
| espnla            | 19.1281299  | 0.402637329  | 0.4377037 | 0.9198855 | 0.357633 | 0.884199 |
| mybbpla           | 903.9496164 | -0.18297414  | 0.0929903 | -1.967669 | 0.049106 | 0.435115 |
| rbsn              | 22.3064494  | 0.139206024  | 0.4106267 | 0.3390087 | 0.734603 | 0.972021 |
| eps15             | 596.9315389 | -0.071769129 | 0.0995649 | -0.720828 | 0.471016 | 0.924838 |
| cb1c              | 88.26904522 | -0.046401292 | 0.2211304 | -0.209837 | 0.833795 | 0.983583 |
| BX323458.1        | 11.34854618 | 0.393092076  | 0.597778  | 0.6575888 | 0.510802 | 0.936253 |
| si:ch211-204d2.4  | 20.11743529 | 0.216755883  | 0.4505296 | 0.4811135 | 0.630436 | 0.957354 |
| aatka             | 188.9852462 | 0.19685045   | 0.1492268 | 1.3191357 | 0.187124 | 0.751002 |
| ora4              | 1.331721622 | 1.594539771  | 1.8084122 | 0.8817347 | 0.37792  | NA       |
| cdh12a            | 17.40270362 | -0.344487807 | 0.4691777 | -0.734237 | 0.462804 | 0.922698 |
| cspg4             | 108.8385431 | 0.071999734  | 0.19753   | 0.3645003 | 0.715484 | 0.96909  |
| ctnnd1            | 1654.453175 | -0.035101105 | 0.0774107 | -0.45344  | 0.650232 | 0.960708 |
| n1rc7             | 2.990509915 | -2.352076253 | 1.2669899 | -1.856429 | 0.063392 | NA       |
| nacclb            | 7.278991651 | -0.082609925 | 0.7847817 | -0.105265 | 0.916166 | NA       |
| map7a             | 27.31336056 | 0.121120724  | 0.3721212 | 0.3254873 | 0.744812 | 0.974094 |
| si:ch211-19719.2  | 204.239924  | 0.000286985  | 0.1585389 | 0.0018102 | 0.998556 | 0.999364 |

|                     |             |              |           |           |          |          |
|---------------------|-------------|--------------|-----------|-----------|----------|----------|
| gal3st1b            | 40.72322079 | 0.544141653  | 0.3044189 | 1.7874765 | 0.073861 | 0.529749 |
| si:ch211-114113.4   | 7.293945833 | 0.512988314  | 0.7300351 | 0.70269   | 0.482249 | NA       |
| vip                 | 135.2456485 | -0.118086108 | 0.1904054 | -0.620182 | 0.535138 | 0.943336 |
| unc13d              | 21.25263469 | 0.594038778  | 0.4291595 | 1.3841913 | 0.1663   | 0.722887 |
| zgc:194398          | 82.11434494 | 0.27750893   | 0.2253529 | 1.2314417 | 0.218158 | 0.785379 |
| TESK1               | 363.9183706 | -0.026490833 | 0.1149415 | -0.230472 | 0.817725 | 0.981594 |
| ftr14l              | 12.88370772 | 0.9213478    | 0.5402868 | 1.705294  | 0.08814  | 0.568452 |
| ovollb              | 13.70839312 | 0.314012899  | 0.5130376 | 0.6120661 | 0.540494 | 0.944563 |
| ora5                | 1.356046616 | 0.792643957  | 1.7222439 | 0.4602391 | 0.645345 | NA       |
| CABZ01049847.1      | 113.1733694 | 0.351413803  | 0.1931106 | 1.8197542 | 0.068796 | 0.513259 |
| bnipla              | 41.66895465 | 0.137314147  | 0.3151879 | 0.435658  | 0.663085 | 0.964736 |
| nphp3               | 56.74570148 | 0.455833232  | 0.2605552 | 1.749469  | 0.08021  | 0.549641 |
| twist2              | 185.835974  | 0.059072408  | 0.1551266 | 0.3808012 | 0.703351 | 0.968134 |
| si:dkey-181m9.8     | 74.58146016 | 0.062913013  | 0.2426934 | 0.2592284 | 0.795459 | 0.978498 |
| CU467961.1          | 85.27263094 | 0.198228928  | 0.2254748 | 0.8791622 | 0.379313 | 0.895192 |
| si:ch211-57m13.8    | 0.157187365 | -0.955901296 | 4.0804729 | -0.234262 | 0.814781 | NA       |
| F0704871.1          | 3.321777663 | -1.21677839  | 1.0491541 | -1.159771 | 0.246142 | NA       |
| foxp3b              | 1.365706081 | 3.891476754  | 1.8557422 | 2.0969922 | 0.035994 | NA       |
| nkx3-1              | 13.82231315 | 0.063768111  | 0.5249816 | 0.1214673 | 0.903321 | 0.990121 |
| zgc:173575          | 76.21742004 | -0.05437742  | 0.2249758 | -0.241703 | 0.80901  | 0.980642 |
| si:zfos-323e3.4     | 91.49300226 | -0.275387141 | 0.2221631 | -1.239572 | 0.215134 | 0.78275  |
| phkb                | 1362.879798 | 0.18218693   | 0.0877467 | 2.0762825 | 0.037868 | 0.381068 |
| pik3ap1             | 44.57473755 | 0.205368574  | 0.2967925 | 0.6919601 | 0.488962 | 0.931926 |
| CABZ01046425.1      | 0.157187365 | -0.955901296 | 4.0804729 | -0.234262 | 0.814781 | NA       |
| ptprh               | 0.964730988 | -0.018658301 | 1.9582344 | -0.009528 | 0.992398 | NA       |
| si:ch211-13f8.2     | 26.40673413 | -0.271335563 | 0.4064322 | -0.667604 | 0.504387 | 0.935541 |
| zgc:162255          | 178.7924581 | -0.158956545 | 0.1599814 | -0.993594 | 0.320421 | 0.868301 |
| brinpl              | 180.6753903 | 0.149389638  | 0.1645848 | 0.9076758 | 0.36405  | 0.886323 |
| spry2               | 977.31521   | 0.038604359  | 0.0875066 | 0.4411596 | 0.659097 | 0.962839 |
| fam83b              | 56.62669116 | -0.237111937 | 0.2700033 | -0.878182 | 0.379845 | 0.895192 |
| cecr2               | 463.9486366 | -0.249860338 | 0.1127826 | -2.215416 | 0.026732 | 0.315011 |
| dcaf6               | 605.3435199 | 0.181559962  | 0.0990039 | 1.8338659 | 0.066674 | 0.504944 |
| pimr22              | 0.325573202 | 0.005883621  | 3.3172783 | 0.0017736 | 0.998585 | NA       |
| MY09B               | 556.7384827 | 0.022051597  | 0.1090461 | 0.2022227 | 0.839743 | 0.984979 |
| zgc:110063          | 448.9336608 | 0.206114955  | 0.105721  | 1.9496123 | 0.051222 | 0.443542 |
| si:dkey-175m17.7    | 45.22644699 | -0.278038642 | 0.3250642 | -0.855335 | 0.392366 | 0.897688 |
| tmod1               | 62.46067241 | 0.441894734  | 0.2539811 | 1.7398726 | 0.081881 | 0.552725 |
| coll2a1a            | 7732.843063 | 0.271366689  | 0.0786647 | 3.4496648 | 0.000561 | 0.019327 |
| si:ch211-263k4.2    | 204.1492496 | -0.271397605 | 0.1512114 | -1.794822 | 0.072682 | 0.52617  |
| arhgap10            | 421.4910178 | 0.052560752  | 0.1168189 | 0.4499335 | 0.652758 | 0.960708 |
| CEP170B (1 of many) | 36.34097078 | -0.010655812 | 0.3149901 | -0.033829 | 0.973013 | 0.996315 |
| sec22a              | 332.9454865 | -0.111870077 | 0.1186645 | -0.942743 | 0.345813 | 0.878481 |
| rec8a               | 0.706508242 | 2.93232624   | 2.4625218 | 1.1907818 | 0.233739 | NA       |
| best1               | 6.624116657 | 0.889067779  | 0.7553241 | 1.1770679 | 0.239168 | NA       |
| tmem234             | 55.1216727  | 0.06253692   | 0.2726093 | 0.2294013 | 0.818557 | 0.981594 |
| amot                | 297.5539499 | -0.050954141 | 0.1297762 | -0.392631 | 0.694592 | 0.96736  |
| tcf20               | 1688.377227 | 0.009969437  | 0.0929269 | 0.1072825 | 0.914565 | 0.991119 |
| zmp:0000000845      | 2.445499181 | 3.680838207  | 1.6029974 | 2.2962222 | 0.021663 | NA       |
| lyrm4               | 131.5153638 | 0.040719201  | 0.1830474 | 0.2224517 | 0.823962 | 0.982196 |
| zc3h4               | 1288.459448 | -0.148765428 | 0.1046055 | -1.422156 | 0.154981 | 0.704624 |
| zmp:0000000846      | 755.3649534 | 0.218682228  | 0.0989904 | 2.2091251 | 0.027166 | 0.31767  |
| mcoln3a             | 82.18020994 | -0.149958498 | 0.2348061 | -0.638648 | 0.523052 | 0.939336 |
| AL954361.1          | 1.338473762 | 1.655884431  | 1.8743577 | 0.883441  | 0.376998 | NA       |
| robo2               | 106.6082949 | -0.054980823 | 0.205165  | -0.267984 | 0.788712 | 0.976703 |

|                   |             |              |           |           |          |          |
|-------------------|-------------|--------------|-----------|-----------|----------|----------|
| unm_sa808         | 29.84348468 | 0.065581754  | 0.3644439 | 0.1799502 | 0.857192 | 0.985643 |
| trip11            | 826.2260731 | -0.013057151 | 0.0879858 | -0.148401 | 0.882027 | 0.988344 |
| mcripl            | 440.758153  | -0.107026766 | 0.1222007 | -0.875828 | 0.381124 | 0.895192 |
| dyncli2a          | 1485.880082 | -0.096119929 | 0.0820502 | -1.171477 | 0.241407 | 0.810468 |
| si:dkey-92i15.4   | 25.86328619 | -0.811193995 | 0.3947998 | -2.054697 | 0.039908 | 0.391511 |
| glis2a            | 164.2270269 | 0.015142495  | 0.1747644 | 0.0866452 | 0.930954 | 0.992702 |
| ifi46             | 10.08023371 | -1.365466547 | 0.6335813 | -2.155156 | 0.03115  | NA       |
| fam98a            | 427.0082865 | 0.143973115  | 0.1260726 | 1.1419855 | 0.25346  | 0.823246 |
| chpfa             | 65.60325387 | 0.041592918  | 0.2426358 | 0.1714212 | 0.863893 | 0.985952 |
| CABZ01059627.1    | 2.516392505 | -0.179090833 | 1.1950274 | -0.149863 | 0.880872 | NA       |
| si:ch211-163m17.4 | 0.341366344 | 1.891903201  | 3.2128156 | 0.5888614 | 0.555954 | NA       |
| acsl2             | 132.3592352 | -0.405161977 | 0.2009026 | -2.016709 | 0.043726 | 0.410733 |
| larp4aa           | 458.9271185 | 0.139649556  | 0.1079734 | 1.2933702 | 0.195883 | 0.76113  |
| cdh26.1           | 103.5896615 | -0.136693465 | 0.2068808 | -0.660735 | 0.508782 | 0.935875 |
| hspl15            | 172.3320871 | 0.157043958  | 0.1682995 | 0.9331219 | 0.350757 | 0.880195 |
| lrrc3             | 23.06721094 | -0.142905567 | 0.3985949 | -0.358523 | 0.719952 | 0.969318 |
| zeb2b             | 1043.894067 | -0.009559277 | 0.0964312 | -0.09913  | 0.921035 | 0.992138 |
| plxcl             | 38.22037911 | -0.360577568 | 0.3303597 | -1.09147  | 0.275066 | 0.839541 |
| filipla           | 31.27194161 | 0.489566428  | 0.3720402 | 1.3158967 | 0.188209 | 0.753063 |
| zgc:194285        | 100.2109554 | 0.289473454  | 0.2037485 | 1.4207389 | 0.155393 | 0.705158 |
| oat               | 243.6329428 | 0.439454601  | 0.1522909 | 2.8856256 | 0.003906 | 0.085637 |
| BX901889.2        | 0.476747244 | 2.393381959  | 3.0525537 | 0.7840589 | 0.433006 | NA       |
| si:ch211-256e16.4 | 4.193097878 | 0.140116853  | 0.9380964 | 0.149363  | 0.881267 | NA       |
| vtg4              | 0.173729368 | -0.955901296 | 4.0804729 | -0.234262 | 0.814781 | NA       |
| tiamla            | 1344.737427 | 0.02208987   | 0.0813321 | 0.271601  | 0.785929 | 0.97627  |
| spc25             | 211.3264653 | -0.035109951 | 0.1579931 | -0.222225 | 0.824139 | 0.982196 |
| znf692            | 46.67628176 | 0.160752659  | 0.2795111 | 0.5751208 | 0.56521  | 0.948739 |
| anapc13           | 154.9161454 | -0.17959101  | 0.1744158 | -1.029672 | 0.303164 | 0.85729  |
| ccdc88aa          | 101.9935749 | -0.112422122 | 0.1975247 | -0.569155 | 0.569251 | 0.948983 |
| ppip5k2           | 812.2827953 | 0.001271974  | 0.094099  | 0.0135174 | 0.989215 | 0.997589 |
| AL954696.1        | 180.8519555 | -0.04371395  | 0.1655725 | -0.264017 | 0.791767 | 0.977853 |
| ftr07             |             | 0 NA         | NA        | NA        | NA       | NA       |
| tctnl             | 139.4005002 | -0.077574572 | 0.1724046 | -0.449957 | 0.652742 | 0.960708 |
| gpr137ba          | 82.30208205 | 0.428149148  | 0.2309478 | 1.8538781 | 0.063757 | 0.493627 |
| gzm3              | 1.686094135 | 0.672481678  | 1.5803796 | 0.4255191 | 0.670458 | NA       |
| hmox2b            | 27.43171773 | 0.866602841  | 0.3858487 | 2.2459656 | 0.024706 | 0.302486 |
| best4             | 4.4836638   | -1.755957374 | 1.0247125 | -1.71361  | 0.0866   | NA       |
| ppplr37           | 1026.096151 | 0.007251293  | 0.0903799 | 0.0802312 | 0.936053 | 0.992702 |
| cuxla             | 1322.934623 | -0.032835921 | 0.0910801 | -0.360517 | 0.71846  | 0.96909  |
| fap               | 680.9367602 | 0.244554696  | 0.0970222 | 2.5206062 | 0.011715 | 0.190352 |
| nucksla           | 6539.21815  | 0.013961983  | 0.0711685 | 0.1961819 | 0.844468 | 0.985174 |
| myo15ab           | 23.42441521 | -0.042215117 | 0.4018192 | -0.10506  | 0.916328 | 0.991314 |
| klh123            | 29.8391902  | 0.122727489  | 0.3801397 | 0.3228484 | 0.74681  | 0.97419  |
| znf990            | 25.21461121 | 0.036786008  | 0.3788522 | 0.0970986 | 0.922648 | 0.99233  |
| mocsl             | 19.42772906 | -0.005052463 | 0.4570781 | -0.011054 | 0.99118  | 0.997679 |
| zgc:195081        | 21.55659476 | 0.05910156   | 0.4308983 | 0.137159  | 0.890905 | 0.989291 |
| snpha             | 0.666819193 | 1.487924459  | 2.4081466 | 0.6178712 | 0.53666  | NA       |
| si:ch211-284d12.3 | 1.957363094 | -1.608186298 | 1.6308555 | -0.9861   | 0.324084 | NA       |
| swi5              | 104.8813698 | -0.297918621 | 0.1943706 | -1.532735 | 0.125341 | 0.654648 |
| adamts14          | 38.56174719 | 0.133133769  | 0.3330368 | 0.399757  | 0.689336 | 0.966763 |
| timeless          | 674.2274361 | -0.048865301 | 0.0950905 | -0.513882 | 0.607334 | 0.956718 |
| dap3              | 645.0023346 | -0.04213356  | 0.0985948 | -0.427341 | 0.669131 | 0.965037 |
| si:ch211-150o23.3 | 83.24766766 | 0.167130883  | 0.2448668 | 0.682538  | 0.494899 | 0.931926 |
| si:dkey-76b14.2   | 9.164935971 | -0.532949311 | 0.6398173 | -0.832971 | 0.404861 | NA       |

|                    |             |              |           |           |          |          |
|--------------------|-------------|--------------|-----------|-----------|----------|----------|
| si:ch73-60h1.1     | 237.7802242 | 0.057318786  | 0.1410858 | 0.406269  | 0.684545 | 0.966043 |
| wnt8a              | 0 NA        | NA           | NA        | NA        | NA       | NA       |
| si:dkey-266m15.6   | 246.7048966 | 0.264511712  | 0.1443801 | 1.8320508 | 0.066944 | 0.506105 |
| socs4              | 3.711597735 | 0.862629428  | 1.0885705 | 0.7924424 | 0.428103 | NA       |
| acaca              | 1302.25401  | 0.147400451  | 0.079277  | 1.8593093 | 0.062983 | 0.489719 |
| kazald2            | 6.898132546 | 0.688778634  | 0.7584005 | 0.9081991 | 0.363773 | NA       |
| si:ch73-256j6.4    | 1.336676355 | -1.486211065 | 1.8623398 | -0.798034 | 0.424851 | NA       |
| ikbip              | 393.163521  | 0.150575304  | 0.1244905 | 1.2095329 | 0.226458 | 0.793959 |
| si:ch211-80h18.1   | 2144.863968 | 0.354984763  | 0.0754412 | 4.7054472 | 2.53E-06 | 0.000223 |
| ddr1               | 870.245887  | 0.192687825  | 0.0898436 | 2.1447023 | 0.031977 | 0.347421 |
| noctb              | 132.2411722 | -0.110663592 | 0.1859909 | -0.594995 | 0.551847 | 0.947215 |
| lingo4b            | 127.619088  | -0.039997067 | 0.1799992 | -0.222207 | 0.824153 | 0.982196 |
| adgrblb            | 877.8437687 | 0.16900765   | 0.1071681 | 1.5770328 | 0.114788 | 0.635447 |
| pocla              | 27.88300732 | -0.078033813 | 0.3722569 | -0.209624 | 0.833962 | 0.983583 |
| lrrccl             | 141.9660363 | -0.362209268 | 0.1746974 | -2.073352 | 0.03814  | 0.382634 |
| si:ch211-158d24.2  | 78.53442195 | -0.058410828 | 0.237156  | -0.246297 | 0.805452 | 0.979883 |
| cers3a             | 135.3614954 | -0.533515237 | 0.1859499 | -2.869135 | 0.004116 | 0.08895  |
| inpp5ja            | 13.29024861 | 0.103442851  | 0.5548327 | 0.1864397 | 0.8521   | 0.985174 |
| cars2              | 115.3332544 | -0.1237961   | 0.1930714 | -0.641193 | 0.521397 | 0.939056 |
| si:ch211-264f5.2   | 21.83071871 | -0.178619834 | 0.456122  | -0.391605 | 0.69535  | 0.96736  |
| zgc:194839         | 35.90595888 | 0.101293337  | 0.3378041 | 0.2998582 | 0.764285 | 0.975374 |
| zgc:171242         | 45.63196594 | -0.294881506 | 0.3190857 | -0.924145 | 0.355411 | 0.882347 |
| grhl3              | 111.1368748 | 0.020664613  | 0.2103251 | 0.0982508 | 0.921733 | 0.992138 |
| si:ch211-57n23.4   | 1.203102906 | -1.262120851 | 1.8388013 | -0.686382 | 0.492472 | NA       |
| si:dkey-22i16.10   | 0 NA        | NA           | NA        | NA        | NA       | NA       |
| slc9a5             | 184.0029427 | -0.149142662 | 0.1579155 | -0.944446 | 0.344942 | 0.878434 |
| lrig2              | 757.8779642 | -0.012530953 | 0.0894238 | -0.14013  | 0.888557 | 0.989291 |
| lonrf11            | 1115.698198 | 0.194631356  | 0.1103005 | 1.7645561 | 0.077638 | 0.542865 |
| mpegl.3            | 0.332524763 | 0.005883742  | 3.292841  | 0.0017868 | 0.998574 | NA       |
| wdr6               | 272.256758  | -0.025098115 | 0.1339053 | -0.187432 | 0.851322 | 0.985174 |
| stox2b             | 1103.800897 | 0.035400606  | 0.0848606 | 0.417162  | 0.67656  | 0.965257 |
| si:dkey-21c19.3    | 541.3866031 | -0.0649024   | 0.1064204 | -0.609868 | 0.541949 | 0.944974 |
| setd5              | 192.3051305 | 0.011925253  | 0.1490095 | 0.0800301 | 0.936213 | 0.992702 |
| fam222bb           | 396.7508586 | 0.161275228  | 0.1208697 | 1.33429   | 0.182109 | 0.744502 |
| myo16              | 205.0137101 | 0.135030335  | 0.1543697 | 0.8747205 | 0.381726 | 0.895192 |
| monla              | 167.3632992 | -0.017861518 | 0.1681574 | -0.106219 | 0.915409 | 0.991171 |
| nomo               | 2654.166042 | 0.037923061  | 0.0730338 | 0.5192536 | 0.603584 | 0.956045 |
| vwa8               | 282.9280896 | 0.084996593  | 0.1328189 | 0.6399433 | 0.522209 | 0.939056 |
| si:ch1073-184j22.2 | 92.50277913 | 0.401450065  | 0.2221217 | 1.807343  | 0.070709 | 0.520162 |
| micu3a             | 309.4684153 | 0.112080778  | 0.122806  | 0.9126655 | 0.361419 | 0.885719 |
| ldlrad3            | 220.2512742 | 0.161931679  | 0.1553785 | 1.0421755 | 0.29733  | 0.853945 |
| ptgerlc            | 1.637563505 | -0.572814497 | 1.5077409 | -0.379916 | 0.704008 | NA       |
| myo1hb             | 21.43395459 | 0.02766099   | 0.4183616 | 0.0661174 | 0.947284 | 0.99381  |
| tblcl10b           | 1155.177746 | 0.096383651  | 0.0842766 | 1.143659  | 0.252765 | 0.822335 |
| ptgerla            | 29.50675629 | 0.298384954  | 0.3471411 | 0.8595495 | 0.390037 | 0.897023 |
| zgc:194224         | 50.2160356  | -0.057699433 | 0.2829538 | -0.203918 | 0.838417 | 0.984797 |
| CT573423.1         | 0.173729368 | -0.955901296 | 4.0804729 | -0.234262 | 0.814781 | NA       |
| lrriq3             | 0.158915748 | 0.967652056  | 4.0804729 | 0.2371421 | 0.812547 | NA       |
| vh11               | 19.54925111 | 0.455758821  | 0.4363198 | 1.0445523 | 0.29623  | 0.853273 |
| CABZ01085419.1     | 157.8000351 | -0.103277289 | 0.1679466 | -0.614941 | 0.538594 | 0.943336 |
| inpp5kb            | 171.3982559 | 0.094484549  | 0.169097  | 0.5587594 | 0.576326 | 0.950611 |
| pnp5a              | 1808.460831 | 0.418633079  | 0.0921083 | 4.545008  | 5.49E-06 | 0.000429 |
| si:dkey-156m2.3    | 17.51553568 | 0.464599941  | 0.4982927 | 0.9323837 | 0.351138 | 0.880473 |
| scpp5              | 377.4399013 | -0.147737086 | 0.1335896 | -1.105903 | 0.268769 | 0.834131 |



|                   |             |              |           |           |          |          |
|-------------------|-------------|--------------|-----------|-----------|----------|----------|
| arhgef9b          | 771.8626796 | 0.126322403  | 0.0903526 | 1.3981055 | 0.162081 | 0.716681 |
| fgf9              | 0.474898508 | 0.855240867  | 2.7202602 | 0.3143967 | 0.75322  | NA       |
| BX322577.1        | 7.09719002  | -0.05948655  | 0.7084583 | -0.083966 | 0.933083 | NA       |
| zgc:171750        | 0           | NA           | NA        | NA        | NA       | NA       |
| fam117aa          | 285.851994  | -0.072523405 | 0.1276312 | -0.568226 | 0.569881 | 0.948983 |
| vtcn1             | 18.23242642 | 0.756968379  | 0.4444486 | 1.703163  | 0.088538 | 0.569447 |
| theg              | 6.439989007 | 0.216927896  | 0.7308752 | 0.2968057 | 0.766615 | NA       |
| si:ch73-62121.1   | 13.82226058 | 0.254248778  | 0.5103331 | 0.4982016 | 0.618342 | 0.957354 |
| samsn1b           | 216.1394613 | 0.155822922  | 0.150939  | 1.032357  | 0.301905 | 0.856944 |
| il21r.2           | 0.31759079  | 1.807926197  | 3.579045  | 0.5051421 | 0.613459 | NA       |
| kcna4             | 26.91569521 | -0.024441577 | 0.3878879 | -0.063012 | 0.949757 | 0.99381  |
| zfyvel            | 145.960564  | -0.144128161 | 0.1753435 | -0.821976 | 0.41109  | 0.903291 |
| ralbp1            | 81.25015988 | 0.02058163   | 0.2396138 | 0.085895  | 0.93155  | 0.992702 |
| tpx2              | 1349.406185 | -0.097726122 | 0.0784767 | -1.245288 | 0.213026 | 0.781631 |
| FNDC10            | 154.2865672 | 0.01239918   | 0.1754714 | 0.0706621 | 0.943667 | 0.993364 |
| supt20            | 167.8756921 | -0.156157998 | 0.1735978 | -0.899539 | 0.368366 | 0.887976 |
| tmem176           | 257.4347813 | 0.166455087  | 0.1501463 | 1.1086191 | 0.267595 | 0.833349 |
| cdk5r2b           | 431.8380983 | 0.428048668  | 0.1093316 | 3.9151399 | 9.04E-05 | 0.004478 |
| hspb9             | 0.474778155 | 0.852397662  | 2.898154  | 0.2941175 | 0.768668 | NA       |
| dock7             | 1705.181376 | -0.041410145 | 0.0782683 | -0.529079 | 0.596751 | 0.954913 |
| myrf              | 44.74478563 | 0.110399211  | 0.305732  | 0.3610979 | 0.718026 | 0.96909  |
| zmp:0000000524    | 283.4959879 | -0.198662308 | 0.1345765 | -1.476204 | 0.139889 | 0.678981 |
| rufyl             | 190.8941049 | -0.075448529 | 0.1722758 | -0.437952 | 0.661421 | 0.964234 |
| arl8a             | 2272.901533 | 0.016464802  | 0.0796263 | 0.2067761 | 0.836185 | 0.984209 |
| frs3              | 19.81017626 | 0.091687948  | 0.4465053 | 0.2053457 | 0.837302 | 0.984645 |
| gigyf1b           | 1040.450056 | -0.056978479 | 0.0858861 | -0.663419 | 0.507062 | 0.935734 |
| phlpp1            | 578.5958372 | -0.177520444 | 0.1109699 | -1.599717 | 0.109661 | 0.623766 |
| synpo21b          | 248.3268165 | 0.157267553  | 0.1442465 | 1.0902696 | 0.275594 | 0.839541 |
| prdm13            | 413.7901931 | 0.004907927  | 0.1158163 | 0.0423768 | 0.966198 | 0.996315 |
| unm_hu7910        | 216.8914747 | 0.061471634  | 0.1464927 | 0.4196225 | 0.674761 | 0.965257 |
| sema7a            | 45.14069986 | 0.310886559  | 0.2962607 | 1.0493682 | 0.294009 | 0.849999 |
| itga8             | 284.5103669 | 0.241598761  | 0.1423922 | 1.696714  | 0.089751 | 0.573763 |
| clip1a            | 360.5565635 | 0.015263949  | 0.1190684 | 0.1281948 | 0.897995 | 0.990121 |
| noslapa           | 579.1143254 | 0.003690603  | 0.0985656 | 0.0374431 | 0.970132 | 0.996315 |
| znf1068           | 4.196630456 | -0.351037918 | 0.9205702 | -0.381327 | 0.702961 | NA       |
| ackr4a            | 9.226063391 | 0.615291819  | 0.6294717 | 0.9774733 | 0.328335 | NA       |
| si:dkey-85k7.12   | 22.67478702 | 0.694448475  | 0.4251872 | 1.6332771 | 0.102411 | 0.608235 |
| cnnm2b            | 75.08407378 | 0.044151166  | 0.2623508 | 0.1682905 | 0.866355 | 0.986673 |
| myo1f             | 34.35167554 | -0.061062767 | 0.3541156 | -0.172437 | 0.863094 | 0.985841 |
| doc2a             | 58.71066753 | 0.013788985  | 0.2689693 | 0.051266  | 0.959114 | 0.995095 |
| si:dkey-145c18.3  | 1.487060251 | 0.360976966  | 1.5663761 | 0.2304536 | 0.817739 | NA       |
| FRMD1             | 198.5554436 | 0.078284268  | 0.1602997 | 0.488362  | 0.625293 | 0.957354 |
| oxgr1a.2          | 0.182570949 | 0.967652056  | 4.0804729 | 0.2371421 | 0.812547 | NA       |
| pnpla8            | 623.6208996 | 0.136024376  | 0.1003127 | 1.3560041 | 0.175098 | 0.735545 |
| si:ch211-137a8.4  | 5628.373593 | -0.052206156 | 0.0640832 | -0.814662 | 0.415266 | 0.906237 |
| b4galnt3a         | 14.13793136 | 0.256616758  | 0.6030499 | 0.4255316 | 0.670449 | 0.965257 |
| tpp2              | 849.5573387 | 0.006912157  | 0.0908708 | 0.0760658 | 0.939367 | 0.992857 |
| rubcn             | 24.94586883 | 0.542084396  | 0.4186958 | 1.2946974 | 0.195425 | 0.760412 |
| gra               | 37.74503    | 0.077227489  | 0.3203365 | 0.2410824 | 0.809491 | 0.980642 |
| plppr4b           | 66.15220305 | 0.062393438  | 0.2467719 | 0.2528385 | 0.800393 | 0.979377 |
| si:ch211-212c13.8 | 198.7842686 | 0.133018842  | 0.2033533 | 0.6541267 | 0.51303  | 0.936253 |
| dna2              | 138.7596537 | 0.132171341  | 0.1771373 | 0.7461518 | 0.455576 | 0.921215 |
| cacna2d3          | 517.7484219 | 0.092684579  | 0.1079118 | 0.8588921 | 0.3904   | 0.897304 |
| rmdn2             | 43.83496922 | 0.049304495  | 0.2945406 | 0.1673946 | 0.86706  | 0.986978 |

|                   |             |              |           |           |          |          |
|-------------------|-------------|--------------|-----------|-----------|----------|----------|
| tmem169b          | 20.41122977 | -0.445932727 | 0.4477378 | -0.995968 | 0.319266 | 0.867746 |
| igl3v3            |             | 0 NA         | NA        | NA        | NA       | NA       |
| yeats2            | 123.6834325 | -0.05010726  | 0.180621  | -0.277417 | 0.78146  | 0.97627  |
| abhd15a           | 121.4186305 | -0.038960392 | 0.186935  | -0.208417 | 0.834904 | 0.984089 |
| si:ch73-21k16.5   | 101.2003241 | -0.5876567   | 0.2011621 | -2.921309 | 0.003486 | 0.079224 |
| nbr1b             | 1233.396926 | -0.048917512 | 0.0854378 | -0.572551 | 0.566949 | 0.948739 |
| tmem70            | 116.0605899 | 0.036082952  | 0.1950405 | 0.1850024 | 0.853227 | 0.985174 |
| RASA2             | 16.71402522 | 0.019435932  | 0.4698374 | 0.0413674 | 0.967003 | 0.996315 |
| lrchl             | 323.8475664 | -0.098763565 | 0.1259047 | -0.784431 | 0.432787 | 0.91326  |
| si:ch211-161c3.6  | 115.4342111 | -0.094263118 | 0.2029259 | -0.46452  | 0.642275 | 0.959994 |
| mgaa              | 603.6608983 | -0.102284452 | 0.1036574 | -0.986755 | 0.323763 | 0.870928 |
| tmem258           | 275.1041336 | -0.171594521 | 0.1343081 | -1.277619 | 0.201384 | 0.767338 |
| tmem184c          | 396.3350781 | 0.016445164  | 0.1179775 | 0.1393924 | 0.88914  | 0.989291 |
| lrrc18a           | 3.440647801 | -0.084995799 | 1.1229163 | -0.075692 | 0.939664 | NA       |
| dennd3a           | 223.9771253 | 0.003100023  | 0.155148  | 0.0199811 | 0.984058 | 0.996944 |
| slc26a10          | 13.06609509 | -0.110821591 | 0.5159442 | -0.214794 | 0.829928 | 0.982821 |
| msantd1           | 81.61241272 | -0.112363005 | 0.2203256 | -0.509986 | 0.610061 | 0.95688  |
| rnfl11            | 1071.5537   | -0.061543077 | 0.0864187 | -0.71215  | 0.476372 | 0.926505 |
| gas211            | 418.8533749 | -0.028440984 | 0.1226874 | -0.231817 | 0.81668  | 0.981594 |
| ap5b1             | 153.5241397 | -0.06455418  | 0.1623785 | -0.397554 | 0.690959 | 0.967157 |
| paxx              | 49.81328184 | 0.199601916  | 0.2756372 | 0.7241473 | 0.468975 | 0.924394 |
| zgc:174320        | 0.173729368 | -0.955901296 | 4.0804729 | -0.234262 | 0.814781 | NA       |
| si:dkey-34m19.3   | 143.77145   | -0.08486598  | 0.1836184 | -0.462187 | 0.643947 | 0.96009  |
| grk5l             | 232.285424  | 0.184447893  | 0.1371999 | 1.3443736 | 0.178828 | 0.739486 |
| rnf165b           | 128.5733467 | -0.052092903 | 0.1858561 | -0.280286 | 0.779258 | 0.976146 |
| si:ch211-225k7.5  |             | 0 NA         | NA        | NA        | NA       | NA       |
| ccdc18            | 106.4237695 | 0.122974696  | 0.2084166 | 0.5900428 | 0.555162 | 0.947449 |
| si:ch211-66e2.3   | 22.815349   | 0.460443339  | 0.3989659 | 1.1540919 | 0.248463 | 0.817939 |
| bub1ba            | 149.2144781 | -0.150732559 | 0.1683745 | -0.895222 | 0.370668 | 0.890626 |
| npb               | 193.7884688 | 0.186137396  | 0.1506041 | 1.2359386 | 0.216481 | 0.783724 |
| ccdc149a          | 14.73000416 | -0.331790468 | 0.5193855 | -0.638814 | 0.522944 | 0.939336 |
| si:dkey-73p2.3    | 28.43645303 | -0.138547155 | 0.4849639 | -0.285685 | 0.775119 | 0.975687 |
| mrpl58            | 49.1335896  | -0.294158355 | 0.2792887 | -1.053241 | 0.29223  | 0.848075 |
| si:dkey-28o19.1   | 9.688435222 | 0.04922996   | 0.6758376 | 0.0728429 | 0.941931 | NA       |
| si:ch211-195b13.6 | 3.686878275 | -0.806547985 | 0.9935615 | -0.811775 | 0.416921 | NA       |
| tnsla             | 1019.213201 | 0.059122911  | 0.0833643 | 0.7092115 | 0.478193 | 0.926857 |
| BX571839.1        | 0.157187365 | -0.955901296 | 4.0804729 | -0.234262 | 0.814781 | NA       |
| si:dkey-238o13.4  | 139.5018073 | -0.019673051 | 0.1741513 | -0.112965 | 0.910058 | 0.990702 |
| plekhh2           | 185.2632891 | -0.027820018 | 0.1602394 | -0.173615 | 0.862168 | 0.985841 |
| arhgef19          | 73.05784038 | 0.158090848  | 0.2494791 | 0.6336837 | 0.526287 | 0.940506 |
| tusc3             | 1037.223124 | 0.078064803  | 0.0863186 | 0.9043793 | 0.365794 | 0.887084 |
| slc22a23          | 407.0261569 | 0.089840554  | 0.1137704 | 0.7896657 | 0.429723 | 0.911615 |
| g0s2              | 29.64869933 | -0.430375924 | 0.3521696 | -1.22207  | 0.221681 | 0.78829  |
| lats2             | 125.0490743 | 0.212262468  | 0.1915236 | 1.1082836 | 0.267739 | 0.833349 |
| cxxc5a            | 848.1519398 | -0.044706944 | 0.0967997 | -0.46185  | 0.644189 | 0.960129 |
| sdkla             | 404.2224254 | 0.030473803  | 0.1268278 | 0.2402769 | 0.810116 | 0.980789 |
| tmem74b           | 1.923637035 | 0.46347727   | 1.4525078 | 0.3190876 | 0.74966  | NA       |
| adm2b             | 7.38397438  | 0.560865271  | 0.7499772 | 0.7478431 | 0.454555 | NA       |
| si:ch73-244f7.3   | 8.103132261 | -0.304576328 | 0.6761921 | -0.450429 | 0.652401 | NA       |
| slc22a31          | 290.2015774 | -0.079586816 | 0.1341496 | -0.593269 | 0.553001 | 0.947265 |
| atp10d            | 288.8660815 | -0.333187513 | 0.1406204 | -2.369411 | 0.017816 | 0.247181 |
| iqgap1            | 1164.730001 | 0.01868367   | 0.0813477 | 0.2296766 | 0.818343 | 0.981594 |
| wdfy3             | 187.3418846 | 0.102655996  | 0.1565611 | 0.6556929 | 0.512022 | 0.936253 |
| map11             | 560.5169135 | 0.085018721  | 0.1142483 | 0.7441574 | 0.456781 | 0.921215 |

|                   |             |              |           |           |          |          |
|-------------------|-------------|--------------|-----------|-----------|----------|----------|
| hemk1             | 161.5851578 | -0.314089685 | 0.1602409 | -1.96011  | 0.049983 | 0.437835 |
| pcdh7a            | 1376.914601 | 0.089001234  | 0.0861897 | 1.0326202 | 0.301782 | 0.856944 |
| ankslab           | 51.72783836 | 0.037434846  | 0.2826786 | 0.132429  | 0.894645 | 0.989716 |
| rims1b            | 63.18872878 | 0.318035725  | 0.2595276 | 1.2254409 | 0.220409 | 0.787278 |
| brd4              | 1073.636232 | 0.044335643  | 0.1111444 | 0.3989013 | 0.689966 | 0.966857 |
| fbxo41            | 26.39484143 | 0.069930873  | 0.3764426 | 0.1857677 | 0.852627 | 0.985174 |
| zgc:163098        | 650.8540122 | -0.181489176 | 0.0950167 | -1.910077 | 0.056123 | 0.464732 |
| si:ch73-24k9.2    | 14.55916441 | -0.7301354   | 0.5190229 | -1.40675  | 0.159502 | 0.710997 |
| mmp17a            | 32.22755676 | -0.25612243  | 0.3460741 | -0.74008  | 0.459252 | 0.921978 |
| chrd12            | 14.86229685 | 0.138541911  | 0.4890881 | 0.2832657 | 0.776973 | 0.975826 |
| zgc:195245        | 49.57066313 | 0.048813222  | 0.283473  | 0.1721971 | 0.863283 | 0.985841 |
| comtd1            | 162.9633692 | 0.207624947  | 0.177297  | 1.1710576 | 0.241576 | 0.810471 |
| CR790388.1        | 3.247854248 | -0.114233917 | 1.0822121 | -0.105556 | 0.915935 | NA       |
| tmco4             | 59.39259131 | -0.268652161 | 0.2653271 | -1.012532 | 0.311284 | 0.863542 |
| BX323994.1        | 0.489712128 | -0.887840729 | 2.693685  | -0.329601 | 0.741702 | NA       |
| abhd16a           | 923.2369361 | 0.028604336  | 0.0852933 | 0.3353643 | 0.73735  | 0.972535 |
| ttl14             | 1527.400384 | 0.104872602  | 0.0761496 | 1.377191  | 0.168453 | 0.725919 |
| CR936408.1        |             | 0 NA         | NA        | NA        | NA       | NA       |
| ano9a             |             | 0 NA         | NA        | NA        | NA       | NA       |
| enox2             | 385.3455745 | -0.013995126 | 0.1148578 | -0.121847 | 0.90302  | 0.990121 |
| sdccag8           | 75.35405695 | -0.067328531 | 0.228312  | -0.294897 | 0.768073 | 0.975687 |
| epn3a             | 448.0625286 | -0.031020073 | 0.1091887 | -0.284096 | 0.776337 | 0.975826 |
| rxrba             | 377.7497894 | 0.056165732  | 0.130843  | 0.4292606 | 0.667734 | 0.964736 |
| tpcn3             | 108.8003841 | -0.056489349 | 0.1904902 | -0.296547 | 0.766812 | 0.975687 |
| duox2             | 4.670875973 | 0.228338941  | 1.0304061 | 0.2216009 | 0.824625 | NA       |
| BX901881.1        | 0.498674062 | 0.926637565  | 2.6784892 | 0.3459553 | 0.729376 | NA       |
| esyt2b            | 204.5003299 | 0.211516069  | 0.1463297 | 1.4454764 | 0.148324 | 0.696298 |
| rbm15b            | 508.7384443 | 0.017543169  | 0.1028103 | 0.1706362 | 0.86451  | 0.98601  |
| il7r              | 7.529411668 | -0.027144877 | 0.7035839 | -0.038581 | 0.969225 | NA       |
| uck11b            | 472.8510136 | -0.04316957  | 0.1125819 | -0.38345  | 0.701386 | 0.968134 |
| COA4              | 77.16615071 | -0.207581516 | 0.2340209 | -0.887021 | 0.375067 | 0.894316 |
| igllc3            | 0.864444467 | 0.614560748  | 2.0893881 | 0.2941343 | 0.768655 | NA       |
| arhgef40          | 47.46623495 | 0.561731305  | 0.291128  | 1.9294993 | 0.053669 | 0.45394  |
| faxcb             | 104.0443359 | 0.009591682  | 0.1932515 | 0.0496332 | 0.960415 | 0.995421 |
| fam118b           | 90.75998319 | -0.099365369 | 0.2067042 | -0.480713 | 0.630721 | 0.957354 |
| mplkip            | 252.2400619 | 0.018804123  | 0.1401479 | 0.1341735 | 0.893265 | 0.989291 |
| alpk3a            | 116.5529499 | 0.486602339  | 0.2023811 | 2.4043861 | 0.0162   | 0.234928 |
| si:ch211-195e19.1 | 469.9652814 | -0.101142233 | 0.1080369 | -0.936182 | 0.349179 | 0.880195 |
| wnk1a             | 2074.792806 | -0.069824884 | 0.0824436 | -0.846941 | 0.397028 | 0.899672 |
| muc2.2            | 0.325573202 | 0.005883621  | 3.3172783 | 0.0017736 | 0.998585 | NA       |
| tex11             | 16.85723571 | 0.509510729  | 0.4704686 | 1.0829857 | 0.278815 | 0.842767 |
| dclk3             | 4.550041397 | 0.222136616  | 0.9937966 | 0.2235232 | 0.823128 | NA       |
| tp53bp1           | 1520.347729 | -0.067700162 | 0.0813919 | -0.831781 | 0.405533 | 0.901305 |
| si:dkey-7f3.9     | 572.7011695 | 0.081440792  | 0.1016389 | 0.8012762 | 0.422972 | 0.90714  |
| abcalb            | 1443.115868 | 0.469240394  | 0.0904312 | 5.188924  | 2.12E-07 | 2.67E-05 |
| si:dkey-7i4.5     | 16.01975355 | 0.658434083  | 0.5072655 | 1.2980068 | 0.194285 | 0.758049 |
| coll7a1b          | 544.1593091 | -0.02876409  | 0.1054394 | -0.272802 | 0.785005 | 0.97627  |
| cbfa2t3           | 76.89485744 | -0.191826947 | 0.2305176 | -0.832158 | 0.40532  | 0.901305 |
| dpy1913           | 920.1533108 | 0.110216963  | 0.0947936 | 1.1627047 | 0.244949 | 0.814877 |
| brca2             | 150.7298529 | -0.131323601 | 0.1721644 | -0.76278  | 0.445594 | 0.917154 |
| tlnr1             | 83.70322442 | 0.017129119  | 0.2305542 | 0.0742954 | 0.940775 | 0.992857 |
| gcfc2             | 179.2611465 | 0.076551642  | 0.170322  | 0.4494526 | 0.653105 | 0.960792 |
| rps6kl1           | 91.36544541 | -0.08245855  | 0.2175946 | -0.378955 | 0.704721 | 0.968134 |
| chsyl             | 572.8741141 | 0.030625961  | 0.1017842 | 0.300891  | 0.763498 | 0.975374 |

|                   |             |              |           |           |          |          |
|-------------------|-------------|--------------|-----------|-----------|----------|----------|
| dhx32b            | 402.8057628 | -0.089523316 | 0.1223421 | -0.731746 | 0.464324 | 0.923325 |
| ftr39p            | 13.24534282 | -0.084169578 | 0.5416398 | -0.155398 | 0.876508 | 0.987881 |
| si:ch211-22d5.2   | 63.6967672  | 0.583604966  | 0.2586995 | 2.2559188 | 0.024076 | 0.299543 |
| zpax4             | 13.08568823 | 0.566285191  | 0.5523002 | 1.0253214 | 0.305212 | 0.85982  |
| zgc:174573        | 16.46694152 | -0.570654937 | 0.4882592 | -1.168754 | 0.242503 | 0.811298 |
| znfl1k            | 1.312859516 | -1.608377215 | 1.7182901 | -0.936034 | 0.349256 | NA       |
| si:dkeyp-75b4.10  | 0.837332501 | -1.876981437 | 2.1230279 | -0.884106 | 0.376639 | NA       |
| opn8b             | 34.02452353 | 0.540901981  | 0.3307048 | 1.6356038 | 0.101923 | 0.60687  |
| rab16a            | 84.4449194  | 0.333825539  | 0.2187372 | 1.5261486 | 0.126973 | 0.656588 |
| cercam            | 274.0918596 | 0.095766706  | 0.1319433 | 0.7258169 | 0.467951 | 0.924328 |
| adgre8            | 0.347458735 | -1.908042286 | 3.4571486 | -0.551912 | 0.581009 | NA       |
| si:dkey-85a20.4   | 129.8716175 | 0.030923504  | 0.1803493 | 0.1714645 | 0.863859 | 0.985952 |
| si:ch211-194c3.5  | 619.7777859 | -0.069397712 | 0.0964993 | -0.719152 | 0.472047 | 0.924838 |
| retreg1           | 11.11186573 | -0.039459008 | 0.5817824 | -0.067824 | 0.945925 | 0.993759 |
| samd1b            | 129.4076607 | 0.019793961  | 0.1904996 | 0.1039055 | 0.917244 | 0.991572 |
| CABZ01079080.1    | 4.152147317 | -0.605711483 | 0.9528364 | -0.635693 | 0.524977 | NA       |
| zgc:172215        | 23.84902863 | 0.070245666  | 0.401158  | 0.1751072 | 0.860995 | 0.985773 |
| mms19             | 241.2889203 | 0.090440017  | 0.139477  | 0.6484223 | 0.516712 | 0.938543 |
| adam12            | 13.93306573 | 0.565419495  | 0.5230774 | 1.0809481 | 0.27972  | 0.843169 |
| jam2b             | 126.8188523 | 0.153438691  | 0.2116636 | 0.7249176 | 0.468503 | 0.924328 |
| frmpd1a           | 21.08659587 | 0.531063372  | 0.424314  | 1.251581  | 0.210723 | 0.778412 |
| si:ch211-71m22.3  | 4.558195236 | -0.51527898  | 0.9159303 | -0.562574 | 0.573725 | NA       |
| hgfb              | 15.53033527 | 0.074519917  | 0.4921993 | 0.1514019 | 0.879659 | 0.987881 |
| si:ch211-5k11.8   | 0.157187365 | -0.955901296 | 4.0804729 | -0.234262 | 0.814781 | NA       |
| sult1st7          | 0.341366344 | 1.891903201  | 3.2128156 | 0.5888614 | 0.555954 | NA       |
| etfbkmt           | 40.96168212 | 0.444656461  | 0.3022941 | 1.4709399 | 0.141307 | 0.681968 |
| fbxw8             | 176.5981528 | -0.106883979 | 0.1766304 | -0.605128 | 0.545094 | 0.945463 |
| rin1a             | 37.55129008 | 0.309565132  | 0.3405396 | 0.909043  | 0.363327 | 0.885944 |
| tanc2a            | 1102.6012   | -0.0585553   | 0.1011474 | -0.57891  | 0.56265  | 0.948728 |
| PRRG3             | 11.38454414 | 0.006600361  | 0.5708231 | 0.0115629 | 0.990774 | 0.997679 |
| mfhas1            | 494.1139688 | -0.040740057 | 0.1077871 | -0.377968 | 0.705455 | 0.968412 |
| mhc2dab           | 0.974750517 | -1.023458015 | 2.0966828 | -0.488132 | 0.625456 | NA       |
| clecl1a           | 26.43369542 | 0.697545319  | 0.3988045 | 1.7490908 | 0.080275 | 0.549641 |
| cluapl            | 138.9163979 | -0.15454194  | 0.1947948 | -0.793357 | 0.42757  | 0.91075  |
| actclc            | 1036.193193 | 0.09475663   | 0.0841311 | 1.1262978 | 0.26004  | 0.828288 |
| si:ch211-229d2.5  | 502.281076  | 0.062619573  | 0.1049032 | 0.596927  | 0.550556 | 0.946549 |
| tmx2a             | 60.22652258 | 0.633992451  | 0.2654305 | 2.388544  | 0.016915 | 0.240289 |
| ikkb              | 58.01829906 | 0.096535561  | 0.2847044 | 0.3390729 | 0.734555 | 0.972021 |
| MTERF4            | 102.9163216 | -0.106395707 | 0.2004156 | -0.530875 | 0.595505 | 0.954434 |
| sowahab           | 69.11880476 | 0.01796374   | 0.2385929 | 0.0752903 | 0.939984 | 0.992857 |
| znfl1i            | 0.341366344 | 1.891903201  | 3.2128156 | 0.5888614 | 0.555954 | NA       |
| becn1             | 338.8180387 | -0.015261215 | 0.1253949 | -0.121705 | 0.903132 | 0.990121 |
| opn4xa            | 10.93833804 | -0.002671833 | 0.5637858 | -0.004739 | 0.996219 | NA       |
| si:dkeyp-118b1.2  | 85.43858879 | 0.080635473  | 0.2118334 | 0.3806551 | 0.703459 | 0.968134 |
| si:dkey-10c21.1   | 6.858347577 | 0.21564233   | 0.7604692 | 0.2835648 | 0.776744 | NA       |
| si:ch73-278m9.1   | 80.11861197 | -0.010567812 | 0.2261355 | -0.046732 | 0.962727 | 0.995927 |
| bc12l11           | 5.485346572 | 0.619488097  | 0.8355098 | 0.7414493 | 0.458421 | NA       |
| CABZ01077217.1    | 119.8103003 | -0.039045817 | 0.1851713 | -0.210863 | 0.832994 | 0.983557 |
| nckap5l           | 116.4888551 | 0.032798668  | 0.1842391 | 0.1780223 | 0.858705 | 0.985773 |
| si:ch211-276i12.9 | 932.7988628 | -0.039572646 | 0.0989574 | -0.399896 | 0.689233 | 0.966763 |
| si:ch211-67f13.8  | 7.433398707 | 0.560412357  | 0.7123264 | 0.7867354 | 0.431437 | NA       |
| thpo              | 1.432557583 | 0.317312701  | 1.6575224 | 0.191438  | 0.848182 | NA       |
| srxn1             | 18.4275548  | -0.611111424 | 0.4437706 | -1.377089 | 0.168485 | 0.725919 |
| bsnb              | 661.5718887 | -0.028718841 | 0.0961566 | -0.298667 | 0.765194 | 0.975374 |

|                   |             |              |           |           |          |          |
|-------------------|-------------|--------------|-----------|-----------|----------|----------|
| best2             | 4.790127156 | -0.110031518 | 0.8495571 | -0.129516 | 0.896949 | NA       |
| galrlb            | 26.33574545 | -0.489473716 | 0.3751379 | -1.304783 | 0.191967 | 0.756256 |
| ace               | 751.8880255 | -0.339710338 | 0.1013354 | -3.352337 | 0.000801 | 0.025849 |
| si:ch211-230g15.5 | 521.8427647 | -0.218013861 | 0.1103323 | -1.975974 | 0.048158 | 0.432457 |
| si:ch211-79k12.1  | 344.1858052 | 0.085114718  | 0.1243162 | 0.6846634 | 0.493556 | 0.931926 |
| sod3b             | 31.49651038 | -0.089052939 | 0.3366553 | -0.264523 | 0.791377 | 0.977616 |
| si:ch211-163m16.7 |             | 0 NA         | NA        | NA        | NA       | NA       |
| tbx19             | 9.840960812 | 0.449932468  | 0.7029656 | 0.6400491 | 0.522141 | NA       |
| nxph2b            | 129.2682272 | 0.149245827  | 0.212533  | 0.7022241 | 0.482539 | 0.928998 |
| zgc:172122        | 57.64569409 | 0.045716189  | 0.259819  | 0.175954  | 0.86033  | 0.985773 |
| uspl3             | 419.7831611 | 0.162981195  | 0.1116229 | 1.4601053 | 0.144261 | 0.68854  |
| megf6a            | 75.94807293 | 0.233934075  | 0.2364116 | 0.9895203 | 0.322409 | 0.870226 |
| tshz2             | 918.5744613 | -0.135278405 | 0.0919485 | -1.471241 | 0.141226 | 0.681968 |
| parp2             | 315.8655408 | -0.045039308 | 0.1266312 | -0.355673 | 0.722085 | 0.97014  |
| adam11            | 87.61956265 | 0.020742117  | 0.2160619 | 0.0960008 | 0.92352  | 0.992588 |
| dpep2             | 13.30772109 | -0.355470795 | 0.5220807 | -0.680873 | 0.495952 | 0.932377 |
| bbs9              | 189.5060895 | 0.076292429  | 0.1600739 | 0.4766074 | 0.633642 | 0.957703 |
| mfn1b             | 779.4550389 | 0.078213097  | 0.0950572 | 0.8228004 | 0.410622 | 0.903084 |
| wdr20a            | 178.4306491 | 0.0566715    | 0.1572575 | 0.3603739 | 0.718568 | 0.96909  |
| si:ch211-162k9.6  | 0.983001374 | 0.918633527  | 2.0854433 | 0.440498  | 0.659576 | NA       |
| zgc:174315        | 58.39341498 | -0.017193409 | 0.2753711 | -0.062437 | 0.950215 | 0.99381  |
| plekhs1           | 41.78132788 | -0.012483307 | 0.3451181 | -0.036171 | 0.971146 | 0.996315 |
| znf414            | 3.579873268 | 0.264645662  | 1.0101716 | 0.2619809 | 0.793336 | NA       |
| slc7a14b          | 4.200088464 | 0.160877098  | 1.0087392 | 0.1594833 | 0.873288 | NA       |
| si:ch211-160f23.5 | 165.6308284 | 0.003531667  | 0.1626071 | 0.021719  | 0.982672 | 0.996944 |
| si:ch211-285c6.2  | 0.31598276  | 0.005883445  | 3.3523626 | 0.001755  | 0.9986   | NA       |
| si:dkey-253d23.11 | 33.68878383 | 0.163087679  | 0.3281366 | 0.4970115 | 0.619181 | 0.957354 |
| trim59            | 70.12837957 | -0.334608131 | 0.2397435 | -1.395692 | 0.162807 | 0.717803 |
| wdr90             | 131.742195  | -0.004164053 | 0.1932707 | -0.021545 | 0.982811 | 0.996944 |
| BX901889.3        |             | 0 NA         | NA        | NA        | NA       | NA       |
| pigw              | 97.96926125 | -0.088573378 | 0.2061388 | -0.429678 | 0.66743  | 0.964736 |
| si:dkey-73p2.2    | 7.972719547 | -0.691643629 | 0.7608207 | -0.909076 | 0.36331  | NA       |
| mn1b              | 480.8087885 | -0.00681123  | 0.1139741 | -0.059761 | 0.952346 | 0.993904 |
| ogdhl             | 112.7847175 | 0.031211379  | 0.1907896 | 0.1635906 | 0.870053 | 0.987399 |
| BX323590.1        | 8.275786206 | 0.60353402   | 0.7194153 | 0.838923  | 0.401513 | NA       |
| nlg2b             | 247.4009169 | -0.018299747 | 0.134242  | -0.136319 | 0.891569 | 0.989291 |
| fam117ab          | 19.28695666 | -0.183870463 | 0.4491438 | -0.40938  | 0.682261 | 0.965476 |
| plchl             | 259.4488917 | -0.153279078 | 0.1436879 | -1.06675  | 0.286085 | 0.845942 |
| zgc:174935        | 82.89018489 | -0.151526905 | 0.2253206 | -0.672495 | 0.501269 | 0.934613 |
| gemin5            | 305.3527067 | -0.134415712 | 0.1350861 | -0.995037 | 0.319718 | 0.86809  |
| si:dkeyp-2e4.2    | 8.916533085 | -0.019470973 | 0.6582864 | -0.029578 | 0.976403 | NA       |
| baiap3            | 50.45088174 | 0.137583093  | 0.299416  | 0.4595048 | 0.645872 | 0.96029  |
| foxel             | 57.75554182 | -0.007652846 | 0.2518096 | -0.030391 | 0.975755 | 0.996762 |
| im:7154036        | 19.99637549 | 0.254077089  | 0.4257174 | 0.596821  | 0.550627 | 0.946549 |
| CR589947.1        | 12.06558348 | -0.584057261 | 0.555247  | -1.051887 | 0.292851 | 0.848607 |
| dcxr              | 150.7866223 | -0.170917018 | 0.1740982 | -0.981728 | 0.326234 | 0.872104 |
| prss59.1          | 514.7231201 | -0.663638309 | 0.139816  | -4.746513 | 2.07E-06 | 0.000186 |
| ube2q11           | 79.85983679 | 0.357553532  | 0.2341653 | 1.5269281 | 0.126779 | 0.656588 |
| zgc:174877        | 178.4608238 | 0.143663579  | 0.1599152 | 0.8983733 | 0.368987 | 0.888432 |
| dhrrsx            | 457.4370597 | 0.094521965  | 0.1139226 | 0.8297031 | 0.406707 | 0.901305 |
| si:dkeyp-75h12.2  | 175.2655681 | 0.020603774  | 0.163044  | 0.1263694 | 0.89944  | 0.990121 |
| si:ch211-247j9.1  | 749.7272879 | 0.127201401  | 0.093586  | 1.3591927 | 0.174086 | 0.734137 |
| bcr               | 1174.148756 | 0.03015692   | 0.084921  | 0.3551172 | 0.722502 | 0.970375 |
| si:ch211-162k9.5  | 7.578549013 | -1.824319501 | 0.7531535 | -2.422241 | 0.015425 | NA       |

|                    |             |              |           |           |          |          |
|--------------------|-------------|--------------|-----------|-----------|----------|----------|
| rapgef3            | 46.07281686 | 0.100903783  | 0.2879446 | 0.3504278 | 0.726018 | 0.970402 |
| gdpd4b             | 67.78228689 | 0.482010393  | 0.2406655 | 2.0028227 | 0.045196 | 0.417766 |
| or115-15           | 2.93081305  | -0.652912877 | 1.1963471 | -0.545755 | 0.585234 | NA       |
| cacnalbb           | 53.88943539 | 0.430908572  | 0.276698  | 1.5573244 | 0.119393 | 0.643644 |
| gcga               | 162.0072056 | -0.129692749 | 0.2106451 | -0.615693 | 0.538097 | 0.943336 |
| and2               | 4164.100218 | 0.61062905   | 0.0808513 | 7.5524967 | 4.27E-14 | 1.84E-11 |
| hbae3              | 12686.89491 | 0.154512396  | 0.2841662 | 0.5437396 | 0.586621 | 0.953319 |
| rlim               | 989.9821207 | 0.051549995  | 0.0842728 | 0.611704  | 0.540734 | 0.944633 |
| si:dkey-205h13.1   | 90.45670435 | -0.158086435 | 0.2156899 | -0.732934 | 0.463599 | 0.922875 |
| tor3a              | 268.2847175 | -0.11629153  | 0.1328126 | -0.875606 | 0.381244 | 0.895192 |
| st3gal11           | 15.41622798 | -0.351929807 | 0.4897269 | -0.718625 | 0.472372 | 0.924838 |
| kmt2ca             | 712.7362434 | 0.038231389  | 0.0948821 | 0.4029356 | 0.686996 | 0.966376 |
| pelpl              | 1448.191877 | -0.222879274 | 0.0878153 | -2.538047 | 0.011147 | 0.183384 |
| lpxn               | 12.13124659 | -0.185549198 | 0.5692691 | -0.325943 | 0.744468 | 0.974094 |
| d1c1               | 274.6819103 | -0.184386207 | 0.1324799 | -1.391805 | 0.163981 | 0.71945  |
| rgmb               | 1281.246668 | -0.020824739 | 0.0841813 | -0.24738  | 0.804614 | 0.979705 |
| ano9b              | 205.1929191 | -0.326576944 | 0.1477066 | -2.210985 | 0.027037 | 0.31691  |
| CABZ01046432.1     |             | 0 NA         | NA        | NA        | NA       | NA       |
| cabin1             | 62.02689682 | -0.155959855 | 0.2494458 | -0.625226 | 0.531823 | 0.942359 |
| hmen2              | 972.272356  | 0.162719696  | 0.093668  | 1.737196  | 0.082353 | 0.553931 |
| pgbd4              | 23.63058646 | 0.083862292  | 0.4081053 | 0.2054918 | 0.837188 | 0.984645 |
| cop1               | 399.9221722 | 0.158249204  | 0.1140024 | 1.3881219 | 0.1651   | 0.721223 |
| AL928650.1         | 3.446489196 | 1.311621177  | 1.0935374 | 1.1994296 | 0.230361 | NA       |
| cd401g             | 1.529345901 | -1.744664827 | 1.7410432 | -1.00208  | 0.316305 | NA       |
| strc1              | 30.51487105 | 0.494471904  | 0.3956045 | 1.2499147 | 0.211331 | 0.778917 |
| slc47a4            | 57.3034441  | 0.153470373  | 0.2787535 | 0.5505594 | 0.581936 | 0.951952 |
| si:ch211-217k17.10 | 1.959600626 | 0.424286044  | 1.4640552 | 0.289802  | 0.771968 | NA       |
| zgc:194659         | 41.88303969 | -1.021024024 | 0.858898  | -1.18876  | 0.234534 | 0.803509 |
| GRIN2B (1 of many) | 21.45306297 | 0.44167984   | 0.4450717 | 0.9923792 | 0.321013 | 0.868715 |
| znf654             | 522.3897686 | -0.24002119  | 0.1068261 | -2.246841 | 0.02465  | 0.302262 |
| sap130b            | 388.0814376 | 0.072583509  | 0.1238724 | 0.5859539 | 0.557907 | 0.948478 |
| si:ch211-165d12.4  | 59.96111203 | -0.391272549 | 0.2842002 | -1.37675  | 0.16859  | 0.725919 |
| flrt2              | 292.7964756 | 0.18241567   | 0.1272527 | 1.4334913 | 0.151717 | 0.700137 |
| abcg2b             | 62.73124551 | -0.860228255 | 0.2628692 | -3.272457 | 0.001066 | 0.032585 |
| CR377211.1         | 1.006415869 | 0.95573537   | 2.0728081 | 0.4610824 | 0.644739 | NA       |
| ppplr9ba           | 1207.792191 | -0.063523183 | 0.0886078 | -0.716903 | 0.473434 | 0.924993 |
| si:ch211-212g7.6   | 481.2181908 | 0.195377905  | 0.1089432 | 1.7933932 | 0.07291  | 0.526902 |
| lrrc3ca            | 19.86238215 | -0.002042001 | 0.4357557 | -0.004686 | 0.996261 | 0.998888 |
| si:ch211-264f5.6   | 229.267214  | 0.155861487  | 0.1541288 | 1.0112418 | 0.311901 | 0.864401 |
| fosl1b             | 4.462268347 | 0.554654817  | 0.9465966 | 0.5859463 | 0.557912 | NA       |
| tjplb              | 1365.14224  | -0.049106963 | 0.0977412 | -0.502418 | 0.615373 | 0.95688  |
| zgc:174153         | 0.515095711 | 0.926015374  | 2.6527421 | 0.3490785 | 0.72703  | NA       |
| arhgef38           | 74.84856182 | -0.257667983 | 0.2371239 | -1.086639 | 0.277196 | 0.840688 |
| phldb1b            | 101.9449185 | 0.07549895   | 0.1971719 | 0.3829093 | 0.701787 | 0.968134 |
| hdx                | 381.5196819 | -0.116838278 | 0.1178498 | -0.991417 | 0.321482 | 0.869201 |
| si:ch211-235m3.5   | 33.04490782 | -0.406473387 | 0.3489213 | -1.164943 | 0.244042 | 0.813415 |
| si:ch211-102c2.4   | 25.9005165  | 0.029510585  | 0.3805997 | 0.0775371 | 0.938196 | 0.99279  |
| agnr               | 2850.524161 | -0.003612751 | 0.0788926 | -0.045793 | 0.963475 | 0.995927 |
| mrpl42             | 222.0482765 | -0.127883955 | 0.156604  | -0.816607 | 0.414153 | 0.906114 |
| tmprss15           | 5.310538659 | -0.729024935 | 0.8154237 | -0.894044 | 0.371298 | NA       |
| lrfn5b             | 418.6584803 | 0.014428745  | 0.1177459 | 0.1225414 | 0.90247  | 0.990121 |
| cerkl              | 64.29221886 | -0.05771875  | 0.2463773 | -0.23427  | 0.814776 | 0.981081 |
| F2RL3              | 34.06545559 | 0.034889637  | 0.3422124 | 0.1019532 | 0.918794 | 0.991623 |
| si:dkey-197c15.6   | 170.698188  | -0.210902818 | 0.1653046 | -1.275843 | 0.202011 | 0.76789  |

|                   |             |              |           |           |          |          |
|-------------------|-------------|--------------|-----------|-----------|----------|----------|
| tapbp.1           | 18.53362229 | 0.077021734  | 0.4759122 | 0.1618402 | 0.871432 | 0.987754 |
| si:dkey-204111.1  | 3.241575888 | 0.897200768  | 1.1249781 | 0.7975273 | 0.425145 | NA       |
| ftr02             | 35.06095982 | -0.821918735 | 0.3634533 | -2.261415 | 0.023734 | 0.29703  |
| sez6b             | 60.46664452 | -0.198897517 | 0.2485548 | -0.800216 | 0.423586 | 0.907829 |
| dnajc30b          | 52.35789889 | 0.13621199   | 0.2693289 | 0.505746  | 0.613035 | 0.95688  |
| zgc:174895        | 58.05822363 | 0.580217713  | 0.2597654 | 2.2336222 | 0.025508 | 0.309193 |
| dpp4              | 385.5287915 | -0.916588254 | 0.1320252 | -6.942524 | 3.85E-12 | 1.25E-09 |
| npbwr2a           | 15.52844175 | -0.006749838 | 0.4800143 | -0.014062 | 0.988781 | 0.997589 |
| si:dkey-12f6.5    | 0.157187365 | -0.955901296 | 4.0804729 | -0.234262 | 0.814781 | NA       |
| tmem1311          | 944.4057499 | -0.192652666 | 0.0880213 | -2.188706 | 0.028618 | 0.328246 |
| pkp3b             | 359.5911701 | -0.03921748  | 0.1220203 | -0.321401 | 0.747906 | 0.97419  |
| coro2ba           | 299.5966791 | 0.067976943  | 0.1330887 | 0.5107642 | 0.609516 | 0.956718 |
| BX649448.1        | 5.633579786 | -0.194298342 | 0.8591359 | -0.226156 | 0.82108  | NA       |
| vipb              | 61.75765175 | -0.661335621 | 0.2540393 | -2.603281 | 0.009234 | 0.161152 |
| si:dkey-238f9.1   | 210.6354894 | 0.110413057  | 0.1492904 | 0.7395858 | 0.459551 | 0.921978 |
| rbm46             | 2.493245458 | -0.612411926 | 1.1997045 | -0.510469 | 0.609723 | NA       |
| atp8b4            | 21.29302423 | -0.158618802 | 0.4101168 | -0.386765 | 0.69893  | 0.967998 |
| nlgn4xa           | 663.0336449 | 0.179193785  | 0.1020243 | 1.7563842 | 0.079023 | 0.547489 |
| si:ch211-149a19.3 | 108.4565101 | 0.18692456   | 0.1911048 | 0.978126  | 0.328012 | 0.872701 |
| si:dkey-57h18.1   | 57.27284746 | 0.101712754  | 0.260536  | 0.3903981 | 0.696242 | 0.96736  |
| pimr126           |             | 0 NA         | NA        | NA        | NA       | NA       |
| si:ch211-131k2.3  | 45.72056513 | 0.54764901   | 0.3236106 | 1.6923085 | 0.090587 | 0.576398 |
| man2b2            | 292.0878263 | -0.062198206 | 0.1524859 | -0.407895 | 0.683351 | 0.965476 |
| si:ch73-15b2.5    | 75.21180319 | -0.120089766 | 0.230491  | -0.521017 | 0.602355 | 0.956045 |
| rhobtb1           | 3.858683095 | -0.106030642 | 0.9572831 | -0.110762 | 0.911805 | NA       |
| trpc7b            | 11.42569328 | -0.03773704  | 0.5522072 | -0.068339 | 0.945516 | 0.993589 |
| cdk17             | 210.86551   | -0.170242082 | 0.1555527 | -1.094433 | 0.273765 | 0.838381 |
| si:dkey-88j15.4   |             | 0 NA         | NA        | NA        | NA       | NA       |
| CABZ01071020.1    | 20.34105896 | -0.430966649 | 0.460774  | -0.93531  | 0.349628 | 0.880195 |
| map3k21           | 73.78018237 | -0.155759027 | 0.2302019 | -0.676619 | 0.498648 | 0.934006 |
| MSANTD2           | 84.32495677 | 0.093545543  | 0.22113   | 0.4230341 | 0.67227  | 0.965257 |
| nckipsd           | 304.9369685 | 0.06845894   | 0.1345128 | 0.50894   | 0.610794 | 0.95688  |
| mvb12bb           | 16.29714242 | -0.968397734 | 0.4775561 | -2.02782  | 0.042579 | 0.405759 |
| gpr4              | 1.60255145  | 1.190672731  | 1.6167718 | 0.7364507 | 0.461456 | NA       |
| GID4              | 49.94094379 | 0.737575512  | 0.2770957 | 2.6618077 | 0.007772 | 0.141128 |
| CABZ01072096.1    | 14.9931221  | 0.1663423    | 0.5046069 | 0.3296473 | 0.741666 | 0.973154 |
| kcntl             | 15.20359732 | 0.317309614  | 0.5166615 | 0.6141538 | 0.539114 | 0.943733 |
| fam20a            | 36.51900264 | 0.131375895  | 0.3198517 | 0.41074   | 0.681263 | 0.965476 |
| zgc:195282        | 4.112858351 | -0.851055301 | 0.9724183 | -0.875195 | 0.381468 | NA       |
| bicd1a            | 107.2782631 | 0.061869333  | 0.1971254 | 0.3138578 | 0.753629 | 0.975024 |
| tcima             | 1505.107528 | -0.088928251 | 0.0801492 | -1.109534 | 0.2672   | 0.833191 |
| stk32a            |             | 0 NA         | NA        | NA        | NA       | NA       |
| kif3cb            | 573.6106234 | 0.004207531  | 0.1030151 | 0.0408438 | 0.96742  | 0.996315 |
| si:ch211-14911.2  | 49.72441389 | -0.113578733 | 0.2767943 | -0.410336 | 0.681559 | 0.965476 |
| gal3st2           | 36.51266939 | 0.176677957  | 0.3302317 | 0.535012  | 0.592642 | 0.954434 |
| mfn2              | 1248.866541 | 0.060822123  | 0.0877424 | 0.6931893 | 0.488191 | 0.93189  |
| fam114a2          | 439.3631234 | -0.127534788 | 0.1104516 | -1.154667 | 0.248227 | 0.817664 |
| ptx3b             | 8.402266544 | -0.177328041 | 0.6458811 | -0.274552 | 0.78366  | NA       |
| cisd1             | 797.0951576 | -0.000715678 | 0.0903139 | -0.007924 | 0.993677 | 0.998672 |
| nitr1f            |             | 0 NA         | NA        | NA        | NA       | NA       |
| eyes              | 2.713536368 | -0.335873978 | 1.2215424 | -0.274959 | 0.783348 | NA       |
| si:ch211-184m13.4 | 0.65919784  | 2.852228985  | 2.3514193 | 1.2129819 | 0.225137 | NA       |
| znfl1g            | 0.513487682 | -0.887846295 | 2.6557956 | -0.334305 | 0.738149 | NA       |
| slc39a5           | 90.28551505 | -0.1658435   | 0.2310988 | -0.71763  | 0.472985 | 0.924993 |

|                    |             |              |           |           |          |          |
|--------------------|-------------|--------------|-----------|-----------|----------|----------|
| si:dkey-17m8.1     | 208.4421886 | -0.020460316 | 0.1531684 | -0.133581 | 0.893734 | 0.989291 |
| zgc:194242         | 5.164783683 | 0.873084348  | 0.9001936 | 0.9698851 | 0.332104 | NA       |
| zgc:175135         | 0.158915748 | 0.967652056  | 4.0804729 | 0.2371421 | 0.812547 | NA       |
| ftr13              | 12.60352719 | -0.244544628 | 0.6184785 | -0.395397 | 0.69255  | 0.96736  |
| stard13a           | 406.3451085 | 0.060124208  | 0.111082  | 0.5412596 | 0.588329 | 0.953319 |
| dpys               | 220.602476  | 0.614055275  | 0.1413774 | 4.3433763 | 1.40E-05 | 0.00095  |
| si:ch1073-464p5.5  | 439.5644904 | 0.429260542  | 0.1115248 | 3.8490127 | 0.000119 | 0.005637 |
| zbtb47b            | 1.451106703 | -1.806925218 | 1.770077  | -1.020817 | 0.307341 | NA       |
| cdc42ep1a          | 45.61357436 | -0.000588225 | 0.2920883 | -0.002014 | 0.998393 | 0.999364 |
| maml3              | 507.3030137 | -0.083087666 | 0.1060433 | -0.783526 | 0.433319 | 0.913654 |
| cd83               | 32.52410824 | -0.508681373 | 0.3469902 | -1.465982 | 0.142653 | 0.684998 |
| ccdc85cb           | 171.0911908 | -0.064478714 | 0.1632835 | -0.394888 | 0.692925 | 0.96736  |
| ptprh              | 24.68395717 | -1.150749823 | 0.401284  | -2.867669 | 0.004135 | 0.089168 |
| myh7               | 1511.665598 | -0.090517665 | 0.0833324 | -1.086224 | 0.27738  | 0.840857 |
| rspo2              | 199.1054275 | 0.06641918   | 0.151346  | 0.4388566 | 0.660765 | 0.963994 |
| mfsd4b             | 164.4510649 | -0.143700316 | 0.1585691 | -0.906232 | 0.364813 | 0.886714 |
| plcd3b             | 164.5604742 | 0.258637403  | 0.1689765 | 1.5306113 | 0.125865 | 0.654803 |
| aff3               | 207.6201444 | 0.038244294  | 0.1522786 | 0.2511469 | 0.801701 | 0.979492 |
| rbpms2b            | 945.8266625 | 0.08573153   | 0.0896588 | 0.9561977 | 0.338972 | 0.87745  |
| nyap2a             | 61.64606288 | -0.036180113 | 0.2548227 | -0.141982 | 0.887095 | 0.989231 |
| zgc:194930         | 9.963817193 | 0.008834805  | 0.6177047 | 0.0143026 | 0.988589 | NA       |
| pkn3               | 225.7055337 | -0.04153534  | 0.1463569 | -0.283795 | 0.776568 | 0.975826 |
| gabrb2a            | 501.5082296 | 0.182364414  | 0.1163222 | 1.5677525 | 0.116939 | 0.639958 |
| castor1            | 182.994792  | 0.063011573  | 0.1631712 | 0.3861685 | 0.699372 | 0.967998 |
| si:dkeyp-73d8.6    | 2.476775735 | 2.681623393  | 1.4401944 | 1.8619872 | 0.062605 | NA       |
| si:ch211-203d1.3   | 84.68508524 | 0.016167068  | 0.2177823 | 0.074235  | 0.940823 | 0.992857 |
| calhm3             | 15.7036261  | 0.759475726  | 0.4922719 | 1.5427973 | 0.12288  | 0.650905 |
| si:ch211-256e16.6  | 11.49203647 | -0.278390873 | 0.5642327 | -0.493397 | 0.621732 | 0.957354 |
| prmt5              | 593.9208158 | -0.058454353 | 0.1127503 | -0.518441 | 0.604151 | 0.95651  |
| SGPP2              | 34.92487413 | -0.037446903 | 0.3280255 | -0.114159 | 0.909112 | 0.990702 |
| akap9              | 1888.131525 | -0.030852678 | 0.0861868 | -0.357974 | 0.720363 | 0.969318 |
| sema4c             | 414.6301214 | -0.024718921 | 0.1126264 | -0.219477 | 0.826278 | 0.982196 |
| sall3a             | 259.0743272 | 0.117041475  | 0.1418229 | 0.8252647 | 0.409221 | 0.90181  |
| ftr34              | 0.849390142 | 1.928131185  | 2.2127708 | 0.8713651 | 0.383555 | NA       |
| cramp1             | 805.6370365 | -0.12297133  | 0.0937149 | -1.312186 | 0.189457 | 0.754244 |
| sik2a              | 39.87067499 | -0.049117413 | 0.3039561 | -0.161594 | 0.871626 | 0.987766 |
| amigol             | 52.0847983  | -0.137604183 | 0.268078  | -0.513299 | 0.607742 | 0.956718 |
| frmd5              | 142.7321399 | 0.069057188  | 0.1716674 | 0.4022733 | 0.687483 | 0.966376 |
| ubtd1b             | 22.43252843 | 0.516162279  | 0.4101155 | 1.2585778 | 0.208183 | 0.775404 |
| amer1              | 668.7401465 | -0.02836933  | 0.0970288 | -0.292381 | 0.769996 | 0.975687 |
| atr                | 211.8116877 | 0.038227573  | 0.1529187 | 0.2499862 | 0.802598 | 0.979592 |
| elf2b              | 664.3714122 | -0.121129113 | 0.1047941 | -1.155877 | 0.247731 | 0.81711  |
| si:ch211-113e8.10  | 546.1447057 | -0.085936136 | 0.1080367 | -0.795434 | 0.426361 | 0.909969 |
| si:dkey-28b4.7     | 342.6939854 | -0.155075739 | 0.1269956 | -1.221111 | 0.222044 | 0.788551 |
| filip1b            | 128.9878875 | -0.055616885 | 0.1807441 | -0.307711 | 0.758302 | 0.975374 |
| fam177a1           | 828.0734125 | -0.113899383 | 0.0926638 | -1.229168 | 0.219009 | 0.785734 |
| alpk2              | 174.959816  | 0.016669786  | 0.1658233 | 0.1005274 | 0.919926 | 0.991857 |
| PRRC2B             | 2515.436824 | 0.006470221  | 0.1171601 | 0.0552255 | 0.955959 | 0.994543 |
| sc:d217            |             | 0 NA         | NA        | NA        | NA       | NA       |
| muc13b             | 289.2759405 | -1.257670062 | 0.1357197 | -9.266672 | 1.92E-20 | 1.90E-17 |
| si:ch1073-174d20.2 | 1305.550428 | 0.162373912  | 0.0991761 | 1.6372283 | 0.101583 | 0.605756 |
| caapl              | 273.2767066 | 0.031220091  | 0.1329639 | 0.2348013 | 0.814363 | 0.981081 |
| cyp2x6             | 2.465707907 | -0.926370273 | 1.3158955 | -0.703985 | 0.481442 | NA       |
| st3gall            | 1.630691012 | -0.616903343 | 1.4938275 | -0.412968 | 0.67963  | NA       |



|                   |             |              |           |           |          |          |
|-------------------|-------------|--------------|-----------|-----------|----------|----------|
| fam171a2b         | 49.68364661 | 0.406971571  | 0.2853449 | 1.4262445 | 0.153798 | 0.702599 |
| si:dkey-53k12.1   | 0 NA        | NA           | NA        | NA        | NA       | NA       |
| wdr53             | 193.8511528 | 0.144631962  | 0.1491802 | 0.9695119 | 0.33229  | 0.874653 |
| CU855821.1        | 0.965400781 | -1.006309521 | 1.9906007 | -0.505531 | 0.613186 | NA       |
| zgc:172341        | 111.7155208 | 0.219135195  | 0.194601  | 1.1260742 | 0.260134 | 0.828288 |
| gpr158b           | 233.797119  | 0.240857171  | 0.1479178 | 1.6283174 | 0.103458 | 0.609625 |
| lrrc7             | 371.5624248 | 0.145750459  | 0.1178184 | 1.2370777 | 0.216058 | 0.783484 |
| plppr4a           | 519.9323309 | 0.190205468  | 0.1049775 | 1.8118685 | 0.070007 | 0.516704 |
| efl1              | 148.5810595 | -0.064953245 | 0.1726939 | -0.376118 | 0.706829 | 0.968664 |
| cep112            | 121.5426277 | 0.011443182  | 0.1857536 | 0.0616041 | 0.950878 | 0.99381  |
| CABZ01059627.2    | 1.797940186 | 0.8407671    | 1.545573  | 0.5439841 | 0.586452 | NA       |
| taf6l             | 364.6395904 | 0.011466485  | 0.121309  | 0.094523  | 0.924694 | 0.992676 |
| naa30             | 653.8843674 | 0.173072261  | 0.0981247 | 1.7637989 | 0.077766 | 0.543372 |
| rnf10             | 6544.872545 | -0.035191188 | 0.0659413 | -0.533674 | 0.593567 | 0.954434 |
| tnrc6a            | 2524.51558  | -0.028845053 | 0.0773138 | -0.373091 | 0.709081 | 0.968664 |
| zgc:194908        | 1.511182322 | -0.351757116 | 1.5857123 | -0.221829 | 0.824447 | NA       |
| asb13a.1          | 71.92419583 | 0.142237856  | 0.233717  | 0.6085901 | 0.542796 | 0.944974 |
| zgc:162612        | 77.97010033 | -0.113314549 | 0.2255662 | -0.502356 | 0.615417 | 0.95688  |
| b3galt1a          | 13.30169974 | 0.279153072  | 0.5450748 | 0.5121371 | 0.608555 | 0.956718 |
| wdr81             | 307.1291096 | 0.051851261  | 0.1325254 | 0.3912553 | 0.695609 | 0.96736  |
| si:dkey-18p12.4   | 9.488163816 | -1.224801753 | 0.7413175 | -1.652196 | 0.098495 | NA       |
| si:ch211-152p11.4 | 38.78652932 | -0.094607242 | 0.3055345 | -0.309645 | 0.756831 | 0.975374 |
| gal3st4           | 1032.065737 | 0.058545318  | 0.0848979 | 0.6895972 | 0.490448 | 0.931926 |
| ccl27b            | 5.692456476 | 0.716721644  | 0.8226503 | 0.8712349 | 0.383626 | NA       |
| sin3aa            | 980.7287643 | -0.051793644 | 0.0865639 | -0.598329 | 0.549621 | 0.946312 |
| rbml2b            | 586.6589141 | 0.059747999  | 0.0998043 | 0.5986513 | 0.549405 | 0.946312 |
| si:dkey-46g23.1   | 93.40129121 | 0.156241055  | 0.2182661 | 0.7158282 | 0.474097 | 0.924993 |
| dhx9              | 1704.732454 | 0.03544826   | 0.0799433 | 0.4434175 | 0.657464 | 0.962444 |
| selenop2          | 193.9958134 | 0.552661256  | 0.1988185 | 2.7797275 | 0.00544  | 0.10944  |
| fuz               | 40.99608795 | -0.356024094 | 0.3321314 | -1.071938 | 0.283748 | 0.84466  |
| kif13ba           | 696.4487739 | -0.0610426   | 0.0924355 | -0.66038  | 0.50901  | 0.936123 |
| znf219            | 898.2237717 | -0.048380395 | 0.088095  | -0.549184 | 0.582879 | 0.952214 |
| efna2b            | 40.49568666 | 0.220515167  | 0.3005075 | 0.7338093 | 0.463065 | 0.922698 |
| CSRNP3            | 11.21184312 | 0.285899965  | 0.6250277 | 0.4574197 | 0.647369 | 0.960581 |
| mcf212            | 30.40551985 | 0.191201738  | 0.3817225 | 0.500892  | 0.616447 | 0.95688  |
| si:ch211-166a6.5  | 1712.011492 | -0.075046245 | 0.0864324 | -0.868265 | 0.385249 | 0.89551  |
| megf8             | 1007.085989 | 0.114579689  | 0.0890886 | 1.2861315 | 0.198397 | 0.763597 |
| col6a4a           | 1691.029991 | 0.187402886  | 0.0755916 | 2.4791509 | 0.01317  | 0.205051 |
| kiz               | 182.7476578 | -0.018676293 | 0.1526052 | -0.122383 | 0.902596 | 0.990121 |
| peak1             | 37.40868752 | 0.00668309   | 0.3331963 | 0.0200575 | 0.983997 | 0.996944 |
| zgc:112998        | 23.92828121 | -0.18747588  | 0.3902479 | -0.480402 | 0.630942 | 0.957354 |
| si:dkey-253d23.4  | 365.0740827 | 0.113189461  | 0.1176527 | 0.9620642 | 0.336017 | 0.876088 |
| si:ch211-112f3.4  | 86.273426   | -0.136712335 | 0.2256543 | -0.605849 | 0.544615 | 0.945438 |
| tap1              | 9.972711251 | 0.234237533  | 0.6339689 | 0.369478  | 0.711771 | NA       |
| si:ch73-296e2.3   | 0 NA        | NA           | NA        | NA        | NA       | NA       |
| peal5             | 34.53012808 | -0.058333809 | 0.3291734 | -0.177213 | 0.859341 | 0.985773 |
| nox5              | 13.22278319 | -0.617889041 | 0.5663929 | -1.090919 | 0.275308 | 0.839541 |
| map6d1            | 99.96214129 | 0.218189376  | 0.201564  | 1.0824819 | 0.279038 | 0.842806 |
| radil             | 108.0454367 | 0.231380896  | 0.1899145 | 1.2183424 | 0.223094 | 0.789115 |
| hnrnpull1         | 3944.006131 | -0.026989832 | 0.0749054 | -0.360319 | 0.718609 | 0.96909  |
| slitrk4           | 445.3267031 | 0.181729595  | 0.1063907 | 1.7081348 | 0.087611 | 0.566637 |
| myh71             | 557.3446994 | 0.005736241  | 0.105545  | 0.0543488 | 0.956657 | 0.994543 |
| isg20             | 271.7288235 | 0.052157266  | 0.143008  | 0.3647158 | 0.715324 | 0.96909  |
| si:ch211-235o23.1 | 308.996519  | -0.048028469 | 0.1366108 | -0.351571 | 0.72516  | 0.970402 |

|                     |             |              |           |           |          |          |
|---------------------|-------------|--------------|-----------|-----------|----------|----------|
| si:dkeyp-73a2. 2    |             | 0 NA         | NA        | NA        | NA       | NA       |
| fam171a1            | 442.3082585 | 0.035610803  | 0.1099009 | 0.3240266 | 0.745918 | 0.97419  |
| L0018102. 1         | 77.5521385  | -0.073722584 | 0.2358234 | -0.312618 | 0.754571 | 0.975114 |
| si:ch211-176g6. 2   | 14.76203357 | 0.089668959  | 0.4977835 | 0.1801364 | 0.857045 | 0.985597 |
| CABZ01033206. 1     | 62.44689818 | -0.068424465 | 0.2827054 | -0.242035 | 0.808753 | 0.980642 |
| ldah                | 100.8700878 | -0.045861238 | 0.2076551 | -0.220853 | 0.825207 | 0.982196 |
| aanat2              | 52.33983914 | 0.00408835   | 0.2710919 | 0.015081  | 0.987968 | 0.997369 |
| tagln3a             | 11.96503142 | -0.084380308 | 0.5471291 | -0.154224 | 0.877433 | 0.987881 |
| si:ch73-208g10. 1   | 8.199427119 | -0.342481134 | 0.7367463 | -0.464856 | 0.642034 | NA       |
| micall1a            | 35.30497783 | -0.066596127 | 0.3249511 | -0.204942 | 0.837617 | 0.984665 |
| lyrm7               | 159.2217184 | -0.101468788 | 0.1740302 | -0.583053 | 0.559858 | 0.948478 |
| rhbdd3              | 92.80304619 | 0.075672725  | 0.2187288 | 0.3459659 | 0.729368 | 0.970822 |
| helq                | 55.30701308 | -0.448106197 | 0.2594842 | -1.726911 | 0.084184 | 0.55797  |
| mrps36              | 881.5897937 | 0.024907263  | 0.0933471 | 0.2668242 | 0.789605 | 0.977238 |
| ninj2               | 15.82974228 | 0.106626111  | 0.5024487 | 0.2122129 | 0.831941 | 0.98349  |
| gpr174              | 4.841161772 | 0.081035297  | 0.8820666 | 0.0918698 | 0.926801 | NA       |
| srbdl               | 29.6036639  | -0.163442691 | 0.378992  | -0.431256 | 0.666282 | 0.964736 |
| ccr2                | 1.515470518 | 0.323632373  | 1.5591799 | 0.2075658 | 0.835568 | NA       |
| kdf1a               | 128.8893525 | -0.047828234 | 0.1853249 | -0.258078 | 0.796347 | 0.978498 |
| man2c1              | 148.5671972 | -0.219118095 | 0.1757886 | -1.246486 | 0.212586 | 0.780627 |
| arrdclb             | 83.59906088 | 0.382934726  | 0.2148038 | 1.7827185 | 0.074632 | 0.532003 |
| kcnmala             | 484.9171384 | 0.01696998   | 0.1060878 | 0.1599617 | 0.872911 | 0.987846 |
| igl4v8              | 0.497574187 | -2.437446738 | 2.6012773 | -0.937019 | 0.348749 | NA       |
| zgc:194578          | 982.2700158 | 0.062294842  | 0.0897857 | 0.6938166 | 0.487797 | 0.931809 |
| gmps                | 1080.961327 | -0.07808083  | 0.0850375 | -0.918193 | 0.358518 | 0.884398 |
| nrtn                | 17.83125746 | 0.147602612  | 0.4543743 | 0.3248481 | 0.745296 | 0.974094 |
| dchs1b              | 1032.445111 | 0.030503732  | 0.0892316 | 0.3418488 | 0.732465 | 0.971719 |
| scyll               | 868.4055478 | 0.060074433  | 0.089105  | 0.6741983 | 0.500185 | 0.934224 |
| si:ch211-189k9. 2   | 484.7513189 | 0.165567499  | 0.103832  | 1.5945718 | 0.110808 | 0.625858 |
| tmem163a            | 20.71840184 | -0.124242049 | 0.4281829 | -0.290161 | 0.771693 | 0.975687 |
| ppplr16b            | 30.29533782 | -0.498748589 | 0.353851  | -1.409488 | 0.158691 | 0.709303 |
| kl                  | 21.78648011 | 0.465015697  | 0.4115739 | 1.1298474 | 0.258541 | 0.826711 |
| si:ch211-218o21. 4  | 21.5449805  | -0.04104144  | 0.4032907 | -0.101766 | 0.918942 | 0.991623 |
| rapgef4             | 54.28361055 | 0.411727571  | 0.2714668 | 1.5166777 | 0.129348 | 0.661083 |
| SLC29A4 (1 of many) | 138.1175584 | 0.062550476  | 0.1764684 | 0.354457  | 0.722996 | 0.970375 |
| CU855878. 1         | 125.5927283 | 0.131973868  | 0.1789234 | 0.7375996 | 0.460758 | 0.921978 |
| tmem151bb           | 3.585485091 | 0.718358313  | 1.0865596 | 0.6611311 | 0.508528 | NA       |
| tas2r200. 1         |             | 0 NA         | NA        | NA        | NA       | NA       |
| tcaim               | 183.7282009 | 0.081980677  | 0.1654233 | 0.4955811 | 0.62019  | 0.957354 |
| trim107             | 67.15651315 | -0.017169043 | 0.2533283 | -0.067774 | 0.945966 | 0.993759 |
| otulinb             | 161.2645481 | -0.141600162 | 0.1657424 | -0.854339 | 0.392917 | 0.897836 |
| phldb2a             | 26.11507803 | -0.5842371   | 0.3734699 | -1.564348 | 0.117736 | 0.641446 |
| dnajc6              | 1299.210941 | 0.18165304   | 0.0857397 | 2.118656  | 0.03412  | 0.359261 |
| si:dkey-183c2. 4    | 22.31726519 | 1.350980199  | 0.422247  | 3.1995024 | 0.001377 | 0.039915 |
| ehbp111b            | 225.9340427 | 0.059106622  | 0.1469741 | 0.4021568 | 0.687569 | 0.966379 |
| si:dkey-7k24. 5     | 20.55863567 | 0.328045156  | 0.4151579 | 0.7901696 | 0.429429 | 0.911489 |
| shroom4             | 355.5906231 | -0.120545484 | 0.1300294 | -0.927063 | 0.353894 | 0.881976 |
| si:ch73-15n24. 1    | 11.95535837 | 0.83248352   | 0.5709175 | 1.4581504 | 0.144799 | 0.688986 |
| si:ch73-34314. 2    | 1.829337094 | 0.319794686  | 1.4914512 | 0.2144185 | 0.830221 | NA       |
| mark2a              | 900.7714519 | -0.07801916  | 0.1003813 | -0.777228 | 0.437024 | 0.914408 |
| ptger4c             | 11.22391446 | 0.327217641  | 0.5946502 | 0.5502691 | 0.582135 | 0.952028 |
| tmem151a            | 168.6943742 | 0.080747975  | 0.1574053 | 0.5129941 | 0.607955 | 0.956718 |
| rapgef11            | 68.27472049 | -0.230260152 | 0.2352464 | -0.978804 | 0.327677 | 0.872701 |
| stoml3a             | 13.19528941 | 0.534171551  | 0.5773497 | 0.9252132 | 0.354855 | 0.882185 |

|                     |             |              |           |           |          |          |
|---------------------|-------------|--------------|-----------|-----------|----------|----------|
| pot1                | 75.36904769 | -0.402152873 | 0.2294872 | -1.752398 | 0.079705 | 0.548406 |
| rassf7a             | 160.3177024 | 0.00625309   | 0.1637135 | 0.0381953 | 0.969532 | 0.996315 |
| klf4                | 15.92329771 | 0.429375702  | 0.4704503 | 0.912691  | 0.361405 | 0.885719 |
| AL954695.2          | 2.180330666 | -1.193210315 | 1.3920002 | -0.857191 | 0.391339 | NA       |
| syt15               | 23.14234004 | -0.25524417  | 0.4105754 | -0.621674 | 0.534156 | 0.943276 |
| si:dkeyp-68b7.5     | 37.52486281 | -0.121106989 | 0.3137435 | -0.386006 | 0.699492 | 0.967998 |
| snx19b              | 398.8553488 | 0.077970542  | 0.1155415 | 0.6748274 | 0.499785 | 0.934186 |
| zgc:152830          | 1388.501799 | -0.270120201 | 0.085093  | -3.174413 | 0.001501 | 0.042656 |
| SLC46A3 (1 of many) | 72.4550638  | 0.516221166  | 0.2365416 | 2.1823698 | 0.029082 | 0.330497 |
| zgc:162200          | 456.9045495 | 0.074269142  | 0.1106876 | 0.67098   | 0.502233 | 0.935304 |
| jmjdlcb             | 2729.358346 | -0.080076112 | 0.0839905 | -0.953395 | 0.34039  | 0.87805  |
| pjvk                | 3.888165651 | -0.24817662  | 1.0128631 | -0.245025 | 0.806437 | NA       |
| sqlea               | 134.9209098 | -0.312793611 | 0.1857456 | -1.683989 | 0.092184 | 0.57849  |
| gfilb               | 7.178842437 | 0.193498069  | 0.7118709 | 0.2718162 | 0.785763 | NA       |
| supt16h             | 2265.69363  | -0.127353741 | 0.0729192 | -1.746504 | 0.080723 | 0.550801 |
| eloa1               | 3.14001781  | 1.491919797  | 1.1146651 | 1.3384467 | 0.180751 | NA       |
| doc2d               | 217.4639448 | -0.006982392 | 0.145864  | -0.047869 | 0.96182  | 0.995907 |
| dlx2a               | 391.2074037 | -0.160357896 | 0.1162926 | -1.378917 | 0.16792  | 0.725624 |
| prkd3               | 91.23636132 | -0.14403068  | 0.2095059 | -0.687478 | 0.491782 | 0.931926 |
| nfatc2b             | 9.487795352 | -0.910052452 | 0.6610793 | -1.376616 | 0.168631 | NA       |
| pus10               | 177.9060626 | -0.036763239 | 0.1549453 | -0.237266 | 0.81245  | 0.981081 |
| nhsb                | 597.8923796 | -0.180260579 | 0.1048451 | -1.719303 | 0.085559 | 0.561521 |
| samd10a             | 101.1044027 | 0.037681683  | 0.2098176 | 0.1795926 | 0.857472 | 0.985703 |
| fam89a              | 39.51415813 | -0.07153951  | 0.3666215 | -0.195132 | 0.84529  | 0.985174 |
| si:ch211-202h22.9   | 2.857879201 | 0.18673648   | 1.1359627 | 0.1643861 | 0.869427 | NA       |
| agbl2               | 39.14864948 | 0.236315119  | 0.3329854 | 0.7096861 | 0.477899 | 0.926857 |
| nrip2               | 548.3168587 | 0.10264447   | 0.1125838 | 0.911716  | 0.361918 | 0.885944 |
| BX927329.1          | 5.316339016 | -0.546352055 | 0.8634332 | -0.632767 | 0.526886 | NA       |
| igl3v5              |             | 0 NA         | NA        | NA        | NA       | NA       |
| senp6b              | 0.488104098 | -2.415107183 | 2.7936704 | -0.864493 | 0.387317 | NA       |
| akap13              | 378.4210344 | -0.055127986 | 0.1132188 | -0.486915 | 0.626318 | 0.957354 |
| si:zfos-223e1.2     | 16.64776335 | 0.179847437  | 0.4599396 | 0.391024  | 0.695779 | 0.96736  |
| si:dkey-178e17.1    | 2.5015376   | 0.17069564   | 1.2767871 | 0.1336916 | 0.893646 | NA       |
| tmem41b             | 102.0474248 | 0.313029451  | 0.1982266 | 1.5791493 | 0.114302 | 0.633643 |
| bahcc1b             | 1185.630104 | -0.094234172 | 0.0871257 | -1.081588 | 0.279436 | 0.842882 |
| adh5                | 1715.206362 | -0.279223687 | 0.0892138 | -3.129825 | 0.001749 | 0.048577 |
| lrrtm41l            | 42.09664269 | 0.177566829  | 0.3097937 | 0.5731777 | 0.566524 | 0.948739 |
| si:cabz01032454.3   | 46.97510189 | -0.030759702 | 0.3029923 | -0.10152  | 0.919138 | 0.991623 |
| kif16bb             | 64.93121083 | 0.208690567  | 0.2672294 | 0.7809416 | 0.434837 | 0.914408 |
| UBA6                | 307.6676903 | 0.026490488  | 0.1241806 | 0.2133222 | 0.831076 | 0.982994 |
| il13ral             | 182.4848118 | -0.181901957 | 0.164163  | -1.108057 | 0.267837 | 0.833349 |
| zmat3               | 15.30073141 | -0.222765484 | 0.494329  | -0.450642 | 0.652247 | 0.960708 |
| RF00001             | 1.450079108 | 1.819886428  | 1.7323838 | 1.0505099 | 0.293484 | NA       |
| dre-mir-125b-2      |             | 0 NA         | NA        | NA        | NA       | NA       |
| RF00001             | 0.794578739 | 3.129658898  | 2.5486248 | 1.2279794 | 0.219455 | NA       |
| dre-let-7d-2        |             | 0 NA         | NA        | NA        | NA       | NA       |
| RF00001             | 0.476386185 | 2.392464142  | 3.0533824 | 0.7835455 | 0.433307 | NA       |
| dre-mir-192         | 0.679516628 | 0.149584948  | 2.5505337 | 0.0586485 | 0.953232 | NA       |
| RF00001             |             | 0 NA         | NA        | NA        | NA       | NA       |
| dre-mir-459         |             | 0 NA         | NA        | NA        | NA       | NA       |
| RF00001             |             | 0 NA         | NA        | NA        | NA       | NA       |
| dre-mir-133c        | 9.612367637 | 0.505598406  | 0.6792769 | 0.7443186 | 0.456684 | NA       |
| RF00001             |             | 0 NA         | NA        | NA        | NA       | NA       |
| RF00001             | 0.166657454 | -0.955901296 | 4.0804729 | -0.234262 | 0.814781 | NA       |

|                |             |              |           |           |          |          |
|----------------|-------------|--------------|-----------|-----------|----------|----------|
| dre-mir-135c-1 | 0           | NA           | NA        | NA        | NA       | NA       |
| RF00001        | 0           | NA           | NA        | NA        | NA       | NA       |
| RF00001        | 0           | NA           | NA        | NA        | NA       | NA       |
| NC_002333.1    | 5.669769664 | 1.73759832   | 0.8785041 | 1.9779057 | 0.047939 | NA       |
| RF00026        | 0           | NA           | NA        | NA        | NA       | NA       |
| RF00001        | 38.72609277 | 0.146157328  | 0.3212878 | 0.4549109 | 0.649173 | 0.960708 |
| NC_002333.2    | 27.44623464 | -0.644579154 | 0.4502464 | -1.431614 | 0.152254 | 0.701157 |
| dre-mir-29b-1  | 6.201260407 | -0.718930114 | 0.7987389 | -0.900082 | 0.368077 | NA       |
| RF00088        | 0.961236193 | 2.170866656  | 2.290243  | 0.9478761 | 0.343193 | NA       |
| RF00093        | 0           | NA           | NA        | NA        | NA       | NA       |
| dre-mir-15a-1  | 0.173729368 | -0.955901296 | 4.0804729 | -0.234262 | 0.814781 | NA       |
| RF00001        | 0           | NA           | NA        | NA        | NA       | NA       |
| RF00440        | 0           | NA           | NA        | NA        | NA       | NA       |
| dre-mir-124-5  | 96.92911533 | 0.475943379  | 0.2018949 | 2.3573822 | 0.018404 | 0.252376 |
| dre-mir-499    | 0           | NA           | NA        | NA        | NA       | NA       |
| RF00571        | 5.119707652 | 0.066909561  | 0.9493068 | 0.0704825 | 0.94381  | NA       |
| mir338-2       | 0           | NA           | NA        | NA        | NA       | NA       |
| RF00001        | 0.323844819 | -1.825095364 | 3.274639  | -0.557342 | 0.577293 | NA       |
| RF00001        | 0           | NA           | NA        | NA        | NA       | NA       |
| RF00612        | 0           | NA           | NA        | NA        | NA       | NA       |
| RF00001        | 0.325573202 | 0.005883621  | 3.3172783 | 0.0017736 | 0.998585 | NA       |
| RF00001        | 2.030514901 | 2.311190427  | 1.6633927 | 1.3894436 | 0.164698 | NA       |
| RF00001        | 0           | NA           | NA        | NA        | NA       | NA       |
| dre-let-7c-2   | 0           | NA           | NA        | NA        | NA       | NA       |
| RF00001        | 0           | NA           | NA        | NA        | NA       | NA       |
| RF00001        | 0           | NA           | NA        | NA        | NA       | NA       |
| RF00001        | 0.492110303 | -0.89618148  | 2.8628934 | -0.313033 | 0.754255 | NA       |
| RF00001        | 0.863695607 | 1.965711988  | 2.22386   | 0.8839189 | 0.37674  | NA       |
| RF00026        | 0           | NA           | NA        | NA        | NA       | NA       |
| RF00001        | 0.31759079  | 1.807926197  | 3.579045  | 0.5051421 | 0.613459 | NA       |
| RF00001        | 0           | NA           | NA        | NA        | NA       | NA       |
| RF00001        | 0           | NA           | NA        | NA        | NA       | NA       |
| RF00001        | 0           | NA           | NA        | NA        | NA       | NA       |
| RF00001        | 0           | NA           | NA        | NA        | NA       | NA       |
| RF00001        | 0.157187365 | -0.955901296 | 4.0804729 | -0.234262 | 0.814781 | NA       |
| RF00001        | 0           | NA           | NA        | NA        | NA       | NA       |
| NC_002333.3    | 16.9145956  | 0.148778326  | 0.5031951 | 0.2956673 | 0.767484 | 0.975687 |
| NC_002333.4    | 15799.68608 | 0.633726969  | 0.2986533 | 2.1219489 | 0.033842 | 0.357857 |
| RF00001        | 0           | NA           | NA        | NA        | NA       | NA       |
| dre-mir-130b   | 1.013460044 | -2.21473548  | 2.0108742 | -1.101379 | 0.270732 | NA       |
| dre-mir-456    | 0           | NA           | NA        | NA        | NA       | NA       |
| RF00413        | 1.133237178 | 0.375573287  | 1.8721312 | 0.2006127 | 0.841001 | NA       |
| RF00001        | 0           | NA           | NA        | NA        | NA       | NA       |
| RF00581        | 0.325452849 | 0.005883619  | 3.3177086 | 0.0017734 | 0.998585 | NA       |
| RF00001        | 2.528020063 | -0.187679332 | 1.1943971 | -0.157133 | 0.87514  | NA       |
| NC_002333.5    | 0.173729368 | -0.955901296 | 4.0804729 | -0.234262 | 0.814781 | NA       |
| RF00026        | 0           | NA           | NA        | NA        | NA       | NA       |
| RF00001        | 0           | NA           | NA        | NA        | NA       | NA       |
| RF00548        | 0.158795395 | 0.967652056  | 4.0804729 | 0.2371421 | 0.812547 | NA       |
| RF00001        | 0           | NA           | NA        | NA        | NA       | NA       |
| RF00211        | 0           | NA           | NA        | NA        | NA       | NA       |
| RF00001        | 0           | NA           | NA        | NA        | NA       | NA       |
| RF00604        | 0           | NA           | NA        | NA        | NA       | NA       |
| RF00001        | 0           | NA           | NA        | NA        | NA       | NA       |
| RF00003        | 0           | NA           | NA        | NA        | NA       | NA       |

|                |             |              |           |           |          |          |
|----------------|-------------|--------------|-----------|-----------|----------|----------|
| RF00001        | 0           | NA           | NA        | NA        | NA       | NA       |
| RF00566        | 3.304397441 | 1.229539124  | 1.0627073 | 1.1569875 | 0.247277 | NA       |
| mir140         | 3.219275555 | 2.458081228  | 1.265492  | 1.9423917 | 0.05209  | NA       |
| RF00342        | 0.658957134 | 2.851427774  | 2.5143902 | 1.1340434 | 0.256776 | NA       |
| dre-mir-183    | 0.157187365 | -0.955901296 | 4.0804729 | -0.234262 | 0.814781 | NA       |
| dre-mir-21-2   | 1.521673218 | 1.029857275  | 1.5956979 | 0.6453961 | 0.518671 | NA       |
| RF00001        | 0           | NA           | NA        | NA        | NA       | NA       |
| dre-mir-141    | 0.635422286 | 2.809933352  | 2.5211574 | 1.114541  | 0.265047 | NA       |
| RF00377        | 0.173729368 | -0.955901296 | 4.0804729 | -0.234262 | 0.814781 | NA       |
| RF00396        | 4.878267767 | 0.546166147  | 0.8752242 | 0.62403   | 0.532608 | NA       |
| RF00001        | 0           | NA           | NA        | NA        | NA       | NA       |
| dre-mir-125c   | 0           | NA           | NA        | NA        | NA       | NA       |
| RF00003        | 0           | NA           | NA        | NA        | NA       | NA       |
| dre-let-7j     | 2.187832662 | 0.192877281  | 1.3358529 | 0.1443851 | 0.885196 | NA       |
| RF01299        | 0.498553709 | 0.926267934  | 2.6786929 | 0.345791  | 0.7295   | NA       |
| RF00089        | 1.32527496  | -2.703143513 | 1.9371225 | -1.395443 | 0.162882 | NA       |
| RF00056        | 0.347458735 | -1.908042286 | 3.4571486 | -0.551912 | 0.581009 | NA       |
| dre-mir-23a-1  | 0           | NA           | NA        | NA        | NA       | NA       |
| dre-mir-153a   | 0           | NA           | NA        | NA        | NA       | NA       |
| RF00619        | 1.689949989 | -0.450849563 | 1.7054564 | -0.264357 | 0.791505 | NA       |
| dre-mir-212    | 0.157187365 | -0.955901296 | 4.0804729 | -0.234262 | 0.814781 | NA       |
| dre-mir-731    | 0           | NA           | NA        | NA        | NA       | NA       |
| RF00001        | 0           | NA           | NA        | NA        | NA       | NA       |
| dre-mir-135c-2 | 0           | NA           | NA        | NA        | NA       | NA       |
| dre-mir-455-2  | 0.330916733 | -1.849579229 | 3.2489867 | -0.569279 | 0.569167 | NA       |
| dre-mir-26b    | 1.493073575 | -0.932799967 | 1.6069462 | -0.58048  | 0.561591 | NA       |
| mir223         | 0           | NA           | NA        | NA        | NA       | NA       |
| dre-mir-26a-1  | 0           | NA           | NA        | NA        | NA       | NA       |
| dre-mir-9-3    | 0.317831496 | 1.808837541  | 3.5779923 | 0.5055454 | 0.613176 | NA       |
| dre-mir-24-3   | 1.300753802 | 1.583438483  | 1.7347538 | 0.9127742 | 0.361361 | NA       |
| dre-mir-724    | 0           | NA           | NA        | NA        | NA       | NA       |
| dre-mir-9-2    | 0.523937293 | 2.50362281   | 2.7291625 | 0.9173594 | 0.358954 | NA       |
| NC_002333.6    | 7.130473445 | -0.079191027 | 0.7101226 | -0.111517 | 0.911206 | NA       |
| RF00096        | 0.158795395 | 0.967652056  | 4.0804729 | 0.2371421 | 0.812547 | NA       |
| RF00093        | 0.5046461   | -2.45370851  | 2.7629627 | -0.888072 | 0.374502 | NA       |
| dre-mir-10b-1  | 0           | NA           | NA        | NA        | NA       | NA       |
| RF00001        | 0           | NA           | NA        | NA        | NA       | NA       |
| RF00396        | 2.579150702 | 0.696969378  | 1.3432688 | 0.5188607 | 0.603858 | NA       |
| dre-mir-124-1  | 0           | NA           | NA        | NA        | NA       | NA       |
| RF00001        | 0.173729368 | -0.955901296 | 4.0804729 | -0.234262 | 0.814781 | NA       |
| RF00001        | 0           | NA           | NA        | NA        | NA       | NA       |
| RF00001        | 0           | NA           | NA        | NA        | NA       | NA       |
| si:dkey-71b5.7 | 433.3745737 | 0.062406983  | 0.1269557 | 0.491565  | 0.623027 | 0.957354 |
| dre-mir-730    | 0.173729368 | -0.955901296 | 4.0804729 | -0.234262 | 0.814781 | NA       |
| RF00001        | 0           | NA           | NA        | NA        | NA       | NA       |
| RF00407        | 0.996127896 | -0.965496869 | 1.8966759 | -0.509047 | 0.610719 | NA       |
| RF00070        | 0.349228403 | 0.005884014  | 3.2372587 | 0.0018176 | 0.99855  | NA       |
| dre-mir-375-2  | 4.90868856  | 0.810005845  | 0.9074219 | 0.8926453 | 0.372047 | NA       |
| dre-mir-200c   | 0           | NA           | NA        | NA        | NA       | NA       |
| NC_002333.7    | 0.811320409 | -1.830272858 | 2.4089013 | -0.759796 | 0.447377 | NA       |
| RF00001        | 0           | NA           | NA        | NA        | NA       | NA       |
| RF00001        | 1.618155215 | -0.032684466 | 1.5883641 | -0.020577 | 0.983583 | NA       |
| RF00001        | 0           | NA           | NA        | NA        | NA       | NA       |
| dre-mir-17a-2  | 0.330916733 | -1.849579229 | 3.2489867 | -0.569279 | 0.569167 | NA       |

|                |             |              |           |           |          |          |
|----------------|-------------|--------------|-----------|-----------|----------|----------|
| RF00611        | 0           | NA           | NA        | NA        | NA       | NA       |
| RF00007        | 0.157187365 | -0.955901296 | 4.0804729 | -0.234262 | 0.814781 | NA       |
| dre-mir-181a-2 | 0.333314908 | -1.858695402 | 3.5126701 | -0.52914  | 0.596708 | NA       |
| RF00004        | 0           | NA           | NA        | NA        | NA       | NA       |
| RF00571        | 13.74387229 | -0.228262375 | 0.5434343 | -0.420037 | 0.674459 | 0.965257 |
| RF01225        | 0.531799352 | 0.999478841  | 2.790358  | 0.3581902 | 0.720201 | NA       |
| RF00001        | 0           | NA           | NA        | NA        | NA       | NA       |
| mir16c         | 0           | NA           | NA        | NA        | NA       | NA       |
| RF00003        | 0           | NA           | NA        | NA        | NA       | NA       |
| RF00001        | 0           | NA           | NA        | NA        | NA       | NA       |
| RF00001        | 0           | NA           | NA        | NA        | NA       | NA       |
| RF00045        | 1.430708847 | -0.318075374 | 1.6858966 | -0.188668 | 0.850353 | NA       |
| dre-mir-27b    | 0.173729368 | -0.955901296 | 4.0804729 | -0.234262 | 0.814781 | NA       |
| RF00001        | 0.316103113 | 0.005883447  | 3.3519121 | 0.0017553 | 0.9986   | NA       |
| dre-mir-152    | 0.158795395 | 0.967652056  | 4.0804729 | 0.2371421 | 0.812547 | NA       |
| RF00396        | 0           | NA           | NA        | NA        | NA       | NA       |
| RF00001        | 0.182570949 | 0.967652056  | 4.0804729 | 0.2371421 | 0.812547 | NA       |
| dre-mir-194a   | 0.166657454 | -0.955901296 | 4.0804729 | -0.234262 | 0.814781 | NA       |
| RF00056        | 1.154923291 | -0.397128357 | 1.7479381 | -0.227198 | 0.82027  | NA       |
| dre-mir-1788   | 0           | NA           | NA        | NA        | NA       | NA       |
| dre-let-7a-5   | 0.673073222 | -1.460830855 | 2.4012698 | -0.608358 | 0.54295  | NA       |
| dre-mir-722    | 0           | NA           | NA        | NA        | NA       | NA       |
| RF01291        | 6.758949206 | 1.094214529  | 0.7731084 | 1.4153442 | 0.156968 | NA       |
| RF00003        | 0           | NA           | NA        | NA        | NA       | NA       |
| RF00001        | 0.500161739 | 2.450146464  | 2.7711133 | 0.8841741 | 0.376602 | NA       |
| RF00001        | 1.410428931 | 0.838481333  | 1.7650076 | 0.4750582 | 0.634746 | NA       |
| dre-mir-24-1   | 0           | NA           | NA        | NA        | NA       | NA       |
| RF00152        | 0.508023798 | 0.926122713  | 2.6636728 | 0.3476864 | 0.728076 | NA       |
| dre-mir-18b    | 0           | NA           | NA        | NA        | NA       | NA       |
| RF00001        | 0.157187365 | -0.955901296 | 4.0804729 | -0.234262 | 0.814781 | NA       |
| RF00001        | 0.158915748 | 0.967652056  | 4.0804729 | 0.2371421 | 0.812547 | NA       |
| RF00049        | 0           | NA           | NA        | NA        | NA       | NA       |
| RF00575        | 0           | NA           | NA        | NA        | NA       | NA       |
| RF00572        | 0           | NA           | NA        | NA        | NA       | NA       |
| RF00001        | 0           | NA           | NA        | NA        | NA       | NA       |
| dre-mir-30c    | 0           | NA           | NA        | NA        | NA       | NA       |
| dre-mir-31     | 0           | NA           | NA        | NA        | NA       | NA       |
| RF00001        | 0           | NA           | NA        | NA        | NA       | NA       |
| RF00030        | 19.01839035 | 0.931446928  | 0.5459697 | 1.7060413 | 0.088    | 0.568063 |
| RF00001        | 0           | NA           | NA        | NA        | NA       | NA       |
| RF00066        | 0           | NA           | NA        | NA        | NA       | NA       |
| RF00020        | 0.506415768 | -0.866825728 | 2.6674086 | -0.324969 | 0.745204 | NA       |
| RF00273        | 0.317831496 | 1.808837541  | 3.5779923 | 0.5055454 | 0.613176 | NA       |
| RF00001        | 0           | NA           | NA        | NA        | NA       | NA       |
| dre-mir-125a-2 | 2.451512504 | 1.983296058  | 1.3229665 | 1.499128  | 0.13384  | NA       |
| dre-mir-135a   | 5.81489598  | 0.251814402  | 0.7716281 | 0.3263417 | 0.744166 | NA       |
| RF00001        | 0           | NA           | NA        | NA        | NA       | NA       |
| RF00001        | 0           | NA           | NA        | NA        | NA       | NA       |
| RF00001        | 0           | NA           | NA        | NA        | NA       | NA       |
| RF00001        | 0.157187365 | -0.955901296 | 4.0804729 | -0.234262 | 0.814781 | NA       |
| RF00190        | 0           | NA           | NA        | NA        | NA       | NA       |
| dre-mir-728    | 0           | NA           | NA        | NA        | NA       | NA       |
| dre-mir-182    | 0.48448895  | 0.85344211   | 2.878836  | 0.2964539 | 0.766883 | NA       |
| RF00001        | 0.673031937 | -1.510323851 | 2.4021096 | -0.628749 | 0.529513 | NA       |

|                |             |              |           |           |          |          |
|----------------|-------------|--------------|-----------|-----------|----------|----------|
| mir196d        | 0           | NA           | NA        | NA        | NA       | NA       |
| RF01290        | 0           | NA           | NA        | NA        | NA       | NA       |
| RF00001        | 0           | NA           | NA        | NA        | NA       | NA       |
| dre-mir-204-1  | 0           | NA           | NA        | NA        | NA       | NA       |
| RF00001        | 0.48448895  | 0.85344211   | 2.878836  | 0.2964539 | 0.766883 | NA       |
| dre-mir-7b     | 5.727422749 | -0.525682013 | 0.8270204 | -0.635634 | 0.525015 | NA       |
| RF00001        | 0.182570949 | 0.967652056  | 4.0804729 | 0.2371421 | 0.812547 | NA       |
| RF01296        | 3.626781327 | 0.262713658  | 1.0782921 | 0.2436387 | 0.807511 | NA       |
| dre-mir-181b-1 | 11.33621417 | -0.158374062 | 0.5614172 | -0.282097 | 0.777869 | 0.975942 |
| RF00001        | 0           | NA           | NA        | NA        | NA       | NA       |
| RF00001        | 0           | NA           | NA        | NA        | NA       | NA       |
| dre-mir-153c   | 0.339758314 | 0.005883863  | 3.2682461 | 0.0018003 | 0.998564 | NA       |
| RF00001        | 0           | NA           | NA        | NA        | NA       | NA       |
| dre-mir-15b    | 0           | NA           | NA        | NA        | NA       | NA       |
| dre-mir-132-1  | 0.655741074 | 0.077611818  | 2.4374018 | 0.031842  | 0.974598 | NA       |
| RF00020        | 0           | NA           | NA        | NA        | NA       | NA       |
| RF00001        | 0           | NA           | NA        | NA        | NA       | NA       |
| RF00001        | 0.157187365 | -0.955901296 | 4.0804729 | -0.234262 | 0.814781 | NA       |
| RF00001        | 0           | NA           | NA        | NA        | NA       | NA       |
| RF00002        | 24.80453346 | 1.214334441  | 1.0671853 | 1.1378853 | 0.255168 | 0.823839 |
| dre-mir-34a    | 0           | NA           | NA        | NA        | NA       | NA       |
| dre-mir-26a-3  | 0           | NA           | NA        | NA        | NA       | NA       |
| dre-mir-454b   | 0.484368597 | 0.855487352  | 2.7040894 | 0.316368  | 0.751723 | NA       |
| RF00001        | 0           | NA           | NA        | NA        | NA       | NA       |
| RF00001        | 0           | NA           | NA        | NA        | NA       | NA       |
| dre-mir-16b    | 5.298700393 | -0.18298347  | 0.8107874 | -0.225686 | 0.821446 | NA       |
| RF00001        | 0           | NA           | NA        | NA        | NA       | NA       |
| rn7sk          | 313.6195769 | 0.587252098  | 0.4676292 | 1.2558071 | 0.209186 | 0.776073 |
| NC_002333.8    | 24.98486023 | 0.057236006  | 0.4226647 | 0.135417  | 0.892282 | 0.989291 |
| dre-mir-29b-2  | 0.95259428  | -3.385964433 | 2.2372857 | -1.513425 | 0.130172 | NA       |
| RF00001        | 0           | NA           | NA        | NA        | NA       | NA       |
| BX936308.1     | 69.85611105 | 0.150376761  | 0.243083  | 0.6186232 | 0.536165 | 0.943336 |
| mir363         | 1.158779144 | -2.454178177 | 2.015231  | -1.217815 | 0.223294 | NA       |
| dre-mir-124-2  | 19.56098018 | -0.406067699 | 0.4496112 | -0.903153 | 0.366445 | 0.887239 |
| dre-mir-9-7    | 0           | NA           | NA        | NA        | NA       | NA       |
| mir99-2        | 0.166657454 | -0.955901296 | 4.0804729 | -0.234262 | 0.814781 | NA       |
| RF00001        | 0           | NA           | NA        | NA        | NA       | NA       |
| dre-mir-138-1  | 0           | NA           | NA        | NA        | NA       | NA       |
| RF00001        | 0.182570949 | 0.967652056  | 4.0804729 | 0.2371421 | 0.812547 | NA       |
| RF00001        | 0           | NA           | NA        | NA        | NA       | NA       |
| mir196b        | 0           | NA           | NA        | NA        | NA       | NA       |
| dre-mir-101b   | 0           | NA           | NA        | NA        | NA       | NA       |
| dre-mir-125b-1 | 0.158795395 | 0.967652056  | 4.0804729 | 0.2371421 | 0.812547 | NA       |
| RF00001        | 0           | NA           | NA        | NA        | NA       | NA       |
| dre-mir-9-5    | 0.173729368 | -0.955901296 | 4.0804729 | -0.234262 | 0.814781 | NA       |
| dre-mir-15c    | 0           | NA           | NA        | NA        | NA       | NA       |
| NC_002333.9    | 13.90282923 | 0.092495702  | 0.5264614 | 0.1756932 | 0.860535 | 0.985773 |
| dre-mir-457b   | 3.477775794 | 0.112172945  | 1.0077155 | 0.1113141 | 0.911367 | NA       |
| RF00096        | 0.31437473  | -1.788572922 | 3.5930657 | -0.497785 | 0.618636 | NA       |
| dre-mir-200a   | 0           | NA           | NA        | NA        | NA       | NA       |
| RF00001        | 0           | NA           | NA        | NA        | NA       | NA       |
| RF00001        | 0           | NA           | NA        | NA        | NA       | NA       |
| dre-mir-124-3  | 5.754700009 | -0.065998096 | 0.794745  | -0.083043 | 0.933817 | NA       |
| RF00004        | 0           | NA           | NA        | NA        | NA       | NA       |

|                |             |              |           |           |          |          |
|----------------|-------------|--------------|-----------|-----------|----------|----------|
| dre-mir-429a   | 0           | NA           | NA        | NA        | NA       | NA       |
| RF00072        | 0           | NA           | NA        | NA        | NA       | NA       |
| dre-let-7c-1   | 0.349228403 | 0.005884014  | 3.2372587 | 0.0018176 | 0.99855  | NA       |
| NC_002333.10   | 0           | NA           | NA        | NA        | NA       | NA       |
| RF00020        | 0           | NA           | NA        | NA        | NA       | NA       |
| RF00581        | 0.806485033 | -1.864932549 | 2.2428596 | -0.831498 | 0.405693 | NA       |
| mir100-2       | 0           | NA           | NA        | NA        | NA       | NA       |
| RF00001        | 0.325452849 | 0.005883619  | 3.3177086 | 0.0017734 | 0.998585 | NA       |
| CR847953.2     | 0           | NA           | NA        | NA        | NA       | NA       |
| NC_002333.11   | 0.648507523 | -0.035374916 | 2.4454854 | -0.014465 | 0.988459 | NA       |
| dre-mir-126a   | 0           | NA           | NA        | NA        | NA       | NA       |
| dre-mir-23a-2  | 0           | NA           | NA        | NA        | NA       | NA       |
| RF00001        | 0           | NA           | NA        | NA        | NA       | NA       |
| dre-mir-301c   | 0           | NA           | NA        | NA        | NA       | NA       |
| RF00001        | 0           | NA           | NA        | NA        | NA       | NA       |
| dre-mir-375-1  | 1.457659176 | 0.9469376    | 1.6749778 | 0.5653434 | 0.57184  | NA       |
| dre-mir-100-1  | 0           | NA           | NA        | NA        | NA       | NA       |
| RF00001        | 0           | NA           | NA        | NA        | NA       | NA       |
| dre-mir-204-2  | 0.340386822 | -1.882368278 | 3.2159502 | -0.585323 | 0.558331 | NA       |
| dre-mir-23b    | 0           | NA           | NA        | NA        | NA       | NA       |
| RF00001        | 0           | NA           | NA        | NA        | NA       | NA       |
| dre-mir-30d    | 0           | NA           | NA        | NA        | NA       | NA       |
| dre-mir-181b-2 | 0.830098949 | -1.902766313 | 2.1285797 | -0.893914 | 0.371368 | NA       |
| RF00001        | 0.158915748 | 0.967652056  | 4.0804729 | 0.2371421 | 0.812547 | NA       |
| RF00133        | 0           | NA           | NA        | NA        | NA       | NA       |
| RF00003        | 0           | NA           | NA        | NA        | NA       | NA       |
| RF00608        | 0           | NA           | NA        | NA        | NA       | NA       |
| dre-mir-103    | 0           | NA           | NA        | NA        | NA       | NA       |
| RF00001        | 0           | NA           | NA        | NA        | NA       | NA       |
| dre-mir-144    | 0           | NA           | NA        | NA        | NA       | NA       |
| mir150         | 0           | NA           | NA        | NA        | NA       | NA       |
| dre-mir-734    | 0           | NA           | NA        | NA        | NA       | NA       |
| dre-mir-216a   | 0           | NA           | NA        | NA        | NA       | NA       |
| RF00001        | 0           | NA           | NA        | NA        | NA       | NA       |
| RF00577        | 0           | NA           | NA        | NA        | NA       | NA       |
| RF00377        | 0           | NA           | NA        | NA        | NA       | NA       |
| dre-mir-7a-3   | 0.330916733 | -1.849579229 | 3.2489867 | -0.569279 | 0.569167 | NA       |
| dre-mir-190a   | 0.474898508 | 0.855240867  | 2.7202602 | 0.3143967 | 0.75322  | NA       |
| dre-mir-10c    | 0.861574924 | -3.219550392 | 2.3111143 | -1.393073 | 0.163598 | NA       |
| RF00001        | 0.476506538 | 2.394892832  | 2.8161716 | 0.8504073 | 0.395099 | NA       |
| dre-mir-205    | 1.96109959  | -0.479788712 | 1.4100909 | -0.340254 | 0.733665 | NA       |
| RF00410        | 0.643404698 | 1.436206627  | 2.5980397 | 0.552804  | 0.580398 | NA       |
| RF00186        | 3.221721803 | -0.098073118 | 1.1145211 | -0.087996 | 0.92988  | NA       |
| mir206-2       | 0           | NA           | NA        | NA        | NA       | NA       |
| dre-mir-133a-2 | 0           | NA           | NA        | NA        | NA       | NA       |
| RF00092        | 1.975822855 | 0.45282007   | 1.4368084 | 0.3151569 | 0.752643 | NA       |
| dre-mir-107b   | 0.347458735 | -1.908042286 | 3.4571486 | -0.551912 | 0.581009 | NA       |
| RF00001        | 0           | NA           | NA        | NA        | NA       | NA       |
| RF00001        | 0           | NA           | NA        | NA        | NA       | NA       |
| dre-mir-218a-1 | 0.158795395 | 0.967652056  | 4.0804729 | 0.2371421 | 0.812547 | NA       |
| RF00001        | 0           | NA           | NA        | NA        | NA       | NA       |
| NC_002333.12   | 23.27625586 | -0.693625326 | 0.4012497 | -1.728663 | 0.083869 | 0.557501 |
| dre-mir-184-1  | 0.158915748 | 0.967652056  | 4.0804729 | 0.2371421 | 0.812547 | NA       |
| mir24-4        | 0.157187365 | -0.955901296 | 4.0804729 | -0.234262 | 0.814781 | NA       |



|                |             |              |           |           |          |          |
|----------------|-------------|--------------|-----------|-----------|----------|----------|
| dre-mir-203a   | 1.656194948 | -0.02003601  | 1.5061657 | -0.013303 | 0.989386 | NA       |
| dre-mir-155    | 0           | NA           | NA        | NA        | NA       | NA       |
| dre-let-7a-2   | 0           | NA           | NA        | NA        | NA       | NA       |
| RF00288        | 0.5046461   | -2.45370851  | 2.7629627 | -0.888072 | 0.374502 | NA       |
| CU929237.1     | 9.102050632 | -0.037556884 | 0.6332932 | -0.059304 | 0.95271  | NA       |
| RF00581        | 0.703759051 | -1.526884723 | 2.5277341 | -0.604053 | 0.545809 | NA       |
| dre-let-7b     | 0.481032184 | -2.398473301 | 2.80721   | -0.854398 | 0.392885 | NA       |
| dre-let-7h     | 0           | NA           | NA        | NA        | NA       | NA       |
| RF00001        | 0           | NA           | NA        | NA        | NA       | NA       |
| dre-mir-15a-2  | 0           | NA           | NA        | NA        | NA       | NA       |
| RF00001        | 0           | NA           | NA        | NA        | NA       | NA       |
| mir29a-1       | 0.825545564 | -1.896597388 | 2.3991135 | -0.790541 | 0.429212 | NA       |
| RF00001        | 0           | NA           | NA        | NA        | NA       | NA       |
| RF00151        | 0           | NA           | NA        | NA        | NA       | NA       |
| RF00425        | 0           | NA           | NA        | NA        | NA       | NA       |
| RF00001        | 0.349228403 | 0.005884014  | 3.2372587 | 0.0018176 | 0.99855  | NA       |
| dre-mir-200b   | 0           | NA           | NA        | NA        | NA       | NA       |
| dre-mir-199-3  | 13.1249596  | -0.634174927 | 0.5920218 | -1.071202 | 0.284079 | 0.844697 |
| RF00609        | 0           | NA           | NA        | NA        | NA       | NA       |
| RF00001        | 0.182570949 | 0.967652056  | 4.0804729 | 0.2371421 | 0.812547 | NA       |
| CABZ01078244.1 | 0           | NA           | NA        | NA        | NA       | NA       |
| dre-mir-338-3  | 0           | NA           | NA        | NA        | NA       | NA       |
| RF00411        | 0           | NA           | NA        | NA        | NA       | NA       |
| dre-mir-128-1  | 0.157187365 | -0.955901296 | 4.0804729 | -0.234262 | 0.814781 | NA       |
| dre-mir-1306   | 0           | NA           | NA        | NA        | NA       | NA       |
| CR847548.1     | 0           | NA           | NA        | NA        | NA       | NA       |
| RF00133        | 2.166936942 | -1.634451512 | 1.5496276 | -1.054738 | 0.291545 | NA       |
| RF00190        | 0           | NA           | NA        | NA        | NA       | NA       |
| RF00421        | 11.90742958 | 0.679291354  | 0.6348961 | 1.0699253 | 0.284653 | 0.844955 |
| NC_002333.13   | 455.4348111 | -0.032685591 | 0.3493231 | -0.093568 | 0.925452 | 0.992676 |
| RF00091        | 0           | NA           | NA        | NA        | NA       | NA       |
| RF00581        | 0           | NA           | NA        | NA        | NA       | NA       |
| RF00001        | 0           | NA           | NA        | NA        | NA       | NA       |
| RF00613        | 0           | NA           | NA        | NA        | NA       | NA       |
| RF00001        | 0           | NA           | NA        | NA        | NA       | NA       |
| RF00001        | 0           | NA           | NA        | NA        | NA       | NA       |
| RF00001        | 0           | NA           | NA        | NA        | NA       | NA       |
| RF00288        | 0           | NA           | NA        | NA        | NA       | NA       |
| dre-let-7e     | 0.182570949 | 0.967652056  | 4.0804729 | 0.2371421 | 0.812547 | NA       |
| RF00001        | 0.157187365 | -0.955901296 | 4.0804729 | -0.234262 | 0.814781 | NA       |
| dre-mir-729    | 6.862821894 | 0.226582971  | 0.7236118 | 0.3131278 | 0.754184 | NA       |
| dre-mir-457a   | 0           | NA           | NA        | NA        | NA       | NA       |
| RF00001        | 0           | NA           | NA        | NA        | NA       | NA       |
| RF00001        | 0           | NA           | NA        | NA        | NA       | NA       |
| RF00001        | 0           | NA           | NA        | NA        | NA       | NA       |
| RF00001        | 1.229586365 | 1.377206388  | 1.8794026 | 0.7327894 | 0.463687 | NA       |
| RF00026        | 0.158795395 | 0.967652056  | 4.0804729 | 0.2371421 | 0.812547 | NA       |
| RF00016        | 1.30115289  | -1.524277999 | 1.8450057 | -0.826164 | 0.408711 | NA       |
| dre-mir-9-1    | 0           | NA           | NA        | NA        | NA       | NA       |
| RF00265        | 0           | NA           | NA        | NA        | NA       | NA       |
| RF00001        | 0.182570949 | 0.967652056  | 4.0804729 | 0.2371421 | 0.812547 | NA       |
| RF00001        | 0           | NA           | NA        | NA        | NA       | NA       |
| RF00001        | 0           | NA           | NA        | NA        | NA       | NA       |
| NC_002333.14   | 4.560168822 | 0.611080918  | 0.9786353 | 0.6244215 | 0.532351 | NA       |
| RF00089        | 1.321151658 | -0.00170508  | 1.7199258 | -0.000991 | 0.999209 | NA       |

|                |             |              |           |           |          |          |
|----------------|-------------|--------------|-----------|-----------|----------|----------|
| RF00001        | 0           | NA           | NA        | NA        | NA       | NA       |
| RF00001        | 0.657349104 | 1.487939685  | 2.418178  | 0.6153144 | 0.538347 | NA       |
| RF00001        | 0           | NA           | NA        | NA        | NA       | NA       |
| NC_002333.15   | 7.655128604 | -0.907176017 | 0.6938673 | -1.30742  | 0.19107  | NA       |
| RF00001        | 0.484248244 | 0.852636534  | 2.8793247 | 0.2961238 | 0.767136 | NA       |
| RF00066        | 0.182570949 | 0.967652056  | 4.0804729 | 0.2371421 | 0.812547 | NA       |
| dre-mir-101a   | 0           | NA           | NA        | NA        | NA       | NA       |
| dre-mir-92a-2  | 3.687589353 | -1.067482214 | 1.0129471 | -1.053838 | 0.291957 | NA       |
| RF00001        | 0           | NA           | NA        | NA        | NA       | NA       |
| RF00001        | 0           | NA           | NA        | NA        | NA       | NA       |
| RF00001        | 0           | NA           | NA        | NA        | NA       | NA       |
| dre-mir-142a   | 0.323844819 | -1.825095364 | 3.274639  | -0.557342 | 0.577293 | NA       |
| CU442763.1     | 0           | NA           | NA        | NA        | NA       | NA       |
| dre-mir-301b   | 0.492110303 | -0.89618148  | 2.8628934 | -0.313033 | 0.754255 | NA       |
| dre-let-7a-6   | 1.651679593 | -3.043323949 | 1.7468161 | -1.742212 | 0.081471 | NA       |
| dre-mir-20b    | 0.182570949 | 0.967652056  | 4.0804729 | 0.2371421 | 0.812547 | NA       |
| dre-mir-21-1   | 68.67329239 | -0.286662407 | 0.2430981 | -1.179205 | 0.238317 | 0.807449 |
| dre-mir-181c   | 0.325452849 | 0.005883619  | 3.3177086 | 0.0017734 | 0.998585 | NA       |
| dre-mir-99-1   | 0           | NA           | NA        | NA        | NA       | NA       |
| RF00211        | 0.157187365 | -0.955901296 | 4.0804729 | -0.234262 | 0.814781 | NA       |
| RF00001        | 0           | NA           | NA        | NA        | NA       | NA       |
| RF00001        | 0.157187365 | -0.955901296 | 4.0804729 | -0.234262 | 0.814781 | NA       |
| dre-mir-137-1  | 11.38054922 | -0.315937067 | 0.5724383 | -0.551915 | 0.581007 | 0.951731 |
| RF00045        | 10.06796961 | -0.52807497  | 0.5910693 | -0.893423 | 0.371631 | NA       |
| RF00001        | 0.158915748 | 0.967652056  | 4.0804729 | 0.2371421 | 0.812547 | NA       |
| dre-mir-1388   | 0           | NA           | NA        | NA        | NA       | NA       |
| RF00001        | 0           | NA           | NA        | NA        | NA       | NA       |
| RF00003        | 0           | NA           | NA        | NA        | NA       | NA       |
| dre-mir-219-1  | 4.38383736  | -0.180872101 | 0.9374998 | -0.19293  | 0.847014 | NA       |
| dre-mir-454a   | 4.010914731 | -0.236911565 | 0.969921  | -0.244259 | 0.807031 | NA       |
| RF00003        | 0           | NA           | NA        | NA        | NA       | NA       |
| dre-let-7a-3   | 0.863695607 | 1.965711988  | 2.22386   | 0.8839189 | 0.37674  | NA       |
| RF01229        | 0           | NA           | NA        | NA        | NA       | NA       |
| RF00001        | 0           | NA           | NA        | NA        | NA       | NA       |
| RF00001        | 0           | NA           | NA        | NA        | NA       | NA       |
| dre-mir-10a    | 0           | NA           | NA        | NA        | NA       | NA       |
| RF00001        | 0           | NA           | NA        | NA        | NA       | NA       |
| RF00004        | 6.185309129 | -0.863997944 | 0.8002892 | -1.079607 | 0.280317 | NA       |
| RF00001        | 0           | NA           | NA        | NA        | NA       | NA       |
| dre-mir-34b    | 0           | NA           | NA        | NA        | NA       | NA       |
| dre-mir-462    | 0           | NA           | NA        | NA        | NA       | NA       |
| RF00026        | 0           | NA           | NA        | NA        | NA       | NA       |
| RF00001        | 0           | NA           | NA        | NA        | NA       | NA       |
| RF00066        | 0.696687138 | -1.510024977 | 2.3787501 | -0.634798 | 0.52556  | NA       |
| RF00001        | 0           | NA           | NA        | NA        | NA       | NA       |
| dre-mir-130c-1 | 0.983121726 | 0.913084443  | 2.2265742 | 0.4100849 | 0.681744 | NA       |
| RF00001        | 0           | NA           | NA        | NA        | NA       | NA       |
| dre-mir-206-1  | 4.548137677 | 0.534682454  | 0.9412951 | 0.5680285 | 0.570016 | NA       |
| CR354430.1     | 1.640082033 | -0.57523401  | 1.5155163 | -0.379563 | 0.70427  | NA       |
| RF00001        | 0.31437473  | -1.788572922 | 3.5930657 | -0.497785 | 0.618636 | NA       |
| RF00001        | 0.633693903 | 1.437927987  | 2.4435336 | 0.5884625 | 0.556222 | NA       |
| RF00409        | 2.352641381 | -0.426468192 | 1.2232374 | -0.348639 | 0.72736  | NA       |
| dre-mir-19c    | 1.202474398 | -0.315413906 | 1.8153552 | -0.173748 | 0.862064 | NA       |
| dre-mir-740    | 0.474778155 | 0.852397662  | 2.898154  | 0.2941175 | 0.768668 | NA       |

|               |             |              |           |           |          |          |
|---------------|-------------|--------------|-----------|-----------|----------|----------|
| RF00001       | 0           | NA           | NA        | NA        | NA       | NA       |
| RF00089       | 0           | NA           | NA        | NA        | NA       | NA       |
| mir199-3a     | 0.31759079  | 1.807926197  | 3.579045  | 0.5051421 | 0.613459 | NA       |
| dre-mir-27a   | 0.645291463 | -2.8201041   | 2.5306349 | -1.114386 | 0.265114 | NA       |
| dre-mir-129-4 | 0.157187365 | -0.955901296 | 4.0804729 | -0.234262 | 0.814781 | NA       |
| dre-mir-27d   | 0           | NA           | NA        | NA        | NA       | NA       |
| dre-mir-142b  | 0           | NA           | NA        | NA        | NA       | NA       |
| RF00026       | 0           | NA           | NA        | NA        | NA       | NA       |
| RF00001       | 0.341486697 | 1.892317624  | 3.2124068 | 0.5890654 | 0.555817 | NA       |
| RF00001       | 0           | NA           | NA        | NA        | NA       | NA       |
| RF00191       | 0.166657454 | -0.955901296 | 4.0804729 | -0.234262 | 0.814781 | NA       |
| dre-mir-726   | 0           | NA           | NA        | NA        | NA       | NA       |
| RF00001       | 0           | NA           | NA        | NA        | NA       | NA       |
| RF00093       | 2.306231433 | 0.416484698  | 1.2264274 | 0.3395918 | 0.734164 | NA       |
| dre-mir-143   | 0.166657454 | -0.955901296 | 4.0804729 | -0.234262 | 0.814781 | NA       |
| RF00001       | 0           | NA           | NA        | NA        | NA       | NA       |
| RF00001       | 0.182570949 | 0.967652056  | 4.0804729 | 0.2371421 | 0.812547 | NA       |
| RF00001       | 0           | NA           | NA        | NA        | NA       | NA       |
| RF00001       | 0.317831496 | 1.808837541  | 3.5779923 | 0.5055454 | 0.613176 | NA       |
| RF00001       | 0           | NA           | NA        | NA        | NA       | NA       |
| RF00001       | 0           | NA           | NA        | NA        | NA       | NA       |
| dre-mir-135b  | 5.938060856 | 0.466203413  | 0.8008723 | 0.5821195 | 0.560486 | NA       |
| dre-mir-460   | 0           | NA           | NA        | NA        | NA       | NA       |
| RF00001       | 0           | NA           | NA        | NA        | NA       | NA       |
| RF00068       | 0           | NA           | NA        | NA        | NA       | NA       |
| RF00319       | 1.230565887 | 3.733090424  | 1.9706951 | 1.8943013 | 0.058185 | NA       |
| RF00001       | 0           | NA           | NA        | NA        | NA       | NA       |
| RF00001       | 0.471562095 | -2.373056629 | 3.0645586 | -0.774355 | 0.438721 | NA       |
| dre-mir-34c   | 0           | NA           | NA        | NA        | NA       | NA       |
| RF00003       | 0.157187365 | -0.955901296 | 4.0804729 | -0.234262 | 0.814781 | NA       |
| RF01299       | 1.523921042 | -0.893741451 | 1.7449739 | -0.51218  | 0.608525 | NA       |
| RF00003       | 0           | NA           | NA        | NA        | NA       | NA       |
| RF00270       | 0.31437473  | -1.788572922 | 3.5930657 | -0.497785 | 0.618636 | NA       |
| RF00001       | 0           | NA           | NA        | NA        | NA       | NA       |
| RF00001       | 0.356300316 | 0.005884122  | 3.214964  | 0.0018302 | 0.99854  | NA       |
| RF00001       | 0           | NA           | NA        | NA        | NA       | NA       |
| RF00001       | 0.356300316 | 0.005884122  | 3.214964  | 0.0018302 | 0.99854  | NA       |
| dre-mir-187   | 0           | NA           | NA        | NA        | NA       | NA       |
| NC_002333.16  | 31.50318652 | 0.279428087  | 0.4012557 | 0.696384  | 0.486188 | 0.930833 |
| RF00001       | 0.316103113 | 0.005883447  | 3.3519121 | 0.0017553 | 0.9986   | NA       |
| RF00004       | 0           | NA           | NA        | NA        | NA       | NA       |
| dre-let-7i    | 1.495661127 | 1.077139194  | 1.7501629 | 0.6154508 | 0.538257 | NA       |
| RF00049       | 0           | NA           | NA        | NA        | NA       | NA       |
| RF00001       | 0           | NA           | NA        | NA        | NA       | NA       |
| NC_002333.17  | 6316.732984 | 0.668539354  | 0.3798483 | 1.7600166 | 0.078405 | 0.545524 |
| dre-let-7a-4  | 0           | NA           | NA        | NA        | NA       | NA       |
| dre-mir-9-6   | 0           | NA           | NA        | NA        | NA       | NA       |
| RF00001       | 0           | NA           | NA        | NA        | NA       | NA       |
| dre-mir-18c   | 0.157187365 | -0.955901296 | 4.0804729 | -0.234262 | 0.814781 | NA       |
| RF00001       | 0           | NA           | NA        | NA        | NA       | NA       |
| NC_002333.18  | 242.4001844 | -0.213985676 | 0.4401731 | -0.48614  | 0.626868 | 0.957354 |
| RF00003       | 0           | NA           | NA        | NA        | NA       | NA       |
| dre-mir-458   | 0           | NA           | NA        | NA        | NA       | NA       |
| RF00151       | 0.31437473  | -1.788572922 | 3.5930657 | -0.497785 | 0.618636 | NA       |

|                |             |              |           |           |          |          |
|----------------|-------------|--------------|-----------|-----------|----------|----------|
| RF00001        | 0 NA        | NA           | NA        | NA        | NA       | NA       |
| RF00001        | 0 NA        | NA           | NA        | NA        | NA       | NA       |
| dre-mir-129-1  | 0 NA        | NA           | NA        | NA        | NA       | NA       |
| dre-let-7d-1   | 0 NA        | NA           | NA        | NA        | NA       | NA       |
| RF00273        | 0 NA        | NA           | NA        | NA        | NA       | NA       |
| RF00020        | 0 NA        | NA           | NA        | NA        | NA       | NA       |
| RF00096        | 0.330916733 | -1.849579229 | 3.2489867 | -0.569279 | 0.569167 | NA       |
| RF00001        | 0 NA        | NA           | NA        | NA        | NA       | NA       |
| RF00001        | 0 NA        | NA           | NA        | NA        | NA       | NA       |
| RF00015        | 0 NA        | NA           | NA        | NA        | NA       | NA       |
| RF00001        | 0.166657454 | -0.955901296 | 4.0804729 | -0.234262 | 0.814781 | NA       |
| RF00150        | 0 NA        | NA           | NA        | NA        | NA       | NA       |
| RF00001        | 0.157187365 | -0.955901296 | 4.0804729 | -0.234262 | 0.814781 | NA       |
| dre-mir-451    | 0 NA        | NA           | NA        | NA        | NA       | NA       |
| RF00001        | 0 NA        | NA           | NA        | NA        | NA       | NA       |
| RF00001        | 0 NA        | NA           | NA        | NA        | NA       | NA       |
| CR847944.3     | 0.182570949 | 0.967652056  | 4.0804729 | 0.2371421 | 0.812547 | NA       |
| RF00093        | 4.742081439 | -0.487210118 | 0.9139108 | -0.533105 | 0.593961 | NA       |
| dre-mir-10b-2  | 4.330756601 | 0.233064551  | 0.9691394 | 0.2404861 | 0.809953 | NA       |
| dre-mir-27e    | 0.814536469 | 0.637862482  | 2.230678  | 0.28595   | 0.774916 | NA       |
| RF00090        | 0.166657454 | -0.955901296 | 4.0804729 | -0.234262 | 0.814781 | NA       |
| dre-mir-130a   | 0.158915748 | 0.967652056  | 4.0804729 | 0.2371421 | 0.812547 | NA       |
| dre-let-7f     | 0 NA        | NA           | NA        | NA        | NA       | NA       |
| RF00068        | 2.456666658 | 0.171472539  | 1.2263118 | 0.1398279 | 0.888796 | NA       |
| dre-mir-429b   | 8.948580077 | -1.359752513 | 0.6734286 | -2.019149 | 0.043472 | NA       |
| RF00001        | 0.5046461   | -2.45370851  | 2.7629627 | -0.888072 | 0.374502 | NA       |
| RF00001        | 0 NA        | NA           | NA        | NA        | NA       | NA       |
| RF00001        | 0.476747244 | 2.393381959  | 3.0525537 | 0.7840589 | 0.433006 | NA       |
| RF00001        | 0.182570949 | 0.967652056  | 4.0804729 | 0.2371421 | 0.812547 | NA       |
| RF00001        | 0.317831496 | 1.808837541  | 3.5779923 | 0.5055454 | 0.613176 | NA       |
| dre-mir-218a-2 | 0.530029684 | -0.939524117 | 2.7937867 | -0.336291 | 0.736652 | NA       |
| dre-mir-732    | 0 NA        | NA           | NA        | NA        | NA       | NA       |
| mir214a        | 0 NA        | NA           | NA        | NA        | NA       | NA       |
| NC_002333.19   | 16.82842674 | -0.175092226 | 0.4725024 | -0.370564 | 0.710963 | 0.968985 |
| dre-mir-10d    | 3.452956192 | -0.119011933 | 1.0565086 | -0.112646 | 0.910311 | NA       |
| RF00001        | 11.18204147 | -0.356265669 | 0.6308528 | -0.564737 | 0.572253 | 0.949494 |
| RF01299        | 0 NA        | NA           | NA        | NA        | NA       | NA       |
| RF00619        | 0 NA        | NA           | NA        | NA        | NA       | NA       |
| RF00001        | 0 NA        | NA           | NA        | NA        | NA       | NA       |
| RF00003        | 0.182570949 | 0.967652056  | 4.0804729 | 0.2371421 | 0.812547 | NA       |
| dre-mir-129-2  | 0 NA        | NA           | NA        | NA        | NA       | NA       |
| RF00001        | 0.365141898 | 1.973577737  | 3.3927314 | 0.5817076 | 0.560764 | NA       |
| RF00340        | 0.316103113 | 0.005883447  | 3.3519121 | 0.0017553 | 0.9986   | NA       |
| dre-mir-145    | 21.81166475 | -0.372861058 | 0.4382415 | -0.850812 | 0.394874 | 0.899087 |
| RF00045        | 8.898768595 | -0.233683939 | 0.6447654 | -0.362432 | 0.717029 | NA       |
| NC_002333.20   | 10.05050441 | 0.188680494  | 0.615502  | 0.3065474 | 0.759188 | NA       |
| dre-mir-190b   | 0 NA        | NA           | NA        | NA        | NA       | NA       |
| dre-mir-125a-1 | 0.158795395 | 0.967652056  | 4.0804729 | 0.2371421 | 0.812547 | NA       |
| mir96          | 0.489712128 | -0.887840729 | 2.693685  | -0.329601 | 0.741702 | NA       |
| dre-mir-7a-2   | 0.166657454 | -0.955901296 | 4.0804729 | -0.234262 | 0.814781 | NA       |
| RF00137        | 0 NA        | NA           | NA        | NA        | NA       | NA       |
| RF01277        | 1.172805874 | 1.340994147  | 1.8747961 | 0.7152747 | 0.474439 | NA       |
| RF00001        | 0 NA        | NA           | NA        | NA        | NA       | NA       |
| RF00270        | 0.657159727 | -2.841717825 | 2.5166161 | -1.129182 | 0.258821 | NA       |

|                |             |              |           |           |          |          |
|----------------|-------------|--------------|-----------|-----------|----------|----------|
| dre-mir-199-2  | 0.166657454 | -0.955901296 | 4.0804729 | -0.234262 | 0.814781 | NA       |
| dre-mir-27c    | 0.706628594 | 2.93253102   | 2.4623982 | 1.1909248 | 0.233683 | NA       |
| arhgap19       | 203.4071735 | 0.046590429  | 0.1637634 | 0.2844985 | 0.776028 | 0.975826 |
| dre-mir-16a    | 0 NA        | NA           | NA        | NA        | NA       | NA       |
| RF00001        | 0 NA        | NA           | NA        | NA        | NA       | NA       |
| dre-mir-130c-2 | 0 NA        | NA           | NA        | NA        | NA       | NA       |
| RF00001        | 0 NA        | NA           | NA        | NA        | NA       | NA       |
| RF00001        | 0 NA        | NA           | NA        | NA        | NA       | NA       |
| dre-mir-727    | 0 NA        | NA           | NA        | NA        | NA       | NA       |
| RF00152        | 0 NA        | NA           | NA        | NA        | NA       | NA       |
| RF00613        | 0.157187365 | -0.955901296 | 4.0804729 | -0.234262 | 0.814781 | NA       |
| RF00581        | 3.784382322 | -0.564770663 | 1.066158  | -0.529725 | 0.596303 | NA       |
| RF00611        | 0 NA        | NA           | NA        | NA        | NA       | NA       |
| dre-mir-218b   | 0 NA        | NA           | NA        | NA        | NA       | NA       |
| CR354430.2     | 0.482760567 | -0.866527181 | 2.7059286 | -0.320233 | 0.748792 | NA       |
| dre-mir-217    | 2.330006987 | 0.432382524  | 1.2175105 | 0.3551366 | 0.722487 | NA       |
| dre-let-7g-1   | 4.946297216 | -0.566432912 | 0.8543305 | -0.663014 | 0.507322 | NA       |
| RF00001        | 0.52295777  | -0.916487494 | 2.6406233 | -0.347072 | 0.728537 | NA       |
| dre-mir-489    | 0 NA        | NA           | NA        | NA        | NA       | NA       |
| mir196a-1      | 0 NA        | NA           | NA        | NA        | NA       | NA       |
| dre-mir-146a   | 4.160597841 | -1.077646608 | 0.949349  | -1.135143 | 0.256316 | NA       |
| NC_002333.21   | 6.133047496 | -0.204562088 | 0.7769143 | -0.263301 | 0.792319 | NA       |
| RF00001        | 1.659102521 | -0.481707176 | 1.6148571 | -0.298297 | 0.765476 | NA       |
| RF00001        | 0.158915748 | 0.967652056  | 4.0804729 | 0.2371421 | 0.812547 | NA       |
| RF01296        | 1.887684329 | 0.826035529  | 1.4328941 | 0.5764805 | 0.56429  | NA       |
| RF00001        | 0 NA        | NA           | NA        | NA        | NA       | NA       |
| RF00001        | 0 NA        | NA           | NA        | NA        | NA       | NA       |
| dre-mir-210    | 4.930414715 | 0.58250929   | 0.8552164 | 0.681125  | 0.495792 | NA       |
| RF00001        | 0.182570949 | 0.967652056  | 4.0804729 | 0.2371421 | 0.812547 | NA       |
| RF00001        | 0.317831496 | 1.808837541  | 3.5779923 | 0.5055454 | 0.613176 | NA       |
| dre-mir-203b   | 6.246316196 | 0.887741531  | 0.8187012 | 1.0843291 | 0.278219 | NA       |
| dre-mir-216b   | 0 NA        | NA           | NA        | NA        | NA       | NA       |
| dre-mir-146b   | 0 NA        | NA           | NA        | NA        | NA       | NA       |
| dre-mir-148    | 0 NA        | NA           | NA        | NA        | NA       | NA       |
| RF00001        | 0 NA        | NA           | NA        | NA        | NA       | NA       |
| RF00001        | 0 NA        | NA           | NA        | NA        | NA       | NA       |
| RF00092        | 0.500161739 | 2.450146464  | 2.7711133 | 0.8841741 | 0.376602 | NA       |
| RF00020        | 0 NA        | NA           | NA        | NA        | NA       | NA       |
| RF00001        | 0.341486697 | 1.892317624  | 3.2124068 | 0.5890654 | 0.555817 | NA       |
| RF00191        | 2.651412346 | -0.007849672 | 1.1463432 | -0.006848 | 0.994536 | NA       |
| RF00001        | 0 NA        | NA           | NA        | NA        | NA       | NA       |
| dre-mir-153b   | 1.504151694 | -0.287778376 | 1.5448187 | -0.186286 | 0.85222  | NA       |
| RF00045        | 6.108331292 | -0.579581822 | 0.8860703 | -0.654104 | 0.513045 | NA       |
| RF00001        | 27.08154465 | -0.08178602  | 0.3614276 | -0.226286 | 0.820979 | 0.981628 |
| RF00001        | 0 NA        | NA           | NA        | NA        | NA       | NA       |
| RF00548        | 0 NA        | NA           | NA        | NA        | NA       | NA       |
| dre-mir-301a   | 0 NA        | NA           | NA        | NA        | NA       | NA       |
| RF00001        | 0.166657454 | -0.955901296 | 4.0804729 | -0.234262 | 0.814781 | NA       |
| dre-mir-107a   | 0 NA        | NA           | NA        | NA        | NA       | NA       |
| RF01234        | 11.14858835 | 0.604505743  | 0.5929432 | 1.0195003 | 0.307966 | 0.861088 |
| dre-let-7g-2   | 0 NA        | NA           | NA        | NA        | NA       | NA       |
| RF00001        | 0.347458735 | -1.908042286 | 3.4571486 | -0.551912 | 0.581009 | NA       |
| RF00001        | 0.365141898 | 1.973577737  | 3.3927314 | 0.5817076 | 0.560764 | NA       |
| RF00015        | 0 NA        | NA           | NA        | NA        | NA       | NA       |

|                |             |              |           |           |          |          |
|----------------|-------------|--------------|-----------|-----------|----------|----------|
| dre-mir-22b    | 0           | NA           | NA        | NA        | NA       | NA       |
| RF00377        | 0           | NA           | NA        | NA        | NA       | NA       |
| RF00284        | 0           | NA           | NA        | NA        | NA       | NA       |
| NC_002333.22   | 0.654133044 | -1.416854166 | 2.5841447 | -0.548287 | 0.583495 | NA       |
| NC_002333.23   | 2.36486066  | 0.8593146    | 1.297465  | 0.6623027 | 0.507777 | NA       |
| RF00001        | 0           | NA           | NA        | NA        | NA       | NA       |
| dre-mir-128-2  | 0.365141898 | 1.973577737  | 3.3927314 | 0.5817076 | 0.560764 | NA       |
| dre-mir-9-4    | 0.492110303 | -0.89618148  | 2.8628934 | -0.313033 | 0.754255 | NA       |
| dre-mir-184-2  | 0           | NA           | NA        | NA        | NA       | NA       |
| dre-mir-30e-2  | 0           | NA           | NA        | NA        | NA       | NA       |
| RF00001        | 0           | NA           | NA        | NA        | NA       | NA       |
| NC_002333.24   | 9.887021234 | -0.380338745 | 0.6112977 | -0.622182 | 0.533822 | NA       |
| RF00026        | 0.339758314 | 0.005883863  | 3.2682461 | 0.0018003 | 0.998564 | NA       |
| dre-mir-23a-3  | 0           | NA           | NA        | NA        | NA       | NA       |
| dre-mir-30b    | 0           | NA           | NA        | NA        | NA       | NA       |
| RF00001        | 0           | NA           | NA        | NA        | NA       | NA       |
| dre-mir-133b   | 0           | NA           | NA        | NA        | NA       | NA       |
| RF00001        | 0           | NA           | NA        | NA        | NA       | NA       |
| dre-mir-125b-3 | 5.928270994 | 0.484135521  | 0.7748643 | 0.6248004 | 0.532102 | NA       |
| RF00001        | 0           | NA           | NA        | NA        | NA       | NA       |
| RF00001        | 0           | NA           | NA        | NA        | NA       | NA       |
| RF00001        | 0           | NA           | NA        | NA        | NA       | NA       |
| RF00396        | 0.158795395 | 0.967652056  | 4.0804729 | 0.2371421 | 0.812547 | NA       |
| RF00001        | 0           | NA           | NA        | NA        | NA       | NA       |
| RF00072        | 0.48983248  | -0.887840757 | 2.6934859 | -0.329625 | 0.741683 | NA       |
| RF00001        | 0.173729368 | -0.955901296 | 4.0804729 | -0.234262 | 0.814781 | NA       |
| RF00001        | 0           | NA           | NA        | NA        | NA       | NA       |
| dre-mir-181b-3 | 16.55108373 | -0.879784139 | 0.4736596 | -1.857419 | 0.063252 | 0.491256 |
| RF00430        | 2.620924942 | -1.609299439 | 1.2818151 | -1.255485 | 0.209303 | NA       |
| dre-mir-22a    | 22.36856264 | 0.038741257  | 0.4119365 | 0.0940467 | 0.925072 | 0.992676 |
| RF00001        | 0           | NA           | NA        | NA        | NA       | NA       |
| dre-mir-124-6  | 13.89424023 | 0.115575081  | 0.5506753 | 0.2098788 | 0.833762 | 0.983583 |
| dre-mir-736    | 0           | NA           | NA        | NA        | NA       | NA       |
| dre-mir-430a-1 | 0           | NA           | NA        | NA        | NA       | NA       |
| dre-mir-122    | 0.158795395 | 0.967652056  | 4.0804729 | 0.2371421 | 0.812547 | NA       |
| RF00066        | 5.126070901 | 0.286874758  | 0.8238968 | 0.3481926 | 0.727696 | NA       |
| RF00001        | 0           | NA           | NA        | NA        | NA       | NA       |
| RF00001        | 0           | NA           | NA        | NA        | NA       | NA       |
| RF00001        | 0           | NA           | NA        | NA        | NA       | NA       |
| RF00100        | 0           | NA           | NA        | NA        | NA       | NA       |
| RF00001        | 0.158795395 | 0.967652056  | 4.0804729 | 0.2371421 | 0.812547 | NA       |
| RF00001        | 0.873165696 | 1.965547116  | 2.2171785 | 0.8865083 | 0.375344 | NA       |
| RF00001        | 0           | NA           | NA        | NA        | NA       | NA       |
| RF00001        | 0           | NA           | NA        | NA        | NA       | NA       |
| RF01241        | 1.325436598 | -2.680967306 | 1.8525508 | -1.447176 | 0.147848 | NA       |
| dre-mir-2193   | 0           | NA           | NA        | NA        | NA       | NA       |
| RF00001        | 0           | NA           | NA        | NA        | NA       | NA       |
| RF00001        | 0           | NA           | NA        | NA        | NA       | NA       |
| RF00001        | 0           | NA           | NA        | NA        | NA       | NA       |
| RF00231        | 7.046573029 | 0.605770739  | 0.7600407 | 0.7970241 | 0.425437 | NA       |
| RF00001        | 0           | NA           | NA        | NA        | NA       | NA       |
| RF00478        | 1.545407487 | 0.993496468  | 1.6449182 | 0.6039792 | 0.545857 | NA       |
| dre-mir-2198   | 0.173729368 | -0.955901296 | 4.0804729 | -0.234262 | 0.814781 | NA       |
| RF00001        | 0           | NA           | NA        | NA        | NA       | NA       |

|              |             |              |           |           |          |    |
|--------------|-------------|--------------|-----------|-----------|----------|----|
| RF00001      | 0.506415768 | -0.866825728 | 2.6674086 | -0.324969 | 0.745204 | NA |
| RF00099      | 0 NA        |              | NA        | NA        | NA       | NA |
| RF00001      | 0 NA        |              | NA        | NA        | NA       | NA |
| RF00001      | 0.340386822 | -1.882368278 | 3.2159502 | -0.585323 | 0.558331 | NA |
| RF00001      | 0.643404698 | 1.436206627  | 2.5980397 | 0.552804  | 0.580398 | NA |
| RF00001      | 0 NA        |              | NA        | NA        | NA       | NA |
| RF00001      | 0.173729368 | -0.955901296 | 4.0804729 | -0.234262 | 0.814781 | NA |
| RF00417      | 1.100311556 | -3.586134366 | 3.9466188 | -0.90866  | 0.36353  | NA |
| RF00001      | 0.339758314 | 0.005883863  | 3.2682461 | 0.0018003 | 0.998564 | NA |
| RF00429      | 1.188797441 | -1.322727039 | 1.8673491 | -0.708345 | 0.478731 | NA |
| RF00001      | 0 NA        |              | NA        | NA        | NA       | NA |
| RF00001      | 0 NA        |              | NA        | NA        | NA       | NA |
| RF00001      | 0 NA        |              | NA        | NA        | NA       | NA |
| RF00001      | 0 NA        |              | NA        | NA        | NA       | NA |
| dre-mir-2187 | 0 NA        |              | NA        | NA        | NA       | NA |
| dre-mir-2192 | 0 NA        |              | NA        | NA        | NA       | NA |
| RF01225      | 0 NA        |              | NA        | NA        | NA       | NA |
| dre-mir-2196 | 0 NA        |              | NA        | NA        | NA       | NA |
| RF00001      | 0 NA        |              | NA        | NA        | NA       | NA |
| RF00302      | 0.633814256 | 1.438196278  | 2.4434004 | 0.5886044 | 0.556127 | NA |
| RF00001      | 0.491560863 | 0.853615855  | 2.865157  | 0.2979299 | 0.765757 | NA |
| RF00001      | 0 NA        |              | NA        | NA        | NA       | NA |
| RF00001      | 0 NA        |              | NA        | NA        | NA       | NA |
| RF00001      | 0 NA        |              | NA        | NA        | NA       | NA |
| RF00302      | 2.113802594 | 0.707668695  | 1.3492795 | 0.5244789 | 0.599945 | NA |
| RF00001      | 0.680773643 | -2.882718692 | 2.4687055 | -1.167705 | 0.242926 | NA |
| RF00593      | 0.825614588 | 1.890321184  | 2.2486323 | 0.8406538 | 0.400542 | NA |
| RF00001      | 0 NA        |              | NA        | NA        | NA       | NA |
| RF00001      | 0 NA        |              | NA        | NA        | NA       | NA |
| RF00001      | 0 NA        |              | NA        | NA        | NA       | NA |
| RF00001      | 1.990324486 | -1.631932347 | 1.6062005 | -1.01602  | 0.30962  | NA |
| RF00001      | 0 NA        |              | NA        | NA        | NA       | NA |
| RF00001      | 0 NA        |              | NA        | NA        | NA       | NA |
| RF00026      | 0 NA        |              | NA        | NA        | NA       | NA |
| RF01241      | 0.158795395 | 0.967652056  | 4.0804729 | 0.2371421 | 0.812547 | NA |
| RF00001      | 0 NA        |              | NA        | NA        | NA       | NA |
| RF00001      | 0 NA        |              | NA        | NA        | NA       | NA |
| RF00001      | 0 NA        |              | NA        | NA        | NA       | NA |
| RF00001      | 0 NA        |              | NA        | NA        | NA       | NA |
| RF00001      | 0 NA        |              | NA        | NA        | NA       | NA |
| RF00428      | 0.341366344 | 1.891903201  | 3.2128156 | 0.5888614 | 0.555954 | NA |
| RF00001      | 0 NA        |              | NA        | NA        | NA       | NA |
| RF00001      | 0 NA        |              | NA        | NA        | NA       | NA |
| RF00001      | 0.31759079  | 1.807926197  | 3.579045  | 0.5051421 | 0.613459 | NA |
| RF00001      | 0 NA        |              | NA        | NA        | NA       | NA |
| RF00001      | 0.474778155 | 0.852397662  | 2.898154  | 0.2941175 | 0.768668 | NA |
| RF00431      | 0 NA        |              | NA        | NA        | NA       | NA |
| RF00001      | 0 NA        |              | NA        | NA        | NA       | NA |
| RF00001      | 0.333314908 | -1.858695402 | 3.5126701 | -0.52914  | 0.596708 | NA |
| RF00001      | 0.157187365 | -0.955901296 | 4.0804729 | -0.234262 | 0.814781 | NA |
| RF00001      | 0 NA        |              | NA        | NA        | NA       | NA |
| RF00001      | 0.658218317 | -0.061628513 | 2.4342948 | -0.025317 | 0.979802 | NA |
| RF00001      | 0 NA        |              | NA        | NA        | NA       | NA |
| RF00003      | 0 NA        |              | NA        | NA        | NA       | NA |

|              |             |              |           |           |          |    |
|--------------|-------------|--------------|-----------|-----------|----------|----|
| RF00001      | 0           | NA           | NA        | NA        | NA       | NA |
| RF00001      | 0           | NA           | NA        | NA        | NA       | NA |
| RF00001      | 0           | NA           | NA        | NA        | NA       | NA |
| RF00006      | 0.838940531 | -0.561526863 | 2.0217856 | -0.277738 | 0.781213 | NA |
| RF00001      | 0           | NA           | NA        | NA        | NA       | NA |
| RF00001      | 0           | NA           | NA        | NA        | NA       | NA |
| RF00001      | 0.157187365 | -0.955901296 | 4.0804729 | -0.234262 | 0.814781 | NA |
| RF00001      | 0           | NA           | NA        | NA        | NA       | NA |
| RF00001      | 0           | NA           | NA        | NA        | NA       | NA |
| RF00001      | 3.034676537 | -0.301987747 | 1.0944881 | -0.275917 | 0.782612 | NA |
| RF00001      | 0.158915748 | 0.967652056  | 4.0804729 | 0.2371421 | 0.812547 | NA |
| RF00001      | 0           | NA           | NA        | NA        | NA       | NA |
| RF00154      | 0           | NA           | NA        | NA        | NA       | NA |
| RF00001      | 0.166657454 | -0.955901296 | 4.0804729 | -0.234262 | 0.814781 | NA |
| RF00001      | 0           | NA           | NA        | NA        | NA       | NA |
| RF00001      | 0           | NA           | NA        | NA        | NA       | NA |
| RF00001      | 0           | NA           | NA        | NA        | NA       | NA |
| RF00001      | 0           | NA           | NA        | NA        | NA       | NA |
| RF00001      | 0           | NA           | NA        | NA        | NA       | NA |
| RF00411      | 0.665839671 | -1.495777257 | 2.4093426 | -0.620824 | 0.534716 | NA |
| RF00001      | 0           | NA           | NA        | NA        | NA       | NA |
| RF00001      | 0           | NA           | NA        | NA        | NA       | NA |
| dre-mir-2191 | 0           | NA           | NA        | NA        | NA       | NA |
| RF00001      | 0           | NA           | NA        | NA        | NA       | NA |
| RF00001      | 0           | NA           | NA        | NA        | NA       | NA |
| RF00001      | 0           | NA           | NA        | NA        | NA       | NA |
| RF00001      | 0           | NA           | NA        | NA        | NA       | NA |
| RF00001      | 0.330916733 | -1.849579229 | 3.2489867 | -0.569279 | 0.569167 | NA |
| RF00001      | 0           | NA           | NA        | NA        | NA       | NA |
| RF00001      | 0           | NA           | NA        | NA        | NA       | NA |
| RF00001      | 0           | NA           | NA        | NA        | NA       | NA |
| RF00001      | 3.284958157 | -0.577324491 | 1.0337626 | -0.558469 | 0.576524 | NA |
| RF00001      | 0.182570949 | 0.967652056  | 4.0804729 | 0.2371421 | 0.812547 | NA |
| RF00001      | 0           | NA           | NA        | NA        | NA       | NA |
| RF00001      | 0           | NA           | NA        | NA        | NA       | NA |
| RF00001      | 0           | NA           | NA        | NA        | NA       | NA |
| RF00001      | 0           | NA           | NA        | NA        | NA       | NA |
| RF00001      | 0           | NA           | NA        | NA        | NA       | NA |
| RF00001      | 0.182570949 | 0.967652056  | 4.0804729 | 0.2371421 | 0.812547 | NA |
| RF00001      | 0.476506538 | 2.394892832  | 2.8161716 | 0.8504073 | 0.395099 | NA |
| RF00001      | 1.014518634 | -0.023592803 | 1.9308724 | -0.012219 | 0.990251 | NA |
| RF00572      | 0           | NA           | NA        | NA        | NA       | NA |
| RF00001      | 0           | NA           | NA        | NA        | NA       | NA |
| RF00001      | 0.158915748 | 0.967652056  | 4.0804729 | 0.2371421 | 0.812547 | NA |
| RF00001      | 0           | NA           | NA        | NA        | NA       | NA |
| RF00026      | 0           | NA           | NA        | NA        | NA       | NA |
| RF00001      | 0           | NA           | NA        | NA        | NA       | NA |
| RF00001      | 1.471026404 | -0.306609088 | 1.5202188 | -0.201687 | 0.840161 | NA |
| RF00429      | 0.52295777  | -0.916487494 | 2.6406233 | -0.347072 | 0.728537 | NA |
| RF00001      | 0           | NA           | NA        | NA        | NA       | NA |
| RF00001      | 0           | NA           | NA        | NA        | NA       | NA |
| RF00001      | 0.333314908 | -1.858695402 | 3.5126701 | -0.52914  | 0.596708 | NA |
| RF00001      | 0           | NA           | NA        | NA        | NA       | NA |
| RF00001      | 0           | NA           | NA        | NA        | NA       | NA |



|         |              |               |            |            |           |           |
|---------|--------------|---------------|------------|------------|-----------|-----------|
| RF00001 | 0            | NA            | NA         | NA         | NA        | NA        |
| RF00001 | 0            | NA            | NA         | NA         | NA        | NA        |
| RF00001 | 0            | NA            | NA         | NA         | NA        | NA        |
| RF00001 | 0            | NA            | NA         | NA         | NA        | NA        |
| RF00001 | 0            | NA            | NA         | NA         | NA        | NA        |
| RF00322 | 1. 645037762 | -0. 524806043 | 1. 568569  | -0. 334576 | 0. 737945 | NA        |
| RF00001 | 0            | NA            | NA         | NA         | NA        | NA        |
| RF00001 | 0            | NA            | NA         | NA         | NA        | NA        |
| RF01233 | 1. 21292401  | 1. 413512392  | 1. 8890573 | 0. 7482634 | 0. 454301 | NA        |
| RF00001 | 0. 471562095 | -2. 373056629 | 3. 0645586 | -0. 774355 | 0. 438721 | NA        |
| RF01233 | 0. 476386185 | 2. 392464142  | 3. 0533824 | 0. 7835455 | 0. 433307 | NA        |
| RF00001 | 0            | NA            | NA         | NA         | NA        | NA        |
| RF00001 | 0            | NA            | NA         | NA         | NA        | NA        |
| RF00001 | 0. 157187365 | -0. 955901296 | 4. 0804729 | -0. 234262 | 0. 814781 | NA        |
| RF00001 | 0            | NA            | NA         | NA         | NA        | NA        |
| RF00001 | 0            | NA            | NA         | NA         | NA        | NA        |
| RF00443 | 0. 365141898 | 1. 973577737  | 3. 3927314 | 0. 5817076 | 0. 560764 | NA        |
| RF00001 | 0            | NA            | NA         | NA         | NA        | NA        |
| RF00001 | 0            | NA            | NA         | NA         | NA        | NA        |
| RF00001 | 0            | NA            | NA         | NA         | NA        | NA        |
| RF00009 | 1. 333689715 | -0. 736234712 | 1. 8666381 | -0. 394417 | 0. 693273 | NA        |
| RF00001 | 0. 182570949 | 0. 967652056  | 4. 0804729 | 0. 2371421 | 0. 812547 | NA        |
| RF00431 | 0            | NA            | NA         | NA         | NA        | NA        |
| RF00001 | 0            | NA            | NA         | NA         | NA        | NA        |
| RF00001 | 2. 454535932 | -0. 239433478 | 1. 2394918 | -0. 193171 | 0. 846825 | NA        |
| RF00001 | 0            | NA            | NA         | NA         | NA        | NA        |
| RF00001 | 0            | NA            | NA         | NA         | NA        | NA        |
| RF00001 | 0            | NA            | NA         | NA         | NA        | NA        |
| RF00001 | 0            | NA            | NA         | NA         | NA        | NA        |
| RF00001 | 0            | NA            | NA         | NA         | NA        | NA        |
| RF00001 | 0            | NA            | NA         | NA         | NA        | NA        |
| RF00001 | 0. 476747244 | 2. 393381959  | 3. 0525537 | 0. 7840589 | 0. 433006 | NA        |
| RF00001 | 0            | NA            | NA         | NA         | NA        | NA        |
| RF00001 | 0. 158795395 | 0. 967652056  | 4. 0804729 | 0. 2371421 | 0. 812547 | NA        |
| RF00001 | 0            | NA            | NA         | NA         | NA        | NA        |
| RF00001 | 25. 21674435 | 0. 089381908  | 0. 3920707 | 0. 227974  | 0. 819666 | 0. 981594 |
| RF00001 | 0            | NA            | NA         | NA         | NA        | NA        |
| RF00001 | 0. 664231641 | -2. 853946573 | 2. 346554  | -1. 216229 | 0. 223898 | NA        |
| RF00001 | 0            | NA            | NA         | NA         | NA        | NA        |
| RF00001 | 0            | NA            | NA         | NA         | NA        | NA        |
| RF00001 | 0. 339758314 | 0. 005883863  | 3. 2682461 | 0. 0018003 | 0. 998564 | NA        |
| RF00001 | 0. 158915748 | 0. 967652056  | 4. 0804729 | 0. 2371421 | 0. 812547 | NA        |
| RF00001 | 0            | NA            | NA         | NA         | NA        | NA        |
| RF00001 | 0. 706508242 | 2. 93232624   | 2. 4625218 | 1. 1907818 | 0. 233739 | NA        |
| RF00263 | 1. 148909967 | 1. 312490708  | 1. 8001617 | 0. 729096  | 0. 465943 | NA        |
| RF00001 | 0            | NA            | NA         | NA         | NA        | NA        |
| RF00001 | 0            | NA            | NA         | NA         | NA        | NA        |
| RF00001 | 0            | NA            | NA         | NA         | NA        | NA        |
| RF00001 | 0            | NA            | NA         | NA         | NA        | NA        |
| RF00001 | 0. 158795395 | 0. 967652056  | 4. 0804729 | 0. 2371421 | 0. 812547 | NA        |
| RF00001 | 0            | NA            | NA         | NA         | NA        | NA        |
| RF00001 | 0            | NA            | NA         | NA         | NA        | NA        |
| RF00618 | 0            | NA            | NA         | NA         | NA        | NA        |
| RF00001 | 0            | NA            | NA         | NA         | NA        | NA        |

|         |             |              |           |           |          |    |
|---------|-------------|--------------|-----------|-----------|----------|----|
| RF00001 | 0 NA        | NA           | NA        | NA        | NA       | NA |
| RF00001 | 0 NA        | NA           | NA        | NA        | NA       | NA |
| RF00001 | 0 NA        | NA           | NA        | NA        | NA       | NA |
| RF00001 | 0 NA        | NA           | NA        | NA        | NA       | NA |
| RF00001 | 0 NA        | NA           | NA        | NA        | NA       | NA |
| RF00001 | 0.158795395 | 0.967652056  | 4.0804729 | 0.2371421 | 0.812547 | NA |
| RF00001 | 0 NA        | NA           | NA        | NA        | NA       | NA |
| RF00001 | 0 NA        | NA           | NA        | NA        | NA       | NA |
| RF00001 | 0.182570949 | 0.967652056  | 4.0804729 | 0.2371421 | 0.812547 | NA |
| RF00001 | 0 NA        | NA           | NA        | NA        | NA       | NA |
| RF00001 | 0 NA        | NA           | NA        | NA        | NA       | NA |
| RF00001 | 0.157187365 | -0.955901296 | 4.0804729 | -0.234262 | 0.814781 | NA |
| RF00001 | 0.347458735 | -1.908042286 | 3.4571486 | -0.551912 | 0.581009 | NA |
| RF00091 | 0.157187365 | -0.955901296 | 4.0804729 | -0.234262 | 0.814781 | NA |
| RF00408 | 1.501522856 | -2.90329683  | 1.7761284 | -1.634621 | 0.102129 | NA |
| RF00001 | 0 NA        | NA           | NA        | NA        | NA       | NA |
| RF00001 | 0 NA        | NA           | NA        | NA        | NA       | NA |
| RF00001 | 0 NA        | NA           | NA        | NA        | NA       | NA |
| RF00001 | 0.476747244 | 2.393381959  | 3.0525537 | 0.7840589 | 0.433006 | NA |
| RF00001 | 0 NA        | NA           | NA        | NA        | NA       | NA |
| RF00001 | 0 NA        | NA           | NA        | NA        | NA       | NA |
| RF00001 | 0.356300316 | 0.005884122  | 3.214964  | 0.0018302 | 0.99854  | NA |
| RF00001 | 0 NA        | NA           | NA        | NA        | NA       | NA |
| RF00001 | 0 NA        | NA           | NA        | NA        | NA       | NA |
| RF00001 | 0 NA        | NA           | NA        | NA        | NA       | NA |
| RF00001 | 0 NA        | NA           | NA        | NA        | NA       | NA |
| RF00001 | 0 NA        | NA           | NA        | NA        | NA       | NA |
| RF00001 | 0 NA        | NA           | NA        | NA        | NA       | NA |
| RF00001 | 0 NA        | NA           | NA        | NA        | NA       | NA |
| RF00026 | 1.298595336 | -1.598743955 | 1.8947659 | -0.843769 | 0.398799 | NA |
| RF00001 | 0 NA        | NA           | NA        | NA        | NA       | NA |
| RF00001 | 0 NA        | NA           | NA        | NA        | NA       | NA |
| RF00001 | 0.332524763 | 0.005883742  | 3.292841  | 0.0017868 | 0.998574 | NA |
| RF00001 | 0 NA        | NA           | NA        | NA        | NA       | NA |
| RF00001 | 0.522329263 | 0.999930388  | 2.8066578 | 0.3562709 | 0.721638 | NA |
| RF00001 | 0 NA        | NA           | NA        | NA        | NA       | NA |
| RF00020 | 0 NA        | NA           | NA        | NA        | NA       | NA |
| RF00001 | 0 NA        | NA           | NA        | NA        | NA       | NA |
| RF00004 | 0 NA        | NA           | NA        | NA        | NA       | NA |
| RF00001 | 0 NA        | NA           | NA        | NA        | NA       | NA |
| RF00001 | 0 NA        | NA           | NA        | NA        | NA       | NA |
| RF00001 | 0 NA        | NA           | NA        | NA        | NA       | NA |
| RF00001 | 0 NA        | NA           | NA        | NA        | NA       | NA |
| RF00001 | 0 NA        | NA           | NA        | NA        | NA       | NA |
| RF00001 | 0 NA        | NA           | NA        | NA        | NA       | NA |
| RF00001 | 0 NA        | NA           | NA        | NA        | NA       | NA |
| RF00001 | 0 NA        | NA           | NA        | NA        | NA       | NA |
| RF00001 | 2.149603552 | -1.218704386 | 1.4777127 | -0.824724 | 0.409529 | NA |
| RF00582 | 0 NA        | NA           | NA        | NA        | NA       | NA |
| RF00001 | 0 NA        | NA           | NA        | NA        | NA       | NA |
| RF00001 | 0 NA        | NA           | NA        | NA        | NA       | NA |
| RF00001 | 0.655741074 | 0.077611818  | 2.4374018 | 0.031842  | 0.974598 | NA |
| RF00001 | 0.341366344 | 1.891903201  | 3.2128156 | 0.5888614 | 0.555954 | NA |
| RF01192 | 0.166657454 | -0.955901296 | 4.0804729 | -0.234262 | 0.814781 | NA |
| RF00001 | 0.182570949 | 0.967652056  | 4.0804729 | 0.2371421 | 0.812547 | NA |
| RF00001 | 0 NA        | NA           | NA        | NA        | NA       | NA |
| RF00322 | 0 NA        | NA           | NA        | NA        | NA       | NA |
| RF00001 | 0 NA        | NA           | NA        | NA        | NA       | NA |

|              |             |              |           |           |          |    |
|--------------|-------------|--------------|-----------|-----------|----------|----|
| RF00001      | 0.158915748 | 0.967652056  | 4.0804729 | 0.2371421 | 0.812547 | NA |
| RF00001      | 0           | NA           | NA        | NA        | NA       | NA |
| RF00020      | 0.173729368 | -0.955901296 | 4.0804729 | -0.234262 | 0.814781 | NA |
| RF00001      | 0           | NA           | NA        | NA        | NA       | NA |
| RF00001      | 0           | NA           | NA        | NA        | NA       | NA |
| RF00001      | 0           | NA           | NA        | NA        | NA       | NA |
| RF00218      | 0           | NA           | NA        | NA        | NA       | NA |
| RF00001      | 0           | NA           | NA        | NA        | NA       | NA |
| RF00001      | 0.158795395 | 0.967652056  | 4.0804729 | 0.2371421 | 0.812547 | NA |
| RF00001      | 0           | NA           | NA        | NA        | NA       | NA |
| RF00001      | 0           | NA           | NA        | NA        | NA       | NA |
| RF00001      | 0           | NA           | NA        | NA        | NA       | NA |
| RF00001      | 0           | NA           | NA        | NA        | NA       | NA |
| RF00001      | 0.173729368 | -0.955901296 | 4.0804729 | -0.234262 | 0.814781 | NA |
| RF00020      | 0.157187365 | -0.955901296 | 4.0804729 | -0.234262 | 0.814781 | NA |
| RF00026      | 0           | NA           | NA        | NA        | NA       | NA |
| RF00001      | 0           | NA           | NA        | NA        | NA       | NA |
| RF00001      | 0           | NA           | NA        | NA        | NA       | NA |
| RF00001      | 0           | NA           | NA        | NA        | NA       | NA |
| RF00001      | 0           | NA           | NA        | NA        | NA       | NA |
| RF00001      | 8.315364946 | 0.361869007  | 0.6682622 | 0.5415075 | 0.588158 | NA |
| RF00001      | 0           | NA           | NA        | NA        | NA       | NA |
| RF00001      | 0           | NA           | NA        | NA        | NA       | NA |
| RF00001      | 0           | NA           | NA        | NA        | NA       | NA |
| RF00001      | 0           | NA           | NA        | NA        | NA       | NA |
| RF00001      | 0           | NA           | NA        | NA        | NA       | NA |
| RF00001      | 0           | NA           | NA        | NA        | NA       | NA |
| RF00001      | 0           | NA           | NA        | NA        | NA       | NA |
| RF00568      | 4.483934258 | -0.145670252 | 0.9869913 | -0.14759  | 0.882666 | NA |
| RF00009      | 4.031570988 | 0.745354741  | 1.0159156 | 0.7336778 | 0.463145 | NA |
| RF00001      | 0           | NA           | NA        | NA        | NA       | NA |
| RF00001      | 0           | NA           | NA        | NA        | NA       | NA |
| RF00001      | 0           | NA           | NA        | NA        | NA       | NA |
| RF00001      | 0.182570949 | 0.967652056  | 4.0804729 | 0.2371421 | 0.812547 | NA |
| dre-mir-2195 | 0           | NA           | NA        | NA        | NA       | NA |
| RF00001      | 2.485036883 | 0.218266609  | 1.2044806 | 0.1812122 | 0.856201 | NA |
| RF00001      | 0.317831496 | 1.808837541  | 3.5779923 | 0.5055454 | 0.613176 | NA |
| RF01192      | 0.476747244 | 2.393381959  | 3.0525537 | 0.7840589 | 0.433006 | NA |
| RF00001      | 3.618300804 | -0.011945638 | 0.9817127 | -0.012168 | 0.990291 | NA |
| RF00001      | 1.121918354 | -0.422914697 | 1.8509454 | -0.228486 | 0.819269 | NA |
| RF00001      | 0.158795395 | 0.967652056  | 4.0804729 | 0.2371421 | 0.812547 | NA |
| RF00001      | 0           | NA           | NA        | NA        | NA       | NA |
| RF00001      | 0           | NA           | NA        | NA        | NA       | NA |
| RF00440      | 0           | NA           | NA        | NA        | NA       | NA |
| RF00001      | 0           | NA           | NA        | NA        | NA       | NA |
| RF00001      | 0           | NA           | NA        | NA        | NA       | NA |
| RF00001      | 0           | NA           | NA        | NA        | NA       | NA |
| RF00001      | 0           | NA           | NA        | NA        | NA       | NA |
| RF00001      | 0           | NA           | NA        | NA        | NA       | NA |
| RF00001      | 0           | NA           | NA        | NA        | NA       | NA |
| RF00001      | 0           | NA           | NA        | NA        | NA       | NA |
| RF00001      | 0           | NA           | NA        | NA        | NA       | NA |
| RF00001      | 1.968321855 | 0.965031282  | 1.4110895 | 0.6838909 | 0.494044 | NA |
| RF00001      | 0           | NA           | NA        | NA        | NA       | NA |
| RF00001      | 0           | NA           | NA        | NA        | NA       | NA |

|                   |             |              |           |           |          |          |
|-------------------|-------------|--------------|-----------|-----------|----------|----------|
| RF00270           | 0.157187365 | -0.955901296 | 4.0804729 | -0.234262 | 0.814781 | NA       |
| RF00001           | 0           | NA           | NA        | NA        | NA       | NA       |
| RF00302           | 0           | NA           | NA        | NA        | NA       | NA       |
| RF00001           | 0.332524763 | 0.005883742  | 3.292841  | 0.0017868 | 0.998574 | NA       |
| RF00001           | 0           | NA           | NA        | NA        | NA       | NA       |
| RF00001           | 0           | NA           | NA        | NA        | NA       | NA       |
| RF00001           | 0           | NA           | NA        | NA        | NA       | NA       |
| dre-mir-2197      | 0           | NA           | NA        | NA        | NA       | NA       |
| RF00001           | 0           | NA           | NA        | NA        | NA       | NA       |
| RF00001           | 0           | NA           | NA        | NA        | NA       | NA       |
| RF00001           | 0           | NA           | NA        | NA        | NA       | NA       |
| RF00001           | 0           | NA           | NA        | NA        | NA       | NA       |
| RF00001           | 0           | NA           | NA        | NA        | NA       | NA       |
| RF00613           | 3.436399648 | -0.432229431 | 1.0343392 | -0.41788  | 0.676035 | NA       |
| RF00553           | 0.173729368 | -0.955901296 | 4.0804729 | -0.234262 | 0.814781 | NA       |
| RF00001           | 0           | NA           | NA        | NA        | NA       | NA       |
| RF00001           | 0           | NA           | NA        | NA        | NA       | NA       |
| RF00001           | 0           | NA           | NA        | NA        | NA       | NA       |
| RF00001           | 0           | NA           | NA        | NA        | NA       | NA       |
| dre-mir-2184      | 2.348628387 | 2.615352647  | 1.4633998 | 1.7871758 | 0.073909 | NA       |
| RF00564           | 0.333314908 | -1.858695402 | 3.5126701 | -0.52914  | 0.596708 | NA       |
| RF00191           | 0.673891106 | 1.487913167  | 2.4008011 | 0.619757  | 0.535418 | NA       |
| RF00001           | 0.158915748 | 0.967652056  | 4.0804729 | 0.2371421 | 0.812547 | NA       |
| RF00001           | 0.173729368 | -0.955901296 | 4.0804729 | -0.234262 | 0.814781 | NA       |
| RF00001           | 0.173729368 | -0.955901296 | 4.0804729 | -0.234262 | 0.814781 | NA       |
| RF00001           | 0           | NA           | NA        | NA        | NA       | NA       |
| RF00001           | 0.347458735 | -1.908042286 | 3.4571486 | -0.551912 | 0.581009 | NA       |
| RF00001           | 0           | NA           | NA        | NA        | NA       | NA       |
| dre-mir-735       | 0           | NA           | NA        | NA        | NA       | NA       |
| RF00001           | 0           | NA           | NA        | NA        | NA       | NA       |
| RF00001           | 0           | NA           | NA        | NA        | NA       | NA       |
| RF00001           | 0           | NA           | NA        | NA        | NA       | NA       |
| RF00001           | 0           | NA           | NA        | NA        | NA       | NA       |
| RF00001           | 0           | NA           | NA        | NA        | NA       | NA       |
| RF00001           | 0           | NA           | NA        | NA        | NA       | NA       |
| RF00001           | 0           | NA           | NA        | NA        | NA       | NA       |
| RF00001           | 0           | NA           | NA        | NA        | NA       | NA       |
| RF00001           | 0.158795395 | 0.967652056  | 4.0804729 | 0.2371421 | 0.812547 | NA       |
| RF00001           | 0           | NA           | NA        | NA        | NA       | NA       |
| RF00001           | 0           | NA           | NA        | NA        | NA       | NA       |
| RF00001           | 0.158915748 | 0.967652056  | 4.0804729 | 0.2371421 | 0.812547 | NA       |
| RF00001           | 8.065268707 | -0.15980402  | 0.6734373 | -0.237296 | 0.812427 | NA       |
| RF00599           | 0.182570949 | 0.967652056  | 4.0804729 | 0.2371421 | 0.812547 | NA       |
| RF00001           | 0           | NA           | NA        | NA        | NA       | NA       |
| BX537109.1        | 7.011048568 | 0.050582143  | 0.7616843 | 0.0664083 | 0.947053 | NA       |
| zgc:l53681        | 6.14302574  | -0.374967155 | 0.7806631 | -0.480319 | 0.631001 | NA       |
| si:dkey-238d18.7  | 0           | NA           | NA        | NA        | NA       | NA       |
| si:ch211-168d23.3 | 28.62639026 | -0.044205031 | 0.3907866 | -0.113118 | 0.909937 | 0.990702 |
| igfn1.4           | 0.650905698 | -0.045771139 | 2.5873401 | -0.01769  | 0.985886 | NA       |
| tspan5a           | 374.8752033 | 0.142087361  | 0.1211419 | 1.1729007 | 0.240836 | 0.809224 |
| nectin1b          | 371.5106436 | 0.163135916  | 0.1359418 | 1.200042  | 0.230123 | 0.797833 |
| si:ch211-229i14.2 | 0.49144051  | 0.855669345  | 2.6923358 | 0.3178167 | 0.750624 | NA       |
| si:ch211-106k21.5 | 10.91077256 | 0.103042583  | 0.713832  | 0.1443513 | 0.885223 | NA       |
| si:dkey-7e14.3    | 5.336619774 | -0.179425931 | 0.8063783 | -0.222508 | 0.823918 | NA       |
| plekhg6           | 54.04979102 | -0.054238519 | 0.2933107 | -0.184918 | 0.853293 | 0.985174 |

|                    |              |               |            |            |           |           |
|--------------------|--------------|---------------|------------|------------|-----------|-----------|
| plxnd1             | 23. 2310923  | -0. 261966256 | 0. 4145438 | -0. 631939 | 0. 527427 | 0. 941361 |
| hmcn2              | 3. 395883513 | 0. 630730556  | 1. 1821412 | 0. 5335493 | 0. 593653 | NA        |
| fgf20b             | 46. 78241523 | -0. 22473626  | 0. 2870265 | -0. 782981 | 0. 433638 | 0. 913667 |
| ttc3               | 1061. 457317 | -0. 079630983 | 0. 0907774 | -0. 877211 | 0. 380372 | 0. 895192 |
| kcnn4              | 13. 81646363 | 0. 488648834  | 0. 518082  | 0. 9431881 | 0. 345585 | 0. 878467 |
| RF00001            | 0 NA         | NA            | NA         | NA         | NA        | NA        |
| BX539307. 2        | 1. 810746688 | 2. 157278989  | 1. 6475449 | 1. 3093901 | 0. 190402 | NA        |
| cd302              | 109. 814547  | 0. 049131947  | 0. 1881697 | 0. 2611044 | 0. 794012 | 0. 977937 |
| slc37a1            | 222. 0093661 | 0. 310044989  | 0. 1443199 | 2. 148317  | 0. 031689 | 0. 345305 |
| slco5a1a           | 1487. 784454 | 0. 127862654  | 0. 1004685 | 1. 2726639 | 0. 203137 | 0. 770099 |
| RF00006            | 0 NA         | NA            | NA         | NA         | NA        | NA        |
| MTERF1             | 116. 1097694 | -0. 094809773 | 0. 1894139 | -0. 500543 | 0. 616693 | 0. 95688  |
| si:ch211-266i6. 3  | 405. 6127849 | -0. 012603847 | 0. 114874  | -0. 109719 | 0. 912632 | 0. 991119 |
| CR792417. 1        | 35. 42424776 | 0. 013602681  | 0. 3623619 | 0. 0375389 | 0. 970055 | 0. 996315 |
| umod               | 0. 349228403 | 0. 005884014  | 3. 2372587 | 0. 0018176 | 0. 99855  | NA        |
| trim331            | 66. 14565283 | 0. 009216202  | 0. 2621788 | 0. 0351524 | 0. 971958 | 0. 996315 |
| RF00017            | 0 NA         | NA            | NA         | NA         | NA        | NA        |
| si:ch211-42i6. 2   | 3. 500761202 | 0. 393235041  | 1. 0328891 | 0. 3807137 | 0. 703416 | NA        |
| si:ch73-267c23. 10 | 9. 662793144 | -0. 247837596 | 0. 6313733 | -0. 392537 | 0. 694661 | NA        |
| wrap53             | 193. 2599042 | -0. 244258063 | 0. 1538675 | -1. 587457 | 0. 112409 | 0. 627726 |
| ccbel              | 28. 21762053 | -0. 180307106 | 0. 3611591 | -0. 499246 | 0. 617606 | 0. 957354 |
| si:ch73-206d17. 1  | 35. 60313336 | 0. 454509256  | 0. 3226568 | 1. 4086463 | 0. 15894  | 0. 709613 |
| znf385d            | 59. 92512545 | -0. 178383647 | 0. 2582801 | -0. 69066  | 0. 48978  | 0. 931926 |
| si:ch211-286b5. 9  | 1. 528006315 | -0. 313383006 | 1. 55636   | -0. 201356 | 0. 84042  | NA        |
| rskrb              | 69. 85715509 | -0. 067799699 | 0. 2400862 | -0. 282397 | 0. 777639 | 0. 975942 |
| ACVR1C             | 13. 63599758 | 0. 654941663  | 0. 5390348 | 1. 2150267 | 0. 224356 | 0. 79161  |
| relb               | 342. 5528615 | -0. 329876538 | 0. 1227784 | -2. 686764 | 0. 007215 | 0. 133582 |
| si:dkey-3h2. 4     | 5. 024967491 | 0. 811117222  | 0. 8799433 | 0. 9217835 | 0. 356642 | NA        |
| vkorc1             | 53. 96107865 | 0. 359700966  | 0. 2883872 | 1. 2472847 | 0. 212293 | 0. 780251 |
| FBX048             | 227. 8215732 | -0. 039524902 | 0. 1568328 | -0. 252019 | 0. 801026 | 0. 979377 |
| opn8a              | 2. 030325524 | 0. 485585208  | 1. 440622  | 0. 3370663 | 0. 736067 | NA        |
| mgp                | 5. 388620869 | 0. 102184602  | 0. 8347452 | 0. 1224141 | 0. 902571 | NA        |
| gsg112a            | 36. 15674008 | 0. 118825941  | 0. 3248038 | 0. 3658392 | 0. 714485 | 0. 96909  |
| grin2da            | 365. 6391494 | -0. 047172953 | 0. 1316244 | -0. 358391 | 0. 720051 | 0. 969318 |
| ntrk3b             | 450. 0741051 | 0. 16326542   | 0. 111999  | 1. 4577402 | 0. 144912 | 0. 688986 |
| gpr156             | 26. 64423348 | -0. 024382718 | 0. 3879614 | -0. 062848 | 0. 949887 | 0. 99381  |
| prr13              | 386. 6986218 | -0. 207978783 | 0. 1390487 | -1. 495726 | 0. 134725 | 0. 670689 |
| nkd3               | 0. 365141898 | 1. 973577737  | 3. 3927314 | 0. 5817076 | 0. 560764 | NA        |
| si:ch211-226h8. 4  | 0 NA         | NA            | NA         | NA         | NA        | NA        |
| nat16              | 1275. 636005 | 0. 337624353  | 0. 0922044 | 3. 6616943 | 0. 000251 | 0. 010194 |
| si:ch73-144d13. 4  | 54. 67389438 | 0. 043935144  | 0. 2979698 | 0. 1474483 | 0. 882778 | 0. 988508 |
| si:dkey-120c6. 5   | 18. 29212598 | -0. 245739561 | 0. 4598698 | -0. 534368 | 0. 593087 | 0. 954434 |
| F2R (1 of many)    | 24. 60156568 | 0. 437207599  | 0. 392498  | 1. 1139104 | 0. 265318 | 0. 831302 |
| si:dkeyp-121d2. 7  | 49. 67465779 | -0. 038440285 | 0. 2821135 | -0. 136258 | 0. 891617 | 0. 989291 |
| zgc:171781         | 0. 31759079  | 1. 807926197  | 3. 579045  | 0. 5051421 | 0. 613459 | NA        |
| kcnpjla. 3         | 181. 947858  | -0. 211746922 | 0. 1745292 | -1. 213246 | 0. 225036 | 0. 792185 |
| hh1a2b. 2          | 233. 9746194 | -0. 183143807 | 0. 1385687 | -1. 321682 | 0. 186274 | 0. 750697 |
| si:rp71-1c10. 10   | 4. 59259124  | -1. 589265973 | 0. 9352558 | -1. 699285 | 0. 089266 | NA        |
| si:ch211-236p5. 2  | 10. 44274423 | -0. 036194943 | 0. 5879862 | -0. 061557 | 0. 950915 | NA        |
| CU469420. 1        | 10. 51531802 | 0. 095429761  | 0. 6292782 | 0. 1516496 | 0. 879463 | NA        |
| fhdc4              | 103. 0180729 | 0. 082015418  | 0. 2105351 | 0. 389557  | 0. 696864 | 0. 96736  |
| F2R (1 of many)    | 0 NA         | NA            | NA         | NA         | NA        | NA        |
| bsnd               | 18. 43435682 | 0. 024246908  | 0. 4667037 | 0. 0519535 | 0. 958566 | 0. 994935 |
| CR925773. 1        | 9. 128624045 | 0. 336149498  | 0. 7087456 | 0. 474288  | 0. 635295 | NA        |

|                    |             |              |           |           |          |          |
|--------------------|-------------|--------------|-----------|-----------|----------|----------|
| taarl2i            | 0.330916733 | -1.849579229 | 3.2489867 | -0.569279 | 0.569167 | NA       |
| ndst2a             | 848.3155508 | -0.013672339 | 0.0998236 | -0.136965 | 0.891058 | 0.989291 |
| acyp2              | 2.124300278 | -1.709794783 | 1.4128316 | -1.21019  | 0.226206 | NA       |
| si:dkey-4p15.5     | 358.4482244 | -0.138659044 | 0.1284801 | -1.079226 | 0.280487 | 0.843423 |
| si:ch211-282j17.5  | 0           | NA           | NA        | NA        | NA       | NA       |
| cnsta              | 112.8602538 | 0.040552719  | 0.2167913 | 0.1870588 | 0.851615 | 0.985174 |
| scg3               | 2144.314245 | 0.025753648  | 0.0775637 | 0.3320323 | 0.739865 | 0.972943 |
| znf1137            | 4.638486244 | -0.182339519 | 0.8674735 | -0.210196 | 0.833515 | NA       |
| FAM107A            | 30.87666812 | -0.039593155 | 0.3492365 | -0.113371 | 0.909737 | 0.990702 |
| si:dkey-27j5.6     | 0.173729368 | -0.955901296 | 4.0804729 | -0.234262 | 0.814781 | NA       |
| proser1            | 1021.365601 | 0.013519315  | 0.0894333 | 0.1511665 | 0.879844 | 0.987881 |
| si:ch211-63b16.4   | 23.54024174 | 0.744093305  | 0.4592984 | 1.6200652 | 0.105218 | 0.613382 |
| erlecl             | 757.6238069 | -0.01862036  | 0.0943204 | -0.197416 | 0.843502 | 0.985174 |
| cabcocol           | 6.229597274 | -0.027451606 | 0.7897174 | -0.034761 | 0.97227  | NA       |
| CU633991.1         | 2.131481258 | -0.271770984 | 1.3260227 | -0.204952 | 0.83761  | NA       |
| si:ch211-67e16.4   | 369.1278643 | -0.003196374 | 0.1155012 | -0.027674 | 0.977922 | 0.996762 |
| si:dkey-274m17.3   | 21.84411503 | -0.159062944 | 0.4178591 | -0.380662 | 0.703454 | 0.968134 |
| CABZ01071939.1     | 100.5682914 | 0.018444195  | 0.2138639 | 0.0862427 | 0.931274 | 0.992702 |
| srrm4              | 639.9714249 | -0.047857418 | 0.0991779 | -0.482541 | 0.629422 | 0.957354 |
| bri3               | 1011.790334 | -0.238155166 | 0.0963135 | -2.472709 | 0.013409 | 0.207707 |
| si:ch211-157b11.12 | 179.5489002 | -0.335312331 | 0.1532605 | -2.187859 | 0.02868  | 0.328405 |
| si:dkey-102g19.3   | 20.15395685 | -0.357196088 | 0.4606099 | -0.775485 | 0.438053 | 0.915284 |
| zgc:101566         | 629.7837537 | -0.053552299 | 0.0991308 | -0.540219 | 0.589046 | 0.953345 |
| cux2b              | 29.43800286 | -0.175686586 | 0.351141  | -0.500331 | 0.616842 | 0.956957 |
| zp2.1              | 1.180506295 | 0.366333622  | 1.928949  | 0.1899136 | 0.849377 | NA       |
| si:dkey-83f18.9    | 0           | NA           | NA        | NA        | NA       | NA       |
| pou6f2             | 26.98696801 | 0.630514523  | 0.3767943 | 1.6733656 | 0.094255 | 0.583986 |
| si:ch211-167j9.5   | 5.252919949 | 0.72971976   | 0.8265429 | 0.8828577 | 0.377313 | NA       |
| isgl5              | 6.424823202 | -0.105571628 | 0.8002381 | -0.131925 | 0.895043 | NA       |
| or111-8            | 0           | NA           | NA        | NA        | NA       | NA       |
| RF00026            | 0.158795395 | 0.967652056  | 4.0804729 | 0.2371421 | 0.812547 | NA       |
| si:dkey-246e3.4    | 0.157187365 | -0.955901296 | 4.0804729 | -0.234262 | 0.814781 | NA       |
| cald1b             | 35.59582354 | 0.032500678  | 0.3285298 | 0.0989277 | 0.921196 | 0.992138 |
| dbx1a              | 216.7292979 | 0.018179297  | 0.1457734 | 0.1247093 | 0.900754 | 0.990121 |
| mterf2             | 100.4724571 | 0.007203075  | 0.1974061 | 0.0364886 | 0.970893 | 0.996315 |
| BX950205.1         | 0           | NA           | NA        | NA        | NA       | NA       |
| srsf10b            | 245.1957295 | -0.232607032 | 0.149886  | -1.551893 | 0.120688 | 0.645578 |
| taarl2c            | 0.316103113 | 0.005883447  | 3.3519121 | 0.0017553 | 0.9986   | NA       |
| med11              | 214.8477557 | -0.287732313 | 0.1694296 | -1.698242 | 0.089462 | 0.572876 |
| si:ch211-236p5.3   | 0.841338706 | -0.563977448 | 2.2263736 | -0.253317 | 0.800024 | NA       |
| si:ch211-282j17.13 | 3.802837586 | -0.646157724 | 1.0163545 | -0.63576  | 0.524933 | NA       |
| CABZ01046949.1     | 0           | NA           | NA        | NA        | NA       | NA       |
| si:ch211-212k18.8  | 110.2582918 | 0.266309463  | 0.1879563 | 1.4168689 | 0.156521 | 0.706794 |
| prpf3              | 488.4149005 | 0.101368473  | 0.1130278 | 0.8968457 | 0.369801 | 0.889487 |
| adgrf7             | 12.9963927  | 1.658034394  | 0.5735885 | 2.8906339 | 0.003845 | 0.084754 |
| znf1055            | 24.62849896 | -0.001448385 | 0.3970814 | -0.003648 | 0.99709  | 0.99906  |
| tdg.2              | 495.6310506 | 0.106089786  | 0.1028235 | 1.0317663 | 0.302182 | 0.857048 |
| dthd1              | 5.058281315 | 0.671938937  | 0.8843914 | 0.7597755 | 0.447389 | NA       |
| cx52.9             | 39.88216671 | 0.563151512  | 0.3606062 | 1.5616801 | 0.118363 | 0.641743 |
| tnfaip811          | 225.2947626 | -0.181616071 | 0.1522122 | -1.193177 | 0.2328   | 0.801255 |
| hdac10             | 164.9673974 | -0.140808257 | 0.1632064 | -0.862762 | 0.388268 | 0.896271 |
| si:ch211-165g14.1  | 179.5695199 | -0.180642498 | 0.1725363 | -1.046982 | 0.295108 | 0.851519 |
| si:dkey-83f18.10   | 0           | NA           | NA        | NA        | NA       | NA       |
| klhl13             | 28.1301933  | 0.612489765  | 0.3595529 | 1.703476  | 0.088479 | 0.569447 |

|                    |             |              |           |           |          |          |
|--------------------|-------------|--------------|-----------|-----------|----------|----------|
| pkig               | 341.9290508 | -0.021341195 | 0.1339583 | -0.159312 | 0.873423 | 0.987858 |
| mogat3a            | 160.8508424 | -0.070587045 | 0.1655453 | -0.426391 | 0.669823 | 0.965223 |
| si:ch211-132p1.4   | 3.411566499 | 0.122552101  | 1.0306589 | 0.1189066 | 0.905349 | NA       |
| fbxw10             | 4.937366276 | 0.579792674  | 0.8448495 | 0.6862674 | 0.492544 | NA       |
| CU179643.1         | 2.865263104 | 1.272037305  | 1.2029355 | 1.0574443 | 0.290309 | NA       |
| si:dkey-92f12.2    | 336.54096   | 0.040045819  | 0.1179086 | 0.3396345 | 0.734132 | 0.971993 |
| mtnr1bb            | 15.97618785 | 0.117017388  | 0.4745948 | 0.2465627 | 0.805247 | 0.979883 |
| znf970             | 17.7569909  | -0.212072521 | 0.4601837 | -0.460843 | 0.644911 | 0.96029  |
| BX546500.1         | 0.681753165 | 0.003445546  | 2.2907653 | 0.0015041 | 0.9988   | NA       |
| si:ch211-116o3.3   | 0 NA        | NA           | NA        | NA        | NA       | NA       |
| BX323559.1         | 0.703759051 | -1.526884723 | 2.5277341 | -0.604053 | 0.545809 | NA       |
| mast3b             | 216.5559852 | -0.040894822 | 0.1565825 | -0.261171 | 0.793961 | 0.977937 |
| ptprjb.2           | 0 NA        | NA           | NA        | NA        | NA       | NA       |
| prodhb             | 49.773509   | 0.090103549  | 0.2814928 | 0.3200918 | 0.748899 | 0.97419  |
| si:ch211-155o21.3  | 10.7646645  | 0.153431455  | 0.5953802 | 0.2577033 | 0.796636 | NA       |
| RF00001            | 0 NA        | NA           | NA        | NA        | NA       | NA       |
| zp2.5              | 3.470233508 | 0.356531717  | 1.1190266 | 0.3186088 | 0.750023 | NA       |
| ch25h13            | 257.4379907 | -0.222695627 | 0.1428929 | -1.55848  | 0.11912  | 0.64321  |
| si:dkey-90123.2    | 3.324643703 | -0.338370208 | 1.1511016 | -0.293953 | 0.768794 | NA       |
| CABZ01115881.1     | 108.4956628 | 0.099004738  | 0.2013972 | 0.4915894 | 0.62301  | 0.957354 |
| dbf4b              | 84.14290216 | 0.001935567  | 0.2157478 | 0.0089714 | 0.992842 | 0.998437 |
| irs4a              | 116.0193103 | -0.218162137 | 0.2002314 | -1.08955  | 0.275911 | 0.839541 |
| hist1h2a11         | 4.550913611 | 0.997591157  | 0.9360277 | 1.065771  | 0.286527 | NA       |
| n1rc311            | 251.5593899 | -0.1317414   | 0.1360678 | -0.968204 | 0.332943 | 0.874926 |
| si:dkey-201121.2   | 0 NA        | NA           | NA        | NA        | NA       | NA       |
| zgc:172051         | 165.4204824 | 0.501943976  | 0.1680933 | 2.9861028 | 0.002826 | 0.068979 |
| kcna7              | 106.9021916 | 0.312961056  | 0.19617   | 1.5953563 | 0.110633 | 0.625514 |
| omga               | 7.839758863 | 0.469734922  | 0.7455881 | 0.6300194 | 0.528682 | NA       |
| si:cabz01069012.2  | 16.63477426 | -0.518562391 | 0.4668226 | -1.110834 | 0.26664  | 0.832673 |
| CABZ01077217.2     | 3.552211862 | -0.002907174 | 1.0321791 | -0.002817 | 0.997753 | NA       |
| nrg2b              | 510.9924481 | 0.022941066  | 0.1018359 | 0.2252748 | 0.821766 | 0.982026 |
| si:ch211-113a14.11 | 23.01997756 | 0.166842761  | 0.4137114 | 0.4032829 | 0.68674  | 0.966376 |
| dre-mir-26a-2      | 1.973157231 | 1.00524485   | 1.3446592 | 0.7475834 | 0.454711 | NA       |
| zgc:136963         | 40.89773392 | 0.027786701  | 0.2997543 | 0.0926983 | 0.926143 | 0.992702 |
| si:ch73-269m14.4   | 0 NA        | NA           | NA        | NA        | NA       | NA       |
| si:dkey-266f7.10   | 3.639086462 | -0.835415989 | 1.0474994 | -0.797534 | 0.425141 | NA       |
| CR846087.1         | 4.915670119 | 1.463763021  | 0.8990625 | 1.6280993 | 0.103504 | NA       |
| cabz01093075.1     | 0.979585893 | -0.937756642 | 1.9970899 | -0.469562 | 0.638668 | NA       |
| psma3              | 2191.045903 | -0.012193695 | 0.0777565 | -0.156819 | 0.875387 | 0.987881 |
| gckr               | 0.965280428 | -1.0079287   | 2.0820225 | -0.48411  | 0.628308 | NA       |
| vav3a              | 3.861349715 | 0.633340446  | 0.9726405 | 0.6511557 | 0.514946 | NA       |
| im:7147486         | 592.7155526 | -0.129616214 | 0.0996792 | -1.300333 | 0.193487 | 0.757219 |
| stk19              | 41.16518747 | -0.106220434 | 0.298714  | -0.355592 | 0.722146 | 0.970155 |
| rnh1               | 14.69461759 | -0.224530955 | 0.4935138 | -0.454964 | 0.649135 | 0.960708 |
| or111-3            | 4.020036043 | 0.035933245  | 0.9556071 | 0.0376025 | 0.970005 | NA       |
| RF00017            | 0 NA        | NA           | NA        | NA        | NA       | NA       |
| hs3st3b1b          | 839.7837148 | 0.219286009  | 0.0972581 | 2.2546811 | 0.024153 | 0.299817 |
| chrng              | 150.9791239 | 0.004681771  | 0.1842668 | 0.0254076 | 0.97973  | 0.99687  |
| ttc41              | 3.951389548 | 0.02458885   | 0.9624272 | 0.0255488 | 0.979617 | NA       |
| cb1n11             | 141.2541944 | -0.084820879 | 0.2130062 | -0.398209 | 0.690476 | 0.967097 |
| mkrn2os.1          | 16.72213619 | -0.662085897 | 0.4616464 | -1.434184 | 0.15152  | 0.700127 |
| crygm2d21          | 15307.06832 | 0.102705645  | 0.1014293 | 1.0125837 | 0.311259 | 0.863542 |
| si:ch211-125m10.6  | 16.41021307 | 0.363936567  | 0.5264682 | 0.6912793 | 0.48939  | 0.931926 |
| si:dkey-175g6.2    | 221.6346996 | 0.730059542  | 0.199014  | 3.6683836 | 0.000244 | 0.010076 |

|                    |             |              |           |           |          |          |
|--------------------|-------------|--------------|-----------|-----------|----------|----------|
| edn3b              | 4.167473589 | -0.093471996 | 0.9409874 | -0.099334 | 0.920873 | NA       |
| ice2               | 168.1248391 | -0.072735554 | 0.1611406 | -0.451379 | 0.651716 | 0.960708 |
| ascc3              | 504.420624  | -0.017182508 | 0.1183756 | -0.145152 | 0.884591 | 0.988801 |
| si:ch211-19719.5   | 3.623139435 | 1.107099738  | 1.013463  | 1.0923929 | 0.27466  | NA       |
| trim63b            | 244.5233622 | 0.244279521  | 0.1514772 | 1.6126485 | 0.106821 | 0.616004 |
| dnajc12            | 62.63227439 | -0.176521827 | 0.2503385 | -0.705133 | 0.480728 | 0.927601 |
| taarl4a            | 0.173729368 | -0.955901296 | 4.0804729 | -0.234262 | 0.814781 | NA       |
| smim15             | 528.5552841 | -0.228446032 | 0.1043568 | -2.189086 | 0.028591 | 0.328246 |
| si:dkey-126g1.7    | 17.4133631  | -0.597703876 | 0.473915  | -1.261205 | 0.207235 | 0.775175 |
| probl              | 53.41732332 | 0.179826871  | 0.2821639 | 0.6373135 | 0.523921 | 0.939336 |
| BMERB1             | 200.7831153 | -0.106533449 | 0.1484405 | -0.717684 | 0.472952 | 0.924993 |
| CR847543.1         | 14.12689411 | 0.216529493  | 0.5223836 | 0.4145028 | 0.678506 | 0.965257 |
| si:dkeyp-97b10.3   | 118.6747077 | -0.254578165 | 0.2101543 | -1.211387 | 0.225747 | 0.793245 |
| CU075735.1         |             | 0 NA         | NA        | NA        | NA       | NA       |
| znf1023            | 2.670703538 | 1.14931245   | 1.1680276 | 0.9839771 | 0.325127 | NA       |
| im:7151449         | 66.43993356 | 0.177975218  | 0.2623914 | 0.6782815 | 0.497593 | 0.933353 |
| si:ch211-238p8.24  | 0.173729368 | -0.955901296 | 4.0804729 | -0.234262 | 0.814781 | NA       |
| RF00274            | 0.547712847 | 2.559541715  | 2.9076406 | 0.8802813 | 0.378707 | NA       |
| SAMD4B             | 1297.650035 | 0.150976903  | 0.0855942 | 1.7638686 | 0.077754 | 0.543372 |
| tmem68             | 308.5781182 | 0.359214403  | 0.1223263 | 2.9365264 | 0.003319 | 0.077033 |
| si:ch1073-513e17.1 | 30.61335582 | 0.219707611  | 0.3758638 | 0.5845404 | 0.558857 | 0.948478 |
| phyh               | 972.4374601 | 0.183769138  | 0.0976653 | 1.8816219 | 0.059887 | 0.478654 |
| znf1152            | 44.68250214 | -0.36674571  | 0.3228389 | -1.136002 | 0.255956 | 0.824633 |
| prodha             | 162.1290924 | 0.123327656  | 0.1599935 | 0.7708291 | 0.440808 | 0.916336 |
| L0018205.1         | 8.597751049 | 0.000306059  | 0.6579053 | 0.0004652 | 0.999629 | NA       |
| gb:bc139872        | 255.3714345 | -0.026895953 | 0.1327905 | -0.202544 | 0.839491 | 0.984979 |
| RGS9BP             | 181.6326694 | 0.556603358  | 0.1565583 | 3.5552457 | 0.000378 | 0.014142 |
| gsdmea             | 9.173602215 | -0.172635799 | 0.6452529 | -0.267547 | 0.789048 | NA       |
| mdc1               | 248.6369352 | -0.146423363 | 0.1358249 | -1.078031 | 0.28102  | 0.84357  |
| top1               | 21.58863797 | 0.057260795  | 0.4088881 | 0.1400402 | 0.888628 | 0.989291 |
| pdgfba             | 76.36177963 | 0.238615152  | 0.2342844 | 1.018485  | 0.308448 | 0.861088 |
| mfsd10             | 125.7137544 | -0.226934311 | 0.1831678 | -1.238942 | 0.215367 | 0.782987 |
| bahd1              | 470.4178285 | 0.018576563  | 0.1106902 | 0.1678248 | 0.866721 | 0.986958 |
| gucy1b1            | 329.8033107 | 0.040698573  | 0.1208689 | 0.3367168 | 0.73633  | 0.972535 |
| itprid1            | 47.85962864 | 0.417180953  | 0.2779891 | 1.5007097 | 0.133431 | 0.667982 |
| ddhdla             | 342.876144  | 0.153786236  | 0.120266  | 1.2787171 | 0.200997 | 0.766855 |
| MYADM              | 436.1189494 | -0.055094169 | 0.1077198 | -0.511458 | 0.60903  | 0.956718 |
| scn11aa            | 4.934895821 | -0.7959014   | 0.8661127 | -0.918935 | 0.35813  | NA       |
| znf521             | 33.21138125 | 0.087247304  | 0.3378629 | 0.2582329 | 0.796227 | 0.978498 |
| sult6b1            | 764.4129292 | -0.13911481  | 0.1009902 | -1.377508 | 0.168355 | 0.725919 |
| zmp:0000001228     | 57.19903887 | -0.096568106 | 0.2637083 | -0.366193 | 0.714221 | 0.96909  |
| itga2.3            | 54.45767413 | -0.09830191  | 0.2981121 | -0.329748 | 0.74159  | 0.973154 |
| si:ch211-266k8.4   | 63.09293829 | -0.055675253 | 0.2440063 | -0.228171 | 0.819513 | 0.981594 |
| dap1b              | 987.9101795 | -0.395319464 | 0.1121481 | -3.524975 | 0.000424 | 0.015595 |
| irgql              | 17.71091877 | -0.027895298 | 0.4828439 | -0.057773 | 0.95393  | 0.994255 |
| atad3              | 219.9868285 | -0.192178773 | 0.1626798 | -1.181331 | 0.237471 | 0.806474 |
| si:dkey-187k19.2   | 0.158795395 | 0.967652056  | 4.0804729 | 0.2371421 | 0.812547 | NA       |
| si:dkey-264d12.5   | 59.60160619 | -0.072323523 | 0.2551302 | -0.283477 | 0.776811 | 0.975826 |
| dpyda.3            | 35.38787743 | -0.404771914 | 0.3355438 | -1.206316 | 0.227696 | 0.794934 |
| stk35              | 109.5239095 | 0.059641455  | 0.2031202 | 0.2936264 | 0.769043 | 0.975687 |
| qdprb2             | 0.989994219 | 0.997631756  | 1.9011773 | 0.5247442 | 0.599761 | NA       |
| si:ch211-232i5.3   | 107.7636401 | -0.165310287 | 0.1928132 | -0.85736  | 0.391246 | 0.897688 |
| mhclzda            | 245.8644377 | -0.047584948 | 0.1643397 | -0.289552 | 0.772159 | 0.975687 |
| lins1              | 35.2893399  | -0.304191299 | 0.3287149 | -0.925396 | 0.35476  | 0.882105 |



|                   |             |              |           |           |          |          |
|-------------------|-------------|--------------|-----------|-----------|----------|----------|
| AL831726.1        | 5.346020839 | -0.739253794 | 0.8287147 | -0.892049 | 0.372367 | NA       |
| ier2b             | 266.1356521 | 0.261341897  | 0.1686406 | 1.549697  | 0.121214 | 0.647458 |
| RF00426           | 0           | NA           | NA        | NA        | NA       | NA       |
| erfl1             | 199.1986835 | 0.154977937  | 0.1527962 | 1.0142786 | 0.31045  | 0.862681 |
| fubp3             | 939.3618494 | -0.042372655 | 0.0942469 | -0.449592 | 0.653005 | 0.960792 |
| si:dkey-7i4.1     | 7.859430206 | -0.410752579 | 0.7063001 | -0.581555 | 0.560866 | NA       |
| gig2o             | 10.37207632 | -0.21986347  | 0.624668  | -0.351969 | 0.724862 | NA       |
| stambpb           | 219.257318  | -0.196654096 | 0.1463555 | -1.343674 | 0.179054 | 0.739994 |
| si:dkey-100n23.5  | 147.4999158 | -0.303005032 | 0.176534  | -1.716412 | 0.086087 | 0.563109 |
| crygm2d2          | 20405.00213 | -0.016737986 | 0.2368398 | -0.070672 | 0.943659 | 0.993364 |
| CR381646.1        | 0           | NA           | NA        | NA        | NA       | NA       |
| pik3c2b           | 932.5283436 | -0.055117086 | 0.089575  | -0.615318 | 0.538345 | 0.943336 |
| CABZ01029822.1    | 10.5200516  | 0.605961514  | 0.6050876 | 1.0014442 | 0.316612 | NA       |
| tnni3k            | 15.03310169 | 0.060697495  | 0.4972969 | 0.1220549 | 0.902856 | 0.990121 |
| pimr14            | 0           | NA           | NA        | NA        | NA       | NA       |
| TCF24             | 45.24868285 | -0.233127344 | 0.2926912 | -0.796496 | 0.425744 | 0.909437 |
| si:ch211-269k10.2 | 320.1858149 | -0.280426157 | 0.147396  | -1.902536 | 0.057101 | 0.468896 |
| si:dkey-24117.3   | 0           | NA           | NA        | NA        | NA       | NA       |
| si:dkeyp-118a3.2  | 81.870063   | 0.163337488  | 0.217984  | 0.7493094 | 0.453671 | 0.920041 |
| BX649442.1        | 0.166657454 | -0.955901296 | 4.0804729 | -0.234262 | 0.814781 | NA       |
| FP102309.1        | 12.26126941 | -0.161946994 | 0.547286  | -0.295909 | 0.767299 | 0.975687 |
| atxn11            | 6.406261953 | 0.21271619   | 0.7697099 | 0.2763589 | 0.782272 | NA       |
| mbd6              | 81.96997443 | 0.093102227  | 0.2178009 | 0.4274648 | 0.669041 | 0.965031 |
| klc4              | 690.4967717 | -0.183325865 | 0.0987726 | -1.85604  | 0.063448 | 0.492164 |
| carmil3           | 432.0579377 | 0.128624531  | 0.1073726 | 1.197927  | 0.230945 | 0.799177 |
| si:ch73-234b20.5  | 193.2030119 | -0.105678102 | 0.1651574 | -0.639863 | 0.522262 | 0.939056 |
| zgc:64002         | 15.33902264 | -0.133470711 | 0.4991653 | -0.267388 | 0.789171 | 0.976965 |
| BX004816.2        | 0           | NA           | NA        | NA        | NA       | NA       |
| cubn              | 257.4042794 | -0.455549216 | 0.146829  | -3.102583 | 0.001918 | 0.051894 |
| RF00017           | 0           | NA           | NA        | NA        | NA       | NA       |
| micall1b.2        | 34.15353618 | 0.074551157  | 0.3670745 | 0.2030954 | 0.83906  | 0.984979 |
| si:dkey-11k2.7    | 190.2802483 | -0.241922895 | 0.5067472 | -0.477404 | 0.633075 | 0.957356 |
| F0704748.1        | 6.099371524 | -0.097228816 | 0.7669566 | -0.126772 | 0.899121 | NA       |
| si:ch73-334d15.2  | 11.94177277 | 0.827976844  | 0.5536757 | 1.4954183 | 0.134805 | 0.670689 |
| RF00281           | 0           | NA           | NA        | NA        | NA       | NA       |
| rbbp81            | 82.20226768 | -0.29542362  | 0.2222126 | -1.329464 | 0.183695 | 0.747284 |
| rhd11             | 14.91308626 | -0.072794733 | 0.5095012 | -0.142875 | 0.886389 | 0.988936 |
| si:ch211-222k6.2  | 58.89606989 | -0.551741454 | 0.2598253 | -2.12351  | 0.033711 | 0.357045 |
| si:dkey-165n16.1  | 66.46140963 | -0.19559163  | 0.2435624 | -0.803045 | 0.421949 | 0.90651  |
| ggt112.2          | 0           | NA           | NA        | NA        | NA       | NA       |
| ftr36             | 1.156651673 | 0.411122976  | 1.6895393 | 0.2433344 | 0.807746 | NA       |
| selenoulb         | 58.28675234 | -0.115538366 | 0.2695827 | -0.428582 | 0.668227 | 0.964736 |
| RF00017           | 0.158795395 | 0.967652056  | 4.0804729 | 0.2371421 | 0.812547 | NA       |
| si:ch211-71k14.1  | 2.59577202  | -0.727067354 | 1.3390184 | -0.542985 | 0.58714  | NA       |
| znf977            | 1.160507527 | -1.286691038 | 1.8769381 | -0.685527 | 0.493012 | NA       |
| chrna4a           | 2.63078507  | -0.313649245 | 1.2539163 | -0.250136 | 0.802482 | NA       |
| znf574            | 137.0473291 | -0.004971249 | 0.178803  | -0.027803 | 0.977819 | 0.996762 |
| RF00001           | 0           | NA           | NA        | NA        | NA       | NA       |
| hcar1-4           | 24.30441328 | 0.023806818  | 0.3890129 | 0.061198  | 0.951202 | 0.99381  |
| col28a1b          | 47.10697579 | -0.144888544 | 0.3044504 | -0.475902 | 0.634144 | 0.95776  |
| si:ch211-274p24.4 | 13.00785816 | 0.045970342  | 0.5255774 | 0.0874664 | 0.930301 | 0.992702 |
| si:ch211-157c3.4  | 329.9588043 | 0.087856546  | 0.1222569 | 0.7186225 | 0.472374 | 0.924838 |
| foxa              | 44.20565022 | -0.196905004 | 0.31008   | -0.635014 | 0.52542  | 0.94013  |
| si:ch73-106k19.5  | 1.452168549 | 2.869798567  | 1.9414573 | 1.4781673 | 0.139363 | NA       |

|                    |             |              |           |           |          |          |
|--------------------|-------------|--------------|-----------|-----------|----------|----------|
| ntng2b             | 167.0254802 | 0.272411302  | 0.1762776 | 1.5453536 | 0.122261 | 0.649888 |
| si:ch1073-164k15.3 | 28.45255837 | 0.686663727  | 0.3864334 | 1.7769262 | 0.07558  | 0.535481 |
| si:ch73-222h13.1   | 15.90383068 | -0.108970155 | 0.4888917 | -0.222892 | 0.823619 | 0.982196 |
| akna               | 146.0963162 | -0.214485521 | 0.1771617 | -1.210677 | 0.226019 | 0.793556 |
| RF00001            | 0 NA        | NA           | NA        | NA        | NA       | NA       |
| slc5a8             | 31.14300153 | 0.129651533  | 0.3420161 | 0.3790802 | 0.704628 | 0.968134 |
| ifnlr1             | 47.69538431 | -0.161954514 | 0.2861548 | -0.565968 | 0.571415 | 0.949418 |
| RF00001            | 0 NA        | NA           | NA        | NA        | NA       | NA       |
| serpina7           | 5.169526445 | 1.533261189  | 0.8673027 | 1.7678502 | 0.077086 | NA       |
| fam183a            | 6.955945973 | 1.159178602  | 0.7895726 | 1.468109  | 0.142075 | NA       |
| si:ch1073-296d18.1 | 17.30727092 | 0.45369713   | 0.4573409 | 0.9920327 | 0.321182 | 0.868935 |
| CR788255.1         | 0 NA        | NA           | NA        | NA        | NA       | NA       |
| sowahd             | 31.60002673 | -0.636711044 | 0.3627744 | -1.755116 | 0.07924  | 0.547489 |
| tmem102            | 198.5501834 | 0.179053858  | 0.1513699 | 1.1828891 | 0.236853 | 0.805854 |
| crygm2d4           | 16608.27778 | 0.033849215  | 0.0709261 | 0.4772462 | 0.633187 | 0.957382 |
| si:dkeyp-69c1.7    | 162.9091876 | 0.237377043  | 0.1935017 | 1.226744  | 0.219919 | 0.786668 |
| figla              | 0.655861427 | 0.077956683  | 2.4372582 | 0.0319854 | 0.974484 | NA       |
| si:ch211-162i8.4   | 5.515847522 | 0.836438464  | 0.828704  | 1.0093332 | 0.312815 | NA       |
| rskra              | 73.58000502 | -0.191552751 | 0.2402907 | -0.797171 | 0.425352 | 0.908894 |
| scpp9              | 85.76521317 | -1.361428098 | 0.2668952 | -5.100984 | 3.38E-07 | 3.93E-05 |
| ubxn2a             | 101.331343  | -0.626533285 | 0.2007418 | -3.12109  | 0.001802 | 0.049493 |
| cbx7b              | 9.758626298 | 0.676438773  | 0.6527119 | 1.0363512 | 0.300038 | NA       |
| si:ch211-232b12.5  | 156.6681538 | -0.11775321  | 0.1663587 | -0.707827 | 0.479053 | 0.926978 |
| grip2a             | 201.8171055 | 0.028997715  | 0.1533656 | 0.1890757 | 0.850033 | 0.985174 |
| nfil3-6            | 174.2805906 | 0.027775341  | 0.2006888 | 0.1384    | 0.889924 | 0.989291 |
| si:ch73-105b23.6   | 32.655183   | 0.2034583    | 0.4111321 | 0.4948733 | 0.62069  | 0.957354 |
| wdr93              | 28.44065782 | 0.048849817  | 0.3681361 | 0.132695  | 0.894435 | 0.989689 |
| prrg2              | 162.3760545 | -0.277270125 | 0.1798349 | -1.541804 | 0.123121 | 0.651012 |
| rorc               | 9.215979461 | -0.782567654 | 0.6461646 | -1.211096 | 0.225858 | NA       |
| fibinb             | 311.7354528 | 0.53188407   | 0.1323328 | 4.0192928 | 5.84E-05 | 0.003162 |
| rosl               | 53.16643949 | -0.936625101 | 0.2889721 | -3.24123  | 0.00119  | 0.035443 |
| cthrcla            | 494.7598719 | 0.293131374  | 0.11096   | 2.641774  | 0.008247 | 0.147053 |
| stk39              | 20.67878632 | 0.16185645   | 0.4254221 | 0.3804609 | 0.703603 | 0.968134 |
| akt3b              | 289.9156563 | 0.002914768  | 0.1368307 | 0.021302  | 0.983005 | 0.996944 |
| cct2               | 704.2628196 | -0.114442189 | 0.0951045 | -1.203331 | 0.228848 | 0.796558 |
| vwa3a              | 10.61477404 | 0.090006542  | 0.6239829 | 0.1442452 | 0.885307 | NA       |
| si:ch73-380n15.2   | 175.6769536 | 0.129889201  | 0.1649242 | 0.7875693 | 0.430949 | 0.91234  |
| si:ch73-361p23.3   | 1.782023436 | -2.171780397 | 1.673072  | -1.298079 | 0.19426  | NA       |
| kbtbd2             | 472.3696007 | 0.069330695  | 0.1088291 | 0.6370601 | 0.524086 | 0.939336 |
| oit3               | 16.52809919 | 0.20752297   | 0.5091844 | 0.4075596 | 0.683597 | 0.96567  |
| exoc7              | 852.1883353 | -0.101930752 | 0.0900677 | -1.131713 | 0.257755 | 0.825314 |
| si:ch211-161h7.4   | 348.9722677 | -0.121903597 | 0.1179085 | -1.033883 | 0.301191 | 0.856944 |
| ucn3l              | 21.34523001 | 0.110461401  | 0.421897  | 0.2618208 | 0.79346  | 0.977937 |
| zgc:100918         | 733.9487463 | 0.021654766  | 0.1098232 | 0.1971784 | 0.843688 | 0.985174 |
| CR847844.1         | 1.818127336 | 1.405806012  | 1.5330681 | 0.9169886 | 0.359149 | NA       |
| kcnab2a            | 21.5725603  | 0.688107137  | 0.4146107 | 1.6596462 | 0.096986 | 0.593561 |
| znf101l            | 18.64680082 | -0.808176515 | 0.4472189 | -1.807116 | 0.070744 | 0.520229 |
| si:ch73-50f9.4     | 57.23230979 | 0.207944596  | 0.2654857 | 0.7832609 | 0.433474 | 0.913667 |
| si:dkeyp-3f10.17   | 6.740896112 | 1.259864322  | 0.8131148 | 1.5494298 | 0.121278 | NA       |
| ypel2b             | 5.247651235 | -0.575062482 | 0.8656907 | -0.664282 | 0.50651  | NA       |
| mtssl1b            | 16.00712055 | -0.072570075 | 0.4939936 | -0.146905 | 0.883207 | 0.988706 |
| zgc:63568          | 101.0453617 | -0.176543226 | 0.2171874 | -0.812861 | 0.416298 | 0.906237 |
| BX942819.2         | 0 NA        | NA           | NA        | NA        | NA       | NA       |
| selenoj            | 720.1266005 | -0.064186595 | 0.0993714 | -0.645926 | 0.518327 | 0.938676 |

|                     |              |               |            |            |           |           |
|---------------------|--------------|---------------|------------|------------|-----------|-----------|
| tmem182b            | 7. 290337721 | -0. 664438463 | 0. 6955182 | -0. 955314 | 0. 339419 | NA        |
| zgc:66473           | 5. 752579326 | -0. 770613114 | 0. 7973876 | -0. 966422 | 0. 333833 | NA        |
| si:ch211-202h22. 10 | 38. 9548051  | -0. 250838426 | 0. 3044533 | -0. 823898 | 0. 409998 | 0. 902615 |
| si:dkey-84h14. 1    | 2. 139814685 | 0. 681223001  | 1. 2737661 | 0. 5348101 | 0. 592781 | NA        |
| si:dkey-152b24. 8   | 2. 652443197 | -0. 362034262 | 1. 2027068 | -0. 301016 | 0. 763402 | NA        |
| armac9              | 230. 921235  | -0. 430539931 | 0. 1799852 | -2. 392085 | 0. 016753 | 0. 238497 |
| crygm2d14           | 9249. 411733 | 0. 03142978   | 0. 0664129 | 0. 4732481 | 0. 636036 | 0. 958465 |
| cebpd               | 2311. 029503 | 0. 034571419  | 0. 1051101 | 0. 3289067 | 0. 742226 | 0. 973154 |
| CABZ01038521. 1     | 9. 459662701 | -0. 115823035 | 0. 6455241 | -0. 179425 | 0. 857604 | NA        |
| lgals915            | 1. 253241566 | 1. 40838817   | 1. 9820666 | 0. 7105655 | 0. 477354 | NA        |
| jac10               | 32. 52142401 | 0. 278038718  | 0. 3393476 | 0. 8193331 | 0. 412596 | 0. 904974 |
| tmem121b            | 11. 33214461 | -0. 127066138 | 0. 5681421 | -0. 223652 | 0. 823028 | 0. 982189 |
| crygm2d1            | 14798. 58762 | 0. 144072628  | 0. 0706326 | 2. 0397463 | 0. 041376 | 0. 398326 |
| cbx8a               | 187. 6403178 | 0. 11177371   | 0. 1556521 | 0. 7180994 | 0. 472696 | 0. 924838 |
| maza                | 451. 3311903 | 0. 219887773  | 0. 1087292 | 2. 0223442 | 0. 043141 | 0. 407581 |
| si:dkey-77f5. 3     | 123. 8016254 | -0. 138002687 | 0. 1880945 | -0. 733688 | 0. 463139 | 0. 922698 |
| scoca               | 433. 7330491 | -0. 03186008  | 0. 1082249 | -0. 294388 | 0. 768462 | 0. 975687 |
| unc5c               | 157. 2966411 | 0. 02612581   | 0. 170065  | 0. 1536225 | 0. 877907 | 0. 987881 |
| raplab              | 398. 9634523 | 0. 188387224  | 0. 1212987 | 1. 5530854 | 0. 120403 | 0. 645215 |
| reep6               | 101. 1233681 | 0. 228958855  | 0. 1991945 | 1. 1494239 | 0. 250381 | 0. 820164 |
| dnah2               | 108. 9308686 | 0. 060303815  | 0. 1973374 | 0. 3055874 | 0. 759919 | 0. 975374 |
| c3a. 2              | 221. 3329422 | 0. 573278714  | 0. 3262447 | 1. 7572047 | 0. 078883 | 0. 547489 |
| si:dkeyp-46h3. 6    | 0. 856702761 | 1. 928463937  | 2. 2075106 | 0. 8735921 | 0. 38234  | NA        |
| cepl62              | 97. 23973546 | -0. 033227339 | 0. 2064851 | -0. 160919 | 0. 872157 | 0. 987846 |
| dnah5               | 76. 99153258 | 0. 160130927  | 0. 2376528 | 0. 6738019 | 0. 500437 | 0. 934237 |
| zgc:66473           | 11. 69269184 | -0. 043307099 | 0. 5664547 | -0. 076453 | 0. 939059 | 0. 992857 |
| tcf23               | 0. 847740827 | 0. 553245907  | 2. 099006  | 0. 2635752 | 0. 792107 | NA        |
| si:dkey-29b11. 3    | 8. 826545824 | -0. 057083044 | 0. 6360851 | -0. 089741 | 0. 928493 | NA        |
| hbbe1. 3            | 1787. 507679 | 0. 122158816  | 0. 1979561 | 0. 6171004 | 0. 537169 | 0. 943336 |
| si:ch73-160p18. 3   | 0. 332645115 | 0. 005883744  | 3. 2924249 | 0. 0017871 | 0. 998574 | NA        |
| prr11               | 76. 97187904 | 0. 1179394    | 0. 2248966 | 0. 5244161 | 0. 599989 | 0. 956045 |
| tshz3a              | 313. 3604435 | -0. 003042582 | 0. 123176  | -0. 024701 | 0. 980293 | 0. 996879 |
| slc25a34            | 76. 77274565 | -0. 194615702 | 0. 229228  | -0. 849005 | 0. 395879 | 0. 899472 |
| tpml                | 3928. 512074 | 0. 00230294   | 0. 0786657 | 0. 029275  | 0. 976645 | 0. 996762 |
| si:ch211-214p13. 3  | 96. 1510072  | -0. 088861446 | 0. 1996792 | -0. 445021 | 0. 656305 | 0. 961833 |
| si:ch73-304f21. 1   | 8. 777672085 | 0. 305327524  | 0. 6825948 | 0. 4473042 | 0. 654655 | NA        |
| bean1               | 293. 5467052 | 0. 020078688  | 0. 1313218 | 0. 1528969 | 0. 87848  | 0. 987881 |
| CR790388. 2         | 1. 87546505  | -0. 809447507 | 1. 4633859 | -0. 553133 | 0. 580172 | NA        |
| zdhhc5b             | 308. 6169862 | 0. 142203556  | 0. 1251271 | 1. 1364729 | 0. 255759 | 0. 824482 |
| taarl2g             | 0            | NA            | NA         | NA         | NA        | NA        |
| serbp1b             | 2925. 731199 | -0. 018126716 | 0. 0705826 | -0. 256816 | 0. 797321 | 0. 978577 |
| si:dkey-187j14. 6   | 16. 86032501 | 0. 112918196  | 0. 4557112 | 0. 2477846 | 0. 804301 | 0. 979643 |
| si:ch211-151p13. 8  | 606. 1627725 | 0. 17745348   | 0. 1233776 | 1. 4382961 | 0. 15035  | 0. 698669 |
| RF00017             | 0            | NA            | NA         | NA         | NA        | NA        |
| spi2                | 4. 308164765 | -2. 028612087 | 1. 0850909 | -1. 869532 | 0. 061549 | NA        |
| ponzr4              | 440. 4826405 | 0. 105686116  | 0. 1382    | 0. 764733  | 0. 444431 | 0. 916726 |
| ptp4a2a             | 1295. 876221 | 0. 182339075  | 0. 0838978 | 2. 173348  | 0. 029754 | 0. 334058 |
| BX664625. 2         | 0. 333314908 | -1. 858695402 | 3. 5126701 | -0. 52914  | 0. 596708 | NA        |
| mmd2a               | 8. 511855724 | 1. 028828327  | 0. 6762629 | 1. 5213438 | 0. 128174 | NA        |
| pel13               | 433. 9088998 | -0. 184783055 | 0. 1090446 | -1. 694563 | 0. 090158 | 0. 574908 |
| si:ch73-57f22. 2    | 20. 4459659  | -0. 53899987  | 0. 4587831 | -1. 174847 | 0. 240056 | 0. 808111 |
| NDUFB1              | 548. 5915668 | 0. 032921785  | 0. 1142683 | 0. 2881095 | 0. 773263 | 0. 975687 |
| ecscr               | 40. 21995559 | 0. 267016341  | 0. 3014936 | 0. 8856452 | 0. 375809 | 0. 894376 |
| si:dkey-21c1. 4     | 27. 7788815  | 0. 175451012  | 0. 369779  | 0. 4744753 | 0. 635161 | 0. 957927 |

|                   |             |              |           |           |          |          |
|-------------------|-------------|--------------|-----------|-----------|----------|----------|
| RF00001           |             | 0 NA         | NA        | NA        | NA       | NA       |
| F2R (1 of many)   |             | 0 NA         | NA        | NA        | NA       | NA       |
| dnajb12b          | 382.5130021 | 0.036847302  | 0.1157103 | 0.3184445 | 0.750148 | 0.97419  |
| ccr6a             | 12.87452626 | 0.353612587  | 0.544488  | 0.6494405 | 0.516054 | 0.937995 |
| cb1n20            | 87.20577479 | 0.112499272  | 0.2186999 | 0.5144003 | 0.606972 | 0.956718 |
| si:dkey-226110.6  | 206.8004473 | 0.089521476  | 0.1441149 | 0.6211811 | 0.53448  | 0.943336 |
| fam124b           | 40.03792744 | 0.410781936  | 0.3044895 | 1.3490843 | 0.17731  | 0.738201 |
| F0704810.1        | 159.0932025 | -0.017643316 | 0.1646245 | -0.107173 | 0.914652 | 0.991119 |
| tradv30.0.6       |             | 0 NA         | NA        | NA        | NA       | NA       |
| si:ch73-322b17.4  | 0.173729368 | -0.955901296 | 4.0804729 | -0.234262 | 0.814781 | NA       |
| CU693494.1        | 10.21842666 | -0.359643624 | 0.6999044 | -0.513847 | 0.607359 | NA       |
| btbd3b            | 207.5541325 | 0.068354822  | 0.188402  | 0.3628136 | 0.716744 | 0.96909  |
| si:dkey-261p22.1  | 5.8927864   | 0.446720255  | 0.7905603 | 0.5650679 | 0.572028 | NA       |
| CU693446.1        | 0.831868617 | -0.546811265 | 2.1107396 | -0.259061 | 0.795588 | NA       |
| CABZ01045212.1    | 10.84899724 | 0.355900917  | 0.6115016 | 0.5820114 | 0.560559 | NA       |
| snip1             | 317.8890299 | 0.024715798  | 0.1298332 | 0.1903658 | 0.849023 | 0.985174 |
| zgc:85936         | 196.7357283 | -0.245566137 | 0.1626663 | -1.509631 | 0.131138 | 0.66388  |
| wu:fe05a04        | 212.9840116 | -0.185016831 | 0.157375  | -1.175643 | 0.239738 | 0.808111 |
| si:ch211-278p9.1  | 11.52525428 | -0.178986107 | 0.593095  | -0.301783 | 0.762817 | 0.975374 |
| znf407            | 152.3902519 | -0.143645324 | 0.1666746 | -0.861831 | 0.388781 | 0.896295 |
| kif3a             | 1628.176953 | 0.090706369  | 0.0829844 | 1.0930534 | 0.27437  | 0.839136 |
| BX510934.1        | 16.89402748 | 0.224807782  | 0.4595495 | 0.4891917 | 0.624706 | 0.957354 |
| fbxo42            | 113.5388022 | -0.434584314 | 0.1941255 | -2.238677 | 0.025177 | 0.30686  |
| cdkl              | 736.5138539 | 0.010344085  | 0.1012599 | 0.1021538 | 0.918635 | 0.991623 |
| si:ch73-308114.2  | 163.381858  | -0.083423076 | 0.172227  | -0.484379 | 0.628117 | 0.957354 |
| pacrg             | 34.22309423 | 0.281280376  | 0.3400839 | 0.8270912 | 0.408185 | 0.90171  |
| si:ch73-105b23.1  | 2.133130573 | 0.201771914  | 1.3031327 | 0.154836  | 0.876951 | NA       |
| nek11             | 4.249810494 | 0.450524148  | 1.0664116 | 0.4224674 | 0.672684 | NA       |
| hdac11            | 15.67857716 | 0.331922659  | 0.5007924 | 0.6627949 | 0.507462 | 0.935734 |
| nox1              | 149.2083036 | -0.78573669  | 0.1759356 | -4.466048 | 7.97E-06 | 0.000592 |
| zmp:0000000912    | 0.317711143 | 1.810477155  | 3.2978238 | 0.5489915 | 0.583011 | NA       |
| zgc:171717        | 0.182570949 | 0.967652056  | 4.0804729 | 0.2371421 | 0.812547 | NA       |
| si:dkeyp-98a7.9   |             | 0 NA         | NA        | NA        | NA       | NA       |
| si:ch211-242f23.8 | 27.56695913 | 0.23012938   | 0.3724192 | 0.617931  | 0.536621 | 0.943336 |
| BX469925.1        | 1.709357036 | -1.205057426 | 1.5258566 | -0.789758 | 0.429669 | NA       |
| si:ch73-95115.5   | 493.3594883 | -0.231618941 | 0.1079122 | -2.146364 | 0.031844 | 0.34636  |
| si:dkey-51d8.3    | 3.62227701  | -0.532200361 | 0.9933508 | -0.535763 | 0.592123 | NA       |
| TENM3             | 370.6835932 | 0.027264651  | 0.1156734 | 0.2357036 | 0.813663 | 0.981081 |
| gpr153            | 150.8999843 | 0.142053409  | 0.1845506 | 0.7697263 | 0.441462 | 0.916336 |
| FP085398.1        | 13.682995   | 0.161930735  | 0.5228372 | 0.3097154 | 0.756777 | 0.975374 |
| RF00001           |             | 0 NA         | NA        | NA        | NA       | NA       |
| maptb             | 1877.518662 | 0.010074824  | 0.0865126 | 0.116455  | 0.907292 | 0.990702 |
| BX649485.1        | 6.823171871 | 0.087990584  | 0.722317  | 0.1218171 | 0.903044 | NA       |
| si:ch211-173a9.6  | 59.32253671 | -1.092939028 | 0.2559814 | -4.269604 | 1.96E-05 | 0.001237 |
| nitrlm            |             | 0 NA         | NA        | NA        | NA       | NA       |
| si:dkey-11o18.5   | 22.30128912 | -0.728176378 | 0.4216398 | -1.727011 | 0.084166 | 0.55797  |
| or128-5           | 6.134276772 | -1.035823825 | 0.7957675 | -1.301666 | 0.19303  | NA       |
| hmgn6             | 5429.82089  | -0.025752357 | 0.0790473 | -0.325784 | 0.744588 | 0.974094 |
| si:dkey-33o22.1   |             | 0 NA         | NA        | NA        | NA       | NA       |
| nsf11c            | 1722.111664 | 0.079778582  | 0.0849379 | 0.9392576 | 0.347599 | 0.880195 |
| cdh26.2           | 210.7182864 | -0.25933714  | 0.149077  | -1.739619 | 0.081926 | 0.552725 |
| znf1064           | 18.79806935 | -0.045847948 | 0.4874704 | -0.094053 | 0.925067 | 0.992676 |
| runx1             | 24.82580406 | 0.114096777  | 0.3790424 | 0.3010133 | 0.763404 | 0.975374 |
| sept7a            | 2382.418282 | -0.039989933 | 0.0749236 | -0.533743 | 0.593519 | 0.954434 |

|                    |             |              |           |           |          |          |
|--------------------|-------------|--------------|-----------|-----------|----------|----------|
| ctslb              |             | 0 NA         | NA        | NA        | NA       | NA       |
| fasn               | 1441.248678 | 0.173573931  | 0.0922252 | 1.8820666 | 0.059827 | 0.478654 |
| si:ch211-219a15.3  | 109.4545796 | 0.266914925  | 0.1881498 | 1.41863   | 0.156007 | 0.706028 |
| si:ch211-248117.3  | 96.76271292 | -0.175844861 | 0.2118338 | -0.830108 | 0.406478 | 0.901305 |
| RF00001            |             | 0 NA         | NA        | NA        | NA       | NA       |
| fibpb              | 20.21795946 | -0.23209183  | 0.4271711 | -0.543323 | 0.586908 | 0.953319 |
| si:ch1073-127d16.1 | 8.266698506 | -0.087842991 | 0.6852336 | -0.128194 | 0.897995 | NA       |
| BX005012.1         | 9.408882924 | -0.078892919 | 0.6255362 | -0.12612  | 0.899637 | NA       |
| si:dkey-1c11.1     | 177.624529  | 0.176224919  | 0.1558304 | 1.1308767 | 0.258107 | 0.825859 |
| klh129             | 270.889091  | -0.111563678 | 0.1303657 | -0.855775 | 0.392122 | 0.897688 |
| atox1              | 403.7352767 | 0.063835085  | 0.1249804 | 0.5107607 | 0.609519 | 0.956718 |
| lpl                | 1132.803746 | 0.132066685  | 0.0881513 | 1.4981819 | 0.134086 | 0.669381 |
| si:dkey-256i11.3   | 0.349228403 | 0.005884014  | 3.2372587 | 0.0018176 | 0.99855  | NA       |
| gfra3              | 150.5453582 | 0.060373213  | 0.1644665 | 0.3670852 | 0.713555 | 0.96909  |
| dicp3.3            | 3.337412422 | 0.27340267   | 1.0376681 | 0.263478  | 0.792182 | NA       |
| FQ311930.1         | 40.43431157 | 0.222871623  | 0.3144428 | 0.7087826 | 0.478459 | 0.926978 |
| si:ch211-226o13.1  | 17.63213105 | 0.055573929  | 0.4596404 | 0.1209074 | 0.903764 | 0.990291 |
| tmprss5            | 65.88073343 | 0.120521874  | 0.2454455 | 0.4910332 | 0.623403 | 0.957354 |
| RF00017            | 372.4928545 | 0.521894221  | 0.4730903 | 1.1031598 | 0.269958 | 0.834705 |
| si:dkey-118k5.3    | 20.27786222 | -0.001429678 | 0.436092  | -0.003278 | 0.997384 | 0.999153 |
| BX664618.1         | 36.38222561 | 0.350120511  | 0.3245301 | 1.0788538 | 0.280653 | 0.84355  |
| asb14b             | 64.0503404  | 0.272190548  | 0.2447736 | 1.1120094 | 0.266134 | 0.832153 |
| map4k3a            | 323.8420623 | 0.066966915  | 0.1204621 | 0.5559168 | 0.578268 | 0.951052 |
| si:dkey-156k2.8    | 0.648507523 | -0.035374916 | 2.4454854 | -0.014465 | 0.988459 | NA       |
| lrrc38b            | 46.23758436 | 0.157953266  | 0.3114096 | 0.5072203 | 0.612    | 0.95688  |
| ccser2a            | 574.0362397 | -0.018668805 | 0.1048089 | -0.178122 | 0.858627 | 0.985773 |
| CR382337.1         | 0.166657454 | -0.955901296 | 4.0804729 | -0.234262 | 0.814781 | NA       |
| rfwd3              | 96.93849795 | -0.143782526 | 0.2045373 | -0.702965 | 0.482078 | 0.928561 |
| CR388166.1         | 4.421089209 | 0.038378663  | 0.9456459 | 0.0405846 | 0.967627 | NA       |
| RF00001            |             | 0 NA         | NA        | NA        | NA       | NA       |
| si:ch211-173d10.4  | 1.22848649  | -0.350511206 | 1.8878393 | -0.185668 | 0.852705 | NA       |
| pimr190            | 2.783339735 | 0.865732034  | 1.1942046 | 0.7249445 | 0.468486 | NA       |
| cnih4              | 43.68803467 | -0.149407543 | 0.2878414 | -0.519062 | 0.603718 | 0.95618  |
| or122-1            |             | 0 NA         | NA        | NA        | NA       | NA       |
| rab27b             | 16.57004402 | -0.488989794 | 0.5043293 | -0.969584 | 0.332254 | 0.874653 |
| ponzr10            | 3.940588922 | -1.288292691 | 1.0074578 | -1.278756 | 0.200983 | NA       |
| crygm2d10          | 15049.59001 | -0.02846361  | 0.0713641 | -0.398851 | 0.690003 | 0.966857 |
| CABZ01074298.1     | 6.711070674 | -0.258991858 | 0.7819192 | -0.331226 | 0.740474 | NA       |
| RF00017            |             | 0 NA         | NA        | NA        | NA       | NA       |
| pum3               | 571.2278186 | 0.008272111  | 0.1033019 | 0.080077  | 0.936176 | 0.992702 |
| tiam2a             | 601.5098061 | -0.086686097 | 0.1024032 | -0.846518 | 0.397264 | 0.899672 |
| rnf152             | 83.61470226 | -0.126153805 | 0.2228802 | -0.566016 | 0.571383 | 0.949418 |
| si:dkeyp-110a12.4  | 244.5770407 | -0.079398864 | 0.1406703 | -0.564432 | 0.57246  | 0.949494 |
| si:ch211-22k7.9    | 13.4100806  | -0.74703608  | 0.5357715 | -1.394318 | 0.163221 | 0.718029 |
| si:dkey-54n8.2     | 308.3467512 | 0.085389256  | 0.1269164 | 0.6727995 | 0.501075 | 0.934477 |
| pdyn               | 69.14122678 | -0.085024918 | 0.2393742 | -0.355197 | 0.722442 | 0.970375 |
| tnfrsf11a          | 206.3054297 | -0.099706806 | 0.1481331 | -0.673089 | 0.50089  | 0.934309 |
| FP236735.1         | 14.87095897 | -0.978573797 | 0.5319915 | -1.839454 | 0.065848 | 0.501768 |
| mfrp               | 12.2901277  | 0.248547484  | 0.5521687 | 0.4501297 | 0.652617 | 0.960708 |
| si:dkey-30g5.1     |             | 0 NA         | NA        | NA        | NA       | NA       |
| agap3              | 32.98574138 | 0.080545988  | 0.3626177 | 0.2221237 | 0.824218 | 0.982196 |
| si:dkey-211g8.9    | 0.166657454 | -0.955901296 | 4.0804729 | -0.234262 | 0.814781 | NA       |
| bcl3               | 59.7367174  | -0.693166273 | 0.2669927 | -2.596199 | 0.009426 | 0.162646 |
| si:ch211-113p18.3  | 194.1484628 | 0.236698279  | 0.1555713 | 1.5214782 | 0.12814  | 0.658954 |

|                     |             |              |           |           |          |          |
|---------------------|-------------|--------------|-----------|-----------|----------|----------|
| si:dkey-33c14.6     | 32.92362255 | 0.231935805  | 0.3523903 | 0.6581787 | 0.510423 | 0.936253 |
| cntn1a              | 759.0471969 | -0.129017373 | 0.0988181 | -1.305605 | 0.191687 | 0.755945 |
| plekhn1             | 153.0318917 | -0.034034311 | 0.1909282 | -0.178257 | 0.858521 | 0.985773 |
| si:ch211-180a12.2   | 410.434814  | 0.011804011  | 0.1205149 | 0.0979465 | 0.921975 | 0.992224 |
| cd44a               | 51.29592072 | -0.205504394 | 0.2706261 | -0.759366 | 0.447633 | 0.917154 |
| SLC2A13 (1 of many) | 10.76916122 | -0.281723734 | 0.636112  | -0.442884 | 0.65785  | NA       |
| si:ch211-11k18.4    | 637.4466493 | 0.163603615  | 0.1133245 | 1.4436737 | 0.148831 | 0.69636  |
| adgrf3a             | 2.178953298 | -0.191895525 | 1.2772276 | -0.150244 | 0.880572 | NA       |
| eevs                | 665.8896705 | 0.763546197  | 0.1265511 | 6.0335006 | 1.60E-09 | 3.17E-07 |
| rnf216              | 342.1665194 | -0.160755851 | 0.1186449 | -1.354933 | 0.175439 | 0.736233 |
| h2afy2              | 5107.51857  | -0.020711829 | 0.0653286 | -0.317041 | 0.751213 | 0.97419  |
| CU896691.1          | 1.975273416 | 0.957536214  | 1.3943287 | 0.6867364 | 0.492249 | NA       |
| ndufa412b           | 5.250292201 | 0.143719652  | 0.8619905 | 0.16673   | 0.867583 | NA       |
| RF00001             |             | 0 NA         | NA        | NA        | NA       | NA       |
| il4                 | 3.364537935 | 0.032386783  | 1.257576  | 0.0257533 | 0.979454 | NA       |
| dact3a              | 133.6904461 | 0.056533437  | 0.1899179 | 0.2976731 | 0.765953 | 0.975374 |
| psme4a              | 336.6842511 | 0.12518099   | 0.1215304 | 1.0300386 | 0.302992 | 0.85729  |
| tmem240a            | 75.53685647 | 0.09851911   | 0.2640094 | 0.3731651 | 0.709026 | 0.968664 |
| nitr10a             |             | 0 NA         | NA        | NA        | NA       | NA       |
| plcel               | 293.8239964 | -0.025851699 | 0.1243853 | -0.207836 | 0.835357 | 0.984089 |
| nudt9               | 385.2515744 | -0.053316281 | 0.1159507 | -0.459818 | 0.645647 | 0.96029  |
| RF00001             |             | 0 NA         | NA        | NA        | NA       | NA       |
| zgc:174972          | 46.56421336 | -0.362831248 | 0.2947023 | -1.231179 | 0.218256 | 0.785404 |
| cdk4                | 312.3506211 | -0.327941271 | 0.1274063 | -2.57398  | 0.010054 | 0.171232 |
| CR933559.1          | 23.92677322 | 0.000657247  | 0.4002977 | 0.0016419 | 0.99869  | 0.999398 |
| pde8a               | 276.2452899 | 0.08857997   | 0.1285589 | 0.6890224 | 0.490809 | 0.931926 |
| RF00017             |             | 0 NA         | NA        | NA        | NA       | NA       |
| CABZ01044053.1      | 2023.866455 | -0.105403869 | 0.0762762 | -1.381871 | 0.167011 | 0.723594 |
| rac1b               | 240.3935131 | 0.06219518   | 0.1503855 | 0.4135717 | 0.679188 | 0.965257 |
| she                 | 67.04419946 | -0.054686414 | 0.2415654 | -0.226383 | 0.820903 | 0.981628 |
| avd                 | 1.386302362 | -1.54102959  | 1.8481342 | -0.83383  | 0.404377 | NA       |
| rpap3               | 333.9372563 | -0.09482772  | 0.1206498 | -0.785975 | 0.431882 | 0.912787 |
| or122-2             |             | 0 NA         | NA        | NA        | NA       | NA       |
| CU657980.2          | 0.158795395 | 0.967652056  | 4.0804729 | 0.2371421 | 0.812547 | NA       |
| CT573433.1          | 172.7304087 | 0.152108872  | 0.1666644 | 0.9126657 | 0.361418 | 0.885719 |
| slc6a11b            | 414.4943067 | 0.150058667  | 0.1343095 | 1.1172605 | 0.263883 | 0.830245 |
| igsf5a              | 35.80556382 | -0.377082166 | 0.3267025 | -1.154206 | 0.248416 | 0.817939 |
| znf365              | 1.80091554  | 2.1734762    | 1.5664644 | 1.3875044 | 0.165288 | NA       |
| bada                | 239.6431377 | -0.211973456 | 0.1398942 | -1.515242 | 0.129711 | 0.662411 |
| si:ch211-114c17.1   | 39.73266339 | 0.030365261  | 0.3375026 | 0.0899705 | 0.928311 | 0.992702 |
| pabpn11             | 1.812633453 | 0.287259488  | 1.3842345 | 0.2075223 | 0.835602 | NA       |
| BX664625.3          | 8.024057105 | 0.64559331   | 0.6934841 | 0.9309418 | 0.351884 | NA       |
| znf1057             | 17.14565997 | -0.1027025   | 0.4615599 | -0.222512 | 0.823916 | 0.982196 |
| wu:fc23c09          | 2.975917756 | 1.763331744  | 1.309229  | 1.3468475 | 0.178029 | NA       |
| CYP27A1 (1 of many) | 11.91416523 | -0.738651817 | 0.557687  | -1.324492 | 0.18534  | 0.74928  |
| si:ch211-114113.12  | 2.508059078 | -1.026597373 | 1.2227302 | -0.839594 | 0.401136 | NA       |
| mhclzfa             | 32.77901528 | 0.328154813  | 0.3730755 | 0.8795935 | 0.37908  | 0.895192 |
| si:dkey-26c10.5     | 96.03525939 | -0.119046125 | 0.2095327 | -0.568151 | 0.569933 | 0.948983 |
| si:ch73-125k17.2    | 1.148092083 | -0.385892966 | 1.819804  | -0.212052 | 0.832067 | NA       |
| rp135a              | 14335.13132 | -0.270196581 | 0.075386  | -3.584173 | 0.000338 | 0.013009 |
| si:dkey-106g10.7    | 189.5208551 | -0.021427166 | 0.1563747 | -0.137024 | 0.891011 | 0.989291 |
| CU929391.1          | 24.75459525 | 0.251861141  | 0.4081559 | 0.6170709 | 0.537188 | 0.943336 |
| si:dkeyp-27c8.2     | 112.7029556 | 0.11801254   | 0.194585  | 0.6064832 | 0.544194 | 0.945438 |
| si:ch73-139j3.4     | 16.30859929 | -0.52844234  | 0.4825349 | -1.095138 | 0.273456 | 0.838214 |

|                     |              |               |            |            |           |           |
|---------------------|--------------|---------------|------------|------------|-----------|-----------|
| fgf18a              | 91. 97880793 | 0. 104948654  | 0. 2209417 | 0. 4750062 | 0. 634783 | 0. 9578   |
| AL935044. 1         | 0. 356300316 | 0. 005884122  | 3. 214964  | 0. 0018302 | 0. 99854  | NA        |
| pimr70              | 3. 541940341 | 1. 056789025  | 1. 1276868 | 0. 9371299 | 0. 348692 | NA        |
| pimr187             | 2. 018457259 | 0. 498928664  | 1. 4424654 | 0. 345886  | 0. 729428 | NA        |
| CR759879. 1         | 62. 05043959 | -0. 088168576 | 0. 2624315 | -0. 335968 | 0. 736895 | 0. 972535 |
| usp43b              | 52. 74397427 | -0. 066063372 | 0. 2747702 | -0. 240431 | 0. 809996 | 0. 980764 |
| fam110b             | 691. 9362604 | 0. 041728494  | 0. 1026844 | 0. 4063761 | 0. 684466 | 0. 966043 |
| uspl8               | 5. 137081238 | -0. 045785776 | 0. 881357  | -0. 051949 | 0. 958569 | NA        |
| tmed6               | 27. 06011307 | -0. 695389991 | 0. 3685649 | -1. 88675  | 0. 059194 | 0. 475427 |
| si:ch211-214c20. 1  | 3. 372114748 | -1. 563192064 | 1. 125122  | -1. 389353 | 0. 164725 | NA        |
| sik3                | 971. 5927354 | -0. 029024048 | 0. 1082533 | -0. 268112 | 0. 788613 | 0. 976703 |
| si:dkey-66i24. 8    | 19. 60986891 | -0. 112008102 | 0. 4365017 | -0. 256604 | 0. 797484 | 0. 978577 |
| kdm6ba              | 2840. 183601 | -0. 007113863 | 0. 0714031 | -0. 09963  | 0. 920638 | 0. 992118 |
| pfn1                | 6112. 713759 | 0. 109481567  | 0. 1872448 | 0. 5846975 | 0. 558751 | 0. 948478 |
| KCNIP4              | 24. 31385666 | -0. 382655868 | 0. 3957297 | -0. 966963 | 0. 333563 | 0. 874933 |
| gstm. 3             | 492. 3162878 | -0. 056163317 | 0. 1111754 | -0. 505178 | 0. 613434 | 0. 95688  |
| fut8b               | 58. 85097309 | 0. 179855447  | 0. 2623807 | 0. 6854752 | 0. 493044 | 0. 931926 |
| pkd112b             |              | 0 NA          | NA         | NA         | NA        | NA        |
| znf217              | 502. 4821982 | -0. 185370417 | 0. 1084154 | -1. 709816 | 0. 0873   | 0. 566175 |
| adrb2a              | 71. 54771905 | -0. 064175706 | 0. 2335869 | -0. 27474  | 0. 783516 | 0. 97627  |
| si:dkey-30c15. 10   | 274. 013673  | -0. 034777961 | 0. 1348022 | -0. 257993 | 0. 796413 | 0. 978518 |
| pcdh2aa15           | 1. 143205378 | 2. 461556447  | 2. 0540176 | 1. 1984106 | 0. 230757 | NA        |
| adgrg2a             | 219. 2532913 | -0. 178504075 | 0. 1438515 | -1. 240892 | 0. 214646 | 0. 782493 |
| hsd17b7             | 213. 2602661 | 0. 07357461   | 0. 166111  | 0. 4429242 | 0. 657821 | 0. 962538 |
| sema4gb             | 16. 38259583 | -0. 10877863  | 0. 4705736 | -0. 231162 | 0. 817189 | 0. 981594 |
| atg4db              | 8. 686453556 | -0. 048120983 | 0. 6717779 | -0. 071632 | 0. 942895 | NA        |
| smoc2               | 237. 8015801 | 0. 181763161  | 0. 1396554 | 1. 301512  | 0. 193083 | 0. 756795 |
| CABZ01056629. 1     | 10. 44188282 | -0. 622154788 | 0. 6257706 | -0. 994222 | 0. 320115 | NA        |
| BX470188. 1         | 6. 784777867 | -0. 944449686 | 0. 7602699 | -1. 242256 | 0. 214142 | NA        |
| si:ch211-112g6. 4   | 5. 310812772 | 0. 587587712  | 0. 9414443 | 0. 6241344 | 0. 532539 | NA        |
| ablim3              | 647. 9477619 | 0. 096297594  | 0. 0966342 | 0. 996517  | 0. 318999 | 0. 867746 |
| ciartb              | 288. 1368731 | 0. 168323807  | 0. 1424519 | 1. 1816185 | 0. 237357 | 0. 806412 |
| tp53inp2            | 481. 6864732 | 0. 129774933  | 0. 1053067 | 1. 2323516 | 0. 217818 | 0. 785256 |
| mpped1              | 416. 0864688 | -0. 192799872 | 0. 1207963 | -1. 596074 | 0. 110472 | 0. 62503  |
| CR381544. 1         | 80. 519926   | -0. 320747463 | 0. 2186903 | -1. 466675 | 0. 142465 | 0. 684592 |
| si:ch211-135n15. 3  | 1. 319972715 | -1. 5487922   | 1. 7260877 | -0. 897285 | 0. 369567 | NA        |
| v2rh13              | 0. 182570949 | 0. 967652056  | 4. 0804729 | 0. 2371421 | 0. 812547 | NA        |
| si:ch211-168f7. 5   | 500. 8876727 | -0. 207987332 | 0. 1072137 | -1. 939932 | 0. 052388 | 0. 449228 |
| CABZ01077220. 1     | 0. 31598276  | 0. 005883445  | 3. 3523626 | 0. 001755  | 0. 9986   | NA        |
| RF00001             |              | 0 NA          | NA         | NA         | NA        | NA        |
| sh3d19              | 330. 1080221 | -0. 021735188 | 0. 1336938 | -0. 162574 | 0. 870854 | 0. 987683 |
| shisa8b             | 65. 70824551 | 0. 038419405  | 0. 2527097 | 0. 1520298 | 0. 879163 | 0. 987881 |
| rcelb               | 8. 724683509 | 0. 700549036  | 0. 6480696 | 1. 0809781 | 0. 279707 | NA        |
| si:dkey-23a23. 3    | 67. 42933008 | 0. 177393541  | 0. 2448538 | 0. 7244877 | 0. 468766 | 0. 924328 |
| zmp:0000000924      | 2. 87064792  | 0. 922616524  | 1. 1908526 | 0. 7747529 | 0. 438486 | NA        |
| fam78ab             | 8. 601731506 | 0. 681106018  | 0. 6694076 | 1. 0174758 | 0. 308927 | NA        |
| F0082877. 1         | 321. 5490174 | 0. 015360652  | 0. 1236634 | 0. 1242134 | 0. 901146 | 0. 990121 |
| tmem163b            | 89. 04464877 | 0. 025054237  | 0. 2165303 | 0. 1157078 | 0. 907884 | 0. 990702 |
| shisa2b             | 39. 77079109 | 0. 255428692  | 0. 3072523 | 0. 831332  | 0. 405786 | 0. 901305 |
| si:ch211-217k17. 12 | 0. 643404698 | 1. 436206627  | 2. 5980397 | 0. 552804  | 0. 580398 | NA        |
| kans11b             | 1288. 127286 | -0. 128643553 | 0. 0850459 | -1. 512636 | 0. 130372 | 0. 662797 |
| si:dkey-16p6. 1     | 6. 588857487 | 0. 002581521  | 0. 7442359 | 0. 0034687 | 0. 997232 | NA        |
| thoc1               | 973. 9314646 | -0. 04685456  | 0. 0881577 | -0. 531486 | 0. 595082 | 0. 954434 |
| si:ch1073-303k11. 2 | 402. 793228  | 0. 183701468  | 0. 1149198 | 1. 5985193 | 0. 109927 | 0. 624178 |

|                   |             |              |           |           |          |          |
|-------------------|-------------|--------------|-----------|-----------|----------|----------|
| lgals17           |             | 0 NA         | NA        | NA        | NA       | NA       |
| si:dkey-83f18.7   |             | 0 NA         | NA        | NA        | NA       | NA       |
| RF00017           |             | 0 NA         | NA        | NA        | NA       | NA       |
| smoc1             | 7.915448443 | 0.117724636  | 0.6840552 | 0.1720982 | 0.86336  | NA       |
| CABZ01038494.1    | 58.06083038 | 0.217237827  | 0.2597657 | 0.8362839 | 0.402995 | 0.90084  |
| gig2p             | 6.78446789  | -0.835155927 | 0.7911111 | -1.055675 | 0.291117 | NA       |
| zgc:174356        | 11.59103598 | -0.387136125 | 0.5743462 | -0.674047 | 0.500282 | 0.934224 |
| si:ch211-181d7.1  | 0.476747244 | 2.393381959  | 3.0525537 | 0.7840589 | 0.433006 | NA       |
| si:ch211-190p8.2  | 0.838940531 | -0.561526863 | 2.0217856 | -0.277738 | 0.781213 | NA       |
| susd5             | 24.49002404 | 0.190836622  | 0.3870781 | 0.4930183 | 0.622    | 0.957354 |
| si:ch73-248e21.5  | 12.92800852 | -0.052027582 | 0.5560998 | -0.093558 | 0.92546  | 0.992676 |
| dre-mir-194b      | 0.340386822 | -1.882368278 | 3.2159502 | -0.585323 | 0.558331 | NA       |
| foxj1b            | 60.93802685 | 0.179265743  | 0.2486863 | 0.7208508 | 0.471001 | 0.924838 |
| doc2b             | 349.351231  | 0.197253827  | 0.1341868 | 1.4699947 | 0.141563 | 0.68225  |
| si:ch211-235i11.4 | 193.6211492 | -0.158733351 | 0.156164  | -1.016453 | 0.309414 | 0.861497 |
| si:dkey-254e13.6  | 9.470419629 | 0.359544146  | 0.6337294 | 0.5673465 | 0.570479 | NA       |
| mrtfba            | 28.39445087 | 0.020896212  | 0.3867493 | 0.0540304 | 0.956911 | 0.994543 |
| notch1            | 89.87792377 | -0.234872567 | 0.2265193 | -1.036876 | 0.299793 | 0.855995 |
| si:ch211-103f14.3 | 173.9066131 | 0.136776864  | 0.156825  | 0.8721624 | 0.38312  | 0.895192 |
| si:ch73-302o18.2  | 5.50945219  | -0.597050631 | 0.8172775 | -0.730536 | 0.465063 | NA       |
| ubap2a            | 2998.346662 | -0.025063794 | 0.0980927 | -0.255511 | 0.798328 | 0.978884 |
| mir1-1            | 1.852202149 | 0.869537402  | 1.455503  | 0.5974137 | 0.550231 | NA       |
| si:ch211-132e22.4 |             | 0 NA         | NA        | NA        | NA       | NA       |
| hbael.3           | 45.51589313 | 0.450693187  | 0.3155609 | 1.4282287 | 0.153226 | 0.702508 |
| znf1028           | 29.22421218 | 0.008466448  | 0.3630538 | 0.0233201 | 0.981395 | 0.996944 |
| alx4a             | 294.4078855 | -0.260468049 | 0.1289996 | -2.019138 | 0.043473 | 0.409154 |
| tmem145           | 130.8525615 | -0.004561832 | 0.1840864 | -0.024781 | 0.98023  | 0.996879 |
| prrt4             | 36.0682306  | 0.227353948  | 0.3243583 | 0.7009346 | 0.483344 | 0.92946  |
| miip              | 70.05514283 | -0.235699099 | 0.2491541 | -0.945997 | 0.34415  | 0.878434 |
| spl               | 138.3719492 | -0.127838254 | 0.1816768 | -0.703657 | 0.481646 | 0.928386 |
| RF00001           |             | 0 NA         | NA        | NA        | NA       | NA       |
| tmem117           | 32.77236077 | -0.065241492 | 0.3415288 | -0.191028 | 0.848504 | 0.985174 |
| acad1             | 967.1502844 | -0.085546321 | 0.0925556 | -0.92427  | 0.355346 | 0.882347 |
| CR925817.1        | 9.04655815  | 0.462401643  | 0.6348978 | 0.7283088 | 0.466425 | NA       |
| zgc:77938         | 752.1752866 | -0.691079071 | 0.0913957 | -7.561392 | 3.99E-14 | 1.75E-11 |
| si:cabz01069013.3 | 12.6317581  | 0.150832601  | 0.5569612 | 0.2708135 | 0.786535 | 0.976575 |
| RF00001           | 0.948068633 | 0.012260313  | 2.0842059 | 0.0058825 | 0.995306 | NA       |
| rp111b            | 22.74167111 | 0.645727789  | 0.4140731 | 1.5594537 | 0.118889 | 0.642772 |
| znf1000           | 2.90133375  | 0.897359733  | 1.141004  | 0.786465  | 0.431595 | NA       |
| cox5aa            | 2758.048206 | -0.084925514 | 0.0835115 | -1.016932 | 0.309186 | 0.861381 |
| nme4              | 33.7123717  | -0.454949167 | 0.3331028 | -1.365792 | 0.172004 | 0.730972 |
| tmem1071          | 63.61567256 | -0.047911535 | 0.2495085 | -0.192024 | 0.847724 | 0.985174 |
| rubcn1            | 15.77149531 | 0.42698411   | 0.5027557 | 0.8492874 | 0.395721 | 0.899378 |
| si:ch211-171h4.7  |             | 0 NA         | NA        | NA        | NA       | NA       |
| notum2            | 141.4584381 | -0.267791424 | 0.179295  | -1.49358  | 0.135285 | 0.670689 |
| si:ch211-66k16.28 | 19.38065256 | 0.554573575  | 0.4538847 | 1.2218379 | 0.221769 | 0.78829  |
| si:ch211-189a15.5 | 41.9254904  | 0.048118481  | 0.303741  | 0.1584195 | 0.874126 | 0.987881 |
| gm2a              | 248.3092577 | 0.061362829  | 0.1507848 | 0.4069563 | 0.68404  | 0.965679 |
| ssh2a             | 564.2585178 | 0.204513041  | 0.120994  | 1.6902736 | 0.090976 | 0.578069 |
| si:dkey-190j3.3   |             | 0 NA         | NA        | NA        | NA       | NA       |
| selenol           | 6.987361973 | -0.446046544 | 0.8493687 | -0.525151 | 0.599478 | NA       |
| si:dkey-24i24.3   | 13.27145411 | 0.295168525  | 0.5514043 | 0.5353032 | 0.59244  | 0.954434 |
| or111-7           | 1.554290354 | 1.886980028  | 1.746668  | 1.0803312 | 0.279995 | NA       |
| taar12j           | 0.820749213 | -1.887809118 | 2.2327507 | -0.845508 | 0.397827 | NA       |



|                    |             |              |           |           |          |          |
|--------------------|-------------|--------------|-----------|-----------|----------|----------|
| CLPB               | 16.16167003 | 0.135429874  | 0.4944832 | 0.2738816 | 0.784176 | 0.97627  |
| tmx3b              | 192.8224954 | 0.418180774  | 0.1526119 | 2.7401578 | 0.006141 | 0.118585 |
| pcdhlgb9           | 29.74770724 | 0.072102842  | 0.3666723 | 0.1966411 | 0.844108 | 0.985174 |
| kenjla.6           | 203.478317  | -0.123763814 | 0.1783825 | -0.693811 | 0.487801 | 0.931809 |
| CR385078.1         | 2.519419188 | -0.595573162 | 1.2058478 | -0.493904 | 0.621374 | NA       |
| cntrl              | 151.6370058 | -0.16012445  | 0.1756177 | -0.911779 | 0.361885 | 0.885944 |
| si:ch211-149k12.3  | 1.330260688 | -0.014903156 | 1.6527429 | -0.009017 | 0.992805 | NA       |
| BX571757.1         | 16.16556577 | -0.011524947 | 0.4782868 | -0.024096 | 0.980776 | 0.996944 |
| pimr137            | 1.139799941 | -2.459945758 | 2.024345  | -1.215181 | 0.224297 | NA       |
| fam217b            | 19.80228731 | 0.175433404  | 0.4411786 | 0.3976472 | 0.69089  | 0.967157 |
| znf982             | 26.64305493 | -0.214457647 | 0.3775061 | -0.568091 | 0.569973 | 0.948983 |
| and1               | 1933.509061 | 0.677599747  | 0.0952072 | 7.117103  | 1.10E-12 | 3.82E-10 |
| st6gal2b           | 54.56360143 | 0.232474466  | 0.2649144 | 0.8775455 | 0.38019  | 0.895192 |
| acot17             | 49.85022772 | 0.155011097  | 0.2991676 | 0.5181414 | 0.60436  | 0.95651  |
| ponzr2             | 37.98500978 | 0.164477448  | 0.3164624 | 0.5197378 | 0.603246 | 0.956045 |
| myct1b             | 10.54609671 | -0.514816618 | 0.6288708 | -0.818637 | 0.412994 | NA       |
| si:ch1073-390k14.1 | 223.3194891 | 0.256803051  | 0.1492053 | 1.7211388 | 0.085226 | 0.560519 |
| si:dkey-23f9.13    |             | 0 NA         | NA        | NA        | NA       | NA       |
| si:dkey-1c7.2      | 0.158795395 | 0.967652056  | 4.0804729 | 0.2371421 | 0.812547 | NA       |
| tmem104            | 213.8421793 | 0.226092951  | 0.1462396 | 1.5460442 | 0.122094 | 0.649408 |
| vps72b             | 79.88555936 | -0.101077067 | 0.2286543 | -0.442052 | 0.658452 | 0.962545 |
| si:ch211-151o1.4   | 12.85977958 | 0.359036617  | 0.5322299 | 0.6745893 | 0.499937 | 0.934224 |
| f10                | 402.7238098 | 0.361314151  | 0.1242429 | 2.908127  | 0.003636 | 0.081517 |
| si:ch73-352p18.4   | 197.4588787 | 0.205419487  | 0.1528009 | 1.3443605 | 0.178832 | 0.739486 |
| ponzr3             | 485.3261479 | 0.110089787  | 0.1547609 | 0.7113538 | 0.476865 | 0.926826 |
| pxna               | 788.3807524 | -0.040724712 | 0.0980148 | -0.415495 | 0.677779 | 0.965257 |
| CR759791.1         | 0.507044276 | -2.459587493 | 2.7586536 | -0.89159  | 0.372613 | NA       |
| chst1              | 368.69559   | 0.169436825  | 0.1234228 | 1.3728168 | 0.169809 | 0.726965 |
| crispld2           | 63.79642415 | -0.122406651 | 0.2476563 | -0.49426  | 0.621122 | 0.957354 |
| si:dkey-175m17.6   | 16.21561411 | -0.328427704 | 0.4871587 | -0.67417  | 0.500203 | 0.934224 |
| si:ch211-153b23.7  | 15.4442536  | 0.013504366  | 0.5065302 | 0.0266605 | 0.97873  | 0.996762 |
| ltb4r2a            | 33.42944478 | -0.120624195 | 0.3447596 | -0.349879 | 0.726429 | 0.970402 |
| si:ch211-152l15.2  | 6.880892859 | 0.372141992  | 0.745793  | 0.4989883 | 0.617788 | NA       |
| rexo4              | 141.2754933 | 0.075698954  | 0.1937297 | 0.3907451 | 0.695986 | 0.96736  |
| si:ch211-142d6.2   |             | 0 NA         | NA        | NA        | NA       | NA       |
| arhgef101a         | 263.364477  | 0.00143034   | 0.1379205 | 0.0103708 | 0.991725 | 0.997679 |
| BX000363.1         | 2.676434871 | 0.357483988  | 1.2400889 | 0.2882729 | 0.773138 | NA       |
| adcy1b             | 44.53658204 | -0.060126415 | 0.3102154 | -0.193822 | 0.846316 | 0.985174 |
| BX927260.1         | 56.79185199 | 0.055425704  | 0.277209  | 0.1999419 | 0.841526 | 0.985174 |
| cdca9              | 3.019501859 | 0.018473864  | 1.1013934 | 0.0167732 | 0.986618 | NA       |
| znf1115            | 4.086007046 | 0.106172476  | 0.9419315 | 0.1127178 | 0.910254 | NA       |
| grn2               | 0.654761552 | -2.837720206 | 2.3559398 | -1.204496 | 0.228398 | NA       |
| CU855711.1         |             | 0 NA         | NA        | NA        | NA       | NA       |
| si:ch211-208k15.1  | 146.6255172 | 0.149165146  | 0.1681237 | 0.8872344 | 0.374953 | 0.894316 |
| si:ch211-212k18.6  | 9.672279932 | -0.049135852 | 0.628513  | -0.078178 | 0.937687 | NA       |
| si:ch211-209f22.3  |             | 0 NA         | NA        | NA        | NA       | NA       |
| lman21b            | 605.1100872 | 0.110439319  | 0.1161433 | 0.9508881 | 0.341661 | 0.878134 |
| RF00001            |             | 0 NA         | NA        | NA        | NA       | NA       |
| zmp:0000000936     | 24.42219217 | 0.108856845  | 0.3812581 | 0.2855201 | 0.775246 | 0.975687 |
| hh1a2b.1           | 19.35084431 | 0.564567956  | 0.4446176 | 1.2697831 | 0.204162 | 0.771764 |
| si:dkey-192d15.3   |             | 0 NA         | NA        | NA        | NA       | NA       |
| hist1h2a11         | 5.271727317 | 1.309230631  | 0.8970595 | 1.4594691 | 0.144436 | NA       |
| si:ch211-201o1.1   | 4.556620613 | 0.828187869  | 0.9074315 | 0.9126726 | 0.361415 | NA       |
| ddias              | 28.14020217 | -0.003921497 | 0.3614851 | -0.010848 | 0.991344 | 0.997679 |

|                   |             |              |           |           |          |          |
|-------------------|-------------|--------------|-----------|-----------|----------|----------|
| dcst2             | 4.132458278 | -0.345974922 | 0.9248943 | -0.37407  | 0.708352 | NA       |
| pdzd8             | 381.5463512 | 0.165764923  | 0.118399  | 1.4000538 | 0.161497 | 0.715364 |
| tlr20.2           | 0.31759079  | 1.807926197  | 3.579045  | 0.5051421 | 0.613459 | NA       |
| ngfra             | 613.8331918 | 0.085245848  | 0.0986277 | 0.8643197 | 0.387412 | 0.895778 |
| tnfaip813         | 203.4701354 | 0.0380002    | 0.1533321 | 0.2478293 | 0.804266 | 0.979643 |
| lgalsl11          | 699.6634884 | -0.029755675 | 0.2606806 | -0.114146 | 0.909122 | 0.990702 |
| si:ch211-226h8.14 | 0.491320158 | 0.8528132    | 2.8656354 | 0.2976    | 0.766008 | NA       |
| ecrg4b            | 168.201547  | 0.522039969  | 0.1907784 | 2.7363688 | 0.006212 | 0.119726 |
| zmp:0000000937    | 3.343546099 | -0.292492952 | 1.0269297 | -0.284823 | 0.77578  | NA       |
| si:ch211-250n8.1  | 6.796843014 | 1.268606433  | 0.7648388 | 1.6586585 | 0.097185 | NA       |
| CR382327.1        | 7.151665102 | -0.39154003  | 0.738056  | -0.530502 | 0.595764 | NA       |
| hmgcl11           | 8.20791631  | 0.82767387   | 0.7136531 | 1.1597706 | 0.246142 | NA       |
| BX322530.1        | 252.6383924 | 0.05107629   | 0.1670672 | 0.305723  | 0.759816 | 0.975374 |
| zgc:174193        | 0           | NA           | NA        | NA        | NA       | NA       |
| MFAP4 (1 of many) | 48.86160784 | 0.670485044  | 0.2883064 | 2.3255993 | 0.02004  | 0.266383 |
| otogl             | 116.1089347 | 0.187618188  | 0.1834772 | 1.0225694 | 0.306511 | 0.860027 |
| cfap299           | 12.83138865 | -0.682708382 | 0.5375964 | -1.269927 | 0.20411  | 0.771764 |
| si:ch211-224110.4 | 6.396002561 | 0.948442407  | 0.776038  | 1.2221598 | 0.221647 | NA       |
| lyplal1           | 48.09636823 | 0.167215814  | 0.2780674 | 0.60135   | 0.547607 | 0.945581 |
| CABZ01059406.1    | 0.506374483 | -0.940103506 | 2.8355584 | -0.331541 | 0.740236 | NA       |
| RF00017           | 0           | NA           | NA        | NA        | NA       | NA       |
| mast1b            | 589.5237415 | 0.038900293  | 0.1119301 | 0.3475408 | 0.728185 | 0.970402 |
| RF00001           | 0           | NA           | NA        | NA        | NA       | NA       |
| si:ch73-180n10.1  | 2.796142981 | 0.137882125  | 1.1306565 | 0.1219487 | 0.90294  | NA       |
| plcxd1            | 139.0163619 | 0.086004825  | 0.1740181 | 0.4942293 | 0.621144 | 0.957354 |
| xyx1l1            | 20.41441983 | -0.089654067 | 0.432002  | -0.207532 | 0.835595 | 0.984089 |
| fgd5a             | 308.9290861 | -0.185857551 | 0.1238011 | -1.501259 | 0.133289 | 0.667628 |
| nes               | 279.8557405 | -0.125731248 | 0.1293003 | -0.972397 | 0.330853 | 0.87417  |
| klh122            | 146.4347464 | -0.16381328  | 0.1783668 | -0.918407 | 0.358406 | 0.884398 |
| prox3             | 385.0067501 | 0.102819455  | 0.1156421 | 0.8891181 | 0.37394  | 0.893677 |
| ppplr3ab          | 103.7373279 | 0.203428089  | 0.2099043 | 0.9691471 | 0.332472 | 0.874653 |
| trabd2b           | 259.8978067 | 0.104749106  | 0.1411677 | 0.7420191 | 0.458076 | 0.921978 |
| wdr59             | 278.0126188 | -0.086095376 | 0.1345879 | -0.639696 | 0.52237  | 0.939056 |
| CR318646.1        | 0           | NA           | NA        | NA        | NA       | NA       |
| zgc:174288        | 38.30648974 | -0.574178755 | 0.3193289 | -1.79808  | 0.072164 | 0.525397 |
| crygm2d3          | 14135.48586 | 0.087352963  | 0.0733771 | 1.1904662 | 0.233863 | 0.802571 |
| citb              | 20.71113344 | 0.23303156   | 0.4487426 | 0.519299  | 0.603552 | 0.956045 |
| paqr8             | 18.39934308 | -0.203928802 | 0.4544736 | -0.448714 | 0.653638 | 0.961112 |
| si:dkey-81j8.6    | 2.263515702 | 0.416243913  | 1.2766289 | 0.3260493 | 0.744387 | NA       |
| si:ch211-237i5.4  | 34.93221169 | 0.474379005  | 0.3335759 | 1.4221021 | 0.154997 | 0.704624 |
| efs               | 611.6961666 | 0.082280846  | 0.1021631 | 0.8053872 | 0.420596 | 0.90651  |
| si:ch211-76m11.5  | 19.93551994 | -0.127886828 | 0.4318894 | -0.29611  | 0.767146 | 0.975687 |
| BX571952.1        | 94.67370008 | -0.042450512 | 0.2028224 | -0.209299 | 0.834215 | 0.983765 |
| dnal4b            | 94.16545713 | 0.087188271  | 0.2191576 | 0.3978337 | 0.690753 | 0.967157 |
| KCNB2             | 3.019271197 | -1.008811366 | 1.1344165 | -0.889278 | 0.373854 | NA       |
| deaf1             | 115.6697038 | 0.206652456  | 0.1895864 | 1.0900171 | 0.275706 | 0.839541 |
| or111-4           | 1.543840742 | 0.401158302  | 1.5787306 | 0.2541018 | 0.799417 | NA       |
| znf1089           | 3.344215891 | -0.580218537 | 1.0458694 | -0.554772 | 0.579051 | NA       |
| taar14f           | 0.341486697 | 1.892317624  | 3.2124068 | 0.5890654 | 0.555817 | NA       |
| znf1021           | 15.75870653 | 0.416948964  | 0.503386  | 0.8282887 | 0.407507 | 0.901305 |
| stxbp6            | 341.4998248 | -0.292789448 | 0.1550324 | -1.888569 | 0.05895  | 0.475038 |
| si:ch211-135n15.1 | 0           | NA           | NA        | NA        | NA       | NA       |
| si:ch211-22k7.9   | 18.29198198 | 0.000402104  | 0.4458954 | 0.0009018 | 0.99928  | 0.999704 |
| si:busml-228j01.4 | 0           | NA           | NA        | NA        | NA       | NA       |

|                    |             |              |           |           |          |          |
|--------------------|-------------|--------------|-----------|-----------|----------|----------|
| smarcd2            | 205.7664248 | -0.276648467 | 0.1486778 | -1.860724 | 0.062783 | 0.489019 |
| clqtnfl            | 70.94945039 | 0.829052847  | 0.2375372 | 3.4902027 | 0.000483 | 0.017416 |
| si:dkeyp-69b9.3    | 517.6727022 | 0.125059233  | 0.1358999 | 0.9202304 | 0.357452 | 0.883975 |
| si:ch211-149b19.2  | 98.0646644  | -0.178024635 | 0.2008869 | -0.886193 | 0.375513 | 0.894316 |
| si:ch1073-340i21.3 | 868.3772748 | 0.148534494  | 0.1180517 | 1.2582155 | 0.208314 | 0.775404 |
| slc23a3            | 42.55513808 | 0.335412513  | 0.3060964 | 1.095774  | 0.273178 | 0.838141 |
| si:dkey-238d18.3   | 0.865544342 | 3.23079022   | 2.2781012 | 1.4181944 | 0.156134 | NA       |
| si:dkeyp-98a7.7    | 0 NA        | NA           | NA        | NA        | NA       | NA       |
| caln1              | 7.482420044 | -0.568454076 | 0.695949  | -0.816804 | 0.41404  | NA       |
| ralgapb            | 469.058032  | -0.031741639 | 0.1255082 | -0.252905 | 0.800342 | 0.979377 |
| si:dkey-21o19.2    | 65.7171063  | -0.210625582 | 0.2455854 | -0.857647 | 0.391087 | 0.897688 |
| CABZ01059403.1     | 13.49901253 | -0.561238742 | 0.5500456 | -1.020349 | 0.307563 | 0.861088 |
| CU570691.1         | 12.84917367 | 0.813211241  | 0.5505224 | 1.4771629 | 0.139632 | 0.678399 |
| cb1n17             | 9.211177492 | -0.013226484 | 0.6244472 | -0.021181 | 0.983101 | NA       |
| si:ch211-241n15.3  | 9.178649562 | -0.916630184 | 0.6573507 | -1.394431 | 0.163187 | NA       |
| RF00001            | 0 NA        | NA           | NA        | NA        | NA       | NA       |
| si:ch211-12h2.8    | 0.792730004 | 1.851900952  | 2.2729754 | 0.8147475 | 0.415217 | NA       |
| si:dkey-185e18.7   | 117.9456041 | -0.170960985 | 0.1831051 | -0.933677 | 0.350471 | 0.880195 |
| CR450793.1         | 3.784239396 | 0.890460279  | 1.1045641 | 0.8061644 | 0.420148 | NA       |
| ypel5              | 522.9701646 | -0.324596957 | 0.1254457 | -2.58755  | 0.009666 | 0.166207 |
| golt1a             | 48.1161418  | -0.00558162  | 0.2804958 | -0.019899 | 0.984124 | 0.996944 |
| si:dkey-259j3.5    | 46.56053135 | -0.299701853 | 0.286921  | -1.044545 | 0.296233 | 0.853273 |
| RF00001            | 0.182570949 | 0.967652056  | 4.0804729 | 0.2371421 | 0.812547 | NA       |
| sycp2              | 2.974872618 | 1.396688758  | 1.2888129 | 1.0837017 | 0.278497 | NA       |
| pdxka              | 347.810135  | 0.0476493    | 0.1281899 | 0.3717087 | 0.71011  | 0.968928 |
| si:dkey-16p19.5    | 2.806163753 | -0.105716368 | 1.2448892 | -0.08492  | 0.932325 | NA       |
| wnk4b              | 348.5567803 | 0.226869767  | 0.1224554 | 1.852672  | 0.063929 | 0.494191 |
| si:dkey-238d18.4   | 53.31069299 | -0.340721126 | 0.2651569 | -1.284979 | 0.198799 | 0.763906 |
| si:ch211-14k19.8   | 77.22112015 | -0.002743206 | 0.2327035 | -0.011788 | 0.990594 | 0.997679 |
| tmem220            | 21.45443492 | 0.128117874  | 0.4094318 | 0.3129163 | 0.754344 | 0.975114 |
| cep131             | 377.8108464 | -0.083855641 | 0.118043  | -0.710382 | 0.477467 | 0.926857 |
| si:ch1073-228j22.2 | 4.453908177 | 0.325742154  | 0.8904742 | 0.3658075 | 0.714509 | NA       |
| si:dkey-24117.5    | 0.182570949 | 0.967652056  | 4.0804729 | 0.2371421 | 0.812547 | NA       |
| mett14             | 59.98805923 | 0.279630973  | 0.2628532 | 1.0638293 | 0.287406 | 0.845979 |
| taarl1b            | 0.158795395 | 0.967652056  | 4.0804729 | 0.2371421 | 0.812547 | NA       |
| si:ch211-207e14.4  | 28.27580694 | 0.358360858  | 0.369375  | 0.9701816 | 0.331956 | 0.874653 |
| AL772298.1         | 0.158915748 | 0.967652056  | 4.0804729 | 0.2371421 | 0.812547 | NA       |
| frmpd1b            | 705.2867279 | -0.065737688 | 0.1058516 | -0.621036 | 0.534576 | 0.943336 |
| si:ch211-175m2.5   | 66.95946935 | 0.073673265  | 0.2496003 | 0.2951649 | 0.767868 | 0.975687 |
| si:dkey-7f16.3     | 1.163885225 | 0.470408     | 1.7459696 | 0.2694251 | 0.787603 | NA       |
| si:dkey-183k8.2    | 4.888132446 | -1.130721286 | 0.9012969 | -1.254549 | 0.209642 | NA       |
| si:ch211-154o6.2   | 326.7267675 | -0.002670033 | 0.1255637 | -0.021264 | 0.983035 | 0.996944 |
| rrnad1             | 48.91137047 | -0.174673138 | 0.2880545 | -0.606389 | 0.544256 | 0.945438 |
| zgc:173585         | 10.32374128 | -0.121097856 | 0.6360996 | -0.190376 | 0.849015 | NA       |
| foxbla             | 377.0456871 | -0.014046291 | 0.1260441 | -0.11144  | 0.911268 | 0.991066 |
| ptpn6              | 73.0938197  | -0.125086548 | 0.2367964 | -0.528245 | 0.597329 | 0.955244 |
| cuzd1.1            | 3.977449713 | -1.910382811 | 1.051626  | -1.816599 | 0.069279 | NA       |
| RF00001            | 0 NA        | NA           | NA        | NA        | NA       | NA       |
| ube2ka             | 400.1403446 | 0.007409661  | 0.1186718 | 0.0624383 | 0.950214 | 0.99381  |
| kcnj1a.5           | 206.7337742 | -0.244252271 | 0.17168   | -1.422718 | 0.154818 | 0.704573 |
| lactb11a           | 278.5176114 | 0.113143797  | 0.1451622 | 0.77943   | 0.435726 | 0.914408 |
| nhs12              | 663.3163864 | -0.024765182 | 0.1055082 | -0.234723 | 0.814424 | 0.981081 |
| si:dkey-83f18.5    | 0 NA        | NA           | NA        | NA        | NA       | NA       |
| ushbpl             | 97.50665494 | -0.414095494 | 0.2014873 | -2.055194 | 0.03986  | 0.391511 |

|                     |              |               |            |            |           |           |
|---------------------|--------------|---------------|------------|------------|-----------|-----------|
| si:ch73-173p19. 1   | 430. 1315677 | 0. 09976813   | 0. 1126517 | 0. 8856334 | 0. 375815 | 0. 894376 |
| gphna               | 1219. 20156  | 0. 099216934  | 0. 0848942 | 1. 1687123 | 0. 24252  | 0. 811298 |
| rgsl                | 33. 14896245 | -0. 844460868 | 0. 3708304 | -2. 277216 | 0. 022773 | 0. 288667 |
| si:ch211-160j14. 3  | 103. 3467961 | 0. 008292296  | 0. 2015169 | 0. 0411494 | 0. 967177 | 0. 996315 |
| si:ch211-214b16. 3  | 4. 066517275 | 0. 268731488  | 0. 9656602 | 0. 2782878 | 0. 780791 | NA        |
| mustnlb             | 76. 90513149 | 0. 106771074  | 0. 2360368 | 0. 4523493 | 0. 651017 | 0. 960708 |
| hbba1               | 0 NA         | NA            | NA         | NA         | NA        | NA        |
| BX510940. 1         | 16. 29128395 | -0. 398714136 | 0. 4709785 | -0. 846565 | 0. 397237 | 0. 899672 |
| mmd2b               | 1. 900261412 | 0. 337116562  | 1. 4509205 | 0. 2323467 | 0. 816269 | NA        |
| si:cabz01054394. 5  | 20. 90415257 | -0. 013858113 | 0. 4259729 | -0. 032533 | 0. 974047 | 0. 99644  |
| si:dkey-160o24. 3   | 21. 81876781 | -0. 052013277 | 0. 412339  | -0. 126142 | 0. 899619 | 0. 990121 |
| plrdgb              | 135. 5196661 | 0. 148018494  | 0. 1769589 | 0. 8364569 | 0. 402898 | 0. 90084  |
| mlxipl              | 13. 44817442 | -0. 360062134 | 0. 5500532 | -0. 654595 | 0. 512728 | 0. 936253 |
| bc12b               | 261. 961248  | 0. 238521835  | 0. 1443963 | 1. 651855  | 0. 098564 | 0. 59799  |
| si:ch211-198b3. 4   | 2. 287301299 | -0. 881736487 | 1. 3686099 | -0. 644257 | 0. 519409 | NA        |
| zmp:0000000951      | 5. 622235483 | -0. 876953324 | 0. 8181059 | -1. 071931 | 0. 283751 | NA        |
| BX663516. 1         | 1. 237328071 | 0. 498012251  | 1. 9151249 | 0. 2600417 | 0. 794832 | NA        |
| negaly6             | 46. 02297943 | -0. 233344764 | 0. 2819026 | -0. 82775  | 0. 407812 | 0. 901418 |
| hbael. 3            | 189. 7507091 | -0. 082843838 | 0. 155877  | -0. 531469 | 0. 595094 | 0. 954434 |
| RF00001             | 0 NA         | NA            | NA         | NA         | NA        | NA        |
| baxa                | 4. 160168753 | -0. 826239556 | 0. 9383418 | -0. 880532 | 0. 378571 | NA        |
| il17rel             | 13. 3527056  | 0. 156983086  | 0. 5251124 | 0. 2989514 | 0. 764977 | 0. 975374 |
| si:ch1073-440b2. 1  | 653. 4639561 | 0. 136222901  | 0. 1020321 | 1. 3350988 | 0. 181844 | 0. 743853 |
| im:7145024          | 52. 1756619  | 0. 361294433  | 0. 2841462 | 1. 271509  | 0. 203548 | 0. 770916 |
| zgc:113119          | 52. 63720292 | 0. 145927972  | 0. 2753306 | 0. 5300099 | 0. 596105 | 0. 954444 |
| gpx2                | 17. 52205067 | -0. 37427523  | 0. 4635623 | -0. 807389 | 0. 419442 | 0. 906454 |
| egr3                | 186. 8994016 | 0. 065087516  | 0. 1574211 | 0. 4134613 | 0. 679269 | 0. 965257 |
| si:dkeyp-104f11. 6  | 12. 20823083 | 0. 373336775  | 0. 5567201 | 0. 6706005 | 0. 502475 | 0. 935304 |
| acot14              | 138. 3709559 | -0. 160808863 | 0. 1778125 | -0. 904373 | 0. 365797 | 0. 887084 |
| afapl1a             | 262. 1970027 | -0. 264309971 | 0. 1344158 | -1. 966361 | 0. 049257 | 0. 435457 |
| RF00325             | 0. 48448895  | 0. 85344211   | 2. 878836  | 0. 2964539 | 0. 766883 | NA        |
| si:ch1073-391i24. 1 | 83. 67799375 | -0. 362363144 | 0. 222173  | -1. 630996 | 0. 102891 | 0. 609169 |
| cyp46a1. 3          | 122. 2418736 | -0. 397714847 | 0. 1980503 | -2. 00815  | 0. 044627 | 0. 41583  |
| si:dkey-16p6. 1     | 17. 4409339  | -0. 171554725 | 0. 4693013 | -0. 365553 | 0. 714698 | 0. 96909  |
| adad1               | 7. 919867036 | -0. 128396484 | 0. 6739455 | -0. 190515 | 0. 848906 | NA        |
| ppplr32             | 1. 622828953 | -0. 034616346 | 1. 4878691 | -0. 023266 | 0. 981438 | NA        |
| si:ch73-264i18. 2   | 0. 339758314 | 0. 005883863  | 3. 2682461 | 0. 0018003 | 0. 998564 | NA        |
| wfdc2               | 102. 5787128 | -0. 051814953 | 0. 2051192 | -0. 252609 | 0. 80057  | 0. 979377 |
| tanc1b              | 231. 8917518 | -0. 139277327 | 0. 1464563 | -0. 950982 | 0. 341613 | 0. 878134 |
| zmp:0000001267      | 11. 98837351 | 0. 594999225  | 0. 5524592 | 1. 0770012 | 0. 28148  | 0. 84357  |
| CR384099. 1         | 34. 28952074 | 0. 333732807  | 0. 3390373 | 0. 9843543 | 0. 324941 | 0. 87132  |
| dre-mir-92b         | 0 NA         | NA            | NA         | NA         | NA        | NA        |
| si:dkey-103g5. 4    | 31. 56525475 | -0. 039034969 | 0. 3583728 | -0. 108923 | 0. 913264 | 0. 991119 |
| RF00017             | 0. 824635066 | -0. 63939233  | 2. 222556  | -0. 287683 | 0. 773589 | NA        |
| nkl. 3              | 0. 182570949 | 0. 967652056  | 4. 0804729 | 0. 2371421 | 0. 812547 | NA        |
| smim13              | 670. 4250439 | 0. 065786384  | 0. 1076639 | 0. 6110347 | 0. 541177 | 0. 944921 |
| si:dkey-73n8. 3     | 45. 88269301 | -0. 06890868  | 0. 2882693 | -0. 239043 | 0. 811072 | 0. 981081 |
| ankrd27             | 308. 4979162 | -0. 097322896 | 0. 1247921 | -0. 77988  | 0. 435461 | 0. 914408 |
| htr3a               | 161. 7725301 | -0. 026313248 | 0. 1613109 | -0. 163121 | 0. 870423 | 0. 987421 |
| adam15              | 55. 647161   | -0. 133551587 | 0. 2645168 | -0. 504889 | 0. 613637 | 0. 95688  |
| zmp:0000001268      | 0. 63035749  | -1. 416391854 | 2. 614809  | -0. 541681 | 0. 588038 | NA        |
| ubapl1a             | 32. 70056266 | -0. 165121567 | 0. 3382309 | -0. 488192 | 0. 625414 | 0. 957354 |
| si:ch211-195o20. 7  | 129. 617216  | 0. 092587741  | 0. 1810787 | 0. 511312  | 0. 609133 | 0. 956718 |
| ngfrb               | 74. 71132073 | 0. 159043967  | 0. 2327541 | 0. 6833133 | 0. 494409 | 0. 931926 |

|                   |             |              |           |           |          |          |
|-------------------|-------------|--------------|-----------|-----------|----------|----------|
| ro60              | 217.0218155 | 0.040789606  | 0.1558011 | 0.2618057 | 0.793471 | 0.977937 |
| si:ch211-91p5.3   | 34.1004307  | 0.061201715  | 0.3281245 | 0.1865198 | 0.852037 | 0.985174 |
| si:ch211-253b8.2  | 223.8917163 | 0.023644978  | 0.1421002 | 0.1663965 | 0.867845 | 0.987245 |
| prrl4             | 610.4082704 | -0.04846077  | 0.1003925 | -0.482713 | 0.6293   | 0.957354 |
| csgalnact1b       | 37.75340033 | -0.176540008 | 0.3201853 | -0.551368 | 0.581381 | 0.951731 |
| tspearb           | 29.53159351 | 0.629755516  | 0.3698123 | 1.7029059 | 0.088586 | 0.569471 |
| mettl15           | 49.54642333 | -0.155141596 | 0.2807292 | -0.552638 | 0.580511 | 0.951621 |
| vsigl01           | 20.3882885  | 0.658969369  | 0.4318994 | 1.5257475 | 0.127073 | 0.656588 |
| r3hcc11           | 365.1004142 | -0.081537814 | 0.119418  | -0.682793 | 0.494737 | 0.931926 |
| dusp23b           | 149.2094844 | 0.355426372  | 0.2025692 | 1.7545922 | 0.079329 | 0.547489 |
| FP885542.1        | 0.530029684 | -0.939524117 | 2.7937867 | -0.336291 | 0.736652 | NA       |
| kcnj111           | 562.1582294 | -0.054432469 | 0.0999815 | -0.544425 | 0.586149 | 0.953245 |
| dus11             | 153.828995  | 0.159780373  | 0.172965  | 0.923773  | 0.355604 | 0.882511 |
| pbx3a             | 28.8461992  | -0.543349538 | 0.3602057 | -1.508442 | 0.131441 | 0.664907 |
| nexmifa           | 1409.393952 | -0.013271098 | 0.0800322 | -0.165822 | 0.868297 | 0.987245 |
| tmem235b          | 7.627697859 | -0.62793242  | 0.6805816 | -0.922641 | 0.356194 | NA       |
| cenpx             | 62.2534092  | -0.213573469 | 0.2581932 | -0.827185 | 0.408132 | 0.90171  |
| adgr11a           | 128.1206255 | -0.169299645 | 0.1945325 | -0.87029  | 0.384142 | 0.895192 |
| si:dkey-240n22.6  | 55.03963348 | -0.657762099 | 0.2796055 | -2.352465 | 0.018649 | 0.254502 |
| si:dkeyp-115d7.2  | 0.356300316 | 0.005884122  | 3.214964  | 0.0018302 | 0.99854  | NA       |
| hnrnpa0a          | 5522.464884 | 0.056029073  | 0.0745217 | 0.7518487 | 0.452142 | 0.918781 |
| BX572619.1        | 224.008693  | -0.153356756 | 0.1481653 | -1.035038 | 0.300651 | 0.856282 |
| si:dkeyp-4f2.1    | 20.38473978 | -0.778260646 | 0.4593522 | -1.694257 | 0.090216 | 0.575093 |
| pmaipl            | 75.65697318 | 0.287590843  | 0.246506  | 1.1666686 | 0.243344 | 0.812133 |
| gc                | 171.2688793 | 0.044416418  | 0.2157541 | 0.205866  | 0.836896 | 0.984636 |
| si:ch73-106115.4  | 5.782524048 | 0.79242063   | 0.8234282 | 0.9623433 | 0.335877 | NA       |
| mapta             | 1372.126833 | 0.199060626  | 0.0970004 | 2.0521631 | 0.040154 | 0.392132 |
| BX088538.1        | 31.29349574 | 0.299606968  | 0.348832  | 0.858886  | 0.390403 | 0.897304 |
| ccdc175           | 4.714365049 | -0.209821384 | 0.8986678 | -0.23348  | 0.815388 | NA       |
| arhgap20          | 106.0156773 | 0.083653244  | 0.2038407 | 0.4103855 | 0.681523 | 0.965476 |
| BX120005.1        | 0.808333769 | -0.605422531 | 2.2351432 | -0.270865 | 0.786495 | NA       |
| urahb             | 8.422815995 | -0.041554932 | 0.648672  | -0.064062 | 0.948921 | NA       |
| si:ch211-198c19.1 | 1.187499141 | 0.431586902  | 1.7362295 | 0.2485771 | 0.803688 | NA       |
| ednrba            | 22.19215383 | -0.29091956  | 0.4208411 | -0.691281 | 0.489389 | 0.931926 |
| si:ch211-110e21.3 | 212.3522702 | -0.125228605 | 0.1550343 | -0.807748 | 0.419236 | 0.906406 |
| rhobtb2b          | 77.85740353 | 0.245370218  | 0.23523   | 1.0431079 | 0.296898 | 0.853798 |
| si:ch73-109d9.4   | 5.141993444 | -0.865679132 | 0.8710899 | -0.993788 | 0.320326 | NA       |
| tspan4a           | 301.8610999 | -0.09901631  | 0.1241401 | -0.797618 | 0.425092 | 0.908819 |
| si:dkeyp-121d4.3  | 411.3370455 | -0.033391487 | 0.1161212 | -0.287557 | 0.773686 | 0.975687 |
| miga2             | 38.18468617 | 0.105633834  | 0.3370063 | 0.3134477 | 0.753941 | 0.975056 |
| wu:fb59d01        | 620.2298995 | -0.887001462 | 0.1058693 | -8.378266 | 5.37E-17 | 3.22E-14 |
| grn1              | 22.43899049 | -0.923670151 | 0.4494857 | -2.054949 | 0.039884 | 0.391511 |
| hopx              | 328.4090558 | -0.017953578 | 0.1227813 | -0.146224 | 0.883745 | 0.988706 |
| fdxr              | 154.7723093 | -0.52024589  | 0.1755078 | -2.964233 | 0.003034 | 0.07278  |
| si:dkey-238d18.10 |             | 0 NA         | NA        | NA        | NA       | NA       |
| clk4a             | 2970.950248 | -0.064287814 | 0.0808897 | -0.794759 | 0.426754 | 0.910217 |
| si:ch211-232p21.6 | 0.809941799 | 0.539629624  | 2.2311614 | 0.2418604 | 0.808888 | NA       |
| zgc:158463        | 8249.989484 | 0.555356803  | 0.4644805 | 1.1956516 | 0.231833 | 0.800045 |
| illfma            | 8.891916057 | 0.405172208  | 0.670659  | 0.6041405 | 0.54575  | NA       |
| RF00001           |             | 0 NA         | NA        | NA        | NA       | NA       |
| ftr35             | 0.678375468 | -2.878459328 | 2.4926399 | -1.154783 | 0.248179 | NA       |
| pnpla2            | 53.27349453 | -0.265426138 | 0.2747194 | -0.966172 | 0.333958 | 0.875256 |
| tmem1761.2        | 146.6922079 | -1.733316662 | 0.1923258 | -9.012397 | 2.02E-19 | 1.59E-16 |
| si:ch73-281i18.3  | 3.551422559 | 1.343649893  | 1.0931499 | 1.2291543 | 0.219014 | NA       |

|                    |             |              |           |           |          |          |
|--------------------|-------------|--------------|-----------|-----------|----------|----------|
| si:dkey-24p1.7     | 4.763366204 | 0.111453985  | 0.8712877 | 0.1279187 | 0.898213 | NA       |
| mbpb               | 1824.581196 | 0.028675426  | 0.078598  | 0.3648366 | 0.715233 | 0.96909  |
| si:dkey-164f24.2   | 1019.225838 | 0.389605341  | 0.0896373 | 4.3464664 | 1.38E-05 | 0.00094  |
| rab12              | 76.06245863 | 0.279362286  | 0.2350578 | 1.1884831 | 0.234643 | 0.803509 |
| si:dkey-205h13.2   | 1306.131503 | 0.048248664  | 0.0924862 | 0.5216849 | 0.60189  | 0.956045 |
| si:ch211-212k18.15 | 1.303389427 | -1.599233742 | 1.7364034 | -0.921004 | 0.357049 | NA       |
| etv7               | 8.989397735 | -0.194061873 | 0.6395516 | -0.303434 | 0.761559 | NA       |
| macf1b             | 21.62106576 | -0.536389535 | 0.4116162 | -1.30313  | 0.19253  | 0.756795 |
| si:ch211-105c13.3  | 746.2350355 | 0.091860552  | 0.0934956 | 0.982512  | 0.325848 | 0.871896 |
| omgb               | 60.09344097 | -0.086876817 | 0.2628754 | -0.330487 | 0.741032 | 0.973154 |
| men1               | 358.1066166 | -0.220534013 | 0.1173002 | -1.880082 | 0.060097 | 0.478687 |
| rp111a             | 121.888036  | 0.053222428  | 0.1917989 | 0.2774908 | 0.781403 | 0.97627  |
| ciz1b              | 53.84501653 | 0.030725033  | 0.2760878 | 0.1112872 | 0.911389 | 0.991066 |
| dhx58              | 13.0200462  | 0.037968414  | 0.5251302 | 0.0723029 | 0.942361 | 0.993276 |
| fam161b            | 32.38509019 | 0.258373752  | 0.3473623 | 0.7438162 | 0.456988 | 0.921431 |
| CR936459.1         | 2.685370062 | 1.173916984  | 1.3156641 | 0.8922619 | 0.372253 | NA       |
| hbae1.1            | 22.92221796 | 0.059522155  | 0.4616686 | 0.1289283 | 0.897414 | 0.990121 |
| si:ch211-132g1.3   | 118.9981329 | 0.029799871  | 0.186861  | 0.1594762 | 0.873294 | 0.987846 |
| si:dkey-24117.4    | 0 NA        | NA           | NA        | NA        | NA       | NA       |
| si:dkey-12j5.1     | 305.245073  | -0.119116263 | 0.1261262 | -0.944421 | 0.344954 | 0.878434 |
| tecr12a            | 32.5280209  | 0.168330799  | 0.3400628 | 0.4949992 | 0.620601 | 0.957354 |
| cplx3b             | 233.688001  | 0.116363221  | 0.1357699 | 0.8570619 | 0.391411 | 0.897688 |
| fam83e             | 170.0208416 | 0.098025395  | 0.1583826 | 0.6189152 | 0.535972 | 0.943336 |
| kcnq4              | 2.472428806 | -2.673971963 | 1.4411044 | -1.855502 | 0.063525 | NA       |
| pimr23             | 0 NA        | NA           | NA        | NA        | NA       | NA       |
| si:ch73-367f21.5   | 23.86669308 | -0.07616164  | 0.3922172 | -0.194182 | 0.846033 | 0.985174 |
| bod111             | 861.2465025 | -0.008607611 | 0.0933185 | -0.092239 | 0.926508 | 0.992702 |
| ugt1b5             | 173.9166522 | 0.293915655  | 0.1548847 | 1.897642  | 0.057743 | 0.471435 |
| si:ch73-78o10.1    | 57.29629106 | 0.352470162  | 0.2539325 | 1.3880465 | 0.165123 | 0.721223 |
| si:ch211-198e20.10 | 3.959907854 | 0.235082836  | 0.9284195 | 0.2532076 | 0.800108 | NA       |
| si:dkeyp-46h3.5    | 0 NA        | NA           | NA        | NA        | NA       | NA       |
| zgc:92594          | 263.493311  | 0.072710988  | 0.1441806 | 0.5043049 | 0.614047 | 0.95688  |
| fb1n7              | 66.24885121 | -0.059545581 | 0.2584274 | -0.230415 | 0.817769 | 0.981594 |
| si:dkeyp-98a7.4    | 0 NA        | NA           | NA        | NA        | NA       | NA       |
| desilb             | 129.2907139 | 0.299684064  | 0.1972276 | 1.5194834 | 0.128641 | 0.659646 |
| erbb4b             | 16.24418363 | 0.592817338  | 0.4711406 | 1.2582598 | 0.208298 | 0.775404 |
| rnf166             | 7.589112188 | -0.467657244 | 0.7459051 | -0.626966 | 0.530681 | NA       |
| BX571825.5         | 0 NA        | NA           | NA        | NA        | NA       | NA       |
| baalcb             | 150.8650467 | 0.004403636  | 0.1628724 | 0.0270373 | 0.97843  | 0.996762 |
| si:ch211-93n23.7   | 9.722078864 | -0.328588805 | 0.6196579 | -0.530275 | 0.595922 | NA       |
| si:dkey-22114.11   | 7.972369242 | 0.874448729  | 0.7553576 | 1.1576619 | 0.247002 | NA       |
| si:dkey-63j12.4    | 11.71454712 | -0.323807199 | 0.6094871 | -0.531278 | 0.595226 | 0.954434 |
| BX957322.1         | 18.85116078 | 0.89642354   | 0.4647861 | 1.9286796 | 0.053771 | 0.454191 |
| sfrp21             | 6.663599877 | -0.24733034  | 0.7600054 | -0.325432 | 0.744854 | NA       |
| MDFI               | 289.3008641 | 0.091101801  | 0.1274637 | 0.7147275 | 0.474777 | 0.925399 |
| pat12              | 4.124764645 | -2.002483718 | 1.0250323 | -1.953581 | 0.050751 | NA       |
| pstpip2            | 11.05674785 | 0.122595239  | 0.5711108 | 0.214661  | 0.830032 | NA       |
| ccdc169            | 4.508447633 | -0.554944054 | 0.9120944 | -0.608428 | 0.542903 | NA       |
| tfpt               | 252.4712189 | -0.107764202 | 0.1332386 | -0.808806 | 0.418627 | 0.906406 |
| xrral              | 9.055560374 | 0.157837632  | 0.6476874 | 0.2436941 | 0.807468 | NA       |
| nhlrc2             | 339.1024126 | 0.020455851  | 0.124081  | 0.1648588 | 0.869055 | 0.987245 |
| si:dkey-265e15.2   | 36.91870503 | 0.149795458  | 0.3371449 | 0.4443058 | 0.656821 | 0.96205  |
| ncam3              | 50.92025167 | -0.885610385 | 0.2812284 | -3.149078 | 0.001638 | 0.046135 |
| pcdh2ab11          | 0 NA        | NA           | NA        | NA        | NA       | NA       |

|                     |             |              |           |           |          |          |
|---------------------|-------------|--------------|-----------|-----------|----------|----------|
| si: cabz01054396.2  | 96.22351758 | 0.061138315  | 0.2084025 | 0.2933665 | 0.769242 | 0.975687 |
| si: dkey-217f16.1   | 1.152686753 | -0.310571849 | 1.95009   | -0.15926  | 0.873464 | NA       |
| CU929037.1          | 0.157187365 | -0.955901296 | 4.0804729 | -0.234262 | 0.814781 | NA       |
| coro7               | 102.1172779 | -0.044322645 | 0.1981228 | -0.223713 | 0.822981 | 0.982189 |
| RF00009             | 18.23659998 | 0.216787849  | 0.534688  | 0.4054474 | 0.685149 | 0.966146 |
| fgd5b               | 8.396280807 | 0.342389437  | 0.6918674 | 0.4948772 | 0.620687 | NA       |
| ptges3b             | 1312.418019 | -0.237406191 | 0.0836879 | -2.836804 | 0.004557 | 0.096369 |
| si: ch211-160d20.5  | 0.325573202 | 0.005883621  | 3.3172783 | 0.0017736 | 0.998585 | NA       |
| dre-mir-2188        | 0.340386822 | -1.882368278 | 3.2159502 | -0.585323 | 0.558331 | NA       |
| BX322587.1          | 0.967129164 | -0.023635743 | 1.9568585 | -0.012078 | 0.990363 | NA       |
| rnaseh2c            | 325.5971272 | -0.036708314 | 0.1270658 | -0.288892 | 0.772664 | 0.975687 |
| si: dkey-117n7.5    | 43.09661266 | 0.162287719  | 0.3000992 | 0.5407802 | 0.588659 | 0.953319 |
| ppml1b              | 49.4815807  | -0.060368252 | 0.2802593 | -0.215401 | 0.829454 | 0.982805 |
| mcama               | 1070.244725 | -0.034848936 | 0.0856468 | -0.406891 | 0.684088 | 0.965679 |
| si: ch1073-406110.2 | 116.6610491 | 0.373889326  | 0.1962494 | 1.9051748 | 0.056757 | 0.467438 |
| ctdsp13             | 528.4059239 | 0.080980403  | 0.1065203 | 0.7602346 | 0.447114 | 0.917154 |
| BX927136.1          |             | 0 NA         | NA        | NA        | NA       | NA       |
| F0704622.1          | 4.947286782 | -0.782317766 | 0.8661206 | -0.903243 | 0.366397 | NA       |
| lsm3                | 400.5895949 | -0.110076822 | 0.1373477 | -0.801447 | 0.422873 | 0.90714  |
| MFAP4 (1 of many)   | 11.61678579 | 0.40972465   | 0.5522977 | 0.7418547 | 0.458175 | 0.921978 |
| btf314              | 591.8152126 | -0.008521147 | 0.1000759 | -0.085147 | 0.932145 | 0.992702 |
| tex26               | 5.432302424 | 0.944881106  | 0.8597096 | 1.0990701 | 0.271738 | NA       |
| ism2a               | 12.45951439 | -0.019054766 | 0.5374127 | -0.035456 | 0.971716 | 0.996315 |
| nfe2l2b             | 253.4978353 | -0.350786611 | 0.141274  | -2.483022 | 0.013027 | 0.20396  |
| atf7ip2             | 171.3143612 | 0.106969022  | 0.1754789 | 0.6095834 | 0.542138 | 0.944974 |
| trabd2a             | 128.8493079 | 0.143334857  | 0.1883942 | 0.7608242 | 0.446762 | 0.917154 |
| abcf3               | 278.207005  | -0.099244544 | 0.1379183 | -0.719589 | 0.471778 | 0.924838 |
| si: ch211-276a23.5  | 45.14623263 | 0.327581928  | 0.296819  | 1.1036419 | 0.269748 | 0.834705 |
| gfral               | 30.73966393 | 0.228808413  | 0.3537169 | 0.6468687 | 0.517717 | 0.938592 |
| BX004785.1          | 0.158795395 | 0.967652056  | 4.0804729 | 0.2371421 | 0.812547 | NA       |
| si: cabz01054394.7  | 23.14297739 | 0.038602161  | 0.3988961 | 0.0967725 | 0.922907 | 0.992466 |
| qpct                | 211.4706107 | 0.344009274  | 0.1433165 | 2.4003472 | 0.01638  | 0.236243 |
| CABZ01077218.1      | 68.66787379 | -0.152871537 | 0.2410407 | -0.634214 | 0.525941 | 0.940236 |
| cyldb               | 87.48282077 | 0.170257567  | 0.2117266 | 0.8041387 | 0.421317 | 0.90651  |
| fam161a             | 153.2866582 | 0.120266013  | 0.162271  | 0.741143  | 0.458607 | 0.921978 |
| si: zfos-754c12.2   | 0.491560863 | 0.853615855  | 2.865157  | 0.2979299 | 0.765757 | NA       |
| aqp8b               | 77.69215992 | -0.803243315 | 0.262564  | -3.059229 | 0.002219 | 0.05751  |
| si: dkey-26g8.5     | 0.50625413  | -0.940106488 | 2.8357787 | -0.331516 | 0.740255 | NA       |
| si: dkey-11o15.7    |             | 0 NA         | NA        | NA        | NA       | NA       |
| si: ch211-286b5.4   |             | 0 NA         | NA        | NA        | NA       | NA       |
| nrg3b               | 466.5095692 | 0.090276836  | 0.1097592 | 0.8224988 | 0.410793 | 0.90316  |
| rnfl30              | 784.1900175 | 0.037320617  | 0.0885436 | 0.4214945 | 0.673394 | 0.965257 |
| hapln1a             | 4023.626808 | 0.319644638  | 0.0688352 | 4.6436251 | 3.42E-06 | 0.000293 |
| si: dkey-288a3.2    | 7.733560586 | 0.043659719  | 0.6955814 | 0.0627672 | 0.949952 | NA       |
| cizla               | 58.9034089  | -0.04687231  | 0.2616564 | -0.179137 | 0.85783  | 0.985703 |
| crebzf              | 763.182833  | -0.016116417 | 0.09953   | -0.161925 | 0.871365 | 0.987754 |
| efna5a              | 585.3543512 | 0.025725472  | 0.0970271 | 0.2651369 | 0.790904 | 0.977402 |
| slc25a32a           | 667.838492  | -0.134637537 | 0.0951405 | -1.415144 | 0.157026 | 0.707677 |
| si: dkeyp-101e12.1  |             | 0 NA         | NA        | NA        | NA       | NA       |
| sertad4             | 299.6448613 | 0.000289103  | 0.1331945 | 0.0021705 | 0.998268 | 0.999329 |
| si: ch73-41e3.7     | 2.296987508 | -0.063120416 | 1.4247498 | -0.044303 | 0.964663 | NA       |
| prr7                | 25.70921465 | 1.009105708  | 0.4050336 | 2.4914126 | 0.012724 | 0.200229 |
| akapla              | 10.29694556 | 0.738494086  | 0.658565  | 1.1213686 | 0.262131 | NA       |
| pcdh18a             | 949.1802561 | 0.021321021  | 0.0994328 | 0.2144264 | 0.830215 | 0.982916 |

|                   |             |              |           |           |          |          |
|-------------------|-------------|--------------|-----------|-----------|----------|----------|
| si:dkey-239j18.3  | 14.33879302 | -0.52829318  | 0.5044754 | -1.047213 | 0.295001 | 0.851519 |
| znf1042           | 19.77111158 | -0.799746246 | 0.4681517 | -1.708306 | 0.08758  | 0.566637 |
| si:dkey-9k7.3     | 39.42236384 | -0.12746977  | 0.3109599 | -0.409924 | 0.681862 | 0.965476 |
| lpar4             | 12.54547387 | 0.681598538  | 0.5449772 | 1.2506918 | 0.211047 | 0.77859  |
| si:rp71-19m20.1   | 314.4962997 | 0.101671729  | 0.1319538 | 0.7705103 | 0.440997 | 0.916336 |
| si:ch211-189a21.1 | 11.71446781 | -0.010394284 | 0.5794827 | -0.017937 | 0.985689 | 0.996944 |
| si:dkey-207m2.4   | 6.166843574 | 0.269501592  | 0.7717837 | 0.3491932 | 0.726944 | NA       |
| asb13b            | 113.9535165 | 0.430065198  | 0.1905032 | 2.2575219 | 0.023975 | 0.299022 |
| MRPS12            | 499.3244988 | -0.074962703 | 0.1119185 | -0.669797 | 0.502987 | 0.935304 |
| slc35d2           | 32.0615949  | -0.193610573 | 0.3604506 | -0.537135 | 0.591174 | 0.954193 |
| si:dkey-262k9.4   | 104.6694533 | 0.215165193  | 0.1993166 | 1.0795148 | 0.280358 | 0.843423 |
| BX296541.1        | 0.173729368 | -0.955901296 | 4.0804729 | -0.234262 | 0.814781 | NA       |
| scarb2c           | 242.0025792 | 0.068272907  | 0.15703   | 0.4347762 | 0.663725 | 0.964736 |
| RF00017           |             | 0 NA         | NA        | NA        | NA       | NA       |
| RF00017           |             | 0 NA         | NA        | NA        | NA       | NA       |
| si:dkey-51d8.1    | 3.766249585 | 1.810788472  | 1.0815698 | 1.6742224 | 0.094087 | NA       |
| si:dkey-22n8.3    | 21.8925439  | -0.187910382 | 0.4544338 | -0.413504 | 0.679237 | 0.965257 |
| cita              | 467.9679847 | -0.048643233 | 0.1046972 | -0.464609 | 0.642212 | 0.959994 |
| cobl11a           | 133.6285029 | -0.036072477 | 0.1964601 | -0.183612 | 0.854318 | 0.985174 |
| atxn711           | 9.749008242 | -1.183389181 | 0.6235102 | -1.897947 | 0.057703 | NA       |
| usp44             | 517.3280233 | -0.140514417 | 0.1035493 | -1.35698  | 0.174787 | 0.735372 |
| si:dkey-16j16.4   | 21.14101635 | -0.203166512 | 0.4126779 | -0.492313 | 0.622498 | 0.957354 |
| si:ch211-112c15.8 | 0.964610636 | -0.018889399 | 1.958304  | -0.009646 | 0.992304 | NA       |
| zgc:172218        | 0.317831496 | 1.808837541  | 3.5779923 | 0.5055454 | 0.613176 | NA       |
| jcada             | 373.5216372 | -0.108201723 | 0.1142732 | -0.946869 | 0.343706 | 0.878434 |
| socs1b            | 1.32527496  | -2.703143513 | 1.9371225 | -1.395443 | 0.162882 | NA       |
| pcdh2ab8          | 2.757753476 | -0.863420747 | 1.1839024 | -0.729301 | 0.465818 | NA       |
| zgc:173705        | 1.596696509 | -0.007252485 | 1.5931558 | -0.004552 | 0.996368 | NA       |
| si:dkeyp-75h12.5  | 1302.071578 | 0.008305368  | 0.094277  | 0.0880954 | 0.929801 | 0.992702 |
| nedd9             | 613.9930218 | -0.047091341 | 0.0984833 | -0.478166 | 0.632532 | 0.957356 |
| soul51            | 6.769351299 | -0.502222987 | 0.7962082 | -0.630768 | 0.528192 | NA       |
| si:dkey-210j14.3  | 50.71615526 | 0.117278457  | 0.2735149 | 0.4287828 | 0.668081 | 0.964736 |
| slc16a12b         | 531.0964759 | 0.070586196  | 0.1175814 | 0.6003177 | 0.548295 | 0.945871 |
| si:dkey-19e4.5    | 1195.609949 | 0.070941836  | 0.0830489 | 0.8542174 | 0.392985 | 0.897848 |
| mmp20a            | 7.146764698 | 0.33333732   | 0.7143281 | 0.4666445 | 0.640754 | NA       |
| dag1b             | 340.8067114 | -0.000300461 | 0.1234527 | -0.002434 | 0.998058 | 0.999271 |
| rpz6              | 42.15225513 | 0.147770683  | 0.3073595 | 0.4807747 | 0.630677 | 0.957354 |
| RF00001           | 0.158795395 | 0.967652056  | 4.0804729 | 0.2371421 | 0.812547 | NA       |
| cd44b             | 15.2094171  | -0.284149392 | 0.5259922 | -0.540216 | 0.589048 | 0.953345 |
| tasora            | 490.3210553 | -0.152155388 | 0.1104408 | -1.37771  | 0.168293 | 0.725919 |
| zmp:0000001289    | 0.173729368 | -0.955901296 | 4.0804729 | -0.234262 | 0.814781 | NA       |
| si:ch211-261n11.8 |             | 0 NA         | NA        | NA        | NA       | NA       |
| CABZ01039863.1    | 34.8573673  | 0.026857854  | 0.3229284 | 0.0831697 | 0.933717 | 0.992702 |
| adgre5b.3         | 73.80721971 | -0.372440119 | 0.2260679 | -1.64747  | 0.099461 | 0.599802 |
| si:ch211-265o23.1 | 101.759643  | -0.066197885 | 0.198808  | -0.332974 | 0.739154 | 0.972722 |
| cacnalg           | 381.7021298 | 0.117602752  | 0.1285535 | 0.9148157 | 0.360288 | 0.885686 |
| clint1b           | 405.6722925 | 0.194131726  | 0.1136149 | 1.7086827 | 0.08751  | 0.566637 |
| sh3tc2            | 432.8707911 | 0.035595759  | 0.1151308 | 0.3091766 | 0.757187 | 0.975374 |
| si:ch211-161h7.8  | 149.8732817 | -0.591460822 | 0.1809807 | -3.268088 | 0.001083 | 0.032921 |
| mlip              | 219.6957026 | 0.044256286  | 0.1537293 | 0.2878845 | 0.773435 | 0.975687 |
| smim4             | 197.2590403 | 0.120425242  | 0.1573494 | 0.7653364 | 0.444071 | 0.916699 |
| dsn1              | 188.3819768 | -0.157261283 | 0.1537919 | -1.022559 | 0.306517 | 0.860027 |
| aldh2.1           | 467.9241873 | -0.10459267  | 0.1044407 | -1.001455 | 0.316607 | 0.867129 |
| iqce              | 154.0022677 | 0.024480274  | 0.1707084 | 0.1434041 | 0.885971 | 0.988936 |



|                    |             |              |           |           |          |          |
|--------------------|-------------|--------------|-----------|-----------|----------|----------|
| rasal3             | 25.47690476 | -0.045920452 | 0.3800081 | -0.120841 | 0.903817 | 0.990291 |
| si:ch211-64i20.3   | 8.714296688 | -0.614654789 | 0.689318  | -0.891685 | 0.372562 | NA       |
| selenow2b          | 551.8271102 | 0.166726651  | 0.1052994 | 1.5833587 | 0.11334  | 0.631061 |
| znf1008            | 93.86563545 | 0.036632184  | 0.2147432 | 0.170586  | 0.864549 | 0.98601  |
| npy2r1             | 8.203772057 | -0.00356251  | 0.6668252 | -0.005342 | 0.995737 | NA       |
| BX005085.1         | 82.84162298 | -0.152095991 | 0.2202485 | -0.690566 | 0.489839 | 0.931926 |
| si:dkey-210j14.5   | 35.72805722 | -0.361018453 | 0.3320063 | -1.087385 | 0.276867 | 0.840075 |
| si:ch211-147k9.8   | 5.335592178 | 0.728977828  | 0.8261993 | 0.8823268 | 0.3776   | NA       |
| si:ch73-367f21.6   | 26.29137344 | -0.124194548 | 0.3897729 | -0.318633 | 0.750005 | 0.97419  |
| si:ch211-189e2.3   | 1.676273031 | -1.177417679 | 1.5072204 | -0.781185 | 0.434694 | NA       |
| si:dkey-88n24.10   |             | 0 NA         | NA        | NA        | NA       | NA       |
| CR388164.1         | 1.118581941 | -2.434763583 | 2.0644676 | -1.179366 | 0.238252 | NA       |
| si:cabz01007807.1  | 26.00775375 | -0.009196079 | 0.3970664 | -0.02316  | 0.981523 | 0.996944 |
| si:zfos-1505d6.3   | 0.339758314 | 0.005883863  | 3.2682461 | 0.0018003 | 0.998564 | NA       |
| si:ch211-59o9.10   | 202.4405573 | 0.01305891   | 0.1454963 | 0.0897542 | 0.928483 | 0.992702 |
| SLC15A5            | 4.340815154 | 0.031549274  | 0.9116765 | 0.0346058 | 0.972394 | NA       |
| spsc3              | 865.0835612 | -0.104236235 | 0.0994355 | -1.04828  | 0.29451  | 0.850662 |
| rnf146             | 730.8358881 | -0.127996492 | 0.1047308 | -1.222148 | 0.221652 | 0.78829  |
| si:ch73-109i22.2   | 9.497193284 | -0.407737101 | 0.623872  | -0.653559 | 0.513396 | NA       |
| or116-2            | 5.301419585 | -0.152288413 | 0.82111   | -0.185467 | 0.852863 | NA       |
| BX511080.1         | 0.158795395 | 0.967652056  | 4.0804729 | 0.2371421 | 0.812547 | NA       |
| cln6b              | 2.833045057 | -0.493546763 | 1.1007781 | -0.448362 | 0.653892 | NA       |
| ccdc9b             | 12.22470164 | -0.185396498 | 0.559212  | -0.331532 | 0.740243 | 0.973048 |
| CR388047.1         | 0.524057646 | 2.503896172  | 2.7289583 | 0.9175282 | 0.358866 | NA       |
| BX682550.1         | 20.36837435 | 0.209924588  | 0.4265467 | 0.4921492 | 0.622614 | 0.957354 |
| si:dkey-16p6.1     | 7.689671405 | 0.843762925  | 0.7602213 | 1.1098912 | 0.267046 | NA       |
| rtn4r              | 380.2824891 | 0.087582237  | 0.1132571 | 0.7733044 | 0.439342 | 0.916082 |
| si:dkey-6b12.5     | 180.5419718 | 0.065089697  | 0.1499999 | 0.4339316 | 0.664338 | 0.964736 |
| BX248410.1         | 1.314749537 | -0.712951519 | 1.7335279 | -0.411272 | 0.680873 | NA       |
| reck               | 732.1709292 | 0.138287795  | 0.1351351 | 1.0233302 | 0.306152 | 0.860027 |
| F2R (1 of many)    | 3.002888572 | -0.969017615 | 1.1816225 | -0.820074 | 0.412174 | NA       |
| si:dkey-165a24.9   | 23.40300309 | -0.185793316 | 0.3943382 | -0.471152 | 0.637532 | 0.958872 |
| znf318             | 1110.293804 | -0.057984661 | 0.0846576 | -0.684931 | 0.493387 | 0.931926 |
| CR394546.2         | 4.190940409 | 0.141720625  | 0.9486018 | 0.1493995 | 0.881238 | NA       |
| rac3a              | 736.7839963 | 0.005636408  | 0.1006879 | 0.055979  | 0.955359 | 0.994543 |
| fa2h               | 877.4175884 | -0.670527715 | 0.0897249 | -7.473153 | 7.83E-14 | 3.29E-11 |
| CABZ01084273.1     | 101.4162679 | 0.140796892  | 0.2062372 | 0.682694  | 0.4948   | 0.931926 |
| rxfp1              | 123.6025155 | -0.054444671 | 0.217466  | -0.250359 | 0.802309 | 0.979492 |
| CU462878.1         | 207.913713  | -0.405498553 | 0.152162  | -2.664913 | 0.007701 | 0.140088 |
| si:dkey-1m11.5     | 3.764371025 | -0.399910944 | 1.0174454 | -0.393054 | 0.69428  | NA       |
| rab11bb            | 434.1396347 | -0.095862147 | 0.1126054 | -0.851311 | 0.394597 | 0.898861 |
| CR626886.1         | 14.83579228 | -0.744096557 | 0.5108607 | -1.456555 | 0.145239 | 0.690044 |
| dre-mir-30a        |             | 0 NA         | NA        | NA        | NA       | NA       |
| si:dkeyp-67a8.4    | 11.21411005 | 0.237658341  | 0.5821781 | 0.4082227 | 0.68311  | 0.965476 |
| slc17a7b           | 146.4969546 | 0.274453318  | 0.1849639 | 1.4838211 | 0.137856 | 0.675313 |
| zmp:0000000984     | 5.79603713  | 0.243035194  | 0.8088975 | 0.3004524 | 0.763832 | NA       |
| si:ch1073-174d20.1 | 128.9117994 | 0.225033461  | 0.1810914 | 1.2426511 | 0.213996 | 0.782319 |
| znf1136            | 61.6516816  | 0.0755591    | 0.2523114 | 0.2994677 | 0.764583 | 0.975374 |
| qdprb2             | 0.847782112 | 0.655103352  | 2.1028616 | 0.3115295 | 0.755398 | NA       |
| si:dkey-248g21.1   | 35.62886452 | 0.024939625  | 0.3651899 | 0.0682922 | 0.945553 | 0.993589 |
| si:ch211-105f12.2  | 18.8330198  | 0.467132137  | 0.4818024 | 0.9695514 | 0.33227  | 0.874653 |
| tmem196b           | 22.83722919 | 0.081980558  | 0.4013394 | 0.2042674 | 0.838145 | 0.984797 |
| si:dkey-94l16.4    | 62.0852937  | -0.30023612  | 0.2459973 | -1.220485 | 0.222281 | 0.788551 |
| tmem240b           | 137.0078187 | 0.117504809  | 0.1792009 | 0.6557154 | 0.512007 | 0.936253 |

|                     |             |              |           |           |          |          |
|---------------------|-------------|--------------|-----------|-----------|----------|----------|
| anapc10             | 137.8931787 | 0.145496807  | 0.2029108 | 0.7170482 | 0.473344 | 0.924993 |
| cyld1               | 21.96219239 | -0.304779256 | 0.4185188 | -0.728233 | 0.466471 | 0.924063 |
| pttglipa            | 282.3196991 | 0.270229914  | 0.1379565 | 1.9588046 | 0.050136 | 0.438277 |
| BX005105.1          | 37.73996665 | 0.284523845  | 0.3349575 | 0.8494326 | 0.395641 | 0.899378 |
| zgc:173709          | 53.62888586 | 0.381696446  | 0.2628301 | 1.4522554 | 0.146431 | 0.692708 |
| si:ch73-362m14.2    | 18.75703515 | -0.267865277 | 0.4628669 | -0.578709 | 0.562786 | 0.948728 |
| F0904898.1          | 0 NA        | NA           | NA        | NA        | NA       | NA       |
| rab11fip4a          | 292.9931377 | 0.112925915  | 0.1353155 | 0.834538  | 0.403978 | 0.901101 |
| BX323556.1          | 8.190583146 | -1.051780064 | 0.7097076 | -1.481991 | 0.138343 | NA       |
| BX548044.3          | 0 NA        | NA           | NA        | NA        | NA       | NA       |
| si:ch211-117c9.1    | 8.379248971 | -1.157131915 | 0.7563983 | -1.529792 | 0.126068 | NA       |
| BX072576.2          | 29.18505514 | 0.554370773  | 0.3646956 | 1.5200916 | 0.128488 | 0.659414 |
| gapvd1              | 581.8244145 | 0.098721588  | 0.1079276 | 0.9147021 | 0.360348 | 0.885686 |
| si:dkeyp-73b11.8    | 564.509002  | -0.998937652 | 0.1095879 | -9.115405 | 7.84E-20 | 6.74E-17 |
| bcam                | 296.1604632 | 0.054551564  | 0.1309449 | 0.4165993 | 0.676972 | 0.965257 |
| si:dkey-16p6.1      | 4.141698948 | -1.04756836  | 1.0037955 | -1.043607 | 0.296667 | NA       |
| si:ch73-286h23.4    | 0.173729368 | -0.955901296 | 4.0804729 | -0.234262 | 0.814781 | NA       |
| lamtor5             | 264.6789188 | -0.027807227 | 0.1385366 | -0.200721 | 0.840917 | 0.985146 |
| mtx3                | 149.0379293 | -0.054095282 | 0.1815785 | -0.297917 | 0.765767 | 0.975374 |
| RF00001             | 0 NA        | NA           | NA        | NA        | NA       | NA       |
| rbm11               | 1.493073575 | -0.932799967 | 1.6069462 | -0.58048  | 0.561591 | NA       |
| rheb                | 494.0251095 | 0.150205245  | 0.1040887 | 1.4430505 | 0.149006 | 0.696454 |
| RF00001             | 0 NA        | NA           | NA        | NA        | NA       | NA       |
| wdr45               | 488.9045494 | 0.053050003  | 0.1095982 | 0.4840406 | 0.628357 | 0.957354 |
| msl1b               | 580.325358  | 0.0749387    | 0.0992594 | 0.7549781 | 0.450262 | 0.918761 |
| gsta.1              | 3425.54299  | -0.923723574 | 0.0974445 | -9.479481 | 2.56E-21 | 2.66E-18 |
| tmem108             | 259.8284697 | 0.079638527  | 0.1474493 | 0.5401078 | 0.589123 | 0.953345 |
| clpb                | 202.2946934 | -0.165612281 | 0.1521874 | -1.088213 | 0.276501 | 0.839541 |
| zp2.3               | 0 NA        | NA           | NA        | NA        | NA       | NA       |
| zgc:113223          | 56.73902822 | 0.267803461  | 0.260163  | 1.0293679 | 0.303307 | 0.85729  |
| phlpp2              | 15.48959576 | 0.18608643   | 0.5294202 | 0.351491  | 0.72522  | 0.970402 |
| CU062628.1          | 2.897729046 | -0.633951666 | 1.2323868 | -0.51441  | 0.606966 | NA       |
| krttlc19e           | 23151.50264 | 0.294713079  | 0.1926098 | 1.5301045 | 0.125991 | 0.654803 |
| BX248410.2          | 0.959146752 | 0.977549673  | 2.0106641 | 0.4861825 | 0.626838 | NA       |
| serpinal            | 3802.183211 | 0.388860737  | 0.0991498 | 3.9219534 | 8.78E-05 | 0.004386 |
| ralyl               | 70.81287135 | 0.219024759  | 0.2354007 | 0.9304337 | 0.352147 | 0.880879 |
| ldlrad2             | 80.51964538 | 0.245793898  | 0.2294124 | 1.0714064 | 0.283987 | 0.844697 |
| usp48               | 499.9135768 | -0.039749928 | 0.1120632 | -0.35471  | 0.722807 | 0.970375 |
| CU929391.2          | 37.84422512 | 0.01684868   | 0.319848  | 0.0526771 | 0.957989 | 0.99467  |
| ubxn1               | 577.5751723 | -0.114643877 | 0.0992552 | -1.155042 | 0.248073 | 0.817415 |
| CABZ01065328.1      | 0 NA        | NA           | NA        | NA        | NA       | NA       |
| rnf212              | 6.230536631 | -1.651919814 | 0.8523702 | -1.938031 | 0.052619 | NA       |
| MAPK8IP1 (1 of many | 172.5514226 | -0.274936272 | 0.1666963 | -1.649325 | 0.099081 | 0.598421 |
| pprc1               | 342.4918533 | 0.203198469  | 0.1451602 | 1.3998221 | 0.161567 | 0.715364 |
| fam20cb             | 134.2249311 | 0.18708727   | 0.1769354 | 1.0573762 | 0.29034  | 0.846262 |
| si:dkey-27o4.1      | 19.9118804  | -0.633762906 | 0.4334372 | -1.462179 | 0.143692 | 0.686818 |
| il191               | 0.839019598 | -0.671793185 | 2.356059  | -0.285134 | 0.775541 | NA       |
| RF00001             | 0 NA        | NA           | NA        | NA        | NA       | NA       |
| zmp:0000000991      | 48.98739761 | -0.192987105 | 0.2896294 | -0.666324 | 0.505204 | 0.935724 |
| dre-mir-222a        | 0 NA        | NA           | NA        | NA        | NA       | NA       |
| pcdh2ab5            | 0.680145136 | -1.475466752 | 2.2805885 | -0.646968 | 0.517653 | NA       |
| CR855311.1          | 841.6851127 | -0.775651369 | 0.3278081 | -2.366175 | 0.017973 | 0.248356 |
| pimr168             | 0 NA        | NA           | NA        | NA        | NA       | NA       |
| znf1065             | 36.03462776 | -0.531131644 | 0.3434086 | -1.546646 | 0.121949 | 0.649101 |

|                    |             |              |           |           |          |          |
|--------------------|-------------|--------------|-----------|-----------|----------|----------|
| RF00001            | 0.158795395 | 0.967652056  | 4.0804729 | 0.2371421 | 0.812547 | NA       |
| dre-mir-132-2      | 1.537947772 | 1.852333309  | 1.7347791 | 1.0677632 | 0.285627 | NA       |
| zgc:86896          | 1935.566117 | 0.241885333  | 0.0852596 | 2.8370456 | 0.004553 | 0.096369 |
| si:dkey-46i9.6     | 72.11241622 | -0.125012373 | 0.2445194 | -0.511258 | 0.609171 | 0.956718 |
| taarl4e            | 0.332645115 | 0.005883744  | 3.2924249 | 0.0017871 | 0.998574 | NA       |
| gzma               | 2.010526176 | -0.478445426 | 1.3048707 | -0.366661 | 0.713872 | NA       |
| CABZ01072157.1     | 4.925628655 | -0.75789046  | 0.8840231 | -0.85732  | 0.391268 | NA       |
| cd3eap             | 133.0071939 | 0.159857707  | 0.1748811 | 0.9140937 | 0.360668 | 0.885686 |
| onecut2            | 4.356057861 | -0.40541178  | 0.9989783 | -0.405826 | 0.68487  | NA       |
| ndufv3             | 892.7465571 | 0.023259499  | 0.1051125 | 0.2212819 | 0.824873 | 0.982196 |
| si:dkey-7114.2     | 8.961215892 | -0.312923658 | 0.6262437 | -0.499684 | 0.617298 | NA       |
| si:cabz01074946.1  | 8.14677219  | -0.715202479 | 0.6966889 | -1.026574 | 0.304621 | NA       |
| CABZ01067973.1     | 3.216216635 | 0.169789409  | 1.0681629 | 0.1589546 | 0.873705 | NA       |
| CABZ01020840.1     | 67.87114906 | -0.342551544 | 0.2797812 | -1.224355 | 0.220818 | 0.787641 |
| ERBB4 (1 of many)  | 13.49436272 | 0.79830962   | 0.5696321 | 1.4014477 | 0.16108  | 0.714331 |
| scppl              | 29.63304898 | 0.258384462  | 0.3565971 | 0.7245838 | 0.468707 | 0.924328 |
| wdsubl             | 241.0115975 | -0.095005182 | 0.1471918 | -0.645452 | 0.518635 | 0.938803 |
| SH2B2              | 58.88212688 | 0.159568248  | 0.2533185 | 0.6299116 | 0.528752 | 0.942109 |
| si:dkey-246i14.3   | 29.73793621 | -0.235684615 | 0.3629866 | -0.649293 | 0.516149 | 0.937997 |
| ctrbl              | 1260.796959 | -0.59130615  | 0.2721802 | -2.17248  | 0.029819 | 0.334457 |
| si:dkeyp-7a3.1     | 7.347576033 | 0.134256773  | 0.7015318 | 0.1913766 | 0.848231 | NA       |
| ponzrl             | 187.7443843 | -0.474105391 | 0.1566182 | -3.02714  | 0.002469 | 0.062293 |
| mtbp               | 90.34790959 | -0.061135899 | 0.2114063 | -0.289187 | 0.772438 | 0.975687 |
| sp100.3            | 1.164634085 | -0.410115428 | 1.7445115 | -0.235089 | 0.81414  | NA       |
| gnbla              | 4613.219485 | 0.003244803  | 0.0908356 | 0.0357217 | 0.971504 | 0.996315 |
| RF00001            | 8.120845422 | 0.288087608  | 0.6726453 | 0.4282905 | 0.66844  | NA       |
| si:ch211-197f20.1  | 3.366813498 | 0.027877911  | 1.0853313 | 0.0256861 | 0.979508 | NA       |
| mrpl20             | 374.4954771 | -0.07965391  | 0.140755  | -0.565905 | 0.571459 | 0.949418 |
| taarl4h            | 2.510577606 | -1.028637339 | 1.2403737 | -0.829296 | 0.406937 | NA       |
| ppplr3aa           | 63.67363801 | -0.068442907 | 0.270891  | -0.252658 | 0.800532 | 0.979377 |
| sycn.1             | 0.656369582 | -1.475482481 | 2.3019817 | -0.640962 | 0.521547 | NA       |
| BX530037.2         |             | 0 NA         | NA        | NA        | NA       | NA       |
| ttl110             | 35.96262196 | -0.302348364 | 0.3397286 | -0.88997  | 0.373482 | 0.893663 |
| si:ch211-269k10.5  | 14.54806016 | 0.609200917  | 0.516635  | 1.1791709 | 0.23833  | 0.807449 |
| ccdc17             | 2.776388175 | 0.871243325  | 1.3254226 | 0.6573325 | 0.510967 | NA       |
| trargla            | 544.9797629 | 0.136359032  | 0.113048  | 1.2062048 | 0.227739 | 0.794934 |
| lipcb              | 50.50485246 | 0.244337327  | 0.2797585 | 0.8733867 | 0.382452 | 0.895192 |
| ANKRD66            | 0.330916733 | -1.849579229 | 3.2489867 | -0.569279 | 0.569167 | NA       |
| thsd7ab            | 11.82200025 | -0.284094025 | 0.6183869 | -0.459411 | 0.645939 | 0.96029  |
| tmem121ab          | 36.91167288 | 0.052338957  | 0.3479951 | 0.1504014 | 0.880448 | 0.987881 |
| zmp:0000000997     |             | 0 NA         | NA        | NA        | NA       | NA       |
| omal               | 51.85287987 | 0.354621209  | 0.2735282 | 1.2964705 | 0.194813 | 0.758937 |
| trim8a             | 426.2825825 | -0.00150921  | 0.1108927 | -0.01361  | 0.989141 | 0.997589 |
| f2rl2              | 57.75052144 | -0.182269793 | 0.2531355 | -0.720048 | 0.471495 | 0.924838 |
| zgc:158404         | 58.26531435 | -0.816471097 | 0.2668202 | -3.060005 | 0.002213 | 0.05751  |
| ifit11             | 15.6361547  | 0.163872206  | 0.4973024 | 0.3295223 | 0.741761 | 0.973154 |
| tmem138            | 105.3057208 | 0.192704571  | 0.2052348 | 0.9389468 | 0.347758 | 0.880195 |
| CABZ01085658.1     | 137.7445348 | 0.043511589  | 0.1813453 | 0.2399377 | 0.810379 | 0.980867 |
| RF00001            | 0.317711143 | 1.810477155  | 3.2978238 | 0.5489915 | 0.583011 | NA       |
| CR753886.1         | 256.9784142 | 0.20935437   | 0.1332489 | 1.5711526 | 0.116147 | 0.63841  |
| FP102786.1         | 0.515095711 | 0.926015374  | 2.6527421 | 0.3490785 | 0.72703  | NA       |
| si:dkey-7j14.6     | 740.3621602 | -0.096396548 | 0.1154842 | -0.834716 | 0.403878 | 0.900979 |
| si:ch1073-110a20.7 | 40.81441247 | -1.238629466 | 0.3250596 | -3.810469 | 0.000139 | 0.006408 |
| mfap5              | 18.75741189 | -0.148775869 | 0.4657449 | -0.319436 | 0.749396 | 0.97419  |

|                    |             |              |           |           |          |          |
|--------------------|-------------|--------------|-----------|-----------|----------|----------|
| PDZD4              | 373.0975303 | -0.056895021 | 0.1182844 | -0.481002 | 0.630515 | 0.957354 |
| mrpl52             | 128.93532   | 0.099819226  | 0.1978581 | 0.5044989 | 0.613911 | 0.95688  |
| naa40              | 6.576068528 | 0.56051929   | 0.7622228 | 0.7353746 | 0.462111 | NA       |
| si:dkey-63j12.4    | 2.211219419 | -1.128190456 | 1.3859967 | -0.813992 | 0.415649 | NA       |
| rassf11            | 0.698456806 | 0.09172817   | 2.5265115 | 0.0363063 | 0.971038 | NA       |
| wdr4               | 145.0280393 | 0.142406518  | 0.1684938 | 0.8451734 | 0.398014 | 0.899672 |
| gpc1b              | 236.0740303 | 0.107862696  | 0.1388029 | 0.7770925 | 0.437104 | 0.914408 |
| taar10b            | 0.158915748 | 0.967652056  | 4.0804729 | 0.2371421 | 0.812547 | NA       |
| pkpla              | 7.790651207 | 0.007668296  | 0.7451974 | 0.0102903 | 0.99179  | NA       |
| si:ch211-213a13.1  | 195.2852812 | -0.138779279 | 0.1483255 | -0.93564  | 0.349458 | 0.880195 |
| F0904898.2         | 0.497574187 | -2.437446738 | 2.6012773 | -0.937019 | 0.348749 | NA       |
| pimr105            | 0 NA        | NA           | NA        | NA        | NA       | NA       |
| si:dkeyp-117b11.1  | 10.44149288 | 0.557473338  | 0.6516386 | 0.8554947 | 0.392277 | NA       |
| F0904898.3         | 0.325452849 | 0.005883619  | 3.3177086 | 0.0017734 | 0.998585 | NA       |
| cd59               | 334.8123996 | 0.258911841  | 0.1350449 | 1.9172272 | 0.055209 | 0.460643 |
| ctif               | 27.53052092 | -0.015084608 | 0.3800133 | -0.039695 | 0.968336 | 0.996315 |
| malrd1             | 27.86099908 | -0.59901209  | 0.3671472 | -1.631531 | 0.102778 | 0.609031 |
| si:dkeyp-106c3.1   | 593.4234214 | 0.175553954  | 0.1068453 | 1.6430673 | 0.100369 | 0.602451 |
| ADGRL3             | 697.6138866 | -0.007267651 | 0.09399   | -0.077324 | 0.938366 | 0.99279  |
| si:ch73-248e21.1   | 47.12034225 | -0.04405956  | 0.279644  | -0.157556 | 0.874807 | 0.987881 |
| si:dkey-197j19.6   | 1.474483169 | 0.984722888  | 1.5416227 | 0.6387574 | 0.522981 | NA       |
| tmtops3b           | 8.425677384 | -0.246728479 | 0.7366892 | -0.334915 | 0.737689 | NA       |
| si:dkey-32n7.8     | 0 NA        | NA           | NA        | NA        | NA       | NA       |
| BX601644.1         | 0.789152885 | -0.566731584 | 2.4003003 | -0.236109 | 0.813348 | NA       |
| smim29             | 245.7471433 | -0.278570988 | 0.141992  | -1.961879 | 0.049777 | 0.437386 |
| kcnj1a.4           | 145.6258174 | -0.038667093 | 0.1905234 | -0.202952 | 0.839173 | 0.984979 |
| myh6               | 43.0260921  | 0.082207734  | 0.3074472 | 0.2673881 | 0.78917  | 0.976965 |
| gp9                | 7.878839491 | -0.033185718 | 0.6855203 | -0.04841  | 0.96139  | NA       |
| si:dkey-54n8.4     | 41.3976388  | 0.108506755  | 0.3164574 | 0.3428795 | 0.731689 | 0.971557 |
| tnk2a              | 86.61379162 | 0.23207548   | 0.2190073 | 1.0596702 | 0.289295 | 0.845979 |
| ly86               | 1.785871259 | 0.751392726  | 1.5456876 | 0.486122  | 0.626881 | NA       |
| gak                | 1741.865261 | -0.021847149 | 0.084378  | -0.25892  | 0.795697 | 0.978498 |
| tomm20a            | 51.79636604 | -0.313538403 | 0.2760939 | -1.135622 | 0.256115 | 0.824633 |
| moto               | 2.547233184 | 3.736360685  | 1.5705053 | 2.3790819 | 0.017356 | NA       |
| si:dkey-201i6.8    | 0.672283077 | 0.02892376   | 2.3005571 | 0.0125725 | 0.989969 | NA       |
| si:ch1073-104i17.1 | 43.08457655 | -0.377130019 | 0.2986648 | -1.26272  | 0.20669  | 0.774273 |
| si:ch73-40i7.5     | 152.8335219 | 0.005316798  | 0.1737816 | 0.0305947 | 0.975593 | 0.996762 |
| si:ch211-166i24.1  | 0 NA        | NA           | NA        | NA        | NA       | NA       |
| si:ch211-79k12.2   | 277.8417293 | -0.197480698 | 0.1284464 | -1.537456 | 0.124182 | 0.652729 |
| tmem241            | 61.92384888 | 0.114469792  | 0.2606761 | 0.4391265 | 0.66057  | 0.963881 |
| slc35f21           | 6.975726536 | 0.55042783   | 0.7460026 | 0.7378363 | 0.460614 | NA       |
| rcbtb2             | 120.8099127 | 0.026861934  | 0.1847578 | 0.14539   | 0.884403 | 0.98879  |
| nell2a             | 1240.470393 | -0.032382724 | 0.0961745 | -0.336708 | 0.736337 | 0.972535 |
| BX005329.1         | 0.491560863 | 0.853615855  | 2.865157  | 0.2979299 | 0.765757 | NA       |
| si:dkey-15b23.3    | 13.044478   | 0.177519162  | 0.5215544 | 0.3403656 | 0.733581 | 0.971993 |
| eif3ea             | 5683.693905 | -0.213949242 | 0.0776287 | -2.756059 | 0.00585  | 0.115107 |
| si:dkey-52j6.3     | 4.09163341  | 0.780225179  | 1.011024  | 0.7717177 | 0.440282 | NA       |
| nlr5               | 8.295796261 | 0.49292929   | 0.702132  | 0.7020464 | 0.48265  | NA       |
| si:dkey-28g23.6    | 85.89825076 | -0.228940059 | 0.2153934 | -1.062893 | 0.287831 | 0.845979 |
| gaa                | 22.49985585 | 0.005754388  | 0.3973991 | 0.0144801 | 0.988447 | 0.997476 |
| cltcb              | 6079.825653 | 0.080343177  | 0.0774003 | 1.0380222 | 0.29926  | 0.855386 |
| gremla             | 0 NA        | NA           | NA        | NA        | NA       | NA       |
| prdm2a             | 267.9389552 | -0.155740498 | 0.132322  | -1.176981 | 0.239203 | 0.807768 |
| leg1.1             | 668.7898595 | 0.012979794  | 0.1278739 | 0.1015046 | 0.91915  | 0.991623 |

|                   |             |              |           |           |          |          |
|-------------------|-------------|--------------|-----------|-----------|----------|----------|
| scn12aa           | 80.36226554 | 0.396838142  | 0.2186783 | 1.8147122 | 0.069568 | 0.514708 |
| celf5b            | 7.046670346 | -1.383826878 | 0.7699456 | -1.797305 | 0.072287 | NA       |
| tnfrsf9b          | 0.173729368 | -0.955901296 | 4.0804729 | -0.234262 | 0.814781 | NA       |
| cfbl              | 33.8313909  | 0.258428621  | 0.3689722 | 0.7004013 | 0.483677 | 0.929461 |
| si:dkey-16p6.1    | 2.960133816 | -1.007892427 | 1.1053167 | -0.911858 | 0.361843 | NA       |
| zmp:0000001003    | 23.55952187 | 0.308526574  | 0.4066021 | 0.7587923 | 0.447977 | 0.917292 |
| tor112            | 6.813223626 | 0.661512266  | 0.7229447 | 0.9150247 | 0.360179 | NA       |
| si:ch73-269m14.2  | 373.9454993 | 0.013415773  | 0.1342641 | 0.0999208 | 0.920407 | 0.992049 |
| zc3h3             | 132.8890651 | -0.019347438 | 0.1810711 | -0.10685  | 0.914908 | 0.991119 |
| plk2a             | 372.8579361 | 0.00389439   | 0.1225817 | 0.0317698 | 0.974656 | 0.996579 |
| si:dkey-13p1.3    | 4.956630725 | 1.481784928  | 0.9412856 | 1.5742139 | 0.115438 | NA       |
| bcas3             | 372.6237815 | 0.047055087  | 0.1162157 | 0.4048943 | 0.685555 | 0.966307 |
| si:ch211-136m16.8 | 39.29232355 | -0.34699594  | 0.3095952 | -1.120805 | 0.262371 | 0.830166 |
| zgc:173556        | 3.286363264 | -0.343212532 | 1.103742  | -0.310954 | 0.755836 | NA       |
| si:dkey-51d8.6    | 6.677891642 | 0.125512964  | 0.8084761 | 0.1552464 | 0.876627 | NA       |
| F0834800.1        | 203.5919514 | 0.109326354  | 0.1525253 | 0.7167752 | 0.473513 | 0.924993 |
| tt111             | 253.3222936 | -0.179930857 | 0.1354265 | -1.328624 | 0.183972 | 0.747376 |
| mfap4             | 39.29845197 | 0.359931161  | 0.3154045 | 1.1411731 | 0.253798 | 0.823394 |
| diaph3            | 120.7588635 | 0.131490434  | 0.1977055 | 0.6650822 | 0.505998 | 0.935724 |
| klhdc8b           | 4.393120486 | -0.773178429 | 0.9498508 | -0.814    | 0.415645 | NA       |
| cstf2             | 1094.02021  | -0.065582096 | 0.0840664 | -0.780123 | 0.435319 | 0.914408 |
| RF00001           | 0.646899493 | -1.455098895 | 2.4290529 | -0.59904  | 0.549146 | NA       |
| si:ch211-207j7.2  | 194.998447  | 0.166957954  | 0.1629938 | 1.0243209 | 0.305684 | 0.860027 |
| fam222a           | 265.5254285 | -0.037732645 | 0.132444  | -0.284895 | 0.775724 | 0.975826 |
| gpr155a           | 343.1336805 | 0.111684916  | 0.1173064 | 0.9520787 | 0.341057 | 0.878134 |
| taar14g           | 0.341366344 | 1.891903201  | 3.2128156 | 0.5888614 | 0.555954 | NA       |
| si:dkey-18a10.3   | 131.4674421 | 0.320112504  | 0.1795424 | 1.7829354 | 0.074597 | 0.532003 |
| kcnj10a           | 9.078433213 | -0.060642019 | 0.6380292 | -0.095046 | 0.924278 | NA       |
| si:dkey-85k15.11  |             | 0 NA         | NA        | NA        | NA       | NA       |
| CACFD1            | 30.77770931 | -0.124817313 | 0.3445661 | -0.362245 | 0.717169 | 0.96909  |
| slc2a10           | 113.8591279 | 0.150182259  | 0.199669  | 0.7521563 | 0.451957 | 0.918761 |
| zgc:171517        |             | 0 NA         | NA        | NA        | NA       | NA       |
| si:dkey-51d8.3    | 0.672283077 | 0.02892376   | 2.3005571 | 0.0125725 | 0.989969 | NA       |
| tmem132e          | 1413.162658 | 0.034960867  | 0.0856671 | 0.4081013 | 0.683199 | 0.965476 |
| igfbp6b           | 108.5263179 | 0.264385188  | 0.1965918 | 1.3448436 | 0.178676 | 0.739486 |
| epor              | 8.430516416 | -0.163559966 | 0.6424007 | -0.254607 | 0.799026 | NA       |
| si:ch211-191d2.2  | 157.4914991 | -0.169136318 | 0.1638871 | -1.032029 | 0.302058 | 0.856944 |
| zmp:0000001006    | 3.050682799 | -0.786358835 | 1.2760481 | -0.616245 | 0.537733 | NA       |
| CABZ01054965.1    | 18.80952872 | -0.911656334 | 0.4506779 | -2.022856 | 0.043088 | 0.4075   |
| si:ch211-209l18.4 | 341.3976298 | 0.171001335  | 0.1217384 | 1.4046626 | 0.160122 | 0.712495 |
| serpina11         | 3920.578871 | 0.125124424  | 0.0967708 | 1.2929979 | 0.196012 | 0.761182 |
| ciita             | 9.820371566 | -0.00776873  | 0.627467  | -0.012381 | 0.990122 | NA       |
| lsm11             | 37.38126339 | -0.020885448 | 0.3214446 | -0.064974 | 0.948195 | 0.99381  |
| CABZ01087514.1    | 37.58424285 | 0.285876589  | 0.3490583 | 0.8189937 | 0.41279  | 0.904974 |
| CR847545.1        | 1.637134418 | 0.001080649  | 1.5015749 | 0.0007197 | 0.999426 | NA       |
| kcnjla.2          | 151.4392789 | 0.076016209  | 0.1647987 | 0.461267  | 0.644607 | 0.96029  |
| F0904898.4        |             | 0 NA         | NA        | NA        | NA       | NA       |
| si:ch1073-263o8.2 | 0.678375468 | -2.878459328 | 2.4926399 | -1.154783 | 0.248179 | NA       |
| si:dkey-210j14.4  | 210.0814901 | 0.078979391  | 0.1510909 | 0.5227277 | 0.601164 | 0.956045 |
| si:dkey-276j7.1   | 4033.6366   | -0.007247973 | 0.0670852 | -0.108041 | 0.913963 | 0.991119 |
| ccl34a.4          | 44.21606954 | -0.664096486 | 0.3111104 | -2.134601 | 0.032794 | 0.352808 |
| si:dkey-217f16.5  | 17.62374772 | 0.073234143  | 0.5363335 | 0.1365459 | 0.89139  | 0.989291 |
| si:rp71-36a1.5    | 4.971251712 | -0.175069817 | 0.839516  | -0.208537 | 0.83481  | NA       |
| gabrac3           | 7.506839387 | 0.04025133   | 0.7834947 | 0.0513741 | 0.959027 | NA       |

|                    |             |              |           |           |          |          |
|--------------------|-------------|--------------|-----------|-----------|----------|----------|
| zmp:0000001301     | 26.12765148 | -0.055945942 | 0.3914369 | -0.142925 | 0.88635  | 0.988936 |
| si:ch211-132p1.3   | 50.7231885  | -1.182282072 | 0.3259084 | -3.627651 | 0.000286 | 0.011419 |
| cmklr1             | 24.01438766 | 0.758477792  | 0.4012848 | 1.8901236 | 0.058741 | 0.474103 |
| or117-1            | 1.834906788 | -0.823777427 | 1.4572737 | -0.565287 | 0.571879 | NA       |
| kanslla            | 1276.019876 | 0.024859813  | 0.0897415 | 0.2770157 | 0.781768 | 0.97627  |
| syncn.3            | 6.542991311 | -0.4838659   | 0.7629407 | -0.634212 | 0.525943 | NA       |
| apnl               | 0.530029684 | -0.939524117 | 2.7937867 | -0.336291 | 0.736652 | NA       |
| si:ch211-256e16.11 | 11.42831205 | -0.581298497 | 0.6535605 | -0.889433 | 0.37377  | 0.893677 |
| creb3l3b           | 40.13627899 | -0.494112999 | 0.3236902 | -1.5265   | 0.126885 | 0.656588 |
| RNF219             | 27.8403191  | 0.002647967  | 0.3750656 | 0.00706   | 0.994367 | 0.998694 |
| si:ch211-152f22.4  | 0.953494487 | 3.392387971  | 2.405043  | 1.4105311 | 0.158383 | NA       |
| npc2               | 1081.616915 | -0.099070657 | 0.1066785 | -0.928684 | 0.353053 | 0.881552 |
| si:ch211-117k10.3  | 417.0976982 | -0.013257682 | 0.1129887 | -0.117336 | 0.906593 | 0.990702 |
| CR559930.1         |             | 0 NA         | NA        | NA        | NA       | NA       |
| si:dkeyp-98a7.3    |             | 0 NA         | NA        | NA        | NA       | NA       |
| si:ch211-120g10.1  | 66.91275313 | -0.121386594 | 0.2898692 | -0.418763 | 0.675389 | 0.965257 |
| or128-4            | 0.173729368 | -0.955901296 | 4.0804729 | -0.234262 | 0.814781 | NA       |
| uspl6              | 36.55908253 | -0.375663868 | 0.3225263 | -1.164754 | 0.244119 | 0.813482 |
| CABZ01054394.1     | 85.51725549 | -0.136070596 | 0.21966   | -0.61946  | 0.535613 | 0.943336 |
| CABZ01033205.1     | 68.07210723 | 0.23255467   | 0.2596759 | 0.8955573 | 0.370489 | 0.890489 |
| si:ch211-170d8.8   | 2.81830725  | -1.704798534 | 1.2904729 | -1.321065 | 0.18648  | NA       |
| si:zfos-364h11.2   | 10.54629435 | 0.903013542  | 0.6248863 | 1.4450845 | 0.148434 | NA       |
| si:dkey-29j8.1     | 2.446447709 | 0.598496899  | 1.2224782 | 0.4895767 | 0.624433 | NA       |
| si:ch73-29c22.1    | 9.204184893 | -0.408718686 | 0.6551707 | -0.623835 | 0.532736 | NA       |
| dlg5b.1            | 210.419987  | 0.028646728  | 0.1458351 | 0.1964323 | 0.844272 | 0.985174 |
| igsf5b             | 28.04763183 | 0.061707623  | 0.3681754 | 0.1676039 | 0.866895 | 0.986978 |
| CU469420.2         | 15.08204287 | -0.484065889 | 0.4876823 | -0.992584 | 0.320913 | 0.868715 |
| atp6ap11b          | 520.2230312 | 0.218784608  | 0.1058948 | 2.0660568 | 0.038823 | 0.386536 |
| ripk3              | 10.78831886 | -0.16489061  | 0.6018961 | -0.273952 | 0.784122 | NA       |
| cb1n18             | 45.99469886 | 0.177065164  | 0.3018235 | 0.5866513 | 0.557438 | 0.948478 |
| cc2d2a             | 282.6519061 | -0.234147093 | 0.1400086 | -1.672376 | 0.09445  | 0.584556 |
| si:dkey-264d12.1   | 38.0986542  | -0.0210815   | 0.3378852 | -0.062392 | 0.95025  | 0.99381  |
| si:dkey-62k3.5     | 157.0345245 | 0.100706991  | 0.1927092 | 0.5225854 | 0.601263 | 0.956045 |
| NABP2              | 135.674221  | -0.087539382 | 0.186511  | -0.469352 | 0.638818 | 0.959658 |
| ifit12             | 3.304115451 | 1.201411346  | 1.1260349 | 1.0669397 | 0.285999 | NA       |
| apof               | 612.6043659 | -0.017137293 | 0.1088357 | -0.15746  | 0.874882 | 0.987881 |
| si:ch211-191o15.6  | 4.945319953 | -0.988005682 | 1.0108875 | -0.977365 | 0.328389 | NA       |
| slc44a1b           | 651.564394  | 0.01369413   | 0.0940938 | 0.1455369 | 0.884287 | 0.98879  |
| si:dkeyp-115e12.6  | 464.8985576 | -0.143160738 | 0.1199368 | -1.193635 | 0.232621 | 0.80121  |
| larsa              | 202.4160589 | 0.046230798  | 0.1447902 | 0.3192952 | 0.749503 | 0.97419  |
| rnf4               | 251.4033781 | 0.076437733  | 0.1374492 | 0.5561163 | 0.578131 | 0.951024 |
| vegfa              | 102.1992837 | -0.035565054 | 0.1954822 | -0.181935 | 0.855634 | 0.985174 |
| si:cabz01071911.3  | 180.0012592 | 0.125447606  | 0.1506863 | 0.8325082 | 0.405122 | 0.901305 |
| mycbp              | 179.9728813 | -0.196100291 | 0.1590177 | -1.233198 | 0.217502 | 0.784786 |
| il34               | 86.60916685 | -0.397702984 | 0.2523623 | -1.575921 | 0.115044 | 0.635519 |
| cobl               | 581.4216456 | 0.213506521  | 0.1007223 | 2.1197533 | 0.034027 | 0.359235 |
| si:ch211-28p3.4    | 52.36253566 | -0.081738461 | 0.2719459 | -0.300569 | 0.763743 | 0.975374 |
| si:dkey-84h14.2    | 6.132109012 | 0.07280439   | 0.7658792 | 0.0950599 | 0.924267 | NA       |
| CR381544.2         | 3.071969823 | 0.147948543  | 1.0953713 | 0.135067  | 0.892559 | NA       |
| znf1124            | 2.946777874 | -1.372920967 | 1.2058418 | -1.138558 | 0.254887 | NA       |
| si:ch211-218h8.1   | 10.27642651 | 0.569244877  | 0.5838662 | 0.9749578 | 0.329581 | NA       |
| aqpla.2            |             | 0 NA         | NA        | NA        | NA       | NA       |
| phox2bb            | 470.3820018 | -0.029031272 | 0.1071598 | -0.270916 | 0.786456 | 0.976539 |
| sacs               | 224.0139545 | 0.174284076  | 0.14863   | 1.1726033 | 0.240955 | 0.809487 |

|                    |             |              |           |           |          |          |
|--------------------|-------------|--------------|-----------|-----------|----------|----------|
| pcdh2ab6           | 2.196553891 | 0.666011611  | 1.3082987 | 0.5090669 | 0.610705 | NA       |
| tmem173            | 17.28812791 | 0.219658549  | 0.4845757 | 0.4533008 | 0.650332 | 0.960708 |
| onecut3b           | 1.341930527 | 3.871810095  | 1.8532521 | 2.0891978 | 0.03669  | NA       |
| slc38a3b           | 413.0985572 | 0.238531589  | 0.1224262 | 1.9483708 | 0.051371 | 0.444245 |
| si:dkey-199k11.6   | 2.044002481 | 1.058544983  | 1.4171311 | 0.7469633 | 0.455086 | NA       |
| cib3               | 9.24173618  | 0.727270435  | 0.6329353 | 1.149044  | 0.250538 | NA       |
| alkal2a            | 7.851595886 | 0.070240496  | 0.6740544 | 0.104206  | 0.917006 | NA       |
| si:zfos-1192g2.3   | 548.3427126 | -0.101266157 | 0.1008921 | -1.003708 | 0.31552  | 0.866773 |
| si:ch211-195j11.27 | 0.323844819 | -1.825095364 | 3.274639  | -0.557342 | 0.577293 | NA       |
| lepa               | 12.33431566 | 0.186855408  | 0.5554521 | 0.3364024 | 0.736567 | 0.972535 |
| xirp2b             | 71.86460769 | 0.296412729  | 0.2332627 | 1.270725  | 0.203826 | 0.771579 |
| zcchc10            | 193.4160183 | 0.007156851  | 0.1483469 | 0.048244  | 0.961522 | 0.995845 |
| si:dkey-88n24.8    |             | 0 NA         | NA        | NA        | NA       | NA       |
| fabp10b            | 40.24259956 | -0.323895152 | 0.3032166 | -1.068197 | 0.285431 | 0.845164 |
| si:ch211-15b10.6   | 716.3585162 | -0.33062451  | 0.1329958 | -2.485977 | 0.01292  | 0.202578 |
| pkhd111            | 535.0808011 | -0.211607455 | 0.1093328 | -1.935443 | 0.052936 | 0.451772 |
| fbxo40.2           | 117.2261844 | 0.407126949  | 0.1924605 | 2.1153791 | 0.034398 | 0.360397 |
| rps19bp1           | 350.7375031 | 0.011598086  | 0.1309117 | 0.0885947 | 0.929404 | 0.992702 |
| rnf207a            | 2.668975156 | 0.759922281  | 1.1584689 | 0.6559712 | 0.511843 | NA       |
| klf15              | 181.8437785 | 0.332132187  | 0.1525825 | 2.1767386 | 0.0295   | 0.332709 |
| lrrc75bb           | 29.8923134  | -0.675470994 | 0.3740763 | -1.805704 | 0.070965 | 0.521075 |
| kcnq2b             | 21.65515436 | 1.079402318  | 0.4289942 | 2.5161235 | 0.011865 | 0.191219 |
| cry3b              | 595.1704959 | 0.257505219  | 0.1032702 | 2.4935089 | 0.012649 | 0.199773 |
| si:ch211-253p18.5  | 24.24918683 | 0.313138684  | 0.3887987 | 0.8054006 | 0.420589 | 0.90651  |
| zgc:174259         | 11.86962931 | 0.650803385  | 0.5748994 | 1.13203   | 0.257622 | 0.825314 |
| actr3              | 1643.651446 | -0.079194017 | 0.1029919 | -0.768935 | 0.441932 | 0.916336 |
| pik3r6b            | 0.878629579 | 0.686795053  | 2.2010162 | 0.3120354 | 0.755014 | NA       |
| or106-10           | 2.760392357 | -0.864660802 | 1.1663532 | -0.741337 | 0.458489 | NA       |
| CR749162.1         |             | 0 NA         | NA        | NA        | NA       | NA       |
| crygm2d20          | 16229.59572 | 0.070551411  | 0.0818994 | 0.8614402 | 0.388996 | 0.896295 |
| mki67              | 2041.127152 | -0.07674644  | 0.080095  | -0.958193 | 0.337966 | 0.876609 |
| rpz                | 325.7628732 | -0.004459623 | 0.1233536 | -0.036153 | 0.97116  | 0.996315 |
| tor4ab             | 3.37293713  | 0.356789418  | 1.0856906 | 0.328629  | 0.742436 | NA       |
| or110-2            | 2.157964717 | 1.142490925  | 1.3332228 | 0.8569392 | 0.391478 | NA       |
| si:dkey-30k22.5    | 0.166657454 | -0.955901296 | 4.0804729 | -0.234262 | 0.814781 | NA       |
| FP017295.1         | 22.84558536 | -0.22988161  | 0.4061272 | -0.566033 | 0.571371 | 0.949418 |
| BX649250.1         | 349.0552725 | -0.002169367 | 0.1194022 | -0.018169 | 0.985504 | 0.996944 |
| urml               | 240.0522982 | -0.199135755 | 0.1387839 | -1.434862 | 0.151327 | 0.69947  |
| or110-1            |             | 0 NA         | NA        | NA        | NA       | NA       |
| BX511123.1         | 0.173729368 | -0.955901296 | 4.0804729 | -0.234262 | 0.814781 | NA       |
| mlnr               | 3.003399983 | 0.000619935  | 1.1508981 | 0.0005387 | 0.99957  | NA       |
| ucp3               | 578.8973748 | 0.153590379  | 0.1363543 | 1.1264062 | 0.259994 | 0.828288 |
| adh8a              | 7.415057132 | -0.486723496 | 0.7386283 | -0.658956 | 0.509924 | NA       |
| si:dkey-192p21.6   | 6.038035482 | -0.777280783 | 0.8106011 | -0.958894 | 0.337612 | NA       |
| rpz2               | 316.5472861 | -0.126229947 | 0.1267602 | -0.995817 | 0.319339 | 0.867749 |
| or111-10           | 0.333314908 | -1.858695402 | 3.5126701 | -0.52914  | 0.596708 | NA       |
| ttc34              | 7.855412714 | -0.180149069 | 0.7096631 | -0.253852 | 0.79961  | NA       |
| si:dkey-19018.2    | 37.32255475 | 0.07243478   | 0.3185148 | 0.2274142 | 0.820102 | 0.981594 |
| CR450686.1         | 13.34145593 | -0.581925111 | 0.5578297 | -1.043195 | 0.296858 | 0.853798 |
| kcnjla.1           | 69.92960539 | 0.653153136  | 0.234104  | 2.7900126 | 0.005271 | 0.107431 |
| FP236356.1         | 0.31598276  | 0.005883445  | 3.3523626 | 0.001755  | 0.9986   | NA       |
| si:ch73-335121.4   | 742.4037616 | 0.086097185  | 0.2850876 | 0.3020025 | 0.76265  | 0.975374 |
| CABZ01015525.1     | 0.824205979 | 0.498048327  | 2.3641483 | 0.2106671 | 0.833147 | NA       |
| glt1dl             | 17.46293737 | -0.247104476 | 0.4527907 | -0.545737 | 0.585247 | 0.952562 |

|                   |             |              |           |           |          |          |
|-------------------|-------------|--------------|-----------|-----------|----------|----------|
| znf975            | 5.47254007  | 0.275323192  | 0.8319435 | 0.3309398 | 0.74069  | NA       |
| fars2             | 93.17290839 | -0.079527349 | 0.2020839 | -0.393536 | 0.693923 | 0.96736  |
| CR381686.1        | 4.464166152 | 0.112051415  | 0.9004303 | 0.1244421 | 0.900965 | NA       |
| slc22a7b.2        | 22.55208557 | 1.268038892  | 0.4168016 | 3.0423083 | 0.002348 | 0.060184 |
| smyd1b            | 446.4037589 | 0.358189449  | 0.1265659 | 2.8300638 | 0.004654 | 0.098004 |
| si:ch73-59p9.2    | 0           | NA           | NA        | NA        | NA       | NA       |
| mylk4a            | 183.8591138 | 0.51828007   | 0.1527034 | 3.3940314 | 0.000689 | 0.02285  |
| si:ch211-71m22.5  | 5.611028805 | 0.847378674  | 0.8416145 | 1.006849  | 0.314007 | NA       |
| si:ch211-225g23.1 | 182.4556652 | -0.137683604 | 0.1585485 | -0.868401 | 0.385175 | 0.89551  |
| dre-mir-221       | 0           | NA           | NA        | NA        | NA       | NA       |
| adra2da           | 70.62504234 | -0.134466709 | 0.2388502 | -0.562975 | 0.573452 | 0.949869 |
| si:ch211-66k16.27 | 15.59911458 | -0.091235136 | 0.4863613 | -0.187587 | 0.8512   | 0.985174 |
| ebf3b             | 9.410493366 | 0.055351331  | 0.6155677 | 0.0899192 | 0.928351 | NA       |
| dmx12             | 2257.17233  | 0.043215764  | 0.0986892 | 0.4378975 | 0.661461 | 0.964234 |
| pmela             | 3019.0402   | -0.130213575 | 0.0850298 | -1.531387 | 0.125674 | 0.654803 |
| card19            | 227.3556299 | 0.149424483  | 0.1396873 | 1.0697073 | 0.284751 | 0.844955 |
| kcnn1a            | 907.8086821 | 0.030393046  | 0.0950666 | 0.3197027 | 0.749194 | 0.97419  |
| hunk              | 1078.089981 | -0.23422909  | 0.086248  | -2.715764 | 0.006612 | 0.124967 |
| RF00001           | 0.983163012 | 1.013789546  | 1.9987523 | 0.5072112 | 0.612007 | NA       |
| nlr6              | 61.30534844 | -0.084568234 | 0.2464793 | -0.343105 | 0.73152  | 0.971557 |
| CABZ01088229.1    | 10.14821255 | 0.28165004   | 0.6150482 | 0.4579316 | 0.647002 | NA       |
| cep120            | 305.5176193 | -0.190761878 | 0.1414006 | -1.349088 | 0.177309 | 0.738201 |
| si:ch73-134f24.1  | 0           | NA           | NA        | NA        | NA       | NA       |
| RF00017           | 0           | NA           | NA        | NA        | NA       | NA       |
| adcy5             | 93.37514755 | -0.140647241 | 0.2183607 | -0.644105 | 0.519507 | 0.938945 |
| rtn3              | 4298.486285 | 0.119930146  | 0.0785906 | 1.5260122 | 0.127007 | 0.656588 |
| plekhd1           | 103.7445353 | 0.240942906  | 0.210313  | 1.1456394 | 0.251944 | 0.821478 |
| CAMSAP3           | 711.4394472 | 0.060602129  | 0.1305871 | 0.4640743 | 0.642595 | 0.959994 |
| si:dkey-84k17.2   | 32.93924635 | 0.451049172  | 0.3440575 | 1.3109703 | 0.189868 | 0.754269 |
| prpf6             | 1646.132718 | -0.072213307 | 0.0837576 | -0.86217  | 0.388594 | 0.896271 |
| AL954327.1        | 6.632868264 | -0.892798355 | 0.7371236 | -1.211192 | 0.225822 | NA       |
| galn              | 110.9422319 | 0.372533692  | 0.2015826 | 1.848045  | 0.064596 | 0.497355 |
| si:ch211-214c20.1 | 1.197130868 | 0.490080416  | 1.8201022 | 0.2692598 | 0.78773  | NA       |
| zgc:165409        | 194.2828713 | -0.06536954  | 0.1541463 | -0.424075 | 0.671511 | 0.965257 |
| si:ch73-38013.5   | 0           | NA           | NA        | NA        | NA       | NA       |
| RF00001           | 0           | NA           | NA        | NA        | NA       | NA       |
| si:ch211-161m3.6  | 70.57404887 | -0.206577691 | 0.2653418 | -0.778534 | 0.436254 | 0.914408 |
| eif2b1            | 414.0152268 | -0.025135622 | 0.1128355 | -0.222763 | 0.82372  | 0.982196 |
| mtcl1             | 12.76132193 | -0.282941254 | 0.570758  | -0.495729 | 0.620086 | 0.957354 |
| zp2.6             | 0.157187365 | -0.955901296 | 4.0804729 | -0.234262 | 0.814781 | NA       |
| si:ch211-214p13.9 | 13.09106112 | -0.447356809 | 0.5487053 | -0.815295 | 0.414903 | 0.906237 |
| TIMM22            | 148.0706512 | -0.07747515  | 0.1681512 | -0.460747 | 0.64498  | 0.96029  |
| RF00001           | 0.158795395 | 0.967652056  | 4.0804729 | 0.2371421 | 0.812547 | NA       |
| snx17             | 443.5757401 | 0.000330491  | 0.1128949 | 0.0029274 | 0.997664 | 0.999174 |
| nrarpa            | 1421.730716 | 0.074386409  | 0.0863718 | 0.8612345 | 0.389109 | 0.896347 |
| BX511100.2        | 0.158795395 | 0.967652056  | 4.0804729 | 0.2371421 | 0.812547 | NA       |
| si:ch211-176g13.8 | 68.06326624 | -0.177916044 | 0.2406919 | -0.739186 | 0.459794 | 0.921978 |
| abhd17aa          | 158.0359421 | -0.435842235 | 0.1656706 | -2.630775 | 0.008519 | 0.151081 |
| pimr27            | 0           | NA           | NA        | NA        | NA       | NA       |
| gabra2a           | 48.90472488 | 0.423782488  | 0.2746611 | 1.5429289 | 0.122848 | 0.650905 |
| si:dkey-66a8.7    | 93.70889763 | 0.276029134  | 0.2274354 | 1.2136597 | 0.224878 | 0.792185 |
| RF00001           | 0           | NA           | NA        | NA        | NA       | NA       |
| ccdc28a           | 15.90428426 | -0.23233742  | 0.4707799 | -0.493516 | 0.621648 | 0.957354 |
| znf1066           | 7.215462522 | -0.06506326  | 0.7056017 | -0.09221  | 0.926531 | NA       |



|                   |             |              |           |           |          |          |
|-------------------|-------------|--------------|-----------|-----------|----------|----------|
| foxcla            | 491.5540383 | -0.258016883 | 0.1128697 | -2.285971 | 0.022256 | 0.283929 |
| RF00003           | 0 NA        | NA           | NA        | NA        | NA       | NA       |
| cnbd1             | 4.537800788 | 0.837033831  | 0.93892   | 0.8914858 | 0.372669 | NA       |
| si:dkey-83f18.11  | 0.182570949 | 0.967652056  | 4.0804729 | 0.2371421 | 0.812547 | NA       |
| zmp:0000001020    | 16.86095469 | 0.052759534  | 0.5191343 | 0.1016298 | 0.91905  | 0.991623 |
| CABZ01073954.1    | 283.0405704 | 0.128185205  | 0.1335133 | 0.9600932 | 0.337008 | 0.876088 |
| atp6ap1la         | 57.9447587  | 0.077181107  | 0.2555649 | 0.302002  | 0.762651 | 0.975374 |
| gpx7              | 200.1337986 | 0.122419194  | 0.1571595 | 0.7789489 | 0.43601  | 0.914408 |
| nfrkb             | 424.1928568 | -0.214528428 | 0.1373809 | -1.561559 | 0.118392 | 0.641743 |
| si:dkey-22o12.2   | 443.6164843 | 0.050207714  | 0.1107715 | 0.4532548 | 0.650365 | 0.960708 |
| CT737190.1        | 49.17970431 | 0.199914173  | 0.2987133 | 0.669251  | 0.503335 | 0.935304 |
| BX511084.1        | 5.401907787 | -0.26144541  | 0.8425321 | -0.310309 | 0.756326 | NA       |
| MAP3K11           | 36.42778354 | 0.239937025  | 0.3471625 | 0.6911375 | 0.489479 | 0.931926 |
| carml1            | 31.20900338 | 0.341770616  | 0.3394226 | 1.0069176 | 0.313974 | 0.865176 |
| ccser2b           | 11.55262815 | 0.510375313  | 0.5663103 | 0.9012291 | 0.367467 | 0.887458 |
| zranb3            | 89.55219628 | -0.133447124 | 0.2070515 | -0.644512 | 0.519244 | 0.938945 |
| ptrjrb.1          | 14.29186037 | -0.394570223 | 0.5183282 | -0.761236 | 0.446516 | 0.917154 |
| stard9            | 221.8088612 | 0.122294098  | 0.1381912 | 0.8849629 | 0.376177 | 0.894698 |
| RF00003           | 0 NA        | NA           | NA        | NA        | NA       | NA       |
| ostf1             | 464.9831986 | -0.163747334 | 0.1053715 | -1.554    | 0.120184 | 0.645215 |
| tnfsf13           | 0 NA        | NA           | NA        | NA        | NA       | NA       |
| mmp19             | 0.853874503 | -1.902668424 | 2.1134959 | -0.900247 | 0.367989 | NA       |
| si:ch211-251f6.7  | 13.82665638 | -1.162710119 | 0.5455684 | -2.13119  | 0.033073 | 0.354192 |
| slc6a19a.2        | 257.4020115 | -1.16332813  | 0.1388497 | -8.378328 | 5.37E-17 | 3.22E-14 |
| si:dkey-156k2.4   | 12.25127787 | -0.146862111 | 0.5407146 | -0.271607 | 0.785924 | 0.97627  |
| snwl              | 1503.461845 | -0.126939589 | 0.0848354 | -1.496305 | 0.134574 | 0.670689 |
| si:ch1073-90m23.1 | 17.48981834 | -0.749506744 | 0.4989712 | -1.502104 | 0.13307  | 0.667628 |
| suox              | 342.2601194 | 0.149562697  | 0.1198561 | 1.2478518 | 0.212085 | 0.77986  |
| TMEM216           | 38.13051125 | -0.178447464 | 0.3395284 | -0.525574 | 0.599184 | 0.955891 |
| si:ch211-66e2.5   | 382.3358842 | 0.115723655  | 0.1177999 | 0.982375  | 0.325915 | 0.871896 |
| si:ch73-217n20.1  | 111.4538896 | -0.111836093 | 0.1943256 | -0.575509 | 0.564947 | 0.948739 |
| kif28             | 10.484989   | -0.63163167  | 0.6096557 | -1.036047 | 0.30018  | NA       |
| si:ch211-170p16.1 | 0 NA        | NA           | NA        | NA        | NA       | NA       |
| pelila            | 26.15784812 | 0.054901491  | 0.3785993 | 0.1450121 | 0.884701 | 0.988838 |
| L0018154.1        | 118.8918097 | 0.160374572  | 0.1852799 | 0.8655798 | 0.386721 | 0.89551  |
| si:ch73-91k6.2    | 33.31472924 | -0.094567304 | 0.3388401 | -0.279091 | 0.780175 | 0.976218 |
| si:dkey-163f14.6  | 101.5615192 | -0.049557774 | 0.2033643 | -0.24369  | 0.807471 | 0.980642 |
| RF00026           | 0 NA        | NA           | NA        | NA        | NA       | NA       |
| arhgef28b         | 20.19423821 | 0.039710664  | 0.4372024 | 0.090829  | 0.927628 | 0.992702 |
| spink4            | 47.31103089 | -0.352825774 | 0.3047882 | -1.15761  | 0.247023 | 0.816669 |
| si:dkey-62k3.6    | 9.080924003 | -0.370035234 | 0.6235433 | -0.593439 | 0.552887 | NA       |
| prok2             | 2.387458266 | 1.912712991  | 1.3551631 | 1.4114264 | 0.158119 | NA       |
| cltcl1            | 136.4722667 | 0.018849395  | 0.1751592 | 0.1076129 | 0.914303 | 0.991119 |
| mvl2ba            | 61.04994946 | -0.318250215 | 0.259131  | -1.228144 | 0.219393 | 0.78594  |
| ugt2a7            | 27.89517669 | -0.578135176 | 0.394595  | -1.465136 | 0.142884 | 0.685108 |
| si:dkeyp-67f1.2   | 37.30192508 | -0.067301825 | 0.3245851 | -0.207347 | 0.835739 | 0.984089 |
| si:dkey-271j15.3  | 93.44750959 | -0.044290822 | 0.2308127 | -0.191891 | 0.847828 | 0.985174 |
| cspp1b            | 230.2301116 | -0.09846277  | 0.1427793 | -0.689615 | 0.490436 | 0.931926 |
| si:ch211-197h24.6 | 708.4808219 | 0.036316065  | 0.0952543 | 0.3812537 | 0.703015 | 0.968134 |
| si:dkey-177p2.18  | 84.90379172 | -0.018655656 | 0.2111652 | -0.088346 | 0.929601 | 0.992702 |
| pip4k2cb          | 24.34281965 | -0.726250399 | 0.4347397 | -1.670541 | 0.094812 | 0.585466 |
| CABZ01072989.1    | 0.182570949 | 0.967652056  | 4.0804729 | 0.2371421 | 0.812547 | NA       |
| si:ch73-352p4.5   | 52.94826208 | -0.164290424 | 0.2630356 | -0.624594 | 0.532238 | 0.942546 |
| igflr1            | 43.8593267  | 0.449421338  | 0.3176942 | 1.4146351 | 0.157176 | 0.707876 |

|                   |             |              |           |           |          |          |
|-------------------|-------------|--------------|-----------|-----------|----------|----------|
| xrn1              | 994.6338237 | 0.029727287  | 0.0927514 | 0.3205049 | 0.748586 | 0.97419  |
| gcsa              | 385.4624558 | -0.124689729 | 0.1125565 | -1.107797 | 0.267949 | 0.833349 |
| lsm8              | 296.2840505 | -0.127203367 | 0.1275046 | -0.997638 | 0.318455 | 0.867746 |
| CT573256.1        | 17.17318044 | 0.726886643  | 0.4659043 | 1.5601629 | 0.118721 | 0.642473 |
| sptssb            | 241.7572461 | -0.003588387 | 0.1416796 | -0.025327 | 0.979794 | 0.996879 |
| fgfbplb           | 131.9652498 | 0.120465344  | 0.1843266 | 0.653543  | 0.513406 | 0.93654  |
| si:dkey-234i14.3  | 19.75299339 | -0.319316026 | 0.459742  | -0.694555 | 0.487334 | 0.931584 |
| bicd12l           | 211.5228868 | 0.299241146  | 0.1594266 | 1.8769838 | 0.06052  | 0.480421 |
| ints12            | 259.6652087 | -0.109184406 | 0.1451546 | -0.752194 | 0.451935 | 0.918761 |
| F0704858.1        | 0.31598276  | 0.005883445  | 3.3523626 | 0.001755  | 0.9986   | NA       |
| cnripla           | 1122.414265 | 0.02636238   | 0.0936781 | 0.2814144 | 0.778393 | 0.975942 |
| havcr2            | 17.81551989 | 0.188631735  | 0.4633199 | 0.4071307 | 0.683912 | 0.965679 |
| RF00017           | 0 NA        | NA           | NA        | NA        | NA       | NA       |
| capn2a            | 1342.409903 | 0.239866822  | 0.0865852 | 2.7702981 | 0.005601 | 0.111976 |
| csnk2a4           | 27.46530981 | 0.21651954   | 0.4060131 | 0.5332821 | 0.593838 | 0.954434 |
| taar14d           | 0 NA        | NA           | NA        | NA        | NA       | NA       |
| si:dkey-238d18.5  | 1.356245041 | -2.710785197 | 1.9732092 | -1.373795 | 0.169505 | NA       |
| BX649490.1        | 2.09163507  | 1.173698227  | 1.3801324 | 0.8504244 | 0.395089 | NA       |
| si:ch211-202f3.4  | 28.67101336 | 0.177490009  | 0.4016541 | 0.4418976 | 0.658563 | 0.962545 |
| aebpl             | 587.3284342 | 0.089988336  | 0.1015813 | 0.8858749 | 0.375685 | 0.894316 |
| CABZ01061592.1    | 54.04877965 | 0.068927279  | 0.2837179 | 0.242943  | 0.80805  | 0.980642 |
| zgc:l14046        | 122.5277154 | 0.006633463  | 0.2042736 | 0.0324734 | 0.974095 | 0.99644  |
| gig2l             | 0 NA        | NA           | NA        | NA        | NA       | NA       |
| taar14b           | 0 NA        | NA           | NA        | NA        | NA       | NA       |
| traf3ip2l         | 168.3024493 | -0.003463922 | 0.1704334 | -0.020324 | 0.983785 | 0.996944 |
| si:dkey-16p6.1    | 4.973646385 | -0.229014269 | 0.9155524 | -0.250138 | 0.802481 | NA       |
| tbx22             | 19.50226386 | -0.115616933 | 0.4287249 | -0.269676 | 0.787409 | 0.976596 |
| RF00001           | 0 NA        | NA           | NA        | NA        | NA       | NA       |
| CT573476.1        | 67.31075947 | 0.017721782  | 0.2876062 | 0.0616182 | 0.950867 | 0.99381  |
| insmla            | 947.2635062 | 0.048017388  | 0.0909812 | 0.5277724 | 0.597657 | 0.95534  |
| adgrf6            | 313.5065564 | -0.202575899 | 0.1337963 | -1.514062 | 0.13001  | 0.662595 |
| cwf1912           | 338.434507  | -0.140146867 | 0.1215498 | -1.152999 | 0.248911 | 0.818009 |
| zbtb40            | 183.0639726 | -0.116717759 | 0.1594397 | -0.73205  | 0.464138 | 0.923204 |
| dclrela           | 172.4438886 | 0.069647438  | 0.1653448 | 0.4212254 | 0.67359  | 0.965257 |
| lysmd2            | 541.0603821 | 0.149337456  | 0.1025167 | 1.4567136 | 0.145195 | 0.690034 |
| CR524827.1        | 0 NA        | NA           | NA        | NA        | NA       | NA       |
| mapkap1           | 108.3719762 | -0.08040514  | 0.2058634 | -0.390575 | 0.696111 | 0.96736  |
| BX890608.2        | 0 NA        | NA           | NA        | NA        | NA       | NA       |
| si:dkeyp-71f10.5  | 8.116196517 | -0.379778582 | 0.7236806 | -0.524788 | 0.599731 | NA       |
| si:ch211-203b20.4 | 0.158915748 | 0.967652056  | 4.0804729 | 0.2371421 | 0.812547 | NA       |
| or111-5           | 1.683107494 | 1.239144993  | 1.5746599 | 0.7869287 | 0.431324 | NA       |
| akap12a           | 184.5028437 | -0.315941844 | 0.1536636 | -2.056062 | 0.039777 | 0.391511 |
| taar18c           | 0 NA        | NA           | NA        | NA        | NA       | NA       |
| si:ch211-266k22.6 | 112.6166141 | -0.03747618  | 0.1861335 | -0.20134  | 0.840432 | 0.985042 |
| zgc:l74260        | 6.703079214 | 0.929083211  | 0.7568748 | 1.2275256 | 0.219625 | NA       |
| serpinb14         | 393.1670808 | -0.093936351 | 0.1339598 | -0.701228 | 0.483161 | 0.92946  |
| si:dkey-21a6.5    | 204.9993492 | -0.244108881 | 0.1566809 | -1.558    | 0.119233 | 0.643307 |
| CR391998.1        | 30.56110883 | 0.153607242  | 0.3605798 | 0.4260006 | 0.670107 | 0.965223 |
| smc6              | 39.84010735 | -0.145903124 | 0.3064659 | -0.476083 | 0.634015 | 0.95776  |
| ddx27             | 582.1231822 | -0.188949358 | 0.0998404 | -1.892513 | 0.058423 | 0.473924 |
| MDFIC2            | 5.32122798  | -1.122310059 | 0.8621679 | -1.30173  | 0.193009 | NA       |
| sv2               | 117.9438403 | -0.099609867 | 0.2048079 | -0.486358 | 0.626714 | 0.957354 |
| si:ch211-198m17.1 | 271.4220885 | -0.292823616 | 0.1473166 | -1.987716 | 0.046843 | 0.425112 |
| si:ch73-264p11.1  | 31.17440098 | -0.363593837 | 0.3440116 | -1.056923 | 0.290547 | 0.846262 |

|                   |             |              |           |           |          |          |
|-------------------|-------------|--------------|-----------|-----------|----------|----------|
| casp7             | 801.345305  | 0.162984196  | 0.0898131 | 1.8147048 | 0.069569 | 0.514708 |
| si:cabz01071909.2 | 21.47071112 | -0.727142815 | 0.4322562 | -1.682203 | 0.092529 | 0.579378 |
| pimr21            | 0 NA        | NA           | NA        | NA        | NA       | NA       |
| si:ch211-181d7.1  | 0.182570949 | 0.967652056  | 4.0804729 | 0.2371421 | 0.812547 | NA       |
| tsen2             | 55.59764775 | -0.268287125 | 0.2612815 | -1.026812 | 0.304509 | 0.858905 |
| si:ch73-233m11.2  | 5.365164936 | 0.019996082  | 0.9144928 | 0.0218658 | 0.982555 | NA       |
| zgc:194007        | 21.65149672 | -0.089324875 | 0.4256832 | -0.209839 | 0.833793 | 0.983583 |
| BX942825.1        | 0 NA        | NA           | NA        | NA        | NA       | NA       |
| zgc:158701        | 5.793260201 | -0.767486554 | 0.8345837 | -0.919604 | 0.35778  | NA       |
| BX950194.1        | 0 NA        | NA           | NA        | NA        | NA       | NA       |
| CR936300.1        | 8.304189222 | -0.869478396 | 0.714792  | -1.216408 | 0.22383  | NA       |
| zgc:162958        | 69.10153249 | -0.265794933 | 0.2480063 | -1.071726 | 0.283843 | 0.844676 |
| CU469539.1        | 0.674011459 | 1.487968231  | 2.2861421 | 0.6508643 | 0.515134 | NA       |
| si:ch211-102c2.7  | 123.3041528 | 0.070235198  | 0.1797889 | 0.3906536 | 0.696053 | 0.96736  |
| CR354402.1        | 0.349228403 | 0.005884014  | 3.2372587 | 0.0018176 | 0.99855  | NA       |
| or137-7           | 0.635542639 | 2.809903053  | 2.5424041 | 1.1052149 | 0.269066 | NA       |
| si:dkey-29d8.3    | 66.63593968 | -0.142931502 | 0.2367378 | -0.603754 | 0.546007 | 0.945526 |
| grnas             | 2.144848486 | -1.167991318 | 1.3031737 | -0.896267 | 0.37011  | NA       |
| BX005355.1        | 0.158795395 | 0.967652056  | 4.0804729 | 0.2371421 | 0.812547 | NA       |
| si:dkeyp-69c1.9   | 13.11116008 | 0.132876565  | 0.5418946 | 0.2452074 | 0.806296 | 0.980105 |
| CR812481.1        | 7.437292437 | -0.246509813 | 0.7167491 | -0.343928 | 0.730901 | NA       |
| si:dkeyp-67e1.3   | 0.157187365 | -0.955901296 | 4.0804729 | -0.234262 | 0.814781 | NA       |
| AL953893.1        | 0 NA        | NA           | NA        | NA        | NA       | NA       |
| znf1172           | 19.57081009 | -0.420505877 | 0.4481262 | -0.938365 | 0.348057 | 0.880195 |
| BX323884.1        | 110.4683465 | 0.06238025   | 0.1908747 | 0.3268126 | 0.74381  | 0.974094 |
| si:ch73-54n14.2   | 0 NA        | NA           | NA        | NA        | NA       | NA       |
| CR388209.1        | 1.480214502 | -0.378082517 | 1.6730776 | -0.22598  | 0.821217 | NA       |
| b3gnt2b           | 554.5051844 | 0.269332062  | 0.1061642 | 2.5369386 | 0.011183 | 0.183548 |
| si:dkeyp-51f12.3  | 3.345223152 | 0.88043495   | 1.0554391 | 0.8341883 | 0.404175 | NA       |
| si:dkey-108k21.21 | 31.09614939 | 0.434741963  | 0.3758094 | 1.1568151 | 0.247348 | 0.81686  |
| rbp7a             | 0.316103113 | 0.005883447  | 3.3519121 | 0.0017553 | 0.9986   | NA       |
| si:ch73-59c19.1   | 2.803454605 | -1.301381158 | 1.2031374 | -1.081656 | 0.279405 | NA       |
| CR974461.1        | 0 NA        | NA           | NA        | NA        | NA       | NA       |
| si:ch211-15j1.5   | 10.16097876 | 0.849142569  | 0.6187223 | 1.372413  | 0.169935 | NA       |
| BX530075.1        | 0 NA        | NA           | NA        | NA        | NA       | NA       |
| ugt5b4            | 223.8938441 | -0.431998696 | 0.1443175 | -2.993392 | 0.002759 | 0.067771 |
| CU571079.1        | 24.84901322 | 0.095949101  | 0.3872376 | 0.2477784 | 0.804306 | 0.979643 |
| BX548073.1        | 11.99570064 | -0.588886482 | 0.593287  | -0.992583 | 0.320913 | 0.868715 |
| BX284679.1        | 0.323844819 | -1.825095364 | 3.274639  | -0.557342 | 0.577293 | NA       |
| si:dkey-103e21.5  | 20.6064471  | -1.062390881 | 0.4267615 | -2.489425 | 0.012795 | 0.2008   |
| or126-1           | 0.666939546 | 1.487980453  | 2.2924711 | 0.6490727 | 0.516291 | NA       |
| si:ch211-12e13.1  | 6.85570318  | -0.343639781 | 0.8394049 | -0.409385 | 0.682257 | NA       |
| gpatch4           | 183.6324213 | 0.107764161  | 0.1857092 | 0.5802845 | 0.561723 | 0.948728 |
| si:ch73-25f10.6   | 469.6033658 | 0.151971796  | 0.1045131 | 1.4540935 | 0.14592  | 0.691682 |
| BX649388.1        | 6.07543883  | 0.553803991  | 0.7666723 | 0.7223477 | 0.470081 | NA       |
| BX005429.1        | 0 NA        | NA           | NA        | NA        | NA       | NA       |
| CU633804.1        | 1.165331617 | 1.275668599  | 1.8732058 | 0.6810083 | 0.495866 | NA       |
| GBGT1 (1 of many) | 4.765213944 | -0.495763531 | 0.8853109 | -0.559988 | 0.575488 | NA       |
| BX927308.1        | 205.0513546 | -0.259070457 | 0.1542051 | -1.680038 | 0.09295  | 0.580357 |
| BX890576.1        | 5.82537333  | 1.11732866   | 0.8259984 | 1.3527008 | 0.176151 | NA       |
| CR847971.1        | 2.497214877 | 1.479473532  | 1.2462217 | 1.1871672 | 0.235162 | NA       |
| BX005313.1        | 1.123285678 | 0.391074727  | 1.9652571 | 0.1989942 | 0.842267 | NA       |
| GBGT1 (1 of many) | 0.641555962 | -0.014184532 | 2.3335058 | -0.006079 | 0.99515  | NA       |
| CR391940.1        | 31.20147959 | -0.17014306  | 0.3439062 | -0.494737 | 0.620786 | 0.957354 |

|                    |             |              |           |           |          |          |
|--------------------|-------------|--------------|-----------|-----------|----------|----------|
| znf106b            | 48.85445061 | 0.026669879  | 0.2777781 | 0.0960114 | 0.923511 | 0.992588 |
| CU694486.1         | 0 NA        | NA           | NA        | NA        | NA       | NA       |
| si:dkeyp-4c7.3     | 1.021349841 | -0.039072774 | 2.0390376 | -0.019162 | 0.984712 | NA       |
| nuggc.2            | 11.30349802 | -0.771774397 | 0.576399  | -1.338959 | 0.180584 | 0.741768 |
| si:dkeyp-122a9.1   | 0.792730004 | 1.851900952  | 2.2729754 | 0.8147475 | 0.415217 | NA       |
| tmem184bb          | 54.14176638 | 0.025840967  | 0.2771725 | 0.0932306 | 0.92572  | 0.992689 |
| si:dkey-172o10.8   | 0 NA        | NA           | NA        | NA        | NA       | NA       |
| BX677668.1         | 2.54255619  | 1.062823932  | 1.3018698 | 0.8163826 | 0.414281 | NA       |
| pth1b              | 0.988894344 | -1.041944082 | 1.9792901 | -0.526423 | 0.598594 | NA       |
| RUNDC1             | 123.2919476 | 0.233728773  | 0.1907156 | 1.2255355 | 0.220374 | 0.787278 |
| CR925863.1         | 0.365141898 | 1.973577737  | 3.3927314 | 0.5817076 | 0.560764 | NA       |
| ttf1               | 57.42751233 | -0.292178545 | 0.2657529 | -1.099437 | 0.271577 | 0.83659  |
| gbgt113            | 1.767669898 | 2.174064496  | 1.6432594 | 1.3230197 | 0.185829 | NA       |
| ms4a17a.3          | 4.248778647 | -0.225709705 | 0.916524  | -0.246267 | 0.805475 | NA       |
| si:dkey-58f10.7    | 12.78700535 | 0.279495156  | 0.5331052 | 0.5242776 | 0.600085 | 0.956045 |
| CR356233.1         | 18.81128672 | 0.129158412  | 0.4719163 | 0.2736892 | 0.784323 | 0.97627  |
| AL929229.1         | 1.465400882 | 0.273436181  | 1.5956724 | 0.1713611 | 0.86394  | NA       |
| CR848717.1         | 0.173729368 | -0.955901296 | 4.0804729 | -0.234262 | 0.814781 | NA       |
| BX470189.2         | 9.781421581 | -0.275183938 | 0.6657049 | -0.413372 | 0.679334 | NA       |
| CR450716.1         | 0 NA        | NA           | NA        | NA        | NA       | NA       |
| BX085193.1         | 0 NA        | NA           | NA        | NA        | NA       | NA       |
| BX005012.2         | 0.31598276  | 0.005883445  | 3.3523626 | 0.001755  | 0.9986   | NA       |
| BX469885.1         | 0 NA        | NA           | NA        | NA        | NA       | NA       |
| BX511112.1         | 0 NA        | NA           | NA        | NA        | NA       | NA       |
| v2ra16             | 1.664634186 | 0.538718286  | 1.5014365 | 0.3588019 | 0.719743 | NA       |
| mrp                | 0 NA        | NA           | NA        | NA        | NA       | NA       |
| dicp1.1            | 2.25349602  | 0.732514473  | 1.3950446 | 0.5250832 | 0.599525 | NA       |
| znf1048            | 17.02762352 | -0.360698387 | 0.4749376 | -0.759465 | 0.447575 | 0.917154 |
| tcnbb              | 4157.680964 | 0.244145079  | 0.0818155 | 2.9840923 | 0.002844 | 0.069229 |
| si:ch211-284e13.11 | 0 NA        | NA           | NA        | NA        | NA       | NA       |
| znf1020            | 3.961563957 | -1.295144316 | 0.9810087 | -1.320217 | 0.186763 | NA       |
| CR735121.1         | 0 NA        | NA           | NA        | NA        | NA       | NA       |
| ccs                | 72.87260073 | -0.296696006 | 0.2649872 | -1.119662 | 0.262858 | 0.830166 |
| CR396590.1         | 0 NA        | NA           | NA        | NA        | NA       | NA       |
| CT027611.1         | 0 NA        | NA           | NA        | NA        | NA       | NA       |
| CR381686.2         | 1.777700466 | 2.052228824  | 3.8880257 | 0.5278331 | 0.597615 | NA       |
| BX530407.1         | 0 NA        | NA           | NA        | NA        | NA       | NA       |
| BX294129.1         | 0.499972362 | -2.44370697  | 3.0013188 | -0.814211 | 0.415524 | NA       |
| si:ch211-139a5.1   | 49.77547965 | 0.044630744  | 0.269379  | 0.1656801 | 0.868409 | 0.987245 |
| CR855277.1         | 1.96965918  | -0.012388435 | 1.3732927 | -0.009021 | 0.992802 | NA       |
| CR513782.1         | 0.681245011 | 1.537021632  | 2.3941387 | 0.6419936 | 0.520877 | NA       |
| si:dkey-256e7.8    | 5.778543344 | 0.397395482  | 0.7966557 | 0.4988297 | 0.617899 | NA       |
| ftr10              | 0 NA        | NA           | NA        | NA        | NA       | NA       |
| n1rc8              | 0.69766666  | 1.536459923  | 2.3782158 | 0.6460557 | 0.518243 | NA       |
| zgc:173545         | 0.476747244 | 2.393381959  | 3.0525537 | 0.7840589 | 0.433006 | NA       |
| si:dkey-20i20.9    | 4.470260803 | -0.327876238 | 0.91496   | -0.35835  | 0.720081 | NA       |
| si:dkey-4c23.3     | 0.999584661 | 0.976925822  | 1.8949579 | 0.5155396 | 0.606176 | NA       |
| si:dkey-239h2.3    | 95.26572665 | -0.612119721 | 0.2615291 | -2.340542 | 0.019256 | 0.25973  |
| BX649633.1         | 0 NA        | NA           | NA        | NA        | NA       | NA       |
| si:ch211-156j16.1  | 1643.180354 | 0.184838209  | 0.0860347 | 2.1484144 | 0.031681 | 0.345305 |
| CR925731.1         | 7.235732395 | 0.127283879  | 0.7312516 | 0.174063  | 0.861816 | NA       |
| si:dkey-70p6.1     | 331.7664527 | 0.250840323  | 0.1266108 | 1.9811928 | 0.04757  | 0.42893  |
| CR391910.1         | 0.855644171 | -0.484665734 | 2.1924736 | -0.221059 | 0.825047 | NA       |
| AL935153.1         | 0.158795395 | 0.967652056  | 4.0804729 | 0.2371421 | 0.812547 | NA       |

|                   |             |              |           |           |          |          |
|-------------------|-------------|--------------|-----------|-----------|----------|----------|
| si:dkey-22f5.9    | 36.07436657 | 1.825071922  | 0.3463647 | 5.2692196 | 1.37E-07 | 1.82E-05 |
| si:dkey-225k4.1   | 18.16733597 | -0.301619289 | 0.4697662 | -0.642063 | 0.520833 | 0.939056 |
| gstk4             | 2.790212228 | 0.891576422  | 1.1702567 | 0.7618639 | 0.446141 | NA       |
| BX649502.1        | 0 NA        | NA           | NA        | NA        | NA       | NA       |
| BX927365.1        | 1.571742854 | 1.077963887  | 1.7704183 | 0.6088752 | 0.542607 | NA       |
| si:dkey-90123.1   | 2.342741209 | -1.88024215  | 1.3614357 | -1.381073 | 0.167256 | NA       |
| tbx5b             | 8.666242664 | 0.470974361  | 0.6762531 | 0.6964469 | 0.486149 | NA       |
| si:dkey-112g5.13  | 0.173729368 | -0.955901296 | 4.0804729 | -0.234262 | 0.814781 | NA       |
| BX511123.2        | 3.580501776 | -0.017168637 | 1.0101965 | -0.016995 | 0.98644  | NA       |
| si:dkey-117n7.4   | 52.27518759 | -0.075541994 | 0.2731183 | -0.276591 | 0.782094 | 0.97627  |
| BX005174.1        | 3.14648155  | -1.43718534  | 1.1345648 | -1.266728 | 0.205252 | NA       |
| CT583708.1        | 6.864456668 | 0.213288383  | 0.7878801 | 0.2707117 | 0.786613 | NA       |
| atn1              | 1137.384638 | 0.017983471  | 0.1009706 | 0.1781059 | 0.85864  | 0.985773 |
| si:ch211-15j1.3   | 1.988211556 | 0.486847799  | 1.3953852 | 0.3488985 | 0.727166 | NA       |
| si:ch211-117n7.6  | 63.56328936 | -0.209337132 | 0.2446577 | -0.855633 | 0.392201 | 0.897688 |
| CT997819.1        | 0.325573202 | 0.005883621  | 3.3172783 | 0.0017736 | 0.998585 | NA       |
| znf1165           | 32.36270272 | -0.445381255 | 0.3363747 | -1.324063 | 0.185482 | 0.74928  |
| hcest             | 5.781983657 | -0.235397148 | 0.8039727 | -0.292792 | 0.769681 | NA       |
| pimr49            | 0 NA        | NA           | NA        | NA        | NA       | NA       |
| si:dkey-147f3.4   | 130.1629217 | -0.105690032 | 0.1771448 | -0.596631 | 0.550754 | 0.946549 |
| AL954134.1        | 2.918879017 | -0.321560732 | 1.216958  | -0.264233 | 0.7916   | NA       |
| znf1044           | 6.284230339 | -0.492937018 | 0.8285748 | -0.594922 | 0.551896 | NA       |
| BX649639.1        | 54.16362482 | 0.233465789  | 0.2727536 | 0.8559587 | 0.392021 | 0.897688 |
| BX899181.1        | 1.804179674 | -0.844890155 | 1.4389594 | -0.587154 | 0.557101 | NA       |
| CR392002.1        | 4.201706538 | -0.331340786 | 1.009439  | -0.328243 | 0.742728 | NA       |
| BX294006.1        | 0.325573202 | 0.005883621  | 3.3172783 | 0.0017736 | 0.998585 | NA       |
| CR318650.1        | 0 NA        | NA           | NA        | NA        | NA       | NA       |
| si:dkey-4c15.8    | 19.56189861 | -0.238243711 | 0.4321697 | -0.551274 | 0.581446 | 0.951731 |
| BX927234.1        | 0.507044276 | -2.459587493 | 2.7586536 | -0.89159  | 0.372613 | NA       |
| si:ch211-125e6.12 | 0 NA        | NA           | NA        | NA        | NA       | NA       |
| cyp2x12           | 43.54254915 | -0.982473852 | 0.3825139 | -2.568466 | 0.010215 | 0.17288  |
| si:dkey-112g5.11  | 1.694663769 | -0.575875761 | 1.4805886 | -0.388951 | 0.697313 | NA       |
| CR788254.1        | 0.157187365 | -0.955901296 | 4.0804729 | -0.234262 | 0.814781 | NA       |
| BX294661.1        | 0.471562095 | -2.373056629 | 3.0645586 | -0.774355 | 0.438721 | NA       |
| CR749763.1        | 0 NA        | NA           | NA        | NA        | NA       | NA       |
| si:ch211-133n4.6  | 672.7842518 | 0.356501107  | 0.098308  | 3.6263681 | 0.000287 | 0.011436 |
| BX571955.1        | 0 NA        | NA           | NA        | NA        | NA       | NA       |
| si:ch211-214p13.8 | 0.839689391 | -1.918726865 | 2.219847  | -0.864351 | 0.387395 | NA       |
| CU633823.1        | 0 NA        | NA           | NA        | NA        | NA       | NA       |
| BX511093.1        | 0 NA        | NA           | NA        | NA        | NA       | NA       |
| CU639436.1        | 0 NA        | NA           | NA        | NA        | NA       | NA       |
| tomm40            | 1271.083694 | 0.137559958  | 0.0824397 | 1.6686134 | 0.095194 | 0.58671  |
| eif4ala           | 10230.71991 | 0.025420616  | 0.0729285 | 0.3485691 | 0.727413 | 0.970402 |
| BX571701.1        | 0 NA        | NA           | NA        | NA        | NA       | NA       |
| si:ch211-235f12.2 | 0 NA        | NA           | NA        | NA        | NA       | NA       |
| BX470185.1        | 10.66727092 | 0.393374527  | 0.5917331 | 0.6647837 | 0.506189 | NA       |
| si:ch211-229n2.6  | 0.166657454 | -0.955901296 | 4.0804729 | -0.234262 | 0.814781 | NA       |
| si:dkey-20d21.12  | 59.23616068 | 0.044319049  | 0.2571275 | 0.1723621 | 0.863153 | 0.985841 |
| cox14             | 218.6824293 | -0.336835617 | 0.1565399 | -2.151755 | 0.031417 | 0.343463 |
| CU468041.1        | 0 NA        | NA           | NA        | NA        | NA       | NA       |
| vtg5              | 0.802200093 | 1.852032281  | 2.2653592 | 0.8175446 | 0.413617 | NA       |
| CR925709.1        | 11.7906021  | -0.232284804 | 0.5695527 | -0.407837 | 0.683393 | 0.965476 |
| AL954694.1        | 0.473170125 | -0.833888596 | 2.9014002 | -0.287409 | 0.773799 | NA       |
| si:dkey-84o3.7    | 0.50625413  | -0.940106488 | 2.8357787 | -0.331516 | 0.740255 | NA       |

|                    |             |              |           |           |          |          |
|--------------------|-------------|--------------|-----------|-----------|----------|----------|
| rad54b             | 65.72560458 | -0.001083209 | 0.2507815 | -0.004319 | 0.996554 | 0.998936 |
| BX649502.2         | 0 NA        |              | NA        | NA        | NA       | NA       |
| cenpw              | 29.74307001 | -0.454288042 | 0.3645648 | -1.246111 | 0.212724 | 0.780843 |
| si:dkey-4i23.5     | 2.713144068 | -1.62154707  | 1.284059  | -1.262829 | 0.206651 | NA       |
| si:dkey-247i3.6    | 6.050454181 | -0.280957676 | 0.8051431 | -0.348954 | 0.727124 | NA       |
| si:ch211-231i17.3  | 0 NA        |              | NA        | NA        | NA       | NA       |
| si:dkeyp-100a1.6   | 23.12813507 | -0.689346292 | 0.4000139 | -1.723306 | 0.084833 | 0.560519 |
| BX663503.1         | 286.8472498 | 0.149768176  | 0.1266569 | 1.1824716 | 0.237019 | 0.805854 |
| ank1a              | 465.4816537 | 0.231125694  | 0.1234137 | 1.8727725 | 0.0611   | 0.482482 |
| CR847899.1         | 0 NA        |              | NA        | NA        | NA       | NA       |
| FP085398.2         | 14.30878702 | -0.81318332  | 0.5116254 | -1.589412 | 0.111968 | 0.627242 |
| BX649522.1         | 11.26716633 | 0.168735413  | 0.564539  | 0.2988906 | 0.765024 | 0.975374 |
| si:dkey-4c15.9     | 11.17137093 | 0.325021576  | 0.5762652 | 0.5640139 | 0.572745 | 0.949717 |
| tex264a            | 459.9073647 | -0.017282837 | 0.1145573 | -0.150866 | 0.880081 | 0.987881 |
| apoc2              | 4565.399535 | 0.140740111  | 0.0899833 | 1.564069  | 0.117801 | 0.641446 |
| cbx3b              | 719.1698848 | 0.145725454  | 0.0960066 | 1.5178692 | 0.129047 | 0.66057  |
| CR788249.1         | 0 NA        |              | NA        | NA        | NA       | NA       |
| ferd3l             | 0.158915748 | 0.967652056  | 4.0804729 | 0.2371421 | 0.812547 | NA       |
| si:dkey-261e22.4   | 20.2335922  | -0.17466507  | 0.4221853 | -0.413717 | 0.679082 | 0.965257 |
| mhclzaa            | 0.878629579 | 0.686795053  | 2.2010162 | 0.3120354 | 0.755014 | NA       |
| si:dkey-147f3.8    | 113.2274364 | -0.077021628 | 0.1996926 | -0.385701 | 0.699718 | 0.967998 |
| si:ch211-272h9.5   | 5.49312606  | 0.407673175  | 0.8593108 | 0.4744188 | 0.635201 | NA       |
| si:dkey-250k15.4   | 6.340908172 | 0.441277195  | 0.7831007 | 0.5634999 | 0.573095 | NA       |
| apoc1              | 3986.78026  | 0.147669074  | 0.1867478 | 0.7907407 | 0.429095 | 0.911406 |
| si:dkey-96n2.1     | 0 NA        |              | NA        | NA        | NA       | NA       |
| si:ch211-59d15.4   | 18.09966686 | 0.423255202  | 0.4559182 | 0.9283577 | 0.353222 | 0.881562 |
| BX321875.1         | 1.964074944 | 0.468159373  | 1.3311091 | 0.3517062 | 0.725059 | NA       |
| BX908388.1         | 0 NA        |              | NA        | NA        | NA       | NA       |
| BX511187.1         | 0.158915748 | 0.967652056  | 4.0804729 | 0.2371421 | 0.812547 | NA       |
| si:dkey-40m6.11    | 0 NA        |              | NA        | NA        | NA       | NA       |
| im:7140055         | 294.1831482 | -0.091445726 | 0.1364344 | -0.670254 | 0.502696 | 0.935304 |
| BX957292.1         | 0.347458735 | -1.908042286 | 3.4571486 | -0.551912 | 0.581009 | NA       |
| CR318588.1         | 5.076764667 | 0.289286122  | 0.8536015 | 0.3389007 | 0.734685 | NA       |
| L0018289.1         | 1.212762372 | 1.332730815  | 1.9345871 | 0.6888968 | 0.490888 | NA       |
| si:ch211-250c4.4   | 189.942699  | -0.39606725  | 0.1525261 | -2.596717 | 0.009412 | 0.162543 |
| CHST12 (1 of many) | 2.0351609   | 0.524903868  | 1.3769596 | 0.381205  | 0.703051 | NA       |
| si:dkey-112g5.16   | 3.083504768 | 1.084665128  | 1.1574183 | 0.9371419 | 0.348686 | NA       |
| ms4a17a.5          | 43.32374042 | -0.006255542 | 0.3236236 | -0.01933  | 0.984578 | 0.996944 |
| BX511089.1         | 0 NA        |              | NA        | NA        | NA       | NA       |
| CR932978.1         | 0.157187365 | -0.955901296 | 4.0804729 | -0.234262 | 0.814781 | NA       |
| AL929092.1         | 3.119658826 | 2.387586659  | 2.5487976 | 0.9367502 | 0.348887 | NA       |
| or103-3            | 0 NA        |              | NA        | NA        | NA       | NA       |
| si:ch211-271e10.3  | 0 NA        |              | NA        | NA        | NA       | NA       |
| si:dkeyp-13a3.10   | 135.4282379 | 0.122753253  | 0.1798375 | 0.6825786 | 0.494873 | 0.931926 |
| CT573163.1         | 0.173729368 | -0.955901296 | 4.0804729 | -0.234262 | 0.814781 | NA       |
| si:dkey-27p18.3    | 13.7525254  | 0.193262128  | 0.54184   | 0.3566775 | 0.721333 | 0.969666 |
| F0904898.5         | 0.679983498 | -1.527277543 | 2.5551009 | -0.597737 | 0.550016 | NA       |
| BX571825.6         | 0 NA        |              | NA        | NA        | NA       | NA       |
| vtg1               | 10.35863756 | 0.017505541  | 0.6197088 | 0.028248  | 0.977464 | NA       |
| or111-9            | 0 NA        |              | NA        | NA        | NA       | NA       |
| si:ch211-243a20.3  | 137.8340102 | -0.938753678 | 0.1774626 | -5.289869 | 1.22E-07 | 1.67E-05 |
| znf1009            | 28.93260706 | -0.213425345 | 0.3576614 | -0.596724 | 0.550691 | 0.946549 |
| si:dkey-26i13.7    | 0 NA        |              | NA        | NA        | NA       | NA       |
| BX005065.1         | 30.21079974 | 0.272183991  | 0.3470703 | 0.7842329 | 0.432903 | 0.913384 |

|                   |             |              |           |           |          |          |
|-------------------|-------------|--------------|-----------|-----------|----------|----------|
| BX000447.1        | 90.0716294  | 0.131902914  | 0.2141289 | 0.6159977 | 0.537896 | 0.943336 |
| si:dkey-20i20.3   | 15.97839814 | -0.271255186 | 0.5026748 | -0.539624 | 0.589457 | 0.953498 |
| BX548061.1        | 0.158795395 | 0.967652056  | 4.0804729 | 0.2371421 | 0.812547 | NA       |
| irgf2             | 0.500282092 | 2.45023829   | 2.5970012 | 0.9434876 | 0.345432 | NA       |
| si:dkey-103k4.1   | 2.50397706  | 0.203701306  | 1.1829685 | 0.172195  | 0.863284 | NA       |
| CR769769.1        | 13.50496098 | -0.280904245 | 0.5127258 | -0.547864 | 0.583785 | 0.952214 |
| si:dkey-102f14.7  | 2.437017663 | 0.5294138    | 1.3960977 | 0.3792097 | 0.704532 | NA       |
| BX510992.1        | 5.760823394 | 0.754771507  | 0.7842935 | 0.9623585 | 0.33587  | NA       |
| si:dkey-211g8.5   | 0.182570949 | 0.967652056  | 4.0804729 | 0.2371421 | 0.812547 | NA       |
| si:ch73-290k24.6  | 64.98190299 | 0.089874823  | 0.243919  | 0.3684617 | 0.712529 | 0.969087 |
| si:ch211-220m6.4  | 1.310464596 | 1.562423165  | 1.9190939 | 0.8141463 | 0.415561 | NA       |
| CR382296.1        | 1.808588223 | -0.269473476 | 1.4809264 | -0.181963 | 0.855612 | NA       |
| si:ch73-27e22.2   | 0 NA        | NA           | NA        | NA        | NA       | NA       |
| CR788230.1        | 0 NA        | NA           | NA        | NA        | NA       | NA       |
| si:dkeyp-41f9.4   | 174.4337531 | 0.104777749  | 0.1695826 | 0.6178567 | 0.53667  | 0.943336 |
| BX511161.1        | 35.0609368  | 0.331014674  | 0.3479555 | 0.9513131 | 0.341445 | 0.878134 |
| si:dkey-3k20.1    | 9.444560426 | -0.893119823 | 0.6438483 | -1.387159 | 0.165393 | NA       |
| si:dkey-234d14.2  | 0.490502273 | -2.421143305 | 2.7891168 | -0.868068 | 0.385357 | NA       |
| BX663611.1        | 1.498766878 | 0.289100544  | 1.5459299 | 0.1870075 | 0.851655 | NA       |
| BX548015.1        | 0 NA        | NA           | NA        | NA        | NA       | NA       |
| AL929266.1        | 4.304820321 | -0.672832946 | 0.8984053 | -0.748919 | 0.453906 | NA       |
| flnb              | 204.4285173 | 0.038574264  | 0.1531107 | 0.251937  | 0.80109  | 0.979377 |
| BX000991.1        | 0.157187365 | -0.955901296 | 4.0804729 | -0.234262 | 0.814781 | NA       |
| cx134b.11         | 119.2512982 | 0.136939874  | 0.2286376 | 0.5989386 | 0.549214 | 0.946312 |
| cenpv             | 37.73778432 | 0.137838576  | 0.3281622 | 0.4200318 | 0.674462 | 0.965257 |
| CU861651.1        | 0.667059899 | 1.488443644  | 2.4079024 | 0.6181495 | 0.536477 | NA       |
| CR392026.1        | 0.632206226 | 0.012903346  | 2.6133421 | 0.0049375 | 0.99606  | NA       |
| AL954142.1        | 1.627904039 | -3.043274384 | 1.7521162 | -1.736914 | 0.082402 | NA       |
| si:dkeyp-26a9.2   | 210.8960458 | -0.100897589 | 0.148119  | -0.681193 | 0.49575  | 0.932377 |
| si:dkey-222h21.6  | 0.339758314 | 0.005883863  | 3.2682461 | 0.0018003 | 0.998564 | NA       |
| BX537166.1        | 15.49273567 | 0.068004485  | 0.4882329 | 0.139287  | 0.889223 | 0.989291 |
| CT027772.1        | 2.01834695  | -1.026639109 | 1.3661031 | -0.751509 | 0.452346 | NA       |
| CT574549.1        | 0.508144151 | 0.926490632  | 2.6634746 | 0.3478504 | 0.727953 | NA       |
| si:dkey-11o15.8   | 0.635662991 | 2.808056561  | 2.7492814 | 1.0213784 | 0.307075 | NA       |
| si:dkey-59l11.7   | 0 NA        | NA           | NA        | NA        | NA       | NA       |
| poldip2           | 1021.037329 | 0.082950043  | 0.0847015 | 0.9793219 | 0.327421 | 0.872701 |
| CR456642.1        | 9.457176256 | 0.582467001  | 0.6185867 | 0.9416094 | 0.346393 | NA       |
| si:dkey-65l23.2   | 0 NA        | NA           | NA        | NA        | NA       | NA       |
| BX927288.1        | 6.21184633  | -0.783068134 | 0.774099  | -1.011586 | 0.311736 | NA       |
| si:ch211-199g17.2 | 24.56175335 | -0.563838152 | 0.3984438 | -1.415101 | 0.157039 | 0.707677 |
| si:dkey-65b12.10  | 1.024339737 | 3.476540236  | 2.0349298 | 1.7084325 | 0.087556 | NA       |
| BX004981.1        | 9.787968138 | 0.04286824   | 0.6000009 | 0.071447  | 0.943042 | NA       |
| pimr152           | 0 NA        | NA           | NA        | NA        | NA       | NA       |
| BX323074.1        | 4.015626252 | -0.282975642 | 1.0006248 | -0.282799 | 0.777331 | NA       |
| CT583646.1        | 0 NA        | NA           | NA        | NA        | NA       | NA       |
| si:ch211-152f2.1  | 0 NA        | NA           | NA        | NA        | NA       | NA       |
| CR383669.1        | 0.166657454 | -0.955901296 | 4.0804729 | -0.234262 | 0.814781 | NA       |
| si:dkeyp-2e4.3    | 14.60274926 | -0.521164502 | 0.5495887 | -0.948281 | 0.342986 | 0.878434 |
| pimr136           | 1.308375155 | 0.736523946  | 1.6727564 | 0.4403056 | 0.659716 | NA       |
| CR383672.1        | 0.341486697 | 1.892317624  | 3.2124068 | 0.5890654 | 0.555817 | NA       |
| BX649499.1        | 0.824875771 | -0.638730095 | 2.222328  | -0.287415 | 0.773795 | NA       |
| CU207311.1        | 0 NA        | NA           | NA        | NA        | NA       | NA       |
| CU467861.1        | 278.085342  | -0.174837732 | 0.1324429 | -1.320099 | 0.186802 | 0.750951 |
| pimr61            | 0 NA        | NA           | NA        | NA        | NA       | NA       |

|                   |             |              |           |           |          |          |
|-------------------|-------------|--------------|-----------|-----------|----------|----------|
| AL590150.1        | 26.7487424  | 0.067257062  | 0.3674665 | 0.1830291 | 0.854775 | 0.985174 |
| si:dkey-57a22.13  | 0.339758314 | 0.005883863  | 3.2682461 | 0.0018003 | 0.998564 | NA       |
| nfil3-4           | 0 NA        | NA           | NA        | NA        | NA       | NA       |
| si:dkey-161j23.6  | 165.9443259 | 0.013572039  | 0.1702891 | 0.0797    | 0.936476 | 0.992702 |
| CT027702.1        | 4.813864927 | -0.066856026 | 0.8718717 | -0.076681 | 0.938877 | NA       |
| si:dkey-222h21.12 | 0 NA        | NA           | NA        | NA        | NA       | NA       |
| BX649478.1        | 6.59443168  | 0.309254869  | 0.7436972 | 0.4158344 | 0.677531 | NA       |
| jac4              | 1.190756486 | 2.514004893  | 1.9965149 | 1.2591967 | 0.207959 | NA       |
| si:ch211-284e13.6 | 490.258423  | -0.114810486 | 0.1073721 | -1.069277 | 0.284945 | 0.845094 |
| BX469930.1        | 13.56159074 | 0.652999605  | 0.548808  | 1.1898508 | 0.234105 | 0.802753 |
| si:dkeyp-113d7.10 | 62.37845559 | -0.180779653 | 0.2507324 | -0.721006 | 0.470906 | 0.924838 |
| si:ch211-51h9.6   | 128.497171  | -0.058716593 | 0.1777616 | -0.330311 | 0.741165 | 0.973154 |
| si:dkey-79f11.7   | 7.156211699 | 0.554007039  | 0.778353  | 0.7117684 | 0.476608 | NA       |
| hsp70.2           | 891.3155606 | -0.013260716 | 0.2743226 | -0.04834  | 0.961445 | 0.995842 |
| si:ch211-218c6.8  | 262.2098004 | -0.234134497 | 0.1406864 | -1.66423  | 0.096066 | 0.590174 |
| si:dkeyp-77c8.3   | 3.22558007  | -0.57441694  | 1.1088593 | -0.518025 | 0.604441 | NA       |
| BX511023.1        | 60.32494551 | -0.044263891 | 0.2572394 | -0.172073 | 0.86338  | 0.985841 |
| BX005340.1        | 0 NA        | NA           | NA        | NA        | NA       | NA       |
| dlgap2b           | 5.900158175 | 0.807723985  | 0.8558754 | 0.9437401 | 0.345302 | NA       |
| BX571809.1        | 2.705725637 | -1.113233272 | 1.2097115 | -0.920247 | 0.357444 | NA       |
| si:dkeyp-51b9.3   | 3.111658872 | 0.479487952  | 1.0763361 | 0.4454816 | 0.655972 | NA       |
| si:dkey-33c12.14  | 0.157187365 | -0.955901296 | 4.0804729 | -0.234262 | 0.814781 | NA       |
| zgc:153759        | 0.833476647 | 0.586781922  | 2.2129474 | 0.2651585 | 0.790887 | NA       |
| snorc             | 465.6483169 | -0.07135001  | 0.1143656 | -0.623876 | 0.532709 | 0.942805 |
| si:dkey-28d5.3    | 0 NA        | NA           | NA        | NA        | NA       | NA       |
| zgc:193742        | 128.3427314 | 0.018570821  | 0.1837201 | 0.1010821 | 0.919485 | 0.991651 |
| CU207217.1        | 0.31598276  | 0.005883445  | 3.3523626 | 0.001755  | 0.9986   | NA       |
| si:dkey-6f10.4    | 0 NA        | NA           | NA        | NA        | NA       | NA       |
| dcun1d4           | 690.8936899 | 0.071832023  | 0.0935254 | 0.7680484 | 0.442458 | 0.916336 |
| BX120005.2        | 0.347458735 | -1.908042286 | 3.4571486 | -0.551912 | 0.581009 | NA       |
| BX936320.1        | 46.68914511 | 0.009804405  | 0.2952329 | 0.0332091 | 0.973508 | 0.996315 |
| taar20d1          | 0 NA        | NA           | NA        | NA        | NA       | NA       |
| BX901930.1        | 0 NA        | NA           | NA        | NA        | NA       | NA       |
| CR396590.2        | 0.157187365 | -0.955901296 | 4.0804729 | -0.234262 | 0.814781 | NA       |
| BX569787.1        | 93.40143542 | -0.478093348 | 0.2145603 | -2.228247 | 0.025864 | 0.310878 |
| si:dkey-79p17.3   | 6.581133323 | 1.02099344   | 0.7662987 | 1.3323701 | 0.182739 | NA       |
| or115-8           | 0.158795395 | 0.967652056  | 4.0804729 | 0.2371421 | 0.812547 | NA       |
| zmp:0000001316    | 31.17031317 | 0.073610556  | 0.3443494 | 0.213767  | 0.830729 | 0.982994 |
| CU467861.2        | 7.726889003 | -0.40403967  | 0.7080562 | -0.570632 | 0.568249 | NA       |
| CR762493.1        | 0.182570949 | 0.967652056  | 4.0804729 | 0.2371421 | 0.812547 | NA       |
| FP103004.1        | 41.63491494 | -0.031774846 | 0.3096737 | -0.102608 | 0.918274 | 0.991623 |
| vtg7              | 13.24977754 | 0.451331493  | 0.6000975 | 0.7520969 | 0.451993 | 0.918761 |
| si:ch1073-394i4.1 | 0.157187365 | -0.955901296 | 4.0804729 | -0.234262 | 0.814781 | NA       |
| CR854838.1        | 0 NA        | NA           | NA        | NA        | NA       | NA       |
| cxc111.5          | 0.182570949 | 0.967652056  | 4.0804729 | 0.2371421 | 0.812547 | NA       |
| BX677668.2        | 7.681255502 | 0.036253148  | 0.6997066 | 0.0518119 | 0.958679 | NA       |
| si:dkey-24c2.7    | 3.542655794 | -1.312436319 | 1.0922668 | -1.201571 | 0.22953  | NA       |
| BX649599.1        | 0 NA        | NA           | NA        | NA        | NA       | NA       |
| CU041345.1        | 0 NA        | NA           | NA        | NA        | NA       | NA       |
| BX537137.1        | 0.365141898 | 1.973577737  | 3.3927314 | 0.5817076 | 0.560764 | NA       |
| BX649502.3        | 0 NA        | NA           | NA        | NA        | NA       | NA       |
| BX005364.1        | 0 NA        | NA           | NA        | NA        | NA       | NA       |
| BX548032.1        | 1.629942151 | 0.008362405  | 1.4412693 | 0.0058021 | 0.995371 | NA       |
| BX088710.1        | 0 NA        | NA           | NA        | NA        | NA       | NA       |



|                    |             |              |           |           |          |          |
|--------------------|-------------|--------------|-----------|-----------|----------|----------|
| zgc:153352         | 33.66221243 | 0.16877361   | 0.3293565 | 0.5124344 | 0.608347 | 0.956718 |
| BX571825.7         | 0 NA        | NA           | NA        | NA        | NA       | NA       |
| CR762431.1         | 37.1147996  | 0.324046938  | 0.3200213 | 1.0125794 | 0.311261 | 0.863542 |
| si:dkey-95p16.1    | 3.484341813 | 0.400398492  | 1.1218348 | 0.356914  | 0.721156 | NA       |
| BX469925.2         | 0 NA        | NA           | NA        | NA        | NA       | NA       |
| si:ch211-246e12.3  | 8.207705983 | -0.716652386 | 0.694328  | -1.032152 | 0.302001 | NA       |
| BX284635.1         | 49.13055055 | -0.215436332 | 0.2748788 | -0.78375  | 0.433187 | 0.913654 |
| BX548073.2         | 0.538871265 | 0.999144257  | 2.7784799 | 0.359601  | 0.719146 | NA       |
| si:dkey-282h22.5   | 4.19646203  | 1.348791886  | 0.994855  | 1.3557673 | 0.175173 | NA       |
| si:dkey-9i23.5     | 1.469259991 | 1.782268073  | 1.7611588 | 1.011986  | 0.311545 | NA       |
| kif1               | 4.843402808 | 0.93712474   | 0.8701069 | 1.0770226 | 0.28147  | NA       |
| rhbdd2             | 79.6679643  | -0.303300777 | 0.2316042 | -1.309565 | 0.190343 | 0.755033 |
| si:dkeyp-20g2.1    | 60.9726118  | -0.039891556 | 0.2513485 | -0.15871  | 0.873897 | 0.987881 |
| si:ch73-46j18.5    | 6553.379876 | 0.182747353  | 0.0664945 | 2.7483083 | 0.00599  | 0.117165 |
| fnrc7rs1           | 46.81278379 | 0.020468419  | 0.2817231 | 0.0726544 | 0.942081 | 0.993099 |
| thbd               | 13.60918652 | 0.074694608  | 0.5401429 | 0.1382868 | 0.890014 | 0.989291 |
| si:dkey-7j22.1     | 4.744476359 | -1.378494707 | 0.9190505 | -1.499912 | 0.133637 | NA       |
| AL953896.1         | 9.228632078 | 0.290242729  | 0.6355146 | 0.456705  | 0.647883 | NA       |
| apopt1             | 195.3052379 | 0.052010986  | 0.1534784 | 0.3388815 | 0.734699 | 0.972021 |
| si:rp71-1f1.4      | 5.485650045 | -0.346963642 | 0.9319233 | -0.372309 | 0.709663 | NA       |
| BX284666.1         | 3.022729205 | -0.266774883 | 1.1062384 | -0.241155 | 0.809435 | NA       |
| sdhaf1             | 251.0346572 | -0.143645389 | 0.1357155 | -1.05843  | 0.289859 | 0.846246 |
| vegfb              | 2.986693087 | -1.392035027 | 1.1691005 | -1.190689 | 0.233776 | NA       |
| si:ch211-207c7.2   | 0.974991223 | -1.022830706 | 2.0964916 | -0.487877 | 0.625637 | NA       |
| si:dkeyp-110g5.4   | 67.96296112 | -0.131232643 | 0.2462854 | -0.532848 | 0.594139 | 0.954434 |
| iqcc               | 79.22905172 | -0.236514795 | 0.2320585 | -1.019203 | 0.308107 | 0.861088 |
| si:ch211-215m21.22 | 0 NA        | NA           | NA        | NA        | NA       | NA       |
| khyn               | 222.0865069 | -0.289134562 | 0.1588586 | -1.820075 | 0.068748 | 0.513259 |
| si:ch73-103b9.2    | 21.99442214 | -0.546369846 | 0.4094187 | -1.334501 | 0.18204  | 0.744499 |
| BX323457.1         | 0.688986717 | 0.114008068  | 2.399209  | 0.047519  | 0.9621   | NA       |
| si:dkey-149i17.8   | 0 NA        | NA           | NA        | NA        | NA       | NA       |
| si:dkeyp-44a8.2    | 1830.490863 | 0.101653147  | 0.0986236 | 1.0307181 | 0.302673 | 0.85729  |
| BX927275.1         | 0.173729368 | -0.955901296 | 4.0804729 | -0.234262 | 0.814781 | NA       |
| si:dkeyp-46h3.2    | 2.613225516 | 0.373494033  | 1.1968048 | 0.312076  | 0.754983 | NA       |
| si:ch211-183d21.1  | 101.451675  | -0.044058148 | 0.2018839 | -0.218235 | 0.827246 | 0.982682 |
| si:dkey-222h21.1   | 0.349228403 | 0.005884014  | 3.2372587 | 0.0018176 | 0.99855  | NA       |
| si:dkey-80c24.5    | 0.639827579 | -1.440067194 | 2.4366738 | -0.590997 | 0.554522 | NA       |
| si:ch73-34314.3    | 0 NA        | NA           | NA        | NA        | NA       | NA       |
| arid1b             | 988.6815985 | -0.184251361 | 0.0945103 | -1.949537 | 0.051231 | 0.443542 |
| znf1013            | 63.88934937 | -0.024155682 | 0.2490241 | -0.097001 | 0.922725 | 0.99233  |
| si:ch73-376124.2   | 80.37009268 | -0.306763886 | 0.2594272 | -1.182466 | 0.237021 | 0.805854 |
| CR405715.1         | 3.106661858 | 0.428580749  | 1.0760283 | 0.3982988 | 0.69041  | NA       |
| CR376835.1         | 0.515885857 | -0.89611015  | 2.8190897 | -0.317872 | 0.750582 | NA       |
| si:dkey-9311.6     | 1.818175409 | -3.213124482 | 1.6789957 | -1.913718 | 0.055656 | NA       |
| pku300             | 0 NA        | NA           | NA        | NA        | NA       | NA       |
| gpsmla             | 867.9734369 | 0.158829851  | 0.0921723 | 1.7231835 | 0.084855 | 0.560519 |
| si:dkey-21e2.11    | 0 NA        | NA           | NA        | NA        | NA       | NA       |
| si:dkey-250k15.10  | 11.42314364 | -1.813637095 | 0.6598756 | -2.748453 | 0.005988 | 0.117165 |
| jac1               | 23.36751868 | 1.314140096  | 0.4477686 | 2.934864  | 0.003337 | 0.077242 |
| nnt2               | 30.2959168  | 0.16649187   | 0.3442113 | 0.4836909 | 0.628605 | 0.957354 |
| si:dkey-47k20.1    | 0.484368597 | 0.855487352  | 2.7040894 | 0.316368  | 0.751723 | NA       |
| si:dkey-88116.4    | 0 NA        | NA           | NA        | NA        | NA       | NA       |
| BX663522.1         | 0 NA        | NA           | NA        | NA        | NA       | NA       |
| BX005153.1         | 1.364296476 | -0.705781629 | 1.7443612 | -0.404607 | 0.685766 | NA       |

|                    |             |              |           |           |          |          |
|--------------------|-------------|--------------|-----------|-----------|----------|----------|
| si:dkey-21e2.8     | 7.540660626 | -0.762536321 | 0.7038242 | -1.083419 | 0.278623 | NA       |
| si:ch211-13315.4   | 4.805872224 | 1.646660299  | 0.9088466 | 1.8118132 | 0.070015 | NA       |
| si:dkey-242h9.5    | 0.157187365 | -0.955901296 | 4.0804729 | -0.234262 | 0.814781 | NA       |
| BX571825.8         | 0 NA        |              | NA        | NA        | NA       | NA       |
| BX927394.1         | 0.845032922 | -3.195649681 | 2.1776262 | -1.467492 | 0.142242 | NA       |
| CR855328.1         | 0 NA        |              | NA        | NA        | NA       | NA       |
| BX649502.4         | 0 NA        |              | NA        | NA        | NA       | NA       |
| BX005068.1         | 0.670675047 | -1.455259498 | 2.4036813 | -0.605429 | 0.544894 | NA       |
| pdapla             | 2029.503684 | 0.047335752  | 0.0724446 | 0.6534062 | 0.513494 | 0.936615 |
| si:dkey-85a20.4    | 1.222514451 | 1.394641811  | 1.9626635 | 0.7105863 | 0.477341 | NA       |
| si:dkey-56e3.2     | 15.22204923 | 0.991711112  | 0.5329855 | 1.8606717 | 0.062791 | 0.489019 |
| fncl7rs2           | 0.645291463 | -2.8201041   | 2.5306349 | -1.114386 | 0.265114 | NA       |
| slc25a5            | 55970.34653 | -0.098478837 | 0.0826205 | -1.191943 | 0.233284 | 0.801695 |
| si:ch211-214j8.12  | 56.10372066 | -0.535257155 | 0.2796867 | -1.913774 | 0.055649 | 0.461579 |
| AL929315.1         | 1.472246632 | 1.049390408  | 1.6667905 | 0.6295875 | 0.528965 | NA       |
| or123-1            | 0.964610636 | -0.018889399 | 1.958304  | -0.009646 | 0.992304 | NA       |
| pimr201            | 0.996127896 | -0.965496869 | 1.8966759 | -0.509047 | 0.610719 | NA       |
| BX927385.1         | 1.51295199  | 0.327014375  | 1.4960191 | 0.2185897 | 0.82697  | NA       |
| si:dkey-6111.4     | 121.4677756 | -0.228805812 | 0.2002776 | -1.142443 | 0.25327  | 0.823033 |
| BX571681.1         | 0 NA        |              | NA        | NA        | NA       | NA       |
| CU394254.1         | 0 NA        |              | NA        | NA        | NA       | NA       |
| BX323586.1         | 0.365141898 | 1.973577737  | 3.3927314 | 0.5817076 | 0.560764 | NA       |
| si:ch211-198d23.1  | 29.63774835 | -0.699997103 | 0.3554857 | -1.969129 | 0.048938 | 0.435115 |
| BX927388.1         | 2.701980093 | 0.767053272  | 1.2236327 | 0.6268656 | 0.530747 | NA       |
| or125-6            | 0 NA        |              | NA        | NA        | NA       | NA       |
| si:ch211-222e20.4  | 123.6921638 | -0.162520358 | 0.1801065 | -0.902357 | 0.366867 | 0.88734  |
| si:ch211-95j8.3    | 1.198429168 | -1.20658346  | 3.9052074 | -0.308968 | 0.757346 | NA       |
| si:dkey-16p19.5    | 12.96434084 | 0.302814927  | 0.5352738 | 0.5657196 | 0.571584 | 0.949472 |
| si:ch1073-385f13.3 | 16.59007957 | -0.623896245 | 0.5151266 | -1.211151 | 0.225837 | 0.79334  |
| BX957274.1         | 0.492110303 | -0.89618148  | 2.8628934 | -0.313033 | 0.754255 | NA       |
| CU861651.2         | 0.635301933 | 2.809457917  | 2.5427008 | 1.1049109 | 0.269198 | NA       |
| pimr150            | 0 NA        |              | NA        | NA        | NA       | NA       |
| BX322660.1         | 0.491560863 | 0.853615855  | 2.865157  | 0.2979299 | 0.765757 | NA       |
| CR925763.1         | 0.31759079  | 1.807926197  | 3.579045  | 0.5051421 | 0.613459 | NA       |
| si:dkey-174k12.3   | 0 NA        |              | NA        | NA        | NA       | NA       |
| si:dkeyp-44d3.1    | 2.573214281 | -0.113217404 | 1.2672649 | -0.08934  | 0.928812 | NA       |
| BX005058.1         | 0 NA        |              | NA        | NA        | NA       | NA       |
| si:dkey-256e7.5    | 17.11468186 | 0.275917587  | 0.4619907 | 0.5972362 | 0.55035  | 0.946549 |
| BX546499.1         | 18.26031338 | -0.313476133 | 0.4401264 | -0.712241 | 0.476315 | 0.926486 |
| si:ch211-15j1.4    | 8.216942997 | -1.17792308  | 0.6972271 | -1.68944  | 0.091135 | NA       |
| znf1003            | 25.57276854 | -0.322955072 | 0.3793873 | -0.851254 | 0.394628 | 0.898861 |
| CU855900.1         | 0 NA        |              | NA        | NA        | NA       | NA       |
| BX936298.1         | 0.158795395 | 0.967652056  | 4.0804729 | 0.2371421 | 0.812547 | NA       |
| si:dkey-262g12.12  | 82.21677328 | -0.072573283 | 0.2209804 | -0.328415 | 0.742598 | 0.973232 |
| aupl               | 718.1831478 | -0.06144513  | 0.1067899 | -0.575383 | 0.565032 | 0.948739 |
| lamp1b             | 820.8708558 | -0.022834527 | 0.0918472 | -0.248614 | 0.803659 | 0.979643 |
| CR848741.1         | 0.158795395 | 0.967652056  | 4.0804729 | 0.2371421 | 0.812547 | NA       |
| si:dkey-204f11.3   | 0 NA        |              | NA        | NA        | NA       | NA       |
| BX322665.1         | 3.70400521  | 2.200596521  | 1.1076107 | 1.986796  | 0.046945 | NA       |
| sptbn4b            | 53.72259179 | -0.011314344 | 0.3140681 | -0.036025 | 0.971262 | 0.996315 |
| zgc:174193         | 1.342958123 | -0.680000894 | 1.7232513 | -0.394603 | 0.693136 | NA       |
| zgc:174931         | 14.58995362 | 0.136116724  | 0.5433557 | 0.2505113 | 0.802192 | 0.979492 |
| pimr29             | 0 NA        |              | NA        | NA        | NA       | NA       |
| CR954294.1         | 0 NA        |              | NA        | NA        | NA       | NA       |

|                   |             |              |           |           |          |          |
|-------------------|-------------|--------------|-----------|-----------|----------|----------|
| CR812470.1        | 51.23397327 | 0.197308716  | 0.2725945 | 0.7238178 | 0.469178 | 0.924496 |
| CR753844.1        | 0.657469457 | 1.487996951  | 2.3011149 | 0.6466417 | 0.517864 | NA       |
| EBF1 (1 of many)  | 0 NA        | NA           | NA        | NA        | NA       | NA       |
| AL935295.1        | 7.486245519 | 0.881755192  | 0.7231124 | 1.2193888 | 0.222697 | NA       |
| ptprua            | 933.8181478 | 0.038283238  | 0.0889484 | 0.4303983 | 0.666906 | 0.964736 |
| BX649641.1        | 0 NA        | NA           | NA        | NA        | NA       | NA       |
| BX571701.2        | 0 NA        | NA           | NA        | NA        | NA       | NA       |
| BX323080.1        | 0.990622727 | -0.0667832   | 1.9438623 | -0.034356 | 0.972593 | NA       |
| ago1              | 9.581502372 | -0.020811096 | 0.6509551 | -0.03197  | 0.974496 | NA       |
| CR381531.1        | 1.155713436 | -1.281524989 | 1.8786642 | -0.682147 | 0.495146 | NA       |
| si:ch211-223p8.8  | 0 NA        | NA           | NA        | NA        | NA       | NA       |
| si:dkey-57a22.11  | 63.33126106 | 0.014795326  | 0.2551394 | 0.0579892 | 0.953757 | 0.994213 |
| qrfpr4            | 10.19625259 | 0.050092628  | 0.6154828 | 0.0813875 | 0.935134 | NA       |
| si:dkey-1h24.6    | 1.521604194 | -0.961730371 | 1.6012032 | -0.60063  | 0.548087 | NA       |
| CR457445.1        | 27.94756295 | -0.007862119 | 0.3852237 | -0.020409 | 0.983717 | 0.996944 |
| ppp3r1a           | 322.3642206 | -0.028911686 | 0.1241311 | -0.232912 | 0.815829 | 0.981594 |
| cyp27c1           | 151.7262519 | 0.246939966  | 0.1653676 | 1.4932793 | 0.135364 | 0.670849 |
| dnaaf3            | 3.952448138 | 0.498436688  | 0.9518073 | 0.5236739 | 0.600505 | NA       |
| si:dkey-93m18.3   | 4.812366959 | 1.154517939  | 0.8772038 | 1.3161342 | 0.188129 | NA       |
| BX005156.1        | 0 NA        | NA           | NA        | NA        | NA       | NA       |
| si:ch211-271e10.2 | 1.143845172 | -1.265201982 | 1.909223  | -0.662679 | 0.507536 | NA       |
| tlr20.3           | 0.496945679 | -0.834564081 | 2.8549631 | -0.29232  | 0.770042 | NA       |
| pard3ba           | 92.07509697 | -0.3053299   | 0.2125067 | -1.436801 | 0.150774 | 0.698912 |
| BX248497.1        | 259.8770446 | 0.093288861  | 0.1334009 | 0.6993121 | 0.484357 | 0.929601 |
| coa6              | 40.60879918 | -0.067623375 | 0.302861  | -0.223282 | 0.823316 | 0.982196 |
| AL954134.2        | 0 NA        | NA           | NA        | NA        | NA       | NA       |
| si:dkey-58f10.12  | 5.290520399 | 1.545334811  | 0.9068263 | 1.7041134 | 0.08836  | NA       |
| AL845369.1        | 0.976719606 | -0.046864593 | 2.2023826 | -0.021279 | 0.983023 | NA       |
| BX649292.1        | 0 NA        | NA           | NA        | NA        | NA       | NA       |
| si:ch211-130h14.6 | 0 NA        | NA           | NA        | NA        | NA       | NA       |
| CU682811.1        | 0.182570949 | 0.967652056  | 4.0804729 | 0.2371421 | 0.812547 | NA       |
| pimr133           | 0 NA        | NA           | NA        | NA        | NA       | NA       |
| tpt1              | 31420.76184 | -0.336505295 | 0.0903635 | -3.723908 | 0.000196 | 0.008396 |
| CT025775.1        | 0 NA        | NA           | NA        | NA        | NA       | NA       |
| cyp11a2           | 11.31026223 | 0.368475751  | 0.5959709 | 0.6182781 | 0.536392 | 0.943336 |
| pimr200           | 0.317711143 | 1.810477155  | 3.2978238 | 0.5489915 | 0.583011 | NA       |
| si:dkeyp-20e4.8   | 0.173729368 | -0.955901296 | 4.0804729 | -0.234262 | 0.814781 | NA       |
| BX649384.2        | 1.157751549 | 2.488197843  | 1.9005833 | 1.3091759 | 0.190475 | NA       |
| or124-1           | 0.48448895  | 0.85344211   | 2.878836  | 0.2964539 | 0.766883 | NA       |
| BX537280.1        | 1.340331546 | -3.866967578 | 3.7746737 | -1.024451 | 0.305622 | NA       |
| CU463109.1        | 0 NA        | NA           | NA        | NA        | NA       | NA       |
| BX571681.2        | 0.158795395 | 0.967652056  | 4.0804729 | 0.2371421 | 0.812547 | NA       |
| si:dkey-31b16.7   | 0 NA        | NA           | NA        | NA        | NA       | NA       |
| si:ch211-266a5.12 | 8.086799692 | 0.673400475  | 0.7287727 | 0.9240199 | 0.355476 | NA       |
| CR847503.1        | 24.82160368 | 0.547006633  | 0.3892359 | 1.4053346 | 0.159922 | 0.712228 |
| VASH1             | 142.4839082 | 0.293099716  | 0.1774065 | 1.6521363 | 0.098507 | 0.597984 |
| BX569790.1        | 0.166657454 | -0.955901296 | 4.0804729 | -0.234262 | 0.814781 | NA       |
| gbgt112           | 17.00940447 | -0.588669639 | 0.4863406 | -1.210406 | 0.226123 | 0.793638 |
| AL954655.2        | 28.15484169 | 0.053592852  | 0.3747717 | 0.1430013 | 0.886289 | 0.988936 |
| si:ch211-67f24.7  | 20.10988102 | -0.570246825 | 0.4432152 | -1.286614 | 0.198229 | 0.76333  |
| unc5da            | 444.9808559 | 0.152083016  | 0.1248219 | 1.2184001 | 0.223072 | 0.789115 |
| si:ch73-381f5.2   | 0 NA        | NA           | NA        | NA        | NA       | NA       |
| si:dkey-188i13.8  | 8.795978087 | -0.050744706 | 0.6326358 | -0.080212 | 0.936069 | NA       |
| si:dkey-184p9.7   | 92.63677558 | -0.30614464  | 0.2338553 | -1.30912  | 0.190494 | 0.755212 |

|                    |             |              |           |           |          |          |
|--------------------|-------------|--------------|-----------|-----------|----------|----------|
| si:dkey-266f7.4    | 0.158795395 | 0.967652056  | 4.0804729 | 0.2371421 | 0.812547 | NA       |
| enam               | 487.6024595 | -0.209913226 | 0.1333698 | -1.573919 | 0.115506 | 0.637206 |
| mhcluka            | 1.290183837 | -0.02344436  | 1.647742  | -0.014228 | 0.988648 | NA       |
| si:ch73-256j6.5    | 5.054126771 | 0.63840888   | 0.9026668 | 0.7072476 | 0.479413 | NA       |
| si:ch211-263k4.2   | 13.00952431 | -0.631876692 | 0.5328277 | -1.185893 | 0.235665 | 0.804824 |
| BX510917.1         | 0.831706979 | -0.653219184 | 2.2172216 | -0.294612 | 0.768291 | NA       |
| si:ch211-57m13.7   | 0.157187365 | -0.955901296 | 4.0804729 | -0.234262 | 0.814781 | NA       |
| BX571825.9         | 0           | NA           | NA        | NA        | NA       | NA       |
| ftr37              | 3.497706781 | -0.118132249 | 1.0030523 | -0.117773 | 0.906248 | NA       |
| si:ch211-150o23.2  | 160.6684542 | 0.10655027   | 0.1645836 | 0.6473929 | 0.517378 | 0.938592 |
| si:ch211-133n4.12  | 0           | NA           | NA        | NA        | NA       | NA       |
| CR396590.3         | 0           | NA           | NA        | NA        | NA       | NA       |
| BX248399.1         | 1.130329852 | -2.449181944 | 2.0196915 | -1.212652 | 0.225263 | NA       |
| caiap              | 1.448230372 | 1.025641948  | 1.6993965 | 0.603533  | 0.546154 | NA       |
| si:dkey-61p9.9     | 67.81784204 | -0.022616937 | 0.2384927 | -0.094833 | 0.924448 | 0.992676 |
| si:dkey-5i3.1      | 0           | NA           | NA        | NA        | NA       | NA       |
| si:dkey-57a22.14   | 0           | NA           | NA        | NA        | NA       | NA       |
| znf1151            | 27.35222313 | -0.326942957 | 0.3663048 | -0.892543 | 0.372102 | 0.892629 |
| si:dkeyp-68b7.7    | 26.37844876 | 0.186642743  | 0.3746307 | 0.4982046 | 0.61834  | 0.957354 |
| si:ch211-253p18.2  | 10.19874    | 0.866856572  | 0.6028628 | 1.4379002 | 0.150462 | NA       |
| BX530064.1         | 0           | NA           | NA        | NA        | NA       | NA       |
| CR769772.1         | 0.547712847 | 2.559541715  | 2.9076406 | 0.8802813 | 0.378707 | NA       |
| tarsl2             | 421.1444546 | -0.017149963 | 0.111267  | -0.154133 | 0.877505 | 0.987881 |
| BX640547.1         | 2.321567749 | 0.03878383   | 1.3533206 | 0.0286583 | 0.977137 | NA       |
| si:ch73-338o16.4   | 2.679911971 | -3.801724469 | 1.5404296 | -2.467964 | 0.013588 | NA       |
| si:rp71-23d18.4    | 0           | NA           | NA        | NA        | NA       | NA       |
| si:ch1073-170o4.1  | 27.49496102 | -0.030447393 | 0.3783812 | -0.080468 | 0.935865 | 0.992702 |
| BX323550.1         | 0           | NA           | NA        | NA        | NA       | NA       |
| znf1109            | 20.00762191 | 0.712809207  | 0.431142  | 1.653305  | 0.098269 | 0.597502 |
| si:dkey-88p24.11   | 176.7134892 | -0.229602389 | 0.1723833 | -1.331929 | 0.182883 | 0.745944 |
| si:dkey-21e2.15    | 13.30480162 | -1.69698518  | 0.578183  | -2.935031 | 0.003335 | 0.077242 |
| BX323038.1         | 2.187365793 | 0.715941476  | 1.3414459 | 0.5337088 | 0.593543 | NA       |
| rprm3              | 67.52829859 | 0.01524555   | 0.2376682 | 0.0641464 | 0.948854 | 0.99381  |
| BX470224.1         | 0.158915748 | 0.967652056  | 4.0804729 | 0.2371421 | 0.812547 | NA       |
| ppib               | 7157.286096 | -0.122138201 | 0.0769261 | -1.587734 | 0.112346 | 0.627572 |
| camta2             | 23.57986604 | -0.301031323 | 0.4008648 | -0.750955 | 0.45268  | 0.919496 |
| CU075735.2         | 0.474778155 | 0.852397662  | 2.898154  | 0.2941175 | 0.768668 | NA       |
| CR855277.2         | 9.71417778  | -0.239654688 | 0.6133349 | -0.39074  | 0.695989 | NA       |
| BX957328.1         | 0.522329263 | 0.999930388  | 2.8066578 | 0.3562709 | 0.721638 | NA       |
| si:ch1073-110a20.2 | 7.706780267 | -0.045341864 | 0.7684577 | -0.059004 | 0.952949 | NA       |
| si:dkey-151g10.6   | 15900.79219 | -0.446044819 | 0.1066779 | -4.18123  | 2.90E-05 | 0.001706 |
| CU466285.1         | 0.474778155 | 0.852397662  | 2.898154  | 0.2941175 | 0.768668 | NA       |
| hoxc9a             | 116.3707196 | 0.075206944  | 0.189899  | 0.3960365 | 0.692078 | 0.967354 |
| stap2a             | 492.5699874 | -0.176603199 | 0.1132587 | -1.559291 | 0.118928 | 0.642772 |
| fn dc7rs4          | 322.6830626 | 0.031353747  | 0.1249198 | 0.2509909 | 0.801821 | 0.979492 |
| si:dkey-21e2.3     | 0           | NA           | NA        | NA        | NA       | NA       |
| si:dkey-93n13.2    | 147.9847486 | 0.174407013  | 0.1662107 | 1.0493127 | 0.294034 | 0.849999 |
| CR388168.1         | 0.325573202 | 0.005883621  | 3.3172783 | 0.0017736 | 0.998585 | NA       |
| si:dkeyp-67a8.4    | 13.96605338 | -0.083295161 | 0.5609039 | -0.148502 | 0.881947 | 0.988344 |
| si:dkey-42p14.3    | 5.098046023 | 0.036350714  | 0.8963052 | 0.0405562 | 0.96765  | NA       |
| BX248511.1         | 5.445308593 | 0.583949486  | 0.863358  | 0.67637   | 0.498806 | NA       |
| CR589943.1         | 4.629053938 | -0.21440723  | 0.8970912 | -0.239003 | 0.811103 | NA       |
| BX548075.1         | 0           | NA           | NA        | NA        | NA       | NA       |
| CR318588.2         | 0           | NA           | NA        | NA        | NA       | NA       |

|                   |             |              |           |           |          |          |
|-------------------|-------------|--------------|-----------|-----------|----------|----------|
| si:ch211-191d15.2 | 0.531799352 | 0.999478841  | 2.790358  | 0.3581902 | 0.720201 | NA       |
| si:ch211-93g21.2  | 1.123526383 | 0.393221643  | 1.8303296 | 0.2148365 | 0.829895 | NA       |
| si:dkey-66g10.2   | 2.280738783 | -1.260458015 | 1.3534773 | -0.931274 | 0.351712 | NA       |
| zgc:162611        | 74.76478849 | 0.427755807  | 0.255867  | 1.6717894 | 0.094566 | 0.584906 |
| AL845320.1        | 0.665960023 | -1.495776328 | 2.4092162 | -0.620856 | 0.534694 | NA       |
| si:ch73-92e7.4    | 81.16936117 | -0.184705999 | 0.2369857 | -0.779397 | 0.435746 | 0.914408 |
| CR788322.1        | 0 NA        | NA           | NA        | NA        | NA       | NA       |
| BX510324.1        | 0.323844819 | -1.825095364 | 3.274639  | -0.557342 | 0.577293 | NA       |
| SRBD1             | 111.2428174 | -0.093291129 | 0.1941553 | -0.480498 | 0.630874 | 0.957354 |
| si:ch211-210c8.7  | 169.2919922 | 0.012114537  | 0.1609921 | 0.0752493 | 0.940016 | 0.992857 |
| si:ch1073-126c3.2 | 22.71136445 | -0.254149959 | 0.4287737 | -0.592737 | 0.553357 | 0.947265 |
| si:ch211-260p9.3  | 4.780340549 | 0.719249351  | 0.8839647 | 0.813663  | 0.415838 | NA       |
| CU138515.1        | 1.507100304 | 1.842319674  | 1.6667457 | 1.1053394 | 0.269013 | NA       |
| BX936337.1        | 843.3685236 | -0.041164178 | 0.1138024 | -0.361716 | 0.717564 | 0.96909  |
| upk3b             | 13.09125375 | 0.067983263  | 0.548906  | 0.1238523 | 0.901432 | 0.990121 |
| zgc:193541        | 2677.864843 | -0.027667132 | 0.0906039 | -0.305364 | 0.760089 | 0.975374 |
| BX537288.1        | 0.325573202 | 0.005883621  | 3.3172783 | 0.0017736 | 0.998585 | NA       |
| si:dkeyp-85e10.3  | 4.279974891 | -0.481451002 | 0.9929285 | -0.48488  | 0.627762 | NA       |
| CU074419.1        | 0.524057646 | 2.503896172  | 2.7289583 | 0.9175282 | 0.358866 | NA       |
| BX649294.1        | 86.32859808 | -0.175822881 | 0.2120779 | -0.829048 | 0.407077 | 0.901305 |
| si:dkey-161j23.7  | 197.5860988 | -0.179086679 | 0.1453994 | -1.231688 | 0.218066 | 0.785379 |
| si:dkey-193b15.5  | 3.035387768 | -0.462580036 | 1.1821187 | -0.391314 | 0.695565 | NA       |
| zgc:171977        | 0 NA        | NA           | NA        | NA        | NA       | NA       |
| si:dkeyp-46h3.3   | 1.354156595 | 0.015823789  | 1.57664   | 0.0100364 | 0.991992 | NA       |
| zgc:194246        | 112.9633937 | 0.309304712  | 0.2073931 | 1.4913933 | 0.135858 | 0.672288 |
| si:ch73-44m9.5    | 0 NA        | NA           | NA        | NA        | NA       | NA       |
| si:dkey-23c22.5   | 5.110236474 | 0.078018599  | 0.8269527 | 0.0943447 | 0.924835 | NA       |
| CT027589.1        | 0.341486697 | 1.892317624  | 3.2124068 | 0.5890654 | 0.555817 | NA       |
| si:ch211-114113.9 | 0.80742327  | 0.548673017  | 2.1289713 | 0.2577174 | 0.796625 | NA       |
| si:dkey-188i13.11 | 122.5072946 | 0.011947729  | 0.1889221 | 0.0632416 | 0.949574 | 0.99381  |
| si:ch211-67f24.7  | 12.03082517 | -0.236314766 | 0.546135  | -0.432704 | 0.66523  | 0.964736 |
| si:ch211-157j23.3 | 8.315656981 | 0.012790738  | 0.6460268 | 0.0197991 | 0.984204 | NA       |
| BX927258.1        | 5.905203015 | 0.287816496  | 0.8096378 | 0.355488  | 0.722224 | NA       |
| zgc:153317        | 12.18710204 | -0.194100305 | 0.5398535 | -0.359543 | 0.719189 | 0.969183 |
| AL954320.1        | 0.173729368 | -0.955901296 | 4.0804729 | -0.234262 | 0.814781 | NA       |
| si:dkey-201121.2  | 0 NA        | NA           | NA        | NA        | NA       | NA       |
| BX323586.2        | 0.157187365 | -0.955901296 | 4.0804729 | -0.234262 | 0.814781 | NA       |
| BX547930.1        | 0 NA        | NA           | NA        | NA        | NA       | NA       |
| BX323812.1        | 0.332524763 | 0.005883742  | 3.292841  | 0.0017868 | 0.998574 | NA       |
| mlnl              | 22.60579551 | -0.429893377 | 0.4055858 | -1.059932 | 0.289176 | 0.845979 |
| crhr2             | 22.70348614 | 0.397126249  | 0.4310293 | 0.9213439 | 0.356871 | 0.883422 |
| zp3c              | 0.323844819 | -1.825095364 | 3.274639  | -0.557342 | 0.577293 | NA       |
| si:ch211-106h4.12 | 115.4280388 | 0.374962945  | 0.2023413 | 1.8531212 | 0.063865 | 0.493997 |
| si:dkey-95h12.2   | 0 NA        | NA           | NA        | NA        | NA       | NA       |
| zgc:171474        | 0 NA        | NA           | NA        | NA        | NA       | NA       |
| BX649641.2        | 0.157187365 | -0.955901296 | 4.0804729 | -0.234262 | 0.814781 | NA       |
| si:dkey-66k12.3   | 0 NA        | NA           | NA        | NA        | NA       | NA       |
| si:dkey-44g23.2   | 0 NA        | NA           | NA        | NA        | NA       | NA       |
| si:ch211-132b12.4 | 0 NA        | NA           | NA        | NA        | NA       | NA       |
| si:ch211-114c12.5 | 1.941330241 | -0.030104089 | 1.3853588 | -0.02173  | 0.982663 | NA       |
| si:dkey-32e6.3    | 69.22531593 | 0.480113303  | 0.2450533 | 1.9592197 | 0.050087 | 0.43824  |
| znf1047           | 11.07752006 | -0.249766087 | 0.5899579 | -0.423363 | 0.672031 | 0.965257 |
| BX537338.1        | 0.182570949 | 0.967652056  | 4.0804729 | 0.2371421 | 0.812547 | NA       |
| BX000981.1        | 0.356300316 | 0.005884122  | 3.214964  | 0.0018302 | 0.99854  | NA       |

|                    |              |               |            |            |           |           |
|--------------------|--------------|---------------|------------|------------|-----------|-----------|
| si:dkey-222h21. 3  | 1. 045287033 | 0. 090981892  | 1. 9340789 | 0. 0470415 | 0. 96248  | NA        |
| BX001050. 1        | 0. 157187365 | -0. 955901296 | 4. 0804729 | -0. 234262 | 0. 814781 | NA        |
| si:dkey-117n7. 3   | 54. 5593462  | -0. 020736775 | 0. 2746711 | -0. 075497 | 0. 939819 | 0. 992857 |
| si:ch211-250g4. 3  | 29. 36937284 | -0. 020277567 | 0. 4098019 | -0. 049481 | 0. 960536 | 0. 995421 |
| CU681845. 1        | 0. 325452849 | 0. 005883619  | 3. 3177086 | 0. 0017734 | 0. 998585 | NA        |
| cytl               | 16282. 17202 | 0. 002910072  | 0. 0947366 | 0. 0307175 | 0. 975495 | 0. 996762 |
| gna15. 3           | 11. 412439   | -0. 992700949 | 0. 5763771 | -1. 722312 | 0. 085013 | 0. 560519 |
| si:ch73-366i20. 1  | 11. 35488606 | -0. 377784147 | 0. 5674414 | -0. 665768 | 0. 50556  | 0. 935724 |
| BX294379. 1        | 20. 81309386 | 0. 164902089  | 0. 4502879 | 0. 3662148 | 0. 714205 | 0. 96909  |
| BX548044. 4        | 0            | NA            | NA         | NA         | NA        | NA        |
| mrpl34             | 374. 0155741 | 0. 149580925  | 0. 118375  | 1. 2636191 | 0. 206367 | 0. 774011 |
| BX649388. 2        | 0            | NA            | NA         | NA         | NA        | NA        |
| si:dkeyp-27c8. 1   | 0. 471562095 | -2. 373056629 | 3. 0645586 | -0. 774355 | 0. 438721 | NA        |
| ftr26              | 1. 332271062 | 0. 763437842  | 1. 6495887 | 0. 462805  | 0. 643504 | NA        |
| BX004981. 2        | 2. 003533331 | -0. 514167452 | 1. 3416074 | -0. 383247 | 0. 701536 | NA        |
| BX321877. 1        | 15. 6420563  | 0. 077896932  | 0. 4878576 | 0. 1596715 | 0. 87314  | 0. 987846 |
| CU207275. 1        | 6. 087781842 | -0. 790499252 | 0. 8061772 | -0. 980553 | 0. 326813 | NA        |
| si:dkey-93m18. 4   | 4. 051944361 | 0. 512815854  | 0. 9762804 | 0. 5252752 | 0. 599392 | NA        |
| znf1128            | 5. 036133973 | -1. 174940285 | 0. 9343531 | -1. 257491 | 0. 208576 | NA        |
| tmsb2              | 854. 4537994 | 0. 153013138  | 0. 0958069 | 1. 5970986 | 0. 110244 | 0. 62463  |
| si:dkeyp-82a1. 3   | 0. 317711143 | 1. 810477155  | 3. 2978238 | 0. 5489915 | 0. 583011 | NA        |
| AL935198. 1        | 2. 416967566 | 0. 996613846  | 1. 2873182 | 0. 7741783 | 0. 438825 | NA        |
| si:ch211-127i16. 2 | 186. 3201115 | -0. 210192681 | 0. 1534323 | -1. 369938 | 0. 170706 | 0. 728116 |
| pias2              | 616. 5810679 | 0. 018008088  | 0. 1038754 | 0. 1733624 | 0. 862367 | 0. 985841 |
| AL929058. 1        | 277. 8638968 | 0. 215582438  | 0. 1336606 | 1. 6129088 | 0. 106764 | 0. 615857 |
| si:dkey-222h21. 11 | 2. 599548558 | -0. 038915716 | 1. 2294682 | -0. 031652 | 0. 974749 | NA        |
| CU499330. 1        | 25. 46119006 | 0. 663391682  | 0. 3975941 | 1. 6685149 | 0. 095214 | 0. 58671  |
| zmat4a             | 107. 3532185 | 0. 059549612  | 0. 1930989 | 0. 3083892 | 0. 757786 | 0. 975374 |
| si:ch211-161n3. 3  | 4. 813421298 | -0. 101856546 | 0. 8721019 | -0. 116794 | 0. 907023 | NA        |
| BX294113. 1        | 0            | NA            | NA         | NA         | NA        | NA        |
| BX005329. 2        | 15. 20172947 | 0. 106656675  | 0. 4940829 | 0. 215868  | 0. 829091 | 0. 982737 |
| si:ch211-202f5. 3  | 252. 3487918 | 0. 326089931  | 0. 146246  | 2. 2297359 | 0. 025765 | 0. 310555 |
| tnni4b. 1          | 2. 022075663 | 1. 607502852  | 1. 3874082 | 1. 1586373 | 0. 246604 | NA        |
| si:dkeyp-77c8. 2   | 40. 65956271 | 0. 638413881  | 0. 3459611 | 1. 8453346 | 0. 064989 | 0. 497901 |
| BX323543. 1        | 0            | NA            | NA         | NA         | NA        | NA        |
| acy3. 1            | 29. 87808098 | -0. 33242003  | 0. 3594296 | -0. 924854 | 0. 355042 | 0. 882321 |
| si:dkey-33c12. 11  | 16. 87688409 | -0. 689103416 | 0. 4615103 | -1. 493148 | 0. 135398 | 0. 670851 |
| rarres3            | 16. 54388201 | -0. 250032156 | 0. 473737  | -0. 527787 | 0. 597647 | 0. 95534  |
| mphosph6           | 224. 0202898 | 0. 094216424  | 0. 141695  | 0. 6649239 | 0. 506099 | 0. 935724 |
| adgrf3b            | 48. 27143387 | 0. 014587014  | 0. 2864228 | 0. 0509283 | 0. 959383 | 0. 995165 |
| BX511259. 1        | 0. 158795395 | 0. 967652056  | 4. 0804729 | 0. 2371421 | 0. 812547 | NA        |
| BX890551. 1        | 0            | NA            | NA         | NA         | NA        | NA        |
| BX294181. 1        | 0            | NA            | NA         | NA         | NA        | NA        |
| CR383662. 1        | 2. 65947283  | -2. 149878984 | 1. 3195394 | -1. 629265 | 0. 103257 | NA        |
| si:ch211-174j14. 2 | 0. 515885857 | -0. 89611015  | 2. 8190897 | -0. 317872 | 0. 750582 | NA        |
| CR847870. 1        | 0            | NA            | NA         | NA         | NA        | NA        |
| si:dkey-83k24. 5   | 73. 77855362 | -0. 292065292 | 0. 227415  | -1. 284283 | 0. 199043 | 0. 764531 |
| CR356233. 2        | 0            | NA            | NA         | NA         | NA        | NA        |
| FAM163A            | 29. 42559266 | 0. 247031908  | 0. 3638875 | 0. 6788689 | 0. 497221 | 0. 93322  |
| selenoh            | 441. 095077  | -0. 374635717 | 0. 1280417 | -2. 925889 | 0. 003435 | 0. 078428 |
| CT737131. 1        | 0            | NA            | NA         | NA         | NA        | NA        |
| si:ch211-213a13. 2 | 14. 18269312 | 0. 611766112  | 0. 5296894 | 1. 1549524 | 0. 24811  | 0. 817415 |
| si:dkeyp-77c8. 4   | 1. 571932231 | 4. 088279848  | 1. 8298064 | 2. 234269  | 0. 025465 | NA        |
| si:ch211-222n4. 2  | 1. 49813837  | 1. 006839534  | 1. 522663  | 0. 661236  | 0. 508461 | NA        |

|                   |             |              |           |           |          |          |
|-------------------|-------------|--------------|-----------|-----------|----------|----------|
| BX950184.1        | 1.180145236 | 0.365759426  | 1.9291048 | 0.1896006 | 0.849622 | NA       |
| BX640520.1        | 1.019741812 | -0.999014948 | 1.9781285 | -0.50503  | 0.613538 | NA       |
| CR513782.2        | 0.356300316 | 0.005884122  | 3.214964  | 0.0018302 | 0.99854  | NA       |
| AL935144.1        | 0           | NA           | NA        | NA        | NA       | NA       |
| si:ch211-234c11.2 | 2.049586718 | 0.555428723  | 1.4044988 | 0.395464  | 0.6925   | NA       |
| si:dkey-104n9.1   | 51.86763713 | 0.608982881  | 0.2887424 | 2.1090872 | 0.034937 | 0.363807 |
| ugt2a7            | 289.175261  | -0.680154553 | 0.1478483 | -4.600355 | 4.22E-06 | 0.000353 |
| si:ch211-161h7.5  | 213.5519004 | -0.486742998 | 0.1977601 | -2.461281 | 0.013844 | 0.211721 |
| BX465186.1        | 0           | NA           | NA        | NA        | NA       | NA       |
| si:ch211-158d24.4 | 55.05012715 | -0.248294606 | 0.2754642 | -0.901368 | 0.367393 | 0.887458 |
| c6                | 23.24101268 | -0.042103978 | 0.4074226 | -0.103342 | 0.917691 | 0.991623 |
| vap               | 0           | NA           | NA        | NA        | NA       | NA       |
| BX548073.3        | 28.09139891 | 0.339691114  | 0.4488766 | 0.7567584 | 0.449195 | 0.918265 |
| STMP1             | 635.978163  | 0.17041572   | 0.1071767 | 1.5900449 | 0.111825 | 0.627242 |
| lgals916          | 0           | NA           | NA        | NA        | NA       | NA       |
| BX682548.1        | 2.412184514 | 1.413354695  | 1.4114983 | 1.0013152 | 0.316674 | NA       |
| CR847870.2        | 0.31437473  | -1.788572922 | 3.5930657 | -0.497785 | 0.618636 | NA       |
| FP016056.1        | 21.72678466 | 0.483667457  | 0.4175705 | 1.1582894 | 0.246746 | 0.816669 |
| SMIM18            | 104.4576767 | -0.110919038 | 0.2143732 | -0.517411 | 0.604869 | 0.95651  |
| ubac2             | 171.0859687 | 0.068427411  | 0.1601548 | 0.4272579 | 0.669191 | 0.965037 |
| c3b.1             | 662.8421821 | 0.194062677  | 0.112416  | 1.7262905 | 0.084295 | 0.55841  |
| thumpd2           | 72.80185456 | -0.118505546 | 0.2316601 | -0.511549 | 0.608967 | 0.956718 |
| CR925713.1        | 5.147699276 | -1.016134835 | 0.8918844 | -1.139312 | 0.254573 | NA       |
| si:ch211-139g16.8 | 6.759432066 | -1.136043102 | 0.8004871 | -1.41919  | 0.155844 | NA       |
| BX897740.1        | 0.157187365 | -0.955901296 | 4.0804729 | -0.234262 | 0.814781 | NA       |
| plscr3a           | 50.80208751 | -1.234725838 | 0.2787494 | -4.42952  | 9.44E-06 | 0.000689 |
| proca             | 51.91247127 | 0.470748922  | 0.2945035 | 1.5984494 | 0.109943 | 0.624178 |
| si:dkey-163f12.10 | 0           | NA           | NA        | NA        | NA       | NA       |
| si:ch73-92i20.1   | 3.18388149  | -0.133375247 | 1.0396492 | -0.128289 | 0.897921 | NA       |
| L0018605.1        | 5.550594294 | 1.253169387  | 0.8449072 | 1.4832035 | 0.13802  | NA       |
| CT573467.1        | 0           | NA           | NA        | NA        | NA       | NA       |
| BX323543.2        | 0           | NA           | NA        | NA        | NA       | NA       |
| BX649502.5        | 0           | NA           | NA        | NA        | NA       | NA       |
| BX649388.3        | 4.282615015 | -0.418654325 | 0.977786  | -0.428166 | 0.668531 | NA       |
| BX511310.1        | 5.686319545 | 0.361854388  | 0.7865784 | 0.460036  | 0.64549  | NA       |
| tac3a             | 63.06137585 | 0.070151587  | 0.254333  | 0.2758257 | 0.782682 | 0.97627  |
| iqsec3b           | 38.80796794 | 0.057211398  | 0.3069434 | 0.1863907 | 0.852138 | 0.985174 |
| adam17b           | 24.75507449 | 0.096241771  | 0.3903233 | 0.2465694 | 0.805241 | 0.979883 |
| cc134b.8          | 0.157187365 | -0.955901296 | 4.0804729 | -0.234262 | 0.814781 | NA       |
| BX005313.2        | 9.639007546 | 0.053166671  | 0.6296435 | 0.0844393 | 0.932707 | NA       |
| tmprss12          | 0           | NA           | NA        | NA        | NA       | NA       |
| si:ch211-132g1.6  | 0           | NA           | NA        | NA        | NA       | NA       |
| BX000444.1        | 0           | NA           | NA        | NA        | NA       | NA       |
| BX004774.1        | 9.603954053 | 0.300428158  | 0.6095837 | 0.4928416 | 0.622125 | NA       |
| CT573344.1        | 42.07016473 | -0.686339429 | 0.3158228 | -2.173179 | 0.029767 | 0.334058 |
| si:ch211-209118.2 | 48.83943898 | -0.353463235 | 0.310384  | -1.138793 | 0.254789 | 0.823484 |
| espn1b            | 24.64456024 | 0.125833746  | 0.3876462 | 0.3246098 | 0.745476 | 0.974094 |
| BX511265.1        | 0.794338034 | 3.131709106  | 2.3335617 | 1.3420297 | 0.179586 | NA       |
| si:dkeyp-122a9.2  | 0.173729368 | -0.955901296 | 4.0804729 | -0.234262 | 0.814781 | NA       |
| si:dkey-266m15.7  | 33.13588017 | -0.089593565 | 0.3420096 | -0.261962 | 0.793351 | 0.977937 |
| CR847509.1        | 0.990784365 | 0.018336633  | 1.8663564 | 0.0098248 | 0.992161 | NA       |
| gstk4             | 0.50625413  | -0.940106488 | 2.8357787 | -0.331516 | 0.740255 | NA       |
| si:dkey-117m1.4   | 317.3463145 | -0.29953099  | 0.1351847 | -2.215717 | 0.026711 | 0.315011 |
| scpp8             | 9.762289614 | -0.611816087 | 0.6371343 | -0.960262 | 0.336923 | NA       |

|                    |             |              |           |           |          |          |
|--------------------|-------------|--------------|-----------|-----------|----------|----------|
| RANBP2             | 1927.706414 | -0.036788713 | 0.1019525 | -0.360842 | 0.718218 | 0.96909  |
| si:ch73-11216.1    | 270.4859017 | -0.02479888  | 0.1363061 | -0.181935 | 0.855634 | 0.985174 |
| si:rp71-45k5.2     | 0 NA        |              | NA        | NA        | NA       | NA       |
| CR788254.2         | 1.371530028 | -0.640785266 | 1.8369316 | -0.348835 | 0.727214 | NA       |
| si:ch211-57f7.7    | 8.772506769 | -0.63564935  | 0.6757714 | -0.940628 | 0.346896 | NA       |
| si:dkey-117n7.2    | 92.16471466 | -0.03426452  | 0.2050178 | -0.167129 | 0.867268 | 0.987125 |
| BX936323.1         | 0 NA        |              | NA        | NA        | NA       | NA       |
| BX294189.1         | 2.50056158  | -0.510623241 | 1.2885816 | -0.396268 | 0.691908 | NA       |
| BX004800.1         | 0 NA        |              | NA        | NA        | NA       | NA       |
| znf1010            | 129.9772434 | -0.022288759 | 0.1861736 | -0.11972  | 0.904705 | 0.990567 |
| CR932983.1         | 0.173729368 | -0.955901296 | 4.0804729 | -0.234262 | 0.814781 | NA       |
| fn dc7rs3          | 47.91491836 | -0.154155882 | 0.2917193 | -0.528439 | 0.597195 | 0.955244 |
| CU137717.1         | 0 NA        |              | NA        | NA        | NA       | NA       |
| pimr83             | 0 NA        |              | NA        | NA        | NA       | NA       |
| si:ch73-21g5.7     | 63.80695224 | -0.550062155 | 0.2672801 | -2.057999 | 0.03959  | 0.390659 |
| si:ch73-236c18.8   | 244.1696153 | 0.003250973  | 0.1412016 | 0.0230236 | 0.981631 | 0.996944 |
| si:dkeyp-106c3.3   | 9.651219914 | -0.09724788  | 0.6021238 | -0.161508 | 0.871693 | NA       |
| CR853291.1         | 0.31437473  | -1.788572922 | 3.5930657 | -0.497785 | 0.618636 | NA       |
| si:rp71-23d18.8    | 4.252733524 | 0.673545725  | 0.9692227 | 0.6949339 | 0.487097 | NA       |
| si:dkey-16p6.2     | 2.188973823 | 1.191399035  | 1.3193453 | 0.9030229 | 0.366514 | NA       |
| BX510336.1         | 0 NA        |              | NA        | NA        | NA       | NA       |
| CR749763.2         | 0.325573202 | 0.005883621  | 3.3172783 | 0.0017736 | 0.998585 | NA       |
| mef2b              | 46.1724475  | -0.259216846 | 0.3033102 | -0.854626 | 0.392758 | 0.897688 |
| CR759927.1         | 3.172882439 | -0.451648694 | 1.0701155 | -0.422056 | 0.672984 | NA       |
| si:dkey-93m18.6    | 9.82008741  | -0.416535716 | 0.6121008 | -0.680502 | 0.496187 | NA       |
| zgc:77118          | 1.297537742 | 0.031968932  | 1.7469507 | 0.0182998 | 0.9854   | NA       |
| si:ch211-15j1.1    | 15.58813849 | 0.694675512  | 0.5206498 | 1.3342472 | 0.182123 | 0.744502 |
| si:dkey-79c1.1     | 2.489280538 | -0.980779674 | 1.2273236 | -0.799121 | 0.42422  | NA       |
| CR354547.1         | 1.834906788 | -0.823777427 | 1.4572737 | -0.565287 | 0.571879 | NA       |
| CT027756.1         | 0.330916733 | -1.849579229 | 3.2489867 | -0.569279 | 0.569167 | NA       |
| EIF2AK1            | 293.8186308 | -0.128508738 | 0.1283464 | -1.001265 | 0.316699 | 0.867129 |
| or125-7            | 0.498553709 | 0.926267934  | 2.6786929 | 0.345791  | 0.7295   | NA       |
| GUCY1A2            | 58.21067233 | -0.110725701 | 0.2783603 | -0.397778 | 0.690794 | 0.967157 |
| si:dkey-30j10.5    | 1.269155061 | 2.614569192  | 3.9472603 | 0.6623757 | 0.50773  | NA       |
| si:dkey-75a21.2    | 158.5477665 | -0.050584486 | 0.1601701 | -0.315817 | 0.752141 | 0.974577 |
| BX571724.1         | 1.99638235  | -0.467313187 | 1.3274943 | -0.352027 | 0.724818 | NA       |
| si:ch211-198m1.1   | 0.182570949 | 0.967652056  | 4.0804729 | 0.2371421 | 0.812547 | NA       |
| chia.6             | 106.2353444 | 0.573060249  | 0.1938697 | 2.9559039 | 0.003118 | 0.073687 |
| CR788285.1         | 0 NA        |              | NA        | NA        | NA       | NA       |
| c3a.4              | 2.010766882 | -0.477928131 | 1.3557981 | -0.352507 | 0.724458 | NA       |
| si:ch211-212c13.10 | 211.3193317 | -0.036914658 | 0.1505456 | -0.245206 | 0.806297 | 0.980105 |
| si:dkey-112e17.1   | 46.4663154  | -0.379268736 | 0.2811413 | -1.349033 | 0.177326 | 0.738201 |
| ftr32              | 0.173729368 | -0.955901296 | 4.0804729 | -0.234262 | 0.814781 | NA       |
| AL845362.1         | 1.628213769 | -0.563718013 | 1.4711157 | -0.383191 | 0.701578 | NA       |
| CR786562.1         | 42.97687091 | -0.412529057 | 0.3106738 | -1.327853 | 0.184227 | 0.747376 |
| CT573148.1         | 8.143504802 | -0.584903656 | 0.7033365 | -0.831613 | 0.405627 | NA       |
| si:ch211-284e13.9  | 1.330071311 | -2.707674392 | 1.853274  | -1.461022 | 0.144009 | NA       |
| si:ch211-146110.7  | 0.182570949 | 0.967652056  | 4.0804729 | 0.2371421 | 0.812547 | NA       |
| BX936308.2         | 24.34763501 | -0.052184678 | 0.3982893 | -0.131022 | 0.895758 | 0.989814 |
| znf1127            | 2.949636131 | 0.642693895  | 1.1063005 | 0.5809397 | 0.561281 | NA       |
| CR749762.2         | 2.135258044 | -1.16186778  | 1.3038928 | -0.891076 | 0.372888 | NA       |
| CR456628.1         | 4.586099761 | -0.21712478  | 0.8893764 | -0.244131 | 0.807129 | NA       |
| AL928845.1         | 2.167672256 | -0.703178131 | 1.2973829 | -0.541997 | 0.58782  | NA       |
| si:ch211-139n6.3   | 16.76157789 | -0.163192465 | 0.4755265 | -0.343183 | 0.731461 | 0.971557 |



|                   |             |              |           |           |          |          |
|-------------------|-------------|--------------|-----------|-----------|----------|----------|
| CR847566.1        | 0.515216064 | 0.926382026  | 2.6525479 | 0.3492423 | 0.726907 | NA       |
| si:ch211-215d8.2  | 95.09800552 | 0.031003929  | 0.2090032 | 0.1483419 | 0.882073 | 0.988344 |
| si:dkey-65l23.2   | 0 NA        | NA           | NA        | NA        | NA       | NA       |
| TST               | 242.6034224 | 0.094012657  | 0.1511809 | 0.6218552 | 0.534037 | 0.943276 |
| si:ch211-89o9.4   | 108.8772995 | 0.315745644  | 0.2067937 | 1.5268626 | 0.126795 | 0.656588 |
| BX649641.3        | 0.347458735 | -1.908042286 | 3.4571486 | -0.551912 | 0.581009 | NA       |
| GMEB2             | 281.8012016 | -0.219878886 | 0.1361436 | -1.615051 | 0.1063   | 0.615567 |
| BX530024.1        | 0.865544342 | 3.23079022   | 2.2781012 | 1.4181944 | 0.156134 | NA       |
| CU681836.1        | 176.5189841 | -0.012877235 | 0.169916  | -0.075786 | 0.939589 | 0.992857 |
| BX537358.1        | 5.152010713 | -1.071074671 | 0.849852  | -1.260307 | 0.207559 | NA       |
| si:dkey-238m4.4   | 2.560008691 | 0.642131771  | 1.2235951 | 0.5247911 | 0.599728 | NA       |
| si:ch211-226h8.11 | 0 NA        | NA           | NA        | NA        | NA       | NA       |
| BX936438.1        | 0.158915748 | 0.967652056  | 4.0804729 | 0.2371421 | 0.812547 | NA       |
| CR753837.1        | 0.974080725 | -0.034512448 | 1.8748673 | -0.018408 | 0.985313 | NA       |
| MFSD3             | 45.36780713 | 0.352063415  | 0.2975752 | 1.1831074 | 0.236767 | 0.805854 |
| znf5691           | 25.43664278 | 0.140724612  | 0.3846845 | 0.3658183 | 0.714501 | 0.96909  |
| si:dkey-229d11.3  | 0.158795395 | 0.967652056  | 4.0804729 | 0.2371421 | 0.812547 | NA       |
| BX901930.2        | 0 NA        | NA           | NA        | NA        | NA       | NA       |
| taarl9o           | 0.514116189 | -2.475533565 | 2.7461255 | -0.901464 | 0.367342 | NA       |
| cngk              | 4.960508824 | -0.035481323 | 0.8789307 | -0.040369 | 0.967799 | NA       |
| si:ch73-62b13.1   | 19.94839405 | 0.284710594  | 0.4285248 | 0.664397  | 0.506436 | 0.935724 |
| AL954694.2        | 0 NA        | NA           | NA        | NA        | NA       | NA       |
| igicls1           | 0 NA        | NA           | NA        | NA        | NA       | NA       |
| or137-6           | 0.182570949 | 0.967652056  | 4.0804729 | 0.2371421 | 0.812547 | NA       |
| si:dkey-204f11.51 | 0 NA        | NA           | NA        | NA        | NA       | NA       |
| BX530037.3        | 0 NA        | NA           | NA        | NA        | NA       | NA       |
| si:dkey-11o1.3    | 5.540068995 | -1.184662756 | 0.8333886 | -1.421501 | 0.155171 | NA       |
| CR786582.1        | 0.166657454 | -0.955901296 | 4.0804729 | -0.234262 | 0.814781 | NA       |
| si:ch211-173m16.2 | 0.633934609 | 1.436045836  | 2.6103598 | 0.5501333 | 0.582228 | NA       |
| CABZ01039782.1    | 7.593610742 | -0.121237459 | 0.7369272 | -0.164518 | 0.869324 | NA       |
| BX510924.1        | 0.158915748 | 0.967652056  | 4.0804729 | 0.2371421 | 0.812547 | NA       |
| CR513782.3        | 0 NA        | NA           | NA        | NA        | NA       | NA       |
| si:dkey-9i23.14   | 10.07790428 | 0.443717976  | 0.6067942 | 0.7312495 | 0.464627 | NA       |
| CU570889.1        | 1.503172171 | -1.79012084  | 1.6481094 | -1.086166 | 0.277405 | NA       |
| ifitml            | 149.2456165 | -0.395244542 | 0.1963427 | -2.013034 | 0.044111 | 0.412803 |
| si:dkey-221j11.3  | 189.8075812 | 0.315007928  | 0.1867535 | 1.6867575 | 0.09165  | 0.57849  |
| BX957257.1        | 0.158795395 | 0.967652056  | 4.0804729 | 0.2371421 | 0.812547 | NA       |
| CT025585.1        | 1.161805827 | -3.660681204 | 1.934818  | -1.892003 | 0.058491 | NA       |
| BX890559.1        | 8.293128398 | 0.120069171  | 0.6546737 | 0.1834031 | 0.854482 | NA       |
| si:dkey-83f18.4   | 0 NA        | NA           | NA        | NA        | NA       | NA       |
| ubb               | 4189.488083 | 0.311342081  | 0.0727218 | 4.2812731 | 1.86E-05 | 0.001178 |
| adgrf8            | 33.07556247 | 0.292941518  | 0.3325376 | 0.8809274 | 0.378357 | 0.895192 |
| si:ch211-209j10.6 | 200.5710084 | 0.037770557  | 0.1535998 | 0.2459025 | 0.805758 | 0.979893 |
| si:dkey-57a22.15  | 2003.783147 | 0.126178605  | 0.0766937 | 1.6452267 | 0.099923 | 0.601211 |
| BX323028.1        | 0.491320158 | 0.8528132    | 2.8656354 | 0.2976    | 0.766008 | NA       |
| si:dkeyp-87a6.2   | 0.330916733 | -1.849579229 | 3.2489867 | -0.569279 | 0.569167 | NA       |
| si:ch211-114l13.1 | 115.0038892 | 0.009480144  | 0.201998  | 0.0469319 | 0.962568 | 0.995927 |
| BX640512.1        | 0 NA        | NA           | NA        | NA        | NA       | NA       |
| si:rp71-1h3.1     | 11.53234389 | 0.320160951  | 0.5622932 | 0.5693844 | 0.569095 | 0.948983 |
| CR524821.1        | 0.825855294 | 1.891116598  | 2.1306575 | 0.8875742 | 0.37477  | NA       |
| si:dkey-38n4.2    | 1.63085265  | -0.564911028 | 1.581708  | -0.357153 | 0.720978 | NA       |
| si:ch73-249k16.4  | 2.113760313 | -1.192408571 | 1.4535733 | -0.820329 | 0.412029 | NA       |
| si:ch211-195h23.4 | 0.663561848 | -1.490280258 | 2.4116568 | -0.617949 | 0.536609 | NA       |
| BX088709.1        | 3.316974524 | 0.926811205  | 1.1009506 | 0.8418281 | 0.399884 | NA       |

|                    |             |              |           |           |          |          |
|--------------------|-------------|--------------|-----------|-----------|----------|----------|
| si:ch211-13f8.1    | 163.4093536 | 0.17513395   | 0.1726498 | 1.0143886 | 0.310397 | 0.862656 |
| si:ch73-27e22.7    | 0 NA        |              | NA        | NA        | NA       | NA       |
| si:ch211-239f4.6   | 0.854503011 | -3.209619274 | 2.2865784 | -1.403678 | 0.160415 | NA       |
| CR396590.4         | 0.31437473  | -1.788572922 | 3.5930657 | -0.497785 | 0.618636 | NA       |
| si:ch211-141e20.2  | 22.31625972 | 0.209195811  | 0.4221037 | 0.4956029 | 0.620175 | 0.957354 |
| si:dkey-58f10.7    | 0.847782112 | 0.655103352  | 2.1028616 | 0.3115295 | 0.755398 | NA       |
| si:ch211-263m18.4  | 0 NA        |              | NA        | NA        | NA       | NA       |
| si:ch211-57i17.2   | 6.838813419 | -0.214714963 | 0.7428252 | -0.289052 | 0.772542 | NA       |
| CU633785.1         | 0 NA        |              | NA        | NA        | NA       | NA       |
| nyap2b             | 202.9476852 | -0.201040771 | 0.151575  | -1.326346 | 0.184725 | 0.747597 |
| BX284697.1         | 1.308615861 | 0.736812935  | 1.6726917 | 0.4404953 | 0.659578 | NA       |
| inpp5jb            | 8.59336609  | -0.795461588 | 0.6492796 | -1.225145 | 0.220521 | NA       |
| CU469531.2         | 2.25628215  | 0.383766697  | 1.3225249 | 0.2901773 | 0.771681 | NA       |
| mtmr3              | 0 NA        |              | NA        | NA        | NA       | NA       |
| acer3              | 6.484508934 | -0.2422217   | 0.7530783 | -0.321642 | 0.747724 | NA       |
| si:ch1073-272j17.3 | 1.043517365 | -0.941794384 | 2.0508711 | -0.459217 | 0.646079 | NA       |
| BX842702.1         | 0 NA        |              | NA        | NA        | NA       | NA       |
| lrrc66             | 1.816168291 | -0.859048062 | 1.5260785 | -0.562912 | 0.573495 | NA       |
| BX649476.1         | 0 NA        |              | NA        | NA        | NA       | NA       |
| EPB41L2            | 2851.420303 | -0.058620189 | 0.0826512 | -0.709248 | 0.478171 | 0.926857 |
| si:ch211-28e16.5   | 0 NA        |              | NA        | NA        | NA       | NA       |
| si:ch211-235i11.5  | 51.36795799 | 0.153846509  | 0.2703034 | 0.5691624 | 0.569246 | 0.948983 |
| tgm2l              | 181.5551693 | 0.157396556  | 0.2068046 | 0.7610882 | 0.446604 | 0.917154 |
| uqcc3              | 220.297507  | -0.084386691 | 0.1444187 | -0.58432  | 0.559005 | 0.948478 |
| BX640539.1         | 2.519686637 | -1.038754654 | 1.3660163 | -0.760426 | 0.447    | NA       |
| si:ch211-150d5.3   | 0.476506538 | 2.394892832  | 2.8161716 | 0.8504073 | 0.395099 | NA       |
| CU469314.1         | 0.687217049 | -1.490137326 | 2.387795  | -0.624064 | 0.532585 | NA       |
| si:dkeyp-82a1.1    | 13.97927102 | -0.176800304 | 0.5146265 | -0.343551 | 0.731184 | 0.971557 |
| si:dkeyp-20g2.3    | 0 NA        |              | NA        | NA        | NA       | NA       |
| CR392330.1         | 0.643284345 | 1.438369819  | 2.4327963 | 0.5912414 | 0.554359 | NA       |
| CT583651.1         | 0 NA        |              | NA        | NA        | NA       | NA       |
| AL953894.1         | 4.177020485 | -0.117630255 | 1.0022356 | -0.117368 | 0.906569 | NA       |
| BX511184.1         | 0 NA        |              | NA        | NA        | NA       | NA       |
| crha               | 0.31598276  | 0.005883445  | 3.3523626 | 0.001755  | 0.9986   | NA       |
| si:dkey-286j17.4   | 30.31651404 | -0.773239577 | 0.3552033 | -2.176893 | 0.029489 | 0.332709 |
| si:ch73-376124.4   | 0.182570949 | 0.967652056  | 4.0804729 | 0.2371421 | 0.812547 | NA       |
| BX323822.1         | 0 NA        |              | NA        | NA        | NA       | NA       |
| casp6              | 82.51861591 | -0.283608274 | 0.2397684 | -1.182843 | 0.236872 | 0.805854 |
| zgc:111986         | 4032.833716 | 0.006182956  | 0.0669611 | 0.0923365 | 0.926431 | 0.992702 |
| BX530075.2         | 0 NA        |              | NA        | NA        | NA       | NA       |
| pimr49             | 0 NA        |              | NA        | NA        | NA       | NA       |
| BX936421.1         | 0.633934609 | 1.436045836  | 2.6103598 | 0.5501333 | 0.582228 | NA       |
| gad1a              | 14.40433478 | -0.462457291 | 0.5118867 | -0.903437 | 0.366294 | 0.887239 |
| sertad2a           | 82.56382437 | -0.257906917 | 0.226149  | -1.140429 | 0.254108 | 0.823394 |
| edil3a             | 1257.910963 | 0.011724979  | 0.0873573 | 0.1342186 | 0.89323  | 0.989291 |
| si:dkey-21e2.12    | 0 NA        |              | NA        | NA        | NA       | NA       |
| BX470229.1         | 9.713339313 | 0.940415974  | 0.6357864 | 1.4791381 | 0.139103 | NA       |
| si:dkey-216e24.9   | 1.196340722 | 1.367701255  | 1.8023662 | 0.7588365 | 0.44795  | NA       |
| CR933734.1         | 0.499182217 | -0.916838237 | 2.6774436 | -0.34243  | 0.732027 | NA       |
| creblb             | 405.7751641 | 0.044832674  | 0.1216005 | 0.3686883 | 0.71236  | 0.969087 |
| si:ch211-229b6.1   | 0.330916733 | -1.849579229 | 3.2489867 | -0.569279 | 0.569167 | NA       |
| swsap1             | 9.193237171 | -0.848542628 | 0.6326809 | -1.341186 | 0.17986  | NA       |
| znf1135            | 8.521576809 | 0.224420297  | 0.6583759 | 0.3408696 | 0.733202 | NA       |
| BX539332.1         | 0.158915748 | 0.967652056  | 4.0804729 | 0.2371421 | 0.812547 | NA       |

|                   |             |              |           |           |          |          |
|-------------------|-------------|--------------|-----------|-----------|----------|----------|
| si:dkey-69c1.1    | 0.173729368 | -0.955901296 | 4.0804729 | -0.234262 | 0.814781 | NA       |
| BX465862.1        | 17.96630081 | -0.153072364 | 0.4848039 | -0.315741 | 0.752199 | 0.974577 |
| CT027825.1        | 0.802200093 | 1.852032281  | 2.2653592 | 0.8175446 | 0.413617 | NA       |
| si:dkeyp-34f6.4   | 0.182570949 | 0.967652056  | 4.0804729 | 0.2371421 | 0.812547 | NA       |
| iqcbl             | 3.808425078 | 0.118521823  | 0.9798701 | 0.1209567 | 0.903725 | NA       |
| si:ch211-9n13.3   | 0 NA        | NA           | NA        | NA        | NA       | NA       |
| CU467110.1        | 106.8944251 | 0.028192249  | 0.2017954 | 0.1397071 | 0.888891 | 0.989291 |
| tnfaip6           | 116.1774509 | 0.249245558  | 0.1975432 | 1.2617269 | 0.207047 | 0.774967 |
| BX927377.1        | 0 NA        | NA           | NA        | NA        | NA       | NA       |
| BX323559.2        | 1.354276948 | 0.016538586  | 1.6286883 | 0.0101545 | 0.991898 | NA       |
| si:dkey-10613.7   | 63.1163442  | 0.400443211  | 0.2439161 | 1.641725  | 0.100647 | 0.603272 |
| BX649502.6        | 4.015357808 | -1.019395617 | 0.9774886 | -1.042872 | 0.297008 | NA       |
| mpc1              | 722.5050042 | -0.047227988 | 0.1093095 | -0.432057 | 0.6657   | 0.964736 |
| CR388143.1        | 17.03174897 | -0.061732031 | 0.4896834 | -0.126065 | 0.89968  | 0.990121 |
| si:dkey-7814.10   | 0 NA        | NA           | NA        | NA        | NA       | NA       |
| BX511129.1        | 29.8167816  | -0.103180155 | 0.3568834 | -0.289114 | 0.772494 | 0.975687 |
| ahdc1             | 719.4803288 | 0.013282897  | 0.095726  | 0.1387596 | 0.88964  | 0.989291 |
| oip5-as1          | 2518.73116  | 0.088218686  | 0.0731513 | 1.2059759 | 0.227827 | 0.794963 |
| si:ch211-14a11.2  | 0.341366344 | 1.891903201  | 3.2128156 | 0.5888614 | 0.555954 | NA       |
| si:dkey-76d14.2   | 6.097595068 | 0.870617931  | 0.7772759 | 1.1200887 | 0.262676 | NA       |
| gpr52             | 48.93091197 | -0.313297427 | 0.2781166 | -1.126497 | 0.259955 | 0.828288 |
| si:dkey-56m15.6   | 0.812928439 | -0.504524747 | 2.2480137 | -0.224431 | 0.822422 | NA       |
| CR384062.1        | 0.651026051 | -0.042574319 | 2.4423909 | -0.017431 | 0.986092 | NA       |
| CU693484.1        | 72.24406954 | -0.257793904 | 0.2522268 | -1.022072 | 0.306747 | 0.860249 |
| si:ch73-7i4.3     | 1.123767089 | 0.391854525  | 1.9650308 | 0.1994139 | 0.841939 | NA       |
| znf653            | 113.9510553 | -0.215490951 | 0.1861939 | -1.157347 | 0.247131 | 0.816774 |
| CT009596.1        | 0.182570949 | 0.967652056  | 4.0804729 | 0.2371421 | 0.812547 | NA       |
| CR361551.1        | 56.691866   | 0.24772342   | 0.2680481 | 0.9241751 | 0.355395 | 0.882347 |
| CU466287.1        | 0.157187365 | -0.955901296 | 4.0804729 | -0.234262 | 0.814781 | NA       |
| si:dkey-175d9.2   | 5.256225367 | -0.184726319 | 0.8114459 | -0.227651 | 0.819918 | NA       |
| CYP46A1           | 5.935344027 | -1.50296269  | 0.9014579 | -1.667258 | 0.095463 | NA       |
| si:ch211-197e7.3  | 4.482879323 | -0.423003952 | 1.0056753 | -0.420617 | 0.674035 | NA       |
| BX571825.10       | 0 NA        | NA           | NA        | NA        | NA       | NA       |
| pamr1             | 171.7978587 | 0.042816591  | 0.175654  | 0.2437553 | 0.80742  | 0.980642 |
| BX530034.1        | 5.663652914 | -0.507253448 | 0.7976694 | -0.635919 | 0.524829 | NA       |
| si:dkey-95p16.2   | 51.31887906 | -0.159951106 | 0.2700539 | -0.592293 | 0.553654 | 0.947383 |
| BX571701.3        | 0 NA        | NA           | NA        | NA        | NA       | NA       |
| BX664716.1        | 1.005718337 | -0.979164561 | 1.8926618 | -0.517348 | 0.604913 | NA       |
| BX004785.2        | 0 NA        | NA           | NA        | NA        | NA       | NA       |
| CR450740.1        | 0 NA        | NA           | NA        | NA        | NA       | NA       |
| si:dkey-7814.8    | 0.513487682 | -0.887846295 | 2.6557956 | -0.334305 | 0.738149 | NA       |
| CR677617.1        | 8.950994705 | -0.662609867 | 0.6920083 | -0.957517 | 0.338306 | NA       |
| urp1              | 45.65844419 | 0.239257794  | 0.294907  | 0.8112992 | 0.417194 | 0.906237 |
| si:ch211-217k17.9 | 131.6153689 | 0.093152851  | 0.2156274 | 0.4320085 | 0.665735 | 0.964736 |
| CU651633.1        | 0 NA        | NA           | NA        | NA        | NA       | NA       |
| si:zfos-905g2.1   | 69.16511733 | -0.514452054 | 0.2449172 | -2.100514 | 0.035684 | 0.368007 |
| zgc:194281        | 14.85636386 | 0.002527847  | 0.5164566 | 0.0048946 | 0.996095 | 0.998888 |
| BX649448.2        | 1.12805203  | -2.447047822 | 1.9526379 | -1.253201 | 0.210133 | NA       |
| rsflb.1           | 0 NA        | NA           | NA        | NA        | NA       | NA       |
| zgc:77614         | 0 NA        | NA           | NA        | NA        | NA       | NA       |
| si:ch211-135f11.6 | 0.347458735 | -1.908042286 | 3.4571486 | -0.551912 | 0.581009 | NA       |
| si:dkey-238j22.1  | 0 NA        | NA           | NA        | NA        | NA       | NA       |
| BX324218.1        | 0.521188103 | -2.493476766 | 2.9577741 | -0.843025 | 0.399215 | NA       |
| BX323812.2        | 0.157187365 | -0.955901296 | 4.0804729 | -0.234262 | 0.814781 | NA       |

|                   |             |              |           |           |          |          |
|-------------------|-------------|--------------|-----------|-----------|----------|----------|
| CT573204.1        | 18.19595259 | 0.600179288  | 0.4664114 | 1.2868024 | 0.198163 | 0.76333  |
| b3gnt3.3          | 35.46349774 | 0.076272757  | 0.3672426 | 0.2076904 | 0.835471 | 0.984089 |
| BX548044.5        | 0.333314908 | -1.858695402 | 3.5126701 | -0.52914  | 0.596708 | NA       |
| slc37a4b          | 22.90181375 | -0.045186905 | 0.3991109 | -0.113219 | 0.909857 | 0.990702 |
| si:dkey-230i18.2  | 0.508023798 | 0.926122713  | 2.6636728 | 0.3476864 | 0.728076 | NA       |
| BX005309.1        | 333.4896994 | 0.077949001  | 0.1300821 | 0.5992295 | 0.54902  | 0.946312 |
| BX539321.1        | 0.975568402 | 0.934212443  | 2.1194354 | 0.4407836 | 0.65937  | NA       |
| CR450686.2        | 7.423900879 | 0.18081293   | 0.6948505 | 0.2602185 | 0.794695 | NA       |
| BX294165.1        | 2.669534639 | -0.737177766 | 1.1629507 | -0.633886 | 0.526155 | NA       |
| si:ch73-56d11.5   | 31.0916954  | -0.137239491 | 0.4207116 | -0.326208 | 0.744267 | 0.974094 |
| si:dkey-111e8.4   | 0.317711143 | 1.810477155  | 3.2978238 | 0.5489915 | 0.583011 | NA       |
| BX649641.4        | 1.155163996 | -0.396716192 | 1.7478367 | -0.226976 | 0.820443 | NA       |
| selenop           | 10566.34289 | 0.24752893   | 0.074483  | 3.3232951 | 0.00089  | 0.028373 |
| BX005438.1        | 58.13563618 | -0.036027474 | 0.2740045 | -0.131485 | 0.895392 | 0.989814 |
| BX842699.1        | 2.350764906 | -2.532271048 | 1.508116  | -1.679096 | 0.093133 | NA       |
| BX324007.1        | 0.173729368 | -0.955901296 | 4.0804729 | -0.234262 | 0.814781 | NA       |
| BX571854.1        | 10.19734144 | 0.456825776  | 0.6424198 | 0.7111016 | 0.477021 | NA       |
| si:dkey-20i20.7   | 23.77331584 | -0.219572453 | 0.3973366 | -0.552611 | 0.58053  | 0.951621 |
| si:ch211-225b11.4 | 103.0998777 | 0.102977643  | 0.1931096 | 0.5332602 | 0.593853 | 0.954434 |
| BX294388.1        | 1.465882293 | 0.270744345  | 1.6885553 | 0.1603408 | 0.872613 | NA       |
| bckdhbl           | 384.7382135 | -0.0164538   | 0.1201466 | -0.136948 | 0.891072 | 0.989291 |
| si:dkey-25o1.7    | 15.3244803  | -0.137442473 | 0.5486468 | -0.250512 | 0.802192 | 0.979492 |
| lamc3             | 877.3715713 | 0.194568362  | 0.1104185 | 1.7620995 | 0.078052 | 0.544221 |
| si:ch73-256j6.4   | 1.477280433 | -1.766093184 | 1.6754071 | -1.054128 | 0.291824 | NA       |
| AL929493.1        | 0.157187365 | -0.955901296 | 4.0804729 | -0.234262 | 0.814781 | NA       |
| BX000981.2        | 15.34865362 | -0.412145514 | 0.507431  | -0.81222  | 0.416665 | 0.906237 |
| CT025897.1        | 8.168485889 | -0.520929859 | 0.6757454 | -0.770897 | 0.440768 | NA       |
| si:dkey-80c24.4   | 0.182570949 | 0.967652056  | 4.0804729 | 0.2371421 | 0.812547 | NA       |
| FP236157.1        | 5.698355393 | -1.548565783 | 0.8944531 | -1.731299 | 0.083398 | NA       |
| zgc:193505        | 611.9527651 | 0.016095016  | 0.1203876 | 0.1336933 | 0.893645 | 0.989291 |
| CU207343.1        |             | 0 NA         | NA        | NA        | NA       | NA       |
| si:dkey-234124.8  | 5.292096345 | 0.332179392  | 0.8473792 | 0.392008  | 0.695052 | NA       |
| si:ch211-282k23.2 | 11.96126721 | -1.512098561 | 0.6302746 | -2.399111 | 0.016435 | 0.236409 |
| CR391910.2        | 2.377437742 | 0.465403164  | 1.2468402 | 0.3732661 | 0.70895  | NA       |
| CR536604.1        | 13.26614175 | 0.585386656  | 0.557019  | 1.0509275 | 0.293292 | 0.849129 |
| si:dkey-88n24.10  | 0.521188103 | -2.493476766 | 2.9577741 | -0.843025 | 0.399215 | NA       |
| oip5              | 24.21546692 | -0.151126218 | 0.382773  | -0.394819 | 0.692976 | 0.96736  |
| BX470224.2        | 0.182570949 | 0.967652056  | 4.0804729 | 0.2371421 | 0.812547 | NA       |
| omd               | 11.99348846 | 0.584642781  | 0.5490818 | 1.0647645 | 0.286982 | 0.845979 |
| si:ch211-93g21.1  | 25.3840617  | 0.161897685  | 0.399949  | 0.4047958 | 0.685628 | 0.966307 |
| or124-3           |             | 0 NA         | NA        | NA        | NA       | NA       |
| BX255912.1        | 2.465697616 | 2.006541235  | 1.3352416 | 1.5027552 | 0.132902 | NA       |
| si:dkey-159f12.2  | 210.6887258 | 0.081454638  | 0.2023063 | 0.4026302 | 0.68722  | 0.966376 |
| cc134b.1          | 74.91678432 | 0.51973784   | 0.2309984 | 2.2499626 | 0.024451 | 0.3019   |
| BX664750.1        |             | 0 NA         | NA        | NA        | NA       | NA       |
| si:dkey-92i17.2   | 76.59129039 | 0.270620495  | 0.2226668 | 1.2153609 | 0.224228 | 0.791484 |
| CT025909.1        | 1.868272784 | -0.804119683 | 1.3949472 | -0.576452 | 0.56431  | NA       |
| si:ch211-234c11.3 | 8.816735011 | -1.199493689 | 0.659938  | -1.817585 | 0.069128 | NA       |
| BX005419.1        | 0.166657454 | -0.955901296 | 4.0804729 | -0.234262 | 0.814781 | NA       |
| si:dkey-45h7.1    | 7.88877645  | -0.176507842 | 0.6785829 | -0.260112 | 0.794777 | NA       |
| sult3st2          | 60.66860892 | -0.183818515 | 0.2579122 | -0.712717 | 0.476021 | 0.926338 |
| si:dkey-27b3.4    | 0.476386185 | 2.392464142  | 3.0533824 | 0.7835455 | 0.433307 | NA       |
| spc24             | 219.7622135 | 0.062494679  | 0.1431389 | 0.4366017 | 0.6624   | 0.964665 |
| CR392341.1        | 6.74679396  | -0.758872203 | 0.7663221 | -0.990278 | 0.322038 | NA       |

|                   |             |              |           |           |          |          |
|-------------------|-------------|--------------|-----------|-----------|----------|----------|
| BX537143.1        |             | 0 NA         | NA        | NA        | NA       | NA       |
| si00a11           | 406.1136682 | 0.309201602  | 0.3104715 | 0.9959097 | 0.319294 | 0.867746 |
| si:ch211-106h4.4  | 21.97301043 | 0.864067923  | 0.4128967 | 2.0926978 | 0.036376 | 0.372502 |
| si:ch211-249h16.8 | 2.475765219 | -1.457410054 | 1.2361177 | -1.179022 | 0.238389 | NA       |
| BX000981.3        | 0.651146404 | -0.045019457 | 2.587009  | -0.017402 | 0.986116 | NA       |
| si:dkey-26i13.5   | 0.968187754 | 2.173022767  | 2.1450023 | 1.0130632 | 0.31103  | NA       |
| BX537282.1        | 2.767855328 | 0.154517109  | 1.2181253 | 0.1268483 | 0.89906  | NA       |
| ugt5a2            | 13.74506441 | -0.875603772 | 0.5472914 | -1.599886 | 0.109624 | 0.623766 |
| AL954868.1        | 1.672417178 | 0.012632872  | 1.4948056 | 0.0084512 | 0.993257 | NA       |
| BX511034.3        | 12.95381316 | 0.457507508  | 0.5217521 | 0.8768677 | 0.380559 | 0.895192 |
| BX294113.2        | 0.490502273 | -2.421143305 | 2.7891168 | -0.868068 | 0.385357 | NA       |
| AL954359.1        | 13.67951133 | 0.077396782  | 0.5328649 | 0.1452465 | 0.884516 | 0.98879  |
| CR513785.1        | 0.173729368 | -0.955901296 | 4.0804729 | -0.234262 | 0.814781 | NA       |
| si:ch211-287n14.3 | 0.82062886  | -1.887809105 | 2.232843  | -0.845473 | 0.397847 | NA       |
| ftr25             | 6.377356831 | 0.516890928  | 0.7591353 | 0.6808944 | 0.495938 | NA       |
| si:dkeyp-2e4.6    | 1.378911671 | 1.64127814   | 1.7384613 | 0.9440982 | 0.345119 | NA       |
| tm7sf3            | 638.1279114 | -0.075008298 | 0.1051665 | -0.713234 | 0.475701 | 0.926202 |
| entpd5b           | 448.9108494 | 0.149763763  | 0.1254722 | 1.1936012 | 0.232634 | 0.80121  |
| si:dkey-6f10.3    | 1.643848528 | 3.056427142  | 1.7262286 | 1.7705808 | 0.07663  | NA       |
| CR318646.2        | 0.798743327 | -0.585351522 | 2.137483  | -0.273851 | 0.784199 | NA       |
| CT573186.1        |             | 0 NA         | NA        | NA        | NA       | NA       |
| si:dkey-285e18.5  | 3.846893898 | -0.1218161   | 0.9698396 | -0.125604 | 0.900045 | NA       |
| BX005283.1        | 2.487032714 | 0.183030945  | 1.1713673 | 0.1562541 | 0.875833 | NA       |
| ankmy2b           | 1.995471851 | 0.006123268  | 1.3624957 | 0.0044942 | 0.996414 | NA       |
| BX001030.1        | 324.8551014 | 0.06445068   | 0.142216  | 0.4531885 | 0.650413 | 0.960708 |
| zgc:171435        | 8.819701317 | -0.152336302 | 0.6489341 | -0.234748 | 0.814404 | NA       |
| si:dkey-28d5.4    |             | 0 NA         | NA        | NA        | NA       | NA       |
| si:ch211-56a11.2  | 60.01397181 | -0.082836082 | 0.2728664 | -0.303577 | 0.76145  | 0.975374 |
| AL845312.1        | 0.157187365 | -0.955901296 | 4.0804729 | -0.234262 | 0.814781 | NA       |
| si:dkey-218h11.6  | 0.166657454 | -0.955901296 | 4.0804729 | -0.234262 | 0.814781 | NA       |
| tmem238a          | 203.9215442 | 0.245993977  | 0.1498621 | 1.6414689 | 0.1007   | 0.603407 |
| CU467633.2        | 0.158915748 | 0.967652056  | 4.0804729 | 0.2371421 | 0.812547 | NA       |
| si:rp71-36a1.2    | 68.92438412 | 0.028709691  | 0.2521951 | 0.1138392 | 0.909365 | 0.990702 |
| si:dkey-193c22.1  | 132.846661  | 0.094296381  | 0.172899  | 0.5453843 | 0.585489 | 0.95262  |
| CU074419.2        | 2.81000832  | 0.188400883  | 1.1884005 | 0.1585332 | 0.874037 | NA       |
| FP016018.1        |             | 0 NA         | NA        | NA        | NA       | NA       |
| BX005301.1        | 1.155163996 | -0.396716192 | 1.7478367 | -0.226976 | 0.820443 | NA       |
| BX649502.7        |             | 0 NA         | NA        | NA        | NA       | NA       |
| BX537166.2        | 1.644635418 | -0.579573079 | 1.506492  | -0.384717 | 0.700447 | NA       |
| BX255917.1        | 0.166657454 | -0.955901296 | 4.0804729 | -0.234262 | 0.814781 | NA       |
| si:dkey-217m5.8   |             | 0 NA         | NA        | NA        | NA       | NA       |
| si:ch73-27e22.4   | 35.15976405 | 0.116674783  | 0.3443504 | 0.3388257 | 0.734741 | 0.972021 |
| si:dkey-126g1.9   | 38.93444507 | 0.080142164  | 0.3399554 | 0.2357432 | 0.813632 | 0.981081 |
| si:ch211-122114.4 |             | 0 NA         | NA        | NA        | NA       | NA       |
| si:dkeyp-46h3.8   | 0.531799352 | 0.999478841  | 2.790358  | 0.3581902 | 0.720201 | NA       |
| CR356222.1        | 3.109964864 | -1.319780657 | 1.2578927 | -1.0492   | 0.294086 | NA       |
| CR385053.1        |             | 0 NA         | NA        | NA        | NA       | NA       |
| arhgap20b         | 1.829442905 | -0.28947141  | 1.4482335 | -0.199879 | 0.841575 | NA       |
| si:dkeyp-7a3.1    | 2.694331001 | 0.060924456  | 1.2351292 | 0.0493264 | 0.960659 | NA       |
| CR854927.1        | 0.475018861 | 0.853207185  | 2.8976509 | 0.2944479 | 0.768416 | NA       |
| si:dkey-256i11.2  | 3.725553428 | 0.137062397  | 1.0344703 | 0.1324953 | 0.894593 | NA       |
| artnb             | 15.73691898 | 0.092604639  | 0.4704945 | 0.196824  | 0.843965 | 0.985174 |
| BX901930.3        |             | 0 NA         | NA        | NA        | NA       | NA       |
| BX470224.3        | 0.333314908 | -1.858695402 | 3.5126701 | -0.52914  | 0.596708 | NA       |

|                    |             |              |           |           |          |          |
|--------------------|-------------|--------------|-----------|-----------|----------|----------|
| rnf212b            | 2.028047701 | 0.488979081  | 1.3304427 | 0.3675311 | 0.713223 | NA       |
| si:dkey-54g2.2     | 0 NA        | NA           | NA        | NA        | NA       | NA       |
| BX276096.1         | 0 NA        | NA           | NA        | NA        | NA       | NA       |
| CR931802.1         | 7.041303072 | -0.411000493 | 0.7226412 | -0.568748 | 0.569527 | NA       |
| BX539307.3         | 24.43775694 | -0.419410752 | 0.3892046 | -1.07761  | 0.281208 | 0.84357  |
| CR396583.1         | 3.820482719 | 0.896018778  | 0.9771635 | 0.9169589 | 0.359164 | NA       |
| si:ch211-209a2.2   | 0.823965273 | 0.503156481  | 2.2182458 | 0.2268263 | 0.820559 | NA       |
| pth1a              | 3.403505862 | 1.619516132  | 1.1109681 | 1.4577522 | 0.144909 | NA       |
| si:dkey-83m22.7    | 12.67005747 | 0.639048376  | 0.5709928 | 1.1191881 | 0.26306  | 0.830245 |
| BX276103.1         | 0.317831496 | 1.808837541  | 3.5779923 | 0.5055454 | 0.613176 | NA       |
| CU207257.1         | 0 NA        | NA           | NA        | NA        | NA       | NA       |
| htrlaa             | 107.2736459 | -0.091212018 | 0.1925677 | -0.473662 | 0.635741 | 0.958142 |
| si:dkey-122c11.1   | 0 NA        | NA           | NA        | NA        | NA       | NA       |
| si:ch211-217k17.11 | 0.365141898 | 1.973577737  | 3.3927314 | 0.5817076 | 0.560764 | NA       |
| FP102171.1         | 0.157187365 | -0.955901296 | 4.0804729 | -0.234262 | 0.814781 | NA       |
| cd180              | 1.820254807 | -0.234595052 | 1.3683104 | -0.171449 | 0.863871 | NA       |
| rimbp2             | 0 NA        | NA           | NA        | NA        | NA       | NA       |
| BX004774.2         | 80.93219826 | -0.027707433 | 0.2878346 | -0.096262 | 0.923313 | 0.992588 |
| FP101875.1         | 0.499972362 | -2.44370697  | 3.0013188 | -0.814211 | 0.415524 | NA       |
| si:ch211-197h24.9  | 164.7809734 | -0.043055905 | 0.1578769 | -0.272718 | 0.78507  | 0.97627  |
| si:ch211-250k18.7  | 10.61715644 | -0.042017686 | 0.6205664 | -0.067709 | 0.946018 | NA       |
| si:ch211-271e10.6  | 0 NA        | NA           | NA        | NA        | NA       | NA       |
| si:dkey-145c18.5   | 7.62871842  | 0.115109593  | 0.7101538 | 0.1620911 | 0.871234 | NA       |
| prr18              | 1309.962079 | -0.349589119 | 0.0908513 | -3.847926 | 0.000119 | 0.005649 |
| si:ch1073-296i8.2  | 58.18917461 | -0.178876088 | 0.289757  | -0.617331 | 0.537016 | 0.943336 |
| rbp2b              | 318.4410367 | 0.151463868  | 0.1428567 | 1.0602504 | 0.289031 | 0.845979 |
| si:ch211-272h9.6   | 0 NA        | NA           | NA        | NA        | NA       | NA       |
| BX547993.1         | 0 NA        | NA           | NA        | NA        | NA       | NA       |
| BX663499.1         | 0 NA        | NA           | NA        | NA        | NA       | NA       |
| cxcl11.7           | 0 NA        | NA           | NA        | NA        | NA       | NA       |
| BX548078.1         | 19.73542691 | 0.724404475  | 0.4343092 | 1.6679465 | 0.095326 | 0.587222 |
| lrriq1             | 20.59833855 | -0.459559541 | 0.4202881 | -1.093439 | 0.274201 | 0.839127 |
| si:dkey-70b23.2    | 10.7124241  | 0.068578431  | 0.6166066 | 0.1112191 | 0.911443 | NA       |
| taarl7a            | 0 NA        | NA           | NA        | NA        | NA       | NA       |
| BX255915.1         | 0 NA        | NA           | NA        | NA        | NA       | NA       |
| CR450686.3         | 10.20833157 | -0.227525585 | 0.6272161 | -0.362755 | 0.716788 | NA       |
| CT583625.1         | 0 NA        | NA           | NA        | NA        | NA       | NA       |
| si:rp71-79p20.2    | 0 NA        | NA           | NA        | NA        | NA       | NA       |
| itln2              | 0 NA        | NA           | NA        | NA        | NA       | NA       |
| si:dkey-81p22.11   | 4.139183675 | -0.081588804 | 0.9303637 | -0.087696 | 0.930119 | NA       |
| slx4               | 4.3542824   | 2.108798521  | 1.0296822 | 2.0480091 | 0.040559 | NA       |
| setbpl             | 26.46299908 | -0.23867628  | 0.3794644 | -0.628982 | 0.529361 | 0.942209 |
| si:dkey-196n19.2   | 8.090340301 | -0.39670784  | 0.7030165 | -0.564294 | 0.572554 | NA       |
| sst6               | 40.6612823  | -0.199362007 | 0.30029   | -0.663898 | 0.506755 | 0.935734 |
| ccdc73             | 1.294259067 | 3.830954643  | 1.9403765 | 1.9743357 | 0.048344 | NA       |
| pimr113            | 4.470857299 | -2.435244432 | 1.1997522 | -2.029789 | 0.042378 | NA       |
| si:dkeyp-2c8.3     | 2.465546269 | -0.967067841 | 1.2236668 | -0.790303 | 0.429351 | NA       |
| CR762470.1         | 0.31759079  | 1.807926197  | 3.579045  | 0.5051421 | 0.613459 | NA       |
| si:ch211-142c4.1   | 0 NA        | NA           | NA        | NA        | NA       | NA       |
| ch25h13            | 2.773508588 | 0.873428394  | 1.1383686 | 0.7672633 | 0.442925 | NA       |
| CT027772.2         | 1.006776927 | 0.956324643  | 2.0726162 | 0.4614094 | 0.644505 | NA       |
| si:ch211-110p13.9  | 80.2707827  | 0.088237026  | 0.2249763 | 0.3922058 | 0.694906 | 0.96736  |
| si:dkey-259j3.5    | 5.863090137 | 0.282114982  | 0.845027  | 0.3338532 | 0.73849  | NA       |
| si:ch211-102c2.8   | 14.02891898 | 0.788646862  | 0.5151514 | 1.530903  | 0.125793 | 0.654803 |

|                   |             |              |           |           |          |          |
|-------------------|-------------|--------------|-----------|-----------|----------|----------|
| BX085193.2        | 2.586773051 | 2.084283134  | 1.3387196 | 1.5569228 | 0.119489 | NA       |
| znf1121           | 8.50154754  | 0.16143141   | 0.7046073 | 0.2291084 | 0.818785 | NA       |
| si:ch73-382f3.1   | 39.53989557 | 0.010807344  | 0.3092628 | 0.0349455 | 0.972123 | 0.996315 |
| CR628410.1        | 7.554990174 | -0.455173192 | 0.7020012 | -0.648394 | 0.51673  | NA       |
| si:ch211-165f21.4 | 1.903597824 | 1.441005883  | 1.4863203 | 0.9695124 | 0.33229  | NA       |
| si:dkey-83f18.14  | 2.781689425 | -0.909541844 | 1.2142429 | -0.749061 | 0.453821 | NA       |
| BX571825.11       | 0 NA        | NA           | NA        | NA        | NA       | NA       |
| zgc:152936        | 3.141756236 | 0.741279492  | 1.1364592 | 0.6522711 | 0.514226 | NA       |
| zgc:136461        | 79.02289469 | 0.549692592  | 0.2985941 | 1.8409362 | 0.065631 | 0.500566 |
| si:ch211-1f22.12  | 1.105255998 | -0.398330741 | 1.974669  | -0.20172  | 0.840135 | NA       |
| si:dkey-57c22.1   | 6.124396134 | 0.69467171   | 0.8044546 | 0.8635313 | 0.387845 | NA       |
| BX649457.1        | 0 NA        | NA           | NA        | NA        | NA       | NA       |
| CU639468.1        | 111.5762064 | 0.033380846  | 0.190373  | 0.1753445 | 0.860809 | 0.985773 |
| si:dkey-19a16.1   | 0 NA        | NA           | NA        | NA        | NA       | NA       |
| BX248512.1        | 0 NA        | NA           | NA        | NA        | NA       | NA       |
| igl3v2            | 0 NA        | NA           | NA        | NA        | NA       | NA       |
| or125-1           | 1.188986818 | 1.302846014  | 1.9437106 | 0.6702881 | 0.502674 | NA       |
| si:dkey-79f11.10  | 1.691124433 | -2.06650781  | 1.8098741 | -1.141796 | 0.253539 | NA       |
| BX957345.1        | 0 NA        | NA           | NA        | NA        | NA       | NA       |
| si:ch211-274k16.2 | 1.943248001 | 2.296079959  | 1.5562465 | 1.4753961 | 0.140106 | NA       |
| si:dkey-248f6.3   | 0.689615224 | -1.495598879 | 2.3854835 | -0.626958 | 0.530687 | NA       |
| weel              | 369.0638058 | 0.168713382  | 0.1145174 | 1.473256  | 0.140682 | 0.681252 |
| CR356223.1        | 3.289620609 | 0.247625166  | 1.0822624 | 0.2288033 | 0.819022 | NA       |
| BX004840.1        | 0 NA        | NA           | NA        | NA        | NA       | NA       |
| BX901878.1        | 0 NA        | NA           | NA        | NA        | NA       | NA       |
| CU137716.1        | 2.587480874 | 0.003150506  | 1.1817579 | 0.0026659 | 0.997873 | NA       |
| BX324213.1        | 3.336862982 | 0.560077037  | 1.0747013 | 0.5211467 | 0.602265 | NA       |
| si:dkey-196j8.2   | 48.78284881 | 0.026091614  | 0.2764724 | 0.0943733 | 0.924813 | 0.992676 |
| zgc:174224        | 24.48931004 | -0.070417118 | 0.3998569 | -0.176106 | 0.860211 | 0.985773 |
| si:dkey-28d5.10   | 1.504351114 | -0.343407952 | 1.5790382 | -0.217479 | 0.827835 | NA       |
| si:zfos-2330d3.7  | 40.21673361 | 0.874000667  | 0.3087527 | 2.8307468 | 0.004644 | 0.097899 |
| pimr69            | 1.062808558 | 2.296330608  | 2.0991908 | 1.0939123 | 0.273993 | NA       |
| CT027791.1        | 0.356300316 | 0.005884122  | 3.214964  | 0.0018302 | 0.99854  | NA       |
| BX908800.1        | 0.500402445 | 2.450713647  | 2.7706722 | 0.8845195 | 0.376416 | NA       |
| tmsb5             | 7.332816155 | -0.083176772 | 0.7251366 | -0.114705 | 0.908679 | NA       |
| CR677513.1        | 4.996043576 | -0.582151711 | 0.8352224 | -0.697002 | 0.485802 | NA       |
| CT027756.2        | 0 NA        | NA           | NA        | NA        | NA       | NA       |
| CR376740.1        | 0.158795395 | 0.967652056  | 4.0804729 | 0.2371421 | 0.812547 | NA       |
| BX530037.4        | 0 NA        | NA           | NA        | NA        | NA       | NA       |
| BX510657.1        | 270.6212845 | 0.07787373   | 0.1458118 | 0.53407   | 0.593293 | 0.954434 |
| trhr2             | 5.9751881   | -0.670117226 | 0.8484906 | -0.789776 | 0.429659 | NA       |
| CU694380.1        | 0.339758314 | 0.005883863  | 3.2682461 | 0.0018003 | 0.998564 | NA       |
| CT030031.1        | 2.711423438 | 1.18318494   | 1.2608956 | 0.9383687 | 0.348055 | NA       |
| BX323559.3        | 59.12540776 | -0.014004645 | 0.2652369 | -0.052801 | 0.957891 | 0.99467  |
| CR456628.2        | 0 NA        | NA           | NA        | NA        | NA       | NA       |
| BX284666.2        | 0 NA        | NA           | NA        | NA        | NA       | NA       |
| BX324137.1        | 0.31598276  | 0.005883445  | 3.3523626 | 0.001755  | 0.9986   | NA       |
| BX276103.2        | 7.314095353 | 0.702024885  | 0.7332387 | 0.9574303 | 0.33835  | NA       |
| CR354542.1        | 0 NA        | NA           | NA        | NA        | NA       | NA       |
| BX890562.1        | 2.171909124 | 1.168434516  | 1.3246536 | 0.882068  | 0.37774  | NA       |
| CR855277.3        | 8.396133958 | 0.03712685   | 0.6805798 | 0.0545518 | 0.956496 | NA       |
| BX005032.1        | 0 NA        | NA           | NA        | NA        | NA       | NA       |
| CR392341.2        | 0 NA        | NA           | NA        | NA        | NA       | NA       |
| rflnb             | 271.0836339 | 0.245693916  | 0.1579474 | 1.5555426 | 0.119817 | 0.644872 |

|                   |             |              |           |           |          |          |
|-------------------|-------------|--------------|-----------|-----------|----------|----------|
| ftr04             | 0.841528083 | 3.19809933   | 2.2959749 | 1.3929156 | 0.163645 | NA       |
| si:dkeyp-1h4.6    | 362.1039033 | 0.563615396  | 0.1302462 | 4.3273077 | 1.51E-05 | 0.001002 |
| BX004770.1        | 10.95335093 | -0.129619786 | 0.6216343 | -0.208515 | 0.834827 | NA       |
| si:dkeyp-77c8.1   | 81.14725019 | 0.104855718  | 0.22384   | 0.4684405 | 0.63947  | 0.959994 |
| BX294181.2        | 2.651518157 | -0.438665464 | 1.4016649 | -0.31296  | 0.754311 | NA       |
| vma21             | 970.0517944 | -0.01705076  | 0.0985515 | -0.173014 | 0.862641 | 0.985841 |
| BX546499.2        | 5.446858043 | -0.961867643 | 0.8636752 | -1.113691 | 0.265412 | NA       |
| BX530407.2        | 0.182570949 | 0.967652056  | 4.0804729 | 0.2371421 | 0.812547 | NA       |
| AL929321.1        | 0           | NA           | NA        | NA        | NA       | NA       |
| si:dkey-9i23.16   | 82.27293707 | 0.18721352   | 0.21485   | 0.8713684 | 0.383553 | 0.895192 |
| si:dkey-251i10.2  | 950.2388709 | -0.102438553 | 0.1266191 | -0.809029 | 0.418499 | 0.906406 |
| BX530064.2        | 1.24549986  | 2.565897048  | 2.0172075 | 1.2720045 | 0.203372 | NA       |
| si:dkey-111e8.5   | 14.22144731 | -0.224455418 | 0.530484  | -0.423114 | 0.672212 | 0.965257 |
| CR396590.5        | 0           | NA           | NA        | NA        | NA       | NA       |
| si:ch211-250k18.6 | 5.624585738 | 0.387384764  | 0.9130805 | 0.4242613 | 0.671375 | NA       |
| BX571825.12       | 0           | NA           | NA        | NA        | NA       | NA       |
| BX548247.1        | 0.841648436 | 3.197630988  | 2.1594651 | 1.4807514 | 0.138673 | NA       |
| ftr79             | 7.637882559 | -2.719039168 | 0.8459943 | -3.214016 | 0.001309 | NA       |
| BX950224.1        | 3.041535484 | 0.633570339  | 1.2158258 | 0.5211029 | 0.602295 | NA       |
| CR933734.2        | 0.158795395 | 0.967652056  | 4.0804729 | 0.2371421 | 0.812547 | NA       |
| si:dkey-222h21.9  | 0.689615224 | -1.495598879 | 2.3854835 | -0.626958 | 0.530687 | NA       |
| CR925803.1        | 0.792368945 | 1.848914193  | 2.4268398 | 0.7618608 | 0.446143 | NA       |
| si:ch211-220f16.1 | 8.261474333 | -0.439387943 | 0.6699774 | -0.655825 | 0.511937 | NA       |
| zgc:77486         | 479.351842  | 0.082282063  | 0.1218411 | 0.6753227 | 0.499471 | 0.934006 |
| CR749763.3        | 5.136812547 | 0.10122001   | 0.8854532 | 0.1143144 | 0.908989 | NA       |
| si:dkeyp-72a4.1   | 1.473854661 | 1.840539378  | 1.7103251 | 1.0761343 | 0.281867 | NA       |
| si:ch211-165f21.7 | 0.824126911 | 0.609775617  | 2.0333139 | 0.2998925 | 0.764259 | NA       |
| BX323543.3        | 0.49144051  | 0.855669345  | 2.6923358 | 0.3178167 | 0.750624 | NA       |
| gzm3.3            | 4.481927387 | -0.313450441 | 0.87407   | -0.35861  | 0.719887 | NA       |
| si:ch211-279g13.1 | 4.376916794 | 1.455614913  | 0.9434212 | 1.5429109 | 0.122852 | NA       |
| BX465838.1        | 0           | NA           | NA        | NA        | NA       | NA       |
| znf1058           | 3.795084593 | 0.321302758  | 1.0658254 | 0.3014591 | 0.763064 | NA       |
| si:dkey-9i23.15   | 129.0119143 | -0.017326352 | 0.1791482 | -0.096715 | 0.922953 | 0.992466 |
| si:ch73-7i4.2     | 9.054141721 | 0.374426573  | 0.6445202 | 0.5809384 | 0.561282 | NA       |
| si:ch73-376124.6  | 37.38776478 | 0.467062329  | 0.3297497 | 1.4164145 | 0.156654 | 0.70691  |
| si:dkey-6a5.3     | 1.545287134 | 0.991900992  | 1.7324568 | 0.5725401 | 0.566956 | NA       |
| cc134b.4          | 1.830353403 | -0.819163785 | 1.4009786 | -0.584708 | 0.558744 | NA       |
| serp2             | 154.0837559 | -0.222570712 | 0.1651548 | -1.347649 | 0.177771 | 0.738343 |
| FP102120.1        | 152.2062243 | 0.066569875  | 0.2001781 | 0.3325532 | 0.739472 | 0.972943 |
| si:dkey-98j1.5    | 3.787009917 | 0.151516999  | 1.0201563 | 0.1485233 | 0.88193  | NA       |
| CU467633.3        | 0.166657454 | -0.955901296 | 4.0804729 | -0.234262 | 0.814781 | NA       |
| CR388373.1        | 0.476626891 | 2.395187592  | 2.815932  | 0.8505843 | 0.395    | NA       |
| swt1              | 162.2651824 | -0.111145164 | 0.1653043 | -0.672367 | 0.50135  | 0.934613 |
| si:dkey-192g7.3   | 56.50598373 | -0.415135583 | 0.2790439 | -1.487707 | 0.136828 | 0.673303 |
| si:ch211-130h14.4 | 5.108387738 | -0.10329453  | 0.8240519 | -0.12535  | 0.900247 | NA       |
| znf1137           | 5.744570171 | -0.416908572 | 0.7933089 | -0.525531 | 0.599214 | NA       |
| si:dkey-111e8.1   | 242.5855634 | -0.203260901 | 0.1646398 | -1.23458  | 0.216987 | 0.784302 |
| BX649641.5        | 1.638501742 | 0.571100201  | 1.5154132 | 0.3768611 | 0.706277 | NA       |
| AL831745.2        | 6.578833708 | -1.051582269 | 0.751882  | -1.3986   | 0.161933 | NA       |
| AL935183.1        | 109.507968  | 0.094698212  | 0.1920378 | 0.4931227 | 0.621926 | 0.957354 |
| CR387989.1        | 0           | NA           | NA        | NA        | NA       | NA       |
| si:dkey-237j10.2  | 11.83595712 | -0.508601891 | 0.5669891 | -0.897022 | 0.369707 | 0.889476 |
| BX890544.1        | 0           | NA           | NA        | NA        | NA       | NA       |
| si:dkeyp-3f10.16  | 0           | NA           | NA        | NA        | NA       | NA       |



|                   |             |              |           |           |          |          |
|-------------------|-------------|--------------|-----------|-----------|----------|----------|
| znf1045           | 0.650905698 | -0.045771139 | 2.5873401 | -0.01769  | 0.985886 | NA       |
| si:dkey-76p14.2   | 2.822437064 | 0.149676251  | 1.157332  | 0.1293287 | 0.897098 | NA       |
| si:ch211-226f6.1  | 0 NA        | NA           | NA        | NA        | NA       | NA       |
| krt17             | 3217.293613 | 0.256923122  | 0.2448824 | 1.0491693 | 0.2941   | 0.849999 |
| si:ch73-376124.3  | 134.5497063 | -0.006237499 | 0.1838329 | -0.03393  | 0.972933 | 0.996315 |
| si:dkeyp-73d8.8   | 33.27508249 | -0.128363431 | 0.3619    | -0.354693 | 0.72282  | 0.970375 |
| si:dkeyp-26a9.7   | 0.158915748 | 0.967652056  | 4.0804729 | 0.2371421 | 0.812547 | NA       |
| CR759830.1        | 1.986870975 | -0.500293445 | 1.3080111 | -0.382484 | 0.702102 | NA       |
| BX004962.1        | 0.666819193 | 1.487924459  | 2.4081466 | 0.6178712 | 0.53666  | NA       |
| taok3b            | 225.6659091 | 0.017586429  | 0.1383845 | 0.1270838 | 0.898874 | 0.990121 |
| BX248332.1        | 0 NA        | NA           | NA        | NA        | NA       | NA       |
| si:dkey-88116.3   | 8.791530513 | -0.175162431 | 0.6351654 | -0.275775 | 0.782721 | NA       |
| cyp2j20           | 33.22606213 | 1.502121069  | 0.3786861 | 3.9666653 | 7.29E-05 | 0.003753 |
| si:ch211-191j22.7 | 9.095768864 | -0.138832499 | 0.6337648 | -0.21906  | 0.826603 | NA       |
| CR749774.1        | 0 NA        | NA           | NA        | NA        | NA       | NA       |
| CU570972.1        | 0 NA        | NA           | NA        | NA        | NA       | NA       |
| CR788236.1        | 0.317831496 | 1.808837541  | 3.5779923 | 0.5055454 | 0.613176 | NA       |
| si:dkey-121n8.7   | 0.173729368 | -0.955901296 | 4.0804729 | -0.234262 | 0.814781 | NA       |
| AL954149.1        | 0 NA        | NA           | NA        | NA        | NA       | NA       |
| si:dkey-81h8.1    | 16.76992328 | 0.040942379  | 0.4927629 | 0.0830874 | 0.933782 | 0.992702 |
| BX936317.1        | 1.544940617 | 1.906194886  | 1.7511677 | 1.0885279 | 0.276362 | NA       |
| si:dkey-21e2.16   | 14.26109332 | -0.443068345 | 0.5614517 | -0.789148 | 0.430026 | 0.911615 |
| CR626882.1        | 0.182570949 | 0.967652056  | 4.0804729 | 0.2371421 | 0.812547 | NA       |
| or103-1           | 0.31598276  | 0.005883445  | 3.3523626 | 0.001755  | 0.9986   | NA       |
| BX323880.1        | 0 NA        | NA           | NA        | NA        | NA       | NA       |
| si:dkey-223d7.6   | 0 NA        | NA           | NA        | NA        | NA       | NA       |
| CR759846.1        | 1.297805191 | -0.760789523 | 1.7411822 | -0.436938 | 0.662156 | NA       |
| CR548634.1        | 3.365315777 | 0.647393608  | 1.0750968 | 0.6021724 | 0.547059 | NA       |
| si:ch211-229n2.7  | 61.3979124  | -0.464260165 | 0.2669096 | -1.739391 | 0.081966 | 0.552725 |
| sult3st3          | 1.504738916 | -1.065827818 | 1.6676907 | -0.639104 | 0.522755 | NA       |
| BX248089.1        | 0.807663976 | 0.546685639  | 2.2534268 | 0.2426019 | 0.808314 | NA       |
| CR450817.1        | 2.801500059 | -1.234292008 | 1.2265752 | -1.006291 | 0.314275 | NA       |
| CR936321.1        | 137.472669  | -0.059243817 | 0.1737472 | -0.340977 | 0.733121 | 0.971947 |
| si:ch211-278p9.3  | 0.989014697 | -1.039032001 | 1.9050484 | -0.54541  | 0.585472 | NA       |
| BX323559.4        | 3.575582659 | -0.105896711 | 1.1161563 | -0.094876 | 0.924413 | NA       |
| BX248118.1        | 9.884337535 | 0.693929356  | 0.6313088 | 1.0991916 | 0.271684 | NA       |
| BX469925.3        | 0.814536469 | 0.637862482  | 2.230678  | 0.28595   | 0.774916 | NA       |
| AL929237.1        | 32.32852526 | 2.818854159  | 0.4371197 | 6.448701  | 1.13E-10 | 2.66E-08 |
| BX005064.1        | 5.049330514 | -0.131840545 | 0.887319  | -0.148583 | 0.881883 | NA       |
| si:ch73-37h15.2   | 79.16017899 | 0.013497739  | 0.2246821 | 0.0600748 | 0.952096 | 0.993904 |
| BX571827.1        | 0 NA        | NA           | NA        | NA        | NA       | NA       |
| znf1168           | 26.91493186 | -0.473380378 | 0.3812514 | -1.241649 | 0.214366 | 0.782493 |
| AL954145.1        | 138.6778368 | 0.19077314   | 0.1707287 | 1.1174052 | 0.263821 | 0.830245 |
| s1c22a21          | 51.38128072 | 0.256064813  | 0.276554  | 0.9259127 | 0.354491 | 0.882105 |
| BX571945.1        | 0 NA        | NA           | NA        | NA        | NA       | NA       |
| BX914211.1        | 14.84519071 | 0.10779956   | 0.4971224 | 0.2168471 | 0.828327 | 0.982721 |
| si:dkey-21o22.2   | 52.7057806  | 0.676444561  | 0.3045106 | 2.2214152 | 0.026323 | 0.312554 |
| CR846087.2        | 0.838899245 | -0.667458734 | 2.2321093 | -0.299026 | 0.76492  | NA       |
| CR318674.1        | 0.182570949 | 0.967652056  | 4.0804729 | 0.2371421 | 0.812547 | NA       |
| CR589874.1        | 42.88266688 | -0.210193114 | 0.3142473 | -0.668878 | 0.503573 | 0.935304 |
| or103-2           | 0.158915748 | 0.967652056  | 4.0804729 | 0.2371421 | 0.812547 | NA       |
| si:ch211-202c21.7 | 2.024203134 | 0.067917171  | 1.3988728 | 0.0485514 | 0.961277 | NA       |
| AL954695.3        | 1.475032609 | 0.318592214  | 1.58558   | 0.200931  | 0.840753 | NA       |
| CR751602.1        | 102.7273737 | -0.20598512  | 0.1997628 | -1.031149 | 0.302471 | 0.85729  |

|                   |             |              |           |           |          |          |
|-------------------|-------------|--------------|-----------|-----------|----------|----------|
| ftr19             | 20.06202031 | -0.151753133 | 0.4244316 | -0.357544 | 0.720684 | 0.969381 |
| igfl              | 44.6998604  | 0.233570023  | 0.2859948 | 0.8166932 | 0.414104 | 0.906107 |
| wu:fc21g02        | 2385.69194  | 0.108053295  | 0.0775921 | 1.3925817 | 0.163746 | 0.71945  |
| BX936305.1        | 0.325573202 | 0.005883621  | 3.3172783 | 0.0017736 | 0.998585 | NA       |
| CT027756.3        | 3.306682052 | -0.914332289 | 1.0575665 | -0.864562 | 0.387279 | NA       |
| BX511265.2        | 2.667487479 | 0.396527576  | 1.1541597 | 0.3435639 | 0.731174 | NA       |
| BX936391.1        | 2.417366654 | -0.564011318 | 1.2848541 | -0.438969 | 0.660684 | NA       |
| CR391990.1        | 0.83198897  | -0.546504737 | 2.1106392 | -0.258929 | 0.79569  | NA       |
| pimr143           | 0 NA        | NA           | NA        | NA        | NA       | NA       |
| pimr134           | 0.679983498 | -1.527277543 | 2.5551009 | -0.597737 | 0.550016 | NA       |
| BX465864.1        | 0 NA        | NA           | NA        | NA        | NA       | NA       |
| BX323875.1        | 0.347458735 | -1.908042286 | 3.4571486 | -0.551912 | 0.581009 | NA       |
| CR812469.1        | 8.411345576 | -0.515803188 | 0.6479093 | -0.796104 | 0.425972 | NA       |
| hist2h3c          | 61.37478682 | 0.088218162  | 0.3016516 | 0.2924505 | 0.769942 | 0.975687 |
| si:ch73-256j6.2   | 1.475152962 | 0.31880875   | 1.5686434 | 0.2032385 | 0.838949 | NA       |
| si:dkey-27j5.10   | 0 NA        | NA           | NA        | NA        | NA       | NA       |
| BX072561.1        | 0.476747244 | 2.393381959  | 3.0525537 | 0.7840589 | 0.433006 | NA       |
| si:ch73-160h15.3  | 74.45658239 | 0.057252018  | 0.2302158 | 0.2486885 | 0.803602 | 0.979643 |
| si:dkeyp-19e1.4   | 0.317711143 | 1.810477155  | 3.2978238 | 0.5489915 | 0.583011 | NA       |
| BX649434.1        | 1.838215462 | -1.418452594 | 1.4563693 | -0.973965 | 0.330074 | NA       |
| AL807389.1        | 0 NA        | NA           | NA        | NA        | NA       | NA       |
| lrplba            | 69.28112803 | 0.147186346  | 0.2328134 | 0.6322074 | 0.527251 | 0.941218 |
| si:ch73-263f13.1  | 0 NA        | NA           | NA        | NA        | NA       | NA       |
| BX927282.1        | 3.307654786 | 2.018094058  | 1.1678469 | 1.7280468 | 0.08398  | NA       |
| znf1027           | 2.760931506 | 1.232510066  | 1.1984884 | 1.0283872 | 0.303768 | NA       |
| cdkn2d            | 76.73766368 | -0.153824319 | 0.2334839 | -0.658822 | 0.51001  | 0.936253 |
| si:ch211-208f21.2 | 7.819056823 | -0.570621593 | 0.7244429 | -0.78767  | 0.43089  | NA       |
| shroom1           | 4.965787829 | 0.014544115  | 0.8372702 | 0.0173709 | 0.986141 | NA       |
| si:ch211-125e6.14 | 0 NA        | NA           | NA        | NA        | NA       | NA       |
| AL954149.2        | 21.39027753 | 0.015697325  | 0.4343009 | 0.0361439 | 0.971168 | 0.996315 |
| BX322661.1        | 0.515095711 | 0.926015374  | 2.6527421 | 0.3490785 | 0.72703  | NA       |
| CU207281.3        | 0.173729368 | -0.955901296 | 4.0804729 | -0.234262 | 0.814781 | NA       |
| nup37             | 225.7713388 | -0.296813157 | 0.1422624 | -2.086378 | 0.036944 | 0.376072 |
| si:dkeyp-82a1.2   | 1.478888463 | -0.978751762 | 1.5408752 | -0.635192 | 0.525303 | NA       |
| BX649484.1        | 2.329697258 | -0.832337136 | 1.2722313 | -0.654234 | 0.512961 | NA       |
| CR936371.1        | 1.434165613 | 0.985213129  | 1.6745955 | 0.588329  | 0.556311 | NA       |
| si:dkey-27d5.10   | 0.182570949 | 0.967652056  | 4.0804729 | 0.2371421 | 0.812547 | NA       |
| znf111            | 0.31598276  | 0.005883445  | 3.3523626 | 0.001755  | 0.9986   | NA       |
| CR354556.1        | 216.8840383 | 0.083038154  | 0.1448611 | 0.5732261 | 0.566492 | 0.948739 |
| si:ch211-226h8.8  | 0 NA        | NA           | NA        | NA        | NA       | NA       |
| CT583646.2        | 8.375174913 | -1.702663013 | 0.7137476 | -2.385525 | 0.017055 | NA       |
| elpl              | 403.5627799 | -0.00778609  | 0.1101448 | -0.07069  | 0.943645 | 0.993364 |
| si:ch73-191k20.3  | 5.005916008 | -0.567605642 | 0.8828104 | -0.642953 | 0.520255 | NA       |
| fth131            | 261.8021494 | 0.350647167  | 0.1349747 | 2.597873  | 0.00938  | 0.16228  |
| CR545465.1        | 0 NA        | NA           | NA        | NA        | NA       | NA       |
| si:dkey-179k24.1  | 0.158915748 | 0.967652056  | 4.0804729 | 0.2371421 | 0.812547 | NA       |
| BX601644.2        | 0.499972362 | -2.44370697  | 3.0013188 | -0.814211 | 0.415524 | NA       |
| si:dkeyp-117b8.4  | 376.9043866 | -0.168395257 | 0.1228538 | -1.370697 | 0.17047  | 0.728048 |
| BX005417.1        | 5.720045756 | -0.246342175 | 0.7963634 | -0.309334 | 0.757068 | NA       |
| si:ch1073-186o8.3 | 6.574081897 | -0.419805136 | 0.7416722 | -0.566025 | 0.571377 | NA       |
| si:dkey-17e16.15  | 203.4541663 | -0.002521168 | 0.1750152 | -0.014405 | 0.988507 | 0.997486 |
| CR854965.1        | 0 NA        | NA           | NA        | NA        | NA       | NA       |
| si:dkey-219e20.2  | 0.664231641 | -2.853946573 | 2.346554  | -1.216229 | 0.223898 | NA       |
| si:dkey-28d5.8    | 1.368970215 | -0.71302941  | 1.6542401 | -0.431031 | 0.666446 | NA       |

|                   |             |              |           |           |          |          |
|-------------------|-------------|--------------|-----------|-----------|----------|----------|
| pimr125           | 2.992899042 | 0.320450137  | 1.0841734 | 0.2955709 | 0.767558 | NA       |
| si:dkey-211g8.4   | 5.68035755  | 0.183455062  | 0.8134969 | 0.2255142 | 0.821579 | NA       |
| BX908395.1        | 0.330916733 | -1.849579229 | 3.2489867 | -0.569279 | 0.569167 | NA       |
| or115-14          | 0 NA        |              | NA        | NA        | NA       | NA       |
| si:dkey-112g5.15  | 0 NA        |              | NA        | NA        | NA       | NA       |
| taarl2h           | 0.317831496 | 1.808837541  | 3.5779923 | 0.5055454 | 0.613176 | NA       |
| CR450777.1        | 2.099764578 | 0.189205728  | 1.382718  | 0.1368361 | 0.89116  | NA       |
| BX649502.8        | 0 NA        |              | NA        | NA        | NA       | NA       |
| znf1171           | 68.76304552 | -0.228871237 | 0.2384958 | -0.959645 | 0.337234 | 0.876339 |
| shda              | 14.85437364 | -0.457843851 | 0.5148106 | -0.889344 | 0.373818 | 0.893677 |
| BX085193.3        | 0 NA        |              | NA        | NA        | NA       | NA       |
| si:dkey-222h21.10 | 5.81628789  | 0.090755708  | 0.8152489 | 0.1113227 | 0.91136  | NA       |
| CU693368.1        | 0.332645115 | 0.005883744  | 3.2924249 | 0.0017871 | 0.998574 | NA       |
| wu:fc17b08        | 26.21057871 | 0.006545657  | 0.3663198 | 0.0178687 | 0.985744 | 0.996944 |
| si:ch211-119d14.2 | 20.64616401 | -0.286493367 | 0.4254479 | -0.673392 | 0.500698 | 0.93428  |
| BX649448.3        | 7.020280117 | 0.602509369  | 0.7254221 | 0.8305638 | 0.40622  | NA       |
| B3GNT10           | 8.399589634 | 0.266032454  | 0.6587168 | 0.4038647 | 0.686312 | NA       |
| BX324164.1        | 0.158795395 | 0.967652056  | 4.0804729 | 0.2371421 | 0.812547 | NA       |
| commd9            | 177.2296136 | 0.061067739  | 0.1540344 | 0.3964551 | 0.691769 | 0.967305 |
| CR388077.1        | 5.817603885 | 0.763373238  | 0.7815995 | 0.9766808 | 0.328727 | NA       |
| taar19g           | 0.157187365 | -0.955901296 | 4.0804729 | -0.234262 | 0.814781 | NA       |
| BX544876.1        | 0 NA        |              | NA        | NA        | NA       | NA       |
| CU539058.1        | 465.7496233 | -0.033050143 | 0.1050997 | -0.314465 | 0.753168 | 0.97481  |
| si:dkey-183n20.15 | 55.68417596 | -0.57367459  | 0.2655286 | -2.1605   | 0.030734 | 0.339614 |
| si:ch73-337115.2  | 27.07614338 | -0.254372125 | 0.3663264 | -0.694387 | 0.48744  | 0.931584 |
| CR855393.2        | 0 NA        |              | NA        | NA        | NA       | NA       |
| si:ch73-222f22.2  | 0 NA        |              | NA        | NA        | NA       | NA       |
| map3k19           | 13.3957134  | -0.901581714 | 0.559551  | -1.611259 | 0.107123 | 0.617015 |
| peak3             | 1.01990345  | -0.910958137 | 1.9547665 | -0.466019 | 0.641202 | NA       |
| BX005156.2        | 0.647019846 | -1.455099716 | 2.4289208 | -0.599073 | 0.549125 | NA       |
| mrpl44            | 450.708999  | -0.021711851 | 0.1175771 | -0.184661 | 0.853495 | 0.985174 |
| si:dkeyp-20g2.3   | 0.182570949 | 0.967652056  | 4.0804729 | 0.2371421 | 0.812547 | NA       |
| usp21             | 293.1476288 | 0.216717764  | 0.1317394 | 1.6450494 | 0.09996  | 0.601211 |
| si:ch73-196i15.3  | 38.41303488 | 0.363050966  | 0.3157377 | 1.1498501 | 0.250206 | 0.820164 |
| dnah11            | 51.69451896 | -0.105842859 | 0.2847016 | -0.371768 | 0.710066 | 0.968928 |
| si:dkey-58f10.10  | 0.507044276 | -2.459587493 | 2.7586536 | -0.89159  | 0.372613 | NA       |
| si:ch211-117m20.4 | 23.64019089 | 0.971243019  | 0.4077946 | 2.3816968 | 0.017233 | 0.242366 |
| CT997819.2        | 1.979517071 | -0.540778015 | 1.4087084 | -0.383882 | 0.701066 | NA       |
| si:rp71-45g20.11  | 2.89285564  | 0.622753531  | 1.1893566 | 0.5236054 | 0.600553 | NA       |
| CR318599.1        | 0.50625413  | -0.940106488 | 2.8357787 | -0.331516 | 0.740255 | NA       |
| CR855337.1        | 18.11822528 | -0.304960686 | 0.4526355 | -0.673745 | 0.500474 | 0.934237 |
| si:dkey-222h21.2  | 29.41104686 | -0.381814455 | 0.3615775 | -1.055969 | 0.290983 | 0.846568 |
| CT573178.1        | 0.482640214 | -0.866525639 | 2.7061322 | -0.320208 | 0.748811 | NA       |
| BX649350.1        | 0.474898508 | 0.855240867  | 2.7202602 | 0.3143967 | 0.75322  | NA       |
| nuprla            | 819.4718255 | -0.446933804 | 0.1321704 | -3.381497 | 0.000721 | 0.023759 |
| BX537274.1        | 4.320806096 | 1.181028392  | 0.9228066 | 1.2798222 | 0.200608 | NA       |
| BX296552.1        | 0.953253781 | 3.394542042  | 2.2020103 | 1.541565  | 0.123179 | NA       |
| si:dkey-237j11.3  | 1.43726132  | 2.849099914  | 1.9089963 | 1.4924596 | 0.135579 | NA       |
| BX000981.4        | 1.325436598 | -2.680967306 | 1.8525508 | -1.447176 | 0.147848 | NA       |
| si:ch211-226o13.3 | 0 NA        |              | NA        | NA        | NA       | NA       |
| si:dkey-247i3.6   | 1.021160465 | -3.467929953 | 2.1547914 | -1.609404 | 0.107528 | NA       |
| si:ch73-92e7.6    | 27.55313874 | 0.24854438   | 0.3627587 | 0.6851508 | 0.493249 | 0.931926 |
| si:ch211-255g12.6 | 10434.11898 | -0.235656118 | 0.0683197 | -3.449316 | 0.000562 | 0.019327 |
| ndufa9b           | 155.3071107 | -0.041370107 | 0.1662712 | -0.248811 | 0.803507 | 0.979643 |

|                    |             |              |           |           |          |          |
|--------------------|-------------|--------------|-----------|-----------|----------|----------|
| CR753837.2         | 0.482640214 | -0.866525639 | 2.7061322 | -0.320208 | 0.748811 | NA       |
| CR788285.2         | 0.182570949 | 0.967652056  | 4.0804729 | 0.2371421 | 0.812547 | NA       |
| si:rp71-80o10.4    | 59.41913365 | -0.306898977 | 0.2555339 | -1.201011 | 0.229747 | 0.79764  |
| CU326349.1         | 0 NA        | NA           | NA        | NA        | NA       | NA       |
| BX322647.1         | 1.495430465 | -0.994616347 | 1.5232261 | -0.652967 | 0.513778 | NA       |
| CR788303.1         | 1.646992309 | -0.633760738 | 1.5074309 | -0.420424 | 0.674175 | NA       |
| BX294389.1         | 0 NA        | NA           | NA        | NA        | NA       | NA       |
| efemp2a            | 566.113454  | 0.167627818  | 0.1077444 | 1.5557918 | 0.119758 | 0.644854 |
| or124-2            | 0.50625413  | -0.940106488 | 2.8357787 | -0.331516 | 0.740255 | NA       |
| SPATA1             | 5.974560588 | 0.152565272  | 0.7633659 | 0.1998586 | 0.841591 | NA       |
| si:dkey-93n13.1    | 40.41082683 | -0.201482569 | 0.322555  | -0.624646 | 0.532204 | 0.942546 |
| si:dkey-9p24.5     | 0.506374483 | -0.940103506 | 2.8355584 | -0.331541 | 0.740236 | NA       |
| BX901918.1         | 0.531799352 | 0.999478841  | 2.790358  | 0.3581902 | 0.720201 | NA       |
| vgl14a             | 59.42139078 | 0.093449863  | 0.2577214 | 0.3626003 | 0.716903 | 0.96909  |
| si:dkey-23f9.12    | 0 NA        | NA           | NA        | NA        | NA       | NA       |
| si:dkeyp-82a1.6    | 171.033673  | -0.205619898 | 0.1770124 | -1.161613 | 0.245393 | 0.815388 |
| pimr88             | 0.157187365 | -0.955901296 | 4.0804729 | -0.234262 | 0.814781 | NA       |
| CR545466.1         | 0.158915748 | 0.967652056  | 4.0804729 | 0.2371421 | 0.812547 | NA       |
| si:dkey-20i20.8    | 13.57145236 | -0.567793038 | 0.6265037 | -0.906288 | 0.364783 | 0.886714 |
| si:dkey-222h21.8   | 0.333314908 | -1.858695402 | 3.5126701 | -0.52914  | 0.596708 | NA       |
| si:dkey-26117.2    | 41.88753712 | 0.440157053  | 0.3048541 | 1.4438287 | 0.148787 | 0.69636  |
| si:ch211-114113.13 | 3.42269719  | -0.374603775 | 1.0723984 | -0.349314 | 0.726854 | NA       |
| CR388079.1         | 0 NA        | NA           | NA        | NA        | NA       | NA       |
| si:ch211-187g4.1   | 0 NA        | NA           | NA        | NA        | NA       | NA       |
| si:ch73-34314.1    | 0 NA        | NA           | NA        | NA        | NA       | NA       |
| CR762497.1         | 0.182570949 | 0.967652056  | 4.0804729 | 0.2371421 | 0.812547 | NA       |
| si:dkey-260g12.1   | 34.78839996 | 0.002065165  | 0.3386639 | 0.006098  | 0.995135 | 0.998694 |
| AL935300.1         | 1.610482533 | 3.038710433  | 1.7590623 | 1.7274603 | 0.084085 | NA       |
| CR759893.1         | 0.158915748 | 0.967652056  | 4.0804729 | 0.2371421 | 0.812547 | NA       |
| si:ch211-125e6.13  | 0 NA        | NA           | NA        | NA        | NA       | NA       |
| si:ch211-165f21.2  | 23.54792419 | -0.048173894 | 0.3961491 | -0.121605 | 0.903211 | 0.990121 |
| samd10b            | 17.06115847 | 0.599996811  | 0.4836384 | 1.2405896 | 0.214757 | 0.782493 |
| BX927413.1         | 0 NA        | NA           | NA        | NA        | NA       | NA       |
| zzef1              | 704.9815721 | -0.10523     | 0.0952154 | -1.105178 | 0.269083 | 0.834439 |
| BX649266.1         | 3.674411502 | 0.261807824  | 0.992143  | 0.2638811 | 0.791872 | NA       |
| si:dkey-85k15.6    | 1.185891111 | -0.36621692  | 1.8036008 | -0.203048 | 0.839098 | NA       |
| adgrg4b            | 17.06803964 | -1.177017386 | 0.4967943 | -2.369225 | 0.017825 | 0.247181 |
| si:dkeyp-30e7.2    | 0 NA        | NA           | NA        | NA        | NA       | NA       |
| celsr2             | 95.95138881 | -0.002584117 | 0.2102878 | -0.012288 | 0.990195 | 0.997679 |
| si:dkey-201k7.1    | 0.31437473  | -1.788572922 | 3.5930657 | -0.497785 | 0.618636 | NA       |
| si:dkey-229d11.5   | 0.173729368 | -0.955901296 | 4.0804729 | -0.234262 | 0.814781 | NA       |
| CR848841.1         | 15.87505115 | 0.550040802  | 0.5034615 | 1.092518  | 0.274605 | 0.839136 |
| si:dkey-78k11.4    | 0.521188103 | -2.493476766 | 2.9577741 | -0.843025 | 0.399215 | NA       |
| si:dkey-199f5.6    | 8.856293416 | -0.275415281 | 0.6392929 | -0.430812 | 0.666605 | NA       |
| BX545856.1         | 1.130880288 | 0.459759413  | 1.9539337 | 0.2352994 | 0.813976 | NA       |
| si:dkey-33c12.10   | 1.139989318 | 0.439423795  | 1.8430523 | 0.2384218 | 0.811554 | NA       |
| CU633933.1         | 0 NA        | NA           | NA        | NA        | NA       | NA       |
| BX548075.2         | 0 NA        | NA           | NA        | NA        | NA       | NA       |
| MFAP4 (1 of many)  | 12.54923421 | 0.088953975  | 0.5367577 | 0.1657246 | 0.868374 | 0.987245 |
| CU463033.1         | 0.158915748 | 0.967652056  | 4.0804729 | 0.2371421 | 0.812547 | NA       |
| si:dkey-4c15.14    | 61.20319572 | -0.177274915 | 0.2507461 | -0.70699  | 0.479573 | 0.927091 |
| aknad1             | 12.39173869 | 0.540109053  | 0.5927671 | 0.9111658 | 0.362208 | 0.885944 |
| si:ch211-264e16.2  | 1.195240847 | -0.382051374 | 1.7326308 | -0.220504 | 0.825479 | NA       |
| si:dkey-13n15.2    | 73.9370508  | 0.197389476  | 0.2605837 | 0.7574897 | 0.448757 | 0.917876 |

|                    |             |              |           |           |          |          |
|--------------------|-------------|--------------|-----------|-----------|----------|----------|
| si:dkey-27p18.7    | 0.499972362 | -2.44370697  | 3.0013188 | -0.814211 | 0.415524 | NA       |
| BX640465.1         | 0.846174082 | -0.46494763  | 2.1994676 | -0.211391 | 0.832582 | NA       |
| si:dkey-12112.1    | 141.0792169 | 0.140409395  | 0.172823  | 0.8124462 | 0.416536 | 0.906237 |
| AL954359.2         | 12.50663418 | -0.264443852 | 0.5384532 | -0.491118 | 0.623343 | 0.957354 |
| si:ch211-222m18.4  | 0           | NA           | NA        | NA        | NA       | NA       |
| her4.2             | 385.1524804 | -0.062654829 | 0.1340812 | -0.46729  | 0.640292 | 0.959994 |
| si:dkey-253d23.8   | 15.70757711 | -0.482076018 | 0.4872897 | -0.989301 | 0.322516 | 0.870226 |
| si:dkey-31f5.8     | 47.87800684 | -0.221605265 | 0.282437  | -0.784618 | 0.432677 | 0.91326  |
| caspl              | 39.57164314 | 0.174137016  | 0.3099145 | 0.5618872 | 0.574193 | 0.950037 |
| CR848723.1         | 1.000134101 | 0.001091541  | 2.0514706 | 0.0005321 | 0.999575 | NA       |
| BX571803.1         | 0.989873867 | 0.997084054  | 1.9939383 | 0.5000576 | 0.617034 | NA       |
| plac8.2            | 1.468480137 | -2.855501588 | 1.8846635 | -1.515125 | 0.129741 | NA       |
| si:dkey-161j23.5   | 160.302558  | -0.203577819 | 0.158689  | -1.282873 | 0.199537 | 0.764903 |
| si:dkeyp-73g8.5    | 0           | NA           | NA        | NA        | NA       | NA       |
| znf1036            | 3.913115897 | -1.938996374 | 1.0792982 | -1.796534 | 0.07241  | NA       |
| CR354556.2         | 1.304877104 | -0.769183969 | 1.7390479 | -0.442302 | 0.658271 | NA       |
| AL929520.1         | 0.482760567 | -0.866527181 | 2.7059286 | -0.320233 | 0.748792 | NA       |
| BX511231.1         | 0.157187365 | -0.955901296 | 4.0804729 | -0.234262 | 0.814781 | NA       |
| BX571945.2         | 0           | NA           | NA        | NA        | NA       | NA       |
| cfp                | 213.6011641 | 0.012014483  | 0.1648372 | 0.072887  | 0.941896 | 0.993099 |
| cdh23              | 3.839234762 | 0.169688405  | 0.9774517 | 0.1736029 | 0.862178 | NA       |
| CR293531.1         | 3.715203682 | 2.675174995  | 1.1953553 | 2.2379748 | 0.025223 | NA       |
| AL928824.1         | 0.356300316 | 0.005884122  | 3.214964  | 0.0018302 | 0.99854  | NA       |
| BX005210.1         | 0.316103113 | 0.005883447  | 3.3519121 | 0.0017553 | 0.9986   | NA       |
| si:dkey-65b12.12   | 2.554262817 | 1.013112256  | 1.3368711 | 0.7578235 | 0.448557 | NA       |
| CR354556.3         | 445.8640655 | 0.092649634  | 0.1088209 | 0.8513958 | 0.39455  | 0.898861 |
| BX465186.2         | 4.618116127 | 0.855756014  | 0.8957444 | 0.9553574 | 0.339397 | NA       |
| or128-8            | 0.878629579 | 0.686795053  | 2.2010162 | 0.3120354 | 0.755014 | NA       |
| si:dkeyp-80c12.8   | 0.182570949 | 0.967652056  | 4.0804729 | 0.2371421 | 0.812547 | NA       |
| si:ch73-199e17.1   | 208.4076476 | -0.093456603 | 0.1624726 | -0.575215 | 0.565146 | 0.948739 |
| BX957308.1         | 0           | NA           | NA        | NA        | NA       | NA       |
| wu:fc63a07         | 103.4541507 | -0.04738534  | 0.208407  | -0.227369 | 0.820137 | 0.981594 |
| txnrd2.1           | 0           | NA           | NA        | NA        | NA       | NA       |
| CU137648.1         | 0           | NA           | NA        | NA        | NA       | NA       |
| BX927218.1         | 10.82159863 | -0.234448283 | 0.5985491 | -0.391694 | 0.695284 | NA       |
| si:dkey-163f12.6   | 8.309348622 | 0.064431356  | 0.7317677 | 0.0880489 | 0.929838 | NA       |
| BX569801.1         | 90.46169086 | 0.224569755  | 0.2336356 | 0.9611965 | 0.336453 | 0.876088 |
| si:ch1073-75o15.4  | 0           | NA           | NA        | NA        | NA       | NA       |
| BX927121.1         | 0           | NA           | NA        | NA        | NA       | NA       |
| si:ch211-162i8.4   | 1.651951293 | 1.990872718  | 1.775745  | 1.1211479 | 0.262225 | NA       |
| si:dkey-27h10.2    | 13.4248463  | -0.276990994 | 0.5456055 | -0.507676 | 0.61168  | 0.95688  |
| si:ch1073-412h12.3 | 0.31598276  | 0.005883445  | 3.3523626 | 0.001755  | 0.9986   | NA       |
| BX510923.1         | 618.1548399 | 0.344956896  | 0.0989007 | 3.4879122 | 0.000487 | 0.01747  |
| si:dkey-58f10.6    | 8.19155362  | 0.062804622  | 0.6564777 | 0.0956691 | 0.923783 | NA       |
| taar19k            | 0           | NA           | NA        | NA        | NA       | NA       |
| si:ch211-202m22.1  | 7.487400256 | -0.699813266 | 0.7305391 | -0.957941 | 0.338093 | NA       |
| si:ch211-284e13.12 | 0.323844819 | -1.825095364 | 3.274639  | -0.557342 | 0.577293 | NA       |
| CR933017.1         | 1.304997457 | -0.766489526 | 1.6584892 | -0.462161 | 0.643966 | NA       |
| BX548075.3         | 0.340386822 | -1.882368278 | 3.2159502 | -0.585323 | 0.558331 | NA       |
| CR376762.1         | 2.401680166 | 0.010086734  | 1.2872093 | 0.0078361 | 0.993748 | NA       |
| BX927101.1         | 3.096759274 | -0.623820686 | 1.1527972 | -0.541137 | 0.588413 | NA       |
| si:ch211-238e22.4  | 0.473290478 | -0.833892061 | 2.901156  | -0.287434 | 0.77378  | NA       |
| BX323457.2         | 7.406729374 | -0.191749105 | 0.7061224 | -0.271552 | 0.785966 | NA       |
| CR376748.1         | 0           | NA           | NA        | NA        | NA       | NA       |

|                    |             |              |           |           |          |          |
|--------------------|-------------|--------------|-----------|-----------|----------|----------|
| AL954767.1         | 75.37090744 | -0.017555435 | 0.2383313 | -0.07366  | 0.941281 | 0.992857 |
| plekha1b           | 62.21244526 | -0.038028414 | 0.2521609 | -0.15081  | 0.880125 | 0.987881 |
| si:ch211-218m3.9   | 3.659847637 | -1.437394816 | 1.0619798 | -1.353505 | 0.175894 | NA       |
| CR925709.2         | 1.157159828 | -0.479018393 | 1.9216574 | -0.249274 | 0.803149 | NA       |
| CR354538.1         | 1.339181337 | 0.685980852  | 1.724488  | 0.3977881 | 0.690786 | NA       |
| cc120b             | 10.95896656 | 0.094261623  | 0.5642342 | 0.1670612 | 0.867322 | NA       |
| gabrz              | 43.71436187 | 0.270675191  | 0.3037505 | 0.8911102 | 0.37287  | 0.892868 |
| si:dkey-716.3      | 83.05389434 | 0.18213583   | 0.2302017 | 0.7912009 | 0.428827 | 0.911406 |
| or132-2            | 3.900959696 | 0.940038804  | 0.9890752 | 0.950422  | 0.341898 | NA       |
| es1                | 3.536019632 | 0.774433352  | 1.1057814 | 0.7003494 | 0.483709 | NA       |
| si:ch211-125e6.8   | 37.57915847 | 0.27270315   | 0.3999396 | 0.6818608 | 0.495327 | 0.931928 |
| si:ch211-152p23.2  | 1.995592204 | 0.006106639  | 1.3025092 | 0.0046884 | 0.996259 | NA       |
| si:ch73-194h10.3   | 0.678375468 | -2.878459328 | 2.4926399 | -1.154783 | 0.248179 | NA       |
| si:ch211-14c7.2    | 450.5128679 | 0.201356835  | 0.1149592 | 1.7515498 | 0.079851 | 0.548745 |
| BX511089.2         | 7.294609958 | -0.190336833 | 0.7475311 | -0.254621 | 0.799016 | NA       |
| si:ch211-1f22.11   | 0           | NA           | NA        | NA        | NA       | NA       |
| ksr2               | 399.4827915 | 0.053215634  | 0.1215187 | 0.4379215 | 0.661443 | 0.964234 |
| BX927181.1         | 0           | NA           | NA        | NA        | NA       | NA       |
| BX548157.1         | 2.45469757  | -0.203670203 | 1.1789681 | -0.172753 | 0.862846 | NA       |
| CR388168.2         | 1.133855642 | 2.462671251  | 1.9506495 | 1.2624878 | 0.206773 | NA       |
| si:dkey-246e1.3    | 46.62122259 | 0.07822211   | 0.2970543 | 0.263326  | 0.792299 | 0.977937 |
| CR786571.2         | 3.634722454 | -0.020626954 | 1.0024845 | -0.020576 | 0.983584 | NA       |
| BX957326.1         | 5.403197038 | 0.635814207  | 0.8411809 | 0.7558591 | 0.449734 | NA       |
| si:ch211-137i24.12 | 63.12658252 | -0.239478023 | 0.2495611 | -0.959597 | 0.337258 | 0.876339 |
| CT027623.1         | 0.687217049 | -1.490137326 | 2.387795  | -0.624064 | 0.532585 | NA       |
| si:dkey-96117.6    | 3.89121766  | 0.12229975   | 0.991096  | 0.1233985 | 0.901792 | NA       |
| si:dkey-121h17.7   | 2.302705644 | -1.857274169 | 1.3604565 | -1.365185 | 0.172195 | NA       |
| BX649349.1         | 0.674681252 | 0.02288157   | 2.4148996 | 0.0094752 | 0.99244  | NA       |
| si:ch211-132b12.6  | 0           | NA           | NA        | NA        | NA       | NA       |
| CU462914.1         | 0           | NA           | NA        | NA        | NA       | NA       |
| taarl2a            | 0           | NA           | NA        | NA        | NA       | NA       |
| BX649490.2         | 21.891941   | -0.701800868 | 0.4403962 | -1.593567 | 0.111033 | 0.626294 |
| BX855614.1         | 34.39368411 | 0.105514559  | 0.3441034 | 0.3066362 | 0.75912  | 0.975374 |
| si:ch73-7i4.1      | 1.046266556 | 2.29659065   | 2.1083099 | 1.0893041 | 0.27602  | NA       |
| BX470218.1         | 0.325573202 | 0.005883621  | 3.3172783 | 0.0017736 | 0.998585 | NA       |
| si:dkey-24h22.5    | 0.325452849 | 0.005883619  | 3.3177086 | 0.0017734 | 0.998585 | NA       |
| nuprlb             | 1738.112378 | -0.500636847 | 0.0779827 | -6.419843 | 1.36E-10 | 3.17E-08 |
| si:dkeyp-53e4.1    | 5.097698417 | 0.264245652  | 0.8740485 | 0.3023238 | 0.762405 | NA       |
| zgc:174855         | 1.670767863 | -0.603556225 | 1.4420043 | -0.418554 | 0.675542 | NA       |
| BX005254.1         | 28.53014791 | 0.544709949  | 0.3698654 | 1.4727248 | 0.140825 | 0.681252 |
| si:ch211-139a5.9   | 132.7346842 | 0.073084141  | 0.1848567 | 0.3953556 | 0.69258  | 0.96736  |
| znf1144            | 66.20129386 | -0.066113133 | 0.2406004 | -0.274784 | 0.783482 | 0.97627  |
| AL953841.1         | 1.648013116 | 0.612181948  | 1.5693341 | 0.3900903 | 0.69647  | NA       |
| AL928920.1         | 0           | NA           | NA        | NA        | NA       | NA       |
| CU652528.1         | 0.785936826 | -3.109243185 | 2.5574139 | -1.215776 | 0.22407  | NA       |
| CT025748.1         | 13.94010979 | -0.452177542 | 0.5402173 | -0.837029 | 0.402576 | 0.90084  |
| cdc42se2           | 59.30806218 | -0.229349451 | 0.281229  | -0.815525 | 0.414772 | 0.906237 |
| epstil             | 1.019274942 | 0.15513021   | 2.1740357 | 0.0713559 | 0.943115 | NA       |
| b4galnt2.1         | 3.790343074 | -0.365487563 | 0.9880281 | -0.369916 | 0.711445 | NA       |
| si:ch211-92117.1   | 1.284479248 | 0.705670405  | 1.8843222 | 0.3744956 | 0.708036 | NA       |
| CT573357.1         | 8.764920908 | 0.71346199   | 0.6401037 | 1.1146037 | 0.26502  | NA       |
| si:dkey-35m8.1     | 91.11683201 | -0.017033531 | 0.2346158 | -0.072602 | 0.942123 | 0.993099 |
| c2cd5              | 968.895519  | -0.029023332 | 0.0874783 | -0.331777 | 0.740057 | 0.972943 |
| BX571803.2         | 1.503643539 | 0.396624324  | 1.5798506 | 0.2510518 | 0.801774 | NA       |

|                    |             |              |           |           |          |          |
|--------------------|-------------|--------------|-----------|-----------|----------|----------|
| BX890572.1         | 1.536847897 | 0.353065782  | 1.5547275 | 0.2270917 | 0.820352 | NA       |
| BX649502.9         | 0 NA        | NA           | NA        | NA        | NA       | NA       |
| CR383662.2         | 0.31437473  | -1.788572922 | 3.5930657 | -0.497785 | 0.618636 | NA       |
| BX957257.2         | 0 NA        | NA           | NA        | NA        | NA       | NA       |
| si:ch73-113g13.3   | 0.340386822 | -1.882368278 | 3.2159502 | -0.585323 | 0.558331 | NA       |
| si:dkey-7n6.2      | 175.2824475 | 0.223249329  | 0.1676045 | 1.3320011 | 0.18286  | 0.745944 |
| si:dkey-21h14.12   | 0.524057646 | 2.503896172  | 2.7289583 | 0.9175282 | 0.358866 | NA       |
| si:ch73-256j6.3    | 0.158795395 | 0.967652056  | 4.0804729 | 0.2371421 | 0.812547 | NA       |
| si:ch211-154e10.1  | 42.8988043  | 0.042774156  | 0.2996485 | 0.1427478 | 0.886489 | 0.988936 |
| si:zfos-364h11.2   | 0.173729368 | -0.955901296 | 4.0804729 | -0.234262 | 0.814781 | NA       |
| si:dkey-222h21.10  | 1.368970215 | -0.71302941  | 1.6542401 | -0.431031 | 0.666446 | NA       |
| si:ch73-68b22.2    | 7.47636218  | -0.855778129 | 0.6932919 | -1.234369 | 0.217065 | NA       |
| CR392012.1         | 0 NA        | NA           | NA        | NA        | NA       | NA       |
| si:dkey-262g12.3   | 28.58314528 | 0.315760196  | 0.360232  | 0.8765468 | 0.380733 | 0.895192 |
| BX323458.2         | 156.805991  | 0.270723336  | 0.1948992 | 1.3890427 | 0.16482  | 0.72105  |
| si:dkey-9p20.18    | 7.786912051 | 0.1733963    | 0.671553  | 0.258202  | 0.796251 | NA       |
| zgc:113984         | 0 NA        | NA           | NA        | NA        | NA       | NA       |
| CR318624.1         | 0.824126911 | 0.609775617  | 2.0333139 | 0.2998925 | 0.764259 | NA       |
| BX323543.4         | 0 NA        | NA           | NA        | NA        | NA       | NA       |
| AL935198.2         | 2.955100014 | 0.316496319  | 1.0785064 | 0.293458  | 0.769172 | NA       |
| si:dkey-84j12.1    | 0 NA        | NA           | NA        | NA        | NA       | NA       |
| taarl6b            | 0 NA        | NA           | NA        | NA        | NA       | NA       |
| si:dkey-148f10.4   | 5.458595664 | 0.264755218  | 0.7973409 | 0.3320477 | 0.739853 | NA       |
| BX323854.2         | 0 NA        | NA           | NA        | NA        | NA       | NA       |
| CR626935.1         | 0 NA        | NA           | NA        | NA        | NA       | NA       |
| si:ch211-120e1.7   | 17.05539397 | 0.095161434  | 0.4555463 | 0.2088952 | 0.83453  | 0.983992 |
| CR391921.1         | 9.482824034 | 0.167369111  | 0.6438222 | 0.2599617 | 0.794893 | NA       |
| ms4a17c.1          | 0 NA        | NA           | NA        | NA        | NA       | NA       |
| si:dkey-68l7.2     | 1.015618509 | 2.235791211  | 2.0934924 | 1.067972  | 0.285533 | NA       |
| dyrk2              | 656.900724  | -0.013933593 | 0.0967818 | -0.143969 | 0.885525 | 0.988936 |
| BX465844.1         | 1.322518982 | 0.714630552  | 1.6676242 | 0.4285321 | 0.668264 | NA       |
| si:ch211-194g2.4   | 0.508144151 | 0.926490632  | 2.6634746 | 0.3478504 | 0.727953 | NA       |
| si:dkey-149m13.5   | 27.84475763 | 0.285740975  | 0.3727788 | 0.7665163 | 0.443369 | 0.916631 |
| AL928977.1         | 1.14957976  | 0.422186685  | 1.750283  | 0.2412105 | 0.809392 | NA       |
| CU570781.1         | 0 NA        | NA           | NA        | NA        | NA       | NA       |
| BX571681.3         | 1.469418374 | -0.969026147 | 1.5650397 | -0.61917  | 0.535804 | NA       |
| BX510324.2         | 0.998526071 | -0.967342786 | 1.9879686 | -0.486599 | 0.626543 | NA       |
| si:ch211-218d20.15 | 62.29926393 | 0.166156026  | 0.2630483 | 0.631656  | 0.527612 | 0.941521 |
| si:dkey-21e2.8     | 0 NA        | NA           | NA        | NA        | NA       | NA       |
| BX842684.1         | 0.157187365 | -0.955901296 | 4.0804729 | -0.234262 | 0.814781 | NA       |
| si:dkey-24f15.2    | 0.31759079  | 1.807926197  | 3.579045  | 0.5051421 | 0.613459 | NA       |
| CU571324.1         | 0.173729368 | -0.955901296 | 4.0804729 | -0.234262 | 0.814781 | NA       |
| BX470247.1         | 0 NA        | NA           | NA        | NA        | NA       | NA       |
| si:ch211-51a19.5   | 1.966682831 | -4.424062371 | 1.6782987 | -2.63604  | 0.008388 | NA       |
| BX510337.1         | 0.333314908 | -1.858695402 | 3.5126701 | -0.52914  | 0.596708 | NA       |
| rhoab              | 1404.475609 | 0.114359043  | 0.0823658 | 1.3884286 | 0.165007 | 0.721223 |
| si:dkeyp-98a7.8    | 0.31759079  | 1.807926197  | 3.579045  | 0.5051421 | 0.613459 | NA       |
| trarglb            | 74.90588752 | 0.137037308  | 0.2304177 | 0.5947342 | 0.552021 | 0.947215 |
| CR769772.2         | 0.173729368 | -0.955901296 | 4.0804729 | -0.234262 | 0.814781 | NA       |
| si:dkey-92j12.5    | 107.2248771 | 0.174493716  | 0.2004937 | 0.87032   | 0.384126 | 0.895192 |
| si:dkey-9i23.6     | 18.59590967 | -0.118591644 | 0.4856119 | -0.244211 | 0.807068 | 0.98034  |
| hb12               | 8.952575992 | -0.436165404 | 0.6464213 | -0.674739 | 0.499842 | NA       |
| CR392012.2         | 2.193097125 | -0.203060173 | 1.2550789 | -0.161791 | 0.871471 | NA       |
| si:dkey-149i17.7   | 0 NA        | NA           | NA        | NA        | NA       | NA       |

|                   |             |              |           |           |          |          |
|-------------------|-------------|--------------|-----------|-----------|----------|----------|
| si:dkey-267j14.7  | 0.489712128 | -0.887840729 | 2.693685  | -0.329601 | 0.741702 | NA       |
| BX005414.1        | 1.022491002 | 2.265845936  | 2.0916203 | 1.083297  | 0.278677 | NA       |
| CR384089.1        | 0.69766666  | 1.536459923  | 2.3782158 | 0.6460557 | 0.518243 | NA       |
| si:dkey-220k22.3  | 9.525031611 | 0.275611879  | 0.6285379 | 0.4384968 | 0.661026 | NA       |
| BX005329.3        | 0 NA        | NA           | NA        | NA        | NA       | NA       |
| si:dkey-204f11.64 | 391.8134709 | 0.014490233  | 0.114193  | 0.1268925 | 0.899025 | 0.990121 |
| si:dkey-201c13.2  | 84.38576458 | 0.192219296  | 0.2613819 | 0.7353963 | 0.462098 | 0.922698 |
| BX510928.1        | 0.158795395 | 0.967652056  | 4.0804729 | 0.2371421 | 0.812547 | NA       |
| bc12a             | 14.595387   | 0.15977112   | 0.5320508 | 0.300293  | 0.763954 | 0.975374 |
| cxcl11.6          | 0 NA        | NA           | NA        | NA        | NA       | NA       |
| sftpba            | 186.5949811 | -0.018567746 | 0.1676581 | -0.110748 | 0.911816 | 0.991066 |
| arl8              | 985.8155355 | 0.025864818  | 0.0894287 | 0.2892229 | 0.772411 | 0.975687 |
| si:dkey-79i2.4    | 7.939038123 | -0.206170715 | 0.7245953 | -0.284532 | 0.776003 | NA       |
| BX294165.2        | 0 NA        | NA           | NA        | NA        | NA       | NA       |
| BX548044.6        | 0 NA        | NA           | NA        | NA        | NA       | NA       |
| or125-2           | 1.153153623 | -1.360395608 | 1.9656115 | -0.692098 | 0.488876 | NA       |
| si:dkey-83f18.6   | 0.332645115 | 0.005883744  | 3.2924249 | 0.0017871 | 0.998574 | NA       |
| zgc:77614         | 0 NA        | NA           | NA        | NA        | NA       | NA       |
| CR318588.3        | 99.64615986 | -0.505957454 | 0.2050337 | -2.467679 | 0.013599 | 0.209269 |
| si:ch211-284e13.5 | 57.1645427  | -0.191680009 | 0.2542729 | -0.753836 | 0.450948 | 0.918761 |
| apela             | 10.65639331 | 0.295217893  | 0.5963069 | 0.4950771 | 0.620546 | NA       |
| acbd7             | 980.9756027 | -0.072434009 | 0.0899546 | -0.805229 | 0.420688 | 0.90651  |
| mical3b           | 461.3419945 | 0.008825444  | 0.1095679 | 0.0805477 | 0.935802 | 0.992702 |
| CR392363.1        | 1.47876811  | -0.978269979 | 1.5879855 | -0.616045 | 0.537865 | NA       |
| v2rc1             | 0.332645115 | 0.005883744  | 3.2924249 | 0.0017871 | 0.998574 | NA       |
| znf1157           | 27.75363321 | -0.6362186   | 0.3866053 | -1.645654 | 0.099835 | 0.600955 |
| si:ch211-12e13.12 | 17.94693912 | 0.37862465   | 0.445838  | 0.8492426 | 0.395746 | 0.899378 |
| loxhd1a           | 9.912270919 | -0.006867754 | 0.6018966 | -0.01141  | 0.990896 | NA       |
| BX530079.1        | 0.158795395 | 0.967652056  | 4.0804729 | 0.2371421 | 0.812547 | NA       |
| zgc:173425        | 0.855602886 | -0.591621869 | 2.0951335 | -0.282379 | 0.777653 | NA       |
| si:ch211-197g15.6 | 10.28374477 | -0.511522218 | 0.6345223 | -0.806153 | 0.420155 | NA       |
| BX927218.2        | 0 NA        | NA           | NA        | NA        | NA       | NA       |
| si:dkey-84o3.2    | 1.80395351  | -0.214910589 | 1.5039205 | -0.1429   | 0.886369 | NA       |
| rpe65b            | 231.5786057 | -0.014960689 | 0.1375415 | -0.108772 | 0.913383 | 0.991119 |
| si:dkey-71d15.2   | 32.52051417 | 0.191021753  | 0.3704716 | 0.5156179 | 0.606121 | 0.956692 |
| BX640536.1        | 0 NA        | NA           | NA        | NA        | NA       | NA       |
| CR788311.1        | 0 NA        | NA           | NA        | NA        | NA       | NA       |
| si:dkey-125i10.3  | 116.9990328 | -0.128033609 | 0.187556  | -0.682642 | 0.494833 | 0.931926 |
| npy2r             | 11.75118757 | -0.002942629 | 0.5876341 | -0.005008 | 0.996005 | 0.998888 |
| fyba              | 2.29625319  | 0.887679114  | 1.2963275 | 0.6847646 | 0.493493 | NA       |
| CT583625.2        | 3.62718367  | 0.286432288  | 1.0098143 | 0.2836485 | 0.77668  | NA       |
| si:dkey-280e8.1   | 3.814908526 | 0.334624159  | 1.0782561 | 0.3103383 | 0.756304 | NA       |
| BX248385.1        | 0 NA        | NA           | NA        | NA        | NA       | NA       |
| BX571803.3        | 0.341366344 | 1.891903201  | 3.2128156 | 0.5888614 | 0.555954 | NA       |
| CR626923.1        | 0.158915748 | 0.967652056  | 4.0804729 | 0.2371421 | 0.812547 | NA       |
| si:dkey-192d15.1  | 1.337304863 | -2.692321341 | 1.849776  | -1.455485 | 0.145535 | NA       |
| CU914617.1        | 0.325452849 | 0.005883619  | 3.3177086 | 0.0017734 | 0.998585 | NA       |
| si:ch211-196h16.4 | 12.41472028 | -0.355319804 | 0.5538958 | -0.641492 | 0.521203 | 0.939056 |
| si:dkey-193n17.9  | 81.64640456 | 0.233111985  | 0.2174225 | 1.0721613 | 0.283648 | 0.84466  |
| twf2a             | 256.2385842 | 0.629650784  | 0.143792  | 4.3788992 | 1.19E-05 | 0.000836 |
| ovch2             | 3.105164137 | 1.127517924  | 1.1162607 | 1.0100848 | 0.312455 | NA       |
| si:ch211-171b20.3 | 0.632206226 | 0.012903346  | 2.6133421 | 0.0049375 | 0.99606  | NA       |
| si:ch211-133n4.11 | 0 NA        | NA           | NA        | NA        | NA       | NA       |
| si:dkey-181m19.11 | 0 NA        | NA           | NA        | NA        | NA       | NA       |



|                   |             |              |           |           |          |          |
|-------------------|-------------|--------------|-----------|-----------|----------|----------|
| BX294387.1        |             | 0 NA         | NA        | NA        | NA       | NA       |
| plxnb2a           | 14.75227535 | -1.05067011  | 0.5566958 | -1.887333 | 0.059116 | 0.475427 |
| l3mbt11           | 127.8171759 | -0.088108955 | 0.1761481 | -0.500198 | 0.616936 | 0.956957 |
| CR392026.2        |             | 0 NA         | NA        | NA        | NA       | NA       |
| si:ch211-208g1.1  | 1.286568689 | 1.536509974  | 1.8937955 | 0.8113389 | 0.417171 | NA       |
| ms4a17a.11        | 443.2675444 | 0.005218722  | 0.1524152 | 0.0342402 | 0.972686 | 0.996315 |
| si:dkey-111i23.1  | 0.339758314 | 0.005883863  | 3.2682461 | 0.0018003 | 0.998564 | NA       |
| CU179758.1        | 5.568352274 | 0.160213459  | 0.7996021 | 0.2003665 | 0.841194 | NA       |
| or133-10          |             | 0 NA         | NA        | NA        | NA       | NA       |
| si:dkey-58f10.4   | 1.292341307 | -0.031881014 | 1.858428  | -0.017155 | 0.986313 | NA       |
| si:ch73-44m9.2    | 0.530029684 | -0.939524117 | 2.7937867 | -0.336291 | 0.736652 | NA       |
| AL953907.1        | 0.173729368 | -0.955901296 | 4.0804729 | -0.234262 | 0.814781 | NA       |
| si:dkey-23a23.1   | 0.173729368 | -0.955901296 | 4.0804729 | -0.234262 | 0.814781 | NA       |
| F13A1 (1 of many) | 0.839569038 | -1.918727829 | 2.2199361 | -0.864317 | 0.387414 | NA       |
| coa5              | 204.5157446 | -0.091759153 | 0.1525131 | -0.601648 | 0.547409 | 0.945526 |
| si:ch211-195b15.8 | 1425.35067  | -0.48005518  | 0.0857008 | -5.601527 | 2.12E-08 | 3.42E-06 |
| BX663515.1        | 0.877488419 | -1.943394526 | 2.3575695 | -0.824321 | 0.409757 | NA       |
| CR749748.1        | 9.413677014 | -0.079551279 | 0.6284597 | -0.126581 | 0.899272 | NA       |
| si:dkey-21e2.13   | 8.098944432 | 0.199349832  | 0.6841956 | 0.2913638 | 0.770773 | NA       |
| BX927394.2        |             | 0 NA         | NA        | NA        | NA       | NA       |
| BX323457.3        | 2.90121581  | 0.98935766   | 1.2050613 | 0.821002  | 0.411645 | NA       |
| zmp:0000001323    | 0.833476647 | 0.586781922  | 2.2129474 | 0.2651585 | 0.790887 | NA       |
| BX936461.1        | 7.824058241 | 0.47553187   | 0.7082762 | 0.6713933 | 0.50197  | NA       |
| BX640520.2        |             | 0 NA         | NA        | NA        | NA       | NA       |
| si:dkey-88l16.5   | 2.011316322 | -0.979272553 | 1.3394436 | -0.731104 | 0.464716 | NA       |
| BX119902.1        |             | 0 NA         | NA        | NA        | NA       | NA       |
| si:ch211-147m20.3 | 0.166657454 | -0.955901296 | 4.0804729 | -0.234262 | 0.814781 | NA       |
| ms4a17a.9         | 208.4599184 | 0.134284779  | 0.1879989 | 0.7142849 | 0.475051 | 0.925575 |
| BX511089.3        |             | 0 NA         | NA        | NA        | NA       | NA       |
| dio2              | 33.51426409 | -0.10319662  | 0.3817499 | -0.270325 | 0.78691  | 0.976596 |
| si:dkey-11o15.10  | 1.276978248 | 1.558674568  | 1.8171775 | 0.8577448 | 0.391033 | NA       |
| gpr186            | 82.09253695 | 0.667905931  | 0.2195573 | 3.0420577 | 0.00235  | 0.060184 |
| si:dkey-163f12.11 | 1.646645792 | 0.041181395  | 1.4832032 | 0.0277652 | 0.977849 | NA       |
| v2ra20            | 0.158915748 | 0.967652056  | 4.0804729 | 0.2371421 | 0.812547 | NA       |
| CR407561.1        | 0.157187365 | -0.955901296 | 4.0804729 | -0.234262 | 0.814781 | NA       |
| pimr152           |             | 0 NA         | NA        | NA        | NA       | NA       |
| si:ch73-313l22.2  |             | 0 NA         | NA        | NA        | NA       | NA       |
| CR396590.6        |             | 0 NA         | NA        | NA        | NA       | NA       |
| BX649434.2        | 0.825545564 | -1.896597388 | 2.3991135 | -0.790541 | 0.429212 | NA       |
| si:dkey-258f14.2  | 43.58234408 | 0.098157474  | 0.2894056 | 0.3391693 | 0.734482 | 0.972021 |
| si:dkey-84o3.6    | 2.485586322 | -0.158818725 | 1.1839578 | -0.134142 | 0.89329  | NA       |
| si:dkey-277m11.2  | 10.6894407  | 0.309066399  | 0.5862258 | 0.5272139 | 0.598045 | NA       |
| si:ch211-197h24.8 | 25.91578869 | -0.081837147 | 0.3989765 | -0.205118 | 0.83748  | 0.984665 |
| illr2             |             | 0 NA         | NA        | NA        | NA       | NA       |
| BX470185.2        | 0.182570949 | 0.967652056  | 4.0804729 | 0.2371421 | 0.812547 | NA       |
| pimr178           | 0.349228403 | 0.005884014  | 3.2372587 | 0.0018176 | 0.99855  | NA       |
| si:dkey-266f7.5   | 0.981272991 | -0.049048874 | 1.9489635 | -0.025167 | 0.979922 | NA       |
| si:ch211-170d8.2  | 10.45439627 | -0.135725447 | 0.5987744 | -0.226672 | 0.820679 | NA       |
| znf1061           | 0.339758314 | 0.005883863  | 3.2682461 | 0.0018003 | 0.998564 | NA       |
| cplx4c            | 221.9552681 | 0.275392401  | 0.1396806 | 1.9715863 | 0.048657 | 0.433734 |
| si:ch211-163b2.4  | 1.420878542 | 2.793083696  | 1.9569603 | 1.4272562 | 0.153506 | NA       |
| cenph             | 40.87892667 | 0.163201952  | 0.3118775 | 0.5232887 | 0.600773 | 0.956045 |
| tyrobp            | 2.319598661 | -0.365565428 | 1.2950908 | -0.28227  | 0.777736 | NA       |
| rbm33b            | 11.43450812 | 0.138804466  | 0.56008   | 0.2478297 | 0.804266 | 0.979643 |

|                    |             |              |           |           |          |          |
|--------------------|-------------|--------------|-----------|-----------|----------|----------|
| si:ch1073-143110.2 | 31.1057979  | 0.112063246  | 0.3639246 | 0.3079298 | 0.758136 | 0.975374 |
| abcc6b.2           | 81.04119272 | 0.085102565  | 0.2216742 | 0.3839084 | 0.701046 | 0.968134 |
| si:ch211-231i17.4  | 2.119495897 | 1.697032437  | 1.4259561 | 1.1901015 | 0.234007 | NA       |
| lingo4a            | 11.44118094 | 0.467595484  | 0.5573541 | 0.8389558 | 0.401494 | 0.90084  |
| si:dkey-22i16.7    | 0.182570949 | 0.967652056  | 4.0804729 | 0.2371421 | 0.812547 | NA       |
| CR749775.1         | 0.841889141 | 3.198609757  | 2.2957028 | 1.3933031 | 0.163528 | NA       |
| or133-2            | 3.160415666 | 0.785550284  | 1.0661922 | 0.7367811 | 0.461255 | NA       |
| si:ch73-196i15.5   | 5.182370976 | 1.084727419  | 0.8586148 | 1.2633458 | 0.206465 | NA       |
| CR936403.1         | 1.121918354 | -0.422914697 | 1.8509454 | -0.228486 | 0.819269 | NA       |
| ungb               | 8.509317487 | -0.098461305 | 0.7160021 | -0.137515 | 0.890623 | NA       |
| CU469568.2         | 3.748764847 | 0.015947995  | 1.013496  | 0.0157356 | 0.987445 | NA       |
| CR735104.1         |             | 0 NA         | NA        | NA        | NA       | NA       |
| BX248322.1         | 1.412036961 | 1.647750358  | 1.816016  | 0.9073435 | 0.364225 | NA       |
| si:dkey-9311.4     | 0.365141898 | 1.973577737  | 3.3927314 | 0.5817076 | 0.560764 | NA       |
| si:ch211-53m15.2   | 0.340386822 | -1.882368278 | 3.2159502 | -0.585323 | 0.558331 | NA       |
| apoa4b.2           | 257.18632   | 0.357638694  | 0.3724962 | 0.9601138 | 0.336998 | 0.876088 |
| si:dkey-58f10.11   | 0.475018861 | 0.853207185  | 2.8976509 | 0.2944479 | 0.768416 | NA       |
| CR450833.1         | 4.435194163 | 0.085846042  | 0.9003295 | 0.0953496 | 0.924037 | NA       |
| F0834814.1         | 8.26068394  | 0.107307028  | 0.6668286 | 0.1609215 | 0.872155 | NA       |
| CR855257.1         | 0.182570949 | 0.967652056  | 4.0804729 | 0.2371421 | 0.812547 | NA       |
| BX005153.2         |             | 0 NA         | NA        | NA        | NA       | NA       |
| AL929210.1         | 0.330916733 | -1.849579229 | 3.2489867 | -0.569279 | 0.569167 | NA       |
| si:ch211-132b12.2  | 30.68224245 | -0.144569747 | 0.3479294 | -0.415515 | 0.677765 | 0.965257 |
| BX511265.3         | 0.513487682 | -0.887846295 | 2.6557956 | -0.334305 | 0.738149 | NA       |
| si:ch211-74m13.1   | 136.0116716 | -0.090859622 | 0.1773735 | -0.51225  | 0.608476 | 0.956718 |
| BX284697.2         |             | 0 NA         | NA        | NA        | NA       | NA       |
| CR392341.3         | 4.581234386 | -0.861992957 | 0.897424  | -0.960519 | 0.336794 | NA       |
| si:ch73-379f5.5    | 0.521188103 | -2.493476766 | 2.9577741 | -0.843025 | 0.399215 | NA       |
| AL929032.1         | 0.157187365 | -0.955901296 | 4.0804729 | -0.234262 | 0.814781 | NA       |
| BX530407.3         |             | 0 NA         | NA        | NA        | NA       | NA       |
| CR377211.2         |             | 0 NA         | NA        | NA        | NA       | NA       |
| nf13-5             | 1408.788615 | -0.248963921 | 0.0849238 | -2.931614 | 0.003372 | 0.077672 |
| BX255915.2         | 0.475018861 | 0.853207185  | 2.8976509 | 0.2944479 | 0.768416 | NA       |
| wnt16              | 47.1737219  | 0.179620179  | 0.2828798 | 0.6349699 | 0.525448 | 0.94013  |
| BX530068.1         | 50.94131755 | -0.249109833 | 0.273479  | -0.910892 | 0.362352 | 0.885944 |
| si:ch211-214p16.2  |             | 0 NA         | NA        | NA        | NA       | NA       |
| si:ch211-156j22.4  | 255.4580894 | -0.235087693 | 0.1345848 | -1.746762 | 0.080679 | 0.550687 |
| si:ch73-18b11.2    | 36.3234807  | -0.38365642  | 0.3449032 | -1.11236  | 0.265984 | 0.831945 |
| CR792454.1         | 1.166362468 | 0.393666232  | 1.8306178 | 0.2150456 | 0.829732 | NA       |
| chst12b            | 1.308694928 | 0.663383953  | 1.8738364 | 0.3540245 | 0.723321 | NA       |
| cc134a.3           | 2.107758276 | -1.698437439 | 1.4463464 | -1.174295 | 0.240277 | NA       |
| si:ch211-197g15.8  | 0.990664012 | 0.018879338  | 1.9436762 | 0.0097132 | 0.99225  | NA       |
| CR377211.3         | 1.445522467 | -1.005141956 | 1.6998642 | -0.591307 | 0.554315 | NA       |
| si:dkey-91f15.1    | 22.33689252 | 1.859519565  | 0.472146  | 3.9384416 | 8.20E-05 | 0.004148 |
| otx1               | 463.3384974 | -0.087455768 | 0.1062836 | -0.822853 | 0.410592 | 0.903084 |
| si:dkey-106c17.2   | 4.891863324 | 0.742810705  | 0.9212946 | 0.8062684 | 0.420088 | NA       |
| si:dkey-84o3.4     | 10.35685653 | 0.173058151  | 0.6478592 | 0.2671231 | 0.789374 | NA       |
| sult1st9           | 3.551219883 | 0.201054133  | 1.1727366 | 0.1714401 | 0.863878 | NA       |
| taar18b            | 0.323844819 | -1.825095364 | 3.274639  | -0.557342 | 0.577293 | NA       |
| FP015823.1         | 0.670675047 | -1.455259498 | 2.4036813 | -0.605429 | 0.544894 | NA       |
| pimr98             | 2.833003772 | -0.522160428 | 1.1125489 | -0.469337 | 0.638829 | NA       |
| si:dkey-194e6.2    | 0.333314908 | -1.858695402 | 3.5126701 | -0.52914  | 0.596708 | NA       |
| si:rp71-17i16.4    | 474.6903065 | 0.120658438  | 0.1225513 | 0.9845544 | 0.324843 | 0.871294 |
| si:dkey-21e2.10    | 0.499972362 | -2.44370697  | 3.0013188 | -0.814211 | 0.415524 | NA       |

|                   |             |              |           |           |          |          |
|-------------------|-------------|--------------|-----------|-----------|----------|----------|
| CR388079.2        | 2.322505987 | 0.862211419  | 1.2581021 | 0.685327  | 0.493138 | NA       |
| sinhcafl          | 828.0203103 | -0.063665909 | 0.0886615 | -0.718079 | 0.472709 | 0.924838 |
| si:ch211-67n3.9   | 69.68359941 | 0.180482845  | 0.2382237 | 0.7576192 | 0.448679 | 0.917876 |
| AL953903.1        | 0 NA        | NA           | NA        | NA        | NA       | NA       |
| si:dkey-240n22.3  | 7.647215216 | -0.379765726 | 0.680808  | -0.557816 | 0.57697  | NA       |
| BX571955.2        | 21.21942534 | 0.023389599  | 0.4274462 | 0.0547194 | 0.956362 | 0.994543 |
| CR932983.2        | 5.693599927 | -0.880503935 | 0.8247154 | -1.067646 | 0.28568  | NA       |
| BX927275.2        | 0.849510495 | 1.927128725  | 2.1168069 | 0.9103942 | 0.362615 | NA       |
| lmo2              | 104.8802745 | 0.075034158  | 0.1973418 | 0.3802244 | 0.703779 | 0.968134 |
| thsd7ba           | 394.8375068 | 0.140891352  | 0.1121249 | 1.2565567 | 0.208914 | 0.776073 |
| si:dkeyp-68b7.10  | 16.00872483 | 0.190772682  | 0.4887086 | 0.3903608 | 0.69627  | 0.96736  |
| CR388166.2        | 21.24534282 | -0.206060919 | 0.4568427 | -0.451054 | 0.65195  | 0.960708 |
| si:dkey-58f10.14  | 5.291707548 | -0.196203305 | 0.8151219 | -0.240704 | 0.809784 | NA       |
| si:ch73-120g24.4  | 109.8518596 | -0.131919804 | 0.198942  | -0.663107 | 0.507262 | 0.935734 |
| ftr33             | 0.856462055 | 1.928072848  | 2.2076658 | 0.8733536 | 0.38247  | NA       |
| FP067425.1        | 0.31598276  | 0.005883445  | 3.3523626 | 0.001755  | 0.9986   | NA       |
| zgc:162928        | 188.1963072 | 0.055229625  | 0.1511643 | 0.3653615 | 0.714842 | 0.96909  |
| taar20t           | 0.182570949 | 0.967652056  | 4.0804729 | 0.2371421 | 0.812547 | NA       |
| CR318668.1        | 0 NA        | NA           | NA        | NA        | NA       | NA       |
| CR388189.1        | 0 NA        | NA           | NA        | NA        | NA       | NA       |
| cb1n7             | 0.332645115 | 0.005883744  | 3.2924249 | 0.0017871 | 0.998574 | NA       |
| BX322661.2        | 104.084452  | 0.186725384  | 0.2166306 | 0.8619529 | 0.388713 | 0.896271 |
| CU468826.1        | 0.166657454 | -0.955901296 | 4.0804729 | -0.234262 | 0.814781 | NA       |
| pold2             | 198.3386255 | 0.05404397   | 0.1539566 | 0.3510338 | 0.725563 | 0.970402 |
| si:dkey-85k15.4   | 2.661044073 | 0.016239213  | 1.1267419 | 0.0144125 | 0.988501 | NA       |
| si:dkey-250k15.7  | 25.48529861 | -0.968061834 | 0.4051689 | -2.38928  | 0.016881 | 0.239981 |
| si:dkey-7f3.14    | 0.157187365 | -0.955901296 | 4.0804729 | -0.234262 | 0.814781 | NA       |
| si:ch211-236l14.1 | 0 NA        | NA           | NA        | NA        | NA       | NA       |
| pimr148           | 0 NA        | NA           | NA        | NA        | NA       | NA       |
| CT573133.1        | 2.814375584 | 0.520974681  | 1.1201875 | 0.4650781 | 0.641876 | NA       |
| si:dkey-103d23.3  | 0.697787013 | 1.536711783  | 2.3781027 | 0.6461924 | 0.518155 | NA       |
| CT025776.1        | 0.158915748 | 0.967652056  | 4.0804729 | 0.2371421 | 0.812547 | NA       |
| si:ch211-106h4.5  | 37.89631545 | 0.191882927  | 0.33579   | 0.5714372 | 0.567703 | 0.948739 |
| or127-1           | 2.126808516 | 1.685638895  | 1.4758742 | 1.1421291 | 0.2534   | NA       |
| CU394254.2        | 0 NA        | NA           | NA        | NA        | NA       | NA       |
| si:dkey-238m4.3   | 0 NA        | NA           | NA        | NA        | NA       | NA       |
| BX005445.1        | 1.997801003 | -1.583517413 | 1.4589375 | -1.085391 | 0.277749 | NA       |
| si:ch211-113e8.9  | 10.02834817 | 0.006122309  | 0.6285095 | 0.009741  | 0.992228 | NA       |
| BX088713.1        | 0.508023798 | 0.926122713  | 2.6636728 | 0.3476864 | 0.728076 | NA       |
| TC2N              | 19.14440386 | 0.084561748  | 0.4695788 | 0.18008   | 0.85709  | 0.985597 |
| si:dkey-10h3.3    | 1.622629532 | 0.016637092  | 1.5873147 | 0.0104813 | 0.991637 | NA       |
| BX908726.1        | 5.630329199 | 0.184411819  | 0.784098  | 0.2351897 | 0.814061 | NA       |
| cd28              | 8.835265882 | 0.052780949  | 0.7053753 | 0.0748268 | 0.940353 | NA       |
| ctslb             | 0 NA        | NA           | NA        | NA        | NA       | NA       |
| si:dkey-73p2.3    | 1.155833789 | -1.281252378 | 1.8785909 | -0.682028 | 0.495221 | NA       |
| BX548073.4        | 0 NA        | NA           | NA        | NA        | NA       | NA       |
| CR545476.1        | 0 NA        | NA           | NA        | NA        | NA       | NA       |
| CR450782.1        | 12.35977381 | -0.072515572 | 0.5409119 | -0.134062 | 0.893354 | 0.989291 |
| CU657976.1        | 0 NA        | NA           | NA        | NA        | NA       | NA       |
| ITLN1 (1 of many) | 41.04573298 | 0.036976196  | 0.4134022 | 0.0894436 | 0.928729 | 0.992702 |
| ftr10             | 0 NA        | NA           | NA        | NA        | NA       | NA       |
| cfdbl             | 275.2628277 | 0.124091411  | 0.1279413 | 0.9699089 | 0.332092 | 0.874653 |
| CU928069.1        | 0 NA        | NA           | NA        | NA        | NA       | NA       |
| BX649508.1        | 0 NA        | NA           | NA        | NA        | NA       | NA       |

|                   |             |              |           |           |          |          |
|-------------------|-------------|--------------|-----------|-----------|----------|----------|
| tspan37           | 50.21975384 | 0.384495916  | 0.29385   | 1.3084769 | 0.190712 | 0.755212 |
| si:ch211-232m8.3  | 19.23740169 | 0.155379661  | 0.4286505 | 0.3624857 | 0.716989 | 0.96909  |
| pimr50            | 0 NA        | NA           | NA        | NA        | NA       | NA       |
| pimr127           | 0.325573202 | 0.005883621  | 3.3172783 | 0.0017736 | 0.998585 | NA       |
| BX649516.1        | 0 NA        | NA           | NA        | NA        | NA       | NA       |
| si:ch211-229g14.3 | 0.158795395 | 0.967652056  | 4.0804729 | 0.2371421 | 0.812547 | NA       |
| si:ch211-132g1.4  | 0 NA        | NA           | NA        | NA        | NA       | NA       |
| CR749763.4        | 0 NA        | NA           | NA        | NA        | NA       | NA       |
| CR847899.2        | 0 NA        | NA           | NA        | NA        | NA       | NA       |
| si:dkey-28k24.2   | 2.827897692 | -1.70872598  | 1.2328078 | -1.386044 | 0.165733 | NA       |
| AL953855.1        | 0 NA        | NA           | NA        | NA        | NA       | NA       |
| si:dkey-192k22.2  | 1.327123696 | -1.628668251 | 1.8860251 | -0.863545 | 0.387838 | NA       |
| BX640512.2        | 0 NA        | NA           | NA        | NA        | NA       | NA       |
| btr04             | 0.521188103 | -2.493476766 | 2.9577741 | -0.843025 | 0.399215 | NA       |
| BX005024.1        | 0 NA        | NA           | NA        | NA        | NA       | NA       |
| CU207311.2        | 0 NA        | NA           | NA        | NA        | NA       | NA       |
| CU694808.1        | 0.862716084 | -0.503809387 | 2.0872007 | -0.24138  | 0.80926  | NA       |
| ftr97             | 60.95652275 | -0.387369543 | 0.2547288 | -1.520714 | 0.128332 | 0.658954 |
| si:dkey-82i20.2   | 48.1156166  | -0.245802886 | 0.2824015 | -0.870402 | 0.384081 | 0.895192 |
| si:ch73-34314.6   | 0 NA        | NA           | NA        | NA        | NA       | NA       |
| CT583652.1        | 0.824247264 | 0.61130654   | 2.1184171 | 0.2885676 | 0.772912 | NA       |
| si:ch211-227e10.6 | 4.552380337 | -0.996942248 | 0.9323587 | -1.069269 | 0.284948 | NA       |
| si:ch211-165f21.2 | 2.170541799 | 0.69101812   | 1.2637478 | 0.5468007 | 0.584516 | NA       |
| si:dkey-250k15.9  | 1.170647409 | -2.468126443 | 1.9121268 | -1.290776 | 0.196782 | NA       |
| si:ch73-266f23.1  | 70.47725572 | 0.146419636  | 0.2346779 | 0.6239175 | 0.532682 | 0.942805 |
| si:ch211-130m23.2 | 47.75725625 | -0.291765105 | 0.2908877 | -1.003016 | 0.315853 | 0.866931 |
| si:dkey-88116.2   | 0 NA        | NA           | NA        | NA        | NA       | NA       |
| CR388373.2        | 17.0686406  | 0.198537461  | 0.4563363 | 0.4350683 | 0.663513 | 0.964736 |
| BX004962.2        | 0.182570949 | 0.967652056  | 4.0804729 | 0.2371421 | 0.812547 | NA       |
| si:ch211-208h16.4 | 235.1796922 | 0.260505941  | 0.1394689 | 1.8678428 | 0.061784 | 0.485049 |
| AL954816.1        | 4.76135809  | -0.100881375 | 0.9117364 | -0.110648 | 0.911896 | NA       |
| BX571724.2        | 0.658957134 | 2.851427774  | 2.5143902 | 1.1340434 | 0.256776 | NA       |
| krt96             | 29.75376304 | -0.123242205 | 0.3796702 | -0.324603 | 0.745481 | 0.974094 |
| CT583625.3        | 0.837961008 | -3.186152199 | 2.1620582 | -1.473666 | 0.140571 | NA       |
| znf1062           | 1.737730516 | 1.270550401  | 1.6042426 | 0.7919939 | 0.428364 | NA       |
| si:dkey-114c15.5  | 13.11135833 | 0.122040758  | 0.5191638 | 0.2350718 | 0.814153 | 0.981081 |
| AL953903.2        | 0 NA        | NA           | NA        | NA        | NA       | NA       |
| si:ch211-255i3.4  | 188.8291226 | 0.213579956  | 0.1656354 | 1.2894584 | 0.197239 | 0.762204 |
| CR388363.1        | 0.666629816 | -2.858789115 | 2.7069088 | -1.056108 | 0.290919 | NA       |
| taar20w           | 0.158795395 | 0.967652056  | 4.0804729 | 0.2371421 | 0.812547 | NA       |
| zgc:163080        | 99.66123913 | -0.514847425 | 0.2024412 | -2.543195 | 0.010984 | 0.181902 |
| CT025913.1        | 0 NA        | NA           | NA        | NA        | NA       | NA       |
| BX649500.1        | 1.147851377 | -0.386326166 | 1.8199142 | -0.212277 | 0.831891 | NA       |
| AL590134.1        | 2.159971835 | -0.214951541 | 1.2581686 | -0.170845 | 0.864346 | NA       |
| CR847563.1        | 6.861081055 | 0.492861431  | 0.82952   | 0.5941526 | 0.55241  | NA       |
| CU469530.1        | 1.97126721  | 0.460325443  | 1.3758336 | 0.3345793 | 0.737942 | NA       |
| CR450836.1        | 68.82750839 | -0.484605448 | 0.2400939 | -2.0184   | 0.04355  | 0.409681 |
| lrrfip1b          | 63.81391361 | 0.196777794  | 0.2597852 | 0.7574634 | 0.448772 | 0.917876 |
| CU695074.1        | 0 NA        | NA           | NA        | NA        | NA       | NA       |
| si:dkey-7814.12   | 0 NA        | NA           | NA        | NA        | NA       | NA       |
| BX640478.1        | 1.983575848 | -1.525970255 | 1.4494796 | -1.052771 | 0.292446 | NA       |
| si:ch211-235f1.3  | 2.362221779 | 0.861878636  | 1.3106976 | 0.6575724 | 0.510813 | NA       |
| abr               | 456.8422799 | 0.082926887  | 0.1058465 | 0.7834638 | 0.433355 | 0.913654 |
| si:ch73-52p7.1    | 20.48712525 | -0.154072491 | 0.4238918 | -0.363471 | 0.716253 | 0.96909  |

|                   |             |              |           |           |          |          |
|-------------------|-------------|--------------|-----------|-----------|----------|----------|
| si:ch211-274p24.2 | 18.9116447  | 0.223222008  | 0.4937229 | 0.4521201 | 0.651182 | 0.960708 |
| BX324164.2        | 2.691932825 | 0.059712836  | 1.1762226 | 0.0507666 | 0.959511 | NA       |
| si:dkey-189h5.6   | 23.27566305 | 0.661721702  | 0.4388433 | 1.5078769 | 0.131586 | 0.665022 |
| si:ch211-127n13.2 | 0 NA        | NA           | NA        | NA        | NA       | NA       |
| BX901918.2        | 0 NA        | NA           | NA        | NA        | NA       | NA       |
| si:dkey-57k2.7    | 59.83739863 | -0.086286381 | 0.2615695 | -0.329879 | 0.741491 | 0.973154 |
| BX957317.1        | 229.9906256 | 0.241900037  | 0.1462839 | 1.6536343 | 0.098202 | 0.59749  |
| si:dkey-23c22.7   | 4.436076923 | -0.768132146 | 0.9371765 | -0.819624 | 0.412431 | NA       |
| si:dkey-19a16.11  | 0 NA        | NA           | NA        | NA        | NA       | NA       |
| CR854927.2        | 0 NA        | NA           | NA        | NA        | NA       | NA       |
| znf1132           | 0.158915748 | 0.967652056  | 4.0804729 | 0.2371421 | 0.812547 | NA       |
| AL732515.1        | 0.158915748 | 0.967652056  | 4.0804729 | 0.2371421 | 0.812547 | NA       |
| si:ch211-197e7.1  | 41.6793661  | -0.1848151   | 0.3049673 | -0.606016 | 0.544504 | 0.945438 |
| AL935117.1        | 2.421211221 | -0.217403659 | 1.2865635 | -0.16898  | 0.865812 | NA       |
| BX649502.10       | 0 NA        | NA           | NA        | NA        | NA       | NA       |
| BX649610.1        | 0 NA        | NA           | NA        | NA        | NA       | NA       |
| AL845306.1        | 0.341366344 | 1.891903201  | 3.2128156 | 0.5888614 | 0.555954 | NA       |
| si:ch211-210b2.4  | 10.88654002 | -0.095202462 | 0.5779782 | -0.164716 | 0.869167 | NA       |
| CU469584.1        | 13.12022907 | 0.144680705  | 0.5495979 | 0.2632483 | 0.792359 | 0.977937 |
| zgc:66156         | 47.52540175 | 0.042793467  | 0.3300061 | 0.1296748 | 0.896824 | 0.989971 |
| CT030044.1        | 1.755852962 | 0.253541306  | 1.5720048 | 0.1612853 | 0.871869 | NA       |
| or128-7           | 0.173729368 | -0.955901296 | 4.0804729 | -0.234262 | 0.814781 | NA       |
| si:ch211-242f23.3 | 0.476386185 | 2.392464142  | 3.0533824 | 0.7835455 | 0.433307 | NA       |
| camkmt            | 195.5166364 | -0.115508557 | 0.150988  | -0.765018 | 0.444261 | 0.916726 |
| CR769772.3        | 0.182570949 | 0.967652056  | 4.0804729 | 0.2371421 | 0.812547 | NA       |
| CR759970.1        | 0 NA        | NA           | NA        | NA        | NA       | NA       |
| CT990618.1        | 251.7075875 | 0.018273915  | 0.1347441 | 0.1356194 | 0.892122 | 0.989291 |
| CR759887.2        | 0 NA        | NA           | NA        | NA        | NA       | NA       |
| mybl2a            | 137.6631105 | -0.059274748 | 0.1749574 | -0.338795 | 0.734764 | 0.972021 |
| si:ch211-157j23.2 | 2.714446866 | -0.699506096 | 1.1675466 | -0.599125 | 0.54909  | NA       |
| CU468920.1        | 2.803108088 | -0.856910311 | 1.1640536 | -0.736143 | 0.461643 | NA       |
| si:ch211-225k7.3  | 1.202474398 | -0.315413906 | 1.8153552 | -0.173748 | 0.862064 | NA       |
| si:dkey-40h20.1   | 7.026930821 | -0.247241673 | 0.7333579 | -0.337136 | 0.736014 | NA       |
| si:dkey-239j18.2  | 0.473170125 | -0.833888596 | 2.9014002 | -0.287409 | 0.773799 | NA       |
| tmem119a          | 22.8447928  | -0.204273247 | 0.3960605 | -0.515763 | 0.60602  | 0.956686 |
| CU694757.1        | 0 NA        | NA           | NA        | NA        | NA       | NA       |
| si:dkey-145c18.4  | 0 NA        | NA           | NA        | NA        | NA       | NA       |
| CR396590.7        | 0.339758314 | 0.005883863  | 3.2682461 | 0.0018003 | 0.998564 | NA       |
| AL928866.1        | 0.829590794 | -0.541313395 | 2.1122702 | -0.256271 | 0.797742 | NA       |
| BX927385.2        | 2.532185647 | 0.2170996    | 1.2338553 | 0.1759522 | 0.860331 | NA       |
| si:dkey-261h17.1  | 746.4206501 | 0.100543657  | 0.0938704 | 1.0710903 | 0.284129 | 0.844697 |
| htr7c             | 7.008289087 | 0.565756776  | 0.7343642 | 0.7704036 | 0.441061 | NA       |
| cox8a             | 2528.503705 | 0.066724951  | 0.0743376 | 0.8975939 | 0.369402 | 0.889127 |
| si:ch211-278p9.2  | 1.69115893  | 3.089930315  | 1.7196362 | 1.7968512 | 0.072359 | NA       |
| si:dkey-269p2.1   | 4.120672337 | 0.570347797  | 0.9314512 | 0.6123217 | 0.540325 | NA       |
| BX936318.1        | 0.665960023 | -1.495776328 | 2.4092162 | -0.620856 | 0.534694 | NA       |
| AL954142.2        | 1.488788634 | 1.021546813  | 1.5869898 | 0.6437009 | 0.519769 | NA       |
| CU682811.2        | 3.800655588 | -1.399519032 | 1.2132727 | -1.153507 | 0.248702 | NA       |
| zgc:152652        | 0 NA        | NA           | NA        | NA        | NA       | NA       |
| BX950187.1        | 5.444956489 | 0.030208912  | 0.9043527 | 0.0334039 | 0.973352 | NA       |
| si:dkeyp-2e4.3    | 30.09717751 | -0.569779257 | 0.3703287 | -1.538577 | 0.123908 | 0.652391 |
| rusc2             | 1761.66391  | 0.087701172  | 0.0758528 | 1.1562017 | 0.247599 | 0.817092 |
| CU595864.1        | 0.157187365 | -0.955901296 | 4.0804729 | -0.234262 | 0.814781 | NA       |
| CR394546.3        | 16.69512548 | -0.181678331 | 0.4838042 | -0.37552  | 0.707273 | 0.968664 |

|                   |             |              |           |           |          |          |
|-------------------|-------------|--------------|-----------|-----------|----------|----------|
| si:dkey-265e7.1   | 3.694692261 | 0.802785408  | 0.9962928 | 0.8057726 | 0.420374 | NA       |
| si:dkey-20015.4   | 106.3897916 | 0.365886895  | 0.1981888 | 1.8461529 | 0.06487  | 0.497901 |
| si:rp71-36a1.1    | 115.2785507 | 0.257667526  | 0.1949774 | 1.3215248 | 0.186326 | 0.750697 |
| si:ch73-274k23.1  | 4.252754854 | -0.673542119 | 0.9439826 | -0.713511 | 0.47553  | NA       |
| adgre17           | 0.531799352 | 0.999478841  | 2.790358  | 0.3581902 | 0.720201 | NA       |
| ftr73             | 0.489712128 | -0.887840729 | 2.693685  | -0.329601 | 0.741702 | NA       |
| mxra7             | 93.27517391 | -0.120301774 | 0.2259566 | -0.532411 | 0.594441 | 0.954434 |
| BX247868.1        | 3.777498543 | 0.133032358  | 0.9561981 | 0.1391264 | 0.88935  | NA       |
| BX957322.2        | 27.91705581 | 3.26535236   | 0.4900749 | 6.6629664 | 2.68E-11 | 7.08E-09 |
| CR926469.1        | 0           | NA           | NA        | NA        | NA       | NA       |
| si:ch211-207c6.2  | 16.13643392 | -0.96391263  | 0.4947951 | -1.948105 | 0.051402 | 0.444245 |
| si:dkey-22p6.2    | 0           | NA           | NA        | NA        | NA       | NA       |
| si:ch211-215c18.3 | 42.94338438 | 0.181934918  | 0.3066243 | 0.593348  | 0.552948 | 0.947265 |
| si:dkey-79f11.9   | 0           | NA           | NA        | NA        | NA       | NA       |
| sc:d0202          | 18.24591813 | 0.452561373  | 0.4925132 | 0.9188817 | 0.358157 | 0.884398 |
| si:dkey-19p15.4   | 0.633934609 | 1.436045836  | 2.6103598 | 0.5501333 | 0.582228 | NA       |
| CR626907.2        | 16.59680681 | -0.110893953 | 0.4575072 | -0.242387 | 0.80848  | 0.980642 |
| CR769777.1        | 1.157562172 | -0.399802663 | 1.8346433 | -0.217918 | 0.827493 | NA       |
| BX004840.2        | 0           | NA           | NA        | NA        | NA       | NA       |
| fkbp1             | 103.2618685 | -0.370495809 | 0.1935828 | -1.913888 | 0.055634 | 0.461579 |
| galnt8b.2         | 18.05913278 | 0.332654847  | 0.4544479 | 0.7319978 | 0.46417  | 0.923204 |
| si:dkey-49n23.3   | 0           | NA           | NA        | NA        | NA       | NA       |
| si:dkey-88n24.3   | 0.323844819 | -1.825095364 | 3.274639  | -0.557342 | 0.577293 | NA       |
| si:ch211-191i18.4 | 13.94827879 | -0.089032152 | 0.5817093 | -0.153053 | 0.878357 | 0.987881 |
| si:dkey-14d8.1    | 34.95739816 | -0.152568809 | 0.3426489 | -0.445263 | 0.65613  | 0.961833 |
| si:ch211-157j23.3 | 1.453504879 | -1.807683458 | 1.6864857 | -1.071864 | 0.283781 | NA       |
| CR318646.3        | 0           | NA           | NA        | NA        | NA       | NA       |
| si:dkeyp-44a8.4   | 250.8754566 | 0.086520732  | 0.1489685 | 0.580799  | 0.561376 | 0.948728 |
| BX248512.2        | 0.996127896 | -0.965496869 | 1.8966759 | -0.509047 | 0.610719 | NA       |
| ftr09             | 0           | NA           | NA        | NA        | NA       | NA       |
| si:dkeyp-72h1.1   | 208.798265  | -0.073792212 | 0.1497743 | -0.492689 | 0.622232 | 0.957354 |
| sh2d1aa           | 0.667059899 | 1.488443644  | 2.4079024 | 0.6181495 | 0.536477 | NA       |
| si:dkey-4c15.12   | 7.571916846 | 0.38717884   | 0.708456  | 0.5465108 | 0.584715 | NA       |
| CU914776.1        | 471.1973531 | 0.674791413  | 0.1238149 | 5.4500038 | 5.04E-08 | 7.38E-06 |
| CR936240.1        | 0.482640214 | -0.866525639 | 2.7061322 | -0.320208 | 0.748811 | NA       |
| si:dkey-7814.7    | 0           | NA           | NA        | NA        | NA       | NA       |
| si:ch211-213b8.4  | 6.241433527 | -1.092539359 | 0.8135975 | -1.34285  | 0.179321 | NA       |
| si:ch211-77g15.32 | 3.156377224 | -1.943486649 | 1.183012  | -1.642829 | 0.100418 | NA       |
| BX640520.3        | 0.365141898 | 1.973577737  | 3.3927314 | 0.5817076 | 0.560764 | NA       |
| BX323065.1        | 2.266611409 | 1.30416549   | 1.3562144 | 0.9616219 | 0.33624  | NA       |
| AL590146.1        | 0.166657454 | -0.955901296 | 4.0804729 | -0.234262 | 0.814781 | NA       |
| zgc:112966        | 9.495729938 | -0.661801998 | 0.6143738 | -1.077198 | 0.281392 | NA       |
| FP016012.1        | 0           | NA           | NA        | NA        | NA       | NA       |
| CR388207.1        | 19.1963919  | -0.125482623 | 0.4787565 | -0.262101 | 0.793243 | 0.977937 |
| gdf10a            | 386.8047061 | 0.19053498   | 0.1195378 | 1.5939304 | 0.110952 | 0.626294 |
| BX294163.1        | 0.173729368 | -0.955901296 | 4.0804729 | -0.234262 | 0.814781 | NA       |
| si:dkey-7814.2    | 1.159600284 | 3.665293876  | 1.9627315 | 1.8674454 | 0.061839 | NA       |
| BX640481.1        | 2.487702507 | -0.19355015  | 1.1912939 | -0.162471 | 0.870935 | NA       |
| pimr179           | 1.958154234 | -0.002462971 | 1.4893867 | -0.001654 | 0.998681 | NA       |
| BX323590.2        | 121.4449354 | -0.25020631  | 0.1909352 | -1.310425 | 0.190052 | 0.754636 |
| BX901878.2        | 6.656796408 | 0.175881869  | 0.7502026 | 0.2344458 | 0.814639 | NA       |
| BX537288.2        | 88.41544472 | -0.109687831 | 0.220018  | -0.49854  | 0.618103 | 0.957354 |
| BX664750.2        | 0           | NA           | NA        | NA        | NA       | NA       |
| CR376741.1        | 4.251108794 | -0.009283605 | 0.9793082 | -0.00948  | 0.992436 | NA       |

|                    |             |              |           |           |          |          |
|--------------------|-------------|--------------|-----------|-----------|----------|----------|
| si:ch1073-75f15.2  | 0.632206226 | 0.012903346  | 2.6133421 | 0.0049375 | 0.99606  | NA       |
| CU468730.1         | 15.07579913 | -0.808969173 | 0.5037443 | -1.605912 | 0.108293 | 0.620153 |
| znf1170            | 31.50575107 | -0.306086184 | 0.3471712 | -0.881658 | 0.377962 | 0.895192 |
| si:ch73-256j6.6    | 0.349228403 | 0.005884014  | 3.2372587 | 0.0018176 | 0.99855  | NA       |
| si:ch73-52f15.5    | 136.5309501 | 0.101232143  | 0.1748947 | 0.5788178 | 0.562712 | 0.948728 |
| si:rp71-1i20.1     | 3.357968661 | -1.557257885 | 1.1169199 | -1.394243 | 0.163244 | NA       |
| BX897741.1         | 8.658369851 | -0.851456593 | 0.6815344 | -1.249323 | 0.211547 | NA       |
| si:dkey-9i23.8     | 0.333314908 | -1.858695402 | 3.5126701 | -0.52914  | 0.596708 | NA       |
| AL935184.2         | 0.173729368 | -0.955901296 | 4.0804729 | -0.234262 | 0.814781 | NA       |
| si:ch211-226h7.8   | 25.89648637 | 0.038047629  | 0.4285398 | 0.0887844 | 0.929253 | 0.992702 |
| si:ch211-285c6.4   | 1.15118779  | 1.305539583  | 1.8815949 | 0.6938473 | 0.487778 | NA       |
| CR847543.2         | 4.206613198 | 0.379276018  | 0.9205703 | 0.4120011 | 0.680339 | NA       |
| RNF224             | 14.06084775 | -0.847287795 | 0.5247774 | -1.614566 | 0.106405 | 0.615567 |
| or125-4            | 5.085124837 | 0.487988137  | 0.862341  | 0.5658877 | 0.57147  | NA       |
| CR388363.2         | 0.166657454 | -0.955901296 | 4.0804729 | -0.234262 | 0.814781 | NA       |
| si:ch211-14a11.1   | 0.498674062 | 0.926637565  | 2.6784892 | 0.3459553 | 0.729376 | NA       |
| BX324123.2         | 790.6185619 | 0.066988423  | 0.0978317 | 0.6847313 | 0.493514 | 0.931926 |
| si:ch211-133n4.7   | 0.839730676 | -1.88066928  | 2.2379651 | -0.840348 | 0.400713 | NA       |
| AL929520.2         | 0 NA        | NA           | NA        | NA        | NA       | NA       |
| FP101887.1         | 198.5590271 | 0.067958267  | 0.1546941 | 0.4393073 | 0.660439 | 0.963802 |
| BX323074.2         | 177.384665  | 0.190859834  | 0.1651971 | 1.1553464 | 0.247949 | 0.817156 |
| si:ch211-217k17.8  | 30.78322245 | 0.122295687  | 0.3821463 | 0.3200232 | 0.748951 | 0.97419  |
| si:dkeyp-117b11.3  | 25.19158123 | 0.005034329  | 0.4143552 | 0.0121498 | 0.990306 | 0.997679 |
| si:dkey-7814.4     | 0 NA        | NA           | NA        | NA        | NA       | NA       |
| BX649490.3         | 0.635662991 | 2.808056561  | 2.7492814 | 1.0213784 | 0.307075 | NA       |
| si:dkeyp-53e4.2    | 0 NA        | NA           | NA        | NA        | NA       | NA       |
| BX927216.1         | 0 NA        | NA           | NA        | NA        | NA       | NA       |
| si:dkey-191c17.2   | 0.476506538 | 2.394892832  | 2.8161716 | 0.8504073 | 0.395099 | NA       |
| CR383662.3         | 7.816621613 | 0.405997032  | 0.719689  | 0.5641284 | 0.572667 | NA       |
| ftr30              | 3.669033475 | -1.470131244 | 1.1224432 | -1.30976  | 0.190277 | NA       |
| AL929017.2         | 9.330124285 | 0.319880153  | 0.6127778 | 0.5220166 | 0.601659 | NA       |
| AL929237.2         | 0.158915748 | 0.967652056  | 4.0804729 | 0.2371421 | 0.812547 | NA       |
| si:ch211-19617.4   | 917.13758   | -0.166638984 | 0.1083631 | -1.537784 | 0.124101 | 0.652708 |
| si:rp71-17i16.6    | 24.0679803  | -0.010246482 | 0.3847396 | -0.026632 | 0.978753 | 0.996762 |
| si:dkey-19a16.13   | 5.256035991 | -0.745087035 | 0.830586  | -0.897062 | 0.369686 | NA       |
| si:dkey-20i20.10   | 8.433798346 | -0.153262578 | 0.6905957 | -0.221928 | 0.82437  | NA       |
| si:ch211-147d7.5   | 5.92958058  | -0.304769043 | 0.784565  | -0.388456 | 0.697679 | NA       |
| si:dkey-240h12.3   | 12.19775107 | -0.041620219 | 0.5455451 | -0.076291 | 0.939188 | 0.992857 |
| si:ch211-191j22.3  | 479.9821942 | -0.109441579 | 0.1103028 | -0.992192 | 0.321104 | 0.868843 |
| BX000705.1         | 0 NA        | NA           | NA        | NA        | NA       | NA       |
| pimr171            | 4.045339317 | 0.235675287  | 1.0124807 | 0.2327702 | 0.81594  | NA       |
| celal.2            | 3.374624228 | 0.613820888  | 1.0289564 | 0.596547  | 0.55081  | NA       |
| si:ch73-90k17.1    | 0.809701093 | 0.53615962   | 2.3788628 | 0.2253848 | 0.82168  | NA       |
| gstt2              | 148.6400347 | -0.192820085 | 0.1673262 | -1.15236  | 0.249173 | 0.818463 |
| BX649377.1         | 5.637758916 | -0.498875061 | 0.8317626 | -0.599781 | 0.548652 | NA       |
| BX470183.1         | 0 NA        | NA           | NA        | NA        | NA       | NA       |
| CU657977.1         | 3.540061454 | -0.115458457 | 1.0132676 | -0.113947 | 0.90928  | NA       |
| CR392001.1         | 0.182570949 | 0.967652056  | 4.0804729 | 0.2371421 | 0.812547 | NA       |
| CR933734.3         | 38.14597485 | 0.19970966   | 0.3098187 | 0.6446017 | 0.519185 | 0.938945 |
| si:ch211-282j17.10 | 0.347458735 | -1.908042286 | 3.4571486 | -0.551912 | 0.581009 | NA       |
| CHST12 (1 of many) | 0.846174082 | -0.46494763  | 2.1994676 | -0.211391 | 0.832582 | NA       |
| AL929457.1         | 7.155902812 | 0.649844262  | 0.7645825 | 0.8499335 | 0.395362 | NA       |
| CU467646.2         | 1.812993516 | -2.135589317 | 1.6619004 | -1.285028 | 0.198782 | NA       |
| CU570881.1         | 0 NA        | NA           | NA        | NA        | NA       | NA       |

|                   |             |              |           |           |          |          |
|-------------------|-------------|--------------|-----------|-----------|----------|----------|
| adgre6            | 0.173729368 | -0.955901296 | 4.0804729 | -0.234262 | 0.814781 | NA       |
| CU459065.1        | 0 NA        |              | NA        | NA        | NA       | NA       |
| si:dkeyp-2e4.5    | 17.33102227 | -0.323893453 | 0.465384  | -0.69597  | 0.486447 | 0.930833 |
| si:dkey-286h21.1  | 0.323844819 | -1.825095364 | 3.274639  | -0.557342 | 0.577293 | NA       |
| si:ch211-167j6.3  | 0 NA        |              | NA        | NA        | NA       | NA       |
| CU986305.1        | 2.639117254 | 0.354391793  | 1.1475719 | 0.3088188 | 0.757459 | NA       |
| BX649622.1        | 9.015832125 | 0.455476674  | 0.6406482 | 0.7109622 | 0.477108 | NA       |
| CR759885.1        | 12.23342737 | 0.23389837   | 0.5785762 | 0.4042654 | 0.686018 | 0.966376 |
| si:ch211-10d23.5  | 39.64580085 | -0.126827767 | 0.3155442 | -0.401933 | 0.687733 | 0.966442 |
| rca2.2            | 19.21948995 | 0.091972092  | 0.4366593 | 0.2106267 | 0.833179 | 0.983583 |
| CR396590.8        | 0 NA        |              | NA        | NA        | NA       | NA       |
| si:dkeyp-77c8.5   | 0.508144151 | 0.926490632  | 2.6634746 | 0.3478504 | 0.727953 | NA       |
| entr1             | 177.4996601 | -0.033678739 | 0.1532597 | -0.21975  | 0.826066 | 0.982196 |
| si:dkey-204f11.13 | 0 NA        |              | NA        | NA        | NA       | NA       |
| BX323839.1        | 8.87952219  | -0.529958659 | 0.6640499 | -0.79807  | 0.42483  | NA       |
| BX950188.2        | 0 NA        |              | NA        | NA        | NA       | NA       |
| znf1090           | 4.837561166 | 0.71231575   | 0.8904311 | 0.7999673 | 0.42373  | NA       |
| si:dkey-71b5.3    | 37.50884205 | 0.266489974  | 0.3276816 | 0.8132588 | 0.41607  | 0.906237 |
| AL845369.2        | 0.658218317 | -0.061628513 | 2.4342948 | -0.025317 | 0.979802 | NA       |
| CR392363.2        | 2.430842948 | -0.188310594 | 1.292486  | -0.145696 | 0.884161 | NA       |
| CR854897.1        | 0.972352342 | -1.017118925 | 1.9872165 | -0.511831 | 0.608769 | NA       |
| BX322661.3        | 0.521188103 | -2.493476766 | 2.9577741 | -0.843025 | 0.399215 | NA       |
| si:dkey-58f10.13  | 1.601761304 | 1.957946414  | 1.7038977 | 1.1490986 | 0.250515 | NA       |
| si:ch211-198c19.3 | 57.41540046 | 0.674202808  | 0.2717645 | 2.4808343 | 0.013108 | 0.20473  |
| BX005462.1        | 0 NA        |              | NA        | NA        | NA       | NA       |
| trim62.2          | 6.578575923 | 1.048996957  | 0.7524614 | 1.3940874 | 0.163291 | NA       |
| senp3a            | 300.638704  | 0.013178416  | 0.1268533 | 0.103887  | 0.917259 | 0.991572 |
| si:dkeyp-82a1.8   | 0.832927207 | 1.89113355   | 2.1260675 | 0.8894983 | 0.373735 | NA       |
| sid1              | 1.006656575 | 0.95954179   | 1.9638723 | 0.4885968 | 0.625127 | NA       |
| si:dkey-33c12.12  | 0.347458735 | -1.908042286 | 3.4571486 | -0.551912 | 0.581009 | NA       |
| CR931802.2        | 0 NA        |              | NA        | NA        | NA       | NA       |
| BX247877.1        | 3.991225693 | 0.027723206  | 0.9734589 | 0.0284791 | 0.97728  | NA       |
| si:dkeyp-106c3.2  | 0.349228403 | 0.005884014  | 3.2372587 | 0.0018176 | 0.99855  | NA       |
| lenep             | 134.280331  | 0.174263752  | 0.1768073 | 0.9856142 | 0.324322 | 0.870928 |
| si:ch211-163g19.2 | 0.157187365 | -0.955901296 | 4.0804729 | -0.234262 | 0.814781 | NA       |
| CR318588.4        | 709.7202294 | -0.067711841 | 0.1123039 | -0.602934 | 0.546552 | 0.945526 |
| BX664610.1        | 168.5154237 | 0.290092875  | 0.1638924 | 1.7700203 | 0.076724 | 0.539626 |
| si:dkey-246j7.1   | 38.15299024 | -0.338523864 | 0.3277102 | -1.032998 | 0.301605 | 0.856944 |
| si:ch73-138i16.1  | 5.019098008 | 0.199529435  | 0.8621608 | 0.2314295 | 0.816981 | NA       |
| CABZ0118770.1     | 4.042285048 | -0.121966028 | 0.9948143 | -0.122602 | 0.902422 | NA       |
| si:dkey-65b13.1   | 2.494224981 | 0.177872727  | 1.1834387 | 0.1503016 | 0.880527 | NA       |
| AL929576.1        | 3.221639233 | -0.153325792 | 1.0931401 | -0.140262 | 0.888453 | NA       |
| BX537162.1        | 0 NA        |              | NA        | NA        | NA       | NA       |
| si:dkey-21e2.14   | 0 NA        |              | NA        | NA        | NA       | NA       |
| si:ch211-122114.7 | 0 NA        |              | NA        | NA        | NA       | NA       |
| cybrd1            | 67.59246635 | 0.002475127  | 0.2406482 | 0.0102853 | 0.991794 | 0.997697 |
| si:dkey-222h21.7  | 0.666629816 | -2.858789115 | 2.7069088 | -1.056108 | 0.290919 | NA       |
| si:ch211-67e16.11 | 213.7536622 | 0.388624776  | 0.1605046 | 2.4212687 | 0.015466 | 0.228575 |
| BX663525.1        | 2.029388282 | 1.599396952  | 1.4420994 | 1.1090754 | 0.267398 | NA       |
| CR925798.1        | 83.58206661 | -0.031435415 | 0.2221662 | -0.141495 | 0.887479 | 0.989291 |
| CT583727.1        | 2.234878028 | 0.830908077  | 1.4103303 | 0.5891585 | 0.555755 | NA       |
| si:dkey-11e23.9   | 1.487730044 | -0.268459873 | 1.5651803 | -0.17152  | 0.863815 | NA       |
| BX548073.5        | 0 NA        |              | NA        | NA        | NA       | NA       |
| pimr100           | 0.689615224 | -1.495598879 | 2.3854835 | -0.626958 | 0.530687 | NA       |



|                    |              |               |            |            |           |           |
|--------------------|--------------|---------------|------------|------------|-----------|-----------|
| spp2               | 8. 682147418 | -0. 422400955 | 0. 7291765 | -0. 579285 | 0. 562397 | NA        |
| si:dkey-11o15. 5   | 20. 19502132 | 0. 512174429  | 0. 43378   | 1. 1807239 | 0. 237712 | 0. 806474 |
| si:ch211-134c9. 2  | 8. 396869272 | 0. 239969364  | 0. 6568117 | 0. 3653549 | 0. 714847 | NA        |
| si:dkey-184a18. 5  | 38. 74684278 | -0. 213442339 | 0. 3102728 | -0. 687918 | 0. 491504 | 0. 931926 |
| BX322575. 1        | 22. 33288638 | 0. 386829103  | 0. 4369466 | 0. 8853006 | 0. 375995 | 0. 894587 |
| si:dkeyp-4f2. 6    | 0. 831078472 | 0. 593707769  | 2. 1126471 | 0. 2810255 | 0. 778691 | NA        |
| AL627088. 1        | 1. 315955223 | -0. 066570411 | 1. 8293747 | -0. 03639  | 0. 970972 | NA        |
| BX465206. 1        | 0. 974991223 | -1. 022830706 | 2. 0964916 | -0. 487877 | 0. 625637 | NA        |
| grid2ipb           | 200. 0562185 | 0. 006017564  | 0. 1488618 | 0. 0404238 | 0. 967755 | 0. 996315 |
| CR846087. 3        | 1. 503962317 | -2. 886341382 | 1. 8017439 | -1. 601971 | 0. 109162 | NA        |
| si:dkeyp-51f12. 2  | 12. 65917895 | 0. 252095628  | 0. 5391022 | 0. 4676212 | 0. 640055 | 0. 959994 |
| si:ch211-209f23. 3 | 0. 182570949 | 0. 967652056  | 4. 0804729 | 0. 2371421 | 0. 812547 | NA        |
| si:dkey-57k2. 6    | 17. 78078341 | -0. 127459115 | 0. 4535008 | -0. 281056 | 0. 778667 | 0. 975942 |
| ftr60              | 1. 471775264 | -1. 028353818 | 1. 5759115 | -0. 652545 | 0. 514049 | NA        |
| BX248510. 2        | 0. 854503011 | -3. 209619274 | 2. 2865784 | -1. 403678 | 0. 160415 | NA        |
| caonaleb           | 10. 16029452 | 0. 435791086  | 0. 6128539 | 0. 7110848 | 0. 477032 | NA        |
| si:dkeyp-86h10. 3  | 373. 3236017 | 0. 443681178  | 0. 1230287 | 3. 6063235 | 0. 000311 | 0. 012137 |
| znf1157            | 25. 47602376 | -0. 209004683 | 0. 3875804 | -0. 539255 | 0. 589711 | 0. 953704 |
| BX927243. 1        |              | 0 NA          | NA         | NA         | NA        | NA        |
| taar19b            | 0. 500402445 | 2. 450713647  | 2. 7706722 | 0. 8845195 | 0. 376416 | NA        |
| dpm2               | 210. 4100696 | -0. 004311521 | 0. 1428573 | -0. 030181 | 0. 975923 | 0. 996762 |
| clqc               | 4. 936765507 | 1. 452901288  | 0. 9347017 | 1. 5544011 | 0. 120089 | NA        |
| CR927456. 1        |              | 0 NA          | NA         | NA         | NA        | NA        |
| si:ch211-13315. 7  | 71. 293955   | -0. 589527872 | 0. 2345063 | -2. 513911 | 0. 01194  | 0. 192266 |
| si:ch211-66k16. 2  | 0. 632206226 | 0. 012903346  | 2. 6133421 | 0. 0049375 | 0. 99606  | NA        |
| dr11. 3            | 1. 451776496 | -2. 862465318 | 1. 8134246 | -1. 578486 | 0. 114454 | NA        |
| cycsa              |              | 0 NA          | NA         | NA         | NA        | NA        |
| si:dkey-284p5. 3   | 20. 37293707 | 1. 029800701  | 0. 4566706 | 2. 2550185 | 0. 024132 | 0. 299742 |
| BX248515. 2        |              | 0 NA          | NA         | NA         | NA        | NA        |
| si:ch1073-15f19. 2 |              | 0 NA          | NA         | NA         | NA        | NA        |
| CT025588. 1        | 2. 803643982 | -0. 199242602 | 1. 1306948 | -0. 176213 | 0. 860127 | NA        |
| si:dkey-253d23. 3  | 43. 16616235 | 0. 137486283  | 0. 300142  | 0. 4580708 | 0. 646902 | 0. 960362 |
| CU207238. 1        | 0. 365141898 | 1. 973577737  | 3. 3927314 | 0. 5817076 | 0. 560764 | NA        |
| BX545856. 2        |              | 0 NA          | NA         | NA         | NA        | NA        |
| si:dkey-97a13. 12  | 21. 97599608 | 0. 636483762  | 0. 4168389 | 1. 5269297 | 0. 126778 | 0. 656588 |
| hmx1               | 198. 1123265 | 0. 108519574  | 0. 1554068 | 0. 6982938 | 0. 484993 | 0. 93001  |
| CU681836. 2        |              | 0 NA          | NA         | NA         | NA        | NA        |
| tns3. 1            | 14. 60703529 | -0. 729378633 | 0. 4953524 | -1. 472444 | 0. 140901 | 0. 681252 |
| BX005024. 2        |              | 0 NA          | NA         | NA         | NA        | NA        |
| FP016213. 1        | 1. 322491243 | -1. 548905306 | 1. 8087333 | -0. 856348 | 0. 391805 | NA        |
| si:ch211-191a16. 2 | 28. 8717066  | 0. 12856261   | 0. 4052818 | 0. 3172178 | 0. 751078 | 0. 97419  |
| znf1175            | 38. 35878597 | -0. 201635918 | 0. 3231188 | -0. 62403  | 0. 532608 | 0. 942805 |
| BX855614. 2        |              | 0 NA          | NA         | NA         | NA        | NA        |
| si:ch211-221n20. 2 | 0. 824205979 | 0. 498048327  | 2. 3641483 | 0. 2106671 | 0. 833147 | NA        |
| FP016142. 1        | 85. 30419962 | -0. 078196242 | 0. 2284763 | -0. 342251 | 0. 732162 | 0. 971665 |
| si:dkey-79f11. 8   | 0. 182570949 | 0. 967652056  | 4. 0804729 | 0. 2371421 | 0. 812547 | NA        |
| tmem123            | 43. 86143341 | 0. 65772658   | 0. 3245319 | 2. 0266929 | 0. 042694 | 0. 406074 |
| ccdc141            | 123. 0528091 | -0. 013011531 | 0. 1979934 | -0. 065717 | 0. 947603 | 0. 99381  |
| ftr38              | 4. 199296081 | -0. 604442874 | 1. 0003253 | -0. 604246 | 0. 54568  | NA        |
| AL845324. 2        | 0. 347458735 | -1. 908042286 | 3. 4571486 | -0. 551912 | 0. 581009 | NA        |
| BX537103. 1        | 1. 561362267 | 1. 873467306  | 1. 7432854 | 1. 0746762 | 0. 28252  | NA        |
| BX296526. 2        | 0. 665049525 | -0. 08670226  | 2. 5686305 | -0. 033754 | 0. 973073 | NA        |
| BX571694. 1        | 5. 478365012 | 0. 102082916  | 0. 7940749 | 0. 1285558 | 0. 897709 | NA        |
| si:dkey-84o3. 3    | 4. 792646926 | -0. 057625585 | 0. 8948861 | -0. 064394 | 0. 948656 | NA        |

|                    |             |              |           |           |          |          |
|--------------------|-------------|--------------|-----------|-----------|----------|----------|
| zgc:162509         | 0.651146404 | -0.045019457 | 2.587009  | -0.017402 | 0.986116 | NA       |
| AL953867.2         | 0           | NA           | NA        | NA        | NA       | NA       |
| BX927401.1         | 0.800351357 | 0.565853532  | 2.1350944 | 0.2650251 | 0.79099  | NA       |
| CT573231.1         | 0.173729368 | -0.955901296 | 4.0804729 | -0.234262 | 0.814781 | NA       |
| ms4a17a.10         | 20.22150248 | 1.096246149  | 0.5214353 | 2.1023629 | 0.035521 | 0.367016 |
| trpm2              | 61.98138624 | -0.199953706 | 0.2556429 | -0.78216  | 0.43412  | 0.914001 |
| CR774194.1         | 2.735064098 | 0.738656946  | 1.2984618 | 0.5688708 | 0.569444 | NA       |
| si:dkey-228a15.1   | 30.67751299 | 0.415927034  | 0.3820925 | 1.0885506 | 0.276352 | 0.839541 |
| CR792453.1         | 0           | NA           | NA        | NA        | NA       | NA       |
| si:dkey-4c15.13    | 85.00935929 | -0.107945711 | 0.2192599 | -0.492319 | 0.622494 | 0.957354 |
| CDPF1              | 103.8380486 | 0.171046165  | 0.1962453 | 0.8715935 | 0.38343  | 0.895192 |
| BX322665.2         | 10.20715938 | -0.00926338  | 0.6182577 | -0.014983 | 0.988046 | NA       |
| si:dkey-7i4.9      | 122.6352524 | -0.125795871 | 0.1860436 | -0.676164 | 0.498937 | 0.934006 |
| BX284666.3         | 0.838778893 | -0.672501496 | 2.3563046 | -0.285405 | 0.775334 | NA       |
| BX465834.1         | 447.0387691 | -0.244335469 | 0.1239154 | -1.971793 | 0.048633 | 0.433734 |
| si:dkey-172k15.6   | 25.92849183 | -0.376355867 | 0.3842254 | -0.979518 | 0.327324 | 0.872658 |
| si:dkey-222h21.2   | 0.316103113 | 0.005883447  | 3.3519121 | 0.0017553 | 0.9986   | NA       |
| CR931763.1         | 0.317831496 | 1.808837541  | 3.5779923 | 0.5055454 | 0.613176 | NA       |
| BX005108.1         | 0.839060883 | -0.561237798 | 2.0216937 | -0.277608 | 0.781313 | NA       |
| CR925709.3         | 0           | NA           | NA        | NA        | NA       | NA       |
| si:ch211-196c10.15 | 6.796686174 | -0.974709666 | 0.7855512 | -1.240797 | 0.214681 | NA       |
| CU657925.1         | 0.157187365 | -0.955901296 | 4.0804729 | -0.234262 | 0.814781 | NA       |
| BX957357.1         | 0           | NA           | NA        | NA        | NA       | NA       |
| si:dkey-21e2.12    | 0           | NA           | NA        | NA        | NA       | NA       |
| si:ch211-234p6.9   | 0.814536469 | 0.637862482  | 2.230678  | 0.28595   | 0.774916 | NA       |
| BX890591.1         | 5.611007012 | -1.68165883  | 0.8504692 | -1.977331 | 0.048004 | NA       |
| znf423             | 0.808333769 | -0.605422531 | 2.2351432 | -0.270865 | 0.786495 | NA       |
| CT573344.2         | 0           | NA           | NA        | NA        | NA       | NA       |
| pimr186            | 2.691609549 | -0.00363273  | 1.1561864 | -0.003142 | 0.997493 | NA       |
| si:ch211-271e10.1  | 1.757887666 | 0.078280266  | 1.5913271 | 0.0491918 | 0.960766 | NA       |
| AL953903.3         | 0.182570949 | 0.967652056  | 4.0804729 | 0.2371421 | 0.812547 | NA       |
| si:dkey-73p2.1     | 1.964195297 | 0.468413351  | 1.323575  | 0.3539001 | 0.723414 | NA       |
| si:ch1073-75o15.3  | 0.847782112 | 0.655103352  | 2.1028616 | 0.3115295 | 0.755398 | NA       |
| sox11b             | 1189.021064 | 0.165768057  | 0.0874234 | 1.896151  | 0.05794  | 0.472262 |
| si:dkey-269i1.4    | 0           | NA           | NA        | NA        | NA       | NA       |
| si:ch73-138e16.3   | 43.94553955 | -0.020708433 | 0.2898803 | -0.071438 | 0.943049 | 0.993364 |
| si:zfos-2330d3.7   | 0.513487682 | -0.887846295 | 2.6557956 | -0.334305 | 0.738149 | NA       |
| cxcl11.8           | 0.166657454 | -0.955901296 | 4.0804729 | -0.234262 | 0.814781 | NA       |
| taar18j            | 0.158795395 | 0.967652056  | 4.0804729 | 0.2371421 | 0.812547 | NA       |
| fdxacb1            | 87.41163413 | -0.134745634 | 0.2174038 | -0.619794 | 0.535393 | 0.943336 |
| leg1.2             | 98.29571808 | -0.183392884 | 0.2489574 | -0.736644 | 0.461339 | 0.922161 |
| CR377211.4         | 2.308238551 | -0.81758949  | 1.2920505 | -0.632784 | 0.526874 | NA       |
| si:dkey-234h16.7   | 211.8671052 | -0.148931294 | 0.1489476 | -0.999891 | 0.317363 | 0.867404 |
| BX465864.2         | 0           | NA           | NA        | NA        | NA       | NA       |
| si:ch211-190k17.19 | 0           | NA           | NA        | NA        | NA       | NA       |
| si:dkey-28d5.1     | 0.158915748 | 0.967652056  | 4.0804729 | 0.2371421 | 0.812547 | NA       |
| si:ch73-222f22.2   | 0           | NA           | NA        | NA        | NA       | NA       |
| dio3b              | 100.4829287 | -0.055536795 | 0.2055041 | -0.270247 | 0.786971 | 0.976596 |
| si:dkey-11o1.2     | 1.539005366 | 0.350453901  | 1.6299364 | 0.2150108 | 0.829759 | NA       |
| zgc:194906         | 0.88633     | -0.542564367 | 2.3109422 | -0.234781 | 0.814379 | NA       |
| emd                | 297.4448437 | 0.092734096  | 0.1279582 | 0.7247221 | 0.468623 | 0.924328 |
| si:ch211-122114.6  | 0           | NA           | NA        | NA        | NA       | NA       |
| hccsa.2            | 0.981822431 | -1.031556312 | 1.9826505 | -0.520292 | 0.60286  | NA       |
| si:ch211-218h8.3   | 1.518295521 | -0.302185166 | 1.6161124 | -0.186983 | 0.851674 | NA       |

|                    |             |              |           |           |          |          |
|--------------------|-------------|--------------|-----------|-----------|----------|----------|
| AL928725.1         |             | 0 NA         | NA        | NA        | NA       | NA       |
| CR769777.2         | 0.31437473  | -1.788572922 | 3.5930657 | -0.497785 | 0.618636 | NA       |
| CR854897.2         | 0.158795395 | 0.967652056  | 4.0804729 | 0.2371421 | 0.812547 | NA       |
| BX908740.1         | 0.349228403 | 0.005884014  | 3.2372587 | 0.0018176 | 0.99855  | NA       |
| CR352226.1         | 1.000443831 | 3.450160141  | 2.0458237 | 1.6864406 | 0.091711 | NA       |
| si:dkey-249d8.1    | 9.05961115  | -0.510958221 | 0.6725015 | -0.759787 | 0.447382 | NA       |
| BX511100.3         | 0.959666193 | -3.394558403 | 2.232981  | -1.520191 | 0.128463 | NA       |
| AL928685.1         |             | 0 NA         | NA        | NA        | NA       | NA       |
| BX936406.1         | 0.166657454 | -0.955901296 | 4.0804729 | -0.234262 | 0.814781 | NA       |
| ghrhr1             | 1.86120087  | -0.798548741 | 1.3883063 | -0.575196 | 0.565158 | NA       |
| ccr8.1             | 7.920588898 | -0.064926293 | 0.7133765 | -0.091013 | 0.927483 | NA       |
| FP067424.1         | 12.94855815 | -0.251850723 | 0.5460069 | -0.461259 | 0.644613 | 0.96029  |
| si:dkey-85n7.8     | 13.81135993 | -0.811274587 | 0.5155316 | -1.573666 | 0.115565 | 0.637206 |
| FP103048.1         |             | 0 NA         | NA        | NA        | NA       | NA       |
| si:dkey-87o1.2     | 247.1456375 | -0.032362865 | 0.1359435 | -0.238061 | 0.811834 | 0.981081 |
| BX666064.1         | 1.011020583 | -2.242667267 | 2.1244332 | -1.055654 | 0.291126 | NA       |
| CU633916.1         | 11.27046255 | 0.32333583   | 0.5814138 | 0.55612   | 0.578129 | 0.951024 |
| si:ch211-105n15.1  |             | 0 NA         | NA        | NA        | NA       | NA       |
| BX649485.2         | 12.29096417 | -0.711304026 | 0.6197278 | -1.147769 | 0.251064 | 0.820469 |
| si:ch1073-155h21.2 | 504.2940092 | 0.144446223  | 0.1245971 | 1.1593066 | 0.246331 | 0.816376 |
| BX649485.3         | 1.450319813 | 1.821033431  | 1.7709124 | 1.0283024 | 0.303808 | NA       |
| CT027631.1         | 0.339758314 | 0.005883863  | 3.2682461 | 0.0018003 | 0.998564 | NA       |
| si:dkey-16n15.6    | 11.62255225 | -0.811934446 | 0.5951057 | -1.364353 | 0.172456 | 0.731348 |
| si:ch73-362i18.1   | 0.158915748 | 0.967652056  | 4.0804729 | 0.2371421 | 0.812547 | NA       |
| hp                 | 155.5211948 | 0.163560806  | 0.2110284 | 0.7750655 | 0.438301 | 0.915672 |
| BX470242.1         | 1.820883314 | -0.81111314  | 1.3805197 | -0.587542 | 0.55684  | NA       |
| dlg4b              | 18.62995147 | 0.461432017  | 0.4894114 | 0.9428306 | 0.345768 | 0.87848  |
| BX005108.2         | 635.2610158 | 0.021656936  | 0.0955861 | 0.2265699 | 0.820758 | 0.981594 |
| BX649481.1         |             | 0 NA         | NA        | NA        | NA       | NA       |
| znhit6             | 154.3272081 | -0.358774637 | 0.1619837 | -2.214881 | 0.026768 | 0.315256 |
| CU855786.1         |             | 0 NA         | NA        | NA        | NA       | NA       |
| si:dkey-231j24.3   | 12.82993281 | 0.040523548  | 0.5616393 | 0.0721523 | 0.942481 | 0.993317 |
| BX649485.4         | 11.48430646 | -0.719747972 | 0.6320311 | -1.138786 | 0.254793 | 0.823484 |
| si:dkey-122a22.2   | 104.9374692 | 0.034807856  | 0.2200056 | 0.1582135 | 0.874289 | 0.987881 |
| BX324132.2         | 8.489836538 | 1.045563258  | 0.7292706 | 1.433711  | 0.151655 | NA       |
| BX649295.1         |             | 0 NA         | NA        | NA        | NA       | NA       |
| ftr92              | 2.783795566 | 0.140307505  | 1.3029173 | 0.1076872 | 0.914244 | NA       |
| smdtla             | 100.2617342 | -0.008626223 | 0.2102303 | -0.041032 | 0.96727  | 0.996315 |
| otulina            |             | 0 NA         | NA        | NA        | NA       | NA       |
| serpinb111         | 17.51810857 | -0.076903708 | 0.4713145 | -0.163169 | 0.870386 | 0.987421 |
| si:ch211-175f12.2  | 190.135001  | 0.427353279  | 0.1619956 | 2.6380554 | 0.008338 | 0.148141 |
| CU682777.2         | 314.9090506 | -0.841787583 | 0.1270629 | -6.624966 | 3.47E-11 | 8.92E-09 |
| alk                | 232.404478  | 0.271600522  | 0.1480143 | 1.8349616 | 0.066511 | 0.50468  |
| AL954317.1         | 0.182570949 | 0.967652056  | 4.0804729 | 0.2371421 | 0.812547 | NA       |
| CR354611.1         | 0.341366344 | 1.891903201  | 3.2128156 | 0.5888614 | 0.555954 | NA       |
| si:dkey-185p13.1   | 0.515216064 | 0.926382026  | 2.6525479 | 0.3492423 | 0.726907 | NA       |
| CR626882.2         | 0.158795395 | 0.967652056  | 4.0804729 | 0.2371421 | 0.812547 | NA       |
| CU929426.1         | 2.704028249 | 1.11939469   | 1.2386107 | 0.9037502 | 0.366128 | NA       |
| BX511173.1         | 0.173729368 | -0.955901296 | 4.0804729 | -0.234262 | 0.814781 | NA       |
| col24a1            | 203.6995499 | 0.333258718  | 0.1680024 | 1.9836549 | 0.047294 | 0.427031 |
| FP102167.1         | 76.67553171 | 0.154342675  | 0.2331967 | 0.6618563 | 0.508063 | 0.935734 |
| BX511100.4         |             | 0 NA         | NA        | NA        | NA       | NA       |
| si:dkey-239n17.6   | 9.952828185 | -0.391204007 | 0.5931453 | -0.659542 | 0.509548 | NA       |
| CU672266.1         | 0.158795395 | 0.967652056  | 4.0804729 | 0.2371421 | 0.812547 | NA       |

|                    |             |              |           |           |          |          |
|--------------------|-------------|--------------|-----------|-----------|----------|----------|
| CR352226.2         | 0.48448895  | 0.85344211   | 2.878836  | 0.2964539 | 0.766883 | NA       |
| CT574585.1         | 0.522329263 | 0.999930388  | 2.8066578 | 0.3562709 | 0.721638 | NA       |
| si:ch211-57m13.3   | 0.173729368 | -0.955901296 | 4.0804729 | -0.234262 | 0.814781 | NA       |
| si:dkey-42i9.16    | 1.81297997  | -0.32088687  | 1.4512486 | -0.221111 | 0.825006 | NA       |
| si:ch211-163l21.11 | 9.045616411 | 0.222274027  | 0.6922602 | 0.3210845 | 0.748146 | NA       |
| CR407550.1         | 0.158795395 | 0.967652056  | 4.0804729 | 0.2371421 | 0.812547 | NA       |
| CU683879.1         | 1.118303205 | 1.297464276  | 1.92255   | 0.6748663 | 0.499761 | NA       |
| ptchl              | 0 NA        | NA           | NA        | NA        | NA       | NA       |
| BX465849.1         | 0.158795395 | 0.967652056  | 4.0804729 | 0.2371421 | 0.812547 | NA       |
| si:ch1073-441p17.1 | 1.551499878 | -0.340953829 | 1.6673473 | -0.204489 | 0.837972 | NA       |
| afp4               | 2919.842658 | 0.207158751  | 0.1941192 | 1.0671731 | 0.285894 | 0.845942 |
| ftr59              | 2.040197956 | 0.521653209  | 1.4801101 | 0.3524422 | 0.724507 | NA       |
| oxrla              | 1471.680302 | 0.132975319  | 0.0822807 | 1.6161179 | 0.106069 | 0.615567 |
| si:ch73-132k15.2   | 0.657977612 | -0.062339112 | 2.4345873 | -0.025606 | 0.979572 | NA       |
| AL844185.1         | 0 NA        | NA           | NA        | NA        | NA       | NA       |
| AL845419.1         | 1.54332809  | -1.824983617 | 1.7446718 | -1.046033 | 0.295546 | NA       |
| FP067424.2         | 0 NA        | NA           | NA        | NA        | NA       | NA       |
| CR352226.3         | 1.545569125 | 1.051525788  | 1.5511744 | 0.6778901 | 0.497841 | NA       |
| CU993818.1         | 7.466702714 | -1.29655579  | 0.7090507 | -1.82858  | 0.067463 | NA       |
| wdr46              | 577.0590895 | -0.10666255  | 0.0977464 | -1.091255 | 0.275161 | 0.839541 |
| FP325358.1         | 0 NA        | NA           | NA        | NA        | NA       | NA       |
| BX001026.1         | 0.31598276  | 0.005883445  | 3.3523626 | 0.001755  | 0.9986   | NA       |
| si:ch211-57m13.9   | 0.182570949 | 0.967652056  | 4.0804729 | 0.2371421 | 0.812547 | NA       |
| si:ch211-158m24.12 | 0 NA        | NA           | NA        | NA        | NA       | NA       |
| BX248517.1         | 0.339758314 | 0.005883863  | 3.2682461 | 0.0018003 | 0.998564 | NA       |
| znf236             | 320.3841742 | 0.021014669  | 0.1295655 | 0.1621934 | 0.871154 | 0.987754 |
| si:ch73-3019.1     | 2.66359034  | 1.122956291  | 1.1792584 | 0.9522564 | 0.340967 | NA       |
| CR339054.1         | 0 NA        | NA           | NA        | NA        | NA       | NA       |
| si:dkey-85n7.7     | 2.068526896 | 0.533299241  | 1.346359  | 0.3961048 | 0.692028 | NA       |
| BX511250.1         | 0.638219549 | -2.807461932 | 2.539214  | -1.105642 | 0.268881 | NA       |
| BX571828.1         | 0.31598276  | 0.005883445  | 3.3523626 | 0.001755  | 0.9986   | NA       |
| pou3f3b            | 1360.891357 | -0.018315256 | 0.0827378 | -0.221365 | 0.824808 | 0.982196 |
| atp5fle            | 1724.689364 | 0.105469559  | 0.1217555 | 0.8662405 | 0.386358 | 0.89551  |
| BX664742.1         | 0 NA        | NA           | NA        | NA        | NA       | NA       |
| BX088696.2         | 1.145453202 | -0.38209434  | 1.8398115 | -0.207681 | 0.835478 | NA       |
| col18a1b           | 299.1790176 | 0.340130715  | 0.1245509 | 2.7308574 | 0.006317 | 0.121156 |
| si:ch211-57m13.10  | 1.477191074 | 4.017654067  | 1.8024171 | 2.2290369 | 0.025811 | NA       |
| prpf31             | 806.0850206 | 0.081560178  | 0.0883878 | 0.9227538 | 0.356136 | 0.883148 |
| BX927181.2         | 0.810062152 | 0.536965757  | 2.3785369 | 0.2257546 | 0.821392 | NA       |
| CR848047.1         | 1270.908332 | -0.130828066 | 0.0848236 | -1.542355 | 0.122987 | 0.65095  |
| AL928685.2         | 36.55183388 | 0.113400162  | 0.3170366 | 0.357688  | 0.720577 | 0.969364 |
| sat1a.2            | 1655.139548 | 0.073251958  | 0.1115241 | 0.6568264 | 0.511293 | 0.936253 |
| BX539325.1         | 1.338594115 | 1.65163228   | 1.7855437 | 0.9250024 | 0.354965 | NA       |
| si:ch211-149b19.4  | 48.50869174 | 0.080751221  | 0.2945566 | 0.274145  | 0.783973 | 0.97627  |
| si:dkey-229b18.3   | 397.339112  | 0.08209392   | 0.1116103 | 0.7355409 | 0.46201  | 0.922621 |
| si:ch1073-324l1.1  | 21.68001147 | -0.162407812 | 0.4096275 | -0.396477 | 0.691753 | 0.967305 |
| si:dkey-209n16.2   | 14.49249091 | 0.169237652  | 0.5434806 | 0.311396  | 0.7555   | 0.975318 |
| col6a3             | 10.29260504 | 0.538076874  | 0.6138624 | 0.8765431 | 0.380735 | NA       |
| CR450738.1         | 0.317831496 | 1.808837541  | 3.5779923 | 0.5055454 | 0.613176 | NA       |
| si:ch211-274k16.9  | 0 NA        | NA           | NA        | NA        | NA       | NA       |
| si:ch73-236e11.2   | 7.912713642 | -0.159561344 | 0.6986136 | -0.228397 | 0.819338 | NA       |
| AL929171.1         | 0.356300316 | 0.005884122  | 3.214964  | 0.0018302 | 0.99854  | NA       |
| si:ch1073-325m22.2 | 2845.670048 | -0.007972682 | 0.0808598 | -0.098599 | 0.921457 | 0.992138 |
| CR855300.1         | 108.7155776 | -0.032096705 | 0.1996571 | -0.160759 | 0.872283 | 0.987846 |

|                    |             |              |           |           |          |          |
|--------------------|-------------|--------------|-----------|-----------|----------|----------|
| si:dkey-258f14.7   | 0.157187365 | -0.955901296 | 4.0804729 | -0.234262 | 0.814781 | NA       |
| si:ch211-57m13.1   | 0.349228403 | 0.005884014  | 3.2372587 | 0.0018176 | 0.99855  | NA       |
| BX664742.2         | 0.871557666 | 0.705131062  | 2.2070113 | 0.3194959 | 0.74935  | NA       |
| myha               | 389.448176  | 0.648962692  | 0.1584653 | 4.0952992 | 4.22E-05 | 0.002358 |
| CU856621.1         | 0.649418021 | -1.460710349 | 2.4263694 | -0.602015 | 0.547164 | NA       |
| si:dkey-151m22.8   | 0.157187365 | -0.955901296 | 4.0804729 | -0.234262 | 0.814781 | NA       |
| tmem265            | 102.6768835 | -0.194650864 | 0.1953519 | -0.996411 | 0.31905  | 0.867746 |
| si:ch73-226113.2   | 14.43575834 | -0.320411913 | 0.5223757 | -0.613374 | 0.539629 | 0.94408  |
| si:dkey-19a16.12   | 1.328773011 | -0.730366326 | 1.5986317 | -0.45687  | 0.647765 | NA       |
| CT573247.1         | 2.023223612 | -0.941421312 | 1.4034182 | -0.670806 | 0.502344 | NA       |
| BX324207.1         | 5.687724652 | 0.499790397  | 0.8256271 | 0.6053464 | 0.544949 | NA       |
| si:ch73-103b2.1    | 1.767480521 | 0.240005077  | 1.5017509 | 0.1598168 | 0.873025 | NA       |
| CR936359.1         | 0           | NA           | NA        | NA        | NA       | NA       |
| si:ch73-341k19.1   | 44.32376033 | 0.265683925  | 0.3035669 | 0.8752072 | 0.381461 | 0.895192 |
| adkb               | 641.7708089 | 0.228635979  | 0.1059065 | 2.1588483 | 0.030862 | 0.33998  |
| BX511100.5         | 1.779775612 | -0.289480223 | 1.45627   | -0.198782 | 0.842433 | NA       |
| si:dkey-22i16.9    | 3.005554197 | -1.370733674 | 1.1560305 | -1.185725 | 0.235731 | NA       |
| BX465868.1         | 0           | NA           | NA        | NA        | NA       | NA       |
| BX890562.2         | 1.139989318 | 0.439423795  | 1.8430523 | 0.2384218 | 0.811554 | NA       |
| CR352226.4         | 0           | NA           | NA        | NA        | NA       | NA       |
| si:ch211-57m13.6   | 0           | NA           | NA        | NA        | NA       | NA       |
| BX571828.2         | 0.166657454 | -0.955901296 | 4.0804729 | -0.234262 | 0.814781 | NA       |
| BX927257.1         | 0.182570949 | 0.967652056  | 4.0804729 | 0.2371421 | 0.812547 | NA       |
| CU467655.1         | 29.51288283 | 0.728269566  | 0.3724109 | 1.9555536 | 0.050518 | 0.440643 |
| fhdc5              | 2.923459989 | 0.534733584  | 1.1796534 | 0.4532972 | 0.650335 | NA       |
| si:ch73-361h17.1   | 40.26668354 | 0.039051226  | 0.3179759 | 0.1228119 | 0.902256 | 0.990121 |
| BX005108.3         | 13.13454251 | -0.43441411  | 0.6293352 | -0.690275 | 0.490021 | 0.931926 |
| zgc:171699         | 0.341486697 | 1.892317624  | 3.2124068 | 0.5890654 | 0.555817 | NA       |
| AL590145.1         | 0           | NA           | NA        | NA        | NA       | NA       |
| erlin2             | 0           | NA           | NA        | NA        | NA       | NA       |
| si:ch73-106g13.1   | 10.07504237 | -0.180639319 | 0.6145849 | -0.293921 | 0.768818 | NA       |
| CU856621.2         | 5.922507671 | -0.978355302 | 0.8800029 | -1.111764 | 0.26624  | NA       |
| BX511100.6         | 0.688945432 | -0.015421672 | 2.3988056 | -0.006429 | 0.994871 | NA       |
| si:ch73-211113.2   | 377.8694057 | -0.018954367 | 0.1231727 | -0.153884 | 0.877701 | 0.987881 |
| si:ch73-261i21.2   | 1.710577264 | 0.023065194  | 1.4878009 | 0.0155029 | 0.987631 | NA       |
| CU469420.3         | 2.143268195 | -0.241278784 | 1.3326509 | -0.181052 | 0.856327 | NA       |
| si:ch211-161n3.5   | 4.81748333  | 0.340684153  | 0.9311622 | 0.3658698 | 0.714462 | NA       |
| CR391978.1         | 0           | NA           | NA        | NA        | NA       | NA       |
| AL807749.1         | 0           | NA           | NA        | NA        | NA       | NA       |
| si:ch211-64i20.5_2 | 0           | NA           | NA        | NA        | NA       | NA       |
| AL935166.1         | 102.3516636 | -0.272780745 | 0.2023896 | -1.3478   | 0.177723 | 0.738343 |
| BX469910.1         | 0           | NA           | NA        | NA        | NA       | NA       |
| znf1073            | 8.694907088 | 0.597923794  | 0.6570651 | 0.9099917 | 0.362827 | NA       |
| CR383662.4         | 1.681028097 | -1.234623942 | 1.5615249 | -0.790653 | 0.429147 | NA       |
| BX323801.1         | 0.889079191 | 3.262746891  | 2.2913259 | 1.4239558 | 0.154459 | NA       |
| znf1112            | 14.30250916 | -0.013723    | 0.5179249 | -0.026496 | 0.978862 | 0.996762 |
| CR388052.1         | 27.04932765 | 0.287397407  | 0.3935878 | 0.7301989 | 0.465269 | 0.923717 |
| si:dkey-29j8.2     | 5.957158246 | -0.177931236 | 0.8821441 | -0.201703 | 0.840149 | NA       |
| si:dkey-240n22.8   | 7.923520214 | -0.858212597 | 0.682005  | -1.258367 | 0.208259 | NA       |
| atp5md             | 1069.322616 | -0.183078853 | 0.2498251 | -0.732828 | 0.463663 | 0.922875 |
| CT027801.1         | 2.762120739 | -0.512131646 | 1.1539238 | -0.443818 | 0.657174 | NA       |
| BX901962.1         | 0           | NA           | NA        | NA        | NA       | NA       |
| si:dkey-21h14.15   | 0           | NA           | NA        | NA        | NA       | NA       |
| si:dkeyp-4f2.3     | 19.11052903 | -0.299129819 | 0.4546901 | -0.657876 | 0.510618 | 0.936253 |

|                    |             |              |           |           |          |          |
|--------------------|-------------|--------------|-----------|-----------|----------|----------|
| znf1115            | 25.03062923 | -0.037135541 | 0.395675  | -0.093854 | 0.925225 | 0.992676 |
| znf1146            | 1.662947089 | 0.022927706  | 1.4800892 | 0.0154908 | 0.987641 | NA       |
| BX649337.1         | 1.467249618 | 0.931888212  | 1.6630798 | 0.5603388 | 0.575248 | NA       |
| BX005012.3         | 2.584185499 | 0.694490974  | 1.3012088 | 0.5337275 | 0.59353  | NA       |
| si:ch211-178j18.4  | 0           | NA           | NA        | NA        | NA       | NA       |
| si:dkey-4e4.1      | 13.86895493 | 0.141352505  | 0.5058626 | 0.2794287 | 0.779916 | 0.976146 |
| si:dkey-262g12.7   | 17.27581078 | -0.278642961 | 0.4517966 | -0.616744 | 0.537403 | 0.943336 |
| si:ch73-6k14.2     | 97.36174994 | 0.341099821  | 0.2169004 | 1.5726101 | 0.115809 | 0.637943 |
| si:ch73-289h5.5    | 0           | NA           | NA        | NA        | NA       | NA       |
| si:ch211-214j24.14 | 234.4860067 | -0.068135479 | 0.1395856 | -0.488127 | 0.62546  | 0.957354 |
| BX784029.1         | 0           | NA           | NA        | NA        | NA       | NA       |
| si:ch211-162i8.2   | 2.276132826 | -0.041240912 | 1.3267094 | -0.031085 | 0.975202 | NA       |
| BX548032.2         | 0.182570949 | 0.967652056  | 4.0804729 | 0.2371421 | 0.812547 | NA       |
| si:ch73-263o4.4    | 75.216812   | 0.201013788  | 0.2288944 | 0.8781945 | 0.379838 | 0.895192 |
| BX649307.1         | 40.45117788 | -0.026401159 | 0.3212412 | -0.082185 | 0.9345   | 0.992702 |
| si:dkey-21h14.3    | 0.500282092 | 2.45023829   | 2.5970012 | 0.9434876 | 0.345432 | NA       |
| CR788248.1         | 0           | NA           | NA        | NA        | NA       | NA       |
| ccl39a.10          | 0           | NA           | NA        | NA        | NA       | NA       |
| si:dkey-191j3.1    | 5.937816895 | -0.177563784 | 0.774843  | -0.229161 | 0.818744 | NA       |
| si:dkeyp-100h4.4   | 0.507044276 | -2.459587493 | 2.7586536 | -0.89159  | 0.372613 | NA       |
| si:dkey-156k2.7    | 0           | NA           | NA        | NA        | NA       | NA       |
| BX957333.1         | 0           | NA           | NA        | NA        | NA       | NA       |
| si:dkeyp-100h4.7   | 0           | NA           | NA        | NA        | NA       | NA       |
| taar20i            | 0.698456806 | 0.09172817   | 2.5265115 | 0.0363063 | 0.971038 | NA       |
| BX927253.1         | 0           | NA           | NA        | NA        | NA       | NA       |
| coll19a1           | 17.8601071  | -0.27334975  | 0.4578418 | -0.59704  | 0.550481 | 0.946549 |
| BX649516.2         | 0.166657454 | -0.955901296 | 4.0804729 | -0.234262 | 0.814781 | NA       |
| BX649516.3         | 0.340386822 | -1.882368278 | 3.2159502 | -0.585323 | 0.558331 | NA       |
| CR381686.3         | 0           | NA           | NA        | NA        | NA       | NA       |
| LRRC56             | 16.49457978 | 0.248072504  | 0.4868443 | 0.5095521 | 0.610365 | 0.95688  |
| si:dkey-21h14.8    | 31.85878696 | 0.434049532  | 0.3434771 | 1.2636927 | 0.20634  | 0.774011 |
| si:dkey-256i11.6   | 0.547712847 | 2.559541715  | 2.9076406 | 0.8802813 | 0.378707 | NA       |
| si:ch211-208g1.1   | 0.166657454 | -0.955901296 | 4.0804729 | -0.234262 | 0.814781 | NA       |
| taar20j            | 0           | NA           | NA        | NA        | NA       | NA       |
| taar20a            | 0.323844819 | -1.825095364 | 3.274639  | -0.557342 | 0.577293 | NA       |
| BX927253.2         | 8.244327063 | -0.466961488 | 0.6693078 | -0.697678 | 0.485378 | NA       |
| BX548032.3         | 69.28712785 | -0.054805517 | 0.2477234 | -0.221237 | 0.824908 | 0.982196 |
| buc                | 2.152391767 | 0.263881274  | 1.2940365 | 0.203921  | 0.838415 | NA       |
| si:dkeyp-98a7.4    | 0           | NA           | NA        | NA        | NA       | NA       |
| BX649399.1         | 0           | NA           | NA        | NA        | NA       | NA       |
| BX465862.2         | 2.23130091  | -0.00402286  | 1.3767331 | -0.002922 | 0.997669 | NA       |
| BX000981.5         | 0.530029684 | -0.939524117 | 2.7937867 | -0.336291 | 0.736652 | NA       |
| BX957333.2         | 0           | NA           | NA        | NA        | NA       | NA       |
| CU326364.1         | 1.782724223 | 1.405699597  | 1.4922252 | 0.9420157 | 0.346185 | NA       |
| BX942819.3         | 0.522329263 | 0.999930388  | 2.8066578 | 0.3562709 | 0.721638 | NA       |
| BX649516.4         | 5.633634618 | -0.671646721 | 0.7939643 | -0.845941 | 0.397586 | NA       |
| si:dkeyp-100h4.2   | 0           | NA           | NA        | NA        | NA       | NA       |
| zgc:123278         | 2.615221348 | 0.33986507   | 1.1563676 | 0.2939075 | 0.768829 | NA       |
| CU570689.1         | 0           | NA           | NA        | NA        | NA       | NA       |
| BX784029.2         | 0           | NA           | NA        | NA        | NA       | NA       |
| ost4               | 447.7131814 | -0.410506945 | 0.1495495 | -2.744957 | 0.006052 | 0.117821 |
| CR392001.2         | 0.157187365 | -0.955901296 | 4.0804729 | -0.234262 | 0.814781 | NA       |
| si:ch73-266f23.3   | 131.2765409 | -0.250987949 | 0.1836191 | -1.366894 | 0.171658 | 0.730287 |
| CR381686.4         | 1.694543416 | -0.576433298 | 1.4371675 | -0.40109  | 0.688354 | NA       |

|                   |             |              |           |           |          |          |
|-------------------|-------------|--------------|-----------|-----------|----------|----------|
| BX469910.2        | 0.158915748 | 0.967652056  | 4.0804729 | 0.2371421 | 0.812547 | NA       |
| BX649349.2        | 0.157187365 | -0.955901296 | 4.0804729 | -0.234262 | 0.814781 | NA       |
| BX119963.1        | 12.9939105  | -0.251093296 | 0.5284202 | -0.475177 | 0.634661 | 0.9578   |
| CR388190.1        | 0 NA        | NA           | NA        | NA        | NA       | NA       |
| zgc:173624        | 29.71046586 | -0.304802959 | 0.3649373 | -0.83522  | 0.403594 | 0.900979 |
| CR388378.1        | 0.665211163 | 0.04738924   | 2.3079847 | 0.0205327 | 0.983618 | NA       |
| CR388052.2        | 0.514116189 | -2.475533565 | 2.7461255 | -0.901464 | 0.367342 | NA       |
| BX465862.3        | 3.805476467 | -0.646204398 | 0.9647922 | -0.669786 | 0.502994 | NA       |
| CU469420.4        | 5.975817603 | -0.190220759 | 0.8076251 | -0.235531 | 0.813797 | NA       |
| si:dkey-21h14.9   | 3.492510346 | -0.139895615 | 1.0216297 | -0.136934 | 0.891083 | NA       |
| CU695141.1        | 0 NA        | NA           | NA        | NA        | NA       | NA       |
| si:dkey-21h14.12  | 0.339758314 | 0.005883863  | 3.2682461 | 0.0018003 | 0.998564 | NA       |
| BX469918.1        | 0.166657454 | -0.955901296 | 4.0804729 | -0.234262 | 0.814781 | NA       |
| BX927135.1        | 0.365141898 | 1.973577737  | 3.3927314 | 0.5817076 | 0.560764 | NA       |
| BX664605.1        | 0 NA        | NA           | NA        | NA        | NA       | NA       |
| taar20g           | 0 NA        | NA           | NA        | NA        | NA       | NA       |
| taar20b           | 0 NA        | NA           | NA        | NA        | NA       | NA       |
| FP015809.1        | 0 NA        | NA           | NA        | NA        | NA       | NA       |
| znf1113           | 2.356889534 | 0.084018267  | 1.2934489 | 0.0649568 | 0.948208 | NA       |
| CU469524.1        | 0 NA        | NA           | NA        | NA        | NA       | NA       |
| si:dkey-21h14.12  | 0.679983498 | -1.527277543 | 2.5551009 | -0.597737 | 0.550016 | NA       |
| si:dkey-247i3.5   | 6.236430567 | 0.583597076  | 0.7714155 | 0.7565276 | 0.449333 | NA       |
| si:dkey-21h14.10  | 0 NA        | NA           | NA        | NA        | NA       | NA       |
| CT027801.2        | 2.860267333 | 1.309207479  | 1.19596   | 1.0946917 | 0.273652 | NA       |
| si:dkey-54j5.2    | 3.622946803 | -0.803326313 | 0.9844146 | -0.816045 | 0.414475 | NA       |
| CR381664.1        | 0 NA        | NA           | NA        | NA        | NA       | NA       |
| si:ch211-112b1.2  | 2.935021932 | 0.96305317   | 1.1805639 | 0.8157569 | 0.414639 | NA       |
| CR381664.2        | 0 NA        | NA           | NA        | NA        | NA       | NA       |
| BX649518.1        | 0 NA        | NA           | NA        | NA        | NA       | NA       |
| si:ch73-263o4.3   | 0.339758314 | 0.005883863  | 3.2682461 | 0.0018003 | 0.998564 | NA       |
| si:dkeyp-100h4.8  | 0 NA        | NA           | NA        | NA        | NA       | NA       |
| znf1050           | 16.49645733 | -0.197289767 | 0.4991575 | -0.395246 | 0.692662 | 0.96736  |
| si:ch211-197k17.3 | 297.6856411 | 0.019366601  | 0.1356611 | 0.1427572 | 0.886482 | 0.988936 |
| CR293502.1        | 1.014439566 | 0.061150899  | 1.9310049 | 0.0316679 | 0.974737 | NA       |
| si:dkey-51d8.9    | 9.082260333 | -1.034600036 | 0.6379788 | -1.621684 | 0.104871 | NA       |
| BX784029.3        | 0.317831496 | 1.808837541  | 3.5779923 | 0.5055454 | 0.613176 | NA       |
| si:ch211-245n8.4  | 25.38632829 | -0.19635723  | 0.3965397 | -0.495177 | 0.620475 | 0.957354 |
| nr6ala            | 0 NA        | NA           | NA        | NA        | NA       | NA       |
| znf1072           | 0.961274223 | -2.176123588 | 2.1499397 | -1.012179 | 0.311453 | NA       |
| si:dkey-260c8.8   | 21.64500636 | -0.332157233 | 0.4165469 | -0.797407 | 0.425215 | 0.908835 |
| BX548046.1        | 0.173729368 | -0.955901296 | 4.0804729 | -0.234262 | 0.814781 | NA       |
| si:dkey-260c8.6   | 4.781996652 | -0.501132016 | 0.8541198 | -0.586723 | 0.55739  | NA       |
| tac4              | 0 NA        | NA           | NA        | NA        | NA       | NA       |
| BX936397.1        | 3.299263622 | -0.558861362 | 1.0363901 | -0.539238 | 0.589722 | NA       |
| pimr206           | 0 NA        | NA           | NA        | NA        | NA       | NA       |
| si:dkey-3d18.5    | 2.801139995 | 0.194813883  | 1.1550565 | 0.1686618 | 0.866063 | NA       |
| FP017151.1        | 8.804028527 | -0.26553725  | 0.6311389 | -0.420727 | 0.673954 | NA       |
| ighv7-1           | 0 NA        | NA           | NA        | NA        | NA       | NA       |
| si:ch211-76123.4  | 400.2766187 | 0.408637317  | 0.132027  | 3.0951033 | 0.001967 | 0.052931 |
| ighv1-3           | 0 NA        | NA           | NA        | NA        | NA       | NA       |
| ighv4-3           | 0 NA        | NA           | NA        | NA        | NA       | NA       |
| CU633478.1        | 0.982063136 | -1.030975913 | 1.9824747 | -0.520045 | 0.603032 | NA       |
| ighd              | 0 NA        | NA           | NA        | NA        | NA       | NA       |
| aplml             | 1491.423058 | 0.072555476  | 0.0975001 | 0.7441579 | 0.456781 | 0.921215 |

|                   |             |              |           |           |          |          |
|-------------------|-------------|--------------|-----------|-----------|----------|----------|
| CT573429.2        | 2.594552787 | -0.001580917 | 1.181351  | -0.001338 | 0.998932 | NA       |
| artna             | 0           | NA           | NA        | NA        | NA       | NA       |
| ighv8-1           | 0           | NA           | NA        | NA        | NA       | NA       |
| BX548060.1        | 3.288253285 | -0.03222391  | 1.045262  | -0.030829 | 0.975406 | NA       |
| si:ch73-367p23.2  | 21310.93091 | 0.318054219  | 0.0812076 | 3.916559  | 8.98E-05 | 0.004474 |
| si:dkey-15f23.1   | 0.317831496 | 1.808837541  | 3.5779923 | 0.5055454 | 0.613176 | NA       |
| ighv4-1           | 0           | NA           | NA        | NA        | NA       | NA       |
| BX908803.1        | 0.157187365 | -0.955901296 | 4.0804729 | -0.234262 | 0.814781 | NA       |
| CU862078.1        | 0.813556947 | -1.876896976 | 2.1385771 | -0.877638 | 0.38014  | NA       |
| or124-4           | 0           | NA           | NA        | NA        | NA       | NA       |
| BX247899.1        | 0           | NA           | NA        | NA        | NA       | NA       |
| BX510989.1        | 9.879866371 | 1.210214521  | 0.6287828 | 1.924694  | 0.054268 | NA       |
| ighv5-2           | 0           | NA           | NA        | NA        | NA       | NA       |
| ighv4-7           | 0           | NA           | NA        | NA        | NA       | NA       |
| CR388364.1        | 6.92428858  | -0.148505188 | 0.723408  | -0.205286 | 0.837349 | NA       |
| BX548046.2        | 63.39029898 | -0.181643618 | 0.2496877 | -0.727483 | 0.46693  | 0.924328 |
| 7-Mar             | 132.1409885 | -0.154576943 | 0.1762366 | -0.877099 | 0.380433 | 0.895192 |
| si:dkey-3n22.9    | 11.94484752 | 0.160194825  | 0.5465126 | 0.2931219 | 0.769429 | 0.975687 |
| si:ch211-251g8.5  | 0           | NA           | NA        | NA        | NA       | NA       |
| ighv4-2           | 0           | NA           | NA        | NA        | NA       | NA       |
| ighv6-1           | 0           | NA           | NA        | NA        | NA       | NA       |
| CR786578.1        | 0           | NA           | NA        | NA        | NA       | NA       |
| nkD3              | 0.476747244 | 2.393381959  | 3.0525537 | 0.7840589 | 0.433006 | NA       |
| ighz              | 0.987447952 | -2.180143481 | 2.1065994 | -1.034911 | 0.30071  | NA       |
| CU695199.1        | 0.339758314 | 0.005883863  | 3.2682461 | 0.0018003 | 0.998564 | NA       |
| BX005368.1        | 1.612179921 | -1.230089424 | 1.6172772 | -0.760593 | 0.4469   | NA       |
| BX510989.2        | 0           | NA           | NA        | NA        | NA       | NA       |
| BX323555.3        | 0.173729368 | -0.955901296 | 4.0804729 | -0.234262 | 0.814781 | NA       |
| ighv4-8           | 0           | NA           | NA        | NA        | NA       | NA       |
| AL929243.1        | 69.02452565 | 0.486716055  | 0.2431545 | 2.0016743 | 0.04532  | 0.418148 |
| ighj1-2           | 0           | NA           | NA        | NA        | NA       | NA       |
| BX649612.1        | 0.967826695 | 2.172518087  | 2.1451904 | 1.012739  | 0.311185 | NA       |
| CR936968.1        | 0.807543623 | 0.548915946  | 2.1288858 | 0.2578419 | 0.796529 | NA       |
| CR954285.1        | 0           | NA           | NA        | NA        | NA       | NA       |
| CR786578.2        | 0.524057646 | 2.503896172  | 2.7289583 | 0.9175282 | 0.358866 | NA       |
| CR847785.1        | 3.480497245 | 0.159394757  | 1.0755009 | 0.1482051 | 0.882181 | NA       |
| ighv1-4           | 0           | NA           | NA        | NA        | NA       | NA       |
| ighv6-2           | 0           | NA           | NA        | NA        | NA       | NA       |
| btr31             | 19.26308425 | -0.278594705 | 0.4481047 | -0.621718 | 0.534127 | 0.943276 |
| si:ch73-269m14.3  | 0           | NA           | NA        | NA        | NA       | NA       |
| si:ch1073-342h5.2 | 61.31363475 | -0.042119762 | 0.268142  | -0.15708  | 0.875182 | 0.987881 |
| si:ch73-379f7.5   | 12.88992735 | -0.087106564 | 0.5357048 | -0.162602 | 0.870832 | 0.987683 |
| ighv5-4           | 0           | NA           | NA        | NA        | NA       | NA       |
| AL627258.1        | 0           | NA           | NA        | NA        | NA       | NA       |
| wu:fj64h06        | 109.1654421 | 0.324798512  | 0.2001339 | 1.6229063 | 0.104609 | 0.612567 |
| si:dkey-211g8.8   | 0.687845557 | -2.894878771 | 2.482332  | -1.166193 | 0.243536 | NA       |
| BX957317.2        | 14.38009576 | -0.09430196  | 0.4933809 | -0.191134 | 0.84842  | 0.985174 |
| FP236454.1        | 0.497574187 | -2.437446738 | 2.6012773 | -0.937019 | 0.348749 | NA       |
| ighv10-1          | 0           | NA           | NA        | NA        | NA       | NA       |
| CU571254.1        | 4.015558471 | -0.974719357 | 0.9927193 | -0.981868 | 0.326165 | NA       |
| ighv5-8           | 0           | NA           | NA        | NA        | NA       | NA       |
| si:ch211-239j9.1  | 717.5989005 | -0.002196445 | 0.0934311 | -0.023509 | 0.981244 | 0.996944 |
| CR352253.1        | 0           | NA           | NA        | NA        | NA       | NA       |
| ighj2-1           | 0           | NA           | NA        | NA        | NA       | NA       |



|                   |             |              |           |           |          |          |
|-------------------|-------------|--------------|-----------|-----------|----------|----------|
| si:ch73-379f7.4   | 1.679891435 | 0.058551884  | 1.5481587 | 0.0378203 | 0.969831 | NA       |
| BX571681.4        | 1.35741394  | 1.61342852   | 1.8633764 | 0.8658629 | 0.386565 | NA       |
| CU695077.1        | 0 NA        | NA           | NA        | NA        | NA       | NA       |
| ighv4-9           | 0 NA        | NA           | NA        | NA        | NA       | NA       |
| cd16412           | 112.6063265 | 0.076496592  | 0.2003255 | 0.3818615 | 0.702564 | 0.968134 |
| ighj2-5           | 0 NA        | NA           | NA        | NA        | NA       | NA       |
| si:ch73-248e21.7  | 13.46062677 | 0.108657648  | 0.5121791 | 0.2121478 | 0.831992 | 0.98349  |
| ighv4-6           | 0 NA        | NA           | NA        | NA        | NA       | NA       |
| BX323079.1        | 0.158915748 | 0.967652056  | 4.0804729 | 0.2371421 | 0.812547 | NA       |
| ighv5-1           | 0 NA        | NA           | NA        | NA        | NA       | NA       |
| CR792438.1        | 4.773025669 | 0.723510502  | 0.9318318 | 0.7764389 | 0.43749  | NA       |
| ighv8-2           | 0 NA        | NA           | NA        | NA        | NA       | NA       |
| ighv5-5           | 0 NA        | NA           | NA        | NA        | NA       | NA       |
| ighv4-5           | 0 NA        | NA           | NA        | NA        | NA       | NA       |
| si:ch211-85n16.3  | 128.0150553 | 0.087420724  | 0.1827459 | 0.478373  | 0.632385 | 0.957356 |
| CR792426.1        | 0.157187365 | -0.955901296 | 4.0804729 | -0.234262 | 0.814781 | NA       |
| ighv1-2           | 0 NA        | NA           | NA        | NA        | NA       | NA       |
| ighj1-1           | 0 NA        | NA           | NA        | NA        | NA       | NA       |
| BX957260.1        | 0.333314908 | -1.858695402 | 3.5126701 | -0.52914  | 0.596708 | NA       |
| ighv1-4           | 0.954322662 | -2.166551746 | 2.1536321 | -1.005999 | 0.314416 | NA       |
| FP236809.1        | 0 NA        | NA           | NA        | NA        | NA       | NA       |
| ighv3-2           | 0 NA        | NA           | NA        | NA        | NA       | NA       |
| BX957344.1        | 0.339758314 | 0.005883863  | 3.2682461 | 0.0018003 | 0.998564 | NA       |
| eppkl             | 75.46879131 | -0.438009757 | 0.2588404 | -1.6922   | 0.090608 | 0.576398 |
| si:ch211-229c8.14 | 0 NA        | NA           | NA        | NA        | NA       | NA       |
| BX927298.1        | 0.862554446 | -0.606014613 | 2.2108469 | -0.27411  | 0.784    | NA       |
| si:ch211-195m9.3  | 54.62467203 | 0.112530017  | 0.2620891 | 0.4293579 | 0.667663 | 0.964736 |
| ighj2-3           | 0 NA        | NA           | NA        | NA        | NA       | NA       |
| fnbp1b            | 1.463792852 | -0.354987176 | 1.5721664 | -0.225795 | 0.821361 | NA       |
| neu3.5            | 5.165131442 | 0.694657888  | 0.8423384 | 0.824678  | 0.409554 | NA       |
| CT573133.2        | 0 NA        | NA           | NA        | NA        | NA       | NA       |
| ighv13-2          | 0 NA        | NA           | NA        | NA        | NA       | NA       |
| BX936397.2        | 13.54055121 | -0.066043333 | 0.5277094 | -0.125151 | 0.900404 | 0.990121 |
| 7-Mar             | 300.1539833 | 0.095683028  | 0.124914  | 0.7659912 | 0.443682 | 0.916631 |
| ighv2-3           | 0.182570949 | 0.967652056  | 4.0804729 | 0.2371421 | 0.812547 | NA       |
| BX890590.1        | 0.158795395 | 0.967652056  | 4.0804729 | 0.2371421 | 0.812547 | NA       |
| defb12            | 0 NA        | NA           | NA        | NA        | NA       | NA       |
| neu3.4            | 0.831947685 | -0.652557682 | 2.2169958 | -0.294343 | 0.768496 | NA       |
| neu3.1            | 103.0882018 | -0.194598306 | 0.1937184 | -1.004542 | 0.315117 | 0.866156 |
| BX572622.1        | 0 NA        | NA           | NA        | NA        | NA       | NA       |
| si:ch211-162i14.1 | 0.173729368 | -0.955901296 | 4.0804729 | -0.234262 | 0.814781 | NA       |
| ighv9-3           | 0 NA        | NA           | NA        | NA        | NA       | NA       |
| ighv1-1           | 0 NA        | NA           | NA        | NA        | NA       | NA       |
| ighv5-3           | 0 NA        | NA           | NA        | NA        | NA       | NA       |
| sox4a             | 0 NA        | NA           | NA        | NA        | NA       | NA       |
| ighv4-3           | 0 NA        | NA           | NA        | NA        | NA       | NA       |
| ighv11-1          | 0 NA        | NA           | NA        | NA        | NA       | NA       |
| BX511272.1        | 1.354036242 | 0.016210196  | 1.6287563 | 0.0099525 | 0.992059 | NA       |
| si:ch211-276a17.5 | 89.71849477 | 0.48727667   | 0.2245047 | 2.170452  | 0.029973 | 0.335036 |
| AL935145.1        | 0 NA        | NA           | NA        | NA        | NA       | NA       |
| CU570787.1        | 2.040435407 | -1.51651584  | 1.4625685 | -1.036885 | 0.299789 | NA       |
| CT027638.1        | 0.158915748 | 0.967652056  | 4.0804729 | 0.2371421 | 0.812547 | NA       |
| ighv2-1           | 0 NA        | NA           | NA        | NA        | NA       | NA       |
| ighv11-2          | 0 NA        | NA           | NA        | NA        | NA       | NA       |

|                   |             |              |           |           |          |          |
|-------------------|-------------|--------------|-----------|-----------|----------|----------|
| CR792438.2        | 1.981998812 | 1.613635914  | 1.4278015 | 1.1301542 | 0.258411 | NA       |
| si:dkey-261j15.2  | 180.5685963 | -0.132782706 | 0.1518485 | -0.874442 | 0.381878 | 0.895192 |
| si:ch211-15j1.7   | 4.506090743 | -0.535077398 | 0.8932246 | -0.59904  | 0.549146 | NA       |
| CU074421.1        | 0 NA        | NA           | NA        | NA        | NA       | NA       |
| rafla             | 72.26961864 | -0.063448253 | 0.2308529 | -0.274843 | 0.783437 | 0.97627  |
| BX470238.1        | 10.01279136 | 0.622815704  | 0.608414  | 1.023671  | 0.305991 | NA       |
| ighv14-1          | 0 NA        | NA           | NA        | NA        | NA       | NA       |
| CU659670.1        | 325.190044  | 0.060368076  | 0.1226454 | 0.4922163 | 0.622566 | 0.957354 |
| CR936968.2        | 107.4686576 | 0.057116075  | 0.1889971 | 0.302206  | 0.762495 | 0.975374 |
| BX324146.1        | 240.7046482 | 0.044000054  | 0.138892  | 0.3167934 | 0.7514   | 0.97419  |
| pimr205           | 0.158795395 | 0.967652056  | 4.0804729 | 0.2371421 | 0.812547 | NA       |
| ighv2-2           | 0 NA        | NA           | NA        | NA        | NA       | NA       |
| si:dkey-217d24.6  | 285.5499913 | -0.311592294 | 0.127909  | -2.436047 | 0.014849 | 0.223115 |
| BX663606.1        | 3.557744617 | 0.458893979  | 1.038345  | 0.4419475 | 0.658527 | NA       |
| ighv9-1           | 0 NA        | NA           | NA        | NA        | NA       | NA       |
| rock2b            | 46.45566167 | 1.643239735  | 0.3155886 | 5.2069046 | 1.92E-07 | 2.47E-05 |
| BX901907.1        | 0.166657454 | -0.955901296 | 4.0804729 | -0.234262 | 0.814781 | NA       |
| AL845295.1        | 0.173729368 | -0.955901296 | 4.0804729 | -0.234262 | 0.814781 | NA       |
| BX005275.1        | 0 NA        | NA           | NA        | NA        | NA       | NA       |
| si:dkey-26h11.1   | 0 NA        | NA           | NA        | NA        | NA       | NA       |
| si:ch211-214p16.3 | 34.89081531 | 0.586935319  | 0.3388393 | 1.7321937 | 0.083239 | 0.556259 |
| AL929009.1        | 0 NA        | NA           | NA        | NA        | NA       | NA       |
| BX005461.1        | 0.31759079  | 1.807926197  | 3.579045  | 0.5051421 | 0.613459 | NA       |
| si:ch211-194e1.7  | 12.94675129 | 0.226454515  | 0.5255747 | 0.4308702 | 0.666563 | 0.964736 |
| CR391935.1        | 0.31759079  | 1.807926197  | 3.579045  | 0.5051421 | 0.613459 | NA       |
| si:ch211-196f5.9  | 58.75562015 | -0.230170217 | 0.2559934 | -0.899126 | 0.368586 | 0.888057 |
| CR383672.2        | 1.705852197 | 2.016319027  | 1.6838861 | 1.1974201 | 0.231143 | NA       |
| apl2              | 280.6348131 | -0.323003866 | 0.1307933 | -2.469575 | 0.013527 | 0.208651 |
| BX005275.2        | 1.306338038 | 0.741623717  | 1.7640738 | 0.420404  | 0.67419  | NA       |
| si:dkey-118j18.2  | 543.9467649 | -0.027757279 | 0.1078315 | -0.257414 | 0.79686  | 0.978569 |
| si:dkey-26h11.2   | 0 NA        | NA           | NA        | NA        | NA       | NA       |
| CR450696.1        | 0 NA        | NA           | NA        | NA        | NA       | NA       |
| CR382294.1        | 0.847782112 | 0.655103352  | 2.1028616 | 0.3115295 | 0.755398 | NA       |
| BX571664.1        | 0 NA        | NA           | NA        | NA        | NA       | NA       |
| si:dkeyp-82h4.1   | 1.665706323 | 0.021681786  | 1.5779834 | 0.0137402 | 0.989037 | NA       |
| FP103106.1        | 1.842930485 | -1.373238437 | 1.4574523 | -0.942218 | 0.346081 | NA       |
| si:ch211-246n15.2 | 0 NA        | NA           | NA        | NA        | NA       | NA       |
| BX571825.13       | 0 NA        | NA           | NA        | NA        | NA       | NA       |
| AL845295.2        | 0 NA        | NA           | NA        | NA        | NA       | NA       |
| mcat              | 0 NA        | NA           | NA        | NA        | NA       | NA       |
| BX571825.14       | 0 NA        | NA           | NA        | NA        | NA       | NA       |
| BX901907.2        | 1.288455455 | -0.74775726  | 1.6799295 | -0.445112 | 0.656239 | NA       |
| CU914550.1        | 1.80395351  | -0.214910589 | 1.5039205 | -0.1429   | 0.886369 | NA       |
| si:dkey-16p19.8   | 0 NA        | NA           | NA        | NA        | NA       | NA       |
| BX571825.15       | 0 NA        | NA           | NA        | NA        | NA       | NA       |
| si:ch211-181p13.2 | 2.945557646 | -2.332905933 | 1.2703563 | -1.836419 | 0.066296 | NA       |
| BX901907.3        | 0 NA        | NA           | NA        | NA        | NA       | NA       |
| BX248324.1        | 132.3321085 | 0.272028641  | 0.1902772 | 1.4296437 | 0.152819 | 0.701776 |
| si:ch211-73m21.1  | 0.157187365 | -0.955901296 | 4.0804729 | -0.234262 | 0.814781 | NA       |
| BX901907.4        | 0.325452849 | 0.005883619  | 3.3177086 | 0.0017734 | 0.998585 | NA       |
| BX571825.16       | 0 NA        | NA           | NA        | NA        | NA       | NA       |
| BX571705.1        | 3.044446312 | 1.847553833  | 1.2127755 | 1.5234096 | 0.127656 | NA       |
| si:dkey-22h13.3   | 7.566820809 | -0.384262059 | 0.6828715 | -0.562715 | 0.573629 | NA       |
| BX324003.1        | 0.158795395 | 0.967652056  | 4.0804729 | 0.2371421 | 0.812547 | NA       |

|                   |             |              |           |           |          |          |
|-------------------|-------------|--------------|-----------|-----------|----------|----------|
| BX088688.1        | 121.6778762 | -0.302845275 | 0.1876246 | -1.614103 | 0.106505 | 0.615567 |
| BX927068.1        | 0 NA        |              | NA        | NA        | NA       | NA       |
| BX890559.2        | 0 NA        |              | NA        | NA        | NA       | NA       |
| si:ch73-10311.2   | 53.58392094 | -0.552476935 | 0.2697197 | -2.048337 | 0.040527 | 0.393799 |
| si:dkey-58j15.11  | 2.487984498 | -0.158914286 | 1.2417172 | -0.127979 | 0.898165 | NA       |
| si:ch211-1f22.8   | 1.967972083 | -0.443319144 | 1.3568954 | -0.326716 | 0.743883 | NA       |
| BX322618.1        | 675.9060446 | -0.032043927 | 0.1032712 | -0.310289 | 0.756341 | 0.975374 |
| si:dkey-27j5.9    | 1.030981568 | 0.030822112  | 1.9223158 | 0.0160338 | 0.987207 | NA       |
| BX842692.1        | 0.158795395 | 0.967652056  | 4.0804729 | 0.2371421 | 0.812547 | NA       |
| BX547930.2        | 0.158795395 | 0.967652056  | 4.0804729 | 0.2371421 | 0.812547 | NA       |
| si:ch211-286b5.2  | 4.8141847   | -0.084259839 | 0.8647521 | -0.097438 | 0.922378 | NA       |
| si:dkey-58j15.10  | 1.005048545 | -0.006083169 | 1.9358873 | -0.003142 | 0.997493 | NA       |
| CT033796.1        | 6.461493527 | -0.848805139 | 0.7868554 | -1.078731 | 0.280708 | NA       |
| irbpl             | 19.93614148 | 0.350177198  | 0.4238688 | 0.8261452 | 0.408722 | 0.90171  |
| AL929349.1        | 0 NA        |              | NA        | NA        | NA       | NA       |
| CR626889.1        | 1.291094336 | -0.753462392 | 1.8405577 | -0.409366 | 0.682271 | NA       |
| si:ch211-176g6.1  | 0.471562095 | -2.373056629 | 3.0645586 | -0.774355 | 0.438721 | NA       |
| si:ch73-94k4.5    | 0 NA        |              | NA        | NA        | NA       | NA       |
| AL928650.2        | 0 NA        |              | NA        | NA        | NA       | NA       |
| BX548015.2        | 3.67127677  | -0.271420755 | 1.020737  | -0.265907 | 0.790311 | NA       |
| si:ch73-236c18.9  | 70.01947614 | -0.266047503 | 0.245104  | -1.085448 | 0.277723 | 0.841383 |
| AL929396.1        | 2.337748693 | 0.022497347  | 1.2351387 | 0.0182144 | 0.985468 | NA       |
| si:dkey-202c14.3  | 5.279695442 | 0.735023563  | 0.9096143 | 0.8080607 | 0.419056 | NA       |
| r1tgr             | 495.7619458 | -0.545498494 | 0.1117644 | -4.88079  | 1.06E-06 | 0.000106 |
| si:dkey-27j5.10   | 0.157187365 | -0.955901296 | 4.0804729 | -0.234262 | 0.814781 | NA       |
| CR854964.1        | 0 NA        |              | NA        | NA        | NA       | NA       |
| CU469541.1        | 0.330916733 | -1.849579229 | 3.2489867 | -0.569279 | 0.569167 | NA       |
| BX088688.2        | 5.876191826 | 0.930866703  | 0.8158614 | 1.1409619 | 0.253886 | NA       |
| BX901898.1        | 0.325452849 | 0.005883619  | 3.3177086 | 0.0017734 | 0.998585 | NA       |
| BX901942.1        | 0.663603133 | -1.440371613 | 2.4108786 | -0.597447 | 0.550209 | NA       |
| BX649533.1        | 0.349228403 | 0.005884014  | 3.2372587 | 0.0018176 | 0.99855  | NA       |
| si:ch211-1f22.7   | 0 NA        |              | NA        | NA        | NA       | NA       |
| CR774189.1        | 2.347886315 | -0.386006999 | 1.2928486 | -0.298571 | 0.765267 | NA       |
| si:ch211-191a16.5 | 7.930780261 | -0.509134972 | 0.6905842 | -0.737253 | 0.460969 | NA       |
| nrp2a             | 1515.56101  | 0.008083673  | 0.0785914 | 0.102857  | 0.918076 | 0.991623 |
| CR925879.1        | 1.132127259 | 1.350278378  | 2.0029569 | 0.6741425 | 0.500221 | NA       |
| rac11             | 2.366988131 | -0.365285818 | 1.2345287 | -0.295891 | 0.767313 | NA       |
| CR774192.1        | 0.182570949 | 0.967652056  | 4.0804729 | 0.2371421 | 0.812547 | NA       |
| BX681416.1        | 0 NA        |              | NA        | NA        | NA       | NA       |
| BX248126.1        | 0 NA        |              | NA        | NA        | NA       | NA       |
| si:dkey-25o16.4   | 342.9758172 | -0.009296681 | 0.1231498 | -0.075491 | 0.939824 | 0.992857 |
| CT573186.2        | 0 NA        |              | NA        | NA        | NA       | NA       |
| si:dkey-19f4.2    | 0 NA        |              | NA        | NA        | NA       | NA       |
| CR556696.1        | 8.183972462 | 0.193679434  | 0.7163822 | 0.2703577 | 0.786885 | NA       |
| CU986306.1        | 0 NA        |              | NA        | NA        | NA       | NA       |
| BX649231.1        | 0.865423989 | 3.229020164  | 2.1645875 | 1.4917485 | 0.135765 | NA       |
| wu:fj29h11        | 325.2324267 | -0.173540955 | 0.1312082 | -1.322638 | 0.185956 | 0.75038  |
| BX322603.1        | 0.182570949 | 0.967652056  | 4.0804729 | 0.2371421 | 0.812547 | NA       |
| CU915827.1        | 4.962598513 | -0.571460603 | 0.8798152 | -0.649523 | 0.516    | NA       |
| CR392024.1        | 1.03927371  | 2.26599918   | 2.0825649 | 1.088081  | 0.276559 | NA       |
| zgc:165656        | 26.34219199 | -0.744829139 | 0.3789141 | -1.965694 | 0.049334 | 0.435504 |
| si:ch211-155o21.4 | 6.536895418 | -0.216701744 | 0.7657834 | -0.28298  | 0.777192 | NA       |
| BX470128.1        | 0.473170125 | -0.833888596 | 2.9014002 | -0.287409 | 0.773799 | NA       |
| BX248418.1        | 70.52376965 | 0.042191886  | 0.2313362 | 0.1823834 | 0.855282 | 0.985174 |

|                    |             |              |           |           |          |          |
|--------------------|-------------|--------------|-----------|-----------|----------|----------|
| si:dkey-27j5.7     | 0.173729368 | -0.955901296 | 4.0804729 | -0.234262 | 0.814781 | NA       |
| CR382370.1         | 0           | NA           | NA        | NA        | NA       | NA       |
| FP067451.1         | 1.206600957 | 0.476016095  | 1.9191448 | 0.2480355 | 0.804107 | NA       |
| si:ch211-152f2.4   | 0.347458735 | -1.908042286 | 3.4571486 | -0.551912 | 0.581009 | NA       |
| si:dkey-182i3.9    | 14.54116657 | -0.084884344 | 0.4982036 | -0.170381 | 0.864711 | 0.986052 |
| si:ch211-286b5.6   | 1.134337053 | 2.462221963  | 2.0582167 | 1.196289  | 0.231584 | NA       |
| adgre9             | 1.778678993 | 0.758118305  | 1.6257845 | 0.4663092 | 0.640994 | NA       |
| cul4a              | 778.9768656 | 0.029883338  | 0.1006608 | 0.2968715 | 0.766565 | 0.97561  |
| si:dkey-9c18.3     | 0           | NA           | NA        | NA        | NA       | NA       |
| BX323590.3         | 0.349228403 | 0.005884014  | 3.2372587 | 0.0018176 | 0.99855  | NA       |
| AL928835.1         | 1.006226492 | -2.236625194 | 2.0993903 | -1.065369 | 0.286709 | NA       |
| BX004779.1         | 0.476626891 | 2.395187592  | 2.815932  | 0.8505843 | 0.395    | NA       |
| si:ch211-1f22.9    | 0           | NA           | NA        | NA        | NA       | NA       |
| MFAP4 (1 of many)  | 0.158915748 | 0.967652056  | 4.0804729 | 0.2371421 | 0.812547 | NA       |
| itgam              | 1.809646813 | 0.774154744  | 1.4887092 | 0.5200174 | 0.603051 | NA       |
| adgre15            | 1.022611355 | 2.264378702  | 2.0087475 | 1.127259  | 0.259633 | NA       |
| BX088594.1         | 0           | NA           | NA        | NA        | NA       | NA       |
| BX908780.2         | 0.166657454 | -0.955901296 | 4.0804729 | -0.234262 | 0.814781 | NA       |
| CR478288.1         | 0           | NA           | NA        | NA        | NA       | NA       |
| lratb.1            | 86.22328933 | -0.174831101 | 0.2361743 | -0.740263 | 0.459141 | 0.921978 |
| BX296516.1         | 0           | NA           | NA        | NA        | NA       | NA       |
| si:ch1073-228b5.2  | 96.20124849 | 0.129754826  | 0.2069446 | 0.6270027 | 0.530657 | 0.942209 |
| BX322618.2         | 0           | NA           | NA        | NA        | NA       | NA       |
| AL928650.3         | 2.90638125  | -1.353498497 | 1.1917493 | -1.135724 | 0.256072 | NA       |
| si:ch1073-357b18.4 | 66.84742742 | 0.180299188  | 0.2473815 | 0.7288304 | 0.466105 | 0.923865 |
| bmb                | 38.9284883  | 0.371843776  | 0.323216  | 1.1504497 | 0.249959 | 0.819849 |
| si:ch73-94k4.4     | 0           | NA           | NA        | NA        | NA       | NA       |
| CR626902.1         | 0.682732688 | 2.892275314  | 2.4663977 | 1.1726719 | 0.240927 | NA       |
| BX649499.2         | 0           | NA           | NA        | NA        | NA       | NA       |
| BX465225.1         | 0           | NA           | NA        | NA        | NA       | NA       |
| CU929161.1         | 0           | NA           | NA        | NA        | NA       | NA       |
| si:ch73-212j7.3    | 14.63914403 | -0.329892911 | 0.5113705 | -0.645115 | 0.518853 | 0.938919 |
| si:dkey-182i3.10   | 69.14745677 | -0.142777006 | 0.2353294 | -0.606711 | 0.544043 | 0.945438 |
| BX469930.2         | 0           | NA           | NA        | NA        | NA       | NA       |
| si:ch211-255p10.3  | 1217.17886  | 0.06575682   | 0.1092161 | 0.6020797 | 0.547121 | 0.945526 |
| BX469908.1         | 2.451900306 | 1.412415922  | 1.3018513 | 1.0849288 | 0.277953 | NA       |
| BX000534.1         | 0.476386185 | 2.392464142  | 3.0533824 | 0.7835455 | 0.433307 | NA       |
| si:ch211-1f22.10   | 0           | NA           | NA        | NA        | NA       | NA       |
| tubel              | 0.805815241 | -0.598842605 | 2.1324592 | -0.280823 | 0.778847 | NA       |
| si:dkey-27j5.6     | 0.316103113 | 0.005883447  | 3.3519121 | 0.0017553 | 0.9986   | NA       |
| adgre16            | 1.306605487 | -0.046335721 | 1.6599707 | -0.027914 | 0.977731 | NA       |
| si:ch211-1f22.13   | 0.323844819 | -1.825095364 | 3.274639  | -0.557342 | 0.577293 | NA       |
| si:dkey-187i8.2    | 1.630680968 | 1.266303401  | 1.7120746 | 0.739631  | 0.459524 | NA       |
| si:ch211-286b5.8   | 3.234958387 | 1.503826065  | 1.1225045 | 1.339706  | 0.180341 | NA       |
| CU914144.1         | 33.55848671 | -0.031572878 | 0.339889  | -0.092892 | 0.92599  | 0.992702 |
| BX908780.3         | 0           | NA           | NA        | NA        | NA       | NA       |
| buc21              | 2.005852438 | -0.474736504 | 1.3528245 | -0.350922 | 0.725647 | NA       |
| BX908756.1         | 0           | NA           | NA        | NA        | NA       | NA       |
| MED9               | 194.3074914 | 0.059135574  | 0.1525785 | 0.3875747 | 0.698331 | 0.967998 |
| CR382370.2         | 748.2862484 | 0.249900273  | 0.1017898 | 2.4550619 | 0.014086 | 0.214639 |
| si:ch73-94k4.1     | 0           | NA           | NA        | NA        | NA       | NA       |
| si:ch211-122h15.4  | 4.709802615 | 1.330412252  | 0.9266945 | 1.4356535 | 0.151101 | NA       |
| si:dkey-11c5.11    | 25.14130899 | 0.253241516  | 0.4177627 | 0.6061851 | 0.544392 | 0.945438 |
| BX510992.2         | 1.51134396  | -0.296330036 | 1.4961018 | -0.198068 | 0.842992 | NA       |

|                   |             |              |           |           |          |          |
|-------------------|-------------|--------------|-----------|-----------|----------|----------|
| BX276101.1        | 16.03562176 | 0.190134515  | 0.4984382 | 0.3814605 | 0.702862 | 0.968134 |
| BX649471.1        | 0 NA        | NA           | NA        | NA        | NA       | NA       |
| AL954187.1        | 0 NA        | NA           | NA        | NA        | NA       | NA       |
| BX908780.4        | 1.358520603 | -2.711649253 | 1.8448862 | -1.469819 | 0.141611 | NA       |
| adgre18           | 0.831198824 | 0.593716313  | 2.0278563 | 0.2927803 | 0.76969  | NA       |
| si:ch211-131k2.2  | 12.86258813 | -0.142393672 | 0.532858  | -0.267226 | 0.789295 | 0.977058 |
| BX296520.1        | 0 NA        | NA           | NA        | NA        | NA       | NA       |
| BX908780.5        | 0 NA        | NA           | NA        | NA        | NA       | NA       |
| adgre19           | 0.973452217 | 1.035664467  | 1.98712   | 0.5211887 | 0.602235 | NA       |
| si:dkey-27j5.11   | 0 NA        | NA           | NA        | NA        | NA       | NA       |
| gpr108            | 1172.76354  | -0.03527904  | 0.0866319 | -0.407229 | 0.68384  | 0.965679 |
| si:dkey-119m7.8   | 132.9917948 | 0.661955694  | 0.1926376 | 3.4362749 | 0.00059  | 0.020129 |
| BX901920.1        | 675.8220591 | -0.088667449 | 0.1110174 | -0.798681 | 0.424476 | 0.908494 |
| si:ch211-1f22.6   | 0 NA        | NA           | NA        | NA        | NA       | NA       |
| BX547930.3        | 0.166657454 | -0.955901296 | 4.0804729 | -0.234262 | 0.814781 | NA       |
| si:dkey-4p15.4    | 0.166657454 | -0.955901296 | 4.0804729 | -0.234262 | 0.814781 | NA       |
| si:ch211-286b5.5  | 472.932033  | -0.030482206 | 0.1216901 | -0.25049  | 0.802208 | 0.979492 |
| abcc3             | 556.8210467 | -0.05914098  | 0.11817   | -0.500474 | 0.616742 | 0.956881 |
| si:dkey-249p7.4   | 2.941743078 | -1.370898796 | 1.1534601 | -1.18851  | 0.234633 | NA       |
| cx134c            | 0.158795395 | 0.967652056  | 4.0804729 | 0.2371421 | 0.812547 | NA       |
| si:ch211-202n12.2 | 4.114456338 | 0.11405482   | 0.9583265 | 0.1190146 | 0.905264 | NA       |
| si:ch211-1f22.2   | 0.490502273 | -2.421143305 | 2.7891168 | -0.868068 | 0.385357 | NA       |
| hemgn             | 220.9319447 | -0.071851238 | 0.1543799 | -0.465418 | 0.641632 | 0.959994 |
| MZT1              | 260.1893382 | 0.106439604  | 0.1526999 | 0.6970508 | 0.485771 | 0.930598 |
| si:ch73-301j1.1   | 4.320870622 | 0.868470345  | 1.0159595 | 0.8548277 | 0.392647 | NA       |
| si:ch211-1f22.16  | 0.974991223 | -1.022830706 | 2.0964916 | -0.487877 | 0.625637 | NA       |
| si:dkey-27j5.10   | 0 NA        | NA           | NA        | NA        | NA       | NA       |
| BX296562.1        | 0 NA        | NA           | NA        | NA        | NA       | NA       |
| AL845365.1        | 0 NA        | NA           | NA        | NA        | NA       | NA       |
| CR450698.1        | 0.317711143 | 1.810477155  | 3.2978238 | 0.5489915 | 0.583011 | NA       |
| BX004780.1        | 0.659318192 | 2.852076546  | 2.5139723 | 1.1344901 | 0.256589 | NA       |
| AL929237.3        | 3.356044113 | -0.534094346 | 1.0608196 | -0.503473 | 0.614632 | NA       |
| BX927123.1        | 0.31598276  | 0.005883445  | 3.3523626 | 0.001755  | 0.9986   | NA       |
| si:dkey-1f1.3     | 6.576427501 | -0.019938494 | 0.7451374 | -0.026758 | 0.978653 | NA       |
| BX928755.1        | 0.158915748 | 0.967652056  | 4.0804729 | 0.2371421 | 0.812547 | NA       |
| CR385078.2        | 0 NA        | NA           | NA        | NA        | NA       | NA       |
| BX927300.1        | 2.292325057 | -1.309420028 | 1.3233486 | -0.989475 | 0.322431 | NA       |
| CU565528.1        | 0 NA        | NA           | NA        | NA        | NA       | NA       |
| CR382372.1        | 19.25422569 | 0.158087134  | 0.4273713 | 0.3699058 | 0.711453 | 0.969006 |
| CT573003.1        | 47.12493821 | 0.522929186  | 0.2995058 | 1.7459734 | 0.080816 | 0.550801 |
| rgs7b             | 55.05686637 | -0.190536007 | 0.2673791 | -0.712606 | 0.476089 | 0.926338 |
| CU660013.1        | 4.918234308 | -0.069690157 | 0.8737117 | -0.079763 | 0.936425 | NA       |
| si:dkey-66i24.9   | 60.02844452 | -0.379274762 | 0.2493964 | -1.520771 | 0.128317 | 0.658954 |
| CR376838.1        | 0 NA        | NA           | NA        | NA        | NA       | NA       |
| CU929359.1        | 0.31759079  | 1.807926197  | 3.579045  | 0.5051421 | 0.613459 | NA       |
| CR388157.1        | 0.904013163 | 2.00662374   | 2.339454  | 0.8577316 | 0.391041 | NA       |
| CU914156.1        | 0 NA        | NA           | NA        | NA        | NA       | NA       |
| AL928716.1        | 0 NA        | NA           | NA        | NA        | NA       | NA       |
| CR932360.1        | 0 NA        | NA           | NA        | NA        | NA       | NA       |
| BX072570.1        | 0.689615224 | -1.495598879 | 2.3854835 | -0.626958 | 0.530687 | NA       |
| BX119915.1        | 0 NA        | NA           | NA        | NA        | NA       | NA       |
| AL928920.2        | 0 NA        | NA           | NA        | NA        | NA       | NA       |
| FP565451.1        | 2.963278591 | -1.417134629 | 1.2972411 | -1.092422 | 0.274648 | NA       |
| si:dkey-21e13.3   | 102.8256196 | -0.003017853 | 0.2081491 | -0.014499 | 0.988432 | 0.997476 |

|                    |             |              |           |           |          |          |
|--------------------|-------------|--------------|-----------|-----------|----------|----------|
| CU550702.1         | 0.80047171  | 0.566096181  | 2.1350079 | 0.2651495 | 0.790894 | NA       |
| si:dkey-1h6.8      | 13.33374311 | 0.530288725  | 0.5428993 | 0.9767717 | 0.328682 | 0.872945 |
| BX001014.1         | 0.967008811 | -0.023866834 | 1.9569279 | -0.012196 | 0.990269 | NA       |
| CR847530.1         | 0.173729368 | -0.955901296 | 4.0804729 | -0.234262 | 0.814781 | NA       |
| CR388421.1         | 0.476386185 | 2.392464142  | 3.0533824 | 0.7835455 | 0.433307 | NA       |
| BX469896.1         | 9.713576858 | 0.120012174  | 0.6444203 | 0.1862328 | 0.852262 | NA       |
| si:dkeyp-104f11.8  | 7.792416224 | -0.430122351 | 0.7026513 | -0.612142 | 0.540444 | NA       |
| BX255913.1         | 0 NA        | NA           | NA        | NA        | NA       | NA       |
| BX470246.1         | 0.792489298 | 1.851487174  | 2.2731551 | 0.814501  | 0.415358 | NA       |
| si:ch211-194k22.8  | 503.505139  | -0.123079353 | 0.1090831 | -1.128309 | 0.25919  | 0.82755  |
| si:dkey-193p11.2   | 379.8228735 | 0.272789217  | 0.1394204 | 1.9565945 | 0.050395 | 0.439877 |
| CR388040.1         | 60.65574596 | 0.095155708  | 0.2701756 | 0.3521995 | 0.724689 | 0.970402 |
| si:dkey-66i24.7    | 58.48005867 | 0.129776018  | 0.2556341 | 0.5076631 | 0.61169  | 0.95688  |
| si:dkeyp-104f11.9  | 0 NA        | NA           | NA        | NA        | NA       | NA       |
| hmx3b              | 8.83207182  | -0.342652619 | 0.7298524 | -0.469482 | 0.638725 | NA       |
| AL732488.1         | 278.5449377 | 0.136021841  | 0.1341392 | 1.0140347 | 0.310566 | 0.86284  |
| BX323889.1         | 20.78874019 | 0.089850848  | 0.4335422 | 0.2072482 | 0.835816 | 0.984089 |
| CR352342.1         | 0 NA        | NA           | NA        | NA        | NA       | NA       |
| si:rp71-1c10.11    | 118.1328774 | 0.362153438  | 0.1996181 | 1.8142316 | 0.069642 | 0.514805 |
| si:dkey-16i5.8     | 15.89440675 | -0.053745638 | 0.5318722 | -0.10105  | 0.919511 | 0.991651 |
| CU660013.2         | 2.338378196 | 1.308032533  | 1.3486442 | 0.969887  | 0.332103 | NA       |
| BX248238.1         | 0.325573202 | 0.005883621  | 3.3172783 | 0.0017736 | 0.998585 | NA       |
| si:dkey-21c1.1     | 282.1025956 | 0.227027163  | 0.1321579 | 1.7178478 | 0.085824 | 0.56251  |
| si:ch211-250m6.2   | 0.341486697 | 1.892317624  | 3.2124068 | 0.5890654 | 0.555817 | NA       |
| CT737227.1         | 10.24927676 | 0.396434626  | 0.6068067 | 0.6533128 | 0.513555 | NA       |
| cpn1               | 0 NA        | NA           | NA        | NA        | NA       | NA       |
| CR385078.3         | 0 NA        | NA           | NA        | NA        | NA       | NA       |
| BX569783.1         | 1.513580497 | -0.354123196 | 1.5602609 | -0.226964 | 0.820452 | NA       |
| CR847530.2         | 0.166657454 | -0.955901296 | 4.0804729 | -0.234262 | 0.814781 | NA       |
| BX255897.1         | 0 NA        | NA           | NA        | NA        | NA       | NA       |
| BX855623.1         | 3.554421656 | 0.254472898  | 1.1018926 | 0.2309416 | 0.81736  | NA       |
| BX255963.1         | 0.682853041 | 2.891318346  | 2.3286279 | 1.2416403 | 0.214369 | NA       |
| BX248390.1         | 2.338497554 | -0.417012027 | 1.2361301 | -0.337353 | 0.735851 | NA       |
| CR749163.2         | 2.769848899 | 0.119127006  | 1.2637627 | 0.0942637 | 0.9249   | NA       |
| si:zfos-911d5.4    | 3.927184907 | 0.250728274  | 0.9773726 | 0.2565329 | 0.797539 | NA       |
| si:dkey-219e21.2   | 31.19214741 | -1.100355254 | 0.4373075 | -2.516205 | 0.011863 | 0.191219 |
| CR405682.1         | 0.31598276  | 0.005883445  | 3.3523626 | 0.001755  | 0.9986   | NA       |
| BX088644.1         | 0.158795395 | 0.967652056  | 4.0804729 | 0.2371421 | 0.812547 | NA       |
| CU469493.1         | 0 NA        | NA           | NA        | NA        | NA       | NA       |
| si:dkey-2211.1     | 0 NA        | NA           | NA        | NA        | NA       | NA       |
| AL928824.2         | 0 NA        | NA           | NA        | NA        | NA       | NA       |
| CR385078.4         | 0 NA        | NA           | NA        | NA        | NA       | NA       |
| CR381684.1         | 0 NA        | NA           | NA        | NA        | NA       | NA       |
| BX296562.2         | 0 NA        | NA           | NA        | NA        | NA       | NA       |
| asb2a.1            | 5.305456784 | 1.359826017  | 0.8466096 | 1.6062019 | 0.10823  | NA       |
| NDUF8              | 66.20921099 | -0.173855176 | 0.2462763 | -0.705936 | 0.480228 | 0.927347 |
| BX001014.2         | 24.01244137 | -0.167922898 | 0.4043409 | -0.4153   | 0.677922 | 0.965257 |
| BX842669.1         | 1.35144869  | -2.705106269 | 1.8223791 | -1.484382 | 0.137708 | NA       |
| CU459210.1         | 0 NA        | NA           | NA        | NA        | NA       | NA       |
| AL928824.3         | 0.31437473  | -1.788572922 | 3.5930657 | -0.497785 | 0.618636 | NA       |
| CU570682.1         | 0.158915748 | 0.967652056  | 4.0804729 | 0.2371421 | 0.812547 | NA       |
| si:ch211-202p1.5   | 1.665973772 | -0.602291113 | 1.6154293 | -0.372837 | 0.70927  | NA       |
| si:ch211-196c10.13 | 62.4988744  | -0.616298279 | 0.2746954 | -2.24357  | 0.02486  | 0.303822 |
| si:ch73-205h11.1   | 4.973160271 | 2.30910207   | 1.0065379 | 2.2941034 | 0.021785 | NA       |

|                   |             |              |           |           |          |          |
|-------------------|-------------|--------------|-----------|-----------|----------|----------|
| BX901952.1        |             | 0 NA         | NA        | NA        | NA       | NA       |
| BX255913.2        | 1.047874586 | 3.504465839  | 2.1494511 | 1.6304003 | 0.103017 | NA       |
| si:rp71-1c10.8    | 1.735091635 | 1.274647451  | 1.6049595 | 0.7941929 | 0.427083 | NA       |
| CT573006.1        | 2.333742488 | -0.378236254 | 1.2239999 | -0.309017 | 0.757309 | NA       |
| si:dkey-61p9.11   | 35.43856263 | 0.048262428  | 0.4298109 | 0.1122876 | 0.910595 | 0.990817 |
| CU694525.1        |             | 0 NA         | NA        | NA        | NA       | NA       |
| BX510919.1        | 0.31437473  | -1.788572922 | 3.5930657 | -0.497785 | 0.618636 | NA       |
| pimr124           | 0.643043639 | 1.435364982  | 2.5984886 | 0.5523846 | 0.580685 | NA       |
| BX510920.1        |             | 0 NA         | NA        | NA        | NA       | NA       |
| BX255897.2        |             | 0 NA         | NA        | NA        | NA       | NA       |
| CR932077.1        | 5.356351093 | 0.357352259  | 0.837478  | 0.4267005 | 0.669598 | NA       |
| CU571074.1        | 975.794548  | -0.208746009 | 0.092494  | -2.25686  | 0.024017 | 0.299249 |
| BX510319.1        | 0.968977899 | 0.950295762  | 2.2382818 | 0.4245648 | 0.671154 | NA       |
| pimr128           | 0.839689391 | -1.918726865 | 2.219847  | -0.864351 | 0.387395 | NA       |
| BX088686.1        | 2.488331015 | -0.610996786 | 1.2334899 | -0.49534  | 0.62036  | NA       |
| BX119992.1        | 0.641555962 | -0.014184532 | 2.3335058 | -0.006079 | 0.99515  | NA       |
| CCDC189           | 2.289809784 | 0.430675828  | 1.2669057 | 0.3399431 | 0.733899 | NA       |
| AL928920.3        | 0.341486697 | 1.892317624  | 3.2124068 | 0.5890654 | 0.555817 | NA       |
| BX294177.1        |             | 0 NA         | NA        | NA        | NA       | NA       |
| CR932360.2        | 0.182570949 | 0.967652056  | 4.0804729 | 0.2371421 | 0.812547 | NA       |
| CR932362.1        | 1.190997191 | 2.512992113  | 1.9069703 | 1.317793  | 0.187573 | NA       |
| si:dkey-148d16.5  |             | 0 NA         | NA        | NA        | NA       | NA       |
| CU929359.2        | 15.48964421 | 0.442841692  | 0.515844  | 0.8584798 | 0.390628 | 0.897545 |
| CU660013.3        | 0.332524763 | 0.005883742  | 3.292841  | 0.0017868 | 0.998574 | NA       |
| si:ch211-28p3.3   | 12.40542312 | -0.570978556 | 0.5554945 | -1.027874 | 0.304009 | 0.858414 |
| selp              | 0.31437473  | -1.788572922 | 3.5930657 | -0.497785 | 0.618636 | NA       |
| CR352243.1        |             | 0 NA         | NA        | NA        | NA       | NA       |
| BX248238.2        | 0.158795395 | 0.967652056  | 4.0804729 | 0.2371421 | 0.812547 | NA       |
| BX569801.2        | 0.789273238 | -0.566394988 | 2.2706407 | -0.249443 | 0.803018 | NA       |
| si:ch73-344o19.1  | 78.45845545 | 0.169273544  | 0.2206535 | 0.7671465 | 0.442994 | 0.916336 |
| BX004999.1        | 30.5251381  | 0.099111373  | 0.4075526 | 0.2431867 | 0.807861 | 0.980642 |
| BX842240.1        | 0.166657454 | -0.955901296 | 4.0804729 | -0.234262 | 0.814781 | NA       |
| BX119915.2        | 3.135949369 | -2.43731969  | 1.2890138 | -1.890841 | 0.058646 | NA       |
| CR848736.1        | 18.32122907 | 0.43175853   | 0.449655  | 0.9601996 | 0.336955 | 0.876088 |
| CR751608.1        | 0.325573202 | 0.005883621  | 3.3172783 | 0.0017736 | 0.998585 | NA       |
| si:ch73-127m5.2   | 346.5930858 | 0.084405547  | 0.1188564 | 0.7101474 | 0.477613 | 0.926857 |
| BX322665.3        | 0.157187365 | -0.955901296 | 4.0804729 | -0.234262 | 0.814781 | NA       |
| BX004803.1        |             | 0 NA         | NA        | NA        | NA       | NA       |
| si:ch211-277e21.1 | 2.411311893 | 0.040878467  | 1.3279644 | 0.0307828 | 0.975443 | NA       |
| si:dkeyp-13d11.1  |             | 0 NA         | NA        | NA        | NA       | NA       |
| CU660013.4        | 286.9257613 | -0.028609632 | 0.1315863 | -0.217421 | 0.82788  | 0.982721 |
| si:dkey-219e21.4  | 19.61337959 | 0.43447446   | 0.4431049 | 0.9805228 | 0.326828 | 0.872658 |
| BX119915.3        | 0.481032184 | -2.398473301 | 2.80721   | -0.854398 | 0.392885 | NA       |
| BX957286.1        |             | 0 NA         | NA        | NA        | NA       | NA       |
| si:dkey-287g12.6  | 86.25255447 | 0.02310727   | 0.2140652 | 0.107945  | 0.914039 | 0.991119 |
| si:ch211-168b3.2  | 62.07388616 | -1.038687186 | 0.2639108 | -3.93575  | 8.29E-05 | 0.004184 |
| BX279523.1        | 35.00713949 | -5.095868642 | 0.6570559 | -7.755609 | 8.79E-15 | 4.35E-12 |
| AL833789.1        | 0.971534457 | -3.409585359 | 2.1825892 | -1.562175 | 0.118247 | NA       |
| AL928920.4        | 0.182570949 | 0.967652056  | 4.0804729 | 0.2371421 | 0.812547 | NA       |
| BX901968.1        |             | 0 NA         | NA        | NA        | NA       | NA       |
| si:dkeyp-106c3.2  | 1.315257692 | -1.612412619 | 1.7573009 | -0.917551 | 0.358854 | NA       |
| CR854832.1        | 0.5046461   | -2.45370851  | 2.7629627 | -0.888072 | 0.374502 | NA       |
| zgc:136683        |             | 0 NA         | NA        | NA        | NA       | NA       |
| CR396584.1        | 1.65689248  | 1.165419669  | 1.5944899 | 0.7309044 | 0.464838 | NA       |

|                   |             |              |           |           |          |          |
|-------------------|-------------|--------------|-----------|-----------|----------|----------|
| si:ch211-256e16.7 | 1.971696297 | -0.0155606   | 1.3945315 | -0.011158 | 0.991097 | NA       |
| CR847898.1        | 3.877819438 | -1.193215828 | 0.9964981 | -1.197409 | 0.231147 | NA       |
| BX571796.1        | 0.317831496 | 1.808837541  | 3.5779923 | 0.5055454 | 0.613176 | NA       |
| CU914157.1        | 21.22097859 | 0.715003001  | 0.4754746 | 1.5037669 | 0.132641 | 0.667222 |
| BX323575.1        | 0 NA        | NA           | NA        | NA        | NA       | NA       |
| BX279523.2        | 0 NA        | NA           | NA        | NA        | NA       | NA       |
| si:ch73-144d13.7  | 27.81183625 | -0.260762046 | 0.3733915 | -0.698361 | 0.484951 | 0.93001  |
| blvrb             | 258.0161173 | 0.095204844  | 0.1590493 | 0.5985871 | 0.549448 | 0.946312 |
| mhc1lja           | 6.213028528 | 0.140244165  | 0.8069313 | 0.1737994 | 0.862023 | NA       |
| CR774195.1        | 0 NA        | NA           | NA        | NA        | NA       | NA       |
| BX569793.1        | 22.31549445 | 0.016728118  | 0.4624009 | 0.0361767 | 0.971141 | 0.996315 |
| CR391963.1        | 62.45891502 | 0.394332134  | 0.2454985 | 1.6062508 | 0.108219 | 0.620087 |
| si:ch211-155k24.9 | 47.7992164  | -0.212311785 | 0.2898213 | -0.732561 | 0.463826 | 0.922875 |
| CR450814.1        | 0.341486697 | 1.892317624  | 3.2124068 | 0.5890654 | 0.555817 | NA       |
| AL807792.1        | 2.168184909 | 0.735148348  | 1.3438971 | 0.5470273 | 0.58436  | NA       |
| CU013548.1        | 3.347628116 | -1.254966004 | 1.0912412 | -1.150035 | 0.250129 | NA       |
| CR848791.1        | 0 NA        | NA           | NA        | NA        | NA       | NA       |
| CU929322.1        | 0.946580956 | -0.97691498  | 2.2566655 | -0.432902 | 0.665086 | NA       |
| CU929206.1        | 2.853033782 | 1.282631816  | 1.1830709 | 1.0841546 | 0.278296 | NA       |
| CT573157.1        | 0 NA        | NA           | NA        | NA        | NA       | NA       |
| zgc:193593        | 265.8292488 | 0.610754611  | 0.1490277 | 4.0982637 | 4.16E-05 | 0.002345 |
| BX927351.1        | 0 NA        | NA           | NA        | NA        | NA       | NA       |
| BX649487.1        | 0 NA        | NA           | NA        | NA        | NA       | NA       |
| CU855854.1        | 0.489712128 | -0.887840729 | 2.693685  | -0.329601 | 0.741702 | NA       |
| CR855311.2        | 1.852710304 | 0.290918308  | 1.3642227 | 0.2132484 | 0.831133 | NA       |
| si:dkey-16p21.8   | 2026.288327 | 0.170832945  | 0.0903196 | 1.8914276 | 0.058567 | 0.473924 |
| BX957346.1        | 291.2800169 | -0.036478791 | 0.1318601 | -0.276648 | 0.782051 | 0.97627  |
| znf1143           | 67.06132607 | -0.370932795 | 0.2534864 | -1.463324 | 0.143379 | 0.686804 |
| BX572077.1        | 9.108503929 | -0.29234107  | 0.6558387 | -0.445751 | 0.655777 | NA       |
| si:ch73-1f23.1    | 2.625372516 | -1.101237991 | 1.2518451 | -0.879692 | 0.379026 | NA       |
| BX649324.1        | 5.398601198 | 0.625845094  | 0.9398732 | 0.6658825 | 0.505486 | NA       |
| znf1012           | 11.59104769 | 0.041385845  | 0.6245322 | 0.066267  | 0.947165 | 0.99381  |
| CU469362.1        | 72.34435951 | 0.109364837  | 0.2257818 | 0.4843828 | 0.628114 | 0.957354 |
| BX927361.1        | 0.339758314 | 0.005883863  | 3.2682461 | 0.0018003 | 0.998564 | NA       |
| si:ch211-286b4.4  | 15.61189716 | 0.622379934  | 0.5061638 | 1.2296019 | 0.218846 | 0.785734 |
| CU207301.1        | 0 NA        | NA           | NA        | NA        | NA       | NA       |
| CR936975.1        | 0.325452849 | 0.005883619  | 3.3177086 | 0.0017734 | 0.998585 | NA       |
| si:ch73-38013.4   | 2.917528393 | 0.025233912  | 1.1832348 | 0.0213262 | 0.982985 | NA       |
| CR790362.1        | 2.285885901 | 1.868135679  | 1.5016923 | 1.2440203 | 0.213492 | NA       |
| CR457444.1        | 0 NA        | NA           | NA        | NA        | NA       | NA       |
| CR931780.1        | 4.025650279 | 0.503726018  | 0.931972  | 0.5404948 | 0.588856 | NA       |
| c1mn              | 43.18628597 | 0.27439179   | 0.3042469 | 0.9018721 | 0.367125 | 0.887458 |
| CR385026.1        | 0.166657454 | -0.955901296 | 4.0804729 | -0.234262 | 0.814781 | NA       |
| CT583650.1        | 0.499972362 | -2.44370697  | 3.0013188 | -0.814211 | 0.415524 | NA       |
| si:dkey-33c3.1    | 3.434871928 | -0.657588907 | 1.1476359 | -0.572994 | 0.566649 | NA       |
| BX511245.1        | 0 NA        | NA           | NA        | NA        | NA       | NA       |
| CU467963.1        | 1.133906971 | -0.442920623 | 1.9523852 | -0.226861 | 0.820532 | NA       |
| CR626887.1        | 1.353218358 | -1.510769436 | 1.7691256 | -0.853964 | 0.393125 | NA       |
| tmem1761.3b       | 420.5744342 | -0.160665006 | 0.1138748 | -1.410892 | 0.158277 | 0.709224 |
| BX294110.1        | 0.340386822 | -1.882368278 | 3.2159502 | -0.585323 | 0.558331 | NA       |
| CR847984.1        | 8.536301195 | -0.869560073 | 0.6686732 | -1.300426 | 0.193455 | NA       |
| CR759918.1        | 273.534345  | 0.030313116  | 0.1362661 | 0.2224553 | 0.823959 | 0.982196 |
| BX323807.1        | 0 NA        | NA           | NA        | NA        | NA       | NA       |
| CU462980.1        | 38.53546543 | 0.452212789  | 0.3235846 | 1.39751   | 0.16226  | 0.716781 |



|                   |             |              |           |           |          |          |
|-------------------|-------------|--------------|-----------|-----------|----------|----------|
| pimr28            | 0.339758314 | 0.005883863  | 3.2682461 | 0.0018003 | 0.998564 | NA       |
| BX322538.1        | 0.522329263 | 0.999930388  | 2.8066578 | 0.3562709 | 0.721638 | NA       |
| CU638693.1        | 1.180306874 | 0.442800236  | 1.7391297 | 0.2546102 | 0.799024 | NA       |
| AL953866.1        | 3.90803161  | 0.935925957  | 0.9828249 | 0.9522815 | 0.340954 | NA       |
| CR388164.2        | 1.17819069  | 0.530495249  | 1.9330381 | 0.274436  | 0.78375  | NA       |
| CR381618.1        | 583.5085303 | -0.006213597 | 0.0998782 | -0.062212 | 0.950394 | 0.99381  |
| serpinb114        | 22.78894717 | -0.805683097 | 0.4365892 | -1.845403 | 0.064979 | 0.497901 |
| CT033825.1        | 218.8336572 | -0.001548332 | 0.1442818 | -0.010731 | 0.991438 | 0.997679 |
| FP102794.1        | 0           | NA           | NA        | NA        | NA       | NA       |
| CR774184.1        | 0           | NA           | NA        | NA        | NA       | NA       |
| CR450848.1        | 0.332645115 | 0.005883744  | 3.2924249 | 0.0017871 | 0.998574 | NA       |
| CU628002.1        | 0           | NA           | NA        | NA        | NA       | NA       |
| BX004991.1        | 77.37770669 | -0.013157952 | 0.2383169 | -0.055212 | 0.95597  | 0.994543 |
| si:dkey-90a13.10  | 0           | NA           | NA        | NA        | NA       | NA       |
| CR925728.1        | 0.846640952 | -1.930134747 | 2.2349699 | -0.863607 | 0.387804 | NA       |
| CU929451.1        | 19.57212435 | -0.647447021 | 0.4381618 | -1.477644 | 0.139503 | 0.678238 |
| CT961047.1        | 0           | NA           | NA        | NA        | NA       | NA       |
| si:dkey-7i4.10    | 24.93251286 | -0.101039007 | 0.3979621 | -0.253891 | 0.79958  | 0.979366 |
| si:ch211-180n24.3 | 1.538455926 | 1.005163047  | 1.5742941 | 0.6384849 | 0.523158 | NA       |
| CU062633.1        | 8.884322669 | -0.967241571 | 0.6840403 | -1.414013 | 0.157358 | NA       |
| si:dkeyp-100a5.4  | 5.109637965 | 0.843507798  | 0.904034  | 0.9330487 | 0.350795 | NA       |
| si:ch73-23124.1   | 429.4701543 | -0.078654182 | 0.1475933 | -0.532912 | 0.594095 | 0.954434 |
| si:dkey-7i4.24    | 5.364680269 | -0.712258055 | 0.845431  | -0.842479 | 0.39952  | NA       |
| si:ch73-185c24.2  | 136.9758822 | -0.445274077 | 0.1929594 | -2.307606 | 0.021021 | 0.273449 |
| BX005128.1        | 0.499302569 | -0.916836436 | 2.6772503 | -0.342455 | 0.732009 | NA       |
| CR759878.1        | 0.31437473  | -1.788572922 | 3.5930657 | -0.497785 | 0.618636 | NA       |
| vps50             | 0.158915748 | 0.967652056  | 4.0804729 | 0.2371421 | 0.812547 | NA       |
| BX005129.1        | 9.952064783 | -0.400757148 | 0.6281293 | -0.638017 | 0.523463 | NA       |
| CR391963.2        | 0.158795395 | 0.967652056  | 4.0804729 | 0.2371421 | 0.812547 | NA       |
| si:ch211-107e6.6  | 0.158915748 | 0.967652056  | 4.0804729 | 0.2371421 | 0.812547 | NA       |
| si:ch211-227m13.1 | 74.43657743 | 0.218756068  | 0.2254383 | 0.9703591 | 0.331868 | 0.874653 |
| AL954322.1        | 0.482640214 | -0.866525639 | 2.7061322 | -0.320208 | 0.748811 | NA       |
| CR790366.1        | 0           | NA           | NA        | NA        | NA       | NA       |
| si:zfos-375h5.1   | 9.02063517  | 0.125863139  | 0.6793934 | 0.1852581 | 0.853027 | NA       |
| CR790377.1        | 0           | NA           | NA        | NA        | NA       | NA       |
| si:ch211-147k10.6 | 142.3603543 | 0.233733809  | 0.1822649 | 1.2823853 | 0.199708 | 0.765017 |
| CU638693.2        | 1.275610923 | 0.724314706  | 1.8883685 | 0.3835664 | 0.7013   | NA       |
| BX927282.2        | 0.871516381 | 0.597595468  | 2.1830013 | 0.2737495 | 0.784277 | NA       |
| BX005392.1        | 7.925238305 | 0.104776962  | 0.6873041 | 0.1524463 | 0.878835 | NA       |
| si:ch211-210b2.3  | 2.839137449 | -1.254938875 | 1.1459382 | -1.095119 | 0.273464 | NA       |
| CR388163.1        | 0           | NA           | NA        | NA        | NA       | NA       |
| CU639412.1        | 0.332524763 | 0.005883742  | 3.292841  | 0.0017868 | 0.998574 | NA       |
| CR385086.1        | 0           | NA           | NA        | NA        | NA       | NA       |
| si:ch211-37e10.2  | 130.5439908 | 0.322707447  | 0.1812688 | 1.7802703 | 0.075032 | 0.533697 |
| si:ch211-135n15.2 | 10.95378566 | 0.54260119   | 0.5802745 | 0.9350767 | 0.349749 | NA       |
| CR589875.1        | 0.317711143 | 1.810477155  | 3.2978238 | 0.5489915 | 0.583011 | NA       |
| BX005461.2        | 3.275567136 | -0.597985638 | 1.0518396 | -0.568514 | 0.569686 | NA       |
| BX323035.1        | 0           | NA           | NA        | NA        | NA       | NA       |
| CU207354.1        | 0.476506538 | 2.394892832  | 2.8161716 | 0.8504073 | 0.395099 | NA       |
| si:dkey-52p2.5    | 0.158915748 | 0.967652056  | 4.0804729 | 0.2371421 | 0.812547 | NA       |
| si:dkey-77f5.8    | 91.06747961 | -0.125744567 | 0.2089615 | -0.601759 | 0.547334 | 0.945526 |
| BX957258.1        | 18.11223504 | -0.291384211 | 0.4465229 | -0.652563 | 0.514038 | 0.936851 |
| CR759863.1        | 0           | NA           | NA        | NA        | NA       | NA       |
| BX897682.1        | 8.362368874 | 0.485968416  | 0.680715  | 0.7139087 | 0.475284 | NA       |

|                    |             |              |           |           |          |          |
|--------------------|-------------|--------------|-----------|-----------|----------|----------|
| CR545469.1         |             | 0 NA         | NA        | NA        | NA       | NA       |
| im:7143333         | 41.28564518 | -0.039623617 | 0.3016024 | -0.131377 | 0.895477 | 0.989814 |
| si:dkey-197j19.5   | 12.22270144 | 0.406163182  | 0.5536842 | 0.7335646 | 0.463214 | 0.922698 |
| BX927244.1         | 5.38142845  | 0.047529847  | 0.8909903 | 0.053345  | 0.957457 | NA       |
| CR848812.1         | 30.33842007 | 0.12406366   | 0.3527277 | 0.3517265 | 0.725043 | 0.970402 |
| si:dkeyp-67f1.1    | 31.03320065 | -0.224326189 | 0.3519231 | -0.63743  | 0.523845 | 0.939336 |
| CR848791.2         | 0.84841062  | -0.578696897 | 2.0997862 | -0.275598 | 0.782857 | NA       |
| BX005254.2         | 4.298259818 | -0.009689555 | 0.9580036 | -0.010114 | 0.99193  | NA       |
| BX005351.1         |             | 0 NA         | NA        | NA        | NA       | NA       |
| si:dkey-29h14.10   | 6.859561294 | -0.627705354 | 0.7288889 | -0.861181 | 0.389138 | NA       |
| CLIP4              | 71.71416264 | 0.128066831  | 0.2298642 | 0.5571414 | 0.577431 | 0.950805 |
| CT025690.1         | 124.1798341 | -0.282750986 | 0.1799675 | -1.571123 | 0.116154 | 0.63841  |
| CU179699.1         |             | 0 NA         | NA        | NA        | NA       | NA       |
| AL844141.1         | 0.31598276  | 0.005883445  | 3.3523626 | 0.001755  | 0.9986   | NA       |
| si:dkey-238d18.13  |             | 0 NA         | NA        | NA        | NA       | NA       |
| CR383662.5         | 1.816708682 | 3.220085527  | 1.6905176 | 1.9047927 | 0.056807 | NA       |
| BX004812.1         | 5.072486762 | -1.262388368 | 0.8849996 | -1.426428 | 0.153745 | NA       |
| CR759863.2         | 0.166657454 | -0.955901296 | 4.0804729 | -0.234262 | 0.814781 | NA       |
| BX119902.2         | 3.949812512 | 1.600184179  | 1.0385976 | 1.5407162 | 0.123386 | NA       |
| si:dkey-206p8.1    | 32.23763416 | 0.024216823  | 0.3514299 | 0.0689094 | 0.945062 | 0.993443 |
| CU633991.2         | 71.05137248 | -0.041391502 | 0.2386955 | -0.173407 | 0.862331 | 0.985841 |
| CR926463.1         | 18.05372587 | 0.68939171   | 0.4646619 | 1.4836415 | 0.137904 | 0.675313 |
| BX248113.1         | 2.820347622 | -0.179421044 | 1.1062596 | -0.162187 | 0.871159 | NA       |
| si:dkeyp-93a5.3    | 0.498553709 | 0.926267934  | 2.6786929 | 0.345791  | 0.7295   | NA       |
| mhc111a            | 0.332524763 | 0.005883742  | 3.292841  | 0.0017868 | 0.998574 | NA       |
| CU972512.1         | 9.048977656 | -0.166899369 | 0.6472469 | -0.25786  | 0.796515 | NA       |
| NPC2 (1 of many)   | 13.81595182 | 0.524685047  | 0.5373823 | 0.976372  | 0.32888  | 0.873157 |
| CR626962.1         |             | 0 NA         | NA        | NA        | NA       | NA       |
| BX957326.2         | 0.499182217 | -0.916838237 | 2.6774436 | -0.34243  | 0.732027 | NA       |
| si:dkeyp-19h3.8    |             | 0 NA         | NA        | NA        | NA       | NA       |
| si:dkey-14d8.22    | 10.79376455 | -0.412657404 | 0.5840507 | -0.706544 | 0.47985  | NA       |
| CU915818.1         | 1.759897197 | -1.409859507 | 1.6105821 | -0.875373 | 0.381371 | NA       |
| CR589944.1         | 131.419419  | -0.135601814 | 0.1938905 | -0.699373 | 0.484319 | 0.929601 |
| fam110c            | 106.4443819 | 0.446372383  | 0.1982811 | 2.2512103 | 0.024372 | 0.301776 |
| si:ch1073-340i21.2 | 195.7454131 | -0.537222477 | 0.1551726 | -3.462096 | 0.000536 | 0.018825 |
| CR847968.1         | 366.2841304 | -0.112165426 | 0.1194349 | -0.939134 | 0.347662 | 0.880195 |
| zgc:153405         | 3.695523692 | 0.556923836  | 1.0174217 | 0.5473874 | 0.584113 | NA       |
| CR847923.1         |             | 0 NA         | NA        | NA        | NA       | NA       |
| AL929222.1         | 1.989269151 | -0.502873238 | 1.3290087 | -0.378382 | 0.705147 | NA       |
| fbx122             | 27.95202263 | 0.206645084  | 0.3922165 | 0.5268648 | 0.598287 | 0.955488 |
| BX005392.2         | 11.94122149 | 0.27142109   | 0.5635784 | 0.481603  | 0.630088 | 0.957354 |
| CR589876.1         | 74.4681097  | 0.169326421  | 0.2548471 | 0.6644236 | 0.506419 | 0.935724 |
| CT737162.1         | 0.158795395 | 0.967652056  | 4.0804729 | 0.2371421 | 0.812547 | NA       |
| BX537308.1         | 33.13202074 | -0.502520362 | 0.3393119 | -1.480998 | 0.138607 | 0.676911 |
| BX890558.1         | 77.29958319 | -0.111794732 | 0.2311735 | -0.483597 | 0.628672 | 0.957354 |
| FP245462.1         | 20.16984427 | -0.205169637 | 0.4815573 | -0.426054 | 0.670068 | 0.965223 |
| CR855375.1         | 3.47645301  | 1.002615667  | 1.1738322 | 0.8541388 | 0.393028 | NA       |
| CR854839.1         | 173.8087766 | 0.279624518  | 0.155022  | 1.8037729 | 0.071267 | 0.522712 |
| CU694256.1         | 0.157187365 | -0.955901296 | 4.0804729 | -0.234262 | 0.814781 | NA       |
| opn1mw1            | 12004.99692 | 0.228011699  | 0.0950298 | 2.3993694 | 0.016423 | 0.236409 |
| FP102888.1         | 0.182570949 | 0.967652056  | 4.0804729 | 0.2371421 | 0.812547 | NA       |
| hbaa1              | 1.008426242 | 2.234978276  | 1.9960971 | 1.1196742 | 0.262853 | NA       |
| BX649300.1         |             | 0 NA         | NA        | NA        | NA       | NA       |
| CU694202.1         |             | 0 NA         | NA        | NA        | NA       | NA       |

|                   |             |              |           |           |          |          |
|-------------------|-------------|--------------|-----------|-----------|----------|----------|
| FP016018.2        | 1.149459407 | 0.422305922  | 1.838616  | 0.2296869 | 0.818335 | NA       |
| BX004972.1        | 0.491320158 | 0.8528132    | 2.8656354 | 0.2976    | 0.766008 | NA       |
| mical3a           | 112.3961079 | -0.054633725 | 0.1910382 | -0.285983 | 0.774891 | 0.975687 |
| CR628341.1        | 21.22929277 | 0.026387092  | 0.4252194 | 0.0620552 | 0.950519 | 0.99381  |
| dhrrs13b.1        | 5.599049389 | -0.333747628 | 0.8209972 | -0.406515 | 0.684364 | NA       |
| CU682780.1        | 0.365141898 | 1.973577737  | 3.3927314 | 0.5817076 | 0.560764 | NA       |
| CU655829.1        | 0.158915748 | 0.967652056  | 4.0804729 | 0.2371421 | 0.812547 | NA       |
| CR786571.3        | 1.470088166 | -1.757445669 | 1.7465606 | -1.006232 | 0.314304 | NA       |
| ugt1b4            | 2.451199519 | -1.028780444 | 1.2504642 | -0.822719 | 0.410668 | NA       |
| CR354383.1        | 6.177573934 | 0.561716721  | 0.7987615 | 0.7032346 | 0.48191  | NA       |
| si:dkey-16m19.1   | 31.01688278 | 0.075173481  | 0.3727906 | 0.2016507 | 0.84019  | 0.985029 |
| CR352292.1        | 2.492145583 | -1.503971322 | 1.2858653 | -1.169618 | 0.242155 | NA       |
| AL845435.1        |             | 0 NA         | NA        | NA        | NA       | NA       |
| si:ch73-38013.3   | 2.486722985 | -1.014424677 | 1.2215208 | -0.83046  | 0.406279 | NA       |
| si:ch211-256a21.4 | 37.91167527 | -0.058134063 | 0.3377193 | -0.172137 | 0.86333  | 0.985841 |
| CU466278.1        | 9.830464494 | -0.542033727 | 0.6133944 | -0.883663 | 0.376878 | NA       |
| CR450813.1        | 0.471562095 | -2.373056629 | 3.0645586 | -0.774355 | 0.438721 | NA       |
| pimr42            | 0.166657454 | -0.955901296 | 4.0804729 | -0.234262 | 0.814781 | NA       |
| CR759845.1        | 8.73613539  | 0.078130415  | 0.6780909 | 0.1152212 | 0.90827  | NA       |
| CT025745.1        | 30.12364495 | -1.172749134 | 0.3575478 | -3.279979 | 0.001038 | 0.031976 |
| BX927349.1        |             | 0 NA         | NA        | NA        | NA       | NA       |
| CR759845.2        | 2.541535383 | 0.209225824  | 1.2009193 | 0.1742214 | 0.861691 | NA       |
| CU468915.1        | 17.18289965 | -0.561178586 | 0.5011451 | -1.119793 | 0.262802 | 0.830166 |
| AL935145.2        | 1.16384394  | 0.399527086  | 1.7443472 | 0.229041  | 0.818837 | NA       |
| CR936518.1        | 3.335753063 | 0.886769592  | 1.055752  | 0.8399412 | 0.400941 | NA       |
| BX629346.1        | 40.15312957 | 0.502269882  | 0.3215232 | 1.5621576 | 0.118251 | 0.641526 |
| CU571318.1        | 604.3951911 | -0.16606743  | 0.0992817 | -1.672689 | 0.094389 | 0.584358 |
| CR759845.3        | 2.120406395 | 1.138056897  | 1.5038092 | 0.7567828 | 0.44918  | NA       |
| CR855375.2        | 6.691416163 | -0.715232576 | 0.7519926 | -0.951116 | 0.341545 | NA       |
| BX897714.1        | 0.166657454 | -0.955901296 | 4.0804729 | -0.234262 | 0.814781 | NA       |
| FP236594.1        |             | 0 NA         | NA        | NA        | NA       | NA       |
| CU927934.1        | 10.09027277 | -0.071894812 | 0.6399725 | -0.11234  | 0.910553 | NA       |
| si:ch211-284f22.3 | 462.0086692 | -0.076360376 | 0.1170195 | -0.652544 | 0.51405  | 0.936851 |
| fxyd61            | 1781.564869 | -0.065590128 | 0.0849468 | -0.772132 | 0.440036 | 0.916082 |
| CU929339.1        | 6.469156165 | -0.996297602 | 0.7536656 | -1.321936 | 0.18619  | NA       |
| si:dkey-159n16.4  |             | 0 NA         | NA        | NA        | NA       | NA       |
| CR388369.1        | 5.213148577 | -0.187784275 | 0.8724411 | -0.21524  | 0.82958  | NA       |
| BX547934.1        | 1.172255439 | -1.303351983 | 1.8073824 | -0.721127 | 0.470831 | NA       |
| sparc12           | 21.29667261 | 0.254727265  | 0.4295928 | 0.5929505 | 0.553214 | 0.947265 |
| CR759845.4        | 0.158795395 | 0.967652056  | 4.0804729 | 0.2371421 | 0.812547 | NA       |
| si:ch73-223p23.2  |             | 0 NA         | NA        | NA        | NA       | NA       |
| BX322555.1        | 0.317831496 | 1.808837541  | 3.5779923 | 0.5055454 | 0.613176 | NA       |
| CR626887.2        |             | 0 NA         | NA        | NA        | NA       | NA       |
| si:ch211-66i15.4  | 6.68485566  | -0.27932794  | 0.7399128 | -0.377515 | 0.705791 | NA       |
| AL954322.2        | 73.00413637 | 0.055034934  | 0.2376092 | 0.2316195 | 0.816834 | 0.981594 |
| CU928073.1        | 0.158915748 | 0.967652056  | 4.0804729 | 0.2371421 | 0.812547 | NA       |
| BX322555.2        |             | 0 NA         | NA        | NA        | NA       | NA       |
| CU855801.1        | 0.347458735 | -1.908042286 | 3.4571486 | -0.551912 | 0.581009 | NA       |
| CR318607.1        | 5.885483825 | -0.061807117 | 0.7993965 | -0.077317 | 0.938371 | NA       |
| CR848665.1        | 3.195939131 | 0.788486769  | 1.0833462 | 0.7278253 | 0.466721 | NA       |
| si:ch73-181m17.1  | 7.093730994 | -0.321487254 | 0.7328147 | -0.438702 | 0.660878 | NA       |
| si:dkey-149i17.11 |             | 0 NA         | NA        | NA        | NA       | NA       |
| im:7152348        | 172.2968667 | 0.016688619  | 0.182377  | 0.0915061 | 0.92709  | 0.992702 |
| BX005462.2        | 0.332645115 | 0.005883744  | 3.2924249 | 0.0017871 | 0.998574 | NA       |

|                   |             |              |           |           |          |          |
|-------------------|-------------|--------------|-----------|-----------|----------|----------|
| si:zfos-1714f5.4  | 2.143027489 | -0.243471598 | 1.4351233 | -0.169652 | 0.865284 | NA       |
| si:ch211-261a10.5 | 5.755639088 | 0.900577898  | 0.8189164 | 1.099719  | 0.271455 | NA       |
| si:dkey-172k15.4  | 52.65720811 | 0.113894525  | 0.2658059 | 0.4284876 | 0.668296 | 0.964736 |
| CR812472.1        | 2.321045053 | -0.000352531 | 1.2231431 | -0.000288 | 0.99977  | NA       |
| si:dkey-60d5.3    | 31.51786993 | 0.100614573  | 0.3446409 | 0.2919403 | 0.770332 | 0.975687 |
| BX120006.1        | 0           | NA           | NA        | NA        | NA       | NA       |
| si:dkey-7j22.2    | 1.649390484 | -0.63991731  | 1.5880575 | -0.402956 | 0.686981 | NA       |
| si:ch211-273k1.5  | 0.317711143 | 1.810477155  | 3.2978238 | 0.5489915 | 0.583011 | NA       |
| CR293508.1        | 0.696687138 | -1.510024977 | 2.3787501 | -0.634798 | 0.52556  | NA       |
| CU927934.2        | 0           | NA           | NA        | NA        | NA       | NA       |
| AL954669.1        | 0.97432143  | -0.03661469  | 1.971898  | -0.018568 | 0.985186 | NA       |
| CR394545.1        | 6.646346796 | -0.114671568 | 0.758717  | -0.151139 | 0.879866 | NA       |
| znf1004           | 1.816829035 | 3.220170394  | 1.6788325 | 1.918101  | 0.055098 | NA       |
| si:ch211-108d22.1 | 0.849630847 | 1.928522947  | 2.2126134 | 0.8716041 | 0.383424 | NA       |
| BX511075.1        | 0.182570949 | 0.967652056  | 4.0804729 | 0.2371421 | 0.812547 | NA       |
| si:ch73-281n10.2  | 9979.413805 | -0.042619303 | 0.0644668 | -0.661104 | 0.508545 | 0.935788 |
| si:dkey-52d15.2   | 0.794578739 | 3.129658898  | 2.5486248 | 1.2279794 | 0.219455 | NA       |
| CR790366.2        | 3.421005594 | -2.09644369  | 1.1566651 | -1.81249  | 0.069911 | NA       |
| AL928927.1        | 0.672283077 | 0.02892376   | 2.3005571 | 0.0125725 | 0.989969 | NA       |
| BX649442.2        | 8.109416289 | -0.190348631 | 0.6709362 | -0.283706 | 0.776636 | NA       |
| si:dkey-56f14.4   | 387.9103044 | 0.297582735  | 0.1556001 | 1.9124847 | 0.055814 | 0.46256  |
| CR762407.2        | 1.114726087 | -0.412825569 | 1.8539615 | -0.222672 | 0.823791 | NA       |
| BX571737.1        | 0           | NA           | NA        | NA        | NA       | NA       |
| si:dkey-27115.1   | 0.182570949 | 0.967652056  | 4.0804729 | 0.2371421 | 0.812547 | NA       |
| si:dkey-33c14.3   | 500.7721437 | 1.144168025  | 0.1564197 | 7.3147296 | 2.58E-13 | 9.81E-11 |
| AL928657.1        | 37.63991506 | -0.00264273  | 0.3452788 | -0.007654 | 0.993893 | 0.998691 |
| AL935115.1        | 0           | NA           | NA        | NA        | NA       | NA       |
| FP102921.1        | 0           | NA           | NA        | NA        | NA       | NA       |
| AL772382.1        | 6.418700987 | -0.838255954 | 0.7512643 | -1.115794 | 0.26451  | NA       |
| FP102170.1        | 10.70677989 | -0.761179789 | 0.5970684 | -1.274862 | 0.202358 | NA       |
| FP015862.1        | 0           | NA           | NA        | NA        | NA       | NA       |
| si:dkey-7i4.23    | 0           | NA           | NA        | NA        | NA       | NA       |
| CR854927.3        | 0           | NA           | NA        | NA        | NA       | NA       |
| BX957346.2        | 0           | NA           | NA        | NA        | NA       | NA       |
| BX005242.1        | 0.698456806 | 0.09172817   | 2.5265115 | 0.0363063 | 0.971038 | NA       |
| CU695222.1        | 0.323844819 | -1.825095364 | 3.274639  | -0.557342 | 0.577293 | NA       |
| CR318658.1        | 0           | NA           | NA        | NA        | NA       | NA       |
| si:dkey-77f5.11   | 63.61866519 | 0.082034029  | 0.3148825 | 0.2605227 | 0.794461 | 0.977937 |
| CR848683.1        | 0.347458735 | -1.908042286 | 3.4571486 | -0.551912 | 0.581009 | NA       |
| CR545465.2        | 0           | NA           | NA        | NA        | NA       | NA       |
| CR753876.1        | 138.908427  | 0.297528352  | 0.1761991 | 1.6885913 | 0.091298 | 0.578443 |
| si:ch211-191c10.3 | 0.805694888 | -0.600710451 | 2.2372785 | -0.268501 | 0.788314 | NA       |
| BX465205.1        | 0.158915748 | 0.967652056  | 4.0804729 | 0.2371421 | 0.812547 | NA       |
| BX664705.1        | 0.182570949 | 0.967652056  | 4.0804729 | 0.2371421 | 0.812547 | NA       |
| CR848742.1        | 0.325573202 | 0.005883621  | 3.3172783 | 0.0017736 | 0.998585 | NA       |
| FP565432.1        | 1.000134101 | 0.001091541  | 2.0514706 | 0.0005321 | 0.999575 | NA       |
| CU459174.1        | 0.698456806 | 0.09172817   | 2.5265115 | 0.0363063 | 0.971038 | NA       |
| BX005254.3        | 4.377860824 | -0.679793102 | 0.9411061 | -0.722334 | 0.470089 | NA       |
| BX324227.1        | 0.340386822 | -1.882368278 | 3.2159502 | -0.585323 | 0.558331 | NA       |
| si:dkey-7i4.11    | 5.698455258 | 0.176792532  | 0.8303935 | 0.2129021 | 0.831403 | NA       |
| CR954963.1        | 1.851060989 | -0.261701952 | 1.428439  | -0.183208 | 0.854635 | NA       |
| GDPGP1            | 35.2514642  | 0.328844149  | 0.3356308 | 0.9797795 | 0.327195 | 0.872658 |
| CR944667.1        | 0           | NA           | NA        | NA        | NA       | NA       |
| si:ch211-207n23.2 | 229.3278104 | 0.36190545   | 0.1670423 | 2.1665501 | 0.030269 | 0.33626  |

|                   |             |              |           |           |          |          |
|-------------------|-------------|--------------|-----------|-----------|----------|----------|
| BX294100.1        | 61.2320691  | 0.281940941  | 0.2526217 | 1.11606   | 0.264396 | 0.830245 |
| BX664738.1        | 0 NA        | NA           | NA        | NA        | NA       | NA       |
| si:ch211-121j5.4  | 174.2113002 | 0.04959393   | 0.1649464 | 0.300667  | 0.763668 | 0.975374 |
| CU861891.1        | 7.215895018 | 0.380178559  | 0.7091973 | 0.5360688 | 0.591911 | NA       |
| CR385035.1        | 8.332459644 | 0.716824527  | 0.6790222 | 1.0556717 | 0.291118 | NA       |
| CR848746.1        | 4.088525574 | 0.104978333  | 0.9438483 | 0.1112237 | 0.911439 | NA       |
| BX936386.1        | 0.491320158 | 0.8528132    | 2.8656354 | 0.2976    | 0.766008 | NA       |
| BX005484.1        | 2.641945512 | 1.579544879  | 1.2360052 | 1.2779436 | 0.201269 | NA       |
| CR749752.1        | 0.166657454 | -0.955901296 | 4.0804729 | -0.234262 | 0.814781 | NA       |
| si:ch73-330k17.3  | 4.823170965 | -0.155586685 | 0.9537804 | -0.163126 | 0.870419 | NA       |
| pcdh1a4           | 23.30715512 | -0.000398115 | 0.3983212 | -0.000999 | 0.999203 | 0.999704 |
| CR381579.1        | 0 NA        | NA           | NA        | NA        | NA       | NA       |
| CR388129.1        | 0 NA        | NA           | NA        | NA        | NA       | NA       |
| BX546459.1        | 0 NA        | NA           | NA        | NA        | NA       | NA       |
| CR383662.6        | 6.328471778 | -0.95993161  | 0.7831348 | -1.225755 | 0.220291 | NA       |
| BX927308.2        | 29.15252855 | 0.151982884  | 0.3827584 | 0.3970727 | 0.691314 | 0.967305 |
| CR538726.1        | 12.85981435 | -0.228152727 | 0.5461806 | -0.417724 | 0.676149 | 0.965257 |
| si:dkey-7i4.21    | 0 NA        | NA           | NA        | NA        | NA       | NA       |
| defb13            | 10.7512387  | -0.523162426 | 0.6218625 | -0.841283 | 0.400189 | NA       |
| CR848757.1        | 206.7360903 | 0.148221228  | 0.1422189 | 1.0422051 | 0.297317 | 0.853945 |
| CU570976.1        | 2.287652314 | 0.433314905  | 1.274729  | 0.3399271 | 0.733911 | NA       |
| CU695073.1        | 0 NA        | NA           | NA        | NA        | NA       | NA       |
| CR847799.1        | 0 NA        | NA           | NA        | NA        | NA       | NA       |
| si:ch211-15316.6  | 170.5089672 | 0.00995478   | 0.1689983 | 0.0589046 | 0.953028 | 0.994154 |
| CU929037.2        | 0 NA        | NA           | NA        | NA        | NA       | NA       |
| FP101861.1        | 22.13867708 | 0.871756714  | 0.4113843 | 2.1190814 | 0.034084 | 0.359261 |
| BX640398.1        | 0.663603133 | -1.440371613 | 2.4108786 | -0.597447 | 0.550209 | NA       |
| CU861453.1        | 90.28097114 | -0.055027115 | 0.2120834 | -0.25946  | 0.795281 | 0.978466 |
| si:dkey-28n18.9   | 145.8998216 | -1.005062101 | 0.1778371 | -5.651587 | 1.59E-08 | 2.62E-06 |
| FP236850.1        | 0 NA        | NA           | NA        | NA        | NA       | NA       |
| BX649398.1        | 0.992082665 | -2.218637874 | 2.2726308 | -0.976242 | 0.328945 | NA       |
| CR847531.1        | 1678.300486 | 0.150663881  | 0.0925042 | 1.6287246 | 0.103371 | 0.609625 |
| CR392042.1        | 0.157187365 | -0.955901296 | 4.0804729 | -0.234262 | 0.814781 | NA       |
| BX120006.2        | 0 NA        | NA           | NA        | NA        | NA       | NA       |
| si:ch211-176124.4 | 48.11927932 | 0.263051157  | 0.297465  | 0.8843095 | 0.376529 | 0.89493  |
| BX000524.1        | 0 NA        | NA           | NA        | NA        | NA       | NA       |
| ulk2              | 1098.966807 | 0.100671299  | 0.0865518 | 1.1631335 | 0.244775 | 0.814435 |
| BX324206.1        | 0 NA        | NA           | NA        | NA        | NA       | NA       |
| CR759882.1        | 0.522329263 | 0.999930388  | 2.8066578 | 0.3562709 | 0.721638 | NA       |
| alkbh3            | 367.2624903 | -0.048002802 | 0.1511807 | -0.317519 | 0.750849 | 0.97419  |
| cox8b             | 324.2567614 | -1.011557379 | 0.1397652 | -7.237546 | 4.57E-13 | 1.70E-10 |
| CR381647.1        | 127.3531743 | 0.101742699  | 0.1813625 | 0.5609909 | 0.574804 | 0.950037 |
| si:dkey-24p1.6    | 0 NA        | NA           | NA        | NA        | NA       | NA       |
| AL808121.1        | 0 NA        | NA           | NA        | NA        | NA       | NA       |
| CR388029.1        | 0.809151653 | 1.852283317  | 2.2398915 | 0.8269523 | 0.408264 | NA       |
| si:dkey-172k15.3  | 71.38516062 | -0.062840495 | 0.2373583 | -0.264749 | 0.791202 | 0.977461 |
| BX957355.1        | 0.63196552  | 0.01215153   | 2.613686  | 0.0046492 | 0.99629  | NA       |
| si:dkey-229e3.2   | 30.0947167  | -0.240998071 | 0.3495176 | -0.689516 | 0.490498 | 0.931926 |
| CT027582.1        | 0.847620474 | 0.550669627  | 2.2003584 | 0.2502636 | 0.802383 | NA       |
| BX005079.1        | 0.158915748 | 0.967652056  | 4.0804729 | 0.2371421 | 0.812547 | NA       |
| AL954387.1        | 1.008546595 | 2.235815189  | 2.0974266 | 1.0659802 | 0.286433 | NA       |
| CR854827.1        | 0 NA        | NA           | NA        | NA        | NA       | NA       |
| CR925728.2        | 0 NA        | NA           | NA        | NA        | NA       | NA       |
| prp33             | 979.2280034 | 0.25524596   | 0.1127607 | 2.2636072 | 0.023598 | 0.296275 |

|                   |             |              |           |           |          |          |
|-------------------|-------------|--------------|-----------|-----------|----------|----------|
| si:dkey-79d12.6   | 4.671879979 | 0.428092421  | 0.8717764 | 0.4910576 | 0.623386 | NA       |
| CR847887.1        | 10.22684392 | -0.519986371 | 0.6133072 | -0.84784  | 0.396527 | NA       |
| CR854827.2        | 0 NA        | NA           | NA        | NA        | NA       | NA       |
| si:dkey-234i14.12 | 0.490502273 | -2.421143305 | 2.7891168 | -0.868068 | 0.385357 | NA       |
| si:ch211-226h8.15 | 1.135704377 | 3.642164013  | 1.9627362 | 1.8556564 | 0.063503 | NA       |
| ugt1b2            | 56.533812   | -0.406880855 | 0.2731481 | -1.489598 | 0.13633  | 0.673106 |
| AL929435.1        | 0 NA        | NA           | NA        | NA        | NA       | NA       |
| CT737162.2        | 29.55013545 | -0.532467984 | 0.372364  | -1.429966 | 0.152727 | 0.701776 |
| si:ch73-147o17.1  | 306.8790068 | 0.059432057  | 0.130589  | 0.4551076 | 0.649032 | 0.960708 |
| BX005012.4        | 0.674801605 | 0.02322667   | 2.4147609 | 0.0096186 | 0.992326 | NA       |
| hbba1             | 0 NA        | NA           | NA        | NA        | NA       | NA       |
| si:ch73-31d8.2    | 48.88567644 | -0.095643941 | 0.2783608 | -0.343597 | 0.731149 | 0.971557 |
| BX323076.1        | 2.198752646 | 0.705381762  | 1.5165421 | 0.4651251 | 0.641842 | NA       |
| BX120016.1        | 0.158795395 | 0.967652056  | 4.0804729 | 0.2371421 | 0.812547 | NA       |
| CR457447.1        | 0 NA        | NA           | NA        | NA        | NA       | NA       |
| zgc:174263        | 382.0301075 | -0.159591978 | 0.1172092 | -1.3616   | 0.173324 | 0.732435 |
| soga3a            | 0 NA        | NA           | NA        | NA        | NA       | NA       |
| BX322555.3        | 115.7573208 | 0.17167277   | 0.2036489 | 0.8429842 | 0.399237 | 0.900683 |
| si:dkey-117a8.2   | 0 NA        | NA           | NA        | NA        | NA       | NA       |
| BX537104.1        | 0.48983248  | -0.887840757 | 2.6934859 | -0.329625 | 0.741683 | NA       |
| si:dkey-42123.9   | 0.855602886 | -0.591621869 | 2.0951335 | -0.282379 | 0.777653 | NA       |
| CR354429.1        | 0 NA        | NA           | NA        | NA        | NA       | NA       |
| yeats2            | 121.4186558 | 0.023571357  | 0.1858863 | 0.1268052 | 0.899095 | 0.990121 |
| si:dkey-77f5.13   | 65.57354357 | -0.155449213 | 0.257007  | -0.604844 | 0.545282 | 0.945526 |
| si:ch211-270g19.5 | 66.3508935  | 0.201872892  | 0.2457055 | 0.8216052 | 0.411302 | 0.903475 |
| BX908753.1        | 6.174849227 | -0.091928317 | 0.7814145 | -0.117643 | 0.90635  | NA       |
| si:dkey-4c15.16   | 47.8547376  | 0.459503638  | 0.2997926 | 1.5327383 | 0.12534  | 0.654648 |
| AL808129.1        | 270.2043669 | 0.203377523  | 0.1285345 | 1.5822802 | 0.113586 | 0.631853 |
| CR925802.1        | 0 NA        | NA           | NA        | NA        | NA       | NA       |
| si:ch211-40k21.5  | 211.495429  | -0.178396867 | 0.145199  | -1.228637 | 0.219208 | 0.785734 |
| CR847898.2        | 23.23554107 | 0.307403253  | 0.4001385 | 0.7682422 | 0.442343 | 0.916336 |
| AL954322.3        | 4.880236855 | 0.748213537  | 0.8935654 | 0.837335  | 0.402404 | NA       |
| si:ch211-266k8.6  | 1.456841292 | -0.346576717 | 1.5569079 | -0.222606 | 0.823842 | NA       |
| CU929145.2        | 26.44237416 | 0.151971181  | 0.380224  | 0.3996886 | 0.689386 | 0.966763 |
| si:ch211-222n22.1 | 1.870901621 | 0.845910272  | 1.4518162 | 0.5826566 | 0.560125 | NA       |
| CR405687.1        | 1.35525647  | 1.617437907  | 1.7202882 | 0.9402134 | 0.347108 | NA       |
| CU571382.2        | 0 NA        | NA           | NA        | NA        | NA       | NA       |
| CR848759.1        | 1.607627531 | 1.245488276  | 1.753893  | 0.7101278 | 0.477625 | NA       |
| CU929145.3        | 0.476626891 | 2.395187592  | 2.815932  | 0.8505843 | 0.395    | NA       |
| si:ch211-147g22.4 | 24.97718098 | -0.264286389 | 0.4137771 | -0.638717 | 0.523007 | 0.939336 |
| CR381689.1        | 1.551702801 | -0.222354593 | 1.6346833 | -0.136023 | 0.891803 | NA       |
| CR352232.1        | 0.173729368 | -0.955901296 | 4.0804729 | -0.234262 | 0.814781 | NA       |
| CU856222.1        | 770.8434557 | 0.066600528  | 0.1016647 | 0.6550996 | 0.512404 | 0.936253 |
| zgc:174574        | 110.0867051 | -0.141616921 | 0.1927341 | -0.734779 | 0.462474 | 0.922698 |
| BX119902.3        | 0.63196552  | 0.01215153   | 2.613686  | 0.0046492 | 0.99629  | NA       |
| si:ch211-261d7.3  | 498.0506785 | -0.078279751 | 0.115072  | -0.680268 | 0.496335 | 0.932415 |
| ANPEP             | 183.7631319 | -0.730149974 | 0.1517108 | -4.812775 | 1.49E-06 | 0.000139 |
| FP102892.1        | 0 NA        | NA           | NA        | NA        | NA       | NA       |
| BX323076.2        | 11.40698677 | 0.898418085  | 0.574336  | 1.5642725 | 0.117754 | 0.641446 |
| BX629344.1        | 113.6882938 | 0.042919251  | 0.1878508 | 0.2284752 | 0.819277 | 0.981594 |
| CU855917.1        | 0.680773643 | -2.882718692 | 2.4687055 | -1.167705 | 0.242926 | NA       |
| s1c26a6           | 16.83594978 | 0.335163754  | 0.4716124 | 0.7106763 | 0.477285 | 0.926857 |
| CU855758.1        | 0.513487682 | -0.887846295 | 2.6557956 | -0.334305 | 0.738149 | NA       |
| BX571762.1        | 0.158795395 | 0.967652056  | 4.0804729 | 0.2371421 | 0.812547 | NA       |

|                   |             |              |           |           |          |          |  |    |  |    |
|-------------------|-------------|--------------|-----------|-----------|----------|----------|--|----|--|----|
| FP016018.3        |             | 0 NA         |           | NA        |          | NA       |  | NA |  | NA |
| CR792422.2        | 4.038546139 | -0.707933183 | 0.9582437 | -0.738782 | 0.460039 | NA       |  |    |  |    |
| flrt2             | 244.4152706 | -0.019897686 | 0.1365865 | -0.145678 | 0.884175 | 0.988784 |  |    |  |    |
| BX530017.1        |             | 0 NA         |           | NA        |          | NA       |  | NA |  | NA |
| CR925755.1        |             | 0 NA         |           | NA        |          | NA       |  | NA |  | NA |
| tbpl2             | 0.158795395 | 0.967652056  | 4.0804729 | 0.2371421 | 0.812547 | NA       |  |    |  |    |
| BX000358.1        |             | 0 NA         |           | NA        |          | NA       |  | NA |  | NA |
| si:dkey-238d18.10 | 0.325573202 | 0.005883621  | 3.3172783 | 0.0017736 | 0.998585 | NA       |  |    |  |    |
| BX901883.1        |             | 0 NA         |           | NA        |          | NA       |  | NA |  | NA |
| zgc:193812        | 47.97401404 | -0.317130423 | 0.299112  | -1.06024  | 0.289036 | 0.845979 |  |    |  |    |
| CT573316.1        |             | 0 NA         |           | NA        |          | NA       |  | NA |  | NA |
| CR812470.2        | 2.136154996 | -0.279267899 | 1.4098922 | -0.198077 | 0.842984 | NA       |  |    |  |    |
| si:zfos-1714f5.3  | 2.827899952 | -1.709122766 | 1.2214816 | -1.399221 | 0.161747 | NA       |  |    |  |    |
| BX927078.1        |             | 0 NA         |           | NA        |          | NA       |  | NA |  | NA |
| CT027805.1        | 0.966459371 | 0.961723876  | 2.0054341 | 0.479559  | 0.631541 | NA       |  |    |  |    |
| si:dkey-276j7.3   | 7.892235628 | 0.101739213  | 0.6834315 | 0.1488653 | 0.88166  | NA       |  |    |  |    |
| BX649242.1        | 1.197089583 | 0.415558675  | 1.7998043 | 0.230891  | 0.817399 | NA       |  |    |  |    |
| CR848791.3        | 0.339758314 | 0.005883863  | 3.2682461 | 0.0018003 | 0.998564 | NA       |  |    |  |    |
| BX005183.1        |             | 0 NA         |           | NA        |          | NA       |  | NA |  | NA |
| si:dkey-81117.6   | 187.350222  | -0.23765477  | 0.1569426 | -1.514279 | 0.129955 | 0.662595 |  |    |  |    |
| si:ch211-14i3.2   | 19.12315223 | -0.302570172 | 0.4370063 | -0.69237  | 0.488705 | 0.931926 |  |    |  |    |
| BX546473.1        |             | 0 NA         |           | NA        |          | NA       |  | NA |  | NA |
| BX957270.1        | 0.182570949 | 0.967652056  | 4.0804729 | 0.2371421 | 0.812547 | NA       |  |    |  |    |
| BX005060.1        |             | 0 NA         |           | NA        |          | NA       |  | NA |  | NA |
| CR759826.1        |             | 0 NA         |           | NA        |          | NA       |  | NA |  | NA |
| si:dkey-170g13.2  | 0.158915748 | 0.967652056  | 4.0804729 | 0.2371421 | 0.812547 | NA       |  |    |  |    |
| CU571161.1        |             | 0 NA         |           | NA        |          | NA       |  | NA |  | NA |
| CT573342.1        | 5.519902796 | 0.46241121   | 0.8095749 | 0.5711778 | 0.567879 | NA       |  |    |  |    |
| CT573316.2        | 0.173729368 | -0.955901296 | 4.0804729 | -0.234262 | 0.814781 | NA       |  |    |  |    |
| CR759841.1        | 3.041937827 | 0.664810714  | 1.0965847 | 0.6062557 | 0.544345 | NA       |  |    |  |    |
| CT583687.1        | 0.340386822 | -1.882368278 | 3.2159502 | -0.585323 | 0.558331 | NA       |  |    |  |    |
| BX000434.1        |             | 0 NA         |           | NA        |          | NA       |  | NA |  | NA |
| slc9alb           | 48.88911376 | 0.505743746  | 0.3471873 | 1.4566886 | 0.145202 | 0.690034 |  |    |  |    |
| si:ch211-33e4.2   | 5.718702763 | -0.663820507 | 0.8233197 | -0.806273 | 0.420085 | NA       |  |    |  |    |
| CR847994.1        | 16.5742137  | 0.014013269  | 0.4644058 | 0.0301746 | 0.975928 | 0.996762 |  |    |  |    |
| AL845550.1        | 0.638219549 | -2.807461932 | 2.539214  | -1.105642 | 0.268881 | NA       |  |    |  |    |
| AL772300.1        | 10.98429696 | -1.420828401 | 0.6039759 | -2.352459 | 0.01865  | NA       |  |    |  |    |
| CR387932.1        | 0.347458735 | -1.908042286 | 3.4571486 | -0.551912 | 0.581009 | NA       |  |    |  |    |
| AL935186.2        | 0.341366344 | 1.891903201  | 3.2128156 | 0.5888614 | 0.555954 | NA       |  |    |  |    |
| ten1              | 51.14878385 | 0.126483738  | 0.275052  | 0.459854  | 0.645621 | 0.96029  |  |    |  |    |
| CR854965.2        | 0.182570949 | 0.967652056  | 4.0804729 | 0.2371421 | 0.812547 | NA       |  |    |  |    |
| BX649628.1        |             | 0 NA         |           | NA        |          | NA       |  | NA |  | NA |
| si:ch211-147g22.7 | 8.044396228 | -0.781054512 | 0.6792357 | -1.149902 | 0.250184 | NA       |  |    |  |    |
| BX324164.3        | 43.20202888 | -0.167326545 | 0.3019965 | -0.554068 | 0.579532 | 0.951257 |  |    |  |    |
| CT027551.1        |             | 0 NA         |           | NA        |          | NA       |  | NA |  | NA |
| BX901883.2        | 121.5870552 | 0.069345145  | 0.1936111 | 0.3581671 | 0.720218 | 0.969318 |  |    |  |    |
| CU638693.3        | 0.173729368 | -0.955901296 | 4.0804729 | -0.234262 | 0.814781 | NA       |  |    |  |    |
| BX279523.3        | 1.960192347 | 2.322231426  | 1.5804913 | 1.4693098 | 0.141749 | NA       |  |    |  |    |
| CR790363.1        | 0.690594747 | 1.536595024  | 2.3851901 | 0.6442233 | 0.519431 | NA       |  |    |  |    |
| CU655820.1        | 6.572316727 | 0.049818768  | 0.8183131 | 0.0608798 | 0.951455 | NA       |  |    |  |    |
| CU896541.1        | 16.29187582 | -0.192060946 | 0.483512  | -0.397221 | 0.691205 | 0.967295 |  |    |  |    |
| si:dkey-244a7.1   | 53.19323965 | 0.190392108  | 0.2635978 | 0.7222826 | 0.470121 | 0.924787 |  |    |  |    |
| FP017274.1        | 133.7321142 | 0.281295834  | 0.1792218 | 1.5695402 | 0.116522 | 0.639148 |  |    |  |    |
| mcf2b             | 35.78604007 | 0.090673808  | 0.3336363 | 0.2717744 | 0.785795 | 0.97627  |  |    |  |    |

|                   |             |              |           |           |          |          |
|-------------------|-------------|--------------|-----------|-----------|----------|----------|
| si:ch211-139d20.3 | 27.77300961 | 0.05739004   | 0.3606299 | 0.1591383 | 0.87356  | 0.987858 |
| ftr90             | 16.63096384 | 0.114846659  | 0.5123931 | 0.2241378 | 0.82265  | 0.982189 |
| si:dkey-108k21.7  | 68.62442564 | 0.259281764  | 0.2443764 | 1.0609934 | 0.288693 | 0.845979 |
| BX248418.2        | 0 NA        | NA           | NA        | NA        | NA       | NA       |
| CR790366.3        | 0 NA        | NA           | NA        | NA        | NA       | NA       |
| CR387933.1        | 0.491320158 | 0.8528132    | 2.8656354 | 0.2976    | 0.766008 | NA       |
| CR936416.1        | 0.648748228 | -0.034664259 | 2.4451882 | -0.014177 | 0.988689 | NA       |
| CR812472.2        | 0 NA        | NA           | NA        | NA        | NA       | NA       |
| CR382363.1        | 1.217246733 | -1.273475927 | 1.9578775 | -0.650437 | 0.51541  | NA       |
| BX005183.2        | 0.341486697 | 1.892317624  | 3.2124068 | 0.5890654 | 0.555817 | NA       |
| BX465853.1        | 0 NA        | NA           | NA        | NA        | NA       | NA       |
| AL929182.1        | 0 NA        | NA           | NA        | NA        | NA       | NA       |
| si:ch211-15d5.12  | 107.0048005 | -0.204967644 | 0.2018565 | -1.015413 | 0.309909 | 0.861992 |
| CR854907.1        | 3.326134883 | 0.022489837  | 1.0222522 | 0.0220003 | 0.982448 | NA       |
| FP101990.1        | 0 NA        | NA           | NA        | NA        | NA       | NA       |
| BX571853.1        | 4.39326942  | 0.68580426   | 0.9365575 | 0.7322607 | 0.464009 | NA       |
| BX530407.4        | 5.104964052 | 1.76863102   | 0.9437094 | 1.8741268 | 0.060913 | NA       |
| si:dkey-33c14.7   | 5.016822446 | 0.200051291  | 0.8525089 | 0.2346618 | 0.814471 | NA       |
| BX465208.1        | 0 NA        | NA           | NA        | NA        | NA       | NA       |
| BX897720.1        | 0 NA        | NA           | NA        | NA        | NA       | NA       |
| si:dkey-77f5.6    | 52.5545694  | -0.074146764 | 0.2683928 | -0.276262 | 0.782347 | 0.97627  |
| BX005459.1        | 0 NA        | NA           | NA        | NA        | NA       | NA       |
| BX539313.1        | 4.686342584 | -0.419930032 | 0.8711711 | -0.482029 | 0.629785 | NA       |
| ugt5a4            | 0.807663976 | 0.546685639  | 2.2534268 | 0.2426019 | 0.808314 | NA       |
| si:ch73-288o11.4  | 1.151428495 | 1.30584825   | 1.8815101 | 0.6940426 | 0.487655 | NA       |
| FP340271.1        | 0.157187365 | -0.955901296 | 4.0804729 | -0.234262 | 0.814781 | NA       |
| BX470254.1        | 0.157187365 | -0.955901296 | 4.0804729 | -0.234262 | 0.814781 | NA       |
| BX511308.1        | 1.686533266 | -1.934326135 | 1.6695123 | -1.158617 | 0.246612 | NA       |
| si:dkey-273g18.1  | 5.796305574 | 0.741436564  | 0.8000319 | 0.9267587 | 0.354052 | NA       |
| si:dkey-81e3.2    | 20.70724128 | 0.363199873  | 0.4292852 | 0.8460573 | 0.397521 | 0.899672 |
| BX547992.2        | 0 NA        | NA           | NA        | NA        | NA       | NA       |
| BX548045.1        | 0 NA        | NA           | NA        | NA        | NA       | NA       |
| CU571319.1        | 1.622870238 | 0.01605098   | 1.4877883 | 0.0107885 | 0.991392 | NA       |
| AL928870.1        | 0.157187365 | -0.955901296 | 4.0804729 | -0.234262 | 0.814781 | NA       |
| si:ch211-106e7.2  | 26.35385037 | -0.337552933 | 0.3951181 | -0.854309 | 0.392934 | 0.897836 |
| lrrc53            | 1.812471815 | 0.241486745  | 1.4258259 | 0.1693662 | 0.865509 | NA       |
| si:ch73-306e8.2   | 10.98411511 | 0.562515779  | 0.5898357 | 0.9536821 | 0.340245 | NA       |
| CR847793.1        | 1.340710299 | 1.573968029  | 1.8034464 | 0.8727556 | 0.382796 | NA       |
| si:ch211-63b16.3  | 7.180081778 | 0.791589682  | 0.7564258 | 1.0464869 | 0.295336 | NA       |
| CR786571.4        | 0.31437473  | -1.788572922 | 3.5930657 | -0.497785 | 0.618636 | NA       |
| si:ch73-250a16.5  | 76.29955184 | -0.028251456 | 0.2315903 | -0.121989 | 0.902908 | 0.990121 |
| si:dkeyp-50b9.1   | 5.702888291 | 0.175323886  | 0.8963739 | 0.1955924 | 0.844929 | NA       |
| CU929360.1        | 9.680643111 | 0.833305129  | 0.6353457 | 1.3115775 | 0.189663 | NA       |
| CU638870.1        | 38.01053975 | -0.237476022 | 0.3073743 | -0.772596 | 0.439762 | 0.916082 |
| BX569790.2        | 0 NA        | NA           | NA        | NA        | NA       | NA       |
| BX470242.2        | 0 NA        | NA           | NA        | NA        | NA       | NA       |
| BX005461.3        | 2.675108832 | 0.038232043  | 1.152332  | 0.033178  | 0.973533 | NA       |
| CR392003.1        | 4.685875714 | -0.181728785 | 0.8657474 | -0.20991  | 0.833738 | NA       |
| CT027718.1        | 0.633934609 | 1.436045836  | 2.6103598 | 0.5501333 | 0.582228 | NA       |
| BX649398.2        | 4.91104545  | 0.790386396  | 0.8756804 | 0.9025969 | 0.36674  | NA       |
| CU928222.1        | 0 NA        | NA           | NA        | NA        | NA       | NA       |
| AL928908.1        | 0 NA        | NA           | NA        | NA        | NA       | NA       |
| BX510360.1        | 0 NA        | NA           | NA        | NA        | NA       | NA       |
| CR788230.2        | 0.31437473  | -1.788572922 | 3.5930657 | -0.497785 | 0.618636 | NA       |



|                   |             |              |           |           |          |          |
|-------------------|-------------|--------------|-----------|-----------|----------|----------|
| CU855930.1        | 24.39740769 | 0.078879168  | 0.4280408 | 0.1842795 | 0.853794 | 0.985174 |
| si:dkey-77f5.15   | 6.289842561 | -0.774742143 | 0.7514455 | -1.031002 | 0.30254  | NA       |
| si:dkey-195m11.8  | 268.149357  | 0.091491249  | 0.1324561 | 0.6907287 | 0.489736 | 0.931926 |
| si:ch211-66i15.5  | 0           | NA           | NA        | NA        | NA       | NA       |
| BX890600.1        | 0.157187365 | -0.955901296 | 4.0804729 | -0.234262 | 0.814781 | NA       |
| CR925728.3        | 1.18140675  | 2.512918391  | 1.9105304 | 1.3152988 | 0.188409 | NA       |
| CR381647.2        | 0.158795395 | 0.967652056  | 4.0804729 | 0.2371421 | 0.812547 | NA       |
| chmp6a            | 9.394222941 | -0.434401994 | 0.6673994 | -0.650888 | 0.515119 | NA       |
| CU929070.1        | 92.21993194 | 0.123469067  | 0.2055253 | 0.6007487 | 0.548007 | 0.945768 |
| si:ch211-225b7.5  | 34.06108377 | -0.235810461 | 0.3281564 | -0.718592 | 0.472393 | 0.924838 |
| BX539313.2        | 3.643811529 | -1.80152991  | 1.1058623 | -1.629073 | 0.103298 | NA       |
| CR931782.1        | 0           | NA           | NA        | NA        | NA       | NA       |
| coa3b             | 86.30464274 | 0.04249941   | 0.2457703 | 0.1729233 | 0.862712 | 0.985841 |
| BX119963.2        | 3.955911939 | -1.876942077 | 1.0796772 | -1.738429 | 0.082135 | NA       |
| si:dkey-208m12.3  | 0           | NA           | NA        | NA        | NA       | NA       |
| si:dkey-125e8.3   | 12.56134134 | -0.4941014   | 0.5768    | -0.856625 | 0.391652 | 0.897688 |
| CU929339.2        | 0           | NA           | NA        | NA        | NA       | NA       |
| BX957326.3        | 1.973785738 | 0.45896702   | 1.3297967 | 0.3451407 | 0.729989 | NA       |
| CR788249.2        | 0.31437473  | -1.788572922 | 3.5930657 | -0.497785 | 0.618636 | NA       |
| trmt61b           | 150.2828484 | -0.085547126 | 0.1734383 | -0.493242 | 0.621841 | 0.957354 |
| CU207343.2        | 0.474778155 | 0.852397662  | 2.898154  | 0.2941175 | 0.768668 | NA       |
| CU693502.1        | 221.3101446 | -0.102204529 | 0.1427623 | -0.715907 | 0.474049 | 0.924993 |
| si:ch73-1f23.1    | 2.144686848 | -1.208846332 | 1.3383997 | -0.903203 | 0.366418 | NA       |
| BX927362.1        | 2.141422715 | 1.160869486  | 1.3025367 | 0.8912375 | 0.372802 | NA       |
| FP015862.2        | 0.831827332 | -0.648936467 | 2.1146571 | -0.306876 | 0.758938 | NA       |
| BX004999.2        | 0           | NA           | NA        | NA        | NA       | NA       |
| zgc:113340        | 69.95923107 | 0.119198891  | 0.2375988 | 0.5016814 | 0.615892 | 0.95688  |
| CR396585.1        | 0.323844819 | -1.825095364 | 3.274639  | -0.557342 | 0.577293 | NA       |
| si:dkey-4c2.11    | 9.977864257 | -0.571357388 | 0.6132901 | -0.931627 | 0.351529 | NA       |
| qkia              | 2881.289586 | -0.03699402  | 0.070206  | -0.526935 | 0.598238 | 0.955488 |
| si:dkey-263j23.1  | 4.469711363 | -0.11796696  | 0.9177674 | -0.128537 | 0.897724 | NA       |
| si:dkey-77f5.11   | 31.34882788 | 0.51313601   | 0.3710536 | 1.382916  | 0.166691 | 0.723339 |
| si:ch211-213d14.2 | 152.9345436 | -0.08004157  | 0.1698433 | -0.471267 | 0.63745  | 0.958872 |
| cfap99            | 13.52303194 | -0.207871856 | 0.5165143 | -0.402451 | 0.687352 | 0.966376 |
| si:ch211-175f11.5 | 0.822518881 | -0.527767586 | 2.1171028 | -0.249288 | 0.803138 | NA       |
| si:ch73-390p7.2   | 118.448011  | 0.104316082  | 0.1941628 | 0.5372609 | 0.591087 | 0.954193 |
| AL928908.2        | 0           | NA           | NA        | NA        | NA       | NA       |
| ugt1b1            | 227.950371  | 0.110168217  | 0.1568173 | 0.7025261 | 0.482351 | 0.928726 |
| AL772314.1        | 424.2219685 | 0.040637168  | 0.148904  | 0.2729085 | 0.784924 | 0.97627  |
| si:dkey-148h10.5  | 17.52369308 | -0.575696083 | 0.4741307 | -1.214214 | 0.224666 | 0.791954 |
| CR382327.2        | 24.8271213  | 0.278309056  | 0.3917065 | 0.7105041 | 0.477392 | 0.926857 |
| CU467639.1        | 0.682973393 | 2.892694129  | 2.4661364 | 1.172966  | 0.240809 | NA       |
| si:dkey-6e2.2     | 309.3147879 | -0.047234418 | 0.1319895 | -0.357865 | 0.720444 | 0.969318 |
| BX511253.1        | 0.500282092 | 2.45023829   | 2.5970012 | 0.9434876 | 0.345432 | NA       |
| CR450813.2        | 0           | NA           | NA        | NA        | NA       | NA       |
| BX511311.1        | 0           | NA           | NA        | NA        | NA       | NA       |
| si:dkey-111k8.3   | 166.2946529 | -0.190983902 | 0.1581818 | -1.207369 | 0.22729  | 0.794617 |
| CU694807.1        | 0           | NA           | NA        | NA        | NA       | NA       |
| si:ch73-288o11.5  | 126.2594875 | -0.057901207 | 0.1859325 | -0.31141  | 0.755489 | 0.975318 |
| CR626907.3        | 234.4595434 | 0.161769066  | 0.3884104 | 0.41649   | 0.677051 | 0.965257 |
| DNAL1 (1 of many) | 0           | NA           | NA        | NA        | NA       | NA       |
| BX571780.1        | 1.11645447  | 0.405375708  | 1.833693  | 0.2210707 | 0.825037 | NA       |
| BX324164.4        | 30.16960328 | -0.611569131 | 0.3634936 | -1.682476 | 0.092477 | 0.579378 |
| CR848836.1        | 0           | NA           | NA        | NA        | NA       | NA       |

|                    |             |              |           |           |          |          |
|--------------------|-------------|--------------|-----------|-----------|----------|----------|
| si:dkey-245f22.3   | 19.12723936 | 0.766112449  | 0.4418851 | 1.7337367 | 0.082965 | 0.555552 |
| BX890629.1         | 2.233132691 | -0.235299971 | 1.4332413 | -0.164173 | 0.869595 | NA       |
| BX649529.1         | 84.25139889 | 0.01649667   | 0.2221376 | 0.0742633 | 0.940801 | 0.992857 |
| CT573383.1         | 62.19163897 | 0.215808073  | 0.264438  | 0.8161007 | 0.414443 | 0.906237 |
| CR854989.1         | 3.658151491 | 0.292741938  | 0.9784745 | 0.299182  | 0.764801 | NA       |
| CR751227.1         | 1.626327003 | 1.212512227  | 1.5424246 | 0.7861079 | 0.431804 | NA       |
| BX323016.1         | 2.83873836  | 0.138056734  | 1.1655859 | 0.1184441 | 0.905716 | NA       |
| BX537110.1         | 24.72615587 | 0.611474063  | 0.3997772 | 1.5295369 | 0.126131 | 0.654806 |
| AL935300.2         | 0.960634429 | 2.169987751  | 2.2906136 | 0.9473391 | 0.343466 | NA       |
| si:dkey-111k8.5    | 53.22991432 | 0.173154407  | 0.2659985 | 0.6509602 | 0.515072 | 0.937646 |
| si:ch73-364h19.1   | 51.48557676 | 0.108049174  | 0.2779881 | 0.3886827 | 0.697511 | 0.9679   |
| BX005129.2         | 3.284247079 | -0.313094724 | 1.0504113 | -0.298069 | 0.765651 | NA       |
| AL928724.1         | 0.31437473  | -1.788572922 | 3.5930657 | -0.497785 | 0.618636 | NA       |
| CU466287.2         | 13.11159212 | -0.215265505 | 0.5445696 | -0.395295 | 0.692625 | 0.96736  |
| ms4a17a.5          | 6.111320098 | -0.073296755 | 0.7543206 | -0.097169 | 0.922592 | NA       |
| si:dkey-7j14.5     | 1239.217744 | 0.042076589  | 0.0895978 | 0.4696161 | 0.638629 | 0.959628 |
| CR847983.1         | 0 NA        | NA           | NA        | NA        | NA       | NA       |
| xkr5b              | 93.70253278 | 0.070833517  | 0.2069149 | 0.3423316 | 0.732101 | 0.971665 |
| pimr26             | 0 NA        | NA           | NA        | NA        | NA       | NA       |
| si:ch73-93k15.5    | 0 NA        | NA           | NA        | NA        | NA       | NA       |
| BX571880.1         | 229.9505776 | 0.149697633  | 0.1852455 | 0.808104  | 0.419031 | 0.906406 |
| si:ch211-252f13.5  | 40.82664262 | 0.474739684  | 0.3277137 | 1.4486418 | 0.147438 | 0.694625 |
| CR848844.1         | 28.81556003 | 0.251471617  | 0.36599   | 0.6870996 | 0.49202  | 0.931926 |
| wwpl               | 1204.204945 | -0.032005617 | 0.0854015 | -0.374766 | 0.707834 | 0.968664 |
| CR627496.1         | 0.981942784 | -1.029083186 | 1.9080416 | -0.53934  | 0.589652 | NA       |
| si:ch211-39f2.3    | 10.42746954 | -0.880917124 | 0.5993614 | -1.469759 | 0.141627 | NA       |
| pimr62             | 0 NA        | NA           | NA        | NA        | NA       | NA       |
| CU137680.1         | 0.157187365 | -0.955901296 | 4.0804729 | -0.234262 | 0.814781 | NA       |
| CU633855.1         | 0 NA        | NA           | NA        | NA        | NA       | NA       |
| cbx6b              | 34.23560852 | 0.058896199  | 0.3338099 | 0.1764363 | 0.859951 | 0.985773 |
| si:ch211-40k21.9   | 61.33725214 | -0.554340549 | 0.2547479 | -2.176036 | 0.029553 | 0.332786 |
| AL954861.1         | 0.173729368 | -0.955901296 | 4.0804729 | -0.234262 | 0.814781 | NA       |
| CR450727.1         | 82.74240847 | 0.241046591  | 0.2340864 | 1.0297336 | 0.303135 | 0.85729  |
| CT573103.1         | 0 NA        | NA           | NA        | NA        | NA       | NA       |
| si:dkey-7i4.15     | 44.26999235 | 0.389340673  | 0.2994472 | 1.300198  | 0.193533 | 0.757219 |
| AL772362.1         | 0.81823394  | 3.165585784  | 2.3439761 | 1.3505196 | 0.176849 | NA       |
| BX908750.1         | 41.17425501 | 0.246213923  | 0.3027558 | 0.8132427 | 0.416079 | 0.906237 |
| cyp8b2             | 5.987299308 | 0.019910089  | 0.7638936 | 0.026064  | 0.979206 | NA       |
| BX511311.2         | 0.157187365 | -0.955901296 | 4.0804729 | -0.234262 | 0.814781 | NA       |
| cyp8b3             | 15.60974665 | -0.065063711 | 0.4763226 | -0.136596 | 0.89135  | 0.989291 |
| BX511311.3         | 117.3057233 | 0.178817055  | 0.2158699 | 0.8283558 | 0.407469 | 0.901305 |
| CR847503.2         | 0 NA        | NA           | NA        | NA        | NA       | NA       |
| BX005083.1         | 0.330916733 | -1.849579229 | 3.2489867 | -0.569279 | 0.569167 | NA       |
| si:ch211-151m7.6   | 0.682853041 | 2.891318346  | 2.3286279 | 1.2416403 | 0.214369 | NA       |
| si:ch73-190f9.4    | 0.340386822 | -1.882368278 | 3.2159502 | -0.585323 | 0.558331 | NA       |
| BX072576.3         | 0 NA        | NA           | NA        | NA        | NA       | NA       |
| si:ch211-256e16.10 | 0 NA        | NA           | NA        | NA        | NA       | NA       |
| si:dkey-208c12.2   | 18.78687471 | 0.715100547  | 0.4464967 | 1.6015807 | 0.109248 | 0.623132 |
| CR391977.1         | 0 NA        | NA           | NA        | NA        | NA       | NA       |
| FP102921.2         | 0.847620474 | 0.550669627  | 2.2003584 | 0.2502636 | 0.802383 | NA       |
| si:dkey-114124.2   | 11.82398567 | 1.674951796  | 0.5839487 | 2.8683203 | 0.004127 | 0.089082 |
| ptprt              | 23.70192028 | 0.124673582  | 0.4038711 | 0.3086965 | 0.757552 | 0.975374 |
| si:ch211-107e6.5   | 4.471949143 | -0.081400179 | 0.8874605 | -0.091723 | 0.926918 | NA       |
| CR847898.3         | 5.051188451 | -1.291838366 | 0.8871025 | -1.456245 | 0.145325 | NA       |

|                   |             |              |           |           |          |          |
|-------------------|-------------|--------------|-----------|-----------|----------|----------|
| CU914602.1        | 17.08399337 | 0.473699881  | 0.4631911 | 1.0226879 | 0.306455 | 0.860027 |
| zgc:92912         | 86.41794598 | 0.399373115  | 0.2350906 | 1.6988049 | 0.089356 | 0.572876 |
| BX294100.2        | 0.476506538 | 2.394892832  | 2.8161716 | 0.8504073 | 0.395099 | NA       |
| CT573048.1        | 0.647019846 | -1.455099716 | 2.4289208 | -0.599073 | 0.549125 | NA       |
| BX663519.1        | 6.591603422 | -0.126700525 | 0.7352199 | -0.17233  | 0.863178 | NA       |
| CR376740.2        | 0.863344592 | -1.91853867  | 2.2027225 | -0.870985 | 0.383762 | NA       |
| arfgap3           | 236.2125636 | -0.209036898 | 0.1445967 | -1.445654 | 0.148274 | 0.696298 |
| si:dkey-238d18.6  | 0 NA        | NA           | NA        | NA        | NA       | NA       |
| CR548634.2        | 1.951268442 | -0.471982518 | 1.416302  | -0.33325  | 0.738946 | NA       |
| BX664750.3        | 0 NA        | NA           | NA        | NA        | NA       | NA       |
| si:dkey-175d9.1   | 0.173729368 | -0.955901296 | 4.0804729 | -0.234262 | 0.814781 | NA       |
| proser3           | 80.45932118 | -0.402543955 | 0.2179145 | -1.847256 | 0.06471  | 0.497355 |
| si:dkey-40c23.1   | 5.101474207 | -0.853404779 | 0.8763694 | -0.973796 | 0.330158 | NA       |
| BX548024.1        | 0.514116189 | -2.475533565 | 2.7461255 | -0.901464 | 0.367342 | NA       |
| FP236741.1        | 5.306123322 | 0.375251937  | 0.8149602 | 0.4604543 | 0.64519  | NA       |
| BX682556.1        | 2.982881774 | 0.648103983  | 1.1218246 | 0.5777231 | 0.563451 | NA       |
| tac3b             | 60.05258724 | 0.07257642   | 0.2482995 | 0.2922938 | 0.770062 | 0.975687 |
| BX088688.3        | 0.705528719 | 0.06743937   | 2.3808454 | 0.0283258 | 0.977402 | NA       |
| CR925804.1        | 1.667503729 | 3.073229702  | 1.7154383 | 1.7915128 | 0.073211 | NA       |
| si:ch211-66h3.4   | 0.316103113 | 0.005883447  | 3.3519121 | 0.0017553 | 0.9986   | NA       |
| CT868708.1        | 0.831198824 | 0.593716313  | 2.0278563 | 0.2927803 | 0.76969  | NA       |
| BX072559.1        | 1.164005578 | 0.473149093  | 1.8147078 | 0.2607302 | 0.794301 | NA       |
| CU571382.3        | 0 NA        | NA           | NA        | NA        | NA       | NA       |
| BX465205.2        | 0 NA        | NA           | NA        | NA        | NA       | NA       |
| CU137681.1        | 7.045272643 | 0.337401201  | 0.7266857 | 0.4643014 | 0.642432 | NA       |
| tmem82            | 71.79713447 | -0.169528191 | 0.2358122 | -0.718912 | 0.472195 | 0.924838 |
| BX324166.1        | 0 NA        | NA           | NA        | NA        | NA       | NA       |
| CU929312.1        | 1.519085666 | -0.960820623 | 1.561202  | -0.615436 | 0.538267 | NA       |
| BX005183.3        | 106.2204441 | -0.029756887 | 0.2132781 | -0.139522 | 0.889038 | 0.989291 |
| CU896691.2        | 0.955930692 | -0.991824331 | 2.0140721 | -0.492447 | 0.622403 | NA       |
| si:dkey-24111.2   | 0 NA        | NA           | NA        | NA        | NA       | NA       |
| igfn1.3           | 1849.118466 | 0.684935461  | 0.0861049 | 7.9546665 | 1.80E-15 | 9.60E-13 |
| si:ch211-108d22.2 | 117.0079712 | 0.318981691  | 0.229949  | 1.3871848 | 0.165385 | 0.721223 |
| BX908796.1        | 0 NA        | NA           | NA        | NA        | NA       | NA       |
| si:ch211-178n15.1 | 124.8612983 | -0.059397147 | 0.2064856 | -0.287658 | 0.773609 | 0.975687 |
| FP102073.1        | 0.166657454 | -0.955901296 | 4.0804729 | -0.234262 | 0.814781 | NA       |
| BX571794.1        | 0.173729368 | -0.955901296 | 4.0804729 | -0.234262 | 0.814781 | NA       |
| si:ch211-210b2.1  | 170.3112529 | -0.178401773 | 0.1805636 | -0.988027 | 0.323139 | 0.870607 |
| BX936342.1        | 0.341366344 | 1.891903201  | 3.2128156 | 0.5888614 | 0.555954 | NA       |
| si:dkey-42p14.6   | 0 NA        | NA           | NA        | NA        | NA       | NA       |
| CU137681.2        | 0 NA        | NA           | NA        | NA        | NA       | NA       |
| BX323450.1        | 0 NA        | NA           | NA        | NA        | NA       | NA       |
| CR762400.1        | 0.837170863 | -1.914744291 | 2.2413088 | -0.854297 | 0.39294  | NA       |
| si:dkey-7i4.14    | 4.661580719 | 0.621544004  | 0.8764442 | 0.7091655 | 0.478222 | NA       |
| FP102794.2        | 0.182570949 | 0.967652056  | 4.0804729 | 0.2371421 | 0.812547 | NA       |
| si:ch211-282b22.1 | 166.6205777 | 0.197977429  | 0.177783  | 1.1135901 | 0.265455 | 0.831302 |
| BX005101.1        | 0 NA        | NA           | NA        | NA        | NA       | NA       |
| CU306817.1        | 4.140681396 | -0.580134982 | 0.9250477 | -0.627141 | 0.530567 | NA       |
| wu:fb18f06        | 516.0257822 | -0.123252684 | 0.3886999 | -0.31709  | 0.751176 | 0.97419  |
| AL928908.3        | 8.127267753 | 1.080969928  | 0.7364091 | 1.4678932 | 0.142133 | NA       |
| si:ch211-246i5.5  | 253.2077275 | -0.120891522 | 0.1344496 | -0.899159 | 0.368568 | 0.888057 |
| CR848661.1        | 0.166657454 | -0.955901296 | 4.0804729 | -0.234262 | 0.814781 | NA       |
| si:ch73-265h17.4  | 6.621521321 | 0.903554781  | 0.8599918 | 1.0506551 | 0.293417 | NA       |
| BX120006.3        | 0.325573202 | 0.005883621  | 3.3172783 | 0.0017736 | 0.998585 | NA       |

|                   |             |              |           |           |          |          |
|-------------------|-------------|--------------|-----------|-----------|----------|----------|
| CR589941.1        | 0.158795395 | 0.967652056  | 4.0804729 | 0.2371421 | 0.812547 | NA       |
| CU469568.3        | 0.166657454 | -0.955901296 | 4.0804729 | -0.234262 | 0.814781 | NA       |
| CU138509.1        | 2.08755984  | -0.687114731 | 1.4598757 | -0.470667 | 0.637879 | NA       |
| CU571091.1        | 0           | NA           | NA        | NA        | NA       | NA       |
| BX936393.1        | 2.456158504 | 0.590997614  | 1.296749  | 0.4557533 | 0.648567 | NA       |
| BX511021.2        | 6.006776622 | 0.357849769  | 0.8333441 | 0.4294142 | 0.667622 | NA       |
| si:dkey-35i13.1   | 1043.012251 | 0.057803802  | 0.0960238 | 0.6019734 | 0.547192 | 0.945526 |
| FP243382.1        | 0           | NA           | NA        | NA        | NA       | NA       |
| atg2b             | 1.956333238 | 0.979788459  | 1.397679  | 0.7010111 | 0.483296 | NA       |
| tgm8              | 0.339758314 | 0.005883863  | 3.2682461 | 0.0018003 | 0.998564 | NA       |
| si:dkey-234i14.2  | 161.5812134 | -0.203754263 | 0.1732602 | -1.176001 | 0.239594 | 0.808091 |
| si:dkey-23k10.3   | 13.59131788 | -0.50396505  | 0.5597502 | -0.900339 | 0.36794  | 0.887482 |
| CR556709.1        | 0.332524763 | 0.005883742  | 3.292841  | 0.0017868 | 0.998574 | NA       |
| CR381579.2        | 0.31437473  | -1.788572922 | 3.5930657 | -0.497785 | 0.618636 | NA       |
| si:dkey-7i4.16    | 15.52073907 | 0.059145308  | 0.5073256 | 0.1165825 | 0.907191 | 0.990702 |
| BX001030.2        | 0           | NA           | NA        | NA        | NA       | NA       |
| BX936406.2        | 0.158795395 | 0.967652056  | 4.0804729 | 0.2371421 | 0.812547 | NA       |
| trappc2           | 717.5011266 | -0.054309982 | 0.1102939 | -0.492412 | 0.622428 | 0.957354 |
| BX511124.1        | 0           | NA           | NA        | NA        | NA       | NA       |
| tesmin            | 0.497574187 | -2.437446738 | 2.6012773 | -0.937019 | 0.348749 | NA       |
| BX324206.2        | 251.2353742 | -0.016693373 | 0.1474868 | -0.113186 | 0.909883 | 0.990702 |
| si:ch211-235m3.10 | 97.61100882 | 0.139975718  | 0.2047979 | 0.6834823 | 0.494302 | 0.931926 |
| CU076099.1        | 6.786828283 | -0.807092876 | 0.7399194 | -1.090785 | 0.275368 | NA       |
| BX569785.1        | 3.331127399 | -1.220879481 | 1.059262  | -1.152576 | 0.249085 | NA       |
| si:ch211-13912.1  | 0.871516381 | 0.597595468  | 2.1830013 | 0.2737495 | 0.784277 | NA       |
| BX005048.1        | 2.825303351 | -0.153247859 | 1.0990189 | -0.139441 | 0.889102 | NA       |
| CR381579.3        | 0           | NA           | NA        | NA        | NA       | NA       |
| FP016235.1        | 1.371798472 | 1.585251294  | 1.7681373 | 0.8965657 | 0.369951 | NA       |
| CU633978.1        | 0.489712128 | -0.887840729 | 2.693685  | -0.329601 | 0.741702 | NA       |
| CU207301.2        | 0.476747244 | 2.393381959  | 3.0525537 | 0.7840589 | 0.433006 | NA       |
| CR450824.1        | 0.957659075 | -0.005829811 | 1.9622935 | -0.002971 | 0.99763  | NA       |
| ftr90             | 2.537720814 | 1.029316458  | 1.2979922 | 0.7930066 | 0.427774 | NA       |
| si:ch211-241f5.3  | 13.84922759 | -0.348914221 | 0.5666871 | -0.615709 | 0.538087 | 0.943336 |
| si:ch211-244k5.1  | 0.678375468 | -2.878459328 | 2.4926399 | -1.154783 | 0.248179 | NA       |
| CR383683.1        | 0           | NA           | NA        | NA        | NA       | NA       |
| sptbn5            | 301.4082733 | -0.133044559 | 0.128733  | -1.033492 | 0.301374 | 0.856944 |
| si:ch211-235i11.3 | 56.22873339 | 0.194131864  | 0.2708137 | 0.7168465 | 0.473469 | 0.924993 |
| FP325112.1        | 1.213552517 | 0.460811839  | 1.8129902 | 0.2541723 | 0.799362 | NA       |
| CT573316.3        | 0           | NA           | NA        | NA        | NA       | NA       |
| si:ch73-265h17.5  | 0.31598276  | 0.005883445  | 3.3523626 | 0.001755  | 0.9986   | NA       |
| CT867948.1        | 0.666939546 | 1.487980453  | 2.2924711 | 0.6490727 | 0.516291 | NA       |
| BX629346.2        | 0           | NA           | NA        | NA        | NA       | NA       |
| pclaf             | 94.8660572  | -0.087538199 | 0.209761  | -0.417323 | 0.676442 | 0.965257 |
| si:ch211-116o3.5  | 345.9632217 | 0.01337926   | 0.1190701 | 0.1123646 | 0.910534 | 0.990805 |
| si:ch211-248a14.8 | 412.9098232 | -0.810080242 | 0.1135077 | -7.136784 | 9.55E-13 | 3.37E-10 |
| CU137681.3        | 0.365141898 | 1.973577737  | 3.3927314 | 0.5817076 | 0.560764 | NA       |
| si:ch73-71c20.5   | 189.641317  | -0.057835776 | 0.1598409 | -0.361833 | 0.717477 | 0.96909  |
| si:dkey-117a8.4   | 0.31598276  | 0.005883445  | 3.3523626 | 0.001755  | 0.9986   | NA       |
| si:dkey-23k10.2   | 5.820720922 | 0.08913485   | 0.7749794 | 0.1150158 | 0.908433 | NA       |
| AL954831.1        | 11.63417131 | -2.156752745 | 0.6607951 | -3.263875 | 0.001099 | 0.033254 |
| si:ch1073-66123.1 | 0.166657454 | -0.955901296 | 4.0804729 | -0.234262 | 0.814781 | NA       |
| ccdc36            | 0.325573202 | 0.005883621  | 3.3172783 | 0.0017736 | 0.998585 | NA       |
| birc6-as2         | 277.3386825 | 0.065289253  | 0.1307809 | 0.4992264 | 0.61762  | 0.957354 |
| BX323807.2        | 0.182570949 | 0.967652056  | 4.0804729 | 0.2371421 | 0.812547 | NA       |

|                   |             |              |           |           |          |          |
|-------------------|-------------|--------------|-----------|-----------|----------|----------|
| CR786576.1        | 0.166657454 | -0.955901296 | 4.0804729 | -0.234262 | 0.814781 | NA       |
| BX957311.1        | 0.657349104 | 1.487939685  | 2.418178  | 0.6153144 | 0.538347 | NA       |
| CR848667.1        | 64.87118854 | -0.238473278 | 0.2582381 | -0.923463 | 0.355766 | 0.882675 |
| BX927318.1        | 0 NA        | NA           | NA        | NA        | NA       | NA       |
| FP017215.1        | 61.0240387  | 0.093037795  | 0.2626269 | 0.3542584 | 0.723145 | 0.970402 |
| BX571794.2        | 0 NA        | NA           | NA        | NA        | NA       | NA       |
| stard10           | 407.0578637 | -0.111008579 | 0.1216448 | -0.912563 | 0.361472 | 0.885719 |
| CU469514.1        | 9.633229107 | -0.217189841 | 0.6519728 | -0.333127 | 0.739038 | NA       |
| BX005129.3        | 1.307705362 | 1.570322523  | 1.7311786 | 0.9070829 | 0.364363 | NA       |
| CU207301.3        | 55.05136116 | -0.196518874 | 0.2690863 | -0.730319 | 0.465195 | 0.923671 |
| BX927282.3        | 0.323844819 | -1.825095364 | 3.274639  | -0.557342 | 0.577293 | NA       |
| BX936342.2        | 7.119768586 | -0.51306066  | 0.7780991 | -0.659377 | 0.509654 | NA       |
| si:dkey-96g2.1    | 81.11515261 | 0.224024542  | 0.239657  | 0.9347716 | 0.349906 | 0.880195 |
| si:ch211-149e23.4 | 6.830865503 | 0.964924105  | 0.7301415 | 1.3215577 | 0.186315 | NA       |
| CR388132.1        | 0.182570949 | 0.967652056  | 4.0804729 | 0.2371421 | 0.812547 | NA       |
| CR352243.2        | 1.345005284 | -3.868052513 | 1.8793794 | -2.058154 | 0.039575 | NA       |
| CR936482.1        | 50.86453932 | -0.054686354 | 0.2721382 | -0.200951 | 0.840737 | 0.985092 |
| CR932000.1        | 2.419057007 | 1.447667353  | 1.3204404 | 1.0963519 | 0.272925 | NA       |
| BX957346.3        | 0.650476611 | 1.436325931  | 2.5890223 | 0.5547754 | 0.579048 | NA       |
| CR628365.1        | 5.646950269 | 0.164583181  | 0.7969749 | 0.2065099 | 0.836393 | NA       |
| si:dkey-188h10.3  | 29.72911578 | -0.105150101 | 0.3739276 | -0.281204 | 0.778554 | 0.975942 |
| AL929222.2        | 232.3066419 | 0.004785965  | 0.1459721 | 0.0327869 | 0.973845 | 0.996316 |
| si:dkey-238d18.9  | 0 NA        | NA           | NA        | NA        | NA       | NA       |
| e1ob              | 69.67235698 | 0.039713676  | 0.2552904 | 0.1555627 | 0.876378 | 0.987881 |
| CT954240.1        | 11.69215885 | 0.509933207  | 0.5805413 | 0.8783754 | 0.37974  | 0.895192 |
| si:dkey-276j7.2   | 6.240876056 | 0.146482846  | 0.7465726 | 0.1962071 | 0.844448 | NA       |
| CU861501.1        | 0 NA        | NA           | NA        | NA        | NA       | NA       |
| BX323987.1        | 0 NA        | NA           | NA        | NA        | NA       | NA       |
| si:rp71-7711.1    | 194.8013077 | -0.062351452 | 0.160018  | -0.389653 | 0.696793 | 0.96736  |
| CU464118.1        | 16.84385782 | -0.343728319 | 0.46631   | -0.737124 | 0.461047 | 0.922038 |
| CR381621.1        | 0.496945679 | -0.834564081 | 2.8549631 | -0.29232  | 0.770042 | NA       |
| BX511195.1        | 0.157187365 | -0.955901296 | 4.0804729 | -0.234262 | 0.814781 | NA       |
| CR854827.3        | 6.167897666 | -0.089508803 | 0.7668564 | -0.116722 | 0.907081 | NA       |
| si:rp71-7711.2    | 5.839687843 | -0.092318545 | 0.8058766 | -0.114557 | 0.908797 | NA       |
| slirp             | 464.7855245 | 0.057915276  | 0.1187364 | 0.4877635 | 0.625717 | 0.957354 |
| CR749763.5        | 0 NA        | NA           | NA        | NA        | NA       | NA       |
| CR626882.3        | 2.3196264   | 0.865094859  | 1.3065791 | 0.6621067 | 0.507903 | NA       |
| BX511010.1        | 0.158795395 | 0.967652056  | 4.0804729 | 0.2371421 | 0.812547 | NA       |
| CU929206.2        | 2.096119431 | -0.243119099 | 1.3460585 | -0.180616 | 0.856669 | NA       |
| CR628327.1        | 2.658446477 | 0.052794587  | 1.2320497 | 0.042851  | 0.96582  | NA       |
| BX005234.1        | 12.91137592 | 0.444713445  | 0.5303063 | 0.8385973 | 0.401695 | 0.90084  |
| CU693494.2        | 7.571844566 | -0.500165671 | 0.7311573 | -0.684074 | 0.493928 | NA       |
| CT573392.1        | 7.193105622 | -0.345332504 | 0.7160026 | -0.482306 | 0.629588 | NA       |
| BX936364.1        | 1.824409104 | 2.133966183  | 1.6102851 | 1.3252101 | 0.185101 | NA       |
| BX537342.1        | 66.33248613 | 0.069146889  | 0.2473129 | 0.2795928 | 0.77979  | 0.976146 |
| mhc11ia           | 4.867857203 | -0.695495728 | 0.9608646 | -0.723823 | 0.469174 | NA       |
| BX000438.1        | 13.92085297 | 0.925284113  | 0.513457  | 1.8020674 | 0.071535 | 0.522931 |
| BX649397.1        | 0.339758314 | 0.005883863  | 3.2682461 | 0.0018003 | 0.998564 | NA       |
| si:ch211-167j9.4  | 163.9225224 | 0.016326865  | 0.1714781 | 0.0952125 | 0.924146 | 0.992676 |
| BX571786.1        | 0.498674062 | 0.926637565  | 2.6784892 | 0.3459553 | 0.729376 | NA       |
| si:ch211-185a18.2 | 120.4820836 | 0.002172586  | 0.1949908 | 0.011142  | 0.99111  | 0.997679 |
| CR391910.3        | 31.26832741 | -0.168322895 | 0.3476509 | -0.484172 | 0.628264 | 0.957354 |
| CR387996.1        | 8.146601351 | 0.072717656  | 0.6561651 | 0.1108222 | 0.911757 | NA       |
| BX465205.3        | 0 NA        | NA           | NA        | NA        | NA       | NA       |

|                   |             |              |           |           |          |          |
|-------------------|-------------|--------------|-----------|-----------|----------|----------|
| si:ch1073-80i24.3 | 1.03821512  | 0.108887395  | 2.0296353 | 0.0536487 | 0.957215 | NA       |
| BX005183.4        | 0           | NA           | NA        | NA        | NA       | NA       |
| CR385053.2        | 0           | NA           | NA        | NA        | NA       | NA       |
| BX649559.1        | 2.956467339 | 0.638032639  | 1.0953084 | 0.5825141 | 0.56022  | NA       |
| CU683879.2        | 1.817897916 | -0.178150001 | 1.5333529 | -0.116183 | 0.907507 | NA       |
| si:dkey-42123.4   | 0.365141898 | 1.973577737  | 3.3927314 | 0.5817076 | 0.560764 | NA       |
| ccdc162           | 0.82223689  | -0.634107248 | 2.2243871 | -0.285071 | 0.77559  | NA       |
| CU467862.1        | 0.158795395 | 0.967652056  | 4.0804729 | 0.2371421 | 0.812547 | NA       |
| BX572077.2        | 0.173729368 | -0.955901296 | 4.0804729 | -0.234262 | 0.814781 | NA       |
| pon3.2            | 128.4781951 | 0.097044816  | 0.1810421 | 0.5360346 | 0.591935 | 0.954434 |
| si:dkey-234i14.6  | 56.70970534 | -0.332815008 | 0.2749378 | -1.21051  | 0.226083 | 0.793638 |
| FP325112.2        | 0.65919784  | 2.852228985  | 2.3514193 | 1.2129819 | 0.225137 | NA       |
| si:ch211-33e4.3   | 0.341486697 | 1.892317624  | 3.2124068 | 0.5890654 | 0.555817 | NA       |
| CR626944.1        | 26.42144536 | -0.379804236 | 0.3714747 | -1.022423 | 0.306581 | 0.860027 |
| zgc:162952        | 101.0213417 | -0.333126545 | 0.197469  | -1.686982 | 0.091607 | 0.57849  |
| AL845357.1        | 0           | NA           | NA        | NA        | NA       | NA       |
| tomm6             | 454.3891173 | -0.096069955 | 0.1074166 | -0.894368 | 0.371125 | 0.891368 |
| CU929037.3        | 0.990234925 | 0.997648457  | 1.9937656 | 0.500384  | 0.616805 | NA       |
| zgc:194207        | 21.93246185 | -0.329975865 | 0.4139957 | -0.797051 | 0.425421 | 0.908944 |
| CR788235.1        | 9.7309971   | -0.269219972 | 0.6451779 | -0.41728  | 0.676473 | NA       |
| BX470154.1        | 0.658957134 | 2.851427774  | 2.5143902 | 1.1340434 | 0.256776 | NA       |
| si:dkey-238d18.12 | 0.157187365 | -0.955901296 | 4.0804729 | -0.234262 | 0.814781 | NA       |
| si:ch211-275j6.5  | 149.6087404 | -0.175761561 | 0.1686202 | -1.042352 | 0.297249 | 0.853945 |
| lypc              | 249.8912572 | -0.325457356 | 0.1459595 | -2.229778 | 0.025762 | 0.310555 |
| CR376747.1        | 0.347458735 | -1.908042286 | 3.4571486 | -0.551912 | 0.581009 | NA       |
| BX530017.2        | 0.649418021 | -1.460710349 | 2.4263694 | -0.602015 | 0.547164 | NA       |
| si:dkey-77f5.4    | 87.18585644 | -0.215387036 | 0.2146738 | -1.003322 | 0.315705 | 0.866931 |
| si:ch211-256e16.8 | 0.158915748 | 0.967652056  | 4.0804729 | 0.2371421 | 0.812547 | NA       |
| CR925777.1        | 1.84053231  | -1.37010149  | 1.4806889 | -0.925314 | 0.354803 | NA       |
| BX324126.1        | 0.158795395 | 0.967652056  | 4.0804729 | 0.2371421 | 0.812547 | NA       |
| si:ch73-144d13.5  | 37.44085726 | 0.227053115  | 0.3242909 | 0.7001526 | 0.483832 | 0.929461 |
| BX927323.1        | 3.447718472 | -0.16613126  | 1.0336897 | -0.160717 | 0.872316 | NA       |
| CU928129.1        | 18.65434265 | 0.139546779  | 0.4738975 | 0.2944662 | 0.768402 | 0.975687 |
| si:dkey-117a8.1   | 11.00960235 | 0.470630309  | 0.6157065 | 0.7643744 | 0.444644 | NA       |
| CT027582.2        | 0           | NA           | NA        | NA        | NA       | NA       |
| zfn576.1          | 445.6729692 | 0.080945564  | 0.1110559 | 0.7288719 | 0.46608  | 0.923865 |
| BX005129.4        | 2.43077492  | 0.191228689  | 1.3198632 | 0.1448852 | 0.884801 | NA       |
| CR933839.1        | 0           | NA           | NA        | NA        | NA       | NA       |
| CU464125.1        | 0           | NA           | NA        | NA        | NA       | NA       |
| smco4             | 174.7682576 | 0.059958828  | 0.1605675 | 0.3734181 | 0.708837 | 0.968664 |
| BX465227.1        | 107.1683688 | -0.006803363 | 0.2049323 | -0.033198 | 0.973517 | 0.996315 |
| si:dkey-239b22.2  | 827.8343215 | 0.07292412   | 0.095995  | 0.7596659 | 0.447454 | 0.917154 |
| lrplaa            | 2439.892972 | 0.078945423  | 0.0799365 | 0.987602  | 0.323348 | 0.870761 |
| CR848825.1        | 0           | NA           | NA        | NA        | NA       | NA       |
| CU463231.1        | 1.81137194  | -0.850924164 | 1.44611   | -0.588423 | 0.556249 | NA       |
| CR382327.3        | 36.86108574 | 0.061235614  | 0.3480782 | 0.1759249 | 0.860353 | 0.985773 |
| BX571712.1        | 0.69605863  | 0.094390757  | 2.3912825 | 0.0394729 | 0.968513 | NA       |
| CR388050.1        | 0.173729368 | -0.955901296 | 4.0804729 | -0.234262 | 0.814781 | NA       |
| pimr40            | 0           | NA           | NA        | NA        | NA       | NA       |
| si:dkey-42123.1   | 1.005718337 | -0.979164561 | 1.8926618 | -0.517348 | 0.604913 | NA       |
| si:ch211-235i11.6 | 24.12032578 | -0.614508688 | 0.4040379 | -1.520918 | 0.12828  | 0.658954 |
| si:dkey-42123.6   | 0.157187365 | -0.955901296 | 4.0804729 | -0.234262 | 0.814781 | NA       |
| CR933730.1        | 8.095741417 | 0.139573932  | 0.679507  | 0.2054047 | 0.837256 | NA       |
| zfn1134           | 106.9072146 | -0.00841241  | 0.1926622 | -0.043664 | 0.965172 | 0.996154 |

|                   |             |              |           |           |          |          |
|-------------------|-------------|--------------|-----------|-----------|----------|----------|
| BX088540.1        | 1.383275679 | -0.656799705 | 1.8044095 | -0.363997 | 0.71586  | NA       |
| si:ch211-105j21.9 | 98.47180405 | -0.139140114 | 0.2292979 | -0.606809 | 0.543977 | 0.945438 |
| si:dkey-74h17.3   | 0.323844819 | -1.825095364 | 3.274639  | -0.557342 | 0.577293 | NA       |
| si:ch211-269k10.4 | 3.014007976 | -0.610927598 | 1.0969643 | -0.556926 | 0.577578 | NA       |
| BX927395.1        | 0           | NA           | NA        | NA        | NA       | NA       |
| CT583687.2        | 0.158915748 | 0.967652056  | 4.0804729 | 0.2371421 | 0.812547 | NA       |
| CR792439.1        | 1.721188513 | 1.296357207  | 1.608938  | 0.8057223 | 0.420403 | NA       |
| BX323586.3        | 165.451494  | 0.058072462  | 0.1729969 | 0.335685  | 0.737108 | 0.972535 |
| CR377210.1        | 4.38081309  | 0.128634759  | 0.9796286 | 0.1313097 | 0.89553  | NA       |
| BX255963.2        | 1.345943521 | -1.646286758 | 1.8089979 | -0.910055 | 0.362794 | NA       |
| CT025854.1        | 0.157187365 | -0.955901296 | 4.0804729 | -0.234262 | 0.814781 | NA       |
| BX324134.1        | 0           | NA           | NA        | NA        | NA       | NA       |
| CR376776.1        | 0.641435609 | -0.01573847  | 2.4541227 | -0.006413 | 0.994883 | NA       |
| CU041346.1        | 0           | NA           | NA        | NA        | NA       | NA       |
| si:dkeyp-84f3.9   | 361.4847919 | -0.038771604 | 0.1154981 | -0.33569  | 0.737104 | 0.972535 |
| CR847983.2        | 0           | NA           | NA        | NA        | NA       | NA       |
| CR381579.4        | 0.317711143 | 1.810477155  | 3.2978238 | 0.5489915 | 0.583011 | NA       |
| BX294160.1        | 26.88149346 | -0.169685455 | 0.3637669 | -0.466468 | 0.640881 | 0.959994 |
| si:dkey-1m11.6    | 9.44411535  | 0.650130297  | 0.6391851 | 1.0171237 | 0.309095 | NA       |
| pimr13            | 0           | NA           | NA        | NA        | NA       | NA       |
| si:ch1073-145m9.1 | 38.32885917 | -0.011612691 | 0.318611  | -0.036448 | 0.970925 | 0.996315 |
| si:ch211-137j23.6 | 2.169603562 | -0.184549162 | 1.2705658 | -0.14525  | 0.884514 | NA       |
| BX530721.1        | 1.479637323 | -1.831571174 | 1.7087478 | -1.071879 | 0.283774 | NA       |
| BX548170.1        | 0           | NA           | NA        | NA        | NA       | NA       |
| CR786577.1        | 103.5934394 | -0.030313038 | 0.1988818 | -0.152417 | 0.878858 | 0.987881 |
| si:dkey-40g16.5   | 1.821862836 | 0.277118821  | 1.3683718 | 0.2025172 | 0.839512 | NA       |
| si:ch211-167b20.8 | 311.7006891 | 0.150778341  | 0.1245838 | 1.2102562 | 0.226181 | 0.793699 |
| CU694532.1        | 19.19541012 | -0.227887683 | 0.4908593 | -0.464263 | 0.64246  | 0.959994 |
| BX323824.1        | 10.70795982 | -0.21578648  | 0.5841125 | -0.369426 | 0.71181  | NA       |
| CR936518.2        | 1.649579861 | 1.177080862  | 1.5643645 | 0.7524339 | 0.45179  | NA       |
| CR759927.2        | 13.58033287 | -0.196388789 | 0.5152725 | -0.381136 | 0.703103 | 0.968134 |
| CU928013.1        | 126.7394458 | -0.118007886 | 0.178447  | -0.661305 | 0.508417 | 0.93575  |
| CU104777.1        | 30.61815223 | -0.78046587  | 0.3689007 | -2.115653 | 0.034374 | 0.360397 |
| BX293559.1        | 0           | NA           | NA        | NA        | NA       | NA       |
| si:ch73-265h17.2  | 1.664675471 | 0.590386896  | 1.4423769 | 0.4093153 | 0.682308 | NA       |
| si:ch1073-100f3.2 | 35.07456725 | 0.09260592   | 0.3370951 | 0.2747175 | 0.783533 | 0.97627  |
| CR751227.2        | 4.442074287 | -0.662365379 | 0.9584808 | -0.691058 | 0.489529 | NA       |
| BX470264.1        | 246.3363215 | 0.070730094  | 0.1374265 | 0.5146758 | 0.60678  | 0.956718 |
| CR352228.1        | 1.332030356 | 0.764519523  | 1.7290471 | 0.4421623 | 0.658372 | NA       |
| BX000451.1        | 0.998646424 | -0.967051882 | 1.9878844 | -0.486473 | 0.626632 | NA       |
| sgipla            | 1125.270141 | 0.191988865  | 0.0874445 | 2.1955504 | 0.028124 | 0.325071 |
| BX649266.2        | 0           | NA           | NA        | NA        | NA       | NA       |
| si:ch73-90p23.1   | 4.934307356 | -0.614482725 | 0.8761549 | -0.70134  | 0.483091 | NA       |
| si:ch73-204p21.2  | 388.4779185 | -0.170628114 | 0.1233484 | -1.383302 | 0.166572 | 0.723276 |
| BX927184.1        | 193.5061304 | 0.024448382  | 0.1610901 | 0.1517684 | 0.87937  | 0.987881 |
| CR387921.1        | 0.513487682 | -0.887846295 | 2.6557956 | -0.334305 | 0.738149 | NA       |
| CU928083.1        | 2.308396687 | -0.898297445 | 1.409892  | -0.637139 | 0.524034 | NA       |
| BX322555.4        | 3.399928744 | 0.950587486  | 1.0958152 | 0.8674706 | 0.385684 | NA       |
| si:dkey-195m11.11 | 28.72459228 | -0.33776229  | 0.3641779 | -0.927465 | 0.353685 | 0.881976 |
| BX293567.1        | 4.783024248 | -1.644244418 | 0.9096227 | -1.807611 | 0.070667 | NA       |
| CU179756.1        | 1.702446761 | -1.140108979 | 1.5927163 | -0.715827 | 0.474098 | NA       |
| BX649356.1        | 0           | NA           | NA        | NA        | NA       | NA       |
| CT574587.1        | 1.643418446 | 0.563086621  | 1.5874073 | 0.354721  | 0.722799 | NA       |
| AL929309.1        | 0.31759079  | 1.807926197  | 3.579045  | 0.5051421 | 0.613459 | NA       |

|                    |             |              |           |           |          |          |
|--------------------|-------------|--------------|-----------|-----------|----------|----------|
| si:ch211-137j23.7  | 0           | NA           | NA        | NA        | NA       | NA       |
| AL954666.1         | 4.809334783 | -0.331918441 | 0.9043803 | -0.367012 | 0.71361  | NA       |
| tex36              | 1.456092431 | 0.343959518  | 1.5906412 | 0.2162395 | 0.828801 | NA       |
| BX465857.1         | 0.665169878 | -0.08121369  | 2.4261845 | -0.033474 | 0.973297 | NA       |
| CR385026.2         | 0           | NA           | NA        | NA        | NA       | NA       |
| BX663528.1         | 0           | NA           | NA        | NA        | NA       | NA       |
| CU464134.1         | 0.474778155 | 0.852397662  | 2.898154  | 0.2941175 | 0.768668 | NA       |
| si:ch73-40a17.4    | 32.29036248 | -0.520445309 | 0.3677643 | -1.41516  | 0.157022 | 0.707677 |
| BX005392.3         | 5.466176727 | 0.792517542  | 0.8459409 | 0.9368474 | 0.348837 | NA       |
| BX323557.1         | 12.77086786 | 0.595985107  | 0.5635802 | 1.0574983 | 0.290284 | 0.846262 |
| BX510649.1         | 3.103483828 | -1.476946765 | 1.190938  | -1.240154 | 0.214918 | NA       |
| CR762392.1         | 0           | NA           | NA        | NA        | NA       | NA       |
| si:dkey-22114.10   | 29.8871531  | 0.295386378  | 0.3563554 | 0.8289094 | 0.407156 | 0.901305 |
| FP102895.1         | 0           | NA           | NA        | NA        | NA       | NA       |
| CT955996.1         | 0           | NA           | NA        | NA        | NA       | NA       |
| asb5a              | 66.3211357  | -0.285809649 | 0.2452683 | -1.165294 | 0.2439   | 0.813336 |
| CU467879.1         | 0           | NA           | NA        | NA        | NA       | NA       |
| pimr175            | 0.317711143 | 1.810477155  | 3.2978238 | 0.5489915 | 0.583011 | NA       |
| si:ch211-207d10.2  | 0           | NA           | NA        | NA        | NA       | NA       |
| CR926464.1         | 0.838899245 | -0.667458734 | 2.2321093 | -0.299026 | 0.76492  | NA       |
| BX664614.1         | 15.55092889 | -0.091148896 | 0.4914172 | -0.185482 | 0.852851 | 0.985174 |
| CU137681.4         | 0           | NA           | NA        | NA        | NA       | NA       |
| CR354430.3         | 1.797777553 | -1.440446692 | 1.5706073 | -0.917127 | 0.359076 | NA       |
| mespbb             | 1.030002046 | -2.236497097 | 2.086282  | -1.072001 | 0.283719 | NA       |
| BX901883.3         | 0.791121974 | 0.591938164  | 2.3987483 | 0.2467696 | 0.805087 | NA       |
| BX663520.1         | 4.208877474 | 1.074534053  | 0.9885303 | 1.0870016 | 0.277036 | NA       |
| CU469568.4         | 1.320910952 | -0.001675893 | 1.6383744 | -0.001023 | 0.999184 | NA       |
| si:ch211-284e13.14 | 18.85396831 | -0.474657591 | 0.4492145 | -1.056639 | 0.290676 | 0.84639  |
| BX469902.1         | 62.85561173 | 0.38259446   | 0.2547833 | 1.5016468 | 0.133188 | 0.667628 |
| CT956066.1         | 1.98262732  | 0.994786605  | 1.343037  | 0.7406993 | 0.458876 | NA       |
| CR391915.1         | 0.158915748 | 0.967652056  | 4.0804729 | 0.2371421 | 0.812547 | NA       |
| CU137680.2         | 0           | NA           | NA        | NA        | NA       | NA       |
| si:dkey-248g15.3   | 191.121003  | 0.002817772  | 0.1772154 | 0.0159003 | 0.987314 | 0.997136 |
| BX511132.1         | 0           | NA           | NA        | NA        | NA       | NA       |
| BX571762.2         | 130.1716261 | 0.083799569  | 0.1766581 | 0.4743603 | 0.635243 | 0.957927 |
| CR589875.2         | 16.32207788 | 0.45625932   | 0.5049516 | 0.9035704 | 0.366223 | 0.887239 |
| arhgef33           | 48.64014882 | -0.300311793 | 0.2833073 | -1.060021 | 0.289135 | 0.845979 |
| BX936420.1         | 0.648627875 | -0.032651702 | 2.3257531 | -0.014039 | 0.988799 | NA       |
| BX950217.1         | 1.323549833 | -0.005077815 | 1.6547343 | -0.003069 | 0.997552 | NA       |
| BX942813.1         | 11.67413946 | -0.127086185 | 0.5580985 | -0.227713 | 0.81987  | 0.981594 |
| FP089511.1         | 1.972456444 | -2.287264619 | 1.5585685 | -1.467542 | 0.142229 | NA       |
| BX004769.1         | 0.499302569 | -0.916836436 | 2.6772503 | -0.342455 | 0.732009 | NA       |
| BX957251.1         | 0.515216064 | 0.926382026  | 2.6525479 | 0.3492423 | 0.726907 | NA       |
| CT033842.1         | 0.182570949 | 0.967652056  | 4.0804729 | 0.2371421 | 0.812547 | NA       |
| si:ch1073-190k2.1  | 358.9433959 | -0.091089292 | 0.1497559 | -0.608252 | 0.543021 | 0.944974 |
| CU855685.1         | 10.72470475 | -0.202537037 | 0.5923279 | -0.341934 | 0.732401 | NA       |
| CR812464.1         | 0.158795395 | 0.967652056  | 4.0804729 | 0.2371421 | 0.812547 | NA       |
| BX000364.1         | 0           | NA           | NA        | NA        | NA       | NA       |
| CR387984.1         | 0           | NA           | NA        | NA        | NA       | NA       |
| ugt1b3             | 3.13451943  | -0.517093665 | 1.149453  | -0.449861 | 0.652811 | NA       |
| BX005375.1         | 25.37001786 | -0.055226379 | 0.3811113 | -0.144909 | 0.884783 | 0.988838 |
| BX957228.1         | 0           | NA           | NA        | NA        | NA       | NA       |
| BX323067.1         | 4.541776841 | 0.344891935  | 0.9083119 | 0.3797065 | 0.704163 | NA       |
| BX571712.2         | 14.86318731 | -0.534655767 | 0.5435277 | -0.983677 | 0.325274 | 0.871659 |



|                   |             |              |           |           |          |          |
|-------------------|-------------|--------------|-----------|-----------|----------|----------|
| EIF3J (1 of many) | 0.333314908 | -1.858695402 | 3.5126701 | -0.52914  | 0.596708 | NA       |
| CR293498.1        | 0           | NA           | NA        | NA        | NA       | NA       |
| BX005450.1        | 5.653478658 | 0.426888659  | 0.8909377 | 0.4791453 | 0.631835 | NA       |
| si:ch211-191c10.1 | 1.514490996 | -1.013920941 | 1.6627523 | -0.609785 | 0.542004 | NA       |
| FP102071.1        | 0           | NA           | NA        | NA        | NA       | NA       |
| BX571774.1        | 0.48448895  | 0.85344211   | 2.878836  | 0.2964539 | 0.766883 | NA       |
| CR848784.1        | 0.967129164 | -0.023635743 | 1.9568585 | -0.012078 | 0.990363 | NA       |
| si:ch211-272b8.7  | 1.008426242 | 2.234978276  | 1.9960971 | 1.1196742 | 0.262853 | NA       |
| CR376785.1        | 0           | NA           | NA        | NA        | NA       | NA       |
| BX640549.1        | 1.176929177 | -1.307615778 | 1.8713043 | -0.698772 | 0.484694 | NA       |
| ftr91             | 7.979834853 | -0.731789211 | 0.7242042 | -1.010474 | 0.312268 | NA       |
| BX004996.1        | 0.158795395 | 0.967652056  | 4.0804729 | 0.2371421 | 0.812547 | NA       |
| AL929523.1        | 1.682365422 | -3.065563608 | 1.7200617 | -1.78224  | 0.07471  | NA       |
| CU633486.1        | 1.862139108 | 0.2356309    | 1.4264702 | 0.1651846 | 0.868799 | NA       |
| BX000438.2        | 132.4173    | -0.005910491 | 0.1943937 | -0.030405 | 0.975744 | 0.996762 |
| itgae.1           | 4.974666197 | -0.592366691 | 0.8515414 | -0.69564  | 0.486654 | NA       |
| si:ch211-130m23.5 | 233.3268214 | 0.04817647   | 0.1399716 | 0.3441875 | 0.730705 | 0.97149  |
| CU571179.1        | 0           | NA           | NA        | NA        | NA       | NA       |
| CT573139.2        | 0.646899493 | -1.455098895 | 2.4290529 | -0.59904  | 0.549146 | NA       |
| BX539313.3        | 3.381035397 | -1.21552056  | 1.0793432 | -1.126167 | 0.260095 | NA       |
| pet100            | 186.1489145 | 0.061533679  | 0.189009  | 0.3255595 | 0.744758 | 0.974094 |
| BX005129.5        | 1.659762023 | 4.182023077  | 1.7410023 | 2.4020779 | 0.016302 | NA       |
| si:dkey-111k8.2   | 48.78551658 | 0.168201866  | 0.2738274 | 0.6142624 | 0.539042 | 0.943733 |
| CR936378.1        | 30.88982164 | -0.14780929  | 0.3396145 | -0.435227 | 0.663398 | 0.964736 |
| AL928707.1        | 0.158915748 | 0.967652056  | 4.0804729 | 0.2371421 | 0.812547 | NA       |
| si:dkey-262k9.2   | 995.1567206 | 0.154634414  | 0.0915283 | 1.6894708 | 0.091129 | 0.578217 |
| CR548622.1        | 3.790102121 | 0.575435662  | 1.0798266 | 0.5328963 | 0.594105 | NA       |
| si:dkey-238d18.8  | 0           | NA           | NA        | NA        | NA       | NA       |
| si:dkey-77f5.14   | 70.73560484 | -0.024680714 | 0.2450442 | -0.100719 | 0.919773 | 0.991852 |
| BX890602.1        | 1.551033009 | 0.394774418  | 1.6365296 | 0.2412266 | 0.80938  | NA       |
| si:ch211-129o18.4 | 7.720834242 | -0.215556094 | 0.7229517 | -0.298161 | 0.76558  | NA       |
| BX571794.3        | 1.498097085 | 0.945410071  | 1.6553522 | 0.5711232 | 0.567916 | NA       |
| si:ch73-144d13.8  | 37.72280437 | -0.250449251 | 0.3235075 | -0.774168 | 0.438831 | 0.916019 |
| si:dkey-7i4.8     | 39.18859393 | -0.16454278  | 0.3245404 | -0.507002 | 0.612153 | 0.95688  |
| CR848840.1        | 0.999464308 | 0.976746318  | 1.8950081 | 0.5154312 | 0.606252 | NA       |
| si:ch211-69110.4  | 32.85859801 | 0.432747138  | 0.3642163 | 1.1881596 | 0.234771 | 0.803509 |
| CU927934.3        | 22.89521562 | 0.098826346  | 0.4008947 | 0.2465144 | 0.805284 | 0.979883 |
| FP015862.3        | 0.166657454 | -0.955901296 | 4.0804729 | -0.234262 | 0.814781 | NA       |
| AL928707.2        | 0.158915748 | 0.967652056  | 4.0804729 | 0.2371421 | 0.812547 | NA       |
| CR391995.1        | 0.476386185 | 2.392464142  | 3.0533824 | 0.7835455 | 0.433307 | NA       |
| BX005332.1        | 0           | NA           | NA        | NA        | NA       | NA       |
| BX663503.2        | 172.9168667 | 0.153815179  | 0.1668246 | 0.9220173 | 0.35652  | 0.883422 |
| CR751602.2        | 45.35494351 | -0.295769686 | 0.2911593 | -1.015835 | 0.309708 | 0.86172  |
| FP017161.1        | 50.72267992 | 0.133122001  | 0.2701291 | 0.4928088 | 0.622148 | 0.957354 |
| CU855758.2        | 0           | NA           | NA        | NA        | NA       | NA       |
| CT025912.1        | 0.166657454 | -0.955901296 | 4.0804729 | -0.234262 | 0.814781 | NA       |
| BX248121.1        | 645.428053  | 0.188712365  | 0.1013034 | 1.8628442 | 0.062484 | 0.487868 |
| BX571712.3        | 0.838899245 | -0.667458734 | 2.2321093 | -0.299026 | 0.76492  | NA       |
| opn6b             | 126.8556012 | 0.17658931   | 0.179001  | 0.9865269 | 0.323875 | 0.870928 |
| BX548024.2        | 1.796479253 | -0.257679604 | 1.3864521 | -0.185855 | 0.852558 | NA       |
| CT009746.1        | 0           | NA           | NA        | NA        | NA       | NA       |
| dscaml1           | 126.2938883 | -0.001463809 | 0.1874491 | -0.007809 | 0.993769 | 0.998672 |
| fkbp3             | 519.7262997 | -0.24586739  | 0.1296047 | -1.897057 | 0.05782  | 0.471676 |
| alp3              | 9.113249852 | 0.898005973  | 0.7091082 | 1.2663878 | 0.205374 | NA       |

|                    |             |              |           |           |          |          |
|--------------------|-------------|--------------|-----------|-----------|----------|----------|
| si:ch1073-205c8.5  | 1.634147777 | 0.520279905  | 1.6026912 | 0.3246289 | 0.745462 | NA       |
| dre-mir-365-1      | 0.173729368 | -0.955901296 | 4.0804729 | -0.234262 | 0.814781 | NA       |
| CU302323.1         | 1.329401519 | -1.62552701  | 1.7303732 | -0.939408 | 0.347521 | NA       |
| AL929457.2         | 3.031292051 | 1.40883543   | 1.1840831 | 1.1898113 | 0.234121 | NA       |
| CU207354.2         | 0 NA        | NA           | NA        | NA        | NA       | NA       |
| CABZ01085140.1     | 61.22997612 | -0.033605812 | 0.2631849 | -0.127689 | 0.898395 | 0.990121 |
| znf1049            | 1.169857263 | -1.300491357 | 1.7916478 | -0.725863 | 0.467923 | NA       |
| trip4              | 125.2639069 | 0.213317418  | 0.1884146 | 1.1321701 | 0.257563 | 0.825314 |
| sh3bgr13           | 1685.31789  | -0.010650689 | 0.0778537 | -0.136804 | 0.891186 | 0.989291 |
| kcnql.2            | 9.097185257 | -0.354565764 | 0.6353434 | -0.558069 | 0.576797 | NA       |
| si:dkey-238o14.3   | 3.641807913 | -0.787910966 | 1.0211598 | -0.771584 | 0.440361 | NA       |
| dre-mir-18a        | 0 NA        | NA           | NA        | NA        | NA       | NA       |
| rab3gap1           | 698.012494  | -0.023124938 | 0.1091781 | -0.211809 | 0.832256 | 0.983557 |
| gnl2               | 869.2445345 | -0.095510841 | 0.0924737 | -1.032844 | 0.301677 | 0.856944 |
| GABRR1 (1 of many) | 120.8644967 | -0.106837044 | 0.1879576 | -0.56841  | 0.569756 | 0.948983 |
| CU459093.1         | 40.92957672 | 0.009907416  | 0.3087323 | 0.0320906 | 0.9744   | 0.996523 |
| RF00001            | 0.356300316 | 0.005884122  | 3.214964  | 0.0018302 | 0.99854  | NA       |
| si:dkey-30f3.2     | 5.673008144 | 0.919904837  | 0.8608273 | 1.0686288 | 0.285237 | NA       |
| CU929178.1         | 0.173729368 | -0.955901296 | 4.0804729 | -0.234262 | 0.814781 | NA       |
| BX000463.1         | 0.663561848 | -1.490280258 | 2.4116568 | -0.617949 | 0.536609 | NA       |
| si:dkey-146c18.5   | 3.833970299 | 0.396630376  | 0.9903035 | 0.4005139 | 0.688778 | NA       |
| CT027696.1         | 1.891927985 | -0.775950481 | 1.4470384 | -0.536234 | 0.591797 | NA       |
| slc12a1            | 87.18982559 | 0.040763002  | 0.2455623 | 0.1659986 | 0.868158 | 0.987245 |
| jac3               | 0.506415768 | -0.866825728 | 2.6674086 | -0.324969 | 0.745204 | NA       |
| RF00001            | 0 NA        | NA           | NA        | NA        | NA       | NA       |
| zgc:64065          | 10.91911913 | 0.343226364  | 0.5695862 | 0.602589  | 0.546782 | NA       |
| BX248243.1         | 0.317831496 | 1.808837541  | 3.5779923 | 0.5055454 | 0.613176 | NA       |
| tefb               | 581.9970588 | 0.24389815   | 0.105039  | 2.3219765 | 0.020234 | 0.267275 |
| tmem106c           | 277.4826543 | -0.014984047 | 0.1400603 | -0.106983 | 0.914803 | 0.991119 |
| si:ch211-215e19.8  | 0.365141898 | 1.973577737  | 3.3927314 | 0.5817076 | 0.560764 | NA       |
| dusp2              | 233.5278498 | 0.138904846  | 0.1417618 | 0.9798468 | 0.327162 | 0.872658 |
| CABZ01079550.1     | 0.496945679 | -0.834564081 | 2.8549631 | -0.29232  | 0.770042 | NA       |
| btc                | 99.43588229 | -0.023568585 | 0.2050375 | -0.114948 | 0.908487 | 0.990702 |
| WSCD1              | 83.90017707 | -0.288260233 | 0.2130744 | -1.352862 | 0.1761   | 0.736505 |
| ctsa               | 623.0650258 | -0.001529535 | 0.1034028 | -0.014792 | 0.988198 | 0.997369 |
| si:dkey-178j11.5   | 15.55266447 | -0.686098184 | 0.4871106 | -1.408506 | 0.158981 | 0.709638 |
| trappc10           | 1009.167556 | -0.130090753 | 0.088053  | -1.477415 | 0.139565 | 0.678238 |
| CABZ01012959.1     | 0.657159727 | -2.841717825 | 2.5166161 | -1.129182 | 0.258821 | NA       |
| RF00001            | 0.317711143 | 1.810477155  | 3.2978238 | 0.5489915 | 0.583011 | NA       |
| FP101882.1         | 65.1021981  | 0.353084185  | 0.2465107 | 1.4323279 | 0.15205  | 0.700984 |
| BX005085.2         | 10.74016116 | -0.235684483 | 0.6424558 | -0.366849 | 0.713731 | NA       |
| si:dkey-44g17.6    | 14.17468941 | 0.303781361  | 0.5653158 | 0.5373657 | 0.591015 | 0.954193 |
| BX324212.1         | 0 NA        | NA           | NA        | NA        | NA       | NA       |
| si:dkeyp-97a10.2   | 44.41811919 | -0.091673951 | 0.2913454 | -0.314657 | 0.753022 | 0.97481  |
| bola3              | 124.6823516 | -0.127192919 | 0.1873884 | -0.678766 | 0.497286 | 0.93322  |
| BX511136.1         | 2.456546305 | 0.172107456  | 1.1977978 | 0.1436866 | 0.885748 | NA       |
| si:ch211-281k19.2  | 0.158795395 | 0.967652056  | 4.0804729 | 0.2371421 | 0.812547 | NA       |
| stk40              | 399.235394  | 0.173594676  | 0.1283085 | 1.3529479 | 0.176072 | 0.736505 |
| ankrd13d           | 420.713693  | 0.035182978  | 0.1121833 | 0.3136205 | 0.753809 | 0.975056 |
| supt3h             | 178.5429782 | -0.435238978 | 0.178916  | -2.432644 | 0.014989 | 0.224348 |
| CR391944.1         | 7.295004671 | 0.275591555  | 0.6887728 | 0.4001197 | 0.689068 | NA       |
| si:dkey-57l19.1    | 0.507044276 | -2.459587493 | 2.7586536 | -0.89159  | 0.372613 | NA       |
| si:dkey-285e18.6   | 0 NA        | NA           | NA        | NA        | NA       | NA       |
| BX572628.1         | 0.983791519 | -0.057426352 | 2.0613195 | -0.027859 | 0.977775 | NA       |

|                   |             |              |           |           |          |          |
|-------------------|-------------|--------------|-----------|-----------|----------|----------|
| uts2d             | 7.419932704 | -0.448196698 | 0.6978264 | -0.642275 | 0.520694 | NA       |
| BX255896.1        | 9.719213419 | 0.118752603  | 0.6225485 | 0.1907524 | 0.84872  | NA       |
| CR925797.1        | 0.820749213 | -1.887809118 | 2.2327507 | -0.845508 | 0.397827 | NA       |
| lhfp12b           | 243.1483451 | 0.102392157  | 0.1429995 | 0.7160317 | 0.473972 | 0.924993 |
| CT583728.1        | 0           | NA           | NA        | NA        | NA       | NA       |
| CR792416.1        | 1.45775179  | -1.018923527 | 1.7692292 | -0.575914 | 0.564673 | NA       |
| cpxmlb            | 197.037273  | 0.135533174  | 0.1530873 | 0.8853325 | 0.375977 | 0.894587 |
| cntn4             | 152.8218179 | -0.128483877 | 0.1769948 | -0.725919 | 0.467888 | 0.924328 |
| zgc:77748         | 737.7895863 | -1.232063517 | 0.1093474 | -11.26742 | 1.90E-29 | 3.76E-26 |
| traj56            | 0           | NA           | NA        | NA        | NA       | NA       |
| aipl2             | 46.9954613  | -0.089833452 | 0.3035798 | -0.295914 | 0.767296 | 0.975687 |
| si:dkey-176f19.4  | 3.443952973 | -0.435106774 | 1.0297039 | -0.422555 | 0.67262  | NA       |
| zgc:162193        | 551.2710146 | 0.081312951  | 0.1083249 | 0.7506394 | 0.45287  | 0.919598 |
| tradv19.0         | 0           | NA           | NA        | NA        | NA       | NA       |
| BX537115.1        | 0.332524763 | 0.005883742  | 3.292841  | 0.0017868 | 0.998574 | NA       |
| dgkab             | 77.26768522 | -0.205764954 | 0.2372628 | -0.867245 | 0.385808 | 0.89551  |
| si:rp71-1h20.5    | 78.60608787 | -0.22159652  | 0.2241161 | -0.988758 | 0.322782 | 0.870524 |
| si:dkey-28i19.3   | 5.292017277 | 0.34933705   | 0.8128001 | 0.4297945 | 0.667345 | NA       |
| or109-4           | 0           | NA           | NA        | NA        | NA       | NA       |
| si:dkeyp-86c4.1   | 2.124970071 | -2.419204104 | 1.5265325 | -1.584771 | 0.113018 | NA       |
| zgc:113184        | 160.6485615 | -0.243550155 | 0.171379  | -1.42112  | 0.155282 | 0.705118 |
| si:dkey-27n6.1    | 0.166657454 | -0.955901296 | 4.0804729 | -0.234262 | 0.814781 | NA       |
| BX663612.1        | 0.996206963 | -1.055667267 | 2.0852244 | -0.506261 | 0.612674 | NA       |
| si:dkey-16p6.1    | 5.381435391 | -1.208118264 | 0.8739192 | -1.382414 | 0.166845 | NA       |
| si:dkey-16l2.20   | 178.5246919 | -0.018050191 | 0.1578101 | -0.114379 | 0.908937 | 0.990702 |
| znf998            | 2.128375508 | 0.245522961  | 1.3038686 | 0.1883034 | 0.850639 | NA       |
| SLC39A11          | 129.5207874 | -0.215158188 | 0.184571  | -1.165721 | 0.243727 | 0.813138 |
| znf1077           | 21.17379652 | -0.12051169  | 0.4381171 | -0.275067 | 0.783265 | 0.97627  |
| CU633999.1        | 1.439509144 | 0.307590293  | 1.6554512 | 0.1858045 | 0.852598 | NA       |
| RF00001           | 1.189776963 | 0.42714694   | 1.8029205 | 0.2369195 | 0.812719 | NA       |
| BX928743.1        | 0.157187365 | -0.955901296 | 4.0804729 | -0.234262 | 0.814781 | NA       |
| mtmr3             | 301.6206996 | 0.006200062  | 0.1250889 | 0.0495652 | 0.960469 | 0.995421 |
| AL954698.1        | 0           | NA           | NA        | NA        | NA       | NA       |
| APCDD1            | 1.320721575 | -2.698764302 | 1.8311672 | -1.473795 | 0.140537 | NA       |
| CU984600.2        | 10.99311694 | -0.013814254 | 0.6650156 | -0.020773 | 0.983427 | NA       |
| ptrhl             | 89.69912902 | 0.218102872  | 0.2182961 | 0.9991148 | 0.317739 | 0.867607 |
| fn3krp            | 24.16548739 | -0.122945396 | 0.4019684 | -0.305858 | 0.759713 | 0.975374 |
| si:ch211-199b20.3 | 56.977667   | -0.301495134 | 0.2583697 | -1.166914 | 0.243245 | 0.812077 |
| wrn               | 61.05396364 | 0.081517238  | 0.2495839 | 0.3266125 | 0.743961 | 0.974094 |
| BX465836.1        | 2.022123736 | -2.267580007 | 1.552276  | -1.46081  | 0.144068 | NA       |
| BICD2             | 56.94804649 | 0.259110568  | 0.2589587 | 1.0005866 | 0.317027 | 0.867335 |
| si:ch211-215e19.3 | 0           | NA           | NA        | NA        | NA       | NA       |
| si:dkey-261j11.1  | 3.942076599 | -1.013670318 | 0.9702486 | -1.044753 | 0.296137 | NA       |
| si:ch211-209j12.6 | 2.096668871 | -0.692607419 | 1.3431709 | -0.515651 | 0.606098 | NA       |
| st8sial           | 844.5070591 | 0.094174903  | 0.1008553 | 0.9337624 | 0.350426 | 0.880195 |
| AL773558.1        | 5.708872458 | -0.02773411  | 0.9247313 | -0.029992 | 0.976074 | NA       |
| tmem56b           | 971.4030849 | -0.038999982 | 0.0922145 | -0.422927 | 0.672349 | 0.965257 |
| olfcg7            | 0.889079191 | 3.262746891  | 2.2913259 | 1.4239558 | 0.154459 | NA       |
| smpd3             | 73.32021555 | -0.027859836 | 0.22991   | -0.121177 | 0.903551 | 0.990235 |
| BX649608.1        | 0           | NA           | NA        | NA        | NA       | NA       |
| thrap3b           | 2261.342623 | -0.010481351 | 0.0711223 | -0.147371 | 0.882839 | 0.98852  |
| BX649416.1        | 53.60538342 | -0.045770553 | 0.2630893 | -0.173973 | 0.861886 | 0.985841 |
| hhex              | 14.68993115 | 0.198707968  | 0.4963793 | 0.4003148 | 0.688925 | 0.966672 |
| tiam2b            | 79.67744755 | -0.38814013  | 0.2218065 | -1.749904 | 0.080135 | 0.549631 |

|                   |             |              |           |           |          |          |
|-------------------|-------------|--------------|-----------|-----------|----------|----------|
| actr5             | 132.861162  | -0.161729619 | 0.1790676 | -0.903176 | 0.366432 | 0.887239 |
| zgc:174698        | 3.239563102 | 0.480334624  | 1.1068762 | 0.4339552 | 0.664321 | NA       |
| fbn2b             | 1021.795639 | 0.160805832  | 0.0858477 | 1.8731526 | 0.061047 | 0.482482 |
| CR626866.1        | 0 NA        | NA           | NA        | NA        | NA       | NA       |
| zgc:85932         | 529.4942398 | -0.111501416 | 0.1052089 | -1.05981  | 0.289231 | 0.845979 |
| meis2a            | 5087.14443  | -0.102321621 | 0.066546  | -1.537608 | 0.124145 | 0.652708 |
| brcc3             | 324.9271196 | -0.074545509 | 0.1323179 | -0.563382 | 0.573175 | 0.949762 |
| CR762475.1        | 0.339758314 | 0.005883863  | 3.2682461 | 0.0018003 | 0.998564 | NA       |
| CR388206.1        | 0.157187365 | -0.955901296 | 4.0804729 | -0.234262 | 0.814781 | NA       |
| cidea             | 10.02439555 | -0.377589963 | 0.6165179 | -0.612456 | 0.540236 | NA       |
| CU928222.2        | 0 NA        | NA           | NA        | NA        | NA       | NA       |
| det1              | 92.33115289 | -0.13038842  | 0.2054192 | -0.634743 | 0.525596 | 0.94013  |
| asmt              | 128.7957324 | 0.002635005  | 0.1785362 | 0.0147589 | 0.988224 | 0.997369 |
| cpne9             | 15.53176486 | 0.057385526  | 0.5156125 | 0.1112958 | 0.911382 | 0.991066 |
| si:ch73-329n5.6   | 140.6374343 | 0.060574453  | 0.4426821 | 0.1368351 | 0.891161 | 0.989291 |
| pcdh15a           | 127.9704139 | 0.221233902  | 0.1949085 | 1.1350656 | 0.256348 | 0.824633 |
| RF00001           | 0 NA        | NA           | NA        | NA        | NA       | NA       |
| si:dkeyp-85h7.1   | 0.333314908 | -1.858695402 | 3.5126701 | -0.52914  | 0.596708 | NA       |
| CU929294.1        | 132.1715623 | 0.167528511  | 0.1917934 | 0.8734843 | 0.382399 | 0.895192 |
| RF00001           | 0.173729368 | -0.955901296 | 4.0804729 | -0.234262 | 0.814781 | NA       |
| znf1053           | 5.449655059 | -0.995702829 | 0.8513733 | -1.169526 | 0.242192 | NA       |
| nipbla            | 1398.330357 | -0.100100533 | 0.0865972 | -1.155933 | 0.247708 | 0.81711  |
| zbtb14            | 406.6613573 | 0.01674086   | 0.120984  | 0.1383726 | 0.889946 | 0.989291 |
| si:dkeyp-13d12.16 | 0.173729368 | -0.955901296 | 4.0804729 | -0.234262 | 0.814781 | NA       |
| CR550307.1        | 0.647689638 | -2.824814845 | 2.5064236 | -1.12703  | 0.25973  | NA       |
| si:zfos-451d2.2   | 1.506000429 | 0.335521124  | 1.4976273 | 0.2240351 | 0.82273  | NA       |
| rbm5              | 3141.230551 | -0.098481924 | 0.0764768 | -1.287736 | 0.197838 | 0.763028 |
| si:dkey-237m9.1   | 0.50625413  | -0.940106488 | 2.8357787 | -0.331516 | 0.740255 | NA       |
| ctxn1             | 6.844777673 | -0.067128461 | 0.7284496 | -0.092153 | 0.926577 | NA       |
| CU695232.1        | 165.3790571 | 0.057137067  | 0.1745061 | 0.3274216 | 0.743349 | 0.973765 |
| tax1bp1a          | 328.7278018 | 0.082760432  | 0.1230541 | 0.672553  | 0.501232 | 0.934613 |
| vstm21            | 57.60034064 | -0.005907236 | 0.264838  | -0.022305 | 0.982205 | 0.996944 |
| unc80             | 50.13093578 | 0.102834168  | 0.2996973 | 0.3431267 | 0.731503 | 0.971557 |
| trpc3             | 9.872380037 | -0.137263378 | 0.6033258 | -0.227511 | 0.820026 | NA       |
| si:dkey-27i16.2   | 47.3472299  | 0.291764818  | 0.2884229 | 1.0115867 | 0.311736 | 0.864257 |
| col5a3a           | 76.08549615 | 0.074463662  | 0.2366238 | 0.3146922 | 0.752995 | 0.97481  |
| efna3b            | 79.04919804 | -0.249548263 | 0.2209693 | -1.129335 | 0.258757 | 0.826867 |
| gnsb              | 110.6922712 | -0.343687121 | 0.189131  | -1.81719  | 0.069188 | 0.514556 |
| CU928205.1        | 0 NA        | NA           | NA        | NA        | NA       | NA       |
| taok1b            | 972.58687   | -0.061656748 | 0.0900883 | -0.684403 | 0.49372  | 0.931926 |
| si:ch211-76m11.8  | 0.815164977 | -0.617697568 | 2.1259573 | -0.29055  | 0.771395 | NA       |
| CR936540.1        | 75.77942509 | 0.159731854  | 0.2244938 | 0.7115203 | 0.476762 | 0.926808 |
| si:zfos-932h1.3   | 105.4930857 | -0.05162169  | 0.2022021 | -0.255297 | 0.798493 | 0.978884 |
| scarb2a           | 1635.346699 | 0.086034055  | 0.087224  | 0.986358  | 0.323957 | 0.870928 |
| nadka             | 14.55978462 | 0.185689948  | 0.5337484 | 0.3478979 | 0.727917 | 0.970402 |
| cypla             | 1437.064878 | -0.065502    | 0.1068789 | -0.612862 | 0.539968 | 0.944206 |
| BX908386.1        | 0.849390142 | 1.928131185  | 2.2127708 | 0.8713651 | 0.383555 | NA       |
| dync11i1          | 1966.442083 | 0.001884222  | 0.0826091 | 0.0228089 | 0.981803 | 0.996944 |
| BX005396.1        | 0 NA        | NA           | NA        | NA        | NA       | NA       |
| dre-mir-193a-1    | 0 NA        | NA           | NA        | NA        | NA       | NA       |
| grmlb             | 6.732479047 | 0.754966059  | 0.7843974 | 0.962479  | 0.335809 | NA       |
| si:cabz01054394.6 | 47.54974681 | -0.39470585  | 0.2838393 | -1.390596 | 0.164348 | 0.720101 |
| CU280645.1        | 0.98968449  | -2.214754691 | 2.0224815 | -1.095068 | 0.273487 | NA       |
| RF00001           | 0.182570949 | 0.967652056  | 4.0804729 | 0.2371421 | 0.812547 | NA       |

|                    |             |              |           |           |          |          |
|--------------------|-------------|--------------|-----------|-----------|----------|----------|
| spef2              | 43.97129581 | 0.111935603  | 0.2965955 | 0.3774016 | 0.705875 | 0.968412 |
| exosc3             | 208.0118658 | -0.346123413 | 0.1789949 | -1.933705 | 0.053149 | 0.452412 |
| BX537137.2         | 0.317711143 | 1.810477155  | 3.2978238 | 0.5489915 | 0.583011 | NA       |
| CR381673.1         | 0.182570949 | 0.967652056  | 4.0804729 | 0.2371421 | 0.812547 | NA       |
| si:ch73-340n8.4    | 90.28430206 | -0.122035329 | 0.2132988 | -0.572133 | 0.567232 | 0.948739 |
| RF00001            |             | 0 NA         | NA        | NA        | NA       | NA       |
| RF00003            |             | 0 NA         | NA        | NA        | NA       | NA       |
| CABZ01065679.1     | 37.3949236  | 0.271830897  | 0.3219752 | 0.8442603 | 0.398524 | 0.900359 |
| rab18b             | 751.0368971 | 0.088888791  | 0.0920187 | 0.9659863 | 0.334051 | 0.875256 |
| mamdc2a            | 159.0175397 | -0.202175341 | 0.167191  | -1.209248 | 0.226568 | 0.794071 |
| si:ch1073-181h11.4 |             | 0 NA         | NA        | NA        | NA       | NA       |
| znf326             | 23.0799193  | 0.186773162  | 0.4094505 | 0.4561557 | 0.648278 | 0.960708 |
| hdac4              | 60.76873116 | 0.057808833  | 0.2548845 | 0.226804  | 0.820576 | 0.981594 |
| mxl3               | 401.4056701 | -0.087814767 | 0.115698  | -0.759    | 0.447853 | 0.917154 |
| si:ch211-66c13.1   | 1.132247612 | 1.34783488   | 1.8934551 | 0.7118388 | 0.476565 | NA       |
| BX322574.1         | 4.611023263 | -1.317200024 | 0.9017012 | -1.460794 | 0.144072 | NA       |
| atp5pd             | 2396.246574 | -0.043796388 | 0.0798598 | -0.548416 | 0.583406 | 0.952214 |
| si:ch211-229110.4  | 11.05634901 | 0.137494197  | 0.5671683 | 0.2424222 | 0.808453 | NA       |
| il17rd             | 310.4100375 | -0.138642847 | 0.1482044 | -0.935484 | 0.349539 | 0.880195 |
| cyp19a1b           | 20.56430223 | 0.465977237  | 0.4340648 | 1.0735199 | 0.283038 | 0.84466  |
| nudcd3             | 710.6150048 | -0.022124961 | 0.1089887 | -0.203002 | 0.839133 | 0.984979 |
| BX901957.1         | 33.83258878 | -0.073733795 | 0.3328361 | -0.221532 | 0.824678 | 0.982196 |
| lrrc74b            | 15.98998287 | 0.890832543  | 0.4948909 | 1.8000584 | 0.071851 | 0.524277 |
| srp54              | 1643.1918   | -0.050960338 | 0.077205  | -0.660065 | 0.509212 | 0.936123 |
| apl1               | 5761.396008 | 0.027493911  | 0.0727656 | 0.3778419 | 0.705548 | 0.968412 |
| si:dkey-165o8.1    | 2.83080852  | -0.460814609 | 1.1456242 | -0.402239 | 0.687508 | NA       |
| BX276102.1         | 9.587787396 | 0.480088934  | 0.6252589 | 0.7678242 | 0.442592 | NA       |
| FLNB               | 798.4427961 | -0.228644484 | 0.1307586 | -1.7486   | 0.08036  | 0.549728 |
| polr1a             | 558.3874288 | -0.16633736  | 0.1024196 | -1.624078 | 0.104359 | 0.612162 |
| si:ch211-207114.1  | 353.838779  | 0.312516183  | 0.127991  | 2.4417044 | 0.014618 | 0.220655 |
| tnfrsf11b          | 88.63379949 | -0.029799262 | 0.2264694 | -0.131582 | 0.895315 | 0.989814 |
| CU694197.1         | 273.7062234 | -0.048817193 | 0.1577634 | -0.309433 | 0.756992 | 0.975374 |
| si:dkey-38122.2    | 17.01912224 | 0.577863385  | 0.4825279 | 1.1975751 | 0.231082 | 0.79927  |
| si:dkey-14o6.1     | 6.3247798   | 0.027106836  | 0.7544923 | 0.0359273 | 0.97134  | NA       |
| ctps1b             | 382.7903906 | -0.029496158 | 0.1206516 | -0.244474 | 0.806864 | 0.980254 |
| tmem176l.3a        | 120.9409546 | 0.034402466  | 0.1845699 | 0.1863926 | 0.852137 | 0.985174 |
| znf1015            | 58.0352584  | -0.248946989 | 0.2572061 | -0.967889 | 0.3331   | 0.874926 |
| si:ch211-76m11.8   | 12.36151027 | 0.360300723  | 0.5945433 | 0.6060126 | 0.544506 | 0.945438 |
| psmg3              | 241.5202147 | -0.021519443 | 0.1507331 | -0.142765 | 0.886476 | 0.988936 |
| ly6pge             | 1474.030971 | 0.198224772  | 0.0958237 | 2.0686397 | 0.03858  | 0.385234 |
| tradv24.0.2        |             | 0 NA         | NA        | NA        | NA       | NA       |
| CU929451.2         | 69.21514171 | -0.197263506 | 0.2433581 | -0.810589 | 0.417602 | 0.906237 |
| FP016106.1         | 12.90937069 | -1.151361144 | 0.5722714 | -2.011915 | 0.044229 | 0.413497 |
| CABZ01079480.1     | 98.9598207  | -0.174143427 | 0.2169581 | -0.802659 | 0.422172 | 0.90651  |
| fam136a            | 321.8858667 | -0.179950224 | 0.1364088 | -1.319198 | 0.187103 | 0.751002 |
| LO017877.1         | 5.671247677 | -0.426798239 | 0.855794  | -0.498716 | 0.617979 | NA       |
| CR925723.1         | 16.98308779 | -0.026130274 | 0.4578471 | -0.057072 | 0.954488 | 0.994533 |
| map3kl             | 243.1405284 | -0.181804782 | 0.1485835 | -1.223586 | 0.221108 | 0.787641 |
| si:dkey-22a18.2    | 6.177570678 | -0.065425124 | 0.7481135 | -0.087453 | 0.930311 | NA       |
| BX936393.2         | 0.531799352 | 0.999478841  | 2.790358  | 0.3581902 | 0.720201 | NA       |
| stbd1              | 26.71734673 | 0.11154504   | 0.3843605 | 0.2902094 | 0.771656 | 0.975687 |
| BX005376.1         | 10.90989328 | -0.63593865  | 0.5958944 | -1.0672   | 0.285881 | NA       |
| si:dkey-19b23.10   | 2.267882965 | 0.837931821  | 1.3107878 | 0.6392582 | 0.522655 | NA       |
| ninl               | 219.8682276 | 0.288538393  | 0.1604242 | 1.7985968 | 0.072082 | 0.525083 |

|                   |             |              |           |           |          |          |
|-------------------|-------------|--------------|-----------|-----------|----------|----------|
| CT956093.1        |             | 0 NA         | NA        | NA        | NA       | NA       |
| RF00067           |             | 0 NA         | NA        | NA        | NA       | NA       |
| SNTA1             | 3.455571483 | 1.681513788  | 1.1001295 | 1.5284689 | 0.126396 | NA       |
| trgv2             |             | 0 NA         | NA        | NA        | NA       | NA       |
| CABZ01079241.1    | 192.8212833 | -0.228189563 | 0.1537424 | -1.484233 | 0.137747 | 0.675209 |
| si:dkey-56m15.8   | 1.16439338  | -0.410527374 | 1.7446119 | -0.235312 | 0.813967 | NA       |
| RF00003           |             | 0 NA         | NA        | NA        | NA       | NA       |
| asiclc            | 5.624435233 | -0.159965696 | 0.7980323 | -0.20045  | 0.841129 | NA       |
| RF00026           |             | 0 NA         | NA        | NA        | NA       | NA       |
| znf1078           | 5.839499462 | 0.068800878  | 0.7882975 | 0.0872778 | 0.930451 | NA       |
| comp              | 835.3434762 | 0.142818298  | 0.0930737 | 1.5344643 | 0.124915 | 0.654531 |
| paf1              | 496.9300857 | 0.010702796  | 0.1092339 | 0.0979805 | 0.921948 | 0.992224 |
| utp6              | 400.0694503 | 0.055248128  | 0.1103641 | 0.5005988 | 0.616653 | 0.95688  |
| BX005003.1        | 663.7988188 | 0.010365567  | 0.108021  | 0.0959588 | 0.923553 | 0.992588 |
| BX537156.1        | 0.340386822 | -1.882368278 | 3.2159502 | -0.585323 | 0.558331 | NA       |
| si:ch211-9d9.8    | 0.49144051  | 0.855669345  | 2.6923358 | 0.3178167 | 0.750624 | NA       |
| slc6a6b           | 84.57474916 | 0.2109597    | 0.2321302 | 0.908799  | 0.363456 | 0.886042 |
| nr1h3             | 642.8861513 | 0.063849665  | 0.0997894 | 0.6398444 | 0.522274 | 0.939056 |
| si:ch211-62a1.4   | 7.552956713 | -0.370037951 | 0.7098191 | -0.521313 | 0.602149 | NA       |
| nars2             | 75.11066598 | -0.162736279 | 0.2377069 | -0.684609 | 0.493591 | 0.931926 |
| zfang6            | 423.964232  | 0.033299338  | 0.1153548 | 0.2886688 | 0.772835 | 0.975687 |
| si:dkey-3h2.4     | 6.606781356 | 0.306746111  | 0.7918925 | 0.3873583 | 0.698491 | NA       |
| si:ch211-1o7.2    | 6.035469875 | 1.036586853  | 0.8262829 | 1.2545181 | 0.209654 | NA       |
| tmem56a           | 243.6600524 | 0.077831759  | 0.1435111 | 0.5423395 | 0.587585 | 0.953319 |
| si:dkey-151g22.1  | 1.142466561 | 0.35959156   | 1.8215264 | 0.1974122 | 0.843505 | NA       |
| pank4             | 406.5982538 | -0.107324429 | 0.1122231 | -0.956349 | 0.338896 | 0.87745  |
| BX957236.1        |             | 0 NA         | NA        | NA        | NA       | NA       |
| ccl39.5           |             | 0 NA         | NA        | NA        | NA       | NA       |
| si:dkey-11f4.14   | 11.93137573 | 0.428904507  | 0.5863508 | 0.731481  | 0.464485 | 0.92346  |
| CU570782.1        | 1.169857263 | -1.300491357 | 1.7916478 | -0.725863 | 0.467923 | NA       |
| gig2g             | 0.489712128 | -0.887840729 | 2.693685  | -0.329601 | 0.741702 | NA       |
| si:ch73-36611.5   | 1882.411743 | 0.309883419  | 0.1020133 | 3.037678  | 0.002384 | 0.06083  |
| ube2a             | 1617.287571 | 0.037746261  | 0.0783489 | 0.4817712 | 0.629969 | 0.957354 |
| RF00001           |             | 0 NA         | NA        | NA        | NA       | NA       |
| arr3b             | 4137.706069 | 0.280057317  | 0.0930103 | 3.0110347 | 0.002604 | 0.064922 |
| tec               | 13.74754857 | -0.536332414 | 0.527064  | -1.017585 | 0.308875 | 0.861088 |
| F0704758.1        | 6.500106906 | 1.160543244  | 0.7832065 | 1.4817844 | 0.138398 | NA       |
| anxald            | 158.61189   | -0.22358518  | 0.1608581 | -1.389953 | 0.164543 | 0.720706 |
| CR792424.1        | 0.982922306 | 1.012515237  | 1.9057885 | 0.5312842 | 0.595222 | NA       |
| RF00017           | 0.158795395 | 0.967652056  | 4.0804729 | 0.2371421 | 0.812547 | NA       |
| CU929365.1        |             | 0 NA         | NA        | NA        | NA       | NA       |
| tollip            | 463.9657819 | -0.013816074 | 0.1074165 | -0.128622 | 0.897657 | 0.990121 |
| traj32            |             | 0 NA         | NA        | NA        | NA       | NA       |
| BX682557.1        | 0.316103113 | 0.005883447  | 3.3519121 | 0.0017553 | 0.9986   | NA       |
| olfcd2            | 0.340386822 | -1.882368278 | 3.2159502 | -0.585323 | 0.558331 | NA       |
| si:ch211-145h19.3 |             | 0 NA         | NA        | NA        | NA       | NA       |
| tradv25.0.1       |             | 0 NA         | NA        | NA        | NA       | NA       |
| hrasa             | 401.8865128 | -0.140262998 | 0.1149185 | -1.220543 | 0.222259 | 0.788551 |
| si:dkey-161111.79 |             | 0 NA         | NA        | NA        | NA       | NA       |
| CT583728.2        | 0.332524763 | 0.005883742  | 3.292841  | 0.0017868 | 0.998574 | NA       |
| lyar              | 226.8703708 | -0.03817917  | 0.1434715 | -0.26611  | 0.790155 | 0.977338 |
| BX005286.1        | 8.159675302 | 0.174331196  | 0.6584333 | 0.2647667 | 0.791189 | NA       |
| zgc:174650        | 3.134842705 | -0.458897072 | 1.042204  | -0.440314 | 0.65971  | NA       |
| ntrk2b            | 32.20720299 | 0.184625119  | 0.3622896 | 0.5096065 | 0.610327 | 0.95688  |

|                    |             |              |           |           |          |          |
|--------------------|-------------|--------------|-----------|-----------|----------|----------|
| si:ch73-215f7.1    | 23.47302916 | 0.36876377   | 0.4068    | 0.9064988 | 0.364672 | 0.886637 |
| CU855694.1         | 0 NA        | NA           | NA        | NA        | NA       | NA       |
| si:ch211-59d8.3    | 10.16378166 | -0.622580834 | 0.6191497 | -1.005542 | 0.314636 | NA       |
| si:dkey-16p6.1     | 25.49221013 | 0.091270184  | 0.3940013 | 0.2316494 | 0.81681  | 0.981594 |
| RF00001            | 0.498553709 | 0.926267934  | 2.6786929 | 0.345791  | 0.7295   | NA       |
| BX321870.1         | 0 NA        | NA           | NA        | NA        | NA       | NA       |
| BX649431.1         | 0 NA        | NA           | NA        | NA        | NA       | NA       |
| CU856358.1         | 0 NA        | NA           | NA        | NA        | NA       | NA       |
| gpr75              | 350.978494  | 0.002199647  | 0.1298472 | 0.0169403 | 0.986484 | 0.996965 |
| rtn4r11b           | 213.2651203 | -0.176573653 | 0.1516734 | -1.16417  | 0.244355 | 0.813858 |
| ccne2              | 282.197018  | -0.031733823 | 0.1254604 | -0.252939 | 0.800315 | 0.979377 |
| si:dkey-106c17.2   | 0.476506538 | 2.394892832  | 2.8161716 | 0.8504073 | 0.395099 | NA       |
| RF00067            | 3.381660525 | 2.057543943  | 1.2163753 | 1.691537  | 0.090734 | NA       |
| BX004823.1         | 42.57074357 | -0.081369024 | 0.315278  | -0.258087 | 0.79634  | 0.978498 |
| si:dkey-25i10.1    | 1.32448807  | 1.535255761  | 1.8059615 | 0.8501044 | 0.395267 | NA       |
| spata22            | 403.9047556 | 0.124028259  | 0.1169171 | 1.060822  | 0.288771 | 0.845979 |
| zc3h7ba            | 137.5255511 | -0.278508799 | 0.1872075 | -1.487701 | 0.13683  | 0.673303 |
| CR388378.2         | 0.846012444 | -0.57358332  | 2.1013569 | -0.272959 | 0.784885 | NA       |
| ncdn               | 261.2419366 | 0.012182987  | 0.1313551 | 0.0927485 | 0.926103 | 0.992702 |
| olfcg6             | 2.424519895 | -0.607345615 | 1.3474589 | -0.450734 | 0.652181 | NA       |
| CABZ01085700.1     | 35.38934176 | 0.417671442  | 0.3392108 | 1.2313033 | 0.218209 | 0.785379 |
| BX323564.1         | 5.605289719 | -0.246905315 | 0.8349939 | -0.295697 | 0.767461 | NA       |
| BX005082.1         | 0 NA        | NA           | NA        | NA        | NA       | NA       |
| zgc:194202         | 3.420847211 | -0.730704325 | 1.0710489 | -0.682232 | 0.495092 | NA       |
| CR381534.1         | 0.998364433 | -1.059644339 | 2.0638714 | -0.513426 | 0.607654 | NA       |
| RF00001            | 0 NA        | NA           | NA        | NA        | NA       | NA       |
| si:ch73-233f7.4    | 2.109664749 | 1.71033585   | 1.3929894 | 1.2278168 | 0.219516 | NA       |
| si:ch1073-286c18.5 | 0 NA        | NA           | NA        | NA        | NA       | NA       |
| BX927336.1         | 8.943187208 | 0.014314188  | 0.6479758 | 0.0220906 | 0.982376 | NA       |
| si:ch211-8c17.2    | 7.050766526 | 0.605744517  | 0.7194384 | 0.8419685 | 0.399806 | NA       |
| FP016142.2         | 0 NA        | NA           | NA        | NA        | NA       | NA       |
| sgcd               | 189.4169618 | 0.212240123  | 0.1574495 | 1.3479882 | 0.177662 | 0.738343 |
| srsf11             | 3572.780912 | -0.033364544 | 0.0696688 | -0.478902 | 0.632008 | 0.957356 |
| BX511079.1         | 0 NA        | NA           | NA        | NA        | NA       | NA       |
| CU914631.1         | 0 NA        | NA           | NA        | NA        | NA       | NA       |
| BX908763.1         | 0.166657454 | -0.955901296 | 4.0804729 | -0.234262 | 0.814781 | NA       |
| pdgfab             | 178.5086261 | 0.087124546  | 0.1582262 | 0.5506327 | 0.581885 | 0.951949 |
| CR457444.2         | 0.688945432 | -0.015421672 | 2.3988056 | -0.006429 | 0.994871 | NA       |
| wbp1               | 434.1992781 | -0.173028911 | 0.1170679 | -1.478021 | 0.139402 | 0.678238 |
| si:ch211-237a4.2   | 0.317831496 | 1.808837541  | 3.5779923 | 0.5055454 | 0.613176 | NA       |
| zgc:194887         | 12.93792003 | -1.268981203 | 0.5619265 | -2.258269 | 0.023929 | 0.298907 |
| CR318595.1         | 0.538871265 | 0.999144257  | 2.7784799 | 0.359601  | 0.719146 | NA       |
| gchfr              | 120.7497264 | 0.014457965  | 0.1841064 | 0.0785305 | 0.937406 | 0.99279  |
| cyb5a              | 902.4326026 | -0.165390553 | 0.1077369 | -1.535134 | 0.124751 | 0.654423 |
| tubb2b             | 0 NA        | NA           | NA        | NA        | NA       | NA       |
| zgc:92140          | 559.6069731 | -0.158698921 | 0.1057089 | -1.501282 | 0.133283 | 0.667628 |
| FP102843.1         | 0 NA        | NA           | NA        | NA        | NA       | NA       |
| hist1h2a11         | 2.67954512  | 1.611931768  | 1.2115434 | 1.330478  | 0.183361 | NA       |
| CU570791.1         | 17.46894406 | 0.053398912  | 0.4549276 | 0.1173789 | 0.90656  | 0.990702 |
| RF00001            | 0.473290478 | -0.833892061 | 2.901156  | -0.287434 | 0.77378  | NA       |
| pithd1             | 37.66697394 | 0.230622263  | 0.330215  | 0.6984004 | 0.484927 | 0.93001  |
| oral               | 2.31240739  | 1.381217865  | 1.4121345 | 0.9781065 | 0.328022 | NA       |
| BX914220.1         | 0.698456806 | 0.09172817   | 2.5265115 | 0.0363063 | 0.971038 | NA       |
| si:dkey-14o6.4     | 5.109475157 | 0.828136354  | 0.924321  | 0.8959402 | 0.370285 | NA       |

|                   |             |              |           |           |          |          |
|-------------------|-------------|--------------|-----------|-----------|----------|----------|
| slx1b             | 59.42422703 | -0.15385172  | 0.2500971 | -0.615168 | 0.538444 | 0.943336 |
| AL840638.1        | 300.2030541 | -0.089096099 | 0.128295  | -0.694463 | 0.487392 | 0.931584 |
| si:dkey-4c15.8    | 11.21791393 | -0.405563501 | 0.5939797 | -0.68279  | 0.494739 | 0.931926 |
| si:ch211-207e19.2 | 3.886328202 | -1.242679728 | 1.1175577 | -1.11196  | 0.266155 | NA       |
| RF00001           | 0           | NA           | NA        | NA        | NA       | NA       |
| chrn2a            | 7.636445584 | -0.154084639 | 0.7088569 | -0.217371 | 0.82792  | NA       |
| si:dkey-15h8.16   | 49.30612151 | -0.283192345 | 0.2942314 | -0.962482 | 0.335808 | 0.876088 |
| BX901954.1        | 0           | NA           | NA        | NA        | NA       | NA       |
| ly6m4             | 0.157187365 | -0.955901296 | 4.0804729 | -0.234262 | 0.814781 | NA       |
| erap2             | 57.74011064 | -0.294076039 | 0.2819816 | -1.042891 | 0.296999 | 0.853798 |
| si:ch211-188p14.2 | 47.99709062 | 0.110240614  | 0.3068129 | 0.3593089 | 0.719364 | 0.969183 |
| CR759843.1        | 11.07293909 | -0.472807103 | 0.5629643 | -0.839853 | 0.400991 | 0.90084  |
| ccnel             | 98.55878726 | 0.141208615  | 0.2050041 | 0.6888088 | 0.490944 | 0.931926 |
| si:dkey-23f9.4    | 85.51865506 | -0.233666216 | 0.2132648 | -1.095663 | 0.273226 | 0.83816  |
| traj54            | 0           | NA           | NA        | NA        | NA       | NA       |
| efna5b            | 6.414523943 | 0.02818101   | 0.7575298 | 0.0372012 | 0.970325 | NA       |
| nitrl2            | 0           | NA           | NA        | NA        | NA       | NA       |
| gspt11            | 3757.40464  | -0.025701234 | 0.0754832 | -0.34049  | 0.733488 | 0.971993 |
| BX914214.1        | 0.317711143 | 1.810477155  | 3.2978238 | 0.5489915 | 0.583011 | NA       |
| tradv6.0.1        | 0           | NA           | NA        | NA        | NA       | NA       |
| RF00001           | 0.654133044 | -1.416854166 | 2.5841447 | -0.548287 | 0.583495 | NA       |
| CABZ01044277.1    | 60.10679619 | 0.304305239  | 0.2827951 | 1.0760625 | 0.281899 | 0.843666 |
| AL929586.1        | 0.650115553 | 1.435486287  | 2.5894636 | 0.5543566 | 0.579335 | NA       |
| irf2bp2b          | 1194.815269 | -0.064521664 | 0.0866774 | -0.744389 | 0.456641 | 0.921215 |
| pycrlb            | 881.5958153 | -0.279129124 | 0.0980881 | -2.845697 | 0.004431 | 0.094528 |
| CU984600.3        | 42.92788039 | 0.180510593  | 0.2968063 | 0.6081764 | 0.54307  | 0.944974 |
| nbeal2            | 78.71985441 | 0.108937449  | 0.220452  | 0.4941549 | 0.621197 | 0.957354 |
| si:ch211-126j24.1 | 1756.782478 | -0.071035668 | 0.0806322 | -0.880984 | 0.378326 | 0.895192 |
| rgn               | 237.1130003 | -0.40390148  | 0.1366833 | -2.955017 | 0.003127 | 0.073687 |
| mthfd2            | 834.4704244 | 0.266219566  | 0.0887038 | 3.0012191 | 0.002689 | 0.066466 |
| ankddl1a          | 114.3633169 | 0.125375789  | 0.1886694 | 0.6645264 | 0.506353 | 0.935724 |
| iqgap3            | 374.5298937 | -0.02728181  | 0.1132035 | -0.240998 | 0.809557 | 0.980642 |
| si:dkey-21e2.7    | 0.811320409 | -1.830272858 | 2.4089013 | -0.759796 | 0.447377 | NA       |
| pcdh11            | 459.8545392 | 0.212423101  | 0.1150529 | 1.8463077 | 0.064848 | 0.497901 |
| BX957252.1        | 0.650235905 | 1.438231835  | 2.4251649 | 0.593045  | 0.553151 | NA       |
| FQ976914.1        | 5.936982178 | 1.210905628  | 0.8743087 | 1.3849863 | 0.166057 | NA       |
| KIF1C             | 15.91399746 | -0.211098881 | 0.48486   | -0.435381 | 0.663286 | 0.964736 |
| CR788237.1        | 0           | NA           | NA        | NA        | NA       | NA       |
| CU469526.1        | 123.88158   | 0.075406108  | 0.1908861 | 0.3950319 | 0.692819 | 0.96736  |
| AL935300.3        | 19.71919619 | 0.087739814  | 0.4388179 | 0.1999459 | 0.841523 | 0.985174 |
| si:ch73-359m17.9  | 97.16854799 | -0.263087172 | 0.2376107 | -1.10722  | 0.268199 | 0.833475 |
| fgf19             | 6.839045498 | -0.288191774 | 0.7605834 | -0.378909 | 0.704756 | NA       |
| si:dkeyp-53d3.3   | 27.06831652 | -0.214658371 | 0.3990952 | -0.537863 | 0.590672 | 0.954193 |
| CT583690.1        | 0.809151653 | 1.852283317  | 2.2398915 | 0.8269523 | 0.408264 | NA       |
| si:dkey-93h22.8   | 164.456329  | 0.127097933  | 0.1665638 | 0.7630586 | 0.445428 | 0.917117 |
| grin3bb           | 51.00932363 | -0.039549605 | 0.2866548 | -0.137969 | 0.890265 | 0.989291 |
| BX323031.1        | 3.941983985 | -0.271453339 | 0.9760577 | -0.278112 | 0.780926 | NA       |
| exd1              | 6.237168294 | 0.920795852  | 0.7829033 | 1.1761297 | 0.239543 | NA       |
| map4k4            | 2852.563222 | -0.005372783 | 0.0883414 | -0.060818 | 0.951504 | 0.99381  |
| prelid1a          | 1249.57148  | -0.189079338 | 0.0888524 | -2.128017 | 0.033336 | 0.355558 |
| BX001023.1        | 57.23910727 | 0.144741234  | 0.2661439 | 0.5438457 | 0.586548 | 0.953319 |
| ppfial            | 387.4889802 | -0.122699004 | 0.1270198 | -0.965983 | 0.334052 | 0.875256 |
| traj55            | 0           | NA           | NA        | NA        | NA       | NA       |
| CU467043.1        | 0           | NA           | NA        | NA        | NA       | NA       |



|                   |             |              |           |           |          |          |
|-------------------|-------------|--------------|-----------|-----------|----------|----------|
| zgc:174180        | 0.475018861 | 0.853207185  | 2.8976509 | 0.2944479 | 0.768416 | NA       |
| nup85             | 284.8671963 | -0.024016366 | 0.1298668 | -0.184931 | 0.853283 | 0.985174 |
| si:zfos-2326c3.2  | 282.0618722 | 0.138523626  | 0.1359205 | 1.0191517 | 0.308131 | 0.861088 |
| CU207221.1        | 448.3428586 | 0.10850416   | 0.1172489 | 0.9254177 | 0.354749 | 0.882105 |
| RF00017           | 0           | NA           | NA        | NA        | NA       | NA       |
| zmiz2             | 149.5622231 | -0.22635365  | 0.17605   | -1.285735 | 0.198536 | 0.763597 |
| CU855895.1        | 0.157187365 | -0.955901296 | 4.0804729 | -0.234262 | 0.814781 | NA       |
| tmprss2           | 216.6618321 | -0.294022008 | 0.1687168 | -1.742696 | 0.081387 | 0.552279 |
| pygol             | 4.160480743 | -0.11077953  | 0.9203258 | -0.12037  | 0.90419  | NA       |
| CABZ01101739.1    | 0           | NA           | NA        | NA        | NA       | NA       |
| ptpn23b           | 342.1052186 | -0.22635034  | 0.1177543 | -1.922225 | 0.054577 | 0.457793 |
| CT583672.1        | 346.5157002 | -0.158752734 | 0.1277183 | -1.242991 | 0.213871 | 0.782251 |
| FQ311908.1        | 13.64209218 | -0.305831924 | 0.5370285 | -0.569489 | 0.569024 | 0.948983 |
| vclb              | 287.0600162 | 0.014412766  | 0.1341576 | 0.1074316 | 0.914447 | 0.991119 |
| rela              | 62.4079676  | 0.207658617  | 0.2535066 | 0.8191449 | 0.412704 | 0.904974 |
| si:ch211-11c3.9   | 0           | NA           | NA        | NA        | NA       | NA       |
| illb              | 306.4322875 | -0.508896421 | 0.1622073 | -3.13732  | 0.001705 | 0.047485 |
| zgc:165603        | 6.410050868 | 0.05972795   | 0.8026957 | 0.0744092 | 0.940685 | NA       |
| si:ch73-236c18.7  | 1.959762264 | 0.47107059   | 1.4392594 | 0.3273007 | 0.74344  | NA       |
| dre-mir-365-2     | 0.473290478 | -0.833892061 | 2.901156  | -0.287434 | 0.77378  | NA       |
| CR388231.1        | 1.182894427 | 3.688339242  | 2.0602285 | 1.7902573 | 0.073413 | NA       |
| CABZ01078350.1    | 17.60538014 | -0.052328811 | 0.4489944 | -0.116547 | 0.907219 | 0.990702 |
| CR925761.1        | 8.712356334 | 0.04384244   | 0.6411351 | 0.0683825 | 0.945481 | NA       |
| parp11            | 3.102057144 | 1.463366333  | 1.1440555 | 1.2791043 | 0.20086  | NA       |
| CU655844.1        | 1.107104734 | 0.423303955  | 1.9651206 | 0.2154086 | 0.829449 | NA       |
| FP245456.1        | 25.16683053 | -0.087657766 | 0.3862923 | -0.226921 | 0.820485 | 0.981594 |
| BX649331.1        | 2.401490789 | -1.294064303 | 1.4085804 | -0.918701 | 0.358252 | NA       |
| si:ch73-170d6.3   | 3.127678178 | 0.441663518  | 1.0960635 | 0.4029543 | 0.686982 | NA       |
| rgrb              | 528.0464331 | -0.066522301 | 0.126063  | -0.527691 | 0.597714 | 0.95534  |
| rptor             | 507.6650939 | -0.157207185 | 0.1077282 | -1.459295 | 0.144484 | 0.688868 |
| BX511018.1        | 0.330916733 | -1.849579229 | 3.2489867 | -0.569279 | 0.569167 | NA       |
| si:dkey-108k24.2  | 0           | NA           | NA        | NA        | NA       | NA       |
| en1b              | 305.391028  | -0.143280052 | 0.1282421 | -1.117262 | 0.263882 | 0.830245 |
| CU929403.1        | 1.489338074 | 0.356860712  | 1.5490398 | 0.2303754 | 0.8178   | NA       |
| pxdn              | 60.35922059 | 0.015841172  | 0.2532064 | 0.0625623 | 0.950115 | 0.99381  |
| ccdc14            | 28.48167532 | 0.125954154  | 0.3549548 | 0.3548457 | 0.722705 | 0.970375 |
| si:dkey-201i2.4   | 1.981016035 | -1.571021256 | 1.5219811 | -1.032221 | 0.301968 | NA       |
| scn4aa            | 7.896745316 | 0.048573328  | 0.7125698 | 0.0681664 | 0.945653 | NA       |
| CABZ01046427.2    | 0           | NA           | NA        | NA        | NA       | NA       |
| CT737182.1        | 0.988894344 | -1.041944082 | 1.9792901 | -0.526423 | 0.598594 | NA       |
| lrtml             | 29.0914112  | 0.205733327  | 0.3548793 | 0.5797276 | 0.562098 | 0.948728 |
| BX548018.1        | 0           | NA           | NA        | NA        | NA       | NA       |
| tfec              | 33.49626566 | -0.395506211 | 0.3542435 | -1.116481 | 0.264216 | 0.830245 |
| dhrrs1311         | 409.3305702 | 0.114914642  | 0.120537  | 0.9533561 | 0.34041  | 0.87805  |
| MYH6 (1 of many)  | 111.0973914 | 0.019817969  | 0.1897691 | 0.104432  | 0.916827 | 0.991541 |
| tbcd              | 267.5935663 | -0.081801822 | 0.129466  | -0.63184  | 0.527491 | 0.941391 |
| lzts3a            | 28.11073296 | 0.088554217  | 0.3695161 | 0.2396491 | 0.810602 | 0.980958 |
| csf3b             | 50.19936568 | -0.737701901 | 0.297491  | -2.479745 | 0.013148 | 0.204871 |
| elmol             | 2680.883408 | 0.001005374  | 0.0712585 | 0.0141088 | 0.988743 | 0.997589 |
| si:ch211-156p11.1 | 0.651026051 | -0.042574319 | 2.4423909 | -0.017431 | 0.986092 | NA       |
| znf1125           | 0.860946417 | -1.914579776 | 2.2239452 | -0.860893 | 0.389297 | NA       |
| rgs2              | 43.86041134 | -0.245204265 | 0.3016308 | -0.812928 | 0.416259 | 0.906237 |
| musk              | 109.5188747 | 0.233836275  | 0.1873417 | 1.2481804 | 0.211965 | 0.77986  |
| BX544876.2        | 0           | NA           | NA        | NA        | NA       | NA       |

|                  |             |              |           |           |          |          |
|------------------|-------------|--------------|-----------|-----------|----------|----------|
| pcxa             | 1560.026235 | 0.069314067  | 0.0819323 | 0.8459918 | 0.397557 | 0.899672 |
| CABZ01007829.1   | 0.158915748 | 0.967652056  | 4.0804729 | 0.2371421 | 0.812547 | NA       |
| BX005124.1       | 0.31759079  | 1.807926197  | 3.579045  | 0.5051421 | 0.613459 | NA       |
| slitrk6          | 398.2123569 | -0.046404694 | 0.1124886 | -0.412528 | 0.679953 | 0.965311 |
| cbx8b            | 213.7201571 | 0.182187303  | 0.1494865 | 1.2187545 | 0.222937 | 0.789115 |
| gig2d            | 1.219995923 | 1.398342718  | 1.8849492 | 0.7418464 | 0.45818  | NA       |
| si:zfos-741a10.3 | 5.335374045 | -0.302275223 | 0.9138716 | -0.330763 | 0.740823 | NA       |
| RF00003          | 0           | NA           | NA        | NA        | NA       | NA       |
| BX640547.2       | 5.195470755 | 0.912320558  | 0.879281  | 1.0375756 | 0.299468 | NA       |
| CU693379.1       | 501.8505006 | 0.024229501  | 0.1169424 | 0.2071917 | 0.83586  | 0.984089 |
| BX547930.4       | 3.576015002 | 0.723892456  | 1.0389736 | 0.6967381 | 0.485967 | NA       |
| nsmcel           | 45.05178135 | -0.047348893 | 0.2950948 | -0.160453 | 0.872524 | 0.987846 |
| cratb            | 192.2792226 | -0.241889456 | 0.155588  | -1.55468  | 0.120022 | 0.645215 |
| polr2b           | 1681.489936 | -0.101731105 | 0.0802315 | -1.26797  | 0.204809 | 0.772822 |
| glrx3            | 1359.614161 | -0.00493099  | 0.0865142 | -0.056996 | 0.954548 | 0.994533 |
| rangrf           | 99.3202694  | 0.067534011  | 0.2022106 | 0.3339785 | 0.738396 | 0.972689 |
| cd7al            | 33.05653468 | -0.200690885 | 0.3531273 | -0.568325 | 0.569815 | 0.948983 |
| pcdh2g28         | 4472.016408 | 0.100947841  | 0.0733842 | 1.3756081 | 0.168943 | 0.725919 |
| sowahca          | 6.779039746 | 0.376200166  | 0.7328624 | 0.5133299 | 0.607721 | NA       |
| cdhr5b           | 49.96449632 | -0.763550201 | 0.3064301 | -2.49176  | 0.012711 | 0.200229 |
| znrf2b           | 87.62886328 | 0.181219937  | 0.2203748 | 0.8223259 | 0.410891 | 0.903176 |
| CABZ01078120.1   | 1.761237778 | -0.220188127 | 1.5792016 | -0.13943  | 0.88911  | NA       |
| traj7            | 0           | NA           | NA        | NA        | NA       | NA       |
| CR382300.1       | 107.2602411 | 0.089899996  | 0.201011  | 0.4472393 | 0.654702 | 0.961305 |
| si:ch211-194m7.5 | 0.696687138 | -1.510024977 | 2.3787501 | -0.634798 | 0.52556  | NA       |
| znf1156          | 91.58864917 | -0.240600849 | 0.2305156 | -1.043751 | 0.296601 | 0.853709 |
| sbno2a           | 24.86181743 | 0.617157066  | 0.387499  | 1.5926674 | 0.111235 | 0.627048 |
| map7d1a          | 573.7954203 | 0.099501733  | 0.1023761 | 0.9719231 | 0.331089 | 0.874339 |
| cyp2aa4          | 125.7680763 | 0.36016594   | 0.1849913 | 1.9469344 | 0.051543 | 0.445067 |
| vwall            | 35.61519989 | -0.715722004 | 0.3342349 | -2.141374 | 0.032244 | 0.349508 |
| RF00001          | 0           | NA           | NA        | NA        | NA       | NA       |
| snap91a          | 1894.067791 | 0.063131165  | 0.0927    | 0.6810267 | 0.495855 | 0.932377 |
| VSTM2B           | 270.6625202 | 0.093108027  | 0.1389924 | 0.6698784 | 0.502935 | 0.935304 |
| L0018021.1       | 56.99129899 | -0.049711108 | 0.2663014 | -0.186672 | 0.851918 | 0.985174 |
| RF00001          | 0           | NA           | NA        | NA        | NA       | NA       |
| stx12            | 743.1352455 | 0.082599897  | 0.0992498 | 0.8322425 | 0.405272 | 0.901305 |
| CU571064.1       | 0.706628594 | 2.93253102   | 2.4623982 | 1.1909248 | 0.233683 | NA       |
| kcnc3b           | 7.322184666 | 0.409835028  | 0.739849  | 0.5539441 | 0.579617 | NA       |
| CABZ01055522.1   | 322.3974079 | 0.0453186    | 0.1329552 | 0.3408561 | 0.733212 | 0.971947 |
| si:dkey-58i8.5   | 1.181217373 | -0.359330701 | 1.8241705 | -0.196983 | 0.843841 | NA       |
| ftr67            | 396.4709291 | -0.130636425 | 0.1148426 | -1.137526 | 0.255318 | 0.823868 |
| sec1411          | 380.4313588 | -0.084394963 | 0.1189644 | -0.709413 | 0.478068 | 0.926857 |
| tcer gla         | 894.9858486 | -0.11904693  | 0.0947426 | -1.25653  | 0.208924 | 0.776073 |
| CT583651.2       | 195.0379942 | 0.042391538  | 0.1469616 | 0.2884532 | 0.773    | 0.975687 |
| cdh22            | 6.461447713 | 0.209972681  | 0.7603219 | 0.2761629 | 0.782423 | NA       |
| farsa            | 1018.876793 | -0.012375301 | 0.1028036 | -0.120378 | 0.904184 | 0.990291 |
| plc12            | 107.4039336 | 0.091298843  | 0.1995879 | 0.4574367 | 0.647357 | 0.960581 |
| CT573793.1       | 0           | NA           | NA        | NA        | NA       | NA       |
| gcdhb            | 255.9526167 | 0.042309616  | 0.1479898 | 0.2858955 | 0.774958 | 0.975687 |
| fam168a          | 107.0998129 | -0.040150023 | 0.1909534 | -0.210261 | 0.833464 | 0.983583 |
| sox4b            | 2710.733948 | -0.244249715 | 0.0744018 | -3.282845 | 0.001028 | 0.031702 |
| BX664606.1       | 0           | NA           | NA        | NA        | NA       | NA       |
| tgm51            | 34.4199515  | -0.207708702 | 0.3463261 | -0.599749 | 0.548674 | 0.946312 |
| sdr42e1          | 44.01117965 | 0.308146991  | 0.3022397 | 1.0195451 | 0.307944 | 0.861088 |

|                   |             |              |           |           |          |          |
|-------------------|-------------|--------------|-----------|-----------|----------|----------|
| CABZ01044108.1    | 0.787665208 | -1.829930327 | 2.4308619 | -0.752791 | 0.451576 | NA       |
| BX005073.1        | 0 NA        |              | NA        | NA        | NA       | NA       |
| FQ311879.1        | 0 NA        |              | NA        | NA        | NA       | NA       |
| lrp12             | 943.8601133 | 0.153950691  | 0.0961259 | 1.6015532 | 0.109254 | 0.623132 |
| SLC25A29          | 24.25732633 | 0.739340938  | 0.3962642 | 1.8657777 | 0.062072 | 0.486493 |
| si:dkey-11d20.1   | 0 NA        |              | NA        | NA        | NA       | NA       |
| smdtlb            | 781.4049987 | 0.033200608  | 0.1241096 | 0.2675103 | 0.789076 | 0.976965 |
| ehd1a             | 808.4201482 | 0.022671463  | 0.0981495 | 0.2309891 | 0.817323 | 0.981594 |
| RF00001           | 0 NA        |              | NA        | NA        | NA       | NA       |
| oxsm              | 229.1286349 | -0.305580226 | 0.1418551 | -2.154171 | 0.031227 | 0.342093 |
| RYR2 (1 of many)  | 750.2721649 | 0.056259225  | 0.1109853 | 0.506907  | 0.61222  | 0.95688  |
| lifra             | 12.80252764 | 0.114122239  | 0.5634539 | 0.2025405 | 0.839494 | 0.984979 |
| nop14             | 600.0700145 | -0.122114966 | 0.0982572 | -1.242809 | 0.213938 | 0.782251 |
| fam57a            | 27.36358095 | 0.108417088  | 0.3880671 | 0.2793772 | 0.779955 | 0.976146 |
| plpp4             | 2.147436038 | 0.228613569  | 1.259339  | 0.1815346 | 0.855948 | NA       |
| RF00001           | 0 NA        |              | NA        | NA        | NA       | NA       |
| BX548044.7        | 2.427105035 | 0.46344952   | 1.3765106 | 0.3366843 | 0.736355 | NA       |
| PRDM15            | 36.22081447 | -0.032196485 | 0.3255794 | -0.09889  | 0.921226 | 0.992138 |
| XPO5              | 178.3195967 | 0.127300938  | 0.172466  | 0.7381219 | 0.46044  | 0.921978 |
| gga3b             | 85.66899765 | -0.0444142   | 0.2221221 | -0.199954 | 0.841517 | 0.985174 |
| exoc6b            | 441.7139641 | -0.076794418 | 0.1081171 | -0.71029  | 0.477525 | 0.926857 |
| si:dkey-199m13.5  | 5.183181456 | -1.027821731 | 0.8746423 | -1.175134 | 0.239941 | NA       |
| BX927164.1        | 0.158795395 | 0.967652056  | 4.0804729 | 0.2371421 | 0.812547 | NA       |
| si:dkey-4j21.2    | 2.453597695 | -1.030026991 | 1.2425449 | -0.828966 | 0.407124 | NA       |
| pclob             | 1222.154155 | 0.189927177  | 0.087273  | 2.176242  | 0.029537 | 0.332786 |
| si:dkey-238i5.3   | 0.665331516 | 0.047715978  | 2.3078578 | 0.0206754 | 0.983505 | NA       |
| stac3             | 774.5872899 | 0.19897792   | 0.0943196 | 2.1096136 | 0.034892 | 0.363705 |
| BX649355.1        | 0.158795395 | 0.967652056  | 4.0804729 | 0.2371421 | 0.812547 | NA       |
| dre-mir-735       | 0 NA        |              | NA        | NA        | NA       | NA       |
| CU861459.1        | 0 NA        |              | NA        | NA        | NA       | NA       |
| si:zfos-128g4.2   | 105.5601953 | 0.185330963  | 0.195938  | 0.9458652 | 0.344217 | 0.878434 |
| cyp2aa9           | 64.25285371 | -0.111729623 | 0.2835926 | -0.393979 | 0.693596 | 0.96736  |
| si:ch211-223a21.1 | 15.98118161 | -0.112316432 | 0.4802103 | -0.23389  | 0.81507  | 0.981081 |
| BX324119.1        | 0.317711143 | 1.810477155  | 3.2978238 | 0.5489915 | 0.583011 | NA       |
| RF00001           | 0 NA        |              | NA        | NA        | NA       | NA       |
| BX323544.1        | 0.158795395 | 0.967652056  | 4.0804729 | 0.2371421 | 0.812547 | NA       |
| pds5b             | 2768.360704 | -0.070888703 | 0.0769692 | -0.921001 | 0.35705  | 0.883467 |
| si:ch211-255f4.2  | 47.48880026 | 0.193407177  | 0.3115185 | 0.620853  | 0.534696 | 0.943336 |
| zmp:0000001082    | 162.1268903 | -0.298224875 | 0.1739813 | -1.71412  | 0.086507 | 0.563804 |
| ubxn8             | 78.15363296 | 0.278106179  | 0.2250376 | 1.235821  | 0.216525 | 0.783739 |
| tfe3a             | 14.79044833 | 0.36323802   | 0.4876477 | 0.7448779 | 0.456346 | 0.921215 |
| pex1              | 176.9316525 | 0.271026582  | 0.1681947 | 1.6113861 | 0.107096 | 0.617015 |
| herc7             | 26.56607235 | -0.171995386 | 0.3850002 | -0.446741 | 0.655062 | 0.961614 |
| abraxas2          | 185.0561926 | 0.00224679   | 0.1508673 | 0.0148925 | 0.988118 | 0.997369 |
| CU062501.1        | 65.19889207 | 0.225986522  | 0.244101  | 0.9257909 | 0.354555 | 0.882105 |
| SHC3              | 66.73244984 | 0.380916449  | 0.2477295 | 1.5376306 | 0.124139 | 0.652708 |
| zgc:153293        | 126.9419817 | -0.238852033 | 0.1844661 | -1.294829 | 0.195379 | 0.760412 |
| CU633999.2        | 21.70432983 | 0.125009722  | 0.4093853 | 0.3053596 | 0.760092 | 0.975374 |
| faslg             | 0.476626891 | 2.395187592  | 2.815932  | 0.8505843 | 0.395    | NA       |
| si:ch211-216p19.5 | 3.433455288 | 0.980028049  | 1.0442268 | 0.9385203 | 0.347977 | NA       |
| krit1             | 254.7331374 | 0.018806502  | 0.1363993 | 0.1378783 | 0.890337 | 0.989291 |
| mcoln2            | 23.43760561 | 0.120070688  | 0.4178697 | 0.28734   | 0.773852 | 0.975687 |
| smarcc1b          | 466.5887912 | -0.028731967 | 0.1047327 | -0.274336 | 0.783826 | 0.97627  |
| zgc:173577        | 14.26794098 | -0.056777712 | 0.494552  | -0.114806 | 0.908599 | 0.990702 |

|                   |             |              |           |           |          |          |
|-------------------|-------------|--------------|-----------|-----------|----------|----------|
| suz12b            | 1062.23034  | -0.001148608 | 0.0857221 | -0.013399 | 0.989309 | 0.997589 |
| prdm1b            | 88.62165193 | -0.157508378 | 0.2281822 | -0.690275 | 0.490021 | 0.931926 |
| si:ch211-196h24.1 | 1.659851382 | -1.161637942 | 1.5333985 | -0.757558 | 0.448716 | NA       |
| tex15             | 5.774379846 | 0.909870758  | 0.8633749 | 1.0538536 | 0.29195  | NA       |
| gigyfla           | 149.6941371 | -0.029245418 | 0.1811093 | -0.161479 | 0.871716 | 0.987811 |
| rrp7a             | 210.0038249 | -0.261288605 | 0.1588517 | -1.644858 | 0.099999 | 0.601211 |
| bxdc2             | 524.9596208 | 0.136109212  | 0.1129905 | 1.2046071 | 0.228355 | 0.795541 |
| kif5aa            | 5049.689071 | 6.94E-05     | 0.0724928 | 0.0009574 | 0.999236 | 0.999704 |
| si:ch73-315f9.2   | 49.26796873 | 0.309194207  | 0.3224497 | 0.9588913 | 0.337614 | 0.876395 |
| trdjl             | 0           | NA           | NA        | NA        | NA       | NA       |
| BX323855.1        | 0.475018861 | 0.853207185  | 2.8976509 | 0.2944479 | 0.768416 | NA       |
| CU856520.1        | 786.6676429 | -0.12370277  | 0.0915474 | -1.351243 | 0.176618 | 0.737268 |
| rp9               | 202.1449903 | -0.081245786 | 0.1691777 | -0.480239 | 0.631057 | 0.957356 |
| dre-mir-7148      | 0           | NA           | NA        | NA        | NA       | NA       |
| nme8              | 24.07013768 | 0.150923552  | 0.3918345 | 0.3851717 | 0.70011  | 0.967998 |
| CT583726.1        | 0           | NA           | NA        | NA        | NA       | NA       |
| pald1a            | 442.6963556 | -0.145517038 | 0.1087621 | -1.337939 | 0.180916 | 0.741776 |
| m1na              | 32.46571953 | 0.157201382  | 0.3566634 | 0.4407556 | 0.65939  | 0.96288  |
| si:dkeyp-92c9.4   | 24.59835614 | -1.039087982 | 0.4042065 | -2.570686 | 0.01015  | 0.172128 |
| BX957297.1        | 4.644996436 | -0.222709595 | 0.9580771 | -0.232455 | 0.816185 | NA       |
| gata4             | 18.96587374 | -0.30650826  | 0.4813192 | -0.636809 | 0.524249 | 0.939336 |
| stard13b          | 514.5454899 | -0.050956289 | 0.1054343 | -0.483299 | 0.628883 | 0.957354 |
| ssh2b             | 442.2046332 | -0.0632761   | 0.1253753 | -0.504693 | 0.613774 | 0.95688  |
| znf1100           | 1.422967141 | 0.331098809  | 1.7641049 | 0.1876866 | 0.851122 | NA       |
| RF00003           | 0           | NA           | NA        | NA        | NA       | NA       |
| pcdhlgl3          | 56.38889471 | 0.154675993  | 0.257483  | 0.6007231 | 0.548024 | 0.945768 |
| si:ch211-9d9.7    | 0.988265837 | 0.023857189  | 1.9450119 | 0.0122658 | 0.990214 | NA       |
| CABZ01064972.1    | 9.225082698 | 0.394168422  | 0.6401605 | 0.6157337 | 0.53807  | NA       |
| rabgap1           | 1061.2075   | 0.018624493  | 0.0861439 | 0.2162021 | 0.82883  | 0.982721 |
| RSBN1             | 236.5701417 | -0.300193977 | 0.1420116 | -2.11387  | 0.034526 | 0.361039 |
| CU459186.1        | 9.676719148 | 1.163617693  | 0.673983  | 1.7264792 | 0.084261 | NA       |
| FP003590.1        | 1.468709556 | -0.366786288 | 1.7646744 | -0.207849 | 0.835347 | NA       |
| mrps16            | 316.8208371 | 0.002990016  | 0.1397579 | 0.0213943 | 0.982931 | 0.996944 |
| CR759816.1        | 6.647152399 | -0.001195502 | 0.7555354 | -0.001582 | 0.998737 | NA       |
| si:ch211-76m11.15 | 0           | NA           | NA        | NA        | NA       | NA       |
| si:ch211-153f2.3  | 44.48146205 | -0.080912585 | 0.2844388 | -0.284464 | 0.776055 | 0.975826 |
| dre-mir-126b      | 0           | NA           | NA        | NA        | NA       | NA       |
| CABZ01112656.1    | 469.8396397 | 0.046356306  | 0.1131624 | 0.4096442 | 0.682067 | 0.965476 |
| pid1              | 44.2061838  | -0.183034136 | 0.2863546 | -0.639187 | 0.522701 | 0.939336 |
| BX649431.2        | 0           | NA           | NA        | NA        | NA       | NA       |
| znf1040           | 53.48904879 | 0.139546136  | 0.2701863 | 0.5164811 | 0.605518 | 0.95651  |
| znf1071           | 2.142291928 | 0.636310703  | 1.3817343 | 0.460516  | 0.645146 | NA       |
| si:ch211-193i15.1 | 1.297255751 | -0.034484508 | 1.7090399 | -0.020178 | 0.983902 | NA       |
| CU459012.1        | 41.02807001 | 0.48009166   | 0.3065433 | 1.5661461 | 0.117314 | 0.640853 |
| zgc:162858        | 268.727853  | 0.025861641  | 0.1303567 | 0.1983914 | 0.842739 | 0.985174 |
| znf1095           | 5.394696306 | -0.537123051 | 0.8723075 | -0.61575  | 0.53806  | NA       |
| zgc:114119        | 272.4184328 | -0.032941306 | 0.1500319 | -0.219562 | 0.826212 | 0.982196 |
| CR352263.1        | 21.5181699  | 0.474499749  | 0.4312154 | 1.1003775 | 0.271168 | 0.835995 |
| cyp2k6            | 9.91112297  | 0.475431706  | 0.6007469 | 0.791401  | 0.42871  | NA       |
| RF01190           | 0           | NA           | NA        | NA        | NA       | NA       |
| si:ch73-311h14.2  | 279.0415166 | 0.054093216  | 0.1282537 | 0.4217673 | 0.673195 | 0.965257 |
| RF00001           | 0.173729368 | -0.955901296 | 4.0804729 | -0.234262 | 0.814781 | NA       |
| CR847947.1        | 1.226716822 | -1.285857512 | 1.9544125 | -0.657925 | 0.510586 | NA       |
| creb5a            | 39.19487413 | -0.060995929 | 0.3115613 | -0.195775 | 0.844786 | 0.985174 |

|                   |             |              |           |           |          |          |
|-------------------|-------------|--------------|-----------|-----------|----------|----------|
| cyp2aa1           | 157.8551472 | -0.52841137  | 0.162381  | -3.254146 | 0.001137 | 0.034075 |
| palm2             | 7.456507971 | 0.731710543  | 0.690453  | 1.0597543 | 0.289256 | NA       |
| EGFLAM            | 8.324457277 | 0.123426632  | 0.6458845 | 0.1910971 | 0.84845  | NA       |
| si:dkey-50i6.6    | 72.65467274 | -0.13839676  | 0.2321426 | -0.596171 | 0.551061 | 0.946549 |
| fxyd1             | 932.4310712 | 0.106540959  | 0.1064992 | 1.000392  | 0.317121 | 0.867335 |
| wacb              | 90.41815055 | 0.024717357  | 0.2080204 | 0.1188218 | 0.905417 | 0.990702 |
| CR749168.1        | 0 NA        | NA           | NA        | NA        | NA       | NA       |
| RF00001           | 0.157187365 | -0.955901296 | 4.0804729 | -0.234262 | 0.814781 | NA       |
| setdbl1b          | 1322.860223 | -0.048769512 | 0.0864266 | -0.564288 | 0.572558 | 0.949494 |
| faua              | 7273.909    | -0.266488144 | 0.0793922 | -3.356603 | 0.000789 | 0.025611 |
| CABZ01034698.1    | 0 NA        | NA           | NA        | NA        | NA       | NA       |
| si:ch211-188p14.5 | 0 NA        | NA           | NA        | NA        | NA       | NA       |
| CU915778.1        | 14.85371436 | 0.692023048  | 0.5233783 | 1.3222234 | 0.186094 | 0.750443 |
| si:dkey-185m8.2   | 8.490569789 | 0.66696346   | 0.6914491 | 0.964588  | 0.334751 | NA       |
| tradv25.0.2       | 0 NA        | NA           | NA        | NA        | NA       | NA       |
| trdj2             | 0.333314908 | -1.858695402 | 3.5126701 | -0.52914  | 0.596708 | NA       |
| scn4ba            | 31.62310177 | 0.772851606  | 0.3496023 | 2.2106596 | 0.027059 | 0.316986 |
| F0818704.1        | 1.483603486 | -0.918010655 | 1.6988633 | -0.540368 | 0.588944 | NA       |
| unc5a             | 9.713252842 | -0.344927183 | 0.6467364 | -0.533335 | 0.593802 | NA       |
| pcdh1g33          | 320.9360715 | 0.137318698  | 0.1247418 | 1.1008237 | 0.270973 | 0.835943 |
| CU138542.1        | 0.471562095 | -2.373056629 | 3.0645586 | -0.774355 | 0.438721 | NA       |
| kcngl             | 55.41502347 | 0.086382386  | 0.280046  | 0.3084578 | 0.757734 | 0.975374 |
| pcbp2             | 3451.783891 | -0.028214195 | 0.069165  | -0.407926 | 0.683328 | 0.965476 |
| cfap157           | 9.245153283 | -0.72966595  | 0.6659777 | -1.095631 | 0.27324  | NA       |
| BX548000.1        | 2.973102951 | 0.995041575  | 1.2096859 | 0.8225619 | 0.410757 | NA       |
| cacnb2a           | 255.6424349 | 0.032567974  | 0.1322826 | 0.2461999 | 0.805527 | 0.979893 |
| si:ch211-227p7.5  | 12.47398025 | -0.027849693 | 0.5355055 | -0.052006 | 0.958524 | 0.994935 |
| BX323797.1        | 0.166657454 | -0.955901296 | 4.0804729 | -0.234262 | 0.814781 | NA       |
| znf1070           | 6.319239139 | -1.6994311   | 0.8038043 | -2.114235 | 0.034495 | NA       |
| rragcb            | 83.19835446 | 0.0256479    | 0.2297274 | 0.1116449 | 0.911105 | 0.991066 |
| tradv2.0.3        | 0 NA        | NA           | NA        | NA        | NA       | NA       |
| BX088596.1        | 29.66386225 | 0.276362456  | 0.3635036 | 0.7602744 | 0.447091 | 0.917154 |
| CR790365.1        | 0 NA        | NA           | NA        | NA        | NA       | NA       |
| CU929262.1        | 0.522329263 | 0.999930388  | 2.8066578 | 0.3562709 | 0.721638 | NA       |
| zgc:111868        | 12.62365995 | -0.634782671 | 0.5663675 | -1.120796 | 0.262375 | 0.830166 |
| znf1154           | 17.71968251 | 0.101369884  | 0.4822863 | 0.2101861 | 0.833522 | 0.983583 |
| tradv6.0.2        | 0 NA        | NA           | NA        | NA        | NA       | NA       |
| BX323051.1        | 0.31437473  | -1.788572922 | 3.5930657 | -0.497785 | 0.618636 | NA       |
| si:dkey-161111.67 | 0 NA        | NA           | NA        | NA        | NA       | NA       |
| si:ch211-147m6.3  | 0 NA        | NA           | NA        | NA        | NA       | NA       |
| bsk146            | 326.2903964 | 0.199815595  | 0.1291439 | 1.5472318 | 0.121807 | 0.648874 |
| FP074867.1        | 6.956273952 | -0.403105631 | 0.706295  | -0.570733 | 0.568181 | NA       |
| si:zfos-741a10.4  | 1.957123383 | 0.475071774  | 1.3245505 | 0.3586664 | 0.719845 | NA       |
| si:ch211-106g8.54 | 0 NA        | NA           | NA        | NA        | NA       | NA       |
| CABZ01032982.1    | 0.656369582 | -1.475482481 | 2.3019817 | -0.640962 | 0.521547 | NA       |
| CU467646.3        | 0.166657454 | -0.955901296 | 4.0804729 | -0.234262 | 0.814781 | NA       |
| F0905040.1        | 24.57415202 | -0.024418099 | 0.3906613 | -0.062505 | 0.950161 | 0.99381  |
| aclya             | 2581.315186 | 0.008055313  | 0.0746656 | 0.1078852 | 0.914087 | 0.991119 |
| sbno1             | 1399.165849 | -0.043423083 | 0.0895748 | -0.484769 | 0.62784  | 0.957354 |
| CR376766.1        | 0 NA        | NA           | NA        | NA        | NA       | NA       |
| BX572078.1        | 1.1953612   | -0.381847657 | 1.7325832 | -0.220392 | 0.825566 | NA       |
| pcif1             | 105.2315161 | 0.162727361  | 0.1933374 | 0.8416757 | 0.399969 | 0.90084  |
| RF00001           | 0 NA        | NA           | NA        | NA        | NA       | NA       |
| BX511142.1        | 1.518457159 | -0.245850314 | 1.574579  | -0.156137 | 0.875925 | NA       |

|                   |             |              |           |           |          |          |
|-------------------|-------------|--------------|-----------|-----------|----------|----------|
| edar              | 29.0118824  | 0.189892777  | 0.3738043 | 0.5080005 | 0.611453 | 0.95688  |
| znf1087           | 7.764594022 | -0.11622613  | 0.7011629 | -0.165762 | 0.868344 | NA       |
| CU929418.1        | 0 NA        |              | NA        | NA        | NA       | NA       |
| RASGRP2           | 15.05517927 | 0.17213103   | 0.5337243 | 0.3225092 | 0.747067 | 0.97419  |
| dock1             | 670.0463526 | -0.18328455  | 0.1064793 | -1.721317 | 0.085193 | 0.560519 |
| CR974475.1        | 0 NA        |              | NA        | NA        | NA       | NA       |
| gabbr4            | 27.30931701 | -0.424577776 | 0.3866483 | -1.098098 | 0.272162 | 0.837242 |
| L0017849.1        | 0.981393344 | -0.052272524 | 2.0628158 | -0.02534  | 0.979783 | NA       |
| CABZ01015815.1    | 58.93141907 | -0.458538039 | 0.2919866 | -1.570408 | 0.11632  | 0.638744 |
| gch2              | 1224.574865 | 0.073567434  | 0.0956055 | 0.7694893 | 0.441603 | 0.916336 |
| dre-mir-19a       | 0 NA        |              | NA        | NA        | NA       | NA       |
| rpl24             | 14195.05076 | -0.379886338 | 0.0800115 | -4.747895 | 2.06E-06 | 0.000186 |
| afmid             | 91.44296157 | -0.282983778 | 0.2262094 | -1.250982 | 0.210941 | 0.778412 |
| FP016019.1        | 0.672911584 | -1.510325414 | 2.402234  | -0.628717 | 0.529534 | NA       |
| clic6             | 115.7569428 | -0.005815523 | 0.1966647 | -0.029571 | 0.976409 | 0.996762 |
| CU929444.1        | 394.5200744 | 0.050289418  | 0.1215397 | 0.4137696 | 0.679043 | 0.965257 |
| zgc:175280        | 111.3582233 | 0.315336173  | 0.2020818 | 1.5604379 | 0.118656 | 0.642318 |
| si:dkey-7114.3    | 7.169771436 | -0.327716293 | 0.7146028 | -0.458599 | 0.646522 | NA       |
| UNC13B            | 148.3203073 | 0.241906098  | 0.1661955 | 1.4555516 | 0.145517 | 0.691029 |
| FP017279.1        | 0 NA        |              | NA        | NA        | NA       | NA       |
| nagk              | 287.2698817 | -0.277605655 | 0.1314839 | -2.111329 | 0.034744 | 0.36274  |
| si:dkey-33i11.4   | 642.6802927 | 0.222202619  | 0.1331352 | 1.669     | 0.095117 | 0.586483 |
| si:dkey-218f9.10  | 165.8069126 | 0.158354118  | 0.1581654 | 1.0011934 | 0.316733 | 0.867129 |
| si:dkey-6d5.1     | 0.317831496 | 1.808837541  | 3.5779923 | 0.5055454 | 0.613176 | NA       |
| naa38             | 345.2213857 | -0.225996795 | 0.1224446 | -1.845707 | 0.064935 | 0.497901 |
| CU459186.2        | 6.411359828 | 3.098962696  | 0.9807952 | 3.159643  | 0.00158  | NA       |
| f3a               | 182.9781941 | 0.172999603  | 0.1526085 | 1.1336174 | 0.256955 | 0.82511  |
| RF01848           | 0 NA        |              | NA        | NA        | NA       | NA       |
| CABZ01055168.1    | 0 NA        |              | NA        | NA        | NA       | NA       |
| phlda1            | 64.3118799  | -0.109735668 | 0.2420799 | -0.453304 | 0.65033  | 0.960708 |
| si:ch73-72b7.1    | 6.627804464 | -0.725680598 | 0.7913929 | -0.916966 | 0.35916  | NA       |
| zgc:195356        | 8.008038641 | 1.150864211  | 0.6939898 | 1.6583301 | 0.097251 | NA       |
| BX663503.3        | 649.1456667 | 0.146404878  | 0.1049464 | 1.3950449 | 0.163002 | 0.717875 |
| btr29             | 2.005182646 | -0.002059822 | 1.3014479 | -0.001583 | 0.998737 | NA       |
| fbxw5             | 928.8015334 | 0.144560936  | 0.0847481 | 1.7057717 | 0.088051 | 0.568063 |
| tradv25.0.3       | 0 NA        |              | NA        | NA        | NA       | NA       |
| CR762408.1        | 0 NA        |              | NA        | NA        | NA       | NA       |
| fnta              | 568.4822278 | -0.161692002 | 0.1049247 | -1.541029 | 0.12331  | 0.651258 |
| igfbp3            | 749.1265963 | 0.105275801  | 0.0901052 | 1.1683655 | 0.242659 | 0.811434 |
| BX511066.1        | 0 NA        |              | NA        | NA        | NA       | NA       |
| bzwlb             | 2296.607739 | 0.017438773  | 0.0882527 | 0.1976004 | 0.843358 | 0.985174 |
| hs3st3bla         | 23.22468388 | -0.141927043 | 0.4360191 | -0.325506 | 0.744798 | 0.974094 |
| si:dkey-190j3.2   | 3.1004604   | 0.186119465  | 1.1084336 | 0.1679121 | 0.866652 | NA       |
| tpst2             | 34.22509963 | 0.284805214  | 0.3359159 | 0.8478467 | 0.396523 | 0.899672 |
| katnall           | 345.858906  | -0.052943687 | 0.1216195 | -0.435322 | 0.663329 | 0.964736 |
| CR450748.1        | 0.173729368 | -0.955901296 | 4.0804729 | -0.234262 | 0.814781 | NA       |
| si:ch211-186j3.3  | 1.147930445 | -0.458203818 | 1.7520625 | -0.261523 | 0.79369  | NA       |
| CR749168.2        | 0.476506538 | 2.394892832  | 2.8161716 | 0.8504073 | 0.395099 | NA       |
| dnaaf4            | 62.39585465 | 0.013885945  | 0.2523496 | 0.0550266 | 0.956117 | 0.994543 |
| RF00017           | 0.182570949 | 0.967652056  | 4.0804729 | 0.2371421 | 0.812547 | NA       |
| naccla            | 67.00743287 | 0.194723733  | 0.250129  | 0.7784933 | 0.436278 | 0.914408 |
| RF00001           | 0 NA        |              | NA        | NA        | NA       | NA       |
| cxc18b.3          | 27.6686491  | -0.051375908 | 0.3756265 | -0.136774 | 0.891209 | 0.989291 |
| si:dkey-161111.78 | 0 NA        |              | NA        | NA        | NA       | NA       |

|                   |              |               |            |            |           |           |
|-------------------|--------------|---------------|------------|------------|-----------|-----------|
| BX000701. 1       | 25. 54882446 | 0. 090786149  | 0. 3857409 | 0. 2353553 | 0. 813933 | 0. 981081 |
| BX530097. 1       | 28. 63386579 | 0. 497532591  | 0. 3598996 | 1. 3824204 | 0. 166843 | 0. 723339 |
| BX666065. 1       | 0. 949676663 | 1. 00110294   | 2. 1117873 | 0. 4740548 | 0. 635461 | NA        |
| hmgb1a            | 11831. 28857 | 0. 094904786  | 0. 0697414 | 1. 3608093 | 0. 173574 | 0. 732917 |
| dok1b             | 54. 94044735 | 0. 108928637  | 0. 2664224 | 0. 4088569 | 0. 682645 | 0. 965476 |
| CR927050. 1       | 0 NA         | NA            | NA         | NA         | NA        | NA        |
| L0018568. 1       | 4. 886277917 | 0. 955634684  | 0. 9316713 | 1. 0257209 | 0. 305023 | NA        |
| ankrd55           | 158. 4130072 | 0. 026597303  | 0. 1654422 | 0. 160765  | 0. 872279 | 0. 987846 |
| fkbp10a           | 135. 6680189 | 0. 313287085  | 0. 1826326 | 1. 7153952 | 0. 086273 | 0. 563208 |
| map2k6            | 960. 7179482 | 0. 006416299  | 0. 0908289 | 0. 0706416 | 0. 943683 | 0. 993364 |
| chia. 2           | 476. 4418514 | -0. 547457952 | 0. 141774  | -3. 861483 | 0. 000113 | 0. 005422 |
| slcla5            | 2061. 180421 | 0. 032206346  | 0. 0719362 | 0. 4477073 | 0. 654364 | 0. 961305 |
| purg              | 53. 794484   | -0. 003428656 | 0. 2628636 | -0. 013043 | 0. 989593 | 0. 997612 |
| CU856516. 1       | 19. 46748355 | 0. 1783056    | 0. 4559835 | 0. 3910352 | 0. 695771 | 0. 96736  |
| CABZ01058261. 1   | 809. 7535176 | -0. 121724307 | 0. 0963266 | -1. 263663 | 0. 206351 | 0. 774011 |
| ier2a             | 578. 5960162 | -0. 003982058 | 0. 1279248 | -0. 031128 | 0. 975167 | 0. 996762 |
| actclb            | 121343. 8334 | 0. 256736709  | 0. 1885659 | 1. 3615227 | 0. 173349 | 0. 732435 |
| BX927287. 1       | 8. 165032132 | 0. 161869301  | 0. 6979331 | 0. 2319267 | 0. 816595 | NA        |
| itchb             | 23. 39186765 | -0. 791758691 | 0. 4011224 | -1. 973858 | 0. 048398 | 0. 433433 |
| zgc:123103        | 4187. 827342 | 0. 29633398   | 0. 1065553 | 2. 7810346 | 0. 005419 | 0. 109223 |
| BX908731. 1       | 1. 845758743 | 0. 297900097  | 1. 3652675 | 0. 2181991 | 0. 827274 | NA        |
| atplb2a           | 6201. 51426  | 0. 14092081   | 0. 0748472 | 1. 8827812 | 0. 05973  | 0. 478372 |
| CU466285. 2       | 0 NA         | NA            | NA         | NA         | NA        | NA        |
| CR855379. 1       | 0. 157187365 | -0. 955901296 | 4. 0804729 | -0. 234262 | 0. 814781 | NA        |
| si:dkey-11f4. 7   | 6. 547578104 | 0. 586494051  | 0. 7661767 | 0. 7654814 | 0. 443985 | NA        |
| BX681417. 1       | 0 NA         | NA            | NA         | NA         | NA        | NA        |
| si:dkey-220o5. 5  | 1. 149418122 | 0. 346570459  | 1. 8373228 | 0. 188628  | 0. 850384 | NA        |
| glyr1             | 1437. 987874 | -0. 047753251 | 0. 0764458 | -0. 624668 | 0. 532189 | 0. 942546 |
| CR318603. 1       | 0. 157187365 | -0. 955901296 | 4. 0804729 | -0. 234262 | 0. 814781 | NA        |
| atp8b2            | 3. 81066062  | -0. 936135673 | 1. 0219372 | -0. 91604  | 0. 359646 | NA        |
| zgc:109982        | 43. 90276539 | 0. 184565236  | 0. 2923074 | 0. 6314081 | 0. 527774 | 0. 941629 |
| ghrhr2            | 2. 096858248 | 0. 683236533  | 1. 3795241 | 0. 4952697 | 0. 62041  | NA        |
| BX571942. 1       | 48. 81365614 | 0. 109791605  | 0. 273683  | 0. 4011634 | 0. 6883   | 0. 966672 |
| ppp2r2bb          | 213. 4827598 | -0. 059128587 | 0. 1461025 | -0. 404706 | 0. 685693 | 0. 966307 |
| prpsap1           | 88. 1294897  | -0. 250207259 | 0. 2236023 | -1. 118983 | 0. 263147 | 0. 830245 |
| CABZ01076667. 1   | 946. 0835093 | -0. 156299491 | 0. 1011049 | -1. 545915 | 0. 122125 | 0. 649408 |
| galnt13           | 340. 4177665 | 0. 11372149   | 0. 1254199 | 0. 9067257 | 0. 364552 | 0. 886564 |
| RF00001           | 0 NA         | NA            | NA         | NA         | NA        | NA        |
| CU929119. 1       | 7. 121035593 | 0. 914852805  | 0. 732911  | 1. 2482455 | 0. 211941 | NA        |
| si:zfos-2372e4. 1 | 8. 426024301 | -0. 774171085 | 0. 7311647 | -1. 058819 | 0. 289682 | NA        |
| hook2             | 183. 38059   | 0. 091006939  | 0. 1636744 | 0. 5560243 | 0. 578194 | 0. 951024 |
| 10-Sep            | 1089. 617294 | -0. 086346917 | 0. 0946944 | -0. 911848 | 0. 361849 | 0. 885944 |
| rasd4             | 644. 1627495 | -0. 056254801 | 0. 0990496 | -0. 567946 | 0. 570072 | 0. 948983 |
| traj47            | 0 NA         | NA            | NA         | NA         | NA        | NA        |
| acap3b            | 97. 12589676 | 0. 000744951  | 0. 1980832 | 0. 0037608 | 0. 996999 | 0. 99906  |
| ppp2cb            | 3229. 804651 | -0. 066682098 | 0. 0713794 | -0. 934193 | 0. 350205 | 0. 880195 |
| si:dkey-68o6. 5   | 19. 17726267 | -0. 452151334 | 0. 4595601 | -0. 983879 | 0. 325175 | 0. 871629 |
| CR450749. 1       | 0 NA         | NA            | NA         | NA         | NA        | NA        |
| CT030005. 1       | 0 NA         | NA            | NA         | NA         | NA        | NA        |
| ipcef1            | 69. 87123002 | 0. 050866203  | 0. 2356759 | 0. 2158312 | 0. 829119 | 0. 982737 |
| CU861469. 1       | 0. 365141898 | 1. 973577737  | 3. 3927314 | 0. 5817076 | 0. 560764 | NA        |
| BX465836. 2       | 0 NA         | NA            | NA         | NA         | NA        | NA        |
| puml              | 2896. 705788 | -0. 018743832 | 0. 0728329 | -0. 257354 | 0. 796906 | 0. 978569 |
| si:ch73-119p20. 1 | 1566. 410153 | 0. 276343947  | 0. 0886815 | 3. 1161398 | 0. 001832 | 0. 050201 |

|                   |             |              |           |           |          |          |
|-------------------|-------------|--------------|-----------|-----------|----------|----------|
| vps52             | 458.5684559 | 0.046222149  | 0.1174992 | 0.3933825 | 0.694037 | 0.96736  |
| tradv15.0         | 0.349228403 | 0.005884014  | 3.2372587 | 0.0018176 | 0.99855  | NA       |
| PITPNC1           | 15.91354488 | -0.040021703 | 0.5158585 | -0.077583 | 0.93816  | 0.99279  |
| si:dkey-16p6.1    | 35.27611629 | -0.319078287 | 0.3314616 | -0.96264  | 0.335728 | 0.876088 |
| slc7a5            | 34.71063869 | 0.340655741  | 0.3293108 | 1.0344506 | 0.300926 | 0.856434 |
| vasna             | 661.8251428 | 0.078197773  | 0.0986452 | 0.7927178 | 0.427942 | 0.910858 |
| si:dkeyp-13d12.11 | 0 NA        | NA           | NA        | NA        | NA       | NA       |
| si:dkeyp-115e12.7 | 239.343443  | -0.136764746 | 0.140144  | -0.975887 | 0.32912  | 0.873436 |
| zgc:103508        | 268.6404644 | -0.017128839 | 0.1325772 | -0.129199 | 0.8972   | 0.990121 |
| atxn3             | 193.5225737 | -0.113479004 | 0.1653661 | -0.686229 | 0.492569 | 0.931926 |
| ugt5b3            | 125.6277591 | -0.523901918 | 0.2174344 | -2.409472 | 0.015976 | 0.233052 |
| znf1039           | 0.325573202 | 0.005883621  | 3.3172783 | 0.0017736 | 0.998585 | NA       |
| utp20             | 398.5713136 | -0.134031727 | 0.1121758 | -1.194837 | 0.232151 | 0.800166 |
| si:dkey-112e7.2   | 477.6553297 | -0.13743551  | 0.1276759 | -1.07644  | 0.28173  | 0.84357  |
| si:ch73-359m17.6  | 0 NA        | NA           | NA        | NA        | NA       | NA       |
| epb41a            | 404.6518357 | -0.198372706 | 0.1378772 | -1.438764 | 0.150217 | 0.698425 |
| si:dkey-228b2.6   | 0 NA        | NA           | NA        | NA        | NA       | NA       |
| st3gal113         | 0.862674799 | -0.605687625 | 2.2107371 | -0.273975 | 0.784104 | NA       |
| RF00001           | 0 NA        | NA           | NA        | NA        | NA       | NA       |
| lsr               | 483.036738  | -0.117378623 | 0.1108791 | -1.058618 | 0.289774 | 0.846246 |
| CR847534.1        | 7.234557703 | 0.953295225  | 0.7123752 | 1.3381927 | 0.180834 | NA       |
| BX914214.2        | 6.726419345 | -0.660832165 | 0.7697994 | -0.858447 | 0.390646 | NA       |
| si:ch73-199g24.2  | 475.7958517 | -0.169732623 | 0.1142291 | -1.485896 | 0.137307 | 0.674358 |
| BX511034.4        | 0 NA        | NA           | NA        | NA        | NA       | NA       |
| xrcc5             | 478.5186347 | -0.261903812 | 0.1049876 | -2.494615 | 0.012609 | 0.19947  |
| cdc37             | 1619.338543 | -0.195132638 | 0.0899508 | -2.169326 | 0.030058 | 0.335259 |
| AL954741.1        | 53.18664226 | 0.030993751  | 0.2827346 | 0.1096214 | 0.91271  | 0.991119 |
| RF00001           | 0.340386822 | -1.882368278 | 3.2159502 | -0.585323 | 0.558331 | NA       |
| si:ch211-51f19.1  | 32.07101858 | 0.262220564  | 0.3445963 | 0.7609499 | 0.446687 | 0.917154 |
| RF00001           | 0 NA        | NA           | NA        | NA        | NA       | NA       |
| zgc:175088        | 1182.952614 | 0.130954811  | 0.0975219 | 1.3428252 | 0.179329 | 0.740258 |
| si:dkey-10p5.10   | 168.1641062 | 0.085200478  | 0.1596739 | 0.5335906 | 0.593625 | 0.954434 |
| si:zfos-169g10.3  | 67.40276824 | -0.0813297   | 0.2548424 | -0.319137 | 0.749622 | 0.97419  |
| jpt1b             | 1858.197714 | 0.075589036  | 0.1015449 | 0.7443906 | 0.45664  | 0.921215 |
| naga              | 361.8527613 | -0.339905708 | 0.158203  | -2.148541 | 0.031671 | 0.345305 |
| nsdhl             | 182.873566  | -0.134358337 | 0.1588585 | -0.845774 | 0.397679 | 0.899672 |
| si:ch211-255f4.9  | 2.483816655 | -0.573279681 | 1.1753477 | -0.487753 | 0.625725 | NA       |
| CU651657.1        | 0.31437473  | -1.788572922 | 3.5930657 | -0.497785 | 0.618636 | NA       |
| CU138553.1        | 0 NA        | NA           | NA        | NA        | NA       | NA       |
| btbd17a           | 282.1843005 | 0.141818737  | 0.1569176 | 0.9037784 | 0.366113 | 0.887239 |
| dlg2              | 144.7888514 | -0.126838805 | 0.1695905 | -0.747912 | 0.454513 | 0.920666 |
| gig2i             | 0.340386822 | -1.882368278 | 3.2159502 | -0.585323 | 0.558331 | NA       |
| zgc:174944        | 6.055371038 | -0.223957455 | 0.787585  | -0.28436  | 0.776135 | NA       |
| BX927130.1        | 4.247249532 | -0.558419465 | 0.9767229 | -0.571728 | 0.567507 | NA       |
| h2afy             | 308.3258181 | -0.249656891 | 0.1264054 | -1.975049 | 0.048263 | 0.432986 |
| si:ch211-246b8.5  | 0 NA        | NA           | NA        | NA        | NA       | NA       |
| CABZ01064859.1    | 142.7179342 | -0.332225283 | 0.1735729 | -1.914038 | 0.055615 | 0.461579 |
| ly6m5             | 17.69934361 | -0.13843067  | 0.4476909 | -0.30921  | 0.757162 | 0.975374 |
| mvda              | 176.088135  | 0.076651525  | 0.1520755 | 0.504036  | 0.614236 | 0.95688  |
| si:ch211-209j12.2 | 13.17200047 | -0.846668638 | 0.542944  | -1.559403 | 0.118901 | 0.642772 |
| pacsin3           | 744.2335557 | 0.214438578  | 0.0977721 | 2.1932484 | 0.028289 | 0.325989 |
| RF00003           | 0 NA        | NA           | NA        | NA        | NA       | NA       |
| crfb15            | 8.725440575 | -0.616138647 | 0.6566336 | -0.938329 | 0.348075 | NA       |
| zgc:92162         | 12.06708507 | 1.214920528  | 0.5599675 | 2.1696268 | 0.030035 | 0.335259 |



|                   |             |              |           |           |          |          |
|-------------------|-------------|--------------|-----------|-----------|----------|----------|
| si:rp71-1d10.8    | 94.19793314 | 0.231592426  | 0.2089373 | 1.1084305 | 0.267676 | 0.833349 |
| znf1079           | 7.138487098 | 0.215459069  | 0.7046981 | 0.3057466 | 0.759798 | NA       |
| si:dkey-220o21.4  | 0 NA        | NA           | NA        | NA        | NA       | NA       |
| CU469503.1        | 0 NA        | NA           | NA        | NA        | NA       | NA       |
| igfbpla           | 1413.876652 | -0.083720398 | 0.0982867 | -0.851798 | 0.394326 | 0.898733 |
| si:rp71-62i8.1    | 15.82470861 | -0.591903602 | 0.5086297 | -1.163722 | 0.244537 | 0.814189 |
| slc25a13          | 9.300484764 | 0.408599165  | 0.675567  | 0.6048241 | 0.545296 | NA       |
| BX890548.1        | 495.6206185 | 0.070437673  | 0.1122364 | 0.6275832 | 0.530277 | 0.942209 |
| hccsb             | 849.3500933 | 0.17318808   | 0.0870751 | 1.9889517 | 0.046707 | 0.424613 |
| CR855320.1        | 1.717690463 | 0.06652635   | 1.4948007 | 0.0445052 | 0.964502 | NA       |
| si:dkey-30e9.6    | 11.6618742  | 0.521074356  | 0.5668249 | 0.9192862 | 0.357946 | 0.884398 |
| CABZ01088346.1    | 65.19297549 | 0.454414593  | 0.2791855 | 1.6276439 | 0.1036   | 0.609882 |
| lhb               | 2.83127539  | -0.872060563 | 1.1245163 | -0.775498 | 0.438045 | NA       |
| BX511034.5        | 8.242286414 | 0.840274856  | 0.6709519 | 1.2523623 | 0.210438 | NA       |
| evx1              | 0 NA        | NA           | NA        | NA        | NA       | NA       |
| slc25a42          | 49.98183601 | -0.147849544 | 0.2927179 | -0.505092 | 0.613494 | 0.95688  |
| AL954861.2        | 4.799179691 | -1.307683096 | 1.0171432 | -1.285643 | 0.198568 | NA       |
| cygbl             | 1018.248577 | -0.013757532 | 0.0887583 | -0.155    | 0.876821 | 0.987881 |
| CT583728.3        | 0 NA        | NA           | NA        | NA        | NA       | NA       |
| zgc:158320        | 52.39152625 | -0.167443361 | 0.2783064 | -0.601651 | 0.547406 | 0.945526 |
| sp9               | 359.2515001 | 0.00323551   | 0.1325109 | 0.0244169 | 0.98052  | 0.996944 |
| poldip3           | 509.756642  | 0.016454472  | 0.1051621 | 0.1564677 | 0.875664 | 0.987881 |
| CABZ01050249.1    | 160.5216918 | -0.010126998 | 0.1678151 | -0.060346 | 0.95188  | 0.993864 |
| si:cabz01030277.1 | 0.157187365 | -0.955901296 | 4.0804729 | -0.234262 | 0.814781 | NA       |
| ppp4r11           | 99.51796872 | 0.102973647  | 0.1980476 | 0.519944  | 0.603103 | 0.956045 |
| rp113             | 19224.30695 | -0.298393436 | 0.0714708 | -4.175042 | 2.98E-05 | 0.001748 |
| si:dkey-27n6.1    | 4.817559143 | -0.478299764 | 0.8585534 | -0.5571   | 0.577459 | NA       |
| si:ch211-209n20.1 | 3.773212606 | -0.13350886  | 1.0172283 | -0.131248 | 0.895579 | NA       |
| dnajbla           | 122.9066103 | 0.303494832  | 0.1895599 | 1.6010496 | 0.109366 | 0.623408 |
| si:dkey-238k10.1  | 20.38671354 | -0.709000744 | 0.4375454 | -1.620405 | 0.105145 | 0.613317 |
| si:ch211-22312.4  | 400.2724438 | 0.023923717  | 0.12532   | 0.190901  | 0.848603 | 0.985174 |
| lrrtm412          | 16.07403826 | 0.073580354  | 0.4800498 | 0.1532765 | 0.87818  | 0.987881 |
| jptla             | 269.6070401 | -0.069952666 | 0.1336105 | -0.523557 | 0.600587 | 0.956045 |
| BX957256.1        | 0.356300316 | 0.005884122  | 3.214964  | 0.0018302 | 0.99854  | NA       |
| lama2             | 48.29573717 | -0.045031053 | 0.3030867 | -0.148575 | 0.881889 | 0.988344 |
| si:dkey-161111.76 | 0 NA        | NA           | NA        | NA        | NA       | NA       |
| cables1           | 41.58582107 | 0.728152819  | 0.3070006 | 2.371829  | 0.0177   | 0.246724 |
| rbpms             | 30.02789003 | -0.30919787  | 0.3516941 | -0.879167 | 0.379311 | 0.895192 |
| cfap410           | 76.21022526 | -0.459124291 | 0.2286693 | -2.007809 | 0.044664 | 0.41583  |
| ccl33.3           | 0.795406914 | -3.1255921   | 2.3628864 | -1.322786 | 0.185907 | NA       |
| CR753902.1        | 0.681245011 | 1.537021632  | 2.3941387 | 0.6419936 | 0.520877 | NA       |
| CU694952.1        | 1.222514451 | 1.394641811  | 1.9626635 | 0.7105863 | 0.477341 | NA       |
| lritlb            | 485.2550907 | 0.383384956  | 0.1304477 | 2.9389934 | 0.003293 | 0.076602 |
| FP085432.1        | 0.332524763 | 0.005883742  | 3.292841  | 0.0017868 | 0.998574 | NA       |
| BX640537.1        | 12.56705356 | -0.853291997 | 0.5575675 | -1.530383 | 0.125922 | 0.654803 |
| zgc:162182        | 7.339482317 | -0.675478786 | 0.7226065 | -0.934781 | 0.349901 | NA       |
| si:dkeyp-79b7.3   | 1.331129901 | -0.800050342 | 1.731093  | -0.462165 | 0.643963 | NA       |
| zgc:158343        | 567.527813  | 0.110009074  | 0.1217362 | 0.9036679 | 0.366172 | 0.887239 |
| bean              | 553.3047495 | 0.210325924  | 0.1120247 | 1.8774951 | 0.06045  | 0.480058 |
| BX914205.1        | 0.356300316 | 0.005884122  | 3.214964  | 0.0018302 | 0.99854  | NA       |
| CR759907.1        | 1.513391121 | -2.914329743 | 1.8767386 | -1.552869 | 0.120454 | NA       |
| ly6m3             | 0.530029684 | -0.939524117 | 2.7937867 | -0.336291 | 0.736652 | NA       |
| nme2b.2           | 9767.75073  | -0.046751006 | 0.1141382 | -0.4096   | 0.6821   | 0.965476 |
| si:ch73-236c18.9  | 0 NA        | NA           | NA        | NA        | NA       | NA       |

|                    |             |              |           |           |          |          |
|--------------------|-------------|--------------|-----------|-----------|----------|----------|
| CR391930.1         | 0.490502273 | -2.421143305 | 2.7891168 | -0.868068 | 0.385357 | NA       |
| lcat               | 104.0061088 | 0.134309038  | 0.2166706 | 0.6198766 | 0.535339 | 0.943336 |
| CABZ01073265.1     | 808.1490536 | -0.041515975 | 0.2257211 | -0.183926 | 0.854072 | 0.985174 |
| CU179702.1         | 0 NA        | NA           | NA        | NA        | NA       | NA       |
| nkx1.2lb           | 197.223797  | -0.143295001 | 0.159496  | -0.898424 | 0.36896  | 0.888432 |
| si:dkey-15h8.17    | 0.166657454 | -0.955901296 | 4.0804729 | -0.234262 | 0.814781 | NA       |
| atgl6l1            | 893.9627816 | -0.066217208 | 0.0877    | -0.755042 | 0.450224 | 0.918761 |
| med24              | 598.6838571 | 0.034506385  | 0.1080627 | 0.3193182 | 0.749485 | 0.97419  |
| si:ch211-246b8.1   | 2.471988433 | -0.636198482 | 1.2642899 | -0.503206 | 0.614819 | NA       |
| BX927335.1         | 0 NA        | NA           | NA        | NA        | NA       | NA       |
| tradv23.1.1        | 0 NA        | NA           | NA        | NA        | NA       | NA       |
| AL844563.1         | 0 NA        | NA           | NA        | NA        | NA       | NA       |
| si:ch1073-268j14.1 | 9.970721675 | 1.114761363  | 0.6146778 | 1.8135703 | 0.069744 | NA       |
| CABZ01073736.1     | 8.784617977 | -0.164288717 | 0.6451832 | -0.254639 | 0.799002 | NA       |
| serpl              | 891.6095337 | -0.183739697 | 0.0875256 | -2.099269 | 0.035793 | 0.368633 |
| CR936249.1         | 3.702677086 | 0.603405183  | 1.0854107 | 0.5559234 | 0.578263 | NA       |
| cbx4               | 377.0237115 | -0.069638581 | 0.1235241 | -0.563765 | 0.572914 | 0.949762 |
| znf1122            | 0.670675047 | -1.455259498 | 2.4036813 | -0.605429 | 0.544894 | NA       |
| cc2dlb             | 259.6782447 | -0.229118038 | 0.1329035 | -1.723943 | 0.084718 | 0.560519 |
| slit1b             | 770.152998  | 0.020171934  | 0.1031793 | 0.1955037 | 0.844999 | 0.985174 |
| pcdh1g18           | 61.38345388 | 0.079729248  | 0.2851639 | 0.2795909 | 0.779791 | 0.976146 |
| sh3d21             | 624.2993817 | 0.18543055   | 0.096688  | 1.9178229 | 0.055133 | 0.460392 |
| atrx1              | 891.7032067 | 0.056399801  | 0.0930332 | 0.606233  | 0.54436  | 0.945438 |
| dre-mir-455-1      | 0.157187365 | -0.955901296 | 4.0804729 | -0.234262 | 0.814781 | NA       |
| elof1              | 1675.525913 | -0.025769161 | 0.081183  | -0.317421 | 0.750924 | 0.97419  |
| tradv14.0          | 1.505880076 | 0.335389091  | 1.4976509 | 0.2239434 | 0.822801 | NA       |
| ogt.1              | 1820.240962 | -0.048677588 | 0.0773123 | -0.629623 | 0.528942 | 0.942109 |
| BX293991.1         | 0.48983248  | -0.887840757 | 2.6934859 | -0.329625 | 0.741683 | NA       |
| ddx46              | 1414.25758  | -0.186299438 | 0.0963852 | -1.932864 | 0.053253 | 0.452412 |
| asb10              | 36.60633581 | -0.003204204 | 0.3187319 | -0.010053 | 0.991979 | 0.997833 |
| prlh               | 6.726854768 | 0.93497721   | 0.7668996 | 1.2191651 | 0.222782 | NA       |
| rnf213a            | 185.0859879 | -0.133789411 | 0.162406  | -0.823796 | 0.410055 | 0.902642 |
| si:dkey-190j3.2    | 0.647019846 | -1.455099716 | 2.4289208 | -0.599073 | 0.549125 | NA       |
| RF00026            | 0 NA        | NA           | NA        | NA        | NA       | NA       |
| pcdh2ab2           | 0 NA        | NA           | NA        | NA        | NA       | NA       |
| BX000985.1         | 0 NA        | NA           | NA        | NA        | NA       | NA       |
| muc5.3             | 186.9089533 | -0.831015679 | 0.1628131 | -5.104109 | 3.32E-07 | 3.89E-05 |
| CT476811.1         | 12.45473035 | -0.257336447 | 0.5386158 | -0.477774 | 0.632811 | 0.957356 |
| FQ312013.1         | 0.182570949 | 0.967652056  | 4.0804729 | 0.2371421 | 0.812547 | NA       |
| CR855306.1         | 0.173729368 | -0.955901296 | 4.0804729 | -0.234262 | 0.814781 | NA       |
| zgc:174863         | 139.3194022 | 0.031400238  | 0.1714969 | 0.1830951 | 0.854723 | 0.985174 |
| hs2st1a            | 209.564806  | 0.141246766  | 0.1460743 | 0.9669516 | 0.333568 | 0.874933 |
| SYDE2              | 142.3069866 | -0.176392156 | 0.1817706 | -0.970411 | 0.331842 | 0.874653 |
| vdra               | 7.581226139 | 0.865049559  | 0.7247968 | 1.1935063 | 0.232671 | NA       |
| mlap               | 0.507044276 | -2.459587493 | 2.7586536 | -0.89159  | 0.372613 | NA       |
| si:ch73-233f7.7    | 1.880182333 | -0.761974007 | 1.5642365 | -0.487122 | 0.626172 | NA       |
| tmem1761.1         | 302.5261865 | 0.16374095   | 0.1284128 | 1.275114  | 0.202269 | 0.768575 |
| CR847906.1         | 3.378008714 | -0.868895362 | 1.0549881 | -0.823607 | 0.410163 | NA       |
| si:ch73-309g22.1   | 0.802200093 | 1.852032281  | 2.2653592 | 0.8175446 | 0.413617 | NA       |
| FP016247.1         | 0.325452849 | 0.005883619  | 3.3177086 | 0.0017734 | 0.998585 | NA       |
| ndufa41            | 3780.696576 | -0.028262384 | 0.0808669 | -0.349492 | 0.72672  | 0.970402 |
| clec3bb            | 32.73585744 | -0.356939913 | 0.3842769 | -0.928861 | 0.352961 | 0.881552 |
| FQ311879.2         | 0.166657454 | -0.955901296 | 4.0804729 | -0.234262 | 0.814781 | NA       |
| traj5              | 0 NA        | NA           | NA        | NA        | NA       | NA       |

|                    |              |               |            |            |           |           |
|--------------------|--------------|---------------|------------|------------|-----------|-----------|
| CABZ01049362. 1    |              | 0 NA          | NA         | NA         | NA        | NA        |
| btr23              | 28. 92290011 | 0. 162706229  | 0. 3664295 | 0. 4440314 | 0. 65702  | 0. 96215  |
| cnm3a              | 1180. 803754 | 0. 091960526  | 0. 0814411 | 1. 129166  | 0. 258828 | 0. 826961 |
| CABZ01034698. 2    | 0. 672403429 | 0. 029250563  | 2. 3004318 | 0. 0127152 | 0. 989855 | NA        |
| zgc:112234         | 15. 96779089 | 0. 305163475  | 0. 4950296 | 0. 616455  | 0. 537594 | 0. 943336 |
| epx4               | 215. 5254552 | 0. 036032352  | 0. 1551833 | 0. 2321922 | 0. 816389 | 0. 981594 |
| mettl23            | 114. 6678199 | -0. 237451189 | 0. 1856175 | -1. 27925  | 0. 200809 | 0. 766855 |
| adssl1             | 2356. 231366 | 0. 435886268  | 0. 082429  | 5. 2880179 | 1. 24E-07 | 1. 67E-05 |
| si:ch211-119e14. 1 | 41. 87024966 | 0. 103546509  | 0. 309385  | 0. 3346849 | 0. 737863 | 0. 972535 |
| zgc:66475          | 586. 297669  | 0. 018934111  | 0. 1040385 | 0. 1819915 | 0. 855589 | 0. 985174 |
| CU571163. 1        | 0. 31598276  | 0. 005883445  | 3. 3523626 | 0. 001755  | 0. 9986   | NA        |
| si:ch73-252p3. 1   | 120. 032181  | 0. 119533561  | 0. 1886205 | 0. 6337252 | 0. 52626  | 0. 940506 |
| gbelb              | 156. 1574246 | 0. 144301855  | 0. 1888547 | 0. 7640891 | 0. 444814 | 0. 916797 |
| si:ch1073-13h15. 3 | 108. 7582279 | -0. 130986022 | 0. 214783  | -0. 609853 | 0. 541959 | 0. 944974 |
| tradv4. 0. 2       |              | 0 NA          | NA         | NA         | NA        | NA        |
| nkiras1            | 189. 4864098 | 0. 045876371  | 0. 151593  | 0. 3026286 | 0. 762173 | 0. 975374 |
| dus3l              | 317. 2121174 | -0. 181645854 | 0. 1208969 | -1. 502485 | 0. 132972 | 0. 667628 |
| BX957252. 2        | 1. 162156842 | -0. 331037298 | 1. 8315853 | -0. 180738 | 0. 856573 | NA        |
| pimr58             |              | 0 NA          | NA         | NA         | NA        | NA        |
| ubl3a              | 1702. 225887 | 0. 032029317  | 0. 0901646 | 0. 3552314 | 0. 722416 | 0. 970375 |
| zgc:113279         | 35. 33950733 | 0. 281889871  | 0. 3525154 | 0. 7996526 | 0. 423912 | 0. 908025 |
| CABZ01066926. 1    | 180. 5706831 | -0. 230255912 | 0. 162589  | -1. 416184 | 0. 156722 | 0. 707054 |
| si:ch73-379j16. 2  | 0. 158915748 | 0. 967652056  | 4. 0804729 | 0. 2371421 | 0. 812547 | NA        |
| si:ch211-188p14. 3 | 13. 39133822 | 0. 385968066  | 0. 5166186 | 0. 7471045 | 0. 455    | 0. 921022 |
| dicp2. 2           | 0. 330916733 | -1. 849579229 | 3. 2489867 | -0. 569279 | 0. 569167 | NA        |
| FQ311924. 1        | 6. 991360453 | 0. 724092315  | 0. 7663631 | 0. 9448423 | 0. 344739 | NA        |
| CR388156. 1        |              | 0 NA          | NA         | NA         | NA        | NA        |
| si:dkey-165b20. 3  | 2. 674799102 | -1. 096281918 | 1. 2186616 | -0. 899579 | 0. 368345 | NA        |
| snx25              | 789. 6391458 | 0. 019290137  | 0. 0907036 | 0. 2126723 | 0. 831583 | 0. 983358 |
| kynu               | 373. 7687561 | -0. 305899751 | 0. 1259347 | -2. 429035 | 0. 015139 | 0. 225353 |
| nbeall             | 183. 5542334 | -0. 066535151 | 0. 1557964 | -0. 427065 | 0. 669332 | 0. 965092 |
| secl6b             | 134. 8679911 | -0. 019270104 | 0. 175525  | -0. 109786 | 0. 912579 | 0. 991119 |
| foxola             | 555. 3070014 | -0. 210005377 | 0. 1085926 | -1. 933883 | 0. 053128 | 0. 452412 |
| CU929079. 1        |              | 0 NA          | NA         | NA         | NA        | NA        |
| CT027744. 1        | 10. 47067067 | -0. 072941999 | 0. 6075585 | -0. 120058 | 0. 904438 | NA        |
| NPC1L1             | 117. 5097746 | -1. 243417721 | 0. 2043813 | -6. 083813 | 1. 17E-09 | 2. 42E-07 |
| mir196a-2          |              | 0 NA          | NA         | NA         | NA        | NA        |
| lyrm5a             | 190. 3535567 | 0. 185713151  | 0. 1508206 | 1. 2313517 | 0. 218191 | 0. 785379 |
| BX088603. 1        | 3. 447021936 | 0. 398019593  | 1. 126451  | 0. 3533395 | 0. 723834 | NA        |
| lygl2              | 0. 489712128 | -0. 887840729 | 2. 693685  | -0. 329601 | 0. 741702 | NA        |
| inpp5ka            | 354. 8828119 | -0. 10970812  | 0. 116275  | -0. 943523 | 0. 345414 | 0. 878434 |
| lmbd2a             | 764. 9863844 | -0. 071518096 | 0. 1050196 | -0. 680998 | 0. 495873 | 0. 932377 |
| CU856423. 1        | 19. 28514996 | 0. 15548996   | 0. 4502241 | 0. 3453612 | 0. 729823 | 0. 971143 |
| RF00001            | 1. 624478268 | 0. 588556441  | 1. 4939716 | 0. 3939542 | 0. 693615 | NA        |
| CU468012. 2        | 0. 182570949 | 0. 967652056  | 4. 0804729 | 0. 2371421 | 0. 812547 | NA        |
| hmgn2              | 14357. 07147 | 0. 05463941   | 0. 0784898 | 0. 6961339 | 0. 486345 | 0. 930833 |
| CR759927. 3        | 41. 39801979 | -0. 2809935   | 0. 3002988 | -0. 935713 | 0. 349421 | 0. 880195 |
| CU929203. 1        |              | 0 NA          | NA         | NA         | NA        | NA        |
| RF00001            |              | 0 NA          | NA         | NA         | NA        | NA        |
| si:dkey-182g1. 10  | 77. 54161271 | -0. 110791098 | 0. 2344985 | -0. 47246  | 0. 636599 | 0. 958607 |
| BX005124. 2        |              | 0 NA          | NA         | NA         | NA        | NA        |
| aldh18a1           | 1140. 063993 | -0. 07415612  | 0. 0861797 | -0. 860482 | 0. 389523 | 0. 896421 |
| CR762480. 1        | 0. 476626891 | 2. 395187592  | 2. 815932  | 0. 8505843 | 0. 395    | NA        |
| CR382383. 2        | 2. 114070043 | 0. 218508395  | 1. 3099    | 0. 166813  | 0. 867517 | NA        |

|                  |             |              |           |           |          |          |
|------------------|-------------|--------------|-----------|-----------|----------|----------|
| tradv23.3.8      | 0.356300316 | 0.005884122  | 3.214964  | 0.0018302 | 0.99854  | NA       |
| BX914205.2       | 0           | NA           | NA        | NA        | NA       | NA       |
| r3hcc1           | 136.6526376 | -0.193127644 | 0.1716745 | -1.124964 | 0.260604 | 0.828546 |
| CU468012.3       | 3.550638206 | -1.661963272 | 1.086592  | -1.529519 | 0.126136 | NA       |
| BX088603.2       | 0           | NA           | NA        | NA        | NA       | NA       |
| btd              | 58.41587528 | -0.21171544  | 0.2619187 | -0.808325 | 0.418903 | 0.906406 |
| si:dkey-211i20.5 | 3.352976145 | -0.245756704 | 1.0634298 | -0.231098 | 0.817239 | NA       |
| CABZ01067558.1   | 13.27770705 | 0.155024746  | 0.5238775 | 0.2959179 | 0.767293 | 0.975687 |
| pigr12.3         | 1.95189695  | -1.022617052 | 1.416056  | -0.722159 | 0.470197 | NA       |
| si:dkey-93h22.7  | 6.861220273 | 1.440278251  | 0.8156337 | 1.7658396 | 0.077423 | NA       |
| BX842700.1       | 1.364416829 | -0.705571612 | 1.7443167 | -0.404497 | 0.685847 | NA       |
| clca5.1          | 0           | NA           | NA        | NA        | NA       | NA       |
| si:ch73-160p18.4 | 0.816075475 | -1.880611245 | 2.2559232 | -0.833633 | 0.404488 | NA       |
| tpbga            | 43.98206215 | 0.323218084  | 0.3105524 | 1.0407843 | 0.297976 | 0.85401  |
| RF00001          | 2.634753246 | 1.586156655  | 1.2604672 | 1.2583879 | 0.208252 | NA       |
| zgc:66483        | 5.993670435 | -0.96823712  | 0.7946797 | -1.218399 | 0.223072 | NA       |
| purab            | 388.5377394 | 0.271460576  | 0.1157198 | 2.3458447 | 0.018984 | 0.257116 |
| RF00001          | 0           | NA           | NA        | NA        | NA       | NA       |
| FP236734.1       | 146.6383251 | -0.11336903  | 0.1761359 | -0.643645 | 0.519806 | 0.938945 |
| sdr39u1          | 340.3083294 | 0.079887976  | 0.1171666 | 0.6818324 | 0.495345 | 0.931928 |
| si:dkey-1b17.6   | 43.90914671 | -0.005591668 | 0.2860721 | -0.019546 | 0.984405 | 0.996944 |
| CABZ01083166.1   | 179.627543  | -0.06673429  | 0.1610337 | -0.414412 | 0.678572 | 0.965257 |
| si:ch211-69b22.5 | 42.27532016 | 0.439466309  | 0.3287663 | 1.3367134 | 0.181316 | 0.742543 |
| chmplb           | 1363.209082 | -0.094043917 | 0.0927915 | -1.013497 | 0.310823 | 0.862927 |
| BX908721.1       | 2.995228194 | -0.657850111 | 1.165773  | -0.564304 | 0.572547 | NA       |
| CR855307.1       | 9.631142079 | -0.279625443 | 0.619518  | -0.45136  | 0.65173  | NA       |
| BX510915.1       | 30.80292364 | -0.018584542 | 0.3918958 | -0.047422 | 0.962177 | 0.995907 |
| cmtm6            | 366.1595121 | -0.205315973 | 0.1192426 | -1.721834 | 0.0851   | 0.560519 |
| sec1417          | 197.0492339 | 0.569469111  | 0.1497938 | 3.8016875 | 0.000144 | 0.006578 |
| akap81           | 3088.87346  | -0.085087992 | 0.0704403 | -1.207945 | 0.227069 | 0.794587 |
| si:ch211-11c3.11 | 0.341366344 | 1.891903201  | 3.2128156 | 0.5888614 | 0.555954 | NA       |
| szl              | 1.504941839 | -0.942645884 | 1.6627636 | -0.566915 | 0.570772 | NA       |
| tradv8.0         | 0           | NA           | NA        | NA        | NA       | NA       |
| trim35-19        | 0.657349104 | 1.487939685  | 2.418178  | 0.6153144 | 0.538347 | NA       |
| eed              | 445.7581518 | -0.030201619 | 0.1240588 | -0.243446 | 0.80766  | 0.980642 |
| dcunld1          | 342.6970018 | 0.095674816  | 0.1189818 | 0.804113  | 0.421332 | 0.90651  |
| si:ch211-76m11.9 | 0.476747244 | 2.393381959  | 3.0525537 | 0.7840589 | 0.433006 | NA       |
| zgc:153184       | 226.8566821 | 0.206245141  | 0.1453614 | 1.4188443 | 0.155944 | 0.705963 |
| pcdhlg3          | 36.50158422 | 0.049260196  | 0.3489757 | 0.1411565 | 0.887746 | 0.989291 |
| L0018363.1       | 131.4230172 | 0.171551363  | 0.1805338 | 0.9502449 | 0.341988 | 0.878434 |
| CABZ01079663.1   | 179.3120758 | 0.019870946  | 0.1524942 | 0.1303062 | 0.896324 | 0.989971 |
| bin3             | 376.8460056 | -0.260887073 | 0.1184766 | -2.202013 | 0.027664 | 0.321596 |
| xpot             | 1154.3208   | -0.0246672   | 0.07977   | -0.309229 | 0.757147 | 0.975374 |
| marveld3         | 48.83349966 | -0.234710724 | 0.2788057 | -0.841843 | 0.399876 | 0.90084  |
| pimr207          | 0.158795395 | 0.967652056  | 4.0804729 | 0.2371421 | 0.812547 | NA       |
| CR381657.1       | 0.785936826 | -3.109243185 | 2.5574139 | -1.215776 | 0.22407  | NA       |
| akt1             | 39.55505128 | -0.139820031 | 0.3037023 | -0.460385 | 0.64524  | 0.96029  |
| CU915256.1       | 2.796063914 | 0.167534363  | 1.1001741 | 0.1522799 | 0.878966 | NA       |
| cox5ab           | 1470.647981 | -0.02481047  | 0.0771448 | -0.321609 | 0.747749 | 0.97419  |
| selenof          | 1051.188241 | -0.025807986 | 0.1039742 | -0.248215 | 0.803968 | 0.979643 |
| snrpg            | 903.8585101 | -0.151150129 | 0.1140459 | -1.325345 | 0.185057 | 0.748632 |
| CR927050.2       | 0.157187365 | -0.955901296 | 4.0804729 | -0.234262 | 0.814781 | NA       |
| znf1074          | 13.29483637 | -0.224602221 | 0.5493318 | -0.408864 | 0.682639 | 0.965476 |
| capgb            | 688.663817  | 0.077687531  | 0.0948609 | 0.8189622 | 0.412808 | 0.904974 |

|                  |             |              |           |           |          |          |
|------------------|-------------|--------------|-----------|-----------|----------|----------|
| si:dkey-203a12.5 | 0           | NA           | NA        | NA        | NA       | NA       |
| dicp3.1          | 16.89878279 | 0.008180872  | 0.4802249 | 0.0170355 | 0.986408 | 0.996965 |
| kdm4b            | 2785.610575 | -0.138284795 | 0.0806305 | -1.715043 | 0.086337 | 0.563258 |
| BX927335.2       | 0           | NA           | NA        | NA        | NA       | NA       |
| bambib           | 114.1406147 | -0.119557193 | 0.1952897 | -0.612204 | 0.540403 | 0.944487 |
| BX569789.1       | 25.0514473  | -0.029124774 | 0.3927715 | -0.074152 | 0.940889 | 0.992857 |
| tent2            | 398.7220921 | -0.024759574 | 0.1253347 | -0.197548 | 0.843399 | 0.985174 |
| BX004980.1       | 0           | NA           | NA        | NA        | NA       | NA       |
| trim35-24        | 1.627395884 | -1.946676945 | 1.7019099 | -1.143819 | 0.252699 | NA       |
| gnb5a            | 453.1443823 | 0.20558749   | 0.107267  | 1.9165965 | 0.055289 | 0.46072  |
| CT009597.1       | 0           | NA           | NA        | NA        | NA       | NA       |
| FP016142.3       | 0           | NA           | NA        | NA        | NA       | NA       |
| spink2.3         | 0           | NA           | NA        | NA        | NA       | NA       |
| vaspa            | 8.748110461 | 0.385984871  | 0.6371778 | 0.6057726 | 0.544666 | NA       |
| CR550302.1       | 0.182570949 | 0.967652056  | 4.0804729 | 0.2371421 | 0.812547 | NA       |
| ccny11           | 250.5359027 | 0.223369736  | 0.1356189 | 1.6470393 | 0.09955  | 0.600153 |
| AL935065.1       | 4.479178197 | -1.011012122 | 0.9008241 | -1.122319 | 0.261727 | NA       |
| neur11b          | 323.6507737 | -0.082696256 | 0.1327247 | -0.623066 | 0.533241 | 0.942971 |
| si:dkey-61n16.5  | 331.588926  | 0.353175992  | 0.1391742 | 2.5376534 | 0.01116  | 0.183437 |
| BX548059.1       | 4.615657976 | -1.338301759 | 0.92645   | -1.444548 | 0.148585 | NA       |
| BX649620.1       | 0.690594747 | 1.536595024  | 2.3851901 | 0.6442233 | 0.519431 | NA       |
| ahrra            | 52.59574207 | 0.378551592  | 0.2749894 | 1.3766044 | 0.168635 | 0.725919 |
| foxred1          | 100.252725  | 0.030589039  | 0.2042163 | 0.1497875 | 0.880932 | 0.988111 |
| CR385021.1       | 0.547712847 | 2.559541715  | 2.9076406 | 0.8802813 | 0.378707 | NA       |
| cacnalhb         | 14.49287227 | 0.265246616  | 0.5144126 | 0.5156301 | 0.606113 | 0.956692 |
| BX284696.1       | 0           | NA           | NA        | NA        | NA       | NA       |
| si:dkey-29j8.1   | 4.697744131 | -0.113304709 | 0.9439408 | -0.120034 | 0.904456 | NA       |
| zgc:163073       | 145.3089833 | 0.245058545  | 0.1672105 | 1.4655691 | 0.142766 | 0.684998 |
| si:dkey-152b24.7 | 13.23078345 | -0.216209287 | 0.5138231 | -0.420785 | 0.673912 | 0.965257 |
| si:rp71-1h20.9   | 17.26017264 | 0.081229216  | 0.4608622 | 0.1762549 | 0.860094 | 0.985773 |
| CU929391.3       | 0.853712865 | -1.943683846 | 2.3771108 | -0.817666 | 0.413548 | NA       |
| evlb             | 1193.520553 | -0.115171949 | 0.0816411 | -1.41071  | 0.15833  | 0.709224 |
| zgc:153993       | 304.9499926 | -0.007393738 | 0.1324339 | -0.05583  | 0.955478 | 0.994543 |
| re1t             | 224.0692345 | 0.309356164  | 0.1438998 | 2.1498027 | 0.031571 | 0.344716 |
| FP236161.1       | 0.977029335 | 3.42365565   | 2.0852004 | 1.6418833 | 0.100614 | NA       |
| ssbp2            | 278.4292385 | 0.024578083  | 0.1364066 | 0.1801825 | 0.857009 | 0.985597 |
| zgc:56622        | 126.2421546 | -0.435808422 | 0.1817915 | -2.397298 | 0.016516 | 0.237008 |
| pcdh10a          | 1545.581541 | -0.073497523 | 0.0862555 | -0.852091 | 0.394164 | 0.898673 |
| pkma             | 7941.585755 | -0.057501322 | 0.067448  | -0.852528 | 0.393921 | 0.898496 |
| gfrala           | 320.0691379 | 0.280745949  | 0.1328106 | 2.1138829 | 0.034525 | 0.361039 |
| CIR1             | 259.8516835 | -0.16359465  | 0.139181  | -1.175409 | 0.239831 | 0.808111 |
| gig2f            | 0           | NA           | NA        | NA        | NA       | NA       |
| ccr9b            | 3.679219139 | -0.48839622  | 0.9924277 | -0.492123 | 0.622633 | NA       |
| mvl2a            | 227.955772  | 0.02873696   | 0.1478868 | 0.1943173 | 0.845927 | 0.985174 |
| heatr1           | 767.0188349 | -0.005509898 | 0.0927142 | -0.059429 | 0.952611 | 0.99398  |
| zgc:113019       | 202.0230697 | 0.082797869  | 0.1508259 | 0.5489634 | 0.583031 | 0.952214 |
| gap43            | 2139.173001 | 0.019225713  | 0.0896445 | 0.2144661 | 0.830184 | 0.982916 |
| baz1a            | 298.5114713 | -0.051094153 | 0.1228805 | -0.415803 | 0.677554 | 0.965257 |
| rgs3a            | 380.4015754 | -0.0263079   | 0.1136866 | -0.231407 | 0.816998 | 0.981594 |
| CABZ01111953.1   | 215.2478369 | -0.089847307 | 0.1517639 | -0.59202  | 0.553837 | 0.947449 |
| si:ch73-46n24.1  | 0.31759079  | 1.807926197  | 3.579045  | 0.5051421 | 0.613459 | NA       |
| ube2d21          | 617.0218176 | 0.150653387  | 0.0972145 | 1.5497015 | 0.121213 | 0.647458 |
| BX682557.2       | 0           | NA           | NA        | NA        | NA       | NA       |
| si:dkey-250k10.4 | 2.131591567 | 1.170707889  | 1.3441419 | 0.8709704 | 0.38377  | NA       |

|                   |             |              |           |           |          |          |
|-------------------|-------------|--------------|-----------|-----------|----------|----------|
| si:dkey-19b23.7   | 156.2264787 | -0.004262054 | 0.1656223 | -0.025734 | 0.97947  | 0.996866 |
| zgc:63863         | 124.3379288 | 0.007011227  | 0.1840643 | 0.0380912 | 0.969615 | 0.996315 |
| pfklb             | 780.3899054 | -0.042757747 | 0.1036368 | -0.412573 | 0.67992  | 0.965311 |
| wdr47b            | 173.7349475 | 0.184075227  | 0.1769415 | 1.0403171 | 0.298193 | 0.85401  |
| igf2bp2b          | 387.7366417 | 0.135267961  | 0.1125501 | 1.2018465 | 0.229423 | 0.797069 |
| BX510342.1        | 0.157187365 | -0.955901296 | 4.0804729 | -0.234262 | 0.814781 | NA       |
| vox               | 3.804730862 | 0.641602525  | 0.9698754 | 0.6615309 | 0.508272 | NA       |
| CR855389.1        | 45.62640399 | -0.570638036 | 0.3002381 | -1.900618 | 0.057352 | 0.469987 |
| BX323861.1        | 0 NA        | NA           | NA        | NA        | NA       | NA       |
| myl12.1           | 6064.844339 | -0.103167869 | 0.0769235 | -1.341174 | 0.179864 | 0.741062 |
| fhdc2             | 142.609791  | 0.075729667  | 0.1742408 | 0.4346265 | 0.663834 | 0.964736 |
| si:ch211-272n13.3 | 402.6813317 | 0.114983138  | 0.1183384 | 0.9716467 | 0.331226 | 0.874339 |
| tradv18.0         | 0 NA        | NA           | NA        | NA        | NA       | NA       |
| CU104782.1        | 0 NA        | NA           | NA        | NA        | NA       | NA       |
| gne               | 475.0179339 | 0.165408351  | 0.1045408 | 1.5822372 | 0.113595 | 0.631853 |
| CU928046.1        | 123.9341753 | 0.107852788  | 0.1954931 | 0.5516962 | 0.581157 | 0.951731 |
| olfcg4            | 4.150461214 | 0.118731858  | 0.9105978 | 0.1303889 | 0.896259 | NA       |
| cyb5b             | 301.4579944 | 0.123358698  | 0.1404252 | 0.8784657 | 0.379691 | 0.895192 |
| glula             | 12029.18197 | 0.085545503  | 0.1133966 | 0.7543923 | 0.450614 | 0.918761 |
| si:ch211-11n16.2  | 252.3814353 | 0.120017515  | 0.1423221 | 0.8432811 | 0.399071 | 0.90062  |
| CT737196.1        | 0 NA        | NA           | NA        | NA        | NA       | NA       |
| CR383669.2        | 0.672283077 | 0.02892376   | 2.3005571 | 0.0125725 | 0.989969 | NA       |
| pcdh2ac           | 0 NA        | NA           | NA        | NA        | NA       | NA       |
| si:dkey-146m20.13 | 0 NA        | NA           | NA        | NA        | NA       | NA       |
| actn4             | 7284.67497  | -0.124543711 | 0.0681255 | -1.82815  | 0.067527 | 0.508678 |
| echdc3            | 47.65139508 | -0.237735358 | 0.3210538 | -0.740484 | 0.459006 | 0.921978 |
| si:ch211-76m11.7  | 0 NA        | NA           | NA        | NA        | NA       | NA       |
| pdk3b             | 8.718331628 | 0.255277613  | 0.6653737 | 0.3836605 | 0.70123  | NA       |
| BX908776.1        | 0.790881268 | 0.5906245    | 2.2495814 | 0.2625486 | 0.792899 | NA       |
| cspg5b            | 1014.862917 | 0.047137282  | 0.0875876 | 0.538173  | 0.590458 | 0.954193 |
| si:dkey-285b23.3  | 0.832617477 | -1.907662728 | 2.2444108 | -0.849961 | 0.395347 | NA       |
| RF00001           | 0 NA        | NA           | NA        | NA        | NA       | NA       |
| mon2              | 1349.579981 | -0.086071101 | 0.0832782 | -1.033537 | 0.301352 | 0.856944 |
| si:dkey-11f4.16   | 98.45865754 | 0.061588494  | 0.2044358 | 0.3012608 | 0.763216 | 0.975374 |
| topaz1            | 41.68294903 | -0.105516006 | 0.3057983 | -0.345051 | 0.730056 | 0.971177 |
| pnp5b             | 207.9239098 | 0.237317314  | 0.1459255 | 1.6262907 | 0.103888 | 0.610484 |
| pik3c2g           | 104.9575627 | -0.1320205   | 0.2059779 | -0.640945 | 0.521558 | 0.939056 |
| CABZ01059119.1    | 87.7352532  | 0.539531716  | 0.2141558 | 2.519342  | 0.011757 | 0.190723 |
| dre-mir-202       | 0 NA        | NA           | NA        | NA        | NA       | NA       |
| BX572620.1        | 17.24894677 | 0.307768317  | 0.473166  | 0.6504447 | 0.515405 | 0.9377   |
| si:dkey-203a12.7  | 0.182570949 | 0.967652056  | 4.0804729 | 0.2371421 | 0.812547 | NA       |
| si:dkey-31f5.11   | 418.1230334 | 0.049979523  | 0.1103631 | 0.4528644 | 0.650646 | 0.960708 |
| FBX046            | 595.5799799 | -0.099490529 | 0.1092908 | -0.910329 | 0.362649 | 0.885944 |
| tusc2a            | 164.7196597 | -0.23587716  | 0.160344  | -1.47107  | 0.141272 | 0.681968 |
| RF00001           | 0 NA        | NA           | NA        | NA        | NA       | NA       |
| sb:cb1058         | 268.7883553 | 0.262476929  | 0.1528671 | 1.7170274 | 0.085974 | 0.562932 |
| tymp              | 27.8912609  | 0.671635447  | 0.361172  | 1.8596001 | 0.062942 | 0.489621 |
| nots              | 12.38700104 | -0.836973318 | 0.5897774 | -1.419134 | 0.15586  | 0.705963 |
| zgc:174944        | 22.67377897 | -0.203419231 | 0.4014704 | -0.506685 | 0.612376 | 0.95688  |
| BX927336.2        | 6.509954753 | 1.527179986  | 0.8028912 | 1.9021008 | 0.057158 | NA       |
| BX005396.2        | 2.32686674  | -2.565353802 | 1.5613754 | -1.643009 | 0.100381 | NA       |
| BX255908.1        | 0.365141898 | 1.973577737  | 3.3927314 | 0.5817076 | 0.560764 | NA       |
| fbxo7             | 186.9362415 | -0.193779145 | 0.1500476 | -1.291451 | 0.196547 | 0.761835 |
| si:dkey-199m13.7  | 20.97030462 | 0.094247662  | 0.4151862 | 0.227001  | 0.820423 | 0.981594 |

|                   |             |              |           |           |          |          |
|-------------------|-------------|--------------|-----------|-----------|----------|----------|
| si:ch211-9d9.1    | 37.14154406 | -0.151363711 | 0.3243138 | -0.46672  | 0.6407   | 0.959994 |
| lpar1             | 55.49140712 | 0.209159923  | 0.2635784 | 0.7935396 | 0.427463 | 0.91075  |
| prkcab            | 12.33841013 | -0.268471598 | 0.5417226 | -0.495589 | 0.620185 | 0.957354 |
| CU138533.1        | 40.61605992 | 0.550518875  | 0.3173462 | 1.7347578 | 0.082784 | 0.554784 |
| nedd4a            | 397.6334196 | -0.327715035 | 0.1144402 | -2.863635 | 0.004188 | 0.090115 |
| GNAZ              | 123.3757602 | -0.174368075 | 0.1901921 | -0.9168   | 0.359248 | 0.884762 |
| zgc:174275        | 1.157441819 | -0.400541316 | 1.7643421 | -0.22702  | 0.820408 | NA       |
| si:ch211-154o6.3  | 177.3228913 | -0.181958968 | 0.1602432 | -1.135518 | 0.256159 | 0.824633 |
| ebf3a             | 301.2118018 | -0.135792757 | 0.1254921 | -1.082082 | 0.279216 | 0.842806 |
| iqsec3a           | 861.7003598 | 0.028203337  | 0.095185  | 0.2963004 | 0.767001 | 0.975687 |
| GPR180            | 39.38571579 | 0.244423125  | 0.3035155 | 0.8053069 | 0.420643 | 0.90651  |
| FP103005.1        | 3.817387012 | 0.38285336   | 1.0044972 | 0.3811393 | 0.7031   | NA       |
| HTR7              | 9.483353519 | -0.547160225 | 0.631377  | -0.866614 | 0.386153 | NA       |
| BX677667.1        |             | 0 NA         | NA        | NA        | NA       | NA       |
| RF01684           | 2.356421422 | 0.450380838  | 1.3913112 | 0.3237096 | 0.746158 | NA       |
| pkmb              | 4789.264641 | 0.139600642  | 0.1019224 | 1.3696762 | 0.170788 | 0.728307 |
| RF00001           |             | 0 NA         | NA        | NA        | NA       | NA       |
| si:ch73-170d6.2   | 10.53279627 | -0.4566533   | 0.6109773 | -0.747415 | 0.454813 | NA       |
| hnrnpabb          | 6178.411591 | 0.005706738  | 0.0732479 | 0.0779099 | 0.9379   | 0.99279  |
| si:ch73-103b2.1   | 51.14010998 | -0.383177296 | 0.2741884 | -1.397496 | 0.162264 | 0.716781 |
| traj4             |             | 0 NA         | NA        | NA        | NA       | NA       |
| tnni4a            | 93.48181044 | 0.178891971  | 0.2157696 | 0.8290878 | 0.407055 | 0.901305 |
| myo7aa            | 215.7863756 | 0.008510649  | 0.1425412 | 0.0597066 | 0.952389 | 0.993904 |
| zgc:163083        | 26.46046472 | -0.33594114  | 0.4055902 | -0.828277 | 0.407513 | 0.901305 |
| agap2             | 635.9680967 | -0.154130693 | 0.099192  | -1.553862 | 0.120217 | 0.645215 |
| CT956056.1        |             | 0 NA         | NA        | NA        | NA       | NA       |
| BX908401.1        | 36.767219   | 0.033047771  | 0.3297214 | 0.1002294 | 0.920162 | 0.992044 |
| si:dkeyp-72e1.6   | 44.85087373 | -0.578087548 | 0.2871671 | -2.01307  | 0.044107 | 0.412803 |
| sp6               | 40.38114839 | -0.204782487 | 0.3184864 | -0.642987 | 0.520233 | 0.939056 |
| CU302200.1        | 1.860572363 | -0.226435781 | 1.3626586 | -0.166172 | 0.868022 | NA       |
| trim105           | 95.12252962 | -0.259585088 | 0.2107181 | -1.231907 | 0.217984 | 0.785379 |
| si:ch211-25d12.7  | 0.473170125 | -0.833888596 | 2.9014002 | -0.287409 | 0.773799 | NA       |
| snn               | 57.58189072 | 0.393544675  | 0.2572029 | 1.5300941 | 0.125993 | 0.654803 |
| CU207221.2        | 21.11340314 | -0.03604632  | 0.4168272 | -0.086478 | 0.931087 | 0.992702 |
| si:ch211-57n23.1  | 39.5577377  | 0.068654908  | 0.3111088 | 0.2206781 | 0.825343 | 0.982196 |
| CU571336.1        | 2.683918177 | -2.803180903 | 1.4392211 | -1.947707 | 0.05145  | NA       |
| BX640537.2        | 32.93772574 | 0.112729967  | 0.3735726 | 0.3017619 | 0.762834 | 0.975374 |
| CR388184.1        | 0.840040406 | 1.927209636  | 2.1227864 | 0.9078679 | 0.363948 | NA       |
| si:ch211-27e6.1   | 7.005191142 | -0.29150516  | 0.7366964 | -0.395692 | 0.692332 | NA       |
| si:dkeyp-51g9.4   | 2.06687758  | 0.027890935  | 1.3936251 | 0.0200132 | 0.984033 | NA       |
| twnk              | 207.6542715 | -0.300733085 | 0.1490554 | -2.017592 | 0.043634 | 0.410116 |
| il17rc            | 286.3189045 | 0.374507686  | 0.1373002 | 2.7276557 | 0.006379 | 0.122178 |
| si:ch211-19312.10 | 23.18646194 | 0.244748782  | 0.403159  | 0.6070775 | 0.543799 | 0.945438 |
| MTFP1             | 204.9169377 | -0.087321815 | 0.1652696 | -0.52836  | 0.59725  | 0.955244 |
| RF00001           | 0.182570949 | 0.967652056  | 4.0804729 | 0.2371421 | 0.812547 | NA       |
| si:ch211-208f21.3 | 0.31598276  | 0.005883445  | 3.3523626 | 0.001755  | 0.9986   | NA       |
| lrrc8c            | 214.5225513 | 0.146985845  | 0.1412989 | 1.0402478 | 0.298225 | 0.85401  |
| snrnp35           | 96.19861313 | -0.503198848 | 0.2004923 | -2.509817 | 0.012079 | 0.193721 |
| BX323064.1        |             | 0 NA         | NA        | NA        | NA       | NA       |
| p2ry2.1           | 7.686238723 | 0.905106639  | 0.7436065 | 1.217185  | 0.223534 | NA       |
| BX649345.1        | 6.928321529 | -0.164650584 | 0.7819297 | -0.21057  | 0.833223 | NA       |
| znf1005           | 48.52948737 | -0.181945693 | 0.3108744 | -0.585271 | 0.558366 | 0.948478 |
| arl4aa            | 137.6379867 | -0.327919682 | 0.1727064 | -1.898712 | 0.057602 | 0.470971 |
| CR407584.1        | 4.452408044 | 0.738780139  | 0.9600981 | 0.769484  | 0.441606 | NA       |

|                   |             |              |           |           |          |          |
|-------------------|-------------|--------------|-----------|-----------|----------|----------|
| zgc:163040        | 7.217046222 | 0.249912588  | 0.712674  | 0.3506689 | 0.725837 | NA       |
| tbce              | 235.5415712 | 0.267651974  | 0.1369528 | 1.9543367 | 0.050661 | 0.44139  |
| mir222b           | 0 NA        | NA           | NA        | NA        | NA       | NA       |
| zgc:154054        | 639.1282175 | -0.165429788 | 0.1025221 | -1.613601 | 0.106614 | 0.615567 |
| BX072564.1        | 0.339758314 | 0.005883863  | 3.2682461 | 0.0018003 | 0.998564 | NA       |
| si:dkey-26m3.1    | 0 NA        | NA           | NA        | NA        | NA       | NA       |
| dpf1              | 175.1724056 | -0.062573269 | 0.1651671 | -0.378848 | 0.7048   | 0.968134 |
| chrn5a            | 7.575903096 | -0.251113184 | 0.6779628 | -0.370394 | 0.711089 | NA       |
| col27a1b          | 71.11189579 | -0.122420672 | 0.2402746 | -0.509503 | 0.6104   | 0.95688  |
| pcdhlg26          | 61.00242111 | -0.043384692 | 0.2811305 | -0.154322 | 0.877356 | 0.987881 |
| BX005245.1        | 0 NA        | NA           | NA        | NA        | NA       | NA       |
| ppala             | 202.2198824 | 0.081115681  | 0.1616854 | 0.5016884 | 0.615887 | 0.95688  |
| CU862015.1        | 0.323844819 | -1.825095364 | 3.274639  | -0.557342 | 0.577293 | NA       |
| nlrc3l            | 95.35066408 | 0.039657778  | 0.2123434 | 0.1867625 | 0.851847 | 0.985174 |
| CABZ01112864.1    | 4.556811079 | 1.584511623  | 1.0617252 | 1.4923934 | 0.135596 | NA       |
| pigr13.5          | 0.347458735 | -1.908042286 | 3.4571486 | -0.551912 | 0.581009 | NA       |
| mapre2            | 1423.226763 | 0.038923656  | 0.0770332 | 0.5052841 | 0.613359 | 0.95688  |
| RF00001           | 0 NA        | NA           | NA        | NA        | NA       | NA       |
| CU467646.4        | 46.54281291 | -0.417427984 | 0.2809949 | -1.485536 | 0.137402 | 0.674358 |
| fam189a2          | 97.68265608 | 0.116264376  | 0.2037794 | 0.5705404 | 0.568311 | 0.948983 |
| si:ch211-209f23.7 | 0 NA        | NA           | NA        | NA        | NA       | NA       |
| FP236551.1        | 1.624478268 | 0.588556441  | 1.4939716 | 0.3939542 | 0.693615 | NA       |
| cldn17            | 9.414033575 | -0.520851077 | 0.6507942 | -0.800331 | 0.423519 | NA       |
| PRLHR             | 24.30876824 | 0.183873881  | 0.391612  | 0.4695308 | 0.63869  | 0.959628 |
| plekhm1           | 453.179876  | -0.058744852 | 0.1244391 | -0.472077 | 0.636872 | 0.958848 |
| CT955967.1        | 0.341486697 | 1.892317624  | 3.2124068 | 0.5890654 | 0.555817 | NA       |
| BX957318.1        | 4.736642882 | 0.23517262   | 0.8760395 | 0.2684498 | 0.788353 | NA       |
| smyhc1            | 8939.109754 | 0.257900697  | 0.0743849 | 3.4671131 | 0.000526 | 0.018573 |
| elov11a           | 304.9871278 | -0.223122746 | 0.1449279 | -1.539544 | 0.123672 | 0.652129 |
| bnip3             | 190.3322986 | -0.13322257  | 0.1578203 | -0.844141 | 0.398591 | 0.900359 |
| si:dkey-27n6.1    | 3.679362733 | -0.85411697  | 1.0750053 | -0.794524 | 0.426891 | NA       |
| BX005073.2        | 0 NA        | NA           | NA        | NA        | NA       | NA       |
| FP085428.1        | 5.450125432 | -1.177132257 | 0.8381374 | -1.404462 | 0.160181 | NA       |
| polr2a            | 2533.116337 | 0.141598376  | 0.0869292 | 1.6288939 | 0.103335 | 0.609625 |
| CU929143.1        | 0.158795395 | 0.967652056  | 4.0804729 | 0.2371421 | 0.812547 | NA       |
| zgc:152863        | 96.26207383 | 0.165294872  | 0.2079429 | 0.7949051 | 0.426669 | 0.910217 |
| CR383676.1        | 34370.01673 | 0.100061954  | 0.0886386 | 1.1288753 | 0.25895  | 0.827219 |
| nup153            | 1344.633717 | 0.098979435  | 0.0885547 | 1.1177214 | 0.263686 | 0.830245 |
| mia2              | 825.3288308 | 0.100300011  | 0.1048809 | 0.9563229 | 0.338909 | 0.87745  |
| ldb3b             | 2604.870776 | 0.301696413  | 0.0820937 | 3.6750267 | 0.000238 | 0.009838 |
| tgfbr3            | 19.00748015 | 0.11796851   | 0.4394388 | 0.2684526 | 0.788351 | 0.976703 |
| bpifc1            | 30.58590228 | -0.046569194 | 0.3723347 | -0.125073 | 0.900465 | 0.990121 |
| si:ch1073-228h2.2 | 24.78490701 | -0.130869736 | 0.4160346 | -0.314565 | 0.753092 | 0.97481  |
| ccl39.7           | 10.71462019 | 0.380935245  | 0.5883895 | 0.6474202 | 0.51736  | NA       |
| CABZ01023255.1    | 52.25580006 | -0.322945834 | 0.3072165 | -1.051199 | 0.293167 | 0.849017 |
| ccn112            | 217.7383995 | 0.143429477  | 0.1473691 | 0.973267  | 0.330421 | 0.874098 |
| si:ch211-207i20.2 | 34.13036583 | -0.124103375 | 0.3287053 | -0.377552 | 0.705763 | 0.968412 |
| FP236356.2        | 0.5046461   | -2.45370851  | 2.7629627 | -0.888072 | 0.374502 | NA       |
| RF00001           | 0 NA        | NA           | NA        | NA        | NA       | NA       |
| creldla           | 308.8649357 | -0.021316026 | 0.1242642 | -0.171538 | 0.863801 | 0.985952 |
| RF00001           | 0 NA        | NA           | NA        | NA        | NA       | NA       |
| apbb2b            | 131.251511  | -0.167920278 | 0.1820672 | -0.922299 | 0.356373 | 0.883422 |
| rhotla            | 1151.026833 | 0.110614563  | 0.0924729 | 1.1961834 | 0.231625 | 0.799752 |
| cox20             | 183.2018039 | 0.059437386  | 0.1699023 | 0.3498328 | 0.726464 | 0.970402 |



|                    |             |              |           |           |          |          |
|--------------------|-------------|--------------|-----------|-----------|----------|----------|
| tcf3b              | 1781.846181 | -0.012951706 | 0.0773224 | -0.167503 | 0.866975 | 0.986978 |
| CR352226.5         | 0 NA        |              | NA        | NA        | NA       | NA       |
| znf1096            | 9.843824584 | 0.420880813  | 0.6957888 | 0.6048974 | 0.545247 | NA       |
| ctbs               | 88.17584463 | 0.006064638  | 0.2174718 | 0.027887  | 0.977752 | 0.996762 |
| glulb              | 4860.189691 | 0.021889041  | 0.0805195 | 0.2718477 | 0.785739 | 0.97627  |
| si:ch211-76m11.5   | 9.877042991 | -0.274446229 | 0.6275933 | -0.4373   | 0.661894 | NA       |
| arhgap39           | 127.786876  | 0.042048365  | 0.1849503 | 0.2273496 | 0.820152 | 0.981594 |
| RF00001            | 0 NA        |              | NA        | NA        | NA       | NA       |
| strn               | 165.5128755 | -0.064269826 | 0.1596663 | -0.402526 | 0.687297 | 0.966376 |
| CR855860.1         | 394.3256793 | 0.044174011  | 0.118422  | 0.3730221 | 0.709132 | 0.968664 |
| dhx38              | 324.6350671 | 0.114385308  | 0.1197329 | 0.9553372 | 0.339407 | 0.87805  |
| tradv13.0          | 0 NA        |              | NA        | NA        | NA       | NA       |
| arhgap11a          | 198.7287514 | -0.120445302 | 0.1491423 | -0.807586 | 0.419329 | 0.906406 |
| piml               | 2272.965472 | 0.118613676  | 0.0769399 | 1.5416402 | 0.123161 | 0.651012 |
| plaat1             | 312.3851483 | -0.048373045 | 0.1348553 | -0.358703 | 0.719817 | 0.969318 |
| histlh2a6          | 6.110358118 | 0.509229993  | 0.8189605 | 0.6218005 | 0.534073 | NA       |
| si:ch211-231f6.6   | 167.3541704 | 0.057080137  | 0.1585608 | 0.3599889 | 0.718855 | 0.969092 |
| olfchl             | 0 NA        |              | NA        | NA        | NA       | NA       |
| si:dkeyp-13d12.21  | 0.182570949 | 0.967652056  | 4.0804729 | 0.2371421 | 0.812547 | NA       |
| pole2              | 89.02379485 | -0.304040591 | 0.2238653 | -1.358141 | 0.174419 | 0.734611 |
| TADA1              | 87.64226053 | 0.111437189  | 0.2221703 | 0.5015845 | 0.61596  | 0.95688  |
| GABRB2 (1 of many) | 7.010487842 | 0.576861993  | 0.7216973 | 0.799313  | 0.424109 | NA       |
| CU929317.1         | 0 NA        |              | NA        | NA        | NA       | NA       |
| BX901923.1         | 7.395291192 | 0.19907077   | 0.6900843 | 0.2884731 | 0.772985 | NA       |
| CU571069.1         | 164.4888233 | -0.005184673 | 0.1793476 | -0.028909 | 0.976938 | 0.996762 |
| CABZ01111454.1     | 28.69321602 | 0.004735797  | 0.3632458 | 0.0130374 | 0.989598 | 0.997612 |
| prtga              | 0.182570949 | 0.967652056  | 4.0804729 | 0.2371421 | 0.812547 | NA       |
| pimr184            | 0.853245996 | -0.479250517 | 2.1942342 | -0.218414 | 0.827107 | NA       |
| si:dkey-206d17.15  | 0 NA        |              | NA        | NA        | NA       | NA       |
| ergic1             | 340.8753067 | 0.124688694  | 0.1200049 | 1.0390301 | 0.298791 | 0.85478  |
| tradv25.0.4        | 0 NA        |              | NA        | NA        | NA       | NA       |
| BX571954.1         | 0 NA        |              | NA        | NA        | NA       | NA       |
| spink2.4           | 0 NA        |              | NA        | NA        | NA       | NA       |
| CABZ01044099.1     | 96.81499681 | 0.12648868   | 0.2166236 | 0.58391   | 0.559281 | 0.948478 |
| tox2               | 423.200705  | -0.015668457 | 0.1113362 | -0.140731 | 0.888082 | 0.989291 |
| CABZ01088109.1     | 1160.823596 | -0.146414048 | 0.0880031 | -1.663737 | 0.096165 | 0.590549 |
| ppfibp1b           | 580.321423  | -0.018190765 | 0.1016633 | -0.178931 | 0.857992 | 0.985703 |
| RF00001            | 0.166657454 | -0.955901296 | 4.0804729 | -0.234262 | 0.814781 | NA       |
| exosc7             | 232.1062265 | -0.211511625 | 0.1383643 | -1.528657 | 0.126349 | 0.655241 |
| si:dkey-16p6.1     | 6.184096407 | 0.718676014  | 0.7989648 | 0.8995089 | 0.368382 | NA       |
| CU467837.1         | 10.234578   | -0.281582702 | 0.6232063 | -0.451829 | 0.651392 | NA       |
| RF00001            | 0.158795395 | 0.967652056  | 4.0804729 | 0.2371421 | 0.812547 | NA       |
| dre-mir-137-2      | 0 NA        |              | NA        | NA        | NA       | NA       |
| mgrn1a             | 485.2671909 | -0.034193447 | 0.1165604 | -0.293354 | 0.769252 | 0.975687 |
| BX908757.1         | 0 NA        |              | NA        | NA        | NA       | NA       |
| abcg2a             | 751.4292625 | -1.039265093 | 0.1058698 | -9.816447 | 9.57E-23 | 1.35E-19 |
| CU929568.1         | 0.31437473  | -1.788572922 | 3.5930657 | -0.497785 | 0.618636 | NA       |
| RF00026            | 0 NA        |              | NA        | NA        | NA       | NA       |
| dnail.1            | 1.353015435 | -1.655062633 | 1.8376086 | -0.900661 | 0.367769 | NA       |
| ap3bla             | 367.3943564 | -0.236680056 | 0.1192767 | -1.984295 | 0.047223 | 0.426582 |
| sugt1              | 491.9141165 | -0.03940381  | 0.1069388 | -0.368471 | 0.712522 | 0.969087 |
| CABZ01084603.1     | 255.1741332 | 0.089192317  | 0.1435684 | 0.6212529 | 0.534433 | 0.943336 |
| AL929114.1         | 1.005718337 | -0.979164561 | 1.8926618 | -0.517348 | 0.604913 | NA       |
| adipoqb            | 34.16082087 | 0.129042703  | 0.3511856 | 0.3674488 | 0.713284 | 0.96909  |

|                   |             |              |           |           |          |          |
|-------------------|-------------|--------------|-----------|-----------|----------|----------|
| evx1              | 19.54516434 | 0.586445503  | 0.4360346 | 1.3449516 | 0.178641 | 0.739486 |
| zmp:0000001114    | 670.1084045 | -0.082168058 | 0.1052482 | -0.780707 | 0.434975 | 0.914408 |
| camk2b2           | 38.70318967 | 0.532630067  | 0.3270466 | 1.6286062 | 0.103396 | 0.609625 |
| si:dkey-11d20.1   | 0.158915748 | 0.967652056  | 4.0804729 | 0.2371421 | 0.812547 | NA       |
| ppp2r2ca          | 1316.797304 | -0.052371263 | 0.0795918 | -0.657999 | 0.510539 | 0.936253 |
| anxalb            | 1072.46189  | -0.144215037 | 0.1112382 | -1.296453 | 0.19482  | 0.758937 |
| CU855936.1        | 0.491320158 | 0.8528132    | 2.8656354 | 0.2976    | 0.766008 | NA       |
| mafgb             | 32.43365753 | -0.112565801 | 0.3585206 | -0.313973 | 0.753542 | 0.974981 |
| CR382281.1        | 1.828745373 | -1.411271231 | 1.4320856 | -0.985466 | 0.324395 | NA       |
| si:dkey-238o14.1  | 2.718924439 | 0.785042324  | 1.1758509 | 0.6676377 | 0.504365 | NA       |
| RF00001           | 0           | NA           | NA        | NA        | NA       | NA       |
| RF00001           | 0           | NA           | NA        | NA        | NA       | NA       |
| zgc:101785        | 20.82676863 | 0.075058454  | 0.4420575 | 0.1697934 | 0.865173 | 0.986367 |
| imp2b             | 5.734970528 | 0.731581719  | 0.8178718 | 0.8944944 | 0.371057 | NA       |
| CR385054.1        | 82.49920586 | 0.213680111  | 0.2303095 | 0.9277955 | 0.353514 | 0.881844 |
| cul3b             | 971.6626299 | 0.101661285  | 0.0841181 | 1.2085541 | 0.226834 | 0.794528 |
| si:ch211-237a4.2  | 7.615124033 | -0.003840573 | 0.7000084 | -0.005486 | 0.995622 | NA       |
| znf1118           | 14.65955055 | 0.120888953  | 0.5097825 | 0.2371383 | 0.812549 | 0.981081 |
| AL935044.2        | 1.497509863 | 1.861276769  | 1.7055995 | 1.0912742 | 0.275152 | NA       |
| sf3a3             | 997.2596008 | 0.013628079  | 0.0879765 | 0.154906  | 0.876895 | 0.987881 |
| dnah1             | 64.0122166  | 0.085318459  | 0.2432238 | 0.3507817 | 0.725752 | 0.970402 |
| mrps24            | 306.1593443 | 0.014477272  | 0.1343987 | 0.1077189 | 0.914219 | 0.991119 |
| CR925761.2        | 2.554623875 | 1.013353592  | 1.2467    | 0.8128287 | 0.416316 | NA       |
| caskb             | 1019.372097 | -0.080445573 | 0.0893633 | -0.900208 | 0.368009 | 0.887482 |
| si:dkey-21c1.8    | 34.55194685 | -0.170373028 | 0.33732   | -0.505078 | 0.613504 | 0.95688  |
| znf1178           | 16.70296231 | 0.281004253  | 0.481877  | 0.5831451 | 0.559796 | 0.948478 |
| CU861477.1        | 94.84539028 | -0.014512351 | 0.2150459 | -0.067485 | 0.946196 | 0.99381  |
| brd3b             | 1487.515464 | -0.022445129 | 0.0797764 | -0.28135  | 0.778442 | 0.975942 |
| cdh29             | 25.65717718 | 1.107884363  | 0.4005631 | 2.7658175 | 0.005678 | 0.113103 |
| CU929402.1        | 3.41793168  | 1.638142378  | 1.1414629 | 1.4351254 | 0.151251 | NA       |
| cnmd              | 3779.694411 | 0.104431578  | 0.0770193 | 1.3559153 | 0.175126 | 0.735545 |
| dre-mir-7146      | 0.166657454 | -0.955901296 | 4.0804729 | -0.234262 | 0.814781 | NA       |
| dcpla             | 323.4884779 | 0.018129126  | 0.1204287 | 0.1505383 | 0.88034  | 0.987881 |
| il17ra2           | 0           | NA           | NA        | NA        | NA       | NA       |
| CR749168.3        | 0           | NA           | NA        | NA        | NA       | NA       |
| si:ch211-113d22.2 | 587.3696536 | 0.080626361  | 0.1063649 | 0.7580165 | 0.448441 | 0.917768 |
| CR626874.1        | 1.127931677 | -2.447047199 | 1.952687  | -1.253169 | 0.210144 | NA       |
| znf1083           | 25.64486352 | 0.147627522  | 0.3847376 | 0.3837096 | 0.701194 | 0.968134 |
| lrp6              | 414.3864585 | -0.025313437 | 0.1269737 | -0.19936  | 0.841981 | 0.985174 |
| CR936977.1        | 0           | NA           | NA        | NA        | NA       | NA       |
| CABZ01092282.1    | 1146.524676 | 0.139117649  | 0.108015  | 1.2879477 | 0.197764 | 0.76301  |
| RF00026           | 0           | NA           | NA        | NA        | NA       | NA       |
| znf1150           | 0.317831496 | 1.808837541  | 3.5779923 | 0.5055454 | 0.613176 | NA       |
| axin2             | 762.9209838 | 0.053555395  | 0.0923836 | 0.5797069 | 0.562112 | 0.948728 |
| FQ377903.1        | 13.81332716 | -0.986820805 | 0.5687519 | -1.735064 | 0.08273  | 0.554784 |
| appl2             | 1012.78214  | -0.010051772 | 0.0875402 | -0.114825 | 0.908584 | 0.990702 |
| C12orf75          | 61.10210875 | 0.064904884  | 0.260097  | 0.2495411 | 0.802942 | 0.979643 |
| FP067440.1        | 0           | NA           | NA        | NA        | NA       | NA       |
| si:ch211-217i17.1 | 3.888835444 | -0.489446539 | 1.0697469 | -0.457535 | 0.647287 | NA       |
| tamm41            | 149.0913474 | 0.011360604  | 0.177558  | 0.0639825 | 0.948984 | 0.99381  |
| tradv6.0.4        | 0           | NA           | NA        | NA        | NA       | NA       |
| angpt11b          | 32.49012908 | 0.373080633  | 0.3542804 | 1.053066  | 0.292311 | 0.848099 |
| si:dkey-205i10.2  | 0.65888811  | -1.481402282 | 2.5795287 | -0.574292 | 0.56577  | NA       |
| CR382337.2        | 1.533229493 | -0.971650616 | 1.6564407 | -0.586589 | 0.557479 | NA       |

|                    |             |              |           |           |          |          |
|--------------------|-------------|--------------|-----------|-----------|----------|----------|
| CABZ01059120.1     | 71.30608976 | 0.080059506  | 0.2338665 | 0.34233   | 0.732103 | 0.971665 |
| tox4b              | 49.25922448 | 0.174650712  | 0.3164606 | 0.5518877 | 0.581025 | 0.951731 |
| si:dkey-16p6.1     | 6.456730677 | -0.3547383   | 0.7515022 | -0.472039 | 0.636899 | NA       |
| CR749167.1         | 0 NA        | NA           | NA        | NA        | NA       | NA       |
| si:dkeyp-9d4.3     | 1787.929684 | 0.008161104  | 0.0765459 | 0.1066172 | 0.915093 | 0.991123 |
| CSDC2 (1 of many)  | 10.02367344 | -0.377966933 | 0.5994719 | -0.6305   | 0.528368 | NA       |
| pam                | 2293.968848 | -0.026382608 | 0.0785344 | -0.335937 | 0.736918 | 0.972535 |
| CU638702.1         | 0 NA        | NA           | NA        | NA        | NA       | NA       |
| CT573484.1         | 4.835953136 | 0.510857596  | 0.8913881 | 0.5731035 | 0.566575 | NA       |
| gb:ai877918        | 93.70770872 | -0.192535538 | 0.209687  | -0.918204 | 0.358512 | 0.884398 |
| lamp1a             | 382.5902499 | 0.042108734  | 0.1301805 | 0.3234643 | 0.746344 | 0.97419  |
| BX908782.1         | 17.90037117 | -0.157945832 | 0.4664721 | -0.338597 | 0.734914 | 0.972117 |
| CU655842.1         | 205.7434152 | 0.220836991  | 0.1561363 | 1.4143856 | 0.157249 | 0.707876 |
| si:ch211-188p14.4  | 147.7455926 | 0.311892072  | 0.1826224 | 1.7078522 | 0.087664 | 0.566637 |
| trgv6              | 2.320976029 | -1.326661722 | 1.2906399 | -1.02791  | 0.303992 | NA       |
| znf1155            | 54.54246151 | -0.057983317 | 0.271029  | -0.213938 | 0.830596 | 0.982994 |
| AL953858.1         | 0 NA        | NA           | NA        | NA        | NA       | NA       |
| znf1160            | 25.38853007 | -0.455651904 | 0.3871819 | -1.176842 | 0.239259 | 0.807768 |
| zgc:171929         | 2.933211226 | -0.653480876 | 1.1152832 | -0.585933 | 0.557921 | NA       |
| sncaip             | 158.8583979 | 0.274365828  | 0.1849982 | 1.483073  | 0.138055 | 0.675718 |
| si:ch1073-185p12.2 | 1.353177072 | -1.582120833 | 1.7185249 | -0.920627 | 0.357245 | NA       |
| BX537249.1         | 0.671303554 | -2.865684129 | 2.3396875 | -1.224815 | 0.220645 | NA       |
| CABZ01056637.1     | 0.829470442 | -0.541620008 | 2.1123709 | -0.256404 | 0.797639 | NA       |
| RF00001            | 0.166657454 | -0.955901296 | 4.0804729 | -0.234262 | 0.814781 | NA       |
| klhdc4             | 345.2435287 | -0.031832718 | 0.1264382 | -0.251765 | 0.801223 | 0.979377 |
| prpf39             | 1823.396397 | -0.065908248 | 0.0757504 | -0.870071 | 0.384262 | 0.895192 |
| RF00001            | 0.158915748 | 0.967652056  | 4.0804729 | 0.2371421 | 0.812547 | NA       |
| si:dkey-247i3.6    | 2.963590581 | -0.346567885 | 1.1088018 | -0.312561 | 0.754614 | NA       |
| si:ch211-117117.7  | 0 NA        | NA           | NA        | NA        | NA       | NA       |
| AL935294.1         | 0 NA        | NA           | NA        | NA        | NA       | NA       |
| si:dkey-264f17.1   | 27.97840008 | -0.16639401  | 0.3638447 | -0.457322 | 0.64744  | 0.960581 |
| BX511018.2         | 3.32782198  | 0.279241825  | 1.0160105 | 0.2748415 | 0.783438 | NA       |
| utrn               | 1590.872021 | -0.100990437 | 0.0878569 | -1.149487 | 0.250355 | 0.820164 |
| gpa33a             | 670.3836967 | -0.04437651  | 0.1011532 | -0.438706 | 0.660875 | 0.964022 |
| kif16ba            | 237.6232604 | 0.044256514  | 0.1383706 | 0.3198405 | 0.749089 | 0.97419  |
| SLC7A1 (1 of many) | 395.6881252 | -0.138732623 | 0.11781   | -1.177597 | 0.238957 | 0.807768 |
| si:ch211-238e22.5  | 3.989147291 | 0.007523638  | 0.9387223 | 0.0080148 | 0.993605 | NA       |
| ccdc135            | 34.82358301 | -0.251284371 | 0.3300903 | -0.761259 | 0.446502 | 0.917154 |
| glis2b             | 21.31136374 | -0.164432288 | 0.4265768 | -0.385469 | 0.69989  | 0.967998 |
| CU633762.1         | 0 NA        | NA           | NA        | NA        | NA       | NA       |
| BX511246.1         | 9.835419103 | 0.588048129  | 0.6455741 | 0.9108918 | 0.362352 | NA       |
| CU929203.2         | 0 NA        | NA           | NA        | NA        | NA       | NA       |
| csppla             | 63.93927409 | -0.008683435 | 0.2510539 | -0.034588 | 0.972408 | 0.996315 |
| tradv23.1.2        | 0 NA        | NA           | NA        | NA        | NA       | NA       |
| CT737123.1         | 2.316570736 | -0.03491942  | 1.3074695 | -0.026708 | 0.978693 | NA       |
| dph5               | 239.4641513 | 0.091006765  | 0.1400371 | 0.649876  | 0.515772 | 0.9377   |
| ebf3a              | 3697.732232 | -0.080948593 | 0.0701461 | -1.154001 | 0.2485   | 0.817939 |
| FP016234.1         | 101.6871095 | 0.673217265  | 0.2005863 | 3.356248  | 0.00079  | 0.025611 |
| CU929199.1         | 13.67491115 | -0.208312711 | 0.5089144 | -0.409328 | 0.682299 | 0.965476 |
| c1r                | 3.937441886 | -0.990111676 | 0.9675049 | -1.023366 | 0.306135 | NA       |
| si:ch211-266k2.1   | 20.04734258 | 0.143441055  | 0.4673143 | 0.3069477 | 0.758883 | 0.975374 |
| si:ch211-152c8.2   | 3.266913936 | -1.251468769 | 1.188681  | -1.052821 | 0.292423 | NA       |
| capzb              | 4132.581408 | 0.077744851  | 0.0727805 | 1.0682093 | 0.285426 | 0.845164 |
| CU571169.1         | 0 NA        | NA           | NA        | NA        | NA       | NA       |

|                    |             |              |           |           |          |          |
|--------------------|-------------|--------------|-----------|-----------|----------|----------|
| si:ch73-29119.1    | 218.2654268 | 0.114710204  | 0.1418301 | 0.808786  | 0.418638 | 0.906406 |
| si:dkey-88e18.8    | 113.1021724 | 0.161352242  | 0.1945047 | 0.8295543 | 0.406791 | 0.901305 |
| zgc:174314         | 0.996248248 | -0.965226587 | 1.8965975 | -0.508925 | 0.610805 | NA       |
| si:dkeyp-104b3.2   | 0.173729368 | -0.955901296 | 4.0804729 | -0.234262 | 0.814781 | NA       |
| zgc:171759         | 22.92131974 | 0.149121861  | 0.4335132 | 0.3439846 | 0.730858 | 0.971497 |
| them6              | 147.2797219 | 0.14139785   | 0.1682815 | 0.8402458 | 0.400771 | 0.90084  |
| si:ch1073-266p11.2 | 61.15527232 | -0.380888789 | 0.2549623 | -1.493903 | 0.135201 | 0.670689 |
| BX936382.1         | 11.581685   | -0.408241051 | 0.5680881 | -0.718623 | 0.472373 | 0.924838 |
| si:ch211-161c3.5   | 88.72091911 | 0.066063912  | 0.2068987 | 0.3193055 | 0.749495 | 0.97419  |
| thumpd1            | 192.6842601 | 0.084776058  | 0.1616406 | 0.5244725 | 0.59995  | 0.956045 |
| rhcgb              | 272.5906642 | 0.421031705  | 0.1445126 | 2.9134594 | 0.003574 | 0.080595 |
| GRM7               | 381.7630063 | 0.007557062  | 0.1136505 | 0.0664939 | 0.946985 | 0.99381  |
| or109-7            | 0 NA        | NA           | NA        | NA        | NA       | NA       |
| FP085414.1         | 877.1003832 | 0.014832829  | 0.0953216 | 0.1556083 | 0.876342 | 0.987881 |
| or109-3            | 0 NA        | NA           | NA        | NA        | NA       | NA       |
| dre-mir-19b        | 0 NA        | NA           | NA        | NA        | NA       | NA       |
| WDR7               | 424.2435554 | 0.10290882   | 0.1350989 | 0.7617297 | 0.446221 | 0.917154 |
| CU457819.1         | 3.530753003 | -0.085782296 | 1.0323748 | -0.083092 | 0.933778 | NA       |
| znfx1              | 13.39876903 | 0.093225446  | 0.5244067 | 0.1777732 | 0.858901 | 0.985773 |
| si:dkeyp-6a3.1     | 0.633934609 | 1.436045836  | 2.6103598 | 0.5501333 | 0.582228 | NA       |
| BX571843.1         | 0.182570949 | 0.967652056  | 4.0804729 | 0.2371421 | 0.812547 | NA       |
| dnai2a             | 5.988316613 | 0.319580571  | 0.7702907 | 0.4148831 | 0.678228 | NA       |
| SLA (1 of many)    | 1.856287422 | 1.405559207  | 1.4793983 | 0.9500884 | 0.342067 | NA       |
| imp2b              | 71.3552805  | -0.0631177   | 0.2312419 | -0.272951 | 0.784891 | 0.97627  |
| fam166b            | 13.17395232 | 0.239767559  | 0.5686034 | 0.421678  | 0.67326  | 0.965257 |
| arhgef15           | 11.11276253 | 0.091693356  | 0.5930325 | 0.1546178 | 0.877123 | 0.987881 |
| zgc:113209         | 130.4433694 | -0.150080054 | 0.1780852 | -0.842743 | 0.399372 | 0.900683 |
| ccl39.3            | 7.122660549 | -0.938511882 | 0.8097241 | -1.159051 | 0.246435 | NA       |
| pja2               | 288.0023274 | 0.015491998  | 0.1259472 | 0.1230039 | 0.902104 | 0.990121 |
| CABZ01065328.2     | 0 NA        | NA           | NA        | NA        | NA       | NA       |
| si:dkey-237g15.2   | 18.72540532 | -0.379741482 | 0.4508756 | -0.842231 | 0.399659 | 0.90084  |
| CU638714.1         | 0 NA        | NA           | NA        | NA        | NA       | NA       |
| chdh               | 37.92015805 | -0.031859004 | 0.3140259 | -0.101453 | 0.919191 | 0.991623 |
| adamts5            | 34.60198641 | 0.210927522  | 0.3374371 | 0.625087  | 0.531914 | 0.942359 |
| SEMA4F             | 75.25698508 | 0.024489506  | 0.2290929 | 0.1068977 | 0.91487  | 0.991119 |
| si:dkey-165e24.1   | 0.522329263 | 0.999930388  | 2.8066578 | 0.3562709 | 0.721638 | NA       |
| hoxa13a            | 11.60214301 | -0.059252558 | 0.580608  | -0.102053 | 0.918715 | 0.991623 |
| pip5klcb           | 728.2454833 | 0.184682976  | 0.1058022 | 1.7455488 | 0.080889 | 0.550801 |
| slc15a1a           | 42.78139219 | -0.784105953 | 0.3106105 | -2.524403 | 0.01159  | 0.188618 |
| ahsalb             | 588.0730288 | 0.091951577  | 0.0977258 | 0.9409136 | 0.346749 | 0.8794   |
| RF00324            | 6.108135033 | 0.716915284  | 0.7815635 | 0.9172834 | 0.358994 | NA       |
| BX248331.1         | 0.325573202 | 0.005883621  | 3.3172783 | 0.0017736 | 0.998585 | NA       |
| fut10              | 25.50999217 | 0.11435983   | 0.3828603 | 0.2986986 | 0.76517  | 0.975374 |
| AL627305.1         | 43.47699549 | -0.30198357  | 0.3056223 | -0.988094 | 0.323107 | 0.870607 |
| FQ377896.1         | 2.730002558 | 1.164557975  | 1.2466845 | 0.934124  | 0.35024  | NA       |
| CR354444.1         | 0.814656822 | 0.635171646  | 2.1267048 | 0.2986647 | 0.765196 | NA       |
| znf1056            | 18.0919475  | -0.021511275 | 0.4570967 | -0.047061 | 0.962465 | 0.995907 |
| SMIM10             | 227.6849449 | -0.411359158 | 0.1417361 | -2.90229  | 0.003704 | 0.082491 |
| lat                | 5.323335117 | 0.191773592  | 0.8197107 | 0.2339528 | 0.815022 | NA       |
| znf1104            | 3.498376573 | -0.388948229 | 0.9971241 | -0.39007  | 0.696485 | NA       |
| pik3r6a            | 130.4107144 | -0.035448194 | 0.1768388 | -0.200455 | 0.841125 | 0.985174 |
| RF00001            | 2.953958854 | -0.371730764 | 1.1500285 | -0.323236 | 0.746516 | NA       |
| BX936384.1         | 0.979664961 | -1.029240033 | 2.0739984 | -0.496259 | 0.619712 | NA       |
| arf4b              | 39.39482376 | -0.328170406 | 0.3791276 | -0.865593 | 0.386713 | 0.89551  |

|                    |             |              |           |           |          |          |
|--------------------|-------------|--------------|-----------|-----------|----------|----------|
| si:ch211-196h24.2  | 2.045231758 | -1.513476115 | 1.5521905 | -0.975058 | 0.329531 | NA       |
| zgc:158464         | 298.1907307 | -0.16055397  | 0.1294064 | -1.240695 | 0.214718 | 0.782493 |
| tradv24.0.3        | 0           | NA           | NA        | NA        | NA       | NA       |
| si:dkey-7114.1     | 5.168555971 | -0.290064932 | 0.8601644 | -0.33722  | 0.735951 | NA       |
| prkacaa            | 341.4517694 | 0.152972774  | 0.1229257 | 1.2444328 | 0.21334  | 0.781631 |
| aglb               | 600.8318686 | 0.599873831  | 0.1127465 | 5.3205546 | 1.03E-07 | 1.43E-05 |
| si:ch1073-398f15.1 | 63.78795932 | -0.055607614 | 0.2475232 | -0.224656 | 0.822247 | 0.982186 |
| AL844192.1         | 13.67360522 | 0.175879281  | 0.5175307 | 0.3398432 | 0.733975 | 0.971993 |
| si:ch73-44m9.3     | 115.7118541 | -0.187770395 | 0.1892038 | -0.992424 | 0.320991 | 0.868715 |
| CR382300.2         | 0           | NA           | NA        | NA        | NA       | NA       |
| AREL1              | 722.9580426 | 0.042009074  | 0.0962762 | 0.4363392 | 0.662591 | 0.964665 |
| si:ch211-125c23.3  | 3.618473728 | -0.751032777 | 1.0632385 | -0.706363 | 0.479962 | NA       |
| znf1174            | 24.33863418 | -0.719425702 | 0.3987637 | -1.80414  | 0.071209 | 0.522678 |
| dcun1d5            | 552.3670142 | 0.212974315  | 0.1025138 | 2.0775185 | 0.037754 | 0.380501 |
| F0907110.1         | 1.507608459 | 0.992720806  | 1.5647909 | 0.6344112 | 0.525813 | NA       |
| si:dkey-102m7.3    | 116.0278933 | -0.167290192 | 0.199459  | -0.83872  | 0.401627 | 0.90084  |
| BX276088.1         | 0.317831496 | 1.808837541  | 3.5779923 | 0.5055454 | 0.613176 | NA       |
| CT955963.1         | 8.691691029 | 0.379288338  | 0.6581911 | 0.5762587 | 0.56444  | NA       |
| eef2b              | 36670.44012 | -0.223817843 | 0.2018751 | -1.108694 | 0.267562 | 0.833349 |
| alad               | 344.171939  | 0.036066689  | 0.1174579 | 0.3070605 | 0.758797 | 0.975374 |
| si:ch211-175l6.1   | 0.158915748 | 0.967652056  | 4.0804729 | 0.2371421 | 0.812547 | NA       |
| txnrd3             | 2518.362752 | 0.137658006  | 0.0800999 | 1.7185787 | 0.085691 | 0.562009 |
| timm23b            | 27.20703105 | -0.01859262  | 0.3702897 | -0.050211 | 0.959954 | 0.995388 |
| amdhd2             | 293.969269  | -0.196452095 | 0.1408094 | -1.395164 | 0.162966 | 0.717875 |
| CABZ01012885.1     | 0           | NA           | NA        | NA        | NA       | NA       |
| si:dkey-83h2.3     | 1.275370218 | 0.72451682   | 1.7471001 | 0.4146968 | 0.678364 | NA       |
| si:dkey-34d22.2    | 0.158795395 | 0.967652056  | 4.0804729 | 0.2371421 | 0.812547 | NA       |
| rock2bl            | 2.158246708 | 1.184029034  | 1.3774349 | 0.8595898 | 0.390015 | NA       |
| il10ra             | 8.545342319 | 0.5811507    | 0.6673353 | 0.8708526 | 0.383835 | NA       |
| CT990567.1         | 0.157187365 | -0.955901296 | 4.0804729 | -0.234262 | 0.814781 | NA       |
| slc25a19           | 84.0406713  | -0.223036373 | 0.2316692 | -0.962737 | 0.33568  | 0.876088 |
| si:dkey-61p9.9     | 2.801287092 | -0.168150196 | 1.1305696 | -0.148731 | 0.881766 | NA       |
| si:dkey-78o7.3     | 0           | NA           | NA        | NA        | NA       | NA       |
| abhd5b             | 1.163413857 | -2.485799194 | 1.9161281 | -1.297303 | 0.194527 | NA       |
| nitr1la            | 0           | NA           | NA        | NA        | NA       | NA       |
| rps18              | 9979.126698 | -0.409341163 | 0.0731741 | -5.594069 | 2.22E-08 | 3.54E-06 |
| lnpep              | 325.0702971 | -0.037377404 | 0.1225936 | -0.304889 | 0.760451 | 0.975374 |
| RF00001            | 0           | NA           | NA        | NA        | NA       | NA       |
| pip5klaa           | 128.0981508 | 0.171633107  | 0.1812325 | 0.9470327 | 0.343622 | 0.878434 |
| pde6c              | 6011.802827 | 0.438323281  | 0.0855308 | 5.1247395 | 2.98E-07 | 3.57E-05 |
| pax7a              | 83.5485484  | -0.156000983 | 0.2348116 | -0.664367 | 0.506456 | 0.935724 |
| F0704610.1         | 326.6743038 | -0.094560177 | 0.1247382 | -0.758069 | 0.44841  | 0.917768 |
| fgd1               | 38.71987558 | -0.294104961 | 0.3263102 | -0.901305 | 0.367426 | 0.887458 |
| CT027704.1         | 0.323844819 | -1.825095364 | 3.274639  | -0.557342 | 0.577293 | NA       |
| BX957252.3         | 3.077193001 | -0.154008103 | 1.0912032 | -0.141136 | 0.887762 | NA       |
| zgc:112265         | 1723.495788 | 0.167686763  | 0.0974543 | 1.7206709 | 0.085311 | 0.560628 |
| si:ch211-166e11.5  | 340.8490766 | -0.069783208 | 0.1213695 | -0.574965 | 0.565315 | 0.948739 |
| camlg              | 360.4179128 | -0.116430778 | 0.1318322 | -0.883174 | 0.377142 | 0.895192 |
| or106-5            | 0           | NA           | NA        | NA        | NA       | NA       |
| si:ch73-106n3.1    | 1.658751506 | -3.048600777 | 1.7233157 | -1.769032 | 0.076889 | NA       |
| si:ch211-171117.14 | 2.703090012 | 0.370984433  | 1.1646911 | 0.318526  | 0.750086 | NA       |
| BX323861.2         | 0           | NA           | NA        | NA        | NA       | NA       |
| si:ch211-227e10.2  | 0           | NA           | NA        | NA        | NA       | NA       |
| ints1              | 775.8014877 | -0.071906354 | 0.1024695 | -0.701734 | 0.482845 | 0.929133 |

|                   |             |              |           |           |          |          |
|-------------------|-------------|--------------|-----------|-----------|----------|----------|
| tpcn2             | 131.6225081 | -0.011728757 | 0.1792922 | -0.065417 | 0.947842 | 0.99381  |
| znf1129           | 18.42736756 | 0.039461202  | 0.489447  | 0.0806241 | 0.935741 | 0.992702 |
| ptpro             | 702.6627082 | -0.019479434 | 0.1090399 | -0.178645 | 0.858217 | 0.985773 |
| BX323994.2        | 0.158795395 | 0.967652056  | 4.0804729 | 0.2371421 | 0.812547 | NA       |
| si:ch73-233f7.8   | 0.837961008 | -3.186152199 | 2.1620582 | -1.473666 | 0.140571 | NA       |
| fam167b           | 59.30824169 | 0.111294206  | 0.2507295 | 0.4438815 | 0.657128 | 0.962166 |
| BX547934.2        | 168.3461972 | -0.319859399 | 0.2088538 | -1.531499 | 0.125646 | 0.654803 |
| irgf4             | 0.657349104 | 1.487939685  | 2.418178  | 0.6153144 | 0.538347 | NA       |
| CU634008.1        | 99.37413701 | -0.525882383 | 0.2026709 | -2.59476  | 0.009466 | 0.163186 |
| CR376738.1        | 2.328478025 | -0.005256243 | 1.2225774 | -0.004299 | 0.99657  | NA       |
| znf1091           | 4.879149437 | -0.212744868 | 0.932643  | -0.22811  | 0.819561 | NA       |
| sec22bb           | 668.3033109 | 0.001271717  | 0.09541   | 0.013329  | 0.989365 | 0.997589 |
| cnga2b            | 42.12379177 | -0.33449609  | 0.3161408 | -1.058061 | 0.290028 | 0.846246 |
| zgc:153383        | 174.9449925 | 0.099712911  | 0.1707906 | 0.5838313 | 0.559334 | 0.948478 |
| fastkd3           | 170.2476391 | -0.10134366  | 0.1568105 | -0.646281 | 0.518097 | 0.938592 |
| cfh               | 842.9454564 | 0.222621278  | 0.1113192 | 1.9998457 | 0.045517 | 0.41824  |
| CR376766.2        | 148.5505613 | 0.211054032  | 0.1668853 | 1.2646656 | 0.205991 | 0.773798 |
| si:dkeyp-13d12.17 |             | 0 NA         | NA        | NA        | NA       | NA       |
| si:ch211-286o17.1 | 530.739335  | -0.064587759 | 0.1127577 | -0.572802 | 0.566779 | 0.948739 |
| BX322631.1        | 9.197622972 | 0.277755221  | 0.6203236 | 0.4477586 | 0.654327 | NA       |
| btr21             | 0.496945679 | -0.834564081 | 2.8549631 | -0.29232  | 0.770042 | NA       |
| olfcs2            | 6.86352947  | 0.064782053  | 0.7391502 | 0.087644  | 0.93016  | NA       |
| nop53             | 1225.743428 | -0.330898622 | 0.0946542 | -3.495868 | 0.000473 | 0.017082 |
| BX649313.1        | 0.173729368 | -0.955901296 | 4.0804729 | -0.234262 | 0.814781 | NA       |
| pnkp              | 209.3510501 | -0.189187446 | 0.1507979 | -1.254576 | 0.209633 | 0.776996 |
| ptk2aa            | 286.7790876 | 0.005520691  | 0.1432143 | 0.0385485 | 0.96925  | 0.996315 |
| si:dkey-217g21.3  | 1.621141855 | -0.556340483 | 1.5189056 | -0.366277 | 0.714158 | NA       |
| CABZ01078737.1    | 135.0149027 | -0.001202098 | 0.179601  | -0.006693 | 0.99466  | 0.998694 |
| paqr7a            | 3.658498007 | -0.008872829 | 0.9857908 | -0.009001 | 0.992819 | NA       |
| BX908799.1        |             | 0 NA         | NA        | NA        | NA       | NA       |
| si:dkey-193i10.1  | 7.566659171 | -0.39566301  | 0.6966114 | -0.567982 | 0.570047 | NA       |
| clrn3             | 55.32506765 | -1.361005286 | 0.2797441 | -4.86518  | 1.14E-06 | 0.000112 |
| nrl               | 45.33579642 | -0.147178691 | 0.3031034 | -0.485573 | 0.62727  | 0.957354 |
| fkrp              | 159.0324325 | 0.226233404  | 0.1694279 | 1.335278  | 0.181785 | 0.743853 |
| znf1182           | 21.65750824 | 0.700874972  | 0.4182495 | 1.675734  | 0.09379  | 0.582661 |
| BX004768.1        | 0.158915748 | 0.967652056  | 4.0804729 | 0.2371421 | 0.812547 | NA       |
| L0017721.1        | 4.418573093 | 0.111234785  | 0.9310672 | 0.1194702 | 0.904903 | NA       |
| fgf10b            | 8.710816333 | -0.169329627 | 0.6481616 | -0.261246 | 0.793903 | NA       |
| si:dkeyp-110c7.4  | 109.5821498 | 0.15278814   | 0.2194992 | 0.6960762 | 0.486381 | 0.930833 |
| si:dkey-43f9.4    | 50.81171396 | -0.36989569  | 0.2842908 | -1.301118 | 0.193218 | 0.757173 |
| smg6              | 587.299695  | -0.244541672 | 0.1050335 | -2.328225 | 0.0199   | 0.265882 |
| pmt               | 310.8553678 | -0.326067087 | 0.1254221 | -2.599758 | 0.009329 | 0.162001 |
| vent              | 1.815221005 | 2.20642324   | 1.6004445 | 1.3786315 | 0.168008 | NA       |
| CR450808.1        | 8.992305308 | -0.278144435 | 0.6767663 | -0.41099  | 0.68108  | NA       |
| foxo6a            | 25.48467138 | -0.28952464  | 0.3894308 | -0.743456 | 0.457206 | 0.921679 |
| nploc4            | 816.6587721 | -0.088007307 | 0.0966652 | -0.910434 | 0.362594 | 0.885944 |
| RF00001           |             | 0 NA         | NA        | NA        | NA       | NA       |
| BX511111.1        | 3.742404164 | -0.118445449 | 0.9878159 | -0.119906 | 0.904557 | NA       |
| CT025669.1        | 2.420114602 | 0.545754006  | 1.3691689 | 0.3986024 | 0.690186 | NA       |
| pbx1a             | 1177.859459 | -0.012723985 | 0.0838692 | -0.151712 | 0.879414 | 0.987881 |
| hic2              | 116.4224664 | 0.273060285  | 0.1967728 | 1.387693  | 0.165231 | 0.721223 |
| CABZ01079251.1    | 64.34127833 | -0.975956486 | 0.2508988 | -3.889842 | 0.0001   | 0.004886 |
| cpeb4b            | 1194.937762 | 0.042466884  | 0.0837781 | 0.506897  | 0.612227 | 0.95688  |
| CR848025.1        | 3.177360012 | 0.801305058  | 1.0662248 | 0.7515348 | 0.452331 | NA       |

|                   |             |              |           |           |          |          |
|-------------------|-------------|--------------|-----------|-----------|----------|----------|
| sos1              | 638.1855155 | -0.099929386 | 0.1126165 | -0.887343 | 0.374894 | 0.894316 |
| ppplr27b          | 34.10031871 | -0.22980837  | 0.3514806 | -0.653829 | 0.513222 | 0.936463 |
| ddx52             | 301.9045673 | 0.073925178  | 0.1410721 | 0.5240242 | 0.600262 | 0.956045 |
| crbl              | 115.0529746 | 0.317188189  | 0.2003127 | 1.5834654 | 0.113315 | 0.631061 |
| RF00001           | 0 NA        | NA           | NA        | NA        | NA       | NA       |
| ubn2b             | 431.3470818 | -0.013148209 | 0.1237133 | -0.10628  | 0.91536  | 0.991171 |
| si:dkey-82i20.2   | 0.473170125 | -0.833888596 | 2.9014002 | -0.287409 | 0.773799 | NA       |
| CR855379.2        | 1.000134101 | 0.001091541  | 2.0514706 | 0.0005321 | 0.999575 | NA       |
| rps27l            | 283.2342147 | -0.420763106 | 0.1488158 | -2.827408 | 0.004693 | 0.098715 |
| cfap20            | 355.1004149 | -0.037043686 | 0.1216072 | -0.304618 | 0.760657 | 0.975374 |
| duspl             | 1244.198128 | 0.026944604  | 0.0984473 | 0.2736956 | 0.784319 | 0.97627  |
| tradv5.0.1        | 0 NA        | NA           | NA        | NA        | NA       | NA       |
| CR387919.1        | 33.13524704 | 0.263678307  | 0.3343181 | 0.7887049 | 0.430284 | 0.911945 |
| spop              | 1097.077554 | 0.021345974  | 0.0890123 | 0.2398093 | 0.810478 | 0.980868 |
| si:dkey-25o1.7    | 6.846637695 | -0.330464206 | 0.7217227 | -0.457883 | 0.647037 | NA       |
| abca3b            | 2280.575252 | 0.029804456  | 0.0733777 | 0.4061784 | 0.684612 | 0.966068 |
| map11c3c          | 38.99366051 | -1.006405589 | 0.3288713 | -3.060181 | 0.002212 | 0.05751  |
| sh3bp5a           | 846.2109856 | 0.082216966  | 0.0898454 | 0.9150936 | 0.360142 | 0.885686 |
| abhd14b           | 261.7585128 | -0.353062691 | 0.1353734 | -2.608066 | 0.009106 | 0.159622 |
| CU639471.1        | 0.31437473  | -1.788572922 | 3.5930657 | -0.497785 | 0.618636 | NA       |
| si:ch1073-178p5.3 | 0.323844819 | -1.825095364 | 3.274639  | -0.557342 | 0.577293 | NA       |
| irak4             | 65.14373064 | -0.314762196 | 0.2491143 | -1.263525 | 0.2064   | 0.774011 |
| ecmla             | 0.182570949 | 0.967652056  | 4.0804729 | 0.2371421 | 0.812547 | NA       |
| nkrf              | 712.7417809 | 0.098793546  | 0.1027352 | 0.9616325 | 0.336234 | 0.876088 |
| CR388413.1        | 0 NA        | NA           | NA        | NA        | NA       | NA       |
| si:dkeyp-88h4.2   | 0 NA        | NA           | NA        | NA        | NA       | NA       |
| btr22             | 2.455635807 | 0.556499109  | 1.2090823 | 0.4602657 | 0.645326 | NA       |
| si:ch211-106g8.62 | 0 NA        | NA           | NA        | NA        | NA       | NA       |
| zgc:173486        | 15.72191357 | -0.050731347 | 0.488613  | -0.103827 | 0.917306 | 0.991572 |
| or108-2           | 0.182570949 | 0.967652056  | 4.0804729 | 0.2371421 | 0.812547 | NA       |
| CR383680.1        | 2.83913066  | 1.294583975  | 1.1843866 | 1.0930418 | 0.274375 | NA       |
| tefm              | 94.18064711 | 0.177014902  | 0.2101856 | 0.8421837 | 0.399685 | 0.90084  |
| CABZ01079427.1    | 154.3428208 | 0.02753495   | 0.191873  | 0.1435061 | 0.88589  | 0.988936 |
| si:dkey-112a7.5   | 1.697990138 | 3.090984544  | 1.8204686 | 1.697906  | 0.089526 | NA       |
| lsm14ab           | 2388.212695 | -0.032460835 | 0.0713757 | -0.454788 | 0.649262 | 0.960708 |
| trgv1             | 0.158915748 | 0.967652056  | 4.0804729 | 0.2371421 | 0.812547 | NA       |
| aqpl1             | 494.7731868 | 0.396250192  | 0.114115  | 3.4723771 | 0.000516 | 0.018314 |
| si:dkeyp-5g9.1    | 5.617109068 | 0.325561877  | 0.8110909 | 0.4013877 | 0.688135 | NA       |
| slbp              | 452.3769745 | -0.070060825 | 0.1163532 | -0.602139 | 0.547082 | 0.945526 |
| tor2a             | 178.5881269 | 0.082117911  | 0.1574478 | 0.5215565 | 0.601979 | 0.956045 |
| zfp2b             | 414.1952054 | -0.228403905 | 0.1207649 | -1.89131  | 0.058583 | 0.473924 |
| BX323453.1        | 13.47752984 | 0.106388568  | 0.5213617 | 0.204059  | 0.838307 | 0.984797 |
| sill              | 246.316249  | 0.043467307  | 0.140069  | 0.3103279 | 0.756312 | 0.975374 |
| CR556708.1        | 0.157187365 | -0.955901296 | 4.0804729 | -0.234262 | 0.814781 | NA       |
| CR318647.1        | 1.126983149 | 2.435713293  | 2.0277577 | 1.2011856 | 0.229679 | NA       |
| si:ch211-209j12.3 | 9.666056129 | -1.256885077 | 0.6450572 | -1.948486 | 0.051357 | NA       |
| BX927122.1        | 1.119429824 | 2.422696301  | 3.9529865 | 0.6128774 | 0.539957 | NA       |
| FP085400.1        | 0.507044276 | -2.459587493 | 2.7586536 | -0.89159  | 0.372613 | NA       |
| ckap2l            | 188.9331285 | -0.182413972 | 0.1529438 | -1.192686 | 0.232992 | 0.80134  |
| CT573787.1        | 1.02226034  | -1.002759318 | 1.9585319 | -0.511995 | 0.608654 | NA       |
| CU694481.1        | 134.2015857 | -0.019639704 | 0.1935809 | -0.101455 | 0.919189 | 0.991623 |
| si:dkeyp-90h9.1   | 5.472309408 | -0.267932666 | 0.8095628 | -0.33096  | 0.740675 | NA       |
| RF00001           | 0 NA        | NA           | NA        | NA        | NA       | NA       |
| si:ch211-195b11.3 | 2167.050427 | 0.131785043  | 0.0894425 | 1.4734049 | 0.140642 | 0.681252 |

|                    |             |              |           |           |          |          |
|--------------------|-------------|--------------|-----------|-----------|----------|----------|
| hid1b              | 100.7000491 | 0.076033374  | 0.1995291 | 0.3810641 | 0.703156 | 0.968134 |
| ccdc40             | 112.3922344 | -0.530340148 | 0.1923667 | -2.756923 | 0.005835 | 0.114918 |
| coa3a              | 403.1772116 | -0.055622915 | 0.1209932 | -0.459719 | 0.645718 | 0.96029  |
| BX324007.2         | 0.481032184 | -2.398473301 | 2.80721   | -0.854398 | 0.392885 | NA       |
| zgc:113886         | 25.9007865  | -0.452703324 | 0.3869001 | -1.170078 | 0.24197  | 0.810713 |
| rpl36              | 6553.69005  | -0.394015298 | 0.1053372 | -3.740513 | 0.000184 | 0.007935 |
| BX649421.1         | 8.19742226  | -0.001960078 | 0.6730096 | -0.002912 | 0.997676 | NA       |
| sox32              | 1.339342975 | 0.752240637  | 1.5961401 | 0.4712874 | 0.637436 | NA       |
| slc8a2b            | 38.22657874 | 0.436833497  | 0.3177211 | 1.3748962 | 0.169164 | 0.726198 |
| gnrhr1             | 2.540435508 | -0.574976222 | 1.2408157 | -0.463386 | 0.643088 | NA       |
| sez6l              | 465.8527385 | -0.090906445 | 0.1092474 | -0.832116 | 0.405344 | 0.901305 |
| CR626884.1         | 0           | NA           | NA        | NA        | NA       | NA       |
| si:ch73-43g23.1    | 327.9222289 | 0.348047968  | 0.1538505 | 2.2622485 | 0.023682 | 0.296761 |
| ubxn4              | 0           | NA           | NA        | NA        | NA       | NA       |
| CABZ01109081.1     | 59.74129373 | -0.096717788 | 0.2649244 | -0.365077 | 0.715054 | 0.96909  |
| cls                | 6.526314167 | -0.097054753 | 0.7716841 | -0.12577  | 0.899914 | NA       |
| RF00001            | 0           | NA           | NA        | NA        | NA       | NA       |
| CU019562.1         | 0.173729368 | -0.955901296 | 4.0804729 | -0.234262 | 0.814781 | NA       |
| olfcw1             | 0.500161739 | 2.450146464  | 2.7711133 | 0.8841741 | 0.376602 | NA       |
| FP016142.4         | 0           | NA           | NA        | NA        | NA       | NA       |
| BX539336.1         | 59.66477439 | 0.162753445  | 0.2688966 | 0.6052641 | 0.545003 | 0.945463 |
| zbtb38             | 40.88544185 | 0.455259282  | 0.3232999 | 1.4081639 | 0.159083 | 0.70993  |
| CR812468.1         | 1.322398629 | 0.712714148  | 1.7579146 | 0.4054316 | 0.68516  | NA       |
| si:ch211-163c2.1   | 0           | NA           | NA        | NA        | NA       | NA       |
| CABZ01089777.1     | 155.3335159 | 0.062954652  | 0.1670947 | 0.3767603 | 0.706352 | 0.968459 |
| CU019663.1         | 0.341366344 | 1.891903201  | 3.2128156 | 0.5888614 | 0.555954 | NA       |
| si:ch1073-209h18.1 | 0.838899245 | -0.667458734 | 2.2321093 | -0.299026 | 0.76492  | NA       |
| taok2b             | 28.19662742 | 0.156687787  | 0.3632706 | 0.4313252 | 0.666232 | 0.964736 |
| CABZ01080550.1     | 1.506866387 | -4.033090985 | 1.8271817 | -2.207274 | 0.027295 | NA       |
| trrap              | 1433.607127 | -0.104836276 | 0.0844531 | -1.241355 | 0.214475 | 0.782493 |
| CABZ01066312.1     | 589.7693586 | -0.102543934 | 0.1018375 | -1.006937 | 0.313965 | 0.865176 |
| si:ch73-197b13.1   | 397.5613995 | 0.179332531  | 0.1145082 | 1.5661114 | 0.117323 | 0.640853 |
| CR354537.1         | 1.461277579 | 2.871418486  | 1.7984467 | 1.5966102 | 0.110353 | NA       |
| klhl12             | 113.3158207 | 0.064971075  | 0.1981834 | 0.3278331 | 0.743038 | 0.973486 |
| BX649328.1         | 1.348572358 | 0.736885736  | 1.7227585 | 0.427736  | 0.668843 | NA       |
| zgc:114200         | 743.9820455 | 0.063548117  | 0.1000927 | 0.6348924 | 0.525499 | 0.94013  |
| chia.1             | 165.0393604 | -0.225940821 | 0.1842116 | -1.226529 | 0.22     | 0.786668 |
| rbml2              | 669.5712761 | 0.205022206  | 0.1047117 | 1.9579685 | 0.050234 | 0.438746 |
| tradv26.0          | 0           | NA           | NA        | NA        | NA       | NA       |
| CR847939.1         | 0.966888458 | -0.025960572 | 2.0723413 | -0.012527 | 0.990005 | NA       |
| BX321870.2         | 0           | NA           | NA        | NA        | NA       | NA       |
| plppr1             | 313.0309975 | 0.062729746  | 0.1240229 | 0.5057917 | 0.613003 | 0.95688  |
| BX005454.1         | 18.8058532  | -0.267424605 | 0.4707737 | -0.568053 | 0.569999 | 0.948983 |
| si:dkey-211i20.4   | 0           | NA           | NA        | NA        | NA       | NA       |
| t1r1               | 1.132058235 | -1.331653689 | 1.8930709 | -0.703436 | 0.481784 | NA       |
| znf1147            | 0.813556947 | -1.876896976 | 2.1385771 | -0.877638 | 0.38014  | NA       |
| si:dkeyp-82b4.6    | 0           | NA           | NA        | NA        | NA       | NA       |
| si:dkey-207m2.4    | 6.629899319 | 0.131772318  | 0.7402395 | 0.1780131 | 0.858713 | NA       |
| CR356223.2         | 2.111272779 | 2.416399201  | 1.5363602 | 1.5728078 | 0.115763 | NA       |
| egf17              | 127.6561539 | -0.28703174  | 0.1757629 | -1.633062 | 0.102456 | 0.608235 |
| si:ch211-51h4.2    | 9.171452651 | 0.734342549  | 0.6600792 | 1.1125067 | 0.26592  | NA       |
| si:ch73-252i11.1   | 48.60385955 | 0.077499719  | 0.2963292 | 0.2615326 | 0.793682 | 0.977937 |
| cxcl11.1           | 1.191117544 | 2.514407445  | 1.9963906 | 1.2594767 | 0.207858 | NA       |
| or120-1            | 2.021378131 | 0.541898701  | 1.442669  | 0.3756223 | 0.707198 | NA       |



|                    |             |              |           |           |          |          |
|--------------------|-------------|--------------|-----------|-----------|----------|----------|
| ep300a             | 588.8404502 | 0.006795612  | 0.0970963 | 0.0699884 | 0.944203 | 0.993364 |
| RF00001            | 0 NA        | NA           | NA        | NA        | NA       | NA       |
| si:dkey-61p9.9     | 12.17002414 | -0.339914544 | 0.5465251 | -0.621956 | 0.533971 | 0.943276 |
| pcdh1g31           | 79.5709876  | -0.111307993 | 0.2444331 | -0.455372 | 0.648842 | 0.960708 |
| CR790382.1         | 0.500161739 | 2.450146464  | 2.7711133 | 0.8841741 | 0.376602 | NA       |
| FQ311920.1         | 0.166657454 | -0.955901296 | 4.0804729 | -0.234262 | 0.814781 | NA       |
| znf974             | 1.018762289 | -3.464169915 | 2.0654717 | -1.677181 | 0.093507 | NA       |
| UBE20              | 430.0328767 | -0.070714206 | 0.1113212 | -0.635227 | 0.52528  | 0.94013  |
| tmem205            | 184.6694603 | -0.052768732 | 0.152473  | -0.346086 | 0.729278 | 0.970822 |
| ifnphi4            | 0.641676315 | -0.015027761 | 2.4538215 | -0.006124 | 0.995114 | NA       |
| lrch3              | 22.96433599 | 0.074803321  | 0.4029258 | 0.1856504 | 0.852719 | 0.985174 |
| si:ch211-241b2.4   | 20.14962152 | -0.095143002 | 0.4394251 | -0.216517 | 0.828585 | 0.982721 |
| CU929154.1         | 0 NA        | NA           | NA        | NA        | NA       | NA       |
| CR450749.2         | 0 NA        | NA           | NA        | NA        | NA       | NA       |
| si:ch211-256e16.11 | 53.29512644 | -0.096930861 | 0.2979187 | -0.32536  | 0.744909 | 0.974094 |
| prss35             | 2234.811141 | 0.03737215   | 0.0776499 | 0.4812907 | 0.63031  | 0.957354 |
| ddr2a              | 278.6431696 | -0.015036509 | 0.1282651 | -0.11723  | 0.906678 | 0.990702 |
| tnnt2b             | 37.59839272 | -0.00656902  | 0.322352  | -0.020378 | 0.983742 | 0.996944 |
| CR407585.1         | 0 NA        | NA           | NA        | NA        | NA       | NA       |
| FQ323156.1         | 1758.868306 | 0.003193532  | 0.0895224 | 0.035673  | 0.971543 | 0.996315 |
| evalbb             | 134.5215184 | -0.052059513 | 0.1735549 | -0.29996  | 0.764208 | 0.975374 |
| BX950868.1         | 0 NA        | NA           | NA        | NA        | NA       | NA       |
| CABZ01066725.1     | 9.163310862 | 0.835238244  | 0.6435203 | 1.2979205 | 0.194315 | NA       |
| si:ch211-285j22.3  | 9.671981089 | -0.295536998 | 0.6161668 | -0.479638 | 0.631485 | NA       |
| traj26             | 0 NA        | NA           | NA        | NA        | NA       | NA       |
| si:dkey-48g21.7    | 7.673186022 | -0.396875829 | 0.7009845 | -0.566169 | 0.571279 | NA       |
| jakmip3            | 246.8911747 | -0.052062678 | 0.1418692 | -0.366977 | 0.713636 | 0.96909  |
| agxt2              | 312.865381  | 0.302096785  | 0.1388934 | 2.1750265 | 0.029628 | 0.333089 |
| CR855206.1         | 0.157187365 | -0.955901296 | 4.0804729 | -0.234262 | 0.814781 | NA       |
| si:dkey-19b23.12   | 546.8272457 | -0.322294249 | 0.1053849 | -3.058259 | 0.002226 | 0.057621 |
| RF00001            | 0 NA        | NA           | NA        | NA        | NA       | NA       |
| tlklb              | 1155.814119 | -0.07826267  | 0.0856806 | -0.913424 | 0.36102  | 0.885686 |
| si:dkey-285b23.4   | 3.703502848 | -0.766757156 | 1.0069201 | -0.761488 | 0.446366 | NA       |
| socs5a             | 223.7552312 | 0.218671362  | 0.1455033 | 1.5028622 | 0.132875 | 0.667546 |
| me2                | 745.4595165 | 0.29236192   | 0.107831  | 2.7112976 | 0.006702 | 0.126215 |
| uraha              | 94.15622529 | -0.56034071  | 0.2057555 | -2.723333 | 0.006463 | 0.122855 |
| si:ch211-175l6.2   | 1.028745031 | 0.127773841  | 2.0351529 | 0.0627834 | 0.949939 | NA       |
| si:ch211-160f23.7  | 442.634843  | 0.12986139   | 0.1177282 | 1.1030606 | 0.270001 | 0.834705 |
| znf1097            | 5.424800581 | 0.434930788  | 0.8075269 | 0.5385961 | 0.590166 | NA       |
| ephb4a             | 693.4733636 | 0.037330538  | 0.0965789 | 0.386529  | 0.699105 | 0.967998 |
| mkrn2os.2          | 37.78681213 | -0.173618617 | 0.3199979 | -0.542562 | 0.587432 | 0.953319 |
| tln1               | 1908.273875 | 0.07539457   | 0.0855351 | 0.8814458 | 0.378077 | 0.895192 |
| zgc:101540         | 127.4017434 | -0.288866874 | 0.1816733 | -1.590035 | 0.111827 | 0.627242 |
| si:dkeyp-93h6.1    | 2.235143064 | 0.230725426  | 1.3313809 | 0.1732978 | 0.862417 | NA       |
| epob               | 9.235655075 | 0.640890358  | 0.6300552 | 1.0171971 | 0.30906  | NA       |
| osmr               | 1.644089234 | 3.056281618  | 1.7682725 | 1.7283997 | 0.083917 | NA       |
| CABZ01052573.1     | 229.0777071 | -0.134817027 | 0.1567297 | -0.860188 | 0.389685 | 0.896421 |
| CU179702.2         | 2.659436043 | -0.335456283 | 1.1470138 | -0.292461 | 0.769935 | NA       |
| cdc20              | 469.9429745 | -0.036549549 | 0.1169023 | -0.31265  | 0.754546 | 0.975114 |
| reep5              | 1849.640514 | -0.065080743 | 0.0868585 | -0.749273 | 0.453692 | 0.920041 |
| si:dkey-190j3.4    | 14.93399311 | -0.034993869 | 0.5194323 | -0.067369 | 0.946288 | 0.99381  |
| RF00415            | 0 NA        | NA           | NA        | NA        | NA       | NA       |
| si:ch211-103a14.5  | 45.76343282 | 0.698684317  | 0.2970883 | 2.3517732 | 0.018684 | 0.2548   |
| rab21              | 804.0354767 | -0.2369663   | 0.1075041 | -2.204253 | 0.027507 | 0.320429 |

|                    |             |              |           |           |          |          |
|--------------------|-------------|--------------|-----------|-----------|----------|----------|
| CR450764.1         |             | 0 NA         | NA        | NA        | NA       | NA       |
| CU074330.1         | 28.44520639 | 0.16742036   | 0.4060196 | 0.4123455 | 0.680086 | 0.965331 |
| RF00003            |             | 0 NA         | NA        | NA        | NA       | NA       |
| RF00001            |             | 0 NA         | NA        | NA        | NA       | NA       |
| BX293993.1         |             | 0 NA         | NA        | NA        | NA       | NA       |
| zfyve9b            | 39.92133004 | 0.118092752  | 0.3250952 | 0.3632559 | 0.716414 | 0.96909  |
| traj37             |             | 0 NA         | NA        | NA        | NA       | NA       |
| ube2ql             | 712.2245731 | -0.06033157  | 0.110319  | -0.546883 | 0.584459 | 0.952406 |
| BX248131.1         |             | 0 NA         | NA        | NA        | NA       | NA       |
| si:ch211-160d14.15 | 0.157187365 | -0.955901296 | 4.0804729 | -0.234262 | 0.814781 | NA       |
| si:ch211-154c21.1  | 14.68557843 | 0.210739702  | 0.4928123 | 0.4276267 | 0.668923 | 0.964961 |
| zmynd19            | 468.1233801 | 0.249328532  | 0.1157541 | 2.1539492 | 0.031244 | 0.342094 |
| cmc4               | 23.94795621 | -0.449495864 | 0.3951171 | -1.137627 | 0.255276 | 0.823868 |
| si:ch211-238e22.7  | 1.680829672 | 1.242412219  | 1.4825682 | 0.8380135 | 0.402023 | NA       |
| slcole1            | 11.15217734 | 0.921467692  | 0.5974786 | 1.5422606 | 0.12301  | 0.65095  |
| col28a2b           | 224.6891812 | 0.47497441   | 0.1438548 | 3.3017617 | 0.000961 | 0.029926 |
| f71                | 90.55393717 | 0.363193311  | 0.2150628 | 1.6887776 | 0.091262 | 0.578443 |
| PLCB4              | 6.531976599 | 0.893196276  | 0.7889672 | 1.1321082 | 0.257589 | NA       |
| CR855274.1         | 0.158915748 | 0.967652056  | 4.0804729 | 0.2371421 | 0.812547 | NA       |
| trip10b            | 110.6973868 | -0.044537869 | 0.2014396 | -0.221098 | 0.825016 | 0.982196 |
| plgrkt             | 462.7983712 | -0.29164148  | 0.1101309 | -2.648135 | 0.008094 | 0.1451   |
| tril               | 71.26534662 | 0.096742872  | 0.2359639 | 0.4099902 | 0.681813 | 0.965476 |
| zgc:154142         | 30.87997779 | 0.053933847  | 0.3463011 | 0.1557426 | 0.876236 | 0.987881 |
| CR450785.1         | 18.85843333 | 0.084238221  | 0.436109  | 0.1931586 | 0.846835 | 0.985174 |
| mmp13b             | 5.18175701  | 1.588831081  | 0.9774405 | 1.6255016 | 0.104056 | NA       |
| timp4.3            | 10.10092007 | -0.709311138 | 0.6350411 | -1.116953 | 0.264014 | NA       |
| CABZ01076996.1     | 53.96473592 | -0.029991543 | 0.2805981 | -0.106884 | 0.914881 | 0.991119 |
| CR381540.1         | 2.646497902 | -0.005451569 | 1.1656753 | -0.004677 | 0.996269 | NA       |
| si:ch211-106g8.20  |             | 0 NA         | NA        | NA        | NA       | NA       |
| zgc:173517         | 17.49918323 | -1.124594608 | 0.4688383 | -2.398683 | 0.016454 | 0.236409 |
| st6galnac4         | 2.533714609 | 0.630839066  | 1.2641073 | 0.4990392 | 0.617752 | NA       |
| si:ch1073-209e23.1 | 89.7392689  | -0.135748047 | 0.227282  | -0.597267 | 0.550329 | 0.946549 |
| si:ch211-213c4.5   |             | 0 NA         | NA        | NA        | NA       | NA       |
| znf1183            | 21.32012133 | 0.039126798  | 0.4267206 | 0.0916918 | 0.926943 | 0.992702 |
| g6fl               | 3.35183824  | 0.29056966   | 1.0520932 | 0.2761824 | 0.782408 | NA       |
| BX927130.2         |             | 0 NA         | NA        | NA        | NA       | NA       |
| nudt12             | 191.9549302 | -0.134412157 | 0.1520326 | -0.884101 | 0.376642 | 0.895051 |
| srsf3a             | 2.622533967 | 0.334388798  | 1.1757394 | 0.2844072 | 0.776098 | NA       |
| CT990625.1         | 2.344982245 | 0.055434299  | 1.2917961 | 0.0429126 | 0.965771 | NA       |
| si:ch73-97h19.2    | 48.26338246 | 0.223504716  | 0.2808121 | 0.7959228 | 0.426077 | 0.909755 |
| BX548164.1         | 1.187499141 | 0.431586902  | 1.7362295 | 0.2485771 | 0.803688 | NA       |
| RF00003            |             | 0 NA         | NA        | NA        | NA       | NA       |
| scrtla             | 327.6801824 | -0.028454098 | 0.1301537 | -0.218619 | 0.826947 | 0.982518 |
| mapk15             | 7.999461254 | 0.365740822  | 0.6696199 | 0.5461917 | 0.584934 | NA       |
| selenok            | 880.2364875 | -0.031842236 | 0.0932585 | -0.34144  | 0.732772 | 0.971719 |
| calm3a             | 2577.827277 | 0.116673114  | 0.0692867 | 1.6839189 | 0.092197 | 0.57849  |
| hif1al             | 5500.10604  | 0.035456092  | 0.0679357 | 0.5219068 | 0.601735 | 0.956045 |
| CU929150.2         | 2.455048585 | 1.034123345  | 1.2639487 | 0.8181688 | 0.413261 | NA       |
| pcdhlg32           | 23.57203339 | -0.309440635 | 0.3975133 | -0.778441 | 0.436309 | 0.914408 |
| RF00001            | 0.182570949 | 0.967652056  | 4.0804729 | 0.2371421 | 0.812547 | NA       |
| si:dkey-269i1.4    | 1.143686789 | 2.463114996  | 1.9467244 | 1.2652613 | 0.205778 | NA       |
| FP016208.1         | 0.317831496 | 1.808837541  | 3.5779923 | 0.5055454 | 0.613176 | NA       |
| RGS13 (1 of many)  | 1.922390063 | -0.012641986 | 1.4123258 | -0.008951 | 0.992858 | NA       |
| CR790380.1         | 77.178954   | 0.144013135  | 0.2294213 | 0.6277236 | 0.530185 | 0.942209 |

|                   |             |              |           |           |          |          |
|-------------------|-------------|--------------|-----------|-----------|----------|----------|
| BX649384.3        | 1.934017622 | -0.025627301 | 1.4611735 | -0.017539 | 0.986007 | NA       |
| RF00003           | 0 NA        |              | NA        | NA        | NA       | NA       |
| si:ch211-223a21.4 | 9.626831812 | -0.241742217 | 0.6434391 | -0.375703 | 0.707137 | NA       |
| cldn151b          | 232.880962  | -0.692801366 | 0.1399092 | -4.951793 | 7.35E-07 | 7.73E-05 |
| esrrb             | 93.21269207 | -0.328009353 | 0.2142931 | -1.530658 | 0.125854 | 0.654803 |
| RF00001           | 0 NA        |              | NA        | NA        | NA       | NA       |
| rnf103            | 604.5257214 | -0.054235628 | 0.110351  | -0.491483 | 0.623085 | 0.957354 |
| gphnb             | 748.5224677 | 0.006247808  | 0.1127694 | 0.0554034 | 0.955817 | 0.994543 |
| ago4              | 967.916136  | 0.100934804  | 0.1081697 | 0.9331152 | 0.35076  | 0.880195 |
| BX640584.1        | 0 NA        |              | NA        | NA        | NA       | NA       |
| FP101914.1        | 419.1926138 | -0.083010884 | 0.1149873 | -0.721914 | 0.470348 | 0.924838 |
| zgc:171695        | 0 NA        |              | NA        | NA        | NA       | NA       |
| BX465868.2        | 0 NA        |              | NA        | NA        | NA       | NA       |
| gprc5c            | 64.18570479 | 0.143106813  | 0.2796729 | 0.5116936 | 0.608865 | 0.956718 |
| BX004873.1        | 0.356300316 | 0.005884122  | 3.214964  | 0.0018302 | 0.99854  | NA       |
| si:dkey-269o24.1  | 2.279318887 | -0.448209836 | 1.2764297 | -0.351143 | 0.725481 | NA       |
| rictora           | 200.1724112 | -0.042574735 | 0.1529799 | -0.278303 | 0.78078  | 0.97627  |
| adc9              | 91.89979605 | 0.051026197  | 0.2097813 | 0.2432352 | 0.807823 | 0.980642 |
| RF00001           | 0 NA        |              | NA        | NA        | NA       | NA       |
| otud1             | 46.66940173 | 0.146613081  | 0.2879085 | 0.509235  | 0.610588 | 0.95688  |
| RF00001           | 0 NA        |              | NA        | NA        | NA       | NA       |
| GAN               | 31.69396989 | 0.00648878   | 0.3441644 | 0.0188537 | 0.984958 | 0.996944 |
| sez6a             | 188.0664925 | 0.115421085  | 0.1510082 | 0.7643367 | 0.444667 | 0.916777 |
| dre-mir-19d       | 0 NA        |              | NA        | NA        | NA       | NA       |
| znf1154           | 32.79470973 | 0.076165218  | 0.3447722 | 0.2209146 | 0.825159 | 0.982196 |
| CU896630.1        | 38.60233556 | -0.068869111 | 0.3156438 | -0.218186 | 0.827284 | 0.982682 |
| si:ch211-285j22.5 | 0 NA        |              | NA        | NA        | NA       | NA       |
| si:dkeyp-97a10.1  | 9.063080045 | -0.218060678 | 0.6824405 | -0.319531 | 0.749324 | NA       |
| si:dkey-11f4.20   | 4.031987873 | 1.079149535  | 1.1518444 | 0.9368883 | 0.348816 | NA       |
| RF00001           | 0 NA        |              | NA        | NA        | NA       | NA       |
| galnt18a          | 68.2911904  | 0.156746233  | 0.2358801 | 0.6645167 | 0.50636  | 0.935724 |
| si:zfos-1069f5.1  | 0.476626891 | 2.395187592  | 2.815932  | 0.8505843 | 0.395    | NA       |
| CR589944.2        | 0.809151653 | 1.852283317  | 2.2398915 | 0.8269523 | 0.408264 | NA       |
| cfap53            | 26.08291809 | 0.321078549  | 0.3823251 | 0.839805  | 0.401018 | 0.90084  |
| znf973            | 14.48297192 | 0.329102781  | 0.5167472 | 0.6368739 | 0.524207 | 0.939336 |
| pdgfrb            | 573.2737846 | -0.000555907 | 0.110652  | -0.005024 | 0.995992 | 0.998888 |
| RF00001           | 0 NA        |              | NA        | NA        | NA       | NA       |
| si:ch211-241b2.5  | 12.41698906 | 0.191988259  | 0.5387261 | 0.3563745 | 0.72156  | 0.969747 |
| si:ch211-183d5.2  | 1.156023166 | 1.375970216  | 1.8668212 | 0.7370659 | 0.461082 | NA       |
| FP085399.1        | 0.316103113 | 0.005883447  | 3.3519121 | 0.0017553 | 0.9986   | NA       |
| histlh2a11        | 1.129151905 | -0.35374975  | 1.9619968 | -0.180301 | 0.856916 | NA       |
| lcor              | 15.28075797 | -0.182298015 | 0.4837199 | -0.376867 | 0.706273 | 0.968459 |
| zgc:173581        | 12.34901872 | 0.15646468   | 0.5868072 | 0.2666373 | 0.789748 | 0.977238 |
| si:ch211-195p4.4  | 0.473290478 | -0.833892061 | 2.901156  | -0.287434 | 0.77378  | NA       |
| BX294383.1        | 0.538871265 | 0.999144257  | 2.7784799 | 0.359601  | 0.719146 | NA       |
| zgc:162297        | 13.06072819 | -0.823616398 | 0.5705081 | -1.443654 | 0.148836 | 0.69636  |
| arhgef12b         | 827.7810385 | -0.007116986 | 0.0927402 | -0.076741 | 0.938829 | 0.992857 |
| si:ch211-255f4.7  | 217.2495634 | -0.287345991 | 0.1414396 | -2.03158  | 0.042196 | 0.403671 |
| uvssa             | 181.3868126 | -0.150918853 | 0.1511089 | -0.998742 | 0.31792  | 0.867746 |
| slc30a8           | 232.6708335 | 0.325162205  | 0.1425723 | 2.2806832 | 0.022567 | 0.286638 |
| prcla             | 400.3699808 | -0.122566273 | 0.115299  | -1.06303  | 0.287768 | 0.845979 |
| slc5a2            | 59.39313144 | 0.330549514  | 0.2580062 | 1.2811687 | 0.200134 | 0.766207 |
| AL831768.1        | 0 NA        |              | NA        | NA        | NA       | NA       |
| CU104709.1        | 0 NA        |              | NA        | NA        | NA       | NA       |

|                   |             |              |           |           |          |          |
|-------------------|-------------|--------------|-----------|-----------|----------|----------|
| nfatc2a           | 8.010868441 | -0.852626941 | 0.7234991 | -1.178477 | 0.238607 | NA       |
| RF00001           | 0           | NA           | NA        | NA        | NA       | NA       |
| BX088583.1        | 0           | NA           | NA        | NA        | NA       | NA       |
| RF00003           | 0           | NA           | NA        | NA        | NA       | NA       |
| RF00026           | 0           | NA           | NA        | NA        | NA       | NA       |
| CR790368.1        | 1.488196914 | -1.045346379 | 1.5889719 | -0.657876 | 0.510618 | NA       |
| hint2             | 199.4475569 | -0.04390785  | 0.1631518 | -0.269123 | 0.787835 | 0.976596 |
| CABZ01117603.1    | 0.657349104 | 1.487939685  | 2.418178  | 0.6153144 | 0.538347 | NA       |
| nr5a2             | 111.367589  | -0.311206901 | 0.1902922 | -1.635416 | 0.101962 | 0.606922 |
| clcal             | 0.31437473  | -1.788572922 | 3.5930657 | -0.497785 | 0.618636 | NA       |
| zgc:194655        | 0.837961008 | -3.186152199 | 2.1620582 | -1.473666 | 0.140571 | NA       |
| RF00001           | 4.162638213 | -0.11198752  | 0.9757587 | -0.11477  | 0.908628 | NA       |
| glrx2             | 200.6276183 | -0.140563221 | 0.1516857 | -0.926674 | 0.354096 | 0.882044 |
| RF00001           | 0           | NA           | NA        | NA        | NA       | NA       |
| si:ch211-212k18.9 | 98.25837929 | 0.123468635  | 0.1985931 | 0.6217165 | 0.534128 | 0.943276 |
| mafk              | 10.82740915 | 0.615486208  | 0.5946735 | 1.0349986 | 0.30067  | NA       |
| si:ch73-47f2.1    | 1.17940642  | -1.3941422   | 1.9835011 | -0.702869 | 0.482137 | NA       |
| vap               | 0           | NA           | NA        | NA        | NA       | NA       |
| CU468012.4        | 0.158795395 | 0.967652056  | 4.0804729 | 0.2371421 | 0.812547 | NA       |
| tradv22.0         | 0           | NA           | NA        | NA        | NA       | NA       |
| wu:fj16a03        | 585.4352291 | 0.062147988  | 0.1428331 | 0.4351091 | 0.663483 | 0.964736 |
| si:dkeyp-93a5.2   | 0.471562095 | -2.373056629 | 3.0645586 | -0.774355 | 0.438721 | NA       |
| wars              | 184.7657002 | -0.002181525 | 0.1747397 | -0.012484 | 0.990039 | 0.997679 |
| stk24a            | 42.25884034 | -0.802296918 | 0.3166673 | -2.533564 | 0.011291 | 0.184823 |
| si:ch211-276i12.4 | 198.2656219 | 0.278486691  | 0.1653485 | 1.684241  | 0.092135 | 0.57849  |
| si:ch211-188f17.1 | 90.78790155 | 0.023421535  | 0.217778  | 0.1075478 | 0.914354 | 0.991119 |
| si:dkey-3p4.7     | 0.347458735 | -1.908042286 | 3.4571486 | -0.551912 | 0.581009 | NA       |
| si:ch211-155m12.5 | 7.403273451 | 0.028860364  | 0.7435764 | 0.0388129 | 0.96904  | NA       |
| zgc:174653        | 2.768244125 | 1.226401688  | 1.2028557 | 1.0195751 | 0.30793  | NA       |
| ttc39b            | 108.2446032 | 0.004401305  | 0.1985626 | 0.0221658 | 0.982316 | 0.996944 |
| CU468826.2        | 0           | NA           | NA        | NA        | NA       | NA       |
| si:ch211-57b15.2  | 0           | NA           | NA        | NA        | NA       | NA       |
| ep400             | 1310.349102 | 0.013051598  | 0.2051127 | 0.0636313 | 0.949264 | 0.99381  |
| BX569788.1        | 7.345720509 | 0.967186097  | 0.7162866 | 1.350278  | 0.176927 | NA       |
| si:ch211-1a19.3   | 122.4590754 | -0.223705081 | 0.1941123 | -1.152452 | 0.249135 | 0.818463 |
| tmprss13a         | 67.39009411 | -0.129350234 | 0.2427885 | -0.532769 | 0.594193 | 0.954434 |
| pimr197           | 0.531799352 | 0.999478841  | 2.790358  | 0.3581902 | 0.720201 | NA       |
| fxyd6             | 230.6378279 | 0.092653319  | 0.1536957 | 0.602836  | 0.546618 | 0.945526 |
| myh11b            | 31.34259856 | 0.041018772  | 0.3482603 | 0.1177819 | 0.90624  | 0.990702 |
| arhgap24          | 123.3298309 | 0.026015044  | 0.1811201 | 0.1436342 | 0.885789 | 0.988936 |
| CCDC39            | 227.9960882 | 0.35596053   | 0.1486957 | 2.3938861 | 0.016671 | 0.2379   |
| dre-mir-93        | 0           | NA           | NA        | NA        | NA       | NA       |
| zbtb7c            | 3.27980159  | 0.509587859  | 1.1117609 | 0.458361  | 0.646693 | NA       |
| INHBC             | 18.30429015 | 0.868580385  | 0.4622928 | 1.8788535 | 0.060265 | 0.47916  |
| CR388413.2        | 0.173729368 | -0.955901296 | 4.0804729 | -0.234262 | 0.814781 | NA       |
| RF00001           | 0.635662991 | 2.808056561  | 2.7492814 | 1.0213784 | 0.307075 | NA       |
| nme3              | 370.7673857 | -0.130789772 | 0.1216538 | -1.075098 | 0.282331 | 0.843666 |
| chrna3            | 117.4170407 | -0.114032284 | 0.1860328 | -0.612969 | 0.539897 | 0.944206 |
| dre-mir-725       | 1.355136117 | 1.617314819  | 1.7203144 | 0.9401275 | 0.347152 | NA       |
| si:dkey-16b10.1   | 3.043088036 | -0.960301471 | 1.1631965 | -0.825571 | 0.409047 | NA       |
| BX901898.2        | 0.476747244 | 2.393381959  | 3.0525537 | 0.7840589 | 0.433006 | NA       |
| traj11            | 0           | NA           | NA        | NA        | NA       | NA       |
| RF00026           | 0           | NA           | NA        | NA        | NA       | NA       |
| soul4             | 390.2039273 | -0.262373911 | 0.118062  | -2.222339 | 0.02626  | 0.312439 |

|                   |             |              |           |           |          |          |
|-------------------|-------------|--------------|-----------|-----------|----------|----------|
| cited4b           | 894.4586835 | -0.205005717 | 0.0875798 | -2.340789 | 0.019243 | 0.25973  |
| hpd1              | 59.20190159 | 0.350673367  | 0.2685497 | 1.3058044 | 0.191619 | 0.755886 |
| RF00001           | 0 NA        | NA           | NA        | NA        | NA       | NA       |
| slcolf4           | 1.473235202 | -2.880156828 | 1.9014466 | -1.514719 | 0.129844 | NA       |
| CT583642.1        | 6.452884867 | -0.527399154 | 0.7356705 | -0.716896 | 0.473438 | NA       |
| ptdss2            | 705.3793392 | 0.007069474  | 0.0968689 | 0.0729798 | 0.941822 | 0.993099 |
| ext1b             | 23.25880606 | 0.340477005  | 0.3980066 | 0.8554557 | 0.392299 | 0.897688 |
| slc22a5           | 35.41296992 | -0.21943314  | 0.349486  | -0.627874 | 0.530087 | 0.942209 |
| msx2b             | 122.9178388 | 0.433553849  | 0.1895    | 2.287883  | 0.022144 | 0.283074 |
| nufip1            | 96.03909144 | -0.155742776 | 0.1987226 | -0.783719 | 0.433205 | 0.913654 |
| fnbplb            | 33.96446273 | 0.090984382  | 0.3367736 | 0.2701648 | 0.787033 | 0.976596 |
| si:ch73-347e22.4  | 194.3336647 | -0.100030848 | 0.1573336 | -0.635788 | 0.524914 | 0.939846 |
| si:ch73-158p21.3  | 10.99822878 | 0.273765978  | 0.56968   | 0.4805609 | 0.630829 | NA       |
| iqcbl             | 98.97276872 | 0.266640359  | 0.2095791 | 1.2722658 | 0.203279 | 0.77034  |
| tradv4.0.3        | 0 NA        | NA           | NA        | NA        | NA       | NA       |
| si:dkey-206d17.12 | 30.29316928 | -0.16423339  | 0.3571805 | -0.459805 | 0.645656 | 0.96029  |
| CU655870.1        | 0.330916733 | -1.849579229 | 3.2489867 | -0.569279 | 0.569167 | NA       |
| traf2b            | 53.91637874 | -0.026897527 | 0.2719465 | -0.098907 | 0.921212 | 0.992138 |
| asflba            | 274.0437927 | -0.05675321  | 0.1271097 | -0.44649  | 0.655243 | 0.961614 |
| zdhhc15a          | 19.55106318 | -0.048786864 | 0.4636938 | -0.105214 | 0.916206 | 0.991314 |
| ccl20a.3          | 15.37936886 | -0.698215304 | 0.5349564 | -1.305182 | 0.191831 | 0.75597  |
| ccl39.1           | 0 NA        | NA           | NA        | NA        | NA       | NA       |
| ppl               | 2400.296811 | -0.309062543 | 0.0774534 | -3.990302 | 6.60E-05 | 0.003443 |
| si:ch73-138e16.6  | 233.818119  | -0.101050396 | 0.1417736 | -0.712759 | 0.475995 | 0.926338 |
| si:dkeyp-107f9.1  | 0.830889095 | -3.176772812 | 2.1868507 | -1.45267  | 0.146315 | NA       |
| rtcb              | 484.9842598 | -0.082703522 | 0.1095065 | -0.755239 | 0.450106 | 0.918761 |
| FQ790208.1        | 32.97222769 | 0.630117882  | 0.336788  | 1.8709631 | 0.06135  | 0.482931 |
| CABZ01075274.1    | 17.01082108 | -0.674483555 | 0.5247409 | -1.285365 | 0.198665 | 0.763777 |
| tmc8              | 31.16593264 | -0.016273057 | 0.3517926 | -0.046258 | 0.963105 | 0.995927 |
| ctsbb             | 33.76902075 | -4.128556977 | 0.5436084 | -7.594726 | 3.08E-14 | 1.42E-11 |
| RF02041           | 0.323844819 | -1.825095364 | 3.274639  | -0.557342 | 0.577293 | NA       |
| syn2b             | 905.2436371 | 0.03622704   | 0.1281099 | 0.2827809 | 0.777345 | 0.975826 |
| trim35-25         | 1.658042689 | -2.037176549 | 1.7532519 | -1.161942 | 0.245259 | NA       |
| BX890539.1        | 18.56128334 | -0.444707073 | 0.4805428 | -0.925426 | 0.354744 | 0.882105 |
| srsf7b            | 248.0836362 | -0.182701101 | 0.1527078 | -1.19641  | 0.231537 | 0.799752 |
| traj3             | 0 NA        | NA           | NA        | NA        | NA       | NA       |
| dhx36             | 536.3604806 | -0.024584357 | 0.1039588 | -0.236482 | 0.813059 | 0.981081 |
| gcna              | 83.67590469 | -0.325701377 | 0.2213796 | -1.471235 | 0.141228 | 0.681968 |
| eif2a             | 607.8517545 | -0.077435468 | 0.1001174 | -0.773446 | 0.439258 | 0.916082 |
| fdft1             | 198.5874451 | 0.056460306  | 0.1622777 | 0.3479241 | 0.727897 | 0.970402 |
| CABZ01058650.1    | 328.4416594 | -0.197560431 | 0.1387216 | -1.424151 | 0.154403 | 0.70398  |
| BX511223.1        | 1.797297137 | 0.789432102  | 1.4750128 | 0.5352036 | 0.592509 | NA       |
| CR812471.1        | 0 NA        | NA           | NA        | NA        | NA       | NA       |
| shoc1             | 1.000684536 | 3.450436576  | 2.0457121 | 1.6866678 | 0.091667 | NA       |
| CU651669.1        | 24.42523225 | -0.056435023 | 0.4200741 | -0.134345 | 0.893129 | 0.989291 |
| si:dkeyp-80d11.14 | 7.118186384 | -0.888662708 | 0.7380837 | -1.204013 | 0.228584 | NA       |
| cnot6b            | 170.3062581 | 0.118539021  | 0.162839  | 0.7279521 | 0.466643 | 0.924218 |
| si:zfos-1011f11.2 | 37.81750236 | 0.035238188  | 0.3286285 | 0.107228  | 0.914608 | 0.991119 |
| glud1b            | 9841.557643 | -0.207082488 | 0.0761855 | -2.718136 | 0.006565 | 0.124228 |
| irx3a             | 1266.177276 | -0.044144789 | 0.0859787 | -0.513439 | 0.607644 | 0.956718 |
| sctr              | 7.829359338 | -0.185166325 | 0.6859811 | -0.269929 | 0.787215 | NA       |
| HECTD4            | 126.2896304 | 0.081876592  | 0.185366  | 0.4417024 | 0.658705 | 0.96255  |
| pwpp2b            | 716.9707793 | -0.071954524 | 0.0925893 | -0.777137 | 0.437078 | 0.914408 |
| ptprub            | 330.9530333 | 0.277901785  | 0.1210558 | 2.2956509 | 0.021696 | 0.278761 |

|                   |             |              |           |           |          |          |
|-------------------|-------------|--------------|-----------|-----------|----------|----------|
| EIF3S6IP          | 3199.448091 | -0.129496438 | 0.0776822 | -1.667002 | 0.095514 | 0.588012 |
| OLFCG2            | 0.182570949 | 0.967652056  | 4.0804729 | 0.2371421 | 0.812547 | NA       |
| SS1812            | 134.9866696 | 0.155568465  | 0.2026182 | 0.7677912 | 0.442611 | 0.916336 |
| SI:DKEYP-80D11.1  | 1.530635153 | 1.862695235  | 1.6702162 | 1.115242  | 0.264747 | NA       |
| SI:CH73-359M17.5  | 2.154077869 | -1.175092161 | 1.3631788 | -0.862023 | 0.388675 | NA       |
| GART              | 414.386537  | -0.259985424 | 0.1245002 | -2.088233 | 0.036777 | 0.374858 |
| PAPPAA            | 15.13380452 | -0.638814831 | 0.5507132 | -1.159977 | 0.246058 | 0.816231 |
| RF00001           | 0.158795395 | 0.967652056  | 4.0804729 | 0.2371421 | 0.812547 | NA       |
| ZGC:162971        | 20.87475611 | -0.490671033 | 0.4246465 | -1.155481 | 0.247893 | 0.81711  |
| ATP11B            | 607.0803948 | 0.00866829   | 0.1163965 | 0.0744721 | 0.940635 | 0.992857 |
| CPNE4A            | 575.9985553 | 0.005216082  | 0.0992835 | 0.0525373 | 0.958101 | 0.99467  |
| CEBPL             | 5.588441643 | -0.657239963 | 0.8454698 | -0.777367 | 0.436943 | NA       |
| RF00017           |             | 0 NA         | NA        | NA        | NA       | NA       |
| TPRN              | 73.11300575 | -0.106202171 | 0.2290145 | -0.463736 | 0.642837 | 0.959994 |
| FP102192.1        | 1.018133782 | -2.22061609  | 2.0917676 | -1.061598 | 0.288418 | NA       |
| SI:CH73-109D9.3   | 169.5174471 | 0.002785225  | 0.156679  | 0.0177766 | 0.985817 | 0.996944 |
| CLDN15B           | 120.1385998 | 0.149556623  | 0.197593  | 0.7568925 | 0.449114 | 0.91823  |
| SI:CH211-152C8.4  | 51.52113308 | -0.181693409 | 0.2885658 | -0.629643 | 0.528928 | 0.942109 |
| F0704777.1        | 21.79231293 | 0.103594046  | 0.4310419 | 0.2403341 | 0.810071 | 0.980789 |
| MED30             | 195.0095546 | -0.262884693 | 0.1556307 | -1.689157 | 0.091189 | 0.578312 |
| VPS33A            | 533.4755006 | -0.005533402 | 0.1076059 | -0.051423 | 0.958989 | 0.995095 |
| CABZ01066813.1    | 163.9801468 | 0.113814569  | 0.1769565 | 0.6431781 | 0.520109 | 0.939056 |
| KIF3B             | 359.6975461 | 0.055001347  | 0.1185411 | 0.4639854 | 0.642658 | 0.959994 |
| SI:DKEY-161111.62 |             | 0 NA         | NA        | NA        | NA       | NA       |
| BX649345.2        |             | 0 NA         | NA        | NA        | NA       | NA       |
| CR854945.1        | 90.15617186 | 0.003795528  | 0.2081594 | 0.0182338 | 0.985452 | 0.996944 |
| ATAD5B            | 83.43702217 | -0.027944057 | 0.2126109 | -0.131433 | 0.895433 | 0.989814 |
| MAP11C3B          | 2253.006418 | -0.079969057 | 0.0749916 | -1.066373 | 0.286255 | 0.845942 |
| SI:DKEY-211F22.5  | 248.5366063 | 0.037450323  | 0.1432077 | 0.2615106 | 0.793699 | 0.977937 |
| SI:DKEYP-104B3.18 | 0.31437473  | -1.788572922 | 3.5930657 | -0.497785 | 0.618636 | NA       |
| COQ8B             | 328.9573847 | 0.142805354  | 0.1248968 | 1.1433868 | 0.252878 | 0.822436 |
| PBX1B             | 17.4226488  | -0.072256947 | 0.4637935 | -0.155796 | 0.876194 | 0.987881 |
| BX510960.1        | 10.34889702 | -0.598583326 | 0.6331996 | -0.945331 | 0.34449  | NA       |
| CABZ01064859.2    | 51.75211133 | -0.005014348 | 0.2763801 | -0.018143 | 0.985525 | 0.996944 |
| SI:DKEY-85K7.7    | 2708.642239 | -0.258028506 | 0.1149641 | -2.244427 | 0.024805 | 0.303335 |
| BX927317.1        |             | 0 NA         | NA        | NA        | NA       | NA       |
| ZNF999            | 23.55836167 | 0.001114398  | 0.3928919 | 0.0028364 | 0.997737 | 0.999174 |
| BX323596.1        |             | 0 NA         | NA        | NA        | NA       | NA       |
| AGPAT2            | 590.5544218 | 0.09808833   | 0.0973723 | 1.0073536 | 0.313765 | 0.865132 |
| ZGC:114173        | 72.59094906 | -0.167365261 | 0.2546533 | -0.657228 | 0.511034 | 0.936253 |
| ZDHHC13           | 716.321576  | -0.027782428 | 0.0955226 | -0.290847 | 0.771169 | 0.975687 |
| LIPEB             | 55.66481605 | 0.126773227  | 0.2667061 | 0.4753293 | 0.634552 | 0.9578   |
| CR293511.1        | 25.92512207 | 0.135251407  | 0.4045158 | 0.3343539 | 0.738113 | 0.972535 |
| RAB19             | 26.61774897 | -0.707941996 | 0.3879189 | -1.824974 | 0.068005 | 0.51014  |
| SI:DKEYP-110C7.8  |             | 0 NA         | NA        | NA        | NA       | NA       |
| SLCOLF2           | 0.158915748 | 0.967652056  | 4.0804729 | 0.2371421 | 0.812547 | NA       |
| SI:CH73-338A16.3  | 13.18323998 | -0.479414828 | 0.5268721 | -0.909926 | 0.362861 | 0.885944 |
| APOA4A            | 280.7663968 | 0.322419555  | 0.1749812 | 1.8425952 | 0.065388 | 0.500198 |
| ORC4              | 281.6815341 | -0.153337313 | 0.1374961 | -1.115212 | 0.26476  | 0.830616 |
| BX001023.2        | 11.30811674 | 0.41703016   | 0.5887382 | 0.7083457 | 0.478731 | 0.926978 |
| NANSB             | 123.5816504 | 0.425275125  | 0.1803698 | 2.3577961 | 0.018384 | 0.25227  |
| SI:DKEY-157E10.8  | 0.332524763 | 0.005883742  | 3.292841  | 0.0017868 | 0.998574 | NA       |
| BX005396.3        |             | 0 NA         | NA        | NA        | NA       | NA       |
| RF00001           |             | 0 NA         | NA        | NA        | NA       | NA       |

|                    |             |              |           |           |          |          |
|--------------------|-------------|--------------|-----------|-----------|----------|----------|
| grap2b             | 27.41074677 | -0.344395625 | 0.4361378 | -0.789649 | 0.429733 | 0.911615 |
| rab42b             | 29.46014041 | 0.21076753   | 0.3629327 | 0.5807344 | 0.561419 | 0.948728 |
| FO704786.1         | 114.4424552 | 0.105503318  | 0.194663  | 0.5419794 | 0.587833 | 0.953319 |
| TMEM200C           | 22.33445631 | 0.144055414  | 0.4319676 | 0.3334866 | 0.738767 | 0.972722 |
| RF00001            | 0.166657454 | -0.955901296 | 4.0804729 | -0.234262 | 0.814781 | NA       |
| BX649556.1         | 0.341486697 | 1.892317624  | 3.2124068 | 0.5890654 | 0.555817 | NA       |
| mcu                | 35.41806174 | 0.157053584  | 0.3229753 | 0.4862712 | 0.626775 | 0.957354 |
| ugt1b7             | 32.63426525 | 0.047195405  | 0.3436233 | 0.1373463 | 0.890757 | 0.989291 |
| sh3rf2             | 113.4096887 | -0.136306872 | 0.1890022 | -0.721192 | 0.470791 | 0.924838 |
| mcm7               | 943.1669546 | -0.250083915 | 0.0937777 | -2.666775 | 0.007658 | 0.139512 |
| s100w              | 155.2394643 | 0.097887333  | 0.1625243 | 0.6022934 | 0.546979 | 0.945526 |
| CR855860.2         | 0.157187365 | -0.955901296 | 4.0804729 | -0.234262 | 0.814781 | NA       |
| BX510922.1         | 25.89091093 | -0.166568162 | 0.3732618 | -0.44625  | 0.655417 | 0.961632 |
| CABZ01095001.1     | 48.89442125 | 0.115446718  | 0.292826  | 0.3942502 | 0.693396 | 0.96736  |
| CABZ01087566.1     | 20.84967615 | 0.271728788  | 0.4623087 | 0.5877648 | 0.55669  | 0.94812  |
| CABZ01048053.1     | 36.65247721 | -0.109661437 | 0.3208653 | -0.341768 | 0.732526 | 0.971719 |
| CR589947.2         | 9.088785067 | -0.920907836 | 0.6457665 | -1.426069 | 0.153848 | NA       |
| cyp2k8             | 75.13946709 | 0.267936122  | 0.2237223 | 1.1976284 | 0.231062 | 0.79927  |
| si:ch211-255f4.13  | 5.924382728 | 0.275353184  | 0.8154067 | 0.3376882 | 0.735598 | NA       |
| BX855614.3         | 24.92014112 | -0.046185632 | 0.3894012 | -0.118607 | 0.905587 | 0.990702 |
| si:dkey-238d18.15  |             | 0 NA         | NA        | NA        | NA       | NA       |
| BX927181.3         | 1.641539711 | -1.960494552 | 1.6347132 | -1.19929  | 0.230415 | NA       |
| rbp4               | 12316.72024 | 0.462897719  | 0.0773868 | 5.9816089 | 2.21E-09 | 4.12E-07 |
| zgc:112964         | 555.0321121 | -0.278895415 | 0.1099498 | -2.53657  | 0.011194 | 0.183548 |
| si:dkey-207b20.2   | 4.10201415  | 0.600689696  | 0.9750146 | 0.6160828 | 0.53784  | NA       |
| CU302413.1         | 0.31598276  | 0.005883445  | 3.3523626 | 0.001755  | 0.9986   | NA       |
| znf513b            | 27.27920475 | 0.0283368    | 0.3838044 | 0.0738314 | 0.941145 | 0.992857 |
| mbd1a              | 356.3174574 | -0.005760995 | 0.118015  | -0.048816 | 0.961066 | 0.995659 |
| zgc:113363         | 40.68142518 | 0.009660974  | 0.3197085 | 0.0302181 | 0.975893 | 0.996762 |
| lambla             | 2615.12481  | 0.031298967  | 0.0709903 | 0.4408907 | 0.659292 | 0.962839 |
| glglb              | 102.6140257 | 0.164483077  | 0.1934617 | 0.85021   | 0.395208 | 0.899244 |
| BX537130.1         | 1.300203366 | -0.766968169 | 1.8665374 | -0.410904 | 0.681143 | NA       |
| CU681841.1         | 319.0878575 | -0.200159307 | 0.1387898 | -1.442176 | 0.149253 | 0.696454 |
| CU278559.1         | 3.143014494 | 0.159721013  | 1.0405673 | 0.1534942 | 0.878009 | NA       |
| pkd112b            | 11.63018879 | -0.069026481 | 0.5959521 | -0.115826 | 0.907791 | 0.990702 |
| sgiplb             | 373.2213097 | -0.134123932 | 0.1240114 | -1.081545 | 0.279455 | 0.842882 |
| meaf6              | 723.9166919 | 0.030948777  | 0.0934355 | 0.3312315 | 0.74047  | 0.973154 |
| fam78aa            | 11.35280413 | 0.552413982  | 0.5655492 | 0.9767743 | 0.328681 | 0.872945 |
| si:ch73-345f18.3   | 26.90923874 | -0.565317602 | 0.4100641 | -1.378608 | 0.168016 | 0.725719 |
| BX511128.1         |             | 0 NA         | NA        | NA        | NA       | NA       |
| polrmt             | 224.7967325 | -0.030726308 | 0.1454144 | -0.211302 | 0.832652 | 0.983557 |
| tradv3.0.3         |             | 0 NA         | NA        | NA        | NA       | NA       |
| osepla             | 1.292152926 | 0.695481366  | 1.7999758 | 0.3863837 | 0.699212 | NA       |
| si:ch211-229110.11 | 0.497574187 | -2.437446738 | 2.6012773 | -0.937019 | 0.348749 | NA       |
| cngb3.1            | 84.97488537 | 0.027216701  | 0.2315184 | 0.1175574 | 0.906418 | 0.990702 |
| CR790382.2         |             | 0 NA         | NA        | NA        | NA       | NA       |
| pedh1g2            | 41.24976779 | -0.312137378 | 0.2956352 | -1.055819 | 0.291051 | 0.846568 |
| nsmfb              | 634.2438002 | 0.047101264  | 0.1053091 | 0.4472667 | 0.654683 | 0.961305 |
| ccdc166            | 0.888099668 | 0.661432581  | 2.1930638 | 0.3016021 | 0.762955 | NA       |
| cep83              | 163.6726718 | 0.020780436  | 0.1585558 | 0.1310607 | 0.895727 | 0.989814 |
| hsd17b4            | 819.3601542 | -0.185447548 | 0.089933  | -2.062064 | 0.039202 | 0.388753 |
| CU651662.1         | 13.60627156 | 0.110815814  | 0.5351033 | 0.2070924 | 0.835938 | 0.984089 |
| zcchc14            | 136.8920509 | 0.234898269  | 0.1749543 | 1.3426267 | 0.179393 | 0.740258 |
| CABZ01049825.1     | 1.450168466 | -3.989344051 | 1.8554429 | -2.150076 | 0.031549 | NA       |

|                   |             |              |           |           |          |          |
|-------------------|-------------|--------------|-----------|-----------|----------|----------|
| gli1              | 311.9270061 | 0.082088233  | 0.1324893 | 0.619584  | 0.535532 | 0.943336 |
| znf1063           | 10.63942348 | 0.026637704  | 0.6132902 | 0.0434341 | 0.965355 | NA       |
| hist1h41          | 2.204526259 | 1.767998486  | 1.3785694 | 1.2824878 | 0.199672 | NA       |
| ldha              | 6384.582335 | 0.048789419  | 0.0648431 | 0.7524226 | 0.451797 | 0.918761 |
| si:dkey-238n5.3   | 0           | NA           | NA        | NA        | NA       | NA       |
| RF00001           | 0           | NA           | NA        | NA        | NA       | NA       |
| BX649411.1        | 17.41191079 | -0.687797969 | 0.4603783 | -1.493984 | 0.13518  | 0.670689 |
| ghl1              | 142.783738  | -0.021756271 | 0.1730103 | -0.125751 | 0.899929 | 0.990121 |
| GPATCH2           | 532.7350034 | 0.110713582  | 0.1126031 | 0.9832197 | 0.325499 | 0.871896 |
| BX927317.2        | 1.553431184 | 0.388620861  | 1.576361  | 0.2465304 | 0.805272 | NA       |
| trim35-12         | 46.28588413 | 0.302032528  | 0.2841453 | 1.062951  | 0.287804 | 0.845979 |
| RF00001           | 0           | NA           | NA        | NA        | NA       | NA       |
| klh18             | 342.030473  | -0.029134069 | 0.1280949 | -0.227441 | 0.820081 | 0.981594 |
| si:ch211-227n13.3 | 41.59679629 | -0.022060769 | 0.3164758 | -0.069708 | 0.944426 | 0.993364 |
| si:dkey-29j8.1    | 7.74350229  | -0.033937959 | 0.7161917 | -0.047387 | 0.962205 | NA       |
| dre-mir-365-3     | 0           | NA           | NA        | NA        | NA       | NA       |
| si:dkey-16p6.4    | 0.349228403 | 0.005884014  | 3.2372587 | 0.0018176 | 0.99855  | NA       |
| BX936433.1        | 4.77216876  | 0.303125721  | 0.8956867 | 0.3384283 | 0.73504  | NA       |
| znf207b           | 958.3663024 | 0.044715725  | 0.0919803 | 0.4861444 | 0.626865 | 0.957354 |
| ndr2              | 7.657228829 | -0.594760244 | 0.7804607 | -0.762063 | 0.446022 | NA       |
| vat11             | 7.717942526 | -0.315175384 | 0.7438681 | -0.423698 | 0.671786 | NA       |
| corin             | 107.4628596 | 0.162652314  | 0.1961763 | 0.8291128 | 0.407041 | 0.901305 |
| zswim6            | 320.8334225 | 0.024288664  | 0.1465994 | 0.1656805 | 0.868408 | 0.987245 |
| CT737129.1        | 6.747962459 | 0.458722706  | 0.7867273 | 0.5830772 | 0.559841 | NA       |
| anapc15           | 253.4053914 | -0.029888134 | 0.1358028 | -0.220085 | 0.825805 | 0.982196 |
| RF00001           | 6.211676486 | 0.901383567  | 0.7981628 | 1.129323  | 0.258762 | NA       |
| slc29a1a          | 1975.608278 | -0.128556471 | 0.0827735 | -1.553112 | 0.120396 | 0.645215 |
| spink2.5          | 0           | NA           | NA        | NA        | NA       | NA       |
| txndc11           | 239.5928369 | 0.268652573  | 0.1486306 | 1.8075183 | 0.070682 | 0.520155 |
| si:dkey-201g16.1  | 5.833497425 | -0.074592897 | 0.8463654 | -0.088133 | 0.929771 | NA       |
| PKN2 (1 of many)  | 518.433719  | 0.102237951  | 0.1022086 | 1.0002872 | 0.317172 | 0.867335 |
| psmd4a            | 388.1065815 | -0.014788823 | 0.1335964 | -0.110698 | 0.911856 | 0.991066 |
| si:ch211-170p16.1 | 0           | NA           | NA        | NA        | NA       | NA       |
| tmem266           | 266.8404442 | -0.067738882 | 0.1308031 | -0.517869 | 0.60455  | 0.95651  |
| CABZ01064248.1    | 0.330916733 | -1.849579229 | 3.2489867 | -0.569279 | 0.569167 | NA       |
| ssnal             | 81.93944516 | -0.09025809  | 0.233166  | -0.387098 | 0.698684 | 0.967998 |
| si:dkey-261o4.1   | 0.341366344 | 1.891903201  | 3.2128156 | 0.5888614 | 0.555954 | NA       |
| CR388172.1        | 0.182570949 | 0.967652056  | 4.0804729 | 0.2371421 | 0.812547 | NA       |
| mrpl15            | 531.2776387 | 0.015779748  | 0.1048161 | 0.150547  | 0.880333 | 0.987881 |
| pcdh1gb2          | 40.36991962 | 0.084500872  | 0.3222704 | 0.2622049 | 0.793163 | 0.977937 |
| smug1             | 158.713545  | -0.075433956 | 0.1742993 | -0.432784 | 0.665172 | 0.964736 |
| si:ch73-100122.3  | 377.5175463 | -0.301958746 | 0.11735   | -2.573146 | 0.010078 | 0.17135  |
| RF00001           | 0           | NA           | NA        | NA        | NA       | NA       |
| si:dkey-31n13.4   | 5.968836044 | -0.666475929 | 0.8071083 | -0.825758 | 0.408942 | NA       |
| ppp4r1            | 324.4209062 | -0.081974764 | 0.1267559 | -0.646714 | 0.517817 | 0.938592 |
| grinaa            | 292.3613165 | 0.097318854  | 0.1333282 | 0.7299193 | 0.46544  | 0.923865 |
| pcdh2ab9          | 5.520091178 | 0.289896252  | 0.8267292 | 0.3506544 | 0.725848 | NA       |
| si:ch73-299h12.6  | 54.61003317 | 0.161830779  | 0.2809703 | 0.5759711 | 0.564635 | 0.948739 |
| si:dkey-50i6.5    | 50.08723087 | -0.487331962 | 0.2970915 | -1.640343 | 0.100934 | 0.604004 |
| CR376800.1        | 0           | NA           | NA        | NA        | NA       | NA       |
| tfr1a             | 48.25163154 | 0.071561472  | 0.2925639 | 0.2446012 | 0.806765 | 0.980254 |
| trnaulapa         | 186.9117019 | -0.098785509 | 0.1513075 | -0.652879 | 0.513834 | 0.936778 |
| apoalb            | 34300.49465 | 0.369037004  | 0.1097477 | 3.3625933 | 0.000772 | 0.025195 |
| znf1076           | 8.585390189 | 0.21975353   | 0.6728078 | 0.3266215 | 0.743954 | NA       |



|                    |             |              |           |           |          |          |
|--------------------|-------------|--------------|-----------|-----------|----------|----------|
| CR382300.3         | 3.616304972 | 0.011985817  | 0.9860463 | 0.0121554 | 0.990302 | NA       |
| tekt1              | 21.84095191 | 0.682414759  | 0.4162941 | 1.639261  | 0.101159 | 0.604409 |
| uba2               | 1604.312005 | 0.000377857  | 0.0868682 | 0.0043498 | 0.996529 | 0.998936 |
| AL928808.1         | 1.664444809 | -1.276834427 | 1.6078081 | -0.794146 | 0.42711  | NA       |
| ctsc               | 509.4449221 | -0.017324583 | 0.1224056 | -0.141534 | 0.887448 | 0.989291 |
| BX088728.1         | 0.330916733 | -1.849579229 | 3.2489867 | -0.569279 | 0.569167 | NA       |
| CR450808.2         | 0.633814256 | 1.438196278  | 2.4434004 | 0.5886044 | 0.556127 | NA       |
| BX005294.1         | 4.444678794 | 0.329994906  | 0.9042936 | 0.3649201 | 0.715171 | NA       |
| CR589882.1         | 2.982848519 | -1.77430278  | 1.3068585 | -1.357685 | 0.174564 | NA       |
| si:ch211-262i1.6   | 244.9874444 | -0.124705425 | 0.1503244 | -0.829575 | 0.406779 | 0.901305 |
| CR293511.2         | 1.377650158 | -0.016994729 | 1.8073416 | -0.009403 | 0.992497 | NA       |
| CU468723.1         | 4.124157088 | 0.85071956   | 1.0295598 | 0.8262945 | 0.408637 | NA       |
| plppr5b            | 49.89732744 | -0.065383361 | 0.270988  | -0.241278 | 0.80934  | 0.980642 |
| arhgap28           | 134.0575819 | 0.039156606  | 0.1774807 | 0.2206246 | 0.825385 | 0.982196 |
| si:dkey-16p6.1     | 6.134583    | -0.570080055 | 0.7767485 | -0.733931 | 0.462991 | NA       |
| si:dkey-34d22.3    | 0           | NA           | NA        | NA        | NA       | NA       |
| f13b               | 0.316103113 | 0.005883447  | 3.3519121 | 0.0017553 | 0.9986   | NA       |
| CABZ01044156.1     | 1.856328707 | 1.455520298  | 1.4825802 | 0.9817481 | 0.326224 | NA       |
| pard3aa            | 4.79232591  | -0.094213416 | 0.8642133 | -0.109016 | 0.913189 | NA       |
| si:ch211-215e19.6  | 0.484368597 | 0.855487352  | 2.7040894 | 0.316368  | 0.751723 | NA       |
| znf644a            | 367.7866319 | -0.041772831 | 0.1207885 | -0.345835 | 0.729467 | 0.970888 |
| mibp               | 827.5173644 | -0.167002537 | 0.0942884 | -1.771188 | 0.076529 | 0.538876 |
| ano2b              | 352.6092247 | -0.006416059 | 0.1158258 | -0.055394 | 0.955825 | 0.994543 |
| wfikn1             | 0.99129252  | -1.049504824 | 2.0876813 | -0.502713 | 0.615166 | NA       |
| si:cabz01021430.2  | 83.96522543 | 0.205911199  | 0.2142066 | 0.9612738 | 0.336415 | 0.876088 |
| gpr1               | 65.12633897 | 0.022569156  | 0.2550106 | 0.0885028 | 0.929477 | 0.992702 |
| si:ch73-193i22.1   | 120.9300908 | 0.105799033  | 0.1949538 | 0.5426876 | 0.587345 | 0.953319 |
| cngb3.2            | 346.7007097 | 0.323697641  | 0.1314115 | 2.4632359 | 0.013769 | 0.210896 |
| BX321912.1         | 0           | NA           | NA        | NA        | NA       | NA       |
| si:dkey-11n14.1    | 25.54903805 | -0.899971128 | 0.4503144 | -1.998539 | 0.045658 | 0.41876  |
| ccdc142            | 297.5452589 | -0.017063932 | 0.1313026 | -0.129959 | 0.896599 | 0.989971 |
| nadsyn1            | 141.5484556 | -0.030658538 | 0.1700872 | -0.180252 | 0.856955 | 0.985597 |
| mfsd1              | 60.96151817 | 0.111586325  | 0.2484515 | 0.4491272 | 0.65334  | 0.96096  |
| cryabb             | 21.57307512 | -0.205585831 | 0.4284296 | -0.479859 | 0.631328 | 0.957356 |
| CU019562.2         | 0           | NA           | NA        | NA        | NA       | NA       |
| CR388148.1         | 0.648627875 | -0.032651702 | 2.3257531 | -0.014039 | 0.988799 | NA       |
| BX088524.1         | 0           | NA           | NA        | NA        | NA       | NA       |
| f8                 | 81.79186799 | -0.150060763 | 0.2269487 | -0.66121  | 0.508478 | 0.93575  |
| CAMK2N1            | 572.1068358 | 0.156777733  | 0.0984652 | 1.5922149 | 0.111336 | 0.627048 |
| si:ch211-171117.14 | 7.927605487 | -0.742730414 | 0.6731386 | -1.103384 | 0.26986  | NA       |
| zgc:174180         | 3.231081583 | -1.086826693 | 1.1388527 | -0.954317 | 0.339923 | NA       |
| pimr168            | 0           | NA           | NA        | NA        | NA       | NA       |
| si:dkey-31g6.6     | 805.1901823 | 0.132581447  | 0.1398065 | 0.9483212 | 0.342966 | 0.878434 |
| CR788226.1         | 11.26879594 | -0.576031674 | 0.5890022 | -0.977979 | 0.328085 | 0.872701 |
| BX908401.2         | 0           | NA           | NA        | NA        | NA       | NA       |
| RF00003            | 0.681753165 | 0.003445546  | 2.2907653 | 0.0015041 | 0.9988   | NA       |
| CR376730.1         | 0.808333769 | -0.605422531 | 2.2351432 | -0.270865 | 0.786495 | NA       |
| CABZ01065131.1     | 322.3004978 | -0.163216885 | 0.1265043 | -1.290208 | 0.196978 | 0.761944 |
| rplp2              | 2668.382523 | -0.34323925  | 0.1135645 | -3.022418 | 0.002508 | 0.063006 |
| tgm114             | 19.04417081 | -0.634684887 | 0.4332444 | -1.464958 | 0.142932 | 0.685174 |
| CABZ01012957.1     | 0.489712128 | -0.887840729 | 2.693685  | -0.329601 | 0.741702 | NA       |
| wbp11              | 329.4979286 | -0.134930683 | 0.1273704 | -1.059356 | 0.289438 | 0.846147 |
| FP102969.1         | 0           | NA           | NA        | NA        | NA       | NA       |
| dusp7              | 674.5537247 | 0.102260238  | 0.1037854 | 0.9853046 | 0.324474 | 0.871051 |

|                    |             |              |           |           |          |          |
|--------------------|-------------|--------------|-----------|-----------|----------|----------|
| drp2               | 10.03175087 | -0.725082801 | 0.620088  | -1.169322 | 0.242274 | NA       |
| si:dkeyp-80d11.10  | 3.707588121 | -0.523771471 | 0.9926133 | -0.527669 | 0.597729 | NA       |
| hdac12             | 38.25781347 | -0.085148615 | 0.3263622 | -0.260902 | 0.794168 | 0.977937 |
| cyp2y3             | 2115.210413 | -0.605956106 | 0.081137  | -7.468311 | 8.12E-14 | 3.35E-11 |
| BX901974.2         | 0           | NA           | NA        | NA        | NA       | NA       |
| si:dkey-1b17.5     | 16.36388082 | -0.411197047 | 0.4898442 | -0.839444 | 0.40122  | 0.90084  |
| si:ch73-208h1.1    | 0           | NA           | NA        | NA        | NA       | NA       |
| gas8               | 115.5631338 | -0.027688671 | 0.1927316 | -0.143664 | 0.885766 | 0.988936 |
| rab11fip2          | 57.01035382 | -0.104453181 | 0.2742276 | -0.3809   | 0.703278 | 0.968134 |
| AL831745.3         | 0           | NA           | NA        | NA        | NA       | NA       |
| fsbp               | 21.45815431 | 0.13767106   | 0.4286837 | 0.3211483 | 0.748098 | 0.97419  |
| lonp2              | 408.7448509 | -0.126832543 | 0.1162962 | -1.090599 | 0.275449 | 0.839541 |
| limala             | 1075.568828 | 0.018754685  | 0.0985925 | 0.1902243 | 0.849133 | 0.985174 |
| relch              | 588.2781815 | 0.0112978    | 0.1040917 | 0.108537  | 0.91357  | 0.991119 |
| CU856523.1         | 0           | NA           | NA        | NA        | NA       | NA       |
| klhl7              | 219.2964859 | 0.000960533  | 0.1579179 | 0.0060825 | 0.995147 | 0.998694 |
| si:dkey-46i9.1     | 4598.6371   | 0.115575117  | 0.0713398 | 1.6200642 | 0.105218 | 0.613382 |
| BX511066.2         | 0.507044276 | -2.459587493 | 2.7586536 | -0.89159  | 0.372613 | NA       |
| grik5              | 409.0448358 | 0.05218742   | 0.1265111 | 0.4125127 | 0.679964 | 0.965311 |
| si:ch211-215p11.3  | 4.992476501 | -1.720205335 | 0.9134381 | -1.883221 | 0.05967  | NA       |
| SUSD2              | 38.52961489 | 0.111064237  | 0.3152363 | 0.3523205 | 0.724598 | 0.970402 |
| si:ch211-284k5.2   | 9.274410437 | -0.638425435 | 0.6418004 | -0.994741 | 0.319862 | NA       |
| acp5b              | 33.86496623 | -0.251273089 | 0.3322818 | -0.756205 | 0.449526 | 0.918468 |
| cdc42ep4a          | 222.4617786 | 0.137424904  | 0.147135  | 0.9340056 | 0.350301 | 0.880195 |
| r3hdml             | 2453.699767 | -0.070719027 | 0.0853575 | -0.828504 | 0.407385 | 0.901305 |
| si:dkey-279j5.1    | 7.946349499 | -0.241645659 | 0.6744672 | -0.358276 | 0.720137 | NA       |
| emp3b              | 12.72040276 | -0.25702307  | 0.5254701 | -0.48913  | 0.62475  | 0.957354 |
| si:dkey-176f19.1   | 0.990502374 | -0.071540256 | 2.0571985 | -0.034776 | 0.972259 | NA       |
| orc2               | 84.86894117 | -0.152954364 | 0.2159823 | -0.70818  | 0.478833 | 0.926978 |
| si:dkey-56m15.2    | 15.59425934 | -0.731237454 | 0.5063106 | -1.444247 | 0.14867  | 0.69636  |
| CR749168.4         | 0           | NA           | NA        | NA        | NA       | NA       |
| fgd4a              | 173.0872959 | -0.054053281 | 0.1545205 | -0.349813 | 0.726479 | 0.970402 |
| pop4               | 106.1738138 | 0.245708339  | 0.1960016 | 1.2536037 | 0.209986 | 0.777432 |
| snpc3              | 178.753979  | -0.07245888  | 0.1517962 | -0.477343 | 0.633118 | 0.957356 |
| BX649328.2         | 0.959026399 | 0.97633837   | 2.1323734 | 0.4578646 | 0.64705  | NA       |
| si:dkey-65j4.2     | 3.166041188 | 0.499010073  | 1.075106  | 0.4641497 | 0.642541 | NA       |
| plppr2a            | 76.40376692 | 0.128155426  | 0.2329957 | 0.5500335 | 0.582296 | 0.95207  |
| BX908782.2         | 49.91328075 | 0.327608741  | 0.2878527 | 1.1381126 | 0.255073 | 0.82375  |
| rbp5               | 783.1488559 | 0.051871228  | 0.1068627 | 0.4854007 | 0.627392 | 0.957354 |
| hk2                | 423.9519442 | -0.089342146 | 0.1289078 | -0.69307  | 0.488266 | 0.93189  |
| CT027586.1         | 0           | NA           | NA        | NA        | NA       | NA       |
| si:dkey-264f17.2   | 30.87131552 | -0.675743817 | 0.4027956 | -1.677634 | 0.093418 | 0.581264 |
| si:ch1073-469d17.2 | 352.3476891 | 0.256664567  | 0.1249578 | 2.0540094 | 0.039975 | 0.391511 |
| RF00003            | 0           | NA           | NA        | NA        | NA       | NA       |
| si:ch73-281i18.6   | 25.90215822 | -0.223876933 | 0.3895362 | -0.574727 | 0.565476 | 0.948739 |
| RF00001            | 0           | NA           | NA        | NA        | NA       | NA       |
| BX511128.2         | 0.873286049 | 1.965740061  | 2.217103  | 0.8866255 | 0.375281 | NA       |
| RF00001            | 0           | NA           | NA        | NA        | NA       | NA       |
| ugt5b2             | 126.2689268 | 0.068214786  | 0.1967293 | 0.3467445 | 0.728783 | 0.970631 |
| znf1047            | 1.140978884 | -0.45099068  | 1.8431693 | -0.244682 | 0.806703 | NA       |
| si:ch73-305o9.3    | 134.1268564 | -0.133240503 | 0.1845034 | -0.722157 | 0.470198 | 0.924787 |
| ATG2A              | 318.8396549 | 0.092008039  | 0.1535423 | 0.5992358 | 0.549016 | 0.946312 |
| nr6ala             | 1.640790851 | -1.137862397 | 1.6540431 | -0.687928 | 0.491498 | NA       |
| cetn2              | 401.6401573 | 0.082303873  | 0.117943  | 0.6978274 | 0.485285 | 0.930188 |

|                    |             |              |           |           |          |          |
|--------------------|-------------|--------------|-----------|-----------|----------|----------|
| CU972516.1         |             | 0 NA         | NA        | NA        | NA       | NA       |
| tmx4               | 29.75069716 | 0.034607326  | 0.3523376 | 0.0982221 | 0.921756 | 0.992138 |
| ftr64              | 15.74936604 | -0.759943999 | 0.5065086 | -1.500357 | 0.133522 | 0.667982 |
| CT583728.4         | 10.2941565  | 0.080593672  | 0.6042802 | 0.1333714 | 0.8939   | NA       |
| CR854829.1         | 0.523937293 | 2.50362281   | 2.7291625 | 0.9173594 | 0.358954 | NA       |
| CR786582.2         |             | 0 NA         | NA        | NA        | NA       | NA       |
| UBE2M              | 1315.32621  | -0.091997572 | 0.0848359 | -1.084418 | 0.27818  | 0.841891 |
| FO907089.1         | 38.62508917 | 0.083306183  | 0.3251753 | 0.2561885 | 0.797805 | 0.978695 |
| arxb               | 33.88710591 | 0.431788977  | 0.3467698 | 1.2451748 | 0.213068 | 0.781631 |
| znf1080            | 8.155139867 | 0.832126978  | 0.7254383 | 1.1470679 | 0.251354 | NA       |
| si:dkey-82o10.4    | 62.9087452  | 0.138896172  | 0.2666597 | 0.5208742 | 0.602454 | 0.956045 |
| CU855885.1         | 0.838940531 | -0.561526863 | 2.0217856 | -0.277738 | 0.781213 | NA       |
| si:ch211-194h1.2   | 6.942201162 | 0.532859385  | 0.7999079 | 0.666151  | 0.505315 | NA       |
| prrl6              | 19.26381588 | 0.343753261  | 0.4409535 | 0.779568  | 0.435645 | 0.914408 |
| si:ch211-1f22.3    | 0.158915748 | 0.967652056  | 4.0804729 | 0.2371421 | 0.812547 | NA       |
| rab3db             | 63.27500691 | -0.565130319 | 0.2489724 | -2.269852 | 0.023217 | 0.292411 |
| col10a1b           | 33.85950043 | 0.784938513  | 0.335916  | 2.3367109 | 0.019454 | 0.261725 |
| rpp25a             | 52.03231229 | 0.32565878   | 0.2851966 | 1.1418749 | 0.253506 | 0.82326  |
| fgf3               | 98.13525793 | 0.120896069  | 0.2012742 | 0.6006536 | 0.548071 | 0.945768 |
| si:dkeyp-53d3.5    | 53.06119656 | -0.074960971 | 0.2710268 | -0.276581 | 0.782102 | 0.97627  |
| washc5             | 446.3921099 | -0.132622684 | 0.1207731 | -1.098115 | 0.272154 | 0.837242 |
| CR354395.1         | 2.675067547 | 0.00734289   | 1.1451584 | 0.0064121 | 0.994884 | NA       |
| nkx2.2b            | 35.84168545 | -0.359710402 | 0.3284533 | -1.095164 | 0.273445 | 0.838214 |
| si:dkey-261j11.2   | 4.858463921 | -0.711126844 | 0.8674526 | -0.819788 | 0.412337 | NA       |
| CABZ01111555.1     | 0.31759079  | 1.807926197  | 3.579045  | 0.5051421 | 0.613459 | NA       |
| or106-8            | 9.159223176 | 0.706592247  | 0.6230224 | 1.1341361 | 0.256737 | NA       |
| BX088583.2         | 11.62786291 | 0.156025924  | 0.5883126 | 0.2652092 | 0.790848 | 0.977402 |
| si:ch1073-475a24.1 | 14.0095587  | 0.059573607  | 0.5982069 | 0.099587  | 0.920672 | 0.992118 |
| scarb1             | 245.6678588 | 0.042841929  | 0.1419817 | 0.3017425 | 0.762848 | 0.975374 |
| dre-mir-7149       | 0.182570949 | 0.967652056  | 4.0804729 | 0.2371421 | 0.812547 | NA       |
| zhx2b              | 37.22990864 | 0.091382539  | 0.3264759 | 0.2799059 | 0.77955  | 0.976146 |
| psmal              | 2025.404715 | -0.078347891 | 0.1087047 | -0.720741 | 0.471069 | 0.924838 |
| dbt                | 1149.477199 | -0.06605353  | 0.0885185 | -0.746212 | 0.455539 | 0.921215 |
| znf1014            | 261.0287909 | -0.011398732 | 0.1343014 | -0.084874 | 0.932361 | 0.992702 |
| CR354430.4         | 6.118511369 | -0.71200158  | 0.7616424 | -0.934824 | 0.349879 | NA       |
| si:dkey-226n24.1   |             | 0 NA         | NA        | NA        | NA       | NA       |
| CU468917.1         | 18.15631309 | -0.683156773 | 0.4518788 | -1.511814 | 0.130581 | 0.662797 |
| CR769772.4         | 0.158915748 | 0.967652056  | 4.0804729 | 0.2371421 | 0.812547 | NA       |
| gucale             | 37.97254343 | 0.07319769   | 0.3539677 | 0.206792  | 0.836172 | 0.984209 |
| CR352338.1         | 4.091591282 | -0.121939567 | 0.9278756 | -0.131418 | 0.895445 | NA       |
| ppargc1b           | 1062.09859  | 0.119103941  | 0.0828873 | 1.4369384 | 0.150735 | 0.698912 |
| si:ch211-106j21.4  | 3.384445331 | 1.634672587  | 1.1123507 | 1.4695658 | 0.141679 | NA       |
| CU928046.2         |             | 0 NA         | NA        | NA        | NA       | NA       |
| tbxta              | 103.2246662 | 0.020857807  | 0.223381  | 0.0933733 | 0.925607 | 0.992676 |
| si:ch211-17218.4   | 30.26264454 | -0.290042208 | 0.3603589 | -0.80487  | 0.420894 | 0.90651  |
| e2f4               | 486.0710527 | -0.009966175 | 0.1185125 | -0.084094 | 0.932982 | 0.992702 |
| epcla              | 537.8543935 | 0.043301831  | 0.1258411 | 0.3440993 | 0.730772 | 0.971497 |
| RF00001            |             | 0 NA         | NA        | NA        | NA       | NA       |
| CU927920.1         | 0.365141898 | 1.973577737  | 3.3927314 | 0.5817076 | 0.560764 | NA       |
| CU467822.1         | 1219.236608 | -0.071993691 | 0.0838018 | -0.859095 | 0.390288 | 0.897286 |
| tecrea             | 105.1456978 | 0.458410619  | 0.1923592 | 2.383097  | 0.017168 | 0.242176 |
| si:ch73-389b16.1   | 37.03367772 | -0.205573126 | 0.3126522 | -0.657514 | 0.510851 | 0.936253 |
| or109-13           | 0.499972362 | -2.44370697  | 3.0013188 | -0.814211 | 0.415524 | NA       |
| cacnaldb           | 45.34683888 | 0.135378894  | 0.2993505 | 0.452242  | 0.651095 | 0.960708 |

|                   |             |              |           |           |          |          |
|-------------------|-------------|--------------|-----------|-----------|----------|----------|
| CU695215.1        |             | 0 NA         | NA        | NA        | NA       | NA       |
| zgc:163077        | 72.76355457 | -0.242789574 | 0.2311222 | -1.050481 | 0.293497 | 0.84935  |
| tgm112            | 168.5181908 | -0.037763924 | 0.1689119 | -0.223572 | 0.823091 | 0.982189 |
| RF00001           |             | 0 NA         | NA        | NA        | NA       | NA       |
| si:dkeyp-57d7.4   | 325.6263741 | 0.42750814   | 0.1368576 | 3.1237448 | 0.001786 | 0.049384 |
| si:ch211-215p11.1 | 6.295189348 | -0.301531137 | 0.7408403 | -0.407012 | 0.683999 | NA       |
| BX640576.1        | 5.074355205 | 0.843388053  | 0.8560393 | 0.9852212 | 0.324515 | NA       |
| preb              | 564.9226902 | -0.116553298 | 0.1026646 | -1.135283 | 0.256257 | 0.824633 |
| rim2a             | 618.5945568 | 0.156977118  | 0.1113625 | 1.4096042 | 0.158657 | 0.709303 |
| si:dkey-109a10.2  | 1.474053087 | -1.032610686 | 1.6163206 | -0.638865 | 0.522911 | NA       |
| zgc:112966        | 5.400637225 | 0.62087875   | 0.8287907 | 0.7491381 | 0.453774 | NA       |
| si:dkey-238i5.2   | 44.80055558 | -0.418083961 | 0.2945105 | -1.419589 | 0.155727 | 0.705963 |
| BX469901.1        |             | 0 NA         | NA        | NA        | NA       | NA       |
| arfgap1           | 1056.649036 | 0.134958616  | 0.0939723 | 1.4361538 | 0.150959 | 0.698912 |
| BX530032.1        | 9.433121967 | 1.004610324  | 0.6223893 | 1.6141188 | 0.106502 | NA       |
| ube2c             | 231.6573938 | -0.220490521 | 0.1394108 | -1.581589 | 0.113743 | 0.632292 |
| micos10           | 729.8118268 | -0.176677802 | 0.0948364 | -1.862974 | 0.062466 | 0.487868 |
| RF00001           | 0.999076506 | 2.235847428  | 2.1027645 | 1.0632895 | 0.287651 | NA       |
| mrps7             | 368.6624914 | -0.109768502 | 0.1156898 | -0.948817 | 0.342713 | 0.878434 |
| znf1109           | 1.981957527 | 1.5673283    | 1.4368427 | 1.0908141 | 0.275355 | NA       |
| lmnb2             | 1658.963664 | 0.105357281  | 0.090114  | 1.1691555 | 0.242341 | 0.811298 |
| si:ch73-208h1.2   |             | 0 NA         | NA        | NA        | NA       | NA       |
| arf6a             | 587.1773698 | 0.089331375  | 0.1020799 | 0.8751124 | 0.381513 | 0.895192 |
| ssr1              | 2173.772398 | -0.070877118 | 0.1080912 | -0.655716 | 0.512007 | 0.936253 |
| ascl1b            | 242.0117035 | -0.248893025 | 0.1368034 | -1.819348 | 0.068858 | 0.513259 |
| CABZ01079192.1    | 293.6225418 | -0.425165642 | 0.1395802 | -3.046031 | 0.002319 | 0.059626 |
| si:dkey-8113.5    | 17.66659051 | -0.314741241 | 0.4596709 | -0.68471  | 0.493527 | 0.931926 |
| etfa              | 2026.327539 | 0.033551956  | 0.0977569 | 0.3432183 | 0.731434 | 0.971557 |
| cyp2k20           | 0.340386822 | -1.882368278 | 3.2159502 | -0.585323 | 0.558331 | NA       |
| L0017682.1        | 12.70102984 | -0.228493376 | 0.5448607 | -0.419361 | 0.674952 | 0.965257 |
| si:ch211-209j12.1 | 1.345435366 | -0.749161695 | 1.66238   | -0.450656 | 0.652237 | NA       |
| dact1             | 473.4731641 | -0.030936595 | 0.1109467 | -0.278842 | 0.780366 | 0.97627  |
| zgc:64201         | 61.24960122 | -0.095460269 | 0.2477296 | -0.385341 | 0.699985 | 0.967998 |
| ccnd1             | 2206.610805 | 0.037690283  | 0.0736232 | 0.5119346 | 0.608697 | 0.956718 |
| trpm2             | 27.13186049 | 0.213431099  | 0.3813192 | 0.5597176 | 0.575672 | 0.950373 |
| si:ch211-155m12.1 | 1.538376859 | 1.065825427  | 1.6585191 | 0.6426368 | 0.52046  | NA       |
| ARHGEF17          | 494.1950088 | 0.180059142  | 0.115044  | 1.5651333 | 0.117552 | 0.641232 |
| myrfl             | 192.9018043 | -1.22584878  | 0.1602634 | -7.648961 | 2.03E-14 | 9.54E-12 |
| si:ch73-359m17.8  | 0.317831496 | 1.808837541  | 3.5779923 | 0.5055454 | 0.613176 | NA       |
| RF00003           |             | 0 NA         | NA        | NA        | NA       | NA       |
| CU929240.1        | 44.27193187 | 0.026886768  | 0.2928726 | 0.0918036 | 0.926854 | 0.992702 |
| si:zfos-1056e6.1  | 26.5044441  | -0.071318308 | 0.3785342 | -0.188407 | 0.850558 | 0.985174 |
| haus6             | 254.9433097 | 0.010778967  | 0.1357715 | 0.0793905 | 0.936722 | 0.992702 |
| zgc:110171        | 3.342835021 | -0.037964433 | 1.0887772 | -0.034869 | 0.972184 | NA       |
| si:ch211-188c18.1 | 1.642360851 | 2.008941093  | 1.6388739 | 1.2258058 | 0.220272 | NA       |
| sstr5             | 156.3988214 | -0.074728429 | 0.1688053 | -0.44269  | 0.65799  | 0.962545 |
| BX323882.1        |             | 0 NA         | NA        | NA        | NA       | NA       |
| BX005396.4        | 0.31759079  | 1.807926197  | 3.579045  | 0.5051421 | 0.613459 | NA       |
| RF00560           | 0.650235905 | 1.438231835  | 2.4251649 | 0.593045  | 0.553151 | NA       |
| sntg2             | 98.28111544 | 0.128855307  | 0.201951  | 0.6380523 | 0.52344  | 0.939336 |
| ulk3              | 79.80807207 | -0.473437525 | 0.2295569 | -2.062397 | 0.03917  | 0.388646 |
| CABZ01078663.1    | 1.529535277 | 0.361682652  | 1.5565073 | 0.2323681 | 0.816252 | NA       |
| BX957361.1        | 0.530029684 | -0.939524117 | 2.7937867 | -0.336291 | 0.736652 | NA       |
| pcdhlg11          | 9.084361523 | 0.906753248  | 0.6495903 | 1.3958847 | 0.162749 | NA       |

|                    |             |              |           |           |          |          |
|--------------------|-------------|--------------|-----------|-----------|----------|----------|
| si:ch73-233f7.6    | 0.948309339 | 0.013153536  | 2.2227673 | 0.0059176 | 0.995278 | NA       |
| BX681417.2         | 0.50625413  | -0.940106488 | 2.8357787 | -0.331516 | 0.740255 | NA       |
| elmod2             | 434.7441433 | -0.096721897 | 0.1160753 | -0.833268 | 0.404693 | 0.901305 |
| kntc1              | 462.8200179 | -0.041168701 | 0.1168305 | -0.35238  | 0.724553 | 0.970402 |
| zgc:158417         | 26.81562232 | -1.292718191 | 0.3806962 | -3.395669 | 0.000685 | 0.02277  |
| trgv7              | 0.325573202 | 0.005883621  | 3.3172783 | 0.0017736 | 0.998585 | NA       |
| RF00001            | 0.31759079  | 1.807926197  | 3.579045  | 0.5051421 | 0.613459 | NA       |
| RF00001            | 0 NA        | NA           | NA        | NA        | NA       | NA       |
| zgc:123107         | 7.382037406 | -0.153254527 | 0.7366082 | -0.208054 | 0.835187 | NA       |
| KLHL28             | 136.6290436 | -0.290176009 | 0.1775332 | -1.634488 | 0.102156 | 0.607531 |
| chrnb4             | 67.22478616 | -0.215192798 | 0.2479253 | -0.867974 | 0.385408 | 0.89551  |
| cfap52             | 27.87350032 | -0.092717365 | 0.3713296 | -0.24969  | 0.802827 | 0.979643 |
| arll               | 939.6762458 | 0.004731371  | 0.0855034 | 0.0553355 | 0.955871 | 0.994543 |
| tradv7.0           | 0 NA        | NA           | NA        | NA        | NA       | NA       |
| CT990567.2         | 2.446286071 | 0.563230481  | 1.2616599 | 0.4464202 | 0.655294 | NA       |
| FP340292.1         | 0 NA        | NA           | NA        | NA        | NA       | NA       |
| tradv16.0          | 0 NA        | NA           | NA        | NA        | NA       | NA       |
| si:ch73-171o20.2   | 0 NA        | NA           | NA        | NA        | NA       | NA       |
| CU929259.1         | 69.03247678 | 0.045461381  | 0.2348945 | 0.1935396 | 0.846536 | 0.985174 |
| si:dkey-207124.2   | 54.26040765 | 0.091181705  | 0.271629  | 0.3356847 | 0.737109 | 0.972535 |
| si:dkey-16p6.1     | 1.977562524 | -0.451836437 | 1.3294431 | -0.339869 | 0.733955 | NA       |
| si:ch73-158p21.2   | 21.34977547 | -0.08385696  | 0.4313231 | -0.194418 | 0.845849 | 0.985174 |
| znf1184            | 42.25780046 | -0.079736257 | 0.3116031 | -0.25589  | 0.798035 | 0.978793 |
| si:dkey-26m3.3     | 16.67888782 | -0.535884024 | 0.4846328 | -1.105753 | 0.268834 | 0.834131 |
| zgc:158316         | 240.4002538 | 0.092751338  | 0.1409264 | 0.6581544 | 0.510439 | 0.936253 |
| si:dkey-30e9.7     | 124.9597297 | 0.019591939  | 0.1831369 | 0.1069797 | 0.914805 | 0.991119 |
| si:ch1073-181h11.1 | 0.182570949 | 0.967652056  | 4.0804729 | 0.2371421 | 0.812547 | NA       |
| bmp5               | 303.4947518 | 0.008137727  | 0.1296265 | 0.0627783 | 0.949943 | 0.99381  |
| chrna7             | 20.56307651 | -0.017192618 | 0.4464437 | -0.03851  | 0.969281 | 0.996315 |
| zgc:158260         | 6.235250206 | 0.883249013  | 0.9116389 | 0.9688584 | 0.332616 | NA       |
| lrrc24             | 10.93260997 | 0.530583135  | 0.5954083 | 0.8911249 | 0.372862 | NA       |
| csrp3              | 33.83711745 | 0.418206334  | 0.3392148 | 1.232866  | 0.217626 | 0.784993 |
| si:ch211-156b7.4   | 326.7185776 | -0.201206178 | 0.1368079 | -1.47072  | 0.141367 | 0.681968 |
| si:ch211-106g8.56  | 0 NA        | NA           | NA        | NA        | NA       | NA       |
| arid1aa            | 2557.172053 | -0.036217188 | 0.0934763 | -0.387448 | 0.698425 | 0.967998 |
| scn2b              | 47.09791527 | 0.344467403  | 0.2925526 | 1.1774546 | 0.239014 | 0.807768 |
| RF00026            | 0 NA        | NA           | NA        | NA        | NA       | NA       |
| arsg               | 58.10699816 | -0.150993316 | 0.2658429 | -0.567979 | 0.570049 | 0.948983 |
| bacel              | 221.0575971 | 0.224482468  | 0.1443815 | 1.5547873 | 0.119997 | 0.645215 |
| sox17              | 3.290893408 | 0.043594092  | 1.0702357 | 0.0407332 | 0.967509 | NA       |
| CR394556.1         | 0.688945432 | -0.015421672 | 2.3988056 | -0.006429 | 0.994871 | NA       |
| pargl              | 89.70024655 | -0.131453404 | 0.2065285 | -0.63649  | 0.524457 | 0.939537 |
| CU459186.3         | 15.24707521 | 0.306413543  | 0.4900016 | 0.6253317 | 0.531753 | 0.942359 |
| L0018584.1         | 2.141182009 | 1.160553506  | 1.3143096 | 0.8830138 | 0.377229 | NA       |
| larpl              | 1087.508151 | 0.093646992  | 0.1177783 | 0.7951123 | 0.426548 | 0.910189 |
| parietopsin        | 194.5016952 | 0.289022247  | 0.1509687 | 1.9144514 | 0.055562 | 0.461579 |
| si:ch211-93f2.1    | 953.6196466 | -0.872108276 | 0.0892022 | -9.776752 | 1.42E-22 | 1.75E-19 |
| CU467822.2         | 4.304741254 | -0.653460528 | 0.9163997 | -0.713074 | 0.4758   | NA       |
| si:dkeyp-80d11.12  | 3.487178102 | -0.660857547 | 1.0223259 | -0.646426 | 0.518004 | NA       |
| BX649341.1         | 0.973692923 | 1.03885578   | 2.0977565 | 0.4952223 | 0.620443 | NA       |
| fam168b            | 1243.094633 | -0.069198032 | 0.0853026 | -0.811206 | 0.417247 | 0.906237 |
| chn1               | 1390.580539 | -0.062734723 | 0.0836696 | -0.749791 | 0.453381 | 0.920041 |
| BX842687.1         | 0 NA        | NA           | NA        | NA        | NA       | NA       |
| tradv24.0.5        | 0.158795395 | 0.967652056  | 4.0804729 | 0.2371421 | 0.812547 | NA       |

|                   |             |              |           |           |          |          |
|-------------------|-------------|--------------|-----------|-----------|----------|----------|
| gb:eh456644       | 5.188635049 | 0.098945652  | 0.8283744 | 0.1194456 | 0.904922 | NA       |
| elav11b           | 2013.509203 | 0.090146143  | 0.079489  | 1.1340706 | 0.256765 | 0.824902 |
| AL953886.1        | 7.600646886 | 0.368840699  | 0.6860051 | 0.5376647 | 0.590809 | NA       |
| si:ch211-24o8.4   | 2.327849517 | 0.435137741  | 1.238135  | 0.3514461 | 0.725254 | NA       |
| zgc:92161         | 79.31848139 | -0.140254481 | 0.2276884 | -0.615993 | 0.537899 | 0.943336 |
| si:ch211-196p9.1  | 263.0988243 | 0.170557355  | 0.1325565 | 1.2866762 | 0.198207 | 0.76333  |
| plekhg5b          | 61.81497909 | -0.23918554  | 0.2521731 | -0.948498 | 0.342876 | 0.878434 |
| CABZ01085195.1    | 15.60698613 | 0.902673999  | 0.4963165 | 1.8187467 | 0.06895  | 0.513259 |
| prkarlab          | 25.61673443 | -0.410351006 | 0.4176835 | -0.982445 | 0.325881 | 0.871896 |
| im:7141269        | 61.53870394 | -0.139764721 | 0.2544437 | -0.549295 | 0.582803 | 0.952214 |
| si:dkey-27n6.4    | 12.51550527 | -1.189129029 | 0.6724228 | -1.768425 | 0.07699  | 0.540058 |
| traj41            | 0 NA        | NA           | NA        | NA        | NA       | NA       |
| homer1b           | 712.2877956 | 0.050163133  | 0.0965928 | 0.5193256 | 0.603534 | 0.956045 |
| znf1016           | 3.239565514 | 0.568724502  | 1.0666325 | 0.5331963 | 0.593898 | NA       |
| RF00001           | 0 NA        | NA           | NA        | NA        | NA       | NA       |
| fah               | 199.8216812 | 0.30663833   | 0.162514  | 1.886843  | 0.059181 | 0.475427 |
| CU467646.5        | 0 NA        | NA           | NA        | NA        | NA       | NA       |
| ptmab             | 23022.02933 | -0.131234423 | 0.0785488 | -1.670738 | 0.094773 | 0.585466 |
| si:dkey-183i3.6   | 5.619236539 | -0.1732644   | 0.8082848 | -0.214361 | 0.830266 | NA       |
| trgv3             | 0 NA        | NA           | NA        | NA        | NA       | NA       |
| cysltr3           | 3.298778708 | -0.64084565  | 1.1492922 | -0.5576   | 0.577117 | NA       |
| CT956002.1        | 0.347458735 | -1.908042286 | 3.4571486 | -0.551912 | 0.581009 | NA       |
| si:ch211-241j8.2  | 0.31759079  | 1.807926197  | 3.579045  | 0.5051421 | 0.613459 | NA       |
| zgc:172014        | 7.962901793 | -1.118584348 | 0.7097929 | -1.575931 | 0.115042 | NA       |
| syt12             | 497.5342477 | -0.003469478 | 0.112668  | -0.030794 | 0.975434 | 0.996762 |
| pdlim5a           | 48.10407894 | 0.010281494  | 0.27644   | 0.0371925 | 0.970332 | 0.996315 |
| ca5a              | 570.1357694 | -0.03531686  | 0.114293  | -0.309003 | 0.757319 | 0.975374 |
| pimr181           | 0.471562095 | -2.373056629 | 3.0645586 | -0.774355 | 0.438721 | NA       |
| RF00001           | 0 NA        | NA           | NA        | NA        | NA       | NA       |
| laptm5            | 40.20091757 | -0.414833797 | 0.3319914 | -1.249532 | 0.211471 | 0.778917 |
| si:ch211-134a4.6  | 0.507044276 | -2.459587493 | 2.7586536 | -0.89159  | 0.372613 | NA       |
| zgc:162592        | 0.157187365 | -0.955901296 | 4.0804729 | -0.234262 | 0.814781 | NA       |
| BX784032.1        | 0 NA        | NA           | NA        | NA        | NA       | NA       |
| cyplc2            | 81.70306317 | 0.151599017  | 0.2243353 | 0.6757699 | 0.499187 | 0.934006 |
| si:ch73-299h12.3  | 14.96662845 | 0.148162474  | 0.4910909 | 0.3017007 | 0.76288  | 0.975374 |
| kyat3             | 393.7240078 | 0.065017623  | 0.1136727 | 0.5719723 | 0.567341 | 0.948739 |
| si:dkey-237i9.1   | 191.5628929 | -0.011614992 | 0.1656985 | -0.070097 | 0.944116 | 0.993364 |
| atp6v0e1          | 277.5721762 | 0.208552833  | 0.1430301 | 1.4581044 | 0.144812 | 0.688986 |
| CABZ01033394.1    | 0 NA        | NA           | NA        | NA        | NA       | NA       |
| RF00001           | 0.173729368 | -0.955901296 | 4.0804729 | -0.234262 | 0.814781 | NA       |
| or130-1           | 4.351932298 | 0.264082756  | 0.9429325 | 0.2800654 | 0.779427 | NA       |
| si:ch1073-82119.1 | 44.14773578 | 0.434604071  | 0.3009756 | 1.4439844 | 0.148743 | 0.69636  |
| L0018493.1        | 1.219644908 | -1.278066794 | 1.9287071 | -0.662655 | 0.507552 | NA       |
| tradv36.2.12      | 0 NA        | NA           | NA        | NA        | NA       | NA       |
| or104-1           | 0.515885857 | -0.89611015  | 2.8190897 | -0.317872 | 0.750582 | NA       |
| si:ch211-120c15.3 | 23.90136299 | -0.448220887 | 0.4211301 | -1.064329 | 0.28718  | 0.845979 |
| si:ch211-271b14.1 | 1102.716579 | -0.004631363 | 0.0830027 | -0.055798 | 0.955503 | 0.994543 |
| zgc:114120        | 17.58352486 | 0.131311241  | 0.4969665 | 0.2642255 | 0.791606 | 0.977715 |
| nap111            | 5268.362043 | -0.026636823 | 0.0707159 | -0.376674 | 0.706416 | 0.968459 |
| lpar3             | 96.53629704 | 0.010522245  | 0.2075174 | 0.0507054 | 0.95956  | 0.995193 |
| col5a3b           | 3358.28821  | 0.20764624   | 0.0986726 | 2.1043958 | 0.035344 | 0.36572  |
| si:dkey-5i16.5    | 10.43828661 | 0.142902716  | 0.5793691 | 0.2466523 | 0.805177 | NA       |
| BX294178.1        | 18.25096896 | 0.153761206  | 0.4853185 | 0.3168254 | 0.751376 | 0.97419  |
| CU984583.1        | 0.332524763 | 0.005883742  | 3.292841  | 0.0017868 | 0.998574 | NA       |

|                   |             |              |           |           |          |          |
|-------------------|-------------|--------------|-----------|-----------|----------|----------|
| traj51            |             | 0 NA         | NA        | NA        | NA       | NA       |
| si:ch211-243p7.3  | 53.31996236 | -0.063042777 | 0.2678182 | -0.235394 | 0.813903 | 0.981081 |
| AL929114.2        | 3.39404823  | 0.684184024  | 1.1379472 | 0.6012441 | 0.547677 | NA       |
| zwi               | 516.0072203 | 0.196820171  | 0.1098037 | 1.792473  | 0.073057 | 0.527239 |
| pimr59            | 0.182570949 | 0.967652056  | 4.0804729 | 0.2371421 | 0.812547 | NA       |
| si:dkey-16p6.1    | 33.87747984 | 0.195045124  | 0.3567113 | 0.5467871 | 0.584525 | 0.952406 |
| si:dkey-16b10.2   | 1.531504366 | 1.015713721  | 1.6492385 | 0.6158683 | 0.537981 | NA       |
| si:dkeyp-13d12.22 | 0.330916733 | -1.849579229 | 3.2489867 | -0.569279 | 0.569167 | NA       |
| irx1a             | 548.5577536 | -0.090970507 | 0.1032996 | -0.880647 | 0.378509 | 0.895192 |
| AL627305.2        | 4.630624185 | 0.021955728  | 0.8674984 | 0.0253092 | 0.979808 | NA       |
| RF00003           | 0.158915748 | 0.967652056  | 4.0804729 | 0.2371421 | 0.812547 | NA       |
| CR788237.2        | 0.52295777  | -0.916487494 | 2.6406233 | -0.347072 | 0.728537 | NA       |
| znf1085           | 9.930636578 | -0.523616164 | 0.6421978 | -0.81535  | 0.414872 | NA       |
| znf1106           | 4.18669591  | -0.002022946 | 0.9802106 | -0.002064 | 0.998353 | NA       |
| mibp2             | 5875.977367 | -0.230090841 | 0.0979803 | -2.348339 | 0.018857 | 0.255927 |
| FP016142.5        | 0.323844819 | -1.825095364 | 3.274639  | -0.557342 | 0.577293 | NA       |
| BX088718.1        | 0.853245996 | -0.479250517 | 2.1942342 | -0.218414 | 0.827107 | NA       |
| dydc2             | 24.74484918 | 0.116480978  | 0.3898231 | 0.2988047 | 0.765089 | 0.975374 |
| adipor2           | 1674.567671 | 0.020076198  | 0.0797006 | 0.2518953 | 0.801122 | 0.979377 |
| RF00001           |             | 0 NA         | NA        | NA        | NA       | NA       |
| FQ311894.1        | 2809.922229 | 0.052854143  | 0.0793444 | 0.6661357 | 0.505324 | 0.935724 |
| mmta              | 616.0323265 | -0.155153521 | 0.101482  | -1.528877 | 0.126295 | 0.655241 |
| cyp2k19           | 182.6360832 | -0.58444165  | 0.1647562 | -3.547313 | 0.000389 | 0.014493 |
| CR382337.3        | 1.595998977 | -1.215473901 | 1.7197136 | -0.706789 | 0.479698 | NA       |
| pcdh1g30          | 242.6645477 | -0.180711212 | 0.1449708 | -1.246535 | 0.212568 | 0.780627 |
| asic1b            | 239.8640631 | 0.010086685  | 0.1467254 | 0.0687453 | 0.945192 | 0.993474 |
| si:ch1073-416d2.4 | 88.90325082 | -0.1006027   | 0.2081197 | -0.483389 | 0.62882  | 0.957354 |
| dennd1b           | 9.981418781 | 0.583735088  | 0.6055372 | 0.9639954 | 0.335048 | NA       |
| magi3a            | 492.8649776 | 0.003547115  | 0.1248908 | 0.0284017 | 0.977342 | 0.996762 |
| CR854963.1        |             | 0 NA         | NA        | NA        | NA       | NA       |
| BX842701.1        | 5.087987469 | 0.20746288   | 0.86533   | 0.23975   | 0.810524 | NA       |
| dtwd2             | 17.66525471 | -1.056860716 | 0.4855538 | -2.176609 | 0.02951  | 0.332709 |
| rbm34             | 203.6039825 | 0.082979217  | 0.1683725 | 0.4928311 | 0.622132 | 0.957354 |
| kdf1b             | 42.76116766 | -0.280272797 | 0.3227083 | -0.868502 | 0.38512  | 0.89551  |
| traj58            |             | 0 NA         | NA        | NA        | NA       | NA       |
| zgc:172128        | 52.57429825 | -0.236536735 | 0.2761677 | -0.856497 | 0.391723 | 0.897688 |
| si:dkey-20i20.11  | 6.082001593 | 0.087313807  | 0.7648484 | 0.1141583 | 0.909112 | NA       |
| pdxcl             | 654.6921684 | 0.035355026  | 0.0931716 | 0.3794614 | 0.704345 | 0.968134 |
| OSCP1 (1 of many) | 262.5066462 | 0.183113487  | 0.1385824 | 1.321333  | 0.18639  | 0.750788 |
| dre-mir-25        | 0.895171582 | 0.645196995  | 2.3062791 | 0.2797567 | 0.779664 | NA       |
| pigr              | 78.46529522 | 0.456105764  | 0.2239728 | 2.0364336 | 0.041707 | 0.400593 |
| aridlab           | 2858.713271 | -0.035364371 | 0.081901  | -0.431794 | 0.665891 | 0.964736 |
| ino80e            | 335.617815  | 0.118627493  | 0.1368334 | 0.8669482 | 0.38597  | 0.89551  |
| CR388178.1        | 2.252787355 | 1.278499495  | 1.3608565 | 0.9394815 | 0.347484 | NA       |
| stk10             | 258.0169994 | -0.020032999 | 0.1324604 | -0.151238 | 0.879788 | 0.987881 |
| kncn              | 8.108989462 | -0.076204328 | 0.695501  | -0.109568 | 0.912752 | NA       |
| xrn2              | 1476.719588 | 0.035202014  | 0.0791504 | 0.4447486 | 0.656501 | 0.961833 |
| zgc:193711        | 56.75705408 | -0.329874063 | 0.2707242 | -1.218488 | 0.223039 | 0.789115 |
| CR376730.2        | 0.656489935 | -1.4754824   | 2.3018704 | -0.640993 | 0.521527 | NA       |
| zfyve9a           | 440.3177725 | 0.068325056  | 0.1150692 | 0.5937737 | 0.552663 | 0.947265 |
| RF00001           |             | 0 NA         | NA        | NA        | NA       | NA       |
| zgc:113442        | 19.42642284 | -0.11738085  | 0.4301087 | -0.27291  | 0.784923 | 0.97627  |
| CR848667.2        |             | 0 NA         | NA        | NA        | NA       | NA       |
| rab3ip            | 979.1458235 | -0.058168007 | 0.0907893 | -0.640692 | 0.521723 | 0.939056 |

|                    |             |              |           |           |          |          |
|--------------------|-------------|--------------|-----------|-----------|----------|----------|
| pcdh20             | 173.7994691 | 0.076857325  | 0.1614922 | 0.4759198 | 0.634132 | 0.95776  |
| si:dkeyp-86d6.2    | 17.82773291 | -0.103354223 | 0.4457856 | -0.231847 | 0.816657 | 0.981594 |
| si:dkey-65l23.2    | 0 NA        |              | NA        | NA        | NA       | NA       |
| metrnla            | 527.0073807 | -0.057295939 | 0.1124581 | -0.509487 | 0.610411 | 0.95688  |
| pinl               | 980.9488338 | -0.151726344 | 0.1099014 | -1.380568 | 0.167412 | 0.724535 |
| si:dkeyp-44d3.5    | 17.82408189 | 0.256953038  | 0.4762211 | 0.5395667 | 0.589496 | 0.953498 |
| pmfbpl             | 47.58151384 | -0.093492012 | 0.3055494 | -0.30598  | 0.75962  | 0.975374 |
| si:ch211-111e20.1  | 6.533643866 | -2.767388365 | 0.919632  | -3.009235 | 0.002619 | NA       |
| foxjla             | 188.3965842 | 0.096126815  | 0.1479241 | 0.6498387 | 0.515796 | 0.9377   |
| RF00001            | 0 NA        |              | NA        | NA        | NA       | NA       |
| si:dkey-65b13.13   | 106.8156256 | 0.8769248    | 0.201462  | 4.352805  | 1.34E-05 | 0.000916 |
| si:ch1073-204b8.1  | 0.968187754 | 2.173022767  | 2.1450023 | 1.0130632 | 0.31103  | NA       |
| zgc:101130         | 101.6869945 | 0.107352475  | 0.1966441 | 0.5459226 | 0.585119 | 0.952487 |
| FQ377605.1         | 16.96946199 | -0.038716402 | 0.4784959 | -0.080913 | 0.935511 | 0.992702 |
| gorasp1b           | 9.289145142 | -0.694496019 | 0.6932033 | -1.001865 | 0.316409 | NA       |
| CU914622.1         | 23.05858104 | 0.0223547    | 0.4695331 | 0.0476105 | 0.962027 | 0.995907 |
| si:dkey-205h23.2   | 7.296451063 | 0.39361518   | 0.68977   | 0.570647  | 0.568239 | NA       |
| si:ch73-358j7.2    | 0.182570949 | 0.967652056  | 4.0804729 | 0.2371421 | 0.812547 | NA       |
| BX088707.1         | 1.138580709 | -0.449151772 | 1.929806  | -0.232745 | 0.81596  | NA       |
| tmem106ba          | 926.3178188 | -0.080349882 | 0.0937427 | -0.857132 | 0.391372 | 0.897688 |
| RF02209            | 0 NA        |              | NA        | NA        | NA       | NA       |
| BX324216.1         | 0.31437473  | -1.788572922 | 3.5930657 | -0.497785 | 0.618636 | NA       |
| si:dkey-260j18.2   | 625.3333354 | 0.092029174  | 0.0974662 | 0.944216  | 0.345059 | 0.878434 |
| BX511111.2         | 7.146064906 | 0.071163196  | 0.734397  | 0.0969002 | 0.922806 | NA       |
| si:dkey-92j16.2    | 3.840958647 | -0.661235096 | 0.9808908 | -0.674117 | 0.500237 | NA       |
| ptbp2a             | 418.1171837 | -0.13929682  | 0.1156879 | -1.204074 | 0.228561 | 0.796028 |
| si:ch211-223g7.6   | 4.160549767 | 0.591090525  | 0.924439  | 0.6394046 | 0.52256  | NA       |
| numbl              | 59.0102959  | -0.057046551 | 0.2502076 | -0.227997 | 0.819649 | 0.981594 |
| pigv               | 71.55502986 | -0.533234323 | 0.2309655 | -2.308719 | 0.020959 | 0.273382 |
| hoxc6b             | 53.1413069  | -0.430827713 | 0.2896646 | -1.487333 | 0.136927 | 0.673303 |
| znf1159            | 23.98907544 | -0.120824452 | 0.4155869 | -0.290732 | 0.771256 | 0.975687 |
| CU571315.2         | 8.333956194 | 0.459795666  | 0.7080606 | 0.6493733 | 0.516097 | NA       |
| etvl               | 336.9667171 | -0.232469595 | 0.1184515 | -1.962572 | 0.049696 | 0.437138 |
| si:dkeyp-44d3.3    | 10.6835733  | 0.386463808  | 0.588603  | 0.656578  | 0.511452 | NA       |
| abhd18             | 288.9712121 | 0.079629531  | 0.1318821 | 0.6037935 | 0.545981 | 0.945526 |
| tmem141            | 57.71468995 | 0.096891802  | 0.2535539 | 0.382135  | 0.702361 | 0.968134 |
| zgc:171592         | 0.63196552  | 0.01215153   | 2.613686  | 0.0046492 | 0.99629  | NA       |
| BX664606.2         | 0 NA        |              | NA        | NA        | NA       | NA       |
| sult4a1            | 888.9888297 | -0.026313763 | 0.0913413 | -0.288082 | 0.773284 | 0.975687 |
| si:ch211-227p7.1   | 0 NA        |              | NA        | NA        | NA       | NA       |
| CABZ01084347.1     | 4.537559929 | 0.776779417  | 0.9484456 | 0.8190026 | 0.412785 | NA       |
| RF00026            | 0 NA        |              | NA        | NA        | NA       | NA       |
| si:dkey-225f5.4    | 189.9376008 | -0.051473045 | 0.1527174 | -0.337048 | 0.736081 | 0.972535 |
| si:ch211-209n20.59 | 2.683599399 | -0.714200784 | 1.150094  | -0.620993 | 0.534604 | NA       |
| eps813a            | 307.0326637 | -0.422449538 | 0.1395597 | -3.027017 | 0.00247  | 0.062293 |
| bmpcr              | 609.8823605 | 0.07654539   | 0.1110735 | 0.6891418 | 0.490734 | 0.931926 |
| spryd3             | 98.62889768 | -0.332980608 | 0.2057634 | -1.618269 | 0.105605 | 0.614545 |
| pkn2               | 107.2966314 | 0.293648714  | 0.1947129 | 1.5081111 | 0.131526 | 0.664995 |
| pde6gb             | 847.8286246 | 0.126148957  | 0.0876428 | 1.439354  | 0.15005  | 0.69814  |
| socs9              | 59.20503974 | -0.187622379 | 0.2555711 | -0.73413  | 0.46287  | 0.922698 |
| irf6               | 262.1678772 | -0.127057699 | 0.1641879 | -0.773855 | 0.439016 | 0.916082 |
| CU633987.1         | 0 NA        |              | NA        | NA        | NA       | NA       |
| thrap3a            | 206.3886113 | 0.069935441  | 0.1450072 | 0.4822896 | 0.6296   | 0.957354 |
| CU571315.3         | 9.204068463 | 0.830665285  | 0.7343064 | 1.1312243 | 0.257961 | NA       |



|                   |             |              |           |           |          |          |
|-------------------|-------------|--------------|-----------|-----------|----------|----------|
| si:dkey-238k10.3  | 28.40376596 | 0.443113876  | 0.3815021 | 1.1614979 | 0.245439 | 0.815388 |
| CR354398.1        | 0 NA        | NA           | NA        | NA        | NA       | NA       |
| gabrgl            | 10.5961783  | -0.368437185 | 0.596871  | -0.617281 | 0.537049 | NA       |
| cxxcla            | 519.7378268 | -0.135930984 | 0.1045602 | -1.300026 | 0.193592 | 0.757219 |
| si:dkey-191j3.2   | 4.674947947 | 0.22351411   | 0.8656309 | 0.2582095 | 0.796245 | NA       |
| si:dkey-1b17.2    | 14.62066731 | -0.703922962 | 0.5260246 | -1.338194 | 0.180833 | 0.741776 |
| cog3              | 532.921386  | -0.140004093 | 0.1104599 | -1.267466 | 0.204989 | 0.772822 |
| si:dkeyp-13d12.24 | 0 NA        | NA           | NA        | NA        | NA       | NA       |
| CU695215.2        | 6.645235635 | -4.33E-05    | 0.7177161 | -6.03E-05 | 0.999952 | NA       |
| apoea             | 3336.946193 | 0.272319023  | 0.2005723 | 1.3577103 | 0.174556 | 0.734625 |
| RF00001           | 0.173729368 | -0.955901296 | 4.0804729 | -0.234262 | 0.814781 | NA       |
| si:dkey-72117.6   | 6.609984116 | 0.460802706  | 0.7531831 | 0.611807  | 0.540665 | NA       |
| ppp2r2d           | 403.6811311 | 0.119310503  | 0.1144708 | 1.0422789 | 0.297282 | 0.853945 |
| ppplcbl           | 1299.46477  | -0.11362546  | 0.0926605 | -1.226255 | 0.220103 | 0.786751 |
| FP009765.1        | 0 NA        | NA           | NA        | NA        | NA       | NA       |
| CABZ01037298.1    | 57.58551107 | 0.104531542  | 0.2636053 | 0.3965456 | 0.691703 | 0.967305 |
| trpc4b            | 26.11552906 | -0.100232591 | 0.3724392 | -0.269125 | 0.787834 | 0.976596 |
| btr25             | 11.4163178  | 0.389639422  | 0.6247277 | 0.6236948 | 0.532828 | 0.942805 |
| AL627305.3        | 24.76675313 | 0.12109669   | 0.4258143 | 0.2843885 | 0.776113 | 0.975826 |
| pnpla3            | 204.4307951 | -0.147284736 | 0.1528015 | -0.963896 | 0.335098 | 0.875906 |
| C14orf28          | 32.04651109 | -0.132796263 | 0.334786  | -0.39666  | 0.691618 | 0.967305 |
| phf13             | 197.5060806 | -0.001442919 | 0.1542061 | -0.009357 | 0.992534 | 0.998239 |
| chmp6b            | 1027.272893 | 0.015110409  | 0.0838758 | 0.1801522 | 0.857033 | 0.985597 |
| znf644b           | 156.5552613 | 0.19929519   | 0.1633818 | 1.2198124 | 0.222536 | 0.788748 |
| gpsm21            | 69.98037257 | 0.128727541  | 0.2300346 | 0.5596008 | 0.575752 | 0.950373 |
| si:dkey-172k15.11 | 107.7747348 | -0.252190935 | 0.2018022 | -1.249694 | 0.211411 | 0.778917 |
| si:dkey-183c6.7   | 11.46245505 | -0.709215018 | 0.5699946 | -1.244249 | 0.213408 | 0.781631 |
| BX950220.1        | 0 NA        | NA           | NA        | NA        | NA       | NA       |
| zgc:193790        | 40.40865724 | -0.14477129  | 0.3101651 | -0.466756 | 0.640675 | 0.959994 |
| si:ch211-214k5.3  | 0.524057646 | 2.503896172  | 2.7289583 | 0.9175282 | 0.358866 | NA       |
| slc52a2           | 86.72194254 | -0.046607678 | 0.207645  | -0.224458 | 0.822401 | 0.982189 |
| RF00001           | 0 NA        | NA           | NA        | NA        | NA       | NA       |
| CR356236.1        | 65.35823802 | -0.175458562 | 0.2850688 | -0.615496 | 0.538227 | 0.943336 |
| FP326652.1        | 0.365141898 | 1.973577737  | 3.3927314 | 0.5817076 | 0.560764 | NA       |
| mab2111           | 3114.473593 | 0.001300346  | 0.0808002 | 0.0160934 | 0.98716  | 0.997136 |
| slc25a43          | 380.1281328 | 0.090648612  | 0.1190706 | 0.7613015 | 0.446477 | 0.917154 |
| CU550719.1        | 0 NA        | NA           | NA        | NA        | NA       | NA       |
| MCOLN3            | 154.4363726 | 0.186552545  | 0.1703169 | 1.0953263 | 0.273374 | 0.838214 |
| mtbl              | 437.8606999 | 0.015058127  | 0.1405892 | 0.1071073 | 0.914704 | 0.991119 |
| tradv28.0         | 0 NA        | NA           | NA        | NA        | NA       | NA       |
| znf1164           | 30.31302789 | -0.282803249 | 0.3523214 | -0.802685 | 0.422157 | 0.90651  |
| CR848705.1        | 0.840160759 | 1.928602366  | 2.2195536 | 0.8689145 | 0.384894 | NA       |
| hadhb             | 2920.567172 | -0.038881844 | 0.0740761 | -0.52489  | 0.599659 | 0.956045 |
| svild             | 632.2689989 | 0.050164666  | 0.1010551 | 0.4964089 | 0.619606 | 0.957354 |
| si:dkeyp-11e3.1   | 165.1464662 | 0.065372686  | 0.1684685 | 0.3880411 | 0.697986 | 0.967998 |
| RGS13 (1 of many) | 14.8612223  | 0.174967765  | 0.5023809 | 0.3482771 | 0.727632 | 0.970402 |
| zgc:92873         | 314.5654978 | 0.015475372  | 0.1269797 | 0.1218728 | 0.903    | 0.990121 |
| b3galt2           | 1371.382862 | 0.134777392  | 0.0807123 | 1.6698486 | 0.094949 | 0.585629 |
| si:dkeyp-82h4.3   | 8.308656504 | 0.398986918  | 0.6863914 | 0.5812819 | 0.56105  | NA       |
| kcna2b            | 18.37865406 | -0.346756513 | 0.4559468 | -0.76052  | 0.446944 | 0.917154 |
| ntn4              | 61.67434235 | -0.22454104  | 0.2488503 | -0.902314 | 0.36689  | 0.88734  |
| grm5b             | 6.567611246 | 0.204250822  | 0.7890366 | 0.258861  | 0.795742 | NA       |
| shcbp1            | 211.5223827 | -0.102604493 | 0.1451049 | -0.707105 | 0.479501 | 0.927091 |
| neolb             | 0 NA        | NA           | NA        | NA        | NA       | NA       |

|                   |             |              |           |           |          |          |
|-------------------|-------------|--------------|-----------|-----------|----------|----------|
| tbcl1d10aa        | 346.5520937 | -0.146870378 | 0.1482813 | -0.990485 | 0.321937 | 0.869551 |
| slc25a47b         | 61.31317812 | 0.094884688  | 0.2489643 | 0.3811176 | 0.703116 | 0.968134 |
| RNF122            | 137.198266  | 0.037341302  | 0.1718604 | 0.2172769 | 0.827993 | 0.982721 |
| spink2.1          | 30.99643026 | 0.108418731  | 0.4217843 | 0.2570478 | 0.797142 | 0.978577 |
| CABZ01072548.1    | 53.48352786 | 0.112272064  | 0.2624048 | 0.4278583 | 0.668754 | 0.964829 |
| mif4gda           | 93.60331349 | -0.219167336 | 0.2128626 | -1.029619 | 0.303189 | 0.85729  |
| mprip             | 1369.13949  | 0.067206247  | 0.0827342 | 0.8123153 | 0.416611 | 0.906237 |
| nr3c2             | 19.38236011 | -0.667007619 | 0.4375674 | -1.524354 | 0.12742  | 0.657518 |
| CT573793.2        | 0.182570949 | 0.967652056  | 4.0804729 | 0.2371421 | 0.812547 | NA       |
| popl              | 81.5177496  | 0.15509231   | 0.2192304 | 0.7074399 | 0.479293 | 0.927091 |
| CABZ01052576.1    | 215.8523296 | -0.203909602 | 0.1402361 | -1.454045 | 0.145934 | 0.691682 |
| RF00001           | 0           | NA           | NA        | NA        | NA       | NA       |
| wu:fd46c06        | 0.316103113 | 0.005883447  | 3.3519121 | 0.0017553 | 0.9986   | NA       |
| si:ch73-233f7.5   | 0.647019846 | -1.455099716 | 2.4289208 | -0.599073 | 0.549125 | NA       |
| adra2b            | 47.84434174 | 0.281677068  | 0.2859412 | 0.9850872 | 0.324581 | 0.871063 |
| nfbkiz            | 272.2019983 | -0.068762031 | 0.1436072 | -0.47882  | 0.632066 | 0.957356 |
| CR954226.1        | 0.158915748 | 0.967652056  | 4.0804729 | 0.2371421 | 0.812547 | NA       |
| si:ch211-255f4.11 | 36.20707998 | 0.095180104  | 0.3376905 | 0.281856  | 0.778054 | 0.975942 |
| mrcla             | 118.5386197 | -0.017694522 | 0.2016636 | -0.087743 | 0.930081 | 0.992702 |
| si:ch73-174h16.5  | 21.5239033  | 0.039696227  | 0.439632  | 0.0902942 | 0.928053 | 0.992702 |
| CU855889.1        | 0           | NA           | NA        | NA        | NA       | NA       |
| dad1              | 1926.827312 | -0.217572476 | 0.2166661 | -1.004183 | 0.31529  | 0.866511 |
| tgm111            | 929.6539593 | 0.183493507  | 0.0903433 | 2.0310685 | 0.042248 | 0.403776 |
| tradv2.0.4        | 0           | NA           | NA        | NA        | NA       | NA       |
| zbtb49            | 146.652191  | 0.10972577   | 0.1886486 | 0.581641  | 0.560808 | 0.948728 |
| ptdss1b           | 5.775915749 | -0.072332246 | 0.7952314 | -0.090957 | 0.927526 | NA       |
| ndufc2            | 1268.894547 | -0.00410256  | 0.0912264 | -0.044971 | 0.96413  | 0.995927 |
| sfl1              | 80.73369772 | -0.088221106 | 0.22134   | -0.398577 | 0.690205 | 0.966922 |
| si:ch73-359m17.2  | 35.63511907 | -0.338099788 | 0.3578183 | -0.944892 | 0.344714 | 0.878434 |
| RF00090           | 0           | NA           | NA        | NA        | NA       | NA       |
| phtf2             | 239.8115031 | -0.038157035 | 0.1624388 | -0.234901 | 0.814286 | 0.981081 |
| BX000696.1        | 0.473290478 | -0.833892061 | 2.901156  | -0.287434 | 0.77378  | NA       |
| iqsec2a           | 207.7467525 | 0.021648358  | 0.1651586 | 0.1310762 | 0.895715 | 0.989814 |
| RF00001           | 0           | NA           | NA        | NA        | NA       | NA       |
| NHLRC3            | 435.6524713 | -0.026029426 | 0.1106906 | -0.235155 | 0.814089 | 0.981081 |
| eps8a             | 542.0579533 | 0.141612293  | 0.1070085 | 1.3233746 | 0.185711 | 0.749744 |
| crygn1            | 90.53509458 | -0.143359506 | 0.2139285 | -0.670128 | 0.502776 | 0.935304 |
| BX666065.2        | 0.157187365 | -0.955901296 | 4.0804729 | -0.234262 | 0.814781 | NA       |
| AL954698.2        | 1.496022185 | 1.07752978   | 1.7500704 | 0.6157065 | 0.538088 | NA       |
| foxal             | 206.7203847 | -0.071679878 | 0.1494998 | -0.479465 | 0.631608 | 0.957356 |
| ptpn12            | 196.5505885 | -0.074752103 | 0.1658352 | -0.450761 | 0.652162 | 0.960708 |
| ece2b             | 30.13545302 | 0.307877043  | 0.3555147 | 0.8660036 | 0.386488 | 0.89551  |
| btr24             | 2.338299129 | 1.347013405  | 1.2702671 | 1.0604174 | 0.288955 | NA       |
| eef1akmt2         | 114.3238077 | -0.092622324 | 0.2123101 | -0.43626  | 0.662648 | 0.964665 |
| ccdc77            | 139.1171852 | 0.173477016  | 0.1703169 | 1.0185541 | 0.308415 | 0.861088 |
| si:ch211-69b7.6   | 66.76898406 | -0.05095925  | 0.2439872 | -0.20886  | 0.834557 | 0.983992 |
| femlc             | 149.3138228 | -0.076021388 | 0.1694158 | -0.448727 | 0.653629 | 0.961112 |
| si:ch211-249o11.5 | 0.48448895  | 0.85344211   | 2.878836  | 0.2964539 | 0.766883 | NA       |
| nrpla             | 1139.89276  | -0.07848043  | 0.0876622 | -0.89526  | 0.370648 | 0.890626 |
| si:dkey-262g12.10 | 99.1957586  | -0.120170613 | 0.2080588 | -0.57758  | 0.563548 | 0.948739 |
| si:dkey-264f17.4  | 12.2720255  | -0.080341721 | 0.5366794 | -0.149702 | 0.881    | 0.988111 |
| si:ch211-117i20.2 | 0.817013712 | 0.525058354  | 2.1207741 | 0.2475786 | 0.80446  | NA       |
| ly6m6             | 0.158795395 | 0.967652056  | 4.0804729 | 0.2371421 | 0.812547 | NA       |
| si:dkeyp-61b2.1   | 11.57423573 | -0.869407051 | 0.6245369 | -1.392083 | 0.163897 | 0.71945  |

|                   |             |              |           |           |          |          |
|-------------------|-------------|--------------|-----------|-----------|----------|----------|
| SDK2 (1 of many)  | 66.14360774 | -0.119583373 | 0.2450986 | -0.487899 | 0.625621 | 0.957354 |
| BX005043.1        | 11.61860112 | -0.111744316 | 0.5717685 | -0.195436 | 0.845051 | 0.985174 |
| RF00001           | 0 NA        | NA           | NA        | NA        | NA       | NA       |
| ppox              | 62.87460618 | 0.053033671  | 0.2435982 | 0.2177097 | 0.827655 | 0.982721 |
| fnipl             | 763.8458382 | 0.009174526  | 0.090066  | 0.1018645 | 0.918864 | 0.991623 |
| CABZ01065425.1    | 0 NA        | NA           | NA        | NA        | NA       | NA       |
| CR381700.1        | 1.16600141  | 0.393120273  | 1.8307582 | 0.2147309 | 0.829977 | NA       |
| hamp              | 267.9921157 | 0.106316754  | 0.1548972 | 0.6863699 | 0.49248  | 0.931926 |
| plala             | 55.59483021 | 0.36777123   | 0.2610687 | 1.4087144 | 0.15892  | 0.709613 |
| emilin2b          | 307.4403812 | 0.360443894  | 0.1249032 | 2.8857849 | 0.003904 | 0.085637 |
| shroom3           | 101.2117576 | 0.166676378  | 0.2077158 | 0.8024251 | 0.422307 | 0.906561 |
| mibl              | 1177.857426 | -0.033150377 | 0.0831263 | -0.398795 | 0.690044 | 0.966857 |
| PCDH8             | 278.854054  | -0.127961424 | 0.1347081 | -0.949916 | 0.342155 | 0.878434 |
| CU694264.1        | 2.411284307 | -1.005654629 | 1.3114965 | -0.766799 | 0.443201 | NA       |
| tradv20.0         | 0 NA        | NA           | NA        | NA        | NA       | NA       |
| CPNE8             | 241.7340916 | -0.034237141 | 0.1456142 | -0.235122 | 0.814114 | 0.981081 |
| zc3h7a            | 638.8050371 | -0.040825185 | 0.0985421 | -0.414292 | 0.678661 | 0.965257 |
| si:ch73-233f7.3   | 0.173729368 | -0.955901296 | 4.0804729 | -0.234262 | 0.814781 | NA       |
| SIKE1             | 664.6669223 | 0.199237089  | 0.0943308 | 2.1121116 | 0.034677 | 0.362421 |
| man2a1            | 11.3719383  | -0.140524031 | 0.5824619 | -0.241259 | 0.809355 | 0.980642 |
| phospho2          | 166.6215914 | 0.30712721   | 0.1641695 | 1.870793  | 0.061374 | 0.482931 |
| jph3              | 543.8159084 | 0.157282641  | 0.1075255 | 1.4627473 | 0.143537 | 0.686804 |
| stc2b             | 18.58119172 | -0.632118053 | 0.5049469 | -1.251851 | 0.210624 | 0.778338 |
| L0018612.1        | 0 NA        | NA           | NA        | NA        | NA       | NA       |
| csf3a             | 20.05316394 | -0.078694854 | 0.4234315 | -0.18585  | 0.852562 | 0.985174 |
| si:dkey-16p6.1    | 16.5213468  | 0.235367767  | 0.46308   | 0.5082659 | 0.611267 | 0.95688  |
| si:ch211-227e10.6 | 8.117960422 | -0.286485845 | 0.6766225 | -0.423406 | 0.671999 | NA       |
| d1g11             | 1491.02152  | 0.050400351  | 0.076349  | 0.6601312 | 0.50917  | 0.936123 |
| RF00026           | 0 NA        | NA           | NA        | NA        | NA       | NA       |
| si:dkey-31g6.4    | 2.874032406 | -0.83422186  | 1.1453618 | -0.728348 | 0.466401 | NA       |
| si:ch211-12p12.2  | 1.56223148  | 1.028403293  | 1.650785  | 0.6229783 | 0.533299 | NA       |
| RF00026           | 0 NA        | NA           | NA        | NA        | NA       | NA       |
| HACD4             | 19.76005776 | -0.350299739 | 0.4354743 | -0.80441  | 0.42116  | 0.90651  |
| BX511079.2        | 0 NA        | NA           | NA        | NA        | NA       | NA       |
| si:ch211-205a14.7 | 3.604009881 | 0.275896284  | 1.0202682 | 0.2704155 | 0.786841 | NA       |
| gpr19             | 171.2361517 | -0.072798079 | 0.1672104 | -0.435368 | 0.663295 | 0.964736 |
| CR450749.3        | 0 NA        | NA           | NA        | NA        | NA       | NA       |
| si:dkey-171c9.3   | 14.79334174 | -0.819852081 | 0.4990047 | -1.642975 | 0.100388 | 0.602451 |
| mapk8ipla         | 879.5630853 | 0.07572615   | 0.0882239 | 0.8583408 | 0.390704 | 0.897617 |
| si:ch211-8c17.3   | 0.524057646 | 2.503896172  | 2.7289583 | 0.9175282 | 0.358866 | NA       |
| si:ch211-71n6.4   | 61.72520153 | 0.26113512   | 0.2514644 | 1.0384577 | 0.299057 | 0.855178 |
| RF00001           | 0 NA        | NA           | NA        | NA        | NA       | NA       |
| CR559945.1        | 0.166657454 | -0.955901296 | 4.0804729 | -0.234262 | 0.814781 | NA       |
| CU695223.1        | 91.27981927 | 0.263873327  | 0.2127224 | 1.2404587 | 0.214806 | 0.782493 |
| zgc:136410        | 327.5157571 | -0.019825851 | 0.1674453 | -0.118402 | 0.905749 | 0.990702 |
| si:ch211-180m24.3 | 4.466821733 | 0.552610044  | 0.9474087 | 0.5832858 | 0.559701 | NA       |
| tkl               | 521.548379  | -0.117750627 | 0.1085181 | -1.085078 | 0.277887 | 0.84162  |
| traj42            | 0 NA        | NA           | NA        | NA        | NA       | NA       |
| CU463038.2        | 12.01073063 | -0.54968821  | 0.6095426 | -0.901804 | 0.367161 | 0.887458 |
| pepd              | 361.1749349 | -0.264844588 | 0.12167   | -2.176746 | 0.0295   | 0.332709 |
| traj44            | 0 NA        | NA           | NA        | NA        | NA       | NA       |
| pdzph1            | 2.896312405 | 1.332635899  | 1.254742  | 1.0620796 | 0.2882   | NA       |
| USP34             | 555.8038729 | -0.04136661  | 0.1118883 | -0.369713 | 0.711596 | 0.969006 |
| pycrla            | 117.1863688 | -0.21265477  | 0.1939422 | -1.096486 | 0.272866 | 0.838096 |

|                   |             |              |           |           |          |          |
|-------------------|-------------|--------------|-----------|-----------|----------|----------|
| si:dkey-157e10.6  | 1.736981655 | 2.082942382  | 1.654932  | 1.2586272 | 0.208165 | NA       |
| soul3             | 468.6916516 | -0.055820837 | 0.1046775 | -0.533265 | 0.59385  | 0.954434 |
| si:dkey-1b17.1    | 45.37761292 | 0.319932397  | 0.2868808 | 1.1152104 | 0.26476  | 0.830616 |
| tradv40.0         | 0           | NA           | NA        | NA        | NA       | NA       |
| RSPH1             | 90.15463972 | 0.24064575   | 0.2093869 | 1.1492876 | 0.250437 | 0.820164 |
| si:dkey-179k24.5  | 1.860531078 | -0.27038751  | 1.3850158 | -0.195223 | 0.845218 | NA       |
| trim35-22         | 0           | NA           | NA        | NA        | NA       | NA       |
| smarcall          | 83.14603228 | -0.102994644 | 0.2143808 | -0.480428 | 0.630923 | 0.957354 |
| isg2012           | 114.6433542 | 0.037883551  | 0.2146739 | 0.1764702 | 0.859925 | 0.985773 |
| znf750            | 42.6293366  | 0.131255702  | 0.3236897 | 0.4054985 | 0.685111 | 0.966146 |
| si:dkey-203a12.2  | 0.341366344 | 1.891903201  | 3.2128156 | 0.5888614 | 0.555954 | NA       |
| coro6             | 35.37891007 | 0.084820455  | 0.3248865 | 0.2610772 | 0.794033 | 0.977937 |
| si:ch211-229110.9 | 1.17979872  | 1.405194507  | 1.8768877 | 0.7486833 | 0.454048 | NA       |
| aaas              | 273.2298652 | -0.149737051 | 0.1291029 | -1.159827 | 0.246119 | 0.816291 |
| lamal             | 216.754102  | -0.238321105 | 0.1678353 | -1.41997  | 0.155616 | 0.705771 |
| CR388413.3        | 0           | NA           | NA        | NA        | NA       | NA       |
| zmizlb            | 99.8901455  | -0.122954513 | 0.2020216 | -0.608621 | 0.542776 | 0.944974 |
| CR391937.1        | 0.31437473  | -1.788572922 | 3.5930657 | -0.497785 | 0.618636 | NA       |
| slcolfl           | 0           | NA           | NA        | NA        | NA       | NA       |
| CABZ01056321.1    | 257.9008859 | 0.036094797  | 0.1426871 | 0.2529648 | 0.800295 | 0.979377 |
| eef1da            | 5032.069636 | -0.19105373  | 0.0858505 | -2.225422 | 0.026053 | 0.311101 |
| CU013526.1        | 0.349228403 | 0.005884014  | 3.2372587 | 0.0018176 | 0.99855  | NA       |
| fbxolla           | 1081.825073 | 0.052478316  | 0.0854905 | 0.6138497 | 0.539315 | 0.943836 |
| dnaja3b           | 230.0878963 | 0.020753394  | 0.1454553 | 0.1426788 | 0.886544 | 0.988936 |
| zgc:175177        | 5.141781473 | 0.449330973  | 0.8425479 | 0.5333002 | 0.593826 | NA       |
| CU929307.1        | 0           | NA           | NA        | NA        | NA       | NA       |
| excl8b.1          | 44.19031497 | -0.379729486 | 0.354255  | -1.07191  | 0.28376  | 0.84466  |
| ca9               | 46.26541644 | -0.030560481 | 0.2844165 | -0.10745  | 0.914432 | 0.991119 |
| CR855379.3        | 0.63518158  | 2.807133192  | 2.749971  | 1.0207865 | 0.307356 | NA       |
| trim35-21         | 1.146871855 | -2.468097658 | 1.9212996 | -1.284598 | 0.198933 | NA       |
| svbp              | 157.0944959 | -0.184066324 | 0.1764014 | -1.043452 | 0.296739 | 0.853798 |
| taf2              | 628.8077581 | -0.023450385 | 0.0969786 | -0.24181  | 0.808927 | 0.980642 |
| ttc39c            | 674.602573  | 0.16681372   | 0.0953265 | 1.7499204 | 0.080132 | 0.549631 |
| si:ch211-156118.8 | 25.90909496 | 0.290646727  | 0.3940326 | 0.7376209 | 0.460745 | 0.921978 |
| scn5lab           | 13.86991549 | 0.141654917  | 0.5417846 | 0.2614598 | 0.793738 | 0.977937 |
| si:dkey-237m9.2   | 0           | NA           | NA        | NA        | NA       | NA       |
| rpl26             | 2.514065613 | 1.01440179   | 1.2390597 | 0.8186868 | 0.412965 | NA       |
| il6               | 9.439670568 | -1.114509848 | 0.6346051 | -1.756226 | 0.07905  | NA       |
| si:dkey-196h17.9  | 3.185928651 | -1.123887219 | 1.1211858 | -1.002409 | 0.316146 | NA       |
| mobla             | 519.956345  | -0.01952816  | 0.1181041 | -0.165347 | 0.868671 | 0.987245 |
| si:ch73-299h12.1  | 39.99798499 | -0.110902005 | 0.3443393 | -0.322072 | 0.747398 | 0.97419  |
| ehmt2             | 303.1124738 | -0.198539949 | 0.1329331 | -1.493533 | 0.135298 | 0.670689 |
| rafla             | 0           | NA           | NA        | NA        | NA       | NA       |
| or106-11          | 1.981637754 | 1.614243472  | 1.4549645 | 1.1094728 | 0.267226 | NA       |
| spintla           | 1621.493057 | -0.029486224 | 0.0844147 | -0.349302 | 0.726863 | 0.970402 |
| fcfl              | 460.4295159 | 0.029480294  | 0.1363211 | 0.2162563 | 0.828788 | 0.982721 |
| SH3RF3            | 10.78408175 | -0.197512719 | 0.6297483 | -0.313638 | 0.753796 | NA       |
| anol              | 250.2418957 | 0.010674248  | 0.149539  | 0.071381  | 0.943095 | 0.993364 |
| SLC5A7            | 19.74626229 | -0.033347505 | 0.4386571 | -0.076022 | 0.939402 | 0.992857 |
| ptarl             | 158.8435652 | 0.074046194  | 0.1808199 | 0.4095026 | 0.682171 | 0.965476 |
| si:dkey-5n7.2     | 2.163857688 | 0.21442682   | 1.2786875 | 0.1676929 | 0.866825 | NA       |
| ptn               | 1332.771513 | 0.114297805  | 0.0804383 | 1.4209367 | 0.155335 | 0.705142 |
| sugct             | 19.26044847 | -0.097769643 | 0.4307062 | -0.226998 | 0.820425 | 0.981594 |
| CR925800.1        | 0           | NA           | NA        | NA        | NA       | NA       |

|                   |             |              |           |           |          |          |
|-------------------|-------------|--------------|-----------|-----------|----------|----------|
| si:dkey-243k1.3   | 0.166657454 | -0.955901296 | 4.0804729 | -0.234262 | 0.814781 | NA       |
| cep551            | 130.9092226 | -0.105682766 | 0.1807804 | -0.584592 | 0.558822 | 0.948478 |
| ddx47             | 319.5458706 | -0.228772598 | 0.1304265 | -1.754034 | 0.079425 | 0.547489 |
| scp2b             | 668.7364804 | -0.103298312 | 0.0956389 | -1.080087 | 0.280104 | 0.843423 |
| CR854899.1        | 0           | NA           | NA        | NA        | NA       | NA       |
| si:dkey-261o4.9   | 0.158915748 | 0.967652056  | 4.0804729 | 0.2371421 | 0.812547 | NA       |
| si:ch211-11p18.6  | 0.166657454 | -0.955901296 | 4.0804729 | -0.234262 | 0.814781 | NA       |
| slc25a12          | 1874.34695  | 0.096075633  | 0.0871858 | 1.101964  | 0.270477 | 0.835266 |
| si:ch73-138e16.4  | 62.90377591 | 0.11759707   | 0.2560272 | 0.4593147 | 0.646008 | 0.96029  |
| si:dkey-202122.6  | 642.2011422 | -0.004394853 | 0.2350579 | -0.018697 | 0.985083 | 0.996944 |
| eloa              | 770.1087179 | -0.067915655 | 0.0965101 | -0.703715 | 0.48161  | 0.928386 |
| micall2a          | 96.21241506 | -0.173033582 | 0.2037023 | -0.849443 | 0.395635 | 0.899378 |
| ndfip11           | 479.9716132 | 0.023008046  | 0.1109479 | 0.207377  | 0.835715 | 0.984089 |
| trim35-23         | 0.530029684 | -0.939524117 | 2.7937867 | -0.336291 | 0.736652 | NA       |
| znf1094           | 4.539151659 | -0.179604214 | 0.9456443 | -0.189928 | 0.849366 | NA       |
| CU570769.1        | 104.9366179 | 0.082972321  | 0.1933551 | 0.429119  | 0.667837 | 0.964736 |
| col4a3bpb         | 476.3123429 | -0.05361275  | 0.114632  | -0.467694 | 0.640003 | 0.959994 |
| si:dkeyp-13d12.20 | 0           | NA           | NA        | NA        | NA       | NA       |
| si:ch211-204c21.1 | 1.273641835 | -0.001638802 | 1.7360344 | -0.000944 | 0.999247 | NA       |
| slc6a16b          | 70.20777747 | 0.03016185   | 0.2393755 | 0.1260023 | 0.89973  | 0.990121 |
| si:zfos-80g12.1   | 241.290107  | 0.015104007  | 0.1392668 | 0.1084538 | 0.913636 | 0.991119 |
| cnm4a             | 11.92360819 | 0.649873893  | 0.549819  | 1.1819779 | 0.237214 | 0.806236 |
| slc44a4           | 135.7594466 | -0.09001285  | 0.1768456 | -0.508991 | 0.610758 | 0.95688  |
| CR774179.2        | 7.356261892 | 0.336150166  | 0.7487369 | 0.4489563 | 0.653463 | NA       |
| slc39a14          | 24.1746809  | 0.065015684  | 0.401294  | 0.1620151 | 0.871294 | 0.987754 |
| ved               | 7.472238877 | -0.448339444 | 0.6846652 | -0.65483  | 0.512577 | NA       |
| RF00003           | 0           | NA           | NA        | NA        | NA       | NA       |
| CU062645.1        | 0.481032184 | -2.398473301 | 2.80721   | -0.854398 | 0.392885 | NA       |
| ap1g1             | 689.4344768 | -0.074492764 | 0.099763  | -0.746698 | 0.455246 | 0.921207 |
| CU658285.1        | 0           | NA           | NA        | NA        | NA       | NA       |
| cnm1b             | 41.22718979 | -0.114322276 | 0.3250132 | -0.351747 | 0.725028 | 0.970402 |
| znf1001           | 2.424319057 | 0.919528807  | 1.3334844 | 0.6895685 | 0.490466 | NA       |
| fut11             | 108.9025503 | 0.243992569  | 0.1985124 | 1.2291052 | 0.219032 | 0.785734 |
| cry2              | 889.969349  | -0.023019643 | 0.0917858 | -0.250797 | 0.801971 | 0.979492 |
| si:ch211-165e15.1 | 47.5308834  | 0.295435776  | 0.2959316 | 0.9983244 | 0.318122 | 0.867746 |
| cep97             | 228.9760982 | 0.058468905  | 0.1421648 | 0.4112755 | 0.680871 | 0.965476 |
| traj46            | 0           | NA           | NA        | NA        | NA       | NA       |
| CR381540.2        | 0           | NA           | NA        | NA        | NA       | NA       |
| CR847850.1        | 4.299140718 | -1.791931195 | 1.1343514 | -1.579697 | 0.114176 | NA       |
| eci2              | 1235.180945 | -0.143131465 | 0.0830516 | -1.723403 | 0.084816 | 0.560519 |
| myhz1.1           | 3335.504462 | -0.036738768 | 0.0676327 | -0.54321  | 0.586985 | 0.953319 |
| scinla            | 2855.236578 | 0.11938279   | 0.0968088 | 1.2331806 | 0.217508 | 0.784786 |
| psmd7             | 836.4392112 | -0.074534331 | 0.1086986 | -0.685697 | 0.492904 | 0.931926 |
| enc2              | 97.18652481 | 0.106970419  | 0.2208108 | 0.4844437 | 0.628071 | 0.957354 |
| azi2              | 105.1520958 | 0.071086963  | 0.2124754 | 0.3345656 | 0.737953 | 0.972535 |
| RF00001           | 0           | NA           | NA        | NA        | NA       | NA       |
| si:ch211-114m9.1  | 22.8253219  | 0.079167672  | 0.4019784 | 0.1969451 | 0.843871 | 0.985174 |
| zgc:165519        | 2.599899573 | 1.145129811  | 1.2328342 | 0.9288595 | 0.352962 | NA       |
| BX088544.1        | 20.70432187 | -0.382795555 | 0.4175299 | -0.91681  | 0.359242 | 0.884762 |
| opn6a             | 292.2771256 | 0.308234521  | 0.1427569 | 2.159157  | 0.030838 | 0.33998  |
| CT027744.2        | 16.95670649 | -0.300047788 | 0.4832828 | -0.620853 | 0.534696 | 0.943336 |
| si:dkey-261j11.3  | 1.617365069 | 0.545179     | 1.5109235 | 0.360825  | 0.71823  | NA       |
| syt14             | 112.5607279 | 0.1652836    | 0.1923477 | 0.8592959 | 0.390177 | 0.89724  |
| si:dkey-13m1.2    | 1.173983821 | -0.423780316 | 1.7585267 | -0.240986 | 0.809566 | NA       |

|                   |             |              |           |           |          |          |
|-------------------|-------------|--------------|-----------|-----------|----------|----------|
| plekhf1           | 244.4950324 | -0.78858166  | 0.1527646 | -5.162072 | 2.44E-07 | 3.04E-05 |
| si:ch211-194b1.1  | 24.74921053 | 0.130960869  | 0.384334  | 0.3407476 | 0.733294 | 0.97199  |
| CABZ01080434.1    | 2.370162906 | 0.398747524  | 1.2679669 | 0.3144779 | 0.753158 | NA       |
| ctnnal            | 1717.449379 | -0.103272167 | 0.0862021 | -1.198023 | 0.230908 | 0.799177 |
| folr              | 144.7126827 | -0.708682449 | 0.18603   | -3.809505 | 0.000139 | 0.006418 |
| shank2a           | 285.8858533 | 0.189934276  | 0.1353167 | 1.4036274 | 0.16043  | 0.71328  |
| si:dkey-22o22.2   | 202.3229295 | -0.209370214 | 0.1527661 | -1.370528 | 0.170522 | 0.728116 |
| BX511025.1        | 0           | NA           | NA        | NA        | NA       | NA       |
| gdpd4a            | 6.112134727 | -0.39463125  | 0.8319523 | -0.474344 | 0.635255 | NA       |
| BX322657.1        | 6.009652954 | -0.282435232 | 0.8330079 | -0.339055 | 0.734569 | NA       |
| CU571328.1        | 0.471562095 | -2.373056629 | 3.0645586 | -0.774355 | 0.438721 | NA       |
| EIF3ha            | 2191.936558 | -0.183306664 | 0.1110257 | -1.651029 | 0.098733 | 0.598327 |
| slcla2b           | 14054.44954 | 0.113371642  | 0.067283  | 1.6849964 | 0.091989 | 0.57849  |
| FP016142.6        | 0.341486697 | 1.892317624  | 3.2124068 | 0.5890654 | 0.555817 | NA       |
| znf1133           | 10.26707252 | -0.178718234 | 0.5965085 | -0.299607 | 0.764477 | NA       |
| cfhl4             | 1192.438376 | 0.241140612  | 0.1236759 | 1.9497784 | 0.051203 | 0.443542 |
| hip1rb            | 350.265208  | -0.085395489 | 0.1299632 | -0.657074 | 0.511133 | 0.936253 |
| olfcg5            | 0.166657454 | -0.955901296 | 4.0804729 | -0.234262 | 0.814781 | NA       |
| si:ch73-170d6.4   | 1.862300746 | 0.281439365  | 1.362817  | 0.2065129 | 0.83639  | NA       |
| CR354372.1        | 125.9453922 | -0.116618875 | 0.196679  | -0.59294  | 0.553221 | 0.947265 |
| BX088535.1        | 0           | NA           | NA        | NA        | NA       | NA       |
| cox18             | 169.9374464 | 0.018170468  | 0.1733079 | 0.104845  | 0.916499 | 0.991349 |
| wnt5b             | 269.3563784 | 0.133562413  | 0.1295145 | 1.0312547 | 0.302421 | 0.85729  |
| tradv24.0.1       | 0           | NA           | NA        | NA        | NA       | NA       |
| si:dkey-7114.5    | 6.173907734 | -1.059992448 | 0.8469011 | -1.251613 | 0.210711 | NA       |
| mpp7a             | 375.492352  | 0.201844574  | 0.1152974 | 1.7506427 | 0.080007 | 0.54952  |
| trak2             | 103.0803603 | -0.127628562 | 0.1973954 | -0.646563 | 0.517915 | 0.938592 |
| btbd17b           | 164.5590393 | 0.322081862  | 0.1715385 | 1.8776072 | 0.060435 | 0.480058 |
| zgc:171673        | 135.3803624 | 0.275886721  | 0.2056317 | 1.3416544 | 0.179708 | 0.741062 |
| dusp16            | 376.0283619 | 0.01549753   | 0.1387505 | 0.1116935 | 0.911066 | 0.991066 |
| si:dkey-3p4.1     | 9.218494456 | 0.396151359  | 0.6581843 | 0.6018851 | 0.547251 | NA       |
| stard4            | 165.7568912 | -0.205060922 | 0.1577031 | -1.300297 | 0.193499 | 0.757219 |
| ADAMTS7           | 37.14095191 | 0.587409266  | 0.3175097 | 1.8500512 | 0.064306 | 0.496087 |
| BX005417.2        | 7.824333568 | -0.538017462 | 0.6795058 | -0.791778 | 0.42849  | NA       |
| zgc:165573        | 252.6696956 | -0.283774022 | 0.136019  | -2.086283 | 0.036953 | 0.376072 |
| numal             | 353.7648084 | -0.267371352 | 0.1238447 | -2.158924 | 0.030856 | 0.33998  |
| si:ch73-359m17.11 | 1.155833789 | -1.281252378 | 1.8785909 | -0.682028 | 0.495221 | NA       |
| FO704745.1        | 1.569973187 | 0.368412993  | 1.6311592 | 0.2258596 | 0.821311 | NA       |
| asb2b             | 183.2687925 | 0.030539544  | 0.1630792 | 0.1872682 | 0.85145  | 0.985174 |
| gpr142            | 3.303736697 | -0.612063836 | 1.0547521 | -0.580292 | 0.561718 | NA       |
| ticaml            | 118.8333237 | -0.23499142  | 0.2000356 | -1.174748 | 0.240096 | 0.808111 |
| CR847898.4        | 5.734852341 | 1.503745231  | 0.8579203 | 1.7527796 | 0.07964  | NA       |
| BX511227.1        | 0.5046461   | -2.45370851  | 2.7629627 | -0.888072 | 0.374502 | NA       |
| hoxa5a            | 106.8741816 | 0.147721872  | 0.2037354 | 0.7250673 | 0.468411 | 0.924328 |
| lrp2a             | 1123.479084 | -0.027788268 | 0.0857042 | -0.324235 | 0.74576  | 0.97419  |
| cript             | 460.8620638 | -0.055610947 | 0.1116247 | -0.498196 | 0.618346 | 0.957354 |
| kdm8              | 52.81768983 | -0.229388405 | 0.2740524 | -0.837024 | 0.402579 | 0.90084  |
| FO704822.1        | 15.01967548 | -0.211082599 | 0.5265123 | -0.400907 | 0.688488 | 0.966672 |
| BX323596.2        | 0.158795395 | 0.967652056  | 4.0804729 | 0.2371421 | 0.812547 | NA       |
| CR847504.1        | 0           | NA           | NA        | NA        | NA       | NA       |
| crtac1b           | 30.25922794 | 0.014325707  | 0.3479191 | 0.0411754 | 0.967156 | 0.996315 |
| CR855206.2        | 0.182570949 | 0.967652056  | 4.0804729 | 0.2371421 | 0.812547 | NA       |
| cc133.2           | 0.158915748 | 0.967652056  | 4.0804729 | 0.2371421 | 0.812547 | NA       |
| si:dkey-225f23.4  | 7.017761589 | 0.603193514  | 0.7301794 | 0.8260894 | 0.408753 | NA       |

|                    |             |              |           |           |          |          |
|--------------------|-------------|--------------|-----------|-----------|----------|----------|
| si:dkey-161111.74  |             | 0 NA         | NA        | NA        | NA       | NA       |
| lck                | 3.369830137 | 0.61733776   | 1.0644415 | 0.579964  | 0.561939 | NA       |
| AL935126.1         | 8.012210017 | -0.106631478 | 0.6670317 | -0.15986  | 0.872992 | NA       |
| pimr182            | 5.514634083 | -0.794441338 | 0.8360437 | -0.950239 | 0.341991 | NA       |
| anapc11            | 156.2433985 | -0.234167817 | 0.1625806 | -1.440318 | 0.149777 | 0.697935 |
| homer3a            | 11.77610388 | 0.451557115  | 0.5505448 | 0.8202004 | 0.412102 | 0.904328 |
| si:ch73-281i18.4   | 29.24055148 | 0.252981102  | 0.3842427 | 0.6583888 | 0.510288 | 0.936253 |
| si:cabz01007816.2  | 2.137416509 | 0.683965003  | 1.3227642 | 0.5170725 | 0.605106 | NA       |
| mccc1              | 1034.969838 | -0.019326132 | 0.0850397 | -0.22726  | 0.820222 | 0.981594 |
| CR450832.1         | 5.967341578 | 0.326211787  | 0.793886  | 0.410905  | 0.681142 | NA       |
| si:ch211-268b14.2  | 10.67568905 | -0.454168228 | 0.5820522 | -0.780288 | 0.435221 | NA       |
| CR762475.2         |             | 0 NA         | NA        | NA        | NA       | NA       |
| AL928951.1         | 0.341366344 | 1.891903201  | 3.2128156 | 0.5888614 | 0.555954 | NA       |
| cdk11b             | 1249.44874  | -0.026292921 | 0.0949526 | -0.276906 | 0.781852 | 0.97627  |
| jazfla             | 41.06725013 | -0.018948502 | 0.31037   | -0.061051 | 0.951318 | 0.99381  |
| traj6              |             | 0 NA         | NA        | NA        | NA       | NA       |
| zgc:112433         | 18.74043606 | -0.125683781 | 0.4365199 | -0.287922 | 0.773406 | 0.975687 |
| si:dkey-33i11.9    | 337.5139682 | -0.578580235 | 0.1258044 | -4.599046 | 4.24E-06 | 0.000353 |
| nfat5b             | 16.57070874 | -0.372634041 | 0.4726884 | -0.788329 | 0.430504 | 0.912117 |
| ftr87              | 13.85156017 | 0.622165571  | 0.5318742 | 1.1697607 | 0.242097 | 0.810733 |
| pde6ha             | 4228.785303 | 0.366025772  | 0.0788958 | 4.6393586 | 3.49E-06 | 0.000298 |
| si:dkey-16p19.5    | 6.684807586 | 0.743488909  | 0.751525  | 0.989307  | 0.322513 | NA       |
| AL645691.1         | 0.951525399 | 2.173186616  | 2.1269879 | 1.0217203 | 0.306913 | NA       |
| RF00001            |             | 0 NA         | NA        | NA        | NA       | NA       |
| gfal1b             | 89.36925173 | 0.425528134  | 0.216663  | 1.964009  | 0.049529 | 0.436253 |
| vasnb              | 477.7669712 | 0.096893986  | 0.1072569 | 0.9033826 | 0.366323 | 0.887239 |
| fam102aa           | 29.26980302 | 0.280485012  | 0.349347  | 0.8028837 | 0.422042 | 0.90651  |
| si:ch73-106k19.2   | 3.906636699 | 0.026207529  | 1.0557753 | 0.024823  | 0.980196 | NA       |
| polr3a             | 215.6206906 | -0.134483114 | 0.1459001 | -0.921748 | 0.35666  | 0.883422 |
| CR678435.1         |             | 0 NA         | NA        | NA        | NA       | NA       |
| metap2b            | 2403.109989 | 0.088761867  | 0.075822  | 1.1706612 | 0.241735 | 0.810593 |
| si:ch211-260e23.9  | 742.6632623 | -0.038322864 | 0.0984466 | -0.389276 | 0.697072 | 0.96736  |
| si:ch73-21d24.1    | 2.871517134 | 0.541551631  | 1.1739678 | 0.4613002 | 0.644583 | NA       |
| si:ch211-106j21.2  | 9.483424802 | -0.236983768 | 0.6198027 | -0.382354 | 0.702199 | NA       |
| mif4gdb            | 76.33849955 | 0.05983349   | 0.2314237 | 0.2585453 | 0.795986 | 0.978498 |
| BX323855.2         | 1.105255998 | -0.398330741 | 1.974669  | -0.20172  | 0.840135 | NA       |
| CU571310.1         | 26.80885009 | -0.445071509 | 0.4351052 | -1.022905 | 0.306353 | 0.860027 |
| si:dkeyp-44b5.5    | 7.03190442  | 0.051784112  | 0.7427964 | 0.0697151 | 0.94442  | NA       |
| il4r.1             | 110.603634  | -0.318910293 | 0.2004903 | -1.590652 | 0.111688 | 0.627242 |
| cpne7              | 49.56321143 | -0.043611188 | 0.3031046 | -0.143882 | 0.885594 | 0.988936 |
| fam160a1b          | 67.38525033 | -0.047009135 | 0.2539905 | -0.185082 | 0.853165 | 0.985174 |
| zgc:152938         | 86.7523976  | -0.198901943 | 0.2331198 | -0.853218 | 0.393539 | 0.898076 |
| mios               | 347.9676614 | -0.064172193 | 0.1240356 | -0.517369 | 0.604898 | 0.95651  |
| sp100.2            | 2.435798677 | -0.155791943 | 1.2619496 | -0.123453 | 0.901748 | NA       |
| polr3h             | 271.0953794 | 0.070348322  | 0.1302848 | 0.5399579 | 0.589226 | 0.953345 |
| btr30              | 17.12457487 | -0.483888851 | 0.4901263 | -0.987274 | 0.323508 | 0.870837 |
| tradv17.0          |             | 0 NA         | NA        | NA        | NA       | NA       |
| si:ch211-214b16.2  | 33.52390278 | 0.457018548  | 0.3733483 | 1.2241076 | 0.220912 | 0.787641 |
| zgc:194627         | 139.9314934 | 0.01506556   | 0.1938989 | 0.077698  | 0.938068 | 0.99279  |
| si:dkey-250k10.1   | 6.155565788 | 0.728776426  | 0.7829694 | 0.9307854 | 0.351965 | NA       |
| si:ch1073-392o20.2 | 725.6551801 | -0.008235941 | 0.1079781 | -0.076274 | 0.939201 | 0.992857 |
| si:dkey-15h8.15    | 87.97448658 | -0.049284792 | 0.2066557 | -0.238487 | 0.811503 | 0.981081 |
| si:ch211-220m17.4  | 4.495850843 | -3.609422925 | 1.2778773 | -2.824546 | 0.004735 | NA       |
| BX323837.1         | 0.157187365 | -0.955901296 | 4.0804729 | -0.234262 | 0.814781 | NA       |

|                  |             |              |           |           |          |          |
|------------------|-------------|--------------|-----------|-----------|----------|----------|
| CU929054.1       | 3.967580536 | -0.744288166 | 0.9588404 | -0.776238 | 0.437609 | NA       |
| znf1158          | 70.51143154 | -0.431832876 | 0.2381561 | -1.813234 | 0.069796 | 0.515747 |
| pmpca            | 737.8988227 | 0.116433908  | 0.1015461 | 1.1466111 | 0.251542 | 0.820927 |
| zgc:109986       | 110.0298578 | -0.180487921 | 0.1984712 | -0.909391 | 0.363144 | 0.885944 |
| r3hdm2           | 19.11410085 | -0.015352466 | 0.4669022 | -0.032882 | 0.973769 | 0.996315 |
| stmdl            | 1.188917794 | -1.322455875 | 1.8672776 | -0.708227 | 0.478804 | NA       |
| slc15a4          | 38.57845289 | 0.261397885  | 0.3248886 | 0.8045769 | 0.421064 | 0.90651  |
| or106-4          | 0.158795395 | 0.967652056  | 4.0804729 | 0.2371421 | 0.812547 | NA       |
| fra10ac1         | 96.04517702 | -0.231248765 | 0.204182  | -1.132562 | 0.257398 | 0.825314 |
| si:dkey-3h2.3    | 6.641788913 | -0.742508624 | 0.7463036 | -0.994915 | 0.319778 | NA       |
| timp4.2          | 1.662397649 | 0.59386351   | 1.4705481 | 0.4038382 | 0.686332 | NA       |
| utpl8            | 32.62487564 | -0.062170486 | 0.3347032 | -0.185748 | 0.852642 | 0.985174 |
| kif22            | 712.0331812 | -0.14587335  | 0.093294  | -1.563587 | 0.117915 | 0.641446 |
| tradv21.0        |             | 0 NA         | NA        | NA        | NA       | NA       |
| frem2b           | 1017.828778 | 0.203364679  | 0.0865703 | 2.3491279 | 0.018817 | 0.255627 |
| hoxc11b          | 12.72588829 | 0.692566159  | 0.594294  | 1.1653594 | 0.243874 | 0.813336 |
| ubc              | 18163.91611 | -0.017642294 | 0.0679968 | -0.259458 | 0.795282 | 0.978466 |
| parn             | 1372.078621 | -0.105056986 | 0.0794635 | -1.322078 | 0.186142 | 0.750443 |
| znf1037          | 2.44255057  | 1.423872034  | 1.2746055 | 1.1171081 | 0.263948 | NA       |
| trmt9b           | 146.8519087 | 0.43369335   | 0.1696429 | 2.5565074 | 0.010573 | 0.17767  |
| RF00001          | 0.476386185 | 2.392464142  | 3.0533824 | 0.7835455 | 0.433307 | NA       |
| si:rp71-7119.2   | 2.598558992 | 0.351393069  | 1.1747479 | 0.2991221 | 0.764847 | NA       |
| si:dkey-29d5.2   | 0.81902083  | -3.15978573  | 2.3136362 | -1.365723 | 0.172026 | NA       |
| pdia3            | 3956.718043 | -0.090092113 | 0.0874853 | -1.029797 | 0.303105 | 0.85729  |
| CR925761.3       | 19.39029036 | -0.747508998 | 0.4585831 | -1.63004  | 0.103093 | 0.609625 |
| chmpla           | 976.1030955 | -0.19265634  | 0.1058978 | -1.819267 | 0.068871 | 0.513259 |
| BX927193.1       | 0.182570949 | 0.967652056  | 4.0804729 | 0.2371421 | 0.812547 | NA       |
| usp47            | 1126.137689 | -0.096012759 | 0.0877218 | -1.094515 | 0.273729 | 0.838381 |
| BX248331.2       | 230.2282735 | 0.353868474  | 0.1399837 | 2.5279269 | 0.011474 | 0.187043 |
| lman21a          | 226.7523286 | -0.076567747 | 0.1468779 | -0.521302 | 0.602156 | 0.956045 |
| zgc:174624       | 59.24667252 | 0.074335351  | 0.2726772 | 0.272613  | 0.785151 | 0.97627  |
| si:dkeyp-107f9.2 | 0.158795395 | 0.967652056  | 4.0804729 | 0.2371421 | 0.812547 | NA       |
| BX511077.1       | 0.836703993 | -0.435975661 | 2.3515416 | -0.1854   | 0.852915 | NA       |
| or106-12         | 0.157187365 | -0.955901296 | 4.0804729 | -0.234262 | 0.814781 | NA       |
| slc16a5b         | 1.474441884 | 0.915576659  | 1.7598873 | 0.5202473 | 0.602891 | NA       |
| or129-1          | 7.858599771 | 0.188566057  | 0.6922018 | 0.2724149 | 0.785303 | NA       |
| dpyda.1          | 8.04517367  | -0.113804712 | 0.6679336 | -0.170383 | 0.864709 | NA       |
| si:dkey-26i24.1  | 11.75078591 | 0.261227298  | 0.5642459 | 0.4629671 | 0.643388 | 0.959994 |
| ckap5            | 3124.459321 | 0.000361776  | 0.076027  | 0.0047585 | 0.996203 | 0.998888 |
| F0818743.1       | 6.047092936 | 0.31410839   | 0.7906039 | 0.3973019 | 0.691145 | NA       |
| RF00001          |             | 0 NA         | NA        | NA        | NA       | NA       |
| znf1181          | 47.3643869  | 0.157707834  | 0.3086603 | 0.510943  | 0.609391 | 0.956718 |
| FP074874.1       | 76.43075118 | -0.162686457 | 0.2279491 | -0.713696 | 0.475415 | 0.925919 |
| CR847844.2       | 6.000294344 | 0.223079234  | 0.8227671 | 0.2711329 | 0.786289 | NA       |
| CR626941.1       | 1.880104261 | 1.476230477  | 1.5562473 | 0.9485835 | 0.342833 | NA       |
| lrrc1            | 386.8846493 | -0.149801764 | 0.1119746 | -1.33782  | 0.180955 | 0.741776 |
| CABZ01085139.1   | 64.34694954 | -0.071103124 | 0.2508661 | -0.283431 | 0.776847 | 0.975826 |
| BX663516.2       | 18.21306473 | 0.39536958   | 0.5361291 | 0.7374522 | 0.460847 | 0.921978 |
| rims2b           | 852.2275712 | 0.205594825  | 0.08948   | 2.2976624 | 0.021581 | 0.27819  |
| BX005336.1       | 1.309244368 | -0.052793947 | 1.7430703 | -0.030288 | 0.975837 | NA       |
| CU570769.2       | 2.716646616 | 0.787868982  | 1.1885074 | 0.6629063 | 0.507391 | NA       |
| dnajc11b         | 319.6127434 | 0.107656749  | 0.1399459 | 0.7692741 | 0.441731 | 0.916336 |
| BX005124.3       |             | 0 NA         | NA        | NA        | NA       | NA       |
| evalba           | 193.9371769 | 0.236746343  | 0.1529433 | 1.5479357 | 0.121638 | 0.648319 |



|                    |             |              |           |           |          |          |
|--------------------|-------------|--------------|-----------|-----------|----------|----------|
| Irrn3b             | 885.0276454 | 0.028934222  | 0.0933789 | 0.3098582 | 0.756669 | 0.975374 |
| CR848025.2         | 1.836875877 | -0.294336615 | 1.4032906 | -0.209747 | 0.833865 | NA       |
| si:ch1073-376c22.1 | 1.879942623 | 1.423332496  | 1.4765853 | 0.9639351 | 0.335078 | NA       |
| otud6b             | 275.4150486 | -0.143031897 | 0.1317623 | -1.08553  | 0.277687 | 0.841383 |
| BX511128.3         | 69.74147708 | -0.11860952  | 0.2326415 | -0.509838 | 0.610165 | 0.95688  |
| CR848032.1         | 1.951199418 | -2.325314723 | 1.5771185 | -1.474407 | 0.140372 | NA       |
| CU138533.2         | 11.5447361  | 0.347697275  | 0.5723978 | 0.60744   | 0.543559 | 0.945438 |
| CR376766.3         | 0           | NA           | NA        | NA        | NA       | NA       |
| si:ch211-205a14.1  | 15.47967514 | -0.913779514 | 0.5119939 | -1.784747 | 0.074302 | 0.530996 |
| si:dkey-13n23.3    | 0.158915748 | 0.967652056  | 4.0804729 | 0.2371421 | 0.812547 | NA       |
| CU469532.1         | 19.15630975 | 0.05727132   | 0.4316405 | 0.1326829 | 0.894444 | 0.989689 |
| AL645691.2         | 8.49507085  | 0.551024351  | 0.6931139 | 0.7949982 | 0.426615 | NA       |
| tmem42a            | 84.58547797 | -0.070913644 | 0.2106931 | -0.336573 | 0.736439 | 0.972535 |
| pcdh2ab3           | 0           | NA           | NA        | NA        | NA       | NA       |
| zgc:123284         | 6.330191112 | 0.295709768  | 0.7482151 | 0.3952202 | 0.69268  | NA       |
| itih3b             | 81.37908653 | 0.232790029  | 0.2370581 | 0.9819957 | 0.326102 | 0.872073 |
| zgc:153039         | 36.46474821 | 0.062279721  | 0.3256346 | 0.1912565 | 0.848325 | 0.985174 |
| CT737184.1         | 1.94316652  | 2.217275299  | 1.6598148 | 1.3358571 | 0.181596 | NA       |
| si:ch73-182e20.4   | 0.31437473  | -1.788572922 | 3.5930657 | -0.497785 | 0.618636 | NA       |
| CR762480.2         | 4.309418247 | 0.242014842  | 0.9082244 | 0.2664703 | 0.789877 | NA       |
| SAMD9              | 0.538871265 | 0.999144257  | 2.7784799 | 0.359601  | 0.719146 | NA       |
| mapk10             | 136.3861919 | -0.067258227 | 0.1774707 | -0.378982 | 0.704701 | 0.968134 |
| si:ch73-299h12.2   | 4.156302856 | 0.362739417  | 0.9691047 | 0.3743036 | 0.708178 | NA       |
| dre-mir-7147       | 0.31759079  | 1.807926197  | 3.579045  | 0.5051421 | 0.613459 | NA       |
| wdr48a             | 83.07843867 | -0.03616719  | 0.2309671 | -0.15659  | 0.875568 | 0.987881 |
| sars2              | 139.6449626 | -0.046847647 | 0.1833716 | -0.255479 | 0.798353 | 0.978884 |
| sumo2b             | 1793.481202 | -0.200711415 | 0.0892125 | -2.249813 | 0.024461 | 0.3019   |
| bmpr1bb            | 143.9972576 | -0.128039047 | 0.1766293 | -0.724903 | 0.468512 | 0.924328 |
| mgst3a             | 1006.481642 | -0.117750321 | 0.0863226 | -1.364073 | 0.172544 | 0.731348 |
| tmem39a            | 208.6448876 | 0.206499495  | 0.163115  | 1.2659745 | 0.205522 | 0.773646 |
| cdh1               | 2061.890718 | 0.117983445  | 0.0806718 | 1.462511  | 0.143601 | 0.686804 |
| BX663521.1         | 0           | NA           | NA        | NA        | NA       | NA       |
| si:dkey-10914.3    | 79.02949959 | -0.193146086 | 0.2322991 | -0.831454 | 0.405717 | 0.901305 |
| EML6               | 668.2604885 | -0.1419092   | 0.097335  | -1.457946 | 0.144856 | 0.688986 |
| nr0b2b             | 0           | NA           | NA        | NA        | NA       | NA       |
| tradvl             | 0           | NA           | NA        | NA        | NA       | NA       |
| F0704661.1         | 63.30148547 | -0.272098408 | 0.2492503 | -1.091668 | 0.274979 | 0.839541 |
| TMEM132D           | 176.4829388 | 0.009403272  | 0.166375  | 0.0565186 | 0.954929 | 0.994543 |
| zbtb42             | 4.214807734 | -1.430223752 | 1.046785  | -1.366301 | 0.171844 | NA       |
| pik3r5             | 29.49358445 | -0.435669449 | 0.3548625 | -1.227713 | 0.219555 | 0.786189 |
| lonpl              | 724.5229205 | -0.040159046 | 0.0927349 | -0.433052 | 0.664977 | 0.964736 |
| dennd4c            | 636.9269913 | -0.150733901 | 0.1058962 | -1.423411 | 0.154617 | 0.704307 |
| L0017726.1         | 305.6730046 | 0.141753097  | 0.1309907 | 1.0821619 | 0.279181 | 0.842806 |
| klhdc3             | 90.86616457 | 0.000851215  | 0.2098922 | 0.0040555 | 0.996764 | 0.998936 |
| cacnalda           | 52.33898692 | -0.233577184 | 0.2785274 | -0.838615 | 0.401686 | 0.90084  |
| znf687a            | 121.2788626 | 0.095197828  | 0.1921629 | 0.4954018 | 0.620317 | 0.957354 |
| cxcl19             | 2.101854019 | 0.635875777  | 1.3699053 | 0.464175  | 0.642522 | NA       |
| thbs4a             | 154.1770515 | 0.183541859  | 0.1818949 | 1.0090546 | 0.312948 | 0.864884 |
| fgf17              | 15.02691253 | -0.187971333 | 0.494385  | -0.380212 | 0.703788 | 0.968134 |
| RF00026            | 0           | NA           | NA        | NA        | NA       | NA       |
| s1c25a35           | 17.77214928 | -0.562907112 | 0.4731049 | -1.189814 | 0.234119 | 0.802753 |
| RF00001            | 0           | NA           | NA        | NA        | NA       | NA       |
| BX000696.2         | 0           | NA           | NA        | NA        | NA       | NA       |
| fam193a            | 525.9767345 | 0.007543583  | 0.1138804 | 0.0662413 | 0.947186 | 0.99381  |

|                    |             |              |           |           |          |          |
|--------------------|-------------|--------------|-----------|-----------|----------|----------|
| si:zfos-128g4.1    | 30.9862568  | 0.027522876  | 0.343395  | 0.0801493 | 0.936118 | 0.992702 |
| zgc:174704         | 7.729071974 | -0.574148626 | 0.7195903 | -0.797883 | 0.424939 | NA       |
| si:ch211-106f21.1  | 4.651025297 | 0.437532443  | 0.9015093 | 0.4853333 | 0.62744  | NA       |
| CU681842.1         | 88.66192491 | 0.197820261  | 0.2563134 | 0.7717904 | 0.440239 | 0.916249 |
| si:ch1073-83b15.1  | 0 NA        | NA           | NA        | NA        | NA       | NA       |
| CABZ01075509.1     | 110.549992  | 0.038311706  | 0.1928249 | 0.1986865 | 0.842508 | 0.985174 |
| mcm2               | 1272.498856 | 0.08885323   | 0.0926201 | 0.9593296 | 0.337393 | 0.876394 |
| brdt               | 533.8634237 | 0.057253601  | 0.1216673 | 0.4705752 | 0.637944 | 0.959147 |
| CABZ01087091.1     | 0 NA        | NA           | NA        | NA        | NA       | NA       |
| cyp2aa12           | 47.26206972 | -0.346742985 | 0.2960115 | -1.171384 | 0.241445 | 0.810468 |
| zgc:112234         | 3.340745579 | -0.317233203 | 1.0628246 | -0.298481 | 0.765336 | NA       |
| si:dkey-151p11.2   | 3.64821329  | 0.536199151  | 1.017648  | 0.5269004 | 0.598263 | NA       |
| calr3b             | 2085.048143 | 0.021575565  | 0.0771307 | 0.2797274 | 0.779687 | 0.976146 |
| tradv29.0          | 0 NA        | NA           | NA        | NA        | NA       | NA       |
| samd1a             | 158.7741556 | 0.063813191  | 0.1637115 | 0.3897904 | 0.696692 | 0.96736  |
| CABZ01069436.1     | 2.812365211 | 0.156154471  | 1.1379333 | 0.1372264 | 0.890852 | NA       |
| cib2               | 256.6752063 | -0.157718995 | 0.137701  | -1.145373 | 0.252055 | 0.821515 |
| pam16              | 192.9735921 | -0.076931158 | 0.1517021 | -0.50712  | 0.612071 | 0.95688  |
| CR759887.3         | 5.030809133 | 1.031347499  | 0.872215  | 1.1824464 | 0.237029 | NA       |
| pcdh10b            | 1597.613451 | -0.002353841 | 0.0894453 | -0.026316 | 0.979005 | 0.996802 |
| olfm2b             | 46.49590914 | 0.246158937  | 0.3045449 | 0.8082846 | 0.418927 | 0.906406 |
| ubfd1              | 238.1646947 | 0.000592743  | 0.1394505 | 0.0042506 | 0.996609 | 0.998936 |
| mfsd11             | 12.22285858 | 0.078483171  | 0.5482423 | 0.1431542 | 0.886168 | 0.988936 |
| cobl11b            | 331.6454026 | -0.063080903 | 0.139888  | -0.450938 | 0.652034 | 0.960708 |
| fam193b            | 630.4701745 | -0.123787225 | 0.099669  | -1.241984 | 0.214243 | 0.782493 |
| baz1b              | 759.3770664 | 0.049448964  | 0.1037884 | 0.47644   | 0.633761 | 0.957737 |
| CU207241.1         | 1.00799616  | -0.980456857 | 2.1019732 | -0.466446 | 0.640896 | NA       |
| si:ch211-195j11.30 | 3.686771469 | -1.708958359 | 1.1129691 | -1.535495 | 0.124662 | NA       |
| CABZ01021435.1     | 8.929807699 | 0.092144745  | 0.6439452 | 0.1430941 | 0.886216 | NA       |
| CU062479.1         | 0.158795395 | 0.967652056  | 4.0804729 | 0.2371421 | 0.812547 | NA       |
| znf1145            | 0 NA        | NA           | NA        | NA        | NA       | NA       |
| si:ch211-211k8.4   | 0.333314908 | -1.858695402 | 3.5126701 | -0.52914  | 0.596708 | NA       |
| CT978957.1         | 20.12365817 | -0.220483692 | 0.4271087 | -0.516224 | 0.605698 | 0.95651  |
| BX088596.2         | 0 NA        | NA           | NA        | NA        | NA       | NA       |
| dclk2b             | 45.14291345 | -0.072598247 | 0.307119  | -0.236385 | 0.813134 | 0.981081 |
| trmt13             | 47.22441224 | 0.310242966  | 0.2867579 | 1.0818986 | 0.279298 | 0.842882 |
| BX927336.3         | 8.91502232  | 0.055898656  | 0.7083757 | 0.078911  | 0.937103 | NA       |
| CU469577.1         | 135.7305585 | 0.339812489  | 0.1759678 | 1.9311065 | 0.05347  | 0.453199 |
| si:rp71-7119.2     | 0 NA        | NA           | NA        | NA        | NA       | NA       |
| traj21             | 0 NA        | NA           | NA        | NA        | NA       | NA       |
| neola              | 1604.541382 | -0.011074077 | 0.0828827 | -0.133611 | 0.89371  | 0.989291 |
| si:ch73-59f11.3    | 11.12720105 | -0.46560031  | 0.5719954 | -0.813993 | 0.415649 | 0.906237 |
| sc:d189            | 124.6526069 | -0.110877272 | 0.1854674 | -0.597826 | 0.549956 | 0.94648  |
| lmf1               | 192.4876316 | -0.018043364 | 0.1478887 | -0.122006 | 0.902894 | 0.990121 |
| carnmt1            | 44.07468107 | -0.124039408 | 0.3078827 | -0.402879 | 0.687037 | 0.966376 |
| CR391991.1         | 8.461723575 | 1.711101     | 0.8041049 | 2.1279575 | 0.033341 | NA       |
| srfb               | 63.41348284 | 0.24667349   | 0.2496936 | 0.9879047 | 0.323199 | 0.870607 |
| si:dkey-203a12.4   | 0 NA        | NA           | NA        | NA        | NA       | NA       |
| RF00001            | 0 NA        | NA           | NA        | NA        | NA       | NA       |
| FP236157.2         | 0.863344592 | -1.91853867  | 2.2027225 | -0.870985 | 0.383762 | NA       |
| CT956002.2         | 0.316103113 | 0.005883447  | 3.3519121 | 0.0017553 | 0.9986   | NA       |
| immt               | 2476.337467 | 0.046352821  | 0.0755732 | 0.6133503 | 0.539645 | 0.94408  |
| CABZ01081830.2     | 0.166657454 | -0.955901296 | 4.0804729 | -0.234262 | 0.814781 | NA       |
| mapre3b            | 653.0523436 | 0.137276213  | 0.1084031 | 1.26635   | 0.205388 | 0.773635 |

|                   |             |              |           |           |          |          |
|-------------------|-------------|--------------|-----------|-----------|----------|----------|
| myt1b             | 337.0254189 | -0.25693928  | 0.1426383 | -1.801335 | 0.07165  | 0.523122 |
| traj60            | 0 NA        |              | NA        | NA        | NA       | NA       |
| sptbn1            | 2253.555419 | 0.027769258  | 0.0867932 | 0.3199474 | 0.749008 | 0.97419  |
| si:ch211-145h19.5 | 14.70656266 | -0.231432412 | 0.4950107 | -0.46753  | 0.640121 | 0.959994 |
| rsul              | 119.9302076 | -0.104729715 | 0.1826221 | -0.573478 | 0.566321 | 0.948739 |
| abhd4             | 703.0651927 | -0.051272358 | 0.1228097 | -0.417494 | 0.676317 | 0.965257 |
| gpr39             | 196.3956321 | -1.06738206  | 0.1548935 | -6.89107  | 5.54E-12 | 1.71E-09 |
| 15-Sep            | 2511.712395 | 0.067277688  | 0.0748325 | 0.8990437 | 0.368629 | 0.888057 |
| clrn1             | 17.00797552 | -0.083541945 | 0.4685391 | -0.178303 | 0.858485 | 0.985773 |
| ppplr26           | 164.6166825 | 0.058679478  | 0.1575257 | 0.3725073 | 0.709515 | 0.968856 |
| hlm               | 4.730135103 | 0.343697729  | 0.9945917 | 0.3455667 | 0.729668 | NA       |
| atg7              | 406.5734043 | -0.023005404 | 0.117729  | -0.19541  | 0.845072 | 0.985174 |
| CABZ01057159.1    | 1.671008568 | -0.604426772 | 1.5019696 | -0.402423 | 0.687373 | NA       |
| si:dkey-31i7.1    | 0.79886368  | -0.585846657 | 2.2427043 | -0.261223 | 0.79392  | NA       |
| jmjd6             | 425.4354063 | -0.261597382 | 0.1146109 | -2.282483 | 0.022461 | 0.285805 |
| mtfl              | 12.47049766 | -0.048321268 | 0.5566619 | -0.086805 | 0.930826 | 0.992702 |
| cremb             | 31.24834374 | 0.286244099  | 0.3572161 | 0.8013191 | 0.422947 | 0.90714  |
| tacrlb            | 9.793624654 | 0.641043456  | 0.6070318 | 1.0560294 | 0.290955 | NA       |
| strn4             | 256.8576299 | 0.01269347   | 0.1455772 | 0.0871941 | 0.930517 | 0.992702 |
| si:ch211-246b8.2  | 15.43733013 | -0.089082453 | 0.4803853 | -0.18544  | 0.852884 | 0.985174 |
| dre-mir-219-3     | 0.341486697 | 1.892317624  | 3.2124068 | 0.5890654 | 0.555817 | NA       |
| hibadha           | 294.0622849 | 0.03191571   | 0.1251503 | 0.255019  | 0.798708 | 0.978905 |
| il16              | 411.3788092 | -0.018914162 | 0.1119025 | -0.169024 | 0.865778 | 0.986517 |
| RF00324           | 5.90565867  | 0.609148129  | 0.9089943 | 0.6701341 | 0.502772 | NA       |
| iffo2b            | 9.332161555 | 0.351220843  | 0.6668389 | 0.5266952 | 0.598405 | NA       |
| gpr184            | 3.758170563 | 0.415878322  | 1.0525082 | 0.3951307 | 0.692746 | NA       |
| si:dkey-206d17.16 | 0 NA        |              | NA        | NA        | NA       | NA       |
| dennd4b           | 690.6561956 | -0.007542444 | 0.1176237 | -0.064123 | 0.948872 | 0.99381  |
| CR388095.1        | 25.41523354 | -0.882644793 | 0.4004751 | -2.203994 | 0.027525 | 0.320429 |
| RF00001           | 0 NA        |              | NA        | NA        | NA       | NA       |
| or106-7           | 0 NA        |              | NA        | NA        | NA       | NA       |
| senp6a            | 410.1407402 | -0.166113022 | 0.1090386 | -1.523433 | 0.12765  | 0.65819  |
| zgc:112334        | 78.96613009 | 0.139283656  | 0.2306992 | 0.6037458 | 0.546013 | 0.945526 |
| si:dkey-223p19.2  | 0.332524763 | 0.005883742  | 3.292841  | 0.0017868 | 0.998574 | NA       |
| si:dkey-156k2.4   | 4.409045267 | -1.210159894 | 0.9640943 | -1.25523  | 0.209395 | NA       |
| zgc:101715        | 18.89774997 | -0.904482589 | 0.466186  | -1.940175 | 0.052358 | 0.449169 |
| CR388046.1        | 0.347458735 | -1.908042286 | 3.4571486 | -0.551912 | 0.581009 | NA       |
| si:ch211-212k5.3  | 1.179919073 | 1.40951731   | 1.9554143 | 0.720828  | 0.471015 | NA       |
| or106-9           | 0.157187365 | -0.955901296 | 4.0804729 | -0.234262 | 0.814781 | NA       |
| noal              | 172.2225661 | -0.169653315 | 0.1590471 | -1.066686 | 0.286114 | 0.845942 |
| hspbpl            | 212.650771  | 0.057804261  | 0.150284  | 0.3846334 | 0.700509 | 0.967998 |
| si:ch211-249c2.1  | 0 NA        |              | NA        | NA        | NA       | NA       |
| ccl39.2           | 0.645291463 | -2.8201041   | 2.5306349 | -1.114386 | 0.265114 | NA       |
| si:ch73-167f10.1  | 6.707731006 | -1.174672944 | 0.7899632 | -1.486997 | 0.137016 | NA       |
| crb3a             | 100.9387869 | -0.068818426 | 0.2023974 | -0.340016 | 0.733844 | 0.971993 |
| CU184832.1        | 0 NA        |              | NA        | NA        | NA       | NA       |
| zgc:110688        | 219.8785177 | 0.028292724  | 0.1449397 | 0.1952035 | 0.845234 | 0.985174 |
| ints4             | 213.152348  | -0.001155206 | 0.1500656 | -0.007698 | 0.993858 | 0.998691 |
| si:ch211-11c3.12  | 0.491560863 | 0.853615855  | 2.865157  | 0.2979299 | 0.765757 | NA       |
| mmp17b            | 168.1641729 | 0.013186145  | 0.1655904 | 0.0796311 | 0.936531 | 0.992702 |
| AL732567.1        | 1.520814049 | -0.306597801 | 1.494253  | -0.205185 | 0.837428 | NA       |
| zgc:171220        | 26.35849379 | -0.910940247 | 0.3788858 | -2.40426  | 0.016205 | 0.234928 |
| vps54             | 435.1978546 | 0.071232118  | 0.1262085 | 0.5644001 | 0.572482 | 0.949494 |
| sirt6             | 155.0904003 | -0.207315818 | 0.1697578 | -1.221245 | 0.221993 | 0.788551 |

|                    |             |              |           |           |          |          |
|--------------------|-------------|--------------|-----------|-----------|----------|----------|
| axin1              | 1230.968866 | -0.077096647 | 0.0829872 | -0.929019 | 0.352879 | 0.881552 |
| CABZ01087948.1     | 121.9802531 | -0.175015847 | 0.1799602 | -0.972525 | 0.330789 | 0.87417  |
| CT573282.1         | 148.4976504 | 0.047120712  | 0.1668531 | 0.2824083 | 0.77763  | 0.975942 |
| cnga2a             | 0.484248244 | 0.852636534  | 2.8793247 | 0.2961238 | 0.767136 | NA       |
| pimr119            | 0 NA        | NA           | NA        | NA        | NA       | NA       |
| CABZ01075125.1     | 44.61932551 | 0.117761591  | 0.2972044 | 0.3962309 | 0.691935 | 0.96733  |
| cmtm8a             | 12.16340567 | 0.725804401  | 0.5638305 | 1.2872741 | 0.197999 | 0.763261 |
| baz2a              | 1914.302119 | -0.070815739 | 0.0844679 | -0.838375 | 0.40182  | 0.90084  |
| nsg2               | 3621.067557 | -0.034240474 | 0.071689  | -0.477625 | 0.632917 | 0.957356 |
| uncx               | 352.2916865 | -0.116542174 | 0.128361  | -0.907925 | 0.363918 | 0.88622  |
| cant1b             | 746.5893684 | -0.29676093  | 0.1019373 | -2.911211 | 0.0036   | 0.081067 |
| eif4a3             | 2235.510215 | -0.177369657 | 0.0861269 | -2.059399 | 0.039456 | 0.390102 |
| cyp2k16            | 584.3347373 | -0.79321521  | 0.1048142 | -7.567821 | 3.80E-14 | 1.71E-11 |
| zgc:195050         | 15.45851587 | -0.273249227 | 0.4959175 | -0.550997 | 0.581635 | 0.951855 |
| BX537303.1         | 0.31437473  | -1.788572922 | 3.5930657 | -0.497785 | 0.618636 | NA       |
| csflra             | 28.02865375 | -0.331085025 | 0.3757424 | -0.881149 | 0.378237 | 0.895192 |
| capn7              | 296.5749417 | -0.242716739 | 0.1414493 | -1.715927 | 0.086175 | 0.563157 |
| CU394253.1         | 0.157187365 | -0.955901296 | 4.0804729 | -0.234262 | 0.814781 | NA       |
| or109-5            | 0.365141898 | 1.973577737  | 3.3927314 | 0.5817076 | 0.560764 | NA       |
| btr20              | 2.977765649 | 0.680887186  | 1.1328965 | 0.6010145 | 0.54783  | NA       |
| znf1034            | 2.815643886 | -1.242473789 | 1.1842794 | -1.049139 | 0.294114 | NA       |
| rbm24a             | 712.426228  | 0.331485385  | 0.097811  | 3.3890392 | 0.000701 | 0.023154 |
| rrn3               | 397.1216404 | -0.033148335 | 0.112002  | -0.295962 | 0.767259 | 0.975687 |
| taf6               | 627.1117169 | -0.078861621 | 0.0972868 | -0.810609 | 0.41759  | 0.906237 |
| si:dkey-246j6.1    | 10.67744517 | -0.10025247  | 0.5862508 | -0.171006 | 0.864219 | NA       |
| si:ch211-107p11.3  | 66.80827786 | 0.137340559  | 0.2367542 | 0.5800978 | 0.561849 | 0.948728 |
| si:ch73-215d9.1    | 292.1229878 | 0.075661744  | 0.1476116 | 0.512573  | 0.60825  | 0.956718 |
| nptna              | 2278.753155 | 0.12156389   | 0.0713116 | 1.7046864 | 0.088253 | 0.568811 |
| si:dkey-211i20.2   | 17.34604432 | -0.147477025 | 0.4694219 | -0.314167 | 0.753394 | 0.974911 |
| tpra               | 1145.149635 | -0.02313852  | 0.0995847 | -0.23235  | 0.816266 | 0.981594 |
| si:ch1073-303d10.1 | 109.3707872 | 0.540099524  | 0.2008193 | 2.6894798 | 0.007156 | 0.132748 |
| rps3               | 16907.43479 | -0.385341362 | 0.0900071 | -4.281235 | 1.86E-05 | 0.001178 |
| tradv10.0.5        | 0 NA        | NA           | NA        | NA        | NA       | NA       |
| CABZ01090373.1     | 208.5374627 | -0.041861283 | 0.1443018 | -0.290095 | 0.771743 | 0.975687 |
| pcdh1g22           | 177.0445622 | -0.176420257 | 0.1586397 | -1.112081 | 0.266103 | 0.832153 |
| hist1h2a2          | 1.839625067 | 1.427864328  | 1.4235423 | 1.0030361 | 0.315843 | NA       |
| xkr5a              | 5.516764809 | -0.599389795 | 0.8044249 | -0.745116 | 0.456202 | NA       |
| gstp2              | 955.2029793 | -0.598373554 | 0.1034132 | -5.78624  | 7.20E-09 | 1.27E-06 |
| si:dkey-237i9.8    | 19.04978812 | -0.131173203 | 0.45653   | -0.287327 | 0.773862 | 0.975687 |
| fadd               | 100.3400111 | 0.176852457  | 0.2159051 | 0.8191211 | 0.412717 | 0.904974 |
| zgc:175136         | 0.506415768 | -0.866825728 | 2.6674086 | -0.324969 | 0.745204 | NA       |
| hmgcs1             | 914.8925882 | 0.013706806  | 0.0856086 | 0.1601102 | 0.872794 | 0.987846 |
| p3h2               | 340.417879  | 0.113459247  | 0.1295095 | 0.876069  | 0.380993 | 0.895192 |
| clnsla             | 403.6252541 | -0.067063604 | 0.1278228 | -0.524661 | 0.599819 | 0.956045 |
| znf1029            | 11.83177662 | 0.888315221  | 0.5874982 | 1.5120305 | 0.130526 | 0.662797 |
| rap2b              | 484.5080625 | -0.023251564 | 0.116306  | -0.199917 | 0.841545 | 0.985174 |
| CABZ01068499.1     | 74.77386138 | -1.123447547 | 0.2498049 | -4.4973   | 6.88E-06 | 0.000521 |
| CR848788.1         | 4.149042561 | 0.597360063  | 0.9403345 | 0.6352634 | 0.525257 | NA       |
| pik3r3a            | 462.7335672 | 0.098393883  | 0.1116303 | 0.8814262 | 0.378087 | 0.895192 |
| CABZ01012962.1     | 0.31437473  | -1.788572922 | 3.5930657 | -0.497785 | 0.618636 | NA       |
| ddahl              | 181.9555736 | -0.222683176 | 0.156868  | -1.419557 | 0.155737 | 0.705963 |
| BX548067.1         | 1.157631196 | 2.488108944  | 1.9178096 | 1.2973702 | 0.194504 | NA       |
| rest               | 540.9805531 | -0.137751379 | 0.1010668 | -1.362974 | 0.172891 | 0.731956 |
| FP015866.1         | 0 NA        | NA           | NA        | NA        | NA       | NA       |

|                    |              |               |            |            |           |           |
|--------------------|--------------|---------------|------------|------------|-----------|-----------|
| CR392341. 4        | 0. 31437473  | -1. 788572922 | 3. 5930657 | -0. 497785 | 0. 618636 | NA        |
| mrap2b             | 4. 313485723 | -0. 722591826 | 1. 0602287 | -0. 681543 | 0. 495528 | NA        |
| pcyox1             | 41. 35987946 | 0. 209465021  | 0. 3188058 | 0. 6570301 | 0. 511162 | 0. 936253 |
| CR383680. 2        | 8. 256800595 | -0. 437606005 | 0. 6933396 | -0. 631157 | 0. 527938 | NA        |
| dnm2b              | 125. 1602361 | -0. 226623295 | 0. 1942296 | -1. 16678  | 0. 243299 | 0. 81212  |
| itga4              | 26. 56098264 | -0. 078664615 | 0. 3730232 | -0. 210884 | 0. 832978 | 0. 983557 |
| zfhx3              | 2600. 502648 | -0. 04076564  | 0. 0735576 | -0. 5542   | 0. 579442 | 0. 951257 |
| zgc:172091         | 0 NA         | NA            | NA         | NA         | NA        | NA        |
| FP016142. 7        | 0 NA         | NA            | NA         | NA         | NA        | NA        |
| ly6m7              | 0. 339758314 | 0. 005883863  | 3. 2682461 | 0. 0018003 | 0. 998564 | NA        |
| LSM2 (1 of many)   | 31. 06056793 | 0. 008422661  | 0. 3599211 | 0. 0234014 | 0. 98133  | 0. 996944 |
| adgrd2             | 105. 9638048 | 0. 283934063  | 0. 2115611 | 1. 34209   | 0. 179567 | 0. 740821 |
| CABZ01099795. 1    | 132. 0852165 | -0. 136211711 | 0. 211589  | -0. 643756 | 0. 519734 | 0. 938945 |
| si:ch211-244c8. 4  | 1156. 620655 | -0. 065462615 | 0. 0927275 | -0. 705968 | 0. 480208 | 0. 927347 |
| CR385065. 1        | 1. 583731624 | 1. 222084814  | 1. 7227164 | 0. 7093941 | 0. 47808  | NA        |
| si:rp71-81e14. 2   | 0. 792609651 | 1. 852046781  | 2. 2530569 | 0. 8220151 | 0. 411068 | NA        |
| zgc:174222         | 16. 40358698 | -0. 234602336 | 0. 4870125 | -0. 481717 | 0. 630007 | 0. 957354 |
| si:dkey-220o21. 3  | 0. 968187754 | 2. 173022767  | 2. 1450023 | 1. 0130632 | 0. 31103  | NA        |
| cldn18             | 0 NA         | NA            | NA         | NA         | NA        | NA        |
| si:dkey-19h16. 8   | 0 NA         | NA            | NA         | NA         | NA        | NA        |
| grem2b             | 55. 94293474 | -0. 442896389 | 0. 2611319 | -1. 696064 | 0. 089874 | 0. 573834 |
| alg14              | 46. 86083773 | 0. 163145462  | 0. 3037619 | 0. 5370833 | 0. 59121  | 0. 954193 |
| tbk1               | 1130. 610964 | -0. 13077037  | 0. 0952108 | -1. 373483 | 0. 169602 | 0. 726856 |
| tradv31. 0         | 0 NA         | NA            | NA         | NA         | NA        | NA        |
| si:ch211-280a23. 2 | 1. 328893364 | -0. 730031117 | 1. 6497933 | -0. 442499 | 0. 658128 | NA        |
| EARS2              | 173. 4771131 | -0. 286604098 | 0. 161826  | -1. 771063 | 0. 07655  | 0. 538876 |
| BX950220. 2        | 0. 182570949 | 0. 967652056  | 4. 0804729 | 0. 2371421 | 0. 812547 | NA        |
| si:ch211-235e9. 6  | 720. 9667462 | 0. 120342396  | 0. 1210386 | 0. 9942477 | 0. 320102 | 0. 868153 |
| FAM180A            | 13. 45230829 | -0. 198552244 | 0. 5322156 | -0. 373067 | 0. 709098 | 0. 968664 |
| BX957361. 2        | 4. 603071845 | 0. 402843399  | 0. 8696388 | 0. 4632307 | 0. 643199 | NA        |
| tradv23. 1. 3      | 0 NA         | NA            | NA         | NA         | NA        | NA        |
| BX936303. 1        | 0. 79886368  | -0. 585846657 | 2. 2427043 | -0. 261223 | 0. 79392  | NA        |
| trappc9            | 181. 7218279 | -0. 007973867 | 0. 1694185 | -0. 047066 | 0. 962461 | 0. 995907 |
| acvr2bb            | 63. 97131064 | 0. 163740415  | 0. 249246  | 0. 6569431 | 0. 511218 | 0. 936253 |
| chl1b              | 937. 1061947 | -0. 064815678 | 0. 0925421 | -0. 700391 | 0. 483683 | 0. 929461 |
| FP089536. 1        | 0. 476747244 | 2. 393381959  | 3. 0525537 | 0. 7840589 | 0. 433006 | NA        |
| BX950225. 1        | 0. 158915748 | 0. 967652056  | 4. 0804729 | 0. 2371421 | 0. 812547 | NA        |
| ndufa412a          | 78. 60031513 | -0. 009891093 | 0. 2217453 | -0. 044606 | 0. 964422 | 0. 995927 |
| tmprss4a           | 365. 5975332 | 0. 004873568  | 0. 1166968 | 0. 0417626 | 0. 966688 | 0. 996315 |
| cibl               | 200. 2645861 | -0. 238938968 | 0. 1561624 | -1. 530067 | 0. 126    | 0. 654803 |
| si:dkeyp-33c10. 7  | 1. 165331617 | 1. 275668599  | 1. 8732058 | 0. 6810083 | 0. 495866 | NA        |
| RF01684            | 0 NA         | NA            | NA         | NA         | NA        | NA        |
| AL953841. 2        | 2. 668545073 | -0. 340598804 | 1. 1965895 | -0. 284641 | 0. 775919 | NA        |
| olfcg8             | 0. 158795395 | 0. 967652056  | 4. 0804729 | 0. 2371421 | 0. 812547 | NA        |
| CR854980. 1        | 38. 23481894 | 0. 061391605  | 0. 3108523 | 0. 1974945 | 0. 843441 | 0. 985174 |
| slc35f4            | 63. 68624907 | -0. 207075633 | 0. 249112  | -0. 831255 | 0. 40583  | 0. 901305 |
| tsc2               | 656. 7881447 | -0. 193018556 | 0. 1090644 | -1. 769768 | 0. 076766 | 0. 539626 |
| gpn2               | 192. 6962779 | 0. 069874425  | 0. 1521264 | 0. 4593184 | 0. 646006 | 0. 96029  |
| nidl1b             | 1156. 037427 | 0. 181140109  | 0. 0894942 | 2. 0240435 | 0. 042966 | 0. 407093 |
| BX571960. 1        | 8. 404740532 | -0. 649983446 | 0. 6635251 | -0. 979591 | 0. 327288 | NA        |
| dnaaf2             | 27. 51886674 | 0. 432114386  | 0. 3738852 | 1. 1557409 | 0. 247787 | 0. 81711  |
| hoxc12b            | 3. 344337487 | -0. 49601232  | 1. 1327987 | -0. 437864 | 0. 661485 | NA        |
| zgc:65873          | 1001. 329816 | -0. 0245114   | 0. 0877337 | -0. 279384 | 0. 77995  | 0. 976146 |
| stom12             | 481. 5119464 | -0. 004630717 | 0. 1083197 | -0. 04275  | 0. 9659   | 0. 996315 |

|                   |             |              |           |           |          |          |
|-------------------|-------------|--------------|-----------|-----------|----------|----------|
| rmi2              | 40.30834061 | -0.012275257 | 0.3068704 | -0.040001 | 0.968092 | 0.996315 |
| L0017843.1        | 23.44614691 | -0.390421115 | 0.3953427 | -0.987551 | 0.323373 | 0.870761 |
| BX004771.1        | 0 NA        |              | NA        | NA        | NA       | NA       |
| si:dkey-19c16.12  | 14.08897839 | 0.255290565  | 0.50579   | 0.5047363 | 0.613744 | 0.95688  |
| ppplr21           | 685.406306  | -0.031425218 | 0.1032026 | -0.3045   | 0.760747 | 0.975374 |
| cdk2ap2           | 678.6180051 | -0.052707747 | 0.096226  | -0.547749 | 0.583864 | 0.952214 |
| nllrc3            | 7.967449538 | 0.304556118  | 0.7346946 | 0.4145343 | 0.678483 | NA       |
| nectin4b          | 21.90508435 | -0.029390008 | 0.4397448 | -0.066834 | 0.946714 | 0.99381  |
| cog6              | 467.5180706 | -0.210546267 | 0.1103215 | -1.908478 | 0.056329 | 0.46566  |
| tradv2.0.2        | 0 NA        |              | NA        | NA        | NA       | NA       |
| si:ch73-14413.1   | 19.46475912 | -0.265442167 | 0.4492454 | -0.590862 | 0.554613 | 0.947449 |
| extla             | 130.2185007 | -0.02146815  | 0.1774643 | -0.120972 | 0.903713 | 0.990291 |
| gpc6a             | 22.44115819 | 0.01168321   | 0.4245288 | 0.0275204 | 0.978045 | 0.996762 |
| ldb1b             | 306.5862347 | -0.007439027 | 0.1257873 | -0.05914  | 0.952841 | 0.994063 |
| CR388178.2        | 45.35164622 | -0.088680995 | 0.3045793 | -0.291159 | 0.77093  | 0.975687 |
| tomm20a           | 595.8579154 | -0.007750757 | 0.1108945 | -0.069893 | 0.944279 | 0.993364 |
| zgc:194948        | 1.832202139 | -0.291611695 | 1.4478466 | -0.201411 | 0.840378 | NA       |
| AL929057.1        | 0.647019846 | -1.455099716 | 2.4289208 | -0.599073 | 0.549125 | NA       |
| FP245458.1        | 2.817080234 | 0.183694354  | 1.2026153 | 0.1527457 | 0.878599 | NA       |
| si:dkey-245n4.2   | 74.63367241 | 0.108972978  | 0.234948  | 0.4638175 | 0.642779 | 0.959994 |
| BX914205.3        | 1.01990345  | -0.910958137 | 1.9547665 | -0.466019 | 0.641202 | NA       |
| stx8              | 117.2901222 | 0.253891601  | 0.1889944 | 1.3433817 | 0.179148 | 0.740021 |
| nr5ala            | 11.50303218 | -0.182386748 | 0.5710715 | -0.319376 | 0.749441 | 0.97419  |
| CR457444.3        | 0.173729368 | -0.955901296 | 4.0804729 | -0.234262 | 0.814781 | NA       |
| CU639397.1        | 0.63035749  | -1.416391854 | 2.614809  | -0.541681 | 0.588038 | NA       |
| CU467880.1        | 0 NA        |              | NA        | NA        | NA       | NA       |
| si:dkey-34d22.1   | 192.4273858 | 0.093960419  | 0.1589212 | 0.5912389 | 0.55436  | 0.947449 |
| CABZ01034691.1    | 0.83198897  | -0.546504737 | 2.1106392 | -0.258929 | 0.79569  | NA       |
| PAMR1 (1 of many) | 113.2449571 | 0.082954812  | 0.1970222 | 0.4210429 | 0.673724 | 0.965257 |
| si:ch73-389k6.1   | 64.09096561 | -0.335215344 | 0.2455022 | -1.365427 | 0.172119 | 0.731144 |
| syce2             | 31.86770701 | 0.23849782   | 0.3500763 | 0.6812739 | 0.495698 | 0.932377 |
| or106-6           | 0 NA        |              | NA        | NA        | NA       | NA       |
| CR394535.1        | 16.66684762 | -0.143416736 | 0.4700439 | -0.305114 | 0.76028  | 0.975374 |
| BX936433.2        | 6.749246371 | 0.045379504  | 0.7409925 | 0.0612415 | 0.951167 | NA       |
| dync1i2b          | 274.6330866 | 0.143658996  | 0.1351005 | 1.063349  | 0.287624 | 0.845979 |
| zgc:113343        | 35.68104187 | -0.961155215 | 0.3460519 | -2.777488 | 0.005478 | 0.109862 |
| si:ch211-227e10.1 | 5.891637609 | 0.659829215  | 0.808908  | 0.8157036 | 0.41467  | NA       |
| mrps2             | 429.0163681 | -0.147544581 | 0.1164027 | -1.267536 | 0.204964 | 0.772822 |
| si:dkey-247k7.2   | 907.0615094 | 0.546758388  | 0.1213969 | 4.5038899 | 6.67E-06 | 0.000513 |
| gpr107            | 795.862275  | -0.063381969 | 0.0927036 | -0.683705 | 0.494161 | 0.931926 |
| CT583728.5        | 0 NA        |              | NA        | NA        | NA       | NA       |
| CR383668.1        | 1.335965277 | -0.738208546 | 1.7273108 | -0.427374 | 0.669107 | NA       |
| vps28             | 1090.84207  | -0.046737215 | 0.0951596 | -0.491145 | 0.623324 | 0.957354 |
| si:ch211-161f7.2  | 1.353874604 | -0.052344131 | 1.8356932 | -0.028515 | 0.977252 | NA       |
| rab11fip4b        | 107.1317628 | -0.024596849 | 0.1915832 | -0.128387 | 0.897843 | 0.990121 |
| il17ralb          | 10.42517038 | -0.310832393 | 0.5854941 | -0.530889 | 0.595496 | NA       |
| si:dkey-19b23.8   | 496.527726  | -0.004571508 | 0.1094945 | -0.041751 | 0.966697 | 0.996315 |
| RF00001           | 0 NA        |              | NA        | NA        | NA       | NA       |
| pimr169           | 0.471562095 | -2.373056629 | 3.0645586 | -0.774355 | 0.438721 | NA       |
| BX681417.3        | 0 NA        |              | NA        | NA        | NA       | NA       |
| BX927130.3        | 2.511755554 | -2.051155635 | 1.4369386 | -1.427448 | 0.153451 | NA       |
| slc10a3           | 254.087088  | -0.26933794  | 0.1389077 | -1.938971 | 0.052505 | 0.449813 |
| BX908386.2        | 2.358936695 | -1.271440774 | 1.3152487 | -0.966692 | 0.333698 | NA       |
| si:ch73-350k19.1  | 0 NA        |              | NA        | NA        | NA       | NA       |

|                   |             |              |           |           |          |          |
|-------------------|-------------|--------------|-----------|-----------|----------|----------|
| dhcr7             | 430.1343751 | -0.404922847 | 0.1184996 | -3.417082 | 0.000633 | 0.02125  |
| si:ch211-149o24.4 | 0 NA        |              | NA        | NA        | NA       | NA       |
| RF00001           | 0.157187365 | -0.955901296 | 4.0804729 | -0.234262 | 0.814781 | NA       |
| si:dkey-265e15.5  | 7.023850571 | -0.271523834 | 0.7265978 | -0.373692 | 0.708633 | NA       |
| si:ch211-199i15.5 | 909.165729  | 0.37118558   | 0.0889765 | 4.1717243 | 3.02E-05 | 0.001759 |
| ppie              | 181.9992679 | -0.056432361 | 0.1661434 | -0.339661 | 0.734112 | 0.971993 |
| mfsd8             | 765.2577617 | 0.137574161  | 0.1017201 | 1.3524782 | 0.176222 | 0.736614 |
| si:ch73-299h12.8  | 30.91403648 | -0.261563671 | 0.3417322 | -0.765405 | 0.44403  | 0.916699 |
| si:dkey-14o6.8    | 5.139066779 | 1.283634365  | 0.8620302 | 1.4890828 | 0.136466 | NA       |
| CR381673.2        | 0.474778155 | 0.852397662  | 2.898154  | 0.2941175 | 0.768668 | NA       |
| CR550302.2        | 0 NA        |              | NA        | NA        | NA       | NA       |
| BX324224.1        | 1.155043644 | -0.397540533 | 1.6900534 | -0.235224 | 0.814035 | NA       |
| znf993            | 3.590951387 | 0.520601822  | 1.0205667 | 0.5101105 | 0.609974 | NA       |
| sh3pxd2b          | 702.4910638 | 0.052142921  | 0.1036028 | 0.5032964 | 0.614756 | 0.95688  |
| si:busml-169i8.11 | 0 NA        |              | NA        | NA        | NA       | NA       |
| zgc:112023        | 105.6563392 | 0.227661926  | 0.1983163 | 1.1479736 | 0.250979 | 0.820469 |
| si:dkeyp-80d11.4  | 0.182570949 | 0.967652056  | 4.0804729 | 0.2371421 | 0.812547 | NA       |
| BX927210.1        | 3.977477452 | -1.00487533  | 0.9616443 | -1.044955 | 0.296044 | NA       |
| opn4xb            | 33.57057669 | 0.233952501  | 0.3281348 | 0.7129768 | 0.47586  | 0.926338 |
| si:ch211-57b15.1  | 2.527511909 | 0.218837717  | 1.1691545 | 0.1871761 | 0.851523 | NA       |
| RF00001           | 0.347458735 | -1.908042286 | 3.4571486 | -0.551912 | 0.581009 | NA       |
| dre-mir-733       | 0 NA        |              | NA        | NA        | NA       | NA       |
| si:dkey-25g12.4   | 6.551632383 | -0.296422445 | 0.746258  | -0.397212 | 0.691211 | NA       |
| si:ch211-223g7.2  | 2.542995321 | -0.541421658 | 1.2481318 | -0.433786 | 0.664444 | NA       |
| ogal              | 67.26320744 | -0.75333634  | 0.2542751 | -2.962682 | 0.00305  | 0.073009 |
| BX088524.2        | 0 NA        |              | NA        | NA        | NA       | NA       |
| CR513789.1        | 4.361910542 | 0.022595313  | 0.8986886 | 0.0251425 | 0.979941 | NA       |
| pla2g15           | 2882.771571 | 0.415695787  | 0.0763845 | 5.4421451 | 5.26E-08 | 7.65E-06 |
| AL645792.1        | 0.316103113 | 0.005883447  | 3.3519121 | 0.0017553 | 0.9986   | NA       |
| fcerg             | 4.90990429  | 0.362252836  | 0.8876006 | 0.4081259 | 0.683181 | NA       |
| cyp24a1           | 1434.326522 | -0.826309265 | 0.2531851 | -3.263657 | 0.0011   | 0.033254 |
| CR812832.1        | 73.37384662 | 0.188259652  | 0.2252217 | 0.8358861 | 0.403219 | 0.900901 |
| si:dkey-56m15.9   | 1.949622383 | 0.987975926  | 1.4020759 | 0.7046523 | 0.481027 | NA       |
| si:dkey-238o14.7  | 3.937458339 | 0.438339111  | 1.014355  | 0.4321358 | 0.665643 | NA       |
| CABZ01110881.1    | 269.9185419 | -0.011846544 | 0.1369239 | -0.086519 | 0.931054 | 0.992702 |
| kcnk4a            | 31.22285105 | -0.187826821 | 0.3433363 | -0.547064 | 0.584335 | 0.952332 |
| PDPR              | 639.9204095 | -0.039990697 | 0.1098222 | -0.36414  | 0.715753 | 0.96909  |
| L0018568.2        | 36.12004688 | -0.029962753 | 0.3591209 | -0.083434 | 0.933507 | 0.992702 |
| CR931813.1        | 1.368503345 | 0.137058825  | 1.8308494 | 0.0748608 | 0.940325 | NA       |
| si:ch211-221j21.3 | 196.4232036 | -0.302426623 | 0.1510043 | -2.002768 | 0.045202 | 0.417766 |
| cyp3a65           | 789.7888843 | -0.909585594 | 0.1326105 | -6.859077 | 6.93E-12 | 2.08E-09 |
| nup54             | 279.4321928 | 0.056690858  | 0.1342161 | 0.422385  | 0.672744 | 0.965257 |
| ephx5             | 173.4942542 | -0.337169057 | 0.1599997 | -2.10731  | 0.035091 | 0.364435 |
| tradv23.1.4       | 0 NA        |              | NA        | NA        | NA       | NA       |
| P2RY14            | 0.990114572 | 0.997810867  | 1.9011265 | 0.5248524 | 0.599686 | NA       |
| BX927130.4        | 3.480257535 | 1.340527425  | 1.0535102 | 1.272439  | 0.203217 | NA       |
| mst1              | 616.5900681 | -0.412679942 | 0.1332538 | -3.096947 | 0.001955 | 0.052674 |
| BX664625.4        | 7.169654339 | 0.207770488  | 0.7138753 | 0.2910459 | 0.771016 | NA       |
| znf1053           | 4.90809684  | 0.190624283  | 0.8506816 | 0.2240842 | 0.822692 | NA       |
| fb1n1             | 106.6556573 | 0.033328835  | 0.2011084 | 0.1657257 | 0.868373 | 0.987245 |
| C1orf232          | 11.39316851 | -0.0632737   | 0.5915835 | -0.106956 | 0.914823 | 0.991119 |
| rhot1b            | 145.460189  | 0.245700697  | 0.1676904 | 1.4652043 | 0.142865 | 0.685108 |
| si:dkey-84h14.1   | 1.138340003 | -0.447034872 | 1.825243  | -0.244918 | 0.80652  | NA       |
| CU464124.1        | 139.1551796 | -0.116766734 | 0.1857046 | -0.628777 | 0.529495 | 0.942209 |

|                   |             |              |           |           |          |          |
|-------------------|-------------|--------------|-----------|-----------|----------|----------|
| si:ch211-212k18.5 | 606.5093935 | -0.051204204 | 0.1138068 | -0.449922 | 0.652766 | 0.960708 |
| capn5a            | 288.8833699 | -0.119945817 | 0.1458201 | -0.82256  | 0.410758 | 0.90316  |
| mrpl3             | 642.7079905 | -0.233608317 | 0.0975069 | -2.395814 | 0.016584 | 0.237453 |
| si:ch73-359m17.7  | 1.171275916 | -3.670007877 | 1.9590228 | -1.873387 | 0.061015 | NA       |
| lclatl            | 659.7140639 | -0.25644621  | 0.1055365 | -2.429928 | 0.015102 | 0.225333 |
| RF00001           | 0 NA        | NA           | NA        | NA        | NA       | NA       |
| si:ch73-347e22.8  | 248.8899321 | 0.159208128  | 0.1376907 | 1.1562737 | 0.247569 | 0.817092 |
| AL929220.1        | 0.682853041 | 2.891318346  | 2.3286279 | 1.2416403 | 0.214369 | NA       |
| si:ch211-127b6.2  | 11.99014996 | 0.108690521  | 0.549175  | 0.197916  | 0.843111 | 0.985174 |
| si:ch73-236c18.5  | 0 NA        | NA           | NA        | NA        | NA       | NA       |
| baiap2b           | 97.29086887 | 0.195069067  | 0.2122949 | 0.9188588 | 0.358169 | 0.884398 |
| dre-mir-338-1     | 0.158795395 | 0.967652056  | 4.0804729 | 0.2371421 | 0.812547 | NA       |
| si:dkey-77g12.4   | 0 NA        | NA           | NA        | NA        | NA       | NA       |
| rrpl              | 429.118089  | -0.107795978 | 0.1221597 | -0.882419 | 0.377551 | 0.895192 |
| clic1             | 446.9160688 | -0.154904344 | 0.1087245 | -1.424742 | 0.154232 | 0.703849 |
| si:ch211-110e21.4 | 34.72442342 | 0.126063035  | 0.3468813 | 0.3634184 | 0.716292 | 0.96909  |
| si:dkey-51d8.1    | 1.506000429 | 0.335521124  | 1.4976273 | 0.2240351 | 0.82273  | NA       |
| CABZ01003476.1    | 1.139989318 | 0.439423795  | 1.8430523 | 0.2384218 | 0.811554 | NA       |
| si:dkeyp-85d8.5   | 34.68496267 | 0.493034763  | 0.3221022 | 1.5306782 | 0.125849 | 0.654803 |
| cyp2aa3           | 117.2365869 | -0.01723538  | 0.2113034 | -0.081567 | 0.934991 | 0.992702 |
| si:dkey-176f19.7  | 2.416336645 | 1.38468514   | 1.3481387 | 1.0271088 | 0.304369 | NA       |
| trim24            | 600.2261384 | -0.108353677 | 0.1149934 | -0.94226  | 0.34606  | 0.878883 |
| FP102192.2        | 7.120681323 | -0.065070664 | 0.7383037 | -0.088135 | 0.929769 | NA       |
| dre-mir-1-2       | 3.370486383 | 1.207576482  | 1.1238424 | 1.074507  | 0.282596 | NA       |
| RF01684           | 0 NA        | NA           | NA        | NA        | NA       | NA       |
| CU467856.1        | 213.8302743 | 0.085440896  | 0.1415186 | 0.603743  | 0.546015 | 0.945526 |
| slitrk5a          | 397.055615  | 0.149569841  | 0.1131712 | 1.3216246 | 0.186293 | 0.750697 |
| BX927407.1        | 0.31759079  | 1.807926197  | 3.579045  | 0.5051421 | 0.613459 | NA       |
| tshz3b            | 1115.67558  | 0.013854985  | 0.0889533 | 0.1557557 | 0.876226 | 0.987881 |
| zgc:158376        | 245.144992  | 0.023829928  | 0.1495145 | 0.1593821 | 0.873368 | 0.987858 |
| cs                | 5854.234235 | 0.135995034  | 0.0680334 | 1.998946  | 0.045614 | 0.418744 |
| pimr214           | 0 NA        | NA           | NA        | NA        | NA       | NA       |
| si:ch211-127m7.2  | 81.3934185  | -0.106362988 | 0.2278752 | -0.46676  | 0.640672 | 0.959994 |
| taldol            | 1351.56019  | -0.010944116 | 0.0879209 | -0.124477 | 0.900938 | 0.990121 |
| lrrc8da           | 123.9492791 | 0.565786868  | 0.1818467 | 3.1113395 | 0.001862 | 0.050796 |
| si:dkey-190j3.6   | 1.780257024 | -0.291083849 | 1.5409438 | -0.1889   | 0.850171 | NA       |
| si:ch211-161m3.4  | 80.50111062 | -0.121184636 | 0.2267988 | -0.534327 | 0.593116 | 0.954434 |
| pax6a             | 1507.523078 | -0.013269121 | 0.0812096 | -0.163393 | 0.870209 | 0.987421 |
| si:ch73-21k16.1   | 41.73608639 | -0.040899323 | 0.2931645 | -0.13951  | 0.889047 | 0.989291 |
| si:ch211-196f19.1 | 17.31137327 | -0.272439238 | 0.4560276 | -0.597418 | 0.550228 | 0.946549 |
| BX005398.1        | 0 NA        | NA           | NA        | NA        | NA       | NA       |
| dnah9             | 12.77004948 | 0.784168199  | 0.5660058 | 1.385442  | 0.165917 | 0.721859 |
| RF00568           | 0 NA        | NA           | NA        | NA        | NA       | NA       |
| CR407701.1        | 2.409075355 | 0.081733625  | 1.3315539 | 0.0613821 | 0.951055 | NA       |
| znf609a           | 366.039043  | -0.150449531 | 0.1213547 | -1.23975  | 0.215068 | 0.78275  |
| cacna2d2a         | 12.00302191 | 0.480891113  | 0.6259336 | 0.7682782 | 0.442322 | 0.916336 |
| rab9b             | 12.64758106 | 0.770927072  | 0.579398  | 1.3305655 | 0.183332 | 0.747003 |
| kif5ba            | 60.61118085 | 0.191628511  | 0.2502895 | 0.7656274 | 0.443898 | 0.916631 |
| si:ch73-281i18.7  | 14.48002123 | -0.129771573 | 0.4982326 | -0.260464 | 0.794506 | 0.977937 |
| znf804b           | 21.38060062 | 0.147366629  | 0.4172495 | 0.3531859 | 0.723949 | 0.970402 |
| fabplb.2          | 5.951823916 | -1.166751519 | 0.8098735 | -1.440659 | 0.149681 | NA       |
| si:ch211-161m3.1  | 7.720023762 | 1.208055662  | 0.7071232 | 1.7084091 | 0.08756  | NA       |
| sarlb             | 2026.377476 | 0.027280968  | 0.084226  | 0.323902  | 0.746012 | 0.97419  |
| uchl5             | 544.6968532 | 0.142246044  | 0.1085176 | 1.3108114 | 0.189921 | 0.754269 |



|                  |             |              |           |           |          |          |
|------------------|-------------|--------------|-----------|-----------|----------|----------|
| znf1102          | 11.2222207  | -0.464046709 | 0.5745145 | -0.80772  | 0.419252 | 0.906406 |
| uhrfl            | 1030.703527 | 0.038612693  | 0.0948302 | 0.4071772 | 0.683878 | 0.965679 |
| RF00001          | 0 NA        | NA           | NA        | NA        | NA       | NA       |
| CT583728.6       | 0 NA        | NA           | NA        | NA        | NA       | NA       |
| RF00001          | 0 NA        | NA           | NA        | NA        | NA       | NA       |
| zgc:109949       | 212.9018099 | 0.201119012  | 0.1532908 | 1.3120099 | 0.189517 | 0.754269 |
| ppp4r3b          | 639.4542986 | -0.052438227 | 0.1094442 | -0.479132 | 0.631845 | 0.957356 |
| si:dkey-269o24.6 | 9.441701892 | 0.058386403  | 0.6106267 | 0.0956172 | 0.923825 | NA       |
| or106-3          | 1.343586631 | -1.572682111 | 1.7206854 | -0.913986 | 0.360724 | NA       |
| si:dkey-56m15.5  | 0.981193923 | 0.036684775  | 1.9489489 | 0.0188229 | 0.984982 | NA       |
| usp10            | 2634.869716 | -0.006376557 | 0.0740458 | -0.086116 | 0.931374 | 0.992702 |
| si:dkey-13m3.2   | 6.349373238 | 0.329933141  | 0.7604736 | 0.4338522 | 0.664396 | NA       |
| CR457444.4       | 0 NA        | NA           | NA        | NA        | NA       | NA       |
| ogdhb            | 794.5344617 | 0.126413545  | 0.0924976 | 1.3666681 | 0.171729 | 0.730416 |
| CR854926.1       | 7.142084202 | -0.240614898 | 0.7748964 | -0.310512 | 0.756171 | NA       |
| RF00003          | 0 NA        | NA           | NA        | NA        | NA       | NA       |
| exosc4           | 266.9553174 | 0.030485     | 0.1311327 | 0.2324745 | 0.816169 | 0.981594 |
| rpl14            | 9128.907377 | -0.301315823 | 0.073253  | -4.113359 | 3.90E-05 | 0.002203 |
| FP074902.1       | 0.476626891 | 2.395187592  | 2.815932  | 0.8505843 | 0.395    | NA       |
| sorbs1           | 1205.47552  | -0.053373433 | 0.081423  | -0.655508 | 0.512141 | 0.936253 |
| BX548028.1       | 0.182570949 | 0.967652056  | 4.0804729 | 0.2371421 | 0.812547 | NA       |
| tradv3.0.1       | 0 NA        | NA           | NA        | NA        | NA       | NA       |
| si:dkey-248e17.5 | 10.05126356 | -0.574522819 | 0.6044922 | -0.950422 | 0.341898 | NA       |
| znf1060          | 11.92900996 | 0.694349712  | 0.5844097 | 1.1881215 | 0.234786 | 0.803509 |
| vwde             | 497.6938118 | 0.205816983  | 0.1079522 | 1.9065566 | 0.056578 | 0.46635  |
| gig2h            | 5.606040993 | -0.365975807 | 0.8056581 | -0.454257 | 0.649644 | NA       |
| CR376738.2       | 1.316934745 | 1.548070948  | 1.8401903 | 0.8412559 | 0.400205 | NA       |
| gig2k            | 0 NA        | NA           | NA        | NA        | NA       | NA       |
| BX005085.3       | 60.56825268 | -0.326287039 | 0.2579603 | -1.264873 | 0.205917 | 0.773798 |
| zfp11            | 402.3705956 | -0.009137941 | 0.1248125 | -0.073213 | 0.941636 | 0.993099 |
| trpm6            | 169.8258916 | -0.014463712 | 0.1577852 | -0.091667 | 0.926963 | 0.992702 |
| cyp2aa11         | 8.916885342 | 0.343031271  | 0.6506084 | 0.5272469 | 0.598022 | NA       |
| spartb           | 257.7768427 | -0.064174473 | 0.1384254 | -0.463603 | 0.642932 | 0.959994 |
| znf1126          | 0.8136773   | -1.876897407 | 2.1384966 | -0.877671 | 0.380122 | NA       |
| dv13b            | 41.02835493 | 0.025275337  | 0.3275673 | 0.0771607 | 0.938496 | 0.992849 |
| pggt1b           | 272.0591465 | -0.061539292 | 0.1452098 | -0.423796 | 0.671715 | 0.965257 |
| RF00001          | 0 NA        | NA           | NA        | NA        | NA       | NA       |
| cc135.1          | 21.46818468 | -0.346961218 | 0.4655125 | -0.745332 | 0.456071 | 0.921215 |
| limkla           | 158.3982187 | -0.031585521 | 0.1831895 | -0.17242  | 0.863107 | 0.985841 |
| CR450787.1       | 0 NA        | NA           | NA        | NA        | NA       | NA       |
| polm             | 22.81305015 | 0.027227376  | 0.4248582 | 0.0640858 | 0.948902 | 0.99381  |
| si:dkey-199m13.4 | 31.21539158 | -0.269627195 | 0.33776   | -0.79828  | 0.424708 | 0.9085   |
| nedd8l           | 0 NA        | NA           | NA        | NA        | NA       | NA       |
| BX537137.3       | 7.614755046 | -0.558211212 | 0.8092798 | -0.689763 | 0.490343 | NA       |
| RF00478          | 1.028583393 | 0.0357399    | 1.9235691 | 0.01858   | 0.985176 | NA       |
| trpmlb           | 713.2371163 | 0.005287893  | 0.0976102 | 0.0541736 | 0.956797 | 0.994543 |
| si:ch211-255f4.5 | 17.92037058 | -0.435251239 | 0.4714836 | -0.923153 | 0.355928 | 0.882844 |
| nsun6            | 40.71450804 | -0.093219518 | 0.3082425 | -0.302423 | 0.76233  | 0.975374 |
| ptprfa           | 1273.664013 | -0.000215474 | 0.0879044 | -0.002451 | 0.998044 | 0.999271 |
| BX640512.3       | 5.543852445 | 0.001849849  | 0.8746788 | 0.0021149 | 0.998313 | NA       |
| litaf            | 176.4563272 | -0.083433261 | 0.1663272 | -0.501621 | 0.615934 | 0.95688  |
| pkdc             | 27.33239279 | -0.648148943 | 0.3706501 | -1.748681 | 0.080346 | 0.549728 |
| card14           | 68.13578427 | -0.027847971 | 0.2396067 | -0.116224 | 0.907475 | 0.990702 |
| CT573799.1       | 0.491320158 | 0.8528132    | 2.8656354 | 0.2976    | 0.766008 | NA       |

|                   |             |              |           |           |          |          |
|-------------------|-------------|--------------|-----------|-----------|----------|----------|
| BX936431.1        | 1.986201183 | -0.027755622 | 1.3794595 | -0.020121 | 0.983947 | NA       |
| CR356246.1        | 5.049481019 | 0.485754758  | 0.8824373 | 0.5504694 | 0.581997 | NA       |
| dpysl4            | 935.7223508 | 0.129054136  | 0.111854  | 1.153773  | 0.248593 | 0.817939 |
| si:ch73-111k22.3  | 5.470244552 | -0.797689344 | 0.8238364 | -0.968262 | 0.332914 | NA       |
| usp43a            | 36.48913515 | -0.314489841 | 0.3314047 | -0.94896  | 0.342641 | 0.878434 |
| zgc:173714        | 13.23391503 | -0.423428654 | 0.5532254 | -0.765382 | 0.444044 | 0.916699 |
| si:dkey-246j6.3   | 5.604875596 | -1.2520512   | 0.8518064 | -1.469878 | 0.141595 | NA       |
| epd               | 1164.56158  | 0.210567706  | 0.096935  | 2.1722568 | 0.029836 | 0.334457 |
| RF02041           | 0           | NA           | NA        | NA        | NA       | NA       |
| RF00286           | 2.606901467 | -1.604952121 | 1.376409  | -1.166043 | 0.243597 | NA       |
| RF00001           | 0           | NA           | NA        | NA        | NA       | NA       |
| dgatla            | 368.0352443 | -0.07225207  | 0.1239636 | -0.582849 | 0.559995 | 0.948628 |
| CR855311.4        | 6.595478984 | 1.043595075  | 0.7468502 | 1.3973286 | 0.162315 | NA       |
| fbxl3a            | 122.6488602 | -0.109541074 | 0.1836793 | -0.596371 | 0.550927 | 0.946549 |
| tradv5.0.2        | 0           | NA           | NA        | NA        | NA       | NA       |
| n4bp212           | 125.6330838 | -0.162313923 | 0.1923917 | -0.843664 | 0.398857 | 0.900446 |
| AL953910.1        | 0           | NA           | NA        | NA        | NA       | NA       |
| si:ch73-106n3.2   | 0           | NA           | NA        | NA        | NA       | NA       |
| CR391991.2        | 0           | NA           | NA        | NA        | NA       | NA       |
| zfang2a           | 430.3511048 | -0.076029455 | 0.1200976 | -0.633064 | 0.526692 | 0.940559 |
| vcana             | 35.41716011 | 0.097867747  | 0.3227417 | 0.3032386 | 0.761708 | 0.975374 |
| sec24c            | 1393.567853 | -0.029884793 | 0.0767237 | -0.389512 | 0.696898 | 0.96736  |
| CR759810.1        | 0.500402445 | 2.450713647  | 2.7706722 | 0.8845195 | 0.376416 | NA       |
| abhd8a            | 8.965781581 | -0.654244519 | 0.6428607 | -1.017708 | 0.308817 | NA       |
| adamts1           | 479.8991233 | 0.121210776  | 0.1086332 | 1.1157804 | 0.264516 | 0.830245 |
| si:dkey-148a17.5  | 1.16573396  | 1.355932297  | 1.8790254 | 0.7216147 | 0.470531 | NA       |
| capsla            | 65.74028147 | -0.097537219 | 0.2434054 | -0.400719 | 0.688627 | 0.966672 |
| si:zfos-943e10.1  | 637.4433001 | 0.018952547  | 0.1034304 | 0.1832395 | 0.85461  | 0.985174 |
| nudt6             | 65.86739029 | -0.213175497 | 0.2585649 | -0.824456 | 0.40968  | 0.902319 |
| YTHDC2            | 76.62401772 | 0.021206152  | 0.2440057 | 0.0869084 | 0.930744 | 0.992702 |
| si:dkeyp-35e5.9   | 9.503612947 | 0.261736131  | 0.6166555 | 0.4244446 | 0.671242 | NA       |
| FP243383.1        | 116.6944473 | 0.109074994  | 0.1943191 | 0.5613189 | 0.57458  | 0.950037 |
| zgc:113102        | 46.31339475 | -0.232478311 | 0.2870476 | -0.809895 | 0.418001 | 0.906305 |
| clec14a           | 172.8228145 | 0.005801643  | 0.1565389 | 0.037062  | 0.970436 | 0.996315 |
| si:ch211-117117.4 | 0.658218317 | -0.061628513 | 2.4342948 | -0.025317 | 0.979802 | NA       |
| F0818719.1        | 52.44308893 | -0.210916767 | 0.2657964 | -0.793528 | 0.427471 | 0.91075  |
| BX546503.1        | 0.496945679 | -0.834564081 | 2.8549631 | -0.29232  | 0.770042 | NA       |
| tt1112            | 105.6184108 | 0.027817662  | 0.2302205 | 0.1208305 | 0.903825 | 0.990291 |
| BX571954.2        | 0.157187365 | -0.955901296 | 4.0804729 | -0.234262 | 0.814781 | NA       |
| gpr132b           | 8.723837196 | -0.209468761 | 0.7143853 | -0.293215 | 0.769358 | NA       |
| vegfaa            | 347.5219362 | -0.01927682  | 0.1235941 | -0.155969 | 0.876058 | 0.987881 |
| gngt2b            | 8492.860875 | 0.165729462  | 0.083984  | 1.9733448 | 0.048456 | 0.433449 |
| trgv5             | 0           | NA           | NA        | NA        | NA       | NA       |
| tctex1d1          | 12.42773609 | 0.839797194  | 0.5658092 | 1.4842411 | 0.137745 | 0.675209 |
| purbb             | 173.3614239 | 0.194514784  | 0.1566877 | 1.2414167 | 0.214452 | 0.782493 |
| CR925723.2        | 0           | NA           | NA        | NA        | NA       | NA       |
| CR354444.2        | 0.182570949 | 0.967652056  | 4.0804729 | 0.2371421 | 0.812547 | NA       |
| RF00001           | 0.182570949 | 0.967652056  | 4.0804729 | 0.2371421 | 0.812547 | NA       |
| rnf213b           | 1.322329605 | -1.61856854  | 1.7319958 | -0.934511 | 0.350041 | NA       |
| tradv10.0.1       | 0           | NA           | NA        | NA        | NA       | NA       |
| sf3b3             | 2210.307444 | -0.107307549 | 0.0732074 | -1.465802 | 0.142702 | 0.684998 |
| notch1a           | 1268.261508 | -0.168781156 | 0.0969826 | -1.740325 | 0.081802 | 0.552725 |
| si:ch211-8c17.4   | 3.793692786 | 0.345501056  | 1.1127703 | 0.3104873 | 0.75619  | NA       |
| si:ch211-218g23.6 | 42.90248218 | -1.316212309 | 0.3625633 | -3.630296 | 0.000283 | 0.011332 |

|                   |             |              |           |           |          |          |
|-------------------|-------------|--------------|-----------|-----------|----------|----------|
| CU462878.2        | 0           | NA           | NA        | NA        | NA       | NA       |
| si:dkeyp-30d6.2   | 1.647704382 | 1.236909279  | 1.5392972 | 0.8035545 | 0.421654 | NA       |
| tomm20b           | 1039.228049 | -0.055792189 | 0.1069687 | -0.521575 | 0.601967 | 0.956045 |
| FP103005.2        | 1.021470194 | -0.036800089 | 1.9461475 | -0.018909 | 0.984914 | NA       |
| si:ch211-255f4.8  | 14.17378813 | -0.152848951 | 0.5029243 | -0.30392  | 0.761189 | 0.975374 |
| si:dkey-201i24.3  | 3.407592378 | 2.088823126  | 1.2507234 | 1.670092  | 0.094901 | NA       |
| si:dkeyp-104b3.1  | 0           | NA           | NA        | NA        | NA       | NA       |
| EPHB3             | 20.49258568 | 0.174880404  | 0.451624  | 0.3872257 | 0.698589 | 0.967998 |
| gtf2b             | 750.8616982 | -0.02180818  | 0.0900636 | -0.242142 | 0.80867  | 0.980642 |
| znf1166           | 16.94934729 | 0.081963175  | 0.46853   | 0.1749369 | 0.861129 | 0.985805 |
| si:ch211-106g8.17 | 0           | NA           | NA        | NA        | NA       | NA       |
| si:dkey-65j6.2    | 200.4217831 | 0.019253484  | 0.151978  | 0.126686  | 0.899189 | 0.990121 |
| prrt2             | 263.8911315 | -0.04401755  | 0.1359124 | -0.323867 | 0.746039 | 0.97419  |
| gata6             | 193.8368944 | -0.359820503 | 0.1577392 | -2.28111  | 0.022542 | 0.286638 |
| cyp2aa6           | 260.5906324 | 0.049608977  | 0.13192   | 0.3760535 | 0.706877 | 0.968664 |
| dkk3a             | 331.166522  | 0.153277285  | 0.1252536 | 1.2237355 | 0.221052 | 0.787641 |
| npm3              | 651.5455164 | -0.207857024 | 0.1153973 | -1.80123  | 0.071667 | 0.523122 |
| sfxn5a            | 12.71461307 | 0.969577654  | 0.5377936 | 1.8028805 | 0.071407 | 0.522931 |
| si:dkey-40j3.3    | 0.673031937 | -1.510323851 | 2.4021096 | -0.628749 | 0.529513 | NA       |
| st8sia4           | 64.13789374 | 0.165052726  | 0.2448934 | 0.6739779 | 0.500325 | 0.934224 |
| pcdh1a3           | 6.077837005 | 0.552901913  | 0.7681004 | 0.7198303 | 0.471629 | NA       |
| CABZ01068244.1    | 0           | NA           | NA        | NA        | NA       | NA       |
| ndst1b            | 897.815226  | 0.025087791  | 0.0874507 | 0.2868793 | 0.774205 | 0.975687 |
| wtip              | 11.92151334 | 0.171475478  | 0.5849961 | 0.2931224 | 0.769429 | 0.975687 |
| zgc:153431        | 2.297389852 | -0.017706958 | 1.2250167 | -0.014454 | 0.988467 | NA       |
| mib2              | 42.55945641 | 0.148795809  | 0.2912808 | 0.5108328 | 0.609468 | 0.956718 |
| actr8             | 275.492846  | 0.017106835  | 0.1433224 | 0.1193591 | 0.904991 | 0.990702 |
| akt2l             | 505.3064174 | -0.154117745 | 0.11867   | -1.298708 | 0.194044 | 0.75784  |
| pent              | 126.679335  | 0.014135503  | 0.1873273 | 0.0754588 | 0.93985  | 0.992857 |
| si:dkey-31j3.11   | 14.24088774 | 0.47429714   | 0.5052073 | 0.9388168 | 0.347825 | 0.880195 |
| CU468002.1        | 0           | NA           | NA        | NA        | NA       | NA       |
| btr18             | 11.80753432 | -0.291666916 | 0.5543137 | -0.526177 | 0.598766 | 0.955763 |
| si:ch73-238c9.1   | 267.8330425 | -0.144214343 | 0.138537  | -1.04098  | 0.297885 | 0.85401  |
| RF00001           | 0           | NA           | NA        | NA        | NA       | NA       |
| npy7r             | 0.682543311 | -1.48135518  | 2.5509761 | -0.580701 | 0.561442 | NA       |
| CT573408.1        | 0           | NA           | NA        | NA        | NA       | NA       |
| traj43            | 0           | NA           | NA        | NA        | NA       | NA       |
| CU914622.2        | 33.58794399 | -0.572659473 | 0.3843585 | -1.48991  | 0.136248 | 0.673089 |
| CT583728.7        | 0           | NA           | NA        | NA        | NA       | NA       |
| zgc:174703        | 14.11942451 | 0.526970228  | 0.5200549 | 1.0132972 | 0.310918 | 0.863012 |
| CR936977.2        | 6.316593469 | -0.458075156 | 0.7722295 | -0.593185 | 0.553057 | NA       |
| si:dkey-36i7.3    | 376.1444888 | -0.637045129 | 0.1250276 | -5.095238 | 3.48E-07 | 4.03E-05 |
| pglyrp6           | 3.383345456 | 0.933465182  | 1.05497   | 0.8848263 | 0.37625  | NA       |
| unc45a            | 310.8717279 | -0.067292531 | 0.1269987 | -0.529868 | 0.596203 | 0.954447 |
| BX088524.3        | 53.92001143 | 0.0391469    | 0.2767072 | 0.1414741 | 0.887495 | 0.989291 |
| gpc5a             | 69.68680129 | -0.201545092 | 0.2423005 | -0.831798 | 0.405523 | 0.901305 |
| znf536            | 1472.474484 | -0.084286623 | 0.0790509 | -1.066232 | 0.286319 | 0.845942 |
| si:ch73-329n5.1   | 7.272428394 | -0.796879184 | 0.7308334 | -1.09037  | 0.27555  | NA       |
| map3k12           | 90.61588127 | -0.229931784 | 0.2342387 | -0.981613 | 0.32629  | 0.872137 |
| CU179757.1        | 0.166657454 | -0.955901296 | 4.0804729 | -0.234262 | 0.814781 | NA       |
| hivepl            | 654.469222  | 0.073985078  | 0.1081264 | 0.6842463 | 0.49382  | 0.931926 |
| bcol1             | 78.74383615 | -0.169524492 | 0.2250242 | -0.753361 | 0.451233 | 0.918761 |
| RF00001           | 0           | NA           | NA        | NA        | NA       | NA       |
| si:zfos-169g10.2  | 7.591346466 | -0.481349869 | 0.7066199 | -0.681201 | 0.495745 | NA       |

|                    |             |              |           |           |          |          |
|--------------------|-------------|--------------|-----------|-----------|----------|----------|
| NINJ1              | 40.93973221 | 0.035771161  | 0.3040769 | 0.1176385 | 0.906354 | 0.990702 |
| brpfl              | 406.032103  | 0.080341057  | 0.1166181 | 0.6889244 | 0.490871 | 0.931926 |
| dapk2b             | 75.67060021 | 0.090963412  | 0.2222686 | 0.40925   | 0.682356 | 0.965476 |
| gga3a              | 397.3995291 | -0.013397029 | 0.125132  | -0.107063 | 0.914739 | 0.991119 |
| CU570782.2         | 0.166657454 | -0.955901296 | 4.0804729 | -0.234262 | 0.814781 | NA       |
| cmc1               | 488.8572248 | 0.037942021  | 0.1062926 | 0.3569583 | 0.721123 | 0.969602 |
| cirbpa             | 18889.41965 | -0.164448756 | 0.0605824 | -2.714464 | 0.006638 | 0.125254 |
| CABZ01063651.1     | 2.524092926 | -0.598563033 | 1.2254527 | -0.488442 | 0.625237 | NA       |
| CR854948.1         | 0           | NA           | NA        | NA        | NA       | NA       |
| si:dkey-9018.3     | 48.56697427 | -0.250598571 | 0.2822664 | -0.887809 | 0.374644 | 0.894316 |
| CABZ01008730.1     | 1.271793099 | -0.729723881 | 1.8766688 | -0.38884  | 0.697395 | NA       |
| si:ch211-215e19.4  | 0           | NA           | NA        | NA        | NA       | NA       |
| bmp16              | 294.2568749 | 0.066137525  | 0.1312404 | 0.503942  | 0.614302 | 0.95688  |
| CU041363.1         | 0.158795395 | 0.967652056  | 4.0804729 | 0.2371421 | 0.812547 | NA       |
| si:dkey-23i12.5    | 231.2493496 | -0.316967463 | 0.1424309 | -2.225413 | 0.026054 | 0.311101 |
| inpp5b             | 585.1670395 | -0.159290677 | 0.1049019 | -1.518472 | 0.128895 | 0.659982 |
| ap4e1              | 263.7072544 | -0.132428048 | 0.1315489 | -1.006683 | 0.314087 | 0.865176 |
| or106-2            | 2.69726507  | 0.736848435  | 1.233001  | 0.5976057 | 0.550103 | NA       |
| RF00001            | 0           | NA           | NA        | NA        | NA       | NA       |
| syncn.2            | 64.05224153 | -0.460603583 | 0.2835675 | -1.624317 | 0.104308 | 0.612044 |
| znf1148            | 6.537784586 | 0.519251935  | 0.7583282 | 0.6847325 | 0.493513 | NA       |
| vipas39            | 263.0984465 | 0.036565353  | 0.1371174 | 0.2666719 | 0.789722 | 0.977238 |
| rfx7b              | 1150.056493 | -0.115322888 | 0.083048  | -1.38863  | 0.164945 | 0.721223 |
| p4ha3              | 21.06100298 | 0.796454374  | 0.4517606 | 1.7630008 | 0.0779   | 0.543735 |
| RF00001            | 0           | NA           | NA        | NA        | NA       | NA       |
| CABZ01064968.1     | 13.50276331 | -0.294943185 | 0.5252714 | -0.561506 | 0.574452 | 0.950037 |
| arnt2              | 1572.428584 | -0.004480342 | 0.0924695 | -0.048452 | 0.961356 | 0.995802 |
| ptpn13             | 1332.230457 | -0.010476008 | 0.0851183 | -0.123076 | 0.902047 | 0.990121 |
| si:ch211-239d6.2   | 0           | NA           | NA        | NA        | NA       | NA       |
| si:busml-194e12.8  | 0           | NA           | NA        | NA        | NA       | NA       |
| cldn23b            | 24.80152406 | -0.427705097 | 0.4290358 | -0.996898 | 0.318814 | 0.867746 |
| crhr2              | 4.723906574 | 0.466924189  | 0.9075306 | 0.5144997 | 0.606903 | NA       |
| traj59             | 0           | NA           | NA        | NA        | NA       | NA       |
| CU694378.1         | 0.530029684 | -0.939524117 | 2.7937867 | -0.336291 | 0.736652 | NA       |
| plpp7a             | 278.4620509 | 0.150127196  | 0.1339708 | 1.1205965 | 0.26246  | 0.830166 |
| cd248a             | 1066.844119 | 0.047300296  | 0.0837676 | 0.5646608 | 0.572304 | 0.949494 |
| rab6a              | 998.9479772 | 0.089704172  | 0.088501  | 1.013595  | 0.310776 | 0.862927 |
| BX510949.1         | 2.459611018 | -2.019780331 | 1.3768551 | -1.466952 | 0.142389 | NA       |
| si:busml-194e12.11 | 0           | NA           | NA        | NA        | NA       | NA       |
| CT978957.2         | 1.903167742 | -0.214939385 | 1.5140883 | -0.14196  | 0.887112 | NA       |
| chmp5b             | 655.5093981 | -0.111106262 | 0.0982008 | -1.131419 | 0.257879 | 0.825396 |
| AL772298.2         | 0.158795395 | 0.967652056  | 4.0804729 | 0.2371421 | 0.812547 | NA       |
| zgc:162730         | 2911.801743 | 0.053366161  | 0.0914912 | 0.5832928 | 0.559696 | 0.948478 |
| si:dkey-122c11.7   | 2.492145583 | -1.503971322 | 1.2858653 | -1.169618 | 0.242155 | NA       |
| znf341             | 67.04644486 | -0.000186039 | 0.2397381 | -0.000776 | 0.999381 | 0.999704 |
| tfr2               | 44.82677521 | 0.263665691  | 0.2864776 | 0.9203711 | 0.357379 | 0.883904 |
| RF00012            | 0           | NA           | NA        | NA        | NA       | NA       |
| vgll14b            | 1567.48932  | -0.06379926  | 0.0782672 | -0.815147 | 0.414988 | 0.906237 |
| plpla              | 275.4107021 | 0.111872942  | 0.1472291 | 0.7598564 | 0.44734  | 0.917154 |
| FP085414.2         | 0.476506538 | 2.394892832  | 2.8161716 | 0.8504073 | 0.395099 | NA       |
| elov11b            | 1294.681463 | -0.080996557 | 0.0897652 | -0.902316 | 0.366889 | 0.88734  |
| gramd2aa           | 188.0579799 | 0.132645725  | 0.1630491 | 0.8135322 | 0.415913 | 0.906237 |
| si:ch211-230g14.6  | 3.118850143 | -0.762100625 | 1.1120714 | -0.685298 | 0.493156 | NA       |
| FP085399.2         | 0.173729368 | -0.955901296 | 4.0804729 | -0.234262 | 0.814781 | NA       |

|                   |             |              |           |           |          |          |
|-------------------|-------------|--------------|-----------|-----------|----------|----------|
| bahcc1a           | 176.0132214 | -0.121523556 | 0.1630605 | -0.745267 | 0.456111 | 0.921215 |
| fundc2            | 700.4982834 | 0.158763375  | 0.1090955 | 1.4552702 | 0.145594 | 0.691067 |
| si:dkeyp-72e1.9   | 193.1871699 | -0.07432418  | 0.1461048 | -0.508705 | 0.610959 | 0.95688  |
| hacd1             | 638.3580147 | 0.293860515  | 0.1105289 | 2.6586766 | 0.007845 | 0.142065 |
| BX005286.3        | 1.189107171 | 1.30530135   | 1.8470888 | 0.7066804 | 0.479765 | NA       |
| mapkbp1           | 169.1313388 | 0.153351788  | 0.1622742 | 0.9450167 | 0.34465  | 0.878434 |
| cav1              | 1621.434816 | 0.175319138  | 0.0784218 | 2.2355911 | 0.025379 | 0.308303 |
| ovca2             | 33.47252324 | -0.539202897 | 0.3317459 | -1.625349 | 0.104088 | 0.611298 |
| RF00026           | 0           | NA           | NA        | NA        | NA       | NA       |
| si:ch211-246m6.5  | 185.6057794 | 0.155561449  | 0.1702767 | 0.9135805 | 0.360937 | 0.885686 |
| si:dkey-262g12.14 | 140.6536927 | -0.030343518 | 0.1705731 | -0.177892 | 0.858808 | 0.985773 |
| DUSP26            | 22.97475086 | 0.015202845  | 0.3978781 | 0.0382098 | 0.96952  | 0.996315 |
| RF00026           | 0           | NA           | NA        | NA        | NA       | NA       |
| aspm              | 633.5809792 | -0.052790855 | 0.0951163 | -0.555014 | 0.578885 | 0.951052 |
| si:dkeyp-4c4.1    | 0.84054856  | 0.569918839  | 2.1047787 | 0.2707738 | 0.786565 | NA       |
| CR388184.2        | 0           | NA           | NA        | NA        | NA       | NA       |
| fahd2a            | 263.1348091 | -0.235680793 | 0.1376927 | -1.711644 | 0.086962 | 0.565098 |
| cfh12             | 38.08402467 | 0.253024579  | 0.3325599 | 0.760839  | 0.446753 | 0.917154 |
| ugt1b6p           | 1.56309065  | 2.947479933  | 1.7916011 | 1.6451653 | 0.099936 | NA       |
| rln1              | 22.70219925 | 0.144155446  | 0.4278425 | 0.3369358 | 0.736165 | 0.972535 |
| l3hypdh           | 49.26081672 | -0.191875992 | 0.2768269 | -0.693126 | 0.48823  | 0.93189  |
| gdnfb             | 3.888004013 | -0.27069952  | 1.0125836 | -0.267335 | 0.789211 | NA       |
| stpgl             | 1.819233999 | -1.452751414 | 1.474507  | -0.985245 | 0.324504 | NA       |
| cyp2aa7           | 130.0619817 | -0.175955584 | 0.193034  | -0.911527 | 0.362018 | 0.885944 |
| CR855320.2        | 0           | NA           | NA        | NA        | NA       | NA       |
| si:ch211-147m6.2  | 0           | NA           | NA        | NA        | NA       | NA       |
| ARMC6             | 50.69223171 | -0.015061471 | 0.2736946 | -0.05503  | 0.956114 | 0.994543 |
| cep128            | 22.93479659 | -0.657107888 | 0.424295  | -1.548705 | 0.121453 | 0.647929 |
| tradv24.0.4       | 0           | NA           | NA        | NA        | NA       | NA       |
| CR457444.5        | 0.638219549 | -2.807461932 | 2.539214  | -1.105642 | 0.268881 | NA       |
| limch1b           | 477.6421844 | 0.055324008  | 0.1045713 | 0.5290556 | 0.596767 | 0.954913 |
| CR354610.1        | 31.24646822 | -0.066895029 | 0.3498665 | -0.191202 | 0.848368 | 0.985174 |
| znf1001           | 64.30667371 | 0.160980134  | 0.2508628 | 0.6417058 | 0.521064 | 0.939056 |
| RF00001           | 0           | NA           | NA        | NA        | NA       | NA       |
| cyrr1             | 558.7289886 | 0.050150764  | 0.0993603 | 0.5047364 | 0.613744 | 0.95688  |
| RF00003           | 0           | NA           | NA        | NA        | NA       | NA       |
| sult2st2          | 479.5861204 | -0.588108632 | 0.1170864 | -5.022858 | 5.09E-07 | 5.75E-05 |
| klhl13            | 61.60782324 | -0.029923639 | 0.2649802 | -0.112928 | 0.910088 | 0.990702 |
| chd1              | 896.9952384 | -0.047003197 | 0.0958475 | -0.490396 | 0.623854 | 0.957354 |
| AL645792.2        | 1.108953469 | 1.331436755  | 3.9243804 | 0.3392731 | 0.734404 | NA       |
| tmem130           | 86.8170818  | -0.082122219 | 0.2380195 | -0.345023 | 0.730077 | 0.971177 |
| nme2b.1           | 8318.885248 | -0.316748728 | 0.0788945 | -4.014841 | 5.95E-05 | 0.003192 |
| CABZ01076737.1    | 8.854489374 | 0.098696032  | 0.6358446 | 0.1552204 | 0.876648 | NA       |
| zgc:113348        | 220.186952  | 0.043035787  | 0.1549295 | 0.2777765 | 0.781184 | 0.97627  |
| kars              | 3937.63997  | -0.113781732 | 0.0677836 | -1.678603 | 0.093229 | 0.580702 |
| prkar1b           | 392.7469173 | 0.190021231  | 0.1172121 | 1.6211742 | 0.10498  | 0.613259 |
| si:ch73-389b16.2  | 1266.468377 | 0.070504391  | 0.0802675 | 0.8783682 | 0.379744 | 0.895192 |
| BX004785.3        | 13.80673021 | 0.086091378  | 0.559569  | 0.153853  | 0.877726 | 0.987881 |
| CR376821.1        | 0           | NA           | NA        | NA        | NA       | NA       |
| CT990567.3        | 0           | NA           | NA        | NA        | NA       | NA       |
| cacna2d4a         | 47.46515785 | -0.225238472 | 0.2870225 | -0.784741 | 0.432605 | 0.91326  |
| agla              | 1781.056154 | 0.181676379  | 0.0912872 | 1.9901628 | 0.046573 | 0.424198 |
| ATE1              | 247.5317675 | -0.029020755 | 0.143988  | -0.20155  | 0.840269 | 0.985029 |
| CR450808.3        | 3.61807464  | 0.29148342   | 1.0032415 | 0.2905416 | 0.771402 | NA       |

|                    |             |              |           |           |          |          |
|--------------------|-------------|--------------|-----------|-----------|----------|----------|
| BX950855.1         | 4.551913468 | -0.730671642 | 0.919361  | -0.79476  | 0.426753 | NA       |
| tmem42b            | 40.02258047 | 0.103798053  | 0.3165344 | 0.3279203 | 0.742972 | 0.973486 |
| CU896644.1         | 0           | NA           | NA        | NA        | NA       | NA       |
| CU459186.4         | 2.414259661 | -0.21179173  | 1.270405  | -0.166712 | 0.867597 | NA       |
| rbms1b             | 6.627515685 | 0.299541787  | 0.7298063 | 0.4104401 | 0.681483 | NA       |
| hint1              | 601.998292  | -0.149007404 | 0.1283306 | -1.161121 | 0.245593 | 0.815431 |
| galnt10            | 133.2202892 | 0.111254424  | 0.1753823 | 0.6343536 | 0.52585  | 0.940223 |
| gpib               | 941.3089161 | 0.193636645  | 0.0949158 | 2.0400878 | 0.041342 | 0.398192 |
| znf1144            | 61.29534886 | -0.102739122 | 0.2651925 | -0.387413 | 0.69845  | 0.967998 |
| si:ch73-236c18.2   | 0.809821446 | 0.539374789  | 2.2312571 | 0.2417358 | 0.808985 | NA       |
| ddr2l              | 35.85837416 | 0.036604345  | 0.3594901 | 0.1018229 | 0.918897 | 0.991623 |
| ankrd13c           | 1395.951194 | -0.036335696 | 0.078819  | -0.461002 | 0.644797 | 0.96029  |
| spink2.2           | 0.157187365 | -0.955901296 | 4.0804729 | -0.234262 | 0.814781 | NA       |
| rbml4b             | 1179.414982 | 0.018407399  | 0.1115891 | 0.1649569 | 0.868978 | 0.987245 |
| CU633479.2         | 123.1520709 | 0.29977642   | 0.2098306 | 1.4286594 | 0.153102 | 0.702423 |
| lrrc8db            | 546.2914981 | -0.04001616  | 0.1057094 | -0.378549 | 0.705023 | 0.968134 |
| CU024870.1         | 0.31437473  | -1.788572922 | 3.5930657 | -0.497785 | 0.618636 | NA       |
| spag8              | 11.63889458 | -0.48436969  | 0.5590421 | -0.866428 | 0.386256 | 0.89551  |
| si:ch211-266c8.1   | 17.66304297 | 0.156594449  | 0.4976956 | 0.314639  | 0.753036 | 0.97481  |
| zgc:55733          | 1647.064854 | 0.006999372  | 0.0789161 | 0.0886938 | 0.929325 | 0.992702 |
| hspa5              | 5348.316783 | 0.016744315  | 0.1039678 | 0.1610529 | 0.872052 | 0.987846 |
| CR339059.1         | 2.651371061 | -0.042699622 | 1.2410748 | -0.034405 | 0.972554 | NA       |
| apbala             | 270.6091923 | 0.258175285  | 0.1360332 | 1.897885  | 0.057711 | 0.471368 |
| mdhlab             | 1497.669449 | 0.371778835  | 0.0827262 | 4.4940884 | 6.99E-06 | 0.000527 |
| si:cabz01021426.2  | 131.2934399 | -0.190731179 | 0.1753882 | -1.08748  | 0.276825 | 0.840075 |
| tnrc6c2            | 760.9346038 | -0.103258041 | 0.0997986 | -1.034665 | 0.300826 | 0.856396 |
| pigr14.2           | 0.968496488 | 0.949457343  | 2.238594  | 0.4241311 | 0.67147  | NA       |
| znf1183            | 13.87766487 | 0.410524686  | 0.5278734 | 0.7776954 | 0.436749 | 0.914408 |
| pdlim7             | 748.8669561 | 0.169851653  | 0.1083477 | 1.5676535 | 0.116962 | 0.639958 |
| ptcd3              | 671.4329835 | -0.065368082 | 0.0966584 | -0.676279 | 0.498863 | 0.934006 |
| RF00001            | 0           | NA           | NA        | NA        | NA       | NA       |
| arf4a              | 9.492361904 | 0.445214782  | 0.6467519 | 0.6883857 | 0.49121  | NA       |
| wu:fu71h07         | 15.21494299 | 0.25422225   | 0.4950984 | 0.5134782 | 0.607617 | 0.956718 |
| RF00001            | 0.166657454 | -0.955901296 | 4.0804729 | -0.234262 | 0.814781 | NA       |
| hoxa4a             | 642.6156032 | -0.057905306 | 0.0949512 | -0.609843 | 0.541966 | 0.944974 |
| wu:fc30c06         | 70.10954527 | 0.007647816  | 0.2311397 | 0.0330874 | 0.973605 | 0.996315 |
| nitr3r.1l          | 0.645291463 | -2.8201041   | 2.5306349 | -1.114386 | 0.265114 | NA       |
| BX005054.1         | 0           | NA           | NA        | NA        | NA       | NA       |
| e2f1               | 31.40610168 | -0.307478571 | 0.3642857 | -0.844059 | 0.398637 | 0.900359 |
| CU855889.2         | 28.53150778 | -0.244585601 | 0.3611644 | -0.677214 | 0.49827  | 0.933914 |
| si:ch73-109d9.2    | 255.177131  | 0.009830752  | 0.133129  | 0.0738438 | 0.941135 | 0.992857 |
| si:dkey-84h14.4    | 0           | NA           | NA        | NA        | NA       | NA       |
| BX927082.1         | 0           | NA           | NA        | NA        | NA       | NA       |
| tradv23.0.1        | 0           | NA           | NA        | NA        | NA       | NA       |
| anpepb             | 667.7575197 | -1.234968548 | 0.1161102 | -10.63618 | 2.02E-26 | 3.64E-23 |
| si:ch1073-181h11.2 | 0.341366344 | 1.891903201  | 3.2128156 | 0.5888614 | 0.555954 | NA       |
| si:dkey-161111.75  | 0           | NA           | NA        | NA        | NA       | NA       |
| carmill            | 36.06164136 | 0.121339432  | 0.3247553 | 0.3736334 | 0.708677 | 0.968664 |
| RF00001            | 0           | NA           | NA        | NA        | NA       | NA       |
| mett117            | 207.7297794 | -0.182140346 | 0.1438855 | -1.26587  | 0.20556  | 0.773646 |
| si:dkeyp-13d12.18  | 0.531799352 | 0.999478841  | 2.790358  | 0.3581902 | 0.720201 | NA       |
| CABZ01074203.1     | 1.165493255 | 1.353703116  | 1.7969125 | 0.7533495 | 0.45124  | NA       |
| srsf2b             | 600.1850159 | -0.012898439 | 0.1031673 | -0.125025 | 0.900504 | 0.990121 |
| traj2              | 0           | NA           | NA        | NA        | NA       | NA       |

|                   |             |              |           |           |          |          |
|-------------------|-------------|--------------|-----------|-----------|----------|----------|
| CT737210.1        | 2.780349839 | -0.217250119 | 1.19037   | -0.182506 | 0.855185 | NA       |
| sept9b            | 414.7353423 | 0.223671326  | 0.1156985 | 1.9332261 | 0.053208 | 0.452412 |
| ndel              | 185.9068328 | 0.072146473  | 0.1502787 | 0.4800845 | 0.631167 | 0.957356 |
| L0017650.1        | 109.1241577 | -0.028154411 | 0.1983516 | -0.141942 | 0.887126 | 0.989231 |
| pcdh2ab10         | 1.454604754 | -0.286731717 | 1.5986585 | -0.179358 | 0.857657 | NA       |
| sgol              | 194.291643  | -0.112822791 | 0.1567677 | -0.719681 | 0.471721 | 0.924838 |
| pimr202           | 0 NA        | NA           | NA        | NA        | NA       | NA       |
| THEM6             | 128.2034148 | 0.476170903  | 0.181329  | 2.6260053 | 0.008639 | 0.152919 |
| erolb             | 371.6255475 | 0.032406531  | 0.1321826 | 0.2451649 | 0.806329 | 0.980105 |
| RF00001           | 0.166657454 | -0.955901296 | 4.0804729 | -0.234262 | 0.814781 | NA       |
| znf185            | 226.5841986 | 0.039557163  | 0.1686048 | 0.2346147 | 0.814508 | 0.981081 |
| si:ch73-1a9.3     | 23847.34479 | -0.016169695 | 0.0614974 | -0.262933 | 0.792602 | 0.977937 |
| CR847936.2        | 0 NA        | NA           | NA        | NA        | NA       | NA       |
| bod1              | 337.4122583 | -0.134125552 | 0.1243538 | -1.078581 | 0.280775 | 0.84357  |
| tfap4             | 180.6921095 | -0.198069569 | 0.1523435 | -1.300151 | 0.193549 | 0.757219 |
| zgc:154055        | 72.77086541 | -0.040725788 | 0.2337274 | -0.174245 | 0.861673 | 0.985841 |
| RF00001           | 0 NA        | NA           | NA        | NA        | NA       | NA       |
| inpp5e            | 335.8246061 | 0.107746075  | 0.1212885 | 0.8883451 | 0.374355 | 0.893914 |
| CR450824.2        | 6.378341993 | -0.92951849  | 0.8054713 | -1.154006 | 0.248498 | NA       |
| RF00001           | 0 NA        | NA           | NA        | NA        | NA       | NA       |
| ildrla            | 304.6688679 | -0.101582231 | 0.1324057 | -0.767205 | 0.44296  | 0.916336 |
| fancm             | 47.6311311  | 0.039255198  | 0.313246  | 0.1253175 | 0.900272 | 0.990121 |
| megf8             | 76.99249896 | 0.520120658  | 0.2237085 | 2.3249925 | 0.020072 | 0.266383 |
| rab27a            | 86.26717798 | -0.001523836 | 0.2419703 | -0.006298 | 0.994975 | 0.998694 |
| zgc:173486        | 0 NA        | NA           | NA        | NA        | NA       | NA       |
| ndrg4             | 3953.376807 | -0.047553807 | 0.0692651 | -0.686548 | 0.492367 | 0.931926 |
| frrs11            | 67.64294375 | 0.118772835  | 0.2557742 | 0.464366  | 0.642386 | 0.959994 |
| FP085399.3        | 0 NA        | NA           | NA        | NA        | NA       | NA       |
| si:dkey-124113.1  | 0.633693903 | 1.437927987  | 2.4435336 | 0.5884625 | 0.556222 | NA       |
| zgc:113295        | 77.29818602 | -0.155415866 | 0.2226088 | -0.698157 | 0.485079 | 0.930084 |
| RF00001           | 0 NA        | NA           | NA        | NA        | NA       | NA       |
| zbtb12.1          | 23.54351012 | 0.035687147  | 0.4168075 | 0.0856202 | 0.931768 | 0.992702 |
| pcdh1gc6          | 202.7723036 | 0.075136905  | 0.149073  | 0.5040277 | 0.614242 | 0.95688  |
| tspan34           | 22.00720932 | -1.764970446 | 0.4536304 | -3.890768 | 9.99E-05 | 0.004879 |
| CABZ01054391.1    | 33.1347399  | 0.286834992  | 0.3352848 | 0.8554966 | 0.392276 | 0.897688 |
| med12             | 1699.33568  | -0.023097356 | 0.0839554 | -0.275115 | 0.783228 | 0.97627  |
| znf1152           | 43.30503406 | 0.170145709  | 0.2961723 | 0.5744821 | 0.565642 | 0.948739 |
| si:dkey-29j8.1    | 0.657349104 | 1.487939685  | 2.418178  | 0.6153144 | 0.538347 | NA       |
| si:dkey-17o15.2   | 314.9343063 | 0.088326362  | 0.1346617 | 0.6559131 | 0.51188  | 0.936253 |
| aamdc             | 136.1286186 | -0.039516483 | 0.1720461 | -0.229685 | 0.818336 | 0.981594 |
| pak1              | 757.2151927 | -0.163366866 | 0.1126803 | -1.449826 | 0.147107 | 0.693916 |
| CU019624.1        | 1.989338175 | 0.986608234  | 1.3675617 | 0.721436  | 0.470641 | NA       |
| poln              | 15.18714994 | 0.369988458  | 0.5059317 | 0.7313012 | 0.464595 | 0.923493 |
| add1              | 422.8576336 | 0.14236775   | 0.1101389 | 1.2926204 | 0.196142 | 0.761539 |
| si:dkeyp-104b3.21 | 1.283111924 | -0.015093912 | 1.7137951 | -0.008807 | 0.992973 | NA       |
| si:ch211-156b7.5  | 2.83127539  | -0.872060563 | 1.1245163 | -0.775498 | 0.438045 | NA       |
| CU062501.2        | 2.257742088 | -0.436600324 | 1.4069071 | -0.310326 | 0.756313 | NA       |
| RF00026           | 0 NA        | NA           | NA        | NA        | NA       | NA       |
| smyhc2            | 2966.726602 | 0.073088233  | 0.0673166 | 1.0857387 | 0.277595 | 0.84125  |
| si:ch73-173p19.2  | 7.567384791 | -0.362136236 | 0.7026677 | -0.515373 | 0.606292 | NA       |
| CR352209.1        | 0.158795395 | 0.967652056  | 4.0804729 | 0.2371421 | 0.812547 | NA       |
| RF00001           | 0.323844819 | -1.825095364 | 3.274639  | -0.557342 | 0.577293 | NA       |
| BX544877.1        | 0.657349104 | 1.487939685  | 2.418178  | 0.6153144 | 0.538347 | NA       |
| terf2ip           | 176.0164708 | -0.315122938 | 0.1545132 | -2.039456 | 0.041405 | 0.39841  |

|                   |             |              |           |           |          |          |
|-------------------|-------------|--------------|-----------|-----------|----------|----------|
| sh3bp5b           | 652.2622958 | 0.016733105  | 0.0994787 | 0.1682079 | 0.86642  | 0.986673 |
| calr3a            | 2785.084675 | 0.099877083  | 0.0744596 | 1.3413594 | 0.179804 | 0.741062 |
| ets2              | 1298.859183 | 0.023898218  | 0.0928601 | 0.2573572 | 0.796903 | 0.978569 |
| bhlha9            | 12.80108341 | 0.351369417  | 0.5389638 | 0.651935  | 0.514443 | 0.937307 |
| slc30a10          | 64.97070369 | -0.331246103 | 0.2465593 | -1.343474 | 0.179118 | 0.740021 |
| cyth4b            | 12.48079792 | 0.189354339  | 0.5408744 | 0.3500893 | 0.726272 | 0.970402 |
| spryl             | 119.9226992 | -0.084191304 | 0.2018605 | -0.417077 | 0.676622 | 0.965257 |
| mymk              | 83.5157641  | 0.178458343  | 0.2143705 | 0.8324762 | 0.40514  | 0.901305 |
| si:ch211-237a4.2  | 1.993076931 | 2.321609457  | 1.5549954 | 1.4930009 | 0.135437 | NA       |
| ppiab             | 6980.649762 | -0.078929363 | 0.0622818 | -1.267294 | 0.20505  | 0.772905 |
| spd11             | 208.7534411 | -0.181103139 | 0.143727  | -1.260049 | 0.207652 | 0.775175 |
| BX548173.1        | 0.981434629 | 0.037139168  | 1.9488154 | 0.0190573 | 0.984795 | NA       |
| RF00017           |             | 0 NA         | NA        | NA        | NA       | NA       |
| ccl39.4           | 0.333314908 | -1.858695402 | 3.5126701 | -0.52914  | 0.596708 | NA       |
| si:dkey-146c18.2  | 0.522329263 | 0.999930388  | 2.8066578 | 0.3562709 | 0.721638 | NA       |
| slc4a3            | 14.01207075 | 0.592650829  | 0.528527  | 1.1213256 | 0.262149 | 0.830166 |
| znf1082           | 14.38127555 | 0.279932835  | 0.5263303 | 0.5318577 | 0.594825 | 0.954434 |
| pcdhlgl           | 20.2245038  | 0.316177344  | 0.4582896 | 0.6899073 | 0.490252 | 0.931926 |
| si:ch211-232d10.3 | 1.347713189 | -0.752436095 | 1.6618253 | -0.452777 | 0.650709 | NA       |
| si:dkey-264f17.3  | 1.019741812 | -0.999014948 | 1.9781285 | -0.50503  | 0.613538 | NA       |
| rps17             | 5901.041598 | -0.317533791 | 0.067551  | -4.700653 | 2.59E-06 | 0.000227 |
| BX323041.1        | 2.528382364 | -0.068179127 | 1.4207516 | -0.047988 | 0.961726 | NA       |
| mark1             | 27.07729574 | -0.134193589 | 0.3947432 | -0.339952 | 0.733893 | 0.971993 |
| fgfr1bl           |             | 0 NA         | NA        | NA        | NA       | NA       |
| si:dkey-151j17.4  | 8.655711325 | 0.645119337  | 0.6868743 | 0.9392102 | 0.347623 | NA       |
| mtpn              | 2570.882624 | -0.049820211 | 0.0760766 | -0.654869 | 0.512552 | 0.936253 |
| RF00001           |             | 0 NA         | NA        | NA        | NA       | NA       |
| CR450827.1        |             | 0 NA         | NA        | NA        | NA       | NA       |
| gcgra             | 172.8499349 | 0.325845613  | 0.1711904 | 1.9034102 | 0.056987 | 0.46855  |
| mag               | 336.3235676 | 0.25746874   | 0.1229618 | 2.0938929 | 0.03627  | 0.372062 |
| ccdc137           | 165.5355419 | 0.061713538  | 0.1816295 | 0.339777  | 0.734024 | 0.971993 |
| si:dkeyp-35e5.5   | 11.67537398 | 0.178398181  | 0.5655207 | 0.3154583 | 0.752414 | 0.974684 |
| si:ch211-207b24.4 | 0.173729368 | -0.955901296 | 4.0804729 | -0.234262 | 0.814781 | NA       |
| si:dkey-74k8.3    | 610.2939274 | 0.025096288  | 0.1020559 | 0.2459072 | 0.805754 | 0.979893 |
| BX677667.2        | 0.157187365 | -0.955901296 | 4.0804729 | -0.234262 | 0.814781 | NA       |
| taf12             | 1938.981576 | 0.046658054  | 0.0816213 | 0.5716406 | 0.567565 | 0.948739 |
| mrpl33            | 451.660619  | 0.1976684    | 0.1252524 | 1.5781605 | 0.114529 | 0.634367 |
| arid3b            | 937.7464084 | -0.136025684 | 0.0984357 | -1.381873 | 0.167011 | 0.723594 |
| ttcl6             | 4.303459406 | 1.147536394  | 0.9853893 | 1.1645513 | 0.244201 | NA       |
| si:dkey-74k8.4    | 23.00621338 | -0.079402799 | 0.396482  | -0.200268 | 0.841271 | 0.985174 |
| znf1023           | 1.669829625 | -1.984133646 | 1.6043401 | -1.236729 | 0.216188 | NA       |
| errfila           | 709.6757797 | 0.354226478  | 0.0977652 | 3.6232387 | 0.000291 | 0.011552 |
| CR388132.2        | 116.4337274 | -0.087999219 | 0.1952475 | -0.450706 | 0.652201 | 0.960708 |
| b4galt4           | 295.8182642 | 0.030355108  | 0.1394494 | 0.2176783 | 0.82768  | 0.982721 |
| gngl0             | 7.759704317 | -0.312151709 | 0.7285782 | -0.42844  | 0.668331 | NA       |
| t1r22             | 4.181655198 | -0.13987312  | 0.9424531 | -0.148414 | 0.882016 | NA       |
| tradv23.0.2       |             | 0 NA         | NA        | NA        | NA       | NA       |
| si:ch211-262i1.3  | 225.9561985 | -0.157411082 | 0.1458369 | -1.079364 | 0.280426 | 0.843423 |
| crebl2            | 612.1564243 | -0.088354168 | 0.0980044 | -0.901532 | 0.367305 | 0.887458 |
| CR388413.4        | 0.84054856  | 0.569918839  | 2.1047787 | 0.2707738 | 0.786565 | NA       |
| BX324181.1        |             | 0 NA         | NA        | NA        | NA       | NA       |
| mlxipl            | 4.769300212 | 0.485623347  | 0.8704314 | 0.5579111 | 0.576905 | NA       |
| pcdhlgl4          | 30.82850195 | 0.029097622  | 0.3425731 | 0.0849384 | 0.93231  | 0.992702 |
| si:dkey-31c13.1   | 109.3986003 | -0.000937165 | 0.1925323 | -0.004868 | 0.996116 | 0.998888 |



|                    |             |              |           |           |          |          |
|--------------------|-------------|--------------|-----------|-----------|----------|----------|
| si:ch211-127b6.2   | 14.14049457 | 0.34259089   | 0.5159016 | 0.6640625 | 0.50665  | 0.935734 |
| znf1154            | 59.34318924 | -0.098603289 | 0.2514657 | -0.392114 | 0.694974 | 0.96736  |
| dnaja2a            | 3219.233404 | 0.023730088  | 0.0720814 | 0.3292124 | 0.741995 | 0.973154 |
| gstpl              | 4269.793326 | -0.46910673  | 0.1084933 | -4.323832 | 1.53E-05 | 0.001014 |
| rnf170             | 432.4041734 | -0.052849368 | 0.1216296 | -0.434511 | 0.663918 | 0.964736 |
| BX323876.1         | 0.339758314 | 0.005883863  | 3.2682461 | 0.0018003 | 0.998564 | NA       |
| hikeshi            | 208.2161555 | -0.083534848 | 0.1472716 | -0.567216 | 0.570567 | 0.949061 |
| si:ch211-215j19.12 | 0.982760668 | 0.918233209  | 2.0855726 | 0.4402787 | 0.659735 | NA       |
| FQ790367.1         | 0.688986717 | 0.114008068  | 2.399209  | 0.047519  | 0.9621   | NA       |
| znf1052            | 9.827663945 | 0.569828468  | 0.6331737 | 0.899956  | 0.368144 | NA       |
| rnf126             | 252.6801573 | -0.036510901 | 0.1352971 | -0.269857 | 0.78727  | 0.976596 |
| fcer1g1            | 63.87863078 | 0.135477588  | 0.2406791 | 0.5628972 | 0.573505 | 0.949869 |
| zgc:113336         | 39.11646114 | -0.393566497 | 0.3197913 | -1.230698 | 0.218436 | 0.785734 |
| CT009487.1         | 0.500161739 | 2.450146464  | 2.7711133 | 0.8841741 | 0.376602 | NA       |
| pcdh2ab12          | 2.649085454 | 1.134032886  | 1.2297283 | 0.9221817 | 0.356434 | NA       |
| trps1              | 35.15011428 | -0.352272201 | 0.3188552 | -1.104803 | 0.269245 | 0.834636 |
| adgre5b.2          | 21.05111685 | 0.920697773  | 0.4315561 | 2.1334373 | 0.032889 | 0.353256 |
| si:dkey-191g9.7    | 472.988405  | -0.065322485 | 0.1110062 | -0.588458 | 0.556225 | 0.947902 |
| abcd3a             | 1046.163708 | -0.184913071 | 0.0861678 | -2.145966 | 0.031876 | 0.346515 |
| si:dkey-14o6.2     | 8.623736396 | 0.11319315   | 0.6325216 | 0.1789554 | 0.857973 | NA       |
| p3h4               | 131.8527687 | 0.064203902  | 0.1776963 | 0.3613126 | 0.717866 | 0.96909  |
| june               | 298.435439  | -0.175669351 | 0.1269502 | -1.383766 | 0.16643  | 0.722981 |
| mchrla             | 0           | NA           | NA        | NA        | NA       | NA       |
| grk3               | 452.7627046 | 0.07486714   | 0.1273453 | 0.5879065 | 0.556595 | 0.948067 |
| si:dkey-29d5.1     | 0           | NA           | NA        | NA        | NA       | NA       |
| tmem222b           | 52.72245849 | -0.379171065 | 0.2639321 | -1.436623 | 0.150825 | 0.698912 |
| FP236513.1         | 59.33060739 | 0.090533093  | 0.2516895 | 0.3597015 | 0.71907  | 0.969183 |
| bmpr1ba            | 332.6189266 | -0.279502495 | 0.1355978 | -2.061262 | 0.039278 | 0.389121 |
| RIMBP2             | 295.0628144 | 0.036087637  | 0.1393789 | 0.2589175 | 0.795699 | 0.978498 |
| rps6kc1            | 990.997455  | -0.098409711 | 0.0858665 | -1.146078 | 0.251763 | 0.821232 |
| RF00324            | 2.945161813 | 0.612116444  | 1.2512656 | 0.4891978 | 0.624702 | NA       |
| ttf2               | 197.2176852 | 0.217025107  | 0.1476892 | 1.4694715 | 0.141705 | 0.6826   |
| CABZ01087953.1     | 20.03750742 | 0.33579526   | 0.4539745 | 0.7396786 | 0.459495 | 0.921978 |
| nkx2.4b            | 45.24773133 | -0.384608232 | 0.3093186 | -1.243405 | 0.213719 | 0.78213  |
| slcold1            | 958.2714298 | -0.554427589 | 0.0912795 | -6.073958 | 1.25E-09 | 2.54E-07 |
| col4a2             | 690.7978145 | 0.160266172  | 0.1065281 | 1.5044492 | 0.132466 | 0.666729 |
| mrps30             | 619.8701988 | -0.166227914 | 0.0984558 | -1.688351 | 0.091344 | 0.57849  |
| CR383680.3         | 1.141597348 | 1.326659567  | 1.9138834 | 0.6931768 | 0.488199 | NA       |
| zgc:136767         | 0.853874503 | -1.902668424 | 2.1134959 | -0.900247 | 0.367989 | NA       |
| kmt5ab             | 155.0547337 | -0.022253322 | 0.1675905 | -0.132784 | 0.894364 | 0.989689 |
| RF00002            | 6.261606524 | 3.521153516  | 1.1164842 | 3.1537873 | 0.001612 | NA       |
| antxr2a            | 196.0178903 | -0.028275766 | 0.1533097 | -0.184436 | 0.853672 | 0.985174 |
| kalrna             | 661.1827387 | -0.059053735 | 0.093988  | -0.628311 | 0.5298   | 0.942209 |
| L0018260.1         | 40.3216166  | -0.272000291 | 0.299711  | -0.907542 | 0.36412  | 0.886386 |
| znf1069            | 10.2319422  | 0.464807182  | 0.6148435 | 0.7559764 | 0.449663 | NA       |
| ttc6               | 26.85295184 | -0.493340309 | 0.3990402 | -1.236317 | 0.216341 | 0.783645 |
| ccpg1              | 25.556612   | -0.367917876 | 0.3871699 | -0.950275 | 0.341973 | 0.878434 |
| snx2               | 420.969529  | -0.169277005 | 0.1083621 | -1.562143 | 0.118254 | 0.641526 |
| si:dkey-23n7.10    | 63.12469006 | 0.407224718  | 0.2522006 | 1.6146855 | 0.106379 | 0.615567 |
| rbm26              | 736.9642454 | -0.124940069 | 0.0928721 | -1.345291 | 0.178531 | 0.739486 |
| CU652893.1         | 0           | NA           | NA        | NA        | NA       | NA       |
| traj28             | 0           | NA           | NA        | NA        | NA       | NA       |
| RF00001            | 0           | NA           | NA        | NA        | NA       | NA       |
| BX323793.1         | 0.62874946  | -2.787682787 | 2.7593918 | -1.010253 | 0.312374 | NA       |

|                   |             |              |           |           |          |          |
|-------------------|-------------|--------------|-----------|-----------|----------|----------|
| RF02250           | 0.173729368 | -0.955901296 | 4.0804729 | -0.234262 | 0.814781 | NA       |
| igfbp7            | 162.1170699 | 0.186551097  | 0.1738496 | 1.0730601 | 0.283244 | 0.84466  |
| atpla3b           | 5528.440282 | 0.286784626  | 0.0888024 | 3.2294708 | 0.00124  | 0.036712 |
| si:dkey-262j3.7   | 0 NA        | NA           | NA        | NA        | NA       | NA       |
| si:dkey-15h8.10   | 8.335762802 | 0.131193384  | 0.6685146 | 0.1962461 | 0.844418 | NA       |
| si:dkey-68o6.8    | 0.507044276 | -2.459587493 | 2.7586536 | -0.89159  | 0.372613 | NA       |
| CR381676.1        | 0.182570949 | 0.967652056  | 4.0804729 | 0.2371421 | 0.812547 | NA       |
| rraga             | 384.4176728 | -0.180715806 | 0.1119831 | -1.613778 | 0.106576 | 0.615567 |
| prkd4             | 1.646883242 | -3.038613469 | 1.8368941 | -1.654213 | 0.098084 | NA       |
| CU464180.1        | 4.315888397 | 0.239358461  | 0.9413607 | 0.2542686 | 0.799288 | NA       |
| dre-mir-17a-1     | 0 NA        | NA           | NA        | NA        | NA       | NA       |
| hoxalla           | 3.046851276 | -0.627152543 | 1.1344861 | -0.552808 | 0.580395 | NA       |
| si:cabz01071912.2 | 48.5431943  | 0.056334494  | 0.2937154 | 0.1917996 | 0.847899 | 0.985174 |
| si:ch211-232d10.1 | 3.488466111 | 0.678446636  | 1.0228082 | 0.6633175 | 0.507127 | NA       |
| CR388378.3        | 0.365141898 | 1.973577737  | 3.3927314 | 0.5817076 | 0.560764 | NA       |
| si:ch211-212k18.4 | 2219.037794 | -0.012227765 | 0.0791366 | -0.154515 | 0.877204 | 0.987881 |
| si:dkey-208k4.2   | 2.632502167 | 1.115435015  | 1.2049961 | 0.9256752 | 0.354615 | NA       |
| diabloa           | 646.6338463 | 0.447054152  | 0.1021618 | 4.3759441 | 1.21E-05 | 0.000845 |
| tufm              | 1765.863531 | -0.044415042 | 0.0937491 | -0.473765 | 0.635667 | 0.958142 |
| BX511034.6        | 0 NA        | NA           | NA        | NA        | NA       | NA       |
| cpne3             | 736.9334794 | 0.15352336   | 0.0912934 | 1.6816474 | 0.092637 | 0.57957  |
| trir              | 581.4474936 | 0.046362421  | 0.1063942 | 0.4357606 | 0.66301  | 0.964736 |
| rab11fip5a        | 37.54972054 | -0.22208132  | 0.3108003 | -0.714547 | 0.474889 | 0.925399 |
| tmsbl             | 1664.896834 | 0.194422492  | 0.2148904 | 0.904752  | 0.365597 | 0.887073 |
| BX247946.1        | 0.672283077 | 0.02892376   | 2.3005571 | 0.0125725 | 0.989969 | NA       |
| AL831726.2        | 0.31598276  | 0.005883445  | 3.3523626 | 0.001755  | 0.9986   | NA       |
| fbxo43            | 6.360797874 | 0.299514805  | 0.7572373 | 0.3955363 | 0.692447 | NA       |
| fam83fb           | 20.49732603 | 0.450478473  | 0.4492241 | 1.0027924 | 0.315961 | 0.866931 |
| BX927261.1        | 0 NA        | NA           | NA        | NA        | NA       | NA       |
| CABZ01019904.1    | 6.879711656 | 0.097928627  | 0.7408051 | 0.1321922 | 0.894832 | NA       |
| traj45            | 0 NA        | NA           | NA        | NA        | NA       | NA       |
| pimr203           | 0.651146404 | -0.045019457 | 2.587009  | -0.017402 | 0.986116 | NA       |
| ptpn22            | 64.95993865 | 0.098110606  | 0.2454713 | 0.3996826 | 0.68939  | 0.966763 |
| si:dkey-43p13.5   | 10.64752315 | -0.389797379 | 0.5971969 | -0.652712 | 0.513942 | NA       |
| BX901923.2        | 766.9816822 | 0.261205784  | 0.1045922 | 2.4973723 | 0.012512 | 0.198084 |
| ugt5b5            | 7.92586666  | -0.06616454  | 0.7213393 | -0.091725 | 0.926917 | NA       |
| slcla8a           | 340.522108  | 0.222178516  | 0.1245865 | 1.7833278 | 0.074533 | 0.531871 |
| cfh13             | 3.883988607 | 1.228683405  | 1.0100866 | 1.2164139 | 0.223827 | NA       |
| pcytlbb           | 55.98671221 | 0.000650701  | 0.2835265 | 0.002295  | 0.998169 | 0.999281 |
| zgc:172128        | 0 NA        | NA           | NA        | NA        | NA       | NA       |
| si:ch73-173h19.3  | 247.0805177 | 0.27685305   | 0.1321754 | 2.0945891 | 0.036208 | 0.371931 |
| BX548173.2        | 0 NA        | NA           | NA        | NA        | NA       | NA       |
| RF00001           | 0 NA        | NA           | NA        | NA        | NA       | NA       |
| si:dkey-283b1.6   | 60.70292015 | -0.945692738 | 0.2740931 | -3.450261 | 0.00056  | 0.019327 |
| CR381540.3        | 18.04697952 | 0.086594775  | 0.4565251 | 0.1896824 | 0.849558 | 0.985174 |
| gpc2              | 119.7264332 | -0.077980112 | 0.193556  | -0.402881 | 0.687036 | 0.966376 |
| gpc6b             | 9.249210437 | 0.73511266   | 0.6211498 | 1.1834708 | 0.236623 | NA       |
| CU694197.2        | 4.30355202  | 0.444550151  | 0.9033861 | 0.4920932 | 0.622653 | NA       |
| sat2b             | 141.746864  | 0.224931953  | 0.1757562 | 1.2797955 | 0.200617 | 0.766801 |
| inpp1la           | 763.9473295 | 0.049952204  | 0.0985995 | 0.5066172 | 0.612423 | 0.95688  |
| lmbrd1            | 630.3216858 | 0.052896567  | 0.1039566 | 0.5088333 | 0.610869 | 0.95688  |
| RF00001           | 0 NA        | NA           | NA        | NA        | NA       | NA       |
| ndellb            | 854.1711238 | 0.109286695  | 0.09627   | 1.1352102 | 0.256287 | 0.824633 |
| RF00026           | 0 NA        | NA           | NA        | NA        | NA       | NA       |

|                    |             |              |           |           |          |          |
|--------------------|-------------|--------------|-----------|-----------|----------|----------|
| nop10              | 383.0324034 | -0.034688168 | 0.1228907 | -0.282269 | 0.777738 | 0.975942 |
| lyplal             | 91.98296455 | 0.190374362  | 0.2052502 | 0.9275233 | 0.353655 | 0.881976 |
| sec23a             | 1176.290455 | -0.033908457 | 0.0914583 | -0.370753 | 0.710821 | 0.968985 |
| opn9               | 256.0557899 | 0.165621396  | 0.1315053 | 1.2594274 | 0.207876 | 0.775404 |
| dynlrbl            | 0 NA        | NA           | NA        | NA        | NA       | NA       |
| myo5c              | 60.73650822 | -0.282410785 | 0.2502267 | -1.12862  | 0.259058 | 0.82743  |
| CR383668.2         | 1.435184007 | 2.837783568  | 3.9414811 | 0.719979  | 0.471538 | NA       |
| olfcs1             | 2.769890184 | 0.154624306  | 1.1442967 | 0.1351261 | 0.892512 | NA       |
| dcp2               | 694.7026476 | -0.019809926 | 0.1017635 | -0.194666 | 0.845654 | 0.985174 |
| eomesb             | 11.97483724 | -0.291118475 | 0.5649994 | -0.515254 | 0.606375 | 0.956718 |
| twsgla             | 727.7451695 | -0.077770188 | 0.136117  | -0.571348 | 0.567764 | 0.948739 |
| si:ch211-165a10.11 | 0 NA        | NA           | NA        | NA        | NA       | NA       |
| prdm10             | 405.6566665 | 0.042222321  | 0.1105187 | 0.3820379 | 0.702433 | 0.968134 |
| cpne4b             | 3.908650073 | 1.539829474  | 1.1131702 | 1.383283  | 0.166578 | NA       |
| arhgap27           | 210.6079069 | 0.090223177  | 0.1439171 | 0.6269108 | 0.530718 | 0.942209 |
| bcol               | 228.7796289 | -0.605556575 | 0.1522533 | -3.977298 | 6.97E-05 | 0.003618 |
| F0681314.1         | 0 NA        | NA           | NA        | NA        | NA       | NA       |
| CABZ01072885.1     | 57.48943407 | -0.256142645 | 0.2585346 | -0.990748 | 0.321809 | 0.869463 |
| si:ch211-117c19.1  | 41.75694245 | 0.497910398  | 0.3122539 | 1.594569  | 0.110809 | 0.625858 |
| si:dkey-56m15.3    | 3.363147021 | 1.59502007   | 1.0838773 | 1.4715874 | 0.141132 | NA       |
| CABZ01055365.1     | 10.72956662 | 0.041151444  | 0.5797515 | 0.0709812 | 0.943413 | NA       |
| zgc:123035         | 213.9785246 | 0.073904233  | 0.1428522 | 0.5173476 | 0.604914 | 0.95651  |
| si:dkey-29m1.2     | 5.286868916 | -0.964600969 | 0.8830922 | -1.092299 | 0.274702 | NA       |
| postnb             | 17561.52379 | 0.388825704  | 0.0648283 | 5.9977761 | 2.00E-09 | 3.77E-07 |
| si:ch211-271d10.2  | 8.480186964 | 0.287757869  | 0.649099  | 0.4433189 | 0.657535 | NA       |
| si:dkey-56m15.7    | 0 NA        | NA           | NA        | NA        | NA       | NA       |
| BX664721.3         | 4.275890614 | 0.217967437  | 0.89791   | 0.2427498 | 0.808199 | NA       |
| tmem200b           | 121.5472163 | -0.029014163 | 0.1867446 | -0.155368 | 0.876531 | 0.987881 |
| dicpl.17           | 0 NA        | NA           | NA        | NA        | NA       | NA       |
| BX942846.1         | 12.01730647 | 0.597015841  | 0.5627202 | 1.0609462 | 0.288714 | 0.845979 |
| slc2a8             | 58.01709543 | 0.110790792  | 0.2530497 | 0.4378223 | 0.661515 | 0.964234 |
| appa               | 5081.835767 | 0.019213918  | 0.0650915 | 0.2951833 | 0.767854 | 0.975687 |
| bniplb             | 331.3168737 | -0.003123546 | 0.1300317 | -0.024021 | 0.980836 | 0.996944 |
| dcc                | 18.55101158 | -0.053376823 | 0.4443869 | -0.120113 | 0.904393 | 0.99032  |
| cdc42bpa           | 37.88319887 | 0.263118148  | 0.3100314 | 0.8486823 | 0.396058 | 0.89957  |
| CABZ01049361.1     | 2.807382738 | 0.496279294  | 1.1318426 | 0.4384703 | 0.661045 | NA       |
| armh3              | 440.7659436 | 0.027099964  | 0.125394  | 0.2161185 | 0.828895 | 0.982721 |
| CU019562.3         | 0 NA        | NA           | NA        | NA        | NA       | NA       |
| lto1               | 122.1545208 | -0.004848914 | 0.1856238 | -0.026122 | 0.97916  | 0.996802 |
| hfml               | 17.58110536 | 0.456332639  | 0.4861607 | 0.9386457 | 0.347913 | 0.880195 |
| ripk2              | 34.75207221 | -0.096568877 | 0.3318518 | -0.291    | 0.771051 | 0.975687 |
| GPR151             | 73.2579387  | -0.154256492 | 0.2392898 | -0.644643 | 0.519159 | 0.938945 |
| ccn2b              | 146.1998303 | -0.116543946 | 0.1813784 | -0.642546 | 0.520519 | 0.939056 |
| arhgap21a          | 437.5501323 | -0.074553694 | 0.1102796 | -0.676043 | 0.499014 | 0.934006 |
| zgc:165508         | 6.114683254 | 0.063609412  | 0.7761546 | 0.0819546 | 0.934683 | NA       |
| si:ch73-380110.2   | 44.59887175 | 0.131486613  | 0.2939718 | 0.4472763 | 0.654676 | 0.961305 |
| AL953886.2         | 0.31437473  | -1.788572922 | 3.5930657 | -0.497785 | 0.618636 | NA       |
| wipfla             | 8.475108622 | 0.279209024  | 0.6459033 | 0.4322769 | 0.66554  | NA       |
| zgc:193726         | 36.15031452 | -0.154281243 | 0.3600636 | -0.428483 | 0.668299 | 0.964736 |
| CR391991.3         | 0.65888811  | -1.481402282 | 2.5795287 | -0.574292 | 0.56577  | NA       |
| FP085399.4         | 0.687217049 | -1.490137326 | 2.387795  | -0.624064 | 0.532585 | NA       |
| L0018474.1         | 311.4633925 | -0.070311033 | 0.124717  | -0.563765 | 0.572914 | 0.949762 |
| hoxala             | 55.21680357 | 0.126441339  | 0.2699647 | 0.4683624 | 0.639525 | 0.959994 |
| CT573245.1         | 0.166657454 | -0.955901296 | 4.0804729 | -0.234262 | 0.814781 | NA       |

|                   |             |              |           |           |          |          |
|-------------------|-------------|--------------|-----------|-----------|----------|----------|
| scmh1             | 456.4791797 | -0.020704411 | 0.1129631 | -0.183285 | 0.854575 | 0.985174 |
| CT573342.2        | 1.618585297 | 1.990384964  | 1.6424254 | 1.2118571 | 0.225567 | NA       |
| nrg1              | 200.7548177 | 0.024580427  | 0.1511782 | 0.1625924 | 0.870839 | 0.987683 |
| fh13b             | 112.7815111 | 0.219844039  | 0.1867236 | 1.1773769 | 0.239045 | 0.807768 |
| si:ch211-182p11.1 | 5.35807848  | -0.186693535 | 0.8355861 | -0.223428 | 0.823202 | NA       |
| plek              | 24.82787097 | 0.097937556  | 0.4833074 | 0.2026403 | 0.839416 | 0.984979 |
| si:dkey-183i3.9   | 134.6252348 | 0.222855581  | 0.1733884 | 1.285297  | 0.198689 | 0.763777 |
| si:ch73-281k2.5   | 169.7400135 | 0.451300144  | 0.1746999 | 2.5832879 | 0.009786 | 0.167691 |
| cdh28             | 3.906003694 | -0.766997554 | 1.0540544 | -0.727664 | 0.466819 | NA       |
| si:ch211-212k5.4  | 4.642048821 | -0.018509183 | 0.8861819 | -0.020886 | 0.983336 | NA       |
| SMARCA4           | 613.2455161 | 0.084426962  | 0.1013756 | 0.8328138 | 0.40495  | 0.901305 |
| rspol             | 40.84021123 | 0.245980011  | 0.3074401 | 0.8000908 | 0.423658 | 0.907829 |
| si:ch211-76m11.8  | 1.788978252 | 0.26630798   | 1.4099501 | 0.1888776 | 0.850189 | NA       |
| csnklg1           | 1032.420695 | 0.014021174  | 0.0848813 | 0.1651856 | 0.868798 | 0.987245 |
| ccdc127a          | 55.2569858  | -0.375560366 | 0.2904034 | -1.293237 | 0.195929 | 0.761148 |
| rtn4b             | 1194.683375 | -0.043231837 | 0.0848031 | -0.509791 | 0.610198 | 0.95688  |
| fgf2              | 25.85677173 | 0.792244665  | 0.4080308 | 1.9416294 | 0.052182 | 0.448824 |
| si:dkey-68o6.6    |             | 0 NA         | NA        | NA        | NA       | NA       |
| CR318589.1        |             | 0 NA         | NA        | NA        | NA       | NA       |
| nop58             | 1341.204816 | -0.098177452 | 0.0947983 | -1.035646 | 0.300367 | 0.856251 |
| FP016005.1        | 18.19865409 | 0.287405429  | 0.4580512 | 0.6274526 | 0.530363 | 0.942209 |
| anxalc            | 957.1245672 | -0.05592946  | 0.1175642 | -0.475736 | 0.634263 | 0.95776  |
| barh12            | 933.3097164 | 0.064693904  | 0.0913917 | 0.7078752 | 0.479023 | 0.926978 |
| FP236354.1        | 0.992392395 | 0.990936841  | 1.9735323 | 0.5021133 | 0.615588 | NA       |
| BX470229.2        | 3.805277046 | -0.624547297 | 0.9806461 | -0.636873 | 0.524207 | NA       |
| CR339044.1        |             | 0 NA         | NA        | NA        | NA       | NA       |
| BX323064.2        | 3.503132634 | 0.693459072  | 1.1173426 | 0.6206324 | 0.534841 | NA       |
| AL732629.1        | 0.492110303 | -0.89618148  | 2.8628934 | -0.313033 | 0.754255 | NA       |
| zgc:194469        | 221.9303921 | -0.183118825 | 0.1511229 | -1.211721 | 0.225619 | 0.793245 |
| esml              | 95.24555268 | -0.491706081 | 0.2321316 | -2.118221 | 0.034156 | 0.359261 |
| gnblb             | 5189.175932 | 0.072724993  | 0.066585  | 1.0922129 | 0.27474  | 0.839332 |
| smchd1            | 439.7818631 | -0.020828271 | 0.11761   | -0.177096 | 0.859433 | 0.985773 |
| sec24a            | 895.2787085 | 0.015122076  | 0.101951  | 0.148327  | 0.882085 | 0.988344 |
| BX927192.1        |             | 0 NA         | NA        | NA        | NA       | NA       |
| si:dkey-238k10.2  | 26.53758836 | 0.118053074  | 0.385865  | 0.305944  | 0.759647 | 0.975374 |
| RF00001           | 0.158795395 | 0.967652056  | 4.0804729 | 0.2371421 | 0.812547 | NA       |
| AGBL1             | 166.3906753 | 0.286043669  | 0.1670603 | 1.7122186 | 0.086856 | 0.565027 |
| CU019647.1        |             | 0 NA         | NA        | NA        | NA       | NA       |
| si:ch211-48m9.1   | 221.9160705 | 0.157173358  | 0.1518858 | 1.0348126 | 0.300756 | 0.856365 |
| stag3             | 3.12269471  | -0.481892129 | 1.1358472 | -0.424258 | 0.671378 | NA       |
| kcnj2b            | 2.342542784 | 0.019054581  | 1.2141842 | 0.0156933 | 0.987479 | NA       |
| sumo2a            | 1.475032609 | 0.318592214  | 1.58558   | 0.200931  | 0.840753 | NA       |
| eri2              | 46.99419792 | -0.266297694 | 0.2985652 | -0.891925 | 0.372433 | 0.892843 |
| npr2              | 332.7657628 | 0.047829087  | 0.1221799 | 0.3914644 | 0.695454 | 0.96736  |
| BX324177.1        |             | 0 NA         | NA        | NA        | NA       | NA       |
| RF00001           | 0.166657454 | -0.955901296 | 4.0804729 | -0.234262 | 0.814781 | NA       |
| trim25            | 267.2516565 | 0.002266785  | 0.1287523 | 0.0176058 | 0.985953 | 0.996944 |
| si:ch73-343g19.4  | 0.333314908 | -1.858695402 | 3.5126701 | -0.52914  | 0.596708 | NA       |
| tppp              | 19.73095467 | -1.007456953 | 0.4555003 | -2.211759 | 0.026983 | 0.316663 |
| ymell1b           | 917.7569979 | 0.143574296  | 0.0858687 | 1.6720221 | 0.09452  | 0.584805 |
| osepla            | 57.91970353 | 0.27644008   | 0.2522638 | 1.0958374 | 0.27315  | 0.838141 |
| b4galt11          | 367.7442304 | -0.087450919 | 0.1274837 | -0.685977 | 0.492727 | 0.931926 |
| BX649453.1        | 3.544618094 | 1.008838813  | 1.0252995 | 0.9839455 | 0.325142 | NA       |
| zgc:152774        | 14.45020697 | -0.971861444 | 0.5436744 | -1.78758  | 0.073844 | 0.529749 |

|                   |             |              |           |           |          |          |
|-------------------|-------------|--------------|-----------|-----------|----------|----------|
| tnk2b             | 547.2264716 | -0.061798515 | 0.1070461 | -0.577308 | 0.563732 | 0.948739 |
| si:dkey-72117.5   | 3.912638737 | 0.235968071  | 0.9523048 | 0.2477863 | 0.8043   | NA       |
| rogdi             | 1134.660821 | 0.137524707  | 0.0835636 | 1.6457488 | 0.099815 | 0.600955 |
| shmt2             | 541.4498024 | 0.293109136  | 0.1518681 | 1.9300239 | 0.053604 | 0.453751 |
| si:ch73-236c18.6  | 0           | NA           | NA        | NA        | NA       | NA       |
| si:dkey-16p6.1    | 2.192894202 | -0.287433415 | 1.4576574 | -0.197189 | 0.84368  | NA       |
| CT573006.2        | 0.832686501 | 1.890338043  | 2.2432774 | 0.842668  | 0.399414 | NA       |
| BX248318.1        | 354.299691  | -0.945021423 | 0.1272641 | -7.425669 | 1.12E-13 | 4.53E-11 |
| RF00600           | 7.461186084 | -0.237960362 | 0.7829463 | -0.303929 | 0.761182 | NA       |
| si:ch73-34h11.1   | 0           | NA           | NA        | NA        | NA       | NA       |
| BX950868.2        | 1.005677052 | -1.070533255 | 2.0800549 | -0.514666 | 0.606787 | NA       |
| p2ry2.3           | 2.816503055 | -0.484067777 | 1.1126493 | -0.435059 | 0.66352  | NA       |
| AL935044.3        | 3.102102804 | -0.957913559 | 1.196179  | -0.800811 | 0.423241 | NA       |
| olfcjl            | 6.323402185 | 0.946776235  | 0.8145161 | 1.1623788 | 0.245082 | NA       |
| slcla3a           | 563.8432562 | -0.020922846 | 0.1092894 | -0.191444 | 0.848177 | 0.985174 |
| RF00001           | 0           | NA           | NA        | NA        | NA       | NA       |
| si:ch73-217b7.1   | 434.9315328 | -0.117355729 | 0.1187948 | -0.987886 | 0.323208 | 0.870607 |
| zgc:153426        | 5514.745533 | 0.139060079  | 0.0741549 | 1.8752642 | 0.060756 | 0.481715 |
| aip               | 1479.302928 | 0.011853576  | 0.0783294 | 0.1513298 | 0.879716 | 0.987881 |
| clnd1a            | 428.5961316 | -0.083896942 | 0.1213235 | -0.691514 | 0.489242 | 0.931926 |
| cdh30             | 0.323844819 | -1.825095364 | 3.274639  | -0.557342 | 0.577293 | NA       |
| hspb7             | 95.3974646  | 0.405929671  | 0.2160214 | 1.879118  | 0.060228 | 0.479065 |
| aatkb             | 439.5083682 | 0.163986878  | 0.1133938 | 1.4461717 | 0.148129 | 0.695914 |
| CT573793.3        | 0.157187365 | -0.955901296 | 4.0804729 | -0.234262 | 0.814781 | NA       |
| si:ch211-203c5.3  | 2.026209009 | -1.602627092 | 1.4484213 | -1.106465 | 0.268525 | NA       |
| zgc:77287         | 28.903099   | -0.150054426 | 0.3602279 | -0.416554 | 0.677005 | 0.965257 |
| CU210919.1        | 0.158915748 | 0.967652056  | 4.0804729 | 0.2371421 | 0.812547 | NA       |
| CR855996.2        | 477.7392601 | -0.656064668 | 0.1092515 | -6.005086 | 1.91E-09 | 3.67E-07 |
| slc39a7           | 1074.340322 | 0.163493446  | 0.0822562 | 1.987613  | 0.046855 | 0.425112 |
| flt4              | 186.4534999 | 0.113969944  | 0.1536545 | 0.7417284 | 0.458252 | 0.921978 |
| CR936974.1        | 0.904013163 | 2.00662374   | 2.339454  | 0.8577316 | 0.391041 | NA       |
| MPV17L            | 183.4713179 | 0.179791912  | 0.1530061 | 1.175064  | 0.239969 | 0.808111 |
| rnasekb           | 1375.536753 | 0.060877018  | 0.0871687 | 0.6983813 | 0.484939 | 0.93001  |
| CT573799.2        | 1.802142557 | -0.848670183 | 1.6231959 | -0.522839 | 0.601086 | NA       |
| si:dkeyp-107f9.4  | 0.173729368 | -0.955901296 | 4.0804729 | -0.234262 | 0.814781 | NA       |
| syng2b            | 435.2310269 | -0.022433126 | 0.1253628 | -0.178946 | 0.85798  | 0.985703 |
| si:ch211-39i2.2   | 325.5091732 | -0.022374994 | 0.1388671 | -0.161125 | 0.871995 | 0.987846 |
| il6r              | 90.3351939  | 0.095170059  | 0.2117617 | 0.4494205 | 0.653128 | 0.960792 |
| si:dkey-41c6.3    | 1.472472796 | 0.260944128  | 1.6737067 | 0.1559079 | 0.876106 | NA       |
| cap2              | 359.9891292 | 0.364886831  | 0.1191886 | 3.0614234 | 0.002203 | 0.057467 |
| BX649416.2        | 65.03569582 | -0.030511911 | 0.2635474 | -0.115774 | 0.907832 | 0.990702 |
| hcn1              | 31.92621745 | 0.139701922  | 0.3703261 | 0.3772403 | 0.705995 | 0.968412 |
| tradv2.0.1        | 0           | NA           | NA        | NA        | NA       | NA       |
| gipcl             | 10.42652742 | 0.407550816  | 0.5894025 | 0.6914643 | 0.489274 | NA       |
| itgblb            | 341.7328566 | -0.040000998 | 0.1194909 | -0.334762 | 0.737805 | 0.972535 |
| si:ch1073-224n8.1 | 265.0005134 | -0.004603313 | 0.129416  | -0.03557  | 0.971625 | 0.996315 |
| CR812836.1        | 0           | NA           | NA        | NA        | NA       | NA       |
| mthfs             | 74.72571973 | -0.029699354 | 0.2418494 | -0.122801 | 0.902265 | 0.990121 |
| si:ch73-299h12.9  | 25.92011427 | 0.075100743  | 0.3985463 | 0.1884367 | 0.850534 | 0.985174 |
| CR855389.2        | 4.289377947 | 0.63061439   | 1.0509022 | 0.6000696 | 0.54846  | NA       |
| CT009570.1        | 0           | NA           | NA        | NA        | NA       | NA       |
| ampd2a            | 218.2454798 | -0.197874391 | 0.192037  | -1.030397 | 0.302824 | 0.85729  |
| L0018176.1        | 43.21692805 | -0.063127515 | 0.3137501 | -0.201203 | 0.84054  | 0.985042 |
| pltp              | 197.6428828 | -0.211789819 | 0.1489675 | -1.421718 | 0.155108 | 0.70492  |

|                  |             |              |           |           |          |          |
|------------------|-------------|--------------|-----------|-----------|----------|----------|
| pcdh1g29         | 170.6693176 | -0.180178436 | 0.1550162 | -1.16232  | 0.245105 | 0.815227 |
| fycola           | 108.9481558 | -0.146994178 | 0.2035702 | -0.722081 | 0.470245 | 0.924787 |
| FP236812.1       | 106.6118343 | 0.040869     | 0.1924855 | 0.2123225 | 0.831855 | 0.98349  |
| si:ch211-266c8.1 | 71.723064   | -0.313579949 | 0.2736338 | -1.145984 | 0.251802 | 0.821232 |
| dre-mir-219-2    | 0 NA        | NA           | NA        | NA        | NA       | NA       |
| slc10a7          | 196.8450843 | -0.044835964 | 0.1466246 | -0.305787 | 0.759767 | 0.975374 |
| RF01268          | 0 NA        | NA           | NA        | NA        | NA       | NA       |
| BX936284.1       | 0 NA        | NA           | NA        | NA        | NA       | NA       |
| CU861667.1       | 0.173729368 | -0.955901296 | 4.0804729 | -0.234262 | 0.814781 | NA       |
| uqcr10           | 1574.950391 | 0.041064168  | 0.1117582 | 0.3674377 | 0.713293 | 0.96909  |
| tcrg             | 3.768536608 | -0.130126361 | 0.9563144 | -0.136071 | 0.891765 | NA       |
| CABZ01075611.1   | 23.42803244 | 0.041724906  | 0.4447357 | 0.0938196 | 0.925253 | 0.992676 |
| BX908386.3       | 0.506415768 | -0.866825728 | 2.6674086 | -0.324969 | 0.745204 | NA       |
| CU138542.2       | 4.014372492 | 1.259531875  | 1.0330261 | 1.2192643 | 0.222744 | NA       |
| CR391991.4       | 1.022491002 | 2.265845936  | 2.0916203 | 1.083297  | 0.278677 | NA       |
| cldn10b          | 63.49146048 | 0.034636163  | 0.2435987 | 0.1421853 | 0.886934 | 0.989231 |
| cyp2k17          | 24.66187383 | -0.123336814 | 0.3897838 | -0.316424 | 0.751681 | 0.974352 |
| znf609b          | 1618.773386 | -0.053859611 | 0.08223   | -0.654987 | 0.512476 | 0.936253 |
| zcchc4           | 80.07442788 | -0.136891775 | 0.238431  | -0.574136 | 0.565876 | 0.948739 |
| RF00001          | 0 NA        | NA           | NA        | NA        | NA       | NA       |
| BX072554.1       | 0 NA        | NA           | NA        | NA        | NA       | NA       |
| cox7c            | 2008.592014 | 0.056801433  | 0.1962371 | 0.289453  | 0.772235 | 0.975687 |
| tmem184a         | 287.283089  | -0.237621191 | 0.1334583 | -1.78049  | 0.074996 | 0.533634 |
| cyp2aa8          | 156.0232779 | 0.255646524  | 0.1947288 | 1.3128336 | 0.189239 | 0.753954 |
| msh6             | 657.7176611 | -0.066452369 | 0.0957926 | -0.693711 | 0.487864 | 0.931809 |
| ppt2             | 418.3743135 | 0.022090428  | 0.108332  | 0.2039141 | 0.838421 | 0.984797 |
| CR456627.1       | 0.825855294 | 1.891116598  | 2.1306575 | 0.8875742 | 0.37477  | NA       |
| RF00001          | 0 NA        | NA           | NA        | NA        | NA       | NA       |
| BX005367.1       | 3.053658153 | -0.168960636 | 1.1399816 | -0.148213 | 0.882174 | NA       |
| dre-mir-133a-1   | 4.010046513 | 1.012976936  | 0.9486069 | 1.0678575 | 0.285585 | NA       |
| arhgap44         | 168.5628472 | 0.218668769  | 0.1732146 | 1.2624153 | 0.206799 | 0.774452 |
| olfcgl           | 0.182570949 | 0.967652056  | 4.0804729 | 0.2371421 | 0.812547 | NA       |
| CU929150.3       | 0 NA        | NA           | NA        | NA        | NA       | NA       |
| sh2d3cb          | 127.3169532 | -0.14065313  | 0.1809581 | -0.777269 | 0.437    | 0.914408 |
| RF00001          | 0 NA        | NA           | NA        | NA        | NA       | NA       |
| CR318653.1       | 0.974201077 | -0.034292541 | 1.8748044 | -0.018291 | 0.985406 | NA       |
| BX511115.1       | 0 NA        | NA           | NA        | NA        | NA       | NA       |
| tmem63ba         | 56.25810607 | 0.143376754  | 0.2635162 | 0.5440909 | 0.586379 | 0.953319 |
| CT990561.2       | 2.673029434 | -1.565258472 | 1.231461  | -1.271058 | 0.203708 | NA       |
| znf1081          | 47.41514338 | 0.027142751  | 0.2874874 | 0.0944137 | 0.924781 | 0.992676 |
| CR847984.2       | 5.511018934 | -0.43709563  | 0.8026129 | -0.544591 | 0.586035 | NA       |
| kcnk9            | 14.16660027 | 0.411941111  | 0.5280355 | 0.780139  | 0.435309 | 0.914408 |
| RF00026          | 0 NA        | NA           | NA        | NA        | NA       | NA       |
| foxil            | 26.78365759 | -0.102912001 | 0.3699747 | -0.27816  | 0.78089  | 0.97627  |
| BX571715.1       | 194.6073529 | -0.388750936 | 0.1652034 | -2.353166 | 0.018614 | 0.254199 |
| CABZ01088484.1   | 50.32942263 | -0.541489651 | 0.2880929 | -1.879566 | 0.060167 | 0.478771 |
| gadd45ab         | 281.9919557 | 0.046521055  | 0.148852  | 0.3125322 | 0.754636 | 0.975114 |
| si:dkey-35h6.1   | 432.0490219 | 0.413169013  | 0.1348521 | 3.0638671 | 0.002185 | 0.057157 |
| slc12a2          | 1789.138428 | 0.120567412  | 0.0768109 | 1.5696651 | 0.116493 | 0.639148 |
| psck6            | 109.4938558 | 0.130693576  | 0.1911051 | 0.6838834 | 0.494049 | 0.931926 |
| si:ch211-152c8.5 | 117.3460735 | 0.133226518  | 0.188241  | 0.7077443 | 0.479104 | 0.926987 |
| BX323876.2       | 0.347458735 | -1.908042286 | 3.4571486 | -0.551912 | 0.581009 | NA       |
| toml             | 547.6059    | 0.091714391  | 0.1059575 | 0.8655772 | 0.386722 | 0.89551  |
| si:dkeyp-4f2.3   | 15.02497444 | 0.192159037  | 0.497503  | 0.386247  | 0.699314 | 0.967998 |

|                     |             |              |           |           |          |          |
|---------------------|-------------|--------------|-----------|-----------|----------|----------|
| RF00001             | 0           | NA           | NA        | NA        | NA       | NA       |
| srl                 | 1864.216648 | 0.276722111  | 0.1031937 | 2.6815795 | 0.007328 | 0.135037 |
| zgc:112234          | 33.17616078 | 0.022371912  | 0.3549997 | 0.0630195 | 0.949751 | 0.99381  |
| si:dkey-99n20.6     | 0.158915748 | 0.967652056  | 4.0804729 | 0.2371421 | 0.812547 | NA       |
| CT737123.2          | 0           | NA           | NA        | NA        | NA       | NA       |
| tradv4.0.1          | 0           | NA           | NA        | NA        | NA       | NA       |
| zgc:171601          | 6.932849166 | 0.538206608  | 0.7438669 | 0.7235255 | 0.469357 | NA       |
| cyp2k18             | 95.36108536 | -1.397128544 | 0.2295927 | -6.085249 | 1.16E-09 | 2.42E-07 |
| gtf2a11             | 129.6824994 | 0.049340526  | 0.1933149 | 0.2552339 | 0.798542 | 0.978884 |
| BX005398.2          | 0           | NA           | NA        | NA        | NA       | NA       |
| zgc:123181          | 13.01921477 | 0.103084253  | 0.5270376 | 0.1955918 | 0.84493  | 0.985174 |
| CABZ01070527.1      | 10.10761846 | -0.442032061 | 0.638952  | -0.691808 | 0.489058 | NA       |
| RF00001             | 0           | NA           | NA        | NA        | NA       | NA       |
| CR847514.1          | 0           | NA           | NA        | NA        | NA       | NA       |
| si:ch73-299h12.4    | 43.1051723  | -0.16394277  | 0.2928006 | -0.559913 | 0.575539 | 0.950373 |
| crebbpa             | 1106.437267 | 0.075582619  | 0.1004216 | 0.7526533 | 0.451658 | 0.918761 |
| znf1179             | 26.78375478 | -0.163367423 | 0.3850538 | -0.424272 | 0.671368 | 0.965257 |
| RF00003             | 0           | NA           | NA        | NA        | NA       | NA       |
| grem1b              | 23.4539796  | 0.396269089  | 0.4300994 | 0.9213431 | 0.356871 | 0.883422 |
| si:ch211-171117.4   | 4.377795456 | -1.242187796 | 0.9922432 | -1.251899 | 0.210607 | NA       |
| CU462913.1          | 5.036467939 | -0.029326243 | 0.9019068 | -0.032516 | 0.974061 | NA       |
| pimr168             | 0           | NA           | NA        | NA        | NA       | NA       |
| si:ch73-236c18.8    | 0           | NA           | NA        | NA        | NA       | NA       |
| SLC16A6 (1 of many) | 14.67002599 | 0.143270583  | 0.5019134 | 0.2854488 | 0.7753   | 0.975687 |
| CABZ01061592.2      | 15.12530324 | 0.416207515  | 0.4861018 | 0.8562146 | 0.391879 | 0.897688 |
| REG                 | 51.35183204 | 0.26347482   | 0.2893648 | 0.9105282 | 0.362544 | 0.885944 |
| BX957336.1          | 0.158795395 | 0.967652056  | 4.0804729 | 0.2371421 | 0.812547 | NA       |
| mhc2b               | 0           | NA           | NA        | NA        | NA       | NA       |
| si:dkey-112a7.4     | 356.8258853 | -0.014555817 | 0.118941  | -0.122378 | 0.902599 | 0.990121 |
| fam219b             | 212.0245923 | 0.134939971  | 0.1449405 | 0.9310025 | 0.351852 | 0.88081  |
| CCNB1IP1            | 0           | NA           | NA        | NA        | NA       | NA       |
| BX511034.7          | 32.01701015 | -0.394711473 | 0.3438866 | -1.147795 | 0.251053 | 0.820469 |
| si:ch211-261d7.6    | 247.2613839 | 0.08681793   | 0.1601118 | 0.5422331 | 0.587658 | 0.953319 |
| si:dkey-31i7.2      | 307.4725743 | 0.45906631   | 0.1784384 | 2.5726878 | 0.010091 | 0.171429 |
| tuba71              | 33.16632876 | 0.714080292  | 0.3616797 | 1.9743442 | 0.048343 | 0.433147 |
| surf4               | 598.5917036 | 0.010643268  | 0.1092873 | 0.0973879 | 0.922418 | 0.99233  |
| CR626884.3          | 0           | NA           | NA        | NA        | NA       | NA       |
| si:dkey-40c23.2     | 12.35821398 | 0.215276851  | 0.5585289 | 0.3854355 | 0.699915 | 0.967998 |
| BX936384.2          | 0           | NA           | NA        | NA        | NA       | NA       |
| msx2a               | 17.89669935 | -0.315251665 | 0.48031   | -0.65635  | 0.511599 | 0.936253 |
| btbd2b              | 171.6230696 | -0.125785298 | 0.1631265 | -0.771091 | 0.440653 | 0.916336 |
| leap2               | 653.6238228 | 0.664109626  | 0.0956865 | 6.9404703 | 3.91E-12 | 1.25E-09 |
| si:dkeyp-97a10.3    | 55.30663439 | -0.1524841   | 0.2672902 | -0.570482 | 0.568351 | 0.948983 |
| CU915762.1          | 1.120189971 | -1.316642239 | 1.923908  | -0.684358 | 0.493749 | NA       |
| si:ch73-132f6.5     | 237.8602027 | -0.165700774 | 0.1503224 | -1.102303 | 0.27033  | 0.835161 |
| RF00415             | 0.482640214 | -0.866525639 | 2.7061322 | -0.320208 | 0.748811 | NA       |
| zgc:103755          | 19.14644625 | -0.914974551 | 0.4498733 | -2.033849 | 0.041967 | 0.40206  |
| dcl1b               | 1140.937988 | -0.053257244 | 0.0898229 | -0.592914 | 0.553239 | 0.947265 |
| kirrel131           | 1316.861328 | 0.111782253  | 0.0856437 | 1.3052008 | 0.191824 | 0.75597  |
| slc35c1             | 190.7785477 | 0.013451898  | 0.1528354 | 0.0880156 | 0.929864 | 0.992702 |
| cct2                | 2024.428129 | -0.20418491  | 0.0885743 | -2.305239 | 0.021153 | 0.274206 |
| prkd2               | 534.7721463 | 0.018700882  | 0.110695  | 0.1689406 | 0.865843 | 0.986517 |
| AL935044.4          | 0           | NA           | NA        | NA        | NA       | NA       |
| CU467646.6          | 174.1960128 | 0.042283077  | 0.1640794 | 0.2576989 | 0.796639 | 0.978569 |

|                   |             |              |           |           |          |          |
|-------------------|-------------|--------------|-----------|-----------|----------|----------|
| CU469104.1        | 0.31437473  | -1.788572922 | 3.5930657 | -0.497785 | 0.618636 | NA       |
| si:dkeyp-87d1.1   | 2.986298497 | 1.416754937  | 1.1829175 | 1.1976786 | 0.231042 | NA       |
| tpm2              | 5627.94235  | 0.008801168  | 0.0808281 | 0.1088875 | 0.913292 | 0.991119 |
| BX640408.1        | 1.005436347 | -1.07115751  | 2.0802502 | -0.514918 | 0.606611 | NA       |
| trdc              | 0.649297668 | -1.460709729 | 2.4265008 | -0.601982 | 0.547186 | NA       |
| grklb             | 742.8000645 | 0.160644418  | 0.1045875 | 1.5359814 | 0.124543 | 0.65376  |
| hsf5              | 4.128452073 | -0.575628705 | 0.9346028 | -0.615907 | 0.537956 | NA       |
| slc16a9b          | 1718.27325  | -0.278067358 | 0.0907391 | -3.06447  | 0.002181 | 0.057157 |
| cd79b             | 2.14416865  | 0.720528717  | 1.4387662 | 0.5007963 | 0.616515 | NA       |
| CR848705.2        | 14.16717096 | -0.283849478 | 0.5245028 | -0.541178 | 0.588385 | 0.953319 |
| il6st             | 1067.857397 | -0.099131681 | 0.0901196 | -1.100001 | 0.271332 | 0.836239 |
| BX088587.1        | 3.092529317 | -0.436081015 | 1.121163  | -0.388954 | 0.69731  | NA       |
| apooa             | 297.9198991 | 0.294202223  | 0.1322563 | 2.2244857 | 0.026116 | 0.311656 |
| si:dkey-57k17.1   | 33.71967815 | -0.16434518  | 0.3526466 | -0.466034 | 0.641191 | 0.959994 |
| CR925761.4        | 11.8387465  | -0.237036202 | 0.5534816 | -0.428264 | 0.668459 | 0.96478  |
| acvr2ab           | 22.7779081  | 0.137243005  | 0.41656   | 0.3294676 | 0.741802 | 0.973154 |
| map7dlb           | 1079.088251 | -0.032662611 | 0.09504   | -0.343672 | 0.731093 | 0.971557 |
| cat               | 1951.355939 | -0.112241209 | 0.083114  | -1.350449 | 0.176872 | 0.737551 |
| si:ch211-271g18.1 | 5.926752322 | -0.808016303 | 0.7868677 | -1.026877 | 0.304478 | NA       |
| CU550719.2        | 0           | NA           | NA        | NA        | NA       | NA       |
| ddx24             | 436.4180714 | -0.127924705 | 0.1170767 | -1.092658 | 0.274544 | 0.839136 |
| sprtn             | 226.2010456 | 0.007160547  | 0.1546965 | 0.0462877 | 0.963081 | 0.995927 |
| psipla            | 117.6873187 | -0.073517958 | 0.1827099 | -0.402375 | 0.687408 | 0.966376 |
| RF00001           | 0           | NA           | NA        | NA        | NA       | NA       |
| zgc:165653        | 155.5978223 | 0.20372972   | 0.1753076 | 1.1621273 | 0.245184 | 0.815227 |
| zgc:91849         | 320.2326664 | 0.089648392  | 0.1220286 | 0.7346507 | 0.462552 | 0.922698 |
| tbxa2r            | 6.201669508 | -0.027420661 | 0.8244529 | -0.033259 | 0.973468 | NA       |
| CU570769.3        | 0.182570949 | 0.967652056  | 4.0804729 | 0.2371421 | 0.812547 | NA       |
| abcc1             | 887.6195553 | 0.276910515  | 0.0871666 | 3.1767952 | 0.001489 | 0.042429 |
| RF00001           | 0.538871265 | 0.999144257  | 2.7784799 | 0.359601  | 0.719146 | NA       |
| si:dkey-203a12.9  | 19.21096631 | -0.34621967  | 0.4310923 | -0.803122 | 0.421904 | 0.90651  |
| myl2a             | 274.102238  | 0.052653884  | 0.1387418 | 0.3795099 | 0.704309 | 0.968134 |
| CABZ01087502.1    | 2.973916584 | -1.016719957 | 1.1754826 | -0.864938 | 0.387073 | NA       |
| si:ch211-162e15.3 | 228.150489  | 0.067989787  | 0.1371024 | 0.4959053 | 0.619961 | 0.957354 |
| ino80da           | 9.517285909 | -0.483606014 | 0.6457914 | -0.748858 | 0.453943 | NA       |
| BX950205.2        | 0           | NA           | NA        | NA        | NA       | NA       |
| si:dkey-33b17.3   | 2.825770221 | -0.548438241 | 1.1399517 | -0.481107 | 0.630441 | NA       |
| mlycd             | 77.8312307  | -0.098231505 | 0.2391914 | -0.410682 | 0.681306 | 0.965476 |
| coq4              | 180.9162397 | 0.183505328  | 0.1541352 | 1.1905482 | 0.233831 | 0.802571 |
| kat2a             | 129.7078823 | 0.417225617  | 0.1891962 | 2.2052531 | 0.027436 | 0.320231 |
| nkx6.2            | 446.9291864 | 0.004886968  | 0.1096546 | 0.0445669 | 0.964453 | 0.995927 |
| si:ch211-223a21.3 | 0.698456806 | 0.09172817   | 2.5265115 | 0.0363063 | 0.971038 | NA       |
| AL935294.2        | 34.94426372 | 0.763991825  | 0.3297074 | 2.3171813 | 0.020494 | 0.269804 |
| hnf4b             | 93.70269665 | -0.408067417 | 0.2075292 | -1.966313 | 0.049262 | 0.435457 |
| or130-1           | 1.876203867 | 0.267259372  | 1.509893  | 0.1770055 | 0.859504 | NA       |
| COLEC10           | 19.44857386 | 0.160495688  | 0.4731305 | 0.3392208 | 0.734443 | 0.972021 |
| CR555298.1        | 0.499972362 | -2.44370697  | 3.0013188 | -0.814211 | 0.415524 | NA       |
| CABZ01112650.1    | 216.3094001 | 0.16804926   | 0.1502928 | 1.1181455 | 0.263505 | 0.830245 |
| zgc:194981        | 61.13590749 | 0.059728291  | 0.2634944 | 0.2266776 | 0.820674 | 0.981594 |
| si:ch211-165a10.9 | 0           | NA           | NA        | NA        | NA       | NA       |
| si:ch211-1i11.3   | 128.550488  | 0.130716409  | 0.1817036 | 0.7193936 | 0.471898 | 0.924838 |
| chek1             | 125.4347279 | 0.093300299  | 0.18227   | 0.5118795 | 0.608735 | 0.956718 |
| CR381531.2        | 8.490616867 | -0.594290335 | 0.6769324 | -0.877917 | 0.379989 | NA       |
| akap17a           | 263.8261033 | -0.260692769 | 0.1399753 | -1.862419 | 0.062544 | 0.487868 |



|                   |             |              |           |           |          |          |
|-------------------|-------------|--------------|-----------|-----------|----------|----------|
| tim44             | 652.8529997 | 0.060159809  | 0.0999858 | 0.6016835 | 0.547385 | 0.945526 |
| junbb             | 1600.70551  | 0.210443501  | 0.2065    | 1.0190967 | 0.308157 | 0.861088 |
| ly6m2             | 66.50974624 | 0.48035482   | 0.2544183 | 1.8880516 | 0.059019 | 0.475271 |
| RF00001           | 0 NA        | NA           | NA        | NA        | NA       | NA       |
| oaz1b             | 5988.417246 | 0.077845821  | 0.0752457 | 1.0345548 | 0.300877 | 0.856418 |
| si:ch73-221f6.4   | 43.05776357 | 0.151073048  | 0.3089962 | 0.4889156 | 0.624901 | 0.957354 |
| CR847998.1        | 1.138340003 | -0.447034872 | 1.825243  | -0.244918 | 0.80652  | NA       |
| nlg3a             | 728.0125292 | -0.053286492 | 0.0992332 | -0.536983 | 0.59128  | 0.954193 |
| si:dkey-28k24.2   | 7.080225718 | -0.905274706 | 0.7359508 | -1.230075 | 0.218669 | NA       |
| dele1             | 207.3951094 | -0.1198106   | 0.1489244 | -0.804506 | 0.421105 | 0.90651  |
| CABZ01077956.1    | 7.903116565 | 0.75623692   | 0.6984625 | 1.0827166 | 0.278934 | NA       |
| dntt              | 0.173729368 | -0.955901296 | 4.0804729 | -0.234262 | 0.814781 | NA       |
| dgke              | 38.46478092 | 0.650867294  | 0.3175611 | 2.0495812 | 0.040405 | 0.39304  |
| cxcl8a            | 185.7262229 | -0.335730036 | 0.2069449 | -1.622316 | 0.104736 | 0.612652 |
| BX510922.2        | 43.81417953 | -0.068448554 | 0.3415047 | -0.200432 | 0.841143 | 0.985174 |
| si:ch211-175m2.4  | 6.005130563 | 0.844187613  | 0.7780094 | 1.0850609 | 0.277895 | NA       |
| tubb6             | 260.6182719 | -0.043504395 | 0.1320628 | -0.329422 | 0.741837 | 0.973154 |
| CR555295.1        | 0.166657454 | -0.955901296 | 4.0804729 | -0.234262 | 0.814781 | NA       |
| si:ch211-238e22.8 | 8.083723971 | -0.19495716  | 0.6699747 | -0.290992 | 0.771058 | NA       |
| dre-mir-92a-1     | 0.804086858 | -1.860428069 | 2.2645275 | -0.821552 | 0.411332 | NA       |
| fbxw11a           | 891.6489429 | -0.131370856 | 0.1000388 | -1.313199 | 0.189116 | 0.753954 |
| si:ch73-221f6.3   | 38.74478471 | -0.463936799 | 0.3073128 | -1.509657 | 0.131131 | 0.66388  |
| jak2a             | 487.3492729 | 0.041679267  | 0.1121685 | 0.3715773 | 0.710208 | 0.968928 |
| top1mt            | 86.44097308 | -0.378675363 | 0.2207117 | -1.715701 | 0.086217 | 0.563157 |
| akt3a             | 32.69321457 | -0.029669834 | 0.3340279 | -0.088824 | 0.929221 | 0.992702 |
| cyp2aa2           | 22.4722189  | 0.40229013   | 0.4229838 | 0.9510769 | 0.341565 | 0.878134 |
| BX511024.1        | 17.76823285 | 0.753972363  | 0.4799092 | 1.5710731 | 0.116166 | 0.63841  |
| lmlba             | 82.71020446 | -0.471343957 | 0.2201022 | -2.141477 | 0.032236 | 0.349508 |
| pyroxd1           | 207.3291387 | -0.221409324 | 0.1571583 | -1.40883  | 0.158885 | 0.709613 |
| si:ch211-93f2.1   | 630.5718537 | -0.887521058 | 0.1119508 | -7.927779 | 2.23E-15 | 1.16E-12 |
| CR790382.3        | 2.089596957 | -0.688810961 | 1.4141349 | -0.48709  | 0.626195 | NA       |
| psd3l             | 1368.509003 | 0.017585959  | 0.0798408 | 0.2202629 | 0.825666 | 0.982196 |
| znf1131           | 1.014398281 | -0.022479402 | 1.8547979 | -0.01212  | 0.99033  | NA       |
| znf648            | 115.1948089 | 0.104030498  | 0.1916504 | 0.5428139 | 0.587258 | 0.953319 |
| CU929073.1        | 60.26061943 | 0.150032596  | 0.2821663 | 0.531717  | 0.594922 | 0.954434 |
| trim35-7          | 21.66031108 | -1.03879628  | 0.4443659 | -2.337705 | 0.019403 | 0.261353 |
| pcdh1gc5          | 148.5997189 | 0.265750397  | 0.1721902 | 1.5433534 | 0.122745 | 0.650905 |
| zgc:112146        | 45.25987762 | -0.820345674 | 0.2929423 | -2.800366 | 0.005104 | 0.104597 |
| cep192            | 158.1064258 | 0.016953811  | 0.1629812 | 0.1040231 | 0.917151 | 0.991572 |
| CU914164.1        | 0.513487682 | -0.887846295 | 2.6557956 | -0.334305 | 0.738149 | NA       |
| CU693471.1        | 5.98638881  | 0.176383191  | 0.7608726 | 0.231817  | 0.81668  | NA       |
| si:dkey-83h2.5    | 32.7526504  | 0.140220659  | 0.3341027 | 0.4196933 | 0.674709 | 0.965257 |
| map3k4            | 933.4276543 | -0.070264333 | 0.0916964 | -0.766271 | 0.443515 | 0.916631 |
| myom1b            | 777.1843465 | 0.333086254  | 0.0969536 | 3.4355209 | 0.000591 | 0.020129 |
| nudc              | 722.2803064 | 0.00931323   | 0.0944973 | 0.0985555 | 0.921491 | 0.992138 |
| tradv3.0.4        | 0 NA        | NA           | NA        | NA        | NA       | NA       |
| manscl            | 429.2956103 | -0.387114588 | 0.1150628 | -3.364375 | 0.000767 | 0.025116 |
| si:dkey-28a3.2    | 117.8997322 | -0.142145367 | 0.1852771 | -0.767204 | 0.44296  | 0.916336 |
| JMJD8             | 47.67681404 | 0.001408252  | 0.2901108 | 0.0048542 | 0.996127 | 0.998888 |
| mipoll            | 113.2106974 | -0.101054764 | 0.1871504 | -0.539966 | 0.589221 | 0.953345 |
| atg10             | 66.9176289  | -0.316644956 | 0.2467859 | -1.283076 | 0.199466 | 0.764896 |
| ptger1b           | 6.681423378 | -0.725535053 | 0.7890848 | -0.919464 | 0.357853 | NA       |
| cdkall            | 112.9917809 | -0.196487146 | 0.1986173 | -0.989275 | 0.322529 | 0.870226 |
| si:dkey-3h23.3    | 0 NA        | NA           | NA        | NA        | NA       | NA       |

|                    |             |              |           |           |          |          |
|--------------------|-------------|--------------|-----------|-----------|----------|----------|
| si:ch211-215p11.1  | 11.15258672 | -0.033258783 | 0.6311424 | -0.052696 | 0.957974 | 0.99467  |
| si:ch211-142b24.8  | 3.782842073 | -0.114960114 | 0.9531681 | -0.120608 | 0.904001 | NA       |
| illrap11b          | 82.66195277 | 0.189815406  | 0.2257488 | 0.8408256 | 0.400446 | 0.90084  |
| olfcg3             | 0.832497125 | -1.9076633   | 2.2445015 | -0.849927 | 0.395365 | NA       |
| si:ch211-260e23.7  | 10.11041889 | -0.043007127 | 0.6308699 | -0.068171 | 0.945649 | NA       |
| znf740a            | 6.310701741 | -0.114045144 | 0.8221322 | -0.138719 | 0.889672 | NA       |
| si:dkey-1c7.2      | 1.580154506 | 0.012622444  | 1.7016302 | 0.0074179 | 0.994081 | NA       |
| si:ch211-128m15.3  | 126.4635654 | 0.1486665    | 0.2007043 | 0.740724  | 0.458861 | 0.921978 |
| rprdl1a            | 95.15153782 | -0.259891486 | 0.2062187 | -1.260271 | 0.207572 | 0.775175 |
| klhdc2             | 393.9407396 | -0.064144488 | 0.1234351 | -0.519662 | 0.603299 | 0.956045 |
| si:dkey-34d22.5    | 2.111723196 | -1.187128474 | 1.3558645 | -0.875551 | 0.381274 | NA       |
| tradv6.0.3         | 0           | NA           | NA        | NA        | NA       | NA       |
| si:dkey-21e5.1     | 77.22148696 | 0.155578669  | 0.2232806 | 0.6967856 | 0.485937 | 0.930826 |
| CABZ01085878.1     | 133.953816  | 0.090621107  | 0.200319  | 0.4523839 | 0.650992 | 0.960708 |
| FP016239.1         | 0.473170125 | -0.833888596 | 2.9014002 | -0.287409 | 0.773799 | NA       |
| CU929568.2         | 0.521188103 | -2.493476766 | 2.9577741 | -0.843025 | 0.399215 | NA       |
| fzd6               | 325.970254  | 0.05355141   | 0.1392712 | 0.3845116 | 0.700599 | 0.967998 |
| bspry              | 37.194179   | -0.016680881 | 0.3155125 | -0.052869 | 0.957836 | 0.99467  |
| v2ral              | 0.333314908 | -1.858695402 | 3.5126701 | -0.52914  | 0.596708 | NA       |
| FP085399.5         | 0           | NA           | NA        | NA        | NA       | NA       |
| PCMTD2 (1 of many) | 37.02753959 | 0.115822957  | 0.3476112 | 0.3331968 | 0.738986 | 0.972722 |
| BX510934.2         | 0.323844819 | -1.825095364 | 3.274639  | -0.557342 | 0.577293 | NA       |
| znf1105            | 24.97250453 | 0.342443964  | 0.3947025 | 0.8676001 | 0.385613 | 0.89551  |
| si:dkey-28i19.1    | 1.474362816 | 0.984604062  | 1.5416449 | 0.6386711 | 0.523037 | NA       |
| kpnbl              | 2417.331394 | -0.090063144 | 0.0878768 | -1.02488  | 0.30542  | 0.85982  |
| si:ch211-76m11.3   | 36.01488327 | -0.78357701  | 0.3682429 | -2.127881 | 0.033347 | 0.355558 |
| si:dkey-109j17.5   | 129.8227668 | 0.265357143  | 0.1773629 | 1.4961252 | 0.134621 | 0.670689 |
| znf1108            | 0.166657454 | -0.955901296 | 4.0804729 | -0.234262 | 0.814781 | NA       |
| si:ch211-207e19.2  | 2.909329861 | -0.284287099 | 1.2215734 | -0.232722 | 0.815977 | NA       |
| si:ch73-138e16.2   | 139.5529467 | 0.023200269  | 0.1921587 | 0.120735  | 0.903901 | 0.990291 |
| BX004857.1         | 33.47750506 | -0.361153729 | 0.3432733 | -1.052088 | 0.292759 | 0.848607 |
| si:dkey-16p6.1     | 11.78036238 | -1.364868829 | 0.5970438 | -2.286045 | 0.022252 | 0.283929 |
| CR931813.2         | 163.5782999 | 0.023947695  | 0.2024832 | 0.1182701 | 0.905854 | 0.990702 |
| RF00001            | 0.31437473  | -1.788572922 | 3.5930657 | -0.497785 | 0.618636 | NA       |
| ostc               | 945.6430466 | -0.016049095 | 0.0848805 | -0.189079 | 0.850031 | 0.985174 |
| cdknlcb            | 29.49003619 | 0.10898313   | 0.3505668 | 0.3108769 | 0.755894 | 0.975374 |
| si:ch73-221f6.1    | 25.88316923 | -0.130064191 | 0.3737434 | -0.348004 | 0.727837 | 0.970402 |
| mtr                | 493.1496974 | 0.085853202  | 0.1195217 | 0.7183064 | 0.472568 | 0.924838 |
| ing2               | 341.9670473 | -0.006098826 | 0.1218642 | -0.050046 | 0.960086 | 0.995388 |
| dre-mir-20a        | 0           | NA           | NA        | NA        | NA       | NA       |
| CU074310.1         | 1.479947053 | 0.313544551  | 1.5674084 | 0.2000401 | 0.841449 | NA       |
| muc5f              | 54.67628953 | -0.721690447 | 0.2878019 | -2.507594 | 0.012156 | 0.194628 |
| si:dkey-7114.4     | 2.668707707 | 1.188493607  | 1.2700562 | 0.9357804 | 0.349386 | NA       |
| si:ch211-153b23.3  | 422.5687515 | -0.425287717 | 0.4134868 | -1.02854  | 0.303696 | 0.857923 |
| sstr1a             | 50.82254857 | 0.083455776  | 0.2742227 | 0.3043358 | 0.760872 | 0.975374 |
| BX072577.1         | 101.915476  | 0.454654253  | 0.1966709 | 2.3117513 | 0.020791 | 0.272632 |
| si:dkey-26m3.2     | 14.49968578 | -0.132512497 | 0.5301878 | -0.249935 | 0.802638 | 0.979592 |
| p2ry2.2            | 0           | NA           | NA        | NA        | NA       | NA       |
| CT030005.2         | 0           | NA           | NA        | NA        | NA       | NA       |
| si:ch211-153f2.7   | 250.7980385 | 0.04398622   | 0.1587891 | 0.2770104 | 0.781772 | 0.97627  |
| TMEM275            | 237.2510264 | -0.129792198 | 0.1384551 | -0.937432 | 0.348536 | 0.880195 |
| RF00001            | 0.158915748 | 0.967652056  | 4.0804729 | 0.2371421 | 0.812547 | NA       |
| si:ch211-261d9.1   | 0.158915748 | 0.967652056  | 4.0804729 | 0.2371421 | 0.812547 | NA       |
| si:ch211-225h24.2  | 49.2160617  | 0.232103951  | 0.3057696 | 0.7590813 | 0.447804 | 0.917154 |

|                     |             |              |           |           |          |          |
|---------------------|-------------|--------------|-----------|-----------|----------|----------|
| fts3                | 687.1963138 | -0.060042281 | 0.1015709 | -0.591137 | 0.554429 | 0.947449 |
| ciao2a              | 175.560529  | 0.027011467  | 0.1544534 | 0.1748842 | 0.861171 | 0.985805 |
| mad211bp            | 82.19175126 | -0.25442396  | 0.219877  | -1.15712  | 0.247223 | 0.81686  |
| sncb                | 4291.900371 | 0.092440421  | 0.0707173 | 1.3071819 | 0.191151 | 0.755886 |
| si:ch211-194m7.8    | 1.197639022 | -0.383828024 | 1.8179943 | -0.211127 | 0.832788 | NA       |
| slc27a1b            | 237.8422287 | 0.234288453  | 0.141629  | 1.6542403 | 0.098079 | 0.59749  |
| CU855694.2          | 0           | NA           | NA        | NA        | NA       | NA       |
| stt3a               | 3318.444567 | -0.093199153 | 0.0775054 | -1.202486 | 0.229175 | 0.796702 |
| BX294178.2          | 1.852202149 | 0.869537402  | 1.455503  | 0.5974137 | 0.550231 | NA       |
| si:dkey-165o8.2     | 14.25449893 | 0.619987484  | 0.5088661 | 1.2183706 | 0.223083 | 0.789115 |
| CR478208.1          | 0           | NA           | NA        | NA        | NA       | NA       |
| kbtbd11             | 110.939284  | 0.365621665  | 0.1891015 | 1.9334675 | 0.053179 | 0.452412 |
| dnajc17             | 81.16679357 | 0.049623996  | 0.2155825 | 0.2301857 | 0.817947 | 0.981594 |
| si:ch211-11n16.3    | 0.365141898 | 1.973577737  | 3.3927314 | 0.5817076 | 0.560764 | NA       |
| ghrhra              | 7.093744293 | -0.201473504 | 0.752768  | -0.267644 | 0.788974 | NA       |
| L0018493.2          | 0.182570949 | 0.967652056  | 4.0804729 | 0.2371421 | 0.812547 | NA       |
| BX511166.1          | 4.119373041 | 0.112083819  | 0.9146039 | 0.122549  | 0.902464 | NA       |
| kcnj12a             | 4.27935767  | -0.897845585 | 0.928134  | -0.967366 | 0.333361 | NA       |
| si:dkey-238k10.3    | 7.631903485 | -0.512516871 | 0.6929527 | -0.739613 | 0.459535 | NA       |
| si:ch211-227e10.1   | 10.99390959 | -0.425265792 | 0.5700567 | -0.746006 | 0.455664 | NA       |
| pimr199             | 1.003361447 | -0.877559612 | 2.0717967 | -0.423574 | 0.671876 | NA       |
| wnt5a               | 14.5632671  | 0.741629939  | 0.5296629 | 1.4001923 | 0.161456 | 0.715364 |
| slain1b             | 32.36963352 | 0.285597882  | 0.3419002 | 0.8353253 | 0.403535 | 0.900979 |
| si:ch1073-67j19.2   | 0.182570949 | 0.967652056  | 4.0804729 | 0.2371421 | 0.812547 | NA       |
| CR388055.1          | 0.547712847 | 2.559541715  | 2.9076406 | 0.8802813 | 0.378707 | NA       |
| CU695117.1          | 141.7379053 | 0.004525393  | 0.1686428 | 0.0268342 | 0.978592 | 0.996762 |
| SLC45A4 (1 of many) | 8.013532524 | 1.433150988  | 0.7216828 | 1.9858461 | 0.04705  | NA       |
| dre-mir-193b        | 0.476747244 | 2.393381959  | 3.0525537 | 0.7840589 | 0.433006 | NA       |
| zgc:110249          | 34.61438649 | 0.02296602   | 0.3275844 | 0.0701072 | 0.944108 | 0.993364 |
| si:ch211-211k8.12   | 0.666939546 | 1.487980453  | 2.2924711 | 0.6490727 | 0.516291 | NA       |
| RF00001             | 0           | NA           | NA        | NA        | NA       | NA       |
| wnk2                | 155.7288974 | 0.146569891  | 0.1659007 | 0.8834798 | 0.376977 | 0.895192 |
| epgn                | 287.2157065 | 0.681616499  | 0.1405937 | 4.8481314 | 1.25E-06 | 0.000121 |
| si:ch211-63i20.3    | 0.865544342 | 3.23079022   | 2.2781012 | 1.4181944 | 0.156134 | NA       |
| ugt5b1              | 93.24210216 | -0.130805069 | 0.2051908 | -0.63748  | 0.523812 | 0.939336 |
| tmem203             | 181.7463838 | 0.132382516  | 0.1633357 | 0.8104936 | 0.417657 | 0.906237 |
| CT027980.1          | 40.13167421 | 0.426474819  | 0.3213765 | 1.3270256 | 0.1845   | 0.747376 |
| c2cd2               | 92.56805224 | 0.050857217  | 0.2095504 | 0.2426968 | 0.80824  | 0.980642 |
| zgc:91999           | 481.7085308 | 0.208528728  | 0.1145538 | 1.8203566 | 0.068705 | 0.513248 |
| scn1bb              | 846.8940231 | 0.013409597  | 0.0870864 | 0.1539804 | 0.877625 | 0.987881 |
| CU896640.1          | 0           | NA           | NA        | NA        | NA       | NA       |
| tmem132a            | 0           | NA           | NA        | NA        | NA       | NA       |
| CT573446.1          | 2.131564824 | 1.776329629  | 1.4874789 | 1.1941881 | 0.232404 | NA       |
| gpr171              | 0           | NA           | NA        | NA        | NA       | NA       |
| ddah2               | 694.7582771 | 0.045249958  | 0.0972776 | 0.4651633 | 0.641814 | 0.959994 |
| lztfl1              | 457.2304712 | 0.164656932  | 0.109804  | 1.499553  | 0.13373  | 0.668448 |
| pigb                | 218.59854   | -0.195392088 | 0.1406566 | -1.389143 | 0.164789 | 0.72105  |
| utp23               | 141.4058562 | -0.019477199 | 0.1697043 | -0.114771 | 0.908626 | 0.990702 |
| hoxa9a              | 39.82207404 | 0.196063937  | 0.3062805 | 0.640145  | 0.522078 | 0.939056 |
| mrella              | 135.196031  | 0.111410825  | 0.1839048 | 0.6058072 | 0.544643 | 0.945438 |
| CU459147.1          | 6.312465669 | -0.653302959 | 0.8112649 | -0.805289 | 0.420653 | NA       |
| lrrc20              | 810.6760434 | 0.007933236  | 0.1216888 | 0.0651928 | 0.94802  | 0.99381  |
| F0704813.1          | 8.604718168 | 0.095510716  | 0.7097121 | 0.1345767 | 0.892947 | NA       |
| selplg              | 17.5510204  | -0.36714621  | 0.4590339 | -0.799824 | 0.423813 | 0.908025 |

|                   |             |              |           |           |          |          |
|-------------------|-------------|--------------|-----------|-----------|----------|----------|
| TPPP              | 39.86905788 | 0.372064313  | 0.3067107 | 1.2130791 | 0.2251   | 0.792185 |
| RF01951           | 0 NA        | NA           | NA        | NA        | NA       | NA       |
| BX897691.1        | 0.31437473  | -1.788572922 | 3.5930657 | -0.497785 | 0.618636 | NA       |
| zdhhc18b          | 119.5109521 | 0.095584963  | 0.1814655 | 0.5267389 | 0.598375 | 0.955488 |
| anapc2            | 231.0956387 | 0.131389409  | 0.1396289 | 0.9409904 | 0.34671  | 0.8794   |
| arl6ip4           | 282.0224556 | 0.04755882   | 0.1446159 | 0.328863  | 0.742259 | 0.973154 |
| snrpf             | 742.0992683 | -0.2878044   | 0.1025869 | -2.80547  | 0.005024 | 0.103574 |
| CABZ01038376.1    | 5.116133695 | 1.276803527  | 0.8904623 | 1.4338658 | 0.151611 | NA       |
| phkalb            | 126.3325176 | 0.230143298  | 0.2174726 | 1.0582637 | 0.289935 | 0.846246 |
| dipklc            | 412.138956  | 0.105031477  | 0.1112356 | 0.9442254 | 0.345054 | 0.878434 |
| CABZ01024659.1    | 0.499972362 | -2.44370697  | 3.0013188 | -0.814211 | 0.415524 | NA       |
| cldn1012          | 8.297829977 | 0.356600246  | 0.7305909 | 0.4880984 | 0.62548  | NA       |
| si:dkey-152b24.6  | 0.804877003 | -3.139754331 | 2.3250379 | -1.35041  | 0.176885 | NA       |
| si:ch211-51i16.3  | 4.756328665 | -0.825780925 | 0.9193287 | -0.898243 | 0.369056 | NA       |
| bmprlab           | 592.6157335 | 0.02184032   | 0.1145968 | 0.1905841 | 0.848851 | 0.985174 |
| ccnf              | 312.5477619 | -0.033245208 | 0.1214971 | -0.27363  | 0.784369 | 0.97627  |
| BX927369.1        | 0.182570949 | 0.967652056  | 4.0804729 | 0.2371421 | 0.812547 | NA       |
| LO018231.1        | 8.572449788 | 0.322760887  | 0.6422709 | 0.5025308 | 0.615294 | NA       |
| SHKBP1            | 161.6651666 | -0.115830686 | 0.1676224 | -0.691021 | 0.489552 | 0.931926 |
| RF00001           | 0 NA        | NA           | NA        | NA        | NA       | NA       |
| cfh15             | 35.26556091 | 0.428225765  | 0.3635147 | 1.178015  | 0.238791 | 0.807768 |
| znf451            | 25.55293441 | -0.101109601 | 0.3816811 | -0.264906 | 0.791082 | 0.977461 |
| CR762475.3        | 0.157187365 | -0.955901296 | 4.0804729 | -0.234262 | 0.814781 | NA       |
| CT027609.1        | 2.3209247   | -0.000714704 | 1.2836677 | -0.000557 | 0.999556 | NA       |
| zgc:172282        | 233.160897  | 0.060875736  | 0.1410838 | 0.4314863 | 0.666115 | 0.964736 |
| rdh8b             | 198.7181346 | 0.353251299  | 0.1542703 | 2.2898211 | 0.022032 | 0.281977 |
| si:ch73-261i21.5  | 44.88960338 | -0.209889127 | 0.329244  | -0.637488 | 0.523807 | 0.939336 |
| si:ch211-64i20.3  | 4.807098245 | -0.311726785 | 0.8619151 | -0.361668 | 0.7176   | NA       |
| znf1043           | 4.136894566 | 0.582434553  | 0.9201667 | 0.6329663 | 0.526756 | NA       |
| SMIM22            | 113.9982019 | -0.441803338 | 0.1916635 | -2.305099 | 0.021161 | 0.274206 |
| CR925723.3        | 0.182570949 | 0.967652056  | 4.0804729 | 0.2371421 | 0.812547 | NA       |
| noslapa           | 83.44254159 | 0.111515334  | 0.2171761 | 0.5134788 | 0.607616 | 0.956718 |
| CU655961.2        | 129.5410996 | 0.006610392  | 0.1813647 | 0.0364481 | 0.970925 | 0.996315 |
| BX000701.2        | 15.63837128 | -0.209150872 | 0.4825856 | -0.433396 | 0.664727 | 0.964736 |
| BX324216.2        | 46.32521029 | 0.23054841   | 0.2827741 | 0.8153094 | 0.414895 | 0.906237 |
| hdhd5             | 79.2232365  | 0.347439269  | 0.2280904 | 1.5232527 | 0.127696 | 0.658251 |
| BX649411.2        | 30.46383035 | -0.035145276 | 0.3752695 | -0.093653 | 0.925384 | 0.992676 |
| CABZ01057891.1    | 306.7569814 | -0.024446296 | 0.1382659 | -0.176806 | 0.85966  | 0.985773 |
| BX548246.1        | 0 NA        | NA           | NA        | NA        | NA       | NA       |
| chd5              | 301.2849652 | 0.036760627  | 0.1364506 | 0.2694061 | 0.787617 | 0.976596 |
| BX649622.2        | 0.530029684 | -0.939524117 | 2.7937867 | -0.336291 | 0.736652 | NA       |
| tenm4             | 1050.824253 | 0.117724936  | 0.0924364 | 1.2735774 | 0.202813 | 0.769849 |
| cc139.6           | 3.591498414 | 0.174593878  | 1.1159885 | 0.1564477 | 0.87568  | NA       |
| zgc:174944        | 15.90177691 | -1.487411602 | 0.5331762 | -2.789719 | 0.005275 | 0.107431 |
| FP236157.3        | 7.680502144 | -0.365175703 | 0.6849071 | -0.533176 | 0.593912 | NA       |
| WDR63             | 27.28314879 | -0.2848853   | 0.3718991 | -0.766028 | 0.443659 | 0.916631 |
| si:ch1073-67j19.1 | 0 NA        | NA           | NA        | NA        | NA       | NA       |
| RF00017           | 0 NA        | NA           | NA        | NA        | NA       | NA       |
| dr1               | 900.1666204 | -0.002406553 | 0.100598  | -0.023922 | 0.980914 | 0.996944 |
| golga7bb          | 1.833460396 | -1.365502627 | 1.4663741 | -0.93121  | 0.351745 | NA       |
| crsp7             | 228.1464505 | 0.293522183  | 0.150137  | 1.9550283 | 0.05058  | 0.440989 |
| F0704866.1        | 0 NA        | NA           | NA        | NA        | NA       | NA       |
| si:dkey-223p19.1  | 29.72029348 | 0.426295511  | 0.3722988 | 1.1450358 | 0.252194 | 0.821834 |
| si:ch211-165a10.8 | 0 NA        | NA           | NA        | NA        | NA       | NA       |

|                    |             |              |           |           |          |          |
|--------------------|-------------|--------------|-----------|-----------|----------|----------|
| FP102783.1         | 224.113225  | 0.095272178  | 0.1382217 | 0.6892706 | 0.490653 | 0.931926 |
| BX927122.2         | 0 NA        |              | NA        | NA        | NA       | NA       |
| ntnla              | 390.1413424 | 0.133747882  | 0.116445  | 1.1485931 | 0.250724 | 0.820469 |
| galr2b             | 117.4964476 | -0.167583967 | 0.1975522 | -0.848302 | 0.39627  | 0.899672 |
| crebrf             | 21.65902187 | -0.021416023 | 0.4451567 | -0.048109 | 0.961629 | 0.995876 |
| si:dkey-57c15.1    | 27.82264807 | -0.040879997 | 0.3683713 | -0.110975 | 0.911636 | 0.991066 |
| p4hb               | 5098.430335 | 0.062896009  | 0.0755122 | 0.8329257 | 0.404887 | 0.901305 |
| sdad1              | 602.6167246 | -0.140920265 | 0.1079077 | -1.305934 | 0.191575 | 0.755886 |
| zgc:171566         | 728.7137764 | 0.116927709  | 0.0934428 | 1.2513293 | 0.210814 | 0.778412 |
| si:ch211-258f1.3   | 62.78124999 | -0.018097392 | 0.2571458 | -0.070378 | 0.943893 | 0.993364 |
| gab2               | 16.4151599  | -0.366953532 | 0.4817131 | -0.761768 | 0.446199 | 0.917154 |
| BX323031.2         | 31.86072187 | 0.041307454  | 0.3553992 | 0.1162283 | 0.907472 | 0.990702 |
| zer1               | 494.3594231 | -0.025561639 | 0.1173374 | -0.217847 | 0.827548 | 0.982721 |
| si:ch73-321d9.2    | 3.88209759  | -0.09269057  | 1.0335097 | -0.089685 | 0.928537 | NA       |
| si:ch211-155e24.3  | 406.9299958 | 0.006325626  | 0.1224387 | 0.0516636 | 0.958797 | 0.995027 |
| dre-mir-193a-2     | 0 NA        |              | NA        | NA        | NA       | NA       |
| cogl               | 265.3229667 | 0.020175642  | 0.1312124 | 0.1537632 | 0.877796 | 0.987881 |
| dre-mir-7a-1       | 14.23744703 | -0.095140831 | 0.6106635 | -0.155799 | 0.876191 | 0.987881 |
| zdhhc24            | 154.1221933 | 0.078354372  | 0.167537  | 0.467684  | 0.640011 | 0.959994 |
| ccdc50             | 278.4438285 | 0.186534304  | 0.1316947 | 1.416415  | 0.156654 | 0.70691  |
| zgc:173705         | 2.123859905 | 0.169197753  | 1.3475445 | 0.1255601 | 0.90008  | NA       |
| F0704635.1         | 47.84954192 | 0.533534923  | 0.279782  | 1.9069666 | 0.056525 | 0.46635  |
| tcirglb            | 446.2490369 | -0.218325318 | 0.1432228 | -1.524375 | 0.127415 | 0.657518 |
| BX005367.2         | 0.658097964 | -0.058121771 | 2.3155427 | -0.025101 | 0.979975 | NA       |
| znf1130            | 6.228058268 | 0.285726639  | 0.7680451 | 0.372018  | 0.709879 | NA       |
| si:ch211-282j17.12 | 0.639947932 | -1.440068751 | 2.4365394 | -0.59103  | 0.5545   | NA       |
| osbplla            | 236.958701  | -0.138257127 | 0.1403717 | -0.984936 | 0.324655 | 0.871063 |
| CR774179.3         | 1.839892516 | 0.784747948  | 1.5189716 | 0.5166311 | 0.605414 | NA       |
| tradv10.0.4        | 0 NA        |              | NA        | NA        | NA       | NA       |
| cyp2k21            | 17.85430645 | -0.764271673 | 0.5115496 | -1.494032 | 0.135167 | 0.670689 |
| ifitm5             | 47.78986898 | -0.122718473 | 0.279837  | -0.438536 | 0.660998 | 0.964099 |
| egln1b             | 0 NA        |              | NA        | NA        | NA       | NA       |
| BX649434.3         | 0.831198824 | 0.593716313  | 2.0278563 | 0.2927803 | 0.76969  | NA       |
| hdac8              | 505.8469686 | 0.116681599  | 0.1127    | 1.0353296 | 0.300515 | 0.856251 |
| si:ch211-238e22.8  | 1.519044381 | -1.017215583 | 1.5559098 | -0.653775 | 0.513257 | NA       |
| CR293509.1         | 52.13881364 | -0.147615864 | 0.2664941 | -0.553918 | 0.579635 | 0.951257 |
| RF00582            | 0 NA        |              | NA        | NA        | NA       | NA       |
| AL935303.1         | 0 NA        |              | NA        | NA        | NA       | NA       |
| si:ch211-142b24.2  | 4.794934793 | -0.690175692 | 0.8917471 | -0.773959 | 0.438955 | NA       |
| CR547131.1         | 0 NA        |              | NA        | NA        | NA       | NA       |
| zgc:174890         | 25.67025513 | -0.069419188 | 0.3833772 | -0.181073 | 0.85631  | 0.985432 |
| ilf3b              | 4566.580968 | -0.003839956 | 0.0643785 | -0.059647 | 0.952437 | 0.993904 |
| erc2               | 35.62591403 | 0.153281307  | 0.3436128 | 0.4460873 | 0.655534 | 0.961684 |
| hdac7a             | 146.7101922 | -0.058840072 | 0.1780798 | -0.330414 | 0.741087 | 0.973154 |
| L0018597.1         | 0 NA        |              | NA        | NA        | NA       | NA       |
| ntan1              | 182.4684512 | 0.005398191  | 0.164107  | 0.0328943 | 0.973759 | 0.996315 |
| CT009487.2         | 6.077790052 | -0.147249341 | 0.8136366 | -0.180977 | 0.856386 | NA       |
| nbeab              | 89.62779515 | 0.170700156  | 0.2334649 | 0.7311597 | 0.464682 | 0.923535 |
| snx7               | 401.6892492 | -0.202852425 | 0.1191089 | -1.703083 | 0.088553 | 0.569447 |
| gcshb              | 381.1178802 | -0.297697034 | 0.1156264 | -2.574647 | 0.010034 | 0.171049 |
| vimr2              | 221.3975908 | 0.118896746  | 0.1689478 | 0.7037483 | 0.48159  | 0.928386 |
| olfcg9             | 2.681753918 | 0.387349055  | 1.2400198 | 0.3123733 | 0.754757 | NA       |
| rhbd13             | 246.5858323 | 0.000876034  | 0.1432359 | 0.006116  | 0.99512  | 0.998694 |
| BX927404.1         | 3.813447593 | -0.178263464 | 1.0668012 | -0.167101 | 0.867291 | NA       |

|                   |             |              |           |           |          |          |
|-------------------|-------------|--------------|-----------|-----------|----------|----------|
| AL929105.1        |             | 0 NA         | NA        | NA        | NA       | NA       |
| dnajc21           | 201.5162358 | 0.147610574  | 0.1554937 | 0.9493026 | 0.342467 | 0.878434 |
| CR318620.1        |             | 0 NA         | NA        | NA        | NA       | NA       |
| si:dkeyp-13d12.19 |             | 0 NA         | NA        | NA        | NA       | NA       |
| adcyp1rl1a        | 1407.290265 | 0.117802556  | 0.0984803 | 1.1962041 | 0.231617 | 0.799752 |
| RF00001           |             | 0 NA         | NA        | NA        | NA       | NA       |
| hmgcrb            | 794.1849261 | -0.009830002 | 0.091647  | -0.107259 | 0.914583 | 0.991119 |
| zgc:85843         | 149.7092295 | -0.200454757 | 0.1659375 | -1.208014 | 0.227042 | 0.794587 |
| MPRIP             | 639.7041496 | -0.030355062 | 0.0992689 | -0.305786 | 0.759767 | 0.975374 |
| etfla             | 79.74884575 | 0.035381213  | 0.2199649 | 0.1608493 | 0.872212 | 0.987846 |
| cfhl1             | 44.30741488 | 0.197493535  | 0.3277812 | 0.6025164 | 0.54683  | 0.945526 |
| agtpbp1           | 169.0687497 | -0.010574222 | 0.1642588 | -0.064375 | 0.948671 | 0.99381  |
| kdrl              | 520.207147  | 0.068736328  | 0.1124122 | 0.6114666 | 0.540891 | 0.944633 |
| ompa              | 232.2115718 | 0.156636652  | 0.1659304 | 0.9439898 | 0.345175 | 0.878434 |
| znf988            | 8.359475    | 0.285005746  | 0.6752715 | 0.422061  | 0.672981 | NA       |
| CT573285.1        |             | 0 NA         | NA        | NA        | NA       | NA       |
| pmp22a            | 1635.335106 | -0.08971919  | 0.0890898 | -1.007065 | 0.313904 | 0.865176 |
| tradv41.0         |             | 0 NA         | NA        | NA        | NA       | NA       |
| fgf4              | 59.89695038 | 0.377704576  | 0.252808  | 1.4940374 | 0.135166 | 0.670689 |
| kmt5aa            | 865.2403193 | -0.040210514 | 0.1063243 | -0.378187 | 0.705291 | 0.968412 |
| si:ch211-260e23.8 | 1.490946104 | 1.017122235  | 1.5862361 | 0.6412174 | 0.521381 | NA       |
| BX255920.1        | 1.024219384 | 3.476404327  | 2.0349832 | 1.7083209 | 0.087577 | NA       |
| mcc               | 86.09972206 | -0.341789185 | 0.2399776 | -1.424254 | 0.154373 | 0.70398  |
| ecmlb             | 233.0419732 | 0.072439054  | 0.1433174 | 0.5054448 | 0.613246 | 0.95688  |
| btr26             | 7.416269482 | 0.720408385  | 0.6916851 | 1.0415266 | 0.297631 | NA       |
| BX088547.1        | 0.31598276  | 0.005883445  | 3.3523626 | 0.001755  | 0.9986   | NA       |
| ogt.1             | 4828.249104 | 0.01190951   | 0.0746208 | 0.1596004 | 0.873196 | 0.987846 |
| BX649431.3        | 1.155902813 | 1.37965966   | 1.9648692 | 0.7021636 | 0.482577 | NA       |
| CR388413.5        | 0.317831496 | 1.808837541  | 3.5779923 | 0.5055454 | 0.613176 | NA       |
| CT025695.1        |             | 0 NA         | NA        | NA        | NA       | NA       |
| CR391991.5        |             | 0 NA         | NA        | NA        | NA       | NA       |
| FP016247.2        | 7.549365895 | -0.304481637 | 0.7063051 | -0.431091 | 0.666402 | NA       |
| si:dkey-65b13.9   | 1.699535932 | -4.202515226 | 1.7804058 | -2.360425 | 0.018254 | NA       |
| zbtb4             | 411.2276351 | 0.017494262  | 0.1159651 | 0.150858  | 0.880088 | 0.987881 |
| cep72             | 63.14865242 | -0.096153261 | 0.2485757 | -0.386817 | 0.698892 | 0.967998 |
| CR457444.6        |             | 0 NA         | NA        | NA        | NA       | NA       |
| nfkb1             | 118.6245625 | -0.431501498 | 0.2129424 | -2.026377 | 0.042726 | 0.406083 |
| RF00003           | 0.166657454 | -0.955901296 | 4.0804729 | -0.234262 | 0.814781 | NA       |
| cc136.1           | 0.8136773   | -1.876897407 | 2.1384966 | -0.877671 | 0.380122 | NA       |
| AL929304.1        |             | 0 NA         | NA        | NA        | NA       | NA       |
| zgc:171534        | 0.182570949 | 0.967652056  | 4.0804729 | 0.2371421 | 0.812547 | NA       |
| si:dkey-16p6.1    | 2.166064227 | -1.181924406 | 1.3265571 | -0.890971 | 0.372945 | NA       |
| RF00001           |             | 0 NA         | NA        | NA        | NA       | NA       |
| si:ch73-338d8.5   | 0.158915748 | 0.967652056  | 4.0804729 | 0.2371421 | 0.812547 | NA       |
| 4-Sep             | 192.6491273 | 0.150377842  | 0.1791487 | 0.8394026 | 0.401243 | 0.90084  |
| FP074902.2        | 125.8596969 | -0.120571011 | 0.2017123 | -0.597738 | 0.550015 | 0.94648  |
| grb2a             | 177.9675397 | -0.154201511 | 0.153219  | -1.006413 | 0.314217 | 0.865176 |
| cnksr3            | 70.29838062 | -0.103159754 | 0.2462057 | -0.418998 | 0.675217 | 0.965257 |
| wu:fa19b12        | 89.30270989 | 0.24770468   | 0.209054  | 1.1848837 | 0.236063 | 0.805091 |
| si:ch211-108c17.2 | 142.292194  | -0.177127025 | 0.1772073 | -0.999547 | 0.31753  | 0.867601 |
| p2ry1             | 333.0514041 | 0.003263463  | 0.1255281 | 0.0259979 | 0.979259 | 0.996802 |
| RF00003           | 0.158915748 | 0.967652056  | 4.0804729 | 0.2371421 | 0.812547 | NA       |
| btr24             | 1.157992254 | 2.488729112  | 2.0174351 | 1.2336105 | 0.217348 | NA       |
| FAT4              | 1090.896614 | -0.040010237 | 0.0947371 | -0.422329 | 0.672785 | 0.965257 |

|                    |             |              |           |           |          |          |
|--------------------|-------------|--------------|-----------|-----------|----------|----------|
| ddx54              | 615.3640593 | -0.055886942 | 0.0983563 | -0.568209 | 0.569893 | 0.948983 |
| mpp1               | 1002.210343 | 0.063656442  | 0.1121209 | 0.5677484 | 0.570206 | 0.948989 |
| si:ch211-79117.1   | 609.4676844 | 0.185331333  | 0.1044448 | 1.7744433 | 0.07599  | 0.537227 |
| CT573239.1         | 21.16777529 | -0.42497606  | 0.4248561 | -1.000282 | 0.317174 | 0.867335 |
| srsf4              | 2661.488833 | 0.000962967  | 0.0700756 | 0.0137418 | 0.989036 | 0.997589 |
| L0017784.1         | 216.366703  | -0.165104209 | 0.1427294 | -1.156764 | 0.247369 | 0.81686  |
| AP3B2              | 755.4294792 | -0.034048023 | 0.1067395 | -0.318982 | 0.74974  | 0.97419  |
| RF00001            | 4.940823041 | 0.983796167  | 0.8689326 | 1.1321892 | 0.257555 | NA       |
| BX927081.1         | 1.63780421  | -0.5728083   | 1.447088  | -0.395835 | 0.692227 | NA       |
| sox8a              | 21.58138538 | -0.186688664 | 0.4353123 | -0.428861 | 0.668024 | 0.964736 |
| CR762475.4         | 0.971534457 | -3.409585359 | 2.1825892 | -1.562175 | 0.118247 | NA       |
| si:dkeyp-79b7.12   | 22.36753276 | -0.427034658 | 0.4119024 | -1.036737 | 0.299858 | 0.855995 |
| si:dkeyp-44b5.5    | 9.285466311 | 0.018385785  | 0.6500967 | 0.0282816 | 0.977438 | NA       |
| CR626886.2         | 2.888358822 | 3.929407778  | 1.5470565 | 2.5399252 | 0.011088 | NA       |
| F0704756.1         | 2.256374764 | -0.860784339 | 1.3799797 | -0.623766 | 0.532781 | NA       |
| BX927327.1         | 0.166657454 | -0.955901296 | 4.0804729 | -0.234262 | 0.814781 | NA       |
| CU914760.1         | 3.417489469 | 0.387520702  | 1.1452612 | 0.3383688 | 0.735085 | NA       |
| CU459186.5         | 5.581985533 | 0.284312877  | 0.8338145 | 0.3409786 | 0.73312  | NA       |
| si:dkey-187j14.7   | 0.158915748 | 0.967652056  | 4.0804729 | 0.2371421 | 0.812547 | NA       |
| si:ch1073-365p7.2  | 8.134939265 | 0.574358769  | 0.7162615 | 0.8018842 | 0.42262  | NA       |
| zgc:165555         | 5.771242853 | 0.546745723  | 0.8291154 | 0.6594326 | 0.509618 | NA       |
| BX601648.1         |             | 0 NA         | NA        | NA        | NA       | NA       |
| AL590151.2         | 1.308694928 | 0.663383953  | 1.8738364 | 0.3540245 | 0.723321 | NA       |
| aspscr1            | 431.8195188 | -0.093751126 | 0.129396  | -0.724529 | 0.468741 | 0.924328 |
| klhdc7a            | 27.11547987 | 0.238171485  | 0.387787  | 0.6141813 | 0.539096 | 0.943733 |
| si:dkey-11o1.7     | 5.286720825 | -1.603227057 | 0.9106265 | -1.760576 | 0.07831  | NA       |
| CABZ01044764.1     | 64.2687208  | 0.410704774  | 0.2529087 | 1.6239249 | 0.104392 | 0.612172 |
| CABZ01069324.1     | 0.507044276 | -2.459587493 | 2.7586536 | -0.89159  | 0.372613 | NA       |
| CU062454.1         |             | 0 NA         | NA        | NA        | NA       | NA       |
| si:dkey-23a13.17   | 16.37122214 | 0.673370983  | 0.4746896 | 1.4185502 | 0.15603  | 0.706028 |
| CABZ01066384.1     | 0.340386822 | -1.882368278 | 3.2159502 | -0.585323 | 0.558331 | NA       |
| CU210845.1         |             | 0 NA         | NA        | NA        | NA       | NA       |
| BX569779.1         | 1.364485853 | 1.598686109  | 1.7892021 | 0.893519  | 0.371579 | NA       |
| CU929328.1         |             | 0 NA         | NA        | NA        | NA       | NA       |
| si:dkey-28d5.14    |             | 0 NA         | NA        | NA        | NA       | NA       |
| si:dkey-24117.2    | 0.166657454 | -0.955901296 | 4.0804729 | -0.234262 | 0.814781 | NA       |
| pafahlb3           |             | 0 NA         | NA        | NA        | NA       | NA       |
| BX247870.2         | 1.640710541 | -1.254508615 | 1.5711514 | -0.798464 | 0.424601 | NA       |
| CR931782.2         | 0.645291463 | -2.8201041   | 2.5306349 | -1.114386 | 0.265114 | NA       |
| BX248521.1         | 1.194732692 | 0.494883045  | 1.8211767 | 0.2717381 | 0.785823 | NA       |
| zgc:112234         | 1.473975014 | 1.841586239  | 1.7355142 | 1.0611185 | 0.288636 | NA       |
| si:dkey-9120.3     | 3726.491156 | -0.048370479 | 0.0918586 | -0.526575 | 0.598489 | 0.955488 |
| si:dkey-23a13.12   |             | 0 NA         | NA        | NA        | NA       | NA       |
| klh133             | 1.677331621 | 0.008224022  | 1.4774054 | 0.0055665 | 0.995559 | NA       |
| pkd112a            | 109.3674243 | 0.369125242  | 0.196251  | 1.8808838 | 0.059988 | 0.478654 |
| zgc:173552         | 2.086089705 | 1.670104828  | 1.5373435 | 1.0863576 | 0.277321 | NA       |
| zp2.2              | 8.017847616 | 1.463652177  | 0.7173651 | 2.0403169 | 0.041319 | NA       |
| si:ch211-277c7.7   | 5.75700557  | 0.419430225  | 0.8159274 | 0.5140534 | 0.607215 | NA       |
| si:cabz01069582.1  |             | 0 NA         | NA        | NA        | NA       | NA       |
| si:ch1073-153i20.4 | 29.30295111 | 0.750162375  | 0.4453994 | 1.6842465 | 0.092134 | 0.57849  |
| si:ch211-113d11.6  | 55.97437474 | -1.168796085 | 0.3102668 | -3.767068 | 0.000165 | 0.007304 |
| zgc:165555         | 25.10715332 | 0.003770124  | 0.4226607 | 0.00892   | 0.992883 | 0.998437 |
| zgc:165555         | 4.646177464 | 1.049646205  | 0.954989  | 1.0991186 | 0.271716 | NA       |
| CABZ01044764.2     | 0.977936578 | -2.1987185   | 2.1132745 | -1.040432 | 0.298139 | NA       |

|                    |             |              |           |           |          |          |
|--------------------|-------------|--------------|-----------|-----------|----------|----------|
| zgc:154164         | 64.26015144 | 0.090073397  | 0.2549127 | 0.35335   | 0.723826 | 0.970402 |
| FP325124.1         | 0 NA        |              | NA        | NA        | NA       | NA       |
| si:dkeyp-32g11.8   | 0.173729368 | -0.955901296 | 4.0804729 | -0.234262 | 0.814781 | NA       |
| FP325123.1         | 6.966834715 | 0.836876521  | 0.7621231 | 1.0980858 | 0.272167 | NA       |
| BX571940.1         | 0 NA        |              | NA        | NA        | NA       | NA       |
| faim2b             | 58.90569786 | 0.22634855   | 0.2628712 | 0.8610626 | 0.389204 | 0.896362 |
| ccr2               | 0 NA        |              | NA        | NA        | NA       | NA       |
| si:ch73-223f5.1    | 2.455368358 | 0.998174369  | 1.3028467 | 0.7661488 | 0.443588 | NA       |
| hist1h2a10         | 4.395987616 | -0.164679889 | 0.9557794 | -0.172299 | 0.863202 | NA       |
| si:dkey-88n24.11   | 8.224605664 | 0.616793612  | 0.7503287 | 0.8220312 | 0.411059 | NA       |
| CR383676.2         | 0 NA        |              | NA        | NA        | NA       | NA       |
| si:ch73-122k23.1   | 0 NA        |              | NA        | NA        | NA       | NA       |
| CR382283.1         | 1.45420241  | -0.348250456 | 1.7546342 | -0.198475 | 0.842674 | NA       |
| si:ch211-220f21.1  | 14.83239525 | 0.040859393  | 0.4942714 | 0.0826659 | 0.934117 | 0.992702 |
| CABZ01058277.1     | 0.831198824 | 0.593716313  | 2.0278563 | 0.2927803 | 0.76969  | NA       |
| CU457819.2         | 3.472512421 | 0.352140983  | 1.1359156 | 0.3100063 | 0.756556 | NA       |
| si:ch211-285c6.5   | 2.138086302 | 0.236781783  | 1.2602819 | 0.18788   | 0.850971 | NA       |
| zgc:165555         | 6.646522474 | 0.701695357  | 0.7992481 | 0.8779443 | 0.379974 | NA       |
| si:ch211-277c7.6   | 0.317711143 | 1.810477155  | 3.2978238 | 0.5489915 | 0.583011 | NA       |
| si:ch211-42c5.5    | 0 NA        |              | NA        | NA        | NA       | NA       |
| si:ch211-220f21.3  | 1.190687462 | -0.370625984 | 1.9333905 | -0.191697 | 0.847979 | NA       |
| fgl1               | 34.4411437  | 0.276598695  | 0.3246429 | 0.8520092 | 0.394209 | 0.898673 |
| CR555293.1         | 0.333314908 | -1.858695402 | 3.5126701 | -0.52914  | 0.596708 | NA       |
| zgc:165555         | 13.14946935 | 0.344026263  | 0.5201945 | 0.6613416 | 0.508393 | 0.93575  |
| si:zfos-405g10.4   | 0.157187365 | -0.955901296 | 4.0804729 | -0.234262 | 0.814781 | NA       |
| si:dkey-23a13.22   | 9.765176604 | 0.66444251   | 0.6163655 | 1.0780009 | 0.281033 | NA       |
| BX005156.3         | 0 NA        |              | NA        | NA        | NA       | NA       |
| si:ch211-160o17.3  | 0 NA        |              | NA        | NA        | NA       | NA       |
| mmell              | 15.70081904 | 0.978219378  | 0.5064064 | 1.9316885 | 0.053398 | 0.45286  |
| strc               | 63.7772408  | -0.01775798  | 0.2724962 | -0.065168 | 0.94804  | 0.99381  |
| si:ch73-22o18.1    | 22.82416371 | 0.055474419  | 0.4278698 | 0.1296526 | 0.896841 | 0.989971 |
| zgc:112234         | 16.4875528  | 0.288400911  | 0.4814305 | 0.5990499 | 0.54914  | 0.946312 |
| gemin6             | 103.3613271 | -0.216294768 | 0.1959634 | -1.103751 | 0.269701 | 0.834705 |
| BX649385.1         | 0.474778155 | 0.852397662  | 2.898154  | 0.2941175 | 0.768668 | NA       |
| si:ch211-113a14.22 | 6.013662414 | 0.512179776  | 0.7740547 | 0.6616842 | 0.508174 | NA       |
| dnajc14            | 55.65614837 | -0.319965605 | 0.2686637 | -1.190952 | 0.233672 | 0.802473 |
| CU457819.3         | 10.10106537 | 1.120043917  | 0.6304985 | 1.7764419 | 0.07566  | NA       |
| FP236327.1         | 0.820790498 | -1.849019722 | 2.2510166 | -0.821415 | 0.41141  | NA       |
| abcc6b.1           | 26.73456283 | -0.198316716 | 0.3661    | -0.541701 | 0.588024 | 0.953319 |
| loc564481          | 4.100470646 | 0.077367366  | 0.9927383 | 0.0779333 | 0.937881 | NA       |
| FP236789.1         | 0.663561848 | -1.490280258 | 2.4116568 | -0.617949 | 0.536609 | NA       |
| CU459186.6         | 1.474923542 | -1.683781257 | 1.8542961 | -0.908043 | 0.363855 | NA       |
| BX248082.1         | 52.08109965 | 0.624900915  | 0.2973269 | 2.1017301 | 0.035577 | 0.367362 |
| zgc:165555         | 3.346842469 | 0.319899283  | 1.0858588 | 0.2946049 | 0.768296 | NA       |
| BX324230.1         | 0 NA        |              | NA        | NA        | NA       | NA       |
| si:ch211-113d11.5  | 285.320024  | 1.037397439  | 0.1719058 | 6.0346865 | 1.59E-09 | 3.17E-07 |
| si:ch211-276i12.11 | 220.8704229 | 0.070099224  | 0.1525426 | 0.4595387 | 0.645847 | 0.96029  |
| si:dkey-83f18.8    | 0 NA        |              | NA        | NA        | NA       | NA       |
| zgc:112234         | 12.15647603 | 0.593267825  | 0.5763427 | 1.0293665 | 0.303307 | 0.85729  |
| si:ch211-163c2.1   | 0 NA        |              | NA        | NA        | NA       | NA       |
| adgrg4a            | 52.65589394 | -1.058203973 | 0.2792756 | -3.789103 | 0.000151 | 0.006841 |
| CU695207.1         | 0 NA        |              | NA        | NA        | NA       | NA       |
| CU457819.4         | 11.24135475 | 0.160895389  | 0.587678  | 0.2737815 | 0.784253 | 0.97627  |
| CR318599.2         | 0 NA        |              | NA        | NA        | NA       | NA       |



|                    |             |              |           |           |          |          |
|--------------------|-------------|--------------|-----------|-----------|----------|----------|
| CR361564.1         | 21.27027371 | -0.420661552 | 0.4302377 | -0.977742 | 0.328202 | 0.872763 |
| BX324006.1         | 0           | NA           | NA        | NA        | NA       | NA       |
| si:dkey-1k23.3     | 4.661044826 | 0.230328756  | 0.9148423 | 0.2517688 | 0.80122  | NA       |
| cd27               | 0           | NA           | NA        | NA        | NA       | NA       |
| si:rp71-46j2.7     | 487.50541   | -0.072755141 | 0.1273345 | -0.57137  | 0.567749 | 0.948739 |
| si:dkey-187j14.8   | 0           | NA           | NA        | NA        | NA       | NA       |
| si:zfos-1837d3.1   | 0           | NA           | NA        | NA        | NA       | NA       |
| si:ch73-368j24.11  | 18.66346813 | 0.435656714  | 0.4568952 | 0.9535157 | 0.340329 | 0.87805  |
| si:dkey-23a13.9    | 27.43460154 | 0.583940343  | 0.3660783 | 1.5951241 | 0.110684 | 0.625514 |
| MINAR1             | 11.49873404 | -0.086391648 | 0.5989844 | -0.14423  | 0.885319 | 0.988936 |
| zgc:l72143         | 3.864603805 | 0.135131366  | 1.035881  | 0.1304507 | 0.89621  | NA       |
| grxcrla            | 80.25560782 | 0.198262671  | 0.2180992 | 0.9090481 | 0.363325 | 0.885944 |
| camtal             | 12.99290258 | -0.333171652 | 0.6086676 | -0.547379 | 0.584119 | 0.952214 |
| FQ976909.1         | 2.149284774 | 0.672138434  | 1.2859945 | 0.5226604 | 0.601211 | NA       |
| BX601648.2         | 33.13093159 | -0.065501324 | 0.3551475 | -0.184434 | 0.853673 | 0.985174 |
| si:ch1073-220m6.1  | 0.31598276  | 0.005883445  | 3.3523626 | 0.001755  | 0.9986   | NA       |
| si:dkey-273g18.1   | 12.90618751 | -0.069583646 | 0.5493776 | -0.126659 | 0.89921  | 0.990121 |
| zgc:l93807         | 0           | NA           | NA        | NA        | NA       | NA       |
| pcdh11             | 465.2675926 | 0.004005387  | 0.109074  | 0.0367217 | 0.970707 | 0.996315 |
| si:cabz01100188.1  | 161.719135  | 0.188578879  | 0.1820044 | 1.0361228 | 0.300145 | 0.856224 |
| si:ch211-63p21.8   | 28.71629233 | -0.159123612 | 0.3783419 | -0.420581 | 0.674061 | 0.965257 |
| hist1h2a11         | 3.511143032 | 0.194817439  | 1.0960675 | 0.1777422 | 0.858925 | NA       |
| CR769769.2         | 441.9572624 | -0.272453737 | 0.1190998 | -2.287609 | 0.02216  | 0.283074 |
| si:ch211-129p13.1  | 29.099638   | 0.053142253  | 0.4058791 | 0.1309312 | 0.89583  | 0.989838 |
| CR548622.2         | 25.99834566 | 0.351726313  | 0.4134553 | 0.8506997 | 0.394936 | 0.899087 |
| si:ch211-63p21.1   | 343.7660502 | 0.337105809  | 0.1443969 | 2.3345783 | 0.019565 | 0.262653 |
| plxna1a            | 175.6448306 | 0.108433052  | 0.1608539 | 0.674109  | 0.500242 | 0.934224 |
| kenk17             | 7.447231809 | -0.351457635 | 0.7309507 | -0.480823 | 0.630643 | NA       |
| AL928854.1         | 53.16603435 | -0.135858033 | 0.2806272 | -0.484123 | 0.628299 | 0.957354 |
| si:dkey-10h3.7     | 0.365141898 | 1.973577737  | 3.3927314 | 0.5817076 | 0.560764 | NA       |
| F0834831.1         | 2.268282054 | -0.828411883 | 1.2910243 | -0.64167  | 0.521087 | NA       |
| si:cabz01021066.1  | 0           | NA           | NA        | NA        | NA       | NA       |
| si:dkeyp-81f3.4    | 8.454333255 | -0.14867402  | 0.6511492 | -0.228326 | 0.819393 | NA       |
| CU457819.5         | 8.08729539  | 0.898339532  | 0.7060701 | 1.2723093 | 0.203263 | NA       |
| si:ch73-54f23.4    | 6.286337722 | 0.01113361   | 0.751286  | 0.0148194 | 0.988176 | NA       |
| si:dkey-11o1.6     | 6.870789765 | -0.074120748 | 0.7489665 | -0.098964 | 0.921167 | NA       |
| si:dkey-82k12.13   | 0.488104098 | -2.415107183 | 2.7936704 | -0.864493 | 0.387317 | NA       |
| CR352285.1         | 170.7049902 | -0.165939513 | 0.1829944 | -0.906801 | 0.364512 | 0.886564 |
| si:ch211-285c6.6   | 1.933829241 | 0.452094942  | 1.5230327 | 0.2968386 | 0.76659  | NA       |
| BX005228.1         | 682.3144697 | -0.131990902 | 0.0934555 | -1.412339 | 0.15785  | 0.709071 |
| si:dkey-125e8.5    | 0.816075475 | -1.880611245 | 2.2559232 | -0.833633 | 0.404488 | NA       |
| si:cabz01093077.1  | 0           | NA           | NA        | NA        | NA       | NA       |
| zgc:l12234         | 10.77086029 | -0.163456385 | 0.5903953 | -0.276859 | 0.781888 | NA       |
| CU695207.2         | 0           | NA           | NA        | NA        | NA       | NA       |
| si:dkey-23a13.2    | 2.369224668 | -0.402718503 | 1.234797  | -0.326141 | 0.744317 | NA       |
| si:ch73-368j24.1   | 0.365141898 | 1.973577737  | 3.3927314 | 0.5817076 | 0.560764 | NA       |
| si:cabz01036006.1  | 86.1049119  | 0.124349424  | 0.2382658 | 0.5218937 | 0.601744 | 0.956045 |
| si:dkey-9a6.4      | 1.983417465 | 0.49112891   | 1.407026  | 0.3490546 | 0.727048 | NA       |
| BX005456.1         | 0           | NA           | NA        | NA        | NA       | NA       |
| si:dkey-88n24.12   | 17.8456088  | 0.168942875  | 0.4946208 | 0.3415604 | 0.732682 | 0.971719 |
| si:ch1073-153i20.5 | 1.165572322 | 1.275978471  | 1.8731226 | 0.6812039 | 0.495742 | NA       |
| si:ch211-126c2.4   | 126.6276302 | -0.005412533 | 0.1829679 | -0.029582 | 0.976401 | 0.996762 |
| F0681390.1         | 2.264666906 | 0.007731593  | 1.3276703 | 0.0058234 | 0.995354 | NA       |
| si:ch211-243a20.4  | 4.525743147 | 0.192365869  | 0.958985  | 0.2005932 | 0.841017 | NA       |

|                    |             |              |           |           |          |          |
|--------------------|-------------|--------------|-----------|-----------|----------|----------|
| zgc:165555         | 4.849574267 | 0.487330251  | 0.8712221 | 0.559364  | 0.575913 | NA       |
| zgc:112234         | 21.39130672 | 0.302247364  | 0.4272285 | 0.7074607 | 0.47928  | 0.927091 |
| FP325123.2         | 7.63251399  | 0.649413952  | 0.7768049 | 0.8360065 | 0.403151 | NA       |
| si:cabz01090193.1  | 79.28238513 | 0.211974887  | 0.2240671 | 0.9460332 | 0.344132 | 0.878434 |
| si:cabz01040626.2  | 0.317831496 | 1.808837541  | 3.5779923 | 0.5055454 | 0.613176 | NA       |
| CABZ01061349.1     | 10.88999679 | 0.075042477  | 0.5762182 | 0.1302327 | 0.896382 | NA       |
| CABZ01083815.1     | 1.28335263  | -0.01629263  | 1.8415936 | -0.008847 | 0.992941 | NA       |
| loc564660          | 0.647689638 | -2.824814845 | 2.5064236 | -1.12703  | 0.25973  | NA       |
| rph3ab             | 30.80666846 | 0.464619524  | 0.3482502 | 1.3341543 | 0.182153 | 0.744502 |
| si:dkey-97120.6    | 57.17318175 | 0.20272045   | 0.2733156 | 0.7417083 | 0.458264 | 0.921978 |
| si:ch73-223f5.2    | 3.659957946 | -0.526282155 | 1.013537  | -0.519253 | 0.603584 | NA       |
| si:ch211-113d11.8  | 5.571906429 | -2.200666126 | 0.9359825 | -2.351183 | 0.018714 | NA       |
| si:dkey-31g16.2    | 2.498031765 | 0.589164278  | 1.2978817 | 0.453943  | 0.64987  | NA       |
| CU457819.6         | 0 NA        | NA           | NA        | NA        | NA       | NA       |
| CABZ01078080.1     | 1.517477636 | -1.737436831 | 1.6886392 | -1.028898 | 0.303528 | NA       |
| si:ch211-220e11.3  | 1.346964328 | 0.025407544  | 1.6307836 | 0.01558   | 0.987569 | NA       |
| zgc:175135         | 0.158915748 | 0.967652056  | 4.0804729 | 0.2371421 | 0.812547 | NA       |
| BX000524.2         | 0 NA        | NA           | NA        | NA        | NA       | NA       |
| CABZ01044765.1     | 0.158795395 | 0.967652056  | 4.0804729 | 0.2371421 | 0.812547 | NA       |
| si:ch73-368j24.12  | 16.30226366 | 0.487474746  | 0.4685499 | 1.0403902 | 0.298159 | 0.85401  |
| fn3c3a             | 965.9439628 | 0.076788284  | 0.0919411 | 0.8351897 | 0.403611 | 0.900979 |
| dre-let-7a-1       | 0.158795395 | 0.967652056  | 4.0804729 | 0.2371421 | 0.812547 | NA       |
| CT574585.2         | 0 NA        | NA           | NA        | NA        | NA       | NA       |
| CR769769.3         | 0.847620474 | 0.550669627  | 2.2003584 | 0.2502636 | 0.802383 | NA       |
| zgc:112234         | 18.10277594 | 0.591963127  | 0.4948591 | 1.1962257 | 0.231609 | 0.799752 |
| si:dkey-23a13.21   | 5.633181788 | 0.468834104  | 0.8547123 | 0.5485286 | 0.583329 | NA       |
| CU466278.2         | 1.675644524 | -0.504222349 | 1.5236145 | -0.330938 | 0.740691 | NA       |
| BX248521.2         | 30.93766214 | 0.256411692  | 0.3405604 | 0.752911  | 0.451503 | 0.918761 |
| BX908792.1         | 0.474898508 | 0.855240867  | 2.7202602 | 0.3143967 | 0.75322  | NA       |
| AL935053.1         | 0 NA        | NA           | NA        | NA        | NA       | NA       |
| zgc:171424         | 0 NA        | NA           | NA        | NA        | NA       | NA       |
| FP015866.2         | 0 NA        | NA           | NA        | NA        | NA       | NA       |
| CR388046.2         | 0 NA        | NA           | NA        | NA        | NA       | NA       |
| CU041319.1         | 0 NA        | NA           | NA        | NA        | NA       | NA       |
| si:ch73-40a2.1     | 2.895051982 | 0.554916025  | 1.1681813 | 0.4750256 | 0.634769 | NA       |
| si:ch211-196f2.3   | 89.53827935 | -0.983319116 | 0.2239341 | -4.39111  | 1.13E-05 | 0.000809 |
| AL954129.1         | 14.3308539  | -0.201198215 | 0.5066052 | -0.39715  | 0.691257 | 0.9673   |
| BX571680.1         | 248.8625515 | 0.083959462  | 0.1506989 | 0.5571338 | 0.577436 | 0.950805 |
| CR318601.1         | 22.3322592  | -0.725977347 | 0.4074579 | -1.781723 | 0.074794 | 0.532583 |
| si:ch73-256g18.2   | 136.4940996 | 0.480049697  | 0.1844812 | 2.6021606 | 0.009264 | 0.161537 |
| si:dkey-86l18.10   | 14.49746094 | 0.233501159  | 0.6073994 | 0.3844277 | 0.700661 | 0.967998 |
| vgf                | 344.2677214 | 0.330133922  | 0.152423  | 2.1659057 | 0.030318 | 0.336618 |
| si:dkey-19b23.14   | 18.35671107 | 0.028934912  | 0.5140659 | 0.0562864 | 0.955114 | 0.994543 |
| znf16l             | 333.2108114 | 0.164448208  | 0.1273411 | 1.2913991 | 0.196565 | 0.761835 |
| FP015866.3         | 0 NA        | NA           | NA        | NA        | NA       | NA       |
| CR318603.2         | 0 NA        | NA           | NA        | NA        | NA       | NA       |
| CR388046.3         | 0.158915748 | 0.967652056  | 4.0804729 | 0.2371421 | 0.812547 | NA       |
| BX914219.1         | 0 NA        | NA           | NA        | NA        | NA       | NA       |
| BX914219.2         | 0 NA        | NA           | NA        | NA        | NA       | NA       |
| CR382325.1         | 9.751190913 | 0.649963212  | 0.6110495 | 1.0636834 | 0.287472 | NA       |
| si:ch73-335l21.3   | 3.294068183 | 0.587080435  | 1.0396743 | 0.5646773 | 0.572293 | NA       |
| AL929307.1         | 0 NA        | NA           | NA        | NA        | NA       | NA       |
| BX323797.2         | 0 NA        | NA           | NA        | NA        | NA       | NA       |
| si:ch1073-363c19.3 | 62.19083473 | -0.095260237 | 0.2544035 | -0.374445 | 0.708073 | 0.968664 |

|                    |             |              |           |           |          |          |
|--------------------|-------------|--------------|-----------|-----------|----------|----------|
| si:dkey-165a24.10  | 1.126323647 | -3.625134986 | 2.0071883 | -1.806076 | 0.070906 | NA       |
| CR388046.4         | 0 NA        |              | NA        | NA        | NA       | NA       |
| CR388231.2         | 2.517413312 | 0.642940231  | 1.2184713 | 0.5276614 | 0.597734 | NA       |
| si:dkey-1h4.4      | 5.018471914 | 0.463337491  | 0.8986721 | 0.5155801 | 0.606148 | NA       |
| si:ch211-235p24.2  | 141.4481552 | 0.100084092  | 0.1713058 | 0.5842421 | 0.559057 | 0.948478 |
| BX908792.2         | 0 NA        |              | NA        | NA        | NA       | NA       |
| si:cabz01101003.1  | 59.25846046 | -0.387399434 | 0.254964  | -1.519428 | 0.128655 | 0.659646 |
| CU972454.1         | 6.86376692  | -0.4987204   | 0.7292498 | -0.683881 | 0.49405  | NA       |
| CU041319.2         | 6.092698698 | -0.71899188  | 0.7676998 | -0.936553 | 0.348988 | NA       |
| CR450827.2         | 2.021845001 | -0.017419018 | 1.3668186 | -0.012744 | 0.989832 | NA       |
| BX663605.1         | 0.489712128 | -0.887840729 | 2.693685  | -0.329601 | 0.741702 | NA       |
| BX511061.1         | 9.637351443 | 0.656978843  | 0.6427201 | 1.022185  | 0.306693 | NA       |
| btr07              | 53.17087453 | -0.725135955 | 0.2880911 | -2.517037 | 0.011835 | 0.191129 |
| BX072554.2         | 0.815164977 | -0.617697568 | 2.1259573 | -0.29055  | 0.771395 | NA       |
| si:dkey-23i12.7    | 101.8468197 | 0.040711331  | 0.2366209 | 0.172053  | 0.863396 | 0.985841 |
| CR450827.3         | 0 NA        |              | NA        | NA        | NA       | NA       |
| si:ch73-367j5.3    | 3.452045694 | 0.149451216  | 1.001564  | 0.1492178 | 0.881382 | NA       |
| BX005056.1         | 1.869252306 | 0.274558892  | 1.376115  | 0.1995174 | 0.841858 | NA       |
| CR388046.5         | 0 NA        |              | NA        | NA        | NA       | NA       |
| si:ch211-194p6.10  | 10.86669469 | 0.70490244   | 0.5950461 | 1.1846181 | 0.236168 | NA       |
| crestin            | 20.20142824 | -0.163721575 | 0.4245462 | -0.385639 | 0.699764 | 0.967998 |
| CU929416.1         | 0.340386822 | -1.882368278 | 3.2159502 | -0.585323 | 0.558331 | NA       |
| si:ch211-22614.6   | 2.60948676  | -0.367025864 | 1.1744564 | -0.312507 | 0.754655 | NA       |
| si:cabz01009626.1  | 4.495802769 | -0.978655812 | 0.9073705 | -1.078562 | 0.280783 | NA       |
| si:dkey-6n21.12    | 158.0801806 | -0.129047175 | 0.16744   | -0.770707 | 0.440881 | 0.916336 |
| BX323060.1         | 0.323844819 | -1.825095364 | 3.274639  | -0.557342 | 0.577293 | NA       |
| amfrb              | 10.64755049 | 0.176221012  | 0.5877057 | 0.2998457 | 0.764295 | NA       |
| BX323060.2         | 0.157187365 | -0.955901296 | 4.0804729 | -0.234262 | 0.814781 | NA       |
| si:ch211-69e13.6   | 0 NA        |              | NA        | NA        | NA       | NA       |
| CT027807.1         | 0 NA        |              | NA        | NA        | NA       | NA       |
| si:dkeyp-75h12.7   | 7.610198128 | 0.88055181   | 0.7206481 | 1.2218888 | 0.22175  | NA       |
| slc8bl             | 90.17932182 | -0.025918189 | 0.2074161 | -0.124957 | 0.900557 | 0.990121 |
| si:dkey-33c9.8     | 8.867184396 | -0.036365175 | 0.6441467 | -0.056455 | 0.95498  | NA       |
| BX255967.1         | 9.126256268 | 0.284036389  | 0.6438889 | 0.4411264 | 0.659122 | NA       |
| CU464087.1         | 4.984179809 | 0.250183814  | 0.9065671 | 0.2759683 | 0.782572 | NA       |
| CT030144.1         | 19.53765284 | -0.179264889 | 0.4465452 | -0.401449 | 0.68809  | 0.966493 |
| si:cabz01007794.1  | 1499.327685 | -0.129635015 | 0.0900425 | -1.439709 | 0.14995  | 0.697935 |
| CR936442.1         | 512.1256816 | 0.194494499  | 0.1252186 | 1.5532392 | 0.120366 | 0.645215 |
| MAJIN              | 1.219644908 | -1.278066794 | 1.9287071 | -0.662655 | 0.507552 | NA       |
| ITLN1 (1 of many)  | 0 NA        |              | NA        | NA        | NA       | NA       |
| CR354377.1         | 0.31759079  | 1.807926197  | 3.579045  | 0.5051421 | 0.613459 | NA       |
| CR388231.3         | 1.38563257  | -0.730926346 | 1.7383954 | -0.42046  | 0.674149 | NA       |
| BX322601.1         | 0.798622974 | -0.586511484 | 2.2429405 | -0.261492 | 0.793713 | NA       |
| BX957276.1         | 4.192774602 | 0.099531328  | 0.9410053 | 0.1057713 | 0.915764 | NA       |
| BX511109.1         | 0.182570949 | 0.967652056  | 4.0804729 | 0.2371421 | 0.812547 | NA       |
| CR388046.6         | 0 NA        |              | NA        | NA        | NA       | NA       |
| si:dkey-183c6.9    | 18.25044999 | -0.700860476 | 0.453961  | -1.543878 | 0.122618 | 0.650831 |
| BX957297.2         | 4.265052205 | -0.9129179   | 0.9365666 | -0.97475  | 0.329684 | NA       |
| CT030012.1         | 1.332391414 | 0.764963579  | 1.7289436 | 0.4424456 | 0.658167 | NA       |
| si:dkey-23i12.9    | 0.158795395 | 0.967652056  | 4.0804729 | 0.2371421 | 0.812547 | NA       |
| BX914219.3         | 0 NA        |              | NA        | NA        | NA       | NA       |
| si:ch211-212k18.13 | 1.112289882 | 3.616281612  | 2.141613  | 1.6885785 | 0.0913   | NA       |
| si:ch211-196f2.6   | 0.712600633 | 0.050786542  | 2.5094348 | 0.0202382 | 0.983853 | NA       |
| CU972454.2         | 0.158915748 | 0.967652056  | 4.0804729 | 0.2371421 | 0.812547 | NA       |

|                    |              |               |            |            |           |           |
|--------------------|--------------|---------------|------------|------------|-----------|-----------|
| si:ch73-335121. 2  | 7. 699722053 | -0. 358000495 | 0. 6881526 | -0. 520234 | 0. 6029   | NA        |
| CT030153. 1        | 1. 178070337 | 0. 530310831  | 1. 9330889 | 0. 2743334 | 0. 783828 | NA        |
| BX571811. 1        | 27. 23951866 | -0. 141811096 | 0. 3632862 | -0. 390356 | 0. 696273 | 0. 96736  |
| CU329666. 1        | 0. 182570949 | 0. 967652056  | 4. 0804729 | 0. 2371421 | 0. 812547 | NA        |
| si:cabz01007812. 1 | 20. 97634379 | -0. 267422914 | 0. 4356038 | -0. 613913 | 0. 539273 | 0. 943836 |
| adad2              | 4. 826049709 | -0. 911093301 | 0. 8607158 | -1. 05853  | 0. 289814 | NA        |
| AL954672. 1        | 0. 182570949 | 0. 967652056  | 4. 0804729 | 0. 2371421 | 0. 812547 | NA        |
| BX927082. 2        | 0 NA         | NA            | NA         | NA         | NA        | NA        |
| BX470211. 1        | 97. 87557673 | 0. 117700549  | 0. 2147225 | 0. 5481519 | 0. 583588 | 0. 952214 |
| alpk3b             | 12. 60525579 | 0. 41382875   | 0. 5644852 | 0. 7331083 | 0. 463492 | 0. 92286  |
| CABP4              | 118. 8861146 | 0. 085910763  | 0. 1898214 | 0. 4525874 | 0. 650846 | 0. 960708 |
| BX957325. 1        | 0. 489712128 | -0. 887840729 | 2. 693685  | -0. 329601 | 0. 741702 | NA        |
| BX323797. 3        | 25. 34148727 | -0. 485686711 | 0. 3965733 | -1. 224709 | 0. 220685 | 0. 787641 |
| CT027989. 1        | 0. 674131812 | 1. 488431101  | 2. 4005609 | 0. 6200347 | 0. 535235 | NA        |
| si:ch211-98n17. 5  | 455. 8125048 | 0. 115503655  | 0. 1147656 | 1. 0064311 | 0. 314208 | 0. 865176 |
| CU972454. 3        | 0 NA         | NA            | NA         | NA         | NA        | NA        |
| adgrgl             | 58. 71630474 | -0. 217080459 | 0. 2851405 | -0. 76131  | 0. 446472 | 0. 917154 |
| zgc:172079         | 8. 034775787 | -1. 166894494 | 0. 7165603 | -1. 628467 | 0. 103426 | NA        |
| si:cabz01102082. 1 | 766. 4439187 | -0. 147791446 | 0. 1078657 | -1. 370144 | 0. 170642 | 0. 728116 |
| BX323060. 3        | 615. 4541418 | 0. 207991042  | 0. 126542  | 1. 6436526 | 0. 100248 | 0. 602341 |
| BX957297. 3        | 2. 326869995 | -0. 408123947 | 1. 2717632 | -0. 320912 | 0. 748277 | NA        |
| BX323797. 4        | 5. 155310338 | 0. 110148274  | 0. 8158099 | 0. 1350171 | 0. 892598 | NA        |
| BX571811. 2        | 13. 66167556 | -0. 275428339 | 0. 5207181 | -0. 528939 | 0. 596847 | 0. 954913 |
| si:cabz01080528. 1 | 69. 52996855 | 0. 166824654  | 0. 2592636 | 0. 6434558 | 0. 519928 | 0. 938995 |
| CR394555. 1        | 1. 817577896 | 2. 147576728  | 1. 5598448 | 1. 3767887 | 0. 168578 | NA        |
| FP015866. 4        | 0 NA         | NA            | NA         | NA         | NA        | NA        |
| FO704741. 1        | 24. 4722778  | -0. 430991798 | 0. 3852414 | -1. 118758 | 0. 263243 | 0. 830245 |
| CR450827. 4        | 0 NA         | NA            | NA         | NA         | NA        | NA        |
| CU972454. 4        | 6. 745937544 | 0. 136163857  | 0. 8101624 | 0. 1680698 | 0. 866528 | NA        |
| NFX1               | 660. 6750677 | -0. 070353608 | 0. 1022499 | -0. 688056 | 0. 491418 | 0. 931926 |
| CT030129. 1        | 3. 844619331 | 0. 90402667   | 1. 0872336 | 0. 8314926 | 0. 405695 | NA        |
| or113-1            | 0 NA         | NA            | NA         | NA         | NA        | NA        |
| CABZ01015815. 2    | 0 NA         | NA            | NA         | NA         | NA        | NA        |
| ms4a17a. 2         | 20. 29479445 | 0. 111544402  | 0. 4729117 | 0. 2358673 | 0. 813536 | 0. 981081 |
| BX005417. 3        | 3. 955669991 | -1. 953232986 | 1. 073546  | -1. 819422 | 0. 068847 | NA        |
| CABZ01018874. 1    | 0 NA         | NA            | NA         | NA         | NA        | NA        |
| or137-9            | 0. 497574187 | -2. 437446738 | 2. 6012773 | -0. 937019 | 0. 348749 | NA        |
| BX957362. 1        | 4. 063490592 | 0. 527901308  | 0. 9594884 | 0. 5501904 | 0. 582189 | NA        |
| si:ch1073-22e3. 1  | 0 NA         | NA            | NA         | NA         | NA        | NA        |
| CABZ01070258. 1    | 0 NA         | NA            | NA         | NA         | NA        | NA        |
| BX324153. 1        | 2. 339955232 | -1. 299353075 | 1. 2991773 | -1. 000135 | 0. 317245 | NA        |
| znf1009            | 130. 8069733 | -0. 073558303 | 0. 1832165 | -0. 401483 | 0. 688065 | 0. 966493 |
| zgc:194186         | 6. 936119062 | -0. 126962323 | 0. 7944575 | -0. 15981  | 0. 873031 | NA        |
| slcolf3            | 1. 823401842 | -0. 813605492 | 1. 4283425 | -0. 569615 | 0. 568939 | NA        |
| CABZ01069022. 1    | 29. 91724791 | -0. 432118387 | 0. 3642593 | -1. 186293 | 0. 235506 | 0. 804824 |
| CR354588. 1        | 1325. 603724 | -0. 057402208 | 0. 0799901 | -0. 717617 | 0. 472994 | 0. 924993 |
| CABZ01015815. 3    | 3. 360600754 | 0. 623054177  | 1. 0533649 | 0. 5914894 | 0. 554193 | NA        |
| CABZ01021433. 1    | 64. 13597357 | 0. 10051597   | 0. 2484399 | 0. 4045886 | 0. 68578  | 0. 966307 |
| CT737190. 2        | 3. 332418911 | 0. 301670756  | 1. 1857603 | 0. 2544113 | 0. 799178 | NA        |
| BX649282. 1        | 0 NA         | NA            | NA         | NA         | NA        | NA        |
| or137-8            | 5. 031079837 | 1. 730012412  | 0. 9364105 | 1. 8474935 | 0. 064676 | NA        |
| or125-3            | 2. 427496245 | 1. 970481706  | 1. 3377192 | 1. 4730159 | 0. 140747 | NA        |
| or121-1            | 0. 356300316 | 0. 005884122  | 3. 214964  | 0. 0018302 | 0. 99854  | NA        |
| or109-11           | 10. 49704044 | 1. 004965612  | 0. 6068686 | 1. 6559856 | 0. 097725 | NA        |

|                  |             |              |           |           |          |          |
|------------------|-------------|--------------|-----------|-----------|----------|----------|
| or113-2          | 0 NA        | NA           | NA        | NA        | NA       | NA       |
| CU467646.7       | 0.6907151   | 1.536847427  | 2.3850752 | 0.6443602 | 0.519342 | NA       |
| CU570689.2       | 80.93987448 | -0.12551025  | 0.2214528 | -0.566943 | 0.570753 | 0.949061 |
| CABZ01083442.1   | 58.26695632 | -0.079013649 | 0.2617333 | -0.301886 | 0.762739 | 0.975374 |
| AL772146.1       | 0 NA        | NA           | NA        | NA        | NA       | NA       |
| CR450833.2       | 0.476386185 | 2.392464142  | 3.0533824 | 0.7835455 | 0.433307 | NA       |
| BX957362.2       | 0 NA        | NA           | NA        | NA        | NA       | NA       |
| CABZ01068273.1   | 2.791747979 | -1.26211145  | 1.1486616 | -1.098767 | 0.27187  | NA       |
| or132-4          | 0 NA        | NA           | NA        | NA        | NA       | NA       |
| or128-6          | 0 NA        | NA           | NA        | NA        | NA       | NA       |
| or126-2          | 0 NA        | NA           | NA        | NA        | NA       | NA       |
| FP074874.2       | 0 NA        | NA           | NA        | NA        | NA       | NA       |
| CABZ01069022.2   | 11.22033734 | 0.161350486  | 0.5803628 | 0.2780166 | 0.781    | 0.97627  |
| si:ch73-266f23.1 | 43.49396237 | 0.100332077  | 0.30001   | 0.3344291 | 0.738056 | 0.972535 |
| or125-5          | 1.071650139 | 3.531689172  | 2.1714985 | 1.6263835 | 0.103868 | NA       |
| or128-1          | 4.470334078 | 2.511445812  | 1.1105964 | 2.2613487 | 0.023738 | NA       |
| CR788316.1       | 0 NA        | NA           | NA        | NA        | NA       | NA       |
| or133-7          | 1.968201502 | 0.964936473  | 1.4111029 | 0.6838172 | 0.494091 | NA       |
| or137-4          | 0.650235905 | 1.438231835  | 2.4251649 | 0.593045  | 0.553151 | NA       |
| BX005319.1       | 0 NA        | NA           | NA        | NA        | NA       | NA       |
| L0018260.2       | 1.353177072 | -1.582120833 | 1.7185249 | -0.920627 | 0.357245 | NA       |
| CU640433.1       | 2.39582848  | 0.868283707  | 1.3000293 | 0.6678955 | 0.5042   | NA       |
| or133-6          | 0.365141898 | 1.973577737  | 3.3927314 | 0.5817076 | 0.560764 | NA       |
| CABZ01015815.4   | 2.478390554 | -0.260134324 | 1.3108601 | -0.198446 | 0.842697 | NA       |
| ptpr             | 300.9489981 | 0.124685849  | 0.1229114 | 1.014437  | 0.310374 | 0.862656 |
| L0018124.1       | 13.94255718 | -0.143346585 | 0.5584431 | -0.25669  | 0.797418 | 0.978577 |
| nmnat1           | 25.31615034 | 0.3767913    | 0.397936  | 0.9468641 | 0.343708 | 0.878434 |
| CR788316.2       | 0 NA        | NA           | NA        | NA        | NA       | NA       |
| AL929321.2       | 0.173729368 | -0.955901296 | 4.0804729 | -0.234262 | 0.814781 | NA       |
| or133-9          | 1.689079533 | -0.005191183 | 1.4752856 | -0.003519 | 0.997192 | NA       |
| BX510938.1       | 0.31759079  | 1.807926197  | 3.579045  | 0.5051421 | 0.613459 | NA       |
| BX957362.3       | 0 NA        | NA           | NA        | NA        | NA       | NA       |
| CR788316.3       | 0.339758314 | 0.005883863  | 3.2682461 | 0.0018003 | 0.998564 | NA       |
| or133-5          | 0.62874946  | -2.787682787 | 2.7593918 | -1.010253 | 0.312374 | NA       |
| AL845428.2       | 0.182570949 | 0.967652056  | 4.0804729 | 0.2371421 | 0.812547 | NA       |
| BX510938.2       | 0.157187365 | -0.955901296 | 4.0804729 | -0.234262 | 0.814781 | NA       |
| CABZ01072523.1   | 70.14773951 | -0.062340657 | 0.2611911 | -0.238678 | 0.811355 | 0.981081 |
| or121-1          | 0 NA        | NA           | NA        | NA        | NA       | NA       |
| or132-2          | 1.147689739 | -0.461796351 | 1.840523  | -0.250905 | 0.801888 | NA       |
| CR354581.1       | 0 NA        | NA           | NA        | NA        | NA       | NA       |
| AL928851.1       | 0 NA        | NA           | NA        | NA        | NA       | NA       |
| AL845428.3       | 0 NA        | NA           | NA        | NA        | NA       | NA       |
| or133-4          | 1.275490571 | 0.72455033   | 1.7746658 | 0.4082742 | 0.683072 | NA       |
| BX957362.4       | 0.166657454 | -0.955901296 | 4.0804729 | -0.234262 | 0.814781 | NA       |
| AL929321.3       | 0 NA        | NA           | NA        | NA        | NA       | NA       |
| or109-6          | 0 NA        | NA           | NA        | NA        | NA       | NA       |
| BX510938.3       | 0 NA        | NA           | NA        | NA        | NA       | NA       |
| BX322787.1       | 9.70202812  | 0.485286352  | 0.654666  | 0.7412732 | 0.458528 | NA       |
| CR318600.2       | 0.347458735 | -1.908042286 | 3.4571486 | -0.551912 | 0.581009 | NA       |
| zgc:171727       | 1.00638813  | -2.205595157 | 2.1251228 | -1.037867 | 0.299332 | NA       |
| CABZ01081777.1   | 31.26228272 | 0.167877297  | 0.3457296 | 0.485574  | 0.627269 | 0.957354 |
| L0018029.1       | 189.2157478 | -0.127490288 | 0.1535248 | -0.830422 | 0.4063   | 0.901305 |
| si:dkeyp-3f10.11 | 0.158795395 | 0.967652056  | 4.0804729 | 0.2371421 | 0.812547 | NA       |
| AL929208.1       | 2.328588334 | 1.358241345  | 1.3165096 | 1.0316988 | 0.302213 | NA       |

|                    |             |              |           |           |          |          |
|--------------------|-------------|--------------|-----------|-----------|----------|----------|
| or137-1            | 0           | NA           | NA        | NA        | NA       | NA       |
| si:dkeyp-3f10.12   | 0           | NA           | NA        | NA        | NA       | NA       |
| or115-9            | 0.991722602 | 2.205448156  | 2.0025633 | 1.1013126 | 0.270761 | NA       |
| or126-4            | 0.508023798 | 0.926122713  | 2.6636728 | 0.3476864 | 0.728076 | NA       |
| or109-1            | 0.332524763 | 0.005883742  | 3.292841  | 0.0017868 | 0.998574 | NA       |
| si:ch1073-166e24.4 | 0.672283077 | 0.02892376   | 2.3005571 | 0.0125725 | 0.989969 | NA       |
| or133-3            | 0           | NA           | NA        | NA        | NA       | NA       |
| si:ch211-218m3.18  | 2.593604259 | 2.07573026   | 1.3474124 | 1.5405308 | 0.123431 | NA       |
| CABZ01015815.5     | 13.57198051 | -0.808232165 | 0.5604914 | -1.442006 | 0.149301 | 0.696454 |
| BX510938.4         | 0           | NA           | NA        | NA        | NA       | NA       |
| or136-1            | 5.205093486 | -0.691694068 | 0.8944909 | -0.773282 | 0.439355 | NA       |
| CABZ01069020.1     | 44.66265322 | -0.030900884 | 0.2899833 | -0.106561 | 0.915137 | 0.991123 |
| CU672227.1         | 0           | NA           | NA        | NA        | NA       | NA       |
| or128-9            | 0           | NA           | NA        | NA        | NA       | NA       |
| CR376774.1         | 5.256177294 | 1.136564262  | 0.8408509 | 1.3516835 | 0.176477 | NA       |
| FP074874.3         | 0.349228403 | 0.005884014  | 3.2372587 | 0.0018176 | 0.99855  | NA       |
| BX510938.5         | 0           | NA           | NA        | NA        | NA       | NA       |
| BX649282.2         | 0           | NA           | NA        | NA        | NA       | NA       |
| BX855614.4         | 118.1594506 | -0.023052784 | 0.1972881 | -0.116848 | 0.90698  | 0.990702 |
| CR391925.1         | 0.158795395 | 0.967652056  | 4.0804729 | 0.2371421 | 0.812547 | NA       |
| or132-1            | 1.861551885 | 0.855572609  | 1.3972186 | 0.6123398 | 0.540313 | NA       |
| AL929321.4         | 0           | NA           | NA        | NA        | NA       | NA       |
| CABZ01117780.1     | 177.2522921 | 0.095181784  | 0.1533362 | 0.6207392 | 0.534771 | 0.943336 |
| AL772146.2         | 2.185355419 | 0.234762648  | 1.2558811 | 0.1869306 | 0.851715 | NA       |
| or126-5            | 0           | NA           | NA        | NA        | NA       | NA       |
| or109-2            | 0.158915748 | 0.967652056  | 4.0804729 | 0.2371421 | 0.812547 | NA       |
| CR788316.4         | 1.029373538 | -0.925560034 | 1.950501  | -0.474524 | 0.635126 | NA       |
| CU915534.1         | 0.166657454 | -0.955901296 | 4.0804729 | -0.234262 | 0.814781 | NA       |
| znf1009            | 100.0169783 | -0.070975613 | 0.1957582 | -0.362568 | 0.716928 | 0.96909  |
| or126-3            | 0.491320158 | 0.8528132    | 2.8656354 | 0.2976    | 0.766008 | NA       |
| znf971             | 62.91816545 | -0.122425743 | 0.2607861 | -0.469449 | 0.638749 | 0.959628 |
| or132-3            | 0.166657454 | -0.955901296 | 4.0804729 | -0.234262 | 0.814781 | NA       |
| BX649282.3         | 0           | NA           | NA        | NA        | NA       | NA       |
| RF00001            | 0           | NA           | NA        | NA        | NA       | NA       |
| RF00001            | 0           | NA           | NA        | NA        | NA       | NA       |
| RF00001            | 0.492110303 | -0.89618148  | 2.8628934 | -0.313033 | 0.754255 | NA       |
| RF00001            | 0           | NA           | NA        | NA        | NA       | NA       |
| RF00001            | 1.168207948 | -2.491219569 | 2.0138345 | -1.237053 | 0.216067 | NA       |
| RF00001            | 0           | NA           | NA        | NA        | NA       | NA       |
| FO904970.1         | 57.9924208  | 0.467168094  | 0.2630983 | 1.7756409 | 0.075792 | 0.536404 |
| RF00001            | 0.182570949 | 0.967652056  | 4.0804729 | 0.2371421 | 0.812547 | NA       |
| RF00001            | 0.347458735 | -1.908042286 | 3.4571486 | -0.551912 | 0.581009 | NA       |
| RF00001            | 0.341366344 | 1.891903201  | 3.2128156 | 0.5888614 | 0.555954 | NA       |
| RF00001            | 0           | NA           | NA        | NA        | NA       | NA       |
| CABZ01041495.1     | 255.2414697 | 0.227071337  | 0.134861  | 1.6837438 | 0.092231 | 0.57849  |
| RF00001            | 0.5046461   | -2.45370851  | 2.7629627 | -0.888072 | 0.374502 | NA       |
| RF00001            | 0           | NA           | NA        | NA        | NA       | NA       |
| RF00001            | 0.158915748 | 0.967652056  | 4.0804729 | 0.2371421 | 0.812547 | NA       |
| RF00001            | 0           | NA           | NA        | NA        | NA       | NA       |
| RF00001            | 0.339758314 | 0.005883863  | 3.2682461 | 0.0018003 | 0.998564 | NA       |
| CABZ01075572.1     | 41.14480734 | -0.18443752  | 0.3149297 | -0.585647 | 0.558113 | 0.948478 |
| RF00001            | 0           | NA           | NA        | NA        | NA       | NA       |
| RF00001            | 0           | NA           | NA        | NA        | NA       | NA       |
| RF00001            | 0           | NA           | NA        | NA        | NA       | NA       |

|                     |  |              |               |            |            |                     |
|---------------------|--|--------------|---------------|------------|------------|---------------------|
| RF00001             |  | 0 NA         | NA            | NA         | NA         | NA                  |
| RF00001             |  | 0. 325573202 | 0. 005883621  | 3. 3172783 | 0. 0017736 | 0. 998585 NA        |
| RF00001             |  | 0 NA         | NA            | NA         | NA         | NA                  |
| CABZ01050944. 1     |  | 4. 235930708 | -0. 791147636 | 0. 9642543 | -0. 820476 | 0. 411945 NA        |
| CR847870. 3         |  | 0. 157187365 | -0. 955901296 | 4. 0804729 | -0. 234262 | 0. 814781 NA        |
| L0017820. 1         |  | 12. 40245733 | 0. 590666256  | 0. 5922257 | 0. 9973667 | 0. 318587 0. 867746 |
| RF00001             |  | 0 NA         | NA            | NA         | NA         | NA                  |
| RF00001             |  | 0 NA         | NA            | NA         | NA         | NA                  |
| RF00001             |  | 0. 476506538 | 2. 394892832  | 2. 8161716 | 0. 8504073 | 0. 395099 NA        |
| RF00001             |  | 0 NA         | NA            | NA         | NA         | NA                  |
| RF00001             |  | 0 NA         | NA            | NA         | NA         | NA                  |
| RF00001             |  | 0 NA         | NA            | NA         | NA         | NA                  |
| RF00001             |  | 0. 650356258 | 1. 438498434  | 2. 4250369 | 0. 5931862 | 0. 553057 NA        |
| CACNA2D3 (1 of many |  | 40. 43894761 | 0. 228771479  | 0. 3036318 | 0. 7534502 | 0. 451179 0. 918761 |
| RF00001             |  | 0. 341486697 | 1. 892317624  | 3. 2124068 | 0. 5890654 | 0. 555817 NA        |
| AL928881. 1         |  | 0 NA         | NA            | NA         | NA         | NA                  |
| RF00001             |  | 0 NA         | NA            | NA         | NA         | NA                  |
| RF00001             |  | 0. 173729368 | -0. 955901296 | 4. 0804729 | -0. 234262 | 0. 814781 NA        |
| RF00001             |  | 0. 347458735 | -1. 908042286 | 3. 4571486 | -0. 551912 | 0. 581009 NA        |
| RF00001             |  | 0. 182570949 | 0. 967652056  | 4. 0804729 | 0. 2371421 | 0. 812547 NA        |
| RF00001             |  | 0 NA         | NA            | NA         | NA         | NA                  |
| RF00001             |  | 0. 52295777  | -0. 916487494 | 2. 6406233 | -0. 347072 | 0. 728537 NA        |
| fzd1                |  | 39. 92579265 | 0. 372782986  | 0. 3194583 | 1. 1669221 | 0. 243242 0. 812077 |
| RF00001             |  | 0 NA         | NA            | NA         | NA         | NA                  |
| RF00001             |  | 0 NA         | NA            | NA         | NA         | NA                  |
| RF00001             |  | 0 NA         | NA            | NA         | NA         | NA                  |
| RF00001             |  | 0 NA         | NA            | NA         | NA         | NA                  |
| RF00001             |  | 0 NA         | NA            | NA         | NA         | NA                  |
| RF00001             |  | 0 NA         | NA            | NA         | NA         | NA                  |
| RF00001             |  | 0 NA         | NA            | NA         | NA         | NA                  |
| BX005256. 1         |  | 6. 364495592 | 0. 029736981  | 0. 7775773 | 0. 0382431 | 0. 969494 NA        |
| RF00001             |  | 0. 158795395 | 0. 967652056  | 4. 0804729 | 0. 2371421 | 0. 812547 NA        |
| RF00001             |  | 0 NA         | NA            | NA         | NA         | NA                  |
| RF00001             |  | 0 NA         | NA            | NA         | NA         | NA                  |
| RF00001             |  | 2. 644660206 | -0. 039015539 | 1. 288445  | -0. 030281 | 0. 975843 NA        |
| RF00001             |  | 0 NA         | NA            | NA         | NA         | NA                  |
| RF00001             |  | 1. 680399589 | -0. 563188862 | 1. 4615875 | -0. 385327 | 0. 699995 NA        |
| RF00001             |  | 0. 340386822 | -1. 882368278 | 3. 2159502 | -0. 585323 | 0. 558331 NA        |
| BX855618. 1         |  | 23. 29814976 | 0. 43507887   | 0. 3917011 | 1. 1107421 | 0. 266679 0. 832673 |
| RF00001             |  | 0. 830098949 | -1. 902766313 | 2. 1285797 | -0. 893914 | 0. 371368 NA        |
| BX664705. 2         |  | 0 NA         | NA            | NA         | NA         | NA                  |
| RF00001             |  | 0 NA         | NA            | NA         | NA         | NA                  |
| TP53I3              |  | 12. 6574484  | -0. 128494084 | 0. 5375906 | -0. 239018 | 0. 811091 0. 981081 |
| RF00001             |  | 0 NA         | NA            | NA         | NA         | NA                  |
| RF00001             |  | 0. 904013163 | 2. 00662374   | 2. 339454  | 0. 8577316 | 0. 391041 NA        |
| RF00001             |  | 0 NA         | NA            | NA         | NA         | NA                  |
| RF00001             |  | 0 NA         | NA            | NA         | NA         | NA                  |
| RF00001             |  | 0. 173729368 | -0. 955901296 | 4. 0804729 | -0. 234262 | 0. 814781 NA        |
| RF00001             |  | 0 NA         | NA            | NA         | NA         | NA                  |
| RF00001             |  | 0 NA         | NA            | NA         | NA         | NA                  |
| RF00001             |  | 0 NA         | NA            | NA         | NA         | NA                  |
| RF00001             |  | 0 NA         | NA            | NA         | NA         | NA                  |
| L0017965. 1         |  | 2. 119533926 | -0. 222058641 | 1. 3047253 | -0. 170196 | 0. 864856 NA        |
| RF00001             |  | 0 NA         | NA            | NA         | NA         | NA                  |

|            |             |              |           |           |          |          |
|------------|-------------|--------------|-----------|-----------|----------|----------|
| RF00001    | 0.347458735 | -1.908042286 | 3.4571486 | -0.551912 | 0.581009 | NA       |
| RF00001    | 0           | NA           | NA        | NA        | NA       | NA       |
| RF00001    | 0           | NA           | NA        | NA        | NA       | NA       |
| RF00001    | 0           | NA           | NA        | NA        | NA       | NA       |
| RF00001    | 0.317831496 | 1.808837541  | 3.5779923 | 0.5055454 | 0.613176 | NA       |
| RF00001    | 0.166657454 | -0.955901296 | 4.0804729 | -0.234262 | 0.814781 | NA       |
| BX321905.1 | 0           | NA           | NA        | NA        | NA       | NA       |
| RF00001    | 0           | NA           | NA        | NA        | NA       | NA       |
| CR931802.3 | 6.925226817 | 0.119768909  | 0.7233401 | 0.1655776 | 0.868489 | NA       |
| BX548062.1 | 207.4732393 | 0.122482496  | 0.1588953 | 0.7708379 | 0.440803 | 0.916336 |
| RF00001    | 0           | NA           | NA        | NA        | NA       | NA       |
| SGCZ       | 11.66273832 | -0.528727498 | 0.5727892 | -0.923075 | 0.355968 | 0.882844 |
| RF00001    | 0           | NA           | NA        | NA        | NA       | NA       |
| CR388042.1 | 11.48879899 | 0.393996395  | 0.5751837 | 0.6849923 | 0.493349 | 0.931926 |
| RF00001    | 0           | NA           | NA        | NA        | NA       | NA       |
| RF00001    | 0.633934609 | 1.436045836  | 2.6103598 | 0.5501333 | 0.582228 | NA       |
| RF00001    | 0           | NA           | NA        | NA        | NA       | NA       |
| RF00001    | 0           | NA           | NA        | NA        | NA       | NA       |
| RF00212    | 0           | NA           | NA        | NA        | NA       | NA       |
| CR751224.1 | 14.08047445 | 0.319122502  | 0.5409315 | 0.58995   | 0.555224 | 0.947449 |
| RF00001    | 0           | NA           | NA        | NA        | NA       | NA       |
| RF00001    | 0           | NA           | NA        | NA        | NA       | NA       |
| RF00001    | 0.531799352 | 0.999478841  | 2.790358  | 0.3581902 | 0.720201 | NA       |
| RF00001    | 0.157187365 | -0.955901296 | 4.0804729 | -0.234262 | 0.814781 | NA       |
| RF00001    | 0           | NA           | NA        | NA        | NA       | NA       |
| RF00001    | 0.158795395 | 0.967652056  | 4.0804729 | 0.2371421 | 0.812547 | NA       |
| RF00001    | 0.500402445 | 2.450713647  | 2.7706722 | 0.8845195 | 0.376416 | NA       |
| RF00001    | 0           | NA           | NA        | NA        | NA       | NA       |
| RF00001    | 0.498553709 | 0.926267934  | 2.6786929 | 0.345791  | 0.7295   | NA       |
| RF00001    | 0.31759079  | 1.807926197  | 3.579045  | 0.5051421 | 0.613459 | NA       |
| LO018254.1 | 0           | NA           | NA        | NA        | NA       | NA       |
| RF00001    | 0           | NA           | NA        | NA        | NA       | NA       |
| RF00001    | 0           | NA           | NA        | NA        | NA       | NA       |
| RF00001    | 0           | NA           | NA        | NA        | NA       | NA       |
| CR936408.2 | 0           | NA           | NA        | NA        | NA       | NA       |
| RF00001    | 0           | NA           | NA        | NA        | NA       | NA       |
| RF00001    | 0           | NA           | NA        | NA        | NA       | NA       |
| RF00001    | 0           | NA           | NA        | NA        | NA       | NA       |
| RF00001    | 0           | NA           | NA        | NA        | NA       | NA       |
| RF00001    | 0.317711143 | 1.810477155  | 3.2978238 | 0.5489915 | 0.583011 | NA       |
| RF00001    | 0           | NA           | NA        | NA        | NA       | NA       |
| RF00001    | 0           | NA           | NA        | NA        | NA       | NA       |
| RF00001    | 0           | NA           | NA        | NA        | NA       | NA       |
| RF00001    | 6.702819723 | 0.04382273   | 0.7894283 | 0.055512  | 0.955731 | NA       |
| RF00001    | 0           | NA           | NA        | NA        | NA       | NA       |
| RF00001    | 0           | NA           | NA        | NA        | NA       | NA       |
| RF00001    | 0           | NA           | NA        | NA        | NA       | NA       |
| RF00001    | 0           | NA           | NA        | NA        | NA       | NA       |
| RF00001    | 0           | NA           | NA        | NA        | NA       | NA       |
| RF00001    | 0.166657454 | -0.955901296 | 4.0804729 | -0.234262 | 0.814781 | NA       |
| RF00001    | 0           | NA           | NA        | NA        | NA       | NA       |
| RF00001    | 0.158915748 | 0.967652056  | 4.0804729 | 0.2371421 | 0.812547 | NA       |
| RF00001    | 0           | NA           | NA        | NA        | NA       | NA       |
| RF00001    | 0           | NA           | NA        | NA        | NA       | NA       |



|                 |             |              |           |           |          |          |
|-----------------|-------------|--------------|-----------|-----------|----------|----------|
| RF00001         | 0.158795395 | 0.967652056  | 4.0804729 | 0.2371421 | 0.812547 | NA       |
| CABZ01076968.1  | 14.35565268 | -0.032563361 | 0.5117734 | -0.063628 | 0.949266 | 0.99381  |
| RF00001         | 0 NA        | NA           | NA        | NA        | NA       | NA       |
| RF00001         | 0 NA        | NA           | NA        | NA        | NA       | NA       |
| RF00001         | 0 NA        | NA           | NA        | NA        | NA       | NA       |
| CR559945.2      | 0.365141898 | 1.973577737  | 3.3927314 | 0.5817076 | 0.560764 | NA       |
| RF00001         | 0 NA        | NA           | NA        | NA        | NA       | NA       |
| RF00001         | 0 NA        | NA           | NA        | NA        | NA       | NA       |
| RF00001         | 0.81902083  | -3.15978573  | 2.3136362 | -1.365723 | 0.172026 | NA       |
| RF00001         | 0 NA        | NA           | NA        | NA        | NA       | NA       |
| RF00001         | 0.491320158 | 0.8528132    | 2.8656354 | 0.2976    | 0.766008 | NA       |
| si:dkey-199f5.3 | 0 NA        | NA           | NA        | NA        | NA       | NA       |
| RF00001         | 0 NA        | NA           | NA        | NA        | NA       | NA       |
| LRRTM4          | 3.98980704  | 0.523716851  | 1.0010882 | 0.5231476 | 0.600872 | NA       |
| RF00001         | 0 NA        | NA           | NA        | NA        | NA       | NA       |
| dut             | 665.2427135 | -0.051689388 | 0.0974542 | -0.530397 | 0.595837 | 0.954434 |
| RF00001         | 0.347458735 | -1.908042286 | 3.4571486 | -0.551912 | 0.581009 | NA       |
| RF00001         | 0 NA        | NA           | NA        | NA        | NA       | NA       |
| RF00001         | 0.182570949 | 0.967652056  | 4.0804729 | 0.2371421 | 0.812547 | NA       |
| MCMDC2          | 43.20831196 | -0.050114406 | 0.3182226 | -0.157482 | 0.874865 | 0.987881 |
| CT027676.1      | 3.11970581  | -0.207812648 | 1.1381273 | -0.182592 | 0.855118 | NA       |
| RF00001         | 0 NA        | NA           | NA        | NA        | NA       | NA       |
| CABZ01060030.1  | 4.631963771 | -0.381485153 | 0.9269418 | -0.411552 | 0.680667 | NA       |
| RF00001         | 0 NA        | NA           | NA        | NA        | NA       | NA       |
| CT027674.1      | 15.54707087 | -0.221219701 | 0.5316076 | -0.416133 | 0.677312 | 0.965257 |
| RF00001         | 0 NA        | NA           | NA        | NA        | NA       | NA       |
| RF00001         | 0 NA        | NA           | NA        | NA        | NA       | NA       |
| L0018627.1      | 41.44827455 | 0.603826121  | 0.3068375 | 1.9679019 | 0.049079 | 0.435115 |
| tmem63bb        | 9.344667376 | -0.487659819 | 0.6711416 | -0.726612 | 0.467463 | NA       |
| RF00001         | 0.166657454 | -0.955901296 | 4.0804729 | -0.234262 | 0.814781 | NA       |
| RF00001         | 0 NA        | NA           | NA        | NA        | NA       | NA       |
| RF00001         | 0 NA        | NA           | NA        | NA        | NA       | NA       |
| znf977          | 1.194261325 | -2.493110929 | 1.9050643 | -1.308675 | 0.190644 | NA       |
| CABZ01068358.1  | 111.0657696 | -0.01222486  | 0.1961422 | -0.062327 | 0.950303 | 0.99381  |
| RF00001         | 0.158795395 | 0.967652056  | 4.0804729 | 0.2371421 | 0.812547 | NA       |
| RF00001         | 36.06269782 | -0.152051299 | 0.3360877 | -0.452416 | 0.65097  | 0.960708 |
| AL929192.1      | 0 NA        | NA           | NA        | NA        | NA       | NA       |
| RF00001         | 0 NA        | NA           | NA        | NA        | NA       | NA       |
| RF00001         | 0 NA        | NA           | NA        | NA        | NA       | NA       |
| RF00001         | 0 NA        | NA           | NA        | NA        | NA       | NA       |
| RF00001         | 0 NA        | NA           | NA        | NA        | NA       | NA       |
| CU655961.3      | 2.460402159 | -0.59235821  | 1.269402  | -0.466643 | 0.640755 | NA       |
| RF00001         | 0 NA        | NA           | NA        | NA        | NA       | NA       |
| RF00001         | 0 NA        | NA           | NA        | NA        | NA       | NA       |
| F0904901.1      | 67.63197599 | 0.433957047  | 0.2494116 | 1.7399232 | 0.081873 | 0.552725 |
| RF00001         | 0 NA        | NA           | NA        | NA        | NA       | NA       |
| si:dkey-7i4.13  | 1.30276092  | -0.69899766  | 1.6987021 | -0.411489 | 0.680714 | NA       |
| RF00001         | 0 NA        | NA           | NA        | NA        | NA       | NA       |
| RF00001         | 0.330916733 | -1.849579229 | 3.2489867 | -0.569279 | 0.569167 | NA       |
| RF00001         | 0 NA        | NA           | NA        | NA        | NA       | NA       |
| RF00001         | 0 NA        | NA           | NA        | NA        | NA       | NA       |
| AL953848.1      | 0 NA        | NA           | NA        | NA        | NA       | NA       |
| RF00001         | 0 NA        | NA           | NA        | NA        | NA       | NA       |
| RF00001         | 0 NA        | NA           | NA        | NA        | NA       | NA       |
| RF00001         | 0 NA        | NA           | NA        | NA        | NA       | NA       |

|                   |             |              |           |           |          |          |
|-------------------|-------------|--------------|-----------|-----------|----------|----------|
| RF00001           | 1.765202698 | 0.243861795  | 1.4581458 | 0.167241  | 0.86718  | NA       |
| RF00001           | 0 NA        |              | NA        | NA        | NA       | NA       |
| RF00001           | 0.182570949 | 0.967652056  | 4.0804729 | 0.2371421 | 0.812547 | NA       |
| BX470232.1        | 0.31759079  | 1.807926197  | 3.579045  | 0.5051421 | 0.613459 | NA       |
| CU856622.1        | 37.65025753 | -0.011644317 | 0.3196661 | -0.036426 | 0.970942 | 0.996315 |
| RF00001           | 0.166657454 | -0.955901296 | 4.0804729 | -0.234262 | 0.814781 | NA       |
| RF00001           | 0 NA        |              | NA        | NA        | NA       | NA       |
| RF00001           | 0 NA        |              | NA        | NA        | NA       | NA       |
| RF00001           | 0 NA        |              | NA        | NA        | NA       | NA       |
| RF00001           | 0 NA        |              | NA        | NA        | NA       | NA       |
| mir196c           | 0 NA        |              | NA        | NA        | NA       | NA       |
| RF00001           | 0 NA        |              | NA        | NA        | NA       | NA       |
| si:dkey-58b18.9   | 0.182570949 | 0.967652056  | 4.0804729 | 0.2371421 | 0.812547 | NA       |
| RF00001           | 0 NA        |              | NA        | NA        | NA       | NA       |
| FP565451.2        | 0 NA        |              | NA        | NA        | NA       | NA       |
| RF00001           | 0 NA        |              | NA        | NA        | NA       | NA       |
| RF00001           | 0.173729368 | -0.955901296 | 4.0804729 | -0.234262 | 0.814781 | NA       |
| RF00001           | 0.158795395 | 0.967652056  | 4.0804729 | 0.2371421 | 0.812547 | NA       |
| RF00001           | 0 NA        |              | NA        | NA        | NA       | NA       |
| RF00001           | 0 NA        |              | NA        | NA        | NA       | NA       |
| L0018188.1        | 90.6668347  | 0.012808628  | 0.2049684 | 0.0624908 | 0.950172 | 0.99381  |
| RF00001           | 0.356300316 | 0.005884122  | 3.214964  | 0.0018302 | 0.99854  | NA       |
| RF00001           | 0.349228403 | 0.005884014  | 3.2372587 | 0.0018176 | 0.99855  | NA       |
| pth4              | 5.078760499 | 0.271863633  | 0.8351082 | 0.325543  | 0.74477  | NA       |
| RF00001           | 0.332524763 | 0.005883742  | 3.292841  | 0.0017868 | 0.998574 | NA       |
| RF00001           | 0 NA        |              | NA        | NA        | NA       | NA       |
| CR847936.3        | 0 NA        |              | NA        | NA        | NA       | NA       |
| RF00001           | 0 NA        |              | NA        | NA        | NA       | NA       |
| si:ch211-218m3.19 | 1.299533574 | -0.037015496 | 1.6621204 | -0.02227  | 0.982233 | NA       |
| RF00001           | 0 NA        |              | NA        | NA        | NA       | NA       |
| RF00001           | 0 NA        |              | NA        | NA        | NA       | NA       |
| RF00001           | 0 NA        |              | NA        | NA        | NA       | NA       |
| RF00001           | 0.333314908 | -1.858695402 | 3.5126701 | -0.52914  | 0.596708 | NA       |
| RF00001           | 0 NA        |              | NA        | NA        | NA       | NA       |
| RF00001           | 0 NA        |              | NA        | NA        | NA       | NA       |
| ZNF821            | 4.697263563 | 0.642467457  | 0.8770005 | 0.7325736 | 0.463819 | NA       |
| CR388373.3        | 2.051194748 | 1.049984536  | 1.4005401 | 0.7496997 | 0.453436 | NA       |
| RF00001           | 0.158795395 | 0.967652056  | 4.0804729 | 0.2371421 | 0.812547 | NA       |
| RF00001           | 0 NA        |              | NA        | NA        | NA       | NA       |
| si:dkey-240n22.6  | 3.107920116 | -0.14405473  | 1.0902706 | -0.132128 | 0.894883 | NA       |
| RF00001           | 0 NA        |              | NA        | NA        | NA       | NA       |
| RF00001           | 0.333314908 | -1.858695402 | 3.5126701 | -0.52914  | 0.596708 | NA       |
| RF00001           | 0 NA        |              | NA        | NA        | NA       | NA       |
| RF00001           | 0 NA        |              | NA        | NA        | NA       | NA       |
| RF00001           | 0.339758314 | 0.005883863  | 3.2682461 | 0.0018003 | 0.998564 | NA       |
| RF00001           | 0 NA        |              | NA        | NA        | NA       | NA       |
| BX530018.3        | 0 NA        |              | NA        | NA        | NA       | NA       |
| RF00001           | 0.182570949 | 0.967652056  | 4.0804729 | 0.2371421 | 0.812547 | NA       |
| RF00001           | 0 NA        |              | NA        | NA        | NA       | NA       |
| RF00001           | 0 NA        |              | NA        | NA        | NA       | NA       |
| RF00158           | 0 NA        |              | NA        | NA        | NA       | NA       |
| RF00001           | 0 NA        |              | NA        | NA        | NA       | NA       |
| CR848788.2        | 7.47907334  | 0.064411352  | 0.6862826 | 0.0938554 | 0.925224 | NA       |
| RF00001           | 0 NA        |              | NA        | NA        | NA       | NA       |

|                     |  |              |  |               |  |            |  |            |  |                    |
|---------------------|--|--------------|--|---------------|--|------------|--|------------|--|--------------------|
| RF00001             |  | 0 NA         |  | NA            |  | NA         |  | NA         |  | NA                 |
| RF00001             |  | 0 NA         |  | NA            |  | NA         |  | NA         |  | NA                 |
| PEBP4               |  | 7. 882285123 |  | 0. 593607244  |  | 0. 6890519 |  | 0. 8614841 |  | 0. 388971 NA       |
| RF00001             |  | 0. 158795395 |  | 0. 967652056  |  | 4. 0804729 |  | 0. 2371421 |  | 0. 812547 NA       |
| RF00001             |  | 0. 158795395 |  | 0. 967652056  |  | 4. 0804729 |  | 0. 2371421 |  | 0. 812547 NA       |
| BX571884. 1         |  | 3. 553730533 |  | 2. 644835215  |  | 1. 2288858 |  | 2. 1522221 |  | 0. 03138 NA        |
| PIEZO2 (1 of many)  |  | 2. 59843864  |  | 0. 351097842  |  | 1. 190121  |  | 0. 2950102 |  | 0. 767986 NA       |
| RF00001             |  | 0. 317831496 |  | 1. 808837541  |  | 3. 5779923 |  | 0. 5055454 |  | 0. 613176 NA       |
| castor1             |  | 0 NA         |  | NA            |  | NA         |  | NA         |  | NA                 |
| RF00001             |  | 0 NA         |  | NA            |  | NA         |  | NA         |  | NA                 |
| CU927890. 1         |  | 11. 94790219 |  | 0. 010112086  |  | 0. 5454915 |  | 0. 0185376 |  | 0. 98521 0. 996944 |
| RF00001             |  | 0. 173729368 |  | -0. 955901296 |  | 4. 0804729 |  | -0. 234262 |  | 0. 814781 NA       |
| RF00001             |  | 0. 635422286 |  | 2. 809933352  |  | 2. 5211574 |  | 1. 114541  |  | 0. 265047 NA       |
| RF00001             |  | 0. 476626891 |  | 2. 395187592  |  | 2. 815932  |  | 0. 8505843 |  | 0. 395 NA          |
| RF00001             |  | 0. 365141898 |  | 1. 973577737  |  | 3. 3927314 |  | 0. 5817076 |  | 0. 560764 NA       |
| RF00001             |  | 0 NA         |  | NA            |  | NA         |  | NA         |  | NA                 |
| RF00001             |  | 0 NA         |  | NA            |  | NA         |  | NA         |  | NA                 |
| RF00001             |  | 0 NA         |  | NA            |  | NA         |  | NA         |  | NA                 |
| RF00001             |  | 0 NA         |  | NA            |  | NA         |  | NA         |  | NA                 |
| RF00001             |  | 0 NA         |  | NA            |  | NA         |  | NA         |  | NA                 |
| RF00001             |  | 0 NA         |  | NA            |  | NA         |  | NA         |  | NA                 |
| RF00001             |  | 0 NA         |  | NA            |  | NA         |  | NA         |  | NA                 |
| znf1108             |  | 1. 162905703 |  | -1. 291967903 |  | 1. 7937161 |  | -0. 720274 |  | 0. 471356 NA       |
| RF00001             |  | 0. 476747244 |  | 2. 393381959  |  | 3. 0525537 |  | 0. 7840589 |  | 0. 433006 NA       |
| RF00001             |  | 0 NA         |  | NA            |  | NA         |  | NA         |  | NA                 |
| RF00001             |  | 0. 855644171 |  | -0. 484665734 |  | 2. 1924736 |  | -0. 221059 |  | 0. 825047 NA       |
| RF00001             |  | 1. 674503363 |  | -1. 987222207 |  | 1. 6182093 |  | -1. 228038 |  | 0. 219433 NA       |
| RF00001             |  | 2. 680693068 |  | -0. 315946754 |  | 1. 1774887 |  | -0. 268323 |  | 0. 788451 NA       |
| RF00001             |  | 0 NA         |  | NA            |  | NA         |  | NA         |  | NA                 |
| RF00001             |  | 0 NA         |  | NA            |  | NA         |  | NA         |  | NA                 |
| RF00001             |  | 0 NA         |  | NA            |  | NA         |  | NA         |  | NA                 |
| si:dkeyp-98a7. 3    |  | 0. 158795395 |  | 0. 967652056  |  | 4. 0804729 |  | 0. 2371421 |  | 0. 812547 NA       |
| RF00001             |  | 0 NA         |  | NA            |  | NA         |  | NA         |  | NA                 |
| RF00001             |  | 0. 173729368 |  | -0. 955901296 |  | 4. 0804729 |  | -0. 234262 |  | 0. 814781 NA       |
| RF00001             |  | 0 NA         |  | NA            |  | NA         |  | NA         |  | NA                 |
| RF00001             |  | 0 NA         |  | NA            |  | NA         |  | NA         |  | NA                 |
| RF00001             |  | 0 NA         |  | NA            |  | NA         |  | NA         |  | NA                 |
| RF00001             |  | 0 NA         |  | NA            |  | NA         |  | NA         |  | NA                 |
| RF00001             |  | 0. 317831496 |  | 1. 808837541  |  | 3. 5779923 |  | 0. 5055454 |  | 0. 613176 NA       |
| RF00001             |  | 0 NA         |  | NA            |  | NA         |  | NA         |  | NA                 |
| RF00001             |  | 0 NA         |  | NA            |  | NA         |  | NA         |  | NA                 |
| RF00001             |  | 1. 840174507 |  | 0. 83446512   |  | 1. 4481728 |  | 0. 5762193 |  | 0. 564467 NA       |
| FO744833. 1         |  | 0 NA         |  | NA            |  | NA         |  | NA         |  | NA                 |
| RF00001             |  | 0 NA         |  | NA            |  | NA         |  | NA         |  | NA                 |
| BX571813. 1         |  | 7. 665286181 |  | -0. 249432596 |  | 0. 7019178 |  | -0. 355359 |  | 0. 722321 NA       |
| RF00001             |  | 0 NA         |  | NA            |  | NA         |  | NA         |  | NA                 |
| RF00001             |  | 0 NA         |  | NA            |  | NA         |  | NA         |  | NA                 |
| RF00001             |  | 0 NA         |  | NA            |  | NA         |  | NA         |  | NA                 |
| INSYN2A (1 of many) |  | 8. 788197356 |  | 0. 047175576  |  | 0. 6427276 |  | 0. 073399  |  | 0. 941489 NA       |
| RF00001             |  | 0 NA         |  | NA            |  | NA         |  | NA         |  | NA                 |
| RF00001             |  | 0 NA         |  | NA            |  | NA         |  | NA         |  | NA                 |
| RF00001             |  | 0. 157187365 |  | -0. 955901296 |  | 4. 0804729 |  | -0. 234262 |  | 0. 814781 NA       |
| RF00001             |  | 0 NA         |  | NA            |  | NA         |  | NA         |  | NA                 |
| RF00001             |  | 0 NA         |  | NA            |  | NA         |  | NA         |  | NA                 |
| RF00001             |  | 0. 166657454 |  | -0. 955901296 |  | 4. 0804729 |  | -0. 234262 |  | 0. 814781 NA       |

|                     |             |              |           |           |          |          |
|---------------------|-------------|--------------|-----------|-----------|----------|----------|
| RF00001             | 0           | NA           | NA        | NA        | NA       | NA       |
| RF00001             | 0           | NA           | NA        | NA        | NA       | NA       |
| RF00001             | 0           | NA           | NA        | NA        | NA       | NA       |
| FP085394.2          | 0.671303554 | -2.865684129 | 2.3396875 | -1.224815 | 0.220645 | NA       |
| RF00001             | 0.158795395 | 0.967652056  | 4.0804729 | 0.2371421 | 0.812547 | NA       |
| BX957322.3          | 222.3857037 | 0.065199014  | 0.1411864 | 0.4617939 | 0.644229 | 0.960129 |
| RF00001             | 0           | NA           | NA        | NA        | NA       | NA       |
| RF00001             | 0           | NA           | NA        | NA        | NA       | NA       |
| RF00001             | 0           | NA           | NA        | NA        | NA       | NA       |
| RF00001             | 0.523937293 | 2.50362281   | 2.7291625 | 0.9173594 | 0.358954 | NA       |
| aars2               | 161.4843447 | -0.016009392 | 0.1675061 | -0.095575 | 0.923858 | 0.992628 |
| RF00001             | 0.182570949 | 0.967652056  | 4.0804729 | 0.2371421 | 0.812547 | NA       |
| RF00001             | 0.65888811  | -1.481402282 | 2.5795287 | -0.574292 | 0.56577  | NA       |
| RF00001             | 0.158915748 | 0.967652056  | 4.0804729 | 0.2371421 | 0.812547 | NA       |
| TCF4                | 55.17463121 | 0.09326424   | 0.2665086 | 0.3499483 | 0.726377 | 0.970402 |
| RF00001             | 0           | NA           | NA        | NA        | NA       | NA       |
| RF00001             | 0           | NA           | NA        | NA        | NA       | NA       |
| RF00001             | 0           | NA           | NA        | NA        | NA       | NA       |
| si:dkeyp-35e5.10    | 9.143009    | -0.476889911 | 0.643395  | -0.741209 | 0.458567 | NA       |
| L0018208.1          | 2.310715795 | -0.856021825 | 1.2274829 | -0.69738  | 0.485565 | NA       |
| RF00001             | 0.330916733 | -1.849579229 | 3.2489867 | -0.569279 | 0.569167 | NA       |
| TANC2               | 466.6518016 | 0.118985149  | 0.1351877 | 0.880148  | 0.378779 | 0.895192 |
| SLC35D3             | 45.0503703  | 0.164280466  | 0.2841602 | 0.5781263 | 0.563179 | 0.948728 |
| hrh2a               | 10.23994385 | -0.560267056 | 0.6051945 | -0.925764 | 0.354569 | NA       |
| RF00001             | 0           | NA           | NA        | NA        | NA       | NA       |
| RF00001             | 0           | NA           | NA        | NA        | NA       | NA       |
| RF00001             | 0           | NA           | NA        | NA        | NA       | NA       |
| RF00001             | 0           | NA           | NA        | NA        | NA       | NA       |
| RF00001             | 0           | NA           | NA        | NA        | NA       | NA       |
| RF00001             | 0.158795395 | 0.967652056  | 4.0804729 | 0.2371421 | 0.812547 | NA       |
| RF00001             | 0           | NA           | NA        | NA        | NA       | NA       |
| RF00001             | 0           | NA           | NA        | NA        | NA       | NA       |
| CR855320.3          | 3.011169428 | 0.628692267  | 1.1205448 | 0.5610595 | 0.574757 | NA       |
| RF00001             | 0           | NA           | NA        | NA        | NA       | NA       |
| RF00001             | 0           | NA           | NA        | NA        | NA       | NA       |
| RF00001             | 0.166657454 | -0.955901296 | 4.0804729 | -0.234262 | 0.814781 | NA       |
| CR356227.1          | 0.158915748 | 0.967652056  | 4.0804729 | 0.2371421 | 0.812547 | NA       |
| RF00001             | 0           | NA           | NA        | NA        | NA       | NA       |
| lyn                 | 193.1430671 | -0.065450682 | 0.1519014 | -0.430876 | 0.666558 | 0.964736 |
| RF00001             | 0           | NA           | NA        | NA        | NA       | NA       |
| RF00001             | 0           | NA           | NA        | NA        | NA       | NA       |
| RF00001             | 0           | NA           | NA        | NA        | NA       | NA       |
| smkr1               | 14.9608345  | 0.664709054  | 0.4947102 | 1.3436333 | 0.179067 | 0.739994 |
| slc18a3b            | 22.28120014 | 0.465392203  | 0.4384446 | 1.0614619 | 0.28848  | 0.845979 |
| erich2              | 48.9443031  | 0.238732485  | 0.2816095 | 0.847743  | 0.396581 | 0.899672 |
| RF00001             | 0           | NA           | NA        | NA        | NA       | NA       |
| RF00001             | 0           | NA           | NA        | NA        | NA       | NA       |
| INSYN2A (1 of many) | 43.2077835  | -0.058321201 | 0.3052163 | -0.191082 | 0.848462 | 0.985174 |
| RF00001             | 0           | NA           | NA        | NA        | NA       | NA       |
| RF00001             | 0           | NA           | NA        | NA        | NA       | NA       |
| RF00001             | 0           | NA           | NA        | NA        | NA       | NA       |
| RF00001             | 0           | NA           | NA        | NA        | NA       | NA       |
| RF00001             | 0.339758314 | 0.005883863  | 3.2682461 | 0.0018003 | 0.998564 | NA       |
| RF00001             | 0           | NA           | NA        | NA        | NA       | NA       |

|                |             |              |           |           |          |          |
|----------------|-------------|--------------|-----------|-----------|----------|----------|
| RF00001        | 0           | NA           | NA        | NA        | NA       | NA       |
| RF00001        | 0.173729368 | -0.955901296 | 4.0804729 | -0.234262 | 0.814781 | NA       |
| RF00001        | 0           | NA           | NA        | NA        | NA       | NA       |
| RF00001        | 0           | NA           | NA        | NA        | NA       | NA       |
| RF00001        | 0           | NA           | NA        | NA        | NA       | NA       |
| RF00001        | 0           | NA           | NA        | NA        | NA       | NA       |
| RF00001        | 0           | NA           | NA        | NA        | NA       | NA       |
| RF00001        | 0.332524763 | 0.005883742  | 3.292841  | 0.0017868 | 0.998574 | NA       |
| RF00001        | 0           | NA           | NA        | NA        | NA       | NA       |
| RF00001        | 0           | NA           | NA        | NA        | NA       | NA       |
| RF00001        | 0           | NA           | NA        | NA        | NA       | NA       |
| RF00001        | 0           | NA           | NA        | NA        | NA       | NA       |
| RF00001        | 0           | NA           | NA        | NA        | NA       | NA       |
| RF00001        | 0           | NA           | NA        | NA        | NA       | NA       |
| RF00001        | 0.173729368 | -0.955901296 | 4.0804729 | -0.234262 | 0.814781 | NA       |
| RF00001        | 0           | NA           | NA        | NA        | NA       | NA       |
| RF00001        | 0           | NA           | NA        | NA        | NA       | NA       |
| RF00001        | 0           | NA           | NA        | NA        | NA       | NA       |
| RF00001        | 0           | NA           | NA        | NA        | NA       | NA       |
| RF00001        | 0           | NA           | NA        | NA        | NA       | NA       |
| RF00001        | 1.435893996 | 1.779576147  | 1.7582136 | 1.0121501 | 0.311466 | NA       |
| RF00001        | 0           | NA           | NA        | NA        | NA       | NA       |
| BX897670.1     | 0           | NA           | NA        | NA        | NA       | NA       |
| RF00001        | 0           | NA           | NA        | NA        | NA       | NA       |
| RF00001        | 0           | NA           | NA        | NA        | NA       | NA       |
| RF00001        | 0           | NA           | NA        | NA        | NA       | NA       |
| RF00001        | 0           | NA           | NA        | NA        | NA       | NA       |
| RF00001        | 0           | NA           | NA        | NA        | NA       | NA       |
| RF00001        | 0.166657454 | -0.955901296 | 4.0804729 | -0.234262 | 0.814781 | NA       |
| RF00001        | 0           | NA           | NA        | NA        | NA       | NA       |
| RF00001        | 0           | NA           | NA        | NA        | NA       | NA       |
| RF00001        | 0           | NA           | NA        | NA        | NA       | NA       |
| RF00001        | 0.182570949 | 0.967652056  | 4.0804729 | 0.2371421 | 0.812547 | NA       |
| RF00001        | 0           | NA           | NA        | NA        | NA       | NA       |
| RF00001        | 0           | NA           | NA        | NA        | NA       | NA       |
| RF00001        | 0           | NA           | NA        | NA        | NA       | NA       |
| RF00001        | 0           | NA           | NA        | NA        | NA       | NA       |
| RF00001        | 0           | NA           | NA        | NA        | NA       | NA       |
| RF00001        | 0           | NA           | NA        | NA        | NA       | NA       |
| RF00001        | 0.513487682 | -0.887846295 | 2.6557956 | -0.334305 | 0.738149 | NA       |
| RF00001        | 0.824126911 | 0.609775617  | 2.0333139 | 0.2998925 | 0.764259 | NA       |
| RF00001        | 0.173729368 | -0.955901296 | 4.0804729 | -0.234262 | 0.814781 | NA       |
| RF00001        | 0.158795395 | 0.967652056  | 4.0804729 | 0.2371421 | 0.812547 | NA       |
| CABZ01073424.1 | 84.47253375 | -0.064483694 | 0.2237381 | -0.288211 | 0.773186 | 0.975687 |
| RF00001        | 0           | NA           | NA        | NA        | NA       | NA       |
| RF00001        | 0           | NA           | NA        | NA        | NA       | NA       |
| RF00001        | 0           | NA           | NA        | NA        | NA       | NA       |
| RF00001        | 0.182570949 | 0.967652056  | 4.0804729 | 0.2371421 | 0.812547 | NA       |
| RF00001        | 0.630477843 | -1.416394215 | 2.6146492 | -0.541715 | 0.588015 | NA       |
| FIG4           | 182.6354397 | -0.133721142 | 0.1543664 | -0.866258 | 0.386349 | 0.89551  |
| RF00001        | 0.182570949 | 0.967652056  | 4.0804729 | 0.2371421 | 0.812547 | NA       |
| RF00001        | 0           | NA           | NA        | NA        | NA       | NA       |
| RF00001        | 0.158915748 | 0.967652056  | 4.0804729 | 0.2371421 | 0.812547 | NA       |
| RF00001        | 0           | NA           | NA        | NA        | NA       | NA       |

|                     |              |               |            |            |           |           |
|---------------------|--------------|---------------|------------|------------|-----------|-----------|
| dre-mir-124-4       | 1. 134096348 | 2. 463209639  | 1. 9253188 | 1. 2793775 | 0. 200764 | NA        |
| RF00001             | 0 NA         |               | NA         | NA         | NA        | NA        |
| RF00001             | 0 NA         |               | NA         | NA         | NA        | NA        |
| RF00001             | 0. 157187365 | -0. 955901296 | 4. 0804729 | -0. 234262 | 0. 814781 | NA        |
| RF00001             | 0 NA         |               | NA         | NA         | NA        | NA        |
| RF00001             | 0 NA         |               | NA         | NA         | NA        | NA        |
| CR382334. 1         | 0. 975300953 | 2. 205404374  | 2. 0287091 | 1. 0870974 | 0. 276994 | NA        |
| RF00001             | 0 NA         |               | NA         | NA         | NA        | NA        |
| RF00001             | 0 NA         |               | NA         | NA         | NA        | NA        |
| RF00001             | 0. 347458735 | -1. 908042286 | 3. 4571486 | -0. 551912 | 0. 581009 | NA        |
| RF00001             | 0 NA         |               | NA         | NA         | NA        | NA        |
| RF00001             | 0 NA         |               | NA         | NA         | NA        | NA        |
| RF00001             | 0. 484248244 | 0. 852636534  | 2. 8793247 | 0. 2961238 | 0. 767136 | NA        |
| RF00001             | 0 NA         |               | NA         | NA         | NA        | NA        |
| FAM163B (1 of many) | 30. 78983876 | -0. 037696702 | 0. 3926529 | -0. 096005 | 0. 923516 | 0. 992588 |
| RF00001             | 15. 13362916 | -0. 210901534 | 0. 4978294 | -0. 423642 | 0. 671827 | 0. 965257 |
| CU693481. 1         | 46. 81934702 | 0. 42846319   | 0. 3030812 | 1. 4136913 | 0. 157453 | 0. 708089 |
| RF00001             | 0 NA         |               | NA         | NA         | NA        | NA        |
| RF00001             | 0. 158915748 | 0. 967652056  | 4. 0804729 | 0. 2371421 | 0. 812547 | NA        |
| RF00001             | 0 NA         |               | NA         | NA         | NA        | NA        |
| RF00001             | 0 NA         |               | NA         | NA         | NA        | NA        |
| RF00001             | 0. 158915748 | 0. 967652056  | 4. 0804729 | 0. 2371421 | 0. 812547 | NA        |
| RF00001             | 0 NA         |               | NA         | NA         | NA        | NA        |
| RF00001             | 0. 158795395 | 0. 967652056  | 4. 0804729 | 0. 2371421 | 0. 812547 | NA        |
| CABZ01109481. 1     | 18. 67377053 | -0. 009426792 | 0. 4607452 | -0. 02046  | 0. 983677 | 0. 996944 |
| RF00001             | 0 NA         |               | NA         | NA         | NA        | NA        |
| CZQB01137059. 1     | 0 NA         |               | NA         | NA         | NA        | NA        |
| RF00001             | 0 NA         |               | NA         | NA         | NA        | NA        |
| RF00001             | 0. 182570949 | 0. 967652056  | 4. 0804729 | 0. 2371421 | 0. 812547 | NA        |
| RF00001             | 3. 488439615 | -0. 057058764 | 1. 1304987 | -0. 050472 | 0. 959746 | NA        |
| LO017771. 1         | 119. 593476  | -0. 157952714 | 0. 1930187 | -0. 818329 | 0. 41317  | 0. 905365 |
| RF00001             | 0 NA         |               | NA         | NA         | NA        | NA        |
| RF00001             | 0 NA         |               | NA         | NA         | NA        | NA        |
| CT573476. 2         | 0 NA         |               | NA         | NA         | NA        | NA        |
| RF00001             | 0. 341366344 | 1. 891903201  | 3. 2128156 | 0. 5888614 | 0. 555954 | NA        |
| RF00001             | 0 NA         |               | NA         | NA         | NA        | NA        |
| RF00001             | 1. 171705999 | -0. 419722109 | 1. 7420638 | -0. 240934 | 0. 809606 | NA        |
| RF00001             | 9. 057596074 | 0. 552936037  | 0. 6384004 | 0. 8661274 | 0. 38642  | NA        |
| RF00001             | 0. 158795395 | 0. 967652056  | 4. 0804729 | 0. 2371421 | 0. 812547 | NA        |
| RF00001             | 0 NA         |               | NA         | NA         | NA        | NA        |
| RF00001             | 0 NA         |               | NA         | NA         | NA        | NA        |
| CR847523. 1         | 6. 289536087 | -0. 617716673 | 0. 770143  | -0. 802081 | 0. 422506 | NA        |
| RF00001             | 0 NA         |               | NA         | NA         | NA        | NA        |
| RF00001             | 0. 476506538 | 2. 394892832  | 2. 8161716 | 0. 8504073 | 0. 395099 | NA        |
| RF00001             | 0 NA         |               | NA         | NA         | NA        | NA        |
| RF00001             | 0 NA         |               | NA         | NA         | NA        | NA        |
| RF00001             | 0 NA         |               | NA         | NA         | NA        | NA        |
| CABZ01084774. 1     | 0 NA         |               | NA         | NA         | NA        | NA        |
| BX571760. 1         | 0 NA         |               | NA         | NA         | NA        | NA        |
| RF00001             | 0 NA         |               | NA         | NA         | NA        | NA        |
| RF00001             | 0 NA         |               | NA         | NA         | NA        | NA        |
| RF00001             | 0. 333314908 | -1. 858695402 | 3. 5126701 | -0. 52914  | 0. 596708 | NA        |
| RF00001             | 0 NA         |               | NA         | NA         | NA        | NA        |
| RF00001             | 0. 476747244 | 2. 393381959  | 3. 0525537 | 0. 7840589 | 0. 433006 | NA        |

|                   |              |               |            |            |           |           |
|-------------------|--------------|---------------|------------|------------|-----------|-----------|
| RF00001           | 0            | NA            | NA         | NA         | NA        | NA        |
| RF00001           | 0            | NA            | NA         | NA         | NA        | NA        |
| RF00001           | 1. 020882972 | 1. 110886363  | 2. 0729323 | 0. 5359009 | 0. 592027 | NA        |
| RF00001           | 0            | NA            | NA         | NA         | NA        | NA        |
| RF00001           | 0. 158915748 | 0. 967652056  | 4. 0804729 | 0. 2371421 | 0. 812547 | NA        |
| RF00001           | 0            | NA            | NA         | NA         | NA        | NA        |
| RF00001           | 0            | NA            | NA         | NA         | NA        | NA        |
| RF00001           | 0            | NA            | NA         | NA         | NA        | NA        |
| RF00001           | 0            | NA            | NA         | NA         | NA        | NA        |
| RF00001           | 0            | NA            | NA         | NA         | NA        | NA        |
| RF00001           | 0            | NA            | NA         | NA         | NA        | NA        |
| RF00001           | 2. 169483209 | -0. 184654375 | 1. 2705773 | -0. 145331 | 0. 884449 | NA        |
| RF00001           | 0            | NA            | NA         | NA         | NA        | NA        |
| RF00001           | 0. 157187365 | -0. 955901296 | 4. 0804729 | -0. 234262 | 0. 814781 | NA        |
| RF00001           | 0            | NA            | NA         | NA         | NA        | NA        |
| RF00001           | 0            | NA            | NA         | NA         | NA        | NA        |
| RF00001           | 0. 317831496 | 1. 808837541  | 3. 5779923 | 0. 5055454 | 0. 613176 | NA        |
| RF00001           | 0            | NA            | NA         | NA         | NA        | NA        |
| RF00001           | 0            | NA            | NA         | NA         | NA        | NA        |
| RF00001           | 0            | NA            | NA         | NA         | NA        | NA        |
| RF00001           | 0            | NA            | NA         | NA         | NA        | NA        |
| RF00001           | 0. 182570949 | 0. 967652056  | 4. 0804729 | 0. 2371421 | 0. 812547 | NA        |
| RF00001           | 0. 173729368 | -0. 955901296 | 4. 0804729 | -0. 234262 | 0. 814781 | NA        |
| RF00001           | 0            | NA            | NA         | NA         | NA        | NA        |
| RF00001           | 0            | NA            | NA         | NA         | NA        | NA        |
| RF00001           | 0. 158795395 | 0. 967652056  | 4. 0804729 | 0. 2371421 | 0. 812547 | NA        |
| RF00001           | 0            | NA            | NA         | NA         | NA        | NA        |
| RF00001           | 0. 166657454 | -0. 955901296 | 4. 0804729 | -0. 234262 | 0. 814781 | NA        |
| RF00001           | 0            | NA            | NA         | NA         | NA        | NA        |
| RF00001           | 0            | NA            | NA         | NA         | NA        | NA        |
| RF00001           | 0            | NA            | NA         | NA         | NA        | NA        |
| LT631684. 1       | 122. 0736997 | -0. 053064802 | 0. 1871499 | -0. 283542 | 0. 776762 | 0. 975826 |
| RF00001           | 0. 158795395 | 0. 967652056  | 4. 0804729 | 0. 2371421 | 0. 812547 | NA        |
| RF00001           | 0            | NA            | NA         | NA         | NA        | NA        |
| FO393424. 1       | 0. 341486697 | 1. 892317624  | 3. 2124068 | 0. 5890654 | 0. 555817 | NA        |
| RF00001           | 0. 158915748 | 0. 967652056  | 4. 0804729 | 0. 2371421 | 0. 812547 | NA        |
| si:ch211-283g2. 2 | 2. 907975581 | -0. 142879554 | 1. 1900869 | -0. 120058 | 0. 904437 | NA        |
| RF00001           | 0            | NA            | NA         | NA         | NA        | NA        |
| RF00001           | 0. 173729368 | -0. 955901296 | 4. 0804729 | -0. 234262 | 0. 814781 | NA        |
| RF00001           | 0            | NA            | NA         | NA         | NA        | NA        |
| RF00001           | 0            | NA            | NA         | NA         | NA        | NA        |
| LO017648. 1       | 202. 5619133 | 0. 120182868  | 0. 1601545 | 0. 7504183 | 0. 453003 | 0. 919774 |
| RF00001           | 0            | NA            | NA         | NA         | NA        | NA        |
| RF00001           | 0            | NA            | NA         | NA         | NA        | NA        |
| BX322587. 2       | 2. 038779303 | 1. 633036174  | 1. 4333532 | 1. 1393117 | 0. 254573 | NA        |
| LO018336. 1       | 16. 89511232 | -0. 191658237 | 0. 4838259 | -0. 396131 | 0. 692009 | 0. 96733  |
| RF00001           | 0. 333314908 | -1. 858695402 | 3. 5126701 | -0. 52914  | 0. 596708 | NA        |
| RF00026           | 0            | NA            | NA         | NA         | NA        | NA        |
| RF00001           | 0. 158915748 | 0. 967652056  | 4. 0804729 | 0. 2371421 | 0. 812547 | NA        |
| RF00001           | 0            | NA            | NA         | NA         | NA        | NA        |
| RF00001           | 0            | NA            | NA         | NA         | NA        | NA        |
| CR385077. 1       | 1. 645614941 | 0. 616136869  | 1. 5879404 | 0. 3880101 | 0. 698009 | NA        |
| BX537277. 1       | 0            | NA            | NA         | NA         | NA        | NA        |
| CU570894. 1       | 42. 19815261 | 0. 228872938  | 0. 3240559 | 0. 7062761 | 0. 480016 | 0. 92721  |

|                   |             |              |           |           |          |          |
|-------------------|-------------|--------------|-----------|-----------|----------|----------|
| RF00001           | 0           | NA           | NA        | NA        | NA       | NA       |
| RF00001           | 4.077526523 | -0.136459383 | 0.9406014 | -0.145077 | 0.88465  | NA       |
| RF00001           | 0           | NA           | NA        | NA        | NA       | NA       |
| AL845330.1        | 4.968265072 | -0.002862773 | 0.8521644 | -0.003359 | 0.99732  | NA       |
| otos              | 1280.649372 | -0.080497753 | 0.0836703 | -0.962083 | 0.336008 | 0.876088 |
| RF00001           | 0.317831496 | 1.808837541  | 3.5779923 | 0.5055454 | 0.613176 | NA       |
| RF00001           | 0           | NA           | NA        | NA        | NA       | NA       |
| RF00001           | 0           | NA           | NA        | NA        | NA       | NA       |
| RF00001           | 0           | NA           | NA        | NA        | NA       | NA       |
| RF00001           | 0           | NA           | NA        | NA        | NA       | NA       |
| RF00001           | 1.141917121 | 1.240920176  | 1.9907629 | 0.623339  | 0.533062 | NA       |
| RF00001           | 0           | NA           | NA        | NA        | NA       | NA       |
| CR749167.2        | 0           | NA           | NA        | NA        | NA       | NA       |
| RF00001           | 0           | NA           | NA        | NA        | NA       | NA       |
| psmb11a           | 0           | NA           | NA        | NA        | NA       | NA       |
| CABZ01072077.1    | 186.3138022 | 0.136782461  | 0.1522713 | 0.8982815 | 0.369035 | 0.888432 |
| RF00001           | 0           | NA           | NA        | NA        | NA       | NA       |
| RF00001           | 0           | NA           | NA        | NA        | NA       | NA       |
| RF00001           | 0           | NA           | NA        | NA        | NA       | NA       |
| RF00001           | 0           | NA           | NA        | NA        | NA       | NA       |
| RF00001           | 0.794578739 | 3.129658898  | 2.5486248 | 1.2279794 | 0.219455 | NA       |
| RF00001           | 0           | NA           | NA        | NA        | NA       | NA       |
| RF00001           | 0           | NA           | NA        | NA        | NA       | NA       |
| RF00001           | 0.824755418 | -0.635765236 | 2.1193875 | -0.299976 | 0.764196 | NA       |
| RF00001           | 1.836714239 | -0.353314448 | 1.6329825 | -0.216361 | 0.828706 | NA       |
| RF00001           | 1.948323087 | 0.00658955   | 1.3760757 | 0.0047887 | 0.996179 | NA       |
| RF00001           | 0.173729368 | -0.955901296 | 4.0804729 | -0.234262 | 0.814781 | NA       |
| RF00001           | 0           | NA           | NA        | NA        | NA       | NA       |
| RF00001           | 0           | NA           | NA        | NA        | NA       | NA       |
| RF00001           | 0           | NA           | NA        | NA        | NA       | NA       |
| RF00001           | 0           | NA           | NA        | NA        | NA       | NA       |
| RF00001           | 0           | NA           | NA        | NA        | NA       | NA       |
| RF00001           | 0           | NA           | NA        | NA        | NA       | NA       |
| CABZ01084774.2    | 0           | NA           | NA        | NA        | NA       | NA       |
| RF00001           | 0.173729368 | -0.955901296 | 4.0804729 | -0.234262 | 0.814781 | NA       |
| RF00001           | 0           | NA           | NA        | NA        | NA       | NA       |
| RF00001           | 0           | NA           | NA        | NA        | NA       | NA       |
| BX572621.1        | 0           | NA           | NA        | NA        | NA       | NA       |
| GALNT3            | 14.57383419 | -0.452895426 | 0.4941681 | -0.916481 | 0.359415 | 0.884844 |
| RF00001           | 0           | NA           | NA        | NA        | NA       | NA       |
| RF00001           | 0.365141898 | 1.973577737  | 3.3927314 | 0.5817076 | 0.560764 | NA       |
| RF00001           | 0.158795395 | 0.967652056  | 4.0804729 | 0.2371421 | 0.812547 | NA       |
| RF00001           | 0           | NA           | NA        | NA        | NA       | NA       |
| RF00001           | 0           | NA           | NA        | NA        | NA       | NA       |
| FITM1 (1 of many) | 4.781639844 | 1.150846655  | 0.8890388 | 1.2944842 | 0.195498 | NA       |
| RF00001           | 0           | NA           | NA        | NA        | NA       | NA       |
| RF00001           | 0           | NA           | NA        | NA        | NA       | NA       |
| RF00001           | 0.347458735 | -1.908042286 | 3.4571486 | -0.551912 | 0.581009 | NA       |
| RF00001           | 0           | NA           | NA        | NA        | NA       | NA       |
| RF00001           | 0           | NA           | NA        | NA        | NA       | NA       |
| RF00001           | 0.158915748 | 0.967652056  | 4.0804729 | 0.2371421 | 0.812547 | NA       |
| RF00001           | 0           | NA           | NA        | NA        | NA       | NA       |
| RF00001           | 0           | NA           | NA        | NA        | NA       | NA       |
| RF00001           | 0.31437473  | -1.788572922 | 3.5930657 | -0.497785 | 0.618636 | NA       |
| RF00001           | 0           | NA           | NA        | NA        | NA       | NA       |



|                  |             |              |           |           |          |          |
|------------------|-------------|--------------|-----------|-----------|----------|----------|
| RF00001          | 0           | NA           | NA        | NA        | NA       | NA       |
| CU929317.2       | 0           | NA           | NA        | NA        | NA       | NA       |
| RF00001          | 0           | NA           | NA        | NA        | NA       | NA       |
| RF00001          | 0.317831496 | 1.808837541  | 3.5779923 | 0.5055454 | 0.613176 | NA       |
| RF00001          | 0           | NA           | NA        | NA        | NA       | NA       |
| RF00001          | 0.665211163 | 0.04738924   | 2.3079847 | 0.0205327 | 0.983618 | NA       |
| RF00001          | 0.658218317 | -0.061628513 | 2.4342948 | -0.025317 | 0.979802 | NA       |
| RF00001          | 0           | NA           | NA        | NA        | NA       | NA       |
| RF00001          | 0.158795395 | 0.967652056  | 4.0804729 | 0.2371421 | 0.812547 | NA       |
| C14orf132        | 102.6323991 | 0.202478605  | 0.197895  | 1.0231616 | 0.306231 | 0.860027 |
| TRIM67           | 6.396764968 | 0.3288162    | 0.7683064 | 0.4279754 | 0.668669 | NA       |
| ARSB             | 92.32085923 | -0.011593593 | 0.2222247 | -0.052171 | 0.958393 | 0.994893 |
| RF00001          | 0           | NA           | NA        | NA        | NA       | NA       |
| RF00001          | 0           | NA           | NA        | NA        | NA       | NA       |
| zgc:113886       | 2.47217781  | 0.54205042   | 1.2284433 | 0.4412498 | 0.659032 | NA       |
| RF00001          | 0           | NA           | NA        | NA        | NA       | NA       |
| RF00001          | 0           | NA           | NA        | NA        | NA       | NA       |
| RF00001          | 0           | NA           | NA        | NA        | NA       | NA       |
| RF00001          | 0           | NA           | NA        | NA        | NA       | NA       |
| RF00001          | 0           | NA           | NA        | NA        | NA       | NA       |
| RF00001          | 0           | NA           | NA        | NA        | NA       | NA       |
| RF00001          | 0           | NA           | NA        | NA        | NA       | NA       |
| RF00001          | 0.166657454 | -0.955901296 | 4.0804729 | -0.234262 | 0.814781 | NA       |
| RF00001          | 0           | NA           | NA        | NA        | NA       | NA       |
| RF00001          | 0.158795395 | 0.967652056  | 4.0804729 | 0.2371421 | 0.812547 | NA       |
| FO704750.1       | 105.9498526 | 0.1088721    | 0.2162641 | 0.5034219 | 0.614668 | 0.95688  |
| FQ378016.1       | 36.92784118 | -0.294313366 | 0.337223  | -0.872756 | 0.382796 | 0.895192 |
| RF00001          | 0           | NA           | NA        | NA        | NA       | NA       |
| si:ch211-283g2.2 | 1.32428865  | 1.606828886  | 1.7292104 | 0.9292269 | 0.352771 | NA       |
| RF00001          | 0.678375468 | -2.878459328 | 2.4926399 | -1.154783 | 0.248179 | NA       |
| RF00001          | 0           | NA           | NA        | NA        | NA       | NA       |
| RF00001          | 0           | NA           | NA        | NA        | NA       | NA       |
| RF00001          | 0           | NA           | NA        | NA        | NA       | NA       |
| RF00001          | 0.166657454 | -0.955901296 | 4.0804729 | -0.234262 | 0.814781 | NA       |
| si:dkey-7i4.19   | 0.706628594 | 2.93253102   | 2.4623982 | 1.1909248 | 0.233683 | NA       |
| RF00001          | 0           | NA           | NA        | NA        | NA       | NA       |
| RF00001          | 0           | NA           | NA        | NA        | NA       | NA       |
| RF00001          | 0           | NA           | NA        | NA        | NA       | NA       |
| RF00001          | 0           | NA           | NA        | NA        | NA       | NA       |
| RF00001          | 0           | NA           | NA        | NA        | NA       | NA       |
| RF00001          | 0           | NA           | NA        | NA        | NA       | NA       |
| WDR70            | 191.0064936 | 0.112685997  | 0.1579385 | 0.71348   | 0.475549 | 0.926088 |
| RF00001          | 0           | NA           | NA        | NA        | NA       | NA       |
| RF00001          | 0           | NA           | NA        | NA        | NA       | NA       |
| RF00001          | 0.323844819 | -1.825095364 | 3.274639  | -0.557342 | 0.577293 | NA       |
| RF00001          | 2.747334859 | 0.862449396  | 1.214295  | 0.710247  | 0.477551 | NA       |
| RF00001          | 0           | NA           | NA        | NA        | NA       | NA       |
| RF00001          | 0.500402445 | 2.450713647  | 2.7706722 | 0.8845195 | 0.376416 | NA       |
| ftr81            | 0.182570949 | 0.967652056  | 4.0804729 | 0.2371421 | 0.812547 | NA       |
| RF00001          | 0           | NA           | NA        | NA        | NA       | NA       |
| RF00001          | 0           | NA           | NA        | NA        | NA       | NA       |
| RF00001          | 0.499972362 | -2.44370697  | 3.0013188 | -0.814211 | 0.415524 | NA       |
| RF00001          | 0           | NA           | NA        | NA        | NA       | NA       |
| RF00001          | 0           | NA           | NA        | NA        | NA       | NA       |

|                   |             |              |           |           |          |          |
|-------------------|-------------|--------------|-----------|-----------|----------|----------|
| RF00001           | 0.476386185 | 2.392464142  | 3.0533824 | 0.7835455 | 0.433307 | NA       |
| RF00001           | 0.983001374 | 0.918633527  | 2.0854433 | 0.440498  | 0.659576 | NA       |
| RF00001           | 0 NA        |              | NA        | NA        | NA       | NA       |
| F0393424.2        | 2.102991924 | -0.208676943 | 1.3330946 | -0.156536 | 0.875611 | NA       |
| RF00001           | 0.158795395 | 0.967652056  | 4.0804729 | 0.2371421 | 0.812547 | NA       |
| RF00001           | 0 NA        |              | NA        | NA        | NA       | NA       |
| RF00001           | 0 NA        |              | NA        | NA        | NA       | NA       |
| RF00001           | 0 NA        |              | NA        | NA        | NA       | NA       |
| RF00001           | 0 NA        |              | NA        | NA        | NA       | NA       |
| RF00001           | 0 NA        |              | NA        | NA        | NA       | NA       |
| RF00001           | 0 NA        |              | NA        | NA        | NA       | NA       |
| RF00001           | 0 NA        |              | NA        | NA        | NA       | NA       |
| RF00001           | 0 NA        |              | NA        | NA        | NA       | NA       |
| RF00001           | 0 NA        |              | NA        | NA        | NA       | NA       |
| RF00001           | 0 NA        |              | NA        | NA        | NA       | NA       |
| RF00001           | 0 NA        |              | NA        | NA        | NA       | NA       |
| RF00001           | 0 NA        |              | NA        | NA        | NA       | NA       |
| RF00001           | 0 NA        |              | NA        | NA        | NA       | NA       |
| RF00001           | 0 NA        |              | NA        | NA        | NA       | NA       |
| RF00001           | 9.79146278  | -0.18392402  | 0.6469759 | -0.284283 | 0.776194 | NA       |
| RF00001           | 0.500402445 | 2.450713647  | 2.7706722 | 0.8845195 | 0.376416 | NA       |
| RF00001           | 0.158795395 | 0.967652056  | 4.0804729 | 0.2371421 | 0.812547 | NA       |
| BX324216.3        | 38.8264765  | 0.45515452   | 0.3060642 | 1.4871212 | 0.136983 | 0.673303 |
| RF00001           | 0 NA        |              | NA        | NA        | NA       | NA       |
| BX649416.3        | 16.8085198  | 0.661230785  | 0.4854102 | 1.3622104 | 0.173132 | 0.732435 |
| znf979            | 1.273641835 | -0.001638802 | 1.7360344 | -0.000944 | 0.999247 | NA       |
| RF00026           | 0 NA        |              | NA        | NA        | NA       | NA       |
| ighv8-4           | 0 NA        |              | NA        | NA        | NA       | NA       |
| FQ377603.1        | 8.587071618 | -0.165596838 | 0.6631147 | -0.249726 | 0.802799 | NA       |
| RF00001           | 0.825734941 | 1.890923829  | 2.1307296 | 0.8874537 | 0.374835 | NA       |
| RF00001           | 0 NA        |              | NA        | NA        | NA       | NA       |
| RF00026           | 0 NA        |              | NA        | NA        | NA       | NA       |
| CABZ01042417.1    | 0.182570949 | 0.967652056  | 4.0804729 | 0.2371421 | 0.812547 | NA       |
| F0680692.1        | 0 NA        |              | NA        | NA        | NA       | NA       |
| traj10            | 0 NA        |              | NA        | NA        | NA       | NA       |
| bmp101            | 5.228154829 | 0.931327539  | 0.8564717 | 1.0874003 | 0.27686  | NA       |
| BX294375.1        | 0 NA        |              | NA        | NA        | NA       | NA       |
| RF00001           | 0 NA        |              | NA        | NA        | NA       | NA       |
| RF00026           | 0 NA        |              | NA        | NA        | NA       | NA       |
| CT573356.1        | 0 NA        |              | NA        | NA        | NA       | NA       |
| RF00001           | 1.135274295 | 0.36816485   | 1.9502173 | 0.1887814 | 0.850264 | NA       |
| si:dkey-4e4.1     | 9.670363015 | -0.083668378 | 0.604925  | -0.138312 | 0.889994 | NA       |
| RF00026           | 0 NA        |              | NA        | NA        | NA       | NA       |
| si:ch211-234c11.2 | 10.67488886 | -0.084107837 | 0.5806205 | -0.144859 | 0.884823 | NA       |
| CU855906.1        | 0.341486697 | 1.892317624  | 3.2124068 | 0.5890654 | 0.555817 | NA       |
| CABZ01088982.1    | 5.820370154 | -1.082912867 | 0.867272  | -1.248643 | 0.211796 | NA       |
| RF00001           | 0 NA        |              | NA        | NA        | NA       | NA       |
| CU928131.1        | 5.137070948 | 1.301986456  | 0.8546551 | 1.5234057 | 0.127657 | NA       |
| BX640537.3        | 50.70607399 | -0.194316341 | 0.271178  | -0.716564 | 0.473643 | 0.924993 |
| RF00069           | 2.46818515  | -0.966979791 | 1.2744033 | -0.758771 | 0.44799  | NA       |
| RF00001           | 0 NA        |              | NA        | NA        | NA       | NA       |
| RF00001           | 34.48709824 | 0.063726177  | 0.329545  | 0.1933762 | 0.846664 | 0.985174 |
| RF00001           | 0 NA        |              | NA        | NA        | NA       | NA       |
| RF00012           | 0 NA        |              | NA        | NA        | NA       | NA       |
| BX005305.1        | 0 NA        |              | NA        | NA        | NA       | NA       |

|                    |             |              |           |           |          |          |
|--------------------|-------------|--------------|-----------|-----------|----------|----------|
| CABZ01068367.1     | 104.5635261 | 0.036088612  | 0.2014091 | 0.1791806 | 0.857796 | 0.985703 |
| CU570800.2         | 1.005048545 | -0.006083169 | 1.9358873 | -0.003142 | 0.997493 | NA       |
| RF00001            | 0           | NA           | NA        | NA        | NA       | NA       |
| RF00020            | 0.158795395 | 0.967652056  | 4.0804729 | 0.2371421 | 0.812547 | NA       |
| CU570800.3         | 0           | NA           | NA        | NA        | NA       | NA       |
| CABZ01078261.1     | 8.343157744 | 0.586199611  | 0.6656473 | 0.880646  | 0.378509 | NA       |
| RF00001            | 0           | NA           | NA        | NA        | NA       | NA       |
| mrps15             | 405.4824497 | 0.00231038   | 0.1185614 | 0.0194868 | 0.984453 | 0.996944 |
| pimr152            | 0           | NA           | NA        | NA        | NA       | NA       |
| CT583728.8         | 0           | NA           | NA        | NA        | NA       | NA       |
| nitr6b             | 0           | NA           | NA        | NA        | NA       | NA       |
| RF00001            | 0           | NA           | NA        | NA        | NA       | NA       |
| CT583728.9         | 0           | NA           | NA        | NA        | NA       | NA       |
| RF00026            | 0           | NA           | NA        | NA        | NA       | NA       |
| im:7150988         | 135.214213  | -0.097854947 | 0.1871819 | -0.52278  | 0.601127 | 0.956045 |
| znf1030            | 15.95696593 | -0.109649952 | 0.4893144 | -0.224089 | 0.822688 | 0.982189 |
| RF00001            | 0           | NA           | NA        | NA        | NA       | NA       |
| RF00003            | 0           | NA           | NA        | NA        | NA       | NA       |
| RF00003            | 0           | NA           | NA        | NA        | NA       | NA       |
| RF00001            | 0.654761552 | -2.837720206 | 2.3559398 | -1.204496 | 0.228398 | NA       |
| znf1140            | 10.13472255 | 0.432608386  | 0.5869571 | 0.7370358 | 0.461101 | NA       |
| RF00003            | 0           | NA           | NA        | NA        | NA       | NA       |
| CU104716.1         | 0           | NA           | NA        | NA        | NA       | NA       |
| nanos1             | 1794.566226 | 0.081603346  | 0.0828181 | 0.9853325 | 0.324461 | 0.871051 |
| CR388042.2         | 0           | NA           | NA        | NA        | NA       | NA       |
| CR762395.1         | 1.324649708 | 1.608767603  | 1.8121952 | 0.8877452 | 0.374678 | NA       |
| RF00001            | 0           | NA           | NA        | NA        | NA       | NA       |
| RF00001            | 0           | NA           | NA        | NA        | NA       | NA       |
| RF00001            | 0.476747244 | 2.393381959  | 3.0525537 | 0.7840589 | 0.433006 | NA       |
| trhde.2            | 67.75137896 | 0.071477979  | 0.2478783 | 0.2883591 | 0.773072 | 0.975687 |
| F0704848.1         | 122.3816991 | 0.038916329  | 0.1852963 | 0.2100221 | 0.83365  | 0.983583 |
| BX005294.2         | 0.515216064 | 0.926382026  | 2.6525479 | 0.3492423 | 0.726907 | NA       |
| RF00001            | 0           | NA           | NA        | NA        | NA       | NA       |
| zgc:173720         | 1.963926852 | -0.986816592 | 1.4260025 | -0.692016 | 0.488927 | NA       |
| RF00026            | 0           | NA           | NA        | NA        | NA       | NA       |
| si:dkey-182g1.2    | 0           | NA           | NA        | NA        | NA       | NA       |
| histlh2ba          | 9.005558192 | 0.857077505  | 0.6963499 | 1.2308145 | 0.218392 | NA       |
| pdgfaa             | 0           | NA           | NA        | NA        | NA       | NA       |
| tmbim1b            | 316.8790126 | -0.105387463 | 0.1275277 | -0.826389 | 0.408583 | 0.90171  |
| RF01848            | 0           | NA           | NA        | NA        | NA       | NA       |
| RF00001            | 0           | NA           | NA        | NA        | NA       | NA       |
| RF00001            | 0.158915748 | 0.967652056  | 4.0804729 | 0.2371421 | 0.812547 | NA       |
| RF00017            | 0           | NA           | NA        | NA        | NA       | NA       |
| dre-mir-430b-6     | 0           | NA           | NA        | NA        | NA       | NA       |
| taarl8e            | 0.508023798 | 0.926122713  | 2.6636728 | 0.3476864 | 0.728076 | NA       |
| atgl1612           | 0.643163992 | 1.4381025    | 2.4329265 | 0.5910999 | 0.554454 | NA       |
| RF00003            | 0           | NA           | NA        | NA        | NA       | NA       |
| si:ch211-66i15.5   | 0.473290478 | -0.833892061 | 2.901156  | -0.287434 | 0.77378  | NA       |
| F0681393.1         | 14.89697667 | 0.141824021  | 0.5934966 | 0.2389635 | 0.811134 | 0.981081 |
| RF00001            | 0           | NA           | NA        | NA        | NA       | NA       |
| si:ch1073-110a20.7 | 0           | NA           | NA        | NA        | NA       | NA       |
| RF00017            | 0           | NA           | NA        | NA        | NA       | NA       |
| si:dkey-234124.1   | 0.651026051 | -0.042574319 | 2.4423909 | -0.017431 | 0.986092 | NA       |
| RF00001            | 0           | NA           | NA        | NA        | NA       | NA       |

|                   |             |              |           |           |          |          |
|-------------------|-------------|--------------|-----------|-----------|----------|----------|
| RF00003           | 0           | NA           | NA        | NA        | NA       | NA       |
| prfl.7            | 0           | NA           | NA        | NA        | NA       | NA       |
| RF00001           | 0.158795395 | 0.967652056  | 4.0804729 | 0.2371421 | 0.812547 | NA       |
| RF00003           | 0           | NA           | NA        | NA        | NA       | NA       |
| RF00003           | 0           | NA           | NA        | NA        | NA       | NA       |
| RASL10B           | 0.82062886  | -1.887809105 | 2.232843  | -0.845473 | 0.397847 | NA       |
| RF00563           | 0.491560863 | 0.853615855  | 2.865157  | 0.2979299 | 0.765757 | NA       |
| AL953865.1        | 4.17541146  | -1.35037684  | 0.9956438 | -1.356285 | 0.175008 | NA       |
| RF00001           | 0           | NA           | NA        | NA        | NA       | NA       |
| hrc               | 15.85741748 | -0.227122942 | 0.4803025 | -0.472875 | 0.636303 | 0.958565 |
| EML4              | 509.4477939 | -0.176263577 | 0.1044406 | -1.687693 | 0.09147  | 0.57849  |
| RF00026           | 0           | NA           | NA        | NA        | NA       | NA       |
| RF00026           | 0           | NA           | NA        | NA        | NA       | NA       |
| histlh2a1         | 4.980140988 | 2.018014144  | 0.9903593 | 2.0376586 | 0.041584 | NA       |
| si:dkeyp-77c4.5   | 3.285177533 | 1.214709053  | 1.1740267 | 1.034652  | 0.300831 | NA       |
| CR352340.1        | 0.339758314 | 0.005883863  | 3.2682461 | 0.0018003 | 0.998564 | NA       |
| RF00017           | 0           | NA           | NA        | NA        | NA       | NA       |
| RF00001           | 0           | NA           | NA        | NA        | NA       | NA       |
| CABZ01092745.1    | 151.9835393 | -0.045125481 | 0.1682367 | -0.268226 | 0.788525 | 0.976703 |
| RF00001           | 0           | NA           | NA        | NA        | NA       | NA       |
| RF00015           | 0           | NA           | NA        | NA        | NA       | NA       |
| RF00017           | 0.158915748 | 0.967652056  | 4.0804729 | 0.2371421 | 0.812547 | NA       |
| RF00001           | 0.166657454 | -0.955901296 | 4.0804729 | -0.234262 | 0.814781 | NA       |
| PHF21B            | 6.720567412 | 0.161458395  | 0.8096656 | 0.1994137 | 0.841939 | NA       |
| RF00001           | 0           | NA           | NA        | NA        | NA       | NA       |
| BX323459.1        | 0.5046461   | -2.45370851  | 2.7629627 | -0.888072 | 0.374502 | NA       |
| lsm12b            | 1104.380772 | -0.009990136 | 0.0916487 | -0.109005 | 0.913199 | 0.991119 |
| RF00001           | 0           | NA           | NA        | NA        | NA       | NA       |
| CR339054.2        | 41.66434195 | -0.184322293 | 0.2997282 | -0.614965 | 0.538578 | 0.943336 |
| RF00096           | 0           | NA           | NA        | NA        | NA       | NA       |
| RF00026           | 0           | NA           | NA        | NA        | NA       | NA       |
| RF00017           | 2.841207645 | 3.885734333  | 1.6287254 | 2.3857516 | 0.017044 | NA       |
| senp7a            | 0           | NA           | NA        | NA        | NA       | NA       |
| BX279525.1        | 1.798018259 | -1.437924379 | 1.5050474 | -0.955401 | 0.339375 | NA       |
| BX000363.2        | 1.343586631 | -1.572682111 | 1.7206854 | -0.913986 | 0.360724 | NA       |
| RF00001           | 0           | NA           | NA        | NA        | NA       | NA       |
| RF00003           | 0           | NA           | NA        | NA        | NA       | NA       |
| RF00012           | 0           | NA           | NA        | NA        | NA       | NA       |
| CT583625.4        | 0           | NA           | NA        | NA        | NA       | NA       |
| dre-mir-430b-6    | 0           | NA           | NA        | NA        | NA       | NA       |
| RF00309           | 0           | NA           | NA        | NA        | NA       | NA       |
| BX571954.3        | 0           | NA           | NA        | NA        | NA       | NA       |
| CABZ01027551.1    | 2.810180002 | -0.860974518 | 1.1367962 | -0.757369 | 0.448829 | NA       |
| zgc:77614         | 0           | NA           | NA        | NA        | NA       | NA       |
| ft2               | 3.111187504 | -0.473154397 | 1.0605992 | -0.44612  | 0.655511 | NA       |
| PLPP7 (1 of many) | 18.78225384 | -0.426707177 | 0.4419101 | -0.965597 | 0.334246 | 0.875298 |
| BX649337.2        | 0.8136773   | -1.876897407 | 2.1384966 | -0.877671 | 0.380122 | NA       |
| RF00001           | 0           | NA           | NA        | NA        | NA       | NA       |
| si:ch211-165a10.1 | 0           | NA           | NA        | NA        | NA       | NA       |
| RF00001           | 0           | NA           | NA        | NA        | NA       | NA       |
| CR925744.1        | 1.471225824 | -0.368161838 | 1.7496834 | -0.210416 | 0.833343 | NA       |
| taar19n           | 0.332524763 | 0.005883742  | 3.292841  | 0.0017868 | 0.998574 | NA       |
| CT573366.1        | 0.158915748 | 0.967652056  | 4.0804729 | 0.2371421 | 0.812547 | NA       |
| CU104741.1        | 6.781554772 | 0.338530258  | 0.729267  | 0.4642062 | 0.6425   | NA       |

|                   |             |              |           |           |          |          |
|-------------------|-------------|--------------|-----------|-----------|----------|----------|
| RF00001           | 0           | NA           | NA        | NA        | NA       | NA       |
| zgc:77614         | 0           | NA           | NA        | NA        | NA       | NA       |
| RF00001           | 0           | NA           | NA        | NA        | NA       | NA       |
| CR855375.3        | 6.607715342 | -0.573718356 | 0.7287942 | -0.787216 | 0.431156 | NA       |
| CR847936.4        | 0           | NA           | NA        | NA        | NA       | NA       |
| RF00001           | 0           | NA           | NA        | NA        | NA       | NA       |
| RF00001           | 0           | NA           | NA        | NA        | NA       | NA       |
| si:dkey-275b16.2  | 0           | NA           | NA        | NA        | NA       | NA       |
| si:dkey-194g4.1   | 63.1234521  | -0.082256014 | 0.2558951 | -0.321444 | 0.747874 | 0.97419  |
| CU302316.1        | 0           | NA           | NA        | NA        | NA       | NA       |
| BX323574.1        | 0.658957134 | 2.851427774  | 2.5143902 | 1.1340434 | 0.256776 | NA       |
| znf1026           | 3.344456597 | -0.579794968 | 1.1134537 | -0.520718 | 0.602563 | NA       |
| FP236810.1        | 13.23820778 | 0.052641784  | 0.6329249 | 0.0831722 | 0.933715 | 0.992702 |
| RF00001           | 0.500161739 | 2.450146464  | 2.7711133 | 0.8841741 | 0.376602 | NA       |
| si:ch73-129a22.11 | 0           | NA           | NA        | NA        | NA       | NA       |
| CABZ01066611.1    | 0           | NA           | NA        | NA        | NA       | NA       |
| si:ch211-226h7.3  | 79.10879723 | 0.585619335  | 0.2789524 | 2.0993526 | 0.035786 | 0.368633 |
| CR944667.2        | 0           | NA           | NA        | NA        | NA       | NA       |
| CU896691.3        | 3.910859867 | 1.873206992  | 1.0497367 | 1.7844541 | 0.07435  | NA       |
| L0018548.1        | 7.730307739 | 0.319102801  | 0.7173331 | 0.4448461 | 0.656431 | NA       |
| si:ch211-153a8.4  | 154.1810057 | -0.260854403 | 0.1710136 | -1.525343 | 0.127174 | 0.656588 |
| si:ch211-147m6.1  | 68.43249042 | -0.131123515 | 0.3029405 | -0.432836 | 0.665134 | 0.964736 |
| BX571720.1        | 0.844404414 | -1.887811648 | 2.2150205 | -0.852277 | 0.39406  | NA       |
| RF00271           | 20.37276408 | 0.03059396   | 0.438679  | 0.0697411 | 0.9444   | 0.993364 |
| cmklr12           | 3.12227691  | -1.093039824 | 1.1410017 | -0.957965 | 0.33808  | NA       |
| BX470083.1        | 0           | NA           | NA        | NA        | NA       | NA       |
| CR792453.2        | 0.157187365 | -0.955901296 | 4.0804729 | -0.234262 | 0.814781 | NA       |
| BX005442.1        | 0           | NA           | NA        | NA        | NA       | NA       |
| L0016987.2        | 131.1819979 | -0.024561922 | 0.1771674 | -0.138637 | 0.889737 | 0.989291 |
| RF00003           | 0           | NA           | NA        | NA        | NA       | NA       |
| RF00001           | 0           | NA           | NA        | NA        | NA       | NA       |
| CR550302.3        | 0           | NA           | NA        | NA        | NA       | NA       |
| dapl1b            | 0.647019846 | -1.455099716 | 2.4289208 | -0.599073 | 0.549125 | NA       |
| RF00001           | 0           | NA           | NA        | NA        | NA       | NA       |
| zgc:77614         | 0           | NA           | NA        | NA        | NA       | NA       |
| F0904885.1        | 0           | NA           | NA        | NA        | NA       | NA       |
| si:ch211-59p23.1  | 3.780714602 | 0.632089269  | 0.9643714 | 0.6554417 | 0.512183 | NA       |
| CU459012.3        | 0.341366344 | 1.891903201  | 3.2128156 | 0.5888614 | 0.555954 | NA       |
| RF00001           | 0           | NA           | NA        | NA        | NA       | NA       |
| pimr152           | 0           | NA           | NA        | NA        | NA       | NA       |
| znf1025           | 26.68521069 | 0.196375437  | 0.3997703 | 0.4912207 | 0.62327  | 0.957354 |
| RF00001           | 0           | NA           | NA        | NA        | NA       | NA       |
| F0834825.1        | 0           | NA           | NA        | NA        | NA       | NA       |
| BX510309.1        | 0           | NA           | NA        | NA        | NA       | NA       |
| RF00001           | 0           | NA           | NA        | NA        | NA       | NA       |
| RF00017           | 0           | NA           | NA        | NA        | NA       | NA       |
| dre-mir-430b-10   | 0           | NA           | NA        | NA        | NA       | NA       |
| tradv10.0.2       | 0.158795395 | 0.967652056  | 4.0804729 | 0.2371421 | 0.812547 | NA       |
| sncgb             | 3095.904527 | 0.178022225  | 0.0730198 | 2.4380002 | 0.014769 | 0.22242  |
| SLC35E2A          | 124.7142991 | -0.052770733 | 0.1893839 | -0.278644 | 0.780518 | 0.97627  |
| RF00001           | 0.158915748 | 0.967652056  | 4.0804729 | 0.2371421 | 0.812547 | NA       |
| PLCB1             | 27.48632994 | 0.249898346  | 0.3609914 | 0.6922556 | 0.488777 | 0.931926 |
| RF00001           | 0           | NA           | NA        | NA        | NA       | NA       |
| RF00003           | 0.158795395 | 0.967652056  | 4.0804729 | 0.2371421 | 0.812547 | NA       |

|                  |             |              |           |           |          |          |
|------------------|-------------|--------------|-----------|-----------|----------|----------|
| RF00001          | 0           | NA           | NA        | NA        | NA       | NA       |
| zgc:171759       | 9.839248954 | 0.975803616  | 0.6458279 | 1.5109345 | 0.130805 | NA       |
| si:dkeyp-44b5.4  | 0           | NA           | NA        | NA        | NA       | NA       |
| GPR139           | 57.12388331 | 0.025629817  | 0.2703933 | 0.0947872 | 0.924484 | 0.992676 |
| BX324227.2       | 0           | NA           | NA        | NA        | NA       | NA       |
| CR847936.5       | 0           | NA           | NA        | NA        | NA       | NA       |
| si:ch211-162i8.7 | 0.166657454 | -0.955901296 | 4.0804729 | -0.234262 | 0.814781 | NA       |
| RF00012          | 0           | NA           | NA        | NA        | NA       | NA       |
| CU570800.4       | 0           | NA           | NA        | NA        | NA       | NA       |
| histlh2a3        | 4.767369996 | 0.241665595  | 0.8964234 | 0.2695887 | 0.787477 | NA       |
| RF00001          | 0           | NA           | NA        | NA        | NA       | NA       |
| RF00001          | 0           | NA           | NA        | NA        | NA       | NA       |
| CR376779.1       | 8.601145578 | -0.935180931 | 0.6627011 | -1.411165 | 0.158196 | NA       |
| RF01848          | 0           | NA           | NA        | NA        | NA       | NA       |
| RF00001          | 0           | NA           | NA        | NA        | NA       | NA       |
| RF00001          | 0           | NA           | NA        | NA        | NA       | NA       |
| RF00017          | 0.365141898 | 1.973577737  | 3.3927314 | 0.5817076 | 0.560764 | NA       |
| BX322614.1       | 0.340386822 | -1.882368278 | 3.2159502 | -0.585323 | 0.558331 | NA       |
| L0017835.1       | 72.47704335 | 0.286388116  | 0.254363  | 1.1259031 | 0.260207 | 0.828288 |
| CABZ01117348.1   | 384.385023  | 0.035407765  | 0.1230848 | 0.2876696 | 0.7736   | 0.975687 |
| BX530407.5       | 0           | NA           | NA        | NA        | NA       | NA       |
| RF00003          | 0           | NA           | NA        | NA        | NA       | NA       |
| RF00026          | 0           | NA           | NA        | NA        | NA       | NA       |
| igsf11           | 6.166640651 | 0.242136739  | 0.7761301 | 0.3119796 | 0.755056 | NA       |
| RF00001          | 0           | NA           | NA        | NA        | NA       | NA       |
| BX324003.2       | 1.477118795 | -1.82826838  | 1.6745074 | -1.091825 | 0.27491  | NA       |
| CR936457.1       | 0.158795395 | 0.967652056  | 4.0804729 | 0.2371421 | 0.812547 | NA       |
| FP101875.2       | 0.635422286 | 2.809933352  | 2.5211574 | 1.114541  | 0.265047 | NA       |
| BX323083.1       | 0           | NA           | NA        | NA        | NA       | NA       |
| RF00001          | 0           | NA           | NA        | NA        | NA       | NA       |
| RF00001          | 0           | NA           | NA        | NA        | NA       | NA       |
| RF00001          | 0           | NA           | NA        | NA        | NA       | NA       |
| RF00001          | 0           | NA           | NA        | NA        | NA       | NA       |
| SPATA48          | 0.853245996 | -0.479250517 | 2.1942342 | -0.218414 | 0.827107 | NA       |
| NPAS3            | 1219.44136  | -0.025388843 | 0.0832193 | -0.305084 | 0.760302 | 0.975374 |
| si:dkey-156j15.1 | 2.533206454 | 1.072379882  | 1.302768  | 0.8231549 | 0.41042  | NA       |
| RF00003          | 0           | NA           | NA        | NA        | NA       | NA       |
| pdxp             | 28.56519417 | 0.427452757  | 0.3731581 | 1.1455005 | 0.252002 | 0.821478 |
| RF00001          | 0           | NA           | NA        | NA        | NA       | NA       |
| BX649559.2       | 3.020298793 | -3.985206909 | 1.5079127 | -2.642863 | 0.008221 | NA       |
| taar19h          | 1.49653034  | 0.347267774  | 1.4998516 | 0.2315348 | 0.816899 | NA       |
| SFMBT1           | 408.3187472 | -0.154823456 | 0.1164577 | -1.329439 | 0.183703 | 0.747284 |
| znf993           | 1.837776331 | 0.836483473  | 1.3925256 | 0.6006952 | 0.548043 | NA       |
| BX664742.3       | 1.473503647 | -0.365440209 | 1.5699691 | -0.232769 | 0.815941 | NA       |
| BX901962.2       | 48.82173225 | -0.568432133 | 0.3600589 | -1.57872  | 0.1144   | 0.633833 |
| RF00020          | 0           | NA           | NA        | NA        | NA       | NA       |
| F0681286.1       | 10.53361741 | 0.08373423   | 0.5898638 | 0.1419552 | 0.887115 | NA       |
| RF00001          | 0           | NA           | NA        | NA        | NA       | NA       |
| CABZ01072242.1   | 51.65771676 | -0.025864591 | 0.2782788 | -0.092945 | 0.925947 | 0.992702 |
| RF00026          | 0           | NA           | NA        | NA        | NA       | NA       |
| crygm2d17        | 18844.36486 | 0.170710858  | 0.0689195 | 2.4769599 | 0.013251 | 0.206152 |
| htrlfa           | 23.25037388 | -0.32202579  | 0.4095311 | -0.786328 | 0.431675 | 0.91277  |
| CU896602.2       | 0           | NA           | NA        | NA        | NA       | NA       |
| znf995           | 2.398388446 | 1.017571019  | 1.3850419 | 0.7346861 | 0.462531 | NA       |

|                    |             |              |           |           |          |          |
|--------------------|-------------|--------------|-----------|-----------|----------|----------|
| pimr58             | 0           | NA           | NA        | NA        | NA       | NA       |
| zgc:174719         | 4.428281475 | 0.034715811  | 0.9264869 | 0.0374704 | 0.97011  | NA       |
| RF00001            | 0           | NA           | NA        | NA        | NA       | NA       |
| RF00003            | 0           | NA           | NA        | NA        | NA       | NA       |
| RF00001            | 0.182570949 | 0.967652056  | 4.0804729 | 0.2371421 | 0.812547 | NA       |
| RF00001            | 0           | NA           | NA        | NA        | NA       | NA       |
| CR388047.2         | 0           | NA           | NA        | NA        | NA       | NA       |
| dre-mir-430a-2     | 0           | NA           | NA        | NA        | NA       | NA       |
| pimr145            | 0           | NA           | NA        | NA        | NA       | NA       |
| CR848715.1         | 0           | NA           | NA        | NA        | NA       | NA       |
| RF00003            | 0           | NA           | NA        | NA        | NA       | NA       |
| RF00003            | 0           | NA           | NA        | NA        | NA       | NA       |
| RF00611            | 0           | NA           | NA        | NA        | NA       | NA       |
| RF00001            | 0           | NA           | NA        | NA        | NA       | NA       |
| tmem254            | 249.4501921 | -0.234060944 | 0.1564619 | -1.495962 | 0.134664 | 0.670689 |
| BX649502.11        | 0           | NA           | NA        | NA        | NA       | NA       |
| CU138548.1         | 0           | NA           | NA        | NA        | NA       | NA       |
| si:dkey-58b18.10   | 0           | NA           | NA        | NA        | NA       | NA       |
| CU570781.2         | 0           | NA           | NA        | NA        | NA       | NA       |
| RF00001            | 0.341366344 | 1.891903201  | 3.2128156 | 0.5888614 | 0.555954 | NA       |
| RF00026            | 0           | NA           | NA        | NA        | NA       | NA       |
| RF00001            | 0           | NA           | NA        | NA        | NA       | NA       |
| pimr156            | 0           | NA           | NA        | NA        | NA       | NA       |
| RF00001            | 0           | NA           | NA        | NA        | NA       | NA       |
| si:ch211-113a14.19 | 22.08888991 | -0.01963926  | 0.421313  | -0.046614 | 0.962821 | 0.995927 |
| RF00001            | 0.173729368 | -0.955901296 | 4.0804729 | -0.234262 | 0.814781 | NA       |
| RF00012            | 0           | NA           | NA        | NA        | NA       | NA       |
| CABZ01058721.1     | 127.1615217 | -0.026956104 | 0.1842326 | -0.146316 | 0.883672 | 0.988706 |
| BX681417.4         | 0           | NA           | NA        | NA        | NA       | NA       |
| CR356242.1         | 1.552641039 | 1.042638452  | 1.5969266 | 0.6529032 | 0.513819 | NA       |
| RF00012            | 0           | NA           | NA        | NA        | NA       | NA       |
| RF00012            | 0           | NA           | NA        | NA        | NA       | NA       |
| BX004816.3         | 0           | NA           | NA        | NA        | NA       | NA       |
| dre-mir-430b-10    | 0           | NA           | NA        | NA        | NA       | NA       |
| RF00001            | 0           | NA           | NA        | NA        | NA       | NA       |
| BX005027.2         | 0           | NA           | NA        | NA        | NA       | NA       |
| RF00026            | 0           | NA           | NA        | NA        | NA       | NA       |
| RF00001            | 0           | NA           | NA        | NA        | NA       | NA       |
| RF00001            | 0           | NA           | NA        | NA        | NA       | NA       |
| mrp122             | 233.0386803 | -0.155151962 | 0.1398442 | -1.109463 | 0.26723  | 0.833191 |
| pimr167            | 0           | NA           | NA        | NA        | NA       | NA       |
| TCERG1L            | 350.1936896 | -0.083429199 | 0.1392252 | -0.599239 | 0.549013 | 0.946312 |
| dre-mir-430b-10    | 0           | NA           | NA        | NA        | NA       | NA       |
| BX537120.1         | 0           | NA           | NA        | NA        | NA       | NA       |
| tmem186            | 0           | NA           | NA        | NA        | NA       | NA       |
| taar20o            | 0           | NA           | NA        | NA        | NA       | NA       |
| RF00001            | 0           | NA           | NA        | NA        | NA       | NA       |
| RF00003            | 0           | NA           | NA        | NA        | NA       | NA       |
| RF00001            | 0.158915748 | 0.967652056  | 4.0804729 | 0.2371421 | 0.812547 | NA       |
| RF00026            | 0           | NA           | NA        | NA        | NA       | NA       |
| RF00001            | 0           | NA           | NA        | NA        | NA       | NA       |
| v2rh12             | 0           | NA           | NA        | NA        | NA       | NA       |
| pimr120            | 0           | NA           | NA        | NA        | NA       | NA       |
| RF00001            | 0.332524763 | 0.005883742  | 3.292841  | 0.0017868 | 0.998574 | NA       |

|                   |             |              |           |           |          |          |
|-------------------|-------------|--------------|-----------|-----------|----------|----------|
| CABZ01101996.1    | 50.73030781 | 0.050793336  | 0.2718609 | 0.1868358 | 0.851789 | 0.985174 |
| RF00001           | 0.173729368 | -0.955901296 | 4.0804729 | -0.234262 | 0.814781 | NA       |
| RF00001           | 0 NA        | NA           | NA        | NA        | NA       | NA       |
| BX005085.4        | 85.05846548 | -0.369075399 | 0.2123228 | -1.738275 | 0.082162 | 0.553176 |
| CR855257.2        | 0.964851341 | -0.019994509 | 2.0736065 | -0.009642 | 0.992307 | NA       |
| dre-mir-430c-1    | 0 NA        | NA           | NA        | NA        | NA       | NA       |
| znf1004           | 0.815164977 | -0.617697568 | 2.1259573 | -0.29055  | 0.771395 | NA       |
| RF00001           | 0.173729368 | -0.955901296 | 4.0804729 | -0.234262 | 0.814781 | NA       |
| msc               | 37.62792044 | -0.019489802 | 0.3287986 | -0.059276 | 0.952732 | 0.994003 |
| CABZ01079267.1    | 35.08239857 | -0.510840963 | 0.3868134 | -1.320639 | 0.186622 | 0.750951 |
| zgc:56628         | 43.03097945 | 0.207651923  | 0.2943965 | 0.7053478 | 0.480594 | 0.927601 |
| RF00001           | 0 NA        | NA           | NA        | NA        | NA       | NA       |
| FQ377903.3        | 127.3964636 | -0.0913154   | 0.1822447 | -0.501059 | 0.616329 | 0.95688  |
| RF00001           | 0.547712847 | 2.559541715  | 2.9076406 | 0.8802813 | 0.378707 | NA       |
| BX548011.1        | 0.506415768 | -0.866825728 | 2.6674086 | -0.324969 | 0.745204 | NA       |
| BX649328.3        | 0.182570949 | 0.967652056  | 4.0804729 | 0.2371421 | 0.812547 | NA       |
| SAMD5             | 35.95058788 | -0.094731208 | 0.3449222 | -0.274645 | 0.783589 | 0.97627  |
| zgc:165555        | 6.925091595 | 0.471986233  | 0.8518845 | 0.5540495 | 0.579545 | NA       |
| RF00001           | 0 NA        | NA           | NA        | NA        | NA       | NA       |
| RF00001           | 0 NA        | NA           | NA        | NA        | NA       | NA       |
| CABZ01092781.1    | 193.8276623 | 0.017012944  | 0.1823825 | 0.0932817 | 0.92568  | 0.992689 |
| RF00001           | 0 NA        | NA           | NA        | NA        | NA       | NA       |
| igl3v1            | 0 NA        | NA           | NA        | NA        | NA       | NA       |
| RF00003           | 0 NA        | NA           | NA        | NA        | NA       | NA       |
| dre-mir-430a-4    | 0 NA        | NA           | NA        | NA        | NA       | NA       |
| CR854927.4        | 0.317711143 | 1.810477155  | 3.2978238 | 0.5489915 | 0.583011 | NA       |
| CU929160.1        | 79.65797161 | -0.164772821 | 0.2286749 | -0.720555 | 0.471183 | 0.924838 |
| RF00001           | 0.476747244 | 2.393381959  | 3.0525537 | 0.7840589 | 0.433006 | NA       |
| RF00003           | 0 NA        | NA           | NA        | NA        | NA       | NA       |
| RF00001           | 0.820749213 | -1.887809118 | 2.2327507 | -0.845508 | 0.397827 | NA       |
| pdgfaa            | 95.13672549 | 0.504958937  | 0.21488   | 2.3499576 | 0.018776 | 0.255518 |
| si:ch211-139n6.10 | 0 NA        | NA           | NA        | NA        | NA       | NA       |
| CU929402.2        | 2.820939343 | 0.897678522  | 1.1253748 | 0.7976707 | 0.425062 | NA       |
| RF00026           | 0 NA        | NA           | NA        | NA        | NA       | NA       |
| RF00001           | 0 NA        | NA           | NA        | NA        | NA       | NA       |
| RF00001           | 0 NA        | NA           | NA        | NA        | NA       | NA       |
| CT573264.1        | 1.568873311 | -0.94347161  | 1.724889  | -0.546975 | 0.584396 | NA       |
| RF00001           | 0 NA        | NA           | NA        | NA        | NA       | NA       |
| CR854942.1        | 0.687217049 | -1.490137326 | 2.387795  | -0.624064 | 0.532585 | NA       |
| RF00001           | 0 NA        | NA           | NA        | NA        | NA       | NA       |
| RF00001           | 0 NA        | NA           | NA        | NA        | NA       | NA       |
| si:ch73-92e7.4    | 30.56656528 | -0.146316666 | 0.3433632 | -0.426128 | 0.670015 | 0.965223 |
| RF00026           | 0 NA        | NA           | NA        | NA        | NA       | NA       |
| traj31            | 0 NA        | NA           | NA        | NA        | NA       | NA       |
| F0834799.1        | 160.8488967 | -0.362296489 | 0.161044  | -2.249674 | 0.02447  | 0.3019   |
| CABZ01044235.1    | 38.32746524 | -0.080119059 | 0.3069455 | -0.26102  | 0.794077 | 0.977937 |
| si:dkey-20i20.4   | 25.4534062  | -0.518644173 | 0.3823998 | -1.356288 | 0.175008 | 0.735545 |
| RF00026           | 0 NA        | NA           | NA        | NA        | NA       | NA       |
| CU929146.1        | 5.886534784 | 0.829289508  | 0.7974345 | 1.0399469 | 0.298365 | NA       |
| F0704648.1        | 1.794991576 | -0.789655873 | 1.4053064 | -0.56191  | 0.574177 | NA       |
| CU929414.1        | 0.530029684 | -0.939524117 | 2.7937867 | -0.336291 | 0.736652 | NA       |
| dre-mir-430c-1    | 0 NA        | NA           | NA        | NA        | NA       | NA       |
| RF00017           | 0 NA        | NA           | NA        | NA        | NA       | NA       |
| si:dkey-31m5.3    | 0 NA        | NA           | NA        | NA        | NA       | NA       |



|                  |             |              |           |           |          |          |
|------------------|-------------|--------------|-----------|-----------|----------|----------|
| RF00026          | 0           | NA           | NA        | NA        | NA       | NA       |
| RF00001          | 0           | NA           | NA        | NA        | NA       | NA       |
| pimr79           | 0.471562095 | -2.373056629 | 3.0645586 | -0.774355 | 0.438721 | NA       |
| RF00026          | 0           | NA           | NA        | NA        | NA       | NA       |
| RF00001          | 0           | NA           | NA        | NA        | NA       | NA       |
| RF00002          | 0           | NA           | NA        | NA        | NA       | NA       |
| RF00001          | 0.99074308  | -0.066552202 | 1.9437949 | -0.034238 | 0.972687 | NA       |
| si:dkey-240e12.6 | 0.508144151 | 0.926490632  | 2.6634746 | 0.3478504 | 0.727953 | NA       |
| RF00026          | 0           | NA           | NA        | NA        | NA       | NA       |
| RF00001          | 0           | NA           | NA        | NA        | NA       | NA       |
| CU633838.1       | 190.8183733 | -0.074967728 | 0.1484128 | -0.50513  | 0.613468 | 0.95688  |
| CABZ01113818.1   | 45.73818741 | 0.472902972  | 0.3025794 | 1.5629054 | 0.118075 | 0.641526 |
| BX324164.5       | 4.270557127 | -0.255929653 | 0.9690645 | -0.2641   | 0.791703 | NA       |
| RF00026          | 0           | NA           | NA        | NA        | NA       | NA       |
| RF00001          | 0           | NA           | NA        | NA        | NA       | NA       |
| zgc:85789        | 137.6012294 | 0.1063312    | 0.1786178 | 0.5953003 | 0.551643 | 0.947138 |
| ank3b            | 401.6865555 | 0.104962957  | 0.1200942 | 0.8740055 | 0.382115 | 0.895192 |
| zgc:165555       | 6.624877646 | 0.86219365   | 0.7959551 | 1.083219  | 0.278711 | NA       |
| CR450812.1       | 2.141581097 | -0.644273583 | 1.3502102 | -0.477165 | 0.633244 | NA       |
| SBSPON           | 49.90086543 | -0.013590757 | 0.2926282 | -0.046444 | 0.962957 | 0.995927 |
| RF00026          | 0           | NA           | NA        | NA        | NA       | NA       |
| CU459155.1       | 0.476747244 | 2.393381959  | 3.0525537 | 0.7840589 | 0.433006 | NA       |
| RF00001          | 0           | NA           | NA        | NA        | NA       | NA       |
| CABZ01041996.1   | 0.158795395 | 0.967652056  | 4.0804729 | 0.2371421 | 0.812547 | NA       |
| RF00001          | 1.000684536 | 3.450436576  | 2.0457121 | 1.6866678 | 0.091667 | NA       |
| BX323861.3       | 1.364416829 | -0.705571612 | 1.7443167 | -0.404497 | 0.685847 | NA       |
| CABZ01066694.1   | 7.069900456 | -0.003769431 | 0.7541542 | -0.004998 | 0.996012 | NA       |
| AL929305.1       | 5.117030894 | 0.876162338  | 0.8453941 | 1.0363952 | 0.300018 | NA       |
| CABZ01070631.1   | 26.27958768 | -0.124086511 | 0.3677152 | -0.337453 | 0.735776 | 0.972535 |
| LO018535.1       | 290.9443277 | -0.062111254 | 0.1395619 | -0.445045 | 0.656288 | 0.961833 |
| RF00026          | 0           | NA           | NA        | NA        | NA       | NA       |
| RF00334          | 2.955138044 | -0.975972046 | 1.1761363 | -0.829812 | 0.406645 | NA       |
| RF00026          | 0           | NA           | NA        | NA        | NA       | NA       |
| RF00003          | 0           | NA           | NA        | NA        | NA       | NA       |
| BX510309.2       | 0           | NA           | NA        | NA        | NA       | NA       |
| RF00001          | 0           | NA           | NA        | NA        | NA       | NA       |
| RF00012          | 0           | NA           | NA        | NA        | NA       | NA       |
| taar18f          | 0.158795395 | 0.967652056  | 4.0804729 | 0.2371421 | 0.812547 | NA       |
| CABZ01085887.1   | 85.45405372 | 0.251256581  | 0.2508279 | 1.001709  | 0.316484 | 0.867129 |
| RF00001          | 0.31759079  | 1.807926197  | 3.579045  | 0.5051421 | 0.613459 | NA       |
| RF00017          | 0           | NA           | NA        | NA        | NA       | NA       |
| RF00026          | 0           | NA           | NA        | NA        | NA       | NA       |
| pimr168          | 0           | NA           | NA        | NA        | NA       | NA       |
| BX511056.1       | 0           | NA           | NA        | NA        | NA       | NA       |
| zgc:173702       | 1.188797441 | -1.322727039 | 1.8673491 | -0.708345 | 0.478731 | NA       |
| zgc:91850        | 0           | NA           | NA        | NA        | NA       | NA       |
| RF00001          | 0           | NA           | NA        | NA        | NA       | NA       |
| RF00001          | 0.158795395 | 0.967652056  | 4.0804729 | 0.2371421 | 0.812547 | NA       |
| kctd14           | 26.45015219 | -0.762362627 | 0.3791337 | -2.010802 | 0.044346 | 0.414025 |
| BX323083.2       | 0           | NA           | NA        | NA        | NA       | NA       |
| RF00001          | 0.158915748 | 0.967652056  | 4.0804729 | 0.2371421 | 0.812547 | NA       |
| RF00026          | 0           | NA           | NA        | NA        | NA       | NA       |
| BX784025.1       | 3.11845205  | 1.894216838  | 1.1650053 | 1.6259298 | 0.103965 | NA       |
| BX548067.2       | 0           | NA           | NA        | NA        | NA       | NA       |

|                   |             |              |           |           |          |          |
|-------------------|-------------|--------------|-----------|-----------|----------|----------|
| RF00017           | 0.665211163 | 0.04738924   | 2.3079847 | 0.0205327 | 0.983618 | NA       |
| AL929237.4        | 0 NA        |              | NA        | NA        | NA       | NA       |
| si:ch211-200p22.4 | 477.4494627 | 0.163901437  | 0.1160215 | 1.412682  | 0.157749 | 0.709035 |
| tmem107           | 75.67290195 | -0.357773232 | 0.2601112 | -1.375462 | 0.168988 | 0.725955 |
| RF00003           | 0 NA        |              | NA        | NA        | NA       | NA       |
| RF00001           | 0.521188103 | -2.493476766 | 2.9577741 | -0.843025 | 0.399215 | NA       |
| traj35            | 0 NA        |              | NA        | NA        | NA       | NA       |
| si:rp71-1f1.6     | 0.31437473  | -1.788572922 | 3.5930657 | -0.497785 | 0.618636 | NA       |
| BX296549.1        | 0.166657454 | -0.955901296 | 4.0804729 | -0.234262 | 0.814781 | NA       |
| CT583625.5        | 1.63835365  | -1.196460847 | 1.6095803 | -0.743337 | 0.457278 | NA       |
| BX005380.1        | 7.854895511 | 0.839200696  | 0.6831833 | 1.2283682 | 0.219309 | NA       |
| CABZ01044731.1    | 219.0511664 | -0.046287953 | 0.1441652 | -0.321076 | 0.748153 | 0.97419  |
| mbd4              | 125.4933603 | -0.249447209 | 0.1879804 | -1.326985 | 0.184514 | 0.747376 |
| BX571681.5        | 0.158915748 | 0.967652056  | 4.0804729 | 0.2371421 | 0.812547 | NA       |
| RF00001           | 0 NA        |              | NA        | NA        | NA       | NA       |
| CT583728.10       | 0.849510495 | 1.927128725  | 2.1168069 | 0.9103942 | 0.362615 | NA       |
| si:dkey-13p1.4    | 21.1195644  | -0.00841967  | 0.4118702 | -0.020443 | 0.98369  | 0.996944 |
| BX640512.4        | 0.166657454 | -0.955901296 | 4.0804729 | -0.234262 | 0.814781 | NA       |
| RF00001           | 0 NA        |              | NA        | NA        | NA       | NA       |
| znf986            | 7.645494587 | 0.539013421  | 0.7124337 | 0.7565804 | 0.449301 | NA       |
| zgc:153733        | 92.89015419 | 0.063680589  | 0.2026239 | 0.3142797 | 0.753309 | 0.974864 |
| CABZ01040626.1    | 0 NA        |              | NA        | NA        | NA       | NA       |
| CR792453.3        | 1.49492231  | -0.276158482 | 1.5635535 | -0.176622 | 0.859805 | NA       |
| RF00001           | 0 NA        |              | NA        | NA        | NA       | NA       |
| RF00001           | 0 NA        |              | NA        | NA        | NA       | NA       |
| RF00001           | 0 NA        |              | NA        | NA        | NA       | NA       |
| RF00001           | 0 NA        |              | NA        | NA        | NA       | NA       |
| hsd11b11b         | 59.75314475 | -0.503800214 | 0.2553739 | -1.972794 | 0.048519 | 0.433449 |
| L0018557.1        | 704.7056292 | -0.075930964 | 0.1008916 | -0.7526   | 0.451691 | 0.918761 |
| RF00001           | 0 NA        |              | NA        | NA        | NA       | NA       |
| BX897685.1        | 0 NA        |              | NA        | NA        | NA       | NA       |
| CR847571.2        | 0.365141898 | 1.973577737  | 3.3927314 | 0.5817076 | 0.560764 | NA       |
| txndc15           | 167.5152989 | -0.01407617  | 0.1594721 | -0.088267 | 0.929664 | 0.992702 |
| FQ976913.1        | 163.3820728 | -0.339504438 | 0.1652823 | -2.054088 | 0.039967 | 0.391511 |
| cmklr12           | 0.365141898 | 1.973577737  | 3.3927314 | 0.5817076 | 0.560764 | NA       |
| RF00001           | 1.004928192 | -0.005789997 | 1.8593771 | -0.003114 | 0.997515 | NA       |
| zgc:77614         | 0 NA        |              | NA        | NA        | NA       | NA       |
| F0904880.1        | 15.90575849 | -0.055918265 | 0.5000501 | -0.111825 | 0.910962 | 0.991059 |
| CABZ01086293.1    | 25.91410226 | 0.044413407  | 0.3912256 | 0.1135238 | 0.909615 | 0.990702 |
| BX324212.2        | 0.9751806   | 2.205383087  | 2.0107884 | 1.0967753 | 0.27274  | NA       |
| RF00026           | 0 NA        |              | NA        | NA        | NA       | NA       |
| RF00001           | 0 NA        |              | NA        | NA        | NA       | NA       |
| RF00001           | 0 NA        |              | NA        | NA        | NA       | NA       |
| CR788249.3        | 0 NA        |              | NA        | NA        | NA       | NA       |
| RF00026           | 0 NA        |              | NA        | NA        | NA       | NA       |
| RF00001           | 0 NA        |              | NA        | NA        | NA       | NA       |
| RF00001           | 0 NA        |              | NA        | NA        | NA       | NA       |
| nitr1k            | 0.789393591 | -0.56601807  | 2.4000363 | -0.235837 | 0.813559 | NA       |
| CR394532.1        | 8.758329411 | 0.266417276  | 0.6459977 | 0.4124121 | 0.680037 | NA       |
| RF00004           | 0 NA        |              | NA        | NA        | NA       | NA       |
| CR388363.3        | 0 NA        |              | NA        | NA        | NA       | NA       |
| AL954848.1        | 0.999584661 | 0.976925822  | 1.8949579 | 0.5155396 | 0.606176 | NA       |
| RF00001           | 0.347458735 | -1.908042286 | 3.4571486 | -0.551912 | 0.581009 | NA       |
| RF00001           | 0 NA        |              | NA        | NA        | NA       | NA       |

|                   |             |              |           |           |          |          |
|-------------------|-------------|--------------|-----------|-----------|----------|----------|
| BX537296.1        | 0           | NA           | NA        | NA        | NA       | NA       |
| BX901962.3        | 43.46652476 | -0.273135635 | 0.3278647 | -0.833074 | 0.404803 | 0.901305 |
| CABZ01057488.1    | 12.88800875 | -0.663038287 | 0.5392772 | -1.229494 | 0.218886 | 0.785734 |
| taar20a1          | 0.658218317 | -0.061628513 | 2.4342948 | -0.025317 | 0.979802 | NA       |
| BX548073.6        | 0           | NA           | NA        | NA        | NA       | NA       |
| znf997            | 3.420847211 | -0.730704325 | 1.0710489 | -0.682232 | 0.495092 | NA       |
| apls3a            | 129.6625713 | -0.695738809 | 0.1817415 | -3.828177 | 0.000129 | 0.006006 |
| BX571853.2        | 1.659731029 | -1.161818817 | 1.5334322 | -0.757659 | 0.448655 | NA       |
| RF00001           | 0           | NA           | NA        | NA        | NA       | NA       |
| dre-mir-430c-1    | 0           | NA           | NA        | NA        | NA       | NA       |
| RF00026           | 0           | NA           | NA        | NA        | NA       | NA       |
| CABZ01086877.1    | 0           | NA           | NA        | NA        | NA       | NA       |
| RF00001           | 1.221603953 | 2.539597172  | 1.9939066 | 1.2736791 | 0.202777 | NA       |
| BX005380.2        | 12.17921565 | -0.004567322 | 0.5423768 | -0.008421 | 0.993281 | 0.998554 |
| RF00001           | 0           | NA           | NA        | NA        | NA       | NA       |
| si:ch211-156118.4 | 2.127395985 | -0.674516466 | 1.2886138 | -0.523443 | 0.600666 | NA       |
| ptpro             | 676.66403   | -0.05583597  | 0.0964264 | -0.579053 | 0.562553 | 0.948728 |
| RF00001           | 0           | NA           | NA        | NA        | NA       | NA       |
| RF00026           | 0           | NA           | NA        | NA        | NA       | NA       |
| RF00001           | 0           | NA           | NA        | NA        | NA       | NA       |
| si:ch73-42p12.2   | 202.8837675 | 0.188141683  | 0.1512107 | 1.2442355 | 0.213413 | 0.781631 |
| si:dkey-199f5.4   | 0           | NA           | NA        | NA        | NA       | NA       |
| FP236318.1        | 90.09887791 | -0.046361468 | 0.2320118 | -0.199824 | 0.841618 | 0.985174 |
| RF00001           | 0           | NA           | NA        | NA        | NA       | NA       |
| RF00001           | 0           | NA           | NA        | NA        | NA       | NA       |
| BX510941.2        | 0.496945679 | -0.834564081 | 2.8549631 | -0.29232  | 0.770042 | NA       |
| zgc:162989        | 269.8765985 | 0.04144902   | 0.1303451 | 0.3179943 | 0.750489 | 0.97419  |
| F0744840.1        | 0.325573202 | 0.005883621  | 3.3172783 | 0.0017736 | 0.998585 | NA       |
| BX510960.2        | 6.375809918 | -0.47395724  | 0.7884304 | -0.60114  | 0.547747 | NA       |
| RF00001           | 1.171747284 | -0.345931323 | 1.8089853 | -0.191229 | 0.848346 | NA       |
| taar20q           | 0.507044276 | -2.459587493 | 2.7586536 | -0.89159  | 0.372613 | NA       |
| CU459094.1        | 7.532743583 | -0.323672945 | 0.6969234 | -0.464431 | 0.642339 | NA       |
| RF00001           | 0           | NA           | NA        | NA        | NA       | NA       |
| RF00001           | 0           | NA           | NA        | NA        | NA       | NA       |
| BX088713.2        | 0           | NA           | NA        | NA        | NA       | NA       |
| sypa              | 10486.92016 | 0.114774607  | 0.0709914 | 1.6167385 | 0.105935 | 0.615567 |
| si:dkey-31m5.7    | 0           | NA           | NA        | NA        | NA       | NA       |
| RF00001           | 0           | NA           | NA        | NA        | NA       | NA       |
| RF00026           | 0           | NA           | NA        | NA        | NA       | NA       |
| CU571382.4        | 0           | NA           | NA        | NA        | NA       | NA       |
| BX119963.3        | 0.523937293 | 2.50362281   | 2.7291625 | 0.9173594 | 0.358954 | NA       |
| CABZ01113373.1    | 239.1836284 | -0.136851288 | 0.1614488 | -0.847645 | 0.396636 | 0.899672 |
| zgc:77614         | 0           | NA           | NA        | NA        | NA       | NA       |
| RF00137           | 0           | NA           | NA        | NA        | NA       | NA       |
| BX470083.2        | 0           | NA           | NA        | NA        | NA       | NA       |
| si:dkey-23f9.7    | 0           | NA           | NA        | NA        | NA       | NA       |
| RF00026           | 0           | NA           | NA        | NA        | NA       | NA       |
| BX004779.2        | 7.511054215 | -0.728375636 | 0.7008941 | -1.039209 | 0.298707 | NA       |
| CABZ01090785.1    | 80.44949214 | -0.219030522 | 0.231274  | -0.947061 | 0.343608 | 0.878434 |
| CABZ01080042.1    | 1.006577507 | 1.047948733  | 1.9691602 | 0.5321805 | 0.594601 | NA       |
| mapk4             | 278.4939245 | 0.227734382  | 0.1280476 | 1.7785132 | 0.07532  | 0.534207 |
| RF00001           | 0           | NA           | NA        | NA        | NA       | NA       |
| si:dkey-27d5.6    | 0           | NA           | NA        | NA        | NA       | NA       |
| RF00003           | 0.31437473  | -1.788572922 | 3.5930657 | -0.497785 | 0.618636 | NA       |

|                    |             |              |           |           |          |          |
|--------------------|-------------|--------------|-----------|-----------|----------|----------|
| CABZ01079179.1     | 250.5732648 | -0.033703402 | 0.1493058 | -0.225734 | 0.821408 | 0.981845 |
| pimr152            | 0.166657454 | -0.955901296 | 4.0804729 | -0.234262 | 0.814781 | NA       |
| CABZ01030278.1     | 0.158915748 | 0.967652056  | 4.0804729 | 0.2371421 | 0.812547 | NA       |
| RF00001            | 0 NA        | NA           | NA        | NA        | NA       | NA       |
| RF01848            | 0 NA        | NA           | NA        | NA        | NA       | NA       |
| dre-mir-430b-1     | 0 NA        | NA           | NA        | NA        | NA       | NA       |
| pimr97             | 0 NA        | NA           | NA        | NA        | NA       | NA       |
| CABZ01115113.1     | 235.9205612 | -0.298609829 | 0.1428916 | -2.089765 | 0.036639 | 0.374263 |
| BX950868.3         | 0 NA        | NA           | NA        | NA        | NA       | NA       |
| CU681855.1         | 6.807106782 | -0.510503529 | 0.7526085 | -0.678312 | 0.497574 | NA       |
| ugt2a7             | 7.03467268  | -0.331582758 | 0.8386423 | -0.39538  | 0.692562 | NA       |
| RF00001            | 0 NA        | NA           | NA        | NA        | NA       | NA       |
| CABZ01068209.1     | 5.299488279 | -0.36050362  | 0.83747   | -0.430467 | 0.666856 | NA       |
| RF00138            | 0 NA        | NA           | NA        | NA        | NA       | NA       |
| F0905027.1         | 0 NA        | NA           | NA        | NA        | NA       | NA       |
| zgc:171310         | 0 NA        | NA           | NA        | NA        | NA       | NA       |
| pimr8              | 0 NA        | NA           | NA        | NA        | NA       | NA       |
| RF00001            | 0 NA        | NA           | NA        | NA        | NA       | NA       |
| CABZ01061508.1     | 14.95640162 | 0.684269851  | 0.50168   | 1.3639569 | 0.172581 | 0.731348 |
| BX321875.2         | 1.865994961 | -0.80082671  | 1.5155802 | -0.528396 | 0.597224 | NA       |
| si:ch211-212k5.1   | 12.98737532 | 0.154785901  | 0.5209116 | 0.2971443 | 0.766356 | 0.97547  |
| RF00026            | 0 NA        | NA           | NA        | NA        | NA       | NA       |
| cacna1db           | 13.61659165 | -0.069661871 | 0.5127752 | -0.135853 | 0.891938 | 0.989291 |
| taar13d            | 0.69491747  | -2.908930307 | 2.6707877 | -1.089166 | 0.276081 | NA       |
| RF00001            | 0 NA        | NA           | NA        | NA        | NA       | NA       |
| CABZ01088049.1     | 4.50785815  | -0.303446804 | 0.9259929 | -0.327699 | 0.743139 | NA       |
| wdr21              | 493.4842388 | -0.24883249  | 0.1117974 | -2.225744 | 0.026031 | 0.311101 |
| CT025875.1         | 25.66130311 | 0.232899847  | 0.3833866 | 0.6074804 | 0.543532 | 0.945438 |
| zgc:174696         | 35.27767213 | 0.783359692  | 0.3444918 | 2.2739576 | 0.022969 | 0.290396 |
| AL954137.1         | 0 NA        | NA           | NA        | NA        | NA       | NA       |
| BX510335.1         | 0 NA        | NA           | NA        | NA        | NA       | NA       |
| RF00003            | 0 NA        | NA           | NA        | NA        | NA       | NA       |
| znf1092            | 3.283467225 | -2.48429585  | 1.2409179 | -2.001983 | 0.045287 | NA       |
| CT573103.2         | 3.801583826 | 0.929502916  | 0.9928142 | 0.9362305 | 0.349155 | NA       |
| BX537296.2         | 0 NA        | NA           | NA        | NA        | NA       | NA       |
| RF00001            | 0 NA        | NA           | NA        | NA        | NA       | NA       |
| RF00026            | 0 NA        | NA           | NA        | NA        | NA       | NA       |
| RF00026            | 0 NA        | NA           | NA        | NA        | NA       | NA       |
| AL590152.1         | 0 NA        | NA           | NA        | NA        | NA       | NA       |
| BX284640.1         | 0.173729368 | -0.955901296 | 4.0804729 | -0.234262 | 0.814781 | NA       |
| CABZ01061524.1     | 4088.47309  | 0.339213497  | 0.1048544 | 3.2350916 | 0.001216 | 0.036159 |
| COX7A2 (1 of many) | 294.8571446 | -0.39039487  | 0.12955   | -3.013468 | 0.002583 | 0.064485 |
| zgc:162154         | 0.514116189 | -2.475533565 | 2.7461255 | -0.901464 | 0.367342 | NA       |
| zdhhc21            | 211.676198  | 0.059634286  | 0.1489218 | 0.4004404 | 0.688832 | 0.966672 |
| CU210890.1         | 10.33799104 | 0.879706477  | 0.6105013 | 1.4409575 | 0.149597 | NA       |
| RF00001            | 0 NA        | NA           | NA        | NA        | NA       | NA       |
| BX247865.1         | 0.681245011 | 1.537021632  | 2.3941387 | 0.6419936 | 0.520877 | NA       |
| BX470214.1         | 0.507044276 | -2.459587493 | 2.7586536 | -0.89159  | 0.372613 | NA       |
| CABZ01092907.1     | 17.29628551 | 0.013535414  | 0.5056028 | 0.0267708 | 0.978643 | 0.996762 |
| AL935195.1         | 3.822918924 | -0.111527712 | 0.9560778 | -0.116651 | 0.907136 | NA       |
| PCP4               | 1373.616763 | 0.046463189  | 0.1176991 | 0.3947624 | 0.693018 | 0.96736  |
| RF00001            | 0.325452849 | 0.005883619  | 3.3177086 | 0.0017734 | 0.998585 | NA       |
| RF00001            | 0.689615224 | -1.495598879 | 2.3854835 | -0.626958 | 0.530687 | NA       |
| CU499311.1         | 0.317831496 | 1.808837541  | 3.5779923 | 0.5055454 | 0.613176 | NA       |

|                   |             |              |           |           |          |          |
|-------------------|-------------|--------------|-----------|-----------|----------|----------|
| RF00001           | 0.158795395 | 0.967652056  | 4.0804729 | 0.2371421 | 0.812547 | NA       |
| CR388207.2        | 3.488865199 | -0.407756555 | 1.0081921 | -0.404443 | 0.685887 | NA       |
| CABZ01086797.1    | 144.558944  | -0.068566164 | 0.1913226 | -0.35838  | 0.720059 | 0.969318 |
| znf994            | 5.344911916 | 0.18470377   | 0.8130714 | 0.227168  | 0.820293 | NA       |
| CABZ01056052.1    | 1.214772745 | 2.539931161  | 1.9967893 | 1.2720076 | 0.20337  | NA       |
| nitr6b            | 0           | NA           | NA        | NA        | NA       | NA       |
| CLEC3A            | 503.4282058 | 0.007169812  | 0.1381417 | 0.0519019 | 0.958607 | 0.994935 |
| RF00001           | 0.158795395 | 0.967652056  | 4.0804729 | 0.2371421 | 0.812547 | NA       |
| RF00138           | 0           | NA           | NA        | NA        | NA       | NA       |
| RF00003           | 0           | NA           | NA        | NA        | NA       | NA       |
| RF00001           | 0           | NA           | NA        | NA        | NA       | NA       |
| znf1098           | 12.40839522 | -0.736924148 | 0.5446917 | -1.35292  | 0.176081 | 0.736505 |
| CU137648.2        | 1.763436286 | 2.118973619  | 1.7835463 | 1.1880677 | 0.234807 | NA       |
| taar20b1          | 0           | NA           | NA        | NA        | NA       | NA       |
| RF00001           | 0           | NA           | NA        | NA        | NA       | NA       |
| prf1.7            | 0.798743327 | -0.585351522 | 2.137483  | -0.273851 | 0.784199 | NA       |
| RF00001           | 0.341366344 | 1.891903201  | 3.2128156 | 0.5888614 | 0.555954 | NA       |
| BX681417.5        | 0           | NA           | NA        | NA        | NA       | NA       |
| RF00026           | 0           | NA           | NA        | NA        | NA       | NA       |
| znf1102           | 12.18558662 | -0.506214309 | 0.5493843 | -0.921421 | 0.356831 | 0.883422 |
| AL772241.1        | 0           | NA           | NA        | NA        | NA       | NA       |
| RF00001           | 0           | NA           | NA        | NA        | NA       | NA       |
| pimr16            | 0           | NA           | NA        | NA        | NA       | NA       |
| RF00001           | 0           | NA           | NA        | NA        | NA       | NA       |
| RF00026           | 0           | NA           | NA        | NA        | NA       | NA       |
| znf1149           | 0.339758314 | 0.005883863  | 3.2682461 | 0.0018003 | 0.998564 | NA       |
| PARD3 (1 of many) | 6.752425643 | 0.939578819  | 0.7354479 | 1.2775599 | 0.201405 | NA       |
| RF00001           | 0           | NA           | NA        | NA        | NA       | NA       |
| si:ch211-221n20.1 | 0.9926331   | 0.990524899  | 2.0829487 | 0.4755397 | 0.634402 | NA       |
| F0203514.1        | 0.158915748 | 0.967652056  | 4.0804729 | 0.2371421 | 0.812547 | NA       |
| hist1h2a3         | 2.086838566 | 1.054253713  | 1.4430912 | 0.7305524 | 0.465053 | NA       |
| si:dkey-3h2.2     | 14.76342756 | 0.283005664  | 0.5169602 | 0.5474418 | 0.584075 | 0.952214 |
| zgc:165555        | 4.03558848  | 0.285577744  | 1.0046077 | 0.2842679 | 0.776205 | NA       |
| RF00026           | 0           | NA           | NA        | NA        | NA       | NA       |
| BX548073.7        | 0           | NA           | NA        | NA        | NA       | NA       |
| RF00026           | 0           | NA           | NA        | NA        | NA       | NA       |
| RF00026           | 0           | NA           | NA        | NA        | NA       | NA       |
| RF00001           | 0           | NA           | NA        | NA        | NA       | NA       |
| RF00015           | 0           | NA           | NA        | NA        | NA       | NA       |
| pimr12            | 0           | NA           | NA        | NA        | NA       | NA       |
| pimr153           | 0           | NA           | NA        | NA        | NA       | NA       |
| tmem14ca          | 318.4663224 | -0.176067671 | 0.1268776 | -1.387697 | 0.165229 | 0.721223 |
| agbl4             | 34.21443209 | -0.360749087 | 0.3348798 | -1.077249 | 0.281369 | 0.84357  |
| si:dkey-108k21.14 | 9.160810255 | -0.25377392  | 0.6205936 | -0.408921 | 0.682597 | NA       |
| RF00001           | 0           | NA           | NA        | NA        | NA       | NA       |
| pimr107           | 0           | NA           | NA        | NA        | NA       | NA       |
| RF00026           | 0           | NA           | NA        | NA        | NA       | NA       |
| RF00026           | 0           | NA           | NA        | NA        | NA       | NA       |
| RF00017           | 1.300513096 | 1.583274097  | 1.7585478 | 0.9003304 | 0.367944 | NA       |
| znf1111           | 9.101293741 | 0.810451126  | 0.6484657 | 1.249798  | 0.211373 | NA       |
| CABZ01020455.1    | 1.503990056 | -0.34389662  | 1.5791308 | -0.217776 | 0.827604 | NA       |
| RF00003           | 0.173729368 | -0.955901296 | 4.0804729 | -0.234262 | 0.814781 | NA       |
| si:dkey-9i5.2     | 4.756922798 | -0.09836913  | 0.8543464 | -0.11514  | 0.908334 | NA       |
| RF00026           | 0           | NA           | NA        | NA        | NA       | NA       |

|                   |             |              |           |           |          |          |
|-------------------|-------------|--------------|-----------|-----------|----------|----------|
| BX629348.1        | 0.182570949 | 0.967652056  | 4.0804729 | 0.2371421 | 0.812547 | NA       |
| RF00001           | 0 NA        | NA           | NA        | NA        | NA       | NA       |
| RF00001           | 0 NA        | NA           | NA        | NA        | NA       | NA       |
| CR847537.1        | 7.04353961  | -0.424110262 | 0.7478659 | -0.567094 | 0.57065  | NA       |
| F0834855.1        | 7.939798022 | -0.229041419 | 0.6945061 | -0.32979  | 0.741558 | NA       |
| si:dkey-28k24.2   | 9.146566061 | -0.829817701 | 0.6802962 | -1.219789 | 0.222545 | NA       |
| BX908804.2        | 0.158915748 | 0.967652056  | 4.0804729 | 0.2371421 | 0.812547 | NA       |
| BX276128.1        | 10.91125732 | 0.102534041  | 0.5965794 | 0.1718699 | 0.86354  | NA       |
| RF00003           | 0 NA        | NA           | NA        | NA        | NA       | NA       |
| FP103007.1        | 0.333314908 | -1.858695402 | 3.5126701 | -0.52914  | 0.596708 | NA       |
| RF01848           | 0 NA        | NA           | NA        | NA        | NA       | NA       |
| RF00001           | 0 NA        | NA           | NA        | NA        | NA       | NA       |
| RF00001           | 0 NA        | NA           | NA        | NA        | NA       | NA       |
| RF00001           | 0 NA        | NA           | NA        | NA        | NA       | NA       |
| zgc:173552        | 5.792502292 | 0.602524811  | 0.7901015 | 0.7625916 | 0.445707 | NA       |
| BX649312.1        | 0 NA        | NA           | NA        | NA        | NA       | NA       |
| pimr101           | 0 NA        | NA           | NA        | NA        | NA       | NA       |
| RF00026           | 0 NA        | NA           | NA        | NA        | NA       | NA       |
| si:ch211-223a21.6 | 1.464703351 | -1.022086365 | 1.5936908 | -0.641333 | 0.521306 | NA       |
| RF00001           | 0 NA        | NA           | NA        | NA        | NA       | NA       |
| CR847936.6        | 162.9696928 | 0.010556571  | 0.1849343 | 0.0570828 | 0.954479 | 0.994533 |
| RF00001           | 0.347458735 | -1.908042286 | 3.4571486 | -0.551912 | 0.581009 | NA       |
| RF00001           | 0 NA        | NA           | NA        | NA        | NA       | NA       |
| RF00001           | 0 NA        | NA           | NA        | NA        | NA       | NA       |
| RF00012           | 0 NA        | NA           | NA        | NA        | NA       | NA       |
| CU137681.5        | 0 NA        | NA           | NA        | NA        | NA       | NA       |
| si:dkey-27d5.14   | 0.157187365 | -0.955901296 | 4.0804729 | -0.234262 | 0.814781 | NA       |
| ptprsa            | 1026.142648 | -0.114283684 | 0.1073342 | -1.064746 | 0.286991 | 0.845979 |
| RF00001           | 0 NA        | NA           | NA        | NA        | NA       | NA       |
| znf1110           | 3.916371824 | -0.327256535 | 1.0512527 | -0.311301 | 0.755571 | NA       |
| RF00001           | 0 NA        | NA           | NA        | NA        | NA       | NA       |
| RF00001           | 0.182570949 | 0.967652056  | 4.0804729 | 0.2371421 | 0.812547 | NA       |
| BX324227.3        | 0.182570949 | 0.967652056  | 4.0804729 | 0.2371421 | 0.812547 | NA       |
| CU929544.1        | 51.38870119 | 0.285833346  | 0.2831885 | 1.0093395 | 0.312812 | 0.864748 |
| CABZ01043952.1    | 30.83371348 | -0.658605207 | 0.344043  | -1.914311 | 0.05558  | 0.461579 |
| RF00001           | 0 NA        | NA           | NA        | NA        | NA       | NA       |
| RF00026           | 0 NA        | NA           | NA        | NA        | NA       | NA       |
| dre-mir-430b-10   | 0 NA        | NA           | NA        | NA        | NA       | NA       |
| BX769173.1        | 0 NA        | NA           | NA        | NA        | NA       | NA       |
| zgc:110045        | 123.8425972 | -0.250120672 | 0.1869888 | -1.337624 | 0.181019 | 0.741859 |
| trib1             | 366.4000651 | 0.337276573  | 0.1200469 | 2.8095412 | 0.004961 | 0.102608 |
| RF00001           | 17.51550874 | -0.306200869 | 0.459757  | -0.666006 | 0.505407 | 0.935724 |
| BX950205.3        | 0 NA        | NA           | NA        | NA        | NA       | NA       |
| FP102169.1        | 6.351729133 | -0.290234711 | 0.7566914 | -0.383558 | 0.701306 | NA       |
| RF00001           | 0 NA        | NA           | NA        | NA        | NA       | NA       |
| si:dkey-58b18.3   | 0 NA        | NA           | NA        | NA        | NA       | NA       |
| RF00001           | 0.31437473  | -1.788572922 | 3.5930657 | -0.497785 | 0.618636 | NA       |
| tln2b             | 46.93639952 | 0.006790846  | 0.3161032 | 0.021483  | 0.98286  | 0.996944 |
| RF00003           | 0 NA        | NA           | NA        | NA        | NA       | NA       |
| ftr32             | 1.803671519 | -0.263747218 | 1.3709897 | -0.192377 | 0.847447 | NA       |
| RF00015           | 0 NA        | NA           | NA        | NA        | NA       | NA       |
| RF00001           | 3.265618891 | 0.578447752  | 1.0514627 | 0.5501362 | 0.582226 | NA       |
| pimr163           | 0 NA        | NA           | NA        | NA        | NA       | NA       |
| RF00003           | 0 NA        | NA           | NA        | NA        | NA       | NA       |

|                     |              |               |            |            |           |           |
|---------------------|--------------|---------------|------------|------------|-----------|-----------|
| BX908796. 2         | 0. 657349104 | 1. 487939685  | 2. 418178  | 0. 6153144 | 0. 538347 | NA        |
| ZNF276              | 343. 367077  | -0. 128523714 | 0. 1275901 | -1. 007318 | 0. 313782 | 0. 865132 |
| VMAC                | 0 NA         | NA            | NA         | NA         | NA        | NA        |
| taar20z             | 0. 157187365 | -0. 955901296 | 4. 0804729 | -0. 234262 | 0. 814781 | NA        |
| RF00001             | 0 NA         | NA            | NA         | NA         | NA        | NA        |
| CU694317. 1         | 2. 994197343 | -0. 334911441 | 1. 0731182 | -0. 312092 | 0. 754971 | NA        |
| CT583728. 11        | 0 NA         | NA            | NA         | NA         | NA        | NA        |
| dicpl. 1            | 0 NA         | NA            | NA         | NA         | NA        | NA        |
| L0018430. 1         | 36. 81371749 | 0. 114662111  | 0. 315123  | 0. 3638646 | 0. 715959 | 0. 96909  |
| RF00001             | 1. 80822816  | 2. 162857379  | 1. 5753167 | 1. 3729667 | 0. 169763 | NA        |
| si:dkey-112g5. 3    | 0 NA         | NA            | NA         | NA         | NA        | NA        |
| FP016018. 4         | 0 NA         | NA            | NA         | NA         | NA        | NA        |
| BX511056. 2         | 0 NA         | NA            | NA         | NA         | NA        | NA        |
| BX000981. 6         | 0 NA         | NA            | NA         | NA         | NA        | NA        |
| BX927193. 2         | 22. 87641387 | -0. 314148186 | 0. 4276562 | -0. 734581 | 0. 462595 | 0. 922698 |
| si:ch211-165a10. 10 | 0 NA         | NA            | NA         | NA         | NA        | NA        |
| RF00026             | 0 NA         | NA            | NA         | NA         | NA        | NA        |
| RF00026             | 0 NA         | NA            | NA         | NA         | NA        | NA        |
| RF00001             | 0 NA         | NA            | NA         | NA         | NA        | NA        |
| L0018128. 1         | 20. 00000756 | -0. 530732326 | 0. 4677031 | -1. 134763 | 0. 256474 | 0. 824773 |
| RF00001             | 0 NA         | NA            | NA         | NA         | NA        | NA        |
| F0681288. 3         | 23. 34436466 | 0. 047812529  | 0. 396764  | 0. 1205062 | 0. 904082 | 0. 990291 |
| RF00017             | 0 NA         | NA            | NA         | NA         | NA        | NA        |
| RF00001             | 0 NA         | NA            | NA         | NA         | NA        | NA        |
| znf1116             | 5. 450435161 | -0. 595471477 | 0. 8135924 | -0. 731904 | 0. 464227 | NA        |
| si:ch211-165a10. 5  | 0 NA         | NA            | NA         | NA         | NA        | NA        |
| RF00001             | 0 NA         | NA            | NA         | NA         | NA        | NA        |
| si:dkey-58b18. 2    | 0. 158915748 | 0. 967652056  | 4. 0804729 | 0. 2371421 | 0. 812547 | NA        |
| RF00003             | 0 NA         | NA            | NA         | NA         | NA        | NA        |
| RF00001             | 0 NA         | NA            | NA         | NA         | NA        | NA        |
| RF00017             | 1. 38602487  | 1. 708040649  | 1. 9015945 | 0. 898215  | 0. 369071 | NA        |
| lgi2a               | 93. 04397712 | 0. 325396268  | 0. 2242948 | 1. 4507528 | 0. 146849 | 0. 693524 |
| pimr44              | 0 NA         | NA            | NA         | NA         | NA        | NA        |
| RF00017             | 0. 508144151 | 0. 926490632  | 2. 6634746 | 0. 3478504 | 0. 727953 | NA        |
| RF00001             | 0 NA         | NA            | NA         | NA         | NA        | NA        |
| RF00001             | 0. 173729368 | -0. 955901296 | 4. 0804729 | -0. 234262 | 0. 814781 | NA        |
| F0082779. 1         | 98. 96896502 | 0. 181352142  | 0. 1966706 | 0. 9221111 | 0. 356471 | 0. 883422 |
| RF00017             | 1. 000134101 | 0. 001091541  | 2. 0514706 | 0. 0005321 | 0. 999575 | NA        |
| CR354547. 2         | 0 NA         | NA            | NA         | NA         | NA        | NA        |
| si:ch73-106115. 2   | 0. 339758314 | 0. 005883863  | 3. 2682461 | 0. 0018003 | 0. 998564 | NA        |
| pimr155             | 0 NA         | NA            | NA         | NA         | NA        | NA        |
| camk2n2             | 795. 9222353 | 0. 022807458  | 0. 0970302 | 0. 2350554 | 0. 814166 | 0. 981081 |
| RF00001             | 0 NA         | NA            | NA         | NA         | NA        | NA        |
| arl311              | 591. 8878882 | 0. 09221544   | 0. 1128322 | 0. 8172796 | 0. 413769 | 0. 905864 |
| CT009620. 1         | 0 NA         | NA            | NA         | NA         | NA        | NA        |
| taar10d             | 0. 639947932 | -1. 440068751 | 2. 4365394 | -0. 59103  | 0. 5545   | NA        |
| CABZ01086611. 1     | 61. 40038386 | 0. 562688207  | 0. 2531715 | 2. 2225571 | 0. 026246 | 0. 312439 |
| RF00003             | 0 NA         | NA            | NA         | NA         | NA        | NA        |
| RF00001             | 0 NA         | NA            | NA         | NA         | NA        | NA        |
| BX005470. 1         | 0. 173729368 | -0. 955901296 | 4. 0804729 | -0. 234262 | 0. 814781 | NA        |
| RF00001             | 0. 158795395 | 0. 967652056  | 4. 0804729 | 0. 2371421 | 0. 812547 | NA        |
| BX537263. 1         | 0 NA         | NA            | NA         | NA         | NA        | NA        |
| RF00001             | 0 NA         | NA            | NA         | NA         | NA        | NA        |
| FP102888. 2         | 1. 286327984 | 1. 536233356  | 1. 8938746 | 0. 811159  | 0. 417274 | NA        |

|                  |             |              |           |           |          |          |
|------------------|-------------|--------------|-----------|-----------|----------|----------|
| CR931980.1       | 0.317831496 | 1.808837541  | 3.5779923 | 0.5055454 | 0.613176 | NA       |
| acyl             | 104.5713027 | 0.100422562  | 0.1974024 | 0.50872   | 0.610949 | 0.95688  |
| RF00001          | 0 NA        |              | NA        | NA        | NA       | NA       |
| RF00026          | 0 NA        |              | NA        | NA        | NA       | NA       |
| RF00001          | 0 NA        |              | NA        | NA        | NA       | NA       |
| RF00026          | 0 NA        |              | NA        | NA        | NA       | NA       |
| RF00001          | 0 NA        |              | NA        | NA        | NA       | NA       |
| CR848784.2       | 0 NA        |              | NA        | NA        | NA       | NA       |
| RF00017          | 0.157187365 | -0.955901296 | 4.0804729 | -0.234262 | 0.814781 | NA       |
| zgc:165555       | 7.476851932 | 0.803842499  | 0.8694959 | 0.9244926 | 0.35523  | NA       |
| CU138548.2       | 0 NA        |              | NA        | NA        | NA       | NA       |
| si:dkeyp-67e1.2  | 0.157187365 | -0.955901296 | 4.0804729 | -0.234262 | 0.814781 | NA       |
| RF00026          | 0 NA        |              | NA        | NA        | NA       | NA       |
| RF00003          | 0 NA        |              | NA        | NA        | NA       | NA       |
| RF00001          | 0.182570949 | 0.967652056  | 4.0804729 | 0.2371421 | 0.812547 | NA       |
| RF00026          | 0 NA        |              | NA        | NA        | NA       | NA       |
| RF00026          | 0 NA        |              | NA        | NA        | NA       | NA       |
| cdaa             | 67.34246394 | -0.370588658 | 0.2376842 | -1.559164 | 0.118958 | 0.642772 |
| CR450686.4       | 0 NA        |              | NA        | NA        | NA       | NA       |
| RF00003          | 0 NA        |              | NA        | NA        | NA       | NA       |
| BX640461.1       | 0.988386189 | 0.023110674  | 1.8675822 | 0.0123746 | 0.990127 | NA       |
| RF00001          | 0 NA        |              | NA        | NA        | NA       | NA       |
| BX537296.3       | 0 NA        |              | NA        | NA        | NA       | NA       |
| AL844518.1       | 8.607163153 | -0.238183201 | 0.6696985 | -0.355657 | 0.722097 | NA       |
| prokr1b          | 8.496709258 | -0.841299385 | 0.6765164 | -1.243576 | 0.213656 | NA       |
| RF00003          | 0 NA        |              | NA        | NA        | NA       | NA       |
| si:ch211-14p21.3 | 1.648092184 | 0.560848653  | 1.4446106 | 0.3882352 | 0.697842 | NA       |
| RF00026          | 0 NA        |              | NA        | NA        | NA       | NA       |
| BX323588.1       | 0 NA        |              | NA        | NA        | NA       | NA       |
| pimr152          | 0 NA        |              | NA        | NA        | NA       | NA       |
| nrsn1            | 1590.184024 | 0.011934811  | 0.0882019 | 0.1353125 | 0.892365 | 0.989291 |
| RF00001          | 0 NA        |              | NA        | NA        | NA       | NA       |
| CT583728.12      | 39.69877145 | 1.154427589  | 0.8898568 | 1.2973183 | 0.194522 | 0.758506 |
| RF00001          | 0 NA        |              | NA        | NA        | NA       | NA       |
| dhrrs13a.2       | 519.6782152 | 0.162133117  | 0.1094006 | 1.4820131 | 0.138337 | 0.676093 |
| RF00001          | 0 NA        |              | NA        | NA        | NA       | NA       |
| RF00001          | 0 NA        |              | NA        | NA        | NA       | NA       |
| si:dkey-27d5.3   | 0 NA        |              | NA        | NA        | NA       | NA       |
| BX324132.3       | 16.66908378 | 0.782425334  | 0.4743284 | 1.6495436 | 0.099036 | 0.598346 |
| zgc:165555       | 7.626111622 | 1.025488398  | 0.7286708 | 1.4073411 | 0.159326 | NA       |
| RF00003          | 0 NA        |              | NA        | NA        | NA       | NA       |
| CR394528.1       | 75.03019763 | -0.509948701 | 0.2369588 | -2.152056 | 0.031393 | 0.343463 |
| RF00001          | 0.173729368 | -0.955901296 | 4.0804729 | -0.234262 | 0.814781 | NA       |
| RF00012          | 0 NA        |              | NA        | NA        | NA       | NA       |
| RF00003          | 0 NA        |              | NA        | NA        | NA       | NA       |
| BX927243.2       | 0 NA        |              | NA        | NA        | NA       | NA       |
| GNG4             | 5.082685224 | 0.41491091   | 0.8871449 | 0.4676924 | 0.640005 | NA       |
| F0834850.1       | 175.8341524 | -0.129727455 | 0.1614595 | -0.803467 | 0.421705 | 0.90651  |
| RF00001          | 0 NA        |              | NA        | NA        | NA       | NA       |
| CABZ01087224.1   | 1.030353061 | 1.083094909  | 1.9769175 | 0.5478706 | 0.583781 | NA       |
| CR847936.7       | 0 NA        |              | NA        | NA        | NA       | NA       |
| RF00026          | 0 NA        |              | NA        | NA        | NA       | NA       |
| RF00001          | 0 NA        |              | NA        | NA        | NA       | NA       |
| BX510996.1       | 24.92009063 | 0.209744817  | 0.3899688 | 0.5378503 | 0.59068  | 0.954193 |



|                   |             |              |           |           |          |          |
|-------------------|-------------|--------------|-----------|-----------|----------|----------|
| RF00001           | 0           | NA           | NA        | NA        | NA       | NA       |
| RF00001           | 0.157187365 | -0.955901296 | 4.0804729 | -0.234262 | 0.814781 | NA       |
| ERG28             | 62.65828546 | -0.172979291 | 0.2453003 | -0.705174 | 0.480702 | 0.927601 |
| RF00001           | 0           | NA           | NA        | NA        | NA       | NA       |
| pimr24            | 0           | NA           | NA        | NA        | NA       | NA       |
| pimr4             | 0.166657454 | -0.955901296 | 4.0804729 | -0.234262 | 0.814781 | NA       |
| AL935126.2        | 1.487286415 | -0.390430437 | 1.7741443 | -0.220067 | 0.825819 | NA       |
| CT583642.2        | 4.728982656 | 0.484328739  | 0.8827058 | 0.5486865 | 0.583221 | NA       |
| pimr11            | 0           | NA           | NA        | NA        | NA       | NA       |
| RF00001           | 0           | NA           | NA        | NA        | NA       | NA       |
| CR759968.2        | 3.298002109 | -1.232628963 | 1.060587  | -1.162214 | 0.245149 | NA       |
| RF00026           | 0           | NA           | NA        | NA        | NA       | NA       |
| si:ch211-51i16.1  | 5.491721949 | 1.002514728  | 0.822547  | 1.2187933 | 0.222923 | NA       |
| RF00026           | 0           | NA           | NA        | NA        | NA       | NA       |
| dre-mir-430c-1    | 0           | NA           | NA        | NA        | NA       | NA       |
| BX323820.1        | 96.40613848 | 0.344957568  | 0.201195  | 1.7145437 | 0.086429 | 0.563483 |
| RF00026           | 0           | NA           | NA        | NA        | NA       | NA       |
| pimr90            | 0           | NA           | NA        | NA        | NA       | NA       |
| traj18            | 0           | NA           | NA        | NA        | NA       | NA       |
| BX936418.1        | 0           | NA           | NA        | NA        | NA       | NA       |
| dre-mir-430b-10   | 0           | NA           | NA        | NA        | NA       | NA       |
| LO018238.1        | 0.323844819 | -1.825095364 | 3.274639  | -0.557342 | 0.577293 | NA       |
| RF00001           | 0           | NA           | NA        | NA        | NA       | NA       |
| RF00017           | 4.962631592 | 1.72011567   | 0.9708223 | 1.771813  | 0.076426 | NA       |
| RF00001           | 0           | NA           | NA        | NA        | NA       | NA       |
| tnfsf14           | 0.978606371 | -3.418616644 | 2.0564823 | -1.662361 | 0.09644  | NA       |
| CABZ01050062.1    | 103.6247493 | -0.097396496 | 0.1991771 | -0.488994 | 0.624846 | 0.957354 |
| si:ch211-221n20.4 | 0           | NA           | NA        | NA        | NA       | NA       |
| RF00001           | 0.157187365 | -0.955901296 | 4.0804729 | -0.234262 | 0.814781 | NA       |
| BX005305.2        | 0.332524763 | 0.005883742  | 3.292841  | 0.0017868 | 0.998574 | NA       |
| CR383662.7        | 1.459669549 | 1.801334326  | 1.6829353 | 1.0703527 | 0.284461 | NA       |
| BX088713.3        | 0           | NA           | NA        | NA        | NA       | NA       |
| CABZ01079178.1    | 7.78262937  | 0.536499514  | 0.757137  | 0.7085897 | 0.478579 | NA       |
| CABZ01068469.1    | 366.5945818 | -0.152231799 | 0.1155435 | -1.317528 | 0.187662 | 0.752195 |
| RF00001           | 0.158915748 | 0.967652056  | 4.0804729 | 0.2371421 | 0.812547 | NA       |
| zgc:173552        | 15.06912294 | 0.432504202  | 0.6006723 | 0.7200335 | 0.471504 | 0.924838 |
| CR589947.3        | 2.805695641 | 0.191177633  | 1.1645026 | 0.1641711 | 0.869596 | NA       |
| CR848784.3        | 0           | NA           | NA        | NA        | NA       | NA       |
| dre-mir-430a-4    | 0           | NA           | NA        | NA        | NA       | NA       |
| RF00001           | 0.31598276  | 0.005883445  | 3.3523626 | 0.001755  | 0.9986   | NA       |
| CU856623.1        | 0.341486697 | 1.892317624  | 3.2124068 | 0.5890654 | 0.555817 | NA       |
| RF00001           | 0           | NA           | NA        | NA        | NA       | NA       |
| RF00001           | 1.157159828 | -0.479018393 | 1.9216574 | -0.249274 | 0.803149 | NA       |
| RF00001           | 0.332645115 | 0.005883744  | 3.2924249 | 0.0017871 | 0.998574 | NA       |
| RF00026           | 0           | NA           | NA        | NA        | NA       | NA       |
| CT033803.1        | 0           | NA           | NA        | NA        | NA       | NA       |
| si:ch73-27e22.1   | 0           | NA           | NA        | NA        | NA       | NA       |
| RF00001           | 0           | NA           | NA        | NA        | NA       | NA       |
| nitr6b            | 0           | NA           | NA        | NA        | NA       | NA       |
| CR933528.1        | 2.33197282  | -0.83366184  | 1.2522951 | -0.665707 | 0.505598 | NA       |
| pimr194           | 0.356300316 | 0.005884122  | 3.214964  | 0.0018302 | 0.99854  | NA       |
| zgc:100951        | 0.182570949 | 0.967652056  | 4.0804729 | 0.2371421 | 0.812547 | NA       |
| RF00001           | 0.173729368 | -0.955901296 | 4.0804729 | -0.234262 | 0.814781 | NA       |
| RF00003           | 0           | NA           | NA        | NA        | NA       | NA       |

|                    |             |              |           |           |          |          |
|--------------------|-------------|--------------|-----------|-----------|----------|----------|
| CR792437.1         | 0           | NA           | NA        | NA        | NA       | NA       |
| wu:fi09b08         | 0.681124658 | 1.536768532  | 2.394256  | 0.6418564 | 0.520966 | NA       |
| BX548011.2         | 0           | NA           | NA        | NA        | NA       | NA       |
| zgc:77614          | 0.166657454 | -0.955901296 | 4.0804729 | -0.234262 | 0.814781 | NA       |
| znf1104            | 0.808093063 | -0.606086435 | 2.2353763 | -0.271134 | 0.786288 | NA       |
| RF00001            | 0.365141898 | 1.973577737  | 3.3927314 | 0.5817076 | 0.560764 | NA       |
| cfap100            | 26.97948717 | 0.44814923   | 0.3727088 | 1.2024112 | 0.229204 | 0.796702 |
| RF00001            | 0           | NA           | NA        | NA        | NA       | NA       |
| RF00001            | 0           | NA           | NA        | NA        | NA       | NA       |
| RF00001            | 0.482760567 | -0.866527181 | 2.7059286 | -0.320233 | 0.748792 | NA       |
| CABZ01084501.1     | 0.173729368 | -0.955901296 | 4.0804729 | -0.234262 | 0.814781 | NA       |
| zgc:165555         | 3.00488766  | 0.312551712  | 1.0953229 | 0.2853512 | 0.775375 | NA       |
| AL929334.1         | 68.41991871 | 0.026267448  | 0.2366992 | 0.110974  | 0.911637 | 0.991066 |
| RF00012            | 0           | NA           | NA        | NA        | NA       | NA       |
| zgc:165555         | 0           | NA           | NA        | NA        | NA       | NA       |
| BX539332.2         | 0.166657454 | -0.955901296 | 4.0804729 | -0.234262 | 0.814781 | NA       |
| RF00015            | 0           | NA           | NA        | NA        | NA       | NA       |
| BX470259.1         | 87.60327985 | 0.000122689  | 0.21899   | 0.0005603 | 0.999553 | 0.999704 |
| RF00001            | 0           | NA           | NA        | NA        | NA       | NA       |
| dtwd1              | 76.24215693 | 0.437583512  | 0.2265051 | 1.9318923 | 0.053373 | 0.45286  |
| RF00001            | 0           | NA           | NA        | NA        | NA       | NA       |
| CABZ01061498.1     | 8.163570028 | -0.085243422 | 0.7100791 | -0.120048 | 0.904445 | NA       |
| si:dkey-16p6.1     | 5.635204618 | 0.168151792  | 0.8037219 | 0.2092164 | 0.834279 | NA       |
| traj15             | 0           | NA           | NA        | NA        | NA       | NA       |
| RF00026            | 0           | NA           | NA        | NA        | NA       | NA       |
| CABZ01084081.1     | 0.838778893 | -0.672501496 | 2.3563046 | -0.285405 | 0.775334 | NA       |
| RF00001            | 0           | NA           | NA        | NA        | NA       | NA       |
| RF00001            | 0           | NA           | NA        | NA        | NA       | NA       |
| RF00001            | 0           | NA           | NA        | NA        | NA       | NA       |
| RF00003            | 0           | NA           | NA        | NA        | NA       | NA       |
| si:ch211-113a14.19 | 9.547196722 | 0.152896838  | 0.6985786 | 0.2188685 | 0.826752 | NA       |
| dre-mir-430a-2     | 0           | NA           | NA        | NA        | NA       | NA       |
| CABZ01002702.1     | 0.158795395 | 0.967652056  | 4.0804729 | 0.2371421 | 0.812547 | NA       |
| F0904980.1         | 4.607716849 | -1.078140962 | 0.945621  | -1.140141 | 0.254228 | NA       |
| RF00067            | 1.227857982 | 0.512196292  | 1.8357735 | 0.2790084 | 0.780238 | NA       |
| RF00001            | 0           | NA           | NA        | NA        | NA       | NA       |
| RF00003            | 0           | NA           | NA        | NA        | NA       | NA       |
| RF00001            | 1.474923542 | -1.683781257 | 1.8542961 | -0.908043 | 0.363855 | NA       |
| RF00001            | 0           | NA           | NA        | NA        | NA       | NA       |
| RF00026            | 0           | NA           | NA        | NA        | NA       | NA       |
| RF00003            | 0           | NA           | NA        | NA        | NA       | NA       |
| RF00026            | 0           | NA           | NA        | NA        | NA       | NA       |
| RF00026            | 0           | NA           | NA        | NA        | NA       | NA       |
| L0018550.2         | 5.622965251 | 0.712078298  | 0.8334309 | 0.854394  | 0.392887 | NA       |
| CABZ01048666.1     | 22.85782107 | -0.389222401 | 0.4194227 | -0.927996 | 0.35341  | 0.881808 |
| RF00276            | 2.16322918  | 0.697500211  | 1.2852221 | 0.5427079 | 0.587331 | NA       |
| CABZ01103860.1     | 11.00393337 | 0.187432736  | 0.5731192 | 0.3270397 | 0.743638 | NA       |
| zgc:162898         | 38.24385748 | 0.046740161  | 0.3377407 | 0.1383907 | 0.889932 | 0.989291 |
| RF00026            | 0           | NA           | NA        | NA        | NA       | NA       |
| RF00001            | 0           | NA           | NA        | NA        | NA       | NA       |
| RF00001            | 0           | NA           | NA        | NA        | NA       | NA       |
| RF00001            | 0           | NA           | NA        | NA        | NA       | NA       |
| BX470197.1         | 0.173729368 | -0.955901296 | 4.0804729 | -0.234262 | 0.814781 | NA       |
| CABZ01043826.1     | 1.504900554 | -1.003731862 | 1.5361977 | -0.653387 | 0.513507 | NA       |

|                   |             |              |           |           |          |          |
|-------------------|-------------|--------------|-----------|-----------|----------|----------|
| mapkapk3          | 112.1675167 | 0.247034695  | 0.1902247 | 1.2986468 | 0.194065 | 0.75784  |
| znf1183           | 62.06937513 | 0.14865588   | 0.2548384 | 0.5833339 | 0.559669 | 0.948478 |
| BX908757.2        | 0 NA        | NA           | NA        | NA        | NA       | NA       |
| zgc:165555        | 13.69015132 | 0.72457825   | 0.5214289 | 1.3896013 | 0.16465  | 0.720786 |
| CU915775.1        | 0.317831496 | 1.808837541  | 3.5779923 | 0.5055454 | 0.613176 | NA       |
| RF00012           | 0 NA        | NA           | NA        | NA        | NA       | NA       |
| taar20i           | 0.365141898 | 1.973577737  | 3.3927314 | 0.5817076 | 0.560764 | NA       |
| wu:fc75a09        | 34.07162627 | -0.697556199 | 0.3313094 | -2.105453 | 0.035252 | 0.365357 |
| RF00026           | 0 NA        | NA           | NA        | NA        | NA       | NA       |
| RF00001           | 0 NA        | NA           | NA        | NA        | NA       | NA       |
| RF00001           | 0 NA        | NA           | NA        | NA        | NA       | NA       |
| si:dkey-19p15.4   | 5.928512942 | 0.530098536  | 0.8377648 | 0.6327534 | 0.526895 | NA       |
| FQ377660.1        | 0.838940531 | -0.561526863 | 2.0217856 | -0.277738 | 0.781213 | NA       |
| CABZ01040998.1    | 29.08291517 | -0.37188044  | 0.3628335 | -1.024934 | 0.305394 | 0.85982  |
| RF00001           | 0.157187365 | -0.955901296 | 4.0804729 | -0.234262 | 0.814781 | NA       |
| RF00001           | 0 NA        | NA           | NA        | NA        | NA       | NA       |
| CR925720.1        | 0 NA        | NA           | NA        | NA        | NA       | NA       |
| CABZ01085137.1    | 6.294134013 | 0.009445951  | 0.8019483 | 0.0117788 | 0.990602 | NA       |
| hist1h2a3         | 7.604848086 | -0.031892597 | 0.7478267 | -0.042647 | 0.965983 | NA       |
| CR956623.2        | 0.688986717 | 0.114008068  | 2.399209  | 0.047519  | 0.9621   | NA       |
| RF00001           | 0.325573202 | 0.005883621  | 3.3172783 | 0.0017736 | 0.998585 | NA       |
| CABZ01081490.1    | 0.173729368 | -0.955901296 | 4.0804729 | -0.234262 | 0.814781 | NA       |
| RF00001           | 0 NA        | NA           | NA        | NA        | NA       | NA       |
| BX322657.2        | 75.54156735 | 0.031369645  | 0.2232625 | 0.1405056 | 0.88826  | 0.989291 |
| RF00001           | 0 NA        | NA           | NA        | NA        | NA       | NA       |
| BX324230.2        | 0.524057646 | 2.503896172  | 2.7289583 | 0.9175282 | 0.358866 | NA       |
| RF00026           | 0 NA        | NA           | NA        | NA        | NA       | NA       |
| RF00001           | 0 NA        | NA           | NA        | NA        | NA       | NA       |
| RF00001           | 0.339758314 | 0.005883863  | 3.2682461 | 0.0018003 | 0.998564 | NA       |
| RF00001           | 0 NA        | NA           | NA        | NA        | NA       | NA       |
| si:ch73-267c23.10 | 13.60649531 | 0.006152313  | 0.5055207 | 0.0121702 | 0.99029  | 0.997679 |
| taar20x           | 0.182570949 | 0.967652056  | 4.0804729 | 0.2371421 | 0.812547 | NA       |
| RF00026           | 0 NA        | NA           | NA        | NA        | NA       | NA       |
| RF00026           | 0 NA        | NA           | NA        | NA        | NA       | NA       |
| BX000981.7        | 0 NA        | NA           | NA        | NA        | NA       | NA       |
| BX322608.1        | 0 NA        | NA           | NA        | NA        | NA       | NA       |
| pimr117           | 0 NA        | NA           | NA        | NA        | NA       | NA       |
| CABZ01002690.1    | 18.00807912 | -0.008385699 | 0.4671171 | -0.017952 | 0.985677 | 0.996944 |
| RF00003           | 0 NA        | NA           | NA        | NA        | NA       | NA       |
| tnfsf18           | 1.642748653 | 1.188727732  | 1.5296627 | 0.7771176 | 0.437089 | NA       |
| CZQB01146713.1    | 0.88633     | -0.542564367 | 2.3109422 | -0.234781 | 0.814379 | NA       |
| lbh               | 118.6369015 | -0.113737143 | 0.1933199 | -0.588336 | 0.556307 | 0.947902 |
| RF00026           | 0 NA        | NA           | NA        | NA        | NA       | NA       |
| CABZ01096573.1    | 34.01171693 | 0.032807239  | 0.3545034 | 0.0925442 | 0.926266 | 0.992702 |
| RF00001           | 0 NA        | NA           | NA        | NA        | NA       | NA       |
| CU972454.5        | 4.12668566  | 0.109277836  | 0.9104872 | 0.1200213 | 0.904466 | NA       |
| RF00004           | 0 NA        | NA           | NA        | NA        | NA       | NA       |
| CU138548.3        | 0 NA        | NA           | NA        | NA        | NA       | NA       |
| adgr12b.1         | 10.41284405 | -0.515449898 | 0.5951809 | -0.866039 | 0.386469 | NA       |
| BOLA2             | 94.53938376 | -0.189828625 | 0.2018758 | -0.940324 | 0.347052 | 0.879707 |
| si:ch211-162i8.5  | 5.161722503 | -0.287522153 | 0.8814761 | -0.326183 | 0.744286 | NA       |
| ftr36             | 158.4093958 | -0.090518635 | 0.1647704 | -0.549362 | 0.582757 | 0.952214 |
| CU138548.4        | 0 NA        | NA           | NA        | NA        | NA       | NA       |
| RF00026           | 0 NA        | NA           | NA        | NA        | NA       | NA       |

|                   |              |               |            |            |           |           |
|-------------------|--------------|---------------|------------|------------|-----------|-----------|
| znf972            | 1. 318275326 | 3. 852130961  | 1. 8593768 | 2. 0717323 | 0. 03829  | NA        |
| RF00001           | 0 NA         |               | NA         | NA         | NA        | NA        |
| CABZ01059626. 1   | 0 NA         |               | NA         | NA         | NA        | NA        |
| RF00001           | 0. 158795395 | 0. 967652056  | 4. 0804729 | 0. 2371421 | 0. 812547 | NA        |
| LT631676. 1       | 5. 603577049 | -0. 201196393 | 0. 8790888 | -0. 228869 | 0. 818971 | NA        |
| bloc1s5           | 162. 4590589 | -0. 285239498 | 0. 1630383 | -1. 749525 | 0. 0802   | 0. 549641 |
| dre-mir-430a-4    | 0 NA         |               | NA         | NA         | NA        | NA        |
| RF00026           | 0 NA         |               | NA         | NA         | NA        | NA        |
| CR318614. 1       | 0. 482760567 | -0. 866527181 | 2. 7059286 | -0. 320233 | 0. 748792 | NA        |
| RF00026           | 0 NA         |               | NA         | NA         | NA        | NA        |
| zgc:165555        | 38. 20670355 | 0. 179612348  | 0. 369511  | 0. 4860812 | 0. 62691  | 0. 957354 |
| CT030017. 1       | 0. 475018861 | 0. 853207185  | 2. 8976509 | 0. 2944479 | 0. 768416 | NA        |
| BX530407. 6       | 0. 538871265 | 0. 999144257  | 2. 7784799 | 0. 359601  | 0. 719146 | NA        |
| ccdc62            | 40. 42865357 | 0. 161328255  | 0. 30563   | 0. 5278548 | 0. 5976   | 0. 95534  |
| igl3v4            | 0. 635662991 | 2. 808056561  | 2. 7492814 | 1. 0213784 | 0. 307075 | NA        |
| RF00003           | 0 NA         |               | NA         | NA         | NA        | NA        |
| RF00001           | 0 NA         |               | NA         | NA         | NA        | NA        |
| pimr152           | 0 NA         |               | NA         | NA         | NA        | NA        |
| RF00001           | 0. 325573202 | 0. 005883621  | 3. 3172783 | 0. 0017736 | 0. 998585 | NA        |
| BX681417. 6       | 0 NA         |               | NA         | NA         | NA        | NA        |
| RF00001           | 0 NA         |               | NA         | NA         | NA        | NA        |
| RF00026           | 0 NA         |               | NA         | NA         | NA        | NA        |
| CR388195. 1       | 0. 182570949 | 0. 967652056  | 4. 0804729 | 0. 2371421 | 0. 812547 | NA        |
| F0393424. 3       | 0 NA         |               | NA         | NA         | NA        | NA        |
| trappc21          | 245. 3286854 | -0. 158373929 | 0. 1533634 | -1. 032671 | 0. 301758 | 0. 856944 |
| BX511067. 1       | 0 NA         |               | NA         | NA         | NA        | NA        |
| BX571665. 1       | 0 NA         |               | NA         | NA         | NA        | NA        |
| zgc:194418        | 0 NA         |               | NA         | NA         | NA        | NA        |
| BX323461. 1       | 1. 33883482  | 1. 656278454  | 1. 8742517 | 0. 8837012 | 0. 376858 | NA        |
| RF00137           | 0. 166657454 | -0. 955901296 | 4. 0804729 | -0. 234262 | 0. 814781 | NA        |
| CR855311. 5       | 10. 50136257 | 0. 009409697  | 0. 6021517 | 0. 0156268 | 0. 987532 | NA        |
| CABZ01050238. 1   | 1. 300513096 | 1. 583274097  | 1. 7585478 | 0. 9003304 | 0. 367944 | NA        |
| znf1011           | 0. 681245011 | 1. 537021632  | 2. 3941387 | 0. 6419936 | 0. 520877 | NA        |
| CABZ01080599. 1   | 4. 206258928 | -1. 338204945 | 1. 0032685 | -1. 333845 | 0. 182255 | NA        |
| RF00001           | 0 NA         |               | NA         | NA         | NA        | NA        |
| timp4. 1          | 18. 44293126 | 0. 168566121  | 0. 4701608 | 0. 3585286 | 0. 719948 | 0. 969318 |
| pimr176           | 0. 475018861 | 0. 853207185  | 2. 8976509 | 0. 2944479 | 0. 768416 | NA        |
| RF00001           | 0. 158915748 | 0. 967652056  | 4. 0804729 | 0. 2371421 | 0. 812547 | NA        |
| dre-mir-2185-1    | 0 NA         |               | NA         | NA         | NA        | NA        |
| lhfp14a           | 20. 67032445 | -0. 152089413 | 0. 4910197 | -0. 309742 | 0. 756757 | 0. 975374 |
| RF01848           | 0 NA         |               | NA         | NA         | NA        | NA        |
| RF00020           | 0 NA         |               | NA         | NA         | NA        | NA        |
| CABZ01053748. 1   | 0. 182570949 | 0. 967652056  | 4. 0804729 | 0. 2371421 | 0. 812547 | NA        |
| RF00001           | 0. 317831496 | 1. 808837541  | 3. 5779923 | 0. 5055454 | 0. 613176 | NA        |
| pimr98            | 0 NA         |               | NA         | NA         | NA        | NA        |
| si:dkey-199m13. 7 | 3. 472002181 | -0. 450485393 | 1. 0627145 | -0. 423901 | 0. 671638 | NA        |
| zgc:174354        | 0. 157187365 | -0. 955901296 | 4. 0804729 | -0. 234262 | 0. 814781 | NA        |
| rcvrnb            | 62. 21785032 | 0. 456374873  | 0. 2531975 | 1. 802446  | 0. 071475 | 0. 522931 |
| RF00026           | 0 NA         |               | NA         | NA         | NA        | NA        |
| CR407594. 1       | 0. 996127896 | -0. 965496869 | 1. 8966759 | -0. 509047 | 0. 610719 | NA        |
| CABZ01046996. 1   | 1. 482224875 | 0. 310728574  | 1. 5024135 | 0. 2068196 | 0. 836151 | NA        |
| BX511311. 4       | 0 NA         |               | NA         | NA         | NA        | NA        |
| RF00001           | 0 NA         |               | NA         | NA         | NA        | NA        |
| trhde. 2          | 148. 923821  | 0. 23484485   | 0. 1802343 | 1. 3029976 | 0. 192576 | 0. 756795 |

|                  |             |              |           |           |          |          |
|------------------|-------------|--------------|-----------|-----------|----------|----------|
| cxcl18a.1        | 9.252327721 | -0.075823912 | 0.6422221 | -0.118065 | 0.906016 | NA       |
| BX511056.3       | 0           | NA           | NA        | NA        | NA       | NA       |
| RF00001          | 25.23441055 | 0.112608265  | 0.3813282 | 0.2953054 | 0.767761 | 0.975687 |
| si:ch211-225k7.2 | 0           | NA           | NA        | NA        | NA       | NA       |
| RF00001          | 0.157187365 | -0.955901296 | 4.0804729 | -0.234262 | 0.814781 | NA       |
| RF00003          | 0           | NA           | NA        | NA        | NA       | NA       |
| BX571738.1       | 2.695148885 | 0.771142461  | 1.1619549 | 0.6636595 | 0.506908 | NA       |
| BX649490.4       | 4.886059806 | -1.083857972 | 1.0101954 | -1.072919 | 0.283307 | NA       |
| RF00003          | 0           | NA           | NA        | NA        | NA       | NA       |
| taar20n          | 0           | NA           | NA        | NA        | NA       | NA       |
| exorh            | 79.86071562 | 0.441660256  | 0.2321524 | 1.9024587 | 0.057111 | 0.468896 |
| BX927341.1       | 0           | NA           | NA        | NA        | NA       | NA       |
| CR450785.2       | 0.513487682 | -0.887846295 | 2.6557956 | -0.334305 | 0.738149 | NA       |
| bcl7ba           | 218.9511578 | 0.110718404  | 0.1450517 | 0.7633032 | 0.445283 | 0.917117 |
| si:ch211-194m7.4 | 2.144446142 | -1.212961122 | 1.4194549 | -0.854526 | 0.392814 | NA       |
| RF00001          | 0.166657454 | -0.955901296 | 4.0804729 | -0.234262 | 0.814781 | NA       |
| RF00003          | 0           | NA           | NA        | NA        | NA       | NA       |
| CR450827.5       | 0           | NA           | NA        | NA        | NA       | NA       |
| pimr106          | 0           | NA           | NA        | NA        | NA       | NA       |
| BX649471.2       | 0           | NA           | NA        | NA        | NA       | NA       |
| zgc:171435       | 70.11926236 | 0.010808923  | 0.2573049 | 0.0420082 | 0.966492 | 0.996315 |
| taar20c1         | 0.173729368 | -0.955901296 | 4.0804729 | -0.234262 | 0.814781 | NA       |
| RF00002          | 74.35823289 | 0.741207053  | 0.2667187 | 2.778984  | 0.005453 | 0.109579 |
| RF00020          | 0           | NA           | NA        | NA        | NA       | NA       |
| RF00001          | 0.672283077 | 0.02892376   | 2.3005571 | 0.0125725 | 0.989969 | NA       |
| CR932017.1       | 0           | NA           | NA        | NA        | NA       | NA       |
| cplx2            | 1503.661263 | 0.080582507  | 0.0850162 | 0.9478485 | 0.343207 | 0.878434 |
| RF00001          | 0.173729368 | -0.955901296 | 4.0804729 | -0.234262 | 0.814781 | NA       |
| RF00026          | 0           | NA           | NA        | NA        | NA       | NA       |
| CU694445.1       | 2.41729763  | -1.996278774 | 1.3784004 | -1.448258 | 0.147545 | NA       |
| zgc:112234       | 42.02000388 | 0.182854111  | 0.3116731 | 0.5866856 | 0.557415 | 0.948478 |
| BX769173.2       | 9.241416786 | -0.958087296 | 0.628259  | -1.524988 | 0.127262 | NA       |
| RF00001          | 0           | NA           | NA        | NA        | NA       | NA       |
| RF00003          | 0           | NA           | NA        | NA        | NA       | NA       |
| atf4a            | 5501.061229 | -0.144904303 | 0.0663185 | -2.184974 | 0.028891 | 0.329785 |
| sptbn4b          | 61.84165827 | -0.076464335 | 0.2614898 | -0.292418 | 0.769967 | 0.975687 |
| dre-mir-430a-11  | 0           | NA           | NA        | NA        | NA       | NA       |
| CU928071.1       | 0.182570949 | 0.967652056  | 4.0804729 | 0.2371421 | 0.812547 | NA       |
| CABZ01069040.1   | 25.20087737 | 0.389494741  | 0.3790027 | 1.0276832 | 0.304099 | 0.858423 |
| BX649315.1       | 0.547712847 | 2.559541715  | 2.9076406 | 0.8802813 | 0.378707 | NA       |
| BX005442.2       | 0           | NA           | NA        | NA        | NA       | NA       |
| CT027583.1       | 1.195402485 | -0.299708368 | 1.9014202 | -0.157623 | 0.874754 | NA       |
| AL929435.2       | 4.091322838 | -0.822116232 | 0.9643988 | -0.852465 | 0.393956 | NA       |
| RF00026          | 0           | NA           | NA        | NA        | NA       | NA       |
| RF00001          | 0           | NA           | NA        | NA        | NA       | NA       |
| si:dkeyp-44b5.4  | 0.332645115 | 0.005883744  | 3.2924249 | 0.0017871 | 0.998574 | NA       |
| zgc:171759       | 19.33946961 | 0.392997152  | 0.4825435 | 0.8144285 | 0.4154   | 0.906237 |
| RF00003          | 0           | NA           | NA        | NA        | NA       | NA       |
| RF00001          | 0           | NA           | NA        | NA        | NA       | NA       |
| FQ377628.1       | 9.325348269 | -0.715617471 | 0.6339735 | -1.128781 | 0.25899  | NA       |
| RF00001          | 0           | NA           | NA        | NA        | NA       | NA       |
| RF00003          | 0           | NA           | NA        | NA        | NA       | NA       |
| dre-mir-430a-2   | 0           | NA           | NA        | NA        | NA       | NA       |
| RF00001          | 0           | NA           | NA        | NA        | NA       | NA       |

|                   |             |              |           |           |          |          |
|-------------------|-------------|--------------|-----------|-----------|----------|----------|
| gjd1a             | 530.8282026 | 0.131808192  | 0.1012272 | 1.3021019 | 0.192882 | 0.756795 |
| CR394552.1        | 10.2587681  | -0.19880306  | 1.3609173 | -0.14608  | 0.883858 | NA       |
| L0018585.1        | 26.823404   | 0.726728388  | 0.3744967 | 1.9405469 | 0.052313 | 0.449084 |
| sb:cb470          | 0.671303554 | -2.865684129 | 2.3396875 | -1.224815 | 0.220645 | NA       |
| taarl6g           | 0 NA        | NA           | NA        | NA        | NA       | NA       |
| npffr1            | 30.28308726 | -0.33526863  | 0.3454752 | -0.970456 | 0.331819 | 0.874653 |
| znf1099           | 3.762601357 | -0.6769597   | 1.039792  | -0.651053 | 0.515012 | NA       |
| NUP85 (1 of many) | 152.7661088 | -0.15548823  | 0.1718633 | -0.90472  | 0.365614 | 0.887073 |
| RF00001           | 0 NA        | NA           | NA        | NA        | NA       | NA       |
| RF00001           | 0 NA        | NA           | NA        | NA        | NA       | NA       |
| RF00003           | 0 NA        | NA           | NA        | NA        | NA       | NA       |
| si:dkey-181m19.17 | 0.83198897  | -0.546504737 | 2.1106392 | -0.258929 | 0.79569  | NA       |
| CR387935.1        | 2.145828008 | -0.204385529 | 1.2594206 | -0.162285 | 0.871081 | NA       |
| CR381686.5        | 23.6637999  | 0.263540813  | 0.4090298 | 0.6443071 | 0.519376 | 0.938945 |
| taarl3b           | 9.264862276 | -0.206654078 | 0.6107811 | -0.338344 | 0.735104 | NA       |
| CABZ01065423.1    | 8.125881309 | 0.282931671  | 0.7110576 | 0.3979026 | 0.690702 | NA       |
| si:dkey-4c23.4    | 0.48448895  | 0.85344211   | 2.878836  | 0.2964539 | 0.766883 | NA       |
| L0017821.1        | 0 NA        | NA           | NA        | NA        | NA       | NA       |
| si:ch211-76m11.3  | 5.185649651 | 0.314619795  | 0.8442548 | 0.3726598 | 0.709402 | NA       |
| RF00001           | 0 NA        | NA           | NA        | NA        | NA       | NA       |
| CU929418.2        | 36.40448321 | -0.067374547 | 0.3190137 | -0.211196 | 0.832734 | 0.983557 |
| RF00001           | 0 NA        | NA           | NA        | NA        | NA       | NA       |
| L0017711.1        | 40.77379523 | 0.520887075  | 0.2993872 | 1.7398441 | 0.081886 | 0.552725 |
| CABZ01062996.1    | 2.068757557 | 2.420409238  | 1.678714  | 1.4418235 | 0.149352 | NA       |
| CR774179.5        | 5.131502548 | -1.314793215 | 0.8898563 | -1.477534 | 0.139532 | NA       |
| RF00012           | 0 NA        | NA           | NA        | NA        | NA       | NA       |
| znf1091           | 4.832496371 | 0.120181524  | 0.8721614 | 0.1377973 | 0.890401 | NA       |
| AXL               | 253.1831149 | 0.073760418  | 0.1514386 | 0.4870649 | 0.626212 | 0.957354 |
| CT583728.13       | 0 NA        | NA           | NA        | NA        | NA       | NA       |
| RF00026           | 1.647584029 | 1.236502647  | 1.5155869 | 0.8158573 | 0.414582 | NA       |
| c1dn15a           | 240.7503308 | -0.90858764  | 0.154141  | -5.894524 | 3.76E-09 | 6.88E-07 |
| F0907124.1        | 0.855482533 | -0.59192753  | 2.095231  | -0.282512 | 0.777551 | NA       |
| CABZ01066921.1    | 8.347740133 | 0.457697021  | 0.6897693 | 0.6635509 | 0.506978 | NA       |
| RF00015           | 0 NA        | NA           | NA        | NA        | NA       | NA       |
| CT737127.1        | 11.52771244 | 0.66800534   | 0.5709638 | 1.169961  | 0.242017 | 0.810713 |
| CU179759.1        | 0.158795395 | 0.967652056  | 4.0804729 | 0.2371421 | 0.812547 | NA       |
| RF00001           | 0 NA        | NA           | NA        | NA        | NA       | NA       |
| CR361551.2        | 7.178529452 | -0.75998396  | 0.7122036 | -1.067088 | 0.285932 | NA       |
| BX510335.2        | 0 NA        | NA           | NA        | NA        | NA       | NA       |
| CABZ01046407.1    | 0.157187365 | -0.955901296 | 4.0804729 | -0.234262 | 0.814781 | NA       |
| znf1121           | 4.987165207 | 0.023824411  | 0.8428933 | 0.028265  | 0.977451 | NA       |
| RF00001           | 10.59287855 | 0.471005825  | 0.6156884 | 0.7650069 | 0.444267 | NA       |
| CABZ01043953.1    | 36.12646629 | -0.168517381 | 0.3337118 | -0.504979 | 0.613574 | 0.95688  |
| RF00001           | 0 NA        | NA           | NA        | NA        | NA       | NA       |
| si:dkey-59p5.1    | 0 NA        | NA           | NA        | NA        | NA       | NA       |
| ube213a           | 819.6983422 | 0.081159482  | 0.0934832 | 0.8681723 | 0.3853   | 0.89551  |
| AL935174.2        | 160.3456271 | -0.040369537 | 0.1613521 | -0.250195 | 0.802436 | 0.979528 |
| neto2b            | 111.5248568 | -0.067787607 | 0.1948959 | -0.347814 | 0.72798  | 0.970402 |
| RF00001           | 4.398143996 | -0.150198626 | 0.9707899 | -0.154718 | 0.877044 | NA       |
| si:dkey-16p19.1   | 1.339342975 | 0.752240637  | 1.5961401 | 0.4712874 | 0.637436 | NA       |
| RF00001           | 0 NA        | NA           | NA        | NA        | NA       | NA       |
| pimr166           | 0 NA        | NA           | NA        | NA        | NA       | NA       |
| si:dkey-58b18.5   | 0 NA        | NA           | NA        | NA        | NA       | NA       |
| RF00001           | 0.158795395 | 0.967652056  | 4.0804729 | 0.2371421 | 0.812547 | NA       |

|                  |             |              |           |           |          |          |  |    |  |    |
|------------------|-------------|--------------|-----------|-----------|----------|----------|--|----|--|----|
| FP236331.1       |             | 0 NA         |           | NA        |          | NA       |  | NA |  | NA |
| znf995           | 3.047133266 | -0.599001039 | 1.1146361 | -0.537396 | 0.590994 | NA       |  |    |  |    |
| RF00001          | 1.79153481  | -2.121951289 | 1.6038116 | -1.323068 | 0.185813 | NA       |  |    |  |    |
| zgc:173552       | 7.124998347 | 0.472915317  | 0.7964812 | 0.5937558 | 0.552675 | NA       |  |    |  |    |
| BX470182.1       | 0.650476611 | 1.436325931  | 2.5890223 | 0.5547754 | 0.579048 | NA       |  |    |  |    |
| CABZ01079748.1   | 12.99916765 | -0.414656186 | 0.5828834 | -0.711388 | 0.476844 | 0.926826 |  |    |  |    |
| znf1169          | 26.01126805 | -0.158318542 | 0.4050911 | -0.390822 | 0.695929 | 0.96736  |  |    |  |    |
| znf1174          | 44.40509815 | 0.154133012  | 0.305484  | 0.5045534 | 0.613873 | 0.95688  |  |    |  |    |
| RF00001          |             | 0 NA         |           | NA        |          | NA       |  |    |  |    |
| RF00001          |             | 0 NA         |           | NA        |          | NA       |  |    |  |    |
| RF00001          |             | 0 NA         |           | NA        |          | NA       |  |    |  |    |
| CR522881.1       | 2.61652089  | -0.301733003 | 1.3199504 | -0.228594 | 0.819184 | NA       |  |    |  |    |
| RF00026          |             | 0 NA         |           | NA        |          | NA       |  |    |  |    |
| CU914811.1       | 0.690594747 | 1.536595024  | 2.3851901 | 0.6442233 | 0.519431 | NA       |  |    |  |    |
| BX537291.1       | 1.665654994 | 2.026647392  | 1.623649  | 1.2482054 | 0.211956 | NA       |  |    |  |    |
| rabepk           | 95.10210105 | -0.101390611 | 0.2128018 | -0.476456 | 0.63375  | 0.957737 |  |    |  |    |
| RF00003          |             | 0 NA         |           | NA        |          | NA       |  |    |  |    |
| RF00001          |             | 0 NA         |           | NA        |          | NA       |  |    |  |    |
| klh110b.2        | 2.807493047 | 1.718795558  | 1.2196335 | 1.4092722 | 0.158755 | NA       |  |    |  |    |
| si:dkey-149i17.9 | 0.347458735 | -1.908042286 | 3.4571486 | -0.551912 | 0.581009 | NA       |  |    |  |    |
| zgc:173552       | 16.1020907  | 0.570954201  | 0.4999283 | 1.1420721 | 0.253424 | 0.823246 |  |    |  |    |
| BX537120.2       | 1.037424974 | 1.067088564  | 1.9721499 | 0.5410788 | 0.588453 | NA       |  |    |  |    |
| RF00003          |             | 0 NA         |           | NA        |          | NA       |  |    |  |    |
| pimr154          |             | 0 NA         |           | NA        |          | NA       |  |    |  |    |
| RF00001          | 0.538871265 | 0.999144257  | 2.7784799 | 0.359601  | 0.719146 | NA       |  |    |  |    |
| RF00001          |             | 0 NA         |           | NA        |          | NA       |  |    |  |    |
| RF00001          | 1.140109671 | 0.438235627  | 1.7543529 | 0.249799  | 0.802743 | NA       |  |    |  |    |
| RF00001          |             | 0 NA         |           | NA        |          | NA       |  |    |  |    |
| si:dkey-31m5.2   |             | 0 NA         |           | NA        |          | NA       |  |    |  |    |
| RF00026          |             | 0 NA         |           | NA        |          | NA       |  |    |  |    |
| pimr147          |             | 0 NA         |           | NA        |          | NA       |  |    |  |    |
| RF00334          |             | 0 NA         |           | NA        |          | NA       |  |    |  |    |
| BX323801.2       |             | 0 NA         |           | NA        |          | NA       |  |    |  |    |
| RF00017          |             | 0 NA         |           | NA        |          | NA       |  |    |  |    |
| RF00001          | 0.349228403 | 0.005884014  | 3.2372587 | 0.0018176 | 0.99855  | NA       |  |    |  |    |
| BX005321.1       | 0.166657454 | -0.955901296 | 4.0804729 | -0.234262 | 0.814781 | NA       |  |    |  |    |
| RF00001          |             | 0 NA         |           | NA        |          | NA       |  |    |  |    |
| SHISAL2A         | 1.972057356 | -0.013639503 | 1.3052274 | -0.01045  | 0.991662 | NA       |  |    |  |    |
| RF01848          |             | 0 NA         |           | NA        |          | NA       |  |    |  |    |
| RF00001          | 0.341486697 | 1.892317624  | 3.2124068 | 0.5890654 | 0.555817 | NA       |  |    |  |    |
| RF00017          | 3.143402296 | -0.163384804 | 1.0518137 | -0.155336 | 0.876556 | NA       |  |    |  |    |
| RF00001          | 0.330916733 | -1.849579229 | 3.2489867 | -0.569279 | 0.569167 | NA       |  |    |  |    |
| RF00001          |             | 0 NA         |           | NA        |          | NA       |  |    |  |    |
| endouc           | 1098.055381 | 0.041397273  | 0.0877257 | 0.4718942 | 0.637002 | 0.958872 |  |    |  |    |
| RF00001          | 0.166657454 | -0.955901296 | 4.0804729 | -0.234262 | 0.814781 | NA       |  |    |  |    |
| RF00001          |             | 0 NA         |           | NA        |          | NA       |  |    |  |    |
| CT573817.1       | 0.158795395 | 0.967652056  | 4.0804729 | 0.2371421 | 0.812547 | NA       |  |    |  |    |
| BX248136.1       | 2.519419188 | -0.595573162 | 1.2058478 | -0.493904 | 0.621374 | NA       |  |    |  |    |
| rpp25b           | 160.0382227 | -0.069319232 | 0.1769975 | -0.39164  | 0.695325 | 0.96736  |  |    |  |    |
| CABZ01067002.1   | 1.330381041 | -0.013681077 | 1.5829989 | -0.008643 | 0.993104 | NA       |  |    |  |    |
| RF00001          |             | 0 NA         |           | NA        |          | NA       |  |    |  |    |
| CABZ01022569.1   |             | 0 NA         |           | NA        |          | NA       |  |    |  |    |
| RF00001          |             | 0 NA         |           | NA        |          | NA       |  |    |  |    |
| AL935186.6       | 9.352986928 | 0.396026186  | 0.6820912 | 0.5806059 | 0.561506 | NA       |  |    |  |    |

|                  |             |              |           |           |          |          |
|------------------|-------------|--------------|-----------|-----------|----------|----------|
| RF00001          | 0           | NA           | NA        | NA        | NA       | NA       |
| zgc:66156        | 449.3538214 | -0.038710644 | 0.1235755 | -0.313255 | 0.754087 | 0.975056 |
| RF00001          | 0           | NA           | NA        | NA        | NA       | NA       |
| thsd1            | 0           | NA           | NA        | NA        | NA       | NA       |
| CT583728.14      | 0           | NA           | NA        | NA        | NA       | NA       |
| dre-mir-430b-10  | 0           | NA           | NA        | NA        | NA       | NA       |
| CU570881.2       | 98.52440099 | 0.001036231  | 0.2133605 | 0.0048567 | 0.996125 | 0.998888 |
| RF00001          | 0           | NA           | NA        | NA        | NA       | NA       |
| RF00001          | 0           | NA           | NA        | NA        | NA       | NA       |
| BX537263.2       | 2.219460231 | 1.199206597  | 1.3211151 | 0.9077231 | 0.364025 | NA       |
| CABZ01084617.1   | 22.48337713 | -0.057551896 | 0.4166793 | -0.13812  | 0.890145 | 0.989291 |
| RF00001          | 0           | NA           | NA        | NA        | NA       | NA       |
| RF00017          | 0           | NA           | NA        | NA        | NA       | NA       |
| RF00006          | 0           | NA           | NA        | NA        | NA       | NA       |
| RF00001          | 0           | NA           | NA        | NA        | NA       | NA       |
| CU179759.2       | 0.349228403 | 0.005884014  | 3.2372587 | 0.0018176 | 0.99855  | NA       |
| RF00026          | 0           | NA           | NA        | NA        | NA       | NA       |
| RF00001          | 0.182570949 | 0.967652056  | 4.0804729 | 0.2371421 | 0.812547 | NA       |
| RF00001          | 2.461700459 | -1.489031409 | 1.3447378 | -1.107302 | 0.268163 | NA       |
| mindy4b          | 56.82168751 | -0.228188207 | 0.2567899 | -0.888618 | 0.374208 | 0.893914 |
| RF00001          | 0.157187365 | -0.955901296 | 4.0804729 | -0.234262 | 0.814781 | NA       |
| CABZ01046980.1   | 8.709758738 | 0.053876422  | 0.6349567 | 0.0848505 | 0.93238  | NA       |
| LO018437.1       | 4.966017248 | 0.566812589  | 0.8933143 | 0.6345053 | 0.525751 | NA       |
| RF00003          | 0           | NA           | NA        | NA        | NA       | NA       |
| CABZ01015105.1   | 37.13425773 | 0.311467172  | 0.3138287 | 0.9924752 | 0.320966 | 0.868715 |
| RF00026          | 0           | NA           | NA        | NA        | NA       | NA       |
| BX649641.6       | 0           | NA           | NA        | NA        | NA       | NA       |
| si:dkey-102c8.2  | 4.243235696 | 0.01415039   | 0.9653876 | 0.0146577 | 0.988305 | NA       |
| zgc:174353       | 0           | NA           | NA        | NA        | NA       | NA       |
| si:dkey-179k24.2 | 0.50625413  | -0.940106488 | 2.8357787 | -0.331516 | 0.740255 | NA       |
| FQ377918.1       | 4.927503887 | -0.040869325 | 0.8856726 | -0.046145 | 0.963195 | NA       |
| taar20o          | 0           | NA           | NA        | NA        | NA       | NA       |
| RF00017          | 0.987286314 | -2.211408174 | 2.0055936 | -1.10262  | 0.270192 | NA       |
| CR762436.1       | 5.059270728 | 0.40690952   | 0.8809686 | 0.4618888 | 0.644161 | NA       |
| BX324194.2       | 0.317831496 | 1.808837541  | 3.5779923 | 0.5055454 | 0.613176 | NA       |
| RF00001          | 0           | NA           | NA        | NA        | NA       | NA       |
| RF00001          | 0           | NA           | NA        | NA        | NA       | NA       |
| RF00001          | 0           | NA           | NA        | NA        | NA       | NA       |
| RF00001          | 0.173729368 | -0.955901296 | 4.0804729 | -0.234262 | 0.814781 | NA       |
| si:ch73-236c18.2 | 0.173729368 | -0.955901296 | 4.0804729 | -0.234262 | 0.814781 | NA       |
| RF00001          | 0           | NA           | NA        | NA        | NA       | NA       |
| RF00017          | 0.657977612 | -0.062339112 | 2.4345873 | -0.025606 | 0.979572 | NA       |
| BX664705.3       | 0           | NA           | NA        | NA        | NA       | NA       |
| taar19c          | 0           | NA           | NA        | NA        | NA       | NA       |
| BX511013.1       | 0           | NA           | NA        | NA        | NA       | NA       |
| zgc:77614        | 0           | NA           | NA        | NA        | NA       | NA       |
| CT583728.15      | 0           | NA           | NA        | NA        | NA       | NA       |
| RF00003          | 0           | NA           | NA        | NA        | NA       | NA       |
| FP003590.2       | 4.388554549 | 0.72980949   | 0.9767193 | 0.7472049 | 0.45494  | NA       |
| RF00017          | 0           | NA           | NA        | NA        | NA       | NA       |
| RF00001          | 0           | NA           | NA        | NA        | NA       | NA       |
| si:ch211-62a1.3  | 1142.733007 | -0.217034066 | 0.0859365 | -2.525516 | 0.011553 | 0.188176 |
| RF00026          | 0           | NA           | NA        | NA        | NA       | NA       |
| BX908757.3       | 0           | NA           | NA        | NA        | NA       | NA       |



|                   |             |              |           |           |          |          |
|-------------------|-------------|--------------|-----------|-----------|----------|----------|
| AL808129.2        | 0.166657454 | -0.955901296 | 4.0804729 | -0.234262 | 0.814781 | NA       |
| RF00003           | 0.317831496 | 1.808837541  | 3.5779923 | 0.5055454 | 0.613176 | NA       |
| LO018598.1        | 47.78927803 | -0.118514687 | 0.3212537 | -0.368913 | 0.712193 | 0.969006 |
| F0818699.1        | 5.97849551  | -0.175322943 | 0.7833382 | -0.223815 | 0.822901 | NA       |
| CR769778.1        | 552.6111344 | 0.022124535  | 0.1066306 | 0.2074876 | 0.835629 | 0.984089 |
| CABZ01092982.1    | 22.82758752 | 0.171963523  | 0.3955786 | 0.434714  | 0.66377  | 0.964736 |
| RF00001           | 0 NA        | NA           | NA        | NA        | NA       | NA       |
| RF00001           | 0 NA        | NA           | NA        | NA        | NA       | NA       |
| zgc:174354        | 0.31437473  | -1.788572922 | 3.5930657 | -0.497785 | 0.618636 | NA       |
| BX248122.1        | 53.83446576 | 0.03895177   | 0.2682097 | 0.1452288 | 0.88453  | 0.98879  |
| si:ch211-238e22.2 | 6.420611836 | -0.954290648 | 0.8056919 | -1.184436 | 0.23624  | NA       |
| F0834823.1        | 19.20141253 | 0.214647363  | 0.444789  | 0.4825824 | 0.629392 | 0.957354 |
| crebbpb           | 1691.003984 | 0.011995534  | 0.0884038 | 0.1356902 | 0.892066 | 0.989291 |
| F0818722.1        | 4.829427407 | -0.482467541 | 0.8546033 | -0.564551 | 0.572379 | NA       |
| F0744833.2        | 29.12008536 | -0.218380745 | 0.3770963 | -0.579111 | 0.562514 | 0.948728 |
| RF00001           | 0 NA        | NA           | NA        | NA        | NA       | NA       |
| RF00026           | 0 NA        | NA           | NA        | NA        | NA       | NA       |
| CR848049.1        | 0.339758314 | 0.005883863  | 3.2682461 | 0.0018003 | 0.998564 | NA       |
| RF00001           | 0 NA        | NA           | NA        | NA        | NA       | NA       |
| RF00001           | 0 NA        | NA           | NA        | NA        | NA       | NA       |
| RF00026           | 0 NA        | NA           | NA        | NA        | NA       | NA       |
| BX572103.1        | 2.129983538 | 0.69036231   | 1.3142718 | 0.5252812 | 0.599388 | NA       |
| CU927887.1        | 0 NA        | NA           | NA        | NA        | NA       | NA       |
| surf2             | 133.1464139 | -0.115896676 | 0.1771117 | -0.65437  | 0.512873 | 0.936253 |
| RF00001           | 0 NA        | NA           | NA        | NA        | NA       | NA       |
| rnf168            | 334.4995771 | -0.069228238 | 0.1230334 | -0.562678 | 0.573654 | 0.949904 |
| CR450780.1        | 12.08682596 | -0.675098964 | 0.554276  | -1.217983 | 0.22323  | 0.789115 |
| RF00001           | 0.166657454 | -0.955901296 | 4.0804729 | -0.234262 | 0.814781 | NA       |
| CU855936.2        | 72.2203779  | -0.30802402  | 0.2427227 | -1.269037 | 0.204428 | 0.772327 |
| zgc:165555        | 4.803794912 | 1.635907081  | 0.9727366 | 1.6817576 | 0.092616 | NA       |
| BX088712.1        | 7.414459619 | 0.562072899  | 0.7109801 | 0.7905607 | 0.4292   | NA       |
| mmp21             | 2.149954567 | 0.226479605  | 1.3449599 | 0.1683913 | 0.866275 | NA       |
| RF00001           | 0 NA        | NA           | NA        | NA        | NA       | NA       |
| dre-mir-430a-2    | 0 NA        | NA           | NA        | NA        | NA       | NA       |
| RF00026           | 0 NA        | NA           | NA        | NA        | NA       | NA       |
| RF00001           | 0 NA        | NA           | NA        | NA        | NA       | NA       |
| CABZ01087629.1    | 108.3304461 | -0.156379965 | 0.1919087 | -0.814866 | 0.415149 | 0.906237 |
| CABZ01114581.1    | 2.486173545 | -0.607687447 | 1.1882682 | -0.511406 | 0.609067 | NA       |
| FP325130.1        | 334.4775583 | -0.312047709 | 0.130206  | -2.39657  | 0.016549 | 0.237307 |
| zgc:165555        | 7.138313004 | 0.590410306  | 0.7747592 | 0.7620566 | 0.446026 | NA       |
| RF00001           | 86.34447511 | 0.315623182  | 0.2238147 | 1.4101987 | 0.158481 | 0.709224 |
| RF00392           | 1.008426242 | 2.234978276  | 1.9960971 | 1.1196742 | 0.262853 | NA       |
| RF00026           | 0 NA        | NA           | NA        | NA        | NA       | NA       |
| RF00001           | 0 NA        | NA           | NA        | NA        | NA       | NA       |
| RF00001           | 0.182570949 | 0.967652056  | 4.0804729 | 0.2371421 | 0.812547 | NA       |
| cst14b.2          | 0.325573202 | 0.005883621  | 3.3172783 | 0.0017736 | 0.998585 | NA       |
| znf1093           | 12.4177704  | 0.379610268  | 0.5884893 | 0.6450589 | 0.518889 | 0.938919 |
| ftr50             | 0.157187365 | -0.955901296 | 4.0804729 | -0.234262 | 0.814781 | NA       |
| RF00001           | 0 NA        | NA           | NA        | NA        | NA       | NA       |
| CR352223.1        | 0.157187365 | -0.955901296 | 4.0804729 | -0.234262 | 0.814781 | NA       |
| RF01848           | 0 NA        | NA           | NA        | NA        | NA       | NA       |
| RF00001           | 0 NA        | NA           | NA        | NA        | NA       | NA       |
| si:dkey-108k21.11 | 2.672751942 | 0.078425227  | 1.2678541 | 0.0618567 | 0.950677 | NA       |
| RF00001           | 0 NA        | NA           | NA        | NA        | NA       | NA       |

|                    |              |               |            |            |           |           |
|--------------------|--------------|---------------|------------|------------|-----------|-----------|
| v2ra18             | 3. 969755701 | 0. 733796862  | 1. 0608495 | 0. 6917068 | 0. 489121 | NA        |
| RF00026            | 0 NA         | NA            | NA         | NA         | NA        | NA        |
| RF00001            | 0 NA         | NA            | NA         | NA         | NA        | NA        |
| BX321875. 3        | 6. 673206771 | 0. 586378166  | 0. 7284575 | 0. 8049586 | 0. 420844 | NA        |
| CR293507. 1        | 104. 5619753 | 0. 176498371  | 0. 203949  | 0. 8654045 | 0. 386817 | 0. 89551  |
| CU467905. 1        | 96. 88416978 | -0. 475389393 | 0. 2155901 | -2. 205061 | 0. 02745  | 0. 320231 |
| RF00003            | 0 NA         | NA            | NA         | NA         | NA        | NA        |
| cmssl              | 121. 1786195 | -0. 000135398 | 0. 1852985 | -0. 000731 | 0. 999417 | 0. 999704 |
| RF00591            | 0 NA         | NA            | NA         | NA         | NA        | NA        |
| TMEM87B            | 17. 48616349 | -0. 190701218 | 0. 4507131 | -0. 42311  | 0. 672215 | 0. 965257 |
| RF00001            | 11. 19943009 | 0. 399121633  | 0. 6092869 | 0. 6550636 | 0. 512427 | 0. 936253 |
| si:ch211-283116. 1 | 0. 948188986 | 0. 012505608  | 2. 084136  | 0. 0060004 | 0. 995212 | NA        |
| si:ch211-199m3. 1  | 0. 62874946  | -2. 787682787 | 2. 7593918 | -1. 010253 | 0. 312374 | NA        |
| histlh2a3          | 6. 869643058 | 0. 670860971  | 0. 7777907 | 0. 8625212 | 0. 388401 | NA        |
| BX511311. 5        | 0 NA         | NA            | NA         | NA         | NA        | NA        |
| BX510335. 3        | 0 NA         | NA            | NA         | NA         | NA        | NA        |
| BX000981. 8        | 0 NA         | NA            | NA         | NA         | NA        | NA        |
| F0704673. 1        | 1. 144594032 | -2. 465288488 | 1. 9220008 | -1. 282668 | 0. 199608 | NA        |
| pimr15             | 0 NA         | NA            | NA         | NA         | NA        | NA        |
| RF00003            | 0 NA         | NA            | NA         | NA         | NA        | NA        |
| RF00001            | 0 NA         | NA            | NA         | NA         | NA        | NA        |
| RF00001            | 0 NA         | NA            | NA         | NA         | NA        | NA        |
| RF00001            | 0. 166657454 | -0. 955901296 | 4. 0804729 | -0. 234262 | 0. 814781 | NA        |
| RF00001            | 0 NA         | NA            | NA         | NA         | NA        | NA        |
| RF00001            | 0 NA         | NA            | NA         | NA         | NA        | NA        |
| si:ch211-238p8. 35 | 0 NA         | NA            | NA         | NA         | NA        | NA        |
| RF00001            | 0. 967947048 | 2. 173210408  | 2. 1170557 | 1. 0265249 | 0. 304644 | NA        |
| si:ch211-106j21. 6 | 6. 249848034 | -0. 167443652 | 0. 7896776 | -0. 212041 | 0. 832075 | NA        |
| BX681416. 2        | 0. 524057646 | 2. 503896172  | 2. 7289583 | 0. 9175282 | 0. 358866 | NA        |
| RF00001            | 0 NA         | NA            | NA         | NA         | NA        | NA        |
| RF00001            | 0 NA         | NA            | NA         | NA         | NA        | NA        |
| F0744854. 1        | 66. 3968195  | 0. 193649428  | 0. 2591582 | 0. 7472248 | 0. 454928 | 0. 921022 |
| RF00026            | 0 NA         | NA            | NA         | NA         | NA        | NA        |
| BX649423. 1        | 0 NA         | NA            | NA         | NA         | NA        | NA        |
| CU459056. 1        | 423. 0701372 | 0. 096185707  | 0. 1096939 | 0. 8768556 | 0. 380565 | 0. 895192 |
| si:dkey-108k21. 24 | 16. 31793329 | 0. 259118935  | 0. 4962217 | 0. 5221838 | 0. 601542 | 0. 956045 |
| si:dkeyp-82b4. 2   | 0. 332524763 | 0. 005883742  | 3. 292841  | 0. 0017868 | 0. 998574 | NA        |
| RF00020            | 0 NA         | NA            | NA         | NA         | NA        | NA        |
| si:dkey-23f9. 8    | 0 NA         | NA            | NA         | NA         | NA        | NA        |
| RF00001            | 0 NA         | NA            | NA         | NA         | NA        | NA        |
| RF00001            | 0 NA         | NA            | NA         | NA         | NA        | NA        |
| tp53rk             | 187. 5916481 | 0. 141235121  | 0. 1549452 | 0. 9115167 | 0. 362023 | 0. 885944 |
| RF00001            | 0 NA         | NA            | NA         | NA         | NA        | NA        |
| taar19m            | 0 NA         | NA            | NA         | NA         | NA        | NA        |
| smim20             | 158. 11488   | 0. 068187938  | 0. 1797593 | 0. 379329  | 0. 704444 | 0. 968134 |
| RF00001            | 0. 158795395 | 0. 967652056  | 4. 0804729 | 0. 2371421 | 0. 812547 | NA        |
| AL954682. 1        | 475. 920046  | 0. 416355523  | 0. 1147847 | 3. 6272724 | 0. 000286 | 0. 011419 |
| CABZ01068208. 1    | 4. 463351523 | 0. 556155727  | 1. 0368873 | 0. 5363705 | 0. 591703 | NA        |
| CT033790. 1        | 0. 182570949 | 0. 967652056  | 4. 0804729 | 0. 2371421 | 0. 812547 | NA        |
| BX649279. 1        | 0. 182570949 | 0. 967652056  | 4. 0804729 | 0. 2371421 | 0. 812547 | NA        |
| RF00001            | 0 NA         | NA            | NA         | NA         | NA        | NA        |
| RF00001            | 0 NA         | NA            | NA         | NA         | NA        | NA        |
| RF00001            | 0 NA         | NA            | NA         | NA         | NA        | NA        |
| CR931802. 4        | 146. 9395765 | 0. 094907155  | 0. 1658215 | 0. 5723452 | 0. 567088 | 0. 948739 |

|                   |             |              |           |           |          |          |
|-------------------|-------------|--------------|-----------|-----------|----------|----------|
| st7               | 147.235233  | -0.3687398   | 0.185667  | -1.986028 | 0.04703  | 0.425619 |
| RF00001           | 0.158795395 | 0.967652056  | 4.0804729 | 0.2371421 | 0.812547 | NA       |
| CR556713.1        | 0 NA        | NA           | NA        | NA        | NA       | NA       |
| RF00003           | 0 NA        | NA           | NA        | NA        | NA       | NA       |
| RF00026           | 0 NA        | NA           | NA        | NA        | NA       | NA       |
| RF00001           | 0 NA        | NA           | NA        | NA        | NA       | NA       |
| taarl8g           | 0 NA        | NA           | NA        | NA        | NA       | NA       |
| BX537263.3        | 25.29269021 | 0.985927475  | 0.4997833 | 1.9727098 | 0.048529 | 0.433449 |
| CU013534.1        | 0.330916733 | -1.849579229 | 3.2489867 | -0.569279 | 0.569167 | NA       |
| CR450827.6        | 0 NA        | NA           | NA        | NA        | NA       | NA       |
| pimr152           | 0 NA        | NA           | NA        | NA        | NA       | NA       |
| RF00001           | 0 NA        | NA           | NA        | NA        | NA       | NA       |
| RF00001           | 0 NA        | NA           | NA        | NA        | NA       | NA       |
| zgc:77614         | 0 NA        | NA           | NA        | NA        | NA       | NA       |
| RF00001           | 0 NA        | NA           | NA        | NA        | NA       | NA       |
| si:dkey-58b18.5   | 0 NA        | NA           | NA        | NA        | NA       | NA       |
| RF00017           | 0 NA        | NA           | NA        | NA        | NA       | NA       |
| RF00001           | 0.166657454 | -0.955901296 | 4.0804729 | -0.234262 | 0.814781 | NA       |
| si:dkey-4j21.2    | 0 NA        | NA           | NA        | NA        | NA       | NA       |
| L0018508.1        | 8.995346461 | -0.292158215 | 0.7257484 | -0.402561 | 0.687271 | NA       |
| si:dkey-22h13.2   | 13.6500121  | 0.885240055  | 0.5442457 | 1.6265449 | 0.103834 | 0.610348 |
| KLHL12            | 161.1088674 | 0.09836603   | 0.1797452 | 0.5472527 | 0.584205 | 0.952277 |
| RF00001           | 0 NA        | NA           | NA        | NA        | NA       | NA       |
| RF00001           | 0 NA        | NA           | NA        | NA        | NA       | NA       |
| CR847970.1        | 8.191293998 | 0.808708209  | 0.7408984 | 1.0915237 | 0.275042 | NA       |
| RF00026           | 0 NA        | NA           | NA        | NA        | NA       | NA       |
| si:dkey-58b18.6   | 0.682973393 | 2.892694129  | 2.4661364 | 1.172966  | 0.240809 | NA       |
| FP015810.1        | 98.19244274 | 0.089680044  | 0.2164649 | 0.4142936 | 0.678659 | 0.965257 |
| si:ch211-165a10.5 | 0 NA        | NA           | NA        | NA        | NA       | NA       |
| BX511129.2        | 59.8455229  | 0.009811191  | 0.2514831 | 0.0390133 | 0.96888  | 0.996315 |
| RF00001           | 0 NA        | NA           | NA        | NA        | NA       | NA       |
| BX681417.7        | 0 NA        | NA           | NA        | NA        | NA       | NA       |
| CR394546.4        | 4.815428416 | -0.696695048 | 0.9469829 | -0.7357   | 0.461913 | NA       |
| CU468896.1        | 1.029332253 | -1.013131007 | 1.9737904 | -0.513292 | 0.607747 | NA       |
| RF00026           | 0 NA        | NA           | NA        | NA        | NA       | NA       |
| si:ch211-122124.6 | 0.339758314 | 0.005883863  | 3.2682461 | 0.0018003 | 0.998564 | NA       |
| L0017951.1        | 222.6161782 | 0.127708695  | 0.1496557 | 0.8533498 | 0.393465 | 0.898076 |
| CR381647.3        | 316.4128736 | -0.024776508 | 0.1280045 | -0.19356  | 0.846521 | 0.985174 |
| BX664750.4        | 0 NA        | NA           | NA        | NA        | NA       | NA       |
| RF00001           | 0 NA        | NA           | NA        | NA        | NA       | NA       |
| RF00001           | 0 NA        | NA           | NA        | NA        | NA       | NA       |
| pimr95            | 0 NA        | NA           | NA        | NA        | NA       | NA       |
| pimr152           | 0 NA        | NA           | NA        | NA        | NA       | NA       |
| CT583728.16       | 0 NA        | NA           | NA        | NA        | NA       | NA       |
| taarl3c           | 0 NA        | NA           | NA        | NA        | NA       | NA       |
| CU695011.1        | 0 NA        | NA           | NA        | NA        | NA       | NA       |
| dre-mir-430b-18   | 0 NA        | NA           | NA        | NA        | NA       | NA       |
| RF00012           | 0 NA        | NA           | NA        | NA        | NA       | NA       |
| RF00001           | 0 NA        | NA           | NA        | NA        | NA       | NA       |
| RF00001           | 0.476506538 | 2.394892832  | 2.8161716 | 0.8504073 | 0.395099 | NA       |
| AL928875.1        | 0.817013712 | 0.525058354  | 2.1207741 | 0.2475786 | 0.80446  | NA       |
| CZQB01141835.1    | 331.7815658 | 0.039931737  | 0.1224621 | 0.3260742 | 0.744368 | 0.974094 |
| RF00026           | 0 NA        | NA           | NA        | NA        | NA       | NA       |
| RF00026           | 0 NA        | NA           | NA        | NA        | NA       | NA       |

|                 |             |              |           |           |          |          |
|-----------------|-------------|--------------|-----------|-----------|----------|----------|
| RF00001         | 0.31437473  | -1.788572922 | 3.5930657 | -0.497785 | 0.618636 | NA       |
| RF00001         | 0.158795395 | 0.967652056  | 4.0804729 | 0.2371421 | 0.812547 | NA       |
| RF00026         | 0 NA        |              | NA        | NA        | NA       | NA       |
| CABZ01058107.1  | 0.69605863  | 0.094390757  | 2.3912825 | 0.0394729 | 0.968513 | NA       |
| RF00001         | 0 NA        |              | NA        | NA        | NA       | NA       |
| znf1116         | 6.508919753 | 0.235687322  | 0.7667531 | 0.3073836 | 0.758551 | NA       |
| RF00020         | 0 NA        |              | NA        | NA        | NA       | NA       |
| RF00001         | 0 NA        |              | NA        | NA        | NA       | NA       |
| RF00017         | 0 NA        |              | NA        | NA        | NA       | NA       |
| BX005424.1      | 0 NA        |              | NA        | NA        | NA       | NA       |
| RF00001         | 0 NA        |              | NA        | NA        | NA       | NA       |
| histlh2a10      | 7.118826888 | 0.784727868  | 0.9062164 | 0.8659387 | 0.386524 | NA       |
| si:dkey-61f9.1  | 0.158915748 | 0.967652056  | 4.0804729 | 0.2371421 | 0.812547 | NA       |
| BX908796.3      | 0.316103113 | 0.005883447  | 3.3519121 | 0.0017553 | 0.9986   | NA       |
| si:dkey-65b13.8 | 0 NA        |              | NA        | NA        | NA       | NA       |
| RF00001         | 0 NA        |              | NA        | NA        | NA       | NA       |
| RF00001         | 0 NA        |              | NA        | NA        | NA       | NA       |
| RF00001         | 0 NA        |              | NA        | NA        | NA       | NA       |
| BX323083.3      | 0 NA        |              | NA        | NA        | NA       | NA       |
| CT033790.2      | 0 NA        |              | NA        | NA        | NA       | NA       |
| RF00001         | 0 NA        |              | NA        | NA        | NA       | NA       |
| RF00015         | 0.698456806 | 0.09172817   | 2.5265115 | 0.0363063 | 0.971038 | NA       |
| RASSF10         | 121.3501334 | -0.236304114 | 0.1834858 | -1.28786  | 0.197795 | 0.76301  |
| RF00026         | 0 NA        |              | NA        | NA        | NA       | NA       |
| RASSF4          | 0 NA        |              | NA        | NA        | NA       | NA       |
| RF00001         | 0 NA        |              | NA        | NA        | NA       | NA       |
| RF00001         | 0.158795395 | 0.967652056  | 4.0804729 | 0.2371421 | 0.812547 | NA       |
| BX681417.8      | 0 NA        |              | NA        | NA        | NA       | NA       |
| CABZ01073424.2  | 67.09673732 | 0.543696778  | 0.2466979 | 2.203897  | 0.027532 | 0.320429 |
| CABZ01021599.1  | 9.479669594 | -1.071168878 | 0.6747198 | -1.587576 | 0.112382 | NA       |
| RF00003         | 0 NA        |              | NA        | NA        | NA       | NA       |
| si:dkey-23f9.11 | 0 NA        |              | NA        | NA        | NA       | NA       |
| znf1067         | 25.8431944  | 0.255808962  | 0.4017846 | 0.6366818 | 0.524332 | 0.939399 |
| RF00001         | 0 NA        |              | NA        | NA        | NA       | NA       |
| znf1101         | 7.084142812 | -0.31964852  | 0.7256706 | -0.440487 | 0.659584 | NA       |
| CT030005.3      | 0 NA        |              | NA        | NA        | NA       | NA       |
| RF00001         | 0 NA        |              | NA        | NA        | NA       | NA       |
| rab38b          | 17.1154656  | -0.27268162  | 0.470861  | -0.579113 | 0.562513 | 0.948728 |
| CT027598.1      | 0.330916733 | -1.849579229 | 3.2489867 | -0.569279 | 0.569167 | NA       |
| F0834857.1      | 7.029091699 | 0.342113743  | 0.7411945 | 0.4615708 | 0.644389 | NA       |
| BX000981.9      | 0 NA        |              | NA        | NA        | NA       | NA       |
| st3ga12         | 88.08249298 | 0.079083164  | 0.2122002 | 0.3726818 | 0.709385 | 0.968809 |
| RF00001         | 0.173729368 | -0.955901296 | 4.0804729 | -0.234262 | 0.814781 | NA       |
| RF00026         | 0 NA        |              | NA        | NA        | NA       | NA       |
| RF00001         | 0 NA        |              | NA        | NA        | NA       | NA       |
| RF00026         | 0 NA        |              | NA        | NA        | NA       | NA       |
| RF00001         | 0 NA        |              | NA        | NA        | NA       | NA       |
| RF00017         | 0 NA        |              | NA        | NA        | NA       | NA       |
| ZNF462          | 60.60606998 | 0.265339387  | 0.2754927 | 0.963145  | 0.335475 | 0.876088 |
| RF00001         | 0.173729368 | -0.955901296 | 4.0804729 | -0.234262 | 0.814781 | NA       |
| RF00001         | 0 NA        |              | NA        | NA        | NA       | NA       |
| BX927362.2      | 2.756804948 | 0.855360153  | 1.162591  | 0.7357361 | 0.461891 | NA       |
| PQLC1           | 15.3999937  | -0.39475139  | 0.5128568 | -0.769711 | 0.441471 | 0.916336 |
| CABZ01088036.1  | 9.068749264 | -0.264363552 | 0.6503003 | -0.406525 | 0.684357 | NA       |

|                    |             |              |           |           |          |          |
|--------------------|-------------|--------------|-----------|-----------|----------|----------|
| CR450780.2         | 3.702953408 | -0.498268928 | 0.9995409 | -0.498498 | 0.618133 | NA       |
| CT737184.2         | 25.14281427 | -0.089415491 | 0.3847542 | -0.232396 | 0.81623  | 0.981594 |
| ndufaf3            | 547.1582347 | -0.14651807  | 0.1261847 | -1.16114  | 0.245585 | 0.815431 |
| taar20b1           | 0.547712847 | 2.559541715  | 2.9076406 | 0.8802813 | 0.378707 | NA       |
| RF00026            | 0 NA        | NA           | NA        | NA        | NA       | NA       |
| CT573263.1         | 0.814536469 | 0.637862482  | 2.230678  | 0.28595   | 0.774916 | NA       |
| pimr174            | 1.32237089  | -1.549165965 | 1.8087987 | -0.856461 | 0.391743 | NA       |
| BX908770.1         | 11.80113444 | -0.023821463 | 0.5551049 | -0.042913 | 0.965771 | 0.996315 |
| adgre5b.3          | 127.3084312 | -0.160017031 | 0.1893684 | -0.845004 | 0.398109 | 0.899783 |
| L0018564.1         | 58.95654344 | 0.322797751  | 0.2564787 | 1.2585755 | 0.208184 | 0.775404 |
| BX294110.2         | 0.333314908 | -1.858695402 | 3.5126701 | -0.52914  | 0.596708 | NA       |
| RF00026            | 0 NA        | NA           | NA        | NA        | NA       | NA       |
| zgc:165555         | 10.9374093  | 1.402893632  | 0.6351063 | 2.2089116 | 0.027181 | NA       |
| RF00001            | 0 NA        | NA           | NA        | NA        | NA       | NA       |
| CT009745.1         | 0 NA        | NA           | NA        | NA        | NA       | NA       |
| F0704758.2         | 20.96488242 | -0.010825673 | 0.4320898 | -0.025054 | 0.980012 | 0.996879 |
| CABZ01072309.1     | 1139.400756 | 0.429751656  | 0.085671  | 5.0163004 | 5.27E-07 | 5.88E-05 |
| si:dkey-7i4.7      | 51.17514783 | 0.039497041  | 0.2746271 | 0.1438206 | 0.885642 | 0.988936 |
| L0017848.1         | 54.28871983 | -0.34927133  | 0.271654  | -1.285721 | 0.19854  | 0.763597 |
| CR762436.2         | 6.115086593 | 0.714474973  | 0.7842429 | 0.9110378 | 0.362275 | NA       |
| RF00001            | 0 NA        | NA           | NA        | NA        | NA       | NA       |
| BX571719.1         | 75.47696723 | 0.297566443  | 0.25999   | 1.1445303 | 0.252404 | 0.821887 |
| RF00026            | 0 NA        | NA           | NA        | NA        | NA       | NA       |
| RF00001            | 0 NA        | NA           | NA        | NA        | NA       | NA       |
| CABZ01061591.1     | 129.2687974 | -0.285034413 | 0.1794746 | -1.58816  | 0.11225  | 0.627572 |
| RF00001            | 0 NA        | NA           | NA        | NA        | NA       | NA       |
| RF00001            | 0 NA        | NA           | NA        | NA        | NA       | NA       |
| RF00003            | 0.173729368 | -0.955901296 | 4.0804729 | -0.234262 | 0.814781 | NA       |
| RF00325            | 0.333314908 | -1.858695402 | 3.5126701 | -0.52914  | 0.596708 | NA       |
| RF00003            | 0 NA        | NA           | NA        | NA        | NA       | NA       |
| BX897729.1         | 6.55217941  | -0.49961682  | 0.7633707 | -0.654488 | 0.512798 | NA       |
| RF00001            | 0 NA        | NA           | NA        | NA        | NA       | NA       |
| efnb3a             | 127.4295351 | 0.021726378  | 0.1898952 | 0.1144125 | 0.908911 | 0.990702 |
| RF00001            | 0 NA        | NA           | NA        | NA        | NA       | NA       |
| RF00001            | 0 NA        | NA           | NA        | NA        | NA       | NA       |
| RF00001            | 0 NA        | NA           | NA        | NA        | NA       | NA       |
| RF00001            | 0.173729368 | -0.955901296 | 4.0804729 | -0.234262 | 0.814781 | NA       |
| si:dkey-47k16.4    | 1.020882972 | 1.110886363  | 2.0729323 | 0.5359009 | 0.592027 | NA       |
| dre-mir-738        | 0 NA        | NA           | NA        | NA        | NA       | NA       |
| si:dkey-58b18.10   | 0 NA        | NA           | NA        | NA        | NA       | NA       |
| F0704721.1         | 23.64540396 | -0.597098068 | 0.3942561 | -1.514493 | 0.129901 | 0.662538 |
| RF00026            | 0 NA        | NA           | NA        | NA        | NA       | NA       |
| zgc:113102         | 41.79891336 | 0.166781762  | 0.298831  | 0.5581139 | 0.576767 | 0.950653 |
| CU207245.1         | 10.79356721 | -0.054226485 | 0.6192041 | -0.087574 | 0.930215 | NA       |
| RF00003            | 0 NA        | NA           | NA        | NA        | NA       | NA       |
| RF00001            | 0 NA        | NA           | NA        | NA        | NA       | NA       |
| si:ch211-207e19.15 | 1.462064469 | -1.02189199  | 1.6689875 | -0.612283 | 0.540351 | NA       |
| RF00001            | 0 NA        | NA           | NA        | NA        | NA       | NA       |
| RF00001            | 0 NA        | NA           | NA        | NA        | NA       | NA       |
| BX005073.3         | 7.185806549 | -0.737002036 | 0.7561235 | -0.974711 | 0.329704 | NA       |
| si:dkey-58b18.8    | 1.537397336 | -0.267812461 | 1.570452  | -0.170532 | 0.864592 | NA       |
| RF00001            | 0 NA        | NA           | NA        | NA        | NA       | NA       |
| tradv10.0.3        | 0 NA        | NA           | NA        | NA        | NA       | NA       |
| BX681417.9         | 0 NA        | NA           | NA        | NA        | NA       | NA       |

|                   |             |              |           |           |          |          |
|-------------------|-------------|--------------|-----------|-----------|----------|----------|
| RF00001           | 0           | NA           | NA        | NA        | NA       | NA       |
| BX000981.10       | 0           | NA           | NA        | NA        | NA       | NA       |
| RF00001           | 0.157187365 | -0.955901296 | 4.0804729 | -0.234262 | 0.814781 | NA       |
| RF00001           | 0.166657454 | -0.955901296 | 4.0804729 | -0.234262 | 0.814781 | NA       |
| pimr58            | 0           | NA           | NA        | NA        | NA       | NA       |
| CABZ01063543.1    | 6.415558202 | 0.531793885  | 0.7742482 | 0.686852  | 0.492176 | NA       |
| RF00001           | 0.538871265 | 0.999144257  | 2.7784799 | 0.359601  | 0.719146 | NA       |
| RF00026           | 0           | NA           | NA        | NA        | NA       | NA       |
| RF00001           | 0           | NA           | NA        | NA        | NA       | NA       |
| RF00016           | 1.158070327 | -1.364965424 | 1.9101513 | -0.714585 | 0.474866 | NA       |
| F0834800.2        | 2.030175172 | -0.943293113 | 1.4749274 | -0.639552 | 0.522464 | NA       |
| RF00026           | 0           | NA           | NA        | NA        | NA       | NA       |
| ighv9-4           | 0           | NA           | NA        | NA        | NA       | NA       |
| CR392045.1        | 6.363158419 | 0.372430042  | 0.7925947 | 0.4698871 | 0.638436 | NA       |
| AL929276.1        | 3.697255607 | -2.645293546 | 1.1972071 | -2.209554 | 0.027136 | NA       |
| RF00001           | 0.158795395 | 0.967652056  | 4.0804729 | 0.2371421 | 0.812547 | NA       |
| dre-mir-430b-6    | 0           | NA           | NA        | NA        | NA       | NA       |
| CU468723.2        | 0.524057646 | 2.503896172  | 2.7289583 | 0.9175282 | 0.358866 | NA       |
| si:ch211-182p11.1 | 54.2137488  | 0.680761827  | 0.275507  | 2.4709419 | 0.013476 | 0.20818  |
| zgc:91850         | 0           | NA           | NA        | NA        | NA       | NA       |
| RF00001           | 0           | NA           | NA        | NA        | NA       | NA       |
| CU138512.1        | 0           | NA           | NA        | NA        | NA       | NA       |
| RF00001           | 0           | NA           | NA        | NA        | NA       | NA       |
| RF00001           | 2.458512138 | -1.034924858 | 1.2999489 | -0.796127 | 0.425958 | NA       |
| RF00026           | 0           | NA           | NA        | NA        | NA       | NA       |
| BX569796.1        | 0           | NA           | NA        | NA        | NA       | NA       |
| dre-mir-430b-10   | 0           | NA           | NA        | NA        | NA       | NA       |
| RF00001           | 0.158795395 | 0.967652056  | 4.0804729 | 0.2371421 | 0.812547 | NA       |
| si:ch211-1n9.6    | 0.166657454 | -0.955901296 | 4.0804729 | -0.234262 | 0.814781 | NA       |
| RF00001           | 0           | NA           | NA        | NA        | NA       | NA       |
| BX530077.1        | 68.24894102 | 0.348577207  | 0.26069   | 1.337133  | 0.181179 | 0.742302 |
| BX649468.1        | 5.045553728 | 0.222882314  | 0.8410748 | 0.264997  | 0.791012 | NA       |
| CABZ01085275.1    | 4.563112935 | 0.336211673  | 0.9340839 | 0.3599373 | 0.718894 | NA       |
| BX681417.10       | 0           | NA           | NA        | NA        | NA       | NA       |
| DGKD              | 21.05580337 | -0.155836497 | 0.4323004 | -0.360482 | 0.718487 | 0.96909  |
| NRXN2             | 291.4572932 | -0.173853615 | 0.1533923 | -1.133392 | 0.25705  | 0.82528  |
| AL929345.1        | 0           | NA           | NA        | NA        | NA       | NA       |
| CR848784.4        | 0.521188103 | -2.493476766 | 2.9577741 | -0.843025 | 0.399215 | NA       |
| RF00003           | 0.497574187 | -2.437446738 | 2.6012773 | -0.937019 | 0.348749 | NA       |
| CABZ01061501.1    | 0.157187365 | -0.955901296 | 4.0804729 | -0.234262 | 0.814781 | NA       |
| RF00017           | 0           | NA           | NA        | NA        | NA       | NA       |
| BX548073.8        | 0           | NA           | NA        | NA        | NA       | NA       |
| BX276107.1        | 29.06231161 | 0.304610754  | 0.3953709 | 0.7704431 | 0.441037 | 0.916336 |
| CR855318.1        | 2.636209929 | -0.718087261 | 1.1839565 | -0.606515 | 0.544173 | NA       |
| znf1018           | 7.39088249  | 0.018877777  | 0.7063773 | 0.0267248 | 0.978679 | NA       |
| AL929009.2        | 1.571622502 | 1.077834218  | 1.7704471 | 0.6087921 | 0.542662 | NA       |
| RF00012           | 0           | NA           | NA        | NA        | NA       | NA       |
| fth131            | 13.01030704 | 1.357825534  | 0.573239  | 2.36869   | 0.017851 | 0.247192 |
| RF00001           | 0           | NA           | NA        | NA        | NA       | NA       |
| RF00001           | 0           | NA           | NA        | NA        | NA       | NA       |
| RF00001           | 0           | NA           | NA        | NA        | NA       | NA       |
| RF00001           | 0           | NA           | NA        | NA        | NA       | NA       |
| CU464134.2        | 1.275009159 | 0.723505083  | 1.8885879 | 0.3830931 | 0.701651 | NA       |
| RF00001           | 0           | NA           | NA        | NA        | NA       | NA       |

|                 |             |              |           |           |          |          |
|-----------------|-------------|--------------|-----------|-----------|----------|----------|
| RF00003         | 0           | NA           | NA        | NA        | NA       | NA       |
| RF00017         | 0.547712847 | 2.559541715  | 2.9076406 | 0.8802813 | 0.378707 | NA       |
| RF00001         | 0           | NA           | NA        | NA        | NA       | NA       |
| CABZ01078858.1  | 230.0889425 | 0.129031416  | 0.1939198 | 0.6653853 | 0.505804 | 0.935724 |
| RF00001         | 0.365141898 | 1.973577737  | 3.3927314 | 0.5817076 | 0.560764 | NA       |
| BX957362.5      | 0           | NA           | NA        | NA        | NA       | NA       |
| pigr13.5        | 0           | NA           | NA        | NA        | NA       | NA       |
| si:dkey-29p23.2 | 2.30802884  | 2.581419231  | 1.4867555 | 1.7362769 | 0.082515 | NA       |
| RF00003         | 0           | NA           | NA        | NA        | NA       | NA       |
| CR352226.6      | 0.365141898 | 1.973577737  | 3.3927314 | 0.5817076 | 0.560764 | NA       |
| RF00001         | 0           | NA           | NA        | NA        | NA       | NA       |
| BX511311.6      | 0           | NA           | NA        | NA        | NA       | NA       |
| zgc:163040      | 9.254362178 | 0.27538616   | 0.6304385 | 0.4368169 | 0.662244 | NA       |
| pimr85          | 0.157187365 | -0.955901296 | 4.0804729 | -0.234262 | 0.814781 | NA       |
| RF00001         | 0           | NA           | NA        | NA        | NA       | NA       |
| FP236810.2      | 37.1263543  | -0.675912432 | 0.3148876 | -2.14652  | 0.031832 | 0.34636  |
| taar19u         | 0           | NA           | NA        | NA        | NA       | NA       |
| RF00001         | 0.325573202 | 0.005883621  | 3.3172783 | 0.0017736 | 0.998585 | NA       |
| RF00012         | 0           | NA           | NA        | NA        | NA       | NA       |
| CR450764.3      | 1.861390247 | 0.809609919  | 1.4440815 | 0.5606401 | 0.575043 | NA       |
| CR384055.1      | 5.661956768 | 0.555606298  | 0.8235598 | 0.6746399 | 0.499905 | NA       |
| RF00001         | 0           | NA           | NA        | NA        | NA       | NA       |
| RF00415         | 0           | NA           | NA        | NA        | NA       | NA       |
| RF00001         | 0.158795395 | 0.967652056  | 4.0804729 | 0.2371421 | 0.812547 | NA       |
| BX957281.1      | 4.755074062 | -0.293614688 | 0.8706555 | -0.337234 | 0.73594  | NA       |
| RF00001         | 0           | NA           | NA        | NA        | NA       | NA       |
| BX511224.1      | 3.942109678 | 1.906102372  | 1.1584065 | 1.645452  | 0.099877 | NA       |
| CABZ01028298.1  | 0           | NA           | NA        | NA        | NA       | NA       |
| BX572627.1      | 1.473854661 | 1.840539378  | 1.7103251 | 1.0761343 | 0.281867 | NA       |
| RF00001         | 0           | NA           | NA        | NA        | NA       | NA       |
| zgc:77058       | 930.2967742 | 0.06324077   | 0.0947236 | 0.6676346 | 0.504367 | 0.935541 |
| CABZ01070469.1  | 140.6301553 | 0.405931241  | 0.1746473 | 2.3242919 | 0.02011  | 0.266523 |
| F0704821.1      | 68.64307795 | 0.2931056    | 0.251167  | 1.1669748 | 0.243221 | 0.812077 |
| BX546453.1      | 2.085540265 | 2.386163972  | 1.5668988 | 1.5228578 | 0.127794 | NA       |
| RF00001         | 0           | NA           | NA        | NA        | NA       | NA       |
| BX005397.1      | 4.4927648   | -0.108464044 | 0.9063359 | -0.119673 | 0.904742 | NA       |
| ctxn1           | 2.692991415 | 0.774103381  | 1.181602  | 0.6551304 | 0.512384 | NA       |
| RF00494         | 97.07614139 | -0.36249235  | 0.2037904 | -1.778751 | 0.075281 | 0.534207 |
| RF00020         | 0           | NA           | NA        | NA        | NA       | NA       |
| AL929536.3      | 291.4080183 | -0.989519719 | 0.147846  | -6.692907 | 2.19E-11 | 5.85E-09 |
| dre-mir-430c-1  | 0           | NA           | NA        | NA        | NA       | NA       |
| RF00026         | 0           | NA           | NA        | NA        | NA       | NA       |
| BX510335.4      | 0           | NA           | NA        | NA        | NA       | NA       |
| RF00026         | 0           | NA           | NA        | NA        | NA       | NA       |
| RF00001         | 0           | NA           | NA        | NA        | NA       | NA       |
| znf1146         | 3.443042474 | -0.163047671 | 1.0258465 | -0.15894  | 0.873716 | NA       |
| L0017802.1      | 3.709399227 | -0.125478213 | 1.0211202 | -0.122883 | 0.9022   | NA       |
| L0017722.1      | 214.7563236 | 0.02088558   | 0.148958  | 0.1402112 | 0.888493 | 0.989291 |
| RF00026         | 0           | NA           | NA        | NA        | NA       | NA       |
| CR382326.1      | 0           | NA           | NA        | NA        | NA       | NA       |
| L0018260.3      | 1.317574539 | -1.543547076 | 1.8100622 | -0.852759 | 0.393793 | NA       |
| CT583662.1      | 0.173729368 | -0.955901296 | 4.0804729 | -0.234262 | 0.814781 | NA       |
| CR925756.1      | 0           | NA           | NA        | NA        | NA       | NA       |
| RF00001         | 0           | NA           | NA        | NA        | NA       | NA       |

|                  |             |              |           |           |          |          |  |    |  |    |
|------------------|-------------|--------------|-----------|-----------|----------|----------|--|----|--|----|
| ighv9-2          |             | 0 NA         |           | NA        |          | NA       |  | NA |  | NA |
| CR394532.2       | 1.332030356 | 0.764519523  | 1.7290471 | 0.4421623 | 0.658372 | NA       |  |    |  |    |
| zgc:153932       | 123.6766501 | 0.125398024  | 0.2183665 | 0.5742548 | 0.565795 | 0.948739 |  |    |  |    |
| si:dkey-88n24.5  | 5.717564858 | -0.339079123 | 0.8024329 | -0.422564 | 0.672614 | NA       |  |    |  |    |
| RF00001          | 0.158915748 | 0.967652056  | 4.0804729 | 0.2371421 | 0.812547 | NA       |  |    |  |    |
| RF00017          | 0.182570949 | 0.967652056  | 4.0804729 | 0.2371421 | 0.812547 | NA       |  |    |  |    |
| CR388148.2       | 0.158795395 | 0.967652056  | 4.0804729 | 0.2371421 | 0.812547 | NA       |  |    |  |    |
| CU571081.1       | 19.01436159 | -0.030339267 | 0.4318293 | -0.070258 | 0.943989 | 0.993364 |  |    |  |    |
| CABZ01084501.2   | 65.95009659 | -0.224554899 | 0.2416701 | -0.929179 | 0.352796 | 0.881552 |  |    |  |    |
| RF00001          |             | 0 NA         |           | NA        |          | NA       |  |    |  |    |
| RF00003          |             | 0 NA         |           | NA        |          | NA       |  |    |  |    |
| RF00026          |             | 0 NA         |           | NA        |          | NA       |  |    |  |    |
| RF00026          |             | 0 NA         |           | NA        |          | NA       |  |    |  |    |
| CR749763.6       |             | 0 NA         |           | NA        |          | NA       |  |    |  |    |
| RF00001          |             | 0 NA         |           | NA        |          | NA       |  |    |  |    |
| RF01848          |             | 0 NA         |           | NA        |          | NA       |  |    |  |    |
| zgc:153659       |             | 0 NA         |           | NA        |          | NA       |  |    |  |    |
| FO904868.1       |             | 0 NA         |           | NA        |          | NA       |  |    |  |    |
| RF00001          | 0.158915748 | 0.967652056  | 4.0804729 | 0.2371421 | 0.812547 | NA       |  |    |  |    |
| RF00001          |             | 0 NA         |           | NA        |          | NA       |  |    |  |    |
| RF00001          |             | 0 NA         |           | NA        |          | NA       |  |    |  |    |
| RF00026          |             | 0 NA         |           | NA        |          | NA       |  |    |  |    |
| dre-mir-430c-1   |             | 0 NA         |           | NA        |          | NA       |  |    |  |    |
| CU571384.1       | 0.489712128 | -0.887840729 | 2.693685  | -0.329601 | 0.741702 | NA       |  |    |  |    |
| BX322657.3       | 36.20442223 | -0.149006681 | 0.3211603 | -0.463964 | 0.642674 | 0.959994 |  |    |  |    |
| insig2           | 95.47008403 | 0.050411547  | 0.2202162 | 0.2289185 | 0.818932 | 0.981594 |  |    |  |    |
| dre-mir-430c-1   |             | 0 NA         |           | NA        |          | NA       |  |    |  |    |
| CABZ01086139.1   | 4.359082284 | -0.653028743 | 0.9264496 | -0.704872 | 0.48089  | NA       |  |    |  |    |
| BX248501.2       | 66.62632474 | -0.112383373 | 0.242462  | -0.463509 | 0.642999 | 0.959994 |  |    |  |    |
| RF00001          | 0.157187365 | -0.955901296 | 4.0804729 | -0.234262 | 0.814781 | NA       |  |    |  |    |
| BX510922.3       | 22.68597804 | -0.306366602 | 0.4384847 | -0.698694 | 0.484743 | 0.93001  |  |    |  |    |
| RF00001          |             | 0 NA         |           | NA        |          | NA       |  |    |  |    |
| CU138548.5       | 0.166657454 | -0.955901296 | 4.0804729 | -0.234262 | 0.814781 | NA       |  |    |  |    |
| si:dkey-83f18.15 | 0.158915748 | 0.967652056  | 4.0804729 | 0.2371421 | 0.812547 | NA       |  |    |  |    |
| RF00003          |             | 0 NA         |           | NA        |          | NA       |  |    |  |    |
| L0018432.1       | 4.991047804 | -0.563120175 | 0.8765745 | -0.64241  | 0.520607 | NA       |  |    |  |    |
| si:dkey-265e15.2 | 4.304501543 | 0.244828421  | 0.9292805 | 0.2634602 | 0.792196 | NA       |  |    |  |    |
| golim4a          | 387.9083898 | 0.080856275  | 0.1155496 | 0.699754  | 0.484081 | 0.929461 |  |    |  |    |
| BX548045.2       | 0.173729368 | -0.955901296 | 4.0804729 | -0.234262 | 0.814781 | NA       |  |    |  |    |
| RF00001          |             | 0 NA         |           | NA        |          | NA       |  |    |  |    |
| FP236630.1       | 6.472523819 | -0.199513179 | 0.7721253 | -0.258395 | 0.796102 | NA       |  |    |  |    |
| RF00026          |             | 0 NA         |           | NA        |          | NA       |  |    |  |    |
| RF00001          | 0.173729368 | -0.955901296 | 4.0804729 | -0.234262 | 0.814781 | NA       |  |    |  |    |
| lrrc4ca          | 127.7197319 | 0.067218784  | 0.1827637 | 0.3677908 | 0.713029 | 0.96909  |  |    |  |    |
| RF00003          |             | 0 NA         |           | NA        |          | NA       |  |    |  |    |
| RF00001          |             | 0 NA         |           | NA        |          | NA       |  |    |  |    |
| zgc:173545       |             | 0 NA         |           | NA        |          | NA       |  |    |  |    |
| RF00001          | 0.514116189 | -2.475533565 | 2.7461255 | -0.901464 | 0.367342 | NA       |  |    |  |    |
| RF00001          | 0.661833465 | -2.849573936 | 2.4898884 | -1.144458 | 0.252434 | NA       |  |    |  |    |
| si:ch211-276i6.1 | 0.173729368 | -0.955901296 | 4.0804729 | -0.234262 | 0.814781 | NA       |  |    |  |    |
| RF00026          |             | 0 NA         |           | NA        |          | NA       |  |    |  |    |
| RF00026          |             | 0 NA         |           | NA        |          | NA       |  |    |  |    |
| CR318624.2       | 14.3100322  | 0.598088842  | 0.5333027 | 1.121481  | 0.262083 | 0.830166 |  |    |  |    |
| RF00003          | 0.332524763 | 0.005883742  | 3.292841  | 0.0017868 | 0.998574 | NA       |  |    |  |    |



|                    |             |              |           |           |          |          |
|--------------------|-------------|--------------|-----------|-----------|----------|----------|
| taar18i            |             | 0 NA         | NA        | NA        | NA       | NA       |
| CT583626.1         | 0.507044276 | -2.459587493 | 2.7586536 | -0.89159  | 0.372613 | NA       |
| CABZ01068600.1     | 63.57293302 | -0.073982095 | 0.2560081 | -0.288983 | 0.772594 | 0.975687 |
| CABZ01058333.1     | 6.486430196 | 0.387607857  | 0.7480964 | 0.5181255 | 0.604371 | NA       |
| RF00001            |             | 0 NA         | NA        | NA        | NA       | NA       |
| RF00334            |             | 0 NA         | NA        | NA        | NA       | NA       |
| dre-mir-430a-4     |             | 0 NA         | NA        | NA        | NA       | NA       |
| CABZ01067151.1     | 59.69340254 | 0.573064942  | 0.2773555 | 2.0661746 | 0.038812 | 0.386536 |
| RF00026            |             | 0 NA         | NA        | NA        | NA       | NA       |
| CU856539.3         | 5.329160059 | 0.01414628   | 0.8040722 | 0.0175933 | 0.985963 | NA       |
| si:ch211-113a14.19 | 3.087801837 | 0.404144085  | 1.1571118 | 0.3492697 | 0.726887 | NA       |
| RF00026            |             | 0 NA         | NA        | NA        | NA       | NA       |
| si:dkey-27d5.5     | 0.365141898 | 1.973577737  | 3.3927314 | 0.5817076 | 0.560764 | NA       |
| RF00001            |             | 0 NA         | NA        | NA        | NA       | NA       |
| RF00001            |             | 0 NA         | NA        | NA        | NA       | NA       |
| RF00001            |             | 0 NA         | NA        | NA        | NA       | NA       |
| CR786566.1         | 0.497574187 | -2.437446738 | 2.6012773 | -0.937019 | 0.348749 | NA       |
| RF00001            | 6.117244063 | 0.713728682  | 0.7585061 | 0.9409663 | 0.346722 | NA       |
| RF00001            |             | 0 NA         | NA        | NA        | NA       | NA       |
| si:ch211-14p21.4   | 0.316103113 | 0.005883447  | 3.3519121 | 0.0017553 | 0.9986   | NA       |
| pimr45             | 0.31759079  | 1.807926197  | 3.579045  | 0.5051421 | 0.613459 | NA       |
| CU459094.2         | 9.675669512 | 0.610486984  | 0.6325446 | 0.9651288 | 0.33448  | NA       |
| RF00017            | 0.960754782 | 2.172439821  | 2.149468  | 1.0106872 | 0.312166 | NA       |
| RF00001            |             | 0 NA         | NA        | NA        | NA       | NA       |
| si:ch211-59d8.2    | 3.143254204 | -1.104107012 | 1.1034214 | -1.000621 | 0.31701  | NA       |
| si:dkeyp-67e1.6    | 0.158915748 | 0.967652056  | 4.0804729 | 0.2371421 | 0.812547 | NA       |
| BX088712.2         | 0.497574187 | -2.437446738 | 2.6012773 | -0.937019 | 0.348749 | NA       |
| RF00001            |             | 0 NA         | NA        | NA        | NA       | NA       |
| RF00026            |             | 0 NA         | NA        | NA        | NA       | NA       |
| RF00001            |             | 0 NA         | NA        | NA        | NA       | NA       |
| fgf12b             | 116.1509834 | 0.039370145  | 0.1947542 | 0.202153  | 0.839797 | 0.984979 |
| BX548011.3         | 0.523937293 | 2.50362281   | 2.7291625 | 0.9173594 | 0.358954 | NA       |
| si:ch211-209n20.3  | 0.838940531 | -0.561526863 | 2.0217856 | -0.277738 | 0.781213 | NA       |
| CABZ01074363.1     | 32.97514186 | -0.40928195  | 0.3388121 | -1.207991 | 0.227051 | 0.794587 |
| RF00001            |             | 0 NA         | NA        | NA        | NA       | NA       |
| RF00001            | 0.166657454 | -0.955901296 | 4.0804729 | -0.234262 | 0.814781 | NA       |
| RF00017            | 0.182570949 | 0.967652056  | 4.0804729 | 0.2371421 | 0.812547 | NA       |
| RF00001            |             | 0 NA         | NA        | NA        | NA       | NA       |
| L0017656.2         | 0.332524763 | 0.005883742  | 3.292841  | 0.0017868 | 0.998574 | NA       |
| CU633775.1         | 46.23554798 | -0.422506046 | 0.2942403 | -1.435922 | 0.151025 | 0.699055 |
| CU571382.5         | 0.473170125 | -0.833888596 | 2.9014002 | -0.287409 | 0.773799 | NA       |
| L0018202.1         | 0.173729368 | -0.955901296 | 4.0804729 | -0.234262 | 0.814781 | NA       |
| si:dkeyp-82b4.4    | 3.12847961  | -0.738354003 | 1.1101592 | -0.665088 | 0.505994 | NA       |
| RF00001            |             | 0 NA         | NA        | NA        | NA       | NA       |
| fam78bb            | 18.11548913 | -0.39638033  | 0.4598351 | -0.862005 | 0.388685 | 0.896271 |
| traj23             |             | 0 NA         | NA        | NA        | NA       | NA       |
| si:ch211-221n20.7  | 0.697787013 | 1.536711783  | 2.3781027 | 0.6461924 | 0.518155 | NA       |
| RF00001            |             | 0 NA         | NA        | NA        | NA       | NA       |
| znf1107            | 3.007407431 | 0.402037127  | 1.194681  | 0.3365226 | 0.736477 | NA       |
| RF00001            |             | 0 NA         | NA        | NA        | NA       | NA       |
| BX927341.2         |             | 0 NA         | NA        | NA        | NA       | NA       |
| CR352226.7         | 0.330916733 | -1.849579229 | 3.2489867 | -0.569279 | 0.569167 | NA       |
| RF00091            | 0.325573202 | 0.005883621  | 3.3172783 | 0.0017736 | 0.998585 | NA       |
| si:dkey-102c8.3    | 513.3150216 | 0.305627351  | 0.1083028 | 2.8219719 | 0.004773 | 0.099662 |

|                   |             |              |           |           |          |          |
|-------------------|-------------|--------------|-----------|-----------|----------|----------|
| CU462871.1        | 1.838215462 | -1.418452594 | 1.4563693 | -0.973965 | 0.330074 | NA       |
| CR936363.1        | 0.547712847 | 2.559541715  | 2.9076406 | 0.8802813 | 0.378707 | NA       |
| CT955984.1        | 0.476506538 | 2.394892832  | 2.8161716 | 0.8504073 | 0.395099 | NA       |
| RF00001           | 0 NA        | NA           | NA        | NA        | NA       | NA       |
| RF00003           | 0 NA        | NA           | NA        | NA        | NA       | NA       |
| znf993            | 18.45637616 | 0.03472943   | 0.467711  | 0.074254  | 0.940808 | 0.992857 |
| pimr30            | 0 NA        | NA           | NA        | NA        | NA       | NA       |
| RF00001           | 0 NA        | NA           | NA        | NA        | NA       | NA       |
| RF00001           | 0 NA        | NA           | NA        | NA        | NA       | NA       |
| RF00001           | 0 NA        | NA           | NA        | NA        | NA       | NA       |
| RF00001           | 0 NA        | NA           | NA        | NA        | NA       | NA       |
| hbbe1.1           | 3206.134541 | 0.126175319  | 0.191328  | 0.6594711 | 0.509593 | 0.936253 |
| BX511311.7        | 0 NA        | NA           | NA        | NA        | NA       | NA       |
| BEND4             | 0.682853041 | 2.891318346  | 2.3286279 | 1.2416403 | 0.214369 | NA       |
| RF00026           | 0 NA        | NA           | NA        | NA        | NA       | NA       |
| TMEM164           | 13.02041125 | 0.678440503  | 0.5305606 | 1.2787239 | 0.200994 | 0.766855 |
| RF00003           | 0 NA        | NA           | NA        | NA        | NA       | NA       |
| RF00001           | 0 NA        | NA           | NA        | NA        | NA       | NA       |
| dre-mir-430a-16   | 0 NA        | NA           | NA        | NA        | NA       | NA       |
| RF00001           | 0 NA        | NA           | NA        | NA        | NA       | NA       |
| RF00001           | 0 NA        | NA           | NA        | NA        | NA       | NA       |
| RF00026           | 0 NA        | NA           | NA        | NA        | NA       | NA       |
| znf976            | 11.66041797 | -0.558673668 | 0.5834696 | -0.957503 | 0.338314 | 0.876778 |
| RF00001           | 0.166657454 | -0.955901296 | 4.0804729 | -0.234262 | 0.814781 | NA       |
| RF00392           | 0 NA        | NA           | NA        | NA        | NA       | NA       |
| pimr64            | 0.791121974 | 0.591938164  | 2.3987483 | 0.2467696 | 0.805087 | NA       |
| BX571674.1        | 0.173729368 | -0.955901296 | 4.0804729 | -0.234262 | 0.814781 | NA       |
| BX470083.3        | 0 NA        | NA           | NA        | NA        | NA       | NA       |
| RF00001           | 0 NA        | NA           | NA        | NA        | NA       | NA       |
| ralbb             | 219.4454072 | -0.168810182 | 0.1503792 | -1.122563 | 0.261623 | 0.829725 |
| RF00026           | 0 NA        | NA           | NA        | NA        | NA       | NA       |
| RF00026           | 0 NA        | NA           | NA        | NA        | NA       | NA       |
| CU861574.1        | 0 NA        | NA           | NA        | NA        | NA       | NA       |
| RF00001           | 0 NA        | NA           | NA        | NA        | NA       | NA       |
| LO018363.2        | 240.1147999 | 0.082106488  | 0.1512283 | 0.5429309 | 0.587177 | 0.953319 |
| CU928063.1        | 0.365141898 | 1.973577737  | 3.3927314 | 0.5817076 | 0.560764 | NA       |
| si:ch211-196f19.1 | 7.906177622 | 0.068521251  | 0.6790613 | 0.1009058 | 0.919625 | NA       |
| BX649423.2        | 0 NA        | NA           | NA        | NA        | NA       | NA       |
| BX901883.4        | 1.166242115 | 0.395001397  | 1.7433393 | 0.2265775 | 0.820752 | NA       |
| RF00026           | 0 NA        | NA           | NA        | NA        | NA       | NA       |
| znf1173           | 47.20748858 | 0.352304197  | 0.2918177 | 1.2072748 | 0.227326 | 0.794617 |
| RF00001           | 0 NA        | NA           | NA        | NA        | NA       | NA       |
| AL935186.8        | 75.10408473 | 0.676871215  | 0.9767728 | 0.6929669 | 0.48833  | 0.93189  |
| RF00026           | 0 NA        | NA           | NA        | NA        | NA       | NA       |
| CABZ01058222.1    | 81.11844547 | -0.535907268 | 0.2533971 | -2.114891 | 0.034439 | 0.360509 |
| BX511082.1        | 0.31437473  | -1.788572922 | 3.5930657 | -0.497785 | 0.618636 | NA       |
| RF00003           | 0 NA        | NA           | NA        | NA        | NA       | NA       |
| RF00026           | 0 NA        | NA           | NA        | NA        | NA       | NA       |
| RF00001           | 0 NA        | NA           | NA        | NA        | NA       | NA       |
| RF00001           | 0.500161739 | 2.450146464  | 2.7711133 | 0.8841741 | 0.376602 | NA       |
| RF00001           | 0.166657454 | -0.955901296 | 4.0804729 | -0.234262 | 0.814781 | NA       |
| si:ch211-223g7.6  | 9.175108089 | 0.112865312  | 0.6370826 | 0.1771596 | 0.859383 | NA       |
| RF00001           | 0 NA        | NA           | NA        | NA        | NA       | NA       |
| RF00003           | 0 NA        | NA           | NA        | NA        | NA       | NA       |

|                     |              |               |            |            |           |           |
|---------------------|--------------|---------------|------------|------------|-----------|-----------|
| RF00015             | 2. 978445486 | -0. 6488162   | 1. 0950752 | -0. 592486 | 0. 553526 | NA        |
| RF00001             | 0 NA         |               | NA         | NA         | NA        | NA        |
| CR925804. 2         | 217. 1024415 | -0. 06863398  | 0. 1637232 | -0. 419207 | 0. 675065 | 0. 965257 |
| RF00001             | 0. 499972362 | -2. 44370697  | 3. 0013188 | -0. 814211 | 0. 415524 | NA        |
| BX511265. 5         | 0 NA         |               | NA         | NA         | NA        | NA        |
| CR925723. 4         | 0 NA         |               | NA         | NA         | NA        | NA        |
| si:ch211-113a14. 19 | 10. 83815179 | 0. 603894095  | 0. 6170455 | 0. 9786865 | 0. 327735 | NA        |
| RF00001             | 0 NA         |               | NA         | NA         | NA        | NA        |
| RF00026             | 0 NA         |               | NA         | NA         | NA        | NA        |
| si:dkey-31m5. 5     | 0 NA         |               | NA         | NA         | NA        | NA        |
| znf1103             | 3. 130877785 | -0. 740837051 | 1. 0798951 | -0. 686027 | 0. 492696 | NA        |
| RF00001             | 1. 36846206  | 0. 063006266  | 1. 7050243 | 0. 0369533 | 0. 970522 | NA        |
| baiap2b             | 17. 04387222 | 0. 032020692  | 0. 4624801 | 0. 0692369 | 0. 944801 | 0. 993409 |
| RF00001             | 0 NA         |               | NA         | NA         | NA        | NA        |
| RF00015             | 0 NA         |               | NA         | NA         | NA        | NA        |
| RF01848             | 0 NA         |               | NA         | NA         | NA        | NA        |
| RF00017             | 0 NA         |               | NA         | NA         | NA        | NA        |
| RF00001             | 0 NA         |               | NA         | NA         | NA        | NA        |
| GABRA2              | 31. 45448949 | 0. 421049085  | 0. 3399606 | 1. 2385233 | 0. 215522 | 0. 783025 |
| si:dkey-234124. 7   | 0. 482640214 | -0. 866525639 | 2. 7061322 | -0. 320208 | 0. 748811 | NA        |
| RF00001             | 0 NA         |               | NA         | NA         | NA        | NA        |
| RF00012             | 0 NA         |               | NA         | NA         | NA        | NA        |
| RF00001             | 0 NA         |               | NA         | NA         | NA        | NA        |
| RF00001             | 0 NA         |               | NA         | NA         | NA        | NA        |
| RF00001             | 0 NA         |               | NA         | NA         | NA        | NA        |
| DYNC2H1             | 393. 7514594 | 0. 05962624   | 0. 1225146 | 0. 486687  | 0. 62648  | 0. 957354 |
| FP340257. 1         | 0 NA         |               | NA         | NA         | NA        | NA        |
| CU462915. 1         | 5. 964341639 | 0. 326872683  | 0. 7592968 | 0. 430494  | 0. 666836 | NA        |
| znf1139             | 6. 394764638 | -0. 301341936 | 0. 7803656 | -0. 386155 | 0. 699382 | NA        |
| GRIK2               | 378. 8734023 | 0. 018857565  | 0. 1188031 | 0. 1587295 | 0. 873882 | 0. 987881 |
| BX908388. 2         | 4. 443915392 | 0. 310950528  | 0. 9030765 | 0. 3443236 | 0. 730603 | NA        |
| RF00001             | 0 NA         |               | NA         | NA         | NA        | NA        |
| RF00001             | 0 NA         |               | NA         | NA         | NA        | NA        |
| zgc:173615          | 19. 12172892 | -0. 434716106 | 0. 4495487 | -0. 967006 | 0. 333541 | 0. 874933 |
| RF00001             | 0 NA         |               | NA         | NA         | NA        | NA        |
| si:dkeyp-67e1. 6    | 3. 873266053 | -1. 191389972 | 1. 0199117 | -1. 168131 | 0. 242754 | NA        |
| CU896602. 3         | 0 NA         |               | NA         | NA         | NA        | NA        |
| BX901942. 2         | 0. 31759079  | 1. 807926197  | 3. 579045  | 0. 5051421 | 0. 613459 | NA        |
| taarl3a             | 0 NA         |               | NA         | NA         | NA        | NA        |
| RF00001             | 0 NA         |               | NA         | NA         | NA        | NA        |
| si:dkey-108k21. 19  | 7. 530751253 | -0. 274794788 | 0. 7484676 | -0. 367143 | 0. 713512 | NA        |
| L0017872. 1         | 177. 8504325 | -0. 045451567 | 0. 1667851 | -0. 272516 | 0. 785225 | 0. 97627  |
| si:dkey-205i10. 1   | 5. 369154339 | -0. 015113375 | 0. 8404679 | -0. 017982 | 0. 985653 | NA        |
| CR788322. 3         | 0 NA         |               | NA         | NA         | NA        | NA        |
| si:dkeyp-82b4. 6    | 0. 984340959 | -1. 03899679  | 2. 1198949 | -0. 490117 | 0. 624051 | NA        |
| RF00001             | 0 NA         |               | NA         | NA         | NA        | NA        |
| BX681417. 11        | 0 NA         |               | NA         | NA         | NA        | NA        |
| RF00015             | 0 NA         |               | NA         | NA         | NA        | NA        |
| BX681417. 12        | 0 NA         |               | NA         | NA         | NA        | NA        |
| cyp46a1. 4          | 15. 39357775 | 0. 669815383  | 0. 484315  | 1. 3830159 | 0. 16666  | 0. 723339 |
| RF00001             | 0 NA         |               | NA         | NA         | NA        | NA        |
| pimr158             | 0 NA         |               | NA         | NA         | NA        | NA        |
| si:ch211-223k15. 1  | 10. 30182593 | -0. 673279685 | 0. 6015224 | -1. 119293 | 0. 263015 | NA        |
| RF00017             | 0. 182570949 | 0. 967652056  | 4. 0804729 | 0. 2371421 | 0. 812547 | NA        |

|                 |             |              |           |           |          |          |
|-----------------|-------------|--------------|-----------|-----------|----------|----------|
| ighj2-2         | 0           | NA           | NA        | NA        | NA       | NA       |
| RF00026         | 0           | NA           | NA        | NA        | NA       | NA       |
| CABZ01112461.1  | 14.11874678 | 0.79942819   | 0.5446009 | 1.4679156 | 0.142127 | 0.683801 |
| BX537305.1      | 0.166657454 | -0.955901296 | 4.0804729 | -0.234262 | 0.814781 | NA       |
| L0018029.2      | 43.8888834  | 0.163258256  | 0.2906947 | 0.5616142 | 0.574379 | 0.950037 |
| RF00001         | 0           | NA           | NA        | NA        | NA       | NA       |
| RF00001         | 0           | NA           | NA        | NA        | NA       | NA       |
| RF00012         | 0           | NA           | NA        | NA        | NA       | NA       |
| AL844172.1      | 0           | NA           | NA        | NA        | NA       | NA       |
| RF00003         | 0           | NA           | NA        | NA        | NA       | NA       |
| RF00001         | 0           | NA           | NA        | NA        | NA       | NA       |
| L0018629.1      | 17.09291402 | 0.528692531  | 0.4720375 | 1.1200224 | 0.262704 | 0.830166 |
| RF00012         | 0           | NA           | NA        | NA        | NA       | NA       |
| BX649502.12     | 0           | NA           | NA        | NA        | NA       | NA       |
| RF00001         | 0.158915748 | 0.967652056  | 4.0804729 | 0.2371421 | 0.812547 | NA       |
| RF00001         | 0           | NA           | NA        | NA        | NA       | NA       |
| AL928650.4      | 0.690594747 | 1.536595024  | 2.3851901 | 0.6442233 | 0.519431 | NA       |
| RF00001         | 0           | NA           | NA        | NA        | NA       | NA       |
| RF00026         | 0           | NA           | NA        | NA        | NA       | NA       |
| RF00001         | 0.182570949 | 0.967652056  | 4.0804729 | 0.2371421 | 0.812547 | NA       |
| RF00017         | 0           | NA           | NA        | NA        | NA       | NA       |
| RF00001         | 0           | NA           | NA        | NA        | NA       | NA       |
| RF00001         | 0           | NA           | NA        | NA        | NA       | NA       |
| RF00026         | 0           | NA           | NA        | NA        | NA       | NA       |
| RF00017         | 0           | NA           | NA        | NA        | NA       | NA       |
| hoxc13b         | 6.473625707 | 0.662048566  | 0.8010118 | 0.8265153 | 0.408512 | NA       |
| RF00067         | 0.489712128 | -0.887840729 | 2.693685  | -0.329601 | 0.741702 | NA       |
| RF00026         | 0           | NA           | NA        | NA        | NA       | NA       |
| zgc:174355      | 0           | NA           | NA        | NA        | NA       | NA       |
| RF00001         | 0           | NA           | NA        | NA        | NA       | NA       |
| RF00017         | 0           | NA           | NA        | NA        | NA       | NA       |
| si:dkey-30g5.1  | 0           | NA           | NA        | NA        | NA       | NA       |
| si:dkey-29p23.1 | 17.12305536 | -0.251582398 | 0.5066929 | -0.496518 | 0.619529 | 0.957354 |
| CT955962.1      | 0.656369582 | -1.475482481 | 2.3019817 | -0.640962 | 0.521547 | NA       |
| zgc:77650       | 700.2992792 | 0.031300563  | 0.0960548 | 0.3258615 | 0.744529 | 0.974094 |
| RF00001         | 0           | NA           | NA        | NA        | NA       | NA       |
| RF01848         | 0           | NA           | NA        | NA        | NA       | NA       |
| RF00026         | 0           | NA           | NA        | NA        | NA       | NA       |
| F0904860.1      | 2.106569042 | 0.673678775  | 1.3041266 | 0.5165747 | 0.605453 | NA       |
| RF00026         | 0           | NA           | NA        | NA        | NA       | NA       |
| RF00001         | 0           | NA           | NA        | NA        | NA       | NA       |
| BX530407.7      | 0.31759079  | 1.807926197  | 3.579045  | 0.5051421 | 0.613459 | NA       |
| B3GAT1          | 39.837144   | 0.527102352  | 0.3235661 | 1.6290405 | 0.103304 | 0.609625 |
| RF00026         | 0           | NA           | NA        | NA        | NA       | NA       |
| L0018011.1      | 0.806605386 | -1.86493339  | 2.2427648 | -0.831533 | 0.405672 | NA       |
| pard3ba         | 2.334999503 | -1.334803475 | 1.2706675 | -1.050474 | 0.2935   | NA       |
| RF00026         | 0           | NA           | NA        | NA        | NA       | NA       |
| BX649628.2      | 0           | NA           | NA        | NA        | NA       | NA       |
| BX005462.3      | 0           | NA           | NA        | NA        | NA       | NA       |
| igl3v2          | 0.491320158 | 0.8528132    | 2.8656354 | 0.2976    | 0.766008 | NA       |
| pimr19          | 0           | NA           | NA        | NA        | NA       | NA       |
| RF00026         | 0           | NA           | NA        | NA        | NA       | NA       |
| BX248331.4      | 0           | NA           | NA        | NA        | NA       | NA       |
| RF00026         | 0           | NA           | NA        | NA        | NA       | NA       |

|                   |             |              |           |           |          |          |
|-------------------|-------------|--------------|-----------|-----------|----------|----------|
| AL953907.2        | 2.755505652 | 0.16322406   | 1.1913363 | 0.1370092 | 0.891024 | NA       |
| nudtl5            | 54.71269904 | 0.468647336  | 0.2792037 | 1.6785139 | 0.093247 | 0.580702 |
| traj17            | 0 NA        | NA           | NA        | NA        | NA       | NA       |
| L0018597.2        | 1.48957878  | 0.358997168  | 1.6239385 | 0.2210657 | 0.825041 | NA       |
| supt4h1           | 530.6318101 | -0.137276568 | 0.1042756 | -1.316478 | 0.188014 | 0.752739 |
| L0018181.1        | 6.349024636 | -0.087187661 | 0.7664693 | -0.113752 | 0.909434 | NA       |
| RF00004           | 0 NA        | NA           | NA        | NA        | NA       | NA       |
| RF00003           | 0 NA        | NA           | NA        | NA        | NA       | NA       |
| RF00001           | 0 NA        | NA           | NA        | NA        | NA       | NA       |
| pimr162           | 0 NA        | NA           | NA        | NA        | NA       | NA       |
| fth129            | 53.82941486 | 0.210523793  | 0.2839245 | 0.741478  | 0.458404 | 0.921978 |
| RF00001           | 0.166657454 | -0.955901296 | 4.0804729 | -0.234262 | 0.814781 | NA       |
| RF00003           | 0 NA        | NA           | NA        | NA        | NA       | NA       |
| RF00001           | 0 NA        | NA           | NA        | NA        | NA       | NA       |
| RF00026           | 0 NA        | NA           | NA        | NA        | NA       | NA       |
| RF00003           | 0 NA        | NA           | NA        | NA        | NA       | NA       |
| BX324156.1        | 0.846132797 | -0.5732773   | 2.1012583 | -0.272826 | 0.784987 | NA       |
| apobec2b          | 6.928949861 | 0.233652653  | 0.7404025 | 0.3155752 | 0.752325 | NA       |
| zgc:174354        | 0 NA        | NA           | NA        | NA        | NA       | NA       |
| RF00026           | 0 NA        | NA           | NA        | NA        | NA       | NA       |
| RF00001           | 0 NA        | NA           | NA        | NA        | NA       | NA       |
| RF00003           | 0 NA        | NA           | NA        | NA        | NA       | NA       |
| CU062431.1        | 0.809701093 | 0.53615962   | 2.3788628 | 0.2253848 | 0.82168  | NA       |
| CABZ01088149.1    | 76.04381109 | -0.298851416 | 0.2276628 | -1.312693 | 0.189286 | 0.753954 |
| WDR1              | 3612.705138 | -0.110460783 | 0.0804027 | -1.373844 | 0.16949  | 0.726744 |
| CU914780.1        | 2.127395985 | -0.674516466 | 1.2886138 | -0.523443 | 0.600666 | NA       |
| CABZ01099833.1    | 19.80622802 | -0.463743478 | 0.4397745 | -1.054503 | 0.291653 | 0.847361 |
| RF00026           | 0 NA        | NA           | NA        | NA        | NA       | NA       |
| CR759843.2        | 0.482760567 | -0.866527181 | 2.7059286 | -0.320233 | 0.748792 | NA       |
| smyhc3            | 143.0025117 | -0.108363309 | 0.1931623 | -0.560996 | 0.5748   | 0.950037 |
| RF00026           | 0 NA        | NA           | NA        | NA        | NA       | NA       |
| BX248510.5        | 48.61085678 | -0.004201985 | 0.2807586 | -0.014967 | 0.988059 | 0.997369 |
| ska2              | 361.6609234 | 0.043775249  | 0.1307472 | 0.3348083 | 0.73777  | 0.972535 |
| RF00001           | 0 NA        | NA           | NA        | NA        | NA       | NA       |
| RF00001           | 0.158795395 | 0.967652056  | 4.0804729 | 0.2371421 | 0.812547 | NA       |
| CU571061.1        | 0 NA        | NA           | NA        | NA        | NA       | NA       |
| CR626887.3        | 2.068647248 | 0.534744295  | 1.3861433 | 0.3857785 | 0.699661 | NA       |
| CABZ01018956.1    | 0 NA        | NA           | NA        | NA        | NA       | NA       |
| RF00001           | 0.158915748 | 0.967652056  | 4.0804729 | 0.2371421 | 0.812547 | NA       |
| t1r20.3           | 0 NA        | NA           | NA        | NA        | NA       | NA       |
| RF00026           | 0 NA        | NA           | NA        | NA        | NA       | NA       |
| parml             | 86.4250647  | -0.479186333 | 0.2422576 | -1.978004 | 0.047928 | 0.43124  |
| RF00001           | 0.157187365 | -0.955901296 | 4.0804729 | -0.234262 | 0.814781 | NA       |
| tspan17           | 65.40909766 | 0.277957351  | 0.2415691 | 1.1506331 | 0.249883 | 0.819849 |
| RF00003           | 0 NA        | NA           | NA        | NA        | NA       | NA       |
| BX927341.3        | 0 NA        | NA           | NA        | NA        | NA       | NA       |
| stx10             | 1.46631138  | -0.357836611 | 1.5716    | -0.227689 | 0.819888 | NA       |
| RF00017           | 2.935171113 | 2.276609462  | 1.3060628 | 1.7431087 | 0.081315 | NA       |
| DOCK9 (1 of many) | 594.4816724 | -0.016376506 | 0.1025147 | -0.159748 | 0.87308  | 0.987846 |
| RF00001           | 0 NA        | NA           | NA        | NA        | NA       | NA       |
| RF00001           | 0 NA        | NA           | NA        | NA        | NA       | NA       |
| trim35-30         | 6.588805163 | -0.138901049 | 0.7484241 | -0.185591 | 0.852765 | NA       |
| CT583728.17       | 0 NA        | NA           | NA        | NA        | NA       | NA       |
| RF00003           | 0.182570949 | 0.967652056  | 4.0804729 | 0.2371421 | 0.812547 | NA       |

|                   |             |              |           |           |          |          |
|-------------------|-------------|--------------|-----------|-----------|----------|----------|
| RF00001           | 0.157187365 | -0.955901296 | 4.0804729 | -0.234262 | 0.814781 | NA       |
| zgc:174355        | 0           | NA           | NA        | NA        | NA       | NA       |
| RF00001           | 0.158795395 | 0.967652056  | 4.0804729 | 0.2371421 | 0.812547 | NA       |
| BX005085.5        | 80.28040175 | 0.031091758  | 0.2243474 | 0.1385876 | 0.889776 | 0.989291 |
| RF00001           | 0.158795395 | 0.967652056  | 4.0804729 | 0.2371421 | 0.812547 | NA       |
| si:dkey-3p4.8     | 3.414202125 | -1.02261613  | 1.0912909 | -0.93707  | 0.348722 | NA       |
| si:dkey-261m9.19  | 12.31759153 | 0.968452822  | 0.5708258 | 1.6965822 | 0.089776 | 0.573763 |
| histlh2a5         | 5.687021421 | 1.493981857  | 0.9880005 | 1.5121265 | 0.130502 | NA       |
| pimr86            | 0           | NA           | NA        | NA        | NA       | NA       |
| si:dkeyp-4f2.1    | 60.07100133 | -1.113768002 | 0.2766477 | -4.025943 | 5.67E-05 | 0.003083 |
| RF00001           | 0           | NA           | NA        | NA        | NA       | NA       |
| AL929023.1        | 0.157187365 | -0.955901296 | 4.0804729 | -0.234262 | 0.814781 | NA       |
| RF00001           | 0           | NA           | NA        | NA        | NA       | NA       |
| CR385053.3        | 0.333314908 | -1.858695402 | 3.5126701 | -0.52914  | 0.596708 | NA       |
| FO904989.1        | 26.5393066  | 0.297349954  | 0.3762544 | 0.7902896 | 0.429359 | 0.911489 |
| RF00001           | 0.182570949 | 0.967652056  | 4.0804729 | 0.2371421 | 0.812547 | NA       |
| CR354435.2        | 3.913721657 | 0.376674241  | 1.0415477 | 0.3616486 | 0.717615 | NA       |
| RF00001           | 0.514116189 | -2.475533565 | 2.7461255 | -0.901464 | 0.367342 | NA       |
| znf996            | 1.960820854 | 1.545180061  | 1.5019148 | 1.0288068 | 0.30357  | NA       |
| FP236812.2        | 19.8119784  | -0.298248736 | 0.4365025 | -0.683269 | 0.494437 | 0.931926 |
| zgc:77614         | 0           | NA           | NA        | NA        | NA       | NA       |
| mkxb              | 41.8981028  | 0.566760964  | 0.2988667 | 1.8963671 | 0.057912 | 0.472224 |
| dre-mir-430c-1    | 0           | NA           | NA        | NA        | NA       | NA       |
| si:busml-105116.2 | 14.82101607 | 0.358967584  | 0.5076995 | 0.7070474 | 0.479537 | 0.927091 |
| RF00003           | 0           | NA           | NA        | NA        | NA       | NA       |
| BX927212.1        | 1.321192943 | 0.064182614  | 1.7200111 | 0.0373152 | 0.970234 | NA       |
| L0018333.1        | 3.909140686 | -0.256456623 | 0.9625748 | -0.266428 | 0.78991  | NA       |
| BX548011.4        | 0.173729368 | -0.955901296 | 4.0804729 | -0.234262 | 0.814781 | NA       |
| BX005305.3        | 0           | NA           | NA        | NA        | NA       | NA       |
| zgc:171759        | 6.878725345 | 0.825845044  | 0.7565407 | 1.0916069 | 0.275006 | NA       |
| CR847936.8        | 0           | NA           | NA        | NA        | NA       | NA       |
| RF00001           | 0           | NA           | NA        | NA        | NA       | NA       |
| F0834825.2        | 0.82384492  | 0.497240531  | 2.3644664 | 0.2102971 | 0.833436 | NA       |
| dre-mir-430b-9    | 0           | NA           | NA        | NA        | NA       | NA       |
| CR788322.4        | 0           | NA           | NA        | NA        | NA       | NA       |
| taar19n           | 0           | NA           | NA        | NA        | NA       | NA       |
| BX005022.1        | 3.663724441 | 0.797036552  | 0.9996784 | 0.797293  | 0.425281 | NA       |
| BX548073.9        | 0           | NA           | NA        | NA        | NA       | NA       |
| RF00026           | 0           | NA           | NA        | NA        | NA       | NA       |
| CABZ01102109.1    | 359.0216127 | 0.06633937   | 0.1272002 | 0.521535  | 0.601994 | 0.956045 |
| CABZ01075242.1    | 84.95823988 | 0.00968317   | 0.2254796 | 0.0429448 | 0.965746 | 0.996315 |
| RF00026           | 0           | NA           | NA        | NA        | NA       | NA       |
| si:ch211-221n20.7 | 0.706628594 | 2.93253102   | 2.4623982 | 1.1909248 | 0.233683 | NA       |
| znf974            | 5.488971763 | -0.272858276 | 0.804332  | -0.339236 | 0.734432 | NA       |
| bc12116           | 86.53053898 | 0.15580001   | 0.2189031 | 0.7117304 | 0.476632 | 0.926737 |
| RF00001           | 0           | NA           | NA        | NA        | NA       | NA       |
| RF00001           | 0           | NA           | NA        | NA        | NA       | NA       |
| RF00026           | 0           | NA           | NA        | NA        | NA       | NA       |
| PLBD2             | 1133.670738 | -0.084204621 | 0.1109021 | -0.75927  | 0.447691 | 0.917154 |
| RF00017           | 0           | NA           | NA        | NA        | NA       | NA       |
| zgc:91850         | 0           | NA           | NA        | NA        | NA       | NA       |
| dre-mir-430b-1    | 0           | NA           | NA        | NA        | NA       | NA       |
| si:dkey-30c15.13  | 64.52081254 | -0.23468749  | 0.2545032 | -0.92214  | 0.356456 | 0.883422 |
| RF00001           | 0.974939894 | 2.204143173  | 2.1427957 | 1.0286297 | 0.303654 | NA       |

|                   |             |              |           |           |          |          |
|-------------------|-------------|--------------|-----------|-----------|----------|----------|
| RF00001           | 0           | NA           | NA        | NA        | NA       | NA       |
| CU138548.6        | 0           | NA           | NA        | NA        | NA       | NA       |
| RF00003           | 0           | NA           | NA        | NA        | NA       | NA       |
| RF00026           | 0           | NA           | NA        | NA        | NA       | NA       |
| BX901889.4        | 0           | NA           | NA        | NA        | NA       | NA       |
| RF00001           | 0.182570949 | 0.967652056  | 4.0804729 | 0.2371421 | 0.812547 | NA       |
| RF00003           | 0           | NA           | NA        | NA        | NA       | NA       |
| BX324132.4        | 0.158795395 | 0.967652056  | 4.0804729 | 0.2371421 | 0.812547 | NA       |
| RF00001           | 0           | NA           | NA        | NA        | NA       | NA       |
| CU571398.1        | 29.75881411 | 0.18796132   | 0.3502231 | 0.5366903 | 0.591482 | 0.954382 |
| taar19q           | 0           | NA           | NA        | NA        | NA       | NA       |
| znf980            | 0.474778155 | 0.852397662  | 2.898154  | 0.2941175 | 0.768668 | NA       |
| RF00001           | 0           | NA           | NA        | NA        | NA       | NA       |
| zgc:77614         | 0           | NA           | NA        | NA        | NA       | NA       |
| BX530407.8        | 0           | NA           | NA        | NA        | NA       | NA       |
| BX511120.1        | 26.52162478 | 0.199373797  | 0.3812872 | 0.5228966 | 0.601046 | 0.956045 |
| BX248108.1        | 14.36284342 | 0.269648325  | 0.5541511 | 0.4865971 | 0.626544 | 0.957354 |
| CR354612.1        | 0           | NA           | NA        | NA        | NA       | NA       |
| RF00001           | 0           | NA           | NA        | NA        | NA       | NA       |
| BX005421.3        | 1.702127983 | 1.327679888  | 1.6321143 | 0.8134724 | 0.415947 | NA       |
| RF00001           | 0           | NA           | NA        | NA        | NA       | NA       |
| dre-mir-430b-9    | 0           | NA           | NA        | NA        | NA       | NA       |
| RF00001           | 0           | NA           | NA        | NA        | NA       | NA       |
| CR376861.1        | 1.347043396 | -0.03673867  | 1.6478654 | -0.022295 | 0.982213 | NA       |
| CR407598.1        | 0           | NA           | NA        | NA        | NA       | NA       |
| BX927253.3        | 0           | NA           | NA        | NA        | NA       | NA       |
| RF00001           | 0           | NA           | NA        | NA        | NA       | NA       |
| HOOK3             | 623.2378274 | 0.065125889  | 0.0972608 | 0.6696007 | 0.503112 | 0.935304 |
| CT573234.1        | 1.305038742 | -0.701644435 | 1.7364554 | -0.404067 | 0.686163 | NA       |
| zgc:173552        | 9.080701835 | 0.66558104   | 0.6413549 | 1.0377733 | 0.299376 | NA       |
| si:rp71-1f1.5     | 6.064474153 | -0.328818683 | 0.8244585 | -0.39883  | 0.690019 | NA       |
| RF00001           | 0           | NA           | NA        | NA        | NA       | NA       |
| tpbgl             | 29.53942816 | -0.509147612 | 0.3632279 | -1.40173  | 0.160996 | 0.714313 |
| RF00001           | 0.157187365 | -0.955901296 | 4.0804729 | -0.234262 | 0.814781 | NA       |
| RF00001           | 0           | NA           | NA        | NA        | NA       | NA       |
| si:dkey-28d5.5    | 1.153435614 | -1.279944679 | 1.813135  | -0.705929 | 0.480232 | NA       |
| dre-mir-430a-2    | 0           | NA           | NA        | NA        | NA       | NA       |
| si:dkey-20i20.15  | 17.72509141 | 0.178347841  | 0.4795555 | 0.3719024 | 0.709966 | 0.968928 |
| AL840638.2        | 0           | NA           | NA        | NA        | NA       | NA       |
| AL844186.1        | 0.158795395 | 0.967652056  | 4.0804729 | 0.2371421 | 0.812547 | NA       |
| RF00017           | 1.336006562 | -0.67423263  | 1.6626322 | -0.405521 | 0.685094 | NA       |
| traj12            | 0           | NA           | NA        | NA        | NA       | NA       |
| RF00002           | 7.190191333 | 0.76857497   | 0.8206434 | 0.9365517 | 0.348989 | NA       |
| si:ch211-238p8.31 | 0           | NA           | NA        | NA        | NA       | NA       |
| RF00001           | 0           | NA           | NA        | NA        | NA       | NA       |
| RF00001           | 0           | NA           | NA        | NA        | NA       | NA       |
| RF00012           | 0           | NA           | NA        | NA        | NA       | NA       |
| RF00026           | 0           | NA           | NA        | NA        | NA       | NA       |
| zgc:77614         | 0           | NA           | NA        | NA        | NA       | NA       |
| znf985            | 3.959200278 | 0.516498373  | 0.9700914 | 0.5324224 | 0.594434 | NA       |
| FQ312024.1        | 9.288818005 | 0.833099384  | 0.6458758 | 1.2898755 | 0.197094 | NA       |
| RF00026           | 0           | NA           | NA        | NA        | NA       | NA       |
| RF00001           | 0           | NA           | NA        | NA        | NA       | NA       |
| RF00026           | 0           | NA           | NA        | NA        | NA       | NA       |

|                |             |              |           |           |          |          |
|----------------|-------------|--------------|-----------|-----------|----------|----------|
| F0904885.2     | 0           | NA           | NA        | NA        | NA       | NA       |
| pimr99         | 0           | NA           | NA        | NA        | NA       | NA       |
| RF00325        | 0.801839034 | 1.849035972  | 2.4180074 | 0.7646941 | 0.444454 | NA       |
| BX005305.4     | 0           | NA           | NA        | NA        | NA       | NA       |
| CABZ01063034.1 | 1.317845244 | 0.720094123  | 1.7511448 | 0.4112134 | 0.680916 | NA       |
| CU499336.2     | 0           | NA           | NA        | NA        | NA       | NA       |
| zgc:77614      | 0           | NA           | NA        | NA        | NA       | NA       |
| RF00001        | 0           | NA           | NA        | NA        | NA       | NA       |
| CR407590.2     | 0           | NA           | NA        | NA        | NA       | NA       |
| CU929458.1     | 0           | NA           | NA        | NA        | NA       | NA       |
| znf1017        | 5.814229443 | 1.122200008  | 0.8114151 | 1.3830159 | 0.16666  | NA       |
| BX276117.1     | 0           | NA           | NA        | NA        | NA       | NA       |
| zgc:194989     | 12.88434296 | -0.035474172 | 0.6048658 | -0.058648 | 0.953232 | 0.994157 |
| zgc:77614      | 0           | NA           | NA        | NA        | NA       | NA       |
| AL954137.2     | 13.14741493 | -0.340696437 | 0.5466913 | -0.623197 | 0.533155 | 0.942971 |
| CR450686.5     | 0.166657454 | -0.955901296 | 4.0804729 | -0.234262 | 0.814781 | NA       |
| BX511178.1     | 3.857342514 | -0.623177831 | 1.0302944 | -0.604854 | 0.545276 | NA       |
| RF00026        | 0           | NA           | NA        | NA        | NA       | NA       |
| CT009714.1     | 1.253241566 | 1.40838817   | 1.9820666 | 0.7105655 | 0.477354 | NA       |
| RF00001        | 0.158915748 | 0.967652056  | 4.0804729 | 0.2371421 | 0.812547 | NA       |
| med8           | 274.3771066 | -0.044215108 | 0.1299119 | -0.340347 | 0.733595 | 0.971993 |
| CT583728.18    | 0           | NA           | NA        | NA        | NA       | NA       |
| RF00001        | 0           | NA           | NA        | NA        | NA       | NA       |
| pimr5          | 0           | NA           | NA        | NA        | NA       | NA       |
| zgc:173705     | 10.02946075 | -0.418522968 | 0.6099415 | -0.686169 | 0.492607 | NA       |
| RF00001        | 0           | NA           | NA        | NA        | NA       | NA       |
| CABZ01079081.1 | 2.145425665 | -0.243978359 | 1.3456858 | -0.181304 | 0.856129 | NA       |
| RF00001        | 0           | NA           | NA        | NA        | NA       | NA       |
| mmp13a         | 737.0997988 | 0.323453606  | 0.4360299 | 0.7418151 | 0.458199 | 0.921978 |
| RF00415        | 0           | NA           | NA        | NA        | NA       | NA       |
| CR762483.1     | 67.27550904 | -1.156119948 | 0.3161784 | -3.656543 | 0.000256 | 0.010359 |
| pimr164        | 0           | NA           | NA        | NA        | NA       | NA       |
| CU694999.1     | 0           | NA           | NA        | NA        | NA       | NA       |
| RF00001        | 0           | NA           | NA        | NA        | NA       | NA       |
| CABZ01056051.1 | 0.166657454 | -0.955901296 | 4.0804729 | -0.234262 | 0.814781 | NA       |
| RF00001        | 0           | NA           | NA        | NA        | NA       | NA       |
| ctxn3          | 32.00432899 | 0.743543738  | 0.3653836 | 2.0349672 | 0.041854 | 0.401564 |
| RF00001        | 0           | NA           | NA        | NA        | NA       | NA       |
| CT027583.2     | 2.69189154  | 0.027219446  | 1.1443641 | 0.0237857 | 0.981024 | NA       |
| dre-mir-430c-1 | 0           | NA           | NA        | NA        | NA       | NA       |
| RF00001        | 0           | NA           | NA        | NA        | NA       | NA       |
| pimr142        | 0.508023798 | 0.926122713  | 2.6636728 | 0.3476864 | 0.728076 | NA       |
| RF00003        | 1.38441684  | 0.93862059   | 3.8711195 | 0.2424675 | 0.808418 | NA       |
| ATP8A1         | 87.55818283 | -0.305596515 | 0.2278603 | -1.341157 | 0.179869 | 0.741062 |
| RF00001        | 0           | NA           | NA        | NA        | NA       | NA       |
| CU302436.1     | 4.940113053 | 1.184809197  | 0.9018592 | 1.3137407 | 0.188933 | NA       |
| CR388079.3     | 0.31759079  | 1.807926197  | 3.579045  | 0.5051421 | 0.613459 | NA       |
| phtf2          | 333.9846663 | -0.101303245 | 0.1190618 | -0.850846 | 0.394855 | 0.899087 |
| RF00026        | 0           | NA           | NA        | NA        | NA       | NA       |
| tmem101        | 502.806329  | -0.049788355 | 0.123392  | -0.403497 | 0.686582 | 0.966376 |
| CR385040.1     | 1.455112909 | -1.012777544 | 1.5956806 | -0.634699 | 0.525624 | NA       |
| CABZ01021592.1 | 872.811463  | -0.077179383 | 0.1142813 | -0.675345 | 0.499456 | 0.934006 |
| RF00026        | 0           | NA           | NA        | NA        | NA       | NA       |
| BX511056.4     | 0           | NA           | NA        | NA        | NA       | NA       |



|                  |             |              |           |           |          |          |
|------------------|-------------|--------------|-----------|-----------|----------|----------|
| CR354547.3       | 0.687845557 | -2.894878771 | 2.482332  | -1.166193 | 0.243536 | NA       |
| CR388165.2       | 0.666939546 | 1.487980453  | 2.2924711 | 0.6490727 | 0.516291 | NA       |
| RF00001          | 0 NA        | NA           | NA        | NA        | NA       | NA       |
| RF00001          | 0.173729368 | -0.955901296 | 4.0804729 | -0.234262 | 0.814781 | NA       |
| RF00001          | 0 NA        | NA           | NA        | NA        | NA       | NA       |
| pimr97           | 0 NA        | NA           | NA        | NA        | NA       | NA       |
| zgc:165555       | 4.408595692 | 1.217065556  | 0.9653629 | 1.2607337 | 0.207405 | NA       |
| si:dkey-149m13.4 | 7.792424008 | -0.828337844 | 0.6884291 | -1.203229 | 0.228888 | NA       |
| taar19e          | 0 NA        | NA           | NA        | NA        | NA       | NA       |
| RF00001          | 0 NA        | NA           | NA        | NA        | NA       | NA       |
| nfr              | 4.517331495 | 0.548883111  | 0.8904501 | 0.6164108 | 0.537623 | NA       |
| RF00026          | 0 NA        | NA           | NA        | NA        | NA       | NA       |
| RF00026          | 0 NA        | NA           | NA        | NA        | NA       | NA       |
| fisl             | 328.6488723 | -0.060434181 | 0.1368605 | -0.441575 | 0.658797 | 0.962613 |
| sival            | 106.0660435 | -0.211818721 | 0.1898244 | -1.115867 | 0.264479 | 0.830245 |
| cdx1a            | 186.8678934 | -1.309723614 | 0.1935446 | -6.767036 | 1.31E-11 | 3.66E-09 |
| RF00003          | 0 NA        | NA           | NA        | NA        | NA       | NA       |
| si:dkey-233e3.3  | 6.141339638 | 0.111170149  | 0.7728854 | 0.1438378 | 0.885629 | NA       |
| RF00001          | 0.157187365 | -0.955901296 | 4.0804729 | -0.234262 | 0.814781 | NA       |
| RF00026          | 0 NA        | NA           | NA        | NA        | NA       | NA       |
| RF00001          | 0 NA        | NA           | NA        | NA        | NA       | NA       |
| BX323555.4       | 0 NA        | NA           | NA        | NA        | NA       | NA       |
| RF00001          | 1.529027123 | 1.078442289  | 1.6043169 | 0.6722128 | 0.501448 | NA       |
| RF00003          | 0 NA        | NA           | NA        | NA        | NA       | NA       |
| asb18            | 33.2396453  | -0.106124786 | 0.350468  | -0.302809 | 0.762036 | 0.975374 |
| RF00001          | 0 NA        | NA           | NA        | NA        | NA       | NA       |
| CT025887.1       | 0 NA        | NA           | NA        | NA        | NA       | NA       |
| RF00026          | 0 NA        | NA           | NA        | NA        | NA       | NA       |
| si:dkey-159n16.2 | 166.0160693 | -0.290413199 | 0.1847354 | -1.57205  | 0.115939 | 0.63841  |
| BX681417.13      | 0 NA        | NA           | NA        | NA        | NA       | NA       |
| BX890543.1       | 0 NA        | NA           | NA        | NA        | NA       | NA       |
| RF00026          | 0 NA        | NA           | NA        | NA        | NA       | NA       |
| pimr82           | 1.630062504 | 0.008546258  | 1.4562697 | 0.0058686 | 0.995318 | NA       |
| AL627164.1       | 0 NA        | NA           | NA        | NA        | NA       | NA       |
| jam3a            | 442.8654331 | 0.101264165  | 0.1208801 | 0.8377242 | 0.402186 | 0.90084  |
| RF00026          | 0 NA        | NA           | NA        | NA        | NA       | NA       |
| dre-mir-430c-1   | 0 NA        | NA           | NA        | NA        | NA       | NA       |
| CU914776.2       | 3.401189167 | 1.668530581  | 1.1084329 | 1.5053059 | 0.132245 | NA       |
| zgc:77614        | 0 NA        | NA           | NA        | NA        | NA       | NA       |
| RF00001          | 0 NA        | NA           | NA        | NA        | NA       | NA       |
| BX470182.2       | 0 NA        | NA           | NA        | NA        | NA       | NA       |
| FP085421.1       | 0.795406914 | -3.1255921   | 2.3628864 | -1.322786 | 0.185907 | NA       |
| RF00001          | 0 NA        | NA           | NA        | NA        | NA       | NA       |
| RF00017          | 0 NA        | NA           | NA        | NA        | NA       | NA       |
| RF00001          | 0 NA        | NA           | NA        | NA        | NA       | NA       |
| RF00001          | 0 NA        | NA           | NA        | NA        | NA       | NA       |
| RF00001          | 0 NA        | NA           | NA        | NA        | NA       | NA       |
| RF00001          | 0 NA        | NA           | NA        | NA        | NA       | NA       |
| BX942815.1       | 6.592300801 | 0.107630101  | 0.7701348 | 0.1397549 | 0.888854 | NA       |
| znf1021          | 10.56991531 | 0.173305893  | 0.627464  | 0.2762005 | 0.782394 | NA       |
| RF00001          | 0 NA        | NA           | NA        | NA        | NA       | NA       |
| L0018106.1       | 5.35277723  | 0.738329854  | 0.8543125 | 0.8642386 | 0.387457 | NA       |
| BX510335.5       | 0 NA        | NA           | NA        | NA        | NA       | NA       |
| RF00001          | 0 NA        | NA           | NA        | NA        | NA       | NA       |

|                    |              |               |            |            |           |           |
|--------------------|--------------|---------------|------------|------------|-----------|-----------|
| BX942837. 1        | 0. 333314908 | -1. 858695402 | 3. 5126701 | -0. 52914  | 0. 596708 | NA        |
| BX321875. 4        | 0. 31759079  | 1. 807926197  | 3. 579045  | 0. 5051421 | 0. 613459 | NA        |
| RF00001            | 0 NA         |               | NA         | NA         | NA        | NA        |
| RF00001            | 0. 182570949 | 0. 967652056  | 4. 0804729 | 0. 2371421 | 0. 812547 | NA        |
| ube2c              | 356. 492619  | -0. 120208234 | 0. 1310132 | -0. 917527 | 0. 358866 | 0. 884602 |
| BX324233. 1        | 0. 484248244 | 0. 852636534  | 2. 8793247 | 0. 2961238 | 0. 767136 | NA        |
| BX908797. 1        | 74. 61754324 | -0. 170970531 | 0. 2399278 | -0. 712592 | 0. 476099 | 0. 926338 |
| RF00001            | 0. 80742327  | 0. 548673017  | 2. 1289713 | 0. 2577174 | 0. 796625 | NA        |
| BX248410. 3        | 1. 828546948 | 0. 849641525  | 1. 4505134 | 0. 5857523 | 0. 558042 | NA        |
| BX908796. 4        | 0 NA         |               | NA         | NA         | NA        | NA        |
| RF00001            | 0 NA         |               | NA         | NA         | NA        | NA        |
| RF01848            | 0 NA         |               | NA         | NA         | NA        | NA        |
| pimr58             | 0 NA         |               | NA         | NA         | NA        | NA        |
| RF00026            | 0 NA         |               | NA         | NA         | NA        | NA        |
| hmox2a             | 658. 8052987 | 0. 131778977  | 0. 1101221 | 1. 196662  | 0. 231438 | 0. 799752 |
| BX537118. 1        | 0. 476626891 | 2. 395187592  | 2. 815932  | 0. 8505843 | 0. 395    | NA        |
| CABZ01067557. 1    | 25. 74649303 | 0. 214025449  | 0. 3855482 | 0. 5551198 | 0. 578813 | 0. 951052 |
| FP074902. 3        | 0 NA         |               | NA         | NA         | NA        | NA        |
| FP016205. 1        | 93. 89432586 | -0. 051648118 | 0. 202725  | -0. 254769 | 0. 798901 | 0. 979066 |
| taar19i            | 0 NA         |               | NA         | NA         | NA        | NA        |
| BX324142. 1        | 11. 57935008 | 0. 407246668  | 0. 620388  | 0. 6564387 | 0. 511542 | 0. 936253 |
| RF00026            | 0 NA         |               | NA         | NA         | NA        | NA        |
| CU570893. 1        | 0. 838940531 | -0. 561526863 | 2. 0217856 | -0. 277738 | 0. 781213 | NA        |
| znf1117            | 32. 65324569 | -0. 039288452 | 0. 3646201 | -0. 107752 | 0. 914193 | 0. 991119 |
| taar20p            | 0. 508023798 | 0. 926122713  | 2. 6636728 | 0. 3476864 | 0. 728076 | NA        |
| CABZ01068246. 1    | 22. 73959075 | -0. 177822087 | 0. 4070597 | -0. 436845 | 0. 662224 | 0. 964665 |
| CT573356. 2        | 0 NA         |               | NA         | NA         | NA        | NA        |
| RF00001            | 0. 341366344 | 1. 891903201  | 3. 2128156 | 0. 5888614 | 0. 555954 | NA        |
| RF00017            | 11. 1176324  | 0. 736906885  | 0. 5937226 | 1. 2411636 | 0. 214545 | 0. 782493 |
| zgc:77614          | 0 NA         |               | NA         | NA         | NA        | NA        |
| RF00026            | 0 NA         |               | NA         | NA         | NA        | NA        |
| CABZ01008739. 1    | 0. 965521134 | -1. 007308141 | 2. 0818297 | -0. 483857 | 0. 628487 | NA        |
| CABZ01072083. 2    | 111. 1562739 | -0. 217330271 | 0. 1965696 | -1. 105615 | 0. 268893 | 0. 834185 |
| si:dkey-11d20. 1   | 2. 606300699 | -0. 010084567 | 1. 1807276 | -0. 008541 | 0. 993185 | NA        |
| pimr92             | 0 NA         |               | NA         | NA         | NA        | NA        |
| BX957231. 1        | 2. 74933069  | 0. 826019583  | 1. 2411006 | 0. 6655541 | 0. 505696 | NA        |
| RF00001            | 0. 499972362 | -2. 44370697  | 3. 0013188 | -0. 814211 | 0. 415524 | NA        |
| BX510309. 3        | 0 NA         |               | NA         | NA         | NA        | NA        |
| RF00001            | 0 NA         |               | NA         | NA         | NA        | NA        |
| BX957279. 1        | 23. 46151422 | -0. 143084728 | 0. 3942021 | -0. 362973 | 0. 716625 | 0. 96909  |
| asip2b             | 295. 346795  | 0. 160540478  | 0. 1347569 | 1. 1913344 | 0. 233522 | 0. 802097 |
| RF00026            | 0. 365141898 | 1. 973577737  | 3. 3927314 | 0. 5817076 | 0. 560764 | NA        |
| CABZ01084131. 1    | 301. 657947  | -0. 095925307 | 0. 1352266 | -0. 709367 | 0. 478097 | 0. 926857 |
| RF00001            | 0. 481032184 | -2. 398473301 | 2. 80721   | -0. 854398 | 0. 392885 | NA        |
| CU928847. 1        | 0. 697787013 | 1. 536711783  | 2. 3781027 | 0. 6461924 | 0. 518155 | NA        |
| RF00001            | 0 NA         |               | NA         | NA         | NA        | NA        |
| RF00020            | 0. 158795395 | 0. 967652056  | 4. 0804729 | 0. 2371421 | 0. 812547 | NA        |
| si:ch211-238p8. 35 | 0 NA         |               | NA         | NA         | NA        | NA        |
| RF00026            | 0 NA         |               | NA         | NA         | NA        | NA        |
| RF00001            | 0. 157187365 | -0. 955901296 | 4. 0804729 | -0. 234262 | 0. 814781 | NA        |
| RF00001            | 0. 158795395 | 0. 967652056  | 4. 0804729 | 0. 2371421 | 0. 812547 | NA        |
| RF00026            | 0 NA         |               | NA         | NA         | NA        | NA        |
| CT583728. 19       | 0 NA         |               | NA         | NA         | NA        | NA        |
| ighj2-4            | 0 NA         |               | NA         | NA         | NA        | NA        |

|                     |              |               |            |            |           |           |
|---------------------|--------------|---------------|------------|------------|-----------|-----------|
| RF00392             |              | 0 NA          | NA         | NA         | NA        | NA        |
| znf985              | 2. 622911725 | 1. 123378738  | 1. 2371861 | 0. 9080111 | 0. 363872 | NA        |
| JMY                 | 75. 44884293 | 0. 179490736  | 0. 2457637 | 0. 7303386 | 0. 465183 | 0. 923671 |
| rab3b               | 1282. 826974 | 0. 096894876  | 0. 0808433 | 1. 1985518 | 0. 230702 | 0. 798822 |
| CABZ01032906. 1     | 0. 157187365 | -0. 955901296 | 4. 0804729 | -0. 234262 | 0. 814781 | NA        |
| taar19a             |              | 0 NA          | NA         | NA         | NA        | NA        |
| CT867973. 1         |              | 0 NA          | NA         | NA         | NA        | NA        |
| RF00026             |              | 0 NA          | NA         | NA         | NA        | NA        |
| L0018106. 2         | 1. 862139108 | 0. 2356309    | 1. 4264702 | 0. 1651846 | 0. 868799 | NA        |
| CU469530. 2         | 3. 320128348 | -1. 59740194  | 1. 1062244 | -1. 444013 | 0. 148735 | NA        |
| RF00012             |              | 0 NA          | NA         | NA         | NA        | NA        |
| RF00001             | 0. 157187365 | -0. 955901296 | 4. 0804729 | -0. 234262 | 0. 814781 | NA        |
| BX294661. 2         |              | 0 NA          | NA         | NA         | NA        | NA        |
| dicpl. 1            | 0. 790881268 | 0. 5906245    | 2. 2495814 | 0. 2625486 | 0. 792899 | NA        |
| RF00001             |              | 0 NA          | NA         | NA         | NA        | NA        |
| CR407598. 2         |              | 0 NA          | NA         | NA         | NA        | NA        |
| CU633479. 5         | 103. 2340052 | 0. 017704798  | 0. 2093635 | 0. 0845649 | 0. 932607 | 0. 992702 |
| ighv8-3             |              | 0 NA          | NA         | NA         | NA        | NA        |
| RF00026             |              | 0 NA          | NA         | NA         | NA        | NA        |
| L0018148. 1         | 348. 6886445 | -0. 140840386 | 0. 1303589 | -1. 080405 | 0. 279962 | 0. 843423 |
| SCARF2              | 27. 6494674  | -0. 324852538 | 0. 3656657 | -0. 888387 | 0. 374333 | 0. 893914 |
| CR749777. 1         | 0. 31598276  | 0. 005883445  | 3. 3523626 | 0. 001755  | 0. 9986   | NA        |
| RF00001             | 0. 333314908 | -1. 858695402 | 3. 5126701 | -0. 52914  | 0. 596708 | NA        |
| dre-mir-430c-1      |              | 0 NA          | NA         | NA         | NA        | NA        |
| RF00017             | 0. 157187365 | -0. 955901296 | 4. 0804729 | -0. 234262 | 0. 814781 | NA        |
| CR450805. 1         | 0. 666819193 | 1. 487924459  | 2. 4081466 | 0. 6178712 | 0. 53666  | NA        |
| CR974456. 1         | 160. 6667055 | 0. 115355999  | 0. 1671407 | 0. 6901731 | 0. 490085 | 0. 931926 |
| RF00003             |              | 0 NA          | NA         | NA         | NA        | NA        |
| si:dkey-31m5. 5     | 0. 333314908 | -1. 858695402 | 3. 5126701 | -0. 52914  | 0. 596708 | NA        |
| zgc:77614           |              | 0 NA          | NA         | NA         | NA        | NA        |
| CABZ01078594. 1     | 882. 6469509 | 0. 120010501  | 0. 1086273 | 1. 1047918 | 0. 26925  | 0. 834636 |
| BX681417. 14        |              | 0 NA          | NA         | NA         | NA        | NA        |
| FP236318. 2         | 240. 2100681 | -0. 03564929  | 0. 1379164 | -0. 258485 | 0. 796033 | 0. 978498 |
| RF00026             |              | 0 NA          | NA         | NA         | NA        | NA        |
| CU467856. 3         | 19. 86185833 | 0. 546582554  | 0. 4380131 | 1. 2478681 | 0. 212079 | 0. 77986  |
| CU655961. 4         | 3. 024577941 | 0. 043760045  | 1. 0942236 | 0. 0399919 | 0. 9681   | NA        |
| PXMP4               | 136. 5379919 | -0. 221078976 | 0. 172859  | -1. 278956 | 0. 200913 | 0. 766855 |
| CU076099. 2         |              | 0 NA          | NA         | NA         | NA        | NA        |
| BX571681. 6         |              | 0 NA          | NA         | NA         | NA        | NA        |
| znf1038             | 7. 312631266 | -0. 206065666 | 0. 7985153 | -0. 258061 | 0. 79636  | NA        |
| znf1026             | 29. 95190067 | -0. 284651654 | 0. 3543394 | -0. 80333  | 0. 421784 | 0. 90651  |
| si:ch211-113a14. 22 | 35. 79014808 | 0. 474887401  | 0. 330521  | 1. 4367843 | 0. 150779 | 0. 698912 |
| RF00026             |              | 0 NA          | NA         | NA         | NA        | NA        |
| FP236318. 3         | 93. 10614684 | 0. 066970276  | 0. 2335975 | 0. 2866909 | 0. 774349 | 0. 975687 |
| RF00026             |              | 0 NA          | NA         | NA         | NA        | NA        |
| taar20r             | 0. 491320158 | 0. 8528132    | 2. 8656354 | 0. 2976    | 0. 766008 | NA        |
| tradv11. 0. 3       |              | 0 NA          | NA         | NA         | NA        | NA        |
| znf1089             | 1. 311251486 | -2. 689957487 | 1. 8333782 | -1. 467214 | 0. 142318 | NA        |
| F0704772. 1         | 41. 89622201 | 0. 576112378  | 0. 7171216 | 0. 8033678 | 0. 421762 | 0. 90651  |
| CT027677. 1         | 1. 174052845 | 2. 488168036  | 2. 0102134 | 1. 2377632 | 0. 215804 | NA        |
| RF00026             |              | 0 NA          | NA         | NA         | NA        | NA        |
| RF00001             |              | 0 NA          | NA         | NA         | NA        | NA        |
| BX649508. 2         | 2. 010216447 | -2. 312787637 | 1. 5274584 | -1. 514141 | 0. 12999  | NA        |
| TTC28               | 1001. 563412 | 0. 082246468  | 0. 1061639 | 0. 7747124 | 0. 43851  | 0. 915831 |

|                   |             |              |           |           |          |          |
|-------------------|-------------|--------------|-----------|-----------|----------|----------|
| RF00001           | 0.173729368 | -0.955901296 | 4.0804729 | -0.234262 | 0.814781 | NA       |
| CU855895.2        | 118.416236  | -0.068751105 | 0.1852188 | -0.371189 | 0.710497 | 0.968985 |
| CT583728.20       | 0 NA        | NA           | NA        | NA        | NA       | NA       |
| RF00026           | 0 NA        | NA           | NA        | NA        | NA       | NA       |
| BX470137.1        | 0.325452849 | 0.005883619  | 3.3177086 | 0.0017734 | 0.998585 | NA       |
| RF00001           | 0.538871265 | 0.999144257  | 2.7784799 | 0.359601  | 0.719146 | NA       |
| BX927341.4        | 0 NA        | NA           | NA        | NA        | NA       | NA       |
| si:dkeyp-53e4.4   | 1.965844612 | 1.013004745  | 1.3823505 | 0.7328132 | 0.463672 | NA       |
| CABZ01073033.1    | 32.96576724 | 0.209010308  | 0.3383404 | 0.6177516 | 0.536739 | 0.943336 |
| CT025695.2        | 0 NA        | NA           | NA        | NA        | NA       | NA       |
| BX511034.8        | 0 NA        | NA           | NA        | NA        | NA       | NA       |
| RF00001           | 0 NA        | NA           | NA        | NA        | NA       | NA       |
| zgc:194551        | 48.47155814 | -0.471431172 | 0.2807357 | -1.67927  | 0.093099 | 0.580702 |
| zgc:77614         | 0 NA        | NA           | NA        | NA        | NA       | NA       |
| BX005022.2        | 1.972528723 | 1.628884857  | 1.4878117 | 1.0948192 | 0.273596 | NA       |
| RF00001           | 0 NA        | NA           | NA        | NA        | NA       | NA       |
| RF00001           | 0 NA        | NA           | NA        | NA        | NA       | NA       |
| dre-mir-430b-10   | 0 NA        | NA           | NA        | NA        | NA       | NA       |
| zp3               | 0.158915748 | 0.967652056  | 4.0804729 | 0.2371421 | 0.812547 | NA       |
| CABZ01084340.1    | 0.658218317 | -0.061628513 | 2.4342948 | -0.025317 | 0.979802 | NA       |
| BX901962.4        | 42.49645631 | 0.347470638  | 0.327461  | 1.0611056 | 0.288642 | 0.845979 |
| pimr80            | 3.444622765 | -0.715088152 | 1.0355396 | -0.690546 | 0.489851 | NA       |
| pimr166           | 0 NA        | NA           | NA        | NA        | NA       | NA       |
| RF00001           | 0.332524763 | 0.005883742  | 3.292841  | 0.0017868 | 0.998574 | NA       |
| RF00003           | 0 NA        | NA           | NA        | NA        | NA       | NA       |
| RF00001           | 0 NA        | NA           | NA        | NA        | NA       | NA       |
| CABZ01065416.1    | 27.78738077 | 0.018493812  | 0.3773318 | 0.0490121 | 0.96091  | 0.9956   |
| AL845320.2        | 1.001591779 | -2.198778422 | 2.0996481 | -1.047213 | 0.295001 | NA       |
| si:dkey-234i14.13 | 0 NA        | NA           | NA        | NA        | NA       | NA       |
| RF00001           | 0.166657454 | -0.955901296 | 4.0804729 | -0.234262 | 0.814781 | NA       |
| tmem14cb          | 43.41752157 | 0.276528967  | 0.298607  | 0.9260634 | 0.354413 | 0.882105 |
| BX769173.3        | 0 NA        | NA           | NA        | NA        | NA       | NA       |
| RF00001           | 0 NA        | NA           | NA        | NA        | NA       | NA       |
| RF00026           | 0 NA        | NA           | NA        | NA        | NA       | NA       |
| CABZ01075628.1    | 9.867569144 | -0.249867197 | 0.6765626 | -0.369319 | 0.71189  | NA       |
| CU862020.1        | 19.2429336  | 0.057872376  | 0.4494411 | 0.1287652 | 0.897543 | 0.990121 |
| RF00026           | 0 NA        | NA           | NA        | NA        | NA       | NA       |
| RF00026           | 0 NA        | NA           | NA        | NA        | NA       | NA       |
| L0017845.1        | 0.166657454 | -0.955901296 | 4.0804729 | -0.234262 | 0.814781 | NA       |
| RF00001           | 0.158915748 | 0.967652056  | 4.0804729 | 0.2371421 | 0.812547 | NA       |
| F0704624.1        | 30.94130279 | 0.154117058  | 0.3463112 | 0.4450247 | 0.656302 | 0.961833 |
| znf1033           | 11.87773576 | -0.306254752 | 0.603459  | -0.507499 | 0.611805 | 0.95688  |
| CT583728.21       | 0.513487682 | -0.887846295 | 2.6557956 | -0.334305 | 0.738149 | NA       |
| RF00017           | 0.158795395 | 0.967652056  | 4.0804729 | 0.2371421 | 0.812547 | NA       |
| CR932978.2        | 0 NA        | NA           | NA        | NA        | NA       | NA       |
| RF00001           | 0 NA        | NA           | NA        | NA        | NA       | NA       |
| RF00026           | 0 NA        | NA           | NA        | NA        | NA       | NA       |
| si:dkeyp-123a12.2 | 13.39397835 | 0.404306859  | 0.5141288 | 0.7863922 | 0.431638 | 0.91277  |
| BX000981.11       | 0 NA        | NA           | NA        | NA        | NA       | NA       |
| RF00001           | 0 NA        | NA           | NA        | NA        | NA       | NA       |
| dre-mir-430a-2    | 0 NA        | NA           | NA        | NA        | NA       | NA       |
| RF00017           | 0.365141898 | 1.973577737  | 3.3927314 | 0.5817076 | 0.560764 | NA       |
| RF00001           | 0 NA        | NA           | NA        | NA        | NA       | NA       |
| si:dkey-4c23.5    | 2.472339447 | 0.577358399  | 1.1758589 | 0.4910099 | 0.623419 | NA       |

|                   |              |               |            |            |           |           |
|-------------------|--------------|---------------|------------|------------|-----------|-----------|
| ftr50             | 4. 858947993 | -1. 450567588 | 0. 9429998 | -1. 538248 | 0. 123988 | NA        |
| CU138548. 7       | 0 NA         | NA            | NA         | NA         | NA        | NA        |
| RF00026           | 0 NA         | NA            | NA         | NA         | NA        | NA        |
| RF00001           | 0 NA         | NA            | NA         | NA         | NA        | NA        |
| RF00016           | 2. 561455083 | 1. 006681515  | 1. 2678067 | 0. 7940339 | 0. 427176 | NA        |
| BX324157. 1       | 0 NA         | NA            | NA         | NA         | NA        | NA        |
| RF00001           | 0 NA         | NA            | NA         | NA         | NA        | NA        |
| RF00001           | 0 NA         | NA            | NA         | NA         | NA        | NA        |
| AL935292. 1       | 2. 943619552 | -0. 020303771 | 1. 1161177 | -0. 018191 | 0. 985486 | NA        |
| zgc:165555        | 4. 835348959 | 0. 452211052  | 0. 9586305 | 0. 4717261 | 0. 637122 | NA        |
| pimr192           | 0. 157187365 | -0. 955901296 | 4. 0804729 | -0. 234262 | 0. 814781 | NA        |
| BX470083. 4       | 0 NA         | NA            | NA         | NA         | NA        | NA        |
| si:dkey-65b13. 8  | 0 NA         | NA            | NA         | NA         | NA        | NA        |
| RF00003           | 0 NA         | NA            | NA         | NA         | NA        | NA        |
| si:dkeyp-74b6. 2  | 0. 330916733 | -1. 849579229 | 3. 2489867 | -0. 569279 | 0. 569167 | NA        |
| RF00001           | 0. 166657454 | -0. 955901296 | 4. 0804729 | -0. 234262 | 0. 814781 | NA        |
| zgc:174353        | 0 NA         | NA            | NA         | NA         | NA        | NA        |
| RF00001           | 0 NA         | NA            | NA         | NA         | NA        | NA        |
| taar19d           | 0. 166657454 | -0. 955901296 | 4. 0804729 | -0. 234262 | 0. 814781 | NA        |
| CABZ01057928. 1   | 51. 46833742 | -0. 270591866 | 0. 2686634 | -1. 007178 | 0. 313849 | 0. 865176 |
| v2rh11            | 0 NA         | NA            | NA         | NA         | NA        | NA        |
| RF00001           | 0 NA         | NA            | NA         | NA         | NA        | NA        |
| CABZ01087415. 1   | 3. 599291602 | -0. 816687586 | 1. 0011778 | -0. 815727 | 0. 414656 | NA        |
| F0704836. 1       | 0. 31437473  | -1. 788572922 | 3. 5930657 | -0. 497785 | 0. 618636 | NA        |
| LHFPL6            | 16. 70137006 | 0. 307455568  | 0. 474943  | 0. 6473525 | 0. 517404 | 0. 938592 |
| RF00271           | 8. 811109489 | -1. 08474038  | 0. 6626254 | -1. 637034 | 0. 101623 | NA        |
| RF00001           | 0 NA         | NA            | NA         | NA         | NA        | NA        |
| si:dkey-33c12. 2  | 0. 365141898 | 1. 973577737  | 3. 3927314 | 0. 5817076 | 0. 560764 | NA        |
| RF00026           | 0 NA         | NA            | NA         | NA         | NA        | NA        |
| si:dkeyp-46h3. 1  | 2. 678255868 | -0. 347307114 | 1. 1457186 | -0. 303135 | 0. 761787 | NA        |
| RF00003           | 0 NA         | NA            | NA         | NA         | NA        | NA        |
| BX511056. 5       | 0 NA         | NA            | NA         | NA         | NA        | NA        |
| si:dkey-112g5. 12 | 0. 681124658 | 1. 536768532  | 2. 394256  | 0. 6418564 | 0. 520966 | NA        |
| RF00001           | 0. 158795395 | 0. 967652056  | 4. 0804729 | 0. 2371421 | 0. 812547 | NA        |
| CU466281. 1       | 0 NA         | NA            | NA         | NA         | NA        | NA        |
| si:dkey-199f5. 7  | 0. 158795395 | 0. 967652056  | 4. 0804729 | 0. 2371421 | 0. 812547 | NA        |
| AL935174. 3       | 10. 52152382 | 0. 529839519  | 0. 5889373 | 0. 8996535 | 0. 368305 | NA        |
| RF00001           | 0. 158915748 | 0. 967652056  | 4. 0804729 | 0. 2371421 | 0. 812547 | NA        |
| RF00026           | 0 NA         | NA            | NA         | NA         | NA        | NA        |
| senp7a            | 0. 173729368 | -0. 955901296 | 4. 0804729 | -0. 234262 | 0. 814781 | NA        |
| RF00001           | 0 NA         | NA            | NA         | NA         | NA        | NA        |
| RF00001           | 0 NA         | NA            | NA         | NA         | NA        | NA        |
| BX681417. 15      | 0 NA         | NA            | NA         | NA         | NA        | NA        |
| nitr1b            | 1. 794351782 | 1. 386458267  | 1. 5674049 | 0. 8845566 | 0. 376396 | NA        |
| BX901889. 5       | 0 NA         | NA            | NA         | NA         | NA        | NA        |
| LO018020. 2       | 0 NA         | NA            | NA         | NA         | NA        | NA        |
| RF00276           | 0 NA         | NA            | NA         | NA         | NA        | NA        |
| RF00001           | 0. 158795395 | 0. 967652056  | 4. 0804729 | 0. 2371421 | 0. 812547 | NA        |
| RF00001           | 0. 166657454 | -0. 955901296 | 4. 0804729 | -0. 234262 | 0. 814781 | NA        |
| CABZ01059407. 1   | 0 NA         | NA            | NA         | NA         | NA        | NA        |
| RF00001           | 0 NA         | NA            | NA         | NA         | NA        | NA        |
| RF00001           | 0 NA         | NA            | NA         | NA         | NA        | NA        |
| RF00001           | 0 NA         | NA            | NA         | NA         | NA        | NA        |
| BX000364. 3       | 0 NA         | NA            | NA         | NA         | NA        | NA        |

|                   |             |              |           |           |          |          |
|-------------------|-------------|--------------|-----------|-----------|----------|----------|
| im:6904045        | 41.7791797  | 0.01972744   | 0.3304383 | 0.0597008 | 0.952394 | 0.993904 |
| RF00001           | 0 NA        |              | NA        | NA        | NA       | NA       |
| si:dkey-15b23.3   | 2.008797794 | -0.976779242 | 1.367901  | -0.714072 | 0.475183 | NA       |
| CR450764.6        | 0 NA        |              | NA        | NA        | NA       | NA       |
| RF00004           | 0 NA        |              | NA        | NA        | NA       | NA       |
| L0017791.1        | 11.14878751 | 0.650786931  | 0.5857463 | 1.111039  | 0.266552 | 0.832634 |
| RF00001           | 0.158915748 | 0.967652056  | 4.0804729 | 0.2371421 | 0.812547 | NA       |
| CU929379.1        | 0.830098949 | -1.902766313 | 2.1285797 | -0.893914 | 0.371368 | NA       |
| F0203432.1        | 1.477239148 | -1.829776285 | 1.7262284 | -1.059985 | 0.289151 | NA       |
| dicpl.3-4         | 2.107987695 | -0.253224681 | 1.3448436 | -0.188293 | 0.850647 | NA       |
| RF00001           | 0 NA        |              | NA        | NA        | NA       | NA       |
| BX323062.1        | 0.845032922 | -3.195649681 | 2.1776262 | -1.467492 | 0.142242 | NA       |
| RF00004           | 1.863950061 | 0.854367974  | 1.453161  | 0.5879376 | 0.556574 | NA       |
| zgc:171445        | 3.852865937 | -0.643768042 | 0.987967  | -0.651609 | 0.514654 | NA       |
| L0018680.1        | 0.680145136 | -1.475466752 | 2.2805885 | -0.646968 | 0.517653 | NA       |
| RF00001           | 0 NA        |              | NA        | NA        | NA       | NA       |
| RF00026           | 0 NA        |              | NA        | NA        | NA       | NA       |
| RF00001           | 0 NA        |              | NA        | NA        | NA       | NA       |
| RF00015           | 0 NA        |              | NA        | NA        | NA       | NA       |
| RF00001           | 0.157187365 | -0.955901296 | 4.0804729 | -0.234262 | 0.814781 | NA       |
| BX005085.6        | 54.90130347 | -0.285560648 | 0.2604245 | -1.09652  | 0.272851 | 0.838096 |
| MARF1             | 473.1568753 | 0.009102599  | 0.1125683 | 0.0808629 | 0.935551 | 0.992702 |
| RF00026           | 0 NA        |              | NA        | NA        | NA       | NA       |
| BX681417.16       | 0 NA        |              | NA        | NA        | NA       | NA       |
| crygm2b           | 8.540852465 | -0.008446182 | 0.6935109 | -0.012179 | 0.990283 | NA       |
| CR450720.1        | 0.513487682 | -0.887846295 | 2.6557956 | -0.334305 | 0.738149 | NA       |
| BX681417.17       | 0 NA        |              | NA        | NA        | NA       | NA       |
| RF00001           | 0.31598276  | 0.005883445  | 3.3523626 | 0.001755  | 0.9986   | NA       |
| BX927234.2        | 0.158795395 | 0.967652056  | 4.0804729 | 0.2371421 | 0.812547 | NA       |
| CDK2AP1           | 168.0247702 | 0.149471937  | 0.1751014 | 0.8536309 | 0.39331  | 0.898076 |
| RF00001           | 1.01525745  | 2.235309641  | 2.0936621 | 1.0676554 | 0.285676 | NA       |
| dre-mir-430a-2    | 0 NA        |              | NA        | NA        | NA       | NA       |
| CR376730.3        | 0 NA        |              | NA        | NA        | NA       | NA       |
| si:ch73-338o16.4  | 0.332524763 | 0.005883742  | 3.292841  | 0.0017868 | 0.998574 | NA       |
| RF00026           | 0 NA        |              | NA        | NA        | NA       | NA       |
| RF00026           | 0 NA        |              | NA        | NA        | NA       | NA       |
| RF00092           | 0.829470442 | -0.541620008 | 2.1123709 | -0.256404 | 0.797639 | NA       |
| si:ch211-238p8.18 | 0 NA        |              | NA        | NA        | NA       | NA       |
| BX649300.2        | 24.25324171 | -0.255015461 | 0.4071876 | -0.626285 | 0.531128 | 0.942209 |
| imp3              | 208.061019  | 0.250001232  | 0.1642066 | 1.5224801 | 0.127889 | 0.658732 |
| RF00001           | 0 NA        |              | NA        | NA        | NA       | NA       |
| CR394572.1        | 0.794578739 | 3.129658898  | 2.5486248 | 1.2279794 | 0.219455 | NA       |
| RPL37A            | 9095.055727 | -0.277223725 | 0.0937834 | -2.955999 | 0.003117 | 0.073687 |
| taarl3e           | 0 NA        |              | NA        | NA        | NA       | NA       |
| RF00003           | 0 NA        |              | NA        | NA        | NA       | NA       |
| zgc:165555        | 17.92543455 | 0.144333413  | 0.5236713 | 0.2756183 | 0.782841 | 0.97627  |
| tsnax             | 273.7101855 | -0.124455607 | 0.1296142 | -0.9602   | 0.336954 | 0.876088 |
| si:ch211-238p8.10 | 2.215457282 | 3.514524741  | 1.6478464 | 2.1327987 | 0.032941 | NA       |
| RF00001           | 0 NA        |              | NA        | NA        | NA       | NA       |
| RF00001           | 0 NA        |              | NA        | NA        | NA       | NA       |
| RF00271           | 0.325452849 | 0.005883619  | 3.3177086 | 0.0017734 | 0.998585 | NA       |
| RF00017           | 0.347458735 | -1.908042286 | 3.4571486 | -0.551912 | 0.581009 | NA       |
| BX510352.1        | 0.173729368 | -0.955901296 | 4.0804729 | -0.234262 | 0.814781 | NA       |
| RF00001           | 0.157187365 | -0.955901296 | 4.0804729 | -0.234262 | 0.814781 | NA       |

|                   |             |              |           |           |          |          |
|-------------------|-------------|--------------|-----------|-----------|----------|----------|
| zgc:174354        | 0.182570949 | 0.967652056  | 4.0804729 | 0.2371421 | 0.812547 | NA       |
| si:ch211-227e10.3 | 4.286003752 | 0.233563751  | 0.9611806 | 0.2429967 | 0.808008 | NA       |
| lurapl            | 315.0151099 | 0.090831835  | 0.1218856 | 0.7452222 | 0.456137 | 0.921215 |
| pimr146           | 0 NA        | NA           | NA        | NA        | NA       | NA       |
| CU693440.1        | 0 NA        | NA           | NA        | NA        | NA       | NA       |
| pimr159           | 0 NA        | NA           | NA        | NA        | NA       | NA       |
| RF00003           | 0 NA        | NA           | NA        | NA        | NA       | NA       |
| CU633857.1        | 2.650543133 | 0.37792834   | 1.2251509 | 0.3084749 | 0.757721 | NA       |
| RF00001           | 0 NA        | NA           | NA        | NA        | NA       | NA       |
| dre-mir-430b-18   | 0 NA        | NA           | NA        | NA        | NA       | NA       |
| RF00003           | 0 NA        | NA           | NA        | NA        | NA       | NA       |
| znf1002           | 3.218377513 | 1.566956631  | 1.1512874 | 1.3610473 | 0.173499 | NA       |
| RF00026           | 0 NA        | NA           | NA        | NA        | NA       | NA       |
| BX681417.18       | 0 NA        | NA           | NA        | NA        | NA       | NA       |
| ubald2            | 62.20402526 | -0.204575387 | 0.2441084 | -0.838051 | 0.402002 | 0.90084  |
| RF00001           | 0 NA        | NA           | NA        | NA        | NA       | NA       |
| RF00001           | 0.31759079  | 1.807926197  | 3.579045  | 0.5051421 | 0.613459 | NA       |
| BX908796.5        | 0 NA        | NA           | NA        | NA        | NA       | NA       |
| RF00001           | 0.182570949 | 0.967652056  | 4.0804729 | 0.2371421 | 0.812547 | NA       |
| nat14             | 71.97535297 | -0.151667767 | 0.2350405 | -0.645284 | 0.518743 | 0.938914 |
| RF00001           | 0.158795395 | 0.967652056  | 4.0804729 | 0.2371421 | 0.812547 | NA       |
| RF00001           | 0 NA        | NA           | NA        | NA        | NA       | NA       |
| CABZ01077555.1    | 9.447900095 | -0.265925632 | 0.6148959 | -0.432473 | 0.665398 | NA       |
| CR753816.1        | 0 NA        | NA           | NA        | NA        | NA       | NA       |
| RF00026           | 0 NA        | NA           | NA        | NA        | NA       | NA       |
| RF00001           | 0 NA        | NA           | NA        | NA        | NA       | NA       |
| AL928685.3        | 0.5046461   | -2.45370851  | 2.7629627 | -0.888072 | 0.374502 | NA       |
| pimr77            | 0 NA        | NA           | NA        | NA        | NA       | NA       |
| RF00026           | 0 NA        | NA           | NA        | NA        | NA       | NA       |
| LO018532.1        | 0.173729368 | -0.955901296 | 4.0804729 | -0.234262 | 0.814781 | NA       |
| RF00026           | 0 NA        | NA           | NA        | NA        | NA       | NA       |
| gnb4b             | 244.9091248 | 0.034365412  | 0.1417653 | 0.2424106 | 0.808462 | 0.980642 |
| CABZ01022564.1    | 0 NA        | NA           | NA        | NA        | NA       | NA       |
| RF00001           | 0 NA        | NA           | NA        | NA        | NA       | NA       |
| RF00003           | 0 NA        | NA           | NA        | NA        | NA       | NA       |
| RF00026           | 0 NA        | NA           | NA        | NA        | NA       | NA       |
| BX890572.2        | 0.332524763 | 0.005883742  | 3.292841  | 0.0017868 | 0.998574 | NA       |
| RF00026           | 0 NA        | NA           | NA        | NA        | NA       | NA       |
| RF00001           | 0 NA        | NA           | NA        | NA        | NA       | NA       |
| RF00001           | 0.349228403 | 0.005884014  | 3.2372587 | 0.0018176 | 0.99855  | NA       |
| hbbe1.2           | 2060.684346 | 0.338666334  | 0.2394299 | 1.4144698 | 0.157224 | 0.707876 |
| pimr58            | 3.024299205 | 1.38326486   | 1.1958341 | 1.1567365 | 0.24738  | NA       |
| BX664750.5        | 0 NA        | NA           | NA        | NA        | NA       | NA       |
| RF00001           | 0 NA        | NA           | NA        | NA        | NA       | NA       |
| BX649556.2        | 0.488104098 | -2.415107183 | 2.7936704 | -0.864493 | 0.387317 | NA       |
| RF00001           | 0 NA        | NA           | NA        | NA        | NA       | NA       |
| RF00001           | 0.158795395 | 0.967652056  | 4.0804729 | 0.2371421 | 0.812547 | NA       |
| n6amt1            | 220.1525911 | -0.170665326 | 0.154279  | -1.106212 | 0.268635 | 0.833906 |
| CABZ01083778.1    | 18.46196029 | 0.029210431  | 0.450679  | 0.0648143 | 0.948322 | 0.99381  |
| CABZ01038524.1    | 10.50027358 | -0.127124387 | 0.5886945 | -0.215943 | 0.829032 | NA       |
| CR925768.1        | 0.817013712 | 0.525058354  | 2.1207741 | 0.2475786 | 0.80446  | NA       |
| CABZ01101813.1    | 163.9845437 | 0.077976197  | 0.1728532 | 0.4511122 | 0.651909 | 0.960708 |
| RF00392           | 0 NA        | NA           | NA        | NA        | NA       | NA       |
| RF00026           | 0 NA        | NA           | NA        | NA        | NA       | NA       |

|                   |              |               |            |            |           |           |
|-------------------|--------------|---------------|------------|------------|-----------|-----------|
| pimr198           | 1. 668410972 | -0. 551125295 | 1. 4848995 | -0. 371153 | 0. 710523 | NA        |
| RF00001           | 0. 157187365 | -0. 955901296 | 4. 0804729 | -0. 234262 | 0. 814781 | NA        |
| BX547993. 2       | 1. 318206302 | 0. 719384813  | 1. 8578549 | 0. 3872126 | 0. 698599 | NA        |
| RF00003           | 0. 157187365 | -0. 955901296 | 4. 0804729 | -0. 234262 | 0. 814781 | NA        |
| RF00001           | 0 NA         | NA            | NA         | NA         | NA        | NA        |
| RF00003           | 0. 48448895  | 0. 85344211   | 2. 878836  | 0. 2964539 | 0. 766883 | NA        |
| RF00001           | 0 NA         | NA            | NA         | NA         | NA        | NA        |
| RF00001           | 0 NA         | NA            | NA         | NA         | NA        | NA        |
| RF00001           | 0 NA         | NA            | NA         | NA         | NA        | NA        |
| RF00001           | 95. 35300378 | 0. 207608139  | 0. 2099907 | 0. 9886539 | 0. 322833 | 0. 870543 |
| zgc:173575        | 36. 16674129 | -0. 149457317 | 0. 3217291 | -0. 464544 | 0. 642258 | 0. 959994 |
| zp3. 2            | 0. 82223689  | -0. 634107248 | 2. 2243871 | -0. 285071 | 0. 77559  | NA        |
| RF00001           | 0. 365141898 | 1. 973577737  | 3. 3927314 | 0. 5817076 | 0. 560764 | NA        |
| tomt              | 0. 182570949 | 0. 967652056  | 4. 0804729 | 0. 2371421 | 0. 812547 | NA        |
| CR854981. 1       | 0 NA         | NA            | NA         | NA         | NA        | NA        |
| dre-mir-430c-1    | 0 NA         | NA            | NA         | NA         | NA        | NA        |
| RF00001           | 0. 500161739 | 2. 450146464  | 2. 7711133 | 0. 8841741 | 0. 376602 | NA        |
| pimr160           | 0 NA         | NA            | NA         | NA         | NA        | NA        |
| RF00017           | 0 NA         | NA            | NA         | NA         | NA        | NA        |
| BX322622. 1       | 1. 46736997  | 0. 931592809  | 1. 6716849 | 0. 5572777 | 0. 577338 | NA        |
| klh110b. 1        | 1. 678671207 | -1. 178627462 | 1. 5304903 | -0. 770098 | 0. 441242 | NA        |
| BX511028. 1       | 2. 633622377 | -2. 100049574 | 1. 2906803 | -1. 627087 | 0. 103719 | NA        |
| RF00211           | 0. 332645115 | 0. 005883744  | 3. 2924249 | 0. 0017871 | 0. 998574 | NA        |
| RF00012           | 0 NA         | NA            | NA         | NA         | NA        | NA        |
| BX548073. 10      | 0 NA         | NA            | NA         | NA         | NA        | NA        |
| shisa6            | 71. 50936213 | -0. 067343929 | 0. 2405858 | -0. 279916 | 0. 779542 | 0. 976146 |
| BX004976. 1       | 0. 488104098 | -2. 415107183 | 2. 7936704 | -0. 864493 | 0. 387317 | NA        |
| CABZ01080056. 1   | 27. 43696579 | 0. 068761325  | 0. 3906648 | 0. 1760111 | 0. 860285 | 0. 985773 |
| MGAT5B            | 2. 898076405 | 0. 190220806  | 1. 1510532 | 0. 1652581 | 0. 868741 | NA        |
| si:dkey-122c11. 8 | 1. 831171287 | 0. 220127097  | 1. 4472705 | 0. 1520981 | 0. 87911  | NA        |
| RF00001           | 0 NA         | NA            | NA         | NA         | NA        | NA        |
| RF00003           | 0 NA         | NA            | NA         | NA         | NA        | NA        |
| CU468041. 2       | 20. 88245932 | 0. 568290812  | 0. 4274463 | 1. 3295023 | 0. 183682 | 0. 747284 |
| RF00003           | 0 NA         | NA            | NA         | NA         | NA        | NA        |
| CR847973. 1       | 0 NA         | NA            | NA         | NA         | NA        | NA        |
| CR293501. 2       | 4. 623201257 | -0. 623971046 | 0. 8698717 | -0. 717314 | 0. 47318  | NA        |
| pimr6             | 0. 476626891 | 2. 395187592  | 2. 815932  | 0. 8505843 | 0. 395    | NA        |
| znf1118           | 5. 770662419 | -0. 456411695 | 0. 8865449 | -0. 514821 | 0. 606678 | NA        |
| AL929520. 3       | 0 NA         | NA            | NA         | NA         | NA        | NA        |
| RF00001           | 0. 341366344 | 1. 891903201  | 3. 2128156 | 0. 5888614 | 0. 555954 | NA        |
| F0082780. 1       | 112. 3857518 | -0. 129485538 | 0. 2051529 | -0. 631166 | 0. 527932 | 0. 941647 |
| RF00618           | 0. 349228403 | 0. 005884014  | 3. 2372587 | 0. 0018176 | 0. 99855  | NA        |
| dre-mir-430c-1    | 0 NA         | NA            | NA         | NA         | NA        | NA        |
| cacng4a           | 22. 31133494 | 0. 010551139  | 0. 4036697 | 0. 026138  | 0. 979147 | 0. 996802 |
| CT030048. 1       | 0. 81823394  | 3. 165585784  | 2. 3439761 | 1. 3505196 | 0. 176849 | NA        |
| clec19a           | 76. 63446814 | -0. 141705097 | 0. 2445507 | -0. 579451 | 0. 562285 | 0. 948728 |
| CABZ01026681. 1   | 63. 9795225  | 0. 021192915  | 0. 2610551 | 0. 0811818 | 0. 935297 | 0. 992702 |
| NCEH1             | 28. 74589976 | -0. 178626431 | 0. 3700066 | -0. 482766 | 0. 629262 | 0. 957354 |
| FP015862. 4       | 2. 44476966  | -3. 679932498 | 1. 6846894 | -2. 184339 | 0. 028937 | NA        |
| RF00026           | 0 NA         | NA            | NA         | NA         | NA        | NA        |
| CABZ01117752. 1   | 8. 089490643 | 0. 875041224  | 0. 7061946 | 1. 2390935 | 0. 215311 | NA        |
| BX323459. 2       | 1. 023239862 | 1. 010298903  | 1. 8853048 | 0. 5358809 | 0. 592041 | NA        |
| cox7b             | 2170. 488927 | -0. 045607222 | 0. 0978135 | -0. 466267 | 0. 641024 | 0. 959994 |
| traj22            | 0 NA         | NA            | NA         | NA         | NA        | NA        |



|                   |             |              |           |           |          |          |
|-------------------|-------------|--------------|-----------|-----------|----------|----------|
| si:ch211-271g18.4 | 1.462226107 | -0.959866663 | 1.6747208 | -0.57315  | 0.566543 | NA       |
| RF00012           | 0           | NA           | NA        | NA        | NA       | NA       |
| si:dkey-235d18.6  | 3.500895102 | -0.389194056 | 1.0285026 | -0.378408 | 0.705127 | NA       |
| CR759836.1        | 83.76560667 | -0.057943617 | 0.2192015 | -0.264339 | 0.791518 | 0.977668 |
| RF00001           | 0           | NA           | NA        | NA        | NA       | NA       |
| BX681417.19       | 0           | NA           | NA        | NA        | NA       | NA       |
| AL928685.4        | 8.945002712 | -1.128571152 | 0.6547716 | -1.72361  | 0.084778 | NA       |
| BX681417.20       | 0           | NA           | NA        | NA        | NA       | NA       |
| si:dkeyp-82b4.3   | 1.428070809 | 2.793119961  | 1.9545841 | 1.4290099 | 0.153001 | NA       |
| RF00026           | 0           | NA           | NA        | NA        | NA       | NA       |
| RF00001           | 0           | NA           | NA        | NA        | NA       | NA       |
| CR847895.1        | 1.976373291 | 2.296841472  | 1.5253575 | 1.5057726 | 0.132126 | NA       |
| pimr160           | 0           | NA           | NA        | NA        | NA       | NA       |
| RF00001           | 0.157187365 | -0.955901296 | 4.0804729 | -0.234262 | 0.814781 | NA       |
| RF00001           | 0           | NA           | NA        | NA        | NA       | NA       |
| cacnaldb          | 16.79759892 | 0.127916217  | 0.5213494 | 0.245356  | 0.806181 | 0.980105 |
| BX649608.2        | 0.641435609 | -0.01573847  | 2.4541227 | -0.006413 | 0.994883 | NA       |
| cc125a            | 168.1754065 | -0.001084241 | 0.1672858 | -0.006481 | 0.994829 | 0.998694 |
| CU468826.3        | 0           | NA           | NA        | NA        | NA       | NA       |
| taar19t           | 0           | NA           | NA        | NA        | NA       | NA       |
| RF00001           | 0           | NA           | NA        | NA        | NA       | NA       |
| CR392335.1        | 0.365141898 | 1.973577737  | 3.3927314 | 0.5817076 | 0.560764 | NA       |
| RF00001           | 0           | NA           | NA        | NA        | NA       | NA       |
| RF00001           | 0           | NA           | NA        | NA        | NA       | NA       |
| RF00017           | 0.182570949 | 0.967652056  | 4.0804729 | 0.2371421 | 0.812547 | NA       |
| BX324110.1        | 0.990114572 | 0.997810867  | 1.9011265 | 0.5248524 | 0.599686 | NA       |
| CR293532.1        | 0           | NA           | NA        | NA        | NA       | NA       |
| si:dkey-83f18.3   | 0           | NA           | NA        | NA        | NA       | NA       |
| CT030160.1        | 1.139989318 | 0.439423795  | 1.8430523 | 0.2384218 | 0.811554 | NA       |
| RF00001           | 0           | NA           | NA        | NA        | NA       | NA       |
| BX511259.2        | 1.778370258 | 1.351853426  | 1.72531   | 0.7835423 | 0.433309 | NA       |
| zgc:173552        | 13.16695396 | -0.059003989 | 0.5587563 | -0.105599 | 0.915901 | 0.991314 |
| RF00017           | 0           | NA           | NA        | NA        | NA       | NA       |
| CR846082.1        | 160.2466052 | 0.014470907  | 0.1834108 | 0.0788989 | 0.937113 | 0.99279  |
| RF00001           | 0           | NA           | NA        | NA        | NA       | NA       |
| L0017917.1        | 104.9988183 | 0.321216296  | 0.1958684 | 1.6399599 | 0.101014 | 0.604004 |
| dre-mir-430a-16   | 0           | NA           | NA        | NA        | NA       | NA       |
| znf1078           | 9.326048061 | -0.505967812 | 0.6243948 | -0.810333 | 0.417749 | NA       |
| RF00001           | 0.182570949 | 0.967652056  | 4.0804729 | 0.2371421 | 0.812547 | NA       |
| prkaa             | 997.0016895 | 0.035918484  | 0.0831563 | 0.4319394 | 0.665785 | 0.964736 |
| RF00001           | 0           | NA           | NA        | NA        | NA       | NA       |
| RF00001           | 0.158795395 | 0.967652056  | 4.0804729 | 0.2371421 | 0.812547 | NA       |
| SAMD12            | 5.249232521 | -0.198399336 | 0.8276573 | -0.239712 | 0.810554 | NA       |
| RF00003           | 0           | NA           | NA        | NA        | NA       | NA       |
| RF00096           | 0.157187365 | -0.955901296 | 4.0804729 | -0.234262 | 0.814781 | NA       |
| pimr89            | 0           | NA           | NA        | NA        | NA       | NA       |
| CU694255.2        | 0           | NA           | NA        | NA        | NA       | NA       |
| RF00001           | 0           | NA           | NA        | NA        | NA       | NA       |
| RF00001           | 0           | NA           | NA        | NA        | NA       | NA       |
| RF00001           | 0.31759079  | 1.807926197  | 3.579045  | 0.5051421 | 0.613459 | NA       |
| si:dkey-27d5.4    | 0           | NA           | NA        | NA        | NA       | NA       |
| pimr18            | 0           | NA           | NA        | NA        | NA       | NA       |
| RF00026           | 0           | NA           | NA        | NA        | NA       | NA       |
| zgc:101806        | 0           | NA           | NA        | NA        | NA       | NA       |

|                 |             |              |           |           |          |          |
|-----------------|-------------|--------------|-----------|-----------|----------|----------|
| RF00001         | 0           | NA           | NA        | NA        | NA       | NA       |
| crygm2d9        | 8600.777892 | 0.121832087  | 0.0739959 | 1.6464701 | 0.099667 | 0.600675 |
| BX664750.6      | 0           | NA           | NA        | NA        | NA       | NA       |
| RF00001         | 0.325573202 | 0.005883621  | 3.3172783 | 0.0017736 | 0.998585 | NA       |
| RF00012         | 0           | NA           | NA        | NA        | NA       | NA       |
| pimr76          | 0.157187365 | -0.955901296 | 4.0804729 | -0.234262 | 0.814781 | NA       |
| RF00001         | 0           | NA           | NA        | NA        | NA       | NA       |
| twfla           | 625.1163201 | -0.133290798 | 0.0991195 | -1.344748 | 0.178707 | 0.739486 |
| CT583728.22     | 0           | NA           | NA        | NA        | NA       | NA       |
| pigbos1         | 200.9402294 | 0.092332686  | 0.15325   | 0.6024972 | 0.546843 | 0.945526 |
| FO904836.1      | 0           | NA           | NA        | NA        | NA       | NA       |
| RF00003         | 0           | NA           | NA        | NA        | NA       | NA       |
| pimr84          | 0.333314908 | -1.858695402 | 3.5126701 | -0.52914  | 0.596708 | NA       |
| RF00026         | 0           | NA           | NA        | NA        | NA       | NA       |
| RF00001         | 0           | NA           | NA        | NA        | NA       | NA       |
| CT033803.2      | 0           | NA           | NA        | NA        | NA       | NA       |
| CT583625.6      | 1.727631919 | 2.10820327   | 1.7671101 | 1.1930232 | 0.23286  | NA       |
| RF00026         | 0           | NA           | NA        | NA        | NA       | NA       |
| BX511311.8      | 0           | NA           | NA        | NA        | NA       | NA       |
| AL954741.2      | 220.9913173 | 0.068584471  | 0.1394348 | 0.4918747 | 0.622808 | 0.957354 |
| RF00001         | 0           | NA           | NA        | NA        | NA       | NA       |
| LO017974.1      | 2.569437495 | 0.599923667  | 1.2389996 | 0.4842001 | 0.628244 | NA       |
| CR932978.3      | 0           | NA           | NA        | NA        | NA       | NA       |
| RF00001         | 0           | NA           | NA        | NA        | NA       | NA       |
| zgc:77614       | 1.030002046 | -2.236497097 | 2.086282  | -1.072001 | 0.283719 | NA       |
| RF00001         | 0.809821446 | 0.539374789  | 2.2312571 | 0.2417358 | 0.808985 | NA       |
| si:dkey-30g5.1  | 0           | NA           | NA        | NA        | NA       | NA       |
| AL929536.5      | 84.26372053 | 0.086334012  | 0.2241495 | 0.3851626 | 0.700117 | 0.967998 |
| si:dkey-47k20.5 | 0.86511426  | -0.498385432 | 2.3277634 | -0.214105 | 0.830465 | NA       |
| RF00026         | 0           | NA           | NA        | NA        | NA       | NA       |
| si:ch73-36p18.1 | 6.261587144 | 0.345509052  | 0.8088258 | 0.4271736 | 0.669253 | NA       |
| RF00001         | 0           | NA           | NA        | NA        | NA       | NA       |
| RF00001         | 0.173729368 | -0.955901296 | 4.0804729 | -0.234262 | 0.814781 | NA       |
| RF00017         | 0           | NA           | NA        | NA        | NA       | NA       |
| RF00001         | 0           | NA           | NA        | NA        | NA       | NA       |
| BX681417.21     | 0           | NA           | NA        | NA        | NA       | NA       |
| chrnb5a         | 82.39661017 | 0.154471111  | 0.2183866 | 0.7073288 | 0.479362 | 0.927091 |
| CR339041.3      | 1.938265528 | 3.32385196   | 1.747094  | 1.9025032 | 0.057105 | NA       |
| CR558302.1      | 0           | NA           | NA        | NA        | NA       | NA       |
| RF00001         | 0.365141898 | 1.973577737  | 3.3927314 | 0.5817076 | 0.560764 | NA       |
| BX470083.5      | 0           | NA           | NA        | NA        | NA       | NA       |
| RF00003         | 0           | NA           | NA        | NA        | NA       | NA       |
| zgc:165555      | 8.349980841 | 1.494435944  | 0.8138668 | 1.8362168 | 0.066326 | NA       |
| RF00003         | 0           | NA           | NA        | NA        | NA       | NA       |
| GGT7            | 183.1572424 | -0.119873598 | 0.1620701 | -0.73964  | 0.459518 | 0.921978 |
| CABZ01043506.1  | 14.41242641 | -0.310703226 | 0.5018622 | -0.619101 | 0.53585  | 0.943336 |
| RF00003         | 0           | NA           | NA        | NA        | NA       | NA       |
| CR376797.1      | 0.349228403 | 0.005884014  | 3.2372587 | 0.0018176 | 0.99855  | NA       |
| RF00001         | 0           | NA           | NA        | NA        | NA       | NA       |
| RF00026         | 0           | NA           | NA        | NA        | NA       | NA       |
| si:dkey-46g23.2 | 6.206544084 | -0.610451054 | 0.8003754 | -0.762706 | 0.445639 | NA       |
| znf1099         | 1.156531321 | 0.4104732    | 1.7646606 | 0.2326074 | 0.816066 | NA       |
| CT583728.23     | 0.31759079  | 1.807926197  | 3.579045  | 0.5051421 | 0.613459 | NA       |
| RF00003         | 0           | NA           | NA        | NA        | NA       | NA       |

|                    |             |              |           |           |          |          |
|--------------------|-------------|--------------|-----------|-----------|----------|----------|
| RF00026            | 0           | NA           | NA        | NA        | NA       | NA       |
| BX465228.2         | 38.11941289 | 0.34045522   | 0.337531  | 1.0086635 | 0.313136 | 0.865039 |
| L0018490.1         | 1.125254766 | 1.282480133  | 1.8916897 | 0.6779548 | 0.4978   | NA       |
| RF00026            | 0           | NA           | NA        | NA        | NA       | NA       |
| RF00001            | 0           | NA           | NA        | NA        | NA       | NA       |
| si:rp71-1k13.6     | 106.4298216 | -0.455028329 | 0.1958532 | -2.323314 | 0.020162 | 0.26686  |
| RF00002            | 0           | NA           | NA        | NA        | NA       | NA       |
| RF00020            | 0.157187365 | -0.955901296 | 4.0804729 | -0.234262 | 0.814781 | NA       |
| RF00563            | 0.182570949 | 0.967652056  | 4.0804729 | 0.2371421 | 0.812547 | NA       |
| RF00001            | 0           | NA           | NA        | NA        | NA       | NA       |
| BX276105.1         | 33.98645395 | -0.099728399 | 0.3431153 | -0.290656 | 0.771315 | 0.975687 |
| znf1001            | 7.956015754 | -0.748277459 | 0.6740588 | -1.110107 | 0.266953 | NA       |
| vapal              | 745.5984216 | 0.029252589  | 0.1069066 | 0.2736275 | 0.784371 | 0.97627  |
| RF00001            | 0.968308107 | 2.170936514  | 2.2853068 | 0.9499541 | 0.342136 | NA       |
| sp5l               | 88.7066424  | 0.093643053  | 0.214616  | 0.4363285 | 0.662598 | 0.964665 |
| ATP9A              | 22.30003282 | 0.193404732  | 0.4089285 | 0.4729549 | 0.636245 | 0.958561 |
| CABZ01117706.1     | 0.981032285 | -0.053008186 | 2.0630462 | -0.025694 | 0.979501 | NA       |
| dre-mir-430b-4     | 0           | NA           | NA        | NA        | NA       | NA       |
| CU855552.1         | 20.1742762  | 0.291731144  | 0.448744  | 0.6501059 | 0.515624 | 0.9377   |
| RF00003            | 0           | NA           | NA        | NA        | NA       | NA       |
| si:ch211-113a14.19 | 19.15072184 | 0.291182916  | 0.4694402 | 0.620277  | 0.535075 | 0.943336 |
| RF00001            | 0           | NA           | NA        | NA        | NA       | NA       |
| RF00003            | 0           | NA           | NA        | NA        | NA       | NA       |
| CT573264.2         | 0.682853041 | 2.891318346  | 2.3286279 | 1.2416403 | 0.214369 | NA       |
| pimr205            | 0.48448895  | 0.85344211   | 2.878836  | 0.2964539 | 0.766883 | NA       |
| CABZ01021532.1     | 0.633814256 | 1.438196278  | 2.4434004 | 0.5886044 | 0.556127 | NA       |
| BX681417.22        | 0           | NA           | NA        | NA        | NA       | NA       |
| si:dkey-1b17.9     | 3.024536655 | 0.016005115  | 1.0895809 | 0.0146892 | 0.98828  | NA       |
| CR533578.1         | 0           | NA           | NA        | NA        | NA       | NA       |
| zgc:194906         | 3.389086833 | -0.576100456 | 1.041582  | -0.553101 | 0.580194 | NA       |
| BX323083.5         | 0           | NA           | NA        | NA        | NA       | NA       |
| pimr165            | 0           | NA           | NA        | NA        | NA       | NA       |
| CR405710.2         | 0.815405682 | -0.617073648 | 2.125746  | -0.290286 | 0.771598 | NA       |
| dre-mir-430c-1     | 0           | NA           | NA        | NA        | NA       | NA       |
| Inpa               | 140.9530776 | 0.180322668  | 0.1770374 | 1.0185568 | 0.308413 | 0.861088 |
| KIRREL3            | 22.2028341  | -0.068333454 | 0.4129896 | -0.16546  | 0.868582 | 0.987245 |
| RF00001            | 0           | NA           | NA        | NA        | NA       | NA       |
| FP016005.2         | 2.124691336 | -0.226559938 | 1.3718063 | -0.165154 | 0.868822 | NA       |
| RF00001            | 0.325573202 | 0.005883621  | 3.3172783 | 0.0017736 | 0.998585 | NA       |
| RF00026            | 0           | NA           | NA        | NA        | NA       | NA       |
| RF00001            | 0           | NA           | NA        | NA        | NA       | NA       |
| RF00017            | 0           | NA           | NA        | NA        | NA       | NA       |
| t1r20.1            | 0.157187365 | -0.955901296 | 4.0804729 | -0.234262 | 0.814781 | NA       |
| htr2b              | 16.40973116 | 0.620701657  | 0.4678742 | 1.3266422 | 0.184627 | 0.747376 |
| CU137681.6         | 0           | NA           | NA        | NA        | NA       | NA       |
| zgc:171759         | 7.202796329 | 0.487017923  | 0.7577232 | 0.6427385 | 0.520394 | NA       |
| F0681393.2         | 0.166657454 | -0.955901296 | 4.0804729 | -0.234262 | 0.814781 | NA       |
| galnt8a.1          | 0.173729368 | -0.955901296 | 4.0804729 | -0.234262 | 0.814781 | NA       |
| L0018551.1         | 0.31437473  | -1.788572922 | 3.5930657 | -0.497785 | 0.618636 | NA       |
| RF00003            | 0           | NA           | NA        | NA        | NA       | NA       |
| RF00001            | 0           | NA           | NA        | NA        | NA       | NA       |
| AL929453.1         | 0           | NA           | NA        | NA        | NA       | NA       |
| RF00001            | 0           | NA           | NA        | NA        | NA       | NA       |
| CABZ01044281.1     | 1202.729867 | 0.644433234  | 0.1014319 | 6.3533556 | 2.11E-10 | 4.79E-08 |

|                    |             |              |           |           |          |          |
|--------------------|-------------|--------------|-----------|-----------|----------|----------|
| L0017799.1         | 19.09547458 | 0.531683465  | 0.4517765 | 1.1768728 | 0.239246 | 0.807768 |
| RF00001            | 0.158795395 | 0.967652056  | 4.0804729 | 0.2371421 | 0.812547 | NA       |
| RF00137            | 0 NA        | NA           | NA        | NA        | NA       | NA       |
| CU856344.1         | 21.09188821 | 0.062605466  | 0.4163465 | 0.1503687 | 0.880474 | 0.987881 |
| RF00017            | 0 NA        | NA           | NA        | NA        | NA       | NA       |
| AL935186.9         | 10275.63756 | 0.908631387  | 0.4663644 | 1.9483294 | 0.051376 | 0.444245 |
| RF00001            | 0 NA        | NA           | NA        | NA        | NA       | NA       |
| srp14              | 269.7618169 | 0.053279982  | 0.137873  | 0.3864425 | 0.699169 | 0.967998 |
| AL935186.10        | 1928.41561  | 1.181337944  | 0.3188368 | 3.7051496 | 0.000211 | 0.008965 |
| BX323887.1         | 3.944543799 | -0.250534251 | 0.9494519 | -0.263872 | 0.791878 | NA       |
| CR382385.1         | 0 NA        | NA           | NA        | NA        | NA       | NA       |
| RF00001            | 0 NA        | NA           | NA        | NA        | NA       | NA       |
| si:dkey-23f9.6     | 0 NA        | NA           | NA        | NA        | NA       | NA       |
| BX649295.2         | 0.157187365 | -0.955901296 | 4.0804729 | -0.234262 | 0.814781 | NA       |
| RF00001            | 0 NA        | NA           | NA        | NA        | NA       | NA       |
| zgc:171446         | 3.055605911 | 2.38765869   | 1.3065198 | 1.8274952 | 0.067625 | NA       |
| CABZ01016118.1     | 10.66334813 | 0.66230461   | 0.5966695 | 1.1100025 | 0.266998 | NA       |
| RF00026            | 0 NA        | NA           | NA        | NA        | NA       | NA       |
| RF00020            | 0 NA        | NA           | NA        | NA        | NA       | NA       |
| RF00001            | 0.166657454 | -0.955901296 | 4.0804729 | -0.234262 | 0.814781 | NA       |
| pimr78             | 0 NA        | NA           | NA        | NA        | NA       | NA       |
| RF00001            | 0 NA        | NA           | NA        | NA        | NA       | NA       |
| CR318589.2         | 0 NA        | NA           | NA        | NA        | NA       | NA       |
| dre-mir-430c-1     | 0 NA        | NA           | NA        | NA        | NA       | NA       |
| RF00026            | 0 NA        | NA           | NA        | NA        | NA       | NA       |
| RF00001            | 0 NA        | NA           | NA        | NA        | NA       | NA       |
| RF00026            | 0 NA        | NA           | NA        | NA        | NA       | NA       |
| RF00003            | 0 NA        | NA           | NA        | NA        | NA       | NA       |
| RF00001            | 0 NA        | NA           | NA        | NA        | NA       | NA       |
| CR456635.1         | 2.457174813 | -0.242525182 | 1.2673965 | -0.191357 | 0.848246 | NA       |
| chst3b             | 24.6208391  | 0.317413512  | 0.4014051 | 0.7907561 | 0.429086 | 0.911406 |
| CU459094.3         | 1.021003325 | 1.111073831  | 2.0728727 | 0.5360068 | 0.591954 | NA       |
| RF00001            | 0 NA        | NA           | NA        | NA        | NA       | NA       |
| RF00001            | 0 NA        | NA           | NA        | NA        | NA       | NA       |
| il4r.2             | 59.59624584 | 0.157100347  | 0.2631929 | 0.5969019 | 0.550573 | 0.946549 |
| pimr58             | 0 NA        | NA           | NA        | NA        | NA       | NA       |
| RF00001            | 0 NA        | NA           | NA        | NA        | NA       | NA       |
| rhoac              | 1794.628642 | -0.158340654 | 0.0767756 | -2.062384 | 0.039171 | 0.388646 |
| CT998556.1         | 84.33817203 | -0.041240086 | 0.2161909 | -0.190758 | 0.848715 | 0.985174 |
| RF00026            | 0 NA        | NA           | NA        | NA        | NA       | NA       |
| ADAM12 (1 of many) | 16.21892255 | 0.583485814  | 0.5165266 | 1.1296336 | 0.258631 | 0.826732 |
| RF00026            | 0 NA        | NA           | NA        | NA        | NA       | NA       |
| CR848040.3         | 0 NA        | NA           | NA        | NA        | NA       | NA       |
| CABZ01084501.3     | 1.275490571 | 0.72455033   | 1.7746658 | 0.4082742 | 0.683072 | NA       |
| CU539054.1         | 1.052358947 | 0.081848854  | 2.0216047 | 0.0404871 | 0.967705 | NA       |
| FO704772.2         | 2087.080264 | 0.77810474   | 0.3820362 | 2.0367302 | 0.041677 | 0.400593 |
| RF00001            | 0.166657454 | -0.955901296 | 4.0804729 | -0.234262 | 0.814781 | NA       |
| RF00001            | 0.365141898 | 1.973577737  | 3.3927314 | 0.5817076 | 0.560764 | NA       |
| si:dkey-193i10.4   | 5.387283544 | 0.448556879  | 0.8454532 | 0.530552  | 0.595729 | NA       |
| RF00003            | 0 NA        | NA           | NA        | NA        | NA       | NA       |
| pimr17             | 0.157187365 | -0.955901296 | 4.0804729 | -0.234262 | 0.814781 | NA       |
| CR932364.1         | 0 NA        | NA           | NA        | NA        | NA       | NA       |
| pimr87             | 0 NA        | NA           | NA        | NA        | NA       | NA       |
| RF00276            | 0 NA        | NA           | NA        | NA        | NA       | NA       |

|                   |              |               |            |            |           |           |
|-------------------|--------------|---------------|------------|------------|-----------|-----------|
| BX908795. 1       | 1. 454725107 | -0. 285028764 | 1. 6786934 | -0. 169792 | 0. 865174 | NA        |
| CABZ01100304. 1   | 60. 85310488 | -0. 161786609 | 0. 2581231 | -0. 626781 | 0. 530803 | 0. 942209 |
| RF00001           | 0 NA         |               | NA         | NA         | NA        | NA        |
| RF00001           | 0. 316103113 | 0. 005883447  | 3. 3519121 | 0. 0017553 | 0. 9986   | NA        |
| RF00001           | 47. 99260215 | -0. 211359632 | 0. 2829667 | -0. 746942 | 0. 455099 | 0. 921022 |
| RF00003           | 0 NA         |               | NA         | NA         | NA        | NA        |
| RF00001           | 0 NA         |               | NA         | NA         | NA        | NA        |
| si:dkey-40n15. 1  | 3. 338312877 | 0. 910738763  | 1. 0530243 | 0. 8648792 | 0. 387105 | NA        |
| msx1a             | 37. 90977809 | 0. 181778513  | 0. 3657706 | 0. 4969741 | 0. 619207 | 0. 957354 |
| CABZ01097761. 1   | 339. 96108   | -0. 163856927 | 0. 1259743 | -1. 300717 | 0. 193355 | 0. 757219 |
| RF00026           | 0 NA         |               | NA         | NA         | NA        | NA        |
| CABZ01067150. 1   | 37. 93234057 | -0. 568416954 | 0. 3502016 | -1. 623113 | 0. 104565 | 0. 612567 |
| CR626884. 4       | 0. 158795395 | 0. 967652056  | 4. 0804729 | 0. 2371421 | 0. 812547 | NA        |
| BX664625. 5       | 2. 018577612 | 0. 498654123  | 1. 3704078 | 0. 3638728 | 0. 715953 | NA        |
| RF00001           | 0 NA         |               | NA         | NA         | NA        | NA        |
| RF00017           | 3. 330381794 | 0. 3024499    | 1. 0525507 | 0. 2873495 | 0. 773845 | NA        |
| RF00026           | 0 NA         |               | NA         | NA         | NA        | NA        |
| cdx1b             | 428. 5836837 | -1. 166755707 | 0. 1208759 | -9. 652512 | 4. 80E-22 | 5. 58E-19 |
| RF00003           | 0 NA         |               | NA         | NA         | NA        | NA        |
| CU137645. 1       | 0 NA         |               | NA         | NA         | NA        | NA        |
| CU633479. 6       | 1. 642198218 | -0. 637391198 | 1. 7197807 | -0. 370624 | 0. 710918 | NA        |
| RF00012           | 0 NA         |               | NA         | NA         | NA        | NA        |
| BX005407. 1       | 3. 131468263 | 0. 139440045  | 1. 1069981 | 0. 1259623 | 0. 899762 | NA        |
| RF01684           | 0 NA         |               | NA         | NA         | NA        | NA        |
| RF00020           | 0. 158915748 | 0. 967652056  | 4. 0804729 | 0. 2371421 | 0. 812547 | NA        |
| RF01848           | 0 NA         |               | NA         | NA         | NA        | NA        |
| RF00001           | 0 NA         |               | NA         | NA         | NA        | NA        |
| BX322657. 4       | 55. 50435234 | -0. 134473421 | 0. 2757766 | -0. 487617 | 0. 625821 | 0. 957354 |
| crygm2d8          | 17776. 91488 | 0. 02166311   | 0. 0813708 | 0. 2662272 | 0. 790064 | 0. 977338 |
| RF00026           | 0 NA         |               | NA         | NA         | NA        | NA        |
| CU138548. 8       | 0 NA         |               | NA         | NA         | NA        | NA        |
| RF00276           | 0. 158795395 | 0. 967652056  | 4. 0804729 | 0. 2371421 | 0. 812547 | NA        |
| znf1127           | 13. 80341389 | -0. 488380967 | 0. 5566134 | -0. 877415 | 0. 380261 | 0. 895192 |
| RF00001           | 0 NA         |               | NA         | NA         | NA        | NA        |
| CT583728. 24      | 0 NA         |               | NA         | NA         | NA        | NA        |
| znf1119           | 36. 31617502 | 0. 126120582  | 0. 3343075 | 0. 3772592 | 0. 705981 | 0. 968412 |
| RF00001           | 0. 157187365 | -0. 955901296 | 4. 0804729 | -0. 234262 | 0. 814781 | NA        |
| RF00001           | 0 NA         |               | NA         | NA         | NA        | NA        |
| BX005305. 5       | 0. 498674062 | 0. 926637565  | 2. 6784892 | 0. 3459553 | 0. 729376 | NA        |
| RF00026           | 0 NA         |               | NA         | NA         | NA        | NA        |
| RF00001           | 0 NA         |               | NA         | NA         | NA        | NA        |
| L0018315. 6       | 0. 482760567 | -0. 866527181 | 2. 7059286 | -0. 320233 | 0. 748792 | NA        |
| si:dkeyp-4c4. 2   | 7. 645524616 | -0. 5270725   | 0. 7041543 | -0. 748518 | 0. 454148 | NA        |
| BX005372. 1       | 0. 347458735 | -1. 908042286 | 3. 4571486 | -0. 551912 | 0. 581009 | NA        |
| RF00001           | 0 NA         |               | NA         | NA         | NA        | NA        |
| si:dkey-19a16. 11 | 0. 489712128 | -0. 887840729 | 2. 693685  | -0. 329601 | 0. 741702 | NA        |
| CABZ01102038. 1   | 25. 9495622  | 0. 23879834   | 0. 3811732 | 0. 6264826 | 0. 530998 | 0. 942209 |
| si:dkey-5i16. 5   | 4. 996383304 | 0. 571558346  | 0. 8879678 | 0. 6436701 | 0. 519789 | NA        |
| znf1046           | 6. 720126116 | 0. 171064197  | 0. 7656163 | 0. 2234333 | 0. 823198 | NA        |
| RF00001           | 6. 437117051 | -0. 299092613 | 0. 7806642 | -0. 383126 | 0. 701626 | NA        |
| L0018205. 2       | 3. 024254665 | -0. 011905315 | 1. 102118  | -0. 010802 | 0. 991381 | NA        |
| BX901973. 1       | 62. 2219462  | -0. 288575851 | 0. 2544433 | -1. 134146 | 0. 256733 | 0. 824902 |
| CABZ01030282. 1   | 0. 158795395 | 0. 967652056  | 4. 0804729 | 0. 2371421 | 0. 812547 | NA        |
| CT583728. 25      | 0 NA         |               | NA         | NA         | NA        | NA        |

|                   |             |              |           |           |          |          |
|-------------------|-------------|--------------|-----------|-----------|----------|----------|
| CR848784.5        | 0           | NA           | NA        | NA        | NA       | NA       |
| RF00001           | 0           | NA           | NA        | NA        | NA       | NA       |
| RF00026           | 0           | NA           | NA        | NA        | NA       | NA       |
| RF00003           | 0           | NA           | NA        | NA        | NA       | NA       |
| BX323448.1        | 0.317831496 | 1.808837541  | 3.5779923 | 0.5055454 | 0.613176 | NA       |
| ccs               | 5.418366223 | -1.039953973 | 0.902401  | -1.15243  | 0.249144 | NA       |
| RF00003           | 0           | NA           | NA        | NA        | NA       | NA       |
| RF00069           | 0           | NA           | NA        | NA        | NA       | NA       |
| BX681417.23       | 0           | NA           | NA        | NA        | NA       | NA       |
| pimr104           | 0           | NA           | NA        | NA        | NA       | NA       |
| dre-mir-2185-1    | 0           | NA           | NA        | NA        | NA       | NA       |
| chia.6            | 54.0885799  | -1.012198659 | 0.2736049 | -3.69949  | 0.000216 | 0.009128 |
| dre-mir-430b-10   | 0           | NA           | NA        | NA        | NA       | NA       |
| CU138548.9        | 0           | NA           | NA        | NA        | NA       | NA       |
| BX537277.2        | 0           | NA           | NA        | NA        | NA       | NA       |
| traj57            | 0           | NA           | NA        | NA        | NA       | NA       |
| BX470259.2        | 232.7705688 | -0.006554855 | 0.1443204 | -0.045419 | 0.963774 | 0.995927 |
| taar16f           | 0           | NA           | NA        | NA        | NA       | NA       |
| RF00001           | 0           | NA           | NA        | NA        | NA       | NA       |
| BX649628.3        | 0           | NA           | NA        | NA        | NA       | NA       |
| CU138548.10       | 0           | NA           | NA        | NA        | NA       | NA       |
| RF00026           | 0           | NA           | NA        | NA        | NA       | NA       |
| CABZ01023247.1    | 1.504392399 | -0.28746346  | 1.5447598 | -0.186089 | 0.852375 | NA       |
| taar191           | 0           | NA           | NA        | NA        | NA       | NA       |
| CU024870.2        | 0.166657454 | -0.955901296 | 4.0804729 | -0.234262 | 0.814781 | NA       |
| RF00001           | 0           | NA           | NA        | NA        | NA       | NA       |
| si:ch211-250e5.16 | 0           | NA           | NA        | NA        | NA       | NA       |
| RF00015           | 0           | NA           | NA        | NA        | NA       | NA       |
| RF00001           | 0           | NA           | NA        | NA        | NA       | NA       |
| FP016239.2        | 0.173729368 | -0.955901296 | 4.0804729 | -0.234262 | 0.814781 | NA       |
| CR628395.1        | 0.182570949 | 0.967652056  | 4.0804729 | 0.2371421 | 0.812547 | NA       |
| zgc:165515        | 69.34630262 | -0.228806338 | 0.2361688 | -0.968825 | 0.332632 | 0.874664 |
| CABZ01039096.1    | 26.80173931 | 0.392336863  | 0.3720557 | 1.0545111 | 0.291649 | 0.847361 |
| CU137681.7        | 0           | NA           | NA        | NA        | NA       | NA       |
| RF00001           | 0           | NA           | NA        | NA        | NA       | NA       |
| CT867973.2        | 0           | NA           | NA        | NA        | NA       | NA       |
| CR847936.9        | 0           | NA           | NA        | NA        | NA       | NA       |
| CABZ01053619.1    | 0           | NA           | NA        | NA        | NA       | NA       |
| RF00001           | 0.500282092 | 2.45023829   | 2.5970012 | 0.9434876 | 0.345432 | NA       |
| CU855758.3        | 0.166657454 | -0.955901296 | 4.0804729 | -0.234262 | 0.814781 | NA       |
| BX927341.5        | 0           | NA           | NA        | NA        | NA       | NA       |
| RF00017           | 0.316103113 | 0.005883447  | 3.3519121 | 0.0017553 | 0.9986   | NA       |
| RF00026           | 0           | NA           | NA        | NA        | NA       | NA       |
| tmem17            | 28.66127281 | -0.040914883 | 0.4160485 | -0.098342 | 0.921661 | 0.992138 |
| RF00003           | 0           | NA           | NA        | NA        | NA       | NA       |
| RF00026           | 0           | NA           | NA        | NA        | NA       | NA       |
| BX510922.4        | 22.45998862 | -0.116235853 | 0.4378085 | -0.265495 | 0.790628 | 0.977402 |
| FP103009.1        | 137.8747094 | 0.17002798   | 0.1880044 | 0.9043832 | 0.365792 | 0.887084 |
| RF00026           | 0           | NA           | NA        | NA        | NA       | NA       |
| CABZ01063556.1    | 173.8480698 | -0.011639483 | 0.1628091 | -0.071492 | 0.943007 | 0.993364 |
| BX511311.9        | 0           | NA           | NA        | NA        | NA       | NA       |
| CU682604.1        | 0.498553709 | 0.926267934  | 2.6786929 | 0.345791  | 0.7295   | NA       |
| RF00001           | 0           | NA           | NA        | NA        | NA       | NA       |
| LRP4              | 26.23669395 | 0.085846795  | 0.3935987 | 0.2181074 | 0.827345 | 0.982696 |

|                    |              |               |            |            |           |           |
|--------------------|--------------|---------------|------------|------------|-----------|-----------|
| CT955962. 2        | 0 NA         | NA            | NA         | NA         | NA        | NA        |
| CU607104. 1        | 0. 655741074 | 0. 077611818  | 2. 4374018 | 0. 031842  | 0. 974598 | NA        |
| RF00001            | 0 NA         | NA            | NA         | NA         | NA        | NA        |
| RF00003            | 0 NA         | NA            | NA         | NA         | NA        | NA        |
| RF00026            | 0 NA         | NA            | NA         | NA         | NA        | NA        |
| RF00001            | 0. 166657454 | -0. 955901296 | 4. 0804729 | -0. 234262 | 0. 814781 | NA        |
| CU929304. 1        | 1. 521872639 | 0. 969710903  | 1. 6500154 | 0. 5876981 | 0. 556735 | NA        |
| RF00001            | 0 NA         | NA            | NA         | NA         | NA        | NA        |
| si:dkey-51d8. 1    | 2. 44912462  | -0. 955953592 | 1. 2546457 | -0. 761931 | 0. 446101 | NA        |
| BX537120. 3        | 0. 157187365 | -0. 955901296 | 4. 0804729 | -0. 234262 | 0. 814781 | NA        |
| chrn2b             | 3. 115355348 | -0. 148478368 | 1. 1362818 | -0. 13067  | 0. 896036 | NA        |
| RF00001            | 0. 173729368 | -0. 955901296 | 4. 0804729 | -0. 234262 | 0. 814781 | NA        |
| ms4a17a. 17        | 19. 20861109 | -2. 269123758 | 0. 4948845 | -4. 585159 | 4. 54E-06 | 0. 000369 |
| RF00001            | 0 NA         | NA            | NA         | NA         | NA        | NA        |
| RF00017            | 0 NA         | NA            | NA         | NA         | NA        | NA        |
| BX546453. 2        | 2. 849078905 | -0. 137979823 | 1. 116776  | -0. 123552 | 0. 90167  | NA        |
| CR450764. 8        | 0 NA         | NA            | NA         | NA         | NA        | NA        |
| RF00003            | 0 NA         | NA            | NA         | NA         | NA        | NA        |
| CABZ01067581. 1    | 36. 6424923  | -0. 111655794 | 0. 3803536 | -0. 293558 | 0. 769096 | 0. 975687 |
| BX548044. 8        | 0. 496945679 | -0. 834564081 | 2. 8549631 | -0. 29232  | 0. 770042 | NA        |
| RF00026            | 0 NA         | NA            | NA         | NA         | NA        | NA        |
| CR388008. 1        | 12. 71368203 | 0. 917258068  | 1. 4304114 | 0. 6412547 | 0. 521357 | 0. 939056 |
| CR925755. 2        | 0. 508023798 | 0. 926122713  | 2. 6636728 | 0. 3476864 | 0. 728076 | NA        |
| dre-mir-430b-1     | 0 NA         | NA            | NA         | NA         | NA        | NA        |
| CABZ01086574. 1    | 5. 104681066 | 0. 831410392  | 0. 9659542 | 0. 8607141 | 0. 389396 | NA        |
| RF00001            | 0 NA         | NA            | NA         | NA         | NA        | NA        |
| RF01848            | 0 NA         | NA            | NA         | NA         | NA        | NA        |
| RF00017            | 0 NA         | NA            | NA         | NA         | NA        | NA        |
| RF00012            | 0 NA         | NA            | NA         | NA         | NA        | NA        |
| RF00001            | 0 NA         | NA            | NA         | NA         | NA        | NA        |
| RF00026            | 0 NA         | NA            | NA         | NA         | NA        | NA        |
| olfcgl             | 0 NA         | NA            | NA         | NA         | NA        | NA        |
| taar20h            | 0 NA         | NA            | NA         | NA         | NA        | NA        |
| si:ch73-329n5. 2   | 5. 272384981 | 0. 907480109  | 1. 0018392 | 0. 9058141 | 0. 365034 | NA        |
| L0017877. 2        | 17. 82287869 | 0. 241669368  | 0. 5175963 | 0. 466907  | 0. 640566 | 0. 959994 |
| CABZ01029422. 1    | 56. 93218404 | 0. 00839458   | 0. 2752763 | 0. 0304951 | 0. 975672 | 0. 996762 |
| TENT5A             | 22. 28270281 | -0. 265987113 | 0. 4152684 | -0. 640518 | 0. 521836 | 0. 939056 |
| BX510986. 1        | 0. 323844819 | -1. 825095364 | 3. 274639  | -0. 557342 | 0. 577293 | NA        |
| CABZ01046954. 1    | 29. 01136669 | -0. 209290442 | 0. 3495017 | -0. 598825 | 0. 549289 | 0. 946312 |
| RF00017            | 0. 674801605 | 0. 02322667   | 2. 4147609 | 0. 0096186 | 0. 992326 | NA        |
| si:ch211-156118. 4 | 0 NA         | NA            | NA         | NA         | NA        | NA        |
| zmp:0000001088     | 34. 24932214 | 0. 316946028  | 0. 3311004 | 0. 9572505 | 0. 338441 | 0. 876992 |
| si:ch211-139n6. 11 | 0 NA         | NA            | NA         | NA         | NA        | NA        |
| BX681417. 24       | 0. 31759079  | 1. 807926197  | 3. 579045  | 0. 5051421 | 0. 613459 | NA        |
| BX276101. 2        | 2. 020305995 | 0. 995994924  | 1. 3816761 | 0. 7208599 | 0. 470996 | NA        |
| RF00026            | 0 NA         | NA            | NA         | NA         | NA        | NA        |
| RF00026            | 0 NA         | NA            | NA         | NA         | NA        | NA        |
| dre-mir-430a-2     | 0 NA         | NA            | NA         | NA         | NA        | NA        |
| dre-mir-430a-4     | 0 NA         | NA            | NA         | NA         | NA        | NA        |
| RF00001            | 0 NA         | NA            | NA         | NA         | NA        | NA        |
| RF00026            | 0 NA         | NA            | NA         | NA         | NA        | NA        |
| RF00001            | 1. 847487126 | 0. 825746177  | 1. 3907326 | 0. 593749  | 0. 55268  | NA        |
| dre-mir-430c-1     | 0 NA         | NA            | NA         | NA         | NA        | NA        |
| FP102122. 1        | 3. 120699874 | 0. 786102603  | 1. 1298564 | 0. 6957544 | 0. 486583 | NA        |

|                 |             |              |           |           |          |          |
|-----------------|-------------|--------------|-----------|-----------|----------|----------|
| BX465198.1      | 1.878093888 | 0.836713984  | 1.3941898 | 0.6001435 | 0.548411 | NA       |
| CABZ01039304.1  | 19.50729883 | -0.308045226 | 0.4427304 | -0.695785 | 0.486563 | 0.930854 |
| pimr157         | 0 NA        | NA           | NA        | NA        | NA       | NA       |
| h2afvb          | 7851.107391 | -0.206843654 | 0.0675115 | -3.063831 | 0.002185 | 0.057157 |
| RF00026         | 0 NA        | NA           | NA        | NA        | NA       | NA       |
| GAA             | 17.90245146 | 0.321095241  | 0.470299  | 0.682747  | 0.494767 | 0.931926 |
| BX510654.1      | 0 NA        | NA           | NA        | NA        | NA       | NA       |
| phyhip          | 115.1751666 | 0.287330621  | 0.1833066 | 1.5674862 | 0.117001 | 0.639994 |
| BX005361.1      | 0 NA        | NA           | NA        | NA        | NA       | NA       |
| FQ378040.1      | 0 NA        | NA           | NA        | NA        | NA       | NA       |
| RF00012         | 0 NA        | NA           | NA        | NA        | NA       | NA       |
| BX681417.25     | 0 NA        | NA           | NA        | NA        | NA       | NA       |
| BX539310.1      | 0.182570949 | 0.967652056  | 4.0804729 | 0.2371421 | 0.812547 | NA       |
| npas4l          | 21.82332671 | 0.122774144  | 0.4106645 | 0.2989646 | 0.764967 | 0.975374 |
| CR792441.1      | 0.158915748 | 0.967652056  | 4.0804729 | 0.2371421 | 0.812547 | NA       |
| RF00001         | 0 NA        | NA           | NA        | NA        | NA       | NA       |
| RF00001         | 0.158915748 | 0.967652056  | 4.0804729 | 0.2371421 | 0.812547 | NA       |
| BX649628.4      | 0 NA        | NA           | NA        | NA        | NA       | NA       |
| si:dkey-23f9.9  | 0 NA        | NA           | NA        | NA        | NA       | NA       |
| zgc:103700      | 1.131388442 | -0.435239073 | 1.7579967 | -0.247577 | 0.804462 | NA       |
| taar19j         | 0 NA        | NA           | NA        | NA        | NA       | NA       |
| CT573303.1      | 0 NA        | NA           | NA        | NA        | NA       | NA       |
| RF00001         | 0 NA        | NA           | NA        | NA        | NA       | NA       |
| RF00001         | 0 NA        | NA           | NA        | NA        | NA       | NA       |
| RF00006         | 0 NA        | NA           | NA        | NA        | NA       | NA       |
| RF00001         | 0 NA        | NA           | NA        | NA        | NA       | NA       |
| znf987          | 0.641555962 | -0.014184532 | 2.3335058 | -0.006079 | 0.99515  | NA       |
| RF00001         | 0 NA        | NA           | NA        | NA        | NA       | NA       |
| RF00026         | 0 NA        | NA           | NA        | NA        | NA       | NA       |
| im:7142702      | 265.7669393 | -0.05218075  | 0.1437679 | -0.362951 | 0.716641 | 0.96909  |
| pimr81          | 0 NA        | NA           | NA        | NA        | NA       | NA       |
| RF00026         | 0 NA        | NA           | NA        | NA        | NA       | NA       |
| CT583723.2      | 0.714370301 | 1.588951002  | 2.5174818 | 0.6311668 | 0.527931 | NA       |
| pimr3           | 0 NA        | NA           | NA        | NA        | NA       | NA       |
| F0834825.3      | 0.864324114 | 0.61432746   | 2.0894637 | 0.294012  | 0.768749 | NA       |
| RF00026         | 0 NA        | NA           | NA        | NA        | NA       | NA       |
| RF00001         | 0 NA        | NA           | NA        | NA        | NA       | NA       |
| si:dkey-28k24.2 | 3.128709029 | 0.141998218  | 1.0408787 | 0.1364215 | 0.891488 | NA       |
| CR352265.3      | 35.8045532  | 0.190487219  | 0.385269  | 0.4944265 | 0.621005 | 0.957354 |
| si:dkey-27d5.9  | 0 NA        | NA           | NA        | NA        | NA       | NA       |
| RF00001         | 0.31598276  | 0.005883445  | 3.3523626 | 0.001755  | 0.9986   | NA       |
| RF00026         | 0 NA        | NA           | NA        | NA        | NA       | NA       |
| RF00001         | 1.689791606 | 2.047579242  | 1.6912512 | 1.210689  | 0.226015 | NA       |
| opn7b           | 4.298926355 | -1.171458194 | 0.9416637 | -1.24403  | 0.213488 | NA       |
| fth127          | 119.1547955 | 0.818114992  | 0.1928742 | 4.2417023 | 2.22E-05 | 0.001384 |
| znf980          | 6.37334697  | 0.278855243  | 0.8605462 | 0.3240445 | 0.745904 | NA       |
| BX601646.1      | 4.776141711 | -0.91319748  | 0.8792683 | -1.038588 | 0.298996 | NA       |
| dre-mir-430c-1  | 0 NA        | NA           | NA        | NA        | NA       | NA       |
| BX323022.1      | 0.325452849 | 0.005883619  | 3.3177086 | 0.0017734 | 0.998585 | NA       |
| RF00026         | 0 NA        | NA           | NA        | NA        | NA       | NA       |
| BX681417.26     | 0 NA        | NA           | NA        | NA        | NA       | NA       |
| RF00001         | 0 NA        | NA           | NA        | NA        | NA       | NA       |
| pitxl           | 342.2629193 | -0.344916892 | 0.1372719 | -2.512654 | 0.011983 | 0.192639 |
| RF00001         | 0 NA        | NA           | NA        | NA        | NA       | NA       |



|                   |             |              |           |           |          |          |
|-------------------|-------------|--------------|-----------|-----------|----------|----------|
| BX571678.1        | 1.486819546 | 0.362713966  | 1.643623  | 0.2206795 | 0.825342 | NA       |
| RF00003           | 0           | NA           | NA        | NA        | NA       | NA       |
| spaca41           | 1443.329517 | 0.102732296  | 0.1029403 | 0.9979793 | 0.318289 | 0.867746 |
| si:ch73-27e22.8   | 23.47034685 | 0.024602281  | 0.4226574 | 0.0582086 | 0.953583 | 0.994213 |
| RF00003           | 0           | NA           | NA        | NA        | NA       | NA       |
| RF00412           | 1.173193676 | 0.383481185  | 1.7405114 | 0.2203267 | 0.825617 | NA       |
| ftr50             | 0.325573202 | 0.005883621  | 3.3172783 | 0.0017736 | 0.998585 | NA       |
| znf1141           | 41.46630159 | 0.23500196   | 0.3120749 | 0.7530308 | 0.451431 | 0.918761 |
| RF00026           | 0           | NA           | NA        | NA        | NA       | NA       |
| pimr160           | 0           | NA           | NA        | NA        | NA       | NA       |
| BX908782.3        | 484.0519772 | -0.301851561 | 0.1244167 | -2.426133 | 0.015261 | 0.22638  |
| RF00001           | 1.702594852 | 0.595742256  | 1.4954742 | 0.3983634 | 0.690362 | NA       |
| RF00001           | 0           | NA           | NA        | NA        | NA       | NA       |
| RF00001           | 1.060059368 | -0.963745058 | 2.1781796 | -0.442454 | 0.65816  | NA       |
| RF00001           | 0.157187365 | -0.955901296 | 4.0804729 | -0.234262 | 0.814781 | NA       |
| RF00001           | 0.635542639 | 2.809903053  | 2.5424041 | 1.1052149 | 0.269066 | NA       |
| CR749763.7        | 0.182570949 | 0.967652056  | 4.0804729 | 0.2371421 | 0.812547 | NA       |
| taar20f           | 0           | NA           | NA        | NA        | NA       | NA       |
| RF00001           | 0           | NA           | NA        | NA        | NA       | NA       |
| ube2e1            | 1180.984791 | -0.192664014 | 0.1094118 | -1.760906 | 0.078254 | 0.545243 |
| RF00026           | 0           | NA           | NA        | NA        | NA       | NA       |
| RF00026           | 0           | NA           | NA        | NA        | NA       | NA       |
| si:dkey-261m9.6   | 7.551340652 | 0.370398005  | 0.6938033 | 0.533866  | 0.593434 | NA       |
| RF00001           | 0           | NA           | NA        | NA        | NA       | NA       |
| taar18h           | 1.113118057 | -1.307738798 | 1.9265899 | -0.678784 | 0.497275 | NA       |
| pigr12.3          | 1.536686259 | 0.295078837  | 1.6385808 | 0.180082  | 0.857088 | NA       |
| si:ch211-165a10.3 | 0           | NA           | NA        | NA        | NA       | NA       |
| CABZ01078320.1    | 150.0279185 | 0.083628332  | 0.1765146 | 0.4737758 | 0.63566  | 0.958142 |
| taar10a           | 0.499972362 | -2.44370697  | 3.0013188 | -0.814211 | 0.415524 | NA       |
| CR354435.3        | 0.31437473  | -1.788572922 | 3.5930657 | -0.497785 | 0.618636 | NA       |
| RF00001           | 0           | NA           | NA        | NA        | NA       | NA       |
| pimr25            | 0           | NA           | NA        | NA        | NA       | NA       |
| RF00003           | 0           | NA           | NA        | NA        | NA       | NA       |
| zgc:56235         | 994.8888293 | 0.140397943  | 0.09269   | 1.5147042 | 0.129847 | 0.662436 |
| RF00026           | 0           | NA           | NA        | NA        | NA       | NA       |
| RF00001           | 0           | NA           | NA        | NA        | NA       | NA       |
| BX470211.2        | 0.339758314 | 0.005883863  | 3.2682461 | 0.0018003 | 0.998564 | NA       |
| RF00001           | 0           | NA           | NA        | NA        | NA       | NA       |
| BX936298.2        | 1.1342167   | 2.46307543   | 1.9505303 | 1.2627722 | 0.206671 | NA       |
| RF00001           | 0.158795395 | 0.967652056  | 4.0804729 | 0.2371421 | 0.812547 | NA       |
| si:ch211-79g12.1  | 6.037124736 | -0.008804292 | 0.7982624 | -0.011029 | 0.9912   | NA       |
| BX511132.2        | 0           | NA           | NA        | NA        | NA       | NA       |
| RF00001           | 0           | NA           | NA        | NA        | NA       | NA       |
| BX537296.4        | 0           | NA           | NA        | NA        | NA       | NA       |
| RF00020           | 0.500161739 | 2.450146464  | 2.7711133 | 0.8841741 | 0.376602 | NA       |
| CABZ01061894.1    | 229.9742041 | 0.109906523  | 0.1607209 | 0.6838348 | 0.494079 | 0.931926 |
| si:ch73-265d7.2   | 160.7109151 | 0.049455817  | 0.1627608 | 0.3038558 | 0.761238 | 0.975374 |
| RF00001           | 0           | NA           | NA        | NA        | NA       | NA       |
| BX664750.7        | 0           | NA           | NA        | NA        | NA       | NA       |
| si:dkey-82i20.5   | 1.471696196 | -0.970093287 | 1.6638649 | -0.583036 | 0.559869 | NA       |
| RF00001           | 0           | NA           | NA        | NA        | NA       | NA       |
| BX470259.3        | 17.71148373 | 0.250128986  | 0.4718726 | 0.5300774 | 0.596058 | 0.954444 |
| CABZ01114053.1    | 217.244098  | -0.060982841 | 0.1451041 | -0.42027  | 0.674289 | 0.965257 |
| RF00001           | 0.496945679 | -0.834564081 | 2.8549631 | -0.29232  | 0.770042 | NA       |

|                    |             |              |           |           |          |          |
|--------------------|-------------|--------------|-----------|-----------|----------|----------|
| CABZ01081294.1     | 13.79539511 | -0.664661571 | 0.5256438 | -1.264472 | 0.206061 | 0.773826 |
| CABZ01031870.1     | 18.53402353 | -0.07920736  | 0.4565377 | -0.173496 | 0.862262 | 0.985841 |
| RF00001            | 0.173729368 | -0.955901296 | 4.0804729 | -0.234262 | 0.814781 | NA       |
| RF00001            | 0 NA        | NA           | NA        | NA        | NA       | NA       |
| rnps1              | 735.2801468 | -0.117862115 | 0.0961358 | -1.225996 | 0.2202   | 0.786959 |
| RF00091            | 2.794266507 | -1.263598512 | 1.1746731 | -1.075702 | 0.28206  | NA       |
| RF00026            | 0 NA        | NA           | NA        | NA        | NA       | NA       |
| RF00012            | 0 NA        | NA           | NA        | NA        | NA       | NA       |
| dre-mir-430c-1     | 0 NA        | NA           | NA        | NA        | NA       | NA       |
| BX537263.4         | 25.93314354 | 1.056063561  | 1.003605  | 1.0522701 | 0.292676 | 0.848607 |
| CR936300.2         | 1.972685863 | -0.53316398  | 1.3772144 | -0.387132 | 0.698658 | NA       |
| RF00001            | 0 NA        | NA           | NA        | NA        | NA       | NA       |
| RF00003            | 0 NA        | NA           | NA        | NA        | NA       | NA       |
| c16h2orf66         | 28.00949293 | -0.045682438 | 0.4075232 | -0.112098 | 0.910746 | 0.990926 |
| CABZ01053323.1     | 0 NA        | NA           | NA        | NA        | NA       | NA       |
| pimr205            | 0.158795395 | 0.967652056  | 4.0804729 | 0.2371421 | 0.812547 | NA       |
| BX649516.5         | 0 NA        | NA           | NA        | NA        | NA       | NA       |
| zgc:162962         | 59.41111554 | -0.224920863 | 0.254907  | -0.882365 | 0.37758  | 0.895192 |
| ZNF521 (1 of many) | 135.5467677 | -0.094529282 | 0.1815749 | -0.520608 | 0.60264  | 0.956045 |
| CR450827.7         | 0.158795395 | 0.967652056  | 4.0804729 | 0.2371421 | 0.812547 | NA       |
| RF00001            | 0 NA        | NA           | NA        | NA        | NA       | NA       |
| RF00001            | 0.515885857 | -0.89611015  | 2.8190897 | -0.317872 | 0.750582 | NA       |
| BX511311.10        | 0 NA        | NA           | NA        | NA        | NA       | NA       |
| zgc:165555         | 2.352710405 | 0.832316174  | 1.3259535 | 0.6277114 | 0.530193 | NA       |
| RF00001            | 0 NA        | NA           | NA        | NA        | NA       | NA       |
| CR352310.1         | 11.11145645 | 0.54467001   | 0.6194624 | 0.8792625 | 0.379259 | 0.895192 |
| CABZ01065417.1     | 41.31032978 | 0.28752767   | 0.3014662 | 0.9537642 | 0.340203 | 0.87805  |
| RF00001            | 0.323844819 | -1.825095364 | 3.274639  | -0.557342 | 0.577293 | NA       |
| nanos2             | 0.484248244 | 0.852636534  | 2.8793247 | 0.2961238 | 0.767136 | NA       |
| CABZ01037174.1     | 45.9292867  | 0.254383336  | 0.3112488 | 0.817299  | 0.413758 | 0.905864 |
| CU693479.1         | 1114.103369 | -0.071286956 | 0.1162567 | -0.613186 | 0.539753 | 0.944178 |
| AL935299.1         | 0.173729368 | -0.955901296 | 4.0804729 | -0.234262 | 0.814781 | NA       |
| CU570894.2         | 156.8918494 | 0.130318229  | 0.1657608 | 0.7861826 | 0.431761 | 0.912787 |
| znf1024            | 101.5705276 | -0.430340271 | 0.2129242 | -2.021096 | 0.04327  | 0.40826  |
| RF00003            | 0 NA        | NA           | NA        | NA        | NA       | NA       |
| zgc:174356         | 1.314347193 | -0.780724162 | 1.7362445 | -0.449663 | 0.652954 | NA       |
| BX511056.6         | 0 NA        | NA           | NA        | NA        | NA       | NA       |
| RF00001            | 0 NA        | NA           | NA        | NA        | NA       | NA       |
| RF00001            | 0 NA        | NA           | NA        | NA        | NA       | NA       |
| RF00003            | 0 NA        | NA           | NA        | NA        | NA       | NA       |
| RF00591            | 0 NA        | NA           | NA        | NA        | NA       | NA       |
| pimr41             | 0 NA        | NA           | NA        | NA        | NA       | NA       |
| CR749164.1         | 17.58194631 | 0.71664227   | 0.4656424 | 1.53904   | 0.123795 | 0.652372 |
| CABZ01077220.2     | 40.83843484 | -0.076600725 | 0.3208873 | -0.238715 | 0.811326 | 0.981081 |
| park7              | 628.7897186 | 0.121984291  | 0.0994127 | 1.2270495 | 0.219804 | 0.786537 |
| taar19s            | 0.158795395 | 0.967652056  | 4.0804729 | 0.2371421 | 0.812547 | NA       |
| RF00001            | 0 NA        | NA           | NA        | NA        | NA       | NA       |
| BX324216.4         | 0.957779428 | -0.006313964 | 2.0780476 | -0.003038 | 0.997576 | NA       |
| izumol             | 1.126862796 | 2.435740157  | 2.0195466 | 1.2060827 | 0.227786 | NA       |
| RF00001            | 0 NA        | NA           | NA        | NA        | NA       | NA       |
| RF00015            | 0 NA        | NA           | NA        | NA        | NA       | NA       |
| CR383662.8         | 5.738075436 | -0.089757859 | 0.7887577 | -0.113796 | 0.909399 | NA       |
| tradv11.0.1        | 0 NA        | NA           | NA        | NA        | NA       | NA       |
| CR933812.1         | 6.316356019 | 0.150379058  | 0.7669421 | 0.1960762 | 0.844551 | NA       |

|                    |              |               |            |            |           |           |
|--------------------|--------------|---------------|------------|------------|-----------|-----------|
| pimr64             | 5. 554608377 | 0. 124258354  | 0. 840795  | 0. 1477867 | 0. 882511 | NA        |
| CU984579. 1        | 54. 98693375 | 0. 275670684  | 0. 2659892 | 1. 0363979 | 0. 300017 | 0. 856146 |
| RF00001            | 0 NA         | NA            | NA         | NA         | NA        | NA        |
| si:dkey-58b18. 10  | 0 NA         | NA            | NA         | NA         | NA        | NA        |
| pimr151            | 0. 166657454 | -0. 955901296 | 4. 0804729 | -0. 234262 | 0. 814781 | NA        |
| BX284638. 1        | 2301. 239227 | 0. 049028663  | 0. 088087  | 0. 5565938 | 0. 577805 | 0. 951024 |
| RF00026            | 0 NA         | NA            | NA         | NA         | NA        | NA        |
| RF00001            | 0 NA         | NA            | NA         | NA         | NA        | NA        |
| RF00001            | 0 NA         | NA            | NA         | NA         | NA        | NA        |
| CR352220. 1        | 5. 340695004 | 0. 542269963  | 0. 8407361 | 0. 6449942 | 0. 518931 | NA        |
| RF00003            | 0 NA         | NA            | NA         | NA         | NA        | NA        |
| BX005442. 3        | 0 NA         | NA            | NA         | NA         | NA        | NA        |
| GJD4               | 8. 442793585 | 0. 902969953  | 0. 7399764 | 1. 2202686 | 0. 222363 | NA        |
| BX005328. 1        | 3. 313259357 | -1. 537242543 | 1. 1410555 | -1. 347211 | 0. 177912 | NA        |
| rln3b              | 4. 186373477 | 0. 816550021  | 0. 9620156 | 0. 8487908 | 0. 395998 | NA        |
| RF00001            | 0 NA         | NA            | NA         | NA         | NA        | NA        |
| RF00003            | 0 NA         | NA            | NA         | NA         | NA        | NA        |
| RF00003            | 0 NA         | NA            | NA         | NA         | NA        | NA        |
| AL928657. 2        | 2. 100005283 | 0. 190729671  | 1. 3369556 | 0. 1426597 | 0. 886559 | NA        |
| si:ch211-133h13. 1 | 6. 796262827 | -0. 16501756  | 0. 7613074 | -0. 216755 | 0. 828399 | NA        |
| RF00026            | 0 NA         | NA            | NA         | NA         | NA        | NA        |
| RF00001            | 0 NA         | NA            | NA         | NA         | NA        | NA        |
| RF00001            | 0 NA         | NA            | NA         | NA         | NA        | NA        |
| BX927243. 3        | 0 NA         | NA            | NA         | NA         | NA        | NA        |
| CABZ01059408. 1    | 35. 78363342 | 0. 056880305  | 0. 3573616 | 0. 1591674 | 0. 873537 | 0. 987858 |
| RF00001            | 0 NA         | NA            | NA         | NA         | NA        | NA        |
| BX927333. 1        | 150. 5295926 | 0. 114389711  | 0. 1796156 | 0. 6368583 | 0. 524217 | 0. 939336 |
| RF00001            | 0. 158795395 | 0. 967652056  | 4. 0804729 | 0. 2371421 | 0. 812547 | NA        |
| CR759875. 1        | 0. 837961008 | -3. 186152199 | 2. 1620582 | -1. 473666 | 0. 140571 | NA        |
| RF00001            | 0. 158795395 | 0. 967652056  | 4. 0804729 | 0. 2371421 | 0. 812547 | NA        |
| nfil3-3            | 4. 456574797 | 0. 987067986  | 0. 9067877 | 1. 0885326 | 0. 27636  | NA        |
| RF00001            | 0 NA         | NA            | NA         | NA         | NA        | NA        |
| BX324134. 2        | 0 NA         | NA            | NA         | NA         | NA        | NA        |
| RF00001            | 0 NA         | NA            | NA         | NA         | NA        | NA        |
| RF00017            | 1. 000564183 | 3. 450262048  | 2. 0260994 | 1. 7029086 | 0. 088585 | NA        |
| RF00001            | 0. 802200093 | 1. 852032281  | 2. 2653592 | 0. 8175446 | 0. 413617 | NA        |
| RF00001            | 0 NA         | NA            | NA         | NA         | NA        | NA        |
| RF00001            | 0. 365141898 | 1. 973577737  | 3. 3927314 | 0. 5817076 | 0. 560764 | NA        |
| RF00026            | 0 NA         | NA            | NA         | NA         | NA        | NA        |
| RF00012            | 0. 476747244 | 2. 393381959  | 3. 0525537 | 0. 7840589 | 0. 433006 | NA        |
| CR762392. 2        | 0 NA         | NA            | NA         | NA         | NA        | NA        |
| FO704771. 1        | 1. 657844264 | 0. 599291606  | 1. 5040408 | 0. 3984544 | 0. 690295 | NA        |
| RF00026            | 0 NA         | NA            | NA         | NA         | NA        | NA        |
| RF00001            | 0 NA         | NA            | NA         | NA         | NA        | NA        |
| RF00001            | 0. 471562095 | -2. 373056629 | 3. 0645586 | -0. 774355 | 0. 438721 | NA        |
| pimr75             | 0 NA         | NA            | NA         | NA         | NA        | NA        |
| RF00001            | 81. 75749931 | -0. 159836793 | 0. 2386844 | -0. 669658 | 0. 503076 | 0. 935304 |
| parapinopsina      | 2. 942534219 | -0. 305163373 | 1. 182621  | -0. 25804  | 0. 796376 | NA        |
| RF00026            | 0 NA         | NA            | NA         | NA         | NA        | NA        |
| BX571768. 1        | 2. 895289432 | -0. 8114558   | 1. 1935079 | -0. 679891 | 0. 496573 | NA        |
| FO904997. 1        | 9. 181537796 | 0. 488655824  | 0. 6287347 | 0. 7772051 | 0. 437038 | NA        |
| AL929276. 2        | 0 NA         | NA            | NA         | NA         | NA        | NA        |
| zgc:172315         | 103. 2298956 | -0. 980171274 | 0. 2047501 | -4. 787159 | 1. 69E-06 | 0. 000155 |
| FP236542. 1        | 37. 89475388 | 0. 287073089  | 0. 3258396 | 0. 8810257 | 0. 378304 | 0. 895192 |

|                |             |              |           |           |          |          |
|----------------|-------------|--------------|-----------|-----------|----------|----------|
| taar12f        | 1.188917794 | -1.322455875 | 1.8672776 | -0.708227 | 0.478804 | NA       |
| znf1051        | 18.72070124 | -0.292377914 | 0.4519425 | -0.646936 | 0.517673 | 0.938592 |
| CABZ01109480.1 | 4.303094199 | -0.905643628 | 0.9979833 | -0.907474 | 0.364156 | NA       |
| taar19o        | 0.317831496 | 1.808837541  | 3.5779923 | 0.5055454 | 0.613176 | NA       |
| AL929536.6     | 61.66938572 | -0.108178944 | 0.2605849 | -0.415139 | 0.67804  | 0.965257 |
| CABZ01086812.1 | 52.52949314 | -0.173620209 | 0.2920468 | -0.594495 | 0.552181 | 0.947265 |
| BX324142.2     | 0           | NA           | NA        | NA        | NA       | NA       |
| RF00026        | 0           | NA           | NA        | NA        | NA       | NA       |
| CABZ01102201.1 | 0.157187365 | -0.955901296 | 4.0804729 | -0.234262 | 0.814781 | NA       |
| ewsrlb         | 24.22368294 | -0.330360968 | 0.9270099 | -0.356373 | 0.721562 | 0.969747 |
| RF00211        | 0.491320158 | 0.8528132    | 2.8656354 | 0.2976    | 0.766008 | NA       |
| RF00001        | 0           | NA           | NA        | NA        | NA       | NA       |
| RF00003        | 0           | NA           | NA        | NA        | NA       | NA       |
| CR388047.3     | 0.182570949 | 0.967652056  | 4.0804729 | 0.2371421 | 0.812547 | NA       |
| CU896602.4     | 0           | NA           | NA        | NA        | NA       | NA       |
| RF00001        | 0           | NA           | NA        | NA        | NA       | NA       |
| RF00397        | 1.429100817 | -0.987439421 | 1.717413  | -0.574957 | 0.56532  | NA       |
| RF00004        | 0.340386822 | -1.882368278 | 3.2159502 | -0.585323 | 0.558331 | NA       |
| RF00026        | 0           | NA           | NA        | NA        | NA       | NA       |
| RF00001        | 0.476506538 | 2.394892832  | 2.8161716 | 0.8504073 | 0.395099 | NA       |
| RF00026        | 0           | NA           | NA        | NA        | NA       | NA       |
| RF00003        | 0           | NA           | NA        | NA        | NA       | NA       |
| RF00001        | 0           | NA           | NA        | NA        | NA       | NA       |
| RF00001        | 0           | NA           | NA        | NA        | NA       | NA       |
| RF00026        | 0           | NA           | NA        | NA        | NA       | NA       |
| RF00017        | 0           | NA           | NA        | NA        | NA       | NA       |
| RF00003        | 0           | NA           | NA        | NA        | NA       | NA       |
| dre-mir-2185-1 | 0           | NA           | NA        | NA        | NA       | NA       |
| BX649300.3     | 16.91784432 | 0.232012308  | 0.4570409 | 0.5076401 | 0.611706 | 0.95688  |
| CABZ01060373.1 | 20.38595966 | 0.030761978  | 0.4724968 | 0.0651052 | 0.94809  | 0.99381  |
| RF00001        | 0           | NA           | NA        | NA        | NA       | NA       |
| arsib          | 21.86122817 | 0.579216881  | 0.4035871 | 1.435172  | 0.151238 | 0.699388 |
| BX005085.7     | 116.7395057 | -0.230183798 | 0.1995694 | -1.153402 | 0.248745 | 0.81797  |
| BX321886.1     | 6.395043373 | -0.920024474 | 0.7766239 | -1.184646 | 0.236157 | NA       |
| RF00003        | 0           | NA           | NA        | NA        | NA       | NA       |
| RF00001        | 0           | NA           | NA        | NA        | NA       | NA       |
| RF00156        | 1.84029486  | 0.834261239  | 1.4323092 | 0.5824589 | 0.560258 | NA       |
| CKS2           | 152.9517344 | 0.002088959  | 0.1839627 | 0.0113553 | 0.99094  | 0.997679 |
| dipklb         | 73.62266694 | 0.056571574  | 0.2534352 | 0.2232191 | 0.823365 | 0.982196 |
| znf1138        | 0.824126911 | 0.609775617  | 2.0333139 | 0.2998925 | 0.764259 | NA       |
| crygm2c        | 24.95009959 | -0.385408343 | 0.4014815 | -0.959965 | 0.337073 | 0.876088 |
| RF00001        | 0           | NA           | NA        | NA        | NA       | NA       |
| CR388102.1     | 1.156341944 | -2.478415815 | 1.9434244 | -1.275283 | 0.202209 | NA       |
| CR749775.2     | 98.48478893 | 0.132102736  | 0.2001685 | 0.6599575 | 0.509281 | 0.936123 |
| RF00001        | 0           | NA           | NA        | NA        | NA       | NA       |
| CABZ01058647.1 | 2.003025176 | 0.00022568   | 1.3772962 | 0.0001639 | 0.999869 | NA       |
| CR626884.5     | 10.50200738 | 0.408574845  | 0.627727  | 0.6508798 | 0.515124 | NA       |
| zgc:173607     | 2.099884931 | 0.190231143  | 1.3502735 | 0.1408834 | 0.887962 | NA       |
| CR352209.2     | 0           | NA           | NA        | NA        | NA       | NA       |
| taar12e        | 0.157187365 | -0.955901296 | 4.0804729 | -0.234262 | 0.814781 | NA       |
| RF00001        | 0           | NA           | NA        | NA        | NA       | NA       |
| BX908804.3     | 0.499182217 | -0.916838237 | 2.6774436 | -0.34243  | 0.732027 | NA       |
| CU672228.1     | 0.547712847 | 2.559541715  | 2.9076406 | 0.8802813 | 0.378707 | NA       |
| BX664603.1     | 1.045915541 | -0.946726316 | 2.0299428 | -0.466381 | 0.640943 | NA       |

|                   |             |              |           |           |          |          |
|-------------------|-------------|--------------|-----------|-----------|----------|----------|
| BX510301.1        |             | 0 NA         | NA        | NA        | NA       | NA       |
| RF00001           |             | 0 NA         | NA        | NA        | NA       | NA       |
| RF01848           |             | 0 NA         | NA        | NA        | NA       | NA       |
| BX936439.1        | 52.64126879 | -0.003374589 | 0.2799881 | -0.012053 | 0.990384 | 0.997679 |
| BX663613.1        | 14.5975693  | -0.213774079 | 0.5312118 | -0.402427 | 0.68737  | 0.966376 |
| cst14b.1          | 373.857706  | -0.018174005 | 0.1343647 | -0.135259 | 0.892407 | 0.989291 |
| si:dkey-7814.13   | 0.182570949 | 0.967652056  | 4.0804729 | 0.2371421 | 0.812547 | NA       |
| RF00026           |             | 0 NA         | NA        | NA        | NA       | NA       |
| RF00001           |             | 0 NA         | NA        | NA        | NA       | NA       |
| CT573337.1        | 1.506818314 | 1.778623951  | 1.6944285 | 1.0496896 | 0.293861 | NA       |
| notum1b           | 227.3762317 | 0.097703321  | 0.1559688 | 0.6264285 | 0.531034 | 0.942209 |
| RF00001           |             | 0 NA         | NA        | NA        | NA       | NA       |
| RF00026           |             | 0 NA         | NA        | NA        | NA       | NA       |
| BX323087.1        | 25.49624166 | 0.225210752  | 0.3777313 | 0.5962195 | 0.551029 | 0.946549 |
| si:dkey-7j22.4    | 3.840560802 | 0.392415398  | 0.9562547 | 0.410367  | 0.681537 | NA       |
| CR392001.3        | 0.166657454 | -0.955901296 | 4.0804729 | -0.234262 | 0.814781 | NA       |
| znf1114           | 26.93140599 | -0.42451634  | 0.3724453 | -1.139809 | 0.254366 | 0.823475 |
| RF00003           |             | 0 NA         | NA        | NA        | NA       | NA       |
| BX649431.4        |             | 0 NA         | NA        | NA        | NA       | NA       |
| RF00001           |             | 0 NA         | NA        | NA        | NA       | NA       |
| pimr118           |             | 0 NA         | NA        | NA        | NA       | NA       |
| taar10c           | 0.365141898 | 1.973577737  | 3.3927314 | 0.5817076 | 0.560764 | NA       |
| CT583728.26       |             | 0 NA         | NA        | NA        | NA       | NA       |
| FP326649.1        | 15.22321068 | -0.265650757 | 0.5133689 | -0.517466 | 0.604831 | 0.95651  |
| RF00026           |             | 0 NA         | NA        | NA        | NA       | NA       |
| RF00003           |             | 0 NA         | NA        | NA        | NA       | NA       |
| si:ch211-255f4.11 | 25.07574769 | 0.172563941  | 0.3963408 | 0.4353928 | 0.663277 | 0.964736 |
| RF00001           |             | 0 NA         | NA        | NA        | NA       | NA       |
| CR318625.1        | 0.500402445 | 2.450713647  | 2.7706722 | 0.8845195 | 0.376416 | NA       |
| F0704607.1        | 10.61211188 | -0.855891108 | 0.6207566 | -1.378787 | 0.16796  | NA       |
| RF00017           | 0.491320158 | 0.8528132    | 2.8656354 | 0.2976    | 0.766008 | NA       |
| RF00017           |             | 0 NA         | NA        | NA        | NA       | NA       |
| BX119314.1        | 0.158795395 | 0.967652056  | 4.0804729 | 0.2371421 | 0.812547 | NA       |
| pimr144           |             | 0 NA         | NA        | NA        | NA       | NA       |
| RF00424           | 2.157964717 | 1.142490925  | 1.3332228 | 0.8569392 | 0.391478 | NA       |
| L0017725.1        | 2.645879438 | -0.755598587 | 1.1842648 | -0.638032 | 0.523453 | NA       |
| RF00003           |             | 0 NA         | NA        | NA        | NA       | NA       |
| RF00026           |             | 0 NA         | NA        | NA        | NA       | NA       |
