# Supplementary material for: Mycn regulates intestinal development through ribosomal biogenesis in a zebrafish model of Feingold syndrome 1
Source: PubMed Central journal article supplement (PMC9624419; doi:10.1371/journal.pbio.3001856), 2022-11-01

Figure 6A

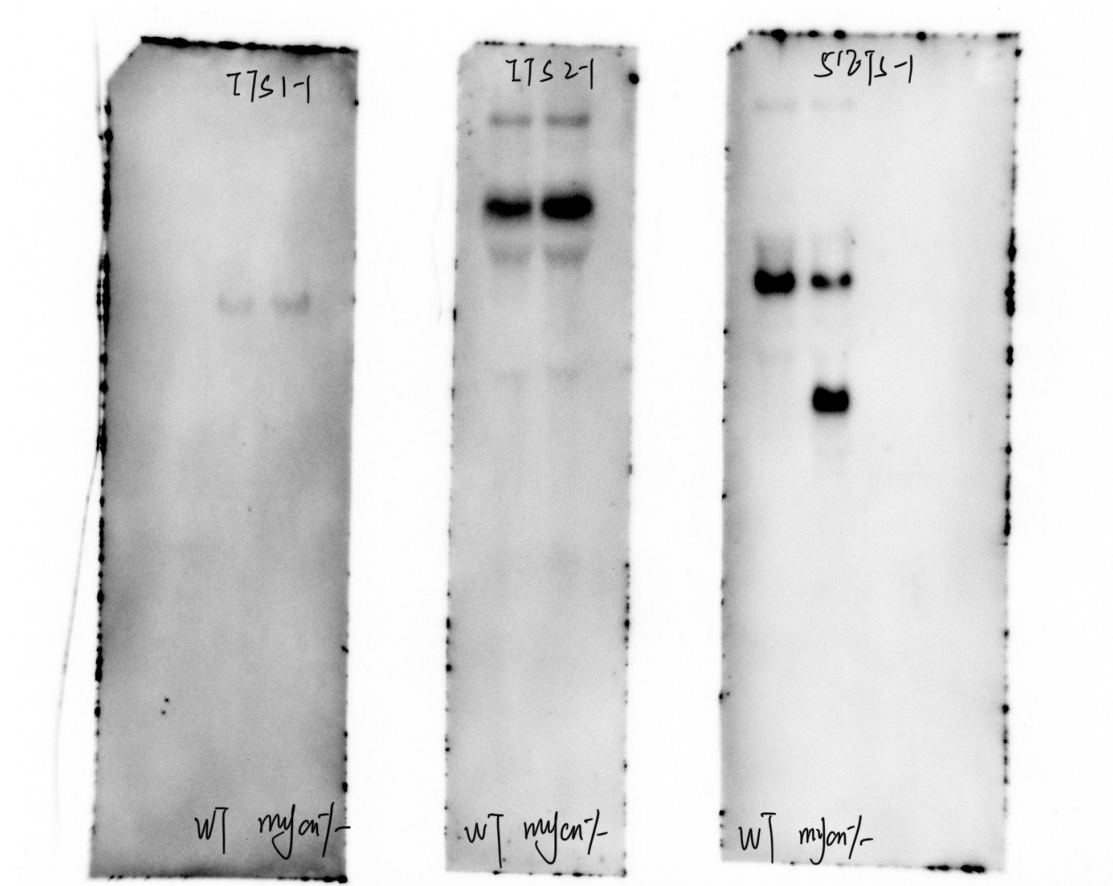

Figure 6C

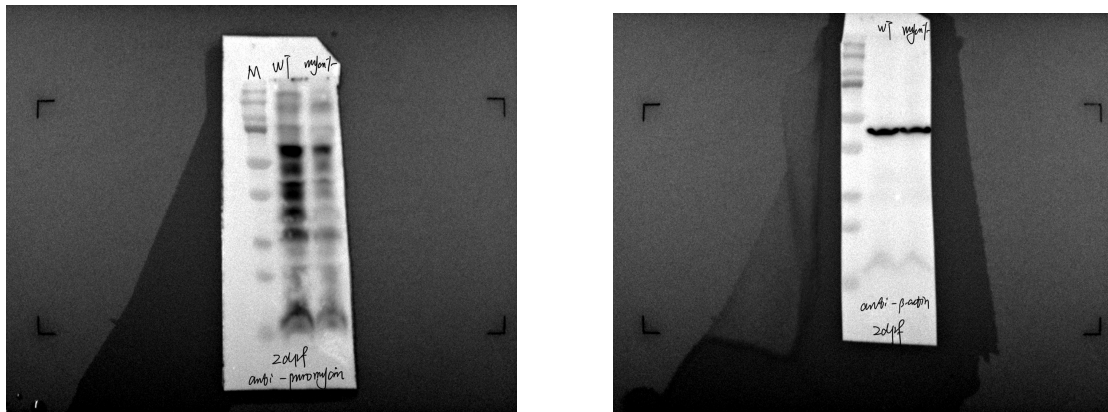

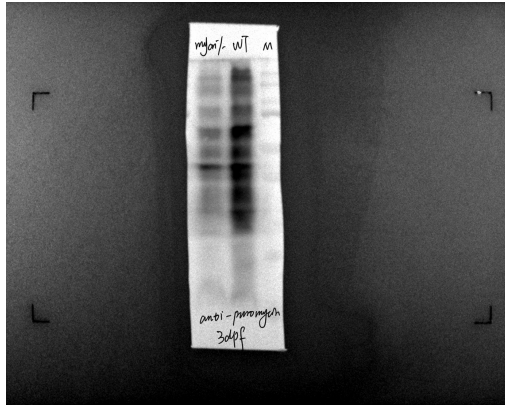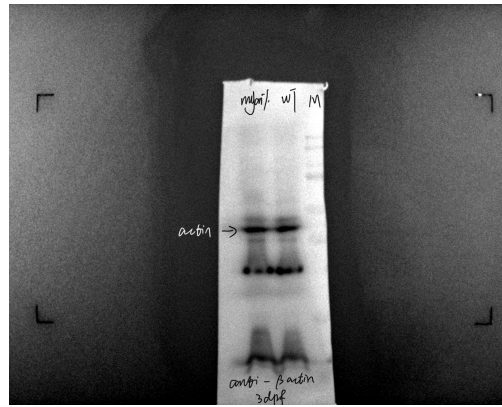

Figure 7C

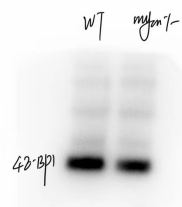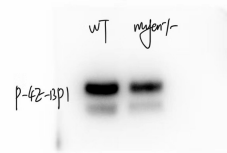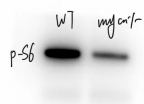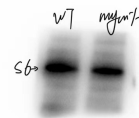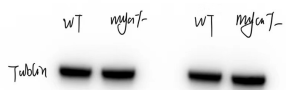

Figure S2B

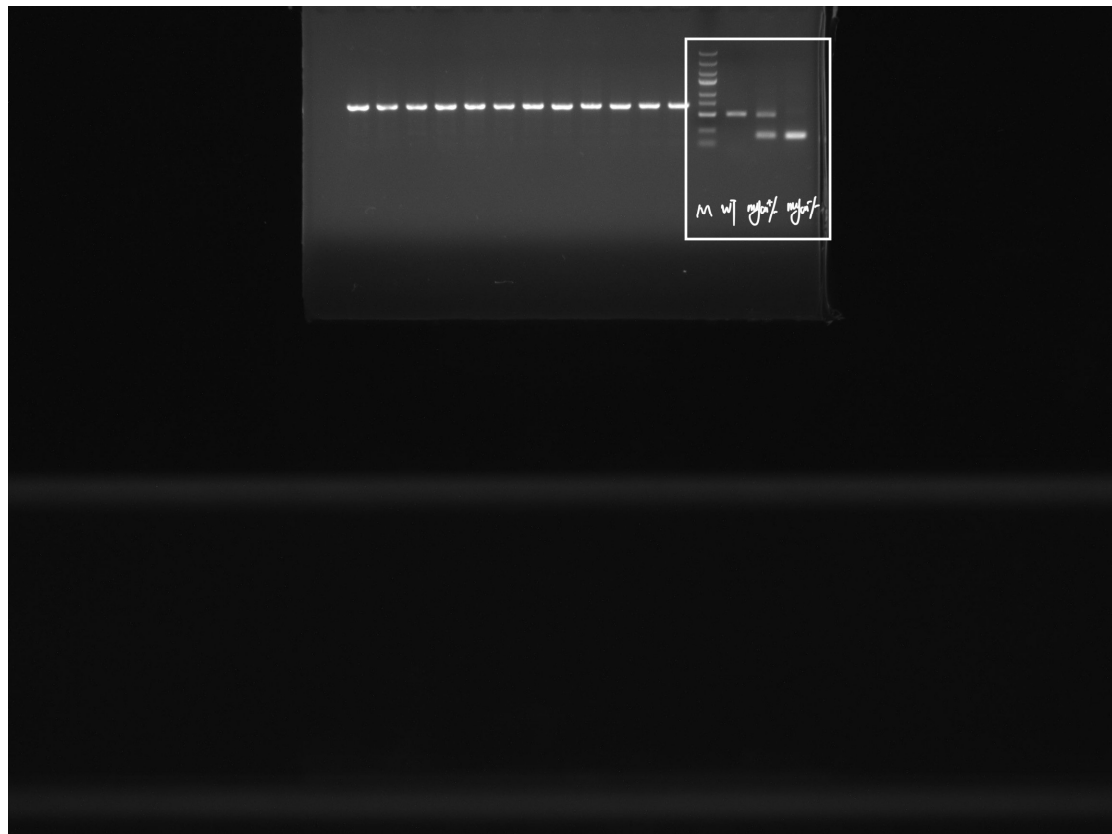

Supplement: pbio.3001856.s014.pdf [file pbio.3001856.s014.pdf]
